# Supplementary material
Source: PubMed Central journal article supplement (PMC8574066)
Supplement: NIHMS1747347-supplement-2.pdf [file NIHMS1747347-supplement-2.pdf]

|    | name     | fold     | log2fold | tstat    | pvalue   | qvalue   | updown | mzmed    | mzmin    | mzmax    | rtmed    | rtmin    |
|----|----------|----------|----------|----------|----------|----------|--------|----------|----------|----------|----------|----------|
| 1  | M454T9_5 | 7.089724 | -2.82573 | -14.527  | 6.50E-07 | 0.009864 | DOWN   | 453.6662 | 453.6613 | 453.6696 | 9.319233 | 9.1011   |
| 2  | M236T9_5 | 4.000193 | -2.00007 | -11.0062 | 1.99E-05 | 0.151    | DOWN   | 235.9605 | 235.9595 | 235.9619 | 9.343692 | 9.146383 |
| 3  | M376T43_ | 3.884295 | -1.95765 | -12.1473 | 0.000155 | 0.537877 | DOWN   | 376.1965 | 376.1964 | 376.1966 | 43.09975 | 42.86967 |
| 4  | M366T9_3 | 2.050817 | -1.0362  | -6.45029 | 0.000212 | 0.5992   | DOWN   | 365.7126 | 365.7123 | 365.7128 | 9.246042 | 9.20785  |
| 5  | M331T10_ | 8.538908 | -3.09405 | -6.63644 | 0.000368 | 0.68844  | DOWN   | 331.2239 | 331.2204 | 331.2338 | 10.15401 | 10.03658 |
| 6  | M656T22  | 38.35961 | 5.261516 | 10.89041 | 0.000402 | 0.700702 | UP     | 656.3214 | 656.3211 | 656.3216 | 21.82867 | 21.823   |
| 7  | M169T9_2 | 2.076783 | -1.05435 | -7.601   | 0.000516 | 0.731253 | DOWN   | 168.9117 | 168.9116 | 168.912  | 9.362817 | 9.264333 |
| 8  | M656T18  | 12.38366 | 3.630366 | 9.794301 | 0.000593 | 0.746069 | UP     | 656.3212 | 656.3212 | 656.3214 | 17.64633 | 17.62883 |
| 9  | M394T20_ | 2.994661 | -1.58239 | -5.42364 | 0.000628 | 0.751837 | DOWN   | 393.5215 | 393.5146 | 393.5281 | 20.238   | 20.20117 |
| 10 | M455T9_7 | 2.404271 | -1.2656  | -5.1468  | 0.000879 | 0.780828 | DOWN   | 454.9245 | 454.9166 | 454.9309 | 9.346042 | 9.175017 |
| 11 | M494T10_ | 3.674821 | 1.877674 | 5.34679  | 0.001072 | 0.794629 | UP     | 493.7574 | 493.757  | 493.758  | 9.785258 | 9.76065  |
| 12 | M656T21_ | 36.90004 | 5.20555  | 8.375033 | 0.001111 | 0.796891 | UP     | 656.3214 | 656.3211 | 656.3216 | 21.10975 | 21.10383 |
| 13 | M1155T10 | 1.504935 | -0.5897  | -6.34111 | 0.001301 | 0.806042 | DOWN   | 1155.09  | 1155.09  | 1155.091 | 9.750217 | 9.665433 |
| 14 | M500T9_1 | 5.987877 | -2.58204 | -5.90078 | 0.001339 | 0.807584 | DOWN   | 499.5551 | 499.5548 | 499.5553 | 9.283908 | 9.24215  |
| 15 | M612T9_2 | 1.716578 | -0.77954 | -4.7147  | 0.001572 | 0.815524 | DOWN   | 611.7664 | 611.7661 | 611.7668 | 9.289925 | 9.219483 |
| 16 | M411T9_4 | 1.710025 | -0.77402 | -4.6768  | 0.001597 | 0.816236 | DOWN   | 411.1106 | 411.1095 | 411.1142 | 9.311167 | 9.103733 |
| 17 | M658T22  | 9.876674 | 3.304025 | 7.246183 | 0.001844 | 0.822365 | UP     | 658.3373 | 658.3367 | 658.3374 | 21.72758 | 21.72283 |
| 18 | M657T21_ | 3.669708 | 1.875665 | 7.014624 | 0.002133 | 0.827801 | UP     | 657.3247 | 657.3246 | 657.3248 | 21.11583 | 21.112   |
| 19 | M668T12  | 3.5457   | 1.82607  | 5.334049 | 0.002144 | 0.827966 | UP     | 668.2848 | 668.2841 | 668.2862 | 12.35477 | 12.35367 |
| 20 | M1983T10 | 1.618967 | -0.69507 | -4.67871 | 0.002251 | 0.829627 | DOWN   | 1983.337 | 1983.335 | 1983.341 | 9.830783 | 9.728083 |
| 21 | M201T9_7 | 2.627941 | -1.39393 | -4.63045 | 0.00238  | 0.831428 | DOWN   | 200.6814 | 200.6777 | 200.6818 | 9.2946   | 9.1178   |
| 22 | M656T21_ | 62.95413 | 5.976229 | 6.803694 | 0.002438 | 0.832185 | UP     | 656.3215 | 656.3213 | 656.3217 | 20.76567 | 20.76367 |
| 23 | M416T23  | 1.547528 | -0.62997 | -4.46178 | 0.002439 | 0.832198 | DOWN   | 416.2145 | 416.2141 | 416.2149 | 22.84967 | 22.82817 |
| 24 | M626T21  | 29.9432  | 4.904157 | 6.694949 | 0.002589 | 0.833989 | UP     | 626.3106 | 626.3104 | 626.3109 | 21.45217 | 21.43683 |
| 25 | M431T9_1 | 2.659454 | -1.41113 | -4.24123 | 0.00285  | 0.83667  | DOWN   | 431.2653 | 431.2649 | 431.2655 | 8.768417 | 8.667783 |
| 26 | M557T9_6 | 2.409452 | -1.2687  | -4.18704 | 0.003051 | 0.838433 | DOWN   | 557.3    | 557.2986 | 557.3041 | 9.237883 | 9.1158   |
| 27 | M476T9_1 | 6.527042 | -2.70643 | -5.28271 | 0.003297 | 0.840305 | DOWN   | 476.2647 | 476.2614 | 476.2728 | 9.17485  | 9.040017 |
| 28 | M662T11_ | 2.126045 | -1.08817 | -5.085   | 0.003305 | 0.840361 | DOWN   | 662.3608 | 662.3603 | 662.3616 | 11.35423 | 11.32332 |
| 29 | M640T24  | 36.39035 | 5.185484 | 6.23912  | 0.003357 | 0.840725 | UP     | 640.3262 | 640.3259 | 640.3263 | 24.146   | 24.14133 |
| 30 | M331T9_1 | 1.439824 | -0.52589 | -4.21247 | 0.003459 | 0.841395 | DOWN   | 331.4225 | 331.4223 | 331.4231 | 9.389617 | 9.30965  |
| 31 | M615T9_2 | 1.592833 | -0.6716  | -4.02767 | 0.003851 | 0.843671 | DOWN   | 614.9189 | 614.9185 | 614.9192 | 9.278717 | 9.219483 |
| 32 | M329T21_ | 1.678586 | -0.74725 | -4.89493 | 0.00389  | 0.843871 | DOWN   | 329.0052 | 329.0048 | 329.0053 | 21.48883 | 21.4795  |
| 33 | M730T10_ | 1.500855 | -0.58578 | -5.2789  | 0.004085 | 0.84482  | DOWN   | 729.9357 | 729.9346 | 729.9409 | 10.1108  | 10.04355 |
| 34 | M1493T10 | 2.423829 | -1.27729 | -3.99731 | 0.0041   | 0.844889 | DOWN   | 1493.272 | 1493.265 | 1493.272 | 9.921708 | 9.806367 |

|    |          |          |          |          |          |          |      |          |          |          |          |          |
|----|----------|----------|----------|----------|----------|----------|------|----------|----------|----------|----------|----------|
| 35 | M271T10_ | 1.199399 | 0.262311 | 4.142538 | 0.004109 | 0.84493  | UP   | 270.7402 | 270.74   | 270.7406 | 9.816183 | 9.728083 |
| 36 | M656T21_ | 25.63287 | 4.679923 | 5.881658 | 0.004172 | 0.845215 | UP   | 656.3213 | 656.3213 | 656.3215 | 21.49333 | 21.4795  |
| 37 | M657T21_ | 5.319157 | 2.411198 | 5.828389 | 0.004284 | 0.845703 | UP   | 657.3248 | 657.3245 | 657.3251 | 20.76567 | 20.76367 |
| 38 | M443T11_ | 1.974336 | -0.98137 | -3.96044 | 0.00437  | 0.846061 | DOWN | 442.6446 | 442.6406 | 442.6455 | 10.95022 | 10.90197 |
| 39 | M475T9_1 | 2.98613  | -1.57828 | -5.11266 | 0.004516 | 0.846637 | DOWN | 475.3848 | 475.384  | 475.3878 | 9.17485  | 9.118517 |
| 40 | M332T9_5 | 1.46039  | -0.54635 | -3.92153 | 0.004577 | 0.846865 | DOWN | 332.0494 | 332.0493 | 332.0502 | 9.398375 | 9.30965  |
| 41 | M717T23  | 3.925304 | 1.972804 | 5.32585  | 0.00465  | 0.847132 | UP   | 717.3011 | 717.3006 | 717.3019 | 23.24    | 23.1905  |
| 42 | M672T12  | 2.88611  | -1.52913 | -4.11864 | 0.004655 | 0.847154 | DOWN | 672.3444 | 672.3436 | 672.3455 | 11.62467 | 11.61205 |
| 43 | M888T10_ | 2.221734 | -1.15169 | -3.90164 | 0.004734 | 0.847433 | DOWN | 887.844  | 887.8431 | 887.845  | 9.531617 | 9.494117 |
| 44 | M290T9_2 | 1.633161 | -0.70767 | -4.09532 | 0.004957 | 0.848173 | DOWN | 289.6459 | 289.6451 | 289.6471 | 9.295167 | 9.264333 |
| 45 | M627T21  | 2.844348 | 1.508098 | 5.513735 | 0.005198 | 0.848905 | UP   | 627.3141 | 627.314  | 627.3141 | 21.4485  | 21.43683 |
| 46 | M559T20  | 1.657645 | -0.72914 | -3.82344 | 0.005276 | 0.849128 | DOWN | 559.4064 | 559.4058 | 559.4068 | 19.9835  | 19.96983 |
| 47 | M657T22  | 3.699254 | 1.887234 | 5.48347  | 0.00528  | 0.849141 | UP   | 657.3246 | 657.3245 | 657.3246 | 21.833   | 21.823   |
| 48 | M302T10_ | 1.935704 | -0.95286 | -3.86305 | 0.005568 | 0.849908 | DOWN | 302.1161 | 302.116  | 302.1233 | 9.830083 | 9.715683 |
| 49 | M638T22  | 10.3183  | 3.367134 | 5.400264 | 0.005686 | 0.850201 | UP   | 638.3107 | 638.3106 | 638.3108 | 21.68867 | 21.66567 |
| 50 | M411T9_8 | 3.561589 | -1.83252 | -4.1383  | 0.005806 | 0.850488 | DOWN | 411.3577 | 411.3567 | 411.3693 | 9.133667 | 9.102033 |
| 51 | M349T9_1 | 1.542577 | -0.62534 | -3.7229  | 0.00589  | 0.850679 | DOWN | 349.3433 | 349.3431 | 349.3442 | 9.2817   | 9.219483 |
| 52 | M346T27  | 2.024079 | 1.017266 | 3.72246  | 0.006027 | 0.850984 | UP   | 346.2949 | 346.2943 | 346.2951 | 26.943   | 26.89683 |
| 53 | M489T10_ | 2.6563   | -1.40942 | -3.75335 | 0.006293 | 0.851536 | DOWN | 489.1511 | 489.1502 | 489.1512 | 9.729367 | 9.636483 |
| 54 | M502T9_2 | 2.155448 | -1.10799 | -3.69324 | 0.006304 | 0.851557 | DOWN | 501.5731 | 501.571  | 501.5744 | 8.867492 | 8.8398   |
| 55 | M578T10_ | 1.810262 | -0.8562  | -3.65034 | 0.006874 | 0.852596 | DOWN | 577.8687 | 577.8685 | 577.8692 | 10.19333 | 10.12287 |
| 56 | M570T11_ | 1.822383 | -0.86583 | -3.7545  | 0.006955 | 0.85273  | DOWN | 570.0751 | 570.0746 | 570.0754 | 10.53962 | 10.4882  |
| 57 | M341T10_ | 2.809178 | 1.490148 | 3.602224 | 0.006961 | 0.852739 | UP   | 341.2068 | 341.206  | 341.2073 | 10.3131  | 10.27972 |
| 58 | M333T9_1 | 1.344645 | -0.42723 | -3.58852 | 0.007102 | 0.852964 | DOWN | 332.8711 | 332.869  | 332.8731 | 9.352117 | 9.110833 |
| 59 | M349T9_5 | 1.441827 | -0.5279  | -3.7391  | 0.007281 | 0.853239 | DOWN | 348.667  | 348.6666 | 348.6676 | 9.289925 | 9.219483 |
| 60 | M498T33  | 1.61284  | -0.6896  | -4.08365 | 0.007472 | 0.853517 | DOWN | 498.3996 | 498.3991 | 498.4003 | 33.18183 | 33.16717 |
| 61 | M353T10_ | 1.793575 | -0.84284 | -3.71543 | 0.007904 | 0.854096 | DOWN | 352.8726 | 352.8724 | 352.8728 | 9.816183 | 9.728083 |
| 62 | M653T9_3 | 2.12528  | -1.08765 | -3.62467 | 0.007936 | 0.854137 | DOWN | 653.4144 | 653.4138 | 653.4149 | 9.404208 | 9.333267 |
| 63 | M201T9_1 | 2.467573 | -1.30309 | -3.88019 | 0.008418 | 0.854709 | DOWN | 200.9163 | 200.9155 | 200.9212 | 9.29015  | 9.1602   |
| 64 | M340T10_ | 1.983426 | -0.98799 | -3.66865 | 0.008529 | 0.854832 | DOWN | 340.2425 | 340.2341 | 340.2482 | 10.37058 | 10.14385 |
| 65 | M213T9_1 | 2.705604 | 1.435951 | 3.78398  | 0.008793 | 0.855112 | UP   | 213.4401 | 213.4385 | 213.4444 | 9.370583 | 9.1503   |
| 66 | M454T9_1 | 3.232128 | -1.69248 | -3.84491 | 0.009051 | 0.855369 | DOWN | 454.0587 | 454.0577 | 454.0597 | 9.197983 | 9.1011   |
| 67 | M658T9_1 | 1.961032 | -0.97161 | -3.55832 | 0.009155 | 0.855469 | DOWN | 657.7366 | 657.7358 | 657.737  | 9.451883 | 9.38595  |
| 68 | M276T9_4 | 2.483709 | -1.3125  | -3.44024 | 0.009388 | 0.855684 | DOWN | 276.3605 | 276.3593 | 276.361  | 9.329083 | 9.1322   |
| 69 | M624T18_ | 4.434604 | 2.148805 | 4.60311  | 0.009574 | 0.85585  | UP   | 624.2949 | 624.2949 | 624.2956 | 17.59258 | 17.58367 |

|     |          |          |          |          |          |          |      |          |          |          |          |          |
|-----|----------|----------|----------|----------|----------|----------|------|----------|----------|----------|----------|----------|
| 70  | M205T9_4 | 2.570395 | -1.36199 | -4.3109  | 0.009605 | 0.855876 | DOWN | 205.097  | 205.0969 | 205.0971 | 8.764808 | 8.667783 |
| 71  | M458T9_6 | 1.421168 | 0.507077 | 3.921897 | 0.009622 | 0.855891 | UP   | 458.0942 | 458.0902 | 458.0947 | 9.443225 | 9.2529   |
| 72  | M295T9_7 | 3.549666 | -1.82768 | -3.46866 | 0.009775 | 0.85602  | DOWN | 295.1629 | 295.1628 | 295.1643 | 8.93705  | 8.914933 |
| 73  | M599T10_ | 2.216142 | -1.14805 | -3.55355 | 0.009981 | 0.856188 | DOWN | 599.3804 | 599.3799 | 599.3811 | 10.24737 | 10.18238 |
| 74  | M815T10_ | 1.512084 | -0.59654 | -3.73382 | 0.01008  | 0.856266 | DOWN | 814.8383 | 814.8375 | 814.8389 | 9.626517 | 9.510117 |
| 75  | M435T9_1 | 5.416074 | -2.43725 | -4.39871 | 0.010095 | 0.856279 | DOWN | 435.3488 | 435.3446 | 435.3522 | 9.2879   | 9.061    |
| 76  | M627T9_2 | 1.826517 | -0.8691  | -3.36552 | 0.010116 | 0.856295 | DOWN | 627.3776 | 627.3765 | 627.3823 | 9.440083 | 9.219483 |
| 77  | M337T9_1 | 1.595763 | -0.67425 | -3.38245 | 0.010137 | 0.856311 | DOWN | 337.2312 | 337.231  | 337.2313 | 9.275217 | 9.146383 |
| 78  | M780T10_ | 1.924414 | -0.94442 | -4.21348 | 0.010157 | 0.856327 | DOWN | 779.7919 | 779.7914 | 779.7919 | 9.994767 | 9.916767 |
| 79  | M520T10_ | 1.810136 | -0.8561  | -3.67589 | 0.010571 | 0.856634 | DOWN | 519.9811 | 519.9805 | 519.9815 | 10.45352 | 10.37598 |
| 80  | M651T12  | 2.046536 | -1.03318 | -3.39381 | 0.010656 | 0.856695 | DOWN | 651.4687 | 651.4654 | 651.4706 | 11.52629 | 11.46135 |
| 81  | M785T10_ | 1.496639 | -0.58173 | -3.33423 | 0.010735 | 0.856749 | DOWN | 785.494  | 785.4934 | 785.4946 | 9.646267 | 9.541483 |
| 82  | M192T11  | 1.630388 | -0.70522 | -3.56856 | 0.010785 | 0.856784 | DOWN | 192.138  | 192.1378 | 192.1382 | 10.91495 | 10.87708 |
| 83  | M310T11_ | 2.182052 | 1.125685 | 3.443944 | 0.010802 | 0.856795 | UP   | 310.211  | 310.2105 | 310.2112 | 10.8937  | 10.82972 |
| 84  | M331T25  | 2.092711 | 1.065373 | 3.548753 | 0.0109   | 0.856862 | UP   | 331.2304 | 331.2302 | 331.2309 | 25.17417 | 25.14117 |
| 85  | M566T11_ | 1.859621 | 0.895009 | 3.292192 | 0.011023 | 0.856943 | UP   | 565.6585 | 565.6583 | 565.659  | 10.69101 | 10.63083 |
| 86  | M202T9_4 | 2.272124 | -1.18404 | -3.29952 | 0.011047 | 0.856959 | DOWN | 201.59   | 201.589  | 201.5912 | 9.3919   | 9.264333 |
| 87  | M197T10_ | 1.645096 | -0.71817 | -3.32417 | 0.011086 | 0.856985 | DOWN | 197.4802 | 197.4733 | 197.4804 | 9.8374   | 9.65225  |
| 88  | M195T9_2 | 2.875978 | -1.52405 | -3.40041 | 0.011112 | 0.857002 | DOWN | 194.596  | 194.5936 | 194.5967 | 9.266408 | 9.146383 |
| 89  | M1033T10 | 1.634906 | -0.70921 | -3.28601 | 0.011169 | 0.857039 | DOWN | 1033.027 | 1033.025 | 1033.03  | 9.976075 | 9.869467 |
| 90  | M656T9   | 1.512967 | -0.59738 | -3.31405 | 0.011244 | 0.857086 | DOWN | 655.6204 | 655.6202 | 655.6208 | 9.390783 | 9.30965  |
| 91  | M724T10_ | 1.750509 | 0.807775 | 3.322148 | 0.011676 | 0.857349 | UP   | 724.105  | 724.1043 | 724.1059 | 9.879483 | 9.6681   |
| 92  | M436T9_1 | 1.497321 | -0.58238 | -3.33999 | 0.012023 | 0.857546 | DOWN | 436.3366 | 436.3365 | 436.3368 | 9.281325 | 9.160617 |
| 93  | M652T9_3 | 1.417053 | -0.50289 | -3.45749 | 0.012195 | 0.85764  | DOWN | 652.4107 | 652.4104 | 652.4109 | 9.408458 | 9.324917 |
| 94  | M674T11  | 1.682043 | -0.75021 | -3.22313 | 0.012214 | 0.85765  | DOWN | 674.3593 | 674.359  | 674.3604 | 10.99152 | 10.9744  |
| 95  | M624T18_ | 5.414449 | 2.436814 | 4.311774 | 0.012217 | 0.857652 | UP   | 624.295  | 624.2945 | 624.2952 | 18.438   | 18.43767 |
| 96  | M284T10_ | 1.948169 | -0.96212 | -3.21131 | 0.0124   | 0.857749 | DOWN | 283.7355 | 283.7349 | 283.7357 | 10.14385 | 10.05935 |
| 97  | M632T11_ | 1.8811   | -0.91158 | -3.24914 | 0.01251  | 0.857805 | DOWN | 632.3493 | 632.349  | 632.3504 | 10.73328 | 10.69717 |
| 98  | M162T10_ | 1.937378 | -0.95411 | -3.41434 | 0.012717 | 0.857909 | DOWN | 162.3331 | 162.333  | 162.3332 | 9.914217 | 9.811217 |
| 99  | M543T9_2 | 1.656237 | -0.72791 | -3.3984  | 0.012726 | 0.857914 | DOWN | 543.2384 | 543.2377 | 543.2391 | 9.314817 | 9.205717 |
| 100 | M459T13  | 1.550411 | -0.63265 | -3.29326 | 0.012767 | 0.857934 | DOWN | 458.6287 | 458.6285 | 458.629  | 13.23031 | 13.21485 |
| 101 | M200T9_2 | 3.463059 | -1.79205 | -3.89947 | 0.012816 | 0.857958 | DOWN | 200.4267 | 200.4266 | 200.4274 | 9.295167 | 9.089733 |
| 102 | M337T9_1 | 2.33096  | -1.22092 | -3.27358 | 0.013124 | 0.858104 | DOWN | 337.3235 | 337.3146 | 337.3237 | 9.365833 | 9.1428   |
| 103 | M267T9_4 | 2.262018 | -1.17761 | -3.62946 | 0.013162 | 0.858122 | DOWN | 267.4392 | 267.4377 | 267.4396 | 9.350125 | 9.275917 |
| 104 | M439T19  | 1.511838 | -0.5963  | -3.32677 | 0.013399 | 0.858229 | DOWN | 438.7862 | 438.786  | 438.7868 | 19.067   | 19.05283 |

|     |          |          |          |          |          |          |      |          |          |          |          |          |
|-----|----------|----------|----------|----------|----------|----------|------|----------|----------|----------|----------|----------|
| 105 | M265T11_ | 2.02961  | -1.0212  | -3.1826  | 0.013443 | 0.858249 | DOWN | 265.0268 | 265.0268 | 265.0271 | 10.89125 | 10.879   |
| 106 | M1538T10 | 2.20081  | -1.13803 | -3.67862 | 0.013483 | 0.858267 | DOWN | 1537.633 | 1537.631 | 1537.635 | 9.929783 | 9.8378   |
| 107 | M780T10_ | 1.465561 | -0.55145 | -3.72488 | 0.01356  | 0.858301 | DOWN | 780.4589 | 780.4576 | 780.4595 | 9.550533 | 9.432183 |
| 108 | M299T40_ | 1.737789 | -0.79725 | -3.21804 | 0.013563 | 0.858302 | DOWN | 299.1487 | 299.1486 | 299.1489 | 39.60417 | 39.46017 |
| 109 | M371T30  | 3.302566 | -1.72359 | -4.10135 | 0.013808 | 0.858406 | DOWN | 371.2271 | 371.2261 | 371.2281 | 30.30375 | 30.26683 |
| 110 | M454T10_ | 3.287479 | -1.71698 | -3.41357 | 0.013859 | 0.858428 | DOWN | 453.8647 | 453.8591 | 453.865  | 9.636483 | 9.610767 |
| 111 | M1153T12 | 1.749392 | -0.80685 | -3.39288 | 0.014002 | 0.858487 | DOWN | 1153.102 | 1153.101 | 1153.103 | 12.2226  | 12.17807 |
| 112 | M894T10_ | 1.949084 | -0.9628  | -3.13363 | 0.014026 | 0.858496 | DOWN | 894.4214 | 894.42   | 894.4218 | 9.6432   | 9.556217 |
| 113 | M688T13  | 2.051985 | -1.03702 | -3.66266 | 0.014027 | 0.858497 | DOWN | 688.3752 | 688.3739 | 688.3758 | 13.28093 | 13.05417 |
| 114 | M376T42_ | 2.688788 | -1.42696 | -4.11632 | 0.014075 | 0.858517 | DOWN | 376.1965 | 376.1964 | 376.1966 | 42.03542 | 41.99217 |
| 115 | M1235T10 | 1.475266 | -0.56097 | -3.29452 | 0.014158 | 0.85855  | DOWN | 1234.586 | 1234.585 | 1234.587 | 9.624117 | 9.52595  |
| 116 | M313T41  | 1.248067 | -0.3197  | -3.85721 | 0.014339 | 0.858621 | DOWN | 313.2006 | 313.2005 | 313.2009 | 41.12917 | 40.91333 |
| 117 | M399T43_ | 1.49802  | -0.58306 | -3.20874 | 0.01497  | 0.858857 | DOWN | 399.2373 | 399.2372 | 399.2375 | 42.57467 | 42.3085  |
| 118 | M621T9_3 | 1.872917 | -0.90529 | -3.18778 | 0.014976 | 0.858859 | DOWN | 621.2348 | 621.2272 | 621.2351 | 9.1036   | 9.0864   |
| 119 | M220T9_1 | 8.360302 | -3.06356 | -4.02401 | 0.014982 | 0.858861 | DOWN | 220.1912 | 220.1862 | 220.1927 | 9.311525 | 9.146383 |
| 120 | M376T45  | 2.742137 | -1.4553  | -4.04219 | 0.015062 | 0.858889 | DOWN | 376.1964 | 376.1963 | 376.1966 | 44.8685  | 44.696   |
| 121 | M376T40  | 2.825987 | -1.49876 | -4.078   | 0.015068 | 0.858892 | DOWN | 376.1966 | 376.1964 | 376.1967 | 40.194   | 39.90633 |
| 122 | M283T9_3 | 3.03451  | -1.60146 | -3.62186 | 0.015114 | 0.858908 | DOWN | 283.2491 | 283.2489 | 283.2492 | 9.299525 | 9.24215  |
| 123 | M454T45  | 1.543281 | -0.626   | -3.10322 | 0.015144 | 0.858918 | DOWN | 454.2643 | 454.2642 | 454.2646 | 44.74625 | 44.14967 |
| 124 | M184T9_7 | 2.268932 | -1.18201 | -3.15321 | 0.015438 | 0.859019 | DOWN | 183.9652 | 183.965  | 183.9664 | 9.3494   | 9.132267 |
| 125 | M993T9   | 2.473341 | -1.30646 | -3.08582 | 0.015438 | 0.859019 | DOWN | 993.3064 | 993.3053 | 993.307  | 8.743925 | 8.701267 |
| 126 | M392T9_2 | 2.210969 | -1.14468 | -3.31767 | 0.015445 | 0.859022 | DOWN | 391.8279 | 391.8267 | 391.8301 | 9.235933 | 9.158833 |
| 127 | M414T12  | 1.752236 | -0.8092  | -3.20106 | 0.015657 | 0.859092 | DOWN | 414.1181 | 414.1178 | 414.1186 | 12.48495 | 12.44168 |
| 128 | M1063T10 | 2.09737  | -1.06858 | -3.21088 | 0.015788 | 0.859135 | DOWN | 1062.629 | 1062.628 | 1062.63  | 9.600067 | 9.556217 |
| 129 | M194T9_6 | 12.72427 | -3.66951 | -3.95518 | 0.016086 | 0.859229 | DOWN | 193.7918 | 193.7915 | 193.7925 | 9.311883 | 9.132267 |
| 130 | M740T10_ | 1.457554 | -0.54355 | -3.06612 | 0.016168 | 0.859254 | DOWN | 740.4638 | 740.4634 | 740.4645 | 9.573233 | 9.46325  |
| 131 | M214T25_ | 1.289079 | 0.36634  | 3.630449 | 0.016359 | 0.859312 | UP   | 214.1797 | 214.1797 | 214.18   | 24.56575 | 24.55033 |
| 132 | M739T9_1 | 2.678234 | -1.42128 | -3.15058 | 0.016406 | 0.859326 | DOWN | 738.6561 | 738.6557 | 738.6569 | 9.457083 | 9.38595  |
| 133 | M376T43_ | 2.764538 | -1.46704 | -3.90868 | 0.016685 | 0.859408 | DOWN | 376.1965 | 376.1963 | 376.1967 | 42.56775 | 42.323   |
| 134 | M809T12  | 1.608757 | -0.68595 | -3.02033 | 0.01682  | 0.859446 | DOWN | 809.3424 | 809.3421 | 809.343  | 11.58453 | 11.5697  |
| 135 | M287T41_ | 1.446703 | -0.53277 | -3.03994 | 0.017114 | 0.859528 | DOWN | 287.1486 | 287.1485 | 287.1488 | 40.5825  | 40.42417 |
| 136 | M279T11  | 2.788365 | -1.47942 | -2.99332 | 0.017249 | 0.859565 | DOWN | 279.2735 | 279.2728 | 279.2738 | 10.87761 | 10.80695 |
| 137 | M659T10_ | 1.147598 | -0.19862 | -3.21476 | 0.017292 | 0.859577 | DOWN | 658.6337 | 658.6332 | 658.6353 | 9.843017 | 9.73145  |
| 138 | M1168T11 | 1.767867 | -0.82201 | -2.99439 | 0.017292 | 0.859577 | DOWN | 1167.578 | 1167.578 | 1167.579 | 11.23303 | 11.19848 |
| 139 | M351T10_ | 2.353621 | -1.23488 | -3.11565 | 0.017342 | 0.85959  | DOWN | 351.3962 | 351.396  | 351.4031 | 9.856867 | 9.758367 |

|     |          |          |          |          |          |          |      |          |          |          |          |          |
|-----|----------|----------|----------|----------|----------|----------|------|----------|----------|----------|----------|----------|
| 140 | M1152T11 | 1.589578 | -0.66864 | -2.98043 | 0.01759  | 0.859655 | DOWN | 1152.21  | 1152.206 | 1152.212 | 10.92253 | 10.85018 |
| 141 | M450T43_ | 1.729847 | -0.79064 | -3.11732 | 0.017632 | 0.859666 | DOWN | 450.2331 | 450.2328 | 450.2332 | 43.445   | 43.33    |
| 142 | M1164T12 | 1.881084 | -0.91156 | -3.58276 | 0.017766 | 0.8597   | DOWN | 1163.593 | 1163.591 | 1163.593 | 12.20889 | 12.19282 |
| 143 | M423T11_ | 2.329528 | 1.220038 | 2.991327 | 0.018064 | 0.859775 | UP   | 423.4856 | 423.483  | 423.4902 | 10.9433  | 10.90197 |
| 144 | M641T24  | 2.668045 | 1.415783 | 3.836552 | 0.018173 | 0.859802 | UP   | 641.3293 | 641.3292 | 641.3298 | 24.14833 | 24.14133 |
| 145 | M271T9_4 | 1.781589 | -0.83316 | -3.1625  | 0.018442 | 0.859866 | DOWN | 270.8521 | 270.8516 | 270.8522 | 8.798117 | 8.715883 |
| 146 | M620T11_ | 1.818177 | -0.86249 | -3.47122 | 0.018637 | 0.859912 | DOWN | 620.2611 | 620.2607 | 620.2618 | 10.7046  | 10.69123 |
| 147 | M741T10_ | 1.502872 | -0.58772 | -3.12126 | 0.018668 | 0.859919 | DOWN | 741.4672 | 741.4668 | 741.4676 | 9.573233 | 9.46325  |
| 148 | M918T11  | 1.855401 | -0.89173 | -2.96849 | 0.018752 | 0.859938 | DOWN | 917.5357 | 917.5347 | 917.5362 | 10.58441 | 10.5663  |
| 149 | M653T10_ | 1.521378 | -0.60538 | -2.9391  | 0.018813 | 0.859952 | DOWN | 653.4062 | 653.4054 | 653.4067 | 9.818525 | 9.715683 |
| 150 | M632T10_ | 2.020762 | -1.0149  | -3.17197 | 0.018893 | 0.85997  | DOWN | 632.3693 | 632.3684 | 632.3701 | 9.840617 | 9.758367 |
| 151 | M635T12_ | 1.571777 | -0.6524  | -2.96461 | 0.018912 | 0.859975 | DOWN | 635.2889 | 635.2885 | 635.2896 | 11.59875 | 11.58453 |
| 152 | M699T11_ | 1.908762 | -0.93264 | -3.02402 | 0.018919 | 0.859976 | DOWN | 698.5431 | 698.5421 | 698.5432 | 10.89815 | 10.89125 |
| 153 | M299T42_ | 1.583824 | -0.66341 | -2.92161 | 0.019262 | 0.860052 | DOWN | 299.185  | 299.1849 | 299.1852 | 41.54617 | 41.316   |
| 154 | M365T9_7 | 2.210613 | -1.14445 | -2.91252 | 0.019577 | 0.860119 | DOWN | 364.8476 | 364.8464 | 364.8496 | 9.311883 | 9.0511   |
| 155 | M354T11_ | 1.361598 | -0.4453  | -2.908   | 0.01965  | 0.860134 | DOWN | 354.2749 | 354.2746 | 354.2752 | 10.6156  | 10.57532 |
| 156 | M868T10_ | 1.744705 | -0.80298 | -3.14651 | 0.019774 | 0.86016  | DOWN | 868.3689 | 868.3684 | 868.3692 | 9.6129   | 9.49445  |
| 157 | M404T41_ | 1.667322 | -0.73753 | -3.08937 | 0.019849 | 0.860175 | DOWN | 404.2639 | 404.2637 | 404.2642 | 40.66858 | 40.5825  |
| 158 | M659T9_3 | 1.469286 | -0.55511 | -2.9039  | 0.019894 | 0.860184 | DOWN | 659.1185 | 659.1181 | 659.1187 | 9.398375 | 9.324917 |
| 159 | M797T9_2 | 2.635211 | -1.39792 | -3.03372 | 0.019997 | 0.860205 | DOWN | 796.9115 | 796.911  | 796.9133 | 8.6816   | 8.6152   |
| 160 | M474T10_ | 1.459904 | -0.54587 | -3.18343 | 0.020163 | 0.860238 | DOWN | 474.3029 | 474.3025 | 474.3031 | 10.27172 | 10.21837 |
| 161 | M430T17  | 1.669498 | -0.73941 | -3.37884 | 0.020163 | 0.860238 | DOWN | 430.2943 | 430.2941 | 430.2954 | 17.2925  | 17.24883 |
| 162 | M455T9_9 | 3.180012 | -1.66903 | -3.56196 | 0.020211 | 0.860248 | DOWN | 455.0284 | 455.027  | 455.0327 | 9.2468   | 9.2033   |
| 163 | M361T10_ | 1.654474 | -0.72637 | -2.88461 | 0.020376 | 0.86028  | DOWN | 360.8071 | 360.8067 | 360.8077 | 9.918833 | 9.822117 |
| 164 | M475T9_1 | 3.724985 | 1.897234 | 2.904209 | 0.020393 | 0.860283 | UP   | 475.4175 | 475.4079 | 475.4192 | 9.254092 | 9.092333 |
| 165 | M311T22  | 1.508767 | -0.59337 | -2.89478 | 0.020412 | 0.860287 | DOWN | 311.185  | 311.1849 | 311.1852 | 22.377   | 22.35067 |
| 166 | M213T9_5 | 12.60286 | -3.65568 | -3.49029 | 0.020426 | 0.86029  | DOWN | 212.7741 | 212.7721 | 212.782  | 9.250817 | 9.160467 |
| 167 | M358T10_ | 1.305425 | -0.38452 | -2.88266 | 0.020451 | 0.860294 | DOWN | 357.7159 | 357.7158 | 357.7161 | 9.566317 | 9.447617 |
| 168 | M696T9_4 | 1.477144 | -0.56281 | -3.01922 | 0.020666 | 0.860335 | DOWN | 696.4371 | 696.4368 | 696.4384 | 9.498117 | 9.40135  |
| 169 | M648T9_1 | 2.317914 | -1.21283 | -3.15122 | 0.020939 | 0.860386 | DOWN | 647.8701 | 647.8696 | 647.8706 | 9.06315  | 9.032567 |
| 170 | M594T9_2 | 1.60216  | -0.68002 | -2.95383 | 0.020966 | 0.860391 | DOWN | 594.2459 | 594.2442 | 594.2464 | 8.996883 | 8.94625  |
| 171 | M457T9_5 | 4.168478 | -2.05952 | -2.92413 | 0.020969 | 0.860392 | DOWN | 457.1127 | 457.1124 | 457.1129 | 9.20405  | 9.129317 |
| 172 | M376T44_ | 2.557784 | -1.35489 | -3.52342 | 0.021054 | 0.860407 | DOWN | 376.1965 | 376.1964 | 376.1966 | 44.10633 | 44.07783 |
| 173 | M626T20  | 12.66581 | 3.662868 | 3.682077 | 0.021155 | 0.860425 | UP   | 626.3105 | 626.3105 | 626.3108 | 19.809   | 19.78    |
| 174 | M724T10_ | 1.528375 | -0.612   | -2.8859  | 0.021599 | 0.860504 | DOWN | 724.4512 | 724.4509 | 724.4519 | 10.32319 | 10.23087 |

|     |          |          |          |          |          |          |      |          |          |          |          |          |
|-----|----------|----------|----------|----------|----------|----------|------|----------|----------|----------|----------|----------|
| 175 | M389T10_ | 1.325996 | -0.40708 | -2.84948 | 0.021612 | 0.860506 | DOWN | 388.5895 | 388.5848 | 388.5899 | 9.92825  | 9.827283 |
| 176 | M193T10_ | 1.970417 | -0.9785  | -2.84427 | 0.02176  | 0.860531 | DOWN | 192.9918 | 192.9916 | 192.9919 | 9.9351   | 9.8378   |
| 177 | M200T9_1 | 2.330288 | -1.22051 | -2.92012 | 0.021803 | 0.860538 | DOWN | 200.1533 | 200.1525 | 200.1546 | 9.280767 | 9.219483 |
| 178 | M376T44_ | 2.423044 | -1.27682 | -3.62002 | 0.022059 | 0.860581 | DOWN | 376.1964 | 376.1964 | 376.1967 | 43.61783 | 43.4595  |
| 179 | M1743T10 | 1.632574 | -0.70715 | -3.10135 | 0.022164 | 0.860599 | DOWN | 1742.714 | 1742.712 | 1742.725 | 9.823575 | 9.759383 |
| 180 | M207T9_7 | 7.000766 | -2.80751 | -3.11617 | 0.022234 | 0.86061  | DOWN | 206.8114 | 206.811  | 206.8126 | 9.311883 | 9.133667 |
| 181 | M418T9_6 | 2.454413 | -1.29538 | -2.91101 | 0.022256 | 0.860614 | DOWN | 418.0563 | 418.055  | 418.0578 | 9.348558 | 9.146383 |
| 182 | M435T9_1 | 8.588461 | -3.1024  | -3.52557 | 0.022488 | 0.860651 | DOWN | 435.2817 | 435.2815 | 435.282  | 8.806967 | 8.697767 |
| 183 | M490T44_ | 1.545424 | -0.628   | -2.82167 | 0.022678 | 0.860681 | DOWN | 490.2643 | 490.264  | 490.2646 | 43.82358 | 43.589   |
| 184 | M288T10_ | 1.295723 | -0.37376 | -3.01566 | 0.022739 | 0.86069  | DOWN | 287.9915 | 287.9909 | 287.995  | 9.972483 | 9.8753   |
| 185 | M488T44_ | 1.804387 | -0.85151 | -3.06952 | 0.022779 | 0.860697 | DOWN | 488.285  | 488.2848 | 488.2851 | 43.91367 | 43.6895  |
| 186 | M319T9_2 | 2.793823 | -1.48224 | -2.84054 | 0.022956 | 0.860724 | DOWN | 319.0159 | 319.0156 | 319.016  | 9.469225 | 9.401917 |
| 187 | M212T10_ | 1.347    | -0.42975 | -2.80143 | 0.023169 | 0.860756 | DOWN | 211.7135 | 211.7135 | 211.7136 | 9.801983 | 9.715683 |
| 188 | M443T11_ | 2.288399 | -1.19434 | -3.08845 | 0.023216 | 0.860763 | DOWN | 442.6555 | 442.6554 | 442.6565 | 10.94603 | 10.88995 |
| 189 | M475T9_8 | 2.781491 | -1.47586 | -3.46446 | 0.023279 | 0.860773 | DOWN | 475.0587 | 475.0587 | 475.059  | 9.146383 | 9.13445  |
| 190 | M187T9_5 | 2.458677 | -1.29788 | -2.79422 | 0.023418 | 0.860793 | DOWN | 187.4261 | 187.4252 | 187.4279 | 9.311883 | 9.132267 |
| 191 | M804T10_ | 1.557966 | -0.63966 | -2.93809 | 0.023448 | 0.860798 | DOWN | 803.8475 | 803.8471 | 803.8478 | 9.633442 | 9.510117 |
| 192 | M1674T10 | 1.461652 | -0.5476  | -2.89151 | 0.023839 | 0.860854 | DOWN | 1673.953 | 1673.951 | 1673.955 | 9.821308 | 9.715683 |
| 193 | M257T10_ | 1.579481 | -0.65945 | -2.78115 | 0.02391  | 0.860864 | DOWN | 256.7561 | 256.7522 | 256.7562 | 9.766742 | 9.65225  |
| 194 | M352T10_ | 2.245969 | -1.16734 | -2.98288 | 0.024112 | 0.860892 | DOWN | 352.1078 | 352.1078 | 352.1081 | 9.743767 | 9.636483 |
| 195 | M446T40_ | 1.38473  | -0.46961 | -2.82251 | 0.024196 | 0.860904 | DOWN | 446.2383 | 446.2381 | 446.2384 | 40.381   | 40.20833 |
| 196 | M239T26  | 1.268704 | -0.34336 | -2.77538 | 0.024706 | 0.860972 | DOWN | 239.1276 | 239.1275 | 239.1277 | 25.99525 | 25.96667 |
| 197 | M1169T11 | 1.808326 | -0.85465 | -2.75782 | 0.024784 | 0.860983 | DOWN | 1168.582 | 1168.58  | 1168.582 | 11.22427 | 11.19848 |
| 198 | M159T9   | 2.182475 | -1.12597 | -2.91201 | 0.024858 | 0.860992 | DOWN | 159.4663 | 159.4659 | 159.4664 | 9.352683 | 9.26575  |
| 199 | M749T9   | 2.188975 | -1.13026 | -2.75787 | 0.024944 | 0.861004 | DOWN | 749.3951 | 749.3941 | 749.3971 | 9.3219   | 9.1158   |
| 200 | M203T9_2 | 1.878918 | -0.9099  | -3.19429 | 0.025044 | 0.861016 | DOWN | 202.9713 | 202.971  | 202.9714 | 9.261975 | 9.219483 |
| 201 | M642T18_ | 3.086314 | 1.625885 | 3.454671 | 0.02535  | 0.861055 | UP   | 642.3057 | 642.3055 | 642.3058 | 17.58367 | 17.5555  |
| 202 | M327T22  | 1.267247 | -0.3417  | -2.75022 | 0.025417 | 0.861064 | DOWN | 327.0079 | 327.0078 | 327.0082 | 21.51583 | 21.47983 |
| 203 | M879T10_ | 1.50178  | -0.58667 | -2.92951 | 0.025499 | 0.861074 | DOWN | 879.3596 | 879.3591 | 879.36   | 9.6129   | 9.49445  |
| 204 | M304T11_ | 2.166023 | 1.115049 | 2.740906 | 0.025514 | 0.861076 | UP   | 303.8254 | 303.8249 | 303.8255 | 10.89125 | 10.879   |
| 205 | M349T9_6 | 1.777993 | -0.83025 | -2.8333  | 0.025571 | 0.861083 | DOWN | 348.6921 | 348.6905 | 348.6966 | 9.158767 | 9.11405  |
| 206 | M478T9_3 | 1.853237 | 0.890047 | 2.957284 | 0.025739 | 0.861103 | UP   | 478.1813 | 478.1793 | 478.1827 | 9.365833 | 9.232283 |
| 207 | M371T2   | 1.959841 | -0.97074 | -3.32423 | 0.025836 | 0.861115 | DOWN | 371.1009 | 371.1008 | 371.1009 | 2.458783 | 2.31565  |
| 208 | M300T10_ | 1.537663 | -0.62074 | -2.92986 | 0.0259   | 0.861123 | DOWN | 300.4916 | 300.4914 | 300.4917 | 9.916617 | 9.822117 |
| 209 | M206T11_ | 1.411383 | -0.49711 | -2.75246 | 0.025996 | 0.861134 | DOWN | 206.0567 | 206.0562 | 206.0569 | 10.92158 | 10.879   |

|     |          |          |          |          |          |          |      |          |          |          |          |          |
|-----|----------|----------|----------|----------|----------|----------|------|----------|----------|----------|----------|----------|
| 210 | M454T9_2 | 2.487846 | -1.3149  | -3.14889 | 0.026084 | 0.861145 | DOWN | 454.4971 | 454.4932 | 454.4975 | 9.307417 | 9.132033 |
| 211 | M966T11_ | 2.370736 | 1.245335 | 2.887887 | 0.026092 | 0.861146 | UP   | 965.7468 | 965.7449 | 965.7494 | 10.89125 | 10.85018 |
| 212 | M396T18  | 3.725704 | 1.897513 | 3.247705 | 0.026099 | 0.861146 | UP   | 396.2455 | 396.2449 | 396.2463 | 18.29492 | 18.239   |
| 213 | M967T10  | 2.35596  | -1.23631 | -2.93606 | 0.026619 | 0.861207 | DOWN | 966.5548 | 966.5533 | 966.5565 | 9.955008 | 9.822117 |
| 214 | M588T10_ | 1.609416 | -0.68654 | -2.74314 | 0.026657 | 0.861211 | DOWN | 588.4222 | 588.4213 | 588.4229 | 9.980983 | 9.916767 |
| 215 | M229T9_6 | 1.474477 | -0.5602  | -2.79319 | 0.026679 | 0.861214 | DOWN | 228.9102 | 228.9083 | 228.9108 | 9.311883 | 9.1322   |
| 216 | M432T9_7 | 1.676586 | -0.74553 | -2.70595 | 0.026845 | 0.861232 | DOWN | 432.1839 | 432.1829 | 432.1862 | 9.250817 | 9.146383 |
| 217 | M500T10_ | 1.893468 | -0.92103 | -2.9079  | 0.027306 | 0.861283 | DOWN | 499.962  | 499.9615 | 499.9625 | 10.13345 | 10.02755 |
| 218 | M1627T9  | 1.949405 | -0.96303 | -2.7368  | 0.027513 | 0.861305 | DOWN | 1627.417 | 1627.415 | 1627.423 | 9.311883 | 9.160467 |
| 219 | M805T10_ | 1.889952 | -0.91835 | -3.01909 | 0.027552 | 0.861309 | DOWN | 804.8506 | 804.85   | 804.8513 | 9.635933 | 9.52515  |
| 220 | M359T11_ | 1.486448 | -0.57187 | -2.73613 | 0.027659 | 0.861321 | DOWN | 359.3603 | 359.3568 | 359.3609 | 10.90669 | 10.80695 |
| 221 | M324T10_ | 1.498754 | -0.58376 | -2.98403 | 0.027681 | 0.861323 | DOWN | 324.4312 | 324.4293 | 324.4317 | 9.75165  | 9.634283 |
| 222 | M214T10_ | 1.576379 | -0.65661 | -2.7023  | 0.027742 | 0.861329 | DOWN | 213.5311 | 213.5233 | 213.5323 | 9.802117 | 9.7124   |
| 223 | M484T30  | 2.016484 | -1.01184 | -3.33236 | 0.027756 | 0.861331 | DOWN | 484.3412 | 484.3409 | 484.3484 | 30.3535  | 30.27883 |
| 224 | M235T9_6 | 1.480134 | -0.56573 | -2.78655 | 0.027819 | 0.861337 | DOWN | 234.8913 | 234.8911 | 234.8914 | 9.296133 | 9.11795  |
| 225 | M866T11  | 2.088442 | -1.06243 | -2.96675 | 0.028021 | 0.861358 | DOWN | 866.0167 | 866.0144 | 866.0177 | 11.21864 | 11.1927  |
| 226 | M201T10_ | 1.860528 | -0.89571 | -2.90427 | 0.02815  | 0.861372 | DOWN | 201.1797 | 201.1795 | 201.1797 | 9.828367 | 9.699733 |
| 227 | M614T11_ | 1.670508 | -0.74029 | -2.67261 | 0.028291 | 0.861386 | DOWN | 614.3023 | 614.2997 | 614.3026 | 10.69717 | 10.50338 |
| 228 | M410T9_3 | 1.695325 | -0.76156 | -2.70305 | 0.028319 | 0.861389 | DOWN | 409.6906 | 409.6836 | 409.691  | 9.234417 | 9.1503   |
| 229 | M665T16  | 1.873724 | -0.90591 | -2.82829 | 0.028385 | 0.861395 | DOWN | 664.537  | 664.5356 | 664.5378 | 15.69602 | 15.66225 |
| 230 | M230T14_ | 1.424547 | -0.5105  | -2.88407 | 0.028389 | 0.861396 | DOWN | 230.1899 | 230.1897 | 230.1902 | 14.39193 | 14.38493 |
| 231 | M315T9_3 | 1.765263 | -0.81988 | -2.81349 | 0.028464 | 0.861403 | DOWN | 314.8198 | 314.8197 | 314.8202 | 9.259867 | 9.146383 |
| 232 | M426T27_ | 1.541956 | -0.62476 | -2.67284 | 0.02871  | 0.861427 | DOWN | 426.2984 | 426.2981 | 426.2987 | 27.01592 | 26.99833 |
| 233 | M645T9_5 | 2.81423  | -1.49274 | -2.97767 | 0.028745 | 0.861431 | DOWN | 645.381  | 645.3732 | 645.384  | 9.1503   | 9.1158   |
| 234 | M1777T10 | 1.515868 | -0.60014 | -2.6663  | 0.028851 | 0.861441 | DOWN | 1777.139 | 1777.136 | 1777.142 | 9.811408 | 9.715683 |
| 235 | M609T10_ | 2.271129 | 1.18341  | 2.859354 | 0.029294 | 0.861483 | UP   | 609.4862 | 609.485  | 609.4864 | 9.964417 | 9.859233 |
| 236 | M237T10_ | 1.843842 | 0.882715 | 2.723483 | 0.029302 | 0.861484 | UP   | 237.157  | 237.1567 | 237.1624 | 9.615058 | 9.52515  |
| 237 | M864T10_ | 1.885555 | -0.91499 | -2.67367 | 0.029342 | 0.861488 | DOWN | 864.1631 | 864.1619 | 864.1641 | 9.979667 | 9.932567 |
| 238 | M219T9_1 | 2.227023 | 1.155117 | 3.157545 | 0.029358 | 0.861489 | UP   | 219.4693 | 219.4676 | 219.4715 | 9.365925 | 9.103733 |
| 239 | M263T10_ | 1.349691 | -0.43263 | -2.64787 | 0.029361 | 0.86149  | DOWN | 262.7053 | 262.7051 | 262.7056 | 9.914217 | 9.636483 |
| 240 | M673T10_ | 1.456692 | -0.5427  | -2.73861 | 0.029404 | 0.861494 | DOWN | 673.4519 | 673.4516 | 673.4531 | 10.38893 | 10.34542 |
| 241 | M554T10_ | 1.826646 | -0.8692  | -2.81205 | 0.029531 | 0.861506 | DOWN | 553.8298 | 553.8295 | 553.8301 | 9.6628   | 9.571683 |
| 242 | M482T10_ | 1.624598 | -0.70008 | -2.7941  | 0.029566 | 0.861509 | DOWN | 482.1945 | 482.194  | 482.1955 | 9.896133 | 9.886433 |
| 243 | M295T26  | 1.423921 | -0.50987 | -3.11351 | 0.029688 | 0.86152  | DOWN | 295.1902 | 295.19   | 295.1904 | 26.00242 | 25.96667 |
| 244 | M508T39_ | 1.831557 | -0.87307 | -2.99227 | 0.029713 | 0.861522 | DOWN | 508.311  | 508.3106 | 508.3114 | 38.856   | 38.83017 |

|     |          |          |          |          |          |          |      |          |          |          |          |          |
|-----|----------|----------|----------|----------|----------|----------|------|----------|----------|----------|----------|----------|
| 245 | M357T10_ | 2.355725 | -1.23617 | -3.0749  | 0.029824 | 0.861532 | DOWN | 356.7734 | 356.7732 | 356.7742 | 9.758367 | 9.728817 |
| 246 | M349T9_1 | 4.415264 | -2.1425  | -3.01092 | 0.029831 | 0.861533 | DOWN | 348.5533 | 348.5519 | 348.5568 | 9.27255  | 9.1178   |
| 247 | M503T9_1 | 2.181434 | -1.12528 | -2.65446 | 0.029947 | 0.861543 | DOWN | 503.4389 | 503.4384 | 503.4416 | 9.273908 | 9.129317 |
| 248 | M474T10_ | 1.744881 | 0.803128 | 2.731612 | 0.029948 | 0.861544 | UP   | 473.9232 | 473.9165 | 473.9234 | 9.547133 | 9.509533 |
| 249 | M285T14  | 3.897726 | -1.96263 | -3.20535 | 0.03018  | 0.861564 | DOWN | 284.9604 | 284.9598 | 284.9608 | 13.71163 | 13.69737 |
| 250 | M288T23_ | 1.977339 | -0.98356 | -2.82267 | 0.030256 | 0.861571 | DOWN | 288.3624 | 288.3567 | 288.3626 | 22.91467 | 22.90033 |
| 251 | M402T11_ | 4.140095 | 2.049664 | 2.947686 | 0.03036  | 0.86158  | UP   | 402.2898 | 402.2861 | 402.2909 | 10.89497 | 10.873   |
| 252 | M643T9_1 | 1.8418   | -0.88112 | -2.95913 | 0.030451 | 0.861588 | DOWN | 642.7544 | 642.7541 | 642.755  | 9.271592 | 9.20785  |
| 253 | M1278T45 | 1.335087 | 0.416934 | 3.209776 | 0.030485 | 0.861591 | UP   | 1277.854 | 1277.853 | 1277.856 | 44.8685  | 44.854   |
| 254 | M188T9_6 | 2.186703 | -1.12876 | -2.68825 | 0.030613 | 0.861602 | DOWN | 187.9414 | 187.9406 | 187.9423 | 9.342692 | 9.1587   |
| 255 | M546T9_4 | 2.488478 | -1.31526 | -2.73705 | 0.03066  | 0.861606 | DOWN | 546.4502 | 546.4417 | 546.4514 | 9.367183 | 9.174967 |
| 256 | M376T41_ | 2.637423 | -1.39913 | -3.26518 | 0.030678 | 0.861608 | DOWN | 376.1965 | 376.1963 | 376.1968 | 40.85575 | 40.64017 |
| 257 | M537T11_ | 1.363545 | -0.44736 | -2.61839 | 0.030829 | 0.861621 | DOWN | 536.6633 | 536.6627 | 536.6636 | 10.57468 | 10.5518  |
| 258 | M274T9_4 | 1.826844 | -0.86935 | -2.63229 | 0.030879 | 0.861625 | DOWN | 274.0601 | 274.0599 | 274.0602 | 8.818558 | 8.772383 |
| 259 | M604T25  | 2.127556 | -1.0892  | -3.21634 | 0.030948 | 0.861631 | DOWN | 604.4398 | 604.4397 | 604.44   | 24.92633 | 24.89917 |
| 260 | M1233T10 | 1.37021  | -0.4544  | -2.78569 | 0.030963 | 0.861632 | DOWN | 1232.58  | 1232.58  | 1232.581 | 9.637333 | 9.52595  |
| 261 | M1032T12 | 1.945953 | -0.96048 | -2.68827 | 0.031005 | 0.861635 | DOWN | 1032.042 | 1032.041 | 1032.046 | 11.6196  | 11.51078 |
| 262 | M703T10_ | 1.787109 | -0.83763 | -2.86465 | 0.031008 | 0.861636 | DOWN | 703.4065 | 703.3989 | 703.4073 | 9.811408 | 9.416817 |
| 263 | M289T10_ | 1.482204 | -0.56774 | -2.65216 | 0.031036 | 0.861638 | DOWN | 288.8068 | 288.8065 | 288.8077 | 9.960467 | 9.853533 |
| 264 | M454T9_1 | 2.351148 | 1.233365 | 3.118642 | 0.031072 | 0.861641 | UP   | 454.3981 | 454.3889 | 454.3981 | 9.36515  | 9.1445   |
| 265 | M406T42  | 1.747671 | 0.805434 | 2.734875 | 0.03111  | 0.861644 | UP   | 406.2069 | 406.2068 | 406.2072 | 41.7405  | 41.44583 |
| 266 | M498T10_ | 1.715035 | -0.77824 | -2.7145  | 0.031226 | 0.861654 | DOWN | 497.9783 | 497.9776 | 497.9785 | 10.3736  | 10.3391  |
| 267 | M434T9_1 | 1.382296 | -0.46707 | -2.63933 | 0.031486 | 0.861675 | DOWN | 434.0325 | 434.032  | 434.0332 | 8.992917 | 8.90715  |
| 268 | M261T9_1 | 1.551484 | -0.63365 | -2.65247 | 0.031637 | 0.861687 | DOWN | 260.5286 | 260.5206 | 260.5296 | 9.348817 | 9.26575  |
| 269 | M350T9_6 | 1.975868 | -0.98249 | -2.65687 | 0.031909 | 0.861709 | DOWN | 349.9548 | 349.9544 | 349.9581 | 9.160617 | 9.09495  |
| 270 | M404T9_4 | 1.708791 | -0.77298 | -2.68829 | 0.032013 | 0.861717 | DOWN | 404.0629 | 404.0622 | 404.0634 | 8.992917 | 8.878667 |
| 271 | M1705T10 | 1.241963 | -0.31262 | -2.66354 | 0.032075 | 0.861722 | DOWN | 1705.176 | 1705.173 | 1705.178 | 9.816317 | 9.715683 |
| 272 | M244T22_ | 1.675272 | -0.7444  | -2.63102 | 0.032246 | 0.861736 | DOWN | 244.1694 | 244.1692 | 244.1695 | 21.50933 | 21.49367 |
| 273 | M348T10_ | 3.148303 | 1.654574 | 2.582425 | 0.032554 | 0.861759 | UP   | 347.5612 | 347.561  | 347.5612 | 9.8322   | 9.7124   |
| 274 | M870T10_ | 1.83518  | -0.87592 | -2.81549 | 0.032555 | 0.861759 | DOWN | 869.8723 | 869.8712 | 869.8741 | 9.597067 | 9.509533 |
| 275 | M320T9_1 | 2.842985 | -1.50741 | -2.83573 | 0.032816 | 0.861779 | DOWN | 319.6538 | 319.6534 | 319.654  | 9.296458 | 9.24215  |
| 276 | M341T10_ | 2.722623 | -1.445   | -2.8107  | 0.032925 | 0.861787 | DOWN | 340.9228 | 340.9225 | 340.9229 | 9.859983 | 9.758367 |
| 277 | M447T11_ | 1.663619 | -0.73432 | -2.59311 | 0.032964 | 0.86179  | DOWN | 447.1691 | 447.1688 | 447.1696 | 11.23541 | 11.19848 |
| 278 | M470T10_ | 1.958136 | -0.96948 | -2.83169 | 0.032965 | 0.86179  | DOWN | 470.2597 | 470.2592 | 470.2599 | 10.11445 | 10.04355 |
| 279 | M871T10_ | 2.435709 | -1.28434 | -2.68446 | 0.032985 | 0.861792 | DOWN | 871.0683 | 871.0682 | 871.0698 | 9.948825 | 9.885167 |



|     |          |          |          |          |          |          |      |          |          |          |          |          |
|-----|----------|----------|----------|----------|----------|----------|------|----------|----------|----------|----------|----------|
| 280 | M674T21  | 6.787381 | 2.762855 | 3.191029 | 0.033048 | 0.861796 | UP   | 674.332  | 674.3316 | 674.3326 | 20.62117 | 20.60933 |
| 281 | M582T9_2 | 2.201751 | -1.13865 | -2.70896 | 0.033121 | 0.861802 | DOWN | 582.1979 | 582.197  | 582.1979 | 9.250817 | 9.22495  |
| 282 | M792T10_ | 1.700999 | -0.76638 | -2.65117 | 0.033131 | 0.861802 | DOWN | 791.5187 | 791.5177 | 791.5217 | 9.91765  | 9.79535  |
| 283 | M174T9_1 | 2.016626 | -1.01194 | -2.59026 | 0.033189 | 0.861807 | DOWN | 173.842  | 173.8413 | 173.8422 | 9.26575  | 9.146383 |
| 284 | M680T10_ | 1.94826  | 0.962186 | 2.581315 | 0.033305 | 0.861815 | UP   | 679.9742 | 679.9683 | 679.9746 | 9.880683 | 9.8207   |
| 285 | M382T9_9 | 1.632814 | -0.70736 | -2.57971 | 0.033352 | 0.861819 | DOWN | 382.0997 | 382.0993 | 382.1015 | 9.174883 | 9.145433 |
| 286 | M341T11_ | 2.825867 | -1.49869 | -2.75759 | 0.033385 | 0.861821 | DOWN | 340.8399 | 340.8394 | 340.84   | 10.8926  | 10.87708 |
| 287 | M666T30  | 3.217417 | 1.685903 | 3.086973 | 0.03353  | 0.861831 | UP   | 666.4482 | 666.4477 | 666.4488 | 30.26633 | 30.25233 |
| 288 | M309T9_3 | 2.430257 | -1.28111 | -2.65727 | 0.033582 | 0.861835 | DOWN | 309.4286 | 309.4256 | 309.4352 | 9.110833 | 8.974933 |
| 289 | M288T9_2 | 2.117846 | -1.0826  | -2.65755 | 0.033801 | 0.861851 | DOWN | 287.7512 | 287.7498 | 287.752  | 9.339433 | 9.1322   |
| 290 | M299T9_1 | 2.100853 | -1.07098 | -2.56295 | 0.033844 | 0.861854 | DOWN | 298.749  | 298.7482 | 298.7498 | 9.213392 | 9.126783 |
| 291 | M1014T16 | 1.535198 | -0.61843 | -2.89635 | 0.03388  | 0.861856 | DOWN | 1014.445 | 1014.444 | 1014.446 | 15.515   | 15.49638 |
| 292 | M579T9_6 | 1.71707  | -0.77995 | -2.83319 | 0.033934 | 0.86186  | DOWN | 579.0305 | 579.0289 | 579.0309 | 9.220817 | 9.158833 |
| 293 | M693T10_ | 1.529059 | -0.61264 | -2.73872 | 0.034044 | 0.861868 | DOWN | 693.2948 | 693.2938 | 693.2951 | 9.605683 | 9.510117 |
| 294 | M769T10_ | 1.430629 | -0.51665 | -2.55233 | 0.034138 | 0.861874 | DOWN | 769.4075 | 769.4049 | 769.4089 | 9.956417 | 9.90755  |
| 295 | M266T24  | 2.695268 | -1.43043 | -3.12906 | 0.034161 | 0.861876 | DOWN | 266.1827 | 266.1826 | 266.1831 | 23.83125 | 23.79017 |
| 296 | M469T9_4 | 3.293795 | -1.71975 | -3.03782 | 0.034165 | 0.861876 | DOWN | 469.0828 | 469.0807 | 469.0835 | 9.26005  | 9.1158   |
| 297 | M1288T10 | 1.442003 | -0.52807 | -2.55631 | 0.03419  | 0.861878 | DOWN | 1287.715 | 1287.715 | 1287.717 | 9.9174   | 9.806367 |
| 298 | M1733T10 | 1.871787 | -0.90442 | -2.65819 | 0.034264 | 0.861883 | DOWN | 1732.939 | 1732.937 | 1732.939 | 9.914217 | 9.8378   |
| 299 | M425T13_ | 1.559841 | -0.6414  | -2.85334 | 0.034304 | 0.861886 | DOWN | 424.8503 | 424.8499 | 424.8513 | 13.33183 | 13.31728 |
| 300 | M214T9_5 | 2.279529 | -1.18874 | -3.10052 | 0.034526 | 0.861901 | DOWN | 213.6931 | 213.6919 | 213.6934 | 9.2752   | 9.1322   |
| 301 | M436T9_1 | 1.802134 | -0.84971 | -2.69072 | 0.034734 | 0.861915 | DOWN | 436.4198 | 436.4192 | 436.4201 | 9.349692 | 9.146383 |
| 302 | M797T9_4 | 2.301609 | -1.20264 | -2.63893 | 0.034772 | 0.861917 | DOWN | 797.4135 | 797.4119 | 797.4145 | 8.74945  | 8.6152   |
| 303 | M782T9   | 2.197876 | -1.13611 | -2.55881 | 0.034802 | 0.861919 | DOWN | 781.5766 | 781.576  | 781.5777 | 9.296458 | 9.219483 |
| 304 | M415T20_ | 2.887648 | -1.52989 | -2.91365 | 0.034859 | 0.861923 | DOWN | 415.2582 | 415.2492 | 415.259  | 20.28767 | 20.25983 |
| 305 | M694T10_ | 1.500459 | -0.5854  | -2.59973 | 0.035102 | 0.861939 | DOWN | 694.4943 | 694.494  | 694.4948 | 9.5502   | 9.4632   |
| 306 | M689T10_ | 1.345085 | -0.4277  | -2.53129 | 0.035185 | 0.861945 | DOWN | 689.4404 | 689.4396 | 689.4417 | 9.823575 | 9.715683 |
| 307 | M288T21_ | 2.901477 | 1.536788 | 2.803458 | 0.035213 | 0.861947 | UP   | 288.3096 | 288.3074 | 288.311  | 21.385   | 21.34867 |
| 308 | M264T11_ | 3.260108 | -1.70492 | -2.64301 | 0.035292 | 0.861952 | DOWN | 264.2888 | 264.2882 | 264.2891 | 10.8914  | 10.87765 |
| 309 | M891T10_ | 1.772157 | -0.82551 | -2.55927 | 0.035294 | 0.861952 | DOWN | 891.3541 | 891.3533 | 891.3549 | 9.60105  | 9.509533 |
| 310 | M209T42  | 1.586694 | -0.66602 | -2.73584 | 0.035534 | 0.861967 | DOWN | 209.1534 | 209.1532 | 209.1534 | 42.1505  | 41.93483 |
| 311 | M333T9_2 | 1.248686 | -0.32041 | -2.67716 | 0.035627 | 0.861973 | DOWN | 333.2056 | 333.2053 | 333.2057 | 9.432583 | 9.324917 |
| 312 | M163T14_ | 1.671392 | -0.74105 | -2.70453 | 0.035637 | 0.861974 | DOWN | 163.1115 | 163.1114 | 163.1115 | 14.2237  | 14.2082  |
| 313 | M383T19  | 2.053547 | 1.038118 | 2.575161 | 0.035657 | 0.861975 | UP   | 383.1748 | 383.1745 | 383.1749 | 19.32983 | 19.3025  |
| 314 | M325T10_ | 1.479377 | -0.56499 | -2.85908 | 0.035698 | 0.861978 | DOWN | 324.7171 | 324.7167 | 324.7173 | 9.81635  | 9.715683 |

|     |          |          |          |          |          |          |      |          |          |          |          |          |
|-----|----------|----------|----------|----------|----------|----------|------|----------|----------|----------|----------|----------|
| 315 | M869T10_ | 1.604144 | -0.6818  | -2.60337 | 0.035727 | 0.86198  | DOWN | 868.8702 | 868.8697 | 868.871  | 9.613367 | 9.49445  |
| 316 | M433T9_1 | 1.720231 | -0.7826  | -2.51919 | 0.035888 | 0.86199  | DOWN | 432.5206 | 432.5195 | 432.5206 | 9.351892 | 9.191133 |
| 317 | M402T11_ | 2.852103 | 1.512026 | 2.735323 | 0.035964 | 0.861994 | UP   | 402.1099 | 402.1024 | 402.1163 | 10.93097 | 10.86008 |
| 318 | M548T40_ | 1.48025  | -0.56584 | -2.73105 | 0.036251 | 0.862012 | DOWN | 548.3428 | 548.3423 | 548.343  | 40.49617 | 40.35233 |
| 319 | M615T9_1 | 2.097648 | -1.06877 | -2.74128 | 0.036317 | 0.862016 | DOWN | 614.8622 | 614.8567 | 614.8629 | 9.206233 | 9.146383 |
| 320 | M319T36  | 1.452666 | -0.5387  | -2.51841 | 0.036361 | 0.862019 | DOWN | 319.284  | 319.2834 | 319.2844 | 36.28083 | 36.28    |
| 321 | M812T11_ | 1.494357 | -0.57952 | -2.53699 | 0.036552 | 0.862031 | DOWN | 812.3613 | 812.361  | 812.3618 | 11.13477 | 11.12207 |
| 322 | M644T19  | 1.428376 | 0.514376 | 2.537641 | 0.036618 | 0.862034 | UP   | 644.4709 | 644.4701 | 644.4713 | 18.66033 | 18.60533 |
| 323 | M869T10_ | 1.664641 | -0.73521 | -2.61637 | 0.036786 | 0.862045 | DOWN | 869.3718 | 869.3714 | 869.373  | 9.61185  | 9.49445  |
| 324 | M608T43_ | 1.135454 | -0.18327 | -2.52936 | 0.036863 | 0.862049 | DOWN | 608.3639 | 608.3635 | 608.3641 | 42.78325 | 42.62517 |
| 325 | M227T9_9 | 4.10633  | -2.03785 | -2.82082 | 0.036933 | 0.862053 | DOWN | 227.1151 | 227.112  | 227.119  | 8.731583 | 8.679733 |
| 326 | M399T12_ | 1.954951 | 0.967133 | 2.893493 | 0.03696  | 0.862055 | UP   | 399.2932 | 399.2932 | 399.2936 | 12.35537 | 12.28105 |
| 327 | M451T9_1 | 1.814699 | -0.85973 | -2.56171 | 0.037191 | 0.862069 | DOWN | 451.348  | 451.3478 | 451.3512 | 9.311525 | 9.129317 |
| 328 | M429T11_ | 1.458969 | -0.54495 | -2.65066 | 0.037245 | 0.862072 | DOWN | 428.7251 | 428.7243 | 428.7261 | 10.91977 | 10.84487 |
| 329 | M504T11_ | 1.52423  | -0.60808 | -2.65925 | 0.037483 | 0.862085 | DOWN | 504.1677 | 504.1676 | 504.1682 | 11.22302 | 11.19848 |
| 330 | M563T11_ | 1.583931 | -0.66351 | -2.52357 | 0.03751  | 0.862087 | DOWN | 563.2536 | 563.2532 | 563.2546 | 11.25916 | 11.23632 |
| 331 | M332T10_ | 1.814073 | -0.85923 | -2.8112  | 0.037642 | 0.862095 | DOWN | 331.6125 | 331.6123 | 331.6128 | 9.830508 | 9.715683 |
| 332 | M393T19_ | 2.814642 | 1.492952 | 2.893757 | 0.037792 | 0.862103 | UP   | 393.2898 | 393.2821 | 393.2903 | 18.943   | 18.89283 |
| 333 | M485T21  | 2.010816 | 1.007781 | 2.874808 | 0.03782  | 0.862105 | UP   | 485.3367 | 485.3366 | 485.3374 | 20.622   | 20.56367 |
| 334 | M563T11_ | 1.68963  | -0.75671 | -2.49443 | 0.037854 | 0.862107 | DOWN | 562.69   | 562.6892 | 562.6908 | 10.64984 | 10.61512 |
| 335 | M1024T10 | 1.492355 | -0.57759 | -2.49212 | 0.037984 | 0.862114 | DOWN | 1023.557 | 1023.555 | 1023.558 | 9.577683 | 9.46325  |
| 336 | M396T11_ | 1.455035 | -0.54105 | -2.49094 | 0.038032 | 0.862117 | DOWN | 395.5196 | 395.5176 | 395.525  | 10.93208 | 10.89125 |
| 337 | M299T9_4 | 3.057301 | -1.61226 | -2.60146 | 0.038105 | 0.862121 | DOWN | 299.3714 | 299.3709 | 299.3716 | 9.134767 | 9.1011   |
| 338 | M335T9_6 | 1.685631 | -0.75329 | -2.49102 | 0.038123 | 0.862122 | DOWN | 334.7675 | 334.767  | 334.7733 | 9.249433 | 9.13445  |
| 339 | M358T10_ | 2.811606 | 1.491394 | 2.645619 | 0.038274 | 0.86213  | UP   | 357.9509 | 357.9507 | 357.9513 | 9.9847   | 9.8914   |
| 340 | M698T10_ | 2.000324 | -1.00023 | -2.61217 | 0.038432 | 0.862139 | DOWN | 697.9229 | 697.9216 | 697.9237 | 9.830833 | 9.683817 |
| 341 | M189T9_1 | 2.657799 | -1.41023 | -2.72977 | 0.038465 | 0.86214  | DOWN | 189.4786 | 189.4784 | 189.4791 | 9.26575  | 9.1911   |
| 342 | M260T9_1 | 2.057055 | -1.04058 | -2.52521 | 0.038488 | 0.862142 | DOWN | 259.6223 | 259.6213 | 259.6239 | 9.295817 | 9.1587   |
| 343 | M628T21  | 5.054171 | 2.337475 | 3.02493  | 0.038853 | 0.862161 | UP   | 628.3263 | 628.3262 | 628.3265 | 20.68617 | 20.679   |
| 344 | M310T17  | 1.702071 | 0.767291 | 2.635129 | 0.039027 | 0.862171 | UP   | 310.2328 | 310.2194 | 310.2332 | 16.94283 | 16.8845  |
| 345 | M382T9_1 | 1.955344 | -0.96742 | -2.46676 | 0.0391   | 0.862175 | DOWN | 382.1508 | 382.1501 | 382.1555 | 9.3474   | 9.1503   |
| 346 | M351T10_ | 2.217054 | 1.148644 | 2.477468 | 0.039177 | 0.862179 | UP   | 351.0975 | 351.0974 | 351.0976 | 9.770733 | 9.76065  |
| 347 | M788T10_ | 1.26438  | -0.33843 | -2.61326 | 0.039542 | 0.862198 | DOWN | 788.4918 | 788.4904 | 788.4939 | 9.94785  | 9.843367 |
| 348 | M448T23  | 1.188737 | -0.24943 | -2.71745 | 0.039714 | 0.862207 | DOWN | 448.2172 | 448.2169 | 448.2182 | 22.92917 | 22.6975  |
| 349 | M475T9_1 | 1.945427 | -0.96009 | -2.62168 | 0.039842 | 0.862213 | DOWN | 475.3966 | 475.3927 | 475.3969 | 9.235933 | 9.032483 |

|     |          |          |          |          |          |          |      |          |          |          |          |          |
|-----|----------|----------|----------|----------|----------|----------|------|----------|----------|----------|----------|----------|
| 350 | M256T19  | 1.548351 | -0.63073 | -2.54715 | 0.03986  | 0.862214 | DOWN | 256.1121 | 256.1119 | 256.1124 | 19.31683 | 19.28617 |
| 351 | M1758T10 | 1.48459  | -0.57006 | -2.58496 | 0.03989  | 0.862215 | DOWN | 1757.711 | 1757.707 | 1757.713 | 9.576992 | 9.478833 |
| 352 | M415T19_ | 2.78431  | 1.47732  | 2.749988 | 0.039923 | 0.862217 | UP   | 415.271  | 415.2694 | 415.2777 | 18.92917 | 18.893   |
| 353 | M202T9_5 | 2.027246 | -1.01952 | -2.45798 | 0.039933 | 0.862218 | DOWN | 201.7618 | 201.7612 | 201.7625 | 9.341242 | 9.250817 |
| 354 | M277T11_ | 1.519793 | 0.603875 | 2.45592  | 0.040344 | 0.862238 | UP   | 277.2669 | 277.2664 | 277.2673 | 10.91386 | 10.873   |
| 355 | M931T10_ | 1.782415 | -0.83383 | -2.4396  | 0.040662 | 0.862254 | DOWN | 930.5859 | 930.5858 | 930.5862 | 10.28047 | 10.21837 |
| 356 | M551T9_5 | 1.904497 | -0.92941 | -2.44055 | 0.040667 | 0.862254 | DOWN | 551.3643 | 551.3637 | 551.3647 | 8.871033 | 8.7875   |
| 357 | M207T10_ | 1.530784 | -0.61427 | -2.65242 | 0.04092  | 0.862266 | DOWN | 206.8553 | 206.8551 | 206.8553 | 9.83135  | 9.715683 |
| 358 | M271T44  | 1.577726 | -0.65785 | -2.80993 | 0.040977 | 0.862269 | DOWN | 271.19   | 271.1899 | 271.1902 | 43.70383 | 43.64633 |
| 359 | M317T9_1 | 1.381283 | -0.46601 | -2.43856 | 0.041018 | 0.862271 | DOWN | 316.907  | 316.9068 | 316.9079 | 9.474408 | 9.370583 |
| 360 | M394T20_ | 1.85172  | -0.88887 | -2.69139 | 0.041069 | 0.862274 | DOWN | 393.5458 | 393.5422 | 393.5486 | 20.216   | 20.21583 |
| 361 | M342T9_4 | 1.893752 | -0.92125 | -2.52111 | 0.041088 | 0.862275 | DOWN | 342.1687 | 342.1685 | 342.1688 | 9.489725 | 9.432183 |
| 362 | M382T10_ | 1.850823 | -0.88817 | -2.43254 | 0.041094 | 0.862275 | DOWN | 381.7261 | 381.7259 | 381.7265 | 9.55335  | 9.46325  |
| 363 | M731T10_ | 1.40139  | 0.486859 | 2.504209 | 0.041414 | 0.86229  | UP   | 731.468  | 731.4658 | 731.4687 | 9.536783 | 9.52515  |
| 364 | M846T10_ | 1.726458 | -0.78782 | -2.5016  | 0.041498 | 0.862294 | DOWN | 845.5868 | 845.5859 | 845.5883 | 9.909442 | 9.7634   |
| 365 | M533T9_3 | 1.964586 | -0.97423 | -2.42991 | 0.041586 | 0.862298 | DOWN | 533.1102 | 533.1096 | 533.1106 | 9.331475 | 9.130683 |
| 366 | M393T10_ | 1.506787 | -0.59148 | -2.51082 | 0.04167  | 0.862302 | DOWN | 392.7485 | 392.7479 | 392.7486 | 9.655967 | 9.52595  |
| 367 | M312T38  | 1.197776 | -0.26036 | -2.54248 | 0.041884 | 0.862312 | DOWN | 312.2976 | 312.2975 | 312.2978 | 38.36667 | 38.35233 |
| 368 | M648T9_2 | 2.648949 | -1.40542 | -2.81943 | 0.04191  | 0.862313 | DOWN | 648.0744 | 648.0664 | 648.0777 | 9.174967 | 9.1322   |
| 369 | M665T31  | 1.421441 | -0.50735 | -2.87973 | 0.042034 | 0.862319 | DOWN | 665.4667 | 665.4661 | 665.467  | 31.37233 | 31.3515  |
| 370 | M548T11_ | 1.943996 | -0.95903 | -2.47234 | 0.04213  | 0.862323 | DOWN | 548.3492 | 548.3484 | 548.3499 | 10.59303 | 10.55068 |
| 371 | M338T10_ | 1.322333 | -0.40309 | -2.61362 | 0.042152 | 0.862324 | DOWN | 338.1563 | 338.156  | 338.1567 | 9.818525 | 9.715683 |
| 372 | M495T36  | 1.628667 | 0.703691 | 2.415501 | 0.042163 | 0.862325 | UP   | 495.3895 | 495.3876 | 495.3896 | 36.13633 | 36.09333 |
| 373 | M251T9_5 | 2.544739 | -1.34752 | -2.57694 | 0.042176 | 0.862325 | DOWN | 251.1358 | 251.1321 | 251.1383 | 9.28135  | 9.095133 |
| 374 | M528T9_2 | 1.948187 | -0.96213 | -2.5026  | 0.042242 | 0.862328 | DOWN | 527.68   | 527.6783 | 527.6805 | 9.189117 | 9.159717 |
| 375 | M203T9_1 | 1.397627 | -0.48298 | -2.41516 | 0.042327 | 0.862332 | DOWN | 202.6716 | 202.6715 | 202.6718 | 9.250817 | 9.133667 |
| 376 | M725T30  | 1.555851 | 0.637704 | 2.573092 | 0.042365 | 0.862334 | UP   | 725.4441 | 725.4434 | 725.4447 | 30.24433 | 30.20833 |
| 377 | M590T10_ | 1.461646 | -0.54759 | -2.42504 | 0.042521 | 0.862341 | DOWN | 590.4705 | 590.4701 | 590.4712 | 9.903567 | 9.822117 |
| 378 | M208T9_2 | 2.244468 | -1.16637 | -2.76183 | 0.042555 | 0.862342 | DOWN | 207.6767 | 207.6761 | 207.6774 | 9.287617 | 9.132267 |
| 379 | M221T9_4 | 1.806525 | -0.85322 | -2.40876 | 0.042607 | 0.862345 | DOWN | 220.7302 | 220.7259 | 220.7306 | 9.3264   | 9.190317 |
| 380 | M529T9_1 | 1.804733 | -0.85179 | -2.40922 | 0.042613 | 0.862345 | DOWN | 528.8544 | 528.8494 | 528.8545 | 9.163117 | 9.1322   |
| 381 | M313T42_ | 1.276721 | -0.35244 | -2.83933 | 0.04268  | 0.862348 | DOWN | 313.2006 | 313.2005 | 313.2009 | 42.1935  | 42.12167 |
| 382 | M230T10_ | 1.493561 | 0.578756 | 2.529236 | 0.042723 | 0.86235  | UP   | 229.9691 | 229.9689 | 229.9692 | 9.945775 | 9.853533 |
| 383 | M303T13  | 1.92635  | -0.94587 | -2.56526 | 0.042728 | 0.86235  | DOWN | 303.1953 | 303.1951 | 303.1953 | 13.40522 | 13.40392 |
| 384 | M316T43_ | 1.640085 | -0.71377 | -2.74703 | 0.042738 | 0.86235  | DOWN | 316.1752 | 316.1751 | 316.1753 | 42.59642 | 42.35167 |

|     |          |          |          |          |          |          |      |          |          |          |          |          |
|-----|----------|----------|----------|----------|----------|----------|------|----------|----------|----------|----------|----------|
| 385 | M492T10_ | 1.809065 | -0.85524 | -2.45373 | 0.042755 | 0.862351 | DOWN | 491.9297 | 491.9293 | 491.9299 | 9.82645  | 9.65225  |
| 386 | M571T9_2 | 1.380702 | -0.4654  | -2.45882 | 0.042801 | 0.862353 | DOWN | 570.7256 | 570.7251 | 570.7261 | 9.186133 | 9.126783 |
| 387 | M212T9_8 | 1.704653 | -0.76948 | -2.57099 | 0.042841 | 0.862355 | DOWN | 211.989  | 211.9882 | 211.9892 | 9.295167 | 9.26575  |
| 388 | M825T12  | 1.401556 | -0.48703 | -2.44022 | 0.042917 | 0.862358 | DOWN | 825.3733 | 825.3731 | 825.3737 | 11.96146 | 11.95512 |
| 389 | M336T9_5 | 2.709766 | -1.43817 | -2.63163 | 0.042917 | 0.862358 | DOWN | 335.9992 | 335.9988 | 336.0029 | 9.256567 | 9.158833 |
| 390 | M702T18  | 7.314583 | 2.870776 | 2.904486 | 0.043052 | 0.862364 | UP   | 702.2902 | 702.2901 | 702.2907 | 18.13608 | 18.116   |
| 391 | M1049T10 | 1.926418 | -0.94592 | -2.56287 | 0.043055 | 0.862364 | DOWN | 1048.649 | 1048.648 | 1048.65  | 10.07688 | 9.98005  |
| 392 | M411T9_3 | 3.256379 | -1.70327 | -2.72259 | 0.043077 | 0.862365 | DOWN | 411.0528 | 411.0501 | 411.0542 | 9.295167 | 9.224517 |
| 393 | M723T9_2 | 2.013439 | -1.00966 | -2.40969 | 0.04336  | 0.862378 | DOWN | 723.2476 | 723.2456 | 723.2505 | 9.1428   | 9.1011   |
| 394 | M557T10_ | 1.464929 | -0.55083 | -2.39739 | 0.043481 | 0.862383 | DOWN | 557.2453 | 557.2443 | 557.247  | 9.91875  | 9.79535  |
| 395 | M189T9_1 | 2.336482 | -1.22434 | -2.60999 | 0.043505 | 0.862384 | DOWN | 189.3037 | 189.3027 | 189.3047 | 9.295167 | 9.11795  |
| 396 | M371T10_ | 1.46542  | -0.55131 | -2.4455  | 0.043573 | 0.862387 | DOWN | 370.7354 | 370.735  | 370.7415 | 9.581933 | 9.478833 |
| 397 | M158T8   | 2.070123 | -1.04972 | -2.43828 | 0.043747 | 0.862394 | DOWN | 158.1536 | 158.1505 | 158.1537 | 8.149867 | 8.045417 |
| 398 | M527T9_1 | 1.864933 | -0.89912 | -2.62709 | 0.043838 | 0.862398 | DOWN | 526.5385 | 526.5383 | 526.5392 | 9.12675  | 9.07945  |
| 399 | M415T10_ | 1.614269 | -0.69088 | -2.47302 | 0.044118 | 0.86241  | DOWN | 415.0541 | 415.0541 | 415.0542 | 9.999    | 9.932567 |
| 400 | M691T9_1 | 1.886199 | -0.91548 | -2.39809 | 0.044174 | 0.862412 | DOWN | 690.6354 | 690.6348 | 690.6363 | 9.367758 | 9.324917 |
| 401 | M249T16  | 1.451628 | -0.53767 | -2.39749 | 0.04447  | 0.862424 | DOWN | 249.2057 | 249.2056 | 249.2058 | 15.71347 | 15.67188 |
| 402 | M980T10  | 1.164847 | -0.22014 | -2.41665 | 0.044679 | 0.862433 | DOWN | 980.0511 | 980.0492 | 980.0523 | 9.843367 | 9.636483 |
| 403 | M662T9_1 | 2.078134 | -1.05529 | -2.70226 | 0.044721 | 0.862434 | DOWN | 662.1336 | 662.1323 | 662.1345 | 9.275917 | 9.219483 |
| 404 | M400T9_8 | 1.593118 | -0.67185 | -2.41078 | 0.044749 | 0.862435 | DOWN | 400.4231 | 400.4225 | 400.4239 | 9.191133 | 9.160617 |
| 405 | M413T9_3 | 1.560101 | -0.64164 | -2.41322 | 0.044777 | 0.862437 | DOWN | 412.6396 | 412.639  | 412.64   | 9.35335  | 9.219483 |
| 406 | M396T42_ | 1.55584  | -0.63769 | -2.57923 | 0.044849 | 0.862439 | DOWN | 396.2225 | 396.2223 | 396.2227 | 41.8555  | 41.7035  |
| 407 | M630T12  | 1.65091  | -0.72326 | -2.41493 | 0.044892 | 0.862441 | DOWN | 630.3335 | 630.333  | 630.3338 | 11.59613 | 11.57787 |
| 408 | M376T39  | 1.941365 | -0.95707 | -2.84218 | 0.045001 | 0.862446 | DOWN | 376.1965 | 376.1965 | 376.1968 | 39.417   | 39.28767 |
| 409 | M434T25_ | 1.661127 | -0.73216 | -2.40927 | 0.045056 | 0.862448 | DOWN | 434.2439 | 434.2435 | 434.2442 | 24.60867 | 24.5655  |
| 410 | M302T9_2 | 1.463332 | -0.54926 | -2.5249  | 0.045141 | 0.862451 | DOWN | 301.8769 | 301.8766 | 301.8777 | 9.277833 | 9.20785  |
| 411 | M435T9_8 | 1.469214 | -0.55504 | -2.44686 | 0.045347 | 0.862459 | DOWN | 435.0448 | 435.0445 | 435.0453 | 9.28995  | 9.129317 |
| 412 | M429T9_1 | 1.71186  | -0.77557 | -2.39229 | 0.045373 | 0.86246  | DOWN | 428.5413 | 428.5333 | 428.5421 | 9.2585   | 9.1503   |
| 413 | M454T20  | 1.458571 | 0.544555 | 2.491782 | 0.045388 | 0.862461 | UP   | 454.316  | 454.3158 | 454.3164 | 19.80908 | 19.79467 |
| 414 | M1003T10 | 1.775454 | -0.82819 | -2.50539 | 0.045578 | 0.862468 | DOWN | 1003.421 | 1003.421 | 1003.422 | 9.626517 | 9.509533 |
| 415 | M804T10_ | 1.531236 | -0.6147  | -2.39603 | 0.045647 | 0.862471 | DOWN | 804.3489 | 804.3482 | 804.3493 | 9.629008 | 9.510117 |
| 416 | M533T11_ | 1.770003 | -0.82375 | -2.39921 | 0.045677 | 0.862472 | DOWN | 533.0048 | 533.004  | 533.0055 | 10.51218 | 10.47197 |
| 417 | M1993T10 | 1.963369 | -0.97333 | -2.50498 | 0.04571  | 0.862473 | DOWN | 1993.361 | 1993.358 | 1993.363 | 9.830558 | 9.728083 |
| 418 | M417T9_7 | 1.582725 | -0.66241 | -2.3771  | 0.046108 | 0.862489 | DOWN | 416.9984 | 416.9934 | 416.9994 | 9.481367 | 9.118517 |
| 419 | M517T9_6 | 1.651714 | -0.72396 | -2.41779 | 0.046231 | 0.862493 | DOWN | 517.4054 | 517.4047 | 517.4062 | 9.280992 | 9.160617 |

|     |          |          |          |          |          |          |      |          |          |          |          |          |
|-----|----------|----------|----------|----------|----------|----------|------|----------|----------|----------|----------|----------|
| 420 | M332T10_ | 1.62357  | -0.69917 | -2.38191 | 0.046428 | 0.862501 | DOWN | 331.6421 | 331.6418 | 331.6422 | 9.921442 | 9.811217 |
| 421 | M591T9_1 | 1.910517 | -0.93396 | -2.37128 | 0.046449 | 0.862502 | DOWN | 590.7999 | 590.7993 | 590.8004 | 9.200658 | 9.07945  |
| 422 | M521T13_ | 2.718928 | -1.44304 | -2.78462 | 0.046525 | 0.862504 | DOWN | 521.4195 | 521.4195 | 521.4317 | 12.61823 | 12.52927 |
| 423 | M617T10_ | 2.268041 | 1.181447 | 2.432212 | 0.046722 | 0.862512 | UP   | 616.8597 | 616.8582 | 616.8644 | 9.831517 | 9.699733 |
| 424 | M494T9_7 | 2.129061 | -1.09022 | -2.35795 | 0.046892 | 0.862518 | DOWN | 494.4269 | 494.4264 | 494.4276 | 9.225983 | 9.147367 |
| 425 | M277T9_1 | 2.844253 | 1.50805  | 2.346061 | 0.046991 | 0.862522 | UP   | 276.805  | 276.8046 | 276.8054 | 9.311042 | 9.1587   |
| 426 | M165T10_ | 7.376533 | 2.882943 | 2.81118  | 0.047044 | 0.862524 | UP   | 165.4077 | 165.4076 | 165.4077 | 9.977992 | 9.8753   |
| 427 | M343T10_ | 1.606378 | -0.68381 | -2.34388 | 0.047182 | 0.862529 | DOWN | 343.1723 | 343.1723 | 343.1724 | 9.758367 | 9.73145  |
| 428 | M860T11_ | 1.635897 | -0.71008 | -2.40576 | 0.047246 | 0.862531 | DOWN | 860.0118 | 860.011  | 860.0129 | 10.75458 | 10.70663 |
| 429 | M740T9_3 | 2.994593 | -1.58236 | -2.34219 | 0.047283 | 0.862532 | DOWN | 739.9836 | 739.9826 | 739.9838 | 9.312075 | 9.24215  |
| 430 | M211T29  | 2.593428 | -1.37486 | -2.81112 | 0.047353 | 0.862535 | DOWN | 211.1092 | 211.1089 | 211.1093 | 28.57817 | 28.55817 |
| 431 | M994T9_1 | 2.816535 | -1.49392 | -2.39003 | 0.047382 | 0.862536 | DOWN | 993.5071 | 993.5055 | 993.5085 | 8.764917 | 8.697767 |
| 432 | M182T10_ | 1.84387  | -0.88274 | -2.35297 | 0.047383 | 0.862536 | DOWN | 181.9659 | 181.9659 | 181.966  | 9.960817 | 9.869467 |
| 433 | M410T21  | 1.407544 | -0.49318 | -2.33332 | 0.047913 | 0.862555 | DOWN | 409.7951 | 409.7947 | 409.7952 | 21.24667 | 21.2445  |
| 434 | M434T9_1 | 2.149777 | -1.10419 | -2.44594 | 0.04796  | 0.862556 | DOWN | 434.4304 | 434.4303 | 434.4319 | 8.8943   | 8.817367 |
| 435 | M376T42_ | 1.929613 | -0.94831 | -2.81084 | 0.048053 | 0.86256  | DOWN | 376.1965 | 376.1965 | 376.1967 | 41.6615  | 41.58967 |
| 436 | M214T9_1 | 1.506961 | -0.59164 | -2.54818 | 0.048093 | 0.862561 | DOWN | 214.4364 | 214.4358 | 214.4366 | 9.3735   | 9.26575  |
| 437 | M410T9_1 | 1.693996 | -0.76043 | -2.37092 | 0.048146 | 0.862563 | DOWN | 409.5038 | 409.5033 | 409.506  | 9.289675 | 9.1503   |
| 438 | M811T11_ | 1.382115 | -0.46688 | -2.3368  | 0.04815  | 0.862563 | DOWN | 811.3578 | 811.3543 | 811.3582 | 11.13453 | 10.90393 |
| 439 | M411T9_9 | 1.766442 | -0.82085 | -2.48905 | 0.048159 | 0.862563 | DOWN | 411.4163 | 411.4154 | 411.4198 | 9.3494   | 9.235933 |
| 440 | M470T10_ | 1.360569 | -0.44421 | -2.56676 | 0.048195 | 0.862565 | DOWN | 469.9504 | 469.95   | 469.9518 | 9.809008 | 9.696683 |
| 441 | M605T12_ | 1.847624 | -0.88567 | -2.76484 | 0.048326 | 0.862569 | DOWN | 605.2782 | 605.2765 | 605.2786 | 11.55968 | 11.54617 |
| 442 | M396T10_ | 1.235902 | -0.30556 | -2.33673 | 0.048443 | 0.862573 | DOWN | 395.5757 | 395.5749 | 395.5759 | 9.903283 | 9.79535  |
| 443 | M503T9_3 | 1.459923 | -0.54589 | -2.33212 | 0.048589 | 0.862578 | DOWN | 502.708  | 502.7074 | 502.7083 | 9.356108 | 9.1602   |
| 444 | M198T23  | 1.683363 | 0.751347 | 2.361143 | 0.048828 | 0.862586 | UP   | 198.1849 | 198.1846 | 198.185  | 22.97983 | 22.94367 |
| 445 | M291T10_ | 1.71006  | -0.77405 | -2.32169 | 0.048878 | 0.862588 | DOWN | 291.2066 | 291.2064 | 291.2069 | 9.90315  | 9.806367 |
| 446 | M250T10_ | 1.343572 | -0.42607 | -2.32585 | 0.048879 | 0.862588 | DOWN | 250.1539 | 250.1538 | 250.1542 | 9.5682   | 9.46325  |
| 447 | M1698T10 | 2.087437 | -1.06173 | -2.63209 | 0.048984 | 0.862592 | DOWN | 1697.607 | 1697.603 | 1697.609 | 9.8207   | 9.728083 |
| 448 | M357T10_ | 1.249368 | -0.3212  | -2.33047 | 0.049086 | 0.862595 | DOWN | 357.2143 | 357.2141 | 357.2144 | 9.566317 | 9.46325  |
| 449 | M197T42_ | 1.449062 | -0.53512 | -2.36582 | 0.049157 | 0.862597 | DOWN | 197.1533 | 197.1532 | 197.1534 | 42.13608 | 41.96217 |
| 450 | M853T9   | 2.074394 | -1.05269 | -2.42087 | 0.049185 | 0.862598 | DOWN | 853.3817 | 853.3809 | 853.3831 | 9.185192 | 9.142767 |
| 451 | M532T10_ | 4.062679 | 2.022431 | 2.725989 | 0.049268 | 0.862601 | UP   | 532.4265 | 532.4257 | 532.427  | 9.98155  | 9.8914   |
| 452 | M648T9_6 | 4.040887 | -2.01467 | -2.74295 | 0.049306 | 0.862602 | DOWN | 648.3083 | 648.2966 | 648.311  | 9.220433 | 9.089333 |
| 453 | M318T9_3 | 1.830688 | -0.87239 | -2.31741 | 0.049757 | 0.862617 | DOWN | 317.6409 | 317.6405 | 317.6413 | 9.24215  | 9.17485  |
| 454 | M357T40_ | 1.206869 | -0.27127 | -2.35592 | 0.049852 | 0.86262  | DOWN | 357.1907 | 357.1905 | 357.191  | 39.98542 | 39.83433 |

|     |          |          |          |          |          |          |      |          |          |          |          |          |
|-----|----------|----------|----------|----------|----------|----------|------|----------|----------|----------|----------|----------|
| 455 | M385T25  | 1.16634  | 0.221988 | 2.532492 | 0.049926 | 0.862623 | UP   | 385.3421 | 385.342  | 385.3423 | 24.56575 | 24.55033 |
| 456 | M423T11_ | 2.824404 | 1.497947 | 2.393227 | 0.050054 | 0.862627 | UP   | 423.0832 | 423.0728 | 423.0862 | 10.91407 | 10.85838 |
| 457 | M235T9_2 | 1.958505 | -0.96975 | -2.34494 | 0.050272 | 0.862634 | DOWN | 234.5966 | 234.5949 | 234.5973 | 9.245983 | 9.1322   |
| 458 | M518T11_ | 1.666337 | 0.73668  | 2.41803  | 0.050356 | 0.862637 | UP   | 518.1529 | 518.1515 | 518.153  | 10.9291  | 10.88995 |
| 459 | M478T39_ | 1.951896 | -0.96488 | -2.3033  | 0.050392 | 0.862638 | DOWN | 478.3008 | 478.3005 | 478.301  | 38.68333 | 38.61133 |
| 460 | M288T22_ | 2.683333 | -1.42403 | -2.6952  | 0.050562 | 0.862643 | DOWN | 288.335  | 288.3295 | 288.3358 | 22.06017 | 22.04267 |
| 461 | M1781T10 | 1.327213 | -0.4084  | -2.30248 | 0.050568 | 0.862643 | DOWN | 1781.198 | 1781.191 | 1781.201 | 9.779267 | 9.743767 |
| 462 | M303T9_1 | 1.681011 | -0.74933 | -2.3879  | 0.050622 | 0.862645 | DOWN | 302.9311 | 302.9307 | 302.9314 | 9.250558 | 9.1445   |
| 463 | M586T9_4 | 1.933225 | -0.95101 | -2.45702 | 0.050655 | 0.862646 | DOWN | 585.9066 | 585.8995 | 585.9073 | 9.312992 | 9.234417 |
| 464 | M612T16  | 1.857815 | -0.89361 | -2.56616 | 0.050797 | 0.862651 | DOWN | 611.7875 | 611.7869 | 611.7877 | 16.47605 | 16.45947 |
| 465 | M264T11_ | 2.16138  | -1.11195 | -2.34126 | 0.050803 | 0.862651 | DOWN | 263.7949 | 263.7943 | 263.796  | 10.92106 | 10.83252 |
| 466 | M709T9_1 | 4.071124 | -2.02543 | -2.57585 | 0.050842 | 0.862652 | DOWN | 708.5115 | 708.5105 | 708.5139 | 8.703817 | 8.63795  |
| 467 | M227T9_1 | 1.952885 | -0.96561 | -2.31343 | 0.050987 | 0.862657 | DOWN | 227.2744 | 227.2735 | 227.2753 | 9.279417 | 9.16125  |
| 468 | M288T9_3 | 1.544716 | -0.62734 | -2.62739 | 0.051007 | 0.862657 | DOWN | 287.7876 | 287.7873 | 287.7877 | 8.878342 | 8.77435  |
| 469 | M503T9_4 | 1.858172 | -0.89388 | -2.64098 | 0.051233 | 0.862664 | DOWN | 502.9037 | 502.903  | 502.9046 | 9.356308 | 9.249433 |
| 470 | M1551T9  | 2.057399 | -1.04082 | -2.35872 | 0.051281 | 0.862666 | DOWN | 1551.16  | 1551.159 | 1551.161 | 9.333667 | 9.298683 |
| 471 | M337T11_ | 1.585377 | 0.664826 | 2.327416 | 0.051297 | 0.862666 | UP   | 336.9012 | 336.901  | 336.9022 | 10.90675 | 10.86008 |
| 472 | M701T10_ | 2.953663 | -1.56251 | -2.35337 | 0.051313 | 0.862667 | DOWN | 701.1042 | 701.1035 | 701.1087 | 9.885167 | 9.856867 |
| 473 | M478T20_ | 3.151305 | -1.65595 | -2.32059 | 0.051322 | 0.862667 | DOWN | 478.3754 | 478.3751 | 478.3821 | 19.9375  | 19.88567 |
| 474 | M242T11_ | 5.171364 | 2.370545 | 2.352683 | 0.051378 | 0.862669 | UP   | 242.1928 | 242.186  | 242.1931 | 10.91813 | 10.85838 |
| 475 | M476T9_6 | 2.036181 | -1.02587 | -2.28872 | 0.051393 | 0.862669 | DOWN | 475.751  | 475.7441 | 475.756  | 9.1991   | 9.087183 |
| 476 | M553T9_3 | 1.696451 | 0.76252  | 2.292324 | 0.051395 | 0.862669 | UP   | 552.7966 | 552.7961 | 552.7969 | 9.253525 | 9.06315  |
| 477 | M378T9_1 | 1.795096 | 0.844061 | 2.315391 | 0.051423 | 0.86267  | UP   | 378.4979 | 378.4976 | 378.4985 | 9.22995  | 9.06315  |
| 478 | M413T9_1 | 1.813753 | -0.85898 | -2.45619 | 0.051464 | 0.862671 | DOWN | 412.5386 | 412.5382 | 412.539  | 9.321425 | 9.249433 |
| 479 | M294T10_ | 3.828226 | 1.936676 | 2.697977 | 0.051544 | 0.862674 | UP   | 294.2648 | 294.2647 | 294.2649 | 9.98155  | 9.859233 |
| 480 | M276T10_ | 1.604358 | -0.682   | -2.39609 | 0.051652 | 0.862677 | DOWN | 275.8165 | 275.8164 | 275.8166 | 9.8207   | 9.73145  |
| 481 | M1113T11 | 1.724952 | -0.78656 | -2.31105 | 0.051714 | 0.862679 | DOWN | 1112.63  | 1112.628 | 1112.631 | 11.22083 | 11.17813 |
| 482 | M290T10_ | 1.335868 | -0.41778 | -2.45298 | 0.05174  | 0.86268  | DOWN | 290.2543 | 290.2464 | 290.2546 | 9.91765  | 9.79535  |
| 483 | M924T9   | 2.222606 | -1.15225 | -2.28406 | 0.052204 | 0.862693 | DOWN | 923.7094 | 923.7092 | 923.7096 | 9.3834   | 9.3261   |
| 484 | M577T10_ | 1.843446 | -0.88241 | -2.34624 | 0.052423 | 0.8627   | DOWN | 577.3669 | 577.3668 | 577.3675 | 10.20043 | 10.11747 |
| 485 | M707T10_ | 1.639956 | -0.71366 | -2.424   | 0.052438 | 0.8627   | DOWN | 707.2099 | 707.2089 | 707.2107 | 9.830183 | 9.715683 |
| 486 | M808T11  | 1.744638 | -0.80293 | -2.51234 | 0.052451 | 0.862701 | DOWN | 808.4082 | 808.4076 | 808.4086 | 11.14532 | 11.11987 |
| 487 | M458T13  | 1.268289 | -0.34288 | -2.39517 | 0.052498 | 0.862702 | DOWN | 458.3643 | 458.3641 | 458.3646 | 13.22963 | 13.21485 |
| 488 | M813T10_ | 1.62529  | -0.7007  | -2.41099 | 0.052639 | 0.862706 | DOWN | 813.2662 | 813.2659 | 813.267  | 9.951283 | 9.843367 |
| 489 | M520T9_4 | 1.831315 | -0.87288 | -2.32969 | 0.052667 | 0.862707 | DOWN | 519.8554 | 519.8541 | 519.8568 | 9.390133 | 9.129317 |

|     |          |          |          |          |          |          |      |          |          |          |          |          |
|-----|----------|----------|----------|----------|----------|----------|------|----------|----------|----------|----------|----------|
| 490 | M534T40_ | 1.370755 | 0.45497  | 2.327716 | 0.052677 | 0.862707 | UP   | 534.2906 | 534.2904 | 534.2908 | 40.38817 | 40.09333 |
| 491 | M1421T10 | 2.08882  | -1.06269 | -2.68029 | 0.052772 | 0.86271  | DOWN | 1421.304 | 1421.303 | 1421.305 | 9.91875  | 9.822117 |
| 492 | M488T11_ | 2.435261 | -1.28408 | -2.39274 | 0.053125 | 0.86272  | DOWN | 487.9741 | 487.9734 | 487.9745 | 10.70756 | 10.64453 |
| 493 | M742T9_4 | 1.780117 | -0.83197 | -2.29478 | 0.05318  | 0.862722 | DOWN | 742.0331 | 742.0326 | 742.034  | 9.317    | 9.24215  |
| 494 | M880T10_ | 1.410007 | -0.4957  | -2.36174 | 0.053246 | 0.862724 | DOWN | 880.3627 | 880.3623 | 880.3634 | 9.6129   | 9.49445  |
| 495 | M261T13_ | 1.500914 | -0.58584 | -2.44513 | 0.053269 | 0.862724 | DOWN | 261.2064 | 261.2062 | 261.2066 | 12.6019  | 12.58695 |
| 496 | M730T11_ | 1.663539 | -0.73426 | -2.33764 | 0.053358 | 0.862727 | DOWN | 729.9826 | 729.9826 | 729.9835 | 11.23607 | 11.22427 |
| 497 | M1432T10 | 1.709964 | -0.77397 | -2.28928 | 0.053372 | 0.862727 | DOWN | 1431.689 | 1431.687 | 1431.69  | 9.872917 | 9.84525  |
| 498 | M404T12  | 2.078244 | -1.05537 | -2.55837 | 0.053418 | 0.862729 | DOWN | 404.1739 | 404.1731 | 404.1744 | 11.7329  | 11.66582 |
| 499 | M1152T12 | 1.593722 | -0.6724  | -2.50057 | 0.053553 | 0.862733 | DOWN | 1152.099 | 1152.099 | 1152.099 | 12.22276 | 12.20887 |
| 500 | M1050T11 | 1.871091 | -0.90388 | -2.28573 | 0.053747 | 0.862738 | DOWN | 1050.351 | 1050.349 | 1050.353 | 10.89355 | 10.83252 |
| 501 | M1234T45 | 1.127151 | 0.172681 | 2.257639 | 0.053931 | 0.862743 | UP   | 1233.828 | 1233.827 | 1233.829 | 44.98333 | 44.98283 |
| 502 | M234T9_5 | 2.07048  | -1.04997 | -2.26189 | 0.053982 | 0.862745 | DOWN | 233.8772 | 233.876  | 233.8781 | 9.2946   | 9.132267 |
| 503 | M367T9_4 | 1.659248 | -0.73053 | -2.30499 | 0.054036 | 0.862746 | DOWN | 367.3984 | 367.398  | 367.3987 | 9.143633 | 9.1178   |
| 504 | M316T9_3 | 5.255991 | 2.393963 | 2.332106 | 0.05407  | 0.862747 | UP   | 316.2261 | 316.2248 | 316.2293 | 8.780533 | 8.672483 |
| 505 | M828T9_5 | 2.703134 | -1.43463 | -2.38566 | 0.05408  | 0.862747 | DOWN | 828.4245 | 828.4237 | 828.4253 | 8.798117 | 8.715883 |
| 506 | M1596T10 | 1.656385 | -0.72804 | -2.25579 | 0.054297 | 0.862753 | DOWN | 1595.897 | 1595.897 | 1595.898 | 10.24985 | 10.18238 |
| 507 | M232T10_ | 1.608543 | 0.685754 | 2.254885 | 0.054539 | 0.86276  | UP   | 231.6151 | 231.6151 | 231.6152 | 9.881192 | 9.822117 |
| 508 | M387T25  | 1.436885 | 0.522944 | 2.355062 | 0.054612 | 0.862762 | UP   | 387.3489 | 387.3485 | 387.3494 | 24.5775  | 24.5635  |
| 509 | M864T9   | 1.901117 | -0.92685 | -2.30082 | 0.054658 | 0.862763 | DOWN | 863.5161 | 863.5151 | 863.5172 | 9.321533 | 9.18975  |
| 510 | M393T20_ | 2.25372  | -1.17231 | -2.56908 | 0.054728 | 0.862765 | DOWN | 393.4388 | 393.4314 | 393.4428 | 20.259   | 20.21583 |
| 511 | M880T10_ | 1.460041 | -0.54601 | -2.40218 | 0.055063 | 0.862774 | DOWN | 879.8612 | 879.8609 | 879.8615 | 9.6129   | 9.49445  |
| 512 | M452T12  | 1.506267 | -0.59098 | -2.24661 | 0.055172 | 0.862777 | DOWN | 452.2119 | 452.2115 | 452.2125 | 12.38518 | 12.36858 |
| 513 | M231T10_ | 1.85317  | 0.889996 | 2.441607 | 0.055241 | 0.862779 | UP   | 231.0489 | 231.0488 | 231.0491 | 9.931108 | 9.827283 |
| 514 | M393T15_ | 1.401112 | -0.48657 | -2.41496 | 0.055341 | 0.862781 | DOWN | 393.3019 | 393.3015 | 393.3022 | 15.28704 | 15.24757 |
| 515 | M504T42_ | 1.245994 | -0.3173  | -2.52183 | 0.055389 | 0.862783 | DOWN | 504.2798 | 504.2797 | 504.2802 | 42.33025 | 42.23667 |
| 516 | M320T9_4 | 1.559879 | -0.64143 | -2.49632 | 0.055703 | 0.862791 | DOWN | 319.9152 | 319.9113 | 319.9156 | 9.3834   | 9.30965  |
| 517 | M190T9_3 | 3.581769 | -1.84067 | -2.65219 | 0.055779 | 0.862793 | DOWN | 189.5741 | 189.5733 | 189.5753 | 9.21845  | 9.1322   |
| 518 | M420T42_ | 1.4348   | -0.52085 | -2.59182 | 0.05587  | 0.862795 | DOWN | 420.2225 | 420.2222 | 420.2229 | 42.23683 | 42.15033 |
| 519 | M327T30  | 3.718765 | -1.89482 | -2.57872 | 0.055941 | 0.862797 | DOWN | 327.201  | 327.2005 | 327.2013 | 30.26733 | 30.226   |
| 520 | M1792T10 | 2.225409 | -1.15407 | -2.29044 | 0.056062 | 0.8628   | DOWN | 1792.041 | 1792.039 | 1792.043 | 9.8232   | 9.7124   |
| 521 | M766T10_ | 1.560289 | -0.64181 | -2.45711 | 0.056176 | 0.862803 | DOWN | 766.4085 | 766.4081 | 766.4127 | 9.9014   | 9.806367 |
| 522 | M456T9_9 | 1.650723 | -0.7231  | -2.30783 | 0.05626  | 0.862805 | DOWN | 456.2911 | 456.2905 | 456.2936 | 9.371592 | 9.129317 |
| 523 | M749T10_ | 2.810295 | 1.490722 | 2.27531  | 0.056405 | 0.862809 | UP   | 748.6735 | 748.6705 | 748.6744 | 9.847125 | 9.758367 |
| 524 | M1153T12 | 1.559315 | -0.64091 | -2.40242 | 0.056457 | 0.86281  | DOWN | 1152.6   | 1152.6   | 1152.601 | 12.22248 | 12.20802 |

|     |          |          |          |          |          |          |      |          |          |          |          |          |
|-----|----------|----------|----------|----------|----------|----------|------|----------|----------|----------|----------|----------|
| 525 | M287T11  | 1.657454 | 0.728969 | 2.418007 | 0.056457 | 0.86281  | UP   | 286.6228 | 286.6217 | 286.623  | 10.8926  | 10.86008 |
| 526 | M600T10_ | 2.284737 | -1.19203 | -2.51251 | 0.056689 | 0.862816 | DOWN | 599.882  | 599.8812 | 599.8836 | 10.25792 | 10.16598 |
| 527 | M602T10_ | 2.143818 | -1.10018 | -2.57228 | 0.056782 | 0.862818 | DOWN | 601.858  | 601.8575 | 601.8591 | 10.24737 | 10.2024  |
| 528 | M324T9_1 | 2.180049 | -1.12436 | -2.45969 | 0.056915 | 0.862822 | DOWN | 323.5055 | 323.5047 | 323.5062 | 9.220933 | 9.174917 |
| 529 | M269T18  | 6.115585 | -2.61249 | -2.59169 | 0.056933 | 0.862822 | DOWN | 269.1468 | 269.1465 | 269.1471 | 18.218   | 18.19283 |
| 530 | M438T19_ | 1.356361 | -0.43974 | -2.24174 | 0.057008 | 0.862824 | DOWN | 438.2844 | 438.284  | 438.2849 | 19.06142 | 19.04017 |
| 531 | M378T10_ | 1.674003 | -0.7433  | -2.48909 | 0.057072 | 0.862826 | DOWN | 378.3495 | 378.349  | 378.3511 | 9.918792 | 9.811217 |
| 532 | M1149T10 | 1.731762 | -0.79224 | -2.55569 | 0.057233 | 0.86283  | DOWN | 1149.365 | 1149.364 | 1149.366 | 9.76855  | 9.665433 |
| 533 | M826T12  | 1.364841 | -0.44873 | -2.27604 | 0.05734  | 0.862832 | DOWN | 826.3768 | 826.3765 | 826.3779 | 11.96225 | 11.94427 |
| 534 | M455T9_1 | 2.443336 | -1.28885 | -2.2177  | 0.057473 | 0.862836 | DOWN | 454.5121 | 454.5043 | 454.5181 | 9.331383 | 9.1503   |
| 535 | M269T31  | 1.054944 | -0.07717 | -2.22083 | 0.057489 | 0.862836 | DOWN | 269.2473 | 269.2472 | 269.2474 | 31.3505  | 31.34883 |
| 536 | M648T11_ | 1.571237 | -0.6519  | -2.22204 | 0.057551 | 0.862837 | DOWN | 648.3445 | 648.3441 | 648.3455 | 10.55008 | 10.5191  |
| 537 | M714T10_ | 1.400286 | -0.48572 | -2.25624 | 0.057587 | 0.862838 | DOWN | 714.4254 | 714.4246 | 714.4261 | 9.566317 | 9.47865  |
| 538 | M784T10_ | 1.415088 | -0.50089 | -2.2275  | 0.057636 | 0.86284  | DOWN | 784.4904 | 784.4898 | 784.4908 | 9.645292 | 9.52595  |
| 539 | M363T7   | 4.041915 | -2.01504 | -2.45407 | 0.057753 | 0.862842 | DOWN | 362.9259 | 362.9181 | 362.9262 | 7.291717 | 7.120467 |
| 540 | M316T28_ | 1.737348 | 0.796887 | 2.212797 | 0.057829 | 0.862844 | UP   | 316.3581 | 316.3574 | 316.3671 | 28.128   | 28.08383 |
| 541 | M357T22_ | 1.390408 | -0.47551 | -2.25577 | 0.057838 | 0.862844 | DOWN | 357.3188 | 357.3185 | 357.319  | 21.74    | 21.71133 |
| 542 | M810T11_ | 2.143369 | -1.09988 | -2.24033 | 0.057987 | 0.862848 | DOWN | 810.3831 | 810.3818 | 810.3841 | 11.22427 | 11.16928 |
| 543 | M198T10_ | 1.531435 | 0.614884 | 2.308827 | 0.058121 | 0.862851 | UP   | 198.1189 | 198.1189 | 198.1191 | 9.98345  | 9.8753   |
| 544 | M815T10_ | 1.404029 | -0.48957 | -2.20927 | 0.05815  | 0.862852 | DOWN | 815.3398 | 815.3393 | 815.3404 | 9.629008 | 9.52515  |
| 545 | M779T10_ | 1.985712 | -0.98966 | -2.2839  | 0.058325 | 0.862856 | DOWN | 779.3738 | 779.3737 | 779.3752 | 9.6055   | 9.541483 |
| 546 | M582T11_ | 2.297762 | -1.20023 | -2.50767 | 0.058569 | 0.862862 | DOWN | 582.037  | 582.0367 | 582.0371 | 11.22007 | 11.16928 |
| 547 | M474T37_ | 1.160035 | -0.21417 | -2.53415 | 0.058634 | 0.862863 | DOWN | 474.2696 | 474.2693 | 474.2697 | 37.32383 | 37.2075  |
| 548 | M221T9_7 | 1.678242 | -0.74695 | -2.2182  | 0.058685 | 0.862865 | DOWN | 220.8249 | 220.822  | 220.8256 | 9.40255  | 9.132267 |
| 549 | M362T16  | 1.24464  | -0.31573 | -2.2453  | 0.058697 | 0.862865 | DOWN | 362.1808 | 362.1807 | 362.181  | 15.96518 | 15.92052 |
| 550 | M508T40_ | 1.256142 | -0.329   | -2.3547  | 0.058708 | 0.862865 | DOWN | 508.3111 | 508.3108 | 508.3113 | 39.69033 | 39.51767 |
| 551 | M731T11_ | 2.809505 | -1.49032 | -2.56692 | 0.05893  | 0.86287  | DOWN | 731.4592 | 731.4588 | 731.4599 | 10.67552 | 10.66012 |
| 552 | M807T11_ | 1.741699 | -0.8005  | -2.23642 | 0.059015 | 0.862872 | DOWN | 807.4063 | 807.406  | 807.4065 | 11.135   | 11.10768 |
| 553 | M414T37  | 1.062167 | -0.08701 | -2.23194 | 0.059063 | 0.862873 | DOWN | 414.3574 | 414.3574 | 414.3576 | 37.47483 | 37.46033 |
| 554 | M591T10_ | 1.457858 | -0.54385 | -2.20326 | 0.0591   | 0.862874 | DOWN | 590.8418 | 590.841  | 590.8419 | 9.924308 | 9.822117 |
| 555 | M639T10_ | 1.405092 | -0.49066 | -2.20171 | 0.059146 | 0.862875 | DOWN | 638.8769 | 638.8766 | 638.8771 | 10.10826 | 10.00428 |
| 556 | M209T10_ | 2.042215 | -1.03013 | -2.3787  | 0.059169 | 0.862876 | DOWN | 209.2678 | 209.2676 | 209.2679 | 9.79065  | 9.73145  |
| 557 | M201T9_6 | 1.945658 | -0.96026 | -2.24012 | 0.059509 | 0.862884 | DOWN | 200.6614 | 200.661  | 200.6624 | 9.265117 | 9.146383 |
| 558 | M394T7   | 1.532559 | -0.61594 | -2.28696 | 0.059527 | 0.862884 | DOWN | 394.2122 | 394.2121 | 394.2126 | 7.10615  | 7.08535  |
| 559 | M318T9_6 | 1.666199 | -0.73656 | -2.19721 | 0.059679 | 0.862888 | DOWN | 317.7945 | 317.7942 | 317.7951 | 9.311167 | 9.129317 |



|     |          |          |          |          |          |          |      |          |          |          |          |          |
|-----|----------|----------|----------|----------|----------|----------|------|----------|----------|----------|----------|----------|
| 560 | M295T10_ | 1.275422 | -0.35097 | -2.35088 | 0.059768 | 0.86289  | DOWN | 295.0923 | 295.0922 | 295.0925 | 9.955442 | 9.859233 |
| 561 | M396T41  | 1.395575 | -0.48086 | -2.21498 | 0.059786 | 0.86289  | DOWN | 396.2224 | 396.2223 | 396.2228 | 41.05817 | 40.87017 |
| 562 | M494T9_6 | 1.431853 | -0.51788 | -2.20395 | 0.059801 | 0.86289  | DOWN | 494.3503 | 494.3494 | 494.351  | 9.311883 | 9.1445   |
| 563 | M548T27  | 1.909549 | 0.933232 | 2.258366 | 0.059876 | 0.862892 | UP   | 548.3269 | 548.3267 | 548.3271 | 26.75267 | 26.6835  |
| 564 | M325T23  | 1.65824  | -0.72965 | -2.45172 | 0.059891 | 0.862892 | DOWN | 325.2006 | 325.2005 | 325.2007 | 22.75583 | 22.741   |
| 565 | M468T10_ | 1.423283 | -0.50922 | -2.20813 | 0.06     | 0.862895 | DOWN | 468.2322 | 468.2319 | 468.2331 | 9.956417 | 9.885167 |
| 566 | M518T10_ | 1.53858  | 0.6216   | 2.202472 | 0.060013 | 0.862895 | UP   | 517.8471 | 517.8467 | 517.8482 | 9.934025 | 9.8753   |
| 567 | M1068T10 | 1.835943 | 0.876522 | 2.395364 | 0.060065 | 0.862896 | UP   | 1068.302 | 1068.3   | 1068.307 | 9.840617 | 9.74925  |
| 568 | M351T9_1 | 1.910847 | -0.93421 | -2.20975 | 0.060071 | 0.862896 | DOWN | 351.1209 | 351.12   | 351.1266 | 9.357033 | 9.250817 |
| 569 | M227T11_ | 5.33764  | 2.416202 | 2.591766 | 0.060073 | 0.862896 | UP   | 227.0867 | 227.0866 | 227.0871 | 10.93208 | 10.85838 |
| 570 | M576T20  | 1.513465 | -0.59786 | -2.20323 | 0.060211 | 0.8629   | DOWN | 576.4073 | 576.4065 | 576.4084 | 20.27383 | 20.21567 |
| 571 | M314T25_ | 1.404595 | 0.490154 | 2.255224 | 0.060416 | 0.862904 | UP   | 314.2302 | 314.2302 | 314.2305 | 25.191   | 25.1595  |
| 572 | M345T11_ | 1.713422 | -0.77688 | -2.18439 | 0.060457 | 0.862905 | DOWN | 345.4915 | 345.4904 | 345.4935 | 10.91183 | 10.8926  |
| 573 | M1716T10 | 1.757326 | -0.81338 | -2.30788 | 0.06051  | 0.862906 | DOWN | 1716.241 | 1716.238 | 1716.245 | 9.82645  | 9.696683 |
| 574 | M703T11_ | 1.407946 | -0.49359 | -2.19479 | 0.060695 | 0.86291  | DOWN | 702.6591 | 702.6583 | 702.6598 | 10.91703 | 10.89355 |
| 575 | M318T9_4 | 1.310131 | -0.38971 | -2.19945 | 0.060721 | 0.862911 | DOWN | 317.7142 | 317.7139 | 317.7145 | 8.840483 | 8.745033 |
| 576 | M307T9_6 | 1.32482  | -0.4058  | -2.21766 | 0.060782 | 0.862912 | DOWN | 307.1159 | 307.1156 | 307.1159 | 8.7035   | 8.623117 |
| 577 | M827T10_ | 1.38834  | -0.47336 | -2.18062 | 0.06094  | 0.862916 | DOWN | 827.3523 | 827.3519 | 827.3528 | 9.613367 | 9.510117 |
| 578 | M342T10_ | 1.338749 | -0.42089 | -2.26829 | 0.060997 | 0.862917 | DOWN | 342.1216 | 342.1212 | 342.1216 | 9.826875 | 9.73145  |
| 579 | M608T9_2 | 1.406019 | -0.49162 | -2.23185 | 0.06119  | 0.862921 | DOWN | 608.3845 | 608.3841 | 608.3848 | 9.289925 | 9.219483 |
| 580 | M217T7_3 | 1.450291 | -0.53634 | -2.30116 | 0.06119  | 0.862921 | DOWN | 217.1044 | 217.1043 | 217.1044 | 6.739167 | 6.617483 |
| 581 | M251T10_ | 2.028723 | 1.020572 | 2.237647 | 0.06124  | 0.862922 | UP   | 251.3874 | 251.3873 | 251.3879 | 9.956417 | 9.859233 |
| 582 | M922T10  | 1.600061 | -0.67813 | -2.19078 | 0.061299 | 0.862923 | DOWN | 921.5256 | 921.5248 | 921.5261 | 9.859667 | 9.774967 |
| 583 | M498T10_ | 1.475188 | -0.5609  | -2.2174  | 0.061333 | 0.862924 | DOWN | 498.3137 | 498.3119 | 498.3203 | 10.4039  | 10.233   |
| 584 | M316T28_ | 2.611248 | 1.384739 | 2.275889 | 0.061355 | 0.862925 | UP   | 316.336  | 316.3354 | 316.3444 | 28.1425  | 28.12733 |
| 585 | M679T11  | 1.29149  | -0.36904 | -2.17384 | 0.06146  | 0.862927 | DOWN | 679.3147 | 679.3145 | 679.3152 | 11.01968 | 10.98193 |
| 586 | M340T9_4 | 1.241901 | -0.31255 | -2.19824 | 0.061474 | 0.862927 | DOWN | 340.0427 | 340.0425 | 340.0428 | 9.296133 | 9.129317 |
| 587 | M409T10_ | 1.644826 | -0.71793 | -2.1864  | 0.061564 | 0.862929 | DOWN | 409.2967 | 409.2962 | 409.2968 | 9.88865  | 9.843367 |
| 588 | M436T9_8 | 1.755155 | -0.8116  | -2.22408 | 0.061569 | 0.862929 | DOWN | 435.9877 | 435.9876 | 435.988  | 9.26575  | 9.129317 |
| 589 | M284T10_ | 1.925001 | -0.94486 | -2.18586 | 0.061611 | 0.86293  | DOWN | 283.717  | 283.7169 | 283.7171 | 9.561767 | 9.47865  |
| 590 | M1790T10 | 1.781901 | -0.83342 | -2.27235 | 0.061612 | 0.86293  | DOWN | 1789.718 | 1789.715 | 1789.719 | 9.787633 | 9.715683 |
| 591 | M592T27  | 2.015543 | 1.011169 | 2.379449 | 0.061726 | 0.862933 | UP   | 592.3534 | 592.3532 | 592.3539 | 27.05667 | 26.99833 |
| 592 | M189T9_1 | 1.865395 | -0.89948 | -2.26415 | 0.061736 | 0.862933 | DOWN | 189.0521 | 189.0516 | 189.0525 | 9.219483 | 9.160617 |
| 593 | M1001T11 | 1.688497 | -0.75574 | -2.2316  | 0.061743 | 0.862933 | DOWN | 1001.031 | 1001.029 | 1001.033 | 10.93208 | 10.88747 |
| 594 | M220T9_6 | 1.340465 | -0.42273 | -2.17647 | 0.061831 | 0.862935 | DOWN | 219.8329 | 219.8288 | 219.833  | 9.303525 | 9.11405  |

|     |          |          |          |          |          |          |      |          |          |          |          |          |
|-----|----------|----------|----------|----------|----------|----------|------|----------|----------|----------|----------|----------|
| 595 | M925T9_1 | 1.796065 | -0.84484 | -2.23335 | 0.061839 | 0.862935 | DOWN | 924.6534 | 924.6527 | 924.6541 | 9.22775  | 9.17485  |
| 596 | M619T11  | 1.455433 | -0.54145 | -2.20939 | 0.062    | 0.862938 | DOWN | 619.2576 | 619.2574 | 619.2582 | 10.69792 | 10.67523 |
| 597 | M617T10_ | 1.49882  | -0.58383 | -2.18836 | 0.062044 | 0.862939 | DOWN | 617.2947 | 617.2935 | 617.2949 | 9.642433 | 9.52595  |
| 598 | M233T11_ | 2.419851 | -1.27492 | -2.42305 | 0.062229 | 0.862943 | DOWN | 233.15   | 233.1499 | 233.1502 | 10.91152 | 10.8628  |
| 599 | M401T11_ | 2.107329 | 1.075416 | 2.316521 | 0.062251 | 0.862944 | UP   | 400.5349 | 400.529  | 400.5368 | 10.97928 | 10.88982 |
| 600 | M532T10_ | 1.805813 | -0.85265 | -2.41515 | 0.062604 | 0.862951 | DOWN | 532.4932 | 532.4932 | 532.4935 | 9.523633 | 9.447983 |
| 601 | M413T9_5 | 11.27826 | -3.49547 | -2.55234 | 0.062648 | 0.862952 | DOWN | 412.7862 | 412.7858 | 412.7959 | 9.25985  | 9.145433 |
| 602 | M270T9_2 | 1.564822 | -0.646   | -2.26909 | 0.062828 | 0.862956 | DOWN | 270.2115 | 270.2114 | 270.2128 | 9.47225  | 9.370583 |
| 603 | M345T9_9 | 3.099104 | -1.63185 | -2.39508 | 0.062852 | 0.862956 | DOWN | 345.0251 | 345.0248 | 345.0254 | 8.88395  | 8.77435  |
| 604 | M332T45  | 1.791389 | -0.84108 | -2.39327 | 0.063144 | 0.862962 | DOWN | 332.1703 | 332.1702 | 332.1703 | 44.811   | 44.66733 |
| 605 | M387T10_ | 2.442686 | 1.288469 | 2.270413 | 0.063149 | 0.862962 | UP   | 387.1035 | 387.0975 | 387.1051 | 9.994767 | 9.918833 |
| 606 | M313T14  | 1.341957 | -0.42434 | -2.26915 | 0.06319  | 0.862963 | DOWN | 313.2353 | 313.2351 | 313.2356 | 13.79976 | 13.77038 |
| 607 | M536T38_ | 1.59802  | 0.676285 | 2.205016 | 0.063225 | 0.862964 | UP   | 536.3061 | 536.3059 | 536.3064 | 37.60417 | 37.51783 |
| 608 | M476T9_5 | 1.86822  | -0.90166 | -2.15679 | 0.063234 | 0.862964 | DOWN | 475.7045 | 475.7034 | 475.7129 | 9.342892 | 9.2033   |
| 609 | M322T9_2 | 2.337934 | 1.225234 | 2.264585 | 0.063397 | 0.862967 | UP   | 321.7005 | 321.7001 | 321.7054 | 9.311883 | 9.06855  |
| 610 | M569T10_ | 2.330057 | -1.22037 | -2.46424 | 0.063458 | 0.862968 | DOWN | 569.356  | 569.3527 | 569.3565 | 10.22983 | 10.13887 |
| 611 | M718T10_ | 2.218698 | 1.149714 | 2.206332 | 0.063652 | 0.862972 | UP   | 717.5165 | 717.5159 | 717.5178 | 10.12765 | 10.05935 |
| 612 | M499T9_2 | 1.213007 | -0.27859 | -2.20434 | 0.063715 | 0.862974 | DOWN | 498.802  | 498.8017 | 498.8024 | 9.424408 | 9.30965  |
| 613 | M552T9_8 | 1.487429 | -0.57282 | -2.17643 | 0.063724 | 0.862974 | DOWN | 552.173  | 552.1719 | 552.1746 | 9.365833 | 9.129317 |
| 614 | M415T9_3 | 1.663867 | -0.73454 | -2.22358 | 0.063878 | 0.862977 | DOWN | 414.6521 | 414.6514 | 414.6539 | 9.363375 | 9.129317 |
| 615 | M885T11_ | 1.469944 | -0.55576 | -2.18101 | 0.064074 | 0.862981 | DOWN | 885.4747 | 885.4744 | 885.476  | 10.91809 | 10.89355 |
| 616 | M346T43_ | 1.759694 | 0.815324 | 2.208788 | 0.064105 | 0.862981 | UP   | 346.1859 | 346.1858 | 346.186  | 43.1935  | 43.02783 |
| 617 | M653T11_ | 1.393115 | -0.47831 | -2.16977 | 0.064207 | 0.862983 | DOWN | 653.3006 | 653.2998 | 653.3007 | 10.58803 | 10.53258 |
| 618 | M499T9_7 | 1.236483 | -0.30624 | -2.20531 | 0.064232 | 0.862984 | DOWN | 499.3037 | 499.3035 | 499.304  | 9.424408 | 9.340183 |
| 619 | M524T9_4 | 1.559363 | -0.64096 | -2.36117 | 0.064312 | 0.862985 | DOWN | 524.0398 | 524.0394 | 524.0402 | 9.158867 | 9.07945  |
| 620 | M235T9_1 | 2.403696 | -1.26525 | -2.47567 | 0.064352 | 0.862986 | DOWN | 235.3698 | 235.3688 | 235.3701 | 9.342092 | 9.249433 |
| 621 | M1137T10 | 2.705473 | -1.43588 | -2.3043  | 0.064628 | 0.862991 | DOWN | 1136.702 | 1136.702 | 1136.703 | 10.22043 | 10.12287 |
| 622 | M206T9_1 | 2.864092 | -1.51808 | -2.21551 | 0.064638 | 0.862992 | DOWN | 206.1538 | 206.1528 | 206.1631 | 9.295167 | 9.132267 |
| 623 | M327T44_ | 1.212912 | -0.27848 | -2.3471  | 0.06478  | 0.862994 | DOWN | 327.2164 | 327.2163 | 327.2165 | 44.33675 | 44.2215  |
| 624 | M327T44_ | 1.391448 | 0.476587 | 2.141807 | 0.064956 | 0.862998 | UP   | 327.1799 | 327.1799 | 327.18   | 43.68967 | 43.45667 |
| 625 | M512T26  | 1.481717 | -0.56727 | -2.22545 | 0.065077 | 0.863    | DOWN | 511.8625 | 511.8622 | 511.8628 | 25.98083 | 25.94833 |
| 626 | M554T10_ | 1.758111 | -0.81403 | -2.15173 | 0.065127 | 0.863001 | DOWN | 554.3312 | 554.3306 | 554.332  | 9.657358 | 9.571683 |
| 627 | M490T15  | 1.52409  | -0.60795 | -2.13627 | 0.065236 | 0.863003 | DOWN | 490.3634 | 490.3624 | 490.3636 | 15.08798 | 15.0287  |
| 628 | M619T16_ | 1.424912 | -0.51087 | -2.1419  | 0.065361 | 0.863005 | DOWN | 619.4795 | 619.4785 | 619.4805 | 16.11123 | 16.0998  |
| 629 | M567T11_ | 2.574778 | -1.36445 | -2.42577 | 0.065382 | 0.863006 | DOWN | 567.0274 | 567.0264 | 567.0284 | 11.11671 | 11.06723 |

|     |          |          |          |          |          |          |      |          |          |          |          |          |
|-----|----------|----------|----------|----------|----------|----------|------|----------|----------|----------|----------|----------|
| 630 | M655T11_ | 2.373958 | 1.247294 | 2.143013 | 0.065389 | 0.863006 | UP   | 654.805  | 654.8046 | 654.8065 | 10.88445 | 10.87487 |
| 631 | M345T9_4 | 1.470042 | -0.55586 | -2.16304 | 0.06541  | 0.863006 | DOWN | 344.8247 | 344.8243 | 344.8254 | 8.887317 | 8.7891   |
| 632 | M501T9_7 | 1.379694 | -0.46435 | -2.13028 | 0.065767 | 0.863013 | DOWN | 501.2643 | 501.2624 | 501.266  | 9.365833 | 9.129317 |
| 633 | M213T9_6 | 7.811657 | -2.96563 | -2.50806 | 0.065826 | 0.863014 | DOWN | 212.7946 | 212.7931 | 212.7988 | 9.280767 | 9.219483 |
| 634 | M225T44_ | 1.391525 | -0.47667 | -2.13023 | 0.065906 | 0.863016 | DOWN | 225.1118 | 225.1117 | 225.112  | 43.83333 | 43.72767 |
| 635 | M416T9_8 | 2.048699 | -1.03471 | -2.18587 | 0.065982 | 0.863017 | DOWN | 416.2894 | 416.2886 | 416.2928 | 9.365833 | 9.046783 |
| 636 | M1721T10 | 1.766755 | -0.8211  | -2.16483 | 0.066033 | 0.863018 | DOWN | 1721.201 | 1721.198 | 1721.204 | 9.772125 | 9.715683 |
| 637 | M452T9_4 | 1.371571 | -0.45583 | -2.19587 | 0.066142 | 0.86302  | DOWN | 452.2233 | 452.2223 | 452.226  | 9.363217 | 9.1158   |
| 638 | M351T44_ | 1.054001 | -0.07588 | -2.13856 | 0.066341 | 0.863024 | DOWN | 351.3255 | 351.3255 | 351.3256 | 43.60342 | 43.60317 |
| 639 | M478T38_ | 1.32521  | -0.40622 | -2.45375 | 0.066344 | 0.863024 | DOWN | 478.3008 | 478.3006 | 478.3009 | 38.36675 | 38.2085  |
| 640 | M402T39  | 1.781347 | -0.83297 | -2.4586  | 0.066532 | 0.863027 | DOWN | 402.3574 | 402.3572 | 402.3577 | 38.79842 | 38.76967 |
| 641 | M301T29  | 5.710718 | -2.51367 | -2.45294 | 0.066571 | 0.863028 | DOWN | 301.156  | 301.1557 | 301.1567 | 28.68817 | 28.64883 |
| 642 | M1181T10 | 3.178316 | -1.66826 | -2.43057 | 0.066751 | 0.863031 | DOWN | 1180.728 | 1180.727 | 1180.729 | 10.27294 | 10.18653 |
| 643 | M406T45_ | 1.93269  | 0.95061  | 2.16044  | 0.066797 | 0.863032 | UP   | 406.207  | 406.2068 | 406.2071 | 44.79683 | 44.71033 |
| 644 | M367T10_ | 1.672537 | -0.74204 | -2.11971 | 0.067077 | 0.863037 | DOWN | 366.7566 | 366.7553 | 366.7586 | 9.830833 | 9.830733 |
| 645 | M377T10_ | 1.25221  | -0.32448 | -2.29515 | 0.067085 | 0.863037 | DOWN | 377.3661 | 377.3658 | 377.367  | 9.918958 | 9.8378   |
| 646 | M380T20_ | 1.38063  | -0.46533 | -2.12132 | 0.067201 | 0.863039 | DOWN | 380.1899 | 380.1897 | 380.1902 | 20.17225 | 20.15783 |
| 647 | M564T9_2 | 2.177746 | -1.12284 | -2.14385 | 0.067205 | 0.863039 | DOWN | 563.8744 | 563.8737 | 563.8745 | 9.431517 | 9.371417 |
| 648 | M1798T10 | 1.607728 | -0.68502 | -2.36848 | 0.06725  | 0.86304  | DOWN | 1798.309 | 1798.307 | 1798.311 | 9.81635  | 9.715683 |
| 649 | M296T24  | 1.308536 | -0.38795 | -2.15549 | 0.067251 | 0.86304  | DOWN | 296.1935 | 296.1934 | 296.1936 | 23.78817 | 23.76083 |
| 650 | M1017T10 | 1.91384  | -0.93647 | -2.12223 | 0.067331 | 0.863042 | DOWN | 1017.438 | 1017.436 | 1017.441 | 10.11782 | 9.939683 |
| 651 | M668T45_ | 1.083309 | 0.115445 | 2.416836 | 0.06741  | 0.863043 | UP   | 667.9809 | 667.9804 | 667.9811 | 44.71033 | 44.6815  |
| 652 | M646T23  | 1.408953 | -0.49462 | -2.11454 | 0.067422 | 0.863043 | DOWN | 646.437  | 646.4364 | 646.4376 | 22.88583 | 22.81383 |
| 653 | M700T10_ | 1.334096 | 0.415863 | 2.163103 | 0.067463 | 0.863044 | UP   | 699.8795 | 699.8783 | 699.8803 | 9.999517 | 9.923533 |
| 654 | M478T28  | 3.967148 | 1.988102 | 2.480563 | 0.067621 | 0.863047 | UP   | 478.2791 | 478.2785 | 478.2797 | 28.02617 | 27.99567 |
| 655 | M302T10_ | 1.810101 | -0.85607 | -2.14364 | 0.067703 | 0.863048 | DOWN | 301.6277 | 301.6273 | 301.6279 | 9.918833 | 9.811217 |
| 656 | M353T43_ | 1.182834 | -0.24225 | -2.27012 | 0.068082 | 0.863055 | DOWN | 353.232  | 353.2319 | 353.2321 | 42.58217 | 42.323   |
| 657 | M1328T9  | 1.299657 | -0.37813 | -2.14776 | 0.068141 | 0.863056 | DOWN | 1327.924 | 1327.923 | 1327.926 | 9.311167 | 9.17485  |
| 658 | M257T10_ | 2.347318 | 1.231014 | 2.110706 | 0.068166 | 0.863056 | UP   | 257.4661 | 257.4661 | 257.4663 | 9.746783 | 9.665433 |
| 659 | M323T20  | 1.450949 | -0.537   | -2.1751  | 0.068236 | 0.863058 | DOWN | 323.1237 | 323.1236 | 323.1241 | 20.17292 | 20.15833 |
| 660 | M605T12_ | 1.330877 | -0.41238 | -2.12225 | 0.068453 | 0.863061 | DOWN | 605.4639 | 605.463  | 605.4645 | 12.23754 | 12.20985 |
| 661 | M206T9_2 | 3.162879 | -1.66124 | -2.1381  | 0.06852  | 0.863063 | DOWN | 206.217  | 206.2169 | 206.2172 | 9.296417 | 9.160467 |
| 662 | M183T9_8 | 2.154245 | -1.10718 | -2.39986 | 0.068618 | 0.863064 | DOWN | 183.1563 | 183.1556 | 183.1565 | 9.166033 | 9.132033 |
| 663 | M255T10_ | 1.925393 | 0.945153 | 2.103186 | 0.068633 | 0.863065 | UP   | 255.4515 | 255.4509 | 255.4519 | 9.736117 | 9.62055  |
| 664 | M281T31_ | 1.148643 | -0.19993 | -2.2304  | 0.068903 | 0.863069 | DOWN | 281.2473 | 281.2471 | 281.2474 | 31.26725 | 31.23383 |

|     |          |          |          |          |          |          |      |          |          |          |          |          |
|-----|----------|----------|----------|----------|----------|----------|------|----------|----------|----------|----------|----------|
| 665 | M187T9_1 | 1.729345 | -0.79023 | -2.10028 | 0.068962 | 0.86307  | DOWN | 186.8951 | 186.8946 | 186.8956 | 9.3919   | 9.1602   |
| 666 | M476T9_1 | 2.917083 | -1.54453 | -2.12657 | 0.06931  | 0.863076 | DOWN | 476.1621 | 476.1588 | 476.1673 | 9.323067 | 9.160467 |
| 667 | M805T12  | 1.911471 | -0.93468 | -2.19375 | 0.069374 | 0.863077 | DOWN | 805.3906 | 805.3898 | 805.3917 | 11.58612 | 11.5607  |
| 668 | M305T9_1 | 2.798267 | -1.48453 | -2.25386 | 0.069461 | 0.863079 | DOWN | 304.8632 | 304.8632 | 304.8633 | 9.457083 | 9.401917 |
| 669 | M229T10_ | 1.904052 | -0.92907 | -2.11561 | 0.069511 | 0.863079 | DOWN | 228.9004 | 228.8921 | 228.9006 | 9.8235   | 9.715683 |
| 670 | M490T41  | 1.83008  | -0.87191 | -2.25664 | 0.069561 | 0.86308  | DOWN | 490.2644 | 490.2642 | 490.2647 | 41.13625 | 40.81267 |
| 671 | M635T10_ | 1.673263 | -0.74266 | -2.0982  | 0.069768 | 0.863084 | DOWN | 635.4364 | 635.4358 | 635.4368 | 9.803133 | 9.715683 |
| 672 | M1493T10 | 1.653476 | -0.7255  | -2.0975  | 0.069886 | 0.863086 | DOWN | 1493.118 | 1493.112 | 1493.122 | 9.904767 | 9.7634   |
| 673 | M935T12  | 2.374393 | -1.24756 | -2.21583 | 0.069911 | 0.863086 | DOWN | 934.5335 | 934.5333 | 934.5338 | 11.5653  | 11.5505  |
| 674 | M1973T10 | 1.561448 | -0.64288 | -2.18042 | 0.070008 | 0.863088 | DOWN | 1972.702 | 1972.7   | 1972.702 | 9.81635  | 9.715683 |
| 675 | M383T9_5 | 2.091664 | -1.06465 | -2.27861 | 0.070239 | 0.863092 | DOWN | 382.9289 | 382.9246 | 382.9299 | 9.174883 | 9.145433 |
| 676 | M620T9_1 | 1.821948 | -0.86548 | -2.09983 | 0.070295 | 0.863092 | DOWN | 619.7437 | 619.7405 | 619.7473 | 9.235933 | 9.079083 |
| 677 | M555T10_ | 1.844352 | -0.88311 | -2.3346  | 0.070308 | 0.863093 | DOWN | 555.354  | 555.3531 | 555.3543 | 10.12053 | 10.05268 |
| 678 | M1736T10 | 1.450701 | -0.53675 | -2.10851 | 0.070365 | 0.863094 | DOWN | 1735.728 | 1735.728 | 1735.729 | 9.605508 | 9.49445  |
| 679 | M169T44_ | 2.230464 | 1.157344 | 2.433593 | 0.070561 | 0.863097 | UP   | 169.122  | 169.1219 | 169.1221 | 44.03467 | 44.02033 |
| 680 | M721T10_ | 1.273205 | -0.34846 | -2.12984 | 0.070597 | 0.863097 | DOWN | 720.8119 | 720.8105 | 720.8125 | 9.8207   | 9.699733 |
| 681 | M480T9_5 | 1.330081 | -0.41151 | -2.08484 | 0.070635 | 0.863098 | DOWN | 480.2834 | 480.2815 | 480.2841 | 9.311167 | 9.129317 |
| 682 | M710T9_1 | 2.463943 | -1.30097 | -2.19544 | 0.070656 | 0.863098 | DOWN | 709.6485 | 709.6476 | 709.6494 | 8.783317 | 8.701267 |
| 683 | M809T11_ | 1.688796 | -0.75599 | -2.08634 | 0.070669 | 0.863099 | DOWN | 809.3798 | 809.3785 | 809.3803 | 11.232   | 11.19848 |
| 684 | M456T9_2 | 2.020306 | -1.01457 | -2.24485 | 0.070772 | 0.8631   | DOWN | 455.6945 | 455.6938 | 455.6948 | 9.242617 | 9.129317 |
| 685 | M594T10_ | 1.851102 | -0.88838 | -2.14293 | 0.0708   | 0.863101 | DOWN | 593.7973 | 593.7971 | 593.7977 | 9.5098   | 9.416817 |
| 686 | M917T11_ | 1.990994 | -0.99349 | -2.38793 | 0.070838 | 0.863101 | DOWN | 917.0326 | 917.0317 | 917.0332 | 10.6171  | 10.61192 |
| 687 | M349T9_7 | 1.733556 | -0.79373 | -2.18094 | 0.070955 | 0.863103 | DOWN | 348.7221 | 348.7216 | 348.7225 | 9.498117 | 9.40135  |
| 688 | M647T9_1 | 3.747922 | -1.90609 | -2.35789 | 0.07103  | 0.863104 | DOWN | 646.5967 | 646.5877 | 646.5978 | 9.166033 | 9.129317 |
| 689 | M778T10_ | 1.268902 | -0.34358 | -2.08187 | 0.071143 | 0.863106 | DOWN | 778.0816 | 778.0805 | 778.0825 | 9.942317 | 9.843367 |
| 690 | M197T10_ | 1.195433 | -0.25753 | -2.17114 | 0.071156 | 0.863106 | DOWN | 197.3305 | 197.3238 | 197.3308 | 9.828367 | 9.699733 |
| 691 | M502T9_8 | 1.371352 | -0.4556  | -2.08313 | 0.07117  | 0.863107 | DOWN | 502.4022 | 502.4019 | 502.4027 | 9.355917 | 9.249433 |
| 692 | M336T10_ | 3.254223 | 1.702313 | 2.380813 | 0.071404 | 0.86311  | UP   | 336.2303 | 336.2294 | 336.2307 | 9.932033 | 9.885167 |
| 693 | M221T9_1 | 1.6728   | -0.74227 | -2.21073 | 0.07147  | 0.863111 | DOWN | 221.484  | 221.4821 | 221.4847 | 9.22995  | 9.132267 |
| 694 | M426T22  | 1.438289 | -0.52435 | -2.12072 | 0.071511 | 0.863112 | DOWN | 426.3057 | 426.3052 | 426.3069 | 21.5535  | 21.4795  |
| 695 | M197T43_ | 1.439253 | 0.52532  | 2.152718 | 0.071599 | 0.863113 | UP   | 197.1533 | 197.1533 | 197.1534 | 43.1     | 42.98483 |
| 696 | M642T10_ | 1.720306 | 0.782665 | 2.342606 | 0.071738 | 0.863116 | UP   | 641.8564 | 641.8555 | 641.8571 | 10.1174  | 10.02042 |
| 697 | M996T26  | 1.445378 | -0.53145 | -2.0773  | 0.071772 | 0.863116 | DOWN | 995.6928 | 995.6917 | 995.6933 | 26.32675 | 26.31767 |
| 698 | M503T9_6 | 2.009605 | -1.00691 | -2.09444 | 0.071975 | 0.863119 | DOWN | 503.188  | 503.1813 | 503.1887 | 9.3494   | 9.18195  |
| 699 | M700T9_4 | 1.594257 | -0.67288 | -2.07539 | 0.072109 | 0.863121 | DOWN | 700.4446 | 700.4445 | 700.4449 | 9.29345  | 9.234417 |

|     |          |          |          |          |          |          |      |          |          |          |          |          |
|-----|----------|----------|----------|----------|----------|----------|------|----------|----------|----------|----------|----------|
| 700 | M478T13_ | 1.689479 | -0.75658 | -2.1034  | 0.072115 | 0.863121 | DOWN | 478.3395 | 478.3387 | 478.3412 | 13.22963 | 13.2     |
| 701 | M441T16  | 1.561902 | -0.6433  | -2.20563 | 0.072163 | 0.863122 | DOWN | 440.802  | 440.8018 | 440.8026 | 16.0674  | 16.06475 |
| 702 | M247T18  | 6.65667  | -2.7348  | -2.42249 | 0.072188 | 0.863123 | DOWN | 247.1649 | 247.1648 | 247.1652 | 18.21683 | 18.20817 |
| 703 | M529T9_5 | 8.148036 | -3.02645 | -2.38896 | 0.07221  | 0.863123 | DOWN | 529.3701 | 529.37   | 529.371  | 8.658083 | 8.586967 |
| 704 | M352T41_ | 1.203549 | -0.2673  | -2.12678 | 0.07232  | 0.863125 | DOWN | 352.1964 | 352.1964 | 352.1966 | 41.4455  | 41.35917 |
| 705 | M669T9_1 | 1.448547 | -0.53461 | -2.07054 | 0.072387 | 0.863126 | DOWN | 668.6664 | 668.6655 | 668.6681 | 9.2796   | 9.1445   |
| 706 | M655T9_4 | 2.037362 | -1.0267  | -2.06873 | 0.0724   | 0.863126 | DOWN | 655.4794 | 655.4788 | 655.4804 | 9.3332   | 9.24215  |
| 707 | M1154T12 | 1.802877 | -0.8503  | -2.07721 | 0.072615 | 0.863129 | DOWN | 1154.104 | 1154.104 | 1154.106 | 12.24459 | 12.19282 |
| 708 | M281T43_ | 1.293727 | -0.37153 | -2.06878 | 0.072676 | 0.86313  | DOWN | 281.1744 | 281.1743 | 281.1744 | 42.53883 | 42.40917 |
| 709 | M227T12_ | 2.639449 | -1.40024 | -2.06997 | 0.072749 | 0.863131 | DOWN | 227.1062 | 227.1001 | 227.1066 | 11.90352 | 11.69913 |
| 710 | M896T12  | 1.676883 | -0.74578 | -2.10723 | 0.072828 | 0.863132 | DOWN | 896.4712 | 896.4706 | 896.4724 | 11.59143 | 11.57545 |
| 711 | M225T17  | 1.524658 | -0.60849 | -2.14346 | 0.072836 | 0.863133 | DOWN | 225.1959 | 225.1958 | 225.196  | 16.88467 | 16.86967 |
| 712 | M865T9   | 2.648105 | -1.40496 | -2.27649 | 0.072887 | 0.863133 | DOWN | 864.5204 | 864.5198 | 864.5215 | 9.254167 | 9.1175   |
| 713 | M423T11_ | 1.823733 | 0.866895 | 2.076759 | 0.073001 | 0.863135 | UP   | 422.9935 | 422.9934 | 423.0032 | 10.90197 | 10.88995 |
| 714 | M216T10_ | 1.901846 | 0.9274   | 2.158651 | 0.073029 | 0.863136 | UP   | 216.1827 | 216.1748 | 216.1827 | 9.970617 | 9.715683 |
| 715 | M592T10_ | 4.520951 | 2.176626 | 2.414471 | 0.073047 | 0.863136 | UP   | 592.3995 | 592.3992 | 592.3997 | 9.967367 | 9.8914   |
| 716 | M592T10_ | 1.48105  | -0.56662 | -2.15583 | 0.073122 | 0.863137 | DOWN | 592.4685 | 592.4678 | 592.4702 | 9.896717 | 9.806367 |
| 717 | M340T11_ | 2.657108 | 1.409857 | 2.191325 | 0.073129 | 0.863137 | UP   | 339.5387 | 339.5385 | 339.5389 | 10.87572 | 10.82935 |
| 718 | M495T9_2 | 1.41721  | -0.50305 | -2.10033 | 0.073294 | 0.86314  | DOWN | 494.5277 | 494.527  | 494.5291 | 8.8398   | 8.75965  |
| 719 | M234T9_3 | 1.489796 | -0.57512 | -2.06326 | 0.073303 | 0.86314  | DOWN | 233.7966 | 233.7939 | 233.7978 | 9.296325 | 9.13445  |
| 720 | M378T9_4 | 1.398274 | -0.48365 | -2.05933 | 0.07344  | 0.863142 | DOWN | 377.6992 | 377.6978 | 377.7062 | 9.189117 | 9.129317 |
| 721 | M324T10_ | 2.030103 | 1.021553 | 2.276155 | 0.073536 | 0.863143 | UP   | 324.1006 | 324.0999 | 324.1009 | 9.74925  | 9.715683 |
| 722 | M1606T9  | 1.51897  | -0.60309 | -2.0798  | 0.073611 | 0.863144 | DOWN | 1606.342 | 1606.339 | 1606.349 | 9.269283 | 9.129317 |
| 723 | M590T9_3 | 1.869872 | -0.90294 | -2.16551 | 0.073784 | 0.863147 | DOWN | 590.3659 | 590.3643 | 590.3665 | 9.275917 | 9.234417 |
| 724 | M315T39_ | 1.235785 | 0.305428 | 2.286274 | 0.073816 | 0.863147 | UP   | 315.18   | 315.1798 | 315.1801 | 39.05275 | 38.94217 |
| 725 | M340T10_ | 1.35955  | -0.44313 | -2.1044  | 0.073858 | 0.863148 | DOWN | 340.034  | 340.0336 | 340.0344 | 9.823592 | 9.715683 |
| 726 | M780T10_ | 1.967229 | -0.97617 | -2.32534 | 0.073893 | 0.863149 | DOWN | 779.7016 | 779.7    | 779.703  | 9.95515  | 9.869467 |
| 727 | M251T9_2 | 1.742267 | -0.80097 | -2.09613 | 0.074143 | 0.863152 | DOWN | 250.7215 | 250.719  | 250.723  | 9.295167 | 9.1322   |
| 728 | M791T11_ | 1.50616  | -0.59088 | -2.05854 | 0.074235 | 0.863154 | DOWN | 790.9932 | 790.9922 | 790.9941 | 10.5188  | 10.47197 |
| 729 | M504T10_ | 1.356778 | -0.44018 | -2.05165 | 0.074322 | 0.863155 | DOWN | 504.1762 | 504.176  | 504.1766 | 9.932    | 9.827283 |
| 730 | M620T33_ | 1.119497 | -0.16285 | -2.26622 | 0.074433 | 0.863156 | DOWN | 620.3636 | 620.3635 | 620.364  | 32.9505  | 32.80683 |
| 731 | M350T39_ | 1.297759 | 0.376022 | 2.074599 | 0.074457 | 0.863157 | UP   | 350.2172 | 350.217  | 350.2174 | 39.47458 | 39.12933 |
| 732 | M636T10_ | 2.826285 | 1.498907 | 2.2718   | 0.074566 | 0.863158 | UP   | 635.8077 | 635.8072 | 635.8106 | 9.8207   | 9.73145  |
| 733 | M624T10_ | 1.970462 | -0.97853 | -2.358   | 0.074706 | 0.86316  | DOWN | 624.3731 | 624.3723 | 624.3749 | 10.31602 | 10.2501  |
| 734 | M546T40_ | 1.279059 | 0.355083 | 2.073695 | 0.074763 | 0.863161 | UP   | 546.327  | 546.3268 | 546.3271 | 39.84867 | 39.704   |

|     |          |          |          |          |          |          |      |          |          |          |          |          |
|-----|----------|----------|----------|----------|----------|----------|------|----------|----------|----------|----------|----------|
| 735 | M190T9_2 | 1.812854 | -0.85826 | -2.04955 | 0.074798 | 0.863162 | DOWN | 189.5556 | 189.5554 | 189.5561 | 9.311167 | 9.132267 |
| 736 | M218T10_ | 1.509715 | -0.59428 | -2.1039  | 0.074798 | 0.863162 | DOWN | 217.5363 | 217.5348 | 217.5369 | 9.842    | 9.7124   |
| 737 | M609T12  | 1.836616 | 0.87705  | 2.188009 | 0.0748   | 0.863162 | UP   | 609.3987 | 609.3984 | 609.3987 | 11.68839 | 11.6717  |
| 738 | M731T11_ | 1.569554 | -0.65036 | -2.1485  | 0.07485  | 0.863163 | DOWN | 731.4965 | 731.4947 | 731.4976 | 10.53258 | 10.4704  |
| 739 | M372T26  | 1.68864  | -0.75586 | -2.07554 | 0.074854 | 0.863163 | DOWN | 372.3298 | 372.3294 | 372.3304 | 26.40533 | 26.36217 |
| 740 | M637T11_ | 1.698649 | -0.76439 | -2.19289 | 0.074874 | 0.863163 | DOWN | 637.305  | 637.3036 | 637.3059 | 10.71272 | 10.67805 |
| 741 | M264T11_ | 3.702871 | -1.88864 | -2.35867 | 0.074985 | 0.863164 | DOWN | 263.8246 | 263.8245 | 263.8253 | 10.86253 | 10.8214  |
| 742 | M323T9_7 | 1.510125 | -0.59467 | -2.21813 | 0.074997 | 0.863165 | DOWN | 323.454  | 323.4537 | 323.4622 | 9.353875 | 9.275917 |
| 743 | M505T11_ | 1.821862 | -0.86541 | -2.36918 | 0.07511  | 0.863166 | DOWN | 505.1709 | 505.1592 | 505.172  | 11.21303 | 10.95055 |
| 744 | M415T9_5 | 1.461237 | -0.54719 | -2.06287 | 0.075231 | 0.863168 | DOWN | 415.0984 | 415.0976 | 415.0994 | 9.2723   | 9.1445   |
| 745 | M278T11_ | 2.439561 | -1.28662 | -2.07724 | 0.0753   | 0.863169 | DOWN | 277.7664 | 277.7664 | 277.7664 | 10.90548 | 10.879   |
| 746 | M473T29  | 1.641225 | -0.71477 | -2.34548 | 0.075446 | 0.863171 | DOWN | 473.335  | 473.3346 | 473.3354 | 29.11467 | 29.06917 |
| 747 | M528T17_ | 10.27182 | 3.36062  | 2.382079 | 0.075622 | 0.863174 | UP   | 528.2368 | 528.2367 | 528.2372 | 17.14667 | 17.1305  |
| 748 | M547T24  | 1.535842 | -0.61903 | -2.04938 | 0.075655 | 0.863174 | DOWN | 547.4659 | 547.4653 | 547.4664 | 23.58717 | 23.56533 |
| 749 | M910T10  | 1.576549 | -0.65677 | -2.19515 | 0.07588  | 0.863177 | DOWN | 909.8062 | 909.8057 | 909.8066 | 9.960817 | 9.843367 |
| 750 | M430T9_1 | 1.421958 | -0.50788 | -2.11762 | 0.076018 | 0.863179 | DOWN | 430.4521 | 430.451  | 430.4546 | 9.311883 | 9.129317 |
| 751 | M201T9_1 | 1.438445 | -0.52451 | -2.04017 | 0.076042 | 0.863179 | DOWN | 200.9773 | 200.9767 | 200.9776 | 9.388367 | 9.250817 |
| 752 | M206T10_ | 1.319624 | -0.40013 | -2.04406 | 0.07609  | 0.86318  | DOWN | 205.5684 | 205.5682 | 205.5685 | 9.82645  | 9.787433 |
| 753 | M561T9_1 | 1.993632 | -0.9954  | -2.12835 | 0.076101 | 0.86318  | DOWN | 561.3442 | 561.3431 | 561.3448 | 9.275917 | 9.219483 |
| 754 | M263T10_ | 1.33878  | -0.42092 | -2.30825 | 0.076173 | 0.863181 | DOWN | 262.8743 | 262.8741 | 262.8744 | 9.841858 | 9.683817 |
| 755 | M214T17  | 1.322215 | -0.40296 | -2.03604 | 0.076344 | 0.863184 | DOWN | 214.0893 | 214.0893 | 214.0894 | 16.97183 | 16.92817 |
| 756 | M193T9_4 | 1.634005 | -0.70841 | -2.19398 | 0.076355 | 0.863184 | DOWN | 192.9175 | 192.9167 | 192.9176 | 9.40325  | 9.295817 |
| 757 | M397T37_ | 1.044678 | -0.06306 | -2.11674 | 0.076378 | 0.863184 | DOWN | 397.3309 | 397.3307 | 397.3311 | 36.92625 | 36.91333 |
| 758 | M925T9_2 | 1.364882 | -0.44878 | -2.03434 | 0.076379 | 0.863184 | DOWN | 925.1551 | 925.1545 | 925.1554 | 9.328967 | 9.175017 |
| 759 | M359T9_2 | 2.054547 | -1.03882 | -2.07955 | 0.076409 | 0.863185 | DOWN | 358.7024 | 358.7019 | 358.7026 | 9.275917 | 9.24215  |
| 760 | M182T10_ | 1.659655 | 0.730884 | 2.038016 | 0.076467 | 0.863185 | UP   | 182.471  | 182.4708 | 182.4711 | 9.824183 | 9.715683 |
| 761 | M309T10_ | 2.573899 | 1.363955 | 2.221017 | 0.07651  | 0.863186 | UP   | 309.1679 | 309.1675 | 309.1682 | 9.979342 | 9.8753   |
| 762 | M614T9_3 | 1.269887 | -0.3447  | -2.05143 | 0.076576 | 0.863187 | DOWN | 614.3431 | 614.3428 | 614.3433 | 9.289925 | 9.219483 |
| 763 | M1723T10 | 1.293069 | -0.3708  | -2.04023 | 0.076701 | 0.863189 | DOWN | 1723.15  | 1723.147 | 1723.156 | 9.886608 | 9.827283 |
| 764 | M314T13_ | 1.870379 | 0.903331 | 2.055395 | 0.076725 | 0.863189 | UP   | 314.2016 | 314.2013 | 314.2021 | 13.3618  | 13.33217 |
| 765 | M739T10_ | 1.757416 | -0.81346 | -2.17155 | 0.076853 | 0.863191 | DOWN | 739.2226 | 739.2224 | 739.2229 | 9.9847   | 9.9009   |
| 766 | M382T9_2 | 1.513273 | -0.59767 | -2.03258 | 0.07687  | 0.863191 | DOWN | 381.6576 | 381.657  | 381.6582 | 8.868383 | 8.712633 |
| 767 | M580T9_4 | 5.011608 | 2.325274 | 2.33011  | 0.076937 | 0.863192 | UP   | 579.9894 | 579.9889 | 579.9899 | 9.317    | 9.235933 |
| 768 | M359T9_4 | 1.785064 | -0.83598 | -2.19289 | 0.07695  | 0.863192 | DOWN | 359.0241 | 359.0231 | 359.0243 | 9.311883 | 9.234417 |
| 769 | M539T10_ | 1.738751 | 0.798051 | 2.033904 | 0.076969 | 0.863192 | UP   | 538.6788 | 538.6784 | 538.6792 | 9.910683 | 9.811217 |

|     |          |          |          |          |          |          |      |          |          |          |          |          |
|-----|----------|----------|----------|----------|----------|----------|------|----------|----------|----------|----------|----------|
| 770 | M378T10_ | 1.612178 | -0.68901 | -2.04297 | 0.076979 | 0.863192 | DOWN | 378.2886 | 378.2874 | 378.2893 | 10.0807  | 10.05935 |
| 771 | M492T13  | 1.571905 | -0.65251 | -2.28996 | 0.077065 | 0.863194 | DOWN | 492.3307 | 492.3301 | 492.3307 | 12.61638 | 12.60358 |
| 772 | M702T10_ | 1.768246 | 0.822319 | 2.098462 | 0.077091 | 0.863194 | UP   | 701.6576 | 701.6521 | 701.6589 | 9.746783 | 9.696683 |
| 773 | M209T10_ | 1.257441 | -0.33049 | -2.12379 | 0.077099 | 0.863194 | DOWN | 209.1867 | 209.1866 | 209.1868 | 9.816142 | 9.715683 |
| 774 | M1867T10 | 1.213911 | -0.27966 | -2.12923 | 0.077128 | 0.863194 | DOWN | 1866.531 | 1866.53  | 1866.54  | 9.8397   | 9.715683 |
| 775 | M331T9_6 | 1.683987 | -0.75188 | -2.20699 | 0.077143 | 0.863195 | DOWN | 330.9775 | 330.977  | 330.9776 | 9.296458 | 9.234417 |
| 776 | M396T9_1 | 1.363821 | -0.44765 | -2.04131 | 0.07722  | 0.863196 | DOWN | 396.4099 | 396.4092 | 396.4116 | 9.294467 | 9.129317 |
| 777 | M315T9_4 | 1.716349 | -0.77934 | -2.11405 | 0.077369 | 0.863198 | DOWN | 314.8588 | 314.8585 | 314.86   | 9.311525 | 9.1445   |
| 778 | M674T10_ | 1.532626 | 0.616006 | 2.028678 | 0.077386 | 0.863198 | UP   | 674.455  | 674.454  | 674.4551 | 10.39007 | 10.36838 |
| 779 | M500T9_2 | 2.20329  | -1.13966 | -2.09459 | 0.077561 | 0.8632   | DOWN | 499.6911 | 499.6898 | 499.6915 | 9.348817 | 9.234417 |
| 780 | M386T25  | 1.228543 | 0.296949 | 2.19219  | 0.077583 | 0.863201 | UP   | 386.3454 | 386.3453 | 386.3456 | 24.56558 | 24.55033 |
| 781 | M202T15  | 9.716402 | 3.280422 | 2.341092 | 0.077587 | 0.863201 | UP   | 202.2162 | 202.216  | 202.2163 | 15.14961 | 15.11695 |
| 782 | M174T9_2 | 1.446863 | -0.53293 | -2.04916 | 0.077639 | 0.863201 | DOWN | 174.0798 | 174.0794 | 174.0805 | 9.26575  | 9.160617 |
| 783 | M456T10_ | 1.393881 | -0.47911 | -2.06174 | 0.077726 | 0.863203 | DOWN | 456.3341 | 456.3335 | 456.3351 | 10.45667 | 10.3828  |
| 784 | M523T9_6 | 1.453189 | -0.53922 | -2.05228 | 0.078005 | 0.863206 | DOWN | 523.4805 | 523.4796 | 523.4813 | 9.262217 | 9.129317 |
| 785 | M162T10_ | 1.956956 | -0.96861 | -2.11922 | 0.078252 | 0.86321  | DOWN | 162.2643 | 162.2542 | 162.2644 | 9.91765  | 9.822117 |
| 786 | M418T9_1 | 1.450064 | -0.53612 | -2.0752  | 0.078304 | 0.86321  | DOWN | 418.3766 | 418.3765 | 418.3769 | 9.26575  | 9.1445   |
| 787 | M262T12  | 1.797258 | 0.845798 | 2.056993 | 0.078317 | 0.86321  | UP   | 262.1411 | 262.141  | 262.1412 | 11.82952 | 11.78683 |
| 788 | M576T31  | 1.212916 | -0.27848 | -2.1135  | 0.078409 | 0.863212 | DOWN | 576.4103 | 576.4101 | 576.4107 | 31.436   | 31.42133 |
| 789 | M784T10_ | 1.552089 | -0.63421 | -2.02828 | 0.07842  | 0.863212 | DOWN | 783.9154 | 783.9153 | 783.9162 | 9.903017 | 9.811217 |
| 790 | M313T10_ | 1.811115 | -0.85688 | -2.13833 | 0.078504 | 0.863213 | DOWN | 312.5873 | 312.587  | 312.5875 | 9.510875 | 9.432533 |
| 791 | M327T43_ | 1.392467 | -0.47764 | -2.14422 | 0.078537 | 0.863213 | DOWN | 327.18   | 327.1798 | 327.18   | 43.22892 | 43.1285  |
| 792 | M235T9_1 | 1.494601 | -0.57976 | -2.04135 | 0.078545 | 0.863213 | DOWN | 235.4187 | 235.4186 | 235.4188 | 9.310917 | 9.146383 |
| 793 | M430T43_ | 1.347517 | -0.4303  | -2.03149 | 0.078612 | 0.863214 | DOWN | 430.2433 | 430.2431 | 430.2436 | 43.32275 | 43.2855  |
| 794 | M213T11_ | 2.532949 | -1.34082 | -2.2782  | 0.078667 | 0.863215 | DOWN | 212.9448 | 212.9375 | 212.9451 | 10.86773 | 10.8214  |
| 795 | M528T18  | 13.99072 | 3.806399 | 2.347571 | 0.078687 | 0.863215 | UP   | 528.237  | 528.2369 | 528.2372 | 17.86917 | 17.85633 |
| 796 | M680T10_ | 3.864364 | 1.950231 | 2.014636 | 0.078817 | 0.863217 | UP   | 679.5332 | 679.529  | 679.5406 | 10.02773 | 9.772883 |
| 797 | M341T38  | 1.082887 | -0.11488 | -2.04584 | 0.078868 | 0.863218 | DOWN | 341.3048 | 341.3047 | 341.3051 | 37.6905  | 37.676   |
| 798 | M270T19_ | 1.787016 | -0.83755 | -2.21245 | 0.078885 | 0.863218 | DOWN | 270.1008 | 270.1006 | 270.1009 | 19.31567 | 19.28883 |
| 799 | M436T9_2 | 1.581813 | -0.66158 | -2.07454 | 0.078892 | 0.863218 | DOWN | 435.6031 | 435.6024 | 435.6052 | 9.297008 | 9.129317 |
| 800 | M181T13  | 1.577226 | 0.657389 | 2.014121 | 0.078892 | 0.863218 | UP   | 181.1695 | 181.1694 | 181.1697 | 13.44886 | 13.42028 |
| 801 | M163T10_ | 2.419229 | 1.274547 | 2.245625 | 0.078905 | 0.863218 | UP   | 162.8421 | 162.8419 | 162.8424 | 9.949233 | 9.843367 |
| 802 | M314T9_5 | 1.446904 | -0.53297 | -2.05188 | 0.079298 | 0.863223 | DOWN | 313.9431 | 313.9427 | 313.9434 | 8.94795  | 8.863633 |
| 803 | M269T9   | 1.802949 | -0.85036 | -2.01241 | 0.079374 | 0.863224 | DOWN | 269.3898 | 269.3887 | 269.3905 | 9.250083 | 9.22495  |
| 804 | M557T10_ | 1.202148 | -0.26561 | -2.06458 | 0.079419 | 0.863225 | DOWN | 557.2116 | 557.2112 | 557.2126 | 9.945258 | 9.843367 |

|     |          |          |          |          |          |          |      |          |          |          |          |          |
|-----|----------|----------|----------|----------|----------|----------|------|----------|----------|----------|----------|----------|
| 805 | M563T9_2 | 2.729072 | -1.44841 | -2.2143  | 0.079421 | 0.863225 | DOWN | 563.2305 | 563.2304 | 563.2308 | 9.488133 | 9.447983 |
| 806 | M627T10_ | 1.240484 | -0.3109  | -2.06264 | 0.079682 | 0.863228 | DOWN | 627.4481 | 627.4467 | 627.4488 | 10.21651 | 10.15473 |
| 807 | M593T10_ | 1.847927 | -0.88591 | -2.08672 | 0.079933 | 0.863231 | DOWN | 593.2118 | 593.2099 | 593.2127 | 9.9351   | 9.8378   |
| 808 | M398T9_3 | 1.737568 | 0.79707  | 2.005038 | 0.079984 | 0.863232 | UP   | 397.9964 | 397.9949 | 397.9977 | 9.25395  | 9.048117 |
| 809 | M251T9_3 | 1.681345 | -0.74962 | -2.03719 | 0.079997 | 0.863232 | DOWN | 250.8121 | 250.811  | 250.8135 | 9.322292 | 9.175017 |
| 810 | M455T9_2 | 3.764467 | -1.91245 | -2.2592  | 0.080028 | 0.863233 | DOWN | 454.5339 | 454.5267 | 454.5409 | 9.303525 | 9.191283 |
| 811 | M675T21  | 1.864709 | 0.89895  | 2.292791 | 0.080156 | 0.863234 | UP   | 675.3349 | 675.3342 | 675.3352 | 20.62    | 20.548   |
| 812 | M825T10_ | 1.881123 | -0.91159 | -2.02508 | 0.08027  | 0.863236 | DOWN | 825.4894 | 825.4885 | 825.4898 | 9.613367 | 9.566767 |
| 813 | M248T18  | 2.505741 | -1.32524 | -2.22707 | 0.08045  | 0.863238 | DOWN | 248.1681 | 248.1681 | 248.1683 | 18.2235  | 18.218   |
| 814 | M699T9_7 | 1.550619 | -0.63284 | -2.14294 | 0.080487 | 0.863238 | DOWN | 699.4879 | 699.4878 | 699.4881 | 9.318283 | 9.129317 |
| 815 | M224T9_3 | 1.858954 | 0.894491 | 2.002067 | 0.080512 | 0.863239 | UP   | 224.1634 | 224.1621 | 224.1652 | 8.830042 | 8.620783 |
| 816 | M440T11_ | 1.436704 | -0.52276 | -2.03506 | 0.080516 | 0.863239 | DOWN | 439.8452 | 439.8447 | 439.8462 | 10.93338 | 10.90197 |
| 817 | M639T10_ | 1.356128 | 0.439493 | 1.999859 | 0.080539 | 0.863239 | UP   | 639.133  | 639.1325 | 639.1336 | 10.40322 | 10.34372 |
| 818 | M1179T10 | 1.387972 | 0.472978 | 2.03832  | 0.080548 | 0.863239 | UP   | 1178.977 | 1178.976 | 1178.978 | 9.872167 | 9.683817 |
| 819 | M520T40_ | 1.41364  | 0.499414 | 2.116256 | 0.08064  | 0.86324  | UP   | 520.3113 | 520.3108 | 520.3114 | 39.84858 | 39.77667 |
| 820 | M611T12  | 1.503192 | 0.588029 | 2.035227 | 0.080794 | 0.863242 | UP   | 611.4058 | 611.4054 | 611.4065 | 11.70442 | 11.66582 |
| 821 | M1559T10 | 1.245024 | -0.31617 | -2.08943 | 0.0808   | 0.863242 | DOWN | 1558.579 | 1558.576 | 1558.58  | 9.932983 | 9.843367 |
| 822 | M449T11_ | 2.49827  | -1.32093 | -2.27473 | 0.080821 | 0.863242 | DOWN | 449.444  | 449.4435 | 449.4445 | 10.91987 | 10.8646  |
| 823 | M662T10_ | 2.171602 | 1.11876  | 2.045067 | 0.080822 | 0.863242 | UP   | 661.5218 | 661.521  | 661.5219 | 9.82645  | 9.80415  |
| 824 | M194T9_8 | 1.636887 | -0.71096 | -2.02198 | 0.081264 | 0.863248 | DOWN | 193.9159 | 193.9156 | 193.916  | 9.3735   | 9.29345  |
| 825 | M508T38_ | 1.247022 | -0.31849 | -1.99246 | 0.081476 | 0.863251 | DOWN | 508.3111 | 508.3108 | 508.3113 | 37.65458 | 37.57533 |
| 826 | M350T10_ | 1.118814 | -0.16197 | -1.99473 | 0.081615 | 0.863252 | DOWN | 350.1364 | 350.1362 | 350.1366 | 9.8207   | 9.715683 |
| 827 | M766T12  | 1.967184 | -0.97613 | -2.01084 | 0.081626 | 0.863252 | DOWN | 766.0422 | 766.0409 | 766.0434 | 12.2371  | 12.19282 |
| 828 | M566T10_ | 1.37727  | -0.46181 | -2.07516 | 0.081687 | 0.863253 | DOWN | 565.6668 | 565.6661 | 565.6675 | 9.990767 | 9.90755  |
| 829 | M399T9_4 | 2.81534  | 1.493309 | 2.257012 | 0.081733 | 0.863254 | UP   | 398.8741 | 398.8737 | 398.8782 | 9.38665  | 9.078567 |
| 830 | M554T10_ | 2.30386  | 1.204053 | 2.203487 | 0.08199  | 0.863257 | UP   | 553.5007 | 553.5003 | 553.5015 | 9.973683 | 9.8914   |
| 831 | M273T9_1 | 1.652258 | -0.72444 | -2.12888 | 0.082063 | 0.863258 | DOWN | 272.6136 | 272.6133 | 272.6137 | 8.834633 | 8.7575   |
| 832 | M193T10_ | 1.768656 | -0.82265 | -2.2523  | 0.082063 | 0.863258 | DOWN | 192.689  | 192.6889 | 192.6892 | 9.919058 | 9.853533 |
| 833 | M575T10_ | 1.390737 | -0.47585 | -2.00417 | 0.082064 | 0.863258 | DOWN | 574.5946 | 574.594  | 574.5951 | 9.902008 | 9.811217 |
| 834 | M1785T10 | 1.612727 | -0.6895  | -2.07814 | 0.08212  | 0.863258 | DOWN | 1785.242 | 1785.241 | 1785.247 | 9.8207   | 9.715683 |
| 835 | M402T11_ | 4.185023 | 2.065236 | 2.050304 | 0.082264 | 0.86326  | UP   | 402.1614 | 402.1588 | 402.1681 | 10.90765 | 10.86155 |
| 836 | M244T9_4 | 1.641862 | -0.71533 | -1.98712 | 0.082271 | 0.86326  | DOWN | 243.766  | 243.7647 | 243.7682 | 9.204617 | 9.078567 |
| 837 | M706T10_ | 1.461148 | 0.547102 | 2.058707 | 0.082297 | 0.86326  | UP   | 706.0097 | 706.009  | 706.01   | 9.960817 | 9.859233 |
| 838 | M621T9_4 | 2.50053  | -1.32223 | -2.05372 | 0.082444 | 0.863262 | DOWN | 621.3187 | 621.317  | 621.3194 | 8.787267 | 8.712633 |
| 839 | M506T42_ | 1.797581 | 0.846057 | 1.989091 | 0.082619 | 0.863264 | UP   | 506.2593 | 506.2593 | 506.2594 | 42.43817 | 42.35183 |



|     |          |          |          |          |          |          |      |          |          |          |          |          |
|-----|----------|----------|----------|----------|----------|----------|------|----------|----------|----------|----------|----------|
| 840 | M221T9_5 | 8.162133 | -3.02895 | -2.29294 | 0.082667 | 0.863265 | DOWN | 220.7763 | 220.7694 | 220.7793 | 9.224517 | 9.089733 |
| 841 | M456T11_ | 1.397849 | -0.48321 | -2.01089 | 0.082752 | 0.863266 | DOWN | 455.6196 | 455.6161 | 455.6197 | 10.94208 | 10.90765 |
| 842 | M1460T10 | 1.509818 | -0.59437 | -2.17249 | 0.082868 | 0.863267 | DOWN | 1460.431 | 1460.43  | 1460.432 | 9.9847   | 9.90755  |
| 843 | M1878T10 | 1.339751 | -0.42197 | -1.98079 | 0.082968 | 0.863268 | DOWN | 1878.386 | 1878.384 | 1878.388 | 9.830283 | 9.7124   |
| 844 | M1095T10 | 1.695123 | 0.76139  | 2.066914 | 0.082994 | 0.863269 | UP   | 1094.804 | 1094.803 | 1094.805 | 9.872883 | 9.743767 |
| 845 | M602T10_ | 1.56391  | -0.64516 | -1.97989 | 0.083314 | 0.863272 | DOWN | 602.3015 | 602.3011 | 602.3017 | 9.598292 | 9.510117 |
| 846 | M450T39_ | 1.090986 | -0.12563 | -2.00994 | 0.083361 | 0.863273 | DOWN | 450.2333 | 450.2331 | 450.2335 | 38.55367 | 38.49617 |
| 847 | M610T12  | 1.853297 | 0.890094 | 2.148217 | 0.083368 | 0.863273 | UP   | 610.4022 | 610.4018 | 610.4024 | 11.68691 | 11.6717  |
| 848 | M289T23_ | 1.62484  | 0.700298 | 2.070025 | 0.083403 | 0.863273 | UP   | 288.7764 | 288.7736 | 288.7789 | 22.91483 | 22.84233 |
| 849 | M520T43_ | 1.375665 | -0.46013 | -2.04529 | 0.083641 | 0.863276 | DOWN | 520.2749 | 520.2747 | 520.2751 | 42.53883 | 42.38067 |
| 850 | M219T9_1 | 1.587651 | -0.66689 | -2.04808 | 0.083981 | 0.86328  | DOWN | 218.5587 | 218.5573 | 218.5589 | 9.40325  | 9.219483 |
| 851 | M595T11_ | 1.739139 | -0.79837 | -1.97302 | 0.084112 | 0.863282 | DOWN | 595.4772 | 595.4767 | 595.4778 | 11.46178 | 11.42372 |
| 852 | M193T10_ | 1.531891 | -0.61531 | -2.00828 | 0.08419  | 0.863283 | DOWN | 192.7781 | 192.778  | 192.7783 | 9.92825  | 9.827283 |
| 853 | M208T10_ | 2.289464 | -1.19501 | -2.12546 | 0.084201 | 0.863283 | DOWN | 207.7605 | 207.7603 | 207.7683 | 9.82645  | 9.715683 |
| 854 | M708T10_ | 1.412802 | -0.49856 | -2.02786 | 0.084247 | 0.863283 | DOWN | 708.4245 | 708.4228 | 708.4253 | 10.05906 | 9.98005  |
| 855 | M221T9_1 | 2.502748 | -1.32351 | -2.07892 | 0.084389 | 0.863285 | DOWN | 221.1886 | 221.1868 | 221.1893 | 9.257575 | 9.146383 |
| 856 | M461T21  | 1.722839 | 0.784788 | 2.076987 | 0.084426 | 0.863285 | UP   | 461.3451 | 461.3448 | 461.3456 | 20.77817 | 20.73683 |
| 857 | M556T10_ | 2.119678 | -1.08385 | -2.20707 | 0.084458 | 0.863286 | DOWN | 555.8554 | 555.8546 | 555.8559 | 10.13295 | 10.02042 |
| 858 | M724T21  | 1.287241 | -0.36428 | -1.98559 | 0.084532 | 0.863286 | DOWN | 724.4822 | 724.4818 | 724.4829 | 21.21633 | 21.20783 |
| 859 | M392T11_ | 1.560418 | -0.64193 | -1.96768 | 0.084819 | 0.86329  | DOWN | 391.7248 | 391.7246 | 391.7249 | 10.88995 | 10.84767 |
| 860 | M418T10_ | 1.451656 | -0.5377  | -2.00307 | 0.084839 | 0.86329  | DOWN | 417.9955 | 417.9954 | 417.9961 | 9.904767 | 9.8378   |
| 861 | M207T9_1 | 2.345821 | 1.230093 | 2.086452 | 0.085076 | 0.863293 | UP   | 207.0357 | 207.035  | 207.0364 | 9.25985  | 9.174967 |
| 862 | M1572T10 | 1.754894 | -0.81138 | -2.07946 | 0.085083 | 0.863293 | DOWN | 1572.262 | 1572.253 | 1572.266 | 9.938075 | 9.822117 |
| 863 | M518T9_2 | 1.711203 | -0.77501 | -1.96771 | 0.085145 | 0.863293 | DOWN | 518.195  | 518.1946 | 518.1959 | 9.241708 | 9.160467 |
| 864 | M526T9_6 | 3.531697 | 1.820362 | 2.219741 | 0.085498 | 0.863297 | UP   | 526.3391 | 526.3381 | 526.3423 | 9.238858 | 9.147367 |
| 865 | M875T11  | 1.471918 | -0.5577  | -1.96255 | 0.08573  | 0.8633   | DOWN | 875.4458 | 875.4454 | 875.4468 | 10.90659 | 10.89355 |
| 866 | M184T9_4 | 1.910557 | -0.93399 | -2.1357  | 0.085735 | 0.8633   | DOWN | 183.874  | 183.8737 | 183.8744 | 9.205717 | 9.174883 |
| 867 | M220T9_3 | 1.862737 | -0.89742 | -1.96319 | 0.085736 | 0.8633   | DOWN | 219.5889 | 219.5878 | 219.5896 | 9.311525 | 9.103733 |
| 868 | M636T11_ | 1.277447 | -0.35326 | -1.98388 | 0.085744 | 0.8633   | DOWN | 636.4784 | 636.4777 | 636.4788 | 11.41303 | 11.37965 |
| 869 | M244T9_8 | 1.707775 | -0.77212 | -1.95838 | 0.085877 | 0.863301 | DOWN | 244.1611 | 244.1597 | 244.1622 | 9.321458 | 9.1322   |
| 870 | M343T11_ | 1.694683 | 0.761015 | 2.078816 | 0.085941 | 0.863302 | UP   | 342.6399 | 342.6397 | 342.64   | 10.8628  | 10.83572 |
| 871 | M472T9_4 | 1.554351 | -0.63631 | -1.95674 | 0.086232 | 0.863305 | DOWN | 471.9128 | 471.9124 | 471.9261 | 9.3261   | 9.279417 |
| 872 | M667T11  | 1.432157 | -0.51819 | -1.96701 | 0.086275 | 0.863306 | DOWN | 667.3157 | 667.3155 | 667.3163 | 11.36835 | 11.30818 |
| 873 | M415T9_6 | 3.119102 | 1.641131 | 2.205517 | 0.086276 | 0.863306 | UP   | 415.1579 | 415.1559 | 415.1586 | 9.379475 | 9.048117 |
| 874 | M807T10_ | 1.416272 | -0.5021  | -1.99557 | 0.08628  | 0.863306 | DOWN | 806.9665 | 806.9662 | 806.9679 | 10.27719 | 10.16598 |

|     |          |          |          |          |          |          |      |          |          |          |          |          |
|-----|----------|----------|----------|----------|----------|----------|------|----------|----------|----------|----------|----------|
| 875 | M622T9_1 | 3.340806 | -1.7402  | -2.07156 | 0.086342 | 0.863307 | DOWN | 621.5696 | 621.569  | 621.5707 | 8.753417 | 8.697767 |
| 876 | M169T10_ | 2.233267 | -1.15916 | -2.09374 | 0.086424 | 0.863307 | DOWN | 168.7245 | 168.722  | 168.7247 | 9.8445   | 9.683817 |
| 877 | M710T9_3 | 2.827765 | -1.49966 | -2.14036 | 0.086462 | 0.863308 | DOWN | 709.9349 | 709.9343 | 709.9354 | 8.791683 | 8.686867 |
| 878 | M176T10_ | 1.75033  | -0.80763 | -1.9636  | 0.086681 | 0.86331  | DOWN | 176.3584 | 176.3583 | 176.3585 | 9.8214   | 9.715683 |
| 879 | M715T10_ | 2.607959 | -1.38292 | -2.2091  | 0.086713 | 0.863311 | DOWN | 714.7263 | 714.7248 | 714.728  | 10.02345 | 9.90755  |
| 880 | M221T10_ | 1.194907 | -0.2569  | -1.98942 | 0.086762 | 0.863311 | DOWN | 220.7903 | 220.7819 | 220.7908 | 9.918792 | 9.827283 |
| 881 | M260T9_7 | 1.674676 | -0.74388 | -1.99337 | 0.086811 | 0.863312 | DOWN | 260.086  | 260.0841 | 260.0934 | 9.357033 | 9.18975  |
| 882 | M394T14  | 1.954296 | 0.966649 | 2.09649  | 0.086812 | 0.863312 | UP   | 394.2198 | 394.2195 | 394.2204 | 13.76303 | 13.74103 |
| 883 | M370T10_ | 1.630179 | -0.70503 | -1.96575 | 0.086871 | 0.863312 | DOWN | 369.8412 | 369.8399 | 369.8432 | 9.903567 | 9.806367 |
| 884 | M1396T10 | 1.726081 | -0.7875  | -2.10084 | 0.086958 | 0.863313 | DOWN | 1396.198 | 1396.196 | 1396.2   | 9.938708 | 9.8378   |
| 885 | M577T10_ | 1.287922 | -0.36505 | -1.99397 | 0.086965 | 0.863313 | DOWN | 576.8835 | 576.8833 | 576.8836 | 9.954767 | 9.859233 |
| 886 | M212T9_1 | 1.769467 | -0.82332 | -1.95729 | 0.087029 | 0.863314 | DOWN | 212.1964 | 212.1935 | 212.197  | 9.295817 | 9.132267 |
| 887 | M963T10_ | 1.581227 | -0.66104 | -1.98618 | 0.087115 | 0.863315 | DOWN | 963.4765 | 963.476  | 963.4782 | 9.61185  | 9.5731   |
| 888 | M354T9_5 | 1.668615 | -0.73865 | -2.09357 | 0.087239 | 0.863316 | DOWN | 353.8083 | 353.808  | 353.8091 | 8.872733 | 8.825567 |
| 889 | M295T9_1 | 1.481461 | -0.56702 | -2.02267 | 0.087338 | 0.863317 | DOWN | 294.5477 | 294.5471 | 294.549  | 9.322542 | 9.234417 |
| 890 | M668T10_ | 2.47782  | -1.30907 | -2.21435 | 0.08735  | 0.863317 | DOWN | 667.8982 | 667.8974 | 667.8988 | 10.4791  | 10.40882 |
| 891 | M584T11  | 1.852279 | -0.8893  | -1.95267 | 0.087376 | 0.863318 | DOWN | 583.8086 | 583.8083 | 583.8089 | 11.24756 | 11.2071  |
| 892 | M429T9_4 | 1.688196 | -0.75548 | -2.01995 | 0.087582 | 0.86332  | DOWN | 429.1391 | 429.1371 | 429.1397 | 9.235933 | 9.061    |
| 893 | M795T11_ | 1.43366  | -0.5197  | -2.01352 | 0.087808 | 0.863322 | DOWN | 795.1331 | 795.1319 | 795.1338 | 10.93752 | 10.90785 |
| 894 | M478T10_ | 1.732394 | 0.792767 | 2.036213 | 0.087884 | 0.863323 | UP   | 477.6971 | 477.6969 | 477.6975 | 9.95605  | 9.843367 |
| 895 | M454T9_6 | 2.259948 | -1.17629 | -1.94591 | 0.08791  | 0.863323 | DOWN | 453.6849 | 453.6802 | 453.691  | 9.4812   | 9.166033 |
| 896 | M1719T10 | 1.175147 | -0.23284 | -2.10515 | 0.087974 | 0.863324 | DOWN | 1719.484 | 1719.482 | 1719.486 | 9.729367 | 9.636483 |
| 897 | M378T37  | 2.115791 | 1.081197 | 2.24484  | 0.088011 | 0.863324 | UP   | 378.2482 | 378.2482 | 378.2483 | 36.953   | 36.75633 |
| 898 | M230T10_ | 4.065492 | 2.02343  | 2.222968 | 0.088073 | 0.863325 | UP   | 230.1441 | 230.1385 | 230.1442 | 9.6095   | 9.49445  |
| 899 | M617T10_ | 1.527593 | -0.61126 | -1.96825 | 0.088183 | 0.863326 | DOWN | 616.7931 | 616.7924 | 616.7934 | 9.637333 | 9.52595  |
| 900 | M271T9_2 | 1.37733  | -0.46187 | -2.00261 | 0.088212 | 0.863326 | DOWN | 270.6849 | 270.6848 | 270.685  | 8.817708 | 8.715883 |
| 901 | M273T9_4 | 1.562972 | -0.64429 | -2.08706 | 0.088319 | 0.863328 | DOWN | 272.7569 | 272.7568 | 272.7573 | 8.82795  | 8.7575   |
| 902 | M806T11_ | 1.580091 | -0.66001 | -1.97667 | 0.0884   | 0.863328 | DOWN | 806.4026 | 806.4024 | 806.403  | 11.13164 | 11.10768 |
| 903 | M404T42_ | 1.421952 | -0.50787 | -2.06092 | 0.088411 | 0.863328 | DOWN | 404.2639 | 404.2637 | 404.2641 | 41.94917 | 41.8915  |
| 904 | M476T10_ | 2.630668 | 1.395429 | 1.949514 | 0.088424 | 0.863329 | UP   | 476.4709 | 476.4708 | 476.4726 | 9.746783 | 9.715683 |
| 905 | M169T44_ | 2.167478 | 1.116017 | 2.234388 | 0.088595 | 0.86333  | UP   | 169.122  | 169.122  | 169.122  | 43.70383 | 43.63217 |
| 906 | M470T9_4 | 1.460782 | -0.54674 | -2.09953 | 0.088726 | 0.863332 | DOWN | 470.2101 | 470.2099 | 470.2104 | 9.1747   | 9.159717 |
| 907 | M318T29_ | 1.352002 | -0.4351  | -1.96794 | 0.088733 | 0.863332 | DOWN | 318.3274 | 318.327  | 318.3276 | 29.03917 | 29.0175  |
| 908 | M207T9_1 | 1.538147 | -0.62119 | -2.08901 | 0.088853 | 0.863333 | DOWN | 207.2779 | 207.2772 | 207.2789 | 9.330642 | 9.11795  |
| 909 | M340T10_ | 2.753808 | -1.46143 | -1.95264 | 0.088868 | 0.863333 | DOWN | 340.1803 | 340.1785 | 340.1839 | 9.886083 | 9.80755  |

|     |          |          |          |          |          |          |      |          |          |          |          |          |
|-----|----------|----------|----------|----------|----------|----------|------|----------|----------|----------|----------|----------|
| 910 | M222T9_5 | 1.611744 | -0.68862 | -1.93797 | 0.088896 | 0.863333 | DOWN | 222.1928 | 222.1925 | 222.194  | 9.300267 | 9.132267 |
| 911 | M217T10_ | 1.308819 | -0.38827 | -1.9644  | 0.088915 | 0.863334 | DOWN | 217.2566 | 217.2564 | 217.2571 | 9.830283 | 9.715683 |
| 912 | M227T9_1 | 1.92194  | -0.94256 | -1.93547 | 0.088966 | 0.863334 | DOWN | 227.2503 | 227.2489 | 227.251  | 9.295817 | 9.1178   |
| 913 | M747T10_ | 1.465196 | -0.55109 | -1.93566 | 0.088992 | 0.863334 | DOWN | 746.9665 | 746.9656 | 746.9671 | 10.39249 | 10.32768 |
| 914 | M828T9_4 | 2.371404 | -1.24574 | -2.02696 | 0.089098 | 0.863336 | DOWN | 828.2572 | 828.2561 | 828.2576 | 8.798117 | 8.697767 |
| 915 | M557T10_ | 1.47073  | -0.55653 | -1.98911 | 0.089141 | 0.863336 | DOWN | 557.3461 | 557.3453 | 557.3464 | 10.32034 | 10.26607 |
| 916 | M202T11_ | 1.44675  | -0.53282 | -1.98955 | 0.089175 | 0.863336 | DOWN | 201.6796 | 201.6793 | 201.6798 | 10.93208 | 10.89355 |
| 917 | M811T11_ | 1.333353 | -0.41506 | -1.93961 | 0.089238 | 0.863337 | DOWN | 811.3584 | 811.3577 | 811.3588 | 10.54073 | 10.50338 |
| 918 | M243T9_5 | 1.926196 | -0.94575 | -1.98359 | 0.089273 | 0.863337 | DOWN | 242.9502 | 242.9475 | 242.9509 | 9.204617 | 9.132267 |
| 919 | M417T9_5 | 1.429627 | -0.51564 | -2.06434 | 0.089443 | 0.863339 | DOWN | 416.9191 | 416.9186 | 416.9199 | 9.296133 | 9.129317 |
| 920 | M1002T11 | 1.663473 | -0.7342  | -2.0587  | 0.089498 | 0.86334  | DOWN | 1002.446 | 1002.446 | 1002.446 | 11.38408 | 11.35247 |
| 921 | M229T11_ | 1.972195 | -0.9798  | -2.07219 | 0.08955  | 0.86334  | DOWN | 229.1951 | 229.195  | 229.1957 | 10.89125 | 10.8628  |
| 922 | M854T10_ | 1.822395 | -0.86584 | -2.0237  | 0.089561 | 0.86334  | DOWN | 854.4239 | 854.4229 | 854.425  | 10.10015 | 10.04355 |
| 923 | M183T10_ | 1.21986  | -0.28672 | -1.9475  | 0.089689 | 0.863342 | DOWN | 183.1741 | 183.174  | 183.1742 | 9.967367 | 9.859233 |
| 924 | M687T11  | 2.91051  | -1.54127 | -2.17195 | 0.089706 | 0.863342 | DOWN | 687.4328 | 687.432  | 687.4332 | 10.50917 | 10.50278 |
| 925 | M451T9_6 | 1.336157 | -0.41809 | -1.94597 | 0.089859 | 0.863343 | DOWN | 451.1096 | 451.1093 | 451.1101 | 9.311883 | 9.146383 |
| 926 | M335T9_1 | 1.534657 | -0.61792 | -2.0097  | 0.089866 | 0.863343 | DOWN | 334.551  | 334.5507 | 334.5514 | 8.90275  | 8.802417 |
| 927 | M859T11  | 1.453792 | -0.53982 | -2.03618 | 0.090206 | 0.863347 | DOWN | 859.0084 | 859.0078 | 859.0096 | 10.72995 | 10.6937  |
| 928 | M287T39  | 1.221824 | 0.289036 | 1.967209 | 0.090207 | 0.863347 | UP   | 287.1486 | 287.1484 | 287.1488 | 39.45883 | 39.22983 |
| 929 | M557T11_ | 1.458092 | -0.54408 | -2.07725 | 0.090208 | 0.863347 | DOWN | 556.6798 | 556.6794 | 556.6817 | 10.65302 | 10.629   |
| 930 | M494T11_ | 1.763685 | -0.81859 | -2.00003 | 0.090232 | 0.863347 | DOWN | 494.1112 | 494.1108 | 494.1115 | 10.94406 | 10.90553 |
| 931 | M163T10_ | 1.478633 | 0.564264 | 2.00058  | 0.09027  | 0.863347 | UP   | 163.1325 | 163.1324 | 163.1326 | 9.918417 | 9.859233 |
| 932 | M365T11_ | 1.665252 | -0.73574 | -2.14559 | 0.090295 | 0.863348 | DOWN | 365.1453 | 365.145  | 365.1455 | 10.89125 | 10.8646  |
| 933 | M896T11_ | 1.609616 | -0.68672 | -2.103   | 0.090546 | 0.86335  | DOWN | 896.0276 | 896.0254 | 896.0285 | 10.5297  | 10.50338 |
| 934 | M837T12  | 1.53991  | 0.622846 | 1.988184 | 0.090611 | 0.863351 | UP   | 836.5707 | 836.5703 | 836.5711 | 12.37287 | 12.3538  |
| 935 | M551T9_6 | 1.528636 | -0.61224 | -2.17255 | 0.090644 | 0.863351 | DOWN | 551.4334 | 551.4329 | 551.4339 | 9.174967 | 9.0637   |
| 936 | M377T10_ | 1.852262 | 0.889288 | 2.021377 | 0.090645 | 0.863351 | UP   | 377.2891 | 377.2883 | 377.2898 | 9.970617 | 9.859233 |
| 937 | M301T11_ | 1.686889 | 0.754365 | 1.925488 | 0.090646 | 0.863351 | UP   | 301.1619 | 301.1609 | 301.1621 | 10.5617  | 10.49138 |
| 938 | M356T10_ | 2.750132 | 1.459501 | 2.134577 | 0.090702 | 0.863352 | UP   | 356.3925 | 356.383  | 356.3928 | 9.78305  | 9.7124   |
| 939 | M365T9_9 | 1.412745 | -0.4985  | -1.97665 | 0.090759 | 0.863352 | DOWN | 365.078  | 365.0777 | 365.0783 | 8.863025 | 8.77435  |
| 940 | M235T9_3 | 1.659149 | -0.73044 | -2.00821 | 0.090768 | 0.863352 | DOWN | 234.6223 | 234.6199 | 234.6228 | 9.311883 | 9.132267 |
| 941 | M287T42  | 1.345803 | 0.428468 | 1.998661 | 0.090806 | 0.863353 | UP   | 287.1486 | 287.1485 | 287.1488 | 42.1145  | 41.7475  |
| 942 | M573T9_4 | 2.146705 | -1.10212 | -1.9225  | 0.090833 | 0.863353 | DOWN | 573.3868 | 573.386  | 573.3873 | 9.143633 | 9.1158   |
| 943 | M1779T10 | 1.542972 | -0.62571 | -2.11019 | 0.090903 | 0.863354 | DOWN | 1779.24  | 1779.239 | 1779.242 | 9.830283 | 9.715683 |
| 944 | M620T9_3 | 2.229642 | -1.15681 | -1.92284 | 0.091053 | 0.863355 | DOWN | 619.8762 | 619.875  | 619.8766 | 9.26575  | 9.234417 |

|     |          |          |          |          |          |          |      |          |          |          |          |          |
|-----|----------|----------|----------|----------|----------|----------|------|----------|----------|----------|----------|----------|
| 945 | M1863T10 | 1.835278 | -0.876   | -2.12231 | 0.091614 | 0.863361 | DOWN | 1863.007 | 1863.004 | 1863.01  | 9.813475 | 9.728083 |
| 946 | M856T10_ | 1.870537 | -0.90345 | -2.00599 | 0.091738 | 0.863362 | DOWN | 855.7712 | 855.7709 | 855.7722 | 9.958492 | 9.9009   |
| 947 | M253T9_5 | 1.49874  | -0.58375 | -1.9198  | 0.09179  | 0.863362 | DOWN | 253.1559 | 253.1526 | 253.1567 | 9.329025 | 9.280767 |
| 948 | M706T9_1 | 1.782053 | -0.83354 | -1.92212 | 0.091812 | 0.863362 | DOWN | 706.0833 | 706.0823 | 706.0835 | 8.849933 | 8.7891   |
| 949 | M417T9_1 | 1.473788 | 0.559529 | 1.953721 | 0.091971 | 0.863364 | UP   | 417.3221 | 417.3215 | 417.3224 | 9.330217 | 9.1445   |
| 950 | M749T11_ | 1.464197 | -0.55011 | -1.99115 | 0.09205  | 0.863365 | DOWN | 749.4154 | 749.4151 | 749.4159 | 11.22302 | 11.19848 |
| 951 | M579T9_8 | 1.500261 | -0.58521 | -1.92652 | 0.092077 | 0.863365 | DOWN | 579.4442 | 579.4434 | 579.4461 | 9.24215  | 9.12675  |
| 952 | M188T9_1 | 3.315399 | 1.729182 | 2.135269 | 0.092115 | 0.863365 | UP   | 187.6746 | 187.6736 | 187.6747 | 9.365833 | 9.278717 |
| 953 | M592T22  | 1.382126 | -0.46689 | -1.91414 | 0.092379 | 0.863368 | DOWN | 592.3842 | 592.3838 | 592.3849 | 22.14583 | 22.13433 |
| 954 | M430T9_7 | 1.366923 | -0.45093 | -2.03938 | 0.092407 | 0.863368 | DOWN | 430.2775 | 430.2767 | 430.278  | 8.88765  | 8.7891   |
| 955 | M477T9_3 | 1.293663 | -0.37146 | -1.91289 | 0.092429 | 0.863368 | DOWN | 476.6556 | 476.6551 | 476.6561 | 9.352667 | 9.220933 |
| 956 | M699T9_2 | 1.646819 | -0.71968 | -1.92508 | 0.092481 | 0.863369 | DOWN | 698.9862 | 698.9859 | 698.9866 | 9.18975  | 9.129317 |
| 957 | M871T10_ | 1.30889  | -0.38834 | -1.92591 | 0.092663 | 0.863371 | DOWN | 871.3094 | 871.3083 | 871.3101 | 9.965892 | 9.859233 |
| 958 | M363T9_3 | 1.411536 | -0.49727 | -2.03033 | 0.092693 | 0.863371 | DOWN | 362.638  | 362.637  | 362.6414 | 9.3494   | 9.204617 |
| 959 | M297T11_ | 1.292438 | -0.3701  | -1.92386 | 0.092851 | 0.863372 | DOWN | 296.7852 | 296.7851 | 296.7856 | 10.90628 | 10.877   |
| 960 | M686T10_ | 1.619012 | 0.695113 | 1.919329 | 0.092961 | 0.863373 | UP   | 685.6651 | 685.6647 | 685.6659 | 9.831467 | 9.743667 |
| 961 | M609T11_ | 4.496793 | 2.168897 | 2.134768 | 0.09302  | 0.863374 | UP   | 609.4225 | 609.4209 | 609.4239 | 11.47808 | 11.45398 |
| 962 | M661T9_3 | 1.418688 | -0.50456 | -1.90963 | 0.093113 | 0.863375 | DOWN | 661.4139 | 661.4132 | 661.4144 | 9.317    | 9.234417 |
| 963 | M323T9_3 | 1.556064 | -0.6379  | -2.00918 | 0.09312  | 0.863375 | DOWN | 322.902  | 322.9011 | 322.9068 | 9.251225 | 9.053483 |
| 964 | M592T10_ | 2.308728 | -1.2071  | -1.94843 | 0.09313  | 0.863375 | DOWN | 592.2316 | 592.2308 | 592.2319 | 9.60105  | 9.509533 |
| 965 | M341T10_ | 2.367949 | 1.243638 | 2.119499 | 0.093261 | 0.863376 | UP   | 340.8184 | 340.8173 | 340.8237 | 9.82645  | 9.76065  |
| 966 | M277T21  | 1.205317 | -0.26941 | -1.98285 | 0.093317 | 0.863377 | DOWN | 277.1796 | 277.1794 | 277.1797 | 20.95025 | 20.92417 |
| 967 | M794T10_ | 1.639987 | -0.71368 | -2.03134 | 0.093458 | 0.863378 | DOWN | 794.0428 | 794.0426 | 794.0434 | 9.886083 | 9.806367 |
| 968 | M204T9_2 | 1.624087 | -0.69963 | -1.90356 | 0.09361  | 0.863379 | DOWN | 203.9119 | 203.9118 | 203.9122 | 9.2903   | 9.129317 |
| 969 | M860T10  | 1.387326 | -0.47231 | -1.92342 | 0.093701 | 0.86338  | DOWN | 859.9327 | 859.9319 | 859.9338 | 9.999517 | 9.90755  |
| 970 | M288T23_ | 1.698105 | 0.763926 | 1.901744 | 0.093722 | 0.86338  | UP   | 288.1814 | 288.174  | 288.1817 | 22.88583 | 22.85683 |
| 971 | M189T9_6 | 1.777969 | -0.83023 | -1.96499 | 0.093903 | 0.863382 | DOWN | 188.92   | 188.9196 | 188.9205 | 9.280767 | 9.146383 |
| 972 | M598T11  | 1.570736 | -0.65144 | -1.96429 | 0.09392  | 0.863382 | DOWN | 597.8335 | 597.8324 | 597.8359 | 10.8937  | 10.80695 |
| 973 | M451T10_ | 2.072155 | -1.05113 | -1.91203 | 0.094031 | 0.863383 | DOWN | 451.2676 | 451.2675 | 451.2681 | 9.9351   | 9.933967 |
| 974 | M423T11_ | 1.966732 | 0.9758   | 1.976819 | 0.094063 | 0.863384 | UP   | 423.1458 | 423.1398 | 423.1481 | 10.99775 | 10.77073 |
| 975 | M402T11_ | 1.862307 | -0.89709 | -1.89881 | 0.094159 | 0.863384 | DOWN | 401.9381 | 401.9295 | 401.9427 | 10.92928 | 10.87708 |
| 976 | M475T9_2 | 1.459051 | -0.54503 | -1.91765 | 0.094528 | 0.863388 | DOWN | 474.6256 | 474.6244 | 474.6259 | 9.311167 | 9.129317 |
| 977 | M791T11_ | 1.578903 | -0.65892 | -2.05695 | 0.094571 | 0.863388 | DOWN | 791.4947 | 791.4931 | 791.4954 | 10.53962 | 10.47197 |
| 978 | M332T9_4 | 1.660436 | -0.73156 | -1.94545 | 0.09464  | 0.863389 | DOWN | 331.9168 | 331.9167 | 331.917  | 9.455367 | 9.401917 |
| 979 | M569T11  | 2.235453 | -1.16057 | -2.05483 | 0.094658 | 0.863389 | DOWN | 568.6801 | 568.6783 | 568.6814 | 11.14038 | 11.11987 |

|      |          |          |          |          |          |          |      |          |          |          |          |          |
|------|----------|----------|----------|----------|----------|----------|------|----------|----------|----------|----------|----------|
| 980  | M842T11_ | 2.578904 | -1.36676 | -2.07429 | 0.094784 | 0.86339  | DOWN | 841.5255 | 841.5241 | 841.5266 | 11.12933 | 11.10528 |
| 981  | M653T27  | 1.803192 | 0.850553 | 1.89989  | 0.09488  | 0.863391 | UP   | 653.4065 | 653.4051 | 653.4076 | 27.30233 | 27.19917 |
| 982  | M475T10_ | 3.802149 | 1.926815 | 1.994492 | 0.09519  | 0.863394 | UP   | 475.2204 | 475.2169 | 475.226  | 9.533767 | 9.284283 |
| 983  | M554T9_1 | 1.985189 | -0.98928 | -1.89737 | 0.095279 | 0.863395 | DOWN | 553.5196 | 553.5193 | 553.5196 | 9.298683 | 9.279417 |
| 984  | M162T9_1 | 1.762688 | -0.81778 | -2.11866 | 0.095311 | 0.863395 | DOWN | 161.5631 | 161.5627 | 161.5671 | 9.275917 | 9.129317 |
| 985  | M379T20  | 1.336895 | -0.41889 | -1.89527 | 0.095322 | 0.863395 | DOWN | 379.1864 | 379.1863 | 379.1866 | 20.17225 | 20.15783 |
| 986  | M873T10_ | 1.458162 | -0.54415 | -2.05798 | 0.095353 | 0.863395 | DOWN | 872.6986 | 872.698  | 872.6989 | 9.972483 | 9.8753   |
| 987  | M839T10_ | 2.346272 | -1.23037 | -1.9337  | 0.095452 | 0.863396 | DOWN | 839.4971 | 839.4967 | 839.4984 | 10.041   | 10.00428 |
| 988  | M478T20_ | 1.884477 | -0.91416 | -1.96557 | 0.095526 | 0.863397 | DOWN | 478.3254 | 478.324  | 478.3311 | 19.95433 | 19.9125  |
| 989  | M456T10_ | 1.688399 | -0.75566 | -1.9434  | 0.095582 | 0.863397 | DOWN | 456.352  | 456.3519 | 456.3522 | 9.6315   | 9.509533 |
| 990  | M230T9   | 1.634695 | -0.70902 | -1.90024 | 0.095716 | 0.863398 | DOWN | 229.6298 | 229.6287 | 229.6302 | 9.2368   | 9.1322   |
| 991  | M642T18_ | 1.359892 | -0.44349 | -1.89008 | 0.095785 | 0.863399 | DOWN | 642.4326 | 642.4322 | 642.433  | 18.16283 | 18.116   |
| 992  | M534T42_ | 1.356789 | 0.440197 | 1.94236  | 0.095837 | 0.863399 | UP   | 534.2905 | 534.2903 | 534.2909 | 41.81967 | 41.618   |
| 993  | M538T9_2 | 1.342385 | -0.4248  | -1.92962 | 0.095921 | 0.8634   | DOWN | 538.0052 | 538.0047 | 538.0054 | 9.438833 | 9.370583 |
| 994  | M678T10_ | 4.172912 | -2.06105 | -2.12671 | 0.096047 | 0.863401 | DOWN | 678.1641 | 678.1623 | 678.1659 | 9.767192 | 9.65225  |
| 995  | M372T11_ | 1.577584 | 0.657717 | 2.036638 | 0.096168 | 0.863402 | UP   | 371.8364 | 371.8363 | 371.8371 | 10.90553 | 10.86008 |
| 996  | M195T9_1 | 1.443293 | -0.52936 | -1.93165 | 0.096173 | 0.863402 | DOWN | 195.4235 | 195.4234 | 195.4241 | 9.280767 | 9.132267 |
| 997  | M797T31  | 1.34878  | -0.43166 | -2.03479 | 0.096233 | 0.863403 | DOWN | 796.5421 | 796.5419 | 796.5426 | 31.25042 | 31.24817 |
| 998  | M747T11  | 1.427261 | -0.51325 | -1.94264 | 0.09625  | 0.863403 | DOWN | 747.4089 | 747.4085 | 747.4093 | 11.2229  | 11.19848 |
| 999  | M1163T12 | 1.508587 | -0.5932  | -1.94896 | 0.096278 | 0.863403 | DOWN | 1163.09  | 1163.089 | 1163.091 | 12.22238 | 12.20873 |
| 1000 | M436T9_1 | 2.735191 | 1.451642 | 1.893987 | 0.096321 | 0.863404 | UP   | 436.402  | 436.4014 | 436.4021 | 9.365833 | 9.29345  |
| 1001 | M869T12_ | 1.317877 | -0.39822 | -1.97061 | 0.096365 | 0.863404 | DOWN | 869.3996 | 869.3992 | 869.4    | 12.47035 | 12.4563  |
| 1002 | M1823T10 | 1.433991 | -0.52004 | -2.11919 | 0.096369 | 0.863404 | DOWN | 1822.597 | 1822.597 | 1822.599 | 9.8207   | 9.715683 |
| 1003 | M431T19  | 1.284384 | -0.36108 | -1.94011 | 0.096452 | 0.863405 | DOWN | 431.2666 | 431.2664 | 431.2668 | 18.953   | 18.951   |
| 1004 | M387T10_ | 3.385994 | 1.759579 | 1.901359 | 0.09649  | 0.863405 | UP   | 387.1697 | 387.1671 | 387.1727 | 10.04417 | 9.859233 |
| 1005 | M684T9_1 | 1.216597 | -0.28285 | -1.89024 | 0.096728 | 0.863407 | DOWN | 683.511  | 683.5105 | 683.5122 | 9.22495  | 9.206    |
| 1006 | M664T9_1 | 1.596922 | -0.67529 | -1.88447 | 0.096748 | 0.863407 | DOWN | 664.0561 | 664.0555 | 664.0579 | 9.46925  | 9.38595  |
| 1007 | M485T11_ | 1.290633 | -0.36808 | -1.87997 | 0.096913 | 0.863409 | DOWN | 485.2161 | 485.216  | 485.2163 | 10.91386 | 10.90197 |
| 1008 | M360T9_1 | 2.000968 | -1.0007  | -1.91422 | 0.096998 | 0.86341  | DOWN | 360.4399 | 360.4397 | 360.4401 | 9.275917 | 9.204617 |
| 1009 | M527T9_9 | 2.362478 | 1.240301 | 1.912151 | 0.097229 | 0.863412 | UP   | 527.0418 | 527.0399 | 527.043  | 9.320875 | 9.12675  |
| 1010 | M718T9_3 | 2.110988 | -1.07792 | -1.90745 | 0.097232 | 0.863412 | DOWN | 718.37   | 718.3697 | 718.3702 | 9.444692 | 9.38595  |
| 1011 | M273T42_ | 1.271971 | -0.34707 | -1.91055 | 0.097247 | 0.863412 | DOWN | 273.1693 | 273.1692 | 273.1694 | 41.53192 | 41.35917 |
| 1012 | M675T11_ | 1.53288  | -0.61625 | -1.88154 | 0.097276 | 0.863412 | DOWN | 675.3628 | 675.3623 | 675.3631 | 11.01157 | 10.98885 |
| 1013 | M331T9_1 | 1.946212 | -0.96067 | -1.88671 | 0.097294 | 0.863412 | DOWN | 331.2572 | 331.2571 | 331.2576 | 9.100792 | 9.048117 |
| 1014 | M1156T11 | 1.16407  | -0.21918 | -1.9145  | 0.097352 | 0.863413 | DOWN | 1155.838 | 1155.838 | 1155.839 | 10.5188  | 10.47223 |

|      |          |          |          |          |          |          |      |          |          |          |          |          |
|------|----------|----------|----------|----------|----------|----------|------|----------|----------|----------|----------|----------|
| 1015 | M605T10_ | 1.614002 | -0.69064 | -1.99985 | 0.097354 | 0.863413 | DOWN | 604.9164 | 604.9158 | 604.917  | 9.990767 | 9.9009   |
| 1016 | M398T9_1 | 2.458228 | -1.29762 | -2.12154 | 0.097402 | 0.863413 | DOWN | 398.4166 | 398.4164 | 398.4176 | 8.97715  | 8.863633 |
| 1017 | M564T36  | 1.361385 | -0.44508 | -2.05487 | 0.097438 | 0.863413 | DOWN | 564.3013 | 564.301  | 564.3016 | 36.396   | 36.23117 |
| 1018 | M877T11  | 1.656935 | -0.72852 | -1.8885  | 0.097489 | 0.863414 | DOWN | 877.4412 | 877.4398 | 877.4418 | 10.91813 | 10.90785 |
| 1019 | M1606T10 | 1.663517 | -0.73424 | -2.00797 | 0.097538 | 0.863414 | DOWN | 1606.354 | 1606.353 | 1606.356 | 9.984083 | 9.916767 |
| 1020 | M250T9_7 | 1.471319 | 0.55711  | 2.023135 | 0.097636 | 0.863415 | UP   | 250.3023 | 250.3022 | 250.3024 | 8.742483 | 8.6529   |
| 1021 | M255T11_ | 1.691535 | -0.75833 | -1.87505 | 0.097677 | 0.863415 | DOWN | 254.5787 | 254.5785 | 254.5792 | 10.8926  | 10.8914  |
| 1022 | M201T9_1 | 1.98259  | -0.98739 | -1.95983 | 0.097699 | 0.863416 | DOWN | 200.8721 | 200.8712 | 200.873  | 9.343517 | 9.26575  |
| 1023 | M1225T10 | 2.849708 | -1.51081 | -2.0348  | 0.097906 | 0.863417 | DOWN | 1224.755 | 1224.753 | 1224.756 | 10.31602 | 10.2501  |
| 1024 | M587T9_5 | 2.463788 | -1.30088 | -1.94785 | 0.098004 | 0.863418 | DOWN | 587.3788 | 587.3775 | 587.3807 | 9.3141   | 9.219483 |
| 1025 | M497T9_8 | 1.424575 | -0.51053 | -1.99949 | 0.09804  | 0.863418 | DOWN | 497.0456 | 497.0451 | 497.0458 | 9.296133 | 9.129317 |
| 1026 | M355T10_ | 1.482752 | -0.56828 | -2.10775 | 0.0981   | 0.863419 | DOWN | 354.8443 | 354.8408 | 354.8447 | 9.861942 | 9.699733 |
| 1027 | M416T11_ | 1.324547 | 0.405499 | 1.880972 | 0.0981   | 0.863419 | UP   | 415.6792 | 415.6789 | 415.681  | 10.92828 | 10.86008 |
| 1028 | M299T9_2 | 1.69412  | -0.76054 | -1.8765  | 0.098182 | 0.86342  | DOWN | 298.7866 | 298.7848 | 298.7875 | 9.295208 | 9.111033 |
| 1029 | M526T11  | 1.339306 | -0.42149 | -1.98189 | 0.098194 | 0.86342  | DOWN | 526.1678 | 526.1674 | 526.1684 | 10.93655 | 10.84395 |
| 1030 | M672T9_3 | 1.389147 | -0.4742  | -1.87287 | 0.098281 | 0.863421 | DOWN | 672.2694 | 672.2687 | 672.2697 | 9.311167 | 9.129317 |
| 1031 | M470T20  | 1.3755   | -0.45996 | -1.91634 | 0.098298 | 0.863421 | DOWN | 470.2856 | 470.2854 | 470.2857 | 20.17667 | 20.17233 |
| 1032 | M476T9_1 | 2.311569 | 1.208872 | 2.064701 | 0.098358 | 0.863421 | UP   | 476.4185 | 476.4172 | 476.4234 | 9.331175 | 9.095133 |
| 1033 | M212T9_6 | 1.845117 | -0.88371 | -2.00205 | 0.098444 | 0.863422 | DOWN | 211.9464 | 211.9457 | 211.947  | 9.3735   | 9.161683 |
| 1034 | M220T10_ | 1.703636 | -0.76862 | -1.93873 | 0.098467 | 0.863422 | DOWN | 219.8852 | 219.8845 | 219.8944 | 9.830283 | 9.7124   |
| 1035 | M1181T10 | 1.638233 | 0.712141 | 2.017314 | 0.098492 | 0.863422 | UP   | 1181.054 | 1181.053 | 1181.056 | 9.844033 | 9.747533 |
| 1036 | M403T7   | 1.584399 | -0.66394 | -1.87701 | 0.098534 | 0.863423 | DOWN | 403.1569 | 403.1568 | 403.1569 | 7.12615  | 7.06105  |
| 1037 | M324T10_ | 1.407971 | -0.49362 | -1.89286 | 0.098536 | 0.863423 | DOWN | 323.8259 | 323.8256 | 323.8262 | 9.740517 | 9.634283 |
| 1038 | M1085T10 | 1.606152 | 0.683609 | 2.020352 | 0.098611 | 0.863423 | UP   | 1084.743 | 1084.74  | 1084.75  | 9.810125 | 9.715683 |
| 1039 | M252T9_2 | 3.177436 | -1.66786 | -2.1164  | 0.098614 | 0.863423 | DOWN | 251.5496 | 251.5455 | 251.5517 | 9.121433 | 9.078567 |
| 1040 | M966T10_ | 1.45459  | -0.54061 | -1.8978  | 0.098702 | 0.863424 | DOWN | 965.5516 | 965.5509 | 965.5526 | 9.94785  | 9.8378   |
| 1041 | M401T11_ | 2.151989 | -1.10567 | -1.87873 | 0.098791 | 0.863425 | DOWN | 401.0114 | 401.0072 | 401.0157 | 10.92498 | 10.84395 |
| 1042 | M885T31  | 1.510569 | -0.59509 | -1.96521 | 0.098842 | 0.863425 | DOWN | 884.5945 | 884.5938 | 884.5952 | 31.18017 | 31.16183 |
| 1043 | M350T10_ | 1.871726 | 0.904369 | 1.898784 | 0.098871 | 0.863425 | UP   | 350.4068 | 350.4066 | 350.4072 | 9.970617 | 9.859233 |
| 1044 | M431T9_1 | 2.481927 | 1.311461 | 1.91563  | 0.098882 | 0.863426 | UP   | 431.1712 | 431.1639 | 431.1767 | 9.3907   | 9.3261   |
| 1045 | M151T10_ | 1.580293 | 0.660192 | 1.899852 | 0.098983 | 0.863426 | UP   | 150.6118 | 150.6071 | 150.6153 | 9.821317 | 9.715683 |
| 1046 | M468T21  | 1.621555 | -0.69738 | -1.92609 | 0.098985 | 0.863426 | DOWN | 468.272  | 468.2715 | 468.2724 | 21.09025 | 21.079   |
| 1047 | M370T9_8 | 1.301515 | -0.38019 | -1.97206 | 0.099004 | 0.863427 | DOWN | 370.2461 | 370.2458 | 370.2469 | 9.168325 | 9.126783 |
| 1048 | M162T10_ | 1.868157 | -0.90162 | -1.90693 | 0.099124 | 0.863428 | DOWN | 161.8665 | 161.8663 | 161.8749 | 9.9093   | 9.746783 |
| 1049 | M291T10_ | 1.495256 | -0.58039 | -1.9028  | 0.099161 | 0.863428 | DOWN | 290.9298 | 290.9296 | 290.9299 | 9.97155  | 9.8753   |

|      |          |          |          |          |          |          |      |          |          |          |          |          |
|------|----------|----------|----------|----------|----------|----------|------|----------|----------|----------|----------|----------|
| 1050 | M780T10_ | 2.230249 | -1.15721 | -2.03638 | 0.099282 | 0.863429 | DOWN | 779.5195 | 779.5181 | 779.5205 | 9.987508 | 9.923533 |
| 1051 | M621T31  | 1.363813 | -0.44765 | -1.86664 | 0.09935  | 0.863429 | DOWN | 621.4403 | 621.4397 | 621.4406 | 31.40692 | 31.39283 |
| 1052 | M313T9_5 | 1.708614 | -0.77283 | -1.86946 | 0.099477 | 0.86343  | DOWN | 313.0678 | 313.0676 | 313.0681 | 8.857667 | 8.75965  |
| 1053 | M585T11_ | 1.351724 | -0.4348  | -1.88093 | 0.099483 | 0.86343  | DOWN | 585.4013 | 585.4007 | 585.4016 | 10.51713 | 10.47197 |
| 1054 | M161T10_ | 1.245759 | -0.31703 | -1.92773 | 0.099511 | 0.863431 | DOWN | 160.9933 | 160.9931 | 160.9935 | 9.8207   | 9.699733 |
| 1055 | M371T9_4 | 1.701207 | -0.76656 | -1.91161 | 0.099597 | 0.863431 | DOWN | 371.3017 | 371.3008 | 371.3019 | 8.688517 | 8.629617 |
| 1056 | M681T11_ | 1.247755 | -0.31933 | -1.86747 | 0.099618 | 0.863432 | DOWN | 681.499  | 681.4989 | 681.4995 | 10.98539 | 10.96538 |
| 1057 | M646T9_3 | 1.577834 | -0.65795 | -1.86931 | 0.099747 | 0.863433 | DOWN | 646.4278 | 646.4267 | 646.4281 | 9.275617 | 9.219483 |
| 1058 | M299T43_ | 1.782258 | -0.83371 | -1.904   | 0.099751 | 0.863433 | DOWN | 299.185  | 299.1849 | 299.1852 | 42.61067 | 42.45267 |
| 1059 | M504T11_ | 1.441116 | -0.52719 | -1.85987 | 0.100006 | 0.863435 | DOWN | 503.7075 | 503.7037 | 503.7089 | 10.9049  | 10.85018 |
| 1060 | M215T9_6 | 1.693587 | -0.76008 | -1.90037 | 0.100018 | 0.863435 | DOWN | 215.3948 | 215.3941 | 215.3951 | 9.311167 | 9.160617 |
| 1061 | M333T10_ | 1.543277 | -0.626   | -1.86017 | 0.100183 | 0.863436 | DOWN | 332.6391 | 332.6389 | 332.64   | 9.845483 | 9.683817 |
| 1062 | M722T10_ | 1.57561  | -0.65591 | -1.99089 | 0.100191 | 0.863436 | DOWN | 721.7114 | 721.711  | 721.7121 | 9.823575 | 9.728083 |
| 1063 | M590T9_1 | 2.099983 | -1.07038 | -1.86343 | 0.100198 | 0.863436 | DOWN | 590.1401 | 590.1399 | 590.1436 | 9.298683 | 9.249433 |
| 1064 | M551T9_3 | 1.490721 | -0.57601 | -1.89381 | 0.100216 | 0.863436 | DOWN | 550.8293 | 550.8274 | 550.8301 | 9.251908 | 9.133667 |
| 1065 | M707T10_ | 1.438759 | 0.524825 | 1.976979 | 0.100226 | 0.863437 | UP   | 706.8852 | 706.8848 | 706.8858 | 9.856867 | 9.715683 |
| 1066 | M704T17  | 3.98846  | 1.995832 | 2.102925 | 0.100412 | 0.863438 | UP   | 704.3055 | 704.3054 | 704.3064 | 17.26333 | 17.219   |
| 1067 | M700T9_1 | 1.581586 | -0.66137 | -1.90313 | 0.10051  | 0.863439 | DOWN | 699.5281 | 699.5275 | 699.529  | 9.311883 | 9.219483 |
| 1068 | M638T10_ | 1.275556 | -0.35113 | -1.89138 | 0.100523 | 0.863439 | DOWN | 638.2021 | 638.2011 | 638.2024 | 9.82645  | 9.728083 |
| 1069 | M325T11_ | 1.963338 | 0.973308 | 2.012321 | 0.100538 | 0.863439 | UP   | 324.8899 | 324.8895 | 324.8899 | 10.93618 | 10.9049  |
| 1070 | M347T10_ | 5.058391 | 2.338678 | 2.094531 | 0.100612 | 0.86344  | UP   | 346.9425 | 346.9424 | 346.9428 | 9.872067 | 9.79065  |
| 1071 | M455T11_ | 1.401894 | -0.48738 | -1.94615 | 0.100634 | 0.86344  | DOWN | 454.8458 | 454.845  | 454.8461 | 11.07605 | 11.0414  |
| 1072 | M207T9_2 | 2.037584 | -1.02686 | -1.88628 | 0.100658 | 0.86344  | DOWN | 207.3666 | 207.3662 | 207.3673 | 9.219483 | 9.1175   |
| 1073 | M660T9_4 | 1.716638 | -0.77959 | -1.85478 | 0.100745 | 0.863441 | DOWN | 660.0765 | 660.0755 | 660.078  | 9.22495  | 9.129317 |
| 1074 | M613T9_1 | 1.763601 | -0.81852 | -1.87139 | 0.100815 | 0.863441 | DOWN | 613.096  | 613.0942 | 613.0969 | 9.084208 | 9.06855  |
| 1075 | M558T10_ | 1.312651 | -0.39248 | -2.00714 | 0.100858 | 0.863442 | DOWN | 558.2627 | 558.2622 | 558.2636 | 9.947667 | 9.843367 |
| 1076 | M536T10_ | 1.679524 | 0.748052 | 1.870515 | 0.100895 | 0.863442 | UP   | 535.927  | 535.9267 | 535.9275 | 9.918833 | 9.811217 |
| 1077 | M480T9_8 | 1.347549 | -0.43034 | -1.87849 | 0.10098  | 0.863443 | DOWN | 480.4277 | 480.4261 | 480.4285 | 9.311167 | 9.1445   |
| 1078 | M474T39_ | 1.77148  | -0.82496 | -1.88814 | 0.100987 | 0.863443 | DOWN | 474.2695 | 474.2691 | 474.2698 | 38.84867 | 38.48217 |
| 1079 | M876T11_ | 1.427422 | -0.51341 | -1.91922 | 0.101194 | 0.863444 | DOWN | 876.4493 | 876.4488 | 876.4502 | 10.90551 | 10.88995 |
| 1080 | M187T44_ | 1.543071 | 0.625804 | 1.861363 | 0.101256 | 0.863445 | UP   | 187.0962 | 187.0961 | 187.0964 | 43.81883 | 43.72767 |
| 1081 | M256T10_ | 1.377143 | -0.46168 | -1.8723  | 0.101418 | 0.863446 | DOWN | 255.5386 | 255.5385 | 255.539  | 9.9264   | 9.62055  |
| 1082 | M510T12  | 1.42877  | -0.51477 | -1.9371  | 0.101422 | 0.863446 | DOWN | 510.2498 | 510.249  | 510.2502 | 12.22212 | 12.20985 |
| 1083 | M418T11_ | 1.214641 | -0.28053 | -1.85037 | 0.101436 | 0.863446 | DOWN | 417.6373 | 417.6366 | 417.6382 | 10.90657 | 10.879   |
| 1084 | M636T12  | 1.422769 | -0.5087  | -1.91567 | 0.101503 | 0.863447 | DOWN | 636.2926 | 636.292  | 636.2938 | 11.60771 | 11.58408 |

|      |          |          |          |          |          |          |      |          |          |          |          |          |
|------|----------|----------|----------|----------|----------|----------|------|----------|----------|----------|----------|----------|
| 1085 | M478T40_ | 1.338365 | -0.42047 | -1.90175 | 0.101577 | 0.863447 | DOWN | 478.3006 | 478.3005 | 478.3009 | 39.53217 | 39.38817 |
| 1086 | M404T19  | 2.037108 | -1.02652 | -1.84937 | 0.101585 | 0.863447 | DOWN | 404.3156 | 404.3153 | 404.3158 | 18.55717 | 18.5295  |
| 1087 | M557T9_1 | 1.643556 | -0.71682 | -1.87122 | 0.101652 | 0.863448 | DOWN | 556.6328 | 556.6317 | 556.6338 | 9.253967 | 9.130683 |
| 1088 | M547T10_ | 1.771451 | -0.82493 | -2.05376 | 0.101656 | 0.863448 | DOWN | 546.8406 | 546.84   | 546.8409 | 10.12765 | 10.03658 |
| 1089 | M353T15_ | 1.451432 | -0.53748 | -1.89735 | 0.101657 | 0.863448 | DOWN | 353.2221 | 353.2219 | 353.2223 | 15.16223 | 15.14527 |
| 1090 | M436T11_ | 2.608374 | 1.383151 | 2.095938 | 0.101724 | 0.863448 | UP   | 435.5477 | 435.5473 | 435.5483 | 10.91289 | 10.873   |
| 1091 | M214T9_3 | 1.596812 | -0.67519 | -1.92556 | 0.101805 | 0.863449 | DOWN | 213.5769 | 213.5763 | 213.5777 | 9.321425 | 9.250817 |
| 1092 | M694T3_2 | 2.665984 | -1.41467 | -1.86993 | 0.101846 | 0.863449 | DOWN | 694.4939 | 694.4936 | 694.4939 | 2.76775  | 2.750983 |
| 1093 | M299T44_ | 1.603699 | 0.681404 | 1.922112 | 0.102066 | 0.863451 | UP   | 299.1487 | 299.1486 | 299.1488 | 44.25475 | 44.04917 |
| 1094 | M328T9_1 | 1.358192 | -0.44169 | -1.86356 | 0.102234 | 0.863452 | DOWN | 327.5051 | 327.5047 | 327.5053 | 9.328967 | 9.129317 |
| 1095 | M516T10_ | 1.270431 | 0.345318 | 1.879061 | 0.102405 | 0.863454 | UP   | 516.3098 | 516.309  | 516.3145 | 10.21867 | 9.995817 |
| 1096 | M620T10_ | 1.357543 | -0.441   | -1.92717 | 0.102544 | 0.863455 | DOWN | 620.3763 | 620.3753 | 620.3768 | 9.818525 | 9.715683 |
| 1097 | M1976T10 | 1.270198 | 0.345053 | 1.845364 | 0.102591 | 0.863455 | UP   | 1975.853 | 1975.851 | 1975.858 | 9.841308 | 9.715683 |
| 1098 | M366T9_4 | 1.544896 | -0.62751 | -1.89652 | 0.102623 | 0.863455 | DOWN | 365.7824 | 365.7821 | 365.7826 | 9.388617 | 9.234417 |
| 1099 | M293T30_ | 1.6541   | 0.726046 | 1.859445 | 0.102649 | 0.863456 | UP   | 292.747  | 292.7468 | 292.7472 | 29.83383 | 29.805   |
| 1100 | M518T9_3 | 1.772531 | -0.82581 | -1.86245 | 0.102726 | 0.863456 | DOWN | 518.2775 | 518.2748 | 518.2838 | 9.257033 | 9.160617 |
| 1101 | M472T10_ | 3.63674  | 1.862646 | 1.91633  | 0.1028   | 0.863457 | UP   | 471.7929 | 471.7927 | 471.7932 | 9.931675 | 9.811217 |
| 1102 | M686T10_ | 1.331004 | -0.41252 | -2.04679 | 0.102862 | 0.863457 | DOWN | 686.3821 | 686.3816 | 686.3832 | 9.816258 | 9.699733 |
| 1103 | M401T11_ | 1.824982 | -0.86788 | -1.84157 | 0.102904 | 0.863458 | DOWN | 401.0248 | 401.0218 | 401.0254 | 10.92225 | 10.86275 |
| 1104 | M234T12  | 1.558891 | 0.64052  | 1.900674 | 0.102912 | 0.863458 | UP   | 234.1462 | 234.1459 | 234.1462 | 12.28482 | 12.26795 |
| 1105 | M641T10_ | 1.147187 | -0.1981  | -1.90925 | 0.102953 | 0.863458 | DOWN | 641.3223 | 641.3215 | 641.3252 | 9.825492 | 9.728083 |
| 1106 | M462T45  | 1.416857 | -0.50269 | -2.00609 | 0.103101 | 0.863459 | DOWN | 462.2694 | 462.2691 | 462.2695 | 44.5235  | 44.25033 |
| 1107 | M665T10_ | 1.349142 | -0.43204 | -1.85127 | 0.103184 | 0.86346  | DOWN | 665.3001 | 665.3    | 665.3004 | 10.09283 | 9.988    |
| 1108 | M358T10_ | 1.565507 | 0.64663  | 1.940786 | 0.103277 | 0.86346  | UP   | 357.8486 | 357.8472 | 357.8515 | 9.842    | 9.8374   |
| 1109 | M212T10_ | 1.228832 | -0.29729 | -1.84782 | 0.103282 | 0.86346  | DOWN | 211.6501 | 211.65   | 211.6502 | 9.8207   | 9.715683 |
| 1110 | M402T11_ | 2.875953 | -1.52404 | -1.88314 | 0.103302 | 0.863461 | DOWN | 402.2347 | 402.2291 | 402.2435 | 10.97531 | 10.83393 |
| 1111 | M415T25_ | 3.333832 | -1.73718 | -1.8432  | 0.103311 | 0.863461 | DOWN | 415.2303 | 415.2299 | 415.2305 | 24.58    | 24.55033 |
| 1112 | M712T9_5 | 1.924778 | -0.94469 | -1.83875 | 0.103338 | 0.863461 | DOWN | 712.2198 | 712.2194 | 712.2206 | 8.712025 | 8.601067 |
| 1113 | M532T10_ | 1.540863 | -0.62374 | -1.85684 | 0.103354 | 0.863461 | DOWN | 531.816  | 531.814  | 531.8166 | 9.624117 | 9.52515  |
| 1114 | M493T11_ | 1.441015 | -0.52709 | -1.92904 | 0.103356 | 0.863461 | DOWN | 493.1741 | 493.1738 | 493.1747 | 11.24971 | 11.23882 |
| 1115 | M364T9_3 | 1.717666 | -0.78045 | -1.8402  | 0.103373 | 0.863461 | DOWN | 363.82   | 363.819  | 363.8207 | 9.365833 | 9.174917 |
| 1116 | M173T9_6 | 1.593129 | -0.67186 | -1.94896 | 0.103576 | 0.863463 | DOWN | 173.4698 | 173.4696 | 173.47   | 9.188725 | 9.146383 |
| 1117 | M313T42_ | 1.089693 | -0.12392 | -1.97182 | 0.103593 | 0.863463 | DOWN | 313.2008 | 313.2007 | 313.201  | 41.73317 | 41.575   |
| 1118 | M288T23_ | 1.460934 | 0.546891 | 1.874192 | 0.10373  | 0.863464 | UP   | 288.1024 | 288.0952 | 288.1035 | 23.0015  | 22.87117 |
| 1119 | M405T21_ | 1.649748 | -0.72225 | -1.85817 | 0.103761 | 0.863464 | DOWN | 404.6153 | 404.6152 | 404.6153 | 20.60933 | 20.57783 |



|      |          |          |          |          |          |          |      |          |          |          |          |          |
|------|----------|----------|----------|----------|----------|----------|------|----------|----------|----------|----------|----------|
| 1120 | M548T9_1 | 1.58935  | -0.66844 | -1.9093  | 0.103777 | 0.863464 | DOWN | 547.6872 | 547.6859 | 547.6878 | 9.311167 | 9.1445   |
| 1121 | M1318T10 | 2.421775 | -1.27607 | -1.99865 | 0.10378  | 0.863464 | DOWN | 1317.762 | 1317.761 | 1317.762 | 10.4705  | 10.40882 |
| 1122 | M710T9_6 | 2.492551 | -1.31762 | -1.89132 | 0.103924 | 0.863465 | DOWN | 710.2213 | 710.2197 | 710.2219 | 8.791683 | 8.686867 |
| 1123 | M313T24  | 2.94247  | 1.557028 | 1.836023 | 0.10393  | 0.863465 | UP   | 313.2199 | 313.2196 | 313.2202 | 23.7765  | 23.74683 |
| 1124 | M534T25  | 1.087996 | -0.12167 | -1.92781 | 0.103956 | 0.863466 | DOWN | 534.2541 | 534.2537 | 534.2543 | 24.60433 | 24.5795  |
| 1125 | M440T26  | 1.479883 | -0.56548 | -1.99939 | 0.103989 | 0.863466 | DOWN | 440.321  | 440.3202 | 440.3213 | 25.59367 | 25.56217 |
| 1126 | M494T10_ | 1.391883 | -0.47704 | -1.90214 | 0.104029 | 0.863466 | DOWN | 494.3785 | 494.3782 | 494.3791 | 9.838958 | 9.62055  |
| 1127 | M341T10_ | 1.128752 | -0.17473 | -1.85373 | 0.104126 | 0.863467 | DOWN | 341.293  | 341.2926 | 341.2936 | 9.823575 | 9.699733 |
| 1128 | M212T9_2 | 1.589685 | -0.66874 | -1.94649 | 0.104145 | 0.863467 | DOWN | 211.8534 | 211.8522 | 211.854  | 9.417717 | 9.219483 |
| 1129 | M368T9_2 | 1.916164 | -0.93822 | -1.83811 | 0.104177 | 0.863467 | DOWN | 367.6558 | 367.6538 | 367.656  | 9.355425 | 9.207667 |
| 1130 | M347T10_ | 1.648381 | 0.72105  | 1.845085 | 0.104259 | 0.863468 | UP   | 347.1832 | 347.1817 | 347.1838 | 10.19043 | 10.12287 |
| 1131 | M454T9_1 | 1.373396 | -0.45775 | -1.87667 | 0.104286 | 0.863468 | DOWN | 454.3448 | 454.3445 | 454.3453 | 9.298283 | 9.146383 |
| 1132 | M223T18  | 1.45091  | -0.53696 | -1.94311 | 0.104288 | 0.863468 | DOWN | 223.0962 | 223.0961 | 223.0963 | 18.49692 | 18.48167 |
| 1133 | M551T9_4 | 1.509168 | -0.59375 | -1.88459 | 0.104398 | 0.863469 | DOWN | 550.9216 | 550.9188 | 550.9218 | 9.328583 | 9.1445   |
| 1134 | M401T11_ | 1.907753 | -0.93187 | -1.9852  | 0.104403 | 0.863469 | DOWN | 401.0525 | 401.0443 | 401.0559 | 10.8914  | 10.8646  |
| 1135 | M362T7   | 2.815981 | -1.49364 | -2.06412 | 0.10452  | 0.86347  | DOWN | 362.2409 | 362.2408 | 362.2409 | 7.2745   | 7.181883 |
| 1136 | M576T10_ | 1.512732 | -0.59716 | -1.84651 | 0.10454  | 0.86347  | DOWN | 576.4751 | 576.4742 | 576.4758 | 9.914217 | 9.811217 |
| 1137 | M418T22  | 1.339764 | -0.42198 | -1.92791 | 0.1046   | 0.86347  | DOWN | 417.7922 | 417.7918 | 417.793  | 21.53717 | 21.52    |
| 1138 | M389T33  | 1.210191 | -0.27523 | -1.83588 | 0.104691 | 0.863471 | DOWN | 389.1114 | 389.1111 | 389.112  | 33.06608 | 33.037   |
| 1139 | M291T9_2 | 1.41746  | -0.50331 | -1.88405 | 0.104708 | 0.863471 | DOWN | 290.591  | 290.5888 | 290.5911 | 9.012525 | 8.89395  |
| 1140 | M806T10_ | 1.589897 | -0.66893 | -1.86265 | 0.104752 | 0.863471 | DOWN | 806.4235 | 806.4212 | 806.4248 | 9.6413   | 9.571683 |
| 1141 | M520T11_ | 1.470086 | 0.5559   | 1.83921  | 0.104763 | 0.863472 | UP   | 519.7083 | 519.7061 | 519.7086 | 10.90553 | 10.88995 |
| 1142 | M364T10_ | 1.507504 | -0.59216 | -1.89473 | 0.104875 | 0.863472 | DOWN | 364.2395 | 364.2378 | 364.2399 | 9.82645  | 9.699733 |
| 1143 | M317T9_9 | 1.692272 | -0.75896 | -1.85564 | 0.104913 | 0.863473 | DOWN | 317.4875 | 317.4868 | 317.4942 | 9.37735  | 9.129317 |
| 1144 | M390T44_ | 1.389511 | -0.47458 | -1.98847 | 0.10494  | 0.863473 | DOWN | 390.2483 | 390.2482 | 390.2487 | 43.8305  | 43.68967 |
| 1145 | M331T9_9 | 1.412027 | -0.49777 | -1.84997 | 0.105195 | 0.863475 | DOWN | 331.2322 | 331.2319 | 331.2324 | 9.314442 | 9.234417 |
| 1146 | M335T10_ | 1.384547 | 0.469414 | 1.830233 | 0.105199 | 0.863475 | UP   | 334.5207 | 334.5206 | 334.5208 | 9.946367 | 9.859233 |
| 1147 | M299T41_ | 1.446047 | -0.53211 | -1.99253 | 0.105276 | 0.863475 | DOWN | 299.1487 | 299.1486 | 299.1489 | 41.25125 | 41.2155  |
| 1148 | M846T10_ | 1.414669 | -0.50046 | -1.83843 | 0.10528  | 0.863475 | DOWN | 846.4065 | 846.4052 | 846.4073 | 9.91875  | 9.811217 |
| 1149 | M520T11_ | 1.771459 | -0.82494 | -1.83696 | 0.105306 | 0.863476 | DOWN | 519.6264 | 519.6256 | 519.6276 | 10.94208 | 10.88995 |
| 1150 | M179T10_ | 1.590184 | -0.66919 | -1.92277 | 0.105317 | 0.863476 | DOWN | 179.1066 | 179.1064 | 179.1067 | 9.934533 | 9.8378   |
| 1151 | M824T9_2 | 3.062202 | -1.61457 | -1.9632  | 0.105397 | 0.863476 | DOWN | 823.9308 | 823.9282 | 823.9309 | 8.837567 | 8.77435  |
| 1152 | M340T10_ | 2.15378  | 1.106871 | 1.827755 | 0.105452 | 0.863477 | UP   | 340.1593 | 340.1548 | 340.1612 | 9.762917 | 9.665433 |
| 1153 | M1438T10 | 1.603333 | -0.68107 | -2.01542 | 0.105479 | 0.863477 | DOWN | 1437.628 | 1437.627 | 1437.63  | 9.970617 | 9.859233 |
| 1154 | M297T10_ | 3.693947 | 1.885163 | 1.87368  | 0.105612 | 0.863478 | UP   | 296.9049 | 296.9048 | 296.905  | 9.999517 | 9.994767 |

|      |           |          |          |          |          |          |      |          |          |          |          |          |
|------|-----------|----------|----------|----------|----------|----------|------|----------|----------|----------|----------|----------|
| 1155 | M657T10_  | 1.320607 | -0.4012  | -2.02711 | 0.105618 | 0.863478 | DOWN | 656.8097 | 656.8092 | 656.8133 | 9.827158 | 9.743667 |
| 1156 | M179T9_4  | 2.529021 | 1.338579 | 1.852722 | 0.10567  | 0.863478 | UP   | 179.2403 | 179.24   | 179.2525 | 9.40255  | 9.1503   |
| 1157 | M504T43_  | 1.137677 | -0.18609 | -2.02423 | 0.105708 | 0.863478 | DOWN | 504.28   | 504.2796 | 504.2801 | 43.02767 | 42.94167 |
| 1158 | M391T11_  | 1.462552 | -0.54849 | -1.87949 | 0.105719 | 0.863479 | DOWN | 391.2867 | 391.2859 | 391.2918 | 10.90598 | 10.83252 |
| 1159 | M410T9_6  | 1.528151 | -0.61179 | -1.91926 | 0.105762 | 0.863479 | DOWN | 410.2483 | 410.2474 | 410.2486 | 9.294467 | 9.1445   |
| 1160 | M223T17   | 1.424833 | 0.510793 | 1.89416  | 0.106227 | 0.863482 | UP   | 223.169  | 223.1689 | 223.1691 | 17.33633 | 17.30467 |
| 1161 | M219T9_1  | 3.316908 | -1.72984 | -2.06384 | 0.106264 | 0.863482 | DOWN | 219.1781 | 219.1763 | 219.1787 | 9.22245  | 9.132033 |
| 1162 | M568T9_2  | 1.410267 | -0.49597 | -1.82047 | 0.106269 | 0.863482 | DOWN | 567.9063 | 567.906  | 567.9067 | 9.176533 | 9.11405  |
| 1163 | M375T9_1  | 1.50372  | -0.58854 | -1.83592 | 0.106316 | 0.863483 | DOWN | 374.5691 | 374.5685 | 374.5704 | 9.2678   | 9.1602   |
| 1164 | M413T9_1  | 1.558991 | -0.64061 | -1.87637 | 0.106372 | 0.863483 | DOWN | 413.1545 | 413.1531 | 413.157  | 9.29345  | 9.129317 |
| 1165 | M219T11_  | 1.369329 | 0.453469 | 1.826678 | 0.106389 | 0.863483 | UP   | 218.9941 | 218.994  | 218.9943 | 10.91977 | 10.85018 |
| 1166 | M1125T10_ | 1.55766  | 0.639381 | 2.005968 | 0.106435 | 0.863484 | UP   | 1125.088 | 1125.085 | 1125.088 | 9.7987   | 9.65225  |
| 1167 | M334T13   | 5.881827 | -2.55626 | -1.95948 | 0.106557 | 0.863485 | DOWN | 334.2432 | 334.2429 | 334.2433 | 12.95191 | 12.92288 |
| 1168 | M475T11_  | 1.187557 | -0.248   | -1.95606 | 0.10664  | 0.863485 | DOWN | 475.1873 | 475.1868 | 475.1875 | 10.91977 | 10.90785 |
| 1169 | M546T10_  | 1.330486 | -0.41195 | -1.90475 | 0.106697 | 0.863486 | DOWN | 546.1573 | 546.1563 | 546.1588 | 9.946417 | 9.8378   |
| 1170 | M277T10_  | 2.711355 | -1.43901 | -1.81756 | 0.106769 | 0.863486 | DOWN | 277.4695 | 277.4692 | 277.4788 | 9.837433 | 9.743767 |
| 1171 | M452T20_  | 1.844328 | -0.8831  | -1.82083 | 0.106812 | 0.863486 | DOWN | 451.9788 | 451.9776 | 451.9795 | 19.85283 | 19.74383 |
| 1172 | M399T12_  | 5.157209 | -2.36659 | -2.06459 | 0.106968 | 0.863487 | DOWN | 399.1777 | 399.1775 | 399.1778 | 12.04664 | 12.03217 |
| 1173 | M506T43   | 1.859613 | 0.895002 | 1.816097 | 0.106976 | 0.863488 | UP   | 506.2593 | 506.2591 | 506.2595 | 42.84092 | 42.71133 |
| 1174 | M610T9_1  | 1.589084 | -0.6682  | -1.81573 | 0.107011 | 0.863488 | DOWN | 610.2467 | 610.2429 | 610.2477 | 9.167733 | 9.145433 |
| 1175 | M666T9    | 1.726775 | -0.78808 | -1.86425 | 0.107232 | 0.863489 | DOWN | 666.3909 | 666.3902 | 666.3912 | 9.461908 | 9.38595  |
| 1176 | M966T11_  | 1.612498 | -0.6893  | -1.81466 | 0.107301 | 0.86349  | DOWN | 966.3188 | 966.3165 | 966.32   | 10.92225 | 10.87487 |
| 1177 | M609T9_6  | 1.413651 | -0.49943 | -1.81309 | 0.107492 | 0.863491 | DOWN | 609.3879 | 609.3876 | 609.3887 | 9.287417 | 9.219483 |
| 1178 | M399T9_7  | 2.216698 | -1.14841 | -1.82026 | 0.107532 | 0.863491 | DOWN | 399.0951 | 399.0943 | 399.1072 | 9.071467 | 8.877267 |
| 1179 | M546T10_  | 1.514283 | -0.59863 | -1.82774 | 0.107574 | 0.863492 | DOWN | 545.6609 | 545.6599 | 545.6637 | 10.36388 | 10.2501  |
| 1180 | M871T10_  | 1.456579 | -0.54258 | -1.82026 | 0.107623 | 0.863492 | DOWN | 870.5289 | 870.5282 | 870.5293 | 10.42597 | 10.3771  |
| 1181 | M273T10_  | 1.681236 | -0.74952 | -1.87806 | 0.107859 | 0.863494 | DOWN | 273.0127 | 273.0123 | 273.0129 | 9.962692 | 9.869467 |
| 1182 | M375T15   | 1.481479 | -0.56704 | -1.81217 | 0.10787  | 0.863494 | DOWN | 375.2039 | 375.2037 | 375.204  | 15.16223 | 15.13058 |
| 1183 | M423T11_  | 2.889687 | 1.530913 | 1.812731 | 0.108047 | 0.863495 | UP   | 423.3264 | 423.3217 | 423.3277 | 10.92541 | 10.82935 |
| 1184 | M641T12   | 2.395361 | -1.26024 | -1.98426 | 0.108055 | 0.863495 | DOWN | 640.7391 | 640.7387 | 640.7397 | 11.67968 | 11.67165 |
| 1185 | M1863T10_ | 1.436378 | -0.52244 | -2.01588 | 0.108056 | 0.863495 | DOWN | 1862.796 | 1862.794 | 1862.798 | 9.8207   | 9.715683 |
| 1186 | M748T11   | 1.463918 | -0.54983 | -1.83902 | 0.108133 | 0.863496 | DOWN | 748.4122 | 748.4117 | 748.4126 | 11.2229  | 11.19848 |
| 1187 | M474T39_  | 1.534533 | -0.6178  | -1.81243 | 0.108133 | 0.863496 | DOWN | 474.2696 | 474.2694 | 474.2698 | 39.37842 | 39.33067 |
| 1188 | M304T23_  | 1.249144 | -0.32094 | -1.84643 | 0.108359 | 0.863497 | DOWN | 304.2843 | 304.2841 | 304.2844 | 23.08917 | 23.05983 |
| 1189 | M549T9_4  | 1.501905 | -0.58679 | -1.94248 | 0.108501 | 0.863498 | DOWN | 549.4906 | 549.4888 | 549.4915 | 9.20785  | 9.174917 |

|      |          |          |          |          |          |          |      |          |          |          |          |          |
|------|----------|----------|----------|----------|----------|----------|------|----------|----------|----------|----------|----------|
| 1190 | M414T21_ | 1.892621 | -0.92039 | -1.85373 | 0.108541 | 0.863498 | DOWN | 413.5344 | 413.5341 | 413.5347 | 20.7385  | 20.66583 |
| 1191 | M294T10_ | 8.151795 | 3.027118 | 2.057276 | 0.108604 | 0.863499 | UP   | 293.7211 | 293.7209 | 293.7245 | 9.958492 | 9.840617 |
| 1192 | M277T10_ | 1.290338 | -0.36775 | -1.80576 | 0.108617 | 0.863499 | DOWN | 277.2702 | 277.2699 | 277.2705 | 9.969925 | 9.859233 |
| 1193 | M690T11  | 2.689776 | -1.42749 | -2.0138  | 0.108675 | 0.863499 | DOWN | 689.9115 | 689.9105 | 689.9126 | 10.57314 | 10.48782 |
| 1194 | M1888T10 | 1.563019 | -0.64434 | -1.85093 | 0.10872  | 0.8635   | DOWN | 1887.626 | 1887.623 | 1887.629 | 9.830283 | 9.699733 |
| 1195 | M626T9_3 | 1.870518 | -0.90344 | -1.80486 | 0.108745 | 0.8635   | DOWN | 626.3314 | 626.3302 | 626.3323 | 9.304558 | 9.234417 |
| 1196 | M486T14  | 1.458726 | -0.54471 | -1.80555 | 0.108761 | 0.8635   | DOWN | 486.2719 | 486.2717 | 486.2723 | 14.05579 | 14.03383 |
| 1197 | M1496T10 | 1.375138 | -0.45958 | -1.80427 | 0.108847 | 0.863501 | DOWN | 1496.23  | 1496.228 | 1496.23  | 9.887117 | 9.79065  |
| 1198 | M213T9_1 | 7.991516 | 2.998469 | 2.046703 | 0.10889  | 0.863501 | UP   | 213.1174 | 213.1165 | 213.1294 | 9.354958 | 9.264333 |
| 1199 | M1230T20 | 1.760604 | -0.81607 | -1.83283 | 0.109065 | 0.863502 | DOWN | 1229.621 | 1229.62  | 1229.623 | 19.67317 | 19.615   |
| 1200 | M446T42_ | 1.187992 | -0.24853 | -1.90082 | 0.109091 | 0.863502 | DOWN | 446.2383 | 446.2381 | 446.2384 | 41.73317 | 41.66133 |
| 1201 | M622T10_ | 2.215426 | -1.14758 | -2.00287 | 0.109167 | 0.863503 | DOWN | 621.8949 | 621.8947 | 621.8955 | 10.30985 | 10.23087 |
| 1202 | M227T14  | 1.829406 | -0.87138 | -1.95473 | 0.109202 | 0.863503 | DOWN | 227.1752 | 227.1751 | 227.183  | 14.28207 | 14.07797 |
| 1203 | M753T31  | 1.266975 | -0.34139 | -1.8688  | 0.109232 | 0.863503 | DOWN | 752.5157 | 752.5152 | 752.5161 | 31.29142 | 31.277   |
| 1204 | M434T9_8 | 3.390944 | 1.761687 | 1.804296 | 0.109357 | 0.863504 | UP   | 433.819  | 433.8152 | 433.8259 | 9.221317 | 9.175017 |
| 1205 | M953T9_1 | 1.964214 | -0.97395 | -1.91398 | 0.10948  | 0.863505 | DOWN | 953.0952 | 953.0929 | 953.0954 | 8.798117 | 8.767783 |
| 1206 | M504T45  | 1.481599 | 0.567155 | 1.910364 | 0.109618 | 0.863506 | UP   | 504.28   | 504.2797 | 504.2802 | 44.83267 | 44.59433 |
| 1207 | M546T9_1 | 1.706244 | -0.77082 | -1.98379 | 0.10967  | 0.863506 | DOWN | 545.5088 | 545.5086 | 545.5094 | 9.207133 | 9.174967 |
| 1208 | M462T40_ | 1.818195 | -0.86251 | -1.87093 | 0.109735 | 0.863507 | DOWN | 462.2694 | 462.2692 | 462.2697 | 40.48875 | 40.23717 |
| 1209 | M261T9_3 | 1.303981 | -0.38292 | -1.79877 | 0.109761 | 0.863507 | DOWN | 260.9597 | 260.953  | 260.9655 | 9.277967 | 9.13445  |
| 1210 | M329T16  | 2.118448 | -1.08301 | -1.91459 | 0.109763 | 0.863507 | DOWN | 329.2229 | 329.222  | 329.2286 | 15.69185 | 15.61447 |
| 1211 | M306T9_2 | 1.619696 | -0.69572 | -1.8326  | 0.10978  | 0.863507 | DOWN | 305.98   | 305.9797 | 305.9812 | 9.311883 | 9.234417 |
| 1212 | M1085T10 | 1.677885 | -0.74664 | -1.8005  | 0.109795 | 0.863507 | DOWN | 1084.981 | 1084.981 | 1084.982 | 9.809108 | 9.715683 |
| 1213 | M423T10_ | 1.738432 | -0.79779 | -1.80462 | 0.109832 | 0.863507 | DOWN | 423.3188 | 423.3142 | 423.3205 | 9.943183 | 9.869467 |
| 1214 | M282T10_ | 1.947607 | 0.961702 | 1.979045 | 0.109891 | 0.863508 | UP   | 282.1472 | 282.147  | 282.1477 | 9.98155  | 9.8753   |
| 1215 | M575T10_ | 1.371114 | -0.45535 | -1.83123 | 0.110002 | 0.863508 | DOWN | 575.3742 | 575.3738 | 575.3752 | 9.9149   | 9.79535  |
| 1216 | M1273T10 | 2.577186 | 1.365797 | 1.927656 | 0.110053 | 0.863509 | UP   | 1272.954 | 1272.951 | 1272.956 | 9.960967 | 9.8914   |
| 1217 | M1058T10 | 1.36256  | -0.44632 | -1.79707 | 0.110125 | 0.863509 | DOWN | 1057.774 | 1057.771 | 1057.775 | 9.970617 | 9.853533 |
| 1218 | M211T10_ | 1.735227 | -0.79512 | -1.9958  | 0.110279 | 0.86351  | DOWN | 210.6728 | 210.6727 | 210.6808 | 9.816267 | 9.699733 |
| 1219 | M583T11  | 1.669058 | -0.73903 | -1.89338 | 0.110342 | 0.863511 | DOWN | 583.3552 | 583.3546 | 583.3591 | 11.24743 | 11.18767 |
| 1220 | M709T10_ | 1.360746 | -0.4444  | -1.79562 | 0.110539 | 0.863512 | DOWN | 708.7005 | 708.6999 | 708.7009 | 9.8397   | 9.747533 |
| 1221 | M489T11_ | 1.738754 | -0.79805 | -1.88007 | 0.110606 | 0.863512 | DOWN | 489.1988 | 489.1985 | 489.1997 | 11.23463 | 11.18397 |
| 1222 | M229T9_2 | 1.861463 | -0.89644 | -1.79819 | 0.110668 | 0.863513 | DOWN | 228.5503 | 228.548  | 228.5514 | 9.20785  | 9.13445  |
| 1223 | M549T9_2 | 1.460573 | -0.54653 | -1.79453 | 0.110689 | 0.863513 | DOWN | 549.1089 | 549.1043 | 549.1098 | 9.29345  | 9.064833 |
| 1224 | M886T31  | 1.523989 | -0.60785 | -1.84861 | 0.110715 | 0.863513 | DOWN | 885.598  | 885.5977 | 885.5993 | 31.18233 | 31.1665  |

|      |          |          |          |          |          |          |      |          |          |          |          |          |
|------|----------|----------|----------|----------|----------|----------|------|----------|----------|----------|----------|----------|
| 1225 | M568T10_ | 1.203144 | -0.26681 | -1.91873 | 0.110717 | 0.863513 | DOWN | 568.0882 | 568.0878 | 568.0884 | 9.964417 | 9.859233 |
| 1226 | M454T9_1 | 1.816259 | -0.86097 | -1.79373 | 0.110721 | 0.863513 | DOWN | 454.0944 | 454.09   | 454.0985 | 9.329875 | 9.132033 |
| 1227 | M1056T10 | 1.309858 | -0.38941 | -1.81459 | 0.110811 | 0.863514 | DOWN | 1056.064 | 1056.063 | 1056.071 | 9.830833 | 9.728083 |
| 1228 | M710T9_7 | 2.37785  | -1.24966 | -1.87389 | 0.110831 | 0.863514 | DOWN | 710.3645 | 710.3642 | 710.3655 | 8.77255  | 8.701267 |
| 1229 | M603T9_1 | 1.508853 | -0.59345 | -1.79405 | 0.111076 | 0.863515 | DOWN | 603.1676 | 603.1658 | 603.1711 | 9.246483 | 9.129317 |
| 1230 | M1093T10 | 1.995023 | -0.99641 | -1.914   | 0.11117  | 0.863516 | DOWN | 1092.676 | 1092.675 | 1092.677 | 10.12955 | 10.02755 |
| 1231 | M703T9_1 | 1.477452 | -0.56311 | -1.87988 | 0.111229 | 0.863516 | DOWN | 703.3236 | 703.3232 | 703.3243 | 9.474408 | 9.38595  |
| 1232 | M393T9_7 | 1.739884 | -0.79899 | -1.79338 | 0.111285 | 0.863517 | DOWN | 393.33   | 393.3284 | 393.3321 | 9.249433 | 9.06855  |
| 1233 | M238T11_ | 2.019746 | -1.01417 | -1.96077 | 0.111341 | 0.863517 | DOWN | 238.1322 | 238.1319 | 238.1328 | 10.94728 | 10.84767 |
| 1234 | M323T38  | 1.071765 | -0.09999 | -1.82383 | 0.111368 | 0.863517 | DOWN | 323.2943 | 323.2942 | 323.2945 | 37.70483 | 37.6905  |
| 1235 | M897T10_ | 7.794982 | 2.962546 | 2.034202 | 0.111459 | 0.863518 | UP   | 897.1639 | 897.1629 | 897.1643 | 9.98155  | 9.8753   |
| 1236 | M615T10_ | 1.85364  | -0.89036 | -1.92364 | 0.111696 | 0.86352  | DOWN | 614.8872 | 614.8864 | 614.8881 | 10.05959 | 9.964133 |
| 1237 | M408T9_5 | 1.450971 | -0.53702 | -1.88695 | 0.111708 | 0.86352  | DOWN | 408.0882 | 408.088  | 408.0884 | 9.46855  | 9.432183 |
| 1238 | M614T8   | 6.088938 | -2.60619 | -1.97544 | 0.111773 | 0.86352  | DOWN | 614.2717 | 614.2716 | 614.2719 | 8.464158 | 8.413783 |
| 1239 | M316T23_ | 1.582792 | -0.66247 | -1.79479 | 0.11183  | 0.86352  | DOWN | 316.4839 | 316.4837 | 316.4843 | 23.04533 | 23.0015  |
| 1240 | M229T10_ | 1.177735 | -0.23602 | -1.83398 | 0.111889 | 0.863521 | DOWN | 229.4248 | 229.4247 | 229.4249 | 9.95385  | 9.843367 |
| 1241 | M616T10_ | 1.533965 | -0.61727 | -1.78968 | 0.111905 | 0.863521 | DOWN | 616.318  | 616.3179 | 616.3184 | 10.24579 | 10.16598 |
| 1242 | M321T11_ | 1.250683 | -0.32272 | -1.81068 | 0.11212  | 0.863522 | DOWN | 321.2209 | 321.2204 | 321.2253 | 10.90765 | 10.8914  |
| 1243 | M446T45_ | 2.281795 | -1.19017 | -1.94756 | 0.112225 | 0.863523 | DOWN | 446.2383 | 446.2381 | 446.2384 | 44.85417 | 44.65267 |
| 1244 | M503T10_ | 1.319885 | 0.400413 | 1.809902 | 0.112262 | 0.863523 | UP   | 502.8957 | 502.8953 | 502.8962 | 10.04792 | 9.955733 |
| 1245 | M195T9_1 | 2.190392 | -1.13119 | -1.79148 | 0.112713 | 0.863526 | DOWN | 194.5769 | 194.5754 | 194.5772 | 9.403375 | 9.1322   |
| 1246 | M815T11_ | 1.872814 | -0.90521 | -1.7816  | 0.112812 | 0.863527 | DOWN | 815.3223 | 815.3217 | 815.3237 | 11.2194  | 11.19848 |
| 1247 | M263T9_3 | 1.760728 | -0.81617 | -1.93234 | 0.112846 | 0.863527 | DOWN | 263.1651 | 263.1642 | 263.166  | 9.304558 | 9.219483 |
| 1248 | M504T41_ | 1.908537 | 0.932467 | 1.867558 | 0.112874 | 0.863527 | UP   | 504.2799 | 504.2796 | 504.2802 | 41.47433 | 41.2875  |
| 1249 | M387T9_2 | 1.377601 | -0.46216 | -1.78606 | 0.112918 | 0.863527 | DOWN | 387.197  | 387.1966 | 387.1981 | 9.449367 | 9.370583 |
| 1250 | M435T9_1 | 1.291485 | -0.36903 | -1.79461 | 0.112919 | 0.863527 | DOWN | 435.333  | 435.3328 | 435.3332 | 9.29345  | 9.146383 |
| 1251 | M234T11_ | 2.013573 | -1.00976 | -1.78278 | 0.112926 | 0.863527 | DOWN | 234.2063 | 234.2062 | 234.2064 | 10.69002 | 10.67523 |
| 1252 | M354T15  | 1.548953 | -0.63129 | -1.83327 | 0.113052 | 0.863528 | DOWN | 354.2255 | 354.2251 | 354.2257 | 15.16933 | 15.14527 |
| 1253 | M493T9_1 | 1.318948 | -0.39939 | -1.79825 | 0.113068 | 0.863528 | DOWN | 492.5555 | 492.5551 | 492.5558 | 9.272133 | 9.1445   |
| 1254 | M546T43  | 1.288437 | 0.365622 | 1.811082 | 0.113106 | 0.863529 | UP   | 546.3269 | 546.3268 | 546.3271 | 43.15    | 42.99933 |
| 1255 | M415T10_ | 1.593917 | -0.67258 | -1.81767 | 0.113176 | 0.863529 | DOWN | 414.7617 | 414.7614 | 414.7622 | 9.688717 | 9.5889   |
| 1256 | M219T9_2 | 1.481066 | -0.56664 | -1.78882 | 0.113183 | 0.863529 | DOWN | 218.5812 | 218.5802 | 218.5835 | 9.372008 | 9.264333 |
| 1257 | M710T11_ | 2.003314 | -1.00239 | -1.83716 | 0.113253 | 0.86353  | DOWN | 709.9474 | 709.9469 | 709.9475 | 10.62492 | 10.56775 |
| 1258 | M375T14_ | 1.27801  | -0.3539  | -1.77811 | 0.113277 | 0.86353  | DOWN | 374.7921 | 374.7919 | 374.7922 | 13.6974  | 13.69375 |
| 1259 | M679T10_ | 1.857392 | -0.89328 | -1.88055 | 0.113288 | 0.86353  | DOWN | 678.8899 | 678.8838 | 678.8951 | 9.824233 | 9.79535  |

|      |          |          |          |          |          |          |      |          |          |          |          |          |
|------|----------|----------|----------|----------|----------|----------|------|----------|----------|----------|----------|----------|
| 1260 | M688T11  | 3.027144 | -1.59796 | -1.98767 | 0.113376 | 0.86353  | DOWN | 687.9349 | 687.9346 | 687.9359 | 10.55887 | 10.52067 |
| 1261 | M337T9_3 | 1.683121 | -0.75114 | -1.80321 | 0.113486 | 0.863531 | DOWN | 336.6272 | 336.6267 | 336.6391 | 9.289067 | 9.142767 |
| 1262 | M526T9_1 | 1.946852 | 0.961144 | 1.941659 | 0.113615 | 0.863532 | UP   | 525.5328 | 525.529  | 525.5338 | 9.250817 | 9.11795  |
| 1263 | M183T13  | 4.784147 | -2.25826 | -1.91094 | 0.113639 | 0.863532 | DOWN | 183.1165 | 183.1161 | 183.1166 | 13.45618 | 13.40577 |
| 1264 | M702T10_ | 2.154904 | 1.107623 | 1.79048  | 0.113666 | 0.863532 | UP   | 701.6021 | 701.5997 | 701.6076 | 9.848417 | 9.810767 |
| 1265 | M393T40  | 1.210406 | -0.27549 | -1.9955  | 0.113677 | 0.863532 | DOWN | 393.2313 | 393.2312 | 393.2315 | 39.52483 | 39.2875  |
| 1266 | M510T11_ | 1.392423 | 0.477597 | 1.845749 | 0.113683 | 0.863532 | UP   | 509.9812 | 509.978  | 509.982  | 10.89061 | 10.7223  |
| 1267 | M621T9_8 | 1.463627 | -0.54955 | -1.84145 | 0.113831 | 0.863533 | DOWN | 621.4792 | 621.478  | 621.4816 | 9.322542 | 9.234417 |
| 1268 | M332T15  | 2.201027 | 1.138177 | 1.776301 | 0.11386  | 0.863533 | UP   | 332.2217 | 332.2215 | 332.2226 | 15.4096  | 15.39512 |
| 1269 | M482T25  | 1.860094 | 0.895375 | 1.786772 | 0.113963 | 0.863534 | UP   | 482.3469 | 482.3463 | 482.3474 | 25.40517 | 25.34783 |
| 1270 | M200T9_2 | 3.244623 | -1.69805 | -1.97674 | 0.114022 | 0.863534 | DOWN | 200.3666 | 200.3662 | 200.3674 | 9.250083 | 9.146383 |
| 1271 | M363T9_1 | 1.635862 | -0.71005 | -1.78474 | 0.114034 | 0.863534 | DOWN | 363.3442 | 363.3437 | 363.3562 | 9.314442 | 9.234417 |
| 1272 | M365T30  | 3.15319  | -1.65681 | -1.96805 | 0.114061 | 0.863535 | DOWN | 365.1357 | 365.1355 | 365.1359 | 30.45233 | 30.437   |
| 1273 | M358T10_ | 1.449333 | -0.53539 | -1.80014 | 0.114158 | 0.863535 | DOWN | 358.4744 | 358.4742 | 358.4745 | 9.960817 | 9.859233 |
| 1274 | M340T36  | 2.469259 | 1.304078 | 1.855683 | 0.114168 | 0.863535 | UP   | 340.3207 | 340.32   | 340.321  | 35.94908 | 35.92017 |
| 1275 | M1023T10 | 1.726843 | -0.78814 | -1.77296 | 0.114189 | 0.863535 | DOWN | 1023.069 | 1023.067 | 1023.07  | 9.914217 | 9.8378   |
| 1276 | M327T10_ | 1.177729 | 0.236008 | 1.785317 | 0.114216 | 0.863536 | UP   | 326.8165 | 326.8161 | 326.8169 | 9.818433 | 9.715683 |
| 1277 | M852T10_ | 1.751102 | -0.80826 | -1.94402 | 0.114258 | 0.863536 | DOWN | 852.1205 | 852.1193 | 852.1206 | 9.909442 | 9.806367 |
| 1278 | M1386T10 | 1.262302 | 0.336057 | 1.868735 | 0.114281 | 0.863536 | UP   | 1385.98  | 1385.978 | 1385.984 | 9.830833 | 9.699733 |
| 1279 | M243T44_ | 1.218926 | -0.28561 | -1.78732 | 0.114427 | 0.863537 | DOWN | 243.1225 | 243.1223 | 243.1226 | 43.69675 | 43.51717 |
| 1280 | M1783T10 | 1.685728 | -0.75337 | -1.9165  | 0.114427 | 0.863537 | DOWN | 1783.494 | 1783.494 | 1783.498 | 9.830283 | 9.728083 |
| 1281 | M434T10_ | 1.401979 | -0.48747 | -1.86925 | 0.114431 | 0.863537 | DOWN | 434.0058 | 434.0045 | 434.0062 | 9.964092 | 9.859233 |
| 1282 | M482T20  | 1.661602 | -0.73257 | -1.77109 | 0.114496 | 0.863537 | DOWN | 482.3236 | 482.3228 | 482.3243 | 20.37533 | 20.375   |
| 1283 | M659T10_ | 1.292667 | -0.37035 | -1.85332 | 0.114506 | 0.863537 | DOWN | 658.9375 | 658.9369 | 658.9392 | 9.846225 | 9.743667 |
| 1284 | M324T9_6 | 1.590432 | -0.66942 | -1.79275 | 0.114543 | 0.863538 | DOWN | 323.8622 | 323.8619 | 323.8625 | 8.9177   | 8.8486   |
| 1285 | M465T11_ | 1.349061 | -0.43196 | -1.77122 | 0.114548 | 0.863538 | DOWN | 465.2117 | 465.2111 | 465.2119 | 10.89875 | 10.8646  |
| 1286 | M674T12  | 1.407826 | -0.49347 | -1.79232 | 0.114567 | 0.863538 | DOWN | 674.3599 | 674.3596 | 674.3602 | 11.60305 | 11.59007 |
| 1287 | M455T10_ | 1.243071 | -0.31391 | -1.8009  | 0.114626 | 0.863538 | DOWN | 454.8463 | 454.8459 | 454.8483 | 10.3781  | 10.08517 |
| 1288 | M538T10_ | 1.131004 | -0.1776  | -1.85712 | 0.114632 | 0.863538 | DOWN | 537.59   | 537.5896 | 537.5902 | 9.945775 | 9.843367 |
| 1289 | M1500T10 | 2.151622 | -1.10542 | -1.85678 | 0.114648 | 0.863538 | DOWN | 1499.515 | 1499.509 | 1499.519 | 9.9014   | 9.8753   |
| 1290 | M966T10_ | 1.833282 | 0.874428 | 1.925141 | 0.114659 | 0.863538 | UP   | 966.202  | 966.2019 | 966.2034 | 9.946367 | 9.843367 |
| 1291 | M196T11  | 1.969403 | 0.977758 | 1.936399 | 0.114817 | 0.863539 | UP   | 195.9083 | 195.908  | 195.9085 | 10.90031 | 10.877   |
| 1292 | M200T10_ | 1.640054 | -0.71374 | -1.77557 | 0.114841 | 0.863539 | DOWN | 200      | 199.9998 | 200.0046 | 9.915767 | 9.8161   |
| 1293 | M277T9_2 | 1.525921 | -0.60968 | -1.79951 | 0.114887 | 0.86354  | DOWN | 276.8379 | 276.8362 | 276.8385 | 9.3471   | 9.1322   |
| 1294 | M550T22  | 1.478465 | -0.5641  | -1.80832 | 0.114945 | 0.86354  | DOWN | 550.3868 | 550.3865 | 550.3869 | 22.33733 | 22.32183 |

|      |          |          |          |          |          |          |      |          |          |          |          |          |
|------|----------|----------|----------|----------|----------|----------|------|----------|----------|----------|----------|----------|
| 1295 | M1779T10 | 1.503004 | -0.58785 | -1.95713 | 0.114957 | 0.86354  | DOWN | 1779.439 | 1779.437 | 1779.441 | 9.825492 | 9.715683 |
| 1296 | M617T9_4 | 1.868661 | -0.902   | -1.78046 | 0.115049 | 0.863541 | DOWN | 617.2736 | 617.2732 | 617.2743 | 9.369958 | 9.324917 |
| 1297 | M710T9_4 | 2.488592 | -1.31533 | -1.86748 | 0.115084 | 0.863541 | DOWN | 710.0782 | 710.0773 | 710.0784 | 8.783317 | 8.701267 |
| 1298 | M311T14  | 1.49932  | -0.58431 | -1.82497 | 0.11511  | 0.863541 | DOWN | 310.7591 | 310.7585 | 310.7592 | 13.69757 | 13.68217 |
| 1299 | M478T10_ | 1.765035 | 0.819697 | 1.935426 | 0.115171 | 0.863541 | UP   | 478.2631 | 478.2624 | 478.2637 | 9.770733 | 9.6681   |
| 1300 | M411T9_1 | 1.593125 | -0.67186 | -1.90319 | 0.115208 | 0.863542 | DOWN | 410.5523 | 410.5507 | 410.5529 | 9.351358 | 9.219483 |
| 1301 | M315T9_1 | 1.677262 | 0.746108 | 1.813512 | 0.115238 | 0.863542 | UP   | 314.5863 | 314.5859 | 314.5865 | 8.870808 | 8.803967 |
| 1302 | M794T9_1 | 2.429556 | -1.28069 | -1.86333 | 0.115356 | 0.863543 | DOWN | 794.2459 | 794.2453 | 794.2465 | 8.767783 | 8.730433 |
| 1303 | M456T9_7 | 1.595609 | -0.67411 | -1.87592 | 0.115387 | 0.863543 | DOWN | 456.1691 | 456.1687 | 456.1694 | 9.241708 | 9.129317 |
| 1304 | M435T9_1 | 4.473574 | -2.16143 | -1.98896 | 0.115414 | 0.863543 | DOWN | 435.4567 | 435.4565 | 435.4569 | 9.196858 | 9.1602   |
| 1305 | M858T10_ | 2.484346 | -1.31287 | -1.99471 | 0.115504 | 0.863543 | DOWN | 857.5711 | 857.57   | 857.5721 | 10.02769 | 9.995817 |
| 1306 | M651T9_1 | 2.518781 | -1.33273 | -1.86949 | 0.115519 | 0.863544 | DOWN | 651.3634 | 651.362  | 651.364  | 9.438833 | 9.340183 |
| 1307 | M405T10_ | 1.378441 | -0.46304 | -1.77425 | 0.115648 | 0.863544 | DOWN | 405.3431 | 405.3431 | 405.3433 | 9.958492 | 9.8753   |
| 1308 | M404T44_ | 1.225038 | -0.29283 | -1.95305 | 0.11565  | 0.863544 | DOWN | 404.2639 | 404.2638 | 404.2641 | 43.7705  | 43.646   |
| 1309 | M320T10_ | 1.272988 | -0.34822 | -1.8165  | 0.115789 | 0.863545 | DOWN | 319.6414 | 319.6411 | 319.6424 | 9.8207   | 9.715683 |
| 1310 | M416T12  | 1.488294 | 0.573659 | 1.774368 | 0.115821 | 0.863545 | UP   | 416.2834 | 416.2826 | 416.2841 | 11.87075 | 11.8442  |
| 1311 | M622T30  | 1.392546 | 0.477725 | 1.83326  | 0.115867 | 0.863546 | UP   | 622.4218 | 622.4207 | 622.4224 | 30.26683 | 30.252   |
| 1312 | M719T23  | 1.236497 | -0.30626 | -1.78309 | 0.11592  | 0.863546 | DOWN | 719.4765 | 719.476  | 719.477  | 22.922   | 22.88583 |
| 1313 | M341T11_ | 1.43447  | -0.52052 | -1.79387 | 0.11595  | 0.863546 | DOWN | 341.2621 | 341.262  | 341.2629 | 10.6624  | 10.66105 |
| 1314 | M357T45  | 1.463839 | -0.54976 | -1.9686  | 0.115976 | 0.863546 | DOWN | 357.1906 | 357.1905 | 357.1907 | 44.71767 | 44.4805  |
| 1315 | M662T10_ | 1.305446 | -0.38454 | -1.82776 | 0.116067 | 0.863547 | DOWN | 661.5027 | 661.5021 | 661.5031 | 9.841442 | 9.728083 |
| 1316 | M829T10_ | 1.372399 | -0.4567  | -1.82902 | 0.116117 | 0.863547 | DOWN | 829.4814 | 829.4807 | 829.4823 | 10.32788 | 10.26307 |
| 1317 | M324T26_ | 2.622299 | 1.390832 | 1.767765 | 0.116168 | 0.863547 | UP   | 324.2444 | 324.2441 | 324.2449 | 25.95133 | 25.9205  |
| 1318 | M438T34  | 3.307132 | -1.72558 | -1.9758  | 0.116237 | 0.863548 | DOWN | 438.3422 | 438.3415 | 438.3424 | 33.8165  | 33.802   |
| 1319 | M350T11_ | 1.419395 | -0.50528 | -1.79305 | 0.116254 | 0.863548 | DOWN | 349.7074 | 349.7073 | 349.7082 | 10.91987 | 10.90197 |
| 1320 | M381T9_1 | 1.258602 | -0.33182 | -1.80765 | 0.116273 | 0.863548 | DOWN | 381.4571 | 381.4569 | 381.4574 | 8.855342 | 8.742633 |
| 1321 | M719T10_ | 1.742051 | 0.800787 | 1.773991 | 0.116382 | 0.863549 | UP   | 719.1262 | 719.124  | 719.1268 | 9.8207   | 9.7124   |
| 1322 | M479T10_ | 1.726379 | 0.787749 | 1.905779 | 0.116383 | 0.863549 | UP   | 478.8281 | 478.8272 | 478.8286 | 9.746783 | 9.65225  |
| 1323 | M1148T10 | 1.649176 | -0.72175 | -1.78812 | 0.116425 | 0.863549 | DOWN | 1148.475 | 1148.474 | 1148.475 | 9.565017 | 9.47865  |
| 1324 | M830T10_ | 1.621735 | -0.69754 | -1.86436 | 0.116466 | 0.863549 | DOWN | 829.5208 | 829.52   | 829.5221 | 9.688425 | 9.5889   |
| 1325 | M522T13_ | 1.250494 | -0.3225  | -1.77219 | 0.116542 | 0.86355  | DOWN | 522.4044 | 522.4039 | 522.4055 | 13.06235 | 13.03953 |
| 1326 | M645T9_1 | 1.589766 | -0.66881 | -1.76063 | 0.116543 | 0.86355  | DOWN | 644.778  | 644.7677 | 644.7784 | 9.262217 | 9.22495  |
| 1327 | M379T11_ | 1.275129 | -0.35064 | -1.85294 | 0.116597 | 0.86355  | DOWN | 379.2956 | 379.2954 | 379.2958 | 11.34627 | 11.34105 |
| 1328 | M556T9_8 | 1.650636 | -0.72302 | -1.76899 | 0.116618 | 0.86355  | DOWN | 556.3483 | 556.348  | 556.35   | 9.401917 | 9.23865  |
| 1329 | M506T39  | 1.564376 | 0.645588 | 1.991596 | 0.116643 | 0.86355  | UP   | 506.2593 | 506.2593 | 506.2594 | 38.76967 | 38.6835  |

|      |           |          |          |          |          |          |      |          |          |          |          |          |
|------|-----------|----------|----------|----------|----------|----------|------|----------|----------|----------|----------|----------|
| 1330 | M1261T10  | 1.530024 | -0.61355 | -1.76768 | 0.116661 | 0.86355  | DOWN | 1260.723 | 1260.722 | 1260.725 | 10.1108  | 10.02755 |
| 1331 | M478T42_  | 1.42066  | 0.506562 | 1.779918 | 0.116693 | 0.863551 | UP   | 478.2643 | 478.2639 | 478.2646 | 42.38067 | 42.12167 |
| 1332 | M661T10_  | 1.320089 | -0.40064 | -1.79846 | 0.116696 | 0.863551 | DOWN | 660.8539 | 660.853  | 660.8561 | 9.836042 | 9.715683 |
| 1333 | M201T10_  | 1.4224   | -0.50833 | -1.76484 | 0.116704 | 0.863551 | DOWN | 201.0837 | 201.0834 | 201.0847 | 9.885167 | 9.73145  |
| 1334 | M410T9_8  | 1.407606 | -0.49324 | -1.76041 | 0.116765 | 0.863551 | DOWN | 410.3643 | 410.3636 | 410.3679 | 9.220933 | 9.1445   |
| 1335 | M462T10_  | 1.348112 | 0.430941 | 1.791024 | 0.116805 | 0.863551 | UP   | 461.8885 | 461.8882 | 461.8889 | 9.814025 | 9.699733 |
| 1336 | M680T42   | 1.327084 | -0.40826 | -1.92553 | 0.11681  | 0.863551 | DOWN | 680.3854 | 680.3853 | 680.3857 | 41.58967 | 41.5175  |
| 1337 | M431T9_6  | 1.456949 | -0.54295 | -1.81787 | 0.116925 | 0.863552 | DOWN | 430.9877 | 430.9863 | 430.9888 | 9.365833 | 9.129317 |
| 1338 | M289T10_  | 1.394645 | -0.4799  | -1.81412 | 0.116944 | 0.863552 | DOWN | 289.0716 | 289.0711 | 289.0719 | 9.961892 | 9.859233 |
| 1339 | M334T21   | 1.628218 | -0.70329 | -1.99089 | 0.117012 | 0.863552 | DOWN | 334.235  | 334.2348 | 334.2351 | 20.86667 | 20.84967 |
| 1340 | M228T10_  | 2.179181 | -1.12379 | -1.91768 | 0.117168 | 0.863553 | DOWN | 227.8712 | 227.8709 | 227.8715 | 9.81525  | 9.65225  |
| 1341 | M490T11_  | 1.298924 | -0.37732 | -1.76278 | 0.117295 | 0.863554 | DOWN | 489.9247 | 489.923  | 489.9253 | 10.91977 | 10.8926  |
| 1342 | M513T33   | 1.282962 | -0.35948 | -1.75438 | 0.11747  | 0.863555 | DOWN | 513.3979 | 513.397  | 513.3985 | 32.82067 | 32.79167 |
| 1343 | M273T16   | 2.0404   | -1.02885 | -1.86695 | 0.117518 | 0.863555 | DOWN | 273.1094 | 273.1092 | 273.1095 | 16.30658 | 16.27878 |
| 1344 | M295T10_  | 1.280715 | -0.35695 | -1.90249 | 0.117583 | 0.863556 | DOWN | 295.497  | 295.4969 | 295.4974 | 9.962617 | 9.859233 |
| 1345 | M335T9_7  | 2.551934 | -1.35159 | -1.93357 | 0.117603 | 0.863556 | DOWN | 334.8107 | 334.8091 | 334.8141 | 9.29665  | 9.1011   |
| 1346 | M391T10_  | 1.386575 | -0.47153 | -1.7611  | 0.117721 | 0.863557 | DOWN | 390.8148 | 390.8145 | 390.8151 | 9.538267 | 9.416817 |
| 1347 | M343T9_7  | 1.416156 | -0.50198 | -1.78195 | 0.117891 | 0.863558 | DOWN | 343.4504 | 343.4502 | 343.4515 | 9.046783 | 9.031633 |
| 1348 | M345T11_  | 1.180658 | -0.23959 | -1.891   | 0.117898 | 0.863558 | DOWN | 345.206  | 345.2057 | 345.2064 | 11.21347 | 11.19848 |
| 1349 | M752T10_  | 1.429086 | 0.515093 | 1.796939 | 0.117942 | 0.863558 | UP   | 751.9873 | 751.9859 | 751.9885 | 9.98345  | 9.8753   |
| 1350 | M829T9_1  | 2.173681 | -1.12014 | -1.78092 | 0.118126 | 0.863559 | DOWN | 828.5911 | 828.5906 | 828.5914 | 8.77555  | 8.730433 |
| 1351 | M215T10_  | 3.412039 | 1.770634 | 1.940108 | 0.1182   | 0.863559 | UP   | 215.1753 | 215.1749 | 215.1756 | 9.6628   | 9.571683 |
| 1352 | M716T25   | 1.386375 | -0.47132 | -1.77101 | 0.118235 | 0.86356  | DOWN | 715.5396 | 715.5392 | 715.5407 | 25.29125 | 25.2745  |
| 1353 | M734T11_  | 2.343922 | -1.22892 | -1.93547 | 0.118255 | 0.86356  | DOWN | 734.4386 | 734.4377 | 734.4392 | 10.69824 | 10.64453 |
| 1354 | M1678T10_ | 1.578948 | -0.65896 | -1.78932 | 0.118381 | 0.863561 | DOWN | 1677.653 | 1677.651 | 1677.656 | 9.817017 | 9.715683 |
| 1355 | M248T10_  | 1.923469 | -0.94371 | -1.75636 | 0.1184   | 0.863561 | DOWN | 248.2408 | 248.2406 | 248.2411 | 9.932033 | 9.8378   |
| 1356 | M357T22_  | 1.607188 | -0.68454 | -1.75363 | 0.118588 | 0.863562 | DOWN | 357.419  | 357.4186 | 357.4192 | 21.57283 | 21.53733 |
| 1357 | M195T18   | 2.273672 | -1.18502 | -1.74769 | 0.118656 | 0.863562 | DOWN | 195.1164 | 195.1162 | 195.1166 | 18.32742 | 18.3115  |
| 1358 | M1541T10  | 1.568995 | -0.64984 | -1.82289 | 0.118661 | 0.863562 | DOWN | 1541.044 | 1541.043 | 1541.051 | 9.918792 | 9.806367 |
| 1359 | M443T11_  | 1.521152 | -0.60516 | -1.79577 | 0.118776 | 0.863563 | DOWN | 442.8317 | 442.8312 | 442.8323 | 11.41772 | 11.3515  |
| 1360 | M351T10_  | 1.49573  | -0.58085 | -1.76242 | 0.118813 | 0.863563 | DOWN | 350.6085 | 350.6082 | 350.6087 | 9.942167 | 9.8378   |
| 1361 | M203T11_  | 1.151392 | 0.203379 | 1.807901 | 0.119088 | 0.863565 | UP   | 202.9829 | 202.9828 | 202.9831 | 10.8926  | 10.88995 |
| 1362 | M282T10_  | 1.149831 | 0.201421 | 1.748875 | 0.119246 | 0.863565 | UP   | 282.1941 | 282.194  | 282.1943 | 9.873067 | 9.79535  |
| 1363 | M1360T11  | 1.364902 | -0.4488  | -1.74689 | 0.119346 | 0.863566 | DOWN | 1360.023 | 1360.022 | 1360.024 | 10.91667 | 10.85018 |
| 1364 | M309T11_  | 1.605505 | 0.683028 | 1.747302 | 0.119354 | 0.863566 | UP   | 309.1847 | 309.1841 | 309.1854 | 11.22767 | 11.2174  |

|      |          |          |          |          |          |          |      |          |          |          |          |          |
|------|----------|----------|----------|----------|----------|----------|------|----------|----------|----------|----------|----------|
| 1365 | M393T21  | 1.383164 | -0.46797 | -1.7633  | 0.11952  | 0.863567 | DOWN | 393.2857 | 393.2854 | 393.2859 | 21.17525 | 21.1505  |
| 1366 | M260T10_ | 1.343989 | -0.42652 | -1.89722 | 0.119667 | 0.863568 | DOWN | 259.8515 | 259.8513 | 259.8517 | 9.741117 | 9.636483 |
| 1367 | M225T9   | 1.492781 | -0.578   | -1.76496 | 0.11971  | 0.863568 | DOWN | 224.5559 | 224.5556 | 224.556  | 9.2796   | 9.129317 |
| 1368 | M659T10_ | 5.424743 | 2.439555 | 1.84032  | 0.11973  | 0.863568 | UP   | 659.4588 | 659.452  | 659.4638 | 9.842217 | 9.747533 |
| 1369 | M841T31  | 1.382497 | -0.46728 | -1.9103  | 0.119751 | 0.863568 | DOWN | 840.5684 | 840.5681 | 840.569  | 31.21967 | 31.20533 |
| 1370 | M472T9_2 | 1.70833  | -0.77259 | -1.75833 | 0.119847 | 0.863569 | DOWN | 471.7521 | 471.7518 | 471.7526 | 9.277967 | 9.1445   |
| 1371 | M324T10_ | 1.344529 | -0.4271  | -1.92314 | 0.120156 | 0.863571 | DOWN | 323.9055 | 323.9053 | 323.9057 | 9.8207   | 9.715683 |
| 1372 | M699T10_ | 1.318242 | -0.39862 | -1.81196 | 0.120457 | 0.863572 | DOWN | 698.9664 | 698.9661 | 698.9668 | 9.830183 | 9.715683 |
| 1373 | M254T11_ | 1.795063 | -0.84403 | -1.80303 | 0.120474 | 0.863572 | DOWN | 253.9208 | 253.9207 | 253.9211 | 10.91852 | 10.87708 |
| 1374 | M900T10_ | 1.328281 | -0.40956 | -1.7815  | 0.120521 | 0.863573 | DOWN | 899.5368 | 899.536  | 899.5372 | 9.504583 | 9.416817 |
| 1375 | M901T9   | 1.431859 | -0.51789 | -1.75472 | 0.120549 | 0.863573 | DOWN | 900.5395 | 900.5392 | 900.5417 | 9.475667 | 9.417317 |
| 1376 | M636T41  | 1.183598 | -0.24318 | -1.73803 | 0.12081  | 0.863574 | DOWN | 636.359  | 636.3587 | 636.3593 | 41.00683 | 40.89883 |
| 1377 | M190T11_ | 1.532589 | -0.61597 | -1.84365 | 0.120865 | 0.863575 | DOWN | 190.3905 | 190.3904 | 190.3908 | 10.9198  | 10.87765 |
| 1378 | M332T10_ | 1.37535  | -0.4598  | -1.82988 | 0.12088  | 0.863575 | DOWN | 332.4372 | 332.4369 | 332.4375 | 9.830558 | 9.715683 |
| 1379 | M815T11_ | 1.33178  | -0.41336 | -1.76762 | 0.12098  | 0.863575 | DOWN | 814.9821 | 814.9815 | 814.9823 | 10.58424 | 10.55068 |
| 1380 | M350T10_ | 1.296514 | -0.37464 | -1.87931 | 0.120984 | 0.863575 | DOWN | 349.6017 | 349.6015 | 349.6018 | 9.83535  | 9.715683 |
| 1381 | M458T10_ | 1.164319 | -0.21949 | -1.79564 | 0.121066 | 0.863576 | DOWN | 458.3992 | 458.3988 | 458.3996 | 9.855658 | 9.7634   |
| 1382 | M463T10_ | 2.92452  | 1.5482   | 1.803648 | 0.12108  | 0.863576 | UP   | 463.0391 | 463.0386 | 463.0397 | 9.915933 | 9.74925  |
| 1383 | M1817T10 | 1.550347 | -0.63259 | -1.80933 | 0.121162 | 0.863576 | DOWN | 1816.69  | 1816.688 | 1816.692 | 9.8207   | 9.699733 |
| 1384 | M310T10_ | 1.653004 | -0.72509 | -1.87543 | 0.121183 | 0.863576 | DOWN | 310.4147 | 310.4146 | 310.4148 | 9.9174   | 9.822117 |
| 1385 | M742T9_5 | 1.925994 | -0.9456  | -1.73431 | 0.121205 | 0.863576 | DOWN | 742.0774 | 742.0766 | 742.0776 | 9.296458 | 9.234417 |
| 1386 | M634T10_ | 1.298054 | -0.37635 | -1.75263 | 0.121206 | 0.863576 | DOWN | 633.6276 | 633.627  | 633.6279 | 9.821308 | 9.715683 |
| 1387 | M842T30  | 1.293484 | 0.371262 | 1.799675 | 0.121247 | 0.863577 | UP   | 841.5498 | 841.5491 | 841.5513 | 30.20133 | 30.19317 |
| 1388 | M1777T10 | 1.504042 | -0.58884 | -1.87358 | 0.121337 | 0.863577 | DOWN | 1776.947 | 1776.945 | 1776.948 | 9.857983 | 9.747533 |
| 1389 | M1496T10 | 1.758076 | -0.814   | -1.74397 | 0.12134  | 0.863577 | DOWN | 1496.387 | 1496.383 | 1496.389 | 9.930333 | 9.822117 |
| 1390 | M349T9_1 | 1.502021 | -0.5869  | -1.74436 | 0.121463 | 0.863578 | DOWN | 349.3225 | 349.32   | 349.3263 | 9.201992 | 9.129317 |
| 1391 | M288T21_ | 1.464293 | -0.5502  | -1.88129 | 0.121491 | 0.863578 | DOWN | 288.2895 | 288.2893 | 288.2896 | 21.40833 | 21.39167 |
| 1392 | M652T27  | 1.639432 | 0.713196 | 1.742892 | 0.121511 | 0.863578 | UP   | 652.4032 | 652.4027 | 652.4034 | 27.31217 | 27.25583 |
| 1393 | M548T39_ | 4.868199 | 2.283388 | 1.959821 | 0.121546 | 0.863578 | UP   | 548.3063 | 548.306  | 548.3065 | 39.43858 | 39.043   |
| 1394 | M561T9_2 | 3.121984 | -1.64246 | -1.86917 | 0.121618 | 0.863579 | DOWN | 561.3604 | 561.3592 | 561.3607 | 8.842717 | 8.55815  |
| 1395 | M665T10_ | 2.344924 | -1.22954 | -1.93462 | 0.121688 | 0.863579 | DOWN | 665.42   | 665.4192 | 665.421  | 10.45167 | 10.40807 |
| 1396 | M338T9_5 | 1.463702 | -0.54962 | -1.78687 | 0.121789 | 0.86358  | DOWN | 337.917  | 337.9167 | 337.9174 | 9.297417 | 9.1445   |
| 1397 | M359T9_3 | 1.710742 | -0.77462 | -1.77626 | 0.121851 | 0.86358  | DOWN | 358.8195 | 358.8188 | 358.82   | 9.172008 | 9.048117 |
| 1398 | M520T39_ | 1.180948 | -0.23995 | -1.8808  | 0.121879 | 0.86358  | DOWN | 520.3115 | 520.311  | 520.3116 | 39.1725  | 39.05717 |
| 1399 | M313T13_ | 31.66734 | 4.984924 | 1.95609  | 0.122051 | 0.863581 | UP   | 313.2847 | 313.284  | 313.2848 | 13.11377 | 13.09803 |



|      |          |          |          |          |          |          |      |          |          |          |          |          |
|------|----------|----------|----------|----------|----------|----------|------|----------|----------|----------|----------|----------|
| 1400 | M481T9_7 | 1.398017 | -0.48338 | -1.78718 | 0.122333 | 0.863583 | DOWN | 481.3772 | 481.3765 | 481.3818 | 9.204617 | 9.1445   |
| 1401 | M824T9_1 | 1.981406 | -0.98652 | -1.75566 | 0.12247  | 0.863583 | DOWN | 823.7629 | 823.7625 | 823.765  | 8.842717 | 8.75965  |
| 1402 | M187T40  | 1.23302  | -0.3022  | -1.9316  | 0.122581 | 0.863584 | DOWN | 187.0962 | 187.0962 | 187.0963 | 40.38808 | 40.20833 |
| 1403 | M223T23  | 1.127747 | 0.173443 | 1.794735 | 0.122582 | 0.863584 | UP   | 223.169  | 223.169  | 223.1692 | 22.81325 | 22.78483 |
| 1404 | M245T45_ | 1.38807  | 0.47308  | 1.73034  | 0.122584 | 0.863584 | UP   | 245.1381 | 245.1379 | 245.1381 | 44.854   | 44.79667 |
| 1405 | M334T9_4 | 1.541125 | -0.62398 | -1.80637 | 0.122593 | 0.863584 | DOWN | 334.1327 | 334.1322 | 334.1356 | 9.220933 | 9.158833 |
| 1406 | M813T10_ | 2.085588 | -1.06045 | -1.8263  | 0.122595 | 0.863584 | DOWN | 813.4834 | 813.4817 | 813.484  | 9.979667 | 9.914217 |
| 1407 | M572T10_ | 1.60379  | -0.68149 | -1.73508 | 0.122731 | 0.863585 | DOWN | 572.404  | 572.4038 | 572.4043 | 9.95385  | 9.869467 |
| 1408 | M397T9_6 | 1.736315 | -0.79603 | -1.8434  | 0.122816 | 0.863585 | DOWN | 397.282  | 397.281  | 397.2831 | 9.279417 | 9.132033 |
| 1409 | M987T11  | 1.591578 | -0.67046 | -1.73553 | 0.122922 | 0.863586 | DOWN | 987.4271 | 987.4267 | 987.4278 | 10.5836  | 10.52067 |
| 1410 | M196T10_ | 1.384563 | -0.46943 | -1.8787  | 0.122924 | 0.863586 | DOWN | 196.3936 | 196.3934 | 196.3937 | 9.8207   | 9.715683 |
| 1411 | M398T10_ | 1.392109 | -0.47727 | -1.75841 | 0.122926 | 0.863586 | DOWN | 398.139  | 398.1388 | 398.1391 | 9.932442 | 9.827283 |
| 1412 | M461T10_ | 1.625883 | -0.70122 | -1.74277 | 0.122953 | 0.863586 | DOWN | 461.28   | 461.2797 | 461.2802 | 10.21435 | 10.13887 |
| 1413 | M820T11_ | 2.901086 | -1.53659 | -1.89746 | 0.12298  | 0.863586 | DOWN | 820.0133 | 820.0126 | 820.0134 | 11.03245 | 11.00902 |
| 1414 | M396T10_ | 2.957593 | 1.564423 | 1.898649 | 0.123009 | 0.863586 | UP   | 395.7789 | 395.7788 | 395.7793 | 9.902617 | 9.79535  |
| 1415 | M275T10_ | 1.424083 | -0.51003 | -1.75906 | 0.12334  | 0.863588 | DOWN | 275.205  | 275.2049 | 275.2052 | 9.8322   | 9.747533 |
| 1416 | M827T12  | 1.373817 | -0.45819 | -1.75698 | 0.123601 | 0.863589 | DOWN | 827.3792 | 827.3782 | 827.3796 | 11.96611 | 11.94427 |
| 1417 | M667T12  | 1.612408 | -0.68922 | -1.81106 | 0.123716 | 0.86359  | DOWN | 667.3868 | 667.3849 | 667.3878 | 11.78703 | 11.72435 |
| 1418 | M313T9_1 | 1.215901 | -0.28203 | -1.72129 | 0.123946 | 0.863591 | DOWN | 312.5533 | 312.553  | 312.5536 | 9.277967 | 9.129317 |
| 1419 | M236T10_ | 2.813514 | 1.492373 | 1.806468 | 0.123961 | 0.863591 | UP   | 236.4618 | 236.4617 | 236.462  | 9.939233 | 9.843367 |
| 1420 | M288T22_ | 2.18477  | 1.127481 | 1.893633 | 0.123984 | 0.863591 | UP   | 288.275  | 288.273  | 288.2787 | 22.05333 | 22.016   |
| 1421 | M189T9_1 | 1.727363 | -0.78857 | -1.73476 | 0.123985 | 0.863591 | DOWN | 189.1895 | 189.189  | 189.1902 | 9.18975  | 9.1322   |
| 1422 | M211T9_1 | 1.43977  | -0.52584 | -1.86672 | 0.124002 | 0.863592 | DOWN | 210.7815 | 210.7814 | 210.7817 | 9.339242 | 9.219483 |
| 1423 | M576T10_ | 1.366986 | -0.451   | -1.75507 | 0.124122 | 0.863592 | DOWN | 575.693  | 575.6924 | 575.6936 | 9.902008 | 9.811217 |
| 1424 | M195T9_1 | 1.376236 | -0.46073 | -1.7187  | 0.124147 | 0.863592 | DOWN | 195.1601 | 195.1599 | 195.1612 | 9.280767 | 9.132267 |
| 1425 | M600T12  | 1.384104 | -0.46895 | -1.72199 | 0.124215 | 0.863593 | DOWN | 600.3229 | 600.3225 | 600.3246 | 11.55805 | 11.52522 |
| 1426 | M401T11_ | 3.30803  | 1.725973 | 1.718245 | 0.124291 | 0.863593 | UP   | 401.2856 | 401.278  | 401.2872 | 10.94208 | 10.873   |
| 1427 | M504T39_ | 1.311042 | -0.39071 | -1.72038 | 0.124323 | 0.863593 | DOWN | 504.28   | 504.2796 | 504.2803 | 39.00933 | 38.84167 |
| 1428 | M1043T19 | 1.379633 | 0.464285 | 1.75227  | 0.124443 | 0.863594 | UP   | 1043.489 | 1043.488 | 1043.489 | 19.4165  | 19.34417 |
| 1429 | M1988T10 | 1.446339 | -0.53241 | -1.8507  | 0.124525 | 0.863594 | DOWN | 1987.642 | 1987.638 | 1987.643 | 9.8207   | 9.699733 |
| 1430 | M338T10_ | 1.485536 | 0.570983 | 1.728196 | 0.124656 | 0.863595 | UP   | 337.621  | 337.6191 | 337.6216 | 9.804242 | 9.45135  |
| 1431 | M464T22  | 1.500221 | -0.58518 | -1.849   | 0.124685 | 0.863595 | DOWN | 464.3131 | 464.3127 | 464.3135 | 21.56567 | 21.55233 |
| 1432 | M283T11_ | 1.538264 | -0.6213  | -1.81601 | 0.124734 | 0.863595 | DOWN | 283.1958 | 283.1952 | 283.1974 | 10.90785 | 10.83417 |
| 1433 | M408T9_3 | 1.542803 | -0.62555 | -1.71988 | 0.124749 | 0.863595 | DOWN | 407.8283 | 407.828  | 407.8286 | 9.496092 | 9.40135  |
| 1434 | M661T10_ | 1.258212 | -0.33137 | -1.72992 | 0.124787 | 0.863596 | DOWN | 661.4642 | 661.4638 | 661.4682 | 9.818525 | 9.715683 |

|      |           |          |          |          |          |          |      |          |          |          |          |          |
|------|-----------|----------|----------|----------|----------|----------|------|----------|----------|----------|----------|----------|
| 1435 | M513T25   | 1.501537 | 0.58644  | 1.715253 | 0.125048 | 0.863597 | UP   | 513.2092 | 513.2077 | 513.2102 | 24.72417 | 24.71033 |
| 1436 | M474T42_  | 1.24041  | 0.310817 | 1.712727 | 0.125256 | 0.863598 | UP   | 474.2694 | 474.2692 | 474.2695 | 42.03533 | 41.949   |
| 1437 | M151T43_  | 1.526483 | 0.610212 | 1.767803 | 0.125298 | 0.863598 | UP   | 151.1115 | 151.1115 | 151.1115 | 42.85517 | 42.71133 |
| 1438 | M541T10_  | 2.046548 | -1.03319 | -1.74519 | 0.12535  | 0.863599 | DOWN | 540.9997 | 540.9995 | 541.0006 | 9.942317 | 9.90755  |
| 1439 | M1097T10_ | 1.622011 | -0.69778 | -1.73028 | 0.125433 | 0.863599 | DOWN | 1096.854 | 1096.851 | 1096.862 | 9.8322   | 9.715683 |
| 1440 | M289T21   | 1.514014 | -0.59838 | -1.86123 | 0.125448 | 0.863599 | DOWN | 289.2929 | 289.2927 | 289.2931 | 21.409   | 21.39167 |
| 1441 | M413T10_  | 1.326688 | -0.40783 | -1.76065 | 0.125496 | 0.863599 | DOWN | 412.5343 | 412.5342 | 412.5345 | 9.964417 | 9.859233 |
| 1442 | M1154T12_ | 1.546863 | -0.62935 | -1.7768  | 0.125505 | 0.863599 | DOWN | 1153.603 | 1153.602 | 1153.604 | 12.23006 | 12.2077  |
| 1443 | M243T23   | 1.887776 | 0.916688 | 1.884989 | 0.125638 | 0.8636   | UP   | 243.0898 | 243.0898 | 243.09   | 23.3815  | 23.381   |
| 1444 | M398T10_  | 1.561317 | -0.64276 | -1.86357 | 0.126103 | 0.863602 | DOWN | 398.3105 | 398.3101 | 398.3112 | 9.582167 | 9.447617 |
| 1445 | M418T9_4  | 1.250499 | -0.3225  | -1.72396 | 0.126116 | 0.863602 | DOWN | 417.9209 | 417.92   | 417.9213 | 8.96255  | 8.877267 |
| 1446 | M605T10_  | 1.234552 | -0.30399 | -1.73376 | 0.126143 | 0.863603 | DOWN | 605.3741 | 605.3738 | 605.3749 | 9.677883 | 9.557333 |
| 1447 | M659T35   | 1.765575 | -0.82014 | -1.79402 | 0.126209 | 0.863603 | DOWN | 659.4924 | 659.4918 | 659.4929 | 35.11117 | 35.07033 |
| 1448 | M389T11_  | 1.671857 | -0.74145 | -1.70676 | 0.126255 | 0.863603 | DOWN | 388.6838 | 388.6835 | 388.6853 | 10.93412 | 10.8628  |
| 1449 | M1765T9_  | 1.440386 | -0.52646 | -1.7094  | 0.126318 | 0.863604 | DOWN | 1765.431 | 1765.427 | 1765.435 | 9.269283 | 9.089733 |
| 1450 | M379T10_  | 1.381395 | -0.46613 | -1.75849 | 0.126338 | 0.863604 | DOWN | 378.7643 | 378.7639 | 378.7648 | 9.960417 | 9.859233 |
| 1451 | M826T10_  | 1.451485 | -0.53753 | -1.80026 | 0.126433 | 0.863604 | DOWN | 825.8293 | 825.8288 | 825.8303 | 9.638308 | 9.540717 |
| 1452 | M374T9_7  | 1.585957 | -0.66535 | -1.79621 | 0.126519 | 0.863605 | DOWN | 374.2369 | 374.2367 | 374.237  | 9.042633 | 9.023483 |
| 1453 | M576T9_2  | 1.610166 | -0.68721 | -1.85655 | 0.126614 | 0.863605 | DOWN | 575.6404 | 575.6397 | 575.6481 | 9.18975  | 9.142767 |
| 1454 | M160T9_3  | 1.445426 | -0.5315  | -1.71877 | 0.12663  | 0.863605 | DOWN | 160.0807 | 160.0801 | 160.0809 | 9.365833 | 9.22495  |
| 1455 | M681T9_2  | 2.189601 | -1.13067 | -1.73279 | 0.126635 | 0.863605 | DOWN | 681.3552 | 681.3549 | 681.3558 | 8.753417 | 8.730433 |
| 1456 | M329T21_  | 2.279448 | 1.188684 | 1.713205 | 0.126646 | 0.863605 | UP   | 329.2149 | 329.2144 | 329.2152 | 20.62033 | 20.6055  |
| 1457 | M193T9_1  | 2.632898 | 1.396652 | 1.719979 | 0.126867 | 0.863606 | UP   | 193.2336 | 193.2325 | 193.2348 | 9.27445  | 9.0511   |
| 1458 | M433T9_1  | 1.292537 | -0.37021 | -1.70432 | 0.126901 | 0.863606 | DOWN | 433.4562 | 433.4528 | 433.4565 | 9.347458 | 9.1445   |
| 1459 | M351T15_  | 1.668377 | -0.73845 | -1.82082 | 0.127007 | 0.863607 | DOWN | 351.1777 | 351.1775 | 351.1777 | 14.97067 | 14.95502 |
| 1460 | M806T11_  | 1.499083 | -0.58408 | -1.73154 | 0.127014 | 0.863607 | DOWN | 806.4027 | 806.4026 | 806.403  | 10.53152 | 10.51422 |
| 1461 | M738T9    | 1.343233 | -0.42571 | -1.71742 | 0.127035 | 0.863607 | DOWN | 737.7576 | 737.7562 | 737.7581 | 9.314442 | 9.234417 |
| 1462 | M766T9_2  | 2.032564 | -1.0233  | -1.72029 | 0.127077 | 0.863607 | DOWN | 766.486  | 766.4857 | 766.4863 | 9.467433 | 9.356517 |
| 1463 | M545T10_  | 1.365894 | -0.44985 | -1.75005 | 0.12712  | 0.863608 | DOWN | 545.2851 | 545.2845 | 545.2863 | 9.618792 | 9.52595  |
| 1464 | M828T9_3  | 2.117121 | -1.0821  | -1.74655 | 0.127132 | 0.863608 | DOWN | 828.0899 | 828.0892 | 828.0906 | 8.791683 | 8.701267 |
| 1465 | M221T10_  | 1.375695 | -0.46016 | -1.72366 | 0.127164 | 0.863608 | DOWN | 221.1534 | 221.1531 | 221.1537 | 9.917167 | 9.811217 |
| 1466 | M363T11_  | 3.377618 | 1.756006 | 1.772049 | 0.127179 | 0.863608 | UP   | 363.2286 | 363.2279 | 363.2353 | 11.1829  | 11.1603  |
| 1467 | M237T11_  | 2.955022 | -1.56317 | -1.90681 | 0.127182 | 0.863608 | DOWN | 237.2596 | 237.2591 | 237.26   | 10.91487 | 10.8646  |
| 1468 | M562T10_  | 2.72994  | 1.448869 | 1.910522 | 0.127247 | 0.863608 | UP   | 561.9229 | 561.9224 | 561.9234 | 9.975142 | 9.859233 |
| 1469 | M660T9_6  | 1.339751 | -0.42196 | -1.71471 | 0.127259 | 0.863608 | DOWN | 660.4895 | 660.4887 | 660.4913 | 9.314442 | 9.234417 |

|      |          |          |          |          |          |          |      |          |          |          |          |          |
|------|----------|----------|----------|----------|----------|----------|------|----------|----------|----------|----------|----------|
| 1470 | M554T9_9 | 1.537533 | -0.62062 | -1.80027 | 0.127484 | 0.863609 | DOWN | 554.489  | 554.486  | 554.4899 | 9.206    | 9.142767 |
| 1471 | M206T9_4 | 1.974833 | -0.98173 | -1.70778 | 0.127551 | 0.86361  | DOWN | 205.5833 | 205.5822 | 205.5843 | 9.295167 | 9.132267 |
| 1472 | M196T10_ | 1.483431 | -0.56894 | -1.87187 | 0.127597 | 0.86361  | DOWN | 196.0757 | 196.0756 | 196.0758 | 9.8207   | 9.715683 |
| 1473 | M237T11_ | 1.780849 | -0.83257 | -1.85426 | 0.127613 | 0.86361  | DOWN | 237.1078 | 237.1075 | 237.1095 | 10.8926  | 10.877   |
| 1474 | M306T24  | 1.540402 | -0.62331 | -1.73441 | 0.12788  | 0.863611 | DOWN | 306.29   | 306.2899 | 306.2901 | 24.2635  | 24.24717 |
| 1475 | M311T10_ | 1.211471 | -0.27676 | -1.7032  | 0.127903 | 0.863611 | DOWN | 311.2605 | 311.2604 | 311.2608 | 10.27583 | 10.21468 |
| 1476 | M358T9_6 | 1.48041  | -0.566   | -1.78298 | 0.128177 | 0.863613 | DOWN | 358.3674 | 358.3665 | 358.3676 | 9.322983 | 9.219483 |
| 1477 | M294T28  | 1.270297 | -0.34517 | -1.74058 | 0.128225 | 0.863613 | DOWN | 294.2061 | 294.206  | 294.2064 | 27.95175 | 27.9245  |
| 1478 | M1109T10 | 1.369479 | -0.45363 | -1.77253 | 0.128236 | 0.863613 | DOWN | 1108.952 | 1108.951 | 1108.953 | 9.914217 | 9.729367 |
| 1479 | M450T9_1 | 1.283816 | -0.36044 | -1.71257 | 0.128255 | 0.863613 | DOWN | 450.4196 | 450.419  | 450.42   | 9.31255  | 9.129317 |
| 1480 | M741T9_4 | 1.543993 | -0.62667 | -1.69921 | 0.128277 | 0.863613 | DOWN | 741.441  | 741.4398 | 741.4414 | 9.328967 | 9.129317 |
| 1481 | M890T9   | 1.992173 | -0.99434 | -1.77774 | 0.12829  | 0.863613 | DOWN | 890.0047 | 890.0041 | 890.0057 | 9.275917 | 9.234417 |
| 1482 | M416T25_ | 1.761752 | 0.817011 | 1.698963 | 0.128349 | 0.863614 | UP   | 416.2483 | 416.2478 | 416.2492 | 25.341   | 25.28867 |
| 1483 | M340T10_ | 1.344866 | -0.42746 | -1.82155 | 0.128401 | 0.863614 | DOWN | 339.753  | 339.7529 | 339.7531 | 9.531583 | 9.432183 |
| 1484 | M330T10_ | 1.920433 | 0.941432 | 1.753515 | 0.128519 | 0.863615 | UP   | 329.8149 | 329.8147 | 329.815  | 10.13219 | 10.06883 |
| 1485 | M734T11_ | 2.363639 | -1.24101 | -1.86136 | 0.128529 | 0.863615 | DOWN | 733.9367 | 733.9365 | 733.9371 | 10.69952 | 10.64453 |
| 1486 | M252T13  | 1.923669 | 0.94386  | 1.694515 | 0.128637 | 0.863615 | UP   | 252.1568 | 252.1566 | 252.1647 | 12.59504 | 12.58705 |
| 1487 | M457T10_ | 1.31634  | -0.39653 | -1.69795 | 0.128706 | 0.863615 | DOWN | 457.2925 | 457.2919 | 457.2929 | 9.795892 | 9.665433 |
| 1488 | M833T10_ | 1.43564  | -0.52169 | -1.78256 | 0.128773 | 0.863616 | DOWN | 833.4727 | 833.4725 | 833.4737 | 9.7091   | 9.602967 |
| 1489 | M753T11_ | 2.32825  | -1.21925 | -1.85796 | 0.12878  | 0.863616 | DOWN | 753.4726 | 753.4715 | 753.4731 | 10.74694 | 10.7188  |
| 1490 | M851T10_ | 1.285122 | -0.36191 | -1.69563 | 0.128813 | 0.863616 | DOWN | 850.9932 | 850.9918 | 850.9935 | 10.35367 | 10.32768 |
| 1491 | M420T11_ | 1.30473  | -0.38375 | -1.71214 | 0.128921 | 0.863616 | DOWN | 420.2372 | 420.2369 | 420.2379 | 10.90659 | 10.89355 |
| 1492 | M251T11_ | 1.54243  | -0.6252  | -1.73623 | 0.128963 | 0.863617 | DOWN | 251.43   | 251.4298 | 251.4304 | 10.8926  | 10.8914  |
| 1493 | M199T22_ | 1.335428 | -0.4173  | -1.75719 | 0.129174 | 0.863618 | DOWN | 199.169  | 199.1689 | 199.1691 | 21.75467 | 21.7515  |
| 1494 | M591T11  | 1.396827 | -0.48215 | -1.82629 | 0.12918  | 0.863618 | DOWN | 591.2625 | 591.2619 | 591.2629 | 10.67582 | 10.63273 |
| 1495 | M536T10_ | 1.624439 | -0.69994 | -1.84675 | 0.129191 | 0.863618 | DOWN | 535.8182 | 535.8178 | 535.8188 | 10.06125 | 9.971833 |
| 1496 | M708T31  | 1.301923 | -0.38064 | -1.85155 | 0.129587 | 0.86362  | DOWN | 708.4894 | 708.489  | 708.4898 | 31.32975 | 31.32017 |
| 1497 | M808T9_1 | 1.421333 | -0.50725 | -1.70137 | 0.129595 | 0.86362  | DOWN | 808.2296 | 808.2264 | 808.2309 | 9.251992 | 9.160617 |
| 1498 | M295T28  | 1.366505 | -0.45049 | -1.73336 | 0.129655 | 0.86362  | DOWN | 295.2093 | 295.2092 | 295.2095 | 27.95175 | 27.9235  |
| 1499 | M397T10_ | 1.196427 | -0.25873 | -1.72428 | 0.129686 | 0.86362  | DOWN | 397.0971 | 397.0969 | 397.0972 | 9.917208 | 9.811217 |
| 1500 | M508T42_ | 1.233242 | 0.302456 | 1.777359 | 0.129707 | 0.86362  | UP   | 508.311  | 508.3108 | 508.3113 | 42.13575 | 42.0065  |
| 1501 | M415T39_ | 1.300175 | -0.37871 | -1.73469 | 0.12987  | 0.863621 | DOWN | 415.2322 | 415.2321 | 415.2323 | 39.49617 | 39.46017 |
| 1502 | M217T10_ | 1.543272 | -0.62599 | -1.68953 | 0.129947 | 0.863621 | DOWN | 216.8127 | 216.8123 | 216.8213 | 9.830833 | 9.715683 |
| 1503 | M171T9_5 | 1.749709 | -0.80711 | -1.74366 | 0.129952 | 0.863621 | DOWN | 171.3558 | 171.3553 | 171.3564 | 9.241708 | 9.1892   |
| 1504 | M820T11_ | 3.020517 | -1.5948  | -1.88941 | 0.129961 | 0.863622 | DOWN | 819.5113 | 819.511  | 819.5126 | 11.05325 | 11.01793 |

|      |          |          |          |          |          |          |      |          |          |          |          |          |
|------|----------|----------|----------|----------|----------|----------|------|----------|----------|----------|----------|----------|
| 1505 | M1634T9  | 1.61097  | -0.68793 | -1.69755 | 0.129985 | 0.863622 | DOWN | 1634.249 | 1634.246 | 1634.252 | 9.246483 | 9.11795  |
| 1506 | M330T9_9 | 1.678419 | 0.747103 | 1.696804 | 0.130052 | 0.863622 | UP   | 330.3099 | 330.3008 | 330.3112 | 9.374083 | 9.234417 |
| 1507 | M365T23  | 1.55598  | 0.637824 | 1.771546 | 0.130054 | 0.863622 | UP   | 365.2895 | 365.2891 | 365.2899 | 22.84233 | 22.7705  |
| 1508 | M383T10_ | 1.404854 | -0.49042 | -1.72997 | 0.130072 | 0.863622 | DOWN | 382.8036 | 382.8035 | 382.8041 | 9.556292 | 9.447617 |
| 1509 | M361T9_1 | 1.558911 | -0.64054 | -1.68907 | 0.130402 | 0.863624 | DOWN | 360.5474 | 360.5453 | 360.5514 | 9.273908 | 9.06855  |
| 1510 | M572T10_ | 1.397794 | -0.48315 | -1.72765 | 0.13043  | 0.863624 | DOWN | 572.4711 | 572.4704 | 572.4717 | 9.9149   | 9.827283 |
| 1511 | M235T10_ | 2.116769 | 1.081864 | 1.814239 | 0.130579 | 0.863624 | UP   | 235.1958 | 235.1955 | 235.1958 | 9.943183 | 9.827283 |
| 1512 | M353T10_ | 1.496992 | -0.58207 | -1.8422  | 0.13061  | 0.863625 | DOWN | 353.1345 | 353.1339 | 353.1347 | 10.34961 | 10.26307 |
| 1513 | M648T11_ | 1.461698 | -0.54765 | -1.74957 | 0.130678 | 0.863625 | DOWN | 647.7229 | 647.7219 | 647.7237 | 10.6824  | 10.64453 |
| 1514 | M335T14  | 1.486279 | -0.57171 | -1.7261  | 0.130682 | 0.863625 | DOWN | 335.2509 | 335.2505 | 335.2513 | 14.48805 | 14.47187 |
| 1515 | M402T11_ | 1.964788 | -0.97437 | -1.6839  | 0.1307   | 0.863625 | DOWN | 401.9552 | 401.954  | 401.9577 | 10.90297 | 10.8214  |
| 1516 | M213T16  | 1.602783 | 0.680579 | 1.683899 | 0.130709 | 0.863625 | UP   | 213.1675 | 213.1674 | 213.1676 | 16.49057 | 16.45715 |
| 1517 | M483T14  | 1.538575 | -0.62159 | -1.72118 | 0.130715 | 0.863625 | DOWN | 483.3684 | 483.3676 | 483.3687 | 13.75568 | 13.68265 |
| 1518 | M199T43  | 1.46474  | 0.550645 | 1.686298 | 0.130909 | 0.863626 | UP   | 199.1326 | 199.1325 | 199.1326 | 42.98483 | 42.55333 |
| 1519 | M220T9_1 | 1.494749 | -0.5799  | -1.82321 | 0.130951 | 0.863626 | DOWN | 220.3104 | 220.3102 | 220.3107 | 9.3261   | 9.1322   |
| 1520 | M535T11_ | 1.311952 | -0.39171 | -1.77641 | 0.130989 | 0.863626 | DOWN | 534.9911 | 534.9905 | 534.9915 | 10.55938 | 10.45607 |
| 1521 | M622T10_ | 1.150735 | -0.20256 | -1.7702  | 0.131049 | 0.863627 | DOWN | 622.4008 | 622.4004 | 622.4046 | 9.678733 | 9.5731   |
| 1522 | M813T11_ | 1.36013  | -0.44374 | -1.707   | 0.131068 | 0.863627 | DOWN | 813.0059 | 813.005  | 813.0074 | 10.59162 | 10.55068 |
| 1523 | M199T9_1 | 1.476219 | -0.56191 | -1.68658 | 0.131123 | 0.863627 | DOWN | 199.318  | 199.3177 | 199.3185 | 9.302883 | 9.166033 |
| 1524 | M804T12  | 1.553513 | -0.63553 | -1.77086 | 0.131162 | 0.863627 | DOWN | 804.387  | 804.3867 | 804.3876 | 11.57397 | 11.5607  |
| 1525 | M562T40_ | 1.898101 | -0.92456 | -1.89257 | 0.131188 | 0.863627 | DOWN | 562.322  | 562.3215 | 562.3223 | 40.48892 | 40.22267 |
| 1526 | M476T10_ | 7.131592 | 2.834224 | 1.891854 | 0.131207 | 0.863627 | UP   | 475.8849 | 475.8845 | 475.8852 | 9.746508 | 9.649833 |
| 1527 | M208T10_ | 1.316731 | -0.39696 | -1.76635 | 0.131295 | 0.863628 | DOWN | 207.5991 | 207.599  | 207.5991 | 9.830183 | 9.715683 |
| 1528 | M214T10_ | 1.217937 | 0.28444  | 1.75738  | 0.131342 | 0.863628 | UP   | 213.7126 | 213.7125 | 213.7126 | 9.9149   | 9.79535  |
| 1529 | M236T9_2 | 1.466287 | -0.55217 | -1.70893 | 0.131417 | 0.863628 | DOWN | 235.5861 | 235.5829 | 235.5867 | 9.295817 | 9.1503   |
| 1530 | M397T31_ | 1.726637 | 0.787965 | 1.703994 | 0.131488 | 0.863629 | UP   | 396.945  | 396.9448 | 396.9452 | 31.133   | 31.11883 |
| 1531 | M248T9_2 | 1.439884 | 0.525953 | 1.755063 | 0.131619 | 0.863629 | UP   | 248.0195 | 248.0193 | 248.0196 | 8.735275 | 8.63795  |
| 1532 | M229T10_ | 1.169259 | -0.22559 | -1.72443 | 0.131738 | 0.86363  | DOWN | 229.1478 | 229.1477 | 229.1479 | 9.945258 | 9.843367 |
| 1533 | M332T10_ | 1.330627 | -0.41211 | -1.85279 | 0.132178 | 0.863632 | DOWN | 331.893  | 331.8925 | 331.8933 | 9.8207   | 9.699733 |
| 1534 | M1771T10 | 1.483429 | 0.568936 | 1.773266 | 0.13218  | 0.863632 | UP   | 1770.988 | 1770.987 | 1771.001 | 9.856867 | 9.747533 |
| 1535 | M464T44_ | 1.459626 | -0.5456  | -1.84504 | 0.132266 | 0.863632 | DOWN | 464.285  | 464.2848 | 464.2853 | 43.87333 | 43.61767 |
| 1536 | M642T10_ | 1.257384 | -0.33042 | -1.6854  | 0.132313 | 0.863633 | DOWN | 641.6577 | 641.6572 | 641.6585 | 9.82645  | 9.699733 |
| 1537 | M165T9_2 | 1.425254 | -0.51122 | -1.73636 | 0.132314 | 0.863633 | DOWN | 164.8455 | 164.8454 | 164.8461 | 9.3494   | 9.264333 |
| 1538 | M287T10_ | 1.22787  | -0.29616 | -1.7047  | 0.132368 | 0.863633 | DOWN | 286.7735 | 286.7734 | 286.7736 | 9.937175 | 9.843367 |
| 1539 | M446T10_ | 1.379559 | -0.46421 | -1.70876 | 0.132441 | 0.863633 | DOWN | 445.6691 | 445.6687 | 445.6693 | 9.80185  | 9.699733 |

|      |          |          |          |          |          |          |      |          |          |          |          |          |
|------|----------|----------|----------|----------|----------|----------|------|----------|----------|----------|----------|----------|
| 1540 | M761T4   | 1.712572 | 0.776165 | 1.674647 | 0.132554 | 0.863634 | UP   | 761.4417 | 761.4414 | 761.4424 | 3.626575 | 3.50555  |
| 1541 | M871T10_ | 1.416931 | -0.50277 | -1.71381 | 0.132583 | 0.863634 | DOWN | 871.0302 | 871.0295 | 871.0309 | 10.45237 | 10.40882 |
| 1542 | M228T9_1 | 1.847329 | -0.88544 | -1.67615 | 0.132681 | 0.863634 | DOWN | 228.4491 | 228.4479 | 228.4499 | 9.280767 | 9.2585   |
| 1543 | M228T9_2 | 1.567983 | -0.64891 | -1.80662 | 0.13271  | 0.863634 | DOWN | 227.5308 | 227.5279 | 227.5309 | 9.321883 | 9.11405  |
| 1544 | M207T9_1 | 3.270045 | -1.70931 | -1.86445 | 0.132715 | 0.863634 | DOWN | 207.0576 | 207.0561 | 207.0583 | 9.342333 | 9.13445  |
| 1545 | M690T18  | 8.662846 | 3.114841 | 1.883304 | 0.132727 | 0.863635 | UP   | 690.3268 | 690.3265 | 690.327  | 18.25775 | 18.241   |
| 1546 | M629T10_ | 1.45178  | -0.53782 | -1.70462 | 0.132747 | 0.863635 | DOWN | 629.0114 | 629.0108 | 629.012  | 9.52755  | 9.432183 |
| 1547 | M382T41_ | 1.376182 | -0.46067 | -1.74341 | 0.132894 | 0.863635 | DOWN | 382.2433 | 382.2432 | 382.2435 | 41.15083 | 41.1145  |
| 1548 | M428T9_7 | 1.370534 | -0.45474 | -1.68305 | 0.132897 | 0.863635 | DOWN | 428.3427 | 428.3423 | 428.3432 | 9.191433 | 9.11795  |
| 1549 | M201T10_ | 1.297076 | -0.37526 | -1.76521 | 0.132915 | 0.863635 | DOWN | 200.5359 | 200.5358 | 200.536  | 9.831142 | 9.715683 |
| 1550 | M944T10_ | 1.252453 | -0.32476 | -1.72031 | 0.132958 | 0.863636 | DOWN | 943.9923 | 943.9915 | 943.9935 | 9.977025 | 9.843367 |
| 1551 | M341T10_ | 1.229767 | -0.29838 | -1.74647 | 0.13302  | 0.863636 | DOWN | 341.343  | 341.3427 | 341.3439 | 9.825492 | 9.715683 |
| 1552 | M355T11_ | 1.706076 | 0.770682 | 1.676169 | 0.133052 | 0.863636 | UP   | 355.184  | 355.1832 | 355.1845 | 10.93208 | 10.91977 |
| 1553 | M828T9_2 | 2.35311  | -1.23457 | -1.75248 | 0.133061 | 0.863636 | DOWN | 827.9226 | 827.922  | 827.9235 | 8.798117 | 8.686867 |
| 1554 | M651T10_ | 1.355177 | -0.43848 | -1.67203 | 0.13307  | 0.863636 | DOWN | 651.2833 | 651.2829 | 651.2862 | 9.640117 | 9.52595  |
| 1555 | M349T9_1 | 2.600926 | 1.379025 | 1.823986 | 0.133137 | 0.863636 | UP   | 349.2753 | 349.2745 | 349.2792 | 9.130358 | 8.9997   |
| 1556 | M270T11_ | 1.554412 | -0.63637 | -1.68547 | 0.133225 | 0.863637 | DOWN | 269.5341 | 269.534  | 269.5348 | 10.90668 | 10.8628  |
| 1557 | M158T10_ | 1.53603  | -0.61921 | -1.71326 | 0.133266 | 0.863637 | DOWN | 157.5465 | 157.5465 | 157.5467 | 9.91765  | 9.822117 |
| 1558 | M1158T10 | 1.727408 | -0.78861 | -1.67796 | 0.133274 | 0.863637 | DOWN | 1157.962 | 1157.96  | 1157.963 | 9.5483   | 9.47865  |
| 1559 | M1158T10 | 1.641781 | -0.71526 | -1.67984 | 0.133304 | 0.863637 | DOWN | 1158.462 | 1158.461 | 1158.464 | 9.553017 | 9.47865  |
| 1560 | M343T9_2 | 1.774568 | 0.827468 | 1.671014 | 0.133313 | 0.863637 | UP   | 342.7901 | 342.7899 | 342.7956 | 9.2887   | 9.048117 |
| 1561 | M788T9_1 | 1.41458  | -0.50037 | -1.70945 | 0.133442 | 0.863638 | DOWN | 788.4247 | 788.4218 | 788.4256 | 9.322983 | 9.234417 |
| 1562 | M542T33  | 1.424636 | -0.51059 | -1.70333 | 0.133521 | 0.863638 | DOWN | 542.426  | 542.4256 | 542.4266 | 33.14558 | 33.12367 |
| 1563 | M415T11_ | 1.254593 | -0.32722 | -1.69657 | 0.133551 | 0.863638 | DOWN | 414.626  | 414.6258 | 414.6264 | 10.9212  | 10.90197 |
| 1564 | M710T11_ | 1.640695 | -0.71431 | -1.72644 | 0.133562 | 0.863638 | DOWN | 709.514  | 709.5128 | 709.5149 | 10.57357 | 10.50338 |
| 1565 | M388T11_ | 7.30914  | 2.869702 | 1.877805 | 0.133563 | 0.863638 | UP   | 387.7291 | 387.7286 | 387.7316 | 10.93097 | 10.80695 |
| 1566 | M420T39_ | 1.554757 | -0.63669 | -1.76013 | 0.133643 | 0.863639 | DOWN | 420.2229 | 420.2223 | 420.223  | 38.669   | 38.53917 |
| 1567 | M712T11_ | 2.158736 | -1.11019 | -1.83266 | 0.133702 | 0.863639 | DOWN | 711.9236 | 711.9223 | 711.9245 | 10.62363 | 10.5518  |
| 1568 | M819T13  | 1.587072 | -0.66637 | -1.7428  | 0.133856 | 0.86364  | DOWN | 819.4061 | 819.4051 | 819.4065 | 12.96013 | 12.95202 |
| 1569 | M652T10_ | 1.290962 | -0.36845 | -1.69029 | 0.133869 | 0.86364  | DOWN | 652.0858 | 652.0855 | 652.0874 | 9.8371   | 9.699733 |
| 1570 | M813T10_ | 1.44341  | -0.52948 | -1.68187 | 0.13388  | 0.86364  | DOWN | 812.8551 | 812.8549 | 812.8558 | 9.923542 | 9.822117 |
| 1571 | M247T11_ | 2.039705 | 1.028361 | 1.758048 | 0.133986 | 0.86364  | UP   | 247.2566 | 247.256  | 247.2566 | 10.87765 | 10.85018 |
| 1572 | M586T28  | 1.245041 | -0.31619 | -1.67146 | 0.13407  | 0.863641 | DOWN | 586.4158 | 586.4153 | 586.4161 | 28.1715  | 28.14183 |
| 1573 | M313T16  | 30.38443 | 4.92526  | 1.873941 | 0.134153 | 0.863641 | UP   | 313.2847 | 313.2846 | 313.2848 | 16.37372 | 16.37367 |
| 1574 | M403T44_ | 1.348755 | -0.43163 | -1.82833 | 0.134193 | 0.863641 | DOWN | 403.2323 | 403.2322 | 403.2324 | 44.49183 | 44.33667 |

|      |          |          |          |          |          |          |      |          |          |          |          |          |
|------|----------|----------|----------|----------|----------|----------|------|----------|----------|----------|----------|----------|
| 1575 | M347T10_ | 2.287135 | -1.19354 | -1.75476 | 0.134346 | 0.863642 | DOWN | 347.3952 | 347.3949 | 347.3954 | 9.830733 | 9.743667 |
| 1576 | M382T42_ | 1.314909 | -0.39496 | -1.67602 | 0.1344   | 0.863642 | DOWN | 382.2433 | 382.2431 | 382.2435 | 41.58217 | 41.3735  |
| 1577 | M1737T10 | 1.362431 | -0.44618 | -1.67845 | 0.134447 | 0.863642 | DOWN | 1736.732 | 1736.731 | 1736.733 | 9.603917 | 9.49445  |
| 1578 | M591T10_ | 1.86522  | -0.89935 | -1.76323 | 0.134492 | 0.863643 | DOWN | 590.867  | 590.8664 | 590.8685 | 10.23818 | 10.18238 |
| 1579 | M533T10_ | 1.794989 | -0.84397 | -1.76628 | 0.134502 | 0.863643 | DOWN | 533.3404 | 533.3401 | 533.3417 | 10.0926  | 9.955733 |
| 1580 | M464T11_ | 1.325587 | -0.40663 | -1.74917 | 0.134628 | 0.863643 | DOWN | 463.7075 | 463.7073 | 463.7079 | 10.90551 | 10.88747 |
| 1581 | M223T10_ | 1.718658 | -0.78128 | -1.67128 | 0.134703 | 0.863643 | DOWN | 222.5895 | 222.5892 | 222.5896 | 9.843625 | 9.76065  |
| 1582 | M859T9   | 2.000799 | -1.00058 | -1.67085 | 0.134791 | 0.863644 | DOWN | 858.7595 | 858.759  | 858.7601 | 9.204617 | 9.14695  |
| 1583 | M471T10_ | 1.389333 | -0.47439 | -1.66536 | 0.134919 | 0.863644 | DOWN | 471.1039 | 471.1032 | 471.1052 | 9.830283 | 9.73145  |
| 1584 | M955T10  | 2.09544  | 1.067253 | 1.674061 | 0.134951 | 0.863645 | UP   | 955.0439 | 955.0433 | 955.0443 | 9.946367 | 9.859233 |
| 1585 | M396T10_ | 17.78966 | 4.152967 | 1.867693 | 0.135135 | 0.863645 | UP   | 396.2241 | 396.2237 | 396.2244 | 9.961892 | 9.859233 |
| 1586 | M351T44_ | 1.44713  | -0.53319 | -1.85816 | 0.135136 | 0.863645 | DOWN | 351.3255 | 351.3254 | 351.3257 | 43.97717 | 43.95667 |
| 1587 | M420T9_3 | 1.519886 | -0.60396 | -1.75426 | 0.135229 | 0.863646 | DOWN | 420.3071 | 420.3064 | 420.3079 | 8.970583 | 8.93705  |
| 1588 | M670T9_1 | 2.764849 | 1.467201 | 1.856658 | 0.135255 | 0.863646 | UP   | 670.3419 | 670.3403 | 670.3426 | 9.443225 | 9.142767 |
| 1589 | M479T9_7 | 1.339114 | -0.42128 | -1.66713 | 0.135489 | 0.863647 | DOWN | 479.2679 | 479.2639 | 479.2684 | 9.276658 | 8.952283 |
| 1590 | M375T10_ | 2.015551 | -1.01117 | -1.66002 | 0.135515 | 0.863647 | DOWN | 374.8395 | 374.8389 | 374.8538 | 9.851867 | 9.8207   |
| 1591 | M448T9_5 | 1.279475 | -0.35555 | -1.68099 | 0.135535 | 0.863647 | DOWN | 448.3762 | 448.3759 | 448.3766 | 9.294467 | 9.129317 |
| 1592 | M617T10_ | 1.424513 | -0.51047 | -1.6751  | 0.135582 | 0.863647 | DOWN | 617.3217 | 617.3207 | 617.3282 | 10.24422 | 9.983433 |
| 1593 | M242T11_ | 5.028556 | 2.330144 | 1.860873 | 0.135637 | 0.863648 | UP   | 242.3578 | 242.3575 | 242.3581 | 10.93468 | 10.85838 |
| 1594 | M393T9_3 | 1.462617 | -0.54855 | -1.66138 | 0.135674 | 0.863648 | DOWN | 392.6334 | 392.6301 | 392.6339 | 9.2386   | 8.978067 |
| 1595 | M347T9_3 | 1.389353 | -0.47441 | -1.66482 | 0.135748 | 0.863648 | DOWN | 346.9947 | 346.9861 | 346.9948 | 9.390992 | 9.324917 |
| 1596 | M395T9_1 | 1.662937 | -0.73373 | -1.73791 | 0.135864 | 0.863649 | DOWN | 395.3542 | 395.3536 | 395.3553 | 9.390083 | 9.145433 |
| 1597 | M828T10_ | 1.312376 | -0.39218 | -1.66987 | 0.136121 | 0.86365  | DOWN | 828.3557 | 828.3551 | 828.3567 | 9.6501   | 9.52595  |
| 1598 | M490T40_ | 1.16856  | -0.22473 | -1.81249 | 0.1362   | 0.86365  | DOWN | 490.2644 | 490.2643 | 490.2645 | 39.9925  | 39.93517 |
| 1599 | M241T26  | 1.280689 | 0.35692  | 1.666944 | 0.136286 | 0.86365  | UP   | 241.1795 | 241.1794 | 241.1796 | 25.68375 | 25.63983 |
| 1600 | M532T37  | 1.524678 | -0.6085  | -1.66539 | 0.136357 | 0.863651 | DOWN | 532.3115 | 532.3112 | 532.3117 | 37.11017 | 36.88967 |
| 1601 | M391T9_1 | 1.650545 | -0.72294 | -1.66116 | 0.136386 | 0.863651 | DOWN | 390.5565 | 390.5562 | 390.5565 | 9.450542 | 9.416817 |
| 1602 | M559T10_ | 1.305468 | -0.38457 | -1.65789 | 0.136638 | 0.863652 | DOWN | 559.0077 | 559.0072 | 559.0106 | 9.88815  | 9.79535  |
| 1603 | M568T10_ | 3.283462 | 1.715218 | 1.804741 | 0.136725 | 0.863652 | UP   | 568.4257 | 568.4254 | 568.4263 | 9.932    | 9.859233 |
| 1604 | M354T11_ | 1.239972 | 0.310308 | 1.777274 | 0.136915 | 0.863653 | UP   | 353.6908 | 353.6906 | 353.6915 | 10.91977 | 10.879   |
| 1605 | M885T10_ | 1.335518 | -0.4174  | -1.74174 | 0.136931 | 0.863653 | DOWN | 885.1749 | 885.1736 | 885.1758 | 9.94785  | 9.843367 |
| 1606 | M465T16  | 1.388383 | -0.47341 | -1.69063 | 0.13719  | 0.863654 | DOWN | 465.2935 | 465.2934 | 465.2942 | 16.02337 | 16.00862 |
| 1607 | M207T9_9 | 1.266363 | -0.34069 | -1.65197 | 0.137208 | 0.863654 | DOWN | 206.8792 | 206.8786 | 206.8799 | 9.341242 | 9.250817 |
| 1608 | M775T10_ | 1.474536 | 0.560261 | 1.68982  | 0.137259 | 0.863655 | UP   | 774.7158 | 774.7135 | 774.7171 | 9.948825 | 9.843367 |
| 1609 | M1016T10 | 1.465367 | 0.551262 | 1.722036 | 0.137314 | 0.863655 | UP   | 1015.677 | 1015.676 | 1015.681 | 9.834067 | 9.73145  |

|      |          |          |          |          |          |          |      |          |          |          |          |          |
|------|----------|----------|----------|----------|----------|----------|------|----------|----------|----------|----------|----------|
| 1610 | M557T11_ | 1.426908 | -0.51289 | -1.71258 | 0.137338 | 0.863655 | DOWN | 557.0135 | 557.0134 | 557.0148 | 10.66002 | 10.63825 |
| 1611 | M332T9_2 | 1.320388 | -0.40096 | -1.66485 | 0.137374 | 0.863655 | DOWN | 331.5604 | 331.5601 | 331.5606 | 9.322983 | 9.234417 |
| 1612 | M815T10_ | 1.674797 | -0.74399 | -1.65957 | 0.137478 | 0.863656 | DOWN | 814.5422 | 814.5416 | 814.5435 | 9.547092 | 9.40135  |
| 1613 | M271T9_1 | 1.417971 | -0.50383 | -1.74807 | 0.137492 | 0.863656 | DOWN | 270.5176 | 270.5173 | 270.5177 | 8.825567 | 8.715883 |
| 1614 | M195T9_1 | 1.503398 | -0.58823 | -1.65942 | 0.137502 | 0.863656 | DOWN | 195.0414 | 195.04   | 195.0416 | 9.307575 | 9.13445  |
| 1615 | M571T20  | 1.467534 | -0.55339 | -1.66656 | 0.13755  | 0.863656 | DOWN | 571.4237 | 571.4237 | 571.4245 | 20.4905  | 20.47667 |
| 1616 | M710T9_2 | 2.484188 | -1.31277 | -1.73213 | 0.137858 | 0.863657 | DOWN | 709.7919 | 709.7912 | 709.7922 | 8.791683 | 8.701267 |
| 1617 | M382T40_ | 1.308034 | -0.3874  | -1.65765 | 0.137884 | 0.863657 | DOWN | 382.2433 | 382.2431 | 382.2433 | 40.40983 | 40.22283 |
| 1618 | M295T9_4 | 1.504233 | -0.58903 | -1.66025 | 0.138023 | 0.863658 | DOWN | 294.7972 | 294.7967 | 294.7975 | 9.317    | 9.234417 |
| 1619 | M339T10_ | 2.572148 | 1.362973 | 1.769693 | 0.13807  | 0.863658 | UP   | 338.5252 | 338.525  | 338.5354 | 9.82645  | 9.715683 |
| 1620 | M358T10_ | 1.34898  | -0.43187 | -1.83524 | 0.138186 | 0.863659 | DOWN | 357.8839 | 357.8837 | 357.884  | 9.8207   | 9.715683 |
| 1621 | M412T9_1 | 1.35452  | -0.43778 | -1.66033 | 0.138276 | 0.863659 | DOWN | 412.3221 | 412.3221 | 412.3224 | 9.465    | 9.355317 |
| 1622 | M431T9_1 | 2.617302 | -1.38808 | -1.71675 | 0.13835  | 0.863659 | DOWN | 431.4471 | 431.4469 | 431.4473 | 8.915283 | 8.892117 |
| 1623 | M871T10_ | 2.393703 | -1.25924 | -1.75931 | 0.138367 | 0.863659 | DOWN | 871.379  | 871.3781 | 871.3794 | 9.640367 | 9.557333 |
| 1624 | M863T10  | 1.574247 | -0.65466 | -1.65277 | 0.138409 | 0.86366  | DOWN | 862.7289 | 862.7276 | 862.7321 | 9.979667 | 9.932567 |
| 1625 | M212T10_ | 1.498494 | 0.583514 | 1.746345 | 0.138621 | 0.86366  | UP   | 212.3821 | 212.3739 | 212.387  | 9.827283 | 9.758367 |
| 1626 | M475T9_5 | 2.197735 | 1.136017 | 1.671603 | 0.138652 | 0.863661 | UP   | 474.9963 | 474.9895 | 474.9997 | 9.38665  | 9.158833 |
| 1627 | M166T9_7 | 1.945932 | -0.96046 | -1.69714 | 0.138774 | 0.863661 | DOWN | 166.1728 | 166.1726 | 166.1731 | 9.317    | 9.250817 |
| 1628 | M339T20_ | 1.486496 | -0.57192 | -1.71207 | 0.138945 | 0.863662 | DOWN | 339.3615 | 339.3609 | 339.3618 | 19.86417 | 19.73617 |
| 1629 | M301T9_4 | 1.408691 | -0.49436 | -1.64494 | 0.139087 | 0.863662 | DOWN | 301.2962 | 301.2957 | 301.2969 | 9.280992 | 9.129317 |
| 1630 | M883T10_ | 1.300136 | -0.37866 | -1.7704  | 0.139092 | 0.863662 | DOWN | 883.0777 | 883.0761 | 883.0785 | 9.956417 | 9.859233 |
| 1631 | M754T31  | 1.372952 | -0.45728 | -1.79005 | 0.139123 | 0.863663 | DOWN | 753.5192 | 753.5185 | 753.5198 | 31.30567 | 31.28017 |
| 1632 | M250T9_3 | 1.373231 | -0.45757 | -1.68936 | 0.139138 | 0.863663 | DOWN | 250.0177 | 250.0171 | 250.019  | 9.348233 | 9.2585   |
| 1633 | M514T22  | 1.474114 | -0.55985 | -1.66196 | 0.13928  | 0.863663 | DOWN | 514.358  | 514.3577 | 514.3588 | 22.41633 | 22.383   |
| 1634 | M372T23_ | 1.227823 | -0.2961  | -1.65638 | 0.139298 | 0.863663 | DOWN | 372.2376 | 372.2376 | 372.2379 | 23.08117 | 23.05933 |
| 1635 | M245T9_4 | 1.632727 | -0.70728 | -1.6439  | 0.139316 | 0.863663 | DOWN | 244.9543 | 244.9536 | 244.9556 | 9.264333 | 9.207667 |
| 1636 | M200T11_ | 1.678141 | -0.74686 | -1.69139 | 0.139323 | 0.863663 | DOWN | 199.8291 | 199.829  | 199.8293 | 10.91977 | 10.90197 |
| 1637 | M613T9_3 | 1.226194 | -0.29419 | -1.73489 | 0.139342 | 0.863664 | DOWN | 613.3397 | 613.3393 | 613.3399 | 9.2817   | 9.219483 |
| 1638 | M371T11_ | 1.339172 | -0.42134 | -1.73395 | 0.139348 | 0.863664 | DOWN | 371.0127 | 371.0086 | 371.0135 | 10.90548 | 10.88995 |
| 1639 | M700T9_2 | 1.70115  | -0.76651 | -1.71381 | 0.139435 | 0.863664 | DOWN | 700.3128 | 700.3118 | 700.3131 | 9.29345  | 9.234417 |
| 1640 | M267T9_2 | 1.558815 | -0.64045 | -1.64104 | 0.139575 | 0.863664 | DOWN | 266.9861 | 266.9846 | 266.9863 | 9.311883 | 9.279417 |
| 1641 | M299T45_ | 1.770772 | 0.824378 | 1.783508 | 0.139591 | 0.863665 | UP   | 299.185  | 299.1849 | 299.1852 | 44.79158 | 44.50883 |
| 1642 | M564T41_ | 1.399737 | -0.48516 | -1.74507 | 0.139617 | 0.863665 | DOWN | 564.3013 | 564.3009 | 564.3016 | 40.70325 | 40.53917 |
| 1643 | M196T9_7 | 1.850069 | -0.88758 | -1.64675 | 0.139624 | 0.863665 | DOWN | 196.2575 | 196.2574 | 196.2581 | 9.307217 | 9.174883 |
| 1644 | M824T13  | 1.336795 | -0.41878 | -1.69426 | 0.139642 | 0.863665 | DOWN | 824.3609 | 824.3607 | 824.3615 | 12.96833 | 12.95282 |

|      |          |          |          |          |          |          |      |          |          |          |          |          |
|------|----------|----------|----------|----------|----------|----------|------|----------|----------|----------|----------|----------|
| 1645 | M321T16  | 1.70946  | -0.77354 | -1.65134 | 0.139705 | 0.863665 | DOWN | 321.2979 | 321.2976 | 321.2986 | 15.64571 | 15.5851  |
| 1646 | M367T11_ | 1.454838 | 0.540858 | 1.641073 | 0.139744 | 0.863665 | UP   | 367.1873 | 367.1871 | 367.188  | 10.94696 | 10.90785 |
| 1647 | M333T10_ | 1.241106 | -0.31163 | -1.63949 | 0.139771 | 0.863665 | DOWN | 332.9534 | 332.9532 | 332.9537 | 9.872875 | 9.779267 |
| 1648 | M253T11_ | 1.698249 | 0.764048 | 1.748182 | 0.139885 | 0.863666 | UP   | 253.3115 | 253.3114 | 253.3117 | 10.8926  | 10.85018 |
| 1649 | M295T9_6 | 1.419678 | -0.50556 | -1.69032 | 0.14001  | 0.863666 | DOWN | 295.0728 | 295.0723 | 295.0743 | 9.314442 | 9.234417 |
| 1650 | M644T10_ | 2.001184 | -1.00085 | -1.79008 | 0.140047 | 0.863666 | DOWN | 643.9083 | 643.9075 | 643.9091 | 10.36838 | 10.34542 |
| 1651 | M342T10_ | 1.323288 | -0.40413 | -1.77955 | 0.140069 | 0.863667 | DOWN | 341.667  | 341.6668 | 341.6673 | 9.82645  | 9.715683 |
| 1652 | M596T10_ | 1.641584 | -0.71509 | -1.66503 | 0.140132 | 0.863667 | DOWN | 595.7232 | 595.7227 | 595.7236 | 9.505883 | 9.416817 |
| 1653 | M463T11_ | 1.437503 | -0.52357 | -1.707   | 0.140467 | 0.863668 | DOWN | 463.1413 | 463.1411 | 463.1421 | 11.23882 | 11.20453 |
| 1654 | M453T9_1 | 3.126084 | 1.644356 | 1.642147 | 0.140479 | 0.863668 | UP   | 453.2673 | 453.2596 | 453.2731 | 9.321425 | 9.07145  |
| 1655 | M984T10  | 1.422293 | -0.50822 | -1.75487 | 0.140482 | 0.863668 | DOWN | 983.7623 | 983.7621 | 983.7624 | 9.823575 | 9.715683 |
| 1656 | M382T44_ | 1.308761 | -0.3882  | -1.82437 | 0.140646 | 0.863669 | DOWN | 382.2432 | 382.2431 | 382.2433 | 44.40125 | 44.3655  |
| 1657 | M560T13  | 1.342386 | 0.4248   | 1.644266 | 0.140725 | 0.863669 | UP   | 560.3667 | 560.3663 | 560.3675 | 13.08373 | 13.06962 |
| 1658 | M1164T12 | 1.571444 | -0.65209 | -1.6533  | 0.140839 | 0.86367  | DOWN | 1164.093 | 1164.092 | 1164.095 | 12.23062 | 12.19362 |
| 1659 | M559T22  | 1.416719 | -0.50255 | -1.63523 | 0.141005 | 0.86367  | DOWN | 559.4063 | 559.4055 | 559.4068 | 22.00508 | 21.9805  |
| 1660 | M714T10_ | 1.568646 | -0.64952 | -1.65427 | 0.141109 | 0.863671 | DOWN | 714.0624 | 714.0624 | 714.063  | 9.8374   | 9.79485  |
| 1661 | M187T10_ | 1.324347 | -0.40528 | -1.70904 | 0.141184 | 0.863671 | DOWN | 186.6232 | 186.6167 | 186.6233 | 9.930125 | 9.827283 |
| 1662 | M398T9_2 | 1.49725  | -0.58232 | -1.67605 | 0.141325 | 0.863672 | DOWN | 397.9399 | 397.9386 | 397.9414 | 9.268217 | 9.1445   |
| 1663 | M955T12  | 6.213815 | -2.63548 | -1.82679 | 0.141327 | 0.863672 | DOWN | 954.5707 | 954.5692 | 954.5708 | 11.64247 | 11.52295 |
| 1664 | M232T10_ | 1.399034 | -0.48443 | -1.63273 | 0.141397 | 0.863672 | DOWN | 232.1524 | 232.1516 | 232.1532 | 9.830083 | 9.715683 |
| 1665 | M281T10_ | 1.344447 | -0.42701 | -1.69727 | 0.141418 | 0.863672 | DOWN | 281.2821 | 281.2819 | 281.2823 | 9.923542 | 9.811217 |
| 1666 | M422T11_ | 1.520441 | -0.60449 | -1.63472 | 0.14147  | 0.863672 | DOWN | 422.3315 | 422.3305 | 422.332  | 10.93428 | 10.90785 |
| 1667 | M631T12_ | 1.493801 | -0.57899 | -1.72717 | 0.141816 | 0.863674 | DOWN | 631.3375 | 631.3313 | 631.3379 | 11.5936  | 11.28597 |
| 1668 | M197T10_ | 1.253346 | -0.32578 | -1.74169 | 0.14187  | 0.863674 | DOWN | 196.7622 | 196.762  | 196.7624 | 9.830658 | 9.715683 |
| 1669 | M224T18  | 1.301863 | -0.38058 | -1.69576 | 0.141886 | 0.863674 | DOWN | 224.0995 | 224.0994 | 224.0997 | 18.482   | 18.467   |
| 1670 | M1781T10 | 1.369432 | -0.45358 | -1.65867 | 0.141898 | 0.863674 | DOWN | 1781.385 | 1781.383 | 1781.389 | 9.823317 | 9.715683 |
| 1671 | M728T25  | 1.748817 | 0.806379 | 1.749761 | 0.141987 | 0.863674 | UP   | 727.5261 | 727.5248 | 727.5266 | 24.66683 | 24.6525  |
| 1672 | M265T10_ | 1.326199 | -0.4073  | -1.62967 | 0.142131 | 0.863675 | DOWN | 265.2972 | 265.297  | 265.3037 | 9.8207   | 9.699733 |
| 1673 | M369T10_ | 2.00406  | 1.002926 | 1.633518 | 0.142178 | 0.863675 | UP   | 368.9446 | 368.9441 | 368.9522 | 9.816167 | 9.79485  |
| 1674 | M713T10_ | 1.181331 | -0.24041 | -1.63998 | 0.142249 | 0.863675 | DOWN | 713.4217 | 713.4214 | 713.4221 | 9.566317 | 9.46325  |
| 1675 | M1554T10 | 1.63247  | -0.70706 | -1.81065 | 0.142333 | 0.863676 | DOWN | 1553.681 | 1553.68  | 1553.681 | 9.914217 | 9.822117 |
| 1676 | M456T10_ | 1.599121 | -0.67728 | -1.62916 | 0.142346 | 0.863676 | DOWN | 455.722  | 455.7207 | 455.7223 | 9.931875 | 9.827283 |
| 1677 | M479T10_ | 1.420554 | -0.50645 | -1.64228 | 0.142352 | 0.863676 | DOWN | 479.198  | 479.1975 | 479.2012 | 9.8397   | 9.715683 |
| 1678 | M790T10_ | 1.157274 | -0.21073 | -1.67704 | 0.142426 | 0.863676 | DOWN | 790.2611 | 790.2601 | 790.2638 | 9.945258 | 9.843367 |
| 1679 | M270T9_1 | 1.742796 | -0.8014  | -1.64975 | 0.142493 | 0.863676 | DOWN | 269.5223 | 269.5219 | 269.5235 | 9.280767 | 9.126783 |



|      |          |          |          |          |          |          |      |          |          |          |          |          |
|------|----------|----------|----------|----------|----------|----------|------|----------|----------|----------|----------|----------|
| 1680 | M562T43_ | 1.413604 | -0.49938 | -1.62654 | 0.142631 | 0.863677 | DOWN | 562.3218 | 562.3217 | 562.3222 | 42.74025 | 42.66833 |
| 1681 | M217T10_ | 1.763294 | 0.818273 | 1.660551 | 0.142675 | 0.863677 | UP   | 217.1231 | 217.115  | 217.1262 | 9.932558 | 9.556217 |
| 1682 | M224T11_ | 1.854498 | -0.89103 | -1.64278 | 0.142677 | 0.863677 | DOWN | 224.1183 | 224.1182 | 224.1191 | 10.8914  | 10.89125 |
| 1683 | M280T28  | 1.468425 | -0.55427 | -1.62567 | 0.142689 | 0.863677 | DOWN | 280.1904 | 280.1903 | 280.1907 | 28.34725 | 28.316   |
| 1684 | M1781T10 | 1.150493 | -0.20225 | -1.62686 | 0.14291  | 0.863678 | DOWN | 1781.18  | 1781.179 | 1781.183 | 9.823575 | 9.728083 |
| 1685 | M177T45  | 1.430896 | 0.516919 | 1.628037 | 0.142977 | 0.863678 | UP   | 177.1271 | 177.1271 | 177.1272 | 44.88283 | 44.653   |
| 1686 | M466T23_ | 3.058888 | -1.61301 | -1.76403 | 0.142982 | 0.863678 | DOWN | 466.3285 | 466.3282 | 466.3291 | 23.1245  | 23.10367 |
| 1687 | M332T21  | 1.771102 | 0.824647 | 1.692657 | 0.142985 | 0.863678 | UP   | 332.237  | 332.2369 | 332.2372 | 21.14283 | 21.108   |
| 1688 | M657T27  | 1.837435 | 0.877693 | 1.659135 | 0.143203 | 0.863679 | UP   | 657.3585 | 657.3583 | 657.3594 | 27.30533 | 27.25583 |
| 1689 | M545T10_ | 1.381265 | -0.46599 | -1.75511 | 0.143286 | 0.86368  | DOWN | 545.4695 | 545.4688 | 545.47   | 9.970617 | 9.859233 |
| 1690 | M580T17_ | 1.559608 | -0.64118 | -1.62773 | 0.143304 | 0.86368  | DOWN | 580.3755 | 580.3746 | 580.3764 | 16.51079 | 16.40297 |
| 1691 | M1546T10 | 1.561593 | -0.64302 | -1.62339 | 0.14351  | 0.86368  | DOWN | 1546.003 | 1546     | 1546.005 | 9.93355  | 9.8378   |
| 1692 | M293T10_ | 1.705843 | -0.77048 | -1.69316 | 0.143568 | 0.863681 | DOWN | 293.4733 | 293.473  | 293.4734 | 9.870433 | 9.79535  |
| 1693 | M557T10_ | 1.257688 | -0.33077 | -1.74842 | 0.143595 | 0.863681 | DOWN | 556.5028 | 556.5024 | 556.5037 | 9.948875 | 9.843367 |
| 1694 | M508T10_ | 1.439306 | -0.52537 | -1.69964 | 0.143717 | 0.863681 | DOWN | 507.6667 | 507.6665 | 507.6669 | 9.519183 | 9.40135  |
| 1695 | M369T35  | 1.145182 | -0.19558 | -1.62117 | 0.143781 | 0.863681 | DOWN | 369.2998 | 369.2995 | 369.2998 | 34.89442 | 34.867   |
| 1696 | M450T41_ | 1.406278 | -0.49188 | -1.73912 | 0.143801 | 0.863682 | DOWN | 450.2331 | 450.2331 | 450.2335 | 41.45292 | 41.273   |
| 1697 | M277T9_3 | 1.442507 | -0.52858 | -1.66376 | 0.143837 | 0.863682 | DOWN | 277.3154 | 277.3144 | 277.3168 | 9.295208 | 9.1322   |
| 1698 | M412T10_ | 1.236888 | -0.30672 | -1.62045 | 0.143897 | 0.863682 | DOWN | 412.2541 | 412.2536 | 412.2593 | 9.991758 | 9.972483 |
| 1699 | M365T18_ | 2.038786 | 1.027711 | 1.744633 | 0.143905 | 0.863682 | UP   | 365.2222 | 365.222  | 365.2224 | 18.36583 | 18.33483 |
| 1700 | M702T10_ | 1.184854 | -0.24471 | -1.70257 | 0.143944 | 0.863682 | DOWN | 701.9237 | 701.9235 | 701.9242 | 9.82645  | 9.715683 |
| 1701 | M312T14  | 1.163193 | -0.21809 | -1.65843 | 0.144217 | 0.863683 | DOWN | 312.232  | 312.2311 | 312.2321 | 13.79979 | 13.785   |
| 1702 | M888T11_ | 2.394514 | -1.25973 | -1.72113 | 0.144224 | 0.863683 | DOWN | 888.03   | 888.0296 | 888.0301 | 11.33025 | 11.3207  |
| 1703 | M189T9_1 | 2.749159 | 1.458991 | 1.758963 | 0.144246 | 0.863683 | UP   | 189.2671 | 189.2658 | 189.2683 | 9.160725 | 9.064833 |
| 1704 | M409T12_ | 1.690985 | 0.757864 | 1.638661 | 0.144332 | 0.863684 | UP   | 409.3366 | 409.3356 | 409.3371 | 12.27392 | 12.22317 |
| 1705 | M459T9_8 | 1.911775 | -0.93491 | -1.66253 | 0.144346 | 0.863684 | DOWN | 459.4703 | 459.4679 | 459.4714 | 8.892333 | 8.802417 |
| 1706 | M288T22_ | 2.162531 | 1.112721 | 1.699294 | 0.144347 | 0.863684 | UP   | 288.3041 | 288.3035 | 288.307  | 22.0235  | 21.76667 |
| 1707 | M542T10_ | 1.23123  | -0.3001  | -1.7572  | 0.144349 | 0.863684 | DOWN | 541.7123 | 541.7119 | 541.7125 | 9.975142 | 9.859233 |
| 1708 | M473T9_1 | 1.443936 | -0.53001 | -1.72888 | 0.14447  | 0.863684 | DOWN | 473.3828 | 473.3823 | 473.3837 | 9.329083 | 9.129317 |
| 1709 | M372T9_5 | 1.781212 | -0.83286 | -1.61735 | 0.144484 | 0.863684 | DOWN | 372.3892 | 372.3891 | 372.3895 | 9.441    | 9.38665  |
| 1710 | M229T12  | 2.239906 | 1.163438 | 1.785758 | 0.144525 | 0.863684 | UP   | 229.1196 | 229.1193 | 229.1201 | 12.25235 | 12.23162 |
| 1711 | M470T9_1 | 1.481519 | -0.56708 | -1.68161 | 0.144541 | 0.863684 | DOWN | 469.9943 | 469.9927 | 469.9957 | 9.29345  | 9.1445   |
| 1712 | M1921T10 | 1.406135 | 0.491735 | 1.67792  | 0.144584 | 0.863685 | UP   | 1920.666 | 1920.664 | 1920.667 | 9.840617 | 9.715683 |
| 1713 | M215T9_3 | 1.996037 | -0.99714 | -1.66223 | 0.144633 | 0.863685 | DOWN | 214.7843 | 214.7838 | 214.785  | 9.227717 | 9.160617 |
| 1714 | M579T9_1 | 1.534697 | -0.61795 | -1.68262 | 0.144773 | 0.863685 | DOWN | 578.5177 | 578.5138 | 578.5231 | 9.167733 | 9.1445   |

|      |          |          |          |          |          |          |      |          |          |          |          |          |
|------|----------|----------|----------|----------|----------|----------|------|----------|----------|----------|----------|----------|
| 1715 | M556T10_ | 1.294899 | -0.37284 | -1.64259 | 0.144815 | 0.863685 | DOWN | 555.7608 | 555.7605 | 555.7611 | 9.9014   | 9.79535  |
| 1716 | M864T12  | 1.741669 | -0.80047 | -1.63944 | 0.144969 | 0.863686 | DOWN | 864.4446 | 864.4444 | 864.4449 | 12.09195 | 12.0457  |
| 1717 | M425T15  | 3.981256 | 1.993224 | 1.805609 | 0.145058 | 0.863686 | UP   | 425.3005 | 425.3    | 425.3014 | 15.07308 | 15.05857 |
| 1718 | M302T10_ | 1.439788 | -0.52586 | -1.61472 | 0.145074 | 0.863686 | DOWN | 302.4132 | 302.4131 | 302.4133 | 9.816133 | 9.7124   |
| 1719 | M364T9_6 | 1.441327 | -0.5274  | -1.61418 | 0.14519  | 0.863687 | DOWN | 364.0638 | 364.0634 | 364.064  | 9.314442 | 9.234417 |
| 1720 | M716T9_4 | 1.346191 | -0.42888 | -1.63001 | 0.145206 | 0.863687 | DOWN | 716.1019 | 716.0997 | 716.1025 | 9.311167 | 9.129317 |
| 1721 | M335T9_1 | 1.848823 | 0.886607 | 1.714037 | 0.145304 | 0.863687 | UP   | 335.2273 | 335.2268 | 335.2274 | 9.317    | 9.24215  |
| 1722 | M474T9_8 | 1.602395 | -0.68023 | -1.63423 | 0.145307 | 0.863687 | DOWN | 474.399  | 474.3975 | 474.3997 | 9.27355  | 9.046783 |
| 1723 | M255T43_ | 1.210963 | -0.27615 | -1.69629 | 0.145341 | 0.863688 | DOWN | 255.1224 | 255.1223 | 255.1225 | 43.05675 | 42.812   |
| 1724 | M382T38_ | 1.488766 | -0.57412 | -1.62207 | 0.145364 | 0.863688 | DOWN | 382.2432 | 382.243  | 382.2437 | 38.1295  | 37.87783 |
| 1725 | M794T9_2 | 2.966141 | -1.56859 | -1.70119 | 0.145421 | 0.863688 | DOWN | 794.4134 | 794.4085 | 794.4151 | 8.742633 | 8.638817 |
| 1726 | M580T9_1 | 1.526417 | -0.61015 | -1.69086 | 0.145479 | 0.863688 | DOWN | 579.768  | 579.7663 | 579.769  | 9.262217 | 9.174883 |
| 1727 | M705T10_ | 1.25633  | -0.32922 | -1.72616 | 0.14548  | 0.863688 | DOWN | 705.0397 | 705.0392 | 705.0398 | 9.8207   | 9.715683 |
| 1728 | M381T27  | 1.403577 | -0.48911 | -1.66695 | 0.145484 | 0.863688 | DOWN | 381.2977 | 381.2972 | 381.298  | 26.97233 | 26.95483 |
| 1729 | M497T9_6 | 1.682285 | 0.750422 | 1.63263  | 0.145548 | 0.863688 | UP   | 496.8726 | 496.8716 | 496.8767 | 9.250817 | 9.06315  |
| 1730 | M653T10_ | 2.33625  | -1.22419 | -1.73199 | 0.145637 | 0.863689 | DOWN | 653.3599 | 653.3595 | 653.3602 | 9.82645  | 9.81635  |
| 1731 | M299T36  | 1.143061 | 0.192902 | 1.766154 | 0.14581  | 0.863689 | UP   | 299.1488 | 299.1487 | 299.1488 | 36.35075 | 36.1075  |
| 1732 | M576T9_5 | 1.519296 | -0.6034  | -1.61666 | 0.145953 | 0.86369  | DOWN | 576.051  | 576.0503 | 576.0568 | 9.195192 | 9.1445   |
| 1733 | M379T10_ | 20.26107 | 4.340638 | 1.801519 | 0.145967 | 0.86369  | UP   | 378.5742 | 378.5738 | 378.575  | 9.969158 | 9.859233 |
| 1734 | M424T11_ | 2.402865 | -1.26476 | -1.61027 | 0.146005 | 0.86369  | DOWN | 424.2065 | 424.2032 | 424.211  | 10.96008 | 10.84828 |
| 1735 | M842T11_ | 2.243068 | -1.16547 | -1.70821 | 0.146017 | 0.86369  | DOWN | 842.0277 | 842.0274 | 842.028  | 11.10931 | 11.0962  |
| 1736 | M723T28  | 1.869916 | 0.902973 | 1.635894 | 0.146158 | 0.863691 | UP   | 723.4284 | 723.428  | 723.4289 | 27.69667 | 27.61033 |
| 1737 | M908T11  | 3.506001 | -1.80983 | -1.78152 | 0.14631  | 0.863691 | DOWN | 908.0673 | 908.067  | 908.0684 | 11.427   | 11.37965 |
| 1738 | M366T9_5 | 1.488717 | -0.57407 | -1.60883 | 0.146352 | 0.863691 | DOWN | 365.9906 | 365.9897 | 365.9923 | 9.241267 | 9.1445   |
| 1739 | M151T41  | 1.331198 | -0.41273 | -1.68916 | 0.146364 | 0.863691 | DOWN | 151.1115 | 151.1114 | 151.1116 | 41.47683 | 41.3595  |
| 1740 | M788T11_ | 1.451505 | 0.537549 | 1.608658 | 0.14639  | 0.863692 | UP   | 788.0727 | 788.0719 | 788.0731 | 10.83252 | 10.80695 |
| 1741 | M161T9_4 | 1.540474 | -0.62337 | -1.61017 | 0.14641  | 0.863692 | DOWN | 161.3504 | 161.3499 | 161.3508 | 9.312075 | 9.219483 |
| 1742 | M558T9_2 | 1.607431 | -0.68476 | -1.61069 | 0.146421 | 0.863692 | DOWN | 558.4791 | 558.4757 | 558.4804 | 9.285192 | 9.1892   |
| 1743 | M453T9_7 | 2.633539 | -1.397   | -1.75553 | 0.146452 | 0.863692 | DOWN | 452.9506 | 452.9459 | 452.9574 | 9.3072   | 9.18975  |
| 1744 | M464T14  | 1.475327 | -0.56104 | -1.68274 | 0.146505 | 0.863692 | DOWN | 464.2902 | 464.29   | 464.2905 | 14.06248 | 14.03425 |
| 1745 | M625T10_ | 2.244099 | 1.166136 | 1.664587 | 0.146514 | 0.863692 | UP   | 624.6863 | 624.6817 | 624.6898 | 9.789375 | 9.715683 |
| 1746 | M430T9_4 | 1.434656 | -0.5207  | -1.63113 | 0.146569 | 0.863692 | DOWN | 430.0624 | 430.0619 | 430.0632 | 9.311167 | 9.129317 |
| 1747 | M247T9_2 | 1.659527 | -0.73077 | -1.72772 | 0.146597 | 0.863692 | DOWN | 246.6501 | 246.65   | 246.6551 | 9.353717 | 9.1322   |
| 1748 | M411T11_ | 1.31284  | -0.39269 | -1.60872 | 0.146699 | 0.863693 | DOWN | 411.3214 | 411.3208 | 411.3217 | 11.09731 | 11.06392 |
| 1749 | M384T11_ | 1.369538 | -0.45369 | -1.60849 | 0.146701 | 0.863693 | DOWN | 384.4836 | 384.4832 | 384.4838 | 10.90548 | 10.879   |

|      |          |          |          |          |          |          |      |          |          |          |          |          |
|------|----------|----------|----------|----------|----------|----------|------|----------|----------|----------|----------|----------|
| 1750 | M520T41_ | 1.737132 | -0.79671 | -1.73685 | 0.146917 | 0.863694 | DOWN | 520.275  | 520.2747 | 520.2753 | 41.38092 | 41.20117 |
| 1751 | M848T10_ | 1.189952 | -0.2509  | -1.62395 | 0.146948 | 0.863694 | DOWN | 847.6705 | 847.6695 | 847.672  | 9.929017 | 9.811217 |
| 1752 | M617T9_2 | 1.389162 | 0.474215 | 1.646482 | 0.147087 | 0.863694 | UP   | 616.6652 | 616.665  | 616.6659 | 9.3471   | 9.22495  |
| 1753 | M172T10_ | 1.25389  | -0.32641 | -1.73432 | 0.147092 | 0.863694 | DOWN | 172.4656 | 172.4655 | 172.4657 | 9.825492 | 9.715683 |
| 1754 | M630T28  | 1.257644 | -0.33072 | -1.71431 | 0.147109 | 0.863694 | DOWN | 630.4422 | 630.4418 | 630.4424 | 28.2005  | 28.17133 |
| 1755 | M1154T10 | 1.186278 | -0.24644 | -1.62102 | 0.147158 | 0.863694 | DOWN | 1153.784 | 1153.783 | 1153.786 | 9.7936   | 9.696683 |
| 1756 | M187T9_4 | 2.205758 | 1.141274 | 1.720474 | 0.147162 | 0.863694 | UP   | 187.1787 | 187.1784 | 187.1795 | 9.203483 | 9.111033 |
| 1757 | M326T10_ | 1.506784 | -0.59147 | -1.68364 | 0.147345 | 0.863695 | DOWN | 325.9247 | 325.9243 | 325.9293 | 9.508883 | 9.40135  |
| 1758 | M194T9_1 | 3.751209 | 1.907356 | 1.731294 | 0.14735  | 0.863695 | UP   | 194.295  | 194.2944 | 194.2962 | 9.356517 | 9.126783 |
| 1759 | M156T10_ | 1.639501 | -0.71326 | -1.61064 | 0.147382 | 0.863695 | DOWN | 156.1019 | 156.1016 | 156.1022 | 9.836367 | 9.715683 |
| 1760 | M450T9_5 | 1.373048 | -0.45738 | -1.62404 | 0.147384 | 0.863695 | DOWN | 449.712  | 449.7112 | 449.7138 | 9.320067 | 9.129317 |
| 1761 | M683T10_ | 1.177974 | -0.23631 | -1.6044  | 0.147411 | 0.863695 | DOWN | 683.438  | 683.4368 | 683.4394 | 9.8184   | 9.715683 |
| 1762 | M245T41  | 1.42225  | 0.508176 | 1.616114 | 0.147441 | 0.863695 | UP   | 245.138  | 245.1379 | 245.1382 | 41.07133 | 40.79817 |
| 1763 | M281T43_ | 1.388147 | -0.47316 | -1.6422  | 0.147471 | 0.863696 | DOWN | 281.1744 | 281.1743 | 281.1745 | 42.86983 | 42.79767 |
| 1764 | M504T21  | 1.411154 | -0.49688 | -1.61424 | 0.147538 | 0.863696 | DOWN | 503.8472 | 503.8469 | 503.8479 | 21.44667 | 21.39167 |
| 1765 | M491T23_ | 1.444778 | 0.530847 | 1.657807 | 0.147554 | 0.863696 | UP   | 491.3435 | 491.3432 | 491.3448 | 22.958   | 22.929   |
| 1766 | M459T9_1 | 1.468296 | -0.55414 | -1.62837 | 0.147562 | 0.863696 | DOWN | 459.0477 | 459.0475 | 459.0482 | 9.294567 | 9.1445   |
| 1767 | M403T11_ | 1.489017 | 0.57436  | 1.665514 | 0.147596 | 0.863696 | UP   | 402.647  | 402.6457 | 402.6473 | 10.91301 | 10.88995 |
| 1768 | M350T44_ | 1.81982  | 0.863796 | 1.668596 | 0.147735 | 0.863697 | UP   | 350.2171 | 350.217  | 350.2173 | 43.94817 | 43.71833 |
| 1769 | M701T10_ | 1.159126 | -0.21304 | -1.62394 | 0.147766 | 0.863697 | DOWN | 701.06   | 701.0598 | 701.0605 | 9.830083 | 9.715683 |
| 1770 | M732T11_ | 2.319608 | -1.21388 | -1.71707 | 0.147832 | 0.863697 | DOWN | 731.9611 | 731.9606 | 731.9617 | 10.67149 | 10.64667 |
| 1771 | M417T9_8 | 2.230219 | 1.157185 | 1.724628 | 0.147901 | 0.863697 | UP   | 417.0517 | 417.0492 | 417.0528 | 9.22775  | 9.06855  |
| 1772 | M598T22  | 1.313005 | -0.39287 | -1.66014 | 0.147906 | 0.863697 | DOWN | 598.4521 | 598.4519 | 598.4524 | 22.38783 | 22.36383 |
| 1773 | M723T10_ | 1.290417 | -0.36784 | -1.74315 | 0.147915 | 0.863697 | DOWN | 723.0048 | 723.0041 | 723.0056 | 9.811408 | 9.7124   |
| 1774 | M672T9_1 | 1.403945 | -0.48949 | -1.6023  | 0.147985 | 0.863697 | DOWN | 672.0216 | 672.0207 | 672.0221 | 9.25985  | 9.1445   |
| 1775 | M315T43_ | 1.367369 | 0.451403 | 1.666212 | 0.148069 | 0.863698 | UP   | 315.18   | 315.1799 | 315.18   | 42.82667 | 42.6395  |
| 1776 | M1097T10 | 1.642425 | -0.71583 | -1.62702 | 0.1481   | 0.863698 | DOWN | 1096.762 | 1096.761 | 1096.768 | 9.8753   | 9.743767 |
| 1777 | M371T26  | 1.829277 | -0.87127 | -1.73701 | 0.148295 | 0.863699 | DOWN | 371.3266 | 371.3263 | 371.3267 | 26.40067 | 26.39067 |
| 1778 | M478T43_ | 1.968973 | -0.97744 | -1.65927 | 0.148303 | 0.863699 | DOWN | 478.2642 | 478.2641 | 478.2646 | 43.27233 | 43.0565  |
| 1779 | M348T21_ | 2.704636 | 1.435434 | 1.603717 | 0.148348 | 0.863699 | UP   | 348.2168 | 348.2166 | 348.2169 | 20.74917 | 20.72233 |
| 1780 | M615T9_3 | 1.378373 | -0.46297 | -1.59961 | 0.148423 | 0.863699 | DOWN | 614.9695 | 614.9598 | 614.9698 | 9.233108 | 9.1503   |
| 1781 | M187T38_ | 1.311505 | -0.39122 | -1.76582 | 0.148556 | 0.8637   | DOWN | 187.0962 | 187.0961 | 187.0963 | 37.93583 | 37.77683 |
| 1782 | M255T43_ | 1.538006 | -0.62106 | -1.63692 | 0.148576 | 0.8637   | DOWN | 255.1224 | 255.1223 | 255.1225 | 42.53917 | 42.39483 |
| 1783 | M1867T10 | 1.424826 | -0.51079 | -1.67673 | 0.148627 | 0.8637   | DOWN | 1866.739 | 1866.737 | 1866.74  | 9.830283 | 9.715683 |
| 1784 | M344T10_ | 3.042195 | -1.60511 | -1.68078 | 0.148787 | 0.8637   | DOWN | 343.7839 | 343.7836 | 343.7845 | 9.809075 | 9.715683 |

|      |          |          |          |          |          |          |      |          |          |          |          |          |
|------|----------|----------|----------|----------|----------|----------|------|----------|----------|----------|----------|----------|
| 1785 | M256T10_ | 1.612841 | 0.689604 | 1.610855 | 0.148955 | 0.863701 | UP   | 255.729  | 255.7211 | 255.7291 | 9.983467 | 9.859233 |
| 1786 | M257T11_ | 1.383085 | -0.46789 | -1.63257 | 0.149073 | 0.863701 | DOWN | 256.5076 | 256.5074 | 256.5082 | 10.91234 | 10.879   |
| 1787 | M501T9_2 | 1.496584 | -0.58167 | -1.60106 | 0.149119 | 0.863702 | DOWN | 500.852  | 500.8499 | 500.8542 | 9.183067 | 9.1445   |
| 1788 | M576T25  | 2.143885 | 1.100228 | 1.70921  | 0.149164 | 0.863702 | UP   | 576.3294 | 576.3291 | 576.3296 | 24.93517 | 24.92733 |
| 1789 | M1111T11 | 1.617317 | -0.6936  | -1.63996 | 0.149206 | 0.863702 | DOWN | 1110.623 | 1110.622 | 1110.624 | 11.22813 | 11.19848 |
| 1790 | M532T31  | 1.20147  | -0.2648  | -1.68218 | 0.14921  | 0.863702 | DOWN | 532.384  | 532.3837 | 532.3841 | 31.45917 | 31.44967 |
| 1791 | M1968T10 | 1.185522 | -0.24552 | -1.76784 | 0.149252 | 0.863702 | DOWN | 1967.99  | 1967.989 | 1967.991 | 9.823575 | 9.715683 |
| 1792 | M489T9_2 | 1.238453 | 0.308539 | 1.65795  | 0.149307 | 0.863702 | UP   | 489.305  | 489.3028 | 489.3053 | 9.065842 | 8.95495  |
| 1793 | M351T16_ | 1.910681 | -0.93409 | -1.70426 | 0.149372 | 0.863703 | DOWN | 351.1775 | 351.1773 | 351.1778 | 16.34881 | 16.18233 |
| 1794 | M449T9_4 | 1.69039  | -0.75736 | -1.60219 | 0.149405 | 0.863703 | DOWN | 448.7251 | 448.7225 | 448.7266 | 9.219483 | 9.089733 |
| 1795 | M462T39  | 1.183912 | -0.24356 | -1.68947 | 0.149458 | 0.863703 | DOWN | 462.2695 | 462.2693 | 462.2697 | 39.22267 | 39.05717 |
| 1796 | M828T9_1 | 2.181048 | -1.12502 | -1.6611  | 0.14946  | 0.863703 | DOWN | 827.756  | 827.7553 | 827.7568 | 8.791683 | 8.686867 |
| 1797 | M209T10_ | 3.179753 | 1.668915 | 1.769211 | 0.149566 | 0.863703 | UP   | 208.5617 | 208.5615 | 208.5619 | 9.983467 | 9.8914   |
| 1798 | M276T43_ | 1.369425 | -0.45357 | -1.60694 | 0.149577 | 0.863703 | DOWN | 276.1439 | 276.1438 | 276.1439 | 43.0855  | 42.88417 |
| 1799 | M270T27  | 3.685955 | -1.88204 | -1.73715 | 0.149655 | 0.863704 | DOWN | 270.3151 | 270.3149 | 270.3153 | 27.31667 | 27.25633 |
| 1800 | M213T10_ | 1.55273  | -0.63481 | -1.68806 | 0.149661 | 0.863704 | DOWN | 212.5507 | 212.5505 | 212.5577 | 9.831925 | 9.772883 |
| 1801 | M536T41_ | 1.402091 | 0.48758  | 1.607269 | 0.149662 | 0.863704 | UP   | 536.3061 | 536.3053 | 536.3063 | 40.77667 | 40.683   |
| 1802 | M395T10_ | 2.421829 | -1.2761  | -1.65112 | 0.149721 | 0.863704 | DOWN | 395.346  | 395.3455 | 395.3464 | 9.964433 | 9.946367 |
| 1803 | M452T9_5 | 1.474627 | -0.56035 | -1.59923 | 0.149785 | 0.863704 | DOWN | 452.2734 | 452.2727 | 452.2737 | 9.29565  | 9.129317 |
| 1804 | M461T12  | 8.279762 | -3.04959 | -1.77809 | 0.149941 | 0.863705 | DOWN | 461.1482 | 461.1478 | 461.1486 | 12.03728 | 12.03522 |
| 1805 | M594T10_ | 2.278855 | -1.18831 | -1.62328 | 0.150093 | 0.863705 | DOWN | 594.3885 | 594.3883 | 594.3886 | 9.947783 | 9.853533 |
| 1806 | M397T9_5 | 4.381084 | 2.131288 | 1.771795 | 0.150098 | 0.863705 | UP   | 397.2303 | 397.2275 | 397.2313 | 9.235933 | 8.94625  |
| 1807 | M1903T10 | 1.462409 | -0.54835 | -1.63825 | 0.150145 | 0.863705 | DOWN | 1903.325 | 1903.323 | 1903.329 | 9.816317 | 9.715683 |
| 1808 | M340T9_3 | 1.416964 | -0.5028  | -1.64058 | 0.150148 | 0.863705 | DOWN | 339.6731 | 339.673  | 339.6732 | 9.174867 | 9.1602   |
| 1809 | M1165T10 | 1.64824  | -0.72093 | -1.62008 | 0.150321 | 0.863706 | DOWN | 1164.8   | 1164.797 | 1164.801 | 9.969925 | 9.885167 |
| 1810 | M1993T10 | 1.340148 | -0.42239 | -1.63296 | 0.150334 | 0.863706 | DOWN | 1992.9   | 1992.898 | 1992.907 | 9.825492 | 9.715683 |
| 1811 | M360T10_ | 1.199581 | -0.26253 | -1.60445 | 0.150351 | 0.863706 | DOWN | 359.7498 | 359.7497 | 359.75   | 9.825492 | 9.715683 |
| 1812 | M583T9_4 | 1.591261 | -0.67017 | -1.67059 | 0.150418 | 0.863706 | DOWN | 582.7738 | 582.7693 | 582.7748 | 9.191133 | 9.142767 |
| 1813 | M518T45  | 1.62703  | -0.70224 | -1.62796 | 0.150649 | 0.863707 | DOWN | 518.2956 | 518.2952 | 518.2957 | 44.91167 | 44.811   |
| 1814 | M1494T10 | 1.492441 | -0.57767 | -1.6226  | 0.150652 | 0.863707 | DOWN | 1494.461 | 1494.459 | 1494.461 | 9.949233 | 9.827283 |
| 1815 | M578T10_ | 1.296385 | -0.37449 | -1.59113 | 0.150702 | 0.863707 | DOWN | 578.454  | 578.4534 | 578.4543 | 9.964092 | 9.853533 |
| 1816 | M657T9_2 | 1.754505 | -0.81106 | -1.62147 | 0.150772 | 0.863708 | DOWN | 656.9778 | 656.9766 | 656.9809 | 9.2796   | 9.234417 |
| 1817 | M1351T10 | 1.333731 | -0.41547 | -1.64872 | 0.15078  | 0.863708 | DOWN | 1350.998 | 1350.997 | 1350.999 | 9.887133 | 9.859667 |
| 1818 | M184T9_3 | 1.762863 | -0.81792 | -1.59381 | 0.150833 | 0.863708 | DOWN | 183.707  | 183.7064 | 183.708  | 9.311883 | 9.1322   |
| 1819 | M276T44_ | 1.867818 | 0.901354 | 1.675569 | 0.150953 | 0.863708 | UP   | 276.1439 | 276.1437 | 276.144  | 44.42275 | 44.308   |

|      |          |          |          |          |          |          |      |          |          |          |          |          |
|------|----------|----------|----------|----------|----------|----------|------|----------|----------|----------|----------|----------|
| 1820 | M478T9_6 | 5.62324  | -2.4914  | -1.76147 | 0.150959 | 0.863708 | DOWN | 478.3593 | 478.3467 | 478.3595 | 9.129317 | 8.98945  |
| 1821 | M359T41  | 1.24928  | -0.3211  | -1.59382 | 0.150979 | 0.863708 | DOWN | 359.2062 | 359.2061 | 359.2065 | 41.17942 | 40.95633 |
| 1822 | M647T9_2 | 1.435147 | -0.5212  | -1.58786 | 0.151008 | 0.863708 | DOWN | 646.6263 | 646.6259 | 646.6268 | 9.314442 | 9.234417 |
| 1823 | M207T10_ | 1.271032 | -0.346   | -1.66176 | 0.151043 | 0.863709 | DOWN | 207.1229 | 207.1228 | 207.123  | 9.836042 | 9.715683 |
| 1824 | M1949T10 | 1.32158  | -0.40226 | -1.72627 | 0.151085 | 0.863709 | DOWN | 1948.841 | 1948.84  | 1948.848 | 9.825492 | 9.715683 |
| 1825 | M836T12  | 1.363118 | 0.44691  | 1.589896 | 0.151114 | 0.863709 | UP   | 835.5672 | 835.5668 | 835.5677 | 12.39787 | 12.38278 |
| 1826 | M213T20  | 1.357751 | -0.44122 | -1.69035 | 0.151133 | 0.863709 | DOWN | 213.1846 | 213.1845 | 213.1847 | 20.32433 | 20.30267 |
| 1827 | M490T9_3 | 1.324739 | -0.40571 | -1.5928  | 0.151139 | 0.863709 | DOWN | 490.3205 | 490.3202 | 490.3208 | 9.40175  | 9.317167 |
| 1828 | M193T9_1 | 1.573164 | -0.65367 | -1.58743 | 0.151208 | 0.863709 | DOWN | 193.2748 | 193.2747 | 193.2754 | 9.174992 | 9.132033 |
| 1829 | M877T10_ | 1.540746 | -0.62363 | -1.59702 | 0.151261 | 0.863709 | DOWN | 877.4987 | 877.4984 | 877.5    | 9.758367 | 9.665433 |
| 1830 | M296T11_ | 1.226728 | -0.29482 | -1.60806 | 0.151334 | 0.86371  | DOWN | 295.5888 | 295.5885 | 295.589  | 10.91372 | 10.8646  |
| 1831 | M335T9_1 | 1.42612  | -0.5121  | -1.58598 | 0.151406 | 0.86371  | DOWN | 335.3495 | 335.3492 | 335.35   | 9.314442 | 9.234417 |
| 1832 | M373T10_ | 4.172041 | 2.060753 | 1.744604 | 0.151449 | 0.86371  | UP   | 373.2372 | 373.2332 | 373.2377 | 9.810767 | 9.715683 |
| 1833 | M365T9_4 | 1.512495 | -0.59693 | -1.58656 | 0.15148  | 0.86371  | DOWN | 364.7361 | 364.7359 | 364.7363 | 9.314442 | 9.234417 |
| 1834 | M953T9_2 | 2.188043 | -1.12964 | -1.71343 | 0.151488 | 0.86371  | DOWN | 953.295  | 953.2939 | 953.2958 | 8.82795  | 8.782183 |
| 1835 | M250T9_2 | 1.659363 | -0.73063 | -1.68439 | 0.151491 | 0.86371  | DOWN | 249.9013 | 249.9011 | 249.9023 | 9.3558   | 9.280767 |
| 1836 | M805T7   | 1.679841 | -0.74832 | -1.64669 | 0.151525 | 0.86371  | DOWN | 804.5137 | 804.5134 | 804.5138 | 7.024983 | 6.996867 |
| 1837 | M890T10_ | 1.207545 | -0.27208 | -1.63687 | 0.151596 | 0.863711 | DOWN | 889.6593 | 889.6581 | 889.6598 | 9.94785  | 9.843367 |
| 1838 | M578T20  | 1.253589 | -0.32606 | -1.58516 | 0.151627 | 0.863711 | DOWN | 578.3684 | 578.3683 | 578.369  | 19.71483 | 19.6705  |
| 1839 | M291T14  | 1.615582 | 0.692054 | 1.614099 | 0.151756 | 0.863711 | UP   | 291.2064 | 291.2059 | 291.2066 | 14.13649 | 14.12162 |
| 1840 | M306T10_ | 1.761568 | 0.81686  | 1.593824 | 0.151831 | 0.863711 | UP   | 306.2428 | 306.2426 | 306.243  | 10.35314 | 10.31147 |
| 1841 | M207T10_ | 2.03017  | 1.0216   | 1.708604 | 0.151843 | 0.863711 | UP   | 206.5193 | 206.5191 | 206.5271 | 9.825767 | 9.715683 |
| 1842 | M359T9_5 | 1.404173 | -0.48972 | -1.67229 | 0.151923 | 0.863712 | DOWN | 359.0722 | 359.0678 | 359.0724 | 9.311883 | 9.158833 |
| 1843 | M248T14  | 21.49907 | -4.4262  | -1.76692 | 0.151947 | 0.863712 | DOWN | 248.1675 | 248.1674 | 248.1677 | 13.68302 | 13.68265 |
| 1844 | M336T9_6 | 1.536466 | -0.61962 | -1.58581 | 0.151968 | 0.863712 | DOWN | 336.0426 | 336.0418 | 336.0454 | 9.227675 | 9.1445   |
| 1845 | M267T10_ | 1.591294 | 0.6702   | 1.60271  | 0.151982 | 0.863712 | UP   | 267.099  | 267.0884 | 267.1002 | 9.979875 | 9.843367 |
| 1846 | M374T9_2 | 1.967593 | -0.97643 | -1.5832  | 0.152149 | 0.863712 | DOWN | 373.7551 | 373.755  | 373.7552 | 9.246483 | 9.234417 |
| 1847 | M259T9_1 | 1.553097 | -0.63515 | -1.59384 | 0.152237 | 0.863713 | DOWN | 258.9787 | 258.9784 | 258.9788 | 8.790425 | 8.686867 |
| 1848 | M276T11_ | 2.058693 | 1.041729 | 1.671898 | 0.152389 | 0.863713 | UP   | 276.196  | 276.1959 | 276.1961 | 10.91642 | 10.90393 |
| 1849 | M1028T18 | 1.331891 | -0.41348 | -1.66016 | 0.1525   | 0.863714 | DOWN | 1028.461 | 1028.46  | 1028.462 | 17.56833 | 17.51067 |
| 1850 | M1230T10 | 2.452315 | -1.29414 | -1.76204 | 0.152539 | 0.863714 | DOWN | 1229.71  | 1229.709 | 1229.711 | 10.31875 | 10.2501  |
| 1851 | M844T10_ | 1.570326 | -0.65106 | -1.68613 | 0.152553 | 0.863714 | DOWN | 843.6287 | 843.6276 | 843.6301 | 9.900133 | 9.859233 |
| 1852 | M343T21  | 1.983122 | -0.98777 | -1.64642 | 0.152558 | 0.863714 | DOWN | 343.2953 | 343.2952 | 343.2963 | 21.33733 | 21.3275  |
| 1853 | M514T14  | 1.195876 | -0.25807 | -1.65474 | 0.152572 | 0.863714 | DOWN | 514.3609 | 514.3607 | 514.3615 | 14.384   | 14.3696  |
| 1854 | M370T45  | 1.075037 | -0.10439 | -1.61653 | 0.152579 | 0.863714 | DOWN | 370.3678 | 370.3675 | 370.3679 | 44.70325 | 44.66817 |

|      |          |          |          |          |          |          |      |          |          |          |          |          |
|------|----------|----------|----------|----------|----------|----------|------|----------|----------|----------|----------|----------|
| 1855 | M504T10_ | 1.583774 | -0.66337 | -1.58566 | 0.152628 | 0.863714 | DOWN | 503.6538 | 503.6531 | 503.6549 | 10.39379 | 10.37437 |
| 1856 | M704T10_ | 1.281046 | -0.35732 | -1.65474 | 0.152637 | 0.863714 | DOWN | 704.0307 | 704.0303 | 704.0335 | 9.83545  | 9.715683 |
| 1857 | M606T10_ | 1.610397 | -0.68742 | -1.58213 | 0.152646 | 0.863714 | DOWN | 605.7494 | 605.7493 | 605.75   | 9.90185  | 9.874067 |
| 1858 | M976T10_ | 1.408145 | -0.4938  | -1.66524 | 0.15273  | 0.863715 | DOWN | 975.9924 | 975.9919 | 975.9932 | 9.743317 | 9.649833 |
| 1859 | M756T11_ | 2.320356 | -1.21435 | -1.73065 | 0.152969 | 0.863715 | DOWN | 755.9497 | 755.9497 | 755.9503 | 10.80047 | 10.73768 |
| 1860 | M1953T10 | 1.538458 | -0.62149 | -1.57916 | 0.152972 | 0.863715 | DOWN | 1952.976 | 1952.974 | 1952.98  | 9.847542 | 9.6681   |
| 1861 | M722T10_ | 1.752992 | 0.809819 | 1.5825   | 0.153057 | 0.863716 | UP   | 722.3167 | 722.3154 | 722.3176 | 9.949233 | 9.843367 |
| 1862 | M233T16  | 1.877698 | -0.90897 | -1.59296 | 0.153106 | 0.863716 | DOWN | 233.1169 | 233.1167 | 233.1173 | 16.31487 | 16.25792 |
| 1863 | M508T42_ | 1.212026 | -0.27742 | -1.59794 | 0.153169 | 0.863716 | DOWN | 508.2747 | 508.2746 | 508.275  | 42.25117 | 42.093   |
| 1864 | M1802T10 | 1.407385 | -0.49302 | -1.58095 | 0.153271 | 0.863716 | DOWN | 1802.431 | 1802.43  | 1802.432 | 9.823575 | 9.715683 |
| 1865 | M438T11_ | 2.742889 | -1.4557  | -1.598   | 0.153291 | 0.863716 | DOWN | 437.5556 | 437.5524 | 437.5563 | 10.89237 | 10.84847 |
| 1866 | M529T9_6 | 1.520404 | -0.60445 | -1.70542 | 0.153448 | 0.863717 | DOWN | 529.3872 | 529.3859 | 529.3884 | 9.25985  | 9.160617 |
| 1867 | M1426T10 | 1.443277 | -0.52935 | -1.57968 | 0.15348  | 0.863717 | DOWN | 1425.592 | 1425.589 | 1425.595 | 9.9404   | 9.8378   |
| 1868 | M432T22  | 1.882589 | -0.91272 | -1.6086  | 0.153585 | 0.863717 | DOWN | 432.3104 | 432.2994 | 432.3108 | 21.69433 | 21.40867 |
| 1869 | M349T9_1 | 1.444863 | -0.53093 | -1.63325 | 0.153758 | 0.863718 | DOWN | 349.23   | 349.2264 | 349.2301 | 9.135642 | 8.889467 |
| 1870 | M548T40_ | 1.250298 | -0.32227 | -1.7536  | 0.153796 | 0.863718 | DOWN | 548.3425 | 548.3422 | 548.343  | 39.748   | 39.70483 |
| 1871 | M932T10_ | 1.503676 | -0.58849 | -1.57691 | 0.153858 | 0.863718 | DOWN | 932.2415 | 932.2402 | 932.242  | 9.958492 | 9.859233 |
| 1872 | M354T9_6 | 1.360775 | -0.44443 | -1.59561 | 0.153914 | 0.863719 | DOWN | 354.2384 | 354.2383 | 354.2385 | 9.352667 | 9.17485  |
| 1873 | M454T25  | 4.47408  | 2.161591 | 1.706846 | 0.153932 | 0.863719 | UP   | 454.291  | 454.2907 | 454.2915 | 25.20117 | 25.18417 |
| 1874 | M233T18  | 1.418897 | -0.50477 | -1.58075 | 0.153997 | 0.863719 | DOWN | 233.1744 | 233.1743 | 233.1745 | 18.30808 | 18.26967 |
| 1875 | M219T11_ | 1.503023 | -0.58787 | -1.60094 | 0.154001 | 0.863719 | DOWN | 218.6329 | 218.6328 | 218.6333 | 10.91977 | 10.90197 |
| 1876 | M394T9_1 | 1.733766 | -0.79391 | -1.57626 | 0.154089 | 0.863719 | DOWN | 394.4845 | 394.4837 | 394.4871 | 9.191433 | 9.089333 |
| 1877 | M457T10_ | 1.581545 | -0.66133 | -1.6471  | 0.154109 | 0.863719 | DOWN | 456.7754 | 456.7748 | 456.7759 | 9.960817 | 9.859233 |
| 1878 | M653T11_ | 1.391272 | -0.4764  | -1.58933 | 0.154201 | 0.86372  | DOWN | 653.3712 | 653.3704 | 653.3716 | 10.71197 | 10.6606  |
| 1879 | M648T9_5 | 1.518674 | -0.60281 | -1.57654 | 0.154225 | 0.86372  | DOWN | 648.2186 | 648.2183 | 648.2196 | 9.314442 | 9.234417 |
| 1880 | M254T11_ | 1.618249 | -0.69443 | -1.60313 | 0.154399 | 0.86372  | DOWN | 253.9975 | 253.9972 | 253.9977 | 10.85552 | 10.83252 |
| 1881 | M469T9_1 | 1.793036 | -0.8424  | -1.57961 | 0.154606 | 0.863721 | DOWN | 468.9403 | 468.9395 | 468.9405 | 9.360617 | 9.174883 |
| 1882 | M219T10_ | 1.601663 | -0.67957 | -1.57234 | 0.154645 | 0.863721 | DOWN | 219.3521 | 219.3519 | 219.3522 | 9.8374   | 9.73145  |
| 1883 | M201T9_2 | 1.347641 | -0.43044 | -1.62815 | 0.154678 | 0.863721 | DOWN | 201.4647 | 201.464  | 201.4651 | 9.330283 | 9.26575  |
| 1884 | M702T9_1 | 1.609089 | -0.68624 | -1.59582 | 0.154751 | 0.863721 | DOWN | 702.3674 | 702.3666 | 702.3688 | 9.29345  | 9.219483 |
| 1885 | M313T45_ | 1.693024 | -0.7596  | -1.63722 | 0.154758 | 0.863721 | DOWN | 313.1644 | 313.1643 | 313.1646 | 44.60983 | 44.59533 |
| 1886 | M272T10_ | 1.499826 | 0.584796 | 1.67452  | 0.154765 | 0.863721 | UP   | 271.9732 | 271.9731 | 271.9737 | 9.886083 | 9.770733 |
| 1887 | M658T10_ | 1.068605 | -0.09573 | -1.60479 | 0.154809 | 0.863722 | DOWN | 657.6795 | 657.679  | 657.6813 | 9.8397   | 9.715683 |
| 1888 | M260T9_5 | 2.131938 | -1.09217 | -1.57133 | 0.154858 | 0.863722 | DOWN | 259.936  | 259.9357 | 259.9363 | 8.767783 | 8.686867 |
| 1889 | M647T10_ | 1.49825  | -0.58328 | -1.62344 | 0.154993 | 0.863722 | DOWN | 647.1362 | 647.1357 | 647.1367 | 9.985117 | 9.8914   |

|      |          |          |          |          |          |          |      |          |          |          |          |          |
|------|----------|----------|----------|----------|----------|----------|------|----------|----------|----------|----------|----------|
| 1890 | M271T9_3 | 1.575515 | -0.65582 | -1.60947 | 0.155119 | 0.863723 | DOWN | 270.7133 | 270.713  | 270.7133 | 9.442533 | 9.370583 |
| 1891 | M334T10_ | 1.161544 | -0.21604 | -1.66406 | 0.155144 | 0.863723 | DOWN | 334.299  | 334.2988 | 334.2994 | 9.83535  | 9.715683 |
| 1892 | M543T10_ | 1.523574 | -0.60746 | -1.57582 | 0.155156 | 0.863723 | DOWN | 543.0365 | 543.0362 | 543.0392 | 9.88815  | 9.806367 |
| 1893 | M404T9_9 | 1.454941 | 0.54096  | 1.633877 | 0.155163 | 0.863723 | UP   | 404.4427 | 404.4425 | 404.4431 | 9.457083 | 9.370583 |
| 1894 | M424T11_ | 2.350681 | 1.233079 | 1.56956  | 0.155192 | 0.863723 | UP   | 424.1807 | 424.1777 | 424.1814 | 10.87636 | 10.86517 |
| 1895 | M724T10_ | 1.37733  | -0.46187 | -1.65299 | 0.155199 | 0.863723 | DOWN | 723.9091 | 723.9089 | 723.9097 | 9.82645  | 9.699733 |
| 1896 | M806T11_ | 1.478539 | 0.564172 | 1.585038 | 0.155325 | 0.863723 | UP   | 806.0571 | 806.0557 | 806.0577 | 10.91111 | 10.8914  |
| 1897 | M317T9_2 | 1.671141 | 0.740833 | 1.579245 | 0.155338 | 0.863723 | UP   | 316.9162 | 316.9158 | 316.9166 | 9.3735   | 9.26575  |
| 1898 | M480T41  | 1.261768 | -0.33545 | -1.57202 | 0.155734 | 0.863725 | DOWN | 480.2799 | 480.2798 | 480.2802 | 40.99983 | 40.79333 |
| 1899 | M318T9_1 | 1.502869 | -0.58772 | -1.56656 | 0.155876 | 0.863725 | DOWN | 318.3831 | 318.3828 | 318.3834 | 9.24215  | 9.129317 |
| 1900 | M291T9_5 | 1.427233 | -0.51322 | -1.60831 | 0.156169 | 0.863726 | DOWN | 290.7917 | 290.791  | 290.7919 | 9.008417 | 8.892117 |
| 1901 | M1790T10 | 1.343678 | -0.42619 | -1.70357 | 0.156273 | 0.863727 | DOWN | 1789.519 | 1789.518 | 1789.522 | 9.82645  | 9.728083 |
| 1902 | M358T40  | 1.187913 | -0.24843 | -1.56782 | 0.156288 | 0.863727 | DOWN | 358.2222 | 358.2222 | 358.2224 | 39.61842 | 39.40267 |
| 1903 | M1876T10 | 1.304651 | -0.38366 | -1.70109 | 0.156354 | 0.863727 | DOWN | 1875.679 | 1875.676 | 1875.686 | 9.830283 | 9.715683 |
| 1904 | M244T9_7 | 1.50053  | -0.58547 | -1.56492 | 0.15637  | 0.863727 | DOWN | 244.1335 | 244.1297 | 244.1349 | 9.268608 | 9.132267 |
| 1905 | M168T10_ | 1.855833 | -0.89207 | -1.57965 | 0.156373 | 0.863727 | DOWN | 167.9654 | 167.9654 | 167.9655 | 9.924092 | 9.8378   |
| 1906 | M890T10_ | 1.419215 | -0.50509 | -1.62685 | 0.156403 | 0.863727 | DOWN | 890.3508 | 890.3502 | 890.3516 | 9.611308 | 9.49445  |
| 1907 | M557T9_2 | 1.311257 | -0.39095 | -1.69709 | 0.156552 | 0.863727 | DOWN | 556.9285 | 556.9182 | 556.93   | 9.206233 | 9.1445   |
| 1908 | M616T21  | 1.361617 | -0.44532 | -1.65333 | 0.156552 | 0.863727 | DOWN | 616.4631 | 616.4628 | 616.4634 | 20.821   | 20.76567 |
| 1909 | M408T10_ | 3.127779 | 1.645139 | 1.658433 | 0.156578 | 0.863728 | UP   | 408.3169 | 408.3157 | 408.3172 | 9.960967 | 9.8914   |
| 1910 | M996T12_ | 2.340641 | -1.2269  | -1.72729 | 0.156722 | 0.863728 | DOWN | 996.1197 | 996.118  | 996.1212 | 11.90427 | 11.88257 |
| 1911 | M277T28  | 1.23356  | -0.30283 | -1.6126  | 0.156768 | 0.863728 | DOWN | 277.1796 | 277.1794 | 277.1798 | 27.95175 | 27.9245  |
| 1912 | M209T43  | 1.238778 | 0.308918 | 1.577914 | 0.156876 | 0.863729 | UP   | 209.1533 | 209.1532 | 209.1534 | 42.99208 | 42.62517 |
| 1913 | M490T10_ | 1.693264 | 0.759807 | 1.708279 | 0.156984 | 0.863729 | UP   | 489.9299 | 489.9293 | 489.9303 | 9.965892 | 9.843367 |
| 1914 | M709T11_ | 2.324878 | -1.21715 | -1.68928 | 0.157176 | 0.86373  | DOWN | 709.4461 | 709.4457 | 709.4474 | 10.60208 | 10.5518  |
| 1915 | M330T9_8 | 1.353051 | -0.43622 | -1.56102 | 0.157192 | 0.86373  | DOWN | 330.288  | 330.2815 | 330.295  | 9.263367 | 9.110833 |
| 1916 | M732T10_ | 1.862421 | -0.89718 | -1.5787  | 0.15724  | 0.86373  | DOWN | 732.2863 | 732.2856 | 732.2865 | 9.772125 | 9.715683 |
| 1917 | M388T11_ | 1.306007 | -0.38516 | -1.57907 | 0.157332 | 0.86373  | DOWN | 387.787  | 387.7823 | 387.7873 | 10.94443 | 10.8646  |
| 1918 | M207T10_ | 1.271909 | -0.347   | -1.6321  | 0.157344 | 0.86373  | DOWN | 207.3609 | 207.3608 | 207.361  | 9.836042 | 9.715683 |
| 1919 | M541T10_ | 1.522862 | -0.60679 | -1.57312 | 0.157349 | 0.86373  | DOWN | 540.7077 | 540.7074 | 540.7084 | 9.979667 | 9.90755  |
| 1920 | M234T10_ | 1.42066  | -0.50656 | -1.62403 | 0.157472 | 0.86373  | DOWN | 233.549  | 233.5482 | 233.5587 | 9.830283 | 9.715683 |
| 1921 | M206T9_2 | 2.385161 | -1.25409 | -1.55974 | 0.157491 | 0.863731 | DOWN | 206.4189 | 206.4186 | 206.4193 | 9.264258 | 9.160617 |
| 1922 | M376T21  | 1.32781  | -0.40905 | -1.5934  | 0.157515 | 0.863731 | DOWN | 376.259  | 376.2588 | 376.2592 | 21.17525 | 21.15717 |
| 1923 | M238T10_ | 1.579031 | 0.65904  | 1.677407 | 0.157576 | 0.863731 | UP   | 238.1082 | 238.1042 | 238.1086 | 10.00385 | 9.8914   |
| 1924 | M508T31  | 2.362648 | 1.240405 | 1.647531 | 0.157718 | 0.863731 | UP   | 508.3396 | 508.3392 | 508.3405 | 31.0465  | 30.96817 |

|      |          |          |          |          |          |          |      |          |          |          |          |          |
|------|----------|----------|----------|----------|----------|----------|------|----------|----------|----------|----------|----------|
| 1925 | M528T9_1 | 1.623899 | -0.69946 | -1.57844 | 0.15779  | 0.863732 | DOWN | 527.5945 | 527.5912 | 527.5971 | 9.212775 | 9.129317 |
| 1926 | M683T9_2 | 2.400476 | -1.26332 | -1.58834 | 0.157884 | 0.863732 | DOWN | 683.2106 | 683.21   | 683.2107 | 8.658083 | 8.629617 |
| 1927 | M559T13  | 1.349261 | -0.43217 | -1.57649 | 0.157911 | 0.863732 | DOWN | 559.3611 | 559.36   | 559.3621 | 12.60203 | 12.5891  |
| 1928 | M753T10_ | 1.482912 | -0.56843 | -1.58318 | 0.157991 | 0.863732 | DOWN | 753.4361 | 753.4352 | 753.4364 | 9.94405  | 9.6681   |
| 1929 | M499T19  | 1.494354 | 0.579522 | 1.559981 | 0.158082 | 0.863732 | UP   | 499.1755 | 499.1725 | 499.1766 | 19.14367 | 19.12633 |
| 1930 | M357T10_ | 1.195263 | -0.25733 | -1.72059 | 0.158092 | 0.863733 | DOWN | 357.1196 | 357.1194 | 357.1198 | 9.823575 | 9.715683 |
| 1931 | M676T10_ | 1.597906 | 0.676183 | 1.632581 | 0.158172 | 0.863733 | UP   | 675.6139 | 675.6123 | 675.6145 | 9.8322   | 9.715683 |
| 1932 | M364T11_ | 1.278907 | -0.35491 | -1.65005 | 0.158173 | 0.863733 | DOWN | 364.2201 | 364.2199 | 364.2203 | 11.2229  | 11.19848 |
| 1933 | M671T10_ | 1.488011 | -0.57338 | -1.63636 | 0.158244 | 0.863733 | DOWN | 670.728  | 670.7275 | 670.7287 | 9.76065  | 9.683817 |
| 1934 | M524T9_7 | 1.616712 | -0.69306 | -1.60231 | 0.158287 | 0.863733 | DOWN | 524.2834 | 524.2809 | 524.2867 | 9.29345  | 9.11405  |
| 1935 | M519T9_2 | 1.807148 | -0.85371 | -1.61268 | 0.158348 | 0.863733 | DOWN | 518.627  | 518.6255 | 518.6281 | 9.28135  | 9.204617 |
| 1936 | M1785T10 | 1.457283 | -0.54328 | -1.70761 | 0.158348 | 0.863733 | DOWN | 1785.444 | 1785.442 | 1785.446 | 9.8161   | 9.715683 |
| 1937 | M725T9_2 | 1.233494 | -0.30275 | -1.57128 | 0.158417 | 0.863734 | DOWN | 724.9676 | 724.9653 | 724.968  | 8.985492 | 8.878667 |
| 1938 | M378T45  | 4.986911 | 2.318147 | 1.727011 | 0.158435 | 0.863734 | UP   | 378.2483 | 378.2481 | 378.2485 | 44.82533 | 44.59567 |
| 1939 | M417T9_2 | 1.56544  | -0.64657 | -1.57983 | 0.158439 | 0.863734 | DOWN | 416.5582 | 416.5576 | 416.5584 | 9.329642 | 9.24215  |
| 1940 | M657T10_ | 1.173454 | -0.23076 | -1.57183 | 0.15859  | 0.863734 | DOWN | 657.2421 | 657.2417 | 657.2427 | 9.830083 | 9.715683 |
| 1941 | M229T9_1 | 1.677585 | -0.74639 | -1.62912 | 0.158611 | 0.863734 | DOWN | 228.5263 | 228.525  | 228.5264 | 9.294883 | 9.132267 |
| 1942 | M331T9_5 | 1.282532 | -0.35899 | -1.59166 | 0.158873 | 0.863735 | DOWN | 330.9349 | 330.9347 | 330.9351 | 9.331083 | 9.234417 |
| 1943 | M379T9_1 | 1.247886 | -0.31949 | -1.61273 | 0.158878 | 0.863735 | DOWN | 378.5784 | 378.5752 | 378.5787 | 8.94605  | 8.817367 |
| 1944 | M214T9_1 | 3.067547 | -1.61709 | -1.70563 | 0.158995 | 0.863735 | DOWN | 214.3913 | 214.3903 | 214.3924 | 9.302758 | 9.142767 |
| 1945 | M664T21  | 1.428476 | -0.51448 | -1.56103 | 0.159113 | 0.863736 | DOWN | 664.4607 | 664.46   | 664.4615 | 20.76367 | 20.72367 |
| 1946 | M701T10_ | 1.383702 | -0.46853 | -1.55604 | 0.159169 | 0.863736 | DOWN | 700.8733 | 700.8729 | 700.8774 | 9.848417 | 9.759383 |
| 1947 | M652T9_2 | 1.705454 | -0.77016 | -1.55324 | 0.159281 | 0.863736 | DOWN | 651.6301 | 651.6221 | 651.6309 | 9.249433 | 9.202433 |
| 1948 | M381T43  | 1.070403 | -0.09815 | -1.65173 | 0.159336 | 0.863737 | DOWN | 381.3359 | 381.3359 | 381.3361 | 42.72617 | 42.697   |
| 1949 | M476T9_3 | 1.463877 | -0.54979 | -1.56883 | 0.159409 | 0.863737 | DOWN | 475.6131 | 475.6036 | 475.6156 | 9.201583 | 9.129317 |
| 1950 | M429T11_ | 1.294939 | -0.37288 | -1.55798 | 0.159413 | 0.863737 | DOWN | 428.886  | 428.8854 | 428.886  | 10.90628 | 10.88747 |
| 1951 | M594T11_ | 1.47942  | -0.56503 | -1.55339 | 0.159414 | 0.863737 | DOWN | 594.4734 | 594.4731 | 594.4738 | 11.45394 | 11.41772 |
| 1952 | M1387T10 | 1.439768 | -0.52584 | -1.62639 | 0.159456 | 0.863737 | DOWN | 1386.55  | 1386.548 | 1386.55  | 9.9677   | 9.869467 |
| 1953 | M313T15  | 42.42613 | 5.406881 | 1.724842 | 0.159571 | 0.863737 | UP   | 313.2848 | 313.2838 | 313.2849 | 14.52452 | 14.48632 |
| 1954 | M536T40_ | 1.581628 | 0.66141  | 1.662066 | 0.159767 | 0.863738 | UP   | 536.3062 | 536.3058 | 536.3065 | 40.3235  | 40.194   |
| 1955 | M550T9_2 | 1.797591 | -0.84607 | -1.55308 | 0.159813 | 0.863738 | DOWN | 549.6743 | 549.6732 | 549.6746 | 9.278125 | 9.219483 |
| 1956 | M765T25  | 2.357428 | -1.23721 | -1.61279 | 0.159818 | 0.863738 | DOWN | 764.5367 | 764.5367 | 764.5371 | 25.02075 | 25.01183 |
| 1957 | M423T11_ | 1.934136 | 0.951689 | 1.554226 | 0.159819 | 0.863738 | UP   | 423.4336 | 423.4275 | 423.4377 | 10.95643 | 10.91813 |
| 1958 | M212T10_ | 1.623764 | 0.699342 | 1.630944 | 0.159861 | 0.863738 | UP   | 212.3976 | 212.3974 | 212.4037 | 9.983467 | 9.8753   |
| 1959 | M214T9_1 | 1.417573 | -0.50342 | -1.54956 | 0.159886 | 0.863738 | DOWN | 214.4586 | 214.4569 | 214.4595 | 9.28135  | 9.18975  |



|      |          |          |          |          |          |          |      |          |          |          |          |          |
|------|----------|----------|----------|----------|----------|----------|------|----------|----------|----------|----------|----------|
| 1960 | M288T23_ | 1.584241 | -0.66379 | -1.55673 | 0.159893 | 0.863738 | DOWN | 288.249  | 288.2393 | 288.2497 | 22.9725  | 22.8715  |
| 1961 | M352T27_ | 1.959926 | -0.9708  | -1.61874 | 0.159995 | 0.863739 | DOWN | 352.2509 | 352.2507 | 352.2514 | 26.842   | 26.81017 |
| 1962 | M510T44_ | 1.381469 | -0.4662  | -1.55029 | 0.160064 | 0.863739 | DOWN | 510.2905 | 510.2901 | 510.2907 | 44.38692 | 44.27917 |
| 1963 | M326T10_ | 3.28125  | 1.714245 | 1.718512 | 0.160089 | 0.863739 | UP   | 326.498  | 326.4978 | 326.4991 | 9.818525 | 9.699733 |
| 1964 | M1040T10 | 1.422234 | -0.50816 | -1.54871 | 0.160096 | 0.863739 | DOWN | 1040.134 | 1040.133 | 1040.135 | 9.82645  | 9.715683 |
| 1965 | M573T9_2 | 1.506917 | -0.5916  | -1.56296 | 0.160122 | 0.863739 | DOWN | 573.3049 | 573.304  | 573.3057 | 9.355633 | 9.220933 |
| 1966 | M685T12_ | 1.696267 | -0.76236 | -1.64803 | 0.16018  | 0.863739 | DOWN | 684.7658 | 684.764  | 684.7659 | 12.06378 | 12.03483 |
| 1967 | M458T9_7 | 1.726133 | 0.787544 | 1.584217 | 0.160267 | 0.863739 | UP   | 458.1807 | 458.1798 | 458.183  | 9.383033 | 9.219483 |
| 1968 | M349T10_ | 8.143996 | 3.025737 | 1.720982 | 0.160279 | 0.86374  | UP   | 349.0458 | 349.0454 | 349.046  | 9.801958 | 9.683817 |
| 1969 | M350T10_ | 1.46201  | -0.54795 | -1.55209 | 0.1604   | 0.86374  | DOWN | 349.77   | 349.7698 | 349.7701 | 9.841308 | 9.81635  |
| 1970 | M212T9_5 | 1.671795 | -0.7414  | -1.55572 | 0.160417 | 0.86374  | DOWN | 211.9195 | 211.9184 | 211.9199 | 9.304867 | 9.264333 |
| 1971 | M1794T10 | 1.322528 | -0.4033  | -1.54718 | 0.160449 | 0.86374  | DOWN | 1793.809 | 1793.806 | 1793.81  | 9.81635  | 9.715683 |
| 1972 | M338T7   | 1.144767 | -0.19505 | -1.60857 | 0.160464 | 0.86374  | DOWN | 338.1934 | 338.1934 | 338.1938 | 7.302217 | 7.2707   |
| 1973 | M701T9_1 | 1.636231 | -0.71038 | -1.54725 | 0.160513 | 0.86374  | DOWN | 700.908  | 700.9075 | 700.9083 | 9.311167 | 9.11405  |
| 1974 | M423T19  | 1.439789 | 0.525857 | 1.604401 | 0.160555 | 0.86374  | UP   | 423.3264 | 423.3259 | 423.3281 | 18.74633 | 18.673   |
| 1975 | M624T10_ | 1.900974 | -0.92674 | -1.67934 | 0.16069  | 0.863741 | DOWN | 623.8711 | 623.8706 | 623.8716 | 10.32374 | 10.2501  |
| 1976 | M489T10_ | 1.232909 | 0.302066 | 1.548711 | 0.160745 | 0.863741 | UP   | 489.3566 | 489.3562 | 489.3568 | 9.8374   | 9.699733 |
| 1977 | M473T9_1 | 1.683686 | -0.75162 | -1.59436 | 0.16076  | 0.863741 | DOWN | 473.3969 | 473.3966 | 473.3973 | 9.18975  | 9.160617 |
| 1978 | M337T10_ | 3.597544 | 1.847012 | 1.670021 | 0.160769 | 0.863741 | UP   | 336.8627 | 336.8551 | 336.8634 | 9.88865  | 9.840617 |
| 1979 | M347T22  | 1.910127 | 0.933669 | 1.692658 | 0.16086  | 0.863741 | UP   | 347.192  | 347.1917 | 347.1923 | 22.10067 | 22.088   |
| 1980 | M333T10_ | 2.058722 | -1.04175 | -1.54556 | 0.160924 | 0.863742 | DOWN | 332.9054 | 332.9053 | 332.9056 | 9.794733 | 9.699733 |
| 1981 | M712T9_3 | 2.010853 | -1.00781 | -1.56054 | 0.161036 | 0.863742 | DOWN | 712.0769 | 712.0762 | 712.0776 | 8.676792 | 8.586967 |
| 1982 | M337T9_2 | 1.680635 | -0.74901 | -1.58531 | 0.161122 | 0.863742 | DOWN | 336.5952 | 336.5943 | 336.5977 | 9.152767 | 9.110833 |
| 1983 | M537T11_ | 1.687755 | 0.755106 | 1.619129 | 0.161285 | 0.863743 | UP   | 537.334  | 537.3336 | 537.3344 | 11.39547 | 11.36692 |
| 1984 | M227T9_7 | 1.715825 | -0.7789  | -1.56564 | 0.161416 | 0.863743 | DOWN | 227.0832 | 227.0793 | 227.0869 | 8.73905  | 8.7035   |
| 1985 | M360T9_1 | 1.522292 | -0.60625 | -1.59412 | 0.161428 | 0.863743 | DOWN | 360.4887 | 360.4886 | 360.4888 | 9.305225 | 9.234417 |
| 1986 | M363T11_ | 1.270704 | -0.34563 | -1.63462 | 0.161479 | 0.863743 | DOWN | 363.2167 | 363.2165 | 363.2169 | 11.22813 | 11.19848 |
| 1987 | M280T9_3 | 1.659455 | -0.73071 | -1.545   | 0.161625 | 0.863744 | DOWN | 280.0794 | 280.0789 | 280.0806 | 9.235933 | 9.145433 |
| 1988 | M672T10_ | 1.221269 | -0.28838 | -1.56883 | 0.161732 | 0.863744 | DOWN | 671.912  | 671.911  | 671.9129 | 10.21885 | 10.14983 |
| 1989 | M328T10_ | 1.216163 | -0.28234 | -1.61573 | 0.161814 | 0.863744 | DOWN | 328.2963 | 328.2959 | 328.2964 | 10.17587 | 10.08517 |
| 1990 | M643T10_ | 2.355688 | -1.23615 | -1.68175 | 0.16185  | 0.863744 | DOWN | 643.4067 | 643.4064 | 643.407  | 10.41657 | 10.32768 |
| 1991 | M199T9_5 | 1.680491 | -0.74888 | -1.55922 | 0.161852 | 0.863744 | DOWN | 199.0266 | 199.0262 | 199.0279 | 9.18975  | 9.132267 |
| 1992 | M357T10_ | 1.251015 | -0.3231  | -1.69043 | 0.161864 | 0.863744 | DOWN | 356.7558 | 356.7556 | 356.756  | 9.823575 | 9.715683 |
| 1993 | M221T9_8 | 1.923495 | -0.94373 | -1.55021 | 0.161966 | 0.863745 | DOWN | 220.8483 | 220.846  | 220.8491 | 9.215892 | 9.160617 |
| 1994 | M197T10_ | 1.140389 | -0.18953 | -1.636   | 0.161967 | 0.863745 | DOWN | 197.3877 | 197.3809 | 197.3879 | 9.823575 | 9.699733 |

|      |          |          |          |          |          |          |      |          |          |          |          |          |
|------|----------|----------|----------|----------|----------|----------|------|----------|----------|----------|----------|----------|
| 1995 | M729T4   | 1.721806 | 0.783922 | 1.561878 | 0.161996 | 0.863745 | UP   | 729.4515 | 729.451  | 729.4522 | 3.542983 | 3.30525  |
| 1996 | M841T12  | 1.633647 | -0.7081  | -1.66431 | 0.162026 | 0.863745 | DOWN | 841.348  | 841.3472 | 841.3487 | 11.94687 | 11.91892 |
| 1997 | M729T10_ | 1.35121  | -0.43425 | -1.64309 | 0.162038 | 0.863745 | DOWN | 729.4462 | 729.4458 | 729.4467 | 9.8207   | 9.715683 |
| 1998 | M839T15  | 1.251637 | -0.32382 | -1.55779 | 0.162144 | 0.863745 | DOWN | 839.3887 | 839.3879 | 839.3915 | 15.48282 | 15.28145 |
| 1999 | M343T9_1 | 1.783694 | -0.83487 | -1.57452 | 0.162163 | 0.863745 | DOWN | 342.591  | 342.5905 | 342.5913 | 9.340717 | 9.24215  |
| 2000 | M378T10_ | 18.4384  | 4.204642 | 1.711055 | 0.16222  | 0.863746 | UP   | 378.1585 | 378.1582 | 378.1591 | 9.901375 | 9.79535  |
| 2001 | M276T41_ | 1.202747 | -0.26633 | -1.54831 | 0.162235 | 0.863746 | DOWN | 276.1802 | 276.18   | 276.1804 | 40.89183 | 40.61133 |
| 2002 | M455T11_ | 1.518901 | -0.60303 | -1.55535 | 0.162269 | 0.863746 | DOWN | 454.9779 | 454.9778 | 454.9799 | 10.9049  | 10.88747 |
| 2003 | M224T10_ | 1.385097 | -0.46999 | -1.55805 | 0.162298 | 0.863746 | DOWN | 223.812  | 223.8117 | 223.8127 | 9.816167 | 9.7124   |
| 2004 | M388T43_ | 1.142164 | 0.19177  | 1.586915 | 0.162397 | 0.863746 | UP   | 388.2326 | 388.2326 | 388.2329 | 43.40217 | 43.3445  |
| 2005 | M708T9   | 1.446936 | -0.533   | -1.59582 | 0.162405 | 0.863746 | DOWN | 708.2162 | 708.2152 | 708.2168 | 9.294467 | 9.129317 |
| 2006 | M364T11_ | 2.128845 | 1.090071 | 1.565383 | 0.162548 | 0.863747 | UP   | 364.1552 | 364.1545 | 364.1557 | 11.18767 | 11.17813 |
| 2007 | M472T9_1 | 5.336297 | -2.41584 | -1.64974 | 0.162601 | 0.863747 | DOWN | 472.3439 | 472.3432 | 472.3452 | 9.104833 | 9.060817 |
| 2008 | M157T10_ | 1.407376 | -0.49301 | -1.62152 | 0.162618 | 0.863747 | DOWN | 157.2116 | 157.2116 | 157.2168 | 9.931675 | 9.827283 |
| 2009 | M1059T11 | 1.431334 | -0.51736 | -1.58463 | 0.162641 | 0.863747 | DOWN | 1058.557 | 1058.556 | 1058.558 | 10.89355 | 10.88747 |
| 2010 | M364T9_9 | 1.723294 | 0.785169 | 1.597119 | 0.162732 | 0.863747 | UP   | 364.125  | 364.1232 | 364.1286 | 9.337367 | 9.0839   |
| 2011 | M441T9   | 1.928716 | 0.947641 | 1.640916 | 0.162794 | 0.863747 | UP   | 441.0834 | 441.0827 | 441.0847 | 9.29345  | 9.110833 |
| 2012 | M171T10_ | 2.040967 | -1.02925 | -1.56931 | 0.162803 | 0.863747 | DOWN | 171.2979 | 171.2978 | 171.298  | 9.842    | 9.699733 |
| 2013 | M454T42_ | 1.386482 | 0.471429 | 1.580884 | 0.162825 | 0.863747 | UP   | 454.2642 | 454.2641 | 454.2645 | 41.978   | 41.76233 |
| 2014 | M953T10_ | 1.512648 | -0.59708 | -1.63996 | 0.162907 | 0.863748 | DOWN | 953.0627 | 953.0619 | 953.0644 | 9.880075 | 9.743767 |
| 2015 | M680T23_ | 1.355217 | -0.43852 | -1.55829 | 0.162913 | 0.863748 | DOWN | 679.5111 | 679.5109 | 679.5114 | 23.04533 | 23.0305  |
| 2016 | M1186T10 | 2.154661 | -1.10746 | -1.67084 | 0.162976 | 0.863748 | DOWN | 1185.683 | 1185.681 | 1185.685 | 10.24737 | 10.19852 |
| 2017 | M643T10_ | 1.248934 | -0.3207  | -1.53932 | 0.163064 | 0.863748 | DOWN | 643.4992 | 643.4989 | 643.4998 | 9.802117 | 9.728083 |
| 2018 | M199T10_ | 1.355861 | 0.439209 | 1.569286 | 0.163072 | 0.863748 | UP   | 199.3102 | 199.3099 | 199.3104 | 9.975217 | 9.859233 |
| 2019 | M307T24_ | 1.517938 | -0.60211 | -1.5431  | 0.16313  | 0.863748 | DOWN | 307.2934 | 307.2932 | 307.2936 | 24.26733 | 24.24717 |
| 2020 | M308T10_ | 1.26604  | -0.34032 | -1.59303 | 0.16333  | 0.863749 | DOWN | 308.2025 | 308.2023 | 308.2025 | 9.962617 | 9.843367 |
| 2021 | M212T10_ | 1.395931 | -0.48123 | -1.55316 | 0.163398 | 0.863749 | DOWN | 211.7789 | 211.7786 | 211.7794 | 9.816175 | 9.715683 |
| 2022 | M1377T10 | 1.382267 | -0.46704 | -1.59796 | 0.163412 | 0.863749 | DOWN | 1376.992 | 1376.99  | 1376.994 | 9.851025 | 9.747533 |
| 2023 | M431T9_1 | 1.362897 | -0.44668 | -1.58946 | 0.163437 | 0.863749 | DOWN | 430.5284 | 430.5277 | 430.5299 | 8.930317 | 8.7891   |
| 2024 | M340T10_ | 1.35146  | -0.43452 | -1.63143 | 0.163467 | 0.863749 | DOWN | 339.7669 | 339.7668 | 339.7673 | 9.507075 | 9.38595  |
| 2025 | M676T9_1 | 1.383525 | -0.46835 | -1.56762 | 0.163493 | 0.863749 | DOWN | 675.6517 | 675.6511 | 675.6535 | 9.313325 | 9.20785  |
| 2026 | M414T11_ | 1.266125 | -0.34042 | -1.62851 | 0.163554 | 0.86375  | DOWN | 413.5762 | 413.576  | 413.5778 | 10.90659 | 10.88747 |
| 2027 | M644T9_1 | 2.761684 | -1.46555 | -1.57759 | 0.163568 | 0.86375  | DOWN | 644.1118 | 644.111  | 644.1122 | 9.325333 | 9.275917 |
| 2028 | M519T10_ | 1.434661 | -0.52071 | -1.53751 | 0.163668 | 0.86375  | DOWN | 518.6634 | 518.6628 | 518.6638 | 10.45568 | 10.40807 |
| 2029 | M353T11_ | 1.987658 | -0.99107 | -1.54224 | 0.163803 | 0.86375  | DOWN | 352.8641 | 352.8633 | 352.8649 | 10.8926  | 10.879   |

|      |          |          |          |          |          |          |      |          |          |          |          |          |
|------|----------|----------|----------|----------|----------|----------|------|----------|----------|----------|----------|----------|
| 2030 | M673T9_2 | 1.256411 | -0.32931 | -1.53973 | 0.163824 | 0.86375  | DOWN | 673.34   | 673.3396 | 673.3406 | 9.389617 | 9.30965  |
| 2031 | M327T45_ | 1.575949 | -0.65622 | -1.57902 | 0.163827 | 0.86375  | DOWN | 327.2163 | 327.2162 | 327.2166 | 44.811   | 44.61    |
| 2032 | M450T9_9 | 2.829737 | 1.500668 | 1.690813 | 0.163938 | 0.863751 | UP   | 450.3546 | 450.3492 | 450.3606 | 9.311167 | 9.0839   |
| 2033 | M349T10_ | 2.105286 | -1.07402 | -1.53335 | 0.16396  | 0.863751 | DOWN | 348.8975 | 348.8974 | 348.8976 | 9.812417 | 9.715683 |
| 2034 | M266T15_ | 1.759867 | 0.815466 | 1.583884 | 0.164004 | 0.863751 | UP   | 266.1536 | 266.1531 | 266.1541 | 15.43913 | 15.35868 |
| 2035 | M431T9_1 | 1.354956 | -0.43825 | -1.53908 | 0.164005 | 0.863751 | DOWN | 431.3166 | 431.3156 | 431.3187 | 9.276658 | 9.06855  |
| 2036 | M555T10_ | 1.319016 | -0.39946 | -1.57798 | 0.164075 | 0.863751 | DOWN | 554.7475 | 554.7471 | 554.7476 | 9.902617 | 9.79535  |
| 2037 | M320T10_ | 1.091645 | -0.1265  | -1.53391 | 0.164081 | 0.863751 | DOWN | 319.8316 | 319.8312 | 319.8331 | 9.828367 | 9.715683 |
| 2038 | M359T45  | 1.344761 | 0.42735  | 1.532419 | 0.164116 | 0.863751 | UP   | 359.2064 | 359.2062 | 359.2064 | 44.93933 | 44.81083 |
| 2039 | M335T9_3 | 1.363896 | -0.44773 | -1.54296 | 0.164125 | 0.863751 | DOWN | 334.7237 | 334.7232 | 334.7241 | 9.183833 | 9.145433 |
| 2040 | M612T9_6 | 1.457647 | -0.54364 | -1.53082 | 0.164377 | 0.863752 | DOWN | 611.9495 | 611.9489 | 611.9511 | 9.314442 | 9.234417 |
| 2041 | M854T16_ | 2.348713 | -1.23187 | -1.62374 | 0.164388 | 0.863752 | DOWN | 854.4499 | 854.4492 | 854.4516 | 16.2856  | 16.23408 |
| 2042 | M667T13  | 1.502971 | -0.58782 | -1.53094 | 0.164393 | 0.863752 | DOWN | 667.4794 | 667.479  | 667.4806 | 12.95248 | 12.9227  |
| 2043 | M368T11_ | 1.407606 | -0.49324 | -1.64907 | 0.164452 | 0.863752 | DOWN | 367.5431 | 367.5429 | 367.5434 | 10.92253 | 10.90553 |
| 2044 | M373T11_ | 1.715238 | -0.77841 | -1.57877 | 0.164485 | 0.863752 | DOWN | 373.3968 | 373.3962 | 373.3985 | 10.89193 | 10.85018 |
| 2045 | M223T9   | 1.379248 | -0.46388 | -1.57887 | 0.164521 | 0.863753 | DOWN | 223.4876 | 223.4873 | 223.4877 | 8.976033 | 8.90715  |
| 2046 | M636T43_ | 1.656936 | -0.72852 | -1.54179 | 0.164712 | 0.863753 | DOWN | 636.359  | 636.3586 | 636.3594 | 42.7835  | 42.53883 |
| 2047 | M331T10_ | 1.295496 | -0.3735  | -1.67869 | 0.165041 | 0.863754 | DOWN | 331.443  | 331.4428 | 331.4435 | 9.825392 | 9.699733 |
| 2048 | M1558T10 | 1.640851 | -0.71444 | -1.58002 | 0.165052 | 0.863754 | DOWN | 1558.416 | 1558.415 | 1558.416 | 9.886608 | 9.806367 |
| 2049 | M525T9_4 | 1.506801 | -0.59149 | -1.55582 | 0.16506  | 0.863754 | DOWN | 525.1735 | 525.1734 | 525.174  | 9.16125  | 9.12675  |
| 2050 | M666T10_ | 2.424909 | -1.27793 | -1.63349 | 0.165098 | 0.863754 | DOWN | 665.9211 | 665.9205 | 665.922  | 10.4923  | 10.40882 |
| 2051 | M468T41  | 1.288719 | -0.36594 | -1.59235 | 0.165125 | 0.863754 | DOWN | 468.2798 | 468.2797 | 468.2801 | 40.942   | 40.87017 |
| 2052 | M602T45  | 1.194172 | 0.25601  | 1.533118 | 0.165205 | 0.863755 | UP   | 601.9413 | 601.9412 | 601.9422 | 44.98342 | 44.98333 |
| 2053 | M487T16  | 1.402363 | -0.48786 | -1.60722 | 0.165285 | 0.863755 | DOWN | 487.2752 | 487.2744 | 487.2761 | 16.02312 | 15.99417 |
| 2054 | M420T45  | 1.579796 | 0.659738 | 1.679366 | 0.165333 | 0.863755 | UP   | 420.2226 | 420.2225 | 420.2228 | 44.926   | 44.72467 |
| 2055 | M435T20  | 1.31632  | -0.39651 | -1.54834 | 0.165381 | 0.863755 | DOWN | 435.2485 | 435.2482 | 435.2486 | 20.17283 | 20.17217 |
| 2056 | M478T9_5 | 1.278726 | -0.35471 | -1.58201 | 0.165396 | 0.863755 | DOWN | 478.3363 | 478.3318 | 478.3463 | 9.168108 | 9.009533 |
| 2057 | M392T9_4 | 2.324653 | 1.217015 | 1.581181 | 0.165427 | 0.863755 | UP   | 391.9962 | 391.9932 | 391.9966 | 9.271333 | 9.245983 |
| 2058 | M473T9_1 | 1.258755 | -0.332   | -1.52893 | 0.16543  | 0.863755 | DOWN | 472.564  | 472.5637 | 472.5646 | 9.295167 | 9.129317 |
| 2059 | M373T39_ | 1.778084 | -0.83032 | -1.59672 | 0.165471 | 0.863755 | DOWN | 373.2218 | 373.2217 | 373.2221 | 38.7265  | 38.40983 |
| 2060 | M214T9_9 | 2.558185 | -1.35512 | -1.5389  | 0.16557  | 0.863756 | DOWN | 213.8076 | 213.8072 | 213.809  | 9.295492 | 9.146383 |
| 2061 | M587T28  | 1.400829 | -0.48628 | -1.56079 | 0.165577 | 0.863756 | DOWN | 587.4193 | 587.4188 | 587.42   | 28.18658 | 28.14183 |
| 2062 | M450T9_4 | 1.717073 | -0.77995 | -1.57609 | 0.165649 | 0.863756 | DOWN | 449.6487 | 449.6434 | 449.6505 | 9.235933 | 9.03845  |
| 2063 | M790T11_ | 1.733319 | -0.79354 | -1.53148 | 0.165652 | 0.863756 | DOWN | 790.3716 | 790.3714 | 790.3727 | 10.62363 | 10.5836  |
| 2064 | M361T9_6 | 1.615797 | 0.692246 | 1.555666 | 0.165745 | 0.863756 | UP   | 361.2592 | 361.2583 | 361.2626 | 9.230817 | 9.09495  |

|      |          |          |          |          |          |          |      |          |          |          |          |          |
|------|----------|----------|----------|----------|----------|----------|------|----------|----------|----------|----------|----------|
| 2065 | M191T11_ | 1.511145 | -0.59564 | -1.57665 | 0.165832 | 0.863756 | DOWN | 190.8459 | 190.8458 | 190.846  | 10.88141 | 10.83572 |
| 2066 | M387T24  | 2.118234 | 1.082862 | 1.686158 | 0.165858 | 0.863757 | UP   | 387.1929 | 387.1927 | 387.193  | 24.32775 | 24.30217 |
| 2067 | M785T28  | 1.464213 | 0.550126 | 1.563681 | 0.165901 | 0.863757 | UP   | 785.4853 | 785.4843 | 785.4863 | 27.84208 | 27.76717 |
| 2068 | M545T9_1 | 1.631205 | -0.70594 | -1.52487 | 0.165914 | 0.863757 | DOWN | 545.1305 | 545.1225 | 545.131  | 9.264333 | 9.174967 |
| 2069 | M680T39  | 1.282155 | -0.35857 | -1.64665 | 0.165924 | 0.863757 | DOWN | 680.3857 | 680.3852 | 680.3858 | 38.99267 | 38.81267 |
| 2070 | M623T9_6 | 1.791848 | -0.84145 | -1.5288  | 0.165925 | 0.863757 | DOWN | 623.4458 | 623.4454 | 623.4474 | 9.377342 | 9.324917 |
| 2071 | M705T10_ | 1.402518 | 0.488019 | 1.550314 | 0.166441 | 0.863758 | UP   | 705.0889 | 705.0864 | 705.0896 | 9.842    | 9.65225  |
| 2072 | M208T12  | 3.124314 | -1.64354 | -1.66521 | 0.166445 | 0.863758 | DOWN | 208.0748 | 208.0747 | 208.075  | 12.06433 | 12.06353 |
| 2073 | M370T9_1 | 1.367064 | -0.45108 | -1.52366 | 0.166985 | 0.86376  | DOWN | 369.508  | 369.5078 | 369.5089 | 9.160258 | 9.130683 |
| 2074 | M272T18  | 1.769262 | 0.823148 | 1.667686 | 0.167064 | 0.86376  | UP   | 272.1854 | 272.1853 | 272.1854 | 17.99633 | 17.98167 |
| 2075 | M268T10_ | 3.032695 | 1.600601 | 1.651324 | 0.167078 | 0.86376  | UP   | 267.7655 | 267.7546 | 267.766  | 9.932567 | 9.665433 |
| 2076 | M356T10_ | 4.070758 | 2.025297 | 1.677771 | 0.167246 | 0.863761 | UP   | 356.2544 | 356.254  | 356.2654 | 9.595867 | 9.275917 |
| 2077 | M345T11_ | 1.263897 | 0.337879 | 1.556074 | 0.16731  | 0.863761 | UP   | 344.7546 | 344.7542 | 344.7562 | 10.94962 | 10.90548 |
| 2078 | M1883T10 | 1.302965 | -0.3818  | -1.55943 | 0.167319 | 0.863761 | DOWN | 1882.996 | 1882.995 | 1883     | 9.825492 | 9.715683 |
| 2079 | M229T10_ | 2.731521 | 1.449705 | 1.652435 | 0.167474 | 0.863761 | UP   | 229.1407 | 229.1407 | 229.1409 | 9.59825  | 9.478833 |
| 2080 | M314T10_ | 1.173453 | -0.23076 | -1.58575 | 0.16748  | 0.863761 | DOWN | 314.3878 | 314.3873 | 314.3884 | 9.983467 | 9.8753   |
| 2081 | M177T18  | 1.332874 | -0.41454 | -1.60889 | 0.16748  | 0.863761 | DOWN | 177.0544 | 177.0543 | 177.0545 | 18.49692 | 18.48167 |
| 2082 | M278T11_ | 1.748925 | -0.80647 | -1.59285 | 0.167501 | 0.863761 | DOWN | 278.237  | 278.2367 | 278.2372 | 10.76537 | 10.74033 |
| 2083 | M598T20  | 1.310212 | -0.3898  | -1.52411 | 0.167506 | 0.863761 | DOWN | 598.4523 | 598.452  | 598.4526 | 20.44767 | 20.41833 |
| 2084 | M376T10_ | 1.391501 | 0.476642 | 1.539193 | 0.167534 | 0.863761 | UP   | 376.2062 | 376.1965 | 376.2064 | 9.972217 | 9.63045  |
| 2085 | M464T10_ | 1.314714 | 0.394749 | 1.634676 | 0.167567 | 0.863762 | UP   | 463.9533 | 463.9527 | 463.9535 | 9.967367 | 9.790617 |
| 2086 | M178T9_1 | 1.798368 | 0.846688 | 1.585355 | 0.167594 | 0.863762 | UP   | 178.3718 | 178.3715 | 178.372  | 9.176542 | 9.09495  |
| 2087 | M324T10_ | 1.09036  | -0.1248  | -1.63859 | 0.167598 | 0.863762 | DOWN | 324.2508 | 324.2505 | 324.2511 | 9.8207   | 9.699733 |
| 2088 | M343T10_ | 1.183385 | -0.24292 | -1.53083 | 0.167636 | 0.863762 | DOWN | 343.048  | 343.0477 | 343.0482 | 9.825492 | 9.715683 |
| 2089 | M453T25  | 1.435791 | 0.521846 | 1.525061 | 0.167651 | 0.863762 | UP   | 453.1669 | 453.1666 | 453.1673 | 24.6005  | 24.58017 |
| 2090 | M587T12  | 1.607258 | 0.684601 | 1.594031 | 0.167676 | 0.863762 | UP   | 587.4167 | 587.4164 | 587.4169 | 11.67752 | 11.66582 |
| 2091 | M444T10_ | 1.674594 | 0.743811 | 1.519408 | 0.167721 | 0.863762 | UP   | 443.5059 | 443.5057 | 443.5059 | 9.999217 | 9.8914   |
| 2092 | M177T30  | 1.92035  | 0.941369 | 1.516703 | 0.167818 | 0.863762 | UP   | 177.1119 | 177.1115 | 177.1119 | 30.237   | 30.209   |
| 2093 | M297T10_ | 1.589845 | -0.66889 | -1.62793 | 0.167819 | 0.863762 | DOWN | 296.5065 | 296.5065 | 296.5066 | 9.964092 | 9.869467 |
| 2094 | M740T9_2 | 1.278932 | -0.35494 | -1.5548  | 0.167871 | 0.863762 | DOWN | 739.8411 | 739.8398 | 739.8414 | 9.322542 | 9.234417 |
| 2095 | M790T10_ | 1.449985 | -0.53604 | -1.51991 | 0.168008 | 0.863763 | DOWN | 789.7456 | 789.7435 | 789.7479 | 9.93035  | 9.822117 |
| 2096 | M377T10_ | 1.448738 | 0.534797 | 1.516385 | 0.168026 | 0.863763 | UP   | 377.0138 | 377.0135 | 377.0143 | 9.967367 | 9.859233 |
| 2097 | M422T11_ | 1.348404 | -0.43125 | -1.51821 | 0.16804  | 0.863763 | DOWN | 422.312  | 422.3102 | 422.313  | 10.71765 | 10.61512 |
| 2098 | M397T9_4 | 1.314032 | -0.394   | -1.52656 | 0.168065 | 0.863763 | DOWN | 397.1737 | 397.173  | 397.175  | 9.280992 | 9.129317 |
| 2099 | M304T24  | 1.202538 | -0.26608 | -1.53085 | 0.168102 | 0.863763 | DOWN | 304.2843 | 304.2842 | 304.2845 | 23.8275  | 23.806   |

|      |          |          |          |          |          |          |      |          |          |          |          |          |
|------|----------|----------|----------|----------|----------|----------|------|----------|----------|----------|----------|----------|
| 2100 | M189T9_1 | 2.544666 | 1.347476 | 1.613031 | 0.168106 | 0.863763 | UP   | 189.2486 | 189.2378 | 189.2494 | 9.174967 | 9.0839   |
| 2101 | M621T10_ | 1.942308 | -0.95777 | -1.60672 | 0.168133 | 0.863763 | DOWN | 621.3936 | 621.3933 | 621.3944 | 10.31292 | 10.26307 |
| 2102 | M1272T10 | 2.228897 | 1.15633  | 1.60702  | 0.168187 | 0.863763 | UP   | 1271.809 | 1271.809 | 1271.81  | 9.983467 | 9.8753   |
| 2103 | M1229T10 | 2.462771 | 1.300283 | 1.648983 | 0.168202 | 0.863763 | UP   | 1229.491 | 1229.488 | 1229.497 | 9.847125 | 9.73145  |
| 2104 | M334T10_ | 1.180069 | -0.23887 | -1.63553 | 0.168346 | 0.863764 | DOWN | 333.8121 | 333.8119 | 333.8125 | 9.843017 | 9.715683 |
| 2105 | M406T21_ | 1.267908 | -0.34245 | -1.51714 | 0.168473 | 0.863764 | DOWN | 406.3524 | 406.3522 | 406.3525 | 21.06475 | 21.04317 |
| 2106 | M197T45  | 1.494065 | -0.57924 | -1.58863 | 0.168564 | 0.863764 | DOWN | 197.1533 | 197.1533 | 197.1534 | 44.92583 | 44.83967 |
| 2107 | M1020T11 | 1.249561 | 0.321421 | 1.513564 | 0.168685 | 0.863765 | UP   | 1019.774 | 1019.774 | 1019.775 | 10.9119  | 10.879   |
| 2108 | M436T10_ | 2.140688 | 1.098075 | 1.582475 | 0.168699 | 0.863765 | UP   | 436.1352 | 436.1351 | 436.1356 | 9.960967 | 9.8753   |
| 2109 | M468T10_ | 1.395569 | 0.480853 | 1.52265  | 0.168768 | 0.863765 | UP   | 468.193  | 468.1922 | 468.1932 | 9.9754   | 9.8753   |
| 2110 | M416T10_ | 1.45047  | -0.53652 | -1.52931 | 0.168887 | 0.863765 | DOWN | 415.7644 | 415.764  | 415.7649 | 9.9351   | 9.8378   |
| 2111 | M552T42_ | 1.169419 | -0.22579 | -1.66227 | 0.168963 | 0.863766 | DOWN | 552.3012 | 552.301  | 552.3013 | 42.45267 | 42.38067 |
| 2112 | M399T9_8 | 1.718799 | -0.7814  | -1.51959 | 0.16905  | 0.863766 | DOWN | 399.1151 | 399.1101 | 399.1167 | 9.235175 | 9.1428   |
| 2113 | M355T10_ | 2.336641 | 1.224436 | 1.530054 | 0.169106 | 0.863766 | UP   | 354.876  | 354.8757 | 354.8763 | 9.78305  | 9.665433 |
| 2114 | M386T9_4 | 1.634463 | 0.708817 | 1.51346  | 0.169207 | 0.863766 | UP   | 385.7748 | 385.7727 | 385.7751 | 8.753167 | 8.670133 |
| 2115 | M488T42  | 1.571779 | -0.6524  | -1.5486  | 0.169255 | 0.863766 | DOWN | 488.2849 | 488.2848 | 488.2852 | 42.11425 | 41.73317 |
| 2116 | M415T9_2 | 2.309435 | 1.20754  | 1.628415 | 0.169395 | 0.863767 | UP   | 414.5917 | 414.5899 | 414.5958 | 9.355917 | 9.06855  |
| 2117 | M607T10_ | 2.509194 | 1.327224 | 1.600512 | 0.169404 | 0.863767 | UP   | 607.1426 | 607.1418 | 607.1435 | 9.975217 | 9.8753   |
| 2118 | M704T10_ | 3.968735 | 1.988679 | 1.671127 | 0.169472 | 0.863767 | UP   | 703.8911 | 703.8903 | 703.8916 | 9.970617 | 9.843367 |
| 2119 | M874T10_ | 1.39108  | -0.47621 | -1.52895 | 0.1695   | 0.863767 | DOWN | 874.4709 | 874.4698 | 874.472  | 9.66805  | 9.58735  |
| 2120 | M570T7   | 1.284125 | -0.36079 | -1.50976 | 0.169546 | 0.863767 | DOWN | 570.4776 | 570.477  | 570.479  | 7.057133 | 6.954633 |
| 2121 | M670T10_ | 1.357635 | -0.4411  | -1.56047 | 0.169551 | 0.863767 | DOWN | 670.4013 | 670.4001 | 670.4016 | 9.744183 | 9.62055  |
| 2122 | M506T9_2 | 1.874057 | -0.90617 | -1.50979 | 0.169575 | 0.863767 | DOWN | 505.8713 | 505.8687 | 505.8724 | 9.256525 | 9.175017 |
| 2123 | M260T24  | 1.334818 | -0.41664 | -1.5173  | 0.169614 | 0.863767 | DOWN | 260.1681 | 260.1679 | 260.1684 | 24.20383 | 24.1715  |
| 2124 | M394T12  | 3.656315 | -1.87039 | -1.63124 | 0.169773 | 0.863768 | DOWN | 394.2223 | 394.2125 | 394.2225 | 12.04834 | 11.87323 |
| 2125 | M1480T9  | 1.924005 | -0.94411 | -1.52916 | 0.1698   | 0.863768 | DOWN | 1479.564 | 1479.561 | 1479.568 | 9.437367 | 9.297883 |
| 2126 | M259T20  | 1.236347 | -0.30608 | -1.51863 | 0.169812 | 0.863768 | DOWN | 259.169  | 259.1689 | 259.1691 | 20.17233 | 20.15783 |
| 2127 | M421T10_ | 1.389809 | 0.474887 | 1.509338 | 0.169832 | 0.863768 | UP   | 421.0453 | 421.045  | 421.0458 | 9.970617 | 9.859233 |
| 2128 | M182T10_ | 1.520131 | -0.6042  | -1.57296 | 0.169875 | 0.863768 | DOWN | 181.909  | 181.9089 | 181.909  | 9.914217 | 9.822117 |
| 2129 | M245T39_ | 1.298059 | 0.376356 | 1.552124 | 0.169881 | 0.863768 | UP   | 245.138  | 245.1379 | 245.1382 | 39.08617 | 39.043   |
| 2130 | M1862T10 | 1.244053 | -0.31505 | -1.5659  | 0.169947 | 0.863768 | DOWN | 1862.188 | 1862.187 | 1862.189 | 9.8374   | 9.73145  |
| 2131 | M272T10_ | 2.716745 | 1.441879 | 1.610025 | 0.169958 | 0.863768 | UP   | 271.8642 | 271.8614 | 271.8672 | 9.743158 | 9.595867 |
| 2132 | M378T10_ | 1.189177 | -0.24996 | -1.5577  | 0.17003  | 0.863769 | DOWN | 377.5913 | 377.591  | 377.592  | 9.961892 | 9.859233 |
| 2133 | M480T18  | 1.259743 | -0.33313 | -1.51438 | 0.17009  | 0.863769 | DOWN | 480.3586 | 480.3583 | 480.3591 | 17.527   | 17.51067 |
| 2134 | M434T25_ | 5.510386 | -2.46215 | -1.66985 | 0.170105 | 0.863769 | DOWN | 434.3308 | 434.3303 | 434.331  | 24.58967 | 24.5795  |

|      |          |          |          |          |          |          |      |          |          |          |          |          |
|------|----------|----------|----------|----------|----------|----------|------|----------|----------|----------|----------|----------|
| 2135 | M417T43_ | 1.470848 | -0.55665 | -1.55038 | 0.170633 | 0.86377  | DOWN | 417.248  | 417.2477 | 417.2483 | 43.29417 | 42.913   |
| 2136 | M742T10_ | 1.426576 | -0.51256 | -1.55918 | 0.170659 | 0.86377  | DOWN | 741.9298 | 741.9286 | 741.9301 | 10.14225 | 9.840617 |
| 2137 | M225T43_ | 1.208324 | -0.27301 | -1.65872 | 0.170748 | 0.863771 | DOWN | 225.1482 | 225.1481 | 225.1483 | 42.9775  | 42.86967 |
| 2138 | M556T9_7 | 1.528023 | -0.61167 | -1.53178 | 0.170778 | 0.863771 | DOWN | 556.2803 | 556.2792 | 556.2804 | 8.658083 | 8.643767 |
| 2139 | M992T10  | 1.440166 | -0.52623 | -1.58445 | 0.170861 | 0.863771 | DOWN | 991.9684 | 991.9669 | 991.9721 | 9.810125 | 9.636483 |
| 2140 | M1959T10 | 1.18453  | -0.24432 | -1.65651 | 0.170914 | 0.863771 | DOWN | 1958.606 | 1958.605 | 1958.607 | 9.823575 | 9.715683 |
| 2141 | M347T10_ | 1.229861 | -0.2985  | -1.53092 | 0.170993 | 0.863771 | DOWN | 346.8955 | 346.8953 | 346.8958 | 9.849433 | 9.715683 |
| 2142 | M389T11_ | 1.152521 | -0.20479 | -1.5194  | 0.171036 | 0.863771 | DOWN | 388.5359 | 388.5357 | 388.5362 | 10.90659 | 10.879   |
| 2143 | M520T10_ | 1.456824 | -0.54283 | -1.53719 | 0.171089 | 0.863771 | DOWN | 520.3155 | 520.3141 | 520.3157 | 10.45967 | 10.39197 |
| 2144 | M455T9_3 | 1.626069 | -0.70139 | -1.50625 | 0.171108 | 0.863772 | DOWN | 454.5624 | 454.5604 | 454.5632 | 9.274067 | 9.174917 |
| 2145 | M579T10_ | 1.206623 | -0.27097 | -1.56279 | 0.171142 | 0.863772 | DOWN | 579.3775 | 579.3773 | 579.3778 | 9.597658 | 9.49445  |
| 2146 | M200T9_1 | 1.82109  | -0.8648  | -1.51789 | 0.171185 | 0.863772 | DOWN | 199.5074 | 199.5058 | 199.5084 | 9.340183 | 9.07525  |
| 2147 | M624T9_1 | 2.669419 | -1.41653 | -1.60258 | 0.171419 | 0.863772 | DOWN | 623.5685 | 623.5675 | 623.5694 | 8.661258 | 8.601067 |
| 2148 | M226T17  | 1.464958 | -0.55086 | -1.61836 | 0.171438 | 0.863772 | DOWN | 226.1991 | 226.199  | 226.1994 | 16.88433 | 16.82617 |
| 2149 | M588T12  | 1.658892 | 0.73022  | 1.59763  | 0.171522 | 0.863773 | UP   | 588.4203 | 588.42   | 588.4205 | 11.68251 | 11.65717 |
| 2150 | M358T37  | 1.269864 | -0.34467 | -1.56082 | 0.171525 | 0.863773 | DOWN | 358.2223 | 358.2221 | 358.2225 | 37.48183 | 37.331   |
| 2151 | M557T9_4 | 1.384078 | -0.46893 | -1.52121 | 0.171592 | 0.863773 | DOWN | 557.1134 | 557.1094 | 557.1162 | 9.255925 | 9.1445   |
| 2152 | M828T11  | 1.435175 | -0.52123 | -1.54947 | 0.171668 | 0.863773 | DOWN | 828.2546 | 828.2539 | 828.2563 | 10.9049  | 10.879   |
| 2153 | M521T11_ | 1.372431 | -0.45673 | -1.52146 | 0.171669 | 0.863773 | DOWN | 521.2569 | 521.2562 | 521.2575 | 10.6471  | 10.63083 |
| 2154 | M452T22  | 1.534827 | 0.618076 | 1.532165 | 0.171689 | 0.863773 | UP   | 452.3278 | 452.326  | 452.3283 | 21.68233 | 21.66567 |
| 2155 | M538T10_ | 1.245567 | -0.3168  | -1.52266 | 0.171757 | 0.863773 | DOWN | 538.0055 | 538.0047 | 538.0064 | 9.918833 | 9.827283 |
| 2156 | M464T43_ | 1.460641 | 0.546602 | 1.636646 | 0.171764 | 0.863773 | UP   | 464.285  | 464.2846 | 464.2851 | 43.22917 | 42.94133 |
| 2157 | M331T10_ | 7.240602 | 2.85611  | 1.661419 | 0.171771 | 0.863773 | UP   | 331.271  | 331.2709 | 331.2713 | 9.823575 | 9.743667 |
| 2158 | M378T39  | 5.587889 | 2.482303 | 1.662031 | 0.17178  | 0.863773 | UP   | 378.2482 | 378.2481 | 378.2485 | 38.81283 | 38.64    |
| 2159 | M659T9_1 | 1.275517 | -0.35108 | -1.53643 | 0.171794 | 0.863773 | DOWN | 658.732  | 658.7314 | 658.7334 | 9.322542 | 9.234417 |
| 2160 | M378T10_ | 1.180162 | -0.23899 | -1.50186 | 0.171803 | 0.863773 | DOWN | 377.8009 | 377.8006 | 377.8015 | 9.924308 | 9.811217 |
| 2161 | M490T11_ | 1.160297 | 0.214494 | 1.502618 | 0.171823 | 0.863774 | UP   | 489.8485 | 489.8483 | 489.849  | 10.91987 | 10.89355 |
| 2162 | M628T15_ | 1.623384 | -0.699   | -1.51616 | 0.171927 | 0.863774 | DOWN | 628.4172 | 628.4169 | 628.4179 | 14.67782 | 14.66168 |
| 2163 | M493T12  | 1.318162 | -0.39853 | -1.57488 | 0.171984 | 0.863774 | DOWN | 493.4189 | 493.4185 | 493.4192 | 11.65717 | 11.65555 |
| 2164 | M491T21  | 1.271724 | 0.346786 | 1.540833 | 0.172049 | 0.863774 | UP   | 491.3098 | 491.309  | 491.3108 | 21.07358 | 21.04117 |
| 2165 | M308T10_ | 3.850577 | 1.945075 | 1.659482 | 0.17205  | 0.863774 | UP   | 308.0629 | 308.0628 | 308.0632 | 9.95385  | 9.859233 |
| 2166 | M578T10_ | 1.228046 | -0.29636 | -1.54562 | 0.172068 | 0.863774 | DOWN | 578.374  | 578.3738 | 578.3743 | 9.597658 | 9.49445  |
| 2167 | M306T9_1 | 1.459472 | -0.54545 | -1.50961 | 0.172107 | 0.863774 | DOWN | 305.689  | 305.6827 | 305.6892 | 9.317    | 9.219483 |
| 2168 | M508T40_ | 1.227553 | -0.29579 | -1.61648 | 0.172186 | 0.863774 | DOWN | 508.2748 | 508.2746 | 508.275  | 39.65433 | 39.561   |
| 2169 | M422T43  | 1.119426 | -0.16276 | -1.5577  | 0.172222 | 0.863775 | DOWN | 422.2745 | 422.2742 | 422.2747 | 42.5245  | 42.29433 |

|      |          |          |          |          |          |          |      |          |          |          |          |          |
|------|----------|----------|----------|----------|----------|----------|------|----------|----------|----------|----------|----------|
| 2170 | M617T10_ | 1.402906 | -0.48842 | -1.55102 | 0.172243 | 0.863775 | DOWN | 616.7477 | 616.7468 | 616.7499 | 9.9351   | 9.827283 |
| 2171 | M709T9_2 | 1.294845 | -0.37278 | -1.50927 | 0.172256 | 0.863775 | DOWN | 708.9268 | 708.9264 | 708.9274 | 9.280992 | 9.129317 |
| 2172 | M688T21  | 1.236101 | -0.3058  | -1.53888 | 0.172312 | 0.863775 | DOWN | 687.5081 | 687.508  | 687.5087 | 20.90683 | 20.89283 |
| 2173 | M742T9_3 | 1.561871 | -0.64327 | -1.50234 | 0.172471 | 0.863775 | DOWN | 741.9678 | 741.9662 | 741.9685 | 9.46925  | 9.38595  |
| 2174 | M332T44_ | 1.405632 | -0.49122 | -1.51819 | 0.172616 | 0.863776 | DOWN | 332.1702 | 332.1701 | 332.1705 | 43.9625  | 43.84783 |
| 2175 | M409T9_1 | 1.433014 | -0.51905 | -1.50358 | 0.172623 | 0.863776 | DOWN | 408.5874 | 408.5867 | 408.5881 | 9.271467 | 9.18975  |
| 2176 | M396T40_ | 1.457955 | -0.54395 | -1.49857 | 0.172698 | 0.863776 | DOWN | 396.2225 | 396.2224 | 396.2227 | 40.48175 | 40.3955  |
| 2177 | M382T16_ | 1.233495 | -0.30275 | -1.50829 | 0.172721 | 0.863776 | DOWN | 382.2719 | 382.2717 | 382.2723 | 16.25613 | 16.22762 |
| 2178 | M559T10_ | 1.306404 | -0.3856  | -1.50515 | 0.172896 | 0.863776 | DOWN | 558.6636 | 558.6632 | 558.664  | 10.34472 | 10.23087 |
| 2179 | M305T24  | 1.218954 | -0.28564 | -1.5061  | 0.173039 | 0.863777 | DOWN | 305.2877 | 305.2876 | 305.2879 | 23.82708 | 23.806   |
| 2180 | M173T10_ | 3.077665 | 1.621836 | 1.651681 | 0.173122 | 0.863777 | UP   | 173.3492 | 173.3492 | 173.3493 | 9.887292 | 9.79065  |
| 2181 | M351T11_ | 1.614289 | 0.690899 | 1.51947  | 0.173183 | 0.863777 | UP   | 351.2178 | 351.2173 | 351.2278 | 10.93415 | 10.76215 |
| 2182 | M360T10_ | 2.305874 | 1.205314 | 1.596386 | 0.173212 | 0.863777 | UP   | 360.4024 | 360.4019 | 360.4028 | 9.856867 | 9.728083 |
| 2183 | M227T11_ | 2.458139 | -1.29757 | -1.5194  | 0.173266 | 0.863777 | DOWN | 226.9865 | 226.9863 | 226.9867 | 10.9398  | 10.85018 |
| 2184 | M332T10_ | 1.231072 | -0.29992 | -1.56459 | 0.173326 | 0.863778 | DOWN | 331.7683 | 331.768  | 331.7689 | 9.836367 | 9.715683 |
| 2185 | M430T10_ | 1.470427 | 0.556236 | 1.578052 | 0.173357 | 0.863778 | UP   | 429.8413 | 429.8405 | 429.8415 | 9.762917 | 9.65225  |
| 2186 | M426T10_ | 2.002804 | 1.002021 | 1.581946 | 0.173359 | 0.863778 | UP   | 426.2076 | 426.1992 | 426.2086 | 9.969158 | 9.843367 |
| 2187 | M390T10_ | 1.323846 | -0.40473 | -1.5569  | 0.173361 | 0.863778 | DOWN | 390.3131 | 390.313  | 390.3133 | 9.543158 | 9.432183 |
| 2188 | M512T10_ | 1.462748 | -0.54868 | -1.55255 | 0.173419 | 0.863778 | DOWN | 511.778  | 511.7775 | 511.7788 | 9.965792 | 9.885167 |
| 2189 | M201T10_ | 1.258754 | -0.332   | -1.55853 | 0.173497 | 0.863778 | DOWN | 200.6306 | 200.6305 | 200.6309 | 9.830183 | 9.715683 |
| 2190 | M646T10_ | 1.793662 | -0.84291 | -1.55508 | 0.173522 | 0.863778 | DOWN | 645.8852 | 645.885  | 645.8858 | 10.37923 | 10.34542 |
| 2191 | M250T9_8 | 1.625011 | -0.70045 | -1.49392 | 0.173555 | 0.863778 | DOWN | 250.428  | 250.4274 | 250.4288 | 9.265117 | 9.22495  |
| 2192 | M705T10_ | 1.691304 | 0.758136 | 1.495348 | 0.173613 | 0.863778 | UP   | 705.1385 | 705.1375 | 705.1386 | 9.8207   | 9.802117 |
| 2193 | M382T11_ | 1.325376 | -0.4064  | -1.54923 | 0.173652 | 0.863778 | DOWN | 381.9502 | 381.95   | 381.9516 | 10.92598 | 10.88747 |
| 2194 | M261T10_ | 1.336735 | -0.41871 | -1.50755 | 0.173788 | 0.863779 | DOWN | 260.7915 | 260.7913 | 260.7917 | 9.761042 | 9.636483 |
| 2195 | M589T9_2 | 1.777707 | -0.83002 | -1.51568 | 0.173884 | 0.863779 | DOWN | 588.7586 | 588.7561 | 588.7601 | 9.264333 | 9.126783 |
| 2196 | M623T10_ | 1.425834 | -0.51181 | -1.50772 | 0.173894 | 0.863779 | DOWN | 623.2791 | 623.2782 | 623.2893 | 10.2024  | 10.07528 |
| 2197 | M682T9_3 | 2.02652  | -1.019   | -1.51199 | 0.173923 | 0.863779 | DOWN | 682.4817 | 682.4811 | 682.4827 | 9.360867 | 9.275917 |
| 2198 | M523T11_ | 1.619205 | 0.695286 | 1.556425 | 0.174143 | 0.86378  | UP   | 522.5071 | 522.506  | 522.5073 | 10.92438 | 10.83572 |
| 2199 | M555T9_1 | 1.487477 | -0.57287 | -1.54881 | 0.174143 | 0.86378  | DOWN | 554.5821 | 554.5753 | 554.5834 | 9.2651   | 9.11405  |
| 2200 | M243T9_1 | 1.263631 | -0.33757 | -1.50018 | 0.174185 | 0.86378  | DOWN | 243.1829 | 243.1826 | 243.183  | 8.519125 | 8.4194   |
| 2201 | M540T32  | 1.249206 | 0.321012 | 1.560723 | 0.174191 | 0.86378  | UP   | 540.4257 | 540.4256 | 540.4258 | 31.76767 | 31.72483 |
| 2202 | M201T44  | 1.38004  | -0.46471 | -1.50341 | 0.174255 | 0.86378  | DOWN | 201.1118 | 201.1117 | 201.1119 | 43.91967 | 43.546   |
| 2203 | M332T10_ | 1.56031  | 0.641832 | 1.495851 | 0.174263 | 0.86378  | UP   | 332.2962 | 332.2959 | 332.2963 | 9.841442 | 9.802117 |
| 2204 | M170T10_ | 1.399771 | -0.48519 | -1.60741 | 0.174274 | 0.86378  | DOWN | 170.2547 | 170.2546 | 170.2547 | 9.845483 | 9.743667 |

|      |          |          |          |          |          |          |      |          |          |          |          |          |
|------|----------|----------|----------|----------|----------|----------|------|----------|----------|----------|----------|----------|
| 2205 | M377T12  | 5.896508 | -2.55986 | -1.64968 | 0.174306 | 0.86378  | DOWN | 377.1957 | 377.1955 | 377.1959 | 12.04791 | 12.03328 |
| 2206 | M238T10_ | 1.557013 | -0.63878 | -1.55461 | 0.174319 | 0.86378  | DOWN | 237.9006 | 237.9005 | 237.9008 | 9.951283 | 9.8378   |
| 2207 | M829T10_ | 1.430395 | -0.51641 | -1.55576 | 0.174342 | 0.86378  | DOWN | 828.9799 | 828.9789 | 828.9802 | 10.34218 | 10.26607 |
| 2208 | M800T10_ | 1.311241 | -0.39093 | -1.49642 | 0.17436  | 0.86378  | DOWN | 800.468  | 800.4676 | 800.4684 | 9.544775 | 9.416817 |
| 2209 | M435T9_3 | 2.227756 | -1.15559 | -1.59395 | 0.174478 | 0.863781 | DOWN | 434.6612 | 434.6605 | 434.6625 | 9.329642 | 9.129317 |
| 2210 | M444T12  | 1.376108 | -0.46059 | -1.49095 | 0.174665 | 0.863781 | DOWN | 443.969  | 443.9689 | 443.9699 | 11.75844 | 11.72088 |
| 2211 | M664T31  | 1.280041 | -0.35619 | -1.60279 | 0.17473  | 0.863781 | DOWN | 664.4631 | 664.4628 | 664.4634 | 31.36558 | 31.34883 |
| 2212 | M559T10_ | 1.76375  | 0.818646 | 1.526346 | 0.174776 | 0.863781 | UP   | 558.8284 | 558.8281 | 558.8285 | 9.93815  | 9.8753   |
| 2213 | M762T16_ | 1.209816 | -0.27479 | -1.49086 | 0.174889 | 0.863782 | DOWN | 761.5313 | 761.5311 | 761.5317 | 16.25613 | 16.2422  |
| 2214 | M192T10_ | 1.195786 | -0.25796 | -1.59711 | 0.174926 | 0.863782 | DOWN | 191.7207 | 191.7206 | 191.721  | 9.989733 | 9.8914   |
| 2215 | M465T14  | 1.467418 | -0.55328 | -1.55936 | 0.174945 | 0.863782 | DOWN | 465.2936 | 465.2934 | 465.2937 | 14.063   | 14.04855 |
| 2216 | M319T9_6 | 1.389694 | -0.47477 | -1.52485 | 0.174955 | 0.863782 | DOWN | 319.2689 | 319.2683 | 319.2691 | 9.3332   | 9.234417 |
| 2217 | M365T11_ | 1.305432 | -0.38453 | -1.57782 | 0.174982 | 0.863782 | DOWN | 364.8286 | 364.8284 | 364.829  | 11.22813 | 11.19848 |
| 2218 | M336T36  | 1.502783 | 0.587636 | 1.561174 | 0.175027 | 0.863782 | UP   | 336.3107 | 336.3101 | 336.3112 | 36.29467 | 36.26583 |
| 2219 | M201T9_2 | 1.796517 | -0.8452  | -1.49816 | 0.175041 | 0.863782 | DOWN | 201.2929 | 201.2926 | 201.2938 | 9.310917 | 9.24215  |
| 2220 | M508T44_ | 1.406955 | -0.49258 | -1.49007 | 0.175071 | 0.863782 | DOWN | 508.2748 | 508.2746 | 508.2751 | 44.35117 | 44.17233 |
| 2221 | M446T40_ | 1.565201 | 0.646348 | 1.524361 | 0.175087 | 0.863782 | UP   | 446.2746 | 446.2742 | 446.2748 | 40.28733 | 40.07883 |
| 2222 | M221T9_1 | 2.314965 | -1.21099 | -1.50506 | 0.175138 | 0.863782 | DOWN | 221.4612 | 221.4596 | 221.4618 | 9.27975  | 9.11795  |
| 2223 | M193T10_ | 1.649128 | -0.7217  | -1.48909 | 0.175193 | 0.863783 | DOWN | 192.7976 | 192.7908 | 192.7977 | 9.811408 | 9.715683 |
| 2224 | M373T11_ | 1.648923 | -0.72152 | -1.54403 | 0.175263 | 0.863783 | DOWN | 372.6166 | 372.6121 | 372.6189 | 10.90618 | 10.83417 |
| 2225 | M763T16_ | 1.21843  | -0.28502 | -1.51923 | 0.175267 | 0.863783 | DOWN | 762.5346 | 762.5343 | 762.535  | 15.51777 | 15.51198 |
| 2226 | M332T10_ | 1.239859 | -0.31018 | -1.63981 | 0.175433 | 0.863783 | DOWN | 332.0946 | 332.0943 | 332.095  | 9.83535  | 9.715683 |
| 2227 | M623T9_5 | 2.118388 | -1.08297 | -1.55002 | 0.175435 | 0.863783 | DOWN | 623.3181 | 623.3167 | 623.3201 | 8.669583 | 8.5728   |
| 2228 | M804T9   | 1.384622 | -0.46949 | -1.50767 | 0.175442 | 0.863783 | DOWN | 803.6438 | 803.643  | 803.6449 | 9.1988   | 9.142767 |
| 2229 | M198T9_2 | 1.323466 | -0.40432 | -1.52784 | 0.175501 | 0.863783 | DOWN | 198.4655 | 198.4649 | 198.4656 | 9.277158 | 9.1428   |
| 2230 | M622T10_ | 1.2938   | -0.37161 | -1.48742 | 0.175508 | 0.863783 | DOWN | 622.2767 | 622.2764 | 622.2772 | 10.24579 | 10.18238 |
| 2231 | M295T9_2 | 1.469442 | -0.55527 | -1.52282 | 0.175597 | 0.863784 | DOWN | 294.5835 | 294.5831 | 294.5837 | 9.317    | 9.234417 |
| 2232 | M409T11_ | 1.166927 | -0.22271 | -1.56925 | 0.175649 | 0.863784 | DOWN | 409.3058 | 409.3057 | 409.306  | 11.09573 | 11.06723 |
| 2233 | M212T9_1 | 1.85826  | -0.89395 | -1.48638 | 0.17567  | 0.863784 | DOWN | 212.3091 | 212.3076 | 212.3097 | 9.272792 | 8.94625  |
| 2234 | M182T9_1 | 1.401335 | -0.4868  | -1.48707 | 0.175877 | 0.863784 | DOWN | 181.6577 | 181.6571 | 181.6578 | 9.382858 | 9.26575  |
| 2235 | M411T10_ | 1.405186 | -0.49076 | -1.49829 | 0.176096 | 0.863785 | DOWN | 410.6607 | 410.6604 | 410.6608 | 9.589158 | 9.478833 |
| 2236 | M731T22  | 1.33547  | -0.41735 | -1.54295 | 0.176362 | 0.863786 | DOWN | 730.5312 | 730.531  | 730.5317 | 21.62367 | 21.578   |
| 2237 | M831T9_2 | 2.068768 | -1.04877 | -1.52989 | 0.176427 | 0.863786 | DOWN | 830.756  | 830.7552 | 830.7562 | 8.6763   | 8.578067 |
| 2238 | M182T9_9 | 2.155071 | -1.10774 | -1.49506 | 0.176492 | 0.863786 | DOWN | 182.3871 | 182.3867 | 182.3872 | 9.175183 | 9.1428   |
| 2239 | M620T27  | 1.496851 | -0.58193 | -1.49075 | 0.176562 | 0.863786 | DOWN | 620.2912 | 620.2905 | 620.2913 | 26.89683 | 26.8555  |



|      |          |          |          |          |          |          |      |          |          |          |          |          |
|------|----------|----------|----------|----------|----------|----------|------|----------|----------|----------|----------|----------|
| 2240 | M697T10_ | 1.216763 | -0.28305 | -1.57823 | 0.176636 | 0.863786 | DOWN | 697.4965 | 697.496  | 697.4968 | 9.82645  | 9.699733 |
| 2241 | M823T9   | 4.862747 | -2.28177 | -1.60427 | 0.176981 | 0.863787 | DOWN | 823.4294 | 823.429  | 823.4307 | 8.799758 | 8.75965  |
| 2242 | M449T9_8 | 1.24928  | -0.3211  | -1.49634 | 0.177012 | 0.863787 | DOWN | 449.4305 | 449.4302 | 449.4309 | 9.294408 | 9.129317 |
| 2243 | M1190T45 | 1.324461 | 0.405406 | 1.508976 | 0.177055 | 0.863787 | UP   | 1189.802 | 1189.799 | 1189.803 | 44.9835  | 44.98333 |
| 2244 | M697T9_5 | 1.890328 | -0.91864 | -1.58162 | 0.177066 | 0.863787 | DOWN | 697.0723 | 697.0712 | 697.0727 | 9.336992 | 9.18975  |
| 2245 | M429T22_ | 1.38502  | -0.46991 | -1.48216 | 0.177116 | 0.863788 | DOWN | 429.1177 | 429.1169 | 429.1191 | 22.27592 | 22.22083 |
| 2246 | M553T10_ | 2.268244 | -1.18158 | -1.52829 | 0.177129 | 0.863788 | DOWN | 553.3576 | 553.3558 | 553.3594 | 9.947167 | 9.869467 |
| 2247 | M621T10_ | 1.880308 | 0.910969 | 1.601457 | 0.177157 | 0.863788 | UP   | 621.3845 | 621.3834 | 621.385  | 9.718283 | 9.62055  |
| 2248 | M612T9_3 | 1.722324 | -0.78436 | -1.48327 | 0.177327 | 0.863788 | DOWN | 611.8149 | 611.8126 | 611.8173 | 9.26025  | 9.064833 |
| 2249 | M1062T10 | 1.460725 | -0.54668 | -1.49097 | 0.177397 | 0.863788 | DOWN | 1062.406 | 1062.405 | 1062.407 | 9.80185  | 9.665433 |
| 2250 | M820T12  | 1.450718 | -0.53677 | -1.54196 | 0.177466 | 0.863789 | DOWN | 820.4181 | 820.4179 | 820.4185 | 11.95898 | 11.94427 |
| 2251 | M645T9_4 | 1.477524 | -0.56318 | -1.47899 | 0.177538 | 0.863789 | DOWN | 645.3658 | 645.3655 | 645.3665 | 9.314442 | 9.234417 |
| 2252 | M339T10_ | 1.302592 | -0.38139 | -1.57377 | 0.177632 | 0.863789 | DOWN | 339.2513 | 339.2471 | 339.2513 | 9.553017 | 9.432183 |
| 2253 | M350T9_7 | 1.727705 | -0.78886 | -1.49568 | 0.177645 | 0.863789 | DOWN | 350.0013 | 349.9991 | 350.0048 | 9.217867 | 9.09495  |
| 2254 | M366T9_6 | 1.80208  | -0.84966 | -1.61585 | 0.177663 | 0.863789 | DOWN | 366.0403 | 366.0377 | 366.0407 | 9.190775 | 9.126783 |
| 2255 | M212T9_3 | 1.712324 | 0.775956 | 1.546403 | 0.177799 | 0.863789 | UP   | 211.876  | 211.8745 | 211.8773 | 9.329083 | 9.0839   |
| 2256 | M451T9_8 | 1.248738 | -0.32047 | -1.48762 | 0.177836 | 0.863789 | DOWN | 451.2786 | 451.2782 | 451.2787 | 9.294408 | 9.129317 |
| 2257 | M182T10_ | 1.149888 | -0.20149 | -1.48484 | 0.17792  | 0.86379  | DOWN | 182.3045 | 182.3043 | 182.3046 | 9.933    | 9.827283 |
| 2258 | M732T21  | 1.255971 | -0.3288  | -1.48431 | 0.177926 | 0.86379  | DOWN | 731.5348 | 731.5346 | 731.5352 | 21.03617 | 20.99983 |
| 2259 | M331T10_ | 1.690533 | -0.75748 | -1.50225 | 0.17795  | 0.86379  | DOWN | 330.8418 | 330.8414 | 330.8419 | 9.970317 | 9.951283 |
| 2260 | M683T10_ | 2.269878 | -1.18262 | -1.49233 | 0.177968 | 0.86379  | DOWN | 682.8927 | 682.887  | 682.8931 | 9.76065  | 9.699733 |
| 2261 | M528T10_ | 1.545298 | -0.62788 | -1.52    | 0.177977 | 0.86379  | DOWN | 527.995  | 527.9947 | 527.9961 | 10.24744 | 10.10718 |
| 2262 | M589T9_1 | 1.850294 | -0.88775 | -1.51749 | 0.178125 | 0.86379  | DOWN | 588.6562 | 588.6548 | 588.6603 | 9.181525 | 9.098833 |
| 2263 | M636T11_ | 1.637284 | -0.7113  | -1.47645 | 0.178149 | 0.86379  | DOWN | 636.0657 | 636.0647 | 636.0677 | 11.06297 | 11.03245 |
| 2264 | M212T10_ | 1.587997 | -0.66721 | -1.47598 | 0.178198 | 0.86379  | DOWN | 211.5436 | 211.5395 | 211.5476 | 9.823575 | 9.699733 |
| 2265 | M224T10_ | 1.473867 | -0.55961 | -1.55321 | 0.17822  | 0.86379  | DOWN | 224.459  | 224.4587 | 224.4595 | 9.8235   | 9.715683 |
| 2266 | M456T9_1 | 1.279124 | -0.35516 | -1.48782 | 0.178267 | 0.863791 | DOWN | 456.3593 | 456.3588 | 456.3625 | 9.328967 | 9.129317 |
| 2267 | M271T9_9 | 1.35918  | -0.44274 | -1.47729 | 0.178282 | 0.863791 | DOWN | 271.3691 | 271.3682 | 271.3702 | 9.329083 | 9.1587   |
| 2268 | M740T11_ | 1.395858 | -0.48115 | -1.47716 | 0.178289 | 0.863791 | DOWN | 740.4924 | 740.4921 | 740.4925 | 10.69296 | 10.66012 |
| 2269 | M868T10_ | 1.241095 | -0.31161 | -1.50622 | 0.178308 | 0.863791 | DOWN | 868.407  | 868.4056 | 868.4074 | 9.953742 | 9.859233 |
| 2270 | M451T9_2 | 1.341649 | -0.42401 | -1.5317  | 0.178343 | 0.863791 | DOWN | 450.5531 | 450.5528 | 450.5557 | 9.306308 | 9.040017 |
| 2271 | M363T24  | 2.05794  | -1.0412  | -1.5686  | 0.178374 | 0.863791 | DOWN | 362.5925 | 362.5919 | 362.5926 | 23.95775 | 23.93533 |
| 2272 | M252T12  | 16.55713 | 4.04938  | 1.630036 | 0.178389 | 0.863791 | UP   | 252.1569 | 252.1569 | 252.157  | 11.73695 | 11.72808 |
| 2273 | M669T31  | 1.192231 | -0.25366 | -1.49629 | 0.178397 | 0.863791 | DOWN | 669.418  | 669.4178 | 669.4185 | 31.35192 | 31.34917 |
| 2274 | M256T10_ | 1.435949 | 0.522005 | 1.486978 | 0.178476 | 0.863791 | UP   | 255.5181 | 255.5176 | 255.5183 | 9.975217 | 9.8753   |

|      |          |          |          |          |          |          |      |          |          |          |          |          |
|------|----------|----------|----------|----------|----------|----------|------|----------|----------|----------|----------|----------|
| 2275 | M288T23_ | 1.773799 | 0.826843 | 1.483987 | 0.178499 | 0.863791 | UP   | 288.2033 | 288.1996 | 288.2112 | 22.893   | 22.857   |
| 2276 | M697T28  | 1.711108 | 0.774931 | 1.477873 | 0.17851  | 0.863791 | UP   | 697.4326 | 697.432  | 697.4331 | 27.52367 | 27.45433 |
| 2277 | M400T12_ | 3.691755 | -1.88431 | -1.6199  | 0.178589 | 0.863791 | DOWN | 400.1811 | 400.1808 | 400.1813 | 12.03728 | 12.031   |
| 2278 | M438T7   | 1.488689 | -0.57404 | -1.51757 | 0.178616 | 0.863791 | DOWN | 438.2384 | 438.2384 | 438.2389 | 7.366883 | 7.288367 |
| 2279 | M212T21  | 2.474568 | -1.30718 | -1.57932 | 0.178667 | 0.863792 | DOWN | 212.0736 | 212.0734 | 212.0738 | 20.69333 | 20.64933 |
| 2280 | M733T21  | 1.334584 | -0.41639 | -1.48154 | 0.178722 | 0.863792 | DOWN | 732.5382 | 732.5364 | 732.5387 | 21.029   | 20.9685  |
| 2281 | M542T10_ | 1.390264 | -0.47536 | -1.51038 | 0.178877 | 0.863792 | DOWN | 542.336  | 542.3354 | 542.3368 | 10.27583 | 10.2024  |
| 2282 | M629T10_ | 1.38218  | 0.466945 | 1.476907 | 0.178889 | 0.863792 | UP   | 629.3619 | 629.3613 | 629.3626 | 9.674742 | 9.5731   |
| 2283 | M368T9_5 | 1.269186 | -0.3439  | -1.48173 | 0.179065 | 0.863793 | DOWN | 368.1948 | 368.194  | 368.195  | 8.992917 | 8.936617 |
| 2284 | M480T42_ | 1.506942 | 0.591624 | 1.492712 | 0.179119 | 0.863793 | UP   | 480.2799 | 480.2796 | 480.2804 | 41.733   | 41.41683 |
| 2285 | M574T10_ | 1.27647  | -0.35216 | -1.52164 | 0.179188 | 0.863793 | DOWN | 574.275  | 574.2744 | 574.2757 | 9.917167 | 9.811217 |
| 2286 | M792T10_ | 1.37286  | -0.45718 | -1.54053 | 0.179324 | 0.863793 | DOWN | 791.9268 | 791.9263 | 791.9278 | 9.9014   | 9.79535  |
| 2287 | M470T11_ | 1.681926 | 0.750114 | 1.477289 | 0.179328 | 0.863793 | UP   | 469.8365 | 469.8362 | 469.8368 | 10.8926  | 10.88995 |
| 2288 | M527T9_8 | 1.36055  | -0.44419 | -1.49837 | 0.179432 | 0.863794 | DOWN | 526.9556 | 526.9548 | 526.9561 | 9.174967 | 9.159717 |
| 2289 | M302T9_4 | 1.469995 | -0.55581 | -1.51283 | 0.17961  | 0.863794 | DOWN | 302.3846 | 302.3842 | 302.3848 | 9.29345  | 9.129317 |
| 2290 | M545T10_ | 1.254082 | -0.32663 | -1.52241 | 0.179668 | 0.863794 | DOWN | 544.7496 | 544.7487 | 544.751  | 9.948875 | 9.859233 |
| 2291 | M205T9_5 | 1.555836 | -0.63769 | -1.47587 | 0.179839 | 0.863795 | DOWN | 205.2373 | 205.2348 | 205.2375 | 9.311167 | 9.11795  |
| 2292 | M596T11_ | 1.723313 | -0.78518 | -1.52561 | 0.179902 | 0.863795 | DOWN | 596.3786 | 596.3776 | 596.38   | 11.3514  | 11.25678 |
| 2293 | M634T9_1 | 1.470202 | -0.55601 | -1.47574 | 0.179906 | 0.863795 | DOWN | 633.766  | 633.7648 | 633.7689 | 9.280992 | 9.129317 |
| 2294 | M698T10_ | 1.677783 | 0.746556 | 1.515065 | 0.179921 | 0.863795 | UP   | 697.5241 | 697.5232 | 697.525  | 9.657075 | 9.540717 |
| 2295 | M229T9_9 | 1.475237 | -0.56095 | -1.50127 | 0.179922 | 0.863795 | DOWN | 229.2691 | 229.2675 | 229.2709 | 9.2946   | 9.142767 |
| 2296 | M218T11_ | 1.143912 | -0.19398 | -1.46972 | 0.179935 | 0.863795 | DOWN | 218.3562 | 218.356  | 218.3562 | 10.90659 | 10.88747 |
| 2297 | M339T10_ | 12.95062 | 3.694949 | 1.622666 | 0.179961 | 0.863795 | UP   | 339.1604 | 339.1602 | 339.1605 | 9.880683 | 9.774967 |
| 2298 | M312T24  | 1.315786 | -0.39593 | -1.53712 | 0.179983 | 0.863795 | DOWN | 312.2166 | 312.2164 | 312.2169 | 23.78817 | 23.7755  |
| 2299 | M285T10_ | 1.355058 | -0.43835 | -1.5171  | 0.180006 | 0.863795 | DOWN | 285.4392 | 285.4391 | 285.4516 | 9.969925 | 9.859233 |
| 2300 | M460T26_ | 1.930593 | 0.949044 | 1.46917  | 0.180066 | 0.863795 | UP   | 460.3415 | 460.3413 | 460.3416 | 25.62608 | 25.59717 |
| 2301 | M1104T10 | 1.278412 | -0.35435 | -1.50928 | 0.180141 | 0.863795 | DOWN | 1103.703 | 1103.702 | 1103.703 | 9.945775 | 9.843367 |
| 2302 | M464T10_ | 1.789647 | 0.839675 | 1.514471 | 0.180228 | 0.863796 | UP   | 463.5765 | 463.576  | 463.5778 | 9.853633 | 9.758367 |
| 2303 | M278T28  | 1.320031 | -0.40057 | -1.50708 | 0.180244 | 0.863796 | DOWN | 278.1828 | 278.1826 | 278.1829 | 27.95175 | 27.9245  |
| 2304 | M716T10_ | 1.418322 | -0.50418 | -1.46971 | 0.180326 | 0.863796 | DOWN | 715.9377 | 715.9373 | 715.9394 | 10.34868 | 10.28192 |
| 2305 | M660T9_2 | 1.301257 | -0.37991 | -1.49539 | 0.180502 | 0.863796 | DOWN | 659.6526 | 659.652  | 659.6541 | 9.322542 | 9.234417 |
| 2306 | M1376T10 | 1.270133 | -0.34498 | -1.58743 | 0.180506 | 0.863796 | DOWN | 1375.768 | 1375.767 | 1375.769 | 10.03065 | 9.932567 |
| 2307 | M226T9_7 | 13.90229 | -3.79725 | -1.61841 | 0.180625 | 0.863797 | DOWN | 226.2346 | 226.2339 | 226.2354 | 9.2946   | 9.132267 |
| 2308 | M176T9_1 | 1.256738 | -0.32968 | -1.55962 | 0.180634 | 0.863797 | DOWN | 175.8887 | 175.888  | 175.8891 | 9.3332   | 9.219483 |
| 2309 | M510T10_ | 2.013421 | -1.00965 | -1.4989  | 0.180641 | 0.863797 | DOWN | 509.6042 | 509.6038 | 509.6044 | 9.979667 | 9.970617 |

|      |          |          |          |          |          |          |      |          |          |          |          |          |
|------|----------|----------|----------|----------|----------|----------|------|----------|----------|----------|----------|----------|
| 2310 | M397T9_7 | 3.695662 | -1.88583 | -1.60918 | 0.180659 | 0.863797 | DOWN | 397.3514 | 397.3503 | 397.3558 | 9.16125  | 9.145433 |
| 2311 | M530T9_2 | 1.751755 | -0.8088  | -1.50154 | 0.18076  | 0.863797 | DOWN | 530.206  | 530.2046 | 530.2071 | 9.298683 | 9.12675  |
| 2312 | M319T10_ | 1.251749 | -0.32395 | -1.47383 | 0.180766 | 0.863797 | DOWN | 318.572  | 318.5715 | 318.5735 | 9.8207   | 9.715683 |
| 2313 | M526T10_ | 1.447324 | 0.533388 | 1.468837 | 0.180869 | 0.863797 | UP   | 525.6111 | 525.61   | 525.6114 | 9.999    | 9.8914   |
| 2314 | M332T23  | 1.170493 | -0.22712 | -1.48057 | 0.181084 | 0.863798 | DOWN | 332.3156 | 332.3154 | 332.3157 | 23.16058 | 23.14617 |
| 2315 | M487T34  | 1.283909 | -0.36054 | -1.47738 | 0.18111  | 0.863798 | DOWN | 487.3237 | 487.3234 | 487.3239 | 33.802   | 33.78767 |
| 2316 | M382T42_ | 1.242623 | -0.31339 | -1.52892 | 0.181128 | 0.863798 | DOWN | 382.2432 | 382.2431 | 382.2434 | 42.07125 | 41.90567 |
| 2317 | M555T10_ | 1.298671 | -0.37704 | -1.49994 | 0.181153 | 0.863798 | DOWN | 555.4876 | 555.4873 | 555.4889 | 9.952017 | 9.843367 |
| 2318 | M401T11_ | 1.690221 | 0.757212 | 1.468819 | 0.18127  | 0.863798 | UP   | 400.9895 | 400.9855 | 400.9945 | 10.93388 | 10.84395 |
| 2319 | M339T9_2 | 1.448095 | -0.53416 | -1.54878 | 0.181354 | 0.863798 | DOWN | 338.6037 | 338.6035 | 338.6038 | 9.462325 | 9.40135  |
| 2320 | M288T24_ | 2.202741 | -1.1393  | -1.46517 | 0.181407 | 0.863798 | DOWN | 288.267  | 288.2655 | 288.2729 | 24.07883 | 24.03917 |
| 2321 | M330T10_ | 1.379803 | 0.464462 | 1.485952 | 0.181528 | 0.863799 | UP   | 329.976  | 329.9757 | 329.9879 | 9.95785  | 9.75805  |
| 2322 | M512T20  | 1.351088 | -0.43412 | -1.56432 | 0.181534 | 0.863799 | DOWN | 512.3343 | 512.334  | 512.3348 | 20.21642 | 20.20133 |
| 2323 | M243T9_6 | 1.776514 | -0.82905 | -1.51898 | 0.181589 | 0.863799 | DOWN | 242.9773 | 242.9752 | 242.9844 | 9.333667 | 9.1322   |
| 2324 | M355T9_1 | 1.332591 | -0.41423 | -1.46949 | 0.18164  | 0.863799 | DOWN | 354.5052 | 354.5043 | 354.5055 | 9.280992 | 9.129317 |
| 2325 | M825T11_ | 1.403391 | -0.48892 | -1.5714  | 0.181674 | 0.863799 | DOWN | 825.3522 | 825.3518 | 825.3524 | 11.22896 | 11.19848 |
| 2326 | M554T22  | 1.240788 | -0.31126 | -1.48413 | 0.181749 | 0.863799 | DOWN | 554.4257 | 554.4254 | 554.4259 | 22.23492 | 22.22517 |
| 2327 | M790T11_ | 1.31631  | -0.3965  | -1.48843 | 0.181753 | 0.863799 | DOWN | 790.4914 | 790.4907 | 790.492  | 10.52609 | 10.48782 |
| 2328 | M240T21  | 2.175517 | -1.12136 | -1.5642  | 0.181801 | 0.863799 | DOWN | 240.2319 | 240.2317 | 240.232  | 21.33708 | 21.3275  |
| 2329 | M502T25_ | 6.488795 | -2.69795 | -1.60987 | 0.181828 | 0.863799 | DOWN | 502.3527 | 502.3522 | 502.3529 | 24.80467 | 24.75367 |
| 2330 | M365T11_ | 1.385083 | -0.46997 | -1.55249 | 0.181858 | 0.8638   | DOWN | 365.2228 | 365.2227 | 365.2232 | 11.22813 | 11.19848 |
| 2331 | M313T9_9 | 1.664381 | -0.73499 | -1.46971 | 0.181896 | 0.8638   | DOWN | 313.2112 | 313.2107 | 313.2115 | 8.9015   | 8.772383 |
| 2332 | M612T11_ | 1.47946  | 0.565071 | 1.545142 | 0.181932 | 0.8638   | UP   | 612.0891 | 612.0883 | 612.0903 | 10.93097 | 10.88982 |
| 2333 | M436T9_1 | 1.417391 | -0.50324 | -1.52388 | 0.181977 | 0.8638   | DOWN | 436.4327 | 436.4325 | 436.4331 | 9.285558 | 9.129317 |
| 2334 | M675T28  | 1.499377 | -0.58436 | -1.47269 | 0.182034 | 0.8638   | DOWN | 675.4721 | 675.4718 | 675.4724 | 28.22867 | 28.1565  |
| 2335 | M325T10_ | 1.153488 | -0.206   | -1.50593 | 0.182044 | 0.8638   | DOWN | 324.5812 | 324.581  | 324.5816 | 9.851025 | 9.715683 |
| 2336 | M355T39  | 1.358395 | 0.441903 | 1.467877 | 0.182146 | 0.8638   | UP   | 355.2114 | 355.2112 | 355.2115 | 39.17242 | 38.97117 |
| 2337 | M1023T26 | 1.468725 | -0.55456 | -1.54024 | 0.182209 | 0.8638   | DOWN | 1022.72  | 1022.719 | 1022.721 | 25.99708 | 25.97017 |
| 2338 | M290T10_ | 1.592377 | -0.67118 | -1.4705  | 0.182224 | 0.8638   | DOWN | 289.5952 | 289.595  | 289.5953 | 9.95825  | 9.946367 |
| 2339 | M155T10_ | 1.205171 | -0.26924 | -1.46057 | 0.182304 | 0.863801 | DOWN | 155.0682 | 155.0681 | 155.0683 | 9.918833 | 9.811217 |
| 2340 | M877T12  | 1.418305 | 0.504167 | 1.527235 | 0.182316 | 0.863801 | UP   | 876.5873 | 876.5861 | 876.5881 | 12.10695 | 12.07727 |
| 2341 | M1872T10 | 1.376501 | -0.46101 | -1.54386 | 0.182332 | 0.863801 | DOWN | 1871.527 | 1871.524 | 1871.529 | 9.8207   | 9.715683 |
| 2342 | M331T9_2 | 1.300079 | -0.3786  | -1.48809 | 0.182388 | 0.863801 | DOWN | 330.6076 | 330.6074 | 330.6079 | 9.322542 | 9.234417 |
| 2343 | M443T10_ | 2.917027 | 1.544499 | 1.60674  | 0.182462 | 0.863801 | UP   | 442.86   | 442.8593 | 442.8605 | 9.75365  | 9.636483 |
| 2344 | M712T10_ | 1.509374 | -0.59395 | -1.55858 | 0.182624 | 0.863801 | DOWN | 711.539  | 711.5382 | 711.5392 | 9.728817 | 9.6048   |

|      |           |          |          |          |          |          |      |          |          |          |          |          |
|------|-----------|----------|----------|----------|----------|----------|------|----------|----------|----------|----------|----------|
| 2345 | M931T10_  | 1.425556 | 0.511525 | 1.45921  | 0.182636 | 0.863801 | UP   | 930.6731 | 930.6725 | 930.6753 | 10.14972 | 10.08517 |
| 2346 | M336T9_3  | 1.476642 | -0.56232 | -1.45917 | 0.182639 | 0.863801 | DOWN | 335.8214 | 335.821  | 335.8224 | 9.314442 | 9.234417 |
| 2347 | M339T10_  | 1.241312 | -0.31187 | -1.49977 | 0.182737 | 0.863802 | DOWN | 339.181  | 339.1808 | 339.1811 | 9.825767 | 9.715683 |
| 2348 | M197T9_1  | 1.68194  | -0.75013 | -1.47256 | 0.1829   | 0.863802 | DOWN | 196.6883 | 196.6873 | 196.6891 | 9.264333 | 9.161683 |
| 2349 | M695T10_  | 1.18777  | -0.24826 | -1.46475 | 0.182948 | 0.863802 | DOWN | 694.5313 | 694.531  | 694.5317 | 10.12412 | 10.03658 |
| 2350 | M522T11_  | 1.478308 | -0.56395 | -1.49534 | 0.18298  | 0.863802 | DOWN | 521.9884 | 521.9878 | 521.989  | 10.53618 | 10.44008 |
| 2351 | M290T9_3  | 1.428352 | -0.51435 | -1.52802 | 0.183118 | 0.863803 | DOWN | 289.6907 | 289.6898 | 289.6908 | 8.978067 | 8.892117 |
| 2352 | M373T9_4  | 1.771678 | -0.82512 | -1.46063 | 0.183178 | 0.863803 | DOWN | 373.0066 | 373.0062 | 373.0073 | 9.275917 | 9.219483 |
| 2353 | M487T14   | 1.460459 | -0.54642 | -1.47363 | 0.183234 | 0.863803 | DOWN | 487.2753 | 487.2746 | 487.2776 | 14.04863 | 13.87298 |
| 2354 | M536T10_  | 1.379893 | -0.46456 | -1.53654 | 0.183235 | 0.863803 | DOWN | 536.4342 | 536.434  | 536.4354 | 9.677883 | 9.571683 |
| 2355 | M191T11_  | 1.194195 | -0.25604 | -1.46588 | 0.18326  | 0.863803 | DOWN | 191.0652 | 191.0651 | 191.0655 | 10.89193 | 10.8646  |
| 2356 | M421T11_  | 1.150831 | -0.20268 | -1.57691 | 0.183497 | 0.863804 | DOWN | 420.7389 | 420.7388 | 420.739  | 10.90551 | 10.89355 |
| 2357 | M1265T11_ | 1.582666 | -0.66236 | -1.46541 | 0.183623 | 0.863804 | DOWN | 1264.965 | 1264.964 | 1264.966 | 10.84029 | 10.83252 |
| 2358 | M577T31   | 1.235936 | -0.3056  | -1.5144  | 0.183665 | 0.863804 | DOWN | 577.4139 | 577.4136 | 577.4142 | 31.43592 | 31.42083 |
| 2359 | M333T10_  | 34.4598  | 5.106842 | 1.605317 | 0.18369  | 0.863804 | UP   | 333.0769 | 333.0766 | 333.0772 | 9.830558 | 9.715683 |
| 2360 | M299T41_  | 1.355116 | 0.438416 | 1.476613 | 0.183856 | 0.863804 | UP   | 299.185  | 299.1849 | 299.1852 | 40.6975  | 40.58233 |
| 2361 | M658T9_3  | 1.173619 | -0.23096 | -1.58443 | 0.183873 | 0.863804 | DOWN | 658.3694 | 658.369  | 658.3697 | 9.415533 | 9.324917 |
| 2362 | M200T10_  | 1.365933 | -0.44989 | -1.54948 | 0.183878 | 0.863804 | DOWN | 200.0838 | 200.0765 | 200.0839 | 9.830183 | 9.715683 |
| 2363 | M763T10_  | 1.175617 | -0.23342 | -1.45801 | 0.183944 | 0.863805 | DOWN | 763.4696 | 763.4676 | 763.4709 | 9.934533 | 9.811217 |
| 2364 | M801T11_  | 1.594697 | -0.67328 | -1.46387 | 0.184083 | 0.863805 | DOWN | 800.5552 | 800.5541 | 800.5563 | 11.12262 | 11.06855 |
| 2365 | M857T10_  | 2.623179 | -1.39132 | -1.59461 | 0.184087 | 0.863805 | DOWN | 857.3732 | 857.3714 | 857.3738 | 10.02508 | 10.01545 |
| 2366 | M291T9_7  | 1.454881 | -0.5409  | -1.52571 | 0.184095 | 0.863805 | DOWN | 290.9923 | 290.9916 | 290.9925 | 8.964767 | 8.89395  |
| 2367 | M1874T10_ | 1.45437  | -0.54039 | -1.49947 | 0.184137 | 0.863805 | DOWN | 1874.001 | 1873.999 | 1874.004 | 9.830083 | 9.715683 |
| 2368 | M783T10_  | 1.415919 | 0.501739 | 1.456938 | 0.184192 | 0.863805 | UP   | 783.4153 | 783.4144 | 783.4183 | 9.943767 | 9.827283 |
| 2369 | M384T11_  | 1.234525 | -0.30396 | -1.45778 | 0.184193 | 0.863805 | DOWN | 383.6168 | 383.6165 | 383.6176 | 10.89875 | 10.879   |
| 2370 | M337T34   | 1.17206  | -0.22905 | -1.45879 | 0.184252 | 0.863805 | DOWN | 337.2735 | 337.2734 | 337.2737 | 34.06283 | 34.04683 |
| 2371 | M235T10_  | 1.268125 | -0.3427  | -1.46237 | 0.18428  | 0.863805 | DOWN | 235.1598 | 235.1596 | 235.16   | 9.930142 | 9.827283 |
| 2372 | M418T25   | 2.28115  | 1.189761 | 1.547754 | 0.184305 | 0.863805 | UP   | 417.6776 | 417.6775 | 417.6777 | 24.5945  | 24.5795  |
| 2373 | M441T10_  | 1.242474 | 0.313216 | 1.482986 | 0.184504 | 0.863806 | UP   | 441.2626 | 441.2621 | 441.2645 | 9.900133 | 9.729367 |
| 2374 | M650T9_4  | 1.568922 | -0.64977 | -1.50639 | 0.18451  | 0.863806 | DOWN | 650.0507 | 650.0502 | 650.0516 | 9.317    | 9.24215  |
| 2375 | M195T10_  | 2.532188 | 1.340385 | 1.590017 | 0.18453  | 0.863806 | UP   | 194.501  | 194.501  | 194.5012 | 9.9754   | 9.8914   |
| 2376 | M564T42_  | 1.50531  | 0.59006  | 1.55716  | 0.184702 | 0.863806 | UP   | 564.3375 | 564.3372 | 564.3378 | 42.20775 | 41.93333 |
| 2377 | M681T9_1  | 1.983335 | -0.98793 | -1.53652 | 0.184775 | 0.863807 | DOWN | 681.2122 | 681.2116 | 681.2127 | 8.786108 | 8.701267 |
| 2378 | M263T11_  | 1.954505 | -0.9668  | -1.45092 | 0.184922 | 0.863807 | DOWN | 263.3029 | 263.3021 | 263.3032 | 10.93231 | 10.8646  |
| 2379 | M398T30   | 1.360641 | -0.44429 | -1.57039 | 0.185167 | 0.863808 | DOWN | 398.3383 | 398.3374 | 398.3395 | 30.15133 | 30.137   |

|      |          |          |          |          |          |          |      |          |          |          |          |          |
|------|----------|----------|----------|----------|----------|----------|------|----------|----------|----------|----------|----------|
| 2380 | M288T23_ | 1.68298  | 0.751018 | 1.534388 | 0.185191 | 0.863808 | UP   | 288.0647 | 288.059  | 288.0665 | 22.9     | 22.8425  |
| 2381 | M790T9   | 1.498591 | -0.58361 | -1.49551 | 0.185323 | 0.863808 | DOWN | 789.6303 | 789.6299 | 789.6312 | 9.317    | 9.234417 |
| 2382 | M996T11  | 1.446577 | -0.53264 | -1.46495 | 0.185627 | 0.863809 | DOWN | 996.4878 | 996.4875 | 996.488  | 11.36618 | 11.34105 |
| 2383 | M892T10_ | 1.285695 | 0.362549 | 1.501548 | 0.185651 | 0.863809 | UP   | 891.5151 | 891.5128 | 891.5159 | 10.19578 | 10.09108 |
| 2384 | M599T10_ | 6.313139 | 2.658358 | 1.59557  | 0.185758 | 0.863809 | UP   | 599.377  | 599.3766 | 599.3772 | 9.931675 | 9.811217 |
| 2385 | M400T10_ | 1.381457 | -0.46619 | -1.50735 | 0.185786 | 0.863809 | DOWN | 400.2803 | 400.2798 | 400.2808 | 9.596358 | 9.510117 |
| 2386 | M1887T10 | 1.623442 | -0.69906 | -1.45735 | 0.185836 | 0.863809 | DOWN | 1886.802 | 1886.8   | 1886.803 | 9.830283 | 9.802117 |
| 2387 | M481T10_ | 1.271281 | -0.34628 | -1.45171 | 0.185853 | 0.863809 | DOWN | 481.3379 | 481.3242 | 481.338  | 10.07398 | 9.9677   |
| 2388 | M307T10_ | 1.676665 | -0.74559 | -1.52451 | 0.185891 | 0.863809 | DOWN | 307.1615 | 307.1614 | 307.1615 | 9.886083 | 9.806367 |
| 2389 | M427T17  | 1.416957 | -0.5028  | -1.45712 | 0.18596  | 0.863809 | DOWN | 427.2927 | 427.2921 | 427.2931 | 16.92783 | 16.86967 |
| 2390 | M373T15_ | 1.535894 | -0.61908 | -1.44729 | 0.186014 | 0.86381  | DOWN | 373.1885 | 373.1881 | 373.189  | 15.43891 | 15.39865 |
| 2391 | M406T44_ | 1.449343 | 0.5354   | 1.461757 | 0.186018 | 0.86381  | UP   | 406.2069 | 406.2067 | 406.2072 | 43.68958 | 43.54567 |
| 2392 | M207T9_8 | 1.767666 | -0.82185 | -1.52501 | 0.186033 | 0.86381  | DOWN | 206.8578 | 206.8574 | 206.8583 | 9.279025 | 9.126783 |
| 2393 | M205T10_ | 2.834781 | 1.503237 | 1.565092 | 0.186089 | 0.86381  | UP   | 204.9655 | 204.9654 | 204.9655 | 9.898425 | 9.874067 |
| 2394 | M674T10_ | 1.227881 | -0.29617 | -1.46126 | 0.186092 | 0.86381  | DOWN | 674.1677 | 674.1669 | 674.1678 | 9.816142 | 9.715683 |
| 2395 | M946T10_ | 1.337056 | 0.41906  | 1.510148 | 0.186192 | 0.86381  | UP   | 945.5603 | 945.559  | 945.5613 | 9.979667 | 9.8753   |
| 2396 | M679T10_ | 1.641738 | 0.715224 | 1.499254 | 0.186223 | 0.86381  | UP   | 679.1854 | 679.1846 | 679.1855 | 9.872067 | 9.8378   |
| 2397 | M1087T25 | 8.889207 | -3.15205 | -1.59142 | 0.186303 | 0.86381  | DOWN | 1086.607 | 1086.605 | 1086.608 | 24.761   | 24.71033 |
| 2398 | M230T10_ | 1.270125 | -0.34497 | -1.46957 | 0.186357 | 0.86381  | DOWN | 229.6215 | 229.6214 | 229.6216 | 9.902008 | 9.79535  |
| 2399 | M373T10_ | 3.086987 | 1.6262   | 1.486857 | 0.186458 | 0.863811 | UP   | 373.0229 | 373.0146 | 373.0231 | 9.853533 | 9.827283 |
| 2400 | M352T11_ | 1.224916 | -0.29268 | -1.44473 | 0.186538 | 0.863811 | DOWN | 352.2746 | 352.2745 | 352.2756 | 10.90659 | 10.879   |
| 2401 | M202T9_8 | 1.481391 | -0.56695 | -1.44986 | 0.186615 | 0.863811 | DOWN | 202.0717 | 202.071  | 202.0723 | 9.296325 | 9.219483 |
| 2402 | M490T10_ | 1.418483 | 0.504349 | 1.459597 | 0.18663  | 0.863811 | UP   | 490.2225 | 490.2223 | 490.223  | 9.748708 | 9.636483 |
| 2403 | M261T9_7 | 1.570003 | -0.65077 | -1.46066 | 0.186645 | 0.863811 | DOWN | 261.4976 | 261.4973 | 261.4979 | 9.431517 | 9.356517 |
| 2404 | M821T10_ | 1.36342  | 0.44723  | 1.505833 | 0.186657 | 0.863811 | UP   | 820.6651 | 820.6634 | 820.6664 | 9.775633 | 9.649833 |
| 2405 | M815T10_ | 2.487111 | 1.314471 | 1.585567 | 0.186789 | 0.863811 | UP   | 814.7635 | 814.7629 | 814.7657 | 9.960417 | 9.859233 |
| 2406 | M205T9_7 | 1.816649 | 0.86128  | 1.463718 | 0.186835 | 0.863811 | UP   | 205.3247 | 205.3183 | 205.325  | 9.175017 | 9.166033 |
| 2407 | M508T44_ | 1.41458  | -0.50037 | -1.52867 | 0.186861 | 0.863811 | DOWN | 508.2749 | 508.2746 | 508.2751 | 43.81183 | 43.66083 |
| 2408 | M841T13  | 1.353503 | -0.4367  | -1.45308 | 0.186954 | 0.863812 | DOWN | 841.4048 | 841.4037 | 841.406  | 13.12005 | 13.08365 |
| 2409 | M952T12_ | 1.810553 | -0.85643 | -1.49781 | 0.186955 | 0.863812 | DOWN | 952.0922 | 952.0917 | 952.0928 | 11.66443 | 11.65107 |
| 2410 | M200T10_ | 2.023073 | -1.01655 | -1.54096 | 0.186965 | 0.863812 | DOWN | 199.9164 | 199.9119 | 199.9165 | 9.818442 | 9.699733 |
| 2411 | M1429T10 | 1.596666 | -0.67506 | -1.44299 | 0.187028 | 0.863812 | DOWN | 1428.632 | 1428.63  | 1428.641 | 9.871467 | 9.7634   |
| 2412 | M492T22  | 1.745647 | 0.803762 | 1.543934 | 0.187124 | 0.863812 | UP   | 492.3448 | 492.3447 | 492.3455 | 21.846   | 21.83833 |
| 2413 | M500T10_ | 1.782633 | 0.83401  | 1.475173 | 0.187131 | 0.863812 | UP   | 500.0962 | 500.0951 | 500.0966 | 9.989733 | 9.8914   |
| 2414 | M622T9_4 | 1.475885 | -0.56158 | -1.46365 | 0.187145 | 0.863812 | DOWN | 622.3228 | 622.3214 | 622.3236 | 9.3332   | 9.219483 |

|      |          |          |          |          |          |          |      |          |          |          |          |          |
|------|----------|----------|----------|----------|----------|----------|------|----------|----------|----------|----------|----------|
| 2415 | M200T10_ | 1.258918 | -0.33218 | -1.48039 | 0.187157 | 0.863812 | DOWN | 200.4041 | 200.404  | 200.4044 | 9.830183 | 9.715683 |
| 2416 | M471T9_3 | 1.369779 | -0.45394 | -1.48641 | 0.187207 | 0.863812 | DOWN | 471.0526 | 471.0517 | 471.053  | 9.303467 | 9.129317 |
| 2417 | M763T16_ | 1.191796 | -0.25314 | -1.44508 | 0.187275 | 0.863812 | DOWN | 762.5346 | 762.5345 | 762.5353 | 16.25587 | 16.2422  |
| 2418 | M1496T10 | 1.909484 | 0.933183 | 1.509024 | 0.187297 | 0.863812 | UP   | 1496.239 | 1496.238 | 1496.241 | 9.976075 | 9.859233 |
| 2419 | M435T9_9 | 64.54395 | 6.01221  | 1.588467 | 0.187377 | 0.863813 | UP   | 435.2684 | 435.2683 | 435.2694 | 9.311167 | 9.160617 |
| 2420 | M1418T9  | 1.327039 | -0.40821 | -1.45053 | 0.187433 | 0.863813 | DOWN | 1417.539 | 1417.538 | 1417.54  | 9.333267 | 9.237017 |
| 2421 | M398T44_ | 1.375345 | 0.459793 | 1.486026 | 0.187438 | 0.863813 | UP   | 398.2382 | 398.2381 | 398.2385 | 43.90225 | 43.8475  |
| 2422 | M1219T10 | 2.039897 | -1.0285  | -1.51264 | 0.187445 | 0.863813 | DOWN | 1218.984 | 1218.976 | 1218.986 | 9.979667 | 9.9009   |
| 2423 | M798T31  | 1.393868 | -0.47909 | -1.55631 | 0.187496 | 0.863813 | DOWN | 797.5455 | 797.5448 | 797.5461 | 31.25    | 31.23383 |
| 2424 | M332T9_1 | 1.288117 | -0.36526 | -1.47593 | 0.187496 | 0.863813 | DOWN | 331.5176 | 331.5174 | 331.5178 | 9.322542 | 9.234417 |
| 2425 | M827T10_ | 1.556429 | -0.63824 | -1.4447  | 0.187588 | 0.863813 | DOWN | 826.502  | 826.5011 | 826.503  | 10.34082 | 10.19348 |
| 2426 | M657T9_4 | 1.189991 | -0.25095 | -1.50334 | 0.187659 | 0.863813 | DOWN | 657.366  | 657.3656 | 657.3678 | 9.4159   | 9.324917 |
| 2427 | M680T43  | 1.165806 | -0.22133 | -1.57355 | 0.187662 | 0.863813 | DOWN | 680.3855 | 680.3852 | 680.3859 | 43.4305  | 43.30133 |
| 2428 | M522T10_ | 21.24678 | 4.409172 | 1.58629  | 0.187824 | 0.863814 | UP   | 522.3146 | 522.3132 | 522.3229 | 10.19387 | 10.11747 |
| 2429 | M336T9_4 | 1.528853 | -0.61245 | -1.44001 | 0.187826 | 0.863814 | DOWN | 335.9876 | 335.9872 | 335.9881 | 9.314442 | 9.249433 |
| 2430 | M445T11_ | 1.212865 | -0.27842 | -1.44944 | 0.187885 | 0.863814 | DOWN | 444.6461 | 444.6459 | 444.6466 | 10.91878 | 10.8914  |
| 2431 | M562T11_ | 1.474752 | -0.56047 | -1.46803 | 0.187992 | 0.863814 | DOWN | 562.3557 | 562.355  | 562.3561 | 10.66105 | 10.61512 |
| 2432 | M352T10_ | 3.132029 | 1.647097 | 1.445324 | 0.188025 | 0.863814 | UP   | 351.776  | 351.7757 | 351.7763 | 9.746783 | 9.636483 |
| 2433 | M334T10_ | 1.193406 | -0.25509 | -1.54111 | 0.188062 | 0.863814 | DOWN | 333.9538 | 333.9535 | 333.9545 | 9.8397   | 9.715683 |
| 2434 | M453T20  | 2.621037 | 1.390138 | 1.460329 | 0.18821  | 0.863815 | UP   | 453.2592 | 453.2587 | 453.2599 | 19.93417 | 19.87883 |
| 2435 | M452T20_ | 1.428578 | -0.51458 | -1.46553 | 0.188292 | 0.863815 | DOWN | 452.1458 | 452.1455 | 452.1465 | 19.83008 | 19.77983 |
| 2436 | M404T24  | 2.24004  | 1.163524 | 1.578057 | 0.188296 | 0.863815 | UP   | 404.2195 | 404.2193 | 404.2196 | 24.33092 | 24.30217 |
| 2437 | M310T9_1 | 1.418194 | -0.50405 | -1.43885 | 0.188349 | 0.863815 | DOWN | 309.5828 | 309.5823 | 309.5831 | 8.8398   | 8.77435  |
| 2438 | M1011T12 | 1.430041 | -0.51606 | -1.46872 | 0.188392 | 0.863815 | DOWN | 1010.503 | 1010.503 | 1010.503 | 12.48635 | 12.45842 |
| 2439 | M334T10_ | 1.557258 | -0.63901 | -1.56599 | 0.188562 | 0.863815 | DOWN | 334.1568 | 334.1542 | 334.1575 | 9.830558 | 9.715683 |
| 2440 | M229T13  | 1.261917 | -0.33562 | -1.43783 | 0.188685 | 0.863816 | DOWN | 228.6824 | 228.6823 | 228.6826 | 13.22963 | 13.21463 |
| 2441 | M716T10_ | 1.3385   | -0.42062 | -1.43666 | 0.188746 | 0.863816 | DOWN | 716.4356 | 716.4348 | 716.4389 | 10.07923 | 9.971833 |
| 2442 | M521T9_1 | 1.652318 | -0.72449 | -1.44758 | 0.188794 | 0.863816 | DOWN | 520.5714 | 520.5657 | 520.5722 | 9.371592 | 9.0511   |
| 2443 | M474T10_ | 1.418166 | -0.50403 | -1.50567 | 0.188822 | 0.863816 | DOWN | 474.1754 | 474.1753 | 474.1758 | 9.538267 | 9.447983 |
| 2444 | M229T9_3 | 1.438775 | -0.52484 | -1.44151 | 0.189023 | 0.863816 | DOWN | 228.5759 | 228.5739 | 228.5761 | 9.320483 | 9.132267 |
| 2445 | M395T11_ | 1.280241 | -0.35642 | -1.44501 | 0.189218 | 0.863817 | DOWN | 395.0676 | 395.067  | 395.0677 | 10.93208 | 10.877   |
| 2446 | M640T10_ | 1.106502 | -0.14601 | -1.44147 | 0.189372 | 0.863817 | DOWN | 640.3633 | 640.3628 | 640.3662 | 9.831517 | 9.728083 |
| 2447 | M348T21_ | 1.494891 | -0.58004 | -1.43755 | 0.189376 | 0.863817 | DOWN | 348.326  | 348.3253 | 348.3265 | 21.11592 | 21.08317 |
| 2448 | M344T21  | 2.173507 | -1.12002 | -1.50886 | 0.189452 | 0.863817 | DOWN | 344.2986 | 344.2984 | 344.2989 | 21.33933 | 21.32283 |
| 2449 | M638T9_2 | 1.584017 | -0.66359 | -1.48855 | 0.189458 | 0.863817 | DOWN | 638.0631 | 638.0619 | 638.0634 | 9.475667 | 9.40135  |

|      |          |          |          |          |          |          |      |          |          |          |          |          |
|------|----------|----------|----------|----------|----------|----------|------|----------|----------|----------|----------|----------|
| 2450 | M248T10_ | 1.380806 | -0.46551 | -1.49171 | 0.189472 | 0.863817 | DOWN | 248.3898 | 248.3893 | 248.3899 | 9.803033 | 9.696683 |
| 2451 | M661T10_ | 1.333655 | -0.41539 | -1.43433 | 0.189479 | 0.863817 | DOWN | 661.0258 | 661.0252 | 661.0263 | 9.842    | 9.699733 |
| 2452 | M245T9_2 | 1.418891 | -0.50476 | -1.4526  | 0.189531 | 0.863818 | DOWN | 244.5574 | 244.5544 | 244.5583 | 9.340383 | 9.132267 |
| 2453 | M1274T10 | 2.771538 | -1.47069 | -1.5664  | 0.189772 | 0.863818 | DOWN | 1273.737 | 1273.734 | 1273.739 | 10.40218 | 10.32952 |
| 2454 | M386T11_ | 1.386362 | -0.4713  | -1.45714 | 0.189775 | 0.863818 | DOWN | 385.5196 | 385.5183 | 385.5197 | 10.97857 | 10.93097 |
| 2455 | M673T9_1 | 1.500233 | -0.58519 | -1.56099 | 0.18986  | 0.863818 | DOWN | 673.1993 | 673.1989 | 673.1996 | 9.475667 | 9.40135  |
| 2456 | M881T10_ | 1.26117  | -0.33476 | -1.50363 | 0.189901 | 0.863818 | DOWN | 880.8639 | 880.8635 | 880.8648 | 9.61185  | 9.510117 |
| 2457 | M330T25_ | 1.399107 | 0.484506 | 1.47541  | 0.189904 | 0.863818 | UP   | 330.2272 | 330.227  | 330.2274 | 25.17333 | 25.146   |
| 2458 | M274T12  | 2.492541 | 1.317617 | 1.536995 | 0.190001 | 0.863819 | UP   | 274.1389 | 274.1386 | 274.1392 | 11.75188 | 11.74603 |
| 2459 | M579T20  | 1.218225 | -0.28478 | -1.43189 | 0.190079 | 0.863819 | DOWN | 579.3719 | 579.3717 | 579.3725 | 19.70758 | 19.6705  |
| 2460 | M288T11_ | 1.229771 | -0.29839 | -1.45222 | 0.190085 | 0.863819 | DOWN | 288.0989 | 288.0988 | 288.0992 | 10.90584 | 10.86275 |
| 2461 | M443T10_ | 1.417494 | -0.50334 | -1.52672 | 0.190198 | 0.863819 | DOWN | 442.8985 | 442.8984 | 442.8989 | 9.743767 | 9.636483 |
| 2462 | M394T9_2 | 1.355927 | -0.43928 | -1.4385  | 0.190225 | 0.863819 | DOWN | 393.7283 | 393.727  | 393.7287 | 9.206    | 9.146383 |
| 2463 | M1441T9  | 1.34056  | -0.42284 | -1.44341 | 0.190249 | 0.863819 | DOWN | 1441.019 | 1441.018 | 1441.02  | 9.26775  | 9.160467 |
| 2464 | M333T10_ | 1.750714 | 0.807944 | 1.477505 | 0.190358 | 0.863819 | UP   | 333.2158 | 333.213  | 333.2177 | 10.14543 | 10.10142 |
| 2465 | M754T11_ | 2.342177 | -1.22785 | -1.55522 | 0.190374 | 0.863819 | DOWN | 753.975  | 753.9742 | 753.9751 | 10.77167 | 10.7223  |
| 2466 | M184T9_9 | 2.791107 | 1.480838 | 1.497372 | 0.190548 | 0.86382  | UP   | 184.1894 | 184.189  | 184.1897 | 9.261475 | 9.1175   |
| 2467 | M1549T10 | 1.481032 | -0.5666  | -1.44064 | 0.190592 | 0.86382  | DOWN | 1549.443 | 1549.441 | 1549.446 | 9.929783 | 9.869467 |
| 2468 | M792T10_ | 1.530229 | -0.61375 | -1.52495 | 0.190615 | 0.86382  | DOWN | 791.5771 | 791.5766 | 791.5777 | 9.893742 | 9.806367 |
| 2469 | M443T11_ | 1.761994 | 0.817209 | 1.434968 | 0.190715 | 0.86382  | UP   | 443.1572 | 443.1565 | 443.1575 | 11.24955 | 11.232   |
| 2470 | M183T9_1 | 1.724661 | 0.786313 | 1.500151 | 0.190729 | 0.86382  | UP   | 183.4495 | 183.4492 | 183.4502 | 9.2143   | 9.1428   |
| 2471 | M499T9_1 | 1.877352 | -0.9087  | -1.45642 | 0.190739 | 0.86382  | DOWN | 498.7826 | 498.7817 | 498.7846 | 9.319233 | 9.20785  |
| 2472 | M1876T10 | 1.513857 | -0.59823 | -1.46557 | 0.190859 | 0.863821 | DOWN | 1876.11  | 1876.11  | 1876.113 | 9.8374   | 9.696683 |
| 2473 | M380T9_2 | 2.731693 | 1.449796 | 1.561378 | 0.190897 | 0.863821 | UP   | 379.784  | 379.7836 | 379.7883 | 9.215475 | 9.064833 |
| 2474 | M277T10_ | 2.386436 | 1.254857 | 1.557289 | 0.190962 | 0.863821 | UP   | 277.0339 | 277.0338 | 277.0341 | 9.961892 | 9.843367 |
| 2475 | M507T18  | 1.356764 | 0.44017  | 1.539074 | 0.190978 | 0.863821 | UP   | 507.3422 | 507.3419 | 507.3439 | 17.89433 | 17.87417 |
| 2476 | M327T10_ | 1.242749 | -0.31353 | -1.54537 | 0.19098  | 0.863821 | DOWN | 327.2109 | 327.2083 | 327.2121 | 9.831517 | 9.715683 |
| 2477 | M357T9_2 | 8.411305 | -3.07233 | -1.55986 | 0.191037 | 0.863821 | DOWN | 357.1756 | 357.1753 | 357.1808 | 9.457083 | 9.295167 |
| 2478 | M713T10_ | 1.218708 | -0.28535 | -1.42817 | 0.191127 | 0.863821 | DOWN | 712.986  | 712.9854 | 712.987  | 9.830283 | 9.699733 |
| 2479 | M395T12  | 5.675866 | -2.50484 | -1.56552 | 0.191138 | 0.863821 | DOWN | 395.2255 | 395.2252 | 395.2261 | 12.0457  | 12.02542 |
| 2480 | M638T21  | 9.651467 | 3.270748 | 1.570706 | 0.191159 | 0.863821 | UP   | 638.3027 | 638.3011 | 638.311  | 20.59333 | 20.58    |
| 2481 | M762T11_ | 1.554062 | -0.63604 | -1.45078 | 0.19135  | 0.863822 | DOWN | 761.9245 | 761.9241 | 761.9251 | 10.86275 | 10.83252 |
| 2482 | M378T41_ | 1.72199  | -0.78408 | -1.5475  | 0.191498 | 0.863822 | DOWN | 378.2483 | 378.248  | 378.2485 | 41.01383 | 40.63883 |
| 2483 | M621T9_1 | 2.033216 | -1.02376 | -1.4706  | 0.191575 | 0.863822 | DOWN | 621.0674 | 621.0667 | 621.0684 | 8.753417 | 8.686867 |
| 2484 | M552T24  | 1.896627 | 0.923436 | 1.545426 | 0.191576 | 0.863822 | UP   | 552.3292 | 552.3289 | 552.3297 | 23.789   | 23.7765  |

|      |          |          |          |          |          |          |      |          |          |          |          |          |
|------|----------|----------|----------|----------|----------|----------|------|----------|----------|----------|----------|----------|
| 2485 | M1081T10 | 1.464042 | -0.54996 | -1.4374  | 0.191628 | 0.863822 | DOWN | 1080.623 | 1080.622 | 1080.624 | 9.81635  | 9.715683 |
| 2486 | M325T10_ | 1.236921 | -0.30675 | -1.5519  | 0.191637 | 0.863822 | DOWN | 324.8814 | 324.8812 | 324.8819 | 9.823575 | 9.715683 |
| 2487 | M228T10_ | 1.326344 | -0.40745 | -1.42668 | 0.191674 | 0.863822 | DOWN | 228.1196 | 228.1188 | 228.1204 | 9.816167 | 9.7124   |
| 2488 | M329T19  | 3.057947 | -1.61256 | -1.55684 | 0.191792 | 0.863823 | DOWN | 329.2163 | 329.2161 | 329.2165 | 18.63342 | 18.61233 |
| 2489 | M154T10_ | 1.49837  | -0.58339 | -1.42641 | 0.19181  | 0.863823 | DOWN | 153.9175 | 153.9171 | 153.9177 | 9.8322   | 9.715683 |
| 2490 | M334T10_ | 3.633066 | -1.86119 | -1.5523  | 0.191841 | 0.863823 | DOWN | 333.6703 | 333.67   | 333.6706 | 9.8214   | 9.8161   |
| 2491 | M666T10_ | 1.246986 | -0.31844 | -1.42533 | 0.191914 | 0.863823 | DOWN | 666.3033 | 666.3031 | 666.3036 | 10.44697 | 10.4121  |
| 2492 | M333T10_ | 1.176199 | -0.23413 | -1.50488 | 0.19203  | 0.863823 | DOWN | 333.4831 | 333.4829 | 333.4844 | 9.8397   | 9.715683 |
| 2493 | M378T22  | 1.645732 | -0.71873 | -1.56247 | 0.192052 | 0.863823 | DOWN | 378.2119 | 378.2118 | 378.212  | 22.46567 | 22.4105  |
| 2494 | M235T9_1 | 1.774774 | -0.82764 | -1.5085  | 0.192135 | 0.863823 | DOWN | 234.5183 | 234.5129 | 234.5183 | 9.280767 | 9.111033 |
| 2495 | M826T10_ | 1.337817 | -0.41988 | -1.49134 | 0.192218 | 0.863824 | DOWN | 825.586  | 825.5855 | 825.5864 | 10.21733 | 10.11747 |
| 2496 | M294T30_ | 3.569945 | 1.835902 | 1.443956 | 0.192253 | 0.863824 | UP   | 294.2239 | 294.2197 | 294.2282 | 29.82658 | 29.77583 |
| 2497 | M330T10_ | 1.305745 | -0.38487 | -1.49902 | 0.192337 | 0.863824 | DOWN | 330.3623 | 330.3621 | 330.3625 | 9.9351   | 9.822117 |
| 2498 | M227T10_ | 1.322929 | 0.403735 | 1.431407 | 0.192348 | 0.863824 | UP   | 227.1417 | 227.1415 | 227.1419 | 9.951283 | 9.843367 |
| 2499 | M568T43_ | 1.211965 | 0.277348 | 1.453029 | 0.192424 | 0.863824 | UP   | 568.3326 | 568.3324 | 568.3328 | 42.53175 | 42.40933 |
| 2500 | M171T10_ | 1.252869 | -0.32524 | -1.43803 | 0.192503 | 0.863824 | DOWN | 171.3824 | 171.3823 | 171.3826 | 9.940783 | 9.827283 |
| 2501 | M499T9_8 | 1.726716 | 0.788031 | 1.50922  | 0.192519 | 0.863824 | UP   | 499.3479 | 499.3474 | 499.3499 | 9.432533 | 9.275917 |
| 2502 | M1964T10 | 1.278085 | -0.35398 | -1.44828 | 0.192578 | 0.863824 | DOWN | 1964.176 | 1964.175 | 1964.183 | 9.8397   | 9.73145  |
| 2503 | M388T10_ | 1.821518 | -0.86514 | -1.49912 | 0.192588 | 0.863824 | DOWN | 388.1723 | 388.1714 | 388.1759 | 9.932    | 9.830083 |
| 2504 | M290T24_ | 1.335519 | 0.4174   | 1.473153 | 0.192618 | 0.863824 | UP   | 289.7153 | 289.7151 | 289.7153 | 24.06292 | 24.059   |
| 2505 | M201T9_2 | 1.612908 | -0.68966 | -1.45654 | 0.192625 | 0.863824 | DOWN | 201.2725 | 201.2717 | 201.2738 | 9.311883 | 9.1322   |
| 2506 | M360T9_6 | 1.468977 | -0.55481 | -1.42289 | 0.192696 | 0.863825 | DOWN | 359.8388 | 359.8372 | 359.8417 | 9.325933 | 9.191133 |
| 2507 | M374T9_1 | 1.861669 | -0.8966  | -1.43587 | 0.192699 | 0.863825 | DOWN | 373.7039 | 373.7038 | 373.7041 | 9.332617 | 9.275917 |
| 2508 | M296T30_ | 1.596171 | 0.674615 | 1.431706 | 0.19275  | 0.863825 | UP   | 295.6763 | 295.676  | 295.6764 | 29.8195  | 29.805   |
| 2509 | M357T10_ | 1.081922 | -0.1136  | -1.48304 | 0.192793 | 0.863825 | DOWN | 357.4836 | 357.4833 | 357.4837 | 9.8207   | 9.715683 |
| 2510 | M564T9_3 | 1.237921 | -0.30792 | -1.42485 | 0.192823 | 0.863825 | DOWN | 564.3579 | 564.3575 | 564.3599 | 9.20965  | 9.126783 |
| 2511 | M404T39_ | 1.249222 | -0.32103 | -1.55743 | 0.192825 | 0.863825 | DOWN | 404.264  | 404.2638 | 404.2643 | 39.1725  | 38.99967 |
| 2512 | M580T43_ | 1.367119 | -0.45114 | -1.46634 | 0.193068 | 0.863825 | DOWN | 580.3325 | 580.3322 | 580.3328 | 43.179   | 42.89867 |
| 2513 | M506T30  | 2.650171 | -1.40609 | -1.43312 | 0.193168 | 0.863826 | DOWN | 506.3164 | 506.3158 | 506.3172 | 30.28    | 30.226   |
| 2514 | M534T41_ | 1.294815 | 0.372746 | 1.495885 | 0.19318  | 0.863826 | UP   | 534.2906 | 534.2905 | 534.291  | 40.94217 | 40.81267 |
| 2515 | M504T10_ | 1.814702 | 0.859733 | 1.526777 | 0.193252 | 0.863826 | UP   | 503.9219 | 503.9216 | 503.9223 | 9.967367 | 9.8753   |
| 2516 | M712T11_ | 1.725014 | -0.78661 | -1.49663 | 0.193291 | 0.863826 | DOWN | 712.4256 | 712.4247 | 712.4268 | 10.57284 | 10.54367 |
| 2517 | M715T10_ | 1.150132 | -0.2018  | -1.42367 | 0.193303 | 0.863826 | DOWN | 715.4079 | 715.4073 | 715.4088 | 9.892708 | 9.7634   |
| 2518 | M552T9_1 | 1.540362 | -0.62327 | -1.47699 | 0.193314 | 0.863826 | DOWN | 551.6052 | 551.6029 | 551.606  | 9.272233 | 9.11405  |
| 2519 | M433T9_5 | 2.333949 | -1.22277 | -1.42004 | 0.193374 | 0.863826 | DOWN | 432.8797 | 432.8729 | 432.8806 | 9.264333 | 9.09495  |



|      |          |          |          |          |          |          |      |          |          |          |          |          |
|------|----------|----------|----------|----------|----------|----------|------|----------|----------|----------|----------|----------|
| 2520 | M382T40_ | 1.968421 | -0.97704 | -1.50359 | 0.193389 | 0.863826 | DOWN | 382.2433 | 382.2432 | 382.2436 | 39.57533 | 39.47117 |
| 2521 | M361T9_8 | 1.946263 | -0.96071 | -1.47002 | 0.193446 | 0.863826 | DOWN | 361.4613 | 361.4608 | 361.469  | 9.224517 | 9.145433 |
| 2522 | M1113T10 | 1.252961 | -0.32534 | -1.4279  | 0.193506 | 0.863826 | DOWN | 1112.613 | 1112.612 | 1112.614 | 9.6694   | 9.557333 |
| 2523 | M403T11_ | 1.167899 | -0.22392 | -1.45432 | 0.19357  | 0.863827 | DOWN | 403.1352 | 403.1351 | 403.1357 | 10.91983 | 10.90197 |
| 2524 | M633T10_ | 2.260584 | 1.176696 | 1.443907 | 0.19365  | 0.863827 | UP   | 632.9811 | 632.9809 | 632.9814 | 9.870475 | 9.811217 |
| 2525 | M709T31  | 1.224022 | -0.29163 | -1.47874 | 0.19378  | 0.863827 | DOWN | 709.4929 | 709.4924 | 709.4934 | 31.33467 | 31.30567 |
| 2526 | M296T11_ | 1.473745 | -0.55949 | -1.42102 | 0.193816 | 0.863827 | DOWN | 296.4963 | 296.4961 | 296.4966 | 10.88228 | 10.83252 |
| 2527 | M470T9_9 | 1.532008 | 0.615424 | 1.420739 | 0.193879 | 0.863827 | UP   | 470.3662 | 470.3652 | 470.3671 | 9.391733 | 9.219483 |
| 2528 | M657T10_ | 2.718383 | -1.44275 | -1.53394 | 0.193904 | 0.863827 | DOWN | 656.9075 | 656.9062 | 656.9078 | 10.49363 | 10.40882 |
| 2529 | M337T28_ | 1.423119 | -0.50906 | -1.43478 | 0.194026 | 0.863828 | DOWN | 337.2631 | 337.2629 | 337.2632 | 28.41083 | 28.38767 |
| 2530 | M339T10_ | 2.255486 | -1.17344 | -1.52205 | 0.194031 | 0.863828 | DOWN | 339.2614 | 339.2612 | 339.2619 | 9.88865  | 9.746783 |
| 2531 | M325T10_ | 1.183586 | -0.24316 | -1.52985 | 0.194051 | 0.863828 | DOWN | 325.0326 | 325.0323 | 325.0333 | 9.823575 | 9.699733 |
| 2532 | M1137T10 | 1.441063 | -0.52713 | -1.44617 | 0.194075 | 0.863828 | DOWN | 1137.484 | 1137.483 | 1137.485 | 9.551608 | 9.547133 |
| 2533 | M316T27_ | 1.176788 | -0.23485 | -1.41738 | 0.19419  | 0.863828 | DOWN | 316.3208 | 316.3206 | 316.3209 | 27.21292 | 27.20167 |
| 2534 | M315T43_ | 1.372662 | 0.456976 | 1.419024 | 0.194336 | 0.863828 | UP   | 315.18   | 315.1798 | 315.1801 | 43.40183 | 43.215   |
| 2535 | M227T9_1 | 1.453874 | -0.5399  | -1.50318 | 0.194338 | 0.863828 | DOWN | 227.1751 | 227.1717 | 227.1751 | 9.389042 | 9.279417 |
| 2536 | M525T10_ | 1.545886 | -0.62843 | -1.49847 | 0.194447 | 0.863828 | DOWN | 524.8271 | 524.8263 | 524.8313 | 10.05918 | 9.8378   |
| 2537 | M316T39_ | 1.276351 | -0.35203 | -1.43374 | 0.194452 | 0.863828 | DOWN | 316.1753 | 316.1752 | 316.1754 | 39.3955  | 39.30183 |
| 2538 | M394T10_ | 1.209619 | 0.274553 | 1.41557  | 0.194691 | 0.863829 | UP   | 394.3426 | 394.3419 | 394.3429 | 9.954767 | 9.843367 |
| 2539 | M324T26_ | 1.624665 | -0.70014 | -1.41557 | 0.194749 | 0.863829 | DOWN | 323.9936 | 323.9934 | 323.994  | 25.99917 | 25.90867 |
| 2540 | M574T10_ | 1.384632 | -0.4695  | -1.47908 | 0.19475  | 0.863829 | DOWN | 573.5657 | 573.5648 | 573.5668 | 9.940783 | 9.827283 |
| 2541 | M1782T9  | 1.241731 | -0.31235 | -1.43903 | 0.194752 | 0.863829 | DOWN | 1781.894 | 1781.893 | 1781.897 | 9.277967 | 9.1445   |
| 2542 | M320T44_ | 1.722966 | -0.78489 | -1.43465 | 0.194875 | 0.863829 | DOWN | 320.1702 | 320.17   | 320.1703 | 44.4085  | 44.13533 |
| 2543 | M795T9   | 3.628838 | -1.85951 | -1.5092  | 0.194893 | 0.863829 | DOWN | 794.7475 | 794.7434 | 794.7482 | 8.746175 | 8.638817 |
| 2544 | M225T44_ | 1.13966  | -0.1886  | -1.47113 | 0.194933 | 0.863829 | DOWN | 225.1119 | 225.1117 | 225.1119 | 44.34817 | 44.1785  |
| 2545 | M682T11_ | 1.517011 | -0.60123 | -1.51425 | 0.194963 | 0.86383  | DOWN | 681.5169 | 681.5168 | 681.5171 | 10.64593 | 10.63083 |
| 2546 | M391T15_ | 1.184045 | -0.24372 | -1.41443 | 0.194969 | 0.86383  | DOWN | 391.2952 | 391.295  | 391.2953 | 15.2927  | 15.26215 |
| 2547 | M1004T25 | 6.900633 | -2.78673 | -1.55308 | 0.195056 | 0.86383  | DOWN | 1003.51  | 1003.51  | 1003.511 | 24.551   | 24.508   |
| 2548 | M409T23  | 1.435787 | 0.521842 | 1.484531 | 0.195058 | 0.86383  | UP   | 409.2872 | 409.2866 | 409.2874 | 22.97267 | 22.91483 |
| 2549 | M534T44_ | 1.14051  | -0.18968 | -1.44977 | 0.195064 | 0.86383  | DOWN | 534.3268 | 534.3266 | 534.3269 | 43.67508 | 43.642   |
| 2550 | M831T9_3 | 1.84034  | -0.87997 | -1.41779 | 0.195166 | 0.86383  | DOWN | 830.9224 | 830.9219 | 830.924  | 8.676792 | 8.601067 |
| 2551 | M387T11_ | 1.602052 | -0.67992 | -1.41326 | 0.195285 | 0.86383  | DOWN | 386.7792 | 386.7781 | 386.7805 | 10.91868 | 10.83417 |
| 2552 | M345T9_1 | 1.292948 | -0.37066 | -1.47059 | 0.195287 | 0.86383  | DOWN | 345.1923 | 345.1921 | 345.1987 | 9.275917 | 8.95495  |
| 2553 | M807T10_ | 1.203235 | -0.26692 | -1.41402 | 0.195301 | 0.86383  | DOWN | 807.4679 | 807.4676 | 807.4691 | 10.27939 | 10.18238 |
| 2554 | M520T9_7 | 1.940197 | -0.9562  | -1.4138  | 0.195417 | 0.86383  | DOWN | 520.333  | 520.3327 | 520.3456 | 8.961583 | 8.872733 |

|      |           |          |          |          |          |          |      |          |          |          |          |          |
|------|-----------|----------|----------|----------|----------|----------|------|----------|----------|----------|----------|----------|
| 2555 | M242T11_  | 1.814575 | -0.85963 | -1.41317 | 0.195417 | 0.86383  | DOWN | 241.8882 | 241.8879 | 241.8882 | 10.89125 | 10.87765 |
| 2556 | M325T9_7  | 1.36216  | -0.4459  | -1.4139  | 0.195422 | 0.86383  | DOWN | 325.0617 | 325.0614 | 325.0716 | 9.25985  | 8.90275  |
| 2557 | M454T28   | 3.435585 | -1.78056 | -1.52941 | 0.195491 | 0.863831 | DOWN | 454.3289 | 454.3285 | 454.3294 | 28.45175 | 28.437   |
| 2558 | M365T12   | 1.92947  | 0.948204 | 1.534076 | 0.195669 | 0.863831 | UP   | 365.2409 | 365.2408 | 365.2409 | 11.76178 | 11.7298  |
| 2559 | M542T9_1  | 1.795499 | -0.84439 | -1.41186 | 0.195705 | 0.863831 | DOWN | 541.5918 | 541.5916 | 541.5921 | 9.249433 | 9.235933 |
| 2560 | M263T10_  | 2.163476 | 1.113351 | 1.467636 | 0.195762 | 0.863831 | UP   | 262.764  | 262.7639 | 262.7642 | 9.9762   | 9.90755  |
| 2561 | M697T9_2  | 1.490383 | -0.57568 | -1.48988 | 0.195971 | 0.863832 | DOWN | 696.573  | 696.5723 | 696.5734 | 9.329083 | 9.129317 |
| 2562 | M706T9_3  | 3.099464 | -1.63202 | -1.51652 | 0.195977 | 0.863832 | DOWN | 706.3703 | 706.3683 | 706.3708 | 8.84285  | 8.7575   |
| 2563 | M355T11_  | 1.305069 | -0.38413 | -1.43145 | 0.195993 | 0.863832 | DOWN | 354.7586 | 354.7581 | 354.7588 | 10.54788 | 10.50338 |
| 2564 | M569T12   | 1.664008 | 0.734662 | 1.505288 | 0.196055 | 0.863832 | UP   | 569.406  | 569.4057 | 569.4062 | 11.68612 | 11.67107 |
| 2565 | M225T10_  | 1.578647 | -0.65869 | -1.44165 | 0.196111 | 0.863832 | DOWN | 224.6991 | 224.6989 | 224.6993 | 9.903283 | 9.806367 |
| 2566 | M812T10_  | 1.261949 | -0.33565 | -1.40991 | 0.196412 | 0.863833 | DOWN | 812.1732 | 812.1725 | 812.1748 | 9.97155  | 9.859233 |
| 2567 | M197T43_  | 1.269307 | 0.344041 | 1.421976 | 0.196444 | 0.863833 | UP   | 197.1533 | 197.1532 | 197.1534 | 42.59633 | 42.42383 |
| 2568 | M432T10_  | 1.629653 | -0.70456 | -1.41841 | 0.19645  | 0.863833 | DOWN | 432.3122 | 432.3119 | 432.3124 | 9.901433 | 9.822117 |
| 2569 | M469T28   | 1.481469 | 0.567028 | 1.425113 | 0.196461 | 0.863833 | UP   | 469.3113 | 469.3109 | 469.3115 | 27.504   | 27.48017 |
| 2570 | M358T11_  | 1.33895  | -0.4211  | -1.46696 | 0.196479 | 0.863833 | DOWN | 357.8095 | 357.8093 | 357.81   | 10.90628 | 10.88747 |
| 2571 | M414T10_  | 1.35147  | -0.43453 | -1.429   | 0.196523 | 0.863833 | DOWN | 413.7879 | 413.7874 | 413.7883 | 10.46667 | 10.39197 |
| 2572 | M188T9_1  | 9.263262 | 3.21152  | 1.547047 | 0.196552 | 0.863833 | UP   | 188.1307 | 188.1278 | 188.1338 | 9.276717 | 9.162767 |
| 2573 | M396T10_  | 1.170904 | -0.22762 | -1.41313 | 0.196553 | 0.863833 | DOWN | 396.1833 | 396.1831 | 396.1835 | 9.924775 | 9.827283 |
| 2574 | M316T43_  | 1.459135 | 0.545113 | 1.429613 | 0.196556 | 0.863833 | UP   | 316.1753 | 316.175  | 316.1754 | 43.258   | 43.12867 |
| 2575 | M680T10_  | 1.866919 | -0.90066 | -1.40858 | 0.196622 | 0.863833 | DOWN | 679.8004 | 679.7929 | 679.802  | 9.787633 | 9.696683 |
| 2576 | M503T9_2  | 1.623233 | 0.69887  | 1.467373 | 0.196875 | 0.863834 | UP   | 502.5895 | 502.5887 | 502.5903 | 9.34825  | 9.280767 |
| 2577 | M200T10_  | 1.376778 | -0.4613  | -1.49417 | 0.196927 | 0.863834 | DOWN | 200.3098 | 200.3023 | 200.3098 | 9.830183 | 9.715683 |
| 2578 | M700T10_  | 8.246471 | -3.04378 | -1.54577 | 0.196963 | 0.863834 | DOWN | 700.3949 | 700.3942 | 700.3951 | 9.85045  | 9.73145  |
| 2579 | M635T11_  | 1.246225 | -0.31756 | -1.41206 | 0.196971 | 0.863834 | DOWN | 635.4132 | 635.4125 | 635.4135 | 10.8926  | 10.86253 |
| 2580 | M250T7_3  | 1.62949  | 0.704421 | 1.427861 | 0.197209 | 0.863834 | UP   | 250.3021 | 250.3019 | 250.3023 | 7.034442 | 6.969117 |
| 2581 | M252T9_7  | 1.68251  | -0.75061 | -1.41811 | 0.197335 | 0.863835 | DOWN | 252.3786 | 252.3779 | 252.3793 | 9.295817 | 9.25985  |
| 2582 | M838T12   | 1.73825  | 0.797635 | 1.417361 | 0.197472 | 0.863835 | UP   | 837.574  | 837.5732 | 837.5758 | 12.37572 | 12.3163  |
| 2583 | M364T10_  | 1.158172 | -0.21185 | -1.48755 | 0.197662 | 0.863835 | DOWN | 364.0443 | 364.0436 | 364.0447 | 9.823575 | 9.699733 |
| 2584 | M1748T10_ | 1.26987  | -0.34468 | -1.47928 | 0.197713 | 0.863835 | DOWN | 1748.263 | 1748.261 | 1748.264 | 9.830283 | 9.728083 |
| 2585 | M652T10_  | 1.233916 | 0.303244 | 1.404723 | 0.197728 | 0.863835 | UP   | 652.4736 | 652.4728 | 652.4746 | 10.39012 | 10.34542 |
| 2586 | M411T9_7  | 2.256344 | 1.173987 | 1.474944 | 0.197773 | 0.863835 | UP   | 411.2886 | 411.2814 | 411.293  | 9.407658 | 9.0511   |
| 2587 | M470T9_2  | 1.315687 | -0.39582 | -1.42954 | 0.197779 | 0.863835 | DOWN | 470.0658 | 470.065  | 470.0661 | 9.29345  | 9.11405  |
| 2588 | M800T11   | 1.488094 | -0.57347 | -1.40462 | 0.197829 | 0.863836 | DOWN | 799.5518 | 799.5513 | 799.5522 | 11.10612 | 11.09303 |
| 2589 | M217T10_  | 1.355405 | -0.43872 | -1.40381 | 0.197983 | 0.863836 | DOWN | 217.174  | 217.1734 | 217.1746 | 9.830283 | 9.696683 |

|      |          |          |          |          |          |          |      |          |          |          |          |          |
|------|----------|----------|----------|----------|----------|----------|------|----------|----------|----------|----------|----------|
| 2590 | M350T9_1 | 2.195069 | 1.134266 | 1.519682 | 0.198014 | 0.863836 | UP   | 350.3925 | 350.3918 | 350.3929 | 9.309717 | 9.1602   |
| 2591 | M437T9_1 | 1.561468 | -0.6429  | -1.40411 | 0.198023 | 0.863836 | DOWN | 437.4282 | 437.4264 | 437.4305 | 9.232283 | 9.133667 |
| 2592 | M377T21  | 1.454159 | -0.54018 | -1.48224 | 0.198083 | 0.863836 | DOWN | 377.2624 | 377.262  | 377.2631 | 21.16258 | 21.13617 |
| 2593 | M845T10_ | 1.382453 | -0.46723 | -1.41469 | 0.198089 | 0.863836 | DOWN | 845.3633 | 845.3619 | 845.365  | 9.643967 | 9.556217 |
| 2594 | M862T17  | 1.247836 | -0.31943 | -1.40421 | 0.198153 | 0.863836 | DOWN | 861.5477 | 861.5468 | 861.5486 | 17.154   | 17.145   |
| 2595 | M271T14_ | 2.802177 | -1.48655 | -1.50189 | 0.198363 | 0.863837 | DOWN | 271.1149 | 271.1147 | 271.115  | 14.22407 | 14.00433 |
| 2596 | M708T10_ | 2.009038 | -1.0065  | -1.40454 | 0.198384 | 0.863837 | DOWN | 707.8555 | 707.8536 | 707.8561 | 9.9754   | 9.90755  |
| 2597 | M829T10_ | 1.351268 | -0.43431 | -1.44011 | 0.198417 | 0.863837 | DOWN | 828.5176 | 828.517  | 828.518  | 9.704617 | 9.5889   |
| 2598 | M288T9_6 | 1.495496 | -0.58062 | -1.40255 | 0.198431 | 0.863837 | DOWN | 288.2583 | 288.2571 | 288.2588 | 9.287617 | 9.146383 |
| 2599 | M335T10_ | 1.388044 | 0.473053 | 1.436226 | 0.198477 | 0.863837 | UP   | 335.1794 | 335.1787 | 335.1796 | 9.816167 | 9.699733 |
| 2600 | M1363T10 | 1.737354 | -0.79689 | -1.40199 | 0.198525 | 0.863837 | DOWN | 1362.862 | 1362.861 | 1362.863 | 9.8207   | 9.7124   |
| 2601 | M741T9_2 | 1.289441 | -0.36675 | -1.42193 | 0.198585 | 0.863837 | DOWN | 740.937  | 740.936  | 740.9374 | 9.322542 | 9.234417 |
| 2602 | M360T30  | 2.858466 | -1.51524 | -1.50948 | 0.198702 | 0.863837 | DOWN | 360.1804 | 360.1801 | 360.1805 | 30.4785  | 30.42383 |
| 2603 | M408T10_ | 3.454611 | 1.788523 | 1.532843 | 0.198711 | 0.863837 | UP   | 408.3393 | 408.3388 | 408.3397 | 9.942317 | 9.811217 |
| 2604 | M403T11_ | 1.152862 | -0.20522 | -1.41695 | 0.198773 | 0.863837 | DOWN | 403.2697 | 403.2696 | 403.2702 | 10.90659 | 10.89355 |
| 2605 | M440T44  | 1.47384  | -0.55958 | -1.40274 | 0.198774 | 0.863837 | DOWN | 440.3153 | 440.3148 | 440.3156 | 43.84783 | 43.80483 |
| 2606 | M481T10_ | 1.494542 | -0.5797  | -1.45459 | 0.198793 | 0.863838 | DOWN | 481.3509 | 481.3398 | 481.3518 | 9.903425 | 9.732983 |
| 2607 | M460T45_ | 1.215626 | -0.2817  | -1.42458 | 0.198882 | 0.863838 | DOWN | 460.2539 | 460.2536 | 460.254  | 44.61692 | 44.40417 |
| 2608 | M1036T10 | 1.39041  | -0.47551 | -1.40432 | 0.198923 | 0.863838 | DOWN | 1036.352 | 1036.351 | 1036.352 | 9.830183 | 9.715683 |
| 2609 | M534T41_ | 1.535042 | -0.61828 | -1.51842 | 0.198957 | 0.863838 | DOWN | 534.3269 | 534.3268 | 534.3271 | 40.7765  | 40.6545  |
| 2610 | M1187T10 | 2.191404 | -1.13186 | -1.51363 | 0.198965 | 0.863838 | DOWN | 1186.687 | 1186.686 | 1186.689 | 10.24337 | 10.2024  |
| 2611 | M404T11_ | 1.236673 | -0.30646 | -1.45586 | 0.198985 | 0.863838 | DOWN | 404.1457 | 404.1455 | 404.1467 | 10.9361  | 10.90785 |
| 2612 | M151T12  | 1.16272  | -0.2175  | -1.42462 | 0.198996 | 0.863838 | DOWN | 151.1479 | 151.1478 | 151.148  | 12.48495 | 12.4426  |
| 2613 | M498T9_8 | 1.419302 | -0.50518 | -1.48817 | 0.199094 | 0.863838 | DOWN | 498.1186 | 498.1183 | 498.119  | 9.344792 | 9.11795  |
| 2614 | M1608T10 | 1.420876 | -0.50678 | -1.49152 | 0.19911  | 0.863838 | DOWN | 1607.69  | 1607.688 | 1607.691 | 9.6315   | 9.52515  |
| 2615 | M607T12  | 1.307235 | -0.38652 | -1.41852 | 0.199125 | 0.863838 | DOWN | 607.4794 | 607.4792 | 607.4797 | 11.71528 | 11.69913 |
| 2616 | M801T10_ | 1.791547 | -0.84121 | -1.44509 | 0.199147 | 0.863838 | DOWN | 800.5986 | 800.5976 | 800.6053 | 9.507933 | 9.416767 |
| 2617 | M647T9_3 | 1.986531 | -0.99025 | -1.4039  | 0.199261 | 0.863838 | DOWN | 646.9538 | 646.9536 | 646.9552 | 9.317    | 9.24215  |
| 2618 | M483T28  | 1.294885 | 0.372824 | 1.403523 | 0.199293 | 0.863839 | UP   | 483.3553 | 483.3538 | 483.3561 | 28.21617 | 28.186   |
| 2619 | M392T22  | 1.685716 | -0.75336 | -1.401   | 0.199314 | 0.863839 | DOWN | 391.5585 | 391.5581 | 391.5592 | 22.1055  | 22.02333 |
| 2620 | M263T11_ | 1.36463  | -0.44851 | -1.39955 | 0.199439 | 0.863839 | DOWN | 262.625  | 262.6249 | 262.6252 | 11.22918 | 11.19848 |
| 2621 | M628T10_ | 1.211388 | -0.27666 | -1.40361 | 0.199477 | 0.863839 | DOWN | 628.3595 | 628.3544 | 628.3598 | 9.681133 | 9.295167 |
| 2622 | M413T10_ | 1.450544 | -0.53659 | -1.43189 | 0.199531 | 0.863839 | DOWN | 413.2036 | 413.2035 | 413.2038 | 9.970617 | 9.8753   |
| 2623 | M178T18  | 1.430641 | -0.51666 | -1.4965  | 0.199569 | 0.863839 | DOWN | 178.0577 | 178.0576 | 178.0578 | 18.48475 | 18.46383 |
| 2624 | M675T11_ | 1.210274 | -0.27533 | -1.42377 | 0.199725 | 0.863839 | DOWN | 675.4091 | 675.4086 | 675.4098 | 10.90553 | 10.89125 |

|      |          |          |          |          |          |          |      |          |          |          |          |          |
|------|----------|----------|----------|----------|----------|----------|------|----------|----------|----------|----------|----------|
| 2625 | M485T8   | 1.294079 | -0.37193 | -1.46261 | 0.199782 | 0.86384  | DOWN | 485.3578 | 485.3576 | 485.358  | 8.485642 | 8.413783 |
| 2626 | M157T9_2 | 1.487296 | -0.57269 | -1.45048 | 0.19983  | 0.86384  | DOWN | 156.8557 | 156.8553 | 156.8563 | 9.300733 | 9.219483 |
| 2627 | M569T27  | 1.944467 | 0.959375 | 1.440455 | 0.199877 | 0.86384  | UP   | 569.3062 | 569.3058 | 569.3092 | 26.72383 | 26.69783 |
| 2628 | M512T10_ | 1.212928 | -0.27849 | -1.50461 | 0.1999   | 0.86384  | DOWN | 512.4033 | 512.4027 | 512.4042 | 9.972917 | 9.859233 |
| 2629 | M539T10_ | 1.218952 | -0.28564 | -1.40368 | 0.199904 | 0.86384  | DOWN | 539.0024 | 539.0017 | 539.0035 | 9.924308 | 9.827283 |
| 2630 | M591T10_ | 1.198826 | -0.26162 | -1.47867 | 0.199996 | 0.86384  | DOWN | 590.5081 | 590.5077 | 590.5087 | 9.916525 | 9.8378   |
| 2631 | M200T10_ | 1.256881 | -0.32985 | -1.48551 | 0.200002 | 0.86384  | DOWN | 200.1569 | 200.1497 | 200.157  | 9.830183 | 9.715683 |
| 2632 | M475T11_ | 1.476994 | -0.56266 | -1.44035 | 0.200019 | 0.86384  | DOWN | 475.4685 | 475.4672 | 475.4689 | 10.95835 | 10.93655 |
| 2633 | M821T12  | 1.419047 | -0.50492 | -1.45391 | 0.200151 | 0.86384  | DOWN | 821.4217 | 821.4214 | 821.4221 | 11.96146 | 11.94427 |
| 2634 | M228T9_1 | 1.689771 | -0.75683 | -1.40036 | 0.200188 | 0.86384  | DOWN | 228.1927 | 228.1903 | 228.1941 | 9.2341   | 9.132267 |
| 2635 | M270T10_ | 1.867228 | 0.900898 | 1.474882 | 0.200217 | 0.86384  | UP   | 270.2996 | 270.2994 | 270.3073 | 9.74925  | 9.636483 |
| 2636 | M1482T10 | 1.423095 | -0.50903 | -1.39647 | 0.200287 | 0.863841 | DOWN | 1482.333 | 1482.327 | 1482.336 | 9.904767 | 9.827283 |
| 2637 | M411T10_ | 2.3645   | 1.241535 | 1.422245 | 0.200303 | 0.863841 | UP   | 410.6823 | 410.682  | 410.6825 | 9.93625  | 9.827283 |
| 2638 | M621T9_2 | 2.357998 | -1.23756 | -1.49115 | 0.200355 | 0.863841 | DOWN | 621.1934 | 621.1926 | 621.1943 | 8.798117 | 8.697767 |
| 2639 | M389T10_ | 1.428158 | -0.51416 | -1.43372 | 0.200399 | 0.863841 | DOWN | 389.0139 | 389.0137 | 389.0141 | 9.514733 | 9.40135  |
| 2640 | M393T11_ | 1.309927 | 0.389486 | 1.410909 | 0.200609 | 0.863841 | UP   | 393.3043 | 393.3039 | 393.3055 | 10.8926  | 10.87487 |
| 2641 | M213T10_ | 1.188727 | -0.24942 | -1.40002 | 0.200615 | 0.863841 | DOWN | 213.1014 | 213.1013 | 213.1014 | 9.984083 | 9.8753   |
| 2642 | M687T21  | 1.221779 | -0.28898 | -1.44482 | 0.200618 | 0.863841 | DOWN | 686.5048 | 686.5044 | 686.5052 | 20.91125 | 20.88133 |
| 2643 | M560T10_ | 1.55177  | -0.63391 | -1.48368 | 0.20063  | 0.863841 | DOWN | 560.1978 | 560.1972 | 560.1981 | 9.893742 | 9.806367 |
| 2644 | M504T9_5 | 1.342673 | -0.42511 | -1.44845 | 0.20064  | 0.863841 | DOWN | 504.3603 | 504.3598 | 504.3606 | 9.206    | 9.159717 |
| 2645 | M432T40  | 1.282085 | -0.35849 | -1.5212  | 0.20073  | 0.863841 | DOWN | 432.2228 | 432.2226 | 432.2229 | 39.77667 | 39.57517 |
| 2646 | M1038T10 | 1.513896 | -0.59827 | -1.45847 | 0.200764 | 0.863842 | DOWN | 1038.463 | 1038.462 | 1038.463 | 9.746783 | 9.65225  |
| 2647 | M438T9_2 | 1.800241 | 0.84819  | 1.398435 | 0.200824 | 0.863842 | UP   | 437.6165 | 437.616  | 437.6169 | 9.25985  | 9.11405  |
| 2648 | M330T11_ | 1.785678 | 0.836472 | 1.439945 | 0.200857 | 0.863842 | UP   | 330.0034 | 330.003  | 330.0039 | 10.88982 | 10.84487 |
| 2649 | M268T10_ | 1.994223 | 0.995827 | 1.519457 | 0.201006 | 0.863842 | UP   | 267.5343 | 267.5298 | 267.5345 | 9.968992 | 9.77355  |
| 2650 | M291T10_ | 1.194278 | -0.25614 | -1.43245 | 0.201027 | 0.863842 | DOWN | 290.5343 | 290.5341 | 290.5346 | 9.97155  | 9.859233 |
| 2651 | M478T39_ | 1.33784  | -0.41991 | -1.42024 | 0.201036 | 0.863842 | DOWN | 478.2643 | 478.264  | 478.2646 | 38.748   | 38.38117 |
| 2652 | M641T9_1 | 1.542835 | -0.62558 | -1.39898 | 0.201037 | 0.863842 | DOWN | 640.8944 | 640.8936 | 640.8951 | 9.300733 | 9.191133 |
| 2653 | M717T9   | 1.352255 | -0.43537 | -1.42225 | 0.201083 | 0.863842 | DOWN | 717.3666 | 717.3662 | 717.367  | 9.484417 | 9.38595  |
| 2654 | M259T11_ | 1.258529 | 0.331739 | 1.42308  | 0.201106 | 0.863842 | UP   | 258.9037 | 258.9035 | 258.9038 | 10.90618 | 10.85838 |
| 2655 | M582T11_ | 1.316276 | -0.39646 | -1.43935 | 0.201165 | 0.863842 | DOWN | 582.3946 | 582.3943 | 582.3952 | 11.10705 | 11.08352 |
| 2656 | M700T10_ | 1.2509   | -0.32297 | -1.43452 | 0.201171 | 0.863842 | DOWN | 699.8253 | 699.825  | 699.8255 | 9.830083 | 9.715683 |
| 2657 | M408T10_ | 1.950521 | 0.96386  | 1.435477 | 0.201182 | 0.863842 | UP   | 408.2303 | 408.2298 | 408.2306 | 9.971292 | 9.859233 |
| 2658 | M683T11_ | 3.507027 | 1.810248 | 1.526819 | 0.201213 | 0.863842 | UP   | 682.5194 | 682.519  | 682.5212 | 10.63825 | 10.54603 |
| 2659 | M676T9_3 | 1.419283 | -0.50516 | -1.40012 | 0.201285 | 0.863843 | DOWN | 675.7696 | 675.7678 | 675.7721 | 9.29345  | 9.159717 |

|      |          |          |          |          |          |          |      |          |          |          |          |          |
|------|----------|----------|----------|----------|----------|----------|------|----------|----------|----------|----------|----------|
| 2660 | M390T10_ | 1.280423 | -0.35662 | -1.44125 | 0.201289 | 0.863843 | DOWN | 389.8115 | 389.8113 | 389.8115 | 9.539883 | 9.432183 |
| 2661 | M675T10_ | 1.256237 | -0.32911 | -1.45574 | 0.201297 | 0.863843 | DOWN | 675.1598 | 675.1596 | 675.16   | 9.83135  | 9.715683 |
| 2662 | M378T11_ | 1.328779 | -0.4101  | -1.39363 | 0.201318 | 0.863843 | DOWN | 378.1856 | 378.1849 | 378.1903 | 10.92925 | 10.88982 |
| 2663 | M363T38  | 1.349891 | 0.432843 | 1.404458 | 0.201381 | 0.863843 | UP   | 363.2866 | 363.2862 | 363.2869 | 37.6905  | 37.66183 |
| 2664 | M380T27_ | 1.187948 | -0.24847 | -1.39719 | 0.201425 | 0.863843 | DOWN | 380.2943 | 380.2941 | 380.2945 | 26.97233 | 26.96917 |
| 2665 | M1082T25 | 10.98784 | -3.45784 | -1.52486 | 0.201489 | 0.863843 | DOWN | 1081.653 | 1081.651 | 1081.653 | 24.76833 | 24.75367 |
| 2666 | M548T9_6 | 1.302145 | -0.38089 | -1.42479 | 0.201601 | 0.863843 | DOWN | 548.2474 | 548.2465 | 548.2487 | 9.219483 | 9.142767 |
| 2667 | M217T10_ | 1.158408 | -0.21214 | -1.40391 | 0.201656 | 0.863843 | DOWN | 216.6879 | 216.6876 | 216.6883 | 9.916617 | 9.79535  |
| 2668 | M822T11  | 1.326646 | -0.40778 | -1.39335 | 0.201696 | 0.863843 | DOWN | 822.3791 | 822.3788 | 822.3798 | 10.85838 | 10.8214  |
| 2669 | M618T9_3 | 1.377263 | 0.461804 | 1.395548 | 0.201834 | 0.863844 | UP   | 618.1487 | 618.1407 | 618.1507 | 9.257033 | 9.1178   |
| 2670 | M367T10_ | 2.340104 | 1.226573 | 1.510838 | 0.201859 | 0.863844 | UP   | 366.6125 | 366.6123 | 366.6131 | 9.9847   | 9.8753   |
| 2671 | M731T37  | 5.729561 | 2.518425 | 1.522079 | 0.201923 | 0.863844 | UP   | 730.5679 | 730.5673 | 730.568  | 37.115   | 37.07183 |
| 2672 | M478T12  | 1.131429 | -0.17815 | -1.4037  | 0.202027 | 0.863844 | DOWN | 478.3998 | 478.3996 | 478.3999 | 11.71984 | 11.70755 |
| 2673 | M469T10_ | 1.295829 | 0.373875 | 1.482341 | 0.202044 | 0.863844 | UP   | 469.3146 | 469.3142 | 469.3147 | 9.9754   | 9.8753   |
| 2674 | M321T9_3 | 1.608379 | -0.68561 | -1.45604 | 0.202059 | 0.863844 | DOWN | 320.9506 | 320.9502 | 320.951  | 9.262975 | 9.18975  |
| 2675 | M163T10_ | 1.71666  | 0.779604 | 1.509254 | 0.202128 | 0.863844 | UP   | 162.9775 | 162.9774 | 162.9829 | 9.971383 | 9.8753   |
| 2676 | M327T10_ | 2.404311 | 1.265623 | 1.504708 | 0.202177 | 0.863844 | UP   | 327.2265 | 327.226  | 327.2285 | 9.818525 | 9.68775  |
| 2677 | M553T9_7 | 1.432001 | -0.51803 | -1.39543 | 0.202249 | 0.863845 | DOWN | 553.2286 | 553.2247 | 553.2292 | 9.16125  | 9.129317 |
| 2678 | M266T14  | 2.011611 | 1.008351 | 1.503474 | 0.202592 | 0.863845 | UP   | 266.1724 | 266.1722 | 266.1725 | 14.29753 | 14.26818 |
| 2679 | M233T10_ | 1.374651 | -0.45907 | -1.38912 | 0.202595 | 0.863845 | DOWN | 232.5436 | 232.543  | 232.5538 | 9.830083 | 9.7124   |
| 2680 | M348T10_ | 1.345296 | -0.42792 | -1.43697 | 0.202656 | 0.863845 | DOWN | 348.3612 | 348.3609 | 348.3614 | 9.830833 | 9.715683 |
| 2681 | M332T10_ | 1.223435 | -0.29094 | -1.47369 | 0.202711 | 0.863845 | DOWN | 332.2511 | 332.2509 | 332.2512 | 9.830783 | 9.715683 |
| 2682 | M572T9_2 | 1.413385 | -0.49915 | -1.40073 | 0.202724 | 0.863845 | DOWN | 571.9799 | 571.9787 | 571.9809 | 9.360783 | 9.250817 |
| 2683 | M581T9_2 | 1.264827 | -0.33894 | -1.46598 | 0.20275  | 0.863845 | DOWN | 581.2717 | 581.271  | 581.273  | 9.2817   | 9.219483 |
| 2684 | M383T45  | 1.206672 | -0.27103 | -1.51857 | 0.202775 | 0.863846 | DOWN | 383.3517 | 383.3516 | 383.3519 | 44.509   | 44.49183 |
| 2685 | M1112T11 | 1.6175   | -0.69377 | -1.41403 | 0.202823 | 0.863846 | DOWN | 1111.626 | 1111.625 | 1111.627 | 11.22302 | 11.19848 |
| 2686 | M176T9_4 | 1.46684  | -0.55271 | -1.4079  | 0.202869 | 0.863846 | DOWN | 176.151  | 176.1503 | 176.1514 | 9.277158 | 9.103733 |
| 2687 | M669T9_3 | 1.365897 | -0.44985 | -1.38785 | 0.203046 | 0.863846 | DOWN | 669.1957 | 669.1949 | 669.1975 | 9.272992 | 9.129317 |
| 2688 | M385T7_1 | 1.405064 | -0.49064 | -1.41619 | 0.203131 | 0.863846 | DOWN | 384.7715 | 384.7713 | 384.772  | 7.065917 | 6.94005  |
| 2689 | M1969T10 | 1.303849 | -0.38278 | -1.41849 | 0.20315  | 0.863846 | DOWN | 1969.105 | 1969.104 | 1969.11  | 9.839008 | 9.73145  |
| 2690 | M781T36  | 1.379858 | 0.46452  | 1.392847 | 0.203203 | 0.863846 | UP   | 781.4711 | 781.4703 | 781.4716 | 35.89383 | 35.87683 |
| 2691 | M348T10_ | 1.2571   | -0.3301  | -1.39309 | 0.203229 | 0.863846 | DOWN | 347.5087 | 347.5085 | 347.5088 | 9.908617 | 9.811217 |
| 2692 | M345T9_1 | 1.268634 | -0.34328 | -1.45472 | 0.203366 | 0.863847 | DOWN | 345.0913 | 345.0912 | 345.0915 | 9.398375 | 9.30965  |
| 2693 | M208T10_ | 1.325634 | -0.40668 | -1.46586 | 0.203398 | 0.863847 | DOWN | 207.8682 | 207.8603 | 207.8682 | 9.823575 | 9.715683 |
| 2694 | M470T9_1 | 1.270964 | -0.34592 | -1.39068 | 0.203426 | 0.863847 | DOWN | 470.4392 | 470.4387 | 470.4404 | 9.285867 | 9.129317 |

|      |          |          |          |          |          |          |      |          |          |          |          |          |
|------|----------|----------|----------|----------|----------|----------|------|----------|----------|----------|----------|----------|
| 2695 | M207T9_2 | 1.788631 | -0.83886 | -1.3945  | 0.203472 | 0.863847 | DOWN | 207.4096 | 207.4078 | 207.4098 | 9.329083 | 9.250817 |
| 2696 | M196T16  | 1.365679 | 0.449619 | 1.40478  | 0.203491 | 0.863847 | UP   | 196.1692 | 196.169  | 196.1694 | 16.37473 | 16.34448 |
| 2697 | M556T9_5 | 1.450298 | -0.53635 | -1.39184 | 0.203494 | 0.863847 | DOWN | 555.9409 | 555.9377 | 555.9412 | 9.242683 | 9.17485  |
| 2698 | M502T10_ | 2.703026 | 1.434575 | 1.513174 | 0.203539 | 0.863847 | UP   | 502.1053 | 502.1047 | 502.106  | 9.75365  | 9.743767 |
| 2699 | M504T37  | 1.441059 | -0.52713 | -1.38587 | 0.203584 | 0.863847 | DOWN | 504.28   | 504.2798 | 504.2804 | 36.871   | 36.49617 |
| 2700 | M454T42_ | 1.33316  | -0.41485 | -1.49965 | 0.203588 | 0.863847 | DOWN | 454.2642 | 454.2641 | 454.2645 | 41.53183 | 41.35917 |
| 2701 | M550T23  | 1.33005  | -0.41148 | -1.41796 | 0.203665 | 0.863847 | DOWN | 549.8711 | 549.8708 | 549.8727 | 22.74133 | 22.7125  |
| 2702 | M562T24  | 1.612148 | -0.68898 | -1.39811 | 0.203676 | 0.863847 | DOWN | 562.3738 | 562.3731 | 562.3744 | 23.72483 | 23.70483 |
| 2703 | M552T10_ | 1.252511 | -0.32482 | -1.39024 | 0.203705 | 0.863847 | DOWN | 551.7147 | 551.7141 | 551.715  | 9.8348   | 9.743667 |
| 2704 | M742T9_1 | 1.2571   | -0.3301  | -1.4064  | 0.203753 | 0.863847 | DOWN | 741.7902 | 741.789  | 741.7905 | 9.322542 | 9.234417 |
| 2705 | M528T9_4 | 1.227004 | -0.29514 | -1.42644 | 0.203851 | 0.863848 | DOWN | 527.9557 | 527.9543 | 527.9563 | 9.250817 | 9.146383 |
| 2706 | M379T9_2 | 1.398944 | -0.48434 | -1.43562 | 0.203871 | 0.863848 | DOWN | 378.7994 | 378.7981 | 378.8005 | 9.285508 | 9.11795  |
| 2707 | M423T11_ | 1.688632 | -0.75585 | -1.4927  | 0.203927 | 0.863848 | DOWN | 422.9782 | 422.977  | 422.9871 | 10.84767 | 10.83393 |
| 2708 | M806T9   | 1.343937 | -0.42647 | -1.39609 | 0.203942 | 0.863848 | DOWN | 806.0128 | 806.0111 | 806.0146 | 9.17485  | 9.146383 |
| 2709 | M415T20_ | 1.543897 | 0.626576 | 1.44852  | 0.203949 | 0.863848 | UP   | 415.3965 | 415.3921 | 415.3969 | 20.24783 | 20.245   |
| 2710 | M593T9_1 | 1.253698 | -0.32619 | -1.38374 | 0.203982 | 0.863848 | DOWN | 592.7985 | 592.798  | 592.799  | 9.29795  | 9.1158   |
| 2711 | M317T10_ | 1.527497 | 0.61117  | 1.397571 | 0.204024 | 0.863848 | UP   | 317.3045 | 317.3043 | 317.3058 | 9.81635  | 9.715683 |
| 2712 | M258T10_ | 1.575377 | 0.655697 | 1.388365 | 0.204039 | 0.863848 | UP   | 257.562  | 257.5619 | 257.5622 | 9.903017 | 9.714783 |
| 2713 | M318T10_ | 1.549707 | 0.631996 | 1.390894 | 0.204071 | 0.863848 | UP   | 317.6574 | 317.6445 | 317.6576 | 9.884917 | 9.811217 |
| 2714 | M395T10_ | 1.768894 | -0.82285 | -1.43614 | 0.204151 | 0.863848 | DOWN | 395.251  | 395.2509 | 395.251  | 9.975217 | 9.8753   |
| 2715 | M158T10_ | 1.705747 | -0.7704  | -1.38578 | 0.204239 | 0.863848 | DOWN | 157.9251 | 157.9205 | 157.93   | 9.847767 | 9.816167 |
| 2716 | M339T10_ | 1.235714 | -0.30534 | -1.48956 | 0.204244 | 0.863848 | DOWN | 338.8606 | 338.8605 | 338.8608 | 9.825767 | 9.715683 |
| 2717 | M247T10_ | 1.672954 | 0.742398 | 1.384551 | 0.204279 | 0.863848 | UP   | 246.6266 | 246.6265 | 246.6268 | 9.902283 | 9.843367 |
| 2718 | M151T43  | 1.123654 | -0.1682  | -1.50111 | 0.20441  | 0.863849 | DOWN | 151.1115 | 151.1115 | 151.1115 | 43.37333 | 43.301   |
| 2719 | M470T17_ | 1.227353 | -0.29555 | -1.38396 | 0.204418 | 0.863849 | DOWN | 470.3736 | 470.3732 | 470.3739 | 17.13925 | 17.1305  |
| 2720 | M512T10_ | 1.501246 | -0.58616 | -1.43197 | 0.204535 | 0.863849 | DOWN | 511.8057 | 511.805  | 511.8072 | 9.602967 | 9.586183 |
| 2721 | M824T9_3 | 1.950193 | -0.96362 | -1.38742 | 0.204719 | 0.863849 | DOWN | 824.0983 | 824.098  | 824.0999 | 8.796167 | 8.75965  |
| 2722 | M297T10_ | 1.447358 | -0.53342 | -1.3808  | 0.204771 | 0.863849 | DOWN | 296.7476 | 296.7475 | 296.7477 | 9.972483 | 9.8753   |
| 2723 | M456T13_ | 1.10876  | -0.14895 | -1.38073 | 0.204805 | 0.86385  | DOWN | 456.3576 | 456.3574 | 456.3579 | 13.22937 | 13.21485 |
| 2724 | M448T11_ | 1.244219 | -0.31524 | -1.38662 | 0.20483  | 0.86385  | DOWN | 448.2865 | 448.2862 | 448.2875 | 10.51669 | 10.45613 |
| 2725 | M230T10_ | 1.33212  | -0.41372 | -1.39258 | 0.204847 | 0.86385  | DOWN | 229.8012 | 229.8011 | 229.8013 | 9.902617 | 9.79535  |
| 2726 | M392T15  | 1.210049 | -0.27507 | -1.38025 | 0.204864 | 0.86385  | DOWN | 392.2985 | 392.2983 | 392.2986 | 15.29263 | 15.26215 |
| 2727 | M760T9_1 | 1.26657  | -0.34093 | -1.41641 | 0.204901 | 0.86385  | DOWN | 760.0037 | 760.0035 | 760.0046 | 9.307575 | 9.20785  |
| 2728 | M479T10_ | 1.365224 | -0.44914 | -1.38588 | 0.204906 | 0.86385  | DOWN | 479.4764 | 479.4759 | 479.4771 | 9.824233 | 9.715683 |
| 2729 | M348T10_ | 1.113882 | -0.1556  | -1.38252 | 0.204931 | 0.86385  | DOWN | 348.3268 | 348.3267 | 348.3272 | 9.872908 | 9.747533 |

|      |          |          |          |          |          |          |      |          |          |          |          |          |
|------|----------|----------|----------|----------|----------|----------|------|----------|----------|----------|----------|----------|
| 2730 | M1765T9_ | 1.110507 | -0.15122 | -1.46427 | 0.204989 | 0.86385  | DOWN | 1764.905 | 1764.903 | 1764.907 | 9.312125 | 9.219483 |
| 2731 | M619T10_ | 1.255397 | -0.32814 | -1.39298 | 0.205062 | 0.86385  | DOWN | 619.0288 | 619.028  | 619.0294 | 9.956417 | 9.843367 |
| 2732 | M461T9_2 | 1.74625  | -0.80426 | -1.37937 | 0.205109 | 0.86385  | DOWN | 461.1994 | 461.1991 | 461.2007 | 8.944258 | 8.888317 |
| 2733 | M519T10_ | 1.170491 | -0.22711 | -1.41297 | 0.205128 | 0.86385  | DOWN | 519.1508 | 519.1505 | 519.1526 | 9.958442 | 9.843367 |
| 2734 | M208T10_ | 1.253599 | -0.32608 | -1.47279 | 0.205338 | 0.863851 | DOWN | 207.522  | 207.5219 | 207.5221 | 9.836042 | 9.715683 |
| 2735 | M434T9_5 | 3.665523 | 1.874019 | 1.46761  | 0.205478 | 0.863851 | UP   | 433.7431 | 433.7429 | 433.7493 | 9.174883 | 9.098833 |
| 2736 | M1381T11 | 1.304245 | -0.38322 | -1.37833 | 0.205479 | 0.863851 | DOWN | 1381.003 | 1381.001 | 1381.004 | 10.879   | 10.81738 |
| 2737 | M720T13  | 1.403004 | -0.48852 | -1.39122 | 0.205615 | 0.863851 | DOWN | 720.4015 | 720.4    | 720.4026 | 13.0108  | 12.77672 |
| 2738 | M521T9_2 | 1.378016 | -0.46259 | -1.39475 | 0.205734 | 0.863851 | DOWN | 520.6522 | 520.6496 | 520.6544 | 9.311883 | 9.160617 |
| 2739 | M724T11  | 1.422295 | -0.50822 | -1.37992 | 0.205875 | 0.863852 | DOWN | 723.6873 | 723.6868 | 723.6879 | 10.8914  | 10.873   |
| 2740 | M834T10  | 1.654991 | -0.72682 | -1.40164 | 0.205907 | 0.863852 | DOWN | 834.4764 | 834.4756 | 834.4768 | 9.69995  | 9.58735  |
| 2741 | M284T9_1 | 1.572211 | -0.6528  | -1.424   | 0.205909 | 0.863852 | DOWN | 283.7442 | 283.7438 | 283.7443 | 9.304558 | 9.234417 |
| 2742 | M612T9_4 | 1.730694 | 0.791351 | 1.378293 | 0.205963 | 0.863852 | UP   | 611.8418 | 611.8412 | 611.842  | 9.275917 | 9.24215  |
| 2743 | M693T10_ | 1.173049 | -0.23026 | -1.41561 | 0.205973 | 0.863852 | DOWN | 693.4907 | 693.4904 | 693.4908 | 9.525625 | 9.432183 |
| 2744 | M207T10_ | 1.343646 | -0.42615 | -1.41604 | 0.205981 | 0.863852 | DOWN | 207.1921 | 207.192  | 207.1922 | 9.872067 | 9.778967 |
| 2745 | M476T9_1 | 1.740659 | 0.799633 | 1.382373 | 0.205998 | 0.863852 | UP   | 476.1162 | 476.1055 | 476.1165 | 9.221317 | 9.126783 |
| 2746 | M536T38_ | 1.249711 | -0.3216  | -1.43495 | 0.206037 | 0.863852 | DOWN | 536.306  | 536.3058 | 536.3066 | 38.453   | 38.3235  |
| 2747 | M698T9_1 | 1.262577 | -0.33637 | -1.38955 | 0.206094 | 0.863852 | DOWN | 697.5215 | 697.5212 | 697.5219 | 9.331083 | 9.234417 |
| 2748 | M403T43  | 1.20957  | -0.27449 | -1.38723 | 0.206106 | 0.863852 | DOWN | 403.2323 | 403.2321 | 403.2325 | 42.81217 | 42.48133 |
| 2749 | M492T9_8 | 1.332493 | -0.41413 | -1.41523 | 0.206134 | 0.863852 | DOWN | 492.4792 | 492.4789 | 492.4797 | 9.30235  | 9.159717 |
| 2750 | M365T9_1 | 1.439958 | -0.52603 | -1.37581 | 0.206193 | 0.863852 | DOWN | 364.5977 | 364.5944 | 364.5979 | 9.311883 | 9.1503   |
| 2751 | M534T26  | 1.421746 | -0.50766 | -1.3919  | 0.206218 | 0.863852 | DOWN | 533.8761 | 533.8753 | 533.8774 | 26.02817 | 26.02    |
| 2752 | M786T20  | 1.50794  | -0.59258 | -1.37703 | 0.206413 | 0.863853 | DOWN | 785.6154 | 785.6151 | 785.616  | 20.2595  | 20.24533 |
| 2753 | M187T9_3 | 1.639772 | -0.7135  | -1.46332 | 0.206479 | 0.863853 | DOWN | 187.1602 | 187.1594 | 187.1606 | 9.238867 | 9.09495  |
| 2754 | M348T17  | 3.420465 | 1.774192 | 1.45414  | 0.206481 | 0.863853 | UP   | 348.2167 | 348.2065 | 348.2175 | 17.01583 | 16.94267 |
| 2755 | M1137T10 | 1.613909 | -0.69056 | -1.39012 | 0.206576 | 0.863853 | DOWN | 1136.982 | 1136.98  | 1136.984 | 9.567217 | 9.447617 |
| 2756 | M1966T10 | 1.275092 | 0.350602 | 1.406796 | 0.206595 | 0.863853 | UP   | 1966.413 | 1966.41  | 1966.42  | 9.84325  | 9.7124   |
| 2757 | M212T10_ | 1.357675 | -0.44114 | -1.37613 | 0.206604 | 0.863853 | DOWN | 212.2598 | 212.2551 | 212.2599 | 9.956867 | 9.859233 |
| 2758 | M1128T10 | 1.564965 | -0.64613 | -1.37618 | 0.206657 | 0.863853 | DOWN | 1128.142 | 1128.141 | 1128.144 | 9.979342 | 9.885167 |
| 2759 | M700T11_ | 1.311164 | -0.39085 | -1.41461 | 0.2067   | 0.863853 | DOWN | 700.168  | 700.1677 | 700.1682 | 10.9049  | 10.88747 |
| 2760 | M258T29  | 3.378767 | 1.756497 | 1.501708 | 0.206854 | 0.863853 | UP   | 258.2788 | 258.2785 | 258.279  | 29.205   | 29.18367 |
| 2761 | M353T9_1 | 1.449154 | -0.53521 | -1.4061  | 0.206906 | 0.863854 | DOWN | 353.124  | 353.123  | 353.1242 | 9.346    | 9.129317 |
| 2762 | M350T43_ | 1.973892 | -0.98104 | -1.44446 | 0.206944 | 0.863854 | DOWN | 350.2171 | 350.2169 | 350.2173 | 43.3875  | 43.17183 |
| 2763 | M641T16  | 1.301947 | -0.38067 | -1.39967 | 0.20698  | 0.863854 | DOWN | 641.4523 | 641.4519 | 641.4541 | 15.5695  | 15.51777 |
| 2764 | M471T25  | 8.072741 | -3.01306 | -1.49928 | 0.207046 | 0.863854 | DOWN | 470.8236 | 470.8236 | 470.8237 | 24.6525  | 24.65117 |

|      |          |          |          |          |          |          |      |          |          |          |          |          |
|------|----------|----------|----------|----------|----------|----------|------|----------|----------|----------|----------|----------|
| 2765 | M200T10_ | 2.478781 | -1.30963 | -1.39301 | 0.207119 | 0.863854 | DOWN | 200.3827 | 200.3753 | 200.3828 | 9.82645  | 9.743667 |
| 2766 | M365T19_ | 1.246866 | -0.31831 | -1.38836 | 0.207318 | 0.863854 | DOWN | 365.2197 | 365.2194 | 365.22   | 18.74633 | 18.73217 |
| 2767 | M597T11_ | 1.844508 | -0.88324 | -1.45806 | 0.207332 | 0.863854 | DOWN | 596.713  | 596.7128 | 596.7146 | 11.3403  | 11.29438 |
| 2768 | M302T8   | 1.34167  | -0.42403 | -1.37185 | 0.207352 | 0.863854 | DOWN | 302.1959 | 302.1958 | 302.196  | 8.495783 | 8.413783 |
| 2769 | M276T9_2 | 1.826314 | -0.86894 | -1.43104 | 0.207374 | 0.863854 | DOWN | 276.0572 | 276.0571 | 276.0573 | 9.36515  | 9.310917 |
| 2770 | M408T9_1 | 1.530934 | -0.61441 | -1.37966 | 0.207473 | 0.863855 | DOWN | 407.7321 | 407.7317 | 407.7325 | 9.315083 | 9.235933 |
| 2771 | M857T11_ | 1.342972 | -0.42543 | -1.40844 | 0.207475 | 0.863855 | DOWN | 856.5308 | 856.5302 | 856.5318 | 10.72995 | 10.70448 |
| 2772 | M848T25_ | 1.422261 | 0.508187 | 1.419017 | 0.207487 | 0.863855 | UP   | 848.4495 | 848.448  | 848.4511 | 24.5945  | 24.55033 |
| 2773 | M663T9_1 | 1.729071 | -0.79    | -1.41955 | 0.207516 | 0.863855 | DOWN | 663.1812 | 663.1809 | 663.1816 | 9.29345  | 9.234417 |
| 2774 | M724T10_ | 1.340263 | -0.42252 | -1.48785 | 0.207524 | 0.863855 | DOWN | 724.4549 | 724.4538 | 724.4563 | 9.8207   | 9.715683 |
| 2775 | M221T10_ | 1.211081 | -0.27629 | -1.44349 | 0.207566 | 0.863855 | DOWN | 220.5966 | 220.5964 | 220.6054 | 9.916617 | 9.811217 |
| 2776 | M349T9_1 | 1.385256 | -0.47015 | -1.37234 | 0.207577 | 0.863855 | DOWN | 349.2645 | 349.2643 | 349.2646 | 9.314442 | 9.234417 |
| 2777 | M829T9_3 | 2.53653  | -1.34286 | -1.43967 | 0.207581 | 0.863855 | DOWN | 828.7585 | 828.7576 | 828.7592 | 8.753417 | 8.712633 |
| 2778 | M675T10_ | 1.399399 | 0.484808 | 1.400797 | 0.207628 | 0.863855 | UP   | 675.3906 | 675.3878 | 675.3913 | 9.926825 | 9.728083 |
| 2779 | M299T45_ | 1.511079 | -0.59558 | -1.46164 | 0.207667 | 0.863855 | DOWN | 299.1487 | 299.1486 | 299.1488 | 44.72567 | 44.59533 |
| 2780 | M302T10_ | 1.928932 | 0.947802 | 1.397543 | 0.207673 | 0.863855 | UP   | 302.2912 | 302.2846 | 302.2987 | 9.960967 | 9.830083 |
| 2781 | M481T9_4 | 1.406488 | -0.4921  | -1.41602 | 0.20772  | 0.863855 | DOWN | 480.743  | 480.742  | 480.7444 | 9.311167 | 9.1445   |
| 2782 | M323T9_2 | 1.411195 | -0.49692 | -1.3722  | 0.207765 | 0.863855 | DOWN | 322.851  | 322.8506 | 322.8512 | 9.3332   | 9.234417 |
| 2783 | M431T9_1 | 1.386398 | -0.47134 | -1.3845  | 0.207789 | 0.863855 | DOWN | 431.2128 | 431.2127 | 431.213  | 8.762975 | 8.715883 |
| 2784 | M265T10_ | 1.767241 | 0.821499 | 1.482875 | 0.207877 | 0.863855 | UP   | 264.7303 | 264.7302 | 264.7306 | 9.985733 | 9.8914   |
| 2785 | M663T10_ | 1.242256 | 0.312962 | 1.391902 | 0.208318 | 0.863856 | UP   | 663.3677 | 663.3673 | 663.3683 | 10.17318 | 10.05268 |
| 2786 | M889T11  | 1.354635 | -0.4379  | -1.37497 | 0.208389 | 0.863856 | DOWN | 888.5312 | 888.53   | 888.5318 | 11.34908 | 11.31508 |
| 2787 | M1005T10 | 1.604457 | -0.68208 | -1.38312 | 0.208426 | 0.863856 | DOWN | 1004.623 | 1004.622 | 1004.624 | 10.00822 | 9.916767 |
| 2788 | M203T12  | 1.800334 | 0.848264 | 1.461892 | 0.208473 | 0.863856 | UP   | 203.1066 | 203.1065 | 203.1067 | 11.52295 | 11.46753 |
| 2789 | M324T10_ | 1.496369 | -0.58147 | -1.44332 | 0.208527 | 0.863857 | DOWN | 324.2704 | 324.2656 | 324.2708 | 9.960967 | 9.758367 |
| 2790 | M526T7   | 2.957798 | -1.56452 | -1.42914 | 0.208602 | 0.863857 | DOWN | 526.3603 | 526.3601 | 526.3605 | 7.186475 | 7.08535  |
| 2791 | M354T9_3 | 1.39738  | 0.482724 | 1.367657 | 0.208607 | 0.863857 | UP   | 353.7663 | 353.7663 | 353.7664 | 9.29345  | 9.234417 |
| 2792 | M205T10_ | 1.202515 | 0.266055 | 1.37925  | 0.208649 | 0.863857 | UP   | 204.6646 | 204.6644 | 204.6646 | 9.86285  | 9.79065  |
| 2793 | M232T10_ | 1.854532 | 0.891055 | 1.443739 | 0.208673 | 0.863857 | UP   | 232.0734 | 232.0732 | 232.0734 | 9.953592 | 9.859233 |
| 2794 | M253T10_ | 1.486887 | 0.572295 | 1.449818 | 0.208732 | 0.863857 | UP   | 252.7472 | 252.7469 | 252.7495 | 9.77345  | 9.729367 |
| 2795 | M307T9_4 | 1.384355 | -0.46921 | -1.38961 | 0.208804 | 0.863857 | DOWN | 307.055  | 307.0545 | 307.0553 | 9.275917 | 9.219483 |
| 2796 | M238T10_ | 20.6156  | 4.365665 | 1.496601 | 0.208829 | 0.863857 | UP   | 238.1412 | 238.141  | 238.1414 | 10.49625 | 10.44008 |
| 2797 | M229T10_ | 1.27317  | -0.34842 | -1.39861 | 0.208855 | 0.863857 | DOWN | 228.952  | 228.9517 | 228.952  | 9.916617 | 9.811217 |
| 2798 | M235T11_ | 1.950002 | -0.96348 | -1.37413 | 0.208957 | 0.863857 | DOWN | 235.2095 | 235.2093 | 235.2096 | 10.68992 | 10.63825 |
| 2799 | M478T10_ | 1.082367 | -0.11419 | -1.40081 | 0.208966 | 0.863857 | DOWN | 477.6457 | 477.6442 | 477.6461 | 9.801883 | 9.696683 |



|      |          |          |          |          |          |          |      |          |          |          |          |          |
|------|----------|----------|----------|----------|----------|----------|------|----------|----------|----------|----------|----------|
| 2800 | M308T9_4 | 1.193886 | -0.25567 | -1.3998  | 0.209008 | 0.863857 | DOWN | 308.2693 | 308.2692 | 308.2695 | 9.25985  | 9.175017 |
| 2801 | M832T10_ | 1.433717 | -0.51976 | -1.36644 | 0.20903  | 0.863858 | DOWN | 831.5273 | 831.5261 | 831.5282 | 9.994658 | 9.8914   |
| 2802 | M375T11_ | 1.239638 | -0.30992 | -1.38354 | 0.209077 | 0.863858 | DOWN | 375.3215 | 375.3205 | 375.3236 | 10.90548 | 10.8646  |
| 2803 | M1878T10 | 1.508803 | 0.593404 | 1.367953 | 0.209229 | 0.863858 | UP   | 1878.177 | 1878.174 | 1878.178 | 9.8374   | 9.699733 |
| 2804 | M235T10_ | 1.241931 | -0.31258 | -1.37357 | 0.209236 | 0.863858 | DOWN | 235.126  | 235.122  | 235.1314 | 9.930908 | 9.811217 |
| 2805 | M232T10_ | 1.396956 | -0.48229 | -1.3689  | 0.209341 | 0.863858 | DOWN | 232.3524 | 232.3517 | 232.3533 | 9.816167 | 9.7124   |
| 2806 | M304T22  | 1.414644 | -0.50044 | -1.41215 | 0.209466 | 0.863858 | DOWN | 304.2843 | 304.2842 | 304.2845 | 22.43917 | 22.42617 |
| 2807 | M336T9_8 | 2.466562 | -1.3025  | -1.37653 | 0.209479 | 0.863858 | DOWN | 336.2933 | 336.2932 | 336.2934 | 9.325333 | 9.275917 |
| 2808 | M646T10_ | 1.482373 | -0.56791 | -1.36537 | 0.209531 | 0.863858 | DOWN | 646.3282 | 646.3278 | 646.3284 | 9.630342 | 9.52595  |
| 2809 | M399T44_ | 1.231288 | -0.30017 | -1.40318 | 0.209534 | 0.863858 | DOWN | 399.2374 | 399.237  | 399.2376 | 43.58867 | 43.43067 |
| 2810 | M805T9   | 1.678456 | -0.74713 | -1.36751 | 0.209585 | 0.863859 | DOWN | 804.5144 | 804.5134 | 804.5149 | 8.644492 | 8.601067 |
| 2811 | M228T9_1 | 1.636327 | -0.71046 | -1.36916 | 0.20965  | 0.863859 | DOWN | 228.4244 | 228.4237 | 228.4255 | 9.26575  | 9.147367 |
| 2812 | M176T10_ | 1.37544  | -0.45989 | -1.45007 | 0.209669 | 0.863859 | DOWN | 176.3692 | 176.369  | 176.3693 | 9.960967 | 9.843367 |
| 2813 | M153T9_3 | 1.753433 | -0.81018 | -1.3889  | 0.209888 | 0.863859 | DOWN | 153.0177 | 153.0174 | 153.0178 | 9.2678   | 9.219483 |
| 2814 | M950T24  | 10.33607 | -3.36962 | -1.49009 | 0.21007  | 0.863859 | DOWN | 949.5732 | 949.5729 | 949.574  | 24.44792 | 24.419   |
| 2815 | M849T10_ | 1.364825 | -0.44872 | -1.39203 | 0.210096 | 0.863859 | DOWN | 848.5156 | 848.5146 | 848.5162 | 10.36511 | 10.27932 |
| 2816 | M226T10_ | 2.053705 | 1.038229 | 1.460729 | 0.210175 | 0.86386  | UP   | 225.6544 | 225.6543 | 225.6545 | 9.886433 | 9.806367 |
| 2817 | M288T9_4 | 1.449811 | -0.53586 | -1.37265 | 0.210232 | 0.86386  | DOWN | 287.9882 | 287.9878 | 287.9884 | 8.857667 | 8.7875   |
| 2818 | M1322T10 | 1.540885 | -0.62376 | -1.38754 | 0.210241 | 0.86386  | DOWN | 1322.2   | 1322.198 | 1322.201 | 9.956417 | 9.885167 |
| 2819 | M394T11_ | 1.270247 | -0.34511 | -1.41975 | 0.210299 | 0.86386  | DOWN | 394.1268 | 394.1251 | 394.1302 | 10.91809 | 10.8926  |
| 2820 | M350T11_ | 1.280831 | -0.35708 | -1.38215 | 0.210305 | 0.86386  | DOWN | 349.6477 | 349.6475 | 349.648  | 10.90765 | 10.879   |
| 2821 | M857T11_ | 1.393244 | -0.47845 | -1.36418 | 0.210398 | 0.86386  | DOWN | 857.0326 | 857.0319 | 857.0335 | 10.73328 | 10.7046  |
| 2822 | M726T10_ | 1.12116  | -0.16499 | -1.3638  | 0.210475 | 0.86386  | DOWN | 725.6612 | 725.661  | 725.6625 | 9.830283 | 9.715683 |
| 2823 | M309T10_ | 1.249675 | -0.32155 | -1.42419 | 0.210509 | 0.86386  | DOWN | 308.5083 | 308.5039 | 308.5087 | 9.840617 | 9.715683 |
| 2824 | M1085T10 | 1.215701 | -0.28179 | -1.36153 | 0.210522 | 0.86386  | DOWN | 1084.65  | 1084.648 | 1084.658 | 9.828642 | 9.7124   |
| 2825 | M468T28  | 1.352476 | 0.435603 | 1.374191 | 0.21057  | 0.86386  | UP   | 468.308  | 468.3076 | 468.3094 | 27.51117 | 27.48267 |
| 2826 | M492T9_2 | 1.360379 | -0.44401 | -1.36219 | 0.210598 | 0.86386  | DOWN | 492.1572 | 492.1564 | 492.1575 | 9.311167 | 9.219483 |
| 2827 | M832T10_ | 1.181034 | -0.24005 | -1.36142 | 0.21062  | 0.86386  | DOWN | 832.4609 | 832.4591 | 832.4632 | 10.29887 | 10.23422 |
| 2828 | M365T9_1 | 1.592019 | -0.67086 | -1.3617  | 0.210623 | 0.86386  | DOWN | 365.1314 | 365.1312 | 365.1317 | 9.325333 | 9.275917 |
| 2829 | M505T15  | 1.352758 | -0.4359  | -1.36791 | 0.210696 | 0.863861 | DOWN | 505.3339 | 505.3337 | 505.3352 | 15.38047 | 15.07322 |
| 2830 | M634T9_2 | 2.349343 | -1.23226 | -1.46618 | 0.21074  | 0.863861 | DOWN | 633.817  | 633.8165 | 633.8179 | 9.376367 | 9.275917 |
| 2831 | M676T11_ | 1.405713 | 0.491302 | 1.361716 | 0.210761 | 0.863861 | UP   | 675.5763 | 675.5759 | 675.578  | 10.90553 | 10.84487 |
| 2832 | M430T11_ | 1.716028 | -0.77907 | -1.40002 | 0.210834 | 0.863861 | DOWN | 430.033  | 430.0327 | 430.0334 | 10.87668 | 10.80695 |
| 2833 | M206T10_ | 1.29868  | -0.37705 | -1.36035 | 0.210866 | 0.863861 | DOWN | 205.6723 | 205.6722 | 205.6724 | 10.3044  | 10.28192 |
| 2834 | M341T10_ | 1.230826 | -0.29963 | -1.42057 | 0.210895 | 0.863861 | DOWN | 340.9867 | 340.9865 | 340.9869 | 9.830458 | 9.715683 |

|      |          |          |          |          |          |          |      |          |          |          |          |          |
|------|----------|----------|----------|----------|----------|----------|------|----------|----------|----------|----------|----------|
| 2835 | M182T11_ | 1.432025 | -0.51806 | -1.41133 | 0.210895 | 0.863861 | DOWN | 181.7573 | 181.7572 | 181.758  | 10.89193 | 10.8646  |
| 2836 | M209T10_ | 1.490494 | -0.57579 | -1.36033 | 0.210914 | 0.863861 | DOWN | 209.2012 | 209.2011 | 209.2014 | 10.43282 | 10.40807 |
| 2837 | M788T10_ | 1.269284 | -0.34402 | -1.3821  | 0.210928 | 0.863861 | DOWN | 787.8127 | 787.8117 | 787.8131 | 9.9014   | 9.79535  |
| 2838 | M294T10_ | 1.75865  | -0.81447 | -1.44819 | 0.210947 | 0.863861 | DOWN | 293.5907 | 293.5906 | 293.5909 | 9.952308 | 9.8914   |
| 2839 | M666T10_ | 2.980202 | 1.57541  | 1.477772 | 0.210975 | 0.863861 | UP   | 665.7038 | 665.7027 | 665.7041 | 9.823575 | 9.715683 |
| 2840 | M234T9_1 | 1.335187 | 0.417041 | 1.370614 | 0.210996 | 0.863861 | UP   | 233.5074 | 233.5065 | 233.5076 | 9.3471   | 9.1322   |
| 2841 | M300T29  | 1.85518  | 0.891559 | 1.456867 | 0.210999 | 0.863861 | UP   | 300.2893 | 300.2892 | 300.2895 | 28.66333 | 28.65133 |
| 2842 | M637T10_ | 1.187252 | -0.24763 | -1.41942 | 0.211009 | 0.863861 | DOWN | 636.715  | 636.7144 | 636.717  | 9.823575 | 9.715683 |
| 2843 | M220T11_ | 1.627293 | 0.702474 | 1.359862 | 0.211054 | 0.863861 | UP   | 219.8244 | 219.8244 | 219.8248 | 10.91936 | 10.9049  |
| 2844 | M891T11_ | 1.50846  | -0.59308 | -1.39923 | 0.211081 | 0.863861 | DOWN | 890.5069 | 890.5064 | 890.5077 | 11.32571 | 11.30593 |
| 2845 | M413T15_ | 1.934338 | 0.95184  | 1.449273 | 0.211096 | 0.863861 | UP   | 413.2896 | 413.2892 | 413.2896 | 15.31108 | 15.30765 |
| 2846 | M685T10_ | 1.484033 | 0.569524 | 1.375803 | 0.2111   | 0.863861 | UP   | 685.4613 | 685.4608 | 685.4618 | 9.799767 | 9.7124   |
| 2847 | M634T25  | 6.934496 | -2.79379 | -1.4814  | 0.211216 | 0.863862 | DOWN | 633.9311 | 633.9297 | 633.9311 | 25.21983 | 25.18417 |
| 2848 | M786T10_ | 2.321327 | 1.21495  | 1.385236 | 0.211248 | 0.863862 | UP   | 785.5394 | 785.537  | 785.5409 | 9.932    | 9.859233 |
| 2849 | M292T9_2 | 1.275647 | -0.35123 | -1.39008 | 0.211269 | 0.863862 | DOWN | 292.1924 | 292.1919 | 292.1924 | 8.985492 | 8.89395  |
| 2850 | M545T9_4 | 2.776267 | -1.47315 | -1.44007 | 0.211297 | 0.863862 | DOWN | 545.3651 | 545.3525 | 545.3661 | 8.779867 | 8.672483 |
| 2851 | M615T9_4 | 1.394192 | -0.47943 | -1.36019 | 0.211352 | 0.863862 | DOWN | 615.0765 | 615.0713 | 615.0785 | 9.176533 | 9.142767 |
| 2852 | M521T9_3 | 1.368017 | -0.45209 | -1.3807  | 0.211451 | 0.863862 | DOWN | 520.7347 | 520.7333 | 520.7356 | 9.160617 | 9.129317 |
| 2853 | M388T20_ | 1.592802 | -0.67157 | -1.37179 | 0.211458 | 0.863862 | DOWN | 387.5543 | 387.5542 | 387.5547 | 19.83625 | 19.76783 |
| 2854 | M1425T9  | 1.969144 | -0.97757 | -1.36329 | 0.211498 | 0.863862 | DOWN | 1425.378 | 1425.375 | 1425.381 | 9.278717 | 9.22495  |
| 2855 | M360T9_3 | 1.631156 | -0.70589 | -1.39571 | 0.211548 | 0.863862 | DOWN | 359.743  | 359.7428 | 359.7432 | 9.138833 | 9.0864   |
| 2856 | M1551T10 | 1.205613 | -0.26977 | -1.37783 | 0.211603 | 0.863862 | DOWN | 1550.524 | 1550.519 | 1550.527 | 9.92825  | 9.827283 |
| 2857 | M548T11_ | 1.308207 | -0.38759 | -1.36443 | 0.211682 | 0.863862 | DOWN | 547.6801 | 547.6798 | 547.6805 | 10.58473 | 10.55068 |
| 2858 | M222T10_ | 13.43239 | 3.747644 | 1.484706 | 0.211708 | 0.863862 | UP   | 222.1099 | 222.1099 | 222.11   | 9.626517 | 9.610767 |
| 2859 | M646T9_1 | 1.330552 | -0.41202 | -1.35764 | 0.211774 | 0.863863 | DOWN | 645.9854 | 645.9848 | 645.9871 | 9.285867 | 9.1445   |
| 2860 | M345T9_5 | 1.32991  | -0.41133 | -1.35951 | 0.211775 | 0.863863 | DOWN | 344.8437 | 344.8433 | 344.8438 | 9.311883 | 9.219483 |
| 2861 | M614T9_1 | 1.45973  | -0.5457  | -1.35709 | 0.211799 | 0.863863 | DOWN | 613.5233 | 613.5227 | 613.525  | 9.314442 | 9.234417 |
| 2862 | M573T10_ | 1.240624 | -0.31107 | -1.36666 | 0.211859 | 0.863863 | DOWN | 573.4975 | 573.4971 | 573.498  | 9.9091   | 9.811217 |
| 2863 | M1475T10 | 1.689447 | -0.75655 | -1.35753 | 0.211883 | 0.863863 | DOWN | 1474.897 | 1474.89  | 1474.9   | 9.926825 | 9.822117 |
| 2864 | M468T13  | 1.171834 | -0.22877 | -1.36271 | 0.211893 | 0.863863 | DOWN | 468.3428 | 468.3426 | 468.3432 | 12.63128 | 12.61823 |
| 2865 | M355T40_ | 1.285443 | -0.36227 | -1.47565 | 0.211938 | 0.863863 | DOWN | 355.2114 | 355.2113 | 355.2115 | 39.71917 | 39.5875  |
| 2866 | M350T44_ | 1.505819 | -0.59055 | -1.3678  | 0.211957 | 0.863863 | DOWN | 350.2172 | 350.2171 | 350.2173 | 44.30783 | 44.23    |
| 2867 | M233T9   | 1.496707 | -0.58179 | -1.42433 | 0.211981 | 0.863863 | DOWN | 233.4026 | 233.4015 | 233.4031 | 9.287617 | 9.132267 |
| 2868 | M476T10_ | 1.177943 | 0.23627  | 1.367665 | 0.212074 | 0.863863 | UP   | 476.4987 | 476.4964 | 476.4989 | 9.856867 | 9.508883 |
| 2869 | M200T10_ | 1.241488 | -0.31207 | -1.42199 | 0.21221  | 0.863863 | DOWN | 199.9312 | 199.9311 | 199.9313 | 9.830083 | 9.715683 |

|      |          |          |          |          |          |          |      |          |          |          |          |          |
|------|----------|----------|----------|----------|----------|----------|------|----------|----------|----------|----------|----------|
| 2870 | M277T19  | 1.956947 | 0.968604 | 1.418908 | 0.212218 | 0.863863 | UP   | 277.2006 | 277.2003 | 277.2011 | 18.97067 | 18.9655  |
| 2871 | M328T10_ | 1.362658 | -0.44642 | -1.38673 | 0.212258 | 0.863863 | DOWN | 327.6608 | 327.6606 | 327.6614 | 9.9744   | 9.843367 |
| 2872 | M656T10_ | 1.270471 | 0.345363 | 1.471221 | 0.212298 | 0.863863 | UP   | 655.8237 | 655.8231 | 655.8246 | 9.830458 | 9.715683 |
| 2873 | M454T43_ | 1.365258 | -0.44917 | -1.38231 | 0.212362 | 0.863864 | DOWN | 454.2642 | 454.2641 | 454.2644 | 42.55333 | 42.4095  |
| 2874 | M234T10_ | 1.161943 | -0.21654 | -1.37205 | 0.212365 | 0.863864 | DOWN | 234.2348 | 234.2346 | 234.2348 | 9.944392 | 9.827283 |
| 2875 | M712T9_6 | 1.336358 | -0.41831 | -1.35662 | 0.212402 | 0.863864 | DOWN | 712.2783 | 712.2766 | 712.2794 | 9.213667 | 9.160617 |
| 2876 | M365T44  | 1.163554 | -0.21854 | -1.42965 | 0.21247  | 0.863864 | DOWN | 365.3412 | 365.341  | 365.3414 | 43.75417 | 43.661   |
| 2877 | M538T13_ | 1.111242 | -0.15217 | -1.35488 | 0.212473 | 0.863864 | DOWN | 538.3996 | 538.3995 | 538.3998 | 13.25862 | 13.24407 |
| 2878 | M316T7_1 | 1.723765 | -0.78556 | -1.35941 | 0.212536 | 0.863864 | DOWN | 316.2115 | 316.2113 | 316.2116 | 7.26615  | 7.1915   |
| 2879 | M581T9_4 | 1.355317 | -0.43863 | -1.40426 | 0.212758 | 0.863864 | DOWN | 581.4162 | 581.4135 | 581.4178 | 9.191133 | 9.129317 |
| 2880 | M434T9_4 | 2.288694 | 1.194525 | 1.470782 | 0.212781 | 0.863864 | UP   | 433.7215 | 433.7204 | 433.7236 | 9.196783 | 9.06855  |
| 2881 | M212T10_ | 1.42507  | -0.51103 | -1.36776 | 0.212797 | 0.863864 | DOWN | 212.188  | 212.188  | 212.1881 | 9.910333 | 9.811217 |
| 2882 | M836T11  | 1.429145 | -0.51515 | -1.38493 | 0.212861 | 0.863864 | DOWN | 835.5209 | 835.5203 | 835.5219 | 10.64621 | 10.59933 |
| 2883 | M1071T10 | 1.180056 | 0.238855 | 1.413648 | 0.212931 | 0.863865 | UP   | 1071.431 | 1071.43  | 1071.432 | 9.77345  | 9.62055  |
| 2884 | M207T10_ | 1.321068 | -0.40171 | -1.44364 | 0.213003 | 0.863865 | DOWN | 207.2838 | 207.2836 | 207.2839 | 9.830083 | 9.715683 |
| 2885 | M871T15  | 1.328744 | -0.41006 | -1.35312 | 0.213011 | 0.863865 | DOWN | 871.4149 | 871.4136 | 871.4164 | 14.7874  | 14.75152 |
| 2886 | M566T43  | 1.332764 | -0.41442 | -1.37433 | 0.213107 | 0.863865 | DOWN | 566.3169 | 566.3167 | 566.3171 | 43.30133 | 43.15717 |
| 2887 | M236T10_ | 1.399776 | -0.4852  | -1.39746 | 0.213221 | 0.863865 | DOWN | 236.2837 | 236.2828 | 236.2845 | 9.816167 | 9.715683 |
| 2888 | M325T9_1 | 1.168075 | -0.22413 | -1.36056 | 0.213261 | 0.863865 | DOWN | 324.6206 | 324.6204 | 324.6208 | 8.825317 | 8.715883 |
| 2889 | M333T10_ | 1.306196 | -0.38537 | -1.41246 | 0.213271 | 0.863865 | DOWN | 333.4055 | 333.4053 | 333.4056 | 9.830558 | 9.715683 |
| 2890 | M433T11_ | 1.348937 | -0.43182 | -1.37597 | 0.213366 | 0.863865 | DOWN | 432.8438 | 432.8429 | 432.8443 | 11.42482 | 11.38158 |
| 2891 | M534T40_ | 1.485816 | -0.57126 | -1.434   | 0.213541 | 0.863866 | DOWN | 534.3268 | 534.3267 | 534.3272 | 39.66842 | 39.64717 |
| 2892 | M417T10_ | 1.280815 | 0.357062 | 1.39963  | 0.213553 | 0.863866 | UP   | 416.8666 | 416.8664 | 416.8668 | 9.983467 | 9.8753   |
| 2893 | M353T17_ | 1.470303 | -0.55611 | -1.38547 | 0.213557 | 0.863866 | DOWN | 353.1569 | 353.1567 | 353.157  | 17.21942 | 17.0445  |
| 2894 | M527T10_ | 3.539944 | 1.823727 | 1.47391  | 0.213671 | 0.863866 | UP   | 526.8309 | 526.8301 | 526.8313 | 9.984083 | 9.8753   |
| 2895 | M488T11_ | 1.440205 | -0.52627 | -1.37672 | 0.213679 | 0.863866 | DOWN | 488.1954 | 488.1952 | 488.1959 | 11.23793 | 11.21303 |
| 2896 | M524T9_1 | 1.52153  | -0.60552 | -1.42371 | 0.213735 | 0.863866 | DOWN | 523.5665 | 523.565  | 523.5672 | 9.366108 | 9.2468   |
| 2897 | M477T10_ | 2.406547 | 1.266965 | 1.436354 | 0.213809 | 0.863866 | UP   | 477.3046 | 477.3043 | 477.305  | 9.816167 | 9.728083 |
| 2898 | M301T9_2 | 1.322725 | -0.40351 | -1.37689 | 0.213826 | 0.863866 | DOWN | 300.7914 | 300.7909 | 300.7923 | 9.28995  | 9.129317 |
| 2899 | M581T25  | 9.911337 | -3.30908 | -1.47468 | 0.213869 | 0.863866 | DOWN | 580.89   | 580.8893 | 580.8902 | 25.0725  | 25.0555  |
| 2900 | M270T13  | 1.232109 | -0.30113 | -1.4225  | 0.213896 | 0.863866 | DOWN | 269.7034 | 269.7032 | 269.704  | 13.25877 | 13.2438  |
| 2901 | M365T9_1 | 1.587323 | -0.6666  | -1.35019 | 0.213943 | 0.863866 | DOWN | 365.4724 | 365.4709 | 365.4762 | 9.174967 | 9.1036   |
| 2902 | M611T11_ | 1.487486 | -0.57288 | -1.39868 | 0.213961 | 0.863866 | DOWN | 611.389  | 611.3886 | 611.3902 | 11.41772 | 11.40895 |
| 2903 | M186T10_ | 1.585169 | -0.66464 | -1.35115 | 0.214031 | 0.863867 | DOWN | 185.5255 | 185.5255 | 185.5256 | 9.951283 | 9.885167 |
| 2904 | M301T10_ | 1.437144 | -0.5232  | -1.35703 | 0.214124 | 0.863867 | DOWN | 301.4532 | 301.4531 | 301.4533 | 9.91875  | 9.811217 |

|      |          |          |          |          |          |          |      |          |          |          |          |          |
|------|----------|----------|----------|----------|----------|----------|------|----------|----------|----------|----------|----------|
| 2905 | M539T13_ | 1.142719 | -0.19247 | -1.35612 | 0.214125 | 0.863867 | DOWN | 539.4031 | 539.4028 | 539.4034 | 13.25869 | 13.24427 |
| 2906 | M304T11_ | 1.335041 | 0.416884 | 1.410374 | 0.214174 | 0.863867 | UP   | 303.9567 | 303.9564 | 303.9572 | 10.93208 | 10.89125 |
| 2907 | M338T9_8 | 1.408621 | -0.49428 | -1.35045 | 0.214205 | 0.863867 | DOWN | 338.3342 | 338.3337 | 338.3365 | 9.255333 | 8.832317 |
| 2908 | M453T7_2 | 2.458561 | -1.29781 | -1.44409 | 0.214235 | 0.863867 | DOWN | 453.3431 | 453.3422 | 453.3432 | 6.85995  | 6.779933 |
| 2909 | M865T35  | 3.309033 | -1.72641 | -1.46499 | 0.214473 | 0.863867 | DOWN | 864.6259 | 864.6251 | 864.6262 | 35.41175 | 35.35867 |
| 2910 | M354T10_ | 1.275982 | 0.351608 | 1.38057  | 0.214494 | 0.863867 | UP   | 353.745  | 353.7444 | 353.7452 | 9.8207   | 9.696683 |
| 2911 | M208T10_ | 1.321348 | -0.40201 | -1.41278 | 0.214503 | 0.863867 | DOWN | 208.1071 | 208.1069 | 208.1071 | 9.8207   | 9.715683 |
| 2912 | M1729T10 | 1.240361 | 0.31076  | 1.405228 | 0.214509 | 0.863867 | UP   | 1729.056 | 1729.054 | 1729.058 | 9.933567 | 9.811217 |
| 2913 | M708T21  | 1.264579 | -0.33866 | -1.35214 | 0.214552 | 0.863868 | DOWN | 708.487  | 708.4865 | 708.4874 | 20.90992 | 20.88133 |
| 2914 | M302T10_ | 1.92724  | 0.946536 | 1.444741 | 0.214572 | 0.863868 | UP   | 301.6972 | 301.697  | 301.7053 | 9.964167 | 9.8322   |
| 2915 | M384T44  | 1.036272 | -0.0514  | -1.34831 | 0.214678 | 0.863868 | DOWN | 384.355  | 384.3549 | 384.3551 | 43.70383 | 43.68967 |
| 2916 | M489T10_ | 1.94546  | 0.960111 | 1.360127 | 0.214832 | 0.863868 | UP   | 489.3285 | 489.3282 | 489.3287 | 9.799767 | 9.743667 |
| 2917 | M769T10_ | 1.394284 | -0.47952 | -1.35435 | 0.214919 | 0.863868 | DOWN | 768.8038 | 768.8034 | 768.8045 | 9.985733 | 9.90755  |
| 2918 | M349T10_ | 1.267009 | -0.34143 | -1.45374 | 0.214952 | 0.863868 | DOWN | 349.4667 | 349.4666 | 349.4669 | 9.830083 | 9.715683 |
| 2919 | M288T10_ | 1.224248 | -0.2919  | -1.37391 | 0.214978 | 0.863868 | DOWN | 288.1404 | 288.14   | 288.1407 | 9.940633 | 9.827283 |
| 2920 | M350T10_ | 1.474841 | -0.56056 | -1.34679 | 0.215002 | 0.863868 | DOWN | 349.9714 | 349.9712 | 349.9717 | 9.830283 | 9.728083 |
| 2921 | M994T9_2 | 1.935584 | -0.95277 | -1.3489  | 0.215069 | 0.863868 | DOWN | 993.7074 | 993.7059 | 993.7085 | 8.734525 | 8.697767 |
| 2922 | M288T10_ | 1.133596 | -0.18091 | -1.34777 | 0.215078 | 0.863868 | DOWN | 287.7024 | 287.7022 | 287.7027 | 9.964092 | 9.859233 |
| 2923 | M214T9_1 | 1.661963 | -0.73289 | -1.35741 | 0.215123 | 0.863869 | DOWN | 214.0887 | 214.0869 | 214.0893 | 9.269717 | 9.132267 |
| 2924 | M433T9_8 | 1.740595 | 0.799581 | 1.352792 | 0.215162 | 0.863869 | UP   | 432.9774 | 432.9752 | 432.9817 | 9.357567 | 9.12675  |
| 2925 | M420T34  | 1.127227 | 0.172779 | 1.411086 | 0.215201 | 0.863869 | UP   | 420.2226 | 420.2224 | 420.2231 | 34.22233 | 34.076   |
| 2926 | M409T10_ | 3.542915 | 1.824937 | 1.36852  | 0.21525  | 0.863869 | UP   | 409.248  | 409.2453 | 409.2543 | 9.98005  | 9.970617 |
| 2927 | M177T10_ | 1.62904  | -0.70402 | -1.35445 | 0.21527  | 0.863869 | DOWN | 176.7453 | 176.7452 | 176.7453 | 9.964417 | 9.885167 |
| 2928 | M372T10_ | 1.600739 | 0.678738 | 1.349064 | 0.215297 | 0.863869 | UP   | 372.1227 | 372.1226 | 372.123  | 9.9722   | 9.8753   |
| 2929 | M553T10_ | 1.277807 | -0.35367 | -1.37552 | 0.215409 | 0.863869 | DOWN | 553.1833 | 553.1823 | 553.1837 | 9.830083 | 9.715683 |
| 2930 | M295T10_ | 1.255541 | -0.32831 | -1.4523  | 0.215412 | 0.863869 | DOWN | 295.21   | 295.2098 | 295.2104 | 9.916617 | 9.79535  |
| 2931 | M315T9_6 | 1.238696 | -0.30882 | -1.36474 | 0.21542  | 0.863869 | DOWN | 315.2289 | 315.2275 | 315.234  | 9.311167 | 9.129317 |
| 2932 | M739T9_3 | 1.291967 | -0.36957 | -1.34476 | 0.215616 | 0.863869 | DOWN | 738.849  | 738.8485 | 738.8493 | 9.317    | 9.234417 |
| 2933 | M1142T10 | 1.619725 | -0.69575 | -1.44596 | 0.215657 | 0.863869 | DOWN | 1141.657 | 1141.657 | 1141.658 | 10.2013  | 10.11747 |
| 2934 | M417T20_ | 4.490872 | -2.167   | -1.46497 | 0.215662 | 0.863869 | DOWN | 417.2637 | 417.2632 | 417.2642 | 20.25975 | 20.21617 |
| 2935 | M312T9_1 | 1.541178 | -0.62403 | -1.35465 | 0.215691 | 0.863869 | DOWN | 311.5841 | 311.5841 | 311.5842 | 9.450542 | 9.416817 |
| 2936 | M636T10_ | 1.495025 | -0.58017 | -1.3445  | 0.21577  | 0.86387  | DOWN | 635.7334 | 635.7326 | 635.7346 | 9.946417 | 9.853533 |
| 2937 | M508T45_ | 1.19723  | -0.2597  | -1.3559  | 0.21587  | 0.86387  | DOWN | 508.2748 | 508.2746 | 508.275  | 44.75717 | 44.58117 |
| 2938 | M203T11_ | 1.863719 | -0.89818 | -1.34393 | 0.215872 | 0.86387  | DOWN | 202.6994 | 202.6993 | 202.6997 | 10.91282 | 10.8926  |
| 2939 | M658T10_ | 1.789349 | -0.83943 | -1.42331 | 0.215973 | 0.86387  | DOWN | 658.0263 | 658.0256 | 658.0287 | 9.853633 | 9.65225  |

|      |           |          |          |          |          |          |      |          |          |          |          |          |
|------|-----------|----------|----------|----------|----------|----------|------|----------|----------|----------|----------|----------|
| 2940 | M322T29_  | 1.823365 | -0.8666  | -1.35885 | 0.215987 | 0.86387  | DOWN | 321.5846 | 321.5843 | 321.5852 | 28.6355  | 28.62    |
| 2941 | M351T10_  | 1.767556 | 0.821756 | 1.350626 | 0.216149 | 0.86387  | UP   | 350.5242 | 350.524  | 350.5243 | 9.82645  | 9.77435  |
| 2942 | M548T39_  | 1.265528 | -0.33974 | -1.36583 | 0.216254 | 0.86387  | DOWN | 548.3425 | 548.3423 | 548.3432 | 39.38833 | 39.063   |
| 2943 | M235T10_  | 1.225817 | -0.29374 | -1.40646 | 0.216335 | 0.863871 | DOWN | 234.521  | 234.5208 | 234.5211 | 9.950258 | 9.843367 |
| 2944 | M421T9_3  | 2.622281 | 1.390822 | 1.415879 | 0.216393 | 0.863871 | UP   | 421.2046 | 421.2044 | 421.2052 | 8.889467 | 8.88765  |
| 2945 | M775T21   | 1.245074 | -0.31623 | -1.35989 | 0.216432 | 0.863871 | DOWN | 774.5575 | 774.5571 | 774.558  | 21.15083 | 21.14033 |
| 2946 | M568T43_  | 1.354821 | 0.438103 | 1.343477 | 0.216462 | 0.863871 | UP   | 568.3325 | 568.3321 | 568.3326 | 43.07117 | 42.85517 |
| 2947 | M520T12_  | 1.439865 | -0.52593 | -1.37218 | 0.216477 | 0.863871 | DOWN | 520.29   | 520.2897 | 520.2906 | 12.14723 | 12.06243 |
| 2948 | M258T10_  | 1.907506 | 0.931687 | 1.463643 | 0.216489 | 0.863871 | UP   | 257.7853 | 257.7849 | 257.7855 | 9.744917 | 9.636483 |
| 2949 | M553T11_  | 1.313951 | -0.39391 | -1.34907 | 0.216507 | 0.863871 | DOWN | 553.2037 | 553.2035 | 553.2057 | 10.94538 | 10.91987 |
| 2950 | M416T42_  | 1.397405 | -0.48275 | -1.34242 | 0.216544 | 0.863871 | DOWN | 416.2276 | 416.2275 | 416.2279 | 42.45992 | 42.1075  |
| 2951 | M1147T10_ | 1.28188  | -0.35826 | -1.34687 | 0.216704 | 0.863871 | DOWN | 1146.971 | 1146.97  | 1146.971 | 9.57265  | 9.46325  |
| 2952 | M220T9_2  | 2.353095 | -1.23456 | -1.43069 | 0.216717 | 0.863871 | DOWN | 219.5655 | 219.5646 | 219.5663 | 9.369667 | 9.197983 |
| 2953 | M182T10_  | 1.453935 | -0.53996 | -1.39163 | 0.216731 | 0.863871 | DOWN | 182.2929 | 182.2928 | 182.2929 | 9.85925  | 9.857983 |
| 2954 | M696T10_  | 1.474127 | 0.559861 | 1.413859 | 0.216882 | 0.863872 | UP   | 696.1595 | 696.1591 | 696.16   | 9.856867 | 9.715683 |
| 2955 | M408T12_  | 1.269395 | -0.34414 | -1.38003 | 0.216932 | 0.863872 | DOWN | 408.333  | 408.3328 | 408.3333 | 12.28077 | 12.25235 |
| 2956 | M233T11_  | 1.32969  | 0.41109  | 1.347897 | 0.216969 | 0.863872 | UP   | 233.0691 | 233.069  | 233.0692 | 10.8914  | 10.879   |
| 2957 | M214T9_1  | 1.367678 | -0.45173 | -1.34212 | 0.217034 | 0.863872 | DOWN | 213.9961 | 213.9951 | 213.9969 | 9.279417 | 9.146383 |
| 2958 | M360T9_2  | 1.530423 | -0.61393 | -1.34549 | 0.217104 | 0.863872 | DOWN | 359.7309 | 359.7308 | 359.7313 | 9.250817 | 9.219483 |
| 2959 | M363T9_1  | 1.147171 | -0.19808 | -1.34512 | 0.217112 | 0.863872 | DOWN | 362.987  | 362.9864 | 362.9872 | 8.993033 | 8.892117 |
| 2960 | M381T16_  | 1.177821 | -0.23612 | -1.34096 | 0.217112 | 0.863872 | DOWN | 381.2687 | 381.2684 | 381.269  | 15.52973 | 15.51198 |
| 2961 | M201T10_  | 1.274866 | -0.35035 | -1.40385 | 0.217143 | 0.863872 | DOWN | 200.9524 | 200.9523 | 200.9525 | 9.830083 | 9.715683 |
| 2962 | M1314T9   | 1.513022 | -0.59743 | -1.38648 | 0.217186 | 0.863872 | DOWN | 1314.083 | 1314.081 | 1314.087 | 9.3471   | 9.0511   |
| 2963 | M423T11_  | 1.877197 | 0.90858  | 1.366601 | 0.217211 | 0.863872 | UP   | 423.2698 | 423.2687 | 423.2769 | 10.92678 | 10.84395 |
| 2964 | M165T30   | 1.80272  | 0.850175 | 1.342668 | 0.217226 | 0.863872 | UP   | 165.0542 | 165.044  | 165.0546 | 29.82658 | 29.7905  |
| 2965 | M460T42_  | 1.527429 | -0.61111 | -1.45282 | 0.217297 | 0.863872 | DOWN | 460.29   | 460.2899 | 460.2902 | 41.676   | 41.51767 |
| 2966 | M620T39   | 1.340583 | 0.42286  | 1.342309 | 0.217321 | 0.863872 | UP   | 620.364  | 620.3639 | 620.3645 | 39.28767 | 39.12933 |
| 2967 | M370T9_7  | 1.2788   | -0.35479 | -1.34278 | 0.217341 | 0.863872 | DOWN | 370.2398 | 370.2329 | 370.2406 | 9.443225 | 9.208217 |
| 2968 | M208T9_8  | 1.305848 | -0.38499 | -1.33882 | 0.217428 | 0.863873 | DOWN | 208.2995 | 208.299  | 208.3002 | 9.237883 | 9.146383 |
| 2969 | M790T10_  | 1.266624 | -0.34099 | -1.34569 | 0.217457 | 0.863873 | DOWN | 790.4492 | 790.4489 | 790.4495 | 9.646267 | 9.52595  |
| 2970 | M226T10_  | 2.129052 | 1.090211 | 1.449708 | 0.217497 | 0.863873 | UP   | 225.6976 | 225.6975 | 225.6978 | 9.943183 | 9.827283 |
| 2971 | M658T10_  | 1.272589 | -0.34777 | -1.34557 | 0.217568 | 0.863873 | DOWN | 658.152  | 658.1514 | 658.1538 | 9.83535  | 9.715683 |
| 2972 | M197T10_  | 2.087671 | -1.06189 | -1.34905 | 0.217595 | 0.863873 | DOWN | 196.6163 | 196.6132 | 196.6165 | 9.9009   | 9.715683 |
| 2973 | M383T14_  | 1.623853 | 0.699421 | 1.377177 | 0.217602 | 0.863873 | UP   | 383.2891 | 383.2888 | 383.2894 | 14.22292 | 14.12177 |
| 2974 | M528T23_  | 1.213824 | -0.27956 | -1.35569 | 0.217662 | 0.863873 | DOWN | 528.3594 | 528.3589 | 528.3598 | 22.65617 | 22.6115  |

|      |          |          |          |          |          |          |      |          |          |          |          |          |
|------|----------|----------|----------|----------|----------|----------|------|----------|----------|----------|----------|----------|
| 2975 | M347T9_5 | 1.167414 | -0.22332 | -1.36396 | 0.217668 | 0.863873 | DOWN | 347.2267 | 347.2261 | 347.2271 | 9.000783 | 8.892117 |
| 2976 | M324T20  | 1.274996 | 0.350492 | 1.344737 | 0.217706 | 0.863873 | UP   | 324.2896 | 324.2891 | 324.29   | 19.831   | 19.78833 |
| 2977 | M682T10_ | 1.484832 | 0.5703   | 1.338737 | 0.217722 | 0.863873 | UP   | 681.6587 | 681.6582 | 681.66   | 9.946467 | 9.843367 |
| 2978 | M230T20  | 1.609678 | -0.68677 | -1.37441 | 0.217842 | 0.863873 | DOWN | 230.1536 | 230.1535 | 230.1539 | 19.73042 | 19.55783 |
| 2979 | M360T10_ | 1.847183 | 0.885327 | 1.454053 | 0.217867 | 0.863873 | UP   | 360.0995 | 360.0892 | 360.0999 | 9.848417 | 9.715683 |
| 2980 | M926T9   | 1.669064 | -0.73904 | -1.35713 | 0.217869 | 0.863873 | DOWN | 925.6567 | 925.6547 | 925.6601 | 9.205342 | 9.103733 |
| 2981 | M783T10_ | 1.31068  | -0.39032 | -1.3381  | 0.217899 | 0.863873 | DOWN | 783.3261 | 783.3256 | 783.3266 | 9.629008 | 9.52595  |
| 2982 | M220T10_ | 1.336979 | -0.41898 | -1.4026  | 0.217949 | 0.863873 | DOWN | 219.6253 | 219.6246 | 219.626  | 9.830183 | 9.7124   |
| 2983 | M527T34  | 1.269245 | -0.34397 | -1.35396 | 0.218    | 0.863873 | DOWN | 527.3981 | 527.3978 | 527.3988 | 33.7445  | 33.72983 |
| 2984 | M605T10_ | 1.872202 | 0.904736 | 1.354969 | 0.218004 | 0.863873 | UP   | 605.349  | 605.3463 | 605.3519 | 9.773942 | 9.640367 |
| 2985 | M317T10_ | 1.358719 | -0.44225 | -1.38113 | 0.218017 | 0.863874 | DOWN | 316.9149 | 316.9147 | 316.9156 | 9.9351   | 9.853533 |
| 2986 | M341T25  | 1.376911 | -0.46144 | -1.34522 | 0.218189 | 0.863874 | DOWN | 341.3524 | 341.352  | 341.3527 | 25.49383 | 25.47233 |
| 2987 | M800T10_ | 1.714142 | 0.777487 | 1.345756 | 0.218272 | 0.863874 | UP   | 800.2378 | 800.237  | 800.2387 | 9.966725 | 9.8753   |
| 2988 | M255T10_ | 4.995204 | 2.320544 | 1.457705 | 0.21834  | 0.863874 | UP   | 254.7267 | 254.7266 | 254.7269 | 9.950283 | 9.853533 |
| 2989 | M394T10_ | 1.36583  | -0.44978 | -1.36992 | 0.218371 | 0.863874 | DOWN | 394.457  | 394.4568 | 394.4571 | 9.972483 | 9.8753   |
| 2990 | M521T13_ | 1.135079 | -0.18279 | -1.35859 | 0.218397 | 0.863874 | DOWN | 521.4057 | 521.4055 | 521.4061 | 12.61781 | 12.61638 |
| 2991 | M507T10_ | 1.332738 | -0.41439 | -1.33649 | 0.218561 | 0.863874 | DOWN | 506.9777 | 506.977  | 506.9784 | 10.44737 | 10.39298 |
| 2992 | M462T9_2 | 1.640875 | -0.71447 | -1.34266 | 0.218605 | 0.863875 | DOWN | 462.2027 | 462.202  | 462.2036 | 8.9459   | 8.93705  |
| 2993 | M577T9_3 | 1.391273 | -0.47641 | -1.33848 | 0.218607 | 0.863875 | DOWN | 577.0781 | 577.0708 | 577.0801 | 9.26575  | 9.061    |
| 2994 | M556T10_ | 1.241005 | -0.31151 | -1.37252 | 0.218636 | 0.863875 | DOWN | 556.4684 | 556.4679 | 556.4694 | 9.902008 | 9.79535  |
| 2995 | M706T10_ | 1.1997   | 0.262674 | 1.440244 | 0.218726 | 0.863875 | UP   | 705.5604 | 705.5597 | 705.5618 | 9.825767 | 9.715683 |
| 2996 | M334T10_ | 2.033773 | -1.02416 | -1.42365 | 0.218735 | 0.863875 | DOWN | 333.9694 | 333.9692 | 333.9707 | 9.848417 | 9.715683 |
| 2997 | M378T41_ | 2.454322 | -1.29532 | -1.34262 | 0.218875 | 0.863875 | DOWN | 378.2483 | 378.2482 | 378.2485 | 41.49583 | 41.40233 |
| 2998 | M313T9_4 | 1.386094 | -0.47102 | -1.33411 | 0.218949 | 0.863875 | DOWN | 312.9247 | 312.9241 | 312.9249 | 8.878342 | 8.7575   |
| 2999 | M595T11_ | 1.362884 | -0.44666 | -1.33548 | 0.219005 | 0.863875 | DOWN | 595.3334 | 595.3325 | 595.3449 | 10.84049 | 10.7249  |
| 3000 | M968T10_ | 1.515853 | -0.60013 | -1.33733 | 0.219063 | 0.863875 | DOWN | 968.4558 | 968.4551 | 968.4566 | 10.07472 | 9.955733 |
| 3001 | M518T42_ | 1.287069 | 0.364089 | 1.337502 | 0.219131 | 0.863875 | UP   | 518.2955 | 518.2954 | 518.2957 | 42.14308 | 42.0055  |
| 3002 | M384T9_1 | 1.46193  | -0.54787 | -1.36294 | 0.219151 | 0.863875 | DOWN | 383.7055 | 383.7042 | 383.7064 | 9.332258 | 9.241267 |
| 3003 | M457T9_6 | 2.018142 | -1.01303 | -1.43375 | 0.219177 | 0.863875 | DOWN | 457.1659 | 457.1652 | 457.1711 | 9.1158   | 9.018167 |
| 3004 | M210T10_ | 1.671995 | -0.74157 | -1.35931 | 0.219243 | 0.863876 | DOWN | 210.163  | 210.1629 | 210.163  | 9.830283 | 9.699733 |
| 3005 | M441T10_ | 1.282984 | -0.3595  | -1.35132 | 0.219621 | 0.863876 | DOWN | 440.7786 | 440.7783 | 440.7789 | 9.929783 | 9.811217 |
| 3006 | M365T9_1 | 1.622756 | -0.69845 | -1.33379 | 0.219662 | 0.863876 | DOWN | 365.2652 | 365.2641 | 365.2717 | 9.24215  | 9.1602   |
| 3007 | M382T9_1 | 1.541703 | -0.62452 | -1.39624 | 0.219675 | 0.863876 | DOWN | 381.5803 | 381.5789 | 381.5808 | 8.896292 | 8.7891   |
| 3008 | M639T10_ | 1.151391 | -0.20338 | -1.43892 | 0.21968  | 0.863876 | DOWN | 638.5766 | 638.5759 | 638.5806 | 9.830283 | 9.715683 |
| 3009 | M197T10_ | 1.499278 | -0.58427 | -1.35022 | 0.219697 | 0.863876 | DOWN | 197.0677 | 197.0677 | 197.0784 | 9.743767 | 9.56645  |

|      |          |          |          |          |          |          |      |          |          |          |          |          |
|------|----------|----------|----------|----------|----------|----------|------|----------|----------|----------|----------|----------|
| 3010 | M347T10_ | 1.198365 | -0.26107 | -1.33734 | 0.219755 | 0.863876 | DOWN | 347.2671 | 347.2669 | 347.2673 | 10.13125 | 10.03658 |
| 3011 | M317T9_3 | 1.432766 | -0.5188  | -1.3596  | 0.219787 | 0.863877 | DOWN | 316.9565 | 316.9562 | 316.9567 | 9.317    | 9.234417 |
| 3012 | M488T11_ | 1.368695 | -0.4528  | -1.33943 | 0.219866 | 0.863877 | DOWN | 487.609  | 487.6088 | 487.61   | 10.9198  | 10.8926  |
| 3013 | M536T11_ | 1.778804 | 0.830907 | 1.437024 | 0.219979 | 0.863877 | UP   | 536.3305 | 536.3303 | 536.3306 | 11.39496 | 11.36615 |
| 3014 | M1170T25 | 7.323024 | -2.87244 | -1.45017 | 0.220034 | 0.863877 | DOWN | 1169.704 | 1169.703 | 1169.706 | 24.92875 | 24.912   |
| 3015 | M398T10_ | 1.689189 | -0.75633 | -1.3397  | 0.220068 | 0.863877 | DOWN | 397.9516 | 397.951  | 397.9522 | 9.920517 | 9.853533 |
| 3016 | M298T24  | 1.138287 | -0.18686 | -1.33494 | 0.220194 | 0.863877 | DOWN | 298.2009 | 298.2006 | 298.2012 | 23.69283 | 23.6825  |
| 3017 | M642T9_2 | 1.536869 | -0.61999 | -1.34028 | 0.220202 | 0.863877 | DOWN | 641.9917 | 641.9898 | 641.9937 | 9.190442 | 9.12675  |
| 3018 | M661T10_ | 1.31819  | -0.39856 | -1.37513 | 0.220246 | 0.863877 | DOWN | 660.8358 | 660.8351 | 660.8363 | 9.830458 | 9.73145  |
| 3019 | M620T31  | 1.208442 | -0.27315 | -1.38016 | 0.2203   | 0.863877 | DOWN | 620.4367 | 620.4364 | 620.4371 | 31.40692 | 31.39217 |
| 3020 | M389T10_ | 1.564486 | 0.645689 | 1.341099 | 0.220321 | 0.863877 | UP   | 388.9775 | 388.9775 | 388.9778 | 9.8734   | 9.779267 |
| 3021 | M208T10_ | 1.311446 | -0.39116 | -1.40132 | 0.220371 | 0.863877 | DOWN | 207.6293 | 207.6214 | 207.6294 | 9.823575 | 9.715683 |
| 3022 | M200T9_1 | 2.370173 | -1.24499 | -1.37023 | 0.22053  | 0.863878 | DOWN | 200.1126 | 200.1074 | 200.1164 | 9.1544   | 9.1322   |
| 3023 | M289T10_ | 1.363682 | 0.447507 | 1.3287   | 0.22064  | 0.863878 | UP   | 289.3167 | 289.3166 | 289.3225 | 9.928667 | 9.859233 |
| 3024 | M427T24  | 11.80755 | -3.56164 | -1.44672 | 0.220733 | 0.863878 | DOWN | 426.7975 | 426.7974 | 426.7977 | 24.45017 | 24.419   |
| 3025 | M364T19  | 22.95068 | 4.520465 | 1.449312 | 0.220829 | 0.863878 | UP   | 364.2957 | 364.2954 | 364.2964 | 18.57017 | 18.55867 |
| 3026 | M453T9_6 | 2.752859 | -1.46093 | -1.44503 | 0.220919 | 0.863878 | DOWN | 452.9317 | 452.9309 | 452.9387 | 9.223908 | 9.098833 |
| 3027 | M923T22  | 1.262052 | -0.33577 | -1.32774 | 0.221015 | 0.863879 | DOWN | 922.6312 | 922.6309 | 922.632  | 22.42917 | 22.422   |
| 3028 | M1894T10 | 1.11569  | -0.15794 | -1.32761 | 0.221029 | 0.863879 | DOWN | 1893.969 | 1893.967 | 1893.972 | 9.8207   | 9.715683 |
| 3029 | M188T10_ | 1.315244 | 0.395331 | 1.406633 | 0.221079 | 0.863879 | UP   | 187.9822 | 187.9821 | 187.9823 | 9.964092 | 9.853533 |
| 3030 | M566T20  | 1.300326 | -0.37887 | -1.34497 | 0.221086 | 0.863879 | DOWN | 566.4316 | 566.431  | 566.4322 | 19.53292 | 19.48217 |
| 3031 | M378T40_ | 4.119459 | 2.042455 | 1.447189 | 0.221114 | 0.863879 | UP   | 378.2482 | 378.248  | 378.2485 | 39.50317 | 39.1725  |
| 3032 | M994T25  | 8.452889 | -3.07944 | -1.44439 | 0.221129 | 0.863879 | DOWN | 993.5992 | 993.599  | 993.6009 | 24.54233 | 24.50667 |
| 3033 | M754T10_ | 1.49771  | -0.58276 | -1.32758 | 0.221181 | 0.863879 | DOWN | 753.8609 | 753.8602 | 753.8617 | 9.790675 | 9.6681   |
| 3034 | M297T11_ | 1.245484 | 0.316706 | 1.327239 | 0.221215 | 0.863879 | UP   | 296.7312 | 296.7307 | 296.7319 | 10.90548 | 10.8926  |
| 3035 | M364T9_4 | 1.592667 | -0.67144 | -1.33851 | 0.221255 | 0.863879 | DOWN | 363.8747 | 363.8697 | 363.8768 | 9.26095  | 9.092333 |
| 3036 | M463T10_ | 2.101178 | 1.071198 | 1.430124 | 0.221294 | 0.863879 | UP   | 463.4392 | 463.4384 | 463.4399 | 9.767875 | 9.649833 |
| 3037 | M341T10_ | 1.131142 | -0.17778 | -1.367   | 0.221353 | 0.863879 | DOWN | 341.2623 | 341.262  | 341.2625 | 9.8736   | 9.779267 |
| 3038 | M386T9_5 | 1.299483 | -0.37794 | -1.38147 | 0.221405 | 0.863879 | DOWN | 386.3391 | 386.3388 | 386.3402 | 9.441    | 9.355317 |
| 3039 | M616T10_ | 1.591178 | -0.6701  | -1.32862 | 0.22162  | 0.86388  | DOWN | 616.3979 | 616.3976 | 616.3981 | 9.918492 | 9.8378   |
| 3040 | M515T25  | 9.646296 | -3.26998 | -1.44232 | 0.221637 | 0.86388  | DOWN | 514.85   | 514.8494 | 514.8504 | 24.82583 | 24.79767 |
| 3041 | M216T9_3 | 1.343596 | -0.4261  | -1.34607 | 0.221711 | 0.86388  | DOWN | 216.123  | 216.1226 | 216.1233 | 8.871883 | 8.688517 |
| 3042 | M339T10_ | 1.252317 | -0.3246  | -1.39727 | 0.221757 | 0.86388  | DOWN | 339.3587 | 339.3584 | 339.3589 | 9.8207   | 9.715683 |
| 3043 | M345T9_1 | 1.71743  | 0.780251 | 1.336879 | 0.221816 | 0.86388  | UP   | 345.2394 | 345.2308 | 345.2397 | 8.819317 | 8.730433 |
| 3044 | M230T10_ | 2.80552  | 1.488268 | 1.426401 | 0.221894 | 0.86388  | UP   | 230.411  | 230.4109 | 230.411  | 9.964167 | 9.859233 |

|      |          |          |          |          |          |          |      |          |          |          |          |          |
|------|----------|----------|----------|----------|----------|----------|------|----------|----------|----------|----------|----------|
| 3045 | M476T22_ | 4.460258 | 2.157127 | 1.422922 | 0.221979 | 0.86388  | UP   | 476.3281 | 476.328  | 476.3362 | 21.52233 | 21.25067 |
| 3046 | M662T10_ | 1.348392 | -0.43124 | -1.33446 | 0.221984 | 0.86388  | DOWN | 662.4657 | 662.4646 | 662.4662 | 9.816133 | 9.715683 |
| 3047 | M174T10_ | 1.30222  | -0.38097 | -1.3389  | 0.222016 | 0.86388  | DOWN | 174.2579 | 174.2575 | 174.2579 | 9.914108 | 9.8378   |
| 3048 | M297T43  | 2.201853 | -1.13872 | -1.40403 | 0.222096 | 0.86388  | DOWN | 297.1695 | 297.1695 | 297.1805 | 42.8265  | 42.51017 |
| 3049 | M383T9_6 | 1.848673 | -0.88649 | -1.32748 | 0.222098 | 0.86388  | DOWN | 383.4259 | 383.4217 | 383.4313 | 9.186775 | 9.0864   |
| 3050 | M560T11_ | 1.48393  | -0.56942 | -1.33677 | 0.222114 | 0.86388  | DOWN | 559.8138 | 559.813  | 559.814  | 10.90765 | 10.873   |
| 3051 | M412T9_9 | 3.141462 | 1.651436 | 1.428899 | 0.222135 | 0.86388  | UP   | 412.2233 | 412.2179 | 412.224  | 9.280767 | 8.872733 |
| 3052 | M383T11_ | 1.733986 | 0.794092 | 1.328394 | 0.222141 | 0.86388  | UP   | 383.2306 | 383.2301 | 383.2309 | 11.27975 | 11.2714  |
| 3053 | M403T42_ | 1.403749 | -0.48929 | -1.3654  | 0.222155 | 0.86388  | DOWN | 403.2324 | 403.2322 | 403.2325 | 41.54025 | 41.057   |
| 3054 | M173T2   | 1.620849 | 0.696749 | 1.407677 | 0.222223 | 0.863881 | UP   | 172.9766 | 172.9765 | 172.9766 | 2.147367 | 2.128683 |
| 3055 | M1030T10 | 1.719767 | 0.782213 | 1.381811 | 0.222256 | 0.863881 | UP   | 1030.252 | 1030.252 | 1030.254 | 9.8207   | 9.699733 |
| 3056 | M264T13  | 1.409236 | 0.494913 | 1.414687 | 0.222262 | 0.863881 | UP   | 264.1566 | 264.1565 | 264.1567 | 12.58763 | 12.57248 |
| 3057 | M1140T10 | 1.521651 | 0.605638 | 1.339284 | 0.222265 | 0.863881 | UP   | 1140.05  | 1140.049 | 1140.054 | 9.791142 | 9.76065  |
| 3058 | M593T9_2 | 1.40904  | -0.49471 | -1.33221 | 0.222426 | 0.863881 | DOWN | 593.2421 | 593.2415 | 593.2426 | 8.989067 | 8.9536   |
| 3059 | M222T27  | 1.68571  | -0.75336 | -1.39144 | 0.222471 | 0.863881 | DOWN | 222.1567 | 222.1566 | 222.1568 | 27.25575 | 27.22733 |
| 3060 | M177T9_5 | 2.111833 | -1.0785  | -1.37045 | 0.222501 | 0.863881 | DOWN | 177.0915 | 177.0914 | 177.0924 | 9.2946   | 9.132267 |
| 3061 | M702T10_ | 1.13919  | -0.18801 | -1.40448 | 0.222542 | 0.863881 | DOWN | 702.4446 | 702.4427 | 702.445  | 9.840617 | 9.715683 |
| 3062 | M545T9_3 | 1.491307 | -0.57658 | -1.33916 | 0.222552 | 0.863881 | DOWN | 545.3057 | 545.3051 | 545.3065 | 9.174225 | 9.133667 |
| 3063 | M849T10_ | 1.620255 | -0.69622 | -1.32827 | 0.222589 | 0.863881 | DOWN | 848.8279 | 848.8265 | 848.8294 | 9.921542 | 9.857983 |
| 3064 | M645T9_3 | 1.432154 | 0.518187 | 1.336486 | 0.222708 | 0.863881 | UP   | 644.9212 | 644.9203 | 644.923  | 9.337408 | 9.275917 |
| 3065 | M338T25_ | 1.798452 | -0.84676 | -1.34564 | 0.222766 | 0.863881 | DOWN | 338.4369 | 338.4364 | 338.4372 | 24.76817 | 24.68983 |
| 3066 | M365T9_3 | 1.424488 | -0.51044 | -1.33407 | 0.222777 | 0.863881 | DOWN | 364.7197 | 364.7189 | 364.7205 | 8.827033 | 8.7575   |
| 3067 | M211T10_ | 7.52443  | 2.911582 | 1.441603 | 0.222847 | 0.863882 | UP   | 211.1037 | 211.0939 | 211.1041 | 9.98345  | 9.8753   |
| 3068 | M416T39_ | 1.537802 | -0.62087 | -1.38186 | 0.222863 | 0.863882 | DOWN | 416.2642 | 416.2639 | 416.2643 | 38.525   | 38.38117 |
| 3069 | M246T10_ | 1.402123 | -0.48761 | -1.33276 | 0.222895 | 0.863882 | DOWN | 245.5176 | 245.5169 | 245.5178 | 9.933967 | 9.827283 |
| 3070 | M203T6_2 | 2.930913 | 1.55135  | 1.433722 | 0.222992 | 0.863882 | UP   | 203.0524 | 203.0523 | 203.0526 | 6.278067 | 6.09805  |
| 3071 | M759T25  | 1.263987 | -0.33798 | -1.32454 | 0.223025 | 0.863882 | DOWN | 758.5624 | 758.5619 | 758.5628 | 25.31833 | 25.3035  |
| 3072 | M366T10_ | 1.350923 | -0.43395 | -1.36289 | 0.223042 | 0.863882 | DOWN | 365.8528 | 365.8527 | 365.8531 | 9.82645  | 9.715683 |
| 3073 | M431T9_5 | 1.27404  | 0.349411 | 1.324264 | 0.223052 | 0.863882 | UP   | 430.9609 | 430.9606 | 430.9614 | 8.797625 | 8.749717 |
| 3074 | M374T14  | 1.188939 | -0.24968 | -1.32339 | 0.223117 | 0.863882 | DOWN | 374.2904 | 374.2902 | 374.2906 | 13.69751 | 13.68268 |
| 3075 | M697T10_ | 1.262331 | -0.33609 | -1.37824 | 0.223136 | 0.863882 | DOWN | 696.8809 | 696.8806 | 696.8812 | 9.830083 | 9.715683 |
| 3076 | M152T10_ | 1.261663 | -0.33533 | -1.37323 | 0.223153 | 0.863882 | DOWN | 152.024  | 152.0239 | 152.024  | 9.915583 | 9.811217 |
| 3077 | M391T9_6 | 1.448503 | -0.53456 | -1.32071 | 0.223168 | 0.863882 | DOWN | 391.2682 | 391.2674 | 391.2687 | 8.9949   | 8.8977   |
| 3078 | M589T12  | 1.867902 | 0.901419 | 1.375035 | 0.223169 | 0.863882 | UP   | 589.4236 | 589.4226 | 589.4243 | 11.67816 | 11.62172 |
| 3079 | M379T10_ | 1.245955 | -0.31725 | -1.3286  | 0.223225 | 0.863882 | DOWN | 379.428  | 379.4276 | 379.4289 | 9.903092 | 9.79535  |



|      |          |          |          |          |          |          |      |          |          |          |          |          |
|------|----------|----------|----------|----------|----------|----------|------|----------|----------|----------|----------|----------|
| 3080 | M678T10_ | 1.434267 | -0.52031 | -1.32243 | 0.223242 | 0.863882 | DOWN | 677.6769 | 677.6756 | 677.6774 | 9.714783 | 9.398167 |
| 3081 | M726T11_ | 2.194343 | 1.133789 | 1.421075 | 0.223284 | 0.863882 | UP   | 726.2962 | 726.2948 | 726.297  | 10.88605 | 10.8214  |
| 3082 | M712T3   | 1.740453 | -0.79946 | -1.34155 | 0.223433 | 0.863883 | DOWN | 711.5012 | 711.5008 | 711.5015 | 3.276167 | 3.07495  |
| 3083 | M609T11_ | 1.23991  | -0.31024 | -1.3211  | 0.223439 | 0.863883 | DOWN | 609.3445 | 609.3442 | 609.3451 | 10.56788 | 10.5191  |
| 3084 | M489T10_ | 1.34812  | -0.43095 | -1.37295 | 0.22344  | 0.863883 | DOWN | 488.978  | 488.9778 | 488.9785 | 10.33037 | 10.27932 |
| 3085 | M343T10_ | 1.471695 | -0.55748 | -1.33342 | 0.223531 | 0.863883 | DOWN | 343.4861 | 343.4834 | 343.4863 | 9.5098   | 9.388367 |
| 3086 | M1377T10 | 1.287244 | -0.36429 | -1.32551 | 0.223543 | 0.863883 | DOWN | 1377.493 | 1377.492 | 1377.495 | 9.84095  | 9.743667 |
| 3087 | M221T10_ | 1.244524 | -0.31559 | -1.38163 | 0.223546 | 0.863883 | DOWN | 221.3395 | 221.3313 | 221.3397 | 9.909433 | 9.811217 |
| 3088 | M324T10_ | 1.378763 | 0.463375 | 1.382577 | 0.223583 | 0.863883 | UP   | 324.4154 | 324.4153 | 324.4156 | 9.82645  | 9.77435  |
| 3089 | M263T11_ | 1.126932 | -0.1724  | -1.36813 | 0.223616 | 0.863883 | DOWN | 262.7306 | 262.7302 | 262.7308 | 10.91376 | 10.879   |
| 3090 | M470T9_6 | 1.473936 | 0.559674 | 1.346836 | 0.223625 | 0.863883 | UP   | 470.296  | 470.2927 | 470.3005 | 9.124475 | 9.03845  |
| 3091 | M379T9_5 | 2.455089 | 1.295776 | 1.427365 | 0.223654 | 0.863883 | UP   | 379.057  | 379.0569 | 379.0572 | 9.304558 | 9.219483 |
| 3092 | M226T10_ | 3.379772 | 1.756926 | 1.436704 | 0.223699 | 0.863883 | UP   | 225.7325 | 225.7324 | 225.7327 | 9.9351   | 9.827283 |
| 3093 | M467T17  | 1.419781 | -0.50567 | -1.35247 | 0.223819 | 0.863883 | DOWN | 467.319  | 467.3184 | 467.3193 | 17.278   | 17.24667 |
| 3094 | M209T9_7 | 1.251087 | -0.32318 | -1.33343 | 0.223845 | 0.863883 | DOWN | 209.4789 | 209.4788 | 209.479  | 9.26575  | 9.1445   |
| 3095 | M293T9_1 | 1.459747 | -0.54572 | -1.32232 | 0.223859 | 0.863883 | DOWN | 292.6939 | 292.6934 | 292.7035 | 9.008417 | 8.90715  |
| 3096 | M228T9_7 | 2.286669 | -1.19325 | -1.32546 | 0.223865 | 0.863883 | DOWN | 227.8853 | 227.8828 | 227.8869 | 9.303242 | 9.146383 |
| 3097 | M1351T10 | 1.475588 | 0.56129  | 1.334421 | 0.223868 | 0.863883 | UP   | 1351.01  | 1351.009 | 1351.012 | 9.969158 | 9.859233 |
| 3098 | M726T11_ | 1.482687 | -0.56821 | -1.39295 | 0.223974 | 0.863883 | DOWN | 726.4302 | 726.4298 | 726.4305 | 11.2229  | 11.19848 |
| 3099 | M332T10_ | 4.523761 | -2.17752 | -1.42515 | 0.224083 | 0.863884 | DOWN | 331.8012 | 331.8008 | 331.8017 | 9.841308 | 9.715683 |
| 3100 | M673T35  | 2.60925  | 1.383635 | 1.425127 | 0.224141 | 0.863884 | UP   | 672.5258 | 672.5249 | 672.527  | 35.1135  | 34.95517 |
| 3101 | M490T39_ | 1.342709 | -0.42515 | -1.35882 | 0.224159 | 0.863884 | DOWN | 490.2645 | 490.2643 | 490.2646 | 39.25883 | 39.11483 |
| 3102 | M1048T25 | 6.298613 | -2.65503 | -1.43498 | 0.224282 | 0.863884 | DOWN | 1047.536 | 1047.536 | 1047.538 | 24.68    | 24.6525  |
| 3103 | M320T16  | 1.460582 | -0.54654 | -1.32057 | 0.224305 | 0.863884 | DOWN | 320.2946 | 320.2944 | 320.2947 | 15.64296 | 15.62888 |
| 3104 | M480T11_ | 1.229474 | -0.29804 | -1.33079 | 0.224363 | 0.863884 | DOWN | 479.5884 | 479.5881 | 479.5886 | 10.892   | 10.8646  |
| 3105 | M349T10_ | 1.200224 | -0.2633  | -1.43126 | 0.224367 | 0.863884 | DOWN | 348.7293 | 348.7291 | 348.7294 | 9.83535  | 9.715683 |
| 3106 | M657T9_3 | 1.245756 | -0.31702 | -1.33673 | 0.224377 | 0.863884 | DOWN | 657.1007 | 657.1001 | 657.1021 | 9.322542 | 9.234417 |
| 3107 | M1083T10 | 1.168152 | -0.22423 | -1.37672 | 0.224409 | 0.863884 | DOWN | 1082.635 | 1082.634 | 1082.64  | 9.847133 | 9.73145  |
| 3108 | M189T9_8 | 2.110928 | -1.07788 | -1.34399 | 0.224416 | 0.863884 | DOWN | 188.9788 | 188.9783 | 188.9791 | 9.174917 | 9.145433 |
| 3109 | M1028T12 | 1.893246 | -0.92086 | -1.3895  | 0.224506 | 0.863884 | DOWN | 1027.792 | 1027.792 | 1027.793 | 12.15013 | 12.10728 |
| 3110 | M534T43_ | 1.501483 | 0.586388 | 1.316776 | 0.224538 | 0.863884 | UP   | 534.2906 | 534.2905 | 534.2907 | 42.97033 | 42.78333 |
| 3111 | M755T10_ | 1.541642 | -0.62447 | -1.31835 | 0.224561 | 0.863884 | DOWN | 755.1775 | 755.1759 | 755.1778 | 9.938742 | 9.853533 |
| 3112 | M344T10_ | 1.175495 | -0.23327 | -1.31654 | 0.224564 | 0.863884 | DOWN | 343.5321 | 343.5318 | 343.5322 | 9.823317 | 9.715683 |
| 3113 | M1032T10 | 1.346632 | -0.42936 | -1.31603 | 0.224728 | 0.863885 | DOWN | 1032.041 | 1032.039 | 1032.042 | 9.746308 | 9.636483 |
| 3114 | M438T14  | 1.191335 | -0.25258 | -1.33123 | 0.224734 | 0.863885 | DOWN | 438.3685 | 438.3682 | 438.3688 | 13.9535  | 13.93132 |

|      |          |          |          |          |          |          |      |          |          |          |          |          |
|------|----------|----------|----------|----------|----------|----------|------|----------|----------|----------|----------|----------|
| 3115 | M608T42  | 1.232398 | -0.30147 | -1.31677 | 0.224742 | 0.863885 | DOWN | 608.3639 | 608.3633 | 608.3642 | 41.991   | 41.66133 |
| 3116 | M542T10_ | 1.170633 | -0.22729 | -1.31634 | 0.224747 | 0.863885 | DOWN | 541.642  | 541.6413 | 541.6443 | 9.903283 | 9.79535  |
| 3117 | M443T11_ | 6.925724 | -2.79196 | -1.43357 | 0.224802 | 0.863885 | DOWN | 443.2279 | 443.2274 | 443.2288 | 10.94132 | 10.90197 |
| 3118 | M342T11_ | 1.433629 | -0.51967 | -1.32965 | 0.224851 | 0.863885 | DOWN | 341.5463 | 341.5461 | 341.5465 | 10.8926  | 10.83572 |
| 3119 | M414T9_6 | 1.261946 | -0.33565 | -1.31753 | 0.224867 | 0.863885 | DOWN | 413.824  | 413.8235 | 413.8251 | 9.423708 | 9.30965  |
| 3120 | M171T9_1 | 1.555356 | -0.63724 | -1.36443 | 0.224868 | 0.863885 | DOWN | 170.7509 | 170.7506 | 170.7512 | 9.317    | 9.24215  |
| 3121 | M859T10  | 1.379158 | -0.46379 | -1.35346 | 0.224878 | 0.863885 | DOWN | 859.3795 | 859.3778 | 859.3813 | 10.11379 | 10.04355 |
| 3122 | M552T18  | 1.328298 | -0.40958 | -1.31807 | 0.224895 | 0.863885 | DOWN | 552.4157 | 552.4153 | 552.4169 | 18.3335  | 18.30017 |
| 3123 | M249T10_ | 1.173874 | -0.23128 | -1.40894 | 0.224919 | 0.863885 | DOWN | 248.6112 | 248.611  | 248.6116 | 9.848833 | 9.73145  |
| 3124 | M379T10_ | 1.122786 | -0.16708 | -1.31748 | 0.22501  | 0.863885 | DOWN | 379.0105 | 379.0101 | 379.0112 | 9.917167 | 9.811217 |
| 3125 | M379T11_ | 1.197765 | -0.26035 | -1.34468 | 0.225055 | 0.863885 | DOWN | 379.1751 | 379.1749 | 379.1759 | 10.90519 | 10.879   |
| 3126 | M156T10_ | 1.436433 | -0.52249 | -1.37512 | 0.225157 | 0.863885 | DOWN | 155.6813 | 155.681  | 155.6817 | 9.830833 | 9.715683 |
| 3127 | M344T10_ | 1.853842 | 0.890518 | 1.416439 | 0.225253 | 0.863885 | UP   | 344.0267 | 344.0265 | 344.0332 | 9.856867 | 9.7634   |
| 3128 | M179T10_ | 1.591546 | -0.67043 | -1.34934 | 0.225302 | 0.863886 | DOWN | 178.7015 | 178.7014 | 178.7019 | 9.992883 | 9.88865  |
| 3129 | M492T14  | 1.187107 | -0.24745 | -1.31403 | 0.225372 | 0.863886 | DOWN | 492.3788 | 492.3786 | 492.379  | 14.38493 | 14.3696  |
| 3130 | M333T28  | 1.132067 | -0.17896 | -1.31691 | 0.225471 | 0.863886 | DOWN | 333.096  | 333.0956 | 333.0962 | 28.2955  | 28.273   |
| 3131 | M1143T10 | 1.897404 | -0.92403 | -1.40767 | 0.225482 | 0.863886 | DOWN | 1142.661 | 1142.659 | 1142.662 | 10.18535 | 10.12287 |
| 3132 | M1892T10 | 1.404386 | -0.48994 | -1.32428 | 0.225567 | 0.863886 | DOWN | 1892.268 | 1892.266 | 1892.271 | 9.816242 | 9.715683 |
| 3133 | M254T10_ | 1.224468 | -0.29215 | -1.31876 | 0.225585 | 0.863886 | DOWN | 254.4227 | 254.4225 | 254.4229 | 9.94785  | 9.853533 |
| 3134 | M186T9   | 1.259547 | -0.3329  | -1.313   | 0.225634 | 0.863886 | DOWN | 186.3767 | 186.3767 | 186.3769 | 9.311167 | 9.129317 |
| 3135 | M558T10_ | 1.241904 | -0.31255 | -1.35729 | 0.225637 | 0.863886 | DOWN | 557.5169 | 557.5165 | 557.5181 | 9.903092 | 9.79535  |
| 3136 | M396T10_ | 1.196546 | -0.25888 | -1.42224 | 0.225746 | 0.863886 | DOWN | 396.4666 | 396.4664 | 396.4668 | 9.903283 | 9.79535  |
| 3137 | M558T10_ | 1.388263 | -0.47328 | -1.3722  | 0.225848 | 0.863886 | DOWN | 557.8315 | 557.831  | 557.8322 | 10.16043 | 10.03658 |
| 3138 | M611T9   | 1.381582 | -0.46632 | -1.32244 | 0.225942 | 0.863887 | DOWN | 610.7889 | 610.7882 | 610.7891 | 9.317    | 9.234417 |
| 3139 | M325T10_ | 1.261018 | -0.33459 | -1.42694 | 0.225945 | 0.863887 | DOWN | 324.5656 | 324.5514 | 324.5659 | 9.823575 | 9.715683 |
| 3140 | M225T10_ | 1.320626 | -0.40122 | -1.34688 | 0.225983 | 0.863887 | DOWN | 225.0637 | 225.0636 | 225.0638 | 9.945258 | 9.8378   |
| 3141 | M493T25  | 11.93262 | -3.57684 | -1.42855 | 0.226084 | 0.863887 | DOWN | 492.8363 | 492.8362 | 492.8365 | 24.76717 | 24.68133 |
| 3142 | M457T13_ | 1.406376 | -0.49198 | -1.39841 | 0.226214 | 0.863887 | DOWN | 457.3487 | 457.3457 | 457.3496 | 13.17118 | 13.01057 |
| 3143 | M351T9_4 | 1.453967 | -0.53999 | -1.31093 | 0.226259 | 0.863887 | DOWN | 350.6808 | 350.6793 | 350.6823 | 9.311883 | 9.146383 |
| 3144 | M789T10_ | 1.264208 | -0.33823 | -1.35615 | 0.226274 | 0.863887 | DOWN | 789.007  | 789.0061 | 789.009  | 9.902008 | 9.79535  |
| 3145 | M822T10_ | 1.539946 | -0.62288 | -1.38307 | 0.226334 | 0.863887 | DOWN | 821.8044 | 821.8044 | 821.8051 | 9.888817 | 9.806367 |
| 3146 | M643T9_4 | 1.488797 | -0.57415 | -1.31671 | 0.226408 | 0.863887 | DOWN | 643.2273 | 643.226  | 643.2277 | 9.353875 | 9.275917 |
| 3147 | M294T10_ | 1.556927 | -0.6387  | -1.34554 | 0.226438 | 0.863887 | DOWN | 293.9097 | 293.9096 | 293.91   | 9.951283 | 9.853533 |
| 3148 | M1975T10 | 1.586958 | -0.66626 | -1.33008 | 0.226449 | 0.863887 | DOWN | 1975.199 | 1975.195 | 1975.203 | 9.866292 | 9.65225  |
| 3149 | M699T9_1 | 1.274286 | -0.34969 | -1.32179 | 0.22645  | 0.863887 | DOWN | 698.5248 | 698.5244 | 698.5277 | 9.348233 | 9.234417 |

|      |          |          |          |          |          |          |      |          |          |          |          |          |
|------|----------|----------|----------|----------|----------|----------|------|----------|----------|----------|----------|----------|
| 3150 | M395T10_ | 1.282769 | -0.35926 | -1.31161 | 0.226514 | 0.863887 | DOWN | 394.7184 | 394.7182 | 394.7186 | 9.960817 | 9.859233 |
| 3151 | M657T12  | 1.215349 | -0.28137 | -1.32534 | 0.226591 | 0.863888 | DOWN | 657.4563 | 657.4557 | 657.4573 | 12.47789 | 12.47028 |
| 3152 | M638T10_ | 1.448939 | -0.535   | -1.31937 | 0.226601 | 0.863888 | DOWN | 637.9997 | 637.9993 | 638.0114 | 9.840042 | 9.728083 |
| 3153 | M588T10_ | 1.550768 | -0.63298 | -1.34814 | 0.226684 | 0.863888 | DOWN | 588.081  | 588.0809 | 588.0814 | 9.9014   | 9.806367 |
| 3154 | M660T10_ | 1.138039 | -0.18655 | -1.30971 | 0.226761 | 0.863888 | DOWN | 659.591  | 659.5892 | 659.5948 | 9.830783 | 9.7124   |
| 3155 | M502T10_ | 1.36135  | 0.445038 | 1.310062 | 0.226797 | 0.863888 | UP   | 502.2722 | 502.272  | 502.2727 | 9.534867 | 9.432183 |
| 3156 | M1323T45 | 1.240137 | -0.3105  | -1.31847 | 0.226978 | 0.863888 | DOWN | 1322.883 | 1322.882 | 1322.887 | 44.75367 | 44.6815  |
| 3157 | M496T9_4 | 2.500285 | -1.32209 | -1.3952  | 0.227025 | 0.863888 | DOWN | 495.7245 | 495.7238 | 495.7247 | 9.146383 | 9.111033 |
| 3158 | M545T25  | 13.56857 | -3.7622  | -1.42526 | 0.22705  | 0.863888 | DOWN | 545.3764 | 545.3761 | 545.3771 | 24.94183 | 24.89767 |
| 3159 | M522T9_5 | 1.379207 | -0.46384 | -1.34297 | 0.227112 | 0.863888 | DOWN | 522.3252 | 522.3248 | 522.3257 | 9.328967 | 9.1445   |
| 3160 | M324T9_1 | 1.236916 | -0.30675 | -1.3084  | 0.227156 | 0.863888 | DOWN | 324.1967 | 324.1965 | 324.1969 | 8.8978   | 8.83365  |
| 3161 | M789T10_ | 1.228803 | -0.29725 | -1.39158 | 0.227281 | 0.863889 | DOWN | 789.064  | 789.0624 | 789.0664 | 9.94785  | 9.843367 |
| 3162 | M580T9_7 | 1.331997 | -0.41359 | -1.32511 | 0.227355 | 0.863889 | DOWN | 580.38   | 580.3761 | 580.3804 | 9.182333 | 9.1445   |
| 3163 | M200T25  | 1.239043 | -0.30923 | -1.32207 | 0.227401 | 0.863889 | DOWN | 200.2369 | 200.2368 | 200.237  | 24.5335  | 24.51967 |
| 3164 | M349T10_ | 1.198899 | -0.26171 | -1.36943 | 0.227535 | 0.863889 | DOWN | 349.0809 | 349.0806 | 349.081  | 9.836042 | 9.715683 |
| 3165 | M167T9_3 | 1.309913 | -0.38947 | -1.34982 | 0.227659 | 0.863889 | DOWN | 166.5454 | 166.545  | 166.5459 | 9.311883 | 9.18975  |
| 3166 | M613T10_ | 2.120978 | -1.08473 | -1.40462 | 0.227659 | 0.863889 | DOWN | 612.8806 | 612.8783 | 612.8819 | 10.31602 | 10.24687 |
| 3167 | M255T10_ | 1.81568  | -0.86051 | -1.30622 | 0.227779 | 0.863889 | DOWN | 254.8717 | 254.8716 | 254.8718 | 9.960417 | 9.869467 |
| 3168 | M245T38  | 1.654772 | 0.726632 | 1.310966 | 0.227803 | 0.863889 | UP   | 245.1381 | 245.1381 | 245.1382 | 38.15833 | 38.0365  |
| 3169 | M458T25_ | 15.38799 | -3.94373 | -1.42141 | 0.227814 | 0.86389  | DOWN | 457.8256 | 457.8252 | 457.8258 | 24.56558 | 24.53583 |
| 3170 | M458T10_ | 1.411765 | 0.4975   | 1.307484 | 0.227896 | 0.86389  | UP   | 458.0843 | 458.0834 | 458.0906 | 9.964092 | 9.729367 |
| 3171 | M670T10_ | 1.118672 | -0.16179 | -1.30744 | 0.227973 | 0.86389  | DOWN | 669.7914 | 669.7913 | 669.7916 | 9.818442 | 9.699733 |
| 3172 | M864T22  | 1.364459 | -0.44833 | -1.32101 | 0.228023 | 0.86389  | DOWN | 863.6138 | 863.6132 | 863.6144 | 21.9555  | 21.92417 |
| 3173 | M522T11_ | 1.33788  | -0.41995 | -1.32023 | 0.228024 | 0.86389  | DOWN | 521.6537 | 521.6528 | 521.6545 | 10.57021 | 10.47223 |
| 3174 | M804T11_ | 1.77252  | -0.8258  | -1.38244 | 0.228025 | 0.86389  | DOWN | 803.9351 | 803.9346 | 803.9375 | 10.55162 | 10.47197 |
| 3175 | M746T23  | 1.357184 | -0.44062 | -1.32177 | 0.228103 | 0.86389  | DOWN | 745.5319 | 745.5304 | 745.5325 | 22.538   | 22.50967 |
| 3176 | M350T9_5 | 1.44341  | -0.52948 | -1.30515 | 0.228129 | 0.86389  | DOWN | 349.9428 | 349.9426 | 349.943  | 9.322983 | 9.234417 |
| 3177 | M567T25  | 10.76134 | -3.42779 | -1.42114 | 0.228134 | 0.86389  | DOWN | 567.3897 | 567.3894 | 567.39   | 25.00117 | 24.972   |
| 3178 | M374T9_3 | 1.384232 | -0.46909 | -1.32169 | 0.228207 | 0.86389  | DOWN | 373.9026 | 373.9019 | 373.9029 | 9.494433 | 9.40135  |
| 3179 | M393T10_ | 1.255964 | 0.328795 | 1.311715 | 0.228216 | 0.86389  | UP   | 393.2503 | 393.25   | 393.2508 | 9.633692 | 9.541483 |
| 3180 | M852T10_ | 1.317064 | -0.39733 | -1.3117  | 0.228241 | 0.86389  | DOWN | 852.3663 | 852.3655 | 852.3672 | 9.957333 | 9.843367 |
| 3181 | M476T9_4 | 1.849861 | 0.887417 | 1.304886 | 0.228242 | 0.86389  | UP   | 475.6505 | 475.6467 | 475.6543 | 9.3165   | 9.133667 |
| 3182 | M1889T10 | 1.687865 | 0.7552   | 1.36992  | 0.228318 | 0.86389  | UP   | 1889.321 | 1889.32  | 1889.323 | 9.8374   | 9.699733 |
| 3183 | M271T16_ | 2.037299 | -1.02666 | -1.33914 | 0.22837  | 0.86389  | DOWN | 271.1151 | 271.1148 | 271.1179 | 16.41835 | 16.12362 |
| 3184 | M504T38_ | 1.288778 | 0.366003 | 1.360918 | 0.228463 | 0.863891 | UP   | 504.28   | 504.2798 | 504.2801 | 37.61867 | 37.54667 |

|      |          |          |          |          |          |          |      |          |          |          |          |          |
|------|----------|----------|----------|----------|----------|----------|------|----------|----------|----------|----------|----------|
| 3185 | M390T11_ | 1.500324 | 0.585274 | 1.326808 | 0.228469 | 0.863891 | UP   | 390.4513 | 390.4511 | 390.4518 | 10.91987 | 10.85838 |
| 3186 | M221T27  | 1.503324 | -0.58816 | -1.38331 | 0.228496 | 0.863891 | DOWN | 221.1534 | 221.1533 | 221.1536 | 27.25083 | 27.22733 |
| 3187 | M333T10_ | 1.066603 | -0.09302 | -1.32799 | 0.228621 | 0.863891 | DOWN | 332.5937 | 332.5934 | 332.5944 | 9.823575 | 9.715683 |
| 3188 | M332T18  | 192.1894 | 7.586385 | 1.420031 | 0.228621 | 0.863891 | UP   | 332.2794 | 332.2794 | 332.2795 | 17.94808 | 17.93333 |
| 3189 | M758T9_2 | 1.41509  | -0.50089 | -1.31654 | 0.228621 | 0.863891 | DOWN | 757.9831 | 757.9826 | 757.9839 | 9.365833 | 9.219483 |
| 3190 | M458T10_ | 1.237876 | -0.30787 | -1.3499  | 0.228623 | 0.863891 | DOWN | 458.0059 | 458.0055 | 458.0067 | 9.903283 | 9.714783 |
| 3191 | M308T9_2 | 1.888278 | -0.91707 | -1.31117 | 0.228632 | 0.863891 | DOWN | 307.8266 | 307.8266 | 307.8268 | 9.46855  | 9.40135  |
| 3192 | M736T20  | 1.385704 | -0.47062 | -1.32002 | 0.22896  | 0.863891 | DOWN | 736.4377 | 736.4372 | 736.4389 | 19.89625 | 19.87883 |
| 3193 | M501T9_8 | 1.219059 | 0.285768 | 1.308991 | 0.229013 | 0.863891 | UP   | 501.3222 | 501.3212 | 501.3233 | 8.894467 | 8.817367 |
| 3194 | M207T10_ | 1.191164 | -0.25237 | -1.37352 | 0.229204 | 0.863892 | DOWN | 207.4603 | 207.4603 | 207.4604 | 9.842908 | 9.73145  |
| 3195 | M327T10_ | 1.390696 | -0.47581 | -1.33948 | 0.229246 | 0.863892 | DOWN | 326.5282 | 326.5276 | 326.5285 | 9.772883 | 9.73145  |
| 3196 | M659T10_ | 1.422709 | -0.50864 | -1.30203 | 0.229363 | 0.863892 | DOWN | 658.9144 | 658.9135 | 658.9155 | 10.15645 | 10.09108 |
| 3197 | M676T25  | 1.741787 | -0.80057 | -1.32746 | 0.229384 | 0.863892 | DOWN | 676.4844 | 676.4834 | 676.4846 | 24.86917 | 24.84    |
| 3198 | M160T9_1 | 1.3092   | -0.38869 | -1.30373 | 0.229395 | 0.863892 | DOWN | 159.661  | 159.6604 | 159.6612 | 9.330283 | 9.20785  |
| 3199 | M399T11_ | 1.710965 | -0.77481 | -1.3374  | 0.22955  | 0.863892 | DOWN | 399.1068 | 399.0965 | 399.1082 | 11.00241 | 10.93412 |
| 3200 | M379T10_ | 1.371476 | -0.45573 | -1.30236 | 0.229595 | 0.863892 | DOWN | 378.7833 | 378.783  | 378.7834 | 9.909433 | 9.874067 |
| 3201 | M451T10_ | 2.249787 | 1.169788 | 1.404204 | 0.229623 | 0.863892 | UP   | 450.6325 | 450.6319 | 450.6331 | 9.771092 | 9.743767 |
| 3202 | M274T10_ | 1.344803 | 0.427395 | 1.390085 | 0.229673 | 0.863892 | UP   | 273.9675 | 273.963  | 273.9676 | 9.984083 | 9.8753   |
| 3203 | M331T28_ | 1.259879 | -0.33329 | -1.31671 | 0.22969  | 0.863892 | DOWN | 331.2476 | 331.2476 | 331.2478 | 28.25933 | 28.23    |
| 3204 | M714T9_2 | 1.182733 | -0.24212 | -1.30039 | 0.229694 | 0.863892 | DOWN | 714.1196 | 714.1189 | 714.1202 | 9.311883 | 9.129317 |
| 3205 | M506T11  | 1.196602 | -0.25894 | -1.31722 | 0.229712 | 0.863892 | DOWN | 506.3878 | 506.3875 | 506.3882 | 10.90551 | 10.88747 |
| 3206 | M726T10_ | 1.289337 | -0.36663 | -1.34517 | 0.229909 | 0.863893 | DOWN | 726.3128 | 726.3122 | 726.3134 | 9.8207   | 9.715683 |
| 3207 | M345T9_6 | 1.682211 | -0.75036 | -1.33634 | 0.229976 | 0.863893 | DOWN | 344.855  | 344.8544 | 344.8576 | 8.878875 | 8.7875   |
| 3208 | M259T11_ | 3.368735 | 1.752207 | 1.316731 | 0.230078 | 0.863893 | UP   | 259.2193 | 259.2122 | 259.2247 | 10.90765 | 10.83572 |
| 3209 | M495T9_6 | 2.299443 | 1.201285 | 1.403722 | 0.230163 | 0.863893 | UP   | 494.7536 | 494.7513 | 494.7551 | 9.38595  | 9.23175  |
| 3210 | M1060T10 | 1.313214 | -0.3931  | -1.40096 | 0.23017  | 0.863893 | DOWN | 1059.721 | 1059.72  | 1059.722 | 9.956417 | 9.843367 |
| 3211 | M165T27  | 1.385105 | -0.47    | -1.37782 | 0.230215 | 0.863893 | DOWN | 165.0908 | 165.0907 | 165.0909 | 27.24867 | 27.22733 |
| 3212 | M352T43_ | 1.153112 | 0.205532 | 1.360504 | 0.23028  | 0.863893 | UP   | 352.1964 | 352.1964 | 352.1965 | 42.66833 | 42.38067 |
| 3213 | M860T19  | 2.489375 | -1.31578 | -1.37268 | 0.230314 | 0.863893 | DOWN | 860.2674 | 860.2661 | 860.2683 | 18.73267 | 18.717   |
| 3214 | M349T10_ | 1.187013 | -0.24734 | -1.40604 | 0.230362 | 0.863893 | DOWN | 349.2494 | 349.2492 | 349.2495 | 9.83535  | 9.715683 |
| 3215 | M648T10_ | 1.237859 | -0.30785 | -1.33457 | 0.230442 | 0.863894 | DOWN | 648.0137 | 648.0134 | 648.0146 | 9.816267 | 9.699733 |
| 3216 | M1673T10 | 1.369613 | -0.45377 | -1.2982  | 0.230495 | 0.863894 | DOWN | 1673.457 | 1673.453 | 1673.458 | 9.91765  | 9.811217 |
| 3217 | M1217T10 | 1.309738 | -0.38928 | -1.32922 | 0.230497 | 0.863894 | DOWN | 1216.579 | 1216.576 | 1216.581 | 9.972483 | 9.859233 |
| 3218 | M360T10_ | 2.082223 | 1.058125 | 1.380635 | 0.230534 | 0.863894 | UP   | 359.8987 | 359.8983 | 359.9014 | 9.976317 | 9.843367 |
| 3219 | M725T11  | 1.458148 | -0.54414 | -1.36797 | 0.230544 | 0.863894 | DOWN | 725.4267 | 725.4263 | 725.4272 | 11.22183 | 11.19848 |

|      |          |          |          |          |          |          |      |          |          |          |          |          |
|------|----------|----------|----------|----------|----------|----------|------|----------|----------|----------|----------|----------|
| 3220 | M213T26  | 4.690429 | 2.22972  | 1.40791  | 0.230546 | 0.863894 | UP   | 213.127  | 213.1268 | 213.1275 | 26.3215  | 26.23867 |
| 3221 | M323T10_ | 1.751035 | 0.808208 | 1.375102 | 0.230557 | 0.863894 | UP   | 322.7707 | 322.7704 | 322.7708 | 9.975217 | 9.8753   |
| 3222 | M508T9_2 | 1.384072 | -0.46892 | -1.35023 | 0.230559 | 0.863894 | DOWN | 508.2017 | 508.2013 | 508.2019 | 9.461008 | 9.370583 |
| 3223 | M695T26  | 1.776039 | -0.82866 | -1.29792 | 0.230574 | 0.863894 | DOWN | 695.4833 | 695.482  | 695.4842 | 26.30458 | 26.27867 |
| 3224 | M462T22  | 1.83277  | -0.87403 | -1.31409 | 0.230619 | 0.863894 | DOWN | 462.3572 | 462.3569 | 462.3574 | 22.00583 | 21.99    |
| 3225 | M363T9_9 | 1.503896 | -0.5887  | -1.30102 | 0.230642 | 0.863894 | DOWN | 362.9712 | 362.971  | 362.9715 | 9.243367 | 9.20785  |
| 3226 | M230T24  | 1.799511 | 0.847605 | 1.366356 | 0.230647 | 0.863894 | UP   | 230.2475 | 230.2474 | 230.2476 | 24.03017 | 24.0245  |
| 3227 | M472T9_1 | 3.770471 | -1.91474 | -1.36915 | 0.230669 | 0.863894 | DOWN | 472.3309 | 472.3296 | 472.3313 | 9.078567 | 8.98945  |
| 3228 | M370T10_ | 1.301907 | -0.38063 | -1.34423 | 0.230866 | 0.863894 | DOWN | 369.9538 | 369.9535 | 369.9547 | 9.874067 | 9.79535  |
| 3229 | M590T25  | 13.10313 | -3.71184 | -1.41039 | 0.230891 | 0.863894 | DOWN | 589.9043 | 589.9041 | 589.9046 | 25.0745  | 25.04117 |
| 3230 | M234T10_ | 1.308939 | -0.3884  | -1.35971 | 0.231012 | 0.863894 | DOWN | 233.6065 | 233.6017 | 233.6112 | 9.901375 | 9.779267 |
| 3231 | M731T21  | 1.239618 | -0.3099  | -1.31574 | 0.231082 | 0.863895 | DOWN | 730.5311 | 730.5308 | 730.5316 | 21.038   | 21.02533 |
| 3232 | M505T10_ | 1.75222  | 0.809184 | 1.339537 | 0.231109 | 0.863895 | UP   | 505.3309 | 505.3296 | 505.3314 | 9.967367 | 9.859233 |
| 3233 | M327T10_ | 1.451943 | 0.537985 | 1.358033 | 0.231193 | 0.863895 | UP   | 326.6803 | 326.6799 | 326.681  | 9.860817 | 9.73145  |
| 3234 | M288T18_ | 1.543537 | -0.62624 | -1.29676 | 0.231222 | 0.863895 | DOWN | 288.1955 | 288.1953 | 288.1957 | 17.70308 | 17.675   |
| 3235 | M667T9_2 | 1.433077 | -0.51912 | -1.29727 | 0.231241 | 0.863895 | DOWN | 667.4173 | 667.4164 | 667.4177 | 9.49445  | 9.40135  |
| 3236 | M449T25  | 10.77501 | -3.42962 | -1.40914 | 0.231257 | 0.863895 | DOWN | 448.8106 | 448.8105 | 448.8108 | 24.55692 | 24.5365  |
| 3237 | M980T9   | 1.982906 | -0.98762 | -1.33092 | 0.23133  | 0.863895 | DOWN | 979.6039 | 979.6028 | 979.6048 | 9.278717 | 9.1503   |
| 3238 | M281T19  | 1.759246 | 0.814958 | 1.320026 | 0.231338 | 0.863895 | UP   | 281.0947 | 281.0939 | 281.0949 | 19.31525 | 19.28883 |
| 3239 | M369T10_ | 1.663414 | -0.73415 | -1.39983 | 0.231431 | 0.863895 | DOWN | 368.5621 | 368.5614 | 368.5623 | 9.8207   | 9.699733 |
| 3240 | M201T11  | 1.204349 | -0.26825 | -1.32382 | 0.231434 | 0.863895 | DOWN | 201.1484 | 201.1484 | 201.1484 | 10.67585 | 10.5836  |
| 3241 | M421T13  | 1.573449 | 0.653931 | 1.3693   | 0.231503 | 0.863895 | UP   | 421.2774 | 421.2769 | 421.2775 | 13.45527 | 13.40485 |
| 3242 | M640T9_3 | 1.305578 | -0.38469 | -1.30842 | 0.231594 | 0.863895 | DOWN | 640.3417 | 640.341  | 640.3422 | 9.498117 | 9.40135  |
| 3243 | M374T30_ | 1.91961  | 0.940813 | 1.296628 | 0.23162  | 0.863895 | UP   | 374.2379 | 374.2377 | 374.2381 | 30.07925 | 30.03617 |
| 3244 | M465T11_ | 1.128085 | -0.17388 | -1.31401 | 0.231725 | 0.863896 | DOWN | 465.1205 | 465.1202 | 465.1206 | 10.90659 | 10.879   |
| 3245 | M385T7_2 | 1.414274 | -0.50006 | -1.34291 | 0.231944 | 0.863896 | DOWN | 385.2732 | 385.2731 | 385.2735 | 6.997767 | 6.94005  |
| 3246 | M376T41_ | 1.378223 | -0.46281 | -1.40668 | 0.232016 | 0.863896 | DOWN | 376.1964 | 376.1964 | 376.1966 | 41.316   | 41.28717 |
| 3247 | M506T10_ | 1.21581  | 0.281918 | 1.36214  | 0.232103 | 0.863896 | UP   | 506.3197 | 506.3195 | 506.3199 | 10.36758 | 10.31147 |
| 3248 | M448T10_ | 1.512927 | -0.59734 | -1.3324  | 0.232108 | 0.863896 | DOWN | 448.408  | 448.4072 | 448.4081 | 9.960817 | 9.8753   |
| 3249 | M1899T10 | 1.394483 | -0.47973 | -1.33387 | 0.232149 | 0.863896 | DOWN | 1898.852 | 1898.85  | 1898.854 | 9.818525 | 9.715683 |
| 3250 | M216T10_ | 1.860166 | -0.89543 | -1.29626 | 0.232274 | 0.863896 | DOWN | 215.9241 | 215.9139 | 215.9246 | 9.90755  | 9.7124   |
| 3251 | M568T25  | 17.15383 | -4.10046 | -1.4057  | 0.232317 | 0.863896 | DOWN | 567.8915 | 567.8909 | 567.8924 | 24.98383 | 24.94083 |
| 3252 | M365T9_8 | 1.287761 | -0.36486 | -1.29808 | 0.23235  | 0.863896 | DOWN | 364.911  | 364.9107 | 364.9111 | 8.870558 | 8.75965  |
| 3253 | M208T9_1 | 1.683261 | -0.75126 | -1.3074  | 0.232357 | 0.863896 | DOWN | 207.6559 | 207.6548 | 207.6563 | 9.224517 | 9.166033 |
| 3254 | M685T12_ | 2.106648 | 1.074949 | 1.379719 | 0.232392 | 0.863897 | UP   | 685.4862 | 685.4858 | 685.4868 | 11.51165 | 11.49042 |

|      |          |          |          |          |          |          |      |          |          |          |          |          |
|------|----------|----------|----------|----------|----------|----------|------|----------|----------|----------|----------|----------|
| 3255 | M325T10_ | 1.317965 | 0.398312 | 1.309188 | 0.23247  | 0.863897 | UP   | 324.6864 | 324.6861 | 324.6866 | 9.823575 | 9.699733 |
| 3256 | M225T43_ | 1.810514 | 0.8564   | 1.355949 | 0.232632 | 0.863897 | UP   | 225.1118 | 225.1118 | 225.112  | 42.83375 | 42.63933 |
| 3257 | M366T11_ | 1.270965 | 0.345925 | 1.321722 | 0.232678 | 0.863897 | UP   | 365.5317 | 365.5316 | 365.5321 | 10.91487 | 10.87487 |
| 3258 | M1213T10 | 1.633625 | 0.708077 | 1.29533  | 0.232699 | 0.863897 | UP   | 1213.453 | 1213.451 | 1213.457 | 9.977042 | 9.859233 |
| 3259 | M333T10_ | 1.254554 | -0.32717 | -1.33211 | 0.232831 | 0.863897 | DOWN | 332.9212 | 332.9209 | 332.9219 | 9.825492 | 9.715683 |
| 3260 | M199T22_ | 1.490594 | -0.57589 | -1.35279 | 0.232959 | 0.863897 | DOWN | 199.169  | 199.1689 | 199.1691 | 22.48192 | 22.45183 |
| 3261 | M593T10_ | 1.15225  | -0.20445 | -1.2956  | 0.233007 | 0.863897 | DOWN | 592.8026 | 592.802  | 592.8028 | 9.930908 | 9.827283 |
| 3262 | M911T11  | 1.611734 | -0.68861 | -1.33125 | 0.233032 | 0.863897 | DOWN | 910.5441 | 910.544  | 910.5461 | 11.43992 | 11.40895 |
| 3263 | M273T44_ | 1.170102 | -0.22663 | -1.29055 | 0.23305  | 0.863898 | DOWN | 273.1693 | 273.1691 | 273.1695 | 44.164   | 43.90517 |
| 3264 | M537T25  | 10.29521 | -3.3639  | -1.40091 | 0.233075 | 0.863898 | DOWN | 536.8629 | 536.8623 | 536.8636 | 24.91308 | 24.869   |
| 3265 | M1666T10 | 1.536429 | -0.61958 | -1.30921 | 0.233121 | 0.863898 | DOWN | 1666.236 | 1666.234 | 1666.236 | 9.842    | 9.696683 |
| 3266 | M696T10_ | 1.161392 | -0.21586 | -1.293   | 0.233124 | 0.863898 | DOWN | 695.5351 | 695.5346 | 695.5353 | 10.12955 | 10.02042 |
| 3267 | M450T38  | 1.152484 | -0.20475 | -1.36576 | 0.233143 | 0.863898 | DOWN | 450.233  | 450.2328 | 450.2334 | 38.11492 | 37.84933 |
| 3268 | M336T9_7 | 1.283908 | -0.36054 | -1.33818 | 0.233176 | 0.863898 | DOWN | 336.2279 | 336.2278 | 336.2281 | 9.328967 | 9.129317 |
| 3269 | M224T8_2 | 1.1445   | 0.194717 | 1.31654  | 0.233228 | 0.863898 | UP   | 224.1619 | 224.1618 | 224.162  | 7.816575 | 7.781733 |
| 3270 | M350T42_ | 1.339581 | 0.421782 | 1.376302 | 0.233266 | 0.863898 | UP   | 350.2171 | 350.2169 | 350.2174 | 42.15067 | 42.1065  |
| 3271 | M546T21  | 1.167468 | -0.22338 | -1.3147  | 0.233272 | 0.863898 | DOWN | 546.4623 | 546.462  | 546.4628 | 21.21367 | 21.19383 |
| 3272 | M403T40  | 1.167948 | -0.22398 | -1.30516 | 0.233302 | 0.863898 | DOWN | 403.2324 | 403.2322 | 403.2325 | 39.98533 | 39.71917 |
| 3273 | M681T10_ | 1.663556 | 0.734271 | 1.289226 | 0.233353 | 0.863898 | UP   | 680.6889 | 680.6851 | 680.694  | 9.848417 | 9.788267 |
| 3274 | M573T10_ | 1.567498 | -0.64846 | -1.29834 | 0.233376 | 0.863898 | DOWN | 573.0398 | 573.0396 | 573.04   | 9.886258 | 9.806367 |
| 3275 | M266T10_ | 1.194845 | 0.256823 | 1.3218   | 0.233385 | 0.863898 | UP   | 265.7906 | 265.7903 | 265.7909 | 9.960892 | 9.8753   |
| 3276 | M432T21_ | 2.549702 | 1.350329 | 1.345637 | 0.233397 | 0.863898 | UP   | 432.1564 | 432.1556 | 432.1571 | 21.42117 | 21.3995  |
| 3277 | M480T25  | 12.92529 | -3.69213 | -1.40083 | 0.23341  | 0.863898 | DOWN | 479.8386 | 479.8383 | 479.8389 | 24.68067 | 24.65217 |
| 3278 | M501T25  | 6.741522 | -2.75307 | -1.40015 | 0.233437 | 0.863898 | DOWN | 501.3501 | 501.3497 | 501.351  | 24.76833 | 24.73917 |
| 3279 | M244T22_ | 1.203975 | -0.26781 | -1.31695 | 0.233596 | 0.863898 | DOWN | 244.2633 | 244.2631 | 244.2633 | 22.30833 | 22.2825  |
| 3280 | M292T9_3 | 1.272249 | -0.34738 | -1.31704 | 0.23364  | 0.863898 | DOWN | 292.4431 | 292.4427 | 292.4432 | 8.993242 | 8.89395  |
| 3281 | M224T10_ | 1.30978  | -0.38932 | -1.32368 | 0.233648 | 0.863898 | DOWN | 224.3809 | 224.3806 | 224.3816 | 9.823225 | 9.715683 |
| 3282 | M623T9_4 | 1.612724 | -0.6895  | -1.33831 | 0.233782 | 0.863899 | DOWN | 623.2007 | 623.2    | 623.2015 | 9.313325 | 9.234417 |
| 3283 | M350T42_ | 1.927703 | -0.94688 | -1.3671  | 0.233825 | 0.863899 | DOWN | 350.2171 | 350.2169 | 350.2172 | 41.65408 | 41.3015  |
| 3284 | M616T10_ | 1.42428  | -0.51023 | -1.28815 | 0.233826 | 0.863899 | DOWN | 615.8822 | 615.8812 | 615.8839 | 9.960717 | 9.843367 |
| 3285 | M173T10_ | 1.046995 | -0.06626 | -1.33737 | 0.233845 | 0.863899 | DOWN | 172.8503 | 172.8502 | 172.8504 | 9.830283 | 9.715683 |
| 3286 | M1768T10 | 1.283875 | -0.3605  | -1.28816 | 0.233928 | 0.863899 | DOWN | 1768.323 | 1768.317 | 1768.326 | 9.816167 | 9.683817 |
| 3287 | M419T11_ | 1.450348 | 0.536399 | 1.292791 | 0.233975 | 0.863899 | UP   | 419.1649 | 419.1572 | 419.1654 | 10.93208 | 10.8926  |
| 3288 | M537T9   | 2.303807 | -1.20402 | -1.37946 | 0.234166 | 0.863899 | DOWN | 537.2948 | 537.2943 | 537.295  | 9.36135  | 9.1011   |
| 3289 | M323T9_1 | 1.194277 | -0.25614 | -1.29028 | 0.234189 | 0.863899 | DOWN | 322.5167 | 322.5165 | 322.5173 | 9.25395  | 9.129317 |

|      |          |          |          |          |          |          |      |          |          |          |          |          |
|------|----------|----------|----------|----------|----------|----------|------|----------|----------|----------|----------|----------|
| 3290 | M564T43_ | 1.140983 | -0.19028 | -1.35455 | 0.234192 | 0.863899 | DOWN | 564.3012 | 564.3011 | 564.3013 | 42.79767 | 42.59633 |
| 3291 | M287T9_3 | 1.400253 | -0.48569 | -1.3535  | 0.23423  | 0.863899 | DOWN | 287.3544 | 287.3542 | 287.3547 | 8.863725 | 8.7875   |
| 3292 | M1701T10 | 1.200629 | -0.26379 | -1.29062 | 0.234232 | 0.863899 | DOWN | 1701.382 | 1701.379 | 1701.385 | 9.830283 | 9.715683 |
| 3293 | M453T9_1 | 2.798308 | -1.48456 | -1.28875 | 0.234406 | 0.8639   | DOWN | 453.44   | 453.4354 | 453.446  | 9.130683 | 9.018167 |
| 3294 | M519T10_ | 1.589092 | 0.668203 | 1.303139 | 0.234497 | 0.8639   | UP   | 518.737  | 518.7357 | 518.7376 | 9.994767 | 9.8753   |
| 3295 | M274T9_5 | 1.998096 | -0.99863 | -1.32851 | 0.234601 | 0.8639   | DOWN | 274.1052 | 274.105  | 274.1068 | 9.395775 | 9.297883 |
| 3296 | M455T10_ | 2.053049 | 1.037768 | 1.357811 | 0.23463  | 0.8639   | UP   | 454.9463 | 454.9457 | 454.9471 | 9.963917 | 9.8753   |
| 3297 | M453T9_1 | 1.839458 | 0.87928  | 1.298544 | 0.234663 | 0.8639   | UP   | 453.2049 | 453.2009 | 453.2118 | 9.221317 | 8.952283 |
| 3298 | M546T25_ | 13.07965 | -3.70925 | -1.3964  | 0.234674 | 0.8639   | DOWN | 545.8778 | 545.8777 | 545.8783 | 24.91217 | 24.89767 |
| 3299 | M361T10_ | 3.115726 | 1.639568 | 1.373603 | 0.234677 | 0.8639   | UP   | 360.9839 | 360.9838 | 360.9855 | 9.88865  | 9.79535  |
| 3300 | M523T25  | 11.45969 | -3.5185  | -1.39629 | 0.234679 | 0.8639   | DOWN | 523.3631 | 523.3624 | 523.3638 | 24.8415  | 24.81183 |
| 3301 | M538T26  | 1.291491 | -0.36904 | -1.29538 | 0.234749 | 0.8639   | DOWN | 538.4305 | 538.4297 | 538.4309 | 26.43533 | 26.4335  |
| 3302 | M608T27  | 1.46813  | 0.55398  | 1.285101 | 0.234768 | 0.8639   | UP   | 608.3759 | 608.3757 | 608.3764 | 27.038   | 26.999   |
| 3303 | M696T9_3 | 1.240877 | -0.31136 | -1.31235 | 0.234872 | 0.8639   | DOWN | 696.0333 | 696.032  | 696.0339 | 9.398375 | 9.30965  |
| 3304 | M460T44_ | 1.369399 | -0.45354 | -1.29604 | 0.234906 | 0.8639   | DOWN | 460.2539 | 460.2536 | 460.2541 | 44.0715  | 43.91983 |
| 3305 | M1074T10 | 1.17519  | -0.23289 | -1.3769  | 0.234967 | 0.8639   | DOWN | 1074.234 | 1074.234 | 1074.234 | 9.848833 | 9.73145  |
| 3306 | M1603T10 | 1.280265 | -0.35644 | -1.30129 | 0.234999 | 0.8639   | DOWN | 1602.718 | 1602.717 | 1602.721 | 9.970617 | 9.8753   |
| 3307 | M211T10_ | 1.138691 | -0.18738 | -1.32374 | 0.235052 | 0.8639   | DOWN | 210.8537 | 210.8536 | 210.8538 | 9.816183 | 9.699733 |
| 3308 | M534T43_ | 1.248999 | 0.320772 | 1.34533  | 0.235058 | 0.8639   | UP   | 534.3269 | 534.3267 | 534.327  | 42.61083 | 42.49567 |
| 3309 | M292T11_ | 1.515055 | -0.59937 | -1.29535 | 0.235065 | 0.8639   | DOWN | 292.3581 | 292.3579 | 292.3583 | 10.92025 | 10.87765 |
| 3310 | M581T9_3 | 1.36233  | -0.44608 | -1.28389 | 0.235121 | 0.863901 | DOWN | 581.3168 | 581.3138 | 581.3181 | 9.191133 | 9.129317 |
| 3311 | M436T24  | 10.12481 | -3.33982 | -1.39419 | 0.235125 | 0.863901 | DOWN | 435.8125 | 435.812  | 435.8129 | 24.45017 | 24.43383 |
| 3312 | M1952T10 | 1.245986 | -0.31729 | -1.36119 | 0.235229 | 0.863901 | DOWN | 1951.708 | 1951.706 | 1951.709 | 9.825492 | 9.715683 |
| 3313 | M175T10_ | 1.44705  | -0.53311 | -1.28511 | 0.235261 | 0.863901 | DOWN | 175.2993 | 175.299  | 175.2996 | 9.900133 | 9.811217 |
| 3314 | M380T9_4 | 1.369904 | -0.45407 | -1.28507 | 0.235268 | 0.863901 | DOWN | 379.8899 | 379.8886 | 379.8924 | 9.286083 | 9.129317 |
| 3315 | M335T9_5 | 1.387269 | -0.47225 | -1.29351 | 0.235284 | 0.863901 | DOWN | 334.7568 | 334.7565 | 334.7661 | 9.332617 | 9.24215  |
| 3316 | M412T9_1 | 1.332721 | -0.41437 | -1.28354 | 0.235309 | 0.863901 | DOWN | 411.9181 | 411.9166 | 411.9196 | 9.272133 | 9.129317 |
| 3317 | M695T9_3 | 2.284888 | -1.19212 | -1.32175 | 0.235327 | 0.863901 | DOWN | 695.3489 | 695.3482 | 695.3501 | 8.696033 | 8.629617 |
| 3318 | M1052T11 | 1.338074 | 0.420158 | 1.338301 | 0.235368 | 0.863901 | UP   | 1051.677 | 1051.677 | 1051.678 | 10.93097 | 10.90785 |
| 3319 | M428T10_ | 1.203157 | 0.266825 | 1.288395 | 0.235437 | 0.863901 | UP   | 428.1856 | 428.1853 | 428.1857 | 9.968092 | 9.8753   |
| 3320 | M335T10_ | 1.49585  | -0.58097 | -1.28434 | 0.23545  | 0.863901 | DOWN | 334.7864 | 334.7862 | 334.7864 | 9.844358 | 9.699733 |
| 3321 | M489T10_ | 1.458345 | 0.544332 | 1.336509 | 0.2355   | 0.863901 | UP   | 489.1794 | 489.179  | 489.1796 | 9.80415  | 9.681183 |
| 3322 | M199T31  | 2.102233 | -1.07192 | -1.28668 | 0.235555 | 0.863901 | DOWN | 199.0727 | 199.0725 | 199.073  | 31.12917 | 31.0905  |
| 3323 | M706T9_2 | 1.421602 | -0.50752 | -1.30739 | 0.23556  | 0.863901 | DOWN | 706.2667 | 706.2665 | 706.2671 | 9.3332   | 9.234417 |
| 3324 | M916T10_ | 1.353523 | 0.43672  | 1.297991 | 0.235594 | 0.863901 | UP   | 915.8918 | 915.8911 | 915.8926 | 9.98345  | 9.8914   |

|      |          |          |          |          |          |          |      |          |          |          |          |          |
|------|----------|----------|----------|----------|----------|----------|------|----------|----------|----------|----------|----------|
| 3325 | M386T10_ | 1.8094   | 0.855512 | 1.346574 | 0.23572  | 0.863901 | UP   | 386.1251 | 386.1247 | 386.1256 | 9.970617 | 9.8753   |
| 3326 | M257T7_1 | 1.527803 | -0.61146 | -1.282   | 0.235743 | 0.863901 | DOWN | 256.8497 | 256.8496 | 256.8499 | 7.010975 | 6.779983 |
| 3327 | M216T10_ | 14.4719  | 3.855183 | 1.393659 | 0.23585  | 0.863902 | UP   | 216.1593 | 216.1592 | 216.1595 | 10.49775 | 10.45607 |
| 3328 | M663T10_ | 1.612638 | -0.68942 | -1.32479 | 0.235876 | 0.863902 | DOWN | 662.9509 | 662.9504 | 662.9516 | 9.821317 | 9.728083 |
| 3329 | M538T10_ | 1.207664 | -0.27222 | -1.29529 | 0.235908 | 0.863902 | DOWN | 538.2953 | 538.2946 | 538.2961 | 9.917208 | 9.811217 |
| 3330 | M457T25  | 4.63766  | -2.2134  | -1.39107 | 0.235937 | 0.863902 | DOWN | 457.3237 | 457.3234 | 457.3238 | 24.56583 | 24.53583 |
| 3331 | M402T11_ | 1.13003  | -0.17636 | -1.30118 | 0.235969 | 0.863902 | DOWN | 402.2666 | 402.2664 | 402.2671 | 10.90659 | 10.89355 |
| 3332 | M167T10_ | 2.146369 | 1.101898 | 1.366124 | 0.235978 | 0.863902 | UP   | 166.544  | 166.5439 | 166.5441 | 9.956867 | 9.859233 |
| 3333 | M600T10_ | 1.194177 | -0.25602 | -1.30035 | 0.236003 | 0.863902 | DOWN | 599.6641 | 599.6638 | 599.6652 | 9.918792 | 9.79535  |
| 3334 | M340T10_ | 1.123074 | -0.16745 | -1.33225 | 0.236064 | 0.863902 | DOWN | 340.2596 | 340.2594 | 340.2598 | 9.886258 | 9.779267 |
| 3335 | M1423T10 | 1.171447 | -0.22829 | -1.3006  | 0.236066 | 0.863902 | DOWN | 1422.553 | 1422.551 | 1422.557 | 9.935675 | 9.827283 |
| 3336 | M341T11_ | 1.697927 | -0.76377 | -1.3005  | 0.236073 | 0.863902 | DOWN | 340.9828 | 340.9826 | 340.9833 | 10.86994 | 10.84487 |
| 3337 | M198T10_ | 6.03569  | 2.593519 | 1.392204 | 0.236227 | 0.863902 | UP   | 198.1488 | 198.1487 | 198.1489 | 10.49775 | 10.45607 |
| 3338 | M749T14  | 1.212309 | -0.27776 | -1.2813  | 0.236248 | 0.863902 | DOWN | 748.5776 | 748.5773 | 748.578  | 13.69728 | 13.67912 |
| 3339 | M999T10_ | 1.62654  | -0.70181 | -1.28101 | 0.23626  | 0.863902 | DOWN | 998.7776 | 998.7766 | 998.7781 | 9.74925  | 9.746783 |
| 3340 | M441T10_ | 1.209488 | 0.274396 | 1.286802 | 0.236462 | 0.863903 | UP   | 440.871  | 440.8708 | 440.8716 | 9.772883 | 9.681183 |
| 3341 | M524T9_9 | 1.364265 | -0.44812 | -1.28233 | 0.236463 | 0.863903 | DOWN | 524.4544 | 524.4535 | 524.4554 | 9.18975  | 9.129317 |
| 3342 | M324T10_ | 1.800846 | 0.848675 | 1.280201 | 0.236537 | 0.863903 | UP   | 323.8483 | 323.8481 | 323.8484 | 9.981067 | 9.8753   |
| 3343 | M694T9_3 | 1.46929  | -0.55512 | -1.28085 | 0.236598 | 0.863903 | DOWN | 694.1319 | 694.1299 | 694.1323 | 9.377342 | 9.324917 |
| 3344 | M379T9_3 | 1.254796 | -0.32745 | -1.29909 | 0.236613 | 0.863903 | DOWN | 378.9129 | 378.9126 | 378.9134 | 8.872733 | 8.803967 |
| 3345 | M231T10_ | 1.34951  | 0.432435 | 1.36598  | 0.236654 | 0.863903 | UP   | 230.8054 | 230.8052 | 230.8055 | 9.9847   | 9.8914   |
| 3346 | M1189T10 | 1.426835 | -0.51282 | -1.29013 | 0.236708 | 0.863903 | DOWN | 1189.129 | 1189.129 | 1189.13  | 9.910333 | 9.811217 |
| 3347 | M611T11_ | 2.020577 | -1.01477 | -1.38103 | 0.236775 | 0.863903 | DOWN | 611.0543 | 611.0539 | 611.0544 | 11.43953 | 11.41772 |
| 3348 | M612T25  | 12.10027 | -3.59697 | -1.38841 | 0.236786 | 0.863903 | DOWN | 611.9175 | 611.9172 | 611.9176 | 25.127   | 25.117   |
| 3349 | M746T10_ | 1.273902 | -0.34925 | -1.28493 | 0.237055 | 0.863903 | DOWN | 746.4224 | 746.422  | 746.4227 | 9.562292 | 9.46325  |
| 3350 | M500T11_ | 3.308996 | 1.726394 | 1.37907  | 0.237156 | 0.863904 | UP   | 500.3478 | 500.3473 | 500.3485 | 10.64595 | 10.58208 |
| 3351 | M454T9_7 | 1.585989 | -0.66538 | -1.27804 | 0.237215 | 0.863904 | DOWN | 453.6999 | 453.6967 | 453.7044 | 9.300858 | 9.190317 |
| 3352 | M238T10_ | 1.365859 | -0.44981 | -1.38161 | 0.237241 | 0.863904 | DOWN | 238.4315 | 238.4314 | 238.4316 | 9.902617 | 9.8378   |
| 3353 | M195T9_9 | 1.468215 | -0.55406 | -1.28148 | 0.237339 | 0.863904 | DOWN | 194.8781 | 194.8776 | 194.8784 | 9.279417 | 9.16125  |
| 3354 | M207T9_1 | 1.617256 | -0.69355 | -1.28073 | 0.237407 | 0.863904 | DOWN | 206.9901 | 206.9896 | 206.9906 | 9.280092 | 9.132267 |
| 3355 | M887T10_ | 1.785699 | -0.83649 | -1.33971 | 0.237446 | 0.863904 | DOWN | 887.3427 | 887.3411 | 887.343  | 9.605975 | 9.510117 |
| 3356 | M502T25_ | 13.03388 | -3.70419 | -1.38613 | 0.237472 | 0.863904 | DOWN | 501.8518 | 501.8513 | 501.8523 | 24.75383 | 24.73817 |
| 3357 | M658T10_ | 1.2877   | -0.3648  | -1.34389 | 0.237492 | 0.863904 | DOWN | 657.9825 | 657.9821 | 657.9828 | 9.8207   | 9.715683 |
| 3358 | M423T25_ | 1.618241 | -0.69443 | -1.30326 | 0.237513 | 0.863904 | DOWN | 423.0457 | 423.0441 | 423.0461 | 24.7975  | 24.72367 |
| 3359 | M290T24_ | 1.122373 | -0.16655 | -1.28119 | 0.237643 | 0.863904 | DOWN | 290.2959 | 290.2958 | 290.296  | 24.07208 | 24.059   |



|      |           |          |          |          |          |          |      |          |          |          |          |          |
|------|-----------|----------|----------|----------|----------|----------|------|----------|----------|----------|----------|----------|
| 3360 | M185T19_  | 1.302225 | -0.38098 | -1.31393 | 0.237794 | 0.863904 | DOWN | 185.1322 | 185.1322 | 185.1324 | 19.41667 | 19.4015  |
| 3361 | M390T10_  | 1.473966 | 0.559704 | 1.345309 | 0.237811 | 0.863904 | UP   | 390.2563 | 390.2559 | 390.257  | 9.94455  | 9.8378   |
| 3362 | M289T23_  | 1.461767 | -0.54771 | -1.27595 | 0.237842 | 0.863905 | DOWN | 288.5559 | 288.5527 | 288.5653 | 22.8715  | 22.828   |
| 3363 | M481T9_9  | 1.779929 | 0.83182  | 1.354888 | 0.237908 | 0.863905 | UP   | 481.4996 | 481.498  | 481.4998 | 9.129317 | 9.09495  |
| 3364 | M398T40_  | 1.067549 | -0.0943  | -1.2807  | 0.237923 | 0.863905 | DOWN | 398.2382 | 398.2381 | 398.2383 | 40.42417 | 40.06433 |
| 3365 | M1055T10_ | 1.473299 | -0.55905 | -1.36263 | 0.238071 | 0.863905 | DOWN | 1054.608 | 1054.607 | 1054.61  | 10.05593 | 9.955733 |
| 3366 | M243T41   | 1.351994 | -0.43509 | -1.32142 | 0.238088 | 0.863905 | DOWN | 243.1224 | 243.1223 | 243.1225 | 41.23417 | 41.158   |
| 3367 | M719T10_  | 1.925967 | 0.945583 | 1.370908 | 0.2381   | 0.863905 | UP   | 719.4761 | 719.4747 | 719.4771 | 9.803133 | 9.699733 |
| 3368 | M546T39_  | 1.263291 | 0.337187 | 1.354274 | 0.238127 | 0.863905 | UP   | 546.3269 | 546.3267 | 546.3273 | 39.22625 | 39.04283 |
| 3369 | M395T10_  | 1.227303 | -0.29549 | -1.31276 | 0.238179 | 0.863905 | DOWN | 395.3136 | 395.3133 | 395.3137 | 9.90295  | 9.79535  |
| 3370 | M1038T25  | 12.0439  | -3.59023 | -1.3842  | 0.238242 | 0.863905 | DOWN | 1037.625 | 1037.623 | 1037.627 | 24.667   | 24.6525  |
| 3371 | M379T10_  | 2.027689 | -1.01984 | -1.31159 | 0.238286 | 0.863905 | DOWN | 379.3741 | 379.374  | 379.3743 | 9.916617 | 9.806367 |
| 3372 | M226T10_  | 2.151668 | 1.105455 | 1.373452 | 0.238384 | 0.863905 | UP   | 226.167  | 226.1605 | 226.1674 | 9.9677   | 9.811217 |
| 3373 | M680T10_  | 1.621943 | -0.69772 | -1.27853 | 0.23852  | 0.863905 | DOWN | 680.0709 | 680.0674 | 680.0762 | 9.830333 | 9.699733 |
| 3374 | M564T37_  | 1.645823 | -0.71881 | -1.37529 | 0.238603 | 0.863906 | DOWN | 564.3011 | 564.3009 | 564.3016 | 36.84283 | 36.684   |
| 3375 | M442T10_  | 1.778445 | 0.830616 | 1.308837 | 0.238668 | 0.863906 | UP   | 442.3091 | 442.3088 | 442.3094 | 9.802117 | 9.683817 |
| 3376 | M679T10_  | 1.732529 | -0.79288 | -1.27329 | 0.238668 | 0.863906 | DOWN | 679.1451 | 679.1446 | 679.1506 | 9.852542 | 9.699733 |
| 3377 | M880T22_  | 1.207135 | -0.27159 | -1.27696 | 0.238705 | 0.863906 | DOWN | 879.6084 | 879.6083 | 879.6092 | 22.34258 | 22.32417 |
| 3378 | M524T25_  | 13.41325 | -3.74559 | -1.38205 | 0.238717 | 0.863906 | DOWN | 523.8651 | 523.8645 | 523.8656 | 24.84058 | 24.82583 |
| 3379 | M229T9_7  | 1.35401  | -0.43724 | -1.29146 | 0.238875 | 0.863906 | DOWN | 228.934  | 228.9334 | 228.935  | 9.265117 | 9.132267 |
| 3380 | M1971T10_ | 1.251432 | -0.32358 | -1.28818 | 0.238945 | 0.863906 | DOWN | 1971.126 | 1971.125 | 1971.137 | 9.842    | 9.715683 |
| 3381 | M574T9_1  | 1.789678 | 0.8397   | 1.272378 | 0.239003 | 0.863906 | UP   | 573.7022 | 573.7017 | 573.7023 | 8.969125 | 8.931783 |
| 3382 | M382T16_  | 1.154023 | -0.20667 | -1.27211 | 0.239064 | 0.863906 | DOWN | 381.7704 | 381.7703 | 381.7706 | 16.25613 | 16.2422  |
| 3383 | M699T10_  | 1.207213 | -0.27168 | -1.30908 | 0.239104 | 0.863906 | DOWN | 699.3484 | 699.348  | 699.3506 | 9.825767 | 9.715683 |
| 3384 | M743T9    | 1.292391 | -0.37004 | -1.29028 | 0.23912  | 0.863906 | DOWN | 742.8904 | 742.8901 | 742.8908 | 9.317    | 9.234417 |
| 3385 | M636T10_  | 1.36108  | -0.44475 | -1.32085 | 0.239232 | 0.863907 | DOWN | 636.1803 | 636.1798 | 636.1806 | 9.8207   | 9.7124   |
| 3386 | M560T10_  | 2.386059 | 1.25463  | 1.375061 | 0.239235 | 0.863907 | UP   | 560.489  | 560.4884 | 560.4898 | 9.979667 | 9.8753   |
| 3387 | M401T14   | 9.268701 | 3.212367 | 1.380757 | 0.239476 | 0.863907 | UP   | 401.1592 | 401.1584 | 401.1593 | 14.45845 | 14.42792 |
| 3388 | M564T45_  | 1.408438 | 0.494096 | 1.329376 | 0.239502 | 0.863907 | UP   | 564.3376 | 564.3372 | 564.3378 | 44.7535  | 44.49483 |
| 3389 | M408T10_  | 1.227637 | -0.29588 | -1.27796 | 0.239534 | 0.863907 | DOWN | 408.0096 | 408.0091 | 408.0097 | 9.95385  | 9.853533 |
| 3390 | M312T10_  | 1.304161 | -0.38312 | -1.27962 | 0.239684 | 0.863907 | DOWN | 311.9537 | 311.9536 | 311.954  | 9.964333 | 9.859233 |
| 3391 | M305T29   | 1.75529  | -0.81171 | -1.32856 | 0.239684 | 0.863907 | DOWN | 305.3028 | 305.3027 | 305.303  | 29.16792 | 29.14933 |
| 3392 | M169T10_  | 2.302921 | 1.203465 | 1.342829 | 0.239709 | 0.863907 | UP   | 168.8403 | 168.8403 | 168.8405 | 9.984083 | 9.8914   |
| 3393 | M333T10_  | 1.341672 | 0.424032 | 1.29326  | 0.239713 | 0.863907 | UP   | 333.3735 | 333.3732 | 333.3737 | 9.973517 | 9.859233 |
| 3394 | M1052T10  | 1.156551 | -0.20983 | -1.28138 | 0.239823 | 0.863907 | DOWN | 1052.195 | 1052.194 | 1052.198 | 9.841442 | 9.73145  |

|      |          |          |          |          |          |          |      |          |          |          |          |          |
|------|----------|----------|----------|----------|----------|----------|------|----------|----------|----------|----------|----------|
| 3395 | M455T10_ | 1.555233 | 0.637131 | 1.281032 | 0.239829 | 0.863907 | UP   | 454.5133 | 454.5128 | 454.5134 | 9.970617 | 9.859233 |
| 3396 | M1105T10 | 1.319004 | -0.39945 | -1.30234 | 0.239832 | 0.863907 | DOWN | 1104.706 | 1104.705 | 1104.706 | 9.950258 | 9.859233 |
| 3397 | M706T10_ | 1.286181 | -0.36309 | -1.32768 | 0.239845 | 0.863907 | DOWN | 705.6624 | 705.6607 | 705.6629 | 9.825767 | 9.715683 |
| 3398 | M518T10_ | 1.367842 | -0.4519  | -1.28081 | 0.239895 | 0.863907 | DOWN | 518.3289 | 518.3285 | 518.3295 | 10.45045 | 10.40882 |
| 3399 | M229T10_ | 1.437099 | -0.52316 | -1.3178  | 0.239901 | 0.863907 | DOWN | 228.7562 | 228.756  | 228.7563 | 9.900133 | 9.779267 |
| 3400 | M400T10_ | 1.655444 | -0.72722 | -1.27845 | 0.240067 | 0.863908 | DOWN | 400.1613 | 400.161  | 400.1617 | 9.955875 | 9.886083 |
| 3401 | M515T10_ | 1.418139 | -0.504   | -1.30662 | 0.240262 | 0.863908 | DOWN | 514.9715 | 514.9709 | 514.9725 | 10.13473 | 10.10718 |
| 3402 | M301T11_ | 1.208443 | -0.27315 | -1.35275 | 0.24029  | 0.863908 | DOWN | 301.1043 | 301.1042 | 301.1048 | 10.75907 | 10.73262 |
| 3403 | M731T23  | 1.253234 | -0.32566 | -1.29075 | 0.240314 | 0.863908 | DOWN | 730.531  | 730.5307 | 730.5317 | 22.61367 | 22.611   |
| 3404 | M349T9_2 | 1.434573 | -0.52062 | -1.26836 | 0.240343 | 0.863908 | DOWN | 348.5881 | 348.5879 | 348.5883 | 9.314442 | 9.234417 |
| 3405 | M478T9_8 | 1.426736 | -0.51272 | -1.30508 | 0.240349 | 0.863908 | DOWN | 478.4889 | 478.485  | 478.4928 | 9.347458 | 9.129317 |
| 3406 | M732T4   | 1.522213 | 0.60617  | 1.274829 | 0.240424 | 0.863908 | UP   | 732.4708 | 732.4703 | 732.4709 | 3.528417 | 3.495283 |
| 3407 | M368T21_ | 1.654572 | 0.726458 | 1.312156 | 0.240468 | 0.863908 | UP   | 367.8091 | 367.8086 | 367.8097 | 20.77958 | 20.7385  |
| 3408 | M857T10_ | 1.254759 | 0.32741  | 1.269122 | 0.240472 | 0.863908 | UP   | 857.4504 | 857.4499 | 857.4509 | 9.816258 | 9.699733 |
| 3409 | M319T10_ | 2.416478 | 1.272906 | 1.37643  | 0.240481 | 0.863908 | UP   | 319.2156 | 319.2152 | 319.216  | 9.818433 | 9.715683 |
| 3410 | M432T12  | 1.276724 | -0.35245 | -1.27993 | 0.240525 | 0.863908 | DOWN | 432.2911 | 432.2909 | 432.2916 | 11.9916  | 11.96045 |
| 3411 | M308T11  | 1.209555 | -0.27448 | -1.32121 | 0.240565 | 0.863908 | DOWN | 307.557  | 307.5567 | 307.558  | 10.9307  | 10.8926  |
| 3412 | M477T20  | 1.625585 | -0.70096 | -1.30499 | 0.240587 | 0.863908 | DOWN | 477.2629 | 477.2626 | 477.2633 | 20.245   | 20.21583 |
| 3413 | M218T11_ | 1.243664 | -0.3146  | -1.27184 | 0.240597 | 0.863908 | DOWN | 217.8602 | 217.8599 | 217.8604 | 10.90553 | 10.87708 |
| 3414 | M537T10_ | 3.5557   | -1.83013 | -1.31686 | 0.240696 | 0.863909 | DOWN | 537.2507 | 537.2494 | 537.2517 | 9.609425 | 9.447617 |
| 3415 | M1933T10 | 1.751853 | 0.808882 | 1.344267 | 0.240739 | 0.863909 | UP   | 1933.142 | 1933.141 | 1933.144 | 9.886433 | 9.743767 |
| 3416 | M536T44_ | 1.480213 | -0.5658  | -1.27967 | 0.240752 | 0.863909 | DOWN | 536.3062 | 536.306  | 536.3063 | 44.06333 | 43.83333 |
| 3417 | M280T27  | 215.4504 | 7.751212 | 1.376123 | 0.240801 | 0.863909 | UP   | 280.2633 | 280.2631 | 280.2636 | 27.29    | 27.27117 |
| 3418 | M419T9_6 | 1.567892 | -0.64883 | -1.30228 | 0.240848 | 0.863909 | DOWN | 418.8827 | 418.881  | 418.883  | 9.264333 | 9.126783 |
| 3419 | M1125T10 | 1.239705 | -0.31    | -1.29906 | 0.241086 | 0.863909 | DOWN | 1125.338 | 1125.338 | 1125.342 | 9.839575 | 9.73145  |
| 3420 | M273T9_3 | 2.255371 | 1.173365 | 1.357353 | 0.241205 | 0.863909 | UP   | 272.731  | 272.7309 | 272.7312 | 9.429367 | 9.288883 |
| 3421 | M534T10_ | 1.802824 | -0.85026 | -1.27019 | 0.24124  | 0.863909 | DOWN | 533.8187 | 533.8169 | 533.8191 | 9.6055   | 9.582167 |
| 3422 | M683T10_ | 1.437761 | 0.523824 | 1.314866 | 0.24126  | 0.863909 | UP   | 683.3506 | 683.3493 | 683.3509 | 9.894417 | 9.806367 |
| 3423 | M1378T10 | 1.396969 | -0.4823  | -1.35387 | 0.241318 | 0.863909 | DOWN | 1378.496 | 1378.495 | 1378.498 | 9.840617 | 9.728083 |
| 3424 | M391T10_ | 1.361608 | -0.44531 | -1.28661 | 0.241412 | 0.86391  | DOWN | 390.6114 | 390.6112 | 390.6115 | 9.508883 | 9.40135  |
| 3425 | M681T10_ | 1.365283 | 0.4492   | 1.272298 | 0.241603 | 0.86391  | UP   | 680.9723 | 680.9702 | 680.9804 | 9.860817 | 9.743667 |
| 3426 | M204T10_ | 1.20781  | -0.27239 | -1.31243 | 0.241738 | 0.86391  | DOWN | 204.4194 | 204.4193 | 204.4196 | 9.85045  | 9.73145  |
| 3427 | M1126T25 | 11.84879 | -3.56667 | -1.37064 | 0.241746 | 0.86391  | DOWN | 1125.678 | 1125.677 | 1125.68  | 24.82667 | 24.81133 |
| 3428 | M541T9_7 | 1.341527 | -0.42388 | -1.26626 | 0.241795 | 0.86391  | DOWN | 541.2608 | 541.2597 | 541.2622 | 9.155008 | 9.07945  |
| 3429 | M299T10_ | 1.607392 | 0.684722 | 1.351581 | 0.241801 | 0.86391  | UP   | 299.0599 | 299.0598 | 299.0601 | 9.979667 | 9.8753   |

|      |           |          |          |          |          |          |      |          |          |          |          |          |
|------|-----------|----------|----------|----------|----------|----------|------|----------|----------|----------|----------|----------|
| 3430 | M204T10_  | 1.211206 | -0.27644 | -1.31383 | 0.241801 | 0.86391  | DOWN | 204.1865 | 204.1863 | 204.1866 | 9.847133 | 9.73145  |
| 3431 | M282T29   | 1.564516 | 0.645716 | 1.335668 | 0.241833 | 0.86391  | UP   | 282.2789 | 282.2786 | 282.279  | 28.65067 | 28.6345  |
| 3432 | M219T9_7  | 1.311025 | -0.3907  | -1.27453 | 0.241896 | 0.86391  | DOWN | 218.9156 | 218.9146 | 218.9158 | 9.41815  | 9.279417 |
| 3433 | M222T28   | 1.253499 | -0.32596 | -1.2768  | 0.241997 | 0.86391  | DOWN | 222.1203 | 222.1201 | 222.1204 | 27.95175 | 27.93817 |
| 3434 | M655T12   | 1.518661 | -0.6028  | -1.34246 | 0.242085 | 0.86391  | DOWN | 655.4146 | 655.4129 | 655.415  | 11.8009  | 11.77773 |
| 3435 | M816T10_  | 1.255521 | -0.32829 | -1.26499 | 0.242105 | 0.863911 | DOWN | 815.8414 | 815.8407 | 815.8417 | 9.626517 | 9.52515  |
| 3436 | M188T9_8  | 3.458966 | 1.790341 | 1.33132  | 0.242177 | 0.863911 | UP   | 187.9778 | 187.9772 | 187.9788 | 9.390192 | 9.0511   |
| 3437 | M497T9_1  | 1.353844 | 0.437062 | 1.262923 | 0.242218 | 0.863911 | UP   | 497.2346 | 497.2337 | 497.2363 | 9.100433 | 8.796533 |
| 3438 | M636T10_  | 1.330928 | -0.41243 | -1.26284 | 0.242273 | 0.863911 | DOWN | 636.3992 | 636.3984 | 636.4001 | 10.10937 | 10.00428 |
| 3439 | M227T7_2  | 1.699824 | -0.76539 | -1.30891 | 0.242406 | 0.863911 | DOWN | 227.1751 | 227.175  | 227.1754 | 6.969117 | 6.94045  |
| 3440 | M524T37   | 1.181843 | 0.241038 | 1.26284  | 0.242419 | 0.863911 | UP   | 524.3061 | 524.3059 | 524.3063 | 36.71275 | 36.46817 |
| 3441 | M545T11_  | 1.335534 | -0.41742 | -1.26566 | 0.24242  | 0.863911 | DOWN | 545.3595 | 545.3591 | 545.3597 | 10.93208 | 10.90785 |
| 3442 | M349T10_  | 1.184779 | 0.244619 | 1.312771 | 0.242453 | 0.863911 | UP   | 349.0632 | 349.063  | 349.0637 | 9.825492 | 9.715683 |
| 3443 | M706T10_  | 2.271171 | 1.183436 | 1.358792 | 0.242484 | 0.863911 | UP   | 706.0991 | 706.0984 | 706.1004 | 9.811867 | 9.699733 |
| 3444 | M355T40_  | 1.481429 | -0.56699 | -1.29346 | 0.242489 | 0.863911 | DOWN | 355.2113 | 355.2112 | 355.2114 | 40.35217 | 40.22283 |
| 3445 | M420T13   | 1.602714 | 0.680517 | 1.27299  | 0.242493 | 0.863911 | UP   | 420.274  | 420.2736 | 420.2742 | 13.44869 | 13.41952 |
| 3446 | M479T25   | 5.111192 | -2.35366 | -1.36872 | 0.242611 | 0.863911 | DOWN | 479.3369 | 479.3368 | 479.337  | 24.67417 | 24.65217 |
| 3447 | M334T10_  | 2.547035 | -1.34882 | -1.36375 | 0.242619 | 0.863911 | DOWN | 333.7649 | 333.7645 | 333.7687 | 9.8887   | 9.747533 |
| 3448 | M189T9_1  | 2.405737 | -1.26648 | -1.28567 | 0.242634 | 0.863911 | DOWN | 188.6507 | 188.6502 | 188.6511 | 9.2033   | 9.1175   |
| 3449 | M229T9_4  | 1.744795 | -0.80306 | -1.26613 | 0.242653 | 0.863911 | DOWN | 228.6004 | 228.598  | 228.6009 | 9.311883 | 9.219483 |
| 3450 | M1426T10_ | 2.162822 | -1.11291 | -1.30625 | 0.242683 | 0.863911 | DOWN | 1425.581 | 1425.58  | 1425.582 | 9.851617 | 9.7634   |
| 3451 | M322T9_5  | 1.878985 | -0.90995 | -1.33186 | 0.242724 | 0.863911 | DOWN | 322.213  | 322.2116 | 322.2143 | 8.882425 | 8.8486   |
| 3452 | M400T10_  | 1.811875 | 0.857483 | 1.343987 | 0.242733 | 0.863911 | UP   | 399.8959 | 399.8953 | 399.896  | 9.934533 | 9.903017 |
| 3453 | M912T10_  | 1.393124 | -0.47832 | -1.26334 | 0.242759 | 0.863911 | DOWN | 911.9993 | 911.9982 | 912.0004 | 9.951442 | 9.869467 |
| 3454 | M602T9_2  | 1.340321 | -0.42258 | -1.26105 | 0.242852 | 0.863912 | DOWN | 601.7383 | 601.7365 | 601.7392 | 9.237883 | 9.146383 |
| 3455 | M520T40_  | 1.320758 | -0.40137 | -1.34963 | 0.242889 | 0.863912 | DOWN | 520.2749 | 520.2746 | 520.2752 | 39.8055  | 39.58967 |
| 3456 | M397T25   | 1.604254 | 0.681903 | 1.358876 | 0.243085 | 0.863912 | UP   | 397.2007 | 397.2003 | 397.2009 | 24.59467 | 24.56517 |
| 3457 | M357T43_  | 1.09651  | 0.132919 | 1.267295 | 0.243134 | 0.863912 | UP   | 357.1906 | 357.1906 | 357.1907 | 43.04942 | 42.98483 |
| 3458 | M994T10_  | 1.458649 | -0.54463 | -1.2602  | 0.243134 | 0.863912 | DOWN | 993.7376 | 993.736  | 993.7394 | 9.95165  | 9.731817 |
| 3459 | M1866T10  | 1.440645 | -0.52672 | -1.26456 | 0.243155 | 0.863912 | DOWN | 1866.328 | 1866.325 | 1866.328 | 9.810158 | 9.699733 |
| 3460 | M799T32   | 1.317123 | -0.39739 | -1.26458 | 0.243157 | 0.863912 | DOWN | 798.5154 | 798.5151 | 798.5155 | 32.25067 | 32.243   |
| 3461 | M464T41_  | 1.318365 | -0.39875 | -1.36138 | 0.243317 | 0.863912 | DOWN | 464.2848 | 464.2847 | 464.285  | 40.82717 | 40.7695  |
| 3462 | M266T11_  | 1.684874 | -0.75264 | -1.26889 | 0.243336 | 0.863912 | DOWN | 265.5435 | 265.5432 | 265.5537 | 10.877   | 10.84767 |
| 3463 | M289T10_  | 1.232656 | -0.30177 | -1.32537 | 0.243371 | 0.863912 | DOWN | 289.3498 | 289.3497 | 289.3499 | 9.968992 | 9.859233 |
| 3464 | M598T10_  | 1.773719 | 0.826778 | 1.321717 | 0.243372 | 0.863912 | UP   | 597.9613 | 597.9576 | 597.9618 | 9.979342 | 9.840617 |

|      |          |          |          |          |          |          |      |          |          |          |          |          |
|------|----------|----------|----------|----------|----------|----------|------|----------|----------|----------|----------|----------|
| 3465 | M676T11_ | 1.257531 | -0.33059 | -1.25913 | 0.243519 | 0.863912 | DOWN | 675.8681 | 675.8671 | 675.8685 | 10.8926  | 10.879   |
| 3466 | M570T12  | 1.72163  | 0.783775 | 1.337842 | 0.24356  | 0.863913 | UP   | 570.4095 | 570.4083 | 570.4098 | 11.70072 | 11.67675 |
| 3467 | M200T10_ | 1.313188 | -0.39307 | -1.32845 | 0.243617 | 0.863913 | DOWN | 199.9895 | 199.9894 | 199.997  | 9.830458 | 9.715683 |
| 3468 | M357T10_ | 1.523154 | -0.60706 | -1.27417 | 0.243645 | 0.863913 | DOWN | 357.0479 | 357.0448 | 357.0528 | 9.8881   | 9.715683 |
| 3469 | M326T36  | 1.173966 | 0.23139  | 1.27738  | 0.243658 | 0.863913 | UP   | 326.3779 | 326.3777 | 326.378  | 35.96292 | 35.93467 |
| 3470 | M355T38  | 1.42877  | -0.51477 | -1.26219 | 0.243841 | 0.863913 | DOWN | 355.2113 | 355.2112 | 355.2116 | 38.37392 | 38.07933 |
| 3471 | M600T10_ | 1.565265 | 0.646407 | 1.26042  | 0.243921 | 0.863913 | UP   | 600.4061 | 600.4049 | 600.4069 | 9.758283 | 9.729367 |
| 3472 | M479T11_ | 1.457956 | 0.543947 | 1.334308 | 0.243957 | 0.863913 | UP   | 478.601  | 478.6005 | 478.6014 | 10.87572 | 10.8214  |
| 3473 | M360T17_ | 7.539452 | 2.91446  | 1.363902 | 0.244062 | 0.863913 | UP   | 360.2142 | 360.2138 | 360.2152 | 16.6795  | 16.65025 |
| 3474 | M1468T9  | 1.545306 | -0.62789 | -1.25994 | 0.244139 | 0.863913 | DOWN | 1467.823 | 1467.818 | 1467.827 | 9.34595  | 9.146383 |
| 3475 | M380T10_ | 1.187797 | -0.24829 | -1.29687 | 0.244315 | 0.863914 | DOWN | 379.9818 | 379.9813 | 379.9825 | 9.92625  | 9.8378   |
| 3476 | M212T10_ | 1.488512 | -0.57387 | -1.28669 | 0.244332 | 0.863914 | DOWN | 212.4301 | 212.4299 | 212.4302 | 9.863283 | 9.779267 |
| 3477 | M460T26_ | 1.688568 | 0.7558   | 1.320113 | 0.244448 | 0.863914 | UP   | 460.2746 | 460.2743 | 460.275  | 25.93683 | 25.8415  |
| 3478 | M351T7   | 2.309834 | -1.20779 | -1.30074 | 0.244462 | 0.863914 | DOWN | 351.2428 | 351.2427 | 351.2431 | 7.327417 | 7.1397   |
| 3479 | M377T10_ | 1.431488 | -0.51752 | -1.282   | 0.244501 | 0.863914 | DOWN | 377.3472 | 377.346  | 377.3476 | 9.894875 | 9.779267 |
| 3480 | M621T10_ | 1.252462 | -0.32477 | -1.25664 | 0.244507 | 0.863914 | DOWN | 621.2732 | 621.273  | 621.2738 | 10.24579 | 10.18238 |
| 3481 | M365T10_ | 6.171113 | 2.625531 | 1.36247  | 0.244553 | 0.863914 | UP   | 364.6314 | 364.6307 | 364.633  | 9.687108 | 9.547133 |
| 3482 | M819T10_ | 1.242797 | -0.31359 | -1.28118 | 0.244582 | 0.863914 | DOWN | 819.092  | 819.0908 | 819.0929 | 9.917167 | 9.811217 |
| 3483 | M686T9_1 | 1.47423  | -0.55996 | -1.29166 | 0.244653 | 0.863914 | DOWN | 686.0371 | 686.0342 | 686.0383 | 9.168108 | 9.12675  |
| 3484 | M491T10_ | 1.340894 | -0.42319 | -1.30385 | 0.244673 | 0.863914 | DOWN | 490.6298 | 490.6296 | 490.6302 | 10.33683 | 10.26607 |
| 3485 | M769T10_ | 1.28871  | -0.36593 | -1.26616 | 0.244731 | 0.863914 | DOWN | 768.9797 | 768.9792 | 768.9801 | 10.45967 | 10.40807 |
| 3486 | M448T11_ | 1.646732 | -0.71961 | -1.26125 | 0.244767 | 0.863914 | DOWN | 448.1319 | 448.1318 | 448.1327 | 10.87765 | 10.8214  |
| 3487 | M341T10_ | 2.003815 | -1.00275 | -1.27261 | 0.24478  | 0.863914 | DOWN | 340.7293 | 340.7265 | 340.7358 | 9.960817 | 9.728083 |
| 3488 | M335T11_ | 5.94199  | 2.570946 | 1.361291 | 0.244797 | 0.863914 | UP   | 335.2307 | 335.2302 | 335.2309 | 11.23103 | 11.18537 |
| 3489 | M404T10_ | 1.212621 | -0.27813 | -1.35341 | 0.244827 | 0.863914 | DOWN | 403.9354 | 403.935  | 403.9354 | 9.975142 | 9.859233 |
| 3490 | M339T11_ | 1.588312 | 0.667494 | 1.262613 | 0.244836 | 0.863914 | UP   | 338.7572 | 338.757  | 338.7577 | 10.89131 | 10.8646  |
| 3491 | M288T10_ | 1.586606 | -0.66594 | -1.27541 | 0.24494  | 0.863914 | DOWN | 287.6378 | 287.6371 | 287.638  | 9.940167 | 9.886083 |
| 3492 | M209T9_3 | 1.223918 | -0.29151 | -1.25482 | 0.244995 | 0.863914 | DOWN | 208.851  | 208.8509 | 208.8511 | 9.297417 | 9.1445   |
| 3493 | M420T38  | 1.290447 | -0.36787 | -1.3391  | 0.245029 | 0.863915 | DOWN | 420.2228 | 420.2223 | 420.2229 | 38.22283 | 37.8345  |
| 3494 | M357T10_ | 1.197254 | -0.25973 | -1.35074 | 0.245037 | 0.863915 | DOWN | 357.294  | 357.2937 | 357.2942 | 9.823575 | 9.715683 |
| 3495 | M437T9_6 | 1.33425  | -0.41603 | -1.25732 | 0.245072 | 0.863915 | DOWN | 437.2221 | 437.2215 | 437.2224 | 9.285867 | 9.1445   |
| 3496 | M266T16_ | 7.775232 | 2.958886 | 1.357696 | 0.245183 | 0.863915 | UP   | 266.211  | 266.2106 | 266.2113 | 16.26198 | 16.19848 |
| 3497 | M760T19  | 13.37183 | -3.74113 | -1.35986 | 0.245362 | 0.863915 | DOWN | 760.3894 | 760.3884 | 760.39   | 19.0895  | 19.07033 |
| 3498 | M296T10_ | 1.30384  | -0.38277 | -1.31872 | 0.245389 | 0.863915 | DOWN | 295.7842 | 295.7841 | 295.7845 | 9.902617 | 9.79535  |
| 3499 | M157T9_3 | 1.40618  | -0.49178 | -1.32001 | 0.245422 | 0.863915 | DOWN | 157.0458 | 157.0452 | 157.0463 | 9.317    | 9.219483 |

|      |          |          |          |          |          |          |      |          |          |          |          |          |
|------|----------|----------|----------|----------|----------|----------|------|----------|----------|----------|----------|----------|
| 3500 | M326T10_ | 1.823009 | 0.866322 | 1.321892 | 0.245499 | 0.863915 | UP   | 325.5443 | 325.5438 | 325.5453 | 9.830833 | 9.715683 |
| 3501 | M309T9_2 | 1.494304 | -0.57947 | -1.2719  | 0.245554 | 0.863915 | DOWN | 309.3325 | 309.3317 | 309.3328 | 8.895033 | 8.745033 |
| 3502 | M844T10_ | 1.227597 | -0.29584 | -1.29346 | 0.24558  | 0.863915 | DOWN | 843.5368 | 843.5362 | 843.5376 | 10.12328 | 10.02755 |
| 3503 | M979T26  | 1.289387 | -0.36669 | -1.25509 | 0.245682 | 0.863915 | DOWN | 978.6939 | 978.6936 | 978.695  | 25.99458 | 25.95967 |
| 3504 | M252T9_5 | 1.464968 | -0.55087 | -1.25334 | 0.245736 | 0.863915 | DOWN | 252.3205 | 252.3184 | 252.3212 | 9.268958 | 9.132267 |
| 3505 | M496T9_3 | 1.388081 | -0.47309 | -1.26052 | 0.245744 | 0.863915 | DOWN | 495.7092 | 495.709  | 495.7094 | 9.24215  | 9.129317 |
| 3506 | M1880T10 | 1.261699 | -0.33537 | -1.32016 | 0.245837 | 0.863916 | DOWN | 1880.489 | 1880.487 | 1880.491 | 9.842    | 9.73145  |
| 3507 | M428T9_3 | 1.560508 | -0.64202 | -1.25835 | 0.245846 | 0.863916 | DOWN | 427.784  | 427.7836 | 427.7848 | 9.150633 | 9.04725  |
| 3508 | M1363T10 | 1.409198 | -0.49487 | -1.32975 | 0.24589  | 0.863916 | DOWN | 1362.537 | 1362.536 | 1362.539 | 9.900767 | 9.806367 |
| 3509 | M360T11_ | 1.374274 | -0.45867 | -1.26115 | 0.245893 | 0.863916 | DOWN | 360.4311 | 360.4308 | 360.4323 | 10.91734 | 10.879   |
| 3510 | M282T11_ | 1.134001 | -0.18142 | -1.31382 | 0.245937 | 0.863916 | DOWN | 282.012  | 282.0115 | 282.0122 | 10.91376 | 10.879   |
| 3511 | M396T9_2 | 1.573154 | -0.65366 | -1.26277 | 0.245943 | 0.863916 | DOWN | 395.7124 | 395.7117 | 395.7178 | 9.191133 | 9.064833 |
| 3512 | M189T9_7 | 2.040952 | -1.02924 | -1.25857 | 0.245944 | 0.863916 | DOWN | 188.9388 | 188.9382 | 188.9411 | 9.241267 | 9.103733 |
| 3513 | M300T27  | 1.307091 | 0.386359 | 1.253963 | 0.245969 | 0.863916 | UP   | 300.3258 | 300.3256 | 300.3259 | 27.45325 | 27.42133 |
| 3514 | M177T44_ | 1.428346 | -0.51435 | -1.25199 | 0.245982 | 0.863916 | DOWN | 177.1271 | 177.1271 | 177.1272 | 43.64408 | 43.20067 |
| 3515 | M458T9_4 | 1.280697 | -0.35693 | -1.27585 | 0.246142 | 0.863916 | DOWN | 458.0304 | 458.0244 | 458.0307 | 9.311883 | 9.1445   |
| 3516 | M1094T10 | 1.303874 | -0.3828  | -1.26719 | 0.246142 | 0.863916 | DOWN | 1094.446 | 1094.443 | 1094.447 | 9.964092 | 9.859233 |
| 3517 | M374T10_ | 1.642277 | -0.7157  | -1.2522  | 0.246209 | 0.863916 | DOWN | 374.131  | 374.1308 | 374.1313 | 9.9468   | 9.932    |
| 3518 | M228T10_ | 1.82962  | 0.871544 | 1.278698 | 0.246282 | 0.863916 | UP   | 227.7389 | 227.7297 | 227.7405 | 9.830833 | 9.7124   |
| 3519 | M759T19  | 16.3793  | -4.0338  | -1.35689 | 0.24629  | 0.863916 | DOWN | 759.3862 | 759.3851 | 759.3886 | 19.09075 | 19.038   |
| 3520 | M240T10_ | 1.572407 | 0.652975 | 1.252319 | 0.246309 | 0.863916 | UP   | 240.3332 | 240.3331 | 240.3333 | 9.983467 | 9.8914   |
| 3521 | M393T7   | 1.136743 | -0.18491 | -1.25488 | 0.2464   | 0.863916 | DOWN | 393.2089 | 393.2087 | 393.2093 | 7.132925 | 7.08535  |
| 3522 | M312T22_ | 462.4934 | 8.853289 | 1.356565 | 0.246432 | 0.863916 | UP   | 312.2531 | 312.2531 | 312.2532 | 21.905   | 21.88017 |
| 3523 | M1097T10 | 1.710444 | 0.774371 | 1.320889 | 0.246475 | 0.863916 | UP   | 1096.664 | 1096.661 | 1096.667 | 9.880217 | 9.6681   |
| 3524 | M200T10_ | 2.445528 | 1.290146 | 1.252865 | 0.24654  | 0.863917 | UP   | 200.2151 | 200.2149 | 200.2151 | 9.818525 | 9.7124   |
| 3525 | M252T22  | 41.01136 | 5.357952 | 1.356129 | 0.246559 | 0.863917 | UP   | 252.232  | 252.2319 | 252.2321 | 21.70333 | 21.69433 |
| 3526 | M548T11_ | 1.261123 | -0.33471 | -1.30499 | 0.246568 | 0.863917 | DOWN | 548.0145 | 548.014  | 548.0149 | 10.57405 | 10.53485 |
| 3527 | M161T9_5 | 1.353938 | -0.43716 | -1.25298 | 0.24657  | 0.863917 | DOWN | 161.4619 | 161.4614 | 161.4623 | 9.322542 | 9.219483 |
| 3528 | M660T10_ | 1.12629  | -0.17158 | -1.25993 | 0.246586 | 0.863917 | DOWN | 659.9385 | 659.938  | 659.939  | 9.825492 | 9.715683 |
| 3529 | M837T22  | 1.298349 | -0.37668 | -1.29997 | 0.246588 | 0.863917 | DOWN | 836.5855 | 836.5845 | 836.5865 | 21.53758 | 21.494   |
| 3530 | M314T9_1 | 4.915277 | -2.29727 | -1.3347  | 0.246617 | 0.863917 | DOWN | 313.6637 | 313.6635 | 313.6642 | 9.167733 | 9.130683 |
| 3531 | M495T9_3 | 1.393705 | -0.47893 | -1.2607  | 0.246625 | 0.863917 | DOWN | 494.5659 | 494.5658 | 494.5662 | 9.24725  | 9.12675  |
| 3532 | M906T24  | 6.171373 | -2.62559 | -1.35477 | 0.246779 | 0.863917 | DOWN | 905.5466 | 905.5465 | 905.5473 | 24.32967 | 24.273   |
| 3533 | M347T10_ | 1.340598 | -0.42288 | -1.30455 | 0.246784 | 0.863917 | DOWN | 346.6807 | 346.6804 | 346.6808 | 9.8207   | 9.7124   |
| 3534 | M694T10_ | 2.725504 | 1.446523 | 1.353279 | 0.246831 | 0.863917 | UP   | 693.7492 | 693.749  | 693.7507 | 9.809817 | 9.715683 |

|      |          |          |          |          |          |          |      |          |          |          |          |          |
|------|----------|----------|----------|----------|----------|----------|------|----------|----------|----------|----------|----------|
| 3535 | M676T10_ | 7.665309 | -2.93834 | -1.35445 | 0.246859 | 0.863917 | DOWN | 676.4683 | 676.4668 | 676.4697 | 9.823317 | 9.715683 |
| 3536 | M335T11_ | 1.220701 | 0.28771  | 1.258587 | 0.246956 | 0.863917 | UP   | 334.6594 | 334.6591 | 334.6601 | 10.91987 | 10.8214  |
| 3537 | M201T10_ | 1.268589 | -0.34323 | -1.30018 | 0.246992 | 0.863917 | DOWN | 200.7254 | 200.7183 | 200.7254 | 9.830458 | 9.715683 |
| 3538 | M696T9_2 | 1.195413 | -0.25751 | -1.27148 | 0.247087 | 0.863917 | DOWN | 695.744  | 695.7434 | 695.7446 | 9.314442 | 9.234417 |
| 3539 | M575T16  | 1.309774 | -0.38932 | -1.30294 | 0.247166 | 0.863917 | DOWN | 575.3587 | 575.3586 | 575.3592 | 15.85554 | 15.81813 |
| 3540 | M358T45  | 1.316203 | -0.39638 | -1.34495 | 0.247248 | 0.863917 | DOWN | 358.2222 | 358.2222 | 358.2223 | 44.82533 | 44.60983 |
| 3541 | M465T10_ | 1.756159 | 0.812423 | 1.312131 | 0.247253 | 0.863917 | UP   | 464.5433 | 464.5429 | 464.5441 | 9.856867 | 9.649833 |
| 3542 | M217T22_ | 1.266385 | -0.34072 | -1.27868 | 0.247291 | 0.863918 | DOWN | 217.1795 | 217.1793 | 217.1796 | 21.7595  | 21.73817 |
| 3543 | M159T10_ | 1.38843  | -0.47345 | -1.25748 | 0.247341 | 0.863918 | DOWN | 158.6048 | 158.6046 | 158.605  | 9.864842 | 9.842    |
| 3544 | M316T42  | 1.880669 | -0.91125 | -1.33579 | 0.247405 | 0.863918 | DOWN | 316.1752 | 316.1751 | 316.1754 | 41.97767 | 41.64717 |
| 3545 | M417T9_3 | 1.564735 | -0.64592 | -1.25205 | 0.247466 | 0.863918 | DOWN | 416.6639 | 416.6638 | 416.6643 | 9.4925   | 9.417317 |
| 3546 | M243T9_2 | 2.697092 | -1.4314  | -1.31842 | 0.247535 | 0.863918 | DOWN | 242.5586 | 242.5568 | 242.5593 | 9.221317 | 9.095133 |
| 3547 | M271T12  | 1.611937 | 0.688795 | 1.347037 | 0.24755  | 0.863918 | UP   | 271.1149 | 271.1148 | 271.1151 | 12.45543 | 12.1516  |
| 3548 | M524T25_ | 10.93088 | -3.45034 | -1.35091 | 0.247631 | 0.863918 | DOWN | 524.366  | 524.3654 | 524.3665 | 24.8555  | 24.81133 |
| 3549 | M294T30_ | 2.052871 | 1.037643 | 1.24724  | 0.247682 | 0.863918 | UP   | 294.2414 | 294.2375 | 294.2488 | 29.84125 | 29.76183 |
| 3550 | M648T9_7 | 1.48031  | -0.5659  | -1.24711 | 0.247686 | 0.863918 | DOWN | 648.3357 | 648.3349 | 648.3365 | 9.314442 | 9.234417 |
| 3551 | M230T12_ | 3.860204 | 1.948677 | 1.351977 | 0.247739 | 0.863918 | UP   | 230.1749 | 230.1748 | 230.175  | 11.76178 | 11.72808 |
| 3552 | M341T10_ | 1.194948 | -0.25695 | -1.32697 | 0.247794 | 0.863918 | DOWN | 341.473  | 341.4727 | 341.4732 | 9.85045  | 9.73145  |
| 3553 | M294T22  | 86.08731 | 6.427729 | 1.351771 | 0.247832 | 0.863918 | UP   | 294.2425 | 294.2425 | 294.2425 | 21.905   | 21.89467 |
| 3554 | M399T43_ | 1.485613 | 0.571059 | 1.259409 | 0.247937 | 0.863918 | UP   | 399.2374 | 399.2372 | 399.2375 | 43.1     | 42.88383 |
| 3555 | M416T38  | 1.104998 | 0.144043 | 1.336839 | 0.247943 | 0.863918 | UP   | 416.2642 | 416.2639 | 416.2643 | 38.06483 | 37.93567 |
| 3556 | M727T11_ | 1.290527 | -0.36796 | -1.25415 | 0.247945 | 0.863918 | DOWN | 726.6632 | 726.6623 | 726.6638 | 10.86977 | 10.83572 |
| 3557 | M252T11_ | 2.566159 | -1.35961 | -1.25089 | 0.247946 | 0.863918 | DOWN | 252.4269 | 252.4265 | 252.4269 | 10.89808 | 10.8646  |
| 3558 | M221T10_ | 1.115197 | -0.1573  | -1.25616 | 0.24797  | 0.863918 | DOWN | 221.2298 | 221.2296 | 221.2301 | 9.924308 | 9.827283 |
| 3559 | M310T11_ | 1.510046 | 0.594592 | 1.332581 | 0.248014 | 0.863919 | UP   | 310.1625 | 310.1624 | 310.1651 | 10.7249  | 10.5191  |
| 3560 | M205T9_2 | 3.62865  | -1.85943 | -1.33715 | 0.248075 | 0.863919 | DOWN | 205.0444 | 205.038  | 205.0447 | 9.132467 | 8.532717 |
| 3561 | M454T11_ | 1.137391 | -0.18573 | -1.25765 | 0.248149 | 0.863919 | DOWN | 454.3457 | 454.3455 | 454.3463 | 11.10065 | 11.06392 |
| 3562 | M528T12  | 27.57019 | 4.785037 | 1.350107 | 0.248157 | 0.863919 | UP   | 528.364  | 528.3636 | 528.3642 | 11.76531 | 11.72885 |
| 3563 | M151T27  | 1.460033 | -0.546   | -1.31351 | 0.24827  | 0.863919 | DOWN | 151.0752 | 151.075  | 151.0752 | 27.25083 | 27.22733 |
| 3564 | M471T9_1 | 30.8102  | 4.945336 | 1.35016  | 0.248272 | 0.863919 | UP   | 471.427  | 471.4257 | 471.4332 | 9.11405  | 8.91235  |
| 3565 | M276T10_ | 5.447732 | -2.44566 | -1.34308 | 0.248273 | 0.863919 | DOWN | 276.4795 | 276.4793 | 276.48   | 9.872883 | 9.747533 |
| 3566 | M761T10_ | 1.262738 | -0.33655 | -1.27587 | 0.248316 | 0.863919 | DOWN | 760.964  | 760.9634 | 760.9643 | 10.16449 | 10.07528 |
| 3567 | M584T9_5 | 1.933262 | 0.951037 | 1.297515 | 0.248398 | 0.863919 | UP   | 584.1378 | 584.1304 | 584.1395 | 9.174967 | 9.06315  |
| 3568 | M417T41_ | 1.117098 | -0.15976 | -1.31359 | 0.2484   | 0.863919 | DOWN | 417.248  | 417.2478 | 417.2482 | 40.58233 | 40.525   |
| 3569 | M206T9_1 | 2.143048 | 1.099664 | 1.245018 | 0.24844  | 0.863919 | UP   | 205.5218 | 205.5214 | 205.5219 | 9.3494   | 9.250817 |

|      |          |          |          |          |          |          |      |          |          |          |          |          |
|------|----------|----------|----------|----------|----------|----------|------|----------|----------|----------|----------|----------|
| 3570 | M595T10_ | 1.126359 | -0.17167 | -1.24544 | 0.248546 | 0.863919 | DOWN | 595.4546 | 595.4542 | 595.455  | 9.916617 | 9.79535  |
| 3571 | M1342T10 | 1.619871 | -0.69588 | -1.29209 | 0.248586 | 0.863919 | DOWN | 1341.723 | 1341.721 | 1341.725 | 9.984083 | 9.885167 |
| 3572 | M1136T10 | 1.356257 | -0.43963 | -1.24761 | 0.248644 | 0.863919 | DOWN | 1136.481 | 1136.481 | 1136.483 | 9.565017 | 9.447617 |
| 3573 | M460T9_1 | 1.711649 | -0.77539 | -1.28107 | 0.248692 | 0.863919 | DOWN | 459.638  | 459.6368 | 459.6387 | 8.899467 | 8.7575   |
| 3574 | M312T10_ | 4.57381  | 2.193396 | 1.329991 | 0.248757 | 0.863919 | UP   | 312.2263 | 312.219  | 312.2266 | 9.847075 | 9.827283 |
| 3575 | M332T9_6 | 1.39475  | -0.48001 | -1.25179 | 0.248837 | 0.86392  | DOWN | 332.1002 | 332.1001 | 332.1005 | 9.29345  | 9.219483 |
| 3576 | M1417T10 | 1.200651 | -0.26382 | -1.25043 | 0.248837 | 0.86392  | DOWN | 1416.64  | 1416.637 | 1416.646 | 9.9014   | 9.79535  |
| 3577 | M1894T10 | 1.295514 | -0.37352 | -1.30211 | 0.248841 | 0.86392  | DOWN | 1894.186 | 1894.185 | 1894.187 | 9.830833 | 9.715683 |
| 3578 | M549T11_ | 1.322777 | -0.40357 | -1.24374 | 0.248871 | 0.86392  | DOWN | 549.3319 | 549.3312 | 549.3326 | 10.60347 | 10.55068 |
| 3579 | M348T9_3 | 1.465926 | -0.55181 | -1.24972 | 0.249008 | 0.86392  | DOWN | 347.9193 | 347.9151 | 347.9276 | 9.275183 | 9.0839   |
| 3580 | M334T9_7 | 1.313319 | -0.39322 | -1.28374 | 0.249017 | 0.86392  | DOWN | 334.3838 | 334.3831 | 334.384  | 8.90275  | 8.818733 |
| 3581 | M288T18_ | 226.3629 | 7.822494 | 1.347598 | 0.249055 | 0.86392  | UP   | 288.2532 | 288.2531 | 288.2532 | 17.94783 | 17.94383 |
| 3582 | M313T9_2 | 1.537707 | 0.62078  | 1.256056 | 0.249109 | 0.86392  | UP   | 312.5926 | 312.5925 | 312.5929 | 9.168067 | 9.1175   |
| 3583 | M520T36  | 1.123707 | 0.168266 | 1.288962 | 0.24911  | 0.86392  | UP   | 520.3113 | 520.3111 | 520.3114 | 36.12208 | 36.02067 |
| 3584 | M395T19_ | 1.137896 | -0.18637 | -1.24798 | 0.249121 | 0.86392  | DOWN | 395.1272 | 395.1271 | 395.1276 | 18.95683 | 18.951   |
| 3585 | M315T9_5 | 1.459241 | -0.54522 | -1.26998 | 0.249124 | 0.86392  | DOWN | 314.9109 | 314.9107 | 314.9117 | 8.872733 | 8.7875   |
| 3586 | M1211T10 | 1.356182 | -0.43955 | -1.25701 | 0.24925  | 0.86392  | DOWN | 1211.023 | 1211.022 | 1211.024 | 9.968992 | 9.859233 |
| 3587 | M432T9_1 | 1.286182 | -0.36309 | -1.25377 | 0.249305 | 0.86392  | DOWN | 432.3568 | 432.3565 | 432.357  | 9.3332   | 9.234417 |
| 3588 | M1876T10 | 1.264874 | -0.33899 | -1.25737 | 0.249308 | 0.86392  | DOWN | 1875.891 | 1875.888 | 1875.892 | 9.830283 | 9.715683 |
| 3589 | M683T11_ | 1.418198 | -0.50406 | -1.29062 | 0.249408 | 0.86392  | DOWN | 682.6841 | 682.6838 | 682.687  | 10.94208 | 10.89125 |
| 3590 | M464T26_ | 1.52787  | -0.61152 | -1.24368 | 0.249465 | 0.86392  | DOWN | 463.9913 | 463.991  | 463.9916 | 26.333   | 26.31767 |
| 3591 | M548T25  | 10.81183 | -3.43454 | -1.34414 | 0.249513 | 0.86392  | DOWN | 547.8538 | 547.8535 | 547.8549 | 24.912   | 24.87067 |
| 3592 | M356T10_ | 1.495631 | 0.580754 | 1.274194 | 0.249542 | 0.863921 | UP   | 355.7717 | 355.7711 | 355.7718 | 9.840617 | 9.73145  |
| 3593 | M242T10_ | 1.496748 | -0.58183 | -1.24165 | 0.249693 | 0.863921 | DOWN | 242.3728 | 242.372  | 242.3738 | 9.8445   | 9.830083 |
| 3594 | M157T9_1 | 1.650921 | -0.72327 | -1.28135 | 0.249699 | 0.863921 | DOWN | 156.8416 | 156.8414 | 156.8419 | 9.317    | 9.24215  |
| 3595 | M173T9_5 | 1.389762 | -0.47484 | -1.28103 | 0.249903 | 0.863921 | DOWN | 173.2334 | 173.2329 | 173.2338 | 9.355917 | 9.245983 |
| 3596 | M369T11_ | 1.108792 | -0.14899 | -1.24522 | 0.249925 | 0.863921 | DOWN | 369.2381 | 369.238  | 369.2383 | 10.90659 | 10.89355 |
| 3597 | M221T28  | 1.174863 | -0.23249 | -1.25856 | 0.249984 | 0.863921 | DOWN | 221.117  | 221.1169 | 221.1172 | 27.95175 | 27.9235  |
| 3598 | M316T23_ | 73.26382 | 6.195029 | 1.344365 | 0.250007 | 0.863921 | UP   | 316.2844 | 316.2843 | 316.2845 | 23.27583 | 23.24867 |
| 3599 | M311T11_ | 1.657519 | 0.729025 | 1.305529 | 0.25001  | 0.863921 | UP   | 311.1655 | 311.1653 | 311.1661 | 10.73762 | 10.6825  |
| 3600 | M212T12_ | 18.01342 | 4.171    | 1.344021 | 0.250092 | 0.863921 | UP   | 212.1644 | 212.1643 | 212.1644 | 11.74021 | 11.72808 |
| 3601 | M982T11  | 1.523113 | -0.60702 | -1.27551 | 0.250187 | 0.863921 | DOWN | 982.472  | 982.4716 | 982.4725 | 10.58862 | 10.51422 |
| 3602 | M238T27  | 1.658614 | -0.72998 | -1.31149 | 0.250201 | 0.863921 | DOWN | 238.1799 | 238.1798 | 238.1801 | 27.24633 | 27.22933 |
| 3603 | M245T9_6 | 1.390592 | -0.4757  | -1.24922 | 0.250275 | 0.863921 | DOWN | 245.3252 | 245.3246 | 245.3257 | 9.277667 | 9.229717 |
| 3604 | M340T11_ | 1.197908 | -0.26052 | -1.23904 | 0.250449 | 0.863922 | DOWN | 340.2593 | 340.2592 | 340.2594 | 11.03488 | 11.00892 |

|      |          |          |          |          |          |          |      |          |          |          |          |          |
|------|----------|----------|----------|----------|----------|----------|------|----------|----------|----------|----------|----------|
| 3605 | M1002T10 | 3.139322 | 1.650453 | 1.305548 | 0.250509 | 0.863922 | UP   | 1001.851 | 1001.849 | 1001.852 | 9.930933 | 9.8914   |
| 3606 | M1858T10 | 1.143677 | -0.19368 | -1.32723 | 0.250571 | 0.863922 | DOWN | 1858.263 | 1858.262 | 1858.264 | 9.82645  | 9.728083 |
| 3607 | M539T10_ | 1.167837 | -0.22384 | -1.30572 | 0.250616 | 0.863922 | DOWN | 538.878  | 538.8773 | 538.8791 | 9.97155  | 9.859233 |
| 3608 | M334T10_ | 4.127901 | 2.045408 | 1.338397 | 0.250621 | 0.863922 | UP   | 333.938  | 333.9295 | 333.9385 | 9.880683 | 9.772883 |
| 3609 | M233T10_ | 1.383617 | -0.46844 | -1.27179 | 0.250649 | 0.863922 | DOWN | 233.3566 | 233.3558 | 233.3571 | 9.816167 | 9.696683 |
| 3610 | M259T11_ | 1.116044 | -0.15839 | -1.24274 | 0.250709 | 0.863922 | DOWN | 259.2014 | 259.2013 | 259.2015 | 10.90659 | 10.89355 |
| 3611 | M850T10_ | 1.127713 | -0.1734  | -1.25042 | 0.250757 | 0.863922 | DOWN | 850.2272 | 850.2267 | 850.2277 | 9.934533 | 9.827283 |
| 3612 | M446T25  | 1.407783 | -0.49342 | -1.23845 | 0.250806 | 0.863922 | DOWN | 445.8239 | 445.8239 | 445.824  | 25.40283 | 25.33283 |
| 3613 | M598T10_ | 1.586152 | 0.665531 | 1.287635 | 0.250858 | 0.863922 | UP   | 598.3652 | 598.3617 | 598.3656 | 9.947667 | 9.843367 |
| 3614 | M350T9_2 | 1.375274 | -0.45972 | -1.23852 | 0.25087  | 0.863922 | DOWN | 349.7661 | 349.7659 | 349.7663 | 9.314442 | 9.234417 |
| 3615 | M456T11_ | 1.284798 | -0.36154 | -1.23959 | 0.250874 | 0.863922 | DOWN | 455.7123 | 455.7109 | 455.7146 | 10.90785 | 10.8926  |
| 3616 | M332T44_ | 1.368772 | -0.45288 | -1.24101 | 0.250899 | 0.863922 | DOWN | 332.1703 | 332.1702 | 332.1704 | 44.40133 | 44.207   |
| 3617 | M341T10_ | 1.194266 | -0.25612 | -1.31749 | 0.250969 | 0.863922 | DOWN | 341.407  | 341.4049 | 341.4073 | 9.823217 | 9.445217 |
| 3618 | M387T16_ | 1.911925 | -0.93503 | -1.33255 | 0.251005 | 0.863922 | DOWN | 387.2487 | 387.2485 | 387.2487 | 16.49057 | 16.44663 |
| 3619 | M664T10_ | 1.794798 | 0.843822 | 1.300945 | 0.251048 | 0.863922 | UP   | 664.4445 | 664.4432 | 664.446  | 9.853633 | 9.7124   |
| 3620 | M681T10_ | 1.389108 | 0.474159 | 1.251017 | 0.251077 | 0.863922 | UP   | 680.8383 | 680.8377 | 680.8386 | 9.94405  | 9.843367 |
| 3621 | M625T9   | 1.500712 | -0.58565 | -1.29328 | 0.251099 | 0.863923 | DOWN | 624.7074 | 624.7064 | 624.708  | 9.3332   | 9.234417 |
| 3622 | M521T9_6 | 1.233592 | -0.30287 | -1.24067 | 0.251102 | 0.863923 | DOWN | 521.0032 | 521.0023 | 521.0046 | 9.330642 | 9.129317 |
| 3623 | M699T9_3 | 1.255254 | -0.32798 | -1.29185 | 0.251128 | 0.863923 | DOWN | 699.3057 | 699.3055 | 699.3061 | 9.314442 | 9.234417 |
| 3624 | M325T10_ | 1.182365 | -0.24168 | -1.33662 | 0.251236 | 0.863923 | DOWN | 325.349  | 325.3487 | 325.3504 | 9.8207   | 9.640367 |
| 3625 | M174T10_ | 1.306776 | -0.38601 | -1.24929 | 0.251254 | 0.863923 | DOWN | 174.1278 | 174.1273 | 174.128  | 9.915583 | 9.811217 |
| 3626 | M166T10_ | 2.094924 | 1.066898 | 1.331704 | 0.251474 | 0.863923 | UP   | 166.1228 | 166.1225 | 166.1229 | 9.946467 | 9.673333 |
| 3627 | M1758T9  | 1.236948 | -0.30678 | -1.25008 | 0.251477 | 0.863923 | DOWN | 1757.76  | 1757.758 | 1757.762 | 9.280992 | 9.129317 |
| 3628 | M372T9_1 | 1.561528 | -0.64296 | -1.24253 | 0.251629 | 0.863923 | DOWN | 371.7284 | 371.7269 | 371.7287 | 8.97715  | 8.90515  |
| 3629 | M204T10_ | 1.199385 | -0.26229 | -1.28788 | 0.251655 | 0.863923 | DOWN | 203.722  | 203.7219 | 203.7221 | 9.850858 | 9.73145  |
| 3630 | M278T22  | 2.476894 | 1.308532 | 1.238382 | 0.251667 | 0.863923 | UP   | 278.1859 | 278.1857 | 278.1863 | 21.59525 | 21.578   |
| 3631 | M388T11_ | 1.262834 | 0.336665 | 1.25577  | 0.251677 | 0.863923 | UP   | 388.1695 | 388.1693 | 388.1755 | 10.91987 | 10.8914  |
| 3632 | M163T31  | 1.897481 | -0.92409 | -1.32803 | 0.251696 | 0.863923 | DOWN | 163.0751 | 163.0751 | 163.0752 | 31.014   | 31.0025  |
| 3633 | M202T11_ | 2.325642 | 1.217629 | 1.332124 | 0.251727 | 0.863923 | UP   | 202.2282 | 202.2281 | 202.2284 | 10.892   | 10.87708 |
| 3634 | M278T10_ | 1.190821 | -0.25196 | -1.25718 | 0.251731 | 0.863923 | DOWN | 277.7932 | 277.7929 | 277.7937 | 9.959533 | 9.859233 |
| 3635 | M1983T10 | 1.415123 | -0.50093 | -1.30368 | 0.251739 | 0.863923 | DOWN | 1982.687 | 1982.686 | 1982.687 | 9.956417 | 9.853533 |
| 3636 | M294T21_ | 18.086   | 4.176802 | 1.338488 | 0.25175  | 0.863923 | UP   | 294.2426 | 294.2423 | 294.2427 | 20.85217 | 20.84967 |
| 3637 | M329T18  | 1.424008 | -0.50996 | -1.23543 | 0.251762 | 0.863923 | DOWN | 328.7266 | 328.7266 | 328.7267 | 18.43433 | 18.40733 |
| 3638 | M604T9   | 1.44025  | -0.52632 | -1.2353  | 0.251765 | 0.863923 | DOWN | 604.2495 | 604.2486 | 604.2498 | 9.1445   | 9.142767 |
| 3639 | M221T10_ | 1.111171 | -0.15208 | -1.24336 | 0.251806 | 0.863923 | DOWN | 220.9675 | 220.9674 | 220.9678 | 9.924308 | 9.827283 |



|      |          |          |          |          |          |          |      |          |          |          |          |          |
|------|----------|----------|----------|----------|----------|----------|------|----------|----------|----------|----------|----------|
| 3640 | M729T10_ | 1.76724  | -0.8215  | -1.23574 | 0.251807 | 0.863923 | DOWN | 728.7427 | 728.7423 | 728.7439 | 9.9      | 9.827283 |
| 3641 | M799T11  | 1.410413 | -0.49612 | -1.23801 | 0.251882 | 0.863924 | DOWN | 798.5483 | 798.5479 | 798.5485 | 11.12052 | 11.09303 |
| 3642 | M378T10_ | 1.166454 | -0.22213 | -1.23838 | 0.251915 | 0.863924 | DOWN | 377.7619 | 377.7616 | 377.7626 | 9.923542 | 9.811217 |
| 3643 | M378T9_6 | 1.514124 | -0.59848 | -1.3105  | 0.251923 | 0.863924 | DOWN | 377.8657 | 377.864  | 377.868  | 9.174967 | 9.1428   |
| 3644 | M478T13_ | 1.57063  | 0.651344 | 1.319169 | 0.25194  | 0.863924 | UP   | 478.3244 | 478.3241 | 478.3249 | 13.24463 | 13.2163  |
| 3645 | M366T9_1 | 1.998115 | -0.99864 | -1.24801 | 0.251973 | 0.863924 | DOWN | 365.5216 | 365.5095 | 365.5223 | 9.31485  | 9.129317 |
| 3646 | M375T11_ | 1.355682 | -0.43902 | -1.245   | 0.251979 | 0.863924 | DOWN | 374.8958 | 374.8951 | 374.896  | 10.8937  | 10.8214  |
| 3647 | M313T9_1 | 1.525812 | -0.60958 | -1.2481  | 0.25203  | 0.863924 | DOWN | 313.3545 | 313.3541 | 313.3552 | 8.8109   | 8.772383 |
| 3648 | M341T11_ | 1.190184 | 0.251185 | 1.246795 | 0.252062 | 0.863924 | UP   | 341.0037 | 341.0035 | 341.0039 | 10.90548 | 10.879   |
| 3649 | M522T13_ | 1.143083 | -0.19293 | -1.24553 | 0.252078 | 0.863924 | DOWN | 522.4089 | 522.4087 | 522.4094 | 12.63073 | 12.61638 |
| 3650 | M518T41_ | 1.229089 | 0.297589 | 1.234357 | 0.252102 | 0.863924 | UP   | 518.2956 | 518.2953 | 518.2959 | 41.18658 | 41.014   |
| 3651 | M462T10_ | 1.487594 | -0.57298 | -1.26457 | 0.252175 | 0.863924 | DOWN | 462.4503 | 462.45   | 462.4517 | 9.825492 | 9.699733 |
| 3652 | M295T9_5 | 1.251755 | -0.32395 | -1.23963 | 0.252205 | 0.863924 | DOWN | 294.8611 | 294.8608 | 294.8613 | 8.977958 | 8.89395  |
| 3653 | M1929T10 | 2.356314 | 1.236532 | 1.321974 | 0.252329 | 0.863924 | UP   | 1928.564 | 1928.562 | 1928.567 | 9.872933 | 9.747533 |
| 3654 | M837T9   | 1.817279 | 0.86178  | 1.237439 | 0.252402 | 0.863924 | UP   | 836.9072 | 836.9032 | 836.9081 | 9.314442 | 9.219483 |
| 3655 | M376T29  | 1.191356 | 0.252604 | 1.233192 | 0.252513 | 0.863924 | UP   | 376.3418 | 376.3417 | 376.3419 | 29.3515  | 29.33367 |
| 3656 | M920T11_ | 1.43472  | -0.52077 | -1.29709 | 0.252533 | 0.863924 | DOWN | 919.5099 | 919.5094 | 919.5104 | 10.53152 | 10.52897 |
| 3657 | M829T10_ | 3.757333 | 1.909709 | 1.317446 | 0.252549 | 0.863924 | UP   | 829.026  | 829.0168 | 829.0265 | 9.923067 | 9.840617 |
| 3658 | M288T23_ | 1.7517   | 0.808756 | 1.236546 | 0.252557 | 0.863924 | UP   | 288.4391 | 288.4317 | 288.4453 | 22.92167 | 22.85683 |
| 3659 | M593T9_3 | 2.491874 | -1.31723 | -1.24797 | 0.252598 | 0.863924 | DOWN | 593.2524 | 593.252  | 593.2532 | 9.25395  | 9.234417 |
| 3660 | M819T10_ | 1.314576 | -0.3946  | -1.26776 | 0.252598 | 0.863924 | DOWN | 818.6629 | 818.6616 | 818.6636 | 9.931875 | 9.827283 |
| 3661 | M259T9_2 | 3.503499 | 1.808796 | 1.27715  | 0.25262  | 0.863924 | UP   | 259.1814 | 259.18   | 259.1819 | 8.809875 | 8.749717 |
| 3662 | M285T9_3 | 1.431126 | -0.51715 | -1.24548 | 0.252625 | 0.863924 | DOWN | 284.739  | 284.7384 | 284.7392 | 9.3332   | 9.234417 |
| 3663 | M204T10_ | 1.200557 | -0.2637  | -1.28287 | 0.252872 | 0.863925 | DOWN | 203.9541 | 203.954  | 203.9543 | 9.850858 | 9.73145  |
| 3664 | M592T10_ | 1.177254 | -0.23543 | -1.2656  | 0.252878 | 0.863925 | DOWN | 592.058  | 592.0575 | 592.0584 | 9.930142 | 9.811217 |
| 3665 | M349T10_ | 1.280493 | -0.3567  | -1.28383 | 0.252974 | 0.863925 | DOWN | 348.8804 | 348.8801 | 348.8807 | 9.830283 | 9.715683 |
| 3666 | M194T9_1 | 2.341736 | 1.227579 | 1.307185 | 0.253023 | 0.863925 | UP   | 194.0337 | 194.0332 | 194.0349 | 9.18975  | 9.110833 |
| 3667 | M214T9_1 | 1.695895 | -0.76205 | -1.2517  | 0.25309  | 0.863925 | DOWN | 214.4135 | 214.413  | 214.4148 | 9.25825  | 9.132267 |
| 3668 | M1966T10 | 1.223999 | -0.2916  | -1.27076 | 0.25317  | 0.863925 | DOWN | 1966.188 | 1966.187 | 1966.193 | 9.8397   | 9.715683 |
| 3669 | M460T40_ | 1.308524 | -0.38794 | -1.24889 | 0.253202 | 0.863925 | DOWN | 460.2901 | 460.29   | 460.2904 | 39.93517 | 39.8485  |
| 3670 | M275T11_ | 1.384702 | -0.46958 | -1.25718 | 0.253219 | 0.863925 | DOWN | 274.5279 | 274.5275 | 274.5283 | 10.92731 | 10.873   |
| 3671 | M1136T10 | 1.595452 | -0.67397 | -1.26634 | 0.253275 | 0.863925 | DOWN | 1136.437 | 1136.436 | 1136.439 | 9.970617 | 9.885167 |
| 3672 | M708T10_ | 1.243331 | 0.31421  | 1.232982 | 0.253282 | 0.863925 | UP   | 708.3963 | 708.3952 | 708.3972 | 10.28195 | 10.18238 |
| 3673 | M295T25_ | 1.43126  | 0.517286 | 1.234855 | 0.253429 | 0.863925 | UP   | 295.1178 | 295.1175 | 295.119  | 24.59467 | 24.5795  |
| 3674 | M217T9_4 | 1.792763 | 0.842185 | 1.301176 | 0.253496 | 0.863926 | UP   | 217.3392 | 217.3391 | 217.3393 | 9.411025 | 9.297883 |

|      |          |          |          |          |          |          |      |          |          |          |          |          |
|------|----------|----------|----------|----------|----------|----------|------|----------|----------|----------|----------|----------|
| 3675 | M484T22  | 1.36779  | -0.45185 | -1.25187 | 0.253573 | 0.863926 | DOWN | 484.3473 | 484.3466 | 484.3477 | 21.52917 | 21.508   |
| 3676 | M529T18  | 1.923489 | 0.943726 | 1.330506 | 0.253615 | 0.863926 | UP   | 529.2405 | 529.2332 | 529.2409 | 17.8785  | 17.84133 |
| 3677 | M275T18  | 1.685763 | -0.7534  | -1.31779 | 0.253698 | 0.863926 | DOWN | 275.1865 | 275.1863 | 275.1865 | 18.04033 | 18.02733 |
| 3678 | M264T11_ | 1.858103 | 0.893831 | 1.249169 | 0.253778 | 0.863926 | UP   | 264.3301 | 264.3299 | 264.3304 | 10.90343 | 10.8646  |
| 3679 | M338T9_2 | 1.312428 | -0.39224 | -1.25256 | 0.253779 | 0.863926 | DOWN | 337.7268 | 337.7267 | 337.7272 | 9.492792 | 9.40135  |
| 3680 | M337T9_7 | 1.304698 | -0.38372 | -1.23067 | 0.253896 | 0.863926 | DOWN | 336.8686 | 336.8685 | 336.8688 | 9.285867 | 9.129317 |
| 3681 | M225T42_ | 1.205231 | -0.26931 | -1.25733 | 0.253911 | 0.863926 | DOWN | 225.1118 | 225.1118 | 225.112  | 42.00658 | 41.87717 |
| 3682 | M1269T10 | 1.650082 | 0.722538 | 1.264503 | 0.25395  | 0.863926 | UP   | 1269.246 | 1269.245 | 1269.248 | 9.977442 | 9.859233 |
| 3683 | M188T9_5 | 2.219732 | -1.15039 | -1.23058 | 0.253951 | 0.863926 | DOWN | 187.9229 | 187.9227 | 187.9236 | 9.245983 | 9.132267 |
| 3684 | M869T11  | 1.4303   | 0.516318 | 1.236148 | 0.253998 | 0.863926 | UP   | 869.4783 | 869.472  | 869.4823 | 10.8914  | 10.72662 |
| 3685 | M236T10_ | 128.4862 | 7.00547  | 1.330816 | 0.254041 | 0.863926 | UP   | 236.1256 | 236.1253 | 236.1257 | 10.21867 | 10.2155  |
| 3686 | M196T9_1 | 1.344499 | -0.42707 | -1.22991 | 0.254089 | 0.863926 | DOWN | 195.6074 | 195.607  | 195.6084 | 9.365833 | 9.234417 |
| 3687 | M378T25_ | 1.700358 | 0.765838 | 1.28224  | 0.254183 | 0.863926 | UP   | 378.212  | 378.2118 | 378.212  | 24.77525 | 24.66033 |
| 3688 | M345T42  | 1.27598  | -0.35161 | -1.23109 | 0.254193 | 0.863926 | DOWN | 345.1905 | 345.1903 | 345.1908 | 42.09283 | 41.91883 |
| 3689 | M700T10_ | 1.198207 | -0.26088 | -1.23031 | 0.254411 | 0.863927 | DOWN | 699.5839 | 699.5836 | 699.5841 | 9.830083 | 9.743667 |
| 3690 | M239T27  | 2.064424 | -1.04574 | -1.3156  | 0.254512 | 0.863927 | DOWN | 239.1832 | 239.183  | 239.1834 | 27.25067 | 27.231   |
| 3691 | M707T10_ | 2.3496   | 1.232415 | 1.29608  | 0.254629 | 0.863927 | UP   | 706.9141 | 706.9133 | 706.9161 | 9.918833 | 9.736117 |
| 3692 | M169T10_ | 1.89806  | 0.924525 | 1.286903 | 0.254647 | 0.863927 | UP   | 168.7575 | 168.7574 | 168.7575 | 9.968992 | 9.859233 |
| 3693 | M969T10  | 1.435531 | -0.52158 | -1.22761 | 0.254718 | 0.863927 | DOWN | 969.4598 | 969.4593 | 969.46   | 10.08007 | 10.02755 |
| 3694 | M404T9_1 | 1.250131 | -0.32208 | -1.26979 | 0.254863 | 0.863927 | DOWN | 403.5844 | 403.5842 | 403.5848 | 9.449367 | 9.355317 |
| 3695 | M415T43_ | 1.376696 | 0.46121  | 1.249974 | 0.254921 | 0.863927 | UP   | 415.2322 | 415.2321 | 415.2323 | 43.41383 | 43.2005  |
| 3696 | M162T9_2 | 1.265874 | -0.34013 | -1.23974 | 0.255092 | 0.863928 | DOWN | 161.6749 | 161.6745 | 161.6753 | 9.314442 | 9.234417 |
| 3697 | M263T10_ | 1.534273 | -0.61756 | -1.25081 | 0.255156 | 0.863928 | DOWN | 262.6534 | 262.6534 | 262.6534 | 9.512983 | 9.447983 |
| 3698 | M512T10_ | 1.323699 | -0.40457 | -1.30797 | 0.255182 | 0.863928 | DOWN | 511.7485 | 511.7483 | 511.7488 | 9.914217 | 9.811217 |
| 3699 | M461T41_ | 1.376639 | -0.46115 | -1.30218 | 0.25525  | 0.863928 | DOWN | 461.2741 | 461.274  | 461.2744 | 40.9565  | 40.8415  |
| 3700 | M520T45_ | 2.503947 | 1.324204 | 1.323503 | 0.255261 | 0.863928 | UP   | 520.2748 | 520.2746 | 520.2751 | 44.87567 | 44.6385  |
| 3701 | M404T10_ | 1.159497 | -0.2135  | -1.22737 | 0.255373 | 0.863928 | DOWN | 404.2432 | 404.2426 | 404.2435 | 10.43278 | 10.39298 |
| 3702 | M185T10_ | 3.531254 | 1.82018  | 1.318505 | 0.255609 | 0.863928 | UP   | 185.1147 | 185.1146 | 185.1164 | 9.673392 | 9.58735  |
| 3703 | M873T10_ | 1.37394  | -0.45832 | -1.27095 | 0.255663 | 0.863928 | DOWN | 873.0061 | 873.005  | 873.0075 | 10.41657 | 10.36157 |
| 3704 | M334T10_ | 1.271725 | -0.34679 | -1.29593 | 0.255727 | 0.863928 | DOWN | 333.6248 | 333.6245 | 333.6255 | 9.830783 | 9.715683 |
| 3705 | M558T10_ | 1.662062 | 0.732974 | 1.310198 | 0.255824 | 0.863928 | UP   | 558.2972 | 558.2951 | 558.2976 | 9.951283 | 9.872067 |
| 3706 | M314T32  | 4.036009 | 2.012929 | 1.322779 | 0.255841 | 0.863929 | UP   | 314.1467 | 314.1464 | 314.147  | 32.08483 | 32.07    |
| 3707 | M372T10_ | 1.510447 | 0.594976 | 1.26998  | 0.256064 | 0.863929 | UP   | 371.6305 | 371.6303 | 371.631  | 9.818442 | 9.715683 |
| 3708 | M199T10_ | 10.27752 | 3.36142  | 1.323617 | 0.25607  | 0.863929 | UP   | 199.1521 | 199.152  | 199.1522 | 10.47939 | 10.45607 |
| 3709 | M861T9   | 1.677944 | -0.74669 | -1.22597 | 0.256098 | 0.863929 | DOWN | 861.1966 | 861.1927 | 861.1989 | 9.328967 | 9.130683 |

|      |          |          |          |          |          |          |      |          |          |          |          |          |
|------|----------|----------|----------|----------|----------|----------|------|----------|----------|----------|----------|----------|
| 3710 | M414T9_1 | 1.447821 | -0.53388 | -1.22305 | 0.256137 | 0.863929 | DOWN | 413.9676 | 413.9672 | 413.9679 | 9.3494   | 9.22495  |
| 3711 | M365T11_ | 7.003069 | 2.807987 | 1.322996 | 0.256183 | 0.863929 | UP   | 365.2318 | 365.231  | 365.2324 | 10.55857 | 10.47685 |
| 3712 | M700T9_3 | 1.470436 | -0.55624 | -1.23905 | 0.256291 | 0.863929 | DOWN | 700.4045 | 700.4037 | 700.4053 | 9.288458 | 9.129317 |
| 3713 | M624T12_ | 1.308052 | -0.38742 | -1.23772 | 0.256383 | 0.863929 | DOWN | 623.5301 | 623.5291 | 623.5307 | 12.4422  | 12.42978 |
| 3714 | M555T10_ | 1.42988  | 0.515894 | 1.275925 | 0.256432 | 0.863929 | UP   | 555.0354 | 555.035  | 555.0355 | 9.932    | 9.843367 |
| 3715 | M333T10_ | 1.180973 | -0.23998 | -1.27916 | 0.256448 | 0.863929 | DOWN | 333.4675 | 333.4672 | 333.4681 | 9.8348   | 9.715683 |
| 3716 | M201T10_ | 1.187791 | -0.24828 | -1.2364  | 0.256552 | 0.863929 | DOWN | 200.8573 | 200.8571 | 200.8574 | 9.830283 | 9.715683 |
| 3717 | M762T16_ | 1.160657 | -0.21494 | -1.22394 | 0.256584 | 0.863929 | DOWN | 761.5311 | 761.5306 | 761.5317 | 15.52669 | 15.51198 |
| 3718 | M680T24  | 1.406667 | -0.49228 | -1.25651 | 0.256603 | 0.863929 | DOWN | 679.5112 | 679.5111 | 679.5113 | 23.89583 | 23.86417 |
| 3719 | M353T9_3 | 1.367067 | -0.45108 | -1.31133 | 0.256655 | 0.86393  | DOWN | 353.4123 | 353.412  | 353.4127 | 9.485058 | 9.40135  |
| 3720 | M923T10_ | 1.149966 | -0.20159 | -1.22517 | 0.256657 | 0.86393  | DOWN | 922.7073 | 922.7067 | 922.7078 | 9.895967 | 9.79535  |
| 3721 | M324T10_ | 1.22759  | -0.29583 | -1.31332 | 0.256764 | 0.86393  | DOWN | 324.2202 | 324.2201 | 324.2204 | 9.8207   | 9.715683 |
| 3722 | M553T17  | 1.320872 | 0.401491 | 1.224677 | 0.256895 | 0.86393  | UP   | 553.4034 | 553.4023 | 553.4046 | 16.66588 | 16.60705 |
| 3723 | M491T28  | 1.261433 | -0.33506 | -1.22101 | 0.256908 | 0.86393  | DOWN | 491.3416 | 491.3414 | 491.3419 | 28.26575 | 28.24533 |
| 3724 | M845T10_ | 1.108421 | -0.14851 | -1.22258 | 0.256921 | 0.86393  | DOWN | 845.016  | 845.0155 | 845.0163 | 9.930908 | 9.827283 |
| 3725 | M888T10_ | 1.224632 | -0.29235 | -1.23289 | 0.256936 | 0.86393  | DOWN | 887.5463 | 887.5445 | 887.5479 | 9.950258 | 9.843367 |
| 3726 | M915T10  | 1.824334 | 0.86737  | 1.262327 | 0.256974 | 0.86393  | UP   | 915.1156 | 915.1136 | 915.1161 | 9.952017 | 9.827283 |
| 3727 | M402T11_ | 1.972909 | -0.98032 | -1.2237  | 0.25705  | 0.86393  | DOWN | 402.3301 | 402.3299 | 402.3404 | 10.90359 | 10.83393 |
| 3728 | M431T20_ | 1.167606 | -0.22355 | -1.22069 | 0.25705  | 0.86393  | DOWN | 431.2665 | 431.2649 | 431.2668 | 20.24533 | 19.95583 |
| 3729 | M432T9_1 | 1.269718 | -0.34451 | -1.26509 | 0.257103 | 0.86393  | DOWN | 431.6969 | 431.6964 | 431.698  | 9.258533 | 9.12675  |
| 3730 | M453T7_1 | 1.373064 | -0.4574  | -1.25762 | 0.257111 | 0.86393  | DOWN | 453.209  | 453.2089 | 453.2092 | 7.365858 | 7.288367 |
| 3731 | M385T10_ | 1.476084 | -0.56178 | -1.26746 | 0.257131 | 0.86393  | DOWN | 384.5308 | 384.5307 | 384.5312 | 9.907858 | 9.806367 |
| 3732 | M223T10_ | 1.25547  | 0.328228 | 1.247375 | 0.257154 | 0.86393  | UP   | 223.2712 | 223.2711 | 223.2715 | 9.894875 | 9.779267 |
| 3733 | M418T11_ | 5.135658 | -2.36055 | -1.31996 | 0.257238 | 0.86393  | DOWN | 418.2336 | 418.2332 | 418.2341 | 10.57644 | 10.53485 |
| 3734 | M209T10_ | 1.230658 | -0.29943 | -1.22063 | 0.257265 | 0.86393  | DOWN | 209.1276 | 209.1197 | 209.1277 | 9.859667 | 9.842    |
| 3735 | M690T23  | 1.368517 | -0.45261 | -1.29405 | 0.257287 | 0.86393  | DOWN | 690.463  | 690.4618 | 690.4636 | 23.01608 | 22.987   |
| 3736 | M429T9_9 | 1.633507 | -0.70797 | -1.21966 | 0.257327 | 0.86393  | DOWN | 429.4659 | 429.464  | 429.4662 | 9.311525 | 9.1445   |
| 3737 | M617T10_ | 1.428409 | 0.514409 | 1.289526 | 0.257331 | 0.86393  | UP   | 617.4369 | 617.4365 | 617.4377 | 9.933017 | 9.91765  |
| 3738 | M408T9_6 | 1.312595 | -0.39242 | -1.26453 | 0.257367 | 0.86393  | DOWN | 408.1467 | 408.1465 | 408.1467 | 9.494433 | 9.416817 |
| 3739 | M328T9_2 | 1.324938 | -0.40592 | -1.21931 | 0.257454 | 0.86393  | DOWN | 327.8985 | 327.8984 | 327.8987 | 9.285867 | 9.129317 |
| 3740 | M554T10_ | 1.316842 | -0.39708 | -1.22082 | 0.25746  | 0.863931 | DOWN | 553.6241 | 553.6234 | 553.6245 | 9.967367 | 9.859233 |
| 3741 | M229T10_ | 1.223425 | -0.29093 | -1.25381 | 0.257478 | 0.863931 | DOWN | 229.3442 | 229.344  | 229.3442 | 9.902008 | 9.79535  |
| 3742 | M295T10_ | 1.262423 | -0.3362  | -1.27055 | 0.257482 | 0.863931 | DOWN | 295.3789 | 295.3786 | 295.3792 | 9.902008 | 9.79535  |
| 3743 | M662T10_ | 1.340294 | -0.42255 | -1.2205  | 0.257498 | 0.863931 | DOWN | 662.2591 | 662.2587 | 662.2595 | 9.83535  | 9.728083 |
| 3744 | M417T44_ | 1.988341 | 0.991566 | 1.291219 | 0.257525 | 0.863931 | UP   | 417.2479 | 417.2478 | 417.248  | 43.74708 | 43.61767 |

|      |          |          |          |          |          |          |      |          |          |          |          |          |
|------|----------|----------|----------|----------|----------|----------|------|----------|----------|----------|----------|----------|
| 3745 | M270T11_ | 3.771931 | 1.915303 | 1.31669  | 0.257594 | 0.863931 | UP   | 270.0119 | 270.0117 | 270.0123 | 10.93468 | 10.873   |
| 3746 | M1203T10 | 2.034959 | 1.024999 | 1.276132 | 0.257597 | 0.863931 | UP   | 1202.776 | 1202.774 | 1202.778 | 9.743767 | 9.636483 |
| 3747 | M686T9_3 | 1.564019 | -0.64526 | -1.22847 | 0.257623 | 0.863931 | DOWN | 686.1984 | 686.1982 | 686.1989 | 9.296458 | 9.234417 |
| 3748 | M228T9_5 | 1.59533  | -0.67385 | -1.24703 | 0.257648 | 0.863931 | DOWN | 227.8351 | 227.8327 | 227.839  | 9.2946   | 9.132267 |
| 3749 | M786T19  | 1.276422 | -0.3521  | -1.23653 | 0.257655 | 0.863931 | DOWN | 785.6155 | 785.6148 | 785.6161 | 18.96567 | 18.943   |
| 3750 | M441T11_ | 1.379722 | 0.464378 | 1.241168 | 0.257659 | 0.863931 | UP   | 441.2175 | 441.2166 | 441.2177 | 10.92425 | 10.86253 |
| 3751 | M161T9_3 | 1.389504 | -0.47457 | -1.22808 | 0.257703 | 0.863931 | DOWN | 161.2638 | 161.2634 | 161.2642 | 9.3332   | 9.234417 |
| 3752 | M628T10_ | 1.301049 | -0.37968 | -1.22281 | 0.257795 | 0.863931 | DOWN | 627.8852 | 627.8847 | 627.8864 | 10.11527 | 10.06242 |
| 3753 | M866T15  | 1.450138 | -0.53619 | -1.23289 | 0.257921 | 0.863931 | DOWN | 866.4599 | 866.459  | 866.4618 | 14.79458 | 14.75145 |
| 3754 | M352T9_4 | 1.45058  | 0.53663  | 1.229906 | 0.257951 | 0.863931 | UP   | 352.0465 | 352.0459 | 352.0472 | 9.329642 | 9.280767 |
| 3755 | M278T11_ | 1.355356 | 0.438672 | 1.254836 | 0.258028 | 0.863931 | UP   | 277.8641 | 277.8637 | 277.8643 | 10.87706 | 10.82935 |
| 3756 | M154T10_ | 1.732945 | -0.79323 | -1.25407 | 0.258049 | 0.863931 | DOWN | 154.4061 | 154.406  | 154.4061 | 9.958617 | 9.869467 |
| 3757 | M457T9_1 | 1.543056 | 0.625791 | 1.268318 | 0.25819  | 0.863931 | UP   | 456.532  | 456.5311 | 456.5381 | 9.206692 | 9.111033 |
| 3758 | M973T10  | 1.259013 | -0.33229 | -1.21725 | 0.258208 | 0.863931 | DOWN | 973.4116 | 973.4114 | 973.4121 | 10.1007  | 10.0118  |
| 3759 | M231T24  | 1.769979 | 0.823732 | 1.241176 | 0.258232 | 0.863931 | UP   | 231.2508 | 231.2505 | 231.251  | 24.04183 | 24.023   |
| 3760 | M423T10_ | 2.110746 | 1.077753 | 1.304909 | 0.258248 | 0.863931 | UP   | 422.8543 | 422.8542 | 422.8549 | 9.979667 | 9.8753   |
| 3761 | M350T9_1 | 1.393793 | -0.47902 | -1.24328 | 0.25826  | 0.863931 | DOWN | 350.4458 | 350.4422 | 350.4459 | 9.322983 | 9.234417 |
| 3762 | M273T42_ | 1.26089  | -0.33444 | -1.27813 | 0.258336 | 0.863932 | DOWN | 273.1693 | 273.1692 | 273.1695 | 42.12892 | 41.906   |
| 3763 | M187T9_2 | 1.542904 | -0.62565 | -1.21876 | 0.258463 | 0.863932 | DOWN | 186.9889 | 186.9887 | 186.9891 | 9.18975  | 9.142767 |
| 3764 | M265T11_ | 1.178275 | 0.236676 | 1.263897 | 0.258579 | 0.863932 | UP   | 265.1521 | 265.152  | 265.1523 | 10.56108 | 10.5191  |
| 3765 | M349T11_ | 1.479049 | 0.56467  | 1.233217 | 0.258591 | 0.863932 | UP   | 349.2096 | 349.2092 | 349.2098 | 10.51239 | 10.42453 |
| 3766 | M536T40_ | 1.203669 | -0.26744 | -1.23702 | 0.258695 | 0.863932 | DOWN | 536.3061 | 536.306  | 536.3062 | 39.863   | 39.73367 |
| 3767 | M390T10_ | 2.329708 | 1.220149 | 1.308671 | 0.258702 | 0.863932 | UP   | 389.8825 | 389.882  | 389.8836 | 9.952017 | 9.843367 |
| 3768 | M521T9_5 | 1.196264 | -0.25854 | -1.23608 | 0.258723 | 0.863932 | DOWN | 520.9254 | 520.9252 | 520.9257 | 9.167733 | 9.129317 |
| 3769 | M428T18  | 1.3078   | 0.387142 | 1.235014 | 0.258753 | 0.863932 | UP   | 428.3004 | 428.3001 | 428.3004 | 17.95383 | 17.93233 |
| 3770 | M370T11_ | 1.102956 | -0.14137 | -1.22214 | 0.258836 | 0.863932 | DOWN | 370.2417 | 370.2417 | 370.2419 | 10.90659 | 10.89355 |
| 3771 | M201T10_ | 1.377637 | 0.462195 | 1.234202 | 0.258928 | 0.863932 | UP   | 200.941  | 200.9408 | 200.9453 | 9.978692 | 9.856867 |
| 3772 | M203T28  | 1.339474 | -0.42167 | -1.30165 | 0.258979 | 0.863932 | DOWN | 202.8396 | 202.8376 | 202.8451 | 27.76442 | 27.72217 |
| 3773 | M217T10_ | 39.08459 | 5.288528 | 1.314367 | 0.259011 | 0.863932 | UP   | 217.1626 | 217.1623 | 217.1627 | 10.47212 | 10.44008 |
| 3774 | M401T16  | 23.53369 | 4.556656 | 1.314328 | 0.259034 | 0.863932 | UP   | 401.1593 | 401.1592 | 401.1593 | 16.14023 | 16.12982 |
| 3775 | M206T9_2 | 1.22773  | 0.295994 | 1.223197 | 0.259045 | 0.863932 | UP   | 206.4408 | 206.44   | 206.4447 | 9.280767 | 9.1322   |
| 3776 | M398T10_ | 1.240933 | -0.31142 | -1.29608 | 0.259231 | 0.863933 | DOWN | 397.729  | 397.7288 | 397.7296 | 9.9091   | 9.79535  |
| 3777 | M204T9_3 | 1.428706 | -0.51471 | -1.2197  | 0.259248 | 0.863933 | DOWN | 204.2141 | 204.214  | 204.2143 | 9.3332   | 9.191133 |
| 3778 | M472T9_1 | 1.365547 | 0.449479 | 1.281747 | 0.259312 | 0.863933 | UP   | 471.5004 | 471.4991 | 471.5007 | 9.401633 | 9.11795  |
| 3779 | M496T10_ | 1.36725  | 0.451277 | 1.276392 | 0.259323 | 0.863933 | UP   | 495.9588 | 495.9576 | 495.9636 | 10.14972 | 9.9677   |

|      |          |          |          |          |          |          |      |          |          |          |          |          |
|------|----------|----------|----------|----------|----------|----------|------|----------|----------|----------|----------|----------|
| 3780 | M244T9_9 | 1.566668 | -0.6477  | -1.2152  | 0.259373 | 0.863933 | DOWN | 244.1879 | 244.1854 | 244.1885 | 9.311883 | 9.275917 |
| 3781 | M628T10_ | 1.347178 | -0.42994 | -1.23058 | 0.259389 | 0.863933 | DOWN | 628.286  | 628.2856 | 628.2861 | 9.624117 | 9.52595  |
| 3782 | M246T11_ | 1.287638 | 0.364727 | 1.217299 | 0.259389 | 0.863933 | UP   | 245.7515 | 245.7507 | 245.7518 | 10.8926  | 10.8646  |
| 3783 | M296T12  | 1.406771 | 0.492387 | 1.303412 | 0.259396 | 0.863933 | UP   | 296.241  | 296.2406 | 296.2421 | 11.84875 | 11.8012  |
| 3784 | M357T37_ | 1.347015 | -0.42977 | -1.29433 | 0.259489 | 0.863933 | DOWN | 357.1906 | 357.1905 | 357.1908 | 36.85625 | 36.5545  |
| 3785 | M1012T13 | 1.284933 | -0.36169 | -1.28558 | 0.259496 | 0.863933 | DOWN | 1011.506 | 1011.505 | 1011.506 | 13.40522 | 13.39008 |
| 3786 | M316T24_ | 170.7971 | 7.41614  | 1.31254  | 0.259582 | 0.863933 | UP   | 316.2843 | 316.2842 | 316.2843 | 24.07483 | 24.05367 |
| 3787 | M296T11_ | 1.275103 | -0.35061 | -1.2134  | 0.259595 | 0.863933 | DOWN | 296.1452 | 296.1438 | 296.1455 | 10.93208 | 10.88747 |
| 3788 | M306T9_5 | 1.774122 | -0.82711 | -1.22339 | 0.259598 | 0.863933 | DOWN | 306.4982 | 306.498  | 306.499  | 9.275917 | 9.219483 |
| 3789 | M456T9_6 | 1.246429 | -0.3178  | -1.26039 | 0.25962  | 0.863933 | DOWN | 456.1559 | 456.1557 | 456.1563 | 9.297925 | 9.146383 |
| 3790 | M793T11_ | 1.274707 | -0.35017 | -1.21594 | 0.259645 | 0.863933 | DOWN | 792.9691 | 792.968  | 792.9697 | 10.52287 | 10.47197 |
| 3791 | M167T10_ | 1.358254 | -0.44175 | -1.23462 | 0.259671 | 0.863933 | DOWN | 166.983  | 166.9829 | 166.9831 | 9.823317 | 9.715683 |
| 3792 | M444T10_ | 1.355124 | -0.43842 | -1.22735 | 0.259678 | 0.863933 | DOWN | 443.6295 | 443.6283 | 443.6297 | 9.946467 | 9.827283 |
| 3793 | M374T11_ | 1.262084 | 0.335808 | 1.212872 | 0.259779 | 0.863933 | UP   | 374.4648 | 374.4643 | 374.4649 | 10.892   | 10.873   |
| 3794 | M352T45  | 1.352467 | -0.43559 | -1.21533 | 0.259782 | 0.863933 | DOWN | 352.1964 | 352.1962 | 352.1966 | 44.90442 | 44.7125  |
| 3795 | M1773T10 | 1.110172 | -0.15078 | -1.21297 | 0.259785 | 0.863933 | DOWN | 1772.718 | 1772.715 | 1772.72  | 9.8207   | 9.715683 |
| 3796 | M379T24  | 1.242942 | 0.313759 | 1.213185 | 0.259808 | 0.863933 | UP   | 379.2955 | 379.2951 | 379.2959 | 23.883   | 23.8195  |
| 3797 | M183T9_1 | 1.459106 | -0.54508 | -1.22185 | 0.259864 | 0.863933 | DOWN | 183.4314 | 183.4307 | 183.432  | 9.338858 | 9.18975  |
| 3798 | M1360T10 | 1.225859 | -0.29379 | -1.21639 | 0.259865 | 0.863933 | DOWN | 1360.024 | 1360.023 | 1360.026 | 9.831517 | 9.699733 |
| 3799 | M303T11_ | 1.279571 | 0.35566  | 1.243424 | 0.259869 | 0.863933 | UP   | 302.5599 | 302.5598 | 302.5602 | 10.89248 | 10.873   |
| 3800 | M478T9_1 | 1.253012 | -0.3254  | -1.2254  | 0.260002 | 0.863934 | DOWN | 477.5541 | 477.5535 | 477.5561 | 9.328967 | 9.129317 |
| 3801 | M358T10_ | 3.062592 | 1.614753 | 1.252868 | 0.260031 | 0.863934 | UP   | 358.299  | 358.2988 | 358.2994 | 9.933967 | 9.8378   |
| 3802 | M1147T10 | 1.319792 | -0.40031 | -1.21473 | 0.260111 | 0.863934 | DOWN | 1147.472 | 1147.471 | 1147.474 | 9.581933 | 9.447617 |
| 3803 | M774T10_ | 1.57082  | 0.651518 | 1.271345 | 0.260157 | 0.863934 | UP   | 774.1262 | 774.123  | 774.1267 | 9.804067 | 9.715683 |
| 3804 | M357T10_ | 1.973027 | 0.98041  | 1.243564 | 0.260158 | 0.863934 | UP   | 356.8345 | 356.8342 | 356.8346 | 9.967367 | 9.859233 |
| 3805 | M206T12  | 1.924362 | 0.94438  | 1.243363 | 0.260239 | 0.863934 | UP   | 206.1539 | 206.1536 | 206.154  | 11.82523 | 11.8012  |
| 3806 | M471T9_7 | 1.616292 | -0.69269 | -1.27922 | 0.260242 | 0.863934 | DOWN | 471.2665 | 471.2664 | 471.2691 | 9.30295  | 9.102783 |
| 3807 | M193T9_2 | 1.379488 | -0.46413 | -1.22503 | 0.260393 | 0.863934 | DOWN | 192.6405 | 192.639  | 192.641  | 9.313933 | 9.11795  |
| 3808 | M1010T10 | 1.345688 | -0.42834 | -1.22886 | 0.260423 | 0.863934 | DOWN | 1009.578 | 1009.577 | 1009.579 | 10.00723 | 9.90755  |
| 3809 | M217T5   | 1.47386  | 0.559599 | 1.211737 | 0.260449 | 0.863934 | UP   | 216.9225 | 216.9225 | 216.9279 | 5.453667 | 5.1459   |
| 3810 | M625T27  | 1.336936 | -0.41893 | -1.25768 | 0.260575 | 0.863934 | DOWN | 625.2465 | 625.246  | 625.2476 | 26.86775 | 26.85367 |
| 3811 | M956T10_ | 1.375977 | -0.46046 | -1.25554 | 0.260614 | 0.863934 | DOWN | 955.5632 | 955.5629 | 955.5642 | 9.531583 | 9.447983 |
| 3812 | M458T25_ | 7.901636 | -2.98215 | -1.30825 | 0.260656 | 0.863934 | DOWN | 457.6482 | 457.6471 | 457.6484 | 25.32233 | 25.319   |
| 3813 | M455T9_1 | 1.708088 | 0.772382 | 1.254238 | 0.260667 | 0.863934 | UP   | 455.0626 | 455.0613 | 455.0629 | 9.175017 | 9.1428   |
| 3814 | M719T9_2 | 1.335199 | -0.41706 | -1.25437 | 0.260766 | 0.863935 | DOWN | 719.074  | 719.0735 | 719.0742 | 9.49445  | 9.40135  |

|      |          |          |          |          |          |          |      |          |          |          |          |          |
|------|----------|----------|----------|----------|----------|----------|------|----------|----------|----------|----------|----------|
| 3815 | M462T10_ | 1.391706 | 0.476854 | 1.255624 | 0.260775 | 0.863935 | UP   | 462.4762 | 462.4759 | 462.477  | 9.8267   | 9.696683 |
| 3816 | M339T10_ | 2.787234 | -1.47883 | -1.30405 | 0.260787 | 0.863935 | DOWN | 338.8284 | 338.8274 | 338.8285 | 9.830833 | 9.699733 |
| 3817 | M435T9_4 | 1.304723 | -0.38374 | -1.25758 | 0.260849 | 0.863935 | DOWN | 434.7265 | 434.7219 | 434.7269 | 9.311167 | 9.129317 |
| 3818 | M823T10_ | 1.370627 | -0.45484 | -1.22616 | 0.260885 | 0.863935 | DOWN | 822.821  | 822.82   | 822.8218 | 9.6364   | 9.586183 |
| 3819 | M289T9_3 | 1.310204 | -0.38979 | -1.21354 | 0.260899 | 0.863935 | DOWN | 288.9389 | 288.9387 | 288.9391 | 8.848167 | 8.75965  |
| 3820 | M1041T10 | 1.403261 | -0.48878 | -1.23784 | 0.260904 | 0.863935 | DOWN | 1040.637 | 1040.636 | 1040.638 | 9.8207   | 9.715683 |
| 3821 | M679T10_ | 1.460452 | 0.546415 | 1.210529 | 0.260951 | 0.863935 | UP   | 679.0323 | 679.0247 | 679.038  | 9.872917 | 9.747533 |
| 3822 | M471T10_ | 1.430491 | 0.51651  | 1.248006 | 0.260955 | 0.863935 | UP   | 471.0783 | 471.0777 | 471.0788 | 9.759167 | 9.731817 |
| 3823 | M415T24  | 1.147069 | 0.197953 | 1.210768 | 0.260961 | 0.863935 | UP   | 415.2111 | 415.2109 | 415.2113 | 24.16608 | 24.14133 |
| 3824 | M220T11_ | 1.191766 | -0.2531  | -1.24752 | 0.260987 | 0.863935 | DOWN | 220.1091 | 220.109  | 220.1092 | 10.92117 | 10.90548 |
| 3825 | M200T10_ | 1.288384 | -0.36556 | -1.27115 | 0.261033 | 0.863935 | DOWN | 199.7641 | 199.764  | 199.7715 | 9.830458 | 9.715683 |
| 3826 | M408T9_4 | 1.333966 | -0.41572 | -1.2626  | 0.261036 | 0.863935 | DOWN | 407.9195 | 407.9194 | 407.9196 | 9.2585   | 9.1158   |
| 3827 | M324T9_3 | 1.186222 | -0.24637 | -1.20938 | 0.261081 | 0.863935 | DOWN | 323.6807 | 323.6803 | 323.6812 | 9.294925 | 9.129317 |
| 3828 | M214T11_ | 1.592026 | -0.67086 | -1.20986 | 0.261093 | 0.863935 | DOWN | 213.6636 | 213.6633 | 213.6637 | 10.93208 | 10.9049  |
| 3829 | M302T10_ | 1.329581 | -0.41097 | -1.22273 | 0.261115 | 0.863935 | DOWN | 302.376  | 302.3758 | 302.3762 | 9.8207   | 9.699733 |
| 3830 | M548T42  | 1.30644  | 0.385641 | 1.257619 | 0.261156 | 0.863935 | UP   | 548.3062 | 548.3059 | 548.3065 | 42.366   | 42.3375  |
| 3831 | M419T17  | 18.92753 | 4.242414 | 1.306856 | 0.261326 | 0.863935 | UP   | 419.1698 | 419.1697 | 419.1699 | 17.05933 | 17.05867 |
| 3832 | M887T10_ | 1.218759 | -0.28541 | -1.20868 | 0.261408 | 0.863935 | DOWN | 886.5597 | 886.5587 | 886.5604 | 10.2013  | 10.10718 |
| 3833 | M450T11_ | 2.175639 | 1.121439 | 1.290856 | 0.261416 | 0.863935 | UP   | 450.1471 | 450.1466 | 450.1472 | 10.90068 | 10.8214  |
| 3834 | M289T23_ | 1.083715 | -0.11599 | -1.24658 | 0.261425 | 0.863935 | DOWN | 289.2926 | 289.2925 | 289.2928 | 22.90033 | 22.88567 |
| 3835 | M677T10_ | 1.238388 | -0.30846 | -1.26647 | 0.261442 | 0.863935 | DOWN | 676.6953 | 676.6949 | 676.6965 | 9.847133 | 9.73145  |
| 3836 | M411T10_ | 1.238577 | -0.30868 | -1.2083  | 0.261443 | 0.863935 | DOWN | 410.638  | 410.6374 | 410.6382 | 9.910075 | 9.811217 |
| 3837 | M476T9_7 | 1.797785 | 0.846221 | 1.21765  | 0.261653 | 0.863936 | UP   | 475.9159 | 475.9127 | 475.9188 | 9.314042 | 9.158833 |
| 3838 | M344T25  | 18.00891 | 4.170639 | 1.305648 | 0.261658 | 0.863936 | UP   | 344.243  | 344.2428 | 344.25   | 25.08733 | 24.98667 |
| 3839 | M824T11  | 1.316337 | -0.39653 | -1.24806 | 0.261684 | 0.863936 | DOWN | 823.8763 | 823.8753 | 823.8776 | 10.90659 | 10.89125 |
| 3840 | M838T10_ | 1.305047 | -0.3841  | -1.23542 | 0.261827 | 0.863936 | DOWN | 838.3683 | 838.3675 | 838.3686 | 9.969925 | 9.8753   |
| 3841 | M472T9_1 | 1.28323  | -0.35978 | -1.20709 | 0.261921 | 0.863936 | DOWN | 472.4241 | 472.4235 | 472.4252 | 9.294925 | 9.129317 |
| 3842 | M226T10_ | 1.414285 | 0.500073 | 1.255793 | 0.261963 | 0.863936 | UP   | 225.975  | 225.9749 | 225.9751 | 9.908617 | 9.811217 |
| 3843 | M370T10_ | 2.516795 | 1.331588 | 1.254578 | 0.26211  | 0.863936 | UP   | 369.6219 | 369.6216 | 369.6221 | 9.949233 | 9.827283 |
| 3844 | M621T12  | 1.247118 | 0.318599 | 1.20672  | 0.262121 | 0.863936 | UP   | 621.459  | 621.458  | 621.4595 | 11.76543 | 11.73695 |
| 3845 | M847T10_ | 1.108207 | -0.14823 | -1.21377 | 0.262137 | 0.863936 | DOWN | 846.9791 | 846.9784 | 846.9794 | 9.924308 | 9.827283 |
| 3846 | M611T25  | 5.586992 | -2.48207 | -1.30151 | 0.262167 | 0.863936 | DOWN | 611.4156 | 611.415  | 611.4164 | 25.16033 | 25.1025  |
| 3847 | M414T24  | 8.899441 | -3.15371 | -1.30182 | 0.262203 | 0.863936 | DOWN | 413.7998 | 413.799  | 413.7998 | 24.33233 | 24.28767 |
| 3848 | M660T11  | 1.746402 | 0.804386 | 1.206127 | 0.262231 | 0.863936 | UP   | 660.0517 | 660.0516 | 660.0546 | 10.89125 | 10.87765 |
| 3849 | M371T10_ | 1.271723 | -0.34678 | -1.21189 | 0.262249 | 0.863936 | DOWN | 371.4334 | 371.4333 | 371.4335 | 9.986767 | 9.8753   |

|      |          |          |          |          |          |          |      |          |          |          |          |          |
|------|----------|----------|----------|----------|----------|----------|------|----------|----------|----------|----------|----------|
| 3850 | M160T9_2 | 1.387435 | -0.47242 | -1.20588 | 0.262317 | 0.863936 | DOWN | 159.8703 | 159.8701 | 159.8706 | 9.375425 | 9.280767 |
| 3851 | M564T11_ | 1.351395 | -0.43445 | -1.2119  | 0.262343 | 0.863936 | DOWN | 564.3419 | 564.3411 | 564.3432 | 10.66079 | 10.61512 |
| 3852 | M727T10_ | 1.353146 | -0.43632 | -1.22111 | 0.26238  | 0.863936 | DOWN | 727.3699 | 727.3688 | 727.3709 | 9.8207   | 9.696683 |
| 3853 | M769T12_ | 1.391098 | -0.47622 | -1.22535 | 0.262405 | 0.863936 | DOWN | 768.7356 | 768.7353 | 768.7361 | 12.23053 | 12.17992 |
| 3854 | M455T9_6 | 1.503262 | 0.588096 | 1.286956 | 0.262446 | 0.863936 | UP   | 454.7943 | 454.7907 | 454.8028 | 9.338567 | 9.161683 |
| 3855 | M332T17_ | 404.4128 | 8.659685 | 1.303048 | 0.262506 | 0.863937 | UP   | 332.2795 | 332.2793 | 332.2795 | 16.57802 | 16.56082 |
| 3856 | M580T9_3 | 1.233482 | -0.30274 | -1.20553 | 0.262513 | 0.863937 | DOWN | 579.9644 | 579.961  | 579.9657 | 9.198567 | 9.129317 |
| 3857 | M358T10_ | 1.085801 | -0.11876 | -1.26904 | 0.262524 | 0.863937 | DOWN | 357.519  | 357.5187 | 357.5192 | 9.8207   | 9.715683 |
| 3858 | M469T10_ | 1.314589 | -0.39461 | -1.20648 | 0.262594 | 0.863937 | DOWN | 468.8044 | 468.8039 | 468.8063 | 9.839008 | 9.699733 |
| 3859 | M355T40_ | 1.208093 | 0.272731 | 1.296791 | 0.262633 | 0.863937 | UP   | 355.2113 | 355.2113 | 355.2115 | 40.06433 | 39.96517 |
| 3860 | M312T21  | 657.2247 | 9.360243 | 1.302565 | 0.262656 | 0.863937 | UP   | 312.2532 | 312.253  | 312.2533 | 20.85217 | 20.84967 |
| 3861 | M780T10_ | 1.3271   | -0.40828 | -1.20886 | 0.262694 | 0.863937 | DOWN | 779.6108 | 779.6106 | 779.6126 | 10.01633 | 9.90755  |
| 3862 | M745T10_ | 1.245575 | -0.31681 | -1.21396 | 0.262778 | 0.863937 | DOWN | 745.4189 | 745.4187 | 745.4192 | 9.563592 | 9.46325  |
| 3863 | M827T10_ | 1.254037 | 0.32658  | 1.204401 | 0.262879 | 0.863937 | UP   | 827.2417 | 827.2412 | 827.2428 | 9.950283 | 9.843367 |
| 3864 | M536T41_ | 1.202264 | 0.265754 | 1.296864 | 0.26288  | 0.863937 | UP   | 536.3062 | 536.3059 | 536.3064 | 41.158   | 41.12883 |
| 3865 | M658T21  | 1.20398  | -0.26781 | -1.22817 | 0.262958 | 0.863937 | DOWN | 658.4736 | 658.4734 | 658.4741 | 21.01417 | 21.0075  |
| 3866 | M679T9   | 1.69982  | -0.76538 | -1.2409  | 0.263013 | 0.863937 | DOWN | 679.3536 | 679.3535 | 679.3539 | 8.813067 | 8.686867 |
| 3867 | M217T22_ | 1.227102 | -0.29525 | -1.20736 | 0.263039 | 0.863937 | DOWN | 217.1795 | 217.1794 | 217.1796 | 22.48783 | 22.46617 |
| 3868 | M787T11_ | 1.326501 | 0.407626 | 1.205494 | 0.263084 | 0.863937 | UP   | 786.8766 | 786.8727 | 786.8767 | 10.85983 | 10.82972 |
| 3869 | M353T13_ | 1.268299 | -0.34289 | -1.21816 | 0.263207 | 0.863937 | DOWN | 352.7876 | 352.7875 | 352.7878 | 12.51412 | 12.49947 |
| 3870 | M435T11_ | 1.505418 | 0.590164 | 1.288868 | 0.263231 | 0.863937 | UP   | 435.3064 | 435.3062 | 435.3075 | 10.90765 | 10.879   |
| 3871 | M350T10_ | 1.446836 | -0.5329  | -1.20339 | 0.263237 | 0.863937 | DOWN | 349.9884 | 349.9882 | 349.9902 | 9.842    | 9.715683 |
| 3872 | M296T21  | 589.6521 | 9.20372  | 1.300458 | 0.263309 | 0.863938 | UP   | 296.2583 | 296.2582 | 296.2585 | 20.52067 | 20.4905  |
| 3873 | M850T10_ | 1.293422 | -0.37119 | -1.23514 | 0.26336  | 0.863938 | DOWN | 849.7091 | 849.7086 | 849.7099 | 9.9014   | 9.822117 |
| 3874 | M296T29  | 129.2872 | 7.014435 | 1.300121 | 0.263412 | 0.863938 | UP   | 296.2582 | 296.2582 | 296.2583 | 29.43    | 29.42933 |
| 3875 | M759T11_ | 1.162045 | -0.21667 | -1.22183 | 0.26344  | 0.863938 | DOWN | 759.0648 | 759.0637 | 759.0649 | 10.91371 | 10.879   |
| 3876 | M247T11_ | 1.238446 | -0.30853 | -1.20727 | 0.263632 | 0.863938 | DOWN | 247.2188 | 247.2187 | 247.2191 | 10.89308 | 10.88747 |
| 3877 | M523T11_ | 1.341238 | -0.42357 | -1.20189 | 0.263774 | 0.863938 | DOWN | 522.7883 | 522.7878 | 522.7895 | 10.90522 | 10.85018 |
| 3878 | M530T10_ | 1.405946 | -0.49154 | -1.25504 | 0.263902 | 0.863938 | DOWN | 529.6462 | 529.6458 | 529.6483 | 10.25792 | 10.10718 |
| 3879 | M241T11_ | 1.110565 | -0.15129 | -1.20444 | 0.263984 | 0.863938 | DOWN | 241.1908 | 241.1899 | 241.191  | 10.90765 | 10.66775 |
| 3880 | M525T9_2 | 1.288691 | -0.36591 | -1.20912 | 0.264001 | 0.863938 | DOWN | 524.81   | 524.8093 | 524.8103 | 9.2585   | 9.159717 |
| 3881 | M333T10_ | 1.168916 | -0.22517 | -1.29418 | 0.264079 | 0.863938 | DOWN | 332.5778 | 332.5777 | 332.5782 | 9.83535  | 9.715683 |
| 3882 | M177T9_7 | 5.14825  | 2.364082 | 1.292437 | 0.264199 | 0.863939 | UP   | 177.1422 | 177.1421 | 177.1427 | 9.215475 | 9.158833 |
| 3883 | M170T10_ | 1.309503 | -0.38902 | -1.21665 | 0.264254 | 0.863939 | DOWN | 170.4389 | 170.4389 | 170.4451 | 9.81635  | 9.715683 |
| 3884 | M384T10_ | 1.256909 | -0.32988 | -1.2023  | 0.264294 | 0.863939 | DOWN | 383.6293 | 383.6291 | 383.6297 | 9.6536   | 9.6413   |

|      |          |          |          |          |          |          |      |          |          |          |          |          |
|------|----------|----------|----------|----------|----------|----------|------|----------|----------|----------|----------|----------|
| 3885 | M1175T10 | 1.272152 | 0.347271 | 1.202489 | 0.264296 | 0.863939 | UP   | 1174.788 | 1174.786 | 1174.789 | 9.887133 | 9.779267 |
| 3886 | M339T10_ | 1.187114 | -0.24746 | -1.24625 | 0.264359 | 0.863939 | DOWN | 338.5081 | 338.5078 | 338.5083 | 9.825492 | 9.715683 |
| 3887 | M690T10_ | 1.298605 | 0.376963 | 1.268568 | 0.264391 | 0.863939 | UP   | 690.492  | 690.4914 | 690.4926 | 10.41845 | 10.3771  |
| 3888 | M1769T10 | 1.236584 | 0.30636  | 1.218634 | 0.264398 | 0.863939 | UP   | 1768.509 | 1768.507 | 1768.511 | 9.8374   | 9.715683 |
| 3889 | M498T9_9 | 1.268355 | -0.34296 | -1.20039 | 0.264482 | 0.863939 | DOWN | 498.1961 | 498.1949 | 498.1968 | 9.280992 | 9.129317 |
| 3890 | M285T7_1 | 1.965279 | -0.97473 | -1.24519 | 0.264563 | 0.863939 | DOWN | 284.9097 | 284.9096 | 284.9098 | 7.23985  | 7.039883 |
| 3891 | M632T25  | 1.771119 | -0.82466 | -1.22007 | 0.26461  | 0.863939 | DOWN | 632.4579 | 632.4568 | 632.458  | 24.7685  | 24.75367 |
| 3892 | M416T43_ | 1.300309 | 0.378854 | 1.286717 | 0.264619 | 0.863939 | UP   | 416.2639 | 416.2639 | 416.264  | 42.8985  | 42.6395  |
| 3893 | M1750T10 | 1.305092 | -0.38415 | -1.20469 | 0.264641 | 0.863939 | DOWN | 1749.578 | 1749.574 | 1749.581 | 9.956417 | 9.843367 |
| 3894 | M686T10_ | 2.36289  | 1.240552 | 1.285005 | 0.264666 | 0.863939 | UP   | 685.9732 | 685.9646 | 685.9741 | 9.830283 | 9.743767 |
| 3895 | M537T10_ | 1.303766 | -0.38269 | -1.23613 | 0.264705 | 0.863939 | DOWN | 537.2198 | 537.2192 | 537.22   | 9.9754   | 9.8914   |
| 3896 | M336T10_ | 1.44136  | 0.527431 | 1.243524 | 0.26476  | 0.863939 | UP   | 335.7743 | 335.774  | 335.7746 | 9.970617 | 9.8753   |
| 3897 | M363T9_2 | 1.131222 | -0.17788 | -1.24383 | 0.264761 | 0.863939 | DOWN | 363.4886 | 363.4879 | 363.4887 | 8.98515  | 8.892117 |
| 3898 | M329T11_ | 2.661763 | 1.412382 | 1.294507 | 0.26478  | 0.863939 | UP   | 329.2759 | 329.2756 | 329.2799 | 10.93708 | 10.879   |
| 3899 | M228T9_9 | 1.452528 | -0.53857 | -1.19961 | 0.264788 | 0.863939 | DOWN | 228.0336 | 228.0335 | 228.0337 | 9.36175  | 9.25985  |
| 3900 | M265T11_ | 1.31612  | 0.396292 | 1.201824 | 0.26479  | 0.863939 | UP   | 264.8135 | 264.8131 | 264.814  | 10.84835 | 10.8214  |
| 3901 | M315T9_2 | 1.233108 | -0.3023  | -1.21978 | 0.264894 | 0.863939 | DOWN | 314.649  | 314.6487 | 314.6494 | 9.295167 | 9.129317 |
| 3902 | M479T10_ | 1.326791 | -0.40794 | -1.20724 | 0.264968 | 0.863939 | DOWN | 479.0405 | 479.0401 | 479.0412 | 9.831517 | 9.715683 |
| 3903 | M340T10_ | 2.021322 | -1.0153  | -1.19865 | 0.265056 | 0.86394  | DOWN | 340.2739 | 340.2709 | 340.2773 | 9.922467 | 9.801833 |
| 3904 | M303T10_ | 1.306419 | -0.38562 | -1.23872 | 0.265091 | 0.86394  | DOWN | 303.3387 | 303.3386 | 303.3387 | 9.97155  | 9.8753   |
| 3905 | M457T13_ | 1.106006 | -0.14536 | -1.1993  | 0.265174 | 0.86394  | DOWN | 457.3611 | 457.3609 | 457.3613 | 13.22937 | 13.21485 |
| 3906 | M822T12  | 1.388013 | -0.47302 | -1.24797 | 0.265206 | 0.86394  | DOWN | 822.4236 | 822.4229 | 822.4246 | 11.96045 | 11.91478 |
| 3907 | M313T22_ | 141.6246 | 7.145928 | 1.294332 | 0.265219 | 0.86394  | UP   | 313.2565 | 313.2565 | 313.2567 | 21.909   | 21.905   |
| 3908 | M750T10_ | 3.765511 | 1.912846 | 1.292048 | 0.26524  | 0.86394  | UP   | 749.9405 | 749.9382 | 749.9414 | 9.856867 | 9.73145  |
| 3909 | M609T9_1 | 1.489086 | -0.57443 | -1.19792 | 0.265266 | 0.86394  | DOWN | 608.6892 | 608.6883 | 608.6945 | 9.3735   | 9.1322   |
| 3910 | M572T10_ | 1.228545 | -0.29695 | -1.22215 | 0.265301 | 0.86394  | DOWN | 571.6972 | 571.6966 | 571.6975 | 9.910075 | 9.811217 |
| 3911 | M809T11_ | 1.128539 | -0.17446 | -1.25403 | 0.265317 | 0.86394  | DOWN | 808.7    | 808.6989 | 808.7006 | 10.9127  | 10.879   |
| 3912 | M302T11_ | 1.553978 | -0.63597 | -1.23475 | 0.265331 | 0.86394  | DOWN | 302.1748 | 302.1745 | 302.1751 | 10.71897 | 10.69123 |
| 3913 | M314T12  | 1.160017 | 0.214146 | 1.216904 | 0.265365 | 0.86394  | UP   | 314.269  | 314.2688 | 314.2693 | 11.91478 | 11.86065 |
| 3914 | M283T10_ | 1.311085 | -0.39076 | -1.24672 | 0.265368 | 0.86394  | DOWN | 282.6595 | 282.6593 | 282.6671 | 9.8322   | 9.715683 |
| 3915 | M1048T10 | 1.24914  | 0.320935 | 1.20462  | 0.265449 | 0.86394  | UP   | 1048.351 | 1048.348 | 1048.353 | 9.8284   | 9.681183 |
| 3916 | M343T19_ | 1.254899 | -0.32757 | -1.21036 | 0.265461 | 0.86394  | DOWN | 343.2378 | 343.2375 | 343.2381 | 19.11117 | 19.09517 |
| 3917 | M1113T10 | 1.234633 | -0.30408 | -1.20185 | 0.265525 | 0.86394  | DOWN | 1113.393 | 1113.392 | 1113.394 | 9.827483 | 9.665433 |
| 3918 | M338T9_4 | 1.828803 | 0.870899 | 1.277133 | 0.265574 | 0.86394  | UP   | 337.8853 | 337.8802 | 337.8856 | 9.46855  | 9.11405  |
| 3919 | M621T9_7 | 1.845769 | -0.88422 | -1.23688 | 0.265581 | 0.86394  | DOWN | 621.444  | 621.4437 | 621.4448 | 8.78295  | 8.703817 |



|      |          |          |          |          |          |          |      |          |          |          |          |          |
|------|----------|----------|----------|----------|----------|----------|------|----------|----------|----------|----------|----------|
| 3920 | M550T9_4 | 1.658008 | 0.729451 | 1.208434 | 0.265612 | 0.86394  | UP   | 550.4467 | 550.4433 | 550.4493 | 9.176533 | 9.129317 |
| 3921 | M358T43_ | 1.548662 | -0.63102 | -1.19668 | 0.265767 | 0.86394  | DOWN | 358.2222 | 358.2221 | 358.2223 | 43.02083 | 42.79783 |
| 3922 | M493T9_5 | 1.344029 | -0.42656 | -1.1963  | 0.265828 | 0.86394  | DOWN | 493.3668 | 493.3665 | 493.3675 | 9.18975  | 9.129317 |
| 3923 | M1279T45 | 1.194892 | 0.25688  | 1.196774 | 0.265927 | 0.863941 | UP   | 1278.857 | 1278.855 | 1278.859 | 44.82533 | 44.79667 |
| 3924 | M386T10_ | 2.294912 | -1.19844 | -1.21361 | 0.265949 | 0.863941 | DOWN | 385.9991 | 385.9988 | 386.0008 | 9.92625  | 9.9014   |
| 3925 | M329T11_ | 1.475696 | 0.561396 | 1.226139 | 0.26598  | 0.863941 | UP   | 328.5326 | 328.5319 | 328.5345 | 10.89907 | 10.879   |
| 3926 | M761T10_ | 1.250701 | -0.32274 | -1.2023  | 0.265988 | 0.863941 | DOWN | 761.3932 | 761.3924 | 761.3937 | 9.567617 | 9.46325  |
| 3927 | M354T45  | 1.018827 | -0.02691 | -1.21703 | 0.266013 | 0.863941 | DOWN | 354.3446 | 354.3444 | 354.3447 | 44.696   | 44.68167 |
| 3928 | M352T9_3 | 4.209412 | -2.07362 | -1.28777 | 0.266019 | 0.863941 | DOWN | 351.9807 | 351.9805 | 351.9938 | 8.983883 | 8.924217 |
| 3929 | M196T10_ | 96.28163 | 6.589189 | 1.291549 | 0.26609  | 0.863941 | UP   | 196.1331 | 196.133  | 196.1332 | 10.20787 | 10.18683 |
| 3930 | M1249T11 | 1.220624 | -0.28762 | -1.19777 | 0.266101 | 0.863941 | DOWN | 1249.023 | 1249.02  | 1249.025 | 10.93208 | 10.873   |
| 3931 | M343T22  | 1.631161 | -0.7059  | -1.20541 | 0.266157 | 0.863941 | DOWN | 342.7398 | 342.7395 | 342.7402 | 22.13958 | 22.03    |
| 3932 | M371T10_ | 1.25731  | 0.33034  | 1.201911 | 0.266179 | 0.863941 | UP   | 371.2073 | 371.2028 | 371.2163 | 9.8207   | 9.507167 |
| 3933 | M232T10_ | 1.39011  | 0.475199 | 1.201369 | 0.266245 | 0.863941 | UP   | 231.8679 | 231.8676 | 231.868  | 9.983467 | 9.8753   |
| 3934 | M153T10_ | 1.687796 | -0.75514 | -1.1958  | 0.266253 | 0.863941 | DOWN | 153.4424 | 153.442  | 153.4427 | 9.844642 | 9.8322   |
| 3935 | M508T40_ | 1.125598 | -0.17069 | -1.21303 | 0.266286 | 0.863941 | DOWN | 508.3113 | 508.311  | 508.3114 | 40.06433 | 39.90617 |
| 3936 | M462T10_ | 1.879004 | 0.909968 | 1.274337 | 0.266308 | 0.863941 | UP   | 461.9413 | 461.941  | 461.9418 | 9.772833 | 9.665433 |
| 3937 | M325T14  | 1.393175 | 0.478376 | 1.216137 | 0.266318 | 0.863941 | UP   | 325.162  | 325.1619 | 325.1623 | 13.56607 | 13.2008  |
| 3938 | M310T26  | 25.78537 | 4.688481 | 1.290816 | 0.266319 | 0.863941 | UP   | 310.2374 | 310.2373 | 310.2376 | 26.1485  | 26.14517 |
| 3939 | M522T10_ | 1.158462 | -0.21221 | -1.19498 | 0.266333 | 0.863941 | DOWN | 521.8466 | 521.8462 | 521.8476 | 9.917167 | 9.79535  |
| 3940 | M953T11_ | 1.370075 | -0.45425 | -1.20687 | 0.266334 | 0.863941 | DOWN | 953.4626 | 953.4623 | 953.4636 | 10.93208 | 10.9049  |
| 3941 | M201T43_ | 1.312601 | 0.392429 | 1.251227 | 0.266451 | 0.863941 | UP   | 201.1118 | 201.1118 | 201.1119 | 43.19283 | 42.94167 |
| 3942 | M298T9_2 | 1.294152 | -0.37201 | -1.19488 | 0.266616 | 0.863941 | DOWN | 298.2505 | 298.2493 | 298.2514 | 9.322667 | 9.1322   |
| 3943 | M1404T10 | 1.251381 | 0.323522 | 1.19703  | 0.266707 | 0.863941 | UP   | 1404.14  | 1404.136 | 1404.141 | 9.94405  | 9.8378   |
| 3944 | M578T44_ | 1.135323 | 0.183102 | 1.253899 | 0.266735 | 0.863941 | UP   | 578.3169 | 578.3168 | 578.3172 | 43.87358 | 43.70383 |
| 3945 | M206T9_2 | 1.560881 | -0.64236 | -1.1963  | 0.266917 | 0.863942 | DOWN | 206.1748 | 206.174  | 206.1755 | 9.294883 | 9.061    |
| 3946 | M349T10_ | 1.06054  | -0.0848  | -1.2371  | 0.266919 | 0.863942 | DOWN | 348.7122 | 348.712  | 348.7123 | 9.825492 | 9.715683 |
| 3947 | M161T10_ | 1.224995 | -0.29278 | -1.21803 | 0.266934 | 0.863942 | DOWN | 161.1088 | 161.1087 | 161.109  | 9.8207   | 9.715683 |
| 3948 | M1173T10 | 1.11876  | 0.161901 | 1.193207 | 0.266973 | 0.863942 | UP   | 1172.514 | 1172.513 | 1172.515 | 9.853633 | 9.743667 |
| 3949 | M474T11_ | 3.590851 | 1.844326 | 1.275287 | 0.266993 | 0.863942 | UP   | 474.1349 | 474.1348 | 474.1353 | 10.83417 | 10.8214  |
| 3950 | M1480T10 | 1.520094 | -0.60416 | -1.22764 | 0.267015 | 0.863942 | DOWN | 1480.155 | 1480.152 | 1480.156 | 9.903567 | 9.806367 |
| 3951 | M497T10_ | 1.296951 | -0.37512 | -1.23972 | 0.267108 | 0.863942 | DOWN | 497.3244 | 497.324  | 497.3248 | 9.8207   | 9.699733 |
| 3952 | M185T10_ | 1.573206 | 0.653707 | 1.217469 | 0.267144 | 0.863942 | UP   | 185.0901 | 185.0899 | 185.0902 | 9.975217 | 9.859233 |
| 3953 | M725T10_ | 1.23396  | -0.3033  | -1.22832 | 0.267152 | 0.863942 | DOWN | 725.2078 | 725.2056 | 725.2086 | 9.83535  | 9.715683 |
| 3954 | M385T10_ | 1.187759 | -0.24824 | -1.24405 | 0.267164 | 0.863942 | DOWN | 384.9576 | 384.9575 | 384.9579 | 9.97155  | 9.859233 |

|      |          |          |          |          |          |          |      |          |          |          |          |          |
|------|----------|----------|----------|----------|----------|----------|------|----------|----------|----------|----------|----------|
| 3955 | M451T9_5 | 1.527743 | -0.6114  | -1.21051 | 0.267187 | 0.863942 | DOWN | 451.0075 | 451.006  | 451.0092 | 9.265675 | 9.129317 |
| 3956 | M477T22  | 2.215888 | 1.147885 | 1.264515 | 0.267257 | 0.863942 | UP   | 477.3394 | 477.3315 | 477.34   | 21.53733 | 21.26517 |
| 3957 | M341T10_ | 1.115605 | -0.15783 | -1.22549 | 0.267302 | 0.863942 | DOWN | 340.7608 | 340.7606 | 340.761  | 9.879483 | 9.779267 |
| 3958 | M550T12  | 14.27421 | 3.835339 | 1.287587 | 0.267318 | 0.863942 | UP   | 550.3464 | 550.3459 | 550.3466 | 11.76648 | 11.73907 |
| 3959 | M415T28  | 1.696414 | 0.762488 | 1.206192 | 0.267325 | 0.863942 | UP   | 414.7573 | 414.7567 | 414.7576 | 27.96817 | 27.8945  |
| 3960 | M524T9_3 | 1.760231 | -0.81576 | -1.22677 | 0.267335 | 0.863942 | DOWN | 523.9285 | 523.928  | 523.9292 | 9.357033 | 9.264333 |
| 3961 | M402T27_ | 1.717716 | -0.78049 | -1.21368 | 0.267344 | 0.863942 | DOWN | 401.7962 | 401.7957 | 401.7965 | 26.78333 | 26.75167 |
| 3962 | M333T11_ | 1.614235 | 0.69085  | 1.262403 | 0.267382 | 0.863942 | UP   | 333.2238 | 333.215  | 333.2243 | 10.88234 | 10.6323  |
| 3963 | M435T11_ | 1.289566 | -0.36689 | -1.22485 | 0.267445 | 0.863942 | DOWN | 435.2197 | 435.2196 | 435.2198 | 10.90548 | 10.879   |
| 3964 | M747T4   | 1.497744 | 0.582791 | 1.196238 | 0.267487 | 0.863942 | UP   | 747.4623 | 747.4619 | 747.4631 | 3.542042 | 3.4619   |
| 3965 | M350T9_1 | 1.485932 | -0.57137 | -1.19787 | 0.267575 | 0.863942 | DOWN | 350.2677 | 350.2675 | 350.2679 | 9.306083 | 9.234417 |
| 3966 | M296T11_ | 1.355557 | -0.43889 | -1.21404 | 0.267582 | 0.863942 | DOWN | 295.8751 | 295.8748 | 295.8755 | 10.90765 | 10.879   |
| 3967 | M309T13_ | 1.56964  | 0.650433 | 1.230411 | 0.267598 | 0.863942 | UP   | 309.1308 | 309.1306 | 309.1311 | 12.75588 | 12.41563 |
| 3968 | M242T10_ | 4.886235 | 2.288723 | 1.286116 | 0.267617 | 0.863942 | UP   | 242.1383 | 242.1379 | 242.1385 | 9.551608 | 9.52595  |
| 3969 | M457T10_ | 1.22776  | -0.29603 | -1.2348  | 0.267639 | 0.863942 | DOWN | 457.4525 | 457.4519 | 457.4538 | 9.758608 | 9.729367 |
| 3970 | M174T10_ | 1.305674 | -0.3848  | -1.26528 | 0.267716 | 0.863943 | DOWN | 173.824  | 173.824  | 173.8241 | 9.914217 | 9.811217 |
| 3971 | M1890T10 | 1.216068 | -0.28222 | -1.21943 | 0.267808 | 0.863943 | DOWN | 1889.532 | 1889.53  | 1889.536 | 9.8207   | 9.728083 |
| 3972 | M867T9   | 1.199904 | -0.26292 | -1.19676 | 0.267809 | 0.863943 | DOWN | 866.557  | 866.5558 | 866.5583 | 8.952633 | 8.90715  |
| 3973 | M329T9_4 | 1.446665 | -0.53273 | -1.192   | 0.26781  | 0.863943 | DOWN | 329.215  | 329.2142 | 329.2152 | 8.954108 | 8.89395  |
| 3974 | M243T44_ | 1.514002 | 0.598367 | 1.191239 | 0.26781  | 0.863943 | UP   | 243.1588 | 243.1586 | 243.1589 | 44.049   | 43.70383 |
| 3975 | M1983T10 | 1.234186 | -0.30356 | -1.19331 | 0.267849 | 0.863943 | DOWN | 1983.107 | 1983.105 | 1983.114 | 9.8397   | 9.728083 |
| 3976 | M245T10_ | 1.343002 | -0.42546 | -1.19821 | 0.267919 | 0.863943 | DOWN | 244.9842 | 244.984  | 244.9941 | 9.946467 | 9.8378   |
| 3977 | M674T28  | 1.202312 | -0.26581 | -1.19854 | 0.267969 | 0.863943 | DOWN | 674.4685 | 674.4682 | 674.4689 | 28.23067 | 28.186   |
| 3978 | M520T9_1 | 1.484543 | -0.57002 | -1.20119 | 0.267975 | 0.863943 | DOWN | 519.5046 | 519.5005 | 519.5094 | 9.250817 | 9.1178   |
| 3979 | M505T11_ | 2.123702 | 1.086581 | 1.27544  | 0.268036 | 0.863943 | UP   | 505.0702 | 505.0696 | 505.0709 | 10.88416 | 10.84828 |
| 3980 | M818T13  | 1.327312 | -0.40851 | -1.25013 | 0.268066 | 0.863943 | DOWN | 818.4022 | 818.4019 | 818.4028 | 12.96697 | 12.95183 |
| 3981 | M1230T10 | 1.183965 | 0.243626 | 1.238974 | 0.268139 | 0.863943 | UP   | 1229.601 | 1229.599 | 1229.602 | 9.823575 | 9.699733 |
| 3982 | M626T9_2 | 1.423056 | 0.508993 | 1.195408 | 0.26828  | 0.863943 | UP   | 625.8387 | 625.8372 | 625.8391 | 9.224517 | 9.03845  |
| 3983 | M875T10  | 1.297334 | -0.37555 | -1.22604 | 0.268355 | 0.863943 | DOWN | 875.4838 | 875.4825 | 875.4839 | 10.40425 | 10.35992 |
| 3984 | M1880T10 | 2.639376 | 1.400197 | 1.280036 | 0.268421 | 0.863943 | UP   | 1880.072 | 1880.069 | 1880.079 | 9.82645  | 9.743767 |
| 3985 | M410T20  | 1.433475 | -0.51952 | -1.18958 | 0.268542 | 0.863944 | DOWN | 410.3372 | 410.3367 | 410.338  | 20.2525  | 20.17233 |
| 3986 | M199T9_4 | 1.416499 | -0.50233 | -1.2217  | 0.268629 | 0.863944 | DOWN | 198.9449 | 198.9423 | 198.9451 | 9.404958 | 9.250817 |
| 3987 | M681T10_ | 1.935488 | 0.952697 | 1.19235  | 0.268658 | 0.863944 | UP   | 680.5468 | 680.5396 | 680.5526 | 9.853633 | 9.743667 |
| 3988 | M536T10_ | 1.194435 | -0.25633 | -1.1887  | 0.26884  | 0.863944 | DOWN | 536.4988 | 536.4985 | 536.4999 | 9.929017 | 9.822117 |
| 3989 | M355T19_ | 1.229206 | -0.29773 | -1.20364 | 0.268894 | 0.863944 | DOWN | 355.2377 | 355.2375 | 355.2381 | 19.04067 | 19.038   |

|      |          |          |          |          |          |          |      |          |          |          |          |          |
|------|----------|----------|----------|----------|----------|----------|------|----------|----------|----------|----------|----------|
| 3990 | M381T9_4 | 1.353037 | -0.4362  | -1.21057 | 0.268932 | 0.863944 | DOWN | 380.6063 | 380.6054 | 380.6087 | 9.29345  | 9.129317 |
| 3991 | M413T15_ | 1.164072 | -0.21918 | -1.20276 | 0.268969 | 0.863944 | DOWN | 413.277  | 413.2768 | 413.2771 | 15.2927  | 15.26215 |
| 3992 | M676T10_ | 2.415256 | -1.27218 | -1.26761 | 0.26899  | 0.863944 | DOWN | 676.0601 | 676.0591 | 676.0606 | 9.821275 | 9.699733 |
| 3993 | M301T10_ | 1.377456 | -0.46201 | -1.19391 | 0.268995 | 0.863944 | DOWN | 301.0361 | 301.036  | 301.0362 | 9.915583 | 9.811217 |
| 3994 | M451T9_1 | 1.366974 | -0.45099 | -1.19563 | 0.268998 | 0.863944 | DOWN | 450.5402 | 450.5396 | 450.5413 | 9.24215  | 9.129317 |
| 3995 | M353T45_ | 1.019419 | -0.02775 | -1.19843 | 0.268999 | 0.863944 | DOWN | 353.3412 | 353.341  | 353.3413 | 44.70317 | 44.68167 |
| 3996 | M199T13  | 1.494429 | 0.579594 | 1.19305  | 0.269093 | 0.863944 | UP   | 199.1519 | 199.1518 | 199.152  | 12.60157 | 12.55835 |
| 3997 | M704T10_ | 1.14129  | -0.19066 | -1.21965 | 0.269203 | 0.863944 | DOWN | 703.9827 | 703.982  | 703.983  | 9.858983 | 9.73145  |
| 3998 | M379T10_ | 1.130475 | -0.17693 | -1.18712 | 0.269256 | 0.863944 | DOWN | 379.1648 | 379.1645 | 379.1656 | 9.924308 | 9.811217 |
| 3999 | M206T9_1 | 1.451659 | -0.5377  | -1.18829 | 0.269367 | 0.863944 | DOWN | 206.1004 | 206.1    | 206.1006 | 8.686867 | 8.521733 |
| 4000 | M891T10_ | 1.307435 | -0.38674 | -1.20151 | 0.26942  | 0.863944 | DOWN | 890.8523 | 890.8517 | 890.8527 | 9.61185  | 9.49445  |
| 4001 | M390T9_1 | 1.18403  | -0.24371 | -1.21149 | 0.269448 | 0.863945 | DOWN | 389.5881 | 389.588  | 389.5887 | 9.041133 | 8.941383 |
| 4002 | M633T10_ | 1.139071 | -0.18786 | -1.19426 | 0.269466 | 0.863945 | DOWN | 633.4592 | 633.4588 | 633.4594 | 10.38894 | 10.32768 |
| 4003 | M358T10_ | 1.256538 | -0.32945 | -1.197   | 0.269503 | 0.863945 | DOWN | 357.9014 | 357.9012 | 357.9018 | 9.8207   | 9.715683 |
| 4004 | M320T11_ | 1.327053 | 0.408227 | 1.258984 | 0.269531 | 0.863945 | UP   | 319.8484 | 319.848  | 319.8485 | 10.90765 | 10.879   |
| 4005 | M234T10_ | 1.802418 | -0.84993 | -1.18741 | 0.269588 | 0.863945 | DOWN | 234.1333 | 234.1256 | 234.1335 | 9.634325 | 9.509533 |
| 4006 | M622T37_ | 1.302427 | -0.3812  | -1.26196 | 0.26962  | 0.863945 | DOWN | 622.3436 | 622.3434 | 622.3438 | 37.31592 | 37.20133 |
| 4007 | M733T10_ | 1.266698 | -0.34107 | -1.20586 | 0.26964  | 0.863945 | DOWN | 732.8932 | 732.8927 | 732.8932 | 9.967367 | 9.8753   |
| 4008 | M673T10_ | 1.305006 | 0.384057 | 1.185915 | 0.269683 | 0.863945 | UP   | 673.1467 | 673.1462 | 673.1474 | 9.82645  | 9.76065  |
| 4009 | M471T9_4 | 1.364536 | -0.44841 | -1.21784 | 0.2697   | 0.863945 | DOWN | 471.1244 | 471.1239 | 471.1277 | 9.255333 | 8.918933 |
| 4010 | M574T11_ | 1.352363 | -0.43548 | -1.23671 | 0.269776 | 0.863945 | DOWN | 574.3908 | 574.39   | 574.3914 | 10.90984 | 10.84767 |
| 4011 | M746T10_ | 1.185787 | -0.24584 | -1.19795 | 0.269783 | 0.863945 | DOWN | 746.4647 | 746.4645 | 746.465  | 10.39556 | 10.32768 |
| 4012 | M762T10_ | 1.312202 | -0.39199 | -1.24363 | 0.269783 | 0.863945 | DOWN | 761.7917 | 761.791  | 761.7924 | 9.91875  | 9.811217 |
| 4013 | M454T21  | 1.550645 | -0.63287 | -1.22824 | 0.269881 | 0.863945 | DOWN | 454.3465 | 454.3461 | 454.3467 | 20.72233 | 20.56217 |
| 4014 | M450T10_ | 2.257501 | 1.174726 | 1.231687 | 0.269967 | 0.863945 | UP   | 450.1406 | 450.1405 | 450.1408 | 9.946083 | 9.90755  |
| 4015 | M245T10_ | 1.272262 | -0.3474  | -1.18937 | 0.269974 | 0.863945 | DOWN | 245.3    | 245.2998 | 245.3005 | 9.955875 | 9.843367 |
| 4016 | M546T41_ | 1.143798 | -0.19383 | -1.24773 | 0.269996 | 0.863945 | DOWN | 546.327  | 546.3268 | 546.3271 | 41.25858 | 41.22967 |
| 4017 | M306T9_3 | 3.464556 | -1.79267 | -1.25983 | 0.270061 | 0.863945 | DOWN | 306.0177 | 306.0176 | 306.0178 | 9.275917 | 9.219483 |
| 4018 | M472T10_ | 1.331238 | -0.41277 | -1.19461 | 0.270121 | 0.863945 | DOWN | 472.4805 | 472.4796 | 472.4808 | 9.970617 | 9.859233 |
| 4019 | M564T39_ | 1.202798 | 0.266395 | 1.247495 | 0.270138 | 0.863945 | UP   | 564.3012 | 564.3009 | 564.3015 | 39.266   | 39.04283 |
| 4020 | M290T10_ | 1.364202 | -0.44806 | -1.20362 | 0.270163 | 0.863945 | DOWN | 290.2673 | 290.2672 | 290.2674 | 9.968992 | 9.8914   |
| 4021 | M245T9_5 | 1.360811 | -0.44447 | -1.19352 | 0.270188 | 0.863945 | DOWN | 245.1496 | 245.1492 | 245.1498 | 8.9459   | 8.892117 |
| 4022 | M446T43_ | 1.604569 | 0.682186 | 1.217182 | 0.270201 | 0.863945 | UP   | 446.2744 | 446.2744 | 446.2746 | 42.83383 | 42.6395  |
| 4023 | M435T9_1 | 1.312959 | -0.39282 | -1.19175 | 0.270387 | 0.863946 | DOWN | 435.4882 | 435.488  | 435.4887 | 9.25985  | 9.129317 |
| 4024 | M1232T10 | 1.205959 | -0.27018 | -1.26899 | 0.27039  | 0.863946 | DOWN | 1231.93  | 1231.928 | 1231.932 | 9.811408 | 9.699733 |

|      |          |          |          |          |          |          |      |          |          |          |          |          |
|------|----------|----------|----------|----------|----------|----------|------|----------|----------|----------|----------|----------|
| 4025 | M373T9_1 | 1.797815 | -0.84624 | -1.2578  | 0.2704   | 0.863946 | DOWN | 372.5374 | 372.5369 | 372.5375 | 9.10275  | 9.03845  |
| 4026 | M542T28_ | 1.169943 | -0.22644 | -1.20948 | 0.270449 | 0.863946 | DOWN | 542.3894 | 542.389  | 542.3895 | 28.14192 | 28.0835  |
| 4027 | M414T9_1 | 1.831346 | -0.8729  | -1.20737 | 0.270461 | 0.863946 | DOWN | 414.3416 | 414.339  | 414.3423 | 9.270683 | 9.129317 |
| 4028 | M321T35  | 1.09386  | -0.12943 | -1.24631 | 0.27047  | 0.863946 | DOWN | 321.2786 | 321.2786 | 321.2787 | 35.38733 | 35.38683 |
| 4029 | M279T10_ | 1.429513 | 0.515523 | 1.245964 | 0.270565 | 0.863946 | UP   | 279.2818 | 279.2814 | 279.2891 | 9.979325 | 9.8753   |
| 4030 | M868T10_ | 1.446948 | -0.53301 | -1.18379 | 0.270622 | 0.863946 | DOWN | 868.4403 | 868.4394 | 868.4417 | 10.44697 | 10.43285 |
| 4031 | M274T18  | 1.757194 | -0.81327 | -1.22517 | 0.270624 | 0.863946 | DOWN | 274.1832 | 274.1831 | 274.1832 | 18.04183 | 18.02567 |
| 4032 | M308T9_1 | 1.445591 | -0.53166 | -1.22938 | 0.27063  | 0.863946 | DOWN | 307.7908 | 307.7906 | 307.7911 | 8.9459   | 8.863633 |
| 4033 | M1401T10 | 1.350486 | 0.433479 | 1.193757 | 0.270648 | 0.863946 | UP   | 1400.756 | 1400.753 | 1400.76  | 9.930908 | 9.827283 |
| 4034 | M326T10_ | 2.113295 | -1.07949 | -1.21523 | 0.270672 | 0.863946 | DOWN | 325.8144 | 325.8138 | 325.8167 | 9.512983 | 9.416817 |
| 4035 | M675T23  | 1.284505 | -0.36121 | -1.2029  | 0.270683 | 0.863946 | DOWN | 674.5049 | 674.5045 | 674.5051 | 23.103   | 23.04483 |
| 4036 | M388T10_ | 1.433226 | -0.51927 | -1.24695 | 0.270696 | 0.863946 | DOWN | 388.0919 | 388.0914 | 388.0922 | 9.91765  | 9.811217 |
| 4037 | M244T10_ | 1.563145 | -0.64445 | -1.19336 | 0.270764 | 0.863946 | DOWN | 244.4335 | 244.4334 | 244.4335 | 9.928458 | 9.8378   |
| 4038 | M723T10_ | 1.118437 | -0.16148 | -1.18833 | 0.270859 | 0.863946 | DOWN | 723.4056 | 723.4049 | 723.4065 | 9.830283 | 9.715683 |
| 4039 | M204T30  | 1.127849 | 0.173574 | 1.183555 | 0.270866 | 0.863946 | UP   | 204.1097 | 204.1096 | 204.1098 | 29.834   | 29.81917 |
| 4040 | M784T9   | 1.431889 | -0.51792 | -1.21213 | 0.27097  | 0.863946 | DOWN | 783.8497 | 783.8494 | 783.8503 | 9.3332   | 9.234417 |
| 4041 | M219T9_4 | 1.405308 | -0.49089 | -1.21764 | 0.271015 | 0.863946 | DOWN | 218.8192 | 218.8182 | 218.8207 | 9.295167 | 9.07525  |
| 4042 | M204T10_ | 2.094176 | 1.066383 | 1.270265 | 0.271042 | 0.863946 | UP   | 203.925  | 203.9249 | 203.9327 | 9.983467 | 9.8914   |
| 4043 | M248T9_1 | 1.355205 | -0.43851 | -1.18505 | 0.271118 | 0.863946 | DOWN | 247.7667 | 247.7661 | 247.7671 | 8.954142 | 8.832317 |
| 4044 | M299T19  | 3.032644 | 1.600576 | 1.262301 | 0.271147 | 0.863946 | UP   | 299.1821 | 299.1814 | 299.1827 | 18.98033 | 18.9675  |
| 4045 | M614T10_ | 1.473038 | 0.558794 | 1.239597 | 0.271147 | 0.863946 | UP   | 613.8283 | 613.8253 | 613.8308 | 9.92625  | 9.827283 |
| 4046 | M657T10_ | 1.481798 | 0.567348 | 1.261458 | 0.271179 | 0.863946 | UP   | 656.6825 | 656.6817 | 656.6838 | 9.831517 | 9.715683 |
| 4047 | M784T11_ | 1.546671 | -0.62917 | -1.22832 | 0.271182 | 0.863946 | DOWN | 783.7224 | 783.7219 | 783.7228 | 10.84838 | 10.8214  |
| 4048 | M534T39_ | 1.325213 | -0.40622 | -1.19051 | 0.271336 | 0.863947 | DOWN | 534.3268 | 534.3267 | 534.3271 | 38.561   | 38.309   |
| 4049 | M589T25  | 6.157827 | -2.62242 | -1.27451 | 0.271373 | 0.863947 | DOWN | 589.4027 | 589.4025 | 589.4029 | 25.05567 | 25.0445  |
| 4050 | M642T9_3 | 1.346496 | -0.42921 | -1.21173 | 0.271452 | 0.863947 | DOWN | 642.0267 | 642.0261 | 642.0271 | 9.498117 | 9.416817 |
| 4051 | M270T11_ | 1.129361 | -0.17551 | -1.18882 | 0.271607 | 0.863947 | DOWN | 270.4805 | 270.4802 | 270.4807 | 10.90659 | 10.89355 |
| 4052 | M408T10_ | 1.410468 | -0.49617 | -1.18131 | 0.271625 | 0.863947 | DOWN | 407.6015 | 407.6013 | 407.6016 | 9.816317 | 9.696683 |
| 4053 | M360T38  | 1.102606 | 0.140918 | 1.23155  | 0.271642 | 0.863947 | UP   | 360.3623 | 360.3621 | 360.3625 | 38.16533 | 38.13667 |
| 4054 | M229T10_ | 1.772506 | -0.82579 | -1.2138  | 0.271787 | 0.863947 | DOWN | 229.0963 | 229.0956 | 229.0969 | 9.82645  | 9.715683 |
| 4055 | M403T11_ | 1.878045 | 0.909232 | 1.181137 | 0.27179  | 0.863947 | UP   | 403.0595 | 403.0593 | 403.06   | 10.91299 | 10.9049  |
| 4056 | M639T10_ | 1.285749 | -0.36261 | -1.22502 | 0.271797 | 0.863947 | DOWN | 638.7786 | 638.778  | 638.7788 | 9.508883 | 9.40135  |
| 4057 | M270T10_ | 1.133875 | 0.181262 | 1.185403 | 0.271875 | 0.863947 | UP   | 269.822  | 269.8219 | 269.8222 | 9.82645  | 9.715683 |
| 4058 | M683T11_ | 1.157312 | -0.21078 | -1.18765 | 0.27205  | 0.863947 | DOWN | 682.5025 | 682.5018 | 682.5029 | 10.98193 | 10.95095 |
| 4059 | M198T9_1 | 1.412566 | -0.49832 | -1.20511 | 0.272083 | 0.863947 | DOWN | 197.6601 | 197.6599 | 197.6603 | 9.321425 | 9.20785  |

|      |          |          |          |          |          |          |      |          |          |          |          |          |
|------|----------|----------|----------|----------|----------|----------|------|----------|----------|----------|----------|----------|
| 4060 | M1029T10 | 1.433861 | -0.5199  | -1.18003 | 0.272137 | 0.863947 | DOWN | 1028.678 | 1028.677 | 1028.679 | 9.505758 | 9.432533 |
| 4061 | M365T18_ | 1.794738 | 0.843774 | 1.179628 | 0.272139 | 0.863948 | UP   | 365.1695 | 365.1692 | 365.1698 | 17.74533 | 17.72017 |
| 4062 | M789T10_ | 1.241515 | -0.3121  | -1.18474 | 0.2723   | 0.863948 | DOWN | 789.4458 | 789.4453 | 789.4463 | 9.645292 | 9.52595  |
| 4063 | M200T23  | 1.242603 | -0.31337 | -1.18203 | 0.272355 | 0.863948 | DOWN | 200.237  | 200.2369 | 200.2371 | 23.42517 | 23.4095  |
| 4064 | M602T10_ | 1.395983 | -0.48128 | -1.21437 | 0.272361 | 0.863948 | DOWN | 602.3597 | 602.3575 | 602.3611 | 10.23695 | 10.18653 |
| 4065 | M388T9_3 | 3.524939 | -1.8176  | -1.26273 | 0.272537 | 0.863948 | DOWN | 388.4228 | 388.4228 | 388.4249 | 9.1175   | 9.111033 |
| 4066 | M508T11_ | 1.500195 | -0.58515 | -1.20925 | 0.272577 | 0.863948 | DOWN | 508.3256 | 508.3251 | 508.326  | 10.73763 | 10.7223  |
| 4067 | M731T10_ | 1.252175 | -0.32444 | -1.21843 | 0.272601 | 0.863948 | DOWN | 731.2171 | 731.2091 | 731.2178 | 9.77355  | 9.699733 |
| 4068 | M702T7   | 6.976243 | -2.80245 | -1.27011 | 0.272641 | 0.863948 | DOWN | 702.4964 | 702.4963 | 702.4967 | 6.8924   | 6.8413   |
| 4069 | M702T9_2 | 1.232616 | -0.30172 | -1.18952 | 0.272691 | 0.863948 | DOWN | 702.3958 | 702.3953 | 702.396  | 9.490958 | 9.38595  |
| 4070 | M456T10_ | 2.275709 | 1.186316 | 1.231718 | 0.272702 | 0.863948 | UP   | 456.0969 | 456.0882 | 456.0971 | 10.13518 | 9.960817 |
| 4071 | M221T11_ | 1.215223 | -0.28122 | -1.22377 | 0.272829 | 0.863948 | DOWN | 220.6107 | 220.6105 | 220.6108 | 10.9198  | 10.873   |
| 4072 | M674T9_2 | 1.277571 | -0.3534  | -1.17785 | 0.272835 | 0.863948 | DOWN | 673.9574 | 673.9566 | 673.9591 | 9.285867 | 9.129317 |
| 4073 | M461T30_ | 1.167838 | -0.22384 | -1.18148 | 0.272873 | 0.863948 | DOWN | 461.2869 | 461.2865 | 461.2872 | 30.22483 | 30.22233 |
| 4074 | M246T9_3 | 1.641241 | -0.71479 | -1.25273 | 0.272889 | 0.863948 | DOWN | 246.1484 | 246.1483 | 246.1485 | 9.340183 | 9.12675  |
| 4075 | M282T10_ | 1.156564 | -0.20984 | -1.17745 | 0.27296  | 0.863948 | DOWN | 281.8164 | 281.8163 | 281.8165 | 9.888342 | 9.811217 |
| 4076 | M288T23_ | 1.08127  | -0.11273 | -1.21144 | 0.272969 | 0.863948 | DOWN | 288.2892 | 288.2891 | 288.2894 | 22.90042 | 22.88567 |
| 4077 | M507T9_1 | 1.613892 | -0.69054 | -1.18255 | 0.272976 | 0.863948 | DOWN | 507.1341 | 507.1333 | 507.1344 | 9.332617 | 9.26575  |
| 4078 | M838T11  | 1.201023 | -0.26426 | -1.17799 | 0.273008 | 0.863948 | DOWN | 837.9988 | 837.9975 | 837.9991 | 10.64209 | 10.61337 |
| 4079 | M620T9_4 | 1.407465 | -0.4931  | -1.19088 | 0.27304  | 0.863948 | DOWN | 619.9843 | 619.9835 | 619.9849 | 9.317    | 9.234417 |
| 4080 | M343T10_ | 3.282345 | -1.71473 | -1.25326 | 0.273172 | 0.863949 | DOWN | 343.3865 | 343.3782 | 343.391  | 9.804067 | 9.431017 |
| 4081 | M487T10_ | 1.369623 | -0.45378 | -1.18856 | 0.273302 | 0.863949 | DOWN | 486.9588 | 486.9575 | 486.962  | 10.17547 | 9.995817 |
| 4082 | M632T10_ | 1.187229 | -0.2476  | -1.20006 | 0.273363 | 0.863949 | DOWN | 631.7542 | 631.7537 | 631.7546 | 9.967367 | 9.859233 |
| 4083 | M424T10_ | 1.226722 | -0.29481 | -1.17607 | 0.273385 | 0.863949 | DOWN | 424.3172 | 424.3168 | 424.3279 | 9.671325 | 9.370583 |
| 4084 | M575T10_ | 1.165564 | -0.22103 | -1.19573 | 0.273431 | 0.863949 | DOWN | 575.0174 | 575.0171 | 575.018  | 9.90295  | 9.79535  |
| 4085 | M354T10_ | 1.171538 | -0.2284  | -1.25288 | 0.273435 | 0.863949 | DOWN | 354.1041 | 354.1038 | 354.1044 | 9.825492 | 9.715683 |
| 4086 | M350T45_ | 1.229788 | -0.29841 | -1.17605 | 0.273555 | 0.863949 | DOWN | 350.2172 | 350.217  | 350.2174 | 44.9835  | 44.82533 |
| 4087 | M844T10_ | 1.575981 | -0.65625 | -1.17798 | 0.273644 | 0.863949 | DOWN | 844.1985 | 844.1971 | 844.1991 | 9.918833 | 9.88865  |
| 4088 | M295T22_ | 1.192231 | -0.25366 | -1.18563 | 0.273714 | 0.863949 | DOWN | 295.19   | 295.1898 | 295.1902 | 22.052   | 22.03783 |
| 4089 | M229T11_ | 1.376308 | -0.4608  | -1.1874  | 0.273752 | 0.863949 | DOWN | 228.7631 | 228.7631 | 228.764  | 10.94208 | 10.88995 |
| 4090 | M487T10_ | 1.20392  | -0.26774 | -1.18286 | 0.273863 | 0.863949 | DOWN | 486.6267 | 486.6264 | 486.6282 | 10.39278 | 10.34372 |
| 4091 | M477T9_5 | 1.255436 | -0.32819 | -1.18666 | 0.273943 | 0.863949 | DOWN | 477.0977 | 477.0974 | 477.098  | 9.321425 | 9.129317 |
| 4092 | M1038T10 | 1.188818 | -0.24953 | -1.21276 | 0.27397  | 0.863949 | DOWN | 1037.739 | 1037.738 | 1037.739 | 9.85525  | 9.73145  |
| 4093 | M388T10_ | 1.334756 | -0.41658 | -1.22389 | 0.27397  | 0.863949 | DOWN | 387.6427 | 387.6416 | 387.6476 | 9.9351   | 9.811217 |
| 4094 | M316T11_ | 1.022097 | -0.03153 | 1.17791  | 0.273986 | 0.86395  | DOWN | 315.5167 | 315.5165 | 315.5167 | 11.47298 | 11.46742 |

|      |          |          |          |          |          |          |      |          |          |          |          |          |
|------|----------|----------|----------|----------|----------|----------|------|----------|----------|----------|----------|----------|
| 4095 | M344T9_3 | 1.45446  | -0.54048 | -1.21877 | 0.27399  | 0.86395  | DOWN | 343.9101 | 343.9095 | 343.9103 | 9.3332   | 9.234417 |
| 4096 | M1759T10 | 1.318405 | -0.39879 | -1.17912 | 0.274077 | 0.86395  | DOWN | 1758.714 | 1758.713 | 1758.716 | 9.59825  | 9.509533 |
| 4097 | M226T9_9 | 1.353508 | -0.4367  | -1.22582 | 0.274099 | 0.86395  | DOWN | 226.4388 | 226.4372 | 226.4399 | 9.30385  | 9.07145  |
| 4098 | M653T10_ | 1.205322 | -0.26942 | -1.1783  | 0.274107 | 0.86395  | DOWN | 652.8512 | 652.85   | 652.8594 | 9.830283 | 9.715683 |
| 4099 | M1725T10 | 1.269237 | 0.343961 | 1.174002 | 0.274182 | 0.86395  | UP   | 1725.23  | 1725.229 | 1725.233 | 9.825392 | 9.715683 |
| 4100 | M1141T11 | 1.1924   | -0.25387 | -1.17802 | 0.274212 | 0.86395  | DOWN | 1140.653 | 1140.652 | 1140.653 | 10.90519 | 10.879   |
| 4101 | M420T11_ | 1.199779 | -0.26277 | -1.18639 | 0.274537 | 0.86395  | DOWN | 420.0135 | 420.0133 | 420.0136 | 10.90519 | 10.879   |
| 4102 | M305T7   | 1.332693 | 0.414345 | 1.173564 | 0.274615 | 0.86395  | UP   | 305.1567 | 305.1565 | 305.157  | 6.853483 | 6.779667 |
| 4103 | M576T10_ | 1.267542 | -0.34203 | -1.21918 | 0.274712 | 0.86395  | DOWN | 576.1556 | 576.1554 | 576.156  | 9.938708 | 9.827283 |
| 4104 | M406T14  | 1.295289 | -0.37327 | -1.19016 | 0.274767 | 0.86395  | DOWN | 406.2947 | 406.2944 | 406.2952 | 13.79973 | 13.76973 |
| 4105 | M200T9_2 | 2.554365 | 1.352965 | 1.256699 | 0.27477  | 0.86395  | UP   | 200.4069 | 200.4061 | 200.4072 | 9.279417 | 9.166033 |
| 4106 | M321T9_2 | 1.683564 | -0.75152 | -1.19528 | 0.274872 | 0.86395  | DOWN | 320.6997 | 320.6994 | 320.6999 | 9.300733 | 9.220933 |
| 4107 | M924T11_ | 1.200055 | 0.263101 | 1.181646 | 0.274893 | 0.86395  | UP   | 924.2201 | 924.2186 | 924.2222 | 10.90553 | 10.86008 |
| 4108 | M477T10_ | 1.866935 | -0.90067 | -1.23835 | 0.275065 | 0.863951 | DOWN | 476.7414 | 476.7412 | 476.7418 | 9.74925  | 9.636483 |
| 4109 | M185T10_ | 1.443516 | -0.52959 | -1.2521  | 0.275223 | 0.863951 | DOWN | 185.1815 | 185.1815 | 185.1815 | 9.918833 | 9.822117 |
| 4110 | M382T16_ | 1.163654 | -0.21866 | -1.17831 | 0.275283 | 0.863951 | DOWN | 381.7704 | 381.7703 | 381.7707 | 15.53113 | 15.51198 |
| 4111 | M526T10_ | 1.390206 | -0.4753  | -1.18948 | 0.275429 | 0.863951 | DOWN | 526.4717 | 526.4715 | 526.4721 | 9.970617 | 9.859233 |
| 4112 | M333T10_ | 1.278803 | -0.35479 | -1.21947 | 0.275523 | 0.863951 | DOWN | 333.1392 | 333.1387 | 333.1395 | 9.839008 | 9.715683 |
| 4113 | M425T19  | 1.625067 | 0.700499 | 1.184833 | 0.275568 | 0.863951 | UP   | 425.3084 | 425.3083 | 425.3089 | 18.80392 | 18.77683 |
| 4114 | M319T10_ | 2.160784 | 1.111555 | 1.251752 | 0.27568  | 0.863951 | UP   | 318.5571 | 318.5565 | 318.5582 | 9.848417 | 9.699733 |
| 4115 | M387T11_ | 2.089395 | -1.06309 | -1.24474 | 0.275704 | 0.863951 | DOWN | 387.2491 | 387.249  | 387.2493 | 11.09168 | 11.0562  |
| 4116 | M1098T10 | 1.336099 | -0.41803 | -1.19344 | 0.275713 | 0.863951 | DOWN | 1097.524 | 1097.524 | 1097.524 | 9.983467 | 9.9009   |
| 4117 | M680T14  | 1.165082 | -0.22043 | -1.17467 | 0.275787 | 0.863951 | DOWN | 679.5111 | 679.5109 | 679.5112 | 14.399   | 14.38542 |
| 4118 | M326T13  | 1.153243 | -0.2057  | -1.17087 | 0.27582  | 0.863951 | DOWN | 326.1497 | 326.1492 | 326.1502 | 12.80607 | 12.7478  |
| 4119 | M202T11_ | 1.124512 | -0.1693  | -1.17215 | 0.275846 | 0.863952 | DOWN | 202.3955 | 202.3953 | 202.3957 | 10.90659 | 10.879   |
| 4120 | M167T10_ | 1.105047 | -0.14411 | -1.23716 | 0.275949 | 0.863952 | DOWN | 167.1052 | 167.1051 | 167.1068 | 9.8207   | 9.696567 |
| 4121 | M534T40_ | 1.180404 | -0.23928 | -1.25091 | 0.275992 | 0.863952 | DOWN | 534.3269 | 534.3268 | 534.3271 | 39.98625 | 39.9205  |
| 4122 | M348T10_ | 1.297086 | -0.37527 | -1.23365 | 0.276084 | 0.863952 | DOWN | 348.128  | 348.1278 | 348.1285 | 9.830783 | 9.715683 |
| 4123 | M373T10_ | 16.59611 | 4.052773 | 1.260084 | 0.27613  | 0.863952 | UP   | 373.213  | 373.2127 | 373.2166 | 9.577683 | 9.47865  |
| 4124 | M1867T10 | 1.224346 | -0.29201 | -1.22365 | 0.27615  | 0.863952 | DOWN | 1867.352 | 1867.35  | 1867.353 | 9.830283 | 9.715683 |
| 4125 | M497T10_ | 1.543667 | -0.62636 | -1.21485 | 0.276176 | 0.863952 | DOWN | 496.5856 | 496.5852 | 496.5858 | 9.933967 | 9.8378   |
| 4126 | M378T10_ | 1.738419 | 0.797776 | 1.234216 | 0.276272 | 0.863952 | UP   | 377.6275 | 377.627  | 377.6278 | 9.951283 | 9.843367 |
| 4127 | M424T11_ | 1.570778 | -0.65148 | -1.18034 | 0.276275 | 0.863952 | DOWN | 423.8769 | 423.869  | 423.8787 | 10.94037 | 10.89125 |
| 4128 | M697T10_ | 1.633525 | 0.707989 | 1.193308 | 0.276301 | 0.863952 | UP   | 697.1704 | 697.1697 | 697.1714 | 9.851175 | 9.747533 |
| 4129 | M317T23  | 115.3339 | 6.849672 | 1.259559 | 0.276312 | 0.863952 | UP   | 317.2878 | 317.2876 | 317.2878 | 23.27583 | 23.24867 |

|      |          |          |          |          |          |          |      |          |          |          |          |          |
|------|----------|----------|----------|----------|----------|----------|------|----------|----------|----------|----------|----------|
| 4130 | M648T21  | 1.57989  | 0.659825 | 1.256456 | 0.27636  | 0.863952 | UP   | 648.2928 | 648.2925 | 648.2932 | 21.433   | 21.37933 |
| 4131 | M377T9_4 | 1.325263 | -0.40628 | -1.19402 | 0.276362 | 0.863952 | DOWN | 376.8355 | 376.8331 | 376.8378 | 9.264792 | 9.142767 |
| 4132 | M198T10_ | 1.315569 | -0.39569 | -1.21649 | 0.276382 | 0.863952 | DOWN | 197.7016 | 197.7015 | 197.7018 | 9.8207   | 9.715683 |
| 4133 | M328T10_ | 1.735793 | 0.795595 | 1.2519   | 0.276406 | 0.863952 | UP   | 327.6836 | 327.6832 | 327.6838 | 9.818525 | 9.715683 |
| 4134 | M225T10_ | 2.856635 | 1.514317 | 1.252418 | 0.276431 | 0.863952 | UP   | 225.4107 | 225.4105 | 225.4125 | 9.956867 | 9.816167 |
| 4135 | M454T12  | 1.221998 | -0.28924 | -1.19368 | 0.276434 | 0.863952 | DOWN | 454.3461 | 454.3459 | 454.3463 | 11.63592 | 11.57545 |
| 4136 | M706T10_ | 1.668402 | 0.738467 | 1.171896 | 0.276471 | 0.863952 | UP   | 706.0489 | 706.0484 | 706.0576 | 9.842    | 9.77435  |
| 4137 | M787T10_ | 1.220903 | -0.28795 | -1.19304 | 0.276585 | 0.863952 | DOWN | 787.2422 | 787.2417 | 787.2438 | 9.9014   | 9.79535  |
| 4138 | M313T21  | 52.87969 | 5.724642 | 1.258653 | 0.276601 | 0.863952 | UP   | 313.2565 | 313.2558 | 313.2565 | 20.864   | 20.85467 |
| 4139 | M1038T10 | 1.214508 | -0.28037 | -1.18868 | 0.27664  | 0.863952 | DOWN | 1038.241 | 1038.24  | 1038.241 | 9.847133 | 9.73145  |
| 4140 | M395T20_ | 1.150934 | -0.2028  | -1.16754 | 0.276723 | 0.863952 | DOWN | 395.3171 | 395.317  | 395.3173 | 20.24517 | 20.23017 |
| 4141 | M558T10_ | 1.245149 | -0.31632 | -1.16741 | 0.276753 | 0.863952 | DOWN | 557.955  | 557.9546 | 557.9573 | 9.9014   | 9.779267 |
| 4142 | M1005T10 | 1.562484 | -0.64384 | -1.16738 | 0.27676  | 0.863952 | DOWN | 1004.905 | 1004.905 | 1004.906 | 9.969925 | 9.956417 |
| 4143 | M677T36  | 1.189477 | -0.25033 | -1.1932  | 0.276777 | 0.863952 | DOWN | 677.4449 | 677.4447 | 677.4454 | 36.33108 | 36.319   |
| 4144 | M458T25_ | 5.455766 | -2.44778 | -1.25769 | 0.276836 | 0.863953 | DOWN | 457.982  | 457.9819 | 457.9831 | 25.37683 | 25.32683 |
| 4145 | M373T9_2 | 1.38864  | -0.47367 | -1.19595 | 0.276863 | 0.863953 | DOWN | 372.6844 | 372.6843 | 372.6846 | 9.494433 | 9.40135  |
| 4146 | M499T9_6 | 1.410452 | -0.49616 | -1.17164 | 0.276866 | 0.863953 | DOWN | 499.1032 | 499.0996 | 499.1038 | 9.2585   | 9.1503   |
| 4147 | M298T23  | 180.9944 | 7.499801 | 1.257783 | 0.276891 | 0.863953 | UP   | 298.2739 | 298.2736 | 298.2739 | 23.29033 | 23.26333 |
| 4148 | M283T10_ | 2.010549 | 1.00759  | 1.249815 | 0.276942 | 0.863953 | UP   | 282.9813 | 282.9811 | 282.9814 | 9.9847   | 9.8753   |
| 4149 | M378T43_ | 3.014109 | 1.591732 | 1.239216 | 0.276968 | 0.863953 | UP   | 378.2482 | 378.248  | 378.2482 | 42.53875 | 42.43817 |
| 4150 | M228T9_1 | 2.438638 | -1.28608 | -1.24973 | 0.276999 | 0.863953 | DOWN | 228.2413 | 228.2401 | 228.243  | 9.310917 | 9.11795  |
| 4151 | M335T9_2 | 2.963816 | 1.567456 | 1.226983 | 0.27706  | 0.863953 | UP   | 334.7182 | 334.7175 | 334.7185 | 8.863517 | 8.818733 |
| 4152 | M705T10_ | 1.136005 | -0.18397 | -1.20189 | 0.277301 | 0.863953 | DOWN | 704.6525 | 704.6515 | 704.6529 | 9.825767 | 9.715683 |
| 4153 | M608T9_1 | 1.501007 | -0.58593 | -1.16669 | 0.277331 | 0.863953 | DOWN | 608.2336 | 608.2329 | 608.2344 | 9.347458 | 9.22495  |
| 4154 | M413T9_1 | 1.37532  | -0.45977 | -1.17093 | 0.277383 | 0.863953 | DOWN | 413.4095 | 413.4092 | 413.4097 | 9.2628   | 9.159717 |
| 4155 | M242T11_ | 1.981493 | 0.986588 | 1.166385 | 0.277389 | 0.863953 | UP   | 242.2106 | 242.2106 | 242.211  | 10.90638 | 10.90012 |
| 4156 | M606T24  | 1.190068 | -0.25104 | -1.19919 | 0.277389 | 0.863953 | DOWN | 606.4625 | 606.4621 | 606.4629 | 23.87667 | 23.85567 |
| 4157 | M792T22  | 1.23761  | -0.30756 | -1.19149 | 0.277397 | 0.863953 | DOWN | 791.5559 | 791.5551 | 791.5565 | 22.12567 | 22.1105  |
| 4158 | M550T11  | 1.440416 | -0.52649 | -1.16701 | 0.277437 | 0.863953 | DOWN | 549.6666 | 549.6662 | 549.6747 | 10.59907 | 10.55068 |
| 4159 | M736T9_2 | 1.557508 | -0.63924 | -1.16533 | 0.277456 | 0.863953 | DOWN | 735.8245 | 735.824  | 735.8249 | 9.317    | 9.234417 |
| 4160 | M629T10_ | 1.26219  | -0.33593 | -1.17598 | 0.277463 | 0.863953 | DOWN | 628.7876 | 628.7865 | 628.7883 | 9.801833 | 9.632083 |
| 4161 | M174T10_ | 1.189559 | -0.25043 | -1.23295 | 0.277535 | 0.863953 | DOWN | 173.6944 | 173.6942 | 173.6945 | 9.972917 | 9.859233 |
| 4162 | M734T10_ | 1.804212 | -0.85137 | -1.24258 | 0.277635 | 0.863953 | DOWN | 733.9852 | 733.9834 | 733.9866 | 9.862217 | 9.747533 |
| 4163 | M289T10_ | 1.151061 | -0.20296 | -1.18167 | 0.27769  | 0.863953 | DOWN | 289.0846 | 289.0844 | 289.0847 | 9.958617 | 9.843367 |
| 4164 | M480T10_ | 1.338862 | -0.42101 | -1.1727  | 0.27773  | 0.863954 | DOWN | 479.7914 | 479.7907 | 479.7921 | 9.834117 | 9.7124   |

|      |          |          |          |          |          |          |      |          |          |          |          |          |
|------|----------|----------|----------|----------|----------|----------|------|----------|----------|----------|----------|----------|
| 4165 | M419T11_ | 1.702105 | 0.76732  | 1.208211 | 0.277737 | 0.863954 | UP   | 419.4801 | 419.4799 | 419.4802 | 10.9676  | 10.93752 |
| 4166 | M359T10_ | 1.843414 | 0.88238  | 1.236953 | 0.277757 | 0.863954 | UP   | 359.3463 | 359.3369 | 359.3497 | 9.864217 | 9.772883 |
| 4167 | M399T9_1 | 4.713456 | 2.236785 | 1.226459 | 0.277792 | 0.863954 | UP   | 398.7659 | 398.7628 | 398.7669 | 9.18195  | 9.04725  |
| 4168 | M309T12  | 1.277404 | -0.35321 | -1.17101 | 0.277815 | 0.863954 | DOWN | 309.1976 | 309.1974 | 309.198  | 11.50505 | 11.48217 |
| 4169 | M406T45_ | 1.446803 | 0.532868 | 1.191943 | 0.277856 | 0.863954 | UP   | 406.207  | 406.207  | 406.2071 | 44.502   | 44.43733 |
| 4170 | M1480T10 | 1.300217 | -0.37875 | -1.17938 | 0.277892 | 0.863954 | DOWN | 1479.852 | 1479.85  | 1479.852 | 10.39603 | 10.34372 |
| 4171 | M402T11_ | 1.645304 | -0.71835 | -1.16504 | 0.277922 | 0.863954 | DOWN | 401.6023 | 401.594  | 401.6049 | 10.91977 | 10.83417 |
| 4172 | M204T10_ | 1.309429 | -0.38894 | -1.18268 | 0.277989 | 0.863954 | DOWN | 204.3514 | 204.3513 | 204.3515 | 9.825492 | 9.715683 |
| 4173 | M269T11_ | 1.428923 | -0.51493 | -1.16664 | 0.278041 | 0.863954 | DOWN | 268.9825 | 268.982  | 268.9831 | 10.91331 | 10.80695 |
| 4174 | M404T42_ | 1.070841 | -0.09874 | -1.21231 | 0.278093 | 0.863954 | DOWN | 404.264  | 404.2639 | 404.2641 | 41.61825 | 41.60367 |
| 4175 | M347T9_8 | 1.443241 | -0.52931 | -1.17866 | 0.278181 | 0.863954 | DOWN | 347.3446 | 347.3419 | 347.3481 | 9.258725 | 9.1178   |
| 4176 | M1930T10 | 1.71526  | 0.778427 | 1.221588 | 0.278385 | 0.863954 | UP   | 1930.001 | 1929.999 | 1930.003 | 9.830283 | 9.699733 |
| 4177 | M500T10_ | 9.758933 | 3.286723 | 1.252927 | 0.278452 | 0.863954 | UP   | 500.3327 | 500.3321 | 500.3328 | 10.33195 | 10.1707  |
| 4178 | M602T10_ | 1.203288 | -0.26698 | -1.17519 | 0.278488 | 0.863954 | DOWN | 601.5522 | 601.551  | 601.5528 | 9.964092 | 9.859233 |
| 4179 | M194T9_3 | 1.792236 | -0.84176 | -1.17162 | 0.278585 | 0.863954 | DOWN | 193.7345 | 193.7329 | 193.7363 | 9.38065  | 9.18975  |
| 4180 | M556T10_ | 1.479255 | -0.56487 | -1.17832 | 0.278589 | 0.863954 | DOWN | 556.2271 | 556.2268 | 556.2298 | 9.9014   | 9.859667 |
| 4181 | M1039T10 | 1.252254 | -0.32453 | -1.17949 | 0.278645 | 0.863954 | DOWN | 1039.244 | 1039.242 | 1039.245 | 9.840617 | 9.715683 |
| 4182 | M524T10_ | 1.264066 | 0.338072 | 1.162425 | 0.278739 | 0.863955 | UP   | 524.3306 | 524.3301 | 524.3319 | 10.37783 | 10.29555 |
| 4183 | M763T10_ | 1.363953 | -0.44779 | -1.20153 | 0.27887  | 0.863955 | DOWN | 763.4418 | 763.4401 | 763.4425 | 10.15526 | 10.05935 |
| 4184 | M327T42_ | 1.21188  | -0.27725 | -1.16963 | 0.278918 | 0.863955 | DOWN | 327.2164 | 327.2162 | 327.2165 | 41.57508 | 41.1865  |
| 4185 | M342T10_ | 1.561271 | 0.642721 | 1.164702 | 0.278941 | 0.863955 | UP   | 342.2255 | 342.2253 | 342.2256 | 9.970617 | 9.859233 |
| 4186 | M340T11_ | 1.597453 | -0.67577 | -1.16259 | 0.278945 | 0.863955 | DOWN | 339.9786 | 339.9783 | 339.979  | 10.89126 | 10.8214  |
| 4187 | M187T39  | 1.081768 | 0.113391 | 1.161492 | 0.278976 | 0.863955 | UP   | 187.0962 | 187.0961 | 187.0963 | 39.03575 | 38.88467 |
| 4188 | M501T9_1 | 1.325993 | -0.40707 | -1.20742 | 0.278994 | 0.863955 | DOWN | 501.4226 | 501.422  | 501.4247 | 9.197458 | 9.12675  |
| 4189 | M227T9_2 | 1.968987 | -0.97745 | -1.20967 | 0.278998 | 0.863955 | DOWN | 227.3206 | 227.3205 | 227.3207 | 9.381158 | 9.284683 |
| 4190 | M482T11_ | 1.289381 | -0.36668 | -1.168   | 0.279053 | 0.863955 | DOWN | 481.5882 | 481.5879 | 481.5892 | 10.89953 | 10.8646  |
| 4191 | M839T9_2 | 1.527737 | -0.6114  | -1.1833  | 0.279082 | 0.863955 | DOWN | 839.2524 | 839.252  | 839.2537 | 9.296458 | 9.219483 |
| 4192 | M275T36  | 1.398242 | 0.483614 | 1.163793 | 0.279098 | 0.863955 | UP   | 275.2577 | 275.2574 | 275.2579 | 36.25892 | 36.2085  |
| 4193 | M613T10_ | 1.806197 | 0.852955 | 1.216682 | 0.279345 | 0.863955 | UP   | 612.6973 | 612.697  | 612.6975 | 9.915767 | 9.859233 |
| 4194 | M700T10_ | 1.343991 | -0.42652 | -1.16266 | 0.279361 | 0.863955 | DOWN | 700.0315 | 700.0311 | 700.0325 | 9.836408 | 9.73145  |
| 4195 | M660T9_1 | 1.320249 | -0.40081 | -1.16551 | 0.279384 | 0.863955 | DOWN | 659.6159 | 659.6155 | 659.6173 | 9.241267 | 9.129317 |
| 4196 | M317T24  | 175.6863 | 7.456858 | 1.25011  | 0.279403 | 0.863955 | UP   | 317.2876 | 317.2875 | 317.2877 | 24.08283 | 24.07483 |
| 4197 | M683T10_ | 1.219883 | -0.28674 | -1.17366 | 0.279496 | 0.863955 | DOWN | 682.9029 | 682.9023 | 682.9032 | 10.21718 | 10.13368 |
| 4198 | M454T10_ | 1.39693  | -0.48226 | -1.17393 | 0.279545 | 0.863955 | DOWN | 454.1144 | 454.114  | 454.1148 | 9.823908 | 9.507167 |
| 4199 | M166T10_ | 2.351049 | 1.233304 | 1.248    | 0.279564 | 0.863955 | UP   | 165.638  | 165.6379 | 165.638  | 9.968992 | 9.8753   |



|      |          |          |          |          |          |          |      |          |          |          |          |          |
|------|----------|----------|----------|----------|----------|----------|------|----------|----------|----------|----------|----------|
| 4200 | M437T9_5 | 1.270656 | -0.34557 | -1.16263 | 0.279568 | 0.863955 | DOWN | 437.1596 | 437.1591 | 437.1599 | 9.280992 | 9.129317 |
| 4201 | M210T11_ | 1.107362 | -0.14713 | -1.16145 | 0.279821 | 0.863956 | DOWN | 210.1487 | 210.1486 | 210.1488 | 10.90659 | 10.89355 |
| 4202 | M236T29  | 1.262021 | -0.33574 | -1.1782  | 0.279835 | 0.863956 | DOWN | 236.1723 | 236.172  | 236.1724 | 28.89925 | 28.87567 |
| 4203 | M319T11_ | 1.239873 | -0.31019 | -1.15955 | 0.279939 | 0.863956 | DOWN | 319.258  | 319.2578 | 319.2583 | 10.878   | 10.84828 |
| 4204 | M646T45  | 1.076768 | -0.10671 | -1.22758 | 0.279948 | 0.863956 | DOWN | 645.9674 | 645.9667 | 645.9679 | 44.84692 | 44.82533 |
| 4205 | M408T9_7 | 1.353639 | 0.436843 | 1.199403 | 0.279949 | 0.863956 | UP   | 408.2285 | 408.2281 | 408.2286 | 9.221317 | 9.126783 |
| 4206 | M1781T10 | 1.529438 | 0.613002 | 1.228986 | 0.280055 | 0.863956 | UP   | 1780.994 | 1780.992 | 1780.996 | 9.853633 | 9.728083 |
| 4207 | M154T10_ | 1.389542 | -0.47461 | -1.16156 | 0.280058 | 0.863956 | DOWN | 153.7023 | 153.7017 | 153.7082 | 9.842    | 9.7124   |
| 4208 | M398T14  | 1.25371  | -0.3262  | -1.1994  | 0.280144 | 0.863956 | DOWN | 398.082  | 398.0817 | 398.0823 | 14.16557 | 14.12183 |
| 4209 | M295T10_ | 1.848494 | -0.88635 | -1.21692 | 0.280186 | 0.863956 | DOWN | 295.1456 | 295.1454 | 295.151  | 9.9468   | 9.622983 |
| 4210 | M907T22  | 1.259604 | -0.33297 | -1.18256 | 0.280238 | 0.863956 | DOWN | 906.6364 | 906.6358 | 906.6373 | 22.04267 | 22.02017 |
| 4211 | M508T42_ | 1.290682 | 0.368134 | 1.227852 | 0.280326 | 0.863956 | UP   | 508.2748 | 508.2746 | 508.2749 | 41.73325 | 41.61817 |
| 4212 | M437T9_8 | 1.266991 | -0.34141 | -1.15747 | 0.280468 | 0.863956 | DOWN | 437.2841 | 437.2839 | 437.2846 | 9.285867 | 9.1445   |
| 4213 | M207T9_1 | 1.797789 | -0.84622 | -1.1633  | 0.280509 | 0.863956 | DOWN | 207.3269 | 207.3231 | 207.3297 | 9.189475 | 9.0839   |
| 4214 | M504T9_1 | 1.198562 | -0.2613  | -1.15835 | 0.280575 | 0.863956 | DOWN | 503.5191 | 503.5182 | 503.5196 | 9.294408 | 9.129317 |
| 4215 | M349T13_ | 1.306223 | -0.3854  | -1.17205 | 0.280655 | 0.863957 | DOWN | 348.9076 | 348.9074 | 348.9078 | 13.43431 | 13.34625 |
| 4216 | M290T23_ | 1.111153 | -0.15206 | -1.16445 | 0.280691 | 0.863957 | DOWN | 290.2956 | 290.2955 | 290.2958 | 22.90033 | 22.88567 |
| 4217 | M348T10_ | 1.188488 | -0.24913 | -1.22682 | 0.28077  | 0.863957 | DOWN | 347.7778 | 347.7777 | 347.7779 | 9.834117 | 9.715683 |
| 4218 | M374T10_ | 1.231964 | -0.30096 | -1.15745 | 0.28079  | 0.863957 | DOWN | 374.1823 | 374.1821 | 374.1823 | 9.514733 | 9.416817 |
| 4219 | M661T10_ | 4.156994 | -2.05554 | -1.20713 | 0.280816 | 0.863957 | DOWN | 660.5439 | 660.5429 | 660.548  | 9.81635  | 9.728083 |
| 4220 | M1211T11 | 1.377484 | -0.46204 | -1.17932 | 0.280854 | 0.863957 | DOWN | 1210.638 | 1210.637 | 1210.639 | 10.90522 | 10.879   |
| 4221 | M224T10_ | 40.55367 | 5.341761 | 1.245262 | 0.28092  | 0.863957 | UP   | 224.1254 | 224.119  | 224.1258 | 9.68585  | 9.6413   |
| 4222 | M393T20_ | 1.919324 | 0.940599 | 1.159773 | 0.280924 | 0.863957 | UP   | 393.3266 | 393.3243 | 393.3303 | 20.23767 | 20.21583 |
| 4223 | M682T10_ | 1.25221  | 0.324477 | 1.190466 | 0.281006 | 0.863957 | UP   | 681.5637 | 681.5629 | 681.5646 | 9.8322   | 9.787433 |
| 4224 | M398T10_ | 1.144668 | -0.19493 | -1.15783 | 0.281072 | 0.863957 | DOWN | 397.5243 | 397.5241 | 397.5244 | 9.91805  | 9.827283 |
| 4225 | M492T7   | 1.468294 | 0.554141 | 1.230146 | 0.281157 | 0.863957 | UP   | 492.3509 | 492.3507 | 492.3511 | 7.039883 | 6.969117 |
| 4226 | M253T9_3 | 1.472851 | -0.55861 | -1.16853 | 0.281184 | 0.863957 | DOWN | 252.7665 | 252.766  | 252.7678 | 9.26575  | 9.1892   |
| 4227 | M1089T10 | 1.432308 | 0.518342 | 1.225985 | 0.281199 | 0.863957 | UP   | 1089.275 | 1089.274 | 1089.276 | 9.82645  | 9.73145  |
| 4228 | M270T10_ | 1.359188 | 0.442745 | 1.217018 | 0.281228 | 0.863957 | UP   | 269.711  | 269.7109 | 269.7112 | 9.77355  | 9.636483 |
| 4229 | M592T44  | 1.103732 | 0.14239  | 1.209497 | 0.281299 | 0.863957 | UP   | 592.3327 | 592.3325 | 592.3328 | 44.387   | 44.30783 |
| 4230 | M336T10_ | 1.735587 | 0.795424 | 1.189056 | 0.281349 | 0.863957 | UP   | 336.1726 | 336.1724 | 336.1831 | 9.785242 | 9.447733 |
| 4231 | M423T10_ | 1.358277 | -0.44178 | -1.16781 | 0.281356 | 0.863957 | DOWN | 423.2751 | 423.2748 | 423.2758 | 9.694075 | 9.5731   |
| 4232 | M258T11_ | 1.293547 | 0.371332 | 1.201229 | 0.281412 | 0.863957 | UP   | 258.3417 | 258.3416 | 258.3421 | 10.89827 | 10.84487 |
| 4233 | M343T12  | 2.100056 | 1.070428 | 1.236585 | 0.281423 | 0.863957 | UP   | 343.259  | 343.2589 | 343.259  | 11.76132 | 11.73907 |
| 4234 | M256T11_ | 1.666628 | 0.736932 | 1.230907 | 0.2815   | 0.863957 | UP   | 256.1541 | 256.1541 | 256.1542 | 10.7249  | 10.474   |

|      |          |          |          |          |          |          |      |          |          |          |          |          |
|------|----------|----------|----------|----------|----------|----------|------|----------|----------|----------|----------|----------|
| 4235 | M361T9_5 | 1.410861 | -0.49658 | -1.16053 | 0.28153  | 0.863957 | DOWN | 361.2096 | 361.2079 | 361.2146 | 9.235933 | 9.098833 |
| 4236 | M357T42_ | 1.169114 | 0.225415 | 1.174237 | 0.281543 | 0.863957 | UP   | 357.1906 | 357.1905 | 357.1907 | 41.93483 | 41.76067 |
| 4237 | M402T9_4 | 1.238522 | -0.30862 | -1.15619 | 0.28155  | 0.863957 | DOWN | 402.3918 | 402.3915 | 402.3922 | 9.272992 | 9.129317 |
| 4238 | M362T11_ | 1.216987 | -0.28331 | -1.20781 | 0.281593 | 0.863958 | DOWN | 361.6154 | 361.6152 | 361.6156 | 11.22813 | 11.19848 |
| 4239 | M547T9_6 | 1.320381 | 0.400954 | 1.169056 | 0.281922 | 0.863958 | UP   | 547.1131 | 547.1115 | 547.1138 | 8.848167 | 8.772383 |
| 4240 | M642T10_ | 1.191209 | -0.25243 | -1.18674 | 0.281933 | 0.863958 | DOWN | 642.2415 | 642.2408 | 642.2438 | 9.825492 | 9.715683 |
| 4241 | M256T10_ | 1.762632 | 0.817731 | 1.224464 | 0.28199  | 0.863958 | UP   | 256.3627 | 256.3626 | 256.3628 | 9.970617 | 9.8753   |
| 4242 | M803T10_ | 1.115186 | 0.157285 | 1.153318 | 0.28208  | 0.863958 | UP   | 803.4618 | 803.4612 | 803.4622 | 10.04167 | 9.939683 |
| 4243 | M1957T10 | 1.384079 | -0.46893 | -1.16291 | 0.282084 | 0.863958 | DOWN | 1957.273 | 1957.271 | 1957.276 | 9.816317 | 9.73145  |
| 4244 | M242T9_6 | 1.287673 | -0.36477 | -1.15453 | 0.282099 | 0.863958 | DOWN | 242.3324 | 242.3313 | 242.3327 | 9.329083 | 9.280767 |
| 4245 | M182T10_ | 1.243548 | -0.31446 | -1.21921 | 0.282232 | 0.863958 | DOWN | 181.6317 | 181.6315 | 181.6317 | 9.97155  | 9.859233 |
| 4246 | M1831T10 | 4.069994 | 2.025027 | 1.236252 | 0.282284 | 0.863958 | UP   | 1831.226 | 1831.223 | 1831.228 | 9.800317 | 9.699733 |
| 4247 | M617T10_ | 1.498605 | 0.58362  | 1.214448 | 0.282311 | 0.863958 | UP   | 616.994  | 616.9931 | 616.9946 | 9.931108 | 9.827283 |
| 4248 | M286T10_ | 1.277713 | -0.35356 | -1.16476 | 0.282397 | 0.863958 | DOWN | 285.9855 | 285.9853 | 285.9859 | 9.959533 | 9.859233 |
| 4249 | M396T9_6 | 2.926877 | 1.549362 | 1.165898 | 0.282398 | 0.863958 | UP   | 395.9393 | 395.9378 | 395.9405 | 9.158833 | 9.046783 |
| 4250 | M415T20_ | 1.348264 | 0.431103 | 1.157135 | 0.282506 | 0.863958 | UP   | 415.3551 | 415.3499 | 415.3613 | 20.24658 | 20.24467 |
| 4251 | M620T10_ | 2.941532 | 1.556568 | 1.235548 | 0.282509 | 0.863958 | UP   | 619.5035 | 619.5029 | 619.5086 | 9.810767 | 9.699733 |
| 4252 | M343T10_ | 2.214896 | 1.147239 | 1.229916 | 0.282542 | 0.863958 | UP   | 343.424  | 343.4238 | 343.4247 | 9.8887   | 9.772883 |
| 4253 | M807T11_ | 1.336254 | -0.41819 | -1.1637  | 0.282641 | 0.863959 | DOWN | 807.4062 | 807.4059 | 807.407  | 10.53152 | 10.50338 |
| 4254 | M638T10_ | 2.858385 | 1.5152   | 1.239835 | 0.282758 | 0.863959 | UP   | 637.5826 | 637.5821 | 637.585  | 9.8207   | 9.715683 |
| 4255 | M588T9_2 | 1.722936 | -0.78487 | -1.15734 | 0.282769 | 0.863959 | DOWN | 588.2878 | 588.2867 | 588.2881 | 8.998867 | 8.983883 |
| 4256 | M1158T10 | 1.304884 | 0.383921 | 1.228599 | 0.282789 | 0.863959 | UP   | 1158.126 | 1158.125 | 1158.126 | 9.744917 | 9.636483 |
| 4257 | M272T10_ | 1.634481 | 0.708833 | 1.20262  | 0.282861 | 0.863959 | UP   | 271.7389 | 271.7387 | 271.7412 | 9.830283 | 9.715683 |
| 4258 | M831T9_1 | 1.885719 | -0.91511 | -1.17078 | 0.282916 | 0.863959 | DOWN | 830.5884 | 830.5876 | 830.5902 | 8.669242 | 8.586967 |
| 4259 | M313T10_ | 2.097666 | -1.06878 | -1.1754  | 0.283023 | 0.863959 | DOWN | 312.9176 | 312.917  | 312.9178 | 9.940783 | 9.853533 |
| 4260 | M477T10_ | 1.375142 | 0.45958  | 1.150942 | 0.283024 | 0.863959 | UP   | 477.0855 | 477.081  | 477.0879 | 9.825492 | 9.728083 |
| 4261 | M1098T10 | 1.38804  | -0.47305 | -1.19528 | 0.283176 | 0.863959 | DOWN | 1097.631 | 1097.631 | 1097.631 | 10.12858 | 10.03658 |
| 4262 | M503T10_ | 2.015693 | 1.011276 | 1.212145 | 0.283247 | 0.863959 | UP   | 502.7128 | 502.7121 | 502.7135 | 9.800317 | 9.65225  |
| 4263 | M571T10_ | 1.220487 | -0.28746 | -1.23507 | 0.283277 | 0.863959 | DOWN | 570.5221 | 570.5219 | 570.5223 | 9.97155  | 9.859233 |
| 4264 | M623T12_ | 1.234249 | -0.30363 | -1.16029 | 0.283285 | 0.863959 | DOWN | 622.5266 | 622.5263 | 622.527  | 12.44178 | 12.441   |
| 4265 | M225T44_ | 1.262728 | 0.336544 | 1.213755 | 0.283327 | 0.863959 | UP   | 225.1482 | 225.1481 | 225.1484 | 44.26467 | 44.04267 |
| 4266 | M387T15  | 1.51359  | -0.59797 | -1.2117  | 0.28335  | 0.863959 | DOWN | 387.2487 | 387.2485 | 387.2489 | 15.42942 | 15.29297 |
| 4267 | M393T19_ | 2.756343 | 1.462756 | 1.151764 | 0.283397 | 0.863959 | UP   | 393.3481 | 393.3452 | 393.3542 | 18.93683 | 18.89317 |
| 4268 | M204T10_ | 3.894248 | -1.96134 | -1.202   | 0.283409 | 0.863959 | DOWN | 203.6926 | 203.6923 | 203.6926 | 9.830733 | 9.715683 |
| 4269 | M215T9_2 | 1.434721 | -0.52077 | -1.15039 | 0.283427 | 0.863959 | DOWN | 214.7619 | 214.7615 | 214.7623 | 9.311167 | 9.132267 |

|      |          |          |          |          |          |          |      |          |          |          |          |          |
|------|----------|----------|----------|----------|----------|----------|------|----------|----------|----------|----------|----------|
| 4270 | M342T10_ | 1.233268 | -0.30249 | -1.21131 | 0.283465 | 0.863959 | DOWN | 342.0244 | 342.024  | 342.0252 | 9.825492 | 9.715683 |
| 4271 | M748T14  | 1.176098 | -0.23401 | -1.15046 | 0.283472 | 0.863959 | DOWN | 747.5743 | 747.5739 | 747.5746 | 13.69728 | 13.68268 |
| 4272 | M327T9_1 | 1.307924 | -0.38728 | -1.14981 | 0.283516 | 0.863959 | DOWN | 326.6697 | 326.6696 | 326.6699 | 9.294408 | 9.1445   |
| 4273 | M317T10_ | 1.119676 | -0.16308 | -1.19964 | 0.283571 | 0.86396  | DOWN | 316.9557 | 316.9555 | 316.956  | 9.8207   | 9.715683 |
| 4274 | M488T15  | 1.268453 | -0.34307 | -1.15103 | 0.283654 | 0.86396  | DOWN | 487.8735 | 487.8728 | 487.8743 | 14.91235 | 14.85495 |
| 4275 | M672T9_2 | 1.27596  | -0.35158 | -1.15001 | 0.283655 | 0.86396  | DOWN | 672.1457 | 672.1448 | 672.1474 | 9.28135  | 9.129317 |
| 4276 | M591T10_ | 1.148129 | -0.19928 | -1.16252 | 0.283685 | 0.86396  | DOWN | 591.283  | 591.2826 | 591.2838 | 9.924308 | 9.827283 |
| 4277 | M182T11_ | 1.108329 | -0.14839 | -1.16048 | 0.283691 | 0.86396  | DOWN | 182.1537 | 182.1537 | 182.1538 | 10.90659 | 10.89355 |
| 4278 | M814T10_ | 1.202438 | -0.26596 | -1.17014 | 0.283746 | 0.86396  | DOWN | 814.1674 | 814.1664 | 814.1683 | 9.917167 | 9.811217 |
| 4279 | M211T10_ | 1.426431 | -0.51241 | -1.15508 | 0.283749 | 0.86396  | DOWN | 211.1211 | 211.1208 | 211.1288 | 9.772883 | 9.683817 |
| 4280 | M326T9_3 | 1.210341 | -0.27541 | -1.15405 | 0.283784 | 0.86396  | DOWN | 326.238  | 326.2379 | 326.2383 | 9.311167 | 9.191133 |
| 4281 | M383T11_ | 1.105614 | -0.14485 | -1.17122 | 0.283796 | 0.86396  | DOWN | 383.2543 | 383.2543 | 383.2545 | 10.90775 | 10.90197 |
| 4282 | M232T11_ | 1.335161 | -0.41701 | -1.15413 | 0.283886 | 0.86396  | DOWN | 232.3151 | 232.3149 | 232.3153 | 10.93312 | 10.90197 |
| 4283 | M349T13_ | 1.443993 | -0.53006 | -1.14883 | 0.283905 | 0.86396  | DOWN | 349.242  | 349.2419 | 349.2422 | 13.42688 | 13.37595 |
| 4284 | M416T29  | 1.626622 | 0.701879 | 1.150551 | 0.283967 | 0.86396  | UP   | 416.2857 | 416.2854 | 416.2863 | 28.99483 | 28.94417 |
| 4285 | M297T10_ | 1.181045 | -0.24006 | -1.17863 | 0.283972 | 0.86396  | DOWN | 297.1745 | 297.1713 | 297.1747 | 9.95825  | 9.842    |
| 4286 | M203T10_ | 1.380309 | -0.46499 | -1.19311 | 0.284001 | 0.86396  | DOWN | 203.461  | 203.4609 | 203.4611 | 9.842    | 9.715683 |
| 4287 | M341T10_ | 1.910402 | -0.93388 | -1.15183 | 0.284079 | 0.86396  | DOWN | 340.797  | 340.7933 | 340.7988 | 9.911567 | 9.743667 |
| 4288 | M805T10_ | 1.260164 | -0.33361 | -1.19489 | 0.28412  | 0.86396  | DOWN | 805.4199 | 805.4196 | 805.4205 | 9.6501   | 9.52595  |
| 4289 | M716T9_2 | 1.617026 | 0.693343 | 1.158493 | 0.284124 | 0.86396  | UP   | 715.9691 | 715.9675 | 715.9707 | 9.433067 | 9.329083 |
| 4290 | M228T10_ | 2.243903 | -1.16601 | -1.21535 | 0.284201 | 0.86396  | DOWN | 228.1744 | 228.1705 | 228.1785 | 9.705275 | 9.5731   |
| 4291 | M644T9_2 | 1.268265 | -0.34286 | -1.14786 | 0.284203 | 0.86396  | DOWN | 644.2854 | 644.2846 | 644.2868 | 9.289892 | 9.129317 |
| 4292 | M312T12_ | 1.318367 | -0.39875 | -1.15182 | 0.28426  | 0.86396  | DOWN | 311.7666 | 311.7665 | 311.7669 | 12.44268 | 12.4266  |
| 4293 | M478T37  | 1.275351 | -0.35089 | -1.18222 | 0.28429  | 0.86396  | DOWN | 478.3007 | 478.3005 | 478.3007 | 37.28783 | 37.10067 |
| 4294 | M891T25  | 1.260685 | -0.33421 | -1.14838 | 0.284299 | 0.86396  | DOWN | 890.6414 | 890.6409 | 890.6417 | 25.38367 | 25.3765  |
| 4295 | M244T9_1 | 1.263344 | -0.33725 | -1.15013 | 0.284432 | 0.86396  | DOWN | 243.6846 | 243.6844 | 243.6846 | 8.503533 | 8.428683 |
| 4296 | M552T10_ | 1.491146 | -0.57642 | -1.15656 | 0.284472 | 0.86396  | DOWN | 551.7451 | 551.7449 | 551.7458 | 9.9351   | 9.827283 |
| 4297 | M1856T10 | 1.265277 | -0.33945 | -1.17211 | 0.284532 | 0.86396  | DOWN | 1855.588 | 1855.586 | 1855.593 | 9.823575 | 9.715683 |
| 4298 | M208T10_ | 1.557724 | -0.63944 | -1.19126 | 0.284533 | 0.86396  | DOWN | 207.8379 | 207.8378 | 207.8385 | 9.834642 | 9.816167 |
| 4299 | M302T10_ | 1.257339 | -0.33037 | -1.20515 | 0.2848   | 0.863961 | DOWN | 302.1676 | 302.1675 | 302.1679 | 9.930908 | 9.827283 |
| 4300 | M210T9_2 | 1.311234 | -0.39093 | -1.14639 | 0.28482  | 0.863961 | DOWN | 209.8329 | 209.8328 | 209.8329 | 9.269283 | 9.129317 |
| 4301 | M203T10_ | 1.118143 | -0.1611  | -1.16663 | 0.284842 | 0.863961 | DOWN | 202.91   | 202.9025 | 202.91   | 9.8207   | 9.699733 |
| 4302 | M623T10_ | 1.144297 | -0.19446 | -1.15354 | 0.284896 | 0.863961 | DOWN | 623.4496 | 623.4491 | 623.45   | 10.41041 | 10.35992 |
| 4303 | M342T10_ | 1.12035  | -0.16395 | -1.19614 | 0.284909 | 0.863961 | DOWN | 341.7638 | 341.7635 | 341.7642 | 9.866292 | 9.79065  |
| 4304 | M201T10_ | 1.195283 | -0.25735 | -1.14605 | 0.284914 | 0.863961 | DOWN | 200.7626 | 200.7626 | 200.7627 | 9.831142 | 9.715683 |

|      |          |          |          |          |          |          |      |          |          |          |          |          |
|------|----------|----------|----------|----------|----------|----------|------|----------|----------|----------|----------|----------|
| 4305 | M152T10_ | 1.195414 | -0.25751 | -1.15371 | 0.284923 | 0.863961 | DOWN | 151.918  | 151.9178 | 151.918  | 9.956417 | 9.859233 |
| 4306 | M575T10_ | 2.72594  | 1.446754 | 1.157178 | 0.284924 | 0.863961 | UP   | 575.4479 | 575.4469 | 575.4484 | 9.958492 | 9.859233 |
| 4307 | M237T11_ | 1.282017 | -0.35842 | -1.17909 | 0.284982 | 0.863961 | DOWN | 236.8992 | 236.8991 | 236.8994 | 10.90551 | 10.879   |
| 4308 | M506T9_3 | 1.481842 | -0.56739 | -1.18046 | 0.284995 | 0.863961 | DOWN | 505.9526 | 505.952  | 505.9533 | 9.327058 | 9.175017 |
| 4309 | M456T22  | 1.552634 | -0.63472 | -1.15084 | 0.284996 | 0.863961 | DOWN | 456.4837 | 456.4836 | 456.4843 | 22.13233 | 22.0635  |
| 4310 | M513T9_3 | 1.243367 | -0.31425 | -1.18042 | 0.285005 | 0.863961 | DOWN | 512.9014 | 512.901  | 512.9027 | 9.432583 | 9.340183 |
| 4311 | M385T9_2 | 1.319625 | -0.40013 | -1.15556 | 0.285021 | 0.863961 | DOWN | 384.7375 | 384.7356 | 384.7379 | 8.883367 | 8.863633 |
| 4312 | M413T24  | 3.385273 | -1.75927 | -1.22791 | 0.285097 | 0.863961 | DOWN | 413.2977 | 413.2972 | 413.298  | 24.32983 | 24.3035  |
| 4313 | M210T10_ | 1.315305 | 0.395397 | 1.14604  | 0.285395 | 0.863961 | UP   | 209.805  | 209.8048 | 209.8051 | 9.9014   | 9.79535  |
| 4314 | M254T9_1 | 1.511599 | -0.59608 | -1.15045 | 0.285459 | 0.863961 | DOWN | 253.5735 | 253.5728 | 253.5746 | 9.18975  | 9.126783 |
| 4315 | M567T11_ | 1.143826 | -0.19387 | -1.14716 | 0.285504 | 0.863961 | DOWN | 566.9291 | 566.9288 | 566.9295 | 10.5188  | 10.47197 |
| 4316 | M346T11_ | 1.278111 | 0.354013 | 1.150307 | 0.285508 | 0.863961 | UP   | 345.5537 | 345.5534 | 345.5551 | 10.8926  | 10.87487 |
| 4317 | M242T18  | 1.300995 | -0.37962 | -1.1788  | 0.285819 | 0.863962 | DOWN | 242.1536 | 242.1536 | 242.1537 | 18.08442 | 18.05483 |
| 4318 | M591T10_ | 1.338291 | -0.42039 | -1.15517 | 0.285831 | 0.863962 | DOWN | 591.3195 | 591.3191 | 591.3217 | 9.887133 | 9.7634   |
| 4319 | M209T10_ | 1.09705  | -0.13363 | -1.1535  | 0.285841 | 0.863962 | DOWN | 208.6156 | 208.6155 | 208.6156 | 9.872908 | 9.747533 |
| 4320 | M1944T10 | 1.386476 | -0.47142 | -1.15345 | 0.285934 | 0.863962 | DOWN | 1943.986 | 1943.983 | 1943.987 | 9.82645  | 9.7124   |
| 4321 | M536T42_ | 1.273805 | -0.34914 | -1.1613  | 0.285965 | 0.863962 | DOWN | 536.3061 | 536.306  | 536.3062 | 41.877   | 41.81983 |
| 4322 | M239T10_ | 1.155276 | -0.20824 | -1.14314 | 0.286059 | 0.863962 | DOWN | 239.2663 | 239.2662 | 239.2664 | 9.917167 | 9.811217 |
| 4323 | M166T27  | 1.773476 | -0.82658 | -1.2098  | 0.286196 | 0.863962 | DOWN | 166.0941 | 166.094  | 166.0942 | 27.2485  | 27.21333 |
| 4324 | M344T11_ | 1.505495 | 0.590238 | 1.183539 | 0.286236 | 0.863962 | UP   | 343.9588 | 343.9582 | 343.9606 | 10.92708 | 10.8214  |
| 4325 | M474T9_1 | 1.246029 | -0.31734 | -1.14312 | 0.286372 | 0.863962 | DOWN | 473.5586 | 473.5581 | 473.5595 | 9.294408 | 9.129317 |
| 4326 | M371T11_ | 1.781804 | -0.83334 | -1.19855 | 0.286424 | 0.863962 | DOWN | 370.8903 | 370.89   | 370.8912 | 10.94844 | 10.90275 |
| 4327 | M638T10_ | 1.345126 | 0.427742 | 1.217969 | 0.286551 | 0.863962 | UP   | 637.6657 | 637.6652 | 637.6693 | 9.834117 | 9.715683 |
| 4328 | M460T11_ | 1.174948 | -0.2326  | -1.14868 | 0.286565 | 0.863963 | DOWN | 460.0917 | 460.0914 | 460.0918 | 10.90519 | 10.879   |
| 4329 | M371T42  | 1.068417 | 0.095475 | 1.179255 | 0.2866   | 0.863963 | UP   | 371.2062 | 371.2061 | 371.2064 | 42.16483 | 42.10733 |
| 4330 | M657T10_ | 1.16694  | -0.22273 | -1.17341 | 0.286647 | 0.863963 | DOWN | 656.638  | 656.6376 | 656.6394 | 9.825492 | 9.715683 |
| 4331 | M550T9_3 | 1.354952 | -0.43824 | -1.14589 | 0.286715 | 0.863963 | DOWN | 550.3546 | 550.3543 | 550.3573 | 9.321425 | 9.22495  |
| 4332 | M742T9_6 | 2.20556  | 1.141145 | 1.212298 | 0.286825 | 0.863963 | UP   | 742.3907 | 742.39   | 742.3912 | 9.437367 | 9.355317 |
| 4333 | M379T28  | 1.486214 | -0.57164 | -1.21921 | 0.286911 | 0.863963 | DOWN | 379.186  | 379.186  | 379.1866 | 27.92917 | 27.89267 |
| 4334 | M351T15_ | 1.361529 | -0.44523 | -1.16756 | 0.286946 | 0.863963 | DOWN | 351.2064 | 351.205  | 351.2068 | 15.42657 | 15.1756  |
| 4335 | M492T28_ | 1.2446   | -0.31568 | -1.15321 | 0.287026 | 0.863963 | DOWN | 491.8434 | 491.8432 | 491.8436 | 28.26608 | 28.25767 |
| 4336 | M473T9_9 | 1.993287 | 0.995149 | 1.152298 | 0.287035 | 0.863963 | UP   | 473.3057 | 473.3043 | 473.3097 | 9.01065  | 8.8486   |
| 4337 | M884T11_ | 1.374876 | 0.459301 | 1.140839 | 0.287072 | 0.863963 | UP   | 884.0016 | 884.0005 | 884.0025 | 10.7766  | 10.75312 |
| 4338 | M520T43_ | 1.777403 | -0.82977 | -1.15702 | 0.287075 | 0.863963 | DOWN | 520.2748 | 520.2745 | 520.2751 | 42.841   | 42.74033 |
| 4339 | M831T9_4 | 1.734156 | -0.79423 | -1.14276 | 0.287162 | 0.863963 | DOWN | 831.09   | 831.0894 | 831.0907 | 8.6848   | 8.586967 |

|      |          |          |          |          |          |          |      |          |          |          |          |          |
|------|----------|----------|----------|----------|----------|----------|------|----------|----------|----------|----------|----------|
| 4340 | M329T20  | 1.64741  | 0.7202   | 1.144529 | 0.28724  | 0.863963 | UP   | 329.2295 | 329.2294 | 329.2299 | 19.555   | 19.50583 |
| 4341 | M549T10_ | 1.254136 | -0.32669 | -1.1403  | 0.287252 | 0.863963 | DOWN | 549.4012 | 549.4006 | 549.4018 | 10.45352 | 10.40807 |
| 4342 | M388T10_ | 3.936953 | 1.97708  | 1.225223 | 0.287269 | 0.863963 | UP   | 388.0716 | 388.071  | 388.0718 | 9.918833 | 9.822117 |
| 4343 | M376T9_3 | 1.400721 | -0.48617 | -1.14407 | 0.287317 | 0.863963 | DOWN | 376.0254 | 376.0242 | 376.0265 | 9.365833 | 9.160617 |
| 4344 | M344T9_1 | 1.515704 | -0.59999 | -1.15582 | 0.28734  | 0.863963 | DOWN | 343.5636 | 343.5633 | 343.5638 | 9.29345  | 9.219483 |
| 4345 | M193T10_ | 1.341729 | -0.42409 | -1.17105 | 0.287376 | 0.863963 | DOWN | 193.2672 | 193.267  | 193.2672 | 9.970617 | 9.885167 |
| 4346 | M243T9_1 | 1.655281 | -0.72708 | -1.15741 | 0.287394 | 0.863963 | DOWN | 243.3436 | 243.3413 | 243.3465 | 9.222375 | 9.1322   |
| 4347 | M1009T16 | 1.309003 | -0.38847 | -1.17469 | 0.287433 | 0.863963 | DOWN | 1009.49  | 1009.489 | 1009.49  | 15.50757 | 15.49638 |
| 4348 | M656T10_ | 1.679783 | 0.748274 | 1.2071   | 0.28747  | 0.863963 | UP   | 655.9183 | 655.9181 | 655.9189 | 9.983433 | 9.8914   |
| 4349 | M436T9_1 | 1.270546 | -0.34545 | -1.1393  | 0.287547 | 0.863963 | DOWN | 436.2771 | 436.2769 | 436.2779 | 9.25985  | 8.859667 |
| 4350 | M175T10_ | 2.762572 | 1.466012 | 1.215612 | 0.287577 | 0.863964 | UP   | 175.4996 | 175.4994 | 175.5011 | 9.8374   | 9.73145  |
| 4351 | M160T10_ | 1.379065 | -0.46369 | -1.14542 | 0.287678 | 0.863964 | DOWN | 160.1218 | 160.1217 | 160.1219 | 9.915583 | 9.811217 |
| 4352 | M314T20  | 1.168342 | -0.22446 | -1.14051 | 0.287758 | 0.863964 | DOWN | 314.3244 | 314.3242 | 314.3246 | 20.484   | 20.46217 |
| 4353 | M385T10_ | 1.896066 | -0.92301 | -1.20818 | 0.287765 | 0.863964 | DOWN | 385.3884 | 385.3847 | 385.3987 | 9.908617 | 9.801833 |
| 4354 | M526T9_3 | 1.376713 | 0.461227 | 1.180751 | 0.287769 | 0.863964 | UP   | 525.705  | 525.7006 | 525.7055 | 9.270833 | 9.146383 |
| 4355 | M207T9_2 | 1.704145 | -0.76905 | -1.14115 | 0.287791 | 0.863964 | DOWN | 207.3879 | 207.3866 | 207.3886 | 9.314408 | 9.07525  |
| 4356 | M734T10_ | 2.2457   | 1.167165 | 1.200513 | 0.28805  | 0.863964 | UP   | 733.5041 | 733.5026 | 733.5045 | 9.9677   | 9.8914   |
| 4357 | M292T10_ | 1.258312 | -0.33149 | -1.14978 | 0.288061 | 0.863964 | DOWN | 292.0528 | 292.0524 | 292.053  | 9.968992 | 9.8753   |
| 4358 | M381T16_ | 1.125749 | -0.17088 | -1.13804 | 0.288169 | 0.863964 | DOWN | 381.2687 | 381.2686 | 381.2689 | 16.25659 | 16.2422  |
| 4359 | M378T11_ | 1.365326 | -0.44925 | -1.13852 | 0.288188 | 0.863964 | DOWN | 378.3303 | 378.3278 | 378.3306 | 10.90765 | 10.86275 |
| 4360 | M242T26  | 1.275871 | 0.351482 | 1.156715 | 0.288252 | 0.863964 | UP   | 242.1828 | 242.1827 | 242.1831 | 25.66108 | 25.652   |
| 4361 | M167T10_ | 1.288598 | -0.3658  | -1.21026 | 0.288438 | 0.863964 | DOWN | 167.2714 | 167.2712 | 167.2714 | 9.932    | 9.843367 |
| 4362 | M653T11_ | 1.887941 | 0.916813 | 1.210146 | 0.28846  | 0.863964 | UP   | 653.1897 | 653.1891 | 653.1904 | 10.87757 | 10.82935 |
| 4363 | M301T10_ | 1.243971 | -0.31495 | -1.19477 | 0.28847  | 0.863964 | DOWN | 301.062  | 301.0619 | 301.0621 | 9.9351   | 9.827283 |
| 4364 | M671T9_1 | 1.287664 | -0.36476 | -1.13693 | 0.288598 | 0.863965 | DOWN | 670.9955 | 670.9948 | 670.9961 | 9.25985  | 9.129317 |
| 4365 | M475T9_3 | 1.822685 | 0.866065 | 1.178521 | 0.288616 | 0.863965 | UP   | 474.9345 | 474.9267 | 474.9388 | 9.16125  | 9.111033 |
| 4366 | M309T10_ | 1.13905  | -0.18783 | -1.20883 | 0.288629 | 0.863965 | DOWN | 308.7613 | 308.7611 | 308.7616 | 9.954767 | 9.843367 |
| 4367 | M663T9_2 | 1.348984 | -0.43187 | -1.14871 | 0.288652 | 0.863965 | DOWN | 663.3979 | 663.3976 | 663.3986 | 9.3332   | 9.234417 |
| 4368 | M664T10_ | 1.252988 | -0.32537 | -1.13653 | 0.288696 | 0.863965 | DOWN | 663.7457 | 663.7451 | 663.746  | 9.810233 | 9.715683 |
| 4369 | M429T9_2 | 1.505081 | 0.589841 | 1.188544 | 0.288756 | 0.863965 | UP   | 428.605  | 428.6046 | 428.6065 | 9.1428   | 9.079083 |
| 4370 | M504T44  | 1.508192 | 0.59282  | 1.161637 | 0.288793 | 0.863965 | UP   | 504.2799 | 504.2796 | 504.2802 | 43.90533 | 43.74183 |
| 4371 | M586T11_ | 1.411549 | -0.49728 | -1.1367  | 0.288835 | 0.863965 | DOWN | 586.307  | 586.3068 | 586.3074 | 10.64667 | 10.37437 |
| 4372 | M624T10_ | 1.207005 | -0.27143 | -1.14105 | 0.288852 | 0.863965 | DOWN | 624.4531 | 624.4527 | 624.4536 | 10.41041 | 10.35992 |
| 4373 | M282T20  | 11.58708 | 3.534445 | 1.220952 | 0.289133 | 0.863965 | UP   | 282.2061 | 282.2061 | 282.2065 | 19.6495  | 19.649   |
| 4374 | M342T10_ | 2.151589 | 1.105402 | 1.202218 | 0.289197 | 0.863965 | UP   | 341.9598 | 341.9594 | 341.9635 | 9.840617 | 9.715683 |

|      |          |          |          |          |          |          |      |          |          |          |          |          |
|------|----------|----------|----------|----------|----------|----------|------|----------|----------|----------|----------|----------|
| 4375 | M682T10_ | 1.079567 | -0.11045 | -1.1363  | 0.289223 | 0.863965 | DOWN | 681.516  | 681.5155 | 681.5174 | 9.857425 | 9.73145  |
| 4376 | M573T10_ | 1.151983 | -0.20412 | -1.13791 | 0.289231 | 0.863965 | DOWN | 573.4618 | 573.4616 | 573.4621 | 9.9149   | 9.79535  |
| 4377 | M315T25_ | 69.74744 | -6.12407 | -1.22059 | 0.289269 | 0.863965 | DOWN | 315.1224 | 315.122  | 315.1227 | 25.11508 | 25.0985  |
| 4378 | M822T10_ | 1.615334 | -0.69183 | -1.14256 | 0.289399 | 0.863965 | DOWN | 822.3972 | 822.3963 | 822.398  | 9.59825  | 9.547133 |
| 4379 | M730T4   | 1.469809 | 0.555629 | 1.138873 | 0.289459 | 0.863965 | UP   | 730.4552 | 730.4547 | 730.4553 | 3.542983 | 3.430683 |
| 4380 | M340T10_ | 1.174786 | -0.2324  | -1.20404 | 0.289526 | 0.863965 | DOWN | 340.0508 | 340.0505 | 340.0512 | 9.857275 | 9.73145  |
| 4381 | M534T10_ | 1.246546 | -0.31794 | -1.17009 | 0.289528 | 0.863965 | DOWN | 534.3474 | 534.3472 | 534.3475 | 9.501692 | 9.40135  |
| 4382 | M255T43_ | 1.424596 | 0.510553 | 1.156773 | 0.289548 | 0.863965 | UP   | 255.1951 | 255.195  | 255.1952 | 43.40925 | 43.31533 |
| 4383 | M304T29  | 1.559855 | -0.64141 | -1.17686 | 0.289561 | 0.863965 | DOWN | 304.2996 | 304.2995 | 304.2997 | 29.16633 | 29.14933 |
| 4384 | M195T9_1 | 1.662674 | -0.73351 | -1.18575 | 0.289562 | 0.863965 | DOWN | 195.3431 | 195.3426 | 195.3436 | 9.327217 | 9.158833 |
| 4385 | M952T12_ | 1.822161 | -0.86565 | -1.20624 | 0.289569 | 0.863965 | DOWN | 951.5911 | 951.5907 | 951.5914 | 11.6717  | 11.64247 |
| 4386 | M446T40_ | 1.354642 | 0.437912 | 1.145687 | 0.289711 | 0.863966 | UP   | 446.2745 | 446.2743 | 446.2748 | 39.70483 | 39.4745  |
| 4387 | M327T9_4 | 1.276809 | -0.35254 | -1.13382 | 0.289727 | 0.863966 | DOWN | 326.8924 | 326.8923 | 326.8926 | 9.294408 | 9.129317 |
| 4388 | M568T11_ | 1.351763 | -0.43484 | -1.1341  | 0.289756 | 0.863966 | DOWN | 568.3835 | 568.3829 | 568.384  | 10.55252 | 10.50403 |
| 4389 | M592T25  | 7.298595 | -2.86762 | -1.21885 | 0.289766 | 0.863966 | DOWN | 591.8802 | 591.8801 | 591.8813 | 25.07017 | 25.05967 |
| 4390 | M552T10_ | 1.24018  | -0.31055 | -1.1465  | 0.289832 | 0.863966 | DOWN | 552.3542 | 552.3536 | 552.3545 | 9.938125 | 9.843367 |
| 4391 | M185T11_ | 1.303458 | -0.38234 | -1.13337 | 0.289881 | 0.863966 | DOWN | 184.5567 | 184.5566 | 184.5568 | 10.88995 | 10.8646  |
| 4392 | M1752T10 | 1.570463 | -0.65119 | -1.13672 | 0.289943 | 0.863966 | DOWN | 1751.619 | 1751.618 | 1751.62  | 9.830283 | 9.7124   |
| 4393 | M206T9_1 | 2.189983 | -1.13092 | -1.14128 | 0.289948 | 0.863966 | DOWN | 205.9351 | 205.9344 | 205.9353 | 9.145433 | 9.126783 |
| 4394 | M1110T11 | 1.47978  | -0.56538 | -1.14047 | 0.289979 | 0.863966 | DOWN | 1109.62  | 1109.619 | 1109.621 | 11.22183 | 11.19848 |
| 4395 | M220T10_ | 1.712259 | 0.775901 | 1.144962 | 0.290001 | 0.863966 | UP   | 220.0419 | 220.0387 | 220.042  | 9.872067 | 9.8378   |
| 4396 | M347T10_ | 1.236033 | -0.30572 | -1.19344 | 0.290055 | 0.863966 | DOWN | 346.5307 | 346.5306 | 346.5308 | 9.825492 | 9.715683 |
| 4397 | M201T9_2 | 1.511466 | -0.59595 | -1.13506 | 0.290219 | 0.863966 | DOWN | 201.2528 | 201.2518 | 201.2533 | 9.327133 | 9.160617 |
| 4398 | M538T10_ | 1.384152 | -0.469   | -1.14763 | 0.290284 | 0.863966 | DOWN | 538.4318 | 538.431  | 538.4326 | 9.655117 | 9.556217 |
| 4399 | M403T10_ | 1.363558 | 0.447376 | 1.141233 | 0.290287 | 0.863966 | UP   | 403.4543 | 403.4541 | 403.4545 | 9.802117 | 9.7124   |
| 4400 | M247T9_1 | 1.874574 | -0.90656 | -1.19452 | 0.29048  | 0.863966 | DOWN | 246.5497 | 246.5496 | 246.5498 | 9.346    | 9.268917 |
| 4401 | M472T9_1 | 1.23076  | -0.29955 | -1.13461 | 0.290567 | 0.863966 | DOWN | 472.4911 | 472.4907 | 472.4921 | 9.285867 | 9.129317 |
| 4402 | M261T10_ | 1.910074 | 0.933628 | 1.139384 | 0.290787 | 0.863967 | UP   | 260.5192 | 260.519  | 260.5192 | 9.934933 | 9.8753   |
| 4403 | M404T36  | 1.259148 | -0.33245 | -1.21302 | 0.290801 | 0.863967 | DOWN | 404.264  | 404.2638 | 404.2641 | 35.79058 | 35.54567 |
| 4404 | M414T11_ | 1.175351 | -0.23309 | -1.14052 | 0.290803 | 0.863967 | DOWN | 414.4056 | 414.4053 | 414.407  | 10.90519 | 10.879   |
| 4405 | M494T9_3 | 1.338981 | -0.42114 | -1.16925 | 0.290819 | 0.863967 | DOWN | 493.614  | 493.6135 | 493.6211 | 9.303525 | 9.146383 |
| 4406 | M423T11_ | 1.663905 | 0.734573 | 1.132657 | 0.290901 | 0.863967 | UP   | 423.2646 | 423.2585 | 423.266  | 10.879   | 10.87195 |
| 4407 | M464T40  | 1.4248   | 0.51076  | 1.204114 | 0.290907 | 0.863967 | UP   | 464.2849 | 464.2848 | 464.2853 | 39.87033 | 39.7335  |
| 4408 | M821T35  | 2.348899 | -1.23198 | -1.15288 | 0.290909 | 0.863967 | DOWN | 820.6    | 820.5984 | 820.6009 | 35.47392 | 35.43017 |
| 4409 | M320T10_ | 3.241392 | 1.696614 | 1.212203 | 0.290924 | 0.863967 | UP   | 320.2617 | 320.2614 | 320.2749 | 9.62555  | 9.616167 |

|      |           |          |          |          |          |          |      |          |          |          |          |          |
|------|-----------|----------|----------|----------|----------|----------|------|----------|----------|----------|----------|----------|
| 4410 | M249T10_  | 1.21051  | -0.27561 | -1.14666 | 0.290954 | 0.863967 | DOWN | 248.8329 | 248.8328 | 248.833  | 9.80185  | 9.696683 |
| 4411 | M637T10_  | 1.141254 | -0.19062 | -1.13677 | 0.290998 | 0.863967 | DOWN | 637.131  | 637.1305 | 637.1424 | 9.816167 | 9.699733 |
| 4412 | M460T10_  | 1.173284 | -0.23055 | -1.17993 | 0.291013 | 0.863967 | DOWN | 459.7402 | 459.7399 | 459.7412 | 9.902617 | 9.714783 |
| 4413 | M316T37_  | 1.15487  | -0.20773 | -1.20475 | 0.291057 | 0.863967 | DOWN | 316.1753 | 316.1752 | 316.1754 | 36.58333 | 36.43967 |
| 4414 | M260T10_  | 2.100188 | 1.070519 | 1.147254 | 0.291064 | 0.863967 | UP   | 259.7563 | 259.7558 | 259.7624 | 9.907917 | 9.77355  |
| 4415 | M1557T10_ | 1.238681 | -0.3088  | -1.14559 | 0.291111 | 0.863967 | DOWN | 1557.454 | 1557.447 | 1557.457 | 9.918833 | 9.8378   |
| 4416 | M1162T10_ | 1.443893 | -0.52996 | -1.1338  | 0.291148 | 0.863967 | DOWN | 1161.632 | 1161.631 | 1161.635 | 9.970617 | 9.843367 |
| 4417 | M782T10_  | 1.233535 | -0.3028  | -1.13996 | 0.291172 | 0.863967 | DOWN | 782.4756 | 782.4748 | 782.4761 | 10.22883 | 10.12287 |
| 4418 | M1557T10_ | 1.218964 | -0.28566 | -1.15929 | 0.291241 | 0.863967 | DOWN | 1557.152 | 1557.149 | 1557.153 | 9.948825 | 9.843367 |
| 4419 | M444T10_  | 1.428454 | 0.514455 | 1.178441 | 0.291292 | 0.863967 | UP   | 443.7417 | 443.7409 | 443.7425 | 9.976317 | 9.827283 |
| 4420 | M283T10_  | 1.332834 | -0.4145  | -1.13411 | 0.29131  | 0.863967 | DOWN | 282.8398 | 282.8397 | 282.8399 | 9.970617 | 9.8914   |
| 4421 | M185T10_  | 1.344757 | -0.42735 | -1.13253 | 0.291375 | 0.863967 | DOWN | 184.993  | 184.9929 | 184.9931 | 9.932033 | 9.811217 |
| 4422 | M387T11_  | 1.298713 | -0.37708 | -1.13922 | 0.291454 | 0.863967 | DOWN | 386.5589 | 386.5589 | 386.56   | 10.89125 | 10.87765 |
| 4423 | M494T16_  | 1.32774  | -0.40897 | -1.13219 | 0.291456 | 0.863967 | DOWN | 494.3469 | 494.3457 | 494.3471 | 15.69547 | 15.52565 |
| 4424 | M285T9_2  | 1.253368 | -0.32581 | -1.13365 | 0.291462 | 0.863967 | DOWN | 284.6831 | 284.683  | 284.6835 | 8.914933 | 8.818733 |
| 4425 | M197T44_  | 1.404002 | -0.48954 | -1.14558 | 0.291509 | 0.863967 | DOWN | 197.1533 | 197.1532 | 197.1535 | 43.9555  | 43.70383 |
| 4426 | M234T10_  | 1.226235 | -0.29424 | -1.17972 | 0.291512 | 0.863967 | DOWN | 234.0324 | 234.0322 | 234.0325 | 9.903283 | 9.822117 |
| 4427 | M695T10_  | 1.737581 | 0.797081 | 1.177346 | 0.291579 | 0.863967 | UP   | 695.0932 | 695.0924 | 695.0935 | 9.85525  | 9.715683 |
| 4428 | M610T10_  | 1.538557 | 0.621578 | 1.147473 | 0.291585 | 0.863967 | UP   | 610.2991 | 610.2974 | 610.2996 | 9.946367 | 9.8753   |
| 4429 | M781T10_  | 1.420717 | -0.50662 | -1.16119 | 0.291643 | 0.863967 | DOWN | 780.5161 | 780.5144 | 780.5206 | 9.862567 | 9.811217 |
| 4430 | M862T24   | 3.267469 | -1.70817 | -1.21044 | 0.291706 | 0.863967 | DOWN | 861.5208 | 861.52   | 861.5216 | 24.20775 | 24.18633 |
| 4431 | M791T9_1  | 1.498418 | -0.58344 | -1.15558 | 0.291709 | 0.863967 | DOWN | 790.5683 | 790.5679 | 790.5696 | 9.305225 | 9.234417 |
| 4432 | M1419T10  | 1.24709  | -0.31857 | -1.17375 | 0.291725 | 0.863968 | DOWN | 1418.545 | 1418.542 | 1418.548 | 9.942742 | 9.8378   |
| 4433 | M155T9    | 1.355698 | -0.43904 | -1.13063 | 0.291745 | 0.863968 | DOWN | 155.3314 | 155.3311 | 155.3318 | 9.3494   | 9.18975  |
| 4434 | M951T10_  | 1.575636 | -0.65593 | -1.12839 | 0.291866 | 0.863968 | DOWN | 951.0601 | 951.059  | 951.0603 | 9.970617 | 9.967367 |
| 4435 | M324T9_1  | 1.318888 | -0.39932 | -1.14157 | 0.2919   | 0.863968 | DOWN | 324.4891 | 324.4887 | 324.4892 | 9.498117 | 9.40135  |
| 4436 | M909T35   | 3.914416 | -1.9688  | -1.19854 | 0.291904 | 0.863968 | DOWN | 908.6523 | 908.6514 | 908.6532 | 35.30975 | 35.27183 |
| 4437 | M224T9_2  | 1.489934 | -0.57525 | -1.15011 | 0.291973 | 0.863968 | DOWN | 223.8592 | 223.8591 | 223.8593 | 9.3494   | 9.22495  |
| 4438 | M662T10_  | 1.237478 | -0.3074  | -1.13413 | 0.291982 | 0.863968 | DOWN | 661.7334 | 661.7326 | 661.7349 | 9.956917 | 9.843367 |
| 4439 | M326T10_  | 1.278896 | 0.354899 | 1.175466 | 0.292001 | 0.863968 | UP   | 325.681  | 325.6807 | 325.6819 | 9.841442 | 9.715683 |
| 4440 | M353T44_  | 1.153529 | 0.206054 | 1.140524 | 0.292059 | 0.863968 | UP   | 353.232  | 353.2319 | 353.2321 | 43.81625 | 43.632   |
| 4441 | M252T14   | 1.350842 | -0.43386 | -1.1279  | 0.292095 | 0.863968 | DOWN | 252.2431 | 252.243  | 252.2432 | 14.29717 | 14.26822 |
| 4442 | M350T11_  | 1.205057 | -0.2691  | -1.17575 | 0.292113 | 0.863968 | DOWN | 350.3981 | 350.3978 | 350.4023 | 10.93208 | 10.879   |
| 4443 | M592T43_  | 1.099497 | 0.136843 | 1.171463 | 0.29214  | 0.863968 | UP   | 592.3327 | 592.3324 | 592.3328 | 42.60358 | 42.5675  |
| 4444 | M307T20   | 1.505377 | 0.590125 | 1.178251 | 0.292235 | 0.863968 | UP   | 307.2476 | 307.2475 | 307.2477 | 19.56217 | 19.5555  |

|      |          |          |          |          |          |          |      |          |          |          |          |          |
|------|----------|----------|----------|----------|----------|----------|------|----------|----------|----------|----------|----------|
| 4445 | M417T9_1 | 1.175812 | -0.23366 | -1.15062 | 0.292245 | 0.863968 | DOWN | 416.516  | 416.5027 | 416.5163 | 9.324967 | 9.27445  |
| 4446 | M655T10_ | 2.038959 | 1.027833 | 1.192835 | 0.292283 | 0.863968 | UP   | 654.9103 | 654.9096 | 654.9107 | 9.872067 | 9.774967 |
| 4447 | M1848T10 | 1.33814  | 0.420229 | 1.13375  | 0.292323 | 0.863968 | UP   | 1848.062 | 1848.061 | 1848.067 | 9.992992 | 9.8914   |
| 4448 | M698T10_ | 1.265603 | 0.339824 | 1.167672 | 0.292359 | 0.863968 | UP   | 698.2413 | 698.2411 | 698.2419 | 9.857275 | 9.73145  |
| 4449 | M1973T10 | 1.169736 | -0.22618 | -1.16418 | 0.292368 | 0.863968 | DOWN | 1973.162 | 1973.16  | 1973.167 | 9.8397   | 9.715683 |
| 4450 | M301T10_ | 1.216682 | -0.28295 | -1.17646 | 0.292423 | 0.863968 | DOWN | 301.3317 | 301.3316 | 301.3318 | 9.930908 | 9.827283 |
| 4451 | M870T10_ | 1.315707 | -0.39584 | -1.15829 | 0.292423 | 0.863968 | DOWN | 869.7894 | 869.7888 | 869.7902 | 9.968992 | 9.8753   |
| 4452 | M209T9_1 | 1.342803 | -0.42525 | -1.12659 | 0.292622 | 0.863968 | DOWN | 208.6116 | 208.6114 | 208.6125 | 9.329642 | 9.132267 |
| 4453 | M563T10_ | 1.27864  | -0.35461 | -1.14742 | 0.292624 | 0.863968 | DOWN | 562.7115 | 562.7108 | 562.7121 | 9.948875 | 9.843367 |
| 4454 | M1012T10 | 1.432135 | -0.51817 | -1.13831 | 0.292708 | 0.863968 | DOWN | 1011.609 | 1011.607 | 1011.609 | 9.531583 | 9.4632   |
| 4455 | M372T9_3 | 1.412638 | -0.49839 | -1.12699 | 0.292744 | 0.863968 | DOWN | 371.782  | 371.7819 | 371.7821 | 9.493125 | 9.432183 |
| 4456 | M681T10_ | 1.197349 | -0.25984 | -1.15467 | 0.292762 | 0.863968 | DOWN | 680.9248 | 680.9242 | 680.9259 | 9.847542 | 9.73145  |
| 4457 | M302T10_ | 1.216067 | -0.28222 | -1.17538 | 0.292821 | 0.863969 | DOWN | 301.7494 | 301.7493 | 301.7496 | 9.930908 | 9.827283 |
| 4458 | M1893T10 | 1.292665 | 0.370349 | 1.162566 | 0.292828 | 0.863969 | UP   | 1892.656 | 1892.655 | 1892.658 | 9.918833 | 9.827283 |
| 4459 | M765T11  | 1.569872 | -0.65065 | -1.14295 | 0.292845 | 0.863969 | DOWN | 765.1493 | 765.1488 | 765.1506 | 10.85521 | 10.83572 |
| 4460 | M281T27  | 221.6559 | 7.792178 | 1.210099 | 0.292859 | 0.863969 | UP   | 281.2666 | 281.2663 | 281.2667 | 27.30333 | 27.215   |
| 4461 | M430T21  | 1.234213 | 0.303591 | 1.168071 | 0.292897 | 0.863969 | UP   | 430.3162 | 430.3159 | 430.3163 | 21.33958 | 21.33417 |
| 4462 | M641T10_ | 1.459209 | 0.545186 | 1.192519 | 0.292902 | 0.863969 | UP   | 641.2384 | 641.2378 | 641.2397 | 9.825767 | 9.699733 |
| 4463 | M837T11  | 1.362181 | -0.44592 | -1.13053 | 0.292914 | 0.863969 | DOWN | 837.4971 | 837.4957 | 837.4974 | 10.6606  | 10.61512 |
| 4464 | M295T10_ | 1.231226 | -0.3001  | -1.18809 | 0.292972 | 0.863969 | DOWN | 294.8058 | 294.8056 | 294.8061 | 9.90295  | 9.79535  |
| 4465 | M626T45  | 1.191923 | 0.253292 | 1.144492 | 0.29299  | 0.863969 | UP   | 625.9305 | 625.9303 | 625.9314 | 44.98333 | 44.8685  |
| 4466 | M233T11_ | 1.125112 | -0.17007 | -1.12678 | 0.293023 | 0.863969 | DOWN | 232.6029 | 232.6029 | 232.6033 | 10.90659 | 10.879   |
| 4467 | M368T21_ | 1.476676 | -0.56235 | -1.13376 | 0.293147 | 0.863969 | DOWN | 367.9208 | 367.9204 | 367.9211 | 20.83533 | 20.74033 |
| 4468 | M1088T10 | 1.908646 | 0.93255  | 1.183203 | 0.293169 | 0.863969 | UP   | 1087.725 | 1087.724 | 1087.727 | 9.900733 | 9.843367 |
| 4469 | M260T11_ | 1.108679 | -0.14884 | -1.12719 | 0.293359 | 0.863969 | DOWN | 260.2047 | 260.2047 | 260.2048 | 10.90659 | 10.89355 |
| 4470 | M682T10_ | 1.774916 | 0.827751 | 1.196298 | 0.29337  | 0.863969 | UP   | 682.43   | 682.4286 | 682.4311 | 9.864892 | 9.73145  |
| 4471 | M923T9   | 1.547229 | 0.629686 | 1.124848 | 0.293406 | 0.863969 | UP   | 922.7066 | 922.7049 | 922.7072 | 9.415167 | 9.30965  |
| 4472 | M288T23_ | 1.553407 | 0.635436 | 1.132066 | 0.293423 | 0.863969 | UP   | 288.4028 | 288.3941 | 288.4046 | 22.90017 | 22.857   |
| 4473 | M398T10_ | 1.292739 | -0.37043 | -1.13359 | 0.29363  | 0.863969 | DOWN | 397.5451 | 397.545  | 397.5452 | 9.894875 | 9.79535  |
| 4474 | M494T10_ | 2.714874 | 1.440885 | 1.191777 | 0.293645 | 0.863969 | UP   | 494.2821 | 494.27   | 494.2828 | 9.68775  | 9.684583 |
| 4475 | M592T10_ | 1.188851 | -0.24957 | -1.14518 | 0.293692 | 0.863969 | DOWN | 592.4319 | 592.4314 | 592.4327 | 9.931875 | 9.822117 |
| 4476 | M381T28  | 2.593852 | -1.3751  | -1.20254 | 0.293724 | 0.863969 | DOWN | 381.3221 | 381.3218 | 381.3223 | 27.88558 | 27.8535  |
| 4477 | M1732T10 | 1.203249 | -0.26694 | -1.16638 | 0.293751 | 0.863969 | DOWN | 1731.851 | 1731.85  | 1731.856 | 9.829325 | 9.715683 |
| 4478 | M457T10_ | 1.314318 | -0.39431 | -1.14797 | 0.293875 | 0.86397  | DOWN | 457.3509 | 457.3506 | 457.3512 | 9.908617 | 9.811217 |
| 4479 | M337T9_1 | 1.288319 | -0.36549 | -1.15632 | 0.293979 | 0.86397  | DOWN | 337.3743 | 337.3741 | 337.3745 | 9.498117 | 9.40135  |



|      |          |          |          |          |          |          |      |          |          |          |          |          |
|------|----------|----------|----------|----------|----------|----------|------|----------|----------|----------|----------|----------|
| 4480 | M286T10_ | 2.511706 | 1.328668 | 1.19793  | 0.293991 | 0.86397  | UP   | 286.0622 | 286.0619 | 286.0625 | 9.989117 | 9.960967 |
| 4481 | M378T44_ | 3.692494 | 1.884595 | 1.205429 | 0.294101 | 0.86397  | UP   | 378.2483 | 378.2481 | 378.2485 | 44.279   | 44.121   |
| 4482 | M848T10_ | 1.106162 | -0.14556 | -1.12731 | 0.294111 | 0.86397  | DOWN | 848.3103 | 848.3097 | 848.3107 | 9.924308 | 9.827283 |
| 4483 | M332T25  | 74.34136 | -6.21609 | -1.20639 | 0.294136 | 0.86397  | DOWN | 332.149  | 332.1487 | 332.1493 | 25.11417 | 25.07333 |
| 4484 | M451T9_1 | 1.739003 | 0.798261 | 1.161205 | 0.294207 | 0.86397  | UP   | 451.4114 | 451.4108 | 451.413  | 9.3165   | 9.197983 |
| 4485 | M546T25_ | 2.894783 | -1.53345 | -1.20178 | 0.294295 | 0.86397  | DOWN | 546.3792 | 546.3791 | 546.3808 | 24.92133 | 24.912   |
| 4486 | M1001T12 | 1.241609 | -0.31221 | -1.15341 | 0.294332 | 0.86397  | DOWN | 1001.443 | 1001.443 | 1001.443 | 12.06378 | 12.031   |
| 4487 | M1339T10 | 1.208956 | 0.273762 | 1.161406 | 0.29434  | 0.86397  | UP   | 1339.458 | 1339.453 | 1339.46  | 9.917208 | 9.827283 |
| 4488 | M1880T10 | 1.194944 | -0.25694 | -1.153   | 0.294353 | 0.86397  | DOWN | 1880.28  | 1880.279 | 1880.282 | 9.830283 | 9.715683 |
| 4489 | M320T40  | 1.599154 | -0.67731 | -1.12745 | 0.294419 | 0.86397  | DOWN | 320.1702 | 320.1699 | 320.1704 | 39.7765  | 39.66167 |
| 4490 | M207T10_ | 1.24731  | -0.31882 | -1.14983 | 0.294425 | 0.86397  | DOWN | 207.0236 | 207.0235 | 207.0312 | 9.830558 | 9.728083 |
| 4491 | M646T26_ | 1.482379 | -0.56791 | -1.12541 | 0.294438 | 0.86397  | DOWN | 646.4791 | 646.4787 | 646.4801 | 26.00308 | 25.8515  |
| 4492 | M502T10_ | 1.355585 | 0.438916 | 1.175166 | 0.294546 | 0.86397  | UP   | 502.1475 | 502.1473 | 502.1479 | 9.967367 | 9.8753   |
| 4493 | M307T17  | 2.227008 | -1.15511 | -1.17135 | 0.29474  | 0.86397  | DOWN | 307.2356 | 307.2353 | 307.2358 | 16.86967 | 16.82617 |
| 4494 | M293T16  | 1.790469 | -0.84034 | -1.14681 | 0.294878 | 0.86397  | DOWN | 293.1357 | 293.1356 | 293.1358 | 16.32088 | 16.16765 |
| 4495 | M478T10_ | 1.645054 | 0.718135 | 1.181274 | 0.294972 | 0.863971 | UP   | 478.3457 | 478.3323 | 478.3459 | 9.554133 | 9.421167 |
| 4496 | M1481T10 | 1.492721 | -0.57794 | -1.14084 | 0.2951   | 0.863971 | DOWN | 1480.855 | 1480.852 | 1480.857 | 10.40831 | 10.32768 |
| 4497 | M180T10_ | 1.18967  | -0.25056 | -1.17395 | 0.2952   | 0.863971 | DOWN | 179.6566 | 179.6565 | 179.6569 | 9.830833 | 9.715683 |
| 4498 | M610T9_2 | 1.262674 | -0.33648 | -1.13181 | 0.295225 | 0.863971 | DOWN | 610.3552 | 610.3507 | 610.3567 | 9.249433 | 9.174917 |
| 4499 | M435T11_ | 1.188048 | -0.24859 | -1.13243 | 0.295236 | 0.863971 | DOWN | 434.8341 | 434.834  | 434.8343 | 10.63183 | 10.59933 |
| 4500 | M428T13  | 1.241863 | 0.312506 | 1.121033 | 0.295294 | 0.863971 | UP   | 428.2878 | 428.2875 | 428.2884 | 12.76303 | 12.76215 |
| 4501 | M229T11_ | 1.224128 | -0.29175 | -1.17068 | 0.295302 | 0.863971 | DOWN | 228.9465 | 228.9461 | 228.9467 | 10.89237 | 10.873   |
| 4502 | M1498T10 | 1.514727 | -0.59906 | -1.12401 | 0.295321 | 0.863971 | DOWN | 1497.73  | 1497.725 | 1497.735 | 9.887642 | 9.859233 |
| 4503 | M454T9_1 | 1.622274 | -0.69802 | -1.11964 | 0.295377 | 0.863971 | DOWN | 454.3774 | 454.3759 | 454.3795 | 9.360208 | 9.275617 |
| 4504 | M432T17  | 1.337157 | -0.41917 | -1.14292 | 0.295473 | 0.863971 | DOWN | 431.7786 | 431.7783 | 431.779  | 17.16983 | 17.16083 |
| 4505 | M208T10_ | 1.633654 | -0.7081  | -1.11959 | 0.295508 | 0.863971 | DOWN | 207.7908 | 207.7889 | 207.791  | 9.830283 | 9.715683 |
| 4506 | M379T10_ | 1.217261 | -0.28364 | -1.12204 | 0.295527 | 0.863971 | DOWN | 379.029  | 379.0287 | 379.0305 | 9.902483 | 9.811217 |
| 4507 | M194T10_ | 1.27519  | 0.350713 | 1.125583 | 0.295539 | 0.863971 | UP   | 193.9258 | 193.917  | 193.9259 | 9.953592 | 9.758367 |
| 4508 | M655T10_ | 1.249005 | -0.32078 | -1.14462 | 0.295563 | 0.863971 | DOWN | 654.7402 | 654.7397 | 654.7425 | 9.825492 | 9.715683 |
| 4509 | M372T11_ | 1.618661 | 0.6948   | 1.160781 | 0.295611 | 0.863971 | UP   | 371.718  | 371.7176 | 371.7216 | 10.8926  | 10.82935 |
| 4510 | M490T40_ | 1.160978 | -0.21534 | -1.13958 | 0.295631 | 0.863971 | DOWN | 490.2645 | 490.2642 | 490.2646 | 40.49617 | 40.22283 |
| 4511 | M260T10_ | 1.206835 | 0.271229 | 1.124479 | 0.295642 | 0.863971 | UP   | 260.4714 | 260.4712 | 260.4715 | 9.7759   | 9.65225  |
| 4512 | M325T11_ | 1.487539 | 0.572928 | 1.141688 | 0.295667 | 0.863971 | UP   | 325.2107 | 325.2104 | 325.2117 | 11.497   | 11.47593 |
| 4513 | M333T18  | 206.1473 | 7.687531 | 1.201903 | 0.29569  | 0.863971 | UP   | 333.2828 | 333.2827 | 333.2828 | 17.94383 | 17.92267 |
| 4514 | M1005T10 | 1.530677 | -0.61417 | -1.11875 | 0.295728 | 0.863971 | DOWN | 1005.064 | 1005.06  | 1005.065 | 9.932033 | 9.9174   |

|      |          |          |          |          |          |          |      |          |          |          |          |          |
|------|----------|----------|----------|----------|----------|----------|------|----------|----------|----------|----------|----------|
| 4515 | M453T23  | 67.80001 | 6.083214 | 1.201552 | 0.295811 | 0.863971 | UP   | 453.2588 | 453.2586 | 453.2593 | 22.52367 | 22.48267 |
| 4516 | M464T42_ | 1.514863 | 0.599188 | 1.13229  | 0.295845 | 0.863971 | UP   | 464.2849 | 464.2848 | 464.2852 | 41.733   | 41.34517 |
| 4517 | M446T10_ | 1.445471 | -0.53154 | -1.11832 | 0.295885 | 0.863971 | DOWN | 445.751  | 445.7492 | 445.7513 | 9.94405  | 9.811217 |
| 4518 | M480T10_ | 1.331365 | -0.41291 | -1.12439 | 0.295893 | 0.863971 | DOWN | 479.6337 | 479.6335 | 479.6349 | 9.831517 | 9.715683 |
| 4519 | M730T10_ | 1.215669 | -0.28175 | -1.16006 | 0.29593  | 0.863971 | DOWN | 730.0517 | 730.0511 | 730.0525 | 9.825492 | 9.715683 |
| 4520 | M398T9_6 | 1.324874 | -0.40586 | -1.11963 | 0.295934 | 0.863971 | DOWN | 398.2325 | 398.2308 | 398.2349 | 9.162008 | 9.1428   |
| 4521 | M175T10_ | 1.388785 | 0.473823 | 1.166526 | 0.295953 | 0.863971 | UP   | 174.8635 | 174.8634 | 174.8636 | 9.970617 | 9.859233 |
| 4522 | M662T10_ | 1.294059 | -0.3719  | -1.1366  | 0.29596  | 0.863971 | DOWN | 661.7969 | 661.7965 | 661.798  | 9.830458 | 9.715683 |
| 4523 | M380T9_3 | 1.372272 | -0.45657 | -1.11956 | 0.295997 | 0.863972 | DOWN | 379.8367 | 379.836  | 379.8378 | 9.280992 | 9.129317 |
| 4524 | M507T9_2 | 8.4935   | 3.086359 | 1.200493 | 0.296009 | 0.863972 | UP   | 507.3154 | 507.3149 | 507.3166 | 8.985867 | 8.889467 |
| 4525 | M407T10_ | 1.306868 | -0.38611 | -1.15449 | 0.296033 | 0.863972 | DOWN | 407.2923 | 407.2921 | 407.2926 | 9.514733 | 9.40135  |
| 4526 | M808T9_2 | 1.365499 | -0.44943 | -1.13814 | 0.296082 | 0.863972 | DOWN | 808.3935 | 808.3929 | 808.3956 | 9.3494   | 9.204617 |
| 4527 | M1647T10 | 1.515748 | 0.60003  | 1.134063 | 0.296279 | 0.863972 | UP   | 1647.012 | 1647.009 | 1647.013 | 9.972483 | 9.859233 |
| 4528 | M226T12_ | 1.264629 | -0.33871 | -1.12037 | 0.296319 | 0.863972 | DOWN | 226.1079 | 226.1078 | 226.1079 | 11.50399 | 11.48757 |
| 4529 | M1955T10 | 1.487735 | -0.57312 | -1.16849 | 0.296324 | 0.863972 | DOWN | 1954.787 | 1954.783 | 1954.788 | 9.948875 | 9.869467 |
| 4530 | M982T28  | 1.272505 | -0.34767 | -1.12462 | 0.296355 | 0.863972 | DOWN | 981.6782 | 981.6779 | 981.6788 | 28.27217 | 28.23067 |
| 4531 | M205T9_6 | 1.533283 | -0.61662 | -1.11732 | 0.296417 | 0.863972 | DOWN | 205.2776 | 205.277  | 205.278  | 9.278717 | 9.13445  |
| 4532 | M331T9_8 | 1.266645 | -0.34101 | -1.1279  | 0.296507 | 0.863972 | DOWN | 331.1894 | 331.189  | 331.1897 | 9.322542 | 9.234417 |
| 4533 | M289T7   | 1.854424 | -0.89097 | -1.15806 | 0.296564 | 0.863972 | DOWN | 289.1518 | 289.1517 | 289.1518 | 7.11425  | 7.111883 |
| 4534 | M209T9_5 | 1.291268 | -0.36879 | -1.14881 | 0.296758 | 0.863972 | DOWN | 209.1646 | 209.1645 | 209.1647 | 9.311883 | 9.1445   |
| 4535 | M1503T10 | 1.399718 | -0.48514 | -1.12151 | 0.296762 | 0.863972 | DOWN | 1502.724 | 1502.722 | 1502.725 | 9.965792 | 9.859233 |
| 4536 | M662T10_ | 1.362842 | 0.446618 | 1.165365 | 0.29684  | 0.863972 | UP   | 662.3164 | 662.3154 | 662.3171 | 9.967367 | 9.859233 |
| 4537 | M188T11_ | 1.516404 | 0.600654 | 1.11577  | 0.296945 | 0.863972 | UP   | 188.0734 | 188.0731 | 188.074  | 10.89907 | 10.88995 |
| 4538 | M421T11_ | 1.143175 | -0.19305 | -1.11571 | 0.296963 | 0.863972 | DOWN | 421.0828 | 421.0825 | 421.0876 | 10.90519 | 10.879   |
| 4539 | M739T10_ | 1.375728 | -0.46019 | -1.11577 | 0.29707  | 0.863973 | DOWN | 739.4523 | 739.4513 | 739.454  | 10.15822 | 10.1133  |
| 4540 | M429T22_ | 1.271692 | -0.34675 | -1.1693  | 0.297081 | 0.863973 | DOWN | 429.3031 | 429.3026 | 429.3036 | 21.5535  | 21.4715  |
| 4541 | M496T9_1 | 1.910123 | 0.933665 | 1.174638 | 0.297081 | 0.863973 | UP   | 496.4217 | 496.4214 | 496.4221 | 9.327592 | 9.2946   |
| 4542 | M687T10_ | 1.358876 | 0.442414 | 1.131164 | 0.297127 | 0.863973 | UP   | 686.5931 | 686.5928 | 686.5938 | 9.9847   | 9.90755  |
| 4543 | M658T9_2 | 1.270306 | -0.34518 | -1.12428 | 0.297133 | 0.863973 | DOWN | 658.0181 | 658.0175 | 658.0195 | 9.314442 | 9.234417 |
| 4544 | M831T9_5 | 1.792963 | -0.84235 | -1.1205  | 0.297253 | 0.863973 | DOWN | 831.2568 | 831.2561 | 831.2575 | 8.683425 | 8.601067 |
| 4545 | M562T43_ | 1.224706 | -0.29244 | -1.13383 | 0.297285 | 0.863973 | DOWN | 562.3219 | 562.3216 | 562.322  | 43.37333 | 43.215   |
| 4546 | M710T10_ | 1.130036 | -0.17637 | -1.11508 | 0.297286 | 0.863973 | DOWN | 710.4524 | 710.4518 | 710.4535 | 9.88865  | 9.774967 |
| 4547 | M536T38_ | 1.301026 | 0.37965  | 1.119253 | 0.297293 | 0.863973 | UP   | 536.3061 | 536.3059 | 536.3065 | 38.07892 | 37.87767 |
| 4548 | M537T10_ | 1.206112 | -0.27036 | -1.17663 | 0.29751  | 0.863973 | DOWN | 536.597  | 536.5966 | 536.5974 | 9.945258 | 9.843367 |
| 4549 | M297T27  | 1.984168 | 0.988534 | 1.11552  | 0.297515 | 0.863973 | UP   | 297.1824 | 297.1823 | 297.1828 | 26.695   | 26.66633 |

|      |          |          |          |          |          |          |      |          |          |          |          |          |
|------|----------|----------|----------|----------|----------|----------|------|----------|----------|----------|----------|----------|
| 4550 | M951T22  | 1.36399  | -0.44783 | -1.15668 | 0.297547 | 0.863973 | DOWN | 950.6625 | 950.6618 | 950.6635 | 22.13217 | 22.10917 |
| 4551 | M465T23_ | 1.384165 | -0.46902 | -1.12231 | 0.297583 | 0.863973 | DOWN | 464.8302 | 464.83   | 464.8306 | 22.71217 | 22.6975  |
| 4552 | M184T10_ | 94.79649 | 6.566762 | 1.196243 | 0.29765  | 0.863973 | UP   | 184.1332 | 184.1329 | 184.1411 | 9.728817 | 9.52515  |
| 4553 | M596T17  | 1.235673 | -0.3053  | -1.12163 | 0.297696 | 0.863973 | DOWN | 596.4155 | 596.4145 | 596.4167 | 16.93533 | 16.91267 |
| 4554 | M575T10_ | 1.64039  | 0.714039 | 1.161993 | 0.297711 | 0.863973 | UP   | 575.2374 | 575.2372 | 575.2383 | 9.994767 | 9.90755  |
| 4555 | M437T25_ | 2.129877 | 1.09077  | 1.183359 | 0.297727 | 0.863973 | UP   | 437.2271 | 437.2267 | 437.228  | 25.34917 | 25.26967 |
| 4556 | M554T9_2 | 1.541715 | -0.62454 | -1.11394 | 0.297755 | 0.863973 | DOWN | 553.9161 | 553.9159 | 553.9172 | 9.29345  | 9.234417 |
| 4557 | M696T28_ | 1.380468 | 0.465158 | 1.114156 | 0.297867 | 0.863973 | UP   | 696.4292 | 696.4287 | 696.4295 | 27.52367 | 27.45433 |
| 4558 | M337T25  | 33.20554 | -5.05335 | -1.1951  | 0.297978 | 0.863973 | DOWN | 337.1043 | 337.1042 | 337.1048 | 25.11567 | 25.0445  |
| 4559 | M430T9_9 | 1.157392 | -0.21088 | -1.11332 | 0.298031 | 0.863973 | DOWN | 430.3889 | 430.3879 | 430.3909 | 9.311883 | 9.129317 |
| 4560 | M434T9_1 | 1.252851 | -0.32521 | -1.11313 | 0.298036 | 0.863973 | DOWN | 434.392  | 434.3917 | 434.3922 | 9.285867 | 9.129317 |
| 4561 | M342T10_ | 1.189925 | -0.25087 | -1.14969 | 0.298208 | 0.863974 | DOWN | 341.6188 | 341.6185 | 341.6192 | 9.8397   | 9.715683 |
| 4562 | M355T43_ | 1.289987 | -0.36736 | -1.11332 | 0.298312 | 0.863974 | DOWN | 355.2112 | 355.2112 | 355.2114 | 43.143   | 43.0425  |
| 4563 | M576T10_ | 1.410834 | -0.49655 | -1.11997 | 0.298388 | 0.863974 | DOWN | 575.8333 | 575.8332 | 575.8339 | 9.900133 | 9.79535  |
| 4564 | M299T22_ | 1.121781 | 0.16579  | 1.112035 | 0.298425 | 0.863974 | UP   | 299.2001 | 299.2    | 299.2005 | 21.93492 | 21.92333 |
| 4565 | M230T13_ | 1.243549 | -0.31446 | -1.1504  | 0.298435 | 0.863974 | DOWN | 230.1749 | 230.1748 | 230.1751 | 12.60358 | 12.57248 |
| 4566 | M358T38  | 1.261431 | -0.33506 | -1.16474 | 0.298451 | 0.863974 | DOWN | 358.2222 | 358.2221 | 358.2224 | 38.29483 | 38.17983 |
| 4567 | M429T9_5 | 1.29636  | -0.37447 | -1.14828 | 0.298552 | 0.863974 | DOWN | 429.2003 | 429.1998 | 429.2027 | 9.255333 | 9.146383 |
| 4568 | M245T43  | 1.170744 | 0.227426 | 1.165548 | 0.298563 | 0.863974 | UP   | 245.138  | 245.138  | 245.1381 | 43.48817 | 43.30133 |
| 4569 | M274T10_ | 1.410802 | 0.496516 | 1.128187 | 0.298622 | 0.863974 | UP   | 274.1702 | 274.1647 | 274.1703 | 9.554883 | 9.27445  |
| 4570 | M666T10_ | 1.263738 | -0.3377  | -1.12033 | 0.298623 | 0.863974 | DOWN | 665.9307 | 665.9295 | 665.9314 | 9.972917 | 9.885167 |
| 4571 | M368T16  | 1.282346 | -0.35879 | -1.11148 | 0.2989   | 0.863974 | DOWN | 368.1394 | 368.1393 | 368.1397 | 15.96518 | 15.92052 |
| 4572 | M454T9_1 | 1.474478 | 0.560204 | 1.135307 | 0.298938 | 0.863974 | UP   | 453.8864 | 453.8857 | 453.8933 | 9.277967 | 9.216183 |
| 4573 | M427T10_ | 1.139185 | -0.188   | -1.11606 | 0.29895  | 0.863974 | DOWN | 426.7184 | 426.7181 | 426.7185 | 9.922    | 9.827283 |
| 4574 | M416T43_ | 1.265202 | -0.33937 | -1.17172 | 0.298957 | 0.863974 | DOWN | 416.2276 | 416.2276 | 416.2278 | 43.3875  | 43.31533 |
| 4575 | M633T11_ | 1.265896 | -0.34016 | -1.11477 | 0.298988 | 0.863974 | DOWN | 633.2695 | 633.2692 | 633.2709 | 10.892   | 10.879   |
| 4576 | M249T7_2 | 1.437353 | -0.52341 | -1.11057 | 0.299019 | 0.863974 | DOWN | 249.3552 | 249.3502 | 249.3595 | 6.830808 | 6.618967 |
| 4577 | M186T10_ | 1.232048 | -0.30106 | -1.12943 | 0.299039 | 0.863974 | DOWN | 185.9292 | 185.9291 | 185.9293 | 9.91765  | 9.827283 |
| 4578 | M454T37_ | 1.293313 | -0.37107 | -1.12324 | 0.299077 | 0.863974 | DOWN | 454.2644 | 454.2643 | 454.2654 | 37.41508 | 37.178   |
| 4579 | M459T9_5 | 2.106681 | -1.07497 | -1.18816 | 0.299164 | 0.863974 | DOWN | 459.3039 | 459.3032 | 459.3047 | 8.88765  | 8.802417 |
| 4580 | M242T11_ | 1.102025 | -0.14016 | -1.11292 | 0.299231 | 0.863974 | DOWN | 242.1749 | 242.1748 | 242.175  | 10.90659 | 10.89355 |
| 4581 | M167T10_ | 1.211388 | -0.27666 | -1.14653 | 0.299257 | 0.863975 | DOWN | 167.472  | 167.4719 | 167.4724 | 9.825492 | 9.715683 |
| 4582 | M243T11_ | 3.258544 | -1.70423 | -1.18607 | 0.299328 | 0.863975 | DOWN | 242.5756 | 242.5754 | 242.5758 | 10.89128 | 10.84847 |
| 4583 | M281T9   | 1.548473 | -0.63085 | -1.12162 | 0.299368 | 0.863975 | DOWN | 280.5326 | 280.5197 | 280.5332 | 9.160617 | 8.9519   |
| 4584 | M565T10_ | 1.192131 | -0.25354 | -1.11069 | 0.299385 | 0.863975 | DOWN | 565.3183 | 565.3177 | 565.3188 | 10.41845 | 10.3771  |

|      |          |          |          |          |          |          |      |          |          |          |          |          |
|------|----------|----------|----------|----------|----------|----------|------|----------|----------|----------|----------|----------|
| 4585 | M378T42_ | 3.303547 | -1.72402 | -1.18941 | 0.299415 | 0.863975 | DOWN | 378.2482 | 378.248  | 378.2484 | 41.84683 | 41.70483 |
| 4586 | M464T18  | 1.430744 | -0.51677 | -1.12338 | 0.299466 | 0.863975 | DOWN | 464.3365 | 464.336  | 464.3369 | 18.16183 | 18.14667 |
| 4587 | M449T9_3 | 1.251093 | -0.32319 | -1.11804 | 0.299493 | 0.863975 | DOWN | 448.6615 | 448.6562 | 448.6618 | 9.239042 | 9.0511   |
| 4588 | M179T10_ | 1.187422 | -0.24783 | -1.11112 | 0.2995   | 0.863975 | DOWN | 178.5349 | 178.5348 | 178.535  | 9.934533 | 9.827283 |
| 4589 | M341T10_ | 1.187189 | -0.24755 | -1.15362 | 0.299553 | 0.863975 | DOWN | 340.906  | 340.9058 | 340.9062 | 9.8397   | 9.715683 |
| 4590 | M288T23_ | 1.56709  | -0.64809 | -1.10934 | 0.299581 | 0.863975 | DOWN | 288.1182 | 288.1128 | 288.1237 | 22.91467 | 22.84267 |
| 4591 | M351T9_1 | 1.618328 | -0.6945  | -1.13288 | 0.299619 | 0.863975 | DOWN | 350.5885 | 350.5765 | 350.5901 | 9.1892   | 9.12675  |
| 4592 | M816T10_ | 1.19249  | -0.25398 | -1.12887 | 0.299629 | 0.863975 | DOWN | 816.0205 | 816.0197 | 816.0216 | 9.917167 | 9.811217 |
| 4593 | M430T10_ | 1.592136 | 0.670964 | 1.179182 | 0.299636 | 0.863975 | UP   | 430.3223 | 430.3214 | 430.323  | 9.766367 | 9.649833 |
| 4594 | M231T10_ | 1.649639 | 0.722151 | 1.172563 | 0.299894 | 0.863975 | UP   | 231.2057 | 231.2053 | 231.2058 | 9.983467 | 9.8753   |
| 4595 | M305T9_6 | 1.593242 | -0.67197 | -1.10828 | 0.29995  | 0.863975 | DOWN | 305.4163 | 305.4162 | 305.4164 | 9.457083 | 9.417317 |
| 4596 | M299T30_ | 1.33015  | 0.411589 | 1.184161 | 0.29997  | 0.863975 | UP   | 299.1615 | 299.1613 | 299.1615 | 29.83392 | 29.8195  |
| 4597 | M888T10_ | 1.758216 | -0.81411 | -1.13981 | 0.3      | 0.863975 | DOWN | 888.3466 | 888.3443 | 888.3478 | 9.608133 | 9.478833 |
| 4598 | M480T9_6 | 1.252281 | -0.32456 | -1.13465 | 0.300021 | 0.863975 | DOWN | 480.3012 | 480.301  | 480.3013 | 9.329083 | 9.219483 |
| 4599 | M313T11  | 4.045407 | 2.016285 | 1.189012 | 0.300071 | 0.863975 | UP   | 313.2486 | 313.2483 | 313.2489 | 11.19761 | 11.16928 |
| 4600 | M496T29  | 1.452067 | -0.53811 | -1.10801 | 0.300231 | 0.863975 | DOWN | 496.3299 | 496.3283 | 496.3309 | 28.8185  | 28.779   |
| 4601 | M1404T10 | 1.299731 | 0.378213 | 1.136179 | 0.300263 | 0.863975 | UP   | 1404.278 | 1404.273 | 1404.279 | 9.917208 | 9.827283 |
| 4602 | M194T11_ | 1.297318 | -0.37553 | -1.11739 | 0.300303 | 0.863975 | DOWN | 194.3342 | 194.334  | 194.3344 | 10.90765 | 10.88747 |
| 4603 | M1837T10 | 1.552073 | 0.634196 | 1.127434 | 0.300363 | 0.863976 | UP   | 1837.188 | 1837.186 | 1837.189 | 9.818142 | 9.758367 |
| 4604 | M185T10_ | 1.203625 | -0.26739 | -1.13362 | 0.300363 | 0.863976 | DOWN | 185.324  | 185.324  | 185.3241 | 9.917167 | 9.811217 |
| 4605 | M488T41_ | 1.102308 | -0.14053 | -1.16884 | 0.300385 | 0.863976 | DOWN | 488.285  | 488.2848 | 488.2851 | 41.09308 | 41.01417 |
| 4606 | M311T10_ | 1.265736 | -0.33998 | -1.14933 | 0.300399 | 0.863976 | DOWN | 310.9781 | 310.9777 | 310.9783 | 9.979667 | 9.8914   |
| 4607 | M427T11_ | 1.247329 | -0.31884 | -1.13315 | 0.300414 | 0.863976 | DOWN | 426.5136 | 426.5134 | 426.5204 | 10.90551 | 10.88747 |
| 4608 | M569T9_6 | 1.671077 | 0.740779 | 1.158031 | 0.300429 | 0.863976 | UP   | 569.3506 | 569.3494 | 569.3508 | 9.420133 | 9.355317 |
| 4609 | M426T11_ | 1.12565  | -0.17076 | -1.13019 | 0.300442 | 0.863976 | DOWN | 426.2531 | 426.2529 | 426.2536 | 10.93928 | 10.91977 |
| 4610 | M480T42_ | 1.139806 | -0.18879 | -1.16471 | 0.300459 | 0.863976 | DOWN | 480.2799 | 480.2798 | 480.28   | 42.43833 | 42.38067 |
| 4611 | M276T11_ | 1.248837 | -0.32059 | -1.10728 | 0.300496 | 0.863976 | DOWN | 276.2839 | 276.2838 | 276.284  | 10.83417 | 10.83252 |
| 4612 | M202T10_ | 16.66951 | 4.05914  | 1.188056 | 0.300512 | 0.863976 | UP   | 202.1437 | 202.1434 | 202.1438 | 9.673333 | 9.626517 |
| 4613 | M634T10_ | 1.240111 | -0.31047 | -1.10704 | 0.300547 | 0.863976 | DOWN | 634.0401 | 634.0398 | 634.0408 | 9.8207   | 9.699733 |
| 4614 | M711T11_ | 1.300201 | -0.37873 | -1.1153  | 0.300555 | 0.863976 | DOWN | 711.3589 | 711.3585 | 711.3595 | 10.93208 | 10.84847 |
| 4615 | M194T10_ | 1.330449 | -0.41191 | -1.12012 | 0.300668 | 0.863976 | DOWN | 193.6986 | 193.6985 | 193.7022 | 9.885167 | 9.7634   |
| 4616 | M313T32  | 2.536881 | 1.343056 | 1.186328 | 0.300703 | 0.863976 | UP   | 313.1432 | 313.1431 | 313.1433 | 32.08467 | 32.07    |
| 4617 | M246T10_ | 1.335119 | -0.41697 | -1.15805 | 0.300756 | 0.863976 | DOWN | 246.189  | 246.1889 | 246.1896 | 9.960967 | 9.869467 |
| 4618 | M551T10_ | 1.420403 | 0.5063   | 1.112488 | 0.300882 | 0.863976 | UP   | 550.71   | 550.71   | 550.7102 | 9.983433 | 9.843367 |
| 4619 | M376T28  | 1.497743 | -0.58279 | -1.10735 | 0.30096  | 0.863976 | DOWN | 375.6142 | 375.6139 | 375.6143 | 28.18533 | 28.15617 |

|      |          |          |          |          |          |          |      |          |          |          |          |          |
|------|----------|----------|----------|----------|----------|----------|------|----------|----------|----------|----------|----------|
| 4620 | M571T10_ | 1.522256 | 0.606211 | 1.119652 | 0.301022 | 0.863976 | UP   | 570.6415 | 570.6409 | 570.6426 | 9.9847   | 9.8753   |
| 4621 | M777T10_ | 1.120454 | -0.16408 | -1.1331  | 0.301049 | 0.863976 | DOWN | 776.6801 | 776.6792 | 776.6817 | 9.823575 | 9.715683 |
| 4622 | M292T44_ | 1.373269 | -0.45761 | -1.12151 | 0.30109  | 0.863976 | DOWN | 292.1751 | 292.175  | 292.1752 | 43.898   | 43.70383 |
| 4623 | M404T40_ | 1.19675  | 0.259122 | 1.166629 | 0.301127 | 0.863976 | UP   | 404.264  | 404.2639 | 404.2643 | 39.676   | 39.53217 |
| 4624 | M226T9_1 | 1.337251 | -0.41927 | -1.10644 | 0.301135 | 0.863976 | DOWN | 225.8385 | 225.8384 | 225.8386 | 9.280458 | 9.1445   |
| 4625 | M363T11_ | 1.356894 | -0.44031 | -1.11709 | 0.301142 | 0.863976 | DOWN | 362.9366 | 362.9358 | 362.9377 | 10.90548 | 10.83417 |
| 4626 | M416T44_ | 1.194366 | 0.256245 | 1.106945 | 0.301159 | 0.863976 | UP   | 416.2278 | 416.2277 | 416.2279 | 44.34383 | 44.26467 |
| 4627 | M348T10_ | 1.263196 | -0.33708 | -1.14613 | 0.301209 | 0.863976 | DOWN | 347.6104 | 347.6102 | 347.6111 | 9.830783 | 9.715683 |
| 4628 | M435T10_ | 1.170799 | -0.22749 | -1.13055 | 0.30121  | 0.863976 | DOWN | 434.728  | 434.7276 | 434.7284 | 9.967367 | 9.843367 |
| 4629 | M750T10_ | 2.018692 | 1.01342  | 1.119875 | 0.301261 | 0.863976 | UP   | 749.8879 | 749.8847 | 749.8883 | 9.830833 | 9.7124   |
| 4630 | M648T9_3 | 1.229641 | -0.29824 | -1.16969 | 0.301265 | 0.863976 | DOWN | 648.1363 | 648.1353 | 648.1368 | 9.2817   | 9.219483 |
| 4631 | M415T42  | 1.416421 | 0.502251 | 1.119892 | 0.301406 | 0.863976 | UP   | 415.2322 | 415.232  | 415.2325 | 42.11458 | 42.03533 |
| 4632 | M656T10_ | 1.35774  | -0.44121 | -1.15056 | 0.30142  | 0.863976 | DOWN | 656.0784 | 656.0778 | 656.0787 | 9.8207   | 9.715683 |
| 4633 | M546T37  | 1.228    | -0.29631 | -1.10735 | 0.301436 | 0.863976 | DOWN | 546.3269 | 546.3266 | 546.3272 | 37.02867 | 36.53933 |
| 4634 | M379T10_ | 1.136609 | -0.18474 | -1.10445 | 0.301507 | 0.863977 | DOWN | 378.6128 | 378.6123 | 378.6136 | 9.924775 | 9.827283 |
| 4635 | M1986T10 | 1.170245 | -0.22681 | -1.10756 | 0.30156  | 0.863977 | DOWN | 1985.822 | 1985.819 | 1985.824 | 9.8161   | 9.715683 |
| 4636 | M576T9_6 | 1.243611 | -0.31454 | -1.14829 | 0.301662 | 0.863977 | DOWN | 576.149  | 576.1424 | 576.1496 | 9.239042 | 9.060817 |
| 4637 | M284T27  | 1.390474 | 0.475577 | 1.126452 | 0.301693 | 0.863977 | UP   | 284.2005 | 284.2    | 284.2009 | 27.08583 | 27.06967 |
| 4638 | M240T18  | 11.08232 | 3.470188 | 1.184428 | 0.301791 | 0.863977 | UP   | 240.2315 | 240.2315 | 240.2319 | 18.29667 | 18.261   |
| 4639 | M807T10_ | 1.306552 | -0.38576 | -1.13966 | 0.301811 | 0.863977 | DOWN | 806.7191 | 806.7184 | 806.7196 | 9.915933 | 9.79535  |
| 4640 | M482T30  | 1.899867 | 0.925898 | 1.11773  | 0.301823 | 0.863977 | UP   | 482.3238 | 482.3236 | 482.3243 | 29.86267 | 29.80483 |
| 4641 | M220T10_ | 1.360815 | 0.444471 | 1.14012  | 0.301905 | 0.863977 | UP   | 219.8544 | 219.8541 | 219.8546 | 9.988125 | 9.8753   |
| 4642 | M662T30  | 1.250604 | -0.32262 | -1.15348 | 0.301923 | 0.863977 | DOWN | 662.4956 | 662.4946 | 662.4965 | 30.26542 | 30.23783 |
| 4643 | M213T9_7 | 1.655591 | -0.72735 | -1.11119 | 0.301987 | 0.863977 | DOWN | 212.8166 | 212.81   | 212.8219 | 9.295817 | 9.07525  |
| 4644 | M288T23_ | 1.388206 | 0.473222 | 1.142599 | 0.302062 | 0.863977 | UP   | 288.3749 | 288.3733 | 288.3751 | 22.88617 | 22.88583 |
| 4645 | M387T10_ | 1.21429  | -0.28011 | -1.14745 | 0.302079 | 0.863977 | DOWN | 386.6414 | 386.641  | 386.6417 | 9.924308 | 9.827283 |
| 4646 | M916T10_ | 1.302256 | -0.38101 | -1.11577 | 0.302115 | 0.863977 | DOWN | 916.1699 | 916.1691 | 916.1711 | 9.843017 | 9.728083 |
| 4647 | M587T9_4 | 1.404397 | -0.48995 | -1.10307 | 0.302263 | 0.863977 | DOWN | 587.2811 | 587.2791 | 587.2825 | 9.275917 | 9.1602   |
| 4648 | M458T9_3 | 1.406901 | -0.49252 | -1.10248 | 0.302313 | 0.863977 | DOWN | 457.9612 | 457.9602 | 457.9615 | 9.220933 | 9.1445   |
| 4649 | M406T23  | 1.165215 | -0.2206  | -1.11199 | 0.302354 | 0.863977 | DOWN | 406.3522 | 406.3519 | 406.3525 | 22.69867 | 22.6975  |
| 4650 | M733T10_ | 1.952424 | 0.965266 | 1.163679 | 0.302355 | 0.863977 | UP   | 732.7863 | 732.7851 | 732.7868 | 9.76855  | 9.665433 |
| 4651 | M705T33  | 1.395842 | 0.481136 | 1.105571 | 0.302403 | 0.863977 | UP   | 704.5055 | 704.5044 | 704.5075 | 33.47025 | 33.39817 |
| 4652 | M224T10_ | 1.721224 | 0.783435 | 1.129546 | 0.302424 | 0.863977 | UP   | 224.2493 | 224.2407 | 224.2494 | 9.887133 | 9.779267 |
| 4653 | M745T23  | 1.54615  | -0.62868 | -1.15752 | 0.302453 | 0.863977 | DOWN | 744.5285 | 744.5265 | 744.5291 | 22.524   | 22.498   |
| 4654 | M340T10_ | 1.17366  | -0.23101 | -1.16465 | 0.30277  | 0.863978 | DOWN | 339.551  | 339.5509 | 339.5514 | 9.857275 | 9.73145  |

|      |          |          |          |          |          |          |      |          |          |          |          |          |
|------|----------|----------|----------|----------|----------|----------|------|----------|----------|----------|----------|----------|
| 4655 | M237T9_6 | 1.305849 | -0.38499 | -1.15285 | 0.302771 | 0.863978 | DOWN | 237.4728 | 237.472  | 237.4737 | 9.347667 | 9.132267 |
| 4656 | M325T10_ | 2.171896 | 1.118955 | 1.165694 | 0.302782 | 0.863978 | UP   | 325.1976 | 325.197  | 325.1979 | 9.8207   | 9.699733 |
| 4657 | M654T10_ | 1.238613 | -0.30873 | -1.11887 | 0.302874 | 0.863978 | DOWN | 654.0631 | 654.0625 | 654.067  | 9.801833 | 9.522017 |
| 4658 | M494T9_5 | 1.235912 | -0.30558 | -1.10141 | 0.30291  | 0.863978 | DOWN | 494.134  | 494.1338 | 494.1343 | 9.3261   | 9.2946   |
| 4659 | M446T10_ | 1.208556 | -0.27328 | -1.10101 | 0.303048 | 0.863978 | DOWN | 445.7043 | 445.6956 | 445.7046 | 9.956417 | 9.77355  |
| 4660 | M509T34  | 1.304716 | -0.38374 | -1.10807 | 0.303063 | 0.863978 | DOWN | 509.368  | 509.3674 | 509.3685 | 33.73    | 33.7155  |
| 4661 | M505T30  | 1.144381 | -0.19457 | -1.1433  | 0.303146 | 0.863978 | DOWN | 505.313  | 505.3123 | 505.3132 | 30.26617 | 30.252   |
| 4662 | M476T9_1 | 1.746555 | 0.804512 | 1.103018 | 0.303158 | 0.863978 | UP   | 476.2297 | 476.226  | 476.2333 | 9.297008 | 9.132267 |
| 4663 | M279T32_ | 1.230856 | 0.299662 | 1.173229 | 0.303158 | 0.863978 | UP   | 279.1589 | 279.1588 | 279.1589 | 32.04892 | 32.041   |
| 4664 | M387T12  | 1.301532 | -0.38021 | -1.1392  | 0.303175 | 0.863978 | DOWN | 387.2489 | 387.2488 | 387.249  | 12.19433 | 12.1357  |
| 4665 | M304T12  | 7.40978  | 2.889431 | 1.178082 | 0.303195 | 0.863978 | UP   | 304.2433 | 304.2426 | 304.2483 | 11.70838 | 11.52522 |
| 4666 | M1337T10 | 1.134758 | -0.18239 | -1.13591 | 0.30321  | 0.863978 | DOWN | 1336.687 | 1336.685 | 1336.693 | 9.910075 | 9.806367 |
| 4667 | M1138T10 | 4.52208  | 2.176986 | 1.178585 | 0.303235 | 0.863978 | UP   | 1137.885 | 1137.878 | 1137.889 | 9.848417 | 9.80415  |
| 4668 | M393T20_ | 1.877549 | 0.90885  | 1.103306 | 0.303246 | 0.863978 | UP   | 393.282  | 393.2798 | 393.287  | 20.27992 | 20.23033 |
| 4669 | M1827T10 | 1.522569 | 0.606508 | 1.156353 | 0.303369 | 0.863978 | UP   | 1827.008 | 1827.005 | 1827.011 | 9.831517 | 9.715683 |
| 4670 | M1768T10 | 1.380326 | -0.46501 | -1.10058 | 0.303371 | 0.863978 | DOWN | 1768.124 | 1768.121 | 1768.126 | 9.806942 | 9.699733 |
| 4671 | M314T9_2 | 2.186274 | -1.12847 | -1.1601  | 0.303517 | 0.863978 | DOWN | 313.6923 | 313.692  | 313.6926 | 8.982542 | 8.863633 |
| 4672 | M265T11_ | 1.487712 | -0.5731  | -1.11361 | 0.303593 | 0.863978 | DOWN | 265.3926 | 265.3925 | 265.3927 | 10.87436 | 10.83252 |
| 4673 | M1458T10 | 1.384711 | -0.46959 | -1.10949 | 0.303647 | 0.863978 | DOWN | 1458.195 | 1458.194 | 1458.196 | 9.886433 | 9.77435  |
| 4674 | M494T9_2 | 1.737282 | 0.796832 | 1.099492 | 0.303673 | 0.863978 | UP   | 493.5628 | 493.5621 | 493.5633 | 9.246042 | 9.219483 |
| 4675 | M701T10_ | 1.216207 | 0.282389 | 1.104342 | 0.303686 | 0.863978 | UP   | 701.0125 | 701.0121 | 701.0133 | 9.871042 | 9.73145  |
| 4676 | M192T9   | 1.22481  | -0.29256 | -1.10361 | 0.303692 | 0.863978 | DOWN | 192.097  | 192.0969 | 192.0971 | 9.28995  | 9.129317 |
| 4677 | M741T9_3 | 1.15346  | -0.20597 | -1.1015  | 0.303722 | 0.863978 | DOWN | 741.3874 | 741.3869 | 741.3879 | 9.458142 | 9.355317 |
| 4678 | M694T9_1 | 1.293569 | -0.37136 | -1.11889 | 0.30399  | 0.863979 | DOWN | 693.7186 | 693.7182 | 693.719  | 9.3332   | 9.234417 |
| 4679 | M718T9_2 | 1.281689 | -0.35805 | -1.11095 | 0.304036 | 0.863979 | DOWN | 717.979  | 717.9769 | 717.9794 | 9.492792 | 9.40135  |
| 4680 | M592T40_ | 1.113964 | -0.1557  | -1.09842 | 0.304043 | 0.863979 | DOWN | 592.3325 | 592.3324 | 592.3328 | 39.86317 | 39.79133 |
| 4681 | M377T11_ | 1.35215  | -0.43526 | -1.09829 | 0.304048 | 0.863979 | DOWN | 376.547  | 376.5433 | 376.5471 | 10.91642 | 10.8926  |
| 4682 | M394T11_ | 1.153093 | -0.20551 | -1.10157 | 0.304138 | 0.863979 | DOWN | 394.3176 | 394.3174 | 394.3178 | 10.575   | 10.55068 |
| 4683 | M552T17_ | 1.288983 | -0.36623 | -1.09792 | 0.304191 | 0.863979 | DOWN | 552.2646 | 552.2642 | 552.2649 | 17.43917 | 17.39267 |
| 4684 | M622T38  | 1.324963 | -0.40595 | -1.17454 | 0.304205 | 0.863979 | DOWN | 622.3434 | 622.3432 | 622.3437 | 38.06467 | 37.9215  |
| 4685 | M333T12_ | 1.178892 | -0.23743 | -1.09859 | 0.304311 | 0.863979 | DOWN | 332.7272 | 332.7271 | 332.7273 | 11.74438 | 11.71363 |
| 4686 | M643T18_ | 1.196643 | -0.25899 | -1.14838 | 0.30436  | 0.863979 | DOWN | 643.3084 | 643.3079 | 643.3085 | 17.59967 | 17.5405  |
| 4687 | M752T10_ | 2.934223 | 1.552979 | 1.160364 | 0.304438 | 0.863979 | UP   | 752.2678 | 752.2653 | 752.2682 | 9.830833 | 9.758367 |
| 4688 | M612T9_7 | 1.717904 | -0.78065 | -1.10901 | 0.304498 | 0.863979 | DOWN | 612.0314 | 612.0228 | 612.0315 | 9.191283 | 9.130683 |
| 4689 | M366T42  | 1.385923 | 0.470847 | 1.150353 | 0.304506 | 0.863979 | UP   | 366.212  | 366.2119 | 366.2122 | 42.10717 | 42.09283 |

|      |           |          |          |          |          |          |      |          |          |          |          |          |
|------|-----------|----------|----------|----------|----------|----------|------|----------|----------|----------|----------|----------|
| 4690 | M238T10_  | 2.719785 | 1.443492 | 1.174094 | 0.304507 | 0.863979 | UP   | 238.1202 | 238.1201 | 238.1203 | 10.29527 | 10.23422 |
| 4691 | M345T10_  | 1.241993 | -0.31266 | -1.12262 | 0.304573 | 0.863979 | DOWN | 344.6697 | 344.6692 | 344.6703 | 9.932033 | 9.843367 |
| 4692 | M377T11_  | 1.214338 | 0.280171 | 1.125721 | 0.304601 | 0.863979 | UP   | 377.2049 | 377.2045 | 377.205  | 10.54367 | 10.50338 |
| 4693 | M283T19   | 1.365738 | -0.44968 | -1.10148 | 0.304603 | 0.863979 | DOWN | 283.1802 | 283.1799 | 283.1803 | 18.83475 | 18.804   |
| 4694 | M351T17   | 1.479061 | -0.56468 | -1.10181 | 0.304659 | 0.863979 | DOWN | 351.1777 | 351.1774 | 351.1777 | 17.05183 | 16.95667 |
| 4695 | M295T9_8  | 1.250615 | -0.32264 | -1.09975 | 0.304675 | 0.863979 | DOWN | 295.1955 | 295.1952 | 295.1956 | 8.985492 | 8.89395  |
| 4696 | M454T11_  | 1.487037 | -0.57244 | -1.13606 | 0.304697 | 0.863979 | DOWN | 453.6775 | 453.6664 | 453.678  | 10.82878 | 10.75595 |
| 4697 | M361T10_  | 1.210315 | -0.27538 | -1.09666 | 0.30473  | 0.863979 | DOWN | 361.3188 | 361.3183 | 361.3192 | 9.823933 | 9.729367 |
| 4698 | M1037T10_ | 1.390241 | -0.47534 | -1.13379 | 0.304731 | 0.863979 | DOWN | 1036.852 | 1036.851 | 1036.853 | 9.8207   | 9.715683 |
| 4699 | M340T10_  | 1.18341  | -0.24295 | -1.17337 | 0.304824 | 0.863979 | DOWN | 339.5346 | 339.5344 | 339.5352 | 9.823575 | 9.715683 |
| 4700 | M755T10_  | 1.304921 | 0.383963 | 1.109641 | 0.304876 | 0.86398  | UP   | 755.4492 | 755.4481 | 755.4502 | 9.817158 | 9.73145  |
| 4701 | M398T12_  | 1.427859 | 0.513854 | 1.120847 | 0.304894 | 0.86398  | UP   | 398.2904 | 398.2901 | 398.2905 | 12.38295 | 12.34017 |
| 4702 | M632T10_  | 1.252934 | 0.32531  | 1.095752 | 0.305078 | 0.86398  | UP   | 631.6981 | 631.6978 | 631.6986 | 10.40425 | 10.34372 |
| 4703 | M316T9_6  | 1.955716 | 0.967697 | 1.119251 | 0.305212 | 0.86398  | UP   | 316.3722 | 316.3715 | 316.3723 | 9.304792 | 9.234417 |
| 4704 | M489T11_  | 1.093899 | -0.12948 | -1.09528 | 0.30527  | 0.86398  | DOWN | 488.6797 | 488.6792 | 488.6801 | 10.9212  | 10.88747 |
| 4705 | M562T39_  | 1.100395 | -0.13802 | -1.09529 | 0.305307 | 0.86398  | DOWN | 562.3223 | 562.3218 | 562.3223 | 38.827   | 38.75517 |
| 4706 | M564T37_  | 1.177084 | -0.23522 | -1.14692 | 0.305408 | 0.86398  | DOWN | 564.3011 | 564.301  | 564.3017 | 37.12258 | 37.043   |
| 4707 | M926T10   | 1.63828  | 0.712182 | 1.110933 | 0.305414 | 0.86398  | UP   | 925.6971 | 925.6968 | 925.6983 | 9.629008 | 9.510117 |
| 4708 | M482T10_  | 1.270954 | -0.34591 | -1.09583 | 0.305491 | 0.86398  | DOWN | 481.5962 | 481.5958 | 481.5968 | 9.857683 | 9.78305  |
| 4709 | M276T44_  | 1.197144 | 0.259596 | 1.165671 | 0.305518 | 0.86398  | UP   | 276.1802 | 276.1801 | 276.1803 | 44.00592 | 43.94817 |
| 4710 | M672T10_  | 1.927343 | 0.946614 | 1.158609 | 0.305544 | 0.86398  | UP   | 672.1606 | 672.1602 | 672.1615 | 9.779267 | 9.743767 |
| 4711 | M1719T10_ | 1.372428 | -0.45673 | -1.09874 | 0.305557 | 0.86398  | DOWN | 1719.114 | 1719.113 | 1719.118 | 9.917167 | 9.79535  |
| 4712 | M433T10_  | 1.308585 | -0.38801 | -1.11298 | 0.305561 | 0.86398  | DOWN | 432.5442 | 432.5436 | 432.5446 | 9.914217 | 9.811217 |
| 4713 | M490T10_  | 1.635138 | 0.709413 | 1.149345 | 0.305693 | 0.86398  | UP   | 489.7636 | 489.7631 | 489.7641 | 9.772667 | 9.665433 |
| 4714 | M157T10_  | 1.350046 | -0.43301 | -1.10349 | 0.305752 | 0.86398  | DOWN | 156.9889 | 156.9888 | 156.989  | 9.909483 | 9.811217 |
| 4715 | M435T9_1  | 1.254401 | -0.327   | -1.09505 | 0.305881 | 0.86398  | DOWN | 435.3925 | 435.3923 | 435.3927 | 9.285867 | 9.129317 |
| 4716 | M541T9_3  | 1.252517 | -0.32483 | -1.10208 | 0.30592  | 0.86398  | DOWN | 540.6046 | 540.6041 | 540.6049 | 9.4498   | 9.370583 |
| 4717 | M793T10_  | 1.311153 | -0.39084 | -1.12991 | 0.305938 | 0.86398  | DOWN | 792.7796 | 792.7791 | 792.7814 | 9.90295  | 9.79535  |
| 4718 | M203T10_  | 1.273837 | -0.34918 | -1.14741 | 0.305956 | 0.86398  | DOWN | 203.1407 | 203.1333 | 203.1408 | 9.823575 | 9.715683 |
| 4719 | M741T9_1  | 1.22589  | -0.29383 | -1.09472 | 0.305977 | 0.86398  | DOWN | 740.8933 | 740.8929 | 740.8935 | 9.2386   | 9.129317 |
| 4720 | M347T10_  | 1.231935 | -0.30093 | -1.14481 | 0.305996 | 0.86398  | DOWN | 347.0459 | 347.0458 | 347.046  | 9.825492 | 9.715683 |
| 4721 | M965T11   | 1.209763 | -0.27472 | -1.1392  | 0.306042 | 0.863981 | DOWN | 964.5437 | 964.5427 | 964.5453 | 10.72301 | 10.59763 |
| 4722 | M411T10_  | 1.11467  | -0.15662 | -1.10312 | 0.306088 | 0.863981 | DOWN | 411.341  | 411.3408 | 411.3412 | 10.31737 | 10.26307 |
| 4723 | M1464T10  | 1.306945 | -0.3862  | -1.10849 | 0.30612  | 0.863981 | DOWN | 1463.82  | 1463.818 | 1463.822 | 10.10881 | 10.0118  |
| 4724 | M633T25   | 3.342711 | -1.74102 | -1.17208 | 0.306132 | 0.863981 | DOWN | 633.4289 | 633.4288 | 633.4293 | 25.21983 | 25.18417 |

|      |          |          |          |          |          |          |      |          |          |          |          |          |
|------|----------|----------|----------|----------|----------|----------|------|----------|----------|----------|----------|----------|
| 4725 | M412T9_7 | 2.183531 | 1.126663 | 1.158506 | 0.306135 | 0.863981 | UP   | 412.1547 | 412.1528 | 412.1579 | 9.256842 | 9.061    |
| 4726 | M748T21  | 1.148066 | -0.19921 | -1.0993  | 0.306184 | 0.863981 | DOWN | 747.5297 | 747.5295 | 747.5299 | 21.32783 | 21.2995  |
| 4727 | M407T10_ | 1.54636  | 0.628876 | 1.112954 | 0.306196 | 0.863981 | UP   | 406.8394 | 406.838  | 406.8407 | 9.946892 | 9.55155  |
| 4728 | M830T10_ | 1.310803 | -0.39045 | -1.09776 | 0.306217 | 0.863981 | DOWN | 830.1712 | 830.1701 | 830.1727 | 9.970617 | 9.859233 |
| 4729 | M303T10_ | 1.176123 | -0.23404 | -1.15608 | 0.306273 | 0.863981 | DOWN | 302.9176 | 302.9174 | 302.9177 | 9.97155  | 9.859233 |
| 4730 | M680T10_ | 1.392486 | 0.477663 | 1.128786 | 0.306278 | 0.863981 | UP   | 680.4183 | 680.4162 | 680.4203 | 9.800633 | 9.728083 |
| 4731 | M591T9_2 | 1.48229  | 0.567828 | 1.159103 | 0.306292 | 0.863981 | UP   | 591.4566 | 591.4564 | 591.4572 | 8.780767 | 8.60815  |
| 4732 | M795T10_ | 1.312389 | -0.3922  | -1.11498 | 0.306404 | 0.863981 | DOWN | 795.3101 | 795.3095 | 795.3106 | 9.886433 | 9.779267 |
| 4733 | M365T10_ | 1.354095 | 0.437329 | 1.124541 | 0.306453 | 0.863981 | UP   | 364.669  | 364.6682 | 364.6694 | 9.840617 | 9.715683 |
| 4734 | M551T11_ | 1.200113 | -0.26317 | -1.09264 | 0.306486 | 0.863981 | DOWN | 551.0043 | 551.0037 | 551.0049 | 10.65006 | 10.629   |
| 4735 | M299T31_ | 1.173713 | 0.23108  | 1.094293 | 0.306554 | 0.863981 | UP   | 299.1615 | 299.1615 | 299.1615 | 31.13283 | 31.12367 |
| 4736 | M656T10_ | 1.252132 | -0.32439 | -1.12617 | 0.306562 | 0.863981 | DOWN | 655.7312 | 655.7308 | 655.7319 | 9.825492 | 9.715683 |
| 4737 | M481T11_ | 1.17076  | -0.22745 | -1.10721 | 0.306599 | 0.863981 | DOWN | 481.1195 | 481.1192 | 481.1198 | 10.90657 | 10.879   |
| 4738 | M277T31  | 1.101202 | -0.13908 | -1.1042  | 0.306621 | 0.863981 | DOWN | 277.1795 | 277.1794 | 277.1797 | 31.105   | 31.10367 |
| 4739 | M276T9_3 | 1.216428 | -0.28265 | -1.09194 | 0.306659 | 0.863981 | DOWN | 276.2352 | 276.2349 | 276.2355 | 8.763733 | 8.672483 |
| 4740 | M317T7   | 1.337783 | -0.41984 | -1.09459 | 0.306669 | 0.863981 | DOWN | 317.1444 | 317.1444 | 317.1444 | 6.9975   | 6.996867 |
| 4741 | M699T10_ | 3.322578 | 1.732303 | 1.168635 | 0.306761 | 0.863981 | UP   | 699.0095 | 699.0089 | 699.0127 | 9.960817 | 9.859233 |
| 4742 | M254T23_ | 1.269513 | -0.34428 | -1.09605 | 0.306804 | 0.863981 | DOWN | 254.0836 | 254.0833 | 254.084  | 23.39225 | 23.38033 |
| 4743 | M228T9_1 | 1.361063 | 0.444734 | 1.119312 | 0.306832 | 0.863981 | UP   | 228.0904 | 228.0902 | 228.0909 | 9.329875 | 9.132267 |
| 4744 | M779T10_ | 1.864272 | 0.898612 | 1.15259  | 0.306874 | 0.863981 | UP   | 778.9651 | 778.9625 | 778.9659 | 9.796792 | 9.715683 |
| 4745 | M681T10_ | 1.852864 | 0.889757 | 1.167924 | 0.306887 | 0.863981 | UP   | 681.4229 | 681.4222 | 681.4237 | 9.851025 | 9.715683 |
| 4746 | M779T10_ | 1.214623 | -0.28051 | -1.09781 | 0.306923 | 0.863981 | DOWN | 778.6162 | 778.616  | 778.6162 | 9.534867 | 9.416817 |
| 4747 | M385T9_5 | 1.568996 | -0.64984 | -1.12826 | 0.306943 | 0.863981 | DOWN | 384.9881 | 384.9879 | 384.9891 | 8.90515  | 8.863633 |
| 4748 | M257T10_ | 1.519317 | 0.603423 | 1.155613 | 0.306958 | 0.863981 | UP   | 257.2326 | 257.2322 | 257.2329 | 9.759167 | 9.636483 |
| 4749 | M584T9_8 | 1.27444  | -0.34986 | -1.10681 | 0.307008 | 0.863981 | DOWN | 584.3809 | 584.3804 | 584.3812 | 8.939    | 8.877267 |
| 4750 | M422T11_ | 2.639499 | -1.40026 | -1.09316 | 0.307051 | 0.863981 | DOWN | 422.2274 | 422.227  | 422.2281 | 10.98306 | 10.9626  |
| 4751 | M821T10_ | 1.261532 | -0.33518 | -1.11684 | 0.307069 | 0.863981 | DOWN | 820.5347 | 820.5337 | 820.5351 | 9.924775 | 9.827283 |
| 4752 | M245T11  | 2.066613 | -1.04727 | -1.1572  | 0.307074 | 0.863981 | DOWN | 245.1232 | 245.1145 | 245.1236 | 10.90765 | 10.879   |
| 4753 | M282T19  | 7.961567 | 2.993052 | 1.169481 | 0.307113 | 0.863981 | UP   | 282.2059 | 282.2059 | 282.2063 | 18.59733 | 18.58783 |
| 4754 | M372T18  | 1.248027 | -0.31965 | -1.12254 | 0.307126 | 0.863981 | DOWN | 372.2641 | 372.2637 | 372.2645 | 17.59892 | 17.58517 |
| 4755 | M684T14  | 1.220583 | -0.28757 | -1.09596 | 0.307224 | 0.863982 | DOWN | 683.53   | 683.5297 | 683.5305 | 14.13643 | 14.12183 |
| 4756 | M326T9_1 | 1.269137 | -0.34385 | -1.09049 | 0.307253 | 0.863982 | DOWN | 325.6693 | 325.6691 | 325.6694 | 9.294408 | 9.129317 |
| 4757 | M520T37_ | 1.137966 | 0.186458 | 1.091387 | 0.307298 | 0.863982 | UP   | 520.3111 | 520.311  | 520.3113 | 36.62583 | 36.5105  |
| 4758 | M318T9_1 | 1.266142 | -0.34044 | -1.11273 | 0.307407 | 0.863982 | DOWN | 318.0906 | 318.0903 | 318.0912 | 9.322542 | 9.234417 |
| 4759 | M249T11_ | 1.113649 | -0.15529 | -1.09345 | 0.307416 | 0.863982 | DOWN | 248.6134 | 248.6132 | 248.6138 | 10.90551 | 10.879   |



|      |          |          |          |          |          |          |      |          |          |          |          |          |
|------|----------|----------|----------|----------|----------|----------|------|----------|----------|----------|----------|----------|
| 4760 | M363T9_2 | 1.292052 | -0.36966 | -1.11196 | 0.307417 | 0.863982 | DOWN | 363.4537 | 363.4519 | 363.4582 | 9.33005  | 9.166033 |
| 4761 | M546T41_ | 1.23481  | 0.304289 | 1.122529 | 0.307426 | 0.863982 | UP   | 546.3269 | 546.3267 | 546.3274 | 40.84133 | 40.5535  |
| 4762 | M288T22_ | 1.097928 | 0.134783 | 1.099872 | 0.307449 | 0.863982 | UP   | 288.2894 | 288.2892 | 288.2897 | 22.07925 | 22.0735  |
| 4763 | M706T10_ | 1.239932 | -0.31026 | -1.12157 | 0.307519 | 0.863982 | DOWN | 706.1482 | 706.1476 | 706.1484 | 9.830083 | 9.699733 |
| 4764 | M706T10_ | 1.26733  | 0.341792 | 1.101794 | 0.307525 | 0.863982 | UP   | 705.9584 | 705.9573 | 705.9585 | 9.951283 | 9.843367 |
| 4765 | M813T11_ | 1.188712 | -0.2494  | -1.09264 | 0.307593 | 0.863982 | DOWN | 812.5043 | 812.5039 | 812.5047 | 10.58424 | 10.5518  |
| 4766 | M225T10_ | 1.26989  | -0.3447  | -1.10983 | 0.307597 | 0.863982 | DOWN | 224.8896 | 224.8894 | 224.8898 | 9.932442 | 9.827283 |
| 4767 | M296T30_ | 135.0442 | 7.077288 | 1.167957 | 0.307691 | 0.863982 | UP   | 296.2582 | 296.2581 | 296.2582 | 30.31017 | 30.31    |
| 4768 | M716T9_3 | 1.283832 | -0.36046 | -1.10929 | 0.307723 | 0.863982 | DOWN | 715.9868 | 715.9865 | 715.9871 | 9.498117 | 9.416817 |
| 4769 | M456T15  | 1.128225 | -0.17405 | -1.08982 | 0.307733 | 0.863982 | DOWN | 456.3577 | 456.3576 | 456.3579 | 15.33952 | 15.32205 |
| 4770 | M284T9_6 | 1.286592 | -0.36355 | -1.11026 | 0.307739 | 0.863982 | DOWN | 284.1855 | 284.1854 | 284.1856 | 8.857667 | 8.772383 |
| 4771 | M542T9_3 | 1.278586 | -0.35455 | -1.08927 | 0.30777  | 0.863982 | DOWN | 541.9006 | 541.9    | 541.9021 | 9.146533 | 9.126783 |
| 4772 | M324T10_ | 1.20216  | -0.26563 | -1.09208 | 0.307817 | 0.863982 | DOWN | 323.8902 | 323.8901 | 323.8903 | 9.8207   | 9.715683 |
| 4773 | M506T18  | 1.191261 | -0.25249 | -1.10845 | 0.307895 | 0.863982 | DOWN | 506.431  | 506.4305 | 506.4322 | 18.0005  | 17.96717 |
| 4774 | M331T9_1 | 2.508982 | -1.3271  | -1.15386 | 0.307977 | 0.863982 | DOWN | 330.5004 | 330.4991 | 330.5005 | 9.07145  | 9.04725  |
| 4775 | M188T11_ | 1.32402  | -0.40493 | -1.14106 | 0.308101 | 0.863982 | DOWN | 188.0485 | 188.0481 | 188.0492 | 10.9198  | 10.85018 |
| 4776 | M589T11_ | 1.428444 | -0.51444 | -1.11132 | 0.308168 | 0.863982 | DOWN | 589.4325 | 589.4317 | 589.4336 | 10.6323  | 10.61337 |
| 4777 | M819T21  | 1.202418 | -0.26594 | -1.1044  | 0.308213 | 0.863982 | DOWN | 818.584  | 818.5835 | 818.5843 | 21.24667 | 21.2265  |
| 4778 | M275T21  | 1.585988 | -0.66538 | -1.11732 | 0.308276 | 0.863982 | DOWN | 275.1599 | 275.1591 | 275.1602 | 21.07375 | 21.0075  |
| 4779 | M367T15  | 1.268614 | -0.34325 | -1.10638 | 0.308287 | 0.863982 | DOWN | 367.2952 | 367.295  | 367.2955 | 14.86834 | 14.80903 |
| 4780 | M908T10_ | 1.280463 | -0.35667 | -1.10283 | 0.308364 | 0.863983 | DOWN | 907.5092 | 907.5075 | 907.5101 | 9.597067 | 9.510117 |
| 4781 | M366T10_ | 1.265618 | -0.33984 | -1.08802 | 0.308427 | 0.863983 | DOWN | 365.8856 | 365.8856 | 365.8858 | 9.914217 | 9.811217 |
| 4782 | M534T10_ | 1.295609 | -0.37363 | -1.10166 | 0.308457 | 0.863983 | DOWN | 533.7703 | 533.7702 | 533.7705 | 9.514733 | 9.40135  |
| 4783 | M635T11_ | 1.169375 | -0.22574 | -1.09163 | 0.30852  | 0.863983 | DOWN | 635.475  | 635.4746 | 635.4754 | 11.39612 | 11.37047 |
| 4784 | M492T10_ | 1.579791 | 0.659734 | 1.122207 | 0.30854  | 0.863983 | UP   | 492.4831 | 492.4827 | 492.4835 | 9.9847   | 9.8914   |
| 4785 | M412T9_4 | 2.162159 | 1.112473 | 1.161187 | 0.308572 | 0.863983 | UP   | 412.0985 | 412.0973 | 412.0988 | 9.147367 | 9.129317 |
| 4786 | M990T23  | 1.610288 | 0.687318 | 1.155    | 0.308585 | 0.863983 | UP   | 989.5285 | 989.527  | 989.5292 | 23.36267 | 23.34933 |
| 4787 | M535T25  | 1.549774 | -0.63206 | -1.08766 | 0.308588 | 0.863983 | DOWN | 535.2583 | 535.2577 | 535.2597 | 24.60717 | 24.5925  |
| 4788 | M183T9_4 | 2.269767 | 1.182544 | 1.156552 | 0.308619 | 0.863983 | UP   | 182.917  | 182.9168 | 182.9173 | 9.152542 | 9.142767 |
| 4789 | M1479T10 | 1.332683 | -0.41433 | -1.10198 | 0.308728 | 0.863983 | DOWN | 1479.113 | 1479.112 | 1479.115 | 9.916483 | 9.79535  |
| 4790 | M635T27  | 1.505131 | 0.589889 | 1.128049 | 0.308878 | 0.863983 | UP   | 635.3762 | 635.3758 | 635.3765 | 27.3015  | 27.25583 |
| 4791 | M153T9_1 | 1.654408 | -0.72631 | -1.08834 | 0.308893 | 0.863983 | DOWN | 152.6124 | 152.6123 | 152.6128 | 9.275917 | 9.24215  |
| 4792 | M391T13  | 1.108288 | -0.14833 | -1.08811 | 0.308982 | 0.863983 | DOWN | 391.2951 | 391.295  | 391.2953 | 13.11228 | 13.08517 |
| 4793 | M709T11_ | 1.364968 | -0.44887 | -1.12056 | 0.30905  | 0.863983 | DOWN | 709.495  | 709.4823 | 709.4957 | 10.90548 | 10.85018 |
| 4794 | M536T9_2 | 2.535517 | -1.34228 | -1.15222 | 0.309056 | 0.863983 | DOWN | 536.0048 | 536.0044 | 536.012  | 9.355317 | 9.095133 |

|      |          |          |          |          |          |          |      |          |          |          |          |          |
|------|----------|----------|----------|----------|----------|----------|------|----------|----------|----------|----------|----------|
| 4795 | M404T11_ | 1.153702 | -0.20627 | -1.09032 | 0.309072 | 0.863983 | DOWN | 404.0686 | 404.0684 | 404.0688 | 10.892   | 10.879   |
| 4796 | M359T10_ | 1.511129 | 0.595627 | 1.111782 | 0.30916  | 0.863983 | UP   | 359.0852 | 359.085  | 359.0855 | 9.942317 | 9.843367 |
| 4797 | M400T10_ | 1.779003 | -0.83107 | -1.138   | 0.309194 | 0.863983 | DOWN | 400.2519 | 400.2434 | 400.2522 | 10.06883 | 9.9677   |
| 4798 | M312T28  | 2.928085 | 1.549957 | 1.158614 | 0.309197 | 0.863983 | UP   | 312.253  | 312.2529 | 312.2532 | 28.36067 | 28.345   |
| 4799 | M216T10_ | 1.576498 | -0.65672 | -1.12134 | 0.309198 | 0.863983 | DOWN | 215.7426 | 215.7414 | 215.751  | 9.831142 | 9.7124   |
| 4800 | M672T10_ | 1.944558 | 0.959442 | 1.154049 | 0.309199 | 0.863983 | UP   | 672.4716 | 672.4712 | 672.4718 | 9.9677   | 9.8914   |
| 4801 | M310T12  | 3.407485 | 1.768708 | 1.162969 | 0.309211 | 0.863983 | UP   | 310.2164 | 310.2158 | 310.2169 | 11.94348 | 11.9002  |
| 4802 | M316T27_ | 1.181317 | -0.2404  | -1.11558 | 0.309248 | 0.863983 | DOWN | 316.3208 | 316.3206 | 316.3209 | 26.50017 | 26.36333 |
| 4803 | M226T9_1 | 1.44786  | -0.53392 | -1.08646 | 0.309294 | 0.863983 | DOWN | 226.4669 | 226.461  | 226.4671 | 9.37135  | 9.129317 |
| 4804 | M573T11_ | 1.230643 | -0.29941 | -1.0856  | 0.309334 | 0.863983 | DOWN | 573.2279 | 573.2275 | 573.2289 | 10.89193 | 10.8646  |
| 4805 | M849T16_ | 5.676183 | -2.50492 | -1.16039 | 0.309355 | 0.863983 | DOWN | 848.6503 | 848.6496 | 848.6513 | 16.14095 | 16.09088 |
| 4806 | M351T11_ | 1.186043 | -0.24616 | -1.1046  | 0.30955  | 0.863984 | DOWN | 350.9316 | 350.9314 | 350.9323 | 10.90519 | 10.877   |
| 4807 | M224T11_ | 1.214662 | -0.28055 | -1.10214 | 0.309561 | 0.863984 | DOWN | 224.1031 | 224.103  | 224.1034 | 10.90659 | 10.879   |
| 4808 | M643T9_5 | 1.573017 | 0.653534 | 1.100782 | 0.309619 | 0.863984 | UP   | 643.3133 | 643.3076 | 643.3142 | 9.130042 | 9.07945  |
| 4809 | M271T9_7 | 1.289684 | -0.36702 | -1.08642 | 0.309649 | 0.863984 | DOWN | 271.0191 | 271.0188 | 271.0193 | 8.761183 | 8.701267 |
| 4810 | M512T9_4 | 1.39009  | -0.47518 | -1.08944 | 0.309725 | 0.863984 | DOWN | 511.9091 | 511.9089 | 511.9096 | 9.2529   | 9.1602   |
| 4811 | M811T10_ | 1.151676 | -0.20373 | -1.10701 | 0.30977  | 0.863984 | DOWN | 810.8654 | 810.8649 | 810.8667 | 9.958617 | 9.843367 |
| 4812 | M346T10_ | 1.184924 | -0.24479 | -1.11047 | 0.309772 | 0.863984 | DOWN | 346.1662 | 346.1661 | 346.1663 | 9.8207   | 9.715683 |
| 4813 | M894T10_ | 1.230557 | -0.29931 | -1.11878 | 0.309801 | 0.863984 | DOWN | 894.2013 | 894.2004 | 894.2017 | 9.948875 | 9.843367 |
| 4814 | M327T9_8 | 1.561279 | -0.64273 | -1.08477 | 0.309804 | 0.863984 | DOWN | 327.4646 | 327.4645 | 327.4648 | 9.28775  | 9.22495  |
| 4815 | M701T26  | 1.427561 | -0.51355 | -1.08861 | 0.309886 | 0.863984 | DOWN | 701.4934 | 701.4933 | 701.4936 | 25.53625 | 25.337   |
| 4816 | M356T19_ | 1.262955 | -0.3368  | -1.09125 | 0.309893 | 0.863984 | DOWN | 356.2411 | 356.2408 | 356.2413 | 19.05283 | 19.03833 |
| 4817 | M229T10_ | 1.431065 | -0.51709 | -1.10011 | 0.309907 | 0.863984 | DOWN | 229.4889 | 229.4883 | 229.4896 | 9.82645  | 9.715683 |
| 4818 | M159T10_ | 1.21918  | -0.28591 | -1.08691 | 0.309908 | 0.863984 | DOWN | 158.5923 | 158.5922 | 158.5925 | 9.950258 | 9.843367 |
| 4819 | M574T10_ | 1.315762 | -0.3959  | -1.13184 | 0.309911 | 0.863984 | DOWN | 573.5329 | 573.5326 | 573.5347 | 9.902617 | 9.79535  |
| 4820 | M643T30  | 1.302877 | -0.3817  | -1.11247 | 0.309965 | 0.863984 | DOWN | 643.4629 | 643.4623 | 643.4637 | 30.255   | 30.22367 |
| 4821 | M1001T10 | 1.292648 | -0.37033 | -1.12435 | 0.309996 | 0.863984 | DOWN | 1000.734 | 1000.732 | 1000.735 | 9.960817 | 9.859233 |
| 4822 | M1465T10 | 1.469038 | -0.55487 | -1.10157 | 0.310009 | 0.863984 | DOWN | 1464.823 | 1464.822 | 1464.825 | 10.14559 | 10.12053 |
| 4823 | M387T14  | 1.181214 | -0.24027 | -1.08392 | 0.310054 | 0.863984 | DOWN | 387.2486 | 387.2486 | 387.2488 | 13.63903 | 13.60968 |
| 4824 | M586T11_ | 1.19561  | -0.25775 | -1.10269 | 0.310107 | 0.863984 | DOWN | 585.9029 | 585.9023 | 585.9031 | 10.51568 | 10.47223 |
| 4825 | M585T11_ | 1.182217 | -0.24149 | -1.0866  | 0.310209 | 0.863984 | DOWN | 585.2763 | 585.2749 | 585.2765 | 11.16452 | 11.16097 |
| 4826 | M302T10_ | 1.302962 | -0.38179 | -1.09658 | 0.310331 | 0.863984 | DOWN | 302.079  | 302.0789 | 302.0792 | 9.8207   | 9.715683 |
| 4827 | M799T10_ | 1.119492 | -0.16284 | -1.09001 | 0.310342 | 0.863984 | DOWN | 798.5066 | 798.5062 | 798.5068 | 10.05251 | 9.939683 |
| 4828 | M372T19  | 1.293951 | -0.37178 | -1.11541 | 0.310371 | 0.863984 | DOWN | 372.2644 | 372.2641 | 372.2647 | 19.45908 | 19.442   |
| 4829 | M820T10_ | 1.392746 | -0.47793 | -1.09454 | 0.310402 | 0.863984 | DOWN | 819.9886 | 819.9882 | 819.9891 | 9.902617 | 9.79535  |

|      |          |          |          |          |          |          |      |          |          |          |          |          |
|------|----------|----------|----------|----------|----------|----------|------|----------|----------|----------|----------|----------|
| 4830 | M672T10_ | 1.195958 | -0.25817 | -1.08384 | 0.31042  | 0.863984 | DOWN | 671.7553 | 671.7547 | 671.7556 | 9.82645  | 9.743667 |
| 4831 | M266T15_ | 6.926782 | 2.792185 | 1.160107 | 0.310512 | 0.863984 | UP   | 266.2113 | 266.2111 | 266.2113 | 14.85343 | 14.80818 |
| 4832 | M309T10_ | 1.704867 | 0.769659 | 1.15335  | 0.310569 | 0.863984 | UP   | 309.2367 | 309.2361 | 309.2418 | 9.633883 | 9.509533 |
| 4833 | M350T43_ | 1.299009 | -0.37741 | -1.15351 | 0.310689 | 0.863984 | DOWN | 350.2171 | 350.217  | 350.2172 | 42.89858 | 42.79783 |
| 4834 | M221T10_ | 2.108557 | -1.07626 | -1.10954 | 0.310694 | 0.863984 | DOWN | 220.8096 | 220.8094 | 220.8103 | 9.823225 | 9.715683 |
| 4835 | M727T10_ | 1.170469 | 0.227086 | 1.086005 | 0.310714 | 0.863985 | UP   | 727.2232 | 727.2229 | 727.2241 | 9.853633 | 9.6681   |
| 4836 | M460T43_ | 1.232538 | 0.301632 | 1.15606  | 0.310719 | 0.863985 | UP   | 460.2539 | 460.2537 | 460.2541 | 43.04233 | 42.97017 |
| 4837 | M347T10_ | 1.209196 | -0.27405 | -1.14873 | 0.310731 | 0.863985 | DOWN | 347.2611 | 347.261  | 347.2612 | 9.831517 | 9.715683 |
| 4838 | M248T11_ | 1.234722 | -0.30419 | -1.0913  | 0.310791 | 0.863985 | DOWN | 247.8809 | 247.88   | 247.8816 | 10.91371 | 10.87708 |
| 4839 | M188T9_9 | 1.894115 | -0.92152 | -1.11862 | 0.310814 | 0.863985 | DOWN | 187.9961 | 187.9956 | 187.9967 | 9.170392 | 9.130683 |
| 4840 | M334T9_2 | 1.214791 | -0.28071 | -1.08899 | 0.310819 | 0.863985 | DOWN | 333.5407 | 333.5397 | 333.5459 | 9.369867 | 9.110833 |
| 4841 | M724T10_ | 1.613087 | 0.689824 | 1.125592 | 0.310856 | 0.863985 | UP   | 723.9575 | 723.9562 | 723.9603 | 9.869467 | 9.743767 |
| 4842 | M290T11_ | 1.24401  | -0.315   | -1.08364 | 0.310961 | 0.863985 | DOWN | 289.8562 | 289.856  | 289.8565 | 10.8926  | 10.83417 |
| 4843 | M288T10_ | 1.131158 | -0.1778  | -1.09492 | 0.31099  | 0.863985 | DOWN | 287.751  | 287.7508 | 287.7512 | 9.939575 | 9.827283 |
| 4844 | M688T10  | 1.261155 | -0.33475 | -1.12262 | 0.311044 | 0.863985 | DOWN | 688.1329 | 688.1321 | 688.1346 | 9.842908 | 9.747533 |
| 4845 | M420T36  | 1.290493 | 0.367923 | 1.099274 | 0.311091 | 0.863985 | UP   | 420.2227 | 420.2226 | 420.223  | 36.39542 | 36.15933 |
| 4846 | M680T11_ | 1.154367 | -0.2071  | -1.08192 | 0.311133 | 0.863985 | DOWN | 680.4962 | 680.496  | 680.4966 | 10.98654 | 10.96452 |
| 4847 | M996T12_ | 1.315499 | -0.39561 | -1.12096 | 0.311166 | 0.863985 | DOWN | 996.4874 | 996.4872 | 996.4878 | 12.07128 | 12.06042 |
| 4848 | M193T9_7 | 1.729    | 0.789938 | 1.08134  | 0.311219 | 0.863985 | UP   | 193.1573 | 193.1568 | 193.1579 | 9.111033 | 9.079083 |
| 4849 | M230T10_ | 1.166398 | -0.22206 | -1.09313 | 0.311234 | 0.863985 | DOWN | 230.4892 | 230.4891 | 230.4893 | 9.943183 | 9.827283 |
| 4850 | M247T11_ | 1.319899 | -0.40043 | -1.09046 | 0.311254 | 0.863985 | DOWN | 246.527  | 246.5267 | 246.5272 | 10.92349 | 10.8926  |
| 4851 | M703T27_ | 1.594183 | -0.67282 | -1.08396 | 0.311354 | 0.863985 | DOWN | 703.0404 | 703.0393 | 703.0411 | 26.76658 | 26.73917 |
| 4852 | M313T44_ | 1.662293 | 0.733175 | 1.143064 | 0.31137  | 0.863985 | UP   | 313.2006 | 313.2006 | 313.2007 | 44.121   | 43.87667 |
| 4853 | M629T11_ | 1.306816 | -0.38606 | -1.08402 | 0.31138  | 0.863985 | DOWN | 628.8901 | 628.8894 | 628.8911 | 10.89907 | 10.8646  |
| 4854 | M537T19  | 1.197718 | -0.26029 | -1.09007 | 0.311498 | 0.863985 | DOWN | 537.4369 | 537.4363 | 537.4374 | 18.93    | 18.90133 |
| 4855 | M687T10_ | 1.34825  | 0.431088 | 1.081004 | 0.311519 | 0.863985 | UP   | 687.2859 | 687.2846 | 687.2878 | 9.811692 | 9.728083 |
| 4856 | M1401T10 | 1.295052 | 0.37301  | 1.098805 | 0.311621 | 0.863985 | UP   | 1400.894 | 1400.889 | 1400.897 | 9.924308 | 9.859233 |
| 4857 | M283T10_ | 1.222936 | -0.29035 | -1.08822 | 0.311912 | 0.863986 | DOWN | 282.9505 | 282.9503 | 282.9505 | 9.939575 | 9.827283 |
| 4858 | M1362T9  | 1.440163 | -0.52623 | -1.0799  | 0.311918 | 0.863986 | DOWN | 1361.995 | 1361.991 | 1362.004 | 9.263    | 9.06855  |
| 4859 | M743T10_ | 1.225893 | 0.293833 | 1.08873  | 0.312001 | 0.863986 | UP   | 743.4041 | 743.404  | 743.4043 | 10.10349 | 10.00428 |
| 4860 | M479T12  | 1.133749 | -0.1811  | -1.08302 | 0.312088 | 0.863986 | DOWN | 479.403  | 479.4028 | 479.4032 | 11.72228 | 11.70755 |
| 4861 | M201T9_9 | 2.153725 | -1.10683 | -1.08057 | 0.31213  | 0.863986 | DOWN | 200.7217 | 200.7209 | 200.7229 | 9.16125  | 9.132033 |
| 4862 | M454T10_ | 1.1925   | -0.25399 | -1.11226 | 0.312273 | 0.863986 | DOWN | 453.7997 | 453.7995 | 453.7999 | 9.830733 | 9.73145  |
| 4863 | M237T11_ | 1.440801 | -0.52687 | -1.09336 | 0.312294 | 0.863986 | DOWN | 236.6469 | 236.6467 | 236.6471 | 10.88747 | 10.84767 |
| 4864 | M1054T10 | 1.381024 | -0.46574 | -1.11258 | 0.312393 | 0.863986 | DOWN | 1053.604 | 1053.603 | 1053.605 | 10.06681 | 9.971833 |

|      |          |          |          |          |          |          |      |          |          |          |          |          |
|------|----------|----------|----------|----------|----------|----------|------|----------|----------|----------|----------|----------|
| 4865 | M1738T10 | 1.358783 | -0.44232 | -1.08602 | 0.312459 | 0.863986 | DOWN | 1737.735 | 1737.733 | 1737.737 | 9.610767 | 9.49445  |
| 4866 | M357T9_3 | 1.111146 | -0.15205 | -1.0996  | 0.312489 | 0.863986 | DOWN | 357.224  | 357.2236 | 357.2241 | 9.082292 | 9.04725  |
| 4867 | M358T10_ | 1.134717 | -0.18233 | -1.14002 | 0.312587 | 0.863986 | DOWN | 357.6586 | 357.6584 | 357.6588 | 9.823575 | 9.699733 |
| 4868 | M186T10_ | 1.489139 | -0.57448 | -1.11655 | 0.312598 | 0.863986 | DOWN | 185.6684 | 185.6683 | 185.677  | 9.916483 | 9.728083 |
| 4869 | M843T10_ | 1.213795 | -0.27953 | -1.07741 | 0.312725 | 0.863986 | DOWN | 842.5332 | 842.5316 | 842.5338 | 10.12412 | 10.04355 |
| 4870 | M389T10_ | 1.221532 | -0.28869 | -1.09042 | 0.312726 | 0.863986 | DOWN | 389.1183 | 389.1179 | 389.1186 | 9.917167 | 9.811217 |
| 4871 | M650T10_ | 1.167688 | -0.22365 | -1.09212 | 0.312734 | 0.863986 | DOWN | 649.8838 | 649.8831 | 649.8851 | 9.887292 | 9.743767 |
| 4872 | M401T11_ | 1.115792 | -0.15807 | -1.0788  | 0.312875 | 0.863986 | DOWN | 401.2632 | 401.2631 | 401.2637 | 10.90659 | 10.89355 |
| 4873 | M345T9_8 | 1.350534 | -0.43353 | -1.07944 | 0.312905 | 0.863986 | DOWN | 344.9805 | 344.9802 | 344.9809 | 8.872733 | 8.85435  |
| 4874 | M521T12  | 1.14735  | -0.19831 | -1.08229 | 0.312914 | 0.863986 | DOWN | 521.4056 | 521.4054 | 521.4058 | 12.01947 | 12.00275 |
| 4875 | M1227T10 | 1.717675 | 0.780457 | 1.145351 | 0.31292  | 0.863986 | UP   | 1227.169 | 1227.166 | 1227.172 | 9.794533 | 9.65225  |
| 4876 | M342T9_5 | 50.89107 | 5.669341 | 1.153182 | 0.313032 | 0.863986 | UP   | 342.4326 | 342.4325 | 342.4327 | 9.33735  | 9.146383 |
| 4877 | M726T10_ | 1.195932 | 0.258135 | 1.121701 | 0.313048 | 0.863986 | UP   | 725.5078 | 725.5073 | 725.5085 | 9.830833 | 9.7124   |
| 4878 | M227T9_3 | 1.526644 | -0.61036 | -1.07671 | 0.31306  | 0.863986 | DOWN | 226.7933 | 226.7908 | 226.7956 | 9.280767 | 9.089733 |
| 4879 | M629T9_1 | 1.254036 | -0.32658 | -1.0777  | 0.313097 | 0.863986 | DOWN | 629.3136 | 629.3134 | 629.3142 | 9.289925 | 9.234417 |
| 4880 | M454T9_1 | 1.57609  | 0.65635  | 1.079601 | 0.313206 | 0.863987 | UP   | 453.9222 | 453.9197 | 453.9278 | 9.355317 | 9.09495  |
| 4881 | M325T9_8 | 1.247359 | -0.31888 | -1.07647 | 0.313281 | 0.863987 | DOWN | 325.1017 | 325.1016 | 325.102  | 9.311167 | 9.129317 |
| 4882 | M275T11_ | 1.52076  | 0.604792 | 1.07646  | 0.313298 | 0.863987 | UP   | 274.8101 | 274.8095 | 274.8105 | 10.892   | 10.88995 |
| 4883 | M803T9   | 1.232453 | -0.30153 | -1.10128 | 0.313306 | 0.863987 | DOWN | 803.4823 | 803.4816 | 803.4827 | 9.17485  | 9.129317 |
| 4884 | M192T15  | 1.147135 | -0.19804 | -1.07602 | 0.313308 | 0.863987 | DOWN | 192.138  | 192.138  | 192.1381 | 14.61876 | 14.5754  |
| 4885 | M413T9_6 | 1.286189 | -0.3631  | -1.07602 | 0.313331 | 0.863987 | DOWN | 412.8455 | 412.8445 | 412.8472 | 9.264692 | 9.129317 |
| 4886 | M613T11_ | 1.52375  | 0.607627 | 1.091523 | 0.31334  | 0.863987 | UP   | 613.1865 | 613.1861 | 613.1887 | 10.91178 | 10.8646  |
| 4887 | M470T10_ | 2.660241 | 1.411557 | 1.134532 | 0.313342 | 0.863987 | UP   | 470.2588 | 470.2587 | 470.2595 | 9.650367 | 9.58735  |
| 4888 | M536T42_ | 1.257407 | 0.330452 | 1.077533 | 0.313554 | 0.863987 | UP   | 536.306  | 536.3058 | 536.3064 | 42.28    | 42.19367 |
| 4889 | M225T10_ | 1.186699 | -0.24695 | -1.09289 | 0.313577 | 0.863987 | DOWN | 225.2715 | 225.2713 | 225.2716 | 9.917167 | 9.811217 |
| 4890 | M423T11_ | 2.199572 | 1.137223 | 1.080423 | 0.313672 | 0.863987 | UP   | 423.2908 | 423.2814 | 423.2953 | 10.97182 | 10.93097 |
| 4891 | M809T10_ | 1.644241 | 0.717422 | 1.128301 | 0.313781 | 0.863987 | UP   | 809.3731 | 809.3712 | 809.3739 | 9.951283 | 9.8378   |
| 4892 | M664T10_ | 3.065636 | 1.616186 | 1.150603 | 0.313784 | 0.863987 | UP   | 663.8846 | 663.8846 | 663.8858 | 9.81635  | 9.699733 |
| 4893 | M339T9_3 | 1.1379   | -0.18637 | -1.07495 | 0.313785 | 0.863987 | DOWN | 338.9801 | 338.9797 | 338.9803 | 9.303467 | 9.129317 |
| 4894 | M409T7   | 1.298102 | -0.3764  | -1.0767  | 0.313804 | 0.863987 | DOWN | 409.1828 | 409.1826 | 409.1833 | 7.153933 | 7.073883 |
| 4895 | M278T11_ | 1.206023 | -0.27026 | -1.08769 | 0.313834 | 0.863987 | DOWN | 278.4212 | 278.4211 | 278.4214 | 10.90659 | 10.88747 |
| 4896 | M311T10_ | 1.286027 | 0.362921 | 1.075509 | 0.313963 | 0.863987 | UP   | 310.7106 | 310.7103 | 310.7108 | 9.6185   | 9.49445  |
| 4897 | M217T10_ | 1.171881 | -0.22883 | -1.12161 | 0.314132 | 0.863987 | DOWN | 217.2216 | 217.2212 | 217.2221 | 9.90295  | 9.806367 |
| 4898 | M383T14_ | 1.459349 | -0.54533 | -1.07732 | 0.314194 | 0.863987 | DOWN | 382.7874 | 382.7865 | 382.7877 | 14.18359 | 14.13505 |
| 4899 | M477T11_ | 2.331947 | 1.221535 | 1.140292 | 0.314239 | 0.863987 | UP   | 476.5191 | 476.5187 | 476.5197 | 10.8926  | 10.80695 |

|      |          |          |          |          |          |          |      |          |          |          |          |          |
|------|----------|----------|----------|----------|----------|----------|------|----------|----------|----------|----------|----------|
| 4900 | M299T42_ | 1.155551 | -0.20858 | -1.11396 | 0.314309 | 0.863987 | DOWN | 299.1486 | 299.1485 | 299.1488 | 42.49583 | 42.29483 |
| 4901 | M510T22  | 1.162942 | -0.21778 | -1.07775 | 0.314342 | 0.863988 | DOWN | 510.3993 | 510.399  | 510.3999 | 21.76567 | 21.745   |
| 4902 | M405T9_2 | 1.352775 | -0.43592 | -1.07404 | 0.314355 | 0.863988 | DOWN | 404.6315 | 404.6309 | 404.6317 | 9.2529   | 9.1587   |
| 4903 | M652T11_ | 1.35795  | -0.44143 | -1.07619 | 0.314396 | 0.863988 | DOWN | 651.8396 | 651.8381 | 651.8398 | 10.8914  | 10.87487 |
| 4904 | M768T9_2 | 1.318576 | -0.39898 | -1.07524 | 0.314457 | 0.863988 | DOWN | 768.4695 | 768.4688 | 768.4701 | 8.91235  | 8.877267 |
| 4905 | M712T10_ | 1.13957  | -0.18849 | -1.07303 | 0.314579 | 0.863988 | DOWN | 711.9113 | 711.9104 | 711.9121 | 9.881233 | 9.747533 |
| 4906 | M426T23  | 1.232427 | -0.3015  | -1.11193 | 0.314613 | 0.863988 | DOWN | 426.1866 | 426.1861 | 426.1872 | 23.0305  | 22.9725  |
| 4907 | M749T11_ | 1.19918  | -0.26205 | -1.08104 | 0.314631 | 0.863988 | DOWN | 749.1376 | 749.1368 | 749.138  | 10.89728 | 10.8646  |
| 4908 | M699T10_ | 2.597333 | 1.377031 | 1.145245 | 0.314666 | 0.863988 | UP   | 699.304  | 699.3031 | 699.3048 | 9.825492 | 9.715683 |
| 4909 | M1489T10 | 1.472423 | -0.55819 | -1.0736  | 0.314774 | 0.863988 | DOWN | 1488.529 | 1488.522 | 1488.53  | 9.949233 | 9.859233 |
| 4910 | M1049T10 | 1.663816 | 0.734496 | 1.132222 | 0.314788 | 0.863988 | UP   | 1049.2   | 1049.196 | 1049.201 | 9.756408 | 9.636483 |
| 4911 | M416T9_1 | 1.32883  | 0.410157 | 1.09611  | 0.314813 | 0.863988 | UP   | 415.5262 | 415.5249 | 415.532  | 9.333667 | 9.166033 |
| 4912 | M705T10_ | 1.345295 | 0.427923 | 1.142219 | 0.314863 | 0.863988 | UP   | 704.5018 | 704.5014 | 704.5022 | 9.857425 | 9.73145  |
| 4913 | M786T24  | 1.639267 | 0.713051 | 1.094155 | 0.314906 | 0.863988 | UP   | 786.4483 | 786.4482 | 786.4524 | 24.03033 | 24.00833 |
| 4914 | M412T9_8 | 1.182286 | 0.241579 | 1.072163 | 0.314922 | 0.863988 | UP   | 412.1952 | 412.1945 | 412.1956 | 9.081717 | 9.03845  |
| 4915 | M421T7   | 1.395834 | -0.48113 | -1.08138 | 0.315017 | 0.863988 | DOWN | 420.8844 | 420.8842 | 420.8846 | 7.237825 | 7.152183 |
| 4916 | M225T10_ | 1.181991 | -0.24122 | -1.08947 | 0.315047 | 0.863988 | DOWN | 225.002  | 225.0018 | 225.0021 | 9.917167 | 9.811217 |
| 4917 | M225T10_ | 3.759341 | 1.91048  | 1.138037 | 0.315062 | 0.863988 | UP   | 224.9518 | 224.9514 | 224.9523 | 9.830283 | 9.7124   |
| 4918 | M385T10_ | 2.098169 | -1.06913 | -1.14567 | 0.31508  | 0.863988 | DOWN | 384.5502 | 384.545  | 384.5504 | 9.965792 | 9.830283 |
| 4919 | M401T11_ | 1.598697 | 0.676897 | 1.076312 | 0.315097 | 0.863988 | UP   | 401.404  | 401.3966 | 401.4081 | 10.91391 | 10.879   |
| 4920 | M526T10_ | 1.268051 | -0.34261 | -1.07193 | 0.315272 | 0.863988 | DOWN | 526.0692 | 526.0685 | 526.0694 | 9.964417 | 9.859233 |
| 4921 | M641T9_3 | 1.329326 | -0.4107  | -1.09299 | 0.315292 | 0.863988 | DOWN | 641.3972 | 641.3964 | 641.3975 | 9.279133 | 9.1602   |
| 4922 | M273T10_ | 2.09822  | -1.06917 | -1.10661 | 0.31538  | 0.863988 | DOWN | 273.2072 | 273.207  | 273.2073 | 9.960817 | 9.843367 |
| 4923 | M1650T10 | 1.414119 | 0.499904 | 1.099743 | 0.315455 | 0.863988 | UP   | 1650.438 | 1650.432 | 1650.44  | 9.929783 | 9.827283 |
| 4924 | M237T9_3 | 1.314183 | -0.39417 | -1.10909 | 0.315471 | 0.863988 | DOWN | 236.7418 | 236.7412 | 236.742  | 9.361017 | 9.241267 |
| 4925 | M209T20  | 1.124437 | -0.1692  | -1.07077 | 0.315527 | 0.863988 | DOWN | 209.1534 | 209.1533 | 209.1536 | 19.78    | 19.75867 |
| 4926 | M305T9_7 | 1.355868 | -0.43922 | -1.09824 | 0.315568 | 0.863989 | DOWN | 305.425  | 305.4247 | 305.4252 | 9.3332   | 9.234417 |
| 4927 | M671T10_ | 1.519807 | 0.603888 | 1.126612 | 0.315591 | 0.863989 | UP   | 670.7722 | 670.7717 | 670.7734 | 9.866    | 9.73145  |
| 4928 | M599T9_2 | 2.412724 | 1.270663 | 1.134615 | 0.315605 | 0.863989 | UP   | 599.0041 | 598.9971 | 599.0043 | 9.401917 | 9.370583 |
| 4929 | M283T10_ | 2.576634 | 1.365487 | 1.092537 | 0.315606 | 0.863989 | UP   | 283.1752 | 283.175  | 283.1775 | 9.95825  | 9.715683 |
| 4930 | M1160T10 | 1.847183 | 0.885327 | 1.125282 | 0.315668 | 0.863989 | UP   | 1159.811 | 1159.81  | 1159.812 | 9.740517 | 9.729367 |
| 4931 | M333T10_ | 1.117995 | -0.16091 | -1.12366 | 0.315676 | 0.863989 | DOWN | 333.2806 | 333.2804 | 333.2813 | 9.8725   | 9.747533 |
| 4932 | M514T9_1 | 1.454212 | 0.540237 | 1.093238 | 0.315687 | 0.863989 | UP   | 513.7098 | 513.7096 | 513.7111 | 9.379767 | 9.204617 |
| 4933 | M375T14_ | 1.309114 | -0.38859 | -1.07127 | 0.315703 | 0.863989 | DOWN | 375.2938 | 375.2934 | 375.294  | 13.7046  | 13.63893 |
| 4934 | M556T9_3 | 1.233341 | -0.30257 | -1.07015 | 0.315771 | 0.863989 | DOWN | 555.7526 | 555.7483 | 555.7538 | 9.24945  | 9.146383 |

|      |           |          |          |          |          |          |      |          |          |          |          |          |
|------|-----------|----------|----------|----------|----------|----------|------|----------|----------|----------|----------|----------|
| 4935 | M548T39_  | 1.462568 | -0.5485  | -1.13994 | 0.315904 | 0.863989 | DOWN | 548.3062 | 548.3059 | 548.3067 | 38.65467 | 38.49617 |
| 4936 | M512T10_  | 1.304298 | -0.38327 | -1.07295 | 0.315907 | 0.863989 | DOWN | 512.232  | 512.2316 | 512.2323 | 9.967367 | 9.885167 |
| 4937 | M725T3    | 1.72673  | -0.78804 | -1.09468 | 0.315944 | 0.863989 | DOWN | 724.5691 | 724.5686 | 724.5692 | 3.20385  | 3.107367 |
| 4938 | M415T9_1  | 1.607238 | -0.68458 | -1.06969 | 0.315988 | 0.863989 | DOWN | 415.4695 | 415.4672 | 415.4705 | 9.382858 | 9.129317 |
| 4939 | M1155T11_ | 1.118103 | -0.16105 | -1.07329 | 0.316026 | 0.863989 | DOWN | 1154.835 | 1154.835 | 1154.836 | 10.5188  | 10.47197 |
| 4940 | M709T11_  | 1.199725 | -0.2627  | -1.07791 | 0.316064 | 0.863989 | DOWN | 708.5107 | 708.5106 | 708.5113 | 10.53335 | 10.50338 |
| 4941 | M567T11_  | 1.14274  | -0.1925  | -1.06955 | 0.316125 | 0.863989 | DOWN | 567.4306 | 567.4303 | 567.431  | 10.5188  | 10.47197 |
| 4942 | M556T9_4  | 1.337232 | -0.41925 | -1.07114 | 0.316225 | 0.863989 | DOWN | 555.8457 | 555.8406 | 555.8476 | 9.3474   | 9.204617 |
| 4943 | M368T10_  | 1.358181 | 0.441676 | 1.11444  | 0.316232 | 0.863989 | UP   | 367.5296 | 367.5293 | 367.537  | 9.970617 | 9.859233 |
| 4944 | M311T10_  | 1.12509  | -0.17004 | -1.07929 | 0.316361 | 0.863989 | DOWN | 310.7589 | 310.7587 | 310.7592 | 10.28872 | 10.21468 |
| 4945 | M178T9_4  | 3.843814 | 1.942538 | 1.141061 | 0.316365 | 0.863989 | UP   | 177.845  | 177.844  | 177.8451 | 9.217308 | 9.0511   |
| 4946 | M460T10_  | 1.406423 | -0.49203 | -1.08763 | 0.316375 | 0.863989 | DOWN | 459.9687 | 459.9678 | 459.9693 | 9.870408 | 9.732983 |
| 4947 | M422T10_  | 1.513551 | -0.59794 | -1.10668 | 0.316393 | 0.863989 | DOWN | 421.7691 | 421.769  | 421.7697 | 10.06405 | 10.02042 |
| 4948 | M299T38   | 1.471484 | 0.557272 | 1.139102 | 0.316423 | 0.863989 | UP   | 299.1487 | 299.1486 | 299.1489 | 38.36667 | 38.28033 |
| 4949 | M393T20_  | 1.0969   | -0.13343 | -1.06862 | 0.316423 | 0.863989 | DOWN | 393.3106 | 393.3105 | 393.3108 | 20.24492 | 20.23017 |
| 4950 | M344T10_  | 1.697351 | 0.763285 | 1.137144 | 0.316462 | 0.863989 | UP   | 343.8923 | 343.8921 | 343.8927 | 9.836042 | 9.73145  |
| 4951 | M1986T10  | 1.360922 | -0.44458 | -1.11601 | 0.31656  | 0.863989 | DOWN | 1986.052 | 1986.051 | 1986.054 | 9.830733 | 9.728083 |
| 4952 | M274T10_  | 1.394271 | 0.479511 | 1.100136 | 0.316577 | 0.863989 | UP   | 274.2011 | 274.2006 | 274.2015 | 10.07741 | 9.988    |
| 4953 | M661T10_  | 2.64416  | 1.40281  | 1.101981 | 0.316582 | 0.863989 | UP   | 661.3763 | 661.3761 | 661.3779 | 9.856342 | 9.73145  |
| 4954 | M697T9_3  | 1.312927 | -0.39279 | -1.0835  | 0.316657 | 0.863989 | DOWN | 696.613  | 696.6126 | 696.6137 | 9.322542 | 9.234417 |
| 4955 | M1111T10  | 1.368019 | -0.45209 | -1.06999 | 0.316754 | 0.863989 | DOWN | 1110.723 | 1110.722 | 1110.724 | 9.946367 | 9.853533 |
| 4956 | M170T10_  | 1.41078  | -0.49649 | -1.10463 | 0.316787 | 0.86399  | DOWN | 170.3937 | 170.3936 | 170.3938 | 9.830558 | 9.743667 |
| 4957 | M1191T45  | 1.283707 | 0.360316 | 1.069071 | 0.316915 | 0.86399  | UP   | 1190.804 | 1190.804 | 1190.805 | 44.9835  | 44.98283 |
| 4958 | M358T10_  | 1.290752 | 0.368212 | 1.097971 | 0.316937 | 0.86399  | UP   | 357.8293 | 357.829  | 357.8297 | 9.816242 | 9.699733 |
| 4959 | M401T11_  | 2.014657 | -1.01053 | -1.07427 | 0.316947 | 0.86399  | DOWN | 401.1978 | 401.1866 | 401.1983 | 10.9198  | 10.84487 |
| 4960 | M527T10_  | 1.752224 | -0.80919 | -1.11452 | 0.316958 | 0.86399  | DOWN | 527.3767 | 527.3756 | 527.3807 | 9.973467 | 9.853533 |
| 4961 | M466T11_  | 1.33551  | 0.417391 | 1.087896 | 0.317044 | 0.86399  | UP   | 465.6891 | 465.6888 | 465.6898 | 10.90765 | 10.879   |
| 4962 | M206T9_2  | 1.98677  | -0.99042 | -1.11848 | 0.317085 | 0.86399  | DOWN | 206.4823 | 206.4734 | 206.4853 | 9.311883 | 9.0511   |
| 4963 | M402T10_  | 1.159042 | -0.21293 | -1.11705 | 0.317106 | 0.86399  | DOWN | 402.1095 | 402.1091 | 402.1097 | 9.975142 | 9.8753   |
| 4964 | M347T10_  | 1.376432 | -0.46093 | -1.10311 | 0.317122 | 0.86399  | DOWN | 346.7457 | 346.7456 | 346.7459 | 9.823575 | 9.728083 |
| 4965 | M327T9_5  | 1.409201 | -0.49488 | -1.07395 | 0.317219 | 0.86399  | DOWN | 327.2014 | 327.2006 | 327.2134 | 8.867533 | 8.68525  |
| 4966 | M311T10_  | 1.169235 | -0.22556 | -1.09256 | 0.317311 | 0.86399  | DOWN | 310.9152 | 310.915  | 310.9154 | 9.934533 | 9.827283 |
| 4967 | M292T11_  | 1.285232 | -0.36203 | -1.06997 | 0.317343 | 0.86399  | DOWN | 291.7361 | 291.7359 | 291.7374 | 10.92431 | 10.87487 |
| 4968 | M257T11_  | 1.329613 | -0.41101 | -1.07675 | 0.317365 | 0.86399  | DOWN | 257.2414 | 257.2411 | 257.2417 | 10.91386 | 10.88747 |
| 4969 | M1010T10  | 1.803991 | 0.851192 | 1.115295 | 0.317385 | 0.86399  | UP   | 1010.294 | 1010.292 | 1010.298 | 9.772883 | 9.73145  |

|      |          |          |          |          |          |          |      |          |          |          |          |          |
|------|----------|----------|----------|----------|----------|----------|------|----------|----------|----------|----------|----------|
| 4970 | M701T9_3 | 1.253469 | -0.32593 | -1.07764 | 0.317487 | 0.86399  | DOWN | 701.356  | 701.355  | 701.3565 | 9.317    | 9.234417 |
| 4971 | M340T10_ | 1.180308 | -0.23916 | -1.10624 | 0.317544 | 0.86399  | DOWN | 340.4054 | 340.4052 | 340.4056 | 9.8397   | 9.715683 |
| 4972 | M290T23_ | 1.196424 | 0.258728 | 1.076306 | 0.317544 | 0.86399  | UP   | 289.715  | 289.7149 | 289.7153 | 22.90042 | 22.88567 |
| 4973 | M319T11_ | 1.207939 | -0.27255 | -1.07276 | 0.317545 | 0.86399  | DOWN | 318.7563 | 318.7562 | 318.7565 | 10.875   | 10.84828 |
| 4974 | M621T11_ | 1.278029 | -0.35392 | -1.06934 | 0.317722 | 0.86399  | DOWN | 620.8681 | 620.8679 | 620.8684 | 10.90551 | 10.8926  |
| 4975 | M739T9_2 | 1.528188 | -0.61182 | -1.0704  | 0.317731 | 0.86399  | DOWN | 738.7661 | 738.7655 | 738.7667 | 9.100792 | 9.0637   |
| 4976 | M255T18  | 1.361514 | 0.445212 | 1.137097 | 0.317776 | 0.86399  | UP   | 255.1588 | 255.156  | 255.1589 | 18.006   | 17.98167 |
| 4977 | M486T16  | 1.266215 | -0.34052 | -1.07277 | 0.317797 | 0.86399  | DOWN | 486.2719 | 486.2716 | 486.2721 | 16.02043 | 15.99393 |
| 4978 | M780T10_ | 1.33031  | -0.41176 | -1.06553 | 0.317838 | 0.86399  | DOWN | 779.5838 | 779.583  | 779.585  | 9.967367 | 9.843367 |
| 4979 | M426T24  | 1.162211 | 0.216872 | 1.072861 | 0.317857 | 0.86399  | UP   | 426.2979 | 426.2976 | 426.2984 | 23.75933 | 23.7395  |
| 4980 | M735T10_ | 1.413395 | -0.49916 | -1.06595 | 0.317958 | 0.86399  | DOWN | 734.6795 | 734.6791 | 734.6799 | 9.948875 | 9.853533 |
| 4981 | M316T38_ | 1.114155 | -0.15595 | -1.0944  | 0.31798  | 0.86399  | DOWN | 316.1752 | 316.1751 | 316.1756 | 38.1795  | 37.94933 |
| 4982 | M484T17_ | 1.171911 | -0.22886 | -1.06584 | 0.317986 | 0.86399  | DOWN | 484.389  | 484.3884 | 484.3897 | 16.9575  | 16.957   |
| 4983 | M411T11_ | 1.113581 | 0.155206 | 1.086806 | 0.318016 | 0.863991 | UP   | 410.5006 | 410.5    | 410.5011 | 10.90659 | 10.879   |
| 4984 | M240T17  | 1.438414 | -0.52448 | -1.0654  | 0.318051 | 0.863991 | DOWN | 240.138  | 240.1376 | 240.1383 | 17.4085  | 17.3365  |
| 4985 | M314T11_ | 1.284673 | 0.361401 | 1.073323 | 0.318053 | 0.863991 | UP   | 314.0679 | 314.0677 | 314.0686 | 10.89125 | 10.87487 |
| 4986 | M1030T16 | 1.147454 | -0.19844 | -1.0728  | 0.318142 | 0.863991 | DOWN | 1030.477 | 1030.476 | 1030.477 | 15.82633 | 15.7888  |
| 4987 | M376T9_4 | 1.400209 | -0.48564 | -1.07271 | 0.318148 | 0.863991 | DOWN | 376.1289 | 376.128  | 376.1318 | 9.174967 | 9.12675  |
| 4988 | M317T10_ | 1.157486 | -0.211   | -1.08202 | 0.318166 | 0.863991 | DOWN | 317.2329 | 317.2326 | 317.233  | 10.41082 | 10.32768 |
| 4989 | M296T10_ | 1.375917 | -0.46039 | -1.07856 | 0.318212 | 0.863991 | DOWN | 295.6662 | 295.6659 | 295.6665 | 9.894683 | 9.806367 |
| 4990 | M456T9_8 | 1.194039 | 0.25585  | 1.074922 | 0.318232 | 0.863991 | UP   | 456.2208 | 456.2201 | 456.225  | 9.25985  | 9.12675  |
| 4991 | M622T9_2 | 1.213901 | -0.27965 | -1.09407 | 0.318251 | 0.863991 | DOWN | 621.8336 | 621.833  | 621.835  | 9.398375 | 9.30965  |
| 4992 | M545T10_ | 1.128078 | -0.17387 | -1.09143 | 0.318273 | 0.863991 | DOWN | 545.4361 | 545.4356 | 545.4375 | 9.957333 | 9.843367 |
| 4993 | M480T9_3 | 1.312373 | -0.39218 | -1.06841 | 0.318318 | 0.863991 | DOWN | 479.6519 | 479.6517 | 479.6524 | 9.285508 | 9.1445   |
| 4994 | M480T12  | 1.29761  | 0.375856 | 1.076727 | 0.318338 | 0.863991 | UP   | 480.4064 | 480.4047 | 480.407  | 11.71363 | 11.67165 |
| 4995 | M403T11_ | 1.891384 | 0.919442 | 1.065274 | 0.318375 | 0.863991 | UP   | 403.2926 | 403.2825 | 403.2929 | 10.93413 | 10.85018 |
| 4996 | M818T10_ | 1.180841 | -0.23981 | -1.08138 | 0.318396 | 0.863991 | DOWN | 817.8833 | 817.8824 | 817.8846 | 9.917167 | 9.811217 |
| 4997 | M373T42_ | 1.303463 | -0.38235 | -1.12648 | 0.318476 | 0.863991 | DOWN | 373.2219 | 373.2219 | 373.222  | 42.45983 | 42.35183 |
| 4998 | M227T9_6 | 1.37829  | 0.462879 | 1.066339 | 0.318572 | 0.863991 | UP   | 226.9191 | 226.9178 | 226.9195 | 9.36515  | 9.11795  |
| 4999 | M228T17  | 1.357328 | -0.44077 | -1.06351 | 0.318596 | 0.863991 | DOWN | 228.1955 | 228.1954 | 228.1956 | 17.27733 | 17.2485  |
| 5000 | M568T11_ | 1.165183 | -0.22056 | -1.06527 | 0.318651 | 0.863991 | DOWN | 567.9322 | 567.9302 | 567.9327 | 10.54519 | 10.47197 |
| 5001 | M562T10_ | 1.324922 | -0.40591 | -1.08875 | 0.318683 | 0.863991 | DOWN | 561.9404 | 561.9399 | 561.9406 | 9.514733 | 9.40135  |
| 5002 | M213T11_ | 1.303635 | -0.38254 | -1.06335 | 0.318694 | 0.863991 | DOWN | 212.887  | 212.8865 | 212.8871 | 10.90553 | 10.85018 |
| 5003 | M597T16  | 1.165144 | -0.22051 | -1.06781 | 0.318703 | 0.863991 | DOWN | 597.3408 | 597.3403 | 597.3409 | 15.85808 | 15.84798 |
| 5004 | M368T11_ | 1.200412 | 0.263529 | 1.06523  | 0.318758 | 0.863991 | UP   | 368.4766 | 368.4763 | 368.477  | 10.90553 | 10.879   |

|      |          |          |          |          |          |          |      |          |          |          |          |          |
|------|----------|----------|----------|----------|----------|----------|------|----------|----------|----------|----------|----------|
| 5005 | M293T14  | 1.114112 | -0.15589 | -1.0676  | 0.318882 | 0.863991 | DOWN | 293.2221 | 293.222  | 293.2223 | 14.06322 | 14.03425 |
| 5006 | M246T11_ | 1.158652 | -0.21245 | -1.06695 | 0.318902 | 0.863991 | DOWN | 246.0277 | 246.0275 | 246.0278 | 10.89875 | 10.8646  |
| 5007 | M755T30  | 1.127096 | -0.17261 | -1.06645 | 0.318913 | 0.863991 | DOWN | 754.5013 | 754.4993 | 754.5015 | 30.23767 | 30.23617 |
| 5008 | M172T10_ | 1.399662 | 0.485079 | 1.106968 | 0.31898  | 0.863991 | UP   | 171.9375 | 171.9374 | 171.9376 | 9.8397   | 9.728083 |
| 5009 | M216T10_ | 1.276786 | -0.35252 | -1.06256 | 0.319021 | 0.863991 | DOWN | 216.4605 | 216.4529 | 216.4609 | 9.82645  | 9.696683 |
| 5010 | M399T10_ | 1.201808 | 0.265206 | 1.103197 | 0.319042 | 0.863991 | UP   | 398.5005 | 398.4998 | 398.5006 | 9.942317 | 9.843367 |
| 5011 | M303T11_ | 1.478006 | 0.563652 | 1.112768 | 0.319049 | 0.863991 | UP   | 302.6471 | 302.6468 | 302.6476 | 10.91407 | 10.82972 |
| 5012 | M450T9_8 | 1.289784 | -0.36713 | -1.06297 | 0.319099 | 0.863991 | DOWN | 450.2859 | 450.2853 | 450.2867 | 9.230442 | 9.129317 |
| 5013 | M363T11_ | 2.936114 | 1.553908 | 1.075572 | 0.319136 | 0.863991 | UP   | 363.1527 | 363.1517 | 363.158  | 11.19758 | 11.16387 |
| 5014 | M312T19  | 1.324861 | -0.40584 | -1.06232 | 0.319161 | 0.863991 | DOWN | 312.1885 | 312.1882 | 312.1887 | 18.92142 | 18.893   |
| 5015 | M357T11_ | 6.381141 | 2.673814 | 1.13605  | 0.319168 | 0.863991 | UP   | 357.2386 | 357.2382 | 357.2448 | 11.30267 | 11.28597 |
| 5016 | M597T9   | 1.414882 | 0.500682 | 1.06361  | 0.319394 | 0.863992 | UP   | 597.4703 | 597.4689 | 597.4789 | 9.085642 | 8.9997   |
| 5017 | M533T14  | 1.287541 | -0.36462 | -1.06375 | 0.319419 | 0.863992 | DOWN | 533.3247 | 533.3239 | 533.3254 | 14.45823 | 14.39883 |
| 5018 | M700T10_ | 3.669726 | 1.875672 | 1.133206 | 0.319457 | 0.863992 | UP   | 700.4901 | 700.4894 | 700.4907 | 9.85525  | 9.758367 |
| 5019 | M636T40_ | 1.211838 | 0.277197 | 1.093704 | 0.31947  | 0.863992 | UP   | 636.3591 | 636.3588 | 636.3594 | 40.35233 | 40.03567 |
| 5020 | M614T9_2 | 1.628501 | -0.70354 | -1.06752 | 0.319475 | 0.863992 | DOWN | 613.9462 | 613.9458 | 613.9469 | 9.098833 | 9.079083 |
| 5021 | M396T10_ | 1.370599 | -0.45481 | -1.10021 | 0.319493 | 0.863992 | DOWN | 395.5263 | 395.5259 | 395.5331 | 9.958492 | 9.853533 |
| 5022 | M815T10_ | 1.217243 | -0.28362 | -1.07619 | 0.319531 | 0.863992 | DOWN | 815.4826 | 815.4817 | 815.4837 | 9.930908 | 9.811217 |
| 5023 | M253T10_ | 1.173516 | -0.23084 | -1.09432 | 0.319554 | 0.863992 | DOWN | 253.4299 | 253.4297 | 253.43   | 9.827158 | 9.683817 |
| 5024 | M477T10_ | 1.634892 | -0.7092  | -1.08552 | 0.319554 | 0.863992 | DOWN | 476.8898 | 476.8895 | 476.8899 | 9.744183 | 9.729367 |
| 5025 | M379T14_ | 7.15393  | 2.838736 | 1.135043 | 0.319679 | 0.863992 | UP   | 379.2562 | 379.256  | 379.2566 | 14.31255 | 14.2583  |
| 5026 | M318T9_7 | 1.962459 | 0.972663 | 1.061307 | 0.31983  | 0.863992 | UP   | 317.8502 | 317.8499 | 317.859  | 8.861875 | 8.77435  |
| 5027 | M330T9_4 | 1.339811 | -0.42203 | -1.06447 | 0.319918 | 0.863992 | DOWN | 329.689  | 329.6887 | 329.6892 | 9.317    | 9.234417 |
| 5028 | M234T10_ | 1.123181 | -0.16759 | -1.06172 | 0.319918 | 0.863992 | DOWN | 234.4376 | 234.4374 | 234.4376 | 9.930908 | 9.827283 |
| 5029 | M568T9_4 | 1.219996 | -0.28688 | -1.09388 | 0.319948 | 0.863992 | DOWN | 568.0395 | 568.0383 | 568.0398 | 9.44095  | 9.340183 |
| 5030 | M427T35  | 2.485467 | -1.31352 | -1.12547 | 0.319956 | 0.863992 | DOWN | 426.8224 | 426.8221 | 426.8226 | 35.33383 | 35.31517 |
| 5031 | M229T10_ | 1.230139 | -0.29882 | -1.08006 | 0.319956 | 0.863992 | DOWN | 228.5607 | 228.5606 | 228.5608 | 9.9014   | 9.79535  |
| 5032 | M524T20_ | 1.505315 | 0.590066 | 1.111484 | 0.319958 | 0.863992 | UP   | 524.3576 | 524.3574 | 524.3584 | 20.46275 | 20.4475  |
| 5033 | M747T10_ | 2.821173 | 1.496295 | 1.132272 | 0.320095 | 0.863992 | UP   | 746.5228 | 746.5106 | 746.5235 | 9.80915  | 9.45945  |
| 5034 | M355T42_ | 1.252996 | -0.32538 | -1.12945 | 0.320159 | 0.863992 | DOWN | 355.2114 | 355.2114 | 355.2115 | 42.3805  | 42.30867 |
| 5035 | M340T11_ | 1.206835 | -0.27123 | -1.07906 | 0.32022  | 0.863992 | DOWN | 340.1164 | 340.1164 | 340.1167 | 10.90659 | 10.879   |
| 5036 | M464T10_ | 1.205292 | -0.26938 | -1.11564 | 0.320242 | 0.863992 | DOWN | 464.1362 | 464.1357 | 464.1422 | 9.830733 | 9.683817 |
| 5037 | M388T43_ | 1.113839 | -0.15554 | -1.12856 | 0.320318 | 0.863992 | DOWN | 388.2327 | 388.2326 | 388.2328 | 43.04942 | 42.88417 |
| 5038 | M518T31_ | 1.898424 | -0.9248  | -1.09202 | 0.320328 | 0.863992 | DOWN | 518.4037 | 518.4032 | 518.4045 | 31.3665  | 31.34917 |
| 5039 | M1953T10 | 1.338436 | -0.42055 | -1.07315 | 0.320402 | 0.863992 | DOWN | 1953.265 | 1953.263 | 1953.266 | 9.823575 | 9.699733 |



|      |           |          |          |          |          |          |      |          |          |          |          |          |
|------|-----------|----------|----------|----------|----------|----------|------|----------|----------|----------|----------|----------|
| 5040 | M209T10_  | 1.374968 | 0.459398 | 1.071639 | 0.320429 | 0.863992 | UP   | 209.1979 | 209.1978 | 209.1979 | 9.810125 | 9.699733 |
| 5041 | M405T11_  | 1.197252 | -0.25973 | -1.06833 | 0.320482 | 0.863992 | DOWN | 404.6184 | 404.6183 | 404.6191 | 10.93415 | 10.90785 |
| 5042 | M815T12   | 1.46641  | 0.552289 | 1.081138 | 0.320495 | 0.863992 | UP   | 814.589  | 814.5884 | 814.5894 | 12.3828  | 12.3538  |
| 5043 | M363T9_1  | 1.612692 | -0.68947 | -1.09395 | 0.320528 | 0.863993 | DOWN | 362.5899 | 362.5889 | 362.5928 | 9.160467 | 9.110833 |
| 5044 | M1423T10_ | 1.258579 | -0.3318  | -1.06094 | 0.320538 | 0.863993 | DOWN | 1422.693 | 1422.69  | 1422.698 | 9.934533 | 9.827283 |
| 5045 | M858T10_  | 1.139804 | -0.18879 | -1.06522 | 0.320581 | 0.863993 | DOWN | 858.3575 | 858.357  | 858.3581 | 9.893742 | 9.79535  |
| 5046 | M843T10_  | 1.12515  | -0.17012 | -1.06537 | 0.320584 | 0.863993 | DOWN | 843.0634 | 843.0625 | 843.0638 | 9.933    | 9.827283 |
| 5047 | M764T11   | 1.260188 | -0.33364 | -1.06261 | 0.320605 | 0.863993 | DOWN | 763.9535 | 763.9533 | 763.9538 | 10.9049  | 10.879   |
| 5048 | M479T10_  | 1.265723 | -0.33996 | -1.08071 | 0.320654 | 0.863993 | DOWN | 478.8834 | 478.8811 | 478.8845 | 9.824183 | 9.431017 |
| 5049 | M543T24_  | 1.453366 | -0.5394  | -1.06435 | 0.320665 | 0.863993 | DOWN | 543.1342 | 543.1335 | 543.1348 | 23.91217 | 23.841   |
| 5050 | M336T9_1  | 1.269425 | -0.34418 | -1.05868 | 0.320758 | 0.863993 | DOWN | 335.5891 | 335.5889 | 335.5892 | 9.294408 | 9.1445   |
| 5051 | M244T11_  | 1.334811 | -0.41664 | -1.05937 | 0.320799 | 0.863993 | DOWN | 244.2633 | 244.263  | 244.2637 | 10.58136 | 10.4882  |
| 5052 | M478T10_  | 1.425733 | -0.5117  | -1.08528 | 0.320892 | 0.863993 | DOWN | 477.9612 | 477.9591 | 477.9618 | 10.28954 | 10.095   |
| 5053 | M754T10_  | 1.212753 | -0.27829 | -1.07067 | 0.32093  | 0.863993 | DOWN | 754.0051 | 754.0038 | 754.0065 | 9.930908 | 9.811217 |
| 5054 | M177T11   | 1.18837  | -0.24898 | -1.06225 | 0.320997 | 0.863993 | DOWN | 177.1292 | 177.129  | 177.1292 | 10.90659 | 10.879   |
| 5055 | M534T9_1  | 1.954926 | 0.967114 | 1.080951 | 0.320998 | 0.863993 | UP   | 533.8713 | 533.8704 | 533.8716 | 9.217583 | 9.1011   |
| 5056 | M435T9_1  | 1.403289 | 0.488813 | 1.085338 | 0.320998 | 0.863993 | UP   | 435.4757 | 435.4752 | 435.476  | 9.25985  | 9.129317 |
| 5057 | M203T13   | 1.796944 | 0.845545 | 1.127217 | 0.321092 | 0.863993 | UP   | 203.1276 | 203.1274 | 203.1276 | 12.82793 | 12.79153 |
| 5058 | M731T11_  | 1.210824 | -0.27599 | -1.05773 | 0.32112  | 0.863993 | DOWN | 731.009  | 731.0086 | 731.0096 | 10.892   | 10.879   |
| 5059 | M704T9_2  | 125.7154 | 6.974018 | 1.131326 | 0.321149 | 0.863993 | UP   | 703.7574 | 703.7563 | 703.7577 | 9.344617 | 9.146383 |
| 5060 | M168T10_  | 1.263711 | -0.33767 | -1.0579  | 0.321228 | 0.863993 | DOWN | 167.8423 | 167.8421 | 167.8424 | 9.929017 | 9.811217 |
| 5061 | M681T10_  | 1.734124 | 0.794207 | 1.125846 | 0.321321 | 0.863993 | UP   | 681.4708 | 681.4701 | 681.4715 | 9.864467 | 9.747533 |
| 5062 | M217T10_  | 1.688418 | 0.755672 | 1.129474 | 0.321328 | 0.863993 | UP   | 217.0326 | 217.0325 | 217.041  | 9.918792 | 9.811217 |
| 5063 | M231T10_  | 2.912987 | 1.542499 | 1.128987 | 0.321406 | 0.863993 | UP   | 230.9037 | 230.9035 | 230.904  | 9.942317 | 9.843367 |
| 5064 | M1487T10_ | 1.236768 | -0.30658 | -1.08069 | 0.321414 | 0.863993 | DOWN | 1486.615 | 1486.614 | 1486.616 | 9.916525 | 9.811217 |
| 5065 | M365T9_1  | 1.255825 | -0.32864 | -1.05695 | 0.321419 | 0.863993 | DOWN | 365.3147 | 365.3137 | 365.3167 | 9.253508 | 9.06855  |
| 5066 | M1240T11  | 1.288426 | 0.36561  | 1.066456 | 0.321422 | 0.863993 | UP   | 1240.085 | 1240.083 | 1240.087 | 10.90765 | 10.87487 |
| 5067 | M1091T10_ | 1.536579 | 0.619722 | 1.104122 | 0.321456 | 0.863993 | UP   | 1091.311 | 1091.31  | 1091.313 | 9.909433 | 9.856867 |
| 5068 | M680T10_  | 1.76967  | -0.82348 | -1.05854 | 0.321475 | 0.863993 | DOWN | 679.602  | 679.595  | 679.608  | 9.925342 | 9.8914   |
| 5069 | M272T11_  | 1.511117 | 0.595615 | 1.074555 | 0.321576 | 0.863993 | UP   | 272.1085 | 272.1083 | 272.1089 | 10.91167 | 10.85018 |
| 5070 | M226T10_  | 1.193984 | -0.25578 | -1.07279 | 0.321612 | 0.863993 | DOWN | 225.5409 | 225.5408 | 225.5411 | 9.917167 | 9.811217 |
| 5071 | M608T11   | 1.244855 | -0.31598 | -1.05718 | 0.321617 | 0.863993 | DOWN | 608.3333 | 608.333  | 608.3338 | 10.8926  | 10.87487 |
| 5072 | M545T37   | 1.250357 | -0.32234 | -1.05665 | 0.321652 | 0.863993 | DOWN | 545.3657 | 545.3653 | 545.3661 | 37.0865  | 37.043   |
| 5073 | M267T14   | 1.668351 | 0.738423 | 1.062816 | 0.321676 | 0.863993 | UP   | 267.1756 | 267.1755 | 267.1762 | 14.28325 | 14.26818 |
| 5074 | M695T12   | 1.19843  | -0.26115 | -1.05694 | 0.321699 | 0.863993 | DOWN | 694.5118 | 694.5112 | 694.5121 | 11.62178 | 11.59755 |

|      |          |          |          |          |          |          |      |          |          |          |          |          |
|------|----------|----------|----------|----------|----------|----------|------|----------|----------|----------|----------|----------|
| 5075 | M1134T10 | 1.36668  | 0.450676 | 1.06258  | 0.321767 | 0.863993 | UP   | 1133.676 | 1133.673 | 1133.678 | 9.680325 | 9.571683 |
| 5076 | M549T10_ | 1.146095 | -0.19673 | -1.07014 | 0.321789 | 0.863993 | DOWN | 549.0491 | 549.0487 | 549.0497 | 9.967367 | 9.843367 |
| 5077 | M827T11  | 1.227672 | -0.29593 | -1.06848 | 0.321801 | 0.863994 | DOWN | 826.9379 | 826.9374 | 826.9403 | 10.89907 | 10.879   |
| 5078 | M379T9_6 | 1.288016 | -0.36515 | -1.05667 | 0.321808 | 0.863994 | DOWN | 379.0696 | 379.0687 | 379.0739 | 9.264692 | 9.1445   |
| 5079 | M1285T10 | 1.455456 | 0.541471 | 1.103623 | 0.321872 | 0.863994 | UP   | 1284.941 | 1284.938 | 1284.945 | 9.931875 | 9.827283 |
| 5080 | M384T11_ | 1.282846 | -0.35935 | -1.05576 | 0.321981 | 0.863994 | DOWN | 383.5459 | 383.5456 | 383.5461 | 10.90522 | 10.879   |
| 5081 | M437T9_9 | 1.172781 | -0.22993 | -1.10199 | 0.322052 | 0.863994 | DOWN | 437.34   | 437.3399 | 437.3403 | 9.26575  | 9.146383 |
| 5082 | M375T10_ | 1.109302 | -0.14965 | -1.07701 | 0.322111 | 0.863994 | DOWN | 374.5408 | 374.5403 | 374.5414 | 9.930142 | 9.827283 |
| 5083 | M1260T11 | 1.18337  | -0.2429  | -1.08192 | 0.322126 | 0.863994 | DOWN | 1260.096 | 1260.095 | 1260.097 | 10.91987 | 10.877   |
| 5084 | M803T26  | 1.19538  | -0.25747 | -1.05539 | 0.322132 | 0.863994 | DOWN | 802.5888 | 802.5883 | 802.5891 | 25.88083 | 25.85283 |
| 5085 | M241T21  | 1.395653 | -0.48094 | -1.11997 | 0.322222 | 0.863994 | DOWN | 241.235  | 241.2349 | 241.2352 | 21.35675 | 21.33683 |
| 5086 | M229T10_ | 1.413474 | 0.499246 | 1.067809 | 0.322235 | 0.863994 | UP   | 229.2114 | 229.2114 | 229.2116 | 9.887133 | 9.806367 |
| 5087 | M475T9_1 | 2.390911 | 1.25756  | 1.055512 | 0.322348 | 0.863994 | UP   | 475.204  | 475.1997 | 475.2082 | 9.355317 | 9.1587   |
| 5088 | M577T11_ | 1.282425 | -0.35887 | -1.05541 | 0.322366 | 0.863994 | DOWN | 577.0309 | 577.0303 | 577.0314 | 10.71547 | 10.69012 |
| 5089 | M206T9_2 | 4.626498 | 2.209921 | 1.122433 | 0.322419 | 0.863994 | UP   | 206.1966 | 206.188  | 206.1989 | 9.263783 | 9.0511   |
| 5090 | M535T18  | 1.757502 | 0.813526 | 1.084447 | 0.322469 | 0.863994 | UP   | 535.3377 | 535.337  | 535.3381 | 17.97333 | 17.95233 |
| 5091 | M566T9_1 | 2.507592 | -1.3263  | -1.10206 | 0.322483 | 0.863994 | DOWN | 565.748  | 565.7466 | 565.7524 | 9.277967 | 9.205717 |
| 5092 | M334T10_ | 1.192149 | -0.25357 | -1.08037 | 0.322547 | 0.863994 | DOWN | 333.5791 | 333.5789 | 333.5795 | 9.968992 | 9.859233 |
| 5093 | M276T10_ | 1.401201 | 0.486664 | 1.104867 | 0.322555 | 0.863994 | UP   | 276.2199 | 276.2198 | 276.2201 | 9.816183 | 9.699733 |
| 5094 | M410T11_ | 1.233567 | -0.30284 | -1.11722 | 0.322598 | 0.863994 | DOWN | 409.683  | 409.6821 | 409.6839 | 10.91987 | 10.879   |
| 5095 | M377T9_1 | 1.360012 | -0.44362 | -1.06055 | 0.32262  | 0.863994 | DOWN | 376.7313 | 376.7298 | 376.7348 | 9.311208 | 9.191133 |
| 5096 | M245T12  | 2.01185  | -1.00852 | -1.10892 | 0.322821 | 0.863994 | DOWN | 245.1057 | 245.1052 | 245.1059 | 11.94868 | 11.87742 |
| 5097 | M562T9   | 1.22228  | -0.28957 | -1.06562 | 0.322857 | 0.863994 | DOWN | 562.3076 | 562.307  | 562.3093 | 9.289725 | 9.1011   |
| 5098 | M564T41_ | 1.65336  | 0.725401 | 1.115532 | 0.322914 | 0.863994 | UP   | 564.3375 | 564.3374 | 564.3378 | 40.68192 | 40.49617 |
| 5099 | M508T11_ | 1.285911 | -0.36279 | -1.05409 | 0.323034 | 0.863994 | DOWN | 507.7398 | 507.739  | 507.7401 | 10.90659 | 10.8646  |
| 5100 | M656T10_ | 1.367196 | 0.45122  | 1.090349 | 0.323091 | 0.863995 | UP   | 655.5879 | 655.5866 | 655.59   | 9.853633 | 9.73145  |
| 5101 | M605T9_1 | 1.466178 | -0.55206 | -1.05354 | 0.323147 | 0.863995 | DOWN | 604.6021 | 604.6018 | 604.6062 | 9.346    | 9.191133 |
| 5102 | M318T9_5 | 1.274683 | -0.35014 | -1.06869 | 0.323192 | 0.863995 | DOWN | 317.7822 | 317.782  | 317.7827 | 9.331083 | 9.234417 |
| 5103 | M359T10_ | 1.791832 | 0.841435 | 1.119435 | 0.323248 | 0.863995 | UP   | 359.4978 | 359.4975 | 359.4983 | 9.85525  | 9.73145  |
| 5104 | M338T11_ | 1.107727 | -0.1476  | -1.06347 | 0.323271 | 0.863995 | DOWN | 338.2154 | 338.2153 | 338.2156 | 10.91376 | 10.89355 |
| 5105 | M538T11_ | 2.254531 | 1.172827 | 1.116066 | 0.323463 | 0.863995 | UP   | 537.9604 | 537.9599 | 537.9612 | 10.52195 | 10.47223 |
| 5106 | M352T44_ | 1.395947 | -0.48124 | -1.1083  | 0.323488 | 0.863995 | DOWN | 352.1964 | 352.1963 | 352.1966 | 44.45875 | 44.14967 |
| 5107 | M302T11_ | 1.394107 | 0.479342 | 1.078487 | 0.323525 | 0.863995 | UP   | 301.7458 | 301.7452 | 301.7462 | 10.86008 | 10.8214  |
| 5108 | M843T10_ | 1.290808 | -0.36827 | -1.06613 | 0.323547 | 0.863995 | DOWN | 843.498  | 843.4967 | 843.4993 | 9.932442 | 9.827283 |
| 5109 | M622T41_ | 1.192833 | 0.254392 | 1.066431 | 0.323696 | 0.863995 | UP   | 622.3434 | 622.3432 | 622.3438 | 41.244   | 40.99967 |

|      |          |          |          |          |          |          |      |          |          |          |          |          |
|------|----------|----------|----------|----------|----------|----------|------|----------|----------|----------|----------|----------|
| 5110 | M1500T10 | 1.596584 | -0.67499 | -1.05703 | 0.323735 | 0.863995 | DOWN | 1499.657 | 1499.654 | 1499.658 | 9.866292 | 9.779267 |
| 5111 | M212T9_9 | 60.15248 | 5.910552 | 1.124071 | 0.323875 | 0.863995 | UP   | 212.1182 | 212.1179 | 212.1183 | 8.961583 | 8.873867 |
| 5112 | M263T10_ | 1.222289 | 0.289586 | 1.055393 | 0.323914 | 0.863995 | UP   | 262.7751 | 262.775  | 262.7754 | 9.8207   | 9.715683 |
| 5113 | M817T10_ | 1.205996 | -0.27023 | -1.07681 | 0.323932 | 0.863995 | DOWN | 817.3403 | 817.3395 | 817.3419 | 9.924308 | 9.811217 |
| 5114 | M294T9_6 | 1.452164 | -0.5382  | -1.0526  | 0.324086 | 0.863995 | DOWN | 294.2729 | 294.2645 | 294.2731 | 9.275917 | 9.219483 |
| 5115 | M445T10_ | 1.795017 | -0.844   | -1.10692 | 0.324129 | 0.863995 | DOWN | 444.8393 | 444.8385 | 444.8402 | 10.27026 | 10.1579  |
| 5116 | M312T22_ | 1.439432 | -0.5255  | -1.05473 | 0.324132 | 0.863995 | DOWN | 312.2167 | 312.2165 | 312.2168 | 22.05983 | 22.03883 |
| 5117 | M823T13  | 1.192456 | -0.25394 | -1.06518 | 0.324167 | 0.863995 | DOWN | 823.3575 | 823.3573 | 823.3581 | 12.96669 | 12.95183 |
| 5118 | M579T10_ | 1.369974 | -0.45415 | -1.05671 | 0.324272 | 0.863995 | DOWN | 578.8634 | 578.8631 | 578.8637 | 9.642433 | 9.58735  |
| 5119 | M340T10_ | 1.180878 | -0.23986 | -1.08998 | 0.324293 | 0.863995 | DOWN | 339.905  | 339.9048 | 339.9051 | 9.8397   | 9.715683 |
| 5120 | M398T10_ | 1.134497 | -0.18205 | -1.05118 | 0.32436  | 0.863995 | DOWN | 397.6694 | 397.6691 | 397.6695 | 9.924308 | 9.811217 |
| 5121 | M210T9_8 | 1.265405 | -0.3396  | -1.04999 | 0.324416 | 0.863996 | DOWN | 210.4651 | 210.465  | 210.4652 | 9.285867 | 9.129317 |
| 5122 | M316T25  | 45.13512 | -5.49618 | -1.1226  | 0.324432 | 0.863996 | DOWN | 316.1256 | 316.1255 | 316.1259 | 25.11567 | 25.0985  |
| 5123 | M355T11_ | 2.579212 | 1.36693  | 1.118944 | 0.324462 | 0.863996 | UP   | 355.2591 | 355.2521 | 355.2592 | 10.7046  | 10.68992 |
| 5124 | M273T30  | 1.643304 | -0.7166  | -1.08922 | 0.324496 | 0.863996 | DOWN | 273.2419 | 273.2417 | 273.2422 | 30.252   | 30.20983 |
| 5125 | M412T9_1 | 1.157089 | -0.2105  | -1.06366 | 0.324498 | 0.863996 | DOWN | 412.344  | 412.3426 | 412.3441 | 9.239042 | 9.174967 |
| 5126 | M412T9_3 | 1.219179 | -0.28591 | -1.05385 | 0.324505 | 0.863996 | DOWN | 412.036  | 412.0351 | 412.0378 | 9.246042 | 9.129317 |
| 5127 | M404T43_ | 1.093045 | -0.12835 | -1.05154 | 0.32464  | 0.863996 | DOWN | 404.264  | 404.2638 | 404.2641 | 43.33017 | 43.20033 |
| 5128 | M566T11_ | 1.13095  | -0.17754 | -1.05203 | 0.324678 | 0.863996 | DOWN | 566.4277 | 566.4274 | 566.428  | 10.5188  | 10.47197 |
| 5129 | M284T9_3 | 1.354368 | -0.43762 | -1.05312 | 0.324743 | 0.863996 | DOWN | 283.8618 | 283.8614 | 283.862  | 9.486892 | 9.284283 |
| 5130 | M213T10_ | 1.228822 | -0.29728 | -1.09323 | 0.324825 | 0.863996 | DOWN | 213.3539 | 213.3538 | 213.3541 | 9.8397   | 9.715683 |
| 5131 | M532T10_ | 1.223445 | -0.29095 | -1.079   | 0.324854 | 0.863996 | DOWN | 532.3938 | 532.3934 | 532.3947 | 9.95385  | 9.843367 |
| 5132 | M501T10_ | 2.171647 | 1.118789 | 1.114926 | 0.3249   | 0.863996 | UP   | 501.4414 | 501.4398 | 501.442  | 9.77345  | 9.746783 |
| 5133 | M541T21  | 1.337915 | -0.41999 | -1.08716 | 0.324937 | 0.863996 | DOWN | 541.3953 | 541.395  | 541.3957 | 21.048   | 20.9975  |
| 5134 | M373T10_ | 1.327346 | -0.40854 | -1.07457 | 0.325045 | 0.863996 | DOWN | 373.4323 | 373.4322 | 373.4324 | 9.504583 | 9.416817 |
| 5135 | M431T10_ | 1.641529 | 0.715041 | 1.055932 | 0.325092 | 0.863996 | UP   | 431.4591 | 431.4587 | 431.4595 | 9.960817 | 9.859233 |
| 5136 | M156T10_ | 1.402174 | -0.48767 | -1.09039 | 0.325177 | 0.863996 | DOWN | 156.2576 | 156.2573 | 156.2581 | 9.830083 | 9.715683 |
| 5137 | M235T10_ | 3.103464 | 1.633879 | 1.120182 | 0.325206 | 0.863996 | UP   | 234.9098 | 234.9096 | 234.9099 | 9.9847   | 9.859233 |
| 5138 | M294T21_ | 5.388122 | 2.429783 | 1.120185 | 0.325338 | 0.863996 | UP   | 294.2349 | 294.2344 | 294.235  | 21.17633 | 21.13067 |
| 5139 | M496T9_1 | 1.363542 | -0.44736 | -1.05749 | 0.325421 | 0.863996 | DOWN | 495.57   | 495.5693 | 495.5736 | 9.363217 | 9.064833 |
| 5140 | M536T11_ | 1.282621 | -0.35909 | -1.04801 | 0.325482 | 0.863996 | DOWN | 536.3287 | 536.3282 | 536.3292 | 10.58424 | 10.5191  |
| 5141 | M291T11_ | 1.2545   | -0.32711 | -1.05042 | 0.325514 | 0.863996 | DOWN | 290.5491 | 290.5456 | 290.5528 | 10.93708 | 10.87765 |
| 5142 | M454T10_ | 1.291816 | 0.3694   | 1.061309 | 0.325522 | 0.863996 | UP   | 454.0663 | 454.0662 | 454.0666 | 9.975217 | 9.8753   |
| 5143 | M325T10_ | 1.293964 | 0.371798 | 1.084986 | 0.325569 | 0.863996 | UP   | 324.6305 | 324.6233 | 324.6307 | 9.960967 | 9.869467 |
| 5144 | M242T14  | 8.488185 | 3.085456 | 1.117817 | 0.325651 | 0.863996 | UP   | 242.1899 | 242.1897 | 242.1905 | 14.35583 | 14.31135 |

|      |          |          |          |          |          |          |      |          |          |          |          |          |
|------|----------|----------|----------|----------|----------|----------|------|----------|----------|----------|----------|----------|
| 5145 | M560T9_1 | 1.515201 | -0.59951 | -1.06637 | 0.325655 | 0.863996 | DOWN | 560.061  | 560.0602 | 560.0615 | 9.2796   | 9.234417 |
| 5146 | M234T9_9 | 1.580111 | 0.660026 | 1.083538 | 0.325683 | 0.863997 | UP   | 234.2242 | 234.2234 | 234.225  | 9.3139   | 9.146383 |
| 5147 | M1069T10 | 1.374948 | -0.45938 | -1.06126 | 0.325695 | 0.863997 | DOWN | 1069.453 | 1069.45  | 1069.453 | 9.787633 | 9.6681   |
| 5148 | M637T10_ | 1.112073 | 0.153252 | 1.054327 | 0.3258   | 0.863997 | UP   | 637.4057 | 637.4055 | 637.4062 | 10.39613 | 10.34372 |
| 5149 | M696T10_ | 1.794591 | 0.843655 | 1.091505 | 0.325801 | 0.863997 | UP   | 696.1311 | 696.13   | 696.1314 | 9.95385  | 9.8378   |
| 5150 | M354T11_ | 1.294451 | -0.37234 | -1.05659 | 0.325826 | 0.863997 | DOWN | 354.2569 | 354.2564 | 354.2572 | 10.51948 | 10.48782 |
| 5151 | M386T10_ | 1.517883 | -0.60206 | -1.08874 | 0.325827 | 0.863997 | DOWN | 386.2119 | 386.211  | 386.2123 | 9.900133 | 9.811217 |
| 5152 | M695T9_2 | 1.343819 | -0.42634 | -1.05758 | 0.325949 | 0.863997 | DOWN | 694.7138 | 694.7131 | 694.7142 | 9.317    | 9.219483 |
| 5153 | M388T10_ | 1.20075  | -0.26394 | -1.05601 | 0.326025 | 0.863997 | DOWN | 388.1117 | 388.1114 | 388.112  | 9.917167 | 9.811217 |
| 5154 | M469T9_8 | 1.151235 | -0.20318 | -1.04693 | 0.326031 | 0.863997 | DOWN | 469.3827 | 469.3822 | 469.3829 | 9.306817 | 9.16125  |
| 5155 | M345T11_ | 1.356516 | 0.439906 | 1.061587 | 0.326107 | 0.863997 | UP   | 344.6934 | 344.6917 | 344.6951 | 10.93097 | 10.8914  |
| 5156 | M1439T10 | 1.282401 | -0.35885 | -1.07    | 0.326109 | 0.863997 | DOWN | 1438.894 | 1438.891 | 1438.895 | 9.956417 | 9.853533 |
| 5157 | M380T9_7 | 1.460347 | -0.54631 | -1.05272 | 0.326163 | 0.863997 | DOWN | 380.3776 | 380.3774 | 380.3783 | 8.86875  | 8.803967 |
| 5158 | M256T18  | 1.253997 | -0.32653 | -1.10199 | 0.326173 | 0.863997 | DOWN | 256.1692 | 256.1691 | 256.1692 | 18.31358 | 18.2905  |
| 5159 | M243T11_ | 1.128169 | 0.173983 | 1.048741 | 0.326276 | 0.863997 | UP   | 243.0806 | 243.0804 | 243.0811 | 10.93153 | 10.89355 |
| 5160 | M839T10_ | 1.692132 | 0.758842 | 1.086919 | 0.326289 | 0.863997 | UP   | 839.4376 | 839.4372 | 839.4382 | 9.983467 | 9.8753   |
| 5161 | M272T9_4 | 1.408904 | -0.49457 | -1.05237 | 0.326328 | 0.863997 | DOWN | 272.47   | 272.4698 | 272.4703 | 8.827542 | 8.745033 |
| 5162 | M396T42_ | 1.16438  | -0.21956 | -1.06479 | 0.326347 | 0.863997 | DOWN | 396.2225 | 396.2224 | 396.2227 | 41.5175  | 41.33667 |
| 5163 | M655T10_ | 1.268092 | -0.34266 | -1.07393 | 0.326381 | 0.863997 | DOWN | 655.2981 | 655.2978 | 655.3003 | 9.828367 | 9.715683 |
| 5164 | M410T9_5 | 1.424924 | -0.51088 | -1.04868 | 0.326465 | 0.863997 | DOWN | 409.8177 | 409.8172 | 409.8181 | 8.972817 | 8.924217 |
| 5165 | M520T38_ | 1.181906 | 0.241115 | 1.108149 | 0.326478 | 0.863997 | UP   | 520.2748 | 520.2746 | 520.2753 | 37.928   | 37.58983 |
| 5166 | M674T10_ | 1.231756 | -0.30072 | -1.05848 | 0.326488 | 0.863997 | DOWN | 673.5865 | 673.5858 | 673.5871 | 9.816167 | 9.7124   |
| 5167 | M677T10_ | 1.206401 | -0.27071 | -1.07168 | 0.32652  | 0.863997 | DOWN | 677.4956 | 677.4954 | 677.4957 | 9.534867 | 9.432183 |
| 5168 | M214T9_1 | 2.072229 | -1.05118 | -1.05079 | 0.326656 | 0.863997 | DOWN | 213.5061 | 213.501  | 213.5072 | 9.18975  | 9.1503   |
| 5169 | M338T25_ | 72.88708 | -6.18759 | -1.11667 | 0.326675 | 0.863997 | DOWN | 338.1076 | 338.1075 | 338.1077 | 25.11283 | 25.07217 |
| 5170 | M458T11_ | 1.381795 | -0.46654 | -1.08013 | 0.326689 | 0.863997 | DOWN | 458.2741 | 458.2729 | 458.2747 | 11.08584 | 11.03898 |
| 5171 | M1031T10 | 1.335155 | -0.41701 | -1.0636  | 0.326701 | 0.863997 | DOWN | 1030.937 | 1030.936 | 1030.938 | 9.80415  | 9.728083 |
| 5172 | M1869T10 | 1.215053 | -0.28102 | -1.09536 | 0.326729 | 0.863997 | DOWN | 1869.425 | 1869.423 | 1869.427 | 9.830283 | 9.728083 |
| 5173 | M475T9_1 | 3.410714 | 1.770074 | 1.07931  | 0.326791 | 0.863997 | UP   | 475.1653 | 475.159  | 475.1736 | 9.38665  | 9.03715  |
| 5174 | M1411T10 | 1.318805 | 0.399231 | 1.046829 | 0.326803 | 0.863997 | UP   | 1411.22  | 1411.219 | 1411.222 | 9.977442 | 9.8753   |
| 5175 | M644T10_ | 1.27378  | 0.349116 | 1.084874 | 0.326895 | 0.863997 | UP   | 643.8859 | 643.8848 | 643.8868 | 9.744917 | 9.62055  |
| 5176 | M702T10_ | 1.280199 | -0.35637 | -1.06306 | 0.326945 | 0.863997 | DOWN | 702.439  | 702.4384 | 702.4397 | 10.25792 | 10.18238 |
| 5177 | M255T10_ | 1.369121 | -0.45325 | -1.04417 | 0.326994 | 0.863998 | DOWN | 255.4179 | 255.4178 | 255.4181 | 9.915583 | 9.811217 |
| 5178 | M618T11  | 1.577911 | 0.658016 | 1.078418 | 0.327014 | 0.863998 | UP   | 617.8039 | 617.8028 | 617.8043 | 10.89193 | 10.87487 |
| 5179 | M521T11_ | 1.256966 | -0.32995 | -1.04395 | 0.327065 | 0.863998 | DOWN | 521.3023 | 521.3018 | 521.3036 | 10.9062  | 10.85018 |

|      |          |          |          |          |          |          |      |          |          |          |          |          |
|------|----------|----------|----------|----------|----------|----------|------|----------|----------|----------|----------|----------|
| 5180 | M578T9_2 | 1.255696 | -0.32849 | -1.04482 | 0.327094 | 0.863998 | DOWN | 578.0398 | 578.0381 | 578.041  | 8.94795  | 8.892117 |
| 5181 | M1072T10 | 1.272627 | -0.34781 | -1.06551 | 0.327144 | 0.863998 | DOWN | 1072.247 | 1072.244 | 1072.248 | 9.803033 | 9.743667 |
| 5182 | M490T42_ | 1.211807 | 0.27716  | 1.089984 | 0.327259 | 0.863998 | UP   | 490.2644 | 490.264  | 490.2646 | 41.82658 | 41.7335  |
| 5183 | M344T10_ | 1.758078 | 0.813999 | 1.097327 | 0.327275 | 0.863998 | UP   | 344.4894 | 344.4891 | 344.4896 | 9.778967 | 9.6681   |
| 5184 | M350T10_ | 1.228028 | -0.29634 | -1.07911 | 0.327276 | 0.863998 | DOWN | 349.6185 | 349.6183 | 349.6187 | 9.825492 | 9.715683 |
| 5185 | M212T10_ | 1.592025 | -0.67086 | -1.04533 | 0.327284 | 0.863998 | DOWN | 212.0626 | 212.0624 | 212.0627 | 9.823317 | 9.715683 |
| 5186 | M1046T11 | 1.275335 | -0.35088 | -1.06741 | 0.327286 | 0.863998 | DOWN | 1045.798 | 1045.798 | 1045.8   | 10.90657 | 10.879   |
| 5187 | M190T9_4 | 1.422581 | -0.50851 | -1.0759  | 0.327351 | 0.863998 | DOWN | 189.7309 | 189.7304 | 189.7311 | 9.249033 | 9.132267 |
| 5188 | M699T10_ | 1.342145 | -0.42454 | -1.06211 | 0.327453 | 0.863998 | DOWN | 698.7791 | 698.7789 | 698.7798 | 9.8207   | 9.715683 |
| 5189 | M348T10_ | 1.093734 | -0.12926 | -1.0809  | 0.327647 | 0.863998 | DOWN | 347.9772 | 347.9768 | 347.9773 | 9.8725   | 9.747533 |
| 5190 | M633T15  | 1.275958 | 0.351581 | 1.09045  | 0.327679 | 0.863998 | UP   | 633.2724 | 633.2719 | 633.2739 | 14.59003 | 14.53128 |
| 5191 | M482T34  | 1.157507 | -0.21102 | -1.04424 | 0.327721 | 0.863998 | DOWN | 482.3683 | 482.3679 | 482.3684 | 33.802   | 33.7875  |
| 5192 | M333T10_ | 1.120958 | -0.16473 | -1.09911 | 0.327774 | 0.863998 | DOWN | 332.7958 | 332.7956 | 332.7965 | 9.8725   | 9.747533 |
| 5193 | M283T11  | 1.859633 | 0.895018 | 1.042705 | 0.327806 | 0.863998 | UP   | 282.5576 | 282.5572 | 282.5577 | 10.93338 | 10.90197 |
| 5194 | M207T9_4 | 1.277307 | -0.35311 | -1.05915 | 0.327857 | 0.863998 | DOWN | 206.7487 | 206.7477 | 206.7527 | 9.35985  | 9.204617 |
| 5195 | M779T10_ | 1.13965  | -0.18859 | -1.04677 | 0.327949 | 0.863998 | DOWN | 778.8859 | 778.8849 | 778.8875 | 9.923542 | 9.827283 |
| 5196 | M346T10_ | 1.466822 | -0.55269 | -1.0469  | 0.32809  | 0.863998 | DOWN | 346.3161 | 346.3159 | 346.3162 | 9.816317 | 9.7124   |
| 5197 | M221T10_ | 1.101084 | -0.13892 | -1.04705 | 0.328114 | 0.863998 | DOWN | 221.3998 | 221.3996 | 221.4001 | 9.934533 | 9.827283 |
| 5198 | M656T10_ | 1.999998 | 0.999998 | 1.112476 | 0.328132 | 0.863998 | UP   | 655.776  | 655.7758 | 655.7771 | 9.810167 | 9.715683 |
| 5199 | M534T38_ | 1.225389 | -0.29324 | -1.04619 | 0.328146 | 0.863998 | DOWN | 534.3269 | 534.3267 | 534.3271 | 37.88517 | 37.3545  |
| 5200 | M415T21  | 1.443571 | 0.529642 | 1.093166 | 0.328181 | 0.863998 | UP   | 415.245  | 415.2442 | 415.2456 | 21.14517 | 21.1225  |
| 5201 | M326T10_ | 1.74774  | 0.805491 | 1.065606 | 0.32819  | 0.863998 | UP   | 325.6963 | 325.6956 | 325.6971 | 9.8322   | 9.743767 |
| 5202 | M510T10_ | 1.198922 | -0.26174 | -1.08497 | 0.328251 | 0.863998 | DOWN | 510.3881 | 510.3878 | 510.3886 | 9.847133 | 9.747533 |
| 5203 | M1803T10 | 1.468048 | -0.5539  | -1.06696 | 0.328353 | 0.863999 | DOWN | 1802.623 | 1802.622 | 1802.628 | 9.81635  | 9.7124   |
| 5204 | M265T9_2 | 1.444064 | 0.530134 | 1.084188 | 0.328358 | 0.863999 | UP   | 265.131  | 265.1308 | 265.1311 | 8.734483 | 8.623117 |
| 5205 | M348T10_ | 2.203171 | 1.139582 | 1.10955  | 0.328409 | 0.863999 | UP   | 347.8434 | 347.8432 | 347.844  | 9.886258 | 9.746783 |
| 5206 | M315T42  | 1.235433 | 0.305017 | 1.09422  | 0.328582 | 0.863999 | UP   | 315.1799 | 315.1798 | 315.1801 | 41.96333 | 41.791   |
| 5207 | M1134T11 | 1.209137 | -0.27398 | -1.0452  | 0.328617 | 0.863999 | DOWN | 1133.857 | 1133.856 | 1133.857 | 10.5188  | 10.47223 |
| 5208 | M416T44_ | 1.196484 | 0.258801 | 1.092471 | 0.328626 | 0.863999 | UP   | 416.2639 | 416.2637 | 416.2642 | 43.67533 | 43.41383 |
| 5209 | M245T14  | 2.058101 | 1.041314 | 1.093905 | 0.328681 | 0.863999 | UP   | 245.1937 | 245.1936 | 245.1939 | 14.29753 | 14.22425 |
| 5210 | M621T9_6 | 2.061052 | 1.043381 | 1.099768 | 0.328698 | 0.863999 | UP   | 621.4018 | 621.4003 | 621.4027 | 9.489067 | 9.38595  |
| 5211 | M751T10_ | 2.261184 | 1.177078 | 1.109679 | 0.328701 | 0.863999 | UP   | 751.0495 | 751.0471 | 751.0505 | 9.839008 | 9.715683 |
| 5212 | M959T9   | 1.608631 | -0.68583 | -1.04619 | 0.328782 | 0.863999 | DOWN | 958.9049 | 958.903  | 958.9082 | 8.90275  | 8.601067 |
| 5213 | M200T9_2 | 1.60044  | 0.678469 | 1.049341 | 0.328885 | 0.863999 | UP   | 200.3031 | 200.3029 | 200.3035 | 9.23175  | 9.1428   |
| 5214 | M335T10_ | 2.390834 | 1.257514 | 1.103186 | 0.328938 | 0.863999 | UP   | 335.4773 | 335.4769 | 335.4777 | 9.799833 | 9.65225  |

|      |          |          |          |          |          |          |      |          |          |          |          |          |
|------|----------|----------|----------|----------|----------|----------|------|----------|----------|----------|----------|----------|
| 5215 | M771T10_ | 1.293778 | -0.37159 | -1.07571 | 0.328939 | 0.863999 | DOWN | 770.9558 | 770.9549 | 770.9563 | 10.45776 | 10.39197 |
| 5216 | M588T9_1 | 1.442475 | -0.52855 | -1.04139 | 0.328966 | 0.863999 | DOWN | 587.7855 | 587.7825 | 587.7869 | 9.317    | 9.234417 |
| 5217 | M669T14  | 1.197003 | -0.25943 | -1.06235 | 0.328988 | 0.863999 | DOWN | 669.495  | 669.4944 | 669.4958 | 14.48749 | 14.4715  |
| 5218 | M704T10_ | 1.658345 | 0.729744 | 1.077328 | 0.329042 | 0.863999 | UP   | 703.7455 | 703.7452 | 703.7463 | 9.95385  | 9.843367 |
| 5219 | M303T10_ | 1.424891 | 0.510852 | 1.10393  | 0.329073 | 0.863999 | UP   | 303.2022 | 303.1919 | 303.2054 | 9.946367 | 9.816183 |
| 5220 | M454T11_ | 1.389858 | 0.474938 | 1.09587  | 0.329116 | 0.863999 | UP   | 454.4552 | 454.455  | 454.4553 | 10.90765 | 10.873   |
| 5221 | M705T10_ | 1.37405  | -0.45843 | -1.04975 | 0.329196 | 0.863999 | DOWN | 705.2768 | 705.2765 | 705.2773 | 9.828367 | 9.715683 |
| 5222 | M1134T10 | 1.375724 | -0.46019 | -1.04723 | 0.329255 | 0.863999 | DOWN | 1134.273 | 1134.273 | 1134.275 | 9.956417 | 9.8753   |
| 5223 | M721T9_1 | 1.545914 | -0.62846 | -1.07828 | 0.329275 | 0.863999 | DOWN | 720.6501 | 720.6494 | 720.6512 | 9.311167 | 9.22495  |
| 5224 | M225T10_ | 1.205092 | -0.26914 | -1.0639  | 0.329289 | 0.863999 | DOWN | 225.0804 | 225.0802 | 225.0804 | 9.924308 | 9.811217 |
| 5225 | M364T11_ | 1.246146 | -0.31747 | -1.03932 | 0.329292 | 0.863999 | DOWN | 363.866  | 363.8645 | 363.8663 | 10.91519 | 10.86008 |
| 5226 | M510T45  | 1.274816 | -0.35029 | -1.10494 | 0.329332 | 0.863999 | DOWN | 510.2903 | 510.2901 | 510.2905 | 44.89733 | 44.79667 |
| 5227 | M448T10_ | 1.456938 | -0.54294 | -1.07039 | 0.329353 | 0.863999 | DOWN | 447.9551 | 447.9546 | 447.9556 | 9.9351   | 9.8378   |
| 5228 | M483T17  | 1.388855 | -0.4739  | -1.03889 | 0.329397 | 0.863999 | DOWN | 483.3422 | 483.3418 | 483.3426 | 17.292   | 17.232   |
| 5229 | M283T10_ | 2.528667 | 1.338377 | 1.107454 | 0.329458 | 0.863999 | UP   | 282.9629 | 282.9627 | 282.963  | 9.983433 | 9.8753   |
| 5230 | M331T23  | 1.496443 | 0.581537 | 1.039307 | 0.329494 | 0.863999 | UP   | 331.1513 | 331.1509 | 331.1529 | 23.39467 | 23.3365  |
| 5231 | M722T10_ | 2.33448  | 1.223101 | 1.096586 | 0.329533 | 0.863999 | UP   | 722.4598 | 722.4592 | 722.4602 | 9.798392 | 9.715683 |
| 5232 | M202T11_ | 1.173251 | -0.23051 | -1.06562 | 0.329597 | 0.863999 | DOWN | 201.8704 | 201.8702 | 201.8704 | 10.91371 | 10.873   |
| 5233 | M212T9_1 | 1.422901 | -0.50883 | -1.09629 | 0.329659 | 0.864    | DOWN | 212.4952 | 212.4929 | 212.4995 | 9.303167 | 9.0511   |
| 5234 | M657T10_ | 1.270265 | 0.345129 | 1.10712  | 0.329662 | 0.864    | UP   | 656.774  | 656.7738 | 656.7743 | 9.830458 | 9.715683 |
| 5235 | M523T9_4 | 4.334111 | 2.115736 | 1.106915 | 0.329671 | 0.864    | UP   | 523.2107 | 523.2075 | 523.2121 | 9.150817 | 9.064833 |
| 5236 | M1229T45 | 1.069553 | 0.097008 | 1.041974 | 0.329721 | 0.864    | UP   | 1228.873 | 1228.872 | 1228.873 | 44.98333 | 44.98283 |
| 5237 | M351T9_9 | 1.213598 | 0.279291 | 1.037633 | 0.329821 | 0.864    | UP   | 351.1077 | 351.1076 | 351.1077 | 9.481492 | 9.416817 |
| 5238 | M571T30  | 1.17338  | -0.23067 | -1.03953 | 0.329975 | 0.864    | DOWN | 571.382  | 571.3813 | 571.3839 | 29.81933 | 29.7905  |
| 5239 | M393T28  | 1.736873 | 0.796492 | 1.058904 | 0.330006 | 0.864    | UP   | 392.7442 | 392.7438 | 392.7445 | 27.83483 | 27.76717 |
| 5240 | M501T21  | 1.135984 | -0.18394 | -1.03955 | 0.330077 | 0.864    | DOWN | 501.4005 | 501.4001 | 501.4006 | 20.80892 | 20.79633 |
| 5241 | M302T10_ | 1.287102 | 0.364126 | 1.036987 | 0.33013  | 0.864    | UP   | 302.3713 | 302.3712 | 302.3713 | 9.960967 | 9.8914   |
| 5242 | M161T9_6 | 1.70607  | -0.77068 | -1.09218 | 0.330265 | 0.864    | DOWN | 161.4764 | 161.4759 | 161.4767 | 9.333667 | 9.234417 |
| 5243 | M407T10_ | 3.351317 | 1.744728 | 1.106552 | 0.330377 | 0.864    | UP   | 407.3157 | 407.3154 | 407.3263 | 9.960967 | 9.84525  |
| 5244 | M696T12  | 1.169635 | -0.22606 | -1.04112 | 0.330404 | 0.864    | DOWN | 695.5154 | 695.5147 | 695.517  | 11.59755 | 11.57545 |
| 5245 | M335T9_1 | 1.351904 | -0.43499 | -1.04294 | 0.330419 | 0.864    | DOWN | 335.4042 | 335.4027 | 335.4103 | 9.255825 | 9.1503   |
| 5246 | M204T10_ | 1.111513 | -0.15252 | -1.05162 | 0.330469 | 0.864    | DOWN | 204.2543 | 204.2542 | 204.2545 | 9.874067 | 9.779267 |
| 5247 | M355T9_2 | 1.380018 | -0.46469 | -1.03671 | 0.330479 | 0.864    | DOWN | 354.9802 | 354.9797 | 354.9804 | 8.889467 | 8.83365  |
| 5248 | M820T10_ | 1.223562 | -0.29109 | -1.05983 | 0.330628 | 0.864    | DOWN | 820.4196 | 820.4187 | 820.4202 | 9.930908 | 9.827283 |
| 5249 | M333T10_ | 1.759842 | 0.815446 | 1.101712 | 0.330636 | 0.864    | UP   | 333.4517 | 333.4513 | 333.4522 | 9.839008 | 9.715683 |

|      |          |          |          |          |          |          |      |          |          |          |          |          |
|------|----------|----------|----------|----------|----------|----------|------|----------|----------|----------|----------|----------|
| 5250 | M418T9_1 | 1.195736 | -0.2579  | -1.03796 | 0.330649 | 0.864    | DOWN | 417.7432 | 417.7423 | 417.7441 | 9.2079   | 9.129317 |
| 5251 | M335T32  | 1.654308 | 0.726228 | 1.092923 | 0.330732 | 0.864    | UP   | 335.125  | 335.125  | 335.1252 | 32.08483 | 32.07033 |
| 5252 | M822T36  | 3.386417 | -1.75976 | -1.09724 | 0.330736 | 0.864    | DOWN | 821.6036 | 821.6031 | 821.6042 | 35.50875 | 35.48283 |
| 5253 | M692T11_ | 1.17346  | 0.230769 | 1.091737 | 0.330771 | 0.864    | UP   | 692.0078 | 692.0074 | 692.0092 | 10.81661 | 10.75312 |
| 5254 | M235T9_1 | 1.469182 | 0.555013 | 1.062262 | 0.330777 | 0.864    | UP   | 235.263  | 235.2598 | 235.2654 | 9.3471   | 9.032567 |
| 5255 | M221T10_ | 1.370328 | -0.45452 | -1.07483 | 0.330811 | 0.864    | DOWN | 220.6139 | 220.6137 | 220.614  | 9.934533 | 9.827283 |
| 5256 | M283T16  | 3.650213 | 1.867981 | 1.104797 | 0.330919 | 0.864    | UP   | 283.115  | 283.1148 | 283.1174 | 15.73027 | 15.49727 |
| 5257 | M651T10_ | 1.256106 | -0.32896 | -1.04896 | 0.330927 | 0.864    | DOWN | 651.3642 | 651.3632 | 651.3648 | 10.40322 | 10.34372 |
| 5258 | M264T9_8 | 1.588405 | -0.66758 | -1.05586 | 0.330931 | 0.864    | DOWN | 264.4992 | 264.4987 | 264.4994 | 9.3332   | 9.275917 |
| 5259 | M1844T10 | 1.526361 | 0.610096 | 1.083134 | 0.330948 | 0.864    | UP   | 1844.324 | 1844.314 | 1844.327 | 9.975217 | 9.8753   |
| 5260 | M1029T16 | 1.13887  | -0.1876  | -1.03809 | 0.331057 | 0.864001 | DOWN | 1029.473 | 1029.473 | 1029.474 | 15.83321 | 15.7888  |
| 5261 | M640T9_1 | 1.325329 | -0.40635 | -1.04033 | 0.33108  | 0.864001 | DOWN | 639.8451 | 639.8445 | 639.8455 | 9.294467 | 9.129317 |
| 5262 | M495T9_9 | 1.247806 | -0.31939 | -1.05416 | 0.331145 | 0.864001 | DOWN | 495.2758 | 495.2756 | 495.276  | 9.349175 | 9.30965  |
| 5263 | M965T10_ | 1.42287  | 0.508803 | 1.051539 | 0.331156 | 0.864001 | UP   | 965.1651 | 965.1634 | 965.1661 | 9.960817 | 9.843367 |
| 5264 | M885T11_ | 1.167365 | -0.22326 | -1.03496 | 0.331216 | 0.864001 | DOWN | 884.9885 | 884.9862 | 884.989  | 10.92253 | 10.85018 |
| 5265 | M1361T10 | 1.302406 | -0.38118 | -1.03469 | 0.331321 | 0.864001 | DOWN | 1360.851 | 1360.851 | 1360.853 | 9.825492 | 9.699733 |
| 5266 | M372T10_ | 1.285089 | -0.36187 | -1.0341  | 0.331338 | 0.864001 | DOWN | 371.7715 | 371.7709 | 371.7718 | 9.972917 | 9.8753   |
| 5267 | M532T20  | 1.283344 | -0.35991 | -1.04384 | 0.331355 | 0.864001 | DOWN | 532.3812 | 532.3811 | 532.3813 | 19.96242 | 19.9555  |
| 5268 | M462T42  | 2.518597 | -1.33262 | -1.09891 | 0.331358 | 0.864001 | DOWN | 462.2694 | 462.2693 | 462.2695 | 42.38058 | 42.26583 |
| 5269 | M396T9_9 | 1.332819 | -0.41448 | -1.03386 | 0.331448 | 0.864001 | DOWN | 396.0597 | 396.0581 | 396.0597 | 9.159717 | 9.09495  |
| 5270 | M530T35  | 2.456445 | -1.29657 | -1.10336 | 0.331515 | 0.864001 | DOWN | 529.8834 | 529.8832 | 529.884  | 35.0285  | 34.99283 |
| 5271 | M786T10_ | 1.122902 | -0.16723 | -1.03409 | 0.331538 | 0.864001 | DOWN | 786.4171 | 786.4163 | 786.4176 | 9.544775 | 9.432183 |
| 5272 | M713T9   | 1.765793 | -0.82032 | -1.04294 | 0.331564 | 0.864001 | DOWN | 712.6498 | 712.6492 | 712.6499 | 8.638817 | 8.578067 |
| 5273 | M386T10_ | 1.196855 | -0.25925 | -1.04273 | 0.331572 | 0.864001 | DOWN | 386.3885 | 386.3881 | 386.3889 | 9.917167 | 9.811217 |
| 5274 | M378T10_ | 3.672431 | 1.876735 | 1.102139 | 0.331573 | 0.864001 | UP   | 377.8501 | 377.8496 | 377.8504 | 9.975217 | 9.8753   |
| 5275 | M176T11_ | 1.360177 | -0.44379 | -1.07001 | 0.331674 | 0.864001 | DOWN | 176.1536 | 176.1534 | 176.1537 | 10.89728 | 10.87487 |
| 5276 | M378T9_1 | 1.830145 | 0.871958 | 1.090758 | 0.331701 | 0.864001 | UP   | 378.4107 | 378.4088 | 378.4122 | 9.20785  | 9.129317 |
| 5277 | M398T9_1 | 1.940107 | 0.956136 | 1.079162 | 0.331704 | 0.864001 | UP   | 397.5206 | 397.5194 | 397.5225 | 9.311883 | 9.147367 |
| 5278 | M488T10_ | 1.399503 | 0.484915 | 1.070549 | 0.331727 | 0.864001 | UP   | 487.5258 | 487.5255 | 487.5262 | 9.872883 | 9.732983 |
| 5279 | M526T34  | 1.172534 | -0.22963 | -1.0514  | 0.331804 | 0.864001 | DOWN | 526.3944 | 526.3942 | 526.3948 | 33.74425 | 33.71567 |
| 5280 | M639T10_ | 1.105775 | -0.14506 | -1.04709 | 0.331865 | 0.864001 | DOWN | 639.4901 | 639.4894 | 639.4933 | 9.830558 | 9.715683 |
| 5281 | M564T11_ | 1.235321 | -0.30489 | -1.03289 | 0.331866 | 0.864001 | DOWN | 564.0074 | 564.0071 | 564.008  | 10.64878 | 10.61512 |
| 5282 | M548T10_ | 1.407323 | 0.492954 | 1.064227 | 0.331868 | 0.864001 | UP   | 547.7741 | 547.7737 | 547.7747 | 9.967367 | 9.843367 |
| 5283 | M888T10_ | 1.118483 | -0.16154 | -1.0333  | 0.332025 | 0.864001 | DOWN | 888.1617 | 888.1607 | 888.1625 | 9.930908 | 9.827283 |
| 5284 | M1643T10 | 1.670195 | 0.740016 | 1.077022 | 0.33214  | 0.864001 | UP   | 1643.411 | 1643.408 | 1643.413 | 9.964417 | 9.843367 |

|      |          |          |          |          |          |          |      |          |          |          |          |          |
|------|----------|----------|----------|----------|----------|----------|------|----------|----------|----------|----------|----------|
| 5285 | M523T10_ | 1.203217 | -0.2669  | -1.03226 | 0.332144 | 0.864001 | DOWN | 522.7988 | 522.7976 | 522.8002 | 9.915583 | 9.79535  |
| 5286 | M333T12_ | 1.579373 | -0.65935 | -1.04097 | 0.332145 | 0.864001 | DOWN | 333.2288 | 333.2285 | 333.2291 | 11.72985 | 11.71363 |
| 5287 | M741T28  | 1.464869 | 0.550771 | 1.046365 | 0.332243 | 0.864001 | UP   | 741.4593 | 741.4589 | 741.4599 | 27.70267 | 27.62467 |
| 5288 | M608T10_ | 1.323254 | -0.40409 | -1.04527 | 0.332311 | 0.864001 | DOWN | 608.2602 | 608.2597 | 608.2604 | 9.600775 | 9.49445  |
| 5289 | M686T10_ | 1.16613  | -0.22173 | -1.04172 | 0.332324 | 0.864001 | DOWN | 685.5105 | 685.5098 | 685.5109 | 9.8207   | 9.715683 |
| 5290 | M270T10_ | 1.571227 | 0.651891 | 1.087445 | 0.332431 | 0.864002 | UP   | 269.9617 | 269.9616 | 269.9618 | 9.75145  | 9.649833 |
| 5291 | M361T9_7 | 2.206927 | 1.142039 | 1.066423 | 0.332548 | 0.864002 | UP   | 361.3075 | 361.3064 | 361.3098 | 9.146383 | 9.03845  |
| 5292 | M406T10_ | 1.731183 | 0.791758 | 1.089388 | 0.332558 | 0.864002 | UP   | 406.2169 | 406.2147 | 406.2172 | 9.62495  | 9.234417 |
| 5293 | M1524T10 | 1.442648 | -0.52872 | -1.07997 | 0.332566 | 0.864002 | DOWN | 1523.878 | 1523.878 | 1523.88  | 10.45352 | 10.40882 |
| 5294 | M533T11_ | 1.468389 | -0.55423 | -1.04317 | 0.332598 | 0.864002 | DOWN | 533.3395 | 533.3387 | 533.3398 | 10.55813 | 10.48972 |
| 5295 | M656T11  | 1.19146  | -0.25273 | -1.03123 | 0.332623 | 0.864002 | DOWN | 656.0064 | 656.0059 | 656.0091 | 10.90519 | 10.88747 |
| 5296 | M721T10_ | 1.171327 | 0.228144 | 1.031259 | 0.33263  | 0.864002 | UP   | 721.3906 | 721.3903 | 721.3912 | 10.06612 | 9.971833 |
| 5297 | M1999T10 | 1.516271 | -0.60053 | -1.03129 | 0.332677 | 0.864002 | DOWN | 1998.844 | 1998.843 | 1998.847 | 9.837292 | 9.81635  |
| 5298 | M695T10_ | 1.270753 | -0.34568 | -1.04529 | 0.332701 | 0.864002 | DOWN | 695.3098 | 695.3094 | 695.3101 | 9.637108 | 9.556217 |
| 5299 | M444T11_ | 1.139362 | -0.18823 | -1.03255 | 0.332721 | 0.864002 | DOWN | 443.5696 | 443.5686 | 443.5759 | 10.89308 | 10.88747 |
| 5300 | M419T24  | 1.457901 | -0.54389 | -1.03463 | 0.332725 | 0.864002 | DOWN | 419.0396 | 419.0394 | 419.0398 | 24.36833 | 24.318   |
| 5301 | M151T10_ | 1.351634 | -0.4347  | -1.04729 | 0.332977 | 0.864002 | DOWN | 150.921  | 150.9209 | 150.9245 | 9.823575 | 9.715683 |
| 5302 | M394T20_ | 1.097872 | -0.13471 | -1.0304  | 0.332978 | 0.864002 | DOWN | 394.3138 | 394.3138 | 394.3141 | 20.24492 | 20.23017 |
| 5303 | M262T9_1 | 1.266788 | -0.34118 | -1.03011 | 0.333099 | 0.864002 | DOWN | 261.8042 | 261.8029 | 261.8066 | 9.38065  | 9.132267 |
| 5304 | M404T10_ | 1.272487 | -0.34765 | -1.06432 | 0.33311  | 0.864002 | DOWN | 404.3737 | 404.3735 | 404.3737 | 9.97155  | 9.8753   |
| 5305 | M224T11_ | 1.098964 | -0.13614 | -1.05176 | 0.333143 | 0.864002 | DOWN | 223.9404 | 223.9403 | 223.941  | 10.91982 | 10.879   |
| 5306 | M313T12  | 1.172664 | -0.22979 | -1.04086 | 0.333154 | 0.864002 | DOWN | 313.2201 | 313.22   | 313.2202 | 12.25186 | 12.23755 |
| 5307 | M472T31  | 1.517839 | 0.602019 | 1.032727 | 0.333175 | 0.864002 | UP   | 472.3402 | 472.3397 | 472.3423 | 31.104   | 31.06033 |
| 5308 | M500T9_8 | 1.432704 | 0.518741 | 1.037699 | 0.333208 | 0.864002 | UP   | 499.9389 | 499.9386 | 499.9442 | 9.41815  | 9.36515  |
| 5309 | M380T11_ | 4.161577 | 2.05713  | 1.096145 | 0.333243 | 0.864002 | UP   | 380.1998 | 380.1964 | 380.2004 | 10.86008 | 10.71928 |
| 5310 | M727T11_ | 1.424678 | -0.51064 | -1.07276 | 0.333252 | 0.864002 | DOWN | 727.4332 | 727.4328 | 727.434  | 11.22183 | 11.19848 |
| 5311 | M316T24_ | 1.378177 | -0.46276 | -1.03042 | 0.333348 | 0.864002 | DOWN | 315.8312 | 315.8311 | 315.8314 | 24.11883 | 24.096   |
| 5312 | M333T19_ | 13.46121 | 3.750736 | 1.098904 | 0.333502 | 0.864002 | UP   | 333.342  | 333.3417 | 333.3427 | 19.15483 | 19.09517 |
| 5313 | M347T10_ | 1.725856 | 0.787312 | 1.094731 | 0.333643 | 0.864002 | UP   | 347.278  | 347.2779 | 347.2781 | 9.839008 | 9.715683 |
| 5314 | M361T9_4 | 1.173425 | -0.23073 | -1.02976 | 0.333651 | 0.864002 | DOWN | 361.1509 | 361.1507 | 361.1512 | 9.29345  | 9.219483 |
| 5315 | M512T29  | 1.479726 | 0.56533  | 1.049198 | 0.333757 | 0.864003 | UP   | 512.3349 | 512.3337 | 512.3357 | 28.5475  | 28.52567 |
| 5316 | M287T23_ | 1.192732 | 0.25427  | 1.039062 | 0.333827 | 0.864003 | UP   | 286.8738 | 286.8737 | 286.874  | 22.90042 | 22.886   |
| 5317 | M358T9_5 | 10.97738 | 3.456461 | 1.096966 | 0.333945 | 0.864003 | UP   | 358.27   | 358.2698 | 358.2707 | 8.8316   | 8.6529   |
| 5318 | M225T10_ | 1.214788 | -0.2807  | -1.05144 | 0.334073 | 0.864003 | DOWN | 225.3495 | 225.3493 | 225.3497 | 9.924308 | 9.811217 |
| 5319 | M391T11_ | 1.250247 | -0.32221 | -1.06945 | 0.334083 | 0.864003 | DOWN | 390.8196 | 390.8193 | 390.8197 | 11.35088 | 11.32643 |



|      |          |          |          |          |          |          |      |          |          |          |          |          |
|------|----------|----------|----------|----------|----------|----------|------|----------|----------|----------|----------|----------|
| 5320 | M296T18  | 1781.405 | 10.7988  | 1.097348 | 0.334112 | 0.864003 | UP   | 296.2582 | 296.258  | 296.2583 | 18.37358 | 18.256   |
| 5321 | M171T19  | 1.407269 | 0.492899 | 1.028135 | 0.334153 | 0.864003 | UP   | 171.1377 | 171.1376 | 171.1378 | 18.98108 | 18.9655  |
| 5322 | M639T10_ | 1.579764 | 0.659709 | 1.052371 | 0.334175 | 0.864003 | UP   | 638.662  | 638.6614 | 638.665  | 9.818442 | 9.715683 |
| 5323 | M455T9_1 | 1.239525 | -0.30979 | -1.02836 | 0.334202 | 0.864003 | DOWN | 455.4172 | 455.417  | 455.418  | 9.275917 | 9.129317 |
| 5324 | M307T9_7 | 1.324437 | -0.40538 | -1.04966 | 0.334221 | 0.864003 | DOWN | 307.4544 | 307.4542 | 307.4545 | 9.3332   | 9.234417 |
| 5325 | M843T10_ | 1.357963 | -0.44144 | -1.05107 | 0.334427 | 0.864003 | DOWN | 842.8132 | 842.8124 | 842.8135 | 9.9014   | 9.779267 |
| 5326 | M450T43_ | 1.26063  | 0.334145 | 1.033228 | 0.334447 | 0.864003 | UP   | 450.2331 | 450.233  | 450.2332 | 42.726   | 42.36617 |
| 5327 | M363T9_1 | 1.219044 | -0.28575 | -1.07954 | 0.334622 | 0.864003 | DOWN | 363.4278 | 363.4276 | 363.428  | 9.289925 | 9.219483 |
| 5328 | M408T10_ | 13.00974 | 3.70152  | 1.095526 | 0.334754 | 0.864003 | UP   | 408.2466 | 408.2466 | 408.2472 | 9.531583 | 9.1932   |
| 5329 | M1940T9  | 1.559605 | -0.64118 | -1.02637 | 0.334815 | 0.864003 | DOWN | 1940.485 | 1940.482 | 1940.487 | 9.29345  | 9.191133 |
| 5330 | M168T9_4 | 1.358676 | -0.4422  | -1.04867 | 0.334837 | 0.864003 | DOWN | 168.3287 | 168.3285 | 168.3294 | 9.144117 | 9.129317 |
| 5331 | M712T9_7 | 1.595288 | -0.67382 | -1.0304  | 0.334851 | 0.864003 | DOWN | 712.3631 | 712.3622 | 712.3636 | 8.676792 | 8.601067 |
| 5332 | M682T10_ | 1.187724 | -0.2482  | -1.08289 | 0.334882 | 0.864003 | DOWN | 682.3419 | 682.3414 | 682.3431 | 9.857833 | 9.747533 |
| 5333 | M377T10_ | 1.250649 | -0.32268 | -1.02967 | 0.334887 | 0.864003 | DOWN | 376.9333 | 376.933  | 376.9344 | 9.894875 | 9.79535  |
| 5334 | M1340T10 | 2.497456 | 1.320459 | 1.091194 | 0.334987 | 0.864003 | UP   | 1339.975 | 1339.971 | 1339.977 | 9.945208 | 9.859233 |
| 5335 | M411T9_1 | 1.460878 | 0.546836 | 1.054996 | 0.334993 | 0.864003 | UP   | 411.4763 | 411.4753 | 411.4792 | 9.329083 | 9.191133 |
| 5336 | M302T27  | 3.057653 | 1.612425 | 1.093773 | 0.335086 | 0.864004 | UP   | 302.3049 | 302.3047 | 302.3051 | 26.622   | 26.593   |
| 5337 | M995T26  | 1.292503 | -0.37017 | -1.03915 | 0.335222 | 0.864004 | DOWN | 994.689  | 994.6871 | 994.6898 | 26.3335  | 26.3045  |
| 5338 | M622T43_ | 1.342798 | -0.42524 | -1.08078 | 0.335237 | 0.864004 | DOWN | 622.3433 | 622.3432 | 622.3438 | 42.841   | 42.654   |
| 5339 | M200T9_2 | 1.463818 | -0.54974 | -1.02859 | 0.335298 | 0.864004 | DOWN | 199.527  | 199.5259 | 199.5279 | 9.232333 | 9.11795  |
| 5340 | M596T11_ | 1.211538 | -0.27684 | -1.02586 | 0.335322 | 0.864004 | DOWN | 596.4109 | 596.4106 | 596.4115 | 11.48757 | 11.46837 |
| 5341 | M294T10_ | 1.508076 | 0.59271  | 1.028475 | 0.335332 | 0.864004 | UP   | 293.7581 | 293.758  | 293.7581 | 9.9677   | 9.8914   |
| 5342 | M464T10_ | 1.401572 | 0.487046 | 1.080706 | 0.335336 | 0.864004 | UP   | 463.9778 | 463.9773 | 463.9785 | 9.79575  | 9.681183 |
| 5343 | M687T10_ | 10.16419 | 3.345423 | 1.09379  | 0.335421 | 0.864004 | UP   | 687.0106 | 687.0103 | 687.013  | 9.8914   | 9.856867 |
| 5344 | M591T27  | 1.516484 | 0.600731 | 1.066724 | 0.335462 | 0.864004 | UP   | 591.3499 | 591.3494 | 591.3502 | 27.05667 | 26.999   |
| 5345 | M557T9_3 | 2.171949 | 1.11899  | 1.076467 | 0.335476 | 0.864004 | UP   | 557.0215 | 557.0165 | 557.0222 | 9.28075  | 9.160617 |
| 5346 | M1009T28 | 1.469538 | -0.55536 | -1.02834 | 0.335534 | 0.864004 | DOWN | 1008.774 | 1008.773 | 1008.774 | 28.37317 | 28.34867 |
| 5347 | M629T10_ | 1.177895 | -0.23621 | -1.02854 | 0.335551 | 0.864004 | DOWN | 628.5315 | 628.5305 | 628.5318 | 9.985733 | 9.8914   |
| 5348 | M687T23  | 1.212094 | -0.2775  | -1.04583 | 0.335565 | 0.864004 | DOWN | 686.5047 | 686.5044 | 686.505  | 22.53975 | 22.52533 |
| 5349 | M841T10_ | 1.846863 | 0.885077 | 1.06772  | 0.335583 | 0.864004 | UP   | 841.3317 | 841.3293 | 841.3326 | 9.9351   | 9.843367 |
| 5350 | M225T10_ | 1.20048  | -0.26361 | -1.05218 | 0.335623 | 0.864004 | DOWN | 224.8112 | 224.8111 | 224.8113 | 9.918792 | 9.811217 |
| 5351 | M225T40  | 1.154022 | -0.20667 | -1.05673 | 0.335688 | 0.864004 | DOWN | 225.1482 | 225.1481 | 225.1484 | 40.28125 | 40.03583 |
| 5352 | M532T45  | 1.387835 | 0.472837 | 1.035158 | 0.335693 | 0.864004 | UP   | 532.3114 | 532.3113 | 532.3115 | 44.64592 | 44.5235  |
| 5353 | M379T10_ | 2.004624 | 1.003332 | 1.024158 | 0.33573  | 0.864004 | UP   | 378.9913 | 378.9853 | 378.9917 | 9.902617 | 9.79535  |
| 5354 | M204T10_ | 1.208127 | -0.27277 | -1.06667 | 0.335744 | 0.864004 | DOWN | 203.7895 | 203.7894 | 203.7896 | 9.872908 | 9.747533 |

|      |           |          |          |          |          |          |      |          |          |          |          |          |
|------|-----------|----------|----------|----------|----------|----------|------|----------|----------|----------|----------|----------|
| 5355 | M562T39_  | 1.130856 | 0.177415 | 1.02418  | 0.335764 | 0.864004 | UP   | 562.3221 | 562.322  | 562.3222 | 39.20833 | 39.10067 |
| 5356 | M639T11   | 1.280567 | -0.35678 | -1.02532 | 0.335808 | 0.864004 | DOWN | 639.2602 | 639.2598 | 639.2703 | 10.892   | 10.873   |
| 5357 | M201T10_  | 1.290744 | -0.3682  | -1.04779 | 0.335868 | 0.864004 | DOWN | 201.1135 | 201.1134 | 201.1137 | 9.82645  | 9.715683 |
| 5358 | M744T10_  | 1.166295 | 0.221932 | 1.033624 | 0.335874 | 0.864004 | UP   | 744.4073 | 744.4063 | 744.408  | 10.11613 | 10.02755 |
| 5359 | M221T10_  | 1.110634 | -0.15138 | -1.02461 | 0.335914 | 0.864004 | DOWN | 221.0524 | 221.0522 | 221.0527 | 9.930908 | 9.827283 |
| 5360 | M618T9_4  | 1.273777 | -0.34911 | -1.02688 | 0.335967 | 0.864004 | DOWN | 618.2546 | 618.2441 | 618.2557 | 9.216183 | 9.12675  |
| 5361 | M227T10_  | 1.070007 | -0.09762 | -1.08347 | 0.335974 | 0.864004 | DOWN | 227.1754 | 227.1753 | 227.1754 | 9.910342 | 9.827283 |
| 5362 | M409T12_  | 1.128547 | -0.17447 | -1.03282 | 0.335981 | 0.864004 | DOWN | 409.3058 | 409.3057 | 409.306  | 11.98198 | 11.97343 |
| 5363 | M332T9_9  | 1.400629 | -0.48607 | -1.04183 | 0.336058 | 0.864004 | DOWN | 332.2418 | 332.2416 | 332.2421 | 9.435733 | 9.34115  |
| 5364 | M333T10_  | 1.165689 | -0.22118 | -1.05064 | 0.336092 | 0.864004 | DOWN | 333.0613 | 333.061  | 333.0616 | 9.836042 | 9.715683 |
| 5365 | M355T10_  | 2.725012 | 1.446262 | 1.088456 | 0.336106 | 0.864004 | UP   | 355.255  | 355.2543 | 355.2553 | 9.77435  | 9.699733 |
| 5366 | M225T10_  | 1.238243 | -0.30829 | -1.04357 | 0.336121 | 0.864004 | DOWN | 225.1929 | 225.1842 | 225.193  | 9.930908 | 9.827283 |
| 5367 | M430T41   | 1.187337 | 0.24773  | 1.023228 | 0.336143 | 0.864004 | UP   | 430.2433 | 430.2433 | 430.2433 | 41.29433 | 41.1145  |
| 5368 | M586T11_  | 1.253534 | -0.326   | -1.02786 | 0.336214 | 0.864004 | DOWN | 586.0315 | 586.0298 | 586.032  | 10.76215 | 10.74033 |
| 5369 | M657T10_  | 1.240374 | -0.31078 | -1.02298 | 0.336257 | 0.864004 | DOWN | 657.2824 | 657.2813 | 657.284  | 9.958442 | 9.843367 |
| 5370 | M286T20   | 1.39035  | 0.475448 | 1.029478 | 0.336265 | 0.864004 | UP   | 286.2373 | 286.2371 | 286.238  | 19.75225 | 19.7365  |
| 5371 | M849T16_  | 3.752129 | -1.90771 | -1.08804 | 0.336387 | 0.864004 | DOWN | 848.8508 | 848.8502 | 848.8517 | 16.13048 | 16.12535 |
| 5372 | M417T41_  | 1.3084   | -0.3878  | -1.02274 | 0.33639  | 0.864004 | DOWN | 417.2479 | 417.2477 | 417.248  | 41.28717 | 41.1725  |
| 5373 | M1856T10_ | 1.229849 | -0.29848 | -1.02479 | 0.336506 | 0.864005 | DOWN | 1855.793 | 1855.792 | 1855.795 | 9.8374   | 9.728083 |
| 5374 | M678T10_  | 1.169808 | -0.22627 | -1.03803 | 0.336661 | 0.864005 | DOWN | 678.0989 | 678.0984 | 678.0997 | 9.850858 | 9.73145  |
| 5375 | M224T13   | 5.385238 | 2.42901  | 1.090212 | 0.336704 | 0.864005 | UP   | 224.1643 | 224.164  | 224.1647 | 13.36113 | 13.20028 |
| 5376 | M565T17   | 1.21229  | -0.27774 | -1.05152 | 0.336933 | 0.864005 | DOWN | 565.3743 | 565.374  | 565.3745 | 17.43858 | 17.41033 |
| 5377 | M405T10_  | 2.40853  | 1.268153 | 1.078737 | 0.33694  | 0.864005 | UP   | 405.2457 | 405.2454 | 405.246  | 9.9014   | 9.79535  |
| 5378 | M534T41_  | 1.120021 | -0.16353 | -1.08736 | 0.336942 | 0.864005 | DOWN | 534.3268 | 534.3267 | 534.3271 | 41.158   | 41.05717 |
| 5379 | M1573T10_ | 1.367841 | -0.4519  | -1.02958 | 0.336959 | 0.864005 | DOWN | 1572.59  | 1572.581 | 1572.595 | 9.920517 | 9.859233 |
| 5380 | M474T42_  | 1.306214 | -0.38539 | -1.02686 | 0.336981 | 0.864005 | DOWN | 474.2694 | 474.2692 | 474.2697 | 41.5175  | 41.273   |
| 5381 | M562T10_  | 1.445277 | -0.53135 | -1.02132 | 0.337138 | 0.864005 | DOWN | 562.2007 | 562.2004 | 562.2009 | 9.95825  | 9.946367 |
| 5382 | M892T25   | 1.257823 | -0.33093 | -1.0255  | 0.33718  | 0.864005 | DOWN | 891.6443 | 891.6441 | 891.6453 | 25.39    | 25.34717 |
| 5383 | M764T10_  | 1.123692 | -0.16825 | -1.0296  | 0.3372   | 0.864005 | DOWN | 764.0703 | 764.0691 | 764.0751 | 9.915933 | 9.79535  |
| 5384 | M804T25   | 1.17693  | -0.23503 | -1.0208  | 0.337256 | 0.864005 | DOWN | 803.5922 | 803.5915 | 803.5926 | 25.35325 | 25.34633 |
| 5385 | M416T9_2  | 1.630115 | -0.70497 | -1.07587 | 0.337295 | 0.864005 | DOWN | 415.775  | 415.7688 | 415.7755 | 9.025033 | 8.980067 |
| 5386 | M452T10_  | 1.808667 | 0.854927 | 1.038222 | 0.337306 | 0.864005 | UP   | 451.5474 | 451.5342 | 451.5479 | 9.537775 | 9.365833 |
| 5387 | M413T11_  | 1.136043 | -0.18402 | -1.02423 | 0.337328 | 0.864005 | DOWN | 413.3565 | 413.3564 | 413.358  | 10.89875 | 10.879   |
| 5388 | M197T10_  | 1.090555 | -0.12506 | -1.04252 | 0.337465 | 0.864005 | DOWN | 197.3461 | 197.3459 | 197.3462 | 9.924308 | 9.811217 |
| 5389 | M150T25   | 162.2829 | -7.34237 | -1.08875 | 0.337468 | 0.864005 | DOWN | 150.0627 | 150.0625 | 150.0628 | 25.11508 | 25.0985  |

|      |          |          |          |          |          |          |      |          |          |          |          |          |
|------|----------|----------|----------|----------|----------|----------|------|----------|----------|----------|----------|----------|
| 5390 | M779T10_ | 3.691816 | 1.884331 | 1.086793 | 0.337559 | 0.864005 | UP   | 778.9549 | 778.9545 | 778.9604 | 9.970617 | 9.840617 |
| 5391 | M388T10_ | 1.198766 | -0.26155 | -1.02316 | 0.337627 | 0.864005 | DOWN | 387.6799 | 387.6796 | 387.6803 | 9.902008 | 9.79535  |
| 5392 | M365T9_1 | 1.998924 | -0.99922 | -1.05426 | 0.337712 | 0.864005 | DOWN | 365.4127 | 365.4116 | 365.4248 | 8.8935   | 8.772383 |
| 5393 | M558T23  | 1.186607 | -0.24684 | -1.01996 | 0.33773  | 0.864005 | DOWN | 558.3844 | 558.3837 | 558.3848 | 22.58492 | 22.569   |
| 5394 | M493T9_2 | 1.273943 | -0.3493  | -1.03731 | 0.337849 | 0.864005 | DOWN | 493.2135 | 493.213  | 493.2142 | 9.320067 | 9.129317 |
| 5395 | M315T25_ | 23.7373  | -4.56908 | -1.08774 | 0.337862 | 0.864005 | DOWN | 315.0616 | 315.0615 | 315.0617 | 25.24433 | 25.14333 |
| 5396 | M451T9_7 | 5.222409 | 2.384715 | 1.087363 | 0.337896 | 0.864006 | UP   | 451.2522 | 451.2512 | 451.2555 | 9.160158 | 8.841533 |
| 5397 | M329T30  | 1.994637 | 0.996127 | 1.076021 | 0.337901 | 0.864006 | UP   | 329.2085 | 329.2081 | 329.209  | 29.90667 | 29.89117 |
| 5398 | M359T10_ | 1.22194  | -0.28917 | -1.03026 | 0.337921 | 0.864006 | DOWN | 358.7006 | 358.7004 | 358.7008 | 9.962617 | 9.859233 |
| 5399 | M378T10_ | 1.111197 | -0.15211 | -1.02237 | 0.337944 | 0.864006 | DOWN | 378.1966 | 378.1962 | 378.1975 | 9.924308 | 9.811217 |
| 5400 | M306T25_ | 1.162501 | -0.21723 | -1.02532 | 0.337974 | 0.864006 | DOWN | 305.52   | 305.5198 | 305.5203 | 24.6945  | 24.68133 |
| 5401 | M272T10_ | 1.113942 | 0.155674 | 1.035324 | 0.338008 | 0.864006 | UP   | 271.7198 | 271.7196 | 271.7202 | 9.851025 | 9.73145  |
| 5402 | M625T11_ | 1.204557 | -0.2685  | -1.02386 | 0.338025 | 0.864006 | DOWN | 624.8972 | 624.8966 | 624.8975 | 10.84658 | 10.8214  |
| 5403 | M1871T10 | 1.107639 | -0.14749 | -1.02032 | 0.338059 | 0.864006 | DOWN | 1871.097 | 1871.096 | 1871.099 | 9.830083 | 9.715683 |
| 5404 | M284T9_8 | 1.6198   | -0.69582 | -1.02618 | 0.338102 | 0.864006 | DOWN | 284.2752 | 284.2746 | 284.2756 | 9.2796   | 9.234417 |
| 5405 | M580T9_6 | 1.596187 | -0.67463 | -1.025   | 0.338115 | 0.864006 | DOWN | 580.2293 | 580.2292 | 580.2294 | 8.911217 | 8.803967 |
| 5406 | M509T10_ | 1.555189 | 0.63709  | 1.031093 | 0.338139 | 0.864006 | UP   | 508.9928 | 508.9925 | 508.9946 | 9.919675 | 9.811217 |
| 5407 | M401T23  | 3.573713 | 1.837424 | 1.054501 | 0.338156 | 0.864006 | UP   | 401.3373 | 401.3366 | 401.3376 | 22.59733 | 22.56983 |
| 5408 | M467T10_ | 1.3221   | -0.40283 | -1.03497 | 0.338191 | 0.864006 | DOWN | 467.0881 | 467.0747 | 467.0883 | 9.8207   | 9.699733 |
| 5409 | M190T10_ | 1.220389 | -0.28734 | -1.03793 | 0.338232 | 0.864006 | DOWN | 189.7444 | 189.7443 | 189.7445 | 9.933    | 9.827283 |
| 5410 | M296T9_2 | 1.745776 | -0.80387 | -1.01885 | 0.338233 | 0.864006 | DOWN | 295.5636 | 295.5632 | 295.5637 | 9.263367 | 9.234417 |
| 5411 | M745T10_ | 1.536566 | 0.61971  | 1.030905 | 0.338287 | 0.864006 | UP   | 745.2645 | 745.2621 | 745.2664 | 9.830658 | 9.699733 |
| 5412 | M322T29_ | 1.472458 | -0.55823 | -1.02809 | 0.338345 | 0.864006 | DOWN | 321.9189 | 321.9185 | 321.9194 | 28.62542 | 28.546   |
| 5413 | M317T10_ | 1.205778 | 0.269965 | 1.026071 | 0.338352 | 0.864006 | UP   | 316.6518 | 316.6516 | 316.6519 | 9.811408 | 9.715683 |
| 5414 | M439T9_1 | 1.193579 | -0.25529 | -1.01879 | 0.338425 | 0.864006 | DOWN | 438.5028 | 438.5021 | 438.5037 | 9.25395  | 9.129317 |
| 5415 | M560T10_ | 1.648905 | 0.721508 | 1.06175  | 0.338427 | 0.864006 | UP   | 560.2529 | 560.2523 | 560.2541 | 9.933967 | 9.811217 |
| 5416 | M183T10_ | 1.261741 | -0.33542 | -1.02642 | 0.338585 | 0.864006 | DOWN | 183.0339 | 183.0338 | 183.034  | 9.979667 | 9.8914   |
| 5417 | M1089T10 | 1.146975 | -0.19783 | -1.03368 | 0.338629 | 0.864006 | DOWN | 1088.702 | 1088.701 | 1088.703 | 9.82645  | 9.699733 |
| 5418 | M474T41_ | 1.300554 | 0.379127 | 1.056814 | 0.338691 | 0.864006 | UP   | 474.2693 | 474.2691 | 474.2697 | 41.0715  | 40.942   |
| 5419 | M396T9_7 | 1.884055 | 0.913841 | 1.078375 | 0.338708 | 0.864006 | UP   | 395.976  | 395.9757 | 395.9763 | 9.048942 | 9.023483 |
| 5420 | M534T42_ | 1.770182 | -0.8239  | -1.08516 | 0.338742 | 0.864006 | DOWN | 534.3269 | 534.3268 | 534.327  | 42.165   | 42.0055  |
| 5421 | M837T11_ | 1.200917 | -0.26414 | -1.03023 | 0.33883  | 0.864006 | DOWN | 836.9953 | 836.9948 | 836.9959 | 10.65408 | 10.61512 |
| 5422 | M328T10_ | 1.263262 | -0.33715 | -1.03755 | 0.33902  | 0.864006 | DOWN | 328.3292 | 328.3289 | 328.3294 | 9.988125 | 9.869467 |
| 5423 | M398T11_ | 1.246082 | -0.3174  | -1.04006 | 0.339039 | 0.864006 | DOWN | 398.2797 | 398.2796 | 398.2799 | 10.9049  | 10.879   |
| 5424 | M182T9_1 | 1.484216 | 0.569701 | 1.034793 | 0.339039 | 0.864006 | UP   | 182.4568 | 182.4565 | 182.4572 | 9.1602   | 9.09495  |

|      |          |          |          |          |          |          |      |          |          |          |          |          |
|------|----------|----------|----------|----------|----------|----------|------|----------|----------|----------|----------|----------|
| 5425 | M439T10_ | 1.223762 | 0.291323 | 1.025408 | 0.339275 | 0.864006 | UP   | 439.1889 | 439.1887 | 439.1893 | 9.994767 | 9.8753   |
| 5426 | M466T11_ | 1.178111 | -0.23648 | -1.01757 | 0.339329 | 0.864007 | DOWN | 466.273  | 466.272  | 466.2761 | 10.94208 | 10.8646  |
| 5427 | M489T11_ | 1.244574 | 0.315651 | 1.026914 | 0.339361 | 0.864007 | UP   | 488.5761 | 488.5757 | 488.5768 | 10.89133 | 10.8646  |
| 5428 | M925T30  | 1.324934 | -0.40592 | -1.02998 | 0.3394   | 0.864007 | DOWN | 924.647  | 924.6461 | 924.6479 | 30.15217 | 30.136   |
| 5429 | M432T11_ | 1.263809 | 0.337778 | 1.02177  | 0.339418 | 0.864007 | UP   | 432.1349 | 432.1332 | 432.1352 | 10.94208 | 10.88995 |
| 5430 | M296T10_ | 5.646309 | 2.497308 | 1.082777 | 0.339421 | 0.864007 | UP   | 296.1466 | 296.1465 | 296.147  | 9.638433 | 9.510117 |
| 5431 | M235T10_ | 5.230774 | 2.387024 | 1.08198  | 0.339503 | 0.864007 | UP   | 234.5976 | 234.5973 | 234.6072 | 9.960817 | 9.843367 |
| 5432 | M456T11_ | 1.212592 | -0.27809 | -1.03231 | 0.339519 | 0.864007 | DOWN | 455.7528 | 455.7523 | 455.7533 | 10.892   | 10.879   |
| 5433 | M286T10_ | 1.573883 | 0.654328 | 1.034622 | 0.339825 | 0.864007 | UP   | 285.6305 | 285.6304 | 285.6308 | 9.959475 | 9.827283 |
| 5434 | M201T16  | 1.241285 | -0.31183 | -1.03531 | 0.33983  | 0.864007 | DOWN | 201.1846 | 201.1844 | 201.1848 | 16.04397 | 15.99403 |
| 5435 | M622T10_ | 1.525309 | 0.609102 | 1.056705 | 0.339919 | 0.864007 | UP   | 622.0872 | 622.0864 | 622.0916 | 9.8374   | 9.73145  |
| 5436 | M416T44_ | 1.527593 | 0.61126  | 1.081937 | 0.339929 | 0.864007 | UP   | 416.264  | 416.2638 | 416.2641 | 44.43017 | 44.2935  |
| 5437 | M500T10_ | 1.24465  | -0.31574 | -1.02271 | 0.340074 | 0.864007 | DOWN | 499.6296 | 499.629  | 499.6299 | 10.43382 | 10.35992 |
| 5438 | M686T10_ | 1.136383 | -0.18445 | -1.06158 | 0.340108 | 0.864007 | DOWN | 685.5555 | 685.5547 | 685.5572 | 9.83535  | 9.715683 |
| 5439 | M356T35  | 1.10019  | -0.13775 | -1.021   | 0.340162 | 0.864007 | DOWN | 356.3157 | 356.3156 | 356.3159 | 35.40175 | 35.38683 |
| 5440 | M1935T10 | 1.678916 | 0.74753  | 1.073356 | 0.340223 | 0.864007 | UP   | 1935.024 | 1935.023 | 1935.026 | 9.864467 | 9.747533 |
| 5441 | M606T9   | 1.407577 | -0.49321 | -1.01591 | 0.34023  | 0.864007 | DOWN | 605.5853 | 605.5843 | 605.5855 | 9.3219   | 9.26575  |
| 5442 | M341T10_ | 1.580975 | 0.660815 | 1.076499 | 0.340239 | 0.864007 | UP   | 341.4426 | 341.44   | 341.4428 | 9.960817 | 9.758367 |
| 5443 | M405T9_3 | 2.878506 | -1.52532 | -1.0741  | 0.340258 | 0.864007 | DOWN | 404.9645 | 404.9589 | 404.9648 | 9.3558   | 9.166033 |
| 5444 | M213T10_ | 1.230215 | -0.29891 | -1.01631 | 0.340285 | 0.864007 | DOWN | 212.7326 | 212.7256 | 212.7328 | 9.93625  | 9.827283 |
| 5445 | M460T43_ | 1.089429 | -0.12357 | -1.06721 | 0.34033  | 0.864007 | DOWN | 460.29   | 460.29   | 460.2901 | 42.79783 | 42.59633 |
| 5446 | M412T9_1 | 1.299395 | -0.37784 | -1.02494 | 0.340349 | 0.864007 | DOWN | 412.2843 | 412.2834 | 412.2885 | 9.328967 | 9.166033 |
| 5447 | M270T10_ | 1.226805 | -0.29491 | -1.04244 | 0.34045  | 0.864007 | DOWN | 270.1091 | 270.1089 | 270.1097 | 9.823575 | 9.699733 |
| 5448 | M830T10_ | 1.131711 | -0.17851 | -1.01312 | 0.340705 | 0.864007 | DOWN | 830.4439 | 830.4428 | 830.4448 | 9.617417 | 9.49445  |
| 5449 | M592T10_ | 1.118412 | -0.16145 | -1.03458 | 0.340748 | 0.864008 | DOWN | 591.6546 | 591.6544 | 591.6555 | 9.924308 | 9.827283 |
| 5450 | M1973T10 | 1.245532 | 0.316762 | 1.014157 | 0.34077  | 0.864008 | UP   | 1972.934 | 1972.931 | 1972.938 | 9.848417 | 9.715683 |
| 5451 | M527T9_2 | 1.848161 | -0.88609 | -1.06453 | 0.340802 | 0.864008 | DOWN | 526.5538 | 526.5531 | 526.5549 | 9.27345  | 9.0637   |
| 5452 | M341T10_ | 1.173206 | -0.23046 | -1.04583 | 0.340849 | 0.864008 | DOWN | 341.1166 | 341.1163 | 341.117  | 9.8397   | 9.715683 |
| 5453 | M665T10_ | 2.210114 | 1.144121 | 1.077383 | 0.340948 | 0.864008 | UP   | 664.7784 | 664.7781 | 664.7788 | 9.830458 | 9.715683 |
| 5454 | M689T9   | 1.203741 | -0.26753 | -1.0135  | 0.34095  | 0.864008 | DOWN | 689.3991 | 689.3987 | 689.3996 | 9.498117 | 9.38595  |
| 5455 | M204T10_ | 1.208882 | -0.27367 | -1.05462 | 0.340987 | 0.864008 | DOWN | 203.5576 | 203.5575 | 203.5577 | 9.872908 | 9.747533 |
| 5456 | M714T10_ | 1.192431 | -0.25391 | -1.04758 | 0.341004 | 0.864008 | DOWN | 713.6482 | 713.647  | 713.6487 | 9.970617 | 9.859233 |
| 5457 | M455T10_ | 1.122822 | -0.16713 | -1.02541 | 0.341006 | 0.864008 | DOWN | 455.3311 | 455.3308 | 455.3313 | 10.44611 | 10.40807 |
| 5458 | M315T15_ | 2.039108 | -1.02794 | -1.05504 | 0.341035 | 0.864008 | DOWN | 315.2639 | 315.2632 | 315.2643 | 14.82415 | 14.795   |
| 5459 | M250T7_1 | 1.284823 | 0.361569 | 1.012781 | 0.341057 | 0.864008 | UP   | 250.072  | 250.0719 | 250.0723 | 7.011717 | 6.925867 |

|      |          |          |          |          |          |          |      |          |          |          |          |          |
|------|----------|----------|----------|----------|----------|----------|------|----------|----------|----------|----------|----------|
| 5460 | M268T24  | 104.2971 | 6.704555 | 1.079607 | 0.341068 | 0.864008 | UP   | 268.2268 | 268.2266 | 268.227  | 24.0895  | 24.08283 |
| 5461 | M172T9_6 | 2.912735 | 1.542375 | 1.073196 | 0.341103 | 0.864008 | UP   | 172.291  | 172.2907 | 172.2979 | 9.170525 | 9.146383 |
| 5462 | M457T9_9 | 1.374659 | -0.45907 | -1.01181 | 0.341283 | 0.864008 | DOWN | 457.3029 | 457.3016 | 457.3051 | 9.329083 | 9.175017 |
| 5463 | M827T10_ | 1.669513 | 0.739427 | 1.035059 | 0.341295 | 0.864008 | UP   | 827.3317 | 827.3313 | 827.3353 | 9.911767 | 9.811217 |
| 5464 | M706T10_ | 1.172388 | -0.22945 | -1.02538 | 0.341307 | 0.864008 | DOWN | 705.7114 | 705.7108 | 705.7118 | 9.825767 | 9.715683 |
| 5465 | M404T10_ | 1.127962 | -0.17372 | -1.05819 | 0.341325 | 0.864008 | DOWN | 404.3948 | 404.3947 | 404.395  | 9.868167 | 9.811217 |
| 5466 | M393T44_ | 1.335135 | -0.41699 | -1.02037 | 0.341343 | 0.864008 | DOWN | 393.2312 | 393.231  | 393.2314 | 44.26483 | 44.07783 |
| 5467 | M478T42_ | 1.318982 | -0.39942 | -1.05008 | 0.341372 | 0.864008 | DOWN | 478.2643 | 478.2641 | 478.2646 | 41.8485  | 41.66133 |
| 5468 | M679T10_ | 1.172548 | -0.22965 | -1.02269 | 0.341497 | 0.864008 | DOWN | 679.0982 | 679.0977 | 679.0994 | 9.874067 | 9.6681   |
| 5469 | M563T10_ | 1.356655 | -0.44005 | -1.02872 | 0.341511 | 0.864008 | DOWN | 563.3254 | 563.3252 | 563.3258 | 9.504583 | 9.40135  |
| 5470 | M203T21  | 1.16353  | -0.21851 | -1.01461 | 0.341534 | 0.864008 | DOWN | 203.1064 | 203.1063 | 203.1065 | 20.9545  | 20.93567 |
| 5471 | M183T43  | 1.539076 | 0.622064 | 1.011293 | 0.341635 | 0.864008 | UP   | 183.1377 | 183.1375 | 183.1377 | 43.07808 | 43.01333 |
| 5472 | M304T25_ | 1.363074 | -0.44686 | -1.01055 | 0.341818 | 0.864008 | DOWN | 303.7347 | 303.7346 | 303.735  | 24.569   | 24.54883 |
| 5473 | M343T9_3 | 2.000191 | 1.000138 | 1.064812 | 0.34187  | 0.864008 | UP   | 343.1161 | 343.1139 | 343.1166 | 9.031458 | 8.90515  |
| 5474 | M451T10_ | 1.64905  | 0.721635 | 1.054483 | 0.341915 | 0.864008 | UP   | 451.1972 | 451.1972 | 451.1994 | 9.8374   | 9.649833 |
| 5475 | M264T15  | 1.158408 | -0.21214 | -1.01569 | 0.341923 | 0.864008 | DOWN | 264.2319 | 264.2316 | 264.2319 | 15.28721 | 15.25052 |
| 5476 | M207T9_1 | 2.028601 | 1.020485 | 1.040436 | 0.341977 | 0.864008 | UP   | 207.2574 | 207.2563 | 207.2577 | 9.190708 | 9.07525  |
| 5477 | M396T10_ | 1.177216 | -0.23538 | -1.06871 | 0.342046 | 0.864008 | DOWN | 396.0206 | 396.0203 | 396.0207 | 9.960417 | 9.859233 |
| 5478 | M401T11_ | 1.746372 | 0.804361 | 1.012191 | 0.342144 | 0.864008 | UP   | 401.3914 | 401.3831 | 401.395  | 10.95643 | 10.80695 |
| 5479 | M258T25  | 1.109946 | -0.15049 | -1.01583 | 0.34218  | 0.864009 | DOWN | 258.2788 | 258.2783 | 258.279  | 24.9865  | 24.9695  |
| 5480 | M664T9_2 | 73.29438 | 6.195631 | 1.076578 | 0.342266 | 0.864009 | UP   | 664.454  | 664.4537 | 664.4549 | 9.3735   | 9.1322   |
| 5481 | M309T14_ | 1.486335 | 0.57176  | 1.06077  | 0.342302 | 0.864009 | UP   | 309.1307 | 309.1306 | 309.1309 | 14.47247 | 14.35498 |
| 5482 | M526T9_8 | 1.603168 | -0.68093 | -1.01446 | 0.342315 | 0.864009 | DOWN | 526.4257 | 526.4224 | 526.432  | 9.37735  | 9.1445   |
| 5483 | M478T41_ | 1.149417 | -0.2009  | -1.05777 | 0.342331 | 0.864009 | DOWN | 478.2643 | 478.264  | 478.2645 | 40.525   | 40.29467 |
| 5484 | M330T9_3 | 1.240883 | -0.31137 | -1.03486 | 0.342459 | 0.864009 | DOWN | 329.679  | 329.6788 | 329.6792 | 9.474408 | 9.370583 |
| 5485 | M536T10_ | 1.160001 | -0.21413 | -1.00934 | 0.342466 | 0.864009 | DOWN | 535.7969 | 535.7964 | 535.7976 | 9.931875 | 9.827283 |
| 5486 | M672T10_ | 1.177177 | 0.235332 | 1.018321 | 0.342536 | 0.864009 | UP   | 672.4365 | 672.4359 | 672.4366 | 9.857683 | 9.774967 |
| 5487 | M504T38_ | 1.145722 | -0.19626 | -1.01511 | 0.342545 | 0.864009 | DOWN | 504.2802 | 504.2797 | 504.2803 | 38.05033 | 37.9215  |
| 5488 | M228T10_ | 1.358397 | -0.44191 | -1.01013 | 0.342645 | 0.864009 | DOWN | 228.1039 | 228.1038 | 228.104  | 9.976075 | 9.8914   |
| 5489 | M1794T10 | 1.259638 | -0.33301 | -1.03617 | 0.342659 | 0.864009 | DOWN | 1794.003 | 1793.999 | 1794.007 | 9.818442 | 9.7124   |
| 5490 | M476T10_ | 1.227933 | 0.296232 | 1.018106 | 0.342817 | 0.864009 | UP   | 476.153  | 476.1527 | 476.1531 | 9.90315  | 9.62055  |
| 5491 | M736T10_ | 1.854621 | 0.891124 | 1.055049 | 0.342819 | 0.864009 | UP   | 735.8878 | 735.8872 | 735.8884 | 9.76455  | 9.681183 |
| 5492 | M226T9_4 | 1.388451 | -0.47348 | -1.01441 | 0.342833 | 0.864009 | DOWN | 226.1108 | 226.11   | 226.1119 | 9.295967 | 9.111033 |
| 5493 | M318T10_ | 1.537611 | 0.620691 | 1.069826 | 0.34288  | 0.864009 | UP   | 318.2357 | 318.2352 | 318.237  | 9.8322   | 9.7124   |
| 5494 | M864T10_ | 1.144547 | -0.19478 | -1.04823 | 0.3429   | 0.864009 | DOWN | 864.0955 | 864.0953 | 864.097  | 9.960417 | 9.859233 |

|      |          |          |          |          |          |          |      |          |          |          |          |          |
|------|----------|----------|----------|----------|----------|----------|------|----------|----------|----------|----------|----------|
| 5495 | M848T11_ | 1.193232 | -0.25487 | -1.03713 | 0.342929 | 0.864009 | DOWN | 847.6837 | 847.6833 | 847.6843 | 10.63183 | 10.59933 |
| 5496 | M656T10_ | 1.182891 | 0.242317 | 1.010648 | 0.343039 | 0.864009 | UP   | 656.4447 | 656.4439 | 656.4453 | 10.38894 | 10.35992 |
| 5497 | M1918T10 | 1.286677 | -0.36365 | -1.01627 | 0.343041 | 0.864009 | DOWN | 1918.302 | 1918.297 | 1918.303 | 9.929783 | 9.811217 |
| 5498 | M243T11_ | 1.506509 | 0.591209 | 1.035586 | 0.343102 | 0.864009 | UP   | 243.0428 | 243.0426 | 243.047  | 10.88348 | 10.84487 |
| 5499 | M529T22  | 1.293904 | -0.37173 | -1.06525 | 0.343151 | 0.864009 | DOWN | 529.2924 | 529.2924 | 529.2931 | 22.1355  | 22.10933 |
| 5500 | M564T41_ | 1.232324 | 0.301381 | 1.04621  | 0.34318  | 0.864009 | UP   | 564.3375 | 564.3371 | 564.3378 | 41.0435  | 40.899   |
| 5501 | M434T11_ | 1.340609 | -0.42289 | -1.01314 | 0.343181 | 0.864009 | DOWN | 434.4709 | 434.4679 | 434.4783 | 10.94208 | 10.8214  |
| 5502 | M620T10_ | 2.997643 | 1.583828 | 1.073905 | 0.34319  | 0.864009 | UP   | 620.2954 | 620.2945 | 620.3    | 9.8371   | 9.728083 |
| 5503 | M256T10_ | 1.338614 | 0.420741 | 1.036241 | 0.343245 | 0.864009 | UP   | 255.7697 | 255.7626 | 255.77   | 9.769908 | 9.746783 |
| 5504 | M352T22  | 1.619467 | 0.695519 | 1.038838 | 0.343366 | 0.864009 | UP   | 352.2243 | 352.2237 | 352.2247 | 22.48425 | 22.46717 |
| 5505 | M617T10_ | 1.576942 | 0.657129 | 1.055311 | 0.343419 | 0.864009 | UP   | 616.6534 | 616.653  | 616.6541 | 9.923542 | 9.811217 |
| 5506 | M330T11_ | 1.215633 | -0.28171 | -1.04437 | 0.343455 | 0.864009 | DOWN | 330.2232 | 330.2229 | 330.2234 | 10.90553 | 10.879   |
| 5507 | M362T10_ | 1.335539 | 0.417422 | 1.062351 | 0.34349  | 0.864009 | UP   | 361.9286 | 361.9284 | 361.9294 | 9.8207   | 9.715683 |
| 5508 | M349T9_9 | 6.37663  | 2.672794 | 1.073099 | 0.343525 | 0.864009 | UP   | 348.8423 | 348.8419 | 348.8425 | 9.3494   | 9.250817 |
| 5509 | M456T9_1 | 1.198986 | -0.26182 | -1.00739 | 0.343544 | 0.864009 | DOWN | 455.5901 | 455.5899 | 455.5906 | 9.311525 | 9.129317 |
| 5510 | M396T10_ | 1.469904 | 0.555722 | 1.027867 | 0.343574 | 0.864009 | UP   | 395.716  | 395.7159 | 395.7163 | 9.956417 | 9.843367 |
| 5511 | M157T10_ | 1.478904 | -0.56453 | -1.00913 | 0.343597 | 0.864009 | DOWN | 157.105  | 157.0999 | 157.1055 | 9.949233 | 9.822117 |
| 5512 | M198T10_ | 1.298585 | -0.37694 | -1.02465 | 0.343689 | 0.86401  | DOWN | 197.9516 | 197.9514 | 197.9516 | 9.830558 | 9.728083 |
| 5513 | M1760T10 | 1.323032 | -0.40385 | -1.01748 | 0.343719 | 0.86401  | DOWN | 1759.937 | 1759.935 | 1759.939 | 9.82645  | 9.699733 |
| 5514 | M819T10_ | 1.197327 | -0.25982 | -1.03312 | 0.343794 | 0.86401  | DOWN | 819.2077 | 819.2069 | 819.2093 | 9.918792 | 9.811217 |
| 5515 | M447T9_5 | 1.142419 | -0.19209 | -1.01282 | 0.343857 | 0.86401  | DOWN | 447.4603 | 447.4596 | 447.4606 | 9.241267 | 9.206    |
| 5516 | M397T10_ | 1.105753 | -0.14503 | -1.00727 | 0.343893 | 0.86401  | DOWN | 396.6294 | 396.6292 | 396.6296 | 9.918792 | 9.811217 |
| 5517 | M463T11_ | 1.644294 | 0.717468 | 1.047861 | 0.343896 | 0.86401  | UP   | 463.2874 | 463.2873 | 463.2881 | 10.50278 | 10.47197 |
| 5518 | M225T10_ | 4.790538 | 2.260188 | 1.071671 | 0.343956 | 0.86401  | UP   | 224.8278 | 224.8276 | 224.828  | 9.967367 | 9.859233 |
| 5519 | M351T10_ | 3.585506 | 1.842177 | 1.068753 | 0.34396  | 0.86401  | UP   | 350.8953 | 350.8951 | 350.9006 | 9.847742 | 9.73145  |
| 5520 | M341T11_ | 1.206131 | -0.27039 | -1.00569 | 0.344067 | 0.86401  | DOWN | 340.9605 | 340.9604 | 340.9619 | 10.90481 | 10.87708 |
| 5521 | M788T24_ | 1.477445 | 0.563104 | 1.028878 | 0.344102 | 0.86401  | UP   | 788.069  | 788.0667 | 788.0709 | 24.096   | 24.08283 |
| 5522 | M216T10_ | 1.196242 | -0.25851 | -1.03401 | 0.344184 | 0.86401  | DOWN | 216.0929 | 216.0925 | 216.1002 | 9.821308 | 9.7124   |
| 5523 | M312T9_4 | 1.276922 | -0.35267 | -1.0477  | 0.344257 | 0.86401  | DOWN | 312.0147 | 312.0144 | 312.0149 | 9.498117 | 9.40135  |
| 5524 | M1998T10 | 1.2697   | -0.34449 | -1.02147 | 0.34428  | 0.86401  | DOWN | 1998.404 | 1998.402 | 1998.407 | 9.8207   | 9.7124   |
| 5525 | M209T10_ | 1.90693  | 0.931252 | 1.068045 | 0.344309 | 0.86401  | UP   | 208.8451 | 208.845  | 208.8453 | 9.8887   | 9.746783 |
| 5526 | M400T11_ | 1.159358 | -0.21333 | -1.01376 | 0.344344 | 0.86401  | DOWN | 400.1304 | 400.1302 | 400.131  | 10.89308 | 10.88747 |
| 5527 | M341T10_ | 2.484203 | 1.312783 | 1.006178 | 0.344426 | 0.86401  | UP   | 340.6313 | 340.6301 | 340.6315 | 9.856867 | 9.758367 |
| 5528 | M325T9_4 | 1.271507 | -0.34654 | -1.0361  | 0.344436 | 0.86401  | DOWN | 324.7636 | 324.7633 | 324.7638 | 9.494433 | 9.40135  |
| 5529 | M352T44_ | 1.342346 | 0.424757 | 1.069081 | 0.344445 | 0.86401  | UP   | 352.1964 | 352.1964 | 352.1967 | 43.9055  | 43.74733 |

|      |          |          |          |          |          |          |      |          |          |          |          |          |
|------|----------|----------|----------|----------|----------|----------|------|----------|----------|----------|----------|----------|
| 5530 | M660T9_5 | 1.637242 | -0.71127 | -1.00488 | 0.344446 | 0.86401  | DOWN | 660.3692 | 660.3687 | 660.37   | 9.275917 | 9.219483 |
| 5531 | M340T10_ | 1.604895 | 0.682479 | 1.008483 | 0.344465 | 0.86401  | UP   | 340.2182 | 340.2162 | 340.2252 | 9.749408 | 9.6681   |
| 5532 | M226T14  | 1.606386 | 0.683818 | 1.049255 | 0.344511 | 0.86401  | UP   | 226.18   | 226.1799 | 226.18   | 14.30447 | 14.2675  |
| 5533 | M319T14  | 1.552039 | 0.634164 | 1.00464  | 0.344549 | 0.86401  | UP   | 319.2485 | 319.2478 | 319.2487 | 13.9903  | 13.96067 |
| 5534 | M740T10_ | 2.547167 | 1.348894 | 1.069209 | 0.344566 | 0.86401  | UP   | 740.1923 | 740.1913 | 740.1928 | 9.856867 | 9.7634   |
| 5535 | M444T10_ | 1.289951 | -0.36732 | -1.02733 | 0.344736 | 0.86401  | DOWN | 444.1582 | 444.1574 | 444.1586 | 9.955025 | 9.843367 |
| 5536 | M400T10_ | 1.45753  | 0.543525 | 1.04669  | 0.344785 | 0.86401  | UP   | 399.9166 | 399.916  | 399.9171 | 9.928458 | 9.811217 |
| 5537 | M542T10_ | 1.564545 | -0.64574 | -1.01948 | 0.344859 | 0.86401  | DOWN | 541.6096 | 541.6093 | 541.6112 | 9.915933 | 9.88865  |
| 5538 | M237T9_2 | 1.282657 | -0.35914 | -1.00659 | 0.34492  | 0.86401  | DOWN | 236.7154 | 236.7132 | 236.7159 | 9.295492 | 9.132267 |
| 5539 | M607T9   | 1.475608 | -0.56131 | -1.00372 | 0.344925 | 0.86401  | DOWN | 607.3431 | 607.3407 | 607.3444 | 9.16125  | 9.12675  |
| 5540 | M781T10_ | 1.09265  | -0.12783 | -1.00369 | 0.344939 | 0.86401  | DOWN | 780.5429 | 780.5418 | 780.5452 | 9.924308 | 9.811217 |
| 5541 | M661T10_ | 1.343508 | 0.426005 | 1.003785 | 0.344958 | 0.86401  | UP   | 660.7323 | 660.7315 | 660.7327 | 9.714783 | 9.62055  |
| 5542 | M290T11_ | 1.178535 | -0.23699 | -1.0424  | 0.345002 | 0.86401  | DOWN | 289.936  | 289.9314 | 289.9361 | 10.92828 | 10.87708 |
| 5543 | M242T11_ | 1.191253 | -0.25248 | -1.02445 | 0.345057 | 0.86401  | DOWN | 241.9052 | 241.905  | 241.9053 | 10.90551 | 10.879   |
| 5544 | M432T10_ | 2.079118 | 1.055972 | 1.066886 | 0.345059 | 0.86401  | UP   | 432.3191 | 432.3151 | 432.3202 | 10.3538  | 10.23087 |
| 5545 | M351T11_ | 1.142912 | 0.192714 | 1.009476 | 0.345128 | 0.864011 | UP   | 351.4522 | 351.452  | 351.4528 | 10.90618 | 10.879   |
| 5546 | M396T23  | 1.396172 | -0.48148 | -1.0085  | 0.345324 | 0.864011 | DOWN | 395.764  | 395.7636 | 395.7641 | 22.53167 | 22.52333 |
| 5547 | M195T9_7 | 2.325201 | 1.217356 | 1.067161 | 0.345327 | 0.864011 | UP   | 194.8396 | 194.8384 | 194.8405 | 9.287867 | 9.07945  |
| 5548 | M456T9_5 | 1.719829 | -0.78227 | -1.0061  | 0.345345 | 0.864011 | DOWN | 456.143  | 456.1319 | 456.1439 | 9.2013   | 9.089733 |
| 5549 | M362T10_ | 2.933091 | 1.552422 | 1.066845 | 0.345356 | 0.864011 | UP   | 362.222  | 362.2217 | 362.2221 | 9.5682   | 9.494117 |
| 5550 | M293T9_2 | 1.496586 | -0.58168 | -1.01629 | 0.345523 | 0.864011 | DOWN | 292.9445 | 292.9442 | 292.9448 | 8.926833 | 8.90715  |
| 5551 | M1235T10 | 1.130413 | -0.17685 | -1.00891 | 0.34558  | 0.864011 | DOWN | 1234.697 | 1234.695 | 1234.697 | 9.925808 | 9.811217 |
| 5552 | M399T9_9 | 1.297941 | -0.37622 | -1.01064 | 0.345647 | 0.864011 | DOWN | 399.3283 | 399.3277 | 399.3286 | 8.985492 | 8.922033 |
| 5553 | M463T20  | 1.18851  | 0.249155 | 1.007655 | 0.345735 | 0.864011 | UP   | 463.3524 | 463.3519 | 463.3533 | 19.54542 | 19.5125  |
| 5554 | M751T30  | 1.406573 | 0.492184 | 1.009222 | 0.345737 | 0.864011 | UP   | 750.5483 | 750.5474 | 750.5488 | 30.23767 | 30.20917 |
| 5555 | M718T28  | 1.188497 | -0.24914 | -1.00602 | 0.345751 | 0.864011 | DOWN | 718.4945 | 718.4942 | 718.4953 | 28.25067 | 28.23    |
| 5556 | M338T9_1 | 1.295039 | -0.373   | -1.04366 | 0.345771 | 0.864011 | DOWN | 337.6908 | 337.6906 | 337.6912 | 9.329083 | 9.14695  |
| 5557 | M464T11_ | 1.180417 | -0.2393  | -1.031   | 0.345817 | 0.864011 | DOWN | 464.0644 | 464.0641 | 464.0655 | 10.91234 | 10.879   |
| 5558 | M315T15_ | 1.254896 | -0.32757 | -1.0132  | 0.345828 | 0.864011 | DOWN | 315.1952 | 315.195  | 315.1955 | 15.41322 | 15.38377 |
| 5559 | M666T10_ | 2.365755 | 1.242301 | 1.064032 | 0.345833 | 0.864011 | UP   | 665.6824 | 665.6819 | 665.6833 | 9.828642 | 9.7124   |
| 5560 | M388T20_ | 1.411755 | -0.49749 | -1.00533 | 0.345839 | 0.864011 | DOWN | 387.6978 | 387.6974 | 387.698  | 19.80642 | 19.76783 |
| 5561 | M354T10_ | 1.576363 | 0.6566   | 1.004981 | 0.345952 | 0.864011 | UP   | 354.4984 | 354.4979 | 354.4987 | 9.82645  | 9.699733 |
| 5562 | M297T17  | 1.629478 | -0.70441 | -1.02479 | 0.346051 | 0.864011 | DOWN | 297.1846 | 297.1839 | 297.1847 | 17.13183 | 17.10267 |
| 5563 | M157T11_ | 1.21932  | -0.28608 | -1.01957 | 0.346168 | 0.864011 | DOWN | 156.7978 | 156.7978 | 156.7979 | 10.90553 | 10.879   |
| 5564 | M326T10_ | 1.234447 | -0.30387 | -1.00079 | 0.346234 | 0.864011 | DOWN | 326.1856 | 326.1854 | 326.1858 | 10.39613 | 10.34372 |

|      |          |          |          |          |          |          |      |          |          |          |          |          |
|------|----------|----------|----------|----------|----------|----------|------|----------|----------|----------|----------|----------|
| 5565 | M193T10_ | 1.306919 | -0.38617 | -1.00991 | 0.346255 | 0.864011 | DOWN | 193.101  | 193.1008 | 193.1083 | 9.811267 | 9.6681   |
| 5566 | M660T10_ | 1.746713 | 0.804642 | 1.064603 | 0.346286 | 0.864011 | UP   | 660.4152 | 660.4147 | 660.4167 | 9.8348   | 9.715683 |
| 5567 | M295T24  | 1.108794 | -0.14899 | -1.03337 | 0.346366 | 0.864011 | DOWN | 295.1902 | 295.1901 | 295.1903 | 23.78817 | 23.7755  |
| 5568 | M401T10_ | 1.38056  | 0.465254 | 1.001009 | 0.346371 | 0.864011 | UP   | 400.8018 | 400.8013 | 400.8023 | 9.933967 | 9.827283 |
| 5569 | M815T10_ | 1.105692 | -0.14495 | -1.0215  | 0.346412 | 0.864011 | DOWN | 815.3053 | 815.3044 | 815.3062 | 9.9149   | 9.79535  |
| 5570 | M665T9   | 80.69772 | 6.334456 | 1.06611  | 0.346447 | 0.864011 | UP   | 665.4574 | 665.4569 | 665.4577 | 9.362817 | 9.1322   |
| 5571 | M495T16  | 1.31954  | -0.40004 | -1.00049 | 0.346464 | 0.864011 | DOWN | 495.3503 | 495.35   | 495.3505 | 15.94663 | 15.68735 |
| 5572 | M470T10_ | 2.352944 | 1.234467 | 1.061678 | 0.346484 | 0.864011 | UP   | 470.4757 | 470.475  | 470.476  | 9.979342 | 9.885167 |
| 5573 | M326T10_ | 1.245811 | 0.317086 | 1.003364 | 0.346523 | 0.864011 | UP   | 325.8921 | 325.8918 | 325.893  | 9.857275 | 9.73145  |
| 5574 | M603T10_ | 1.881828 | 0.912135 | 1.05508  | 0.346673 | 0.864012 | UP   | 602.8286 | 602.8268 | 602.8326 | 9.844033 | 9.7124   |
| 5575 | M376T11_ | 1.245321 | -0.31652 | -1.011   | 0.346702 | 0.864012 | DOWN | 375.8016 | 375.8009 | 375.8018 | 10.8926  | 10.877   |
| 5576 | M287T10_ | 1.118298 | -0.1613  | -1.00653 | 0.346708 | 0.864012 | DOWN | 287.3619 | 287.3618 | 287.3621 | 9.934533 | 9.827283 |
| 5577 | M472T9_9 | 1.377768 | -0.46233 | -1.00444 | 0.346742 | 0.864012 | DOWN | 472.3157 | 472.3153 | 472.3214 | 9.236775 | 9.129317 |
| 5578 | M536T39  | 1.318095 | -0.39845 | -1.06193 | 0.346793 | 0.864012 | DOWN | 536.306  | 536.3058 | 536.3066 | 38.75533 | 38.64    |
| 5579 | M317T29  | 1.186783 | -0.24706 | -0.99953 | 0.346819 | 0.864012 | DOWN | 317.3241 | 317.324  | 317.3242 | 29.03975 | 29.0175  |
| 5580 | M428T11_ | 1.162608 | -0.21737 | -1.00969 | 0.346838 | 0.864012 | DOWN | 427.9037 | 427.9034 | 427.9043 | 10.90657 | 10.879   |
| 5581 | M811T9   | 1.49647  | -0.58156 | -1.01053 | 0.34693  | 0.864012 | DOWN | 810.619  | 810.6151 | 810.6198 | 9.263933 | 9.095133 |
| 5582 | M893T11_ | 1.286825 | -0.36382 | -1.02681 | 0.346954 | 0.864012 | DOWN | 893.021  | 893.0203 | 893.022  | 10.90785 | 10.8926  |
| 5583 | M842T31  | 1.316483 | -0.39669 | -1.01645 | 0.346972 | 0.864012 | DOWN | 841.5715 | 841.5703 | 841.573  | 31.212   | 31.18233 |
| 5584 | M397T10_ | 1.119819 | -0.16327 | -1.00401 | 0.346975 | 0.864012 | DOWN | 397.0549 | 397.0547 | 397.055  | 9.924308 | 9.811217 |
| 5585 | M569T9_2 | 1.226753 | -0.29484 | -0.9999  | 0.346984 | 0.864012 | DOWN | 569.1238 | 569.1236 | 569.124  | 9.3907   | 9.340183 |
| 5586 | M350T11_ | 1.154409 | -0.20715 | -1.00537 | 0.346992 | 0.864012 | DOWN | 350.4612 | 350.4611 | 350.4618 | 10.90519 | 10.879   |
| 5587 | M412T9_2 | 2.195292 | 1.134413 | 1.052367 | 0.346994 | 0.864012 | UP   | 411.9788 | 411.9765 | 411.9798 | 9.288817 | 9.147367 |
| 5588 | M551T11_ | 1.370666 | 0.454877 | 1.03909  | 0.346995 | 0.864012 | UP   | 551.318  | 551.3178 | 551.319  | 10.60298 | 10.59413 |
| 5589 | M368T10_ | 2.015535 | 1.011163 | 1.023842 | 0.347023 | 0.864012 | UP   | 367.553  | 367.5528 | 367.5532 | 9.968992 | 9.8753   |
| 5590 | M881T10_ | 1.102591 | -0.1409  | -0.99898 | 0.34706  | 0.864012 | DOWN | 880.5353 | 880.5341 | 880.5355 | 9.9149   | 9.79535  |
| 5591 | M208T10_ | 1.184355 | -0.2441  | -0.99919 | 0.347069 | 0.864012 | DOWN | 208.3217 | 208.3216 | 208.3218 | 9.972483 | 9.8914   |
| 5592 | M412T10_ | 1.401907 | 0.487391 | 1.033136 | 0.347153 | 0.864012 | UP   | 411.6434 | 411.6432 | 411.6438 | 9.984083 | 9.8753   |
| 5593 | M398T9_8 | 1.198533 | -0.26127 | -1.01878 | 0.347251 | 0.864012 | DOWN | 398.3253 | 398.3248 | 398.3255 | 8.986758 | 8.922033 |
| 5594 | M210T11_ | 1.943095 | -0.95836 | -1.00185 | 0.347285 | 0.864012 | DOWN | 210.1196 | 210.1191 | 210.1197 | 10.89248 | 10.87487 |
| 5595 | M524T40_ | 1.265489 | 0.339695 | 1.019413 | 0.347297 | 0.864012 | UP   | 524.3062 | 524.306  | 524.3064 | 39.87075 | 39.8055  |
| 5596 | M387T10_ | 1.193601 | -0.25532 | -1.0014  | 0.347311 | 0.864012 | DOWN | 386.8182 | 386.8178 | 386.8183 | 9.902008 | 9.79535  |
| 5597 | M254T10_ | 1.320185 | -0.40074 | -1.01095 | 0.347465 | 0.864012 | DOWN | 253.5235 | 253.5233 | 253.5238 | 9.908417 | 9.65225  |
| 5598 | M329T10_ | 1.111282 | 0.152225 | 1.020003 | 0.347498 | 0.864012 | UP   | 328.9873 | 328.9872 | 328.9902 | 9.9754   | 9.8753   |
| 5599 | M815T10_ | 1.241836 | -0.31247 | -1.01112 | 0.347574 | 0.864012 | DOWN | 814.7036 | 814.7029 | 814.7043 | 9.932033 | 9.827283 |



|      |           |          |          |          |          |          |      |          |          |          |          |          |
|------|-----------|----------|----------|----------|----------|----------|------|----------|----------|----------|----------|----------|
| 5600 | M400T10_  | 1.201825 | -0.26523 | -1.00799 | 0.347586 | 0.864012 | DOWN | 399.9997 | 399.999  | 399.9999 | 9.967367 | 9.859233 |
| 5601 | M435T10_  | 1.378806 | -0.46342 | -1.02902 | 0.347697 | 0.864012 | DOWN | 434.82   | 434.8194 | 434.8206 | 9.7992   | 9.729367 |
| 5602 | M1272T10_ | 1.67477  | 0.743963 | 1.035881 | 0.347716 | 0.864012 | UP   | 1271.69  | 1271.689 | 1271.691 | 9.979342 | 9.859233 |
| 5603 | M750T10_  | 1.678117 | 0.746843 | 1.059302 | 0.347744 | 0.864012 | UP   | 749.8335 | 749.8308 | 749.8347 | 9.823575 | 9.715683 |
| 5604 | M578T11_  | 1.36833  | -0.45242 | -1.01607 | 0.347775 | 0.864012 | DOWN | 577.6999 | 577.6996 | 577.7004 | 10.72662 | 10.6899  |
| 5605 | M186T6    | 1.301396 | -0.38006 | -1.00614 | 0.347802 | 0.864012 | DOWN | 186.1486 | 186.1485 | 186.1487 | 6.471242 | 6.354383 |
| 5606 | M1482T10_ | 1.288183 | -0.36534 | -1.04136 | 0.347802 | 0.864012 | DOWN | 1482.051 | 1482.05  | 1482.052 | 9.900767 | 9.79535  |
| 5607 | M189T9_9  | 1.816327 | 0.861024 | 1.012972 | 0.347851 | 0.864012 | UP   | 188.9975 | 188.997  | 188.9982 | 9.182617 | 9.142767 |
| 5608 | M388T10_  | 1.198023 | -0.26066 | -1.0363  | 0.347912 | 0.864012 | DOWN | 387.8573 | 387.857  | 387.8578 | 9.930908 | 9.827283 |
| 5609 | M472T22   | 1.516509 | 0.600754 | 1.027857 | 0.347924 | 0.864012 | UP   | 472.3028 | 472.3025 | 472.303  | 21.69533 | 21.67983 |
| 5610 | M271T10_  | 1.44067  | 0.52674  | 1.050847 | 0.348001 | 0.864012 | UP   | 270.9807 | 270.9805 | 270.9808 | 9.830283 | 9.715683 |
| 5611 | M204T10_  | 1.243724 | -0.31467 | -1.01451 | 0.348009 | 0.864012 | DOWN | 204.1189 | 204.1187 | 204.119  | 9.825492 | 9.715683 |
| 5612 | M176T11_  | 1.268343 | -0.34294 | -0.99905 | 0.348117 | 0.864013 | DOWN | 175.5724 | 175.5723 | 175.5724 | 10.93208 | 10.87765 |
| 5613 | M316T10_  | 1.501481 | 0.586386 | 1.057118 | 0.348141 | 0.864013 | UP   | 316.3457 | 316.3456 | 316.3458 | 9.983467 | 9.8753   |
| 5614 | M500T10_  | 1.313406 | -0.39331 | -1.02529 | 0.348167 | 0.864013 | DOWN | 499.9191 | 499.9177 | 499.9292 | 9.885167 | 9.714783 |
| 5615 | M267T29   | 1.206399 | 0.270708 | 1.04156  | 0.348191 | 0.864013 | UP   | 267.1716 | 267.1714 | 267.1717 | 28.58875 | 28.55817 |
| 5616 | M267T17   | 1.368106 | -0.45218 | -0.99656 | 0.348259 | 0.864013 | DOWN | 267.12   | 267.1199 | 267.1201 | 17.14117 | 17.08867 |
| 5617 | M578T30   | 1.273941 | 0.349299 | 1.033322 | 0.348284 | 0.864013 | UP   | 578.3958 | 578.3954 | 578.3964 | 30.28092 | 30.266   |
| 5618 | M928T10_  | 1.093117 | -0.12845 | -1.01468 | 0.348386 | 0.864013 | DOWN | 927.503  | 927.5014 | 927.5033 | 9.958442 | 9.859233 |
| 5619 | M1828T11  | 1.314317 | -0.39431 | -1.00052 | 0.348423 | 0.864013 | DOWN | 1827.592 | 1827.591 | 1827.596 | 10.90551 | 10.879   |
| 5620 | M463T10_  | 1.798882 | 0.8471   | 1.057069 | 0.34843  | 0.864013 | UP   | 463.3252 | 463.325  | 463.3256 | 10.43184 | 10.39197 |
| 5621 | M567T9_1  | 1.328269 | -0.40955 | -0.99715 | 0.348482 | 0.864013 | DOWN | 566.5158 | 566.5146 | 566.5161 | 9.45135  | 9.38595  |
| 5622 | M722T10_  | 2.998513 | 1.584247 | 1.060168 | 0.348516 | 0.864013 | UP   | 722.4078 | 722.4071 | 722.408  | 9.844517 | 9.73145  |
| 5623 | M395T11_  | 1.29329  | -0.37105 | -1.00743 | 0.348701 | 0.864013 | DOWN | 394.6529 | 394.6527 | 394.6534 | 10.93283 | 10.80695 |
| 5624 | M301T10_  | 1.367377 | -0.45141 | -1.01843 | 0.348786 | 0.864013 | DOWN | 300.92   | 300.9199 | 300.9202 | 9.501658 | 9.416817 |
| 5625 | M308T10_  | 1.15454  | -0.20732 | -1.02339 | 0.348816 | 0.864013 | DOWN | 307.7713 | 307.7709 | 307.7714 | 9.951283 | 9.843367 |
| 5626 | M840T10_  | 1.164891 | -0.22019 | -1.0348  | 0.348876 | 0.864013 | DOWN | 839.743  | 839.7418 | 839.7442 | 9.984067 | 9.8914   |
| 5627 | M798T10_  | 4.110734 | 2.039396 | 1.045171 | 0.348882 | 0.864013 | UP   | 798.4531 | 798.4528 | 798.4553 | 9.859233 | 9.840617 |
| 5628 | M266T11_  | 1.287631 | -0.36472 | -1.00375 | 0.348917 | 0.864013 | DOWN | 265.6371 | 265.635  | 265.6372 | 10.919   | 10.87487 |
| 5629 | M373T10_  | 1.144752 | -0.19503 | -1.00837 | 0.34895  | 0.864013 | DOWN | 373.248  | 373.2478 | 373.2545 | 9.531467 | 9.416817 |
| 5630 | M600T10_  | 2.193967 | 1.133542 | 1.03715  | 0.349042 | 0.864013 | UP   | 599.534  | 599.5332 | 599.5388 | 9.816183 | 9.715683 |
| 5631 | M697T10_  | 2.136632 | 1.095338 | 1.056147 | 0.349056 | 0.864013 | UP   | 697.4021 | 697.4006 | 697.4044 | 10.01333 | 9.840617 |
| 5632 | M358T9_3  | 1.186993 | -0.24731 | -0.99646 | 0.349117 | 0.864013 | DOWN | 357.8771 | 357.8768 | 357.8777 | 9.296925 | 9.1011   |
| 5633 | M734T10_  | 1.499615 | 0.584592 | 1.045383 | 0.349123 | 0.864013 | UP   | 734.3708 | 734.3702 | 734.3711 | 9.849558 | 9.73145  |
| 5634 | M389T10_  | 1.194715 | -0.25667 | -0.99828 | 0.349163 | 0.864013 | DOWN | 388.6849 | 388.6846 | 388.6853 | 9.902483 | 9.811217 |

|      |          |          |          |          |          |          |      |          |          |          |          |          |
|------|----------|----------|----------|----------|----------|----------|------|----------|----------|----------|----------|----------|
| 5635 | M344T9_6 | 1.232797 | -0.30194 | -1.01952 | 0.349235 | 0.864013 | DOWN | 344.2255 | 344.2253 | 344.2256 | 9.311883 | 9.219483 |
| 5636 | M345T10_ | 1.219349 | 0.286111 | 0.997105 | 0.349281 | 0.864013 | UP   | 344.8508 | 344.8503 | 344.8513 | 9.821383 | 9.7124   |
| 5637 | M239T11_ | 1.219184 | -0.28592 | -0.99508 | 0.349304 | 0.864013 | DOWN | 238.7862 | 238.7859 | 238.7866 | 10.9161  | 10.83417 |
| 5638 | M311T19_ | 1.222582 | -0.28993 | -0.99417 | 0.349305 | 0.864013 | DOWN | 311.1851 | 311.1849 | 311.1853 | 18.92142 | 18.90133 |
| 5639 | M294T10_ | 1.209083 | -0.27391 | -1.01781 | 0.349374 | 0.864013 | DOWN | 294.278  | 294.2777 | 294.2781 | 9.95385  | 9.843367 |
| 5640 | M642T25  | 1.306935 | 0.386187 | 1.020474 | 0.349468 | 0.864013 | UP   | 642.4785 | 642.4781 | 642.48   | 25.226   | 25.14117 |
| 5641 | M236T9_7 | 1.860415 | -0.89562 | -1.00252 | 0.34959  | 0.864014 | DOWN | 236.0132 | 236.0102 | 236.0141 | 9.279417 | 9.146383 |
| 5642 | M284T11_ | 1.057434 | -0.08057 | -0.9958  | 0.34964  | 0.864014 | DOWN | 283.9973 | 283.9973 | 283.9974 | 10.91983 | 10.90785 |
| 5643 | M524T21  | 1.17436  | -0.23188 | -1.00046 | 0.349705 | 0.864014 | DOWN | 524.4204 | 524.42   | 524.4208 | 20.99475 | 20.97067 |
| 5644 | M673T10_ | 1.317142 | -0.39741 | -0.99761 | 0.349725 | 0.864014 | DOWN | 672.555  | 672.5544 | 672.5557 | 9.816167 | 9.699733 |
| 5645 | M664T10_ | 1.343536 | 0.426035 | 0.993404 | 0.34975  | 0.864014 | UP   | 663.8971 | 663.8948 | 663.9001 | 9.997142 | 9.989483 |
| 5646 | M1939T10 | 1.967516 | 0.976375 | 1.039742 | 0.349792 | 0.864014 | UP   | 1939.391 | 1939.386 | 1939.396 | 9.809233 | 9.715683 |
| 5647 | M723T10_ | 1.719346 | 0.78186  | 1.055012 | 0.349799 | 0.864014 | UP   | 723.4563 | 723.4542 | 723.4568 | 9.859983 | 9.73145  |
| 5648 | M414T9_9 | 1.374683 | -0.4591  | -0.99436 | 0.349878 | 0.864014 | DOWN | 413.9485 | 413.9483 | 413.9493 | 9.14655  | 9.0637   |
| 5649 | M418T9_9 | 1.219449 | -0.28623 | -1.0144  | 0.349908 | 0.864014 | DOWN | 418.2551 | 418.2546 | 418.2557 | 8.961583 | 8.8486   |
| 5650 | M238T11_ | 1.516387 | -0.60064 | -1.00026 | 0.349944 | 0.864014 | DOWN | 237.8316 | 237.8313 | 237.8317 | 10.86253 | 10.8214  |
| 5651 | M688T25  | 1.322458 | -0.40322 | -1.02859 | 0.349948 | 0.864014 | DOWN | 687.5081 | 687.5068 | 687.5087 | 25.37567 | 25.3635  |
| 5652 | M316T11_ | 1.25142  | -0.32357 | -0.99721 | 0.349977 | 0.864014 | DOWN | 316.4022 | 316.4021 | 316.4027 | 10.90553 | 10.86253 |
| 5653 | M817T10_ | 1.403638 | 0.489171 | 1.018794 | 0.35012  | 0.864014 | UP   | 816.843  | 816.8402 | 816.8447 | 9.979342 | 9.8753   |
| 5654 | M568T11_ | 1.29923  | -0.37766 | -1.00324 | 0.350168 | 0.864014 | DOWN | 568.4336 | 568.4331 | 568.4353 | 10.5518  | 10.48782 |
| 5655 | M254T10_ | 1.306847 | -0.38609 | -1.02298 | 0.350203 | 0.864014 | DOWN | 253.6581 | 253.6579 | 253.6584 | 9.80185  | 9.699733 |
| 5656 | M333T25  | 13.11545 | -3.7132  | -1.05667 | 0.350254 | 0.864014 | DOWN | 333.1522 | 333.1521 | 333.1524 | 25.11508 | 25.11283 |
| 5657 | M324T11_ | 1.306457 | -0.38566 | -0.99276 | 0.350268 | 0.864014 | DOWN | 323.6233 | 323.623  | 323.624  | 10.89953 | 10.879   |
| 5658 | M197T41_ | 1.086131 | 0.119198 | 1.000764 | 0.350346 | 0.864014 | UP   | 197.1533 | 197.1532 | 197.1534 | 40.82442 | 40.712   |
| 5659 | M820T21  | 1.189759 | -0.25067 | -1.00741 | 0.350428 | 0.864014 | DOWN | 819.5873 | 819.5867 | 819.5877 | 21.24675 | 21.21967 |
| 5660 | M360T9_1 | 1.63222  | -0.70684 | -0.99606 | 0.350435 | 0.864014 | DOWN | 359.5468 | 359.5466 | 359.5469 | 9.317    | 9.24215  |
| 5661 | M340T39  | 1.464323 | -0.55023 | -0.99503 | 0.35048  | 0.864014 | DOWN | 340.3209 | 340.3201 | 340.321  | 38.72633 | 38.71217 |
| 5662 | M446T39_ | 1.336454 | -0.41841 | -1.00139 | 0.35051  | 0.864014 | DOWN | 446.2746 | 446.2744 | 446.2749 | 38.8415  | 38.58267 |
| 5663 | M512T9_5 | 1.5206   | 0.604641 | 1.037508 | 0.350528 | 0.864014 | UP   | 512.2928 | 512.2921 | 512.2939 | 8.96815  | 8.90715  |
| 5664 | M252T11_ | 2.545964 | -1.34821 | -1.05524 | 0.350539 | 0.864014 | DOWN | 252.3501 | 252.3498 | 252.3502 | 10.90765 | 10.879   |
| 5665 | M326T10_ | 3.168484 | 1.663793 | 1.055034 | 0.350564 | 0.864014 | UP   | 325.9475 | 325.9472 | 325.9476 | 9.8207   | 9.715683 |
| 5666 | M691T9_2 | 1.610212 | 0.687251 | 1.036062 | 0.350609 | 0.864014 | UP   | 690.998  | 690.9979 | 690.9994 | 9.25985  | 9.207667 |
| 5667 | M350T9_8 | 1.593103 | 0.67184  | 0.995619 | 0.350671 | 0.864014 | UP   | 350.0464 | 350.0462 | 350.047  | 9.24215  | 9.221317 |
| 5668 | M341T10_ | 1.575062 | 0.655408 | 1.03324  | 0.350721 | 0.864014 | UP   | 341.1003 | 341.0998 | 341.1006 | 9.861225 | 9.73145  |
| 5669 | M339T11_ | 1.200495 | -0.26363 | -0.99144 | 0.350779 | 0.864014 | DOWN | 339.4787 | 339.4785 | 339.4787 | 10.892   | 10.8646  |

|      |          |          |          |          |          |          |      |          |          |          |          |          |
|------|----------|----------|----------|----------|----------|----------|------|----------|----------|----------|----------|----------|
| 5670 | M409T10_ | 1.131921 | -0.17877 | -1.00791 | 0.350852 | 0.864014 | DOWN | 408.5708 | 408.5704 | 408.571  | 9.939575 | 9.827283 |
| 5671 | M1467T10 | 2.791383 | 1.48098  | 1.049409 | 0.350904 | 0.864014 | UP   | 1467.097 | 1467.093 | 1467.099 | 9.958217 | 9.8753   |
| 5672 | M322T9_6 | 1.446491 | -0.53256 | -0.9918  | 0.35099  | 0.864014 | DOWN | 322.3012 | 322.3001 | 322.305  | 9.159717 | 9.089333 |
| 5673 | M158T10_ | 1.489489 | -0.57482 | -0.99101 | 0.351038 | 0.864015 | DOWN | 158.1542 | 158.1541 | 158.1545 | 9.870017 | 9.842    |
| 5674 | M538T9_6 | 1.771186 | -0.82472 | -1.01587 | 0.351094 | 0.864015 | DOWN | 538.2982 | 538.2978 | 538.2984 | 9.384008 | 9.160617 |
| 5675 | M471T9_1 | 1.424153 | -0.5101  | -1.00399 | 0.351109 | 0.864015 | DOWN | 470.8007 | 470.8002 | 470.8012 | 9.385275 | 9.24215  |
| 5676 | M282T10_ | 1.664147 | -0.73478 | -1.03745 | 0.351166 | 0.864015 | DOWN | 282.4129 | 282.4127 | 282.4159 | 9.970617 | 9.859233 |
| 5677 | M404T11_ | 1.167392 | -0.22329 | -0.99052 | 0.351221 | 0.864015 | DOWN | 404.2722 | 404.2713 | 404.2803 | 10.9198  | 10.84733 |
| 5678 | M204T10_ | 1.320179 | 0.400733 | 1.025156 | 0.351266 | 0.864015 | UP   | 204.2086 | 204.2084 | 204.2161 | 9.8207   | 9.699733 |
| 5679 | M1848T10 | 1.195448 | -0.25755 | -0.99201 | 0.351284 | 0.864015 | DOWN | 1847.854 | 1847.852 | 1847.857 | 9.970617 | 9.8914   |
| 5680 | M401T10_ | 1.103594 | -0.14221 | -1.00695 | 0.351315 | 0.864015 | DOWN | 400.6143 | 400.614  | 400.6144 | 9.933    | 9.827283 |
| 5681 | M162T10_ | 1.352503 | -0.43563 | -0.99234 | 0.351339 | 0.864015 | DOWN | 162.3711 | 162.3711 | 162.3712 | 9.914217 | 9.811217 |
| 5682 | M660T10_ | 1.619831 | 0.695843 | 1.045432 | 0.351448 | 0.864015 | UP   | 659.8558 | 659.8519 | 659.8567 | 9.946467 | 9.758367 |
| 5683 | M1133T11 | 1.182366 | -0.24168 | -1.00029 | 0.351458 | 0.864015 | DOWN | 1132.854 | 1132.853 | 1132.854 | 10.5188  | 10.47197 |
| 5684 | M185T10_ | 1.432537 | 0.518572 | 1.032115 | 0.351461 | 0.864015 | UP   | 184.6439 | 184.6437 | 184.6505 | 9.98345  | 9.859233 |
| 5685 | M400T22  | 1.212142 | -0.27756 | -0.99366 | 0.351462 | 0.864015 | DOWN | 400.353  | 400.3526 | 400.3532 | 21.55267 | 21.5515  |
| 5686 | M350T10_ | 1.612386 | -0.6892  | -1.00471 | 0.35147  | 0.864015 | DOWN | 349.5146 | 349.5144 | 349.5147 | 9.9174   | 9.811217 |
| 5687 | M311T10_ | 3.484669 | 1.801022 | 1.051479 | 0.351496 | 0.864015 | UP   | 311.4828 | 311.4823 | 311.4829 | 9.743767 | 9.56645  |
| 5688 | M829T28  | 1.385571 | 0.47048  | 0.995815 | 0.351505 | 0.864015 | UP   | 828.5087 | 828.5079 | 828.5094 | 27.93067 | 27.85283 |
| 5689 | M725T10_ | 1.641388 | 0.714916 | 1.050165 | 0.351611 | 0.864015 | UP   | 724.5072 | 724.5056 | 724.5076 | 9.858425 | 9.73145  |
| 5690 | M430T9_8 | 1.767411 | 0.821638 | 1.046647 | 0.351638 | 0.864015 | UP   | 430.3305 | 430.329  | 430.331  | 9.239042 | 9.129317 |
| 5691 | M618T10_ | 1.997848 | 0.998447 | 1.038895 | 0.351681 | 0.864015 | UP   | 617.8039 | 617.7978 | 617.8086 | 9.816317 | 9.62495  |
| 5692 | M705T10_ | 6.215146 | 2.635788 | 1.052933 | 0.351721 | 0.864015 | UP   | 704.7021 | 704.7017 | 704.7029 | 9.830283 | 9.7124   |
| 5693 | M373T45  | 1.058971 | -0.08266 | -1.03175 | 0.351731 | 0.864015 | DOWN | 373.2219 | 373.2218 | 373.222  | 44.76783 | 44.624   |
| 5694 | M477T9_8 | 1.157276 | -0.21073 | -0.99126 | 0.351731 | 0.864015 | DOWN | 477.4071 | 477.4069 | 477.4072 | 9.294408 | 9.129317 |
| 5695 | M318T9_1 | 1.176356 | -0.23432 | -0.99024 | 0.351845 | 0.864015 | DOWN | 318.2155 | 318.215  | 318.2164 | 8.82795  | 8.742633 |
| 5696 | M591T10_ | 1.958034 | 0.969406 | 1.039051 | 0.352092 | 0.864015 | UP   | 591.3732 | 591.3726 | 591.3745 | 9.637258 | 9.557333 |
| 5697 | M536T28  | 64.01955 | 6.000441 | 1.052008 | 0.352145 | 0.864015 | UP   | 536.3492 | 536.3474 | 536.3504 | 27.70617 | 27.65467 |
| 5698 | M619T10_ | 1.151618 | -0.20366 | -1.00787 | 0.352177 | 0.864015 | DOWN | 619.4242 | 619.4237 | 619.4281 | 9.825492 | 9.715683 |
| 5699 | M353T13_ | 1.276077 | -0.35172 | -0.98775 | 0.352221 | 0.864015 | DOWN | 353.2892 | 353.2889 | 353.2893 | 12.52832 | 12.48692 |
| 5700 | M726T11_ | 1.179925 | -0.2387  | -0.99002 | 0.352298 | 0.864015 | DOWN | 726.1087 | 726.1079 | 726.1092 | 10.892   | 10.8646  |
| 5701 | M458T9_1 | 1.286304 | -0.36323 | -0.98757 | 0.352463 | 0.864015 | DOWN | 458.3814 | 458.3743 | 458.3817 | 9.303525 | 9.146383 |
| 5702 | M396T9_1 | 1.34863  | -0.43149 | -0.98729 | 0.352468 | 0.864015 | DOWN | 396.3543 | 396.3529 | 396.3561 | 9.371592 | 9.18975  |
| 5703 | M496T31  | 1.700764 | 0.766183 | 1.004564 | 0.352596 | 0.864016 | UP   | 496.3392 | 496.3391 | 496.3399 | 31.29167 | 31.277   |
| 5704 | M821T10_ | 1.180502 | -0.2394  | -1.00172 | 0.352622 | 0.864016 | DOWN | 820.9654 | 820.9645 | 820.9666 | 9.917167 | 9.811217 |

|      |          |          |          |          |          |          |      |          |          |          |          |          |
|------|----------|----------|----------|----------|----------|----------|------|----------|----------|----------|----------|----------|
| 5705 | M417T9_1 | 1.369957 | -0.45413 | -0.992   | 0.352622 | 0.864016 | DOWN | 417.3995 | 417.399  | 417.4006 | 9.345625 | 9.2946   |
| 5706 | M226T10_ | 1.192914 | -0.25449 | -0.99786 | 0.352631 | 0.864016 | DOWN | 225.7164 | 225.7162 | 225.7165 | 9.917167 | 9.811217 |
| 5707 | M660T10_ | 1.314718 | 0.394753 | 0.988767 | 0.35264  | 0.864016 | UP   | 659.8946 | 659.8936 | 659.8973 | 9.8371   | 9.696683 |
| 5708 | M390T11_ | 1.143102 | -0.19295 | -0.9935  | 0.352664 | 0.864016 | DOWN | 389.5655 | 389.565  | 389.5656 | 10.90551 | 10.879   |
| 5709 | M295T16  | 2.017922 | 1.012871 | 1.006612 | 0.352694 | 0.864016 | UP   | 295.2093 | 295.2091 | 295.2097 | 16.22733 | 16.21317 |
| 5710 | M454T43_ | 1.381167 | 0.465888 | 1.03122  | 0.352757 | 0.864016 | UP   | 454.2642 | 454.2641 | 454.2644 | 43.4595  | 43.371   |
| 5711 | M318T10_ | 1.454627 | -0.54065 | -1.04537 | 0.352819 | 0.864016 | DOWN | 317.9306 | 317.9299 | 317.931  | 9.758367 | 9.747533 |
| 5712 | M1422T10 | 1.438308 | -0.52437 | -0.98662 | 0.352842 | 0.864016 | DOWN | 1421.821 | 1421.821 | 1421.823 | 9.828642 | 9.7124   |
| 5713 | M443T12  | 1.116805 | -0.15938 | -0.99464 | 0.352927 | 0.864016 | DOWN | 443.3005 | 443.3003 | 443.3006 | 11.71523 | 11.68457 |
| 5714 | M496T19  | 1.239454 | -0.3097  | -0.98677 | 0.352928 | 0.864016 | DOWN | 496.303  | 496.3024 | 496.3033 | 18.59967 | 18.58517 |
| 5715 | M646T10_ | 1.134204 | 0.18168  | 0.990049 | 0.352979 | 0.864016 | UP   | 646.4351 | 646.4346 | 646.4356 | 10.40425 | 10.35992 |
| 5716 | M769T10_ | 4.267078 | 2.093248 | 1.048376 | 0.353034 | 0.864016 | UP   | 769.4823 | 769.4817 | 769.4833 | 9.760483 | 9.743767 |
| 5717 | M188T9_2 | 1.333437 | -0.41515 | -0.98982 | 0.353059 | 0.864016 | DOWN | 187.693  | 187.6924 | 187.6937 | 9.250817 | 9.18975  |
| 5718 | M620T10_ | 3.2479   | 1.699507 | 1.049469 | 0.353065 | 0.864016 | UP   | 620.335  | 620.3344 | 620.3402 | 9.823575 | 9.715683 |
| 5719 | M496T9_6 | 1.228228 | -0.29658 | -0.98652 | 0.353082 | 0.864016 | DOWN | 495.8258 | 495.8251 | 495.826  | 9.277317 | 9.129317 |
| 5720 | M202T10_ | 1.231585 | 0.300517 | 0.992465 | 0.353086 | 0.864016 | UP   | 201.5416 | 201.5414 | 201.5417 | 9.960967 | 9.859233 |
| 5721 | M208T10_ | 1.270538 | -0.34544 | -1.02339 | 0.353122 | 0.864016 | DOWN | 207.968  | 207.9679 | 207.968  | 9.8207   | 9.715683 |
| 5722 | M464T42_ | 1.386746 | -0.4717  | -1.0029  | 0.353131 | 0.864016 | DOWN | 464.285  | 464.2849 | 464.2852 | 42.22183 | 42.09283 |
| 5723 | M294T9_1 | 1.625817 | -0.70116 | -0.98681 | 0.35321  | 0.864016 | DOWN | 293.5013 | 293.5009 | 293.5015 | 9.35335  | 9.235933 |
| 5724 | M429T10_ | 1.324237 | -0.40516 | -1.01223 | 0.35323  | 0.864016 | DOWN | 428.5753 | 428.5748 | 428.5756 | 9.958617 | 9.869467 |
| 5725 | M390T43  | 1.180948 | -0.23994 | -0.98918 | 0.353256 | 0.864016 | DOWN | 390.2483 | 390.2482 | 390.2485 | 43.366   | 42.94167 |
| 5726 | M333T10_ | 1.232947 | -0.30211 | -1.00225 | 0.353273 | 0.864016 | DOWN | 332.9822 | 332.982  | 332.9825 | 9.830508 | 9.699733 |
| 5727 | M225T10_ | 1.179721 | -0.23845 | -1.00223 | 0.353273 | 0.864016 | DOWN | 225.4461 | 225.4459 | 225.4462 | 9.917167 | 9.811217 |
| 5728 | M241T10_ | 2.719822 | 1.443512 | 1.043852 | 0.353398 | 0.864016 | UP   | 240.8938 | 240.8936 | 240.8939 | 9.951283 | 9.843367 |
| 5729 | M876T12  | 1.214686 | 0.280583 | 1.040867 | 0.353429 | 0.864016 | UP   | 875.5836 | 875.5829 | 875.5838 | 12.10564 | 12.08987 |
| 5730 | M702T10_ | 1.158823 | -0.21266 | -0.9943  | 0.353449 | 0.864016 | DOWN | 702.0622 | 702.062  | 702.0629 | 9.836042 | 9.743667 |
| 5731 | M258T11_ | 1.200815 | -0.26401 | -0.98652 | 0.35354  | 0.864016 | DOWN | 257.5226 | 257.5224 | 257.5228 | 10.89308 | 10.873   |
| 5732 | M292T26  | 3.336605 | 1.738381 | 1.04816  | 0.353694 | 0.864016 | UP   | 292.2269 | 292.2268 | 292.2269 | 26.29167 | 26.27517 |
| 5733 | M163T10_ | 1.416712 | 0.502546 | 1.001717 | 0.353772 | 0.864016 | UP   | 162.6996 | 162.6993 | 162.705  | 9.960967 | 9.859233 |
| 5734 | M393T9_1 | 1.431443 | -0.51747 | -0.9878  | 0.35385  | 0.864016 | DOWN | 392.5229 | 392.522  | 392.5237 | 9.352758 | 9.1602   |
| 5735 | M597T15  | 1.219445 | -0.28622 | -0.98729 | 0.353861 | 0.864016 | DOWN | 597.3407 | 597.3404 | 597.3408 | 14.84639 | 14.51687 |
| 5736 | M474T10_ | 1.230498 | -0.29924 | -1.00744 | 0.353922 | 0.864016 | DOWN | 473.6442 | 473.6439 | 473.6446 | 9.960817 | 9.843367 |
| 5737 | M589T9_5 | 1.498977 | -0.58398 | -0.98425 | 0.35393  | 0.864016 | DOWN | 589.267  | 589.2643 | 589.2675 | 9.311883 | 9.22495  |
| 5738 | M317T27  | 1.211343 | -0.27661 | -0.984   | 0.354007 | 0.864016 | DOWN | 317.3241 | 317.3239 | 317.3243 | 27.2135  | 27.18717 |
| 5739 | M534T10_ | 1.320482 | -0.40106 | -0.99447 | 0.354029 | 0.864016 | DOWN | 533.842  | 533.8417 | 533.8424 | 10.08598 | 9.995817 |

|      |          |          |          |          |          |          |      |          |          |          |          |          |
|------|----------|----------|----------|----------|----------|----------|------|----------|----------|----------|----------|----------|
| 5740 | M259T10_ | 1.272869 | -0.34808 | -0.99997 | 0.354039 | 0.864016 | DOWN | 258.9657 | 258.957  | 258.9659 | 9.900833 | 9.762917 |
| 5741 | M488T10_ | 1.263762 | 0.337725 | 1.043416 | 0.354081 | 0.864016 | UP   | 488.1352 | 488.135  | 488.1353 | 9.842325 | 9.696683 |
| 5742 | M420T22  | 5.908829 | -2.56287 | -1.04683 | 0.354105 | 0.864017 | DOWN | 420.3104 | 420.3096 | 420.3108 | 21.98433 | 21.95883 |
| 5743 | M341T11_ | 1.20346  | -0.26719 | -0.9851  | 0.35411  | 0.864017 | DOWN | 341.0428 | 341.0427 | 341.0429 | 10.892   | 10.8646  |
| 5744 | M235T10_ | 1.495843 | 0.580959 | 1.022343 | 0.354126 | 0.864017 | UP   | 235.1135 | 235.1134 | 235.1136 | 9.967367 | 9.859233 |
| 5745 | M1380T11 | 1.367445 | -0.45148 | -0.98723 | 0.354173 | 0.864017 | DOWN | 1380.001 | 1379.999 | 1380.005 | 10.85383 | 10.80547 |
| 5746 | M606T10_ | 1.358759 | -0.44229 | -1.01063 | 0.3542   | 0.864017 | DOWN | 606.1628 | 606.1624 | 606.163  | 9.504583 | 9.416817 |
| 5747 | M300T10_ | 1.570422 | 0.651153 | 1.041382 | 0.354249 | 0.864017 | UP   | 300.1833 | 300.183  | 300.1835 | 9.989592 | 9.916767 |
| 5748 | M455T9_5 | 1.546647 | -0.62914 | -0.98614 | 0.354289 | 0.864017 | DOWN | 454.7757 | 454.7686 | 454.779  | 9.217867 | 9.1602   |
| 5749 | M602T23  | 1.213537 | -0.27922 | -1.01058 | 0.354366 | 0.864017 | DOWN | 602.4108 | 602.4102 | 602.4113 | 22.74117 | 22.71283 |
| 5750 | M602T10_ | 2.159693 | 1.110826 | 1.042963 | 0.354391 | 0.864017 | UP   | 601.9927 | 601.9919 | 601.9965 | 9.842    | 9.73145  |
| 5751 | M401T11_ | 1.745996 | -0.80405 | -0.98729 | 0.354405 | 0.864017 | DOWN | 401.2101 | 401.2065 | 401.2131 | 10.99268 | 10.93415 |
| 5752 | M570T10_ | 1.321037 | -0.40167 | -0.9849  | 0.354416 | 0.864017 | DOWN | 570.3606 | 570.3602 | 570.3608 | 10.4882  | 10.47197 |
| 5753 | M310T18  | 1.678383 | 0.747072 | 1.042809 | 0.354472 | 0.864017 | UP   | 310.2429 | 310.2374 | 310.243  | 18.011   | 17.74617 |
| 5754 | M426T9_3 | 1.592899 | -0.67165 | -1.01662 | 0.354549 | 0.864017 | DOWN | 426.4475 | 426.4475 | 426.4476 | 9.174883 | 9.145433 |
| 5755 | M309T17  | 1.339252 | -0.42143 | -0.98284 | 0.354594 | 0.864017 | DOWN | 309.1307 | 309.1306 | 309.1308 | 17.07417 | 16.92833 |
| 5756 | M464T41_ | 28.52932 | -4.83437 | -1.04598 | 0.354601 | 0.864017 | DOWN | 464.3576 | 464.3575 | 464.3578 | 40.87    | 40.84133 |
| 5757 | M312T9_5 | 1.180019 | -0.23881 | -0.99282 | 0.354731 | 0.864017 | DOWN | 312.1556 | 312.1553 | 312.1563 | 9.492792 | 9.416817 |
| 5758 | M660T10_ | 1.254935 | -0.32761 | -0.98505 | 0.354761 | 0.864017 | DOWN | 660.0654 | 660.0649 | 660.066  | 9.830283 | 9.715683 |
| 5759 | M1407T10 | 1.362929 | 0.446711 | 1.003654 | 0.35482  | 0.864017 | UP   | 1407.259 | 1407.253 | 1407.262 | 9.917208 | 9.843367 |
| 5760 | M452T9_6 | 1.223308 | -0.29079 | -0.98239 | 0.354902 | 0.864017 | DOWN | 452.3415 | 452.341  | 452.342  | 9.285867 | 9.129317 |
| 5761 | M817T10_ | 1.259344 | -0.33267 | -1.01139 | 0.354906 | 0.864017 | DOWN | 816.562  | 816.5612 | 816.5629 | 9.924308 | 9.827283 |
| 5762 | M1853T10 | 1.329758 | -0.41116 | -0.98596 | 0.354934 | 0.864017 | DOWN | 1852.929 | 1852.927 | 1852.932 | 9.8374   | 9.715683 |
| 5763 | M620T9_2 | 1.508134 | -0.59276 | -0.98178 | 0.354968 | 0.864017 | DOWN | 619.8531 | 619.8513 | 619.8537 | 9.311167 | 9.130683 |
| 5764 | M480T43  | 1.42992  | -0.51593 | -1.0364  | 0.355038 | 0.864017 | DOWN | 480.2799 | 480.2799 | 480.28   | 43.25092 | 43.2005  |
| 5765 | M522T9_2 | 1.168334 | -0.22445 | -0.98184 | 0.355086 | 0.864017 | DOWN | 521.885  | 521.8834 | 521.8857 | 9.242183 | 9.129317 |
| 5766 | M311T18  | 1.135985 | -0.18394 | -0.98144 | 0.355132 | 0.864017 | DOWN | 310.7446 | 310.7444 | 310.7448 | 18.01267 | 17.97833 |
| 5767 | M370T10_ | 6.294795 | 2.654159 | 1.04358  | 0.355198 | 0.864017 | UP   | 370.1729 | 370.1726 | 370.1732 | 9.960817 | 9.859233 |
| 5768 | M289T41  | 1.162431 | -0.21715 | -0.9853  | 0.355265 | 0.864017 | DOWN | 289.1642 | 289.1642 | 289.1643 | 40.95117 | 40.8845  |
| 5769 | M257T10_ | 1.260832 | -0.33438 | -0.98324 | 0.355317 | 0.864017 | DOWN | 256.5198 | 256.5196 | 256.52   | 9.931675 | 9.827283 |
| 5770 | M489T10_ | 1.280912 | 0.357171 | 1.040306 | 0.355329 | 0.864017 | UP   | 488.7175 | 488.717  | 488.7176 | 9.848833 | 9.696683 |
| 5771 | M689T10_ | 1.223888 | -0.29147 | -0.98228 | 0.355372 | 0.864017 | DOWN | 688.6009 | 688.6003 | 688.6015 | 9.81635  | 9.699733 |
| 5772 | M1362T10 | 1.277332 | -0.35313 | -0.98193 | 0.355391 | 0.864017 | DOWN | 1361.857 | 1361.856 | 1361.858 | 9.8207   | 9.699733 |
| 5773 | M352T10_ | 1.053729 | -0.0755  | -1.03722 | 0.355455 | 0.864017 | DOWN | 351.6225 | 351.6224 | 351.6227 | 9.836042 | 9.715683 |
| 5774 | M720T10_ | 1.133118 | -0.1803  | -0.98075 | 0.355458 | 0.864017 | DOWN | 719.6688 | 719.6683 | 719.6696 | 9.816225 | 9.715683 |

|      |          |          |          |          |          |          |      |          |          |          |          |          |
|------|----------|----------|----------|----------|----------|----------|------|----------|----------|----------|----------|----------|
| 5775 | M268T10_ | 1.238903 | -0.30906 | -0.98099 | 0.355602 | 0.864017 | DOWN | 268.2619 | 268.2618 | 268.2619 | 9.818525 | 9.699733 |
| 5776 | M592T10_ | 1.325786 | -0.40685 | -1.00451 | 0.355604 | 0.864017 | DOWN | 592.0963 | 592.0958 | 592.0981 | 9.900133 | 9.779267 |
| 5777 | M463T10_ | 1.262646 | 0.336451 | 1.039557 | 0.355641 | 0.864017 | UP   | 463.0131 | 463.0127 | 463.0139 | 9.842325 | 9.696683 |
| 5778 | M340T9_2 | 1.194035 | -0.25585 | -0.9869  | 0.355665 | 0.864018 | DOWN | 339.6286 | 339.6282 | 339.6287 | 9.246483 | 9.129317 |
| 5779 | M456T11_ | 1.47603  | 0.561722 | 0.988578 | 0.35573  | 0.864018 | UP   | 455.665  | 455.6642 | 455.6652 | 10.92717 | 10.80695 |
| 5780 | M657T10_ | 1.258857 | -0.33211 | -0.99721 | 0.35576  | 0.864018 | DOWN | 657.0723 | 657.072  | 657.0727 | 9.830733 | 9.699733 |
| 5781 | M341T10_ | 1.169384 | -0.22575 | -1.01197 | 0.355767 | 0.864018 | DOWN | 340.6146 | 340.6144 | 340.6149 | 9.8397   | 9.715683 |
| 5782 | M801T9   | 1.221374 | -0.2885  | -1.01    | 0.355772 | 0.864018 | DOWN | 801.2852 | 801.2825 | 801.2868 | 9.16805  | 9.129317 |
| 5783 | M374T11_ | 1.202191 | -0.26567 | -0.98085 | 0.355916 | 0.864018 | DOWN | 374.487  | 374.4858 | 374.4875 | 10.92253 | 10.89355 |
| 5784 | M990T10  | 1.3476   | -0.43039 | -0.98955 | 0.355975 | 0.864018 | DOWN | 990.2047 | 990.2042 | 990.2064 | 9.816183 | 9.6681   |
| 5785 | M695T10_ | 2.090994 | 1.064189 | 1.040928 | 0.355975 | 0.864018 | UP   | 694.7356 | 694.7352 | 694.7369 | 9.830558 | 9.715683 |
| 5786 | M357T11_ | 1.179619 | -0.23832 | -0.98088 | 0.355979 | 0.864018 | DOWN | 356.5284 | 356.5281 | 356.5285 | 10.892   | 10.8646  |
| 5787 | M349T10_ | 1.216785 | -0.28307 | -1.01339 | 0.355997 | 0.864018 | DOWN | 349.0977 | 349.0974 | 349.0979 | 9.825492 | 9.715683 |
| 5788 | M655T36  | 1.316822 | 0.39706  | 1.026294 | 0.356014 | 0.864018 | UP   | 655.3956 | 655.3948 | 655.3959 | 35.92017 | 35.8915  |
| 5789 | M637T11_ | 1.177616 | -0.23587 | -0.98259 | 0.356017 | 0.864018 | DOWN | 637.2597 | 637.2593 | 637.261  | 10.892   | 10.8646  |
| 5790 | M208T10_ | 1.861233 | 0.896259 | 1.027165 | 0.356044 | 0.864018 | UP   | 208.4454 | 208.4453 | 208.4532 | 9.92825  | 9.743767 |
| 5791 | M635T9_2 | 1.239524 | 0.309786 | 0.987927 | 0.356115 | 0.864018 | UP   | 635.0907 | 635.0905 | 635.0918 | 8.853017 | 8.727567 |
| 5792 | M550T10_ | 1.519955 | -0.60403 | -0.97951 | 0.356118 | 0.864018 | DOWN | 550.2816 | 550.2811 | 550.2821 | 9.932033 | 9.827283 |
| 5793 | M822T10_ | 1.202776 | -0.26637 | -1.00732 | 0.356129 | 0.864018 | DOWN | 822.2973 | 822.2965 | 822.299  | 9.924308 | 9.827283 |
| 5794 | M334T10_ | 1.650638 | -0.72302 | -0.9938  | 0.356157 | 0.864018 | DOWN | 334.332  | 334.3318 | 334.3321 | 9.960817 | 9.869467 |
| 5795 | M533T10_ | 1.199943 | -0.26297 | -0.98285 | 0.356177 | 0.864018 | DOWN | 533.2569 | 533.2566 | 533.2572 | 10.4915  | 10.42407 |
| 5796 | M737T11  | 1.166462 | -0.22214 | -0.9851  | 0.356243 | 0.864018 | DOWN | 737.0363 | 737.0355 | 737.0394 | 10.90659 | 10.879   |
| 5797 | M580T10_ | 1.259539 | 0.332896 | 0.979156 | 0.356289 | 0.864018 | UP   | 580.25   | 580.2492 | 580.2504 | 9.948875 | 9.859233 |
| 5798 | M370T10_ | 1.934933 | 0.952284 | 0.980146 | 0.356296 | 0.864018 | UP   | 370.2258 | 370.2256 | 370.2259 | 9.900767 | 9.806367 |
| 5799 | M433T10_ | 1.208026 | -0.27265 | -0.99926 | 0.35631  | 0.864018 | DOWN | 432.8204 | 432.8197 | 432.8212 | 9.97155  | 9.859233 |
| 5800 | M453T9_1 | 1.553996 | -0.63598 | -1.00113 | 0.356351 | 0.864018 | DOWN | 453.2299 | 453.2231 | 453.2336 | 9.3141   | 9.146383 |
| 5801 | M467T10_ | 1.192046 | -0.25344 | -1.02111 | 0.356357 | 0.864018 | DOWN | 466.5906 | 466.5904 | 466.5909 | 9.983467 | 9.8753   |
| 5802 | M200T11_ | 1.196384 | -0.25868 | -0.97926 | 0.356375 | 0.864018 | DOWN | 200.4947 | 200.4946 | 200.4948 | 10.8926  | 10.879   |
| 5803 | M314T13  | 1.67875  | 0.747387 | 1.031352 | 0.356377 | 0.864018 | UP   | 314.2114 | 314.2113 | 314.2115 | 12.82052 | 12.79125 |
| 5804 | M696T9_1 | 1.265395 | -0.33959 | -0.99409 | 0.356387 | 0.864018 | DOWN | 695.6138 | 695.6135 | 695.6142 | 9.322542 | 9.234417 |
| 5805 | M494T11_ | 1.312918 | -0.39278 | -0.98397 | 0.356476 | 0.864018 | DOWN | 494.1386 | 494.1381 | 494.139  | 11.25067 | 11.18397 |
| 5806 | M466T10_ | 1.814693 | -0.85973 | -0.97827 | 0.35664  | 0.864018 | DOWN | 466.2863 | 466.286  | 466.2866 | 9.756408 | 9.636483 |
| 5807 | M556T10_ | 1.42624  | -0.51222 | -0.98318 | 0.356686 | 0.864018 | DOWN | 555.7267 | 555.7264 | 555.7269 | 9.886433 | 9.779267 |
| 5808 | M705T21  | 1.308545 | -0.38796 | -1.00854 | 0.35669  | 0.864018 | DOWN | 704.5678 | 704.5669 | 704.5687 | 21.4235  | 21.40867 |
| 5809 | M584T23  | 1.396545 | 0.481862 | 1.008982 | 0.356703 | 0.864018 | UP   | 583.5572 | 583.5569 | 583.5579 | 22.90025 | 22.88567 |

|      |          |          |          |          |          |          |      |          |          |          |          |          |
|------|----------|----------|----------|----------|----------|----------|------|----------|----------|----------|----------|----------|
| 5810 | M299T40_ | 1.203208 | 0.266886 | 0.977975 | 0.356737 | 0.864018 | UP   | 299.185  | 299.1848 | 299.1852 | 40.35308 | 40.15067 |
| 5811 | M260T11_ | 5.410523 | -2.43577 | -1.04059 | 0.356748 | 0.864018 | DOWN | 260.2424 | 260.2422 | 260.2427 | 10.8926  | 10.879   |
| 5812 | M248T10_ | 1.378855 | -0.46347 | -0.97794 | 0.356752 | 0.864018 | DOWN | 247.9477 | 247.9474 | 247.9479 | 9.772833 | 9.76065  |
| 5813 | M640T9_4 | 1.454982 | -0.541   | -0.9925  | 0.356794 | 0.864018 | DOWN | 640.3912 | 640.3902 | 640.3932 | 9.343517 | 9.235933 |
| 5814 | M414T11_ | 1.211272 | -0.27652 | -0.99577 | 0.356794 | 0.864018 | DOWN | 413.9795 | 413.9793 | 413.9796 | 10.90548 | 10.879   |
| 5815 | M659T10_ | 1.283491 | -0.36007 | -0.978   | 0.356828 | 0.864018 | DOWN | 659.3282 | 659.3275 | 659.3288 | 9.825492 | 9.788267 |
| 5816 | M568T10_ | 1.378478 | -0.46308 | -0.98711 | 0.356858 | 0.864018 | DOWN | 567.8307 | 567.8304 | 567.831  | 9.960817 | 9.8753   |
| 5817 | M342T10_ | 1.291061 | -0.36856 | -1.00598 | 0.356905 | 0.864018 | DOWN | 342.2687 | 342.2666 | 342.2689 | 9.957333 | 9.951283 |
| 5818 | M227T9_2 | 1.530106 | -0.61363 | -0.98262 | 0.356964 | 0.864018 | DOWN | 227.479  | 227.4775 | 227.4798 | 9.280175 | 9.146383 |
| 5819 | M847T10_ | 1.113388 | 0.154957 | 0.979287 | 0.357099 | 0.864018 | UP   | 847.4884 | 847.488  | 847.4889 | 10.10432 | 10.03658 |
| 5820 | M314T9_3 | 1.194535 | -0.25645 | -0.9838  | 0.357119 | 0.864018 | DOWN | 313.7032 | 313.7029 | 313.7035 | 9.246483 | 9.129317 |
| 5821 | M273T44_ | 1.216694 | -0.28297 | -1.00202 | 0.357178 | 0.864018 | DOWN | 273.1692 | 273.1691 | 273.1694 | 43.66083 | 43.402   |
| 5822 | M411T10_ | 1.20401  | 0.267848 | 1.002846 | 0.35719  | 0.864018 | UP   | 411.1585 | 411.1581 | 411.1587 | 9.979342 | 9.8753   |
| 5823 | M269T10_ | 1.404471 | 0.490027 | 1.009576 | 0.357222 | 0.864019 | UP   | 269.2788 | 269.2787 | 269.2789 | 9.999217 | 9.8914   |
| 5824 | M394T9_1 | 1.6517   | 0.723952 | 0.99482  | 0.357226 | 0.864019 | UP   | 394.4011 | 394.4007 | 394.4015 | 9.18215  | 9.03845  |
| 5825 | M386T10_ | 1.458783 | 0.544765 | 1.0295   | 0.357236 | 0.864019 | UP   | 385.9789 | 385.9788 | 385.979  | 9.902617 | 9.79535  |
| 5826 | M176T10_ | 1.23917  | -0.30937 | -1.00766 | 0.357255 | 0.864019 | DOWN | 175.9619 | 175.9619 | 175.9739 | 9.8207   | 9.715683 |
| 5827 | M224T6   | 1.519149 | -0.60326 | -0.98651 | 0.357287 | 0.864019 | DOWN | 224.1223 | 224.1223 | 224.1225 | 6.4277   | 6.319217 |
| 5828 | M319T9_1 | 1.263837 | -0.33781 | -0.99169 | 0.357306 | 0.864019 | DOWN | 318.68   | 318.6798 | 318.6807 | 9.322542 | 9.234417 |
| 5829 | M741T10_ | 1.960832 | 0.971466 | 1.037469 | 0.357345 | 0.864019 | UP   | 741.3321 | 741.3314 | 741.3325 | 9.848833 | 9.73145  |
| 5830 | M422T10_ | 1.447762 | 0.533825 | 1.009152 | 0.357352 | 0.864019 | UP   | 422.4186 | 422.4179 | 422.4187 | 9.975142 | 9.859233 |
| 5831 | M246T11_ | 1.180369 | 0.239238 | 0.982118 | 0.357363 | 0.864019 | UP   | 246.0454 | 246.0447 | 246.0462 | 10.94208 | 10.8926  |
| 5832 | M455T10_ | 1.974198 | -0.98127 | -0.98971 | 0.357451 | 0.864019 | DOWN | 455.3215 | 455.3214 | 455.3225 | 9.967367 | 9.859233 |
| 5833 | M1181T10 | 1.160033 | -0.21417 | -0.97763 | 0.357504 | 0.864019 | DOWN | 1181.268 | 1181.267 | 1181.275 | 9.830558 | 9.699733 |
| 5834 | M379T17  | 1.757151 | 0.813238 | 1.029459 | 0.357529 | 0.864019 | UP   | 379.2952 | 379.295  | 379.2957 | 17.09542 | 17.05783 |
| 5835 | M578T9_3 | 1.377208 | -0.46175 | -0.98601 | 0.357532 | 0.864019 | DOWN | 578.3298 | 578.3296 | 578.331  | 9.420133 | 9.355317 |
| 5836 | M492T28_ | 2.878196 | 1.525165 | 1.037261 | 0.357547 | 0.864019 | UP   | 492.345  | 492.3447 | 492.3454 | 28.272   | 28.22917 |
| 5837 | M507T10_ | 1.255623 | 0.328404 | 0.976683 | 0.35755  | 0.864019 | UP   | 506.7314 | 506.7308 | 506.7317 | 9.967367 | 9.859233 |
| 5838 | M400T19  | 98.25999 | -6.61853 | -1.03869 | 0.35761  | 0.864019 | DOWN | 400.1964 | 400.1962 | 400.1964 | 18.54442 | 18.54183 |
| 5839 | M407T11_ | 1.363981 | 0.447823 | 1.021832 | 0.357618 | 0.864019 | UP   | 407.4351 | 407.4346 | 407.4357 | 10.86874 | 10.83572 |
| 5840 | M209T12  | 1.456074 | 0.542084 | 0.98773  | 0.357659 | 0.864019 | UP   | 209.1511 | 209.151  | 209.1513 | 12.48519 | 12.44175 |
| 5841 | M268T10_ | 1.950076 | 0.96353  | 1.026599 | 0.357675 | 0.864019 | UP   | 268.076  | 268.0757 | 268.0762 | 9.960817 | 9.859233 |
| 5842 | M283T12  | 1.448968 | -0.53503 | -0.97595 | 0.357677 | 0.864019 | DOWN | 283.1971 | 283.1966 | 283.2069 | 11.50446 | 11.45297 |
| 5843 | M752T11_ | 1.172855 | -0.23002 | -0.97872 | 0.357705 | 0.864019 | DOWN | 751.5039 | 751.5035 | 751.5042 | 10.90519 | 10.88747 |
| 5844 | M866T10_ | 1.131575 | -0.17833 | -1.02784 | 0.357724 | 0.864019 | DOWN | 865.5346 | 865.534  | 865.5362 | 9.97155  | 9.859233 |

|      |          |          |          |          |          |          |      |          |          |          |          |          |
|------|----------|----------|----------|----------|----------|----------|------|----------|----------|----------|----------|----------|
| 5845 | M1028T9  | 2.190067 | 1.130975 | 1.032791 | 0.357764 | 0.864019 | UP   | 1028.442 | 1028.44  | 1028.444 | 9.416358 | 9.288883 |
| 5846 | M654T10_ | 1.259609 | 0.332976 | 1.005985 | 0.357794 | 0.864019 | UP   | 654.0217 | 654.0214 | 654.0223 | 9.970617 | 9.859233 |
| 5847 | M367T16  | 1.208185 | -0.27284 | -0.98065 | 0.357816 | 0.864019 | DOWN | 367.1361 | 367.136  | 367.1363 | 15.95783 | 15.92052 |
| 5848 | M463T11_ | 1.224109 | -0.29173 | -0.97592 | 0.357816 | 0.864019 | DOWN | 462.8205 | 462.8203 | 462.8213 | 10.91987 | 10.84847 |
| 5849 | M1004T10 | 1.623947 | -0.6995  | -0.9809  | 0.357826 | 0.864019 | DOWN | 1003.646 | 1003.645 | 1003.647 | 9.9351   | 9.853533 |
| 5850 | M1133T11 | 1.182082 | 0.24133  | 1.01556  | 0.357873 | 0.864019 | UP   | 1132.85  | 1132.85  | 1132.851 | 10.8926  | 10.87487 |
| 5851 | M255T9   | 1.755144 | -0.81159 | -1.01567 | 0.3579   | 0.864019 | DOWN | 254.8603 | 254.86   | 254.8604 | 9.322342 | 9.12675  |
| 5852 | M746T10_ | 1.362709 | 0.446478 | 1.034871 | 0.35808  | 0.864019 | UP   | 746.4693 | 746.4667 | 746.4703 | 9.839008 | 9.715683 |
| 5853 | M675T10_ | 2.551685 | 1.35145  | 1.031009 | 0.358089 | 0.864019 | UP   | 675.3479 | 675.3444 | 675.3488 | 9.9387   | 9.856867 |
| 5854 | M512T9_2 | 1.731825 | 0.792294 | 1.016475 | 0.358114 | 0.864019 | UP   | 511.6984 | 511.6982 | 511.6986 | 9.4601   | 9.370583 |
| 5855 | M256T10_ | 1.802527 | -0.85002 | -1.02489 | 0.358235 | 0.864019 | DOWN | 256.3198 | 256.3195 | 256.3199 | 9.960817 | 9.859233 |
| 5856 | M437T28  | 1.533376 | 0.616712 | 0.99348  | 0.358412 | 0.864019 | UP   | 436.7703 | 436.7697 | 436.7704 | 28.06917 | 27.98217 |
| 5857 | M417T9_9 | 1.352588 | 0.435723 | 0.974375 | 0.358426 | 0.864019 | UP   | 417.1104 | 417.1095 | 417.1139 | 9.249433 | 9.078567 |
| 5858 | M482T9_1 | 1.434772 | -0.52082 | -0.97541 | 0.358427 | 0.864019 | DOWN | 481.8377 | 481.8375 | 481.8381 | 9.275917 | 9.191133 |
| 5859 | M1685T10 | 1.299134 | -0.37755 | -0.98272 | 0.358458 | 0.864019 | DOWN | 1685.448 | 1685.446 | 1685.451 | 9.82645  | 9.728083 |
| 5860 | M715T27  | 1.180602 | -0.23952 | -0.97834 | 0.358484 | 0.864019 | DOWN | 714.5361 | 714.5356 | 714.5363 | 26.901   | 26.88233 |
| 5861 | M465T10_ | 1.239646 | 0.309928 | 0.982946 | 0.358531 | 0.864019 | UP   | 465.3372 | 465.3349 | 465.3375 | 10.189   | 10.08517 |
| 5862 | M513T10_ | 1.379197 | -0.46383 | -1.01135 | 0.358574 | 0.864019 | DOWN | 512.6538 | 512.6524 | 512.6542 | 10.4441  | 10.39298 |
| 5863 | M364T10_ | 1.373937 | 0.458316 | 1.028701 | 0.358606 | 0.864019 | UP   | 363.8832 | 363.8822 | 363.8836 | 9.84095  | 9.715683 |
| 5864 | M1126T10 | 1.333251 | -0.41495 | -1.00798 | 0.358629 | 0.864019 | DOWN | 1125.819 | 1125.818 | 1125.82  | 9.979667 | 9.885167 |
| 5865 | M288T11_ | 163.4587 | 7.352782 | 1.036116 | 0.358674 | 0.864019 | UP   | 288.1495 | 288.1493 | 288.1496 | 11.43215 | 11.42402 |
| 5866 | M241T11_ | 1.260436 | -0.33392 | -0.97426 | 0.358793 | 0.864019 | DOWN | 241.3117 | 241.3117 | 241.3118 | 10.91674 | 10.87765 |
| 5867 | M810T10_ | 1.271313 | -0.34632 | -1.00852 | 0.358838 | 0.86402  | DOWN | 809.5612 | 809.5602 | 809.5616 | 9.900133 | 9.811217 |
| 5868 | M171T9_3 | 1.197014 | -0.25944 | -0.97542 | 0.358967 | 0.86402  | DOWN | 171.1042 | 171.1033 | 171.1045 | 9.333667 | 9.219483 |
| 5869 | M360T29  | 1.154407 | -0.20715 | -0.9738  | 0.359047 | 0.86402  | DOWN | 360.3469 | 360.3468 | 360.347  | 29.28117 | 29.27483 |
| 5870 | M213T10_ | 1.216298 | 0.282496 | 0.99092  | 0.359085 | 0.86402  | UP   | 213.3937 | 213.3935 | 213.3944 | 9.918833 | 9.811217 |
| 5871 | M271T10_ | 1.310429 | 0.39004  | 0.98739  | 0.359114 | 0.86402  | UP   | 271.0621 | 271.0619 | 271.0622 | 9.983467 | 9.8753   |
| 5872 | M392T9_3 | 1.285795 | -0.36266 | -0.97514 | 0.359131 | 0.86402  | DOWN | 391.9367 | 391.9363 | 391.9418 | 9.237667 | 9.1428   |
| 5873 | M213T9_4 | 1.544604 | -0.62724 | -1.01798 | 0.359143 | 0.86402  | DOWN | 212.6083 | 212.6079 | 212.6091 | 9.2129   | 9.1178   |
| 5874 | M254T26  | 1.328771 | 0.410092 | 0.975003 | 0.359181 | 0.86402  | UP   | 254.1534 | 254.1533 | 254.1535 | 25.75267 | 25.7395  |
| 5875 | M472T9_3 | 1.144716 | 0.19499  | 0.972798 | 0.359184 | 0.86402  | UP   | 471.8617 | 471.8615 | 471.8619 | 9.220933 | 9.129317 |
| 5876 | M641T10_ | 1.288611 | -0.36582 | -0.97692 | 0.359212 | 0.86402  | DOWN | 640.7819 | 640.7815 | 640.7825 | 9.825767 | 9.699733 |
| 5877 | M1091T10 | 1.170521 | 0.227151 | 0.979932 | 0.359215 | 0.86402  | UP   | 1090.717 | 1090.715 | 1090.721 | 9.834117 | 9.715683 |
| 5878 | M469T41  | 18.51324 | -4.21049 | -1.03478 | 0.359225 | 0.86402  | DOWN | 469.3133 | 469.3129 | 469.3135 | 40.87    | 40.8415  |
| 5879 | M752T10_ | 2.164799 | 1.114233 | 1.032256 | 0.359246 | 0.86402  | UP   | 752.1605 | 752.1577 | 752.161  | 9.846225 | 9.715683 |



|      |          |          |          |          |          |          |      |          |          |          |          |          |
|------|----------|----------|----------|----------|----------|----------|------|----------|----------|----------|----------|----------|
| 5880 | M254T12  | 94.47284 | -6.56183 | -1.03444 | 0.359364 | 0.86402  | DOWN | 254.1385 | 254.1384 | 254.1388 | 11.52295 | 11.48308 |
| 5881 | M454T11_ | 3.666839 | -1.87454 | -1.03339 | 0.359414 | 0.86402  | DOWN | 454.327  | 454.3268 | 454.328  | 10.86275 | 10.81958 |
| 5882 | M434T11_ | 1.12581  | 0.170963 | 0.988098 | 0.359426 | 0.86402  | UP   | 434.3267 | 434.326  | 434.327  | 10.90548 | 10.87487 |
| 5883 | M340T10_ | 1.599528 | -0.67765 | -0.9749  | 0.359442 | 0.86402  | DOWN | 339.7297 | 339.7295 | 339.73   | 9.806942 | 9.715683 |
| 5884 | M1413T10 | 1.527421 | -0.6111  | -0.98437 | 0.359492 | 0.86402  | DOWN | 1413.242 | 1413.241 | 1413.248 | 9.912633 | 9.900133 |
| 5885 | M211T11_ | 1.095408 | -0.13147 | -0.9746  | 0.359555 | 0.86402  | DOWN | 211.152  | 211.152  | 211.1521 | 10.90659 | 10.89355 |
| 5886 | M348T10_ | 1.081863 | -0.11352 | -0.99984 | 0.359631 | 0.86402  | DOWN | 348.4955 | 348.4953 | 348.4957 | 9.872475 | 9.747533 |
| 5887 | M259T10_ | 1.322698 | -0.40348 | -0.98307 | 0.359635 | 0.86402  | DOWN | 258.8602 | 258.86   | 258.8604 | 9.81635  | 9.699733 |
| 5888 | M520T12_ | 1.156025 | -0.20917 | -0.97236 | 0.359713 | 0.86402  | DOWN | 520.3935 | 520.3933 | 520.3937 | 11.63474 | 11.61345 |
| 5889 | M676T10_ | 1.247858 | -0.31945 | -0.9746  | 0.359723 | 0.86402  | DOWN | 676.4115 | 676.4093 | 676.4124 | 9.86435  | 9.743667 |
| 5890 | M572T10_ | 1.114312 | -0.15615 | -0.98067 | 0.359769 | 0.86402  | DOWN | 571.9831 | 571.9825 | 571.9833 | 9.9149   | 9.79535  |
| 5891 | M1851T10 | 1.260283 | -0.33375 | -0.99094 | 0.359818 | 0.86402  | DOWN | 1851.282 | 1851.281 | 1851.286 | 9.822467 | 9.715683 |
| 5892 | M378T43_ | 3.575328 | -1.83808 | -1.03199 | 0.359831 | 0.86402  | DOWN | 378.2482 | 378.2481 | 378.2484 | 42.94167 | 42.78333 |
| 5893 | M278T10_ | 1.402794 | -0.4883  | -0.97169 | 0.359917 | 0.86402  | DOWN | 278.2991 | 278.2989 | 278.2995 | 9.932033 | 9.843367 |
| 5894 | M331T10_ | 1.30771  | 0.387042 | 1.015236 | 0.359977 | 0.86402  | UP   | 331.4634 | 331.459  | 331.4635 | 9.97155  | 9.856867 |
| 5895 | M850T11_ | 1.134504 | -0.18206 | -0.97698 | 0.359981 | 0.86402  | DOWN | 850.1805 | 850.1798 | 850.1813 | 10.90519 | 10.879   |
| 5896 | M421T11_ | 1.696862 | 0.762869 | 1.025054 | 0.360059 | 0.86402  | UP   | 421.3124 | 421.3121 | 421.3132 | 10.90343 | 10.879   |
| 5897 | M643T10_ | 1.216673 | -0.28294 | -1.00175 | 0.360099 | 0.86402  | DOWN | 643.1203 | 643.1143 | 643.1234 | 9.830558 | 9.699733 |
| 5898 | M497T9_9 | 1.412401 | -0.49815 | -0.97846 | 0.360318 | 0.86402  | DOWN | 497.1239 | 497.1233 | 497.1247 | 9.365833 | 9.191133 |
| 5899 | M355T20_ | 1.190719 | -0.25183 | -1.00336 | 0.360338 | 0.86402  | DOWN | 355.2378 | 355.2376 | 355.238  | 19.88958 | 19.88183 |
| 5900 | M220T10_ | 1.690716 | 0.757635 | 1.008219 | 0.360362 | 0.86402  | UP   | 220.2266 | 220.2265 | 220.2268 | 9.886783 | 9.859667 |
| 5901 | M330T10_ | 1.154575 | -0.20736 | -0.97248 | 0.360401 | 0.864021 | DOWN | 329.7769 | 329.7767 | 329.7773 | 9.902617 | 9.665433 |
| 5902 | M436T9_6 | 1.631137 | 0.705878 | 1.022426 | 0.360512 | 0.864021 | UP   | 435.8454 | 435.8452 | 435.8459 | 9.325533 | 9.275917 |
| 5903 | M438T43_ | 1.081408 | -0.11291 | -1.02588 | 0.360611 | 0.864021 | DOWN | 438.2693 | 438.2692 | 438.2695 | 43.3445  | 43.12867 |
| 5904 | M591T35  | 2.883892 | 1.528017 | 1.030664 | 0.36062  | 0.864021 | UP   | 591.4295 | 591.4291 | 591.4301 | 34.55217 | 34.53717 |
| 5905 | M271T45  | 1.236869 | -0.30669 | -0.97055 | 0.360621 | 0.864021 | DOWN | 271.1901 | 271.1899 | 271.1902 | 44.768   | 44.46583 |
| 5906 | M678T10_ | 1.171588 | -0.22847 | -0.99521 | 0.360739 | 0.864021 | DOWN | 677.5116 | 677.5113 | 677.5126 | 9.825767 | 9.715683 |
| 5907 | M407T23  | 1.235477 | -0.30507 | -0.97311 | 0.360743 | 0.864021 | DOWN | 407.3554 | 407.355  | 407.3564 | 22.71217 | 22.683   |
| 5908 | M518T43_ | 1.261193 | 0.334789 | 0.972289 | 0.360755 | 0.864021 | UP   | 518.2955 | 518.2953 | 518.2958 | 42.61067 | 42.43817 |
| 5909 | M221T10_ | 5.526832 | 2.466453 | 1.030179 | 0.360797 | 0.864021 | UP   | 220.5365 | 220.5363 | 220.5488 | 9.918133 | 9.715683 |
| 5910 | M500T9_4 | 1.258663 | -0.33189 | -0.99008 | 0.360823 | 0.864021 | DOWN | 499.7956 | 499.7953 | 499.7963 | 9.155008 | 9.07945  |
| 5911 | M214T9_1 | 2.179697 | 1.124128 | 1.025517 | 0.36086  | 0.864021 | UP   | 214.1335 | 214.1317 | 214.1341 | 9.328967 | 9.1322   |
| 5912 | M564T42_ | 1.273052 | 0.348291 | 0.970442 | 0.360873 | 0.864021 | UP   | 564.3013 | 564.301  | 564.3016 | 41.53183 | 41.44583 |
| 5913 | M1958T10 | 1.665671 | 0.736103 | 1.004861 | 0.360886 | 0.864021 | UP   | 1958.384 | 1958.383 | 1958.386 | 9.870017 | 9.79065  |
| 5914 | M414T9_1 | 1.430184 | -0.5162  | -0.97003 | 0.360973 | 0.864021 | DOWN | 414.2234 | 414.2226 | 414.2239 | 9.306642 | 9.20785  |

|      |          |          |          |          |          |          |      |          |          |          |          |          |
|------|----------|----------|----------|----------|----------|----------|------|----------|----------|----------|----------|----------|
| 5915 | M407T9_3 | 1.535512 | -0.61872 | -0.96888 | 0.360982 | 0.864021 | DOWN | 407.2252 | 407.2249 | 407.2254 | 8.843083 | 8.679733 |
| 5916 | M879T10_ | 1.111483 | -0.15249 | -0.98105 | 0.361034 | 0.864021 | DOWN | 879.1271 | 879.1264 | 879.128  | 9.9091   | 9.79535  |
| 5917 | M223T11_ | 1.129431 | -0.1756  | -0.97338 | 0.361042 | 0.864021 | DOWN | 222.854  | 222.8538 | 222.8543 | 10.92487 | 10.879   |
| 5918 | M163T10_ | 1.282703 | 0.359187 | 0.970379 | 0.361086 | 0.864021 | UP   | 162.6669 | 162.6666 | 162.6669 | 9.754208 | 9.636483 |
| 5919 | M348T10_ | 1.182759 | -0.24216 | -0.98139 | 0.361095 | 0.864021 | DOWN | 348.2567 | 348.2566 | 348.2568 | 9.63565  | 9.52595  |
| 5920 | M913T10_ | 1.403896 | -0.48944 | -0.96917 | 0.361194 | 0.864021 | DOWN | 912.9194 | 912.9187 | 912.9206 | 9.983217 | 9.946367 |
| 5921 | M773T10_ | 1.715677 | 0.778778 | 1.029582 | 0.361308 | 0.864021 | UP   | 773.0236 | 773.0194 | 773.0248 | 9.823575 | 9.715683 |
| 5922 | M231T10_ | 1.099141 | -0.13638 | -0.96884 | 0.361395 | 0.864021 | DOWN | 230.6872 | 230.6871 | 230.6872 | 9.924308 | 9.811217 |
| 5923 | M493T11_ | 1.195776 | -0.25795 | -0.99888 | 0.361437 | 0.864021 | DOWN | 492.6385 | 492.6381 | 492.6388 | 10.93338 | 10.89355 |
| 5924 | M163T10_ | 1.195221 | 0.257277 | 0.973968 | 0.361503 | 0.864021 | UP   | 163.2027 | 163.2027 | 163.2028 | 9.983433 | 9.8753   |
| 5925 | M846T11  | 1.478766 | 0.564394 | 0.968334 | 0.36151  | 0.864021 | UP   | 845.5712 | 845.5696 | 845.5718 | 10.8926  | 10.89125 |
| 5926 | M448T9_1 | 1.370661 | -0.45487 | -0.98591 | 0.361549 | 0.864021 | DOWN | 447.5277 | 447.5273 | 447.5281 | 9.262217 | 9.142767 |
| 5927 | M1506T10 | 1.338048 | -0.42013 | -0.98558 | 0.361762 | 0.864021 | DOWN | 1506.244 | 1506.241 | 1506.245 | 9.887817 | 9.79535  |
| 5928 | M326T23  | 1.18253  | -0.24188 | -0.98988 | 0.36177  | 0.864021 | DOWN | 326.196  | 326.1959 | 326.1961 | 23.3945  | 23.36683 |
| 5929 | M1337T10 | 1.787714 | 0.838116 | 1.014522 | 0.361777 | 0.864021 | UP   | 1337.202 | 1337.201 | 1337.205 | 9.874067 | 9.79535  |
| 5930 | M294T11  | 7.849748 | 2.972646 | 1.028478 | 0.361803 | 0.864021 | UP   | 294.2487 | 294.2427 | 294.2491 | 10.91734 | 10.85838 |
| 5931 | M171T12  | 1.765013 | -0.81968 | -1.01832 | 0.361824 | 0.864021 | DOWN | 171.1166 | 171.1164 | 171.1167 | 12.2665  | 12.2226  |
| 5932 | M202T11_ | 1.152061 | -0.20422 | -0.97097 | 0.36183  | 0.864021 | DOWN | 202.0097 | 202.0096 | 202.0099 | 10.90519 | 10.879   |
| 5933 | M315T40  | 1.49524  | -0.58038 | -0.9724  | 0.361862 | 0.864021 | DOWN | 315.1799 | 315.1799 | 315.1801 | 40.16533 | 39.8775  |
| 5934 | M537T28  | 140.8812 | 7.138335 | 1.028293 | 0.361925 | 0.864021 | UP   | 537.3511 | 537.3506 | 537.3518 | 27.69583 | 27.66417 |
| 5935 | M548T10_ | 2.97179  | 1.571332 | 1.027421 | 0.361927 | 0.864021 | UP   | 548.2886 | 548.2883 | 548.2892 | 9.983467 | 9.8753   |
| 5936 | M501T10_ | 1.675073 | 0.744224 | 1.013108 | 0.362013 | 0.864022 | UP   | 500.836  | 500.835  | 500.8367 | 9.787492 | 9.699733 |
| 5937 | M499T11  | 1.236802 | -0.30661 | -0.9937  | 0.36207  | 0.864022 | DOWN | 498.5992 | 498.5988 | 498.5993 | 10.90765 | 10.879   |
| 5938 | M716T12  | 1.188199 | 0.248776 | 0.966599 | 0.362124 | 0.864022 | UP   | 716.4937 | 716.4932 | 716.4942 | 11.62748 | 11.57545 |
| 5939 | M151T45  | 1.111346 | -0.15231 | -1.00663 | 0.36213  | 0.864022 | DOWN | 151.1115 | 151.1114 | 151.1115 | 44.79667 | 44.7535  |
| 5940 | M361T11_ | 1.177918 | -0.23624 | -0.96899 | 0.362243 | 0.864022 | DOWN | 361.4199 | 361.4197 | 361.4209 | 10.90519 | 10.879   |
| 5941 | M1775T10 | 1.658285 | 0.729692 | 1.021508 | 0.362267 | 0.864022 | UP   | 1775.012 | 1775.01  | 1775.016 | 9.85305  | 9.728083 |
| 5942 | M255T11_ | 1.28921  | 0.366488 | 0.974603 | 0.362276 | 0.864022 | UP   | 255.0573 | 255.0572 | 255.0574 | 10.88306 | 10.8646  |
| 5943 | M328T10_ | 1.125317 | -0.17033 | -0.96671 | 0.362392 | 0.864022 | DOWN | 327.8811 | 327.8809 | 327.8815 | 9.8207   | 9.715683 |
| 5944 | M210T10_ | 1.169998 | -0.22651 | -0.96879 | 0.362427 | 0.864022 | DOWN | 210.2645 | 210.2644 | 210.272  | 9.823317 | 9.715683 |
| 5945 | M369T9_1 | 1.30205  | -0.38078 | -0.97084 | 0.36246  | 0.864022 | DOWN | 368.8557 | 368.8541 | 368.8563 | 9.203808 | 9.126783 |
| 5946 | M547T21  | 1.235299 | -0.30486 | -0.96564 | 0.362513 | 0.864022 | DOWN | 547.4656 | 547.4646 | 547.4671 | 21.20317 | 21.1795  |
| 5947 | M230T10_ | 1.283918 | -0.36055 | -0.97016 | 0.36259  | 0.864022 | DOWN | 229.5362 | 229.5315 | 229.5407 | 9.887642 | 9.79535  |
| 5948 | M261T10_ | 3.46044  | 1.790955 | 0.997731 | 0.362628 | 0.864022 | UP   | 261.0824 | 261.0823 | 261.0825 | 9.977533 | 9.916767 |
| 5949 | M1711T9  | 323.8202 | 8.339049 | 1.026409 | 0.362712 | 0.864022 | UP   | 1711.391 | 1711.39  | 1711.396 | 9.333667 | 9.311883 |

|      |          |          |          |          |          |          |      |          |          |          |          |          |
|------|----------|----------|----------|----------|----------|----------|------|----------|----------|----------|----------|----------|
| 5950 | M314T9_6 | 1.142781 | -0.19255 | -0.96603 | 0.36272  | 0.864022 | DOWN | 314.1102 | 314.1098 | 314.1103 | 9.294567 | 9.129317 |
| 5951 | M1110T10 | 1.13849  | -0.18712 | -0.99504 | 0.362746 | 0.864022 | DOWN | 1110.436 | 1110.435 | 1110.437 | 9.75145  | 9.65225  |
| 5952 | M373T10_ | 2.110242 | 1.077408 | 1.022687 | 0.362762 | 0.864022 | UP   | 372.8483 | 372.8482 | 372.8486 | 9.8153   | 9.715683 |
| 5953 | M508T10_ | 23.38479 | 4.547499 | 1.025924 | 0.362906 | 0.864022 | UP   | 508.2982 | 508.298  | 508.2982 | 9.567617 | 9.447617 |
| 5954 | M699T10_ | 1.610673 | 0.687664 | 1.022817 | 0.362942 | 0.864022 | UP   | 699.4439 | 699.4435 | 699.4443 | 9.825492 | 9.715683 |
| 5955 | M454T17  | 1.5836   | -0.66321 | -1.02184 | 0.36296  | 0.864022 | DOWN | 454.3463 | 454.3458 | 454.3463 | 17.43767 | 17.25617 |
| 5956 | M551T11_ | 1.229819 | -0.29845 | -0.99132 | 0.363012 | 0.864022 | DOWN | 551.3384 | 551.3378 | 551.3406 | 10.67448 | 10.61667 |
| 5957 | M438T39_ | 1.129111 | 0.175188 | 0.982487 | 0.363053 | 0.864022 | UP   | 438.2694 | 438.2692 | 438.2695 | 39.158   | 39.0715  |
| 5958 | M447T9_1 | 1.581389 | -0.66119 | -0.96578 | 0.363115 | 0.864022 | DOWN | 446.6394 | 446.6386 | 446.64   | 8.738925 | 8.667783 |
| 5959 | M478T39_ | 1.238206 | 0.308251 | 0.97475  | 0.363193 | 0.864022 | UP   | 478.2644 | 478.2642 | 478.2647 | 39.46017 | 39.2875  |
| 5960 | M243T10_ | 1.220073 | -0.28697 | -0.99144 | 0.363203 | 0.864022 | DOWN | 242.5995 | 242.5995 | 242.5997 | 9.830508 | 9.715683 |
| 5961 | M459T10_ | 1.876576 | -0.9081  | -0.9966  | 0.363259 | 0.864022 | DOWN | 459.2041 | 459.203  | 459.2047 | 9.960817 | 9.843367 |
| 5962 | M351T9_6 | 1.355275 | 0.438586 | 0.966031 | 0.363271 | 0.864022 | UP   | 350.758  | 350.7577 | 350.7688 | 9.458417 | 9.317    |
| 5963 | M504T9_3 | 1.204482 | -0.26841 | -0.9693  | 0.363344 | 0.864022 | DOWN | 504.2809 | 504.2774 | 504.2818 | 9.36145  | 9.22495  |
| 5964 | M698T11  | 1.212956 | -0.27853 | -0.98324 | 0.363352 | 0.864022 | DOWN | 698.0399 | 698.0389 | 698.0403 | 10.90197 | 10.88995 |
| 5965 | M680T10_ | 1.071115 | -0.09911 | -0.9718  | 0.363365 | 0.864022 | DOWN | 679.5095 | 679.509  | 679.5104 | 9.84095  | 9.715683 |
| 5966 | M518T10_ | 1.563389 | 0.644676 | 1.015813 | 0.363379 | 0.864022 | UP   | 518.4388 | 518.4383 | 518.4389 | 9.989733 | 9.8914   |
| 5967 | M718T10_ | 1.453902 | 0.53993  | 1.018851 | 0.363449 | 0.864022 | UP   | 718.4704 | 718.4699 | 718.4706 | 9.844267 | 9.715683 |
| 5968 | M335T9_1 | 2.260605 | -1.17671 | -1.00965 | 0.363486 | 0.864022 | DOWN | 335.3168 | 335.3165 | 335.3171 | 9.174883 | 9.142767 |
| 5969 | M211T10_ | 1.706367 | -0.77093 | -0.97991 | 0.363488 | 0.864022 | DOWN | 211.1962 | 211.1922 | 211.2003 | 9.858033 | 9.699733 |
| 5970 | M232T21  | 1.200956 | -0.26418 | -0.98773 | 0.363686 | 0.864023 | DOWN | 232.1694 | 232.1693 | 232.1695 | 20.76567 | 20.7635  |
| 5971 | M188T9_1 | 3.349527 | 1.743958 | 1.013473 | 0.363713 | 0.864023 | UP   | 188.4773 | 188.4725 | 188.478  | 9.365742 | 9.1175   |
| 5972 | M472T25_ | 1.46349  | -0.54941 | -0.98336 | 0.363787 | 0.864023 | DOWN | 472.3399 | 472.3393 | 472.3403 | 25.26067 | 25.14333 |
| 5973 | M671T10_ | 1.247371 | 0.318891 | 0.963731 | 0.363789 | 0.864023 | UP   | 671.3847 | 671.3825 | 671.3855 | 9.76065  | 9.65225  |
| 5974 | M647T9_4 | 1.390877 | -0.476   | -0.96582 | 0.363792 | 0.864023 | DOWN | 647.0703 | 647.0697 | 647.0805 | 9.297858 | 9.219483 |
| 5975 | M461T11_ | 1.140755 | -0.18999 | -0.97077 | 0.363826 | 0.864023 | DOWN | 461.4881 | 461.4878 | 461.4882 | 10.90519 | 10.879   |
| 5976 | M394T9_3 | 1.295619 | 0.373641 | 0.964573 | 0.363843 | 0.864023 | UP   | 393.9766 | 393.9759 | 393.9773 | 8.872733 | 8.7891   |
| 5977 | M396T10_ | 1.095844 | -0.13204 | -0.96406 | 0.363849 | 0.864023 | DOWN | 395.7582 | 395.758  | 395.7583 | 9.917167 | 9.811217 |
| 5978 | M590T35  | 2.675924 | 1.420037 | 1.021329 | 0.363887 | 0.864023 | UP   | 590.4261 | 590.4258 | 590.4262 | 34.55142 | 34.5155  |
| 5979 | M444T45  | 1.029588 | 0.042067 | 0.963171 | 0.363899 | 0.864023 | UP   | 444.4044 | 444.4041 | 444.4046 | 44.80392 | 44.78217 |
| 5980 | M400T11_ | 1.410739 | -0.49645 | -0.96394 | 0.363904 | 0.864023 | DOWN | 400.4011 | 400.4006 | 400.4015 | 10.94835 | 10.81958 |
| 5981 | M619T10_ | 1.924104 | 0.944187 | 1.020944 | 0.363945 | 0.864023 | UP   | 618.5931 | 618.5923 | 618.5969 | 9.823575 | 9.715683 |
| 5982 | M216T10_ | 1.352252 | -0.43536 | -0.96734 | 0.364008 | 0.864023 | DOWN | 216.3464 | 216.346  | 216.3471 | 9.830333 | 9.715683 |
| 5983 | M682T10_ | 1.200866 | -0.26408 | -1.0025  | 0.364036 | 0.864023 | DOWN | 681.931  | 681.9304 | 681.9319 | 9.886608 | 9.747533 |
| 5984 | M787T10_ | 1.246875 | -0.31832 | -0.98546 | 0.364036 | 0.864023 | DOWN | 787.2988 | 787.2979 | 787.2996 | 9.938708 | 9.8378   |

|      |          |          |          |          |          |          |      |          |          |          |          |          |
|------|----------|----------|----------|----------|----------|----------|------|----------|----------|----------|----------|----------|
| 5985 | M379T32_ | 2.061989 | -1.04404 | -0.98912 | 0.364044 | 0.864023 | DOWN | 378.9423 | 378.9418 | 378.9424 | 31.69567 | 31.6525  |
| 5986 | M324T9_8 | 1.504094 | -0.58889 | -0.96232 | 0.364083 | 0.864023 | DOWN | 324.1106 | 324.1084 | 324.113  | 9.168958 | 9.079083 |
| 5987 | M416T25_ | 1.098123 | 0.135039 | 0.964627 | 0.364183 | 0.864023 | UP   | 416.2146 | 416.2145 | 416.2148 | 24.59817 | 24.5795  |
| 5988 | M310T10_ | 1.202248 | -0.26574 | -0.98565 | 0.364184 | 0.864023 | DOWN | 310.188  | 310.1876 | 310.188  | 9.903017 | 9.811217 |
| 5989 | M335T10_ | 1.167232 | -0.22309 | -0.98194 | 0.364204 | 0.864023 | DOWN | 334.5025 | 334.5023 | 334.5027 | 9.8207   | 9.715683 |
| 5990 | M879T11_ | 1.301933 | -0.38065 | -0.99562 | 0.364247 | 0.864023 | DOWN | 878.5441 | 878.543  | 878.5455 | 10.7837  | 10.76313 |
| 5991 | M227T11_ | 1.19432  | -0.25619 | -0.97647 | 0.36429  | 0.864023 | DOWN | 226.5281 | 226.5281 | 226.5282 | 10.90551 | 10.879   |
| 5992 | M703T10_ | 1.125888 | -0.17106 | -0.9666  | 0.36432  | 0.864023 | DOWN | 702.9276 | 702.9272 | 702.9285 | 9.830733 | 9.715683 |
| 5993 | M694T9_2 | 1.405917 | -0.49151 | -0.99483 | 0.364346 | 0.864023 | DOWN | 693.8432 | 693.8427 | 693.8435 | 9.313325 | 9.234417 |
| 5994 | M818T10_ | 1.10887  | -0.14909 | -0.96591 | 0.364386 | 0.864023 | DOWN | 817.8225 | 817.8219 | 817.8235 | 9.915583 | 9.79535  |
| 5995 | M251T10_ | 2.057844 | -1.04113 | -1.02059 | 0.364401 | 0.864023 | DOWN | 250.9223 | 250.922  | 250.9224 | 9.986767 | 9.8914   |
| 5996 | M308T10_ | 1.306872 | -0.38612 | -0.96218 | 0.364413 | 0.864023 | DOWN | 307.8966 | 307.8928 | 307.8969 | 9.902617 | 9.79535  |
| 5997 | M726T10_ | 1.548498 | 0.63087  | 1.017777 | 0.364538 | 0.864023 | UP   | 725.559  | 725.5571 | 725.5595 | 9.858425 | 9.73145  |
| 5998 | M786T10_ | 1.44952  | -0.53557 | -0.9703  | 0.364567 | 0.864023 | DOWN | 786.4967 | 786.4953 | 786.4987 | 9.6055   | 9.52595  |
| 5999 | M520T9_2 | 1.374273 | -0.45867 | -0.96526 | 0.364571 | 0.864023 | DOWN | 519.5891 | 519.5879 | 519.5903 | 9.160408 | 9.142767 |
| 6000 | M683T10_ | 1.095007 | -0.13094 | -0.98077 | 0.364613 | 0.864023 | DOWN | 682.5214 | 682.521  | 682.5216 | 9.84095  | 9.715683 |
| 6001 | M189T10_ | 1.198721 | -0.2615  | -0.96354 | 0.364657 | 0.864023 | DOWN | 188.7465 | 188.7462 | 188.7465 | 9.970617 | 9.8753   |
| 6002 | M1552T10 | 1.458483 | -0.54447 | -0.96479 | 0.364778 | 0.864023 | DOWN | 1551.641 | 1551.637 | 1551.644 | 9.86645  | 9.857983 |
| 6003 | M808T10_ | 1.124022 | -0.16867 | -0.96091 | 0.364795 | 0.864023 | DOWN | 807.97   | 807.9688 | 807.9707 | 10.27475 | 10.18238 |
| 6004 | M1566T9  | 244.8883 | 7.93598  | 1.021135 | 0.364923 | 0.864023 | UP   | 1565.799 | 1565.796 | 1565.805 | 9.38065  | 9.333667 |
| 6005 | M415T9_9 | 1.382874 | 0.467669 | 0.960672 | 0.36498  | 0.864023 | UP   | 415.3472 | 415.3461 | 415.3519 | 9.178417 | 9.129317 |
| 6006 | M697T10_ | 3.034825 | -1.60161 | -1.01895 | 0.365097 | 0.864023 | DOWN | 697.2621 | 697.261  | 697.2627 | 9.830833 | 9.715683 |
| 6007 | M678T10_ | 1.587828 | 0.667055 | 1.0197   | 0.365105 | 0.864023 | UP   | 677.6041 | 677.6036 | 677.6052 | 9.847817 | 9.715683 |
| 6008 | M471T9_2 | 1.433501 | -0.51954 | -0.96123 | 0.365121 | 0.864023 | DOWN | 470.9781 | 470.9767 | 470.9801 | 9.439233 | 9.41815  |
| 6009 | M589T10_ | 1.118614 | -0.16171 | -0.9613  | 0.36515  | 0.864023 | DOWN | 589.3984 | 589.3977 | 589.3986 | 9.939575 | 9.827283 |
| 6010 | M424T11_ | 1.210096 | -0.27512 | -0.97314 | 0.365154 | 0.864023 | DOWN | 424.3447 | 424.3445 | 424.3448 | 10.62797 | 10.59763 |
| 6011 | M200T10_ | 1.068479 | -0.09556 | -0.96015 | 0.365272 | 0.864024 | DOWN | 200.2439 | 200.2438 | 200.2441 | 9.857833 | 9.747533 |
| 6012 | M289T23_ | 1.070753 | -0.09863 | -0.98975 | 0.365297 | 0.864024 | DOWN | 289.4286 | 289.4284 | 289.4288 | 22.90042 | 22.88567 |
| 6013 | M1332T10 | 1.17591  | 0.233778 | 0.966017 | 0.365325 | 0.864024 | UP   | 1331.741 | 1331.74  | 1331.742 | 9.96665  | 9.8753   |
| 6014 | M242T13  | 2.045325 | 1.03233  | 1.018844 | 0.365327 | 0.864024 | UP   | 242.1748 | 242.1747 | 242.1749 | 13.18607 | 12.95185 |
| 6015 | M283T10_ | 1.330139 | 0.411577 | 0.973841 | 0.3654   | 0.864024 | UP   | 282.5944 | 282.5941 | 282.5945 | 9.975217 | 9.859233 |
| 6016 | M407T9_4 | 1.422817 | 0.50875  | 0.966982 | 0.365429 | 0.864024 | UP   | 407.225  | 407.2247 | 407.2343 | 9.226258 | 9.1158   |
| 6017 | M199T9_1 | 3.040529 | 1.604322 | 1.015021 | 0.365459 | 0.864024 | UP   | 199.4865 | 199.4762 | 199.4882 | 9.36565  | 9.111033 |
| 6018 | M724T10_ | 1.766017 | 0.8205   | 1.018475 | 0.365482 | 0.864024 | UP   | 723.5069 | 723.5004 | 723.5076 | 9.8018   | 9.602967 |
| 6019 | M617T9_1 | 1.35738  | -0.44083 | -0.97104 | 0.365518 | 0.864024 | DOWN | 616.5539 | 616.5464 | 616.555  | 9.182992 | 9.1445   |

|      |          |          |          |          |          |          |      |          |          |          |          |          |
|------|----------|----------|----------|----------|----------|----------|------|----------|----------|----------|----------|----------|
| 6020 | M358T11_ | 1.23635  | -0.30609 | -0.96861 | 0.365544 | 0.864024 | DOWN | 358.2119 | 358.2118 | 358.2119 | 10.89133 | 10.88747 |
| 6021 | M1033T12 | 1.390902 | -0.47602 | -0.95914 | 0.365584 | 0.864024 | DOWN | 1032.542 | 1032.542 | 1032.542 | 11.60483 | 11.56978 |
| 6022 | M167T9_6 | 3.150398 | 1.655534 | 1.015473 | 0.365612 | 0.864024 | UP   | 167.2168 | 167.2166 | 167.2171 | 9.126783 | 9.110833 |
| 6023 | M522T33  | 2.576372 | 1.365341 | 1.008175 | 0.36571  | 0.864024 | UP   | 522.355  | 522.3545 | 522.3554 | 33.36917 | 33.34033 |
| 6024 | M1216T11 | 1.262511 | -0.3363  | -0.97104 | 0.365747 | 0.864024 | DOWN | 1215.903 | 1215.902 | 1215.904 | 10.91519 | 10.88747 |
| 6025 | M204T10_ | 1.241151 | -0.31168 | -0.97472 | 0.365873 | 0.864024 | DOWN | 203.8864 | 203.8863 | 203.8866 | 9.825492 | 9.715683 |
| 6026 | M584T9_9 | 7.060623 | 2.819795 | 1.018587 | 0.365883 | 0.864024 | UP   | 584.4376 | 584.4368 | 584.4389 | 9.199675 | 9.05865  |
| 6027 | M302T11_ | 1.593232 | 0.671956 | 1.017074 | 0.365916 | 0.864024 | UP   | 302.2115 | 302.2114 | 302.2115 | 10.57278 | 10.56775 |
| 6028 | M315T10_ | 3.521338 | 1.816124 | 1.018088 | 0.366004 | 0.864024 | UP   | 315.2832 | 315.2806 | 315.2834 | 9.512983 | 9.431017 |
| 6029 | M525T10_ | 1.391732 | -0.47688 | -0.99421 | 0.366006 | 0.864024 | DOWN | 524.9299 | 524.9297 | 524.9301 | 9.9351   | 9.8378   |
| 6030 | M570T10_ | 1.145259 | -0.19567 | -0.96044 | 0.366039 | 0.864024 | DOWN | 570.3922 | 570.3916 | 570.3924 | 9.957333 | 9.859233 |
| 6031 | M338T10_ | 1.562907 | 0.644232 | 0.978097 | 0.366067 | 0.864024 | UP   | 338.3305 | 338.3301 | 338.3306 | 9.886433 | 9.856867 |
| 6032 | M409T11_ | 1.227641 | -0.29589 | -0.96226 | 0.366115 | 0.864024 | DOWN | 409.4663 | 409.4656 | 409.4667 | 10.93338 | 10.89355 |
| 6033 | M333T12_ | 1.125994 | -0.1712  | -0.95797 | 0.366131 | 0.864024 | DOWN | 332.9781 | 332.9779 | 332.9782 | 11.73907 | 11.69992 |
| 6034 | M437T25_ | 1.446662 | 0.532728 | 0.997423 | 0.366396 | 0.864024 | UP   | 437.1929 | 437.1929 | 437.1932 | 24.59467 | 24.5795  |
| 6035 | M330T13  | 42.83069 | 5.420573 | 1.017611 | 0.366406 | 0.864024 | UP   | 330.1712 | 330.1712 | 330.1712 | 12.95385 | 12.9227  |
| 6036 | M1040T22 | 1.437123 | -0.52318 | -0.96366 | 0.36643  | 0.864024 | DOWN | 1039.719 | 1039.718 | 1039.721 | 22.2625  | 22.22517 |
| 6037 | M347T9_9 | 1.182514 | -0.24186 | -0.95746 | 0.366488 | 0.864024 | DOWN | 347.4274 | 347.4268 | 347.4276 | 8.985492 | 8.892117 |
| 6038 | M836T22_ | 1.255778 | -0.32858 | -0.99068 | 0.36652  | 0.864024 | DOWN | 835.5823 | 835.5816 | 835.5829 | 22.24767 | 22.22517 |
| 6039 | M599T10_ | 1.384949 | 0.469833 | 1.000015 | 0.366617 | 0.864024 | UP   | 599.4023 | 599.402  | 599.4028 | 9.75145  | 9.636483 |
| 6040 | M219T10_ | 1.404623 | -0.49018 | -0.95814 | 0.366678 | 0.864024 | DOWN | 219.4456 | 219.4408 | 219.4505 | 9.830558 | 9.715683 |
| 6041 | M284T10_ | 1.279323 | 0.355381 | 0.956775 | 0.366697 | 0.864024 | UP   | 283.9252 | 283.9247 | 283.9255 | 9.971292 | 9.859233 |
| 6042 | M439T14_ | 1.096315 | -0.13266 | -0.95905 | 0.36673  | 0.864024 | DOWN | 439.3721 | 439.3717 | 439.3724 | 13.94618 | 13.91597 |
| 6043 | M1437T10 | 1.293442 | -0.37122 | -0.97561 | 0.366742 | 0.864024 | DOWN | 1436.828 | 1436.827 | 1436.831 | 10.35832 | 10.26307 |
| 6044 | M631T17  | 1.290432 | -0.36785 | -0.97241 | 0.366757 | 0.864024 | DOWN | 631.479  | 631.4785 | 631.4795 | 17.04467 | 17.00067 |
| 6045 | M211T9_2 | 1.149271 | -0.20072 | -0.95659 | 0.366795 | 0.864024 | DOWN | 211.1519 | 211.1518 | 211.1519 | 9.328967 | 9.191133 |
| 6046 | M690T10_ | 1.186971 | -0.24728 | -0.95656 | 0.366802 | 0.864024 | DOWN | 689.7129 | 689.7125 | 689.7133 | 9.986767 | 9.8914   |
| 6047 | M213T9_1 | 2.001966 | 1.001417 | 0.957892 | 0.36681  | 0.864024 | UP   | 213.4841 | 213.4788 | 213.4869 | 9.313283 | 9.142767 |
| 6048 | M405T10_ | 1.403432 | 0.488959 | 0.981827 | 0.366863 | 0.864024 | UP   | 405.4558 | 405.4552 | 405.4561 | 9.957333 | 9.853533 |
| 6049 | M735T10_ | 1.445123 | -0.53119 | -0.9588  | 0.366893 | 0.864024 | DOWN | 735.4448 | 735.4441 | 735.4455 | 9.772833 | 9.74925  |
| 6050 | M362T10_ | 2.065092 | 1.046206 | 1.002431 | 0.366927 | 0.864025 | UP   | 362.2413 | 362.2411 | 362.2415 | 9.93625  | 9.743767 |
| 6051 | M430T9_6 | 1.144031 | -0.19413 | -0.95998 | 0.366988 | 0.864025 | DOWN | 430.1869 | 430.1867 | 430.1875 | 9.296133 | 9.129317 |
| 6052 | M187T38_ | 1.17343  | -0.23073 | -1.01279 | 0.366989 | 0.864025 | DOWN | 187.0962 | 187.0962 | 187.0964 | 38.41    | 38.295   |
| 6053 | M578T9_1 | 5.616915 | 2.489778 | 1.016087 | 0.367006 | 0.864025 | UP   | 577.5871 | 577.5842 | 577.5876 | 9.1036   | 9.053483 |
| 6054 | M318T10_ | 1.152308 | -0.20453 | -0.96901 | 0.367019 | 0.864025 | DOWN | 317.9006 | 317.9004 | 317.9016 | 9.823575 | 9.699733 |

|      |          |          |          |          |          |          |      |          |          |          |          |          |
|------|----------|----------|----------|----------|----------|----------|------|----------|----------|----------|----------|----------|
| 6055 | M815T11_ | 1.436081 | 0.522137 | 0.957027 | 0.367023 | 0.864025 | UP   | 814.5792 | 814.5786 | 814.58   | 11.22378 | 11.18047 |
| 6056 | M815T10_ | 1.538748 | 0.621757 | 0.956088 | 0.367064 | 0.864025 | UP   | 815.0609 | 815.0607 | 815.0621 | 9.967367 | 9.859233 |
| 6057 | M678T10_ | 12.96589 | -3.69665 | -1.01556 | 0.367251 | 0.864025 | DOWN | 678.4991 | 678.4989 | 678.4993 | 9.5415   | 9.416817 |
| 6058 | M469T13  | 1.159182 | -0.21311 | -0.95534 | 0.367385 | 0.864025 | DOWN | 469.3461 | 469.3458 | 469.3465 | 12.63128 | 12.61708 |
| 6059 | M775T10_ | 1.443134 | 0.529205 | 1.011095 | 0.367422 | 0.864025 | UP   | 775.4581 | 775.4547 | 775.4594 | 9.825767 | 9.715683 |
| 6060 | M773T10_ | 1.43249  | 0.518525 | 1.00903  | 0.367423 | 0.864025 | UP   | 772.9669 | 772.9643 | 772.9681 | 9.823575 | 9.699733 |
| 6061 | M205T11_ | 1.401998 | -0.48748 | -0.95801 | 0.367591 | 0.864025 | DOWN | 205.3498 | 205.3495 | 205.3501 | 10.91734 | 10.879   |
| 6062 | M286T9_2 | 1.174111 | -0.23157 | -0.95593 | 0.367613 | 0.864025 | DOWN | 286.2373 | 286.2371 | 286.2375 | 9.493625 | 9.38595  |
| 6063 | M514T9_2 | 1.327979 | -0.40923 | -0.96212 | 0.367628 | 0.864025 | DOWN | 513.8317 | 513.8312 | 513.8337 | 9.43365  | 9.355317 |
| 6064 | M364T10_ | 1.226397 | -0.29443 | -0.95952 | 0.367739 | 0.864025 | DOWN | 363.9623 | 363.962  | 363.9625 | 9.5812   | 9.46325  |
| 6065 | M375T10_ | 1.547737 | -0.63016 | -0.96597 | 0.367744 | 0.864025 | DOWN | 374.5007 | 374.5004 | 374.5007 | 9.956417 | 9.843367 |
| 6066 | M679T10_ | 1.147674 | -0.19871 | -0.96848 | 0.36775  | 0.864025 | DOWN | 678.5093 | 678.5089 | 678.5099 | 9.825767 | 9.715683 |
| 6067 | M358T10_ | 1.292137 | -0.36976 | -0.9651  | 0.367806 | 0.864025 | DOWN | 358.2669 | 358.2667 | 358.2672 | 9.8207   | 9.699733 |
| 6068 | M254T11_ | 1.204618 | -0.26858 | -0.95499 | 0.36782  | 0.864025 | DOWN | 253.9595 | 253.9593 | 253.9597 | 10.8914  | 10.879   |
| 6069 | M476T11_ | 1.451667 | 0.537711 | 1.012286 | 0.367833 | 0.864025 | UP   | 476.3278 | 476.3277 | 476.3279 | 10.57863 | 10.45613 |
| 6070 | M1073T10 | 1.124768 | -0.16963 | -0.96937 | 0.367956 | 0.864025 | DOWN | 1073.325 | 1073.324 | 1073.326 | 9.742933 | 9.62055  |
| 6071 | M332T10_ | 1.655628 | 0.727378 | 0.95907  | 0.36796  | 0.864025 | UP   | 331.8352 | 331.8351 | 331.8353 | 9.902408 | 9.843367 |
| 6072 | M184T16  | 1.116125 | 0.158499 | 0.9635   | 0.367962 | 0.864025 | UP   | 184.1693 | 184.1692 | 184.1694 | 16.45947 | 16.42735 |
| 6073 | M462T10_ | 1.570997 | 0.651681 | 1.000949 | 0.367965 | 0.864025 | UP   | 461.9146 | 461.9141 | 461.9153 | 9.80415  | 9.759383 |
| 6074 | M453T9_4 | 1.459703 | 0.545675 | 0.96604  | 0.367972 | 0.864025 | UP   | 452.7333 | 452.7311 | 452.7353 | 9.243475 | 9.175017 |
| 6075 | M504T9_4 | 1.442842 | 0.528913 | 0.961954 | 0.367978 | 0.864025 | UP   | 504.3477 | 504.3468 | 504.3483 | 8.755392 | 8.601067 |
| 6076 | M357T9_1 | 1.620235 | -0.6962  | -0.95458 | 0.368033 | 0.864025 | DOWN | 357.0845 | 357.0842 | 357.085  | 9.433625 | 9.3834   |
| 6077 | M372T20  | 1.244412 | -0.31546 | -0.98327 | 0.368036 | 0.864025 | DOWN | 372.2643 | 372.2641 | 372.2646 | 19.912   | 19.87883 |
| 6078 | M195T9_6 | 1.558453 | -0.64011 | -0.9756  | 0.368049 | 0.864025 | DOWN | 194.8201 | 194.8194 | 194.8207 | 9.147367 | 9.110833 |
| 6079 | M429T10_ | 1.424512 | 0.510468 | 0.973382 | 0.368151 | 0.864025 | UP   | 429.0287 | 429.0281 | 429.0291 | 9.951283 | 9.843367 |
| 6080 | M1875T10 | 1.465435 | 0.551329 | 0.983084 | 0.36818  | 0.864025 | UP   | 1875.467 | 1875.466 | 1875.47  | 9.801833 | 9.699733 |
| 6081 | M636T9_2 | 1.309101 | -0.38858 | -0.95357 | 0.368329 | 0.864025 | DOWN | 636.3926 | 636.3866 | 636.3955 | 9.496283 | 9.208217 |
| 6082 | M454T11_ | 1.204695 | -0.26867 | -0.96221 | 0.368382 | 0.864025 | DOWN | 453.8426 | 453.8425 | 453.8427 | 11.07665 | 11.06392 |
| 6083 | M197T10_ | 1.271887 | 0.346971 | 0.975205 | 0.368397 | 0.864025 | UP   | 196.9183 | 196.918  | 196.9253 | 9.87145  | 9.728083 |
| 6084 | M239T14  | 1.741497 | 0.800328 | 1.003281 | 0.368435 | 0.864025 | UP   | 239.1275 | 239.1274 | 239.1276 | 14.00472 | 13.98908 |
| 6085 | M513T10_ | 1.360973 | 0.444639 | 0.977908 | 0.36845  | 0.864025 | UP   | 513.0948 | 513.0942 | 513.0955 | 9.902617 | 9.62055  |
| 6086 | M881T11_ | 1.286512 | -0.36347 | -0.95434 | 0.368455 | 0.864025 | DOWN | 881.0219 | 881.0204 | 881.0228 | 10.79563 | 10.75595 |
| 6087 | M346T23_ | 2.386572 | -1.25494 | -0.9851  | 0.36846  | 0.864025 | DOWN | 346.2526 | 346.2525 | 346.2528 | 22.69883 | 22.68383 |
| 6088 | M705T10_ | 1.043102 | -0.06088 | -0.96542 | 0.36846  | 0.864025 | DOWN | 704.5542 | 704.5538 | 704.5546 | 9.8397   | 9.715683 |
| 6089 | M935T26  | 1.24684  | -0.31828 | -0.9533  | 0.368537 | 0.864025 | DOWN | 934.6678 | 934.6673 | 934.668  | 25.98042 | 25.9655  |

|      |          |          |          |          |          |          |      |          |          |          |          |          |
|------|----------|----------|----------|----------|----------|----------|------|----------|----------|----------|----------|----------|
| 6090 | M710T30  | 1.193212 | 0.25485  | 0.979569 | 0.36865  | 0.864026 | UP   | 710.4744 | 710.4732 | 710.4746 | 30.266   | 30.23617 |
| 6091 | M320T42  | 1.451329 | -0.53737 | -0.95269 | 0.3688   | 0.864026 | DOWN | 320.1702 | 320.1701 | 320.1703 | 41.906   | 41.77633 |
| 6092 | M376T11_ | 1.319008 | -0.39945 | -0.95301 | 0.368831 | 0.864026 | DOWN | 375.6356 | 375.6346 | 375.6418 | 10.94208 | 10.879   |
| 6093 | M378T9_1 | 1.345769 | -0.42843 | -0.96458 | 0.368901 | 0.864026 | DOWN | 377.5431 | 377.5411 | 377.5456 | 9.257592 | 9.1036   |
| 6094 | M851T10_ | 1.34571  | -0.42837 | -0.96538 | 0.368949 | 0.864026 | DOWN | 851.1759 | 851.1753 | 851.1764 | 9.902008 | 9.779267 |
| 6095 | M644T10_ | 1.332642 | 0.414289 | 1.001005 | 0.368951 | 0.864026 | UP   | 643.6339 | 643.6338 | 643.6353 | 9.825767 | 9.715683 |
| 6096 | M774T10_ | 3.302947 | 1.723754 | 1.010824 | 0.369061 | 0.864026 | UP   | 774.1844 | 774.1795 | 774.1867 | 9.813433 | 9.7124   |
| 6097 | M993T11_ | 1.325355 | -0.40638 | -0.9627  | 0.36915  | 0.864026 | DOWN | 993.1834 | 993.1822 | 993.1867 | 10.89772 | 10.85838 |
| 6098 | M661T10_ | 1.21662  | -0.28288 | -0.98461 | 0.369157 | 0.864026 | DOWN | 661.2964 | 661.2958 | 661.2974 | 9.8397   | 9.715683 |
| 6099 | M332T10_ | 1.351241 | 0.434285 | 1.001483 | 0.369159 | 0.864026 | UP   | 332.2128 | 332.2126 | 332.2129 | 10.16684 | 10.08517 |
| 6100 | M388T10_ | 1.182205 | -0.24148 | -0.95478 | 0.369212 | 0.864026 | DOWN | 387.8197 | 387.8193 | 387.8199 | 9.902483 | 9.811217 |
| 6101 | M429T9_3 | 1.406688 | -0.4923  | -0.95989 | 0.369266 | 0.864026 | DOWN | 429.0749 | 429.0747 | 429.0756 | 9.29345  | 9.175017 |
| 6102 | M435T24_ | 1.421538 | -0.50745 | -0.95241 | 0.369275 | 0.864026 | DOWN | 434.7085 | 434.7084 | 434.7086 | 23.91017 | 23.89933 |
| 6103 | M402T9_2 | 1.446241 | -0.53231 | -0.95399 | 0.3693   | 0.864026 | DOWN | 402.1835 | 402.1824 | 402.1836 | 9.3907   | 9.3834   |
| 6104 | M204T10_ | 1.886289 | 0.915551 | 1.00813  | 0.369397 | 0.864026 | UP   | 203.572  | 203.5718 | 203.572  | 9.97155  | 9.859233 |
| 6105 | M1756T10 | 1.300418 | -0.37897 | -0.9727  | 0.3694   | 0.864026 | DOWN | 1756.13  | 1756.128 | 1756.131 | 9.970617 | 9.885167 |
| 6106 | M339T10_ | 1.247421 | -0.31895 | -0.96792 | 0.369428 | 0.864026 | DOWN | 339.4057 | 339.4056 | 339.4058 | 9.830733 | 9.715683 |
| 6107 | M182T11_ | 1.239213 | -0.30942 | -0.95203 | 0.369437 | 0.864026 | DOWN | 181.8478 | 181.8477 | 181.8479 | 10.89907 | 10.873   |
| 6108 | M367T9_2 | 1.382292 | -0.46706 | -0.9561  | 0.369497 | 0.864026 | DOWN | 366.9274 | 366.9268 | 366.9283 | 9.159717 | 9.1175   |
| 6109 | M781T10_ | 1.179108 | -0.2377  | -0.99125 | 0.369512 | 0.864026 | DOWN | 780.6228 | 780.6222 | 780.6236 | 9.5415   | 9.416817 |
| 6110 | M227T10_ | 15.43726 | 3.948345 | 1.010204 | 0.369535 | 0.864026 | UP   | 227.1977 | 227.1973 | 227.1978 | 9.994767 | 9.8753   |
| 6111 | M430T10_ | 2.107292 | 1.07539  | 0.999575 | 0.369635 | 0.864026 | UP   | 429.5507 | 429.55   | 429.5514 | 9.942317 | 9.811217 |
| 6112 | M622T39  | 1.204021 | -0.26786 | -1.00921 | 0.369708 | 0.864026 | DOWN | 622.3434 | 622.3432 | 622.3437 | 39.3235  | 39.24433 |
| 6113 | M742T10_ | 2.793931 | 1.482296 | 1.00601  | 0.369787 | 0.864026 | UP   | 742.4218 | 742.4212 | 742.4225 | 9.82645  | 9.715683 |
| 6114 | M187T10_ | 1.579683 | -0.65963 | -0.97083 | 0.369808 | 0.864026 | DOWN | 187.2064 | 187.2062 | 187.2066 | 9.9903   | 9.928667 |
| 6115 | M425T25  | 2.86953  | -1.52081 | -1.00775 | 0.369933 | 0.864026 | DOWN | 425.1568 | 425.1564 | 425.1571 | 25.05883 | 25.00117 |
| 6116 | M459T11_ | 1.162451 | -0.21717 | -0.95    | 0.369939 | 0.864026 | DOWN | 458.533  | 458.5328 | 458.5343 | 10.89308 | 10.88747 |
| 6117 | M233T10_ | 1.083483 | -0.11568 | -0.9626  | 0.370014 | 0.864026 | DOWN | 233.208  | 233.199  | 233.2081 | 9.9091   | 9.79535  |
| 6118 | M610T9_3 | 2.874272 | 1.523197 | 1.008912 | 0.370021 | 0.864026 | UP   | 610.4609 | 610.457  | 610.4625 | 9.239667 | 9.06315  |
| 6119 | M263T10_ | 1.056204 | -0.07889 | -0.97359 | 0.370033 | 0.864026 | DOWN | 262.5347 | 262.5345 | 262.5347 | 9.855658 | 9.683817 |
| 6120 | M244T11_ | 1.426085 | -0.51206 | -0.97856 | 0.370065 | 0.864026 | DOWN | 244.2337 | 244.2333 | 244.2343 | 10.87765 | 10.83572 |
| 6121 | M318T9_9 | 2.018141 | 1.013027 | 1.004052 | 0.370136 | 0.864026 | UP   | 318.0502 | 318.0498 | 318.0508 | 9.3332   | 9.234417 |
| 6122 | M306T10_ | 2.234694 | 1.160077 | 1.006234 | 0.370162 | 0.864026 | UP   | 305.943  | 305.9427 | 305.9432 | 9.972833 | 9.8914   |
| 6123 | M319T11_ | 1.23953  | -0.30979 | -0.97622 | 0.370238 | 0.864026 | DOWN | 319.0816 | 319.0811 | 319.0835 | 10.91809 | 10.87765 |
| 6124 | M379T10_ | 1.092205 | -0.12724 | -0.95464 | 0.370251 | 0.864026 | DOWN | 378.5937 | 378.5934 | 378.5946 | 9.917167 | 9.811217 |

|      |          |          |          |          |          |          |      |          |          |          |          |          |
|------|----------|----------|----------|----------|----------|----------|------|----------|----------|----------|----------|----------|
| 6125 | M316T28_ | 2.0005   | -1.00036 | -0.95221 | 0.370273 | 0.864027 | DOWN | 316.3043 | 316.3028 | 316.3085 | 28.08383 | 28.02533 |
| 6126 | M282T10_ | 1.897168 | 0.923848 | 1.002837 | 0.370301 | 0.864027 | UP   | 281.8917 | 281.8916 | 281.8955 | 9.946367 | 9.840617 |
| 6127 | M487T9_1 | 1.32832  | -0.4096  | -0.94962 | 0.370356 | 0.864027 | DOWN | 486.9078 | 486.9074 | 486.908  | 9.2529   | 9.1587   |
| 6128 | M259T12  | 34.63541 | -5.11418 | -1.00811 | 0.370359 | 0.864027 | DOWN | 259.094  | 259.0937 | 259.094  | 11.51607 | 11.49763 |
| 6129 | M930T12  | 1.474867 | -0.56058 | -0.99575 | 0.370378 | 0.864027 | DOWN | 929.5772 | 929.577  | 929.5791 | 11.5404  | 11.52653 |
| 6130 | M205T9_8 | 1.643024 | -0.71635 | -0.97075 | 0.370378 | 0.864027 | DOWN | 205.344  | 205.3434 | 205.3453 | 9.322625 | 9.16125  |
| 6131 | M207T10_ | 1.581551 | 0.66134  | 0.974159 | 0.370416 | 0.864027 | UP   | 207.1588 | 207.1587 | 207.1589 | 9.596017 | 9.478833 |
| 6132 | M177T44_ | 1.19994  | 0.262962 | 1.000216 | 0.370484 | 0.864027 | UP   | 177.1271 | 177.127  | 177.1272 | 44.19267 | 44.0635  |
| 6133 | M343T10_ | 1.318828 | -0.39926 | -0.94993 | 0.370496 | 0.864027 | DOWN | 342.8265 | 342.8264 | 342.8267 | 9.523633 | 9.416817 |
| 6134 | M658T35  | 1.275257 | -0.35079 | -0.97499 | 0.370518 | 0.864027 | DOWN | 658.489  | 658.4889 | 658.4892 | 35.09867 | 35.09383 |
| 6135 | M498T28  | 1.175124 | -0.23281 | -0.94941 | 0.370598 | 0.864027 | DOWN | 498.3629 | 498.3625 | 498.3637 | 28.09883 | 28.0545  |
| 6136 | M523T13  | 1.1443   | -0.19447 | -0.94904 | 0.370627 | 0.864027 | DOWN | 523.4123 | 523.412  | 523.4132 | 12.63073 | 12.60235 |
| 6137 | M520T35  | 1.294008 | -0.37185 | -0.96459 | 0.370665 | 0.864027 | DOWN | 520.3111 | 520.3109 | 520.3113 | 35.422   | 35.07417 |
| 6138 | M352T40_ | 1.137763 | -0.1862  | -0.95291 | 0.370743 | 0.864027 | DOWN | 352.1965 | 352.1962 | 352.1966 | 39.77667 | 39.3595  |
| 6139 | M278T10_ | 1.219223 | 0.285962 | 0.958934 | 0.370773 | 0.864027 | UP   | 277.7521 | 277.7516 | 277.7625 | 9.869467 | 9.747533 |
| 6140 | M166T9_2 | 1.330798 | -0.41229 | -0.94952 | 0.370781 | 0.864027 | DOWN | 165.8606 | 165.8603 | 165.861  | 9.324483 | 9.219483 |
| 6141 | M266T10_ | 1.30023  | 0.378767 | 0.959397 | 0.370798 | 0.864027 | UP   | 266.1458 | 266.1457 | 266.1462 | 9.811267 | 9.699733 |
| 6142 | M703T9_2 | 1.335917 | -0.41783 | -0.96218 | 0.370842 | 0.864027 | DOWN | 703.3981 | 703.3979 | 703.3987 | 9.448983 | 9.432533 |
| 6143 | M608T10_ | 1.308861 | -0.38831 | -0.96039 | 0.370879 | 0.864027 | DOWN | 607.714  | 607.7134 | 607.7146 | 9.514733 | 9.416817 |
| 6144 | M266T16_ | 1.417941 | -0.5038  | -0.94907 | 0.371037 | 0.864027 | DOWN | 266.1723 | 266.1721 | 266.1725 | 16.45831 | 16.43207 |
| 6145 | M1177T10 | 1.156824 | 0.21017  | 0.956168 | 0.371049 | 0.864027 | UP   | 1176.691 | 1176.69  | 1176.693 | 9.846225 | 9.65225  |
| 6146 | M357T10_ | 1.920876 | -0.94176 | -0.99983 | 0.371065 | 0.864027 | DOWN | 357.1369 | 357.1366 | 357.1374 | 9.840617 | 9.7124   |
| 6147 | M789T11  | 1.231104 | -0.29995 | -0.96635 | 0.371096 | 0.864027 | DOWN | 788.6115 | 788.6109 | 788.612  | 10.90548 | 10.88747 |
| 6148 | M1869T10 | 1.423725 | -0.50967 | -0.95138 | 0.371101 | 0.864027 | DOWN | 1869.226 | 1869.223 | 1869.232 | 9.920517 | 9.903017 |
| 6149 | M727T10_ | 1.547842 | 0.630258 | 1.004153 | 0.37111  | 0.864027 | UP   | 726.6655 | 726.6641 | 726.6662 | 9.8397   | 9.715683 |
| 6150 | M494T10_ | 1.266069 | -0.34036 | -0.9622  | 0.371121 | 0.864027 | DOWN | 494.4063 | 494.4059 | 494.4077 | 9.8207   | 9.699733 |
| 6151 | M348T10_ | 1.284817 | -0.36156 | -0.95222 | 0.371142 | 0.864027 | DOWN | 348.2946 | 348.2831 | 348.2949 | 9.845483 | 9.715683 |
| 6152 | M1168T10 | 1.35362  | -0.43682 | -0.96017 | 0.37118  | 0.864027 | DOWN | 1167.778 | 1167.776 | 1167.779 | 9.95825  | 9.859233 |
| 6153 | M503T9_1 | 1.449431 | 0.535486 | 0.977615 | 0.371197 | 0.864027 | UP   | 502.5114 | 502.5095 | 502.5122 | 9.246458 | 9.160617 |
| 6154 | M527T11_ | 1.203329 | -0.26703 | -0.95055 | 0.371236 | 0.864027 | DOWN | 527.3291 | 527.3281 | 527.33   | 10.51568 | 10.47197 |
| 6155 | M1299T10 | 1.33335  | 0.415056 | 0.949483 | 0.371265 | 0.864027 | UP   | 1299.406 | 1299.404 | 1299.406 | 9.967367 | 9.8914   |
| 6156 | M636T9_1 | 1.43215  | -0.51818 | -0.94719 | 0.371424 | 0.864027 | DOWN | 635.5388 | 635.5375 | 635.5411 | 9.174967 | 9.1175   |
| 6157 | M727T11_ | 1.190648 | -0.25175 | -0.95038 | 0.371466 | 0.864027 | DOWN | 727.2168 | 727.2159 | 727.2173 | 10.892   | 10.8646  |
| 6158 | M803T25  | 1.187367 | -0.24777 | -0.94675 | 0.371599 | 0.864027 | DOWN | 802.5885 | 802.5883 | 802.5892 | 25.36083 | 25.32883 |
| 6159 | M357T10_ | 1.112039 | -0.15321 | -0.96881 | 0.371679 | 0.864027 | DOWN | 357.1018 | 357.1018 | 357.1021 | 9.8397   | 9.715683 |



|      |          |          |          |          |          |          |      |          |          |          |          |          |
|------|----------|----------|----------|----------|----------|----------|------|----------|----------|----------|----------|----------|
| 6160 | M227T11_ | 1.088386 | -0.12219 | -0.96618 | 0.371693 | 0.864027 | DOWN | 227.1752 | 227.1752 | 227.1753 | 10.9198  | 10.89355 |
| 6161 | M598T10_ | 6.086721 | 2.605665 | 1.004815 | 0.371697 | 0.864027 | UP   | 598.4546 | 598.4531 | 598.4556 | 9.693842 | 9.5889   |
| 6162 | M248T10_ | 1.182014 | -0.24125 | -0.9691  | 0.371748 | 0.864027 | DOWN | 247.9293 | 247.9292 | 247.9294 | 9.9351   | 9.8378   |
| 6163 | M338T20  | 5.867444 | -2.55273 | -1.00169 | 0.371954 | 0.864028 | DOWN | 338.2535 | 338.2532 | 338.2538 | 19.59892 | 19.555   |
| 6164 | M479T21_ | 1.179582 | -0.23828 | -0.95832 | 0.37197  | 0.864028 | DOWN | 479.4031 | 479.4028 | 479.4033 | 20.83542 | 20.82333 |
| 6165 | M337T11_ | 1.089088 | -0.12312 | -0.9513  | 0.371978 | 0.864028 | DOWN | 337.212  | 337.2119 | 337.2122 | 10.90659 | 10.89355 |
| 6166 | M454T9_4 | 1.455088 | 0.541106 | 0.946734 | 0.372016 | 0.864028 | UP   | 453.5878 | 453.5839 | 453.595  | 9.431517 | 9.22495  |
| 6167 | M1143T11 | 1.300438 | -0.379   | -0.95882 | 0.3721   | 0.864028 | DOWN | 1142.522 | 1142.52  | 1142.523 | 10.91602 | 10.87765 |
| 6168 | M319T9_3 | 1.176763 | -0.23482 | -0.96019 | 0.372118 | 0.864028 | DOWN | 319.1361 | 319.136  | 319.1363 | 8.697433 | 8.623117 |
| 6169 | M594T9_4 | 1.148084 | -0.19923 | -0.96748 | 0.372131 | 0.864028 | DOWN | 594.4947 | 594.4944 | 594.4948 | 9.464967 | 9.40135  |
| 6170 | M366T19  | 21.78203 | 4.445067 | 1.004097 | 0.372138 | 0.864028 | UP   | 366.2228 | 366.2176 | 366.2233 | 18.7465  | 18.717   |
| 6171 | M486T10_ | 19.68362 | 4.298924 | 1.00378  | 0.372233 | 0.864028 | UP   | 486.3163 | 486.3116 | 486.3168 | 9.5812   | 9.46325  |
| 6172 | M742T10_ | 1.531483 | 0.614929 | 0.953694 | 0.372257 | 0.864028 | UP   | 742.4738 | 742.469  | 742.4756 | 9.729767 | 9.47865  |
| 6173 | M341T9_2 | 1.174105 | -0.23156 | -0.94514 | 0.372287 | 0.864028 | DOWN | 340.9312 | 340.9309 | 340.9314 | 9.25985  | 9.129317 |
| 6174 | M495T10_ | 1.09039  | 0.124845 | 0.958527 | 0.372361 | 0.864028 | UP   | 494.6625 | 494.6621 | 494.6629 | 9.823542 | 9.62055  |
| 6175 | M259T13  | 1.55985  | 0.641407 | 0.978395 | 0.372365 | 0.864028 | UP   | 259.13   | 259.1297 | 259.1301 | 12.89432 | 12.8648  |
| 6176 | M476T9_1 | 1.491337 | 0.576607 | 0.964486 | 0.372378 | 0.864028 | UP   | 475.5453 | 475.5373 | 475.5484 | 9.277967 | 9.14695  |
| 6177 | M175T10_ | 1.592077 | -0.67091 | -0.95021 | 0.37247  | 0.864028 | DOWN | 174.5182 | 174.5181 | 174.5182 | 9.876008 | 9.811217 |
| 6178 | M477T10_ | 4.688131 | 2.229013 | 1.002534 | 0.372563 | 0.864028 | UP   | 477.2789 | 477.2786 | 477.2795 | 9.972483 | 9.859233 |
| 6179 | M476T9_1 | 24.64248 | -4.62308 | -1.0031  | 0.372569 | 0.864028 | DOWN | 476.2499 | 476.2497 | 476.2502 | 9.285867 | 9.147367 |
| 6180 | M726T10_ | 1.499845 | 0.584813 | 1.000731 | 0.372587 | 0.864028 | UP   | 725.6111 | 725.6098 | 725.6117 | 9.8397   | 9.715683 |
| 6181 | M666T11  | 1.213378 | 0.279029 | 0.944934 | 0.372597 | 0.864028 | UP   | 666.3927 | 666.3916 | 666.3933 | 11.49698 | 11.47593 |
| 6182 | M230T22  | 4.666667 | 2.222393 | 0.999221 | 0.372643 | 0.864028 | UP   | 230.2475 | 230.2473 | 230.2478 | 21.68167 | 21.6675  |
| 6183 | M373T23_ | 1.256322 | -0.32921 | -0.96331 | 0.372768 | 0.864028 | DOWN | 372.7674 | 372.7673 | 372.7675 | 22.538   | 22.524   |
| 6184 | M343T31  | 2.228804 | -1.15627 | -1.00035 | 0.37282  | 0.864028 | DOWN | 343.1538 | 343.1537 | 343.1539 | 30.56817 | 30.468   |
| 6185 | M654T10_ | 1.267651 | 0.342157 | 0.991267 | 0.372834 | 0.864028 | UP   | 653.926  | 653.9254 | 653.9268 | 9.82645  | 9.699733 |
| 6186 | M415T11_ | 1.633411 | 0.707888 | 0.964837 | 0.37284  | 0.864028 | UP   | 414.9924 | 414.9922 | 414.9929 | 10.89355 | 10.88747 |
| 6187 | M172T21  | 1.618608 | -0.69475 | -0.94447 | 0.372932 | 0.864028 | DOWN | 172.1694 | 172.1692 | 172.1694 | 20.706   | 20.67833 |
| 6188 | M396T45  | 1.310667 | 0.390301 | 0.966993 | 0.37297  | 0.864028 | UP   | 396.2226 | 396.2225 | 396.2227 | 44.92592 | 44.78217 |
| 6189 | M401T11_ | 1.489872 | -0.57519 | -0.94812 | 0.37301  | 0.864028 | DOWN | 400.8942 | 400.8917 | 400.9007 | 10.91825 | 10.879   |
| 6190 | M414T15  | 1.176812 | -0.23488 | -0.9521  | 0.373038 | 0.864028 | DOWN | 414.2803 | 414.2801 | 414.2805 | 15.2927  | 15.26215 |
| 6191 | M1754T10 | 1.351294 | -0.43434 | -0.94392 | 0.373083 | 0.864028 | DOWN | 1754.249 | 1754.246 | 1754.253 | 9.830083 | 9.715683 |
| 6192 | M725T10_ | 1.488168 | 0.573537 | 0.999415 | 0.373097 | 0.864028 | UP   | 724.5579 | 724.5566 | 724.5585 | 9.8397   | 9.715683 |
| 6193 | M176T10_ | 1.366176 | 0.450143 | 0.944161 | 0.373152 | 0.864028 | UP   | 175.6793 | 175.6792 | 175.6793 | 9.92625  | 9.859233 |
| 6194 | M315T25_ | 1.205738 | 0.269917 | 0.961694 | 0.373174 | 0.864028 | UP   | 315.3277 | 315.3269 | 315.3283 | 24.72483 | 24.6945  |

|      |          |          |          |          |          |          |      |          |          |          |          |          |
|------|----------|----------|----------|----------|----------|----------|------|----------|----------|----------|----------|----------|
| 6195 | M532T44  | 1.325178 | 0.406186 | 0.999296 | 0.373176 | 0.864028 | UP   | 532.3113 | 532.3112 | 532.3114 | 43.66075 | 43.60333 |
| 6196 | M207T9_1 | 8.356473 | 3.062894 | 1.001161 | 0.373372 | 0.864028 | UP   | 206.5035 | 206.4981 | 206.5047 | 9.16125  | 9.111033 |
| 6197 | M564T39_ | 1.225897 | 0.293838 | 0.949362 | 0.373382 | 0.864028 | UP   | 564.301  | 564.3009 | 564.3015 | 38.57575 | 38.525   |
| 6198 | M316T11_ | 1.244998 | 0.316143 | 0.943091 | 0.373383 | 0.864028 | UP   | 316.3211 | 316.321  | 316.3216 | 10.90068 | 10.88995 |
| 6199 | M406T9_3 | 4.965893 | 2.312053 | 0.99965  | 0.373429 | 0.864028 | UP   | 405.8062 | 405.806  | 405.8069 | 9.462242 | 9.370583 |
| 6200 | M416T40_ | 1.123873 | -0.16848 | -0.99681 | 0.373458 | 0.864028 | DOWN | 416.2641 | 416.264  | 416.2643 | 39.58967 | 39.51783 |
| 6201 | M470T10_ | 1.524514 | 0.608349 | 0.960917 | 0.373459 | 0.864028 | UP   | 469.5421 | 469.5417 | 469.5428 | 9.75805  | 9.729367 |
| 6202 | M317T9_5 | 2.561494 | 1.356985 | 0.980592 | 0.373558 | 0.864028 | UP   | 317.1963 | 317.1959 | 317.2011 | 9.04175  | 8.90305  |
| 6203 | M184T9_2 | 1.595708 | -0.6742  | -0.94612 | 0.373562 | 0.864028 | DOWN | 183.6894 | 183.6886 | 183.6904 | 9.227192 | 9.1322   |
| 6204 | M831T10  | 1.208785 | -0.27356 | -0.94235 | 0.373629 | 0.864028 | DOWN | 831.4569 | 831.4563 | 831.4572 | 10.32195 | 10.24687 |
| 6205 | M427T9_5 | 1.444564 | -0.53063 | -0.96693 | 0.37365  | 0.864028 | DOWN | 427.4249 | 427.4244 | 427.4257 | 9.249433 | 9.098833 |
| 6206 | M698T10_ | 1.639982 | 0.71368  | 0.99428  | 0.373684 | 0.864029 | UP   | 697.5108 | 697.5098 | 697.5118 | 9.645292 | 9.540717 |
| 6207 | M573T9_1 | 1.454592 | -0.54061 | -0.94212 | 0.373709 | 0.864029 | DOWN | 573.2904 | 573.2899 | 573.2916 | 9.315083 | 9.191133 |
| 6208 | M342T10_ | 1.098875 | -0.13603 | -0.96677 | 0.37373  | 0.864029 | DOWN | 341.976  | 341.9758 | 341.9761 | 9.857683 | 9.73145  |
| 6209 | M200T9_8 | 2.150139 | -1.10443 | -0.98554 | 0.37377  | 0.864029 | DOWN | 199.7997 | 199.7987 | 199.8005 | 9.220933 | 9.07525  |
| 6210 | M197T10_ | 1.136451 | -0.18454 | -0.94751 | 0.373795 | 0.864029 | DOWN | 197.1666 | 197.1597 | 197.1668 | 9.828367 | 9.699733 |
| 6211 | M654T9   | 1.35756  | -0.44102 | -0.96756 | 0.373828 | 0.864029 | DOWN | 653.5034 | 653.5025 | 653.5038 | 9.317    | 9.234417 |
| 6212 | M552T11_ | 1.25804  | 0.331178 | 0.962858 | 0.373857 | 0.864029 | UP   | 552.2921 | 552.2898 | 552.2934 | 10.90659 | 10.879   |
| 6213 | M477T10_ | 1.638588 | 0.712453 | 0.963528 | 0.373859 | 0.864029 | UP   | 476.5812 | 476.581  | 476.5813 | 9.975217 | 9.859233 |
| 6214 | M327T11_ | 1.236456 | 0.306211 | 0.97855  | 0.373871 | 0.864029 | UP   | 327.1954 | 327.1877 | 327.1957 | 11.24166 | 11.22177 |
| 6215 | M646T10_ | 1.268627 | 0.343268 | 0.979063 | 0.373956 | 0.864029 | UP   | 646.3403 | 646.3395 | 646.3416 | 9.825767 | 9.715683 |
| 6216 | M949T10  | 1.198717 | -0.26149 | -0.95992 | 0.374079 | 0.864029 | DOWN | 949.0647 | 949.0637 | 949.0659 | 9.855658 | 9.747533 |
| 6217 | M377T10_ | 7.356844 | -2.87909 | -0.99913 | 0.374112 | 0.864029 | DOWN | 376.818  | 376.8175 | 376.825  | 9.915767 | 9.816167 |
| 6218 | M599T22  | 1.266986 | -0.3414  | -0.94105 | 0.37427  | 0.864029 | DOWN | 599.4547 | 599.4544 | 599.4562 | 22.3915  | 22.382   |
| 6219 | M599T10_ | 1.149259 | -0.2007  | -0.96123 | 0.374328 | 0.864029 | DOWN | 599.0571 | 599.0567 | 599.0574 | 9.962808 | 9.859233 |
| 6220 | M392T9_1 | 1.210711 | 0.275855 | 0.966348 | 0.374331 | 0.864029 | UP   | 391.7454 | 391.745  | 391.7456 | 9.253783 | 9.111033 |
| 6221 | M364T9_1 | 1.358709 | 0.442236 | 0.983818 | 0.374443 | 0.864029 | UP   | 363.5399 | 363.5391 | 363.54   | 9.087183 | 9.079083 |
| 6222 | M284T11_ | 1.227148 | -0.29531 | -0.94175 | 0.37465  | 0.864029 | DOWN | 283.7951 | 283.795  | 283.7952 | 10.91813 | 10.879   |
| 6223 | M391T10_ | 1.526866 | 0.610573 | 0.987054 | 0.374774 | 0.864029 | UP   | 391.238  | 391.2377 | 391.2381 | 9.986767 | 9.916767 |
| 6224 | M589T10_ | 1.18218  | -0.24145 | -0.99065 | 0.374782 | 0.864029 | DOWN | 588.8882 | 588.8877 | 588.8884 | 9.902617 | 9.811217 |
| 6225 | M195T10_ | 1.132599 | -0.17964 | -0.96462 | 0.374809 | 0.864029 | DOWN | 194.8934 | 194.8931 | 194.8937 | 9.903742 | 9.827283 |
| 6226 | M683T11_ | 1.200266 | -0.26335 | -0.94076 | 0.374848 | 0.864029 | DOWN | 682.7318 | 682.7317 | 682.7324 | 10.892   | 10.8646  |
| 6227 | M259T9_4 | 1.447375 | -0.53344 | -0.95071 | 0.374861 | 0.864029 | DOWN | 259.2464 | 259.2453 | 259.2475 | 9.285383 | 9.219483 |
| 6228 | M379T11_ | 1.541127 | 0.623986 | 0.980832 | 0.374907 | 0.864029 | UP   | 379.2779 | 379.2777 | 379.2784 | 10.89907 | 10.84395 |
| 6229 | M179T10_ | 1.122059 | -0.16615 | -0.98509 | 0.375039 | 0.864029 | DOWN | 178.8368 | 178.8366 | 178.8369 | 9.975142 | 9.859233 |

|      |          |          |          |          |          |          |      |          |          |          |          |          |
|------|----------|----------|----------|----------|----------|----------|------|----------|----------|----------|----------|----------|
| 6230 | M291T10_ | 2.053638 | 1.038182 | 0.991841 | 0.375051 | 0.864029 | UP   | 290.8144 | 290.8143 | 290.8148 | 9.932    | 9.806367 |
| 6231 | M284T10_ | 2.181516 | 1.125331 | 0.99287  | 0.375122 | 0.864029 | UP   | 283.6004 | 283.6001 | 283.6004 | 9.968992 | 9.8914   |
| 6232 | M407T9_2 | 1.461591 | 0.54754  | 0.954016 | 0.375134 | 0.864029 | UP   | 407.1891 | 407.1889 | 407.1898 | 8.914933 | 8.818733 |
| 6233 | M217T9_2 | 1.175942 | -0.23382 | -0.94749 | 0.375161 | 0.864029 | DOWN | 217.0072 | 217.007  | 217.0073 | 9.280992 | 9.129317 |
| 6234 | M1940T10 | 1.426216 | 0.512192 | 0.963821 | 0.375198 | 0.864029 | UP   | 1939.626 | 1939.624 | 1939.628 | 9.880817 | 9.73145  |
| 6235 | M302T10_ | 1.38082  | -0.46552 | -0.98542 | 0.375229 | 0.864029 | DOWN | 301.9242 | 301.924  | 301.9243 | 9.907858 | 9.806367 |
| 6236 | M204T10_ | 1.201267 | -0.26456 | -0.95938 | 0.37523  | 0.864029 | DOWN | 204.0216 | 204.0214 | 204.0216 | 9.8736   | 9.747533 |
| 6237 | M360T10_ | 1.221813 | -0.28902 | -0.94513 | 0.375256 | 0.864029 | DOWN | 359.6179 | 359.6178 | 359.6181 | 9.850858 | 9.73145  |
| 6238 | M387T21_ | 1.725936 | 0.787379 | 0.949982 | 0.37534  | 0.864029 | UP   | 387.2487 | 387.2486 | 387.2488 | 21.46333 | 21.2995  |
| 6239 | M283T10_ | 1.078841 | 0.109483 | 0.96325  | 0.375347 | 0.864029 | UP   | 282.9082 | 282.9081 | 282.9082 | 9.841442 | 9.73145  |
| 6240 | M475T10_ | 2.768653 | 1.469184 | 0.99583  | 0.375387 | 0.864029 | UP   | 474.767  | 474.7664 | 474.7694 | 9.748708 | 9.40255  |
| 6241 | M388T20_ | 1.40937  | -0.49505 | -0.94358 | 0.375483 | 0.86403  | DOWN | 387.8406 | 387.8405 | 387.8409 | 19.83983 | 19.79433 |
| 6242 | M454T18_ | 2.206999 | -1.14209 | -0.99431 | 0.375525 | 0.86403  | DOWN | 454.3461 | 454.346  | 454.3465 | 18.36258 | 18.29233 |
| 6243 | M391T11_ | 1.836785 | 0.877183 | 0.966108 | 0.375633 | 0.86403  | UP   | 391.0396 | 391.0394 | 391.04   | 11.0985  | 11.06855 |
| 6244 | M415T40  | 1.174189 | -0.23167 | -0.96116 | 0.375647 | 0.86403  | DOWN | 415.2322 | 415.2321 | 415.2323 | 40.29467 | 40.15083 |
| 6245 | M154T11_ | 1.218527 | -0.28514 | -0.94188 | 0.375663 | 0.86403  | DOWN | 154.1568 | 154.1567 | 154.157  | 10.892   | 10.8646  |
| 6246 | M388T10_ | 44.64967 | 5.480578 | 0.995871 | 0.375675 | 0.86403  | UP   | 388.2895 | 388.2803 | 388.2908 | 9.902208 | 9.822117 |
| 6247 | M325T10_ | 2.613601 | -1.38604 | -0.9918  | 0.375758 | 0.86403  | DOWN | 324.9271 | 324.9267 | 324.928  | 9.830283 | 9.715683 |
| 6248 | M246T10_ | 1.166184 | -0.2218  | -0.95187 | 0.375767 | 0.86403  | DOWN | 245.8056 | 245.8053 | 245.8061 | 9.959533 | 9.843367 |
| 6249 | M1371T10 | 1.281491 | -0.35782 | -0.9392  | 0.375819 | 0.86403  | DOWN | 1371.09  | 1371.089 | 1371.091 | 9.972483 | 9.9009   |
| 6250 | M348T11  | 1.193317 | -0.25498 | -0.94556 | 0.375827 | 0.86403  | DOWN | 347.8121 | 347.8118 | 347.8128 | 10.91987 | 10.83252 |
| 6251 | M432T9_3 | 4.228293 | 2.080075 | 0.994798 | 0.37587  | 0.86403  | UP   | 431.8545 | 431.8525 | 431.857  | 9.250125 | 9.1445   |
| 6252 | M369T11_ | 50.13291 | 5.647686 | 0.995212 | 0.37596  | 0.86403  | UP   | 369.1704 | 369.1693 | 369.181  | 10.92253 | 10.873   |
| 6253 | M558T18  | 1.207029 | -0.27146 | -0.94865 | 0.375999 | 0.86403  | DOWN | 558.4207 | 558.4206 | 558.4209 | 18.32283 | 18.276   |
| 6254 | M474T9_3 | 1.126189 | 0.171448 | 0.937676 | 0.376083 | 0.86403  | UP   | 473.9961 | 473.9959 | 473.9963 | 9.2585   | 9.129317 |
| 6255 | M538T9_4 | 1.243965 | -0.31495 | -0.9681  | 0.376099 | 0.86403  | DOWN | 538.1176 | 538.1173 | 538.1179 | 9.4498   | 9.355317 |
| 6256 | M388T10_ | 2.786584 | 1.478498 | 0.993492 | 0.376109 | 0.86403  | UP   | 387.8393 | 387.8388 | 387.8399 | 9.935675 | 9.853533 |
| 6257 | M798T10_ | 1.140599 | -0.18979 | -0.93749 | 0.376125 | 0.86403  | DOWN | 798.3458 | 798.3453 | 798.3465 | 10.34725 | 10.0118  |
| 6258 | M535T10_ | 1.185582 | -0.2456  | -0.96228 | 0.376139 | 0.86403  | DOWN | 535.3509 | 535.3507 | 535.3511 | 9.508883 | 9.40135  |
| 6259 | M1326T10 | 1.25791  | -0.33103 | -0.95901 | 0.376153 | 0.86403  | DOWN | 1326.043 | 1326.041 | 1326.044 | 9.942317 | 9.843367 |
| 6260 | M476T10_ | 1.330888 | 0.412389 | 0.957253 | 0.376164 | 0.86403  | UP   | 475.8265 | 475.8263 | 475.8268 | 10.16706 | 10.08517 |
| 6261 | M341T10_ | 32.84298 | -5.03751 | -0.99412 | 0.376431 | 0.86403  | DOWN | 340.5812 | 340.5746 | 340.5818 | 9.830833 | 9.715683 |
| 6262 | M214T11_ | 1.163569 | -0.21856 | -0.93761 | 0.376435 | 0.86403  | DOWN | 214.2205 | 214.2205 | 214.2207 | 10.90522 | 10.879   |
| 6263 | M478T43_ | 1.177346 | 0.235538 | 0.971445 | 0.376482 | 0.86403  | UP   | 478.2643 | 478.2641 | 478.2645 | 42.76917 | 42.611   |
| 6264 | M324T10_ | 1.344809 | -0.4274  | -0.94973 | 0.376528 | 0.86403  | DOWN | 323.925  | 323.921  | 323.9251 | 9.501433 | 9.416817 |

|      |          |          |          |          |          |          |      |          |          |          |          |          |
|------|----------|----------|----------|----------|----------|----------|------|----------|----------|----------|----------|----------|
| 6265 | M225T10_ | 1.192154 | -0.25357 | -0.96317 | 0.376689 | 0.86403  | DOWN | 225.2548 | 225.2546 | 225.2549 | 9.930908 | 9.827283 |
| 6266 | M404T21  | 2.604388 | 1.380944 | 0.993295 | 0.376773 | 0.86403  | UP   | 404.2066 | 404.2062 | 404.2066 | 20.85217 | 20.84967 |
| 6267 | M369T10_ | 1.81239  | -0.85789 | -0.94265 | 0.376802 | 0.86403  | DOWN | 368.533  | 368.5318 | 368.5436 | 9.856867 | 9.699733 |
| 6268 | M1407T10 | 1.318856 | 0.399287 | 0.954426 | 0.376847 | 0.86403  | UP   | 1407.121 | 1407.115 | 1407.122 | 9.902483 | 9.843367 |
| 6269 | M344T10_ | 1.583301 | 0.662935 | 0.989065 | 0.376874 | 0.86403  | UP   | 343.7676 | 343.7674 | 343.7681 | 9.8649   | 9.73145  |
| 6270 | M534T42_ | 1.11739  | -0.16013 | -0.93794 | 0.376881 | 0.86403  | DOWN | 534.3268 | 534.3268 | 534.3269 | 41.70483 | 41.58933 |
| 6271 | M1932T10 | 1.193393 | -0.25507 | -0.95891 | 0.376899 | 0.86403  | DOWN | 1931.563 | 1931.562 | 1931.567 | 9.84325  | 9.728083 |
| 6272 | M356T19_ | 1.447419 | -0.53348 | -0.96351 | 0.376937 | 0.86403  | DOWN | 356.2412 | 356.241  | 356.2415 | 19.4315  | 19.4     |
| 6273 | M677T10_ | 1.230088 | -0.29876 | -0.93962 | 0.376975 | 0.86403  | DOWN | 676.5162 | 676.5155 | 676.5186 | 9.831517 | 9.715683 |
| 6274 | M346T9_3 | 1.330624 | -0.4121  | -0.94306 | 0.376986 | 0.86403  | DOWN | 345.7575 | 345.7574 | 345.7577 | 9.390783 | 9.324917 |
| 6275 | M183T9_1 | 1.596546 | -0.67495 | -0.96602 | 0.377004 | 0.86403  | DOWN | 182.6604 | 182.6598 | 182.6611 | 9.257675 | 9.1428   |
| 6276 | M572T11_ | 1.155477 | -0.20849 | -0.94048 | 0.377032 | 0.86403  | DOWN | 572.4523 | 572.452  | 572.4531 | 10.892   | 10.8646  |
| 6277 | M762T9_2 | 1.276472 | -0.35216 | -0.93847 | 0.377107 | 0.86403  | DOWN | 762.3308 | 762.3302 | 762.3318 | 9.369667 | 9.234417 |
| 6278 | M340T10_ | 1.163274 | 0.218191 | 0.93847  | 0.377191 | 0.864031 | UP   | 339.9359 | 339.9356 | 339.9386 | 9.85785  | 9.799767 |
| 6279 | M207T10_ | 1.538612 | 0.62163  | 0.954771 | 0.377214 | 0.864031 | UP   | 207.4447 | 207.4446 | 207.4448 | 9.781008 | 9.770733 |
| 6280 | M784T28  | 1.404763 | 0.490327 | 0.949286 | 0.377231 | 0.864031 | UP   | 784.4823 | 784.4817 | 784.4828 | 27.83967 | 27.76717 |
| 6281 | M317T10_ | 1.320742 | -0.40135 | -0.94311 | 0.377259 | 0.864031 | DOWN | 317.1056 | 317.1053 | 317.1138 | 9.938142 | 9.827283 |
| 6282 | M316T9_1 | 5.385102 | 2.428974 | 0.991916 | 0.37726  | 0.864031 | UP   | 315.6147 | 315.6089 | 315.6155 | 8.842717 | 8.730433 |
| 6283 | M357T11_ | 1.37116  | -0.4554  | -0.96092 | 0.37731  | 0.864031 | DOWN | 357.0665 | 357.0662 | 357.067  | 10.88313 | 10.84767 |
| 6284 | M378T11_ | 1.322016 | -0.40274 | -0.93499 | 0.377381 | 0.864031 | DOWN | 378.3738 | 378.373  | 378.3834 | 10.91979 | 10.8926  |
| 6285 | M271T14_ | 1.30954  | 0.38906  | 0.98145  | 0.377389 | 0.864031 | UP   | 271.1148 | 271.1147 | 271.1148 | 13.58015 | 13.49295 |
| 6286 | M358T10_ | 1.260986 | -0.33455 | -0.96103 | 0.377411 | 0.864031 | DOWN | 358.0643 | 358.0642 | 358.0644 | 9.51295  | 9.40135  |
| 6287 | M440T10_ | 1.166687 | -0.22242 | -0.95091 | 0.377482 | 0.864031 | DOWN | 440.2557 | 440.2554 | 440.2558 | 9.917167 | 9.811217 |
| 6288 | M289T11_ | 19.85754 | 4.311615 | 0.991661 | 0.377495 | 0.864031 | UP   | 289.1529 | 289.1526 | 289.1531 | 11.42402 | 11.41772 |
| 6289 | M452T10_ | 1.396441 | 0.481754 | 0.957817 | 0.377509 | 0.864031 | UP   | 451.711  | 451.7107 | 451.7163 | 9.825492 | 9.715683 |
| 6290 | M398T10_ | 1.246633 | -0.31804 | -0.94044 | 0.377607 | 0.864031 | DOWN | 398.48   | 398.4799 | 398.4802 | 9.9014   | 9.806367 |
| 6291 | M324T9_9 | 1.233549 | -0.30282 | -0.93952 | 0.377615 | 0.864031 | DOWN | 324.1571 | 324.1566 | 324.1573 | 9.498117 | 9.40135  |
| 6292 | M195T10_ | 1.212578 | -0.27808 | -0.95334 | 0.377669 | 0.864031 | DOWN | 195.3364 | 195.3363 | 195.3365 | 9.983467 | 9.9009   |
| 6293 | M574T9_2 | 1.415598 | -0.50141 | -0.93849 | 0.377749 | 0.864031 | DOWN | 574.2136 | 574.2126 | 574.2154 | 9.328667 | 9.132267 |
| 6294 | M439T10_ | 1.227679 | 0.295933 | 0.935176 | 0.377762 | 0.864031 | UP   | 439.2416 | 439.2413 | 439.2419 | 10.16418 | 10.06883 |
| 6295 | M364T10_ | 1.703272 | -0.76831 | -0.95608 | 0.377844 | 0.864031 | DOWN | 363.8503 | 363.8457 | 363.8504 | 9.840617 | 9.810767 |
| 6296 | M592T9_2 | 1.269049 | -0.34375 | -0.95769 | 0.377862 | 0.864031 | DOWN | 592.4011 | 592.4009 | 592.4013 | 9.494433 | 9.40135  |
| 6297 | M554T10_ | 1.372088 | -0.45637 | -0.9752  | 0.377866 | 0.864031 | DOWN | 553.9097 | 553.9093 | 553.9101 | 9.9182   | 9.8378   |
| 6298 | M440T11_ | 1.183374 | -0.24291 | -0.93345 | 0.377901 | 0.864031 | DOWN | 439.9336 | 439.9289 | 439.9338 | 10.91265 | 10.88747 |
| 6299 | M661T10_ | 1.272525 | -0.34769 | -0.93727 | 0.377981 | 0.864031 | DOWN | 661.3484 | 661.3474 | 661.3486 | 10.44697 | 10.40807 |

|      |          |          |          |          |          |          |      |          |          |          |          |          |
|------|----------|----------|----------|----------|----------|----------|------|----------|----------|----------|----------|----------|
| 6300 | M192T10_ | 1.354201 | 0.437442 | 0.97282  | 0.378081 | 0.864031 | UP   | 191.9385 | 191.9381 | 191.9387 | 9.924383 | 9.843367 |
| 6301 | M1136T10 | 1.251317 | -0.32345 | -0.93388 | 0.37811  | 0.864031 | DOWN | 1135.98  | 1135.979 | 1135.98  | 9.57265  | 9.4632   |
| 6302 | M802T27_ | 1.481505 | -0.56706 | -0.95034 | 0.378157 | 0.864031 | DOWN | 801.5827 | 801.5823 | 801.5835 | 26.78133 | 26.75383 |
| 6303 | M368T10_ | 1.652432 | 0.724591 | 0.959362 | 0.378226 | 0.864031 | UP   | 367.7879 | 367.7813 | 367.7881 | 9.964092 | 9.840617 |
| 6304 | M312T10_ | 2.12745  | 1.089125 | 0.989078 | 0.378302 | 0.864031 | UP   | 311.8084 | 311.7939 | 311.8085 | 9.984083 | 9.856867 |
| 6305 | M342T11_ | 1.349901 | -0.43285 | -0.95758 | 0.378329 | 0.864031 | DOWN | 342.1095 | 342.106  | 342.1098 | 10.94844 | 10.88747 |
| 6306 | M443T10_ | 1.159777 | -0.21385 | -0.97763 | 0.378336 | 0.864031 | DOWN | 442.9223 | 442.9221 | 442.9229 | 9.831517 | 9.699733 |
| 6307 | M671T9_2 | 1.338886 | -0.42103 | -0.93254 | 0.378344 | 0.864031 | DOWN | 671.3454 | 671.3449 | 671.3466 | 9.48185  | 9.40135  |
| 6308 | M1284T11 | 1.192898 | -0.25447 | -0.95469 | 0.378404 | 0.864031 | DOWN | 1284.173 | 1284.172 | 1284.174 | 10.88995 | 10.8628  |
| 6309 | M481T10_ | 1.110125 | -0.15072 | -0.9324  | 0.378417 | 0.864031 | DOWN | 481.3743 | 481.3742 | 481.3746 | 10.1599  | 10.06883 |
| 6310 | M325T9_5 | 1.186213 | -0.24636 | -0.93419 | 0.378498 | 0.864031 | DOWN | 324.8212 | 324.8208 | 324.8216 | 8.825317 | 8.715883 |
| 6311 | M271T13  | 1.393313 | 0.478519 | 0.9379   | 0.378505 | 0.864031 | UP   | 271.1149 | 271.1147 | 271.115  | 13.02478 | 12.87942 |
| 6312 | M243T11_ | 1.093115 | -0.12845 | -0.93351 | 0.378525 | 0.864031 | DOWN | 243.1782 | 243.1781 | 243.1783 | 10.90659 | 10.89355 |
| 6313 | M678T11_ | 1.184568 | -0.24436 | -0.9335  | 0.378571 | 0.864031 | DOWN | 678.3079 | 678.3077 | 678.3086 | 10.892   | 10.8646  |
| 6314 | M1378T10 | 1.195077 | -0.2571  | -0.95095 | 0.378572 | 0.864031 | DOWN | 1377.995 | 1377.993 | 1377.995 | 9.84095  | 9.73145  |
| 6315 | M602T9_1 | 1.168579 | -0.22476 | -0.94595 | 0.378573 | 0.864031 | DOWN | 601.6337 | 601.6325 | 601.6375 | 9.272133 | 9.06855  |
| 6316 | M370T11_ | 1.180026 | -0.23882 | -0.93783 | 0.378578 | 0.864031 | DOWN | 369.7468 | 369.7466 | 369.747  | 10.90519 | 10.88747 |
| 6317 | M190T9_1 | 1.458533 | -0.54452 | -0.94079 | 0.378616 | 0.864031 | DOWN | 189.5373 | 189.5367 | 189.5382 | 9.205342 | 9.11405  |
| 6318 | M373T9_6 | 4.632559 | 2.211809 | 0.987782 | 0.378692 | 0.864031 | UP   | 373.2525 | 373.2515 | 373.2545 | 9.003817 | 8.985867 |
| 6319 | M430T9_3 | 1.319082 | -0.39953 | -0.96223 | 0.378696 | 0.864031 | DOWN | 429.9982 | 429.9974 | 430.0015 | 9.3471   | 9.1503   |
| 6320 | M416T41_ | 1.117329 | 0.160054 | 0.97712  | 0.378721 | 0.864031 | UP   | 416.2642 | 416.2639 | 416.2642 | 40.86292 | 40.6975  |
| 6321 | M396T40_ | 1.381561 | -0.4663  | -0.95172 | 0.378772 | 0.864031 | DOWN | 396.2225 | 396.2225 | 396.2227 | 40.12208 | 39.84883 |
| 6322 | M399T9_3 | 1.206782 | -0.27116 | -0.94715 | 0.378784 | 0.864031 | DOWN | 398.8268 | 398.8262 | 398.827  | 8.985492 | 8.922033 |
| 6323 | M396T43_ | 1.156302 | -0.20952 | -0.9807  | 0.378867 | 0.864031 | DOWN | 396.2225 | 396.2225 | 396.2228 | 43.32983 | 43.11433 |
| 6324 | M219T9_5 | 1.361998 | -0.44572 | -0.94163 | 0.378911 | 0.864032 | DOWN | 218.843  | 218.8419 | 218.8437 | 9.283292 | 9.132267 |
| 6325 | M585T10_ | 2.514443 | 1.330239 | 0.987017 | 0.37893  | 0.864032 | UP   | 585.3348 | 585.3276 | 585.3363 | 9.622983 | 9.510117 |
| 6326 | M188T9_4 | 1.722765 | 0.784726 | 0.931374 | 0.378955 | 0.864032 | UP   | 187.9046 | 187.895  | 187.9051 | 9.174575 | 9.126783 |
| 6327 | M256T28  | 1.277059 | -0.35283 | -0.94094 | 0.378987 | 0.864032 | DOWN | 256.2995 | 256.2994 | 256.2996 | 27.86283 | 27.84817 |
| 6328 | M878T10_ | 1.103511 | -0.1421  | -0.94215 | 0.37914  | 0.864032 | DOWN | 877.5883 | 877.5859 | 877.5891 | 9.90295  | 9.79535  |
| 6329 | M609T10_ | 1.385256 | 0.470152 | 0.955915 | 0.37916  | 0.864032 | UP   | 608.9567 | 608.9562 | 608.9573 | 9.975217 | 9.8753   |
| 6330 | M267T10_ | 1.332464 | 0.414096 | 0.931329 | 0.379168 | 0.864032 | UP   | 266.7623 | 266.7622 | 266.7624 | 9.877725 | 9.811217 |
| 6331 | M290T11_ | 1.146314 | -0.197   | -0.93626 | 0.379171 | 0.864032 | DOWN | 289.7251 | 289.7248 | 289.7253 | 10.90519 | 10.879   |
| 6332 | M505T9_3 | 1.196241 | -0.25851 | -0.93579 | 0.379178 | 0.864032 | DOWN | 504.6934 | 504.6924 | 504.6938 | 9.221892 | 9.129317 |
| 6333 | M481T11_ | 1.433923 | 0.519968 | 0.940354 | 0.379188 | 0.864032 | UP   | 481.4881 | 481.4881 | 481.4884 | 10.84767 | 10.8214  |
| 6334 | M228T11_ | 1.085421 | -0.11825 | -0.93548 | 0.379232 | 0.864032 | DOWN | 228.1592 | 228.1592 | 228.1593 | 10.90659 | 10.89355 |

|      |          |          |          |          |          |          |      |          |          |          |          |          |
|------|----------|----------|----------|----------|----------|----------|------|----------|----------|----------|----------|----------|
| 6335 | M205T10_ | 1.204011 | -0.26785 | -0.96546 | 0.379304 | 0.864032 | DOWN | 205.1315 | 205.1314 | 205.1316 | 9.8374   | 9.715683 |
| 6336 | M546T35  | 2.998155 | 1.584075 | 0.986775 | 0.379313 | 0.864032 | UP   | 546.3996 | 546.3994 | 546.3998 | 34.63017 | 34.62367 |
| 6337 | M494T29_ | 1.310139 | 0.38972  | 0.953927 | 0.379327 | 0.864032 | UP   | 494.3236 | 494.3232 | 494.3237 | 28.815   | 28.79983 |
| 6338 | M520T42_ | 1.109925 | 0.150462 | 0.937628 | 0.379412 | 0.864032 | UP   | 520.3112 | 520.3108 | 520.3115 | 42.02117 | 41.80517 |
| 6339 | M324T9_2 | 1.289772 | -0.36712 | -0.93654 | 0.379481 | 0.864032 | DOWN | 323.5278 | 323.5274 | 323.528  | 8.9244   | 8.8486   |
| 6340 | M523T10_ | 1.357448 | -0.4409  | -0.94972 | 0.379489 | 0.864032 | DOWN | 522.5531 | 522.5525 | 522.5549 | 9.9478   | 9.8914   |
| 6341 | M503T9_9 | 1.37102  | 0.455249 | 0.970379 | 0.379532 | 0.864032 | UP   | 503.361  | 503.3599 | 503.3701 | 9.448983 | 9.174967 |
| 6342 | M899T34  | 1.457084 | -0.54308 | -0.93817 | 0.379619 | 0.864032 | DOWN | 898.6106 | 898.6101 | 898.6108 | 33.99183 | 33.9455  |
| 6343 | M291T23  | 1.371893 | 0.456168 | 0.929957 | 0.379636 | 0.864032 | UP   | 290.7259 | 290.7257 | 290.7261 | 22.89325 | 22.88567 |
| 6344 | M744T9_2 | 1.367534 | -0.45158 | -0.93445 | 0.379646 | 0.864032 | DOWN | 744.035  | 744.0344 | 744.0358 | 9.317    | 9.234417 |
| 6345 | M529T11_ | 1.310379 | -0.38998 | -0.92954 | 0.379963 | 0.864032 | DOWN | 529.4019 | 529.4011 | 529.404  | 11.26983 | 11.15128 |
| 6346 | M372T9_4 | 5.840609 | 2.546119 | 0.98416  | 0.380001 | 0.864032 | UP   | 372.2496 | 372.249  | 372.2501 | 8.989    | 8.936617 |
| 6347 | M341T10_ | 10.46505 | -3.38751 | -0.9857  | 0.380029 | 0.864032 | DOWN | 341.3101 | 341.3094 | 341.3108 | 9.828642 | 9.715683 |
| 6348 | M304T23_ | 1.109658 | -0.15012 | -0.94497 | 0.380033 | 0.864032 | DOWN | 304.2844 | 304.2843 | 304.2846 | 22.74158 | 22.741   |
| 6349 | M342T11_ | 1.311207 | 0.390895 | 0.93011  | 0.380048 | 0.864032 | UP   | 341.7471 | 341.7461 | 341.7484 | 10.94208 | 10.8628  |
| 6350 | M670T10_ | 1.149094 | 0.200497 | 0.930224 | 0.380079 | 0.864032 | UP   | 670.4324 | 670.4319 | 670.433  | 9.81635  | 9.78305  |
| 6351 | M583T23  | 1.461388 | 0.547339 | 0.958612 | 0.380093 | 0.864032 | UP   | 582.5609 | 582.5606 | 582.5617 | 22.886   | 22.857   |
| 6352 | M463T10_ | 2.592287 | 1.374226 | 0.985137 | 0.380097 | 0.864032 | UP   | 462.5492 | 462.5488 | 462.5493 | 9.967367 | 9.859233 |
| 6353 | M389T9_4 | 2.050978 | 1.036312 | 0.973869 | 0.380162 | 0.864032 | UP   | 389.3201 | 389.3197 | 389.3205 | 9.03845  | 8.985867 |
| 6354 | M888T10_ | 1.468141 | 0.553991 | 0.94887  | 0.380166 | 0.864032 | UP   | 888.0292 | 888.0283 | 888.0305 | 9.971292 | 9.859233 |
| 6355 | M756T9_1 | 1.244747 | -0.31585 | -0.92872 | 0.380211 | 0.864032 | DOWN | 755.6728 | 755.6726 | 755.6734 | 9.294308 | 9.1445   |
| 6356 | M675T11_ | 1.283623 | -0.36022 | -0.92891 | 0.380228 | 0.864032 | DOWN | 675.1276 | 675.1254 | 675.1283 | 10.892   | 10.8646  |
| 6357 | M529T9_4 | 1.537599 | 0.62068  | 0.962635 | 0.380238 | 0.864032 | UP   | 529.3011 | 529.2976 | 529.3041 | 9.355317 | 9.064833 |
| 6358 | M254T9_5 | 2.577783 | -1.36613 | -0.98001 | 0.380292 | 0.864032 | DOWN | 254.4387 | 254.4385 | 254.4387 | 9.37135  | 9.2529   |
| 6359 | M392T20_ | 1.098314 | -0.13529 | -0.92936 | 0.380392 | 0.864032 | DOWN | 391.5065 | 391.5063 | 391.5067 | 20.245   | 20.23017 |
| 6360 | M427T9_2 | 1.305002 | -0.38405 | -0.93947 | 0.38054  | 0.864032 | DOWN | 427.2646 | 427.2644 | 427.2649 | 9.311883 | 9.206    |
| 6361 | M168T10_ | 1.467519 | 0.553379 | 0.938445 | 0.380621 | 0.864032 | UP   | 168.1855 | 168.1854 | 168.1856 | 9.964092 | 9.843367 |
| 6362 | M355T11_ | 1.133894 | 0.181285 | 0.954662 | 0.380732 | 0.864033 | UP   | 354.7768 | 354.7765 | 354.777  | 10.61286 | 10.58208 |
| 6363 | M221T9_1 | 1.278561 | -0.35452 | -0.93597 | 0.380752 | 0.864033 | DOWN | 221.166  | 221.1649 | 221.1666 | 9.3471   | 9.204617 |
| 6364 | M525T21  | 1.219628 | -0.28644 | -0.9412  | 0.380757 | 0.864033 | DOWN | 525.4239 | 525.4233 | 525.4249 | 20.9975  | 20.93867 |
| 6365 | M450T40_ | 1.237581 | -0.30752 | -0.97193 | 0.380775 | 0.864033 | DOWN | 450.2333 | 450.2331 | 450.2334 | 39.51483 | 39.34533 |
| 6366 | M768T10_ | 1.236234 | -0.30595 | -0.92752 | 0.380794 | 0.864033 | DOWN | 768.4779 | 768.4777 | 768.4783 | 10.45352 | 10.40807 |
| 6367 | M525T24_ | 1.312089 | -0.39187 | -0.92729 | 0.380916 | 0.864033 | DOWN | 525.3796 | 525.3792 | 525.3799 | 24.1315  | 24.06833 |
| 6368 | M188T11_ | 1.176476 | -0.23447 | -0.92923 | 0.380925 | 0.864033 | DOWN | 188.4658 | 188.4657 | 188.466  | 10.90522 | 10.879   |
| 6369 | M356T10_ | 4.00115  | 2.000415 | 0.983632 | 0.380946 | 0.864033 | UP   | 355.5805 | 355.5802 | 355.5808 | 9.8207   | 9.715683 |

|      |           |          |          |          |          |          |      |          |          |          |          |          |
|------|-----------|----------|----------|----------|----------|----------|------|----------|----------|----------|----------|----------|
| 6370 | M1961T10_ | 1.236247 | 0.305967 | 0.928342 | 0.380969 | 0.864033 | UP   | 1961.273 | 1961.27  | 1961.281 | 9.802117 | 9.715683 |
| 6371 | M316T29   | 1.158061 | -0.21171 | -0.92707 | 0.381009 | 0.864033 | DOWN | 316.3207 | 316.3206 | 316.3208 | 29.03975 | 29.0175  |
| 6372 | M277T11_  | 1.446425 | 0.532492 | 0.965217 | 0.38104  | 0.864033 | UP   | 276.6827 | 276.6825 | 276.6919 | 10.877   | 10.82972 |
| 6373 | M431T9_9  | 1.179265 | -0.23789 | -0.92901 | 0.381183 | 0.864033 | DOWN | 431.1172 | 431.1116 | 431.1183 | 9.241267 | 8.936617 |
| 6374 | M391T11_  | 1.14506  | -0.19542 | -0.93061 | 0.381282 | 0.864033 | DOWN | 390.6532 | 390.6529 | 390.6535 | 10.90519 | 10.879   |
| 6375 | M662T10_  | 1.104249 | -0.14307 | -0.95013 | 0.381436 | 0.864033 | DOWN | 662.3831 | 662.3826 | 662.3841 | 9.825767 | 9.715683 |
| 6376 | M576T42   | 1.07509  | -0.10446 | -0.94924 | 0.381455 | 0.864033 | DOWN | 576.3375 | 576.3374 | 576.3378 | 42.44525 | 42.208   |
| 6377 | M712T9_4  | 1.187923 | -0.24844 | -0.93309 | 0.381709 | 0.864033 | DOWN | 712.1438 | 712.1432 | 712.1443 | 9.246483 | 9.129317 |
| 6378 | M528T22   | 1.274771 | -0.35024 | -0.93785 | 0.381729 | 0.864033 | DOWN | 528.3737 | 528.3735 | 528.3742 | 22.26417 | 22.20933 |
| 6379 | M682T11_  | 1.191583 | -0.25288 | -0.92669 | 0.381754 | 0.864033 | DOWN | 681.7238 | 681.7235 | 681.7243 | 10.892   | 10.8646  |
| 6380 | M396T10_  | 1.305242 | 0.384317 | 0.942755 | 0.381759 | 0.864033 | UP   | 395.696  | 395.6955 | 395.6961 | 9.971292 | 9.859233 |
| 6381 | M407T10_  | 1.304855 | 0.383889 | 0.92566  | 0.381785 | 0.864033 | UP   | 406.8082 | 406.8079 | 406.8188 | 9.8322   | 9.699733 |
| 6382 | M214T9_1  | 1.40805  | -0.4937  | -0.94594 | 0.381845 | 0.864033 | DOWN | 214.111  | 214.1097 | 214.1115 | 9.311883 | 9.22495  |
| 6383 | M842T10_  | 1.434296 | -0.52034 | -0.92672 | 0.381847 | 0.864033 | DOWN | 841.5286 | 841.5281 | 841.5296 | 9.978692 | 9.960967 |
| 6384 | M1155T11  | 1.159294 | -0.21325 | -0.92672 | 0.381863 | 0.864033 | DOWN | 1154.816 | 1154.815 | 1154.817 | 10.90659 | 10.89355 |
| 6385 | M706T25   | 1.186418 | -0.24661 | -0.94473 | 0.381864 | 0.864033 | DOWN | 706.3286 | 706.3276 | 706.3297 | 24.75325 | 24.7245  |
| 6386 | M420T37   | 1.082898 | -0.1149  | -0.94338 | 0.381867 | 0.864033 | DOWN | 420.2227 | 420.2224 | 420.2228 | 36.986   | 36.72717 |
| 6387 | M235T10_  | 1.261115 | 0.3347   | 0.932065 | 0.381896 | 0.864033 | UP   | 235.4013 | 235.3998 | 235.4015 | 9.940667 | 9.859233 |
| 6388 | M722T10_  | 2.830441 | 1.501027 | 0.980791 | 0.381926 | 0.864033 | UP   | 722.2556 | 722.2554 | 722.2564 | 9.8207   | 9.715683 |
| 6389 | M359T10_  | 1.574799 | 0.655167 | 0.977726 | 0.381954 | 0.864033 | UP   | 358.9797 | 358.9794 | 358.9798 | 9.8649   | 9.73145  |
| 6390 | M525T10_  | 1.30219  | -0.38094 | -0.94759 | 0.382011 | 0.864033 | DOWN | 525.3314 | 525.3287 | 525.3319 | 9.843742 | 9.715683 |
| 6391 | M258T10_  | 1.97114  | 0.97903  | 0.974025 | 0.382021 | 0.864033 | UP   | 258.1695 | 258.1694 | 258.1698 | 9.566767 | 9.52595  |
| 6392 | M523T10_  | 1.282541 | -0.359   | -0.93355 | 0.382022 | 0.864033 | DOWN | 523.2715 | 523.269  | 523.272  | 9.543608 | 9.478833 |
| 6393 | M347T9_6  | 1.599283 | 0.677425 | 0.954162 | 0.382053 | 0.864033 | UP   | 347.2488 | 347.2418 | 347.253  | 9.447692 | 9.132267 |
| 6394 | M356T10_  | 1.976757 | 0.983135 | 0.925019 | 0.382055 | 0.864033 | UP   | 355.96   | 355.9599 | 355.9602 | 9.865667 | 9.79065  |
| 6395 | M571T11_  | 1.195366 | -0.25745 | -0.92542 | 0.382076 | 0.864033 | DOWN | 571.3551 | 571.3548 | 571.3561 | 10.72662 | 10.67805 |
| 6396 | M348T9_6  | 1.988754 | 0.991864 | 0.969203 | 0.382157 | 0.864033 | UP   | 348.2376 | 348.2293 | 348.241  | 9.237667 | 8.967683 |
| 6397 | M353T16   | 1.566704 | -0.64773 | -0.95822 | 0.382161 | 0.864033 | DOWN | 353.1569 | 353.1567 | 353.1571 | 15.58545 | 15.41775 |
| 6398 | M670T9_3  | 1.385867 | -0.47079 | -0.9322  | 0.382172 | 0.864033 | DOWN | 670.4654 | 670.4649 | 670.4678 | 9.449308 | 9.355317 |
| 6399 | M567T15   | 1.181498 | -0.24062 | -0.92775 | 0.382264 | 0.864033 | DOWN | 567.2882 | 567.2879 | 567.2886 | 14.57553 | 14.51577 |
| 6400 | M554T11_  | 1.199554 | -0.2625  | -0.94021 | 0.382285 | 0.864033 | DOWN | 554.4639 | 554.4638 | 554.4642 | 10.77367 | 10.75595 |
| 6401 | M331T10_  | 1.537103 | 0.620213 | 0.925572 | 0.382342 | 0.864033 | UP   | 331.4938 | 331.4937 | 331.4941 | 9.983433 | 9.8753   |
| 6402 | M406T10_  | 1.268073 | -0.34264 | -0.92859 | 0.38235  | 0.864033 | DOWN | 406.3444 | 406.3443 | 406.3446 | 9.816317 | 9.699733 |
| 6403 | M525T10_  | 1.412496 | -0.49825 | -0.93068 | 0.382467 | 0.864033 | DOWN | 525.107  | 525.1066 | 525.1081 | 9.956867 | 9.885167 |
| 6404 | M154T10_  | 1.257106 | -0.33011 | -0.93363 | 0.382489 | 0.864034 | DOWN | 153.5943 | 153.594  | 153.5946 | 9.829083 | 9.7124   |

|      |           |          |          |          |          |          |      |          |          |          |          |          |
|------|-----------|----------|----------|----------|----------|----------|------|----------|----------|----------|----------|----------|
| 6405 | M403T10_  | 2.796401 | 1.483571 | 0.979207 | 0.382512 | 0.864034 | UP   | 403.3169 | 403.3167 | 403.3173 | 9.627808 | 9.540717 |
| 6406 | M394T9_8  | 4.753986 | 2.249138 | 0.978394 | 0.382577 | 0.864034 | UP   | 394.2317 | 394.2311 | 394.232  | 8.976617 | 8.924217 |
| 6407 | M191T10_  | 1.402448 | -0.48795 | -0.94888 | 0.382608 | 0.864034 | DOWN | 191.1446 | 191.1445 | 191.1447 | 9.956417 | 9.853533 |
| 6408 | M224T10_  | 1.246849 | -0.31829 | -0.92924 | 0.382674 | 0.864034 | DOWN | 224.4306 | 224.4305 | 224.4307 | 9.902617 | 9.811217 |
| 6409 | M1158T10_ | 1.105246 | -0.14437 | -0.92571 | 0.382689 | 0.864034 | DOWN | 1158.228 | 1158.227 | 1158.228 | 9.810767 | 9.665433 |
| 6410 | M272T26_  | 1.108141 | -0.14814 | -0.92628 | 0.382759 | 0.864034 | DOWN | 272.2944 | 272.2943 | 272.2946 | 26.0325  | 26.00933 |
| 6411 | M550T10_  | 1.429448 | -0.51546 | -0.92419 | 0.382789 | 0.864034 | DOWN | 550.3484 | 550.3483 | 550.3487 | 9.655967 | 9.644783 |
| 6412 | M769T10_  | 1.311203 | 0.390892 | 0.952375 | 0.382853 | 0.864034 | UP   | 769.3904 | 769.3848 | 769.3916 | 9.8207   | 9.715683 |
| 6413 | M966T11_  | 1.151165 | -0.20309 | -0.92359 | 0.38287  | 0.864034 | DOWN | 966.0322 | 966.0314 | 966.0367 | 10.90519 | 10.88747 |
| 6414 | M365T31   | 1.905738 | -0.93035 | -0.96585 | 0.382907 | 0.864034 | DOWN | 365.1357 | 365.1356 | 365.1358 | 31.005   | 31.00317 |
| 6415 | M225T10_  | 1.254493 | 0.327104 | 0.931457 | 0.382913 | 0.864034 | UP   | 224.559  | 224.5589 | 224.5591 | 9.967367 | 9.859233 |
| 6416 | M351T11_  | 1.233481 | 0.302735 | 0.923503 | 0.382932 | 0.864034 | UP   | 350.589  | 350.5876 | 350.5901 | 10.91977 | 10.88982 |
| 6417 | M457T10_  | 1.214949 | -0.2809  | -0.9337  | 0.383013 | 0.864034 | DOWN | 456.8239 | 456.8235 | 456.8241 | 9.916525 | 9.811217 |
| 6418 | M238T9_4  | 2.731472 | -1.44968 | -0.97646 | 0.383124 | 0.864034 | DOWN | 238.2569 | 238.2568 | 238.257  | 9.370967 | 9.221317 |
| 6419 | M571T9_1  | 1.615211 | 0.691723 | 0.945705 | 0.38318  | 0.864034 | UP   | 570.5641 | 570.5625 | 570.5683 | 9.328967 | 9.264333 |
| 6420 | M396T10_  | 1.089207 | -0.12328 | -0.9276  | 0.383186 | 0.864034 | DOWN | 396.2037 | 396.2034 | 396.2038 | 9.917167 | 9.811217 |
| 6421 | M365T10_  | 1.934878 | 0.952243 | 0.965374 | 0.383245 | 0.864034 | UP   | 364.6122 | 364.6118 | 364.6154 | 9.8753   | 9.73145  |
| 6422 | M448T9_3  | 1.280194 | -0.35636 | -0.95096 | 0.383277 | 0.864034 | DOWN | 447.8072 | 447.8069 | 447.8077 | 9.278983 | 9.1445   |
| 6423 | M878T9    | 1.418796 | -0.50467 | -0.92535 | 0.3833   | 0.864034 | DOWN | 877.5542 | 877.5534 | 877.555  | 9.48955  | 9.40135  |
| 6424 | M409T9_4  | 1.354477 | -0.43774 | -0.92241 | 0.383307 | 0.864034 | DOWN | 409.3163 | 409.3157 | 409.3164 | 8.978067 | 8.922033 |
| 6425 | M674T31_  | 2.139889 | -1.09754 | -0.96574 | 0.383395 | 0.864034 | DOWN | 674.4922 | 674.4918 | 674.4939 | 31.40708 | 31.3925  |
| 6426 | M383T11_  | 1.152395 | -0.20463 | -0.9235  | 0.383443 | 0.864034 | DOWN | 382.8107 | 382.8105 | 382.8115 | 10.89875 | 10.879   |
| 6427 | M545T12_  | 1.238454 | -0.30854 | -0.92823 | 0.383532 | 0.864034 | DOWN | 545.4263 | 545.4259 | 545.4265 | 11.9459  | 11.93173 |
| 6428 | M662T10_  | 1.577389 | 0.657538 | 0.97428  | 0.383574 | 0.864034 | UP   | 662.3386 | 662.3378 | 662.3406 | 9.825492 | 9.7124   |
| 6429 | M384T11_  | 1.149415 | -0.2009  | -0.92317 | 0.383655 | 0.864034 | DOWN | 383.7409 | 383.7407 | 383.7418 | 10.89875 | 10.879   |
| 6430 | M273T38   | 1.269037 | -0.34373 | -0.97081 | 0.383663 | 0.864034 | DOWN | 273.1693 | 273.1693 | 273.1694 | 38.10767 | 37.935   |
| 6431 | M759T10_  | 1.232298 | -0.30135 | -0.92323 | 0.383762 | 0.864034 | DOWN | 759.3986 | 759.3972 | 759.3995 | 9.642433 | 9.52595  |
| 6432 | M151T10_  | 1.396562 | -0.48188 | -0.9358  | 0.3838   | 0.864034 | DOWN | 150.7116 | 150.7115 | 150.7196 | 9.816258 | 9.715683 |
| 6433 | M1151T10_ | 1.952747 | 0.965505 | 0.962542 | 0.38386  | 0.864034 | UP   | 1151.053 | 1151.05  | 1151.055 | 9.960967 | 9.8914   |
| 6434 | M435T24_  | 2.252424 | -1.17148 | -0.94594 | 0.383868 | 0.864034 | DOWN | 435.3108 | 435.3107 | 435.3112 | 24.43567 | 24.4045  |
| 6435 | M327T10_  | 1.118737 | -0.16187 | -0.94176 | 0.383874 | 0.864034 | DOWN | 326.6953 | 326.6949 | 326.6962 | 9.830558 | 9.699733 |
| 6436 | M298T10_  | 1.212482 | -0.27796 | -0.93255 | 0.383929 | 0.864034 | DOWN | 297.7107 | 297.7105 | 297.7109 | 9.95385  | 9.843367 |
| 6437 | M315T11_  | 2.13291  | 1.092823 | 0.965036 | 0.383934 | 0.864034 | UP   | 315.1772 | 315.177  | 315.1777 | 11.03245 | 10.94853 |
| 6438 | M324T10_  | 1.242896 | -0.31371 | -0.92541 | 0.383959 | 0.864034 | DOWN | 324.3288 | 324.3286 | 324.3291 | 9.964092 | 9.859233 |
| 6439 | M481T10_  | 1.168655 | -0.22485 | -0.92581 | 0.383995 | 0.864034 | DOWN | 480.5019 | 480.5009 | 480.5031 | 9.766358 | 9.636483 |



|      |          |          |          |          |          |          |      |          |          |          |          |          |
|------|----------|----------|----------|----------|----------|----------|------|----------|----------|----------|----------|----------|
| 6440 | M572T11_ | 1.279636 | -0.35573 | -0.93781 | 0.38403  | 0.864034 | DOWN | 571.6903 | 571.6897 | 571.691  | 10.74723 | 10.6937  |
| 6441 | M356T15  | 12.67947 | 3.664422 | 0.976443 | 0.384134 | 0.864034 | UP   | 356.1507 | 356.1503 | 356.1508 | 14.88273 | 14.86757 |
| 6442 | M663T10_ | 1.544544 | 0.627181 | 0.959739 | 0.38418  | 0.864034 | UP   | 663.4768 | 663.4758 | 663.4785 | 9.85045  | 9.801833 |
| 6443 | M583T9_7 | 1.353087 | -0.43625 | -0.92097 | 0.384241 | 0.864034 | DOWN | 583.2927 | 583.2905 | 583.2941 | 9.250817 | 9.09495  |
| 6444 | M450T9_7 | 1.472729 | -0.55849 | -0.93809 | 0.384344 | 0.864035 | DOWN | 450.1851 | 450.1848 | 450.1861 | 9.160167 | 9.12675  |
| 6445 | M592T9_1 | 1.287333 | -0.36439 | -0.95908 | 0.38435  | 0.864035 | DOWN | 591.7546 | 591.7537 | 591.759  | 9.300733 | 9.219483 |
| 6446 | M823T10_ | 1.327011 | 0.408181 | 0.928822 | 0.384398 | 0.864035 | UP   | 823.0338 | 823.0329 | 823.0345 | 9.954217 | 9.843367 |
| 6447 | M172T10_ | 1.115681 | -0.15793 | -0.92015 | 0.38441  | 0.864035 | DOWN | 171.5035 | 171.5031 | 171.5038 | 9.934533 | 9.827283 |
| 6448 | M749T10_ | 1.598957 | 0.677131 | 0.972833 | 0.384436 | 0.864035 | UP   | 748.7279 | 748.7254 | 748.729  | 9.825492 | 9.715683 |
| 6449 | M367T22_ | 1.271531 | 0.346567 | 0.962586 | 0.384444 | 0.864035 | UP   | 367.2378 | 367.2376 | 367.2379 | 22.323   | 22.31017 |
| 6450 | M293T11_ | 1.346458 | -0.42917 | -0.92629 | 0.384479 | 0.864035 | DOWN | 292.5736 | 292.5734 | 292.574  | 10.87572 | 10.8214  |
| 6451 | M164T10_ | 1.153323 | -0.2058  | -0.93333 | 0.38451  | 0.864035 | DOWN | 164.3596 | 164.3595 | 164.3598 | 9.830458 | 9.715683 |
| 6452 | M326T10_ | 1.825005 | 0.8679   | 0.954934 | 0.38461  | 0.864035 | UP   | 325.5291 | 325.5289 | 325.53   | 9.828592 | 9.747533 |
| 6453 | M1008T15 | 1.218423 | -0.28502 | -0.94662 | 0.38467  | 0.864035 | DOWN | 1008.487 | 1008.487 | 1008.487 | 14.75848 | 14.7368  |
| 6454 | M351T11_ | 1.138621 | -0.18729 | -0.92346 | 0.384694 | 0.864035 | DOWN | 351.3894 | 351.3892 | 351.3898 | 10.90519 | 10.879   |
| 6455 | M696T10_ | 1.274524 | 0.349958 | 0.942296 | 0.384764 | 0.864035 | UP   | 696.3159 | 696.3131 | 696.3166 | 9.816167 | 9.541483 |
| 6456 | M346T11_ | 1.54349  | 0.626197 | 0.941437 | 0.384805 | 0.864035 | UP   | 346.2318 | 346.2236 | 346.2335 | 10.90765 | 10.74145 |
| 6457 | M603T10_ | 1.195884 | -0.25808 | -0.94898 | 0.38483  | 0.864035 | DOWN | 603.305  | 603.3046 | 603.306  | 9.60105  | 9.478833 |
| 6458 | M707T10_ | 1.225654 | -0.29355 | -0.93742 | 0.3849   | 0.864035 | DOWN | 706.772  | 706.7702 | 706.7724 | 9.825767 | 9.715683 |
| 6459 | M194T10_ | 1.206049 | -0.27029 | -0.9269  | 0.384908 | 0.864035 | DOWN | 193.7094 | 193.7088 | 193.7096 | 9.840617 | 9.758367 |
| 6460 | M326T9_5 | 2.80349  | -1.48722 | -0.93355 | 0.384913 | 0.864035 | DOWN | 326.3219 | 326.3218 | 326.322  | 9.37735  | 9.204617 |
| 6461 | M637T11_ | 1.198496 | -0.26122 | -0.92423 | 0.384924 | 0.864035 | DOWN | 636.5054 | 636.505  | 636.5058 | 10.878   | 10.86253 |
| 6462 | M535T11_ | 1.723426 | 0.785279 | 0.951963 | 0.384933 | 0.864035 | UP   | 534.8406 | 534.8394 | 534.8411 | 10.89255 | 10.83572 |
| 6463 | M289T23_ | 1.382219 | 0.466986 | 0.918604 | 0.385187 | 0.864035 | UP   | 288.5334 | 288.5293 | 288.538  | 22.86417 | 22.84233 |
| 6464 | M847T26  | 1.200557 | -0.2637  | -0.92184 | 0.385261 | 0.864035 | DOWN | 846.6151 | 846.6147 | 846.6155 | 25.93575 | 25.90983 |
| 6465 | M1839T10 | 1.273906 | -0.34926 | -0.91872 | 0.385277 | 0.864035 | DOWN | 1839.105 | 1839.103 | 1839.106 | 9.914217 | 9.811217 |
| 6466 | M341T11_ | 1.142879 | -0.19267 | -0.92912 | 0.385298 | 0.864035 | DOWN | 341.3223 | 341.3221 | 341.3233 | 10.90657 | 10.879   |
| 6467 | M471T17  | 1.224041 | -0.29165 | -0.9183  | 0.385343 | 0.864035 | DOWN | 471.3772 | 471.3767 | 471.3778 | 17.13592 | 17.117   |
| 6468 | M212T10_ | 1.23068  | -0.29946 | -0.92904 | 0.385432 | 0.864035 | DOWN | 211.896  | 211.8958 | 211.8961 | 9.82645  | 9.715683 |
| 6469 | M555T10_ | 1.232206 | -0.30124 | -0.934   | 0.385445 | 0.864035 | DOWN | 555.1006 | 555.1001 | 555.1008 | 9.95825  | 9.859233 |
| 6470 | M444T11_ | 1.271869 | -0.34695 | -0.91874 | 0.38546  | 0.864035 | DOWN | 443.8186 | 443.8184 | 443.8195 | 10.90553 | 10.879   |
| 6471 | M536T43  | 1.222444 | -0.28977 | -0.92488 | 0.385522 | 0.864035 | DOWN | 536.3062 | 536.306  | 536.3064 | 42.8265  | 42.62517 |
| 6472 | M402T11_ | 1.561705 | -0.64312 | -0.9184  | 0.385567 | 0.864035 | DOWN | 401.8029 | 401.8015 | 401.8089 | 10.94603 | 10.80695 |
| 6473 | M276T11_ | 1.175166 | -0.23286 | -0.92145 | 0.38562  | 0.864035 | DOWN | 275.6688 | 275.6687 | 275.6689 | 10.89875 | 10.8646  |
| 6474 | M320T10_ | 1.103846 | -0.14254 | -0.94031 | 0.385644 | 0.864035 | DOWN | 319.5233 | 319.5229 | 319.525  | 9.830558 | 9.715683 |

|      |          |          |          |          |          |          |      |          |          |          |          |          |
|------|----------|----------|----------|----------|----------|----------|------|----------|----------|----------|----------|----------|
| 6475 | M335T10_ | 1.186014 | -0.24612 | -0.93031 | 0.385684 | 0.864035 | DOWN | 334.9274 | 334.9271 | 334.9276 | 9.979342 | 9.8753   |
| 6476 | M347T10_ | 1.239475 | -0.30973 | -0.93189 | 0.385727 | 0.864035 | DOWN | 347.111  | 347.1107 | 347.1111 | 9.834067 | 9.699733 |
| 6477 | M1924T10 | 1.689504 | 0.7566   | 0.949308 | 0.385775 | 0.864035 | UP   | 1923.783 | 1923.779 | 1923.784 | 9.847133 | 9.728083 |
| 6478 | M318T9_1 | 1.217072 | -0.28341 | -0.92803 | 0.385784 | 0.864035 | DOWN | 318.0487 | 318.0484 | 318.049  | 8.848167 | 8.7575   |
| 6479 | M203T10_ | 1.219835 | -0.28669 | -0.96215 | 0.385844 | 0.864035 | DOWN | 203.3404 | 203.3402 | 203.3404 | 9.970617 | 9.859233 |
| 6480 | M277T11_ | 1.19868  | -0.26145 | -0.9174  | 0.38586  | 0.864035 | DOWN | 276.5526 | 276.5525 | 276.5527 | 10.89907 | 10.8646  |
| 6481 | M318T9_1 | 1.263781 | -0.33775 | -0.92769 | 0.385928 | 0.864035 | DOWN | 318.3708 | 318.3705 | 318.3713 | 9.331083 | 9.234417 |
| 6482 | M794T10_ | 1.382462 | -0.46724 | -0.91718 | 0.385949 | 0.864035 | DOWN | 794.453  | 794.4521 | 794.456  | 9.921208 | 9.872067 |
| 6483 | M400T11_ | 1.310302 | -0.3899  | -0.91899 | 0.386031 | 0.864035 | DOWN | 400.4208 | 400.4196 | 400.4213 | 10.92208 | 10.8214  |
| 6484 | M327T10_ | 1.171027 | -0.22777 | -0.93743 | 0.386084 | 0.864035 | DOWN | 326.5584 | 326.5581 | 326.5585 | 9.818525 | 9.715683 |
| 6485 | M599T9_4 | 2.008949 | 1.006441 | 0.964184 | 0.386128 | 0.864036 | UP   | 599.4202 | 599.4196 | 599.4206 | 9.479567 | 9.370583 |
| 6486 | M1640T10 | 1.492865 | 0.578084 | 0.9617   | 0.386165 | 0.864036 | UP   | 1639.645 | 1639.642 | 1639.65  | 9.915583 | 9.843367 |
| 6487 | M435T9_1 | 5.20715  | 2.380494 | 0.971413 | 0.386182 | 0.864036 | UP   | 434.5959 | 434.5927 | 434.5975 | 9.0839   | 9.06315  |
| 6488 | M324T9_5 | 1.97985  | 0.985391 | 0.963335 | 0.3862   | 0.864036 | UP   | 323.8232 | 323.823  | 323.8238 | 9.468325 | 9.370583 |
| 6489 | M883T11_ | 1.286397 | 0.363336 | 0.9185   | 0.386203 | 0.864036 | UP   | 883.459  | 883.4581 | 883.4597 | 10.91611 | 10.73768 |
| 6490 | M478T9_2 | 1.157599 | -0.21114 | -0.91736 | 0.386216 | 0.864036 | DOWN | 478.1065 | 478.1055 | 478.1067 | 9.29345  | 9.129317 |
| 6491 | M533T9_2 | 1.299721 | -0.3782  | -0.93525 | 0.386226 | 0.864036 | DOWN | 533.0675 | 533.0668 | 533.068  | 9.438833 | 9.38595  |
| 6492 | M1318T29 | 1.720399 | -0.78274 | -0.92354 | 0.386448 | 0.864036 | DOWN | 1317.977 | 1317.976 | 1317.979 | 28.80933 | 28.77683 |
| 6493 | M360T10_ | 4.74774  | 2.247241 | 0.970739 | 0.386514 | 0.864036 | UP   | 359.6822 | 359.682  | 359.6824 | 9.951283 | 9.843367 |
| 6494 | M289T23_ | 1.429625 | 0.515636 | 0.918279 | 0.386537 | 0.864036 | UP   | 288.5805 | 288.5788 | 288.5847 | 22.929   | 22.90067 |
| 6495 | M194T9_9 | 2.051263 | 1.036512 | 0.929234 | 0.386538 | 0.864036 | UP   | 193.976  | 193.9758 | 193.9768 | 9.16125  | 9.111033 |
| 6496 | M454T10_ | 1.093877 | -0.12945 | -0.91853 | 0.38656  | 0.864036 | DOWN | 454.3294 | 454.3289 | 454.3296 | 10.44611 | 10.40807 |
| 6497 | M1247T10 | 1.340701 | -0.42299 | -0.94966 | 0.386644 | 0.864036 | DOWN | 1247.308 | 1247.307 | 1247.308 | 9.916525 | 9.8378   |
| 6498 | M362T10_ | 1.519536 | 0.60363  | 0.943764 | 0.386722 | 0.864036 | UP   | 361.8518 | 361.8517 | 361.8521 | 9.778967 | 9.6681   |
| 6499 | M210T10_ | 1.262707 | -0.33652 | -0.91723 | 0.386744 | 0.864036 | DOWN | 210.2044 | 210.2042 | 210.2045 | 10.46372 | 10.40882 |
| 6500 | M227T9_1 | 1.779365 | -0.83136 | -0.91999 | 0.38676  | 0.864036 | DOWN | 227.1895 | 227.1868 | 227.2008 | 8.701925 | 8.5386   |
| 6501 | M431T10_ | 2.003962 | 1.002855 | 0.96718  | 0.386772 | 0.864036 | UP   | 430.5361 | 430.5353 | 430.5364 | 9.951283 | 9.843367 |
| 6502 | M278T10_ | 1.208196 | -0.27285 | -0.93365 | 0.386828 | 0.864036 | DOWN | 277.8901 | 277.8898 | 277.8902 | 9.95385  | 9.859233 |
| 6503 | M622T10_ | 1.070187 | -0.09786 | -0.95309 | 0.386857 | 0.864036 | DOWN | 621.5147 | 621.5144 | 621.5151 | 10.28154 | 10.21468 |
| 6504 | M492T16  | 1.113419 | -0.155   | -0.91528 | 0.386968 | 0.864036 | DOWN | 492.3788 | 492.3766 | 492.3791 | 15.59945 | 15.40973 |
| 6505 | M1162T10 | 1.54826  | -0.63065 | -0.91495 | 0.387006 | 0.864036 | DOWN | 1162.353 | 1162.352 | 1162.356 | 9.923708 | 9.900133 |
| 6506 | M302T11_ | 1.21287  | 0.278425 | 0.950868 | 0.387041 | 0.864036 | UP   | 302.0425 | 302.042  | 302.0429 | 10.89904 | 10.8646  |
| 6507 | M283T10_ | 1.691611 | 0.758398 | 0.967071 | 0.387046 | 0.864036 | UP   | 283.1651 | 283.1649 | 283.1652 | 9.830083 | 9.743667 |
| 6508 | M431T10_ | 1.948524 | 0.962382 | 0.96485  | 0.387148 | 0.864036 | UP   | 430.9572 | 430.957  | 430.9576 | 9.951283 | 9.843367 |
| 6509 | M570T10_ | 1.170969 | -0.2277  | -0.92124 | 0.38719  | 0.864036 | DOWN | 570.2736 | 570.2726 | 570.274  | 10.41657 | 10.39197 |

|      |          |          |          |          |          |          |      |          |          |          |          |          |
|------|----------|----------|----------|----------|----------|----------|------|----------|----------|----------|----------|----------|
| 6510 | M326T10_ | 1.11999  | -0.16349 | -0.91537 | 0.387222 | 0.864036 | DOWN | 326.2247 | 326.2244 | 326.2258 | 9.830558 | 9.73145  |
| 6511 | M708T11_ | 1.134392 | -0.18192 | -0.91636 | 0.387229 | 0.864036 | DOWN | 707.5434 | 707.5432 | 707.5437 | 10.62073 | 10.5836  |
| 6512 | M275T22  | 2.470451 | 1.304775 | 0.9574   | 0.387229 | 0.864036 | UP   | 275.2771 | 275.277  | 275.2773 | 21.52183 | 21.49333 |
| 6513 | M389T9_5 | 1.462501 | -0.54844 | -0.9166  | 0.387272 | 0.864036 | DOWN | 389.4518 | 389.4518 | 389.4519 | 9.443225 | 9.38595  |
| 6514 | M583T9_1 | 1.573052 | 0.653566 | 0.960565 | 0.387283 | 0.864036 | UP   | 582.5075 | 582.5066 | 582.5078 | 9.069958 | 9.03845  |
| 6515 | M754T10_ | 1.504395 | 0.589184 | 0.914592 | 0.387308 | 0.864036 | UP   | 754.3256 | 754.3241 | 754.3268 | 9.9677   | 9.8753   |
| 6516 | M235T11_ | 1.31573  | -0.39586 | -0.9143  | 0.387399 | 0.864036 | DOWN | 235.4833 | 235.4831 | 235.4836 | 10.892   | 10.873   |
| 6517 | M419T10_ | 1.757439 | 0.813475 | 0.914087 | 0.387415 | 0.864036 | UP   | 418.5077 | 418.5014 | 418.508  | 9.946367 | 9.8753   |
| 6518 | M317T9_8 | 1.274608 | -0.35005 | -0.9145  | 0.387432 | 0.864036 | DOWN | 317.4749 | 317.4745 | 317.4751 | 9.317    | 9.234417 |
| 6519 | M268T15_ | 1.2039   | -0.26772 | -0.92379 | 0.387483 | 0.864036 | DOWN | 268.1177 | 268.1175 | 268.1178 | 14.67778 | 14.63255 |
| 6520 | M351T24  | 1.712378 | 0.776001 | 0.951701 | 0.38752  | 0.864036 | UP   | 351.2737 | 351.2732 | 351.2743 | 23.79867 | 23.74633 |
| 6521 | M340T10_ | 1.268352 | -0.34296 | -0.93897 | 0.387564 | 0.864036 | DOWN | 339.6966 | 339.6964 | 339.6975 | 9.822467 | 9.715683 |
| 6522 | M236T11_ | 1.139985 | -0.18901 | -0.91394 | 0.387574 | 0.864036 | DOWN | 235.9932 | 235.993  | 235.9934 | 10.89953 | 10.879   |
| 6523 | M239T11_ | 2.168091 | 1.116425 | 0.966472 | 0.387581 | 0.864036 | UP   | 238.6258 | 238.6256 | 238.6262 | 10.92253 | 10.83252 |
| 6524 | M478T40_ | 1.129586 | -0.17579 | -0.93386 | 0.387626 | 0.864036 | DOWN | 478.3005 | 478.3005 | 478.3009 | 39.92058 | 39.79133 |
| 6525 | M460T42_ | 1.15955  | -0.21357 | -0.9667  | 0.387643 | 0.864036 | DOWN | 460.29   | 460.2897 | 460.2901 | 42.36625 | 42.28    |
| 6526 | M973T11  | 1.458822 | 0.544804 | 0.923176 | 0.387668 | 0.864036 | UP   | 973.2685 | 973.2676 | 973.2729 | 10.8906  | 10.87765 |
| 6527 | M395T11_ | 1.188795 | -0.2495  | -0.91541 | 0.387827 | 0.864036 | DOWN | 395.321  | 395.3202 | 395.3215 | 10.59655 | 10.5518  |
| 6528 | M758T9_1 | 1.248549 | 0.320252 | 0.959886 | 0.387837 | 0.864036 | UP   | 757.8339 | 757.833  | 757.8346 | 9.191283 | 9.12675  |
| 6529 | M349T9_1 | 1.288222 | -0.36538 | -0.91958 | 0.387922 | 0.864036 | DOWN | 349.0883 | 349.0845 | 349.0886 | 9.314442 | 9.234417 |
| 6530 | M683T10_ | 1.22891  | -0.29738 | -0.95248 | 0.387963 | 0.864037 | DOWN | 682.6298 | 682.6196 | 682.6301 | 9.834117 | 9.715683 |
| 6531 | M475T9_4 | 1.333623 | -0.41535 | -0.91639 | 0.387994 | 0.864037 | DOWN | 474.9428 | 474.9425 | 474.9541 | 9.343517 | 9.175017 |
| 6532 | M405T21_ | 1.335842 | -0.41775 | -0.91683 | 0.388115 | 0.864037 | DOWN | 404.9497 | 404.9491 | 404.9504 | 20.628   | 20.591   |
| 6533 | M521T9_4 | 5.438805 | 2.44329  | 0.966833 | 0.388267 | 0.864037 | UP   | 520.8204 | 520.8179 | 520.8234 | 9.1445   | 9.064833 |
| 6534 | M762T11_ | 1.307332 | -0.38663 | -0.93502 | 0.388275 | 0.864037 | DOWN | 762.4745 | 762.4742 | 762.4746 | 10.69492 | 10.66012 |
| 6535 | M260T11_ | 1.189064 | -0.24983 | -0.92625 | 0.388281 | 0.864037 | DOWN | 259.5006 | 259.5005 | 259.5008 | 10.90659 | 10.88747 |
| 6536 | M1301T10 | 1.429253 | -0.51526 | -0.91363 | 0.388288 | 0.864037 | DOWN | 1301.31  | 1301.309 | 1301.31  | 9.972483 | 9.960967 |
| 6537 | M835T11_ | 1.154402 | -0.20715 | -0.91532 | 0.388333 | 0.864037 | DOWN | 834.5174 | 834.5168 | 834.518  | 10.66105 | 10.61512 |
| 6538 | M302T10_ | 1.187729 | -0.24821 | -0.91198 | 0.388451 | 0.864037 | DOWN | 302.3389 | 302.3386 | 302.3461 | 9.830833 | 9.715683 |
| 6539 | M341T10_ | 4.835198 | -2.27358 | -0.96603 | 0.388574 | 0.864037 | DOWN | 341.0203 | 341.02   | 341.0204 | 9.951283 | 9.843367 |
| 6540 | M286T10_ | 1.127897 | -0.17363 | -0.92393 | 0.388608 | 0.864037 | DOWN | 285.7122 | 285.7089 | 285.7125 | 9.942317 | 9.571683 |
| 6541 | M268T10_ | 1.735764 | 0.795571 | 0.96243  | 0.388629 | 0.864037 | UP   | 268.0302 | 268.03   | 268.0303 | 9.970617 | 9.8753   |
| 6542 | M715T10_ | 1.574101 | -0.65453 | -0.94481 | 0.388646 | 0.864037 | DOWN | 715.4979 | 715.4973 | 715.498  | 9.505267 | 9.40135  |
| 6543 | M1333T9  | 1.254767 | -0.32742 | -0.95138 | 0.388653 | 0.864037 | DOWN | 1332.96  | 1332.96  | 1332.962 | 9.305658 | 9.24215  |
| 6544 | M279T10_ | 1.191047 | -0.25223 | -0.91849 | 0.388723 | 0.864037 | DOWN | 278.9333 | 278.9325 | 278.9336 | 9.931875 | 9.827283 |

|      |          |          |          |          |          |          |      |          |          |          |          |          |
|------|----------|----------|----------|----------|----------|----------|------|----------|----------|----------|----------|----------|
| 6545 | M402T11_ | 1.483753 | 0.569251 | 0.913149 | 0.388767 | 0.864037 | UP   | 401.6815 | 401.6753 | 401.6872 | 10.91918 | 10.85838 |
| 6546 | M193T9_1 | 1.278558 | -0.35452 | -0.9127  | 0.388787 | 0.864037 | DOWN | 193.4741 | 193.4734 | 193.4754 | 9.303492 | 9.1503   |
| 6547 | M350T10_ | 1.17163  | 0.228517 | 0.915817 | 0.388792 | 0.864037 | UP   | 349.8193 | 349.819  | 349.8196 | 9.825492 | 9.699733 |
| 6548 | M703T10_ | 1.119454 | -0.1628  | -0.91901 | 0.388795 | 0.864037 | DOWN | 702.9389 | 702.9386 | 702.9395 | 10.25264 | 10.2024  |
| 6549 | M334T19  | 1.642593 | 0.715975 | 0.917596 | 0.388816 | 0.864037 | UP   | 334.1708 | 334.17   | 334.1713 | 18.90025 | 18.8735  |
| 6550 | M995T22  | 1.251434 | -0.32358 | -0.92225 | 0.388913 | 0.864037 | DOWN | 994.689  | 994.6882 | 994.69   | 22.2045  | 22.18067 |
| 6551 | M369T15  | 1.796728 | -0.84537 | -0.95807 | 0.388947 | 0.864037 | DOWN | 369.1883 | 369.1882 | 369.1885 | 14.6487  | 14.5321  |
| 6552 | M788T10_ | 1.360286 | -0.44391 | -0.91171 | 0.389003 | 0.864037 | DOWN | 787.7557 | 787.7545 | 787.7562 | 9.887133 | 9.779267 |
| 6553 | M474T10_ | 1.575568 | 0.655872 | 0.929995 | 0.389005 | 0.864037 | UP   | 474.0735 | 474.0728 | 474.0736 | 9.967367 | 9.859233 |
| 6554 | M227T12_ | 1.244136 | -0.31514 | -0.91088 | 0.389019 | 0.864037 | DOWN | 226.6094 | 226.6094 | 226.6096 | 12.37065 | 12.33917 |
| 6555 | M620T19  | 1.259383 | -0.33272 | -0.9428  | 0.389036 | 0.864037 | DOWN | 620.4823 | 620.4818 | 620.4824 | 18.63867 | 18.629   |
| 6556 | M873T10_ | 1.099587 | -0.13696 | -0.91185 | 0.389059 | 0.864037 | DOWN | 873.4677 | 873.467  | 873.468  | 9.678733 | 9.557333 |
| 6557 | M1348T10 | 2.50321  | 1.323779 | 0.964323 | 0.389137 | 0.864037 | UP   | 1348.077 | 1348.075 | 1348.08  | 9.964417 | 9.8753   |
| 6558 | M1047T10 | 1.877268 | 0.908635 | 0.946753 | 0.389239 | 0.864037 | UP   | 1046.618 | 1046.617 | 1046.619 | 9.746142 | 9.636483 |
| 6559 | M223T10_ | 1.479303 | -0.56492 | -0.93312 | 0.389252 | 0.864037 | DOWN | 223.4602 | 223.4534 | 223.4604 | 9.930192 | 9.816167 |
| 6560 | M894T10_ | 2.172545 | 1.119386 | 0.953365 | 0.389266 | 0.864037 | UP   | 894.2722 | 894.2714 | 894.2729 | 9.960967 | 9.8753   |
| 6561 | M432T9_6 | 1.315081 | -0.39515 | -0.93813 | 0.389272 | 0.864037 | DOWN | 432.0469 | 432.0446 | 432.0478 | 9.329025 | 9.129317 |
| 6562 | M175T14  | 1.534179 | 0.617466 | 0.963158 | 0.389364 | 0.864037 | UP   | 175.0751 | 175.075  | 175.0752 | 13.79973 | 13.77065 |
| 6563 | M673T10_ | 1.24945  | -0.32129 | -0.93858 | 0.389399 | 0.864037 | DOWN | 672.5989 | 672.5985 | 672.5993 | 9.816258 | 9.699733 |
| 6564 | M696T10_ | 1.219098 | -0.28581 | -0.92576 | 0.389415 | 0.864037 | DOWN | 696.2695 | 696.2691 | 696.2714 | 9.831517 | 9.715683 |
| 6565 | M727T10_ | 1.485441 | 0.570892 | 0.960392 | 0.389443 | 0.864037 | UP   | 726.6146 | 726.6126 | 726.6152 | 9.857275 | 9.73145  |
| 6566 | M688T9   | 1.329805 | -0.41121 | -0.93585 | 0.38948  | 0.864037 | DOWN | 687.9068 | 687.8998 | 687.9078 | 9.174967 | 9.12675  |
| 6567 | M402T9_3 | 1.271498 | -0.34653 | -0.91045 | 0.389503 | 0.864037 | DOWN | 402.2121 | 402.2119 | 402.2127 | 8.810233 | 8.715883 |
| 6568 | M594T10_ | 1.173098 | -0.23032 | -0.92821 | 0.38957  | 0.864037 | DOWN | 594.2173 | 594.2166 | 594.2178 | 9.523633 | 9.432183 |
| 6569 | M1410T10 | 1.441434 | 0.527505 | 0.951342 | 0.389574 | 0.864037 | UP   | 1410.249 | 1410.245 | 1410.25  | 9.948283 | 9.822117 |
| 6570 | M386T10_ | 2.018896 | 1.013567 | 0.959264 | 0.389622 | 0.864037 | UP   | 386.4081 | 386.4073 | 386.4085 | 9.896717 | 9.79065  |
| 6571 | M473T9_4 | 1.300252 | -0.37879 | -0.92971 | 0.389696 | 0.864037 | DOWN | 472.978  | 472.9776 | 472.9903 | 9.374083 | 9.324917 |
| 6572 | M580T43_ | 1.248359 | 0.320033 | 0.946515 | 0.389731 | 0.864037 | UP   | 580.3325 | 580.3323 | 580.3327 | 42.63958 | 42.5675  |
| 6573 | M453T18  | 1.92232  | -0.94285 | -0.96069 | 0.389734 | 0.864037 | DOWN | 453.3429 | 453.3429 | 453.3432 | 18.3255  | 18.29233 |
| 6574 | M601T9_2 | 1.422243 | -0.50817 | -0.90935 | 0.389821 | 0.864037 | DOWN | 601.3969 | 601.3962 | 601.398  | 8.90115  | 8.84285  |
| 6575 | M620T9_5 | 1.748625 | 0.806221 | 0.959506 | 0.389825 | 0.864038 | UP   | 620.3986 | 620.3984 | 620.4018 | 9.429367 | 9.234417 |
| 6576 | M317T10_ | 1.337823 | -0.41989 | -0.91481 | 0.389835 | 0.864038 | DOWN | 317.3657 | 317.3577 | 317.3663 | 9.951283 | 9.8322   |
| 6577 | M307T9_2 | 1.384413 | -0.46927 | -0.91118 | 0.38984  | 0.864038 | DOWN | 306.6497 | 306.6495 | 306.6499 | 8.858283 | 8.83365  |
| 6578 | M378T40_ | 2.725808 | -1.44668 | -0.96192 | 0.389842 | 0.864038 | DOWN | 378.2483 | 378.248  | 378.2486 | 40.0645  | 39.83417 |
| 6579 | M378T21  | 1.316508 | 0.396717 | 0.944983 | 0.389911 | 0.864038 | UP   | 378.3877 | 378.3876 | 378.3885 | 21.3995  | 21.363   |

|      |          |          |          |          |          |          |      |          |          |          |          |          |
|------|----------|----------|----------|----------|----------|----------|------|----------|----------|----------|----------|----------|
| 6580 | M347T10_ | 1.168103 | -0.22417 | -0.92783 | 0.389945 | 0.864038 | DOWN | 347.1427 | 347.1425 | 347.1429 | 9.968992 | 9.859233 |
| 6581 | M643T9_3 | 1.371257 | -0.4555  | -0.91144 | 0.389979 | 0.864038 | DOWN | 643.1994 | 643.1985 | 643.2007 | 9.303925 | 9.20785  |
| 6582 | M173T10_ | 1.177715 | -0.23599 | -0.93789 | 0.390016 | 0.864038 | DOWN | 173.4784 | 173.4783 | 173.4786 | 9.841442 | 9.73145  |
| 6583 | M390T9_5 | 3.820676 | -1.93383 | -0.95917 | 0.390022 | 0.864038 | DOWN | 390.2503 | 390.2496 | 390.2508 | 9.49105  | 9.38595  |
| 6584 | M1643T10 | 1.708349 | -0.7726  | -0.9315  | 0.390133 | 0.864038 | DOWN | 1643.058 | 1643.055 | 1643.06  | 9.962692 | 9.94455  |
| 6585 | M266T12  | 1.38075  | 0.465452 | 0.953693 | 0.390195 | 0.864038 | UP   | 266.2111 | 266.2108 | 266.2112 | 12.2597  | 12.23848 |
| 6586 | M325T10_ | 1.339529 | 0.421725 | 0.908524 | 0.390222 | 0.864038 | UP   | 325.0481 | 325.0477 | 325.0486 | 9.8374   | 9.73145  |
| 6587 | M816T11_ | 1.27843  | -0.35437 | -0.91283 | 0.390351 | 0.864038 | DOWN | 816.3693 | 816.3687 | 816.3701 | 10.87708 | 10.85018 |
| 6588 | M470T10_ | 2.184074 | 1.127022 | 0.958216 | 0.390387 | 0.864038 | UP   | 470.3218 | 470.3212 | 470.3222 | 9.645292 | 9.541483 |
| 6589 | M257T25  | 1.228672 | -0.2971  | -0.93806 | 0.390538 | 0.864038 | DOWN | 257.2664 | 257.2663 | 257.2665 | 24.69583 | 24.638   |
| 6590 | M895T10_ | 1.355349 | -0.43866 | -0.93227 | 0.390544 | 0.864038 | DOWN | 895.0759 | 895.0753 | 895.0786 | 9.505758 | 9.447983 |
| 6591 | M345T41  | 1.09765  | -0.13442 | -0.9077  | 0.390586 | 0.864038 | DOWN | 345.1906 | 345.1905 | 345.1908 | 41.388   | 41.17233 |
| 6592 | M586T9_3 | 1.282079 | -0.35849 | -0.90763 | 0.390596 | 0.864038 | DOWN | 585.8078 | 585.8064 | 585.8108 | 9.365833 | 9.250817 |
| 6593 | M343T20_ | 5.100726 | -2.3507  | -0.95744 | 0.390798 | 0.864038 | DOWN | 343.2092 | 343.2086 | 343.2099 | 19.59217 | 19.5695  |
| 6594 | M640T10_ | 6.222682 | 2.637536 | 0.961091 | 0.39087  | 0.864038 | UP   | 640.3194 | 640.3089 | 640.3237 | 9.857275 | 9.73145  |
| 6595 | M197T11  | 1.195586 | -0.25772 | -0.91814 | 0.390878 | 0.864038 | DOWN | 197.4582 | 197.4581 | 197.4583 | 10.90659 | 10.879   |
| 6596 | M188T9_3 | 1.717183 | 0.780043 | 0.952259 | 0.390904 | 0.864038 | UP   | 187.7108 | 187.7102 | 187.712  | 9.304925 | 9.0511   |
| 6597 | M636T35  | 2.874887 | 1.523505 | 0.957935 | 0.390915 | 0.864038 | UP   | 636.4578 | 636.4577 | 636.459  | 34.50992 | 34.46517 |
| 6598 | M1701T10 | 1.725313 | 0.786858 | 0.959439 | 0.390951 | 0.864038 | UP   | 1701.197 | 1701.192 | 1701.2   | 9.816183 | 9.715683 |
| 6599 | M1632T10 | 1.29802  | -0.37631 | -0.92677 | 0.390954 | 0.864038 | DOWN | 1632.158 | 1632.153 | 1632.159 | 9.903092 | 9.806367 |
| 6600 | M619T19_ | 1.257303 | -0.33033 | -0.94135 | 0.390957 | 0.864038 | DOWN | 619.4789 | 619.4785 | 619.4792 | 18.63867 | 18.629   |
| 6601 | M407T9_1 | 1.281615 | -0.35796 | -0.90678 | 0.391034 | 0.864038 | DOWN | 406.9082 | 406.9079 | 406.9083 | 9.438833 | 9.38595  |
| 6602 | M378T24_ | 9.167752 | 3.196568 | 0.960641 | 0.391095 | 0.864038 | UP   | 378.2397 | 378.2396 | 378.2399 | 24.169   | 24.14133 |
| 6603 | M720T10_ | 1.241424 | 0.311996 | 0.925012 | 0.391238 | 0.864038 | UP   | 719.5605 | 719.5597 | 719.5607 | 9.830558 | 9.699733 |
| 6604 | M635T10_ | 1.088673 | 0.122571 | 0.906291 | 0.391278 | 0.864038 | UP   | 635.3993 | 635.3989 | 635.3995 | 10.39613 | 10.34372 |
| 6605 | M502T10_ | 1.284897 | -0.36165 | -0.91129 | 0.391282 | 0.864038 | DOWN | 501.6373 | 501.6364 | 501.6377 | 10.47749 | 10.37598 |
| 6606 | M1638T10 | 1.380548 | 0.465241 | 0.937455 | 0.391438 | 0.864038 | UP   | 1638.089 | 1638.081 | 1638.093 | 9.933967 | 9.827283 |
| 6607 | M338T9_9 | 1.290061 | 0.367439 | 0.914353 | 0.39146  | 0.864038 | UP   | 338.3776 | 338.3717 | 338.3778 | 9.29375  | 9.129317 |
| 6608 | M359T17  | 1.245905 | -0.31719 | -0.90903 | 0.391484 | 0.864038 | DOWN | 359.2556 | 359.2551 | 359.2564 | 16.70833 | 16.69367 |
| 6609 | M1156T10 | 1.340193 | 0.42244  | 0.915255 | 0.391569 | 0.864038 | UP   | 1156.003 | 1156.002 | 1156.003 | 9.805842 | 9.732983 |
| 6610 | M994T10_ | 1.217225 | -0.2836  | -0.91621 | 0.391578 | 0.864038 | DOWN | 993.8177 | 993.8148 | 993.8196 | 9.766367 | 9.40255  |
| 6611 | M772T14  | 1.146481 | -0.19721 | -0.9057  | 0.391592 | 0.864038 | DOWN | 771.5631 | 771.5625 | 771.5635 | 13.69715 | 13.66475 |
| 6612 | M521T11_ | 1.579777 | 0.659721 | 0.936432 | 0.391618 | 0.864038 | UP   | 521.1875 | 521.1863 | 521.1903 | 10.93873 | 10.84487 |
| 6613 | M709T11_ | 1.158878 | -0.21273 | -0.90721 | 0.391642 | 0.864038 | DOWN | 709.0009 | 709.0004 | 709.0027 | 10.90519 | 10.879   |
| 6614 | M680T10_ | 1.494176 | 0.57935  | 0.947472 | 0.391667 | 0.864038 | UP   | 680.4664 | 680.4657 | 680.4669 | 9.8397   | 9.715683 |

|      |          |          |          |          |          |          |      |          |          |          |          |          |
|------|----------|----------|----------|----------|----------|----------|------|----------|----------|----------|----------|----------|
| 6615 | M209T9_4 | 1.423176 | -0.50911 | -0.90617 | 0.391746 | 0.864039 | DOWN | 208.9243 | 208.9238 | 208.9247 | 9.280767 | 9.204617 |
| 6616 | M721T25  | 1.387773 | -0.47277 | -0.9097  | 0.391761 | 0.864039 | DOWN | 720.5103 | 720.5099 | 720.511  | 24.94183 | 24.94083 |
| 6617 | M556T9_2 | 2.514243 | 1.330124 | 0.955183 | 0.391847 | 0.864039 | UP   | 555.6607 | 555.6566 | 555.6618 | 9.208942 | 9.06855  |
| 6618 | M519T12  | 1.132732 | -0.17981 | -0.9051  | 0.391885 | 0.864039 | DOWN | 519.3901 | 519.3898 | 519.3902 | 11.62774 | 11.60717 |
| 6619 | M846T10_ | 1.090691 | -0.12524 | -0.90662 | 0.391887 | 0.864039 | DOWN | 846.3426 | 846.3422 | 846.343  | 9.930908 | 9.827283 |
| 6620 | M573T10_ | 1.240449 | -0.31086 | -0.9297  | 0.391918 | 0.864039 | DOWN | 572.7217 | 572.7211 | 572.7221 | 9.923808 | 9.8378   |
| 6621 | M325T10_ | 1.215526 | 0.281581 | 0.939843 | 0.391929 | 0.864039 | UP   | 325.3641 | 325.3637 | 325.3651 | 9.846458 | 9.715683 |
| 6622 | M152T10_ | 1.197889 | -0.26049 | -0.90984 | 0.392296 | 0.864039 | DOWN | 152.0675 | 152.0674 | 152.0675 | 9.956417 | 9.843367 |
| 6623 | M335T10_ | 1.181975 | -0.2412  | -0.92654 | 0.392297 | 0.864039 | DOWN | 334.6446 | 334.6443 | 334.6454 | 9.830558 | 9.715683 |
| 6624 | M672T10_ | 1.074207 | -0.10327 | -0.90827 | 0.392377 | 0.864039 | DOWN | 672.3884 | 672.388  | 672.3889 | 9.75365  | 9.636483 |
| 6625 | M232T10_ | 1.295918 | 0.373974 | 0.912922 | 0.392436 | 0.864039 | UP   | 232.3934 | 232.3933 | 232.4062 | 9.9323   | 9.827283 |
| 6626 | M517T11_ | 2.043293 | 1.030896 | 0.945452 | 0.392509 | 0.864039 | UP   | 516.9931 | 516.9912 | 516.9936 | 10.92253 | 10.879   |
| 6627 | M657T11_ | 1.137649 | -0.18606 | -0.90415 | 0.392545 | 0.864039 | DOWN | 656.8972 | 656.8967 | 656.8995 | 10.90519 | 10.879   |
| 6628 | M407T11_ | 1.211028 | -0.27623 | -0.9039  | 0.392553 | 0.864039 | DOWN | 406.661  | 406.6605 | 406.6621 | 10.95837 | 10.80695 |
| 6629 | M459T9_7 | 1.206785 | -0.27117 | -0.90434 | 0.392576 | 0.864039 | DOWN | 459.4014 | 459.4011 | 459.4017 | 9.288458 | 9.129317 |
| 6630 | M466T11_ | 1.102145 | 0.140314 | 0.908416 | 0.392633 | 0.864039 | UP   | 466.3722 | 466.3685 | 466.3728 | 10.89904 | 10.873   |
| 6631 | M235T10_ | 1.106741 | -0.14632 | -0.90348 | 0.392723 | 0.864039 | DOWN | 234.7242 | 234.724  | 234.7242 | 9.930908 | 9.827283 |
| 6632 | M312T12_ | 2.065441 | 1.04645  | 0.953729 | 0.392748 | 0.864039 | UP   | 312.2683 | 312.2682 | 312.2692 | 12.42703 | 12.41563 |
| 6633 | M274T13  | 1.133376 | -0.18063 | -0.91971 | 0.392794 | 0.864039 | DOWN | 274.0837 | 274.0836 | 274.0839 | 13.01866 | 12.9959  |
| 6634 | M266T10_ | 1.249924 | 0.32184  | 0.907256 | 0.392835 | 0.864039 | UP   | 265.9117 | 265.9115 | 265.9123 | 9.8207   | 9.78305  |
| 6635 | M519T9_3 | 1.350594 | -0.43359 | -0.90863 | 0.392901 | 0.864039 | DOWN | 518.7112 | 518.7108 | 518.7123 | 9.235175 | 9.064833 |
| 6636 | M324T10_ | 2.340561 | 1.226854 | 0.955481 | 0.392904 | 0.864039 | UP   | 323.9698 | 323.9695 | 323.9699 | 9.976075 | 9.9009   |
| 6637 | M852T9   | 1.34738  | 0.430157 | 0.909161 | 0.392963 | 0.864039 | UP   | 851.5471 | 851.5461 | 851.5476 | 8.85555  | 8.745033 |
| 6638 | M175T10_ | 1.427604 | 0.513596 | 0.935685 | 0.393008 | 0.864039 | UP   | 175.1823 | 175.1821 | 175.1826 | 9.984083 | 9.859233 |
| 6639 | M960T11  | 1.301537 | 0.380217 | 0.905849 | 0.393023 | 0.864039 | UP   | 960.421  | 960.4203 | 960.4227 | 10.91734 | 10.85018 |
| 6640 | M699T10_ | 1.558998 | 0.640619 | 0.93251  | 0.393139 | 0.864039 | UP   | 699.25   | 699.2494 | 699.2502 | 9.962617 | 9.843367 |
| 6641 | M156T10_ | 1.374716 | -0.45913 | -0.90427 | 0.393164 | 0.864039 | DOWN | 155.8171 | 155.8165 | 155.8249 | 9.830783 | 9.715683 |
| 6642 | M413T10_ | 1.198271 | -0.26095 | -0.91768 | 0.393248 | 0.864039 | DOWN | 413.2959 | 413.2957 | 413.296  | 10.18999 | 10.10142 |
| 6643 | M659T10_ | 1.810028 | 0.856012 | 0.902304 | 0.393257 | 0.864039 | UP   | 659.0665 | 659.0646 | 659.0679 | 9.912942 | 9.743767 |
| 6644 | M240T23  | 1.08938  | 0.123507 | 0.912925 | 0.39337  | 0.864039 | UP   | 240.1954 | 240.1953 | 240.1955 | 22.8     | 22.7845  |
| 6645 | M355T10_ | 2.896994 | -1.53456 | -0.94962 | 0.393411 | 0.864039 | DOWN | 355.237  | 355.2364 | 355.246  | 9.840617 | 9.684583 |
| 6646 | M746T20  | 1.661118 | -0.73215 | -0.90187 | 0.393469 | 0.864039 | DOWN | 745.5361 | 745.5355 | 745.5364 | 19.894   | 19.88283 |
| 6647 | M1398T10 | 1.156465 | -0.20972 | -0.9031  | 0.393511 | 0.864039 | DOWN | 1398.341 | 1398.339 | 1398.341 | 9.9014   | 9.79535  |
| 6648 | M455T10_ | 1.399473 | 0.484884 | 0.905668 | 0.393515 | 0.864039 | UP   | 454.7727 | 454.7656 | 454.7737 | 9.957333 | 9.59825  |
| 6649 | M493T10_ | 1.263934 | -0.33792 | -0.90163 | 0.39359  | 0.864039 | DOWN | 493.166  | 493.1655 | 493.1665 | 9.8091   | 9.681183 |

|      |          |          |          |          |          |          |      |          |          |          |          |          |
|------|----------|----------|----------|----------|----------|----------|------|----------|----------|----------|----------|----------|
| 6650 | M460T9_2 | 2.522979 | 1.335128 | 0.954817 | 0.393596 | 0.864039 | UP   | 460.1151 | 460.1148 | 460.1155 | 9.16325  | 9.110833 |
| 6651 | M432T10_ | 1.591449 | 0.670341 | 0.941667 | 0.393703 | 0.86404  | UP   | 432.216  | 432.2155 | 432.2165 | 9.999258 | 9.8914   |
| 6652 | M549T11_ | 1.122676 | 0.166941 | 0.902851 | 0.393726 | 0.86404  | UP   | 548.5468 | 548.5467 | 548.5471 | 10.92487 | 10.89125 |
| 6653 | M310T19  | 1.826403 | 0.869005 | 0.952068 | 0.393768 | 0.86404  | UP   | 310.243  | 310.2378 | 310.2431 | 18.63867 | 18.62883 |
| 6654 | M355T18_ | 1.186571 | -0.2468  | -0.90279 | 0.393782 | 0.86404  | DOWN | 355.2377 | 355.2376 | 355.2377 | 17.584   | 17.57133 |
| 6655 | M188T9_1 | 5.672856 | 2.504075 | 0.953979 | 0.393988 | 0.86404  | UP   | 188.0548 | 188.0545 | 188.0554 | 9.153992 | 9.12675  |
| 6656 | M312T26_ | 1.430149 | -0.51617 | -0.90505 | 0.394029 | 0.86404  | DOWN | 312.4856 | 312.4852 | 312.486  | 26.1415  | 26.09383 |
| 6657 | M209T10_ | 1.129736 | -0.17599 | -0.93692 | 0.394148 | 0.86404  | DOWN | 208.9566 | 208.9565 | 208.9568 | 9.818442 | 9.699733 |
| 6658 | M677T10_ | 1.32631  | 0.407418 | 0.903496 | 0.394228 | 0.86404  | UP   | 677.371  | 677.367  | 677.3718 | 9.956417 | 9.827283 |
| 6659 | M433T10_ | 1.148884 | -0.20023 | -0.90652 | 0.394245 | 0.86404  | DOWN | 433.053  | 433.0437 | 433.0534 | 9.965717 | 9.859233 |
| 6660 | M728T10_ | 1.151111 | -0.20303 | -0.90051 | 0.394315 | 0.86404  | DOWN | 728.3336 | 728.3322 | 728.3341 | 9.830658 | 9.715683 |
| 6661 | M352T9_6 | 1.369467 | -0.45361 | -0.90381 | 0.394377 | 0.86404  | DOWN | 352.4362 | 352.4299 | 352.4365 | 9.347458 | 9.1445   |
| 6662 | M294T16  | 1.11349  | 0.155089 | 0.903568 | 0.394454 | 0.86404  | UP   | 294.2061 | 294.206  | 294.2064 | 16.25497 | 16.21315 |
| 6663 | M538T9_1 | 1.298007 | -0.3763  | -0.89987 | 0.394489 | 0.86404  | DOWN | 537.8043 | 537.8036 | 537.8046 | 9.2529   | 9.1587   |
| 6664 | M456T10_ | 1.170184 | -0.22674 | -0.90904 | 0.394536 | 0.86404  | DOWN | 456.2721 | 456.2717 | 456.2722 | 9.964092 | 9.859233 |
| 6665 | M527T10_ | 1.392858 | -0.47805 | -0.90214 | 0.394639 | 0.86404  | DOWN | 527.0422 | 527.0421 | 527.0426 | 9.945208 | 9.869467 |
| 6666 | M451T20_ | 1.25355  | -0.32602 | -0.91554 | 0.394654 | 0.86404  | DOWN | 451.3637 | 451.363  | 451.3644 | 20.2595  | 20.245   |
| 6667 | M404T35  | 1.265363 | -0.33955 | -0.952   | 0.394721 | 0.86404  | DOWN | 404.264  | 404.2637 | 404.2641 | 35.094   | 35.012   |
| 6668 | M525T9_7 | 1.629037 | 0.704019 | 0.901226 | 0.394727 | 0.86404  | UP   | 525.3645 | 525.3631 | 525.3654 | 9.279183 | 9.160617 |
| 6669 | M200T10_ | 1.062441 | -0.08738 | -0.89932 | 0.394761 | 0.86404  | DOWN | 200.4701 | 200.47   | 200.4704 | 9.857833 | 9.747533 |
| 6670 | M549T9_1 | 1.207833 | -0.27242 | -0.92333 | 0.394809 | 0.86404  | DOWN | 549.0159 | 549.0146 | 549.017  | 9.18975  | 9.12675  |
| 6671 | M447T9_2 | 1.223308 | 0.290788 | 0.901144 | 0.394809 | 0.86404  | UP   | 446.8257 | 446.8241 | 446.8262 | 9.292658 | 9.142767 |
| 6672 | M381T9_1 | 1.397733 | -0.48309 | -0.90613 | 0.3949   | 0.86404  | DOWN | 381.3251 | 381.3241 | 381.3286 | 9.233108 | 9.129317 |
| 6673 | M228T11_ | 1.153041 | -0.20544 | -0.90018 | 0.394934 | 0.86404  | DOWN | 227.6025 | 227.6025 | 227.6027 | 10.89875 | 10.879   |
| 6674 | M336T10_ | 2.688679 | 1.426897 | 0.950503 | 0.395069 | 0.86404  | UP   | 335.5266 | 335.5262 | 335.5269 | 9.830283 | 9.699733 |
| 6675 | M415T43_ | 1.25343  | 0.325882 | 0.940122 | 0.395164 | 0.86404  | UP   | 415.2323 | 415.232  | 415.2326 | 42.769   | 42.38067 |
| 6676 | M231T10_ | 1.106272 | -0.14571 | -0.90774 | 0.39517  | 0.86404  | DOWN | 230.9541 | 230.9539 | 230.9541 | 9.930908 | 9.827283 |
| 6677 | M517T9_2 | 1.194811 | -0.25678 | -0.90003 | 0.39518  | 0.86404  | DOWN | 517.0576 | 517.0562 | 517.0591 | 9.257033 | 9.132267 |
| 6678 | M295T21_ | 1.161659 | -0.21619 | -0.90335 | 0.395191 | 0.86404  | DOWN | 295.1902 | 295.19   | 295.1903 | 21.1075  | 21.06833 |
| 6679 | M309T27  | 1.091016 | -0.12567 | -0.89869 | 0.395214 | 0.86404  | DOWN | 309.2058 | 309.2057 | 309.206  | 27.16967 | 27.142   |
| 6680 | M163T10_ | 1.259069 | -0.33236 | -0.89827 | 0.395279 | 0.86404  | DOWN | 163.2131 | 163.213  | 163.2131 | 9.903017 | 9.811217 |
| 6681 | M173T10_ | 1.191372 | -0.25262 | -0.90108 | 0.395294 | 0.86404  | DOWN | 172.5204 | 172.5203 | 172.5207 | 9.926275 | 9.811217 |
| 6682 | M416T10_ | 1.262118 | -0.33585 | -0.90637 | 0.395331 | 0.86404  | DOWN | 416.4409 | 416.4408 | 416.4411 | 9.972483 | 9.8753   |
| 6683 | M406T21_ | 9.093192 | 3.184787 | 0.95114  | 0.395391 | 0.86404  | UP   | 406.2016 | 406.2014 | 406.2024 | 20.89583 | 20.85467 |
| 6684 | M1860T10 | 1.0958   | -0.13198 | -0.91892 | 0.395398 | 0.86404  | DOWN | 1860.115 | 1860.114 | 1860.123 | 9.843017 | 9.715683 |

|      |          |          |          |          |          |          |      |          |          |          |          |          |
|------|----------|----------|----------|----------|----------|----------|------|----------|----------|----------|----------|----------|
| 6685 | M777T10_ | 2.327897 | 1.219027 | 0.948901 | 0.395431 | 0.86404  | UP   | 776.5131 | 776.5077 | 776.5159 | 9.8322   | 9.758367 |
| 6686 | M668T10_ | 1.292349 | 0.369996 | 0.898227 | 0.395501 | 0.86404  | UP   | 668.213  | 668.2126 | 668.2134 | 9.999    | 9.8914   |
| 6687 | M318T9_8 | 1.152754 | -0.20509 | -0.90437 | 0.395565 | 0.864041 | DOWN | 317.8813 | 317.881  | 317.8814 | 8.840483 | 8.742633 |
| 6688 | M496T21  | 1.109972 | 0.150523 | 0.900317 | 0.39575  | 0.864041 | UP   | 496.3627 | 496.3625 | 496.363  | 21.09842 | 21.08267 |
| 6689 | M281T44_ | 1.098211 | -0.13516 | -0.91742 | 0.395766 | 0.864041 | DOWN | 281.1744 | 281.1743 | 281.1745 | 44.09233 | 43.8335  |
| 6690 | M355T18_ | 1.193399 | -0.25508 | -0.91845 | 0.395772 | 0.864041 | DOWN | 355.2377 | 355.2376 | 355.2379 | 18.2505  | 18.23183 |
| 6691 | M416T45_ | 1.179161 | 0.237761 | 0.910606 | 0.395862 | 0.864041 | UP   | 416.2277 | 416.2275 | 416.2278 | 44.86125 | 44.56667 |
| 6692 | M1613T9  | 1.201264 | -0.26455 | -0.91836 | 0.395901 | 0.864041 | DOWN | 1613.043 | 1613.04  | 1613.048 | 9.285867 | 9.129317 |
| 6693 | M265T24  | 1.078951 | -0.10963 | -0.89762 | 0.395914 | 0.864041 | DOWN | 265.1795 | 265.1794 | 265.1796 | 23.8205  | 23.79017 |
| 6694 | M572T10_ | 1.344151 | -0.4267  | -0.90401 | 0.395984 | 0.864041 | DOWN | 571.9469 | 571.9465 | 571.9472 | 9.887133 | 9.779267 |
| 6695 | M777T36  | 1.716798 | -0.77972 | -0.90524 | 0.396232 | 0.864041 | DOWN | 776.5739 | 776.5728 | 776.5749 | 35.5665  | 35.54567 |
| 6696 | M203T9_4 | 1.533394 | 0.616728 | 0.900738 | 0.396276 | 0.864041 | UP   | 203.309  | 203.3089 | 203.309  | 9.424317 | 9.355317 |
| 6697 | M1504T10 | 1.225685 | -0.29359 | -0.93288 | 0.396377 | 0.864041 | DOWN | 1504.075 | 1504.073 | 1504.076 | 9.914217 | 9.811217 |
| 6698 | M524T36  | 1.070072 | 0.097708 | 0.902735 | 0.396383 | 0.864041 | UP   | 524.3062 | 524.306  | 524.3063 | 36.1295  | 35.952   |
| 6699 | M460T11_ | 1.161232 | -0.21566 | -0.91183 | 0.396446 | 0.864041 | DOWN | 459.7587 | 459.7585 | 459.7602 | 10.91183 | 10.879   |
| 6700 | M532T11  | 1.514466 | 0.598809 | 0.936087 | 0.396455 | 0.864041 | UP   | 531.943  | 531.9394 | 531.9439 | 10.91987 | 10.879   |
| 6701 | M553T9_6 | 1.296911 | -0.37508 | -0.89593 | 0.396464 | 0.864041 | DOWN | 553.1375 | 553.1309 | 553.1385 | 9.235933 | 9.129317 |
| 6702 | M849T11_ | 1.280392 | -0.35659 | -0.896   | 0.396469 | 0.864041 | DOWN | 848.6872 | 848.6856 | 848.6881 | 10.6323  | 10.61512 |
| 6703 | M203T11_ | 1.189678 | -0.25057 | -0.90216 | 0.396491 | 0.864041 | DOWN | 202.5871 | 202.5869 | 202.5876 | 10.89907 | 10.873   |
| 6704 | M514T11  | 1.613379 | 0.690085 | 0.942101 | 0.396503 | 0.864041 | UP   | 514.3485 | 514.3483 | 514.3486 | 11.39496 | 11.3806  |
| 6705 | M235T10_ | 1.266898 | 0.341301 | 0.908617 | 0.396556 | 0.864041 | UP   | 234.992  | 234.9917 | 234.9922 | 9.933967 | 9.8378   |
| 6706 | M561T10_ | 1.177841 | -0.23614 | -0.907   | 0.396566 | 0.864041 | DOWN | 561.3477 | 561.3471 | 561.3481 | 9.591025 | 9.49445  |
| 6707 | M760T10_ | 2.698622 | 1.432223 | 0.948253 | 0.396661 | 0.864041 | UP   | 760.462  | 760.456  | 760.4625 | 10.15645 | 9.916767 |
| 6708 | M535T10_ | 1.267435 | -0.34191 | -0.9158  | 0.3967   | 0.864041 | DOWN | 535.0523 | 535.0518 | 535.0526 | 9.514733 | 9.40135  |
| 6709 | M287T10_ | 2.16238  | -1.11262 | -0.91235 | 0.396728 | 0.864041 | DOWN | 287.4392 | 287.439  | 287.4394 | 9.972483 | 9.8753   |
| 6710 | M879T10_ | 1.201743 | 0.265129 | 0.929198 | 0.396767 | 0.864041 | UP   | 879.06   | 879.0585 | 879.0612 | 9.964417 | 9.859233 |
| 6711 | M307T22_ | 1.365121 | -0.44903 | -0.89604 | 0.396783 | 0.864041 | DOWN | 306.646  | 306.6456 | 306.6464 | 21.58792 | 21.55133 |
| 6712 | M849T10_ | 1.327977 | -0.40923 | -0.91893 | 0.3968   | 0.864041 | DOWN | 849.4472 | 849.446  | 849.4477 | 9.692608 | 9.5889   |
| 6713 | M326T9_2 | 1.332752 | 0.414408 | 0.895356 | 0.396802 | 0.864041 | UP   | 325.711  | 325.706  | 325.7111 | 9.16125  | 9.12675  |
| 6714 | M205T10_ | 1.729353 | 0.790232 | 0.927976 | 0.396866 | 0.864041 | UP   | 205.4073 | 205.4018 | 205.4129 | 9.863258 | 9.636483 |
| 6715 | M1305T10 | 1.158874 | -0.21272 | -0.90502 | 0.396923 | 0.864041 | DOWN | 1304.75  | 1304.749 | 1304.752 | 10.15384 | 10.06883 |
| 6716 | M555T27  | 1.23222  | 0.30126  | 0.947335 | 0.396927 | 0.864041 | UP   | 555.2772 | 555.277  | 555.2776 | 27.34575 | 27.08567 |
| 6717 | M349T10_ | 1.106793 | -0.14639 | -0.90477 | 0.396964 | 0.864041 | DOWN | 349.4834 | 349.4833 | 349.4837 | 9.8207   | 9.699733 |
| 6718 | M363T9_1 | 1.132243 | -0.17918 | -0.89828 | 0.396973 | 0.864041 | DOWN | 363.2377 | 363.2372 | 363.238  | 8.993242 | 8.892117 |
| 6719 | M186T10_ | 1.149892 | -0.2015  | -0.91351 | 0.397154 | 0.864041 | DOWN | 185.7863 | 185.7861 | 185.7901 | 9.933967 | 9.816167 |



|      |          |          |          |          |          |          |      |          |          |          |          |          |
|------|----------|----------|----------|----------|----------|----------|------|----------|----------|----------|----------|----------|
| 6720 | M188T11_ | 1.277924 | -0.3538  | -0.89468 | 0.397168 | 0.864041 | DOWN | 187.7277 | 187.7275 | 187.7284 | 10.94208 | 10.8926  |
| 6721 | M731T10_ | 1.617204 | 0.693501 | 0.94212  | 0.397191 | 0.864041 | UP   | 731.0747 | 731.0739 | 731.0754 | 9.941642 | 9.827283 |
| 6722 | M1235T20 | 1.176562 | -0.23458 | -0.89453 | 0.397211 | 0.864041 | DOWN | 1234.575 | 1234.574 | 1234.576 | 19.67317 | 19.6345  |
| 6723 | M208T9_4 | 1.436479 | -0.52254 | -0.89674 | 0.397215 | 0.864041 | DOWN | 207.7193 | 207.7187 | 207.7203 | 9.280767 | 9.132267 |
| 6724 | M548T9_4 | 2.304061 | 1.204179 | 0.942892 | 0.397285 | 0.864041 | UP   | 547.9591 | 547.9564 | 547.9596 | 9.124625 | 9.06315  |
| 6725 | M899T10_ | 1.165224 | -0.22061 | -0.90296 | 0.397313 | 0.864041 | DOWN | 898.7545 | 898.7543 | 898.755  | 9.957333 | 9.843367 |
| 6726 | M359T39  | 1.154544 | 0.207323 | 0.929776 | 0.397328 | 0.864041 | UP   | 359.2062 | 359.2061 | 359.2065 | 39.13217 | 39.0285  |
| 6727 | M382T10_ | 1.145783 | -0.19633 | -0.91689 | 0.397331 | 0.864041 | DOWN | 382.3428 | 382.3426 | 382.3431 | 10.41032 | 10.35992 |
| 6728 | M268T11_ | 1.235997 | -0.30567 | -0.89402 | 0.397437 | 0.864041 | DOWN | 268.196  | 268.1957 | 268.1966 | 11.49637 | 11.46837 |
| 6729 | M222T8   | 1.226642 | -0.29471 | -0.89508 | 0.397548 | 0.864042 | DOWN | 222.1253 | 222.1252 | 222.1254 | 7.955633 | 7.636567 |
| 6730 | M396T11_ | 1.352514 | -0.43564 | -0.92668 | 0.397587 | 0.864042 | DOWN | 396.137  | 396.1366 | 396.1374 | 10.87765 | 10.8214  |
| 6731 | M542T11_ | 1.439242 | 0.525309 | 0.910989 | 0.397635 | 0.864042 | UP   | 542.2015 | 542.2005 | 542.2019 | 10.86029 | 10.8214  |
| 6732 | M480T10_ | 1.338172 | -0.42026 | -0.92784 | 0.397692 | 0.864042 | DOWN | 480.2573 | 480.257  | 480.2657 | 9.894392 | 9.601917 |
| 6733 | M556T11_ | 1.23257  | -0.30167 | -0.89886 | 0.397768 | 0.864042 | DOWN | 555.6685 | 555.6682 | 555.6693 | 10.93708 | 10.8914  |
| 6734 | M700T11_ | 1.124766 | -0.16962 | -0.89336 | 0.397846 | 0.864042 | DOWN | 700.3443 | 700.3441 | 700.3464 | 10.90519 | 10.879   |
| 6735 | M217T10_ | 1.278082 | -0.35398 | -0.91105 | 0.397913 | 0.864042 | DOWN | 217.3629 | 217.3553 | 217.3634 | 9.842    | 9.715683 |
| 6736 | M931T10_ | 1.127807 | -0.17352 | -0.93291 | 0.397981 | 0.864042 | DOWN | 930.7074 | 930.706  | 930.7082 | 9.964092 | 9.859233 |
| 6737 | M212T10_ | 1.14649  | -0.19722 | -0.90377 | 0.398024 | 0.864042 | DOWN | 212.3151 | 212.3149 | 212.3153 | 9.80915  | 9.699733 |
| 6738 | M468T9_3 | 2.116193 | 1.081471 | 0.931708 | 0.398072 | 0.864042 | UP   | 468.3983 | 468.3974 | 468.3986 | 8.931725 | 8.877267 |
| 6739 | M1179T10 | 1.248453 | -0.32014 | -0.91308 | 0.398093 | 0.864042 | DOWN | 1179.341 | 1179.339 | 1179.342 | 9.895025 | 9.811217 |
| 6740 | M810T10_ | 1.213531 | -0.27921 | -0.91644 | 0.398115 | 0.864042 | DOWN | 809.6213 | 809.6206 | 809.622  | 9.972483 | 9.859233 |
| 6741 | M545T13  | 1.169656 | -0.22608 | -0.89616 | 0.398127 | 0.864042 | DOWN | 545.3943 | 545.3932 | 545.3949 | 12.62401 | 12.61608 |
| 6742 | M395T19_ | 1.134228 | -0.18171 | -0.90056 | 0.398161 | 0.864042 | DOWN | 395.3172 | 395.3169 | 395.3174 | 18.95925 | 18.943   |
| 6743 | M248T11_ | 1.146167 | -0.19682 | -0.89669 | 0.398201 | 0.864042 | DOWN | 248.0883 | 248.0882 | 248.0885 | 10.90519 | 10.879   |
| 6744 | M270T19_ | 1.211045 | -0.27625 | -0.89549 | 0.398218 | 0.864042 | DOWN | 270.1849 | 270.1849 | 270.1851 | 19.038   | 19.02383 |
| 6745 | M233T10_ | 1.217019 | -0.28335 | -0.92346 | 0.398248 | 0.864042 | DOWN | 232.6059 | 232.597  | 232.6068 | 9.968642 | 9.843367 |
| 6746 | M640T10_ | 4.096989 | 2.034564 | 0.944576 | 0.39825  | 0.864042 | UP   | 640.448  | 640.4469 | 640.4488 | 9.8207   | 9.715683 |
| 6747 | M396T9_3 | 2.558002 | -1.35502 | -0.9328  | 0.398254 | 0.864042 | DOWN | 395.7703 | 395.7664 | 395.7723 | 9.167733 | 9.1011   |
| 6748 | M602T10_ | 2.601739 | 1.379476 | 0.943395 | 0.398268 | 0.864042 | UP   | 602.0311 | 602.0308 | 602.0349 | 9.826875 | 9.73145  |
| 6749 | M786T10_ | 1.215531 | -0.28159 | -0.90279 | 0.398343 | 0.864042 | DOWN | 785.9565 | 785.954  | 785.9571 | 10.23882 | 10.13887 |
| 6750 | M261T10_ | 1.354178 | 0.437418 | 0.939679 | 0.398452 | 0.864042 | UP   | 261.4304 | 261.4301 | 261.4305 | 9.967367 | 9.859233 |
| 6751 | M527T9_1 | 1.46793  | -0.55378 | -0.90126 | 0.398488 | 0.864042 | DOWN | 527.2664 | 527.2654 | 527.2669 | 9.475667 | 9.355317 |
| 6752 | M695T10_ | 1.599944 | 0.678022 | 0.900732 | 0.398535 | 0.864042 | UP   | 695.2785 | 695.278  | 695.2788 | 9.816183 | 9.715683 |
| 6753 | M1410T10 | 1.265962 | 0.340234 | 0.912689 | 0.398621 | 0.864042 | UP   | 1410.112 | 1410.107 | 1410.114 | 9.925417 | 9.859233 |
| 6754 | M271T10_ | 1.122533 | 0.166757 | 0.926199 | 0.398654 | 0.864042 | UP   | 271.4858 | 271.4857 | 271.4862 | 9.864467 | 9.73145  |

|      |          |          |          |          |          |          |      |          |          |          |          |          |
|------|----------|----------|----------|----------|----------|----------|------|----------|----------|----------|----------|----------|
| 6755 | M382T36  | 1.22775  | 0.296017 | 0.930113 | 0.398711 | 0.864042 | UP   | 382.2432 | 382.2431 | 382.2434 | 36.184   | 35.89133 |
| 6756 | M628T10_ | 1.211715 | -0.27705 | -0.93327 | 0.398724 | 0.864042 | DOWN | 627.6401 | 627.6389 | 627.6409 | 9.965792 | 9.859233 |
| 6757 | M310T10_ | 1.09517  | -0.13116 | -0.90358 | 0.398808 | 0.864042 | DOWN | 310.4783 | 310.4782 | 310.4784 | 9.933    | 9.827283 |
| 6758 | M1854T10 | 1.360554 | 0.444194 | 0.907393 | 0.398894 | 0.864042 | UP   | 1854.024 | 1854.021 | 1854.024 | 9.964333 | 9.8914   |
| 6759 | M669T10  | 1.616139 | 0.692551 | 0.931829 | 0.399016 | 0.864042 | UP   | 669.4518 | 669.4512 | 669.4525 | 9.888733 | 9.743767 |
| 6760 | M244T14_ | 1.470194 | 0.556007 | 0.924521 | 0.399141 | 0.864042 | UP   | 244.1905 | 244.1904 | 244.1906 | 14.30463 | 14.28207 |
| 6761 | M309T10_ | 1.292262 | 0.369898 | 0.893559 | 0.399166 | 0.864042 | UP   | 308.8038 | 308.8011 | 308.804  | 9.953592 | 9.859233 |
| 6762 | M352T10_ | 3.623586 | 1.857418 | 0.942323 | 0.399261 | 0.864042 | UP   | 352.1819 | 352.1815 | 352.1821 | 9.9351   | 9.843367 |
| 6763 | M340T9_1 | 1.690388 | 0.757354 | 0.892325 | 0.3993   | 0.864042 | UP   | 339.609  | 339.6083 | 339.6091 | 9.37615  | 9.275917 |
| 6764 | M1670T10 | 1.165784 | -0.2213  | -0.89051 | 0.399328 | 0.864042 | DOWN | 1670.265 | 1670.262 | 1670.268 | 9.810233 | 9.715683 |
| 6765 | M332T10_ | 1.193301 | -0.25496 | -0.91496 | 0.399331 | 0.864042 | DOWN | 332.2352 | 332.235  | 332.236  | 9.830558 | 9.715683 |
| 6766 | M700T10_ | 1.371803 | 0.456073 | 0.931626 | 0.399343 | 0.864042 | UP   | 699.9641 | 699.9638 | 699.9646 | 9.830283 | 9.715683 |
| 6767 | M396T38  | 1.121625 | -0.16559 | -0.89818 | 0.399567 | 0.864043 | DOWN | 396.2226 | 396.2223 | 396.2227 | 37.60417 | 37.41717 |
| 6768 | M189T9_1 | 1.336738 | -0.41872 | -0.88974 | 0.399571 | 0.864043 | DOWN | 189.2856 | 189.2848 | 189.2864 | 9.22495  | 9.160617 |
| 6769 | M474T37_ | 1.281975 | -0.35837 | -0.92357 | 0.399579 | 0.864043 | DOWN | 474.2694 | 474.2693 | 474.2697 | 36.57425 | 36.38117 |
| 6770 | M511T11  | 1.17351  | -0.23083 | -0.89377 | 0.399648 | 0.864043 | DOWN | 510.6031 | 510.6029 | 510.6038 | 10.892   | 10.8646  |
| 6771 | M305T9_2 | 1.623783 | -0.69936 | -0.88999 | 0.399724 | 0.864043 | DOWN | 304.8726 | 304.8724 | 304.8729 | 9.2796   | 9.234417 |
| 6772 | M1486T10 | 1.682029 | -0.7502  | -0.89164 | 0.399732 | 0.864043 | DOWN | 1486.462 | 1486.461 | 1486.463 | 9.880533 | 9.857983 |
| 6773 | M357T10_ | 1.213497 | 0.27917  | 0.92842  | 0.399767 | 0.864043 | UP   | 356.9125 | 356.9122 | 356.9127 | 9.842908 | 9.715683 |
| 6774 | M436T23  | 6.11452  | -2.61224 | -0.94072 | 0.399814 | 0.864043 | DOWN | 436.3051 | 436.304  | 436.306  | 22.66883 | 22.655   |
| 6775 | M257T10_ | 1.158798 | -0.21263 | -0.89734 | 0.399844 | 0.864043 | DOWN | 256.6887 | 256.6885 | 256.6889 | 9.968992 | 9.859233 |
| 6776 | M205T10_ | 1.729169 | 0.790079 | 0.926696 | 0.399853 | 0.864043 | UP   | 205.3661 | 205.366  | 205.3663 | 9.857983 | 9.787633 |
| 6777 | M729T11_ | 1.167669 | -0.22363 | -0.88977 | 0.399889 | 0.864043 | DOWN | 729.11   | 729.1091 | 729.1103 | 10.87704 | 10.85018 |
| 6778 | M188T9_1 | 2.349932 | 1.232619 | 0.941117 | 0.399906 | 0.864043 | UP   | 188.0704 | 188.0703 | 188.0705 | 8.735275 | 8.6529   |
| 6779 | M177T10_ | 1.22997  | -0.29862 | -0.9212  | 0.399919 | 0.864043 | DOWN | 176.5017 | 176.5016 | 176.5018 | 9.95825  | 9.843367 |
| 6780 | M224T10_ | 1.292751 | 0.370445 | 0.901349 | 0.399927 | 0.864043 | UP   | 224.2989 | 224.2986 | 224.2991 | 9.985733 | 9.8753   |
| 6781 | M376T10_ | 1.354014 | 0.437243 | 0.906118 | 0.400012 | 0.864043 | UP   | 376.0538 | 376.0466 | 376.054  | 9.972917 | 9.856867 |
| 6782 | M283T10_ | 1.164998 | -0.22033 | -0.9375  | 0.40003  | 0.864043 | DOWN | 282.9284 | 282.9282 | 282.9286 | 9.83535  | 9.715683 |
| 6783 | M461T14  | 1.155355 | 0.208337 | 0.919804 | 0.400073 | 0.864043 | UP   | 461.298  | 461.2968 | 461.2983 | 14.41346 | 14.29718 |
| 6784 | M388T11_ | 2.063571 | 1.045143 | 0.938924 | 0.400078 | 0.864043 | UP   | 388.2488 | 388.2484 | 388.2524 | 10.94208 | 10.8646  |
| 6785 | M194T9_1 | 1.438583 | -0.52465 | -0.8896  | 0.400132 | 0.864043 | DOWN | 194.4959 | 194.4957 | 194.4963 | 9.2946   | 9.22495  |
| 6786 | M676T10_ | 1.179152 | -0.23775 | -0.90448 | 0.400135 | 0.864043 | DOWN | 676.4849 | 676.4821 | 676.4854 | 10.25295 | 10.18238 |
| 6787 | M428T9_6 | 1.197785 | -0.26037 | -0.88826 | 0.400327 | 0.864043 | DOWN | 428.2797 | 428.2785 | 428.28   | 9.275617 | 9.1445   |
| 6788 | M851T25  | 1.342226 | 0.424628 | 0.897103 | 0.400348 | 0.864043 | UP   | 851.3984 | 851.3971 | 851.399  | 24.59467 | 24.59233 |
| 6789 | M781T10_ | 1.182295 | -0.24159 | -0.89074 | 0.400396 | 0.864043 | DOWN | 781.4395 | 781.4385 | 781.4427 | 9.858833 | 9.827283 |

|      |          |          |          |          |          |          |      |          |          |          |          |          |
|------|----------|----------|----------|----------|----------|----------|------|----------|----------|----------|----------|----------|
| 6790 | M1104T10 | 1.189709 | 0.250609 | 0.922448 | 0.400455 | 0.864043 | UP   | 1103.941 | 1103.938 | 1103.943 | 9.772833 | 9.636483 |
| 6791 | M355T10_ | 1.239784 | -0.31009 | -0.91595 | 0.400459 | 0.864043 | DOWN | 354.606  | 354.6057 | 354.6062 | 9.92825  | 9.827283 |
| 6792 | M651T10_ | 1.120657 | -0.16435 | -0.92155 | 0.400459 | 0.864043 | DOWN | 650.5927 | 650.5917 | 650.593  | 9.801833 | 9.699733 |
| 6793 | M1002T11 | 1.821403 | 0.86505  | 0.930862 | 0.400527 | 0.864043 | UP   | 1002.405 | 1002.404 | 1002.407 | 10.95835 | 10.90785 |
| 6794 | M156T10_ | 1.256375 | -0.32927 | -0.90591 | 0.400571 | 0.864043 | DOWN | 156.1472 | 156.1466 | 156.1476 | 9.84525  | 9.715683 |
| 6795 | M231T10_ | 1.323758 | 0.404639 | 0.889363 | 0.400601 | 0.864043 | UP   | 231.0038 | 231.0038 | 231.0039 | 9.938708 | 9.827283 |
| 6796 | M1959T10 | 1.138551 | -0.1872  | -0.90928 | 0.40063  | 0.864043 | DOWN | 1959.265 | 1959.263 | 1959.268 | 9.8397   | 9.715683 |
| 6797 | M1329T10 | 1.274842 | -0.35032 | -0.89338 | 0.400778 | 0.864043 | DOWN | 1328.781 | 1328.778 | 1328.783 | 9.959533 | 9.843367 |
| 6798 | M402T11_ | 1.388021 | -0.47303 | -0.89422 | 0.400869 | 0.864043 | DOWN | 402.4572 | 402.4507 | 402.4583 | 10.84767 | 10.8214  |
| 6799 | M587T10_ | 1.784033 | 0.835142 | 0.931419 | 0.400953 | 0.864043 | UP   | 587.376  | 587.3756 | 587.3763 | 9.967367 | 9.843367 |
| 6800 | M741T10_ | 1.168848 | -0.22509 | -0.90168 | 0.401016 | 0.864043 | DOWN | 741.4285 | 741.427  | 741.4291 | 10.09153 | 10.02755 |
| 6801 | M679T28  | 1.366084 | 0.450046 | 0.900696 | 0.401066 | 0.864043 | UP   | 679.4024 | 679.4014 | 679.4027 | 27.52533 | 27.45433 |
| 6802 | M704T10_ | 3.657536 | -1.87087 | -0.93566 | 0.401069 | 0.864043 | DOWN | 703.646  | 703.6456 | 703.6463 | 9.8207   | 9.7124   |
| 6803 | M459T11_ | 1.226179 | -0.29417 | -0.90801 | 0.401086 | 0.864043 | DOWN | 459.2772 | 459.2738 | 459.2788 | 10.95022 | 10.91977 |
| 6804 | M253T11_ | 1.215883 | -0.282   | -0.89587 | 0.401149 | 0.864043 | DOWN | 253.494  | 253.4938 | 253.4946 | 10.86264 | 10.84487 |
| 6805 | M848T25_ | 1.155278 | -0.20824 | -0.88659 | 0.401165 | 0.864043 | DOWN | 847.6185 | 847.618  | 847.619  | 25.37592 | 25.36183 |
| 6806 | M891T26  | 1.206144 | -0.2704  | -0.88652 | 0.401204 | 0.864043 | DOWN | 890.6414 | 890.6411 | 890.6419 | 25.9535  | 25.924   |
| 6807 | M214T10_ | 1.896427 | 0.923284 | 0.933217 | 0.401256 | 0.864043 | UP   | 214.0414 | 214.0413 | 214.0415 | 9.746783 | 9.636483 |
| 6808 | M1755T10 | 1.219404 | -0.28618 | -0.89558 | 0.401265 | 0.864043 | DOWN | 1755.431 | 1755.427 | 1755.436 | 9.952358 | 9.843367 |
| 6809 | M301T11_ | 1.230847 | -0.29965 | -0.8989  | 0.401273 | 0.864043 | DOWN | 300.933  | 300.9326 | 300.9333 | 10.8926  | 10.83417 |
| 6810 | M326T10_ | 3.709649 | 1.891283 | 0.938102 | 0.401275 | 0.864043 | UP   | 325.9076 | 325.9073 | 325.908  | 9.81635  | 9.715683 |
| 6811 | M1039T26 | 1.284456 | -0.36116 | -0.90825 | 0.40129  | 0.864043 | DOWN | 1038.715 | 1038.715 | 1038.716 | 26.33683 | 26.30333 |
| 6812 | M236T10_ | 2.018597 | 1.013353 | 0.934928 | 0.401299 | 0.864043 | UP   | 236.4412 | 236.441  | 236.4413 | 9.948875 | 9.827283 |
| 6813 | M343T10_ | 1.474966 | 0.560682 | 0.934788 | 0.401307 | 0.864043 | UP   | 343.4074 | 343.4072 | 343.4079 | 9.8397   | 9.73145  |
| 6814 | M489T10_ | 1.153544 | 0.206073 | 0.890094 | 0.401392 | 0.864043 | UP   | 489.0652 | 489.0575 | 489.0656 | 9.960817 | 9.7565   |
| 6815 | M457T21  | 1.347058 | 0.429812 | 0.906286 | 0.4014   | 0.864044 | UP   | 457.1577 | 457.1572 | 457.1584 | 20.99317 | 20.9685  |
| 6816 | M699T9_5 | 1.237216 | -0.3071  | -0.89863 | 0.401406 | 0.864044 | DOWN | 699.4372 | 699.4369 | 699.4376 | 9.331083 | 9.234417 |
| 6817 | M327T9_7 | 1.69872  | -0.76445 | -0.89388 | 0.401493 | 0.864044 | DOWN | 327.3558 | 327.3555 | 327.3562 | 8.873867 | 8.8486   |
| 6818 | M513T11_ | 1.162281 | -0.21696 | -0.9025  | 0.401496 | 0.864044 | DOWN | 513.3784 | 513.378  | 513.379  | 10.90519 | 10.879   |
| 6819 | M389T9_2 | 1.611981 | -0.68884 | -0.88584 | 0.401558 | 0.864044 | DOWN | 389.0686 | 389.0683 | 389.0687 | 9.488133 | 9.416817 |
| 6820 | M342T10_ | 1.236329 | -0.30606 | -0.90837 | 0.401588 | 0.864044 | DOWN | 341.8297 | 341.8293 | 341.8298 | 9.825492 | 9.715683 |
| 6821 | M563T10_ | 1.358397 | -0.4419  | -0.89742 | 0.401615 | 0.864044 | DOWN | 562.6254 | 562.6176 | 562.6259 | 9.977042 | 9.842    |
| 6822 | M489T7   | 1.431719 | 0.517748 | 0.923    | 0.40162  | 0.864044 | UP   | 489.3037 | 489.3036 | 489.3043 | 7.488017 | 7.470417 |
| 6823 | M433T9_1 | 1.297824 | -0.3761  | -0.88572 | 0.401662 | 0.864044 | DOWN | 433.1806 | 433.1802 | 433.1818 | 9.315258 | 9.234417 |
| 6824 | M474T44_ | 1.439677 | 0.525745 | 0.929076 | 0.401669 | 0.864044 | UP   | 474.2693 | 474.2691 | 474.2695 | 43.7185  | 43.31567 |

|      |          |          |          |          |          |          |      |          |          |          |          |          |
|------|----------|----------|----------|----------|----------|----------|------|----------|----------|----------|----------|----------|
| 6825 | M339T10_ | 1.181489 | -0.24061 | -0.89204 | 0.401751 | 0.864044 | DOWN | 339.2137 | 339.2136 | 339.2142 | 9.832367 | 9.7124   |
| 6826 | M395T10_ | 1.207772 | -0.27235 | -0.90715 | 0.401868 | 0.864044 | DOWN | 395.0888 | 395.0883 | 395.089  | 9.94785  | 9.843367 |
| 6827 | M382T43_ | 1.208596 | -0.27333 | -0.8852  | 0.401874 | 0.864044 | DOWN | 382.2433 | 382.2431 | 382.2435 | 42.73308 | 42.38067 |
| 6828 | M249T10_ | 1.482525 | 0.568056 | 0.885234 | 0.401874 | 0.864044 | UP   | 248.7967 | 248.7964 | 248.8067 | 9.756575 | 9.665433 |
| 6829 | M380T10_ | 1.085941 | -0.11895 | -0.88719 | 0.401908 | 0.864044 | DOWN | 379.5635 | 379.5631 | 379.5643 | 9.924308 | 9.811217 |
| 6830 | M208T14  | 1.960961 | 0.971561 | 0.929981 | 0.401915 | 0.864044 | UP   | 208.1692 | 208.1689 | 208.1694 | 14.2922  | 14.2675  |
| 6831 | M1976T10 | 1.177031 | -0.23515 | -0.89409 | 0.401916 | 0.864044 | DOWN | 1976.081 | 1976.08  | 1976.087 | 9.843017 | 9.73145  |
| 6832 | M344T10_ | 1.521042 | 0.60506  | 0.931828 | 0.402024 | 0.864044 | UP   | 343.5485 | 343.5483 | 343.549  | 9.830083 | 9.73145  |
| 6833 | M635T12_ | 1.138461 | -0.18708 | -0.88496 | 0.402054 | 0.864044 | DOWN | 635.4744 | 635.4738 | 635.4747 | 12.47252 | 12.47083 |
| 6834 | M849T11_ | 1.955152 | 0.967281 | 0.929054 | 0.402071 | 0.864044 | UP   | 848.6438 | 848.6422 | 848.6447 | 10.9183  | 10.89355 |
| 6835 | M397T12_ | 1.110717 | -0.15149 | -0.88475 | 0.402105 | 0.864044 | DOWN | 397.3616 | 397.3615 | 397.3618 | 11.60615 | 11.59273 |
| 6836 | M863T22  | 1.209448 | -0.27435 | -0.89651 | 0.402137 | 0.864044 | DOWN | 862.6102 | 862.6098 | 862.6107 | 21.95283 | 21.929   |
| 6837 | M695T10_ | 1.461097 | 0.547052 | 0.904314 | 0.402312 | 0.864044 | UP   | 695.2154 | 695.2146 | 695.2161 | 9.9754   | 9.8914   |
| 6838 | M433T9_6 | 1.142728 | -0.19248 | -0.88447 | 0.402316 | 0.864044 | DOWN | 432.9142 | 432.9137 | 432.9153 | 9.294408 | 9.129317 |
| 6839 | M677T11_ | 1.192954 | -0.25454 | -0.88475 | 0.40235  | 0.864044 | DOWN | 677.3095 | 677.3093 | 677.3098 | 10.892   | 10.8646  |
| 6840 | M570T34  | 1.148448 | -0.19969 | -0.89965 | 0.402381 | 0.864044 | DOWN | 570.4209 | 570.4204 | 570.421  | 33.6725  | 33.672   |
| 6841 | M413T10_ | 1.142123 | -0.19172 | -0.90156 | 0.402408 | 0.864044 | DOWN | 412.7288 | 412.7286 | 412.729  | 9.948875 | 9.843367 |
| 6842 | M541T9_2 | 1.235012 | -0.30453 | -0.89423 | 0.402538 | 0.864044 | DOWN | 540.5941 | 540.5938 | 540.595  | 9.146875 | 9.126783 |
| 6843 | M1159T10 | 1.295607 | -0.37363 | -0.88903 | 0.402588 | 0.864044 | DOWN | 1159.396 | 1159.395 | 1159.397 | 9.956417 | 9.843367 |
| 6844 | M386T10_ | 3.571322 | 1.836458 | 0.932427 | 0.402633 | 0.864044 | UP   | 386.2648 | 386.2643 | 386.2652 | 9.507933 | 9.40135  |
| 6845 | M341T10_ | 1.141283 | -0.19066 | -0.91259 | 0.402679 | 0.864044 | DOWN | 340.9702 | 340.97   | 340.9703 | 9.857275 | 9.73145  |
| 6846 | M303T11_ | 1.189641 | -0.25053 | -0.88605 | 0.402707 | 0.864044 | DOWN | 303.2696 | 303.2694 | 303.2698 | 10.892   | 10.8646  |
| 6847 | M293T10_ | 1.217223 | -0.28359 | -0.90884 | 0.402708 | 0.864044 | DOWN | 292.6596 | 292.6594 | 292.6597 | 9.984083 | 9.8753   |
| 6848 | M318T9_1 | 1.931702 | 0.949872 | 0.929956 | 0.402745 | 0.864044 | UP   | 318.1309 | 318.1306 | 318.1311 | 9.3332   | 9.234417 |
| 6849 | M256T40  | 1.128403 | 0.174282 | 0.88426  | 0.402754 | 0.864044 | UP   | 256.2631 | 256.2631 | 256.2635 | 39.87742 | 39.84867 |
| 6850 | M527T9_6 | 1.307289 | -0.38658 | -0.90128 | 0.402828 | 0.864044 | DOWN | 526.8701 | 526.8636 | 526.8707 | 9.272133 | 9.1322   |
| 6851 | M321T20  | 3.762325 | -1.91162 | -0.93314 | 0.402835 | 0.864044 | DOWN | 321.2269 | 321.2267 | 321.227  | 19.59175 | 19.555   |
| 6852 | M216T10_ | 1.232155 | -0.30118 | -0.88964 | 0.402883 | 0.864044 | DOWN | 215.8259 | 215.8258 | 215.826  | 9.82645  | 9.743667 |
| 6853 | M847T25_ | 1.167913 | -0.22393 | -0.88324 | 0.402891 | 0.864044 | DOWN | 846.6153 | 846.6147 | 846.6154 | 25.36183 | 25.3575  |
| 6854 | M191T11_ | 1.160195 | -0.21437 | -0.89175 | 0.402919 | 0.864044 | DOWN | 190.9951 | 190.9951 | 190.9953 | 10.892   | 10.8646  |
| 6855 | M343T10_ | 1.476391 | 0.562075 | 0.931515 | 0.402929 | 0.864044 | UP   | 343.0643 | 343.0642 | 343.0649 | 9.8397   | 9.73145  |
| 6856 | M542T10_ | 1.293999 | -0.37184 | -0.91141 | 0.402993 | 0.864044 | DOWN | 542.3547 | 542.3537 | 542.3552 | 9.872067 | 9.806367 |
| 6857 | M728T10_ | 1.188774 | -0.24947 | -0.89069 | 0.403153 | 0.864044 | DOWN | 727.6098 | 727.6094 | 727.6104 | 9.960817 | 9.859233 |
| 6858 | M525T9_6 | 2.551308 | -1.35124 | -0.93299 | 0.403168 | 0.864044 | DOWN | 525.3032 | 525.3023 | 525.3037 | 9.184025 | 9.04725  |
| 6859 | M520T43_ | 1.602371 | -0.68021 | -0.93099 | 0.40338  | 0.864044 | DOWN | 520.3112 | 520.311  | 520.3115 | 43.07117 | 42.79783 |

|      |          |          |          |          |          |          |      |          |          |          |          |          |
|------|----------|----------|----------|----------|----------|----------|------|----------|----------|----------|----------|----------|
| 6860 | M484T19  | 1.178833 | -0.23736 | -0.88528 | 0.403467 | 0.864045 | DOWN | 484.3891 | 484.3886 | 484.3895 | 18.77625 | 18.76167 |
| 6861 | M462T10_ | 1.190288 | -0.25131 | -0.89706 | 0.403606 | 0.864045 | DOWN | 461.7564 | 461.7561 | 461.7567 | 9.967367 | 9.859233 |
| 6862 | M198T10_ | 1.400034 | -0.48546 | -0.88836 | 0.403622 | 0.864045 | DOWN | 198.1703 | 198.1669 | 198.1752 | 9.888325 | 9.822117 |
| 6863 | M289T9_1 | 1.23523  | -0.30478 | -0.88264 | 0.403676 | 0.864045 | DOWN | 288.688  | 288.6879 | 288.6883 | 8.840483 | 8.745033 |
| 6864 | M247T11_ | 1.290129 | -0.36751 | -0.88806 | 0.403684 | 0.864045 | DOWN | 246.7351 | 246.7343 | 246.7353 | 10.9049  | 10.87765 |
| 6865 | M1290T10 | 1.424767 | 0.510726 | 0.907912 | 0.403688 | 0.864045 | UP   | 1290.168 | 1290.163 | 1290.17  | 9.954767 | 9.8914   |
| 6866 | M228T10_ | 1.523834 | -0.60771 | -0.88364 | 0.40375  | 0.864045 | DOWN | 228.3655 | 228.3653 | 228.3788 | 9.903092 | 9.79535  |
| 6867 | M386T9_1 | 1.438692 | -0.52476 | -0.88233 | 0.40376  | 0.864045 | DOWN | 385.6208 | 385.6207 | 385.621  | 9.429367 | 9.40135  |
| 6868 | M237T10_ | 1.33357  | 0.415294 | 0.888901 | 0.403777 | 0.864045 | UP   | 236.9557 | 236.9555 | 236.9557 | 9.960817 | 9.843367 |
| 6869 | M718T9_4 | 1.080752 | 0.112035 | 0.889568 | 0.403795 | 0.864045 | UP   | 718.4606 | 718.4598 | 718.462  | 8.872883 | 8.772383 |
| 6870 | M540T37_ | 1.30555  | -0.38466 | -0.89795 | 0.403964 | 0.864045 | DOWN | 540.4253 | 540.4249 | 540.4254 | 37.01483 | 37.01417 |
| 6871 | M267T10_ | 1.199684 | 0.262654 | 0.891122 | 0.403967 | 0.864045 | UP   | 267.271  | 267.2709 | 267.2713 | 9.790617 | 9.6681   |
| 6872 | M173T10_ | 1.322937 | 0.403745 | 0.914928 | 0.404009 | 0.864045 | UP   | 173.2537 | 173.2536 | 173.2537 | 9.841442 | 9.715683 |
| 6873 | M1129T10 | 1.262325 | 0.336083 | 0.881937 | 0.404013 | 0.864045 | UP   | 1129.17  | 1129.169 | 1129.17  | 9.743767 | 9.65225  |
| 6874 | M466T10_ | 1.102186 | 0.140368 | 0.88249  | 0.404152 | 0.864045 | UP   | 466.3532 | 466.353  | 466.3534 | 9.794492 | 9.683817 |
| 6875 | M289T9_4 | 1.28881  | -0.36604 | -0.88314 | 0.404173 | 0.864045 | DOWN | 289.1522 | 289.1521 | 289.1524 | 8.8398   | 8.77435  |
| 6876 | M475T21  | 2.082458 | 1.058288 | 0.884466 | 0.404191 | 0.864045 | UP   | 475.2661 | 475.266  | 475.2666 | 20.60667 | 20.59117 |
| 6877 | M721T36  | 1.186397 | 0.246587 | 0.889882 | 0.404288 | 0.864045 | UP   | 721.4709 | 721.4707 | 721.4712 | 36.12558 | 36.1075  |
| 6878 | M655T9_2 | 1.210593 | -0.27571 | -0.88049 | 0.40442  | 0.864045 | DOWN | 655.0955 | 655.086  | 655.0962 | 9.298683 | 9.130683 |
| 6879 | M225T10_ | 1.262675 | -0.33648 | -0.89019 | 0.404483 | 0.864045 | DOWN | 225.4628 | 225.4626 | 225.4629 | 9.930908 | 9.8378   |
| 6880 | M341T9_1 | 1.130081 | -0.17643 | -0.8801  | 0.404538 | 0.864045 | DOWN | 340.6942 | 340.6938 | 340.6943 | 9.250817 | 9.129317 |
| 6881 | M351T10_ | 1.704552 | 0.769393 | 0.91831  | 0.404547 | 0.864045 | UP   | 351.0317 | 351.0241 | 351.0319 | 9.956867 | 9.840617 |
| 6882 | M618T10_ | 2.195289 | 1.134411 | 0.924869 | 0.404566 | 0.864045 | UP   | 617.7649 | 617.7633 | 617.7684 | 9.8207   | 9.715683 |
| 6883 | M1011T13 | 1.224662 | -0.29238 | -0.91828 | 0.404665 | 0.864045 | DOWN | 1010.502 | 1010.502 | 1010.503 | 13.40538 | 13.37562 |
| 6884 | M407T10_ | 1.238971 | -0.30914 | -0.8802  | 0.404717 | 0.864045 | DOWN | 406.5086 | 406.5083 | 406.5096 | 9.823575 | 9.699733 |
| 6885 | M406T39  | 1.257511 | 0.330571 | 0.892063 | 0.404783 | 0.864045 | UP   | 406.207  | 406.2066 | 406.2074 | 38.76983 | 38.61133 |
| 6886 | M434T9_6 | 1.66124  | 0.73226  | 0.884284 | 0.40482  | 0.864045 | UP   | 433.7637 | 433.7593 | 433.7729 | 9.301008 | 9.145433 |
| 6887 | M564T9_1 | 1.212738 | -0.27827 | -0.89062 | 0.40487  | 0.864045 | DOWN | 563.6937 | 563.693  | 563.6948 | 9.297858 | 9.1011   |
| 6888 | M674T31_ | 2.055861 | -1.03974 | -0.91014 | 0.404887 | 0.864045 | DOWN | 673.991  | 673.9906 | 673.9918 | 31.436   | 31.3925  |
| 6889 | M468T10_ | 1.124489 | -0.16927 | -0.89432 | 0.404959 | 0.864045 | DOWN | 468.3618 | 468.3615 | 468.3624 | 9.6277   | 9.52595  |
| 6890 | M318T29_ | 1.313284 | -0.39318 | -0.88168 | 0.404967 | 0.864045 | DOWN | 317.6305 | 317.6303 | 317.6306 | 29.0405  | 29.02017 |
| 6891 | M849T10_ | 1.396418 | 0.481731 | 0.882775 | 0.404991 | 0.864045 | UP   | 848.556  | 848.5553 | 848.557  | 10.14225 | 10.09153 |
| 6892 | M858T11  | 1.301515 | -0.38019 | -0.89925 | 0.405113 | 0.864045 | DOWN | 857.5331 | 857.5324 | 857.5344 | 10.71178 | 10.70448 |
| 6893 | M1112T10 | 1.183365 | 0.242895 | 0.899011 | 0.405138 | 0.864045 | UP   | 1111.905 | 1111.905 | 1111.907 | 9.8362   | 9.732983 |
| 6894 | M936T26  | 1.290054 | -0.36743 | -0.87908 | 0.405142 | 0.864045 | DOWN | 935.671  | 935.67   | 935.672  | 25.97017 | 25.93817 |

|      |          |          |          |          |          |          |      |          |          |          |          |          |
|------|----------|----------|----------|----------|----------|----------|------|----------|----------|----------|----------|----------|
| 6895 | M820T11_ | 1.319995 | -0.40053 | -0.89337 | 0.405143 | 0.864045 | DOWN | 820.495  | 820.4949 | 820.4956 | 10.92593 | 10.8926  |
| 6896 | M662T9_2 | 1.265233 | -0.3394  | -0.89045 | 0.405253 | 0.864045 | DOWN | 662.253  | 662.2518 | 662.2536 | 9.331083 | 9.234417 |
| 6897 | M857T10_ | 1.553783 | 0.635785 | 0.922405 | 0.405258 | 0.864045 | UP   | 856.7775 | 856.7768 | 856.7782 | 9.958617 | 9.843367 |
| 6898 | M470T9_8 | 2.008029 | 1.00578  | 0.925062 | 0.405295 | 0.864045 | UP   | 470.3699 | 470.3696 | 470.37   | 8.779867 | 8.686867 |
| 6899 | M187T11  | 1.168046 | 0.224097 | 0.904527 | 0.405318 | 0.864045 | UP   | 187.4324 | 187.4323 | 187.4329 | 10.92208 | 10.89125 |
| 6900 | M356T10_ | 2.873183 | 1.52265  | 0.927176 | 0.405387 | 0.864045 | UP   | 356.2414 | 356.2412 | 356.2415 | 10.44474 | 10.37598 |
| 6901 | M219T11_ | 1.141905 | -0.19144 | -0.88198 | 0.405431 | 0.864046 | DOWN | 218.7897 | 218.7896 | 218.7898 | 10.89904 | 10.879   |
| 6902 | M333T10_ | 8.5944   | -3.1034  | -0.92808 | 0.405552 | 0.864046 | DOWN | 332.7644 | 332.7635 | 332.7648 | 9.856867 | 9.683817 |
| 6903 | M366T10_ | 1.433111 | 0.519151 | 0.8995   | 0.405631 | 0.864046 | UP   | 366.1976 | 366.1926 | 366.1978 | 9.948825 | 9.840617 |
| 6904 | M396T10_ | 1.222199 | -0.28948 | -0.8953  | 0.405672 | 0.864046 | DOWN | 395.738  | 395.7276 | 395.7383 | 9.874067 | 9.571683 |
| 6905 | M471T9_6 | 1.223876 | -0.29146 | -0.90585 | 0.405696 | 0.864046 | DOWN | 471.2524 | 471.2519 | 471.2551 | 9.25985  | 9.041133 |
| 6906 | M258T10_ | 1.332852 | -0.41452 | -0.88509 | 0.405701 | 0.864046 | DOWN | 258.4867 | 258.4867 | 258.4867 | 9.803    | 9.77435  |
| 6907 | M596T9   | 1.363961 | -0.4478  | -0.88108 | 0.405751 | 0.864046 | DOWN | 596.0015 | 596.0013 | 596.002  | 9.359942 | 9.234417 |
| 6908 | M373T20_ | 1.490797 | -0.57608 | -0.88194 | 0.405787 | 0.864046 | DOWN | 373.2712 | 373.2708 | 373.2716 | 20.37483 | 20.34667 |
| 6909 | M519T21  | 1.274662 | 0.350115 | 0.877567 | 0.405791 | 0.864046 | UP   | 519.292  | 519.291  | 519.2922 | 21.09925 | 21.06517 |
| 6910 | M243T10_ | 1.208439 | -0.27314 | -0.90237 | 0.405812 | 0.864046 | DOWN | 242.8133 | 242.8132 | 242.8134 | 9.825492 | 9.699733 |
| 6911 | M655T10_ | 1.19939  | 0.262301 | 0.916317 | 0.405827 | 0.864046 | UP   | 654.6398 | 654.6393 | 654.6416 | 9.838842 | 9.73145  |
| 6912 | M678T20  | 1.258567 | -0.33178 | -0.87748 | 0.406029 | 0.864046 | DOWN | 678.4172 | 678.417  | 678.4181 | 19.66125 | 19.555   |
| 6913 | M151T42_ | 1.110468 | -0.15117 | -0.88781 | 0.406081 | 0.864046 | DOWN | 151.1115 | 151.1114 | 151.1116 | 41.80383 | 41.69033 |
| 6914 | M422T10_ | 1.12615  | -0.1714  | -0.91626 | 0.406086 | 0.864046 | DOWN | 422.386  | 422.3852 | 422.3863 | 9.97155  | 9.859233 |
| 6915 | M339T10_ | 1.100951 | 0.13875  | 0.885907 | 0.406119 | 0.864046 | UP   | 338.6826 | 338.6823 | 338.6828 | 9.836042 | 9.699733 |
| 6916 | M431T10_ | 1.378101 | 0.462681 | 0.891913 | 0.406177 | 0.864046 | UP   | 430.5966 | 430.5963 | 430.5968 | 9.967367 | 9.859233 |
| 6917 | M271T11_ | 1.134272 | -0.18177 | -0.88099 | 0.406261 | 0.864046 | DOWN | 271.0782 | 271.0781 | 271.0784 | 10.90519 | 10.879   |
| 6918 | M734T9   | 1.277018 | -0.35278 | -0.89342 | 0.406271 | 0.864046 | DOWN | 734.3474 | 734.3469 | 734.3479 | 9.3332   | 9.234417 |
| 6919 | M444T10_ | 3.292062 | 1.718991 | 0.926587 | 0.406277 | 0.864046 | UP   | 444.1827 | 444.1825 | 444.183  | 9.9744   | 9.859233 |
| 6920 | M820T11_ | 1.145617 | -0.19612 | -0.88165 | 0.406282 | 0.864046 | DOWN | 819.6723 | 819.6719 | 819.6728 | 10.892   | 10.8646  |
| 6921 | M728T10_ | 1.443155 | 0.529226 | 0.924989 | 0.406306 | 0.864046 | UP   | 727.723  | 727.7213 | 727.7236 | 9.8397   | 9.715683 |
| 6922 | M439T11_ | 1.286426 | -0.36337 | -0.87889 | 0.406318 | 0.864046 | DOWN | 438.5767 | 438.5763 | 438.578  | 10.91743 | 10.879   |
| 6923 | M1969T10 | 1.372561 | 0.456871 | 0.898179 | 0.406325 | 0.864046 | UP   | 1968.881 | 1968.878 | 1968.883 | 9.831925 | 9.715683 |
| 6924 | M204T10_ | 1.614162 | 0.690785 | 0.923739 | 0.406358 | 0.864046 | UP   | 204.1046 | 204.1045 | 204.1047 | 9.960817 | 9.859233 |
| 6925 | M1559T10 | 2.378096 | 1.249807 | 0.921895 | 0.406391 | 0.864046 | UP   | 1558.74  | 1558.738 | 1558.743 | 9.958217 | 9.843367 |
| 6926 | M213T10_ | 2.142084 | 1.099015 | 0.877751 | 0.406405 | 0.864046 | UP   | 213.2175 | 213.2173 | 213.2264 | 9.919675 | 9.853533 |
| 6927 | M1153T10 | 1.563788 | 0.645045 | 0.923973 | 0.406502 | 0.864046 | UP   | 1152.874 | 1152.873 | 1152.875 | 9.751483 | 9.634283 |
| 6928 | M208T10_ | 1.442369 | 0.52844  | 0.893593 | 0.406522 | 0.864046 | UP   | 208.3774 | 208.3772 | 208.3782 | 9.830558 | 9.728083 |
| 6929 | M398T10_ | 1.184945 | -0.24482 | -0.87665 | 0.406614 | 0.864046 | DOWN | 397.9934 | 397.993  | 397.9937 | 9.887133 | 9.79535  |

|      |           |          |          |          |          |          |      |          |          |          |          |          |
|------|-----------|----------|----------|----------|----------|----------|------|----------|----------|----------|----------|----------|
| 6930 | M800T32   | 1.211239 | -0.27648 | -0.87568 | 0.40677  | 0.864046 | DOWN | 799.5189 | 799.5185 | 799.5195 | 32.25775 | 32.243   |
| 6931 | M599T10_  | 1.182567 | -0.24192 | -0.88327 | 0.406773 | 0.864046 | DOWN | 599.1943 | 599.1934 | 599.1946 | 9.958617 | 9.843367 |
| 6932 | M420T10_  | 1.157102 | -0.21052 | -0.87744 | 0.406893 | 0.864046 | DOWN | 420.4223 | 420.4219 | 420.4226 | 9.902008 | 9.79535  |
| 6933 | M729T10_  | 1.219728 | -0.28656 | -0.89933 | 0.406943 | 0.864046 | DOWN | 729.3952 | 729.3951 | 729.3954 | 9.8207   | 9.699733 |
| 6934 | M447T13   | 1.571688 | 0.652315 | 0.900916 | 0.406971 | 0.864046 | UP   | 447.2926 | 447.2924 | 447.2929 | 12.70533 | 12.64667 |
| 6935 | M462T44   | 1.169972 | -0.22647 | -0.90998 | 0.40698  | 0.864046 | DOWN | 462.2694 | 462.2693 | 462.2696 | 43.73267 | 43.474   |
| 6936 | M863T21   | 1.191084 | -0.25227 | -0.87943 | 0.407001 | 0.864046 | DOWN | 862.6101 | 862.6096 | 862.6105 | 21.33667 | 21.3025  |
| 6937 | M820T22   | 1.140529 | -0.1897  | -0.8841  | 0.407075 | 0.864046 | DOWN | 819.5874 | 819.5869 | 819.5881 | 21.86833 | 21.8415  |
| 6938 | M1036T10_ | 1.242378 | -0.3131  | -0.87665 | 0.407166 | 0.864046 | DOWN | 1035.851 | 1035.85  | 1035.852 | 9.840617 | 9.715683 |
| 6939 | M703T10_  | 1.64164  | 0.715138 | 0.87737  | 0.407189 | 0.864046 | UP   | 703.4811 | 703.4771 | 703.4816 | 10.45116 | 10.36125 |
| 6940 | M777T10_  | 2.242742 | 1.165264 | 0.922411 | 0.407203 | 0.864046 | UP   | 776.6243 | 776.6206 | 776.6251 | 9.811408 | 9.715683 |
| 6941 | M332T9_8  | 1.270964 | -0.34592 | -0.88742 | 0.407232 | 0.864046 | DOWN | 332.1872 | 332.187  | 332.1874 | 9.3332   | 9.234417 |
| 6942 | M564T37_  | 1.078703 | -0.1093  | -0.91978 | 0.40724  | 0.864046 | DOWN | 564.3011 | 564.301  | 564.3016 | 37.43883 | 37.4315  |
| 6943 | M389T10_  | 1.273859 | -0.34921 | -0.87818 | 0.407261 | 0.864046 | DOWN | 388.5442 | 388.5439 | 388.5442 | 9.894875 | 9.79535  |
| 6944 | M384T9_7  | 1.308735 | -0.38817 | -0.88242 | 0.407338 | 0.864046 | DOWN | 384.4869 | 384.4866 | 384.4877 | 8.94795  | 8.8486   |
| 6945 | M626T10_  | 1.158806 | -0.21264 | -0.87447 | 0.407366 | 0.864046 | DOWN | 626.3877 | 626.3875 | 626.3893 | 9.967367 | 9.859233 |
| 6946 | M359T10_  | 1.467208 | 0.553073 | 0.921751 | 0.407406 | 0.864046 | UP   | 359.3646 | 359.3643 | 359.3647 | 9.8397   | 9.73145  |
| 6947 | M264T11_  | 1.169617 | -0.22604 | -0.87714 | 0.407457 | 0.864047 | DOWN | 264.4398 | 264.4397 | 264.4402 | 10.87704 | 10.85018 |
| 6948 | M413T11_  | 1.440898 | -0.52697 | -0.87815 | 0.407697 | 0.864047 | DOWN | 412.7493 | 412.7392 | 412.7509 | 10.8914  | 10.89125 |
| 6949 | M193T11_  | 1.150754 | -0.20258 | -0.87412 | 0.407773 | 0.864047 | DOWN | 193.2391 | 193.239  | 193.2393 | 10.89907 | 10.8646  |
| 6950 | M599T10_  | 2.193597 | 1.133298 | 0.917554 | 0.407878 | 0.864047 | UP   | 599.4358 | 599.4338 | 599.4371 | 9.587217 | 9.49445  |
| 6951 | M694T10_  | 1.130823 | -0.17737 | -0.87308 | 0.408064 | 0.864047 | DOWN | 693.5278 | 693.526  | 693.5281 | 10.12955 | 10.03658 |
| 6952 | M479T11_  | 1.128429 | -0.17432 | -0.87368 | 0.40829  | 0.864047 | DOWN | 478.5004 | 478.5    | 478.5007 | 10.892   | 10.8646  |
| 6953 | M658T10_  | 1.234319 | -0.30372 | -0.8753  | 0.408296 | 0.864047 | DOWN | 658.4125 | 658.4118 | 658.4131 | 10.16418 | 10.06883 |
| 6954 | M622T45   | 1.224674 | 0.292398 | 0.877742 | 0.408302 | 0.864047 | UP   | 622.3434 | 622.3432 | 622.3436 | 44.79675 | 44.6385  |
| 6955 | M341T11_  | 1.208663 | -0.27341 | -0.89667 | 0.408315 | 0.864047 | DOWN | 340.6688 | 340.6687 | 340.6691 | 10.90548 | 10.88995 |
| 6956 | M619T10_  | 1.214837 | 0.280763 | 0.89798  | 0.408428 | 0.864047 | UP   | 618.9649 | 618.964  | 618.9652 | 9.98345  | 9.8753   |
| 6957 | M348T10_  | 1.172157 | 0.229166 | 0.873068 | 0.408572 | 0.864047 | UP   | 347.9591 | 347.9587 | 347.9602 | 9.831517 | 9.728083 |
| 6958 | M820T13   | 1.259271 | -0.33259 | -0.9103  | 0.40871  | 0.864047 | DOWN | 820.418  | 820.4177 | 820.4183 | 13.20113 | 13.18635 |
| 6959 | M221T10_  | 3.063001 | 1.614946 | 0.916371 | 0.408821 | 0.864047 | UP   | 221.2135 | 221.2132 | 221.2139 | 9.946367 | 9.779267 |
| 6960 | M364T10_  | 1.575227 | 0.655559 | 0.902615 | 0.40886  | 0.864047 | UP   | 364.4192 | 364.4191 | 364.4198 | 9.801833 | 9.73145  |
| 6961 | M502T10_  | 1.378122 | 0.462704 | 0.899501 | 0.40892  | 0.864047 | UP   | 502.069  | 502.0687 | 502.0753 | 9.93625  | 9.859233 |
| 6962 | M622T40   | 1.059001 | 0.082704 | 0.899371 | 0.409006 | 0.864047 | UP   | 622.3434 | 622.3432 | 622.3437 | 39.99967 | 39.8485  |
| 6963 | M363T8    | 1.38274  | -0.46753 | -0.87243 | 0.409016 | 0.864047 | DOWN | 363.1985 | 363.1984 | 363.1989 | 7.576167 | 7.44795  |
| 6964 | M537T11_  | 1.134496 | 0.182051 | 0.879617 | 0.409062 | 0.864047 | UP   | 536.9974 | 536.9944 | 536.9985 | 10.53485 | 10.15473 |

|      |          |          |          |          |          |          |      |          |          |          |          |          |
|------|----------|----------|----------|----------|----------|----------|------|----------|----------|----------|----------|----------|
| 6965 | M384T9_4 | 1.426957 | -0.51294 | -0.87628 | 0.409236 | 0.864047 | DOWN | 384.2037 | 384.2024 | 384.21   | 9.264333 | 9.11795  |
| 6966 | M655T10_ | 1.460451 | 0.546414 | 0.897458 | 0.409395 | 0.864047 | UP   | 654.6188 | 654.6129 | 654.6192 | 9.946367 | 9.715683 |
| 6967 | M771T10_ | 1.290337 | -0.36775 | -0.87519 | 0.409474 | 0.864047 | DOWN | 771.4573 | 771.457  | 771.4576 | 10.45817 | 10.39197 |
| 6968 | M200T9_2 | 1.2939   | -0.37173 | -0.87029 | 0.40959  | 0.864048 | DOWN | 200.4916 | 200.491  | 200.4922 | 9.183058 | 9.1322   |
| 6969 | M293T17  | 1.293347 | -0.37111 | -0.87655 | 0.409616 | 0.864048 | DOWN | 293.1357 | 293.1357 | 293.1358 | 17.14392 | 17.07417 |
| 6970 | M1099T10 | 1.377499 | -0.46205 | -0.88778 | 0.409638 | 0.864048 | DOWN | 1098.634 | 1098.634 | 1098.635 | 10.14543 | 10.03658 |
| 6971 | M348T16  | 1.195235 | -0.25729 | -0.89043 | 0.409674 | 0.864048 | DOWN | 348.2141 | 348.214  | 348.2144 | 16.24793 | 16.21315 |
| 6972 | M167T9_5 | 1.743908 | 0.802324 | 0.893605 | 0.409694 | 0.864048 | UP   | 166.7692 | 166.769  | 166.7693 | 9.146692 | 9.095133 |
| 6973 | M278T10_ | 1.630576 | 0.705382 | 0.909686 | 0.409714 | 0.864048 | UP   | 278.4628 | 278.4623 | 278.4628 | 9.979667 | 9.8914   |
| 6974 | M373T9_7 | 1.987822 | 0.991189 | 0.904014 | 0.409753 | 0.864048 | UP   | 373.4864 | 373.4861 | 373.4868 | 9.2873   | 9.10275  |
| 6975 | M349T9_3 | 1.798479 | -0.84678 | -0.90839 | 0.409763 | 0.864048 | DOWN | 348.6001 | 348.5993 | 348.6024 | 9.175692 | 9.095133 |
| 6976 | M212T11_ | 1.304117 | -0.38307 | -0.87767 | 0.409832 | 0.864048 | DOWN | 212.1551 | 212.1528 | 212.1554 | 10.90553 | 10.84395 |
| 6977 | M684T10_ | 1.611645 | 0.688534 | 0.914963 | 0.40984  | 0.864048 | UP   | 683.5787 | 683.5785 | 683.5789 | 9.830283 | 9.7124   |
| 6978 | M575T10_ | 1.33225  | 0.413865 | 0.893639 | 0.409894 | 0.864048 | UP   | 575.1635 | 575.1632 | 575.1638 | 9.967367 | 9.859233 |
| 6979 | M184T11_ | 1.205459 | 0.269583 | 0.876182 | 0.409903 | 0.864048 | UP   | 183.9583 | 183.958  | 183.9587 | 10.93208 | 10.89355 |
| 6980 | M394T10_ | 1.177329 | -0.23552 | -0.87246 | 0.409955 | 0.864048 | DOWN | 393.8714 | 393.8713 | 393.8716 | 9.957333 | 9.8753   |
| 6981 | M264T18  | 1.324351 | -0.40529 | -0.88272 | 0.409979 | 0.864048 | DOWN | 264.1354 | 264.1348 | 264.1358 | 18.0745  | 18.05517 |
| 6982 | M272T11_ | 1.116461 | -0.15893 | -0.86974 | 0.409987 | 0.864048 | DOWN | 271.5927 | 271.5926 | 271.5929 | 10.90519 | 10.879   |
| 6983 | M397T10_ | 1.828097 | -0.87034 | -0.87051 | 0.410059 | 0.864048 | DOWN | 396.6707 | 396.6706 | 396.6709 | 9.88865  | 9.79535  |
| 6984 | M532T9   | 1.249703 | -0.32159 | -0.89713 | 0.410061 | 0.864048 | DOWN | 531.8358 | 531.8356 | 531.8361 | 9.304558 | 9.175017 |
| 6985 | M156T10_ | 1.421595 | -0.50751 | -0.87541 | 0.410086 | 0.864048 | DOWN | 155.9302 | 155.9265 | 155.9333 | 9.84845  | 9.7124   |
| 6986 | M352T9_1 | 1.309255 | 0.388746 | 0.876808 | 0.410125 | 0.864048 | UP   | 351.5774 | 351.5773 | 351.5776 | 8.735017 | 8.623117 |
| 6987 | M447T9_4 | 1.254005 | -0.32654 | -0.87968 | 0.410142 | 0.864048 | DOWN | 447.3934 | 447.3933 | 447.3942 | 9.330283 | 9.234417 |
| 6988 | M254T9_4 | 1.456259 | 0.542267 | 0.904913 | 0.410207 | 0.864048 | UP   | 254.3535 | 254.3533 | 254.3543 | 9.475667 | 9.40135  |
| 6989 | M1871T10 | 1.844897 | 0.88354  | 0.910325 | 0.410219 | 0.864048 | UP   | 1870.89  | 1870.89  | 1870.896 | 9.82645  | 9.7634   |
| 6990 | M655T10_ | 1.159722 | 0.213779 | 0.87012  | 0.410386 | 0.864048 | UP   | 655.0094 | 655.0087 | 655.0101 | 9.821275 | 9.7124   |
| 6991 | M160T10_ | 1.244244 | -0.31527 | -0.87181 | 0.410485 | 0.864048 | DOWN | 159.8559 | 159.8558 | 159.856  | 9.915583 | 9.811217 |
| 6992 | M517T11_ | 1.235581 | -0.30519 | -0.86969 | 0.410489 | 0.864048 | DOWN | 516.8803 | 516.8799 | 516.8813 | 10.90659 | 10.879   |
| 6993 | M450T11_ | 1.118221 | -0.1612  | -0.86851 | 0.410496 | 0.864048 | DOWN | 450.4502 | 450.45   | 450.4509 | 10.89904 | 10.879   |
| 6994 | M368T10_ | 1.350808 | -0.43382 | -0.87353 | 0.41056  | 0.864048 | DOWN | 367.7208 | 367.7157 | 367.721  | 9.915633 | 9.843367 |
| 6995 | M429T22_ | 1.238613 | -0.30873 | -0.86949 | 0.410561 | 0.864048 | DOWN | 428.9017 | 428.9012 | 428.9021 | 21.568   | 21.54367 |
| 6996 | M511T10_ | 1.181552 | -0.24068 | -0.88591 | 0.410572 | 0.864048 | DOWN | 511.3082 | 511.308  | 511.3085 | 9.975217 | 9.8753   |
| 6997 | M561T10_ | 1.542048 | -0.62485 | -0.86959 | 0.410685 | 0.864048 | DOWN | 560.9479 | 560.9474 | 560.948  | 9.88815  | 9.859667 |
| 6998 | M203T10_ | 1.236871 | -0.3067  | -0.90919 | 0.410848 | 0.864048 | DOWN | 203.2297 | 203.2296 | 203.2298 | 9.842    | 9.715683 |
| 6999 | M534T38_ | 1.110079 | 0.150662 | 0.876824 | 0.410929 | 0.864048 | UP   | 534.2906 | 534.2905 | 534.2911 | 38.13683 | 38.07967 |



|      |          |          |          |          |          |          |      |          |          |          |          |          |
|------|----------|----------|----------|----------|----------|----------|------|----------|----------|----------|----------|----------|
| 7000 | M337T12  | 1.193826 | -0.25559 | -0.87295 | 0.410965 | 0.864048 | DOWN | 337.2962 | 337.296  | 337.2964 | 12.2964  | 12.28105 |
| 7001 | M290T9_1 | 1.427566 | -0.51356 | -0.86872 | 0.411015 | 0.864048 | DOWN | 289.5235 | 289.5233 | 289.5237 | 8.952283 | 8.89395  |
| 7002 | M579T10_ | 1.159025 | -0.21291 | -0.86961 | 0.411035 | 0.864048 | DOWN | 579.4967 | 579.4965 | 579.4969 | 9.956417 | 9.843367 |
| 7003 | M571T10_ | 1.456751 | -0.54275 | -0.87925 | 0.41109  | 0.864048 | DOWN | 571.175  | 571.1743 | 571.1754 | 9.887133 | 9.806367 |
| 7004 | M492T31  | 1.291445 | 0.368986 | 0.888029 | 0.411202 | 0.864048 | UP   | 492.2799 | 492.2798 | 492.2801 | 30.52442 | 30.469   |
| 7005 | M317T22  | 1.280308 | 0.356491 | 0.91455  | 0.411279 | 0.864048 | UP   | 317.1721 | 317.1717 | 317.1722 | 22.0595  | 22.05333 |
| 7006 | M353T9_2 | 1.234682 | 0.304139 | 0.872823 | 0.411349 | 0.864048 | UP   | 353.3788 | 353.3783 | 353.3791 | 8.856267 | 8.7891   |
| 7007 | M385T10_ | 1.912824 | -0.9357  | -0.8702  | 0.411355 | 0.864048 | DOWN | 385.4395 | 385.4374 | 385.4483 | 9.8322   | 9.816167 |
| 7008 | M275T10_ | 1.176838 | -0.23492 | -0.86687 | 0.411427 | 0.864048 | DOWN | 275.0775 | 275.0774 | 275.0777 | 9.972833 | 9.8914   |
| 7009 | M696T26  | 1.424518 | -0.51047 | -0.86648 | 0.411467 | 0.864048 | DOWN | 695.986  | 695.985  | 695.9863 | 26.31667 | 26.247   |
| 7010 | M341T10_ | 3.72548  | -1.89743 | -0.91366 | 0.411483 | 0.864048 | DOWN | 340.5984 | 340.598  | 340.5985 | 9.857683 | 9.73145  |
| 7011 | M1847T10 | 1.273079 | -0.34832 | -0.87474 | 0.411517 | 0.864048 | DOWN | 1846.584 | 1846.583 | 1846.586 | 9.811408 | 9.715683 |
| 7012 | M396T37  | 1.270808 | 0.345746 | 0.870991 | 0.411606 | 0.864049 | UP   | 396.2225 | 396.2223 | 396.2227 | 36.9565  | 36.684   |
| 7013 | M368T10_ | 1.877688 | 0.908958 | 0.91139  | 0.411623 | 0.864049 | UP   | 368.1625 | 368.1619 | 368.1628 | 9.766367 | 9.758367 |
| 7014 | M150T10_ | 1.401977 | 0.487462 | 0.904211 | 0.411656 | 0.864049 | UP   | 150.048  | 150.0433 | 150.0483 | 9.806367 | 9.76065  |
| 7015 | M525T26  | 1.712655 | 0.776235 | 0.886275 | 0.411728 | 0.864049 | UP   | 525.2795 | 525.2788 | 525.2803 | 26.35725 | 26.319   |
| 7016 | M301T10_ | 1.191982 | -0.25336 | -0.88835 | 0.411739 | 0.864049 | DOWN | 300.6456 | 300.6455 | 300.6458 | 9.933    | 9.827283 |
| 7017 | M787T11_ | 1.211341 | -0.2766  | -0.87853 | 0.411848 | 0.864049 | DOWN | 787.0274 | 787.0272 | 787.0302 | 10.90519 | 10.879   |
| 7018 | M474T9_6 | 2.492053 | 1.317335 | 0.886229 | 0.41186  | 0.864049 | UP   | 474.2912 | 474.2833 | 474.2946 | 9.219483 | 9.110833 |
| 7019 | M685T10_ | 1.173789 | -0.23117 | -0.88283 | 0.411943 | 0.864049 | DOWN | 684.542  | 684.5416 | 684.5423 | 9.825767 | 9.715683 |
| 7020 | M212T10_ | 1.145944 | -0.19654 | -0.8713  | 0.411987 | 0.864049 | DOWN | 212.0133 | 212.0132 | 212.0134 | 9.970617 | 9.859233 |
| 7021 | M253T11_ | 1.192474 | -0.25396 | -0.87802 | 0.412035 | 0.864049 | DOWN | 252.6485 | 252.6398 | 252.6487 | 10.90659 | 10.879   |
| 7022 | M504T12  | 1.23654  | 0.306309 | 0.89757  | 0.41204  | 0.864049 | UP   | 504.2909 | 504.2905 | 504.2922 | 12.22327 | 12.20977 |
| 7023 | M397T10_ | 1.188806 | -0.24951 | -0.86849 | 0.412069 | 0.864049 | DOWN | 397.2809 | 397.2807 | 397.2811 | 9.954767 | 9.859233 |
| 7024 | M571T10_ | 1.270817 | -0.34576 | -0.89513 | 0.412082 | 0.864049 | DOWN | 570.9252 | 570.9238 | 570.9256 | 9.938708 | 9.843367 |
| 7025 | M229T10_ | 1.217644 | -0.28409 | -0.86572 | 0.412113 | 0.864049 | DOWN | 229.2285 | 229.2283 | 229.2286 | 9.916617 | 9.811217 |
| 7026 | M478T18_ | 1.089767 | -0.12402 | -0.87422 | 0.412156 | 0.864049 | DOWN | 478.3521 | 478.352  | 478.3524 | 17.52692 | 17.51067 |
| 7027 | M663T10_ | 1.21448  | -0.28034 | -0.87291 | 0.412398 | 0.864049 | DOWN | 662.7791 | 662.7784 | 662.7796 | 9.830733 | 9.715683 |
| 7028 | M260T9_2 | 1.327608 | 0.40883  | 0.888588 | 0.412454 | 0.864049 | UP   | 259.6511 | 259.6501 | 259.6512 | 9.382183 | 9.36515  |
| 7029 | M448T13  | 1.635063 | 0.709346 | 0.906305 | 0.412507 | 0.864049 | UP   | 448.2959 | 448.2956 | 448.2961 | 12.73325 | 12.69008 |
| 7030 | M527T9_1 | 1.379562 | 0.46421  | 0.883426 | 0.412673 | 0.864049 | UP   | 527.3641 | 527.3638 | 527.3647 | 8.7401   | 8.6152   |
| 7031 | M416T11_ | 1.126248 | -0.17152 | -0.87456 | 0.412721 | 0.864049 | DOWN | 415.5991 | 415.599  | 415.6004 | 10.90519 | 10.879   |
| 7032 | M911T10_ | 1.408561 | -0.49422 | -0.86852 | 0.412731 | 0.864049 | DOWN | 911.4852 | 911.4849 | 911.4867 | 9.81635  | 9.810767 |
| 7033 | M302T24  | 1.131573 | -0.17833 | -0.87659 | 0.412816 | 0.864049 | DOWN | 302.2687 | 302.2685 | 302.2688 | 24.48967 | 24.463   |
| 7034 | M227T9_1 | 1.352271 | -0.43538 | -0.89845 | 0.412817 | 0.864049 | DOWN | 227.1753 | 227.1752 | 227.1802 | 8.820225 | 8.686867 |

|      |          |          |          |          |          |          |      |          |          |          |          |          |
|------|----------|----------|----------|----------|----------|----------|------|----------|----------|----------|----------|----------|
| 7035 | M489T10_ | 1.568422 | 0.649314 | 0.899079 | 0.412841 | 0.864049 | UP   | 488.568  | 488.5677 | 488.5683 | 9.809892 | 9.649833 |
| 7036 | M331T10_ | 1.236792 | 0.306603 | 0.902806 | 0.412914 | 0.864049 | UP   | 331.2094 | 331.2093 | 331.2107 | 10.14385 | 9.848417 |
| 7037 | M663T10_ | 1.32462  | 0.405578 | 0.90031  | 0.413001 | 0.864049 | UP   | 663.4497 | 663.4489 | 663.4516 | 9.856867 | 9.73145  |
| 7038 | M269T10_ | 1.308234 | -0.38762 | -0.87654 | 0.413016 | 0.864049 | DOWN | 268.7214 | 268.7213 | 268.7215 | 9.956417 | 9.843367 |
| 7039 | M649T10_ | 1.151129 | -0.20305 | -0.86901 | 0.413093 | 0.864049 | DOWN | 649.2711 | 649.2678 | 649.2714 | 9.8235   | 9.632083 |
| 7040 | M533T31  | 1.139184 | -0.188   | -0.88979 | 0.413104 | 0.864049 | DOWN | 533.3876 | 533.3872 | 533.3878 | 31.45167 | 31.43567 |
| 7041 | M263T11_ | 1.206176 | -0.27044 | -0.87237 | 0.413106 | 0.864049 | DOWN | 263.4898 | 263.4893 | 263.4942 | 10.90765 | 10.877   |
| 7042 | M237T9_4 | 1.363189 | -0.44699 | -0.88999 | 0.413412 | 0.864049 | DOWN | 237.0931 | 237.0917 | 237.0946 | 9.304717 | 9.1322   |
| 7043 | M541T37_ | 1.258635 | 0.33186  | 0.867682 | 0.413421 | 0.864049 | UP   | 541.4143 | 541.4137 | 541.4144 | 37.0725  | 37.02917 |
| 7044 | M546T9_3 | 1.349471 | -0.43239 | -0.86294 | 0.413448 | 0.864049 | DOWN | 545.6833 | 545.6812 | 545.6839 | 9.13835  | 9.12675  |
| 7045 | M432T26_ | 1.174016 | 0.231452 | 0.877465 | 0.413476 | 0.864049 | UP   | 431.8081 | 431.8072 | 431.8087 | 25.565   | 25.526   |
| 7046 | M532T39  | 1.228683 | 0.297113 | 0.90999  | 0.413544 | 0.864049 | UP   | 532.3111 | 532.3111 | 532.3116 | 38.669   | 38.56817 |
| 7047 | M489T10_ | 1.575153 | 0.655492 | 0.894147 | 0.413548 | 0.864049 | UP   | 489.2997 | 489.2993 | 489.3006 | 9.75365  | 9.636483 |
| 7048 | M268T10_ | 1.583503 | 0.66312  | 0.89253  | 0.413555 | 0.864049 | UP   | 267.5459 | 267.5453 | 267.5461 | 9.969158 | 9.859233 |
| 7049 | M1181T10 | 1.285804 | -0.36267 | -0.86814 | 0.413577 | 0.864049 | DOWN | 1181.166 | 1181.163 | 1181.171 | 9.8887   | 9.74925  |
| 7050 | M508T25  | 1.950015 | -0.96349 | -0.87287 | 0.413618 | 0.864049 | DOWN | 508.3455 | 508.3453 | 508.3459 | 24.60933 | 24.59233 |
| 7051 | M195T10_ | 3.799765 | 1.92591  | 0.906488 | 0.413667 | 0.864049 | UP   | 194.5572 | 194.5567 | 194.5574 | 9.507167 | 9.346    |
| 7052 | M301T11_ | 1.371987 | 0.456267 | 0.875529 | 0.413683 | 0.86405  | UP   | 301.3899 | 301.3889 | 301.3903 | 10.86155 | 10.82935 |
| 7053 | M309T14_ | 1.32184  | 0.402547 | 0.8842   | 0.413692 | 0.86405  | UP   | 309.1307 | 309.1305 | 309.1308 | 14.0342  | 13.78533 |
| 7054 | M365T10_ | 1.597487 | 0.675805 | 0.901319 | 0.41372  | 0.86405  | UP   | 364.6511 | 364.6502 | 364.6515 | 9.818525 | 9.696683 |
| 7055 | M316T37_ | 1.105193 | -0.1443  | -0.87923 | 0.413743 | 0.86405  | DOWN | 316.1752 | 316.1751 | 316.1754 | 37.137   | 36.986   |
| 7056 | M589T10_ | 1.317251 | -0.39753 | -0.8768  | 0.413757 | 0.86405  | DOWN | 589.4129 | 589.4123 | 589.4145 | 9.964167 | 9.859233 |
| 7057 | M761T11  | 1.161554 | -0.21606 | -0.86344 | 0.413796 | 0.86405  | DOWN | 761.3293 | 761.3291 | 761.3301 | 10.892   | 10.8646  |
| 7058 | M422T23  | 1.244328 | 0.315367 | 0.872214 | 0.413948 | 0.86405  | UP   | 422.3471 | 422.3466 | 422.3476 | 22.8135  | 22.8     |
| 7059 | M719T10_ | 2.160582 | 1.11142  | 0.910124 | 0.414105 | 0.86405  | UP   | 718.6285 | 718.6279 | 718.6291 | 9.81635  | 9.715683 |
| 7060 | M723T10_ | 1.351227 | 0.43427  | 0.872544 | 0.414208 | 0.86405  | UP   | 723.0506 | 723.0491 | 723.0543 | 9.975142 | 9.843367 |
| 7061 | M717T10_ | 1.369855 | 0.454023 | 0.905838 | 0.414222 | 0.86405  | UP   | 717.4669 | 717.4664 | 717.4672 | 9.844267 | 9.715683 |
| 7062 | M705T10_ | 1.159115 | -0.21302 | -0.8611  | 0.414266 | 0.86405  | DOWN | 705.4174 | 705.4167 | 705.418  | 10.29022 | 10.19852 |
| 7063 | M749T10_ | 1.135483 | -0.18331 | -0.86925 | 0.414421 | 0.86405  | DOWN | 749.4442 | 749.4437 | 749.4451 | 10.40409 | 10.32952 |
| 7064 | M384T11_ | 1.219987 | -0.28687 | -0.86519 | 0.414484 | 0.86405  | DOWN | 384.1909 | 384.1907 | 384.1911 | 10.89355 | 10.88747 |
| 7065 | M1000T10 | 1.730889 | -0.79151 | -0.87231 | 0.414512 | 0.86405  | DOWN | 1000.061 | 1000.061 | 1000.062 | 9.9351   | 9.853533 |
| 7066 | M291T9_8 | 1.174237 | -0.23172 | -0.87246 | 0.414535 | 0.86405  | DOWN | 291.1514 | 291.1507 | 291.1524 | 9.189242 | 9.1445   |
| 7067 | M348T10_ | 1.403159 | 0.488678 | 0.908842 | 0.414573 | 0.86405  | UP   | 347.6442 | 347.644  | 347.6443 | 9.825767 | 9.7124   |
| 7068 | M883T9   | 1.169067 | -0.22536 | -0.86103 | 0.414589 | 0.86405  | DOWN | 882.5702 | 882.5686 | 882.5705 | 8.96255  | 8.892117 |
| 7069 | M1174T10 | 1.228176 | -0.29652 | -0.86644 | 0.414623 | 0.86405  | DOWN | 1174.413 | 1174.412 | 1174.414 | 9.8322   | 9.699733 |

|      |          |          |          |          |          |          |      |          |          |          |          |          |
|------|----------|----------|----------|----------|----------|----------|------|----------|----------|----------|----------|----------|
| 7070 | M177T10_ | 1.210473 | -0.27557 | -0.88642 | 0.414652 | 0.86405  | DOWN | 176.689  | 176.6888 | 176.689  | 9.960817 | 9.859233 |
| 7071 | M557T17  | 1.17969  | -0.23841 | -0.86743 | 0.414658 | 0.86405  | DOWN | 557.2202 | 557.2195 | 557.2209 | 17.41667 | 17.3795  |
| 7072 | M609T10_ | 1.136135 | -0.18413 | -0.86471 | 0.41472  | 0.86405  | DOWN | 609.1359 | 609.135  | 609.1364 | 9.9149   | 9.79535  |
| 7073 | M654T11_ | 1.140942 | -0.19022 | -0.86599 | 0.414744 | 0.86405  | DOWN | 654.0772 | 654.0768 | 654.0778 | 10.90548 | 10.879   |
| 7074 | M322T10_ | 1.507416 | 0.592078 | 0.879185 | 0.414747 | 0.86405  | UP   | 321.7097 | 321.7096 | 321.7205 | 9.92825  | 9.827283 |
| 7075 | M438T9_6 | 1.324344 | 0.405278 | 0.899368 | 0.414809 | 0.86405  | UP   | 438.1094 | 438.1089 | 438.1101 | 9.457083 | 9.189117 |
| 7076 | M172T10_ | 1.450445 | 0.536495 | 0.901224 | 0.414874 | 0.86405  | UP   | 172.0686 | 172.0539 | 172.0687 | 9.824183 | 9.7124   |
| 7077 | M698T10_ | 1.18369  | -0.24329 | -0.8613  | 0.414886 | 0.86405  | DOWN | 698.013  | 698.0123 | 698.0137 | 9.958617 | 9.843367 |
| 7078 | M632T11_ | 1.180811 | -0.23978 | -0.85978 | 0.414975 | 0.86405  | DOWN | 631.9659 | 631.9651 | 631.9671 | 10.89308 | 10.88747 |
| 7079 | M232T11_ | 1.228619 | 0.297038 | 0.861781 | 0.414982 | 0.86405  | UP   | 231.8588 | 231.8586 | 231.859  | 10.89839 | 10.88995 |
| 7080 | M523T10_ | 1.197186 | -0.25965 | -0.88882 | 0.41501  | 0.86405  | DOWN | 522.8271 | 522.8228 | 522.828  | 9.520558 | 9.374083 |
| 7081 | M616T10_ | 1.178177 | -0.23656 | -0.86569 | 0.41512  | 0.86405  | DOWN | 615.5337 | 615.5328 | 615.5345 | 9.923808 | 9.827283 |
| 7082 | M411T10_ | 1.197784 | -0.26037 | -0.86823 | 0.415162 | 0.86405  | DOWN | 410.9641 | 410.9635 | 410.9643 | 9.962617 | 9.843367 |
| 7083 | M528T10_ | 1.268764 | -0.34342 | -0.86751 | 0.415203 | 0.86405  | DOWN | 527.6613 | 527.6598 | 527.6639 | 10.26124 | 10.13368 |
| 7084 | M416T9_5 | 1.266378 | -0.34071 | -0.88615 | 0.415266 | 0.86405  | DOWN | 416.0972 | 416.0967 | 416.0985 | 9.365833 | 9.03845  |
| 7085 | M659T10_ | 1.625185 | 0.700604 | 0.862633 | 0.415319 | 0.86405  | UP   | 658.5688 | 658.5598 | 658.5701 | 9.82145  | 9.759383 |
| 7086 | M1335T11 | 1.257461 | -0.33051 | -0.86411 | 0.415354 | 0.86405  | DOWN | 1335.444 | 1335.443 | 1335.445 | 10.93097 | 10.89355 |
| 7087 | M298T10_ | 1.278053 | -0.35395 | -0.88356 | 0.41536  | 0.86405  | DOWN | 298.2068 | 298.2058 | 298.2069 | 10.40874 | 10.34372 |
| 7088 | M282T10_ | 1.177165 | -0.23532 | -0.88771 | 0.41543  | 0.86405  | DOWN | 281.8552 | 281.8551 | 281.8553 | 9.825767 | 9.715683 |
| 7089 | M334T9_1 | 1.228012 | -0.29632 | -0.85921 | 0.415613 | 0.86405  | DOWN | 333.5014 | 333.4993 | 333.5033 | 9.287625 | 9.146383 |
| 7090 | M328T10_ | 1.268753 | -0.34341 | -0.87077 | 0.415629 | 0.86405  | DOWN | 327.5608 | 327.5606 | 327.5612 | 9.8214   | 9.7124   |
| 7091 | M183T10_ | 1.208472 | -0.27318 | -0.86522 | 0.415644 | 0.86405  | DOWN | 183.0501 | 183.05   | 183.0502 | 9.979667 | 9.8753   |
| 7092 | M228T11_ | 1.240042 | -0.31039 | -0.85898 | 0.415652 | 0.86405  | DOWN | 227.8085 | 227.8082 | 227.8086 | 10.93708 | 10.89125 |
| 7093 | M254T10_ | 1.226869 | -0.29498 | -0.86372 | 0.415738 | 0.86405  | DOWN | 254.0742 | 254.074  | 254.0744 | 9.766308 | 9.636483 |
| 7094 | M609T9_5 | 1.251606 | -0.32378 | -0.88417 | 0.415797 | 0.864051 | DOWN | 609.3097 | 609.3089 | 609.31   | 9.063425 | 9.056733 |
| 7095 | M324T9_7 | 1.411912 | 0.49765  | 0.882305 | 0.415818 | 0.864051 | UP   | 324.0324 | 324.0218 | 324.0325 | 9.424667 | 9.09495  |
| 7096 | M810T10_ | 1.161877 | 0.216457 | 0.859442 | 0.415912 | 0.864051 | UP   | 809.9457 | 809.9451 | 809.9464 | 10.2654  | 10.18238 |
| 7097 | M373T23_ | 2.121869 | 1.085335 | 0.899723 | 0.415921 | 0.864051 | UP   | 373.2409 | 373.2329 | 373.2413 | 23.05975 | 23.04533 |
| 7098 | M399T10_ | 1.233638 | 0.302919 | 0.889483 | 0.415933 | 0.864051 | UP   | 399.2489 | 399.2486 | 399.2493 | 10.15933 | 10.06883 |
| 7099 | M548T9_2 | 1.243319 | -0.3142  | -0.85917 | 0.41596  | 0.864051 | DOWN | 547.775  | 547.7741 | 547.7815 | 9.240392 | 9.1445   |
| 7100 | M353T17_ | 1.378789 | -0.4634  | -0.86738 | 0.415967 | 0.864051 | DOWN | 353.1569 | 353.1568 | 353.1569 | 16.724   | 16.57833 |
| 7101 | M322T9_4 | 1.887277 | -0.91631 | -0.86072 | 0.41606  | 0.864051 | DOWN | 322.0935 | 322.0934 | 322.0936 | 9.340717 | 9.275917 |
| 7102 | M362T9_4 | 1.315544 | -0.39566 | -0.87127 | 0.416082 | 0.864051 | DOWN | 362.1642 | 362.1641 | 362.1754 | 9.300733 | 9.24215  |
| 7103 | M532T40_ | 1.137822 | 0.186274 | 0.899838 | 0.41619  | 0.864051 | UP   | 532.3114 | 532.3111 | 532.3116 | 39.5825  | 39.33067 |
| 7104 | M541T11_ | 1.216324 | -0.28253 | -0.88359 | 0.416241 | 0.864051 | DOWN | 541.0938 | 541.0935 | 541.0947 | 10.90548 | 10.879   |

|      |          |          |          |          |          |          |      |          |          |          |          |          |
|------|----------|----------|----------|----------|----------|----------|------|----------|----------|----------|----------|----------|
| 7105 | M460T10_ | 1.559429 | 0.641017 | 0.873595 | 0.416245 | 0.864051 | UP   | 459.692  | 459.6918 | 459.6924 | 9.970617 | 9.885167 |
| 7106 | M282T11_ | 1.271813 | 0.346887 | 0.87486  | 0.416282 | 0.864051 | UP   | 282.3515 | 282.3512 | 282.3529 | 10.93338 | 10.85838 |
| 7107 | M387T10_ | 1.348332 | 0.431175 | 0.85732  | 0.416293 | 0.864051 | UP   | 387.0138 | 387.0107 | 387.0147 | 9.950258 | 9.853533 |
| 7108 | M497T9_1 | 3.014345 | 1.591844 | 0.904823 | 0.416341 | 0.864051 | UP   | 496.5628 | 496.5612 | 496.5638 | 9.303167 | 9.129317 |
| 7109 | M239T11_ | 2.115336 | 1.080887 | 0.902209 | 0.416349 | 0.864051 | UP   | 239.1446 | 239.1443 | 239.1446 | 10.50278 | 10.485   |
| 7110 | M243T11_ | 1.154813 | -0.20766 | -0.8571  | 0.416421 | 0.864051 | DOWN | 243.1148 | 243.1148 | 243.1151 | 10.90522 | 10.879   |
| 7111 | M1345T10 | 2.462731 | 1.300259 | 0.900924 | 0.416438 | 0.864051 | UP   | 1345.281 | 1345.278 | 1345.282 | 9.954217 | 9.8753   |
| 7112 | M537T10_ | 1.195012 | -0.25703 | -0.85843 | 0.416567 | 0.864051 | DOWN | 537.4917 | 537.4907 | 537.4935 | 9.929783 | 9.811217 |
| 7113 | M360T10_ | 1.4723   | 0.558071 | 0.901357 | 0.416593 | 0.864051 | UP   | 359.8836 | 359.8833 | 359.8837 | 9.8397   | 9.73145  |
| 7114 | M816T10_ | 1.219248 | 0.285991 | 0.888425 | 0.416611 | 0.864051 | UP   | 816.1358 | 816.1336 | 816.1364 | 9.967367 | 9.8753   |
| 7115 | M1011T10 | 1.267724 | -0.34224 | -0.8565  | 0.416642 | 0.864051 | DOWN | 1010.605 | 1010.603 | 1010.606 | 9.532267 | 9.447617 |
| 7116 | M579T11_ | 1.124984 | -0.1699  | -0.86488 | 0.416731 | 0.864051 | DOWN | 579.3338 | 579.3328 | 579.3344 | 11.39598 | 11.37367 |
| 7117 | M657T10_ | 1.100615 | 0.13831  | 0.88092  | 0.416746 | 0.864051 | UP   | 656.727  | 656.7264 | 656.7286 | 9.8397   | 9.715683 |
| 7118 | M615T10_ | 1.579314 | -0.6593  | -0.86266 | 0.416764 | 0.864051 | DOWN | 615.3225 | 615.3222 | 615.3232 | 9.956417 | 9.869467 |
| 7119 | M756T12  | 1.49446  | 0.579624 | 0.894767 | 0.4168   | 0.864051 | UP   | 756.4871 | 756.4867 | 756.4876 | 11.99948 | 11.98813 |
| 7120 | M399T18  | 1.457613 | 0.543608 | 0.898764 | 0.417101 | 0.864051 | UP   | 399.2638 | 399.2635 | 399.264  | 18.4235  | 18.40833 |
| 7121 | M181T10_ | 1.376481 | -0.46098 | -0.85722 | 0.417223 | 0.864051 | DOWN | 181.0773 | 181.0766 | 181.0773 | 9.9351   | 9.811217 |
| 7122 | M367T10_ | 1.899481 | -0.92561 | -0.87854 | 0.417229 | 0.864051 | DOWN | 366.6635 | 366.6596 | 366.6671 | 9.975308 | 9.885167 |
| 7123 | M269T30  | 1.575015 | 0.655366 | 0.857064 | 0.417236 | 0.864051 | UP   | 269.208  | 269.2078 | 269.2082 | 29.7465  | 29.73233 |
| 7124 | M309T37  | 1.030148 | -0.04285 | -0.88173 | 0.4173   | 0.864051 | DOWN | 309.2787 | 309.2784 | 309.2787 | 37.09208 | 37.069   |
| 7125 | M371T10_ | 1.506231 | 0.590944 | 0.89911  | 0.417373 | 0.864051 | UP   | 371.2339 | 371.2241 | 371.2373 | 9.6048   | 9.553017 |
| 7126 | M454T37_ | 1.038073 | -0.05391 | -0.88264 | 0.417382 | 0.864051 | DOWN | 454.2643 | 454.2642 | 454.2646 | 36.93533 | 36.75583 |
| 7127 | M510T11_ | 1.249748 | 0.321638 | 0.866198 | 0.417522 | 0.864051 | UP   | 510.4932 | 510.4924 | 510.4934 | 10.88982 | 10.85018 |
| 7128 | M687T10_ | 1.299691 | 0.378169 | 0.856934 | 0.417578 | 0.864051 | UP   | 686.6586 | 686.6585 | 686.6619 | 9.91765  | 9.811217 |
| 7129 | M526T9_4 | 1.40538  | -0.49096 | -0.85618 | 0.417582 | 0.864051 | DOWN | 526.2917 | 526.2913 | 526.2919 | 8.95495  | 8.872733 |
| 7130 | M390T11_ | 1.190545 | 0.251622 | 0.863315 | 0.417689 | 0.864051 | UP   | 390.374  | 390.3737 | 390.3743 | 10.892   | 10.879   |
| 7131 | M372T23_ | 1.277795 | -0.35366 | -0.85558 | 0.417692 | 0.864051 | DOWN | 372.4669 | 372.4667 | 372.4671 | 22.70517 | 22.66867 |
| 7132 | M226T12_ | 1.208148 | -0.2728  | -0.85973 | 0.417697 | 0.864051 | DOWN | 226.1077 | 226.1076 | 226.1079 | 12.38317 | 12.36843 |
| 7133 | M158T10_ | 1.153778 | -0.20637 | -0.86884 | 0.417706 | 0.864051 | DOWN | 157.5826 | 157.5824 | 157.5828 | 9.968992 | 9.859233 |
| 7134 | M435T25  | 1.459245 | 0.545222 | 0.863899 | 0.418093 | 0.864052 | UP   | 434.8577 | 434.8574 | 434.8578 | 24.59358 | 24.5795  |
| 7135 | M253T11_ | 1.137765 | -0.1862  | -0.85725 | 0.4181   | 0.864052 | DOWN | 252.8887 | 252.8886 | 252.8889 | 10.90519 | 10.879   |
| 7136 | M412T24  | 1.553767 | 0.63577  | 0.890438 | 0.418102 | 0.864052 | UP   | 412.3264 | 412.3257 | 412.327  | 24.03    | 23.982   |
| 7137 | M394T19  | 1.085524 | -0.11839 | -0.85793 | 0.418152 | 0.864052 | DOWN | 394.314  | 394.3137 | 394.3142 | 18.96117 | 18.951   |
| 7138 | M891T11_ | 1.34539  | 0.428024 | 0.853567 | 0.41817  | 0.864052 | UP   | 891.491  | 891.4858 | 891.4927 | 10.94044 | 10.75312 |
| 7139 | M723T9_1 | 1.209134 | -0.27397 | -0.85876 | 0.418214 | 0.864052 | DOWN | 722.6626 | 722.6619 | 722.6633 | 9.19135  | 9.12675  |

|      |          |          |          |          |          |          |      |          |          |          |          |          |
|------|----------|----------|----------|----------|----------|----------|------|----------|----------|----------|----------|----------|
| 7140 | M769T12_ | 1.290493 | -0.36792 | -0.8556  | 0.418277 | 0.864052 | DOWN | 769.0712 | 769.0698 | 769.0715 | 12.21748 | 12.20977 |
| 7141 | M457T9_2 | 1.122931 | -0.16727 | -0.85347 | 0.418279 | 0.864052 | DOWN | 456.9457 | 456.9452 | 456.9459 | 9.294408 | 9.129317 |
| 7142 | M342T9_3 | 1.755457 | 0.811847 | 0.853469 | 0.418282 | 0.864052 | UP   | 341.9434 | 341.9302 | 341.9437 | 9.352183 | 9.304717 |
| 7143 | M196T9_6 | 1.537352 | -0.62045 | -0.85764 | 0.418293 | 0.864052 | DOWN | 196.0072 | 196.0071 | 196.0073 | 9.075083 | 9.04725  |
| 7144 | M1110T10 | 1.426559 | 0.51254  | 0.88572  | 0.418298 | 0.864052 | UP   | 1109.906 | 1109.906 | 1109.908 | 9.754208 | 9.743767 |
| 7145 | M620T40  | 1.079165 | 0.109916 | 0.897012 | 0.418403 | 0.864052 | UP   | 620.3642 | 620.3637 | 620.3645 | 39.82717 | 39.604   |
| 7146 | M684T10_ | 1.117776 | -0.16063 | -0.86143 | 0.418412 | 0.864052 | DOWN | 684.4975 | 684.4969 | 684.4976 | 9.825767 | 9.715683 |
| 7147 | M395T10_ | 1.198846 | -0.26165 | -0.87243 | 0.418524 | 0.864052 | DOWN | 394.9005 | 394.9004 | 394.9006 | 9.94785  | 9.843367 |
| 7148 | M323T17  | 1.324521 | -0.40547 | -0.85287 | 0.418548 | 0.864052 | DOWN | 323.1464 | 323.1463 | 323.1465 | 17.14117 | 17.08867 |
| 7149 | M261T9_5 | 1.202642 | -0.26621 | -0.89803 | 0.418568 | 0.864052 | DOWN | 261.2062 | 261.206  | 261.2063 | 9.469225 | 9.370583 |
| 7150 | M568T7   | 1.33168  | -0.41325 | -0.86205 | 0.418602 | 0.864052 | DOWN | 568.3295 | 568.3289 | 568.3298 | 7.124633 | 7.08535  |
| 7151 | M312T10_ | 1.657279 | 0.728817 | 0.894499 | 0.418629 | 0.864052 | UP   | 312.4011 | 312.3884 | 312.4013 | 9.82645  | 9.728083 |
| 7152 | M293T10_ | 1.153048 | -0.20545 | -0.85953 | 0.418634 | 0.864052 | DOWN | 293.4235 | 293.4233 | 293.4238 | 9.948875 | 9.843367 |
| 7153 | M489T10_ | 1.310143 | -0.38972 | -0.89012 | 0.418635 | 0.864052 | DOWN | 488.7452 | 488.7449 | 488.7453 | 9.8207   | 9.699733 |
| 7154 | M882T30  | 1.368182 | -0.45226 | -0.86756 | 0.418639 | 0.864052 | DOWN | 881.6241 | 881.6236 | 881.625  | 30.18017 | 30.15217 |
| 7155 | M473T10_ | 1.68595  | -0.75356 | -0.86176 | 0.418683 | 0.864052 | DOWN | 473.3246 | 473.3236 | 473.3292 | 9.599133 | 9.420133 |
| 7156 | M472T9_5 | 1.207804 | -0.27239 | -0.87818 | 0.418727 | 0.864052 | DOWN | 472.044  | 472.043  | 472.0444 | 9.280767 | 9.207667 |
| 7157 | M182T9_7 | 1.478787 | 0.564415 | 0.852949 | 0.418739 | 0.864052 | UP   | 182.1842 | 182.1838 | 182.1848 | 9.175017 | 9.1175   |
| 7158 | M1083T11 | 1.247217 | 0.318713 | 0.888015 | 0.418752 | 0.864052 | UP   | 1082.707 | 1082.702 | 1082.709 | 10.91813 | 10.87487 |
| 7159 | M1554T10 | 1.18931  | -0.25013 | -0.85328 | 0.418832 | 0.864052 | DOWN | 1553.984 | 1553.977 | 1553.987 | 9.9118   | 9.843367 |
| 7160 | M438T42  | 1.130282 | 0.176683 | 0.894243 | 0.418913 | 0.864052 | UP   | 438.2693 | 438.2692 | 438.2695 | 41.77633 | 41.60383 |
| 7161 | M416T42_ | 1.217052 | -0.28339 | -0.89246 | 0.418983 | 0.864052 | DOWN | 416.2276 | 416.2274 | 416.2278 | 41.80508 | 41.7335  |
| 7162 | M197T10_ | 1.311784 | 0.39153  | 0.881827 | 0.419215 | 0.864052 | UP   | 197.1894 | 197.1893 | 197.1896 | 9.933967 | 9.843367 |
| 7163 | M179T10_ | 1.177882 | -0.23619 | -0.88483 | 0.419267 | 0.864052 | DOWN | 179.2421 | 179.242  | 179.2421 | 9.908417 | 9.79535  |
| 7164 | M531T34  | 1.149473 | -0.20097 | -0.87699 | 0.419326 | 0.864052 | DOWN | 531.3498 | 531.3497 | 531.35   | 33.74425 | 33.72983 |
| 7165 | M206T9_1 | 2.16877  | -1.11688 | -0.89385 | 0.419365 | 0.864052 | DOWN | 205.8901 | 205.8878 | 205.891  | 9.264333 | 9.103733 |
| 7166 | M710T31  | 1.125875 | -0.17105 | -0.87636 | 0.419367 | 0.864052 | DOWN | 710.4955 | 710.4954 | 710.4962 | 31.34192 | 31.32283 |
| 7167 | M476T7   | 1.422794 | -0.50873 | -0.88208 | 0.419372 | 0.864052 | DOWN | 476.3278 | 476.3275 | 476.328  | 6.989483 | 6.8236   |
| 7168 | M581T9_1 | 1.334602 | -0.41641 | -0.85184 | 0.419386 | 0.864052 | DOWN | 581.218  | 581.2135 | 581.2202 | 9.167283 | 9.103733 |
| 7169 | M358T11_ | 1.230586 | -0.29935 | -0.8563  | 0.419568 | 0.864052 | DOWN | 358.1472 | 358.1463 | 358.1475 | 10.892   | 10.85018 |
| 7170 | M359T10_ | 1.328889 | 0.41022  | 0.863532 | 0.41959  | 0.864052 | UP   | 358.754  | 358.7538 | 358.7543 | 9.95825  | 9.843367 |
| 7171 | M406T10_ | 1.231456 | -0.30036 | -0.8643  | 0.419738 | 0.864052 | DOWN | 406.4407 | 406.4406 | 406.4408 | 9.514733 | 9.40135  |
| 7172 | M193T9_6 | 1.149242 | 0.200682 | 0.877237 | 0.41979  | 0.864052 | UP   | 193.1384 | 193.1383 | 193.1467 | 8.90715  | 8.7654   |
| 7173 | M283T10_ | 1.250363 | -0.32235 | -0.85585 | 0.419825 | 0.864052 | DOWN | 283.4449 | 283.4447 | 283.4454 | 9.940783 | 9.827283 |
| 7174 | M448T10_ | 1.349156 | -0.43206 | -0.85153 | 0.419831 | 0.864052 | DOWN | 448.4672 | 448.4666 | 448.4677 | 9.903017 | 9.827283 |

|      |          |          |          |          |          |          |      |          |          |          |          |          |
|------|----------|----------|----------|----------|----------|----------|------|----------|----------|----------|----------|----------|
| 7175 | M243T42  | 1.253117 | -0.32552 | -0.86866 | 0.419839 | 0.864052 | DOWN | 243.1224 | 243.1223 | 243.1225 | 42.1355  | 41.791   |
| 7176 | M908T22  | 1.212466 | -0.27794 | -0.88393 | 0.419862 | 0.864052 | DOWN | 907.6396 | 907.6389 | 907.6402 | 22.03333 | 22.00917 |
| 7177 | M1401T10 | 1.267859 | -0.34239 | -0.8863  | 0.419898 | 0.864052 | DOWN | 1401.306 | 1401.305 | 1401.309 | 9.945208 | 9.853533 |
| 7178 | M473T9_2 | 1.193391 | -0.25507 | -0.85195 | 0.419916 | 0.864052 | DOWN | 472.8174 | 472.817  | 472.8179 | 9.304717 | 9.129317 |
| 7179 | M372T10_ | 1.507622 | 0.592274 | 0.875301 | 0.419991 | 0.864052 | UP   | 372.0173 | 372.016  | 372.0175 | 9.801833 | 9.699733 |
| 7180 | M177T10_ | 1.215597 | -0.28167 | -0.86022 | 0.420019 | 0.864052 | DOWN | 176.5561 | 176.556  | 176.5562 | 9.970617 | 9.859233 |
| 7181 | M324T10_ | 1.3126   | 0.392428 | 0.860191 | 0.420136 | 0.864053 | UP   | 324.0107 | 324.0101 | 324.0112 | 9.984083 | 9.8753   |
| 7182 | M505T9_7 | 1.276341 | -0.35201 | -0.84997 | 0.420168 | 0.864053 | DOWN | 505.4588 | 505.4582 | 505.46   | 9.299842 | 9.130683 |
| 7183 | M202T9_1 | 1.278337 | -0.35427 | -0.8572  | 0.420335 | 0.864053 | DOWN | 202.1444 | 202.1436 | 202.1451 | 9.300108 | 9.18975  |
| 7184 | M340T10_ | 3.239753 | -1.69588 | -0.89227 | 0.420452 | 0.864053 | DOWN | 339.5839 | 339.5807 | 339.5843 | 9.864875 | 9.747533 |
| 7185 | M573T10_ | 1.23101  | -0.29984 | -0.87614 | 0.420464 | 0.864053 | DOWN | 573.2463 | 573.2456 | 573.2466 | 9.9351   | 9.843367 |
| 7186 | M676T9_2 | 1.659847 | 0.73105  | 0.892525 | 0.420517 | 0.864053 | UP   | 675.669  | 675.6601 | 675.6693 | 9.496283 | 9.40135  |
| 7187 | M387T10_ | 1.285011 | -0.36178 | -0.88039 | 0.420544 | 0.864053 | DOWN | 387.0717 | 387.0649 | 387.0719 | 9.901375 | 9.811217 |
| 7188 | M363T9_5 | 1.341448 | -0.42379 | -0.84925 | 0.420632 | 0.864053 | DOWN | 362.7365 | 362.7347 | 362.7387 | 9.190317 | 9.142767 |
| 7189 | M228T11_ | 1.183258 | 0.242765 | 0.851976 | 0.420642 | 0.864053 | UP   | 228.4229 | 228.414  | 228.4231 | 10.8914  | 10.873   |
| 7190 | M888T10_ | 2.388615 | 1.256174 | 0.891473 | 0.420693 | 0.864053 | UP   | 888.0925 | 888.0916 | 888.0929 | 9.9677   | 9.946367 |
| 7191 | M346T9_4 | 1.301074 | -0.3797  | -0.85718 | 0.420705 | 0.864053 | DOWN | 345.8589 | 345.8587 | 345.8591 | 9.3332   | 9.234417 |
| 7192 | M662T10_ | 1.296483 | -0.3746  | -0.84857 | 0.420785 | 0.864053 | DOWN | 662.209  | 662.2082 | 662.2094 | 9.842    | 9.78305  |
| 7193 | M562T10_ | 1.096427 | -0.13281 | -0.84873 | 0.420785 | 0.864053 | DOWN | 561.8715 | 561.8709 | 561.8717 | 9.954767 | 9.859233 |
| 7194 | M874T10_ | 1.969834 | 0.978074 | 0.892299 | 0.420785 | 0.864053 | UP   | 873.6601 | 873.6594 | 873.6611 | 9.93625  | 9.827283 |
| 7195 | M268T10_ | 1.542182 | 0.624973 | 0.87422  | 0.420793 | 0.864053 | UP   | 268.313  | 268.3127 | 268.3132 | 9.964258 | 9.843367 |
| 7196 | M173T10_ | 1.143634 | -0.19363 | -0.87352 | 0.420906 | 0.864053 | DOWN | 173.2963 | 173.2962 | 173.2964 | 9.847542 | 9.73145  |
| 7197 | M199T44  | 1.341276 | -0.42361 | -0.8764  | 0.420908 | 0.864053 | DOWN | 199.1326 | 199.1325 | 199.1327 | 44.03467 | 43.83333 |
| 7198 | M323T26_ | 1.283494 | -0.36008 | -0.84809 | 0.421054 | 0.864053 | DOWN | 323.2413 | 323.2411 | 323.2415 | 26.01425 | 25.89433 |
| 7199 | M255T10_ | 1.167047 | -0.22286 | -0.84897 | 0.421117 | 0.864053 | DOWN | 254.9567 | 254.9565 | 254.9568 | 9.964092 | 9.853533 |
| 7200 | M301T9_5 | 1.54294  | 0.625682 | 0.849065 | 0.421131 | 0.864053 | UP   | 301.3335 | 301.3333 | 301.3335 | 9.438675 | 9.38595  |
| 7201 | M205T10_ | 1.348987 | -0.43188 | -0.85053 | 0.421222 | 0.864053 | DOWN | 204.5846 | 204.5839 | 204.5848 | 9.823575 | 9.715683 |
| 7202 | M193T10_ | 1.36915  | 0.45328  | 0.850655 | 0.421464 | 0.864053 | UP   | 192.6269 | 192.6268 | 192.6269 | 9.983467 | 9.843367 |
| 7203 | M224T11_ | 1.169531 | 0.22593  | 0.864536 | 0.421471 | 0.864053 | UP   | 224.3589 | 224.3586 | 224.3591 | 10.89193 | 10.87487 |
| 7204 | M451T9_9 | 1.949798 | -0.96332 | -0.85886 | 0.421522 | 0.864053 | DOWN | 451.3287 | 451.3278 | 451.3294 | 9.132467 | 8.93705  |
| 7205 | M578T39  | 1.137558 | 0.18594  | 0.861987 | 0.421531 | 0.864053 | UP   | 578.317  | 578.3167 | 578.3174 | 38.75525 | 38.51067 |
| 7206 | M728T10_ | 1.322043 | -0.40277 | -0.85805 | 0.42154  | 0.864053 | DOWN | 728.1872 | 728.1856 | 728.1886 | 9.967367 | 9.885167 |
| 7207 | M451T11_ | 1.324636 | 0.405596 | 0.854312 | 0.421566 | 0.864053 | UP   | 451.038  | 451.0379 | 451.0388 | 10.94538 | 10.90012 |
| 7208 | M363T9_1 | 1.650294 | -0.72272 | -0.85108 | 0.421608 | 0.864053 | DOWN | 363.3585 | 363.3565 | 363.3597 | 9.2468   | 9.103733 |
| 7209 | M421T9_4 | 1.951569 | 0.964635 | 0.888693 | 0.421667 | 0.864053 | UP   | 421.2422 | 421.2417 | 421.2433 | 8.985233 | 8.872967 |

|      |          |          |          |          |          |          |      |          |          |          |          |          |
|------|----------|----------|----------|----------|----------|----------|------|----------|----------|----------|----------|----------|
| 7210 | M415T9_8 | 1.462114 | -0.54806 | -0.84956 | 0.421722 | 0.864053 | DOWN | 415.254  | 415.2525 | 415.2542 | 8.941383 | 8.745983 |
| 7211 | M332T10_ | 1.152108 | -0.20428 | -0.86654 | 0.421743 | 0.864053 | DOWN | 331.9838 | 331.9835 | 331.9844 | 9.967533 | 9.859233 |
| 7212 | M193T29  | 1.633732 | -0.70817 | -0.84636 | 0.421952 | 0.864053 | DOWN | 193.1382 | 193.1382 | 193.1385 | 28.5055  | 28.447   |
| 7213 | M176T9_2 | 1.663985 | -0.73464 | -0.84651 | 0.42197  | 0.864053 | DOWN | 176.1144 | 176.1139 | 176.1148 | 9.250817 | 9.219483 |
| 7214 | M205T10_ | 1.260333 | -0.33381 | -0.85908 | 0.421984 | 0.864053 | DOWN | 204.5167 | 204.5165 | 204.5168 | 9.8374   | 9.699733 |
| 7215 | M635T34  | 2.052376 | 1.037295 | 0.890854 | 0.421991 | 0.864053 | UP   | 635.456  | 635.4555 | 635.4565 | 34.46708 | 34.40183 |
| 7216 | M331T10_ | 1.206977 | -0.2714  | -0.8492  | 0.422087 | 0.864053 | DOWN | 331.4112 | 331.4106 | 331.4114 | 9.825392 | 9.715683 |
| 7217 | M998T9   | 1.337418 | -0.41945 | -0.84887 | 0.422144 | 0.864053 | DOWN | 997.6034 | 997.6027 | 997.6044 | 9.4159   | 9.30965  |
| 7218 | M636T44_ | 1.154763 | -0.2076  | -0.84721 | 0.422151 | 0.864053 | DOWN | 636.3592 | 636.3587 | 636.3594 | 44.14975 | 43.89083 |
| 7219 | M564T10_ | 1.772136 | 0.825489 | 0.884984 | 0.422242 | 0.864053 | UP   | 564.2172 | 564.2164 | 564.2176 | 9.9754   | 9.8753   |
| 7220 | M694T10_ | 1.121377 | 0.165272 | 0.854631 | 0.422258 | 0.864053 | UP   | 693.5096 | 693.5093 | 693.5102 | 9.972483 | 9.859233 |
| 7221 | M527T10_ | 1.16672  | -0.22246 | -0.86119 | 0.422287 | 0.864054 | DOWN | 526.7524 | 526.7518 | 526.7527 | 9.945258 | 9.843367 |
| 7222 | M246T9_2 | 1.773081 | -0.82626 | -0.8897  | 0.422312 | 0.864054 | DOWN | 245.7482 | 245.7481 | 245.7483 | 9.360833 | 9.284683 |
| 7223 | M1978T10 | 1.155291 | -0.20826 | -0.8491  | 0.422317 | 0.864054 | DOWN | 1978.125 | 1978.124 | 1978.133 | 9.8397   | 9.715683 |
| 7224 | M377T10_ | 1.516078 | -0.60034 | -0.84562 | 0.422411 | 0.864054 | DOWN | 376.8429 | 376.8342 | 376.8438 | 9.816308 | 9.715683 |
| 7225 | M999T11  | 1.408227 | 0.49388  | 0.889447 | 0.422474 | 0.864054 | UP   | 998.767  | 998.7632 | 998.77   | 10.90765 | 10.84847 |
| 7226 | M346T10_ | 1.366755 | 0.450754 | 0.878924 | 0.422518 | 0.864054 | UP   | 345.8189 | 345.8187 | 345.8192 | 9.816475 | 9.699733 |
| 7227 | M378T44_ | 1.14569  | -0.19622 | -0.84914 | 0.422522 | 0.864054 | DOWN | 378.2482 | 378.248  | 378.2484 | 43.71825 | 43.33017 |
| 7228 | M535T9   | 3.253063 | 1.701799 | 0.891181 | 0.422674 | 0.864054 | UP   | 535.2805 | 535.2799 | 535.2815 | 9.046783 | 9.031633 |
| 7229 | M395T9_2 | 1.458774 | 0.544756 | 0.858617 | 0.422761 | 0.864054 | UP   | 394.9537 | 394.9521 | 394.9569 | 9.295167 | 9.098833 |
| 7230 | M277T10_ | 1.806679 | -0.85334 | -0.84637 | 0.422796 | 0.864054 | DOWN | 276.715  | 276.7033 | 276.7153 | 9.8445   | 9.759383 |
| 7231 | M887T11  | 1.149403 | -0.20089 | -0.84637 | 0.422819 | 0.864054 | DOWN | 887.0036 | 887.003  | 887.0058 | 10.90628 | 10.879   |
| 7232 | M172T9_2 | 1.426972 | -0.51296 | -0.85154 | 0.422832 | 0.864054 | DOWN | 172.0399 | 172.0396 | 172.0403 | 9.311883 | 9.206    |
| 7233 | M167T10_ | 1.200911 | -0.26413 | -0.86552 | 0.422834 | 0.864054 | DOWN | 167.3495 | 167.3494 | 167.3496 | 9.8207   | 9.715683 |
| 7234 | M410T9_2 | 1.267249 | -0.3417  | -0.85894 | 0.422887 | 0.864054 | DOWN | 409.5639 | 409.5636 | 409.5643 | 9.204617 | 9.158833 |
| 7235 | M371T10_ | 1.751186 | 0.808332 | 0.873727 | 0.422896 | 0.864054 | UP   | 370.7441 | 370.744  | 370.7442 | 9.932    | 9.843367 |
| 7236 | M446T44_ | 1.068613 | -0.09574 | -0.88695 | 0.422904 | 0.864054 | DOWN | 446.2383 | 446.2381 | 446.2383 | 44.322   | 44.317   |
| 7237 | M317T10_ | 1.461295 | -0.54725 | -0.84908 | 0.422944 | 0.864054 | DOWN | 316.8783 | 316.8771 | 316.8795 | 9.859233 | 9.4159   |
| 7238 | M332T24  | 1.088167 | -0.1219  | -0.86649 | 0.422947 | 0.864054 | DOWN | 332.3156 | 332.3155 | 332.3158 | 24.4495  | 24.43383 |
| 7239 | M540T11_ | 1.149565 | -0.20109 | -0.84779 | 0.423062 | 0.864054 | DOWN | 539.5288 | 539.5287 | 539.5294 | 10.89875 | 10.879   |
| 7240 | M895T11  | 1.149169 | -0.20059 | -0.84594 | 0.423081 | 0.864054 | DOWN | 894.6199 | 894.6195 | 894.6218 | 10.892   | 10.879   |
| 7241 | M200T10_ | 1.226905 | -0.29502 | -0.86895 | 0.423175 | 0.864054 | DOWN | 199.84   | 199.8398 | 199.84   | 9.970617 | 9.8753   |
| 7242 | M680T25  | 1.167176 | -0.22302 | -0.84416 | 0.423176 | 0.864054 | DOWN | 679.5113 | 679.5112 | 679.5114 | 24.65642 | 24.6235  |
| 7243 | M396T10_ | 1.377403 | -0.46195 | -0.85207 | 0.423186 | 0.864054 | DOWN | 396.3486 | 396.3474 | 396.3493 | 9.84525  | 9.82645  |
| 7244 | M578T42  | 1.638644 | 0.712503 | 0.887624 | 0.423195 | 0.864054 | UP   | 578.3168 | 578.3167 | 578.3173 | 41.719   | 41.50317 |

|      |          |          |          |          |          |          |      |          |          |          |          |          |
|------|----------|----------|----------|----------|----------|----------|------|----------|----------|----------|----------|----------|
| 7245 | M572T9_1 | 1.390374 | -0.47547 | -0.84999 | 0.423218 | 0.864054 | DOWN | 571.8836 | 571.8825 | 571.8842 | 9.371592 | 9.234417 |
| 7246 | M320T10_ | 1.251554 | 0.32372  | 0.850504 | 0.423246 | 0.864054 | UP   | 320.1558 | 320.142  | 320.156  | 9.8207   | 9.715683 |
| 7247 | M274T22  | 1.961945 | 0.972285 | 0.877076 | 0.423312 | 0.864054 | UP   | 274.2738 | 274.2737 | 274.274  | 21.51792 | 21.49333 |
| 7248 | M454T40_ | 1.099327 | 0.13662  | 0.845657 | 0.423324 | 0.864054 | UP   | 454.2643 | 454.2642 | 454.2645 | 40.33783 | 40.32333 |
| 7249 | M678T10_ | 1.106335 | -0.14579 | -0.87145 | 0.423327 | 0.864054 | DOWN | 677.5572 | 677.5566 | 677.5576 | 9.830558 | 9.715683 |
| 7250 | M377T9_5 | 1.244843 | -0.31596 | -0.87732 | 0.423372 | 0.864054 | DOWN | 376.8869 | 376.8859 | 376.8904 | 9.170442 | 9.07145  |
| 7251 | M250T10_ | 1.25348  | 0.325939 | 0.873782 | 0.423377 | 0.864054 | UP   | 250.1142 | 250.114  | 250.1142 | 9.967367 | 9.859233 |
| 7252 | M450T11_ | 1.265911 | 0.340176 | 0.843839 | 0.423404 | 0.864054 | UP   | 449.8394 | 449.8389 | 449.8402 | 10.89907 | 10.879   |
| 7253 | M727T10_ | 1.18353  | 0.243096 | 0.878578 | 0.423449 | 0.864054 | UP   | 726.7683 | 726.7674 | 726.7689 | 9.830458 | 9.715683 |
| 7254 | M623T19  | 1.157871 | -0.21147 | -0.86288 | 0.423479 | 0.864054 | DOWN | 623.0729 | 623.0721 | 623.0735 | 18.64183 | 18.62867 |
| 7255 | M541T9_6 | 1.229857 | -0.29849 | -0.86588 | 0.423563 | 0.864054 | DOWN | 540.7178 | 540.7175 | 540.7179 | 9.4498   | 9.355317 |
| 7256 | M479T18  | 1.105888 | -0.14521 | -0.85167 | 0.423623 | 0.864054 | DOWN | 479.3555 | 479.3553 | 479.3557 | 17.52725 | 17.52533 |
| 7257 | M553T9_5 | 1.683798 | 0.751719 | 0.872628 | 0.423637 | 0.864054 | UP   | 553.0432 | 553.0399 | 553.0476 | 9.18195  | 9.110833 |
| 7258 | M471T31  | 1.179588 | -0.23828 | -0.85049 | 0.423651 | 0.864054 | DOWN | 471.3369 | 471.3367 | 471.3371 | 31.14067 | 31.10883 |
| 7259 | M321T9_1 | 1.315065 | -0.39513 | -0.84404 | 0.423682 | 0.864054 | DOWN | 320.5079 | 320.5065 | 320.5121 | 9.152825 | 9.11405  |
| 7260 | M160T10_ | 1.212069 | 0.277472 | 0.843104 | 0.423685 | 0.864054 | UP   | 159.6743 | 159.6742 | 159.6744 | 9.951283 | 9.843367 |
| 7261 | M479T11_ | 1.208029 | -0.27265 | -0.86742 | 0.423702 | 0.864054 | DOWN | 479.2037 | 479.2035 | 479.204  | 10.90553 | 10.88747 |
| 7262 | M546T9_2 | 1.309748 | -0.38929 | -0.84532 | 0.42373  | 0.864054 | DOWN | 545.5932 | 545.593  | 545.5933 | 9.365833 | 9.234417 |
| 7263 | M206T9_1 | 1.31714  | -0.39741 | -0.85108 | 0.423764 | 0.864054 | DOWN | 205.8681 | 205.8675 | 205.8688 | 9.204617 | 9.132267 |
| 7264 | M547T9_2 | 3.043415 | 1.605691 | 0.887647 | 0.423809 | 0.864054 | UP   | 546.6298 | 546.6261 | 546.6329 | 9.16125  | 9.1036   |
| 7265 | M491T10_ | 1.236544 | -0.30631 | -0.86798 | 0.423849 | 0.864054 | DOWN | 491.3572 | 491.357  | 491.3574 | 9.967367 | 9.859233 |
| 7266 | M212T16  | 1.11166  | 0.152715 | 0.842756 | 0.423861 | 0.864054 | UP   | 212.1643 | 212.1641 | 212.1643 | 16.46093 | 16.4466  |
| 7267 | M283T10_ | 1.212872 | -0.27843 | -0.85961 | 0.423997 | 0.864054 | DOWN | 283.4895 | 283.4893 | 283.4896 | 9.948875 | 9.843367 |
| 7268 | M694T10_ | 2.162187 | 1.112491 | 0.886767 | 0.424053 | 0.864054 | UP   | 693.7719 | 693.7715 | 693.7723 | 9.816167 | 9.728083 |
| 7269 | M846T25  | 1.19295  | 0.254534 | 0.847717 | 0.424077 | 0.864054 | UP   | 846.4428 | 846.4424 | 846.4432 | 24.59817 | 24.5795  |
| 7270 | M370T10_ | 1.752512 | 0.809424 | 0.879531 | 0.42409  | 0.864054 | UP   | 370.3389 | 370.3381 | 370.3394 | 9.8881   | 9.743767 |
| 7271 | M1797T10 | 1.26254  | -0.33633 | -0.84788 | 0.424095 | 0.864054 | DOWN | 1796.697 | 1796.695 | 1796.701 | 9.886608 | 9.7634   |
| 7272 | M294T9_3 | 1.207815 | -0.2724  | -0.8528  | 0.424121 | 0.864054 | DOWN | 293.6923 | 293.6922 | 293.6925 | 8.72745  | 8.629617 |
| 7273 | M592T10_ | 1.273932 | 0.349288 | 0.842417 | 0.424145 | 0.864054 | UP   | 591.6175 | 591.6166 | 591.6178 | 9.930892 | 9.811217 |
| 7274 | M407T10_ | 1.231021 | -0.29986 | -0.84285 | 0.424244 | 0.864054 | DOWN | 406.6729 | 406.6725 | 406.6735 | 9.825492 | 9.699733 |
| 7275 | M1420T10 | 1.236165 | -0.30587 | -0.84329 | 0.424295 | 0.864054 | DOWN | 1419.795 | 1419.793 | 1419.802 | 9.971833 | 9.869467 |
| 7276 | M233T10_ | 1.265465 | -0.33967 | -0.86392 | 0.424318 | 0.864054 | DOWN | 233.1552 | 233.1545 | 233.1561 | 9.829083 | 9.728083 |
| 7277 | M520T40_ | 1.215563 | 0.281625 | 0.844146 | 0.424332 | 0.864054 | UP   | 520.2749 | 520.2745 | 520.2751 | 40.4385  | 40.1365  |
| 7278 | M705T10_ | 1.18649  | -0.2467  | -0.85904 | 0.424377 | 0.864054 | DOWN | 704.9984 | 704.9981 | 704.9986 | 9.958617 | 9.859233 |
| 7279 | M212T10_ | 1.702744 | 0.767862 | 0.864904 | 0.424423 | 0.864054 | UP   | 212.1284 | 212.1271 | 212.1404 | 9.816167 | 9.715683 |



|      |          |          |          |          |          |          |      |          |          |          |          |          |
|------|----------|----------|----------|----------|----------|----------|------|----------|----------|----------|----------|----------|
| 7280 | M488T45  | 1.1822   | -0.24147 | -0.86753 | 0.42447  | 0.864054 | DOWN | 488.285  | 488.2848 | 488.2852 | 44.72475 | 44.581   |
| 7281 | M1040T19 | 1.24991  | -0.32182 | -0.85373 | 0.424488 | 0.864054 | DOWN | 1039.538 | 1039.536 | 1039.539 | 19.40417 | 19.372   |
| 7282 | M297T10_ | 1.179516 | -0.2382  | -0.8647  | 0.424523 | 0.864055 | DOWN | 297.037  | 297.0369 | 297.0372 | 9.94785  | 9.843367 |
| 7283 | M1052T9_ | 1.337234 | -0.41925 | -0.85754 | 0.424544 | 0.864055 | DOWN | 1052.314 | 1052.311 | 1052.316 | 9.310917 | 9.241267 |
| 7284 | M381T9_6 | 1.09432  | -0.13003 | -0.85414 | 0.424555 | 0.864055 | DOWN | 381.0558 | 381.0557 | 381.0562 | 8.847867 | 8.742633 |
| 7285 | M501T10_ | 1.210686 | 0.275824 | 0.864925 | 0.424648 | 0.864055 | UP   | 500.877  | 500.8767 | 500.8777 | 9.975142 | 9.8753   |
| 7286 | M231T10_ | 1.570362 | -0.6511  | -0.85439 | 0.424708 | 0.864055 | DOWN | 230.5799 | 230.5798 | 230.5802 | 9.946467 | 9.827283 |
| 7287 | M576T11  | 1.36623  | -0.4502  | -0.84245 | 0.424834 | 0.864055 | DOWN | 576.0258 | 576.0248 | 576.0294 | 10.94632 | 10.879   |
| 7288 | M635T10_ | 1.169651 | -0.22608 | -0.84079 | 0.424881 | 0.864055 | DOWN | 634.9022 | 634.9018 | 634.9028 | 9.8207   | 9.715683 |
| 7289 | M918T10  | 1.251562 | -0.32373 | -0.85027 | 0.425077 | 0.864055 | DOWN | 917.9694 | 917.9681 | 917.9718 | 9.940167 | 9.859233 |
| 7290 | M452T23  | 1.296535 | -0.37466 | -0.86044 | 0.425108 | 0.864055 | DOWN | 452.2026 | 452.2024 | 452.2031 | 23.393   | 23.36567 |
| 7291 | M315T28_ | 1.281371 | 0.357689 | 0.842323 | 0.425225 | 0.864055 | UP   | 314.6943 | 314.6939 | 314.6944 | 28.12742 | 28.11283 |
| 7292 | M1040T11 | 1.228786 | 0.297234 | 0.840192 | 0.425247 | 0.864055 | UP   | 1039.799 | 1039.798 | 1039.8   | 10.892   | 10.85838 |
| 7293 | M184T10_ | 2.031838 | 1.022785 | 0.884416 | 0.425256 | 0.864055 | UP   | 184.066  | 184.0597 | 184.0661 | 9.952017 | 9.827283 |
| 7294 | M368T10_ | 1.228031 | -0.29635 | -0.85335 | 0.425282 | 0.864055 | DOWN | 368.4376 | 368.4374 | 368.4377 | 9.91875  | 9.811217 |
| 7295 | M378T12  | 1.25256  | 0.324879 | 0.853577 | 0.425352 | 0.864055 | UP   | 378.1992 | 378.1991 | 378.1995 | 12.0491  | 12.03728 |
| 7296 | M522T9_3 | 1.609009 | 0.686173 | 0.862736 | 0.425383 | 0.864055 | UP   | 521.9707 | 521.9683 | 521.9722 | 9.166033 | 9.064833 |
| 7297 | M241T10_ | 1.918406 | 0.939908 | 0.868905 | 0.425436 | 0.864055 | UP   | 241.3618 | 241.3616 | 241.3619 | 9.951283 | 9.827283 |
| 7298 | M445T45  | 1.014126 | 0.020236 | 0.864738 | 0.425471 | 0.864055 | UP   | 445.4081 | 445.4077 | 445.4082 | 44.82533 | 44.76767 |
| 7299 | M446T42_ | 1.205736 | -0.26991 | -0.86168 | 0.425521 | 0.864055 | DOWN | 446.2382 | 446.2381 | 446.2384 | 42.43825 | 42.39483 |
| 7300 | M565T10_ | 2.099957 | 1.07036  | 0.88058  | 0.425623 | 0.864055 | UP   | 564.9404 | 564.9402 | 564.941  | 9.963342 | 9.8753   |
| 7301 | M610T22  | 1.203018 | -0.26666 | -0.87406 | 0.425632 | 0.864055 | DOWN | 610.4938 | 610.4934 | 610.4942 | 22.31467 | 22.29667 |
| 7302 | M1003T10 | 1.223841 | -0.29142 | -0.86571 | 0.425707 | 0.864055 | DOWN | 1003.264 | 1003.262 | 1003.265 | 9.960817 | 9.859233 |
| 7303 | M200T10_ | 1.271354 | -0.34637 | -0.86382 | 0.425858 | 0.864055 | DOWN | 199.6045 | 199.6044 | 199.6046 | 9.830733 | 9.715683 |
| 7304 | M302T10_ | 1.568946 | 0.649796 | 0.878689 | 0.425989 | 0.864055 | UP   | 301.711  | 301.7104 | 301.7198 | 9.951283 | 9.842    |
| 7305 | M393T19_ | 1.817319 | -0.86181 | -0.84091 | 0.426025 | 0.864055 | DOWN | 393.333  | 393.3305 | 393.3375 | 18.90733 | 18.81983 |
| 7306 | M204T10_ | 1.285063 | 0.361839 | 0.861646 | 0.426122 | 0.864055 | UP   | 204.0898 | 204.0892 | 204.0899 | 9.923067 | 9.802117 |
| 7307 | M709T21  | 1.152857 | -0.20521 | -0.83855 | 0.426166 | 0.864055 | DOWN | 709.4903 | 709.4889 | 709.4918 | 20.90367 | 20.89533 |
| 7308 | M376T35  | 2.038592 | -1.02757 | -0.87071 | 0.426235 | 0.864055 | DOWN | 376.313  | 376.3128 | 376.3131 | 35.16925 | 35.1275  |
| 7309 | M346T31_ | 1.729381 | -0.79026 | -0.86895 | 0.426248 | 0.864055 | DOWN | 346.2724 | 346.272  | 346.2728 | 31.40717 | 31.32067 |
| 7310 | M695T9_1 | 1.597436 | -0.67576 | -0.85113 | 0.426265 | 0.864055 | DOWN | 694.5332 | 694.5227 | 694.5338 | 9.441642 | 9.208217 |
| 7311 | M440T10_ | 1.922906 | -0.94329 | -0.88217 | 0.426308 | 0.864055 | DOWN | 440.2985 | 440.2982 | 440.3057 | 9.8161   | 9.683817 |
| 7312 | M200T9_5 | 1.592667 | 0.671445 | 0.868314 | 0.426314 | 0.864055 | UP   | 199.6109 | 199.6102 | 199.6111 | 9.36515  | 9.18195  |
| 7313 | M225T10_ | 1.154948 | -0.20783 | -0.8458  | 0.426328 | 0.864055 | DOWN | 224.6207 | 224.6206 | 224.6208 | 9.915583 | 9.827283 |
| 7314 | M505T10_ | 1.152918 | -0.20529 | -0.8427  | 0.426337 | 0.864055 | DOWN | 505.0673 | 505.0668 | 505.0688 | 9.987092 | 9.8753   |

|      |          |          |          |          |          |          |      |          |          |          |          |          |
|------|----------|----------|----------|----------|----------|----------|------|----------|----------|----------|----------|----------|
| 7315 | M401T11_ | 1.310784 | -0.39043 | -0.83799 | 0.426363 | 0.864055 | DOWN | 400.9429 | 400.9375 | 400.9461 | 10.93208 | 10.9198  |
| 7316 | M329T9_2 | 1.300041 | -0.37856 | -0.84356 | 0.426392 | 0.864055 | DOWN | 329.0696 | 329.0693 | 329.0699 | 9.320842 | 9.234417 |
| 7317 | M221T9_1 | 1.367812 | 0.45187  | 0.846701 | 0.426441 | 0.864055 | UP   | 221.1425 | 221.1407 | 221.1434 | 9.373617 | 9.132267 |
| 7318 | M697T10_ | 1.353717 | 0.436927 | 0.881979 | 0.426524 | 0.864055 | UP   | 697.2    | 697.1996 | 697.2011 | 9.956417 | 9.730467 |
| 7319 | M169T10_ | 1.301763 | 0.380467 | 0.875115 | 0.426564 | 0.864055 | UP   | 168.8198 | 168.8194 | 168.8202 | 9.951283 | 9.843367 |
| 7320 | M534T9_3 | 3.127163 | 1.644854 | 0.882627 | 0.42659  | 0.864055 | UP   | 534.2911 | 534.2863 | 534.2926 | 8.9999   | 8.9396   |
| 7321 | M430T11_ | 1.121493 | -0.16542 | -0.83811 | 0.4266   | 0.864055 | DOWN | 430.118  | 430.1178 | 430.1186 | 10.892   | 10.8646  |
| 7322 | M520T37_ | 1.182867 | 0.242288 | 0.857412 | 0.426604 | 0.864055 | UP   | 520.2749 | 520.2746 | 520.2752 | 37.32767 | 37.259   |
| 7323 | M1120T10 | 1.152702 | -0.20502 | -0.85682 | 0.426615 | 0.864055 | DOWN | 1119.675 | 1119.674 | 1119.675 | 9.929783 | 9.827283 |
| 7324 | M436T28  | 1.114327 | -0.15617 | -0.85274 | 0.426619 | 0.864055 | DOWN | 436.2544 | 436.2537 | 436.2546 | 27.92233 | 27.89267 |
| 7325 | M227T11_ | 1.144762 | -0.19505 | -0.83732 | 0.426736 | 0.864056 | DOWN | 226.7492 | 226.7491 | 226.7493 | 10.892   | 10.879   |
| 7326 | M684T9_4 | 1.310129 | -0.38971 | -0.83849 | 0.426921 | 0.864056 | DOWN | 684.3362 | 684.3356 | 684.3367 | 9.311883 | 9.234417 |
| 7327 | M375T10_ | 1.230626 | 0.299392 | 0.838345 | 0.426948 | 0.864056 | UP   | 374.7816 | 374.7811 | 374.7842 | 9.960817 | 9.830283 |
| 7328 | M407T10_ | 1.262304 | -0.33606 | -0.83686 | 0.426979 | 0.864056 | DOWN | 406.9724 | 406.9722 | 406.9726 | 9.816167 | 9.699733 |
| 7329 | M1555T10 | 1.205354 | -0.26946 | -0.85465 | 0.426981 | 0.864056 | DOWN | 1555.101 | 1555.098 | 1555.102 | 9.886783 | 9.779267 |
| 7330 | M478T21_ | 1.156272 | -0.20948 | -0.85379 | 0.426987 | 0.864056 | DOWN | 478.3998 | 478.3995 | 478.3999 | 20.83542 | 20.82333 |
| 7331 | M645T45  | 1.125739 | -0.17087 | -0.86914 | 0.427193 | 0.864056 | DOWN | 645.4658 | 645.4655 | 645.4661 | 44.85408 | 44.82533 |
| 7332 | M339T35  | 1.081248 | -0.1127  | -0.83902 | 0.427195 | 0.864056 | DOWN | 339.2892 | 339.2891 | 339.2894 | 35.40758 | 35.38683 |
| 7333 | M356T9_4 | 2.080892 | 1.057202 | 0.872389 | 0.427326 | 0.864056 | UP   | 356.3853 | 356.3848 | 356.3855 | 9.237842 | 9.22495  |
| 7334 | M424T10_ | 1.340148 | 0.422392 | 0.847021 | 0.427338 | 0.864056 | UP   | 423.8085 | 423.8077 | 423.8094 | 9.951442 | 9.843367 |
| 7335 | M394T9_5 | 1.301409 | 0.380075 | 0.837673 | 0.427338 | 0.864056 | UP   | 394.1393 | 394.1379 | 394.1451 | 9.275917 | 9.11795  |
| 7336 | M323T43  | 1.232365 | -0.30143 | -0.84402 | 0.427382 | 0.864056 | DOWN | 323.1851 | 323.1849 | 323.1852 | 43.279   | 43.0855  |
| 7337 | M374T10_ | 1.448566 | 0.534626 | 0.87376  | 0.427383 | 0.864056 | UP   | 374.0483 | 374.0481 | 374.0528 | 9.951283 | 9.758367 |
| 7338 | M320T39  | 1.315667 | 0.395794 | 0.836841 | 0.427414 | 0.864056 | UP   | 320.1702 | 320.1701 | 320.1704 | 39.20842 | 39.07167 |
| 7339 | M431T9_3 | 1.433691 | -0.51973 | -0.84699 | 0.42744  | 0.864056 | DOWN | 430.8612 | 430.8598 | 430.862  | 9.236475 | 9.1322   |
| 7340 | M225T10_ | 2.664517 | -1.41387 | -0.86445 | 0.427494 | 0.864056 | DOWN | 225.3258 | 225.3246 | 225.3338 | 9.830283 | 9.715683 |
| 7341 | M452T21  | 1.244632 | -0.31572 | -0.84146 | 0.427497 | 0.864056 | DOWN | 452.2025 | 452.2021 | 452.2028 | 20.98358 | 20.9685  |
| 7342 | M699T10_ | 1.147057 | 0.197937 | 0.87794  | 0.427505 | 0.864056 | UP   | 699.3958 | 699.3955 | 699.3961 | 9.85045  | 9.73145  |
| 7343 | M534T44_ | 1.125376 | 0.170407 | 0.862072 | 0.427651 | 0.864056 | UP   | 534.2906 | 534.2905 | 534.2906 | 44.38683 | 44.23617 |
| 7344 | M335T10_ | 1.370296 | 0.454488 | 0.861631 | 0.42773  | 0.864056 | UP   | 334.7901 | 334.7898 | 334.7997 | 9.907917 | 9.7124   |
| 7345 | M474T10_ | 1.190337 | 0.251371 | 0.878943 | 0.427766 | 0.864056 | UP   | 474.4995 | 474.4993 | 474.5002 | 9.903283 | 9.62055  |
| 7346 | M455T20  | 2.471094 | 1.30515  | 0.870183 | 0.427781 | 0.864056 | UP   | 455.3189 | 455.3186 | 455.3198 | 19.8225  | 19.75867 |
| 7347 | M488T17  | 1.253527 | 0.325993 | 0.837305 | 0.427849 | 0.864056 | UP   | 488.2975 | 488.2969 | 488.2978 | 17.27792 | 17.24667 |
| 7348 | M508T43_ | 1.337636 | 0.419685 | 0.842707 | 0.427902 | 0.864056 | UP   | 508.2748 | 508.2746 | 508.275  | 42.6395  | 42.45283 |
| 7349 | M443T11_ | 1.126568 | -0.17193 | -0.86354 | 0.427912 | 0.864056 | DOWN | 443.3463 | 443.3456 | 443.3464 | 11.32312 | 11.28255 |

|      |          |          |          |          |          |          |      |          |          |          |          |          |
|------|----------|----------|----------|----------|----------|----------|------|----------|----------|----------|----------|----------|
| 7350 | M554T10_ | 1.391502 | -0.47664 | -0.83834 | 0.427923 | 0.864056 | DOWN | 554.1548 | 554.1546 | 554.1554 | 9.981083 | 9.949233 |
| 7351 | M245T10_ | 1.43141  | -0.51744 | -0.83632 | 0.42793  | 0.864056 | DOWN | 245.4031 | 245.403  | 245.4031 | 9.929783 | 9.811217 |
| 7352 | M400T10_ | 1.131159 | -0.1778  | -0.83843 | 0.428011 | 0.864056 | DOWN | 399.976  | 399.9755 | 399.977  | 9.934533 | 9.827283 |
| 7353 | M1025T10 | 1.181643 | -0.24079 | -0.83751 | 0.428017 | 0.864056 | DOWN | 1024.561 | 1024.56  | 1024.562 | 9.563592 | 9.527517 |
| 7354 | M1858T10 | 1.18365  | 0.243242 | 0.874643 | 0.428031 | 0.864056 | UP   | 1857.868 | 1857.867 | 1857.871 | 9.830083 | 9.715683 |
| 7355 | M446T11_ | 1.793723 | 0.842957 | 0.877042 | 0.428065 | 0.864056 | UP   | 445.9981 | 445.9973 | 445.9992 | 10.90659 | 10.85838 |
| 7356 | M151T44  | 1.187851 | 0.248354 | 0.880415 | 0.428133 | 0.864056 | UP   | 151.1115 | 151.1114 | 151.1116 | 44.30792 | 44.049   |
| 7357 | M410T10_ | 1.737582 | 0.797081 | 0.877576 | 0.428233 | 0.864056 | UP   | 409.6773 | 409.6769 | 409.6775 | 9.935675 | 9.827283 |
| 7358 | M204T10_ | 1.250357 | -0.32234 | -0.85724 | 0.428254 | 0.864056 | DOWN | 204.2839 | 204.2765 | 204.284  | 9.836367 | 9.715683 |
| 7359 | M580T10_ | 1.197814 | -0.2604  | -0.83729 | 0.428286 | 0.864056 | DOWN | 580.1781 | 580.1777 | 580.1786 | 9.900133 | 9.811217 |
| 7360 | M424T11_ | 1.172932 | -0.23012 | -0.84731 | 0.428341 | 0.864056 | DOWN | 423.8431 | 423.8429 | 423.8432 | 10.63183 | 10.59763 |
| 7361 | M1709T10 | 1.236142 | 0.305844 | 0.85943  | 0.428365 | 0.864056 | UP   | 1709.346 | 1709.342 | 1709.351 | 9.823225 | 9.715683 |
| 7362 | M687T25  | 1.202004 | -0.26544 | -0.84218 | 0.428391 | 0.864056 | DOWN | 686.5048 | 686.5042 | 686.505  | 25.38508 | 25.3575  |
| 7363 | M185T19_ | 1.163133 | -0.21802 | -0.83511 | 0.428517 | 0.864056 | DOWN | 185.1322 | 185.1321 | 185.1323 | 19.03858 | 19.02383 |
| 7364 | M382T43_ | 1.176085 | -0.23399 | -0.84493 | 0.428534 | 0.864056 | DOWN | 382.2432 | 382.2431 | 382.2434 | 43.33725 | 43.114   |
| 7365 | M1885T10 | 1.1714   | -0.22823 | -0.83544 | 0.428549 | 0.864056 | DOWN | 1885.108 | 1885.106 | 1885.11  | 9.8207   | 9.715683 |
| 7366 | M461T10_ | 1.194668 | -0.25661 | -0.83414 | 0.428751 | 0.864056 | DOWN | 460.7594 | 460.7591 | 460.7597 | 9.914217 | 9.811217 |
| 7367 | M174T11_ | 1.170509 | -0.22714 | -0.83625 | 0.428811 | 0.864056 | DOWN | 173.9605 | 173.9605 | 173.9607 | 10.892   | 10.8646  |
| 7368 | M326T10_ | 1.593715 | 0.672394 | 0.873828 | 0.428824 | 0.864056 | UP   | 326.0136 | 326.0128 | 326.0143 | 9.831517 | 9.743767 |
| 7369 | M166T9_8 | 1.237159 | -0.30703 | -0.83467 | 0.428824 | 0.864056 | DOWN | 166.2893 | 166.2888 | 166.2897 | 9.333433 | 9.234417 |
| 7370 | M424T21  | 1.154603 | 0.207396 | 0.836075 | 0.428832 | 0.864056 | UP   | 424.3417 | 424.3413 | 424.3422 | 21.13067 | 21.11583 |
| 7371 | M417T9_1 | 1.211006 | -0.27621 | -0.84777 | 0.428873 | 0.864056 | DOWN | 417.231  | 417.2305 | 417.2343 | 9.320067 | 9.1445   |
| 7372 | M702T11_ | 1.366046 | 0.450007 | 0.860734 | 0.428881 | 0.864056 | UP   | 701.9957 | 701.9952 | 701.996  | 10.78557 | 10.76855 |
| 7373 | M699T9_6 | 1.22176  | -0.28896 | -0.84595 | 0.429048 | 0.864057 | DOWN | 699.4685 | 699.4678 | 699.4696 | 9.488842 | 9.38595  |
| 7374 | M324T11_ | 1.256194 | -0.32906 | -0.84105 | 0.429147 | 0.864057 | DOWN | 324.273  | 324.264  | 324.2737 | 10.9049  | 10.64667 |
| 7375 | M1993T10 | 1.250763 | -0.32281 | -0.85473 | 0.429192 | 0.864057 | DOWN | 1993.132 | 1993.131 | 1993.133 | 9.830733 | 9.715683 |
| 7376 | M876T11_ | 1.424509 | 0.510465 | 0.853872 | 0.429263 | 0.864057 | UP   | 875.9069 | 875.903  | 875.9094 | 10.90765 | 10.85838 |
| 7377 | M445T10_ | 1.238089 | -0.30812 | -0.84467 | 0.429292 | 0.864057 | DOWN | 445.219  | 445.2185 | 445.2196 | 9.954767 | 9.843367 |
| 7378 | M455T9_1 | 1.346591 | 0.429312 | 0.837076 | 0.429439 | 0.864057 | UP   | 455.1437 | 455.1355 | 455.1462 | 9.2612   | 9.142767 |
| 7379 | M886T10  | 1.09705  | -0.13363 | -0.83207 | 0.429519 | 0.864057 | DOWN | 886.0538 | 886.0527 | 886.0545 | 9.931875 | 9.827283 |
| 7380 | M335T9_1 | 1.306277 | 0.385461 | 0.845151 | 0.429566 | 0.864057 | UP   | 335.2306 | 335.2303 | 335.2307 | 8.696033 | 8.673233 |
| 7381 | M491T9_1 | 1.350167 | 0.433138 | 0.833197 | 0.429578 | 0.864057 | UP   | 491.1698 | 491.1691 | 491.17   | 9.249825 | 9.174883 |
| 7382 | M203T10_ | 1.165349 | -0.22076 | -0.83473 | 0.429593 | 0.864057 | DOWN | 202.5732 | 202.5731 | 202.5733 | 9.989733 | 9.8914   |
| 7383 | M339T10_ | 1.232473 | -0.30156 | -0.84985 | 0.429625 | 0.864057 | DOWN | 339.0829 | 339.0827 | 339.0831 | 9.95825  | 9.859233 |
| 7384 | M1264T10 | 1.428969 | 0.514975 | 0.853524 | 0.429646 | 0.864057 | UP   | 1263.794 | 1263.791 | 1263.796 | 9.970617 | 9.859233 |

|      |          |          |          |          |          |          |      |          |          |          |          |          |
|------|----------|----------|----------|----------|----------|----------|------|----------|----------|----------|----------|----------|
| 7385 | M453T10_ | 1.161402 | -0.21587 | -0.84568 | 0.429735 | 0.864057 | DOWN | 452.9038 | 452.9034 | 452.9038 | 9.8445   | 9.715683 |
| 7386 | M344T10_ | 1.151002 | -0.20289 | -0.86011 | 0.429745 | 0.864057 | DOWN | 343.6665 | 343.6662 | 343.6669 | 9.8397   | 9.715683 |
| 7387 | M346T10_ | 1.212127 | -0.27754 | -0.85203 | 0.429764 | 0.864057 | DOWN | 345.8025 | 345.8024 | 345.8027 | 9.8207   | 9.715683 |
| 7388 | M421T10_ | 1.35317  | 0.436343 | 0.862964 | 0.429794 | 0.864057 | UP   | 420.9555 | 420.9552 | 420.9558 | 9.931875 | 9.827283 |
| 7389 | M495T9_4 | 1.322733 | 0.403522 | 0.849493 | 0.42981  | 0.864057 | UP   | 494.5856 | 494.5855 | 494.5856 | 9.133667 | 9.110833 |
| 7390 | M522T9_4 | 1.117082 | 0.159735 | 0.853034 | 0.429816 | 0.864057 | UP   | 522.2396 | 522.2391 | 522.2401 | 9.18195  | 9.12675  |
| 7391 | M151T10_ | 1.123134 | -0.16753 | -0.8321  | 0.429903 | 0.864057 | DOWN | 150.5153 | 150.5074 | 150.5156 | 9.830183 | 9.715683 |
| 7392 | M607T10_ | 1.399965 | -0.48539 | -0.8406  | 0.429936 | 0.864057 | DOWN | 607.4093 | 607.4088 | 607.4098 | 9.960817 | 9.859233 |
| 7393 | M624T9_2 | 1.488901 | -0.57425 | -0.83133 | 0.429994 | 0.864057 | DOWN | 624.2158 | 624.2152 | 624.2176 | 9.328667 | 9.046783 |
| 7394 | M361T10_ | 1.295673 | -0.3737  | -0.83378 | 0.430028 | 0.864057 | DOWN | 361.2513 | 361.2499 | 361.2526 | 9.8322   | 9.816167 |
| 7395 | M235T10_ | 1.09591  | -0.13213 | -0.84212 | 0.430042 | 0.864057 | DOWN | 234.8441 | 234.8438 | 234.8441 | 9.94405  | 9.843367 |
| 7396 | M780T10_ | 1.158984 | -0.21286 | -0.83901 | 0.430206 | 0.864057 | DOWN | 779.6197 | 779.6195 | 779.6199 | 9.534867 | 9.432183 |
| 7397 | M536T44_ | 1.393897 | 0.479124 | 0.852055 | 0.430265 | 0.864057 | UP   | 536.3062 | 536.306  | 536.3065 | 43.55308 | 43.2725  |
| 7398 | M559T10_ | 1.225155 | -0.29296 | -0.83155 | 0.43038  | 0.864057 | DOWN | 558.7018 | 558.701  | 558.703  | 9.9014   | 9.79535  |
| 7399 | M588T25  | 1.422845 | -0.50878 | -0.84434 | 0.430413 | 0.864057 | DOWN | 588.4315 | 588.4309 | 588.4322 | 24.66633 | 24.62317 |
| 7400 | M447T10_ | 1.194488 | 0.256393 | 0.83612  | 0.430518 | 0.864057 | UP   | 446.7593 | 446.7582 | 446.7614 | 9.745008 | 9.431017 |
| 7401 | M244T22_ | 1.209965 | -0.27496 | -0.84911 | 0.430529 | 0.864057 | DOWN | 244.1693 | 244.1692 | 244.1694 | 21.905   | 21.88933 |
| 7402 | M410T10_ | 1.09948  | -0.13682 | -0.83494 | 0.430543 | 0.864057 | DOWN | 410.168  | 410.1676 | 410.1682 | 9.918792 | 9.811217 |
| 7403 | M497T21  | 1.12191  | 0.165957 | 0.835358 | 0.43071  | 0.864057 | UP   | 497.366  | 497.3658 | 497.3663 | 21.09842 | 21.08667 |
| 7404 | M463T21  | 1.218768 | 0.285424 | 0.832164 | 0.430754 | 0.864057 | UP   | 463.3527 | 463.3519 | 463.3532 | 21.21967 | 21.20783 |
| 7405 | M201T9_1 | 1.44344  | -0.52951 | -0.82969 | 0.43081  | 0.864057 | DOWN | 200.8934 | 200.8916 | 200.8935 | 9.280767 | 9.219483 |
| 7406 | M579T9_3 | 1.359116 | -0.44267 | -0.83072 | 0.43085  | 0.864057 | DOWN | 578.6158 | 578.6149 | 578.6162 | 9.15945  | 9.12675  |
| 7407 | M536T22_ | 1.297324 | -0.37554 | -0.84804 | 0.430992 | 0.864057 | DOWN | 536.1263 | 536.126  | 536.1277 | 21.555   | 21.47883 |
| 7408 | M703T10_ | 1.155557 | 0.208588 | 0.870785 | 0.43104  | 0.864057 | UP   | 703.4454 | 703.4447 | 703.4459 | 9.830183 | 9.715683 |
| 7409 | M450T40_ | 1.321772 | -0.40247 | -0.8691  | 0.431095 | 0.864057 | DOWN | 450.2332 | 450.233  | 450.2334 | 40.165   | 39.84867 |
| 7410 | M574T11_ | 1.133505 | -0.18079 | -0.83171 | 0.431222 | 0.864057 | DOWN | 574.0249 | 574.0244 | 574.0253 | 10.90522 | 10.879   |
| 7411 | M578T45  | 1.300944 | -0.37956 | -0.83433 | 0.431348 | 0.864058 | DOWN | 578.3169 | 578.3168 | 578.3171 | 44.8325  | 44.609   |
| 7412 | M636T38  | 1.030754 | -0.0437  | -0.82881 | 0.431374 | 0.864058 | DOWN | 636.359  | 636.3587 | 636.3591 | 37.74808 | 37.633   |
| 7413 | M576T9_1 | 1.23891  | -0.30907 | -0.84834 | 0.431464 | 0.864058 | DOWN | 575.546  | 575.5447 | 575.5464 | 9.292008 | 9.224517 |
| 7414 | M813T11_ | 1.12539  | -0.17042 | -0.83155 | 0.431631 | 0.864058 | DOWN | 812.7991 | 812.7985 | 812.8002 | 10.92225 | 10.9198  |
| 7415 | M459T10_ | 1.172558 | -0.22966 | -0.82813 | 0.431736 | 0.864058 | DOWN | 459.1831 | 459.1826 | 459.1837 | 9.861225 | 9.65225  |
| 7416 | M894T35  | 1.27062  | -0.34553 | -0.83673 | 0.431757 | 0.864058 | DOWN | 893.6248 | 893.6242 | 893.6255 | 35.4285  | 35.38717 |
| 7417 | M382T9_4 | 1.581777 | -0.66155 | -0.82852 | 0.43181  | 0.864058 | DOWN | 381.8582 | 381.8582 | 381.8589 | 8.81155  | 8.77435  |
| 7418 | M1713T10 | 1.298274 | -0.3766  | -0.8286  | 0.431829 | 0.864058 | DOWN | 1713.165 | 1713.162 | 1713.169 | 9.82645  | 9.802117 |
| 7419 | M1039T10 | 1.155275 | -0.20824 | -0.84477 | 0.431912 | 0.864058 | DOWN | 1038.742 | 1038.741 | 1038.742 | 9.85525  | 9.715683 |

|      |          |          |          |          |          |          |      |          |          |          |          |          |
|------|----------|----------|----------|----------|----------|----------|------|----------|----------|----------|----------|----------|
| 7420 | M1220T9  | 1.239646 | -0.30993 | -0.83461 | 0.431937 | 0.864058 | DOWN | 1219.741 | 1219.736 | 1219.743 | 9.448983 | 9.38595  |
| 7421 | M212T10_ | 1.186245 | -0.2464  | -0.82854 | 0.431941 | 0.864058 | DOWN | 211.7679 | 211.7677 | 211.7681 | 9.75145  | 9.636483 |
| 7422 | M501T9_9 | 2.143352 | -1.09987 | -0.83529 | 0.432046 | 0.864058 | DOWN | 501.3423 | 501.3397 | 501.3442 | 9.320483 | 9.142767 |
| 7423 | M602T12  | 1.226434 | 0.29447  | 0.843828 | 0.43209  | 0.864058 | UP   | 602.3748 | 602.373  | 602.3755 | 12.07792 | 12.0494  |
| 7424 | M515T10_ | 1.700127 | 0.765643 | 0.855934 | 0.432144 | 0.864058 | UP   | 515.4027 | 515.402  | 515.4031 | 9.983433 | 9.8914   |
| 7425 | M250T10_ | 1.17082  | -0.22752 | -0.85121 | 0.432232 | 0.864058 | DOWN | 250.2462 | 250.2461 | 250.2463 | 9.929783 | 9.827283 |
| 7426 | M323T10_ | 1.172405 | -0.22947 | -0.83086 | 0.432245 | 0.864058 | DOWN | 323.2049 | 323.2048 | 323.2052 | 9.959533 | 9.843367 |
| 7427 | M374T23  | 1.233142 | -0.30234 | -0.8411  | 0.432259 | 0.864058 | DOWN | 373.7708 | 373.7702 | 373.7713 | 22.53233 | 22.52333 |
| 7428 | M679T10_ | 1.47034  | 0.556149 | 0.870489 | 0.432275 | 0.864058 | UP   | 678.5549 | 678.5545 | 678.5562 | 9.843017 | 9.73145  |
| 7429 | M481T9_3 | 1.372874 | -0.4572  | -0.85053 | 0.43232  | 0.864058 | DOWN | 480.668  | 480.6677 | 480.6697 | 9.368208 | 9.18975  |
| 7430 | M1400T10 | 1.292384 | 0.370035 | 0.827068 | 0.432333 | 0.864058 | UP   | 1400.214 | 1400.212 | 1400.216 | 9.964167 | 9.8753   |
| 7431 | M172T10_ | 1.206806 | -0.27119 | -0.82873 | 0.432339 | 0.864058 | DOWN | 171.7578 | 171.7577 | 171.758  | 9.930142 | 9.811217 |
| 7432 | M1010T10 | 1.637665 | 0.71164  | 0.869888 | 0.432614 | 0.864058 | UP   | 1010.093 | 1010.092 | 1010.094 | 9.98155  | 9.8914   |
| 7433 | M617T9_3 | 1.261561 | -0.33521 | -0.83471 | 0.432623 | 0.864058 | DOWN | 616.7716 | 616.7649 | 616.7726 | 9.204617 | 9.12675  |
| 7434 | M729T10_ | 1.171055 | 0.227809 | 0.830022 | 0.432627 | 0.864058 | UP   | 728.9889 | 728.9861 | 728.9896 | 9.825767 | 9.715683 |
| 7435 | M394T10_ | 1.169634 | -0.22606 | -0.84287 | 0.432757 | 0.864058 | DOWN | 394.2752 | 394.2751 | 394.2753 | 9.945258 | 9.843367 |
| 7436 | M421T11_ | 1.116327 | 0.158759 | 0.86029  | 0.43276  | 0.864058 | UP   | 421.231  | 421.2309 | 421.2315 | 10.94161 | 10.90785 |
| 7437 | M536T9_1 | 1.354702 | -0.43798 | -0.82611 | 0.43281  | 0.864058 | DOWN | 535.6314 | 535.6311 | 535.6316 | 9.438833 | 9.38595  |
| 7438 | M400T12_ | 1.208722 | -0.27348 | -0.82779 | 0.432903 | 0.864058 | DOWN | 400.1865 | 400.1864 | 400.1865 | 12.2954  | 12.28152 |
| 7439 | M360T11_ | 1.180846 | -0.23982 | -0.83541 | 0.43299  | 0.864058 | DOWN | 360.3114 | 360.3109 | 360.3116 | 10.63183 | 10.6089  |
| 7440 | M404T10_ | 1.170212 | -0.22677 | -0.84419 | 0.432995 | 0.864058 | DOWN | 404.0956 | 404.0954 | 404.0957 | 9.979667 | 9.8753   |
| 7441 | M847T11_ | 1.155484 | -0.2085  | -0.83197 | 0.433014 | 0.864058 | DOWN | 846.6801 | 846.6796 | 846.6806 | 10.63183 | 10.59933 |
| 7442 | M348T10_ | 1.751789 | 0.808829 | 0.868876 | 0.433047 | 0.864058 | UP   | 347.6592 | 347.6591 | 347.6607 | 9.967367 | 9.840617 |
| 7443 | M244T14_ | 1.401105 | 0.486565 | 0.83857  | 0.433061 | 0.864058 | UP   | 244.2057 | 244.2054 | 244.2058 | 13.5806  | 13.56563 |
| 7444 | M419T9_8 | 1.234235 | 0.303618 | 0.837844 | 0.433096 | 0.864058 | UP   | 419.3222 | 419.3219 | 419.3305 | 9.370583 | 9.174967 |
| 7445 | M709T11_ | 1.138949 | -0.1877  | -0.82572 | 0.433102 | 0.864058 | DOWN | 708.5472 | 708.5466 | 708.5476 | 10.6206  | 10.59763 |
| 7446 | M278T10_ | 2.398881 | 1.262361 | 0.870349 | 0.43313  | 0.864058 | UP   | 277.5436 | 277.5433 | 277.5437 | 9.979667 | 9.8753   |
| 7447 | M430T9_5 | 1.524203 | 0.608056 | 0.827111 | 0.433204 | 0.864058 | UP   | 430.1241 | 430.1226 | 430.1264 | 9.329083 | 9.160617 |
| 7448 | M196T9_3 | 1.361313 | 0.444999 | 0.827859 | 0.433217 | 0.864058 | UP   | 195.6891 | 195.6885 | 195.6892 | 9.146383 | 9.1175   |
| 7449 | M864T11  | 1.362666 | -0.44643 | -0.82984 | 0.433302 | 0.864058 | DOWN | 863.5385 | 863.5378 | 863.5392 | 11.23089 | 11.15797 |
| 7450 | M677T10_ | 1.32418  | 0.405099 | 0.868221 | 0.433478 | 0.864058 | UP   | 676.6082 | 676.6072 | 676.6087 | 9.825492 | 9.699733 |
| 7451 | M512T33  | 1.18009  | -0.2389  | -0.83704 | 0.433482 | 0.864058 | DOWN | 512.394  | 512.3936 | 512.395  | 32.83517 | 32.82067 |
| 7452 | M674T10_ | 1.117159 | -0.15983 | -0.82967 | 0.433484 | 0.864058 | DOWN | 673.5253 | 673.5237 | 673.5257 | 9.977442 | 9.859233 |
| 7453 | M748T10_ | 1.487816 | 0.573196 | 0.860064 | 0.433527 | 0.864058 | UP   | 747.5172 | 747.5139 | 747.5185 | 9.823575 | 9.715683 |
| 7454 | M397T9_8 | 1.238044 | -0.30806 | -0.8329  | 0.433565 | 0.864058 | DOWN | 397.4091 | 397.4084 | 397.4109 | 9.191133 | 9.129317 |

|      |          |          |          |          |          |          |      |          |          |          |          |          |
|------|----------|----------|----------|----------|----------|----------|------|----------|----------|----------|----------|----------|
| 7455 | M700T10_ | 1.145848 | -0.19642 | -0.83225 | 0.433586 | 0.864059 | DOWN | 700.104  | 700.1035 | 700.1042 | 9.964092 | 9.859233 |
| 7456 | M378T9_3 | 1.671845 | -0.74144 | -0.82454 | 0.433677 | 0.864059 | DOWN | 377.6467 | 377.6449 | 377.6504 | 9.215892 | 9.110833 |
| 7457 | M1014T10 | 1.074722 | -0.10396 | -0.8246  | 0.433704 | 0.864059 | DOWN | 1013.849 | 1013.848 | 1013.854 | 9.818525 | 9.715683 |
| 7458 | M446T10_ | 1.243391 | -0.31428 | -0.83619 | 0.433748 | 0.864059 | DOWN | 446.456  | 446.4554 | 446.4562 | 9.960467 | 9.843367 |
| 7459 | M1184T10 | 1.135971 | -0.18393 | -0.83639 | 0.433765 | 0.864059 | DOWN | 1183.759 | 1183.758 | 1183.762 | 9.917167 | 9.811217 |
| 7460 | M527T10_ | 1.205513 | -0.26965 | -0.84378 | 0.433909 | 0.864059 | DOWN | 526.8818 | 526.8814 | 526.8826 | 10.4722  | 10.40807 |
| 7461 | M464T25  | 1.837395 | -0.87766 | -0.82588 | 0.433968 | 0.864059 | DOWN | 464.2278 | 464.2274 | 464.2286 | 24.86967 | 24.826   |
| 7462 | M226T10_ | 1.233216 | -0.30243 | -0.82367 | 0.434179 | 0.864059 | DOWN | 225.6376 | 225.6375 | 225.6458 | 9.927808 | 9.843367 |
| 7463 | M356T10_ | 1.345497 | 0.428139 | 0.840139 | 0.434304 | 0.864059 | UP   | 356.0206 | 356.0201 | 356.0208 | 9.979325 | 9.859233 |
| 7464 | M610T11  | 1.149707 | -0.20127 | -0.82589 | 0.434469 | 0.864059 | DOWN | 610.2071 | 610.207  | 610.2075 | 10.892   | 10.8646  |
| 7465 | M1140T10 | 2.322059 | 1.215405 | 0.867101 | 0.434502 | 0.864059 | UP   | 1139.954 | 1139.951 | 1139.955 | 9.91875  | 9.743767 |
| 7466 | M323T27  | 1.623838 | -0.69941 | -0.82253 | 0.43465  | 0.864059 | DOWN | 323.2115 | 323.211  | 323.2126 | 27.21375 | 27.14417 |
| 7467 | M506T10_ | 1.18571  | -0.24575 | -0.83036 | 0.434815 | 0.864059 | DOWN | 505.8049 | 505.8044 | 505.8053 | 9.565017 | 9.478833 |
| 7468 | M1024T26 | 1.499625 | -0.5846  | -0.82904 | 0.434909 | 0.864059 | DOWN | 1023.724 | 1023.723 | 1023.725 | 26.00567 | 25.974   |
| 7469 | M330T9_1 | 1.247619 | -0.31918 | -0.82713 | 0.43499  | 0.864059 | DOWN | 330.4575 | 330.4574 | 330.4577 | 9.235933 | 9.129317 |
| 7470 | M364T9_1 | 1.286859 | -0.36385 | -0.82878 | 0.434994 | 0.864059 | DOWN | 364.3347 | 364.3346 | 364.3349 | 9.270833 | 9.234417 |
| 7471 | M1290T10 | 1.230764 | -0.29955 | -0.824   | 0.435078 | 0.864059 | DOWN | 1290.157 | 1290.156 | 1290.158 | 9.880533 | 9.872067 |
| 7472 | M454T10_ | 1.144415 | -0.19461 | -0.83888 | 0.435084 | 0.864059 | DOWN | 453.8897 | 453.8894 | 453.8902 | 9.834067 | 9.73145  |
| 7473 | M336T10_ | 1.318339 | 0.398721 | 0.853454 | 0.435258 | 0.864059 | UP   | 336.22   | 336.2197 | 336.2201 | 9.801833 | 9.715683 |
| 7474 | M316T9_4 | 1.673455 | 0.74283  | 0.821912 | 0.435282 | 0.864059 | UP   | 316.2431 | 316.2424 | 316.2472 | 8.73465  | 8.641583 |
| 7475 | M1930T10 | 1.46966  | 0.555483 | 0.861364 | 0.435352 | 0.864059 | UP   | 1930.221 | 1930.219 | 1930.222 | 9.849433 | 9.73145  |
| 7476 | M382T39_ | 1.206967 | -0.27139 | -0.82712 | 0.435365 | 0.864059 | DOWN | 382.2433 | 382.2431 | 382.2434 | 39.28767 | 39.0775  |
| 7477 | M231T10_ | 1.196586 | 0.258924 | 0.839031 | 0.435383 | 0.864059 | UP   | 231.1829 | 231.1828 | 231.1829 | 9.893283 | 9.779267 |
| 7478 | M637T10_ | 1.196347 | -0.25864 | -0.84318 | 0.435401 | 0.864059 | DOWN | 636.9007 | 636.8999 | 636.9014 | 10.10092 | 10.00428 |
| 7479 | M1013T16 | 1.174521 | -0.23207 | -0.83985 | 0.435406 | 0.864059 | DOWN | 1013.442 | 1013.441 | 1013.442 | 15.515   | 15.47318 |
| 7480 | M640T10_ | 1.217826 | 0.284307 | 0.825991 | 0.435422 | 0.864059 | UP   | 640.0733 | 640.0726 | 640.074  | 10.40332 | 10.34372 |
| 7481 | M294T10_ | 1.14641  | -0.19712 | -0.82278 | 0.435517 | 0.864059 | DOWN | 293.6409 | 293.6405 | 293.641  | 9.91875  | 9.811217 |
| 7482 | M289T11_ | 1.132499 | 0.179509 | 0.830707 | 0.435529 | 0.864059 | UP   | 289.3213 | 289.3211 | 289.3215 | 10.90657 | 10.8914  |
| 7483 | M526T9_7 | 1.301865 | 0.380579 | 0.829407 | 0.435666 | 0.864059 | UP   | 526.3608 | 526.3606 | 526.361  | 8.719975 | 8.601067 |
| 7484 | M242T9_3 | 1.125669 | -0.17078 | -0.82052 | 0.435693 | 0.864059 | DOWN | 241.9415 | 241.94   | 241.9416 | 9.295817 | 9.132267 |
| 7485 | M199T10_ | 1.190789 | -0.25192 | -0.84655 | 0.435726 | 0.864059 | DOWN | 199.114  | 199.1139 | 199.1271 | 9.8378   | 9.816167 |
| 7486 | M247T12  | 1.116171 | -0.15856 | -0.82419 | 0.435795 | 0.864059 | DOWN | 247.2165 | 247.2163 | 247.2167 | 12.33978 | 12.33912 |
| 7487 | M474T45  | 1.154769 | 0.207604 | 0.827532 | 0.435801 | 0.864059 | UP   | 474.2694 | 474.2691 | 474.2696 | 44.84692 | 44.739   |
| 7488 | M703T10_ | 1.151571 | 0.203604 | 0.857425 | 0.435802 | 0.864059 | UP   | 703.4985 | 703.4981 | 703.4987 | 9.872475 | 9.743667 |
| 7489 | M319T10_ | 1.17307  | -0.23029 | -0.83028 | 0.435974 | 0.86406  | DOWN | 318.8785 | 318.8782 | 318.8793 | 9.831517 | 9.699733 |

|      |          |          |          |          |          |         |      |          |          |          |          |          |
|------|----------|----------|----------|----------|----------|---------|------|----------|----------|----------|----------|----------|
| 7490 | M674T10_ | 1.156496 | -0.20976 | -0.83584 | 0.43598  | 0.86406 | DOWN | 674.4258 | 674.4254 | 674.4263 | 9.834117 | 9.715683 |
| 7491 | M323T9_6 | 1.611788 | 0.688662 | 0.842688 | 0.436083 | 0.86406 | UP   | 323.4238 | 323.4234 | 323.4266 | 9.082742 | 9.0637   |
| 7492 | M427T9_4 | 1.157209 | -0.21065 | -0.83172 | 0.436089 | 0.86406 | DOWN | 427.3618 | 427.3616 | 427.362  | 9.27355  | 9.204617 |
| 7493 | M892T26  | 1.176661 | -0.2347  | -0.82143 | 0.436121 | 0.86406 | DOWN | 891.645  | 891.6447 | 891.6453 | 25.94533 | 25.934   |
| 7494 | M706T13  | 1.208413 | -0.27311 | -0.83618 | 0.436207 | 0.86406 | DOWN | 705.5721 | 705.5713 | 705.5734 | 12.50105 | 12.48495 |
| 7495 | M754T10_ | 1.260035 | -0.33346 | -0.82068 | 0.43623  | 0.86406 | DOWN | 754.4804 | 754.4795 | 754.481  | 9.969925 | 9.942317 |
| 7496 | M272T10_ | 1.291521 | 0.369071 | 0.84164  | 0.436238 | 0.86406 | UP   | 271.6441 | 271.6439 | 271.6442 | 9.957333 | 9.843367 |
| 7497 | M220T9_1 | 1.326612 | 0.407746 | 0.820284 | 0.436286 | 0.86406 | UP   | 220.4846 | 220.4834 | 220.4856 | 9.311883 | 9.132267 |
| 7498 | M348T9_2 | 1.437858 | -0.52392 | -0.83123 | 0.436414 | 0.86406 | DOWN | 347.8289 | 347.8282 | 347.8294 | 8.958567 | 8.877267 |
| 7499 | M514T9_3 | 1.250847 | -0.32291 | -0.81918 | 0.436426 | 0.86406 | DOWN | 514.0041 | 514.0036 | 514.0051 | 9.464933 | 9.38595  |
| 7500 | M453T11  | 1.141744 | -0.19124 | -0.82169 | 0.436514 | 0.86406 | DOWN | 453.1413 | 453.1411 | 453.1416 | 10.90197 | 10.8646  |
| 7501 | M294T10_ | 1.586952 | -0.66626 | -0.82088 | 0.436519 | 0.86406 | DOWN | 294.0426 | 294.0424 | 294.0429 | 9.909217 | 9.811217 |
| 7502 | M672T10_ | 1.460132 | 0.546098 | 0.860037 | 0.436597 | 0.86406 | UP   | 671.7106 | 671.7098 | 671.7117 | 9.779267 | 9.665433 |
| 7503 | M420T44_ | 1.229181 | -0.2977  | -0.85663 | 0.4366   | 0.86406 | DOWN | 420.2225 | 420.2224 | 420.2228 | 43.86208 | 43.628   |
| 7504 | M576T10_ | 2.098401 | 1.069291 | 0.860525 | 0.436622 | 0.86406 | UP   | 575.6217 | 575.6206 | 575.6227 | 9.942317 | 9.859233 |
| 7505 | M163T30  | 1.797299 | -0.84583 | -0.85352 | 0.436637 | 0.86406 | DOWN | 163.0752 | 163.0751 | 163.0752 | 30.45933 | 30.4395  |
| 7506 | M355T21_ | 1.474629 | -0.56035 | -0.85054 | 0.436657 | 0.86406 | DOWN | 355.2378 | 355.2376 | 355.238  | 21.42058 | 21.17417 |
| 7507 | M414T10_ | 1.180982 | -0.23999 | -0.83172 | 0.436719 | 0.86406 | DOWN | 413.7975 | 413.7973 | 413.7977 | 10.18999 | 10.10142 |
| 7508 | M682T9_1 | 1.127843 | -0.17357 | -0.81869 | 0.436738 | 0.86406 | DOWN | 681.7877 | 681.7872 | 681.7884 | 9.328967 | 9.129317 |
| 7509 | M528T10_ | 1.372956 | 0.457285 | 0.836901 | 0.436791 | 0.86406 | UP   | 527.7165 | 527.7158 | 527.7171 | 9.95385  | 9.843367 |
| 7510 | M218T9   | 1.235743 | -0.30538 | -0.81848 | 0.436831 | 0.86406 | DOWN | 218.245  | 218.2381 | 218.2458 | 9.348233 | 9.26575  |
| 7511 | M249T7_1 | 1.173734 | -0.2311  | -0.82412 | 0.436919 | 0.86406 | DOWN | 249.1567 | 249.1566 | 249.157  | 7.039883 | 6.925867 |
| 7512 | M469T10_ | 1.348476 | -0.43133 | -0.81968 | 0.436937 | 0.86406 | DOWN | 468.6272 | 468.6262 | 468.6281 | 10.24737 | 10.18653 |
| 7513 | M460T10_ | 1.23848  | 0.308571 | 0.822367 | 0.436938 | 0.86406 | UP   | 459.5111 | 459.5106 | 459.5113 | 9.866025 | 9.79535  |
| 7514 | M386T10_ | 1.229113 | 0.297618 | 0.837218 | 0.436946 | 0.86406 | UP   | 386.4589 | 386.4519 | 386.4594 | 9.970617 | 9.8445   |
| 7515 | M1293T10 | 1.437306 | 0.523367 | 0.851121 | 0.436987 | 0.86406 | UP   | 1292.795 | 1292.795 | 1292.798 | 9.951283 | 9.859233 |
| 7516 | M430T10_ | 1.999905 | 0.999931 | 0.85987  | 0.437055 | 0.86406 | UP   | 430.0547 | 430.0539 | 430.055  | 9.952017 | 9.859233 |
| 7517 | M361T10_ | 1.268138 | -0.34271 | -0.82733 | 0.437228 | 0.86406 | DOWN | 360.6567 | 360.6563 | 360.6568 | 9.8207   | 9.73145  |
| 7518 | M579T9_5 | 3.12401  | 1.643399 | 0.860157 | 0.437285 | 0.86406 | UP   | 578.9306 | 578.9281 | 578.9313 | 9.06855  | 9.0637   |
| 7519 | M193T13  | 1.431922 | -0.51795 | -0.82598 | 0.437318 | 0.86406 | DOWN | 193.1585 | 193.1585 | 193.1586 | 12.6456  | 12.57233 |
| 7520 | M185T10_ | 1.338236 | 0.420333 | 0.831336 | 0.43738  | 0.86406 | UP   | 184.7859 | 184.7856 | 184.7859 | 9.972917 | 9.859233 |
| 7521 | M320T10_ | 1.137501 | -0.18587 | -0.81711 | 0.437521 | 0.86406 | DOWN | 320.17   | 320.1569 | 320.1704 | 9.818508 | 9.699733 |
| 7522 | M620T44_ | 1.339312 | 0.421492 | 0.860652 | 0.43756  | 0.86406 | UP   | 620.364  | 620.3638 | 620.3642 | 44.44283 | 44.2505  |
| 7523 | M467T10_ | 1.129217 | -0.17532 | -0.82913 | 0.437647 | 0.86406 | DOWN | 467.3586 | 467.3582 | 467.3591 | 9.636967 | 9.541483 |
| 7524 | M335T10_ | 1.397303 | -0.48265 | -0.81741 | 0.437679 | 0.86406 | DOWN | 335.3141 | 335.3136 | 335.3143 | 9.964167 | 9.885167 |

|      |          |          |          |          |          |          |      |          |          |          |          |          |
|------|----------|----------|----------|----------|----------|----------|------|----------|----------|----------|----------|----------|
| 7525 | M490T42_ | 1.390848 | 0.475965 | 0.835019 | 0.437693 | 0.86406  | UP   | 490.2643 | 490.264  | 490.2646 | 42.28708 | 42.04967 |
| 7526 | M301T32  | 1.262111 | 0.335838 | 0.846563 | 0.437713 | 0.86406  | UP   | 301.1408 | 301.1405 | 301.1409 | 32.46017 | 32.44517 |
| 7527 | M263T10_ | 1.119113 | 0.162356 | 0.820689 | 0.437773 | 0.86406  | UP   | 262.9463 | 262.9462 | 262.9465 | 9.830733 | 9.665433 |
| 7528 | M706T10_ | 1.091101 | 0.125784 | 0.839035 | 0.437858 | 0.86406  | UP   | 705.6121 | 705.6117 | 705.6124 | 9.850858 | 9.73145  |
| 7529 | M484T11_ | 1.122166 | -0.16629 | -0.83176 | 0.437867 | 0.86406  | DOWN | 483.7355 | 483.7346 | 483.7356 | 10.90765 | 10.88995 |
| 7530 | M311T9_2 | 1.401783 | -0.48726 | -0.82112 | 0.437875 | 0.86406  | DOWN | 311.2524 | 311.252  | 311.2526 | 9.365833 | 9.219483 |
| 7531 | M970T11  | 1.147703 | -0.19875 | -0.81665 | 0.437878 | 0.86406  | DOWN | 969.7841 | 969.7829 | 969.7888 | 10.90519 | 10.879   |
| 7532 | M665T10_ | 1.149959 | -0.20158 | -0.82343 | 0.437883 | 0.86406  | DOWN | 664.7128 | 664.7121 | 664.7134 | 9.8207   | 9.715683 |
| 7533 | M390T10_ | 1.192866 | -0.25443 | -0.81694 | 0.437939 | 0.86406  | DOWN | 390.4815 | 390.4812 | 390.4817 | 10.00899 | 9.9009   |
| 7534 | M721T9_2 | 1.444885 | -0.53095 | -0.81656 | 0.437946 | 0.86406  | DOWN | 721.2309 | 721.2297 | 721.232  | 9.1445   | 9.07945  |
| 7535 | M680T11_ | 1.105998 | -0.14535 | -0.82201 | 0.437991 | 0.86406  | DOWN | 680.0134 | 680.0131 | 680.0137 | 10.83176 | 10.79918 |
| 7536 | M233T21  | 1.185124 | -0.24504 | -0.82847 | 0.438042 | 0.86406  | DOWN | 233.1726 | 233.1725 | 233.1727 | 20.7675  | 20.75117 |
| 7537 | M325T11_ | 1.209782 | -0.27475 | -0.81841 | 0.438073 | 0.86406  | DOWN | 324.8169 | 324.8168 | 324.8175 | 10.892   | 10.8646  |
| 7538 | M553T9_1 | 1.321426 | -0.4021  | -0.81674 | 0.438082 | 0.86406  | DOWN | 552.6584 | 552.6577 | 552.6585 | 9.220933 | 9.191133 |
| 7539 | M235T23  | 1.361626 | -0.44533 | -0.8171  | 0.438146 | 0.86406  | DOWN | 235.0962 | 235.0961 | 235.0964 | 23.38058 | 23.35467 |
| 7540 | M397T10_ | 1.074577 | -0.10377 | -0.82006 | 0.438202 | 0.86406  | DOWN | 396.6501 | 396.6499 | 396.6502 | 9.917167 | 9.811217 |
| 7541 | M343T10_ | 1.147797 | -0.19887 | -0.84319 | 0.438212 | 0.86406  | DOWN | 342.9473 | 342.947  | 342.9474 | 9.8397   | 9.715683 |
| 7542 | M554T29_ | 1.3656   | -0.44954 | -0.81713 | 0.438214 | 0.86406  | DOWN | 553.8943 | 553.894  | 553.8947 | 28.77258 | 28.7035  |
| 7543 | M596T10_ | 1.154771 | 0.207607 | 0.817618 | 0.438247 | 0.86406  | UP   | 595.8055 | 595.8049 | 595.8074 | 9.917167 | 9.79535  |
| 7544 | M189T10_ | 1.633099 | 0.707612 | 0.848747 | 0.438306 | 0.864061 | UP   | 188.5999 | 188.5998 | 188.6    | 9.967367 | 9.8914   |
| 7545 | M446T22  | 1.186813 | -0.24709 | -0.81731 | 0.43833  | 0.864061 | DOWN | 446.1443 | 446.1439 | 446.1448 | 22.25667 | 22.23533 |
| 7546 | M302T10_ | 1.362367 | 0.446116 | 0.851292 | 0.438519 | 0.864061 | UP   | 301.9939 | 301.9936 | 301.9942 | 9.954217 | 9.843367 |
| 7547 | M416T9_7 | 1.52591  | 0.60967  | 0.840557 | 0.438525 | 0.864061 | UP   | 416.2275 | 416.2254 | 416.2299 | 9.15945  | 8.955933 |
| 7548 | M619T10_ | 1.263162 | 0.33704  | 0.857666 | 0.438645 | 0.864061 | UP   | 618.5538 | 618.553  | 618.557  | 9.839008 | 9.715683 |
| 7549 | M203T9_3 | 1.16353  | 0.218509 | 0.844137 | 0.438646 | 0.864061 | UP   | 203.1835 | 203.1834 | 203.1836 | 8.872733 | 8.7875   |
| 7550 | M368T19_ | 1.252214 | 0.324482 | 0.816585 | 0.438687 | 0.864061 | UP   | 368.2344 | 368.2245 | 368.2359 | 18.732   | 18.70267 |
| 7551 | M363T11_ | 1.208088 | -0.27273 | -0.81737 | 0.43881  | 0.864061 | DOWN | 363.0675 | 363.0655 | 363.069  | 10.90669 | 10.86008 |
| 7552 | M405T9_1 | 1.286622 | -0.36359 | -0.81461 | 0.438953 | 0.864061 | DOWN | 404.5005 | 404.5001 | 404.501  | 9.464933 | 9.370583 |
| 7553 | M280T10_ | 1.27978  | 0.355896 | 0.823662 | 0.439005 | 0.864061 | UP   | 280.333  | 280.3327 | 280.3333 | 9.95385  | 9.843367 |
| 7554 | M190T10_ | 1.147085 | -0.19797 | -0.82611 | 0.439097 | 0.864061 | DOWN | 189.8924 | 189.8922 | 189.8925 | 9.917167 | 9.811217 |
| 7555 | M474T11_ | 1.303512 | 0.382403 | 0.853257 | 0.439123 | 0.864061 | UP   | 474.0764 | 474.0752 | 474.0814 | 10.93358 | 10.8926  |
| 7556 | M332T10_ | 1.585775 | -0.66519 | -0.84639 | 0.439157 | 0.864061 | DOWN | 331.5517 | 331.5515 | 331.5519 | 9.818433 | 9.7124   |
| 7557 | M253T10_ | 1.189587 | -0.25046 | -0.83191 | 0.439204 | 0.864061 | DOWN | 253.2017 | 253.2016 | 253.2021 | 9.903283 | 9.732983 |
| 7558 | M327T9_6 | 1.127406 | -0.17301 | -0.8156  | 0.439258 | 0.864061 | DOWN | 327.2833 | 327.2831 | 327.2835 | 9.280458 | 9.129317 |
| 7559 | M610T10_ | 1.083684 | -0.11594 | -0.81843 | 0.439394 | 0.864061 | DOWN | 609.9477 | 609.9469 | 609.9481 | 9.914217 | 9.79535  |



|      |          |          |          |          |          |          |      |          |          |          |          |          |
|------|----------|----------|----------|----------|----------|----------|------|----------|----------|----------|----------|----------|
| 7560 | M1851T10 | 1.263289 | -0.33718 | -0.82082 | 0.439402 | 0.864061 | DOWN | 1851.079 | 1851.077 | 1851.08  | 9.8207   | 9.73145  |
| 7561 | M475T9_1 | 1.145334 | -0.19577 | -0.81427 | 0.439475 | 0.864061 | DOWN | 475.2494 | 475.2493 | 475.2496 | 9.303467 | 9.129317 |
| 7562 | M404T43_ | 1.044881 | -0.06334 | -0.8138  | 0.43951  | 0.864061 | DOWN | 404.264  | 404.2638 | 404.2641 | 42.70425 | 42.66833 |
| 7563 | M235T10_ | 1.106289 | -0.14573 | -0.81407 | 0.439512 | 0.864061 | DOWN | 234.8724 | 234.8723 | 234.8725 | 9.934533 | 9.827283 |
| 7564 | M432T41  | 1.19401  | -0.25582 | -0.82694 | 0.439519 | 0.864061 | DOWN | 432.2227 | 432.2224 | 432.2229 | 40.92308 | 40.72633 |
| 7565 | M341T10_ | 1.237163 | -0.30704 | -0.83391 | 0.439528 | 0.864061 | DOWN | 341.3262 | 341.3252 | 341.3263 | 9.825492 | 9.715683 |
| 7566 | M634T11_ | 1.248392 | 0.320071 | 0.813476 | 0.439528 | 0.864061 | UP   | 633.8739 | 633.8735 | 633.8748 | 10.87812 | 10.8214  |
| 7567 | M321T10_ | 1.189715 | 0.250616 | 0.81351  | 0.439573 | 0.864061 | UP   | 321.1309 | 321.1308 | 321.1313 | 10.04033 | 9.948333 |
| 7568 | M326T11_ | 1.085371 | -0.11819 | -0.81954 | 0.439575 | 0.864061 | DOWN | 325.7741 | 325.774  | 325.7744 | 10.90519 | 10.879   |
| 7569 | M578T38  | 1.328505 | -0.4098  | -0.85151 | 0.439723 | 0.864061 | DOWN | 578.317  | 578.3165 | 578.3175 | 38.0215  | 37.748   |
| 7570 | M212T10_ | 1.187949 | -0.24847 | -0.82277 | 0.439764 | 0.864061 | DOWN | 211.8164 | 211.8162 | 211.8165 | 9.8207   | 9.699733 |
| 7571 | M735T11_ | 1.118182 | -0.16115 | -0.81316 | 0.439773 | 0.864061 | DOWN | 734.5495 | 734.5491 | 734.5527 | 10.89875 | 10.879   |
| 7572 | M315T14  | 1.667547 | -0.73773 | -0.84647 | 0.439852 | 0.864061 | DOWN | 315.2038 | 315.2034 | 315.2044 | 14.06217 | 14.01913 |
| 7573 | M608T10_ | 1.357671 | -0.44113 | -0.81508 | 0.439861 | 0.864061 | DOWN | 608.248  | 608.2465 | 608.2482 | 9.917167 | 9.874067 |
| 7574 | M636T10_ | 1.083375 | 0.115533 | 0.813458 | 0.43996  | 0.864061 | UP   | 636.4026 | 636.4022 | 636.4029 | 10.39613 | 10.34372 |
| 7575 | M378T10_ | 1.073686 | -0.10257 | -0.81693 | 0.439979 | 0.864061 | DOWN | 378.1775 | 378.1771 | 378.1782 | 9.917167 | 9.811217 |
| 7576 | M257T10_ | 1.315067 | 0.395137 | 0.836778 | 0.439981 | 0.864061 | UP   | 257.4553 | 257.4551 | 257.4556 | 9.809683 | 9.65225  |
| 7577 | M731T4   | 1.342252 | 0.424656 | 0.812556 | 0.440065 | 0.864061 | UP   | 731.4673 | 731.4669 | 731.4679 | 3.527333 | 3.257667 |
| 7578 | M328T10_ | 1.285929 | 0.362811 | 0.822894 | 0.440112 | 0.864061 | UP   | 328.1805 | 328.1805 | 328.1807 | 9.787433 | 9.683817 |
| 7579 | M343T10_ | 1.633183 | 0.707687 | 0.848315 | 0.440198 | 0.864061 | UP   | 343.2067 | 343.2042 | 343.2071 | 9.730592 | 9.45135  |
| 7580 | M599T10_ | 1.077123 | -0.10718 | -0.81339 | 0.440322 | 0.864061 | DOWN | 599.4171 | 599.4166 | 599.4175 | 9.907958 | 9.79535  |
| 7581 | M1957T10 | 1.339552 | 0.421751 | 0.833427 | 0.44055  | 0.864061 | UP   | 1956.593 | 1956.59  | 1956.597 | 9.853633 | 9.73145  |
| 7582 | M470T7   | 1.687701 | 0.75506  | 0.852624 | 0.440568 | 0.864061 | UP   | 470.3694 | 470.3692 | 470.3699 | 7.025433 | 6.969117 |
| 7583 | M1885T10 | 1.185184 | 0.245111 | 0.811502 | 0.44063  | 0.864061 | UP   | 1884.685 | 1884.683 | 1884.687 | 9.830083 | 9.696683 |
| 7584 | M253T12  | 2.091574 | 1.064589 | 0.854293 | 0.44064  | 0.864062 | UP   | 253.1601 | 253.16   | 253.1691 | 11.74896 | 11.74257 |
| 7585 | M983T28  | 1.283956 | -0.3606  | -0.81089 | 0.440892 | 0.864062 | DOWN | 982.6813 | 982.6795 | 982.6826 | 28.27217 | 28.24383 |
| 7586 | M441T10_ | 1.741432 | 0.800274 | 0.851605 | 0.440899 | 0.864062 | UP   | 441.3438 | 441.3434 | 441.344  | 10.43184 | 10.37598 |
| 7587 | M351T23  | 1.310468 | -0.39008 | -0.81881 | 0.440904 | 0.864062 | DOWN | 351.1045 | 351.1043 | 351.1052 | 22.92933 | 22.84233 |
| 7588 | M257T10_ | 1.215219 | 0.281217 | 0.840719 | 0.440939 | 0.864062 | UP   | 256.8276 | 256.8274 | 256.8279 | 9.979667 | 9.8914   |
| 7589 | M466T10_ | 1.170995 | -0.22773 | -0.81752 | 0.440968 | 0.864062 | DOWN | 465.8374 | 465.8371 | 465.8376 | 9.818525 | 9.699733 |
| 7590 | M241T10_ | 1.366876 | 0.450883 | 0.820958 | 0.440969 | 0.864062 | UP   | 240.544  | 240.5439 | 240.5443 | 9.9351   | 9.827283 |
| 7591 | M819T31  | 1.225289 | 0.293122 | 0.814706 | 0.440979 | 0.864062 | UP   | 819.4766 | 819.4756 | 819.477  | 31.133   | 31.11083 |
| 7592 | M254T10_ | 1.891167 | -0.91928 | -0.82855 | 0.440988 | 0.864062 | DOWN | 254.4121 | 254.4119 | 254.4124 | 9.956417 | 9.869467 |
| 7593 | M822T10_ | 1.271602 | -0.34665 | -0.82488 | 0.441047 | 0.864062 | DOWN | 821.865  | 821.8646 | 821.8655 | 9.902617 | 9.811217 |
| 7594 | M771T10_ | 1.986779 | 0.990432 | 0.851674 | 0.441101 | 0.864062 | UP   | 770.5427 | 770.5377 | 770.5431 | 9.811308 | 9.715683 |

|      |          |          |          |          |          |          |      |          |          |          |          |          |
|------|----------|----------|----------|----------|----------|----------|------|----------|----------|----------|----------|----------|
| 7595 | M804T10_ | 1.188145 | -0.24871 | -0.81195 | 0.441145 | 0.864062 | DOWN | 804.4889 | 804.4881 | 804.4898 | 10.26148 | 10.19852 |
| 7596 | M326T16  | 1.116952 | 0.159567 | 0.825271 | 0.441247 | 0.864062 | UP   | 326.2324 | 326.2323 | 326.2326 | 16.24279 | 16.21315 |
| 7597 | M580T10_ | 1.367293 | -0.45132 | -0.82947 | 0.441275 | 0.864062 | DOWN | 579.8447 | 579.8444 | 579.8466 | 10.21012 | 10.12287 |
| 7598 | M257T7_2 | 1.260859 | 0.334407 | 0.810212 | 0.441288 | 0.864062 | UP   | 257.1841 | 257.1841 | 257.1842 | 6.998833 | 6.93925  |
| 7599 | M217T10_ | 1.263299 | -0.3372  | -0.81495 | 0.441309 | 0.864062 | DOWN | 217.4295 | 217.4289 | 217.4299 | 9.830558 | 9.715683 |
| 7600 | M619T10_ | 1.116961 | 0.159579 | 0.837543 | 0.441368 | 0.864062 | UP   | 618.672  | 618.6715 | 618.6764 | 9.8207   | 9.699733 |
| 7601 | M726T10_ | 1.156931 | -0.2103  | -0.81735 | 0.441386 | 0.864062 | DOWN | 726.1163 | 726.1155 | 726.1171 | 9.830283 | 9.699733 |
| 7602 | M723T9_3 | 1.53909  | -0.62208 | -0.81006 | 0.441418 | 0.864062 | DOWN | 723.4218 | 723.4189 | 723.4226 | 9.306308 | 9.234417 |
| 7603 | M211T11_ | 1.166089 | -0.22168 | -0.81005 | 0.441426 | 0.864062 | DOWN | 210.9084 | 210.9083 | 210.9086 | 10.89907 | 10.879   |
| 7604 | M351T10_ | 2.423261 | -1.27695 | -0.82038 | 0.441449 | 0.864062 | DOWN | 351.2277 | 351.2215 | 351.2346 | 9.861342 | 9.665433 |
| 7605 | M639T9_1 | 1.266543 | -0.3409  | -0.81073 | 0.441513 | 0.864062 | DOWN | 638.6471 | 638.6452 | 638.6476 | 9.205067 | 9.16125  |
| 7606 | M966T10_ | 1.517017 | 0.601237 | 0.845021 | 0.44154  | 0.864062 | UP   | 966.0082 | 966.0073 | 966.0098 | 9.9722   | 9.8753   |
| 7607 | M787T11_ | 1.087806 | 0.121421 | 0.814167 | 0.44156  | 0.864062 | UP   | 787.2386 | 787.2381 | 787.2404 | 10.90551 | 10.879   |
| 7608 | M331T11_ | 1.114899 | -0.15691 | -0.80973 | 0.44157  | 0.864062 | DOWN | 330.6263 | 330.6262 | 330.6268 | 10.892   | 10.879   |
| 7609 | M294T10_ | 1.219798 | -0.28664 | -0.80961 | 0.441587 | 0.864062 | DOWN | 294.1117 | 294.1109 | 294.1119 | 9.523383 | 9.447617 |
| 7610 | M598T10_ | 1.344054 | 0.426591 | 0.82964  | 0.441648 | 0.864062 | UP   | 597.8773 | 597.8764 | 597.881  | 9.809217 | 9.699733 |
| 7611 | M455T10_ | 1.175168 | -0.23287 | -0.82563 | 0.441733 | 0.864062 | DOWN | 455.4954 | 455.495  | 455.4956 | 9.968992 | 9.859233 |
| 7612 | M349T10_ | 1.044745 | -0.06315 | -0.81565 | 0.441782 | 0.864062 | DOWN | 349.2322 | 349.2321 | 349.2323 | 9.825492 | 9.715683 |
| 7613 | M404T9_2 | 1.173271 | -0.23054 | -0.82772 | 0.441808 | 0.864062 | DOWN | 403.6575 | 403.6573 | 403.6579 | 9.449367 | 9.370583 |
| 7614 | M246T11_ | 1.261489 | -0.33513 | -0.81547 | 0.441813 | 0.864062 | DOWN | 245.5648 | 245.5643 | 245.5649 | 10.91734 | 10.88995 |
| 7615 | M711T10_ | 2.342375 | 1.227972 | 0.848076 | 0.441833 | 0.864062 | UP   | 710.7687 | 710.7669 | 710.7697 | 9.859983 | 9.715683 |
| 7616 | M281T10_ | 1.349329 | 0.432243 | 0.809104 | 0.441862 | 0.864062 | UP   | 280.979  | 280.9787 | 280.9792 | 9.968092 | 9.8753   |
| 7617 | M356T10_ | 1.290218 | 0.367614 | 0.815478 | 0.441938 | 0.864062 | UP   | 356.134  | 356.1334 | 356.134  | 9.856867 | 9.715683 |
| 7618 | M204T10_ | 1.249471 | -0.32132 | -0.82817 | 0.441942 | 0.864062 | DOWN | 204.0512 | 204.0437 | 204.0513 | 9.836367 | 9.715683 |
| 7619 | M180T11_ | 1.140535 | -0.18971 | -0.82063 | 0.442068 | 0.864062 | DOWN | 180.149  | 180.1489 | 180.1491 | 10.89193 | 10.8646  |
| 7620 | M327T25_ | 1.22401  | -0.29162 | -0.81259 | 0.442109 | 0.864062 | DOWN | 326.9161 | 326.9155 | 326.9165 | 25.17633 | 25.15567 |
| 7621 | M987T10  | 1.217124 | -0.28348 | -0.81781 | 0.442167 | 0.864062 | DOWN | 987.2595 | 987.2586 | 987.2608 | 9.82645  | 9.715683 |
| 7622 | M452T11_ | 1.13217  | -0.17909 | -0.80952 | 0.442417 | 0.864062 | DOWN | 452.1423 | 452.1421 | 452.1424 | 10.892   | 10.8646  |
| 7623 | M440T9_3 | 1.327773 | 0.409009 | 0.841597 | 0.442437 | 0.864062 | UP   | 440.1247 | 440.1244 | 440.125  | 9.284058 | 9.12675  |
| 7624 | M507T10_ | 1.35216  | 0.435266 | 0.808017 | 0.442459 | 0.864062 | UP   | 506.9573 | 506.9566 | 506.9594 | 10.4188  | 10.35992 |
| 7625 | M759T10_ | 2.116595 | 1.081745 | 0.84852  | 0.442506 | 0.864062 | UP   | 759.4525 | 759.4515 | 759.453  | 9.983817 | 9.859233 |
| 7626 | M197T41_ | 1.186059 | 0.246176 | 0.84929  | 0.442512 | 0.864062 | UP   | 197.1533 | 197.1532 | 197.1534 | 41.27317 | 41.15567 |
| 7627 | M274T11_ | 1.202339 | 0.265844 | 0.808728 | 0.442561 | 0.864062 | UP   | 273.7218 | 273.7207 | 273.7222 | 10.9049  | 10.879   |
| 7628 | M399T31_ | 2.277674 | 1.187561 | 0.810385 | 0.442562 | 0.864062 | UP   | 399.2144 | 399.2097 | 399.2188 | 31.12408 | 31.038   |
| 7629 | M265T11_ | 1.169857 | -0.22633 | -0.8077  | 0.442622 | 0.864062 | DOWN | 265.0984 | 265.0983 | 265.0987 | 10.89875 | 10.8646  |

|      |          |          |          |          |          |          |      |          |          |          |          |          |
|------|----------|----------|----------|----------|----------|----------|------|----------|----------|----------|----------|----------|
| 7630 | M441T10_ | 1.300169 | -0.3787  | -0.80986 | 0.442632 | 0.864062 | DOWN | 440.9235 | 440.9229 | 440.924  | 9.845483 | 9.743767 |
| 7631 | M337T9_1 | 3.166774 | 1.663014 | 0.849125 | 0.442633 | 0.864062 | UP   | 337.0199 | 337.0196 | 337.0201 | 9.480467 | 9.38065  |
| 7632 | M314T25_ | 1.108035 | 0.148003 | 0.827644 | 0.442636 | 0.864062 | UP   | 314.3244 | 314.3241 | 314.3244 | 24.72467 | 24.71033 |
| 7633 | M417T37  | 1.260889 | 0.334441 | 0.823023 | 0.442685 | 0.864062 | UP   | 417.2479 | 417.2474 | 417.2481 | 36.94833 | 36.46833 |
| 7634 | M635T9_1 | 1.310339 | 0.38994  | 0.808374 | 0.442807 | 0.864062 | UP   | 634.7564 | 634.7557 | 634.7566 | 8.896158 | 8.82795  |
| 7635 | M475T7   | 1.279093 | -0.35512 | -0.81665 | 0.442818 | 0.864062 | DOWN | 475.3245 | 475.3243 | 475.325  | 6.968375 | 6.881933 |
| 7636 | M453T10_ | 1.142507 | -0.1922  | -0.82365 | 0.442873 | 0.864062 | DOWN | 452.7983 | 452.7981 | 452.7984 | 9.834067 | 9.73145  |
| 7637 | M369T10_ | 1.472088 | 0.557864 | 0.812709 | 0.442915 | 0.864062 | UP   | 368.6199 | 368.6198 | 368.62   | 9.887642 | 9.857983 |
| 7638 | M423T23  | 1.314114 | -0.39409 | -0.82719 | 0.443015 | 0.864062 | DOWN | 422.7752 | 422.7747 | 422.7756 | 23.04483 | 23.01617 |
| 7639 | M1463T10 | 2.002818 | 1.002031 | 0.844818 | 0.443092 | 0.864063 | UP   | 1463.485 | 1463.482 | 1463.487 | 9.94455  | 9.853533 |
| 7640 | M287T9_1 | 1.213174 | -0.27879 | -0.83018 | 0.443167 | 0.864063 | DOWN | 287.1873 | 287.1869 | 287.1878 | 8.8398   | 8.803967 |
| 7641 | M210T10_ | 1.147419 | -0.19839 | -0.8244  | 0.443182 | 0.864063 | DOWN | 210.3212 | 210.3211 | 210.3213 | 9.871467 | 9.7634   |
| 7642 | M277T11_ | 1.138961 | -0.18772 | -0.8075  | 0.443205 | 0.864063 | DOWN | 276.8129 | 276.8128 | 276.8131 | 10.892   | 10.8646  |
| 7643 | M1049T10 | 1.074032 | 0.103037 | 0.818214 | 0.443223 | 0.864063 | UP   | 1048.903 | 1048.903 | 1048.907 | 9.843017 | 9.728083 |
| 7644 | M283T11_ | 1.313916 | 0.393873 | 0.829882 | 0.443296 | 0.864063 | UP   | 282.9437 | 282.9436 | 282.9439 | 10.89907 | 10.88995 |
| 7645 | M617T10_ | 1.605363 | 0.6829   | 0.847944 | 0.443383 | 0.864063 | UP   | 616.9367 | 616.9361 | 616.9372 | 9.8207   | 9.715683 |
| 7646 | M664T10_ | 1.258264 | 0.331434 | 0.816425 | 0.443414 | 0.864063 | UP   | 664.27   | 664.2693 | 664.2718 | 9.818508 | 9.7124   |
| 7647 | M838T10_ | 1.209661 | -0.2746  | -0.8249  | 0.44342  | 0.864063 | DOWN | 838.21   | 838.2093 | 838.2104 | 9.948875 | 9.843367 |
| 7648 | M771T10_ | 1.526768 | 0.610481 | 0.841669 | 0.443428 | 0.864063 | UP   | 770.5982 | 770.5938 | 770.5988 | 9.835675 | 9.715683 |
| 7649 | M1976T10 | 1.097781 | -0.13459 | -0.82325 | 0.443491 | 0.864063 | DOWN | 1976.309 | 1976.308 | 1976.311 | 9.8207   | 9.715683 |
| 7650 | M200T10_ | 1.179031 | -0.2376  | -0.81078 | 0.443516 | 0.864063 | DOWN | 199.8297 | 199.8296 | 199.8297 | 9.830283 | 9.715683 |
| 7651 | M593T45  | 1.17798  | -0.23632 | -0.81868 | 0.443534 | 0.864063 | DOWN | 592.9259 | 592.9255 | 592.9266 | 44.98333 | 44.98333 |
| 7652 | M733T3   | 1.295313 | 0.373301 | 0.805953 | 0.443569 | 0.864063 | UP   | 733.4831 | 733.4826 | 733.484  | 3.4632   | 3.403517 |
| 7653 | M418T42  | 1.121357 | -0.16525 | -0.84801 | 0.443571 | 0.864063 | DOWN | 418.2795 | 418.2794 | 418.2797 | 41.898   | 41.834   |
| 7654 | M499T9_5 | 1.406518 | 0.492128 | 0.820336 | 0.443573 | 0.864063 | UP   | 499.0222 | 499.0212 | 499.0225 | 9.15295  | 9.1175   |
| 7655 | M311T11_ | 1.12254  | 0.166767 | 0.805983 | 0.443594 | 0.864063 | UP   | 311.4516 | 311.4512 | 311.4521 | 10.92802 | 10.879   |
| 7656 | M299T10_ | 1.174254 | -0.23174 | -0.82693 | 0.443598 | 0.864063 | DOWN | 298.6325 | 298.6324 | 298.6327 | 9.986767 | 9.8914   |
| 7657 | M287T45  | 1.228724 | -0.29716 | -0.84027 | 0.443604 | 0.864063 | DOWN | 287.1486 | 287.1484 | 287.1488 | 44.696   | 44.39433 |
| 7658 | M385T11_ | 1.147812 | -0.19889 | -0.80714 | 0.44369  | 0.864063 | DOWN | 384.6843 | 384.6839 | 384.6851 | 10.91265 | 10.879   |
| 7659 | M249T23  | 1.482761 | 0.568286 | 0.84694  | 0.443703 | 0.864063 | UP   | 249.182  | 249.1817 | 249.1821 | 23.03075 | 22.987   |
| 7660 | M523T9_1 | 1.738003 | -0.79743 | -0.81036 | 0.443729 | 0.864063 | DOWN | 522.9528 | 522.9511 | 522.9573 | 9.406667 | 9.329083 |
| 7661 | M1046T10 | 1.11898  | 0.162184 | 0.834731 | 0.443729 | 0.864063 | UP   | 1045.725 | 1045.725 | 1045.727 | 9.823575 | 9.715683 |
| 7662 | M264T11_ | 1.207072 | -0.27151 | -0.81243 | 0.443809 | 0.864063 | DOWN | 264.0261 | 264.026  | 264.0266 | 10.90519 | 10.879   |
| 7663 | M395T11_ | 1.164169 | 0.219301 | 0.834679 | 0.44383  | 0.864063 | UP   | 395.2309 | 395.2308 | 395.2314 | 10.89308 | 10.85838 |
| 7664 | M297T10_ | 1.164458 | -0.21966 | -0.82023 | 0.443892 | 0.864063 | DOWN | 296.629  | 296.6288 | 296.6292 | 9.945258 | 9.827283 |

|      |          |          |          |          |          |          |      |          |          |          |          |          |
|------|----------|----------|----------|----------|----------|----------|------|----------|----------|----------|----------|----------|
| 7665 | M359T10_ | 1.157901 | -0.21151 | -0.83015 | 0.443901 | 0.864063 | DOWN | 359.2328 | 359.2327 | 359.233  | 9.916617 | 9.811217 |
| 7666 | M514T16  | 1.177589 | -0.23584 | -0.83554 | 0.443944 | 0.864063 | DOWN | 514.3607 | 514.3602 | 514.361  | 15.58545 | 15.5625  |
| 7667 | M336T9_9 | 1.364247 | -0.4481  | -0.80531 | 0.443957 | 0.864063 | DOWN | 336.4608 | 336.4584 | 336.4611 | 9.275917 | 9.21385  |
| 7668 | M407T10_ | 1.101629 | -0.13964 | -0.81359 | 0.443975 | 0.864063 | DOWN | 407.2904 | 407.2902 | 407.2905 | 10.07398 | 9.971833 |
| 7669 | M335T10_ | 1.177748 | 0.236031 | 0.813307 | 0.443995 | 0.864063 | UP   | 334.8329 | 334.8325 | 334.8333 | 9.8207   | 9.699733 |
| 7670 | M157T10_ | 1.169988 | -0.22649 | -0.81871 | 0.443995 | 0.864063 | DOWN | 157.4806 | 157.4804 | 157.4808 | 9.964092 | 9.859233 |
| 7671 | M213T10_ | 1.093476 | -0.12892 | -0.82023 | 0.443997 | 0.864063 | DOWN | 213.0019 | 213.0019 | 213.002  | 9.8207   | 9.715683 |
| 7672 | M1110T10 | 1.233348 | 0.302579 | 0.81683  | 0.444002 | 0.864063 | UP   | 1109.718 | 1109.716 | 1109.721 | 9.945208 | 9.843367 |
| 7673 | M287T10_ | 1.593323 | -0.67204 | -0.83215 | 0.44405  | 0.864063 | DOWN | 287.2327 | 287.2326 | 287.233  | 10.34472 | 10.32768 |
| 7674 | M515T10_ | 2.265942 | 1.180111 | 0.847309 | 0.4441   | 0.864063 | UP   | 515.3268 | 515.3257 | 515.3287 | 9.718283 | 9.602967 |
| 7675 | M254T10_ | 1.202089 | -0.26554 | -0.8071  | 0.444247 | 0.864063 | DOWN | 254.172  | 254.1718 | 254.1723 | 9.76065  | 9.636483 |
| 7676 | M291T9_4 | 1.210838 | -0.27601 | -0.80593 | 0.444304 | 0.864063 | DOWN | 290.6718 | 290.671  | 290.6729 | 9.206    | 9.147367 |
| 7677 | M1994T10 | 1.239803 | -0.31011 | -0.80852 | 0.444307 | 0.864063 | DOWN | 1993.661 | 1993.659 | 1993.666 | 9.8374   | 9.699733 |
| 7678 | M313T30  | 1.320732 | 0.401338 | 0.83227  | 0.44439  | 0.864063 | UP   | 313.2348 | 313.2347 | 313.2349 | 29.90625 | 29.90533 |
| 7679 | M539T9_4 | 1.137132 | -0.1854  | -0.82639 | 0.444394 | 0.864063 | DOWN | 539.4154 | 539.4152 | 539.4155 | 9.458142 | 9.355317 |
| 7680 | M712T10_ | 1.213408 | -0.27906 | -0.83069 | 0.44442  | 0.864063 | DOWN | 712.1294 | 712.1288 | 712.13   | 9.972833 | 9.859233 |
| 7681 | M384T9_6 | 1.244683 | -0.31578 | -0.80488 | 0.444442 | 0.864063 | DOWN | 384.4383 | 384.4322 | 384.4389 | 9.333267 | 9.249433 |
| 7682 | M548T44_ | 1.15177  | 0.203852 | 0.825038 | 0.44445  | 0.864063 | UP   | 548.3063 | 548.3061 | 548.3065 | 44.34392 | 44.2505  |
| 7683 | M697T9_4 | 1.471325 | -0.55712 | -0.80619 | 0.444542 | 0.864063 | DOWN | 696.7434 | 696.7426 | 696.7442 | 9.263367 | 9.219483 |
| 7684 | M359T14  | 2.941053 | -1.55633 | -0.84156 | 0.444551 | 0.864063 | DOWN | 359.2803 | 359.2799 | 359.2808 | 13.62439 | 13.58025 |
| 7685 | M223T11_ | 1.182974 | -0.24242 | -0.80523 | 0.444625 | 0.864063 | DOWN | 223.2694 | 223.2693 | 223.2695 | 10.91642 | 10.90553 |
| 7686 | M855T10  | 1.438899 | 0.524965 | 0.833938 | 0.444821 | 0.864063 | UP   | 855.4264 | 855.4255 | 855.4273 | 9.961333 | 9.843367 |
| 7687 | M402T11_ | 1.346607 | 0.429329 | 0.803621 | 0.444903 | 0.864063 | UP   | 401.8393 | 401.836  | 401.842  | 10.92828 | 10.90393 |
| 7688 | M199T45  | 1.130249 | -0.17664 | -0.81522 | 0.444954 | 0.864063 | DOWN | 199.1326 | 199.1325 | 199.1327 | 44.56658 | 44.35083 |
| 7689 | M277T11_ | 1.215232 | -0.28123 | -0.80571 | 0.444961 | 0.864063 | DOWN | 277.3855 | 277.3851 | 277.3856 | 10.8926  | 10.85018 |
| 7690 | M331T11_ | 1.160411 | -0.21464 | -0.80367 | 0.445021 | 0.864063 | DOWN | 331.3766 | 331.3765 | 331.3769 | 10.9049  | 10.87765 |
| 7691 | M488T10_ | 1.564185 | 0.645411 | 0.839374 | 0.445026 | 0.864063 | UP   | 488.1755 | 488.1753 | 488.1758 | 9.979667 | 9.8753   |
| 7692 | M473T9_1 | 2.011894 | 1.008554 | 0.842408 | 0.445172 | 0.864063 | UP   | 473.3291 | 473.3282 | 473.3297 | 9.146383 | 9.110833 |
| 7693 | M393T15_ | 1.254014 | -0.32655 | -0.80301 | 0.445176 | 0.864063 | DOWN | 393.0979 | 393.0977 | 393.0979 | 15.29263 | 15.26455 |
| 7694 | M173T9_2 | 2.120938 | 1.084702 | 0.840162 | 0.445193 | 0.864063 | UP   | 172.7612 | 172.7606 | 172.7617 | 9.18975  | 9.079083 |
| 7695 | M619T10_ | 2.159108 | 1.110435 | 0.845615 | 0.445222 | 0.864063 | UP   | 619.4642 | 619.4634 | 619.4678 | 9.85525  | 9.743667 |
| 7696 | M678T3   | 1.436906 | -0.52297 | -0.80318 | 0.445246 | 0.864063 | DOWN | 678.4994 | 678.4988 | 678.4995 | 3.2799   | 3.257667 |
| 7697 | M224T11_ | 1.615729 | -0.69219 | -0.80945 | 0.445253 | 0.864063 | DOWN | 223.7006 | 223.7    | 223.701  | 10.93208 | 10.87708 |
| 7698 | M393T19_ | 1.07444  | -0.10359 | -0.80677 | 0.445305 | 0.864063 | DOWN | 393.3107 | 393.3104 | 393.311  | 18.95125 | 18.943   |
| 7699 | M422T11_ | 1.210624 | -0.27575 | -0.80416 | 0.445331 | 0.864063 | DOWN | 421.6483 | 421.6479 | 421.6489 | 10.9049  | 10.879   |

|      |          |          |          |          |          |          |      |          |          |          |          |          |
|------|----------|----------|----------|----------|----------|----------|------|----------|----------|----------|----------|----------|
| 7700 | M385T9_7 | 1.340624 | -0.4229  | -0.80732 | 0.445337 | 0.864063 | DOWN | 385.0689 | 385.0686 | 385.0692 | 9.1602   | 9.11405  |
| 7701 | M776T21  | 1.12899  | -0.17503 | -0.80314 | 0.445467 | 0.864063 | DOWN | 775.561  | 775.5605 | 775.5614 | 21.15067 | 21.13033 |
| 7702 | M213T10_ | 1.26892  | 0.343601 | 0.802429 | 0.44551  | 0.864064 | UP   | 212.5622 | 212.5619 | 212.5726 | 9.824233 | 9.78735  |
| 7703 | M817T10_ | 1.236511 | -0.30628 | -0.80339 | 0.445554 | 0.864064 | DOWN | 817.2276 | 817.2267 | 817.2283 | 9.932033 | 9.827283 |
| 7704 | M233T11_ | 1.200851 | -0.26406 | -0.80577 | 0.445557 | 0.864064 | DOWN | 233.1032 | 233.1031 | 233.1034 | 10.9049  | 10.87708 |
| 7705 | M414T9_7 | 1.204366 | -0.26827 | -0.80509 | 0.445637 | 0.864064 | DOWN | 413.8391 | 413.8366 | 413.8395 | 9.312658 | 9.129317 |
| 7706 | M835T15  | 1.276425 | -0.35211 | -0.82189 | 0.445684 | 0.864064 | DOWN | 835.437  | 835.4366 | 835.4384 | 15.48267 | 15.44327 |
| 7707 | M460T43_ | 1.231005 | 0.299836 | 0.802315 | 0.445707 | 0.864064 | UP   | 460.2901 | 460.2899 | 460.2902 | 43.2145  | 43.17183 |
| 7708 | M380T20_ | 1.199394 | 0.262306 | 0.804011 | 0.445764 | 0.864064 | UP   | 380.2792 | 380.2789 | 380.2796 | 19.62092 | 19.58383 |
| 7709 | M218T11_ | 1.271305 | -0.34631 | -0.80262 | 0.445786 | 0.864064 | DOWN | 217.8294 | 217.8293 | 217.8297 | 10.91386 | 10.8214  |
| 7710 | M753T10_ | 1.193961 | 0.255756 | 0.821959 | 0.445872 | 0.864064 | UP   | 753.3273 | 753.3263 | 753.3283 | 9.823575 | 9.699733 |
| 7711 | M359T10_ | 2.548001 | -1.34937 | -0.81393 | 0.44604  | 0.864064 | DOWN | 359.2095 | 359.2092 | 359.2206 | 9.975217 | 9.8914   |
| 7712 | M375T9_4 | 1.959781 | 0.970692 | 0.838375 | 0.446144 | 0.864064 | UP   | 375.2414 | 375.237  | 375.2487 | 9.101967 | 9.056733 |
| 7713 | M788T9_2 | 1.407977 | -0.49362 | -0.8013  | 0.446147 | 0.864064 | DOWN | 788.4623 | 788.4601 | 788.4633 | 8.974933 | 8.799267 |
| 7714 | M383T11_ | 1.377956 | 0.46253  | 0.837161 | 0.446157 | 0.864064 | UP   | 382.6641 | 382.6639 | 382.665  | 10.90522 | 10.879   |
| 7715 | M583T10_ | 1.172082 | 0.229074 | 0.815775 | 0.446159 | 0.864064 | UP   | 583.124  | 583.1226 | 583.1245 | 9.986767 | 9.8753   |
| 7716 | M323T9_5 | 1.121968 | -0.16603 | -0.80118 | 0.446195 | 0.864064 | DOWN | 323.0774 | 323.0771 | 323.0778 | 9.285558 | 9.129317 |
| 7717 | M268T9_2 | 1.229568 | -0.29815 | -0.80624 | 0.446214 | 0.864064 | DOWN | 267.9847 | 267.9846 | 267.9848 | 8.772642 | 8.682683 |
| 7718 | M410T23_ | 1.357724 | 0.44119  | 0.801887 | 0.446261 | 0.864064 | UP   | 409.6214 | 409.621  | 409.622  | 22.95817 | 22.91483 |
| 7719 | M575T11  | 1.809372 | 0.855489 | 0.840832 | 0.44649  | 0.864064 | UP   | 575.3759 | 575.3756 | 575.3765 | 10.93622 | 10.88995 |
| 7720 | M203T8_1 | 1.349839 | 0.432787 | 0.80104  | 0.446526 | 0.864064 | UP   | 203.0077 | 203.0076 | 203.0113 | 7.962458 | 7.853817 |
| 7721 | M236T9_1 | 1.25394  | -0.32647 | -0.80379 | 0.446548 | 0.864064 | DOWN | 236.3643 | 236.3604 | 236.3648 | 9.26575  | 9.1503   |
| 7722 | M624T45_ | 1.135595 | 0.183448 | 0.818634 | 0.446551 | 0.864064 | UP   | 623.9543 | 623.954  | 623.9546 | 44.98342 | 44.98283 |
| 7723 | M254T11_ | 1.143194 | -0.19307 | -0.80096 | 0.446593 | 0.864064 | DOWN | 253.6081 | 253.608  | 253.6088 | 10.89875 | 10.8646  |
| 7724 | M399T12_ | 1.246183 | 0.317516 | 0.800736 | 0.446616 | 0.864064 | UP   | 398.7921 | 398.7917 | 398.7924 | 12.3975  | 12.3538  |
| 7725 | M380T9_1 | 1.535301 | 0.618522 | 0.832951 | 0.446737 | 0.864064 | UP   | 379.6167 | 379.6152 | 379.6193 | 9.2965   | 9.061    |
| 7726 | M487T10_ | 1.137531 | -0.18591 | -0.80117 | 0.446806 | 0.864064 | DOWN | 486.8153 | 486.815  | 486.8157 | 9.985117 | 9.8753   |
| 7727 | M326T10_ | 1.466308 | 0.552189 | 0.824199 | 0.446873 | 0.864064 | UP   | 325.726  | 325.7257 | 325.7261 | 9.951283 | 9.859233 |
| 7728 | M540T9_1 | 1.128062 | 0.173847 | 0.825777 | 0.44691  | 0.864064 | UP   | 540.0285 | 540.0281 | 540.029  | 8.817842 | 8.715883 |
| 7729 | M251T10_ | 1.390957 | 0.476077 | 0.81988  | 0.446952 | 0.864064 | UP   | 251.3628 | 251.3626 | 251.3629 | 9.946467 | 9.843367 |
| 7730 | M159T11  | 1.378515 | -0.46311 | -0.81009 | 0.447164 | 0.864064 | DOWN | 159.1975 | 159.1974 | 159.1975 | 10.84828 | 10.8214  |
| 7731 | M681T10_ | 1.060817 | -0.08518 | -0.79941 | 0.447189 | 0.864064 | DOWN | 680.5121 | 680.5116 | 680.5131 | 9.842908 | 9.715683 |
| 7732 | M835T11_ | 1.144838 | -0.19514 | -0.79984 | 0.447235 | 0.864064 | DOWN | 835.0192 | 835.0189 | 835.0194 | 10.65349 | 10.61512 |
| 7733 | M640T9_5 | 1.257189 | -0.3302  | -0.83379 | 0.447282 | 0.864064 | DOWN | 640.4572 | 640.457  | 640.4573 | 9.491642 | 9.416817 |
| 7734 | M478T9_4 | 2.068126 | 1.048324 | 0.837541 | 0.44735  | 0.864064 | UP   | 478.2553 | 478.2487 | 478.2556 | 9.251508 | 9.129317 |

|      |          |          |          |          |          |          |      |          |          |          |          |          |
|------|----------|----------|----------|----------|----------|----------|------|----------|----------|----------|----------|----------|
| 7735 | M1636T10 | 1.190237 | 0.251248 | 0.815935 | 0.447399 | 0.864064 | UP   | 1635.898 | 1635.891 | 1635.9   | 9.902208 | 9.853533 |
| 7736 | M552T9_6 | 1.94106  | 0.956845 | 0.837112 | 0.447429 | 0.864064 | UP   | 551.8814 | 551.8764 | 551.8831 | 9.20785  | 9.1036   |
| 7737 | M396T9_8 | 1.58319  | 0.662834 | 0.80456  | 0.447442 | 0.864064 | UP   | 396.0316 | 396.0274 | 396.0321 | 9.07145  | 8.922033 |
| 7738 | M628T28  | 1.126269 | 0.171552 | 0.803102 | 0.447504 | 0.864064 | UP   | 628.1835 | 628.1831 | 628.1842 | 27.61083 | 27.59033 |
| 7739 | M377T11_ | 1.301573 | -0.38026 | -0.80926 | 0.447589 | 0.864064 | DOWN | 377.2797 | 377.2701 | 377.2802 | 11.15472 | 10.9049  |
| 7740 | M408T11_ | 1.607128 | 0.684485 | 0.825902 | 0.447621 | 0.864064 | UP   | 408.1261 | 408.1258 | 408.1264 | 10.91181 | 10.879   |
| 7741 | M1815T10 | 1.900548 | 0.926416 | 0.825811 | 0.447698 | 0.864064 | UP   | 1815.196 | 1815.195 | 1815.199 | 9.903017 | 9.827283 |
| 7742 | M854T10_ | 1.110325 | -0.15098 | -0.79972 | 0.447716 | 0.864064 | DOWN | 853.7762 | 853.7746 | 853.7772 | 9.964417 | 9.8753   |
| 7743 | M235T9_5 | 1.506264 | 0.590974 | 0.801034 | 0.447763 | 0.864064 | UP   | 234.8631 | 234.86   | 234.8657 | 9.365817 | 9.132267 |
| 7744 | M534T43_ | 1.182983 | -0.24243 | -0.79839 | 0.447968 | 0.864065 | DOWN | 534.3269 | 534.3268 | 534.3269 | 43.3425  | 43.22917 |
| 7745 | M520T44_ | 1.135261 | 0.183023 | 0.810378 | 0.44803  | 0.864065 | UP   | 520.3113 | 520.3111 | 520.3114 | 43.5745  | 43.474   |
| 7746 | M304T25_ | 1.089583 | -0.12378 | -0.80678 | 0.448038 | 0.864065 | DOWN | 304.2844 | 304.2842 | 304.2845 | 24.6955  | 24.68133 |
| 7747 | M1097T10 | 1.154787 | -0.20763 | -0.82506 | 0.448064 | 0.864065 | DOWN | 1097.34  | 1097.338 | 1097.341 | 9.967367 | 9.859233 |
| 7748 | M219T9_6 | 1.288262 | 0.365426 | 0.800417 | 0.448075 | 0.864065 | UP   | 218.8962 | 218.8941 | 218.8965 | 9.319942 | 9.1602   |
| 7749 | M321T18  | 1.177754 | -0.23604 | -0.83453 | 0.448141 | 0.864065 | DOWN | 321.1672 | 321.1671 | 321.1672 | 17.74733 | 17.70517 |
| 7750 | M359T10_ | 1.313643 | 0.393573 | 0.811794 | 0.448186 | 0.864065 | UP   | 358.6187 | 358.613  | 358.6189 | 9.964092 | 9.840617 |
| 7751 | M205T10_ | 1.334852 | 0.41668  | 0.833451 | 0.448195 | 0.864065 | UP   | 205.1781 | 205.1779 | 205.1783 | 9.855658 | 9.73145  |
| 7752 | M228T10_ | 1.316943 | -0.39719 | -0.80343 | 0.448315 | 0.864065 | DOWN | 228.4973 | 228.4972 | 228.4975 | 9.9351   | 9.853533 |
| 7753 | M571T10_ | 1.107907 | -0.14784 | -0.80284 | 0.448368 | 0.864065 | DOWN | 570.6836 | 570.683  | 570.684  | 9.932033 | 9.827283 |
| 7754 | M848T10_ | 1.226441 | -0.29448 | -0.79818 | 0.448429 | 0.864065 | DOWN | 848.3746 | 848.3742 | 848.3752 | 9.916483 | 9.811217 |
| 7755 | M396T39_ | 1.120208 | 0.163767 | 0.828164 | 0.448528 | 0.864065 | UP   | 396.2225 | 396.2224 | 396.2228 | 38.8415  | 38.597   |
| 7756 | M380T9_8 | 1.375821 | 0.460293 | 0.814064 | 0.448545 | 0.864065 | UP   | 380.3865 | 380.3857 | 380.3881 | 9.203483 | 9.12675  |
| 7757 | M1076T10 | 1.094691 | -0.13052 | -0.82874 | 0.448559 | 0.864065 | DOWN | 1076.137 | 1076.135 | 1076.137 | 9.752875 | 9.636483 |
| 7758 | M1553T10 | 1.343288 | -0.42577 | -0.81788 | 0.448584 | 0.864065 | DOWN | 1552.876 | 1552.875 | 1552.878 | 10.19027 | 10.13368 |
| 7759 | M954T10_ | 1.277039 | -0.3528  | -0.79732 | 0.448661 | 0.864065 | DOWN | 953.6871 | 953.6867 | 953.6895 | 9.508883 | 9.38595  |
| 7760 | M411T41  | 1.054755 | -0.07691 | -0.80702 | 0.448731 | 0.864065 | DOWN | 411.3465 | 411.3465 | 411.3468 | 40.78867 | 40.755   |
| 7761 | M228T9_8 | 1.149363 | -0.20084 | -0.81596 | 0.44874  | 0.864065 | DOWN | 227.9721 | 227.9719 | 227.9722 | 8.7536   | 8.686867 |
| 7762 | M201T10_ | 1.18737  | 0.247769 | 0.822181 | 0.448805 | 0.864065 | UP   | 201.3625 | 201.3623 | 201.3625 | 9.816183 | 9.715683 |
| 7763 | M473T9_3 | 1.170614 | 0.227266 | 0.806628 | 0.448911 | 0.864065 | UP   | 472.9275 | 472.9271 | 472.9276 | 9.47395  | 9.245983 |
| 7764 | M600T10_ | 3.121982 | 1.642462 | 0.837743 | 0.448935 | 0.864065 | UP   | 600.2873 | 600.2864 | 600.2913 | 10.07917 | 9.840617 |
| 7765 | M288T10_ | 1.265324 | 0.339507 | 0.831767 | 0.448936 | 0.864065 | UP   | 287.7187 | 287.7186 | 287.7189 | 9.8802   | 9.772883 |
| 7766 | M508T39_ | 1.343433 | 0.425925 | 0.838127 | 0.448996 | 0.864065 | UP   | 508.2749 | 508.2749 | 508.2752 | 39.28033 | 39.20133 |
| 7767 | M253T11_ | 1.162375 | -0.21708 | -0.79645 | 0.449059 | 0.864065 | DOWN | 252.9539 | 252.9537 | 252.954  | 10.89907 | 10.879   |
| 7768 | M315T41_ | 1.096654 | 0.133108 | 0.798735 | 0.449098 | 0.864065 | UP   | 315.1799 | 315.1799 | 315.1802 | 41.47433 | 41.25283 |
| 7769 | M254T11_ | 1.144743 | -0.19502 | -0.79887 | 0.449105 | 0.864065 | DOWN | 254.112  | 254.1119 | 254.1128 | 10.89875 | 10.8646  |

|      |          |          |          |          |          |          |      |          |          |          |          |          |
|------|----------|----------|----------|----------|----------|----------|------|----------|----------|----------|----------|----------|
| 7770 | M477T9_6 | 2.624589 | 1.392092 | 0.835008 | 0.449172 | 0.864065 | UP   | 477.1709 | 477.1649 | 477.1711 | 9.1036   | 9.053483 |
| 7771 | M476T10_ | 1.07384  | 0.102779 | 0.815084 | 0.449248 | 0.864065 | UP   | 476.3106 | 476.31   | 476.3114 | 10.44611 | 10.40807 |
| 7772 | M498T10_ | 1.223914 | -0.2915  | -0.80297 | 0.449248 | 0.864065 | DOWN | 498.1996 | 498.1992 | 498.1999 | 9.5265   | 9.432183 |
| 7773 | M414T9_3 | 1.26558  | -0.3398  | -0.79559 | 0.449349 | 0.864065 | DOWN | 413.7178 | 413.7175 | 413.7181 | 9.146383 | 9.110833 |
| 7774 | M169T10_ | 1.392176 | 0.477342 | 0.810365 | 0.449506 | 0.864065 | UP   | 168.8815 | 168.8814 | 168.8816 | 9.958617 | 9.859233 |
| 7775 | M420T9_2 | 1.331552 | 0.413109 | 0.798101 | 0.449541 | 0.864065 | UP   | 419.7215 | 419.7206 | 419.722  | 9.2585   | 9.175017 |
| 7776 | M319T10_ | 1.100532 | 0.138201 | 0.795191 | 0.449572 | 0.864065 | UP   | 318.5886 | 318.5882 | 318.5887 | 9.972483 | 9.859233 |
| 7777 | M413T10_ | 1.124988 | -0.16991 | -0.80399 | 0.449609 | 0.864065 | DOWN | 412.8704 | 412.8702 | 412.8706 | 9.948875 | 9.843367 |
| 7778 | M377T35  | 2.085929 | -1.06069 | -0.82476 | 0.449642 | 0.864065 | DOWN | 376.8147 | 376.8145 | 376.815  | 35.18558 | 35.152   |
| 7779 | M232T11_ | 1.128716 | -0.17468 | -0.79765 | 0.449706 | 0.864065 | DOWN | 232.1277 | 232.1277 | 232.128  | 10.90519 | 10.879   |
| 7780 | M813T11_ | 1.21661  | -0.28287 | -0.80427 | 0.449732 | 0.864065 | DOWN | 813.3634 | 813.3627 | 813.3646 | 11.13275 | 11.08352 |
| 7781 | M621T10_ | 1.380709 | 0.465409 | 0.834766 | 0.449752 | 0.864065 | UP   | 621.1702 | 621.1696 | 621.1742 | 9.830558 | 9.715683 |
| 7782 | M379T9_1 | 1.181008 | -0.24002 | -0.82249 | 0.449778 | 0.864065 | DOWN | 379.2633 | 379.263  | 379.2636 | 9.06315  | 9.048117 |
| 7783 | M401T10_ | 1.769251 | 0.823139 | 0.828059 | 0.449806 | 0.864065 | UP   | 401.2613 | 401.2548 | 401.2621 | 9.634475 | 9.4468   |
| 7784 | M281T11_ | 1.148452 | -0.19969 | -0.79874 | 0.449998 | 0.864065 | DOWN | 280.9595 | 280.9593 | 280.9598 | 10.93018 | 10.90765 |
| 7785 | M412T10_ | 1.112247 | -0.15348 | -0.80138 | 0.450016 | 0.864065 | DOWN | 412.0608 | 412.0606 | 412.0609 | 9.94785  | 9.843367 |
| 7786 | M375T9_5 | 1.238707 | 0.308836 | 0.799274 | 0.450036 | 0.864065 | UP   | 375.2647 | 375.259  | 375.2713 | 9.278342 | 9.20785  |
| 7787 | M455T9_8 | 1.18038  | -0.23925 | -0.79474 | 0.450043 | 0.864065 | DOWN | 454.9943 | 454.9937 | 454.9944 | 9.277317 | 9.129317 |
| 7788 | M717T11  | 1.322059 | 0.402787 | 0.794018 | 0.450153 | 0.864065 | UP   | 717.4028 | 717.4023 | 717.4031 | 11.49131 | 11.4686  |
| 7789 | M797T9_3 | 1.314878 | -0.39493 | -0.80135 | 0.450154 | 0.864065 | DOWN | 797.0794 | 797.0771 | 797.082  | 8.718275 | 8.578067 |
| 7790 | M606T25  | 1.16304  | -0.2179  | -0.80753 | 0.45016  | 0.864065 | DOWN | 606.4625 | 606.4623 | 606.4628 | 24.55108 | 24.543   |
| 7791 | M361T9_3 | 1.460675 | -0.54664 | -0.79425 | 0.450184 | 0.864065 | DOWN | 360.966  | 360.9659 | 360.9675 | 9.325333 | 9.24215  |
| 7792 | M698T10_ | 1.163167 | -0.21806 | -0.82409 | 0.450238 | 0.864065 | DOWN | 698.4847 | 698.4843 | 698.4857 | 9.8736   | 9.7634   |
| 7793 | M201T9_1 | 1.526529 | -0.61025 | -0.79503 | 0.450276 | 0.864065 | DOWN | 200.9971 | 200.9969 | 200.998  | 9.272583 | 9.202433 |
| 7794 | M1840T10 | 1.76207  | 0.817271 | 0.831126 | 0.450401 | 0.864065 | UP   | 1840.113 | 1840.109 | 1840.116 | 9.82645  | 9.6681   |
| 7795 | M365T11_ | 1.24713  | 0.318612 | 0.798692 | 0.450411 | 0.864065 | UP   | 364.6657 | 364.6651 | 364.6671 | 10.90551 | 10.879   |
| 7796 | M748T10_ | 1.117455 | 0.160217 | 0.83082  | 0.450469 | 0.864066 | UP   | 747.6237 | 747.6216 | 747.6248 | 9.825767 | 9.715683 |
| 7797 | M342T19  | 1.13755  | 0.18593  | 0.803895 | 0.450633 | 0.864066 | UP   | 342.3001 | 342.2996 | 342.3008 | 18.81958 | 18.80583 |
| 7798 | M684T10_ | 1.141515 | -0.19095 | -0.80637 | 0.450715 | 0.864066 | DOWN | 683.5291 | 683.5283 | 683.5294 | 9.825767 | 9.715683 |
| 7799 | M1890T10 | 1.251027 | -0.32311 | -0.80353 | 0.45097  | 0.864066 | DOWN | 1889.74  | 1889.739 | 1889.742 | 9.8207   | 9.715683 |
| 7800 | M745T4   | 1.317006 | 0.397262 | 0.792695 | 0.451042 | 0.864066 | UP   | 745.4466 | 745.4462 | 745.4473 | 3.558683 | 3.491133 |
| 7801 | M801T31  | 1.164331 | -0.2195  | -0.81722 | 0.451129 | 0.864066 | DOWN | 801.4976 | 801.4966 | 801.4981 | 31.24275 | 31.23367 |
| 7802 | M639T16  | 1.133557 | -0.18086 | -0.79739 | 0.45117  | 0.864066 | DOWN | 639.4452 | 639.4448 | 639.4456 | 15.55916 | 15.54018 |
| 7803 | M441T10_ | 1.157568 | -0.2111  | -0.81516 | 0.451174 | 0.864066 | DOWN | 441.1681 | 441.1676 | 441.1683 | 9.962808 | 9.859233 |
| 7804 | M704T10_ | 1.109689 | -0.15016 | -0.80621 | 0.451196 | 0.864066 | DOWN | 704.4627 | 704.4617 | 704.4633 | 9.867392 | 9.73145  |

|      |          |          |          |          |          |          |      |          |          |          |          |          |
|------|----------|----------|----------|----------|----------|----------|------|----------|----------|----------|----------|----------|
| 7805 | M441T10_ | 1.846096 | 0.884477 | 0.792061 | 0.4512   | 0.864066 | UP   | 441.3947 | 441.3941 | 441.3952 | 9.916525 | 9.649833 |
| 7806 | M264T11_ | 1.233414 | -0.30266 | -0.80069 | 0.451215 | 0.864066 | DOWN | 264.3994 | 264.3989 | 264.3997 | 10.8926  | 10.873   |
| 7807 | M478T10_ | 1.129236 | -0.17535 | -0.8122  | 0.451279 | 0.864066 | DOWN | 477.6272 | 477.6261 | 477.6277 | 10.3044  | 10.26607 |
| 7808 | M1040T10 | 1.182946 | -0.24238 | -0.79495 | 0.451339 | 0.864066 | DOWN | 1039.63  | 1039.629 | 1039.631 | 9.8207   | 9.715683 |
| 7809 | M410T10_ | 1.924362 | 0.94438  | 0.832815 | 0.451345 | 0.864066 | UP   | 410.0679 | 410.0676 | 410.0679 | 9.951283 | 9.853533 |
| 7810 | M434T9_1 | 1.187863 | 0.248368 | 0.797873 | 0.451368 | 0.864066 | UP   | 434.0724 | 434.0719 | 434.0728 | 9.204217 | 9.158833 |
| 7811 | M704T10_ | 1.137025 | 0.185263 | 0.829632 | 0.451495 | 0.864066 | UP   | 703.5969 | 703.5966 | 703.5972 | 9.85045  | 9.73145  |
| 7812 | M785T10_ | 1.107996 | -0.14795 | -0.79969 | 0.451533 | 0.864066 | DOWN | 785.414  | 785.4138 | 785.4146 | 9.544775 | 9.432183 |
| 7813 | M967T11  | 1.124986 | -0.16991 | -0.79143 | 0.451552 | 0.864066 | DOWN | 967.4899 | 967.489  | 967.4908 | 10.90519 | 10.879   |
| 7814 | M299T10_ | 1.303088 | -0.38193 | -0.79298 | 0.451556 | 0.864066 | DOWN | 298.7274 | 298.7268 | 298.7276 | 9.942317 | 9.827283 |
| 7815 | M511T10_ | 1.212178 | -0.2776  | -0.8134  | 0.451564 | 0.864066 | DOWN | 511.0407 | 511.0403 | 511.042  | 9.874317 | 9.747533 |
| 7816 | M288T11_ | 1.31413  | 0.394108 | 0.83256  | 0.451574 | 0.864066 | UP   | 288.1805 | 288.1804 | 288.1806 | 10.74955 | 10.69717 |
| 7817 | M620T35  | 1.255514 | -0.32828 | -0.83234 | 0.451767 | 0.864066 | DOWN | 620.3639 | 620.3637 | 620.364  | 34.60983 | 34.51267 |
| 7818 | M360T9_8 | 1.293378 | 0.371144 | 0.795334 | 0.451822 | 0.864066 | UP   | 359.9845 | 359.9842 | 359.9868 | 8.931783 | 8.7875   |
| 7819 | M257T10_ | 1.158931 | 0.212795 | 0.793646 | 0.451905 | 0.864066 | UP   | 257.1353 | 257.1333 | 257.1357 | 9.946467 | 9.650367 |
| 7820 | M227T9_1 | 2.422232 | 1.276337 | 0.796278 | 0.452031 | 0.864066 | UP   | 227.2158 | 227.2092 | 227.2215 | 8.7779   | 8.405567 |
| 7821 | M202T9_1 | 1.34191  | 0.424287 | 0.795285 | 0.452043 | 0.864066 | UP   | 201.5284 | 201.5278 | 201.529  | 9.276658 | 9.132267 |
| 7822 | M505T10_ | 1.075021 | -0.10436 | -0.82524 | 0.452063 | 0.864066 | DOWN | 505.306  | 505.3053 | 505.3077 | 10.3828  | 10.32768 |
| 7823 | M826T10_ | 1.178886 | 0.237424 | 0.791316 | 0.452083 | 0.864066 | UP   | 825.8975 | 825.8971 | 825.8984 | 9.944392 | 9.827283 |
| 7824 | M711T9_1 | 1.556001 | -0.63784 | -0.80555 | 0.452116 | 0.864066 | DOWN | 710.5077 | 710.5063 | 710.5088 | 8.728617 | 8.672483 |
| 7825 | M409T10_ | 1.729243 | 0.79014  | 0.828953 | 0.452173 | 0.864066 | UP   | 408.7842 | 408.7839 | 408.7844 | 9.935675 | 9.827283 |
| 7826 | M634T10_ | 1.194147 | -0.25598 | -0.79188 | 0.452176 | 0.864066 | DOWN | 634.2164 | 634.216  | 634.2174 | 9.958617 | 9.859233 |
| 7827 | M1974T10 | 1.194868 | -0.25685 | -0.79503 | 0.452178 | 0.864066 | DOWN | 1974.052 | 1974.05  | 1974.059 | 9.830558 | 9.715683 |
| 7828 | M363T10_ | 1.97346  | 0.980727 | 0.828951 | 0.452249 | 0.864066 | UP   | 362.6315 | 362.6313 | 362.6318 | 9.770733 | 9.758367 |
| 7829 | M1474T9  | 1.276208 | -0.35186 | -0.79368 | 0.45225  | 0.864066 | DOWN | 1473.68  | 1473.678 | 1473.686 | 9.252983 | 9.06855  |
| 7830 | M357T11_ | 1.203577 | -0.26733 | -0.80521 | 0.45228  | 0.864066 | DOWN | 356.8272 | 356.827  | 356.8279 | 10.91987 | 10.88747 |
| 7831 | M784T10_ | 1.231207 | -0.30007 | -0.79812 | 0.452293 | 0.864066 | DOWN | 784.3296 | 784.3291 | 784.3302 | 9.6457   | 9.52595  |
| 7832 | M247T13  | 1.337891 | 0.419961 | 0.817036 | 0.452358 | 0.864066 | UP   | 247.1301 | 247.1299 | 247.1303 | 13.39046 | 13.31815 |
| 7833 | M198T10_ | 1.168255 | -0.22436 | -0.81495 | 0.452377 | 0.864066 | DOWN | 197.6907 | 197.6906 | 197.6908 | 9.988125 | 9.8914   |
| 7834 | M283T8   | 1.66046  | 0.731583 | 0.814104 | 0.452403 | 0.864066 | UP   | 283.0695 | 283.0694 | 283.0695 | 8.2012   | 8.15375  |
| 7835 | M355T9_5 | 1.58069  | -0.66055 | -0.82287 | 0.452447 | 0.864066 | DOWN | 355.2274 | 355.2228 | 355.2319 | 8.979867 | 8.83365  |
| 7836 | M466T22_ | 1.149956 | -0.20158 | -0.79293 | 0.452494 | 0.864066 | DOWN | 466.3734 | 466.373  | 466.3737 | 21.58058 | 21.56633 |
| 7837 | M1047T10 | 1.113349 | -0.15491 | -0.81069 | 0.452536 | 0.864066 | DOWN | 1046.728 | 1046.726 | 1046.729 | 9.825492 | 9.699733 |
| 7838 | M175T10_ | 1.529325 | 0.612895 | 0.828751 | 0.45263  | 0.864066 | UP   | 175.1227 | 175.1226 | 175.1228 | 9.967367 | 9.869467 |
| 7839 | M265T11_ | 1.111051 | -0.15193 | -0.78935 | 0.452666 | 0.864066 | DOWN | 265.0572 | 265.057  | 265.0575 | 10.90628 | 10.8646  |



|      |          |          |          |          |          |          |      |          |          |          |          |          |
|------|----------|----------|----------|----------|----------|----------|------|----------|----------|----------|----------|----------|
| 7840 | M509T11_ | 1.214381 | -0.28022 | -0.81176 | 0.452729 | 0.864066 | DOWN | 509.4055 | 509.4045 | 509.4058 | 10.87708 | 10.8628  |
| 7841 | M404T39_ | 1.50255  | 0.587413 | 0.822086 | 0.452836 | 0.864066 | UP   | 404.2639 | 404.2637 | 404.2642 | 38.5545  | 38.2945  |
| 7842 | M374T20  | 1.440349 | -0.52642 | -0.79341 | 0.452883 | 0.864066 | DOWN | 373.773  | 373.7727 | 373.7733 | 20.36792 | 20.36033 |
| 7843 | M742T10_ | 2.363048 | 1.240649 | 0.827217 | 0.452951 | 0.864067 | UP   | 742.3854 | 742.3851 | 742.3858 | 9.791825 | 9.683817 |
| 7844 | M346T9_7 | 1.356272 | 0.439646 | 0.817953 | 0.452967 | 0.864067 | UP   | 345.9611 | 345.9581 | 345.9632 | 9.343517 | 9.175017 |
| 7845 | M436T9_9 | 1.116591 | 0.159101 | 0.807635 | 0.453006 | 0.864067 | UP   | 436.2124 | 436.2122 | 436.2127 | 9.18195  | 9.12675  |
| 7846 | M1925T10 | 1.130455 | 0.176904 | 0.789367 | 0.45301  | 0.864067 | UP   | 1925.436 | 1925.435 | 1925.438 | 9.830558 | 9.715683 |
| 7847 | M852T10_ | 1.076418 | -0.10624 | -0.81831 | 0.453038 | 0.864067 | DOWN | 851.566  | 851.5658 | 851.5665 | 9.934533 | 9.827283 |
| 7848 | M567T9_2 | 1.219208 | -0.28594 | -0.79809 | 0.453103 | 0.864067 | DOWN | 566.6374 | 566.6315 | 566.6377 | 9.43365  | 9.26025  |
| 7849 | M211T10_ | 1.220049 | 0.28694  | 0.826141 | 0.453248 | 0.864067 | UP   | 210.9477 | 210.9474 | 210.9479 | 9.887567 | 9.762917 |
| 7850 | M305T9_3 | 1.284833 | -0.36158 | -0.8032  | 0.453249 | 0.864067 | DOWN | 305.1348 | 305.1279 | 305.135  | 9.317    | 9.234417 |
| 7851 | M352T42  | 1.062499 | -0.08746 | -0.82708 | 0.453282 | 0.864067 | DOWN | 352.1966 | 352.1964 | 352.1966 | 42.03533 | 41.99217 |
| 7852 | M350T40_ | 1.097285 | -0.13394 | -0.82834 | 0.453319 | 0.864067 | DOWN | 350.2173 | 350.217  | 350.2173 | 39.96367 | 39.79117 |
| 7853 | M780T10_ | 1.587575 | -0.66682 | -0.79669 | 0.453324 | 0.864067 | DOWN | 780.468  | 780.4649 | 780.4686 | 9.979667 | 9.9009   |
| 7854 | M323T26_ | 1.263412 | -0.33733 | -0.78812 | 0.453346 | 0.864067 | DOWN | 323.4921 | 323.492  | 323.4923 | 26.0075  | 25.89433 |
| 7855 | M659T10_ | 4.061997 | -2.02219 | -0.82615 | 0.453434 | 0.864067 | DOWN | 658.5012 | 658.4997 | 658.5024 | 9.844517 | 9.715683 |
| 7856 | M410T10_ | 1.575047 | 0.655395 | 0.803674 | 0.45344  | 0.864067 | UP   | 410.1468 | 410.1453 | 410.1499 | 9.933967 | 9.859667 |
| 7857 | M523T9_3 | 1.199    | -0.26183 | -0.79078 | 0.45348  | 0.864067 | DOWN | 523.1252 | 523.1243 | 523.1259 | 9.280992 | 9.129317 |
| 7858 | M273T9_2 | 1.3578   | -0.44127 | -0.78822 | 0.453495 | 0.864067 | DOWN | 272.699  | 272.6989 | 272.6991 | 9.37735  | 9.30295  |
| 7859 | M154T10_ | 1.279641 | -0.35574 | -0.78924 | 0.453512 | 0.864067 | DOWN | 153.5497 | 153.5495 | 153.55   | 9.90185  | 9.830283 |
| 7860 | M420T25  | 1.733096 | -0.79335 | -0.79478 | 0.453532 | 0.864067 | DOWN | 420.2016 | 420.2012 | 420.202  | 25.07033 | 25.03    |
| 7861 | M561T10_ | 1.130454 | -0.1769  | -0.80707 | 0.453572 | 0.864067 | DOWN | 561.1189 | 561.1188 | 561.1191 | 9.983467 | 9.8753   |
| 7862 | M434T10_ | 1.154361 | -0.20709 | -0.79667 | 0.453601 | 0.864067 | DOWN | 433.5397 | 433.5391 | 433.5406 | 9.968992 | 9.859233 |
| 7863 | M1555T10 | 1.369311 | 0.45345  | 0.807227 | 0.453627 | 0.864067 | UP   | 1554.625 | 1554.622 | 1554.626 | 9.968992 | 9.859233 |
| 7864 | M264T11_ | 1.107593 | -0.14743 | -0.78799 | 0.453649 | 0.864067 | DOWN | 264.0672 | 264.0671 | 264.0676 | 10.89772 | 10.8646  |
| 7865 | M332T17_ | 1.563454 | -0.64474 | -0.78872 | 0.453671 | 0.864067 | DOWN | 332.1939 | 332.1927 | 332.195  | 17.02992 | 16.97217 |
| 7866 | M217T10_ | 1.216401 | 0.282619 | 0.792616 | 0.45368  | 0.864067 | UP   | 217.296  | 217.2958 | 217.3044 | 9.946367 | 9.859233 |
| 7867 | M232T20  | 1.151007 | -0.2029  | -0.80385 | 0.453693 | 0.864067 | DOWN | 232.1694 | 232.1692 | 232.1695 | 20.41808 | 20.40333 |
| 7868 | M300T30_ | 1.205634 | -0.26979 | -0.79276 | 0.453852 | 0.864067 | DOWN | 300.1646 | 300.1645 | 300.1647 | 29.83392 | 29.81917 |
| 7869 | M399T11_ | 1.097766 | -0.13457 | -0.79086 | 0.45386  | 0.864067 | DOWN | 399.4041 | 399.4041 | 399.4047 | 10.91983 | 10.90197 |
| 7870 | M300T10_ | 1.844552 | 0.88327  | 0.827183 | 0.453881 | 0.864067 | UP   | 299.712  | 299.7116 | 299.7198 | 9.531725 | 9.38665  |
| 7871 | M540T9_4 | 1.137325 | -0.18564 | -0.80201 | 0.453933 | 0.864067 | DOWN | 540.4188 | 540.4186 | 540.419  | 9.458142 | 9.355317 |
| 7872 | M303T10_ | 1.091066 | 0.125738 | 0.789854 | 0.45409  | 0.864067 | UP   | 302.5873 | 302.5871 | 302.5877 | 9.932033 | 9.811217 |
| 7873 | M618T9_2 | 1.661699 | 0.732659 | 0.825062 | 0.454119 | 0.864067 | UP   | 618.0372 | 618.029  | 618.038  | 9.166033 | 9.126783 |
| 7874 | M216T9_1 | 1.305454 | -0.38455 | -0.78682 | 0.454167 | 0.864067 | DOWN | 215.723  | 215.7226 | 215.7232 | 9.280767 | 9.275917 |

|      |          |          |          |          |          |          |      |          |          |          |          |          |
|------|----------|----------|----------|----------|----------|----------|------|----------|----------|----------|----------|----------|
| 7875 | M365T21  | 1.670429 | -0.74022 | -0.80088 | 0.45417  | 0.864067 | DOWN | 365.2771 | 365.2765 | 365.2778 | 21.33683 | 21.30867 |
| 7876 | M236T10_ | 1.768088 | 0.82219  | 0.822032 | 0.454218 | 0.864067 | UP   | 236.1551 | 236.1547 | 236.1553 | 9.956417 | 9.859233 |
| 7877 | M483T11  | 1.993854 | 0.99556  | 0.826762 | 0.454371 | 0.864067 | UP   | 483.201  | 483.1994 | 483.2034 | 10.97928 | 10.85018 |
| 7878 | M272T10_ | 1.263667 | -0.33762 | -0.80422 | 0.454438 | 0.864067 | DOWN | 272.2457 | 272.2454 | 272.2458 | 9.809217 | 9.7124   |
| 7879 | M338T10_ | 1.699652 | -0.76524 | -0.79258 | 0.454583 | 0.864067 | DOWN | 338.0938 | 338.0904 | 338.0953 | 9.871042 | 9.827283 |
| 7880 | M562T45_ | 1.574451 | -0.65485 | -0.80972 | 0.454624 | 0.864067 | DOWN | 562.3219 | 562.3218 | 562.3221 | 44.96917 | 44.9525  |
| 7881 | M778T12  | 1.519537 | 0.603632 | 0.81821  | 0.454708 | 0.864067 | UP   | 778.4694 | 778.4689 | 778.4705 | 12.0037  | 11.97343 |
| 7882 | M394T11_ | 1.098566 | -0.13562 | -0.78593 | 0.454876 | 0.864067 | DOWN | 393.6781 | 393.6779 | 393.6782 | 10.892   | 10.879   |
| 7883 | M1636T10 | 1.333835 | -0.41558 | -0.79346 | 0.454899 | 0.864067 | DOWN | 1636.13  | 1636.127 | 1636.136 | 9.951283 | 9.859233 |
| 7884 | M567T9_5 | 2.267727 | 1.181247 | 0.821254 | 0.454916 | 0.864067 | UP   | 567.4969 | 567.4967 | 567.4975 | 9.438833 | 9.355317 |
| 7885 | M637T10_ | 1.520456 | 0.604504 | 0.8261   | 0.454982 | 0.864067 | UP   | 636.8402 | 636.8397 | 636.8438 | 9.828642 | 9.699733 |
| 7886 | M454T9_1 | 1.532147 | -0.61555 | -0.78557 | 0.455027 | 0.864067 | DOWN | 453.5296 | 453.5217 | 453.5332 | 9.245983 | 9.1445   |
| 7887 | M258T10_ | 1.193597 | -0.25532 | -0.79094 | 0.455063 | 0.864067 | DOWN | 258.3846 | 258.3793 | 258.3903 | 9.82075  | 9.665433 |
| 7888 | M1951T10 | 1.368904 | -0.45302 | -0.78711 | 0.455275 | 0.864067 | DOWN | 1951.479 | 1951.475 | 1951.481 | 9.825492 | 9.728083 |
| 7889 | M229T10_ | 1.495055 | -0.5802  | -0.79145 | 0.455277 | 0.864067 | DOWN | 229.4077 | 229.4076 | 229.4081 | 9.917208 | 9.859667 |
| 7890 | M349T10_ | 1.616708 | 0.69306  | 0.825728 | 0.455282 | 0.864067 | UP   | 349.4322 | 349.4321 | 349.4326 | 9.830733 | 9.715683 |
| 7891 | M1035T10 | 1.225771 | -0.29369 | -0.79357 | 0.455319 | 0.864067 | DOWN | 1034.69  | 1034.689 | 1034.691 | 9.91875  | 9.88865  |
| 7892 | M343T10_ | 1.090325 | -0.12476 | -0.80307 | 0.45539  | 0.864067 | DOWN | 343.3066 | 343.3064 | 343.3069 | 9.872475 | 9.7634   |
| 7893 | M398T43_ | 1.1176   | -0.1604  | -0.82008 | 0.455394 | 0.864067 | DOWN | 398.2382 | 398.2381 | 398.2383 | 42.5535  | 42.35183 |
| 7894 | M471T11_ | 1.211068 | 0.27628  | 0.790824 | 0.455478 | 0.864068 | UP   | 470.5875 | 470.5868 | 470.5887 | 10.90785 | 10.82972 |
| 7895 | M1988T10 | 1.3586   | -0.44212 | -0.80782 | 0.455636 | 0.864068 | DOWN | 1988.124 | 1988.123 | 1988.127 | 9.972483 | 9.859233 |
| 7896 | M563T11_ | 1.305878 | -0.38502 | -0.79582 | 0.455657 | 0.864068 | DOWN | 563.025  | 563.0236 | 563.0319 | 10.63933 | 10.49965 |
| 7897 | M243T9_1 | 1.249412 | -0.32125 | -0.7854  | 0.455698 | 0.864068 | DOWN | 242.5094 | 242.5091 | 242.5096 | 8.759725 | 8.63795  |
| 7898 | M414T17  | 1.134048 | -0.18148 | -0.79034 | 0.455782 | 0.864068 | DOWN | 414.1764 | 414.176  | 414.1769 | 16.782   | 16.76767 |
| 7899 | M524T9_5 | 1.342976 | -0.42543 | -0.78467 | 0.455901 | 0.864068 | DOWN | 524.1927 | 524.1923 | 524.1936 | 9.153292 | 9.11405  |
| 7900 | M636T10_ | 1.058655 | -0.08223 | -0.78354 | 0.455954 | 0.864068 | DOWN | 635.8492 | 635.8484 | 635.8514 | 9.823575 | 9.715683 |
| 7901 | M370T29_ | 1.330051 | -0.41148 | -0.78515 | 0.455992 | 0.864068 | DOWN | 369.5986 | 369.5985 | 369.5988 | 28.79167 | 28.7035  |
| 7902 | M311T24_ | 1.420602 | -0.5065  | -0.78594 | 0.456028 | 0.864068 | DOWN | 310.6505 | 310.6502 | 310.6509 | 23.93767 | 23.89983 |
| 7903 | M370T29_ | 1.32222  | -0.40296 | -0.78637 | 0.456117 | 0.864068 | DOWN | 369.9331 | 369.9329 | 369.9332 | 28.7745  | 28.70617 |
| 7904 | M474T42_ | 1.270711 | 0.345636 | 0.817019 | 0.456293 | 0.864068 | UP   | 474.2694 | 474.2693 | 474.2697 | 42.3805  | 42.23667 |
| 7905 | M295T10_ | 1.177241 | 0.23541  | 0.793722 | 0.456311 | 0.864068 | UP   | 294.819  | 294.8189 | 294.8193 | 9.95385  | 9.853533 |
| 7906 | M386T11_ | 1.153022 | -0.20542 | -0.78301 | 0.456464 | 0.864068 | DOWN | 385.8332 | 385.8327 | 385.8338 | 10.91265 | 10.879   |
| 7907 | M228T11_ | 1.097216 | -0.13385 | -0.78383 | 0.456477 | 0.864068 | DOWN | 228.0952 | 228.0951 | 228.0954 | 10.92728 | 10.90197 |
| 7908 | M418T9_5 | 1.293444 | 0.371218 | 0.782458 | 0.456572 | 0.864068 | UP   | 417.996  | 417.9881 | 417.9968 | 9.18975  | 9.1445   |
| 7909 | M355T10_ | 2.037452 | 1.026766 | 0.820568 | 0.456584 | 0.864068 | UP   | 355.2379 | 355.2378 | 355.2381 | 10.43739 | 10.37598 |

|      |          |          |          |          |          |          |      |          |          |          |          |          |
|------|----------|----------|----------|----------|----------|----------|------|----------|----------|----------|----------|----------|
| 7910 | M351T9_1 | 1.266602 | 0.340964 | 0.788102 | 0.45666  | 0.864068 | UP   | 351.243  | 351.2429 | 351.2432 | 8.735017 | 8.629617 |
| 7911 | M294T10_ | 1.23025  | 0.298952 | 0.794455 | 0.456668 | 0.864068 | UP   | 294.2062 | 294.2059 | 294.2077 | 10.3289  | 10.01477 |
| 7912 | M577T11_ | 1.193608 | -0.25533 | -0.78503 | 0.456863 | 0.864068 | DOWN | 577.4092 | 577.4053 | 577.4101 | 10.91977 | 10.8926  |
| 7913 | M509T10_ | 1.213413 | -0.27907 | -0.78621 | 0.456885 | 0.864068 | DOWN | 508.8555 | 508.855  | 508.8556 | 9.504583 | 9.40135  |
| 7914 | M394T9_4 | 1.38901  | 0.474057 | 0.782109 | 0.456937 | 0.864068 | UP   | 394.0862 | 394.0844 | 394.0878 | 9.187908 | 9.098833 |
| 7915 | M194T9_1 | 1.39338  | 0.478589 | 0.793442 | 0.456987 | 0.864068 | UP   | 193.5731 | 193.573  | 193.5737 | 9.128708 | 9.110833 |
| 7916 | M192T10_ | 1.221822 | -0.28903 | -0.78705 | 0.456987 | 0.864068 | DOWN | 192.4757 | 192.4756 | 192.4759 | 9.915633 | 9.827283 |
| 7917 | M293T10_ | 1.165794 | -0.22131 | -0.78774 | 0.457129 | 0.864068 | DOWN | 293.0727 | 293.0724 | 293.0727 | 9.900133 | 9.811217 |
| 7918 | M549T30  | 1.112309 | -0.15356 | -0.79126 | 0.457141 | 0.864068 | DOWN | 549.3391 | 549.3386 | 549.3394 | 30.28133 | 30.26683 |
| 7919 | M662T10_ | 1.175333 | -0.23307 | -0.79857 | 0.45719  | 0.864068 | DOWN | 662.4257 | 662.4251 | 662.4307 | 9.825767 | 9.715683 |
| 7920 | M848T11_ | 1.135174 | -0.18291 | -0.78138 | 0.457228 | 0.864068 | DOWN | 848.4077 | 848.4071 | 848.4081 | 10.90519 | 10.879   |
| 7921 | M202T9_1 | 1.241567 | -0.31216 | -0.80045 | 0.45725  | 0.864068 | DOWN | 202.1802 | 202.1801 | 202.1852 | 8.858283 | 8.7875   |
| 7922 | M1129T10 | 1.120583 | -0.16425 | -0.78264 | 0.457253 | 0.864068 | DOWN | 1129.266 | 1129.265 | 1129.269 | 9.843017 | 9.73145  |
| 7923 | M680T41_ | 1.073275 | -0.10202 | -0.81373 | 0.457429 | 0.864068 | DOWN | 680.3854 | 680.3851 | 680.3858 | 41.17233 | 41.04417 |
| 7924 | M586T10_ | 1.50044  | 0.585386 | 0.813522 | 0.457466 | 0.864068 | UP   | 586.4607 | 586.4601 | 586.4609 | 9.98155  | 9.8914   |
| 7925 | M1426T10 | 1.323919 | -0.40482 | -0.78131 | 0.457472 | 0.864068 | DOWN | 1425.732 | 1425.724 | 1425.736 | 9.952017 | 9.869467 |
| 7926 | M217T10_ | 1.467883 | -0.55374 | -0.78209 | 0.457474 | 0.864068 | DOWN | 217.1069 | 217.1068 | 217.107  | 9.62355  | 9.52515  |
| 7927 | M302T10_ | 1.382986 | -0.46779 | -0.78666 | 0.457505 | 0.864068 | DOWN | 301.8708 | 301.8606 | 301.8711 | 9.918833 | 9.822117 |
| 7928 | M847T10_ | 1.192422 | -0.2539  | -0.78055 | 0.457781 | 0.864068 | DOWN | 846.9148 | 846.9135 | 846.9161 | 9.900133 | 9.811217 |
| 7929 | M331T28_ | 1.211018 | 0.27622  | 0.780001 | 0.457847 | 0.864068 | UP   | 331.3035 | 331.3026 | 331.3037 | 28.39592 | 28.37317 |
| 7930 | M650T10_ | 1.112582 | -0.15391 | -0.78953 | 0.457896 | 0.864068 | DOWN | 650.4859 | 650.4855 | 650.4866 | 10.28154 | 10.19852 |
| 7931 | M406T10_ | 1.281925 | -0.35831 | -0.78496 | 0.457991 | 0.864068 | DOWN | 405.9141 | 405.9131 | 405.9142 | 9.893742 | 9.779267 |
| 7932 | M866T10_ | 1.134319 | -0.18183 | -0.78074 | 0.458026 | 0.864068 | DOWN | 866.4952 | 866.4945 | 866.4956 | 9.958617 | 9.843367 |
| 7933 | M526T24_ | 1.252218 | -0.32449 | -0.78064 | 0.458028 | 0.864068 | DOWN | 525.7139 | 525.7137 | 525.7141 | 24.12733 | 24.11067 |
| 7934 | M505T28  | 1.290193 | -0.36759 | -0.78111 | 0.458101 | 0.864069 | DOWN | 504.8896 | 504.8893 | 504.8897 | 28.39592 | 28.3475  |
| 7935 | M186T11  | 1.280588 | -0.35681 | -0.7853  | 0.45818  | 0.864069 | DOWN | 186.2215 | 186.2214 | 186.2216 | 11.45298 | 11.3951  |
| 7936 | M359T10_ | 2.46464  | 1.301377 | 0.809293 | 0.45831  | 0.864069 | UP   | 358.962  | 358.9619 | 358.9623 | 9.81635  | 9.7124   |
| 7937 | M450T9_2 | 1.411435 | -0.49716 | -0.7809  | 0.458328 | 0.864069 | DOWN | 449.6169 | 449.6157 | 449.6182 | 9.240042 | 9.129317 |
| 7938 | M373T43  | 1.312657 | -0.39249 | -0.81913 | 0.458403 | 0.864069 | DOWN | 373.2217 | 373.2215 | 373.2221 | 43.445   | 43.08533 |
| 7939 | M1972T10 | 1.18924  | -0.25004 | -0.80873 | 0.45841  | 0.864069 | DOWN | 1971.563 | 1971.559 | 1971.565 | 9.967367 | 9.859233 |
| 7940 | M586T10_ | 1.352302 | 0.435417 | 0.80908  | 0.458451 | 0.864069 | UP   | 585.6579 | 585.6575 | 585.658  | 9.954217 | 9.843367 |
| 7941 | M380T11_ | 1.102559 | -0.14086 | -0.78642 | 0.458468 | 0.864069 | DOWN | 379.9029 | 379.9027 | 379.9043 | 10.90659 | 10.879   |
| 7942 | M443T10_ | 1.212054 | 0.277454 | 0.807812 | 0.458494 | 0.864069 | UP   | 443.3632 | 443.3626 | 443.3639 | 9.756408 | 9.636483 |
| 7943 | M1880T10 | 1.534198 | -0.61749 | -0.7816  | 0.458533 | 0.864069 | DOWN | 1880.297 | 1880.293 | 1880.298 | 9.93625  | 9.840617 |
| 7944 | M1386T11 | 1.711389 | 0.775167 | 0.811327 | 0.458562 | 0.864069 | UP   | 1385.886 | 1385.881 | 1385.886 | 10.93752 | 10.90785 |

|      |          |          |          |          |          |          |      |          |          |          |          |          |
|------|----------|----------|----------|----------|----------|----------|------|----------|----------|----------|----------|----------|
| 7945 | M182T9_8 | 1.491082 | 0.576359 | 0.78053  | 0.45859  | 0.864069 | UP   | 182.2015 | 182.2013 | 182.2029 | 9.1503   | 9.132267 |
| 7946 | M460T11_ | 1.149879 | -0.20148 | -0.77893 | 0.458639 | 0.864069 | DOWN | 460.2596 | 460.2524 | 460.2599 | 10.90553 | 10.88747 |
| 7947 | M170T10_ | 1.105917 | -0.14524 | -0.78425 | 0.458802 | 0.864069 | DOWN | 170.004  | 170.0038 | 170.0042 | 9.8397   | 9.715683 |
| 7948 | M586T11_ | 1.193122 | 0.254742 | 0.792962 | 0.458925 | 0.864069 | UP   | 586.4033 | 586.3997 | 586.404  | 10.90765 | 10.88995 |
| 7949 | M353T10_ | 1.295387 | 0.373383 | 0.779869 | 0.458973 | 0.864069 | UP   | 353.4815 | 353.4814 | 353.4818 | 9.960817 | 9.859233 |
| 7950 | M444T10_ | 1.331029 | 0.412542 | 0.790651 | 0.459008 | 0.864069 | UP   | 444.2709 | 444.2701 | 444.2713 | 9.977442 | 9.859233 |
| 7951 | M240T22  | 1.564257 | 0.645477 | 0.811725 | 0.459051 | 0.864069 | UP   | 240.1647 | 240.1644 | 240.1648 | 21.77883 | 21.767   |
| 7952 | M176T9_3 | 1.31974  | -0.40025 | -0.80522 | 0.459096 | 0.864069 | DOWN | 176.1312 | 176.1306 | 176.1315 | 9.304792 | 9.219483 |
| 7953 | M517T9_5 | 1.218354 | 0.284934 | 0.778211 | 0.45914  | 0.864069 | UP   | 517.3557 | 517.3551 | 517.3564 | 8.810442 | 8.701267 |
| 7954 | M585T10_ | 1.529269 | 0.612842 | 0.797467 | 0.459211 | 0.864069 | UP   | 584.8574 | 584.8565 | 584.8581 | 9.973517 | 9.8753   |
| 7955 | M441T11_ | 1.129088 | -0.17516 | -0.78225 | 0.459297 | 0.864069 | DOWN | 441.0801 | 441.08   | 441.0867 | 10.90522 | 10.88747 |
| 7956 | M292T10_ | 1.231922 | -0.30091 | -0.77913 | 0.459334 | 0.864069 | DOWN | 292.0031 | 292.0025 | 292.0031 | 9.973467 | 9.859233 |
| 7957 | M825T11_ | 1.120917 | -0.16468 | -0.77737 | 0.45944  | 0.864069 | DOWN | 825.2928 | 825.2921 | 825.2966 | 10.90628 | 10.873   |
| 7958 | M174T11_ | 1.228473 | 0.296866 | 0.787204 | 0.459463 | 0.864069 | UP   | 173.8308 | 173.8307 | 173.8309 | 10.87708 | 10.82935 |
| 7959 | M306T25_ | 1.2026   | 0.266157 | 0.778427 | 0.459466 | 0.864069 | UP   | 305.8307 | 305.8305 | 305.8309 | 24.69492 | 24.68133 |
| 7960 | M197T44_ | 1.114787 | 0.156767 | 0.779439 | 0.45947  | 0.864069 | UP   | 197.1533 | 197.1532 | 197.1533 | 44.466   | 44.40867 |
| 7961 | M513T9_2 | 1.172511 | -0.2296  | -0.79897 | 0.459498 | 0.864069 | DOWN | 512.797  | 512.7964 | 512.798  | 9.449367 | 9.370583 |
| 7962 | M496T9_1 | 1.2781   | 0.354001 | 0.789141 | 0.459625 | 0.864069 | UP   | 496.3666 | 496.3655 | 496.3669 | 9.161458 | 9.110833 |
| 7963 | M515T11_ | 1.160162 | -0.21433 | -0.77783 | 0.459637 | 0.864069 | DOWN | 514.5645 | 514.5638 | 514.5647 | 10.90481 | 10.8646  |
| 7964 | M445T9   | 1.315137 | 0.395213 | 0.812787 | 0.45965  | 0.864069 | UP   | 445.2427 | 445.2417 | 445.2431 | 9.270833 | 9.219483 |
| 7965 | M696T10_ | 1.447625 | 0.533688 | 0.812924 | 0.459737 | 0.864069 | UP   | 695.8417 | 695.8411 | 695.8424 | 9.8207   | 9.715683 |
| 7966 | M268T9_1 | 1.235074 | -0.3046  | -0.77975 | 0.459751 | 0.864069 | DOWN | 267.784  | 267.7839 | 267.7842 | 8.78005  | 8.682683 |
| 7967 | M1478T10 | 1.283219 | -0.35977 | -0.7783  | 0.459875 | 0.864069 | DOWN | 1478.104 | 1478.1   | 1478.107 | 9.915583 | 9.8378   |
| 7968 | M349T10_ | 1.25282  | -0.32518 | -0.77777 | 0.459898 | 0.864069 | DOWN | 349.014  | 349.0084 | 349.0142 | 9.883383 | 9.843367 |
| 7969 | M680T38  | 1.112395 | 0.15367  | 0.814333 | 0.459919 | 0.864069 | UP   | 680.3857 | 680.3854 | 680.3859 | 37.73367 | 37.41633 |
| 7970 | M702T10_ | 1.129346 | 0.175487 | 0.809782 | 0.460129 | 0.864069 | UP   | 702.4951 | 702.4947 | 702.4954 | 9.865433 | 9.779267 |
| 7971 | M564T40_ | 1.109153 | 0.149458 | 0.79391  | 0.460177 | 0.864069 | UP   | 564.3013 | 564.301  | 564.3015 | 39.8055  | 39.6905  |
| 7972 | M196T10_ | 1.102208 | 0.140396 | 0.801002 | 0.460221 | 0.864069 | UP   | 196.0992 | 196.0991 | 196.1065 | 9.984083 | 9.8753   |
| 7973 | M1968T10 | 1.154607 | 0.207402 | 0.778943 | 0.460271 | 0.864069 | UP   | 1968.221 | 1968.218 | 1968.222 | 9.840617 | 9.715683 |
| 7974 | M488T41_ | 1.350382 | 0.433368 | 0.776394 | 0.460415 | 0.864069 | UP   | 488.2849 | 488.2847 | 488.2852 | 40.58217 | 40.4385  |
| 7975 | M1057T10 | 1.271023 | -0.34599 | -0.78339 | 0.460434 | 0.864069 | DOWN | 1056.7   | 1056.699 | 1056.701 | 9.970617 | 9.9009   |
| 7976 | M339T10_ | 1.100168 | -0.13772 | -0.78455 | 0.460476 | 0.864069 | DOWN | 339.0053 | 339.0052 | 339.0055 | 9.802117 | 9.7124   |
| 7977 | M558T9_1 | 1.229139 | -0.29765 | -0.77559 | 0.460476 | 0.864069 | DOWN | 558.3883 | 558.388  | 558.3895 | 9.330875 | 9.126783 |
| 7978 | M319T10_ | 1.279494 | 0.355574 | 0.81108  | 0.460548 | 0.864069 | UP   | 318.8637 | 318.8633 | 318.865  | 9.855808 | 9.73145  |
| 7979 | M272T10_ | 1.201353 | -0.26466 | -0.80359 | 0.46063  | 0.864069 | DOWN | 271.7712 | 271.7709 | 271.7717 | 9.975142 | 9.8753   |

|      |          |          |          |          |          |         |      |          |          |          |          |          |
|------|----------|----------|----------|----------|----------|---------|------|----------|----------|----------|----------|----------|
| 7980 | M506T42_ | 1.287126 | 0.364154 | 0.776402 | 0.460649 | 0.86407 | UP   | 506.2595 | 506.2594 | 506.2596 | 41.89167 | 41.80517 |
| 7981 | M224T8_1 | 1.622799 | -0.69848 | -0.80276 | 0.460688 | 0.86407 | DOWN | 224.1224 | 224.1224 | 224.1225 | 8.268533 | 8.11435  |
| 7982 | M494T10_ | 1.161074 | 0.215461 | 0.781273 | 0.460724 | 0.86407 | UP   | 493.7148 | 493.7136 | 493.7151 | 9.989733 | 9.8914   |
| 7983 | M661T9_2 | 1.331299 | -0.41283 | -0.78054 | 0.460775 | 0.86407 | DOWN | 660.5732 | 660.5727 | 660.5739 | 9.339908 | 9.234417 |
| 7984 | M524T9_2 | 1.32539  | -0.40642 | -0.77454 | 0.460894 | 0.86407 | DOWN | 523.6499 | 523.649  | 523.6508 | 9.358417 | 9.20785  |
| 7985 | M1436T10 | 1.222372 | -0.28968 | -0.77985 | 0.460973 | 0.86407 | DOWN | 1435.825 | 1435.823 | 1435.826 | 10.32456 | 10.26307 |
| 7986 | M580T9_5 | 1.254438 | -0.32704 | -0.77758 | 0.46098  | 0.86407 | DOWN | 580.0635 | 580.0578 | 580.064  | 9.166033 | 9.142767 |
| 7987 | M182T10_ | 1.0426   | -0.06019 | -0.78239 | 0.461065 | 0.86407 | DOWN | 181.7702 | 181.7701 | 181.7795 | 9.957333 | 9.859233 |
| 7988 | M476T9_1 | 1.221488 | 0.28864  | 0.790476 | 0.461067 | 0.86407 | UP   | 476.3265 | 476.3263 | 476.3286 | 9.224075 | 9.023433 |
| 7989 | M570T10_ | 1.150622 | -0.20241 | -0.77453 | 0.461077 | 0.86407 | DOWN | 570.4107 | 570.4106 | 570.4114 | 9.664767 | 9.557333 |
| 7990 | M378T9_8 | 2.320555 | -1.21447 | -0.8118  | 0.461174 | 0.86407 | DOWN | 378.2517 | 378.2499 | 378.2583 | 9.219483 | 8.909    |
| 7991 | M668T10_ | 1.197919 | -0.26053 | -0.78298 | 0.461175 | 0.86407 | DOWN | 668.3409 | 668.3408 | 668.3412 | 10.37858 | 10.34542 |
| 7992 | M498T21  | 1.194128 | 0.255957 | 0.779623 | 0.461184 | 0.86407 | UP   | 498.3692 | 498.3683 | 498.3699 | 21.10792 | 21.079   |
| 7993 | M404T37_ | 1.173455 | -0.23076 | -0.79256 | 0.461213 | 0.86407 | DOWN | 404.264  | 404.2638 | 404.2642 | 37.18142 | 36.9865  |
| 7994 | M518T31_ | 1.727539 | -0.78872 | -0.79385 | 0.461232 | 0.86407 | DOWN | 517.902  | 517.9017 | 517.9023 | 31.37833 | 31.34917 |
| 7995 | M223T11_ | 1.220625 | 0.287621 | 0.805564 | 0.461265 | 0.86407 | UP   | 223.1395 | 223.1304 | 223.1396 | 10.90519 | 10.68888 |
| 7996 | M366T10_ | 1.537752 | 0.620823 | 0.807588 | 0.461329 | 0.86407 | UP   | 365.62   | 365.6197 | 365.6202 | 9.816167 | 9.715683 |
| 7997 | M399T10_ | 1.232269 | 0.301318 | 0.794459 | 0.461405 | 0.86407 | UP   | 398.9722 | 398.9717 | 398.9725 | 9.944392 | 9.827283 |
| 7998 | M339T10_ | 1.229159 | -0.29767 | -0.78543 | 0.461489 | 0.86407 | DOWN | 339.1977 | 339.1974 | 339.1987 | 9.830783 | 9.715683 |
| 7999 | M599T9_1 | 1.191086 | -0.25228 | -0.77341 | 0.461518 | 0.86407 | DOWN | 598.8601 | 598.8587 | 598.8605 | 9.146667 | 9.111033 |
| 8000 | M325T9_3 | 1.355032 | -0.43833 | -0.77595 | 0.461607 | 0.86407 | DOWN | 324.7153 | 324.7152 | 324.7154 | 9.20785  | 9.176533 |
| 8001 | M1489T10 | 1.302251 | -0.38101 | -0.77361 | 0.461693 | 0.86407 | DOWN | 1488.808 | 1488.799 | 1488.813 | 9.918833 | 9.830733 |
| 8002 | M393T44_ | 1.236926 | -0.30676 | -0.78697 | 0.46174  | 0.86407 | DOWN | 393.2312 | 393.2309 | 393.2314 | 43.58175 | 43.215   |
| 8003 | M562T38_ | 1.077162 | 0.107236 | 0.787418 | 0.461817 | 0.86407 | UP   | 562.3219 | 562.3216 | 562.3223 | 38.16533 | 37.96467 |
| 8004 | M428T11_ | 1.197121 | -0.25957 | -0.80077 | 0.461844 | 0.86407 | DOWN | 428.2229 | 428.2225 | 428.2232 | 10.91642 | 10.877   |
| 8005 | M173T10_ | 1.233388 | 0.302627 | 0.799865 | 0.46191  | 0.86407 | UP   | 173.1212 | 173.1211 | 173.1213 | 9.816317 | 9.715683 |
| 8006 | M814T10_ | 1.423514 | -0.50946 | -0.78079 | 0.461941 | 0.86407 | DOWN | 813.9308 | 813.9297 | 813.9315 | 9.88865  | 9.806367 |
| 8007 | M438T19_ | 1.660594 | 0.7317   | 0.795518 | 0.462138 | 0.86407 | UP   | 438.2972 | 438.2966 | 438.2983 | 19.14017 | 19.09517 |
| 8008 | M620T11_ | 1.221661 | -0.28884 | -0.77252 | 0.462159 | 0.86407 | DOWN | 620.3664 | 620.366  | 620.367  | 10.90659 | 10.89355 |
| 8009 | M380T10_ | 1.161963 | -0.21656 | -0.77285 | 0.462201 | 0.86407 | DOWN | 380.1133 | 380.1129 | 380.1138 | 9.933    | 9.827283 |
| 8010 | M526T25  | 1.200492 | -0.26363 | -0.77255 | 0.462211 | 0.86407 | DOWN | 526.436  | 526.4353 | 526.4368 | 24.81183 | 24.78267 |
| 8011 | M1150T11 | 1.114769 | -0.15674 | -0.77352 | 0.46225  | 0.86407 | DOWN | 1150.314 | 1150.313 | 1150.315 | 10.89953 | 10.879   |
| 8012 | M379T10_ | 1.081337 | -0.11282 | -0.77386 | 0.462388 | 0.86407 | DOWN | 379.1457 | 379.1453 | 379.1465 | 9.917167 | 9.811217 |
| 8013 | M660T9_3 | 1.305711 | -0.38484 | -0.77208 | 0.4626   | 0.86407 | DOWN | 659.9571 | 659.9558 | 659.9579 | 9.0839   | 9.078567 |
| 8014 | M420T33  | 1.575904 | -0.65618 | -0.7837  | 0.46262  | 0.86407 | DOWN | 419.8148 | 419.8145 | 419.8156 | 33.369   | 33.3115  |

|      |          |          |          |          |          |          |      |          |          |          |          |          |
|------|----------|----------|----------|----------|----------|----------|------|----------|----------|----------|----------|----------|
| 8015 | M520T42_ | 1.117193 | -0.15988 | -0.77426 | 0.462623 | 0.86407  | DOWN | 520.3113 | 520.3109 | 520.3114 | 42.47417 | 42.30867 |
| 8016 | M295T10_ | 1.504209 | -0.58901 | -0.77274 | 0.462687 | 0.86407  | DOWN | 294.5329 | 294.5326 | 294.5366 | 9.924267 | 9.88865  |
| 8017 | M283T11_ | 1.535059 | 0.618294 | 0.79787  | 0.462761 | 0.86407  | UP   | 283.4038 | 283.4036 | 283.4041 | 10.90765 | 10.8214  |
| 8018 | M344T9_7 | 1.13746  | -0.18582 | -0.77324 | 0.462905 | 0.86407  | DOWN | 344.4235 | 344.4233 | 344.4237 | 8.893558 | 8.802417 |
| 8019 | M590T10_ | 1.233037 | -0.30222 | -0.77088 | 0.463006 | 0.86407  | DOWN | 589.6976 | 589.697  | 589.6981 | 9.9014   | 9.811217 |
| 8020 | M265T11_ | 1.162664 | -0.21743 | -0.77132 | 0.463019 | 0.86407  | DOWN | 264.8544 | 264.8543 | 264.8549 | 10.89875 | 10.8646  |
| 8021 | M359T11_ | 1.125465 | -0.17052 | -0.77328 | 0.463094 | 0.86407  | DOWN | 358.5129 | 358.5128 | 358.5135 | 10.89875 | 10.879   |
| 8022 | M207T10_ | 1.166173 | -0.22178 | -0.78182 | 0.463237 | 0.86407  | DOWN | 206.7862 | 206.7861 | 206.7938 | 9.830783 | 9.715683 |
| 8023 | M776T25  | 1.207776 | -0.27235 | -0.77046 | 0.46324  | 0.86407  | DOWN | 775.5608 | 775.5597 | 775.5612 | 25.49783 | 25.47783 |
| 8024 | M553T9_2 | 1.219733 | -0.28657 | -0.79607 | 0.463296 | 0.864071 | DOWN | 552.7794 | 552.7785 | 552.7798 | 9.162633 | 9.07945  |
| 8025 | M481T11_ | 1.646967 | 0.719812 | 0.809302 | 0.463311 | 0.864071 | UP   | 481.2043 | 481.2039 | 481.205  | 10.92936 | 10.89125 |
| 8026 | M229T11_ | 1.097163 | -0.13378 | -0.78031 | 0.463334 | 0.864071 | DOWN | 229.3791 | 229.3789 | 229.3792 | 10.892   | 10.8646  |
| 8027 | M597T11_ | 1.133403 | -0.18066 | -0.77209 | 0.463337 | 0.864071 | DOWN | 597.0073 | 597.0069 | 597.01   | 10.91895 | 10.877   |
| 8028 | M706T10_ | 1.222855 | -0.29025 | -0.79176 | 0.463407 | 0.864071 | DOWN | 706.199  | 706.1979 | 706.1994 | 9.830733 | 9.715683 |
| 8029 | M952T10_ | 1.171701 | -0.2286  | -0.77337 | 0.463416 | 0.864071 | DOWN | 951.5355 | 951.5343 | 951.5366 | 9.67075  | 9.52595  |
| 8030 | M162T10_ | 1.225364 | -0.29321 | -0.77206 | 0.463455 | 0.864071 | DOWN | 162.2163 | 162.2162 | 162.2164 | 9.92825  | 9.811217 |
| 8031 | M532T43  | 1.708355 | 0.772608 | 0.793959 | 0.463474 | 0.864071 | UP   | 532.3112 | 532.311  | 532.3115 | 42.86967 | 42.5245  |
| 8032 | M169T10_ | 1.124603 | -0.16942 | -0.77686 | 0.463486 | 0.864071 | DOWN | 169.4907 | 169.4905 | 169.4909 | 9.8397   | 9.715683 |
| 8033 | M245T42  | 1.16749  | 0.22341  | 0.784242 | 0.463554 | 0.864071 | UP   | 245.138  | 245.1379 | 245.1382 | 42.07867 | 41.618   |
| 8034 | M271T10_ | 1.694963 | -0.76125 | -0.80535 | 0.463623 | 0.864071 | DOWN | 271.2446 | 271.2444 | 271.2452 | 9.888767 | 9.747533 |
| 8035 | M725T9_5 | 1.150372 | -0.2021  | -0.78878 | 0.463634 | 0.864071 | DOWN | 725.4687 | 725.4673 | 725.4696 | 8.992917 | 8.878667 |
| 8036 | M399T9_5 | 1.292733 | -0.37042 | -0.77286 | 0.463654 | 0.864071 | DOWN | 399.0009 | 398.9993 | 399.0033 | 9.16125  | 9.12675  |
| 8037 | M341T9_4 | 1.41062  | -0.49633 | -0.77024 | 0.4637   | 0.864071 | DOWN | 341.3029 | 341.3024 | 341.3031 | 9.311167 | 9.204617 |
| 8038 | M232T11_ | 1.158771 | -0.2126  | -0.76949 | 0.463812 | 0.864071 | DOWN | 232.2407 | 232.2405 | 232.2408 | 10.89907 | 10.873   |
| 8039 | M478T38_ | 1.136022 | -0.18399 | -0.78813 | 0.463832 | 0.864071 | DOWN | 478.2643 | 478.264  | 478.2643 | 38.03583 | 37.82    |
| 8040 | M344T10_ | 1.491955 | -0.5772  | -0.77486 | 0.463838 | 0.864071 | DOWN | 343.688  | 343.6879 | 343.6882 | 9.930933 | 9.8914   |
| 8041 | M194T9_1 | 1.919708 | -0.94089 | -0.79601 | 0.463925 | 0.864071 | DOWN | 194.3146 | 194.3131 | 194.3156 | 9.27115  | 9.11795  |
| 8042 | M312T10_ | 1.147652 | -0.19869 | -0.77523 | 0.463981 | 0.864071 | DOWN | 311.7271 | 311.727  | 311.7272 | 9.958617 | 9.843367 |
| 8043 | M379T9_8 | 1.866561 | -0.90038 | -0.7942  | 0.464122 | 0.864071 | DOWN | 379.1464 | 379.1462 | 379.1465 | 9.2529   | 9.18975  |
| 8044 | M166T10_ | 1.238276 | 0.308333 | 0.779541 | 0.464131 | 0.864071 | UP   | 166.0843 | 166.0842 | 166.0976 | 9.766367 | 9.746783 |
| 8045 | M393T9_5 | 1.103882 | 0.142585 | 0.768735 | 0.464158 | 0.864071 | UP   | 393.2095 | 393.2093 | 393.2097 | 8.870558 | 8.7891   |
| 8046 | M292T10_ | 1.114895 | -0.15691 | -0.80106 | 0.464249 | 0.864071 | DOWN | 291.6551 | 291.655  | 291.6551 | 9.97155  | 9.859233 |
| 8047 | M396T24  | 1.261939 | 0.335642 | 0.800813 | 0.464293 | 0.864071 | UP   | 396.2743 | 396.2733 | 396.2748 | 23.6825  | 23.643   |
| 8048 | M286T7_1 | 1.197112 | -0.25956 | -0.78579 | 0.46435  | 0.864071 | DOWN | 285.7421 | 285.742  | 285.7424 | 6.9967   | 6.94005  |
| 8049 | M320T38  | 1.269088 | 0.343792 | 0.769353 | 0.464355 | 0.864071 | UP   | 320.1702 | 320.1701 | 320.1703 | 38.30917 | 38.17967 |

|      |          |          |          |          |          |          |      |          |          |          |          |          |
|------|----------|----------|----------|----------|----------|----------|------|----------|----------|----------|----------|----------|
| 8050 | M997T9   | 1.177131 | -0.23527 | -0.76954 | 0.464409 | 0.864071 | DOWN | 996.6001 | 996.5987 | 996.6009 | 9.423708 | 9.30965  |
| 8051 | M274T9_1 | 1.842653 | 0.881784 | 0.775804 | 0.464415 | 0.864071 | UP   | 273.6039 | 273.6038 | 273.6039 | 9.45135  | 9.40135  |
| 8052 | M360T9_7 | 1.454457 | 0.540481 | 0.793227 | 0.464545 | 0.864071 | UP   | 359.887  | 359.8862 | 359.8908 | 9.163642 | 9.07945  |
| 8053 | M515T11_ | 1.639761 | 0.713485 | 0.804301 | 0.464582 | 0.864071 | UP   | 515.3519 | 515.3514 | 515.3521 | 11.39612 | 11.3662  |
| 8054 | M849T11_ | 1.360787 | 0.444441 | 0.797631 | 0.4646   | 0.864071 | UP   | 848.8645 | 848.8637 | 848.8658 | 10.87099 | 10.82935 |
| 8055 | M528T11  | 1.098832 | -0.13597 | -0.76797 | 0.464662 | 0.864071 | DOWN | 527.6752 | 527.6747 | 527.6754 | 10.89875 | 10.879   |
| 8056 | M410T10_ | 1.6024   | 0.680235 | 0.785266 | 0.464669 | 0.864071 | UP   | 410.1246 | 410.1243 | 410.1246 | 9.9351   | 9.811217 |
| 8057 | M726T10_ | 1.108263 | -0.1483  | -0.78802 | 0.464706 | 0.864071 | DOWN | 726.0652 | 726.0641 | 726.0658 | 9.8397   | 9.699733 |
| 8058 | M1163T10 | 1.246903 | -0.31835 | -0.77678 | 0.46476  | 0.864071 | DOWN | 1162.553 | 1162.551 | 1162.554 | 9.95385  | 9.843367 |
| 8059 | M1288T10 | 1.120966 | 0.164743 | 0.777923 | 0.464777 | 0.864071 | UP   | 1287.548 | 1287.546 | 1287.555 | 9.9351   | 9.8378   |
| 8060 | M312T9_3 | 1.222805 | -0.29019 | -0.7954  | 0.464784 | 0.864071 | DOWN | 311.9814 | 311.9812 | 311.9816 | 9.329083 | 9.191283 |
| 8061 | M193T9_1 | 1.205878 | -0.27008 | -0.76898 | 0.464787 | 0.864071 | DOWN | 193.4362 | 193.4255 | 193.4363 | 9.333667 | 9.25985  |
| 8062 | M231T10_ | 1.778484 | 0.830648 | 0.784174 | 0.464846 | 0.864071 | UP   | 230.607  | 230.607  | 230.6072 | 9.940783 | 9.853533 |
| 8063 | M286T11  | 1.138862 | -0.18759 | -0.76754 | 0.464868 | 0.864071 | DOWN | 285.7419 | 285.7417 | 285.7422 | 10.892   | 10.879   |
| 8064 | M1785T10 | 1.267811 | -0.34234 | -0.76875 | 0.464928 | 0.864071 | DOWN | 1785.419 | 1785.415 | 1785.421 | 9.94455  | 9.811217 |
| 8065 | M343T10_ | 1.503358 | 0.588188 | 0.784205 | 0.464934 | 0.864071 | UP   | 342.7225 | 342.7223 | 342.7229 | 9.855142 | 9.743767 |
| 8066 | M438T41_ | 1.175034 | -0.2327  | -0.77071 | 0.465027 | 0.864071 | DOWN | 438.2694 | 438.2693 | 438.2696 | 41.21933 | 41.014   |
| 8067 | M416T9_1 | 1.460883 | -0.54684 | -0.76833 | 0.465058 | 0.864071 | DOWN | 416.3882 | 416.3879 | 416.3884 | 9.0804   | 9.031633 |
| 8068 | M341T11_ | 1.115589 | -0.15781 | -0.7676  | 0.465083 | 0.864071 | DOWN | 340.8993 | 340.8992 | 340.8996 | 10.90551 | 10.879   |
| 8069 | M353T15_ | 1.229817 | 0.298443 | 0.780572 | 0.465089 | 0.864071 | UP   | 353.1569 | 353.1567 | 353.157  | 14.707   | 14.45817 |
| 8070 | M713T10_ | 1.129452 | -0.17562 | -0.77224 | 0.465128 | 0.864071 | DOWN | 713.359  | 713.3583 | 713.3599 | 9.87145  | 9.65225  |
| 8071 | M437T9_3 | 1.9168   | 0.9387   | 0.800985 | 0.465175 | 0.864071 | UP   | 436.7911 | 436.7907 | 436.7918 | 9.34115  | 9.268917 |
| 8072 | M168T9_3 | 1.421161 | 0.50707  | 0.781343 | 0.465266 | 0.864071 | UP   | 168.1178 | 168.1177 | 168.1185 | 9.16125  | 9.1428   |
| 8073 | M462T23  | 1.73819  | 0.797586 | 0.767549 | 0.465407 | 0.864071 | UP   | 462.3484 | 462.3481 | 462.3485 | 22.756   | 22.7255  |
| 8074 | M530T9_3 | 1.252154 | -0.32441 | -0.79252 | 0.465468 | 0.864071 | DOWN | 530.4797 | 530.478  | 530.4805 | 9.189792 | 9.129317 |
| 8075 | M740T28  | 1.351466 | 0.434525 | 0.775931 | 0.465632 | 0.864071 | UP   | 740.4555 | 740.4551 | 740.4559 | 27.70267 | 27.639   |
| 8076 | M634T11_ | 1.22819  | -0.29653 | -0.76607 | 0.465788 | 0.864071 | DOWN | 634.1719 | 634.1712 | 634.1727 | 10.892   | 10.873   |
| 8077 | M345T9_1 | 1.240614 | -0.31105 | -0.77753 | 0.465807 | 0.864071 | DOWN | 344.5276 | 344.5274 | 344.5283 | 9.3332   | 9.234417 |
| 8078 | M387T21_ | 1.53444  | 0.617712 | 0.794048 | 0.465836 | 0.864071 | UP   | 387.1801 | 387.1801 | 387.1801 | 20.85217 | 20.84967 |
| 8079 | M528T9_6 | 1.265068 | -0.33922 | -0.77602 | 0.465917 | 0.864071 | DOWN | 528.1282 | 528.1216 | 528.1291 | 9.236775 | 9.118517 |
| 8080 | M288T10_ | 1.191852 | -0.2532  | -0.77132 | 0.466045 | 0.864072 | DOWN | 288.1875 | 288.1874 | 288.1877 | 9.951283 | 9.869467 |
| 8081 | M324T10_ | 1.162297 | -0.21698 | -0.77165 | 0.466157 | 0.864072 | DOWN | 323.8633 | 323.863  | 323.8637 | 9.964092 | 9.859233 |
| 8082 | M396T10_ | 1.224487 | -0.29218 | -0.76768 | 0.466194 | 0.864072 | DOWN | 396.0603 | 396.0595 | 396.0671 | 9.884917 | 9.811217 |
| 8083 | M545T10_ | 1.141008 | -0.19031 | -0.76721 | 0.466229 | 0.864072 | DOWN | 544.7162 | 544.716  | 544.7167 | 9.915583 | 9.79535  |
| 8084 | M458T10_ | 1.145829 | -0.19639 | -0.76584 | 0.466271 | 0.864072 | DOWN | 458.1094 | 458.1093 | 458.1095 | 9.914217 | 9.811217 |

|      |          |          |          |          |          |          |      |          |          |          |          |          |
|------|----------|----------|----------|----------|----------|----------|------|----------|----------|----------|----------|----------|
| 8085 | M413T10_ | 1.611555 | 0.688454 | 0.800108 | 0.466415 | 0.864072 | UP   | 412.8142 | 412.8134 | 412.8148 | 10.0702  | 9.988    |
| 8086 | M826T10_ | 1.224293 | 0.291949 | 0.778818 | 0.466442 | 0.864072 | UP   | 825.5705 | 825.5698 | 825.571  | 10.11693 | 10.02042 |
| 8087 | M396T12  | 1.080602 | -0.11184 | -0.76735 | 0.46646  | 0.864072 | DOWN | 396.3583 | 396.3581 | 396.3585 | 11.61325 | 11.59007 |
| 8088 | M253T11_ | 1.1581   | -0.21176 | -0.76478 | 0.466519 | 0.864072 | DOWN | 253.3798 | 253.3797 | 253.3804 | 10.89193 | 10.8646  |
| 8089 | M342T11_ | 1.171309 | 0.228122 | 0.796311 | 0.466596 | 0.864072 | UP   | 341.6849 | 341.6843 | 341.6869 | 10.92019 | 10.9049  |
| 8090 | M382T10_ | 1.189402 | 0.250236 | 0.784905 | 0.466704 | 0.864072 | UP   | 382.3732 | 382.3729 | 382.3732 | 9.983467 | 9.8914   |
| 8091 | M747T21  | 1.110253 | -0.15089 | -0.76889 | 0.466709 | 0.864072 | DOWN | 746.5262 | 746.5258 | 746.5263 | 21.31408 | 21.294   |
| 8092 | M521T10  | 1.202451 | -0.26598 | -0.7735  | 0.466732 | 0.864072 | DOWN | 521.2914 | 521.2913 | 521.2919 | 10.29527 | 10.23087 |
| 8093 | M251T10_ | 1.427084 | 0.51307  | 0.794841 | 0.466739 | 0.864072 | UP   | 251.1622 | 251.1618 | 251.1627 | 9.967533 | 9.859233 |
| 8094 | M295T12_ | 1.116027 | -0.15837 | -0.78251 | 0.466792 | 0.864072 | DOWN | 295.2378 | 295.2377 | 295.2378 | 11.61613 | 11.58313 |
| 8095 | M249T11_ | 1.320581 | -0.40117 | -0.76411 | 0.466802 | 0.864072 | DOWN | 249.2741 | 249.2739 | 249.2746 | 10.91813 | 10.8214  |
| 8096 | M427T10_ | 1.331424 | 0.41297  | 0.768757 | 0.466826 | 0.864072 | UP   | 426.7433 | 426.7427 | 426.7435 | 9.953367 | 9.843367 |
| 8097 | M871T10_ | 1.105064 | -0.14413 | -0.76497 | 0.466916 | 0.864072 | DOWN | 871.242  | 871.2406 | 871.2426 | 9.950258 | 9.843367 |
| 8098 | M1186T10 | 1.154849 | -0.2077  | -0.77638 | 0.466992 | 0.864072 | DOWN | 1186.066 | 1186.065 | 1186.069 | 9.930908 | 9.811217 |
| 8099 | M343T10_ | 1.523666 | 0.607547 | 0.800878 | 0.467319 | 0.864072 | UP   | 342.7055 | 342.7053 | 342.7062 | 9.80915  | 9.715683 |
| 8100 | M653T11_ | 1.08684  | -0.12014 | -0.77063 | 0.467331 | 0.864072 | DOWN | 653.4255 | 653.425  | 653.4269 | 11.48723 | 11.43923 |
| 8101 | M1742T11 | 1.189806 | -0.25073 | -0.77947 | 0.467377 | 0.864072 | DOWN | 1741.661 | 1741.66  | 1741.663 | 10.86253 | 10.84395 |
| 8102 | M222T11  | 1.197432 | -0.25994 | -0.76363 | 0.467391 | 0.864072 | DOWN | 221.5986 | 221.5985 | 221.5988 | 11.22472 | 11.20247 |
| 8103 | M400T11_ | 1.185524 | -0.24552 | -0.76311 | 0.467399 | 0.864072 | DOWN | 399.9352 | 399.935  | 399.9362 | 10.93562 | 10.91642 |
| 8104 | M363T10_ | 1.307091 | 0.38636  | 0.770519 | 0.4674   | 0.864072 | UP   | 363.4733 | 363.4718 | 363.4764 | 9.832125 | 9.699733 |
| 8105 | M292T30  | 1.261715 | 0.335386 | 0.779021 | 0.467579 | 0.864072 | UP   | 292.2561 | 292.2558 | 292.2562 | 29.92033 | 29.906   |
| 8106 | M200T9_1 | 2.021898 | 1.01571  | 0.762531 | 0.467639 | 0.864072 | UP   | 200.1333 | 200.1324 | 200.1342 | 9.160933 | 9.126783 |
| 8107 | M396T10_ | 1.195006 | 0.257018 | 0.777577 | 0.467652 | 0.864072 | UP   | 396.1527 | 396.1521 | 396.1532 | 9.608675 | 9.52515  |
| 8108 | M345T10_ | 1.243884 | 0.314852 | 0.777108 | 0.46768  | 0.864072 | UP   | 344.6145 | 344.6141 | 344.615  | 9.816183 | 9.699733 |
| 8109 | M355T9_6 | 2.341327 | 1.227326 | 0.800183 | 0.467725 | 0.864072 | UP   | 355.2747 | 355.2744 | 355.2748 | 9.465    | 9.355317 |
| 8110 | M215T10_ | 1.193811 | -0.25557 | -0.76285 | 0.467797 | 0.864072 | DOWN | 215.3843 | 215.3762 | 215.3849 | 9.823225 | 9.7124   |
| 8111 | M462T28_ | 1.201828 | -0.26523 | -0.78202 | 0.46782  | 0.864072 | DOWN | 462.3765 | 462.376  | 462.3775 | 28.24317 | 28.186   |
| 8112 | M590T10_ | 1.347479 | -0.43026 | -0.7642  | 0.467881 | 0.864072 | DOWN | 590.0299 | 590.0297 | 590.0301 | 9.903283 | 9.874067 |
| 8113 | M353T10_ | 1.251691 | 0.323878 | 0.763754 | 0.4679   | 0.864072 | UP   | 353.1722 | 353.1683 | 353.1723 | 9.894775 | 9.7634   |
| 8114 | M259T10_ | 1.220771 | -0.28779 | -0.77991 | 0.467929 | 0.864072 | DOWN | 258.625  | 258.6143 | 258.6251 | 9.794825 | 9.6681   |
| 8115 | M762T10_ | 1.24926  | -0.32107 | -0.76918 | 0.467996 | 0.864072 | DOWN | 762.2028 | 762.2021 | 762.2038 | 9.514733 | 9.416817 |
| 8116 | M697T10_ | 1.298041 | 0.376336 | 0.791045 | 0.468085 | 0.864072 | UP   | 697.3562 | 697.3555 | 697.3566 | 9.82645  | 9.699733 |
| 8117 | M570T9_3 | 1.295755 | 0.373793 | 0.763455 | 0.468124 | 0.864072 | UP   | 570.4783 | 570.4777 | 570.4803 | 8.788392 | 8.629617 |
| 8118 | M1078T10 | 1.181479 | -0.24059 | -0.7903  | 0.468141 | 0.864072 | DOWN | 1077.897 | 1077.896 | 1077.898 | 9.75805  | 9.714783 |
| 8119 | M355T21_ | 1.170156 | -0.2267  | -0.78312 | 0.468191 | 0.864072 | DOWN | 355.2379 | 355.2378 | 355.238  | 20.75117 | 20.73633 |



|      |          |          |          |          |          |          |      |          |          |          |          |          |
|------|----------|----------|----------|----------|----------|----------|------|----------|----------|----------|----------|----------|
| 8120 | M1862T10 | 1.180853 | -0.23983 | -0.76796 | 0.46823  | 0.864072 | DOWN | 1861.981 | 1861.98  | 1861.986 | 9.828367 | 9.715683 |
| 8121 | M358T43_ | 1.102418 | -0.14067 | -0.7973  | 0.468327 | 0.864072 | DOWN | 358.2222 | 358.2221 | 358.2223 | 42.6035  | 42.53917 |
| 8122 | M196T10_ | 1.126815 | -0.17225 | -0.77411 | 0.468365 | 0.864072 | DOWN | 196.1266 | 196.1265 | 196.1266 | 9.970617 | 9.859233 |
| 8123 | M395T24_ | 1.43211  | 0.518142 | 0.787705 | 0.468459 | 0.864072 | UP   | 395.3    | 395.2992 | 395.3002 | 24.04    | 24.01567 |
| 8124 | M511T9_2 | 1.93867  | -0.95507 | -0.78036 | 0.468463 | 0.864072 | DOWN | 510.9353 | 510.9345 | 510.9363 | 9.314683 | 9.174917 |
| 8125 | M395T18  | 1.140851 | -0.19011 | -0.77537 | 0.468469 | 0.864072 | DOWN | 395.2423 | 395.2421 | 395.2425 | 18.30525 | 18.26967 |
| 8126 | M276T10_ | 1.131211 | -0.17787 | -0.79186 | 0.468481 | 0.864072 | DOWN | 276.2081 | 276.2079 | 276.2082 | 9.85045  | 9.73145  |
| 8127 | M371T10_ | 1.259112 | -0.33241 | -0.7616  | 0.468542 | 0.864072 | DOWN | 370.7493 | 370.7492 | 370.7495 | 10.27436 | 10.19852 |
| 8128 | M736T9_1 | 1.239549 | -0.30982 | -0.76819 | 0.468598 | 0.864072 | DOWN | 735.6844 | 735.6833 | 735.6848 | 9.3332   | 9.234417 |
| 8129 | M431T10_ | 1.54948  | 0.631784 | 0.794376 | 0.468649 | 0.864073 | UP   | 431.2126 | 431.2124 | 431.2129 | 9.99435  | 9.8914   |
| 8130 | M964T11  | 1.253937 | 0.326465 | 0.791609 | 0.468667 | 0.864073 | UP   | 963.7492 | 963.7474 | 963.7503 | 10.89789 | 10.87487 |
| 8131 | M491T9_3 | 1.440377 | 0.526447 | 0.768163 | 0.468667 | 0.864073 | UP   | 491.3202 | 491.3165 | 491.3206 | 8.960667 | 8.922033 |
| 8132 | M287T40  | 1.087257 | -0.12069 | -0.77548 | 0.468804 | 0.864073 | DOWN | 287.1487 | 287.1485 | 287.1488 | 40.09333 | 39.94933 |
| 8133 | M629T9_2 | 1.278186 | -0.3541  | -0.76219 | 0.468818 | 0.864073 | DOWN | 629.3262 | 629.3256 | 629.3265 | 8.825567 | 8.75965  |
| 8134 | M313T20  | 1.096139 | -0.13243 | -0.77238 | 0.468831 | 0.864073 | DOWN | 313.3211 | 313.3209 | 313.3213 | 20.47725 | 20.46217 |
| 8135 | M161T10_ | 1.175538 | -0.23332 | -0.76294 | 0.468896 | 0.864073 | DOWN | 160.9248 | 160.9247 | 160.9248 | 9.929783 | 9.827283 |
| 8136 | M469T9_9 | 1.232529 | -0.30162 | -0.79261 | 0.468908 | 0.864073 | DOWN | 469.4554 | 469.4552 | 469.4555 | 9.3217   | 9.191133 |
| 8137 | M430T11_ | 1.204052 | -0.2679  | -0.76628 | 0.468934 | 0.864073 | DOWN | 429.6061 | 429.6055 | 429.6062 | 10.8926  | 10.879   |
| 8138 | M658T11_ | 1.130628 | -0.17712 | -0.76465 | 0.468969 | 0.864073 | DOWN | 658.1047 | 658.1042 | 658.1077 | 10.90519 | 10.879   |
| 8139 | M548T41  | 1.17858  | 0.23705  | 0.776009 | 0.468983 | 0.864073 | UP   | 548.3064 | 548.3061 | 548.3065 | 41.04283 | 40.94217 |
| 8140 | M311T10_ | 1.201148 | -0.26441 | -0.77321 | 0.468994 | 0.864073 | DOWN | 310.5371 | 310.5368 | 310.5379 | 9.8207   | 9.7124   |
| 8141 | M356T10_ | 1.148361 | 0.199577 | 0.788881 | 0.469062 | 0.864073 | UP   | 356.3753 | 356.3749 | 356.3754 | 9.841442 | 9.73145  |
| 8142 | M381T9_3 | 2.21612  | 1.148036 | 0.796574 | 0.469069 | 0.864073 | UP   | 380.5936 | 380.5934 | 380.5938 | 9.317    | 9.219483 |
| 8143 | M183T44  | 1.478005 | -0.56365 | -0.76003 | 0.469094 | 0.864073 | DOWN | 183.1376 | 183.1376 | 183.1378 | 43.71833 | 43.41383 |
| 8144 | M1016T10 | 1.330728 | -0.41222 | -0.7615  | 0.46911  | 0.864073 | DOWN | 1015.991 | 1015.99  | 1015.992 | 9.972833 | 9.916767 |
| 8145 | M694T10_ | 1.216877 | 0.283184 | 0.760626 | 0.469242 | 0.864073 | UP   | 694.4224 | 694.4217 | 694.4275 | 10.03772 | 9.923533 |
| 8146 | M234T9_1 | 1.213433 | -0.27909 | -0.781   | 0.469245 | 0.864073 | DOWN | 234.4897 | 234.4873 | 234.4905 | 9.295492 | 9.132267 |
| 8147 | M168T11  | 1.170184 | -0.22674 | -0.76444 | 0.469262 | 0.864073 | DOWN | 168.0855 | 168.0854 | 168.0859 | 10.91673 | 10.8646  |
| 8148 | M958T9   | 1.55228  | -0.63439 | -0.77504 | 0.469329 | 0.864073 | DOWN | 958.4036 | 958.4032 | 958.4061 | 8.880517 | 8.772383 |
| 8149 | M810T9_1 | 1.249125 | 0.320918 | 0.782786 | 0.469393 | 0.864073 | UP   | 809.5407 | 809.5389 | 809.5428 | 8.809258 | 8.727567 |
| 8150 | M1358T10 | 1.13773  | -0.18616 | -0.75985 | 0.469433 | 0.864073 | DOWN | 1358.018 | 1358.017 | 1358.019 | 9.825767 | 9.7124   |
| 8151 | M202T10_ | 1.413922 | -0.4997  | -0.76355 | 0.469467 | 0.864073 | DOWN | 201.9475 | 201.9472 | 201.9476 | 9.951283 | 9.843367 |
| 8152 | M841T10_ | 1.289232 | 0.366512 | 0.76571  | 0.469495 | 0.864073 | UP   | 840.8982 | 840.8974 | 840.8987 | 9.983433 | 9.8753   |
| 8153 | M270T11_ | 1.113587 | -0.15521 | -0.75941 | 0.46953  | 0.864073 | DOWN | 269.9695 | 269.9693 | 269.9697 | 10.892   | 10.879   |
| 8154 | M369T9_3 | 1.36026  | 0.443883 | 0.771903 | 0.469553 | 0.864073 | UP   | 369.1284 | 369.1209 | 369.1288 | 9.224733 | 9.0839   |

|      |          |          |          |          |          |          |      |          |          |          |          |          |
|------|----------|----------|----------|----------|----------|----------|------|----------|----------|----------|----------|----------|
| 8155 | M389T11_ | 1.100597 | -0.13829 | -0.75931 | 0.469582 | 0.864073 | DOWN | 388.7362 | 388.7359 | 388.7365 | 10.89875 | 10.879   |
| 8156 | M1840T10 | 1.052202 | 0.073411 | 0.759552 | 0.469637 | 0.864073 | UP   | 1840.319 | 1840.318 | 1840.326 | 9.8397   | 9.73145  |
| 8157 | M617T10_ | 1.636069 | 0.710234 | 0.793875 | 0.4697   | 0.864073 | UP   | 616.8982 | 616.8962 | 616.9014 | 9.8207   | 9.715683 |
| 8158 | M1985T10 | 1.293984 | -0.37182 | -0.76036 | 0.469762 | 0.864073 | DOWN | 1985.162 | 1985.158 | 1985.164 | 9.836367 | 9.715683 |
| 8159 | M290T11_ | 1.094645 | -0.13046 | -0.76289 | 0.469776 | 0.864073 | DOWN | 290.4224 | 290.4223 | 290.4226 | 10.90519 | 10.879   |
| 8160 | M352T11_ | 1.635885 | 0.710072 | 0.795569 | 0.4698   | 0.864073 | UP   | 352.2299 | 352.2293 | 352.23   | 10.68649 | 10.67523 |
| 8161 | M601T10_ | 1.690924 | 0.757812 | 0.787186 | 0.469915 | 0.864073 | UP   | 601.1577 | 601.1568 | 601.1627 | 9.82645  | 9.715683 |
| 8162 | M701T9_4 | 1.160934 | -0.21529 | -0.76826 | 0.469923 | 0.864073 | DOWN | 701.3923 | 701.392  | 701.3925 | 9.490958 | 9.38595  |
| 8163 | M691T11_ | 1.158492 | 0.212248 | 0.766314 | 0.470097 | 0.864073 | UP   | 691.0048 | 691.0044 | 691.0051 | 10.80621 | 10.78395 |
| 8164 | M241T10_ | 1.244951 | -0.31609 | -0.75864 | 0.470104 | 0.864073 | DOWN | 240.7104 | 240.7101 | 240.7191 | 9.939825 | 9.827283 |
| 8165 | M573T11_ | 1.212695 | -0.27822 | -0.75814 | 0.470124 | 0.864073 | DOWN | 572.8405 | 572.84   | 572.8413 | 10.86275 | 10.8214  |
| 8166 | M760T9_2 | 1.39366  | -0.47888 | -0.7611  | 0.470188 | 0.864073 | DOWN | 760.0243 | 760.0237 | 760.0248 | 9.491642 | 9.447983 |
| 8167 | M249T10_ | 1.310024 | 0.389593 | 0.779852 | 0.470274 | 0.864073 | UP   | 249.2408 | 249.2406 | 249.2408 | 9.772833 | 9.74925  |
| 8168 | M464T11_ | 1.305291 | 0.384371 | 0.76937  | 0.470358 | 0.864073 | UP   | 464.4398 | 464.4395 | 464.4402 | 10.892   | 10.879   |
| 8169 | M351T18  | 1.119209 | -0.16248 | -0.76153 | 0.47057  | 0.864073 | DOWN | 351.1777 | 351.1776 | 351.1778 | 17.884   | 17.7625  |
| 8170 | M229T19  | 1.60929  | 0.686425 | 0.757342 | 0.470617 | 0.864073 | UP   | 229.0743 | 229.074  | 229.0747 | 19.33967 | 19.31433 |
| 8171 | M226T10_ | 1.1681   | -0.22416 | -0.77508 | 0.470739 | 0.864073 | DOWN | 225.5247 | 225.5245 | 225.5248 | 9.930908 | 9.811217 |
| 8172 | M261T10_ | 1.451331 | 0.537377 | 0.787589 | 0.470771 | 0.864073 | UP   | 261.3211 | 261.3208 | 261.3213 | 9.97155  | 9.859233 |
| 8173 | M431T26_ | 1.276013 | -0.35164 | -0.75709 | 0.470776 | 0.864073 | DOWN | 431.3213 | 431.3212 | 431.3218 | 26.01917 | 25.90633 |
| 8174 | M461T10_ | 1.735423 | 0.795287 | 0.767365 | 0.470808 | 0.864073 | UP   | 461.197  | 461.1946 | 461.1992 | 9.742275 | 9.557333 |
| 8175 | M471T10_ | 1.158793 | -0.21262 | -0.76526 | 0.47087  | 0.864073 | DOWN | 471.2403 | 471.2397 | 471.2406 | 9.964092 | 9.859233 |
| 8176 | M255T10_ | 1.223165 | -0.29062 | -0.75686 | 0.47088  | 0.864073 | DOWN | 254.8825 | 254.8822 | 254.8825 | 9.917167 | 9.811217 |
| 8177 | M209T6   | 1.222282 | -0.28958 | -0.75981 | 0.471055 | 0.864073 | DOWN | 208.8907 | 208.8906 | 208.8908 | 5.540017 | 5.408433 |
| 8178 | M168T9_1 | 1.780104 | 0.831962 | 0.786216 | 0.471121 | 0.864073 | UP   | 167.8768 | 167.8765 | 167.8772 | 9.166925 | 9.126783 |
| 8179 | M743T10_ | 1.172225 | 0.22925  | 0.763113 | 0.471248 | 0.864073 | UP   | 743.0226 | 743.0198 | 743.0232 | 9.825767 | 9.7124   |
| 8180 | M342T14_ | 1.182479 | -0.24181 | -0.76421 | 0.471328 | 0.864073 | DOWN | 341.7665 | 341.7663 | 341.7675 | 14.13648 | 14.12183 |
| 8181 | M820T10_ | 1.420999 | -0.50691 | -0.75848 | 0.471371 | 0.864074 | DOWN | 819.7523 | 819.7522 | 819.7525 | 9.96095  | 9.946367 |
| 8182 | M483T32  | 1.181165 | -0.24021 | -0.7572  | 0.471396 | 0.864074 | DOWN | 482.8381 | 482.8375 | 482.8384 | 32.12833 | 32.05633 |
| 8183 | M705T13  | 1.135058 | -0.18277 | -0.75931 | 0.471505 | 0.864074 | DOWN | 704.5684 | 704.5681 | 704.569  | 12.51528 | 12.49947 |
| 8184 | M471T7   | 1.60456  | 0.682178 | 0.79038  | 0.471569 | 0.864074 | UP   | 471.3727 | 471.3725 | 471.3728 | 7.024983 | 6.969117 |
| 8185 | M363T9_1 | 1.127541 | -0.17318 | -0.75569 | 0.471571 | 0.864074 | DOWN | 363.1626 | 363.1623 | 363.163  | 8.82515  | 8.715883 |
| 8186 | M268T29  | 1.254293 | -0.32687 | -0.75558 | 0.471573 | 0.864074 | DOWN | 268.1751 | 268.1748 | 268.1752 | 28.58883 | 28.549   |
| 8187 | M430T10_ | 1.468579 | 0.55442  | 0.789162 | 0.471574 | 0.864074 | UP   | 429.5814 | 429.5806 | 429.5817 | 9.951442 | 9.859233 |
| 8188 | M316T45  | 1.261443 | 0.335075 | 0.756991 | 0.471596 | 0.864074 | UP   | 316.1752 | 316.1751 | 316.1754 | 44.83217 | 44.56667 |
| 8189 | M902T10_ | 1.320734 | -0.40134 | -0.75766 | 0.471639 | 0.864074 | DOWN | 901.8435 | 901.8419 | 901.8443 | 9.600067 | 9.510117 |

|      |          |          |          |          |          |          |      |          |          |          |          |          |
|------|----------|----------|----------|----------|----------|----------|------|----------|----------|----------|----------|----------|
| 8190 | M325T11_ | 1.089118 | -0.12316 | -0.75924 | 0.472057 | 0.864074 | DOWN | 324.9457 | 324.9455 | 324.946  | 10.90519 | 10.879   |
| 8191 | M236T9_9 | 1.21546  | -0.2815  | -0.75731 | 0.472062 | 0.864074 | DOWN | 236.3387 | 236.3355 | 236.3393 | 9.312908 | 9.219483 |
| 8192 | M778T10_ | 1.248809 | -0.32055 | -0.75523 | 0.472095 | 0.864074 | DOWN | 778.3708 | 778.3702 | 778.3717 | 9.64815  | 9.46325  |
| 8193 | M340T10_ | 1.342264 | 0.424669 | 0.754582 | 0.472144 | 0.864074 | UP   | 340.4713 | 340.4686 | 340.475  | 9.896908 | 9.830083 |
| 8194 | M434T9_3 | 1.42987  | 0.515884 | 0.784907 | 0.47218  | 0.864074 | UP   | 433.656  | 433.6548 | 433.6581 | 9.225442 | 9.142767 |
| 8195 | M360T10_ | 1.452568 | 0.538606 | 0.789953 | 0.472202 | 0.864074 | UP   | 360.2522 | 360.2518 | 360.2523 | 9.836042 | 9.73145  |
| 8196 | M683T10_ | 1.068363 | -0.0954  | -0.75773 | 0.472371 | 0.864074 | DOWN | 682.5693 | 682.5689 | 682.5695 | 9.825767 | 9.715683 |
| 8197 | M1763T10 | 1.26106  | 0.334637 | 0.763611 | 0.472393 | 0.864074 | UP   | 1762.592 | 1762.59  | 1762.594 | 9.816267 | 9.715683 |
| 8198 | M455T10_ | 1.140411 | -0.18955 | -0.76727 | 0.472449 | 0.864074 | DOWN | 454.8948 | 454.8945 | 454.8952 | 9.830508 | 9.73145  |
| 8199 | M169T10_ | 1.163172 | 0.218065 | 0.754181 | 0.472476 | 0.864074 | UP   | 169.1792 | 169.179  | 169.1793 | 9.951283 | 9.859233 |
| 8200 | M365T9_1 | 1.150299 | -0.20201 | -0.76677 | 0.472534 | 0.864074 | DOWN | 365.2453 | 365.2448 | 365.2461 | 8.863025 | 8.75965  |
| 8201 | M395T9_6 | 1.175806 | -0.23365 | -0.761   | 0.472541 | 0.864074 | DOWN | 395.2156 | 395.2153 | 395.2157 | 9.032567 | 9.008317 |
| 8202 | M350T9_1 | 1.116275 | -0.15869 | -0.75418 | 0.472654 | 0.864074 | DOWN | 350.1981 | 350.1978 | 350.1982 | 9.328967 | 9.129317 |
| 8203 | M286T18  | 1.365011 | -0.44891 | -0.75478 | 0.472749 | 0.864074 | DOWN | 286.1799 | 286.1796 | 286.1804 | 17.93333 | 17.91383 |
| 8204 | M318T10_ | 1.558648 | 0.640295 | 0.789897 | 0.472786 | 0.864074 | UP   | 318.3533 | 318.3527 | 318.3534 | 9.816167 | 9.699733 |
| 8205 | M515T9   | 1.3242   | 0.405121 | 0.777584 | 0.472868 | 0.864074 | UP   | 514.9194 | 514.9186 | 514.9196 | 9.240392 | 9.12675  |
| 8206 | M277T10_ | 1.454478 | 0.540502 | 0.761261 | 0.472874 | 0.864074 | UP   | 277.0954 | 277.0951 | 277.0957 | 9.881483 | 9.746783 |
| 8207 | M778T10_ | 1.179119 | -0.23771 | -0.77874 | 0.47288  | 0.864074 | DOWN | 777.8483 | 777.8447 | 777.8492 | 9.8207   | 9.699733 |
| 8208 | M341T10_ | 2.051548 | -1.03671 | -0.78553 | 0.472915 | 0.864074 | DOWN | 340.9372 | 340.9367 | 340.9373 | 9.845483 | 9.73145  |
| 8209 | M381T10_ | 1.50817  | 0.592799 | 0.770856 | 0.472997 | 0.864074 | UP   | 380.6916 | 380.6913 | 380.6919 | 9.989117 | 9.8914   |
| 8210 | M412T9_1 | 1.263951 | -0.33794 | -0.75481 | 0.473016 | 0.864074 | DOWN | 412.4419 | 412.4412 | 412.442  | 8.825567 | 8.7875   |
| 8211 | M707T10_ | 1.117474 | -0.16024 | -0.75479 | 0.473058 | 0.864074 | DOWN | 706.7231 | 706.7228 | 706.7237 | 9.825492 | 9.715683 |
| 8212 | M400T9_4 | 1.191621 | -0.25292 | -0.77584 | 0.473197 | 0.864074 | DOWN | 399.8295 | 399.8292 | 399.8309 | 9.075083 | 8.992917 |
| 8213 | M220T10_ | 1.188154 | -0.24872 | -0.75435 | 0.473216 | 0.864074 | DOWN | 220.4115 | 220.4114 | 220.4116 | 9.9014   | 9.79535  |
| 8214 | M654T10_ | 1.142282 | -0.19192 | -0.75298 | 0.47329  | 0.864074 | DOWN | 653.716  | 653.7156 | 653.7183 | 9.972483 | 9.859233 |
| 8215 | M210T11_ | 1.192849 | 0.254412 | 0.763652 | 0.473319 | 0.864074 | UP   | 210.1983 | 210.1981 | 210.1988 | 10.90522 | 10.8646  |
| 8216 | M241T9_3 | 1.369652 | -0.45381 | -0.75835 | 0.473365 | 0.864074 | DOWN | 241.1221 | 241.1219 | 241.1223 | 9.0511   | 9.023483 |
| 8217 | M580T10_ | 1.20813  | -0.27278 | -0.75256 | 0.473419 | 0.864074 | DOWN | 580.4224 | 580.4219 | 580.4234 | 10.15273 | 10.06883 |
| 8218 | M352T10_ | 1.457991 | 0.543982 | 0.786429 | 0.473431 | 0.864074 | UP   | 351.7915 | 351.7913 | 351.7916 | 9.508883 | 9.40135  |
| 8219 | M353T42_ | 1.303242 | -0.3821  | -0.76129 | 0.473433 | 0.864074 | DOWN | 353.2321 | 353.232  | 353.2322 | 41.61825 | 41.47433 |
| 8220 | M1237T10 | 1.211026 | 0.27623  | 0.756926 | 0.473509 | 0.864074 | UP   | 1237.04  | 1237.039 | 1237.041 | 9.922825 | 9.827283 |
| 8221 | M482T32  | 1.220808 | -0.28784 | -0.75764 | 0.47353  | 0.864074 | DOWN | 482.3365 | 482.3362 | 482.3368 | 32.14283 | 32.11317 |
| 8222 | M224T24  | 1.06667  | 0.093114 | 0.755102 | 0.473556 | 0.864074 | UP   | 224.1723 | 224.1722 | 224.1724 | 23.98317 | 23.979   |
| 8223 | M590T10_ | 1.285711 | -0.36257 | -0.77316 | 0.473565 | 0.864074 | DOWN | 590.1735 | 590.1728 | 590.1743 | 9.918833 | 9.822117 |
| 8224 | M454T11_ | 1.072648 | -0.10118 | -0.75325 | 0.473567 | 0.864074 | DOWN | 454.3461 | 454.346  | 454.3461 | 10.67585 | 10.64593 |

|      |          |          |          |          |          |          |      |          |          |          |          |          |
|------|----------|----------|----------|----------|----------|----------|------|----------|----------|----------|----------|----------|
| 8225 | M454T9_1 | 1.550232 | 0.632484 | 0.758339 | 0.473604 | 0.864074 | UP   | 454.3163 | 454.3097 | 454.3196 | 9.324917 | 9.0864   |
| 8226 | M1420T10 | 1.157165 | -0.21059 | -0.75292 | 0.473635 | 0.864074 | DOWN | 1419.52  | 1419.518 | 1419.525 | 9.886783 | 9.779267 |
| 8227 | M586T10_ | 1.567056 | 0.648057 | 0.782784 | 0.473733 | 0.864074 | UP   | 586.4227 | 586.422  | 586.423  | 9.9677   | 9.843367 |
| 8228 | M268T11_ | 1.221799 | 0.289007 | 0.765927 | 0.473798 | 0.864074 | UP   | 268.198  | 268.1977 | 268.1984 | 10.90548 | 10.89355 |
| 8229 | M553T10_ | 1.188688 | -0.24937 | -0.78044 | 0.473874 | 0.864074 | DOWN | 552.8558 | 552.8552 | 552.8562 | 9.94405  | 9.827283 |
| 8230 | M820T26  | 1.148155 | -0.19932 | -0.7516  | 0.473893 | 0.864074 | DOWN | 819.5869 | 819.5867 | 819.5875 | 25.55608 | 25.54183 |
| 8231 | M346T44  | 1.210744 | 0.275894 | 0.753968 | 0.473948 | 0.864074 | UP   | 346.1859 | 346.1858 | 346.186  | 44.4085  | 44.236   |
| 8232 | M534T10_ | 1.142829 | -0.19261 | -0.756   | 0.474065 | 0.864074 | DOWN | 534.484  | 534.4835 | 534.4847 | 9.95385  | 9.843367 |
| 8233 | M334T10_ | 1.120303 | -0.16389 | -0.77205 | 0.47408  | 0.864074 | DOWN | 334.4867 | 334.4864 | 334.4871 | 9.825492 | 9.715683 |
| 8234 | M1467T10 | 1.877132 | 0.90853  | 0.783488 | 0.474084 | 0.864074 | UP   | 1466.509 | 1466.506 | 1466.513 | 9.946367 | 9.827283 |
| 8235 | M599T10_ | 1.103323 | -0.14186 | -0.7512  | 0.474167 | 0.864075 | DOWN | 598.5483 | 598.5477 | 598.5486 | 9.917208 | 9.811217 |
| 8236 | M469T11_ | 1.17521  | 0.232919 | 0.754719 | 0.474228 | 0.864075 | UP   | 469.1711 | 469.17   | 469.1716 | 10.91734 | 10.873   |
| 8237 | M634T10_ | 1.430814 | 0.516836 | 0.780656 | 0.474258 | 0.864075 | UP   | 633.8831 | 633.8827 | 633.8839 | 9.969158 | 9.859233 |
| 8238 | M463T22  | 1.51894  | -0.60307 | -0.75164 | 0.474314 | 0.864075 | DOWN | 463.3606 | 463.36   | 463.361  | 22.01683 | 21.987   |
| 8239 | M527T9_7 | 1.336591 | 0.418558 | 0.768659 | 0.474332 | 0.864075 | UP   | 526.8625 | 526.8622 | 526.8626 | 8.730783 | 8.601067 |
| 8240 | M234T9_2 | 1.240159 | -0.31052 | -0.78108 | 0.474337 | 0.864075 | DOWN | 233.747  | 233.7455 | 233.7483 | 9.330825 | 9.219483 |
| 8241 | M449T9_1 | 1.155229 | -0.20818 | -0.75399 | 0.47444  | 0.864075 | DOWN | 448.5118 | 448.5117 | 448.5121 | 9.22775  | 9.142767 |
| 8242 | M892T18  | 1.238683 | -0.30881 | -0.77626 | 0.474459 | 0.864075 | DOWN | 892.4758 | 892.4749 | 892.4766 | 17.846   | 17.8345  |
| 8243 | M614T25  | 1.124078 | -0.16874 | -0.78421 | 0.474477 | 0.864075 | DOWN | 614.4416 | 614.4409 | 614.4428 | 24.54342 | 24.53317 |
| 8244 | M257T10_ | 1.241333 | -0.31189 | -0.7699  | 0.474499 | 0.864075 | DOWN | 257.222  | 257.2214 | 257.222  | 9.810767 | 9.681183 |
| 8245 | M278T10_ | 1.190691 | 0.251799 | 0.772726 | 0.474706 | 0.864075 | UP   | 277.5098 | 277.5097 | 277.5099 | 9.8207   | 9.715683 |
| 8246 | M378T19  | 1.292716 | -0.37041 | -0.75763 | 0.474798 | 0.864075 | DOWN | 378.2228 | 378.2226 | 378.2232 | 19.43108 | 19.386   |
| 8247 | M795T11_ | 1.268806 | -0.34347 | -0.77004 | 0.474803 | 0.864075 | DOWN | 795.3268 | 795.3251 | 795.3276 | 10.6604  | 10.61512 |
| 8248 | M449T9_5 | 1.214047 | -0.27982 | -0.75024 | 0.47485  | 0.864075 | DOWN | 448.7916 | 448.7912 | 448.7932 | 9.279108 | 9.1445   |
| 8249 | M210T10_ | 1.137709 | -0.18613 | -0.76371 | 0.474906 | 0.864075 | DOWN | 209.9767 | 209.9766 | 209.9768 | 9.871467 | 9.7634   |
| 8250 | M228T11_ | 1.130738 | -0.17726 | -0.74996 | 0.474943 | 0.864075 | DOWN | 227.7305 | 227.7304 | 227.7306 | 10.892   | 10.879   |
| 8251 | M261T11_ | 1.159416 | -0.2134  | -0.76285 | 0.474966 | 0.864075 | DOWN | 261.2082 | 261.208  | 261.2084 | 10.9321  | 10.8914  |
| 8252 | M333T24  | 1.12527  | -0.17027 | -0.75663 | 0.474983 | 0.864075 | DOWN | 333.3189 | 333.3186 | 333.3191 | 24.45233 | 24.432   |
| 8253 | M173T10_ | 1.122401 | 0.166588 | 0.785827 | 0.475044 | 0.864075 | UP   | 172.5937 | 172.5936 | 172.5938 | 9.843017 | 9.715683 |
| 8254 | M444T10_ | 1.226674 | -0.29475 | -0.7637  | 0.475049 | 0.864075 | DOWN | 444.4704 | 444.4698 | 444.4707 | 9.960817 | 9.853533 |
| 8255 | M455T11_ | 1.12249  | -0.1667  | -0.74984 | 0.475091 | 0.864075 | DOWN | 454.5478 | 454.5476 | 454.5481 | 10.892   | 10.879   |
| 8256 | M952T22  | 1.205536 | -0.26967 | -0.763   | 0.47511  | 0.864075 | DOWN | 951.666  | 951.6649 | 951.6672 | 22.13175 | 22.11983 |
| 8257 | M456T10_ | 1.145925 | -0.19651 | -0.75846 | 0.475119 | 0.864075 | DOWN | 456.0203 | 456.0198 | 456.0205 | 9.97155  | 9.869467 |
| 8258 | M1051T10 | 1.195204 | 0.257257 | 0.76192  | 0.47518  | 0.864075 | UP   | 1050.827 | 1050.825 | 1050.829 | 9.870017 | 9.822117 |
| 8259 | M314T30  | 1.362762 | 0.446534 | 0.777094 | 0.475224 | 0.864075 | UP   | 314.2378 | 314.2375 | 314.2381 | 29.90692 | 29.90533 |

|      |          |          |          |          |          |          |      |          |          |          |          |          |
|------|----------|----------|----------|----------|----------|----------|------|----------|----------|----------|----------|----------|
| 8260 | M576T10_ | 1.337124 | 0.419133 | 0.753688 | 0.475231 | 0.864075 | UP   | 576.4101 | 576.4026 | 576.4107 | 9.967367 | 9.859233 |
| 8261 | M323T10_ | 1.130421 | -0.17686 | -0.75198 | 0.475479 | 0.864075 | DOWN | 322.6499 | 322.6496 | 322.65   | 9.970617 | 9.859233 |
| 8262 | M638T10_ | 1.976359 | 0.982845 | 0.786114 | 0.475573 | 0.864075 | UP   | 638.4935 | 638.4927 | 638.4956 | 9.8348   | 9.728083 |
| 8263 | M498T9_2 | 1.630915 | -0.70568 | -0.74917 | 0.475613 | 0.864075 | DOWN | 497.7099 | 497.708  | 497.7113 | 9.419167 | 9.204617 |
| 8264 | M850T10_ | 1.329743 | 0.411147 | 0.748922 | 0.47562  | 0.864075 | UP   | 849.9683 | 849.9668 | 849.9687 | 9.972217 | 9.95825  |
| 8265 | M363T9_4 | 1.470676 | 0.556479 | 0.764032 | 0.475727 | 0.864075 | UP   | 362.6862 | 362.6856 | 362.692  | 9.3297   | 9.11795  |
| 8266 | M1008T10 | 1.11712  | 0.159784 | 0.754216 | 0.475752 | 0.864075 | UP   | 1008.397 | 1008.396 | 1008.401 | 9.85525  | 9.743667 |
| 8267 | M200T9_9 | 1.447497 | -0.53356 | -0.75506 | 0.475823 | 0.864075 | DOWN | 199.8196 | 199.819  | 199.8227 | 9.279417 | 9.132267 |
| 8268 | M208T10_ | 1.208013 | -0.27264 | -0.76177 | 0.476097 | 0.864075 | DOWN | 208.03   | 208.0299 | 208.0376 | 9.8207   | 9.715683 |
| 8269 | M329T10_ | 1.518453 | 0.602602 | 0.767449 | 0.476142 | 0.864075 | UP   | 329.4669 | 329.4667 | 329.4672 | 10.17253 | 10.08517 |
| 8270 | M556T9_6 | 1.220925 | 0.287975 | 0.747458 | 0.476229 | 0.864075 | UP   | 556.2798 | 556.2792 | 556.2805 | 9.46855  | 9.38595  |
| 8271 | M396T10_ | 1.288477 | -0.36567 | -0.76015 | 0.476296 | 0.864075 | DOWN | 396.0389 | 396.0386 | 396.039  | 9.964092 | 9.859233 |
| 8272 | M421T31_ | 1.247128 | 0.31861  | 0.779148 | 0.476332 | 0.864075 | UP   | 421.2321 | 421.232  | 421.2324 | 31.13258 | 31.11883 |
| 8273 | M320T9_3 | 1.194881 | -0.25687 | -0.75585 | 0.476398 | 0.864075 | DOWN | 319.8634 | 319.863  | 319.8636 | 9.3332   | 9.234417 |
| 8274 | M277T10_ | 1.131171 | -0.17782 | -0.76921 | 0.476485 | 0.864075 | DOWN | 276.9881 | 276.988  | 276.9884 | 9.8397   | 9.715683 |
| 8275 | M229T9_1 | 1.281682 | -0.35804 | -0.74884 | 0.476541 | 0.864075 | DOWN | 229.2943 | 229.2927 | 229.2949 | 9.40325  | 9.18975  |
| 8276 | M270T40  | 1.141506 | -0.19094 | -0.75703 | 0.476573 | 0.864075 | DOWN | 270.2787 | 270.2787 | 270.2792 | 40.42417 | 40.36667 |
| 8277 | M310T23_ | 1.783847 | 0.834992 | 0.775926 | 0.476705 | 0.864075 | UP   | 310.2224 | 310.2221 | 310.2225 | 22.69842 | 22.68367 |
| 8278 | M346T10_ | 1.221599 | -0.28877 | -0.74755 | 0.476743 | 0.864075 | DOWN | 346.0168 | 346.0165 | 346.0169 | 9.8207   | 9.715683 |
| 8279 | M196T10_ | 1.170097 | -0.22663 | -0.75513 | 0.476782 | 0.864075 | DOWN | 195.9077 | 195.9075 | 195.909  | 9.964092 | 9.816167 |
| 8280 | M210T9_6 | 1.123096 | -0.16748 | -0.74691 | 0.476878 | 0.864075 | DOWN | 210.1678 | 210.1676 | 210.1679 | 9.273475 | 9.1602   |
| 8281 | M180T10_ | 1.093554 | -0.12902 | -0.76709 | 0.476893 | 0.864076 | DOWN | 179.5205 | 179.5204 | 179.5207 | 9.830833 | 9.715683 |
| 8282 | M1107T10 | 1.138023 | -0.18653 | -0.74625 | 0.47692  | 0.864076 | DOWN | 1106.867 | 1106.866 | 1106.868 | 9.830733 | 9.683817 |
| 8283 | M288T9_5 | 1.239915 | -0.31024 | -0.75701 | 0.477027 | 0.864076 | DOWN | 288.1888 | 288.1885 | 288.1891 | 8.878825 | 8.7891   |
| 8284 | M374T10_ | 1.221485 | 0.288637 | 0.747749 | 0.477038 | 0.864076 | UP   | 374.3558 | 374.3543 | 374.3565 | 9.828367 | 9.816167 |
| 8285 | M324T10_ | 1.317119 | -0.39739 | -0.75473 | 0.477231 | 0.864076 | DOWN | 324.1777 | 324.1712 | 324.1777 | 9.918833 | 9.8378   |
| 8286 | M727T9_2 | 1.355619 | -0.43895 | -0.75004 | 0.477239 | 0.864076 | DOWN | 727.4768 | 727.4758 | 727.4774 | 9.325333 | 9.2585   |
| 8287 | M962T11  | 1.213287 | -0.27892 | -0.75572 | 0.47726  | 0.864076 | DOWN | 961.815  | 961.8137 | 961.8158 | 10.89815 | 10.873   |
| 8288 | M562T10_ | 1.160155 | -0.21432 | -0.75332 | 0.477285 | 0.864076 | DOWN | 561.9577 | 561.9573 | 561.9587 | 9.939575 | 9.827283 |
| 8289 | M621T9_5 | 1.28077  | -0.35701 | -0.74599 | 0.477331 | 0.864076 | DOWN | 621.3458 | 621.3384 | 621.3478 | 9.25395  | 9.12675  |
| 8290 | M560T10_ | 1.15553  | -0.20856 | -0.75536 | 0.47734  | 0.864076 | DOWN | 559.8281 | 559.8276 | 559.829  | 9.931875 | 9.827283 |
| 8291 | M389T10_ | 1.125594 | 0.170687 | 0.746519 | 0.477412 | 0.864076 | UP   | 389.4695 | 389.4689 | 389.4697 | 9.970617 | 9.859233 |
| 8292 | M708T11_ | 1.148217 | -0.1994  | -0.75179 | 0.47766  | 0.864076 | DOWN | 707.5071 | 707.5067 | 707.5077 | 10.53335 | 10.50338 |
| 8293 | M442T11_ | 1.558936 | 0.640561 | 0.778642 | 0.477678 | 0.864076 | UP   | 442.3272 | 442.3271 | 442.3274 | 11.12518 | 11.11092 |
| 8294 | M598T9   | 1.818012 | 0.862362 | 0.780565 | 0.477728 | 0.864076 | UP   | 598.4165 | 598.4163 | 598.4169 | 9.461008 | 9.370583 |

|      |          |          |          |          |          |          |      |          |          |          |          |          |
|------|----------|----------|----------|----------|----------|----------|------|----------|----------|----------|----------|----------|
| 8295 | M415T25_ | 1.317254 | 0.397534 | 0.763684 | 0.477843 | 0.864076 | UP   | 415.2449 | 415.2447 | 415.2452 | 25.347   | 25.28867 |
| 8296 | M560T10_ | 1.242062 | -0.31274 | -0.75841 | 0.477847 | 0.864076 | DOWN | 560.3094 | 560.3085 | 560.3162 | 10.17547 | 10.14385 |
| 8297 | M1348T10 | 1.088898 | -0.12287 | -0.74781 | 0.477904 | 0.864076 | DOWN | 1347.773 | 1347.772 | 1347.774 | 10.21493 | 10.13368 |
| 8298 | M738T10_ | 1.194764 | -0.25673 | -0.74821 | 0.478037 | 0.864076 | DOWN | 738.4488 | 738.4484 | 738.4529 | 10.11868 | 10.02042 |
| 8299 | M678T11_ | 1.174322 | -0.23183 | -0.74467 | 0.478258 | 0.864076 | DOWN | 677.8089 | 677.8084 | 677.8093 | 10.877   | 10.84767 |
| 8300 | M382T44_ | 1.099842 | 0.137297 | 0.745027 | 0.478435 | 0.864076 | UP   | 382.2432 | 382.243  | 382.2435 | 43.91975 | 43.61767 |
| 8301 | M335T9_8 | 1.341117 | -0.42343 | -0.74758 | 0.47848  | 0.864076 | DOWN | 334.8864 | 334.8846 | 334.8871 | 9.048117 | 8.88325  |
| 8302 | M630T10_ | 1.357519 | 0.440973 | 0.743422 | 0.478488 | 0.864076 | UP   | 629.7106 | 629.7101 | 629.7144 | 9.88815  | 9.885167 |
| 8303 | M253T17  | 1.575775 | 0.656062 | 0.780339 | 0.478535 | 0.864076 | UP   | 253.2352 | 253.2348 | 253.2355 | 17.351   | 17.2755  |
| 8304 | M560T10_ | 1.152569 | -0.20485 | -0.7498  | 0.478546 | 0.864076 | DOWN | 560.4539 | 560.4535 | 560.4542 | 9.946467 | 9.843367 |
| 8305 | M573T10_ | 1.297192 | -0.37539 | -0.74739 | 0.478617 | 0.864076 | DOWN | 573.1786 | 573.1781 | 573.179  | 9.915583 | 9.874067 |
| 8306 | M518T11_ | 1.116635 | -0.15916 | -0.74353 | 0.478631 | 0.864076 | DOWN | 518.2344 | 518.233  | 518.2349 | 10.90765 | 10.88747 |
| 8307 | M879T11_ | 1.235825 | -0.30547 | -0.75577 | 0.478655 | 0.864076 | DOWN | 879.0456 | 879.0446 | 879.0468 | 10.79102 | 10.75595 |
| 8308 | M416T10_ | 1.130971 | 0.177562 | 0.743107 | 0.478672 | 0.864076 | UP   | 416.2442 | 416.2437 | 416.2445 | 9.92625  | 9.811217 |
| 8309 | M718T23  | 1.151121 | -0.20304 | -0.76804 | 0.478682 | 0.864076 | DOWN | 718.4732 | 718.4725 | 718.474  | 22.91483 | 22.90067 |
| 8310 | M217T10_ | 1.230193 | -0.29888 | -0.74881 | 0.478697 | 0.864076 | DOWN | 216.6324 | 216.6318 | 216.6412 | 9.8322   | 9.7124   |
| 8311 | M860T11_ | 1.223762 | -0.29132 | -0.75402 | 0.478709 | 0.864076 | DOWN | 859.5103 | 859.5097 | 859.5109 | 10.71349 | 10.67585 |
| 8312 | M459T10_ | 1.164349 | -0.21952 | -0.75034 | 0.478918 | 0.864076 | DOWN | 458.8571 | 458.8558 | 458.8577 | 9.972917 | 9.859233 |
| 8313 | M313T10_ | 1.641139 | -0.7147  | -0.76338 | 0.478939 | 0.864076 | DOWN | 313.0265 | 313.0262 | 313.0282 | 9.82645  | 9.715683 |
| 8314 | M504T11_ | 1.226352 | 0.294373 | 0.760521 | 0.478954 | 0.864076 | UP   | 503.7669 | 503.7664 | 503.7673 | 10.89193 | 10.8646  |
| 8315 | M365T11_ | 1.664966 | 0.735493 | 0.743134 | 0.47896  | 0.864076 | UP   | 365.234  | 365.2338 | 365.2341 | 11.24006 | 11.2174  |
| 8316 | M623T9_3 | 1.448506 | -0.53457 | -0.75547 | 0.479007 | 0.864076 | DOWN | 623.1926 | 623.1925 | 623.1933 | 8.6833   | 8.638817 |
| 8317 | M733T10_ | 1.17365  | 0.231003 | 0.771747 | 0.479009 | 0.864076 | UP   | 733.4837 | 733.4831 | 733.484  | 9.644725 | 9.52595  |
| 8318 | M288T12  | 1.614282 | 0.690892 | 0.756273 | 0.479137 | 0.864076 | UP   | 288.232  | 288.2318 | 288.2323 | 11.8283  | 11.80248 |
| 8319 | M592T42_ | 1.296531 | 0.374657 | 0.778096 | 0.479144 | 0.864076 | UP   | 592.3325 | 592.3324 | 592.3326 | 42.0205  | 41.97767 |
| 8320 | M415T25_ | 1.084057 | 0.116441 | 0.744092 | 0.479269 | 0.864076 | UP   | 415.2111 | 415.211  | 415.2112 | 24.59467 | 24.5795  |
| 8321 | M404T9_5 | 1.149688 | -0.20124 | -0.75266 | 0.479398 | 0.864076 | DOWN | 404.2634 | 404.2627 | 404.2641 | 8.99315  | 8.878667 |
| 8322 | M1007T10 | 1.184666 | -0.24448 | -0.75745 | 0.479462 | 0.864076 | DOWN | 1007.452 | 1007.45  | 1007.453 | 9.956417 | 9.859233 |
| 8323 | M611T11_ | 1.25637  | -0.32926 | -0.74244 | 0.479471 | 0.864076 | DOWN | 610.6343 | 610.634  | 610.6353 | 10.85476 | 10.8214  |
| 8324 | M879T9   | 1.328624 | -0.40993 | -0.74748 | 0.479545 | 0.864076 | DOWN | 879.4882 | 879.4873 | 879.4887 | 9.300733 | 9.132267 |
| 8325 | M266T9_1 | 1.227993 | -0.2963  | -0.75082 | 0.479567 | 0.864076 | DOWN | 265.8858 | 265.8855 | 265.8859 | 8.985492 | 8.924217 |
| 8326 | M1509T10 | 1.209577 | -0.2745  | -0.75349 | 0.479567 | 0.864076 | DOWN | 1508.85  | 1508.85  | 1508.853 | 10.18144 | 10.05268 |
| 8327 | M493T7   | 1.137189 | 0.185472 | 0.748023 | 0.479569 | 0.864076 | UP   | 493.3543 | 493.354  | 493.3555 | 7.121733 | 7.0112   |
| 8328 | M701T9_5 | 1.72158  | 0.783733 | 0.758572 | 0.479604 | 0.864076 | UP   | 701.4526 | 701.4521 | 701.4536 | 9.275917 | 9.234417 |
| 8329 | M193T10_ | 1.402119 | 0.487609 | 0.762417 | 0.479701 | 0.864076 | UP   | 193.3975 | 193.3973 | 193.398  | 9.840617 | 9.743767 |

|      |          |          |          |          |          |          |      |          |          |          |          |          |
|------|----------|----------|----------|----------|----------|----------|------|----------|----------|----------|----------|----------|
| 8330 | M1260T10 | 1.181081 | -0.24011 | -0.74632 | 0.479708 | 0.864077 | DOWN | 1259.72  | 1259.719 | 1259.721 | 10.08665 | 10.0118  |
| 8331 | M818T10_ | 1.252449 | 0.324752 | 0.752299 | 0.479719 | 0.864077 | UP   | 818.4592 | 818.4588 | 818.4596 | 9.975217 | 9.8753   |
| 8332 | M395T24_ | 1.248386 | -0.32006 | -0.74169 | 0.479727 | 0.864077 | DOWN | 394.5372 | 394.5371 | 394.538  | 24.1225  | 24.06667 |
| 8333 | M854T10_ | 1.529171 | 0.61275  | 0.7752   | 0.479736 | 0.864077 | UP   | 854.0129 | 854.0122 | 854.0134 | 9.983433 | 9.8914   |
| 8334 | M411T10_ | 1.115097 | -0.15717 | -0.7509  | 0.479751 | 0.864077 | DOWN | 411.1749 | 411.1746 | 411.1751 | 9.930908 | 9.827283 |
| 8335 | M296T9_1 | 1.224287 | -0.29194 | -0.74136 | 0.479753 | 0.864077 | DOWN | 295.5297 | 295.5295 | 295.5299 | 8.977958 | 8.89395  |
| 8336 | M1457T10 | 1.255731 | -0.32853 | -0.75863 | 0.479839 | 0.864077 | DOWN | 1456.902 | 1456.901 | 1456.904 | 9.8887   | 9.806367 |
| 8337 | M363T10_ | 1.056499 | -0.07929 | -0.74236 | 0.479865 | 0.864077 | DOWN | 363.4909 | 363.4902 | 363.4912 | 9.825767 | 9.699733 |
| 8338 | M227T11_ | 1.288567 | 0.365768 | 0.753563 | 0.479915 | 0.864077 | UP   | 226.782  | 226.7817 | 226.7868 | 10.89128 | 10.85018 |
| 8339 | M262T10_ | 1.242982 | -0.31381 | -0.74828 | 0.479934 | 0.864077 | DOWN | 262.0542 | 262.0539 | 262.0544 | 9.850258 | 9.759383 |
| 8340 | M331T9_7 | 1.331083 | -0.4126  | -0.75956 | 0.479946 | 0.864077 | DOWN | 331.0817 | 331.0768 | 331.082  | 9.1602   | 9.09495  |
| 8341 | M332T10_ | 1.100632 | 0.138332 | 0.771916 | 0.480026 | 0.864077 | UP   | 331.7846 | 331.7844 | 331.7848 | 9.823575 | 9.715683 |
| 8342 | M699T10_ | 1.168903 | -0.22515 | -0.74302 | 0.480055 | 0.864077 | DOWN | 699.3779 | 699.3776 | 699.3784 | 10.02963 | 9.939683 |
| 8343 | M1054T10 | 1.669518 | 0.739431 | 0.773892 | 0.480085 | 0.864077 | UP   | 1054.04  | 1054.039 | 1054.04  | 9.807033 | 9.76065  |
| 8344 | M317T10_ | 1.229435 | 0.297995 | 0.758934 | 0.480096 | 0.864077 | UP   | 317.3377 | 317.3376 | 317.3384 | 9.970617 | 9.8914   |
| 8345 | M184T11_ | 1.238025 | -0.30804 | -0.74119 | 0.480218 | 0.864077 | DOWN | 184.1033 | 184.1031 | 184.1034 | 10.88995 | 10.85018 |
| 8346 | M740T10_ | 1.217847 | -0.28433 | -0.74032 | 0.48029  | 0.864077 | DOWN | 740.4922 | 740.492  | 740.4929 | 10.27436 | 10.19852 |
| 8347 | M826T10_ | 1.205114 | -0.26917 | -0.74326 | 0.480383 | 0.864077 | DOWN | 826.3306 | 826.3292 | 826.3312 | 9.609358 | 9.510117 |
| 8348 | M281T32  | 1.506446 | 0.591149 | 0.740791 | 0.480436 | 0.864077 | UP   | 281.1657 | 281.1655 | 281.1665 | 32.46017 | 32.43117 |
| 8349 | M277T10_ | 1.115169 | -0.15726 | -0.76712 | 0.480456 | 0.864077 | DOWN | 277.2489 | 277.2487 | 277.249  | 9.857275 | 9.73145  |
| 8350 | M172T9_4 | 1.557102 | 0.638863 | 0.76652  | 0.480482 | 0.864077 | UP   | 172.0724 | 172.0719 | 172.0727 | 9.148833 | 9.146383 |
| 8351 | M297T10_ | 1.178565 | -0.23703 | -0.75303 | 0.480488 | 0.864077 | DOWN | 297.3014 | 297.3013 | 297.3017 | 9.954767 | 9.843367 |
| 8352 | M312T9_2 | 1.420892 | -0.5068  | -0.7478  | 0.480495 | 0.864077 | DOWN | 311.6573 | 311.6568 | 311.6576 | 9.167558 | 9.14695  |
| 8353 | M226T10_ | 1.200063 | -0.26311 | -0.74767 | 0.480537 | 0.864077 | DOWN | 225.8895 | 225.8894 | 225.8896 | 9.932033 | 9.827283 |
| 8354 | M171T11_ | 1.195183 | -0.25723 | -0.75305 | 0.480581 | 0.864077 | DOWN | 170.8158 | 170.8157 | 170.8159 | 10.9049  | 10.879   |
| 8355 | M613T9_2 | 1.921438 | 0.942186 | 0.774111 | 0.480629 | 0.864077 | UP   | 613.2819 | 613.2763 | 613.283  | 9.311167 | 9.191283 |
| 8356 | M221T10_ | 1.09716  | -0.13377 | -0.74073 | 0.4807   | 0.864077 | DOWN | 221.492  | 221.4919 | 221.4923 | 9.933567 | 9.827283 |
| 8357 | M622T42_ | 1.04688  | -0.0661  | -0.74901 | 0.480718 | 0.864077 | DOWN | 622.3433 | 622.3431 | 622.3435 | 41.906   | 41.6905  |
| 8358 | M394T9_1 | 1.487787 | 0.573168 | 0.770559 | 0.480719 | 0.864077 | UP   | 394.4571 | 394.4569 | 394.4573 | 9.0511   | 9.023483 |
| 8359 | M166T9_5 | 1.246613 | -0.31801 | -0.7544  | 0.480787 | 0.864077 | DOWN | 166.067  | 166.0663 | 166.0674 | 9.331083 | 9.219483 |
| 8360 | M584T10_ | 1.553264 | 0.635303 | 0.767795 | 0.480794 | 0.864077 | UP   | 584.29   | 584.2896 | 584.2904 | 9.951283 | 9.843367 |
| 8361 | M239T10_ | 1.216986 | 0.283312 | 0.770038 | 0.480895 | 0.864077 | UP   | 239.3523 | 239.3521 | 239.3523 | 9.952017 | 9.859233 |
| 8362 | M740T10_ | 1.167567 | -0.2235  | -0.76615 | 0.480949 | 0.864077 | DOWN | 739.6887 | 739.6881 | 739.69   | 9.968092 | 9.859233 |
| 8363 | M369T10_ | 1.45967  | 0.545643 | 0.74301  | 0.481134 | 0.864077 | UP   | 368.9142 | 368.9128 | 368.9151 | 9.820883 | 9.715683 |
| 8364 | M363T9_1 | 1.228846 | -0.2973  | -0.73898 | 0.481157 | 0.864077 | DOWN | 363.151  | 363.1494 | 363.158  | 9.329083 | 9.12675  |

|      |          |          |          |          |          |          |      |          |          |          |          |          |
|------|----------|----------|----------|----------|----------|----------|------|----------|----------|----------|----------|----------|
| 8365 | M341T10_ | 1.655304 | 0.727096 | 0.775012 | 0.481193 | 0.864077 | UP   | 341.4893 | 341.4892 | 341.4895 | 9.8207   | 9.715683 |
| 8366 | M628T9   | 1.297482 | -0.37571 | -0.75045 | 0.481195 | 0.864077 | DOWN | 627.6782 | 627.6775 | 627.6786 | 9.402933 | 9.340183 |
| 8367 | M387T11_ | 1.612044 | 0.688891 | 0.752274 | 0.481258 | 0.864077 | UP   | 387.4748 | 387.4745 | 387.475  | 11.15073 | 11.0962  |
| 8368 | M519T9_1 | 1.160031 | -0.21416 | -0.73877 | 0.481262 | 0.864077 | DOWN | 518.5502 | 518.5493 | 518.5505 | 9.3771   | 9.22495  |
| 8369 | M399T11_ | 1.215515 | 0.281568 | 0.746744 | 0.481291 | 0.864077 | UP   | 399.4241 | 399.4239 | 399.4248 | 10.89875 | 10.8646  |
| 8370 | M280T9_4 | 1.410364 | -0.49607 | -0.73853 | 0.481296 | 0.864077 | DOWN | 280.1856 | 280.1852 | 280.1859 | 9.011692 | 8.95495  |
| 8371 | M601T9_1 | 1.316491 | -0.3967  | -0.73949 | 0.481336 | 0.864077 | DOWN | 600.6925 | 600.6925 | 600.693  | 9.385992 | 9.26575  |
| 8372 | M477T10_ | 1.103414 | 0.141974 | 0.763528 | 0.481371 | 0.864077 | UP   | 477.3126 | 477.3124 | 477.313  | 10.44611 | 10.40807 |
| 8373 | M701T31  | 1.133925 | -0.18133 | -0.74352 | 0.481387 | 0.864077 | DOWN | 700.5059 | 700.5055 | 700.5062 | 31.2915  | 31.28017 |
| 8374 | M178T9_1 | 2.181135 | 1.125079 | 0.771252 | 0.481429 | 0.864077 | UP   | 177.5988 | 177.5984 | 177.5989 | 9.129525 | 9.110833 |
| 8375 | M278T21  | 1.470479 | 0.556287 | 0.741261 | 0.481449 | 0.864077 | UP   | 278.1829 | 278.1824 | 278.183  | 20.93    | 20.9125  |
| 8376 | M313T45_ | 1.110951 | 0.151796 | 0.739184 | 0.481486 | 0.864077 | UP   | 313.1645 | 313.1643 | 313.1646 | 44.92233 | 44.811   |
| 8377 | M277T10_ | 1.392547 | 0.477726 | 0.77273  | 0.481487 | 0.864077 | UP   | 277.0212 | 277.0208 | 277.0213 | 9.972483 | 9.8753   |
| 8378 | M879T22_ | 1.110324 | -0.15098 | -0.74058 | 0.481493 | 0.864077 | DOWN | 878.605  | 878.6047 | 878.6055 | 22.33517 | 22.3245  |
| 8379 | M314T9_7 | 1.160787 | -0.2151  | -0.75587 | 0.481501 | 0.864077 | DOWN | 314.2804 | 314.2799 | 314.2808 | 9.259408 | 9.129317 |
| 8380 | M214T9_7 | 1.616534 | -0.6929  | -0.75628 | 0.481511 | 0.864077 | DOWN | 213.764  | 213.7622 | 213.765  | 9.382858 | 9.147367 |
| 8381 | M1473T10 | 1.514909 | 0.599231 | 0.767977 | 0.481627 | 0.864077 | UP   | 1473.326 | 1473.32  | 1473.33  | 9.934533 | 9.843367 |
| 8382 | M319T9_5 | 1.286127 | -0.36303 | -0.74839 | 0.481671 | 0.864077 | DOWN | 319.2307 | 319.2304 | 319.2309 | 9.3332   | 9.234417 |
| 8383 | M195T9_1 | 1.276842 | 0.352579 | 0.750618 | 0.481691 | 0.864077 | UP   | 195.1221 | 195.1216 | 195.124  | 9.220933 | 9.12675  |
| 8384 | M288T24_ | 1.662929 | -0.73373 | -0.738   | 0.481733 | 0.864077 | DOWN | 288.2373 | 288.229  | 288.2419 | 24.06933 | 24.02833 |
| 8385 | M254T10_ | 1.198002 | -0.26063 | -0.73851 | 0.481737 | 0.864077 | DOWN | 253.9806 | 253.9805 | 253.9807 | 9.82645  | 9.787633 |
| 8386 | M422T11_ | 1.288467 | 0.365655 | 0.764327 | 0.481831 | 0.864077 | UP   | 422.2448 | 422.2445 | 422.245  | 10.89875 | 10.879   |
| 8387 | M631T10_ | 1.122412 | -0.1666  | -0.74708 | 0.481843 | 0.864077 | DOWN | 631.4698 | 631.4692 | 631.4721 | 9.828267 | 9.699733 |
| 8388 | M632T10_ | 1.439387 | 0.525455 | 0.76487  | 0.48209  | 0.864077 | UP   | 632.1648 | 632.164  | 632.1658 | 9.972917 | 9.859233 |
| 8389 | M361T11_ | 1.303218 | -0.38208 | -0.74965 | 0.482102 | 0.864077 | DOWN | 361.2492 | 361.2486 | 361.2495 | 11.26795 | 11.23408 |
| 8390 | M797T10_ | 1.17583  | -0.23368 | -0.73809 | 0.482113 | 0.864077 | DOWN | 797.3425 | 797.3421 | 797.3429 | 10.34318 | 10.08538 |
| 8391 | M348T10_ | 2.053025 | -1.03775 | -0.76723 | 0.48214  | 0.864077 | DOWN | 348.4475 | 348.4472 | 348.4478 | 9.989733 | 9.8914   |
| 8392 | M1020T11 | 1.193691 | -0.25543 | -0.7454  | 0.482323 | 0.864077 | DOWN | 1020.381 | 1020.38  | 1020.383 | 10.90765 | 10.879   |
| 8393 | M682T11_ | 1.197591 | -0.26014 | -0.73809 | 0.482376 | 0.864077 | DOWN | 682.228  | 682.2275 | 682.2296 | 10.87593 | 10.84767 |
| 8394 | M350T11_ | 1.254307 | 0.32689  | 0.745829 | 0.482428 | 0.864077 | UP   | 350.1523 | 350.1519 | 350.1533 | 10.90522 | 10.873   |
| 8395 | M413T9_9 | 1.287798 | 0.364906 | 0.750032 | 0.482453 | 0.864077 | UP   | 413.0649 | 413.0643 | 413.0651 | 9.190317 | 9.06315  |
| 8396 | M340T32  | 1.471041 | 0.556837 | 0.737941 | 0.482494 | 0.864077 | UP   | 340.2842 | 340.2841 | 340.2845 | 32.09917 | 32.085   |
| 8397 | M387T10_ | 1.140016 | -0.18905 | -0.74424 | 0.482524 | 0.864077 | DOWN | 387.3884 | 387.3883 | 387.3891 | 9.9091   | 9.811217 |
| 8398 | M436T9_3 | 1.324149 | -0.40507 | -0.73937 | 0.48253  | 0.864077 | DOWN | 435.6661 | 435.6656 | 435.6691 | 9.365833 | 9.129317 |
| 8399 | M359T30_ | 1.631894 | -0.70655 | -0.74472 | 0.482635 | 0.864078 | DOWN | 358.7571 | 358.7569 | 358.7572 | 29.57617 | 29.54517 |



|      |          |          |          |          |          |          |      |          |          |          |          |          |
|------|----------|----------|----------|----------|----------|----------|------|----------|----------|----------|----------|----------|
| 8400 | M778T36  | 1.774477 | -0.82739 | -0.74419 | 0.482647 | 0.864078 | DOWN | 777.5771 | 777.5763 | 777.5774 | 35.56033 | 35.53133 |
| 8401 | M479T9_2 | 1.912031 | 0.935106 | 0.770678 | 0.482676 | 0.864078 | UP   | 478.6374 | 478.6371 | 478.6377 | 9.29345  | 9.129317 |
| 8402 | M1025T9  | 1.767502 | 0.821711 | 0.769149 | 0.482788 | 0.864078 | UP   | 1025.261 | 1025.258 | 1025.262 | 9.4159   | 9.29015  |
| 8403 | M451T9_1 | 1.243942 | 0.314919 | 0.760876 | 0.482806 | 0.864078 | UP   | 451.484  | 451.4816 | 451.4847 | 9.209458 | 9.12675  |
| 8404 | M1628T10 | 1.189165 | -0.24995 | -0.73951 | 0.482865 | 0.864078 | DOWN | 1628.481 | 1628.48  | 1628.482 | 9.973008 | 9.8914   |
| 8405 | M363T9_8 | 1.167683 | -0.22365 | -0.73644 | 0.482866 | 0.864078 | DOWN | 362.9419 | 362.9412 | 362.9426 | 9.235933 | 9.191133 |
| 8406 | M525T9_8 | 1.26039  | 0.33387  | 0.756468 | 0.482876 | 0.864078 | UP   | 525.4471 | 525.4466 | 525.4475 | 9.250817 | 9.12675  |
| 8407 | M386T9_3 | 1.21061  | -0.27573 | -0.73767 | 0.482892 | 0.864078 | DOWN | 385.7324 | 385.7321 | 385.7327 | 9.434192 | 9.355317 |
| 8408 | M701T18_ | 1.621148 | 0.697015 | 0.770682 | 0.482935 | 0.864078 | UP   | 701.4932 | 701.4931 | 701.4935 | 17.82775 | 17.55683 |
| 8409 | M789T10_ | 1.302089 | -0.38083 | -0.73821 | 0.48297  | 0.864078 | DOWN | 788.6007 | 788.5994 | 788.601  | 9.933567 | 9.8378   |
| 8410 | M325T10_ | 1.123133 | -0.16753 | -0.76624 | 0.483041 | 0.864078 | DOWN | 324.8965 | 324.8962 | 324.8974 | 9.851025 | 9.743667 |
| 8411 | M857T11_ | 1.11228  | -0.15352 | -0.75722 | 0.483121 | 0.864078 | DOWN | 857.4812 | 857.48   | 857.4826 | 10.90659 | 10.879   |
| 8412 | M520T44_ | 1.166633 | 0.222351 | 0.758108 | 0.483251 | 0.864078 | UP   | 520.2749 | 520.2746 | 520.2752 | 43.86933 | 43.6895  |
| 8413 | M180T11_ | 1.273329 | -0.34861 | -0.75438 | 0.483295 | 0.864078 | DOWN | 180.0124 | 180.0123 | 180.0125 | 10.86267 | 10.8214  |
| 8414 | M241T10_ | 1.888981 | 0.917608 | 0.76528  | 0.483375 | 0.864078 | UP   | 240.9302 | 240.9301 | 240.9304 | 9.92625  | 9.827283 |
| 8415 | M341T11_ | 1.0997   | -0.13711 | -0.73794 | 0.483378 | 0.864078 | DOWN | 340.538  | 340.5378 | 340.5391 | 10.89875 | 10.879   |
| 8416 | M636T27  | 1.331944 | 0.413533 | 0.737907 | 0.483506 | 0.864078 | UP   | 636.38   | 636.3792 | 636.3804 | 27.28808 | 27.25517 |
| 8417 | M423T9_5 | 1.217621 | -0.28407 | -0.73493 | 0.483553 | 0.864078 | DOWN | 423.1303 | 423.13   | 423.1306 | 9.2529   | 9.1587   |
| 8418 | M250T9_1 | 1.39095  | -0.47607 | -0.74332 | 0.483558 | 0.864078 | DOWN | 249.5659 | 249.5653 | 249.5661 | 9.055808 | 8.788667 |
| 8419 | M607T10_ | 1.189704 | -0.2506  | -0.73659 | 0.483764 | 0.864078 | DOWN | 607.2568 | 607.2562 | 607.2586 | 9.597658 | 9.510117 |
| 8420 | M723T10_ | 1.092572 | -0.12773 | -0.73596 | 0.483802 | 0.864078 | DOWN | 722.7585 | 722.7583 | 722.7587 | 9.818525 | 9.699733 |
| 8421 | M340T10_ | 1.317726 | 0.39805  | 0.768367 | 0.483897 | 0.864078 | UP   | 339.9213 | 339.921  | 339.9216 | 9.855658 | 9.73145  |
| 8422 | M190T10_ | 1.255372 | -0.32811 | -0.75513 | 0.483917 | 0.864078 | DOWN | 190.0291 | 190.029  | 190.0292 | 9.914217 | 9.8378   |
| 8423 | M157T10_ | 1.137857 | -0.18632 | -0.7412  | 0.483945 | 0.864078 | DOWN | 157.323  | 157.3229 | 157.3232 | 9.968992 | 9.859233 |
| 8424 | M175T10_ | 1.34407  | 0.426609 | 0.757472 | 0.483962 | 0.864078 | UP   | 175.0574 | 175.0512 | 175.0576 | 9.984083 | 9.8378   |
| 8425 | M1874T10 | 1.130055 | -0.17639 | -0.74033 | 0.484016 | 0.864078 | DOWN | 1873.794 | 1873.791 | 1873.796 | 9.830833 | 9.715683 |
| 8426 | M417T9_1 | 1.211484 | -0.27678 | -0.74535 | 0.484108 | 0.864078 | DOWN | 417.1976 | 417.1972 | 417.1978 | 9.037158 | 9.008317 |
| 8427 | M323T10_ | 1.185995 | -0.2461  | -0.73634 | 0.484235 | 0.864078 | DOWN | 322.503  | 322.5029 | 322.5033 | 9.960817 | 9.843367 |
| 8428 | M545T9_2 | 1.242144 | -0.31283 | -0.73338 | 0.484259 | 0.864078 | DOWN | 545.2165 | 545.2153 | 545.2175 | 9.315792 | 9.1587   |
| 8429 | M153T10_ | 1.384278 | 0.469134 | 0.761036 | 0.484281 | 0.864078 | UP   | 152.6238 | 152.6144 | 152.624  | 9.874067 | 9.840617 |
| 8430 | M482T10_ | 1.21399  | -0.27976 | -0.73693 | 0.484369 | 0.864078 | DOWN | 481.9477 | 481.9474 | 481.9501 | 9.84525  | 9.743667 |
| 8431 | M746T10_ | 1.443796 | 0.529867 | 0.766077 | 0.484399 | 0.864078 | UP   | 746.4163 | 746.4138 | 746.4172 | 9.823575 | 9.699733 |
| 8432 | M184T11_ | 1.138879 | -0.18761 | -0.7336  | 0.484462 | 0.864078 | DOWN | 184.2447 | 184.2446 | 184.2449 | 10.892   | 10.8646  |
| 8433 | M706T10_ | 1.189267 | -0.25007 | -0.73361 | 0.484498 | 0.864078 | DOWN | 705.9194 | 705.9176 | 705.9195 | 10.2516  | 10.21468 |
| 8434 | M678T34  | 1.587772 | 0.667004 | 0.758239 | 0.484556 | 0.864078 | UP   | 678.4788 | 678.4785 | 678.4791 | 34.39475 | 34.35917 |

|      |          |          |          |          |          |          |      |          |          |          |          |          |
|------|----------|----------|----------|----------|----------|----------|------|----------|----------|----------|----------|----------|
| 8435 | M394T11_ | 1.271577 | -0.34662 | -0.73317 | 0.484584 | 0.864078 | DOWN | 394.2033 | 394.1966 | 394.2053 | 10.92925 | 10.89355 |
| 8436 | M376T15_ | 2.061816 | 1.043915 | 0.767977 | 0.484657 | 0.864078 | UP   | 376.2073 | 376.2071 | 376.2076 | 15.1608  | 15.10288 |
| 8437 | M578T10_ | 1.093925 | -0.12951 | -0.73348 | 0.484705 | 0.864078 | DOWN | 577.6678 | 577.6675 | 577.6679 | 9.944392 | 9.827283 |
| 8438 | M398T39  | 1.33991  | -0.42214 | -0.76796 | 0.484796 | 0.864078 | DOWN | 398.2381 | 398.238  | 398.2384 | 39.115   | 38.94217 |
| 8439 | M195T9_5 | 1.340585 | -0.42286 | -0.74311 | 0.48481  | 0.864078 | DOWN | 194.7783 | 194.7771 | 194.7787 | 9.329642 | 9.166033 |
| 8440 | M477T10_ | 1.271182 | 0.346171 | 0.734908 | 0.484897 | 0.864078 | UP   | 477.1501 | 477.1497 | 477.1506 | 9.809075 | 9.7124   |
| 8441 | M697T10_ | 1.11861  | 0.161707 | 0.732318 | 0.484988 | 0.864078 | UP   | 697.3824 | 697.3821 | 697.383  | 9.970617 | 9.859233 |
| 8442 | M251T11_ | 1.249499 | -0.32135 | -0.73219 | 0.485022 | 0.864078 | DOWN | 250.9826 | 250.9823 | 250.9826 | 10.83252 | 10.80695 |
| 8443 | M351T10_ | 1.816337 | 0.861032 | 0.760653 | 0.485084 | 0.864078 | UP   | 350.774  | 350.7738 | 350.7743 | 9.8887   | 9.7634   |
| 8444 | M475T9_1 | 1.349743 | 0.432684 | 0.73509  | 0.485096 | 0.864078 | UP   | 475.1259 | 475.1139 | 475.1282 | 9.079083 | 9.023433 |
| 8445 | M492T10_ | 1.272809 | -0.34802 | -0.73388 | 0.485166 | 0.864078 | DOWN | 492.2264 | 492.2262 | 492.2266 | 9.970617 | 9.967367 |
| 8446 | M398T10_ | 1.074261 | -0.10334 | -0.73402 | 0.485213 | 0.864078 | DOWN | 397.6901 | 397.6899 | 397.6903 | 9.917167 | 9.811217 |
| 8447 | M219T9_1 | 1.198584 | -0.26133 | -0.74105 | 0.485234 | 0.864078 | DOWN | 219.252  | 219.2507 | 219.2524 | 9.357567 | 9.279417 |
| 8448 | M527T10_ | 1.186961 | -0.24727 | -0.73416 | 0.485251 | 0.864078 | DOWN | 527.4366 | 527.436  | 527.437  | 9.95825  | 9.859233 |
| 8449 | M791T21  | 1.080636 | -0.11188 | -0.73211 | 0.485256 | 0.864078 | DOWN | 790.5527 | 790.5521 | 790.553  | 21.43667 | 21.408   |
| 8450 | M873T10_ | 1.112905 | -0.15433 | -0.73406 | 0.48528  | 0.864078 | DOWN | 872.5246 | 872.5237 | 872.5249 | 9.950258 | 9.843367 |
| 8451 | M954T10_ | 2.087919 | 1.062066 | 0.764644 | 0.485289 | 0.864078 | UP   | 954.2862 | 954.2834 | 954.287  | 9.956867 | 9.8914   |
| 8452 | M643T10_ | 1.089675 | -0.1239  | -0.73434 | 0.4854   | 0.864078 | DOWN | 642.6198 | 642.6188 | 642.6203 | 9.8207   | 9.715683 |
| 8453 | M222T10_ | 1.177419 | -0.23563 | -0.73238 | 0.485414 | 0.864078 | DOWN | 221.5259 | 221.5258 | 221.526  | 9.9014   | 9.79535  |
| 8454 | M703T10_ | 1.059056 | -0.08278 | -0.73136 | 0.485483 | 0.864079 | DOWN | 702.9762 | 702.9757 | 702.9765 | 9.857833 | 9.73145  |
| 8455 | M337T9_8 | 1.168984 | -0.22526 | -0.74992 | 0.485544 | 0.864079 | DOWN | 336.8871 | 336.8865 | 336.8872 | 8.978067 | 8.892117 |
| 8456 | M1034T10 | 1.22506  | -0.29285 | -0.74044 | 0.485555 | 0.864079 | DOWN | 1033.608 | 1033.606 | 1033.609 | 9.770733 | 9.636483 |
| 8457 | M673T10_ | 1.405385 | 0.490965 | 0.757953 | 0.485601 | 0.864079 | UP   | 673.4596 | 673.4588 | 673.4597 | 9.968992 | 9.859233 |
| 8458 | M348T25  | 1.102022 | -0.14015 | -0.73096 | 0.485836 | 0.864079 | DOWN | 348.3105 | 348.3104 | 348.3107 | 24.64833 | 24.63767 |
| 8459 | M637T10_ | 1.203817 | -0.26762 | -0.73611 | 0.485871 | 0.864079 | DOWN | 636.9169 | 636.9165 | 636.9176 | 9.953417 | 9.843367 |
| 8460 | M1343T10 | 1.931373 | 0.949627 | 0.760971 | 0.486178 | 0.864079 | UP   | 1342.753 | 1342.75  | 1342.755 | 9.967533 | 9.8753   |
| 8461 | M203T11_ | 1.108513 | -0.14863 | -0.73056 | 0.486225 | 0.864079 | DOWN | 202.7271 | 202.727  | 202.7273 | 10.892   | 10.879   |
| 8462 | M647T26  | 1.305036 | -0.38409 | -0.7381  | 0.486231 | 0.864079 | DOWN | 646.981  | 646.9806 | 646.9819 | 26.00467 | 25.8495  |
| 8463 | M569T10_ | 1.645761 | 0.718755 | 0.759606 | 0.486251 | 0.864079 | UP   | 568.8041 | 568.803  | 568.8046 | 9.957033 | 9.8753   |
| 8464 | M464T11_ | 1.388635 | 0.473667 | 0.76417  | 0.486354 | 0.864079 | UP   | 464.3089 | 464.3085 | 464.3092 | 11.15472 | 11.11578 |
| 8465 | M1342T10 | 1.140888 | -0.19016 | -0.73472 | 0.486362 | 0.864079 | DOWN | 1342.235 | 1342.228 | 1342.238 | 9.918292 | 9.827283 |
| 8466 | M266T10_ | 1.740665 | 0.799638 | 0.733226 | 0.486386 | 0.864079 | UP   | 266.0246 | 266.0242 | 266.0247 | 9.951283 | 9.859233 |
| 8467 | M556T10_ | 1.139277 | -0.18812 | -0.7395  | 0.486388 | 0.864079 | DOWN | 556.0806 | 556.0803 | 556.0809 | 9.95605  | 9.843367 |
| 8468 | M371T11_ | 1.146568 | -0.19732 | -0.72973 | 0.486407 | 0.864079 | DOWN | 371.3726 | 371.3719 | 371.373  | 10.91977 | 10.8214  |
| 8469 | M550T9_5 | 1.72409  | 0.785835 | 0.762331 | 0.486449 | 0.864079 | UP   | 550.4684 | 550.4679 | 550.4689 | 9.348233 | 9.29345  |

|      |          |          |          |          |          |          |      |          |          |          |          |          |
|------|----------|----------|----------|----------|----------|----------|------|----------|----------|----------|----------|----------|
| 8470 | M1871T10 | 2.855168 | 1.513576 | 0.762185 | 0.486488 | 0.864079 | UP   | 1871.318 | 1871.316 | 1871.321 | 9.944942 | 9.840617 |
| 8471 | M222T9_1 | 1.219473 | -0.28626 | -0.73808 | 0.486514 | 0.864079 | DOWN | 221.5078 | 221.5058 | 221.5082 | 9.358725 | 9.142767 |
| 8472 | M423T11_ | 1.550305 | -0.63255 | -0.73692 | 0.486627 | 0.864079 | DOWN | 423.3959 | 423.3875 | 423.3989 | 10.93538 | 10.8628  |
| 8473 | M220T9_1 | 1.422428 | -0.50836 | -0.73277 | 0.486703 | 0.864079 | DOWN | 219.5182 | 219.5152 | 219.5186 | 9.2673   | 9.098833 |
| 8474 | M671T11  | 1.247603 | -0.31916 | -0.73491 | 0.486766 | 0.864079 | DOWN | 671.2208 | 671.2193 | 671.2215 | 10.90785 | 10.8914  |
| 8475 | M819T22  | 1.106517 | -0.14603 | -0.73052 | 0.486807 | 0.864079 | DOWN | 818.584  | 818.5835 | 818.5842 | 21.88275 | 21.85283 |
| 8476 | M627T9_3 | 1.747076 | 0.804942 | 0.761668 | 0.486885 | 0.864079 | UP   | 627.4547 | 627.4543 | 627.4665 | 9.224517 | 9.1428   |
| 8477 | M792T33  | 1.231481 | 0.300395 | 0.731224 | 0.486889 | 0.864079 | UP   | 791.556  | 791.5549 | 791.5577 | 33.35433 | 33.326   |
| 8478 | M437T9_1 | 1.318543 | -0.39894 | -0.73709 | 0.487005 | 0.864079 | DOWN | 436.5462 | 436.5456 | 436.5486 | 9.302667 | 9.129317 |
| 8479 | M1132T11 | 1.13167  | -0.17845 | -0.73241 | 0.487024 | 0.864079 | DOWN | 1131.85  | 1131.849 | 1131.851 | 10.5188  | 10.47197 |
| 8480 | M384T11_ | 1.287494 | 0.364565 | 0.745255 | 0.487029 | 0.864079 | UP   | 383.5993 | 383.5987 | 383.6014 | 10.93929 | 10.879   |
| 8481 | M212T9_1 | 1.382025 | -0.46678 | -0.72844 | 0.487151 | 0.864079 | DOWN | 212.2873 | 212.2858 | 212.2923 | 9.357567 | 9.053483 |
| 8482 | M484T10_ | 1.24598  | 0.31728  | 0.741653 | 0.487215 | 0.864079 | UP   | 484.3294 | 484.3176 | 484.33   | 9.64815  | 9.586183 |
| 8483 | M647T10_ | 1.245067 | -0.31622 | -0.73258 | 0.48724  | 0.864079 | DOWN | 647.3316 | 647.3307 | 647.3327 | 9.637733 | 9.52595  |
| 8484 | M637T9_4 | 1.14724  | -0.19817 | -0.73303 | 0.487253 | 0.864079 | DOWN | 637.2668 | 637.2653 | 637.2671 | 9.43315  | 9.40135  |
| 8485 | M163T3   | 1.312292 | 0.392089 | 0.74427  | 0.487435 | 0.864079 | UP   | 163.1326 | 163.1325 | 163.1326 | 2.5164   | 2.28205  |
| 8486 | M287T10_ | 1.269776 | 0.344574 | 0.739252 | 0.487485 | 0.864079 | UP   | 286.7349 | 286.7348 | 286.735  | 9.964167 | 9.8753   |
| 8487 | M212T15  | 1.658196 | -0.72961 | -0.75261 | 0.487519 | 0.864079 | DOWN | 212.2005 | 212.2003 | 212.2008 | 14.8099  | 14.78027 |
| 8488 | M289T22  | 1.067175 | 0.093797 | 0.735486 | 0.487615 | 0.864079 | UP   | 289.2928 | 289.2926 | 289.2931 | 22.07925 | 22.0735  |
| 8489 | M175T11  | 1.115324 | -0.15746 | -0.72764 | 0.487634 | 0.864079 | DOWN | 174.8834 | 174.8833 | 174.8835 | 10.90522 | 10.879   |
| 8490 | M353T11_ | 1.107178 | -0.14689 | -0.72758 | 0.487704 | 0.864079 | DOWN | 353.2604 | 353.2601 | 353.2607 | 10.892   | 10.879   |
| 8491 | M399T11_ | 1.119354 | -0.16267 | -0.7318  | 0.487774 | 0.864079 | DOWN | 398.9405 | 398.9403 | 398.9411 | 10.91983 | 10.90197 |
| 8492 | M381T11_ | 1.289929 | 0.367292 | 0.732713 | 0.48778  | 0.864079 | UP   | 380.88   | 380.8773 | 380.8859 | 10.91895 | 10.84847 |
| 8493 | M420T10_ | 1.35165  | 0.434722 | 0.756244 | 0.487908 | 0.864079 | UP   | 420.3762 | 420.3759 | 420.3764 | 9.930142 | 9.827283 |
| 8494 | M230T11_ | 1.09692  | -0.13346 | -0.72719 | 0.488036 | 0.864079 | DOWN | 230.2623 | 230.2622 | 230.2624 | 10.89193 | 10.8646  |
| 8495 | M359T10_ | 1.339398 | 0.421585 | 0.75548  | 0.48811  | 0.864079 | UP   | 359.1275 | 359.1271 | 359.1303 | 9.847075 | 9.827283 |
| 8496 | M343T19_ | 1.161177 | -0.21559 | -0.74381 | 0.488178 | 0.864079 | DOWN | 343.2377 | 343.2375 | 343.238  | 18.74558 | 18.72667 |
| 8497 | M508T11_ | 1.115988 | -0.15832 | -0.72936 | 0.488213 | 0.864079 | DOWN | 508.0002 | 507.9999 | 508.0008 | 10.90551 | 10.879   |
| 8498 | M701T18_ | 1.244216 | 0.315237 | 0.753405 | 0.488284 | 0.864079 | UP   | 701.4933 | 701.4929 | 701.4937 | 18.4085  | 18.327   |
| 8499 | M1935T10 | 1.495033 | 0.580178 | 0.758481 | 0.4883   | 0.864079 | UP   | 1934.802 | 1934.8   | 1934.804 | 9.843017 | 9.747533 |
| 8500 | M720T10_ | 1.159213 | -0.21315 | -0.73195 | 0.488363 | 0.864079 | DOWN | 720.1175 | 720.1153 | 720.1183 | 9.825767 | 9.715683 |
| 8501 | M733T11  | 1.212844 | -0.27839 | -0.72969 | 0.488368 | 0.86408  | DOWN | 733.2885 | 733.2878 | 733.2891 | 10.91407 | 10.84847 |
| 8502 | M1483T10 | 1.319649 | -0.40015 | -0.72661 | 0.488433 | 0.86408  | DOWN | 1483.376 | 1483.375 | 1483.378 | 9.879675 | 9.779267 |
| 8503 | M393T9_8 | 1.271507 | -0.34654 | -0.72887 | 0.488439 | 0.86408  | DOWN | 393.3867 | 393.3852 | 393.3889 | 9.311883 | 9.160617 |
| 8504 | M177T9_3 | 1.775534 | 0.828253 | 0.758055 | 0.488516 | 0.86408  | UP   | 176.8641 | 176.8637 | 176.8687 | 9.280767 | 9.11795  |

|      |          |          |          |          |          |         |      |          |          |          |          |          |
|------|----------|----------|----------|----------|----------|---------|------|----------|----------|----------|----------|----------|
| 8505 | M425T10_ | 1.313323 | 0.393222 | 0.741325 | 0.488615 | 0.86408 | UP   | 425.2043 | 425.1958 | 425.2054 | 9.970617 | 9.843367 |
| 8506 | M643T21_ | 1.206438 | -0.27075 | -0.7291  | 0.488649 | 0.86408 | DOWN | 643.4819 | 643.481  | 643.4824 | 20.75917 | 20.73683 |
| 8507 | M430T25_ | 1.452531 | 0.538569 | 0.736115 | 0.488699 | 0.86408 | UP   | 429.6414 | 429.6412 | 429.6415 | 24.58017 | 24.5795  |
| 8508 | M268T10_ | 1.317364 | 0.397654 | 0.738467 | 0.488706 | 0.86408 | UP   | 267.7821 | 267.7817 | 267.7824 | 9.954217 | 9.843367 |
| 8509 | M285T7_3 | 1.169042 | -0.22533 | -0.74594 | 0.48871  | 0.86408 | DOWN | 285.2405 | 285.2404 | 285.2408 | 7.039683 | 6.94005  |
| 8510 | M763T28  | 1.237822 | -0.3078  | -0.72569 | 0.488772 | 0.86408 | DOWN | 762.5213 | 762.5208 | 762.5216 | 28.24533 | 28.18517 |
| 8511 | M640T16  | 1.112595 | -0.15393 | -0.73135 | 0.488796 | 0.86408 | DOWN | 640.4488 | 640.4485 | 640.4493 | 15.5575  | 15.53263 |
| 8512 | M554T44  | 1.152286 | -0.2045  | -0.74269 | 0.488834 | 0.86408 | DOWN | 554.1757 | 554.175  | 554.1766 | 44.46617 | 44.4085  |
| 8513 | M389T10_ | 1.19667  | -0.25903 | -0.72862 | 0.488848 | 0.86408 | DOWN | 388.6051 | 388.6048 | 388.6055 | 9.971292 | 9.859233 |
| 8514 | M355T10_ | 1.274548 | -0.34999 | -0.72541 | 0.488872 | 0.86408 | DOWN | 354.6363 | 354.6362 | 354.6365 | 9.818433 | 9.699733 |
| 8515 | M276T10_ | 1.126532 | -0.17189 | -0.74624 | 0.48906  | 0.86408 | DOWN | 276.4677 | 276.4675 | 276.4677 | 9.8397   | 9.715683 |
| 8516 | M438T25  | 1.30789  | 0.387241 | 0.750884 | 0.489104 | 0.86408 | UP   | 438.1963 | 438.1961 | 438.1965 | 24.607   | 24.56517 |
| 8517 | M311T11_ | 1.161363 | 0.215819 | 0.72876  | 0.489158 | 0.86408 | UP   | 310.743  | 310.7426 | 310.7432 | 10.90553 | 10.89355 |
| 8518 | M660T10_ | 1.047484 | -0.06693 | -0.72835 | 0.489238 | 0.86408 | DOWN | 659.5446 | 659.5441 | 659.5466 | 9.843017 | 9.715683 |
| 8519 | M324T10_ | 1.195274 | -0.25734 | -0.73656 | 0.489336 | 0.86408 | DOWN | 323.8834 | 323.883  | 323.8835 | 9.514733 | 9.416817 |
| 8520 | M590T10_ | 1.102446 | -0.14071 | -0.72452 | 0.489394 | 0.86408 | DOWN | 589.7684 | 589.768  | 589.7694 | 9.9351   | 9.827283 |
| 8521 | M695T10_ | 1.209134 | -0.27397 | -0.72599 | 0.489439 | 0.86408 | DOWN | 694.9244 | 694.9232 | 694.925  | 10.02372 | 10.0044  |
| 8522 | M1234T10 | 1.168825 | -0.22506 | -0.7245  | 0.489458 | 0.86408 | DOWN | 1233.584 | 1233.583 | 1233.585 | 9.64815  | 9.52595  |
| 8523 | M488T10_ | 2.238591 | 1.162591 | 0.755364 | 0.489517 | 0.86408 | UP   | 488.4749 | 488.4725 | 488.4752 | 9.729367 | 9.5812   |
| 8524 | M397T10_ | 1.255576 | -0.32835 | -0.73368 | 0.489583 | 0.86408 | DOWN | 396.853  | 396.8526 | 396.8533 | 9.968992 | 9.859233 |
| 8525 | M645T26  | 1.253702 | -0.32619 | -0.72436 | 0.489621 | 0.86408 | DOWN | 645.4759 | 645.4751 | 645.4763 | 26.00308 | 25.90867 |
| 8526 | M891T10_ | 1.093515 | -0.12897 | -0.72516 | 0.489819 | 0.86408 | DOWN | 891.3728 | 891.3716 | 891.3735 | 9.934533 | 9.827283 |
| 8527 | M204T21  | 1.279321 | 0.355379 | 0.729423 | 0.489827 | 0.86408 | UP   | 204.1097 | 204.1094 | 204.1098 | 20.96592 | 20.94167 |
| 8528 | M701T11_ | 1.071699 | -0.0999  | -0.73303 | 0.489951 | 0.86408 | DOWN | 701.4939 | 701.4938 | 701.494  | 11.29715 | 11.20712 |
| 8529 | M1234T20 | 1.18192  | -0.24113 | -0.7274  | 0.489986 | 0.86408 | DOWN | 1233.573 | 1233.572 | 1233.574 | 19.67817 | 19.6585  |
| 8530 | M226T9_1 | 1.238531 | -0.30863 | -0.72354 | 0.489991 | 0.86408 | DOWN | 226.4876 | 226.4859 | 226.4889 | 9.287967 | 9.1322   |
| 8531 | M541T37_ | 1.223521 | -0.29104 | -0.7369  | 0.4901   | 0.86408 | DOWN | 541.4287 | 541.4286 | 541.429  | 37.02883 | 37.011   |
| 8532 | M399T10_ | 1.403025 | -0.48854 | -0.72329 | 0.490149 | 0.86408 | DOWN | 398.7446 | 398.7446 | 398.7449 | 9.960967 | 9.8914   |
| 8533 | M378T42_ | 1.530962 | -0.61444 | -0.72334 | 0.490154 | 0.86408 | DOWN | 378.2482 | 378.2482 | 378.2484 | 42.25117 | 42.20833 |
| 8534 | M416T11_ | 1.290861 | 0.368334 | 0.736242 | 0.490169 | 0.86408 | UP   | 415.9987 | 415.9986 | 415.9995 | 10.89875 | 10.879   |
| 8535 | M228T11_ | 1.312679 | -0.39251 | -0.72704 | 0.490262 | 0.86408 | DOWN | 227.5465 | 227.5459 | 227.5472 | 10.91102 | 10.84767 |
| 8536 | M571T11_ | 1.214183 | -0.27999 | -0.72856 | 0.490323 | 0.86408 | DOWN | 570.7491 | 570.7487 | 570.7499 | 10.93333 | 10.8646  |
| 8537 | M451T22  | 1.272109 | -0.34722 | -0.72371 | 0.490344 | 0.86408 | DOWN | 451.3243 | 451.324  | 451.3249 | 21.69658 | 21.68    |
| 8538 | M421T11_ | 1.327703 | 0.408933 | 0.748683 | 0.490569 | 0.86408 | UP   | 421.2523 | 421.2521 | 421.2525 | 10.89875 | 10.879   |
| 8539 | M1270T10 | 1.186263 | -0.24642 | -0.72963 | 0.490576 | 0.86408 | DOWN | 1269.673 | 1269.668 | 1269.675 | 9.977867 | 9.8753   |

|      |          |          |          |          |          |          |      |          |          |          |          |          |
|------|----------|----------|----------|----------|----------|----------|------|----------|----------|----------|----------|----------|
| 8540 | M241T10_ | 1.281713 | 0.358073 | 0.748886 | 0.490599 | 0.86408  | UP   | 240.9089 | 240.9087 | 240.9089 | 9.930908 | 9.827283 |
| 8541 | M273T10_ | 1.255823 | -0.32863 | -0.72576 | 0.490633 | 0.86408  | DOWN | 273.1234 | 273.1172 | 273.1293 | 9.945775 | 9.827283 |
| 8542 | M290T9_4 | 1.303141 | -0.38199 | -0.72265 | 0.490689 | 0.86408  | DOWN | 289.8579 | 289.8566 | 289.8583 | 8.952192 | 8.892117 |
| 8543 | M841T10_ | 1.20264  | -0.2662  | -0.72927 | 0.490741 | 0.86408  | DOWN | 840.7337 | 840.7332 | 840.7349 | 9.9468   | 9.843367 |
| 8544 | M236T9_6 | 1.14659  | -0.19735 | -0.72181 | 0.490986 | 0.86408  | DOWN | 235.9878 | 235.9869 | 235.9888 | 9.311167 | 9.132267 |
| 8545 | M339T10_ | 1.060529 | -0.08478 | -0.74268 | 0.491042 | 0.86408  | DOWN | 338.8075 | 338.8074 | 338.8077 | 9.962617 | 9.8753   |
| 8546 | M782T10_ | 1.447868 | 0.53393  | 0.750175 | 0.491148 | 0.86408  | UP   | 781.7026 | 781.7001 | 781.7034 | 9.969158 | 9.859233 |
| 8547 | M237T12_ | 1.248183 | 0.319829 | 0.724743 | 0.491158 | 0.86408  | UP   | 237.1095 | 237.1095 | 237.1095 | 12.16525 | 12.15077 |
| 8548 | M201T43_ | 1.086798 | -0.12008 | -0.72291 | 0.491159 | 0.86408  | DOWN | 201.1118 | 201.1118 | 201.112  | 42.65383 | 42.56767 |
| 8549 | M440T22_ | 1.20322  | -0.2669  | -0.72143 | 0.491201 | 0.86408  | DOWN | 439.8056 | 439.8048 | 439.8075 | 21.62733 | 21.6155  |
| 8550 | M308T10_ | 1.208264 | -0.27294 | -0.72156 | 0.491232 | 0.86408  | DOWN | 307.7441 | 307.7439 | 307.7572 | 9.917167 | 9.859233 |
| 8551 | M338T10_ | 1.159322 | -0.21328 | -0.72168 | 0.491272 | 0.86408  | DOWN | 337.8052 | 337.7997 | 337.8053 | 9.823575 | 9.699733 |
| 8552 | M661T10_ | 1.22828  | -0.29664 | -0.74626 | 0.491293 | 0.86408  | DOWN | 661.3917 | 661.3903 | 661.3923 | 10.15822 | 10.07528 |
| 8553 | M700T31  | 1.131182 | -0.17783 | -0.73701 | 0.491332 | 0.864081 | DOWN | 699.5026 | 699.502  | 699.5029 | 31.2915  | 31.28017 |
| 8554 | M961T10  | 1.310059 | -0.38963 | -0.72553 | 0.491456 | 0.864081 | DOWN | 960.5944 | 960.593  | 960.5961 | 9.960467 | 9.956417 |
| 8555 | M493T9_4 | 1.671203 | 0.740887 | 0.745308 | 0.49147  | 0.864081 | UP   | 493.3359 | 493.3352 | 493.336  | 8.936367 | 8.877267 |
| 8556 | M680T26_ | 1.522812 | -0.60674 | -0.75012 | 0.491546 | 0.864081 | DOWN | 679.5114 | 679.5113 | 679.5115 | 25.56467 | 25.337   |
| 8557 | M816T11_ | 1.162723 | -0.21751 | -0.72116 | 0.491585 | 0.864081 | DOWN | 815.9856 | 815.9847 | 815.9862 | 10.60347 | 10.53485 |
| 8558 | M519T9_4 | 1.352192 | 0.4353   | 0.727966 | 0.491647 | 0.864081 | UP   | 519.4223 | 519.4175 | 519.4269 | 9.280458 | 9.160617 |
| 8559 | M725T9_4 | 1.483655 | -0.56916 | -0.72162 | 0.491657 | 0.864081 | DOWN | 725.4445 | 725.4445 | 725.4446 | 9.325333 | 9.2585   |
| 8560 | M173T10_ | 1.093821 | 0.129376 | 0.752275 | 0.491662 | 0.864081 | UP   | 172.7161 | 172.716  | 172.7161 | 9.8397   | 9.715683 |
| 8561 | M168T10_ | 1.23769  | -0.30765 | -0.7309  | 0.491676 | 0.864081 | DOWN | 167.7173 | 167.7171 | 167.7194 | 9.830833 | 9.715683 |
| 8562 | M364T10_ | 1.62204  | 0.697809 | 0.745012 | 0.491682 | 0.864081 | UP   | 364.2577 | 364.2568 | 364.2697 | 9.787633 | 9.640367 |
| 8563 | M476T9_9 | 1.184734 | -0.24456 | -0.7374  | 0.491863 | 0.864081 | DOWN | 476.0677 | 476.0626 | 476.0681 | 8.858133 | 8.745033 |
| 8564 | M558T10_ | 1.214377 | 0.280217 | 0.720211 | 0.491906 | 0.864081 | UP   | 557.6487 | 557.6486 | 557.6489 | 9.903742 | 9.79535  |
| 8565 | M152T10_ | 1.155253 | -0.20821 | -0.72028 | 0.491933 | 0.864081 | DOWN | 151.8954 | 151.8952 | 151.8956 | 9.942317 | 9.843367 |
| 8566 | M173T10_ | 1.409566 | -0.49525 | -0.7205  | 0.491944 | 0.864081 | DOWN | 173.0806 | 173.0805 | 173.0808 | 9.628092 | 9.540717 |
| 8567 | M293T9_3 | 1.161232 | -0.21566 | -0.72622 | 0.491968 | 0.864081 | DOWN | 293.1907 | 293.1906 | 293.1918 | 8.745917 | 8.643767 |
| 8568 | M242T10_ | 1.177537 | -0.23577 | -0.72034 | 0.492134 | 0.864081 | DOWN | 241.9621 | 241.9619 | 241.9622 | 9.903567 | 9.811217 |
| 8569 | M337T28_ | 1.261962 | -0.33567 | -0.72036 | 0.492135 | 0.864081 | DOWN | 336.5944 | 336.5941 | 336.5945 | 28.39158 | 28.37683 |
| 8570 | M778T10_ | 1.293656 | -0.37145 | -0.72134 | 0.49215  | 0.864081 | DOWN | 778.4864 | 778.4859 | 778.4875 | 9.547133 | 9.40135  |
| 8571 | M228T9_1 | 1.201644 | -0.26501 | -0.72585 | 0.492205 | 0.864081 | DOWN | 228.2176 | 228.2159 | 228.2183 | 9.357567 | 9.275917 |
| 8572 | M400T9_5 | 1.189992 | -0.25095 | -0.7218  | 0.492237 | 0.864081 | DOWN | 399.9419 | 399.9414 | 399.9424 | 9.365833 | 9.219483 |
| 8573 | M282T22  | 1.178714 | 0.237214 | 0.724741 | 0.492299 | 0.864081 | UP   | 282.2212 | 282.2209 | 282.2218 | 22.10667 | 22.08183 |
| 8574 | M403T9_2 | 1.219048 | -0.28575 | -0.72685 | 0.492306 | 0.864081 | DOWN | 402.8174 | 402.8173 | 402.8175 | 9.429367 | 9.40135  |

|      |          |          |          |          |          |          |      |          |          |          |          |          |
|------|----------|----------|----------|----------|----------|----------|------|----------|----------|----------|----------|----------|
| 8575 | M575T10_ | 1.154413 | -0.20716 | -0.74447 | 0.492342 | 0.864081 | DOWN | 575.0539 | 575.0538 | 575.0542 | 9.930908 | 9.827283 |
| 8576 | M577T11_ | 1.083802 | -0.1161  | -0.72207 | 0.492346 | 0.864081 | DOWN | 577.4186 | 577.4184 | 577.4189 | 10.5188  | 10.47197 |
| 8577 | M212T10_ | 1.235027 | 0.304543 | 0.719388 | 0.492379 | 0.864081 | UP   | 212.4822 | 212.4821 | 212.4824 | 9.790675 | 9.73145  |
| 8578 | M344T19_ | 1.313885 | 0.393839 | 0.744307 | 0.492434 | 0.864081 | UP   | 344.2412 | 344.2411 | 344.2413 | 19.0965  | 19.09517 |
| 8579 | M259T11_ | 1.123879 | -0.16849 | -0.7193  | 0.492452 | 0.864081 | DOWN | 258.6822 | 258.6821 | 258.6823 | 10.892   | 10.879   |
| 8580 | M468T20  | 1.298087 | 0.376387 | 0.719093 | 0.492552 | 0.864081 | UP   | 468.3316 | 468.3311 | 468.3323 | 19.80992 | 19.78833 |
| 8581 | M270T11_ | 1.143308 | -0.19321 | -0.74446 | 0.492571 | 0.864081 | DOWN | 269.7345 | 269.7339 | 269.7347 | 10.91809 | 10.90553 |
| 8582 | M351T10_ | 1.059352 | 0.083181 | 0.736214 | 0.492589 | 0.864081 | UP   | 351.1459 | 351.1458 | 351.146  | 9.8397   | 9.715683 |
| 8583 | M220T10_ | 1.239638 | -0.30992 | -0.72167 | 0.492603 | 0.864081 | DOWN | 219.6581 | 219.6579 | 219.6582 | 9.932033 | 9.827283 |
| 8584 | M573T10_ | 1.135936 | -0.18388 | -0.73522 | 0.49269  | 0.864081 | DOWN | 572.7895 | 572.7891 | 572.7901 | 9.918792 | 9.811217 |
| 8585 | M201T9_4 | 1.426696 | 0.512678 | 0.719783 | 0.492728 | 0.864081 | UP   | 200.6208 | 200.6207 | 200.6211 | 9.16125  | 9.142767 |
| 8586 | M562T10_ | 1.263879 | -0.33786 | -0.7284  | 0.492738 | 0.864081 | DOWN | 561.5724 | 561.5719 | 561.573  | 9.95385  | 9.827283 |
| 8587 | M683T36  | 1.646296 | -0.71922 | -0.74329 | 0.49274  | 0.864081 | DOWN | 682.5043 | 682.5035 | 682.5054 | 36.21575 | 36.19383 |
| 8588 | M188T9_2 | 1.239198 | -0.30941 | -0.71965 | 0.49281  | 0.864081 | DOWN | 188.4957 | 188.4944 | 188.4959 | 9.175017 | 9.132267 |
| 8589 | M347T10_ | 1.249322 | 0.321145 | 0.719005 | 0.492914 | 0.864081 | UP   | 347.4919 | 347.4917 | 347.4981 | 9.972483 | 9.8753   |
| 8590 | M699T10_ | 1.1453   | -0.19573 | -0.74144 | 0.492959 | 0.864081 | DOWN | 698.9863 | 698.986  | 698.9873 | 9.865867 | 9.779267 |
| 8591 | M391T11_ | 1.226158 | 0.294145 | 0.719709 | 0.493016 | 0.864081 | UP   | 391.4904 | 391.4892 | 391.4905 | 10.94652 | 10.92828 |
| 8592 | M231T10_ | 1.068779 | -0.09596 | -0.72066 | 0.493027 | 0.864081 | DOWN | 231.0839 | 231.0747 | 231.084  | 9.943183 | 9.827283 |
| 8593 | M577T10_ | 1.199197 | 0.262069 | 0.718273 | 0.493036 | 0.864081 | UP   | 576.9768 | 576.9765 | 576.9773 | 9.953367 | 9.859233 |
| 8594 | M696T10_ | 1.457743 | 0.543736 | 0.748766 | 0.4931   | 0.864081 | UP   | 695.7733 | 695.7726 | 695.7738 | 9.772883 | 9.747533 |
| 8595 | M470T10_ | 1.191133 | -0.25233 | -0.72294 | 0.493111 | 0.864081 | DOWN | 470.4251 | 470.4249 | 470.4254 | 9.967367 | 9.859233 |
| 8596 | M618T9_1 | 1.396926 | -0.48226 | -0.72049 | 0.493122 | 0.864081 | DOWN | 617.693  | 617.69   | 617.6972 | 9.142767 | 8.872733 |
| 8597 | M299T39_ | 1.124159 | 0.168846 | 0.751277 | 0.49316  | 0.864081 | UP   | 299.185  | 299.1849 | 299.1852 | 39.25883 | 39.04283 |
| 8598 | M548T37  | 1.094517 | 0.130294 | 0.747362 | 0.493277 | 0.864081 | UP   | 548.3427 | 548.3425 | 548.3429 | 36.94342 | 36.67617 |
| 8599 | M327T25_ | 1.383493 | 0.468315 | 0.722764 | 0.493291 | 0.864081 | UP   | 327.1989 | 327.1984 | 327.1992 | 24.63792 | 24.59267 |
| 8600 | M437T11_ | 1.177029 | -0.23515 | -0.72247 | 0.493314 | 0.864081 | DOWN | 436.5045 | 436.5044 | 436.5057 | 10.90659 | 10.879   |
| 8601 | M277T10_ | 1.061076 | -0.08553 | -0.72752 | 0.493366 | 0.864081 | DOWN | 276.7278 | 276.7276 | 276.7279 | 9.8802   | 9.779267 |
| 8602 | M352T40_ | 1.087232 | -0.12066 | -0.74644 | 0.493417 | 0.864081 | DOWN | 352.1965 | 352.1963 | 352.1967 | 40.28758 | 40.28017 |
| 8603 | M731T11_ | 1.090744 | 0.125312 | 0.727668 | 0.49342  | 0.864081 | UP   | 730.529  | 730.5287 | 730.5295 | 10.62363 | 10.59933 |
| 8604 | M478T39_ | 1.136838 | -0.18503 | -0.74649 | 0.493509 | 0.864081 | DOWN | 478.2644 | 478.2642 | 478.2646 | 39.09333 | 39.02833 |
| 8605 | M450T22  | 1.234697 | -0.30416 | -0.71748 | 0.493527 | 0.864081 | DOWN | 450.321  | 450.3208 | 450.3215 | 21.68492 | 21.67983 |
| 8606 | M151T42_ | 1.421671 | -0.50759 | -0.74814 | 0.493704 | 0.864081 | DOWN | 151.1115 | 151.1114 | 151.1115 | 42.26517 | 42.02117 |
| 8607 | M1179T10 | 1.086294 | 0.119414 | 0.725781 | 0.493816 | 0.864081 | UP   | 1178.872 | 1178.871 | 1178.873 | 9.843017 | 9.683817 |
| 8608 | M294T19  | 1.529957 | 0.613491 | 0.732196 | 0.49382  | 0.864081 | UP   | 294.2272 | 294.2271 | 294.2276 | 18.96558 | 18.95117 |
| 8609 | M809T16  | 1.213283 | -0.27892 | -0.72131 | 0.493975 | 0.864081 | DOWN | 809.3786 | 809.3771 | 809.3796 | 15.71543 | 15.67228 |

|      |           |          |          |          |          |          |      |          |          |          |          |          |
|------|-----------|----------|----------|----------|----------|----------|------|----------|----------|----------|----------|----------|
| 8610 | M330T11_  | 1.229786 | -0.29841 | -0.71646 | 0.494111 | 0.864081 | DOWN | 330.3599 | 330.3597 | 330.36   | 10.84847 | 10.82972 |
| 8611 | M390T10_  | 1.219896 | 0.286759 | 0.721176 | 0.49428  | 0.864081 | UP   | 390.4687 | 390.4685 | 390.4689 | 9.979342 | 9.8753   |
| 8612 | M631T10_  | 1.299024 | 0.377428 | 0.716289 | 0.494286 | 0.864081 | UP   | 630.7762 | 630.7756 | 630.7766 | 10.39007 | 10.34542 |
| 8613 | M422T11_  | 1.08816  | -0.12189 | -0.72251 | 0.49432  | 0.864082 | DOWN | 422.0179 | 422.0175 | 422.0183 | 10.892   | 10.879   |
| 8614 | M456T13_  | 1.553688 | 0.635697 | 0.74213  | 0.494352 | 0.864082 | UP   | 456.3435 | 456.3426 | 456.3458 | 13.0404  | 12.99785 |
| 8615 | M1470T10_ | 1.5167   | 0.600936 | 0.745852 | 0.494591 | 0.864082 | UP   | 1470.279 | 1470.277 | 1470.284 | 9.923708 | 9.859233 |
| 8616 | M359T11_  | 1.12581  | -0.17096 | -0.72302 | 0.49479  | 0.864082 | DOWN | 359.0158 | 359.0155 | 359.0161 | 10.90373 | 10.88995 |
| 8617 | M680T40_  | 1.167661 | 0.223621 | 0.71554  | 0.494804 | 0.864082 | UP   | 680.3854 | 680.3853 | 680.3857 | 40.1365  | 39.9205  |
| 8618 | M374T10_  | 1.186709 | -0.24697 | -0.72634 | 0.494809 | 0.864082 | DOWN | 373.8803 | 373.8801 | 373.8805 | 9.972483 | 9.8914   |
| 8619 | M639T10_  | 1.170816 | 0.227514 | 0.733814 | 0.494823 | 0.864082 | UP   | 638.5353 | 638.5347 | 638.5387 | 9.831517 | 9.715683 |
| 8620 | M362T9_3  | 1.194743 | -0.2567  | -0.71865 | 0.494857 | 0.864082 | DOWN | 361.9715 | 361.9701 | 361.9747 | 9.29345  | 9.159717 |
| 8621 | M434T10_  | 1.21989  | -0.28675 | -0.71616 | 0.494865 | 0.864082 | DOWN | 434.0506 | 434.0501 | 434.051  | 9.939575 | 9.843367 |
| 8622 | M508T41_  | 1.359119 | -0.44267 | -0.72863 | 0.494866 | 0.864082 | DOWN | 508.2749 | 508.2747 | 508.275  | 40.63983 | 40.4675  |
| 8623 | M698T9_3  | 1.315773 | -0.39591 | -0.73183 | 0.494993 | 0.864082 | DOWN | 697.6525 | 697.6522 | 697.6528 | 9.305225 | 9.234417 |
| 8624 | M243T11_  | 1.08966  | 0.123878 | 0.731656 | 0.495132 | 0.864082 | UP   | 243.3182 | 243.3179 | 243.322  | 10.92225 | 10.80695 |
| 8625 | M350T9_1  | 1.112974 | -0.15442 | -0.71466 | 0.495157 | 0.864082 | DOWN | 349.5193 | 349.5187 | 349.5194 | 9.285867 | 9.129317 |
| 8626 | M331T9_3  | 1.195156 | -0.2572  | -0.71683 | 0.495225 | 0.864082 | DOWN | 330.6207 | 330.6205 | 330.621  | 9.320067 | 9.129317 |
| 8627 | M348T26_  | 1.297057 | -0.37524 | -0.71817 | 0.495244 | 0.864082 | DOWN | 348.496  | 348.4959 | 348.4963 | 26.3215  | 26.25033 |
| 8628 | M294T30_  | 2.265214 | 1.179647 | 0.71903  | 0.4953   | 0.864082 | UP   | 294.1814 | 294.1707 | 294.1837 | 29.805   | 29.776   |
| 8629 | M457T10_  | 1.162526 | -0.21726 | -0.71952 | 0.495336 | 0.864082 | DOWN | 456.7983 | 456.7978 | 456.7987 | 9.968992 | 9.859233 |
| 8630 | M611T11_  | 1.151422 | -0.20342 | -0.71439 | 0.49536  | 0.864082 | DOWN | 611.0607 | 611.0603 | 611.061  | 10.89193 | 10.8646  |
| 8631 | M709T30_  | 1.122392 | 0.166577 | 0.736494 | 0.495372 | 0.864082 | UP   | 709.4708 | 709.4704 | 709.4714 | 30.25158 | 30.226   |
| 8632 | M236T10_  | 2.330732 | 1.220783 | 0.747058 | 0.495459 | 0.864082 | UP   | 236.4266 | 236.4264 | 236.4267 | 9.946367 | 9.843367 |
| 8633 | M343T9_6  | 1.259519 | -0.33287 | -0.71531 | 0.495546 | 0.864082 | DOWN | 343.2492 | 343.249  | 343.2496 | 9.312075 | 9.234417 |
| 8634 | M531T9_2  | 1.30395  | -0.38289 | -0.72384 | 0.495553 | 0.864082 | DOWN | 530.6518 | 530.6506 | 530.6526 | 9.29345  | 9.237017 |
| 8635 | M1219T10_ | 1.266988 | 0.341403 | 0.714982 | 0.49556  | 0.864082 | UP   | 1218.582 | 1218.581 | 1218.587 | 9.975142 | 9.859233 |
| 8636 | M354T9_4  | 1.399456 | 0.484866 | 0.734279 | 0.49562  | 0.864082 | UP   | 353.8144 | 353.8125 | 353.8149 | 9.358725 | 9.174967 |
| 8637 | M644T10_  | 1.183314 | 0.242833 | 0.733955 | 0.495662 | 0.864082 | UP   | 644.4865 | 644.486  | 644.4877 | 9.834117 | 9.715683 |
| 8638 | M598T25_  | 1.195262 | -0.25733 | -0.73029 | 0.495681 | 0.864082 | DOWN | 598.4521 | 598.4515 | 598.4532 | 25.0435  | 24.9865  |
| 8639 | M437T10_  | 1.241921 | 0.312573 | 0.732877 | 0.495704 | 0.864082 | UP   | 436.6265 | 436.6263 | 436.6274 | 9.98345  | 9.859233 |
| 8640 | M217T10_  | 1.265787 | -0.34003 | -0.71355 | 0.495791 | 0.864082 | DOWN | 217.4028 | 217.4026 | 217.4102 | 9.900833 | 9.806367 |
| 8641 | M1953T10_ | 1.33296  | -0.41463 | -0.72001 | 0.495827 | 0.864082 | DOWN | 1953.492 | 1953.49  | 1953.493 | 9.8207   | 9.715683 |
| 8642 | M219T11_  | 1.103576 | -0.14219 | -0.71334 | 0.495917 | 0.864082 | DOWN | 218.8425 | 218.8423 | 218.8427 | 10.892   | 10.879   |
| 8643 | M568T9_3  | 1.178351 | -0.23677 | -0.72336 | 0.495951 | 0.864082 | DOWN | 567.9175 | 567.9164 | 567.9184 | 9.449367 | 9.370583 |
| 8644 | M402T15_  | 1.231398 | 0.300297 | 0.716028 | 0.496033 | 0.864082 | UP   | 402.1906 | 402.1896 | 402.1908 | 14.92685 | 14.91228 |

|      |          |          |          |          |          |          |      |          |          |          |          |          |
|------|----------|----------|----------|----------|----------|----------|------|----------|----------|----------|----------|----------|
| 8645 | M531T11  | 1.235701 | 0.30533  | 0.727721 | 0.496035 | 0.864082 | UP   | 530.5348 | 530.5314 | 530.5361 | 10.92253 | 10.879   |
| 8646 | M300T10_ | 1.090189 | -0.12458 | -0.72412 | 0.496078 | 0.864082 | DOWN | 299.9032 | 299.9029 | 299.9033 | 9.964092 | 9.859233 |
| 8647 | M366T10_ | 1.177815 | -0.23611 | -0.7145  | 0.496126 | 0.864082 | DOWN | 365.835  | 365.8344 | 365.8351 | 9.830658 | 9.699733 |
| 8648 | M458T9_9 | 1.640841 | 0.714435 | 0.743871 | 0.496132 | 0.864082 | UP   | 458.3204 | 458.3202 | 458.3213 | 9.396625 | 9.2585   |
| 8649 | M681T11_ | 1.244495 | -0.31556 | -0.71451 | 0.496222 | 0.864082 | DOWN | 680.8904 | 680.8903 | 680.8913 | 10.88747 | 10.86008 |
| 8650 | M1908T10 | 1.24506  | -0.31622 | -0.71943 | 0.496228 | 0.864082 | DOWN | 1908.24  | 1908.239 | 1908.241 | 9.82645  | 9.715683 |
| 8651 | M196T23  | 1.130795 | -0.17734 | -0.71749 | 0.496326 | 0.864082 | DOWN | 196.1046 | 196.1045 | 196.1047 | 22.88567 | 22.857   |
| 8652 | M969T11_ | 1.24744  | 0.318971 | 0.722819 | 0.49657  | 0.864082 | UP   | 969.0046 | 969.0037 | 969.0054 | 10.91813 | 10.85018 |
| 8653 | M351T9_8 | 1.089154 | 0.123208 | 0.725058 | 0.496579 | 0.864082 | UP   | 350.8325 | 350.8324 | 350.8327 | 9.26575  | 9.11405  |
| 8654 | M729T10_ | 1.370673 | 0.454884 | 0.746388 | 0.496599 | 0.864082 | UP   | 728.8334 | 728.833  | 728.834  | 9.818433 | 9.715683 |
| 8655 | M547T27  | 1.345331 | 0.427961 | 0.727533 | 0.496716 | 0.864082 | UP   | 547.3235 | 547.3232 | 547.3237 | 26.74067 | 26.6835  |
| 8656 | M714T9_1 | 1.132895 | -0.18001 | -0.71358 | 0.496779 | 0.864082 | DOWN | 713.9842 | 713.9836 | 713.9849 | 9.246483 | 9.129317 |
| 8657 | M205T9_1 | 1.281661 | -0.35802 | -0.71473 | 0.496798 | 0.864082 | DOWN | 204.9317 | 204.9313 | 204.9323 | 9.330825 | 9.277967 |
| 8658 | M420T35_ | 1.19674  | 0.25911  | 0.734779 | 0.496818 | 0.864082 | UP   | 420.2225 | 420.2224 | 420.2228 | 34.64758 | 34.54183 |
| 8659 | M273T39  | 1.291634 | -0.3692  | -0.74568 | 0.49686  | 0.864082 | DOWN | 273.1693 | 273.1692 | 273.1696 | 38.7265  | 38.48183 |
| 8660 | M842T10_ | 1.172969 | -0.23016 | -0.72372 | 0.496935 | 0.864082 | DOWN | 842.3421 | 842.3418 | 842.3426 | 9.948875 | 9.843367 |
| 8661 | M458T11_ | 1.139198 | -0.18802 | -0.71475 | 0.496974 | 0.864082 | DOWN | 458.309  | 458.3088 | 458.3102 | 10.91234 | 10.8646  |
| 8662 | M655T9_3 | 1.217916 | -0.28441 | -0.71335 | 0.497004 | 0.864082 | DOWN | 655.2372 | 655.2362 | 655.2376 | 9.317    | 9.234417 |
| 8663 | M423T25_ | 1.288878 | -0.36612 | -0.71245 | 0.497005 | 0.864082 | DOWN | 422.7945 | 422.7937 | 422.7946 | 24.7755  | 24.75283 |
| 8664 | M885T9   | 1.34378  | -0.4263  | -0.71347 | 0.497117 | 0.864082 | DOWN | 884.577  | 884.5765 | 884.5777 | 8.944917 | 8.878667 |
| 8665 | M411T7_2 | 1.316157 | -0.39633 | -0.71128 | 0.497123 | 0.864082 | DOWN | 410.8556 | 410.8554 | 410.8558 | 7.24735  | 7.082667 |
| 8666 | M430T10_ | 1.800094 | 0.848072 | 0.738496 | 0.497133 | 0.864082 | UP   | 430.0316 | 430.0305 | 430.0324 | 9.903583 | 9.859233 |
| 8667 | M431T26_ | 1.235185 | -0.30473 | -0.71125 | 0.497141 | 0.864082 | DOWN | 430.6526 | 430.6524 | 430.6529 | 26.01683 | 25.89433 |
| 8668 | M364T10_ | 1.545621 | 0.628186 | 0.743528 | 0.497186 | 0.864082 | UP   | 364.4378 | 364.4365 | 364.4381 | 9.8207   | 9.699733 |
| 8669 | M350T10_ | 1.134724 | -0.18234 | -0.71799 | 0.497201 | 0.864082 | DOWN | 349.8359 | 349.8357 | 349.836  | 9.8207   | 9.715683 |
| 8670 | M510T44_ | 1.106852 | -0.14646 | -0.74517 | 0.497252 | 0.864082 | DOWN | 510.2904 | 510.2901 | 510.2907 | 44.013   | 43.93417 |
| 8671 | M347T9_4 | 1.412987 | 0.498748 | 0.733597 | 0.497257 | 0.864082 | UP   | 347.2039 | 347.2036 | 347.205  | 9.102008 | 8.983883 |
| 8672 | M550T10_ | 1.193285 | -0.25494 | -0.72968 | 0.49726  | 0.864082 | DOWN | 549.9482 | 549.9472 | 549.9486 | 9.985117 | 9.9009   |
| 8673 | M844T10_ | 1.191804 | -0.25315 | -0.74094 | 0.497271 | 0.864082 | DOWN | 843.7497 | 843.7492 | 843.7501 | 9.9847   | 9.9009   |
| 8674 | M312T10_ | 1.906888 | 0.93122  | 0.742043 | 0.49736  | 0.864083 | UP   | 312.0758 | 312.0751 | 312.0766 | 9.7634   | 9.65225  |
| 8675 | M474T9_4 | 1.123113 | -0.1675  | -0.71282 | 0.497407 | 0.864083 | DOWN | 474.1787 | 474.1783 | 474.179  | 9.241267 | 9.129317 |
| 8676 | M232T10_ | 1.163068 | -0.21794 | -0.7159  | 0.497442 | 0.864083 | DOWN | 232.4706 | 232.4705 | 232.4707 | 9.9468   | 9.827283 |
| 8677 | M195T23_ | 1.078223 | -0.10866 | -0.7118  | 0.497446 | 0.864083 | DOWN | 195.1013 | 195.1012 | 195.1015 | 22.87883 | 22.85683 |
| 8678 | M1643T10 | 1.17797  | -0.2363  | -0.71767 | 0.497532 | 0.864083 | DOWN | 1643.399 | 1643.398 | 1643.402 | 9.8796   | 9.7634   |
| 8679 | M247T11_ | 1.293079 | -0.37081 | -0.71346 | 0.497542 | 0.864083 | DOWN | 247.4835 | 247.4833 | 247.4837 | 10.8924  | 10.84487 |



|      |          |          |          |          |          |          |      |          |          |          |          |          |
|------|----------|----------|----------|----------|----------|----------|------|----------|----------|----------|----------|----------|
| 8680 | M346T11_ | 1.20417  | 0.268039 | 0.719167 | 0.497682 | 0.864083 | UP   | 346.3557 | 346.3512 | 346.3568 | 10.90785 | 10.873   |
| 8681 | M618T10_ | 1.5862   | 0.665575 | 0.743577 | 0.497733 | 0.864083 | UP   | 617.725  | 617.7244 | 617.7284 | 9.8348   | 9.73145  |
| 8682 | M1175T10 | 1.111285 | 0.152229 | 0.721147 | 0.497747 | 0.864083 | UP   | 1174.683 | 1174.682 | 1174.685 | 9.843475 | 9.78305  |
| 8683 | M287T23_ | 1.053636 | -0.07538 | -0.71656 | 0.497754 | 0.864083 | DOWN | 287.1565 | 287.1563 | 287.1567 | 22.90042 | 22.88567 |
| 8684 | M554T10_ | 1.103798 | -0.14248 | -0.71742 | 0.498038 | 0.864083 | DOWN | 554.3618 | 554.3613 | 554.362  | 9.943183 | 9.827283 |
| 8685 | M841T21  | 1.165608 | -0.22108 | -0.70958 | 0.498132 | 0.864083 | DOWN | 840.566  | 840.5655 | 840.5662 | 21.25517 | 21.24683 |
| 8686 | M732T10_ | 1.459781 | 0.545752 | 0.738466 | 0.498213 | 0.864083 | UP   | 732.3809 | 732.3802 | 732.3815 | 9.969158 | 9.859233 |
| 8687 | M346T10_ | 1.232254 | 0.3013   | 0.725092 | 0.498305 | 0.864083 | UP   | 345.7965 | 345.7962 | 345.7967 | 9.979325 | 9.859233 |
| 8688 | M244T22_ | 1.083077 | -0.11514 | -0.72652 | 0.498315 | 0.864083 | DOWN | 244.2633 | 244.2632 | 244.2634 | 21.97633 | 21.97183 |
| 8689 | M438T38  | 1.207331 | -0.27182 | -0.71025 | 0.498378 | 0.864083 | DOWN | 438.2694 | 438.2692 | 438.2696 | 37.56017 | 37.51783 |
| 8690 | M336T10_ | 1.14253  | -0.19223 | -0.70914 | 0.498382 | 0.864083 | DOWN | 336.1526 | 336.1524 | 336.1575 | 9.825492 | 9.699733 |
| 8691 | M260T11_ | 1.14623  | -0.1969  | -0.71481 | 0.498409 | 0.864083 | DOWN | 260.0902 | 260.09   | 260.0905 | 10.90522 | 10.879   |
| 8692 | M280T9_1 | 1.242695 | -0.31347 | -0.71183 | 0.498429 | 0.864083 | DOWN | 280.0027 | 280.0008 | 280.0049 | 9.2368   | 9.1322   |
| 8693 | M1645T10 | 1.142328 | -0.19198 | -0.71057 | 0.498511 | 0.864083 | DOWN | 1645.122 | 1645.121 | 1645.128 | 9.902008 | 9.811217 |
| 8694 | M238T9_3 | 1.653222 | 0.725281 | 0.732758 | 0.498526 | 0.864083 | UP   | 238.1504 | 238.1495 | 238.1511 | 9.34115  | 9.1175   |
| 8695 | M529T9_2 | 1.468118 | 0.553968 | 0.716909 | 0.498529 | 0.864083 | UP   | 529.1267 | 529.1255 | 529.1285 | 9.212983 | 9.142767 |
| 8696 | M534T39_ | 1.194717 | 0.256669 | 0.723369 | 0.498545 | 0.864083 | UP   | 534.2908 | 534.2904 | 534.2909 | 38.68325 | 38.55383 |
| 8697 | M194T9_1 | 1.572188 | 0.652774 | 0.733366 | 0.498595 | 0.864083 | UP   | 194.053  | 194.0526 | 194.0534 | 9.280767 | 9.111033 |
| 8698 | M455T10_ | 1.214396 | -0.28024 | -0.71612 | 0.498601 | 0.864083 | DOWN | 455.1722 | 455.1718 | 455.1723 | 9.88865  | 9.811217 |
| 8699 | M291T11_ | 1.113267 | 0.154799 | 0.710808 | 0.498635 | 0.864083 | UP   | 290.9926 | 290.9923 | 290.9927 | 10.9049  | 10.88747 |
| 8700 | M212T10_ | 1.17995  | -0.23873 | -0.71403 | 0.49866  | 0.864083 | DOWN | 212.2945 | 212.2942 | 212.2952 | 9.816167 | 9.7124   |
| 8701 | M441T10_ | 1.171776 | -0.2287  | -0.71727 | 0.498727 | 0.864083 | DOWN | 440.6518 | 440.6513 | 440.6521 | 9.970617 | 9.8753   |
| 8702 | M274T26  | 1.124643 | -0.16947 | -0.72443 | 0.498789 | 0.864083 | DOWN | 274.2736 | 274.2735 | 274.2738 | 25.69192 | 25.673   |
| 8703 | M848T10_ | 1.206814 | -0.2712  | -0.72614 | 0.4988   | 0.864083 | DOWN | 847.7371 | 847.7361 | 847.7377 | 9.903017 | 9.79535  |
| 8704 | M249T11_ | 1.104321 | -0.14316 | -0.70935 | 0.498822 | 0.864083 | DOWN | 249.0649 | 249.0648 | 249.0653 | 10.892   | 10.879   |
| 8705 | M355T11_ | 1.131559 | -0.17831 | -0.71062 | 0.498833 | 0.864083 | DOWN | 354.9208 | 354.9207 | 354.9211 | 10.90519 | 10.879   |
| 8706 | M1153T10 | 1.407802 | 0.493444 | 0.71938  | 0.499048 | 0.864083 | UP   | 1153.161 | 1153.16  | 1153.162 | 9.994767 | 9.8914   |
| 8707 | M1032T12 | 1.302413 | -0.38119 | -0.71427 | 0.499168 | 0.864083 | DOWN | 1031.792 | 1031.791 | 1031.794 | 11.63327 | 11.56978 |
| 8708 | M157T11_ | 1.037997 | 0.053802 | 0.712132 | 0.499226 | 0.864083 | UP   | 156.9846 | 156.9845 | 156.9847 | 11.47891 | 11.4686  |
| 8709 | M909T10_ | 1.134322 | -0.18183 | -0.70763 | 0.499267 | 0.864083 | DOWN | 908.6876 | 908.6867 | 908.6883 | 10.4133  | 10.32768 |
| 8710 | M1751T10 | 1.175018 | -0.23268 | -0.71012 | 0.49936  | 0.864083 | DOWN | 1751.278 | 1751.276 | 1751.28  | 9.951283 | 9.843367 |
| 8711 | M701T10_ | 1.03208  | -0.04555 | -0.71008 | 0.499572 | 0.864083 | DOWN | 701.4436 | 701.4432 | 701.444  | 9.825767 | 9.715683 |
| 8712 | M186T10_ | 1.446262 | 0.532328 | 0.734579 | 0.499612 | 0.864083 | UP   | 185.6432 | 185.6431 | 185.6433 | 9.999    | 9.8914   |
| 8713 | M225T10_ | 1.441195 | 0.527265 | 0.71046  | 0.499726 | 0.864083 | UP   | 224.9236 | 224.9235 | 224.9237 | 9.917167 | 9.914217 |
| 8714 | M248T12  | 1.165082 | 0.220431 | 0.706882 | 0.499755 | 0.864083 | UP   | 248.2006 | 248.2003 | 248.2009 | 11.75123 | 11.72088 |

|      |          |          |          |          |          |          |      |          |          |          |          |          |
|------|----------|----------|----------|----------|----------|----------|------|----------|----------|----------|----------|----------|
| 8715 | M478T30  | 1.828439 | -0.87061 | -0.71992 | 0.499886 | 0.864083 | DOWN | 478.0067 | 478.006  | 478.0072 | 29.56575 | 29.47083 |
| 8716 | M302T9_1 | 1.276076 | 0.351714 | 0.714708 | 0.49996  | 0.864083 | UP   | 301.8394 | 301.8388 | 301.8405 | 9.287267 | 9.04725  |
| 8717 | M420T43_ | 1.076144 | -0.10587 | -0.72402 | 0.499983 | 0.864083 | DOWN | 420.2226 | 420.2225 | 420.2229 | 43.33717 | 43.215   |
| 8718 | M172T10_ | 1.102549 | -0.14084 | -0.70938 | 0.500008 | 0.864083 | DOWN | 171.6306 | 171.6302 | 171.6309 | 9.931875 | 9.827283 |
| 8719 | M1100T10 | 1.227443 | 0.295656 | 0.706313 | 0.500047 | 0.864083 | UP   | 1100.342 | 1100.341 | 1100.343 | 9.98155  | 9.8753   |
| 8720 | M797T21  | 1.179465 | -0.23813 | -0.70872 | 0.500146 | 0.864083 | DOWN | 796.5396 | 796.5394 | 796.5402 | 21.15483 | 21.13267 |
| 8721 | M512T9_3 | 1.193949 | -0.25574 | -0.72577 | 0.500219 | 0.864083 | DOWN | 511.7808 | 511.7802 | 511.7817 | 9.44825  | 9.355317 |
| 8722 | M1970T10 | 1.347518 | -0.4303  | -0.71295 | 0.500264 | 0.864083 | DOWN | 1970.245 | 1970.242 | 1970.248 | 9.830283 | 9.728083 |
| 8723 | M218T11_ | 1.104385 | -0.14324 | -0.70653 | 0.500268 | 0.864083 | DOWN | 217.9855 | 217.9853 | 217.9856 | 10.892   | 10.879   |
| 8724 | M488T9   | 1.579377 | 0.659355 | 0.706062 | 0.500329 | 0.864083 | UP   | 488.0243 | 488.0241 | 488.0247 | 9.310767 | 9.283817 |
| 8725 | M249T10_ | 1.334869 | 0.416698 | 0.712289 | 0.500353 | 0.864083 | UP   | 249.0585 | 249.055  | 249.0586 | 9.960817 | 9.649833 |
| 8726 | M645T10_ | 1.173781 | 0.231164 | 0.729246 | 0.500454 | 0.864084 | UP   | 644.558  | 644.5575 | 644.5597 | 9.825492 | 9.715683 |
| 8727 | M468T10_ | 1.218489 | -0.28509 | -0.72038 | 0.500461 | 0.864084 | DOWN | 467.6599 | 467.6591 | 467.6613 | 9.77355  | 9.6681   |
| 8728 | M255T10_ | 1.216452 | 0.282679 | 0.727211 | 0.500497 | 0.864084 | UP   | 255.1763 | 255.1762 | 255.1766 | 9.970617 | 9.859233 |
| 8729 | M638T10_ | 1.194619 | -0.25655 | -0.70577 | 0.500527 | 0.864084 | DOWN | 638.1211 | 638.1205 | 638.1233 | 9.9351   | 9.824233 |
| 8730 | M402T10_ | 1.240742 | 0.311203 | 0.707315 | 0.500564 | 0.864084 | UP   | 401.7494 | 401.7491 | 401.7637 | 9.902617 | 9.64815  |
| 8731 | M553T9_8 | 1.105533 | -0.14474 | -0.71315 | 0.500565 | 0.864084 | DOWN | 553.4312 | 553.4306 | 553.4316 | 9.441    | 9.340183 |
| 8732 | M656T10_ | 1.120605 | -0.16428 | -0.71151 | 0.500705 | 0.864084 | DOWN | 656.2474 | 656.2471 | 656.2489 | 9.855658 | 9.73145  |
| 8733 | M198T14  | 1.607414 | 0.684742 | 0.730812 | 0.500713 | 0.864084 | UP   | 198.185  | 198.1848 | 198.1851 | 14.29745 | 14.26692 |
| 8734 | M492T10_ | 1.219953 | 0.286825 | 0.723318 | 0.500721 | 0.864084 | UP   | 491.8651 | 491.8646 | 491.8653 | 9.979325 | 9.859233 |
| 8735 | M946T10_ | 1.296714 | -0.37486 | -0.70814 | 0.500758 | 0.864084 | DOWN | 946.3107 | 946.3103 | 946.3118 | 9.946367 | 9.8753   |
| 8736 | M653T9_2 | 1.202391 | -0.26591 | -0.71051 | 0.500766 | 0.864084 | DOWN | 653.3522 | 653.3501 | 653.3578 | 9.3261   | 9.12675  |
| 8737 | M376T11_ | 1.148217 | -0.1994  | -0.70505 | 0.500864 | 0.864084 | DOWN | 376.277  | 376.2768 | 376.2776 | 10.892   | 10.873   |
| 8738 | M444T10_ | 1.230876 | -0.29969 | -0.71638 | 0.500906 | 0.864084 | DOWN | 443.9777 | 443.9774 | 443.9782 | 9.8207   | 9.699733 |
| 8739 | M365T9_6 | 1.402048 | 0.487535 | 0.709294 | 0.500921 | 0.864084 | UP   | 364.7977 | 364.7967 | 364.8004 | 9.236775 | 9.053483 |
| 8740 | M737T10_ | 1.326023 | -0.40711 | -0.70609 | 0.501048 | 0.864084 | DOWN | 736.5752 | 736.5747 | 736.5781 | 9.81635  | 9.536783 |
| 8741 | M383T9_4 | 1.234722 | -0.30419 | -0.70454 | 0.501091 | 0.864084 | DOWN | 382.8745 | 382.8727 | 382.8787 | 9.263367 | 9.146383 |
| 8742 | M329T9_3 | 1.166371 | 0.222027 | 0.716442 | 0.501128 | 0.864084 | UP   | 329.1109 | 329.1012 | 329.1113 | 9.331383 | 9.234417 |
| 8743 | M551T10_ | 1.276096 | -0.35174 | -0.71075 | 0.501195 | 0.864084 | DOWN | 550.8503 | 550.8497 | 550.8512 | 9.644725 | 9.624117 |
| 8744 | M399T10_ | 1.339589 | 0.42179  | 0.728507 | 0.501421 | 0.864084 | UP   | 398.5221 | 398.522  | 398.5224 | 9.930908 | 9.827283 |
| 8745 | M664T10_ | 1.192189 | 0.253613 | 0.703678 | 0.501681 | 0.864084 | UP   | 663.8697 | 663.8691 | 663.8705 | 10.15645 | 10.07528 |
| 8746 | M303T25_ | 1.140704 | 0.189924 | 0.709549 | 0.501822 | 0.864084 | UP   | 302.7497 | 302.7496 | 302.7499 | 24.69575 | 24.68133 |
| 8747 | M324T26_ | 1.248838 | -0.32059 | -0.70299 | 0.502101 | 0.864084 | DOWN | 323.7428 | 323.7427 | 323.7431 | 26.0115  | 25.90867 |
| 8748 | M493T8   | 1.586306 | -0.66567 | -0.70345 | 0.502157 | 0.864084 | DOWN | 493.3349 | 493.3349 | 493.335  | 7.5224   | 7.418917 |
| 8749 | M676T10_ | 1.24603  | -0.31734 | -0.71592 | 0.502255 | 0.864084 | DOWN | 676.1062 | 676.1058 | 676.1066 | 9.844033 | 9.73145  |

|      |           |          |          |          |          |          |      |          |          |          |          |          |
|------|-----------|----------|----------|----------|----------|----------|------|----------|----------|----------|----------|----------|
| 8750 | M744T10_  | 1.295475 | 0.373481 | 0.728667 | 0.502266 | 0.864084 | UP   | 744.1676 | 744.1664 | 744.1683 | 9.831517 | 9.728083 |
| 8751 | M827T10_  | 1.166632 | -0.22235 | -0.71664 | 0.502346 | 0.864084 | DOWN | 827.0034 | 827.0017 | 827.0042 | 10.31598 | 10.21468 |
| 8752 | M182T9_1  | 1.306868 | 0.386114 | 0.710913 | 0.502347 | 0.864084 | UP   | 182.422  | 182.4205 | 182.4224 | 9.190033 | 9.1175   |
| 8753 | M544T25   | 1.377645 | -0.4622  | -0.71789 | 0.502361 | 0.864084 | DOWN | 544.4051 | 544.4047 | 544.4056 | 24.5365  | 24.49217 |
| 8754 | M283T10_  | 1.171193 | -0.22798 | -0.71184 | 0.502398 | 0.864084 | DOWN | 282.6816 | 282.6813 | 282.6816 | 9.95385  | 9.843367 |
| 8755 | M228T23_  | 1.395575 | -0.48086 | -0.70949 | 0.502504 | 0.864084 | DOWN | 228.2682 | 228.2682 | 228.2684 | 23.48367 | 23.4695  |
| 8756 | M697T10_  | 1.101759 | 0.139809 | 0.706575 | 0.502537 | 0.864084 | UP   | 696.9553 | 696.9546 | 696.9556 | 9.9847   | 9.8914   |
| 8757 | M809T19   | 1.190002 | -0.25096 | -0.7181  | 0.502544 | 0.864084 | DOWN | 808.6011 | 808.6008 | 808.602  | 18.96583 | 18.95117 |
| 8758 | M546T44   | 1.062847 | 0.087934 | 0.728603 | 0.502547 | 0.864084 | UP   | 546.327  | 546.3267 | 546.3271 | 44.28625 | 44.12083 |
| 8759 | M1337T10_ | 1.224963 | -0.29274 | -0.70315 | 0.5026   | 0.864084 | DOWN | 1337.071 | 1337.071 | 1337.073 | 9.872067 | 9.779267 |
| 8760 | M480T10_  | 1.346016 | 0.428696 | 0.702031 | 0.502622 | 0.864084 | UP   | 480.228  | 480.2274 | 480.2283 | 9.816183 | 9.7124   |
| 8761 | M177T9_1  | 1.798772 | 0.847013 | 0.726078 | 0.502659 | 0.864084 | UP   | 177.3704 | 177.3661 | 177.3711 | 9.185617 | 9.126783 |
| 8762 | M612T9_8  | 1.211052 | -0.27626 | -0.71121 | 0.50266  | 0.864084 | DOWN | 612.3581 | 612.3577 | 612.3584 | 9.317    | 9.234417 |
| 8763 | M418T10_  | 1.208644 | 0.27339  | 0.703304 | 0.502753 | 0.864084 | UP   | 417.7282 | 417.7278 | 417.7292 | 9.991958 | 9.8753   |
| 8764 | M687T30   | 1.17609  | -0.234   | -0.72362 | 0.502784 | 0.864084 | DOWN | 687.4893 | 687.488  | 687.49   | 30.26467 | 30.237   |
| 8765 | M1643T10_ | 1.257901 | 0.331018 | 0.717639 | 0.502873 | 0.864084 | UP   | 1643.232 | 1643.225 | 1643.237 | 9.917208 | 9.806367 |
| 8766 | M472T9_6  | 1.3667   | 0.450697 | 0.703109 | 0.502917 | 0.864084 | UP   | 472.1141 | 472.1132 | 472.118  | 9.3471   | 9.129317 |
| 8767 | M362T9_2  | 1.224187 | -0.29182 | -0.70196 | 0.503064 | 0.864084 | DOWN | 361.9242 | 361.9235 | 361.9276 | 9.272625 | 9.18195  |
| 8768 | M466T10_  | 1.114043 | -0.15581 | -0.7305  | 0.503129 | 0.864084 | DOWN | 466.4065 | 466.4062 | 466.4067 | 9.830658 | 9.699733 |
| 8769 | M815T10_  | 1.373596 | 0.457958 | 0.721569 | 0.50313  | 0.864084 | UP   | 814.9359 | 814.9353 | 814.9362 | 9.9722   | 9.8914   |
| 8770 | M637T10_  | 1.263527 | 0.337456 | 0.708824 | 0.503207 | 0.864084 | UP   | 637.2192 | 637.2117 | 637.2195 | 9.960817 | 9.843367 |
| 8771 | M583T9_2  | 1.331157 | -0.41268 | -0.70583 | 0.503296 | 0.864084 | DOWN | 582.6746 | 582.6694 | 582.6761 | 9.170392 | 9.1036   |
| 8772 | M597T34   | 1.180049 | -0.23885 | -0.70155 | 0.503379 | 0.864084 | DOWN | 597.4206 | 597.4201 | 597.421  | 33.6145  | 33.60017 |
| 8773 | M486T11_  | 1.151525 | 0.203546 | 0.714    | 0.503385 | 0.864084 | UP   | 485.9974 | 485.9971 | 486.0045 | 10.90553 | 10.88995 |
| 8774 | M209T7    | 1.26774  | -0.34226 | -0.71716 | 0.503516 | 0.864084 | DOWN | 208.8906 | 208.8905 | 208.8907 | 6.641025 | 6.51355  |
| 8775 | M363T10_  | 1.958875 | 0.970025 | 0.733219 | 0.503527 | 0.864085 | UP   | 362.7431 | 362.7374 | 362.7434 | 9.835183 | 9.736117 |
| 8776 | M701T10_  | 1.121951 | 0.16601  | 0.730487 | 0.503541 | 0.864085 | UP   | 701.4917 | 701.4914 | 701.4921 | 9.865433 | 9.7634   |
| 8777 | M382T11_  | 1.237395 | 0.307306 | 0.727183 | 0.503751 | 0.864085 | UP   | 381.8076 | 381.8074 | 381.8084 | 10.90551 | 10.879   |
| 8778 | M226T10_  | 1.121703 | -0.16569 | -0.70486 | 0.503815 | 0.864085 | DOWN | 226.3597 | 226.3596 | 226.3598 | 9.888342 | 9.811217 |
| 8779 | M361T11_  | 1.211987 | 0.277375 | 0.714413 | 0.503864 | 0.864085 | UP   | 360.5919 | 360.5917 | 360.5922 | 10.892   | 10.8646  |
| 8780 | M490T11_  | 1.115451 | -0.15763 | -0.70146 | 0.503933 | 0.864085 | DOWN | 489.5028 | 489.5027 | 489.5036 | 10.89907 | 10.879   |
| 8781 | M251T10_  | 1.109121 | -0.14942 | -0.7028  | 0.504122 | 0.864085 | DOWN | 251.1473 | 251.1471 | 251.1473 | 9.979342 | 9.8753   |
| 8782 | M339T10_  | 1.231971 | -0.30097 | -0.71225 | 0.504221 | 0.864085 | DOWN | 339.343  | 339.3427 | 339.3431 | 9.8207   | 9.715683 |
| 8783 | M805T10_  | 1.149854 | -0.20145 | -0.72069 | 0.504292 | 0.864085 | DOWN | 805.4917 | 805.4897 | 805.5027 | 10.233   | 10.01477 |
| 8784 | M663T10_  | 1.475179 | 0.56089  | 0.69971  | 0.504343 | 0.864085 | UP   | 663.304  | 663.2964 | 663.3051 | 9.8322   | 9.699733 |

|      |          |          |          |          |          |          |      |          |          |          |          |          |
|------|----------|----------|----------|----------|----------|----------|------|----------|----------|----------|----------|----------|
| 8785 | M707T10_ | 1.157854 | -0.21145 | -0.70306 | 0.504345 | 0.864085 | DOWN | 707.4723 | 707.4717 | 707.4744 | 9.804833 | 9.728083 |
| 8786 | M996T10  | 1.171768 | -0.22869 | -0.70435 | 0.504377 | 0.864085 | DOWN | 995.5099 | 995.5094 | 995.5134 | 9.801883 | 9.681183 |
| 8787 | M320T9_5 | 1.245835 | -0.31711 | -0.69951 | 0.504532 | 0.864085 | DOWN | 320.2302 | 320.2302 | 320.2307 | 9.423708 | 9.324917 |
| 8788 | M430T43_ | 1.403829 | -0.48937 | -0.73221 | 0.504546 | 0.864085 | DOWN | 430.2432 | 430.2431 | 430.2434 | 42.95592 | 42.81217 |
| 8789 | M206T11_ | 1.130126 | 0.176483 | 0.715259 | 0.504548 | 0.864085 | UP   | 206.2146 | 206.2145 | 206.2148 | 10.892   | 10.879   |
| 8790 | M358T10_ | 1.148766 | -0.20009 | -0.70604 | 0.504602 | 0.864085 | DOWN | 357.9333 | 357.9329 | 357.9335 | 9.964092 | 9.859233 |
| 8791 | M378T9_2 | 1.126344 | -0.17165 | -0.71398 | 0.50461  | 0.864085 | DOWN | 377.5954 | 377.5946 | 377.5979 | 9.197875 | 9.129317 |
| 8792 | M437T9_1 | 1.218918 | -0.2856  | -0.69985 | 0.504627 | 0.864085 | DOWN | 437.3644 | 437.3641 | 437.3646 | 9.159717 | 9.132267 |
| 8793 | M727T10_ | 1.149521 | 0.201033 | 0.698671 | 0.504677 | 0.864085 | UP   | 727.4308 | 727.4302 | 727.4311 | 10.33466 | 10.26307 |
| 8794 | M620T10_ | 1.085329 | -0.11813 | -0.69866 | 0.504725 | 0.864085 | DOWN | 619.5438 | 619.5424 | 619.5478 | 9.828367 | 9.699733 |
| 8795 | M746T9   | 1.182798 | 0.242203 | 0.700982 | 0.504773 | 0.864085 | UP   | 746.1424 | 746.1417 | 746.1455 | 9.348233 | 9.24215  |
| 8796 | M631T12_ | 1.183749 | -0.24336 | -0.69845 | 0.504776 | 0.864085 | DOWN | 631.4452 | 631.4428 | 631.4459 | 11.50338 | 11.42402 |
| 8797 | M710T9_5 | 1.479017 | 0.564639 | 0.712076 | 0.504812 | 0.864085 | UP   | 710.1759 | 710.1716 | 710.1775 | 9.250817 | 9.023483 |
| 8798 | M377T11_ | 1.108938 | -0.14918 | -0.70155 | 0.504855 | 0.864085 | DOWN | 377.0355 | 377.0354 | 377.0358 | 10.892   | 10.879   |
| 8799 | M416T45_ | 1.070266 | -0.09797 | -0.71894 | 0.504929 | 0.864085 | DOWN | 416.2641 | 416.2639 | 416.2641 | 44.81433 | 44.65283 |
| 8800 | M820T10_ | 1.219345 | -0.28611 | -0.71979 | 0.504981 | 0.864085 | DOWN | 819.6365 | 819.636  | 819.6388 | 9.942317 | 9.843367 |
| 8801 | M937T35  | 1.201121 | -0.26438 | -0.69842 | 0.50503  | 0.864085 | DOWN | 936.6464 | 936.6457 | 936.6488 | 35.27867 | 35.25417 |
| 8802 | M189T9_5 | 1.273411 | 0.348698 | 0.698828 | 0.505052 | 0.864085 | UP   | 188.7649 | 188.7638 | 188.7659 | 9.219483 | 9.11795  |
| 8803 | M524T42_ | 1.144039 | 0.194136 | 0.703939 | 0.505073 | 0.864085 | UP   | 524.306  | 524.3059 | 524.3061 | 42.33025 | 42.17917 |
| 8804 | M681T11_ | 1.174264 | 0.231757 | 0.697985 | 0.505103 | 0.864085 | UP   | 680.514  | 680.514  | 680.5141 | 10.67585 | 10.64593 |
| 8805 | M685T10_ | 1.161982 | -0.21659 | -0.71819 | 0.505238 | 0.864085 | DOWN | 684.8909 | 684.89   | 684.8913 | 9.986767 | 9.8914   |
| 8806 | M237T11_ | 1.102039 | -0.14018 | -0.69747 | 0.505313 | 0.864085 | DOWN | 237.0352 | 237.035  | 237.0353 | 10.89875 | 10.879   |
| 8807 | M387T17  | 1.116467 | -0.15894 | -0.69844 | 0.505314 | 0.864085 | DOWN | 386.9181 | 386.918  | 386.9184 | 16.51771 | 16.47588 |
| 8808 | M233T10_ | 1.160908 | -0.21525 | -0.70532 | 0.505325 | 0.864085 | DOWN | 232.7981 | 232.7979 | 232.8061 | 9.932    | 9.843367 |
| 8809 | M1245T10 | 1.202625 | -0.26619 | -0.69811 | 0.505381 | 0.864085 | DOWN | 1244.571 | 1244.571 | 1244.572 | 9.970617 | 9.8753   |
| 8810 | M645T10_ | 2.212952 | 1.145972 | 0.726615 | 0.505424 | 0.864085 | UP   | 645.3495 | 645.3486 | 645.3503 | 9.816333 | 9.699733 |
| 8811 | M227T10_ | 1.164189 | -0.21933 | -0.71057 | 0.505497 | 0.864085 | DOWN | 226.8857 | 226.8855 | 226.886  | 9.929783 | 9.827283 |
| 8812 | M650T10_ | 1.346178 | 0.428869 | 0.713913 | 0.505529 | 0.864085 | UP   | 650.4005 | 650.3958 | 650.4021 | 10.06398 | 9.9174   |
| 8813 | M423T10_ | 1.29351  | 0.371291 | 0.723749 | 0.505672 | 0.864085 | UP   | 422.9101 | 422.9099 | 422.9105 | 9.983467 | 9.8753   |
| 8814 | M1858T10 | 1.138212 | 0.186769 | 0.699412 | 0.50568  | 0.864085 | UP   | 1858.464 | 1858.462 | 1858.467 | 9.8397   | 9.81635  |
| 8815 | M289T9_2 | 1.381599 | 0.466339 | 0.696828 | 0.505692 | 0.864085 | UP   | 288.7609 | 288.7605 | 288.7612 | 8.992917 | 8.892117 |
| 8816 | M172T9_5 | 1.769269 | 0.823154 | 0.729209 | 0.505702 | 0.864085 | UP   | 172.2725 | 172.2705 | 172.2749 | 9.261625 | 9.1322   |
| 8817 | M306T27  | 1.620202 | -0.69617 | -0.72122 | 0.50577  | 0.864085 | DOWN | 306.1851 | 306.1846 | 306.1855 | 27.20217 | 27.15717 |
| 8818 | M297T10_ | 1.332583 | 0.414225 | 0.720183 | 0.505798 | 0.864085 | UP   | 296.9181 | 296.918  | 296.9183 | 9.949233 | 9.853533 |
| 8819 | M707T11_ | 1.149954 | -0.20158 | -0.69683 | 0.505875 | 0.864085 | DOWN | 707.1451 | 707.1354 | 707.1455 | 10.89954 | 10.88747 |

|      |          |          |          |          |          |          |      |          |          |          |          |          |
|------|----------|----------|----------|----------|----------|----------|------|----------|----------|----------|----------|----------|
| 8820 | M767T12  | 1.306623 | -0.38584 | -0.69901 | 0.505875 | 0.864085 | DOWN | 766.7115 | 766.7092 | 766.7126 | 12.20873 | 12.07727 |
| 8821 | M420T10_ | 1.224906 | 0.292672 | 0.717644 | 0.505877 | 0.864085 | UP   | 419.9126 | 419.9122 | 419.9128 | 9.918792 | 9.811217 |
| 8822 | M840T10_ | 1.135506 | -0.18333 | -0.70036 | 0.505925 | 0.864085 | DOWN | 839.5841 | 839.5838 | 839.5845 | 9.930908 | 9.827283 |
| 8823 | M237T11_ | 1.213165 | -0.27878 | -0.69711 | 0.50596  | 0.864085 | DOWN | 236.8401 | 236.8392 | 236.8403 | 10.92349 | 10.8646  |
| 8824 | M386T10_ | 1.152023 | 0.204169 | 0.697606 | 0.506026 | 0.864085 | UP   | 385.5556 | 385.5504 | 385.5608 | 9.902233 | 9.779267 |
| 8825 | M420T11_ | 1.131584 | -0.17834 | -0.69622 | 0.506028 | 0.864085 | DOWN | 420.1559 | 420.1556 | 420.1562 | 10.90659 | 10.879   |
| 8826 | M364T9_1 | 1.382035 | -0.46679 | -0.69764 | 0.506067 | 0.864085 | DOWN | 364.4266 | 364.4262 | 364.4271 | 8.92085  | 8.877267 |
| 8827 | M589T10_ | 1.404056 | -0.4896  | -0.69613 | 0.506096 | 0.864085 | DOWN | 589.4366 | 589.434  | 589.4374 | 9.916767 | 9.79065  |
| 8828 | M628T11_ | 1.223207 | -0.29067 | -0.6968  | 0.506173 | 0.864085 | DOWN | 627.7643 | 627.7637 | 627.7648 | 10.91813 | 10.8914  |
| 8829 | M627T10_ | 1.6349   | 0.709202 | 0.703862 | 0.506197 | 0.864085 | UP   | 626.8801 | 626.8793 | 626.8827 | 9.81635  | 9.73145  |
| 8830 | M333T10_ | 1.296347 | 0.374452 | 0.725242 | 0.506254 | 0.864085 | UP   | 333.1075 | 333.1073 | 333.1081 | 9.830558 | 9.715683 |
| 8831 | M387T10_ | 1.446096 | -0.53216 | -0.71271 | 0.506298 | 0.864085 | DOWN | 387.426  | 387.4174 | 387.4261 | 9.915583 | 9.806367 |
| 8832 | M274T10_ | 1.271829 | -0.3469  | -0.69755 | 0.506339 | 0.864085 | DOWN | 273.6286 | 273.6285 | 273.629  | 9.9174   | 9.827283 |
| 8833 | M431T10_ | 1.152593 | -0.20488 | -0.69606 | 0.506362 | 0.864085 | DOWN | 430.8501 | 430.8496 | 430.8514 | 9.801992 | 9.699733 |
| 8834 | M727T9_1 | 1.538039 | 0.621092 | 0.718942 | 0.506464 | 0.864085 | UP   | 727.3029 | 727.3022 | 727.307  | 9.249592 | 9.161683 |
| 8835 | M282T10_ | 1.24146  | -0.31204 | -0.69554 | 0.506522 | 0.864085 | DOWN | 281.9266 | 281.9265 | 281.927  | 9.964333 | 9.8914   |
| 8836 | M352T9_7 | 1.168878 | -0.22512 | -0.69857 | 0.506535 | 0.864085 | DOWN | 352.4771 | 352.4771 | 352.4773 | 9.481492 | 9.416817 |
| 8837 | M406T10_ | 1.156428 | -0.20968 | -0.69788 | 0.506544 | 0.864085 | DOWN | 406.3769 | 406.376  | 406.3774 | 9.902392 | 9.822117 |
| 8838 | M349T10_ | 1.089382 | 0.12351  | 0.718779 | 0.506548 | 0.864085 | UP   | 348.6627 | 348.6625 | 348.6628 | 9.864467 | 9.747533 |
| 8839 | M540T11_ | 1.286511 | 0.363463 | 0.714436 | 0.50655  | 0.864085 | UP   | 540.1945 | 540.1915 | 540.195  | 10.84828 | 10.83417 |
| 8840 | M752T10_ | 1.071663 | 0.099851 | 0.723496 | 0.506578 | 0.864085 | UP   | 752.1075 | 752.105  | 752.1085 | 9.83135  | 9.715683 |
| 8841 | M364T11_ | 1.286877 | 0.363874 | 0.695379 | 0.506593 | 0.864085 | UP   | 363.7994 | 363.7986 | 363.7998 | 10.90393 | 10.83572 |
| 8842 | M284T10_ | 1.197068 | -0.25951 | -0.69529 | 0.506606 | 0.864085 | DOWN | 284.3934 | 284.3931 | 284.3937 | 9.9351   | 9.8378   |
| 8843 | M281T31_ | 1.224519 | 0.292215 | 0.702269 | 0.506664 | 0.864086 | UP   | 281.2946 | 281.2944 | 281.2947 | 31.40708 | 31.39283 |
| 8844 | M333T10_ | 1.604378 | 0.682014 | 0.717906 | 0.506749 | 0.864086 | UP   | 332.6128 | 332.6126 | 332.6128 | 10.17253 | 10.14972 |
| 8845 | M665T11_ | 1.110302 | 0.150952 | 0.702069 | 0.506805 | 0.864086 | UP   | 665.3889 | 665.3885 | 665.3895 | 11.49742 | 11.47593 |
| 8846 | M411T10_ | 1.150585 | -0.20237 | -0.71462 | 0.506954 | 0.864086 | DOWN | 410.9951 | 410.9948 | 410.9954 | 9.597067 | 9.478833 |
| 8847 | M241T10_ | 1.348335 | 0.431179 | 0.716682 | 0.507015 | 0.864086 | UP   | 241.1936 | 241.1935 | 241.1938 | 9.933    | 9.827283 |
| 8848 | M401T11_ | 1.280159 | -0.35632 | -0.69582 | 0.507019 | 0.864086 | DOWN | 401.3619 | 401.3529 | 401.3625 | 10.94835 | 10.91813 |
| 8849 | M460T45_ | 1.056517 | -0.07932 | -0.70939 | 0.507045 | 0.864086 | DOWN | 460.2901 | 460.29   | 460.2904 | 44.77508 | 44.4515  |
| 8850 | M187T42  | 1.028966 | 0.041195 | 0.706692 | 0.507051 | 0.864086 | UP   | 187.0962 | 187.0961 | 187.0962 | 41.76125 | 41.604   |
| 8851 | M160T10  | 1.154105 | -0.20677 | -0.71344 | 0.507358 | 0.864086 | DOWN | 1606.687 | 1606.686 | 1606.688 | 9.61185  | 9.49445  |
| 8852 | M255T10_ | 1.267296 | 0.341754 | 0.700285 | 0.507359 | 0.864086 | UP   | 254.775  | 254.7748 | 254.7756 | 9.512983 | 9.416817 |
| 8853 | M271T10_ | 1.180588 | -0.23951 | -0.71679 | 0.507428 | 0.864086 | DOWN | 270.7285 | 270.7274 | 270.7289 | 9.8445   | 9.73145  |
| 8854 | M838T10_ | 1.184052 | -0.24373 | -0.70013 | 0.507438 | 0.864086 | DOWN | 837.7665 | 837.7663 | 837.7668 | 9.946467 | 9.843367 |

|      |          |          |          |          |          |          |      |          |          |          |          |          |
|------|----------|----------|----------|----------|----------|----------|------|----------|----------|----------|----------|----------|
| 8855 | M738T10_ | 1.140501 | 0.189668 | 0.713334 | 0.507696 | 0.864086 | UP   | 737.9516 | 737.9502 | 737.9524 | 10.38528 | 10.34725 |
| 8856 | M459T9_2 | 1.265136 | -0.33929 | -0.69328 | 0.50777  | 0.864086 | DOWN | 459.0926 | 459.0911 | 459.0928 | 9.346    | 9.20785  |
| 8857 | M414T25  | 1.252377 | -0.32467 | -0.70625 | 0.507782 | 0.864086 | DOWN | 414.3324 | 414.3316 | 414.333  | 24.75283 | 24.71033 |
| 8858 | M1959T10 | 1.394605 | 0.479857 | 0.712326 | 0.507832 | 0.864086 | UP   | 1958.833 | 1958.826 | 1958.837 | 9.836408 | 9.787433 |
| 8859 | M418T12  | 1.216154 | -0.28233 | -0.69421 | 0.50784  | 0.864086 | DOWN | 418.3061 | 418.3058 | 418.307  | 11.80096 | 11.77773 |
| 8860 | M1317T45 | 1.072951 | 0.101584 | 0.700334 | 0.508    | 0.864086 | UP   | 1316.925 | 1316.923 | 1316.925 | 44.71042 | 44.68167 |
| 8861 | M421T11_ | 1.284393 | 0.361086 | 0.712614 | 0.508004 | 0.864086 | UP   | 420.7981 | 420.7979 | 420.7985 | 10.80745 | 10.73323 |
| 8862 | M681T26  | 1.516799 | -0.60103 | -0.71525 | 0.508008 | 0.864086 | DOWN | 680.5146 | 680.5145 | 680.5148 | 25.53625 | 25.337   |
| 8863 | M229T11_ | 1.311741 | -0.39148 | -0.71028 | 0.508062 | 0.864086 | DOWN | 229.4605 | 229.4602 | 229.4606 | 10.88453 | 10.85018 |
| 8864 | M209T9_2 | 1.351558 | -0.43462 | -0.69296 | 0.508118 | 0.864086 | DOWN | 208.6491 | 208.6491 | 208.6493 | 9.089333 | 9.04725  |
| 8865 | M424T10_ | 1.105538 | -0.14475 | -0.69911 | 0.50814  | 0.864086 | DOWN | 424.2868 | 424.2867 | 424.287  | 10.2203  | 10.10142 |
| 8866 | M824T32  | 1.321153 | -0.4018  | -0.69517 | 0.508155 | 0.864086 | DOWN | 823.6046 | 823.6044 | 823.605  | 32.01275 | 31.998   |
| 8867 | M665T10_ | 1.147524 | -0.19852 | -0.69279 | 0.508158 | 0.864086 | DOWN | 665.3    | 665.2996 | 665.3002 | 10.42545 | 10.3828  |
| 8868 | M504T28_ | 1.261671 | -0.33534 | -0.69432 | 0.508159 | 0.864086 | DOWN | 504.3879 | 504.3874 | 504.3881 | 28.37817 | 28.361   |
| 8869 | M368T10_ | 1.75537  | 0.811775 | 0.722904 | 0.508214 | 0.864086 | UP   | 368.2385 | 368.2383 | 368.2406 | 9.86545  | 9.67     |
| 8870 | M684T10_ | 1.053468 | -0.07515 | -0.70573 | 0.508226 | 0.864086 | DOWN | 683.6393 | 683.6388 | 683.64   | 9.856808 | 9.73145  |
| 8871 | M244T11_ | 1.133587 | -0.18089 | -0.69254 | 0.508293 | 0.864086 | DOWN | 243.6515 | 243.6514 | 243.6516 | 10.892   | 10.879   |
| 8872 | M315T11_ | 1.120558 | -0.16422 | -0.6927  | 0.508363 | 0.864086 | DOWN | 315.38   | 315.3799 | 315.3809 | 10.90657 | 10.88747 |
| 8873 | M365T19_ | 1.4515   | 0.537545 | 0.719959 | 0.508387 | 0.864086 | UP   | 365.2197 | 365.2194 | 365.2201 | 19.11117 | 19.0965  |
| 8874 | M204T10_ | 1.193396 | 0.255072 | 0.698092 | 0.508393 | 0.864086 | UP   | 203.8568 | 203.8567 | 203.8569 | 9.830833 | 9.715683 |
| 8875 | M842T10_ | 1.140377 | -0.18951 | -0.69486 | 0.508401 | 0.864086 | DOWN | 842.1141 | 842.1138 | 842.1147 | 9.934533 | 9.827283 |
| 8876 | M239T9_3 | 1.501666 | 0.586564 | 0.708564 | 0.508402 | 0.864086 | UP   | 239.0891 | 239.0889 | 239.0892 | 8.959983 | 8.94625  |
| 8877 | M187T43  | 1.455271 | 0.541288 | 0.717966 | 0.508446 | 0.864086 | UP   | 187.0962 | 187.0962 | 187.0962 | 42.7545  | 42.654   |
| 8878 | M421T31_ | 1.255366 | -0.32811 | -0.70155 | 0.508516 | 0.864086 | DOWN | 421.3288 | 421.3284 | 421.3291 | 31.26283 | 31.2515  |
| 8879 | M436T9_4 | 1.520502 | -0.60455 | -0.69444 | 0.508575 | 0.864086 | DOWN | 435.7323 | 435.73   | 435.7334 | 9.366333 | 9.278717 |
| 8880 | M217T10_ | 1.122796 | -0.1671  | -0.70308 | 0.508629 | 0.864086 | DOWN | 216.9583 | 216.9583 | 216.9584 | 9.918792 | 9.811217 |
| 8881 | M316T43_ | 1.286965 | -0.36397 | -0.69436 | 0.508669 | 0.864086 | DOWN | 316.1753 | 316.1751 | 316.1821 | 42.97017 | 42.92717 |
| 8882 | M379T9_9 | 1.128261 | -0.1741  | -0.6957  | 0.508689 | 0.864086 | DOWN | 379.1744 | 379.1721 | 379.1773 | 9.277017 | 9.11405  |
| 8883 | M410T10_ | 1.116401 | 0.158856 | 0.699212 | 0.508819 | 0.864086 | UP   | 410.2337 | 410.2333 | 410.2338 | 9.964092 | 9.859233 |
| 8884 | M258T10_ | 1.336342 | -0.41829 | -0.69364 | 0.508911 | 0.864086 | DOWN | 258.1555 | 258.1475 | 258.1557 | 9.801917 | 9.683817 |
| 8885 | M492T9_5 | 1.377909 | 0.462481 | 0.700646 | 0.508974 | 0.864086 | UP   | 492.3237 | 492.3232 | 492.3238 | 8.94275  | 8.936617 |
| 8886 | M597T10_ | 1.136502 | 0.1846   | 0.702259 | 0.509018 | 0.864086 | UP   | 596.8956 | 596.8952 | 596.8963 | 9.9351   | 9.827283 |
| 8887 | M344T10_ | 1.435905 | -0.52196 | -0.69582 | 0.509238 | 0.864086 | DOWN | 343.909  | 343.9089 | 343.9094 | 9.870017 | 9.743767 |
| 8888 | M271T11_ | 1.217174 | -0.28354 | -0.69149 | 0.509346 | 0.864086 | DOWN | 271.4708 | 271.4707 | 271.4708 | 10.92253 | 10.88995 |
| 8889 | M498T9_1 | 1.751369 | 0.808483 | 0.717567 | 0.509356 | 0.864086 | UP   | 498.3648 | 498.3634 | 498.3651 | 8.941383 | 8.544683 |

|      |          |          |          |          |          |          |      |          |          |          |          |          |
|------|----------|----------|----------|----------|----------|----------|------|----------|----------|----------|----------|----------|
| 8890 | M449T11_ | 1.271957 | 0.34705  | 0.713964 | 0.509371 | 0.864086 | UP   | 449.2671 | 449.2609 | 449.2677 | 10.90343 | 10.879   |
| 8891 | M253T11_ | 1.149775 | -0.20135 | -0.69157 | 0.509403 | 0.864086 | DOWN | 253.1689 | 253.1689 | 253.1689 | 10.90554 | 10.873   |
| 8892 | M623T10_ | 1.202825 | -0.26643 | -0.69647 | 0.509427 | 0.864086 | DOWN | 622.8845 | 622.8837 | 622.886  | 9.804067 | 9.715683 |
| 8893 | M210T10_ | 1.239576 | -0.30985 | -0.70052 | 0.509443 | 0.864086 | DOWN | 210.4303 | 210.429  | 210.437  | 9.8378   | 9.715683 |
| 8894 | M314T11_ | 1.09067  | -0.12521 | -0.69739 | 0.509492 | 0.864086 | DOWN | 314.2199 | 314.2198 | 314.2201 | 11.48294 | 11.47298 |
| 8895 | M416T9_1 | 1.562735 | 0.644073 | 0.718886 | 0.509496 | 0.864086 | UP   | 416.4088 | 416.4076 | 416.4116 | 9.341333 | 9.2612   |
| 8896 | M1641T10 | 1.116444 | -0.15891 | -0.69258 | 0.509513 | 0.864086 | DOWN | 1641.356 | 1641.355 | 1641.361 | 9.910075 | 9.811217 |
| 8897 | M401T10_ | 1.162913 | 0.217743 | 0.690711 | 0.509535 | 0.864086 | UP   | 400.8854 | 400.8853 | 400.8857 | 9.979892 | 9.859233 |
| 8898 | M372T10_ | 1.274148 | 0.349532 | 0.709657 | 0.5096   | 0.864086 | UP   | 372.0359 | 372.0343 | 372.0363 | 9.870017 | 9.758367 |
| 8899 | M195T9_1 | 1.210967 | -0.27616 | -0.69095 | 0.509631 | 0.864086 | DOWN | 195.4048 | 195.404  | 195.4059 | 9.3114   | 9.25985  |
| 8900 | M457T10_ | 1.096361 | -0.13272 | -0.69833 | 0.509644 | 0.864086 | DOWN | 456.6011 | 456.601  | 456.6016 | 9.542242 | 9.346    |
| 8901 | M348T10_ | 1.156554 | 0.209833 | 0.705928 | 0.509715 | 0.864086 | UP   | 348.3783 | 348.3781 | 348.3784 | 9.830658 | 9.715683 |
| 8902 | M665T10_ | 1.205174 | -0.26924 | -0.69722 | 0.509863 | 0.864087 | DOWN | 665.2807 | 665.2802 | 665.2813 | 9.8207   | 9.715683 |
| 8903 | M229T10_ | 1.105155 | 0.144249 | 0.693342 | 0.509899 | 0.864087 | UP   | 229.2354 | 229.2352 | 229.2355 | 10.32456 | 10.26307 |
| 8904 | M366T10_ | 1.236668 | 0.306458 | 0.697763 | 0.509985 | 0.864087 | UP   | 365.8158 | 365.8015 | 365.8161 | 9.840617 | 9.715683 |
| 8905 | M1107T10 | 1.147241 | -0.19817 | -0.70049 | 0.510084 | 0.864087 | DOWN | 1106.654 | 1106.653 | 1106.654 | 9.678733 | 9.541483 |
| 8906 | M251T10_ | 1.25278  | 0.325133 | 0.71342  | 0.510116 | 0.864087 | UP   | 251.4654 | 251.465  | 251.4712 | 9.983433 | 9.885167 |
| 8907 | M385T10_ | 1.263938 | 0.337926 | 0.689104 | 0.510261 | 0.864087 | UP   | 385.0582 | 385.058  | 385.0583 | 9.938042 | 9.811217 |
| 8908 | M371T11_ | 1.112494 | -0.1538  | -0.689   | 0.510337 | 0.864087 | DOWN | 371.1311 | 371.131  | 371.1313 | 10.892   | 10.879   |
| 8909 | M688T23  | 1.138055 | -0.18657 | -0.69927 | 0.510362 | 0.864087 | DOWN | 687.5083 | 687.5075 | 687.5085 | 22.53867 | 22.524   |
| 8910 | M307T10_ | 1.1612   | -0.21562 | -0.71376 | 0.510371 | 0.864087 | DOWN | 307.4661 | 307.466  | 307.4665 | 9.908417 | 9.79535  |
| 8911 | M364T11_ | 1.112407 | -0.15369 | -0.68993 | 0.510372 | 0.864087 | DOWN | 364.2776 | 364.2772 | 364.2781 | 10.89907 | 10.8646  |
| 8912 | M678T11_ | 1.153121 | -0.20554 | -0.69026 | 0.510539 | 0.864087 | DOWN | 677.9778 | 677.977  | 677.9788 | 10.86683 | 10.8214  |
| 8913 | M378T28  | 1.239654 | 0.309937 | 0.718856 | 0.510577 | 0.864087 | UP   | 378.212  | 378.2118 | 378.2122 | 27.98167 | 27.76717 |
| 8914 | M684T11_ | 1.153532 | -0.20606 | -0.69094 | 0.510585 | 0.864087 | DOWN | 683.9379 | 683.9375 | 683.9394 | 10.8926  | 10.8646  |
| 8915 | M233T11_ | 1.102323 | -0.14055 | -0.68857 | 0.510789 | 0.864087 | DOWN | 233.0116 | 233.0115 | 233.0119 | 10.892   | 10.879   |
| 8916 | M478T10_ | 1.184143 | -0.24384 | -0.68838 | 0.510859 | 0.864087 | DOWN | 477.5061 | 477.5058 | 477.5063 | 9.870017 | 9.665433 |
| 8917 | M236T11_ | 1.216    | -0.28214 | -0.69036 | 0.510887 | 0.864087 | DOWN | 235.7584 | 235.7582 | 235.7585 | 10.93468 | 10.90197 |
| 8918 | M168T10_ | 1.076709 | -0.10663 | -0.68816 | 0.511038 | 0.864087 | DOWN | 167.5946 | 167.5944 | 167.595  | 9.825767 | 9.7124   |
| 8919 | M325T10_ | 1.326432 | -0.40755 | -0.68877 | 0.511074 | 0.864087 | DOWN | 324.5353 | 324.5351 | 324.5355 | 9.8207   | 9.699733 |
| 8920 | M400T9_1 | 1.557269 | -0.63902 | -0.68797 | 0.511078 | 0.864087 | DOWN | 399.5931 | 399.5928 | 399.5942 | 9.2585   | 9.1503   |
| 8921 | M331T10_ | 1.093924 | -0.12951 | -0.69585 | 0.511082 | 0.864087 | DOWN | 331.3957 | 331.3956 | 331.3958 | 9.8207   | 9.715683 |
| 8922 | M284T10_ | 1.178383 | -0.23681 | -0.71826 | 0.511102 | 0.864087 | DOWN | 284.0729 | 284.0727 | 284.0731 | 9.960817 | 9.843367 |
| 8923 | M656T10_ | 1.363151 | 0.446945 | 0.68901  | 0.511235 | 0.864087 | UP   | 656.2047 | 656.2045 | 656.2049 | 9.818442 | 9.801833 |
| 8924 | M368T11_ | 1.112525 | -0.15384 | -0.68739 | 0.51127  | 0.864087 | DOWN | 368.3556 | 368.3555 | 368.3558 | 10.892   | 10.879   |

|      |          |          |          |          |          |          |      |          |          |          |          |          |
|------|----------|----------|----------|----------|----------|----------|------|----------|----------|----------|----------|----------|
| 8925 | M345T45  | 1.599328 | -0.67747 | -0.69435 | 0.511292 | 0.864087 | DOWN | 345.1905 | 345.1904 | 345.1908 | 44.9475  | 44.696   |
| 8926 | M315T11_ | 1.106398 | -0.14587 | -0.69116 | 0.511314 | 0.864087 | DOWN | 315.0044 | 315.004  | 315.0045 | 10.892   | 10.879   |
| 8927 | M476T9_1 | 1.452525 | 0.538563 | 0.693603 | 0.511394 | 0.864087 | UP   | 476.1761 | 476.1716 | 476.1833 | 9.268917 | 9.1175   |
| 8928 | M522T10_ | 1.387597 | -0.47259 | -0.6871  | 0.511448 | 0.864087 | DOWN | 521.6286 | 521.6283 | 521.6294 | 9.9351   | 9.827283 |
| 8929 | M759T10_ | 1.274828 | -0.3503  | -0.68714 | 0.511459 | 0.864087 | DOWN | 758.7186 | 758.7182 | 758.7189 | 9.931108 | 9.903017 |
| 8930 | M371T11_ | 1.188753 | -0.24945 | -0.68746 | 0.51156  | 0.864087 | DOWN | 371.3058 | 371.3056 | 371.306  | 10.95925 | 10.90785 |
| 8931 | M1200T10 | 1.252409 | 0.324706 | 0.69705  | 0.511574 | 0.864087 | UP   | 1200.027 | 1200.026 | 1200.029 | 9.98155  | 9.8753   |
| 8932 | M447T10_ | 1.143466 | 0.193414 | 0.686814 | 0.511651 | 0.864087 | UP   | 447.2832 | 447.283  | 447.2836 | 10.47553 | 10.45607 |
| 8933 | M999T10_ | 1.23368  | 0.302969 | 0.702487 | 0.511686 | 0.864087 | UP   | 999.2615 | 999.2604 | 999.2624 | 9.979325 | 9.8753   |
| 8934 | M465T23_ | 1.266204 | -0.34051 | -0.68666 | 0.511706 | 0.864087 | DOWN | 465.0811 | 465.0808 | 465.0813 | 22.6985  | 22.63967 |
| 8935 | M1830T10 | 1.139049 | 0.18783  | 0.688398 | 0.511738 | 0.864087 | UP   | 1829.893 | 1829.89  | 1829.895 | 9.8374   | 9.728083 |
| 8936 | M947T10_ | 1.228969 | -0.29745 | -0.69525 | 0.51175  | 0.864087 | DOWN | 947.4138 | 947.4132 | 947.4142 | 9.8207   | 9.715683 |
| 8937 | M626T9_1 | 1.329933 | -0.41135 | -0.68724 | 0.511767 | 0.864087 | DOWN | 625.5579 | 625.5571 | 625.5582 | 9.275917 | 9.234417 |
| 8938 | M748T10_ | 1.467094 | -0.55296 | -0.68826 | 0.511771 | 0.864087 | DOWN | 747.5703 | 747.5678 | 747.5707 | 9.839008 | 9.715683 |
| 8939 | M283T10_ | 1.059832 | 0.083835 | 0.708164 | 0.511906 | 0.864087 | UP   | 282.6472 | 282.6471 | 282.6473 | 9.841442 | 9.73145  |
| 8940 | M365T10_ | 1.048903 | -0.06888 | -0.68633 | 0.511967 | 0.864087 | DOWN | 365.0628 | 365.0627 | 365.0631 | 9.816183 | 9.715683 |
| 8941 | M534T39_ | 1.134215 | -0.18169 | -0.71338 | 0.511969 | 0.864087 | DOWN | 534.327  | 534.3267 | 534.3271 | 39.25533 | 39.1725  |
| 8942 | M517T9_4 | 1.2903   | 0.367706 | 0.705341 | 0.512084 | 0.864087 | UP   | 517.269  | 517.2684 | 517.2693 | 9.214783 | 9.129317 |
| 8943 | M561T10_ | 1.159507 | -0.21351 | -0.69179 | 0.512122 | 0.864087 | DOWN | 560.5779 | 560.5774 | 560.5787 | 9.939575 | 9.827283 |
| 8944 | M270T10_ | 1.128846 | 0.174849 | 0.686176 | 0.512133 | 0.864087 | UP   | 269.7553 | 269.7551 | 269.7555 | 9.82645  | 9.715683 |
| 8945 | M299T31_ | 1.030439 | 0.043259 | 0.702937 | 0.512133 | 0.864087 | UP   | 299.2579 | 299.2577 | 299.258  | 31.24825 | 31.225   |
| 8946 | M217T11  | 1.378798 | 0.463411 | 0.694311 | 0.512282 | 0.864087 | UP   | 217.4294 | 217.4293 | 217.4297 | 10.88936 | 10.8646  |
| 8947 | M275T11_ | 1.128522 | -0.17443 | -0.68613 | 0.512345 | 0.864087 | DOWN | 275.4101 | 275.4099 | 275.4101 | 10.8926  | 10.8646  |
| 8948 | M657T10_ | 1.472315 | -0.55809 | -0.68856 | 0.512358 | 0.864087 | DOWN | 657.1564 | 657.1558 | 657.1584 | 9.856867 | 9.758367 |
| 8949 | M468T9_2 | 1.225739 | -0.29365 | -0.69079 | 0.512381 | 0.864087 | DOWN | 468.2664 | 468.2663 | 468.2665 | 8.950592 | 8.90275  |
| 8950 | M265T11_ | 1.488897 | 0.574244 | 0.689196 | 0.512417 | 0.864087 | UP   | 264.6027 | 264.6025 | 264.6028 | 10.91813 | 10.82972 |
| 8951 | M561T10_ | 1.165304 | -0.22071 | -0.69821 | 0.512499 | 0.864087 | DOWN | 560.5605 | 560.5604 | 560.561  | 9.523633 | 9.416817 |
| 8952 | M1952T10 | 1.180486 | -0.23938 | -0.69569 | 0.512519 | 0.864087 | DOWN | 1952.392 | 1952.391 | 1952.4   | 9.810767 | 9.728083 |
| 8953 | M592T11_ | 1.134253 | 0.181742 | 0.694492 | 0.512544 | 0.864087 | UP   | 591.9677 | 591.9673 | 591.9681 | 10.93208 | 10.873   |
| 8954 | M352T9_2 | 1.305822 | 0.384958 | 0.692173 | 0.512544 | 0.864087 | UP   | 351.9119 | 351.9117 | 351.912  | 8.742358 | 8.623117 |
| 8955 | M405T11_ | 1.180292 | -0.23914 | -0.68516 | 0.512612 | 0.864087 | DOWN | 404.7849 | 404.7848 | 404.7856 | 10.90775 | 10.90197 |
| 8956 | M809T10_ | 1.256977 | 0.329958 | 0.685374 | 0.512721 | 0.864087 | UP   | 809.4652 | 809.4649 | 809.4661 | 9.951283 | 9.843367 |
| 8957 | M401T11_ | 1.462179 | 0.54812  | 0.708043 | 0.512734 | 0.864087 | UP   | 401.2403 | 401.2328 | 401.246  | 10.93618 | 10.81958 |
| 8958 | M172T10_ | 1.217844 | 0.28433  | 0.687256 | 0.512816 | 0.864087 | UP   | 171.8227 | 171.8226 | 171.8229 | 9.830558 | 9.715683 |
| 8959 | M532T36  | 1.215045 | 0.28101  | 0.704043 | 0.512964 | 0.864087 | UP   | 532.3114 | 532.3111 | 532.3117 | 36.39808 | 36.02667 |



|      |          |          |          |          |          |          |      |          |          |          |          |          |
|------|----------|----------|----------|----------|----------|----------|------|----------|----------|----------|----------|----------|
| 8960 | M307T10_ | 1.945399 | 0.960066 | 0.684386 | 0.513092 | 0.864088 | UP   | 307.2457 | 307.2377 | 307.2463 | 10.3838  | 10.3246  |
| 8961 | M359T11_ | 1.249127 | -0.32092 | -0.68598 | 0.513101 | 0.864088 | DOWN | 358.9044 | 358.9034 | 358.9056 | 10.94208 | 10.8926  |
| 8962 | M390T11_ | 1.301671 | 0.380365 | 0.698619 | 0.513116 | 0.864088 | UP   | 390.2544 | 390.2543 | 390.2546 | 11.1244  | 11.1008  |
| 8963 | M371T10_ | 1.141145 | -0.19048 | -0.68727 | 0.513136 | 0.864088 | DOWN | 371.0288 | 371.0285 | 371.029  | 9.964092 | 9.859233 |
| 8964 | M342T10_ | 1.050564 | -0.07116 | -0.71606 | 0.513145 | 0.864088 | DOWN | 341.721  | 341.7208 | 341.7212 | 9.960417 | 9.8753   |
| 8965 | M177T9_9 | 2.11928  | 1.083574 | 0.710821 | 0.513171 | 0.864088 | UP   | 177.3532 | 177.3528 | 177.3537 | 9.365833 | 9.18975  |
| 8966 | M534T42_ | 1.167564 | 0.223501 | 0.685368 | 0.513263 | 0.864088 | UP   | 534.2906 | 534.2905 | 534.2907 | 42.49567 | 42.28    |
| 8967 | M534T10_ | 1.255835 | 0.328647 | 0.691541 | 0.513264 | 0.864088 | UP   | 533.5172 | 533.5164 | 533.5177 | 9.946467 | 9.859233 |
| 8968 | M750T10_ | 1.168999 | 0.225274 | 0.697469 | 0.51338  | 0.864088 | UP   | 750.4705 | 750.4616 | 750.4715 | 9.946367 | 9.859233 |
| 8969 | M470T13  | 1.168602 | -0.22478 | -0.68425 | 0.513417 | 0.864088 | DOWN | 470.3496 | 470.3488 | 470.3505 | 12.66003 | 12.63188 |
| 8970 | M508T37_ | 1.108161 | 0.148168 | 0.690128 | 0.513564 | 0.864088 | UP   | 508.3111 | 508.3107 | 508.3113 | 36.54033 | 36.49617 |
| 8971 | M661T10_ | 1.157321 | -0.21079 | -0.68758 | 0.513596 | 0.864088 | DOWN | 660.7716 | 660.771  | 660.7732 | 9.958617 | 9.843367 |
| 8972 | M526T10_ | 1.162873 | -0.21769 | -0.69472 | 0.513617 | 0.864088 | DOWN | 525.7891 | 525.7884 | 525.7894 | 9.948875 | 9.843367 |
| 8973 | M514T10_ | 1.177621 | 0.235876 | 0.69226  | 0.513662 | 0.864088 | UP   | 514.4466 | 514.446  | 514.447  | 9.983467 | 9.8753   |
| 8974 | M501T9_3 | 1.812323 | 0.85784  | 0.71481  | 0.51367  | 0.864088 | UP   | 500.9569 | 500.9566 | 500.9574 | 9.146533 | 9.0637   |
| 8975 | M239T10_ | 1.444619 | 0.530689 | 0.690412 | 0.513721 | 0.864088 | UP   | 238.7747 | 238.7744 | 238.7748 | 9.967367 | 9.859233 |
| 8976 | M1413T10 | 1.247274 | 0.318779 | 0.702646 | 0.513782 | 0.864088 | UP   | 1413.112 | 1413.106 | 1413.114 | 9.960817 | 9.885167 |
| 8977 | M287T9_2 | 1.302772 | -0.38158 | -0.6831  | 0.513836 | 0.864088 | DOWN | 287.2452 | 287.2441 | 287.2462 | 9.295333 | 9.132267 |
| 8978 | M559T10_ | 1.331859 | 0.413441 | 0.707235 | 0.513882 | 0.864088 | UP   | 559.245  | 559.2443 | 559.246  | 9.918792 | 9.827283 |
| 8979 | M399T10_ | 1.216511 | 0.28275  | 0.703666 | 0.514009 | 0.864088 | UP   | 398.9507 | 398.9502 | 398.9514 | 9.924308 | 9.811217 |
| 8980 | M502T9_1 | 1.208205 | 0.272866 | 0.697896 | 0.514017 | 0.864088 | UP   | 501.54   | 501.5388 | 501.5402 | 9.153917 | 9.110833 |
| 8981 | M696T10_ | 1.110786 | -0.15158 | -0.68315 | 0.514029 | 0.864088 | DOWN | 695.5065 | 695.5062 | 695.5068 | 9.637333 | 9.52595  |
| 8982 | M548T10_ | 1.077442 | -0.10761 | -0.69455 | 0.514237 | 0.864088 | DOWN | 547.5965 | 547.5963 | 547.5966 | 9.959533 | 9.843367 |
| 8983 | M655T25  | 1.429602 | -0.51561 | -0.69777 | 0.514245 | 0.864088 | DOWN | 655.442  | 655.4416 | 655.4427 | 25.27983 | 25.257   |
| 8984 | M422T20  | 1.224988 | 0.292768 | 0.691027 | 0.51429  | 0.864088 | UP   | 422.3473 | 422.347  | 422.3475 | 20.20858 | 20.187   |
| 8985 | M473T11_ | 1.368768 | 0.452878 | 0.702585 | 0.514298 | 0.864088 | UP   | 473.0946 | 473.091  | 473.0953 | 10.93208 | 10.92225 |
| 8986 | M394T34_ | 1.238684 | -0.30881 | -0.68436 | 0.514322 | 0.864088 | DOWN | 394.3676 | 394.3674 | 394.3681 | 34.46717 | 34.43567 |
| 8987 | M231T14  | 1.267502 | -0.34199 | -0.70343 | 0.514352 | 0.864088 | DOWN | 231.1411 | 231.1409 | 231.1412 | 13.69715 | 13.68272 |
| 8988 | M662T9_3 | 1.144748 | -0.19503 | -0.68921 | 0.514352 | 0.864088 | DOWN | 662.2838 | 662.2837 | 662.2856 | 9.464933 | 9.370583 |
| 8989 | M288T10_ | 1.052397 | -0.07368 | -0.70629 | 0.514564 | 0.864088 | DOWN | 288.2553 | 288.2551 | 288.2556 | 9.964092 | 9.859233 |
| 8990 | M235T10_ | 1.130471 | 0.176924 | 0.701224 | 0.514571 | 0.864088 | UP   | 235.2743 | 235.2738 | 235.2802 | 9.946642 | 9.8753   |
| 8991 | M406T43_ | 1.249935 | 0.321853 | 0.683741 | 0.514588 | 0.864088 | UP   | 406.2068 | 406.2068 | 406.2071 | 43.215   | 42.9845  |
| 8992 | M697T10_ | 1.148458 | -0.1997  | -0.68346 | 0.514636 | 0.864088 | DOWN | 696.5099 | 696.5096 | 696.5103 | 9.629008 | 9.52595  |
| 8993 | M555T10_ | 1.247365 | 0.318884 | 0.685339 | 0.514643 | 0.864088 | UP   | 554.793  | 554.7823 | 554.7935 | 9.939825 | 9.843367 |
| 8994 | M365T19_ | 1.100784 | -0.13853 | -0.68869 | 0.514827 | 0.864088 | DOWN | 364.5833 | 364.5829 | 364.5835 | 18.59967 | 18.5235  |

|      |          |          |          |          |          |          |      |          |          |          |          |          |
|------|----------|----------|----------|----------|----------|----------|------|----------|----------|----------|----------|----------|
| 8995 | M210T11_ | 1.116161 | -0.15855 | -0.68146 | 0.514848 | 0.864088 | DOWN | 209.7696 | 209.7695 | 209.7697 | 10.892   | 10.879   |
| 8996 | M407T10_ | 1.183654 | -0.24325 | -0.68139 | 0.514881 | 0.864088 | DOWN | 407.1369 | 407.1366 | 407.1372 | 9.8207   | 9.699733 |
| 8997 | M176T10_ | 1.138728 | -0.18742 | -0.68626 | 0.514896 | 0.864088 | DOWN | 175.9441 | 175.9439 | 175.9444 | 9.827258 | 9.715683 |
| 8998 | M568T9_1 | 1.170338 | -0.22693 | -0.682   | 0.514921 | 0.864088 | DOWN | 567.8657 | 567.8652 | 567.8668 | 8.85435  | 8.802417 |
| 8999 | M348T10_ | 1.096396 | -0.13277 | -0.68607 | 0.515018 | 0.864088 | DOWN | 347.7688 | 347.7687 | 347.7688 | 10.1384  | 10.03658 |
| 9000 | M623T10_ | 1.29431  | 0.372183 | 0.693668 | 0.515027 | 0.864088 | UP   | 622.9654 | 622.9641 | 622.9691 | 9.8207   | 9.7124   |
| 9001 | M277T10_ | 1.088135 | -0.12186 | -0.68259 | 0.515043 | 0.864088 | DOWN | 277.2824 | 277.2821 | 277.2828 | 9.94785  | 9.843367 |
| 9002 | M201T10_ | 1.054823 | -0.077   | -0.68197 | 0.515119 | 0.864088 | DOWN | 200.6965 | 200.6964 | 200.6968 | 9.858408 | 9.747533 |
| 9003 | M701T10_ | 1.520664 | 0.604701 | 0.681929 | 0.51516  | 0.864088 | UP   | 700.5344 | 700.5337 | 700.5404 | 9.844033 | 9.73145  |
| 9004 | M362T10_ | 1.128542 | 0.17446  | 0.695671 | 0.515188 | 0.864088 | UP   | 362.3004 | 362.3002 | 362.3006 | 9.816175 | 9.699733 |
| 9005 | M405T11_ | 1.18235  | -0.24166 | -0.68132 | 0.515224 | 0.864088 | DOWN | 405.2225 | 405.2167 | 405.2248 | 10.9331  | 10.879   |
| 9006 | M406T40_ | 1.223479 | -0.29099 | -0.68306 | 0.515313 | 0.864088 | DOWN | 406.2069 | 406.2068 | 406.2071 | 40.46717 | 40.3955  |
| 9007 | M257T10_ | 1.472569 | 0.558335 | 0.684878 | 0.515335 | 0.864088 | UP   | 256.6152 | 256.6149 | 256.6153 | 9.918492 | 9.8378   |
| 9008 | M289T10_ | 1.205721 | -0.2699  | -0.6806  | 0.515345 | 0.864088 | DOWN | 289.4528 | 289.4525 | 289.4528 | 9.994767 | 9.9847   |
| 9009 | M336T11_ | 1.222979 | 0.2904   | 0.691428 | 0.515359 | 0.864088 | UP   | 336.0726 | 336.0721 | 336.0736 | 10.89907 | 10.879   |
| 9010 | M480T10_ | 1.139071 | -0.18786 | -0.69767 | 0.515373 | 0.864088 | DOWN | 479.6621 | 479.662  | 479.6638 | 9.871475 | 9.77355  |
| 9011 | M723T10_ | 1.80239  | 0.849911 | 0.704177 | 0.515393 | 0.864088 | UP   | 723.3542 | 723.3539 | 723.3553 | 9.843742 | 9.715683 |
| 9012 | M327T9_3 | 2.286174 | 1.192935 | 0.694874 | 0.515535 | 0.864088 | UP   | 326.8736 | 326.8733 | 326.8742 | 9.394517 | 9.275917 |
| 9013 | M510T18  | 1.197345 | -0.25984 | -0.68707 | 0.515544 | 0.864088 | DOWN | 510.3415 | 510.3409 | 510.3417 | 18.423   | 18.39217 |
| 9014 | M683T10_ | 1.176115 | -0.23403 | -0.6836  | 0.515612 | 0.864088 | DOWN | 683.0722 | 683.0719 | 683.0725 | 9.8207   | 9.747533 |
| 9015 | M240T13  | 1.319186 | 0.399648 | 0.694478 | 0.515689 | 0.864088 | UP   | 240.1742 | 240.1739 | 240.1746 | 13.17268 | 13.15652 |
| 9016 | M1467T11 | 1.212938 | 0.278506 | 0.697486 | 0.515852 | 0.864088 | UP   | 1467.064 | 1467.063 | 1467.065 | 10.87823 | 10.82935 |
| 9017 | M436T9_1 | 1.396947 | 0.482277 | 0.705487 | 0.515891 | 0.864088 | UP   | 435.5363 | 435.5344 | 435.5379 | 9.365833 | 9.061    |
| 9018 | M359T23  | 1.1468   | 0.197614 | 0.685642 | 0.515956 | 0.864088 | UP   | 359.3267 | 359.3263 | 359.3269 | 23.45083 | 23.42883 |
| 9019 | M825T10_ | 1.191533 | 0.252818 | 0.690168 | 0.515985 | 0.864088 | UP   | 824.5574 | 824.5567 | 824.5582 | 9.972483 | 9.859233 |
| 9020 | M350T41  | 1.266565 | 0.340921 | 0.696421 | 0.516134 | 0.864088 | UP   | 350.2171 | 350.217  | 350.2174 | 40.942   | 40.63983 |
| 9021 | M634T34  | 1.632608 | 0.707179 | 0.706794 | 0.516172 | 0.864088 | UP   | 634.4525 | 634.4521 | 634.4528 | 34.47208 | 34.43517 |
| 9022 | M561T10_ | 1.134335 | -0.18185 | -0.6829  | 0.516188 | 0.864088 | DOWN | 561.205  | 561.2046 | 561.2057 | 9.930908 | 9.827283 |
| 9023 | M736T9_3 | 1.113391 | -0.15496 | -0.68066 | 0.516197 | 0.864088 | DOWN | 736.4322 | 736.4311 | 736.433  | 9.438833 | 9.370583 |
| 9024 | M349T9_4 | 1.440138 | 0.526207 | 0.681014 | 0.516201 | 0.864088 | UP   | 348.645  | 348.6343 | 348.6465 | 9.259033 | 9.1445   |
| 9025 | M305T9_4 | 1.252035 | 0.324275 | 0.690557 | 0.516267 | 0.864088 | UP   | 305.1551 | 305.1469 | 305.1561 | 9.106183 | 8.8978   |
| 9026 | M730T10_ | 1.379051 | 0.463676 | 0.704367 | 0.516286 | 0.864088 | UP   | 730.2474 | 730.2467 | 730.2478 | 9.968992 | 9.859233 |
| 9027 | M764T10_ | 1.211617 | -0.27693 | -0.68655 | 0.516323 | 0.864088 | DOWN | 764.4815 | 764.4809 | 764.4827 | 10.30778 | 10.19852 |
| 9028 | M805T10_ | 1.149149 | -0.20057 | -0.68326 | 0.516376 | 0.864089 | DOWN | 804.9904 | 804.9895 | 804.9918 | 10.2852  | 10.21468 |
| 9029 | M177T9_8 | 1.268836 | -0.34351 | -0.69931 | 0.516461 | 0.864089 | DOWN | 177.3368 | 177.3364 | 177.3371 | 9.175017 | 9.11405  |

|      |          |          |          |          |          |          |      |          |          |          |          |          |
|------|----------|----------|----------|----------|----------|----------|------|----------|----------|----------|----------|----------|
| 9030 | M923T11_ | 1.168681 | -0.22488 | -0.67889 | 0.516525 | 0.864089 | DOWN | 923.3247 | 923.3229 | 923.325  | 10.90659 | 10.8646  |
| 9031 | M318T11_ | 1.24957  | 0.321431 | 0.690271 | 0.516623 | 0.864089 | UP   | 317.7999 | 317.7994 | 317.8002 | 10.86994 | 10.8214  |
| 9032 | M885T10_ | 1.074651 | -0.10387 | -0.67973 | 0.516634 | 0.864089 | DOWN | 884.564  | 884.5629 | 884.5644 | 9.924308 | 9.811217 |
| 9033 | M392T10_ | 1.719208 | 0.781745 | 0.681521 | 0.516648 | 0.864089 | UP   | 391.7623 | 391.76   | 391.7722 | 9.58735  | 9.43325  |
| 9034 | M497T9_2 | 1.310617 | -0.39025 | -0.68089 | 0.516654 | 0.864089 | DOWN | 496.6393 | 496.6366 | 496.6452 | 9.375425 | 9.129317 |
| 9035 | M440T9_2 | 1.232916 | 0.302075 | 0.697075 | 0.51674  | 0.864089 | UP   | 440.0593 | 440.0591 | 440.0596 | 9.227708 | 9.11405  |
| 9036 | M409T10_ | 1.10871  | 0.148882 | 0.685347 | 0.516765 | 0.864089 | UP   | 409.2303 | 409.2299 | 409.2304 | 9.964092 | 9.859233 |
| 9037 | M516T9_2 | 1.224162 | -0.29179 | -0.70709 | 0.516841 | 0.864089 | DOWN | 516.2688 | 516.2685 | 516.269  | 9.388367 | 9.277967 |
| 9038 | M238T10_ | 1.261006 | 0.334576 | 0.679154 | 0.516882 | 0.864089 | UP   | 238.316  | 238.3158 | 238.3162 | 9.951283 | 9.942317 |
| 9039 | M258T11_ | 1.111326 | -0.15228 | -0.68358 | 0.516883 | 0.864089 | DOWN | 257.7565 | 257.7562 | 257.7566 | 10.892   | 10.8646  |
| 9040 | M394T10_ | 1.137889 | -0.18636 | -0.67944 | 0.516906 | 0.864089 | DOWN | 393.8328 | 393.8326 | 393.833  | 9.960817 | 9.843367 |
| 9041 | M258T27  | 1.302071 | -0.38081 | -0.69949 | 0.516987 | 0.864089 | DOWN | 258.2424 | 258.2422 | 258.2425 | 26.5495  | 26.53717 |
| 9042 | M364T10_ | 1.243701 | 0.314639 | 0.701545 | 0.516988 | 0.864089 | UP   | 363.8651 | 363.865  | 363.8652 | 9.811267 | 9.699733 |
| 9043 | M414T9_1 | 1.22327  | -0.29074 | -0.68511 | 0.516989 | 0.864089 | DOWN | 414.282  | 414.2814 | 414.2959 | 9.25985  | 9.1445   |
| 9044 | M615T9_5 | 1.287069 | 0.364089 | 0.687364 | 0.517014 | 0.864089 | UP   | 615.0971 | 615.0952 | 615.0979 | 9.288325 | 9.219483 |
| 9045 | M653T28_ | 1.27566  | -0.35124 | -0.67871 | 0.517064 | 0.864089 | DOWN | 653.4689 | 653.4687 | 653.4692 | 28.40333 | 28.39167 |
| 9046 | M1356T10 | 1.198455 | -0.26118 | -0.67746 | 0.517221 | 0.864089 | DOWN | 1356.193 | 1356.192 | 1356.194 | 9.821308 | 9.699733 |
| 9047 | M224T9_1 | 1.138735 | -0.18743 | -0.68068 | 0.517247 | 0.864089 | DOWN | 223.822  | 223.8218 | 223.8221 | 8.952283 | 8.715883 |
| 9048 | M692T9   | 1.238597 | -0.30871 | -0.68799 | 0.517266 | 0.864089 | DOWN | 691.6598 | 691.6545 | 691.6686 | 9.39965  | 9.18195  |
| 9049 | M211T14  | 1.144194 | -0.19433 | -0.67927 | 0.517304 | 0.864089 | DOWN | 211.1801 | 211.18   | 211.1803 | 14.08495 | 14.01972 |
| 9050 | M152T11_ | 1.201874 | -0.26529 | -0.68244 | 0.517383 | 0.864089 | DOWN | 151.5313 | 151.5312 | 151.5313 | 10.9049  | 10.88747 |
| 9051 | M1476T10 | 1.626871 | 0.7021   | 0.704946 | 0.51748  | 0.864089 | UP   | 1476.377 | 1476.375 | 1476.38  | 9.933967 | 9.853533 |
| 9052 | M173T10_ | 1.191792 | 0.253133 | 0.693795 | 0.517503 | 0.864089 | UP   | 173.1074 | 173.1073 | 173.1075 | 9.816167 | 9.715683 |
| 9053 | M1631T10 | 1.204053 | 0.267899 | 0.692369 | 0.517523 | 0.864089 | UP   | 1630.956 | 1630.953 | 1630.961 | 9.930333 | 9.822117 |
| 9054 | M641T34  | 1.157876 | -0.21148 | -0.67689 | 0.517569 | 0.864089 | DOWN | 641.4464 | 641.4461 | 641.4474 | 33.52825 | 33.48483 |
| 9055 | M504T26  | 1.22804  | 0.296358 | 0.677873 | 0.517612 | 0.864089 | UP   | 504.3007 | 504.299  | 504.3011 | 26.39017 | 26.32467 |
| 9056 | M203T10_ | 1.188409 | -0.24903 | -0.68517 | 0.517627 | 0.864089 | DOWN | 203.3935 | 203.3934 | 203.4012 | 9.8397   | 9.73145  |
| 9057 | M1156T10 | 1.184243 | -0.24397 | -0.67694 | 0.517636 | 0.864089 | DOWN | 1155.637 | 1155.636 | 1155.64  | 9.695933 | 9.602967 |
| 9058 | M168T10_ | 1.339581 | 0.421782 | 0.680859 | 0.517726 | 0.864089 | UP   | 168.0622 | 168.0621 | 168.0623 | 9.967367 | 9.859233 |
| 9059 | M389T10_ | 1.109294 | -0.14964 | -0.69017 | 0.517834 | 0.864089 | DOWN | 388.8629 | 388.8627 | 388.863  | 9.932033 | 9.827283 |
| 9060 | M508T38_ | 1.15125  | -0.2032  | -0.68541 | 0.517859 | 0.864089 | DOWN | 508.311  | 508.3107 | 508.3115 | 38.4745  | 38.007   |
| 9061 | M260T9_4 | 1.248508 | -0.3202  | -0.67874 | 0.518047 | 0.864089 | DOWN | 259.6851 | 259.685  | 259.6855 | 8.767783 | 8.715883 |
| 9062 | M370T9_1 | 2.036993 | 1.026441 | 0.704281 | 0.518106 | 0.864089 | UP   | 370.4617 | 370.4613 | 370.4619 | 9.442567 | 9.355317 |
| 9063 | M643T21_ | 1.306845 | 0.386088 | 0.67658  | 0.518117 | 0.864089 | UP   | 643.2569 | 643.2566 | 643.2573 | 20.59283 | 20.57683 |
| 9064 | M418T44  | 1.110455 | 0.151151 | 0.690134 | 0.518341 | 0.864089 | UP   | 418.2795 | 418.2795 | 418.2797 | 44.05308 | 43.86217 |

|      |          |          |          |          |          |          |      |          |          |          |          |          |
|------|----------|----------|----------|----------|----------|----------|------|----------|----------|----------|----------|----------|
| 9065 | M270T10_ | 1.341984 | 0.424368 | 0.690216 | 0.518383 | 0.864089 | UP   | 270.0058 | 270.0057 | 270.006  | 9.837433 | 9.699733 |
| 9066 | M1661T10 | 1.190642 | -0.25174 | -0.67697 | 0.518529 | 0.864089 | DOWN | 1660.527 | 1660.522 | 1660.53  | 9.772092 | 9.73145  |
| 9067 | M378T24_ | 1.155497 | 0.208513 | 0.676707 | 0.518611 | 0.864089 | UP   | 378.212  | 378.2118 | 378.2121 | 23.842   | 23.7015  |
| 9068 | M459T9_3 | 1.275344 | 0.350886 | 0.67645  | 0.518648 | 0.864089 | UP   | 459.1143 | 459.1137 | 459.1161 | 9.340183 | 9.092333 |
| 9069 | M173T9_1 | 1.656765 | 0.728369 | 0.698592 | 0.518651 | 0.864089 | UP   | 172.7449 | 172.7445 | 172.7455 | 9.146383 | 9.09495  |
| 9070 | M592T40_ | 1.163323 | 0.218252 | 0.702478 | 0.518651 | 0.864089 | UP   | 592.3326 | 592.3324 | 592.3328 | 40.22283 | 40.10767 |
| 9071 | M808T20  | 1.134284 | -0.18178 | -0.67627 | 0.518664 | 0.864089 | DOWN | 807.5976 | 807.5971 | 807.5982 | 20.25933 | 20.23017 |
| 9072 | M330T9_5 | 1.410009 | -0.4957  | -0.68452 | 0.518714 | 0.864089 | DOWN | 329.7316 | 329.7315 | 329.7316 | 9.296458 | 9.24215  |
| 9073 | M1490T10 | 1.159746 | -0.21381 | -0.67497 | 0.518779 | 0.864089 | DOWN | 1489.861 | 1489.857 | 1489.863 | 9.901433 | 9.7634   |
| 9074 | M430T38  | 1.390014 | -0.4751  | -0.67711 | 0.518788 | 0.864089 | DOWN | 430.3888 | 430.3887 | 430.3895 | 37.892   | 37.82    |
| 9075 | M260T11_ | 1.112469 | -0.15376 | -0.67489 | 0.518809 | 0.864089 | DOWN | 259.7222 | 259.7221 | 259.7223 | 10.892   | 10.879   |
| 9076 | M712T10_ | 1.31229  | 0.392086 | 0.696185 | 0.518811 | 0.864089 | UP   | 711.5017 | 711.5012 | 711.5022 | 9.631542 | 9.478833 |
| 9077 | M355T20_ | 1.149183 | -0.20061 | -0.68828 | 0.518838 | 0.864089 | DOWN | 355.2377 | 355.2376 | 355.2379 | 20.38958 | 20.3895  |
| 9078 | M461T10_ | 1.131213 | 0.177871 | 0.677971 | 0.518989 | 0.864089 | UP   | 460.8366 | 460.836  | 460.8376 | 9.970617 | 9.859233 |
| 9079 | M574T10_ | 1.175578 | -0.23337 | -0.68971 | 0.518992 | 0.864089 | DOWN | 573.8167 | 573.8165 | 573.817  | 9.929783 | 9.843367 |
| 9080 | M458T10_ | 1.106687 | -0.14625 | -0.68685 | 0.519063 | 0.864089 | DOWN | 457.5554 | 457.5549 | 457.5555 | 9.968992 | 9.859233 |
| 9081 | M1036T32 | 1.474225 | -0.55996 | -0.67493 | 0.519076 | 0.864089 | DOWN | 1035.765 | 1035.764 | 1035.765 | 31.78183 | 31.75333 |
| 9082 | M362T10_ | 1.477509 | 0.563166 | 0.69712  | 0.519196 | 0.864089 | UP   | 361.7193 | 361.7192 | 361.7194 | 9.956867 | 9.859233 |
| 9083 | M360T11_ | 1.207133 | 0.271585 | 0.693865 | 0.519217 | 0.864089 | UP   | 359.7403 | 359.74   | 359.7406 | 10.91813 | 10.8646  |
| 9084 | M335T10_ | 1.156612 | -0.20991 | -0.69396 | 0.519253 | 0.864089 | DOWN | 335.3955 | 335.3953 | 335.3962 | 9.816258 | 9.743667 |
| 9085 | M455T10_ | 1.209933 | -0.27493 | -0.68537 | 0.519301 | 0.864089 | DOWN | 454.9845 | 454.9842 | 454.9846 | 9.830283 | 9.699733 |
| 9086 | M750T10_ | 1.248838 | 0.320586 | 0.673909 | 0.519368 | 0.864089 | UP   | 750.4161 | 750.4155 | 750.4167 | 9.946467 | 9.843367 |
| 9087 | M233T11_ | 1.730849 | 0.79148  | 0.673882 | 0.519394 | 0.864089 | UP   | 232.9774 | 232.9772 | 232.9778 | 10.93208 | 10.90197 |
| 9088 | M297T15  | 1.339107 | -0.42127 | -0.67385 | 0.519402 | 0.864089 | DOWN | 297.1845 | 297.1841 | 297.1846 | 15.4096  | 15.3689  |
| 9089 | M496T9_9 | 1.169267 | -0.2256  | -0.67748 | 0.519557 | 0.864089 | DOWN | 496.2487 | 496.2484 | 496.2488 | 9.268917 | 9.129317 |
| 9090 | M493T16  | 1.127195 | -0.17274 | -0.67421 | 0.519569 | 0.864089 | DOWN | 493.3823 | 493.3821 | 493.3825 | 15.5886  | 15.57742 |
| 9091 | M566T11_ | 1.173465 | -0.23077 | -0.67943 | 0.519578 | 0.864089 | DOWN | 566.0141 | 566.0138 | 566.0142 | 10.75735 | 10.69123 |
| 9092 | M448T22  | 1.444951 | 0.531021 | 0.677037 | 0.519711 | 0.86409  | UP   | 448.3188 | 448.3188 | 448.3196 | 21.65667 | 21.63    |
| 9093 | M213T9_1 | 1.495102 | 0.580244 | 0.683698 | 0.51983  | 0.86409  | UP   | 213.1776 | 213.1774 | 213.1836 | 9.220933 | 9.106183 |
| 9094 | M209T10_ | 1.205206 | -0.26928 | -0.67347 | 0.519921 | 0.86409  | DOWN | 208.7321 | 208.7276 | 208.7324 | 9.924383 | 9.8378   |
| 9095 | M299T11_ | 1.236778 | -0.30659 | -0.68592 | 0.520049 | 0.86409  | DOWN | 299.2099 | 299.2096 | 299.2103 | 11.49742 | 11.47298 |
| 9096 | M249T10_ | 1.186919 | -0.24722 | -0.69345 | 0.520069 | 0.86409  | DOWN | 249.4842 | 249.4839 | 249.4844 | 9.967367 | 9.859233 |
| 9097 | M586T33  | 1.370901 | 0.455125 | 0.673413 | 0.520089 | 0.86409  | UP   | 586.4521 | 586.451  | 586.4528 | 33.12367 | 33.1095  |
| 9098 | M503T26  | 1.306863 | 0.386108 | 0.689441 | 0.520111 | 0.86409  | UP   | 503.2974 | 503.297  | 503.2975 | 26.37767 | 26.32467 |
| 9099 | M247T15  | 1.902954 | 0.92824  | 0.689219 | 0.520195 | 0.86409  | UP   | 247.2458 | 247.2456 | 247.2459 | 14.97784 | 14.95502 |

|      |          |          |          |          |          |         |      |          |          |          |          |          |
|------|----------|----------|----------|----------|----------|---------|------|----------|----------|----------|----------|----------|
| 9100 | M453T9_1 | 1.381802 | -0.46655 | -0.67761 | 0.520374 | 0.86409 | DOWN | 453.4108 | 453.4101 | 453.4205 | 9.219483 | 9.166033 |
| 9101 | M251T13  | 1.46031  | 0.546275 | 0.694097 | 0.520417 | 0.86409 | UP   | 251.1615 | 251.1612 | 251.1617 | 12.6314  | 12.61627 |
| 9102 | M698T10_ | 1.16343  | 0.218385 | 0.692381 | 0.520428 | 0.86409 | UP   | 698.4664 | 698.4659 | 698.467  | 10.24368 | 10.18238 |
| 9103 | M554T9_7 | 1.603714 | 0.681417 | 0.701946 | 0.520553 | 0.86409 | UP   | 554.3034 | 554.3    | 554.3039 | 9.160617 | 9.12675  |
| 9104 | M677T10_ | 1.177584 | -0.23583 | -0.69864 | 0.520595 | 0.86409 | DOWN | 676.9694 | 676.9681 | 676.9701 | 9.828367 | 9.7124   |
| 9105 | M358T11_ | 1.089977 | -0.1243  | -0.6734  | 0.520622 | 0.86409 | DOWN | 358.0574 | 358.0571 | 358.0581 | 10.90551 | 10.88995 |
| 9106 | M229T11_ | 1.112952 | -0.15439 | -0.67196 | 0.520627 | 0.86409 | DOWN | 228.5893 | 228.5892 | 228.5894 | 10.892   | 10.879   |
| 9107 | M661T10_ | 1.141227 | 0.190586 | 0.671818 | 0.520668 | 0.86409 | UP   | 661.3328 | 661.3324 | 661.3341 | 9.825392 | 9.699733 |
| 9108 | M1008T28 | 1.242573 | -0.31333 | -0.67177 | 0.520737 | 0.86409 | DOWN | 1007.771 | 1007.77  | 1007.771 | 28.38292 | 28.362   |
| 9109 | M336T28  | 1.231909 | -0.3009  | -0.67165 | 0.520782 | 0.86409 | DOWN | 336.26   | 336.2597 | 336.2601 | 28.40375 | 28.37683 |
| 9110 | M575T15  | 1.247871 | -0.31947 | -0.68451 | 0.520824 | 0.86409 | DOWN | 575.3588 | 575.3585 | 575.359  | 14.83917 | 14.82427 |
| 9111 | M287T26  | 1.174666 | -0.23225 | -0.67659 | 0.520864 | 0.86409 | DOWN | 287.2771 | 287.2768 | 287.2773 | 26.10367 | 26.08883 |
| 9112 | M284T23  | 1.128672 | 0.174626 | 0.683723 | 0.520891 | 0.86409 | UP   | 284.1164 | 284.1163 | 284.1168 | 23.38233 | 23.30817 |
| 9113 | M472T10_ | 1.1674   | -0.2233  | -0.67238 | 0.521081 | 0.86409 | DOWN | 472.242  | 472.2413 | 472.2423 | 9.95385  | 9.843367 |
| 9114 | M161T25  | 1.143069 | -0.19291 | -0.67304 | 0.521134 | 0.86409 | DOWN | 161.0594 | 161.0592 | 161.0595 | 25.41733 | 25.39    |
| 9115 | M167T9_7 | 1.735539 | 0.795384 | 0.697375 | 0.521144 | 0.86409 | UP   | 167.4261 | 167.4261 | 167.4265 | 9.1428   | 9.133667 |
| 9116 | M498T11_ | 1.414129 | 0.499913 | 0.683597 | 0.521148 | 0.86409 | UP   | 498.3669 | 498.3661 | 498.3673 | 10.9198  | 10.8214  |
| 9117 | M213T9_1 | 1.387658 | 0.472652 | 0.670699 | 0.52131  | 0.86409 | UP   | 213.4617 | 213.461  | 213.4676 | 9.424233 | 9.132267 |
| 9118 | M508T37_ | 1.113387 | -0.15496 | -0.6705  | 0.5215   | 0.86409 | DOWN | 508.3111 | 508.3109 | 508.3113 | 37.22217 | 37.08683 |
| 9119 | M252T11_ | 1.100057 | -0.13758 | -0.67092 | 0.521522 | 0.86409 | DOWN | 251.8896 | 251.8894 | 251.8897 | 10.892   | 10.879   |
| 9120 | M1011T23 | 1.14697  | -0.19783 | -0.67667 | 0.521588 | 0.86409 | DOWN | 1010.684 | 1010.683 | 1010.685 | 22.59067 | 22.56833 |
| 9121 | M211T11_ | 1.115101 | -0.15717 | -0.67021 | 0.521616 | 0.86409 | DOWN | 210.5288 | 210.5288 | 210.5289 | 10.892   | 10.879   |
| 9122 | M1095T10 | 1.211113 | 0.276334 | 0.696876 | 0.521645 | 0.86409 | UP   | 1094.709 | 1094.709 | 1094.71  | 9.857833 | 9.747533 |
| 9123 | M630T11_ | 1.118235 | -0.16122 | -0.67535 | 0.52168  | 0.86409 | DOWN | 630.4421 | 630.4415 | 630.4427 | 11.49197 | 11.47593 |
| 9124 | M650T9_2 | 1.384086 | 0.468933 | 0.693011 | 0.521688 | 0.86409 | UP   | 649.7874 | 649.7786 | 649.7882 | 9.16125  | 9.111033 |
| 9125 | M284T10_ | 1.303058 | 0.381901 | 0.693623 | 0.52176  | 0.86409 | UP   | 283.9854 | 283.9852 | 283.9973 | 9.932    | 9.843367 |
| 9126 | M905T9   | 1.305454 | -0.38455 | -0.67339 | 0.521803 | 0.86409 | DOWN | 904.5526 | 904.5514 | 904.553  | 8.909325 | 8.788667 |
| 9127 | M446T42_ | 1.094935 | -0.13085 | -0.6828  | 0.521806 | 0.86409 | DOWN | 446.2745 | 446.2744 | 446.2747 | 41.81933 | 41.73333 |
| 9128 | M813T10_ | 1.297182 | -0.37538 | -0.66978 | 0.521907 | 0.86409 | DOWN | 813.391  | 813.3907 | 813.3918 | 9.896717 | 9.859667 |
| 9129 | M390T9_4 | 1.094141 | -0.1298  | -0.67041 | 0.521961 | 0.86409 | DOWN | 389.9229 | 389.9221 | 389.9231 | 8.993033 | 8.89395  |
| 9130 | M249T10_ | 1.612055 | -0.6889  | -0.69209 | 0.521964 | 0.86409 | DOWN | 249.2615 | 249.2613 | 249.2618 | 9.961333 | 9.8914   |
| 9131 | M286T10_ | 1.242967 | 0.313788 | 0.672631 | 0.52197  | 0.86409 | UP   | 286.0499 | 286.0496 | 286.0501 | 9.926125 | 9.827283 |
| 9132 | M805T10_ | 1.194761 | 0.256723 | 0.6757   | 0.521978 | 0.86409 | UP   | 805.349  | 805.3486 | 805.3495 | 9.969158 | 9.859233 |
| 9133 | M638T11_ | 1.125201 | -0.17018 | -0.66965 | 0.521979 | 0.86409 | DOWN | 638.1705 | 638.1701 | 638.1717 | 10.892   | 10.8646  |
| 9134 | M360T9_9 | 1.203252 | -0.26694 | -0.67046 | 0.52199  | 0.86409 | DOWN | 360.2553 | 360.2552 | 360.2555 | 9.314442 | 9.24215  |

|      |          |          |          |          |          |          |      |          |          |          |          |          |
|------|----------|----------|----------|----------|----------|----------|------|----------|----------|----------|----------|----------|
| 9135 | M353T10_ | 1.265141 | 0.339298 | 0.698636 | 0.521995 | 0.86409  | UP   | 353.3521 | 353.3519 | 353.3523 | 9.8207   | 9.699733 |
| 9136 | M178T9_7 | 1.338705 | -0.42084 | -0.66976 | 0.522001 | 0.86409  | DOWN | 178.0205 | 178.0203 | 178.0208 | 9.195075 | 9.1428   |
| 9137 | M340T35  | 1.082026 | -0.11374 | -0.66997 | 0.522034 | 0.86409  | DOWN | 340.2925 | 340.2924 | 340.2926 | 35.40117 | 35.38733 |
| 9138 | M338T11_ | 1.181871 | 0.241073 | 0.681869 | 0.522061 | 0.86409  | UP   | 337.9255 | 337.9254 | 337.9258 | 10.89875 | 10.873   |
| 9139 | M666T31  | 1.228908 | -0.29738 | -0.68062 | 0.5222   | 0.86409  | DOWN | 666.4692 | 666.4686 | 666.4699 | 31.36467 | 31.34883 |
| 9140 | M245T10_ | 1.258803 | 0.332052 | 0.681711 | 0.522295 | 0.86409  | UP   | 244.5796 | 244.5793 | 244.5797 | 9.970617 | 9.859233 |
| 9141 | M450T11_ | 1.17216  | 0.22917  | 0.677772 | 0.522312 | 0.86409  | UP   | 450.3645 | 450.3639 | 450.3648 | 10.9049  | 10.8646  |
| 9142 | M382T9_1 | 1.441904 | -0.52797 | -0.67234 | 0.522348 | 0.86409  | DOWN | 382.2016 | 382.2009 | 382.2051 | 9.297725 | 9.249433 |
| 9143 | M377T10_ | 1.104927 | 0.143952 | 0.684876 | 0.522363 | 0.86409  | UP   | 377.1771 | 377.1768 | 377.1773 | 9.902617 | 9.79535  |
| 9144 | M420T11_ | 1.204423 | -0.26834 | -0.67852 | 0.522404 | 0.86409  | DOWN | 419.6557 | 419.655  | 419.6559 | 10.90551 | 10.88995 |
| 9145 | M241T17  | 1.109669 | 0.150129 | 0.668766 | 0.522472 | 0.86409  | UP   | 241.1795 | 241.1794 | 241.1796 | 17.33667 | 17.31917 |
| 9146 | M350T10_ | 1.420288 | -0.50618 | -0.69616 | 0.522516 | 0.86409  | DOWN | 349.8531 | 349.853  | 349.8538 | 9.82645  | 9.699733 |
| 9147 | M888T10_ | 1.087143 | -0.12054 | -0.66984 | 0.522519 | 0.86409  | DOWN | 887.7555 | 887.7544 | 887.7563 | 9.930908 | 9.827283 |
| 9148 | M345T9_2 | 1.130191 | -0.17657 | -0.68719 | 0.522557 | 0.86409  | DOWN | 344.5732 | 344.5729 | 344.5733 | 9.314442 | 9.234417 |
| 9149 | M616T10_ | 1.239225 | 0.309438 | 0.69127  | 0.52264  | 0.86409  | UP   | 615.8293 | 615.8282 | 615.8295 | 9.930908 | 9.811217 |
| 9150 | M353T11_ | 1.092749 | -0.12796 | -0.66845 | 0.522688 | 0.86409  | DOWN | 353.0365 | 353.0364 | 353.0371 | 10.892   | 10.879   |
| 9151 | M662T23  | 1.138606 | -0.18727 | -0.67147 | 0.522748 | 0.86409  | DOWN | 662.4843 | 662.4839 | 662.4852 | 23.1105  | 23.045   |
| 9152 | M1733T11 | 1.123203 | -0.16762 | -0.66826 | 0.522778 | 0.86409  | DOWN | 1732.64  | 1732.638 | 1732.643 | 10.892   | 10.8646  |
| 9153 | M806T10_ | 1.228404 | 0.296785 | 0.693847 | 0.522883 | 0.86409  | UP   | 806.356  | 806.3552 | 806.3568 | 9.930908 | 9.827283 |
| 9154 | M1052T9_ | 1.341521 | 0.42387  | 0.683609 | 0.522894 | 0.86409  | UP   | 1051.717 | 1051.716 | 1051.718 | 8.680933 | 8.60815  |
| 9155 | M1831T10 | 1.079755 | 0.110705 | 0.683283 | 0.522914 | 0.86409  | UP   | 1831.427 | 1831.426 | 1831.434 | 9.843017 | 9.73145  |
| 9156 | M595T11_ | 1.099386 | -0.1367  | -0.66926 | 0.522922 | 0.86409  | DOWN | 595.1943 | 595.1937 | 595.1962 | 10.892   | 10.8646  |
| 9157 | M449T11_ | 1.205007 | 0.269041 | 0.68101  | 0.523    | 0.864091 | UP   | 449.2249 | 449.2247 | 449.2255 | 10.89193 | 10.8646  |
| 9158 | M301T10_ | 1.141813 | -0.19133 | -0.68622 | 0.523239 | 0.864091 | DOWN | 301.4788 | 301.4785 | 301.4789 | 9.942317 | 9.903017 |
| 9159 | M480T10_ | 1.241088 | -0.31161 | -0.68082 | 0.523253 | 0.864091 | DOWN | 480.3026 | 480.3017 | 480.3028 | 10.14972 | 10.10718 |
| 9160 | M384T12  | 1.162443 | 0.21716  | 0.668621 | 0.523275 | 0.864091 | UP   | 384.2742 | 384.2739 | 384.2859 | 12.28836 | 12.23685 |
| 9161 | M561T10_ | 1.151401 | -0.20339 | -0.66989 | 0.523305 | 0.864091 | DOWN | 560.8102 | 560.8094 | 560.8112 | 9.962617 | 9.859233 |
| 9162 | M465T10_ | 1.120141 | 0.16368  | 0.667382 | 0.523331 | 0.864091 | UP   | 464.7025 | 464.6998 | 464.7028 | 9.872883 | 9.56645  |
| 9163 | M223T10_ | 1.04943  | 0.069606 | 0.689457 | 0.523425 | 0.864091 | UP   | 223.0826 | 223.0825 | 223.0829 | 9.85525  | 9.73145  |
| 9164 | M750T10_ | 1.356675 | 0.440075 | 0.684077 | 0.523507 | 0.864091 | UP   | 749.9935 | 749.992  | 749.9948 | 9.8207   | 9.715683 |
| 9165 | M473T9_1 | 1.711435 | 0.775206 | 0.688142 | 0.523687 | 0.864091 | UP   | 473.3606 | 473.3599 | 473.3608 | 8.941217 | 8.610133 |
| 9166 | M742T11  | 1.171291 | -0.2281  | -0.66916 | 0.523777 | 0.864091 | DOWN | 741.6119 | 741.6111 | 741.6129 | 10.85333 | 10.83417 |
| 9167 | M829T10_ | 1.083098 | -0.11516 | -0.67373 | 0.523833 | 0.864091 | DOWN | 829.4406 | 829.4404 | 829.4412 | 9.6129   | 9.510117 |
| 9168 | M584T9_4 | 1.197495 | -0.26002 | -0.66993 | 0.523862 | 0.864091 | DOWN | 584.0375 | 584.0333 | 584.0384 | 9.20785  | 9.06315  |
| 9169 | M722T10_ | 1.142493 | 0.192186 | 0.688775 | 0.523866 | 0.864091 | UP   | 721.8567 | 721.8563 | 721.8574 | 9.8207   | 9.699733 |

|      |          |          |          |          |          |          |      |          |          |          |          |          |
|------|----------|----------|----------|----------|----------|----------|------|----------|----------|----------|----------|----------|
| 9170 | M382T9_8 | 1.478814 | 0.564441 | 0.684071 | 0.523945 | 0.864091 | UP   | 382.0447 | 382.0441 | 382.0491 | 9.200733 | 9.119933 |
| 9171 | M461T9_1 | 1.534094 | 0.617387 | 0.691433 | 0.524009 | 0.864091 | UP   | 461.0709 | 461.0703 | 461.0711 | 9.163642 | 9.142767 |
| 9172 | M735T10_ | 1.096587 | -0.13302 | -0.66612 | 0.524071 | 0.864091 | DOWN | 735.4967 | 735.4958 | 735.4978 | 9.82645  | 9.699733 |
| 9173 | M828T10_ | 1.169283 | 0.225625 | 0.669216 | 0.524084 | 0.864091 | UP   | 828.1972 | 828.1965 | 828.1974 | 9.948875 | 9.843367 |
| 9174 | M193T9_1 | 1.371265 | 0.455507 | 0.666109 | 0.524121 | 0.864091 | UP   | 193.493  | 193.4923 | 193.494  | 9.175017 | 9.0511   |
| 9175 | M250T9_6 | 1.170508 | 0.227135 | 0.675239 | 0.524262 | 0.864091 | UP   | 250.2832 | 250.2823 | 250.2839 | 9.3771   | 9.295817 |
| 9176 | M657T10_ | 1.286173 | -0.36308 | -0.68429 | 0.524267 | 0.864091 | DOWN | 657.0287 | 657.0281 | 657.0291 | 9.844033 | 9.759383 |
| 9177 | M169T10_ | 1.245117 | 0.316282 | 0.679486 | 0.524354 | 0.864091 | UP   | 168.9381 | 168.9378 | 168.9386 | 9.95605  | 9.843367 |
| 9178 | M193T9_5 | 1.209535 | -0.27445 | -0.66652 | 0.524394 | 0.864091 | DOWN | 193.0154 | 193.0152 | 193.0157 | 9.175017 | 9.1428   |
| 9179 | M306T10_ | 1.219665 | 0.286485 | 0.678137 | 0.524428 | 0.864091 | UP   | 306.1813 | 306.181  | 306.1814 | 9.972917 | 9.8753   |
| 9180 | M1001T10 | 1.362796 | 0.446569 | 0.676384 | 0.524555 | 0.864091 | UP   | 1001.051 | 1001.05  | 1001.053 | 9.999217 | 9.8914   |
| 9181 | M184T12  | 1.195124 | 0.257161 | 0.665472 | 0.524557 | 0.864091 | UP   | 184.0966 | 184.0964 | 184.0967 | 11.82783 | 11.788   |
| 9182 | M295T12_ | 1.141545 | -0.19099 | -0.68505 | 0.524608 | 0.864091 | DOWN | 295.2379 | 295.2378 | 295.2379 | 11.85163 | 11.8416  |
| 9183 | M324T10_ | 1.144417 | -0.19461 | -0.66524 | 0.524616 | 0.864091 | DOWN | 323.576  | 323.5759 | 323.5763 | 9.8207   | 9.715683 |
| 9184 | M320T44_ | 1.297742 | -0.376   | -0.66977 | 0.524622 | 0.864091 | DOWN | 320.1702 | 320.17   | 320.1703 | 43.8335  | 43.63217 |
| 9185 | M1054T11 | 1.103727 | -0.14238 | -0.66517 | 0.524653 | 0.864091 | DOWN | 1053.95  | 1053.949 | 1053.952 | 10.89875 | 10.877   |
| 9186 | M408T11_ | 1.087508 | 0.121026 | 0.67008  | 0.524659 | 0.864091 | UP   | 407.567  | 407.5654 | 407.5676 | 10.92253 | 10.8646  |
| 9187 | M546T38  | 1.464318 | 0.550229 | 0.695887 | 0.524743 | 0.864091 | UP   | 546.3269 | 546.3267 | 546.3272 | 37.58983 | 37.43167 |
| 9188 | M953T10_ | 1.219204 | -0.28594 | -0.6766  | 0.524799 | 0.864091 | DOWN | 952.622  | 952.6173 | 952.6222 | 9.902617 | 9.79535  |
| 9189 | M568T11_ | 1.137482 | -0.18584 | -0.67603 | 0.524815 | 0.864091 | DOWN | 568.1753 | 568.1749 | 568.1754 | 10.89815 | 10.879   |
| 9190 | M1216T18 | 1.236865 | -0.30669 | -0.6861  | 0.524852 | 0.864091 | DOWN | 1215.606 | 1215.605 | 1215.608 | 18.08233 | 17.9375  |
| 9191 | M204T11  | 1.118374 | -0.1614  | -0.66487 | 0.524882 | 0.864091 | DOWN | 203.6777 | 203.6776 | 203.6779 | 10.89875 | 10.873   |
| 9192 | M346T10_ | 1.105205 | -0.14431 | -0.67073 | 0.524916 | 0.864091 | DOWN | 346.1829 | 346.1827 | 346.1831 | 9.825492 | 9.715683 |
| 9193 | M253T10_ | 1.197022 | -0.25945 | -0.6701  | 0.524945 | 0.864091 | DOWN | 252.9003 | 252.9002 | 252.9004 | 9.970617 | 9.8753   |
| 9194 | M412T32_ | 1.297009 | -0.37519 | -0.66848 | 0.525008 | 0.864091 | DOWN | 412.3053 | 412.3052 | 412.3054 | 32.02717 | 31.9985  |
| 9195 | M359T10_ | 1.173697 | -0.23106 | -0.67001 | 0.52506  | 0.864091 | DOWN | 358.8481 | 358.848  | 358.8482 | 9.857683 | 9.81635  |
| 9196 | M413T32_ | 1.339316 | -0.4215  | -0.66946 | 0.525093 | 0.864091 | DOWN | 412.807  | 412.8068 | 412.8071 | 32.02667 | 31.998   |
| 9197 | M305T11_ | 1.208998 | 0.273812 | 0.685725 | 0.525094 | 0.864091 | UP   | 304.6692 | 304.6686 | 304.6708 | 10.90551 | 10.879   |
| 9198 | M895T9   | 1.299041 | -0.37745 | -0.66445 | 0.525095 | 0.864091 | DOWN | 894.8837 | 894.8827 | 894.8862 | 9.36515  | 9.288883 |
| 9199 | M268T9_3 | 1.233761 | -0.30306 | -0.66557 | 0.525166 | 0.864091 | DOWN | 268.1854 | 268.1852 | 268.1857 | 8.776417 | 8.682683 |
| 9200 | M800T10_ | 1.108967 | -0.14922 | -0.66481 | 0.525296 | 0.864091 | DOWN | 799.51   | 799.5091 | 799.5111 | 10.05251 | 9.955733 |
| 9201 | M1013T10 | 1.227702 | 0.29596  | 0.674334 | 0.52531  | 0.864091 | UP   | 1012.725 | 1012.722 | 1012.726 | 9.983467 | 9.8914   |
| 9202 | M431T10_ | 1.392325 | 0.477496 | 0.688419 | 0.525352 | 0.864091 | UP   | 430.5596 | 430.5589 | 430.56   | 9.900133 | 9.79535  |
| 9203 | M620T33_ | 1.102719 | -0.14106 | -0.68785 | 0.52536  | 0.864091 | DOWN | 620.3641 | 620.3637 | 620.3642 | 33.36917 | 33.25467 |
| 9204 | M273T28  | 1.238979 | 0.309151 | 0.675699 | 0.525405 | 0.864091 | UP   | 273.2978 | 273.2976 | 273.2979 | 28.26608 | 28.25767 |

|      |          |          |          |          |          |          |      |          |          |          |          |          |
|------|----------|----------|----------|----------|----------|----------|------|----------|----------|----------|----------|----------|
| 9205 | M414T9_8 | 1.226051 | 0.294019 | 0.675124 | 0.525494 | 0.864091 | UP   | 413.8778 | 413.8769 | 413.878  | 9.06315  | 9.023483 |
| 9206 | M798T10_ | 1.405947 | 0.491543 | 0.69235  | 0.525598 | 0.864091 | UP   | 797.8723 | 797.8716 | 797.8741 | 9.9677   | 9.859233 |
| 9207 | M416T41_ | 1.34     | -0.42223 | -0.68078 | 0.525602 | 0.864091 | DOWN | 416.2276 | 416.2275 | 416.2278 | 41.16933 | 40.85583 |
| 9208 | M1400T10 | 1.322077 | 0.402807 | 0.671042 | 0.525703 | 0.864091 | UP   | 1400.348 | 1400.347 | 1400.353 | 9.999217 | 9.946367 |
| 9209 | M729T10_ | 1.079636 | -0.11054 | -0.6635  | 0.525728 | 0.864091 | DOWN | 728.9376 | 728.9358 | 728.9381 | 9.825492 | 9.715683 |
| 9210 | M317T10_ | 1.646802 | -0.71967 | -0.66931 | 0.525761 | 0.864091 | DOWN | 316.6108 | 316.6104 | 316.6118 | 9.951283 | 9.822117 |
| 9211 | M600T10_ | 1.211084 | -0.2763  | -0.66474 | 0.525954 | 0.864091 | DOWN | 600.2476 | 600.2471 | 600.2478 | 9.874317 | 9.779267 |
| 9212 | M254T11_ | 1.901297 | -0.92698 | -0.6796  | 0.526228 | 0.864091 | DOWN | 253.6467 | 253.6464 | 253.6471 | 10.90669 | 10.83252 |
| 9213 | M420T11_ | 1.223574 | 0.291102 | 0.68705  | 0.526289 | 0.864091 | UP   | 420.2962 | 420.2958 | 420.2973 | 10.77397 | 10.74842 |
| 9214 | M150T10_ | 1.192498 | 0.253987 | 0.672105 | 0.526308 | 0.864091 | UP   | 150.0909 | 150.0907 | 150.091  | 9.8161   | 9.770733 |
| 9215 | M503T11_ | 1.118643 | 0.161749 | 0.673351 | 0.526328 | 0.864091 | UP   | 502.5185 | 502.5156 | 502.5199 | 10.91977 | 10.8628  |
| 9216 | M511T9_5 | 1.207042 | -0.27148 | -0.66301 | 0.526384 | 0.864092 | DOWN | 511.4076 | 511.4074 | 511.4078 | 9.249442 | 9.1602   |
| 9217 | M589T37  | 1.118643 | -0.16175 | -0.66495 | 0.526405 | 0.864092 | DOWN | 589.3923 | 589.3917 | 589.3928 | 36.808   | 36.76983 |
| 9218 | M648T10_ | 1.150851 | -0.2027  | -0.67138 | 0.526444 | 0.864092 | DOWN | 647.7648 | 647.7646 | 647.7651 | 9.970617 | 9.8753   |
| 9219 | M1177T10 | 1.093776 | -0.12932 | -0.67445 | 0.5266   | 0.864092 | DOWN | 1176.586 | 1176.585 | 1176.588 | 9.8207   | 9.7124   |
| 9220 | M579T9_7 | 1.34278  | -0.42522 | -0.66638 | 0.526602 | 0.864092 | DOWN | 579.2264 | 579.2257 | 579.2273 | 8.922533 | 8.892117 |
| 9221 | M366T10_ | 1.370588 | 0.454795 | 0.67335  | 0.526631 | 0.864092 | UP   | 366.0696 | 366.0692 | 366.0698 | 9.972917 | 9.8753   |
| 9222 | M431T26_ | 1.227324 | -0.29552 | -0.66195 | 0.526639 | 0.864092 | DOWN | 430.987  | 430.9868 | 430.9873 | 26.01683 | 25.90867 |
| 9223 | M345T10_ | 1.340447 | 0.422715 | 0.678204 | 0.526642 | 0.864092 | UP   | 345.4557 | 345.4555 | 345.4558 | 9.8207   | 9.699733 |
| 9224 | M478T44_ | 1.090119 | -0.12449 | -0.66896 | 0.526646 | 0.864092 | DOWN | 478.2643 | 478.2641 | 478.2644 | 44.33667 | 44.14983 |
| 9225 | M524T43_ | 1.134272 | 0.181766 | 0.677371 | 0.526674 | 0.864092 | UP   | 524.3061 | 524.3059 | 524.3062 | 43.24375 | 43.114   |
| 9226 | M413T32_ | 1.155673 | -0.20873 | -0.66502 | 0.526675 | 0.864092 | DOWN | 413.3815 | 413.3812 | 413.3816 | 31.57258 | 31.55267 |
| 9227 | M322T11_ | 1.103497 | -0.14208 | -0.66199 | 0.526691 | 0.864092 | DOWN | 322.233  | 322.2326 | 322.2336 | 10.89875 | 10.879   |
| 9228 | M543T24_ | 1.219241 | -0.28598 | -0.66182 | 0.526714 | 0.864092 | DOWN | 542.6325 | 542.6322 | 542.6342 | 23.93317 | 23.871   |
| 9229 | M641T19  | 1.075203 | 0.104609 | 0.662311 | 0.526718 | 0.864092 | UP   | 641.461  | 641.4606 | 641.4612 | 18.63867 | 18.62883 |
| 9230 | M606T12  | 1.136006 | -0.18397 | -0.66742 | 0.526915 | 0.864092 | DOWN | 606.4677 | 606.4669 | 606.4681 | 12.22292 | 12.2077  |
| 9231 | M201T9_3 | 1.38308  | 0.467884 | 0.665584 | 0.526963 | 0.864092 | UP   | 200.597  | 200.5969 | 200.5975 | 9.1624   | 9.12675  |
| 9232 | M250T10_ | 1.904212 | -0.92919 | -0.67514 | 0.527013 | 0.864092 | DOWN | 250.0028 | 250.0024 | 250.003  | 9.960467 | 9.859233 |
| 9233 | M165T10_ | 1.159776 | -0.21385 | -0.66418 | 0.52721  | 0.864092 | DOWN | 165.4786 | 165.4785 | 165.4787 | 9.958617 | 9.843367 |
| 9234 | M160T10_ | 1.247262 | -0.31877 | -0.66094 | 0.527224 | 0.864092 | DOWN | 159.5135 | 159.5133 | 159.5136 | 9.946367 | 9.8378   |
| 9235 | M459T28  | 1.372339 | 0.456637 | 0.661006 | 0.527276 | 0.864092 | UP   | 458.7831 | 458.7827 | 458.7838 | 28.17117 | 28.11267 |
| 9236 | M349T10_ | 1.275614 | 0.351192 | 0.68741  | 0.527301 | 0.864092 | UP   | 349.3999 | 349.3997 | 349.4002 | 9.8207   | 9.715683 |
| 9237 | M783T10_ | 1.159554 | -0.21357 | -0.67675 | 0.527309 | 0.864092 | DOWN | 782.9768 | 782.9763 | 782.9775 | 10.21836 | 10.10142 |
| 9238 | M487T11_ | 1.114747 | -0.15672 | -0.66072 | 0.527378 | 0.864092 | DOWN | 486.7957 | 486.7955 | 486.7966 | 10.892   | 10.879   |
| 9239 | M398T10_ | 1.149827 | -0.20142 | -0.66079 | 0.527453 | 0.864092 | DOWN | 397.9731 | 397.9728 | 397.9734 | 9.886433 | 9.79535  |



|      |          |          |          |          |          |          |      |          |          |          |          |          |
|------|----------|----------|----------|----------|----------|----------|------|----------|----------|----------|----------|----------|
| 9240 | M346T31_ | 1.501059 | -0.58598 | -0.67114 | 0.527485 | 0.864092 | DOWN | 345.6037 | 345.6036 | 345.6039 | 31.39217 | 31.34917 |
| 9241 | M207T9_1 | 1.492119 | -0.57736 | -0.66194 | 0.527576 | 0.864092 | DOWN | 207.0998 | 207.0983 | 207.1005 | 9.199983 | 9.061    |
| 9242 | M325T10_ | 1.142304 | 0.191946 | 0.687915 | 0.527609 | 0.864092 | UP   | 325.2127 | 325.2124 | 325.2135 | 9.851025 | 9.73145  |
| 9243 | M283T10_ | 1.12847  | -0.17437 | -0.66398 | 0.527655 | 0.864092 | DOWN | 283.2199 | 283.2196 | 283.22   | 9.930908 | 9.827283 |
| 9244 | M437T31  | 1.195209 | 0.257263 | 0.67217  | 0.527667 | 0.864092 | UP   | 437.2067 | 437.2062 | 437.2075 | 31.10933 | 31.07533 |
| 9245 | M744T10_ | 1.287088 | 0.364111 | 0.674122 | 0.527671 | 0.864092 | UP   | 744.1163 | 744.1138 | 744.1174 | 9.823575 | 9.699733 |
| 9246 | M556T9_1 | 1.356178 | 0.439546 | 0.676122 | 0.527876 | 0.864092 | UP   | 555.5673 | 555.5671 | 555.5674 | 9.16125  | 9.145433 |
| 9247 | M377T19  | 1.190422 | -0.25147 | -0.67412 | 0.527926 | 0.864092 | DOWN | 377.2197 | 377.2195 | 377.2201 | 19.41758 | 19.37283 |
| 9248 | M228T9_1 | 1.350756 | 0.433767 | 0.659572 | 0.528156 | 0.864092 | UP   | 227.5037 | 227.5019 | 227.5067 | 9.329083 | 9.0511   |
| 9249 | M166T10_ | 1.179154 | -0.23775 | -0.66268 | 0.528191 | 0.864092 | DOWN | 165.6486 | 165.6485 | 165.6486 | 9.964092 | 9.859233 |
| 9250 | M182T9_5 | 1.267273 | 0.341727 | 0.661172 | 0.52826  | 0.864092 | UP   | 182.1536 | 182.1491 | 182.1537 | 9.271    | 9.11405  |
| 9251 | M405T21_ | 1.23995  | -0.31028 | -0.65935 | 0.528266 | 0.864092 | DOWN | 404.7824 | 404.7823 | 404.7828 | 20.622   | 20.59333 |
| 9252 | M370T10_ | 1.124396 | -0.16915 | -0.66204 | 0.528329 | 0.864092 | DOWN | 369.64   | 369.6398 | 369.6403 | 9.902483 | 9.811217 |
| 9253 | M237T9_1 | 1.827501 | 0.869872 | 0.683455 | 0.528329 | 0.864092 | UP   | 236.6822 | 236.682  | 236.69   | 8.92085  | 8.818733 |
| 9254 | M801T10_ | 1.170169 | -0.22672 | -0.66858 | 0.528405 | 0.864092 | DOWN | 801.4719 | 801.4709 | 801.473  | 9.560692 | 9.46325  |
| 9255 | M707T10_ | 1.10347  | -0.14205 | -0.66094 | 0.52845  | 0.864092 | DOWN | 706.6724 | 706.6717 | 706.6753 | 9.823317 | 9.715683 |
| 9256 | M628T15_ | 1.177414 | -0.23562 | -0.67716 | 0.528483 | 0.864092 | DOWN | 628.3171 | 628.3168 | 628.3182 | 14.59005 | 14.57432 |
| 9257 | M438T9_1 | 1.168892 | -0.22514 | -0.65882 | 0.528548 | 0.864092 | DOWN | 437.5603 | 437.5514 | 437.561  | 9.304717 | 9.146383 |
| 9258 | M221T9_6 | 1.440421 | -0.52649 | -0.66574 | 0.528555 | 0.864092 | DOWN | 220.8021 | 220.8003 | 220.8061 | 9.303042 | 9.132267 |
| 9259 | M375T10_ | 1.27504  | -0.35054 | -0.66046 | 0.528574 | 0.864092 | DOWN | 375.3181 | 375.318  | 375.3183 | 9.919058 | 9.8378   |
| 9260 | M426T10_ | 1.176139 | 0.234059 | 0.673746 | 0.528579 | 0.864092 | UP   | 426.2308 | 426.2301 | 426.231  | 9.92625  | 9.8378   |
| 9261 | M522T10_ | 1.19116  | -0.25237 | -0.67577 | 0.528585 | 0.864092 | DOWN | 521.8781 | 521.8776 | 521.8792 | 9.956417 | 9.843367 |
| 9262 | M416T44_ | 1.116527 | -0.15902 | -0.66762 | 0.528663 | 0.864092 | DOWN | 416.2276 | 416.2276 | 416.228  | 43.91233 | 43.67517 |
| 9263 | M429T11_ | 1.198847 | -0.26165 | -0.67443 | 0.528716 | 0.864092 | DOWN | 428.8238 | 428.8233 | 428.8242 | 10.87704 | 10.84487 |
| 9264 | M202T9_1 | 1.17761  | -0.23586 | -0.66111 | 0.528752 | 0.864092 | DOWN | 202.3698 | 202.3692 | 202.3705 | 9.30385  | 9.111033 |
| 9265 | M1007T10 | 1.151357 | -0.20334 | -0.66086 | 0.528754 | 0.864092 | DOWN | 1006.588 | 1006.586 | 1006.59  | 9.802117 | 9.699733 |
| 9266 | M177T10_ | 1.255263 | -0.32799 | -0.66069 | 0.528866 | 0.864092 | DOWN | 176.9455 | 176.9455 | 176.9457 | 9.919058 | 9.827283 |
| 9267 | M160T10_ | 1.142014 | 0.191581 | 0.658456 | 0.52887  | 0.864092 | UP   | 160.1688 | 160.1687 | 160.1689 | 9.960817 | 9.843367 |
| 9268 | M405T10_ | 1.190519 | -0.25159 | -0.67553 | 0.529059 | 0.864092 | DOWN | 405.4733 | 405.4729 | 405.4735 | 9.900767 | 9.822117 |
| 9269 | M483T30  | 1.273529 | -0.34883 | -0.66251 | 0.529076 | 0.864092 | DOWN | 483.3267 | 483.3257 | 483.3269 | 29.8485  | 29.84833 |
| 9270 | M473T9_1 | 1.420296 | -0.50619 | -0.66267 | 0.529146 | 0.864092 | DOWN | 473.4179 | 473.4138 | 473.4228 | 9.166033 | 9.078567 |
| 9271 | M498T9_6 | 1.497636 | 0.582687 | 0.663727 | 0.529155 | 0.864092 | UP   | 497.9478 | 497.9467 | 497.9485 | 9.147367 | 9.110833 |
| 9272 | M441T10_ | 1.12644  | -0.17177 | -0.67136 | 0.529161 | 0.864092 | DOWN | 440.8217 | 440.8217 | 440.8226 | 9.834117 | 9.699733 |
| 9273 | M389T10_ | 1.159973 | -0.21409 | -0.65795 | 0.529185 | 0.864092 | DOWN | 388.8206 | 388.8203 | 388.8207 | 9.91875  | 9.811217 |
| 9274 | M277T11_ | 1.141241 | -0.1906  | -0.66215 | 0.529197 | 0.864092 | DOWN | 277.0827 | 277.0825 | 277.0832 | 10.85983 | 10.83252 |

|      |          |          |          |          |          |          |      |          |          |          |          |          |
|------|----------|----------|----------|----------|----------|----------|------|----------|----------|----------|----------|----------|
| 9275 | M478T11  | 1.142989 | -0.19281 | -0.68082 | 0.529275 | 0.864092 | DOWN | 477.7263 | 477.726  | 477.7267 | 10.91977 | 10.8914  |
| 9276 | M394T9_6 | 1.277885 | -0.35376 | -0.65961 | 0.529315 | 0.864092 | DOWN | 394.1966 | 394.1955 | 394.2011 | 9.239042 | 9.064833 |
| 9277 | M584T37  | 1.131333 | -0.17802 | -0.65828 | 0.52938  | 0.864092 | DOWN | 584.4366 | 584.4363 | 584.4369 | 36.79908 | 36.78383 |
| 9278 | M218T10_ | 1.266345 | -0.34067 | -0.65732 | 0.529434 | 0.864092 | DOWN | 217.5842 | 217.5841 | 217.5843 | 9.886433 | 9.886083 |
| 9279 | M665T11_ | 1.16107  | 0.215455 | 0.678261 | 0.529499 | 0.864092 | UP   | 665.4102 | 665.4098 | 665.4115 | 10.72718 | 10.6937  |
| 9280 | M276T11_ | 1.134441 | 0.181981 | 0.657166 | 0.529523 | 0.864092 | UP   | 275.9488 | 275.9481 | 275.9493 | 10.892   | 10.8646  |
| 9281 | M207T9_1 | 1.527512 | 0.611184 | 0.676062 | 0.52958  | 0.864092 | UP   | 206.9689 | 206.9687 | 206.9703 | 9.279417 | 9.132267 |
| 9282 | M373T10_ | 1.442028 | 0.5281   | 0.681919 | 0.529671 | 0.864092 | UP   | 372.5272 | 372.5271 | 372.5273 | 9.5098   | 9.432183 |
| 9283 | M439T10_ | 1.273142 | -0.34839 | -0.66205 | 0.529685 | 0.864092 | DOWN | 439.2808 | 439.2776 | 439.2816 | 9.5442   | 9.278717 |
| 9284 | M245T39_ | 1.075768 | 0.105366 | 0.660599 | 0.529719 | 0.864092 | UP   | 245.1381 | 245.1379 | 245.1382 | 38.66167 | 38.53917 |
| 9285 | M720T10_ | 1.192113 | -0.25352 | -0.66335 | 0.529744 | 0.864092 | DOWN | 719.9799 | 719.9794 | 719.9803 | 9.508883 | 9.40135  |
| 9286 | M287T10_ | 1.116386 | -0.15884 | -0.65754 | 0.529758 | 0.864092 | DOWN | 287.2361 | 287.2357 | 287.2363 | 9.9351   | 9.827283 |
| 9287 | M383T11_ | 1.172299 | -0.22934 | -0.65878 | 0.529815 | 0.864092 | DOWN | 383.3034 | 383.3032 | 383.3036 | 10.6825  | 10.6624  |
| 9288 | M218T11_ | 1.079632 | -0.11054 | -0.66184 | 0.5299   | 0.864093 | DOWN | 218.2306 | 218.2305 | 218.2308 | 10.90519 | 10.879   |
| 9289 | M266T27  | 1.142036 | 0.191609 | 0.658696 | 0.529932 | 0.864093 | UP   | 266.1535 | 266.1534 | 266.1538 | 26.73767 | 26.72383 |
| 9290 | M451T11_ | 1.149358 | -0.20083 | -0.65807 | 0.530151 | 0.864093 | DOWN | 450.9516 | 450.9459 | 450.952  | 10.90467 | 10.8646  |
| 9291 | M227T10_ | 1.12005  | -0.16356 | -0.67151 | 0.530188 | 0.864093 | DOWN | 227.3691 | 227.3689 | 227.3692 | 9.8397   | 9.715683 |
| 9292 | M752T10_ | 1.138852 | 0.18758  | 0.67508  | 0.530238 | 0.864093 | UP   | 752.2141 | 752.212  | 752.2151 | 9.823575 | 9.715683 |
| 9293 | M298T26  | 1.44274  | 0.528812 | 0.675372 | 0.530252 | 0.864093 | UP   | 298.2736 | 298.2732 | 298.2738 | 25.51167 | 25.501   |
| 9294 | M590T11_ | 1.10653  | -0.14604 | -0.65622 | 0.530301 | 0.864093 | DOWN | 590.1774 | 590.1769 | 590.1795 | 10.90519 | 10.879   |
| 9295 | M635T10_ | 1.140434 | 0.189583 | 0.656036 | 0.530308 | 0.864093 | UP   | 634.573  | 634.5727 | 634.5758 | 9.813467 | 9.649833 |
| 9296 | M357T35  | 1.108648 | -0.1488  | -0.66652 | 0.530322 | 0.864093 | DOWN | 357.1906 | 357.1904 | 357.1908 | 35.25383 | 35.14233 |
| 9297 | M283T11_ | 1.259008 | 0.332288 | 0.667779 | 0.530341 | 0.864093 | UP   | 282.8558 | 282.8556 | 282.8561 | 10.892   | 10.8646  |
| 9298 | M200T9_1 | 1.196254 | 0.258524 | 0.661822 | 0.530358 | 0.864093 | UP   | 200.2176 | 200.217  | 200.2181 | 9.26575  | 9.16125  |
| 9299 | M265T11_ | 1.174613 | -0.23219 | -0.65598 | 0.530385 | 0.864093 | DOWN | 264.9764 | 264.9762 | 264.977  | 10.86994 | 10.84487 |
| 9300 | M633T10_ | 1.283651 | -0.36025 | -0.65607 | 0.530471 | 0.864093 | DOWN | 633.1375 | 633.1373 | 633.1382 | 9.816167 | 9.7124   |
| 9301 | M673T12  | 1.139123 | 0.187923 | 0.658784 | 0.530503 | 0.864093 | UP   | 673.4513 | 673.4508 | 673.4519 | 11.53137 | 11.51165 |
| 9302 | M559T11_ | 1.281031 | 0.357306 | 0.659916 | 0.530621 | 0.864093 | UP   | 559.0016 | 559.0009 | 559.0017 | 10.61667 | 10.5836  |
| 9303 | M540T37_ | 1.129722 | -0.17597 | -0.65779 | 0.530745 | 0.864093 | DOWN | 540.4103 | 540.4098 | 540.4106 | 37.07217 | 37.0575  |
| 9304 | M747T22  | 1.086364 | -0.11951 | -0.6574  | 0.530781 | 0.864093 | DOWN | 746.5262 | 746.5259 | 746.5266 | 21.98783 | 21.96617 |
| 9305 | M430T25_ | 1.642936 | -0.71628 | -0.65665 | 0.530921 | 0.864093 | DOWN | 430.1595 | 430.1593 | 430.1598 | 24.59417 | 24.5795  |
| 9306 | M378T9_7 | 1.265648 | -0.33988 | -0.65511 | 0.530929 | 0.864093 | DOWN | 378.2013 | 378.2005 | 378.204  | 9.168583 | 9.0637   |
| 9307 | M790T10_ | 1.141195 | -0.19055 | -0.65918 | 0.530935 | 0.864093 | DOWN | 789.6895 | 789.6891 | 789.6897 | 9.940783 | 9.827283 |
| 9308 | M909T22  | 1.271608 | -0.34665 | -0.66437 | 0.530964 | 0.864093 | DOWN | 908.6438 | 908.6432 | 908.6445 | 22.01683 | 22.00083 |
| 9309 | M1958T10 | 1.211304 | -0.27656 | -0.65449 | 0.531163 | 0.864093 | DOWN | 1958.155 | 1958.154 | 1958.156 | 9.823575 | 9.715683 |

|      |          |          |          |          |          |          |      |          |          |          |          |          |
|------|----------|----------|----------|----------|----------|----------|------|----------|----------|----------|----------|----------|
| 9310 | M366T9_7 | 1.379006 | 0.463629 | 0.671192 | 0.531178 | 0.864093 | UP   | 366.148  | 366.1477 | 366.1515 | 9.191133 | 9.12675  |
| 9311 | M596T10_ | 1.252798 | -0.32515 | -0.65697 | 0.531443 | 0.864093 | DOWN | 596.4583 | 596.4581 | 596.4587 | 9.915933 | 9.903017 |
| 9312 | M169T9_4 | 1.380908 | 0.465617 | 0.668796 | 0.531452 | 0.864093 | UP   | 169.3687 | 169.3682 | 169.3689 | 9.29345  | 9.111033 |
| 9313 | M931T10_ | 1.134981 | 0.182669 | 0.670229 | 0.531473 | 0.864093 | UP   | 930.6328 | 930.631  | 930.633  | 9.948875 | 9.843367 |
| 9314 | M783T10_ | 1.364456 | 0.448326 | 0.677417 | 0.531476 | 0.864093 | UP   | 782.883  | 782.8804 | 782.8841 | 9.972917 | 9.859233 |
| 9315 | M1217T10 | 1.304736 | -0.38376 | -0.65432 | 0.531506 | 0.864093 | DOWN | 1216.691 | 1216.684 | 1216.696 | 9.964167 | 9.79535  |
| 9316 | M480T39  | 1.195218 | -0.25727 | -0.67499 | 0.531753 | 0.864093 | DOWN | 480.2801 | 480.2796 | 480.2806 | 39.20117 | 39.00483 |
| 9317 | M206T9_2 | 1.979977 | 0.985484 | 0.679603 | 0.531867 | 0.864093 | UP   | 205.5413 | 205.5404 | 205.5421 | 9.295492 | 9.219483 |
| 9318 | M513T10_ | 1.197659 | -0.26022 | -0.66288 | 0.531877 | 0.864093 | DOWN | 513.3635 | 513.3631 | 513.364  | 9.531467 | 9.432183 |
| 9319 | M374T9_4 | 1.129335 | -0.17547 | -0.65587 | 0.53204  | 0.864093 | DOWN | 373.9314 | 373.9311 | 373.9316 | 9.0864   | 9.03845  |
| 9320 | M279T13  | 1.382148 | 0.466912 | 0.675848 | 0.532082 | 0.864093 | UP   | 279.039  | 279.0389 | 279.0392 | 13.01024 | 12.99582 |
| 9321 | M373T39_ | 1.066245 | -0.09254 | -0.67545 | 0.532151 | 0.864093 | DOWN | 373.222  | 373.2218 | 373.2221 | 39.417   | 39.11483 |
| 9322 | M244T21  | 1.167731 | -0.22371 | -0.66238 | 0.532176 | 0.864093 | DOWN | 244.1693 | 244.1691 | 244.1694 | 21.19008 | 21.17933 |
| 9323 | M781T25  | 1.13507  | -0.18278 | -0.65808 | 0.532203 | 0.864093 | DOWN | 780.5445 | 780.5439 | 780.5447 | 25.32017 | 25.3     |
| 9324 | M221T11_ | 1.100366 | -0.13798 | -0.65399 | 0.532232 | 0.864093 | DOWN | 220.5172 | 220.5168 | 220.5174 | 10.892   | 10.8646  |
| 9325 | M312T12_ | 1.085519 | -0.11839 | -0.65694 | 0.532343 | 0.864093 | DOWN | 312.2168 | 312.2168 | 312.217  | 12.25185 | 12.2372  |
| 9326 | M169T9_3 | 1.149925 | 0.20154  | 0.652495 | 0.532379 | 0.864093 | UP   | 169.1398 | 169.1391 | 169.1403 | 9.338858 | 9.20785  |
| 9327 | M405T10_ | 1.193096 | 0.25471  | 0.66688  | 0.532506 | 0.864093 | UP   | 405.0164 | 405.0111 | 405.0166 | 9.970617 | 9.79535  |
| 9328 | M178T9_2 | 2.587186 | 1.371384 | 0.680909 | 0.532563 | 0.864093 | UP   | 177.6162 | 177.6147 | 177.6169 | 9.183625 | 9.103733 |
| 9329 | M817T11_ | 1.182764 | -0.24216 | -0.6573  | 0.532563 | 0.864093 | DOWN | 816.7559 | 816.7534 | 816.7562 | 10.93752 | 10.86275 |
| 9330 | M564T10_ | 1.163285 | -0.2182  | -0.66033 | 0.532584 | 0.864093 | DOWN | 563.7122 | 563.7119 | 563.713  | 9.945258 | 9.843367 |
| 9331 | M373T30  | 1.145338 | -0.19577 | -0.65353 | 0.532691 | 0.864093 | DOWN | 373.2347 | 373.2345 | 373.2352 | 30.07908 | 30.0495  |
| 9332 | M331T10_ | 1.141679 | 0.191158 | 0.652525 | 0.532728 | 0.864093 | UP   | 330.7252 | 330.7243 | 330.7305 | 9.859233 | 9.715683 |
| 9333 | M253T11_ | 1.093351 | -0.12876 | -0.6532  | 0.532768 | 0.864093 | DOWN | 252.6009 | 252.6006 | 252.6011 | 10.90551 | 10.879   |
| 9334 | M730T11_ | 1.244234 | -0.31526 | -0.65196 | 0.532768 | 0.864093 | DOWN | 729.6137 | 729.6135 | 729.6148 | 10.90765 | 10.89125 |
| 9335 | M698T10_ | 1.096237 | -0.13256 | -0.65256 | 0.5329   | 0.864093 | DOWN | 698.3516 | 698.3513 | 698.3522 | 9.831517 | 9.715683 |
| 9336 | M391T10_ | 1.17151  | 0.228369 | 0.654586 | 0.532924 | 0.864093 | UP   | 390.5989 | 390.5986 | 390.599  | 9.951283 | 9.859233 |
| 9337 | M513T10_ | 1.113742 | -0.15542 | -0.65157 | 0.532948 | 0.864093 | DOWN | 513.3202 | 513.3186 | 513.3232 | 10.16365 | 10.10142 |
| 9338 | M509T10_ | 1.230328 | -0.29904 | -0.66356 | 0.53299  | 0.864093 | DOWN | 508.9614 | 508.961  | 508.9618 | 10.17355 | 10.10718 |
| 9339 | M373T10_ | 1.425706 | 0.511676 | 0.678217 | 0.533042 | 0.864093 | UP   | 372.6004 | 372.6    | 372.6006 | 9.968992 | 9.8753   |
| 9340 | M420T10_ | 1.231555 | -0.30048 | -0.6514  | 0.533049 | 0.864093 | DOWN | 420.4674 | 420.4668 | 420.4677 | 9.933967 | 9.827283 |
| 9341 | M399T10_ | 1.172134 | 0.229138 | 0.653776 | 0.533059 | 0.864093 | UP   | 398.784  | 398.7829 | 398.7845 | 9.970617 | 9.869467 |
| 9342 | M1998T10 | 1.230666 | -0.29944 | -0.66205 | 0.533098 | 0.864093 | DOWN | 1998.167 | 1998.166 | 1998.168 | 9.830083 | 9.715683 |
| 9343 | M225T10_ | 2.175346 | -1.12124 | -0.67358 | 0.533111 | 0.864093 | DOWN | 225.1586 | 225.1584 | 225.1596 | 9.92825  | 9.644783 |
| 9344 | M474T10_ | 1.064467 | 0.090131 | 0.651736 | 0.533114 | 0.864093 | UP   | 474.1557 | 474.1554 | 474.1562 | 9.872908 | 9.747533 |

|      |          |          |          |          |          |          |      |          |          |          |          |          |
|------|----------|----------|----------|----------|----------|----------|------|----------|----------|----------|----------|----------|
| 9345 | M346T31_ | 1.5367   | -0.61984 | -0.6617  | 0.533134 | 0.864093 | DOWN | 345.9382 | 345.938  | 345.9384 | 31.3855  | 31.36367 |
| 9346 | M388T11_ | 1.091367 | -0.12614 | -0.65165 | 0.533152 | 0.864093 | DOWN | 387.6564 | 387.6562 | 387.6566 | 10.89875 | 10.879   |
| 9347 | M363T9_1 | 1.222725 | 0.2901   | 0.675523 | 0.533156 | 0.864093 | UP   | 363.3063 | 363.306  | 363.3068 | 9.295008 | 9.175017 |
| 9348 | M589T10_ | 1.237812 | 0.307792 | 0.66047  | 0.53316  | 0.864093 | UP   | 589.312  | 589.3113 | 589.3129 | 9.701933 | 9.5889   |
| 9349 | M258T11_ | 1.127205 | 0.17275  | 0.663937 | 0.533162 | 0.864093 | UP   | 258.2336 | 258.2332 | 258.2338 | 10.87765 | 10.84847 |
| 9350 | M178T10_ | 1.319752 | 0.400266 | 0.651108 | 0.533283 | 0.864093 | UP   | 178.1604 | 178.1601 | 178.1605 | 9.944208 | 9.827283 |
| 9351 | M556T10_ | 1.161082 | -0.21547 | -0.66074 | 0.533298 | 0.864093 | DOWN | 555.6256 | 555.625  | 555.6258 | 9.94785  | 9.827283 |
| 9352 | M219T10_ | 1.121151 | -0.16498 | -0.65835 | 0.533351 | 0.864094 | DOWN | 219.2709 | 219.2706 | 219.2709 | 9.990767 | 9.8753   |
| 9353 | M517T9_7 | 1.225221 | -0.29304 | -0.65207 | 0.533398 | 0.864094 | DOWN | 517.4879 | 517.4872 | 517.4882 | 9.238858 | 9.1445   |
| 9354 | M651T10_ | 1.250427 | 0.322421 | 0.657344 | 0.533409 | 0.864094 | UP   | 650.5858 | 650.5857 | 650.5863 | 9.979342 | 9.8753   |
| 9355 | M488T38  | 1.104984 | 0.144026 | 0.679138 | 0.533476 | 0.864094 | UP   | 488.285  | 488.2847 | 488.2853 | 38.42425 | 38.30917 |
| 9356 | M352T11_ | 1.08519  | -0.11795 | -0.65144 | 0.533489 | 0.864094 | DOWN | 352.1019 | 352.1018 | 352.1025 | 10.89875 | 10.879   |
| 9357 | M272T28  | 1.184757 | 0.244591 | 0.659693 | 0.533714 | 0.864094 | UP   | 272.2945 | 272.2944 | 272.2946 | 28.26017 | 28.25767 |
| 9358 | M944T10_ | 1.17797  | -0.2363  | -0.6505  | 0.533787 | 0.864094 | DOWN | 944.4211 | 944.4205 | 944.4215 | 9.973867 | 9.8753   |
| 9359 | M241T10_ | 1.5205   | 0.604545 | 0.669296 | 0.533828 | 0.864094 | UP   | 240.6824 | 240.6823 | 240.6826 | 9.946417 | 9.843367 |
| 9360 | M404T11_ | 1.107918 | -0.14785 | -0.65328 | 0.533976 | 0.864094 | DOWN | 403.6062 | 403.606  | 403.6068 | 10.91983 | 10.90197 |
| 9361 | M621T10_ | 1.172005 | -0.22898 | -0.65123 | 0.533983 | 0.864094 | DOWN | 620.7816 | 620.7799 | 620.7825 | 9.95385  | 9.843367 |
| 9362 | M449T9_6 | 1.164694 | -0.21995 | -0.65078 | 0.534059 | 0.864094 | DOWN | 449.1693 | 449.1688 | 449.1696 | 9.3471   | 9.11405  |
| 9363 | M198T11_ | 1.168951 | 0.225214 | 0.650877 | 0.534148 | 0.864094 | UP   | 198.1516 | 198.1512 | 198.1521 | 10.91386 | 10.88995 |
| 9364 | M428T9_4 | 1.264075 | 0.338082 | 0.654581 | 0.534253 | 0.864094 | UP   | 428.1548 | 428.1539 | 428.1554 | 9.2162   | 9.161683 |
| 9365 | M307T22_ | 1.186102 | -0.24623 | -0.67325 | 0.53436  | 0.864094 | DOWN | 306.5031 | 306.5025 | 306.5032 | 21.60175 | 21.52917 |
| 9366 | M386T9_2 | 1.163743 | -0.21877 | -0.65363 | 0.534491 | 0.864094 | DOWN | 385.6269 | 385.6266 | 385.6273 | 9.160617 | 9.126783 |
| 9367 | M330T10_ | 1.253983 | 0.326518 | 0.672231 | 0.534543 | 0.864094 | UP   | 329.6487 | 329.6483 | 329.6497 | 9.951283 | 9.714783 |
| 9368 | M418T41  | 1.419495 | 0.505378 | 0.658549 | 0.534582 | 0.864094 | UP   | 418.2795 | 418.2793 | 418.2797 | 41.086   | 40.79817 |
| 9369 | M528T10_ | 1.155676 | -0.20874 | -0.66479 | 0.534583 | 0.864094 | DOWN | 528.3444 | 528.3439 | 528.3446 | 9.951283 | 9.843367 |
| 9370 | M391T11_ | 1.417884 | 0.503739 | 0.672211 | 0.534654 | 0.864094 | UP   | 391.2571 | 391.2562 | 391.2596 | 11.13665 | 11.04138 |
| 9371 | M508T41_ | 1.099072 | -0.13629 | -0.67038 | 0.534706 | 0.864094 | DOWN | 508.2749 | 508.2746 | 508.2752 | 41.28017 | 41.086   |
| 9372 | M655T10_ | 1.176491 | -0.23449 | -0.65019 | 0.534717 | 0.864094 | DOWN | 655.3417 | 655.3408 | 655.3438 | 9.858833 | 9.696683 |
| 9373 | M261T9_2 | 1.206829 | -0.27122 | -0.64904 | 0.534789 | 0.864094 | DOWN | 260.9278 | 260.9246 | 260.9286 | 9.269633 | 9.132267 |
| 9374 | M360T10_ | 1.251741 | -0.32394 | -0.66007 | 0.534859 | 0.864094 | DOWN | 359.7336 | 359.7327 | 359.7345 | 9.871892 | 9.747533 |
| 9375 | M162T10_ | 1.177894 | -0.23621 | -0.64988 | 0.534941 | 0.864094 | DOWN | 162.0997 | 162.0994 | 162.0997 | 9.9182   | 9.811217 |
| 9376 | M502T9_5 | 1.247863 | 0.319459 | 0.669937 | 0.534941 | 0.864094 | UP   | 502.1899 | 502.1885 | 502.1903 | 9.18195  | 9.11405  |
| 9377 | M413T20_ | 1.149774 | 0.201351 | 0.66704  | 0.534962 | 0.864094 | UP   | 412.8471 | 412.8468 | 412.8471 | 20.245   | 20.23017 |
| 9378 | M480T10_ | 1.264889 | -0.33901 | -0.65097 | 0.535041 | 0.864094 | DOWN | 480.1589 | 480.1584 | 480.1601 | 9.78795  | 9.699733 |
| 9379 | M319T10_ | 1.469274 | 0.555103 | 0.667227 | 0.535088 | 0.864094 | UP   | 319.3184 | 319.3179 | 319.3197 | 9.830733 | 9.747533 |

|      |          |          |          |          |          |          |      |          |          |          |          |          |
|------|----------|----------|----------|----------|----------|----------|------|----------|----------|----------|----------|----------|
| 9380 | M733T36  | 1.421907 | -0.50783 | -0.64908 | 0.535089 | 0.864094 | DOWN | 732.5473 | 732.5468 | 732.5474 | 35.66708 | 35.64667 |
| 9381 | M324T10_ | 1.169692 | -0.22613 | -0.65134 | 0.535092 | 0.864094 | DOWN | 323.669  | 323.6688 | 323.6691 | 9.968992 | 9.859233 |
| 9382 | M625T31  | 1.097905 | -0.13475 | -0.66211 | 0.535101 | 0.864094 | DOWN | 625.3917 | 625.3915 | 625.3919 | 31.3945  | 31.3925  |
| 9383 | M213T27  | 1.132658 | 0.179712 | 0.661162 | 0.535109 | 0.864094 | UP   | 213.2209 | 213.2207 | 213.2212 | 27.36883 | 27.32683 |
| 9384 | M443T10_ | 1.252646 | -0.32498 | -0.64803 | 0.535123 | 0.864094 | DOWN | 443.4503 | 443.4496 | 443.4589 | 9.8445   | 9.696683 |
| 9385 | M728T11_ | 1.240845 | -0.31132 | -0.67051 | 0.535169 | 0.864094 | DOWN | 728.4362 | 728.4351 | 728.4367 | 11.22177 | 11.19848 |
| 9386 | M485T9_1 | 1.156403 | -0.20964 | -0.65046 | 0.535179 | 0.864094 | DOWN | 484.7879 | 484.7863 | 484.7884 | 8.900475 | 8.8486   |
| 9387 | M1470T10 | 1.614876 | 0.691424 | 0.673515 | 0.535365 | 0.864094 | UP   | 1470.134 | 1470.125 | 1470.135 | 9.953642 | 9.8914   |
| 9388 | M412T11_ | 1.170508 | 0.227134 | 0.662503 | 0.535501 | 0.864094 | UP   | 412.3914 | 412.3911 | 412.3916 | 10.90657 | 10.89355 |
| 9389 | M788T11_ | 1.115594 | -0.15781 | -0.65387 | 0.535512 | 0.864094 | DOWN | 788.3497 | 788.3494 | 788.3505 | 10.8926  | 10.879   |
| 9390 | M536T10_ | 1.199092 | -0.26194 | -0.64911 | 0.535565 | 0.864094 | DOWN | 536.3705 | 536.3704 | 536.371  | 9.970617 | 9.960967 |
| 9391 | M578T43_ | 1.337812 | -0.41988 | -0.66704 | 0.535581 | 0.864094 | DOWN | 578.3169 | 578.3168 | 578.3174 | 43.45933 | 43.28683 |
| 9392 | M352T3   | 1.487049 | -0.57245 | -0.65044 | 0.53559  | 0.864094 | DOWN | 351.7517 | 351.7515 | 351.7518 | 3.433767 | 3.2467   |
| 9393 | M317T10_ | 1.176179 | 0.234107 | 0.647179 | 0.535643 | 0.864094 | UP   | 317.2753 | 317.2752 | 317.2757 | 9.8374   | 9.699733 |
| 9394 | M586T11_ | 1.184937 | -0.24481 | -0.64914 | 0.535675 | 0.864094 | DOWN | 585.7925 | 585.7921 | 585.7929 | 10.87708 | 10.85018 |
| 9395 | M245T10_ | 1.189636 | -0.25052 | -0.65399 | 0.535698 | 0.864094 | DOWN | 244.6594 | 244.6497 | 244.6595 | 9.962617 | 9.843367 |
| 9396 | M353T7   | 1.285239 | -0.36204 | -0.64708 | 0.53571  | 0.864094 | DOWN | 352.8971 | 352.897  | 352.8973 | 7.275133 | 7.2096   |
| 9397 | M381T25  | 1.161797 | -0.21636 | -0.64945 | 0.535756 | 0.864094 | DOWN | 381.131  | 381.1296 | 381.1312 | 25.34783 | 25.3175  |
| 9398 | M332T11  | 1.160498 | -0.21474 | -0.64764 | 0.53589  | 0.864094 | DOWN | 332.3827 | 332.3826 | 332.3908 | 10.9127  | 10.873   |
| 9399 | M549T9_3 | 1.418617 | 0.504485 | 0.665473 | 0.535892 | 0.864094 | UP   | 549.1995 | 549.1968 | 549.2006 | 9.145433 | 9.110833 |
| 9400 | M497T11_ | 1.095153 | -0.13113 | -0.64698 | 0.535922 | 0.864094 | DOWN | 497.2148 | 497.2146 | 497.2151 | 10.892   | 10.879   |
| 9401 | M422T11_ | 1.224719 | 0.29245  | 0.649681 | 0.535925 | 0.864094 | UP   | 421.7236 | 421.7232 | 421.7244 | 10.97928 | 10.86253 |
| 9402 | M633T10_ | 1.226334 | 0.294352 | 0.648202 | 0.535957 | 0.864094 | UP   | 633.2145 | 633.2141 | 633.2276 | 9.887133 | 9.827283 |
| 9403 | M1230T10 | 1.193301 | 0.254957 | 0.651224 | 0.536027 | 0.864094 | UP   | 1229.983 | 1229.982 | 1229.984 | 9.75365  | 9.636483 |
| 9404 | M203T10_ | 1.173846 | 0.231244 | 0.655604 | 0.536085 | 0.864094 | UP   | 202.8926 | 202.8899 | 202.8998 | 9.834042 | 9.816167 |
| 9405 | M674T10_ | 1.192812 | -0.25437 | -0.65242 | 0.53618  | 0.864094 | DOWN | 673.5427 | 673.5424 | 673.5429 | 9.825492 | 9.715683 |
| 9406 | M474T11_ | 1.217213 | 0.283581 | 0.668019 | 0.53619  | 0.864094 | UP   | 474.1797 | 474.1784 | 474.1802 | 10.91881 | 10.879   |
| 9407 | M608T41  | 1.220376 | -0.28733 | -0.67491 | 0.536229 | 0.864094 | DOWN | 608.364  | 608.3639 | 608.3641 | 41.24425 | 41.07133 |
| 9408 | M363T9_1 | 1.198191 | 0.260857 | 0.651961 | 0.536237 | 0.864094 | UP   | 363.1989 | 363.1982 | 363.1995 | 9.071467 | 8.888317 |
| 9409 | M607T10_ | 1.144677 | -0.19494 | -0.65699 | 0.536243 | 0.864094 | DOWN | 607.4397 | 607.4395 | 607.4418 | 9.894392 | 9.79535  |
| 9410 | M1349T10 | 1.15601  | -0.20915 | -0.64962 | 0.536253 | 0.864094 | DOWN | 1348.777 | 1348.775 | 1348.777 | 10.20787 | 10.14983 |
| 9411 | M182T10_ | 1.056202 | -0.07889 | -0.66616 | 0.5363   | 0.864094 | DOWN | 182.1538 | 182.1537 | 182.1539 | 9.918792 | 9.827283 |
| 9412 | M569T9_4 | 1.1257   | -0.17082 | -0.65084 | 0.536388 | 0.864094 | DOWN | 569.3133 | 569.3129 | 569.3136 | 9.154525 | 9.126783 |
| 9413 | M1858T10 | 1.106966 | -0.14661 | -0.64755 | 0.536393 | 0.864094 | DOWN | 1857.653 | 1857.652 | 1857.659 | 9.830558 | 9.715683 |
| 9414 | M473T9_1 | 1.210915 | 0.276097 | 0.652351 | 0.53641  | 0.864094 | UP   | 473.4851 | 473.4847 | 473.4863 | 9.36515  | 9.142767 |

|      |          |          |          |          |          |          |      |          |          |          |          |          |
|------|----------|----------|----------|----------|----------|----------|------|----------|----------|----------|----------|----------|
| 9415 | M340T11_ | 1.168038 | -0.22409 | -0.64604 | 0.536422 | 0.864094 | DOWN | 339.8868 | 339.8867 | 339.8874 | 10.90343 | 10.877   |
| 9416 | M592T10_ | 1.321687 | 0.402381 | 0.661324 | 0.536475 | 0.864094 | UP   | 591.9622 | 591.9613 | 591.9639 | 9.977042 | 9.8753   |
| 9417 | M224T10_ | 1.223827 | -0.2914  | -0.646   | 0.536568 | 0.864094 | DOWN | 224.191  | 224.1819 | 224.1915 | 9.830833 | 9.7124   |
| 9418 | M1359T10 | 1.116229 | -0.15863 | -0.64695 | 0.536582 | 0.864094 | DOWN | 1359.021 | 1359.02  | 1359.022 | 9.825767 | 9.715683 |
| 9419 | M824T10_ | 1.152957 | -0.20534 | -0.64898 | 0.536611 | 0.864094 | DOWN | 824.0512 | 824.0505 | 824.0515 | 9.9351   | 9.827283 |
| 9420 | M431T10_ | 1.392274 | 0.477443 | 0.665319 | 0.53671  | 0.864094 | UP   | 431.0419 | 431.0411 | 431.042  | 9.909442 | 9.79535  |
| 9421 | M450T45  | 1.356889 | -0.4403  | -0.67427 | 0.53672  | 0.864094 | DOWN | 450.2331 | 450.233  | 450.2333 | 44.8685  | 44.60983 |
| 9422 | M227T10_ | 1.116636 | -0.15916 | -0.66098 | 0.536726 | 0.864094 | DOWN | 226.9819 | 226.9818 | 226.982  | 9.8397   | 9.715683 |
| 9423 | M377T9_2 | 1.19172  | 0.253045 | 0.661015 | 0.53673  | 0.864094 | UP   | 376.7747 | 376.7742 | 376.7747 | 8.799642 | 8.667783 |
| 9424 | M369T11_ | 1.098959 | -0.13614 | -0.64572 | 0.536763 | 0.864094 | DOWN | 369.3556 | 369.3555 | 369.3558 | 10.89875 | 10.879   |
| 9425 | M200T9_2 | 1.365889 | 0.44984  | 0.656556 | 0.536817 | 0.864094 | UP   | 200.3865 | 200.3861 | 200.3876 | 9.405025 | 9.132267 |
| 9426 | M233T11_ | 1.078846 | -0.10949 | -0.6472  | 0.536992 | 0.864095 | DOWN | 232.757  | 232.7569 | 232.7572 | 10.90519 | 10.879   |
| 9427 | M322T10_ | 1.119313 | 0.162613 | 0.656984 | 0.53702  | 0.864095 | UP   | 321.9953 | 321.995  | 321.9955 | 9.975217 | 9.8753   |
| 9428 | M387T9_1 | 1.171984 | -0.22895 | -0.65244 | 0.537023 | 0.864095 | DOWN | 387.1282 | 387.128  | 387.1294 | 9.44825  | 9.355317 |
| 9429 | M315T39_ | 1.09358  | 0.129059 | 0.658885 | 0.537043 | 0.864095 | UP   | 315.18   | 315.1798 | 315.1801 | 38.69783 | 38.42433 |
| 9430 | M614T10_ | 1.209809 | -0.27478 | -0.64547 | 0.537076 | 0.864095 | DOWN | 614.3407 | 614.3399 | 614.3409 | 9.968992 | 9.859233 |
| 9431 | M206T10_ | 1.180844 | 0.239818 | 0.64522  | 0.537103 | 0.864095 | UP   | 206.1155 | 206.1153 | 206.1155 | 9.830283 | 9.728083 |
| 9432 | M1007T28 | 1.232452 | -0.30153 | -0.64497 | 0.537211 | 0.864095 | DOWN | 1006.767 | 1006.766 | 1006.768 | 28.38933 | 28.37683 |
| 9433 | M183T9_5 | 1.666788 | 0.737071 | 0.669722 | 0.537276 | 0.864095 | UP   | 182.9346 | 182.9339 | 182.9358 | 9.1602   | 9.079083 |
| 9434 | M294T9_4 | 1.38837  | -0.47339 | -0.64838 | 0.537277 | 0.864095 | DOWN | 293.7426 | 293.7414 | 293.7448 | 9.333667 | 9.219483 |
| 9435 | M475T9_9 | 1.365583 | -0.44952 | -0.65586 | 0.5373   | 0.864095 | DOWN | 475.0872 | 475.0866 | 475.0949 | 9.280967 | 9.17485  |
| 9436 | M753T21  | 1.124086 | -0.16875 | -0.64993 | 0.537307 | 0.864095 | DOWN | 752.5134 | 752.5129 | 752.5139 | 21.02075 | 21.011   |
| 9437 | M434T9_1 | 1.09091  | 0.125532 | 0.658036 | 0.537319 | 0.864095 | UP   | 434.4564 | 434.4562 | 434.4567 | 9.18195  | 9.12675  |
| 9438 | M1861T10 | 1.1218   | 0.165815 | 0.654215 | 0.537506 | 0.864095 | UP   | 1860.534 | 1860.531 | 1860.538 | 9.810767 | 9.728083 |
| 9439 | M420T10_ | 1.202469 | 0.266    | 0.66213  | 0.537528 | 0.864095 | UP   | 420.0027 | 420.0024 | 420.003  | 9.934533 | 9.827283 |
| 9440 | M179T10_ | 1.119983 | 0.163476 | 0.645703 | 0.537583 | 0.864095 | UP   | 179.0277 | 179.0276 | 179.028  | 9.969158 | 9.8914   |
| 9441 | M319T10_ | 1.576302 | 0.656544 | 0.662061 | 0.537636 | 0.864095 | UP   | 318.9103 | 318.9101 | 318.9106 | 9.92825  | 9.8378   |
| 9442 | M684T10_ | 1.187781 | -0.24827 | -0.64761 | 0.537646 | 0.864095 | DOWN | 683.948  | 683.9475 | 683.9481 | 9.842    | 9.715683 |
| 9443 | M370T10_ | 1.380756 | -0.46546 | -0.65195 | 0.53769  | 0.864095 | DOWN | 369.7984 | 369.7977 | 369.8058 | 9.946367 | 9.859233 |
| 9444 | M453T10_ | 1.145188 | -0.19558 | -0.65202 | 0.53769  | 0.864095 | DOWN | 452.8604 | 452.8602 | 452.8607 | 9.981567 | 9.8753   |
| 9445 | M1857T10 | 1.135084 | -0.1828  | -0.64787 | 0.537705 | 0.864095 | DOWN | 1857.239 | 1857.235 | 1857.241 | 9.823575 | 9.715683 |
| 9446 | M404T11_ | 1.248081 | 0.319712 | 0.65955  | 0.537742 | 0.864095 | UP   | 404.2862 | 404.2861 | 404.2863 | 10.90628 | 10.88747 |
| 9447 | M372T25  | 1.213508 | -0.27918 | -0.64405 | 0.537786 | 0.864095 | DOWN | 372.2222 | 372.2221 | 372.2225 | 24.57175 | 24.5215  |
| 9448 | M652T10_ | 1.246722 | -0.31814 | -0.64878 | 0.537856 | 0.864095 | DOWN | 651.6987 | 651.6982 | 651.6993 | 9.967367 | 9.843367 |
| 9449 | M395T20_ | 1.065953 | -0.09214 | -0.64449 | 0.537889 | 0.864095 | DOWN | 395.1272 | 395.1271 | 395.1274 | 20.24492 | 20.23017 |

|      |          |          |          |          |          |          |      |          |          |          |          |          |
|------|----------|----------|----------|----------|----------|----------|------|----------|----------|----------|----------|----------|
| 9450 | M367T10_ | 1.218957 | -0.28565 | -0.64566 | 0.53789  | 0.864095 | DOWN | 366.8213 | 366.8212 | 366.8218 | 9.845483 | 9.728083 |
| 9451 | M282T10_ | 1.054244 | 0.076209 | 0.663978 | 0.537903 | 0.864095 | UP   | 282.3911 | 282.391  | 282.3911 | 9.847133 | 9.73145  |
| 9452 | M265T10_ | 1.259799 | -0.33319 | -0.65427 | 0.537915 | 0.864095 | DOWN | 264.8585 | 264.8581 | 264.8587 | 9.77345  | 9.76065  |
| 9453 | M879T11_ | 1.34696  | 0.429707 | 0.668011 | 0.537959 | 0.864095 | UP   | 878.8941 | 878.8924 | 878.896  | 10.94208 | 10.879   |
| 9454 | M355T31  | 1.145035 | 0.195392 | 0.643359 | 0.538003 | 0.864095 | UP   | 355.284  | 355.2839 | 355.2842 | 30.97358 | 30.95183 |
| 9455 | M213T12_ | 1.102438 | -0.1407  | -0.66383 | 0.538105 | 0.864095 | DOWN | 213.1483 | 213.1483 | 213.1484 | 11.82647 | 11.74257 |
| 9456 | M642T21  | 1.14839  | -0.19961 | -0.6584  | 0.538249 | 0.864095 | DOWN | 642.4788 | 642.4784 | 642.4789 | 20.753   | 20.50483 |
| 9457 | M337T10_ | 1.418029 | 0.503887 | 0.668771 | 0.538296 | 0.864095 | UP   | 336.5011 | 336.5009 | 336.506  | 9.816058 | 9.7124   |
| 9458 | M188T9_7 | 1.55705  | 0.638815 | 0.664106 | 0.538314 | 0.864095 | UP   | 187.96   | 187.9592 | 187.9613 | 9.280767 | 9.16125  |
| 9459 | M476T43  | 1.254366 | -0.32696 | -0.64298 | 0.538353 | 0.864095 | DOWN | 476.2487 | 476.2486 | 476.249  | 43.1     | 42.726   |
| 9460 | M310T9_3 | 1.1704   | -0.227   | -0.65076 | 0.538413 | 0.864095 | DOWN | 309.9018 | 309.8998 | 309.9032 | 9.344125 | 9.191133 |
| 9461 | M511T22  | 1.142908 | -0.19271 | -0.64381 | 0.538437 | 0.864095 | DOWN | 511.4027 | 511.4026 | 511.4032 | 21.76583 | 21.7525  |
| 9462 | M406T40_ | 1.21984  | -0.28669 | -0.64545 | 0.538442 | 0.864095 | DOWN | 406.2069 | 406.2067 | 406.207  | 39.63283 | 39.442   |
| 9463 | M674T9_1 | 1.159876 | 0.21397  | 0.64377  | 0.538597 | 0.864095 | UP   | 673.8348 | 673.8337 | 673.835  | 9.475667 | 9.245983 |
| 9464 | M215T23  | 1.086792 | -0.12008 | -0.64391 | 0.53863  | 0.864095 | DOWN | 215.1638 | 215.1637 | 215.1638 | 22.91467 | 22.90033 |
| 9465 | M510T11_ | 1.176936 | -0.23504 | -0.65276 | 0.538682 | 0.864095 | DOWN | 509.6836 | 509.6826 | 509.6838 | 10.87598 | 10.83572 |
| 9466 | M357T10_ | 1.121254 | 0.165114 | 0.664402 | 0.53879  | 0.864095 | UP   | 357.2766 | 357.2762 | 357.2768 | 9.846225 | 9.715683 |
| 9467 | M310T23_ | 1.207511 | -0.27204 | -0.64369 | 0.538793 | 0.864095 | DOWN | 310.3897 | 310.3896 | 310.3899 | 22.69767 | 22.66867 |
| 9468 | M288T11_ | 1.181314 | -0.24039 | -0.64222 | 0.538803 | 0.864095 | DOWN | 287.8226 | 287.8222 | 287.8228 | 10.90275 | 10.86275 |
| 9469 | M489T10_ | 1.120528 | 0.164179 | 0.651236 | 0.538888 | 0.864095 | UP   | 489.3399 | 489.3396 | 489.3402 | 9.638933 | 9.541483 |
| 9470 | M642T19  | 1.08529  | 0.118081 | 0.642699 | 0.538888 | 0.864095 | UP   | 642.4644 | 642.464  | 642.4645 | 18.63867 | 18.62883 |
| 9471 | M270T11_ | 1.177853 | -0.23616 | -0.64516 | 0.538898 | 0.864095 | DOWN | 270.2056 | 270.2054 | 270.2057 | 10.90628 | 10.84847 |
| 9472 | M210T9_5 | 1.253877 | 0.326396 | 0.641812 | 0.539063 | 0.864095 | UP   | 210.1486 | 210.1486 | 210.1487 | 9.329083 | 9.11405  |
| 9473 | M332T10_ | 1.081154 | -0.11257 | -0.65557 | 0.539069 | 0.864095 | DOWN | 332.0789 | 332.0787 | 332.0792 | 9.823575 | 9.715683 |
| 9474 | M160T11  | 1.169646 | 0.226072 | 0.642358 | 0.539129 | 0.864095 | UP   | 159.5716 | 159.5715 | 159.5717 | 11.49014 | 11.47298 |
| 9475 | M227T10_ | 1.220244 | 0.287169 | 0.664577 | 0.539209 | 0.864095 | UP   | 226.6925 | 226.6924 | 226.6927 | 9.933    | 9.827283 |
| 9476 | M248T11_ | 1.104724 | -0.14369 | -0.65114 | 0.539212 | 0.864095 | DOWN | 247.6391 | 247.6386 | 247.6394 | 10.92598 | 10.8926  |
| 9477 | M415T9_1 | 1.505172 | 0.589929 | 0.661297 | 0.539254 | 0.864095 | UP   | 414.5326 | 414.5303 | 414.5345 | 9.171208 | 9.110833 |
| 9478 | M160T10_ | 1.167484 | -0.2234  | -0.64168 | 0.539266 | 0.864095 | DOWN | 160.0541 | 160.054  | 160.0542 | 9.967367 | 9.859233 |
| 9479 | M438T9_9 | 1.42806  | 0.514056 | 0.666442 | 0.53941  | 0.864096 | UP   | 438.3231 | 438.322  | 438.3233 | 9.219483 | 9.142767 |
| 9480 | M280T9_2 | 1.236495 | -0.30626 | -0.64367 | 0.539427 | 0.864096 | DOWN | 280.046  | 280.0457 | 280.0465 | 9.150733 | 9.133667 |
| 9481 | M557T10_ | 1.265446 | -0.33965 | -0.64125 | 0.539526 | 0.864097 | DOWN | 556.8074 | 556.8072 | 556.8078 | 9.915583 | 9.88865  |
| 9482 | M674T10_ | 1.450865 | 0.536913 | 0.663251 | 0.539646 | 0.864097 | UP   | 674.4869 | 674.4856 | 674.4878 | 9.817158 | 9.728083 |
| 9483 | M395T10_ | 1.280816 | -0.35706 | -0.64067 | 0.539652 | 0.864097 | DOWN | 394.8716 | 394.8693 | 394.8741 | 9.9      | 9.779267 |
| 9484 | M207T10_ | 1.259126 | 0.332423 | 0.661293 | 0.539731 | 0.864098 | UP   | 207.2611 | 207.2611 | 207.2612 | 9.81635  | 9.699733 |

|      |          |          |          |          |          |          |      |          |          |          |          |          |
|------|----------|----------|----------|----------|----------|----------|------|----------|----------|----------|----------|----------|
| 9485 | M795T30  | 1.249263 | 0.321077 | 0.648986 | 0.53984  | 0.864098 | UP   | 794.5742 | 794.5717 | 794.5755 | 30.22225 | 30.18017 |
| 9486 | M1430T10 | 1.303294 | -0.38216 | -0.64004 | 0.540119 | 0.8641   | DOWN | 1429.891 | 1429.888 | 1429.892 | 9.91875  | 9.900133 |
| 9487 | M255T10_ | 1.146044 | -0.19666 | -0.64324 | 0.540142 | 0.8641   | DOWN | 255.1871 | 255.1869 | 255.1872 | 9.958617 | 9.843367 |
| 9488 | M342T11_ | 2.331196 | 1.221071 | 0.661058 | 0.540219 | 0.8641   | UP   | 342.2751 | 342.2745 | 342.2753 | 10.61788 | 10.55068 |
| 9489 | M308T10_ | 1.108317 | 0.148371 | 0.640731 | 0.540251 | 0.864101 | UP   | 308.1486 | 308.1483 | 308.1488 | 9.954767 | 9.843367 |
| 9490 | M360T11_ | 1.134153 | 0.181615 | 0.643718 | 0.540331 | 0.864101 | UP   | 360.4971 | 360.4968 | 360.4981 | 10.91381 | 10.90197 |
| 9491 | M332T10_ | 1.030126 | -0.04282 | -0.64473 | 0.540404 | 0.864101 | DOWN | 332.1104 | 332.1101 | 332.111  | 9.825492 | 9.715683 |
| 9492 | M316T38_ | 1.033924 | -0.04813 | -0.64511 | 0.540417 | 0.864101 | DOWN | 316.1753 | 316.1751 | 316.1754 | 37.57533 | 37.51533 |
| 9493 | M359T40  | 1.159645 | -0.21368 | -0.64151 | 0.540492 | 0.864102 | DOWN | 359.2062 | 359.206  | 359.2064 | 39.97817 | 39.74767 |
| 9494 | M997T11  | 1.092072 | -0.12707 | -0.64258 | 0.540593 | 0.864102 | DOWN | 997.2359 | 997.2353 | 997.2366 | 10.89954 | 10.88747 |
| 9495 | M277T11_ | 1.109367 | -0.14974 | -0.6392  | 0.540608 | 0.864102 | DOWN | 277.3436 | 277.3433 | 277.3437 | 10.91289 | 10.877   |
| 9496 | M199T9_1 | 1.327506 | 0.408719 | 0.651478 | 0.540705 | 0.864103 | UP   | 199.3388 | 199.3381 | 199.3391 | 9.4098   | 9.250817 |
| 9497 | M273T43  | 1.049264 | -0.06938 | -0.64216 | 0.540789 | 0.864103 | DOWN | 273.1693 | 273.1692 | 273.1694 | 43.1575  | 43.07083 |
| 9498 | M593T10_ | 1.278565 | 0.354526 | 0.639341 | 0.54086  | 0.864104 | UP   | 593.0413 | 593.0409 | 593.0429 | 9.970617 | 9.859233 |
| 9499 | M637T10_ | 1.23905  | 0.309234 | 0.664296 | 0.540875 | 0.864104 | UP   | 636.7993 | 636.7987 | 636.8021 | 9.823575 | 9.728083 |
| 9500 | M403T9_1 | 1.23407  | -0.30342 | -0.65247 | 0.540886 | 0.864104 | DOWN | 402.7445 | 402.7441 | 402.7447 | 9.451883 | 9.355317 |
| 9501 | M452T9_8 | 1.514598 | 0.598935 | 0.638757 | 0.540997 | 0.864105 | UP   | 452.4352 | 452.4286 | 452.4407 | 9.242292 | 9.11405  |
| 9502 | M276T9_1 | 1.401056 | -0.48651 | -0.65064 | 0.541057 | 0.864105 | DOWN | 275.5133 | 275.5131 | 275.5136 | 8.837567 | 8.697767 |
| 9503 | M671T25  | 1.114755 | -0.15673 | -0.63811 | 0.54124  | 0.864106 | DOWN | 670.5097 | 670.5093 | 670.5104 | 25.21042 | 25.19967 |
| 9504 | M219T11_ | 1.175881 | 0.233742 | 0.643167 | 0.541332 | 0.864106 | UP   | 219.1626 | 219.1623 | 219.1628 | 10.94178 | 10.89355 |
| 9505 | M1981T10 | 1.153653 | -0.20621 | -0.64343 | 0.541406 | 0.864107 | DOWN | 1981.056 | 1981.055 | 1981.059 | 9.839008 | 9.715683 |
| 9506 | M352T10_ | 1.209569 | 0.274493 | 0.661061 | 0.541416 | 0.864107 | UP   | 352.2533 | 352.2532 | 352.2534 | 9.880375 | 9.7124   |
| 9507 | M310T11_ | 1.105441 | -0.14462 | -0.63793 | 0.541431 | 0.864107 | DOWN | 309.5309 | 309.5307 | 309.5316 | 10.892   | 10.8646  |
| 9508 | M408T9_2 | 1.251637 | -0.32382 | -0.63963 | 0.541491 | 0.864107 | DOWN | 407.7613 | 407.761  | 407.7615 | 9.457083 | 9.38595  |
| 9509 | M296T10_ | 1.231158 | -0.30002 | -0.63846 | 0.541664 | 0.864108 | DOWN | 296.2919 | 296.2918 | 296.2921 | 9.509033 | 9.40135  |
| 9510 | M439T10_ | 1.187273 | -0.24765 | -0.6411  | 0.541714 | 0.864108 | DOWN | 439.0443 | 439.044  | 439.0446 | 9.914217 | 9.811217 |
| 9511 | M520T41_ | 1.407393 | 0.493025 | 0.657884 | 0.54193  | 0.86411  | UP   | 520.2749 | 520.2745 | 520.2751 | 40.94217 | 40.8845  |
| 9512 | M246T10_ | 1.184874 | 0.244733 | 0.658813 | 0.541945 | 0.86411  | UP   | 246.3933 | 246.3932 | 246.3935 | 9.984083 | 9.8753   |
| 9513 | M469T27_ | 1.256475 | -0.32938 | -0.63985 | 0.54202  | 0.86411  | DOWN | 468.6629 | 468.6626 | 468.6632 | 26.84775 | 26.8385  |
| 9514 | M484T10_ | 1.164631 | -0.21987 | -0.63776 | 0.542031 | 0.86411  | DOWN | 483.8845 | 483.884  | 483.8856 | 9.970617 | 9.822117 |
| 9515 | M721T10_ | 1.139251 | 0.188086 | 0.648902 | 0.542051 | 0.86411  | UP   | 721.3113 | 721.3099 | 721.3119 | 9.823575 | 9.699733 |
| 9516 | M546T40_ | 1.219788 | -0.28663 | -0.66509 | 0.542125 | 0.864111 | DOWN | 546.3268 | 546.3267 | 546.3272 | 40.32333 | 40.16717 |
| 9517 | M306T10_ | 1.09847  | -0.1355  | -0.65558 | 0.542164 | 0.864111 | DOWN | 305.5609 | 305.5607 | 305.5611 | 9.958617 | 9.859233 |
| 9518 | M380T11_ | 1.145192 | -0.19559 | -0.63648 | 0.542253 | 0.864111 | DOWN | 380.1526 | 380.1524 | 380.1538 | 10.90628 | 10.88747 |
| 9519 | M355T9_3 | 1.255778 | 0.328581 | 0.636971 | 0.542269 | 0.864111 | UP   | 355.1513 | 355.1512 | 355.1514 | 9.270833 | 9.191133 |



|      |          |          |          |          |          |          |      |          |          |          |          |          |
|------|----------|----------|----------|----------|----------|----------|------|----------|----------|----------|----------|----------|
| 9520 | M239T22  | 1.556984 | 0.638754 | 0.662817 | 0.542287 | 0.864111 | UP   | 239.1615 | 239.1613 | 239.1617 | 21.76333 | 21.745   |
| 9521 | M289T10_ | 1.142391 | -0.19206 | -0.64127 | 0.542388 | 0.864112 | DOWN | 289.3629 | 289.3626 | 289.3631 | 9.915583 | 9.79535  |
| 9522 | M474T44_ | 1.157288 | -0.21075 | -0.64717 | 0.542402 | 0.864112 | DOWN | 474.2695 | 474.2692 | 474.2696 | 44.47308 | 44.164   |
| 9523 | M1693T10 | 1.357201 | 0.440634 | 0.66058  | 0.542539 | 0.864113 | UP   | 1693.478 | 1693.474 | 1693.48  | 9.8445   | 9.743667 |
| 9524 | M543T45  | 1.046777 | 0.065954 | 0.635967 | 0.542649 | 0.864113 | UP   | 542.529  | 542.5287 | 542.5295 | 44.8685  | 44.83967 |
| 9525 | M553T11_ | 1.256669 | -0.3296  | -0.63629 | 0.542802 | 0.864114 | DOWN | 552.6166 | 552.6161 | 552.6174 | 10.89125 | 10.879   |
| 9526 | M423T10_ | 1.358327 | 0.441831 | 0.642546 | 0.542877 | 0.864115 | UP   | 423.4707 | 423.4699 | 423.4711 | 9.964167 | 9.859233 |
| 9527 | M678T10_ | 1.608177 | -0.68543 | -0.6365  | 0.542926 | 0.864115 | DOWN | 678.1452 | 678.1401 | 678.1483 | 9.859233 | 9.79485  |
| 9528 | M585T23  | 1.210788 | 0.275947 | 0.647267 | 0.542939 | 0.864115 | UP   | 584.5607 | 584.5601 | 584.5614 | 22.88592 | 22.8715  |
| 9529 | M222T10_ | 1.226866 | -0.29498 | -0.64065 | 0.542995 | 0.864115 | DOWN | 222.4017 | 222.4016 | 222.4018 | 9.81635  | 9.715683 |
| 9530 | M468T40  | 1.780505 | -0.83229 | -0.65876 | 0.543    | 0.864115 | DOWN | 468.4407 | 468.4402 | 468.4412 | 40.15083 | 40.1365  |
| 9531 | M439T11_ | 1.101818 | -0.13989 | -0.63544 | 0.543063 | 0.864116 | DOWN | 438.7859 | 438.7858 | 438.7866 | 10.89875 | 10.879   |
| 9532 | M187T41_ | 1.398891 | -0.48428 | -0.65834 | 0.543209 | 0.864116 | DOWN | 187.0962 | 187.0961 | 187.0963 | 41.21567 | 41.03033 |
| 9533 | M541T9_1 | 1.692203 | 0.758903 | 0.652664 | 0.543223 | 0.864116 | UP   | 540.5152 | 540.5148 | 540.5156 | 9.459117 | 9.38595  |
| 9534 | M194T10_ | 1.18026  | -0.2391  | -0.64054 | 0.543242 | 0.864117 | DOWN | 193.7731 | 193.7719 | 193.7732 | 9.975142 | 9.743767 |
| 9535 | M353T45_ | 1.026481 | -0.03771 | -0.6442  | 0.543279 | 0.864117 | DOWN | 353.2321 | 353.232  | 353.2322 | 44.78933 | 44.653   |
| 9536 | M628T11_ | 1.272459 | 0.347619 | 0.650004 | 0.543291 | 0.864117 | UP   | 628.3522 | 628.3515 | 628.3526 | 10.90657 | 10.89355 |
| 9537 | M238T12  | 1.371067 | 0.455299 | 0.63654  | 0.543331 | 0.864117 | UP   | 238.1775 | 238.1773 | 238.1775 | 11.95898 | 11.93173 |
| 9538 | M333T11_ | 1.181645 | -0.2408  | -0.64283 | 0.54338  | 0.864117 | DOWN | 333.1396 | 333.1391 | 333.147  | 10.89128 | 10.86253 |
| 9539 | M629T25_ | 1.321946 | 0.402663 | 0.635712 | 0.543401 | 0.864117 | UP   | 629.1166 | 629.1156 | 629.1172 | 25.25475 | 25.17267 |
| 9540 | M171T10_ | 1.134487 | -0.18204 | -0.64108 | 0.543432 | 0.864118 | DOWN | 170.6907 | 170.6907 | 170.6908 | 9.830283 | 9.715683 |
| 9541 | M243T11_ | 1.108241 | -0.14827 | -0.63443 | 0.543514 | 0.864118 | DOWN | 242.6452 | 242.6451 | 242.6453 | 10.892   | 10.879   |
| 9542 | M163T10_ | 1.094775 | -0.13063 | -0.63406 | 0.543764 | 0.864119 | DOWN | 163.3208 | 163.3206 | 163.3208 | 9.9351   | 9.827283 |
| 9543 | M705T11_ | 1.104708 | -0.14367 | -0.63472 | 0.543795 | 0.86412  | DOWN | 704.8077 | 704.8075 | 704.8095 | 10.89875 | 10.879   |
| 9544 | M480T20_ | 1.37539  | -0.45984 | -0.63399 | 0.543823 | 0.86412  | DOWN | 480.3313 | 480.3307 | 480.3318 | 19.75117 | 19.73767 |
| 9545 | M1053T9  | 1.420492 | 0.506391 | 0.637943 | 0.543952 | 0.86412  | UP   | 1052.719 | 1052.717 | 1052.72  | 8.66735  | 8.60815  |
| 9546 | M313T43_ | 1.135607 | 0.183464 | 0.647263 | 0.543956 | 0.86412  | UP   | 313.1643 | 313.1642 | 313.1644 | 43.0995  | 43.04233 |
| 9547 | M473T36  | 1.303553 | 0.382449 | 0.634076 | 0.543988 | 0.864121 | UP   | 473.3445 | 473.3442 | 473.3456 | 36.194   | 36.11533 |
| 9548 | M322T10_ | 1.176581 | -0.2346  | -0.64109 | 0.544008 | 0.864121 | DOWN | 321.8899 | 321.8895 | 321.8904 | 9.97385  | 9.8753   |
| 9549 | M1404T10 | 1.277944 | 0.353825 | 0.642379 | 0.544014 | 0.864121 | UP   | 1403.73  | 1403.726 | 1403.731 | 9.93625  | 9.843367 |
| 9550 | M342T11_ | 1.090218 | -0.12462 | -0.63373 | 0.544136 | 0.864121 | DOWN | 341.7897 | 341.7895 | 341.7899 | 10.892   | 10.879   |
| 9551 | M318T10_ | 1.332676 | -0.41433 | -0.63376 | 0.544152 | 0.864121 | DOWN | 318.3963 | 318.3962 | 318.3963 | 9.96095  | 9.946367 |
| 9552 | M264T11_ | 1.258904 | -0.33217 | -0.63694 | 0.544195 | 0.864122 | DOWN | 263.5333 | 263.5296 | 263.5335 | 10.89958 | 10.83417 |
| 9553 | M316T24_ | 1.216313 | -0.28252 | -0.6333  | 0.544262 | 0.864122 | DOWN | 315.6306 | 315.6304 | 315.6307 | 24.12667 | 24.08817 |
| 9554 | M552T22  | 1.168795 | -0.22502 | -0.63335 | 0.544281 | 0.864122 | DOWN | 552.3296 | 552.3293 | 552.3303 | 22.383   | 22.3815  |

|      |          |          |          |          |          |          |      |          |          |          |          |          |
|------|----------|----------|----------|----------|----------|----------|------|----------|----------|----------|----------|----------|
| 9555 | M928T10_ | 1.109555 | 0.149981 | 0.633216 | 0.544607 | 0.864124 | UP   | 927.663  | 927.6626 | 927.6634 | 10.16706 | 10.08517 |
| 9556 | M1764T10 | 1.201586 | 0.26494  | 0.635815 | 0.544622 | 0.864124 | UP   | 1764.319 | 1764.313 | 1764.325 | 9.830083 | 9.699733 |
| 9557 | M907T26_ | 1.110059 | -0.15064 | -0.6349  | 0.544768 | 0.864125 | DOWN | 906.6367 | 906.6362 | 906.6369 | 26.2875  | 26.247   |
| 9558 | M760T10_ | 1.237464 | 0.307387 | 0.635218 | 0.544782 | 0.864125 | UP   | 759.5264 | 759.5255 | 759.5275 | 9.964258 | 9.843367 |
| 9559 | M358T11_ | 1.142212 | -0.19183 | -0.63885 | 0.544803 | 0.864125 | DOWN | 357.9087 | 357.9083 | 357.9089 | 10.89193 | 10.85018 |
| 9560 | M563T9_1 | 1.187762 | -0.24825 | -0.63229 | 0.544838 | 0.864125 | DOWN | 562.5637 | 562.5635 | 562.5642 | 9.451883 | 9.370583 |
| 9561 | M467T10_ | 1.738501 | 0.797844 | 0.652124 | 0.544849 | 0.864125 | UP   | 466.7555 | 466.7553 | 466.756  | 9.967367 | 9.859233 |
| 9562 | M579T32  | 1.100937 | -0.13873 | -0.65681 | 0.544996 | 0.864126 | DOWN | 579.2929 | 579.2925 | 579.2932 | 32.4745  | 32.46017 |
| 9563 | M355T45  | 1.178783 | 0.237298 | 0.631873 | 0.545138 | 0.864127 | UP   | 355.2113 | 355.2111 | 355.2114 | 44.83267 | 44.58083 |
| 9564 | M835T22_ | 1.080049 | -0.1111  | -0.63605 | 0.54521  | 0.864127 | DOWN | 834.5787 | 834.5784 | 834.5792 | 21.53683 | 21.52267 |
| 9565 | M313T9_6 | 1.431599 | 0.517628 | 0.655955 | 0.545266 | 0.864127 | UP   | 313.0881 | 313.0874 | 313.0886 | 9.2585   | 9.1587   |
| 9566 | M359T10_ | 1.391206 | -0.47634 | -0.65622 | 0.545317 | 0.864128 | DOWN | 359.1126 | 359.1122 | 359.1128 | 9.82645  | 9.715683 |
| 9567 | M241T11_ | 1.076196 | -0.10594 | -0.63747 | 0.54535  | 0.864128 | DOWN | 241.274  | 241.2738 | 241.2742 | 10.94603 | 10.90785 |
| 9568 | M446T10_ | 1.081468 | -0.11299 | -0.63187 | 0.545365 | 0.864128 | DOWN | 446.2012 | 446.2009 | 446.2021 | 9.888425 | 9.743767 |
| 9569 | M686T9_2 | 1.269221 | -0.34394 | -0.63143 | 0.545374 | 0.864128 | DOWN | 686.0701 | 686.0694 | 686.0703 | 9.314442 | 9.219483 |
| 9570 | M461T24  | 1.314233 | 0.394221 | 0.633651 | 0.545529 | 0.864129 | UP   | 461.3079 | 461.3067 | 461.308  | 24.23283 | 24.1925  |
| 9571 | M712T11_ | 1.188501 | 0.249143 | 0.631083 | 0.545592 | 0.864129 | UP   | 712.3892 | 712.3889 | 712.3903 | 11.4828  | 11.47593 |
| 9572 | M589T11_ | 1.23599  | 0.305667 | 0.649269 | 0.545696 | 0.86413  | UP   | 589.4164 | 589.4154 | 589.4166 | 10.86046 | 10.8214  |
| 9573 | M233T11_ | 1.20812  | -0.27276 | -0.63195 | 0.545727 | 0.86413  | DOWN | 233.0781 | 233.0781 | 233.0783 | 10.50338 | 10.4882  |
| 9574 | M562T44_ | 1.120624 | 0.164302 | 0.643527 | 0.545733 | 0.86413  | UP   | 562.3219 | 562.3216 | 562.3221 | 44.26467 | 44.09217 |
| 9575 | M344T18  | 1.329448 | -0.41083 | -0.63746 | 0.545739 | 0.86413  | DOWN | 343.9101 | 343.9099 | 343.9103 | 18.0635  | 18.055   |
| 9576 | M971T11  | 1.191981 | -0.25336 | -0.63286 | 0.54582  | 0.86413  | DOWN | 971.2494 | 971.2479 | 971.2515 | 10.92225 | 10.90197 |
| 9577 | M242T11_ | 1.09463  | -0.13044 | -0.63087 | 0.54588  | 0.864131 | DOWN | 242.3746 | 242.3746 | 242.3748 | 10.892   | 10.879   |
| 9578 | M529T9_7 | 1.281174 | 0.357467 | 0.65471  | 0.545965 | 0.864131 | UP   | 529.473  | 529.4715 | 529.4778 | 9.351292 | 9.23175  |
| 9579 | M552T10_ | 1.379631 | 0.464283 | 0.645648 | 0.54598  | 0.864131 | UP   | 552.1808 | 552.1797 | 552.1814 | 9.946892 | 9.859233 |
| 9580 | M398T12_ | 1.122858 | 0.167176 | 0.639442 | 0.546129 | 0.864132 | UP   | 398.365  | 398.3641 | 398.3652 | 11.60763 | 11.58417 |
| 9581 | M1050T10 | 1.05098  | -0.07174 | -0.63272 | 0.546135 | 0.864132 | DOWN | 1050.269 | 1050.268 | 1050.271 | 9.855658 | 9.747533 |
| 9582 | M360T9_5 | 1.116345 | -0.15878 | -0.63381 | 0.546141 | 0.864132 | DOWN | 359.7809 | 359.7788 | 359.7828 | 9.382592 | 9.219483 |
| 9583 | M355T19_ | 1.149861 | -0.20146 | -0.64324 | 0.546149 | 0.864132 | DOWN | 355.2377 | 355.2375 | 355.2379 | 18.70217 | 18.6895  |
| 9584 | M1166T9_ | 1.132407 | -0.17939 | -0.63063 | 0.546167 | 0.864132 | DOWN | 1165.749 | 1165.747 | 1165.751 | 8.96255  | 8.892117 |
| 9585 | M870T10_ | 1.08488  | -0.11754 | -0.63131 | 0.546187 | 0.864132 | DOWN | 869.8564 | 869.8554 | 869.8566 | 9.94785  | 9.827283 |
| 9586 | M389T10_ | 1.209747 | 0.274705 | 0.652571 | 0.546275 | 0.864133 | UP   | 388.6649 | 388.6646 | 388.6651 | 9.934533 | 9.827283 |
| 9587 | M165T10_ | 1.232598 | -0.3017  | -0.6331  | 0.546429 | 0.864134 | DOWN | 165.2694 | 165.269  | 165.2697 | 9.939233 | 9.827283 |
| 9588 | M318T10_ | 1.152838 | -0.20519 | -0.64433 | 0.54683  | 0.864136 | DOWN | 318.2668 | 318.2653 | 318.267  | 9.982183 | 9.772883 |
| 9589 | M824T10_ | 1.16008  | 0.214225 | 0.630689 | 0.546841 | 0.864136 | UP   | 824.3716 | 824.3704 | 824.3725 | 9.975217 | 9.859233 |

|      |          |          |          |          |          |          |      |          |          |          |          |          |
|------|----------|----------|----------|----------|----------|----------|------|----------|----------|----------|----------|----------|
| 9590 | M829T9_2 | 1.327851 | -0.40909 | -0.62926 | 0.546858 | 0.864136 | DOWN | 828.6534 | 828.6525 | 828.6537 | 9.46855  | 9.40135  |
| 9591 | M697T10_ | 1.186866 | -0.24716 | -0.63589 | 0.546866 | 0.864136 | DOWN | 697.4425 | 697.4421 | 697.4432 | 9.839008 | 9.73145  |
| 9592 | M354T11_ | 1.226021 | -0.29398 | -0.62902 | 0.546903 | 0.864136 | DOWN | 353.861  | 353.8608 | 353.8651 | 10.90442 | 10.85838 |
| 9593 | M359T10_ | 1.951593 | 0.964652 | 0.654006 | 0.546956 | 0.864136 | UP   | 358.7192 | 358.7185 | 358.7283 | 9.5812   | 9.54805  |
| 9594 | M321T14  | 1.252622 | 0.324951 | 0.638056 | 0.546969 | 0.864136 | UP   | 321.217  | 321.2165 | 321.2177 | 14.07725 | 14.01972 |
| 9595 | M661T10_ | 1.155367 | 0.208351 | 0.633573 | 0.546972 | 0.864136 | UP   | 660.8901 | 660.8895 | 660.8982 | 10.13865 | 9.887133 |
| 9596 | M221T10_ | 1.183127 | 0.242604 | 0.629794 | 0.547109 | 0.864137 | UP   | 220.8757 | 220.8756 | 220.8758 | 9.949233 | 9.827283 |
| 9597 | M924T22  | 1.184841 | -0.24469 | -0.62849 | 0.547206 | 0.864138 | DOWN | 923.6348 | 923.6347 | 923.6354 | 22.42617 | 22.4105  |
| 9598 | M222T10_ | 1.19428  | 0.256141 | 0.631967 | 0.547254 | 0.864138 | UP   | 222.3978 | 222.3975 | 222.3979 | 9.975217 | 9.859233 |
| 9599 | M382T11_ | 1.092483 | -0.12761 | -0.63106 | 0.547257 | 0.864138 | DOWN | 382.0026 | 382.0023 | 382.0032 | 10.90659 | 10.879   |
| 9600 | M744T10_ | 1.106395 | -0.14587 | -0.63077 | 0.547292 | 0.864138 | DOWN | 743.906  | 743.9058 | 743.9062 | 10.11782 | 10.0118  |
| 9601 | M373T10_ | 1.095229 | -0.13123 | -0.63047 | 0.547322 | 0.864138 | DOWN | 373.4718 | 373.4716 | 373.472  | 9.957333 | 9.843367 |
| 9602 | M369T10_ | 1.119043 | -0.16227 | -0.63133 | 0.54733  | 0.864138 | DOWN | 368.8377 | 368.8375 | 368.8378 | 9.902483 | 9.811217 |
| 9603 | M326T10_ | 1.406552 | 0.492163 | 0.640661 | 0.547446 | 0.864139 | UP   | 326.4523 | 326.4521 | 326.4525 | 9.956867 | 9.859233 |
| 9604 | M618T16  | 1.116289 | -0.15871 | -0.63094 | 0.54747  | 0.864139 | DOWN | 618.4667 | 618.4664 | 618.467  | 15.56626 | 15.53263 |
| 9605 | M633T11_ | 1.197829 | 0.260421 | 0.642998 | 0.547504 | 0.864139 | UP   | 632.7111 | 632.71   | 632.7117 | 10.59062 | 10.56032 |
| 9606 | M392T10_ | 1.16986  | -0.22634 | -0.63023 | 0.547531 | 0.864139 | DOWN | 392.1669 | 392.1665 | 392.1674 | 9.851467 | 9.699733 |
| 9607 | M1112T10 | 1.120102 | -0.16363 | -0.62845 | 0.547549 | 0.864139 | DOWN | 1111.61  | 1111.609 | 1111.611 | 9.667392 | 9.541483 |
| 9608 | M189T9_4 | 1.154663 | -0.20747 | -0.6279  | 0.547593 | 0.86414  | DOWN | 188.7462 | 188.7459 | 188.7468 | 9.212842 | 9.12675  |
| 9609 | M467T22  | 1.340739 | 0.423029 | 0.627984 | 0.547669 | 0.86414  | UP   | 467.3478 | 467.3465 | 467.3481 | 21.673   | 21.65233 |
| 9610 | M432T11_ | 1.162826 | -0.21764 | -0.63498 | 0.547676 | 0.86414  | DOWN | 431.8405 | 431.8403 | 431.8407 | 11.41762 | 11.3951  |
| 9611 | M242T10_ | 1.16239  | -0.21709 | -0.63164 | 0.547731 | 0.86414  | DOWN | 242.3882 | 242.3862 | 242.3883 | 9.88865  | 9.636483 |
| 9612 | M187T9_6 | 1.289188 | -0.36646 | -0.62865 | 0.547738 | 0.86414  | DOWN | 187.4444 | 187.4439 | 187.4449 | 9.197733 | 9.1322   |
| 9613 | M728T11_ | 1.152539 | -0.20482 | -0.6306  | 0.547762 | 0.864141 | DOWN | 728.365  | 728.3645 | 728.3654 | 10.90393 | 10.8646  |
| 9614 | M560T10_ | 1.183614 | -0.2432  | -0.64162 | 0.547806 | 0.864141 | DOWN | 559.7563 | 559.756  | 559.7565 | 9.9014   | 9.874067 |
| 9615 | M258T11_ | 1.184618 | 0.244422 | 0.629911 | 0.547892 | 0.864141 | UP   | 258.2727 | 258.2726 | 258.2733 | 10.8914  | 10.83252 |
| 9616 | M361T11_ | 1.733219 | 0.793454 | 0.627319 | 0.547933 | 0.864141 | UP   | 361.3811 | 361.3809 | 361.3816 | 10.90393 | 10.84487 |
| 9617 | M318T10_ | 1.066829 | -0.09333 | -0.64158 | 0.547975 | 0.864142 | DOWN | 317.5802 | 317.5802 | 317.5813 | 9.826875 | 9.73145  |
| 9618 | M165T28  | 1.419857 | 0.505746 | 0.6273   | 0.547993 | 0.864142 | UP   | 165.0543 | 165.0542 | 165.0544 | 27.94    | 27.91017 |
| 9619 | M243T9_8 | 1.106561 | 0.146083 | 0.632038 | 0.548206 | 0.864143 | UP   | 243.1174 | 243.1163 | 243.1199 | 9.382625 | 9.132267 |
| 9620 | M222T9_4 | 1.11864  | 0.161746 | 0.627343 | 0.548282 | 0.864143 | UP   | 221.8501 | 221.8495 | 221.851  | 9.365833 | 9.26575  |
| 9621 | M463T11_ | 1.084932 | -0.11761 | -0.63021 | 0.5483   | 0.864143 | DOWN | 463.2535 | 463.2531 | 463.2536 | 10.892   | 10.879   |
| 9622 | M796T24  | 1.17471  | 0.232305 | 0.62663  | 0.548362 | 0.864144 | UP   | 795.5047 | 795.5037 | 795.5052 | 23.623   | 23.60783 |
| 9623 | M379T23  | 1.236738 | 0.30654  | 0.629464 | 0.548521 | 0.864145 | UP   | 379.267  | 379.2665 | 379.2671 | 22.75567 | 22.741   |
| 9624 | M1963T10 | 1.206096 | -0.27034 | -0.6329  | 0.548565 | 0.864145 | DOWN | 1963.288 | 1963.288 | 1963.289 | 9.830558 | 9.715683 |

|      |          |          |          |          |          |          |      |          |          |          |          |          |
|------|----------|----------|----------|----------|----------|----------|------|----------|----------|----------|----------|----------|
| 9625 | M399T10_ | 1.126468 | -0.17181 | -0.62627 | 0.548596 | 0.864145 | DOWN | 398.7295 | 398.7294 | 398.7297 | 9.930142 | 9.827283 |
| 9626 | M347T23  | 1.791541 | -0.8412  | -0.6308  | 0.548601 | 0.864145 | DOWN | 347.2559 | 347.2554 | 347.2567 | 23.06692 | 23.045   |
| 9627 | M467T9_1 | 1.240303 | 0.310692 | 0.632806 | 0.548623 | 0.864145 | UP   | 467.2344 | 467.2339 | 467.2354 | 9.230225 | 9.129317 |
| 9628 | M405T10_ | 1.158339 | 0.212058 | 0.626083 | 0.548712 | 0.864146 | UP   | 405.2459 | 405.2457 | 405.2461 | 10.47857 | 10.40882 |
| 9629 | M617T16  | 1.109188 | -0.1495  | -0.62854 | 0.548722 | 0.864146 | DOWN | 617.4633 | 617.4629 | 617.4637 | 15.56626 | 15.54018 |
| 9630 | M690T10_ | 1.166891 | -0.22267 | -0.63208 | 0.548759 | 0.864146 | DOWN | 690.4025 | 690.4011 | 690.4038 | 9.523383 | 9.40135  |
| 9631 | M367T11_ | 1.167564 | -0.2235  | -0.63107 | 0.548859 | 0.864146 | DOWN | 366.5998 | 366.5994 | 366.6039 | 10.90765 | 10.88747 |
| 9632 | M496T37  | 1.18132  | -0.2404  | -0.62615 | 0.548896 | 0.864147 | DOWN | 496.3839 | 496.3835 | 496.3841 | 37.3885  | 37.374   |
| 9633 | M839T11  | 1.135751 | -0.18365 | -0.62806 | 0.548965 | 0.864147 | DOWN | 839.4727 | 839.4725 | 839.4736 | 10.64246 | 10.629   |
| 9634 | M319T11_ | 1.133071 | -0.18024 | -0.6325  | 0.549031 | 0.864147 | DOWN | 319.359  | 319.3587 | 319.3594 | 10.90553 | 10.879   |
| 9635 | M243T18  | 1.210703 | -0.27585 | -0.63161 | 0.549062 | 0.864147 | DOWN | 243.1564 | 243.1562 | 243.1569 | 18.09183 | 18.009   |
| 9636 | M212T10_ | 1.150562 | -0.20234 | -0.63761 | 0.549085 | 0.864148 | DOWN | 212.4694 | 212.4686 | 212.4699 | 9.830833 | 9.715683 |
| 9637 | M639T10_ | 1.134058 | -0.18149 | -0.63538 | 0.549087 | 0.864148 | DOWN | 639.0334 | 639.033  | 639.034  | 9.943183 | 9.843367 |
| 9638 | M294T12  | 1.091965 | -0.12693 | -0.62781 | 0.549106 | 0.864148 | DOWN | 294.2062 | 294.2061 | 294.2063 | 12.25186 | 12.23755 |
| 9639 | M1142T10 | 1.492549 | 0.577779 | 0.643314 | 0.549172 | 0.864148 | UP   | 1142.132 | 1142.128 | 1142.133 | 9.847125 | 9.787633 |
| 9640 | M229T11_ | 1.358066 | -0.44155 | -0.62639 | 0.549245 | 0.864148 | DOWN | 229.2282 | 229.2277 | 229.229  | 10.89907 | 10.88995 |
| 9641 | M360T10_ | 1.083397 | 0.115562 | 0.628916 | 0.549286 | 0.864149 | UP   | 360.42   | 360.4197 | 360.4205 | 9.930908 | 9.811217 |
| 9642 | M206T9_5 | 1.273203 | 0.348463 | 0.626233 | 0.549383 | 0.864149 | UP   | 205.6044 | 205.6043 | 205.6048 | 9.303492 | 9.147367 |
| 9643 | M369T11_ | 1.137417 | 0.185761 | 0.630194 | 0.549428 | 0.864149 | UP   | 369.4234 | 369.4233 | 369.4236 | 10.89193 | 10.877   |
| 9644 | M398T40_ | 1.353723 | -0.43693 | -0.65252 | 0.549563 | 0.86415  | DOWN | 398.2381 | 398.2381 | 398.2382 | 39.81975 | 39.69033 |
| 9645 | M378T38_ | 1.450258 | -0.53631 | -0.62472 | 0.549565 | 0.86415  | DOWN | 378.2483 | 378.2481 | 378.2486 | 38.338   | 38.26583 |
| 9646 | M305T25  | 1.075004 | -0.10434 | -0.63117 | 0.549585 | 0.86415  | DOWN | 305.2878 | 305.2876 | 305.2879 | 24.6955  | 24.68133 |
| 9647 | M387T10_ | 1.193678 | 0.255413 | 0.644053 | 0.549636 | 0.86415  | UP   | 386.8378 | 386.8371 | 386.8383 | 9.930908 | 9.827283 |
| 9648 | M509T9_4 | 1.368258 | -0.45234 | -0.62453 | 0.549689 | 0.864151 | DOWN | 509.3927 | 509.3922 | 509.3928 | 9.438833 | 9.38595  |
| 9649 | M422T31  | 1.27152  | -0.34655 | -0.62811 | 0.549709 | 0.864151 | DOWN | 421.8305 | 421.8301 | 421.8307 | 31.27717 | 31.2625  |
| 9650 | M235T9_4 | 1.250587 | -0.32261 | -0.62529 | 0.549948 | 0.864152 | DOWN | 234.8368 | 234.8337 | 234.8388 | 9.29345  | 9.11795  |
| 9651 | M1940T10 | 1.130639 | -0.17714 | -0.62402 | 0.549994 | 0.864152 | DOWN | 1939.842 | 1939.839 | 1939.846 | 9.816183 | 9.7124   |
| 9652 | M315T24  | 1.209139 | -0.27398 | -0.62415 | 0.550125 | 0.864153 | DOWN | 315.4299 | 315.4298 | 315.43   | 24.12158 | 24.096   |
| 9653 | M701T9_2 | 1.232169 | -0.3012  | -0.62856 | 0.550278 | 0.864154 | DOWN | 701.2293 | 701.2288 | 701.2307 | 9.317    | 9.234417 |
| 9654 | M435T24_ | 1.24211  | -0.31279 | -0.62391 | 0.550289 | 0.864154 | DOWN | 434.5081 | 434.5079 | 434.5084 | 23.95    | 23.9105  |
| 9655 | M265T10_ | 1.272741 | 0.347938 | 0.62532  | 0.550291 | 0.864154 | UP   | 264.515  | 264.5147 | 264.5152 | 9.77435  | 9.766367 |
| 9656 | M490T10_ | 1.112245 | -0.15347 | -0.63118 | 0.550349 | 0.864154 | DOWN | 490.4896 | 490.4894 | 490.4898 | 9.967367 | 9.859233 |
| 9657 | M357T10_ | 1.833034 | -0.87423 | -0.64604 | 0.550483 | 0.864155 | DOWN | 356.5317 | 356.5313 | 356.532  | 9.830833 | 9.6681   |
| 9658 | M775T22  | 1.083753 | -0.11604 | -0.62554 | 0.550491 | 0.864155 | DOWN | 774.5576 | 774.5572 | 774.5581 | 21.744   | 21.7165  |
| 9659 | M592T42_ | 1.230905 | -0.29972 | -0.64882 | 0.550494 | 0.864155 | DOWN | 592.3325 | 592.3323 | 592.3329 | 42.36633 | 42.2225  |

|      |          |          |          |          |          |          |      |          |          |          |          |          |
|------|----------|----------|----------|----------|----------|----------|------|----------|----------|----------|----------|----------|
| 9660 | M387T13  | 1.273182 | 0.348439 | 0.648378 | 0.550505 | 0.864155 | UP   | 387.2488 | 387.2488 | 387.2489 | 12.99613 | 12.909   |
| 9661 | M1093T10 | 1.212833 | 0.278381 | 0.641642 | 0.550618 | 0.864156 | UP   | 1092.758 | 1092.757 | 1092.759 | 9.850992 | 9.747533 |
| 9662 | M598T10_ | 1.099023 | -0.13622 | -0.62712 | 0.550631 | 0.864156 | DOWN | 598.4319 | 598.4312 | 598.4364 | 9.599533 | 9.253783 |
| 9663 | M303T10_ | 1.356292 | 0.439667 | 0.644734 | 0.550634 | 0.864156 | UP   | 302.5018 | 302.5015 | 302.5021 | 9.9677   | 9.859233 |
| 9664 | M729T10_ | 1.070091 | -0.09773 | -0.63186 | 0.550646 | 0.864156 | DOWN | 728.8852 | 728.8846 | 728.8857 | 9.830458 | 9.715683 |
| 9665 | M379T11_ | 1.137815 | -0.18627 | -0.62265 | 0.550852 | 0.864157 | DOWN | 379.1075 | 379.1074 | 379.1079 | 10.90553 | 10.879   |
| 9666 | M643T19  | 1.1046   | 0.143525 | 0.632149 | 0.550866 | 0.864157 | UP   | 643.4679 | 643.4672 | 643.4686 | 18.64183 | 18.61433 |
| 9667 | M537T10_ | 1.080837 | -0.11215 | -0.6241  | 0.550978 | 0.864157 | DOWN | 537.3003 | 537.2999 | 537.301  | 9.918792 | 9.811217 |
| 9668 | M510T10_ | 1.187125 | -0.24747 | -0.6338  | 0.551002 | 0.864158 | DOWN | 509.7369 | 509.7367 | 509.7374 | 9.8207   | 9.715683 |
| 9669 | M929T10_ | 1.110409 | 0.151091 | 0.622962 | 0.55104  | 0.864158 | UP   | 928.6663 | 928.6659 | 928.6665 | 10.16706 | 10.08517 |
| 9670 | M454T9_1 | 1.585333 | 0.664786 | 0.622472 | 0.55114  | 0.864158 | UP   | 454.2914 | 454.2881 | 454.2978 | 9.393675 | 9.11405  |
| 9671 | M342T10_ | 1.785266 | -0.83614 | -0.62473 | 0.551343 | 0.864159 | DOWN | 341.6028 | 341.602  | 341.6031 | 9.819625 | 9.743667 |
| 9672 | M1857T10 | 1.195466 | -0.25757 | -0.62391 | 0.551405 | 0.86416  | DOWN | 1857.446 | 1857.445 | 1857.448 | 9.847542 | 9.73145  |
| 9673 | M671T10_ | 1.115168 | -0.15726 | -0.62683 | 0.551482 | 0.86416  | DOWN | 671.0475 | 671.0469 | 671.0487 | 9.851025 | 9.73145  |
| 9674 | M395T10_ | 1.241758 | 0.312384 | 0.622132 | 0.551533 | 0.86416  | UP   | 394.8028 | 394.8014 | 394.8029 | 10.40882 | 10.39197 |
| 9675 | M333T11_ | 1.13782  | -0.18627 | -0.62263 | 0.551665 | 0.864161 | DOWN | 333.1934 | 333.1932 | 333.1936 | 11.49698 | 11.47593 |
| 9676 | M395T9_3 | 1.251748 | 0.323944 | 0.626656 | 0.551754 | 0.864161 | UP   | 395.0107 | 395.0067 | 395.0126 | 9.26575  | 9.142767 |
| 9677 | M235T10_ | 1.100354 | -0.13797 | -0.62169 | 0.551755 | 0.864161 | DOWN | 235.3639 | 235.3638 | 235.364  | 9.933    | 9.827283 |
| 9678 | M204T10_ | 1.116335 | 0.15877  | 0.623502 | 0.55182  | 0.864162 | UP   | 204.4415 | 204.4414 | 204.4491 | 9.8207   | 9.715683 |
| 9679 | M303T10_ | 1.116192 | 0.158586 | 0.644169 | 0.551872 | 0.864162 | UP   | 303.1816 | 303.1812 | 303.182  | 9.967533 | 9.859233 |
| 9680 | M400T10_ | 1.190358 | 0.251396 | 0.635408 | 0.551885 | 0.864162 | UP   | 400.3482 | 400.3478 | 400.3488 | 9.930908 | 9.811217 |
| 9681 | M698T10_ | 1.149931 | 0.201547 | 0.637325 | 0.551896 | 0.864162 | UP   | 698.2616 | 698.2609 | 698.2622 | 9.816317 | 9.715683 |
| 9682 | M154T11_ | 1.275335 | -0.35088 | -0.62172 | 0.552034 | 0.864163 | DOWN | 154.3955 | 154.3954 | 154.3957 | 10.88453 | 10.86008 |
| 9683 | M768T12  | 1.213134 | -0.27874 | -0.62258 | 0.552057 | 0.864163 | DOWN | 768.4008 | 768.3996 | 768.4019 | 12.20977 | 12.17992 |
| 9684 | M187T44_ | 1.118362 | -0.16139 | -0.64553 | 0.552111 | 0.864163 | DOWN | 187.0962 | 187.0961 | 187.0963 | 44.2835  | 44.092   |
| 9685 | M204T10_ | 1.12615  | 0.1714   | 0.623822 | 0.552134 | 0.864163 | UP   | 204.3735 | 204.3733 | 204.3736 | 9.82645  | 9.715683 |
| 9686 | M1983T10 | 1.489484 | -0.57481 | -0.62185 | 0.552134 | 0.864163 | DOWN | 1983.121 | 1983.119 | 1983.122 | 9.932    | 9.8914   |
| 9687 | M477T9_9 | 1.188376 | -0.24899 | -0.62931 | 0.552169 | 0.864164 | DOWN | 477.4776 | 477.4768 | 477.4826 | 9.29345  | 9.129317 |
| 9688 | M850T11_ | 1.115121 | -0.1572  | -0.62206 | 0.552256 | 0.864164 | DOWN | 850.2912 | 850.2903 | 850.2947 | 10.90551 | 10.879   |
| 9689 | M194T9_1 | 1.805355 | -0.85228 | -0.63928 | 0.55228  | 0.864164 | DOWN | 193.9956 | 193.9947 | 193.9967 | 9.237192 | 9.061    |
| 9690 | M428T19_ | 1.138529 | -0.18717 | -0.62055 | 0.552303 | 0.864164 | DOWN | 428.2951 | 428.2941 | 428.2951 | 19.16433 | 19.0965  |
| 9691 | M341T10_ | 1.482074 | -0.56762 | -0.62229 | 0.552317 | 0.864164 | DOWN | 341.0541 | 341.0539 | 341.0546 | 9.938867 | 9.8914   |
| 9692 | M524T20_ | 1.255875 | -0.32869 | -0.64213 | 0.552361 | 0.864165 | DOWN | 524.3786 | 524.3777 | 524.3797 | 20.47717 | 20.4475  |
| 9693 | M159T10_ | 1.207254 | -0.27173 | -0.62945 | 0.552401 | 0.864165 | DOWN | 159.3612 | 159.3611 | 159.3628 | 9.778967 | 9.746783 |
| 9694 | M389T11_ | 1.221088 | 0.288167 | 0.630329 | 0.552402 | 0.864165 | UP   | 389.251  | 389.251  | 389.2513 | 11.11213 | 11.09168 |

|      |          |          |          |          |          |          |      |          |          |          |          |          |
|------|----------|----------|----------|----------|----------|----------|------|----------|----------|----------|----------|----------|
| 9695 | M818T10_ | 1.086955 | -0.12029 | -0.62456 | 0.552496 | 0.864165 | DOWN | 817.944  | 817.943  | 817.9459 | 9.90295  | 9.79535  |
| 9696 | M289T20_ | 1.156662 | -0.20997 | -0.644   | 0.552553 | 0.864166 | DOWN | 289.1989 | 289.1988 | 289.1992 | 19.6645  | 19.6415  |
| 9697 | M518T44_ | 1.087074 | 0.120449 | 0.624599 | 0.552592 | 0.864166 | UP   | 518.2956 | 518.2954 | 518.2959 | 43.94817 | 43.90517 |
| 9698 | M205T10_ | 1.186797 | -0.24707 | -0.63457 | 0.552704 | 0.864166 | DOWN | 204.6068 | 204.6067 | 204.6144 | 9.8207   | 9.715683 |
| 9699 | M420T10_ | 1.191123 | 0.252322 | 0.634028 | 0.552705 | 0.864166 | UP   | 420.49   | 420.4897 | 420.4903 | 9.930908 | 9.811217 |
| 9700 | M417T40  | 1.286224 | -0.36314 | -0.63786 | 0.552729 | 0.864166 | DOWN | 417.248  | 417.2478 | 417.2482 | 40.05017 | 39.6905  |
| 9701 | M1848T10 | 1.227656 | -0.29591 | -0.61985 | 0.552752 | 0.864167 | DOWN | 1848.425 | 1848.422 | 1848.427 | 9.828267 | 9.715683 |
| 9702 | M570T10_ | 1.174081 | 0.231531 | 0.623356 | 0.552763 | 0.864167 | UP   | 570.4998 | 570.4992 | 570.5002 | 9.957333 | 9.843367 |
| 9703 | M639T10_ | 1.164574 | 0.219802 | 0.638452 | 0.55279  | 0.864167 | UP   | 639.448  | 639.4473 | 639.4498 | 9.830283 | 9.715683 |
| 9704 | M545T11_ | 1.085719 | -0.11865 | -0.624   | 0.552857 | 0.864167 | DOWN | 545.3287 | 545.328  | 545.3296 | 10.64445 | 10.59763 |
| 9705 | M262T10_ | 1.205303 | -0.2694  | -0.62188 | 0.553008 | 0.864168 | DOWN | 261.8441 | 261.8438 | 261.8443 | 9.958617 | 9.843367 |
| 9706 | M578T11_ | 1.083756 | -0.11604 | -0.62181 | 0.553044 | 0.864168 | DOWN | 577.9202 | 577.9199 | 577.9205 | 10.5188  | 10.47197 |
| 9707 | M469T27_ | 1.301679 | -0.38037 | -0.62335 | 0.553149 | 0.864169 | DOWN | 468.9973 | 468.9967 | 468.9982 | 26.85367 | 26.824   |
| 9708 | M660T10_ | 1.217294 | -0.28368 | -0.61919 | 0.553161 | 0.864169 | DOWN | 659.8121 | 659.8116 | 659.8127 | 9.914217 | 9.811217 |
| 9709 | M154T10_ | 1.136247 | 0.184277 | 0.621234 | 0.553171 | 0.864169 | UP   | 154.2571 | 154.2569 | 154.2571 | 9.9164   | 9.811217 |
| 9710 | M1067T10 | 1.130685 | -0.1772  | -0.62937 | 0.553223 | 0.864169 | DOWN | 1066.681 | 1066.68  | 1066.682 | 9.964167 | 9.843367 |
| 9711 | M373T24  | 1.522247 | 0.606203 | 0.643419 | 0.553278 | 0.864169 | UP   | 373.2555 | 373.2554 | 373.256  | 23.79117 | 23.776   |
| 9712 | M350T10_ | 1.402552 | 0.488055 | 0.619348 | 0.553384 | 0.86417  | UP   | 349.5501 | 349.5494 | 349.5504 | 9.770733 | 9.758367 |
| 9713 | M343T20_ | 1.19004  | -0.25101 | -0.63408 | 0.553485 | 0.86417  | DOWN | 343.24   | 343.2399 | 343.2402 | 20.25967 | 20.17233 |
| 9714 | M446T44_ | 1.11135  | 0.152314 | 0.618515 | 0.553517 | 0.864171 | UP   | 446.2382 | 446.2379 | 446.2385 | 43.57467 | 43.3445  |
| 9715 | M302T11_ | 1.110309 | -0.15096 | -0.62204 | 0.553603 | 0.864171 | DOWN | 302.1184 | 302.1183 | 302.1186 | 10.90551 | 10.879   |
| 9716 | M1473T10 | 1.878663 | 0.909706 | 0.641205 | 0.553608 | 0.864171 | UP   | 1473.475 | 1473.471 | 1473.476 | 9.974558 | 9.93625  |
| 9717 | M1839T10 | 1.133284 | -0.18051 | -0.62237 | 0.553736 | 0.864172 | DOWN | 1838.772 | 1838.771 | 1838.773 | 9.82645  | 9.743667 |
| 9718 | M251T10_ | 1.29794  | 0.376224 | 0.621154 | 0.55375  | 0.864172 | UP   | 250.7335 | 250.7229 | 250.7339 | 9.94455  | 9.811217 |
| 9719 | M211T10_ | 1.062843 | -0.08793 | -0.62029 | 0.553779 | 0.864172 | DOWN | 210.7747 | 210.7746 | 210.7825 | 9.830183 | 9.699733 |
| 9720 | M705T11_ | 1.093907 | -0.12949 | -0.61827 | 0.553846 | 0.864172 | DOWN | 704.6285 | 704.628  | 704.6303 | 10.91263 | 10.877   |
| 9721 | M249T10_ | 1.198739 | 0.261518 | 0.619443 | 0.553917 | 0.864173 | UP   | 249.322  | 249.3215 | 249.332  | 9.972917 | 9.859233 |
| 9722 | M295T7_1 | 1.296247 | 0.374341 | 0.643741 | 0.553937 | 0.864173 | UP   | 294.9385 | 294.9384 | 294.9387 | 7.3641   | 7.204733 |
| 9723 | M286T10_ | 1.111178 | -0.15209 | -0.62334 | 0.553965 | 0.864173 | DOWN | 286.3478 | 286.3476 | 286.3479 | 9.95385  | 9.843367 |
| 9724 | M328T18  | 1.25501  | -0.3277  | -0.62117 | 0.554035 | 0.864173 | DOWN | 328.4762 | 328.476  | 328.4767 | 18.41433 | 18.37883 |
| 9725 | M613T9_4 | 1.2395   | 0.309759 | 0.633143 | 0.554097 | 0.864174 | UP   | 613.3893 | 613.3816 | 613.3902 | 9.18195  | 9.126783 |
| 9726 | M1670T10 | 1.18176  | -0.24094 | -0.6172  | 0.554261 | 0.864174 | DOWN | 1669.59  | 1669.589 | 1669.591 | 9.914217 | 9.811217 |
| 9727 | M622T42_ | 1.103223 | 0.141725 | 0.625827 | 0.55432  | 0.864175 | UP   | 622.3433 | 622.343  | 622.3437 | 42.29433 | 42.10717 |
| 9728 | M654T10_ | 1.077767 | -0.10805 | -0.62735 | 0.554323 | 0.864175 | DOWN | 653.9649 | 653.9644 | 653.9654 | 9.818525 | 9.73145  |
| 9729 | M758T10_ | 1.217519 | -0.28394 | -0.61956 | 0.554334 | 0.864175 | DOWN | 758.2348 | 758.2327 | 758.2356 | 9.94455  | 9.811217 |

|      |          |          |          |          |          |          |      |          |          |          |          |          |
|------|----------|----------|----------|----------|----------|----------|------|----------|----------|----------|----------|----------|
| 9730 | M677T10_ | 1.149936 | -0.20155 | -0.62078 | 0.554372 | 0.864175 | DOWN | 677.1019 | 677.1015 | 677.1028 | 9.831242 | 9.715683 |
| 9731 | M264T10_ | 1.310757 | -0.3904  | -0.62324 | 0.554377 | 0.864175 | DOWN | 264.0575 | 264.0575 | 264.0696 | 9.842    | 9.649833 |
| 9732 | M810T11_ | 1.409536 | 0.49522  | 0.639338 | 0.554393 | 0.864175 | UP   | 810.3465 | 810.3436 | 810.3467 | 10.93415 | 10.8214  |
| 9733 | M419T10_ | 1.161446 | 0.215922 | 0.630572 | 0.554399 | 0.864175 | UP   | 419.4488 | 419.4485 | 419.449  | 9.917167 | 9.811217 |
| 9734 | M325T9_1 | 1.133556 | -0.18086 | -0.63314 | 0.554414 | 0.864175 | DOWN | 325.2464 | 325.2461 | 325.2466 | 9.487467 | 9.40135  |
| 9735 | M271T9_6 | 1.29428  | 0.37215  | 0.63973  | 0.554436 | 0.864175 | UP   | 270.9459 | 270.9453 | 270.9466 | 9.347667 | 9.26575  |
| 9736 | M220T9_8 | 1.232402 | 0.301473 | 0.634726 | 0.554456 | 0.864175 | UP   | 219.9043 | 219.9027 | 219.9047 | 9.3114   | 9.174883 |
| 9737 | M374T15  | 1.40643  | 0.492038 | 0.617624 | 0.554499 | 0.864176 | UP   | 374.1916 | 374.1914 | 374.1932 | 15.42452 | 15.37912 |
| 9738 | M731T10_ | 1.160063 | -0.2142  | -0.61778 | 0.554501 | 0.864176 | DOWN | 731.1664 | 731.1657 | 731.167  | 9.816317 | 9.699733 |
| 9739 | M417T10_ | 1.295951 | -0.37401 | -0.61663 | 0.55464  | 0.864176 | DOWN | 417.1195 | 417.1195 | 417.1199 | 9.970617 | 9.946367 |
| 9740 | M930T10  | 1.101824 | 0.139894 | 0.616444 | 0.554743 | 0.864177 | UP   | 929.6695 | 929.6692 | 929.6698 | 10.16706 | 10.08517 |
| 9741 | M479T9_1 | 1.462299 | -0.54824 | -0.61696 | 0.554803 | 0.864177 | DOWN | 478.5649 | 478.5617 | 478.5677 | 9.390567 | 9.13445  |
| 9742 | M198T13  | 1.160932 | 0.215284 | 0.640587 | 0.55482  | 0.864177 | UP   | 198.1487 | 198.1485 | 198.1488 | 12.59533 | 12.5577  |
| 9743 | M590T9_4 | 1.293915 | -0.37174 | -0.61778 | 0.554899 | 0.864178 | DOWN | 590.3749 | 590.3744 | 590.3761 | 8.796167 | 8.742633 |
| 9744 | M1345T10 | 1.067396 | 0.094095 | 0.61619  | 0.554913 | 0.864178 | UP   | 1345.406 | 1345.401 | 1345.412 | 9.891925 | 9.779267 |
| 9745 | M248T11_ | 1.157698 | -0.21126 | -0.61684 | 0.55505  | 0.864178 | DOWN | 247.7685 | 247.7683 | 247.7686 | 10.8926  | 10.8646  |
| 9746 | M406T11_ | 1.116047 | -0.1584  | -0.61978 | 0.555098 | 0.864179 | DOWN | 406.4637 | 406.4633 | 406.4639 | 10.92593 | 10.879   |
| 9747 | M222T9_3 | 1.198314 | -0.26101 | -0.61613 | 0.555122 | 0.864179 | DOWN | 221.8261 | 221.8255 | 221.8265 | 9.334033 | 9.126783 |
| 9748 | M166T10_ | 1.205319 | -0.26941 | -0.61579 | 0.555148 | 0.864179 | DOWN | 165.5992 | 165.599  | 165.5992 | 9.918833 | 9.811217 |
| 9749 | M341T10_ | 1.091482 | -0.12629 | -0.623   | 0.555154 | 0.864179 | DOWN | 340.5507 | 340.5503 | 340.551  | 9.844758 | 9.73145  |
| 9750 | M472T10_ | 1.140939 | -0.19022 | -0.62182 | 0.555163 | 0.864179 | DOWN | 472.3998 | 472.3992 | 472.4001 | 9.964092 | 9.843367 |
| 9751 | M338T10_ | 1.298934 | 0.377328 | 0.616406 | 0.55529  | 0.86418  | UP   | 338.3276 | 338.3274 | 338.3276 | 9.523633 | 9.416817 |
| 9752 | M179T9_2 | 1.167497 | 0.223419 | 0.633621 | 0.555295 | 0.86418  | UP   | 178.8496 | 178.8493 | 178.8503 | 9.358417 | 9.24215  |
| 9753 | M178T10_ | 1.211116 | -0.27634 | -0.61997 | 0.555396 | 0.86418  | DOWN | 177.7263 | 177.7262 | 177.7263 | 9.972483 | 9.9009   |
| 9754 | M658T10_ | 1.206326 | 0.27062  | 0.627107 | 0.555409 | 0.86418  | UP   | 658.3851 | 658.3848 | 658.3861 | 10.39752 | 10.34372 |
| 9755 | M621T10_ | 1.047409 | -0.06683 | -0.62291 | 0.555416 | 0.86418  | DOWN | 620.5113 | 620.511  | 620.5118 | 10.28872 | 10.21468 |
| 9756 | M744T9_3 | 1.158399 | -0.21213 | -0.61739 | 0.555428 | 0.86418  | DOWN | 744.0696 | 744.0678 | 744.0703 | 9.474408 | 9.370583 |
| 9757 | M265T11_ | 1.114889 | -0.1569  | -0.61714 | 0.555465 | 0.864181 | DOWN | 264.5614 | 264.5614 | 264.5619 | 10.89875 | 10.8646  |
| 9758 | M193T9_9 | 1.32786  | 0.409103 | 0.615527 | 0.555528 | 0.864181 | UP   | 193.2144 | 193.2143 | 193.2145 | 9.295817 | 9.1587   |
| 9759 | M495T10_ | 1.132667 | -0.17972 | -0.61873 | 0.555583 | 0.864181 | DOWN | 494.8137 | 494.8131 | 494.814  | 9.568783 | 9.49445  |
| 9760 | M1865T10 | 1.070989 | -0.09894 | -0.61558 | 0.555641 | 0.864181 | DOWN | 1864.657 | 1864.656 | 1864.659 | 9.82645  | 9.728083 |
| 9761 | M327T10_ | 1.222515 | 0.289852 | 0.631437 | 0.555656 | 0.864182 | UP   | 326.5914 | 326.5914 | 326.5915 | 9.941642 | 9.853533 |
| 9762 | M291T11_ | 1.122956 | 0.167301 | 0.614906 | 0.555719 | 0.864182 | UP   | 291.04   | 291.0399 | 291.0401 | 10.93153 | 10.90553 |
| 9763 | M533T10_ | 1.09406  | -0.12969 | -0.61605 | 0.555762 | 0.864182 | DOWN | 532.596  | 532.5955 | 532.5971 | 9.943183 | 9.827283 |
| 9764 | M437T11_ | 1.097902 | -0.13475 | -0.61473 | 0.555838 | 0.864182 | DOWN | 437.4912 | 437.4911 | 437.4922 | 10.892   | 10.879   |

|      |          |          |          |          |          |          |      |          |          |          |          |          |
|------|----------|----------|----------|----------|----------|----------|------|----------|----------|----------|----------|----------|
| 9765 | M412T10_ | 1.209387 | 0.274277 | 0.632405 | 0.55592  | 0.864183 | UP   | 411.588  | 411.5877 | 411.5881 | 9.95825  | 9.859233 |
| 9766 | M467T10_ | 1.060277 | 0.084441 | 0.621735 | 0.555985 | 0.864183 | UP   | 466.8565 | 466.856  | 466.8568 | 9.794742 | 9.65225  |
| 9767 | M188T11_ | 1.33019  | -0.41163 | -0.61476 | 0.556007 | 0.864183 | DOWN | 187.6997 | 187.6997 | 187.7    | 10.879   | 10.87708 |
| 9768 | M203T11_ | 1.12496  | -0.16987 | -0.6217  | 0.556089 | 0.864184 | DOWN | 202.9552 | 202.9552 | 202.9553 | 10.90551 | 10.88747 |
| 9769 | M442T11_ | 1.086081 | -0.11913 | -0.61429 | 0.556092 | 0.864184 | DOWN | 442.3427 | 442.3424 | 442.3432 | 11.30821 | 11.28597 |
| 9770 | M486T10_ | 1.100483 | -0.13814 | -0.61773 | 0.556231 | 0.864184 | DOWN | 486.3533 | 486.3531 | 486.3535 | 10.1599  | 10.06883 |
| 9771 | M661T10_ | 1.216447 | 0.282673 | 0.635181 | 0.556435 | 0.864185 | UP   | 660.8158 | 660.8152 | 660.8161 | 9.951283 | 9.859233 |
| 9772 | M332T10_ | 1.047203 | 0.066542 | 0.615945 | 0.55652  | 0.864186 | UP   | 332.4528 | 332.4526 | 332.4534 | 9.847817 | 9.73145  |
| 9773 | M414T16  | 1.226762 | 0.294855 | 0.616494 | 0.556576 | 0.864186 | UP   | 414.1657 | 414.1652 | 414.1664 | 16.0998  | 16.05235 |
| 9774 | M233T20  | 1.146126 | -0.19677 | -0.62438 | 0.556621 | 0.864186 | DOWN | 233.1726 | 233.1725 | 233.1728 | 20.40417 | 20.40333 |
| 9775 | M291T10_ | 1.156265 | 0.209472 | 0.619119 | 0.556683 | 0.864187 | UP   | 290.5151 | 290.5124 | 290.5154 | 9.956417 | 9.843367 |
| 9776 | M496T10_ | 1.148311 | -0.19951 | -0.63136 | 0.556727 | 0.864187 | DOWN | 495.7036 | 495.7031 | 495.7041 | 9.942317 | 9.827283 |
| 9777 | M674T9_3 | 1.268021 | -0.34258 | -0.61874 | 0.556744 | 0.864187 | DOWN | 674.3428 | 674.3419 | 674.3449 | 9.381658 | 9.30965  |
| 9778 | M183T9_9 | 1.480677 | 0.566257 | 0.624349 | 0.556748 | 0.864187 | UP   | 183.1736 | 183.1693 | 183.1747 | 9.206    | 9.111033 |
| 9779 | M732T11_ | 1.135795 | -0.1837  | -0.61546 | 0.556785 | 0.864187 | DOWN | 732.1287 | 732.128  | 732.129  | 10.892   | 10.85838 |
| 9780 | M380T10_ | 1.113115 | -0.1546  | -0.62128 | 0.5568   | 0.864187 | DOWN | 380.3021 | 380.3014 | 380.3022 | 9.650367 | 9.557333 |
| 9781 | M292T11_ | 1.276515 | -0.35221 | -0.61332 | 0.55683  | 0.864187 | DOWN | 291.7839 | 291.7838 | 291.7841 | 10.94208 | 10.88995 |
| 9782 | M157T8   | 1.127119 | -0.17264 | -0.61307 | 0.556852 | 0.864188 | DOWN | 157.0833 | 157.0833 | 157.0834 | 8.478133 | 8.368967 |
| 9783 | M188T9_1 | 1.286692 | -0.36367 | -0.61306 | 0.556878 | 0.864188 | DOWN | 188.4405 | 188.4402 | 188.4408 | 9.166033 | 9.126783 |
| 9784 | M551T10_ | 1.455402 | 0.541418 | 0.635971 | 0.556905 | 0.864188 | UP   | 551.3794 | 551.3788 | 551.3798 | 9.642633 | 9.556217 |
| 9785 | M741T10_ | 1.148136 | -0.19929 | -0.62117 | 0.556984 | 0.864188 | DOWN | 740.9265 | 740.9255 | 740.9269 | 10.11541 | 10.02042 |
| 9786 | M921T10_ | 1.24068  | 0.311131 | 0.624575 | 0.557065 | 0.864189 | UP   | 920.6938 | 920.6934 | 920.6947 | 9.933    | 9.811217 |
| 9787 | M327T42_ | 1.270609 | -0.34552 | -0.61908 | 0.557122 | 0.864189 | DOWN | 327.2163 | 327.2162 | 327.2165 | 42.09283 | 42.021   |
| 9788 | M418T39  | 1.087165 | 0.120571 | 0.618954 | 0.557123 | 0.864189 | UP   | 418.2796 | 418.2795 | 418.2798 | 39.38833 | 39.17233 |
| 9789 | M399T31_ | 1.687504 | -0.75489 | -0.61384 | 0.557164 | 0.864189 | DOWN | 399.2355 | 399.2306 | 399.2392 | 31.13325 | 31.062   |
| 9790 | M504T28_ | 1.230682 | -0.29946 | -0.61333 | 0.557257 | 0.86419  | DOWN | 503.8863 | 503.8858 | 503.8865 | 28.38933 | 28.362   |
| 9791 | M1015T12 | 1.117104 | -0.15976 | -0.62892 | 0.557328 | 0.86419  | DOWN | 1015.458 | 1015.458 | 1015.458 | 12.47125 | 12.45587 |
| 9792 | M700T10_ | 1.151452 | -0.20345 | -0.61292 | 0.557338 | 0.86419  | DOWN | 700.0558 | 700.0553 | 700.0579 | 9.939283 | 9.843367 |
| 9793 | M202T9_7 | 1.253253 | -0.32568 | -0.62022 | 0.557363 | 0.86419  | DOWN | 201.8668 | 201.8665 | 201.8673 | 9.419733 | 9.26575  |
| 9794 | M313T10_ | 1.20488  | 0.26889  | 0.637017 | 0.557458 | 0.864191 | UP   | 312.6991 | 312.6988 | 312.6994 | 9.8207   | 9.728083 |
| 9795 | M567T10_ | 1.163686 | -0.2187  | -0.61393 | 0.557539 | 0.864191 | DOWN | 567.1927 | 567.1921 | 567.193  | 9.988125 | 9.9009   |
| 9796 | M1136T10 | 1.145323 | -0.19575 | -0.62336 | 0.557576 | 0.864191 | DOWN | 1135.726 | 1135.725 | 1135.728 | 9.8322   | 9.715683 |
| 9797 | M474T10_ | 1.338222 | 0.420317 | 0.623434 | 0.557587 | 0.864191 | UP   | 473.5733 | 473.5731 | 473.5741 | 9.761783 | 9.665433 |
| 9798 | M203T8_3 | 1.257222 | 0.330239 | 0.618764 | 0.557649 | 0.864192 | UP   | 203.1832 | 203.1832 | 203.1834 | 8.256033 | 8.10135  |
| 9799 | M351T9_1 | 1.289376 | 0.366673 | 0.625339 | 0.557655 | 0.864192 | UP   | 351.2222 | 351.2201 | 351.2275 | 9.065125 | 8.8486   |



|      |          |          |          |          |          |          |      |          |          |          |          |          |
|------|----------|----------|----------|----------|----------|----------|------|----------|----------|----------|----------|----------|
| 9800 | M678T10_ | 1.210276 | -0.27534 | -0.6142  | 0.55768  | 0.864192 | DOWN | 678.1867 | 678.1861 | 678.1881 | 9.944392 | 9.843367 |
| 9801 | M388T10_ | 1.184393 | 0.244148 | 0.630383 | 0.557706 | 0.864192 | UP   | 387.66   | 387.6597 | 387.6603 | 9.929017 | 9.811217 |
| 9802 | M669T11  | 1.273879 | 0.349228 | 0.616296 | 0.557954 | 0.864203 | UP   | 669.0603 | 669.0602 | 669.0608 | 10.89125 | 10.879   |
| 9803 | M542T9_2 | 1.300019 | 0.378532 | 0.626073 | 0.558092 | 0.864209 | UP   | 541.7247 | 541.7244 | 541.7252 | 9.3907   | 9.340183 |
| 9804 | M589T11_ | 1.183651 | 0.243244 | 0.625194 | 0.558097 | 0.864209 | UP   | 589.4131 | 589.4122 | 589.4135 | 10.52067 | 10.47223 |
| 9805 | M739T10_ | 1.117723 | -0.16056 | -0.61322 | 0.558192 | 0.864214 | DOWN | 738.9507 | 738.9498 | 738.9511 | 10.11868 | 10.03658 |
| 9806 | M323T10_ | 1.102707 | -0.14105 | -0.61313 | 0.5582   | 0.864214 | DOWN | 322.8766 | 322.8762 | 322.8767 | 9.942317 | 9.827283 |
| 9807 | M1047T10 | 1.020637 | 0.029469 | 0.616084 | 0.558248 | 0.864216 | UP   | 1046.986 | 1046.985 | 1046.988 | 9.842325 | 9.747533 |
| 9808 | M495T9_1 | 1.454722 | 0.540743 | 0.632901 | 0.558368 | 0.864222 | UP   | 495.4139 | 495.4127 | 495.4146 | 9.371842 | 9.16125  |
| 9809 | M268T9_5 | 1.158587 | -0.21237 | -0.63062 | 0.558384 | 0.864222 | DOWN | 268.3493 | 268.3484 | 268.3497 | 9.365833 | 9.279417 |
| 9810 | M205T10_ | 1.123113 | 0.167504 | 0.615844 | 0.558477 | 0.864226 | UP   | 204.6809 | 204.6806 | 204.6819 | 9.81635  | 9.715683 |
| 9811 | M685T9_1 | 1.488093 | -0.57347 | -0.61055 | 0.558509 | 0.864228 | DOWN | 684.6929 | 684.6925 | 684.6936 | 9.325333 | 9.275917 |
| 9812 | M366T11_ | 1.192797 | -0.25435 | -0.61293 | 0.558586 | 0.864231 | DOWN | 365.9537 | 365.9535 | 365.9539 | 10.90548 | 10.8646  |
| 9813 | M486T10_ | 1.203612 | 0.26737  | 0.609594 | 0.559075 | 0.864253 | UP   | 485.8916 | 485.8911 | 485.8916 | 9.967367 | 9.8914   |
| 9814 | M225T10_ | 1.179392 | -0.23804 | -0.61022 | 0.559128 | 0.864255 | DOWN | 225.3842 | 225.3755 | 225.3843 | 9.902008 | 9.79535  |
| 9815 | M644T12  | 1.185876 | -0.24595 | -0.62651 | 0.559147 | 0.864256 | DOWN | 644.4755 | 644.4747 | 644.476  | 12.26278 | 12.22265 |
| 9816 | M887T10_ | 1.066157 | -0.09242 | -0.61107 | 0.559161 | 0.864257 | DOWN | 886.6666 | 886.6654 | 886.6672 | 9.918792 | 9.811217 |
| 9817 | M399T10_ | 1.159507 | 0.213512 | 0.622958 | 0.559202 | 0.864259 | UP   | 399.3809 | 399.3804 | 399.3815 | 9.917167 | 9.811217 |
| 9818 | M233T11_ | 1.08663  | -0.11986 | -0.61603 | 0.55931  | 0.864263 | DOWN | 233.4536 | 233.4534 | 233.4557 | 10.9062  | 10.879   |
| 9819 | M350T36  | 1.207594 | 0.272135 | 0.634079 | 0.559371 | 0.864266 | UP   | 350.2172 | 350.217  | 350.2307 | 36.27733 | 36.04983 |
| 9820 | M235T10_ | 1.068733 | -0.0959  | -0.60995 | 0.55947  | 0.864271 | DOWN | 234.9277 | 234.9275 | 234.9278 | 9.924308 | 9.811217 |
| 9821 | M422T9_2 | 1.599549 | 0.677665 | 0.62877  | 0.559473 | 0.864271 | UP   | 422.0891 | 422.0886 | 422.0894 | 9.459117 | 9.40135  |
| 9822 | M332T10_ | 1.131456 | 0.17818  | 0.629642 | 0.559522 | 0.864273 | UP   | 332.2673 | 332.2671 | 332.2675 | 9.823575 | 9.715683 |
| 9823 | M615T10_ | 1.251991 | 0.324224 | 0.614009 | 0.559575 | 0.864275 | UP   | 615.0591 | 615.0583 | 615.0598 | 9.9677   | 9.8753   |
| 9824 | M648T45  | 1.132172 | -0.17909 | -0.61602 | 0.559598 | 0.864276 | DOWN | 647.9435 | 647.9427 | 647.944  | 44.8325  | 44.73933 |
| 9825 | M342T10_ | 1.19214  | -0.25355 | -0.61641 | 0.559598 | 0.864276 | DOWN | 341.6829 | 341.6828 | 341.6833 | 9.825767 | 9.715683 |
| 9826 | M386T11_ | 1.15313  | 0.205555 | 0.619112 | 0.559614 | 0.864277 | UP   | 386.3488 | 386.3486 | 386.349  | 10.89875 | 10.879   |
| 9827 | M325T10_ | 1.401021 | -0.48648 | -0.62304 | 0.559696 | 0.864281 | DOWN | 324.5504 | 324.5504 | 324.5506 | 9.838108 | 9.73145  |
| 9828 | M754T10_ | 1.20459  | 0.268542 | 0.611129 | 0.559739 | 0.864283 | UP   | 753.5325 | 753.5316 | 753.5345 | 9.933567 | 9.811217 |
| 9829 | M356T9_3 | 1.243247 | -0.31411 | -0.60852 | 0.559763 | 0.864284 | DOWN | 356.1946 | 356.1943 | 356.195  | 8.9519   | 8.857533 |
| 9830 | M420T35_ | 1.121338 | 0.165221 | 0.610333 | 0.560053 | 0.864296 | UP   | 420.2226 | 420.2223 | 420.2229 | 35.34083 | 35.29967 |
| 9831 | M398T9_4 | 1.139355 | -0.18822 | -0.61331 | 0.560187 | 0.864302 | DOWN | 398.0529 | 398.0523 | 398.054  | 9.29345  | 9.129317 |
| 9832 | M492T17  | 1.272046 | -0.34715 | -0.62909 | 0.560374 | 0.864311 | DOWN | 492.34   | 492.3393 | 492.3405 | 16.69483 | 16.67983 |
| 9833 | M415T23  | 1.088003 | 0.121682 | 0.607977 | 0.560566 | 0.864319 | UP   | 415.2111 | 415.2108 | 415.2114 | 22.85692 | 22.82817 |
| 9834 | M282T10_ | 1.095317 | 0.131348 | 0.626639 | 0.560632 | 0.864322 | UP   | 282.1229 | 282.1228 | 282.123  | 9.864467 | 9.73145  |

|      |           |          |          |          |          |          |      |          |          |          |          |          |
|------|-----------|----------|----------|----------|----------|----------|------|----------|----------|----------|----------|----------|
| 9835 | M434T9_1  | 1.291414 | 0.368952 | 0.627881 | 0.560751 | 0.864327 | UP   | 433.518  | 433.5177 | 433.5183 | 9.277833 | 9.129317 |
| 9836 | M348T3_2  | 1.265171 | -0.33933 | -0.60707 | 0.560789 | 0.864329 | DOWN | 348.2564 | 348.2562 | 348.2564 | 3.402667 | 3.2799   |
| 9837 | M197T10_  | 1.291866 | 0.369457 | 0.613421 | 0.560794 | 0.864329 | UP   | 196.8613 | 196.8543 | 196.8617 | 9.865467 | 9.65225  |
| 9838 | M1225T10_ | 1.130363 | -0.17679 | -0.62046 | 0.560806 | 0.86433  | DOWN | 1224.741 | 1224.74  | 1224.742 | 9.8207   | 9.772833 |
| 9839 | M534T11   | 1.180427 | -0.23931 | -0.61544 | 0.560812 | 0.86433  | DOWN | 533.6738 | 533.673  | 533.6741 | 10.55593 | 10.45613 |
| 9840 | M158T16   | 1.104383 | -0.14324 | -0.60773 | 0.560887 | 0.864333 | DOWN | 158.1536 | 158.1536 | 158.1537 | 15.80467 | 15.71147 |
| 9841 | M162T10_  | 1.165655 | -0.22114 | -0.61414 | 0.560904 | 0.864334 | DOWN | 161.983  | 161.9829 | 161.9831 | 9.915933 | 9.811217 |
| 9842 | M318T9_1  | 1.22853  | -0.29693 | -0.61106 | 0.560984 | 0.864338 | DOWN | 318.2288 | 318.2236 | 318.2292 | 9.25985  | 9.129317 |
| 9843 | M167T9_4  | 1.301628 | -0.38032 | -0.60773 | 0.561054 | 0.864341 | DOWN | 166.7536 | 166.7533 | 166.7539 | 9.161142 | 9.132267 |
| 9844 | M417T11_  | 1.172555 | -0.22966 | -0.60666 | 0.561092 | 0.864342 | DOWN | 416.6557 | 416.6529 | 416.657  | 10.91497 | 10.87487 |
| 9845 | M821T11_  | 1.117527 | -0.16031 | -0.61689 | 0.56111  | 0.864343 | DOWN | 821.4681 | 821.4675 | 821.469  | 10.89923 | 10.873   |
| 9846 | M343T11_  | 1.112893 | -0.15432 | -0.60802 | 0.561167 | 0.864346 | DOWN | 342.7619 | 342.7617 | 342.7623 | 10.892   | 10.8646  |
| 9847 | M439T11_  | 1.063839 | 0.08928  | 0.606974 | 0.56121  | 0.864348 | UP   | 438.6981 | 438.698  | 438.6987 | 10.90659 | 10.879   |
| 9848 | M316T9_5  | 1.418553 | -0.50442 | -0.60988 | 0.561222 | 0.864348 | DOWN | 316.3322 | 316.3319 | 316.3323 | 9.362817 | 9.250817 |
| 9849 | M584T9_2  | 1.493904 | -0.57909 | -0.61071 | 0.561256 | 0.86435  | DOWN | 583.8426 | 583.8422 | 583.8428 | 9.333667 | 9.275917 |
| 9850 | M327T45_  | 1.124879 | 0.16977  | 0.623262 | 0.561343 | 0.864354 | UP   | 327.18   | 327.1799 | 327.1801 | 44.95467 | 44.77217 |
| 9851 | M352T10_  | 1.275578 | 0.351151 | 0.609549 | 0.561388 | 0.864356 | UP   | 351.9785 | 351.9784 | 351.9787 | 9.818442 | 9.715683 |
| 9852 | M1435T10_ | 1.168918 | -0.22517 | -0.60901 | 0.561418 | 0.864357 | DOWN | 1434.549 | 1434.546 | 1434.55  | 9.95385  | 9.869467 |
| 9853 | M461T10_  | 1.242248 | 0.312953 | 0.61056  | 0.561422 | 0.864357 | UP   | 460.5591 | 460.5589 | 460.5595 | 9.964167 | 9.8753   |
| 9854 | M717T10_  | 1.125064 | -0.17001 | -0.61209 | 0.561603 | 0.864365 | DOWN | 716.9373 | 716.9362 | 716.9379 | 10.0702  | 9.988    |
| 9855 | M624T45_  | 1.054794 | -0.07696 | -0.61406 | 0.561606 | 0.864365 | DOWN | 624.456  | 624.4559 | 624.4564 | 44.9835  | 44.98283 |
| 9856 | M682T9_2  | 1.240281 | -0.31067 | -0.60558 | 0.561756 | 0.864372 | DOWN | 682.322  | 682.3152 | 682.3233 | 9.16125  | 9.0839   |
| 9857 | M187T10_  | 1.058409 | -0.0819  | -0.60559 | 0.561775 | 0.864373 | DOWN | 186.7609 | 186.7608 | 186.7612 | 9.935675 | 9.827283 |
| 9858 | M327T9_2  | 1.082674 | 0.114599 | 0.612451 | 0.561843 | 0.864376 | UP   | 326.8505 | 326.8503 | 326.8506 | 9.191283 | 9.12675  |
| 9859 | M619T19_  | 1.537483 | -0.62057 | -0.60521 | 0.561868 | 0.864377 | DOWN | 619.45   | 619.439  | 619.4509 | 18.64583 | 18.6355  |
| 9860 | M350T43_  | 1.113981 | -0.15573 | -0.61425 | 0.561961 | 0.864381 | DOWN | 350.217  | 350.217  | 350.2172 | 42.58192 | 42.5245  |
| 9861 | M481T10_  | 1.150848 | -0.2027  | -0.60626 | 0.562045 | 0.864385 | DOWN | 480.6863 | 480.6854 | 480.6864 | 9.985117 | 9.859233 |
| 9862 | M350T10_  | 1.161439 | 0.215914 | 0.627045 | 0.562113 | 0.864388 | UP   | 350.3578 | 350.3571 | 350.3581 | 9.830283 | 9.728083 |
| 9863 | M278T10_  | 1.099048 | -0.13625 | -0.60465 | 0.562171 | 0.86439  | DOWN | 278.1401 | 278.1398 | 278.1405 | 9.957333 | 9.843367 |
| 9864 | M370T9_9  | 1.374748 | 0.459167 | 0.617384 | 0.562243 | 0.864393 | UP   | 370.331  | 370.329  | 370.3312 | 9.264333 | 9.262217 |
| 9865 | M393T9_1  | 1.383275 | 0.468088 | 0.615985 | 0.562257 | 0.864394 | UP   | 393.4964 | 393.4958 | 393.498  | 9.154525 | 9.11405  |
| 9866 | M358T10_  | 1.12167  | -0.16565 | -0.62528 | 0.562265 | 0.864394 | DOWN | 357.5015 | 357.5012 | 357.5019 | 9.839008 | 9.715683 |
| 9867 | M361T11_  | 1.198607 | -0.26136 | -0.60488 | 0.562578 | 0.864408 | DOWN | 361.2011 | 361.201  | 361.2014 | 11.13999 | 11.10768 |
| 9868 | M952T26   | 1.131016 | -0.17762 | -0.60695 | 0.562632 | 0.86441  | DOWN | 951.666  | 951.6657 | 951.6668 | 26.30583 | 26.25133 |
| 9869 | M267T9_1  | 1.431351 | -0.51738 | -0.61205 | 0.562652 | 0.864411 | DOWN | 266.5551 | 266.554  | 266.5652 | 9.08685  | 8.909    |

|      |          |          |          |          |          |          |      |          |          |          |          |          |
|------|----------|----------|----------|----------|----------|----------|------|----------|----------|----------|----------|----------|
| 9870 | M462T10_ | 1.153346 | -0.20583 | -0.61006 | 0.562654 | 0.864411 | DOWN | 461.7064 | 461.7061 | 461.7073 | 9.975217 | 9.8753   |
| 9871 | M177T43  | 1.165854 | 0.221388 | 0.618579 | 0.562726 | 0.864415 | UP   | 177.1271 | 177.1271 | 177.1272 | 42.8555  | 42.55333 |
| 9872 | M486T11_ | 1.115353 | -0.1575  | -0.60709 | 0.562797 | 0.864418 | DOWN | 486.2195 | 486.219  | 486.2199 | 10.91978 | 10.90548 |
| 9873 | M220T10_ | 1.414659 | -0.50045 | -0.60654 | 0.562806 | 0.864418 | DOWN | 219.8177 | 219.81   | 219.8182 | 9.82645  | 9.7124   |
| 9874 | M308T10_ | 1.121705 | 0.165693 | 0.606194 | 0.562844 | 0.86442  | UP   | 308.4548 | 308.4545 | 308.4549 | 9.94785  | 9.827283 |
| 9875 | M342T9_1 | 1.218074 | 0.284602 | 0.626737 | 0.562913 | 0.864423 | UP   | 341.5844 | 341.5843 | 341.5846 | 9.311167 | 9.219483 |
| 9876 | M200T9_4 | 1.236931 | -0.30676 | -0.60376 | 0.563031 | 0.864428 | DOWN | 199.567  | 199.5661 | 199.5671 | 9.330708 | 9.1428   |
| 9877 | M190T10_ | 1.114677 | -0.15663 | -0.61566 | 0.563069 | 0.86443  | DOWN | 190.2005 | 190.2003 | 190.2077 | 9.985733 | 9.8753   |
| 9878 | M650T10_ | 1.125675 | -0.17079 | -0.61803 | 0.563092 | 0.864431 | DOWN | 650.2683 | 650.2671 | 650.2695 | 9.872925 | 9.746783 |
| 9879 | M1329T11 | 1.104534 | -0.14344 | -0.60453 | 0.563107 | 0.864431 | DOWN | 1329.385 | 1329.383 | 1329.388 | 10.90657 | 10.879   |
| 9880 | M209T10_ | 1.127764 | -0.17346 | -0.60981 | 0.563156 | 0.864433 | DOWN | 209.2326 | 209.2324 | 209.2326 | 9.979342 | 9.8753   |
| 9881 | M176T9_6 | 1.240495 | 0.310916 | 0.604264 | 0.563163 | 0.864434 | UP   | 176.41   | 176.41   | 176.4101 | 9.22495  | 9.132267 |
| 9882 | M1869T10 | 1.134946 | -0.18262 | -0.60631 | 0.563205 | 0.864436 | DOWN | 1869.215 | 1869.213 | 1869.221 | 9.830833 | 9.715683 |
| 9883 | M546T24  | 1.150182 | -0.20186 | -0.6127  | 0.563289 | 0.864439 | DOWN | 546.4623 | 546.4621 | 546.4631 | 23.58667 | 23.57783 |
| 9884 | M504T10_ | 1.142429 | -0.1921  | -0.62084 | 0.563329 | 0.864441 | DOWN | 503.9885 | 503.9877 | 503.9886 | 10.38893 | 10.34542 |
| 9885 | M336T9_2 | 1.444439 | -0.53051 | -0.60915 | 0.563346 | 0.864442 | DOWN | 335.6326 | 335.6321 | 335.6328 | 9.245792 | 9.098833 |
| 9886 | M220T9_4 | 1.645564 | -0.71858 | -0.60281 | 0.563437 | 0.864446 | DOWN | 219.784  | 219.7821 | 219.7887 | 9.295167 | 9.132267 |
| 9887 | M398T10_ | 1.135955 | -0.18391 | -0.60607 | 0.56349  | 0.864448 | DOWN | 397.8089 | 397.8087 | 397.8091 | 9.559017 | 9.447617 |
| 9888 | M388T44_ | 1.061845 | -0.08657 | -0.60448 | 0.563515 | 0.864449 | DOWN | 388.2327 | 388.2326 | 388.2329 | 43.76133 | 43.63217 |
| 9889 | M834T15  | 1.138989 | -0.18775 | -0.60991 | 0.563523 | 0.864449 | DOWN | 834.4334 | 834.4329 | 834.4341 | 15.48708 | 15.45273 |
| 9890 | M227T9_1 | 1.20136  | -0.26467 | -0.61351 | 0.563557 | 0.864451 | DOWN | 227.1339 | 227.1307 | 227.1386 | 8.841533 | 8.697767 |
| 9891 | M534T10_ | 1.091997 | -0.12697 | -0.60449 | 0.563558 | 0.864451 | DOWN | 533.7861 | 533.7857 | 533.7872 | 9.939575 | 9.827283 |
| 9892 | M414T21_ | 1.263669 | -0.33762 | -0.60619 | 0.563578 | 0.864452 | DOWN | 413.7851 | 413.7847 | 413.7857 | 20.75392 | 20.73683 |
| 9893 | M380T11_ | 1.105206 | -0.14432 | -0.60245 | 0.56359  | 0.864452 | DOWN | 380.026  | 380.0258 | 380.0268 | 10.892   | 10.879   |
| 9894 | M1941T10 | 1.145159 | -0.19555 | -0.6078  | 0.563605 | 0.864453 | DOWN | 1941.194 | 1941.193 | 1941.198 | 9.842    | 9.7124   |
| 9895 | M240T19  | 1.369282 | 0.45342  | 0.623975 | 0.563618 | 0.864454 | UP   | 240.0678 | 240.0675 | 240.068  | 19.316   | 19.23333 |
| 9896 | M369T11_ | 1.22141  | 0.288548 | 0.60839  | 0.563673 | 0.864456 | UP   | 368.8316 | 368.8315 | 368.8372 | 10.94443 | 10.83417 |
| 9897 | M315T11_ | 1.082185 | -0.11395 | -0.60933 | 0.563688 | 0.864457 | DOWN | 314.7215 | 314.7214 | 314.7217 | 11.49657 | 11.47298 |
| 9898 | M198T10_ | 1.162293 | -0.21697 | -0.60634 | 0.563764 | 0.86446  | DOWN | 197.6371 | 197.6369 | 197.6482 | 9.831242 | 9.743667 |
| 9899 | M260T10_ | 1.069388 | -0.09679 | -0.60542 | 0.563862 | 0.864464 | DOWN | 260.2337 | 260.2335 | 260.234  | 9.74925  | 9.62055  |
| 9900 | M268T10_ | 1.089964 | -0.12428 | -0.60296 | 0.563874 | 0.864465 | DOWN | 267.5183 | 267.5172 | 267.5185 | 9.8161   | 9.699733 |
| 9901 | M817T10_ | 1.183819 | 0.243449 | 0.608119 | 0.563932 | 0.864467 | UP   | 817.4557 | 817.4552 | 817.4559 | 9.972917 | 9.8753   |
| 9902 | M804T10_ | 1.167763 | 0.223748 | 0.613291 | 0.563932 | 0.864467 | UP   | 804.2115 | 804.211  | 804.2118 | 9.964092 | 9.859233 |
| 9903 | M259T25  | 1.074234 | -0.10331 | -0.61007 | 0.563965 | 0.864469 | DOWN | 259.2821 | 259.2819 | 259.2823 | 24.98592 | 24.9695  |
| 9904 | M613T10_ | 1.168333 | -0.22445 | -0.6029  | 0.563967 | 0.864469 | DOWN | 613.2971 | 613.296  | 613.2986 | 9.917167 | 9.811217 |

|      |          |          |          |          |          |          |      |          |          |          |          |          |
|------|----------|----------|----------|----------|----------|----------|------|----------|----------|----------|----------|----------|
| 9905 | M446T42_ | 1.121239 | 0.165093 | 0.626142 | 0.564062 | 0.864473 | UP   | 446.2382 | 446.2381 | 446.2385 | 42.04967 | 41.96367 |
| 9906 | M361T38  | 1.124211 | 0.168913 | 0.621636 | 0.564252 | 0.864481 | UP   | 361.3658 | 361.3656 | 361.366  | 38.16533 | 38.151   |
| 9907 | M409T9_2 | 1.185627 | -0.24565 | -0.60149 | 0.564253 | 0.864481 | DOWN | 408.6458 | 408.6457 | 408.6464 | 9.219483 | 9.133667 |
| 9908 | M718T10_ | 1.20989  | 0.274876 | 0.604565 | 0.564339 | 0.864485 | UP   | 718.036  | 718.0353 | 718.0369 | 9.802542 | 9.715683 |
| 9909 | M518T10_ | 1.098107 | -0.13502 | -0.60114 | 0.564397 | 0.864488 | DOWN | 517.8157 | 517.8151 | 517.8169 | 9.902617 | 9.79535  |
| 9910 | M368T24  | 1.435972 | 0.522027 | 0.62657  | 0.564404 | 0.864488 | UP   | 368.3004 | 368.3003 | 368.3008 | 23.80958 | 23.791   |
| 9911 | M469T9_7 | 1.272311 | -0.34745 | -0.60114 | 0.564508 | 0.864493 | DOWN | 469.3387 | 469.3374 | 469.3389 | 8.926175 | 8.624833 |
| 9912 | M382T45  | 1.296521 | -0.37465 | -0.60135 | 0.564508 | 0.864493 | DOWN | 382.2433 | 382.2432 | 382.2436 | 44.86133 | 44.56667 |
| 9913 | M327T10_ | 1.175585 | 0.233379 | 0.600885 | 0.56463  | 0.864498 | UP   | 326.7637 | 326.7636 | 326.764  | 9.872558 | 9.79065  |
| 9914 | M440T11_ | 1.325451 | 0.406484 | 0.601286 | 0.56466  | 0.864499 | UP   | 439.7528 | 439.7524 | 439.7545 | 10.91185 | 10.879   |
| 9915 | M326T10_ | 1.125861 | 0.171029 | 0.601005 | 0.564672 | 0.8645   | UP   | 325.8622 | 325.8607 | 325.8624 | 9.895983 | 9.743767 |
| 9916 | M1138T10 | 1.358825 | 0.44236  | 0.625409 | 0.5648   | 0.864505 | UP   | 1137.78  | 1137.777 | 1137.785 | 9.7936   | 9.665433 |
| 9917 | M391T9_3 | 1.226066 | -0.29404 | -0.60069 | 0.565021 | 0.864515 | DOWN | 390.6694 | 390.6689 | 390.6696 | 9.10275  | 9.03845  |
| 9918 | M621T19  | 1.095201 | -0.1312  | -0.6001  | 0.565135 | 0.86452  | DOWN | 621.4856 | 621.4853 | 621.4858 | 18.64258 | 18.629   |
| 9919 | M390T10_ | 1.276701 | 0.352421 | 0.605541 | 0.565207 | 0.864523 | UP   | 390.3186 | 390.3182 | 390.3194 | 9.933967 | 9.827283 |
| 9920 | M278T10_ | 1.080634 | -0.11188 | -0.60128 | 0.565255 | 0.864525 | DOWN | 277.5316 | 277.5313 | 277.532  | 9.944392 | 9.827283 |
| 9921 | M540T10_ | 1.500354 | 0.585303 | 0.604703 | 0.565351 | 0.864529 | UP   | 539.9406 | 539.9405 | 539.9407 | 9.923067 | 9.859233 |
| 9922 | M733T10_ | 1.098395 | -0.1354  | -0.60816 | 0.565352 | 0.864529 | DOWN | 733.2472 | 733.2467 | 733.2478 | 9.8207   | 9.699733 |
| 9923 | M232T10_ | 1.085146 | 0.117889 | 0.615134 | 0.565471 | 0.864535 | UP   | 231.5717 | 231.5716 | 231.5719 | 9.855658 | 9.7634   |
| 9924 | M371T25  | 1.242825 | 0.313623 | 0.617157 | 0.565549 | 0.864538 | UP   | 371.2189 | 371.2189 | 371.2191 | 24.5925  | 24.536   |
| 9925 | M670T10_ | 1.125224 | -0.17021 | -0.60034 | 0.565581 | 0.864539 | DOWN | 669.5331 | 669.5325 | 669.534  | 9.9847   | 9.8753   |
| 9926 | M502T9_9 | 1.165904 | -0.22145 | -0.60155 | 0.565712 | 0.864545 | DOWN | 502.4286 | 502.4274 | 502.4297 | 9.276658 | 9.129317 |
| 9927 | M493T10_ | 1.21218  | -0.2776  | -0.59981 | 0.565713 | 0.864545 | DOWN | 492.9681 | 492.9666 | 492.9716 | 10.11527 | 10.0118  |
| 9928 | M305T11_ | 1.17933  | 0.237967 | 0.601039 | 0.565732 | 0.864546 | UP   | 304.5366 | 304.5363 | 304.5371 | 10.892   | 10.88995 |
| 9929 | M631T10_ | 1.261172 | -0.33476 | -0.60731 | 0.565795 | 0.864549 | DOWN | 630.8812 | 630.8804 | 630.8817 | 9.886083 | 9.7634   |
| 9930 | M379T10_ | 1.3031   | 0.381948 | 0.624345 | 0.565854 | 0.864551 | UP   | 378.7284 | 378.7281 | 378.7291 | 9.92825  | 9.822117 |
| 9931 | M435T11_ | 1.183892 | 0.243537 | 0.607941 | 0.565867 | 0.864552 | UP   | 435.4564 | 435.455  | 435.4579 | 10.89355 | 10.87487 |
| 9932 | M461T41_ | 1.048479 | -0.0683  | -0.61736 | 0.565872 | 0.864552 | DOWN | 461.274  | 461.2738 | 461.2743 | 40.51767 | 40.43867 |
| 9933 | M577T9_4 | 1.185989 | -0.24609 | -0.59998 | 0.5659   | 0.864553 | DOWN | 577.1745 | 577.1718 | 577.1762 | 9.16125  | 9.110833 |
| 9934 | M587T9_1 | 1.231054 | -0.29989 | -0.5995  | 0.565985 | 0.864557 | DOWN | 586.743  | 586.7425 | 586.7432 | 9.3172   | 9.275917 |
| 9935 | M459T10_ | 1.475823 | -0.56152 | -0.60157 | 0.565994 | 0.864557 | DOWN | 459.0484 | 459.0483 | 459.0486 | 9.991958 | 9.916767 |
| 9936 | M160T10_ | 1.177092 | -0.23523 | -0.60844 | 0.566043 | 0.864559 | DOWN | 160.0072 | 160.007  | 160.0072 | 9.956417 | 9.843367 |
| 9937 | M458T10_ | 1.411979 | -0.49772 | -0.59858 | 0.566048 | 0.86456  | DOWN | 457.8451 | 457.8448 | 457.8453 | 9.960967 | 9.90755  |
| 9938 | M193T10_ | 1.245301 | -0.31649 | -0.60654 | 0.566192 | 0.864566 | DOWN | 192.9651 | 192.965  | 192.9654 | 9.960967 | 9.8914   |
| 9939 | M216T10_ | 1.256664 | -0.3296  | -0.6081  | 0.566382 | 0.864574 | DOWN | 216.0188 | 216.0187 | 216.025  | 9.977042 | 9.869467 |

|      |          |          |          |          |          |          |      |          |          |          |          |          |
|------|----------|----------|----------|----------|----------|----------|------|----------|----------|----------|----------|----------|
| 9940 | M253T9_4 | 1.250567 | -0.32258 | -0.59832 | 0.566461 | 0.864578 | DOWN | 252.9279 | 252.9277 | 252.9281 | 8.826967 | 8.686867 |
| 9941 | M255T44_ | 1.122275 | -0.16643 | -0.59944 | 0.566532 | 0.864581 | DOWN | 255.1224 | 255.1223 | 255.1225 | 44.10667 | 43.76133 |
| 9942 | M1015T13 | 1.109742 | -0.15022 | -0.6061  | 0.566645 | 0.864586 | DOWN | 1015.458 | 1015.457 | 1015.458 | 13.41193 | 13.36148 |
| 9943 | M403T44_ | 1.20551  | 0.269644 | 0.597184 | 0.566899 | 0.864597 | UP   | 403.2323 | 403.2321 | 403.2325 | 43.5315  | 43.37317 |
| 9944 | M1214T10 | 1.13499  | -0.18268 | -0.59738 | 0.566956 | 0.864599 | DOWN | 1214.293 | 1214.29  | 1214.294 | 9.964417 | 9.859233 |
| 9945 | M358T10_ | 1.10526  | -0.14439 | -0.60132 | 0.566975 | 0.8646   | DOWN | 358.2173 | 358.2117 | 358.2185 | 9.595942 | 9.447617 |
| 9946 | M177T10_ | 1.195076 | -0.2571  | -0.59762 | 0.567011 | 0.864601 | DOWN | 177.0788 | 177.0787 | 177.0789 | 9.932033 | 9.827283 |
| 9947 | M726T10_ | 1.168494 | -0.22465 | -0.59882 | 0.567015 | 0.864602 | DOWN | 726.2628 | 726.2622 | 726.2632 | 9.836042 | 9.699733 |
| 9948 | M765T10_ | 1.072768 | -0.10134 | -0.60749 | 0.56703  | 0.864602 | DOWN | 765.2108 | 765.2095 | 765.2145 | 9.9091   | 9.79535  |
| 9949 | M265T11_ | 1.135531 | 0.183367 | 0.597715 | 0.567099 | 0.864605 | UP   | 264.5207 | 264.5165 | 264.5208 | 10.879   | 10.87765 |
| 9950 | M1998T10 | 1.232758 | -0.30189 | -0.59728 | 0.567131 | 0.864607 | DOWN | 1997.943 | 1997.941 | 1997.948 | 9.830833 | 9.747533 |
| 9951 | M288T17  | 1.190156 | -0.25115 | -0.59731 | 0.567203 | 0.86461  | DOWN | 288.1955 | 288.1954 | 288.1956 | 17.21967 | 17.21933 |
| 9952 | M520T44_ | 1.168819 | 0.225052 | 0.61792  | 0.567215 | 0.86461  | UP   | 520.3112 | 520.3109 | 520.3115 | 44.049   | 43.83333 |
| 9953 | M558T35  | 1.30682  | -0.38606 | -0.59984 | 0.567382 | 0.864618 | DOWN | 558.4724 | 558.4716 | 558.4731 | 34.55633 | 34.55117 |
| 9954 | M364T10_ | 1.207439 | -0.27195 | -0.59636 | 0.567425 | 0.864619 | DOWN | 364.4548 | 364.4546 | 364.4549 | 9.96095  | 9.843367 |
| 9955 | M316T10_ | 1.161876 | -0.21646 | -0.59747 | 0.567431 | 0.86462  | DOWN | 315.8979 | 315.8977 | 315.8981 | 9.890925 | 9.827283 |
| 9956 | M274T10_ | 1.213452 | 0.279117 | 0.597375 | 0.567435 | 0.86462  | UP   | 273.7188 | 273.7185 | 273.719  | 9.95385  | 9.843367 |
| 9957 | M525T24_ | 1.189791 | -0.25071 | -0.5964  | 0.567465 | 0.864621 | DOWN | 525.0451 | 525.045  | 525.0455 | 24.117   | 24.096   |
| 9958 | M445T10_ | 1.318647 | 0.399058 | 0.610731 | 0.567493 | 0.864622 | UP   | 444.7766 | 444.7755 | 444.7773 | 9.970617 | 9.859233 |
| 9959 | M161T10_ | 1.141399 | -0.1908  | -0.60109 | 0.567593 | 0.864627 | DOWN | 161.0403 | 161.0402 | 161.0404 | 9.924267 | 9.811217 |
| 9960 | M214T10_ | 1.048074 | 0.067741 | 0.600592 | 0.567617 | 0.864628 | UP   | 213.8894 | 213.8893 | 213.8894 | 9.887642 | 9.79535  |
| 9961 | M757T12  | 1.382142 | 0.466906 | 0.617855 | 0.567788 | 0.864635 | UP   | 757.4908 | 757.4908 | 757.4912 | 11.99063 | 11.98695 |
| 9962 | M785T9   | 1.314412 | -0.39442 | -0.59581 | 0.567885 | 0.864639 | DOWN | 785.0449 | 785.0446 | 785.0457 | 9.29345  | 9.234417 |
| 9963 | M309T10_ | 1.310374 | 0.389979 | 0.596999 | 0.567915 | 0.864641 | UP   | 308.5426 | 308.5424 | 308.5428 | 9.816183 | 9.715683 |
| 9964 | M475T10_ | 1.131416 | -0.17813 | -0.5969  | 0.567986 | 0.864644 | DOWN | 474.5503 | 474.5498 | 474.5508 | 9.97155  | 9.8753   |
| 9965 | M634T10_ | 1.075698 | -0.10527 | -0.60162 | 0.567995 | 0.864644 | DOWN | 634.4627 | 634.4625 | 634.4629 | 10.38894 | 10.34372 |
| 9966 | M312T26_ | 1.213483 | 0.279154 | 0.610694 | 0.568225 | 0.864654 | UP   | 312.2345 | 312.2342 | 312.2348 | 26.16633 | 26.13633 |
| 9967 | M418T19  | 1.196716 | 0.259081 | 0.610937 | 0.568315 | 0.864658 | UP   | 417.7596 | 417.759  | 417.7597 | 18.9655  | 18.9365  |
| 9968 | M1355T10 | 1.195536 | -0.25766 | -0.59536 | 0.568318 | 0.864658 | DOWN | 1355.193 | 1355.192 | 1355.194 | 9.82645  | 9.699733 |
| 9969 | M348T12  | 1.333254 | 0.414952 | 0.60967  | 0.56838  | 0.864661 | UP   | 348.311  | 348.3108 | 348.3114 | 12.44202 | 12.41208 |
| 9970 | M398T10_ | 1.260168 | 0.333616 | 0.604182 | 0.568496 | 0.864666 | UP   | 397.6073 | 397.6072 | 397.6076 | 9.967367 | 9.859233 |
| 9971 | M419T10_ | 1.152829 | 0.205178 | 0.603531 | 0.568567 | 0.864669 | UP   | 418.9412 | 418.9408 | 418.9414 | 9.95165  | 9.843367 |
| 9972 | M505T9_5 | 1.132898 | -0.18002 | -0.5947  | 0.5686   | 0.86467  | DOWN | 504.8264 | 504.825  | 504.8275 | 9.008417 | 8.863633 |
| 9973 | M298T10_ | 1.246789 | -0.31822 | -0.59445 | 0.568638 | 0.864672 | DOWN | 298.1445 | 298.1442 | 298.1448 | 9.932033 | 9.827283 |
| 9974 | M638T10_ | 1.163892 | 0.218957 | 0.617632 | 0.568722 | 0.864675 | UP   | 637.6243 | 637.6236 | 637.6267 | 9.839008 | 9.715683 |

|       |          |          |          |          |          |          |      |          |          |          |          |          |
|-------|----------|----------|----------|----------|----------|----------|------|----------|----------|----------|----------|----------|
| 9975  | M575T9   | 1.234025 | 0.303371 | 0.610305 | 0.568781 | 0.864678 | UP   | 574.6197 | 574.6188 | 574.6202 | 9.3471   | 9.249433 |
| 9976  | M239T10_ | 1.069122 | -0.09643 | -0.59419 | 0.568807 | 0.864679 | DOWN | 238.6398 | 238.6392 | 238.6492 | 9.903092 | 9.79535  |
| 9977  | M749T11_ | 1.143002 | -0.19283 | -0.61241 | 0.568854 | 0.864681 | DOWN | 748.953  | 748.9519 | 748.9536 | 10.90477 | 10.879   |
| 9978  | M462T11_ | 1.29645  | 0.374567 | 0.614847 | 0.568871 | 0.864682 | UP   | 461.5826 | 461.5823 | 461.5831 | 10.9331  | 10.90785 |
| 9979  | M720T9   | 1.285939 | -0.36282 | -0.59394 | 0.568989 | 0.864687 | DOWN | 719.5035 | 719.5032 | 719.5043 | 9.311883 | 9.24215  |
| 9980  | M721T10_ | 1.277395 | 0.353205 | 0.614272 | 0.569008 | 0.864688 | UP   | 721.2612 | 721.2598 | 721.2618 | 9.835725 | 9.715683 |
| 9981  | M393T11_ | 1.216604 | -0.28286 | -0.59391 | 0.569013 | 0.864688 | DOWN | 392.7065 | 392.7063 | 392.7072 | 10.92819 | 10.82972 |
| 9982  | M404T9_8 | 1.167764 | -0.22375 | -0.6041  | 0.569066 | 0.86469  | DOWN | 404.427  | 404.4267 | 404.4314 | 9.464967 | 9.355317 |
| 9983  | M579T9_4 | 2.03159  | 1.02261  | 0.605238 | 0.569085 | 0.864691 | UP   | 578.7101 | 578.7075 | 578.7164 | 9.0035   | 8.909    |
| 9984  | M373T41_ | 1.116065 | -0.15842 | -0.61496 | 0.569166 | 0.864694 | DOWN | 373.2219 | 373.2217 | 373.222  | 41.18667 | 41.15767 |
| 9985  | M760T10_ | 1.241427 | 0.311999 | 0.593618 | 0.56917  | 0.864695 | UP   | 759.9094 | 759.9077 | 759.91   | 10.35992 | 10.31147 |
| 9986  | M675T9_2 | 1.189429 | -0.25027 | -0.60107 | 0.569194 | 0.864696 | DOWN | 675.3456 | 675.3455 | 675.3469 | 9.46855  | 9.416817 |
| 9987  | M188T9_1 | 1.674701 | 0.743904 | 0.616726 | 0.5692   | 0.864696 | UP   | 188.2092 | 188.2082 | 188.2095 | 9.356467 | 9.11795  |
| 9988  | M879T22_ | 1.085708 | -0.11864 | -0.59451 | 0.569215 | 0.864697 | DOWN | 878.6052 | 878.6047 | 878.6057 | 21.62367 | 21.59533 |
| 9989  | M457T22  | 1.186522 | -0.24674 | -0.59882 | 0.569249 | 0.864698 | DOWN | 456.6502 | 456.6501 | 456.6509 | 22.14142 | 22.1035  |
| 9990  | M228T9_1 | 1.138231 | -0.18679 | -0.61284 | 0.569335 | 0.864702 | DOWN | 228.1787 | 228.1785 | 228.1788 | 8.779867 | 8.686867 |
| 9991  | M213T9_1 | 1.397294 | 0.482635 | 0.593271 | 0.569399 | 0.864704 | UP   | 213.1603 | 213.1541 | 213.1618 | 9.378267 | 9.11795  |
| 9992  | M433T25  | 1.054135 | 0.076059 | 0.593174 | 0.569453 | 0.864707 | UP   | 433.2411 | 433.241  | 433.2413 | 24.59467 | 24.5795  |
| 9993  | M437T9_2 | 1.262585 | -0.33638 | -0.59315 | 0.569487 | 0.864708 | DOWN | 436.6086 | 436.6079 | 436.6125 | 9.363375 | 9.129317 |
| 9994  | M364T9_7 | 1.250686 | 0.32272  | 0.595722 | 0.569493 | 0.864708 | UP   | 364.0758 | 364.0748 | 364.0783 | 9.217708 | 9.110833 |
| 9995  | M599T10_ | 1.289528 | -0.36684 | -0.5932  | 0.569551 | 0.864711 | DOWN | 598.6668 | 598.6658 | 598.6745 | 9.831517 | 9.715683 |
| 9996  | M653T28_ | 1.239812 | -0.31012 | -0.59375 | 0.569565 | 0.864712 | DOWN | 652.9671 | 652.9669 | 652.9675 | 28.39625 | 28.34867 |
| 9997  | M417T42_ | 1.166473 | 0.222153 | 0.59967  | 0.569613 | 0.864714 | UP   | 417.2479 | 417.2476 | 417.2481 | 42.20775 | 42.0355  |
| 9998  | M972T10  | 1.185816 | 0.24588  | 0.596295 | 0.569697 | 0.864717 | UP   | 972.2895 | 972.2883 | 972.2905 | 9.975217 | 9.8753   |
| 9999  | M504T40  | 1.093304 | 0.128695 | 0.602892 | 0.569778 | 0.864721 | UP   | 504.28   | 504.2798 | 504.2802 | 40.33067 | 40.15067 |
| 10000 | M403T11_ | 1.17381  | 0.231199 | 0.59988  | 0.569786 | 0.864721 | UP   | 403.1152 | 403.115  | 403.1154 | 10.89875 | 10.873   |
| 10001 | M490T10_ | 1.133355 | -0.1806  | -0.5952  | 0.569788 | 0.864721 | DOWN | 489.5551 | 489.5546 | 489.5556 | 9.985733 | 9.8753   |
| 10002 | M432T25_ | 1.049544 | 0.069763 | 0.592698 | 0.569821 | 0.864723 | UP   | 432.2377 | 432.2376 | 432.2378 | 24.59817 | 24.5795  |
| 10003 | M262T10_ | 1.278525 | 0.35448  | 0.592737 | 0.569914 | 0.864727 | UP   | 261.5711 | 261.5599 | 261.5718 | 9.93625  | 9.811217 |
| 10004 | M894T10_ | 1.107727 | -0.1476  | -0.59462 | 0.569921 | 0.864727 | DOWN | 893.7127 | 893.712  | 893.7132 | 9.948875 | 9.843367 |
| 10005 | M239T9_2 | 1.253073 | 0.325471 | 0.592664 | 0.569925 | 0.864727 | UP   | 238.9126 | 238.905  | 238.9129 | 8.9343   | 8.796533 |
| 10006 | M342T13  | 1.153233 | 0.205684 | 0.592641 | 0.569939 | 0.864728 | UP   | 342.2636 | 342.2633 | 342.2638 | 12.55878 | 12.5146  |
| 10007 | M370T9_2 | 1.379848 | -0.46451 | -0.59397 | 0.569957 | 0.864728 | DOWN | 369.5782 | 369.5781 | 369.5784 | 8.83365  | 8.827133 |
| 10008 | M522T10_ | 1.184635 | 0.244443 | 0.599944 | 0.570013 | 0.864731 | UP   | 521.6325 | 521.6324 | 521.6332 | 10.47857 | 10.39197 |
| 10009 | M273T10_ | 1.287052 | 0.364071 | 0.599766 | 0.570029 | 0.864731 | UP   | 272.5793 | 272.579  | 272.5794 | 9.975217 | 9.859233 |

|       |          |          |          |          |          |          |      |          |          |          |          |          |
|-------|----------|----------|----------|----------|----------|----------|------|----------|----------|----------|----------|----------|
| 10010 | M502T9_4 | 1.218607 | 0.285233 | 0.594154 | 0.570062 | 0.864733 | UP   | 502.0165 | 502.0146 | 502.017  | 9.23175  | 9.12675  |
| 10011 | M533T9_4 | 1.758038 | 0.813966 | 0.61562  | 0.570124 | 0.864736 | UP   | 533.2831 | 533.2828 | 533.2832 | 9.474408 | 9.38595  |
| 10012 | M500T9_9 | 1.193041 | 0.254644 | 0.609054 | 0.570145 | 0.864736 | UP   | 500.0223 | 500.0212 | 500.0226 | 9.186542 | 9.12675  |
| 10013 | M921T10_ | 1.136695 | 0.184845 | 0.60413  | 0.5702   | 0.864739 | UP   | 921.0504 | 921.0496 | 921.0513 | 9.939575 | 9.827283 |
| 10014 | M276T11_ | 1.112151 | -0.15335 | -0.59525 | 0.57029  | 0.864743 | DOWN | 275.9805 | 275.9803 | 275.9806 | 10.892   | 10.8646  |
| 10015 | M535T27_ | 1.243219 | 0.31408  | 0.591805 | 0.570323 | 0.864744 | UP   | 535.3923 | 535.392  | 535.393  | 26.795   | 26.75383 |
| 10016 | M1904T10 | 1.22359  | -0.29112 | -0.59814 | 0.570355 | 0.864745 | DOWN | 1903.543 | 1903.541 | 1903.547 | 9.823225 | 9.7124   |
| 10017 | M337T28_ | 1.235805 | -0.30545 | -0.5933  | 0.570362 | 0.864746 | DOWN | 336.9288 | 336.9285 | 336.9289 | 28.38867 | 28.362   |
| 10018 | M207T10_ | 1.091309 | -0.12606 | -0.5963  | 0.570506 | 0.864755 | DOWN | 206.9544 | 206.9543 | 206.9545 | 9.84915  | 9.73145  |
| 10019 | M335T11_ | 1.098406 | -0.13541 | -0.5915  | 0.570645 | 0.864764 | DOWN | 334.8983 | 334.8982 | 334.8986 | 10.89907 | 10.879   |
| 10020 | M410T10_ | 1.047709 | -0.06724 | -0.60025 | 0.570726 | 0.86477  | DOWN | 410.3377 | 410.3375 | 410.3379 | 10.31737 | 10.26307 |
| 10021 | M367T10_ | 1.17143  | -0.22827 | -0.59112 | 0.570815 | 0.864775 | DOWN | 367.076  | 367.0759 | 367.0833 | 9.916525 | 9.811217 |
| 10022 | M500T9_1 | 1.245393 | -0.3166  | -0.59137 | 0.57087  | 0.864779 | DOWN | 500.1017 | 500.1006 | 500.1027 | 9.346    | 9.1322   |
| 10023 | M1076T10 | 1.229438 | -0.298   | -0.59193 | 0.570987 | 0.864787 | DOWN | 1076.227 | 1076.226 | 1076.23  | 9.80755  | 9.681183 |
| 10024 | M1954T10 | 1.129746 | 0.175998 | 0.599151 | 0.571095 | 0.864794 | UP   | 1953.946 | 1953.939 | 1953.949 | 9.830283 | 9.715683 |
| 10025 | M360T11_ | 1.137718 | -0.18614 | -0.59062 | 0.571266 | 0.864805 | DOWN | 359.6454 | 359.6453 | 359.6467 | 10.89953 | 10.879   |
| 10026 | M209T19_ | 1.106454 | 0.145943 | 0.592565 | 0.571278 | 0.864806 | UP   | 209.1281 | 209.128  | 209.1283 | 19.04675 | 19.038   |
| 10027 | M380T36  | 1.21234  | 0.277794 | 0.590933 | 0.571364 | 0.864811 | UP   | 380.337  | 380.3366 | 380.3371 | 36.3375  | 36.28567 |
| 10028 | M708T10_ | 1.357829 | 0.441301 | 0.609219 | 0.571383 | 0.864813 | UP   | 708.0351 | 708.0344 | 708.0355 | 9.802117 | 9.73145  |
| 10029 | M294T10_ | 1.089802 | -0.12407 | -0.59181 | 0.571564 | 0.864825 | DOWN | 293.7079 | 293.7076 | 293.708  | 9.939575 | 9.827283 |
| 10030 | M487T11_ | 1.191955 | 0.25333  | 0.599786 | 0.57163  | 0.864829 | UP   | 487.4393 | 487.4387 | 487.4399 | 10.89875 | 10.879   |
| 10031 | M321T11_ | 1.090977 | -0.12562 | -0.59171 | 0.571655 | 0.86483  | DOWN | 320.7963 | 320.7961 | 320.7968 | 10.90519 | 10.879   |
| 10032 | M695T10_ | 1.133233 | -0.18044 | -0.58991 | 0.571683 | 0.864832 | DOWN | 695.2329 | 695.2325 | 695.2337 | 9.828642 | 9.699733 |
| 10033 | M847T25_ | 1.149301 | 0.200757 | 0.589547 | 0.571817 | 0.864841 | UP   | 847.4463 | 847.4461 | 847.4468 | 24.59467 | 24.5795  |
| 10034 | M619T23  | 1.186165 | -0.2463  | -0.58983 | 0.571824 | 0.864842 | DOWN | 619.4384 | 619.4371 | 619.4399 | 22.69817 | 22.65617 |
| 10035 | M330T28  | 1.157536 | 0.211057 | 0.590136 | 0.571863 | 0.864844 | UP   | 330.3001 | 330.2998 | 330.3004 | 28.39767 | 28.3485  |
| 10036 | M332T10_ | 1.1053   | -0.14444 | -0.6047  | 0.571921 | 0.864848 | DOWN | 331.5958 | 331.5956 | 331.596  | 9.836042 | 9.699733 |
| 10037 | M194T10_ | 1.123214 | -0.16763 | -0.59619 | 0.571952 | 0.86485  | DOWN | 194.1669 | 194.1667 | 194.167  | 9.82645  | 9.715683 |
| 10038 | M397T9_2 | 1.111191 | -0.15304 | -0.59052 | 0.572002 | 0.864853 | DOWN | 396.6442 | 396.643  | 396.6464 | 9.214392 | 9.129317 |
| 10039 | M231T10_ | 1.209189 | 0.274039 | 0.610433 | 0.572014 | 0.864854 | UP   | 230.7415 | 230.7413 | 230.7416 | 9.914217 | 9.79535  |
| 10040 | M351T10_ | 1.17881  | 0.237331 | 0.589548 | 0.572084 | 0.864858 | UP   | 351.1225 | 351.1223 | 351.1233 | 9.858833 | 9.747533 |
| 10041 | M316T10_ | 1.157657 | -0.21121 | -0.58899 | 0.572122 | 0.864861 | DOWN | 316.2778 | 316.2776 | 316.2785 | 9.924308 | 9.811217 |
| 10042 | M569T10_ | 1.121022 | 0.164814 | 0.591738 | 0.572159 | 0.864863 | UP   | 568.8548 | 568.853  | 568.8553 | 9.950258 | 9.827283 |
| 10043 | M508T10_ | 1.186516 | 0.246731 | 0.589952 | 0.572217 | 0.864867 | UP   | 508.0497 | 508.0496 | 508.0502 | 9.967367 | 9.859233 |
| 10044 | M276T11_ | 1.299817 | 0.378309 | 0.613087 | 0.572274 | 0.864871 | UP   | 275.7128 | 275.7123 | 275.7221 | 10.89768 | 10.8214  |

|       |          |          |          |          |          |          |      |          |          |          |          |          |
|-------|----------|----------|----------|----------|----------|----------|------|----------|----------|----------|----------|----------|
| 10045 | M200T9_3 | 1.454278 | -0.5403  | -0.58889 | 0.572313 | 0.864873 | DOWN | 199.547  | 199.5461 | 199.5484 | 9.287292 | 9.12675  |
| 10046 | M315T11_ | 1.098604 | -0.13567 | -0.58934 | 0.572316 | 0.864874 | DOWN | 315.223  | 315.2228 | 315.223  | 11.49197 | 11.47593 |
| 10047 | M1182T10 | 1.104817 | -0.14381 | -0.59767 | 0.572466 | 0.864883 | DOWN | 1182.018 | 1182.017 | 1182.019 | 9.970617 | 9.8753   |
| 10048 | M222T6   | 1.211435 | -0.27672 | -0.58853 | 0.572499 | 0.864886 | DOWN | 222.1253 | 222.1252 | 222.1255 | 6.45715  | 6.289267 |
| 10049 | M235T10_ | 1.064993 | -0.09084 | -0.58997 | 0.572541 | 0.864888 | DOWN | 234.6407 | 234.6405 | 234.6408 | 9.918792 | 9.811217 |
| 10050 | M729T11_ | 1.108464 | -0.14856 | -0.59258 | 0.572644 | 0.864895 | DOWN | 728.5528 | 728.5521 | 728.5534 | 10.892   | 10.8646  |
| 10051 | M188T9_1 | 1.542816 | 0.625566 | 0.608785 | 0.572646 | 0.864895 | UP   | 188.228  | 188.2273 | 188.2286 | 9.365833 | 9.1503   |
| 10052 | M641T10_ | 1.099474 | -0.13681 | -0.58811 | 0.572805 | 0.864906 | DOWN | 640.9031 | 640.9023 | 640.9041 | 9.8207   | 9.715683 |
| 10053 | M211T11_ | 1.118348 | 0.161369 | 0.587941 | 0.572813 | 0.864906 | UP   | 211.2977 | 211.2976 | 211.2978 | 10.91105 | 10.873   |
| 10054 | M425T11_ | 1.092942 | -0.12822 | -0.59021 | 0.5729   | 0.864912 | DOWN | 425.4229 | 425.4183 | 425.4241 | 10.90553 | 10.8214  |
| 10055 | M643T18_ | 1.082916 | -0.11492 | -0.59648 | 0.572952 | 0.864915 | DOWN | 643.4678 | 643.4671 | 643.4681 | 18.01183 | 17.99367 |
| 10056 | M216T10_ | 1.253521 | -0.32599 | -0.59323 | 0.573011 | 0.864919 | DOWN | 215.8997 | 215.8996 | 215.9133 | 9.81635  | 9.699733 |
| 10057 | M779T10_ | 1.133811 | -0.18118 | -0.58773 | 0.573032 | 0.86492  | DOWN | 778.5565 | 778.5552 | 778.5583 | 9.964092 | 9.869467 |
| 10058 | M1923T10 | 1.166462 | -0.22214 | -0.59405 | 0.573073 | 0.864923 | DOWN | 1923.062 | 1923.059 | 1923.064 | 9.932033 | 9.827283 |
| 10059 | M503T11_ | 1.214143 | -0.27994 | -0.58917 | 0.573156 | 0.864928 | DOWN | 502.6265 | 502.6233 | 502.6284 | 10.9312  | 10.89125 |
| 10060 | M294T10_ | 1.109554 | -0.14998 | -0.58991 | 0.573172 | 0.864929 | DOWN | 294.195  | 294.1948 | 294.1951 | 9.944392 | 9.827283 |
| 10061 | M655T36_ | 1.174975 | 0.23263  | 0.589511 | 0.57318  | 0.86493  | UP   | 655.463  | 655.4626 | 655.4635 | 36.29733 | 36.26633 |
| 10062 | M396T9_1 | 1.153208 | -0.20565 | -0.6027  | 0.573234 | 0.864933 | DOWN | 395.593  | 395.5921 | 395.5942 | 9.235933 | 9.142767 |
| 10063 | M724T10_ | 1.19493  | 0.256926 | 0.589391 | 0.573357 | 0.864941 | UP   | 724.0544 | 724.0524 | 724.0552 | 9.830283 | 9.728083 |
| 10064 | M212T10_ | 1.310193 | 0.389779 | 0.58734  | 0.573372 | 0.864942 | UP   | 211.8388 | 211.8386 | 211.8389 | 9.95825  | 9.8914   |
| 10065 | M470T17_ | 1.148283 | 0.199478 | 0.590133 | 0.573382 | 0.864943 | UP   | 470.3581 | 470.3577 | 470.3593 | 16.70892 | 16.66567 |
| 10066 | M527T9_3 | 1.088035 | -0.12173 | -0.58716 | 0.573552 | 0.864954 | DOWN | 526.6125 | 526.611  | 526.6129 | 9.303467 | 9.129317 |
| 10067 | M178T11_ | 1.18708  | 0.247418 | 0.587237 | 0.573552 | 0.864954 | UP   | 177.5741 | 177.5739 | 177.5743 | 10.8914  | 10.88995 |
| 10068 | M235T10_ | 1.185786 | 0.245844 | 0.589041 | 0.573565 | 0.864955 | UP   | 234.8007 | 234.8004 | 234.8012 | 9.967533 | 9.859233 |
| 10069 | M796T9   | 1.360489 | -0.44413 | -0.59008 | 0.573596 | 0.864957 | DOWN | 795.6444 | 795.6424 | 795.6457 | 9.023433 | 8.924217 |
| 10070 | M547T11  | 1.088898 | 0.122868 | 0.58692  | 0.57364  | 0.86496  | UP   | 546.95   | 546.9496 | 546.9508 | 10.892   | 10.879   |
| 10071 | M719T10_ | 1.108485 | -0.14859 | -0.59123 | 0.573826 | 0.864972 | DOWN | 718.9131 | 718.9127 | 718.9138 | 10.0758  | 9.971833 |
| 10072 | M651T11  | 1.093391 | 0.128809 | 0.592698 | 0.5739   | 0.864977 | UP   | 651.4207 | 651.4205 | 651.4212 | 11.49197 | 11.47593 |
| 10073 | M559T10_ | 1.165759 | -0.22127 | -0.58727 | 0.573941 | 0.864979 | DOWN | 559.0796 | 559.079  | 559.0797 | 9.937175 | 9.859233 |
| 10074 | M632T9   | 1.890484 | 0.918756 | 0.607255 | 0.573946 | 0.86498  | UP   | 631.9338 | 631.9333 | 631.9339 | 9.420133 | 9.38665  |
| 10075 | M244T10_ | 1.132389 | 0.17937  | 0.589984 | 0.574029 | 0.864985 | UP   | 244.1445 | 244.1442 | 244.1542 | 9.74925  | 9.636483 |
| 10076 | M319T10_ | 1.062872 | -0.08797 | -0.58922 | 0.574037 | 0.864986 | DOWN | 319.186  | 319.1857 | 319.1871 | 9.825767 | 9.699733 |
| 10077 | M476T8   | 1.166221 | 0.221841 | 0.610092 | 0.574069 | 0.864988 | UP   | 476.3278 | 476.3157 | 476.328  | 7.8849   | 7.7961   |
| 10078 | M659T21  | 1.102264 | -0.14047 | -0.59076 | 0.574451 | 0.865012 | DOWN | 659.477  | 659.4763 | 659.4776 | 21.01417 | 20.98517 |
| 10079 | M756T10_ | 1.322231 | -0.40297 | -0.60482 | 0.574456 | 0.865013 | DOWN | 756.3203 | 756.3192 | 756.3207 | 9.970617 | 9.885167 |



|       |          |          |          |          |          |          |      |          |          |          |          |          |
|-------|----------|----------|----------|----------|----------|----------|------|----------|----------|----------|----------|----------|
| 10080 | M160T10_ | 1.168462 | -0.22461 | -0.59284 | 0.574472 | 0.865014 | DOWN | 159.7416 | 159.7414 | 159.7416 | 9.957333 | 9.843367 |
| 10081 | M571T34  | 1.096473 | -0.13287 | -0.58783 | 0.574474 | 0.865014 | DOWN | 571.4243 | 571.4241 | 571.4245 | 33.67217 | 33.65767 |
| 10082 | M747T10_ | 1.118991 | -0.1622  | -0.58709 | 0.574616 | 0.865023 | DOWN | 747.4677 | 747.467  | 747.4686 | 10.3828  | 10.32952 |
| 10083 | M1074T10 | 1.096817 | 0.133323 | 0.593768 | 0.574874 | 0.86504  | UP   | 1074.465 | 1074.463 | 1074.466 | 9.983467 | 9.8914   |
| 10084 | M191T10_ | 1.22317  | -0.29063 | -0.58478 | 0.57488  | 0.86504  | DOWN | 190.6218 | 190.6215 | 190.6219 | 9.967367 | 9.859233 |
| 10085 | M578T10_ | 1.076057 | -0.10575 | -0.58603 | 0.574948 | 0.865045 | DOWN | 578.4176 | 578.4173 | 578.4177 | 9.94785  | 9.843367 |
| 10086 | M194T9_1 | 1.6548   | 0.726657 | 0.604712 | 0.574985 | 0.865047 | UP   | 194.1141 | 194.1138 | 194.1143 | 9.283817 | 9.1428   |
| 10087 | M294T10_ | 1.272825 | -0.34803 | -0.59414 | 0.574998 | 0.865048 | DOWN | 294.152  | 294.1416 | 294.1522 | 9.956417 | 9.843367 |
| 10088 | M248T11_ | 1.152607 | -0.2049  | -0.58459 | 0.575089 | 0.865054 | DOWN | 247.7038 | 247.7036 | 247.704  | 10.91997 | 10.87765 |
| 10089 | M299T41_ | 1.088944 | 0.12293  | 0.587428 | 0.575292 | 0.865067 | UP   | 299.185  | 299.1849 | 299.1852 | 41.03608 | 40.92767 |
| 10090 | M495T9_8 | 1.281805 | 0.358176 | 0.585559 | 0.575321 | 0.865069 | UP   | 495.2403 | 495.2399 | 495.2413 | 9.074008 | 8.8622   |
| 10091 | M209T11_ | 1.131442 | -0.17816 | -0.58403 | 0.57537  | 0.865072 | DOWN | 209.3931 | 209.3913 | 209.3933 | 10.90375 | 10.879   |
| 10092 | M391T9_2 | 1.502304 | -0.58718 | -0.58382 | 0.575442 | 0.865077 | DOWN | 390.5971 | 390.597  | 390.5985 | 8.734433 | 8.686867 |
| 10093 | M344T10_ | 1.146881 | 0.197716 | 0.597767 | 0.575449 | 0.865077 | UP   | 344.0056 | 344.0051 | 344.0059 | 9.989483 | 9.8753   |
| 10094 | M283T9_2 | 1.252499 | 0.32481  | 0.584191 | 0.575505 | 0.865081 | UP   | 283.0169 | 283.0161 | 283.0182 | 9.348233 | 9.219483 |
| 10095 | M357T11_ | 1.102874 | -0.14127 | -0.60455 | 0.575521 | 0.865082 | DOWN | 356.8917 | 356.8915 | 356.8924 | 10.90657 | 10.877   |
| 10096 | M161T30  | 1.064951 | 0.090787 | 0.587334 | 0.575558 | 0.865084 | UP   | 161.0958 | 161.0958 | 161.0959 | 29.83383 | 29.8195  |
| 10097 | M248T7_1 | 1.202822 | 0.266424 | 0.590507 | 0.575594 | 0.865086 | UP   | 248.0192 | 248.0191 | 248.0195 | 7.0405   | 6.969117 |
| 10098 | M614T10_ | 1.172388 | -0.22945 | -0.58807 | 0.575642 | 0.865089 | DOWN | 613.5763 | 613.5656 | 613.5782 | 10.42075 | 10.34372 |
| 10099 | M304T10  | 1.241651 | 0.31226  | 0.583377 | 0.575714 | 0.865094 | UP   | 303.9543 | 303.9542 | 303.9544 | 9.946367 | 9.8753   |
| 10100 | M190T10_ | 1.129516 | -0.1757  | -0.58809 | 0.575723 | 0.865095 | DOWN | 190.349  | 190.3488 | 190.3492 | 9.97155  | 9.859233 |
| 10101 | M395T10_ | 1.202705 | 0.266283 | 0.595707 | 0.575821 | 0.865101 | UP   | 395.4346 | 395.4343 | 395.4352 | 9.944392 | 9.859233 |
| 10102 | M447T10_ | 1.159592 | 0.213618 | 0.583018 | 0.575959 | 0.86511  | UP   | 446.7506 | 446.7502 | 446.751  | 9.968992 | 9.8753   |
| 10103 | M381T11_ | 1.146275 | -0.19695 | -0.58348 | 0.575964 | 0.86511  | DOWN | 381.0962 | 381.0962 | 381.0965 | 10.9645  | 10.91813 |
| 10104 | M854T10_ | 1.093831 | -0.12939 | -0.58295 | 0.576016 | 0.865114 | DOWN | 854.1078 | 854.1063 | 854.1096 | 9.917167 | 9.811217 |
| 10105 | M457T9_3 | 1.486466 | 0.571886 | 0.604209 | 0.576143 | 0.865122 | UP   | 457.0171 | 457.0147 | 457.0179 | 9.371592 | 9.166033 |
| 10106 | M489T4   | 2.346731 | -1.23065 | -0.60012 | 0.576167 | 0.865123 | DOWN | 489.3037 | 489.3032 | 489.3041 | 3.594242 | 3.3745   |
| 10107 | M456T24  | 1.292459 | -0.37012 | -0.59985 | 0.576257 | 0.865129 | DOWN | 456.3526 | 456.3518 | 456.3534 | 24.24483 | 24.22917 |
| 10108 | M559T10_ | 1.188122 | 0.248684 | 0.588756 | 0.57626  | 0.865129 | UP   | 559.4493 | 559.4484 | 559.4508 | 9.900833 | 9.79535  |
| 10109 | M332T10_ | 1.222297 | 0.289595 | 0.5849   | 0.576263 | 0.865129 | UP   | 332.3261 | 332.3259 | 332.3265 | 9.923033 | 9.822117 |
| 10110 | M500T9_1 | 1.136446 | 0.184529 | 0.588099 | 0.576283 | 0.865131 | UP   | 500.2628 | 500.2614 | 500.2635 | 9.319667 | 9.219483 |
| 10111 | M596T10_ | 1.231497 | -0.30041 | -0.58255 | 0.576466 | 0.865143 | DOWN | 596.2971 | 596.2965 | 596.2976 | 9.924717 | 9.827283 |
| 10112 | M381T9_7 | 1.230681 | 0.299456 | 0.586039 | 0.576595 | 0.865151 | UP   | 381.1046 | 381.1038 | 381.106  | 9.147367 | 9.12675  |
| 10113 | M208T10_ | 1.440531 | 0.5266   | 0.600394 | 0.57663  | 0.865153 | UP   | 208.1376 | 208.1305 | 208.1378 | 9.810158 | 9.63045  |
| 10114 | M194T9_1 | 1.450153 | 0.536205 | 0.583318 | 0.576635 | 0.865153 | UP   | 194.2765 | 194.276  | 194.2794 | 9.175017 | 9.1175   |

|       |          |          |          |          |          |          |      |          |          |          |          |          |
|-------|----------|----------|----------|----------|----------|----------|------|----------|----------|----------|----------|----------|
| 10115 | M510T9_1 | 1.072353 | -0.10078 | -0.60385 | 0.576815 | 0.865165 | DOWN | 509.7502 | 509.7493 | 509.7504 | 9.31485  | 9.234417 |
| 10116 | M357T20  | 1.337683 | 0.419737 | 0.604624 | 0.576872 | 0.865169 | UP   | 357.2532 | 357.2532 | 357.2535 | 20.37483 | 20.36067 |
| 10117 | M265T10_ | 1.191765 | -0.2531  | -0.58181 | 0.576902 | 0.865171 | DOWN | 265.002  | 264.9946 | 265.0024 | 9.77435  | 9.75365  |
| 10118 | M757T10_ | 1.120769 | -0.16449 | -0.58224 | 0.576937 | 0.865173 | DOWN | 757.2188 | 757.2168 | 757.2192 | 9.964417 | 9.843367 |
| 10119 | M348T10_ | 1.483254 | -0.56877 | -0.58192 | 0.577055 | 0.86518  | DOWN | 348.0111 | 348.011  | 348.0111 | 9.8322   | 9.699733 |
| 10120 | M664T10_ | 1.234893 | 0.304386 | 0.589652 | 0.577088 | 0.865182 | UP   | 664.3145 | 664.3133 | 664.315  | 9.830283 | 9.779267 |
| 10121 | M280T10_ | 1.107333 | -0.14709 | -0.59586 | 0.577204 | 0.86519  | DOWN | 279.6844 | 279.6844 | 279.6846 | 9.902617 | 9.811217 |
| 10122 | M569T7   | 1.043674 | -0.06167 | -0.58349 | 0.577307 | 0.865197 | DOWN | 569.474  | 569.4737 | 569.4746 | 7.034133 | 6.94005  |
| 10123 | M570T10_ | 1.506684 | 0.591377 | 0.602469 | 0.577316 | 0.865197 | UP   | 569.5362 | 569.5353 | 569.5366 | 9.964333 | 9.8914   |
| 10124 | M892T11  | 1.07527  | 0.104699 | 0.581059 | 0.577343 | 0.865199 | UP   | 891.7297 | 891.7281 | 891.7373 | 10.94308 | 10.90393 |
| 10125 | M564T44_ | 1.077997 | -0.10835 | -0.60444 | 0.577366 | 0.8652   | DOWN | 564.3375 | 564.3372 | 564.3377 | 43.68967 | 43.488   |
| 10126 | M249T11_ | 1.157974 | -0.2116  | -0.59059 | 0.577422 | 0.865204 | DOWN | 248.8568 | 248.8567 | 248.857  | 10.93208 | 10.89355 |
| 10127 | M356T10_ | 1.68136  | 0.749629 | 0.602288 | 0.577428 | 0.865204 | UP   | 356.2726 | 356.2723 | 356.2728 | 9.714167 | 9.6048   |
| 10128 | M819T10_ | 1.120167 | -0.16371 | -0.59526 | 0.577432 | 0.865205 | DOWN | 819.1466 | 819.1453 | 819.1475 | 9.958617 | 9.853533 |
| 10129 | M260T20  | 1.123101 | -0.16749 | -0.59566 | 0.577773 | 0.865226 | DOWN | 260.1722 | 260.172  | 260.1723 | 20.17258 | 20.12883 |
| 10130 | M398T11_ | 1.138783 | -0.18749 | -0.57985 | 0.578049 | 0.865244 | DOWN | 398.3552 | 398.3521 | 398.3554 | 10.91219 | 10.879   |
| 10131 | M403T9_5 | 1.188399 | -0.24902 | -0.5808  | 0.578061 | 0.865245 | DOWN | 403.1574 | 403.1572 | 403.1577 | 8.853017 | 8.77435  |
| 10132 | M318T10_ | 1.187881 | -0.24839 | -0.58147 | 0.578118 | 0.865249 | DOWN | 317.9443 | 317.9439 | 317.9457 | 9.8207   | 9.715683 |
| 10133 | M555T11_ | 1.264235 | 0.338265 | 0.588267 | 0.578291 | 0.86526  | UP   | 555.3581 | 555.3575 | 555.3594 | 10.89176 | 10.8214  |
| 10134 | M348T9_5 | 1.300856 | 0.379461 | 0.583162 | 0.57831  | 0.865261 | UP   | 348.0178 | 348.0163 | 348.0216 | 9.1503   | 9.1158   |
| 10135 | M396T44_ | 1.125768 | 0.17091  | 0.593677 | 0.578528 | 0.865275 | UP   | 396.2226 | 396.2224 | 396.2227 | 44.437   | 44.1785  |
| 10136 | M632T13  | 1.133661 | -0.18099 | -0.57972 | 0.578534 | 0.865275 | DOWN | 632.4746 | 632.4742 | 632.4757 | 13.44902 | 13.41962 |
| 10137 | M342T10_ | 1.129598 | -0.17581 | -0.59408 | 0.578585 | 0.865278 | DOWN | 341.6997 | 341.6992 | 341.7094 | 9.830183 | 9.696683 |
| 10138 | M332T10_ | 1.086781 | -0.12006 | -0.5886  | 0.578585 | 0.865278 | DOWN | 332.4692 | 332.4691 | 332.4694 | 9.872167 | 9.747533 |
| 10139 | M425T11_ | 1.084185 | 0.116612 | 0.601579 | 0.578767 | 0.86529  | UP   | 425.2729 | 425.2728 | 425.2733 | 10.94844 | 10.90785 |
| 10140 | M296T10_ | 1.138518 | -0.18716 | -0.58142 | 0.578768 | 0.86529  | DOWN | 296.3073 | 296.3069 | 296.3075 | 9.965892 | 9.843367 |
| 10141 | M494T16_ | 1.230446 | -0.29918 | -0.58236 | 0.578772 | 0.86529  | DOWN | 494.3468 | 494.3467 | 494.3472 | 15.96126 | 15.93568 |
| 10142 | M221T11_ | 1.166837 | 0.222603 | 0.578565 | 0.578803 | 0.865292 | UP   | 220.7517 | 220.7514 | 220.7527 | 10.91688 | 10.879   |
| 10143 | M638T30  | 1.264369 | 0.338417 | 0.578448 | 0.578932 | 0.865301 | UP   | 638.3961 | 638.3956 | 638.3972 | 30.31033 | 30.2525  |
| 10144 | M333T34  | 1.109129 | 0.149427 | 0.590615 | 0.579078 | 0.86531  | UP   | 333.3343 | 333.334  | 333.3345 | 33.89008 | 33.87367 |
| 10145 | M248T7_2 | 1.07597  | -0.10564 | -0.58231 | 0.579228 | 0.865319 | DOWN | 248.2465 | 248.2464 | 248.2467 | 7.025433 | 6.95505  |
| 10146 | M913T10_ | 1.199547 | -0.26249 | -0.58474 | 0.579237 | 0.86532  | DOWN | 912.5401 | 912.5396 | 912.5417 | 9.630433 | 9.52515  |
| 10147 | M643T10_ | 1.109606 | 0.150048 | 0.579913 | 0.579292 | 0.865324 | UP   | 642.7415 | 642.7409 | 642.7424 | 9.8207   | 9.715683 |
| 10148 | M917T11_ | 1.066126 | -0.09238 | -0.59148 | 0.579345 | 0.865327 | DOWN | 917.2582 | 917.257  | 917.2588 | 10.92731 | 10.879   |
| 10149 | M179T9_3 | 1.253581 | -0.32606 | -0.58778 | 0.579431 | 0.865332 | DOWN | 179.0641 | 179.0639 | 179.0644 | 9.146233 | 9.095133 |

|       |          |          |          |          |          |          |      |          |          |          |          |          |
|-------|----------|----------|----------|----------|----------|----------|------|----------|----------|----------|----------|----------|
| 10150 | M191T11_ | 1.070517 | -0.09831 | -0.58279 | 0.57958  | 0.865342 | DOWN | 190.6931 | 190.693  | 190.6932 | 10.89875 | 10.879   |
| 10151 | M398T43_ | 1.184179 | -0.24389 | -0.57741 | 0.579632 | 0.865345 | DOWN | 398.2381 | 398.2378 | 398.2383 | 43.24367 | 42.913   |
| 10152 | M874T10_ | 1.129348 | -0.17549 | -0.58661 | 0.579659 | 0.865347 | DOWN | 873.9169 | 873.915  | 873.9174 | 9.948875 | 9.843367 |
| 10153 | M663T10_ | 1.059587 | -0.0835  | -0.57925 | 0.579705 | 0.86535  | DOWN | 663.347  | 663.3464 | 663.3485 | 9.834117 | 9.715683 |
| 10154 | M1956T10 | 1.182932 | -0.24237 | -0.58299 | 0.579722 | 0.865351 | DOWN | 1956.368 | 1956.367 | 1956.371 | 9.830558 | 9.715683 |
| 10155 | M432T11_ | 1.089485 | 0.123647 | 0.581853 | 0.5798   | 0.865356 | UP   | 432.2906 | 432.2902 | 432.2913 | 11.11092 | 11.07605 |
| 10156 | M418T9_8 | 1.170998 | -0.22774 | -0.57811 | 0.579899 | 0.865362 | DOWN | 418.2008 | 418.2006 | 418.2011 | 9.008925 | 8.9997   |
| 10157 | M505T9_1 | 1.191988 | 0.25337  | 0.576916 | 0.579907 | 0.865363 | UP   | 504.5759 | 504.5748 | 504.5764 | 8.936617 | 8.878667 |
| 10158 | M198T11_ | 1.085482 | -0.11834 | -0.57763 | 0.579933 | 0.865364 | DOWN | 197.8044 | 197.8043 | 197.8045 | 10.892   | 10.879   |
| 10159 | M331T28_ | 1.057256 | -0.08032 | -0.57903 | 0.580104 | 0.865375 | DOWN | 331.0989 | 331.0986 | 331.099  | 28.31    | 28.27433 |
| 10160 | M494T19  | 1.127889 | -0.17363 | -0.57773 | 0.580251 | 0.865385 | DOWN | 494.347  | 494.3457 | 494.3471 | 18.6145  | 18.5995  |
| 10161 | M284T10_ | 1.115734 | -0.15799 | -0.57993 | 0.580261 | 0.865385 | DOWN | 283.7151 | 283.7148 | 283.7152 | 9.934533 | 9.827283 |
| 10162 | M268T15_ | 1.593197 | 0.671924 | 0.597916 | 0.580289 | 0.865387 | UP   | 268.1692 | 268.1692 | 268.1693 | 15.14657 | 15.1171  |
| 10163 | M369T11_ | 1.328089 | 0.409352 | 0.576527 | 0.580307 | 0.865388 | UP   | 369.3054 | 369.3044 | 369.3058 | 10.91096 | 10.84487 |
| 10164 | M179T10_ | 1.137753 | -0.18619 | -0.5937  | 0.580329 | 0.86539  | DOWN | 178.9721 | 178.9721 | 178.9722 | 9.902617 | 9.811217 |
| 10165 | M711T9_2 | 1.15068  | -0.20249 | -0.58047 | 0.580363 | 0.865392 | DOWN | 710.8892 | 710.8889 | 710.8899 | 9.372925 | 9.16125  |
| 10166 | M354T10_ | 1.113996 | 0.155744 | 0.596317 | 0.580372 | 0.865392 | UP   | 353.5478 | 353.5478 | 353.548  | 9.841442 | 9.73145  |
| 10167 | M635T10_ | 1.072773 | -0.10134 | -0.57805 | 0.580382 | 0.865393 | DOWN | 634.986  | 634.9854 | 634.9879 | 9.823575 | 9.715683 |
| 10168 | M903T10  | 1.174454 | 0.23199  | 0.59731  | 0.580512 | 0.865401 | UP   | 903.2591 | 903.2555 | 903.2602 | 9.979667 | 9.8753   |
| 10169 | M355T41_ | 1.08685  | -0.12015 | -0.58485 | 0.580554 | 0.865404 | DOWN | 355.2114 | 355.2112 | 355.2115 | 41.3305  | 41.158   |
| 10170 | M488T43_ | 1.143862 | -0.19391 | -0.5958  | 0.580627 | 0.865408 | DOWN | 488.2849 | 488.2847 | 488.2851 | 43.33625 | 43.01367 |
| 10171 | M604T10_ | 1.243008 | -0.31384 | -0.597   | 0.580804 | 0.86542  | DOWN | 604.3359 | 604.3347 | 604.3365 | 10.23653 | 10.18653 |
| 10172 | M266T22  | 1.398271 | 0.483643 | 0.578719 | 0.580861 | 0.865423 | UP   | 266.1512 | 266.1509 | 266.1515 | 21.51542 | 21.4715  |
| 10173 | M382T42_ | 1.03638  | -0.05155 | -0.57535 | 0.580875 | 0.865424 | DOWN | 382.3394 | 382.3392 | 382.3395 | 41.6185  | 41.60383 |
| 10174 | M659T10_ | 1.179968 | -0.23875 | -0.57537 | 0.580911 | 0.865426 | DOWN | 659.0229 | 659.0221 | 659.0261 | 9.947783 | 9.827283 |
| 10175 | M444T9_1 | 1.331113 | 0.412633 | 0.587255 | 0.580961 | 0.86543  | UP   | 443.8031 | 443.8028 | 443.8046 | 8.695383 | 8.601067 |
| 10176 | M357T10_ | 1.200794 | 0.263989 | 0.575888 | 0.581065 | 0.865436 | UP   | 356.5625 | 356.5624 | 356.5627 | 9.553017 | 9.447617 |
| 10177 | M562T41  | 1.148386 | 0.199608 | 0.587304 | 0.581136 | 0.865441 | UP   | 562.322  | 562.3218 | 562.3222 | 41.18667 | 41.10033 |
| 10178 | M346T9_8 | 1.220276 | -0.28721 | -0.58826 | 0.581171 | 0.865443 | DOWN | 346.1568 | 346.1563 | 346.1574 | 9.317    | 9.275917 |
| 10179 | M230T10_ | 1.319838 | 0.400361 | 0.576972 | 0.581196 | 0.865445 | UP   | 230.0839 | 230.0838 | 230.0842 | 9.9351   | 9.827283 |
| 10180 | M274T10_ | 1.282086 | 0.358493 | 0.579456 | 0.581244 | 0.865448 | UP   | 273.7658 | 273.7656 | 273.766  | 9.971292 | 9.859233 |
| 10181 | M1983T10 | 1.075078 | 0.104441 | 0.579028 | 0.581252 | 0.865448 | UP   | 1982.878 | 1982.876 | 1982.884 | 9.828367 | 9.715683 |
| 10182 | M378T10_ | 1.135577 | -0.18343 | -0.58002 | 0.58129  | 0.86545  | DOWN | 378.4227 | 378.4224 | 378.4229 | 9.903283 | 9.806367 |
| 10183 | M245T23_ | 1.080293 | -0.11142 | -0.58134 | 0.581303 | 0.865451 | DOWN | 245.2666 | 245.2664 | 245.2666 | 23.103   | 23.089   |
| 10184 | M634T9_3 | 1.262622 | -0.33642 | -0.57466 | 0.581317 | 0.865452 | DOWN | 634.4222 | 634.4217 | 634.4227 | 8.7968   | 8.745033 |

|       |           |          |          |          |          |          |      |          |          |          |          |          |
|-------|-----------|----------|----------|----------|----------|----------|------|----------|----------|----------|----------|----------|
| 10185 | M259T9_5  | 1.157872 | -0.21148 | -0.57476 | 0.581386 | 0.865457 | DOWN | 259.432  | 259.4317 | 259.4323 | 8.798117 | 8.712633 |
| 10186 | M241T10_  | 1.162003 | 0.216614 | 0.588898 | 0.581414 | 0.865458 | UP   | 240.6975 | 240.6973 | 240.6975 | 9.940783 | 9.827283 |
| 10187 | M358T30   | 1.171045 | 0.227796 | 0.589419 | 0.581484 | 0.865463 | UP   | 358.2642 | 358.2639 | 358.2643 | 30.07875 | 30.06383 |
| 10188 | M653T10_  | 1.134149 | -0.18161 | -0.57471 | 0.581605 | 0.86547  | DOWN | 652.7279 | 652.7228 | 652.7285 | 9.869467 | 9.699733 |
| 10189 | M758T10_  | 1.284212 | -0.36088 | -0.57453 | 0.581608 | 0.865471 | DOWN | 757.983  | 757.981  | 757.9859 | 9.986767 | 9.932033 |
| 10190 | M349T16   | 1.182664 | -0.24204 | -0.57811 | 0.58162  | 0.865471 | DOWN | 349.2175 | 349.2173 | 349.2177 | 16.24118 | 16.21298 |
| 10191 | M656T10_  | 1.207159 | 0.271616 | 0.574333 | 0.581727 | 0.865478 | UP   | 655.8738 | 655.8725 | 655.8746 | 9.964092 | 9.843367 |
| 10192 | M373T20_  | 1.351484 | -0.43454 | -0.57546 | 0.581756 | 0.86548  | DOWN | 373.267  | 373.2666 | 373.2722 | 19.91117 | 19.8975  |
| 10193 | M243T44_  | 1.124502 | -0.16929 | -0.59785 | 0.581874 | 0.865487 | DOWN | 243.1223 | 243.1223 | 243.1224 | 44.2215  | 44.12083 |
| 10194 | M1107T10_ | 1.144184 | 0.194319 | 0.574316 | 0.581967 | 0.865493 | UP   | 1107.138 | 1107.137 | 1107.14  | 9.97385  | 9.859233 |
| 10195 | M368T11_  | 1.104384 | 0.143241 | 0.577521 | 0.582102 | 0.865502 | UP   | 368.4231 | 368.423  | 368.4234 | 10.89904 | 10.879   |
| 10196 | M174T10_  | 1.229685 | -0.29829 | -0.57356 | 0.582253 | 0.865511 | DOWN | 173.7274 | 173.7272 | 173.7275 | 9.858833 | 9.746783 |
| 10197 | M299T43_  | 1.092471 | 0.127595 | 0.583974 | 0.582287 | 0.865513 | UP   | 299.185  | 299.1848 | 299.1853 | 43.33708 | 43.12833 |
| 10198 | M367T9_5  | 1.196759 | -0.25913 | -0.57394 | 0.582384 | 0.86552  | DOWN | 367.4405 | 367.4401 | 367.4472 | 9.362817 | 9.22495  |
| 10199 | M876T10_  | 1.291801 | -0.36938 | -0.58812 | 0.582425 | 0.865522 | DOWN | 875.5847 | 875.5836 | 875.5859 | 9.95165  | 9.885167 |
| 10200 | M719T10_  | 1.12612  | 0.17136  | 0.586785 | 0.582455 | 0.865524 | UP   | 718.5544 | 718.5539 | 718.5552 | 9.825767 | 9.715683 |
| 10201 | M353T42_  | 1.1551   | -0.20802 | -0.59634 | 0.582507 | 0.865527 | DOWN | 353.2321 | 353.232  | 353.2321 | 42.07833 | 41.97767 |
| 10202 | M217T9_3  | 1.107841 | -0.14775 | -0.57511 | 0.582579 | 0.865532 | DOWN | 217.3165 | 217.3163 | 217.3166 | 9.256517 | 9.129317 |
| 10203 | M359T43_  | 1.170634 | 0.227291 | 0.596817 | 0.582585 | 0.865532 | UP   | 359.2062 | 359.2061 | 359.2064 | 43.4595  | 43.371   |
| 10204 | M477T11_  | 1.126171 | -0.17143 | -0.57261 | 0.582638 | 0.865536 | DOWN | 477.2045 | 477.1985 | 477.2048 | 10.89061 | 10.85018 |
| 10205 | M385T11_  | 1.086628 | 0.119858 | 0.57502  | 0.582645 | 0.865536 | UP   | 384.6125 | 384.6122 | 384.613  | 10.92828 | 10.879   |
| 10206 | M241T10_  | 1.195166 | 0.257211 | 0.584668 | 0.583039 | 0.865561 | UP   | 240.9899 | 240.9819 | 240.99   | 9.968992 | 9.859233 |
| 10207 | M500T9_1  | 1.120539 | -0.16419 | -0.5774  | 0.58304  | 0.865561 | DOWN | 500.1811 | 500.1786 | 500.1814 | 9.2311   | 9.129317 |
| 10208 | M1078T10_ | 1.204145 | -0.26801 | -0.57456 | 0.583066 | 0.865563 | DOWN | 1078.135 | 1078.133 | 1078.135 | 9.803    | 9.76065  |
| 10209 | M611T10_  | 1.551109 | 0.6333   | 0.594349 | 0.583086 | 0.865564 | UP   | 611.4019 | 611.4014 | 611.4023 | 10.44008 | 10.42665 |
| 10210 | M227T10_  | 1.247118 | 0.318598 | 0.591421 | 0.583109 | 0.865565 | UP   | 226.9525 | 226.9523 | 226.9527 | 9.934533 | 9.827283 |
| 10211 | M1099T23  | 1.239206 | -0.30942 | -0.57197 | 0.583111 | 0.865565 | DOWN | 1098.737 | 1098.737 | 1098.739 | 22.712   | 22.68317 |
| 10212 | M392T10_  | 1.115895 | -0.1582  | -0.57357 | 0.58322  | 0.865572 | DOWN | 391.5482 | 391.5481 | 391.5487 | 9.879358 | 9.746783 |
| 10213 | M964T10_  | 1.453926 | 0.539954 | 0.593034 | 0.583275 | 0.865576 | UP   | 964.3932 | 964.3894 | 964.3939 | 9.957033 | 9.8753   |
| 10214 | M684T10_  | 1.110114 | -0.15071 | -0.57385 | 0.583279 | 0.865576 | DOWN | 683.9012 | 683.9007 | 683.9018 | 9.82645  | 9.715683 |
| 10215 | M358T22_  | 1.190212 | -0.25122 | -0.57248 | 0.583294 | 0.865577 | DOWN | 357.5862 | 357.586  | 357.5865 | 21.57658 | 21.53683 |
| 10216 | M698T31   | 1.107828 | -0.14773 | -0.58009 | 0.583404 | 0.865584 | DOWN | 698.4991 | 698.4987 | 698.4995 | 31.2915  | 31.27733 |
| 10217 | M610T10_  | 1.551149 | 0.633337 | 0.591896 | 0.583407 | 0.865584 | UP   | 610.1879 | 610.1872 | 610.1883 | 9.983467 | 9.9754   |
| 10218 | M470T11_  | 1.140318 | -0.18944 | -0.57989 | 0.583635 | 0.865598 | DOWN | 470.342  | 470.3412 | 470.3424 | 10.91181 | 10.873   |
| 10219 | M347T11_  | 1.167027 | -0.22284 | -0.57112 | 0.583994 | 0.865621 | DOWN | 347.4236 | 347.4235 | 347.424  | 10.90548 | 10.88747 |

|       |          |          |          |          |          |          |      |          |          |          |          |          |
|-------|----------|----------|----------|----------|----------|----------|------|----------|----------|----------|----------|----------|
| 10220 | M392T11_ | 1.414653 | -0.50045 | -0.5876  | 0.584055 | 0.865625 | DOWN | 392.3347 | 392.3343 | 392.3362 | 10.93655 | 10.82935 |
| 10221 | M174T11_ | 1.194837 | -0.25681 | -0.57047 | 0.584059 | 0.865625 | DOWN | 174.2467 | 174.2466 | 174.2468 | 10.8926  | 10.8646  |
| 10222 | M548T9_5 | 1.085289 | -0.11808 | -0.57507 | 0.584192 | 0.865633 | DOWN | 548.1567 | 548.1547 | 548.1572 | 9.241267 | 9.1445   |
| 10223 | M224T11_ | 1.084466 | -0.11698 | -0.57107 | 0.58421  | 0.865635 | DOWN | 223.6857 | 223.6856 | 223.6858 | 10.892   | 10.879   |
| 10224 | M783T11  | 1.089674 | -0.1239  | -0.57037 | 0.584216 | 0.865635 | DOWN | 783.1016 | 783.0996 | 783.1026 | 10.892   | 10.8646  |
| 10225 | M260T9_9 | 1.214481 | -0.28034 | -0.57099 | 0.584311 | 0.865641 | DOWN | 260.4909 | 260.4873 | 260.4918 | 9.285867 | 9.1892   |
| 10226 | M214T10_ | 1.186954 | -0.24726 | -0.57038 | 0.584324 | 0.865642 | DOWN | 214.1853 | 214.1852 | 214.193  | 9.823575 | 9.802117 |
| 10227 | M366T9_8 | 1.203552 | -0.2673  | -0.57079 | 0.584388 | 0.865646 | DOWN | 366.2491 | 366.2447 | 366.2505 | 9.220383 | 9.1175   |
| 10228 | M378T10_ | 1.051957 | -0.07308 | -0.57154 | 0.584421 | 0.865648 | DOWN | 377.7811 | 377.7807 | 377.7819 | 9.917167 | 9.811217 |
| 10229 | M487T11_ | 1.134125 | -0.18158 | -0.57018 | 0.584527 | 0.865654 | DOWN | 487.3359 | 487.3355 | 487.3363 | 10.89133 | 10.87765 |
| 10230 | M289T10_ | 1.396655 | 0.481975 | 0.573622 | 0.584547 | 0.865656 | UP   | 288.5291 | 288.5287 | 288.532  | 9.972483 | 9.811217 |
| 10231 | M778T44  | 1.122184 | 0.16631  | 0.570592 | 0.584567 | 0.865657 | UP   | 778.0473 | 778.0458 | 778.0474 | 44.1065  | 44.03467 |
| 10232 | M353T10_ | 1.110457 | 0.151154 | 0.573096 | 0.584576 | 0.865657 | UP   | 352.9767 | 352.9766 | 352.977  | 9.8235   | 9.728083 |
| 10233 | M233T11_ | 1.067902 | -0.09478 | -0.57549 | 0.584665 | 0.865663 | DOWN | 232.7411 | 232.741  | 232.7412 | 10.89875 | 10.879   |
| 10234 | M460T10_ | 1.245991 | 0.317293 | 0.584254 | 0.584714 | 0.865666 | UP   | 460.1374 | 460.1367 | 460.1376 | 9.9847   | 9.8753   |
| 10235 | M1131T10 | 1.276543 | -0.35224 | -0.56977 | 0.584761 | 0.865669 | DOWN | 1131.414 | 1131.413 | 1131.422 | 9.8445   | 9.6681   |
| 10236 | M655T10_ | 1.199196 | 0.262068 | 0.573307 | 0.584846 | 0.865674 | UP   | 654.5731 | 654.5727 | 654.5745 | 9.95605  | 9.843367 |
| 10237 | M730T11_ | 1.108892 | -0.14912 | -0.57349 | 0.584855 | 0.865675 | DOWN | 729.6665 | 729.6658 | 729.6669 | 10.892   | 10.8646  |
| 10238 | M479T9_8 | 1.325506 | 0.406544 | 0.586428 | 0.584929 | 0.86568  | UP   | 479.309  | 479.3083 | 479.3212 | 8.902258 | 8.7891   |
| 10239 | M608T10_ | 1.242401 | -0.31313 | -0.5807  | 0.585076 | 0.865689 | DOWN | 608.344  | 608.3434 | 608.3446 | 9.975217 | 9.8753   |
| 10240 | M217T8   | 1.134256 | 0.181746 | 0.570268 | 0.58509  | 0.86569  | UP   | 217.1045 | 217.1043 | 217.1046 | 8.424325 | 8.279433 |
| 10241 | M1928T10 | 1.366985 | 0.450997 | 0.584484 | 0.585112 | 0.865691 | UP   | 1928.342 | 1928.34  | 1928.344 | 9.8374   | 9.73145  |
| 10242 | M338T10_ | 1.131821 | -0.17865 | -0.56868 | 0.585219 | 0.865698 | DOWN | 338.476  | 338.4704 | 338.4762 | 9.823575 | 9.715683 |
| 10243 | M402T11_ | 1.142294 | 0.191934 | 0.568539 | 0.585453 | 0.865712 | UP   | 402.4001 | 402.3997 | 402.4005 | 10.90551 | 10.87572 |
| 10244 | M440T11_ | 1.148378 | 0.199598 | 0.576972 | 0.58565  | 0.865725 | UP   | 440.2228 | 440.2225 | 440.223  | 10.9212  | 10.90197 |
| 10245 | M252T10_ | 1.15296  | 0.205343 | 0.575189 | 0.585653 | 0.865725 | UP   | 252.3424 | 252.3423 | 252.3426 | 9.938708 | 9.827283 |
| 10246 | M225T44_ | 1.156994 | -0.21038 | -0.58787 | 0.585678 | 0.865726 | DOWN | 225.1482 | 225.1481 | 225.1484 | 43.716   | 43.64633 |
| 10247 | M459T26  | 1.25169  | 0.323878 | 0.578102 | 0.58569  | 0.865727 | UP   | 459.2712 | 459.2709 | 459.2714 | 25.92483 | 25.87933 |
| 10248 | M479T11_ | 1.148901 | -0.20025 | -0.56997 | 0.585841 | 0.865737 | DOWN | 479.4348 | 479.4345 | 479.4351 | 10.9049  | 10.89125 |
| 10249 | M564T40_ | 1.168022 | 0.224067 | 0.567608 | 0.585965 | 0.865744 | UP   | 564.3012 | 564.301  | 564.3016 | 40.30917 | 40.09333 |
| 10250 | M362T11_ | 1.071016 | -0.09898 | -0.56904 | 0.585978 | 0.865745 | DOWN | 362.2083 | 362.2079 | 362.2114 | 10.91878 | 10.879   |
| 10251 | M516T11_ | 1.06082  | -0.08518 | -0.57543 | 0.58598  | 0.865745 | DOWN | 515.9778 | 515.9776 | 515.9781 | 10.53543 | 10.48782 |
| 10252 | M1649T10 | 1.153494 | -0.20601 | -0.56705 | 0.586241 | 0.865761 | DOWN | 1648.9   | 1648.899 | 1648.904 | 9.915583 | 9.811217 |
| 10253 | M462T40_ | 1.093518 | 0.128977 | 0.586959 | 0.586267 | 0.865763 | UP   | 462.2695 | 462.2693 | 462.2695 | 40.02133 | 40.02117 |
| 10254 | M234T9_8 | 1.328004 | 0.40926  | 0.567752 | 0.586553 | 0.865781 | UP   | 234.1424 | 234.1406 | 234.1464 | 9.276833 | 9.132267 |

|       |          |          |          |          |          |          |      |          |          |          |          |          |
|-------|----------|----------|----------|----------|----------|----------|------|----------|----------|----------|----------|----------|
| 10255 | M514T9_4 | 1.164034 | -0.21913 | -0.57484 | 0.586592 | 0.865783 | DOWN | 514.1087 | 514.1085 | 514.1103 | 9.4498   | 9.355317 |
| 10256 | M326T11_ | 1.157678 | 0.211234 | 0.573836 | 0.586609 | 0.865784 | UP   | 326.4105 | 326.4098 | 326.4112 | 10.90657 | 10.84847 |
| 10257 | M472T10_ | 1.129361 | -0.17551 | -0.57005 | 0.586622 | 0.865785 | DOWN | 471.582  | 471.581  | 471.5822 | 9.967367 | 9.859233 |
| 10258 | M738T10_ | 1.12894  | -0.17497 | -0.57759 | 0.586643 | 0.865787 | DOWN | 738.0869 | 738.086  | 738.087  | 9.977442 | 9.8753   |
| 10259 | M287T44_ | 1.126338 | 0.17164  | 0.56662  | 0.586706 | 0.86579  | UP   | 287.1486 | 287.1485 | 287.1488 | 44.0345  | 43.9485  |
| 10260 | M365T10_ | 1.110318 | -0.15097 | -0.57073 | 0.586765 | 0.865794 | DOWN | 365.4577 | 365.4569 | 365.4578 | 9.8207   | 9.699733 |
| 10261 | M212T9_1 | 1.480779 | -0.56636 | -0.56824 | 0.586825 | 0.865798 | DOWN | 212.4742 | 212.4725 | 212.4747 | 9.3471   | 9.132267 |
| 10262 | M600T10_ | 1.102674 | 0.141007 | 0.57554  | 0.58702  | 0.86581  | UP   | 600.3261 | 600.3253 | 600.3299 | 9.825492 | 9.728083 |
| 10263 | M411T10_ | 1.161478 | 0.215962 | 0.573031 | 0.587065 | 0.865813 | UP   | 411.2362 | 411.2359 | 411.2365 | 9.968992 | 9.859233 |
| 10264 | M283T20  | 1.167072 | -0.22289 | -0.56575 | 0.587076 | 0.865813 | DOWN | 283.3104 | 283.3103 | 283.3106 | 20.426   | 20.40417 |
| 10265 | M401T11_ | 1.336064 | 0.417989 | 0.569093 | 0.587133 | 0.865817 | UP   | 401.4683 | 401.4655 | 401.477  | 10.91977 | 10.87708 |
| 10266 | M252T9_3 | 1.202489 | -0.26602 | -0.56657 | 0.587171 | 0.865819 | DOWN | 251.9059 | 251.9029 | 251.9072 | 9.285542 | 9.132267 |
| 10267 | M722T10_ | 1.083902 | 0.116234 | 0.578039 | 0.587172 | 0.865819 | UP   | 722.0493 | 722.0481 | 722.05   | 9.739308 | 9.4159   |
| 10268 | M1292T26 | 1.234993 | 0.304503 | 0.565678 | 0.587225 | 0.865823 | UP   | 1291.953 | 1291.952 | 1291.954 | 26.01367 | 25.98083 |
| 10269 | M635T11_ | 1.102709 | -0.14105 | -0.56984 | 0.587227 | 0.865823 | DOWN | 635.2598 | 635.2596 | 635.2611 | 10.892   | 10.8646  |
| 10270 | M343T11_ | 1.128482 | 0.174384 | 0.57204  | 0.587255 | 0.865825 | UP   | 343.2534 | 343.2533 | 343.2541 | 10.892   | 10.85018 |
| 10271 | M360T10_ | 1.137476 | -0.18584 | -0.56649 | 0.587338 | 0.86583  | DOWN | 360.236  | 360.2357 | 360.2361 | 9.893283 | 9.840617 |
| 10272 | M289T11_ | 1.171423 | 0.228263 | 0.565377 | 0.587371 | 0.865832 | UP   | 289.0432 | 289.0431 | 289.0433 | 10.91401 | 10.877   |
| 10273 | M216T12_ | 1.159846 | -0.21393 | -0.56524 | 0.587407 | 0.865834 | DOWN | 216.1744 | 216.1743 | 216.1746 | 11.56974 | 11.54862 |
| 10274 | M218T10_ | 1.374857 | -0.45928 | -0.56524 | 0.58742  | 0.865835 | DOWN | 218.1101 | 218.1101 | 218.1104 | 9.63045  | 9.556217 |
| 10275 | M396T9_5 | 1.13079  | -0.17733 | -0.56576 | 0.58744  | 0.865836 | DOWN | 395.8818 | 395.8807 | 395.884  | 9.2386   | 9.06855  |
| 10276 | M494T9_4 | 1.159132 | -0.21304 | -0.56546 | 0.587454 | 0.865837 | DOWN | 493.6918 | 493.6916 | 493.6921 | 9.175017 | 9.12675  |
| 10277 | M384T11_ | 1.130426 | -0.17687 | -0.57706 | 0.587474 | 0.865838 | DOWN | 384.0538 | 384.0536 | 384.0546 | 10.90657 | 10.879   |
| 10278 | M946T10_ | 1.204012 | 0.26785  | 0.566496 | 0.587561 | 0.865844 | UP   | 945.636  | 945.6353 | 945.6368 | 9.996725 | 9.90755  |
| 10279 | M203T8_2 | 1.473115 | 0.55887  | 0.584136 | 0.587609 | 0.865847 | UP   | 203.0523 | 203.0522 | 203.0525 | 8.181483 | 8.071983 |
| 10280 | M645T9_2 | 1.201679 | 0.265052 | 0.566503 | 0.587618 | 0.865847 | UP   | 644.8969 | 644.8873 | 644.8985 | 9.240775 | 9.04725  |
| 10281 | M409T10_ | 1.174954 | 0.232604 | 0.566949 | 0.587619 | 0.865847 | UP   | 408.6115 | 408.611  | 408.6117 | 9.967367 | 9.859233 |
| 10282 | M373T10_ | 1.193711 | 0.255454 | 0.564962 | 0.587728 | 0.865854 | UP   | 372.6156 | 372.6073 | 372.6158 | 9.942317 | 9.827283 |
| 10283 | M318T10_ | 1.171663 | 0.228558 | 0.586522 | 0.587733 | 0.865854 | UP   | 318.2212 | 318.2209 | 318.2223 | 9.841308 | 9.73145  |
| 10284 | M519T15  | 1.086709 | 0.119965 | 0.567022 | 0.587762 | 0.865856 | UP   | 519.3895 | 519.3886 | 519.3904 | 14.8973  | 14.86757 |
| 10285 | M415T11_ | 1.082604 | -0.11451 | -0.5646  | 0.587879 | 0.865863 | DOWN | 414.5456 | 414.5454 | 414.5468 | 10.89875 | 10.879   |
| 10286 | M288T24_ | 1.850838 | 0.888179 | 0.564902 | 0.587892 | 0.865864 | UP   | 288.3332 | 288.3266 | 288.3408 | 24.08483 | 23.98183 |
| 10287 | M227T10_ | 1.236842 | 0.306661 | 0.585427 | 0.587903 | 0.865865 | UP   | 226.5085 | 226.4994 | 226.5087 | 9.933567 | 9.827283 |
| 10288 | M623T9_7 | 1.283129 | -0.35967 | -0.56478 | 0.587913 | 0.865865 | DOWN | 623.4434 | 623.4431 | 623.4436 | 8.693858 | 8.586967 |
| 10289 | M227T7_1 | 1.243981 | -0.31496 | -0.56492 | 0.588123 | 0.865878 | DOWN | 226.9513 | 226.9512 | 226.9514 | 7.404058 | 7.2944   |

|       |          |          |          |          |          |          |      |          |          |          |          |          |
|-------|----------|----------|----------|----------|----------|----------|------|----------|----------|----------|----------|----------|
| 10290 | M235T9_7 | 1.170273 | -0.22685 | -0.57269 | 0.588158 | 0.865881 | DOWN | 234.9954 | 234.9945 | 234.9962 | 9.310917 | 9.132267 |
| 10291 | M594T11_ | 1.163456 | 0.218417 | 0.56795  | 0.588159 | 0.865881 | UP   | 594.3463 | 594.3451 | 594.3488 | 10.84847 | 10.82935 |
| 10292 | M757T11  | 1.085906 | -0.1189  | -0.56413 | 0.58819  | 0.865883 | DOWN | 756.6643 | 756.6639 | 756.6652 | 10.892   | 10.879   |
| 10293 | M233T11_ | 1.075863 | -0.10549 | -0.56655 | 0.588351 | 0.865893 | DOWN | 233.2591 | 233.259  | 233.2592 | 10.89875 | 10.879   |
| 10294 | M260T10_ | 1.168433 | -0.22458 | -0.56389 | 0.588372 | 0.865894 | DOWN | 260.3793 | 260.3787 | 260.3795 | 9.950258 | 9.827283 |
| 10295 | M354T10_ | 1.231926 | -0.30092 | -0.5634  | 0.588613 | 0.865909 | DOWN | 353.6973 | 353.697  | 353.711  | 9.8322   | 9.728083 |
| 10296 | M239T10_ | 1.236888 | 0.306715 | 0.569999 | 0.588659 | 0.865912 | UP   | 239.4988 | 239.4984 | 239.505  | 9.967517 | 9.8753   |
| 10297 | M278T11_ | 1.083751 | -0.11603 | -0.5639  | 0.588659 | 0.865912 | DOWN | 277.8432 | 277.8431 | 277.8434 | 10.892   | 10.879   |
| 10298 | M252T10_ | 1.086859 | -0.12016 | -0.56415 | 0.588755 | 0.865918 | DOWN | 252.2321 | 252.2318 | 252.2322 | 10.43905 | 10.39298 |
| 10299 | M451T24  | 1.170853 | 0.22756  | 0.563104 | 0.588803 | 0.86592  | UP   | 451.3607 | 451.3604 | 451.361  | 24.023   | 23.9865  |
| 10300 | M409T9_5 | 1.101627 | 0.139636 | 0.563909 | 0.588821 | 0.865922 | UP   | 409.3877 | 409.3871 | 409.388  | 9.3385   | 9.204617 |
| 10301 | M400T12_ | 1.150063 | -0.20171 | -0.56458 | 0.588829 | 0.865922 | DOWN | 400.1866 | 400.1863 | 400.1868 | 11.60903 | 11.59273 |
| 10302 | M724T23  | 1.086267 | -0.11938 | -0.56981 | 0.588909 | 0.865927 | DOWN | 724.3388 | 724.3385 | 724.3393 | 23.11742 | 23.0885  |
| 10303 | M242T9_2 | 1.174806 | -0.23242 | -0.57868 | 0.588953 | 0.86593  | DOWN | 241.8292 | 241.8263 | 241.8298 | 9.320483 | 9.234417 |
| 10304 | M481T10_ | 1.422751 | 0.508683 | 0.562847 | 0.588965 | 0.86593  | UP   | 480.7821 | 480.782  | 480.7832 | 9.74925  | 9.729367 |
| 10305 | M315T10_ | 1.312551 | 0.392374 | 0.584862 | 0.58902  | 0.865934 | UP   | 315.1249 | 315.1247 | 315.1252 | 9.967533 | 9.8753   |
| 10306 | M311T19_ | 1.499922 | 0.584887 | 0.563693 | 0.58903  | 0.865934 | UP   | 311.2464 | 311.2458 | 311.2471 | 18.64333 | 18.62917 |
| 10307 | M396T44_ | 1.169147 | -0.22546 | -0.57126 | 0.589038 | 0.865935 | DOWN | 396.2225 | 396.2224 | 396.2227 | 43.73267 | 43.58883 |
| 10308 | M338T11_ | 1.09742  | -0.13412 | -0.56272 | 0.589182 | 0.865944 | DOWN | 337.985  | 337.9849 | 337.9852 | 10.892   | 10.879   |
| 10309 | M477T10_ | 1.257525 | 0.330587 | 0.562769 | 0.589302 | 0.865951 | UP   | 477.0554 | 477.0552 | 477.0555 | 9.76855  | 9.65225  |
| 10310 | M531T9_1 | 1.167659 | -0.22362 | -0.57882 | 0.589395 | 0.865957 | DOWN | 530.5657 | 530.5623 | 530.5669 | 9.2468   | 9.1445   |
| 10311 | M166T9_1 | 1.201382 | -0.26469 | -0.56726 | 0.589412 | 0.865958 | DOWN | 165.8452 | 165.8446 | 165.8455 | 9.317    | 9.219483 |
| 10312 | M474T9_7 | 1.370305 | 0.454497 | 0.584398 | 0.589537 | 0.865966 | UP   | 474.3229 | 474.3117 | 474.3231 | 9.186017 | 9.110833 |
| 10313 | M357T11_ | 1.105165 | -0.14426 | -0.56523 | 0.589593 | 0.865969 | DOWN | 357.3686 | 357.3684 | 357.3688 | 10.892   | 10.8646  |
| 10314 | M696T10_ | 1.152112 | -0.20428 | -0.57237 | 0.589601 | 0.86597  | DOWN | 695.9155 | 695.9153 | 695.9158 | 9.972483 | 9.8753   |
| 10315 | M226T9_2 | 1.150525 | -0.20229 | -0.57202 | 0.589632 | 0.865972 | DOWN | 225.8829 | 225.8821 | 225.8832 | 9.270833 | 9.132267 |
| 10316 | M401T11_ | 1.84602  | -0.88442 | -0.56219 | 0.589646 | 0.865972 | DOWN | 401.3395 | 401.3386 | 401.3421 | 10.9006  | 10.78678 |
| 10317 | M324T11_ | 1.101705 | -0.13974 | -0.56506 | 0.589655 | 0.865973 | DOWN | 324.35   | 324.3498 | 324.3504 | 10.892   | 10.8646  |
| 10318 | M361T10_ | 1.513729 | 0.598107 | 0.573606 | 0.589655 | 0.865973 | UP   | 360.5228 | 360.5223 | 360.5231 | 9.811408 | 9.7124   |
| 10319 | M221T10_ | 1.319321 | -0.3998  | -0.56336 | 0.589674 | 0.865974 | DOWN | 220.7328 | 220.7217 | 220.734  | 9.844992 | 9.715683 |
| 10320 | M496T32  | 1.251874 | 0.32409  | 0.571985 | 0.589736 | 0.865978 | UP   | 496.3392 | 496.339  | 496.3398 | 32.21492 | 32.20033 |
| 10321 | M243T10_ | 1.112363 | -0.15363 | -0.56613 | 0.589741 | 0.865978 | DOWN | 242.6234 | 242.6233 | 242.6235 | 9.97385  | 9.8753   |
| 10322 | M260T10_ | 1.190407 | -0.25145 | -0.57267 | 0.589741 | 0.865978 | DOWN | 260.0612 | 260.0611 | 260.0613 | 9.894317 | 9.827283 |
| 10323 | M509T9_3 | 1.267269 | -0.34172 | -0.56729 | 0.589855 | 0.865985 | DOWN | 509.2207 | 509.2197 | 509.2211 | 8.985083 | 8.82795  |
| 10324 | M476T44  | 1.354211 | -0.43745 | -0.56355 | 0.589895 | 0.865988 | DOWN | 476.2487 | 476.2484 | 476.2604 | 43.79033 | 43.642   |

|       |          |          |          |          |          |          |      |          |          |          |          |          |
|-------|----------|----------|----------|----------|----------|----------|------|----------|----------|----------|----------|----------|
| 10325 | M524T35  | 1.122618 | -0.16687 | -0.58395 | 0.589918 | 0.865989 | DOWN | 524.3061 | 524.3059 | 524.3062 | 35.41383 | 35.23917 |
| 10326 | M869T10_ | 1.136203 | 0.18422  | 0.578877 | 0.590035 | 0.865996 | UP   | 868.574  | 868.5737 | 868.5748 | 9.985733 | 9.8753   |
| 10327 | M730T11_ | 1.093268 | -0.12865 | -0.56162 | 0.590113 | 0.866001 | DOWN | 730.4927 | 730.4918 | 730.4934 | 10.54073 | 10.50338 |
| 10328 | M272T7   | 1.246616 | -0.31802 | -0.56435 | 0.590162 | 0.866004 | DOWN | 272.1851 | 272.185  | 272.1852 | 7.376933 | 7.282133 |
| 10329 | M400T10_ | 1.138065 | 0.186583 | 0.572464 | 0.590181 | 0.866005 | UP   | 399.8326 | 399.8322 | 399.8334 | 9.930908 | 9.827283 |
| 10330 | M454T9_1 | 1.180614 | 0.239537 | 0.577297 | 0.590194 | 0.866006 | UP   | 454.2762 | 454.2757 | 454.2786 | 9.206033 | 9.12675  |
| 10331 | M247T30  | 1.196178 | 0.258432 | 0.577356 | 0.590327 | 0.866014 | UP   | 247.2265 | 247.2264 | 247.2266 | 29.74667 | 29.732   |
| 10332 | M342T10_ | 1.140744 | -0.18998 | -0.56162 | 0.590407 | 0.866019 | DOWN | 342.0567 | 342.0564 | 342.0569 | 9.8207   | 9.699733 |
| 10333 | M391T11_ | 1.167482 | 0.2234   | 0.57718  | 0.590477 | 0.866024 | UP   | 391.4153 | 391.4149 | 391.4158 | 10.90765 | 10.8646  |
| 10334 | M308T10_ | 1.154161 | 0.206844 | 0.560639 | 0.590539 | 0.866027 | UP   | 308.2152 | 308.2151 | 308.2156 | 10.40392 | 10.35992 |
| 10335 | M561T30_ | 1.268465 | -0.34308 | -0.56604 | 0.590605 | 0.866031 | DOWN | 560.9022 | 560.9018 | 560.903  | 29.58858 | 29.5585  |
| 10336 | M336T11_ | 1.096755 | -0.13324 | -0.5603  | 0.590624 | 0.866033 | DOWN | 336.4419 | 336.4417 | 336.442  | 10.892   | 10.879   |
| 10337 | M198T10_ | 1.075882 | 0.105519 | 0.570196 | 0.590718 | 0.866038 | UP   | 197.6726 | 197.6724 | 197.6727 | 9.984083 | 9.8753   |
| 10338 | M400T11_ | 1.137618 | 0.186016 | 0.566058 | 0.590914 | 0.86605  | UP   | 400.3401 | 400.3399 | 400.3405 | 10.892   | 10.879   |
| 10339 | M238T11_ | 1.117401 | -0.16015 | -0.56516 | 0.590915 | 0.86605  | DOWN | 237.6745 | 237.6743 | 237.6745 | 10.92203 | 10.8926  |
| 10340 | M352T11_ | 1.340032 | 0.422268 | 0.560451 | 0.59098  | 0.866054 | UP   | 352.1657 | 352.1615 | 352.1668 | 10.91977 | 10.90393 |
| 10341 | M296T10_ | 1.123627 | -0.16816 | -0.56655 | 0.590991 | 0.866055 | DOWN | 296.0996 | 296.0994 | 296.1    | 9.94785  | 9.843367 |
| 10342 | M255T10_ | 1.128588 | -0.17452 | -0.56056 | 0.590996 | 0.866055 | DOWN | 254.6524 | 254.6522 | 254.6524 | 9.957333 | 9.843367 |
| 10343 | M236T11_ | 1.086985 | -0.12033 | -0.55973 | 0.591007 | 0.866056 | DOWN | 236.1939 | 236.1939 | 236.1942 | 10.89875 | 10.8646  |
| 10344 | M697T10_ | 1.102805 | -0.14118 | -0.55968 | 0.591061 | 0.866059 | DOWN | 697.309  | 697.3089 | 697.3096 | 9.831517 | 9.715683 |
| 10345 | M341T9_3 | 1.267791 | -0.34232 | -0.56012 | 0.591106 | 0.866062 | DOWN | 341.2748 | 341.2746 | 341.2749 | 9.257558 | 9.1587   |
| 10346 | M326T12  | 1.161215 | 0.215635 | 0.563908 | 0.591177 | 0.866067 | UP   | 325.7126 | 325.7122 | 325.7126 | 11.50572 | 11.4828  |
| 10347 | M620T20  | 1.166865 | -0.22264 | -0.55967 | 0.591185 | 0.866067 | DOWN | 620.4345 | 620.4338 | 620.4351 | 20.41133 | 20.375   |
| 10348 | M341T11_ | 1.143401 | -0.19333 | -0.56609 | 0.591309 | 0.866075 | DOWN | 341.1795 | 341.1792 | 341.18   | 11.48973 | 11.46753 |
| 10349 | M676T10_ | 1.152143 | -0.20432 | -0.56091 | 0.591385 | 0.866079 | DOWN | 675.5223 | 675.522  | 675.5249 | 9.830558 | 9.715683 |
| 10350 | M299T39_ | 1.022157 | 0.031616 | 0.574349 | 0.591405 | 0.866081 | UP   | 299.1487 | 299.1486 | 299.1489 | 39.25167 | 39.18667 |
| 10351 | M640T11_ | 1.156731 | 0.210053 | 0.568208 | 0.591433 | 0.866082 | UP   | 640.295  | 640.2936 | 640.2998 | 10.92684 | 10.89125 |
| 10352 | M336T10_ | 1.166269 | -0.2219  | -0.55919 | 0.591458 | 0.866084 | DOWN | 335.8717 | 335.8716 | 335.8725 | 9.823575 | 9.699733 |
| 10353 | M225T42_ | 1.247183 | 0.318673 | 0.576398 | 0.591466 | 0.866084 | UP   | 225.1119 | 225.1118 | 225.112  | 41.5105  | 41.35933 |
| 10354 | M410T12  | 1.134425 | -0.18196 | -0.559   | 0.591507 | 0.866087 | DOWN | 410.3092 | 410.3087 | 410.3098 | 11.98318 | 11.95752 |
| 10355 | M216T11_ | 1.115041 | -0.1571  | -0.56113 | 0.591513 | 0.866087 | DOWN | 215.5565 | 215.5562 | 215.557  | 10.89907 | 10.879   |
| 10356 | M272T9_2 | 1.436942 | -0.523   | -0.56725 | 0.591514 | 0.866087 | DOWN | 272.2327 | 272.2318 | 272.2335 | 9.441667 | 9.297883 |
| 10357 | M881T11_ | 1.179944 | -0.23872 | -0.57744 | 0.591549 | 0.866089 | DOWN | 881.4631 | 881.4622 | 881.4635 | 10.94009 | 10.89355 |
| 10358 | M237T11_ | 1.121685 | -0.16567 | -0.5619  | 0.59157  | 0.866091 | DOWN | 236.8645 | 236.8643 | 236.8646 | 10.90522 | 10.879   |
| 10359 | M1988T10 | 1.124942 | -0.16985 | -0.56508 | 0.591622 | 0.866094 | DOWN | 1988.11  | 1988.107 | 1988.112 | 9.834117 | 9.715683 |



|       |          |          |          |          |          |          |      |          |          |          |          |          |
|-------|----------|----------|----------|----------|----------|----------|------|----------|----------|----------|----------|----------|
| 10360 | M298T10_ | 1.208553 | 0.273281 | 0.56443  | 0.591643 | 0.866095 | UP   | 297.558  | 297.5578 | 297.5581 | 9.975217 | 9.8753   |
| 10361 | M523T11_ | 1.125402 | 0.17044  | 0.558698 | 0.591748 | 0.866102 | UP   | 522.6731 | 522.6719 | 522.6738 | 10.8926  | 10.88995 |
| 10362 | M352T10_ | 1.119769 | 0.163201 | 0.579314 | 0.591876 | 0.866109 | UP   | 351.7517 | 351.7516 | 351.7518 | 9.901375 | 9.779267 |
| 10363 | M484T30_ | 1.095489 | -0.13158 | -0.56937 | 0.591962 | 0.866115 | DOWN | 484.384  | 484.3835 | 484.3841 | 30.26608 | 30.25233 |
| 10364 | M339T10_ | 1.165949 | 0.221505 | 0.559537 | 0.592013 | 0.866118 | UP   | 338.8882 | 338.8876 | 338.8883 | 9.968992 | 9.859233 |
| 10365 | M209T8   | 1.369751 | 0.453914 | 0.575987 | 0.592021 | 0.866118 | UP   | 208.8906 | 208.8905 | 208.8908 | 7.661067 | 7.476967 |
| 10366 | M464T11_ | 1.074478 | -0.10364 | -0.55822 | 0.592055 | 0.86612  | DOWN | 463.9686 | 463.9683 | 463.9688 | 10.89875 | 10.879   |
| 10367 | M601T45  | 1.05692  | -0.07987 | -0.55792 | 0.592168 | 0.866127 | DOWN | 601.4398 | 601.4386 | 601.4402 | 44.9835  | 44.98283 |
| 10368 | M1572T10 | 1.146381 | 0.197087 | 0.573896 | 0.59227  | 0.866134 | UP   | 1572.43  | 1572.425 | 1572.433 | 9.952017 | 9.859233 |
| 10369 | M956T10_ | 1.277019 | 0.35278  | 0.56219  | 0.592274 | 0.866134 | UP   | 955.9547 | 955.9535 | 955.9552 | 9.91875  | 9.811217 |
| 10370 | M375T19_ | 1.214943 | -0.28089 | -0.55856 | 0.592436 | 0.866144 | DOWN | 374.7585 | 374.7582 | 374.7589 | 19.11258 | 19.05283 |
| 10371 | M527T21  | 1.197496 | 0.26002  | 0.574897 | 0.592494 | 0.866147 | UP   | 527.2775 | 527.2763 | 527.278  | 20.72183 | 20.63683 |
| 10372 | M272T10_ | 1.102621 | 0.140937 | 0.557374 | 0.592681 | 0.866159 | UP   | 271.8976 | 271.8975 | 271.8978 | 9.94405  | 9.843367 |
| 10373 | M351T10_ | 1.113914 | 0.155638 | 0.578253 | 0.59271  | 0.86616  | UP   | 351.2502 | 351.2501 | 351.2503 | 9.901375 | 9.779267 |
| 10374 | M1574T10 | 1.300707 | 0.379296 | 0.561153 | 0.592845 | 0.866169 | UP   | 1573.572 | 1573.57  | 1573.572 | 9.946467 | 9.859233 |
| 10375 | M393T20_ | 1.219155 | 0.285881 | 0.55754  | 0.592853 | 0.866169 | UP   | 393.466  | 393.4622 | 393.4697 | 20.24783 | 20.21583 |
| 10376 | M524T42_ | 1.114863 | -0.15687 | -0.55746 | 0.592999 | 0.866178 | DOWN | 524.3061 | 524.306  | 524.3062 | 41.96992 | 41.77633 |
| 10377 | M539T11_ | 1.137687 | -0.1861  | -0.55662 | 0.593018 | 0.866179 | DOWN | 539.4725 | 539.4721 | 539.4732 | 10.93468 | 10.89355 |
| 10378 | M379T10_ | 1.580811 | -0.66067 | -0.57583 | 0.593109 | 0.866185 | DOWN | 379.0687 | 379.0681 | 379.0722 | 9.956867 | 9.830083 |
| 10379 | M442T9_1 | 1.133217 | -0.18042 | -0.55647 | 0.593132 | 0.866186 | DOWN | 441.7883 | 441.7877 | 441.7887 | 8.968967 | 8.89395  |
| 10380 | M793T11_ | 1.101367 | -0.1393  | -0.55651 | 0.593152 | 0.866187 | DOWN | 792.5586 | 792.5583 | 792.5607 | 10.892   | 10.879   |
| 10381 | M316T10_ | 1.1193   | 0.162597 | 0.55957  | 0.593196 | 0.86619  | UP   | 315.9157 | 315.9155 | 315.9163 | 9.969925 | 9.8753   |
| 10382 | M410T9_9 | 1.124404 | -0.16916 | -0.5689  | 0.593322 | 0.866198 | DOWN | 410.4242 | 410.4228 | 410.4243 | 9.191133 | 9.142767 |
| 10383 | M486T30  | 1.161733 | -0.21628 | -0.56711 | 0.59346  | 0.866206 | DOWN | 486.3902 | 486.389  | 486.3909 | 30.25275 | 30.2235  |
| 10384 | M450T41_ | 1.195423 | -0.25752 | -0.57812 | 0.593494 | 0.866208 | DOWN | 450.2332 | 450.233  | 450.2333 | 40.84133 | 40.58233 |
| 10385 | M636T11_ | 1.104693 | -0.14365 | -0.55945 | 0.59362  | 0.866216 | DOWN | 636.1665 | 636.1662 | 636.1677 | 10.892   | 10.8646  |
| 10386 | M378T9_1 | 1.145041 | -0.1954  | -0.55988 | 0.593724 | 0.866222 | DOWN | 378.3572 | 378.3561 | 378.3615 | 9.29345  | 9.129317 |
| 10387 | M1024T10 | 1.15587  | 0.208979 | 0.555688 | 0.593853 | 0.86623  | UP   | 1023.609 | 1023.597 | 1023.61  | 9.659033 | 9.556217 |
| 10388 | M534T44_ | 1.212965 | -0.27854 | -0.57453 | 0.593979 | 0.866238 | DOWN | 534.3269 | 534.3267 | 534.327  | 44.1425  | 43.90517 |
| 10389 | M457T12  | 1.167565 | -0.2235  | -0.56083 | 0.593996 | 0.866239 | DOWN | 457.3143 | 457.3137 | 457.3151 | 11.58313 | 11.55517 |
| 10390 | M289T9_5 | 1.427436 | 0.513427 | 0.556715 | 0.594003 | 0.866239 | UP   | 289.1896 | 289.1892 | 289.1898 | 8.796167 | 8.745033 |
| 10391 | M443T19  | 1.167077 | -0.2229  | -0.5586  | 0.594041 | 0.866241 | DOWN | 443.1334 | 443.1331 | 443.1348 | 19.20125 | 19.18333 |
| 10392 | M209T41  | 1.045163 | -0.06373 | -0.56346 | 0.594093 | 0.866245 | DOWN | 209.1533 | 209.1532 | 209.1535 | 41.35933 | 41.12883 |
| 10393 | M614T10_ | 1.172184 | 0.2292   | 0.555706 | 0.594101 | 0.866245 | UP   | 613.7657 | 613.7653 | 613.7661 | 9.958617 | 9.859233 |
| 10394 | M709T9_3 | 1.133347 | -0.18059 | -0.5552  | 0.594105 | 0.866245 | DOWN | 708.9536 | 708.9534 | 708.9546 | 8.91235  | 8.8622   |

|       |          |          |          |          |          |          |      |          |          |          |          |          |
|-------|----------|----------|----------|----------|----------|----------|------|----------|----------|----------|----------|----------|
| 10395 | M205T11_ | 1.077443 | -0.10761 | -0.55587 | 0.59412  | 0.866246 | DOWN | 205.321  | 205.3209 | 205.3212 | 10.90551 | 10.879   |
| 10396 | M569T9_7 | 1.205082 | 0.269131 | 0.569317 | 0.594197 | 0.866251 | UP   | 569.4467 | 569.4461 | 569.4475 | 9.421867 | 9.223417 |
| 10397 | M393T11_ | 1.095169 | 0.131153 | 0.567345 | 0.594221 | 0.866252 | UP   | 393.23   | 393.2266 | 393.2318 | 10.92661 | 10.88995 |
| 10398 | M600T10_ | 1.18408  | -0.24377 | -0.5592  | 0.5943   | 0.866257 | DOWN | 600.3071 | 600.3061 | 600.3081 | 9.58245  | 9.49445  |
| 10399 | M716T10_ | 1.162874 | 0.217695 | 0.555197 | 0.594335 | 0.866259 | UP   | 716.4761 | 716.4757 | 716.4771 | 9.5565   | 9.4632   |
| 10400 | M313T10_ | 1.150978 | -0.20286 | -0.56737 | 0.594335 | 0.866259 | DOWN | 313.3254 | 313.325  | 313.3271 | 9.802117 | 9.7124   |
| 10401 | M524T9_6 | 1.078553 | -0.1091  | -0.56721 | 0.594597 | 0.866275 | DOWN | 524.2167 | 524.2153 | 524.217  | 9.415533 | 9.30965  |
| 10402 | M370T11_ | 1.08606  | -0.1191  | -0.55406 | 0.594695 | 0.866281 | DOWN | 370.1238 | 370.1236 | 370.124  | 10.892   | 10.879   |
| 10403 | M333T10_ | 1.05062  | 0.071242 | 0.570347 | 0.594715 | 0.866282 | UP   | 333.1235 | 333.1233 | 333.1242 | 9.864467 | 9.73145  |
| 10404 | M463T11_ | 1.074834 | -0.10411 | -0.55402 | 0.594757 | 0.866285 | DOWN | 462.5608 | 462.5606 | 462.5613 | 10.892   | 10.879   |
| 10405 | M220T9_1 | 1.224938 | 0.292709 | 0.557635 | 0.594762 | 0.866285 | UP   | 220.3878 | 220.3874 | 220.3888 | 9.287617 | 9.132267 |
| 10406 | M919T11_ | 1.082698 | -0.11463 | -0.55476 | 0.594803 | 0.866288 | DOWN | 919.3764 | 919.3761 | 919.378  | 10.89875 | 10.879   |
| 10407 | M681T30  | 1.13711  | 0.185372 | 0.554077 | 0.594818 | 0.866289 | UP   | 681.4179 | 681.4174 | 681.4182 | 30.26633 | 30.25233 |
| 10408 | M298T11_ | 1.068058 | -0.09499 | -0.55601 | 0.594857 | 0.866291 | DOWN | 298.3973 | 298.3971 | 298.3976 | 10.90343 | 10.879   |
| 10409 | M160T10_ | 1.142935 | -0.19274 | -0.56159 | 0.594947 | 0.866296 | DOWN | 159.6275 | 159.6273 | 159.6275 | 9.950258 | 9.843367 |
| 10410 | M552T11_ | 1.126652 | -0.17204 | -0.55907 | 0.594994 | 0.866299 | DOWN | 552.4168 | 552.415  | 552.4176 | 10.90765 | 10.877   |
| 10411 | M457T9_1 | 1.51898  | 0.603103 | 0.570327 | 0.594995 | 0.866299 | UP   | 457.3385 | 457.3379 | 457.3392 | 8.825567 | 8.745917 |
| 10412 | M358T10_ | 1.164153 | -0.21928 | -0.5563  | 0.594996 | 0.866299 | DOWN | 357.9669 | 357.9667 | 357.9672 | 9.962617 | 9.859233 |
| 10413 | M403T15_ | 1.098318 | -0.1353  | -0.56382 | 0.595001 | 0.8663   | DOWN | 403.1014 | 403.101  | 403.1018 | 14.92703 | 14.92685 |
| 10414 | M495T10_ | 1.094935 | -0.13085 | -0.56652 | 0.59504  | 0.866302 | DOWN | 495.449  | 495.4486 | 495.4494 | 9.82645  | 9.747533 |
| 10415 | M390T11_ | 1.094096 | -0.12974 | -0.55369 | 0.59506  | 0.866303 | DOWN | 389.6193 | 389.6191 | 389.6199 | 10.90659 | 10.85838 |
| 10416 | M721T11  | 1.36679  | -0.45079 | -0.56215 | 0.59508  | 0.866304 | DOWN | 720.9129 | 720.9125 | 720.9139 | 11.24178 | 11.19848 |
| 10417 | M438T44  | 1.151479 | -0.20349 | -0.55381 | 0.595144 | 0.866308 | DOWN | 438.2693 | 438.2692 | 438.2696 | 44.24758 | 44.129   |
| 10418 | M224T10_ | 1.20656  | -0.2709  | -0.55508 | 0.595173 | 0.86631  | DOWN | 223.533  | 223.5308 | 223.535  | 9.88615  | 9.874317 |
| 10419 | M1001T11 | 1.191495 | -0.25277 | -0.55829 | 0.595234 | 0.866314 | DOWN | 1001.443 | 1001.443 | 1001.443 | 11.37373 | 11.3298  |
| 10420 | M387T16_ | 1.122921 | -0.16726 | -0.55403 | 0.595261 | 0.866315 | DOWN | 387.2485 | 387.2485 | 387.2489 | 16.06738 | 15.9172  |
| 10421 | M455T9_1 | 1.185321 | 0.245278 | 0.569122 | 0.595268 | 0.866316 | UP   | 455.2106 | 455.2102 | 455.2153 | 9.197983 | 9.11405  |
| 10422 | M530T10_ | 1.174099 | -0.23155 | -0.55796 | 0.595324 | 0.866319 | DOWN | 530.0084 | 530.0079 | 530.0087 | 9.943183 | 9.843367 |
| 10423 | M292T9_1 | 1.255518 | -0.32828 | -0.55399 | 0.595579 | 0.866335 | DOWN | 291.6674 | 291.6671 | 291.6679 | 9.388367 | 9.264333 |
| 10424 | M656T10_ | 1.117518 | -0.1603  | -0.55376 | 0.595673 | 0.86634  | DOWN | 656.3303 | 656.3296 | 656.3319 | 9.962617 | 9.843367 |
| 10425 | M221T9_9 | 1.124104 | -0.16878 | -0.56    | 0.595843 | 0.866351 | DOWN | 221.0451 | 221.0433 | 221.0458 | 9.297883 | 9.224517 |
| 10426 | M305T10_ | 1.218214 | 0.284768 | 0.554864 | 0.595873 | 0.866352 | UP   | 304.5148 | 304.5146 | 304.515  | 9.967367 | 9.859233 |
| 10427 | M808T10_ | 1.225649 | -0.29355 | -0.5527  | 0.595938 | 0.866356 | DOWN | 807.6526 | 807.6515 | 807.654  | 9.931317 | 9.903017 |
| 10428 | M432T9_5 | 1.093235 | -0.1286  | -0.55216 | 0.595971 | 0.866358 | DOWN | 431.9811 | 431.9805 | 431.9822 | 9.289892 | 9.129317 |
| 10429 | M580T44_ | 1.07453  | -0.10371 | -0.56054 | 0.595997 | 0.86636  | DOWN | 580.3327 | 580.3326 | 580.3328 | 43.79008 | 43.61767 |

|       |          |          |          |          |          |          |      |          |          |          |          |          |
|-------|----------|----------|----------|----------|----------|----------|------|----------|----------|----------|----------|----------|
| 10430 | M637T10_ | 1.124305 | 0.169033 | 0.571322 | 0.596018 | 0.866361 | UP   | 636.7566 | 636.756  | 636.7592 | 9.8397   | 9.715683 |
| 10431 | M333T10_ | 1.107866 | -0.14778 | -0.55278 | 0.596093 | 0.866366 | DOWN | 332.8125 | 332.812  | 332.813  | 9.828367 | 9.683817 |
| 10432 | M500T11_ | 1.153662 | 0.206221 | 0.555068 | 0.596117 | 0.866367 | UP   | 499.7222 | 499.7199 | 499.7237 | 10.90765 | 10.85838 |
| 10433 | M410T23_ | 1.210913 | 0.276096 | 0.556428 | 0.596134 | 0.866368 | UP   | 409.7886 | 409.7886 | 409.7889 | 22.91483 | 22.857   |
| 10434 | M405T11_ | 1.149764 | -0.20134 | -0.55868 | 0.596149 | 0.866369 | DOWN | 405.3    | 405.2999 | 405.3004 | 10.90659 | 10.879   |
| 10435 | M166T9_3 | 1.224699 | -0.29243 | -0.55152 | 0.596391 | 0.866384 | DOWN | 165.9507 | 165.9502 | 165.9511 | 9.332617 | 9.234417 |
| 10436 | M247T11_ | 1.107961 | -0.14791 | -0.55138 | 0.596447 | 0.866387 | DOWN | 246.9991 | 246.9989 | 246.9994 | 10.89875 | 10.8646  |
| 10437 | M199T9_8 | 1.416036 | 0.501858 | 0.561825 | 0.596474 | 0.866389 | UP   | 199.2555 | 199.254  | 199.2564 | 9.2585   | 9.16125  |
| 10438 | M241T9_1 | 1.279794 | -0.35591 | -0.55131 | 0.596545 | 0.866393 | DOWN | 240.639  | 240.639  | 240.6392 | 9.3332   | 9.249433 |
| 10439 | M357T10_ | 1.353782 | -0.437   | -0.55128 | 0.596685 | 0.866401 | DOWN | 356.547  | 356.5451 | 356.5489 | 9.9      | 9.840617 |
| 10440 | M779T10_ | 1.064133 | -0.08968 | -0.55691 | 0.596717 | 0.866403 | DOWN | 779.3111 | 779.3102 | 779.3131 | 9.916617 | 9.811217 |
| 10441 | M406T9_4 | 1.092556 | 0.127708 | 0.560023 | 0.596718 | 0.866403 | UP   | 406.0255 | 406.0254 | 406.0262 | 8.817708 | 8.724633 |
| 10442 | M801T27  | 1.238381 | -0.30846 | -0.55333 | 0.596741 | 0.866405 | DOWN | 801.081  | 801.0808 | 801.0813 | 26.78242 | 26.73767 |
| 10443 | M270T31  | 1.051454 | -0.07239 | -0.55881 | 0.596755 | 0.866406 | DOWN | 270.2506 | 270.2504 | 270.2507 | 31.37767 | 31.34883 |
| 10444 | M789T10_ | 1.215439 | 0.281477 | 0.555003 | 0.596809 | 0.866409 | UP   | 788.7138 | 788.7128 | 788.7145 | 9.946367 | 9.8914   |
| 10445 | M331T10_ | 1.103979 | -0.14271 | -0.56043 | 0.596831 | 0.86641  | DOWN | 330.914  | 330.9138 | 330.9141 | 9.8397   | 9.715683 |
| 10446 | M278T10_ | 1.08236  | -0.11418 | -0.55264 | 0.596844 | 0.866411 | DOWN | 278.012  | 278.0117 | 278.0135 | 9.946467 | 9.843367 |
| 10447 | M188T9_1 | 1.338807 | -0.42095 | -0.55611 | 0.59694  | 0.866417 | DOWN | 188.1909 | 188.1902 | 188.1917 | 9.197733 | 9.1587   |
| 10448 | M608T12  | 1.164845 | -0.22014 | -0.55137 | 0.596984 | 0.866419 | DOWN | 608.4833 | 608.4824 | 608.4838 | 11.70864 | 11.68457 |
| 10449 | M719T10_ | 1.090496 | -0.12498 | -0.56414 | 0.597164 | 0.86643  | DOWN | 719.4936 | 719.4902 | 719.495  | 9.558908 | 9.38595  |
| 10450 | M1036T18 | 1.271717 | -0.34678 | -0.55572 | 0.59727  | 0.866437 | DOWN | 1035.838 | 1035.837 | 1035.838 | 17.8655  | 17.84883 |
| 10451 | M309T10_ | 1.142065 | 0.191645 | 0.557112 | 0.597284 | 0.866437 | UP   | 309.1112 | 309.1109 | 309.1115 | 9.948875 | 9.843367 |
| 10452 | M221T9_1 | 1.308482 | 0.387894 | 0.555762 | 0.59729  | 0.866438 | UP   | 221.119  | 221.1182 | 221.1199 | 9.295167 | 9.1428   |
| 10453 | M287T10_ | 1.300305 | 0.37885  | 0.570316 | 0.597291 | 0.866438 | UP   | 287.4432 | 287.4426 | 287.4526 | 9.845483 | 9.73145  |
| 10454 | M435T9_5 | 1.220848 | 0.287883 | 0.550816 | 0.597376 | 0.866443 | UP   | 434.78   | 434.7796 | 434.7802 | 8.806967 | 8.697767 |
| 10455 | M480T9_2 | 1.118074 | -0.16102 | -0.5499  | 0.597424 | 0.866446 | DOWN | 479.5778 | 479.5766 | 479.5782 | 9.2311   | 9.129317 |
| 10456 | M884T10_ | 1.172346 | 0.229398 | 0.550847 | 0.597508 | 0.866451 | UP   | 883.956  | 883.9544 | 883.9571 | 9.939575 | 9.827283 |
| 10457 | M552T9_7 | 1.251267 | -0.32339 | -0.55106 | 0.597549 | 0.866453 | DOWN | 551.9741 | 551.9711 | 551.976  | 9.16125  | 9.142767 |
| 10458 | M697T10_ | 1.085023 | 0.117726 | 0.551206 | 0.597627 | 0.866458 | UP   | 697.463  | 697.4626 | 697.4636 | 10.25295 | 10.18238 |
| 10459 | M288T20_ | 1.101507 | -0.13948 | -0.56547 | 0.597635 | 0.866458 | DOWN | 288.1957 | 288.1955 | 288.1958 | 20.04017 | 20.0185  |
| 10460 | M757T31  | 1.143937 | -0.19401 | -0.54981 | 0.59765  | 0.866459 | DOWN | 757.4711 | 757.4705 | 757.4717 | 31.25558 | 31.21917 |
| 10461 | M650T9_1 | 1.314898 | -0.39495 | -0.56501 | 0.597687 | 0.866462 | DOWN | 649.7338 | 649.7337 | 649.7347 | 9.268917 | 9.235933 |
| 10462 | M395T11_ | 1.130001 | -0.17632 | -0.55018 | 0.597985 | 0.866479 | DOWN | 395.1801 | 395.1796 | 395.1819 | 10.892   | 10.88995 |
| 10463 | M285T10_ | 1.1681   | 0.224164 | 0.566984 | 0.598097 | 0.866486 | UP   | 285.246  | 285.2409 | 285.2462 | 9.942317 | 9.759167 |
| 10464 | M420T41  | 1.126451 | -0.17178 | -0.56199 | 0.598364 | 0.866502 | DOWN | 420.2227 | 420.2225 | 420.2229 | 40.899   | 40.69733 |

|       |          |          |          |          |          |          |      |          |          |          |          |          |
|-------|----------|----------|----------|----------|----------|----------|------|----------|----------|----------|----------|----------|
| 10465 | M460T11_ | 1.147598 | -0.19862 | -0.54979 | 0.598434 | 0.866506 | DOWN | 460.349  | 460.3476 | 460.3497 | 10.89308 | 10.88995 |
| 10466 | M417T11_ | 1.162964 | 0.217806 | 0.558061 | 0.598472 | 0.866509 | UP   | 417.2725 | 417.2722 | 417.273  | 11.26665 | 11.2423  |
| 10467 | M418T11_ | 1.089598 | 0.123795 | 0.550111 | 0.598677 | 0.866521 | UP   | 417.7192 | 417.7187 | 417.72   | 10.90522 | 10.879   |
| 10468 | M156T10_ | 1.194593 | -0.25652 | -0.55553 | 0.59877  | 0.866526 | DOWN | 155.8814 | 155.8812 | 155.8818 | 9.886083 | 9.79065  |
| 10469 | M350T9_3 | 1.436861 | 0.52292  | 0.559863 | 0.598959 | 0.866538 | UP   | 349.7761 | 349.7759 | 349.7762 | 9.110958 | 9.04175  |
| 10470 | M525T10_ | 1.062748 | 0.087799 | 0.54939  | 0.598984 | 0.866539 | UP   | 524.6517 | 524.6513 | 524.6518 | 9.851583 | 9.73145  |
| 10471 | M231T10_ | 1.155072 | 0.207983 | 0.56004  | 0.599035 | 0.866542 | UP   | 230.769  | 230.7688 | 230.7692 | 9.939283 | 9.827283 |
| 10472 | M559T11_ | 1.195806 | -0.25798 | -0.54753 | 0.599135 | 0.866548 | DOWN | 559.3607 | 559.3599 | 559.3611 | 10.91372 | 10.879   |
| 10473 | M233T26  | 1.131215 | 0.177873 | 0.553754 | 0.599201 | 0.866552 | UP   | 233.2107 | 233.2105 | 233.2108 | 26.25033 | 26.22283 |
| 10474 | M328T10_ | 1.163895 | 0.218961 | 0.567135 | 0.599302 | 0.866558 | UP   | 327.7066 | 327.7061 | 327.7069 | 9.823575 | 9.699733 |
| 10475 | M267T11_ | 1.181046 | -0.24007 | -0.54742 | 0.59932  | 0.866559 | DOWN | 266.6055 | 266.6053 | 266.6056 | 10.92731 | 10.90197 |
| 10476 | M473T9_7 | 1.226915 | -0.29504 | -0.54804 | 0.59932  | 0.866559 | DOWN | 473.2523 | 473.2513 | 473.2535 | 9.36145  | 9.046783 |
| 10477 | M487T9_2 | 1.272292 | -0.34743 | -0.54704 | 0.599402 | 0.866564 | DOWN | 487.3738 | 487.3733 | 487.3742 | 9.286983 | 9.1587   |
| 10478 | M195T9_1 | 1.319449 | 0.399936 | 0.563846 | 0.59945  | 0.866567 | UP   | 195.1413 | 195.1404 | 195.1416 | 9.329083 | 9.219483 |
| 10479 | M552T42_ | 1.07941  | -0.11024 | -0.54907 | 0.599454 | 0.866567 | DOWN | 552.3011 | 552.3008 | 552.3013 | 41.8915  | 41.56067 |
| 10480 | M706T10_ | 1.312503 | 0.392321 | 0.563807 | 0.599509 | 0.866571 | UP   | 705.853  | 705.8482 | 705.8537 | 9.848417 | 9.715683 |
| 10481 | M1569T10 | 1.203003 | -0.26664 | -0.54682 | 0.599542 | 0.866573 | DOWN | 1568.74  | 1568.735 | 1568.745 | 9.923867 | 9.806367 |
| 10482 | M309T30  | 1.184082 | 0.243769 | 0.555079 | 0.599559 | 0.866574 | UP   | 309.2825 | 309.2823 | 309.2827 | 29.91358 | 29.8915  |
| 10483 | M299T23  | 1.179184 | 0.237789 | 0.55448  | 0.599654 | 0.866579 | UP   | 299.3055 | 299.3052 | 299.3056 | 23.2925  | 23.29117 |
| 10484 | M833T10_ | 1.186595 | 0.246827 | 0.547237 | 0.599799 | 0.866588 | UP   | 833.4205 | 833.4197 | 833.4207 | 9.967367 | 9.8753   |
| 10485 | M317T26  | 1.17503  | 0.232697 | 0.558257 | 0.599833 | 0.86659  | UP   | 317.172  | 317.1717 | 317.1725 | 25.9885  | 25.97967 |
| 10486 | M481T28  | 1.337162 | 0.419174 | 0.548518 | 0.599901 | 0.866594 | UP   | 480.7963 | 480.7961 | 480.7965 | 28.2585  | 28.21533 |
| 10487 | M299T31_ | 1.159654 | -0.21369 | -0.54676 | 0.599909 | 0.866595 | DOWN | 299.3134 | 299.3134 | 299.3136 | 30.854   | 30.829   |
| 10488 | M482T15  | 1.113719 | 0.155386 | 0.549399 | 0.599931 | 0.866596 | UP   | 482.3469 | 482.3467 | 482.3471 | 14.50266 | 14.48632 |
| 10489 | M421T10_ | 1.349554 | 0.432482 | 0.559706 | 0.599969 | 0.866598 | UP   | 420.9782 | 420.9775 | 420.9783 | 9.950625 | 9.903017 |
| 10490 | M248T11_ | 1.074181 | -0.10324 | -0.54685 | 0.599993 | 0.8666   | DOWN | 248.3684 | 248.3683 | 248.3688 | 10.90657 | 10.879   |
| 10491 | M890T10_ | 1.283081 | 0.359613 | 0.55781  | 0.600028 | 0.866602 | UP   | 889.5907 | 889.5897 | 889.5914 | 9.874067 | 9.79535  |
| 10492 | M640T10_ | 1.077754 | 0.108027 | 0.559241 | 0.600321 | 0.866619 | UP   | 640.0286 | 640.028  | 640.0293 | 9.816267 | 9.699733 |
| 10493 | M1948T10 | 1.131401 | 0.178111 | 0.551639 | 0.600349 | 0.866621 | UP   | 1947.966 | 1947.965 | 1947.972 | 9.816425 | 9.715683 |
| 10494 | M366T11_ | 1.279948 | 0.356086 | 0.565881 | 0.600475 | 0.866628 | UP   | 366.191  | 366.1887 | 366.1914 | 11.05325 | 11.02653 |
| 10495 | M390T44_ | 1.116523 | -0.15901 | -0.54703 | 0.600507 | 0.86663  | DOWN | 390.2484 | 390.2482 | 390.2485 | 44.121   | 44.06333 |
| 10496 | M1155T11 | 1.102181 | -0.14036 | -0.5561  | 0.600523 | 0.866631 | DOWN | 1155.174 | 1155.169 | 1155.175 | 10.92828 | 10.88995 |
| 10497 | M198T11_ | 1.089931 | -0.12424 | -0.54486 | 0.600719 | 0.866643 | DOWN | 198.1977 | 198.1976 | 198.1978 | 10.892   | 10.879   |
| 10498 | M258T9_1 | 1.130463 | -0.17691 | -0.54854 | 0.600729 | 0.866643 | DOWN | 257.5187 | 257.5186 | 257.5189 | 8.659975 | 8.563317 |
| 10499 | M686T10_ | 1.151689 | -0.20375 | -0.54524 | 0.600735 | 0.866644 | DOWN | 685.9079 | 685.9058 | 685.909  | 9.939683 | 9.9174   |

|       |          |          |          |          |          |          |      |          |          |          |          |          |
|-------|----------|----------|----------|----------|----------|----------|------|----------|----------|----------|----------|----------|
| 10500 | M758T11_ | 1.151575 | -0.20361 | -0.54508 | 0.600771 | 0.866646 | DOWN | 758.3723 | 758.372  | 758.3726 | 10.87487 | 10.86253 |
| 10501 | M577T11_ | 1.542964 | -0.6257  | -0.54476 | 0.600796 | 0.866647 | DOWN | 577.3653 | 577.3651 | 577.3662 | 10.70448 | 10.69123 |
| 10502 | M673T10_ | 1.104466 | -0.14335 | -0.54617 | 0.600892 | 0.866653 | DOWN | 673.4088 | 673.4082 | 673.4095 | 9.825767 | 9.715683 |
| 10503 | M1165T10 | 1.167044 | -0.22286 | -0.54498 | 0.600994 | 0.866659 | DOWN | 1164.601 | 1164.599 | 1164.602 | 9.959533 | 9.843367 |
| 10504 | M311T10_ | 1.140048 | -0.18909 | -0.54507 | 0.601007 | 0.86666  | DOWN | 310.7195 | 310.7193 | 310.7196 | 9.97155  | 9.859233 |
| 10505 | M229T11_ | 1.248145 | -0.31979 | -0.5445  | 0.601014 | 0.86666  | DOWN | 228.5563 | 228.5562 | 228.5565 | 10.8858  | 10.87487 |
| 10506 | M174T10_ | 1.331677 | -0.41324 | -0.55265 | 0.601044 | 0.866662 | DOWN | 174.4299 | 174.4296 | 174.4299 | 9.968992 | 9.853533 |
| 10507 | M335T10_ | 1.115664 | 0.157903 | 0.545262 | 0.601192 | 0.866671 | UP   | 335.0792 | 335.0789 | 335.0795 | 9.972483 | 9.8753   |
| 10508 | M368T10_ | 1.16846  | 0.224609 | 0.543982 | 0.601291 | 0.866677 | UP   | 367.627  | 367.6268 | 367.6271 | 9.858833 | 9.747533 |
| 10509 | M830T10_ | 1.179439 | 0.238101 | 0.547247 | 0.601376 | 0.866682 | UP   | 829.547  | 829.5465 | 829.5477 | 9.965717 | 9.859233 |
| 10510 | M241T11_ | 1.098996 | -0.13619 | -0.54522 | 0.601414 | 0.866684 | DOWN | 241.2403 | 241.2381 | 241.2405 | 10.89907 | 10.873   |
| 10511 | M196T10_ | 1.156556 | -0.20984 | -0.54714 | 0.601455 | 0.866686 | DOWN | 196.0628 | 196.0626 | 196.0629 | 9.915933 | 9.811217 |
| 10512 | M564T44_ | 1.220514 | -0.28749 | -0.5619  | 0.601511 | 0.86669  | DOWN | 564.3012 | 564.3011 | 564.3014 | 43.9485  | 43.63217 |
| 10513 | M544T9_2 | 1.245528 | 0.316757 | 0.551243 | 0.601635 | 0.866697 | UP   | 544.3489 | 544.348  | 544.3502 | 9.175725 | 8.97035  |
| 10514 | M437T9_1 | 1.247492 | 0.319031 | 0.562424 | 0.601668 | 0.866699 | UP   | 437.492  | 437.4899 | 437.4978 | 9.372042 | 9.18195  |
| 10515 | M528T9_3 | 1.099195 | 0.136448 | 0.544041 | 0.601668 | 0.866699 | UP   | 527.8681 | 527.8663 | 527.8686 | 9.243625 | 9.129317 |
| 10516 | M271T10_ | 1.045563 | 0.06428  | 0.559803 | 0.601685 | 0.8667   | UP   | 271.233  | 271.2292 | 271.2334 | 9.845483 | 9.73145  |
| 10517 | M249T10_ | 1.081016 | -0.11239 | -0.55408 | 0.601755 | 0.866704 | DOWN | 249.0184 | 249.0181 | 249.0186 | 9.903017 | 9.634283 |
| 10518 | M302T23  | 1.079727 | -0.11067 | -0.54337 | 0.601766 | 0.866705 | DOWN | 302.2687 | 302.2685 | 302.2689 | 23.23425 | 23.2195  |
| 10519 | M200T10_ | 1.164487 | -0.21969 | -0.55405 | 0.60178  | 0.866706 | DOWN | 199.6701 | 199.67   | 199.6702 | 9.830733 | 9.7124   |
| 10520 | M788T9_3 | 1.13925  | -0.18808 | -0.54307 | 0.601878 | 0.866712 | DOWN | 788.4676 | 788.467  | 788.4682 | 9.468325 | 9.355317 |
| 10521 | M339T10_ | 1.172905 | -0.23009 | -0.5489  | 0.601941 | 0.866715 | DOWN | 338.8449 | 338.8446 | 338.8451 | 9.825767 | 9.715683 |
| 10522 | M272T11_ | 1.404296 | 0.489847 | 0.544055 | 0.60198  | 0.866718 | UP   | 271.6337 | 271.6332 | 271.6411 | 10.88635 | 10.84828 |
| 10523 | M475T20  | 1.114751 | -0.15672 | -0.54936 | 0.601986 | 0.866718 | DOWN | 475.2413 | 475.2409 | 475.2441 | 20.17217 | 19.9125  |
| 10524 | M511T10_ | 1.164996 | -0.22032 | -0.5435  | 0.602271 | 0.866735 | DOWN | 511.3273 | 511.3269 | 511.3277 | 10.02508 | 9.970617 |
| 10525 | M614T34  | 1.098776 | -0.1359  | -0.54419 | 0.602312 | 0.866737 | DOWN | 614.4472 | 614.4468 | 614.4475 | 33.60075 | 33.60017 |
| 10526 | M214T10_ | 1.319826 | 0.400347 | 0.563253 | 0.602453 | 0.866746 | UP   | 214      | 213.9999 | 214.0002 | 9.810125 | 9.715683 |
| 10527 | M328T10_ | 1.304335 | 0.383315 | 0.56048  | 0.602521 | 0.86675  | UP   | 328.2168 | 328.2164 | 328.2171 | 9.81635  | 9.715683 |
| 10528 | M525T9_3 | 1.383361 | -0.46818 | -0.54854 | 0.602543 | 0.866751 | DOWN | 525.0892 | 525.0888 | 525.0894 | 9.382183 | 9.280767 |
| 10529 | M337T11_ | 1.102429 | 0.140686 | 0.546252 | 0.602749 | 0.866763 | UP   | 336.5006 | 336.5005 | 336.501  | 10.89875 | 10.879   |
| 10530 | M430T10_ | 1.112643 | -0.15399 | -0.55462 | 0.602761 | 0.866764 | DOWN | 430.2472 | 430.2466 | 430.2491 | 9.961892 | 9.869467 |
| 10531 | M347T10_ | 1.075698 | -0.10527 | -0.54662 | 0.602826 | 0.866768 | DOWN | 347.4115 | 347.4113 | 347.4117 | 9.845208 | 9.715683 |
| 10532 | M454T18_ | 1.967818 | -0.9766  | -0.55042 | 0.602863 | 0.86677  | DOWN | 454.3061 | 454.3059 | 454.3062 | 17.87467 | 17.86383 |
| 10533 | M178T10_ | 1.563872 | 0.645122 | 0.543662 | 0.602887 | 0.866771 | UP   | 177.9155 | 177.9154 | 177.9156 | 9.972483 | 9.946367 |
| 10534 | M375T9_7 | 1.192896 | -0.25447 | -0.54309 | 0.602893 | 0.866772 | DOWN | 375.374  | 375.3738 | 375.376  | 9.145433 | 9.110833 |

|       |          |          |          |          |          |          |      |          |          |          |          |          |
|-------|----------|----------|----------|----------|----------|----------|------|----------|----------|----------|----------|----------|
| 10535 | M232T11_ | 1.132921 | -0.18005 | -0.54617 | 0.602908 | 0.866772 | DOWN | 231.6891 | 231.6887 | 231.6891 | 10.90548 | 10.873   |
| 10536 | M204T10_ | 1.143955 | -0.19403 | -0.54793 | 0.602917 | 0.866773 | DOWN | 203.6251 | 203.625  | 203.6328 | 9.8397   | 9.73145  |
| 10537 | M1865T10 | 1.077182 | 0.107262 | 0.547995 | 0.602926 | 0.866774 | UP   | 1864.863 | 1864.862 | 1864.865 | 9.82645  | 9.715683 |
| 10538 | M524T44  | 1.182401 | 0.24172  | 0.553139 | 0.603005 | 0.866778 | UP   | 524.306  | 524.3059 | 524.3062 | 43.711   | 43.50283 |
| 10539 | M365T10_ | 1.320634 | 0.40123  | 0.561457 | 0.603015 | 0.866779 | UP   | 365.4212 | 365.4204 | 365.4214 | 9.810767 | 9.747533 |
| 10540 | M834T9   | 1.211223 | -0.27646 | -0.54135 | 0.603018 | 0.866779 | DOWN | 834.4028 | 834.4023 | 834.4038 | 9.300733 | 9.22495  |
| 10541 | M600T30  | 1.162363 | -0.21706 | -0.54664 | 0.603071 | 0.866782 | DOWN | 600.4393 | 600.4384 | 600.4398 | 30.2805  | 30.2515  |
| 10542 | M613T9_5 | 1.148744 | 0.200057 | 0.544467 | 0.603075 | 0.866782 | UP   | 613.4985 | 613.4898 | 613.4993 | 9.262675 | 9.197983 |
| 10543 | M419T10_ | 1.134414 | 0.181947 | 0.552303 | 0.603117 | 0.866785 | UP   | 418.9634 | 418.963  | 418.9637 | 9.930908 | 9.827283 |
| 10544 | M442T10_ | 1.092369 | -0.12746 | -0.5605  | 0.603153 | 0.866787 | DOWN | 441.8943 | 441.8938 | 441.8949 | 9.9091   | 9.747533 |
| 10545 | M282T11_ | 1.223244 | 0.290712 | 0.549364 | 0.603324 | 0.866797 | UP   | 282.2641 | 282.2638 | 282.2644 | 10.87572 | 10.80695 |
| 10546 | M332T10_ | 1.220973 | -0.28803 | -0.5409  | 0.603335 | 0.866798 | DOWN | 331.9087 | 331.9086 | 331.9088 | 9.830558 | 9.728083 |
| 10547 | M267T10_ | 1.122674 | 0.16694  | 0.557809 | 0.603345 | 0.866798 | UP   | 266.6068 | 266.6066 | 266.607  | 9.975142 | 9.8753   |
| 10548 | M272T14  | 1.118243 | -0.16123 | -0.54063 | 0.603635 | 0.866815 | DOWN | 272.2577 | 272.2574 | 272.2584 | 13.96063 | 13.94515 |
| 10549 | M472T11_ | 1.23856  | 0.308664 | 0.550972 | 0.60364  | 0.866816 | UP   | 471.8136 | 471.8127 | 471.8145 | 10.92604 | 10.90197 |
| 10550 | M174T10_ | 1.245912 | -0.3172  | -0.54033 | 0.603685 | 0.866818 | DOWN | 174.1618 | 174.1552 | 174.1619 | 9.942317 | 9.827283 |
| 10551 | M443T11_ | 1.404093 | 0.489639 | 0.556756 | 0.603732 | 0.866821 | UP   | 443.3306 | 443.3302 | 443.3318 | 11.14016 | 11.10768 |
| 10552 | M741T10_ | 1.155793 | -0.20888 | -0.54086 | 0.603773 | 0.866823 | DOWN | 741.4958 | 741.4955 | 741.4967 | 10.28725 | 10.19852 |
| 10553 | M194T9_1 | 1.163711 | -0.21873 | -0.54399 | 0.603785 | 0.866824 | DOWN | 194.477  | 194.4766 | 194.4774 | 9.36145  | 9.20785  |
| 10554 | M1725T10 | 1.157404 | -0.21089 | -0.54151 | 0.603855 | 0.866828 | DOWN | 1724.729 | 1724.729 | 1724.731 | 9.810125 | 9.715683 |
| 10555 | M517T9_3 | 1.322008 | 0.402731 | 0.561155 | 0.603893 | 0.866831 | UP   | 517.2142 | 517.2135 | 517.2144 | 9.250817 | 9.142767 |
| 10556 | M173T10_ | 1.12246  | 0.166664 | 0.554032 | 0.603912 | 0.866832 | UP   | 172.8384 | 172.8382 | 172.8446 | 9.83835  | 9.715683 |
| 10557 | M425T11_ | 1.111373 | -0.15234 | -0.54129 | 0.603987 | 0.866836 | DOWN | 424.8465 | 424.8462 | 424.8467 | 10.6323  | 10.59933 |
| 10558 | M246T9_1 | 1.180344 | 0.239207 | 0.540783 | 0.604239 | 0.866851 | UP   | 245.7236 | 245.7234 | 245.7237 | 9.253242 | 9.12675  |
| 10559 | M370T10_ | 1.160329 | 0.214534 | 0.544736 | 0.604317 | 0.866856 | UP   | 370.2012 | 370.2009 | 370.2013 | 9.95385  | 9.843367 |
| 10560 | M217T7_2 | 1.153809 | 0.206405 | 0.539403 | 0.604325 | 0.866856 | UP   | 216.9224 | 216.9224 | 216.9225 | 6.685242 | 6.61905  |
| 10561 | M445T11_ | 1.144239 | -0.19439 | -0.5524  | 0.604327 | 0.866856 | DOWN | 445.35   | 445.3497 | 445.3506 | 10.89125 | 10.87487 |
| 10562 | M552T9_5 | 1.969111 | 0.977545 | 0.552357 | 0.604404 | 0.866861 | UP   | 551.8109 | 551.8095 | 551.8115 | 9.332617 | 9.234417 |
| 10563 | M722T10_ | 1.050546 | -0.07114 | -0.54347 | 0.604429 | 0.866862 | DOWN | 722.3572 | 722.3567 | 722.3578 | 9.825767 | 9.715683 |
| 10564 | M518T43_ | 1.133879 | -0.18127 | -0.54292 | 0.604432 | 0.866862 | DOWN | 518.2955 | 518.2952 | 518.2959 | 43.01367 | 42.78333 |
| 10565 | M371T11_ | 1.065861 | -0.09202 | -0.5404  | 0.604563 | 0.86687  | DOWN | 371.2448 | 371.2446 | 371.245  | 10.90659 | 10.89355 |
| 10566 | M430T44_ | 1.084941 | -0.11762 | -0.53973 | 0.604594 | 0.866872 | DOWN | 430.2433 | 430.2431 | 430.2435 | 44.44442 | 44.23    |
| 10567 | M442T9_2 | 1.149769 | -0.20134 | -0.53893 | 0.604624 | 0.866873 | DOWN | 442.2899 | 442.2893 | 442.2903 | 8.961442 | 8.878667 |
| 10568 | M316T12  | 1.094057 | -0.12969 | -0.54349 | 0.604731 | 0.86688  | DOWN | 315.7243 | 315.7234 | 315.7248 | 11.50562 | 11.48217 |
| 10569 | M1291T26 | 1.186227 | -0.24638 | -0.53877 | 0.604732 | 0.86688  | DOWN | 1290.949 | 1290.948 | 1290.95  | 26.01483 | 25.87783 |

|       |          |          |          |          |          |          |      |          |          |          |          |          |
|-------|----------|----------|----------|----------|----------|----------|------|----------|----------|----------|----------|----------|
| 10570 | M884T10_ | 1.280005 | 0.356149 | 0.542533 | 0.60482  | 0.866885 | UP   | 883.7569 | 883.7561 | 883.7572 | 9.918833 | 9.811217 |
| 10571 | M646T26_ | 1.16611  | -0.2217  | -0.53909 | 0.604821 | 0.866885 | DOWN | 645.9775 | 645.9772 | 645.9782 | 25.99383 | 25.87783 |
| 10572 | M238T11_ | 1.13768  | -0.1861  | -0.55322 | 0.604889 | 0.866889 | DOWN | 237.7705 | 237.7703 | 237.7705 | 10.91299 | 10.877   |
| 10573 | M340T10_ | 1.15416  | -0.20684 | -0.54191 | 0.604898 | 0.86689  | DOWN | 339.7594 | 339.7593 | 339.7601 | 9.886608 | 9.75365  |
| 10574 | M310T20_ | 1.155237 | 0.208189 | 0.553853 | 0.604899 | 0.86689  | UP   | 310.1775 | 310.1774 | 310.1777 | 20.0415  | 20.02717 |
| 10575 | M514T10_ | 1.237633 | -0.30758 | -0.54207 | 0.604955 | 0.866893 | DOWN | 513.6085 | 513.6083 | 513.6088 | 9.979667 | 9.90755  |
| 10576 | M511T21  | 1.326877 | 0.408035 | 0.54111  | 0.605015 | 0.866896 | UP   | 511.3219 | 511.3214 | 511.3223 | 21.20092 | 21.19333 |
| 10577 | M371T10_ | 1.170652 | 0.227312 | 0.538966 | 0.605134 | 0.866903 | UP   | 371.2562 | 371.2557 | 371.2613 | 9.964092 | 9.824233 |
| 10578 | M659T34  | 1.106358 | -0.14582 | -0.53972 | 0.60514  | 0.866904 | DOWN | 659.4771 | 659.4767 | 659.4773 | 33.54242 | 33.528   |
| 10579 | M299T39_ | 1.210038 | -0.27505 | -0.54883 | 0.605231 | 0.866909 | DOWN | 299.1487 | 299.1485 | 299.1489 | 38.88483 | 38.6995  |
| 10580 | M355T30  | 1.360251 | -0.44387 | -0.53925 | 0.60539  | 0.866918 | DOWN | 355.224  | 355.2229 | 355.225  | 30.19533 | 30.165   |
| 10581 | M412T9_1 | 1.059136 | -0.08289 | -0.53887 | 0.605463 | 0.866923 | DOWN | 412.2743 | 412.2737 | 412.2749 | 8.90275  | 8.77435  |
| 10582 | M502T21  | 1.100769 | -0.13851 | -0.54125 | 0.605533 | 0.866927 | DOWN | 502.4039 | 502.4037 | 502.4042 | 20.815   | 20.79667 |
| 10583 | M270T19_ | 1.198984 | 0.261812 | 0.537925 | 0.605535 | 0.866927 | UP   | 270.1849 | 270.1848 | 270.1852 | 19.43108 | 19.41733 |
| 10584 | M814T12  | 1.175706 | 0.233527 | 0.543752 | 0.605636 | 0.866933 | UP   | 813.5855 | 813.5851 | 813.5859 | 12.39075 | 12.32467 |
| 10585 | M152T11_ | 1.086875 | -0.12019 | -0.53779 | 0.605674 | 0.866935 | DOWN | 151.764  | 151.7639 | 151.7641 | 10.892   | 10.879   |
| 10586 | M450T42  | 1.122267 | -0.16642 | -0.54835 | 0.605692 | 0.866936 | DOWN | 450.2332 | 450.233  | 450.2333 | 41.97783 | 41.80517 |
| 10587 | M215T9_4 | 1.092999 | -0.12829 | -0.54027 | 0.605717 | 0.866938 | DOWN | 215.0673 | 215.0666 | 215.068  | 9.295733 | 9.220933 |
| 10588 | M226T10_ | 1.173909 | -0.23132 | -0.53783 | 0.605799 | 0.866942 | DOWN | 225.5755 | 225.5668 | 225.5756 | 9.8796   | 9.79535  |
| 10589 | M342T9_2 | 1.290446 | -0.36787 | -0.54535 | 0.605804 | 0.866943 | DOWN | 341.6093 | 341.6091 | 341.6095 | 9.2529   | 9.1587   |
| 10590 | M717T10_ | 1.127355 | 0.172942 | 0.547298 | 0.605821 | 0.866944 | UP   | 717.3827 | 717.3823 | 717.3831 | 9.818508 | 9.715683 |
| 10591 | M351T10_ | 1.456607 | -0.54261 | -0.54317 | 0.605839 | 0.866945 | DOWN | 351.2659 | 351.2623 | 351.269  | 9.8887   | 9.73145  |
| 10592 | M340T10_ | 1.796896 | 0.845507 | 0.537177 | 0.605905 | 0.866949 | UP   | 340.2893 | 340.2794 | 340.2895 | 9.872933 | 9.743767 |
| 10593 | M396T42_ | 1.104087 | -0.14285 | -0.53758 | 0.605905 | 0.866949 | DOWN | 396.2225 | 396.2224 | 396.2225 | 42.26533 | 42.2075  |
| 10594 | M200T9_1 | 1.275863 | -0.35147 | -0.5387  | 0.605969 | 0.866952 | DOWN | 199.8595 | 199.859  | 199.8603 | 9.1602   | 9.142767 |
| 10595 | M177T42  | 1.076477 | 0.106318 | 0.539769 | 0.605972 | 0.866952 | UP   | 177.1271 | 177.1271 | 177.1272 | 41.647   | 41.40267 |
| 10596 | M759T9   | 1.142337 | -0.19199 | -0.54324 | 0.605977 | 0.866953 | DOWN | 759.4887 | 759.4871 | 759.4895 | 9.494433 | 9.40135  |
| 10597 | M424T11_ | 1.506225 | 0.590937 | 0.536831 | 0.606027 | 0.866956 | UP   | 424.273  | 424.2693 | 424.274  | 10.87708 | 10.81738 |
| 10598 | M398T10_ | 1.148256 | 0.199444 | 0.537159 | 0.60614  | 0.866962 | UP   | 397.9058 | 397.9049 | 397.9061 | 9.979342 | 9.859233 |
| 10599 | M445T11_ | 1.053242 | -0.07484 | -0.53879 | 0.606213 | 0.866967 | DOWN | 444.7363 | 444.7357 | 444.7417 | 10.91403 | 10.88747 |
| 10600 | M332T9_3 | 1.190367 | -0.25141 | -0.54236 | 0.606277 | 0.86697  | DOWN | 331.8581 | 331.8579 | 331.8584 | 9.312075 | 9.234417 |
| 10601 | M473T9_8 | 1.374111 | -0.4585  | -0.54131 | 0.606308 | 0.866972 | DOWN | 473.2952 | 473.295  | 473.3047 | 9.4341   | 9.340183 |
| 10602 | M404T9_6 | 1.295175 | -0.37315 | -0.5374  | 0.60641  | 0.866978 | DOWN | 404.2787 | 404.2787 | 404.2792 | 9.283817 | 9.1587   |
| 10603 | M863T26_ | 1.144109 | -0.19422 | -0.53616 | 0.606434 | 0.86698  | DOWN | 862.61   | 862.6096 | 862.6107 | 26.26067 | 26.24633 |
| 10604 | M335T10_ | 1.151031 | -0.20293 | -0.53807 | 0.606475 | 0.866982 | DOWN | 335.3375 | 335.3373 | 335.3377 | 9.8235   | 9.699733 |

|       |          |          |          |          |          |          |      |          |          |          |          |          |
|-------|----------|----------|----------|----------|----------|----------|------|----------|----------|----------|----------|----------|
| 10605 | M211T10_ | 1.07648  | -0.10632 | -0.54129 | 0.606489 | 0.866983 | DOWN | 211.1521 | 211.152  | 211.1522 | 9.954767 | 9.843367 |
| 10606 | M793T10_ | 1.163243 | -0.21815 | -0.53652 | 0.606637 | 0.866991 | DOWN | 792.8265 | 792.8256 | 792.8333 | 9.960817 | 9.843367 |
| 10607 | M325T11_ | 1.13176  | 0.178569 | 0.540687 | 0.606678 | 0.866994 | UP   | 325.2484 | 325.2479 | 325.2485 | 10.91813 | 10.88747 |
| 10608 | M407T12  | 1.213755 | 0.279477 | 0.540033 | 0.606705 | 0.866995 | UP   | 407.2957 | 407.2954 | 407.296  | 12.40564 | 12.37287 |
| 10609 | M417T42_ | 1.205041 | 0.269082 | 0.542223 | 0.606819 | 0.867002 | UP   | 417.248  | 417.2478 | 417.2483 | 41.67567 | 41.53167 |
| 10610 | M1896T10 | 1.212928 | -0.27849 | -0.53576 | 0.606891 | 0.867006 | DOWN | 1896.101 | 1896.098 | 1896.103 | 9.81635  | 9.715683 |
| 10611 | M295T11_ | 1.283652 | 0.360254 | 0.538495 | 0.606938 | 0.867009 | UP   | 295.0852 | 295.0848 | 295.0858 | 11.32332 | 11.3207  |
| 10612 | M516T10_ | 1.217487 | -0.28391 | -0.54272 | 0.606958 | 0.86701  | DOWN | 515.9244 | 515.9235 | 515.9247 | 9.960642 | 9.853533 |
| 10613 | M481T10_ | 1.247167 | -0.31865 | -0.53559 | 0.607056 | 0.867016 | DOWN | 480.999  | 480.9986 | 480.9997 | 9.821308 | 9.743667 |
| 10614 | M451T20_ | 1.101569 | -0.13956 | -0.53668 | 0.607112 | 0.867019 | DOWN | 451.2797 | 451.2794 | 451.28   | 20.15083 | 20.13117 |
| 10615 | M357T44_ | 1.129962 | 0.176274 | 0.540117 | 0.607138 | 0.867021 | UP   | 357.1906 | 357.1904 | 357.1907 | 44.22167 | 44.02033 |
| 10616 | M538T10_ | 1.120676 | -0.16437 | -0.53897 | 0.607168 | 0.867022 | DOWN | 537.9249 | 537.9248 | 537.9251 | 9.960817 | 9.859233 |
| 10617 | M589T10_ | 1.061952 | -0.08672 | -0.53501 | 0.607203 | 0.867024 | DOWN | 588.6275 | 588.6269 | 588.6279 | 9.9351   | 9.827283 |
| 10618 | M771T9   | 1.280052 | -0.3562  | -0.53547 | 0.607387 | 0.867035 | DOWN | 770.544  | 770.5422 | 770.5447 | 8.663742 | 8.61235  |
| 10619 | M459T10_ | 1.101355 | -0.13928 | -0.5348  | 0.607394 | 0.867036 | DOWN | 459.1113 | 459.1103 | 459.1119 | 9.968992 | 9.8753   |
| 10620 | M619T10_ | 1.552573 | 0.634661 | 0.547924 | 0.607424 | 0.867037 | UP   | 618.6341 | 618.6335 | 618.6377 | 9.853633 | 9.73145  |
| 10621 | M404T10_ | 1.109494 | -0.1499  | -0.53481 | 0.607464 | 0.86704  | DOWN | 403.7394 | 403.7389 | 403.7396 | 9.642433 | 9.541483 |
| 10622 | M650T9_3 | 1.327489 | 0.4087   | 0.549688 | 0.607474 | 0.86704  | UP   | 649.9084 | 649.9041 | 649.9108 | 9.26025  | 9.16125  |
| 10623 | M342T10_ | 1.090028 | -0.12437 | -0.53461 | 0.607474 | 0.86704  | DOWN | 342.3821 | 342.3817 | 342.3824 | 9.824233 | 9.715683 |
| 10624 | M490T45  | 1.143291 | 0.193192 | 0.543101 | 0.6075   | 0.867042 | UP   | 490.2643 | 490.2641 | 490.2645 | 44.9115  | 44.76783 |
| 10625 | M271T9_8 | 1.17327  | 0.230535 | 0.540804 | 0.607501 | 0.867042 | UP   | 271.1773 | 271.1771 | 271.1777 | 8.805375 | 8.715883 |
| 10626 | M226T11  | 1.280914 | 0.357174 | 0.54676  | 0.607513 | 0.867042 | UP   | 226.1047 | 226.1042 | 226.1051 | 10.90548 | 10.8646  |
| 10627 | M209T10_ | 1.185805 | 0.245867 | 0.535713 | 0.60753  | 0.867043 | UP   | 209.0861 | 209.086  | 209.0863 | 9.874067 | 9.778967 |
| 10628 | M462T40_ | 1.069954 | 0.097549 | 0.546872 | 0.607674 | 0.867052 | UP   | 462.2694 | 462.2691 | 462.2696 | 39.66883 | 39.48883 |
| 10629 | M356T10_ | 1.143754 | 0.193776 | 0.544597 | 0.607731 | 0.867055 | UP   | 355.978  | 355.9773 | 355.9806 | 9.831242 | 9.715683 |
| 10630 | M321T10_ | 1.154111 | -0.20678 | -0.54014 | 0.607786 | 0.867058 | DOWN | 321.2375 | 321.2371 | 321.2378 | 9.975142 | 9.859233 |
| 10631 | M352T10_ | 1.061286 | 0.085814 | 0.542508 | 0.607819 | 0.86706  | UP   | 351.9954 | 351.9953 | 351.9956 | 9.857275 | 9.73145  |
| 10632 | M609T10_ | 1.104337 | -0.14318 | -0.54096 | 0.607825 | 0.867061 | DOWN | 608.6737 | 608.6734 | 608.6748 | 9.918792 | 9.811217 |
| 10633 | M350T37  | 1.131517 | -0.17826 | -0.53892 | 0.607843 | 0.867062 | DOWN | 350.2173 | 350.217  | 350.2173 | 36.99258 | 36.71217 |
| 10634 | M169T10_ | 1.195538 | -0.25766 | -0.53628 | 0.607884 | 0.867064 | DOWN | 169.0432 | 169.0431 | 169.0432 | 9.8207   | 9.715683 |
| 10635 | M345T10_ | 1.108517 | 0.14863  | 0.535375 | 0.607904 | 0.867065 | UP   | 345.0929 | 345.0929 | 345.0931 | 9.8207   | 9.699733 |
| 10636 | M244T10_ | 1.233703 | -0.303   | -0.53689 | 0.607924 | 0.867066 | DOWN | 243.5538 | 243.5537 | 243.554  | 9.948875 | 9.843367 |
| 10637 | M538T9_7 | 1.137136 | -0.1854  | -0.53392 | 0.607949 | 0.867068 | DOWN | 538.3454 | 538.3448 | 538.3456 | 9.283817 | 9.191283 |
| 10638 | M470T9_3 | 1.10988  | -0.1504  | -0.54015 | 0.60797  | 0.867069 | DOWN | 470.1381 | 470.1375 | 470.1388 | 9.240958 | 9.160617 |
| 10639 | M296T19  | 1.156803 | -0.21014 | -0.53613 | 0.608072 | 0.867075 | DOWN | 296.2453 | 296.2422 | 296.2459 | 18.627   | 18.36967 |



|       |          |          |          |          |          |          |      |          |          |          |          |          |
|-------|----------|----------|----------|----------|----------|----------|------|----------|----------|----------|----------|----------|
| 10640 | M218T10_ | 1.134389 | -0.18192 | -0.53383 | 0.608219 | 0.867083 | DOWN | 217.7639 | 217.7638 | 217.764  | 9.978692 | 9.8914   |
| 10641 | M504T11_ | 1.143887 | -0.19394 | -0.5371  | 0.608452 | 0.867097 | DOWN | 504.0349 | 504.0311 | 504.0355 | 10.95602 | 10.90765 |
| 10642 | M706T10_ | 1.252387 | 0.32468  | 0.553523 | 0.608478 | 0.867099 | UP   | 705.8244 | 705.8239 | 705.8246 | 9.945208 | 9.699933 |
| 10643 | M206T10_ | 1.135005 | -0.1827  | -0.53969 | 0.608517 | 0.867101 | DOWN | 206.2828 | 206.2826 | 206.2905 | 9.8207   | 9.715683 |
| 10644 | M592T40_ | 1.142452 | -0.19213 | -0.53351 | 0.608703 | 0.867112 | DOWN | 592.3325 | 592.3323 | 592.333  | 39.56083 | 39.50033 |
| 10645 | M346T23_ | 1.561379 | -0.64282 | -0.53366 | 0.608775 | 0.867116 | DOWN | 346.2526 | 346.2524 | 346.2531 | 23.06683 | 23.04483 |
| 10646 | M508T10_ | 1.085036 | 0.117742 | 0.535369 | 0.609    | 0.867129 | UP   | 508.3354 | 508.3267 | 508.3356 | 10.17547 | 10.06883 |
| 10647 | M660T29_ | 1.270005 | -0.34483 | -0.53438 | 0.6091   | 0.867135 | DOWN | 659.9933 | 659.9931 | 659.9936 | 28.81008 | 28.78933 |
| 10648 | M657T10_ | 1.132511 | 0.179524 | 0.540677 | 0.609128 | 0.867136 | UP   | 657.3817 | 657.3815 | 657.382  | 10.40425 | 10.34372 |
| 10649 | M534T44_ | 1.144777 | 0.195067 | 0.55009  | 0.609254 | 0.867143 | UP   | 534.3268 | 534.3267 | 534.3273 | 44.43725 | 44.43333 |
| 10650 | M509T11_ | 1.097685 | -0.13446 | -0.53186 | 0.609339 | 0.867148 | DOWN | 509.4295 | 509.4291 | 509.4298 | 10.91386 | 10.9049  |
| 10651 | M1300T10 | 1.114122 | -0.15591 | -0.54471 | 0.609351 | 0.867149 | DOWN | 1300.289 | 1300.288 | 1300.292 | 9.810233 | 9.699733 |
| 10652 | M352T27_ | 1.232005 | -0.30101 | -0.53358 | 0.60937  | 0.86715  | DOWN | 351.7492 | 351.7489 | 351.7493 | 26.842   | 26.82383 |
| 10653 | M379T32_ | 1.2104   | -0.27548 | -0.54675 | 0.609521 | 0.867159 | DOWN | 379.2767 | 379.2766 | 379.2768 | 31.68142 | 31.66683 |
| 10654 | M429T10_ | 1.107134 | 0.14683  | 0.536641 | 0.609561 | 0.867161 | UP   | 429.2722 | 429.272  | 429.2724 | 10.08833 | 9.988    |
| 10655 | M460T45_ | 1.103982 | -0.14272 | -0.53148 | 0.609606 | 0.867164 | DOWN | 460.2539 | 460.2536 | 460.254  | 44.94033 | 44.811   |
| 10656 | M353T27_ | 1.11304  | -0.1545  | -0.53135 | 0.609608 | 0.867164 | DOWN | 352.5017 | 352.5007 | 352.5019 | 26.81692 | 26.76617 |
| 10657 | M430T9_2 | 1.111435 | -0.15242 | -0.54223 | 0.609657 | 0.867167 | DOWN | 429.9048 | 429.9043 | 429.9063 | 9.297417 | 9.18975  |
| 10658 | M440T29_ | 1.291386 | -0.36892 | -0.53482 | 0.609674 | 0.867168 | DOWN | 440.3308 | 440.3304 | 440.3309 | 28.82908 | 28.79767 |
| 10659 | M1963T10 | 1.14636  | -0.19706 | -0.53147 | 0.60972  | 0.86717  | DOWN | 1963.063 | 1963.055 | 1963.065 | 9.828392 | 9.715683 |
| 10660 | M332T34  | 1.089337 | 0.12345  | 0.535706 | 0.609725 | 0.867171 | UP   | 332.331  | 332.3308 | 332.3311 | 33.89075 | 33.87367 |
| 10661 | M551T22  | 1.133627 | -0.18095 | -0.53611 | 0.609728 | 0.867171 | DOWN | 551.2965 | 551.2959 | 551.2968 | 21.97092 | 21.96117 |
| 10662 | M959T10  | 1.142291 | -0.19193 | -0.53781 | 0.609971 | 0.867185 | DOWN | 959.3948 | 959.3939 | 959.3958 | 9.600583 | 9.509533 |
| 10663 | M283T30  | 1.294139 | 0.371992 | 0.530858 | 0.610179 | 0.867197 | UP   | 283.1748 | 283.1741 | 283.175  | 30.23617 | 30.00817 |
| 10664 | M552T9_3 | 1.291926 | 0.369523 | 0.540655 | 0.610261 | 0.867202 | UP   | 551.7878 | 551.7854 | 551.7883 | 9.132967 | 9.111033 |
| 10665 | M792T10_ | 1.222537 | 0.289879 | 0.534705 | 0.610391 | 0.867209 | UP   | 791.9623 | 791.9606 | 791.9632 | 9.964167 | 9.859233 |
| 10666 | M160T10_ | 1.121691 | 0.165675 | 0.531952 | 0.610442 | 0.867212 | UP   | 160.214  | 160.2138 | 160.214  | 9.9174   | 9.827283 |
| 10667 | M451T12  | 1.137213 | -0.1855  | -0.5305  | 0.610591 | 0.867221 | DOWN | 451.2087 | 451.2085 | 451.2089 | 12.38367 | 12.38278 |
| 10668 | M254T10_ | 1.150902 | -0.20276 | -0.5322  | 0.610695 | 0.867227 | DOWN | 254.1933 | 254.1931 | 254.1936 | 9.958617 | 9.8378   |
| 10669 | M499T9_9 | 1.619968 | 0.695965 | 0.5468   | 0.610758 | 0.86723  | UP   | 499.369  | 499.3678 | 499.3693 | 8.936617 | 8.909    |
| 10670 | M758T10_ | 1.202737 | 0.266321 | 0.534591 | 0.610786 | 0.867232 | UP   | 758.123  | 758.1224 | 758.1243 | 9.95385  | 9.843367 |
| 10671 | M375T30_ | 1.241344 | -0.3119  | -0.53087 | 0.610826 | 0.867234 | DOWN | 374.605  | 374.6047 | 374.6051 | 29.58092 | 29.5715  |
| 10672 | M179T9_1 | 1.211474 | -0.27676 | -0.53082 | 0.610841 | 0.867235 | DOWN | 178.6022 | 178.6018 | 178.603  | 9.292008 | 9.147367 |
| 10673 | M416T41_ | 1.038559 | 0.054583 | 0.543943 | 0.610865 | 0.867236 | UP   | 416.2277 | 416.2276 | 416.2279 | 40.62467 | 40.453   |
| 10674 | M578T9_4 | 1.162585 | -0.21734 | -0.53262 | 0.610972 | 0.867243 | DOWN | 578.4202 | 578.4198 | 578.4236 | 9.311883 | 9.11405  |

|       |          |          |          |          |          |          |      |          |          |          |          |          |
|-------|----------|----------|----------|----------|----------|----------|------|----------|----------|----------|----------|----------|
| 10675 | M638T10_ | 1.10839  | 0.148465 | 0.549942 | 0.611014 | 0.867245 | UP   | 637.7077 | 637.7074 | 637.7104 | 9.825767 | 9.715683 |
| 10676 | M383T9_2 | 1.225893 | -0.29383 | -0.52974 | 0.611017 | 0.867245 | DOWN | 382.6529 | 382.6524 | 382.6583 | 9.235933 | 9.023483 |
| 10677 | M414T9_2 | 1.218032 | -0.28455 | -0.53186 | 0.611038 | 0.867246 | DOWN | 413.6569 | 413.656  | 413.661  | 9.365833 | 9.061    |
| 10678 | M338T10_ | 1.096168 | -0.13247 | -0.53879 | 0.611065 | 0.867248 | DOWN | 338.2166 | 338.2158 | 338.2171 | 9.947958 | 9.843367 |
| 10679 | M825T32  | 1.249691 | -0.32157 | -0.53355 | 0.611093 | 0.86725  | DOWN | 824.6081 | 824.6077 | 824.6086 | 32.013   | 31.998   |
| 10680 | M598T10_ | 1.095665 | -0.13181 | -0.53564 | 0.61115  | 0.867253 | DOWN | 597.7209 | 597.7204 | 597.7212 | 9.909433 | 9.811217 |
| 10681 | M166T10_ | 1.143528 | -0.19349 | -0.53381 | 0.611177 | 0.867254 | DOWN | 165.7364 | 165.7363 | 165.7366 | 9.962617 | 9.859233 |
| 10682 | M361T9_2 | 1.179358 | -0.238   | -0.53015 | 0.611208 | 0.867256 | DOWN | 360.7571 | 360.7568 | 360.7573 | 9.314442 | 9.234417 |
| 10683 | M481T10_ | 1.11942  | -0.16275 | -0.52873 | 0.611343 | 0.867264 | DOWN | 480.7542 | 480.7538 | 480.7554 | 9.80755  | 9.6681   |
| 10684 | M301T10_ | 1.129227 | 0.175335 | 0.528711 | 0.611361 | 0.867265 | UP   | 300.5109 | 300.5104 | 300.5112 | 9.9351   | 9.827283 |
| 10685 | M932T10_ | 1.307785 | -0.38713 | -0.5402  | 0.611372 | 0.867266 | DOWN | 932.1628 | 932.1616 | 932.1634 | 9.967367 | 9.9009   |
| 10686 | M390T10_ | 1.494877 | 0.580027 | 0.530936 | 0.61153  | 0.867275 | UP   | 390.2896 | 390.2892 | 390.2993 | 9.965792 | 9.8914   |
| 10687 | M1203T17 | 1.228104 | 0.296433 | 0.540082 | 0.61163  | 0.86728  | UP   | 1202.593 | 1202.593 | 1202.595 | 16.50158 | 16.46157 |
| 10688 | M707T11  | 1.374969 | 0.459399 | 0.535849 | 0.611701 | 0.867285 | UP   | 707.3737 | 707.3732 | 707.375  | 11.48757 | 11.47593 |
| 10689 | M399T11_ | 1.090251 | -0.12466 | -0.52814 | 0.611736 | 0.867287 | DOWN | 399.2716 | 399.2673 | 399.2718 | 10.89728 | 10.879   |
| 10690 | M601T10_ | 1.090534 | -0.12503 | -0.52845 | 0.611772 | 0.867289 | DOWN | 600.719  | 600.7184 | 600.7195 | 9.954767 | 9.843367 |
| 10691 | M155T10_ | 1.156012 | -0.20916 | -0.53846 | 0.611782 | 0.867289 | DOWN | 154.9094 | 154.9093 | 154.9094 | 9.951442 | 9.843367 |
| 10692 | M362T9_5 | 1.266459 | -0.3408  | -0.52807 | 0.611783 | 0.867289 | DOWN | 362.1908 | 362.1903 | 362.1911 | 9.487467 | 9.40135  |
| 10693 | M561T26  | 1.163512 | -0.21849 | -0.53266 | 0.611837 | 0.867292 | DOWN | 561.3653 | 561.3649 | 561.3659 | 26.18508 | 26.16567 |
| 10694 | M711T10_ | 1.064926 | 0.090753 | 0.528019 | 0.611923 | 0.867297 | UP   | 710.8383 | 710.8379 | 710.8391 | 9.83925  | 9.73145  |
| 10695 | M397T10_ | 1.082621 | -0.11453 | -0.5296  | 0.612053 | 0.867305 | DOWN | 396.7948 | 396.7945 | 396.7954 | 9.9351   | 9.827283 |
| 10696 | M237T9_5 | 1.154024 | -0.20667 | -0.53211 | 0.612078 | 0.867306 | DOWN | 237.1193 | 237.1184 | 237.1199 | 9.315083 | 9.132267 |
| 10697 | M432T10_ | 1.081351 | -0.11284 | -0.52757 | 0.612112 | 0.867308 | DOWN | 432.4014 | 432.4011 | 432.4021 | 9.985117 | 9.8753   |
| 10698 | M197T10_ | 1.070626 | 0.098455 | 0.527559 | 0.61212  | 0.867309 | UP   | 197.0818 | 197.0817 | 197.0823 | 9.845208 | 9.699733 |
| 10699 | M339T10_ | 1.044089 | -0.06224 | -0.52983 | 0.612169 | 0.867311 | DOWN | 339.2306 | 339.2303 | 339.2308 | 9.823575 | 9.715683 |
| 10700 | M524T10_ | 1.35812  | 0.441611 | 0.530424 | 0.612313 | 0.86732  | UP   | 524.1554 | 524.1539 | 524.1556 | 9.960967 | 9.8753   |
| 10701 | M353T10_ | 1.13242  | -0.17941 | -0.52817 | 0.612477 | 0.867329 | DOWN | 352.5994 | 352.5989 | 352.5995 | 9.972917 | 9.859233 |
| 10702 | M464T43  | 1.116635 | -0.15916 | -0.5476  | 0.612503 | 0.867331 | DOWN | 464.2849 | 464.2848 | 464.2851 | 42.7545  | 42.5675  |
| 10703 | M386T10_ | 1.186266 | -0.24643 | -0.52847 | 0.612587 | 0.867335 | DOWN | 385.9598 | 385.9595 | 385.9609 | 9.894875 | 9.79535  |
| 10704 | M259T24_ | 1.061382 | -0.08594 | -0.52738 | 0.612618 | 0.867337 | DOWN | 259.2821 | 259.282  | 259.2823 | 23.726   | 23.71017 |
| 10705 | M388T10_ | 1.046086 | -0.065   | -0.52861 | 0.612742 | 0.867344 | DOWN | 388.4658 | 388.4656 | 388.4661 | 9.929783 | 9.827283 |
| 10706 | M207T8   | 1.245004 | -0.31615 | -0.52688 | 0.612755 | 0.867345 | DOWN | 206.8935 | 206.8934 | 206.8936 | 7.8106   | 7.510867 |
| 10707 | M459T9_6 | 1.189883 | -0.25082 | -0.53414 | 0.612757 | 0.867345 | DOWN | 459.3401 | 459.3389 | 459.3417 | 9.298683 | 9.1175   |
| 10708 | M402T11_ | 1.126563 | 0.171928 | 0.532701 | 0.612846 | 0.86735  | UP   | 402.1896 | 402.1895 | 402.19   | 10.892   | 10.879   |
| 10709 | M319T9_4 | 1.189083 | -0.24985 | -0.52788 | 0.613124 | 0.867366 | DOWN | 319.1732 | 319.1728 | 319.1743 | 8.9788   | 8.877267 |

|       |          |          |          |          |          |          |      |          |          |          |          |          |
|-------|----------|----------|----------|----------|----------|----------|------|----------|----------|----------|----------|----------|
| 10710 | M705T10_ | 1.139108 | 0.187904 | 0.53328  | 0.613148 | 0.867367 | UP   | 705.4577 | 705.4567 | 705.4588 | 9.9677   | 9.859233 |
| 10711 | M230T10_ | 1.142354 | 0.19201  | 0.532319 | 0.613162 | 0.867368 | UP   | 229.6043 | 229.6041 | 229.6044 | 9.951283 | 9.843367 |
| 10712 | M369T11_ | 1.162803 | 0.217607 | 0.528317 | 0.613176 | 0.867369 | UP   | 368.904  | 368.9038 | 368.9045 | 10.8926  | 10.879   |
| 10713 | M809T29  | 1.326221 | -0.40732 | -0.52908 | 0.613181 | 0.867369 | DOWN | 809.0743 | 809.0733 | 809.0743 | 28.78933 | 28.74917 |
| 10714 | M431T20_ | 1.145043 | 0.195401 | 0.526479 | 0.613206 | 0.867371 | UP   | 431.24   | 431.2398 | 431.2406 | 20       | 19.98483 |
| 10715 | M412T9_6 | 1.16523  | -0.22062 | -0.52781 | 0.613212 | 0.867371 | DOWN | 412.1074 | 412.1067 | 412.1078 | 8.899467 | 8.77435  |
| 10716 | M245T44  | 1.119331 | 0.162637 | 0.529975 | 0.613235 | 0.867372 | UP   | 245.138  | 245.138  | 245.1382 | 44.16417 | 43.94833 |
| 10717 | M357T10_ | 1.07118  | 0.099201 | 0.538602 | 0.613247 | 0.867373 | UP   | 356.7385 | 356.738  | 356.7386 | 9.841442 | 9.73145  |
| 10718 | M676T10_ | 1.327786 | 0.409023 | 0.544305 | 0.613275 | 0.867375 | UP   | 675.7939 | 675.7929 | 675.7942 | 9.504583 | 9.432533 |
| 10719 | M271T10_ | 1.043429 | 0.061332 | 0.540423 | 0.613384 | 0.867381 | UP   | 270.9923 | 270.9921 | 270.9927 | 9.841442 | 9.73145  |
| 10720 | M999T10_ | 1.237684 | -0.30764 | -0.53778 | 0.613492 | 0.867387 | DOWN | 999.0717 | 999.0696 | 999.0731 | 9.787808 | 9.728083 |
| 10721 | M479T11_ | 1.170092 | -0.22662 | -0.52554 | 0.613577 | 0.867392 | DOWN | 478.9651 | 478.9646 | 478.9658 | 10.91813 | 10.8646  |
| 10722 | M579T9_2 | 1.381526 | 0.466263 | 0.541977 | 0.613583 | 0.867392 | UP   | 578.542  | 578.5412 | 578.5425 | 9.317    | 9.234417 |
| 10723 | M268T10_ | 1.150018 | 0.201657 | 0.539821 | 0.613761 | 0.867402 | UP   | 268.0138 | 268.0023 | 268.014  | 9.77355  | 9.665433 |
| 10724 | M234T10_ | 1.181326 | -0.24041 | -0.53143 | 0.613802 | 0.867405 | DOWN | 233.5289 | 233.5289 | 233.5291 | 9.8207   | 9.696683 |
| 10725 | M261T9_6 | 1.189958 | -0.25091 | -0.52917 | 0.613891 | 0.86741  | DOWN | 261.3361 | 261.3356 | 261.3366 | 9.195483 | 9.132267 |
| 10726 | M520T39_ | 1.057611 | -0.08081 | -0.54066 | 0.614022 | 0.867417 | DOWN | 520.3113 | 520.311  | 520.3115 | 39.48183 | 39.45667 |
| 10727 | M469T40  | 1.269406 | -0.34415 | -0.53095 | 0.614223 | 0.867429 | DOWN | 469.4437 | 469.4435 | 469.4444 | 40.16517 | 40.10767 |
| 10728 | M707T10_ | 1.151175 | -0.20311 | -0.52536 | 0.6143   | 0.867433 | DOWN | 706.8624 | 706.8615 | 706.8636 | 9.915583 | 9.811217 |
| 10729 | M354T10_ | 1.106905 | -0.14653 | -0.53443 | 0.614302 | 0.867433 | DOWN | 354.2284 | 354.2282 | 354.2286 | 9.89435  | 9.79535  |
| 10730 | M654T10_ | 1.166222 | -0.22184 | -0.52894 | 0.614432 | 0.867441 | DOWN | 654.3933 | 654.393  | 654.3935 | 9.830283 | 9.699733 |
| 10731 | M554T9_8 | 1.177367 | -0.23556 | -0.52425 | 0.61444  | 0.867441 | DOWN | 554.3976 | 554.3901 | 554.3984 | 9.28395  | 9.16125  |
| 10732 | M611T37  | 1.151734 | -0.20381 | -0.52748 | 0.614537 | 0.867447 | DOWN | 611.4366 | 611.4347 | 611.4371 | 36.53933 | 36.46917 |
| 10733 | M869T10_ | 1.447092 | 0.533157 | 0.540331 | 0.614642 | 0.867453 | UP   | 868.5122 | 868.5111 | 868.5131 | 9.694608 | 9.58735  |
| 10734 | M520T39_ | 1.063643 | -0.08901 | -0.52505 | 0.614647 | 0.867453 | DOWN | 520.3111 | 520.311  | 520.3117 | 38.62575 | 38.453   |
| 10735 | M324T10_ | 1.117635 | -0.16045 | -0.52395 | 0.614664 | 0.867454 | DOWN | 324.2352 | 324.2348 | 324.2355 | 9.835675 | 9.728083 |
| 10736 | M375T9_3 | 1.266097 | 0.340387 | 0.523574 | 0.614773 | 0.86746  | UP   | 375.0117 | 375.0112 | 375.0119 | 9.317    | 9.275917 |
| 10737 | M782T11_ | 1.172429 | -0.2295  | -0.52382 | 0.61486  | 0.867465 | DOWN | 781.6126 | 781.6111 | 781.6141 | 10.91673 | 10.84395 |
| 10738 | M409T10_ | 1.382494 | -0.46727 | -0.52796 | 0.614881 | 0.867466 | DOWN | 409.2094 | 409.2057 | 409.2118 | 9.93775  | 9.885167 |
| 10739 | M255T11_ | 1.065564 | -0.09162 | -0.52494 | 0.614897 | 0.867467 | DOWN | 255.0365 | 255.0363 | 255.0367 | 10.90628 | 10.873   |
| 10740 | M1135T11 | 1.152147 | -0.20432 | -0.52352 | 0.614927 | 0.867469 | DOWN | 1134.86  | 1134.859 | 1134.861 | 10.52609 | 10.47223 |
| 10741 | M192T10_ | 1.211577 | 0.276886 | 0.534578 | 0.614954 | 0.86747  | UP   | 191.7879 | 191.7877 | 191.7882 | 9.93625  | 9.843367 |
| 10742 | M708T10_ | 1.148991 | -0.20037 | -0.52328 | 0.614961 | 0.867471 | DOWN | 707.7862 | 707.7853 | 707.7869 | 9.830558 | 9.728083 |
| 10743 | M325T11_ | 1.070555 | -0.09836 | -0.52523 | 0.614963 | 0.867471 | DOWN | 324.9195 | 324.9193 | 324.9196 | 10.89875 | 10.879   |
| 10744 | M473T11_ | 1.147658 | 0.198693 | 0.535206 | 0.615055 | 0.867476 | UP   | 472.9942 | 472.9929 | 472.9949 | 10.90522 | 10.879   |

|       |          |          |          |          |          |          |      |          |          |          |          |          |
|-------|----------|----------|----------|----------|----------|----------|------|----------|----------|----------|----------|----------|
| 10745 | M249T10_ | 1.084027 | 0.116401 | 0.534869 | 0.615082 | 0.867478 | UP   | 248.9241 | 248.9239 | 248.9248 | 9.811217 | 9.729367 |
| 10746 | M1682T10 | 1.151591 | -0.20363 | -0.52908 | 0.61517  | 0.867483 | DOWN | 1681.547 | 1681.543 | 1681.549 | 9.842    | 9.747533 |
| 10747 | M193T9_3 | 1.334279 | 0.41606  | 0.523413 | 0.615247 | 0.867487 | UP   | 192.898  | 192.8973 | 192.8994 | 9.2612   | 9.111033 |
| 10748 | M293T10_ | 1.175042 | -0.23271 | -0.52427 | 0.61531  | 0.867491 | DOWN | 292.5434 | 292.543  | 292.5435 | 9.968992 | 9.8753   |
| 10749 | M1319T29 | 1.289998 | -0.36737 | -0.52605 | 0.615342 | 0.867492 | DOWN | 1318.98  | 1318.98  | 1318.981 | 28.82908 | 28.808   |
| 10750 | M378T40_ | 1.359756 | -0.44335 | -0.52246 | 0.61552  | 0.867503 | DOWN | 378.2482 | 378.2481 | 378.2483 | 40.40967 | 40.352   |
| 10751 | M272T29  | 1.12779  | -0.1735  | -0.52307 | 0.61559  | 0.867507 | DOWN | 272.2945 | 272.2944 | 272.2946 | 29.29125 | 29.27483 |
| 10752 | M189T9_3 | 1.398492 | -0.48387 | -0.52726 | 0.615594 | 0.867507 | DOWN | 188.7282 | 188.7274 | 188.7287 | 9.170525 | 9.147367 |
| 10753 | M404T37_ | 1.085973 | 0.118989 | 0.524248 | 0.615769 | 0.867517 | UP   | 404.264  | 404.2638 | 404.2642 | 36.61183 | 36.39633 |
| 10754 | M1939T10 | 1.195581 | -0.25771 | -0.52529 | 0.61587  | 0.867522 | DOWN | 1938.53  | 1938.529 | 1938.532 | 9.885883 | 9.827283 |
| 10755 | M376T11_ | 1.201738 | 0.265122 | 0.52207  | 0.615924 | 0.867525 | UP   | 376.2078 | 376.207  | 376.2082 | 10.8937  | 10.8214  |
| 10756 | M424T10_ | 1.143448 | 0.19339  | 0.538232 | 0.616028 | 0.867531 | UP   | 423.7605 | 423.7602 | 423.7606 | 9.945258 | 9.843367 |
| 10757 | M518T41_ | 1.099877 | -0.13734 | -0.53509 | 0.616041 | 0.867532 | DOWN | 518.2954 | 518.2953 | 518.2956 | 40.7265  | 40.71183 |
| 10758 | M426T11_ | 1.282644 | 0.359121 | 0.52158  | 0.616112 | 0.867536 | UP   | 426.2663 | 426.266  | 426.2668 | 10.90765 | 10.8646  |
| 10759 | M359T10_ | 1.050801 | -0.07149 | -0.52686 | 0.616213 | 0.867542 | DOWN | 358.5953 | 358.5951 | 358.5955 | 9.831517 | 9.699733 |
| 10760 | M416T40_ | 1.113075 | 0.154551 | 0.542071 | 0.61624  | 0.867543 | UP   | 416.264  | 416.2638 | 416.2643 | 40.338   | 40.15083 |
| 10761 | M540T13  | 1.117854 | -0.16073 | -0.52901 | 0.616477 | 0.867557 | DOWN | 540.4069 | 540.4055 | 540.4073 | 13.24427 | 13.21485 |
| 10762 | M449T10_ | 1.169886 | 0.226368 | 0.521368 | 0.616505 | 0.867558 | UP   | 448.8126 | 448.8124 | 448.813  | 9.965717 | 9.843367 |
| 10763 | M504T39_ | 1.144344 | 0.19452  | 0.522904 | 0.616508 | 0.867559 | UP   | 504.2802 | 504.2798 | 504.2803 | 38.52492 | 38.36683 |
| 10764 | M403T18  | 1.220448 | -0.28741 | -0.52936 | 0.61654  | 0.86756  | DOWN | 403.2925 | 403.2918 | 403.2933 | 17.976   | 17.948   |
| 10765 | M317T10_ | 1.104322 | -0.14316 | -0.53059 | 0.616605 | 0.867564 | DOWN | 316.7948 | 316.7947 | 316.795  | 9.970617 | 9.8753   |
| 10766 | M207T9_6 | 1.51638  | -0.60063 | -0.52207 | 0.616664 | 0.867567 | DOWN | 206.7903 | 206.785  | 206.7913 | 9.275525 | 9.132267 |
| 10767 | M265T10_ | 1.300235 | 0.378772 | 0.532986 | 0.616672 | 0.867568 | UP   | 264.5308 | 264.5307 | 264.531  | 9.762917 | 9.636483 |
| 10768 | M203T10_ | 1.13621  | 0.184229 | 0.520668 | 0.616702 | 0.867569 | UP   | 202.9669 | 202.9667 | 202.967  | 9.965792 | 9.8753   |
| 10769 | M430T11_ | 1.080585 | -0.11181 | -0.52152 | 0.61675  | 0.867572 | DOWN | 429.9321 | 429.932  | 429.9328 | 10.892   | 10.8646  |
| 10770 | M213T11_ | 1.103937 | -0.14266 | -0.52216 | 0.616878 | 0.867579 | DOWN | 213.2752 | 213.2749 | 213.2753 | 10.92487 | 10.9049  |
| 10771 | M1027T18 | 1.060864 | -0.08524 | -0.52044 | 0.616884 | 0.86758  | DOWN | 1027.458 | 1027.457 | 1027.458 | 17.57017 | 17.5255  |
| 10772 | M508T42_ | 1.103206 | 0.141703 | 0.527514 | 0.616956 | 0.867584 | UP   | 508.311  | 508.3109 | 508.3113 | 41.77633 | 41.58933 |
| 10773 | M288T24_ | 1.040591 | -0.0574  | -0.52907 | 0.617018 | 0.867587 | DOWN | 288.2893 | 288.2892 | 288.2894 | 24.06292 | 24.05467 |
| 10774 | M1069T10 | 1.159176 | 0.2131   | 0.532826 | 0.617028 | 0.867588 | UP   | 1068.586 | 1068.585 | 1068.588 | 9.640367 | 9.509533 |
| 10775 | M277T10_ | 1.097074 | -0.13366 | -0.53084 | 0.617078 | 0.867591 | DOWN | 277.4905 | 277.4903 | 277.4906 | 9.8397   | 9.715683 |
| 10776 | M258T11_ | 1.127318 | -0.17289 | -0.52062 | 0.617101 | 0.867592 | DOWN | 258.1667 | 258.1642 | 258.1668 | 10.89907 | 10.879   |
| 10777 | M225T10_ | 1.329677 | 0.411076 | 0.532696 | 0.61713  | 0.867594 | UP   | 225.1427 | 225.1338 | 225.1435 | 9.830833 | 9.7124   |
| 10778 | M415T20_ | 1.047219 | -0.06656 | -0.52192 | 0.617185 | 0.867597 | DOWN | 415.2924 | 415.2922 | 415.2926 | 20.245   | 20.23017 |
| 10779 | M445T10_ | 1.14123  | -0.19059 | -0.52285 | 0.61727  | 0.867602 | DOWN | 444.6883 | 444.6876 | 444.6887 | 9.94785  | 9.827283 |

|       |          |          |          |          |          |          |      |          |          |          |          |          |
|-------|----------|----------|----------|----------|----------|----------|------|----------|----------|----------|----------|----------|
| 10780 | M410T10_ | 1.055997 | -0.07861 | -0.52904 | 0.61731  | 0.867604 | DOWN | 409.699  | 409.6986 | 409.6992 | 9.917167 | 9.811217 |
| 10781 | M372T23_ | 1.173659 | -0.23101 | -0.51967 | 0.617367 | 0.867607 | DOWN | 372.0656 | 372.0654 | 372.0658 | 22.69833 | 22.6705  |
| 10782 | M235T10_ | 1.06202  | -0.08681 | -0.5207  | 0.617391 | 0.867608 | DOWN | 235.0762 | 235.0759 | 235.0763 | 9.930908 | 9.827283 |
| 10783 | M1028T10 | 1.253391 | -0.32584 | -0.51978 | 0.61744  | 0.867611 | DOWN | 1028.301 | 1028.3   | 1028.302 | 9.821275 | 9.766367 |
| 10784 | M445T10_ | 1.16225  | -0.21692 | -0.52324 | 0.617498 | 0.867614 | DOWN | 445.1725 | 445.172  | 445.1729 | 9.954767 | 9.843367 |
| 10785 | M163T13  | 1.102263 | -0.14047 | -0.52533 | 0.617517 | 0.867616 | DOWN | 163.0752 | 163.0751 | 163.0753 | 12.62403 | 12.42808 |
| 10786 | M361T11_ | 1.128232 | -0.17406 | -0.52088 | 0.617568 | 0.867618 | DOWN | 361.2159 | 361.2158 | 361.2183 | 11.23303 | 10.94603 |
| 10787 | M253T14  | 1.210055 | -0.27507 | -0.51952 | 0.617617 | 0.867621 | DOWN | 253.2463 | 253.2459 | 253.2465 | 14.29936 | 14.26822 |
| 10788 | M342T10_ | 1.102352 | -0.14058 | -0.5236  | 0.617731 | 0.867628 | DOWN | 342.1629 | 342.1626 | 342.163  | 9.977442 | 9.859233 |
| 10789 | M371T11_ | 1.114691 | 0.156644 | 0.525916 | 0.617766 | 0.86763  | UP   | 370.8728 | 370.8726 | 370.8729 | 10.90519 | 10.879   |
| 10790 | M289T10_ | 1.274732 | -0.35019 | -0.52007 | 0.61781  | 0.867632 | DOWN | 289.0617 | 289.0569 | 289.0673 | 9.873758 | 9.830833 |
| 10791 | M730T10_ | 1.109463 | -0.14986 | -0.53079 | 0.617854 | 0.867634 | DOWN | 729.7375 | 729.7372 | 729.7381 | 9.970617 | 9.859233 |
| 10792 | M309T11_ | 1.171556 | 0.228426 | 0.521367 | 0.617949 | 0.86764  | UP   | 308.6464 | 308.6452 | 308.6468 | 10.93413 | 10.8646  |
| 10793 | M217T10_ | 1.119108 | 0.16235  | 0.536314 | 0.617959 | 0.86764  | UP   | 217.049  | 217.0488 | 217.0491 | 9.903283 | 9.79535  |
| 10794 | M234T11_ | 1.087529 | -0.12105 | -0.51878 | 0.617993 | 0.867642 | DOWN | 233.9585 | 233.9584 | 233.9587 | 10.89875 | 10.879   |
| 10795 | M672T10_ | 1.137532 | -0.18591 | -0.52428 | 0.618027 | 0.867644 | DOWN | 672.4103 | 672.4088 | 672.4154 | 10.008   | 9.916767 |
| 10796 | M963T11  | 1.099142 | -0.13638 | -0.51865 | 0.618113 | 0.867649 | DOWN | 962.5873 | 962.5864 | 962.592  | 10.91403 | 10.89355 |
| 10797 | M675T10_ | 1.275298 | -0.35083 | -0.52208 | 0.618119 | 0.867649 | DOWN | 674.8876 | 674.8842 | 674.8896 | 9.958517 | 9.8378   |
| 10798 | M352T10_ | 1.083239 | -0.11535 | -0.52267 | 0.618138 | 0.867651 | DOWN | 352.4986 | 352.4985 | 352.4987 | 9.84305  | 9.715683 |
| 10799 | M943T25  | 1.169381 | -0.22574 | -0.52032 | 0.618149 | 0.867651 | DOWN | 943.1727 | 943.1714 | 943.173  | 25.20833 | 25.11417 |
| 10800 | M199T10_ | 1.235046 | -0.30457 | -0.51874 | 0.61821  | 0.867655 | DOWN | 199.4451 | 199.4378 | 199.4454 | 9.8397   | 9.715683 |
| 10801 | M249T9_1 | 1.375528 | -0.45999 | -0.52127 | 0.618248 | 0.867657 | DOWN | 248.7497 | 248.7496 | 248.7499 | 9.064833 | 9.023483 |
| 10802 | M300T9_2 | 1.188038 | -0.24858 | -0.52054 | 0.618312 | 0.86766  | DOWN | 300.379  | 300.3789 | 300.3792 | 9.494433 | 9.416817 |
| 10803 | M247T11_ | 1.184452 | -0.24422 | -0.51827 | 0.618313 | 0.86766  | DOWN | 247.109  | 247.1089 | 247.1092 | 10.85428 | 10.83252 |
| 10804 | M552T11_ | 1.17795  | -0.23628 | -0.51822 | 0.61833  | 0.867661 | DOWN | 552.3514 | 552.3503 | 552.3523 | 11.03898 | 11.03245 |
| 10805 | M209T10_ | 1.081803 | -0.11344 | -0.52833 | 0.618421 | 0.867666 | DOWN | 209.0615 | 209.0614 | 209.0615 | 9.985733 | 9.8914   |
| 10806 | M386T10_ | 1.188633 | -0.2493  | -0.52882 | 0.618452 | 0.867668 | DOWN | 386.4826 | 386.4824 | 386.4827 | 10.00373 | 9.9009   |
| 10807 | M284T10_ | 1.133333 | -0.18057 | -0.5227  | 0.618467 | 0.867669 | DOWN | 283.5768 | 283.5765 | 283.5769 | 9.94785  | 9.843367 |
| 10808 | M441T12  | 1.073203 | -0.10192 | -0.51817 | 0.618542 | 0.867673 | DOWN | 441.3108 | 441.3105 | 441.3111 | 12.31038 | 12.29538 |
| 10809 | M358T11_ | 1.079163 | -0.10991 | -0.51741 | 0.618943 | 0.867696 | DOWN | 357.6686 | 357.6685 | 357.6693 | 10.892   | 10.8646  |
| 10810 | M276T10_ | 1.167821 | -0.22382 | -0.52533 | 0.618983 | 0.867698 | DOWN | 275.9487 | 275.9486 | 275.9488 | 9.8207   | 9.715683 |
| 10811 | M560T9_2 | 1.311434 | -0.39115 | -0.52065 | 0.618987 | 0.867698 | DOWN | 560.4607 | 560.4601 | 560.4622 | 9.24535  | 9.048117 |
| 10812 | M471T9_8 | 1.302354 | 0.381122 | 0.528763 | 0.618996 | 0.867699 | UP   | 471.354  | 471.3515 | 471.3544 | 8.979208 | 8.878667 |
| 10813 | M378T11_ | 1.110018 | -0.15058 | -0.51719 | 0.619036 | 0.867701 | DOWN | 377.8793 | 377.8789 | 377.8799 | 10.90765 | 10.88747 |
| 10814 | M270T11_ | 1.063063 | -0.08823 | -0.51932 | 0.619091 | 0.867704 | DOWN | 270.2875 | 270.2874 | 270.2876 | 10.89875 | 10.879   |

|       |           |          |          |          |          |          |      |          |          |          |          |          |
|-------|-----------|----------|----------|----------|----------|----------|------|----------|----------|----------|----------|----------|
| 10815 | M363T9_6  | 1.155752 | 0.208832 | 0.517053 | 0.619117 | 0.867706 | UP   | 362.7587 | 362.7585 | 362.7591 | 8.697675 | 8.60815  |
| 10816 | M397T11_  | 1.116659 | -0.15919 | -0.52777 | 0.619153 | 0.867708 | DOWN | 396.5028 | 396.5023 | 396.504  | 10.90548 | 10.8926  |
| 10817 | M398T10_  | 1.134439 | -0.18198 | -0.52003 | 0.619156 | 0.867708 | DOWN | 398.2796 | 398.2795 | 398.2796 | 9.938708 | 9.853533 |
| 10818 | M683T10_  | 1.218721 | -0.28537 | -0.52478 | 0.619164 | 0.867708 | DOWN | 683.4865 | 683.4861 | 683.4869 | 9.842    | 9.715683 |
| 10819 | M1185T45  | 1.128824 | 0.17482  | 0.518992 | 0.619358 | 0.867719 | UP   | 1184.846 | 1184.846 | 1184.847 | 44.9835  | 44.98333 |
| 10820 | M419T10_  | 1.119265 | 0.162551 | 0.525646 | 0.619386 | 0.867721 | UP   | 419.4263 | 419.4258 | 419.4266 | 9.931875 | 9.827283 |
| 10821 | M214T10_  | 1.09081  | 0.1254   | 0.516576 | 0.619425 | 0.867723 | UP   | 214.3545 | 214.3544 | 214.3622 | 9.810233 | 9.699733 |
| 10822 | M288T23_  | 1.240803 | 0.311274 | 0.516608 | 0.619439 | 0.867724 | UP   | 288.221  | 288.2148 | 288.2259 | 22.88583 | 22.8425  |
| 10823 | M303T9_2  | 1.159994 | -0.21412 | -0.52476 | 0.619705 | 0.867739 | DOWN | 303.4782 | 303.4776 | 303.4782 | 9.382183 | 9.20785  |
| 10824 | M1436T10_ | 1.1903   | -0.25133 | -0.52897 | 0.619756 | 0.867741 | DOWN | 1435.811 | 1435.81  | 1435.812 | 9.902117 | 9.822117 |
| 10825 | M572T11_  | 1.076058 | 0.105756 | 0.519322 | 0.619759 | 0.867742 | UP   | 572.2536 | 572.2524 | 572.2549 | 10.90548 | 10.88747 |
| 10826 | M182T10_  | 1.230313 | -0.29903 | -0.51607 | 0.619776 | 0.867742 | DOWN | 181.5794 | 181.5792 | 181.5795 | 9.960817 | 9.859233 |
| 10827 | M642T10_  | 1.141439 | 0.190854 | 0.517525 | 0.619907 | 0.86775  | UP   | 642.4937 | 642.4924 | 642.4939 | 10.27243 | 10.21468 |
| 10828 | M443T10_  | 1.240244 | 0.310624 | 0.518291 | 0.619937 | 0.867752 | UP   | 443.2455 | 443.2447 | 443.2467 | 9.946367 | 9.859233 |
| 10829 | M364T10_  | 1.298655 | 0.377018 | 0.53181  | 0.61997  | 0.867753 | UP   | 364.2968 | 364.2928 | 364.297  | 9.581417 | 9.447617 |
| 10830 | M708T10_  | 1.191216 | -0.25244 | -0.52459 | 0.620011 | 0.867756 | DOWN | 707.5328 | 707.5323 | 707.5355 | 9.802117 | 9.7124   |
| 10831 | M730T10_  | 1.149121 | -0.20053 | -0.5167  | 0.620015 | 0.867756 | DOWN | 730.1956 | 730.1952 | 730.1959 | 9.95385  | 9.843367 |
| 10832 | M321T27_  | 1.255762 | -0.32856 | -0.51719 | 0.620069 | 0.867759 | DOWN | 321.4375 | 321.4374 | 321.4377 | 26.79683 | 26.76683 |
| 10833 | M1742T10_ | 1.103385 | -0.14194 | -0.51711 | 0.620072 | 0.867759 | DOWN | 1742.376 | 1742.369 | 1742.377 | 9.960967 | 9.859233 |
| 10834 | M472T8    | 1.434554 | -0.5206  | -0.51559 | 0.620083 | 0.86776  | DOWN | 472.3568 | 472.3567 | 472.3568 | 7.5224   | 7.418917 |
| 10835 | M1429T10_ | 1.270333 | -0.34521 | -0.52054 | 0.62009  | 0.86776  | DOWN | 1428.644 | 1428.641 | 1428.645 | 9.942008 | 9.8914   |
| 10836 | M249T10_  | 1.122702 | -0.16698 | -0.51555 | 0.62013  | 0.867762 | DOWN | 249.1306 | 249.1303 | 249.1307 | 9.9351   | 9.827283 |
| 10837 | M722T10_  | 1.151512 | 0.20353  | 0.516093 | 0.62021  | 0.867767 | UP   | 722.3941 | 722.3937 | 722.3943 | 10.10793 | 9.98005  |
| 10838 | M495T19   | 1.102276 | -0.14049 | -0.51961 | 0.620218 | 0.867767 | DOWN | 495.3504 | 495.3499 | 495.3504 | 18.61442 | 18.58783 |
| 10839 | M1054T11_ | 1.094018 | -0.12964 | -0.51557 | 0.620226 | 0.867768 | DOWN | 1054.277 | 1054.277 | 1054.281 | 10.892   | 10.879   |
| 10840 | M489T11_  | 1.085021 | 0.117723 | 0.515654 | 0.620233 | 0.867768 | UP   | 488.5008 | 488.5004 | 488.5011 | 10.892   | 10.879   |
| 10841 | M341T10_  | 1.147833 | -0.19891 | -0.51881 | 0.620308 | 0.867772 | DOWN | 341.0857 | 341.082  | 341.086  | 9.944392 | 9.801917 |
| 10842 | M205T11_  | 1.102044 | 0.140182 | 0.516787 | 0.620319 | 0.867773 | UP   | 205.3689 | 205.3687 | 205.3692 | 10.90197 | 10.8646  |
| 10843 | M235T11_  | 1.293725 | 0.371531 | 0.521863 | 0.620531 | 0.867785 | UP   | 235.3082 | 235.3079 | 235.3084 | 10.89125 | 10.8646  |
| 10844 | M1507T10_ | 1.120651 | 0.164337 | 0.515965 | 0.620612 | 0.867789 | UP   | 1507.382 | 1507.381 | 1507.384 | 9.97155  | 9.859233 |
| 10845 | M759T10_  | 1.170705 | 0.227378 | 0.519309 | 0.620745 | 0.867797 | UP   | 758.6164 | 758.6147 | 758.6172 | 9.975217 | 9.8753   |
| 10846 | M471T8    | 1.423677 | -0.50962 | -0.51454 | 0.620786 | 0.867799 | DOWN | 471.3535 | 471.3534 | 471.3535 | 7.5224   | 7.418917 |
| 10847 | M735T11_  | 1.172469 | 0.22955  | 0.516048 | 0.620871 | 0.867804 | UP   | 734.7397 | 734.7394 | 734.7406 | 10.9348  | 10.90553 |
| 10848 | M653T11_  | 1.136194 | 0.184209 | 0.528436 | 0.620935 | 0.867807 | UP   | 653.0302 | 653.0288 | 653.0316 | 10.89728 | 10.83572 |
| 10849 | M654T10_  | 1.124096 | -0.16877 | -0.51523 | 0.620993 | 0.86781  | DOWN | 654.3051 | 654.304  | 654.3055 | 9.842    | 9.7124   |

|       |          |          |          |          |          |          |      |          |          |          |          |          |
|-------|----------|----------|----------|----------|----------|----------|------|----------|----------|----------|----------|----------|
| 10850 | M498T9_1 | 1.135477 | -0.1833  | -0.51422 | 0.621059 | 0.867814 | DOWN | 497.5165 | 497.516  | 497.5168 | 9.220975 | 9.145433 |
| 10851 | M219T7   | 1.207222 | -0.27169 | -0.52169 | 0.62107  | 0.867815 | DOWN | 218.9195 | 218.9194 | 218.9197 | 6.6336   | 6.47965  |
| 10852 | M224T19  | 1.058877 | -0.08254 | -0.52933 | 0.62107  | 0.867815 | DOWN | 224.0954 | 224.0953 | 224.0956 | 19.33733 | 19.28883 |
| 10853 | M1742T10 | 1.108742 | -0.14892 | -0.5221  | 0.621144 | 0.867819 | DOWN | 1742.446 | 1742.441 | 1742.45  | 9.952433 | 9.843367 |
| 10854 | M277T11_ | 1.338598 | 0.420723 | 0.529    | 0.621165 | 0.86782  | UP   | 276.639  | 276.6387 | 276.6391 | 10.86158 | 10.83572 |
| 10855 | M307T9_5 | 1.197144 | -0.2596  | -0.51718 | 0.621214 | 0.867823 | DOWN | 307.0935 | 307.0931 | 307.0938 | 9.3332   | 9.234417 |
| 10856 | M309T13_ | 1.17777  | 0.236058 | 0.523034 | 0.62132  | 0.867829 | UP   | 309.1306 | 309.1305 | 309.1307 | 13.37548 | 13.30282 |
| 10857 | M201T10_ | 1.143425 | -0.19336 | -0.51438 | 0.621323 | 0.867829 | DOWN | 201.4362 | 201.4361 | 201.4364 | 9.82645  | 9.728083 |
| 10858 | M509T11_ | 1.080098 | -0.11116 | -0.51588 | 0.621339 | 0.86783  | DOWN | 509.1684 | 509.1679 | 509.1689 | 10.89953 | 10.8646  |
| 10859 | M212T10_ | 1.126419 | 0.171744 | 0.51766  | 0.621343 | 0.86783  | UP   | 211.9761 | 211.9735 | 211.9764 | 9.932033 | 9.827283 |
| 10860 | M448T11_ | 1.12674  | 0.172154 | 0.518801 | 0.621563 | 0.867842 | UP   | 448.1728 | 448.1719 | 448.1732 | 10.90537 | 10.879   |
| 10861 | M166T10_ | 1.122047 | -0.16613 | -0.51957 | 0.621652 | 0.867847 | DOWN | 165.528  | 165.5279 | 165.5281 | 9.968992 | 9.859233 |
| 10862 | M539T10_ | 1.087196 | -0.12061 | -0.51552 | 0.621672 | 0.867848 | DOWN | 539.2916 | 539.2909 | 539.2919 | 9.9275   | 9.811217 |
| 10863 | M500T9_3 | 1.170483 | -0.2271  | -0.52195 | 0.621685 | 0.867849 | DOWN | 499.7701 | 499.7677 | 499.7709 | 9.1445   | 9.1011   |
| 10864 | M719T10_ | 1.1346   | -0.18218 | -0.52632 | 0.621695 | 0.86785  | DOWN | 718.7054 | 718.7051 | 718.7055 | 9.9847   | 9.8914   |
| 10865 | M473T10_ | 1.17025  | -0.22682 | -0.51793 | 0.621723 | 0.867851 | DOWN | 472.5872 | 472.587  | 472.5876 | 9.960967 | 9.8753   |
| 10866 | M524T10_ | 1.119801 | -0.16324 | -0.51936 | 0.621784 | 0.867855 | DOWN | 523.973  | 523.9728 | 523.9735 | 9.830083 | 9.715683 |
| 10867 | M334T10_ | 1.37235  | 0.456649 | 0.516236 | 0.621785 | 0.867855 | UP   | 334.3144 | 334.3143 | 334.3147 | 9.830558 | 9.728083 |
| 10868 | M1035T10 | 1.167848 | -0.22385 | -0.51934 | 0.62185  | 0.867858 | DOWN | 1034.907 | 1034.906 | 1034.908 | 9.9847   | 9.9009   |
| 10869 | M620T10_ | 1.168615 | 0.2248   | 0.51915  | 0.621936 | 0.867863 | UP   | 619.9573 | 619.9568 | 619.958  | 9.956417 | 9.859233 |
| 10870 | M552T9_9 | 1.186581 | 0.24681  | 0.518081 | 0.621959 | 0.867864 | UP   | 552.4486 | 552.4481 | 552.4488 | 8.996883 | 8.952283 |
| 10871 | M521T9_9 | 1.384273 | 0.469128 | 0.523616 | 0.622003 | 0.867867 | UP   | 521.3177 | 521.3166 | 521.3288 | 9.357458 | 9.089333 |
| 10872 | M463T11_ | 1.231431 | -0.30034 | -0.51344 | 0.622037 | 0.867869 | DOWN | 462.6308 | 462.6284 | 462.631  | 10.91642 | 10.89125 |
| 10873 | M405T10_ | 1.340966 | -0.42327 | -0.51856 | 0.622076 | 0.867871 | DOWN | 404.5838 | 404.5837 | 404.584  | 9.968992 | 9.8753   |
| 10874 | M220T9_1 | 1.239778 | -0.31008 | -0.51319 | 0.622223 | 0.867879 | DOWN | 220.1461 | 220.1447 | 220.1529 | 9.397575 | 9.174883 |
| 10875 | M163T10_ | 1.169461 | 0.225843 | 0.512264 | 0.62252  | 0.867896 | UP   | 162.7248 | 162.7244 | 162.7249 | 9.902408 | 9.827283 |
| 10876 | M495T29_ | 1.186029 | 0.246139 | 0.520029 | 0.622522 | 0.867896 | UP   | 495.327  | 495.3267 | 495.3272 | 28.80933 | 28.79983 |
| 10877 | M330T29_ | 1.278842 | -0.35484 | -0.51482 | 0.622525 | 0.867896 | DOWN | 330.5    | 330.4998 | 330.5    | 28.8195  | 28.79767 |
| 10878 | M391T11_ | 1.133334 | -0.18057 | -0.51266 | 0.622574 | 0.867899 | DOWN | 391.3675 | 391.3671 | 391.3696 | 10.90628 | 10.873   |
| 10879 | M474T40  | 1.219442 | -0.28622 | -0.52962 | 0.622602 | 0.8679   | DOWN | 474.2695 | 474.2692 | 474.2697 | 39.92067 | 39.57517 |
| 10880 | M211T11_ | 1.039237 | 0.055525 | 0.516796 | 0.622639 | 0.867902 | UP   | 210.8807 | 210.8805 | 210.8809 | 10.91376 | 10.88995 |
| 10881 | M247T11_ | 1.083107 | 0.115176 | 0.511722 | 0.622741 | 0.867908 | UP   | 247.4061 | 247.4058 | 247.4064 | 10.892   | 10.879   |
| 10882 | M425T11_ | 1.142965 | -0.19278 | -0.51371 | 0.622757 | 0.867909 | DOWN | 424.6907 | 424.6899 | 424.6912 | 10.90551 | 10.879   |
| 10883 | M246T10_ | 1.154856 | 0.207713 | 0.51238  | 0.62279  | 0.86791  | UP   | 246.3083 | 246.3081 | 246.3084 | 9.964258 | 9.843367 |
| 10884 | M391T22  | 1.179329 | 0.237966 | 0.519907 | 0.623023 | 0.867923 | UP   | 391.4155 | 391.415  | 391.4158 | 22.13283 | 22.045   |

|       |          |          |          |          |          |          |      |          |          |          |          |          |
|-------|----------|----------|----------|----------|----------|----------|------|----------|----------|----------|----------|----------|
| 10885 | M379T9_1 | 1.168631 | 0.224819 | 0.511323 | 0.623106 | 0.867928 | UP   | 379.4387 | 379.4381 | 379.4392 | 9.075083 | 9.031633 |
| 10886 | M712T9_1 | 1.326861 | -0.40802 | -0.51117 | 0.623121 | 0.867929 | DOWN | 711.9333 | 711.933  | 711.9338 | 8.67005  | 8.6275   |
| 10887 | M312T10_ | 1.172376 | 0.229436 | 0.512406 | 0.62316  | 0.867931 | UP   | 311.5634 | 311.563  | 311.5637 | 9.984083 | 9.8753   |
| 10888 | M857T10_ | 1.193195 | -0.25483 | -0.51089 | 0.623223 | 0.867934 | DOWN | 856.9374 | 856.9357 | 856.9395 | 9.933267 | 9.811217 |
| 10889 | M173T10_ | 1.150802 | -0.20264 | -0.52567 | 0.623319 | 0.86794  | DOWN | 173.1673 | 173.1672 | 173.1676 | 9.872933 | 9.759383 |
| 10890 | M718T10_ | 1.108804 | -0.149   | -0.5115  | 0.623375 | 0.867943 | DOWN | 717.9876 | 717.9873 | 717.9884 | 9.818508 | 9.715683 |
| 10891 | M374T11_ | 1.138858 | -0.18759 | -0.51414 | 0.623422 | 0.867946 | DOWN | 374.4171 | 374.4157 | 374.4195 | 10.90519 | 10.879   |
| 10892 | M171T9_2 | 1.149292 | -0.20075 | -0.51495 | 0.62343  | 0.867946 | DOWN | 170.8723 | 170.8717 | 170.8726 | 9.332617 | 9.219483 |
| 10893 | M1635T10 | 1.19829  | 0.260977 | 0.518844 | 0.623469 | 0.867948 | UP   | 1634.514 | 1634.51  | 1634.52  | 9.928667 | 9.843367 |
| 10894 | M363T32_ | 1.236995 | -0.30684 | -0.51256 | 0.623495 | 0.86795  | DOWN | 363.3006 | 363.3005 | 363.3007 | 31.73983 | 31.73867 |
| 10895 | M430T10_ | 1.047917 | -0.06752 | -0.51169 | 0.623525 | 0.867951 | DOWN | 430.244  | 430.2436 | 430.2487 | 9.582792 | 9.146383 |
| 10896 | M368T11_ | 1.162594 | 0.217348 | 0.513603 | 0.623552 | 0.867953 | UP   | 368.0227 | 368.0226 | 368.0234 | 10.90522 | 10.879   |
| 10897 | M1333T10 | 1.16893  | -0.22519 | -0.51078 | 0.623569 | 0.867954 | DOWN | 1332.745 | 1332.742 | 1332.745 | 9.989483 | 9.956417 |
| 10898 | M1342T10 | 1.264386 | 0.338437 | 0.523833 | 0.623631 | 0.867957 | UP   | 1342.492 | 1342.49  | 1342.494 | 9.902617 | 9.806367 |
| 10899 | M892T10_ | 1.273436 | -0.34873 | -0.51605 | 0.623639 | 0.867958 | DOWN | 892.1133 | 892.1118 | 892.1147 | 9.504583 | 9.416817 |
| 10900 | M696T18  | 1.119174 | -0.16243 | -0.51044 | 0.623773 | 0.867965 | DOWN | 696.4318 | 696.4315 | 696.4319 | 18.09917 | 17.86917 |
| 10901 | M993T11_ | 1.137907 | -0.18638 | -0.51365 | 0.623839 | 0.867969 | DOWN | 993.3223 | 993.3221 | 993.3239 | 10.9198  | 10.89355 |
| 10902 | M351T9_2 | 1.174068 | -0.23152 | -0.51214 | 0.623853 | 0.867969 | DOWN | 350.6215 | 350.6209 | 350.6217 | 9.317    | 9.234417 |
| 10903 | M205T10_ | 1.12451  | -0.1693  | -0.50986 | 0.623966 | 0.867976 | DOWN | 204.7041 | 204.7041 | 204.7042 | 9.8207   | 9.715683 |
| 10904 | M551T9_2 | 1.14807  | 0.199211 | 0.512022 | 0.624191 | 0.867988 | UP   | 550.8171 | 550.8165 | 550.8172 | 9.3172   | 9.275917 |
| 10905 | M294T10_ | 1.100369 | -0.13799 | -0.51341 | 0.624199 | 0.867989 | DOWN | 294.3703 | 294.3701 | 294.3704 | 9.948875 | 9.843367 |
| 10906 | M388T10_ | 1.656889 | -0.72848 | -0.50938 | 0.624263 | 0.867992 | DOWN | 387.7    | 387.6913 | 387.7004 | 9.923708 | 9.79535  |
| 10907 | M563T10_ | 1.120641 | -0.16432 | -0.51201 | 0.624326 | 0.867996 | DOWN | 562.9561 | 562.9556 | 562.957  | 9.939575 | 9.827283 |
| 10908 | M945T10  | 1.126582 | 0.171953 | 0.518818 | 0.624341 | 0.867996 | UP   | 945.4462 | 945.4431 | 945.4475 | 9.987092 | 9.8753   |
| 10909 | M389T9_3 | 1.067083 | -0.09367 | -0.50924 | 0.624346 | 0.867997 | DOWN | 389.2542 | 389.2535 | 389.2543 | 8.985492 | 8.892117 |
| 10910 | M346T42  | 1.120576 | -0.16424 | -0.50963 | 0.624428 | 0.868001 | DOWN | 346.186  | 346.1859 | 346.1861 | 41.647   | 41.575   |
| 10911 | M432T10_ | 1.223843 | 0.291419 | 0.50979  | 0.624439 | 0.868002 | UP   | 431.956  | 431.9556 | 431.9564 | 9.968992 | 9.859233 |
| 10912 | M427T10_ | 1.118725 | -0.16186 | -0.51209 | 0.624554 | 0.868008 | DOWN | 427.2678 | 427.2673 | 427.2686 | 9.972917 | 9.859233 |
| 10913 | M555T9_2 | 1.091945 | -0.1269  | -0.51051 | 0.624615 | 0.868011 | DOWN | 555.2763 | 555.2756 | 555.277  | 9.461042 | 9.38595  |
| 10914 | M460T10_ | 1.175577 | 0.233369 | 0.519601 | 0.624647 | 0.868013 | UP   | 459.6054 | 459.6053 | 459.6056 | 9.98345  | 9.8753   |
| 10915 | M372T9_6 | 1.130923 | -0.1775  | -0.51995 | 0.624749 | 0.868019 | DOWN | 372.4861 | 372.4859 | 372.4868 | 9.303167 | 9.06315  |
| 10916 | M396T39_ | 1.172778 | -0.22993 | -0.51565 | 0.624806 | 0.868022 | DOWN | 396.2226 | 396.2225 | 396.2227 | 39.302   | 39.187   |
| 10917 | M731T19  | 1.194253 | -0.25611 | -0.51806 | 0.624886 | 0.868026 | DOWN | 731.4512 | 731.4512 | 731.4513 | 19.431   | 19.41867 |
| 10918 | M477T9_4 | 1.147199 | -0.19812 | -0.51362 | 0.624921 | 0.868028 | DOWN | 476.8204 | 476.8192 | 476.8291 | 8.890775 | 8.765117 |
| 10919 | M775T10_ | 1.04709  | -0.06639 | -0.50851 | 0.624942 | 0.86803  | DOWN | 774.884  | 774.8831 | 774.8846 | 9.953367 | 9.859233 |



|       |          |          |          |          |          |          |      |          |          |          |          |          |
|-------|----------|----------|----------|----------|----------|----------|------|----------|----------|----------|----------|----------|
| 10920 | M641T9_2 | 1.12045  | -0.16408 | -0.50837 | 0.625069 | 0.868036 | DOWN | 641.2638 | 641.2631 | 641.2645 | 9.485058 | 9.40135  |
| 10921 | M482T11_ | 1.184905 | 0.244772 | 0.525714 | 0.625106 | 0.868039 | UP   | 482.1153 | 482.1148 | 482.1156 | 10.87765 | 10.8214  |
| 10922 | M438T20  | 1.076034 | 0.105724 | 0.508058 | 0.625138 | 0.86804  | UP   | 438.3684 | 438.368  | 438.3693 | 20.245   | 20.23033 |
| 10923 | M404T10_ | 1.139335 | -0.18819 | -0.50918 | 0.625244 | 0.868046 | DOWN | 403.7125 | 403.7124 | 403.7127 | 9.968992 | 9.8753   |
| 10924 | M391T11_ | 1.069897 | 0.097472 | 0.508301 | 0.625313 | 0.86805  | UP   | 390.5795 | 390.5792 | 390.5797 | 10.89875 | 10.879   |
| 10925 | M200T10_ | 1.139541 | -0.18845 | -0.5123  | 0.625396 | 0.868054 | DOWN | 199.6288 | 199.6287 | 199.6289 | 9.964092 | 9.859233 |
| 10926 | M1862T10 | 1.155851 | -0.20896 | -0.51299 | 0.625421 | 0.868056 | DOWN | 1861.771 | 1861.77  | 1861.775 | 9.821225 | 9.73145  |
| 10927 | M838T10_ | 1.142555 | -0.19226 | -0.51647 | 0.625487 | 0.86806  | DOWN | 838.2739 | 838.2734 | 838.2746 | 9.979667 | 9.8753   |
| 10928 | M797T10_ | 1.206399 | -0.27071 | -0.50807 | 0.625596 | 0.868066 | DOWN | 796.5791 | 796.5785 | 796.5795 | 9.896717 | 9.859667 |
| 10929 | M401T27_ | 1.143473 | -0.19342 | -0.51483 | 0.6256   | 0.868066 | DOWN | 401.2942 | 401.294  | 401.2944 | 26.80983 | 26.78333 |
| 10930 | M570T10_ | 1.081115 | -0.11252 | -0.51012 | 0.625619 | 0.868067 | DOWN | 569.9136 | 569.9132 | 569.914  | 9.932033 | 9.827283 |
| 10931 | M374T10_ | 1.344897 | -0.4275  | -0.50968 | 0.625629 | 0.868067 | DOWN | 374.1709 | 374.1705 | 374.171  | 9.566767 | 9.478833 |
| 10932 | M367T19  | 1.167075 | 0.222897 | 0.512766 | 0.625755 | 0.868074 | UP   | 367.1726 | 367.1725 | 367.1726 | 19.30225 | 19.14367 |
| 10933 | M564T43_ | 1.161461 | -0.21594 | -0.52471 | 0.625765 | 0.868075 | DOWN | 564.3375 | 564.3372 | 564.3378 | 42.76917 | 42.52433 |
| 10934 | M594T9_1 | 1.157747 | -0.21132 | -0.50736 | 0.62577  | 0.868075 | DOWN | 594.1962 | 594.1956 | 594.197  | 9.29795  | 9.0637   |
| 10935 | M444T10_ | 1.181052 | -0.24007 | -0.50865 | 0.626042 | 0.86809  | DOWN | 444.425  | 444.4247 | 444.4251 | 9.9468   | 9.843367 |
| 10936 | M1046T10 | 1.147059 | -0.19794 | -0.51017 | 0.626045 | 0.86809  | DOWN | 1046.431 | 1046.43  | 1046.431 | 9.82645  | 9.715683 |
| 10937 | M182T10_ | 1.24869  | 0.320415 | 0.507402 | 0.626103 | 0.868093 | UP   | 181.5552 | 181.555  | 181.5553 | 9.965717 | 9.869467 |
| 10938 | M662T11_ | 1.225011 | -0.29279 | -0.50795 | 0.626325 | 0.868106 | DOWN | 662.3331 | 662.3321 | 662.3339 | 10.89125 | 10.85018 |
| 10939 | M203T6_1 | 1.094587 | -0.13039 | -0.50691 | 0.626386 | 0.868109 | DOWN | 203.0078 | 203.0077 | 203.0079 | 5.503475 | 5.45645  |
| 10940 | M453T9_3 | 1.145006 | 0.195355 | 0.513553 | 0.626454 | 0.868113 | UP   | 452.6949 | 452.684  | 452.6957 | 9.3297   | 9.1445   |
| 10941 | M749T10_ | 1.044106 | 0.062269 | 0.522367 | 0.626461 | 0.868113 | UP   | 748.7806 | 748.7786 | 748.7817 | 9.83135  | 9.715683 |
| 10942 | M442T10_ | 1.358568 | 0.442087 | 0.521466 | 0.626469 | 0.868113 | UP   | 442.3471 | 442.3466 | 442.3475 | 10.43278 | 10.3771  |
| 10943 | M651T10_ | 1.141012 | 0.190314 | 0.507172 | 0.626475 | 0.868114 | UP   | 650.7587 | 650.7582 | 650.7591 | 9.95385  | 9.843367 |
| 10944 | M402T10_ | 1.154829 | 0.207679 | 0.517374 | 0.626513 | 0.868116 | UP   | 401.6704 | 401.6698 | 401.6751 | 9.929542 | 9.827283 |
| 10945 | M289T39  | 1.029958 | -0.04259 | -0.5211  | 0.626534 | 0.868117 | DOWN | 289.1642 | 289.1641 | 289.1645 | 38.79108 | 38.69767 |
| 10946 | M449T10_ | 1.150341 | 0.202062 | 0.506909 | 0.626536 | 0.868117 | UP   | 449.1433 | 449.1429 | 449.1436 | 9.968992 | 9.859233 |
| 10947 | M756T9_3 | 1.172331 | 0.22938  | 0.521253 | 0.626593 | 0.86812  | UP   | 755.8214 | 755.8213 | 755.8218 | 9.42045  | 9.3834   |
| 10948 | M225T10_ | 1.208171 | 0.272825 | 0.508063 | 0.626677 | 0.868125 | UP   | 224.7328 | 224.7328 | 224.733  | 9.95825  | 9.8753   |
| 10949 | M719T9_1 | 1.073847 | 0.102788 | 0.505685 | 0.626728 | 0.868128 | UP   | 718.5587 | 718.5578 | 718.56   | 9.478517 | 9.416817 |
| 10950 | M912T10_ | 1.135337 | -0.18312 | -0.50654 | 0.626772 | 0.86813  | DOWN | 911.537  | 911.536  | 911.5374 | 9.59825  | 9.478833 |
| 10951 | M501T9_1 | 1.251761 | 0.32396  | 0.521407 | 0.626823 | 0.868133 | UP   | 500.7725 | 500.771  | 500.7728 | 9.365833 | 9.234417 |
| 10952 | M600T10_ | 1.203809 | -0.26761 | -0.50576 | 0.626848 | 0.868134 | DOWN | 600.233  | 600.2327 | 600.2334 | 9.760008 | 9.65225  |
| 10953 | M766T10_ | 1.115415 | 0.157581 | 0.505882 | 0.626991 | 0.868142 | UP   | 765.9192 | 765.9189 | 765.9198 | 10.16588 | 10.08517 |
| 10954 | M270T10_ | 1.119901 | 0.163371 | 0.51352  | 0.626992 | 0.868142 | UP   | 270.1597 | 270.1596 | 270.1599 | 9.74925  | 9.636483 |

|       |          |          |          |          |          |          |      |          |          |          |          |          |
|-------|----------|----------|----------|----------|----------|----------|------|----------|----------|----------|----------|----------|
| 10955 | M552T9_2 | 1.268876 | 0.343551 | 0.508291 | 0.627064 | 0.868146 | UP   | 551.6971 | 551.6941 | 551.6996 | 9.17485  | 9.129317 |
| 10956 | M616T10_ | 1.254868 | 0.327535 | 0.522264 | 0.62713  | 0.86815  | UP   | 616.0713 | 616.0704 | 616.0761 | 9.818525 | 9.73145  |
| 10957 | M303T10_ | 1.213918 | -0.27967 | -0.50818 | 0.627206 | 0.868154 | DOWN | 302.883  | 302.8828 | 302.8832 | 9.983467 | 9.8914   |
| 10958 | M230T14_ | 1.105936 | -0.14527 | -0.50832 | 0.627277 | 0.868158 | DOWN | 230.0482 | 230.048  | 230.0485 | 13.5805  | 13.49257 |
| 10959 | M1297T10 | 1.103392 | 0.141946 | 0.507674 | 0.627311 | 0.86816  | UP   | 1296.882 | 1296.88  | 1296.884 | 9.979325 | 9.859233 |
| 10960 | M380T10_ | 1.219249 | -0.28599 | -0.50476 | 0.627422 | 0.868166 | DOWN | 379.8442 | 379.8421 | 379.8465 | 9.90295  | 9.779267 |
| 10961 | M631T10_ | 1.15361  | -0.20616 | -0.50648 | 0.627426 | 0.868166 | DOWN | 631.2254 | 631.2241 | 631.2266 | 9.9351   | 9.827283 |
| 10962 | M674T10_ | 1.263494 | -0.33742 | -0.50451 | 0.627505 | 0.86817  | DOWN | 674.4483 | 674.4479 | 674.4486 | 9.91765  | 9.811217 |
| 10963 | M1862T10 | 1.320831 | 0.401445 | 0.523078 | 0.627589 | 0.868175 | UP   | 1862.409 | 1862.406 | 1862.413 | 9.8207   | 9.728083 |
| 10964 | M333T10_ | 1.043529 | 0.061471 | 0.505578 | 0.627672 | 0.868179 | UP   | 332.61   | 332.6098 | 332.6106 | 9.843742 | 9.715683 |
| 10965 | M623T9_1 | 1.291152 | -0.36866 | -0.50501 | 0.627783 | 0.868185 | DOWN | 622.9795 | 622.9789 | 622.9803 | 9.250817 | 9.234417 |
| 10966 | M201T9_1 | 1.525467 | -0.60925 | -0.51696 | 0.627873 | 0.86819  | DOWN | 200.9565 | 200.956  | 200.9584 | 9.45945  | 9.388367 |
| 10967 | M552T11_ | 1.15194  | 0.204066 | 0.511814 | 0.627978 | 0.868196 | UP   | 552.3006 | 552.3003 | 552.302  | 11.32458 | 11.3006  |
| 10968 | M375T11_ | 1.155177 | -0.20811 | -0.50845 | 0.628039 | 0.868199 | DOWN | 374.7297 | 374.7296 | 374.7299 | 10.91478 | 10.879   |
| 10969 | M339T9_5 | 1.410087 | 0.495785 | 0.520015 | 0.628055 | 0.8682   | UP   | 339.2072 | 339.2007 | 339.2078 | 9.354867 | 9.235933 |
| 10970 | M303T10_ | 1.16433  | 0.2195   | 0.504915 | 0.628122 | 0.868204 | UP   | 302.6198 | 302.6195 | 302.6199 | 9.923158 | 9.900133 |
| 10971 | M881T10_ | 1.198097 | 0.260744 | 0.506502 | 0.628203 | 0.868208 | UP   | 881.1165 | 881.1149 | 881.1179 | 9.968992 | 9.859233 |
| 10972 | M279T10_ | 1.251773 | 0.323974 | 0.503325 | 0.628362 | 0.868217 | UP   | 278.989  | 278.9888 | 278.9891 | 9.93625  | 9.827283 |
| 10973 | M481T8   | 1.448716 | -0.53477 | -0.50321 | 0.628454 | 0.868222 | DOWN | 481.2609 | 481.2609 | 481.2611 | 7.706    | 7.564033 |
| 10974 | M291T11_ | 1.207337 | 0.271828 | 0.506117 | 0.628482 | 0.868224 | UP   | 291.164  | 291.1637 | 291.1651 | 10.94208 | 10.83572 |
| 10975 | M374T9_5 | 1.126994 | -0.17248 | -0.51034 | 0.628586 | 0.868229 | DOWN | 373.9825 | 373.9824 | 373.9827 | 9.304633 | 9.1011   |
| 10976 | M659T29  | 1.269334 | -0.34407 | -0.50529 | 0.62862  | 0.868231 | DOWN | 659.4916 | 659.4913 | 659.4917 | 28.80867 | 28.783   |
| 10977 | M375T11_ | 1.090135 | -0.12451 | -0.50522 | 0.628829 | 0.868242 | DOWN | 375.2177 | 375.2174 | 375.2178 | 10.90628 | 10.879   |
| 10978 | M381T18  | 1.150218 | 0.201907 | 0.51388  | 0.628845 | 0.868243 | UP   | 381.311  | 381.3107 | 381.3113 | 17.9805  | 17.91767 |
| 10979 | M289T44  | 1.232053 | -0.30106 | -0.50255 | 0.628846 | 0.868243 | DOWN | 289.1643 | 289.1641 | 289.1644 | 44.18558 | 43.70383 |
| 10980 | M444T10_ | 1.139336 | -0.18819 | -0.50508 | 0.628919 | 0.868247 | DOWN | 443.941  | 443.9405 | 443.9416 | 9.94785  | 9.827283 |
| 10981 | M501T11_ | 1.099489 | -0.13683 | -0.51    | 0.628992 | 0.868251 | DOWN | 501.1886 | 501.1883 | 501.1891 | 10.92598 | 10.90553 |
| 10982 | M300T10_ | 1.060578 | -0.08485 | -0.51326 | 0.628999 | 0.868252 | DOWN | 300.1972 | 300.197  | 300.1974 | 9.958617 | 9.843367 |
| 10983 | M286T24  | 1.183758 | 0.243375 | 0.514887 | 0.629066 | 0.868255 | UP   | 286.2738 | 286.2736 | 286.2739 | 23.95    | 23.75383 |
| 10984 | M683T11_ | 1.140685 | 0.189901 | 0.502302 | 0.629094 | 0.868257 | UP   | 682.5616 | 682.5611 | 682.5621 | 10.8848  | 10.85838 |
| 10985 | M541T10_ | 1.361213 | 0.444893 | 0.502671 | 0.629118 | 0.868258 | UP   | 541.1861 | 541.1858 | 541.1862 | 9.750783 | 9.696683 |
| 10986 | M290T23_ | 1.070854 | -0.09876 | -0.51423 | 0.629225 | 0.868264 | DOWN | 290.4379 | 290.4379 | 290.4381 | 22.90025 | 22.88567 |
| 10987 | M250T15  | 1.142942 | 0.192752 | 0.504623 | 0.62931  | 0.868269 | UP   | 250.1071 | 250.1069 | 250.1077 | 14.66334 | 14.61788 |
| 10988 | M451T10_ | 1.215931 | -0.28206 | -0.5049  | 0.629483 | 0.868278 | DOWN | 451.3442 | 451.344  | 451.3453 | 9.536783 | 9.432533 |
| 10989 | M237T10_ | 1.177522 | -0.23575 | -0.5027  | 0.6295   | 0.868279 | DOWN | 237.4693 | 237.4692 | 237.4695 | 9.939575 | 9.92825  |

|       |          |          |          |          |          |          |      |          |          |          |          |          |
|-------|----------|----------|----------|----------|----------|----------|------|----------|----------|----------|----------|----------|
| 10990 | M256T10_ | 1.158891 | 0.212745 | 0.504075 | 0.629601 | 0.868284 | UP   | 256.3305 | 256.3302 | 256.3308 | 9.958617 | 9.859233 |
| 10991 | M474T10_ | 1.196924 | -0.25933 | -0.50397 | 0.629619 | 0.868285 | DOWN | 474.4165 | 474.4162 | 474.4168 | 9.956417 | 9.843367 |
| 10992 | M324T9_1 | 1.066474 | -0.09285 | -0.50436 | 0.629666 | 0.868288 | DOWN | 324.42   | 324.4198 | 324.4201 | 8.810233 | 8.715883 |
| 10993 | M227T9_4 | 1.219315 | -0.28607 | -0.50193 | 0.629695 | 0.86829  | DOWN | 226.8202 | 226.8169 | 226.8204 | 9.2946   | 9.098833 |
| 10994 | M907T26_ | 1.114866 | -0.15687 | -0.50204 | 0.629695 | 0.86829  | DOWN | 906.6363 | 906.636  | 906.637  | 25.59067 | 25.56417 |
| 10995 | M454T10_ | 1.190808 | -0.25194 | -0.50704 | 0.629722 | 0.868291 | DOWN | 454.0358 | 454.0347 | 454.0364 | 9.951283 | 9.869467 |
| 10996 | M699T10_ | 1.138391 | 0.186996 | 0.501206 | 0.629758 | 0.868293 | UP   | 699.4888 | 699.4884 | 699.4916 | 9.871042 | 9.7634   |
| 10997 | M653T9_1 | 1.218401 | 0.284989 | 0.512605 | 0.629768 | 0.868294 | UP   | 653.3346 | 653.3345 | 653.3354 | 9.224517 | 9.18975  |
| 10998 | M288T23_ | 1.423588 | 0.509532 | 0.501171 | 0.629777 | 0.868294 | UP   | 288.3369 | 288.3348 | 288.344  | 22.94367 | 22.828   |
| 10999 | M352T11_ | 1.285    | 0.361769 | 0.520302 | 0.629844 | 0.868298 | UP   | 352.0386 | 352.0371 | 352.0394 | 10.93338 | 10.90553 |
| 11000 | M486T28  | 1.135058 | -0.18277 | -0.50463 | 0.629866 | 0.868299 | DOWN | 486.3568 | 486.3564 | 486.3576 | 28.28083 | 28.274   |
| 11001 | M252T11_ | 1.11492  | 0.15694  | 0.501126 | 0.629899 | 0.868301 | UP   | 252.1015 | 252.1012 | 252.1016 | 10.91642 | 10.87487 |
| 11002 | M402T27_ | 1.244369 | -0.31541 | -0.50254 | 0.6299   | 0.868301 | DOWN | 401.5451 | 401.5449 | 401.5452 | 26.79783 | 26.76617 |
| 11003 | M574T30  | 1.153757 | -0.20634 | -0.505   | 0.630086 | 0.868311 | DOWN | 574.4427 | 574.4419 | 574.4436 | 30.2805  | 30.26467 |
| 11004 | M542T29  | 1.17445  | -0.23199 | -0.50059 | 0.630143 | 0.868314 | DOWN | 541.8519 | 541.8512 | 541.852  | 28.54733 | 28.51083 |
| 11005 | M472T9_1 | 1.336688 | 0.418663 | 0.511406 | 0.630149 | 0.868314 | UP   | 472.3575 | 472.3565 | 472.3578 | 8.954767 | 8.878667 |
| 11006 | M251T10_ | 1.280837 | 0.357086 | 0.513879 | 0.630332 | 0.868324 | UP   | 250.9476 | 250.947  | 250.9481 | 9.969158 | 9.859233 |
| 11007 | M329T21_ | 1.094096 | 0.12974  | 0.500332 | 0.630382 | 0.868327 | UP   | 329.316  | 329.3158 | 329.3161 | 21.37117 | 21.363   |
| 11008 | M354T19  | 1.123279 | -0.16772 | -0.5154  | 0.630404 | 0.868328 | DOWN | 354.2216 | 354.2214 | 354.2222 | 19.32967 | 19.27483 |
| 11009 | M597T10_ | 1.171435 | 0.228276 | 0.50247  | 0.630438 | 0.86833  | UP   | 596.6297 | 596.6282 | 596.6303 | 9.916525 | 9.827283 |
| 11010 | M244T9_5 | 1.336241 | -0.41818 | -0.50179 | 0.63045  | 0.868331 | DOWN | 243.7923 | 243.7897 | 243.7932 | 9.2709   | 9.219483 |
| 11011 | M166T24  | 1.060026 | 0.084099 | 0.500931 | 0.630461 | 0.868331 | UP   | 166.0986 | 166.0985 | 166.0986 | 23.68925 | 23.65833 |
| 11012 | M651T9_2 | 1.126319 | 0.171616 | 0.500349 | 0.630499 | 0.868333 | UP   | 651.4798 | 651.4789 | 651.4802 | 9.481367 | 9.370583 |
| 11013 | M415T41_ | 1.074211 | -0.10328 | -0.50195 | 0.630558 | 0.868336 | DOWN | 415.2322 | 415.2321 | 415.2323 | 40.66867 | 40.525   |
| 11014 | M478T40_ | 1.042282 | 0.059745 | 0.514859 | 0.630575 | 0.868337 | UP   | 478.2644 | 478.2642 | 478.2646 | 40.007   | 39.9925  |
| 11015 | M633T10_ | 1.181857 | -0.24106 | -0.50194 | 0.630579 | 0.868338 | DOWN | 632.8974 | 632.8968 | 632.8986 | 9.943183 | 9.827283 |
| 11016 | M734T10_ | 1.139334 | 0.188191 | 0.506685 | 0.630623 | 0.86834  | UP   | 734.4873 | 734.4865 | 734.4879 | 9.650367 | 9.556217 |
| 11017 | M359T10_ | 1.138032 | 0.186541 | 0.504102 | 0.630635 | 0.868341 | UP   | 359.0032 | 359.0026 | 359.0042 | 9.968992 | 9.843367 |
| 11018 | M334T10_ | 1.061573 | 0.086204 | 0.500622 | 0.630715 | 0.868345 | UP   | 333.7959 | 333.7958 | 333.7972 | 9.828642 | 9.699733 |
| 11019 | M262T10_ | 1.197266 | 0.259744 | 0.500914 | 0.630762 | 0.868347 | UP   | 262.2033 | 262.203  | 262.2035 | 9.956417 | 9.843367 |
| 11020 | M220T10_ | 1.16586  | -0.22139 | -0.49961 | 0.6308   | 0.86835  | DOWN | 220.1785 | 220.1781 | 220.186  | 9.830283 | 9.7124   |
| 11021 | M373T40  | 1.04267  | -0.06028 | -0.51654 | 0.630808 | 0.86835  | DOWN | 373.2218 | 373.2218 | 373.2221 | 40.16517 | 40.165   |
| 11022 | M869T12_ | 1.166804 | -0.22256 | -0.49981 | 0.630883 | 0.868354 | DOWN | 869.3999 | 869.3995 | 869.4    | 12.09943 | 12.0761  |
| 11023 | M551T10_ | 1.070066 | -0.0977  | -0.5023  | 0.630914 | 0.868356 | DOWN | 551.248  | 551.2478 | 551.2482 | 9.9091   | 9.79535  |
| 11024 | M366T10_ | 1.051595 | -0.07258 | -0.50609 | 0.630917 | 0.868356 | DOWN | 366.2307 | 366.2305 | 366.2309 | 9.8207   | 9.715683 |

|       |          |          |          |          |          |          |      |          |          |          |          |          |
|-------|----------|----------|----------|----------|----------|----------|------|----------|----------|----------|----------|----------|
| 11025 | M497T9_1 | 1.204063 | 0.267911 | 0.502333 | 0.630919 | 0.868356 | UP   | 497.4373 | 497.4362 | 497.4379 | 9.170442 | 9.132267 |
| 11026 | M519T10_ | 1.154731 | 0.207557 | 0.50881  | 0.63096  | 0.868358 | UP   | 519.4058 | 519.4047 | 519.4061 | 9.979342 | 9.8753   |
| 11027 | M366T9_9 | 1.139413 | -0.18829 | -0.50261 | 0.630971 | 0.868359 | DOWN | 366.2968 | 366.2967 | 366.2972 | 9.253508 | 9.174883 |
| 11028 | M218T11_ | 1.082816 | -0.11479 | -0.5     | 0.631017 | 0.868361 | DOWN | 217.5866 | 217.5846 | 217.5868 | 10.90375 | 10.88995 |
| 11029 | M440T29_ | 1.273532 | -0.34884 | -0.50166 | 0.631043 | 0.868363 | DOWN | 439.9964 | 439.9959 | 439.9965 | 28.83467 | 28.79767 |
| 11030 | M658T10_ | 1.04268  | 0.060296 | 0.516831 | 0.631067 | 0.868364 | UP   | 657.6339 | 657.6333 | 657.636  | 9.8397   | 9.715683 |
| 11031 | M345T9_1 | 1.087699 | -0.12128 | -0.50095 | 0.631135 | 0.868368 | DOWN | 345.2382 | 345.238  | 345.2386 | 9.3332   | 9.234417 |
| 11032 | M225T45_ | 1.146108 | 0.196743 | 0.499457 | 0.631182 | 0.86837  | UP   | 225.1119 | 225.1119 | 225.1119 | 44.854   | 44.73917 |
| 11033 | M578T11_ | 1.085162 | -0.11791 | -0.50453 | 0.63128  | 0.868376 | DOWN | 578.4219 | 578.4214 | 578.4221 | 10.5188  | 10.47223 |
| 11034 | M191T10_ | 1.12704  | -0.17254 | -0.50308 | 0.631346 | 0.868379 | DOWN | 190.6945 | 190.6942 | 190.6947 | 9.985117 | 9.8753   |
| 11035 | M540T9_3 | 1.103997 | -0.14274 | -0.49905 | 0.631434 | 0.868384 | DOWN | 540.363  | 540.3621 | 540.3633 | 8.810442 | 8.715883 |
| 11036 | M397T10_ | 1.046063 | -0.06497 | -0.49992 | 0.631445 | 0.868384 | DOWN | 397.0766 | 397.0763 | 397.0767 | 9.917167 | 9.811217 |
| 11037 | M1767T10 | 1.099265 | -0.13654 | -0.49878 | 0.631466 | 0.868386 | DOWN | 1766.778 | 1766.775 | 1766.779 | 9.808967 | 9.715683 |
| 11038 | M280T11_ | 1.184517 | 0.244299 | 0.502887 | 0.631553 | 0.86839  | UP   | 280.3728 | 280.3726 | 280.3734 | 10.90481 | 10.85018 |
| 11039 | M530T11  | 1.261617 | 0.335274 | 0.510365 | 0.631638 | 0.868395 | UP   | 530.3182 | 530.3177 | 530.3191 | 11.32145 | 11.28597 |
| 11040 | M988T11  | 1.104366 | -0.14322 | -0.50127 | 0.631642 | 0.868395 | DOWN | 988.431  | 988.43   | 988.4319 | 10.58582 | 10.48782 |
| 11041 | M1576T10 | 1.297285 | -0.3755  | -0.50132 | 0.631646 | 0.868395 | DOWN | 1575.96  | 1575.951 | 1575.962 | 9.9174   | 9.887133 |
| 11042 | M495T9_1 | 1.153474 | 0.205985 | 0.503209 | 0.631714 | 0.868399 | UP   | 494.5062 | 494.5036 | 494.5069 | 9.295967 | 9.110833 |
| 11043 | M541T9_5 | 1.106173 | -0.14558 | -0.50468 | 0.63176  | 0.868401 | DOWN | 540.6974 | 540.697  | 540.698  | 8.847658 | 8.749717 |
| 11044 | M401T11_ | 1.248176 | -0.31982 | -0.49991 | 0.631795 | 0.868403 | DOWN | 401.1141 | 401.1072 | 401.1166 | 10.92117 | 10.85838 |
| 11045 | M484T17_ | 1.146397 | -0.19711 | -0.50313 | 0.631843 | 0.868406 | DOWN | 484.3456 | 484.3452 | 484.3458 | 17.307   | 17.24667 |
| 11046 | M289T11_ | 1.281685 | 0.358042 | 0.512969 | 0.631901 | 0.868409 | UP   | 289.1882 | 289.1832 | 289.193  | 10.82161 | 10.67552 |
| 11047 | M454T40_ | 1.124836 | 0.169714 | 0.515478 | 0.631944 | 0.868411 | UP   | 454.2642 | 454.2641 | 454.2645 | 39.89183 | 39.704   |
| 11048 | M504T43_ | 1.202149 | -0.26562 | -0.50354 | 0.631961 | 0.868412 | DOWN | 504.2799 | 504.2796 | 504.2801 | 43.48817 | 43.33    |
| 11049 | M651T10_ | 1.082411 | -0.11425 | -0.49917 | 0.631969 | 0.868413 | DOWN | 651.146  | 651.1454 | 651.1473 | 9.887117 | 9.7634   |
| 11050 | M1230T10 | 1.210779 | -0.27594 | -0.49839 | 0.631971 | 0.868413 | DOWN | 1229.787 | 1229.787 | 1229.788 | 9.960892 | 9.859233 |
| 11051 | M592T11_ | 1.183341 | 0.242866 | 0.498249 | 0.631976 | 0.868413 | UP   | 591.8247 | 591.8238 | 591.8252 | 10.86144 | 10.83572 |
| 11052 | M311T39  | 1.038584 | -0.05462 | -0.5082  | 0.632096 | 0.86842  | DOWN | 311.2943 | 311.2942 | 311.2945 | 39.20117 | 39.1725  |
| 11053 | M263T10_ | 1.070866 | -0.09878 | -0.49956 | 0.632144 | 0.868422 | DOWN | 263.214  | 263.2139 | 263.2143 | 9.772833 | 9.665433 |
| 11054 | M433T9_7 | 1.106999 | -0.14665 | -0.50022 | 0.63216  | 0.868423 | DOWN | 432.9645 | 432.9637 | 432.9653 | 9.369658 | 9.30965  |
| 11055 | M712T9_2 | 1.188109 | -0.24867 | -0.50276 | 0.632289 | 0.86843  | DOWN | 712.0087 | 712.0083 | 712.0093 | 9.16125  | 9.158833 |
| 11056 | M494T11_ | 1.100008 | 0.137514 | 0.498338 | 0.632386 | 0.868435 | UP   | 494.0038 | 494.0033 | 494.0041 | 10.89907 | 10.879   |
| 11057 | M208T10_ | 1.149381 | 0.200857 | 0.501338 | 0.632445 | 0.868438 | UP   | 207.6989 | 207.691  | 207.6989 | 9.856867 | 9.73145  |
| 11058 | M763T11  | 1.099221 | -0.13648 | -0.49787 | 0.632521 | 0.868442 | DOWN | 762.5188 | 762.5185 | 762.5206 | 10.89875 | 10.8646  |
| 11059 | M389T10_ | 1.287379 | 0.364437 | 0.510477 | 0.632583 | 0.868446 | UP   | 389.4481 | 389.4478 | 389.4549 | 9.888817 | 9.79535  |

|       |          |          |          |          |          |          |      |          |          |          |          |          |
|-------|----------|----------|----------|----------|----------|----------|------|----------|----------|----------|----------|----------|
| 11060 | M397T9_1 | 1.310763 | 0.390407 | 0.507684 | 0.632732 | 0.868454 | UP   | 396.5883 | 396.5877 | 396.5915 | 9.18975  | 9.142767 |
| 11061 | M518T44_ | 1.114572 | -0.15649 | -0.49662 | 0.632886 | 0.868462 | DOWN | 518.2956 | 518.2953 | 518.2958 | 43.60333 | 43.40183 |
| 11062 | M395T9_7 | 1.109552 | 0.149977 | 0.497846 | 0.632891 | 0.868462 | UP   | 395.2149 | 395.2148 | 395.2153 | 9.379233 | 9.253783 |
| 11063 | M201T10_ | 1.172359 | 0.229414 | 0.496571 | 0.632914 | 0.868464 | UP   | 200.9234 | 200.9222 | 200.9239 | 9.872475 | 9.7634   |
| 11064 | M697T10_ | 1.124189 | 0.168885 | 0.505797 | 0.632973 | 0.868467 | UP   | 697.3262 | 697.3258 | 697.327  | 10.18453 | 10.12765 |
| 11065 | M851T9   | 1.145433 | 0.195893 | 0.496281 | 0.633044 | 0.868471 | UP   | 850.5435 | 850.5429 | 850.5439 | 8.85555  | 8.742633 |
| 11066 | M353T44_ | 1.101112 | 0.138961 | 0.510989 | 0.633046 | 0.868471 | UP   | 353.2321 | 353.2319 | 353.2323 | 44.3725  | 44.27917 |
| 11067 | M209T10_ | 1.049562 | -0.06979 | -0.4995  | 0.633266 | 0.868483 | DOWN | 209.0158 | 209.0158 | 209.0159 | 9.842908 | 9.73145  |
| 11068 | M289T24_ | 1.039096 | -0.05533 | -0.50366 | 0.633346 | 0.868487 | DOWN | 289.2928 | 289.2926 | 289.2928 | 24.0675  | 24.05467 |
| 11069 | M379T14_ | 1.355422 | 0.438742 | 0.497219 | 0.633348 | 0.868487 | UP   | 379.1992 | 379.1986 | 379.1994 | 13.87268 | 13.8436  |
| 11070 | M587T9_3 | 1.168585 | 0.224762 | 0.495933 | 0.633394 | 0.868489 | UP   | 587.1814 | 587.1782 | 587.1842 | 9.3363   | 9.250817 |
| 11071 | M364T11_ | 1.163578 | -0.21857 | -0.4998  | 0.633461 | 0.868493 | DOWN | 363.9328 | 363.9284 | 363.9335 | 10.92598 | 10.879   |
| 11072 | M535T10_ | 1.087972 | -0.12164 | -0.49869 | 0.633474 | 0.868494 | DOWN | 535.4104 | 535.41   | 535.4117 | 9.94785  | 9.843367 |
| 11073 | M803T10_ | 1.105261 | 0.144387 | 0.500273 | 0.633509 | 0.868496 | UP   | 802.9826 | 802.9824 | 802.9829 | 9.954217 | 9.843367 |
| 11074 | M663T10_ | 1.118483 | 0.161544 | 0.500931 | 0.633549 | 0.868498 | UP   | 663.3906 | 663.3901 | 663.3932 | 9.839008 | 9.816167 |
| 11075 | M206T9_2 | 1.180504 | 0.239402 | 0.502251 | 0.633636 | 0.868502 | UP   | 206.4614 | 206.4567 | 206.4619 | 9.303042 | 9.129317 |
| 11076 | M447T10_ | 1.179168 | 0.23777  | 0.496349 | 0.633703 | 0.868506 | UP   | 446.7351 | 446.7345 | 446.7361 | 9.9351   | 9.714783 |
| 11077 | M684T10_ | 1.090204 | -0.1246  | -0.49625 | 0.633711 | 0.868506 | DOWN | 683.6678 | 683.6674 | 683.668  | 9.834117 | 9.715683 |
| 11078 | M1825T10 | 1.115976 | 0.158306 | 0.494975 | 0.633925 | 0.868518 | UP   | 1825.478 | 1825.474 | 1825.483 | 9.842    | 9.73145  |
| 11079 | M824T10_ | 1.12506  | -0.17    | -0.49977 | 0.633959 | 0.86852  | DOWN | 823.6315 | 823.6302 | 823.632  | 9.929783 | 9.843367 |
| 11080 | M195T9_4 | 1.395727 | 0.481016 | 0.511567 | 0.634007 | 0.868522 | UP   | 194.7586 | 194.758  | 194.759  | 9.369667 | 9.204617 |
| 11081 | M478T24  | 1.12772  | -0.17341 | -0.49766 | 0.634042 | 0.868524 | DOWN | 478.3521 | 478.3519 | 478.3523 | 23.68183 | 23.6675  |
| 11082 | M420T10_ | 1.120331 | 0.163925 | 0.510744 | 0.63415  | 0.86853  | UP   | 420.3996 | 420.3991 | 420.3997 | 9.943183 | 9.843367 |
| 11083 | M474T41_ | 1.130054 | -0.17639 | -0.5078  | 0.634168 | 0.868531 | DOWN | 474.2694 | 474.269  | 474.2696 | 40.65433 | 40.32333 |
| 11084 | M533T10_ | 1.166902 | 0.222683 | 0.509062 | 0.634173 | 0.868531 | UP   | 532.7009 | 532.7001 | 532.7017 | 9.964417 | 9.859233 |
| 11085 | M658T10_ | 1.099344 | 0.136643 | 0.507567 | 0.634255 | 0.868536 | UP   | 657.5464 | 657.546  | 657.5473 | 9.823575 | 9.715683 |
| 11086 | M379T10_ | 1.051762 | -0.07281 | -0.49583 | 0.63438  | 0.868542 | DOWN | 378.7478 | 378.7473 | 378.7485 | 9.917167 | 9.811217 |
| 11087 | M270T10_ | 1.06735  | 0.094034 | 0.501523 | 0.634382 | 0.868542 | UP   | 269.5717 | 269.5716 | 269.5718 | 9.83135  | 9.699733 |
| 11088 | M668T13  | 1.13004  | -0.17637 | -0.49425 | 0.634425 | 0.868545 | DOWN | 668.4832 | 668.4826 | 668.4838 | 12.93876 | 12.92288 |
| 11089 | M337T9_1 | 1.234369 | 0.303774 | 0.495532 | 0.634544 | 0.868551 | UP   | 336.5679 | 336.5676 | 336.5682 | 8.783317 | 8.658183 |
| 11090 | M689T36  | 1.274168 | -0.34956 | -0.49401 | 0.634635 | 0.868556 | DOWN | 688.5208 | 688.5203 | 688.5214 | 35.74933 | 35.733   |
| 11091 | M212T9_7 | 1.196138 | 0.258383 | 0.494169 | 0.634721 | 0.868561 | UP   | 211.9669 | 211.9663 | 211.9678 | 9.37135  | 9.1322   |
| 11092 | M225T42_ | 1.136315 | -0.18436 | -0.49752 | 0.63488  | 0.868569 | DOWN | 225.1482 | 225.1481 | 225.1484 | 41.88367 | 41.69    |
| 11093 | M195T11_ | 1.064152 | 0.089705 | 0.496012 | 0.634957 | 0.868573 | UP   | 194.6984 | 194.6983 | 194.6988 | 10.91263 | 10.879   |
| 11094 | M482T10_ | 1.104574 | -0.14349 | -0.5042  | 0.63498  | 0.868574 | DOWN | 482.1431 | 482.1427 | 482.1434 | 9.970617 | 9.8753   |

|       |          |          |          |          |          |          |      |          |          |          |          |          |
|-------|----------|----------|----------|----------|----------|----------|------|----------|----------|----------|----------|----------|
| 11095 | M159T7_2 | 1.309403 | -0.38891 | -0.49877 | 0.634986 | 0.868575 | DOWN | 158.9638 | 158.9637 | 158.9639 | 7.43355  | 7.216    |
| 11096 | M1125T10 | 1.174897 | -0.23253 | -0.49922 | 0.635059 | 0.868579 | DOWN | 1124.988 | 1124.987 | 1124.988 | 9.8207   | 9.699733 |
| 11097 | M184T9_8 | 1.259163 | -0.33246 | -0.49611 | 0.63507  | 0.868579 | DOWN | 184.1694 | 184.1693 | 184.1697 | 8.571933 | 8.339017 |
| 11098 | M246T10_ | 1.190182 | -0.25118 | -0.49395 | 0.635122 | 0.868582 | DOWN | 246.0922 | 246.0919 | 246.1    | 9.946467 | 9.827283 |
| 11099 | M554T9_5 | 1.169836 | -0.22631 | -0.49325 | 0.635286 | 0.868591 | DOWN | 554.1476 | 554.1471 | 554.1485 | 9.064833 | 9.03845  |
| 11100 | M401T10_ | 1.080545 | -0.11176 | -0.49838 | 0.63533  | 0.868593 | DOWN | 400.8023 | 400.8022 | 400.8024 | 9.538267 | 9.416817 |
| 11101 | M483T10_ | 1.301793 | 0.3805   | 0.501394 | 0.635331 | 0.868593 | UP   | 483.0354 | 483.0352 | 483.0393 | 9.960967 | 9.772833 |
| 11102 | M211T10_ | 1.06972  | -0.09723 | -0.49688 | 0.635359 | 0.868595 | DOWN | 211.4681 | 211.4678 | 211.4764 | 9.818525 | 9.699733 |
| 11103 | M234T9_1 | 1.422752 | 0.508685 | 0.51093  | 0.635447 | 0.868599 | UP   | 234.4645 | 234.4616 | 234.4662 | 9.275917 | 9.132033 |
| 11104 | M1671T10 | 1.292602 | -0.37028 | -0.49637 | 0.635491 | 0.868602 | DOWN | 1670.954 | 1670.953 | 1670.956 | 9.964092 | 9.853533 |
| 11105 | M347T9_7 | 1.164469 | 0.219673 | 0.494929 | 0.635718 | 0.868614 | UP   | 347.2984 | 347.2962 | 347.3032 | 9.246042 | 9.0864   |
| 11106 | M495T29_ | 1.170281 | 0.226856 | 0.499995 | 0.635757 | 0.868616 | UP   | 495.3268 | 495.3265 | 495.327  | 29.11192 | 29.1     |
| 11107 | M291T10_ | 1.146009 | 0.196619 | 0.498814 | 0.635761 | 0.868616 | UP   | 291.2975 | 291.2972 | 291.2978 | 9.962617 | 9.843367 |
| 11108 | M356T10_ | 1.283984 | -0.36063 | -0.49557 | 0.635786 | 0.868617 | DOWN | 356.0128 | 356.0123 | 356.0129 | 9.82645  | 9.772883 |
| 11109 | M1919T10 | 1.150329 | -0.20205 | -0.49823 | 0.635812 | 0.868619 | DOWN | 1919.02  | 1919.019 | 1919.024 | 9.8322   | 9.715683 |
| 11110 | M438T39_ | 1.127712 | 0.173399 | 0.510574 | 0.635825 | 0.868619 | UP   | 438.2694 | 438.2692 | 438.2697 | 38.633   | 38.40983 |
| 11111 | M201T10_ | 1.075409 | -0.10488 | -0.49209 | 0.635894 | 0.868623 | DOWN | 201.4775 | 201.4773 | 201.4776 | 9.970617 | 9.8753   |
| 11112 | M212T11_ | 1.088002 | -0.12168 | -0.49391 | 0.635951 | 0.868626 | DOWN | 211.5349 | 211.5348 | 211.535  | 10.89875 | 10.879   |
| 11113 | M498T9_5 | 1.095629 | -0.13176 | -0.49811 | 0.635983 | 0.868628 | DOWN | 497.8676 | 497.8673 | 497.868  | 9.16125  | 9.12675  |
| 11114 | M207T9_1 | 1.200102 | 0.263157 | 0.49666  | 0.636061 | 0.868632 | UP   | 206.9007 | 206.9004 | 206.9008 | 9.262125 | 9.147367 |
| 11115 | M664T10_ | 1.144187 | -0.19432 | -0.50103 | 0.636086 | 0.868633 | DOWN | 663.6785 | 663.6777 | 663.6788 | 9.972917 | 9.859233 |
| 11116 | M563T10_ | 1.092216 | -0.12726 | -0.49208 | 0.636169 | 0.868638 | DOWN | 563.256  | 563.2554 | 563.2562 | 9.951283 | 9.869467 |
| 11117 | M996T22  | 1.113117 | -0.15461 | -0.49246 | 0.636272 | 0.868643 | DOWN | 995.692  | 995.6906 | 995.6938 | 22.20967 | 22.19633 |
| 11118 | M809T20  | 1.179342 | -0.23798 | -0.49178 | 0.636274 | 0.868643 | DOWN | 808.6008 | 808.6003 | 808.6025 | 20.25367 | 20.21583 |
| 11119 | M685T9_2 | 1.191188 | 0.252402 | 0.491588 | 0.636382 | 0.868649 | UP   | 685.3915 | 685.3907 | 685.392  | 8.9177   | 8.802417 |
| 11120 | M446T44_ | 1.125997 | -0.1712  | -0.50373 | 0.636415 | 0.868651 | DOWN | 446.2745 | 446.2743 | 446.2748 | 43.68483 | 43.14267 |
| 11121 | M892T9   | 1.363114 | 0.446906 | 0.49808  | 0.636471 | 0.868654 | UP   | 892.303  | 892.3021 | 892.3066 | 9.494433 | 9.432183 |
| 11122 | M620T17  | 1.114767 | -0.15674 | -0.49827 | 0.636479 | 0.868654 | DOWN | 620.3751 | 620.375  | 620.3755 | 17.26267 | 17.24867 |
| 11123 | M1135T10 | 1.112458 | -0.15375 | -0.50149 | 0.636531 | 0.868657 | DOWN | 1135.31  | 1135.309 | 1135.311 | 9.8322   | 9.715683 |
| 11124 | M359T30_ | 1.407494 | -0.49313 | -0.49346 | 0.636567 | 0.868659 | DOWN | 359.0079 | 359.0078 | 359.0081 | 29.57617 | 29.56083 |
| 11125 | M731T10_ | 1.158089 | -0.21175 | -0.49275 | 0.636572 | 0.868659 | DOWN | 730.9506 | 730.9501 | 730.9515 | 9.958617 | 9.843367 |
| 11126 | M608T43_ | 1.103451 | -0.14202 | -0.50414 | 0.636623 | 0.868662 | DOWN | 608.3638 | 608.3636 | 608.3642 | 43.19325 | 43.09983 |
| 11127 | M450T10_ | 1.141323 | -0.19071 | -0.4926  | 0.636629 | 0.868662 | DOWN | 449.6001 | 449.5995 | 449.6005 | 9.986767 | 9.8914   |
| 11128 | M868T10_ | 1.10923  | 0.149559 | 0.494217 | 0.636643 | 0.868663 | UP   | 867.8732 | 867.8729 | 867.8735 | 9.951283 | 9.859233 |
| 11129 | M466T13  | 1.230067 | 0.298737 | 0.497719 | 0.636699 | 0.868666 | UP   | 465.8714 | 465.8706 | 465.8718 | 13.33901 | 13.31802 |

|       |          |          |          |          |          |          |      |          |          |          |          |          |
|-------|----------|----------|----------|----------|----------|----------|------|----------|----------|----------|----------|----------|
| 11130 | M423T11_ | 1.417235 | -0.50308 | -0.49081 | 0.6368   | 0.868671 | DOWN | 423.1853 | 423.1833 | 423.1913 | 10.98333 | 10.86517 |
| 11131 | M552T10_ | 1.140484 | -0.18965 | -0.49098 | 0.636847 | 0.868674 | DOWN | 551.9815 | 551.9807 | 551.9819 | 9.933967 | 9.859233 |
| 11132 | M1432T10 | 1.129604 | -0.17582 | -0.49087 | 0.63708  | 0.868686 | DOWN | 1431.701 | 1431.699 | 1431.705 | 9.94785  | 9.853533 |
| 11133 | M206T10_ | 1.070515 | 0.098305 | 0.49259  | 0.637222 | 0.868694 | UP   | 206.3457 | 206.3455 | 206.3518 | 9.894392 | 9.811217 |
| 11134 | M367T9_1 | 1.245041 | 0.316193 | 0.49436  | 0.637223 | 0.868694 | UP   | 366.7182 | 366.7169 | 366.7205 | 9.232283 | 9.1602   |
| 11135 | M227T11_ | 1.073741 | -0.10265 | -0.49051 | 0.637246 | 0.868695 | DOWN | 226.9536 | 226.9535 | 226.9537 | 10.892   | 10.879   |
| 11136 | M721T10_ | 1.05017  | -0.07062 | -0.49059 | 0.637258 | 0.868696 | DOWN | 721.2115 | 721.2102 | 721.2122 | 9.825492 | 9.715683 |
| 11137 | M687T10_ | 1.136521 | -0.18462 | -0.49004 | 0.637286 | 0.868697 | DOWN | 686.5266 | 686.526  | 686.5267 | 9.80415  | 9.699733 |
| 11138 | M737T25  | 1.16213  | 0.216771 | 0.498099 | 0.637422 | 0.868704 | UP   | 736.5181 | 736.5181 | 736.5186 | 25.26967 | 25.24533 |
| 11139 | M259T11_ | 1.071926 | -0.10021 | -0.49011 | 0.637431 | 0.868705 | DOWN | 258.9805 | 258.9804 | 258.9806 | 10.892   | 10.879   |
| 11140 | M560T10_ | 1.201334 | 0.264637 | 0.503124 | 0.637446 | 0.868706 | UP   | 559.9944 | 559.9929 | 559.9951 | 9.9351   | 9.827283 |
| 11141 | M1832T10 | 1.347746 | 0.430548 | 0.504557 | 0.637468 | 0.868707 | UP   | 1831.628 | 1831.626 | 1831.637 | 9.8095   | 9.728083 |
| 11142 | M182T9_6 | 1.256257 | 0.329132 | 0.489739 | 0.637527 | 0.86871  | UP   | 182.1667 | 182.166  | 182.1675 | 9.245983 | 9.095133 |
| 11143 | M455T9_1 | 1.100438 | -0.13808 | -0.49194 | 0.63756  | 0.868712 | DOWN | 455.3486 | 455.3485 | 455.3489 | 9.316842 | 9.129317 |
| 11144 | M216T10_ | 1.123394 | -0.16786 | -0.49118 | 0.637678 | 0.868718 | DOWN | 216.2764 | 216.2721 | 216.2813 | 9.8235   | 9.715683 |
| 11145 | M579T10_ | 1.100045 | 0.137562 | 0.489407 | 0.637727 | 0.868721 | UP   | 579.1676 | 579.1666 | 579.1678 | 9.942317 | 9.827283 |
| 11146 | M302T10_ | 1.200026 | -0.26307 | -0.48937 | 0.637728 | 0.868721 | DOWN | 302.0461 | 302.0415 | 302.0463 | 9.900133 | 9.811217 |
| 11147 | M529T11_ | 1.149005 | 0.200385 | 0.489973 | 0.637889 | 0.868729 | UP   | 529.0157 | 529.0124 | 529.0159 | 10.90765 | 10.87708 |
| 11148 | M752T11_ | 1.085923 | 0.118922 | 0.494328 | 0.637904 | 0.86873  | UP   | 751.6999 | 751.6995 | 751.7013 | 10.90659 | 10.88747 |
| 11149 | M835T22_ | 1.104647 | -0.14359 | -0.49358 | 0.637991 | 0.868735 | DOWN | 834.5789 | 834.5781 | 834.5794 | 22.23967 | 22.23317 |
| 11150 | M439T14_ | 1.057666 | -0.08088 | -0.4907  | 0.638009 | 0.868736 | DOWN | 439.3162 | 439.3161 | 439.3163 | 14.41488 | 14.39883 |
| 11151 | M747T10_ | 1.130168 | -0.17654 | -0.49195 | 0.63802  | 0.868736 | DOWN | 747.4251 | 747.4243 | 747.4259 | 9.544317 | 9.46325  |
| 11152 | M1625T10 | 1.16535  | -0.22076 | -0.49875 | 0.638129 | 0.868742 | DOWN | 1624.77  | 1624.766 | 1624.771 | 9.979958 | 9.916767 |
| 11153 | M257T10_ | 1.090898 | 0.125517 | 0.488991 | 0.638156 | 0.868743 | UP   | 256.9888 | 256.9885 | 256.9889 | 9.74925  | 9.65225  |
| 11154 | M649T10_ | 1.112418 | -0.1537  | -0.49881 | 0.638238 | 0.868748 | DOWN | 649.0823 | 649.0816 | 649.0824 | 9.979958 | 9.8753   |
| 11155 | M883T10_ | 1.090127 | -0.1245  | -0.50308 | 0.638353 | 0.868754 | DOWN | 883.3394 | 883.3383 | 883.3409 | 9.97155  | 9.859233 |
| 11156 | M653T10_ | 1.130797 | 0.17734  | 0.488377 | 0.638553 | 0.868764 | UP   | 652.7716 | 652.7713 | 652.772  | 9.944392 | 9.843367 |
| 11157 | M543T10_ | 1.412663 | 0.498417 | 0.506228 | 0.638557 | 0.868765 | UP   | 542.8073 | 542.8068 | 542.8106 | 9.621675 | 9.311883 |
| 11158 | M1899T10 | 1.229075 | -0.29757 | -0.48807 | 0.63862  | 0.868768 | DOWN | 1899.132 | 1899.127 | 1899.135 | 9.946467 | 9.827283 |
| 11159 | M414T21_ | 1.191371 | -0.25262 | -0.48981 | 0.638624 | 0.868768 | DOWN | 413.6595 | 413.6585 | 413.6597 | 20.85283 | 20.70933 |
| 11160 | M432T9_8 | 1.235162 | -0.3047  | -0.48987 | 0.638676 | 0.868771 | DOWN | 432.2477 | 432.2455 | 432.2507 | 9.392442 | 9.175017 |
| 11161 | M417T25  | 1.115245 | -0.15736 | -0.48958 | 0.638678 | 0.868771 | DOWN | 417.2177 | 417.2172 | 417.2184 | 24.5945  | 24.56583 |
| 11162 | M439T18  | 1.161513 | 0.216005 | 0.493387 | 0.638685 | 0.868771 | UP   | 439.316  | 439.3157 | 439.3165 | 17.66642 | 17.645   |
| 11163 | M363T32_ | 1.188932 | -0.24967 | -0.48774 | 0.638832 | 0.868779 | DOWN | 362.799  | 362.7989 | 362.7991 | 31.75333 | 31.73867 |
| 11164 | M500T24  | 1.248776 | -0.32051 | -0.49752 | 0.638876 | 0.868781 | DOWN | 500.3786 | 500.3785 | 500.3788 | 24.40258 | 24.39233 |

|       |          |          |          |          |          |          |      |          |          |          |          |          |
|-------|----------|----------|----------|----------|----------|----------|------|----------|----------|----------|----------|----------|
| 11165 | M961T11  | 1.079024 | -0.10973 | -0.48754 | 0.63905  | 0.868791 | DOWN | 960.7054 | 960.7042 | 960.7061 | 10.892   | 10.879   |
| 11166 | M539T9_3 | 1.270459 | 0.345349 | 0.492632 | 0.639144 | 0.868796 | UP   | 539.3811 | 539.3808 | 539.3824 | 9.144858 | 9.07945  |
| 11167 | M183T9_3 | 1.74378  | 0.802218 | 0.500532 | 0.639156 | 0.868796 | UP   | 182.6952 | 182.6949 | 182.6958 | 9.138533 | 9.111033 |
| 11168 | M622T10_ | 1.082231 | 0.114009 | 0.50115  | 0.639279 | 0.868803 | UP   | 622.0465 | 622.0459 | 622.0472 | 9.8207   | 9.715683 |
| 11169 | M538T11_ | 1.130042 | -0.17638 | -0.48711 | 0.639304 | 0.868804 | DOWN | 537.9143 | 537.9126 | 537.9148 | 10.89248 | 10.87765 |
| 11170 | M382T9_5 | 1.127454 | -0.17307 | -0.48755 | 0.639363 | 0.868807 | DOWN | 381.8771 | 381.8754 | 381.8774 | 9.17485  | 9.145433 |
| 11171 | M272T9_1 | 1.144863 | 0.195175 | 0.489095 | 0.639485 | 0.868814 | UP   | 272.1856 | 272.1853 | 272.186  | 8.935292 | 8.858283 |
| 11172 | M380T9_5 | 1.275945 | 0.351566 | 0.496902 | 0.639679 | 0.868824 | UP   | 380.2427 | 380.2426 | 380.2429 | 9.494433 | 9.40135  |
| 11173 | M425T10_ | 1.320368 | -0.40094 | -0.48836 | 0.639712 | 0.868826 | DOWN | 424.9573 | 424.9569 | 424.9576 | 9.960817 | 9.869467 |
| 11174 | M1220T10 | 1.166252 | 0.221879 | 0.488146 | 0.639718 | 0.868826 | UP   | 1220.084 | 1220.077 | 1220.085 | 9.979667 | 9.88865  |
| 11175 | M419T10_ | 1.238725 | 0.308855 | 0.495497 | 0.639843 | 0.868832 | UP   | 419.1459 | 419.1454 | 419.1461 | 9.970617 | 9.859233 |
| 11176 | M446T43_ | 1.102561 | 0.140859 | 0.487883 | 0.63999  | 0.86884  | UP   | 446.2382 | 446.238  | 446.2384 | 43.028   | 42.7545  |
| 11177 | M476T10_ | 1.116552 | -0.15905 | -0.48845 | 0.640004 | 0.868841 | DOWN | 476.1014 | 476.1012 | 476.102  | 9.968992 | 9.8753   |
| 11178 | M303T11_ | 1.14933  | 0.200793 | 0.491516 | 0.640012 | 0.868841 | UP   | 302.6127 | 302.6122 | 302.6129 | 10.87765 | 10.85018 |
| 11179 | M478T45_ | 1.144554 | 0.194786 | 0.494465 | 0.640058 | 0.868844 | UP   | 478.2644 | 478.2639 | 478.2645 | 44.83967 | 44.72467 |
| 11180 | M264T10_ | 1.20162  | -0.26498 | -0.48957 | 0.640071 | 0.868844 | DOWN | 264.3989 | 264.3989 | 264.399  | 9.533975 | 9.447983 |
| 11181 | M229T11_ | 1.05459  | -0.07668 | -0.48733 | 0.640149 | 0.868849 | DOWN | 229.1625 | 229.1623 | 229.1625 | 10.91811 | 10.89355 |
| 11182 | M151T10_ | 1.134107 | -0.18156 | -0.48782 | 0.640153 | 0.868849 | DOWN | 150.786  | 150.7858 | 150.786  | 9.934533 | 9.827283 |
| 11183 | M440T10_ | 1.24207  | 0.312747 | 0.493164 | 0.640156 | 0.868849 | UP   | 440.0537 | 440.0462 | 440.0538 | 9.946367 | 9.859233 |
| 11184 | M639T10_ | 1.14285  | -0.19264 | -0.48661 | 0.640169 | 0.86885  | DOWN | 639.0725 | 639.0716 | 639.0731 | 9.830083 | 9.715683 |
| 11185 | M387T10_ | 1.64863  | -0.72127 | -0.48585 | 0.640263 | 0.868855 | DOWN | 387.217  | 387.2072 | 387.221  | 10.00733 | 9.932    |
| 11186 | M309T38  | 1.137263 | 0.185566 | 0.499547 | 0.640407 | 0.868862 | UP   | 309.2786 | 309.2785 | 309.2788 | 37.60417 | 37.57533 |
| 11187 | M1392T10 | 1.128143 | -0.17395 | -0.48944 | 0.640458 | 0.868865 | DOWN | 1391.799 | 1391.797 | 1391.801 | 10.27972 | 10.19852 |
| 11188 | M410T9_4 | 1.147524 | 0.198525 | 0.485301 | 0.640474 | 0.868866 | UP   | 409.7498 | 409.7488 | 409.751  | 9.159658 | 9.1158   |
| 11189 | M386T10_ | 1.163231 | 0.218137 | 0.498964 | 0.640513 | 0.868868 | UP   | 386.4284 | 386.4278 | 386.4288 | 9.935675 | 9.827283 |
| 11190 | M693T3   | 1.224566 | -0.29227 | -0.48796 | 0.640545 | 0.868869 | DOWN | 693.4905 | 693.4903 | 693.491  | 3.310433 | 3.0588   |
| 11191 | M195T10_ | 1.132958 | 0.180094 | 0.496263 | 0.640589 | 0.868872 | UP   | 195.1684 | 195.1681 | 195.1686 | 9.939233 | 9.827283 |
| 11192 | M404T10_ | 1.209438 | -0.27434 | -0.48564 | 0.640609 | 0.868873 | DOWN | 403.9922 | 403.992  | 403.9923 | 9.830833 | 9.728083 |
| 11193 | M501T9_5 | 1.153385 | 0.205874 | 0.499222 | 0.640654 | 0.868875 | UP   | 501.1001 | 501.0989 | 501.1065 | 9.193867 | 9.12675  |
| 11194 | M530T30  | 1.099203 | -0.13646 | -0.49116 | 0.640663 | 0.868876 | DOWN | 530.4165 | 530.416  | 530.4166 | 30.2875  | 30.2805  |
| 11195 | M202T9_2 | 1.215364 | -0.28139 | -0.48841 | 0.640708 | 0.868878 | DOWN | 201.5489 | 201.5482 | 201.5498 | 9.295817 | 9.12675  |
| 11196 | M690T9_1 | 1.20464  | -0.2686  | -0.48495 | 0.640768 | 0.868881 | DOWN | 689.6544 | 689.6473 | 689.6561 | 9.1892   | 9.158833 |
| 11197 | M203T10_ | 1.238486 | -0.30858 | -0.49054 | 0.640845 | 0.868885 | DOWN | 203.2971 | 203.297  | 203.2972 | 9.830283 | 9.715683 |
| 11198 | M235T12  | 1.168897 | 0.225148 | 0.496435 | 0.640848 | 0.868885 | UP   | 235.1303 | 235.1302 | 235.1304 | 11.82355 | 11.75363 |
| 11199 | M394T24_ | 1.159491 | -0.21349 | -0.48522 | 0.640852 | 0.868886 | DOWN | 394.0357 | 394.0355 | 394.0362 | 24.1225  | 24.11067 |



|       |          |          |          |          |          |          |      |          |          |          |          |          |
|-------|----------|----------|----------|----------|----------|----------|------|----------|----------|----------|----------|----------|
| 11200 | M1012T23 | 1.10262  | 0.140935 | 0.484578 | 0.640981 | 0.868892 | UP   | 1011.688 | 1011.686 | 1011.688 | 22.5965  | 22.5435  |
| 11201 | M653T11_ | 1.079593 | 0.110488 | 0.496491 | 0.641056 | 0.868896 | UP   | 653.2721 | 653.2718 | 653.2727 | 11.49742 | 11.47593 |
| 11202 | M509T12  | 1.155967 | -0.2091  | -0.48767 | 0.64113  | 0.8689   | DOWN | 509.2463 | 509.246  | 509.2464 | 12.22296 | 12.1785  |
| 11203 | M224T10_ | 1.075576 | -0.10511 | -0.48583 | 0.641193 | 0.868903 | DOWN | 224.0401 | 224.0399 | 224.0403 | 9.924742 | 9.811217 |
| 11204 | M579T11_ | 1.107537 | -0.14736 | -0.48466 | 0.641281 | 0.868908 | DOWN | 579.0174 | 579.0165 | 579.0177 | 10.71065 | 10.6899  |
| 11205 | M381T9_1 | 1.164319 | -0.21949 | -0.49412 | 0.641293 | 0.868909 | DOWN | 381.4297 | 381.429  | 381.4346 | 9.303167 | 9.129317 |
| 11206 | M232T11_ | 1.106202 | 0.145615 | 0.49509  | 0.641348 | 0.868912 | UP   | 232.2992 | 232.2986 | 232.2993 | 10.91977 | 10.8926  |
| 11207 | M388T11_ | 1.112852 | -0.15426 | -0.4842  | 0.641349 | 0.868912 | DOWN | 387.8305 | 387.8301 | 387.8307 | 10.8926  | 10.873   |
| 11208 | M268T10_ | 1.173751 | 0.231127 | 0.495715 | 0.641431 | 0.868916 | UP   | 267.8644 | 267.8641 | 267.8646 | 9.960817 | 9.859233 |
| 11209 | M346T43_ | 1.146367 | 0.197068 | 0.483939 | 0.641506 | 0.86892  | UP   | 346.1859 | 346.1858 | 346.186  | 42.71883 | 42.395   |
| 11210 | M203T30  | 1.040631 | 0.057459 | 0.483814 | 0.641516 | 0.86892  | UP   | 203.1065 | 203.1064 | 203.1065 | 29.83392 | 29.8195  |
| 11211 | M890T11  | 1.143701 | 0.19371  | 0.490562 | 0.641519 | 0.86892  | UP   | 889.7054 | 889.7041 | 889.7073 | 10.91674 | 10.89125 |
| 11212 | M520T11_ | 1.137611 | 0.186008 | 0.499091 | 0.641631 | 0.868926 | UP   | 519.8221 | 519.8204 | 519.8231 | 10.90659 | 10.879   |
| 11213 | M553T10_ | 1.311785 | 0.391531 | 0.502098 | 0.641671 | 0.868928 | UP   | 552.7646 | 552.7639 | 552.7657 | 9.969158 | 9.859233 |
| 11214 | M758T10_ | 1.141593 | 0.191049 | 0.485304 | 0.64168  | 0.868929 | UP   | 758.3988 | 758.3976 | 758.3995 | 9.958617 | 9.843367 |
| 11215 | M452T10_ | 1.112049 | -0.15322 | -0.4953  | 0.641702 | 0.86893  | DOWN | 451.8159 | 451.8156 | 451.8162 | 9.83535  | 9.715683 |
| 11216 | M579T11_ | 1.0728   | -0.10138 | -0.48415 | 0.641757 | 0.868933 | DOWN | 578.9233 | 578.9231 | 578.9242 | 10.52897 | 10.47197 |
| 11217 | M351T10_ | 1.159915 | 0.214019 | 0.483435 | 0.641783 | 0.868934 | UP   | 350.98   | 350.9799 | 350.9803 | 9.883025 | 9.811217 |
| 11218 | M545T12  | 1.139971 | 0.188997 | 0.489257 | 0.641922 | 0.86895  | UP   | 544.9244 | 544.9239 | 544.9255 | 11.99327 | 11.97343 |
| 11219 | M398T11_ | 1.141315 | -0.1907  | -0.48366 | 0.642061 | 0.868965 | DOWN | 397.7873 | 397.7872 | 397.7878 | 10.91376 | 10.89355 |
| 11220 | M418T11_ | 1.20842  | 0.273122 | 0.493506 | 0.64212  | 0.868972 | UP   | 417.5969 | 417.5959 | 417.5975 | 10.89128 | 10.80695 |
| 11221 | M300T10_ | 1.077347 | -0.10748 | -0.49908 | 0.642215 | 0.868982 | DOWN | 300.2119 | 300.2118 | 300.2124 | 9.918833 | 9.811217 |
| 11222 | M215T9_1 | 1.159253 | -0.2132  | -0.4858  | 0.642437 | 0.869007 | DOWN | 214.7393 | 214.739  | 214.7399 | 9.264333 | 9.1322   |
| 11223 | M496T11  | 1.140859 | -0.19012 | -0.48423 | 0.642468 | 0.86901  | DOWN | 495.8361 | 495.836  | 495.8365 | 10.90785 | 10.90553 |
| 11224 | M405T9_4 | 1.074456 | 0.103607 | 0.482679 | 0.642563 | 0.869021 | UP   | 405.2733 | 405.2731 | 405.2736 | 8.825317 | 8.715883 |
| 11225 | M347T11_ | 1.063954 | -0.08944 | -0.48191 | 0.642779 | 0.869045 | DOWN | 347.0054 | 347.0053 | 347.0056 | 10.89907 | 10.879   |
| 11226 | M919T10_ | 1.135992 | 0.183953 | 0.491275 | 0.642821 | 0.869049 | UP   | 918.8249 | 918.8234 | 918.8251 | 9.944392 | 9.827283 |
| 11227 | M327T10_ | 1.226985 | 0.295117 | 0.482119 | 0.642848 | 0.869052 | UP   | 326.868  | 326.8614 | 326.8742 | 9.871017 | 9.715683 |
| 11228 | M227T9_5 | 1.419971 | 0.505861 | 0.481801 | 0.642853 | 0.869053 | UP   | 226.8438 | 226.8399 | 226.8448 | 9.34115  | 9.04725  |
| 11229 | M217T10_ | 1.070436 | -0.0982  | -0.48665 | 0.642897 | 0.869058 | DOWN | 216.7777 | 216.7776 | 216.7778 | 9.929783 | 9.811217 |
| 11230 | M434T27  | 1.117855 | -0.16073 | -0.4887  | 0.642907 | 0.869059 | DOWN | 434.3834 | 434.383  | 434.3837 | 27.34483 | 27.31883 |
| 11231 | M580T10_ | 1.153594 | -0.20614 | -0.48229 | 0.642917 | 0.86906  | DOWN | 580.0948 | 580.0938 | 580.0951 | 9.946467 | 9.843367 |
| 11232 | M615T34  | 1.085383 | -0.1182  | -0.48296 | 0.642931 | 0.869062 | DOWN | 615.4508 | 615.4502 | 615.451  | 33.60067 | 33.60017 |
| 11233 | M1416T10 | 1.123415 | 0.167891 | 0.485774 | 0.643046 | 0.869074 | UP   | 1415.531 | 1415.529 | 1415.534 | 9.950258 | 9.827283 |
| 11234 | M373T10_ | 1.114283 | -0.15612 | -0.49176 | 0.643076 | 0.869077 | DOWN | 373.0639 | 373.0638 | 373.0642 | 9.983467 | 9.8914   |

|       |          |          |          |          |          |          |      |          |          |          |          |          |
|-------|----------|----------|----------|----------|----------|----------|------|----------|----------|----------|----------|----------|
| 11235 | M850T36  | 1.14105  | -0.19036 | -0.48173 | 0.643093 | 0.869079 | DOWN | 849.598  | 849.5978 | 849.5987 | 35.57467 | 35.5585  |
| 11236 | M490T10_ | 1.1138   | 0.15549  | 0.492621 | 0.643208 | 0.869092 | UP   | 490.3433 | 490.3427 | 490.3434 | 9.62495  | 9.52595  |
| 11237 | M415T20_ | 1.409573 | 0.495259 | 0.481172 | 0.643288 | 0.869101 | UP   | 415.3301 | 415.324  | 415.3352 | 20.24483 | 20.2135  |
| 11238 | M384T10_ | 1.180629 | 0.239555 | 0.487388 | 0.643316 | 0.869104 | UP   | 384.3074 | 384.3073 | 384.3076 | 9.731817 | 9.6186   |
| 11239 | M284T10_ | 1.115959 | -0.15828 | -0.48538 | 0.643324 | 0.869105 | DOWN | 283.8471 | 283.8469 | 283.8473 | 9.945258 | 9.827283 |
| 11240 | M1707T10 | 1.13445  | -0.18199 | -0.48108 | 0.643546 | 0.869129 | DOWN | 1707.129 | 1707.127 | 1707.13  | 9.972833 | 9.8914   |
| 11241 | M823T10_ | 1.216365 | 0.282576 | 0.482406 | 0.643643 | 0.86914  | UP   | 822.7886 | 822.785  | 822.7894 | 9.885167 | 9.8445   |
| 11242 | M591T10_ | 1.145182 | 0.195577 | 0.491519 | 0.643699 | 0.869146 | UP   | 590.5435 | 590.543  | 590.5447 | 9.933967 | 9.8378   |
| 11243 | M351T9_1 | 1.124573 | 0.169378 | 0.482984 | 0.643747 | 0.869152 | UP   | 351.3163 | 351.3158 | 351.3169 | 9.312158 | 9.175017 |
| 11244 | M657T9_1 | 1.21596  | -0.2821  | -0.48059 | 0.643787 | 0.869156 | DOWN | 656.8616 | 656.8607 | 656.8619 | 9.312075 | 9.234417 |
| 11245 | M409T10_ | 1.051696 | -0.07272 | -0.48856 | 0.644025 | 0.869182 | DOWN | 408.7628 | 408.7623 | 408.763  | 9.917167 | 9.811217 |
| 11246 | M334T10_ | 1.574943 | -0.6553  | -0.47984 | 0.644267 | 0.869209 | DOWN | 333.6414 | 333.6412 | 333.6417 | 9.960967 | 9.859233 |
| 11247 | M281T11_ | 1.106109 | 0.145493 | 0.480876 | 0.644471 | 0.869231 | UP   | 281.4679 | 281.4674 | 281.4681 | 10.90734 | 10.88995 |
| 11248 | M496T10_ | 1.123936 | -0.16856 | -0.48329 | 0.644529 | 0.869238 | DOWN | 496.3797 | 496.3792 | 496.38   | 10.08177 | 9.995817 |
| 11249 | M1683T11 | 1.133145 | -0.18033 | -0.49268 | 0.644529 | 0.869238 | DOWN | 1683.397 | 1683.395 | 1683.401 | 10.8926  | 10.86008 |
| 11250 | M296T11_ | 1.108416 | -0.1485  | -0.48036 | 0.644571 | 0.869242 | DOWN | 296.2229 | 296.2226 | 296.2233 | 10.892   | 10.88747 |
| 11251 | M667T9_1 | 1.230895 | -0.29971 | -0.47936 | 0.644688 | 0.869255 | DOWN | 666.7538 | 666.7531 | 666.756  | 9.40325  | 9.220933 |
| 11252 | M215T10_ | 1.151275 | 0.203232 | 0.481718 | 0.644748 | 0.869262 | UP   | 214.5314 | 214.5295 | 214.5317 | 9.856867 | 9.758367 |
| 11253 | M222T30  | 1.046059 | 0.064965 | 0.478943 | 0.644825 | 0.86927  | UP   | 222.1204 | 222.1203 | 222.1204 | 29.83392 | 29.83367 |
| 11254 | M1416T10 | 1.320997 | -0.40163 | -0.47885 | 0.644889 | 0.869277 | DOWN | 1416.499 | 1416.499 | 1416.501 | 9.872917 | 9.844033 |
| 11255 | M224T11_ | 1.134979 | 0.182665 | 0.48021  | 0.645062 | 0.869296 | UP   | 224.4132 | 224.4129 | 224.4135 | 10.8926  | 10.85018 |
| 11256 | M353T41  | 1.109665 | -0.15012 | -0.49415 | 0.645233 | 0.869315 | DOWN | 353.2321 | 353.232  | 353.2322 | 41.04292 | 40.64    |
| 11257 | M842T11_ | 1.115245 | -0.15736 | -0.48543 | 0.645351 | 0.869328 | DOWN | 841.8865 | 841.8849 | 841.8872 | 10.90659 | 10.879   |
| 11258 | M193T10_ | 1.243354 | 0.314237 | 0.490714 | 0.645426 | 0.869336 | UP   | 193.2457 | 193.2456 | 193.253  | 9.8214   | 9.743667 |
| 11259 | M246T15  | 1.42861  | 0.514612 | 0.485207 | 0.645455 | 0.86934  | UP   | 246.2425 | 246.2423 | 246.2426 | 14.98539 | 14.95597 |
| 11260 | M951T26  | 1.102058 | -0.1402  | -0.4795  | 0.645466 | 0.869341 | DOWN | 950.6624 | 950.6622 | 950.6633 | 26.31667 | 26.30333 |
| 11261 | M640T10_ | 1.14859  | -0.19986 | -0.49351 | 0.645536 | 0.869348 | DOWN | 640.4047 | 640.3995 | 640.4085 | 9.844033 | 9.728083 |
| 11262 | M371T11_ | 1.092934 | 0.128206 | 0.483631 | 0.645574 | 0.869353 | UP   | 371.0628 | 371.0626 | 371.063  | 10.892   | 10.879   |
| 11263 | M1569T10 | 1.108209 | 0.14823  | 0.482884 | 0.645743 | 0.869371 | UP   | 1568.905 | 1568.904 | 1568.913 | 9.9081   | 9.806367 |
| 11264 | M458T9_1 | 1.275531 | -0.3511  | -0.4933  | 0.645777 | 0.869375 | DOWN | 457.5722 | 457.5717 | 457.5738 | 9.206    | 9.046483 |
| 11265 | M457T9_8 | 1.081275 | 0.112734 | 0.478267 | 0.645851 | 0.869383 | UP   | 457.2332 | 457.2327 | 457.2336 | 9.264767 | 9.129317 |
| 11266 | M226T9_8 | 1.135003 | -0.1827  | -0.49037 | 0.646003 | 0.8694   | DOWN | 226.3827 | 226.3779 | 226.3828 | 8.820225 | 8.682683 |
| 11267 | M296T9_3 | 1.285062 | -0.36184 | -0.47768 | 0.646141 | 0.869415 | DOWN | 295.5997 | 295.5986 | 295.5999 | 9.348233 | 9.24215  |
| 11268 | M474T11_ | 1.106204 | -0.14562 | -0.48098 | 0.646179 | 0.869419 | DOWN | 474.2802 | 474.2799 | 474.281  | 10.91079 | 10.87765 |
| 11269 | M236T9_1 | 1.349657 | -0.43259 | -0.47751 | 0.646203 | 0.869422 | DOWN | 235.5596 | 235.5585 | 235.5605 | 9.199983 | 9.147367 |

|       |          |          |          |          |          |          |      |          |          |          |          |          |
|-------|----------|----------|----------|----------|----------|----------|------|----------|----------|----------|----------|----------|
| 11270 | M491T9_2 | 1.115017 | -0.15707 | -0.4908  | 0.646421 | 0.869446 | DOWN | 491.2977 | 491.2976 | 491.2979 | 9.2585   | 9.146383 |
| 11271 | M799T10_ | 1.311913 | 0.391672 | 0.492565 | 0.64643  | 0.869447 | UP   | 799.1489 | 799.1478 | 799.1508 | 9.983433 | 9.8914   |
| 11272 | M219T9_1 | 1.361205 | -0.44488 | -0.4774  | 0.646434 | 0.869447 | DOWN | 219.2017 | 219.1995 | 219.2023 | 9.2309   | 9.126783 |
| 11273 | M520T42_ | 1.220876 | 0.287917 | 0.481264 | 0.646446 | 0.869448 | UP   | 520.2748 | 520.2746 | 520.275  | 42.00667 | 41.76217 |
| 11274 | M265T10_ | 1.092621 | -0.12779 | -0.48102 | 0.646533 | 0.869458 | DOWN | 264.9741 | 264.9739 | 264.9742 | 9.979342 | 9.8753   |
| 11275 | M356T10_ | 1.050756 | 0.071428 | 0.479513 | 0.646561 | 0.869461 | UP   | 355.7543 | 355.7539 | 355.7545 | 9.828367 | 9.715683 |
| 11276 | M264T11_ | 1.084855 | -0.1175  | -0.47652 | 0.646581 | 0.869463 | DOWN | 264.3182 | 264.3181 | 264.3186 | 10.89875 | 10.8646  |
| 11277 | M622T19  | 1.11486  | 0.156863 | 0.483508 | 0.646653 | 0.869471 | UP   | 622.4892 | 622.4883 | 622.4906 | 18.62867 | 18.59733 |
| 11278 | M782T10_ | 1.143419 | 0.193355 | 0.482393 | 0.646722 | 0.869479 | UP   | 781.7771 | 781.7758 | 781.7782 | 9.933    | 9.843367 |
| 11279 | M469T9_2 | 1.394525 | 0.479773 | 0.483589 | 0.646809 | 0.869488 | UP   | 468.9881 | 468.9874 | 468.9886 | 8.937392 | 8.863633 |
| 11280 | M477T11_ | 1.125556 | -0.17064 | -0.48586 | 0.646856 | 0.869493 | DOWN | 476.7643 | 476.7628 | 476.7647 | 10.92203 | 10.879   |
| 11281 | M309T29  | 1.094004 | -0.12962 | -0.47961 | 0.646906 | 0.869499 | DOWN | 309.2058 | 309.2057 | 309.2059 | 29.18367 | 29.17    |
| 11282 | M417T10_ | 1.089878 | 0.124167 | 0.482994 | 0.646939 | 0.869502 | UP   | 416.7862 | 416.7856 | 416.7872 | 9.979342 | 9.8753   |
| 11283 | M521T9_7 | 1.096644 | 0.133095 | 0.476444 | 0.646966 | 0.869505 | UP   | 521.088  | 521.0873 | 521.0884 | 9.176533 | 9.12675  |
| 11284 | M310T20_ | 1.123142 | 0.16754  | 0.488148 | 0.646978 | 0.869506 | UP   | 310.1775 | 310.1774 | 310.1778 | 19.66383 | 19.6415  |
| 11285 | M547T10_ | 1.116924 | 0.159531 | 0.476371 | 0.647052 | 0.869515 | UP   | 547.083  | 547.0825 | 547.0834 | 9.945258 | 9.843367 |
| 11286 | M490T11_ | 1.089553 | 0.123737 | 0.483861 | 0.647211 | 0.869532 | UP   | 489.7454 | 489.745  | 489.7456 | 10.89875 | 10.879   |
| 11287 | M358T10_ | 1.234671 | 0.304127 | 0.481209 | 0.647259 | 0.869537 | UP   | 357.8097 | 357.8094 | 357.8144 | 9.970617 | 9.840617 |
| 11288 | M335T9_1 | 1.233727 | -0.30302 | -0.48322 | 0.647281 | 0.86954  | DOWN | 335.4478 | 335.4461 | 335.4512 | 9.275017 | 9.12675  |
| 11289 | M423T9_4 | 1.28616  | 0.36307  | 0.486187 | 0.647303 | 0.869542 | UP   | 422.9285 | 422.926  | 422.9285 | 9.417317 | 9.014483 |
| 11290 | M526T9_2 | 1.082914 | -0.11492 | -0.47595 | 0.647444 | 0.869557 | DOWN | 525.6173 | 525.6154 | 525.618  | 9.214392 | 9.129317 |
| 11291 | M432T9_2 | 1.1594   | -0.21338 | -0.4755  | 0.647453 | 0.869558 | DOWN | 431.7902 | 431.79   | 431.7925 | 9.166858 | 9.146383 |
| 11292 | M390T10_ | 1.245646 | 0.316894 | 0.477456 | 0.647471 | 0.86956  | UP   | 389.9037 | 389.9029 | 389.9041 | 9.9244   | 9.811217 |
| 11293 | M551T9_1 | 1.3716   | 0.45586  | 0.489043 | 0.647489 | 0.869562 | UP   | 550.5369 | 550.5349 | 550.5394 | 9.278933 | 9.12675  |
| 11294 | M407T11_ | 1.108819 | -0.14902 | -0.47708 | 0.64756  | 0.86957  | DOWN | 407.3277 | 407.3275 | 407.328  | 10.8926  | 10.85018 |
| 11295 | M283T10_ | 1.130865 | -0.17743 | -0.47868 | 0.647561 | 0.86957  | DOWN | 283.307  | 283.3068 | 283.3072 | 9.972483 | 9.843367 |
| 11296 | M273T10_ | 1.155403 | 0.208396 | 0.474913 | 0.647578 | 0.869572 | UP   | 272.6618 | 272.6568 | 272.6619 | 9.967367 | 9.77355  |
| 11297 | M288T20_ | 1.091383 | -0.12616 | -0.49038 | 0.64768  | 0.869583 | DOWN | 288.1956 | 288.1955 | 288.1959 | 19.66567 | 19.6415  |
| 11298 | M273T29  | 1.103328 | -0.14186 | -0.47587 | 0.647703 | 0.869586 | DOWN | 273.2977 | 273.2976 | 273.298  | 29.28725 | 29.2785  |
| 11299 | M159T10_ | 1.17569  | 0.233508 | 0.477525 | 0.647762 | 0.869592 | UP   | 159.3996 | 159.3994 | 159.3997 | 9.9351   | 9.827283 |
| 11300 | M311T10_ | 1.08807  | -0.12177 | -0.48025 | 0.64794  | 0.869611 | DOWN | 310.8322 | 310.819  | 310.8324 | 9.823575 | 9.7124   |
| 11301 | M213T10_ | 1.045363 | -0.064   | -0.48607 | 0.648033 | 0.869622 | DOWN | 213.1778 | 213.1777 | 213.1779 | 9.871042 | 9.7634   |
| 11302 | M324T10_ | 1.283434 | -0.36001 | -0.47783 | 0.648134 | 0.869633 | DOWN | 323.936  | 323.9359 | 323.9363 | 9.8348   | 9.715683 |
| 11303 | M632T10_ | 1.134984 | -0.18267 | -0.47499 | 0.648146 | 0.869634 | DOWN | 632.123  | 632.1226 | 632.1241 | 9.95385  | 9.843367 |
| 11304 | M520T39_ | 1.124101 | 0.168771 | 0.482939 | 0.648235 | 0.869644 | UP   | 520.2749 | 520.2746 | 520.2752 | 39.2445  | 39.05717 |

|       |          |          |          |          |          |          |      |          |          |          |          |          |
|-------|----------|----------|----------|----------|----------|----------|------|----------|----------|----------|----------|----------|
| 11305 | M420T44_ | 1.400223 | 0.485657 | 0.492303 | 0.648256 | 0.869646 | UP   | 420.2227 | 420.2224 | 420.2227 | 44.19267 | 44.09217 |
| 11306 | M408T10_ | 1.064711 | -0.09046 | -0.47723 | 0.648293 | 0.86965  | DOWN | 408.2959 | 408.2936 | 408.2962 | 9.929225 | 9.811217 |
| 11307 | M496T9_2 | 1.110083 | 0.150668 | 0.475196 | 0.64851  | 0.869674 | UP   | 495.6503 | 495.6487 | 495.651  | 9.160333 | 9.12675  |
| 11308 | M331T10_ | 1.158179 | -0.21186 | -0.47603 | 0.648558 | 0.869679 | DOWN | 331.4268 | 331.4265 | 331.4272 | 9.830558 | 9.715683 |
| 11309 | M288T24_ | 1.155974 | -0.20911 | -0.47352 | 0.648562 | 0.869679 | DOWN | 288.3684 | 288.3658 | 288.3717 | 24.07483 | 23.99617 |
| 11310 | M488T41_ | 1.115211 | -0.15732 | -0.47615 | 0.648636 | 0.869687 | DOWN | 488.285  | 488.2847 | 488.2852 | 41.45967 | 41.30167 |
| 11311 | M219T9_1 | 1.434937 | 0.520987 | 0.489916 | 0.64864  | 0.869688 | UP   | 219.4467 | 219.4455 | 219.4476 | 9.295167 | 9.142767 |
| 11312 | M708T12  | 1.23418  | 0.303553 | 0.482807 | 0.648713 | 0.869696 | UP   | 708.3765 | 708.3759 | 708.3776 | 11.51165 | 11.49042 |
| 11313 | M399T11_ | 1.060295 | -0.08447 | -0.47441 | 0.648724 | 0.869697 | DOWN | 399.3438 | 399.3437 | 399.3442 | 10.90519 | 10.879   |
| 11314 | M660T29_ | 1.260422 | -0.33391 | -0.47563 | 0.648733 | 0.869698 | DOWN | 660.495  | 660.4946 | 660.4955 | 28.80542 | 28.783   |
| 11315 | M402T31  | 1.173818 | 0.231208 | 0.476895 | 0.648761 | 0.869701 | UP   | 401.5756 | 401.5753 | 401.5758 | 31.13308 | 31.105   |
| 11316 | M342T14_ | 1.119189 | -0.16245 | -0.47561 | 0.648875 | 0.869713 | DOWN | 342.2682 | 342.2681 | 342.2683 | 14.13604 | 14.1213  |
| 11317 | M326T10_ | 1.492316 | 0.577553 | 0.472929 | 0.648955 | 0.869722 | UP   | 325.5753 | 325.5752 | 325.5761 | 9.853633 | 9.73145  |
| 11318 | M421T9_2 | 1.161008 | -0.21538 | -0.47302 | 0.648998 | 0.869727 | DOWN | 421.1907 | 421.1904 | 421.1912 | 9.46     | 9.40135  |
| 11319 | M482T10_ | 1.119397 | -0.16272 | -0.47588 | 0.649001 | 0.869727 | DOWN | 481.8807 | 481.8803 | 481.8809 | 9.979342 | 9.859233 |
| 11320 | M284T20  | 1.15454  | 0.207318 | 0.480726 | 0.649019 | 0.869729 | UP   | 284.3137 | 284.3134 | 284.3139 | 20.41967 | 20.39    |
| 11321 | M285T17  | 1.145099 | 0.195473 | 0.477259 | 0.649025 | 0.86973  | UP   | 285.2534 | 285.253  | 285.2536 | 16.87017 | 16.85517 |
| 11322 | M711T10_ | 1.110551 | -0.15128 | -0.47416 | 0.649042 | 0.869731 | DOWN | 711.2821 | 711.2814 | 711.2827 | 9.956417 | 9.843367 |
| 11323 | M431T11_ | 1.148399 | -0.19962 | -0.47724 | 0.649069 | 0.869734 | DOWN | 431.104  | 431.1035 | 431.1046 | 10.90765 | 10.88747 |
| 11324 | M1824T10 | 1.14165  | 0.19112  | 0.474929 | 0.649268 | 0.869756 | UP   | 1823.962 | 1823.956 | 1823.963 | 9.830833 | 9.715683 |
| 11325 | M359T10_ | 1.151777 | -0.20386 | -0.47407 | 0.649309 | 0.86976  | DOWN | 359.1387 | 359.1385 | 359.146  | 9.957333 | 9.843367 |
| 11326 | M227T9_8 | 1.224198 | 0.291836 | 0.472874 | 0.649311 | 0.869761 | UP   | 227.1232 | 227.1223 | 227.1243 | 9.341617 | 9.132033 |
| 11327 | M651T45  | 1.073527 | 0.102359 | 0.473662 | 0.649352 | 0.869765 | UP   | 650.9226 | 650.9209 | 650.9233 | 44.83258 | 44.82533 |
| 11328 | M231T10_ | 1.037295 | 0.052826 | 0.483861 | 0.649362 | 0.869766 | UP   | 231.3818 | 231.3817 | 231.3818 | 9.85525  | 9.73145  |
| 11329 | M260T9_6 | 1.14465  | 0.194906 | 0.472775 | 0.649458 | 0.869777 | UP   | 260.0557 | 260.0545 | 260.056  | 9.310917 | 9.1322   |
| 11330 | M466T10_ | 1.11313  | 0.154623 | 0.472731 | 0.649461 | 0.869777 | UP   | 465.7436 | 465.7409 | 465.744  | 9.7583   | 9.56645  |
| 11331 | M264T30  | 1.174871 | 0.232502 | 0.480373 | 0.649496 | 0.869781 | UP   | 264.253  | 264.2528 | 264.2531 | 29.76133 | 29.74667 |
| 11332 | M464T26_ | 1.225693 | 0.293598 | 0.475169 | 0.649629 | 0.869795 | UP   | 464.3264 | 464.3254 | 464.327  | 26.29733 | 26.25817 |
| 11333 | M310T16  | 1.132011 | -0.17889 | -0.47499 | 0.649757 | 0.869809 | DOWN | 309.7369 | 309.7368 | 309.7373 | 15.5556  | 15.48167 |
| 11334 | M405T10_ | 1.090275 | -0.12469 | -0.47269 | 0.649821 | 0.869816 | DOWN | 404.5554 | 404.5552 | 404.5556 | 9.964092 | 9.859233 |
| 11335 | M536T23  | 1.124665 | -0.1695  | -0.47289 | 0.649854 | 0.86982  | DOWN | 536.3711 | 536.3707 | 536.3713 | 22.64033 | 22.58433 |
| 11336 | M236T9_3 | 1.207621 | -0.27217 | -0.47229 | 0.649953 | 0.86983  | DOWN | 235.6114 | 235.6093 | 235.6145 | 9.318992 | 9.132267 |
| 11337 | M501T11_ | 1.102403 | 0.140652 | 0.471327 | 0.650007 | 0.869836 | UP   | 501.1179 | 501.1159 | 501.1188 | 10.89193 | 10.877   |
| 11338 | M252T9_4 | 1.314852 | -0.3949  | -0.48044 | 0.650097 | 0.869846 | DOWN | 251.9372 | 251.9316 | 251.9421 | 9.310917 | 9.06855  |
| 11339 | M719T10_ | 1.14245  | -0.19213 | -0.47112 | 0.650187 | 0.869856 | DOWN | 719.027  | 719.0262 | 719.0277 | 9.8207   | 9.7124   |

|       |          |          |          |          |          |          |      |          |          |          |          |          |
|-------|----------|----------|----------|----------|----------|----------|------|----------|----------|----------|----------|----------|
| 11340 | M351T9_3 | 1.238598 | 0.308709 | 0.475541 | 0.650203 | 0.869857 | UP   | 350.6342 | 350.6331 | 350.6361 | 9.226608 | 9.06855  |
| 11341 | M216T11_ | 1.135348 | 0.183135 | 0.47434  | 0.650302 | 0.869868 | UP   | 215.7835 | 215.7831 | 215.784  | 10.91813 | 10.89125 |
| 11342 | M340T10_ | 1.043716 | -0.06173 | -0.47751 | 0.650367 | 0.869875 | DOWN | 339.5673 | 339.5665 | 339.5675 | 9.830283 | 9.715683 |
| 11343 | M404T10_ | 1.21959  | 0.286396 | 0.471918 | 0.65049  | 0.869888 | UP   | 404.2943 | 404.2904 | 404.2969 | 10.10142 | 9.9009   |
| 11344 | M536T10_ | 1.068692 | -0.09585 | -0.47422 | 0.650655 | 0.869906 | DOWN | 535.894  | 535.8937 | 535.8943 | 9.893742 | 9.79535  |
| 11345 | M443T11_ | 1.218335 | -0.28491 | -0.47065 | 0.650727 | 0.869914 | DOWN | 443.2404 | 443.24   | 443.2411 | 11.3369  | 11.32643 |
| 11346 | M858T10_ | 1.284416 | 0.361113 | 0.486236 | 0.650741 | 0.869916 | UP   | 857.8498 | 857.849  | 857.8501 | 9.948825 | 9.8753   |
| 11347 | M266T11_ | 1.355025 | 0.438319 | 0.470218 | 0.650752 | 0.869917 | UP   | 266.1749 | 266.1748 | 266.1776 | 10.86253 | 10.85018 |
| 11348 | M701T3   | 1.232596 | -0.3017  | -0.47427 | 0.650824 | 0.869925 | DOWN | 701.4928 | 701.4922 | 701.4928 | 3.392183 | 3.2799   |
| 11349 | M1014T10 | 1.08438  | -0.11687 | -0.47146 | 0.650866 | 0.869929 | DOWN | 1014.161 | 1014.16  | 1014.164 | 9.985117 | 9.8753   |
| 11350 | M302T10_ | 1.142551 | 0.192259 | 0.470025 | 0.650907 | 0.869934 | UP   | 302.4646 | 302.4645 | 302.4648 | 9.903017 | 9.8378   |
| 11351 | M378T38_ | 1.50869  | 0.593297 | 0.470134 | 0.651018 | 0.869946 | UP   | 378.2482 | 378.248  | 378.2485 | 37.892   | 37.50317 |
| 11352 | M622T43_ | 1.100153 | 0.137704 | 0.484258 | 0.651112 | 0.869956 | UP   | 622.3433 | 622.3431 | 622.3434 | 43.40183 | 43.2725  |
| 11353 | M450T9_3 | 1.269934 | -0.34475 | -0.46977 | 0.651161 | 0.869961 | DOWN | 449.6306 | 449.63   | 449.6307 | 9.142767 | 9.092333 |
| 11354 | M270T10_ | 1.107388 | -0.14716 | -0.47396 | 0.651189 | 0.869964 | DOWN | 270.3603 | 270.3601 | 270.3604 | 9.8207   | 9.699733 |
| 11355 | M641T10_ | 1.135588 | 0.18344  | 0.484015 | 0.651317 | 0.869978 | UP   | 641.2805 | 641.2797 | 641.2836 | 9.839008 | 9.715683 |
| 11356 | M254T10_ | 1.104922 | -0.14394 | -0.48327 | 0.651511 | 0.869999 | DOWN | 253.849  | 253.8489 | 253.8494 | 9.80415  | 9.6681   |
| 11357 | M663T10_ | 1.143998 | -0.19409 | -0.47648 | 0.65169  | 0.870018 | DOWN | 662.6966 | 662.6951 | 662.6975 | 9.949233 | 9.843367 |
| 11358 | M967T23  | 1.113573 | -0.1552  | -0.47083 | 0.651692 | 0.870018 | DOWN | 966.6575 | 966.6571 | 966.6581 | 22.50975 | 22.46783 |
| 11359 | M808T10_ | 1.205127 | 0.269185 | 0.483537 | 0.651737 | 0.870023 | UP   | 807.5927 | 807.5923 | 807.5932 | 9.942317 | 9.827283 |
| 11360 | M380T9_6 | 1.118388 | -0.16142 | -0.46878 | 0.651746 | 0.870024 | DOWN | 380.3325 | 380.3319 | 380.3345 | 9.320875 | 9.064833 |
| 11361 | M291T13  | 1.209111 | -0.27395 | -0.47047 | 0.651751 | 0.870025 | DOWN | 291.2163 | 291.2161 | 291.2166 | 13.34619 | 13.27312 |
| 11362 | M223T24  | 1.032878 | 0.04667  | 0.468779 | 0.651819 | 0.870032 | UP   | 223.169  | 223.169  | 223.1692 | 23.98192 | 23.96583 |
| 11363 | M500T15  | 1.164635 | -0.21988 | -0.46871 | 0.651851 | 0.870035 | DOWN | 500.3787 | 500.3784 | 500.379  | 15.4096  | 15.26215 |
| 11364 | M1013T15 | 1.241444 | -0.31202 | -0.4782  | 0.651895 | 0.87004  | DOWN | 1013.442 | 1013.442 | 1013.444 | 14.79503 | 14.73692 |
| 11365 | M214T9_8 | 1.205104 | -0.26916 | -0.46923 | 0.651916 | 0.870042 | DOWN | 213.7858 | 213.7843 | 213.7871 | 9.37735  | 9.132267 |
| 11366 | M1087T10 | 1.23844  | -0.30852 | -0.46851 | 0.651924 | 0.870043 | DOWN | 1086.681 | 1086.68  | 1086.681 | 9.955825 | 9.90755  |
| 11367 | M324T9_1 | 1.479472 | 0.565082 | 0.478846 | 0.651953 | 0.870046 | UP   | 324.4289 | 324.4287 | 324.4294 | 9.400042 | 9.38595  |
| 11368 | M920T11_ | 1.111203 | -0.15212 | -0.47016 | 0.651963 | 0.870048 | DOWN | 920.4615 | 920.4588 | 920.4622 | 10.94326 | 10.89355 |
| 11369 | M454T44  | 1.100973 | -0.13878 | -0.48601 | 0.652056 | 0.870058 | DOWN | 454.2642 | 454.2641 | 454.2643 | 43.89808 | 43.747   |
| 11370 | M1651T10 | 1.140128 | -0.1892  | -0.46868 | 0.65206  | 0.870058 | DOWN | 1650.613 | 1650.606 | 1650.617 | 9.9014   | 9.843367 |
| 11371 | M348T26_ | 1.339326 | 0.421508 | 0.468292 | 0.652165 | 0.870069 | UP   | 348.245  | 348.2447 | 348.2454 | 26.33117 | 26.2905  |
| 11372 | M654T10_ | 1.097547 | -0.13428 | -0.47125 | 0.65222  | 0.870075 | DOWN | 653.7945 | 653.7937 | 653.7951 | 9.830833 | 9.715683 |
| 11373 | M354T9_1 | 1.139352 | -0.18821 | -0.4682  | 0.65226  | 0.87008  | DOWN | 353.5221 | 353.5215 | 353.5224 | 8.8858   | 8.802417 |
| 11374 | M381T9_1 | 1.16554  | -0.221   | -0.47203 | 0.65242  | 0.870097 | DOWN | 381.3788 | 381.3745 | 381.3812 | 9.160933 | 9.1175   |

|       |          |          |          |          |          |          |      |          |          |          |          |          |
|-------|----------|----------|----------|----------|----------|----------|------|----------|----------|----------|----------|----------|
| 11375 | M320T41_ | 1.233866 | 0.303185 | 0.4682   | 0.65251  | 0.870106 | UP   | 320.1702 | 320.1701 | 320.1703 | 40.525   | 40.25167 |
| 11376 | M381T9_1 | 1.26933  | -0.34407 | -0.46793 | 0.652525 | 0.870108 | DOWN | 381.4125 | 381.4119 | 381.4127 | 9.075083 | 9.031633 |
| 11377 | M347T9_1 | 1.127127 | -0.17265 | -0.46814 | 0.652726 | 0.87013  | DOWN | 346.5728 | 346.5725 | 346.5824 | 9.29345  | 9.087183 |
| 11378 | M683T10_ | 1.12089  | 0.164644 | 0.467126 | 0.652869 | 0.870145 | UP   | 682.8055 | 682.8048 | 682.8065 | 9.9722   | 9.8753   |
| 11379 | M443T11_ | 1.079292 | -0.11008 | -0.46714 | 0.652938 | 0.870153 | DOWN | 443.1008 | 443.1006 | 443.1013 | 10.892   | 10.879   |
| 11380 | M587T9_2 | 1.162996 | -0.21785 | -0.47024 | 0.652958 | 0.870155 | DOWN | 587.0771 | 587.0731 | 587.0792 | 9.183308 | 9.12675  |
| 11381 | M213T10_ | 1.468231 | 0.554079 | 0.482049 | 0.653113 | 0.870171 | UP   | 212.5009 | 212.498  | 212.5012 | 9.937158 | 9.840617 |
| 11382 | M261T10_ | 1.134026 | -0.18145 | -0.46733 | 0.653167 | 0.870177 | DOWN | 261.3323 | 261.332  | 261.3323 | 9.95385  | 9.843367 |
| 11383 | M373T9_3 | 1.071916 | -0.10019 | -0.46904 | 0.653177 | 0.870178 | DOWN | 372.7357 | 372.7355 | 372.736  | 9.46855  | 9.416817 |
| 11384 | M383T10_ | 1.098512 | -0.13555 | -0.46733 | 0.653245 | 0.870186 | DOWN | 383.3461 | 383.3459 | 383.3464 | 10.39752 | 10.36125 |
| 11385 | M786T10_ | 1.108503 | 0.148612 | 0.470213 | 0.653248 | 0.870186 | UP   | 785.5616 | 785.5613 | 785.5626 | 9.999217 | 9.8753   |
| 11386 | M352T10_ | 1.040544 | -0.05734 | -0.46897 | 0.653255 | 0.870187 | DOWN | 352.3688 | 352.3686 | 352.369  | 9.8207   | 9.699733 |
| 11387 | M650T11_ | 1.157095 | 0.210507 | 0.474652 | 0.653328 | 0.870194 | UP   | 649.7551 | 649.7546 | 649.7564 | 10.90785 | 10.82972 |
| 11388 | M332T10_ | 1.205966 | 0.270189 | 0.466442 | 0.653365 | 0.870198 | UP   | 331.5079 | 331.5077 | 331.5171 | 9.967367 | 9.859233 |
| 11389 | M181T10_ | 1.29947  | 0.377923 | 0.47352  | 0.653429 | 0.870205 | UP   | 180.5271 | 180.527  | 180.5272 | 9.960967 | 9.843367 |
| 11390 | M254T11_ | 1.105424 | -0.1446  | -0.46669 | 0.653473 | 0.87021  | DOWN | 253.883  | 253.8829 | 253.8838 | 10.89875 | 10.8646  |
| 11391 | M259T11_ | 1.671532 | 0.741171 | 0.466055 | 0.653649 | 0.870229 | UP   | 259.241  | 259.2405 | 259.2422 | 10.91977 | 10.88747 |
| 11392 | M475T9_1 | 1.151348 | 0.203324 | 0.475701 | 0.653707 | 0.870235 | UP   | 474.5563 | 474.5557 | 474.5566 | 9.330283 | 9.250817 |
| 11393 | M230T10_ | 1.102559 | 0.140856 | 0.474769 | 0.653708 | 0.870235 | UP   | 230.157  | 230.1568 | 230.1572 | 9.940783 | 9.827283 |
| 11394 | M258T10_ | 1.247206 | 0.3187   | 0.475441 | 0.653811 | 0.870246 | UP   | 257.8551 | 257.8547 | 257.8555 | 9.752425 | 9.62055  |
| 11395 | M668T9_2 | 1.215059 | 0.281026 | 0.466359 | 0.653817 | 0.870247 | UP   | 668.4523 | 668.452  | 668.4527 | 8.719033 | 8.6529   |
| 11396 | M398T42_ | 1.072152 | -0.10051 | -0.47975 | 0.653853 | 0.870251 | DOWN | 398.2383 | 398.238  | 398.2384 | 41.719   | 41.33033 |
| 11397 | M308T10_ | 1.13921  | -0.18803 | -0.48199 | 0.653903 | 0.870256 | DOWN | 308.3686 | 308.3683 | 308.3687 | 9.914217 | 9.822117 |
| 11398 | M330T10_ | 1.162674 | -0.21745 | -0.47458 | 0.65393  | 0.870259 | DOWN | 330.2552 | 330.2531 | 330.2561 | 9.886933 | 9.75365  |
| 11399 | M376T10_ | 1.125894 | 0.171071 | 0.465612 | 0.653936 | 0.87026  | UP   | 375.6417 | 375.6416 | 375.642  | 9.968642 | 9.869467 |
| 11400 | M1154T11 | 1.048654 | -0.06854 | -0.46583 | 0.653943 | 0.87026  | DOWN | 1153.832 | 1153.831 | 1153.833 | 10.5188  | 10.47197 |
| 11401 | M1497T10 | 1.217523 | -0.28395 | -0.46749 | 0.653961 | 0.870262 | DOWN | 1496.845 | 1496.843 | 1496.846 | 9.967367 | 9.869467 |
| 11402 | M480T21  | 1.127549 | -0.17319 | -0.47714 | 0.653973 | 0.870264 | DOWN | 480.4063 | 480.406  | 480.4076 | 20.8355  | 20.81117 |
| 11403 | M703T11_ | 1.071144 | -0.09915 | -0.46548 | 0.654019 | 0.870269 | DOWN | 703.4693 | 703.4691 | 703.4708 | 10.892   | 10.879   |
| 11404 | M532T10_ | 1.11353  | -0.15514 | -0.4653  | 0.65412  | 0.870279 | DOWN | 532.1087 | 532.1083 | 532.1089 | 9.965892 | 9.8914   |
| 11405 | M583T10_ | 1.078902 | -0.10956 | -0.46941 | 0.654202 | 0.870288 | DOWN | 583.3293 | 583.3291 | 583.3295 | 9.591542 | 9.49445  |
| 11406 | M293T7   | 1.23131  | -0.30019 | -0.46644 | 0.654248 | 0.870293 | DOWN | 293.1903 | 293.1903 | 293.1904 | 6.99785  | 6.982017 |
| 11407 | M150T10_ | 1.21601  | 0.282155 | 0.481167 | 0.654472 | 0.870317 | UP   | 150.1902 | 150.19   | 150.1947 | 9.825692 | 9.743667 |
| 11408 | M413T9_7 | 1.090408 | 0.124868 | 0.465717 | 0.654527 | 0.870323 | UP   | 412.9056 | 412.9052 | 412.9079 | 9.245983 | 9.129317 |
| 11409 | M924T10_ | 1.158638 | 0.21243  | 0.471193 | 0.654712 | 0.870343 | UP   | 923.6907 | 923.6901 | 923.6913 | 9.629008 | 9.510117 |

|       |          |          |          |          |          |          |      |          |          |          |          |          |
|-------|----------|----------|----------|----------|----------|----------|------|----------|----------|----------|----------|----------|
| 11410 | M676T10_ | 1.092166 | -0.12719 | -0.46592 | 0.654717 | 0.870343 | DOWN | 675.6999 | 675.6997 | 675.7002 | 9.82645  | 9.699733 |
| 11411 | M457T9_4 | 1.067839 | -0.09469 | -0.46423 | 0.654853 | 0.870358 | DOWN | 457.0792 | 457.0784 | 457.0803 | 9.277017 | 9.078567 |
| 11412 | M639T10_ | 1.12614  | -0.17139 | -0.46451 | 0.654888 | 0.870362 | DOWN | 638.9112 | 638.9111 | 638.9129 | 9.840617 | 9.7634   |
| 11413 | M212T9_4 | 1.371487 | 0.455741 | 0.464729 | 0.65492  | 0.870365 | UP   | 211.898  | 211.897  | 211.8987 | 9.295167 | 9.111033 |
| 11414 | M434T9_7 | 1.081082 | -0.11248 | -0.46411 | 0.654936 | 0.870367 | DOWN | 433.7862 | 433.7816 | 433.7874 | 9.250817 | 8.892117 |
| 11415 | M793T10_ | 1.146531 | -0.19728 | -0.46471 | 0.654997 | 0.870373 | DOWN | 793.1883 | 793.1873 | 793.191  | 9.952017 | 9.843367 |
| 11416 | M716T10_ | 1.097263 | 0.13391  | 0.473708 | 0.655142 | 0.870389 | UP   | 716.3816 | 716.3755 | 716.3817 | 9.8207   | 9.577683 |
| 11417 | M224T11_ | 1.190027 | 0.250994 | 0.469811 | 0.655148 | 0.870389 | UP   | 224.3265 | 224.3264 | 224.3271 | 10.91878 | 10.87487 |
| 11418 | M843T10_ | 1.208981 | 0.273791 | 0.474688 | 0.655319 | 0.870408 | UP   | 843.1917 | 843.1887 | 843.1929 | 9.924775 | 9.843367 |
| 11419 | M167T10_ | 1.112306 | 0.153553 | 0.46395  | 0.655336 | 0.870409 | UP   | 166.8481 | 166.848  | 166.8481 | 9.946467 | 9.827283 |
| 11420 | M441T10_ | 1.091394 | -0.12617 | -0.4719  | 0.655398 | 0.870416 | DOWN | 441.3456 | 441.3449 | 441.346  | 9.8161   | 9.699733 |
| 11421 | M848T10_ | 1.068664 | -0.09581 | -0.46557 | 0.655568 | 0.870434 | DOWN | 847.553  | 847.5523 | 847.5565 | 10.04355 | 9.929783 |
| 11422 | M487T10_ | 1.25792  | 0.33104  | 0.475088 | 0.655618 | 0.87044  | UP   | 487.4238 | 487.4232 | 487.4341 | 9.950733 | 9.55155  |
| 11423 | M367T22_ | 1.096559 | -0.13298 | -0.46997 | 0.655799 | 0.870459 | DOWN | 367.2377 | 367.2376 | 367.238  | 21.638   | 21.6215  |
| 11424 | M426T11_ | 1.076519 | -0.10637 | -0.46398 | 0.655821 | 0.870461 | DOWN | 426.3678 | 426.3676 | 426.368  | 10.89953 | 10.879   |
| 11425 | M890T10_ | 1.058234 | -0.08166 | -0.46408 | 0.655827 | 0.870462 | DOWN | 889.8694 | 889.8683 | 889.8699 | 9.930908 | 9.827283 |
| 11426 | M683T14  | 1.104155 | -0.14294 | -0.46303 | 0.655883 | 0.870468 | DOWN | 682.5262 | 682.526  | 682.5268 | 14.13633 | 14.1213  |
| 11427 | M249T11_ | 1.185979 | 0.246078 | 0.463637 | 0.655911 | 0.870471 | UP   | 248.5385 | 248.5382 | 248.5389 | 10.94208 | 10.89125 |
| 11428 | M166T9_6 | 1.286111 | -0.36301 | -0.47392 | 0.655916 | 0.870471 | DOWN | 166.1006 | 166.1003 | 166.1012 | 9.175783 | 9.111033 |
| 11429 | M398T11_ | 1.063659 | -0.08904 | -0.46771 | 0.65595  | 0.870475 | DOWN | 398.4306 | 398.4284 | 398.4309 | 10.91371 | 10.879   |
| 11430 | M251T10_ | 1.193922 | -0.25571 | -0.46348 | 0.655952 | 0.870475 | DOWN | 250.613  | 250.6129 | 250.6132 | 9.942317 | 9.843367 |
| 11431 | M524T41_ | 1.183589 | 0.243169 | 0.462567 | 0.656001 | 0.87048  | UP   | 524.3061 | 524.306  | 524.3063 | 41.46692 | 41.07167 |
| 11432 | M498T9_4 | 1.092142 | 0.12716  | 0.471283 | 0.656002 | 0.87048  | UP   | 497.7889 | 497.7878 | 497.7893 | 9.20785  | 9.12675  |
| 11433 | M947T10_ | 1.111632 | -0.15268 | -0.46774 | 0.656146 | 0.870496 | DOWN | 946.7413 | 946.7405 | 946.7438 | 9.977442 | 9.8753   |
| 11434 | M1765T10 | 1.103266 | 0.14178  | 0.465028 | 0.65616  | 0.870497 | UP   | 1764.508 | 1764.505 | 1764.514 | 9.82645  | 9.715683 |
| 11435 | M1930T10 | 1.122129 | 0.166238 | 0.472393 | 0.656207 | 0.870502 | UP   | 1930.493 | 1930.49  | 1930.494 | 9.81635  | 9.715683 |
| 11436 | M278T9_1 | 1.206171 | -0.27043 | -0.4633  | 0.656304 | 0.870513 | DOWN | 277.6814 | 277.6813 | 277.6818 | 8.8398   | 8.7891   |
| 11437 | M520T37_ | 1.047821 | 0.067392 | 0.477797 | 0.656346 | 0.870517 | UP   | 520.275  | 520.2749 | 520.2751 | 36.97117 | 36.94833 |
| 11438 | M266T11_ | 1.143314 | -0.19322 | -0.46246 | 0.656361 | 0.870519 | DOWN | 265.524  | 265.5224 | 265.5242 | 10.92816 | 10.84847 |
| 11439 | M327T10_ | 1.097585 | -0.13433 | -0.4651  | 0.656458 | 0.870529 | DOWN | 327.3255 | 327.3251 | 327.3261 | 9.972917 | 9.859233 |
| 11440 | M841T10_ | 1.106781 | -0.14637 | -0.46338 | 0.656496 | 0.870533 | DOWN | 840.9616 | 840.9614 | 840.9623 | 9.931108 | 9.827283 |
| 11441 | M619T18  | 1.05673  | -0.07961 | -0.46247 | 0.656521 | 0.870536 | DOWN | 619.4789 | 619.4787 | 619.479  | 18.011   | 17.99367 |
| 11442 | M491T10_ | 1.141186 | 0.190534 | 0.474594 | 0.656619 | 0.870546 | UP   | 491.2308 | 491.2299 | 491.2313 | 9.7953   | 9.746783 |
| 11443 | M398T10_ | 1.046668 | -0.0658  | -0.4617  | 0.65665  | 0.87055  | DOWN | 398.1183 | 398.118  | 398.1184 | 9.917167 | 9.811217 |
| 11444 | M353T43_ | 1.072202 | -0.10058 | -0.46172 | 0.656745 | 0.87056  | DOWN | 353.2321 | 353.232  | 353.2322 | 43.08525 | 42.884   |

|       |          |          |          |          |          |          |      |          |          |          |          |          |
|-------|----------|----------|----------|----------|----------|----------|------|----------|----------|----------|----------|----------|
| 11445 | M331T11_ | 1.119437 | 0.162773 | 0.462379 | 0.65688  | 0.870574 | UP   | 331.4769 | 331.4765 | 331.4772 | 10.87765 | 10.8214  |
| 11446 | M399T40  | 1.069819 | -0.09737 | -0.46707 | 0.656898 | 0.870576 | DOWN | 399.2373 | 399.2373 | 399.2375 | 40.24433 | 40.10767 |
| 11447 | M389T11_ | 1.103332 | -0.14187 | -0.46134 | 0.656903 | 0.870576 | DOWN | 389.124  | 389.1239 | 389.1242 | 10.93468 | 10.90785 |
| 11448 | M1169T10 | 1.122492 | -0.16671 | -0.4755  | 0.656938 | 0.87058  | DOWN | 1169.109 | 1169.108 | 1169.11  | 9.967367 | 9.859233 |
| 11449 | M372T23_ | 1.140947 | -0.19023 | -0.46119 | 0.656947 | 0.870581 | DOWN | 372.2663 | 372.266  | 372.2665 | 22.69142 | 22.66867 |
| 11450 | M654T28  | 1.218742 | -0.28539 | -0.46123 | 0.65697  | 0.870584 | DOWN | 653.9713 | 653.9701 | 653.9725 | 28.44517 | 28.33267 |
| 11451 | M532T40_ | 1.040055 | -0.05666 | -0.47392 | 0.657003 | 0.870587 | DOWN | 532.3113 | 532.3112 | 532.3119 | 40.266   | 40.20833 |
| 11452 | M412T32_ | 1.104771 | -0.14375 | -0.46302 | 0.657018 | 0.870589 | DOWN | 412.3781 | 412.378  | 412.3783 | 31.56742 | 31.56567 |
| 11453 | M724T34  | 1.321291 | 0.401949 | 0.471972 | 0.657107 | 0.870598 | UP   | 723.5087 | 723.5083 | 723.5092 | 34.31342 | 34.29217 |
| 11454 | M369T11_ | 1.069672 | 0.097168 | 0.462163 | 0.657293 | 0.870618 | UP   | 368.5167 | 368.5165 | 368.5171 | 10.8914  | 10.87487 |
| 11455 | M206T9_8 | 1.342225 | 0.424626 | 0.460929 | 0.657397 | 0.870629 | UP   | 205.775  | 205.774  | 205.7754 | 9.1691   | 9.126783 |
| 11456 | M252T11_ | 1.147078 | -0.19796 | -0.46959 | 0.657435 | 0.870633 | DOWN | 251.7086 | 251.7085 | 251.7093 | 10.91977 | 10.89125 |
| 11457 | M260T9_3 | 1.184622 | -0.24443 | -0.46161 | 0.657502 | 0.87064  | DOWN | 259.681  | 259.6797 | 259.6813 | 9.280767 | 9.207667 |
| 11458 | M221T10_ | 1.119763 | -0.16319 | -0.46808 | 0.657521 | 0.870642 | DOWN | 221.4159 | 221.4158 | 221.4163 | 9.91765  | 9.811217 |
| 11459 | M295T25_ | 1.089674 | 0.123897 | 0.462152 | 0.657603 | 0.870651 | UP   | 295.1901 | 295.1899 | 295.1903 | 25.15933 | 25.14117 |
| 11460 | M302T9_3 | 1.754201 | 0.810814 | 0.467658 | 0.657661 | 0.870657 | UP   | 302.2142 | 302.2134 | 302.2146 | 8.64725  | 8.53335  |
| 11461 | M236T11_ | 1.064564 | -0.09026 | -0.46013 | 0.657855 | 0.870677 | DOWN | 236.2101 | 236.21   | 236.2103 | 10.90551 | 10.879   |
| 11462 | M885T21  | 1.122554 | -0.16678 | -0.465   | 0.658079 | 0.870701 | DOWN | 884.5922 | 884.5917 | 884.5926 | 21.34883 | 21.32817 |
| 11463 | M296T9_4 | 1.158495 | -0.21225 | -0.46136 | 0.658129 | 0.870706 | DOWN | 295.8639 | 295.8638 | 295.8645 | 8.939    | 8.863633 |
| 11464 | M455T11_ | 1.11401  | 0.155763 | 0.465549 | 0.658155 | 0.870709 | UP   | 455.1991 | 455.1987 | 455.1992 | 10.8914  | 10.879   |
| 11465 | M734T36  | 1.283516 | -0.3601  | -0.46093 | 0.658164 | 0.87071  | DOWN | 733.5504 | 733.55   | 733.5519 | 35.65325 | 35.63333 |
| 11466 | M446T10_ | 1.129972 | -0.17629 | -0.46201 | 0.658297 | 0.870724 | DOWN | 445.9229 | 445.9224 | 445.9236 | 9.94785  | 9.843367 |
| 11467 | M361T10_ | 1.048884 | -0.06886 | -0.46037 | 0.658331 | 0.870728 | DOWN | 361.1771 | 361.1769 | 361.1778 | 9.924308 | 9.811217 |
| 11468 | M616T9   | 1.170627 | -0.22728 | -0.46244 | 0.658367 | 0.870732 | DOWN | 616.4474 | 616.437  | 616.448  | 9.312167 | 9.1503   |
| 11469 | M630T11_ | 1.076355 | -0.10615 | -0.46028 | 0.658424 | 0.870738 | DOWN | 629.729  | 629.7289 | 629.73   | 10.892   | 10.879   |
| 11470 | M352T27_ | 1.191703 | -0.25303 | -0.45973 | 0.658453 | 0.870741 | DOWN | 352      | 351.9997 | 352.0002 | 26.839   | 26.81267 |
| 11471 | M340T10_ | 1.465101 | 0.551    | 0.459432 | 0.658462 | 0.870742 | UP   | 339.7127 | 339.7122 | 339.7128 | 9.816183 | 9.728083 |
| 11472 | M231T10_ | 1.106881 | 0.1465   | 0.466961 | 0.658565 | 0.870753 | UP   | 230.6246 | 230.6244 | 230.6249 | 9.939283 | 9.827283 |
| 11473 | M715T10_ | 1.07265  | -0.10118 | -0.46088 | 0.6586   | 0.870756 | DOWN | 715.4727 | 715.4721 | 715.4728 | 9.54805  | 9.447617 |
| 11474 | M736T10_ | 1.161898 | -0.21648 | -0.4589  | 0.658622 | 0.870759 | DOWN | 735.9642 | 735.9635 | 735.9647 | 9.956417 | 9.843367 |
| 11475 | M184T9_1 | 1.250798 | 0.322848 | 0.465226 | 0.658635 | 0.87076  | UP   | 183.6154 | 183.6142 | 183.6155 | 9.239867 | 9.190317 |
| 11476 | M1503T10 | 1.154912 | -0.20778 | -0.4612  | 0.658643 | 0.870761 | DOWN | 1502.946 | 1502.945 | 1502.948 | 9.8796   | 9.79535  |
| 11477 | M485T11_ | 1.084125 | -0.11653 | -0.45884 | 0.658699 | 0.870767 | DOWN | 485.4601 | 485.46   | 485.4611 | 10.89907 | 10.879   |
| 11478 | M378T29  | 1.1231   | 0.167487 | 0.475606 | 0.658704 | 0.870767 | UP   | 378.2121 | 378.212  | 378.2122 | 28.79    | 28.70833 |
| 11479 | M326T10_ | 1.054098 | -0.07601 | -0.46341 | 0.65884  | 0.870782 | DOWN | 325.5596 | 325.5592 | 325.5606 | 9.831142 | 9.715683 |



|       |          |          |          |          |          |          |      |          |          |          |          |          |
|-------|----------|----------|----------|----------|----------|----------|------|----------|----------|----------|----------|----------|
| 11480 | M334T10_ | 1.067375 | 0.094067 | 0.472366 | 0.658879 | 0.870786 | UP   | 334.0947 | 334.0946 | 334.0955 | 9.864467 | 9.747533 |
| 11481 | M174T10_ | 1.092485 | -0.12761 | -0.46448 | 0.65893  | 0.870791 | DOWN | 173.5448 | 173.5448 | 173.5449 | 9.8348   | 9.715683 |
| 11482 | M396T10_ | 1.209399 | -0.27429 | -0.45937 | 0.658983 | 0.870797 | DOWN | 396.446  | 396.4459 | 396.4461 | 9.960417 | 9.946367 |
| 11483 | M478T41_ | 1.167861 | -0.22387 | -0.4594  | 0.658994 | 0.870798 | DOWN | 478.2643 | 478.2641 | 478.2647 | 41.22258 | 40.942   |
| 11484 | M1442T10 | 1.149195 | -0.20062 | -0.46093 | 0.659001 | 0.870799 | DOWN | 1441.986 | 1441.983 | 1441.988 | 9.946467 | 9.859233 |
| 11485 | M434T10_ | 1.176182 | 0.234111 | 0.458312 | 0.659084 | 0.870808 | UP   | 434.2307 | 434.2303 | 434.2311 | 9.964092 | 9.859233 |
| 11486 | M526T10_ | 1.108312 | -0.14836 | -0.46437 | 0.659204 | 0.87082  | DOWN | 526.38   | 526.3795 | 526.3804 | 10.46805 | 10.42407 |
| 11487 | M536T45  | 1.1332   | 0.180402 | 0.461036 | 0.6593   | 0.87083  | UP   | 536.3061 | 536.3059 | 536.3063 | 44.8685  | 44.62383 |
| 11488 | M399T10_ | 1.10257  | 0.14087  | 0.464411 | 0.659328 | 0.870833 | UP   | 399.4017 | 399.4012 | 399.4024 | 9.931875 | 9.827283 |
| 11489 | M747T33  | 1.092785 | -0.12801 | -0.45891 | 0.659332 | 0.870834 | DOWN | 746.5262 | 746.5258 | 746.5267 | 33.41258 | 33.39817 |
| 11490 | M255T44_ | 1.161483 | 0.215968 | 0.461493 | 0.659337 | 0.870834 | UP   | 255.195  | 255.195  | 255.1951 | 43.84058 | 43.74733 |
| 11491 | M432T11_ | 1.099967 | 0.137461 | 0.460408 | 0.659813 | 0.870884 | UP   | 432.3077 | 432.3065 | 432.3089 | 10.94373 | 10.879   |
| 11492 | M299T10_ | 1.349029 | -0.43192 | -0.45935 | 0.659838 | 0.870887 | DOWN | 298.822  | 298.8218 | 298.8222 | 9.894317 | 9.827283 |
| 11493 | M248T11_ | 1.142428 | 0.192103 | 0.457457 | 0.659866 | 0.87089  | UP   | 247.6034 | 247.5939 | 247.6036 | 10.90553 | 10.879   |
| 11494 | M358T22_ | 1.166455 | -0.22213 | -0.45799 | 0.659873 | 0.870891 | DOWN | 357.7534 | 357.7531 | 357.7538 | 21.578   | 21.54367 |
| 11495 | M909T10_ | 1.133314 | -0.18055 | -0.46194 | 0.659994 | 0.870903 | DOWN | 908.6907 | 908.6897 | 908.6913 | 10.15308 | 10.08517 |
| 11496 | M334T10_ | 1.136606 | 0.184733 | 0.460107 | 0.660036 | 0.870908 | UP   | 333.7183 | 333.7182 | 333.7185 | 9.958617 | 9.843367 |
| 11497 | M478T44_ | 1.046849 | -0.06605 | -0.46871 | 0.660253 | 0.870931 | DOWN | 478.2643 | 478.264  | 478.2645 | 43.8045  | 43.71817 |
| 11498 | M726T10_ | 1.386323 | 0.471263 | 0.457121 | 0.660333 | 0.870939 | UP   | 725.7123 | 725.7119 | 725.7136 | 9.8348   | 9.7124   |
| 11499 | M454T9_2 | 1.194869 | 0.256852 | 0.45651  | 0.660335 | 0.870939 | UP   | 454.4589 | 454.4538 | 454.4646 | 9.29565  | 9.191283 |
| 11500 | M506T10_ | 1.085209 | -0.11797 | -0.45798 | 0.660336 | 0.87094  | DOWN | 505.6398 | 505.6395 | 505.6407 | 10.37437 | 10.35992 |
| 11501 | M540T9_2 | 1.0832   | -0.1153  | -0.46103 | 0.660343 | 0.87094  | DOWN | 540.3059 | 540.3058 | 540.3061 | 9.480467 | 9.38595  |
| 11502 | M503T10_ | 1.142655 | 0.192389 | 0.457321 | 0.660509 | 0.870958 | UP   | 503.3205 | 503.3141 | 503.321  | 10.09699 | 10.01333 |
| 11503 | M250T29  | 1.122493 | -0.16671 | -0.45636 | 0.660623 | 0.87097  | DOWN | 250.1879 | 250.1878 | 250.1879 | 28.992   | 28.95117 |
| 11504 | M619T9   | 1.186158 | -0.2463  | -0.45784 | 0.660641 | 0.870972 | DOWN | 619.2706 | 619.2704 | 619.2707 | 9.332617 | 9.275917 |
| 11505 | M274T9_2 | 1.203512 | -0.26725 | -0.45822 | 0.660694 | 0.870977 | DOWN | 273.636  | 273.6359 | 273.6361 | 9.371417 | 9.29015  |
| 11506 | M615T45_ | 1.051162 | 0.071986 | 0.455717 | 0.660717 | 0.87098  | UP   | 615.4408 | 615.44   | 615.4419 | 44.9835  | 44.98333 |
| 11507 | M632T10_ | 1.160283 | -0.21448 | -0.46479 | 0.660721 | 0.87098  | DOWN | 631.778  | 631.7777 | 631.7783 | 9.900133 | 9.874067 |
| 11508 | M757T10_ | 1.12537  | 0.1704   | 0.457136 | 0.660721 | 0.87098  | UP   | 757.0005 | 756.9992 | 757.0012 | 9.948875 | 9.843367 |
| 11509 | M406T10_ | 1.136094 | 0.184082 | 0.467917 | 0.660764 | 0.870985 | UP   | 406.398  | 406.3976 | 406.3981 | 9.948875 | 9.843367 |
| 11510 | M253T10_ | 1.176605 | -0.23463 | -0.46678 | 0.660781 | 0.870986 | DOWN | 252.9743 | 252.9663 | 252.9744 | 9.8161   | 9.747533 |
| 11511 | M337T11_ | 1.152889 | -0.20525 | -0.45572 | 0.660817 | 0.87099  | DOWN | 337.3534 | 337.3532 | 337.3541 | 10.8914  | 10.873   |
| 11512 | M681T23  | 1.097422 | -0.13412 | -0.45933 | 0.660875 | 0.870996 | DOWN | 681.4322 | 681.4315 | 681.4332 | 23.07417 | 23.0305  |
| 11513 | M415T9_4 | 1.186365 | 0.246548 | 0.464076 | 0.661021 | 0.871012 | UP   | 414.9015 | 414.901  | 414.9019 | 9.382183 | 9.145433 |
| 11514 | M183T9_7 | 1.2021   | 0.265557 | 0.455291 | 0.661062 | 0.871016 | UP   | 183.0628 | 183.06   | 183.063  | 8.94575  | 8.88765  |

|       |          |          |          |          |          |          |      |          |          |          |          |          |
|-------|----------|----------|----------|----------|----------|----------|------|----------|----------|----------|----------|----------|
| 11515 | M367T10_ | 1.499974 | 0.584938 | 0.468202 | 0.661199 | 0.87103  | UP   | 367.3655 | 367.3644 | 367.3712 | 9.859983 | 9.699733 |
| 11516 | M459T10_ | 1.084102 | -0.1165  | -0.45627 | 0.661247 | 0.871035 | DOWN | 459.0859 | 459.0853 | 459.086  | 9.914217 | 9.811217 |
| 11517 | M219T10_ | 1.193037 | 0.254638 | 0.455308 | 0.661353 | 0.871046 | UP   | 219.2146 | 219.2144 | 219.2147 | 10.42127 | 10.32768 |
| 11518 | M338T10_ | 1.072605 | -0.10112 | -0.46715 | 0.661407 | 0.871052 | DOWN | 337.6654 | 337.6646 | 337.6657 | 9.744917 | 9.62055  |
| 11519 | M328T9_4 | 1.178041 | 0.23639  | 0.468815 | 0.661411 | 0.871053 | UP   | 328.2868 | 328.2867 | 328.287  | 9.29345  | 9.24215  |
| 11520 | M396T43_ | 1.116948 | 0.159562 | 0.454702 | 0.661437 | 0.871055 | UP   | 396.2225 | 396.2223 | 396.2227 | 42.72592 | 42.46717 |
| 11521 | M454T9_2 | 1.228594 | 0.297008 | 0.457917 | 0.661497 | 0.871062 | UP   | 453.5441 | 453.5415 | 453.5512 | 9.261817 | 9.221317 |
| 11522 | M409T11_ | 1.131367 | -0.17807 | -0.46264 | 0.661549 | 0.871067 | DOWN | 409.2308 | 409.2307 | 409.2407 | 11.23148 | 11.135   |
| 11523 | M394T9_1 | 1.310513 | 0.390132 | 0.454637 | 0.66159  | 0.871071 | UP   | 394.3076 | 394.3062 | 394.3132 | 9.295167 | 9.0839   |
| 11524 | M225T10_ | 1.256038 | -0.32888 | -0.45436 | 0.661648 | 0.871077 | DOWN | 224.7604 | 224.7494 | 224.762  | 9.8399   | 9.715683 |
| 11525 | M484T11_ | 1.120958 | -0.16473 | -0.46363 | 0.661653 | 0.871078 | DOWN | 484.1302 | 484.1297 | 484.1304 | 10.90548 | 10.879   |
| 11526 | M201T10_ | 1.118718 | -0.16185 | -0.45524 | 0.661916 | 0.871106 | DOWN | 201.2451 | 201.2448 | 201.2452 | 9.968992 | 9.859233 |
| 11527 | M184T10_ | 1.217489 | -0.28391 | -0.45568 | 0.662007 | 0.871115 | DOWN | 183.5024 | 183.5024 | 183.5024 | 9.902408 | 9.827283 |
| 11528 | M537T12  | 1.103499 | -0.14209 | -0.45737 | 0.662117 | 0.871127 | DOWN | 537.4008 | 537.4005 | 537.4009 | 11.71528 | 11.70755 |
| 11529 | M351T10_ | 1.031949 | -0.04537 | -0.4675  | 0.662155 | 0.871131 | DOWN | 351.379  | 351.3788 | 351.379  | 9.82645  | 9.728083 |
| 11530 | M466T18  | 1.127476 | -0.1731  | -0.46507 | 0.662156 | 0.871131 | DOWN | 466.3058 | 466.3057 | 466.306  | 18.1265  | 18.09917 |
| 11531 | M718T3   | 1.160312 | 0.214512 | 0.45353  | 0.662284 | 0.871144 | UP   | 718.4914 | 718.4908 | 718.4915 | 3.4632   | 3.329983 |
| 11532 | M369T10_ | 1.11568  | 0.157923 | 0.457369 | 0.662305 | 0.871146 | UP   | 368.6569 | 368.6565 | 368.658  | 9.951283 | 9.843367 |
| 11533 | M720T10_ | 1.112416 | -0.1537  | -0.4552  | 0.662399 | 0.871156 | DOWN | 719.8422 | 719.8415 | 719.8431 | 9.508883 | 9.416817 |
| 11534 | M289T11_ | 1.139148 | 0.187955 | 0.453716 | 0.662495 | 0.871166 | UP   | 289.1355 | 289.1353 | 289.1357 | 10.82972 | 10.8214  |
| 11535 | M249T11_ | 1.097312 | 0.133974 | 0.465139 | 0.662582 | 0.871175 | UP   | 249.0274 | 249.0273 | 249.0277 | 10.91376 | 10.879   |
| 11536 | M535T27_ | 1.211798 | -0.27715 | -0.45535 | 0.662613 | 0.871179 | DOWN | 534.7235 | 534.7232 | 534.7236 | 26.78933 | 26.73833 |
| 11537 | M590T9_2 | 1.24146  | 0.312037 | 0.454504 | 0.662675 | 0.871185 | UP   | 590.2656 | 590.2632 | 590.2682 | 9.332617 | 9.275917 |
| 11538 | M510T10_ | 1.128542 | -0.17446 | -0.46377 | 0.66268  | 0.871186 | DOWN | 510.1204 | 510.12   | 510.1206 | 9.886258 | 9.7634   |
| 11539 | M258T11_ | 1.227782 | -0.29605 | -0.45304 | 0.662756 | 0.871194 | DOWN | 258.2459 | 258.2457 | 258.2459 | 10.93618 | 10.83572 |
| 11540 | M403T41  | 1.043398 | -0.06129 | -0.45463 | 0.662982 | 0.871217 | DOWN | 403.2323 | 403.2322 | 403.2326 | 40.568   | 40.26583 |
| 11541 | M182T9_3 | 1.187835 | 0.248335 | 0.45629  | 0.663029 | 0.871222 | UP   | 181.8946 | 181.8943 | 181.8946 | 9.40325  | 9.26575  |
| 11542 | M335T9_1 | 1.067244 | -0.09389 | -0.45279 | 0.663089 | 0.871228 | DOWN | 335.2439 | 335.2436 | 335.2441 | 9.310917 | 9.16125  |
| 11543 | M508T44_ | 1.174117 | 0.231577 | 0.46036  | 0.663155 | 0.871235 | UP   | 508.3111 | 508.3107 | 508.3115 | 43.81183 | 43.56017 |
| 11544 | M220T10_ | 1.164299 | -0.21946 | -0.45174 | 0.663466 | 0.871268 | DOWN | 219.9936 | 219.9924 | 219.9943 | 9.830283 | 9.801833 |
| 11545 | M231T10_ | 1.045894 | -0.06474 | -0.45269 | 0.663471 | 0.871268 | DOWN | 230.8855 | 230.8854 | 230.8855 | 9.917167 | 9.811217 |
| 11546 | M673T10_ | 1.144686 | 0.194952 | 0.453698 | 0.663477 | 0.871269 | UP   | 673.4717 | 673.4711 | 673.4731 | 10.31255 | 10.26617 |
| 11547 | M422T10_ | 1.22378  | 0.291345 | 0.4573   | 0.66348  | 0.871269 | UP   | 421.9505 | 421.95   | 421.9508 | 9.975217 | 9.859233 |
| 11548 | M667T45  | 1.011921 | -0.0171  | -0.4517  | 0.663507 | 0.871272 | DOWN | 667.4788 | 667.4785 | 667.4792 | 44.696   | 44.68167 |
| 11549 | M416T39_ | 1.106091 | 0.14547  | 0.467289 | 0.663567 | 0.871278 | UP   | 416.2641 | 416.2639 | 416.2641 | 38.971   | 38.856   |

|       |          |          |          |          |          |          |      |          |          |          |          |          |
|-------|----------|----------|----------|----------|----------|----------|------|----------|----------|----------|----------|----------|
| 11550 | M680T21  | 1.075552 | -0.10508 | -0.45363 | 0.663618 | 0.871284 | DOWN | 679.5112 | 679.5111 | 679.5118 | 20.64883 | 20.62683 |
| 11551 | M264T9_7 | 1.226648 | 0.294722 | 0.456534 | 0.663644 | 0.871286 | UP   | 264.4362 | 264.4358 | 264.4369 | 8.745983 | 8.643767 |
| 11552 | M304T11_ | 1.117598 | -0.1604  | -0.45359 | 0.66369  | 0.871291 | DOWN | 303.5689 | 303.5687 | 303.569  | 10.85923 | 10.85018 |
| 11553 | M722T10_ | 1.154338 | -0.20707 | -0.45231 | 0.66372  | 0.871294 | DOWN | 721.9283 | 721.9277 | 721.9288 | 9.842    | 9.747533 |
| 11554 | M469T9_5 | 1.273937 | 0.349294 | 0.465623 | 0.663851 | 0.871308 | UP   | 469.1456 | 469.1452 | 469.1461 | 9.204617 | 9.142767 |
| 11555 | M325T11_ | 1.098511 | -0.13555 | -0.45185 | 0.663897 | 0.871313 | DOWN | 325.0791 | 325.0787 | 325.0795 | 10.91183 | 10.8646  |
| 11556 | M328T10_ | 1.084829 | -0.11747 | -0.4556  | 0.664017 | 0.871325 | DOWN | 328.1051 | 328.1048 | 328.1059 | 9.985117 | 9.8753   |
| 11557 | M416T20  | 1.042177 | -0.0596  | -0.45247 | 0.664211 | 0.871345 | DOWN | 416.2958 | 416.2957 | 416.2961 | 20.24492 | 20.23017 |
| 11558 | M1230T45 | 1.077969 | 0.108315 | 0.452941 | 0.664225 | 0.871347 | UP   | 1229.876 | 1229.875 | 1229.877 | 44.98342 | 44.94033 |
| 11559 | M615T10_ | 1.16419  | 0.219327 | 0.464141 | 0.664274 | 0.871352 | UP   | 615.1691 | 615.1689 | 615.1697 | 9.8207   | 9.699733 |
| 11560 | M643T9_2 | 1.137055 | -0.1853  | -0.45343 | 0.664321 | 0.871357 | DOWN | 643.0815 | 643.0788 | 643.083  | 9.174992 | 9.142767 |
| 11561 | M366T11_ | 1.075958 | -0.10562 | -0.45445 | 0.66433  | 0.871358 | DOWN | 365.6023 | 365.5988 | 365.6031 | 10.95602 | 10.89355 |
| 11562 | M405T11_ | 1.081371 | 0.112862 | 0.453147 | 0.664398 | 0.871365 | UP   | 405.0835 | 405.0829 | 405.0837 | 10.91813 | 10.88747 |
| 11563 | M1726T10 | 1.155629 | 0.208678 | 0.460125 | 0.664407 | 0.871366 | UP   | 1725.729 | 1725.728 | 1725.736 | 9.816183 | 9.699733 |
| 11564 | M328T11_ | 1.166475 | 0.222155 | 0.457236 | 0.664443 | 0.871369 | UP   | 327.7922 | 327.7914 | 327.794  | 10.90765 | 10.879   |
| 11565 | M474T10_ | 1.233609 | 0.302885 | 0.450937 | 0.664461 | 0.871371 | UP   | 473.7518 | 473.7517 | 473.7521 | 9.970617 | 9.8753   |
| 11566 | M268T9_6 | 1.190425 | -0.25148 | -0.45225 | 0.664481 | 0.871373 | DOWN | 268.3859 | 268.3857 | 268.3862 | 8.73905  | 8.672483 |
| 11567 | M492T9_3 | 1.14986  | -0.20146 | -0.45599 | 0.664506 | 0.871376 | DOWN | 492.233  | 492.2321 | 492.2341 | 9.2628   | 9.12675  |
| 11568 | M898T9   | 1.201813 | -0.26521 | -0.45338 | 0.664644 | 0.87139  | DOWN | 897.6673 | 897.6669 | 897.6705 | 9.37135  | 9.288883 |
| 11569 | M379T12  | 1.292438 | 0.370095 | 0.464529 | 0.66468  | 0.871394 | UP   | 378.7468 | 378.7466 | 378.747  | 12.0041  | 11.98813 |
| 11570 | M578T44_ | 1.151139 | 0.203062 | 0.463316 | 0.664736 | 0.8714   | UP   | 578.317  | 578.3167 | 578.3172 | 44.25017 | 44.1065  |
| 11571 | M351T9_1 | 1.167278 | -0.22315 | -0.4508  | 0.664972 | 0.871425 | DOWN | 351.3608 | 351.3604 | 351.3635 | 9.280767 | 9.146383 |
| 11572 | M249T10_ | 1.147249 | -0.19818 | -0.45132 | 0.665091 | 0.871437 | DOWN | 249.3531 | 249.3528 | 249.3533 | 9.948875 | 9.843367 |
| 11573 | M729T10_ | 1.11812  | -0.16108 | -0.45083 | 0.665105 | 0.871438 | DOWN | 728.5305 | 728.5299 | 728.5313 | 9.8207   | 9.699733 |
| 11574 | M460T10_ | 1.167644 | -0.2236  | -0.45086 | 0.665134 | 0.871441 | DOWN | 460.2002 | 460.1988 | 460.2013 | 9.952825 | 9.869467 |
| 11575 | M794T11_ | 1.151305 | 0.20327  | 0.451796 | 0.66514  | 0.871442 | UP   | 794.1015 | 794.101  | 794.1017 | 11.22153 | 11.19512 |
| 11576 | M603T11  | 1.060827 | -0.08519 | -0.44935 | 0.665189 | 0.871447 | DOWN | 603.3732 | 603.3729 | 603.3736 | 11.10648 | 11.07725 |
| 11577 | M854T11  | 1.060588 | 0.084864 | 0.449708 | 0.665233 | 0.871452 | UP   | 854.3611 | 854.3607 | 854.3617 | 10.89875 | 10.879   |
| 11578 | M920T10  | 1.095272 | 0.131289 | 0.457551 | 0.665313 | 0.87146  | UP   | 919.5446 | 919.5439 | 919.5455 | 9.934533 | 9.827283 |
| 11579 | M266T11_ | 1.07007  | -0.09771 | -0.44905 | 0.665387 | 0.871468 | DOWN | 266.0834 | 266.0834 | 266.0836 | 10.892   | 10.8646  |
| 11580 | M207T10_ | 1.128314 | -0.17417 | -0.45052 | 0.665392 | 0.871468 | DOWN | 206.6181 | 206.618  | 206.626  | 9.8207   | 9.715683 |
| 11581 | M640T10_ | 1.120211 | 0.16377  | 0.454329 | 0.665454 | 0.871475 | UP   | 639.8675 | 639.8665 | 639.88   | 9.895    | 9.743767 |
| 11582 | M797T9_1 | 1.296754 | 0.374905 | 0.463519 | 0.665559 | 0.871486 | UP   | 796.6476 | 796.6465 | 796.6481 | 9.008417 | 8.909    |
| 11583 | M360T10_ | 1.074841 | -0.10412 | -0.44925 | 0.665669 | 0.871497 | DOWN | 360.2697 | 360.2694 | 360.27   | 9.816175 | 9.699733 |
| 11584 | M250T10_ | 1.135619 | -0.18348 | -0.45015 | 0.665714 | 0.871502 | DOWN | 250.0223 | 250.0122 | 250.0225 | 9.948875 | 9.843367 |

|       |          |          |          |          |          |          |      |          |          |          |          |          |
|-------|----------|----------|----------|----------|----------|----------|------|----------|----------|----------|----------|----------|
| 11585 | M256T10_ | 1.144748 | 0.19503  | 0.449751 | 0.665742 | 0.871505 | UP   | 256.3733 | 256.3729 | 256.3735 | 9.964092 | 9.843367 |
| 11586 | M256T10_ | 1.077542 | 0.107744 | 0.44878  | 0.665846 | 0.871515 | UP   | 256.1514 | 256.1512 | 256.1523 | 9.9174   | 9.827283 |
| 11587 | M465T10_ | 1.31251  | -0.39233 | -0.44817 | 0.665974 | 0.871529 | DOWN | 464.6768 | 464.6766 | 464.6774 | 9.802117 | 9.6681   |
| 11588 | M276T10_ | 1.046534 | -0.06562 | -0.44859 | 0.666035 | 0.871535 | DOWN | 275.5696 | 275.5694 | 275.5699 | 9.841308 | 9.715683 |
| 11589 | M383T11_ | 1.115213 | 0.157319 | 0.464246 | 0.666046 | 0.871536 | UP   | 382.7386 | 382.7385 | 382.7397 | 10.91982 | 10.89355 |
| 11590 | M370T10_ | 1.084465 | -0.11698 | -0.44975 | 0.666121 | 0.871544 | DOWN | 370.0421 | 370.032  | 370.0426 | 9.922    | 9.811217 |
| 11591 | M597T11_ | 1.096315 | 0.132662 | 0.450652 | 0.666128 | 0.871545 | UP   | 596.7957 | 596.7952 | 596.7963 | 10.90657 | 10.879   |
| 11592 | M297T29  | 1.060126 | 0.084236 | 0.448861 | 0.666159 | 0.871548 | UP   | 297.2422 | 297.2419 | 297.2424 | 28.57083 | 28.528   |
| 11593 | M352T43_ | 1.139177 | -0.18799 | -0.4561  | 0.666196 | 0.871552 | DOWN | 352.1965 | 352.1963 | 352.1967 | 43.34367 | 43.20067 |
| 11594 | M430T10_ | 1.066342 | 0.092671 | 0.448095 | 0.666265 | 0.871559 | UP   | 429.8177 | 429.8174 | 429.8179 | 9.801808 | 9.7124   |
| 11595 | M620T34  | 1.100473 | 0.138124 | 0.464589 | 0.666268 | 0.871559 | UP   | 620.3639 | 620.3636 | 620.3643 | 34.10417 | 33.775   |
| 11596 | M460T24  | 1.126894 | -0.17235 | -0.44757 | 0.666386 | 0.871571 | DOWN | 460.3415 | 460.3413 | 460.3416 | 24.38475 | 24.376   |
| 11597 | M534T27  | 1.173231 | -0.23049 | -0.44924 | 0.666393 | 0.871572 | DOWN | 534.389  | 534.3887 | 534.3897 | 26.80292 | 26.7685  |
| 11598 | M980T26  | 1.100132 | -0.13768 | -0.44748 | 0.6664   | 0.871573 | DOWN | 979.6973 | 979.6964 | 979.6978 | 25.96967 | 25.95233 |
| 11599 | M882T11_ | 1.164212 | -0.21935 | -0.45102 | 0.666406 | 0.871573 | DOWN | 882.4653 | 882.4539 | 882.4672 | 10.8926  | 10.7223  |
| 11600 | M1397T10 | 1.131208 | 0.177864 | 0.449067 | 0.666428 | 0.871576 | UP   | 1397.39  | 1397.389 | 1397.391 | 9.970617 | 9.859233 |
| 11601 | M749T18  | 1.07818  | 0.108598 | 0.448809 | 0.666555 | 0.871589 | UP   | 748.574  | 748.5733 | 748.5748 | 17.593   | 17.57083 |
| 11602 | M178T9_6 | 1.244631 | 0.315719 | 0.450376 | 0.66665  | 0.871599 | UP   | 177.8782 | 177.8781 | 177.8785 | 9.338375 | 9.24215  |
| 11603 | M494T29_ | 1.143187 | 0.193062 | 0.452521 | 0.666651 | 0.871599 | UP   | 494.3234 | 494.3232 | 494.3235 | 29.1165  | 29.0875  |
| 11604 | M251T10_ | 1.170441 | -0.22705 | -0.44727 | 0.666652 | 0.871599 | DOWN | 250.8374 | 250.8373 | 250.8396 | 9.933    | 9.843367 |
| 11605 | M288T22_ | 1.152714 | -0.20504 | -0.44867 | 0.666679 | 0.871602 | DOWN | 288.3518 | 288.3438 | 288.3525 | 22.08083 | 22.057   |
| 11606 | M842T21  | 1.082996 | -0.11503 | -0.45248 | 0.666681 | 0.871602 | DOWN | 841.5688 | 841.5685 | 841.5697 | 21.25067 | 21.22733 |
| 11607 | M349T25  | 1.107081 | 0.14676  | 0.44717  | 0.666833 | 0.871617 | UP   | 349.314  | 349.3137 | 349.3143 | 24.65175 | 24.631   |
| 11608 | M500T9_7 | 1.164513 | 0.219727 | 0.463214 | 0.666854 | 0.87162  | UP   | 499.939  | 499.9382 | 499.9392 | 9.146383 | 9.11405  |
| 11609 | M1771T10 | 1.065742 | -0.09186 | -0.4508  | 0.666982 | 0.871633 | DOWN | 1770.792 | 1770.789 | 1770.795 | 9.830283 | 9.7124   |
| 11610 | M624T12_ | 1.134389 | -0.18192 | -0.44699 | 0.666999 | 0.871635 | DOWN | 624.4446 | 624.4442 | 624.4447 | 11.84607 | 11.8399  |
| 11611 | M223T11_ | 1.085421 | -0.11825 | -0.44781 | 0.667026 | 0.871637 | DOWN | 223.2844 | 223.2844 | 223.2849 | 10.91734 | 10.88995 |
| 11612 | M1490T10 | 1.053555 | -0.07527 | -0.44674 | 0.667121 | 0.871647 | DOWN | 1490.005 | 1490.002 | 1490.014 | 9.887133 | 9.779267 |
| 11613 | M326T11_ | 1.105103 | -0.14418 | -0.45075 | 0.667133 | 0.871649 | DOWN | 325.6769 | 325.6765 | 325.6776 | 10.90802 | 10.873   |
| 11614 | M462T25  | 1.120806 | -0.16454 | -0.44926 | 0.667167 | 0.871652 | DOWN | 462.3527 | 462.3523 | 462.3529 | 24.62317 | 24.60717 |
| 11615 | M297T10_ | 1.17661  | 0.234636 | 0.449607 | 0.667227 | 0.871658 | UP   | 297.4447 | 297.4445 | 297.4449 | 9.946417 | 9.843367 |
| 11616 | M607T10_ | 1.090416 | -0.12488 | -0.457   | 0.667255 | 0.871661 | DOWN | 606.5938 | 606.5935 | 606.5945 | 9.886525 | 9.806367 |
| 11617 | M480T11_ | 1.087757 | -0.12136 | -0.44651 | 0.667288 | 0.871665 | DOWN | 479.7068 | 479.7064 | 479.7071 | 10.90548 | 10.879   |
| 11618 | M166T8   | 1.150388 | 0.20212  | 0.447881 | 0.667315 | 0.871667 | UP   | 166.0471 | 166.0471 | 166.0472 | 7.96315  | 7.8284   |
| 11619 | M183T9_1 | 1.363294 | -0.4471  | -0.44773 | 0.667356 | 0.871672 | DOWN | 183.2092 | 183.2087 | 183.2094 | 9.154342 | 9.1322   |

|       |          |          |          |          |          |          |      |          |          |          |          |          |
|-------|----------|----------|----------|----------|----------|----------|------|----------|----------|----------|----------|----------|
| 11620 | M1345T10 | 1.141318 | -0.1907  | -0.44644 | 0.667399 | 0.871676 | DOWN | 1345.02  | 1345.015 | 1345.023 | 9.928667 | 9.827283 |
| 11621 | M207T9_1 | 1.305725 | 0.384851 | 0.450468 | 0.667409 | 0.871677 | UP   | 207.0776 | 207.0739 | 207.0832 | 9.352117 | 9.132267 |
| 11622 | M692T10  | 1.375681 | 0.460146 | 0.459777 | 0.667457 | 0.871682 | UP   | 692.3708 | 692.3701 | 692.3758 | 10.16032 | 9.856867 |
| 11623 | M898T11  | 1.189346 | 0.250168 | 0.447769 | 0.667487 | 0.871685 | UP   | 898.4007 | 898.4006 | 898.4024 | 10.8914  | 10.89125 |
| 11624 | M665T15  | 1.092704 | -0.1279  | -0.44589 | 0.667506 | 0.871687 | DOWN | 665.4846 | 665.484  | 665.4854 | 15.17552 | 15.13173 |
| 11625 | M662T10_ | 1.13751  | -0.18588 | -0.44766 | 0.667598 | 0.871697 | DOWN | 661.9866 | 661.9859 | 661.9877 | 9.830283 | 9.715683 |
| 11626 | M313T13_ | 1.269145 | 0.343857 | 0.457574 | 0.667657 | 0.871703 | UP   | 313.1983 | 313.1979 | 313.1985 | 13.34659 | 13.33272 |
| 11627 | M615T10_ | 1.099683 | 0.137088 | 0.446449 | 0.667703 | 0.871707 | UP   | 615.4876 | 615.4869 | 615.488  | 9.598992 | 9.478833 |
| 11628 | M568T10_ | 1.131483 | 0.178215 | 0.447965 | 0.667707 | 0.871708 | UP   | 567.5457 | 567.5451 | 567.5461 | 9.95165  | 9.843367 |
| 11629 | M483T23  | 1.115835 | 0.158124 | 0.449069 | 0.667721 | 0.871709 | UP   | 483.256  | 483.2559 | 483.2561 | 23.414   | 23.07433 |
| 11630 | M294T10_ | 1.19596  | 0.25817  | 0.455133 | 0.667816 | 0.871719 | UP   | 294.1475 | 294.1467 | 294.1477 | 9.504583 | 9.40135  |
| 11631 | M612T9_5 | 1.276261 | 0.351924 | 0.446609 | 0.667974 | 0.871735 | UP   | 611.9229 | 611.9173 | 611.9264 | 9.238883 | 9.053483 |
| 11632 | M299T43_ | 1.056213 | -0.0789  | -0.44527 | 0.668222 | 0.871761 | DOWN | 299.185  | 299.185  | 299.1852 | 42.96325 | 42.8985  |
| 11633 | M359T9_1 | 1.18557  | -0.24558 | -0.44488 | 0.668246 | 0.871763 | DOWN | 358.5806 | 358.5802 | 358.5809 | 9.292275 | 9.0637   |
| 11634 | M404T45  | 1.185708 | -0.24575 | -0.46127 | 0.668275 | 0.871766 | DOWN | 404.2639 | 404.2637 | 404.2641 | 44.926   | 44.79667 |
| 11635 | M354T24  | 1.117074 | -0.15972 | -0.44622 | 0.668291 | 0.871768 | DOWN | 354.2848 | 354.2846 | 354.2849 | 23.746   | 23.73167 |
| 11636 | M239T10_ | 1.205272 | -0.26936 | -0.44697 | 0.668313 | 0.87177  | DOWN | 239.0889 | 239.0887 | 239.0889 | 9.608767 | 9.52595  |
| 11637 | M368T9_1 | 1.133894 | 0.181286 | 0.450139 | 0.668335 | 0.871773 | UP   | 367.6074 | 367.6073 | 367.6077 | 9.120075 | 9.095133 |
| 11638 | M165T11  | 1.061285 | -0.08581 | -0.44772 | 0.668387 | 0.871778 | DOWN | 165.3627 | 165.3627 | 165.3628 | 10.89875 | 10.879   |
| 11639 | M321T27_ | 1.213275 | -0.27891 | -0.44503 | 0.668569 | 0.871797 | DOWN | 321.0363 | 321.036  | 321.0363 | 26.80275 | 26.7805  |
| 11640 | M570T10_ | 1.184291 | 0.244023 | 0.451858 | 0.668689 | 0.871809 | UP   | 569.7519 | 569.7517 | 569.7536 | 9.964    | 9.88865  |
| 11641 | M464T11_ | 1.134875 | 0.182533 | 0.44948  | 0.66882  | 0.871822 | UP   | 463.7982 | 463.7974 | 463.8034 | 10.92734 | 10.87487 |
| 11642 | M555T10_ | 1.170597 | -0.22724 | -0.44403 | 0.668883 | 0.871829 | DOWN | 555.165  | 555.1625 | 555.1656 | 9.940783 | 9.843367 |
| 11643 | M242T10_ | 1.153646 | 0.206201 | 0.449979 | 0.668884 | 0.871829 | UP   | 242.4098 | 242.4097 | 242.4099 | 9.985733 | 9.8914   |
| 11644 | M609T10_ | 1.105495 | 0.144692 | 0.452788 | 0.669239 | 0.871865 | UP   | 609.0977 | 609.0962 | 609.098  | 9.957333 | 9.859233 |
| 11645 | M339T10_ | 1.126385 | 0.1717   | 0.445109 | 0.669252 | 0.871867 | UP   | 338.9531 | 338.9528 | 338.9533 | 9.967367 | 9.859233 |
| 11646 | M346T9_6 | 1.245413 | 0.316625 | 0.447727 | 0.669304 | 0.871872 | UP   | 345.9119 | 345.9117 | 345.9123 | 8.814858 | 8.697767 |
| 11647 | M1565T10 | 1.247732 | 0.319309 | 0.447897 | 0.669407 | 0.871883 | UP   | 1565.236 | 1565.234 | 1565.238 | 9.934875 | 9.918833 |
| 11648 | M609T10_ | 1.105684 | 0.14494  | 0.443219 | 0.669415 | 0.871884 | UP   | 609.0315 | 609.0311 | 609.0318 | 10.39613 | 10.34372 |
| 11649 | M383T11_ | 1.051938 | -0.07305 | -0.4434  | 0.669443 | 0.871886 | DOWN | 382.8777 | 382.8775 | 382.8824 | 10.90553 | 10.88747 |
| 11650 | M535T11_ | 1.083111 | -0.11518 | -0.44399 | 0.669451 | 0.871887 | DOWN | 534.6564 | 534.6561 | 534.6568 | 10.51828 | 10.47223 |
| 11651 | M233T11_ | 1.130119 | 0.176475 | 0.445752 | 0.669456 | 0.871888 | UP   | 233.2001 | 233.1998 | 233.201  | 10.93208 | 10.6311  |
| 11652 | M334T9_5 | 1.156185 | 0.209372 | 0.444181 | 0.669527 | 0.871895 | UP   | 334.1764 | 334.1753 | 334.1818 | 9.249433 | 9.118517 |
| 11653 | M591T7   | 1.056877 | 0.079808 | 0.457353 | 0.669709 | 0.871914 | UP   | 591.456  | 591.4558 | 591.4566 | 7.034133 | 6.94005  |
| 11654 | M542T10_ | 1.052189 | -0.07339 | -0.44835 | 0.669821 | 0.871925 | DOWN | 542.3226 | 542.3218 | 542.3246 | 9.915583 | 9.79535  |

|       |          |          |          |          |          |          |      |          |          |          |          |          |
|-------|----------|----------|----------|----------|----------|----------|------|----------|----------|----------|----------|----------|
| 11655 | M634T10_ | 1.079156 | 0.109903 | 0.443854 | 0.669846 | 0.871928 | UP   | 634.1243 | 634.1237 | 634.1268 | 9.8207   | 9.715683 |
| 11656 | M528T30  | 1.0752   | -0.1046  | -0.44875 | 0.669887 | 0.871932 | DOWN | 528.4101 | 528.4097 | 528.4103 | 30.2805  | 30.266   |
| 11657 | M404T10_ | 1.108158 | 0.148163 | 0.442642 | 0.669894 | 0.871933 | UP   | 403.7986 | 403.7904 | 403.7989 | 10.45436 | 10.42453 |
| 11658 | M678T9   | 1.142497 | 0.19219  | 0.445062 | 0.669959 | 0.871939 | UP   | 677.6009 | 677.6006 | 677.6028 | 9.329083 | 9.129317 |
| 11659 | M661T9_1 | 1.274458 | 0.349883 | 0.442491 | 0.669982 | 0.871942 | UP   | 660.5366 | 660.5352 | 660.5369 | 9.307292 | 9.126783 |
| 11660 | M381T10_ | 1.138312 | -0.1869  | -0.44467 | 0.670078 | 0.871952 | DOWN | 380.5324 | 380.5283 | 380.5328 | 9.929017 | 9.811217 |
| 11661 | M358T41  | 1.181719 | -0.24089 | -0.45836 | 0.670151 | 0.871959 | DOWN | 358.2223 | 358.2222 | 358.2224 | 41.12092 | 40.899   |
| 11662 | M215T7   | 1.161273 | -0.21571 | -0.4456  | 0.670203 | 0.871964 | DOWN | 215.1251 | 215.125  | 215.1253 | 7.288167 | 7.244783 |
| 11663 | M234T11_ | 1.232332 | 0.301391 | 0.446953 | 0.670301 | 0.871974 | UP   | 234.4457 | 234.4454 | 234.4459 | 10.89224 | 10.87765 |
| 11664 | M446T11_ | 1.090777 | 0.125356 | 0.441907 | 0.670358 | 0.87198  | UP   | 445.8225 | 445.817  | 445.8246 | 10.90197 | 10.67637 |
| 11665 | M289T11_ | 1.100005 | -0.13751 | -0.44396 | 0.670486 | 0.871993 | DOWN | 288.5706 | 288.5703 | 288.5708 | 10.85552 | 10.8214  |
| 11666 | M472T10_ | 1.132711 | -0.17978 | -0.4424  | 0.670507 | 0.871995 | DOWN | 472.3489 | 472.3482 | 472.349  | 9.958617 | 9.843367 |
| 11667 | M592T7   | 1.117986 | -0.1609  | -0.45484 | 0.67061  | 0.872006 | DOWN | 592.4598 | 592.4595 | 592.4604 | 6.9967   | 6.954633 |
| 11668 | M359T44  | 1.151813 | 0.203907 | 0.444679 | 0.670626 | 0.872008 | UP   | 359.2062 | 359.206  | 359.2064 | 44.44942 | 44.09217 |
| 11669 | M201T9_8 | 1.179463 | -0.23813 | -0.44132 | 0.670686 | 0.872014 | DOWN | 200.7018 | 200.6989 | 200.7025 | 9.272583 | 9.133667 |
| 11670 | M609T9_3 | 1.348306 | 0.431148 | 0.455206 | 0.670709 | 0.872016 | UP   | 608.9267 | 608.9265 | 608.9268 | 9.332617 | 9.275917 |
| 11671 | M568T10_ | 1.091151 | 0.125851 | 0.446072 | 0.670809 | 0.872026 | UP   | 568.3665 | 568.3658 | 568.3668 | 9.544833 | 9.40135  |
| 11672 | M503T10_ | 1.131379 | 0.178082 | 0.441066 | 0.670842 | 0.87203  | UP   | 502.8735 | 502.8729 | 502.8743 | 9.967367 | 9.859233 |
| 11673 | M234T11_ | 1.154088 | 0.206753 | 0.445585 | 0.670895 | 0.872035 | UP   | 234.118  | 234.1179 | 234.1182 | 11.33537 | 11.30818 |
| 11674 | M213T9_8 | 1.348541 | -0.4314  | -0.44137 | 0.671027 | 0.872049 | DOWN | 212.8392 | 212.8366 | 212.8418 | 9.17485  | 9.032483 |
| 11675 | M424T11_ | 1.270184 | -0.34504 | -0.44277 | 0.671029 | 0.872049 | DOWN | 423.5299 | 423.5235 | 423.5301 | 10.95095 | 10.80222 |
| 11676 | M287T10_ | 1.166425 | -0.22209 | -0.44064 | 0.671224 | 0.872069 | DOWN | 287.1615 | 287.1614 | 287.1616 | 9.960642 | 9.932    |
| 11677 | M185T10_ | 1.217034 | -0.28337 | -0.44101 | 0.671246 | 0.872071 | DOWN | 185.3827 | 185.3826 | 185.3827 | 9.903283 | 9.874067 |
| 11678 | M234T9_4 | 1.06564  | -0.09172 | -0.44102 | 0.671262 | 0.872073 | DOWN | 233.8569 | 233.8566 | 233.857  | 9.28135  | 9.11405  |
| 11679 | M339T10_ | 1.130273 | -0.17667 | -0.44689 | 0.671384 | 0.872085 | DOWN | 338.6197 | 338.6196 | 338.6202 | 9.95385  | 9.843367 |
| 11680 | M1836T10 | 1.032299 | -0.04586 | -0.44055 | 0.671432 | 0.87209  | DOWN | 1835.866 | 1835.864 | 1835.873 | 9.843017 | 9.73145  |
| 11681 | M440T30  | 1.088675 | -0.12257 | -0.44882 | 0.671521 | 0.872099 | DOWN | 440.3579 | 440.3576 | 440.358  | 30.23733 | 30.2225  |
| 11682 | M1050T11 | 1.072417 | -0.10087 | -0.44133 | 0.671549 | 0.872102 | DOWN | 1050.025 | 1050.025 | 1050.028 | 10.892   | 10.879   |
| 11683 | M762T32  | 1.087856 | -0.12149 | -0.44243 | 0.6716   | 0.872107 | DOWN | 761.5609 | 761.5606 | 761.5614 | 31.76775 | 31.73867 |
| 11684 | M449T10_ | 1.214827 | 0.280751 | 0.440271 | 0.671622 | 0.872109 | UP   | 449.025  | 449.024  | 449.0255 | 9.956417 | 9.843367 |
| 11685 | M245T10_ | 1.180882 | -0.23987 | -0.44514 | 0.671671 | 0.872114 | DOWN | 244.6192 | 244.6189 | 244.6196 | 9.975217 | 9.8753   |
| 11686 | M768T10_ | 1.157009 | -0.2104  | -0.44155 | 0.671688 | 0.872116 | DOWN | 767.6559 | 767.6545 | 767.6568 | 9.949233 | 9.827283 |
| 11687 | M184T11_ | 1.184657 | 0.244469 | 0.439857 | 0.671698 | 0.872117 | UP   | 183.648  | 183.6479 | 183.6481 | 10.89133 | 10.85018 |
| 11688 | M188T10_ | 1.15285  | 0.205204 | 0.439789 | 0.671736 | 0.872121 | UP   | 188.1794 | 188.1791 | 188.1795 | 9.967367 | 9.843367 |
| 11689 | M276T11_ | 1.076348 | -0.10614 | -0.44211 | 0.671759 | 0.872123 | DOWN | 276.24   | 276.2399 | 276.2402 | 10.89875 | 10.8646  |

|       |          |          |          |          |          |          |      |          |          |          |          |          |
|-------|----------|----------|----------|----------|----------|----------|------|----------|----------|----------|----------|----------|
| 11690 | M313T25_ | 1.082723 | 0.114664 | 0.446698 | 0.671776 | 0.872125 | UP   | 313.2272 | 313.2269 | 313.2274 | 24.85558 | 24.8265  |
| 11691 | M288T9_1 | 1.091197 | -0.12591 | -0.43972 | 0.671777 | 0.872125 | DOWN | 287.5217 | 287.5214 | 287.5221 | 8.878667 | 8.827133 |
| 11692 | M227T9_2 | 1.217669 | 0.284123 | 0.441623 | 0.671801 | 0.872128 | UP   | 226.7701 | 226.7689 | 226.7708 | 9.292008 | 9.204617 |
| 11693 | M917T10  | 1.098959 | 0.136138 | 0.446833 | 0.672066 | 0.872155 | UP   | 917.324  | 917.3232 | 917.3246 | 9.939283 | 9.827283 |
| 11694 | M419T11_ | 1.117901 | 0.160793 | 0.442707 | 0.672145 | 0.872163 | UP   | 419.2886 | 419.2874 | 419.2889 | 10.50049 | 10.45585 |
| 11695 | M376T9_1 | 1.202842 | -0.26645 | -0.44237 | 0.672148 | 0.872163 | DOWN | 375.7663 | 375.7659 | 375.7679 | 9.314442 | 9.24215  |
| 11696 | M327T16  | 1.106962 | 0.146606 | 0.440218 | 0.672186 | 0.872167 | UP   | 327.2357 | 327.2354 | 327.2358 | 16.24224 | 16.21925 |
| 11697 | M283T9_1 | 1.152962 | -0.20535 | -0.43958 | 0.672304 | 0.872179 | DOWN | 282.8719 | 282.8716 | 282.872  | 9.4098   | 9.288883 |
| 11698 | M408T12_ | 1.183058 | 0.24252  | 0.443624 | 0.672307 | 0.872179 | UP   | 407.7975 | 407.7972 | 407.7983 | 12.36967 | 12.31023 |
| 11699 | M493T11_ | 1.104425 | 0.143296 | 0.443293 | 0.672372 | 0.872186 | UP   | 492.5283 | 492.5279 | 492.5286 | 10.90657 | 10.879   |
| 11700 | M1820T10 | 1.171141 | 0.227914 | 0.447608 | 0.672397 | 0.872188 | UP   | 1819.565 | 1819.563 | 1819.57  | 9.816183 | 9.715683 |
| 11701 | M254T9_2 | 1.200534 | 0.263676 | 0.44628  | 0.672407 | 0.872189 | UP   | 253.962  | 253.9618 | 253.9626 | 9.49985  | 9.416817 |
| 11702 | M746T27  | 1.141012 | 0.190313 | 0.440391 | 0.672414 | 0.87219  | UP   | 746.4441 | 746.4434 | 746.4449 | 27.4775  | 27.4495  |
| 11703 | M278T10_ | 1.174323 | 0.23183  | 0.449677 | 0.67256  | 0.872205 | UP   | 278.2743 | 278.2741 | 278.2744 | 9.97155  | 9.859233 |
| 11704 | M751T10_ | 1.038374 | -0.05433 | -0.4428  | 0.672588 | 0.872208 | DOWN | 751.1024 | 751.101  | 751.1034 | 9.825492 | 9.715683 |
| 11705 | M480T9_7 | 1.123779 | -0.16836 | -0.44168 | 0.672671 | 0.872216 | DOWN | 480.3578 | 480.3559 | 480.3596 | 9.275917 | 9.159717 |
| 11706 | M342T10_ | 1.135801 | -0.18371 | -0.43999 | 0.672769 | 0.872226 | DOWN | 341.5888 | 341.5887 | 341.589  | 9.948875 | 9.843367 |
| 11707 | M369T10_ | 1.131828 | 0.178654 | 0.450346 | 0.673139 | 0.872264 | UP   | 369.4212 | 369.4208 | 369.4224 | 9.948875 | 9.843367 |
| 11708 | M306T10_ | 1.13101  | 0.177612 | 0.437649 | 0.67322  | 0.872272 | UP   | 306.1921 | 306.1917 | 306.1924 | 9.971292 | 9.859233 |
| 11709 | M319T10_ | 1.209147 | 0.27399  | 0.450214 | 0.673286 | 0.872279 | UP   | 319.3368 | 319.3332 | 319.3372 | 9.8753   | 9.715683 |
| 11710 | M473T11_ | 1.104729 | 0.143692 | 0.452779 | 0.6733   | 0.87228  | UP   | 472.8958 | 472.8943 | 472.8963 | 10.92598 | 10.879   |
| 11711 | M237T11_ | 1.153138 | -0.20557 | -0.44804 | 0.673317 | 0.872282 | DOWN | 236.6637 | 236.6631 | 236.6641 | 10.91734 | 10.87487 |
| 11712 | M228T10_ | 1.096393 | -0.13276 | -0.43795 | 0.673319 | 0.872282 | DOWN | 227.9646 | 227.9645 | 227.9647 | 9.915583 | 9.827283 |
| 11713 | M638T10_ | 1.072069 | 0.100398 | 0.437672 | 0.673352 | 0.872286 | UP   | 638.4087 | 638.4081 | 638.4092 | 10.41845 | 10.34542 |
| 11714 | M206T11_ | 1.137155 | -0.18543 | -0.44385 | 0.673588 | 0.87231  | DOWN | 205.6885 | 205.6885 | 205.6887 | 10.91734 | 10.88995 |
| 11715 | M273T10_ | 1.134764 | 0.182393 | 0.437081 | 0.673623 | 0.872313 | UP   | 273.4628 | 273.4625 | 273.4631 | 9.958617 | 9.843367 |
| 11716 | M723T34  | 1.242703 | 0.313482 | 0.445169 | 0.67364  | 0.872315 | UP   | 722.5051 | 722.5047 | 722.5055 | 34.31008 | 34.288   |
| 11717 | M725T10_ | 1.12435  | -0.16909 | -0.4383  | 0.673671 | 0.872318 | DOWN | 725.0609 | 725.0598 | 725.0621 | 9.939575 | 9.827283 |
| 11718 | M974T29  | 1.161317 | 0.215762 | 0.43711  | 0.673672 | 0.872318 | UP   | 973.5826 | 973.5802 | 973.5833 | 28.9895  | 28.936   |
| 11719 | M792T21  | 1.049856 | -0.07019 | -0.43908 | 0.673786 | 0.87233  | DOWN | 791.5562 | 791.5556 | 791.5564 | 21.43767 | 21.40617 |
| 11720 | M348T10_ | 1.046491 | 0.06556  | 0.447126 | 0.673804 | 0.872331 | UP   | 348.1449 | 348.1447 | 348.145  | 9.864467 | 9.747533 |
| 11721 | M417T30  | 1.09126  | 0.125995 | 0.436763 | 0.673899 | 0.872341 | UP   | 417.261  | 417.2608 | 417.2656 | 30.1505  | 29.90617 |
| 11722 | M491T23_ | 1.163779 | -0.21882 | -0.43676 | 0.673958 | 0.872347 | DOWN | 491.1436 | 491.1429 | 491.1441 | 22.987   | 22.9725  |
| 11723 | M305T11_ | 1.195425 | 0.257524 | 0.437105 | 0.674002 | 0.872352 | UP   | 305.3325 | 305.3323 | 305.3349 | 10.93468 | 10.873   |
| 11724 | M202T9_3 | 1.147794 | -0.19886 | -0.43839 | 0.674023 | 0.872354 | DOWN | 201.5686 | 201.5682 | 201.5691 | 9.3494   | 9.20785  |

|       |          |          |          |          |          |          |      |          |          |          |          |          |
|-------|----------|----------|----------|----------|----------|----------|------|----------|----------|----------|----------|----------|
| 11725 | M378T11_ | 1.088113 | -0.12183 | -0.44428 | 0.674106 | 0.872362 | DOWN | 377.9463 | 377.9456 | 377.95   | 10.90659 | 10.85018 |
| 11726 | M619T16_ | 1.107058 | -0.14673 | -0.44072 | 0.67413  | 0.872365 | DOWN | 619.4702 | 619.4697 | 619.4705 | 15.55905 | 15.54172 |
| 11727 | M520T41_ | 1.10872  | -0.14889 | -0.43812 | 0.674136 | 0.872365 | DOWN | 520.3112 | 520.311  | 520.3116 | 40.76933 | 40.23717 |
| 11728 | M388T11_ | 1.053801 | -0.0756  | -0.45088 | 0.674153 | 0.872367 | DOWN | 388.2523 | 388.2521 | 388.2524 | 10.6624  | 10.64593 |
| 11729 | M579T11_ | 1.101013 | -0.13883 | -0.43628 | 0.674182 | 0.87237  | DOWN | 578.6828 | 578.6819 | 578.6832 | 10.72995 | 10.69123 |
| 11730 | M257T10_ | 1.129327 | 0.175463 | 0.43661  | 0.674371 | 0.872389 | UP   | 257.0929 | 257.0925 | 257.0932 | 9.95605  | 9.859233 |
| 11731 | M685T14  | 1.1222   | 0.16633  | 0.43796  | 0.674373 | 0.872389 | UP   | 684.5329 | 684.5325 | 684.534  | 14.14371 | 14.10673 |
| 11732 | M240T10_ | 1.08054  | -0.11175 | -0.43828 | 0.674383 | 0.87239  | DOWN | 239.5618 | 239.5618 | 239.5619 | 9.908417 | 9.811217 |
| 11733 | M250T10_ | 1.130063 | -0.1764  | -0.43719 | 0.674413 | 0.872393 | DOWN | 249.5758 | 249.5756 | 249.576  | 9.939575 | 9.827283 |
| 11734 | M223T11_ | 1.071138 | 0.099144 | 0.441073 | 0.67449  | 0.872401 | UP   | 223.0534 | 223.0534 | 223.0535 | 11.36835 | 11.3369  |
| 11735 | M452T9_2 | 1.19308  | 0.25469  | 0.44882  | 0.674693 | 0.872422 | UP   | 451.6302 | 451.6284 | 451.6352 | 9.1602   | 9.110833 |
| 11736 | M423T30  | 1.091025 | -0.12568 | -0.44288 | 0.674837 | 0.872436 | DOWN | 423.3313 | 423.331  | 423.3315 | 30.23733 | 30.2225  |
| 11737 | M680T44  | 1.033541 | -0.0476  | -0.44705 | 0.675073 | 0.87246  | DOWN | 680.3853 | 680.3853 | 680.3855 | 44.19283 | 44.12083 |
| 11738 | M398T11_ | 1.091523 | -0.12634 | -0.43749 | 0.675214 | 0.872474 | DOWN | 398.4114 | 398.411  | 398.4118 | 10.91263 | 10.879   |
| 11739 | M1962T10 | 1.118983 | -0.16219 | -0.43913 | 0.675241 | 0.872477 | DOWN | 1961.7   | 1961.697 | 1961.702 | 9.951283 | 9.853533 |
| 11740 | M219T10_ | 1.150267 | 0.201969 | 0.445346 | 0.675336 | 0.872487 | UP   | 218.6618 | 218.6565 | 218.6619 | 9.933967 | 9.914217 |
| 11741 | M209T19_ | 1.104096 | -0.14287 | -0.44024 | 0.675339 | 0.872487 | DOWN | 209.1282 | 209.1281 | 209.1284 | 19.41592 | 19.386   |
| 11742 | M207T7   | 1.109516 | 0.14993  | 0.439033 | 0.675441 | 0.872497 | UP   | 206.8936 | 206.8935 | 206.8936 | 6.552683 | 6.4242   |
| 11743 | M331T29_ | 1.24919  | -0.32099 | -0.4367  | 0.675442 | 0.872497 | DOWN | 330.7507 | 330.7506 | 330.7509 | 28.82317 | 28.8035  |
| 11744 | M1557T10 | 1.103083 | 0.141542 | 0.437179 | 0.675596 | 0.872513 | UP   | 1557.294 | 1557.291 | 1557.296 | 9.940783 | 9.843367 |
| 11745 | M195T10_ | 1.077153 | 0.107223 | 0.435951 | 0.67597  | 0.872551 | UP   | 195.0476 | 195.0472 | 195.0477 | 9.903092 | 9.874067 |
| 11746 | M253T11_ | 1.211536 | 0.276837 | 0.433539 | 0.676097 | 0.872563 | UP   | 252.8148 | 252.8143 | 252.8149 | 10.86253 | 10.83572 |
| 11747 | M334T10_ | 1.052076 | 0.073239 | 0.446388 | 0.676134 | 0.872567 | UP   | 333.6091 | 333.6088 | 333.6098 | 9.871042 | 9.747533 |
| 11748 | M356T10_ | 1.125499 | -0.17057 | -0.43526 | 0.67615  | 0.872569 | DOWN | 356.1683 | 356.168  | 356.1684 | 9.948875 | 9.843367 |
| 11749 | M217T10_ | 1.219309 | 0.286064 | 0.435042 | 0.676172 | 0.872571 | UP   | 216.8769 | 216.8768 | 216.887  | 9.874067 | 9.82645  |
| 11750 | M275T10_ | 1.123112 | 0.167502 | 0.436589 | 0.676368 | 0.872591 | UP   | 274.9168 | 274.9166 | 274.9172 | 9.9847   | 9.8753   |
| 11751 | M303T25_ | 1.070586 | -0.0984  | -0.43842 | 0.676439 | 0.872598 | DOWN | 303.0562 | 303.056  | 303.0564 | 24.69575 | 24.68133 |
| 11752 | M541T10_ | 1.142462 | -0.19215 | -0.43427 | 0.676454 | 0.872599 | DOWN | 541.2861 | 541.2857 | 541.2865 | 9.965792 | 9.859233 |
| 11753 | M443T10_ | 1.089352 | -0.12347 | -0.435   | 0.676566 | 0.872611 | DOWN | 443.0929 | 443.0927 | 443.1022 | 9.970617 | 9.822117 |
| 11754 | M349T28  | 1.126639 | -0.17203 | -0.43273 | 0.676789 | 0.872633 | DOWN | 348.7834 | 348.7829 | 348.7836 | 28.22933 | 28.20133 |
| 11755 | M324T10_ | 1.098709 | -0.13581 | -0.43298 | 0.676834 | 0.872638 | DOWN | 324.399  | 324.3988 | 324.3992 | 9.879508 | 9.870017 |
| 11756 | M348T28  | 1.134172 | -0.18164 | -0.43389 | 0.676875 | 0.872642 | DOWN | 348.2815 | 348.2814 | 348.2822 | 28.23067 | 28.20083 |
| 11757 | M383T9_1 | 1.200811 | 0.264009 | 0.434027 | 0.676896 | 0.872644 | UP   | 382.6    | 382.5991 | 382.6017 | 9.1464   | 9.088183 |
| 11758 | M325T10_ | 1.135096 | -0.18281 | -0.43738 | 0.676917 | 0.872646 | DOWN | 325.2277 | 325.2273 | 325.2287 | 9.837158 | 9.699733 |
| 11759 | M585T37  | 1.07886  | -0.10951 | -0.43396 | 0.67698  | 0.872652 | DOWN | 585.4401 | 585.4398 | 585.4407 | 36.79842 | 36.7795  |



|       |          |          |          |          |          |          |      |          |          |          |          |          |
|-------|----------|----------|----------|----------|----------|----------|------|----------|----------|----------|----------|----------|
| 11760 | M968T23  | 1.100178 | -0.13774 | -0.43792 | 0.677048 | 0.872659 | DOWN | 967.6609 | 967.6597 | 967.6613 | 22.50525 | 22.48    |
| 11761 | M729T11_ | 1.131638 | -0.17841 | -0.43295 | 0.677076 | 0.872662 | DOWN | 729.2939 | 729.2933 | 729.2946 | 10.90553 | 10.88747 |
| 11762 | M246T11_ | 1.089153 | 0.123207 | 0.431801 | 0.67734  | 0.872688 | UP   | 246.2952 | 246.2948 | 246.2954 | 10.89904 | 10.85838 |
| 11763 | M617T19  | 1.100355 | -0.13797 | -0.43172 | 0.67738  | 0.872692 | DOWN | 617.4636 | 617.4633 | 617.4638 | 18.96558 | 18.90733 |
| 11764 | M641T10_ | 1.098082 | -0.13499 | -0.44007 | 0.677406 | 0.872695 | DOWN | 640.7412 | 640.7406 | 640.7434 | 9.865875 | 9.743767 |
| 11765 | M764T10_ | 1.138273 | 0.186847 | 0.441083 | 0.677444 | 0.872699 | UP   | 763.9421 | 763.9365 | 763.9445 | 10.09108 | 9.8753   |
| 11766 | M636T44_ | 1.036726 | -0.05203 | -0.43208 | 0.677487 | 0.872703 | DOWN | 636.3591 | 636.3588 | 636.3592 | 43.60325 | 43.56017 |
| 11767 | M313T25_ | 1.041684 | 0.058918 | 0.441122 | 0.67749  | 0.872703 | UP   | 313.3211 | 313.3209 | 313.3212 | 24.72467 | 24.71033 |
| 11768 | M194T10_ | 1.140108 | -0.18917 | -0.43579 | 0.677533 | 0.872708 | DOWN | 193.5715 | 193.5713 | 193.5716 | 9.964092 | 9.859233 |
| 11769 | M481T18  | 1.134161 | -0.18163 | -0.4323  | 0.677624 | 0.872717 | DOWN | 481.3629 | 481.3627 | 481.3631 | 17.86442 | 17.82017 |
| 11770 | M491T11_ | 1.045627 | -0.06437 | -0.43236 | 0.677637 | 0.872718 | DOWN | 491.3828 | 491.3825 | 491.3832 | 10.92593 | 10.89355 |
| 11771 | M230T10_ | 1.091115 | 0.125803 | 0.439022 | 0.677676 | 0.872722 | UP   | 230.3455 | 230.3453 | 230.3457 | 9.934533 | 9.827283 |
| 11772 | M1025T16 | 1.08459  | -0.11715 | -0.44222 | 0.677705 | 0.872725 | DOWN | 1024.518 | 1024.518 | 1024.518 | 15.82213 | 15.7888  |
| 11773 | M864T21  | 1.084462 | -0.11698 | -0.4362  | 0.677717 | 0.872726 | DOWN | 863.6136 | 863.6131 | 863.6142 | 21.3365  | 21.31917 |
| 11774 | M357T37_ | 1.12513  | -0.17009 | -0.43608 | 0.677824 | 0.872737 | DOWN | 357.1906 | 357.1906 | 357.1908 | 37.46033 | 37.302   |
| 11775 | M395T9_4 | 1.142393 | 0.192059 | 0.443425 | 0.677841 | 0.872739 | UP   | 395.0659 | 395.0646 | 395.0684 | 9.193867 | 9.129317 |
| 11776 | M280T11_ | 1.119902 | 0.163373 | 0.431042 | 0.677861 | 0.872741 | UP   | 280.35   | 280.3499 | 280.3502 | 10.89248 | 10.89125 |
| 11777 | M327T10_ | 1.112063 | -0.15324 | -0.43353 | 0.677994 | 0.872754 | DOWN | 326.6873 | 326.6871 | 326.6877 | 10.40425 | 10.34542 |
| 11778 | M224T11_ | 1.091816 | -0.12673 | -0.43067 | 0.678086 | 0.872763 | DOWN | 223.5554 | 223.5552 | 223.556  | 10.93312 | 10.89355 |
| 11779 | M373T15_ | 1.078448 | -0.10896 | -0.43139 | 0.678141 | 0.872769 | DOWN | 373.2846 | 373.2844 | 373.2849 | 15.29289 | 15.24757 |
| 11780 | M292T10_ | 1.122735 | -0.16702 | -0.43851 | 0.678167 | 0.872771 | DOWN | 291.7006 | 291.7004 | 291.7009 | 10.38643 | 10.34372 |
| 11781 | M481T11_ | 1.834263 | 0.875201 | 0.439243 | 0.67821  | 0.872776 | UP   | 481.3996 | 481.3992 | 481.3997 | 10.66457 | 10.629   |
| 11782 | M1170T10 | 1.113142 | -0.15464 | -0.43978 | 0.678277 | 0.872782 | DOWN | 1170.038 | 1170.038 | 1170.04  | 9.95385  | 9.859233 |
| 11783 | M1339T10 | 1.156325 | -0.20955 | -0.4315  | 0.678302 | 0.872785 | DOWN | 1338.706 | 1338.705 | 1338.71  | 9.942317 | 9.859233 |
| 11784 | M925T10_ | 1.137787 | 0.186231 | 0.438532 | 0.678335 | 0.872788 | UP   | 924.694  | 924.6934 | 924.6947 | 9.626517 | 9.510117 |
| 11785 | M233T10_ | 1.050743 | -0.07141 | -0.43169 | 0.678407 | 0.872796 | DOWN | 233.4003 | 233.3999 | 233.4003 | 9.90875  | 9.79535  |
| 11786 | M750T14  | 1.080468 | -0.11166 | -0.43174 | 0.678468 | 0.872802 | DOWN | 749.5812 | 749.5805 | 749.5815 | 13.68275 | 13.66813 |
| 11787 | M287T10_ | 1.177349 | 0.235543 | 0.430108 | 0.678551 | 0.87281  | UP   | 286.6863 | 286.6861 | 286.6936 | 9.9351   | 9.827283 |
| 11788 | M334T10_ | 1.394547 | 0.479797 | 0.443089 | 0.678847 | 0.87284  | UP   | 334.2832 | 334.2828 | 334.2914 | 9.823575 | 9.715683 |
| 11789 | M215T11_ | 1.058967 | -0.08266 | -0.43015 | 0.678897 | 0.872845 | DOWN | 215.1486 | 215.1486 | 215.149  | 10.90659 | 10.879   |
| 11790 | M722T10_ | 1.117775 | 0.16063  | 0.433654 | 0.679062 | 0.872861 | UP   | 722.3076 | 722.3061 | 722.3092 | 9.840617 | 9.715683 |
| 11791 | M1136T10 | 1.141043 | 0.190353 | 0.432109 | 0.67918  | 0.872873 | UP   | 1135.736 | 1135.735 | 1135.737 | 9.953367 | 9.859233 |
| 11792 | M420T9_1 | 1.15211  | 0.204278 | 0.433893 | 0.679241 | 0.872879 | UP   | 419.6199 | 419.6195 | 419.6207 | 9.28135  | 9.129317 |
| 11793 | M1114T10 | 1.162577 | 0.217326 | 0.434674 | 0.679284 | 0.872883 | UP   | 1114.001 | 1113.999 | 1114.003 | 9.859983 | 9.774967 |
| 11794 | M181T10_ | 1.172393 | 0.229456 | 0.430088 | 0.679374 | 0.872892 | UP   | 181.1217 | 181.1215 | 181.1218 | 9.979342 | 9.859233 |

|       |          |          |          |          |          |          |      |          |          |          |          |          |
|-------|----------|----------|----------|----------|----------|----------|------|----------|----------|----------|----------|----------|
| 11795 | M441T29_ | 1.243772 | -0.31472 | -0.43089 | 0.67942  | 0.872897 | DOWN | 440.6652 | 440.6647 | 440.6653 | 28.82083 | 28.79767 |
| 11796 | M254T11_ | 1.085353 | 0.118164 | 0.435946 | 0.67946  | 0.872901 | UP   | 253.8027 | 253.8026 | 253.8028 | 10.89907 | 10.8646  |
| 11797 | M567T10_ | 1.067278 | 0.093936 | 0.42924  | 0.679503 | 0.872905 | UP   | 567.3631 | 567.3627 | 567.3634 | 9.522992 | 9.40135  |
| 11798 | M576T10_ | 1.06634  | -0.09267 | -0.42888 | 0.679545 | 0.872909 | DOWN | 576.2299 | 576.2297 | 576.2302 | 9.948875 | 9.843367 |
| 11799 | M708T10_ | 1.09298  | -0.12827 | -0.4297  | 0.679563 | 0.872911 | DOWN | 707.8354 | 707.826  | 707.836  | 9.825492 | 9.715683 |
| 11800 | M640T11_ | 1.13225  | -0.17919 | -0.43261 | 0.679568 | 0.872912 | DOWN | 640.1415 | 640.1405 | 640.1418 | 10.90765 | 10.8646  |
| 11801 | M393T43  | 1.065164 | -0.09108 | -0.44    | 0.679608 | 0.872916 | DOWN | 393.2313 | 393.231  | 393.2315 | 42.94167 | 42.82667 |
| 11802 | M775T10_ | 1.116155 | 0.158538 | 0.433342 | 0.679749 | 0.87293  | UP   | 775.2907 | 775.2856 | 775.2912 | 9.824183 | 9.7124   |
| 11803 | M244T11_ | 1.137116 | -0.18538 | -0.43098 | 0.679784 | 0.872933 | DOWN | 244.1814 | 244.1789 | 244.1817 | 10.91978 | 10.88747 |
| 11804 | M360T10_ | 1.368248 | 0.452329 | 0.43877  | 0.679789 | 0.872934 | UP   | 359.524  | 359.5239 | 359.524  | 9.960817 | 9.859233 |
| 11805 | M384T11_ | 1.049377 | -0.06953 | -0.42921 | 0.679802 | 0.872935 | DOWN | 384.1237 | 384.1233 | 384.1239 | 10.892   | 10.879   |
| 11806 | M339T10_ | 1.12122  | -0.16507 | -0.43093 | 0.679864 | 0.872941 | DOWN | 339.4364 | 339.4362 | 339.4366 | 9.94785  | 9.843367 |
| 11807 | M245T22  | 1.081991 | -0.11369 | -0.44075 | 0.679929 | 0.872948 | DOWN | 245.2665 | 245.2664 | 245.2666 | 22.30567 | 22.296   |
| 11808 | M517T10_ | 1.152787 | -0.20513 | -0.43032 | 0.680134 | 0.872968 | DOWN | 516.7954 | 516.7949 | 516.7958 | 9.548667 | 9.46325  |
| 11809 | M438T43_ | 1.130224 | -0.17661 | -0.44229 | 0.680181 | 0.872973 | DOWN | 438.2693 | 438.2692 | 438.2696 | 42.74017 | 42.40933 |
| 11810 | M277T10_ | 1.064542 | -0.09023 | -0.43344 | 0.680209 | 0.872976 | DOWN | 276.9686 | 276.9684 | 276.9763 | 9.8397   | 9.715683 |
| 11811 | M791T27  | 1.065392 | -0.09138 | -0.42883 | 0.680227 | 0.872977 | DOWN | 790.5889 | 790.5885 | 790.5894 | 27.31833 | 27.20167 |
| 11812 | M864T26  | 1.125347 | -0.17037 | -0.42748 | 0.680366 | 0.872991 | DOWN | 863.6137 | 863.6134 | 863.6141 | 25.5685  | 25.54183 |
| 11813 | M1421T10 | 1.089389 | -0.12352 | -0.4315  | 0.680413 | 0.872996 | DOWN | 1420.749 | 1420.748 | 1420.751 | 9.8207   | 9.699733 |
| 11814 | M301T10_ | 1.190372 | -0.25141 | -0.42916 | 0.68043  | 0.872998 | DOWN | 301.1573 | 301.1572 | 301.1573 | 9.915583 | 9.874067 |
| 11815 | M1024T18 | 1.074191 | -0.10325 | -0.43171 | 0.680479 | 0.873003 | DOWN | 1023.506 | 1023.505 | 1023.507 | 17.57133 | 17.5555  |
| 11816 | M645T36  | 1.274567 | -0.35001 | -0.42787 | 0.680519 | 0.873006 | DOWN | 645.4977 | 645.4966 | 645.4982 | 35.85117 | 35.81933 |
| 11817 | M768T9_1 | 1.200863 | -0.26407 | -0.42796 | 0.680561 | 0.873011 | DOWN | 767.967  | 767.9656 | 767.9682 | 9.058417 | 8.90515  |
| 11818 | M564T41_ | 1.101134 | -0.13899 | -0.43056 | 0.680661 | 0.873021 | DOWN | 564.3013 | 564.3009 | 564.3016 | 41.10758 | 40.94217 |
| 11819 | M512T10_ | 1.168551 | -0.22472 | -0.42878 | 0.680664 | 0.873021 | DOWN | 511.6944 | 511.6942 | 511.6946 | 9.830283 | 9.715683 |
| 11820 | M786T9_2 | 1.171335 | 0.228154 | 0.427296 | 0.680686 | 0.873023 | UP   | 786.1351 | 786.1301 | 786.1359 | 9.302667 | 9.234417 |
| 11821 | M374T11_ | 1.091099 | 0.125782 | 0.428953 | 0.680696 | 0.873024 | UP   | 373.9319 | 373.9312 | 373.9323 | 10.93655 | 10.82972 |
| 11822 | M419T10_ | 1.12338  | 0.167846 | 0.426882 | 0.680745 | 0.873029 | UP   | 418.7839 | 418.7837 | 418.7842 | 9.970617 | 9.8753   |
| 11823 | M620T36_ | 1.052827 | 0.074269 | 0.441436 | 0.68076  | 0.87303  | UP   | 620.3639 | 620.3639 | 620.3644 | 36.19258 | 35.919   |
| 11824 | M912T10_ | 1.409865 | 0.495557 | 0.439513 | 0.680897 | 0.873044 | UP   | 912.3328 | 912.3308 | 912.3341 | 9.605683 | 9.49445  |
| 11825 | M358T9_1 | 1.107541 | -0.14736 | -0.43014 | 0.680962 | 0.873051 | DOWN | 357.6644 | 357.6639 | 357.6646 | 9.272133 | 9.234417 |
| 11826 | M960T9_1 | 1.25143  | 0.323578 | 0.43666  | 0.680967 | 0.873051 | UP   | 959.6174 | 959.6164 | 959.618  | 9.394433 | 9.284283 |
| 11827 | M423T11_ | 1.181727 | -0.2409  | -0.42728 | 0.68114  | 0.873068 | DOWN | 423.352  | 423.3419 | 423.3559 | 10.97242 | 10.88747 |
| 11828 | M568T10_ | 1.12827  | 0.174112 | 0.429373 | 0.68114  | 0.873068 | UP   | 568.311  | 568.31   | 568.3119 | 9.951283 | 9.843367 |
| 11829 | M887T10_ | 1.250671 | 0.322703 | 0.430435 | 0.681178 | 0.873072 | UP   | 886.598  | 886.5973 | 886.5985 | 9.918833 | 9.811217 |

|       |          |          |          |          |          |          |      |          |          |          |          |          |
|-------|----------|----------|----------|----------|----------|----------|------|----------|----------|----------|----------|----------|
| 11830 | M541T10_ | 1.135458 | 0.183275 | 0.436277 | 0.681183 | 0.873073 | UP   | 541.4519 | 541.4511 | 541.4521 | 10.05251 | 9.955733 |
| 11831 | M763T10_ | 1.137261 | -0.18556 | -0.4266  | 0.681191 | 0.873073 | DOWN | 763.4779 | 763.4766 | 763.4787 | 10.28725 | 10.19852 |
| 11832 | M719T25  | 1.133294 | 0.180523 | 0.426108 | 0.681291 | 0.873083 | UP   | 719.4925 | 719.4919 | 719.4927 | 24.6525  | 24.638   |
| 11833 | M245T9_1 | 1.154931 | 0.207807 | 0.42623  | 0.681347 | 0.873089 | UP   | 244.5296 | 244.5275 | 244.5303 | 9.295167 | 9.1175   |
| 11834 | M1153T10 | 1.080946 | -0.11229 | -0.42615 | 0.681358 | 0.87309  | DOWN | 1153.412 | 1153.41  | 1153.413 | 9.975142 | 9.8753   |
| 11835 | M373T41_ | 1.066066 | 0.092297 | 0.441362 | 0.681468 | 0.873101 | UP   | 373.222  | 373.2219 | 373.2221 | 40.97067 | 40.94233 |
| 11836 | M335T11_ | 1.038297 | -0.05422 | -0.43011 | 0.681499 | 0.873104 | DOWN | 335.3648 | 335.3646 | 335.3659 | 10.91982 | 10.879   |
| 11837 | M454T43_ | 1.124551 | -0.16935 | -0.42982 | 0.681737 | 0.873128 | DOWN | 454.2642 | 454.2641 | 454.2644 | 43.07833 | 42.85533 |
| 11838 | M358T11_ | 1.080515 | 0.11172  | 0.428001 | 0.681826 | 0.873136 | UP   | 358.4479 | 358.4477 | 358.4486 | 10.892   | 10.87487 |
| 11839 | M235T10_ | 1.059216 | -0.083   | -0.42533 | 0.681948 | 0.873148 | DOWN | 235.2147 | 235.2145 | 235.2148 | 9.930908 | 9.811217 |
| 11840 | M199T10_ | 1.128444 | -0.17433 | -0.43073 | 0.681983 | 0.873152 | DOWN | 199.4694 | 199.4692 | 199.4694 | 9.968992 | 9.859233 |
| 11841 | M180T10_ | 1.120608 | 0.164282 | 0.429492 | 0.682032 | 0.873157 | UP   | 180.2067 | 180.2066 | 180.2068 | 9.989117 | 9.8914   |
| 11842 | M400T9_2 | 1.125132 | -0.17009 | -0.43364 | 0.682041 | 0.873158 | DOWN | 399.6498 | 399.6492 | 399.6508 | 9.299058 | 9.1445   |
| 11843 | M681T11_ | 1.085615 | -0.11851 | -0.42686 | 0.682046 | 0.873158 | DOWN | 681.0165 | 681.0147 | 681.0168 | 10.83417 | 10.79918 |
| 11844 | M291T30  | 1.102423 | 0.140678 | 0.430132 | 0.682119 | 0.873166 | UP   | 291.2528 | 291.2527 | 291.2529 | 29.92025 | 29.90533 |
| 11845 | M478T40_ | 1.043309 | -0.06117 | -0.42495 | 0.682183 | 0.873172 | DOWN | 478.2642 | 478.264  | 478.2646 | 39.748   | 39.63283 |
| 11846 | M1131T10 | 1.098542 | -0.13559 | -0.4285  | 0.682204 | 0.873174 | DOWN | 1131.172 | 1131.171 | 1131.173 | 9.975217 | 9.8753   |
| 11847 | M344T33  | 1.064662 | 0.090395 | 0.424925 | 0.682223 | 0.873176 | UP   | 344.3156 | 344.3151 | 344.3159 | 32.9505  | 32.89283 |
| 11848 | M600T10_ | 1.054437 | -0.07647 | -0.42484 | 0.682398 | 0.873193 | DOWN | 600.4209 | 600.4199 | 600.4223 | 9.914217 | 9.522017 |
| 11849 | M219T9_1 | 1.273552 | -0.34886 | -0.42523 | 0.682406 | 0.873194 | DOWN | 219.2293 | 219.2279 | 219.2324 | 9.310917 | 9.204617 |
| 11850 | M209T10_ | 1.038639 | -0.05469 | -0.42851 | 0.682456 | 0.873199 | DOWN | 209.0269 | 209.0268 | 209.027  | 9.841442 | 9.73145  |
| 11851 | M678T10_ | 1.169025 | -0.22531 | -0.42623 | 0.68249  | 0.873202 | DOWN | 678.3712 | 678.3702 | 678.3758 | 9.869467 | 9.827283 |
| 11852 | M308T10_ | 1.155839 | 0.208941 | 0.427154 | 0.682743 | 0.873227 | UP   | 308.0119 | 308.0116 | 308.0123 | 9.979342 | 9.8753   |
| 11853 | M1775T10 | 1.078601 | 0.109161 | 0.423934 | 0.682785 | 0.873231 | UP   | 1775.199 | 1775.195 | 1775.201 | 9.8207   | 9.728083 |
| 11854 | M633T37  | 1.078169 | -0.10858 | -0.4243  | 0.682799 | 0.873233 | DOWN | 633.4186 | 633.418  | 633.4189 | 36.54708 | 36.52383 |
| 11855 | M619T10_ | 1.110602 | 0.151342 | 0.429432 | 0.682856 | 0.873239 | UP   | 618.9243 | 618.9237 | 618.9247 | 9.958617 | 9.843367 |
| 11856 | M434T9_1 | 1.200807 | 0.264004 | 0.432512 | 0.682903 | 0.873243 | UP   | 434.3276 | 434.3273 | 434.3278 | 9.457083 | 9.370583 |
| 11857 | M964T10_ | 1.108973 | 0.149225 | 0.42398  | 0.68291  | 0.873244 | UP   | 963.7489 | 963.7476 | 963.7522 | 9.975217 | 9.8753   |
| 11858 | M620T36_ | 1.019258 | -0.02752 | -0.42542 | 0.682947 | 0.873248 | DOWN | 620.364  | 620.3639 | 620.3644 | 35.57467 | 35.55567 |
| 11859 | M333T10_ | 1.029783 | 0.04234  | 0.429548 | 0.68296  | 0.873249 | UP   | 333.2648 | 333.2646 | 333.2654 | 9.847817 | 9.73145  |
| 11860 | M454T9_3 | 1.111114 | 0.152007 | 0.424128 | 0.682963 | 0.873249 | UP   | 453.5649 | 453.5555 | 453.5654 | 9.3494   | 9.175017 |
| 11861 | M446T39_ | 1.086867 | -0.12018 | -0.42563 | 0.682965 | 0.873249 | DOWN | 446.2746 | 446.2744 | 446.2749 | 39.25883 | 39.11483 |
| 11862 | M845T10_ | 1.130695 | 0.17721  | 0.432973 | 0.683221 | 0.873275 | UP   | 844.5781 | 844.5755 | 844.5795 | 9.938708 | 9.827283 |
| 11863 | M456T10_ | 1.114043 | 0.155806 | 0.43074  | 0.683352 | 0.873288 | UP   | 455.5919 | 455.5917 | 455.6035 | 10.14725 | 10.05268 |
| 11864 | M370T9_5 | 1.153902 | -0.20652 | -0.42326 | 0.683378 | 0.87329  | DOWN | 369.8126 | 369.8122 | 369.8133 | 8.963    | 8.89395  |

|       |          |          |          |          |          |          |      |          |          |          |          |          |
|-------|----------|----------|----------|----------|----------|----------|------|----------|----------|----------|----------|----------|
| 11865 | M787T24  | 1.17847  | -0.23692 | -0.42458 | 0.683397 | 0.873292 | DOWN | 787.0656 | 787.0647 | 787.0663 | 24.11333 | 24.088   |
| 11866 | M729T10_ | 1.168892 | 0.225141 | 0.431475 | 0.68341  | 0.873293 | UP   | 728.7817 | 728.7789 | 728.7829 | 9.8374   | 9.715683 |
| 11867 | M248T30  | 1.189914 | 0.250858 | 0.435604 | 0.683429 | 0.873295 | UP   | 248.2298 | 248.2296 | 248.23   | 29.74683 | 29.71833 |
| 11868 | M561T13  | 1.094703 | -0.13054 | -0.43052 | 0.683614 | 0.873313 | DOWN | 561.3705 | 561.3698 | 561.3713 | 13.08343 | 13.03922 |
| 11869 | M803T11  | 1.159818 | 0.213898 | 0.428583 | 0.683661 | 0.873318 | UP   | 803.433  | 803.4321 | 803.4344 | 10.5189  | 10.47197 |
| 11870 | M172T9_1 | 1.131561 | 0.178314 | 0.432796 | 0.683718 | 0.873324 | UP   | 171.5888 | 171.5884 | 171.5892 | 9.16835  | 9.111033 |
| 11871 | M268T10_ | 1.072429 | 0.100883 | 0.429061 | 0.683737 | 0.873326 | UP   | 267.7224 | 267.7223 | 267.7224 | 9.859667 | 9.806367 |
| 11872 | M257T9_2 | 1.072907 | -0.10152 | -0.42343 | 0.683787 | 0.873331 | DOWN | 256.85   | 256.8499 | 256.8501 | 8.66015  | 8.5728   |
| 11873 | M642T10_ | 1.211141 | 0.276367 | 0.42261  | 0.68381  | 0.873333 | UP   | 642.1573 | 642.1571 | 642.1602 | 9.8374   | 9.715683 |
| 11874 | M645T10_ | 1.096119 | 0.132405 | 0.430122 | 0.683874 | 0.873339 | UP   | 645.4124 | 645.4116 | 645.4141 | 9.839008 | 9.715683 |
| 11875 | M548T11_ | 1.099179 | 0.136426 | 0.425994 | 0.683953 | 0.873347 | UP   | 548.4248 | 548.4242 | 548.4252 | 10.91152 | 10.879   |
| 11876 | M267T10_ | 1.126226 | -0.1715  | -0.42257 | 0.68397  | 0.873349 | DOWN | 266.5275 | 266.5273 | 266.5276 | 9.918792 | 9.811217 |
| 11877 | M404T41_ | 1.118032 | 0.160962 | 0.436116 | 0.683999 | 0.873351 | UP   | 404.2639 | 404.2637 | 404.264  | 40.98767 | 40.856   |
| 11878 | M523T9_2 | 1.115461 | 0.157641 | 0.428136 | 0.684045 | 0.873356 | UP   | 523.0395 | 523.0375 | 523.0404 | 9.278717 | 9.129317 |
| 11879 | M766T10_ | 1.200639 | -0.2638  | -0.42232 | 0.684069 | 0.873358 | DOWN | 765.5873 | 765.5861 | 765.5879 | 9.821383 | 9.801833 |
| 11880 | M546T10_ | 1.135694 | -0.18357 | -0.42215 | 0.684106 | 0.873362 | DOWN | 545.9411 | 545.9409 | 545.9416 | 9.5812   | 9.49445  |
| 11881 | M444T11_ | 1.120343 | 0.16394  | 0.425609 | 0.684134 | 0.873365 | UP   | 443.6595 | 443.6586 | 443.6605 | 10.90551 | 10.873   |
| 11882 | M221T11_ | 1.066562 | 0.092967 | 0.422256 | 0.684149 | 0.873366 | UP   | 221.3498 | 221.3495 | 221.35   | 10.90537 | 10.879   |
| 11883 | M316T44_ | 1.057431 | -0.08056 | -0.42205 | 0.684253 | 0.873376 | DOWN | 316.1753 | 316.1752 | 316.1753 | 44.31942 | 44.193   |
| 11884 | M171T10_ | 1.04407  | -0.06222 | -0.4249  | 0.684267 | 0.873378 | DOWN | 170.5648 | 170.5647 | 170.5649 | 9.855658 | 9.73145  |
| 11885 | M162T10_ | 1.145096 | -0.19547 | -0.42524 | 0.684325 | 0.873384 | DOWN | 161.7106 | 161.7105 | 161.7107 | 9.768183 | 9.636483 |
| 11886 | M295T11_ | 1.098168 | -0.1351  | -0.42341 | 0.684327 | 0.873384 | DOWN | 295.0114 | 295.0111 | 295.0123 | 10.8926  | 10.873   |
| 11887 | M1445T10 | 1.267116 | 0.341549 | 0.426816 | 0.684427 | 0.873394 | UP   | 1445.088 | 1445.084 | 1445.091 | 9.941642 | 9.8914   |
| 11888 | M299T9_3 | 1.291268 | 0.368789 | 0.424109 | 0.684437 | 0.873395 | UP   | 299.2386 | 299.2379 | 299.2389 | 9.04055  | 8.985867 |
| 11889 | M566T10_ | 1.206334 | -0.27063 | -0.42151 | 0.684639 | 0.873415 | DOWN | 566.429  | 566.4272 | 566.4294 | 9.979667 | 9.859233 |
| 11890 | M512T10_ | 1.089296 | -0.1234  | -0.425   | 0.684813 | 0.873432 | DOWN | 511.6452 | 511.645  | 511.6455 | 9.849558 | 9.73145  |
| 11891 | M508T43_ | 1.156062 | 0.209219 | 0.431361 | 0.684846 | 0.873435 | UP   | 508.3111 | 508.3107 | 508.3113 | 43.05683 | 42.7835  |
| 11892 | M696T28_ | 1.140047 | -0.18909 | -0.4209  | 0.684942 | 0.873444 | DOWN | 695.5567 | 695.5565 | 695.5571 | 28.2575  | 28.22917 |
| 11893 | M623T10_ | 1.103213 | 0.141712 | 0.431773 | 0.684953 | 0.873445 | UP   | 622.9254 | 622.9247 | 622.9293 | 9.834117 | 9.728083 |
| 11894 | M381T17  | 1.126498 | -0.17185 | -0.42475 | 0.68503  | 0.873453 | DOWN | 381.1882 | 381.1881 | 381.1884 | 17.12683 | 17.00117 |
| 11895 | M623T10_ | 1.072795 | 0.101375 | 0.429885 | 0.685114 | 0.873461 | UP   | 622.5181 | 622.5176 | 622.5189 | 10.29527 | 10.21468 |
| 11896 | M297T10_ | 1.073216 | -0.10194 | -0.42064 | 0.685167 | 0.873466 | DOWN | 296.5959 | 296.5956 | 296.596  | 9.954767 | 9.843367 |
| 11897 | M353T11_ | 1.071595 | 0.09976  | 0.424348 | 0.68523  | 0.873473 | UP   | 352.9271 | 352.9231 | 352.9276 | 10.91813 | 10.877   |
| 11898 | M1136T32 | 1.084464 | -0.11698 | -0.42046 | 0.685339 | 0.873483 | DOWN | 1135.782 | 1135.78  | 1135.782 | 32.02733 | 31.99867 |
| 11899 | M921T11  | 1.065498 | 0.091527 | 0.420184 | 0.685436 | 0.873493 | UP   | 920.7299 | 920.7289 | 920.7307 | 10.892   | 10.879   |

|       |          |          |          |          |          |          |      |          |          |          |          |          |
|-------|----------|----------|----------|----------|----------|----------|------|----------|----------|----------|----------|----------|
| 11900 | M312T10_ | 1.067197 | 0.093827 | 0.421675 | 0.685485 | 0.873498 | UP   | 311.5994 | 311.5994 | 311.5995 | 9.979667 | 9.8914   |
| 11901 | M374T10_ | 1.240124 | 0.310485 | 0.430128 | 0.685559 | 0.873505 | UP   | 374.0722 | 374.072  | 374.0725 | 9.811267 | 9.699733 |
| 11902 | M220T9_1 | 1.291114 | 0.368616 | 0.420333 | 0.685564 | 0.873506 | UP   | 220.4612 | 220.4595 | 220.4622 | 9.329492 | 9.11795  |
| 11903 | M386T9_6 | 1.214748 | 0.280657 | 0.42731  | 0.685577 | 0.873507 | UP   | 386.3602 | 386.36   | 386.3603 | 9.166033 | 9.111033 |
| 11904 | M212T10_ | 1.13649  | 0.184586 | 0.420114 | 0.685655 | 0.873515 | UP   | 211.9655 | 211.9614 | 211.9658 | 9.8348   | 9.80185  |
| 11905 | M703T27_ | 1.137972 | -0.18647 | -0.42042 | 0.685675 | 0.873516 | DOWN | 702.9934 | 702.9926 | 702.9937 | 26.85383 | 26.78133 |
| 11906 | M388T42  | 1.040671 | 0.057514 | 0.427766 | 0.685739 | 0.873523 | UP   | 388.2327 | 388.2326 | 388.2328 | 41.9205  | 41.805   |
| 11907 | M227T23_ | 1.133282 | 0.180507 | 0.420543 | 0.685863 | 0.873535 | UP   | 227.2003 | 227.2002 | 227.2003 | 22.65383 | 22.62733 |
| 11908 | M451T10_ | 1.116483 | -0.15896 | -0.42015 | 0.685936 | 0.873542 | DOWN | 451.1691 | 451.1688 | 451.174  | 9.816133 | 9.801917 |
| 11909 | M339T10_ | 1.098439 | 0.135454 | 0.419726 | 0.686158 | 0.873564 | UP   | 338.9899 | 338.9897 | 338.9902 | 9.823317 | 9.728083 |
| 11910 | M278T11_ | 1.113582 | -0.15521 | -0.42029 | 0.686201 | 0.873568 | DOWN | 277.7353 | 277.7352 | 277.7354 | 10.7766  | 10.75312 |
| 11911 | M262T16  | 1.290801 | -0.36827 | -0.41899 | 0.686249 | 0.873573 | DOWN | 262.2373 | 262.2371 | 262.2375 | 16.06581 | 16.05238 |
| 11912 | M891T11_ | 1.06753  | -0.09428 | -0.41974 | 0.686382 | 0.873586 | DOWN | 891.295  | 891.2942 | 891.2974 | 10.892   | 10.879   |
| 11913 | M438T11_ | 1.044743 | -0.06315 | -0.41866 | 0.686479 | 0.873595 | DOWN | 437.73   | 437.7299 | 437.7308 | 10.91987 | 10.89355 |
| 11914 | M512T9_6 | 1.136566 | -0.18468 | -0.4259  | 0.686483 | 0.873596 | DOWN | 512.3135 | 512.313  | 512.3146 | 8.980067 | 8.90515  |
| 11915 | M368T9_3 | 1.112082 | -0.15326 | -0.4241  | 0.686522 | 0.8736   | DOWN | 367.8101 | 367.8094 | 367.811  | 8.961583 | 8.832317 |
| 11916 | M267T11_ | 1.107963 | 0.14791  | 0.418363 | 0.686747 | 0.873622 | UP   | 267.1487 | 267.1486 | 267.1489 | 10.89953 | 10.87487 |
| 11917 | M750T10_ | 1.095398 | -0.13145 | -0.41828 | 0.686867 | 0.873633 | DOWN | 749.9462 | 749.9456 | 749.9468 | 10.40358 | 10.36125 |
| 11918 | M451T36  | 1.223257 | 0.290727 | 0.425779 | 0.686879 | 0.873635 | UP   | 451.3627 | 451.3622 | 451.3633 | 36.2275  | 36.2035  |
| 11919 | M1741T10 | 1.12208  | -0.16618 | -0.42719 | 0.686958 | 0.873642 | DOWN | 1741.436 | 1741.434 | 1741.441 | 9.855658 | 9.747533 |
| 11920 | M342T10_ | 1.144086 | 0.194196 | 0.422507 | 0.687003 | 0.873647 | UP   | 341.8133 | 341.8051 | 341.8141 | 9.862375 | 9.715683 |
| 11921 | M395T9_1 | 1.042746 | 0.060388 | 0.417579 | 0.687238 | 0.87367  | UP   | 394.5176 | 394.5172 | 394.5184 | 8.837567 | 8.745033 |
| 11922 | M292T11_ | 1.0982   | -0.13514 | -0.41753 | 0.687286 | 0.873674 | DOWN | 291.9508 | 291.9507 | 291.9514 | 10.88323 | 10.8214  |
| 11923 | M393T9_6 | 1.568138 | -0.64905 | -0.42401 | 0.687312 | 0.873677 | DOWN | 393.247  | 393.2466 | 393.2495 | 8.851258 | 8.682683 |
| 11924 | M227T9_1 | 1.359523 | 0.4431   | 0.417484 | 0.687313 | 0.873677 | UP   | 227.1969 | 227.1944 | 227.1975 | 9.218083 | 9.0864   |
| 11925 | M551T10_ | 1.08473  | -0.11734 | -0.41803 | 0.687329 | 0.873679 | DOWN | 551.0126 | 551.0121 | 551.0127 | 9.983467 | 9.8753   |
| 11926 | M363T11_ | 1.060031 | -0.08411 | -0.41742 | 0.687361 | 0.873682 | DOWN | 363.0026 | 363.0023 | 363.0038 | 10.90519 | 10.879   |
| 11927 | M509T10_ | 1.074882 | 0.104178 | 0.418664 | 0.687379 | 0.873683 | UP   | 509.3389 | 509.3381 | 509.3392 | 10.13219 | 10.06883 |
| 11928 | M1748T10 | 1.129878 | 0.176167 | 0.4173   | 0.68744  | 0.873689 | UP   | 1748.022 | 1748.016 | 1748.024 | 9.977442 | 9.859233 |
| 11929 | M185T11_ | 1.128765 | 0.174745 | 0.417342 | 0.687442 | 0.87369  | UP   | 185.0213 | 185.0212 | 185.0213 | 10.8926  | 10.8646  |
| 11930 | M424T11_ | 1.216653 | 0.282917 | 0.419329 | 0.687512 | 0.873697 | UP   | 423.507  | 423.5008 | 423.513  | 10.96997 | 10.84767 |
| 11931 | M280T32  | 1.062784 | -0.08785 | -0.41859 | 0.687603 | 0.873705 | DOWN | 280.1622 | 280.162  | 280.1623 | 32.46017 | 32.45933 |
| 11932 | M687T10_ | 1.130001 | -0.17632 | -0.41794 | 0.687622 | 0.873707 | DOWN | 686.5696 | 686.5692 | 686.5704 | 9.82645  | 9.699733 |
| 11933 | M706T11_ | 1.099356 | -0.13666 | -0.417   | 0.687686 | 0.873713 | DOWN | 706.1108 | 706.1104 | 706.1123 | 10.89875 | 10.873   |
| 11934 | M250T10_ | 1.116944 | -0.15956 | -0.41754 | 0.687695 | 0.873714 | DOWN | 249.799  | 249.7987 | 249.7992 | 9.934533 | 9.827283 |

|       |          |          |          |          |          |          |      |          |          |          |          |          |
|-------|----------|----------|----------|----------|----------|----------|------|----------|----------|----------|----------|----------|
| 11935 | M210T11_ | 1.075094 | 0.104463 | 0.419831 | 0.687707 | 0.873716 | UP   | 209.7987 | 209.7986 | 209.7988 | 10.89875 | 10.879   |
| 11936 | M160T10_ | 1.128457 | 0.174352 | 0.419347 | 0.687756 | 0.87372  | UP   | 160.3235 | 160.3232 | 160.3287 | 9.9351   | 9.827283 |
| 11937 | M1639T10 | 1.117046 | -0.15969 | -0.41722 | 0.687756 | 0.87372  | DOWN | 1639.472 | 1639.464 | 1639.474 | 9.91875  | 9.827283 |
| 11938 | M661T10_ | 1.021487 | -0.03067 | -0.42288 | 0.688096 | 0.873754 | DOWN | 661.4199 | 661.4172 | 661.4217 | 9.830833 | 9.664033 |
| 11939 | M592T11_ | 1.12705  | -0.17255 | -0.41657 | 0.688127 | 0.873757 | DOWN | 591.7064 | 591.7063 | 591.7069 | 10.77638 | 10.74842 |
| 11940 | M374T30_ | 1.13954  | -0.18845 | -0.41799 | 0.688132 | 0.873757 | DOWN | 374.2705 | 374.2704 | 374.2706 | 29.58708 | 29.56083 |
| 11941 | M344T19_ | 1.111673 | 0.152732 | 0.418056 | 0.688134 | 0.873757 | UP   | 344.2414 | 344.2409 | 344.2415 | 18.74633 | 18.73333 |
| 11942 | M791T10_ | 1.175376 | 0.233122 | 0.422113 | 0.688216 | 0.873765 | UP   | 790.5291 | 790.5279 | 790.5294 | 9.970617 | 9.8753   |
| 11943 | M389T11_ | 1.115032 | -0.15709 | -0.41626 | 0.688217 | 0.873765 | DOWN | 389.1319 | 389.1315 | 389.1325 | 11.24277 | 11.21362 |
| 11944 | M277T10_ | 1.219303 | 0.286057 | 0.4165   | 0.688217 | 0.873765 | UP   | 277.3336 | 277.3335 | 277.334  | 9.948875 | 9.869467 |
| 11945 | M701T25  | 1.270934 | 0.345889 | 0.423835 | 0.688217 | 0.873765 | UP   | 701.4933 | 701.4931 | 701.4935 | 25.04242 | 24.84117 |
| 11946 | M799T9   | 1.160616 | -0.21489 | -0.41865 | 0.688241 | 0.873768 | DOWN | 798.9367 | 798.9364 | 798.9377 | 9.329642 | 9.24215  |
| 11947 | M554T9_3 | 1.212462 | 0.27794  | 0.428906 | 0.688307 | 0.873774 | UP   | 554.0373 | 554.029  | 554.0383 | 9.0871   | 8.94605  |
| 11948 | M431T10_ | 1.094067 | -0.1297  | -0.42663 | 0.688361 | 0.873779 | DOWN | 431.333  | 431.3326 | 431.3341 | 9.787433 | 9.665433 |
| 11949 | M242T11_ | 1.081147 | 0.112562 | 0.421105 | 0.688441 | 0.873787 | UP   | 241.7419 | 241.7418 | 241.742  | 10.90522 | 10.879   |
| 11950 | M384T10_ | 1.128611 | -0.17455 | -0.42039 | 0.688492 | 0.873792 | DOWN | 384.3136 | 384.3127 | 384.314  | 10.42665 | 10.39298 |
| 11951 | M239T10_ | 1.042222 | 0.059662 | 0.416114 | 0.688496 | 0.873793 | UP   | 239.4662 | 239.466  | 239.4662 | 9.902617 | 9.811217 |
| 11952 | M1647T10 | 1.271218 | 0.346212 | 0.429298 | 0.688497 | 0.873793 | UP   | 1646.827 | 1646.824 | 1646.832 | 9.918833 | 9.822117 |
| 11953 | M464T9_2 | 1.315446 | 0.395552 | 0.428135 | 0.688546 | 0.873797 | UP   | 464.3276 | 464.3264 | 464.3278 | 9.233917 | 9.146383 |
| 11954 | M1392T11 | 1.146282 | -0.19696 | -0.41677 | 0.688599 | 0.873803 | DOWN | 1391.998 | 1391.997 | 1391.998 | 10.83417 | 10.8214  |
| 11955 | M854T16_ | 1.113362 | -0.15492 | -0.41676 | 0.688619 | 0.873805 | DOWN | 854.1158 | 854.1148 | 854.1169 | 16.2564  | 16.2422  |
| 11956 | M299T10_ | 1.081897 | -0.11356 | -0.41768 | 0.688664 | 0.873809 | DOWN | 299.1488 | 299.1486 | 299.149  | 10.01853 | 9.923533 |
| 11957 | M1008T16 | 1.084861 | -0.11751 | -0.4187  | 0.688725 | 0.873815 | DOWN | 1008.487 | 1008.486 | 1008.487 | 15.51357 | 15.51095 |
| 11958 | M901T10  | 1.166742 | -0.22249 | -0.42166 | 0.688801 | 0.873822 | DOWN | 901.3415 | 901.3409 | 901.342  | 9.597067 | 9.49445  |
| 11959 | M477T9_7 | 1.068781 | 0.095966 | 0.415449 | 0.688892 | 0.873831 | UP   | 477.3299 | 477.3297 | 477.33   | 9.204092 | 9.11405  |
| 11960 | M187T44_ | 1.042941 | 0.060658 | 0.423437 | 0.688893 | 0.873831 | UP   | 187.0962 | 187.0961 | 187.0963 | 43.56017 | 43.4995  |
| 11961 | M400T10_ | 1.122245 | 0.166388 | 0.42187  | 0.68892  | 0.873834 | UP   | 399.8531 | 399.8525 | 399.8538 | 9.95165  | 9.843367 |
| 11962 | M368T10_ | 1.221214 | -0.28832 | -0.4173  | 0.688964 | 0.873838 | DOWN | 367.7448 | 367.7448 | 367.7518 | 9.799767 | 9.747533 |
| 11963 | M240T10_ | 1.180744 | -0.2397  | -0.41577 | 0.689059 | 0.873847 | DOWN | 240.0971 | 240.0877 | 240.0981 | 9.946367 | 9.811217 |
| 11964 | M529T9_3 | 1.061315 | -0.08585 | -0.41923 | 0.689082 | 0.87385  | DOWN | 529.2155 | 529.2138 | 529.2159 | 9.16125  | 9.12675  |
| 11965 | M280T10_ | 1.059459 | -0.08333 | -0.42969 | 0.689086 | 0.87385  | DOWN | 279.9491 | 279.9489 | 279.9496 | 9.975142 | 9.859233 |
| 11966 | M242T9_1 | 1.176062 | -0.23396 | -0.41803 | 0.689196 | 0.873861 | DOWN | 241.8048 | 241.8021 | 241.8051 | 9.311167 | 9.279417 |
| 11967 | M733T10_ | 1.149226 | -0.20066 | -0.41723 | 0.689201 | 0.873861 | DOWN | 733.315  | 733.3143 | 733.3155 | 9.9174   | 9.827283 |
| 11968 | M424T11_ | 1.048339 | 0.068105 | 0.419393 | 0.689237 | 0.873865 | UP   | 424.4767 | 424.4763 | 424.4771 | 10.90343 | 10.879   |
| 11969 | M173T9_3 | 1.171894 | 0.228842 | 0.423165 | 0.689252 | 0.873866 | UP   | 172.777  | 172.7766 | 172.7772 | 9.175258 | 9.142767 |

|       |          |          |          |          |          |          |      |          |          |          |          |          |
|-------|----------|----------|----------|----------|----------|----------|------|----------|----------|----------|----------|----------|
| 11970 | M674T36  | 1.1142   | -0.15601 | -0.41481 | 0.689285 | 0.873869 | DOWN | 674.4954 | 674.4948 | 674.4963 | 36.32342 | 36.30683 |
| 11971 | M351T11_ | 1.157805 | 0.211392 | 0.418517 | 0.689427 | 0.873883 | UP   | 350.9701 | 350.9696 | 350.971  | 10.91849 | 10.879   |
| 11972 | M446T45_ | 1.21866  | 0.285296 | 0.415791 | 0.689671 | 0.873907 | UP   | 446.2744 | 446.2743 | 446.2746 | 44.94033 | 44.66717 |
| 11973 | M350T10_ | 1.11508  | 0.157147 | 0.429076 | 0.689761 | 0.873916 | UP   | 349.5839 | 349.5837 | 349.5845 | 9.816133 | 9.699733 |
| 11974 | M628T10_ | 1.120414 | -0.16403 | -0.42126 | 0.689764 | 0.873916 | DOWN | 627.7842 | 627.7833 | 627.7844 | 9.6413   | 9.52595  |
| 11975 | M512T9_1 | 1.181291 | 0.240365 | 0.42212  | 0.689772 | 0.873917 | UP   | 511.6765 | 511.6762 | 511.6774 | 9.443225 | 9.38595  |
| 11976 | M643T10_ | 1.125219 | 0.170206 | 0.414517 | 0.690062 | 0.873945 | UP   | 642.7105 | 642.71   | 642.7133 | 9.968092 | 9.840617 |
| 11977 | M367T9_6 | 1.258733 | 0.331972 | 0.417297 | 0.690063 | 0.873945 | UP   | 367.4897 | 367.4884 | 367.4899 | 9.095142 | 9.06855  |
| 11978 | M218T11_ | 1.085038 | -0.11775 | -0.41462 | 0.690191 | 0.873957 | DOWN | 218.0379 | 218.0378 | 218.0381 | 10.89953 | 10.86008 |
| 11979 | M556T11_ | 1.201106 | 0.264364 | 0.413376 | 0.690256 | 0.873964 | UP   | 555.8675 | 555.8667 | 555.8697 | 10.8914  | 10.88995 |
| 11980 | M687T15  | 1.07942  | 0.110257 | 0.414916 | 0.69039  | 0.873977 | UP   | 687.4666 | 687.466  | 687.4671 | 15.16151 | 15.14642 |
| 11981 | M195T10_ | 1.094788 | -0.13065 | -0.41788 | 0.690405 | 0.873978 | DOWN | 194.9782 | 194.978  | 194.9784 | 9.977442 | 9.8753   |
| 11982 | M411T10_ | 1.155111 | -0.20803 | -0.41492 | 0.690435 | 0.873981 | DOWN | 411.3292 | 411.3289 | 411.3294 | 9.605975 | 9.547133 |
| 11983 | M387T11_ | 1.152003 | 0.204145 | 0.416751 | 0.690443 | 0.873982 | UP   | 387.297  | 387.2968 | 387.2973 | 10.8926  | 10.879   |
| 11984 | M651T10_ | 1.070128 | 0.097784 | 0.412968 | 0.690524 | 0.87399  | UP   | 650.8909 | 650.8883 | 650.8921 | 9.92375  | 9.8753   |
| 11985 | M334T10_ | 1.126973 | -0.17245 | -0.41805 | 0.690546 | 0.873992 | DOWN | 334.2749 | 334.2677 | 334.2751 | 9.967367 | 9.840617 |
| 11986 | M263T10_ | 1.073246 | 0.101981 | 0.415745 | 0.690687 | 0.874005 | UP   | 262.6333 | 262.6332 | 262.6337 | 9.903017 | 9.65225  |
| 11987 | M702T11_ | 1.07608  | -0.10579 | -0.41286 | 0.690695 | 0.874006 | DOWN | 702.4812 | 702.4775 | 702.4822 | 10.9049  | 10.879   |
| 11988 | M159T7_1 | 1.135474 | 0.183295 | 0.415051 | 0.690951 | 0.874031 | UP   | 158.9638 | 158.9637 | 158.964  | 6.60275  | 6.4126   |
| 11989 | M212T9_1 | 1.269856 | 0.344665 | 0.412418 | 0.691088 | 0.874044 | UP   | 212.2176 | 212.2164 | 212.2204 | 9.204617 | 9.0511   |
| 11990 | M450T9_1 | 1.201437 | -0.26476 | -0.41318 | 0.691202 | 0.874055 | DOWN | 449.5624 | 449.5571 | 449.5659 | 9.39195  | 9.0839   |
| 11991 | M388T10_ | 1.052978 | -0.07448 | -0.41534 | 0.691245 | 0.87406  | DOWN | 388.2518 | 388.2515 | 388.2521 | 9.954767 | 9.843367 |
| 11992 | M621T18  | 1.060078 | -0.08417 | -0.4127  | 0.69139  | 0.874074 | DOWN | 621.4857 | 621.4853 | 621.486  | 18.01183 | 17.99367 |
| 11993 | M504T10_ | 1.111225 | 0.152151 | 0.412836 | 0.691545 | 0.874089 | UP   | 503.8648 | 503.864  | 503.8651 | 9.977025 | 9.859233 |
| 11994 | M1151T9  | 1.224866 | -0.29262 | -0.41294 | 0.691677 | 0.874101 | DOWN | 1150.545 | 1150.544 | 1150.546 | 9.060817 | 9.031633 |
| 11995 | M233T11_ | 1.104193 | 0.142993 | 0.414909 | 0.691721 | 0.874106 | UP   | 233.1149 | 233.1141 | 233.115  | 11.3222  | 11.06705 |
| 11996 | M841T10_ | 1.097301 | -0.13396 | -0.42174 | 0.691729 | 0.874106 | DOWN | 841.3688 | 841.3685 | 841.3691 | 10.10223 | 9.971833 |
| 11997 | M848T10_ | 1.105978 | 0.145323 | 0.421792 | 0.691738 | 0.874107 | UP   | 848.4913 | 848.4911 | 848.492  | 10.13878 | 10.02042 |
| 11998 | M165T10_ | 1.080029 | -0.11107 | -0.41221 | 0.691768 | 0.87411  | DOWN | 165.2381 | 165.238  | 165.2439 | 9.946417 | 9.859233 |
| 11999 | M635T10_ | 1.403685 | 0.48922  | 0.411094 | 0.691796 | 0.874113 | UP   | 634.7858 | 634.7838 | 634.7866 | 9.95165  | 9.840617 |
| 12000 | M1033T10 | 1.078674 | -0.10926 | -0.41149 | 0.6918   | 0.874113 | DOWN | 1032.81  | 1032.809 | 1032.812 | 9.827158 | 9.683817 |
| 12001 | M245T23_ | 1.225162 | 0.292972 | 0.420141 | 0.691862 | 0.874119 | UP   | 245.1509 | 245.1507 | 245.151  | 22.8135  | 22.537   |
| 12002 | M756T10_ | 1.1806   | 0.23952  | 0.411161 | 0.691907 | 0.874124 | UP   | 755.6618 | 755.6606 | 755.6623 | 9.951283 | 9.843367 |
| 12003 | M336T10_ | 1.062789 | 0.087855 | 0.410927 | 0.692012 | 0.874134 | UP   | 336.0853 | 336.0748 | 336.0857 | 9.831517 | 9.7124   |
| 12004 | M327T43_ | 1.061612 | 0.086256 | 0.417418 | 0.692109 | 0.874143 | UP   | 327.2164 | 327.2163 | 327.2164 | 43.0855  | 42.8555  |

|       |          |          |          |          |          |          |      |          |          |          |          |          |
|-------|----------|----------|----------|----------|----------|----------|------|----------|----------|----------|----------|----------|
| 12005 | M471T10_ | 1.109745 | 0.150228 | 0.423058 | 0.692111 | 0.874143 | UP   | 470.5266 | 470.5261 | 470.5271 | 9.904767 | 9.729367 |
| 12006 | M578T43_ | 1.083739 | 0.116017 | 0.424306 | 0.692121 | 0.874144 | UP   | 578.3169 | 578.3165 | 578.317  | 42.95617 | 42.85533 |
| 12007 | M318T9_1 | 1.417907 | -0.50376 | -0.41668 | 0.692314 | 0.874163 | DOWN | 318.0626 | 318.0625 | 318.0628 | 9.333667 | 9.26575  |
| 12008 | M1767T10 | 1.079967 | 0.110987 | 0.413191 | 0.692425 | 0.874174 | UP   | 1766.589 | 1766.588 | 1766.59  | 9.842    | 9.73145  |
| 12009 | M390T10_ | 1.100513 | -0.13818 | -0.41031 | 0.692429 | 0.874174 | DOWN | 389.5523 | 389.5521 | 389.5525 | 9.886733 | 9.779267 |
| 12010 | M1573T24 | 1.036786 | 0.052118 | -0.4113  | 0.692545 | 0.874185 | UP   | 1573.122 | 1573.118 | 1573.126 | 24.11067 | 24.00833 |
| 12011 | M320T10_ | 1.065536 | -0.09158 | -0.41655 | 0.69262  | 0.874192 | DOWN | 320.4793 | 320.4791 | 320.4796 | 9.8207   | 9.699733 |
| 12012 | M204T9_1 | 1.064846 | -0.09064 | -0.40992 | 0.692753 | 0.874205 | DOWN | 203.6101 | 203.61   | 203.6104 | 9.280992 | 9.129317 |
| 12013 | M371T10_ | 1.163559 | -0.21854 | -0.41018 | 0.692869 | 0.874216 | DOWN | 370.6446 | 370.6439 | 370.6452 | 9.92825  | 9.811217 |
| 12014 | M200T9_2 | 1.13301  | 0.18016  | 0.409828 | 0.692958 | 0.874225 | UP   | 200.3466 | 200.346  | 200.3469 | 9.153992 | 9.1175   |
| 12015 | M718T9_1 | 1.093993 | -0.1296  | -0.412   | 0.693086 | 0.874237 | DOWN | 717.959  | 717.9576 | 717.9597 | 8.868383 | 8.77435  |
| 12016 | M385T27  | 1.081367 | 0.112857 | 0.409242 | 0.6931   | 0.874239 | UP   | 385.35   | 385.3496 | 385.3503 | 26.83892 | 26.81267 |
| 12017 | M284T9_7 | 1.185703 | -0.24574 | -0.41315 | 0.693107 | 0.874239 | DOWN | 284.2411 | 284.2407 | 284.2414 | 9.348233 | 9.234417 |
| 12018 | M1167T10 | 1.134407 | -0.18194 | -0.40959 | 0.693184 | 0.874247 | DOWN | 1166.852 | 1166.851 | 1166.854 | 9.962617 | 9.859233 |
| 12019 | M240T9   | 1.13706  | -0.18531 | -0.40946 | 0.693222 | 0.87425  | DOWN | 240.3734 | 240.3732 | 240.3737 | 9.055958 | 9.046783 |
| 12020 | M236T11_ | 1.14963  | 0.201169 | 0.409515 | 0.693368 | 0.874264 | UP   | 236.2457 | 236.2454 | 236.246  | 10.93708 | 10.87765 |
| 12021 | M332T10_ | 1.091387 | 0.126162 | 0.418895 | 0.693369 | 0.874265 | UP   | 332.4213 | 332.421  | 332.4216 | 9.823575 | 9.699733 |
| 12022 | M562T37  | 1.128077 | -0.17387 | -0.41967 | 0.69343  | 0.87427  | DOWN | 562.322  | 562.3216 | 562.3223 | 36.74083 | 36.48183 |
| 12023 | M556T30  | 1.111701 | -0.15277 | -0.40877 | 0.693435 | 0.874271 | DOWN | 556.4132 | 556.4125 | 556.4139 | 30.2805  | 30.2405  |
| 12024 | M461T28  | 1.039138 | -0.05539 | -0.41009 | 0.69347  | 0.874274 | DOWN | 461.3732 | 461.3729 | 461.3733 | 28.244   | 28.2     |
| 12025 | M684T10_ | 1.1298   | 0.176067 | 0.408695 | 0.693485 | 0.874276 | UP   | 684.4494 | 684.4487 | 684.4518 | 9.81635  | 9.73145  |
| 12026 | M782T11_ | 1.105172 | 0.144271 | 0.408829 | 0.693588 | 0.874286 | UP   | 782.047  | 782.0463 | 782.0482 | 10.8926  | 10.873   |
| 12027 | M431T9_7 | 1.401596 | 0.48707  | 0.418099 | 0.693593 | 0.874286 | UP   | 431.0506 | 431.0502 | 431.0543 | 9.1587   | 9.089733 |
| 12028 | M275T10_ | 1.057857 | -0.08114 | -0.40872 | 0.693622 | 0.874289 | DOWN | 274.714  | 274.7135 | 274.7141 | 9.979342 | 9.8753   |
| 12029 | M570T9_1 | 1.082463 | -0.11432 | -0.41277 | 0.693675 | 0.874294 | DOWN | 570.3168 | 570.3161 | 570.3171 | 9.1531   | 9.126783 |
| 12030 | M783T10_ | 1.089987 | -0.12431 | -0.40863 | 0.69374  | 0.8743   | DOWN | 782.6764 | 782.6756 | 782.6782 | 9.960817 | 9.816167 |
| 12031 | M750T10_ | 1.042389 | -0.05989 | -0.42006 | 0.693748 | 0.874301 | DOWN | 749.7813 | 749.7784 | 749.7824 | 9.830783 | 9.715683 |
| 12032 | M375T9_2 | 1.116495 | 0.158977 | 0.418789 | 0.694081 | 0.874333 | UP   | 374.7324 | 374.732  | 374.7328 | 9.172008 | 9.048117 |
| 12033 | M362T9_1 | 1.143715 | 0.193727 | 0.408813 | 0.694129 | 0.874338 | UP   | 361.8735 | 361.8719 | 361.8781 | 9.238283 | 9.07145  |
| 12034 | M345T10_ | 1.145112 | -0.19549 | -0.41278 | 0.694142 | 0.874339 | DOWN | 344.7118 | 344.7116 | 344.7121 | 9.994767 | 9.8914   |
| 12035 | M660T10_ | 1.116261 | -0.15867 | -0.41826 | 0.694283 | 0.874352 | DOWN | 660.2874 | 660.2867 | 660.288  | 9.857683 | 9.73145  |
| 12036 | M309T10_ | 1.104759 | 0.143732 | 0.408235 | 0.694313 | 0.874355 | UP   | 308.672  | 308.6718 | 308.6725 | 9.951283 | 9.853533 |
| 12037 | M402T10_ | 1.090519 | -0.12502 | -0.4079  | 0.69432  | 0.874356 | DOWN | 401.8019 | 401.8015 | 401.8021 | 9.9847   | 9.8753   |
| 12038 | M394T9_1 | 1.322018 | 0.402742 | 0.418508 | 0.694332 | 0.874357 | UP   | 393.5537 | 393.5461 | 393.5555 | 9.197983 | 9.106183 |
| 12039 | M535T27_ | 1.256576 | 0.329498 | 0.407588 | 0.69438  | 0.874362 | UP   | 535.058  | 535.0575 | 535.0587 | 26.78067 | 26.72333 |



|       |           |          |          |          |          |          |      |          |          |          |          |          |
|-------|-----------|----------|----------|----------|----------|----------|------|----------|----------|----------|----------|----------|
| 12040 | M876T10_  | 1.114625 | 0.156558 | 0.407845 | 0.694409 | 0.874364 | UP   | 876.4888 | 876.4859 | 876.489  | 10.37908 | 10.3771  |
| 12041 | M381T9_5  | 1.201554 | -0.2649  | -0.40868 | 0.694426 | 0.874366 | DOWN | 380.6602 | 380.6544 | 380.6631 | 9.168108 | 9.126783 |
| 12042 | M431T11_  | 1.077519 | -0.10771 | -0.40795 | 0.69444  | 0.874367 | DOWN | 431.0174 | 431.0168 | 431.0183 | 10.91265 | 10.879   |
| 12043 | M407T11_  | 1.163443 | -0.2184  | -0.40751 | 0.694706 | 0.874393 | DOWN | 407.4874 | 407.4859 | 407.4908 | 10.90197 | 10.83417 |
| 12044 | M453T10_  | 1.109099 | -0.14939 | -0.4114  | 0.694782 | 0.8744   | DOWN | 452.5747 | 452.5742 | 452.5752 | 9.75805  | 9.636483 |
| 12045 | M923T10_  | 1.110477 | 0.151179 | 0.4165   | 0.694857 | 0.874407 | UP   | 922.9272 | 922.9265 | 922.9277 | 9.944392 | 9.827283 |
| 12046 | M572T30   | 1.072025 | -0.10034 | -0.41027 | 0.694859 | 0.874408 | DOWN | 572.4365 | 572.436  | 572.4366 | 30.28092 | 30.266   |
| 12047 | M313T10_  | 1.085125 | -0.11786 | -0.40847 | 0.694891 | 0.874411 | DOWN | 312.7286 | 312.7284 | 312.7292 | 9.501692 | 9.40135  |
| 12048 | M397T12_  | 1.081504 | -0.11304 | -0.40963 | 0.695196 | 0.87444  | DOWN | 397.0916 | 397.0914 | 397.0921 | 12.48563 | 12.441   |
| 12049 | M392T11_  | 1.041052 | 0.058042 | 0.406741 | 0.695198 | 0.87444  | UP   | 392.3271 | 392.327  | 392.3275 | 10.5469  | 10.52015 |
| 12050 | M400T9_6  | 1.136775 | -0.18495 | -0.40919 | 0.695207 | 0.874441 | DOWN | 400.1769 | 400.1765 | 400.1769 | 8.955933 | 8.922033 |
| 12051 | M165T9_1  | 1.101228 | -0.13911 | -0.40653 | 0.695228 | 0.874443 | DOWN | 164.6261 | 164.6255 | 164.6267 | 9.37735  | 9.129317 |
| 12052 | M550T10_  | 1.074048 | -0.10306 | -0.41367 | 0.69526  | 0.874446 | DOWN | 550.4411 | 550.4408 | 550.4414 | 9.999    | 9.8914   |
| 12053 | M1360T10_ | 1.16608  | -0.22167 | -0.41548 | 0.695302 | 0.87445  | DOWN | 1359.703 | 1359.7   | 1359.709 | 9.918242 | 9.822117 |
| 12054 | M1023T10_ | 1.229562 | 0.298144 | 0.408743 | 0.695355 | 0.874455 | UP   | 1022.866 | 1022.865 | 1022.866 | 9.946367 | 9.843367 |
| 12055 | M578T40_  | 1.107584 | 0.147416 | 0.411927 | 0.695362 | 0.874456 | UP   | 578.3169 | 578.3167 | 578.3174 | 40.35217 | 40.079   |
| 12056 | M594T32   | 1.18602  | 0.246128 | 0.414986 | 0.695464 | 0.874466 | UP   | 594.4151 | 594.4146 | 594.4153 | 31.85425 | 31.84017 |
| 12057 | M323T10_  | 1.082491 | -0.11436 | -0.41332 | 0.695545 | 0.874473 | DOWN | 322.8919 | 322.8917 | 322.892  | 9.903017 | 9.827283 |
| 12058 | M419T9_3  | 1.165128 | 0.220489 | 0.405978 | 0.69557  | 0.874476 | UP   | 418.6885 | 418.6864 | 418.6914 | 9.388367 | 9.224517 |
| 12059 | M669T9_2  | 1.167265 | 0.223132 | 0.407085 | 0.695611 | 0.87448  | UP   | 668.954  | 668.9531 | 668.9547 | 8.719033 | 8.696033 |
| 12060 | M292T11_  | 1.1307   | 0.177216 | 0.410662 | 0.695623 | 0.874481 | UP   | 291.6598 | 291.6596 | 291.6602 | 10.8906  | 10.8646  |
| 12061 | M394T9_9  | 1.135613 | 0.183472 | 0.407865 | 0.695641 | 0.874482 | UP   | 394.2536 | 394.252  | 394.2546 | 9.220933 | 9.129317 |
| 12062 | M559T23_  | 1.115714 | -0.15797 | -0.41443 | 0.695758 | 0.874494 | DOWN | 558.8865 | 558.8861 | 558.8867 | 22.71983 | 22.69817 |
| 12063 | M286T10_  | 1.079402 | -0.11023 | -0.40619 | 0.695762 | 0.874494 | DOWN | 286.3718 | 286.3717 | 286.372  | 9.968992 | 9.859233 |
| 12064 | M368T10_  | 1.163105 | -0.21798 | -0.40566 | 0.695784 | 0.874496 | DOWN | 368.1151 | 368.114  | 368.125  | 9.836042 | 9.728083 |
| 12065 | M602T10_  | 1.079417 | 0.110253 | 0.407632 | 0.695804 | 0.874498 | UP   | 602.3898 | 602.3893 | 602.3903 | 10.0614  | 9.939683 |
| 12066 | M222T9_2  | 1.281259 | -0.35756 | -0.40699 | 0.695848 | 0.874502 | DOWN | 221.5301 | 221.5294 | 221.5315 | 9.29075  | 9.277967 |
| 12067 | M396T20_  | 1.068654 | -0.0958  | -0.40867 | 0.695956 | 0.874513 | DOWN | 396.1374 | 396.1372 | 396.1377 | 20.245   | 20.23017 |
| 12068 | M210T11_  | 1.070038 | 0.097662 | 0.407457 | 0.696013 | 0.874518 | UP   | 210.4996 | 210.4995 | 210.4997 | 10.89875 | 10.879   |
| 12069 | M330T29_  | 1.197846 | -0.26044 | -0.40747 | 0.696038 | 0.87452  | DOWN | 330.2491 | 330.2489 | 330.2492 | 28.82383 | 28.79767 |
| 12070 | M547T9_3  | 1.150752 | -0.20258 | -0.40725 | 0.69609  | 0.874525 | DOWN | 546.8267 | 546.8256 | 546.8363 | 9.390083 | 9.111033 |
| 12071 | M414T14   | 1.08992  | 0.124222 | 0.405014 | 0.696171 | 0.874533 | UP   | 414.2848 | 414.2842 | 414.2857 | 13.56563 | 13.53637 |
| 12072 | M369T10_  | 1.057798 | -0.08106 | -0.40549 | 0.696182 | 0.874534 | DOWN | 368.6383 | 368.6379 | 368.6393 | 9.902008 | 9.79535  |
| 12073 | M481T9_5  | 1.138983 | -0.18775 | -0.40497 | 0.696184 | 0.874534 | DOWN | 480.8033 | 480.8029 | 480.8041 | 9.29565  | 9.219483 |
| 12074 | M726T10_  | 1.082599 | 0.114499 | 0.405006 | 0.696253 | 0.874541 | UP   | 726.1661 | 726.1652 | 726.1668 | 9.9351   | 9.827283 |

|       |          |          |          |          |          |          |      |          |          |          |          |          |
|-------|----------|----------|----------|----------|----------|----------|------|----------|----------|----------|----------|----------|
| 12075 | M1958T10 | 1.152805 | 0.205148 | 0.406702 | 0.696255 | 0.874541 | UP   | 1958.373 | 1958.371 | 1958.375 | 9.830283 | 9.715683 |
| 12076 | M295T11_ | 1.119079 | -0.16231 | -0.40707 | 0.696261 | 0.874542 | DOWN | 294.6107 | 294.6101 | 294.6112 | 10.91881 | 10.88995 |
| 12077 | M518T44_ | 1.135489 | 0.183313 | 0.406146 | 0.696272 | 0.874543 | UP   | 518.2956 | 518.2954 | 518.296  | 44.41867 | 44.19267 |
| 12078 | M753T11_ | 1.118867 | 0.162039 | 0.405302 | 0.696274 | 0.874543 | UP   | 752.978  | 752.9771 | 752.9785 | 10.892   | 10.85838 |
| 12079 | M1110T10 | 1.067964 | -0.09486 | -0.40477 | 0.69628  | 0.874544 | DOWN | 1109.811 | 1109.809 | 1109.812 | 9.843883 | 9.683817 |
| 12080 | M411T7_1 | 1.240705 | 0.31116  | 0.406611 | 0.696321 | 0.874547 | UP   | 410.8556 | 410.8554 | 410.8557 | 6.6237   | 6.587767 |
| 12081 | M393T10_ | 1.108215 | -0.14824 | -0.41121 | 0.696528 | 0.874567 | DOWN | 393.2485 | 393.2483 | 393.2486 | 9.956417 | 9.843367 |
| 12082 | M237T41  | 1.147175 | 0.198085 | 0.419145 | 0.696562 | 0.87457  | UP   | 237.1847 | 237.1845 | 237.1848 | 40.77658 | 40.755   |
| 12083 | M697T9_6 | 1.172436 | -0.22951 | -0.4113  | 0.69658  | 0.874572 | DOWN | 697.3614 | 697.3591 | 697.3631 | 9.374525 | 9.279417 |
| 12084 | M578T10_ | 1.133004 | -0.18015 | -0.40428 | 0.696649 | 0.874579 | DOWN | 577.6312 | 577.6308 | 577.6316 | 9.981567 | 9.859233 |
| 12085 | M547T10_ | 1.111967 | -0.15311 | -0.40527 | 0.69674  | 0.874587 | DOWN | 546.8808 | 546.8807 | 546.881  | 9.9551   | 9.843367 |
| 12086 | M205T10_ | 1.059956 | -0.084   | -0.4071  | 0.696782 | 0.874591 | DOWN | 205.3443 | 205.3443 | 205.3444 | 9.8207   | 9.699733 |
| 12087 | M426T11_ | 1.069305 | 0.096673 | 0.405387 | 0.696815 | 0.874595 | UP   | 426.3458 | 426.3455 | 426.346  | 10.892   | 10.879   |
| 12088 | M225T42_ | 1.083763 | -0.11605 | -0.41706 | 0.696838 | 0.874597 | DOWN | 225.1119 | 225.1117 | 225.1119 | 42.42383 | 42.323   |
| 12089 | M222T10_ | 1.150853 | 0.202704 | 0.404246 | 0.696879 | 0.874601 | UP   | 221.6199 | 221.6196 | 221.62   | 9.964092 | 9.8753   |
| 12090 | M400T11_ | 1.074794 | -0.10406 | -0.40385 | 0.696999 | 0.874612 | DOWN | 400.2635 | 400.2634 | 400.2639 | 10.892   | 10.879   |
| 12091 | M562T10_ | 1.102989 | -0.14142 | -0.40352 | 0.69714  | 0.874626 | DOWN | 562.3431 | 562.3424 | 562.3511 | 9.655475 | 9.478833 |
| 12092 | M452T10_ | 1.039308 | -0.05562 | -0.40532 | 0.697179 | 0.874629 | DOWN | 451.666  | 451.6656 | 451.6662 | 9.933567 | 9.827283 |
| 12093 | M238T11_ | 1.091226 | 0.125951 | 0.406133 | 0.69718  | 0.874629 | UP   | 237.9472 | 237.9366 | 237.9474 | 10.8926  | 10.879   |
| 12094 | M644T36  | 1.206536 | -0.27087 | -0.40372 | 0.697222 | 0.874633 | DOWN | 644.4942 | 644.494  | 644.4949 | 35.8505  | 35.83683 |
| 12095 | M333T30  | 1.102629 | -0.14095 | -0.40437 | 0.697287 | 0.87464  | DOWN | 333.319  | 333.3189 | 333.3192 | 29.50858 | 29.48917 |
| 12096 | M259T10_ | 1.087861 | -0.12149 | -0.40401 | 0.697322 | 0.874643 | DOWN | 259.4124 | 259.4121 | 259.4124 | 9.915933 | 9.811217 |
| 12097 | M377T9_6 | 1.09803  | 0.134917 | 0.403485 | 0.697357 | 0.874646 | UP   | 377.1039 | 377.1006 | 377.1076 | 9.320483 | 9.202433 |
| 12098 | M532T40_ | 1.051079 | 0.071872 | 0.405261 | 0.697371 | 0.874648 | UP   | 532.3114 | 532.3111 | 532.3116 | 39.97817 | 39.83417 |
| 12099 | M636T11_ | 1.058807 | -0.08244 | -0.40548 | 0.697524 | 0.874662 | DOWN | 635.7135 | 635.7129 | 635.7148 | 10.87704 | 10.85018 |
| 12100 | M236T9_8 | 1.3339   | 0.41565  | 0.411976 | 0.697564 | 0.874666 | UP   | 236.1807 | 236.1804 | 236.1808 | 8.941217 | 8.878667 |
| 12101 | M562T45_ | 1.046635 | -0.06576 | -0.40607 | 0.697661 | 0.874675 | DOWN | 562.322  | 562.3217 | 562.3221 | 44.66017 | 44.59533 |
| 12102 | M680T10_ | 1.341478 | 0.423823 | 0.41421  | 0.697691 | 0.874678 | UP   | 679.5653 | 679.5566 | 679.57   | 9.8902   | 9.73145  |
| 12103 | M428T19_ | 1.120457 | 0.164087 | 0.405578 | 0.697723 | 0.874681 | UP   | 428.1518 | 428.1515 | 428.1524 | 19.15458 | 19.0995  |
| 12104 | M1562T10 | 1.253615 | 0.326095 | 0.407676 | 0.697747 | 0.874683 | UP   | 1562.222 | 1562.222 | 1562.222 | 9.903567 | 9.874067 |
| 12105 | M262T11  | 1.140026 | -0.18907 | -0.40741 | 0.697791 | 0.874687 | DOWN | 262.4256 | 262.4254 | 262.426  | 10.91674 | 10.88747 |
| 12106 | M410T10_ | 1.048211 | -0.06793 | -0.40821 | 0.697874 | 0.874695 | DOWN | 409.7644 | 409.764  | 409.7646 | 9.917167 | 9.811217 |
| 12107 | M254T9_3 | 1.097904 | -0.13475 | -0.40274 | 0.697937 | 0.874701 | DOWN | 254.1345 | 254.1344 | 254.1346 | 9.3907   | 9.12675  |
| 12108 | M472T25_ | 1.196673 | -0.25903 | -0.4027  | 0.698017 | 0.874709 | DOWN | 472.0888 | 472.0885 | 472.0892 | 25.26683 | 25.17267 |
| 12109 | M478T43_ | 1.136121 | -0.18412 | -0.40798 | 0.698049 | 0.874712 | DOWN | 478.3006 | 478.3004 | 478.3008 | 42.582   | 42.42383 |

|       |          |          |          |          |          |          |      |          |          |          |          |          |
|-------|----------|----------|----------|----------|----------|----------|------|----------|----------|----------|----------|----------|
| 12110 | M273T10_ | 1.114782 | 0.156762 | 0.402257 | 0.698187 | 0.874725 | UP   | 272.9165 | 272.9163 | 272.9167 | 9.958617 | 9.843367 |
| 12111 | M331T29_ | 1.20607  | -0.27031 | -0.40312 | 0.698195 | 0.874726 | DOWN | 331.0016 | 331.0014 | 331.0019 | 28.82117 | 28.79    |
| 12112 | M445T10_ | 1.095884 | -0.13209 | -0.40752 | 0.698214 | 0.874728 | DOWN | 444.6414 | 444.641  | 444.6417 | 9.960817 | 9.859233 |
| 12113 | M680T40_ | 1.140884 | -0.19015 | -0.4141  | 0.698267 | 0.874733 | DOWN | 680.3856 | 680.3855 | 680.3859 | 39.604   | 39.44583 |
| 12114 | M372T12  | 1.109532 | 0.149951 | 0.405368 | 0.698276 | 0.874734 | UP   | 372.1496 | 372.1494 | 372.1498 | 11.6717  | 11.66018 |
| 12115 | M719T28  | 1.100614 | -0.13831 | -0.40822 | 0.69831  | 0.874737 | DOWN | 719.4982 | 719.4975 | 719.499  | 28.237   | 28.2     |
| 12116 | M767T10  | 1.277612 | 0.35345  | 0.407653 | 0.698406 | 0.874746 | UP   | 766.6172 | 766.616  | 766.6182 | 10.42565 | 10.39197 |
| 12117 | M221T30_ | 1.334727 | 0.416544 | 0.401817 | 0.698422 | 0.874747 | UP   | 221.129  | 221.1278 | 221.1371 | 29.77617 | 29.7615  |
| 12118 | M320T17  | 1.073837 | -0.10277 | -0.40177 | 0.698456 | 0.874751 | DOWN | 320.2217 | 320.2216 | 320.2219 | 16.66558 | 16.63667 |
| 12119 | M753T10_ | 1.108188 | 0.148202 | 0.402169 | 0.698591 | 0.874764 | UP   | 753.1551 | 753.154  | 753.1555 | 9.958617 | 9.843367 |
| 12120 | M542T11_ | 1.098989 | -0.13618 | -0.40659 | 0.698607 | 0.874765 | DOWN | 542.0045 | 542.0034 | 542.005  | 10.57938 | 10.55068 |
| 12121 | M230T10_ | 1.103671 | 0.14231  | 0.410404 | 0.698656 | 0.87477  | UP   | 230.4358 | 230.4356 | 230.436  | 9.944392 | 9.827283 |
| 12122 | M869T25  | 1.146871 | -0.1977  | -0.40439 | 0.698679 | 0.874772 | DOWN | 868.5973 | 868.5945 | 868.5989 | 25.38258 | 25.36617 |
| 12123 | M518T40  | 1.168632 | -0.22482 | -0.40919 | 0.698752 | 0.874779 | DOWN | 518.2956 | 518.2953 | 518.2958 | 40.381   | 40.02133 |
| 12124 | M219T9_9 | 1.162034 | -0.21665 | -0.40132 | 0.698805 | 0.874784 | DOWN | 219.1551 | 219.1534 | 219.156  | 9.278717 | 9.132267 |
| 12125 | M354T11_ | 1.075466 | 0.104962 | 0.408339 | 0.698822 | 0.874785 | UP   | 353.7552 | 353.7548 | 353.7554 | 10.90519 | 10.877   |
| 12126 | M260T9_8 | 1.157485 | -0.21099 | -0.40118 | 0.698838 | 0.874787 | DOWN | 260.2059 | 260.2057 | 260.2062 | 9.333433 | 9.275917 |
| 12127 | M311T11_ | 1.073114 | 0.101803 | 0.401677 | 0.69893  | 0.874796 | UP   | 310.6879 | 310.6871 | 310.6883 | 10.90785 | 10.87572 |
| 12128 | M1678T10 | 1.102113 | -0.14027 | -0.40094 | 0.698982 | 0.874801 | DOWN | 1677.832 | 1677.831 | 1677.836 | 9.81635  | 9.699733 |
| 12129 | M762T9_1 | 1.070037 | 0.09766  | 0.404324 | 0.698989 | 0.874801 | UP   | 761.6653 | 761.6633 | 761.6659 | 9.484417 | 9.40135  |
| 12130 | M257T10_ | 1.113057 | 0.154527 | 0.401565 | 0.699055 | 0.874808 | UP   | 256.5521 | 256.5518 | 256.5524 | 9.95385  | 9.843367 |
| 12131 | M511T10_ | 1.104909 | -0.14393 | -0.40126 | 0.699056 | 0.874808 | DOWN | 511.4791 | 511.4789 | 511.4793 | 9.968992 | 9.8753   |
| 12132 | M1683T10 | 1.102196 | 0.14038  | 0.401202 | 0.699083 | 0.87481  | UP   | 1683.388 | 1683.385 | 1683.389 | 9.9754   | 9.8753   |
| 12133 | M194T10_ | 1.117906 | -0.1608  | -0.40297 | 0.699089 | 0.874811 | DOWN | 194.0072 | 194.0006 | 194.0138 | 9.8161   | 9.416817 |
| 12134 | M829T11  | 1.151969 | 0.204102 | 0.407749 | 0.699132 | 0.874815 | UP   | 828.6422 | 828.6401 | 828.6445 | 10.8926  | 10.87487 |
| 12135 | M660T10_ | 1.042739 | 0.060379 | 0.413454 | 0.699142 | 0.874816 | UP   | 660.4594 | 660.4588 | 660.4613 | 9.8397   | 9.715683 |
| 12136 | M355T44_ | 1.157626 | -0.21117 | -0.40816 | 0.699156 | 0.874817 | DOWN | 355.2114 | 355.2112 | 355.2115 | 44.29367 | 44.049   |
| 12137 | M753T11_ | 1.093411 | -0.12884 | -0.41046 | 0.699179 | 0.874819 | DOWN | 752.5954 | 752.5936 | 752.596  | 10.91897 | 10.88995 |
| 12138 | M385T9_8 | 1.058506 | -0.08203 | -0.40057 | 0.699224 | 0.874824 | DOWN | 385.2219 | 385.2195 | 385.2224 | 9.311167 | 9.129317 |
| 12139 | M384T9_3 | 1.075798 | 0.105407 | 0.4009   | 0.699244 | 0.874825 | UP   | 384.0836 | 384.0827 | 384.084  | 9.008317 | 8.878667 |
| 12140 | M467T10_ | 1.124148 | -0.16883 | -0.40359 | 0.699415 | 0.874842 | DOWN | 466.9762 | 466.9761 | 466.9771 | 9.816208 | 9.683817 |
| 12141 | M273T10_ | 1.055103 | -0.07738 | -0.40311 | 0.699513 | 0.874851 | DOWN | 273.373  | 273.3725 | 273.3736 | 9.944392 | 9.843367 |
| 12142 | M507T10_ | 1.088662 | -0.12256 | -0.40004 | 0.69961  | 0.874861 | DOWN | 506.6747 | 506.6737 | 506.6801 | 9.955442 | 9.746783 |
| 12143 | M379T11_ | 1.091803 | 0.126713 | 0.400841 | 0.69985  | 0.874884 | UP   | 379.2496 | 379.2494 | 379.256  | 10.9049  | 10.879   |
| 12144 | M231T11  | 1.138579 | -0.18723 | -0.39963 | 0.699888 | 0.874888 | DOWN | 231.1692 | 231.1691 | 231.1694 | 10.83112 | 10.8214  |

|       |          |          |          |          |          |          |      |          |          |          |          |          |
|-------|----------|----------|----------|----------|----------|----------|------|----------|----------|----------|----------|----------|
| 12145 | M282T10_ | 1.143344 | -0.19326 | -0.40085 | 0.700008 | 0.874899 | DOWN | 281.5493 | 281.549  | 281.5496 | 9.967533 | 9.8914   |
| 12146 | M355T37  | 1.094222 | 0.129906 | 0.400871 | 0.700072 | 0.874905 | UP   | 355.2114 | 355.2112 | 355.2117 | 37.34517 | 36.96283 |
| 12147 | M385T10_ | 1.066904 | 0.093431 | 0.399318 | 0.700119 | 0.87491  | UP   | 385.0463 | 385.046  | 385.0467 | 9.972917 | 9.859233 |
| 12148 | M394T34_ | 1.103442 | 0.142011 | 0.400698 | 0.700122 | 0.87491  | UP   | 394.3162 | 394.3153 | 394.3167 | 33.79483 | 33.74467 |
| 12149 | M488T39  | 1.081919 | -0.11359 | -0.4135  | 0.700144 | 0.874912 | DOWN | 488.2849 | 488.2849 | 488.2854 | 38.856   | 38.82717 |
| 12150 | M440T22_ | 1.141554 | -0.191   | -0.40174 | 0.700259 | 0.874923 | DOWN | 440.3072 | 440.306  | 440.3077 | 21.63717 | 21.60833 |
| 12151 | M730T10_ | 1.062141 | -0.08698 | -0.40214 | 0.700266 | 0.874924 | DOWN | 730.4094 | 730.4089 | 730.4105 | 10.31875 | 10.2501  |
| 12152 | M344T11_ | 1.080761 | -0.11205 | -0.40225 | 0.700339 | 0.874931 | DOWN | 344.0473 | 344.047  | 344.0477 | 10.89907 | 10.85018 |
| 12153 | M445T11_ | 1.110644 | 0.151396 | 0.399784 | 0.70035  | 0.874932 | UP   | 444.8271 | 444.826  | 444.8279 | 10.91086 | 10.877   |
| 12154 | M215T11_ | 1.108263 | 0.1483   | 0.398798 | 0.700561 | 0.874952 | UP   | 215.1626 | 215.1626 | 215.1627 | 10.8914  | 10.88995 |
| 12155 | M550T10_ | 1.069716 | -0.09723 | -0.40662 | 0.700655 | 0.874961 | DOWN | 549.7442 | 549.7436 | 549.7447 | 9.972483 | 9.8753   |
| 12156 | M250T10_ | 1.124413 | -0.16917 | -0.3999  | 0.700687 | 0.874965 | DOWN | 250.0947 | 250.0944 | 250.0948 | 9.943183 | 9.827283 |
| 12157 | M612T9_1 | 1.152826 | -0.20517 | -0.40126 | 0.700972 | 0.874992 | DOWN | 611.7072 | 611.7001 | 611.7081 | 9.17485  | 9.09495  |
| 12158 | M256T10_ | 1.107886 | 0.147809 | 0.398974 | 0.701098 | 0.875004 | UP   | 255.8348 | 255.8345 | 255.8351 | 9.948875 | 9.843367 |
| 12159 | M332T9_7 | 1.193251 | -0.2549  | -0.39792 | 0.701098 | 0.875004 | DOWN | 332.1446 | 332.1444 | 332.1448 | 9.360867 | 9.250817 |
| 12160 | M433T9_2 | 1.084724 | 0.117327 | 0.406138 | 0.701107 | 0.875005 | UP   | 432.7216 | 432.7196 | 432.7244 | 9.264333 | 9.166033 |
| 12161 | M659T10_ | 1.019674 | -0.02811 | -0.40093 | 0.701183 | 0.875012 | DOWN | 658.5884 | 658.5879 | 658.5905 | 9.8397   | 9.715683 |
| 12162 | M1064T10 | 1.073007 | 0.10166  | 0.400895 | 0.701239 | 0.875018 | UP   | 1064.368 | 1064.366 | 1064.37  | 9.766367 | 9.65225  |
| 12163 | M476T10_ | 1.024841 | -0.0354  | -0.40046 | 0.701266 | 0.87502  | DOWN | 475.9117 | 475.9115 | 475.9121 | 9.847133 | 9.73145  |
| 12164 | M423T10_ | 1.11665  | -0.15918 | -0.39945 | 0.70129  | 0.875023 | DOWN | 422.5818 | 422.5815 | 422.5821 | 9.948875 | 9.843367 |
| 12165 | M471T9_9 | 1.074214 | 0.103282 | 0.401287 | 0.701338 | 0.875027 | UP   | 471.3601 | 471.3597 | 471.3603 | 9.397575 | 9.219483 |
| 12166 | M228T23_ | 1.061919 | -0.08667 | -0.40346 | 0.701348 | 0.875028 | DOWN | 228.2035 | 228.2034 | 228.2036 | 23.02325 | 23.00133 |
| 12167 | M553T34  | 1.098322 | -0.1353  | -0.39831 | 0.7014   | 0.875033 | DOWN | 553.394  | 553.3929 | 553.3946 | 33.6725  | 33.64383 |
| 12168 | M919T10_ | 1.135642 | -0.18351 | -0.39817 | 0.701419 | 0.875035 | DOWN | 918.8979 | 918.8962 | 918.8989 | 9.9351   | 9.903017 |
| 12169 | M632T11_ | 1.09803  | -0.13492 | -0.40016 | 0.701458 | 0.875039 | DOWN | 631.7025 | 631.7018 | 631.7031 | 10.91265 | 10.87765 |
| 12170 | M603T23  | 1.071485 | -0.09961 | -0.40096 | 0.701665 | 0.875059 | DOWN | 603.4145 | 603.414  | 603.415  | 22.74217 | 22.69817 |
| 12171 | M220T9_5 | 1.234641 | 0.304092 | 0.397382 | 0.701792 | 0.875071 | UP   | 219.8064 | 219.8011 | 219.8079 | 9.383775 | 9.20785  |
| 12172 | M717T10_ | 1.054251 | -0.07622 | -0.39788 | 0.701805 | 0.875072 | DOWN | 716.5129 | 716.5125 | 716.5134 | 10.1384  | 10.05268 |
| 12173 | M509T10_ | 1.084146 | -0.11656 | -0.3998  | 0.701812 | 0.875073 | DOWN | 509.4695 | 509.4694 | 509.4702 | 9.849558 | 9.73145  |
| 12174 | M203T10_ | 1.051519 | -0.07248 | -0.39941 | 0.701826 | 0.875074 | DOWN | 202.7364 | 202.7362 | 202.7365 | 9.979342 | 9.8753   |
| 12175 | M411T9_5 | 1.120636 | -0.16432 | -0.40167 | 0.701871 | 0.875078 | DOWN | 411.1704 | 411.1688 | 411.1717 | 9.273908 | 9.11405  |
| 12176 | M790T11_ | 1.065584 | -0.09164 | -0.39774 | 0.701994 | 0.87509  | DOWN | 789.7858 | 789.7855 | 789.7879 | 10.892   | 10.879   |
| 12177 | M232T11_ | 1.139768 | 0.18874  | 0.400754 | 0.702101 | 0.8751   | UP   | 231.5275 | 231.5272 | 231.5275 | 10.83417 | 10.8214  |
| 12178 | M457T10_ | 1.067783 | -0.09462 | -0.39649 | 0.702151 | 0.875105 | DOWN | 457.169  | 457.1684 | 457.1696 | 9.5876   | 9.46325  |
| 12179 | M364T11_ | 1.174299 | 0.2318   | 0.40165  | 0.702182 | 0.875108 | UP   | 363.7619 | 363.7613 | 363.766  | 11.02038 | 10.87765 |

|       |          |          |          |          |          |          |      |          |          |          |          |          |
|-------|----------|----------|----------|----------|----------|----------|------|----------|----------|----------|----------|----------|
| 12180 | M421T11_ | 1.056083 | -0.07872 | -0.39649 | 0.702226 | 0.875112 | DOWN | 420.5718 | 420.5717 | 420.5727 | 10.89875 | 10.8646  |
| 12181 | M450T39_ | 1.059294 | -0.0831  | -0.40246 | 0.702228 | 0.875113 | DOWN | 450.2333 | 450.2328 | 450.2334 | 38.91367 | 38.76967 |
| 12182 | M323T10_ | 1.396738 | 0.482061 | 0.397615 | 0.702248 | 0.875115 | UP   | 323.2203 | 323.22   | 323.2205 | 9.990767 | 9.8914   |
| 12183 | M811T10_ | 1.120608 | -0.16428 | -0.40266 | 0.702255 | 0.875115 | DOWN | 811.4385 | 811.438  | 811.4388 | 9.964092 | 9.859233 |
| 12184 | M184T9_5 | 1.177956 | 0.236286 | 0.396724 | 0.70248  | 0.875137 | UP   | 183.9308 | 183.9301 | 183.931  | 9.174917 | 9.11795  |
| 12185 | M453T9_1 | 1.0802   | -0.1113  | -0.39752 | 0.702525 | 0.875141 | DOWN | 453.3416 | 453.3413 | 453.3428 | 9.304717 | 8.9997   |
| 12186 | M1834T10 | 1.079819 | -0.11079 | -0.39667 | 0.702875 | 0.875175 | DOWN | 1834.037 | 1834.034 | 1834.04  | 9.970617 | 9.859233 |
| 12187 | M351T10_ | 1.024667 | -0.03516 | -0.4085  | 0.70294  | 0.875181 | DOWN | 350.8782 | 350.8781 | 350.879  | 9.830083 | 9.479567 |
| 12188 | M359T10_ | 1.143091 | 0.192941 | 0.39761  | 0.70299  | 0.875186 | UP   | 358.6365 | 358.636  | 358.6375 | 9.973467 | 9.843367 |
| 12189 | M324T10_ | 1.067607 | 0.09438  | 0.408606 | 0.703047 | 0.875191 | UP   | 324.0683 | 324.0681 | 324.0689 | 9.857983 | 9.743667 |
| 12190 | M349T10_ | 1.025423 | -0.03622 | -0.4044  | 0.703084 | 0.875195 | DOWN | 349.3831 | 349.383  | 349.3832 | 9.8397   | 9.73145  |
| 12191 | M528T23_ | 1.095771 | 0.131947 | 0.395114 | 0.703088 | 0.875195 | UP   | 527.8575 | 527.8572 | 527.8581 | 22.66883 | 22.62767 |
| 12192 | M395T23  | 1.175508 | -0.23328 | -0.39676 | 0.703166 | 0.875202 | DOWN | 395.0726 | 395.0722 | 395.0728 | 23.18917 | 23.11817 |
| 12193 | M560T20  | 1.090489 | -0.12497 | -0.40043 | 0.703255 | 0.875211 | DOWN | 560.4094 | 560.4092 | 560.4104 | 19.984   | 19.9555  |
| 12194 | M224T23  | 1.041552 | 0.058735 | 0.395078 | 0.703312 | 0.875216 | UP   | 224.1723 | 224.1722 | 224.1725 | 22.81375 | 22.79883 |
| 12195 | M658T34  | 1.075749 | -0.10534 | -0.39548 | 0.703332 | 0.875218 | DOWN | 658.4736 | 658.4731 | 658.4738 | 33.5425  | 33.52817 |
| 12196 | M1885T10 | 1.070217 | -0.0979  | -0.3952  | 0.703334 | 0.875219 | DOWN | 1884.898 | 1884.895 | 1884.899 | 9.8374   | 9.7124   |
| 12197 | M929T10_ | 1.065964 | 0.092159 | 0.399314 | 0.703341 | 0.875219 | UP   | 929.1031 | 929.1014 | 929.1033 | 9.94785  | 9.827283 |
| 12198 | M592T10_ | 1.086273 | 0.119386 | 0.394841 | 0.703417 | 0.875226 | UP   | 591.5119 | 591.5108 | 591.512  | 9.9847   | 9.8914   |
| 12199 | M897T10_ | 1.135267 | 0.183031 | 0.397709 | 0.70353  | 0.875237 | UP   | 897.4971 | 897.4958 | 897.4974 | 10.42863 | 10.40882 |
| 12200 | M171T9_4 | 1.219633 | -0.28645 | -0.3948  | 0.703662 | 0.87525  | DOWN | 171.3365 | 171.3361 | 171.3371 | 9.275917 | 9.219483 |
| 12201 | M418T9_7 | 1.153654 | -0.20621 | -0.39586 | 0.70375  | 0.875258 | DOWN | 418.1139 | 418.1133 | 418.1143 | 9.3771   | 9.24215  |
| 12202 | M234T10_ | 1.115108 | -0.15718 | -0.39845 | 0.703751 | 0.875258 | DOWN | 234.4551 | 234.4549 | 234.4554 | 9.975217 | 9.869467 |
| 12203 | M500T11_ | 1.078368 | -0.10885 | -0.39427 | 0.703855 | 0.875268 | DOWN | 499.8298 | 499.8281 | 499.8307 | 10.892   | 10.879   |
| 12204 | M1936T10 | 1.090464 | -0.12494 | -0.40178 | 0.703897 | 0.875272 | DOWN | 1936.371 | 1936.369 | 1936.378 | 9.8348   | 9.715683 |
| 12205 | M171T11_ | 1.062313 | -0.08721 | -0.3941  | 0.703962 | 0.875278 | DOWN | 171.0943 | 171.0942 | 171.0944 | 10.89875 | 10.879   |
| 12206 | M399T42  | 1.058214 | 0.081632 | 0.395157 | 0.704044 | 0.875286 | UP   | 399.2374 | 399.237  | 399.2374 | 41.9635  | 41.93333 |
| 12207 | M411T10_ | 1.047101 | -0.0664  | -0.39847 | 0.70405  | 0.875287 | DOWN | 410.7041 | 410.7038 | 410.7043 | 9.917167 | 9.811217 |
| 12208 | M402T11_ | 1.186785 | -0.24706 | -0.39369 | 0.70423  | 0.875304 | DOWN | 401.6583 | 401.6523 | 401.6659 | 10.92308 | 10.87765 |
| 12209 | M482T29  | 1.074089 | -0.10311 | -0.39346 | 0.704258 | 0.875307 | DOWN | 481.8726 | 481.8722 | 481.8736 | 28.61392 | 28.546   |
| 12210 | M410T11_ | 1.04502  | -0.06353 | -0.39354 | 0.704299 | 0.875311 | DOWN | 409.5455 | 409.5448 | 409.546  | 10.90551 | 10.879   |
| 12211 | M854T10_ | 1.11134  | -0.1523  | -0.3948  | 0.70431  | 0.875312 | DOWN | 853.9722 | 853.9719 | 853.9738 | 10.38817 | 10.32952 |
| 12212 | M304T9_3 | 1.115153 | -0.15724 | -0.39371 | 0.704399 | 0.87532  | DOWN | 304.4023 | 304.4015 | 304.4034 | 8.92085  | 8.7575   |
| 12213 | M441T29_ | 1.19994  | -0.26296 | -0.39522 | 0.704589 | 0.875338 | DOWN | 440.9994 | 440.9989 | 440.9996 | 28.81783 | 28.8065  |
| 12214 | M1221T10 | 1.224986 | 0.292765 | 0.395538 | 0.70462  | 0.875341 | UP   | 1220.991 | 1220.989 | 1220.992 | 9.968992 | 9.960967 |

|       |           |          |          |          |          |          |      |          |          |          |          |          |
|-------|-----------|----------|----------|----------|----------|----------|------|----------|----------|----------|----------|----------|
| 12215 | M343T24   | 1.114014 | -0.15577 | -0.39464 | 0.704683 | 0.875347 | DOWN | 343.3316 | 343.331  | 343.3318 | 23.50083 | 23.47933 |
| 12216 | M294T9_5  | 1.08309  | -0.11515 | -0.39335 | 0.704742 | 0.875353 | DOWN | 294.0599 | 294.0595 | 294.06   | 9.275917 | 9.234417 |
| 12217 | M395T24_  | 1.155612 | -0.20866 | -0.39268 | 0.704849 | 0.875363 | DOWN | 394.7881 | 394.7877 | 394.7885 | 24.10058 | 24.07233 |
| 12218 | M520T9_6  | 1.534381 | -0.61766 | -0.40286 | 0.705127 | 0.87539  | DOWN | 520.2753 | 520.275  | 520.2756 | 8.806892 | 8.730433 |
| 12219 | M560T11_  | 1.080052 | -0.1111  | -0.39233 | 0.705196 | 0.875396 | DOWN | 560.2598 | 560.2594 | 560.2612 | 10.90373 | 10.879   |
| 12220 | M720T10_  | 1.120023 | 0.163529 | 0.394513 | 0.705243 | 0.875401 | UP   | 719.5639 | 719.5632 | 719.5658 | 9.979342 | 9.859233 |
| 12221 | M478T39_  | 1.053285 | -0.0749  | -0.39846 | 0.705384 | 0.875414 | DOWN | 478.3007 | 478.3005 | 478.3009 | 39.22983 | 39.18683 |
| 12222 | M639T10_  | 1.262865 | -0.3367  | -0.39251 | 0.705424 | 0.875418 | DOWN | 639.4064 | 639.4054 | 639.4101 | 9.8207   | 9.699733 |
| 12223 | M172T10_  | 1.135046 | 0.182751 | 0.393729 | 0.705481 | 0.875423 | UP   | 171.6908 | 171.6907 | 171.6909 | 9.951283 | 9.843367 |
| 12224 | M610T25   | 1.056582 | 0.079405 | 0.394072 | 0.70554  | 0.875429 | UP   | 610.3947 | 610.3944 | 610.3954 | 24.85567 | 24.83617 |
| 12225 | M352T10_  | 1.027727 | -0.03946 | -0.40272 | 0.705572 | 0.875432 | DOWN | 352.1249 | 352.1247 | 352.1251 | 9.82645  | 9.728083 |
| 12226 | M387T10_  | 1.049541 | -0.06976 | -0.39455 | 0.70564  | 0.875438 | DOWN | 387.2486 | 387.2482 | 387.2488 | 9.954767 | 9.843367 |
| 12227 | M548T9_7  | 1.159786 | 0.213858 | 0.397332 | 0.705688 | 0.875443 | UP   | 548.3376 | 548.3372 | 548.3382 | 9.146383 | 9.11405  |
| 12228 | M888T11_  | 1.119786 | -0.16322 | -0.393   | 0.705695 | 0.875444 | DOWN | 887.9883 | 887.9877 | 887.9898 | 10.8914  | 10.86008 |
| 12229 | M506T10_  | 1.072104 | -0.10045 | -0.39234 | 0.705725 | 0.875446 | DOWN | 505.9974 | 505.9969 | 505.9976 | 9.972917 | 9.859233 |
| 12230 | M469T21   | 1.063221 | 0.088441 | 0.391787 | 0.705757 | 0.875449 | UP   | 469.3267 | 469.3263 | 469.3268 | 21.09358 | 21.07    |
| 12231 | M244T11_  | 1.139128 | 0.187929 | 0.401014 | 0.705846 | 0.875458 | UP   | 244.227  | 244.2266 | 244.2274 | 11.36835 | 11.33537 |
| 12232 | M1618T11  | 1.076023 | -0.10571 | -0.39506 | 0.70591  | 0.875464 | DOWN | 1618.491 | 1618.49  | 1618.493 | 10.89125 | 10.8646  |
| 12233 | M1048T10_ | 1.087963 | -0.12163 | -0.39323 | 0.705991 | 0.875472 | DOWN | 1047.729 | 1047.728 | 1047.731 | 9.946367 | 9.8753   |
| 12234 | M900T10_  | 1.077597 | -0.10782 | -0.39571 | 0.705994 | 0.875472 | DOWN | 899.837  | 899.8366 | 899.8378 | 9.945258 | 9.827283 |
| 12235 | M508T41_  | 1.167499 | 0.223421 | 0.394522 | 0.706    | 0.875472 | UP   | 508.3111 | 508.311  | 508.3114 | 40.83425 | 40.66883 |
| 12236 | M770T9_1  | 1.081132 | -0.11254 | -0.39276 | 0.706033 | 0.875476 | DOWN | 769.5405 | 769.5397 | 769.5411 | 8.632533 | 8.54835  |
| 12237 | M640T19   | 1.066554 | 0.092957 | 0.395591 | 0.706113 | 0.875483 | UP   | 640.3181 | 640.3172 | 640.319  | 19.431   | 19.386   |
| 12238 | M583T9_5  | 1.200662 | 0.26383  | 0.39097  | 0.706143 | 0.875486 | UP   | 582.8735 | 582.8698 | 582.8765 | 9.227808 | 9.09495  |
| 12239 | M862T11_  | 1.103717 | -0.14237 | -0.39761 | 0.706192 | 0.875491 | DOWN | 861.9877 | 861.9869 | 861.9881 | 10.7249  | 10.7046  |
| 12240 | M565T9_2  | 1.064425 | -0.09007 | -0.39206 | 0.706227 | 0.875494 | DOWN | 565.3619 | 565.3616 | 565.3621 | 9.213908 | 9.095133 |
| 12241 | M417T12_  | 1.097731 | -0.13452 | -0.3945  | 0.706338 | 0.875505 | DOWN | 417.3348 | 417.3341 | 417.3352 | 11.74397 | 11.70755 |
| 12242 | M617T10_  | 1.103627 | 0.142252 | 0.394787 | 0.706359 | 0.875507 | UP   | 617.2263 | 617.2257 | 617.2266 | 9.98155  | 9.8914   |
| 12243 | M195T10_  | 1.125462 | -0.17052 | -0.39073 | 0.7064   | 0.87551  | DOWN | 194.8243 | 194.8242 | 194.8243 | 9.999    | 9.986767 |
| 12244 | M369T11_  | 1.061089 | -0.08555 | -0.39046 | 0.706494 | 0.875519 | DOWN | 368.8627 | 368.8625 | 368.8629 | 10.89875 | 10.879   |
| 12245 | M212T12_  | 1.101409 | 0.13935  | 0.401136 | 0.706502 | 0.87552  | UP   | 212.1643 | 212.1642 | 212.1644 | 12.22349 | 12.19358 |
| 12246 | M652T10_  | 1.142757 | 0.192519 | 0.390842 | 0.706581 | 0.875528 | UP   | 651.6554 | 651.655  | 651.6555 | 9.958442 | 9.843367 |
| 12247 | M742T9_2  | 1.182783 | 0.242185 | 0.394097 | 0.706622 | 0.875532 | UP   | 741.9373 | 741.9329 | 741.9386 | 9.32955  | 9.234417 |
| 12248 | M652T11_  | 1.088477 | -0.12231 | -0.39043 | 0.706678 | 0.875537 | DOWN | 651.8239 | 651.8228 | 651.8246 | 10.89904 | 10.85838 |
| 12249 | M791T11_  | 1.129994 | -0.17631 | -0.39283 | 0.706731 | 0.875542 | DOWN | 791.3775 | 791.3766 | 791.3779 | 10.91987 | 10.90197 |

|       |          |          |          |          |          |          |      |          |          |          |          |          |
|-------|----------|----------|----------|----------|----------|----------|------|----------|----------|----------|----------|----------|
| 12250 | M299T28  | 1.211772 | -0.27712 | -0.39008 | 0.706742 | 0.875543 | DOWN | 299.1613 | 299.1613 | 299.1618 | 27.96008 | 27.92233 |
| 12251 | M485T11_ | 1.114369 | -0.15623 | -0.39136 | 0.706841 | 0.875552 | DOWN | 484.9366 | 484.9335 | 484.9388 | 10.91977 | 10.87708 |
| 12252 | M319T9_7 | 1.109927 | -0.15047 | -0.39073 | 0.706869 | 0.875555 | DOWN | 319.2725 | 319.2722 | 319.2726 | 8.983333 | 8.9396   |
| 12253 | M390T10_ | 1.101455 | -0.13941 | -0.39435 | 0.706896 | 0.875558 | DOWN | 389.689  | 389.6843 | 389.6892 | 9.9091   | 9.79535  |
| 12254 | M195T12  | 1.048852 | -0.06881 | -0.39598 | 0.70691  | 0.875559 | DOWN | 195.1379 | 195.1378 | 195.1379 | 11.8371  | 11.7572  |
| 12255 | M591T10_ | 1.167506 | 0.22343  | 0.391234 | 0.706961 | 0.875564 | UP   | 591.1482 | 591.1477 | 591.1498 | 9.979342 | 9.859233 |
| 12256 | M362T11_ | 1.280142 | 0.356304 | 0.390208 | 0.706967 | 0.875564 | UP   | 362.076  | 362.0755 | 362.0779 | 10.94208 | 10.88747 |
| 12257 | M258T9_2 | 1.160381 | -0.2146  | -0.39148 | 0.707109 | 0.875578 | DOWN | 257.6012 | 257.601  | 257.6012 | 9.055808 | 9.031633 |
| 12258 | M462T12  | 1.138132 | -0.18667 | -0.39162 | 0.70725  | 0.875591 | DOWN | 462.2443 | 462.2434 | 462.2449 | 12.17191 | 12.13862 |
| 12259 | M194T9_1 | 1.288457 | 0.365645 | 0.390162 | 0.707481 | 0.875613 | UP   | 194.0147 | 194.0139 | 194.0179 | 9.213125 | 9.175017 |
| 12260 | M577T18_ | 1.097009 | -0.13358 | -0.3964  | 0.707519 | 0.875616 | DOWN | 577.3744 | 577.3743 | 577.3748 | 18.30533 | 18.26967 |
| 12261 | M481T11_ | 1.11238  | 0.15365  | 0.393664 | 0.707534 | 0.875618 | UP   | 480.5134 | 480.5131 | 480.5138 | 10.90669 | 10.90197 |
| 12262 | M238T11_ | 1.084947 | 0.117624 | 0.389256 | 0.707601 | 0.875624 | UP   | 237.9121 | 237.9119 | 237.9122 | 10.90522 | 10.8646  |
| 12263 | M376T37  | 1.191989 | 0.253371 | 0.390646 | 0.707683 | 0.875632 | UP   | 376.2633 | 376.2631 | 376.2635 | 36.82775 | 36.7985  |
| 12264 | M347T21_ | 1.13336  | -0.18061 | -0.39344 | 0.707709 | 0.875634 | DOWN | 346.9568 | 346.9566 | 346.9571 | 20.62017 | 20.56317 |
| 12265 | M680T20  | 1.089439 | -0.12359 | -0.38877 | 0.707773 | 0.87564  | DOWN | 679.5115 | 679.5111 | 679.512  | 19.86767 | 19.78833 |
| 12266 | M810T9_2 | 1.1395   | -0.1884  | -0.38861 | 0.707795 | 0.875643 | DOWN | 810.0524 | 810.0479 | 810.0528 | 9.46855  | 9.416817 |
| 12267 | M206T9_7 | 1.170022 | 0.226536 | 0.388298 | 0.707925 | 0.875655 | UP   | 205.6703 | 205.6698 | 205.6708 | 9.159975 | 9.132267 |
| 12268 | M487T10_ | 1.071058 | -0.09904 | -0.38847 | 0.707954 | 0.875658 | DOWN | 486.7212 | 486.72   | 486.7214 | 9.983433 | 9.8753   |
| 12269 | M157T10_ | 1.085433 | 0.118271 | 0.391447 | 0.708116 | 0.875673 | UP   | 157.3715 | 157.3687 | 157.374  | 9.950667 | 9.843367 |
| 12270 | M255T10_ | 1.210418 | -0.27551 | -0.39324 | 0.708123 | 0.875674 | DOWN | 255.2872 | 255.2871 | 255.2874 | 9.9351   | 9.853533 |
| 12271 | M434T9_9 | 1.072155 | -0.10051 | -0.38979 | 0.708271 | 0.875687 | DOWN | 433.8468 | 433.8455 | 433.8482 | 9.311167 | 9.129317 |
| 12272 | M1435T10 | 1.113191 | -0.1547  | -0.39137 | 0.708311 | 0.875691 | DOWN | 1434.737 | 1434.736 | 1434.738 | 9.999    | 9.8914   |
| 12273 | M351T10_ | 1.033841 | -0.04801 | -0.39342 | 0.708376 | 0.875697 | DOWN | 350.507  | 350.5068 | 350.5072 | 9.857833 | 9.73145  |
| 12274 | M478T9_7 | 1.073633 | 0.102501 | 0.389235 | 0.708437 | 0.875703 | UP   | 478.4144 | 478.4142 | 478.4146 | 9.29015  | 9.129317 |
| 12275 | M296T30_ | 1.051072 | 0.071861 | 0.388295 | 0.708445 | 0.875704 | UP   | 296.2128 | 296.2126 | 296.213  | 29.83408 | 29.7905  |
| 12276 | M622T44  | 1.021061 | -0.03007 | -0.38789 | 0.708515 | 0.875711 | DOWN | 622.3434 | 622.3432 | 622.3437 | 44.16417 | 43.891   |
| 12277 | M365T9_2 | 1.107966 | -0.14791 | -0.39184 | 0.708531 | 0.875712 | DOWN | 364.6275 | 364.627  | 364.6275 | 8.94795  | 8.877267 |
| 12278 | M400T9_3 | 1.140382 | 0.189517 | 0.387319 | 0.708666 | 0.875725 | UP   | 399.7015 | 399.7012 | 399.7078 | 9.275917 | 9.103733 |
| 12279 | M382T11_ | 1.081    | -0.11237 | -0.38756 | 0.708783 | 0.875736 | DOWN | 382.3211 | 382.3184 | 382.3213 | 10.89875 | 10.69012 |
| 12280 | M494T10_ | 1.164682 | -0.21994 | -0.39215 | 0.708868 | 0.875744 | DOWN | 494.3184 | 494.3179 | 494.3191 | 9.531467 | 9.447617 |
| 12281 | M291T28  | 1.04403  | -0.06216 | -0.38731 | 0.708889 | 0.875746 | DOWN | 291.1952 | 291.195  | 291.1953 | 27.51183 | 27.46533 |
| 12282 | M263T11_ | 1.127046 | -0.17255 | -0.38758 | 0.708938 | 0.87575  | DOWN | 262.9564 | 262.9562 | 262.9567 | 10.8926  | 10.8646  |
| 12283 | M1675T11 | 1.068912 | -0.09614 | -0.38704 | 0.708989 | 0.875755 | DOWN | 1674.825 | 1674.823 | 1674.825 | 10.892   | 10.879   |
| 12284 | M685T10_ | 1.148767 | -0.20009 | -0.38818 | 0.709138 | 0.875769 | DOWN | 685.1916 | 685.1915 | 685.1918 | 9.951283 | 9.843367 |

|       |          |          |          |          |          |          |      |          |          |          |          |          |
|-------|----------|----------|----------|----------|----------|----------|------|----------|----------|----------|----------|----------|
| 12285 | M344T9_2 | 1.255603 | 0.32838  | 0.396773 | 0.70915  | 0.87577  | UP   | 343.7009 | 343.7004 | 343.7013 | 8.888783 | 8.818733 |
| 12286 | M605T10_ | 1.064865 | -0.09067 | -0.3888  | 0.709176 | 0.875773 | DOWN | 604.5051 | 604.5041 | 604.5104 | 9.818508 | 9.715683 |
| 12287 | M643T10_ | 1.056304 | -0.07902 | -0.38932 | 0.70919  | 0.875774 | DOWN | 643.1622 | 643.1612 | 643.1654 | 9.823575 | 9.715683 |
| 12288 | M737T10_ | 1.061717 | 0.086399 | 0.387845 | 0.709234 | 0.875778 | UP   | 737.3938 | 737.3926 | 737.3944 | 10.31875 | 10.2501  |
| 12289 | M686T10_ | 1.073502 | 0.102324 | 0.387438 | 0.709261 | 0.875781 | UP   | 685.8822 | 685.8816 | 685.8832 | 10.20291 | 10.13368 |
| 12290 | M330T9_2 | 1.187427 | 0.247839 | 0.387669 | 0.709298 | 0.875784 | UP   | 329.5435 | 329.5398 | 329.544  | 8.82235  | 8.715883 |
| 12291 | M235T11_ | 1.062244 | 0.087115 | 0.388146 | 0.709361 | 0.87579  | UP   | 234.675  | 234.6748 | 234.6751 | 11.49592 | 11.47593 |
| 12292 | M480T10_ | 1.135736 | -0.18363 | -0.38626 | 0.709403 | 0.875794 | DOWN | 479.5641 | 479.564  | 479.5646 | 9.842    | 9.699733 |
| 12293 | M1305T10 | 1.056474 | -0.07926 | -0.38624 | 0.709412 | 0.875795 | DOWN | 1305.058 | 1305.055 | 1305.059 | 9.924308 | 9.827283 |
| 12294 | M358T10_ | 1.108133 | -0.14813 | -0.39245 | 0.709456 | 0.875799 | DOWN | 357.5686 | 357.5683 | 357.5686 | 9.9351   | 9.8378   |
| 12295 | M774T10_ | 1.080089 | -0.11115 | -0.38751 | 0.709539 | 0.875807 | DOWN | 774.2388 | 774.2355 | 774.2406 | 9.818433 | 9.715683 |
| 12296 | M526T10_ | 1.071224 | -0.09926 | -0.38883 | 0.709551 | 0.875808 | DOWN | 526.2465 | 526.2459 | 526.2476 | 10.29246 | 10.19852 |
| 12297 | M346T9_2 | 1.150142 | -0.20181 | -0.38658 | 0.709564 | 0.875809 | DOWN | 345.6853 | 345.6849 | 345.6867 | 9.314442 | 9.234417 |
| 12298 | M399T9_2 | 1.147243 | -0.19817 | -0.38622 | 0.709613 | 0.875814 | DOWN | 398.8215 | 398.8159 | 398.8228 | 9.375792 | 9.234417 |
| 12299 | M332T10_ | 1.281933 | 0.35832  | 0.386093 | 0.709662 | 0.875819 | UP   | 332.0472 | 332.0469 | 332.0473 | 9.9754   | 9.885167 |
| 12300 | M699T10_ | 1.045323 | -0.06395 | -0.38703 | 0.709706 | 0.875823 | DOWN | 698.5391 | 698.5384 | 698.5398 | 9.872475 | 9.73145  |
| 12301 | M241T13  | 1.232601 | -0.30171 | -0.38598 | 0.709749 | 0.875827 | DOWN | 241.1194 | 241.1192 | 241.1195 | 13.47807 | 13.43433 |
| 12302 | M432T26_ | 1.146179 | -0.19683 | -0.38563 | 0.709867 | 0.875838 | DOWN | 431.6558 | 431.6556 | 431.6563 | 26.02092 | 25.90867 |
| 12303 | M209T9_6 | 1.159986 | -0.21411 | -0.38553 | 0.709893 | 0.87584  | DOWN | 209.1648 | 209.1574 | 209.1712 | 8.7681   | 8.672483 |
| 12304 | M284T9_2 | 1.213638 | 0.279338 | 0.390763 | 0.710136 | 0.875863 | UP   | 283.8279 | 283.8275 | 283.8279 | 9.431508 | 9.27445  |
| 12305 | M1687T9  | 1.113359 | -0.15492 | -0.38572 | 0.710139 | 0.875863 | DOWN | 1687.452 | 1687.448 | 1687.456 | 9.352117 | 9.29345  |
| 12306 | M301T9_1 | 1.13048  | -0.17694 | -0.38514 | 0.710313 | 0.87588  | DOWN | 300.7005 | 300.7002 | 300.7006 | 8.946925 | 8.847333 |
| 12307 | M484T9_1 | 1.073473 | -0.10229 | -0.38567 | 0.710319 | 0.87588  | DOWN | 483.6465 | 483.6447 | 483.6468 | 8.985492 | 8.89395  |
| 12308 | M698T10_ | 1.113044 | -0.15451 | -0.38876 | 0.710432 | 0.875891 | DOWN | 697.9427 | 697.9421 | 697.9431 | 9.841308 | 9.73145  |
| 12309 | M756T11_ | 1.056939 | 0.079892 | 0.385017 | 0.710502 | 0.875897 | UP   | 756.4654 | 756.4652 | 756.4661 | 10.89875 | 10.879   |
| 12310 | M492T12  | 1.045775 | -0.06457 | -0.38989 | 0.71052  | 0.875899 | DOWN | 492.4154 | 492.4151 | 492.4158 | 11.66508 | 11.62792 |
| 12311 | M520T21  | 1.08257  | -0.11446 | -0.38524 | 0.71056  | 0.875903 | DOWN | 520.3889 | 520.388  | 520.3897 | 21.13667 | 21.12633 |
| 12312 | M752T10_ | 1.112048 | -0.15322 | -0.38895 | 0.710561 | 0.875903 | DOWN | 752.4507 | 752.4498 | 752.4511 | 10.16418 | 10.10142 |
| 12313 | M978T10  | 1.101209 | 0.139088 | 0.393615 | 0.710723 | 0.875918 | UP   | 978.3171 | 978.3138 | 978.3187 | 9.75365  | 9.636483 |
| 12314 | M327T23  | 1.176625 | 0.234655 | 0.391213 | 0.710801 | 0.875925 | UP   | 327.1928 | 327.1924 | 327.1986 | 23.48367 | 23.393   |
| 12315 | M324T10_ | 1.107484 | -0.14729 | -0.38391 | 0.711111 | 0.875955 | DOWN | 324.1931 | 324.1926 | 324.197  | 9.946467 | 9.843367 |
| 12316 | M364T10_ | 1.02679  | -0.03814 | -0.38649 | 0.711506 | 0.875991 | DOWN | 364.2756 | 364.2747 | 364.276  | 9.825767 | 9.699733 |
| 12317 | M925T10_ | 1.081857 | 0.11351  | 0.388108 | 0.71153  | 0.875994 | UP   | 925.3933 | 925.391  | 925.394  | 9.958617 | 9.843367 |
| 12318 | M485T30  | 1.079754 | -0.1107  | -0.38839 | 0.71158  | 0.875998 | DOWN | 485.3872 | 485.3869 | 485.3874 | 30.26608 | 30.25233 |
| 12319 | M821T11_ | 1.089721 | -0.12396 | -0.38305 | 0.71169  | 0.876009 | DOWN | 820.9991 | 820.9974 | 821.0023 | 10.91222 | 10.83417 |



|       |          |          |          |          |          |          |      |          |          |          |          |          |
|-------|----------|----------|----------|----------|----------|----------|------|----------|----------|----------|----------|----------|
| 12320 | M213T9_1 | 1.345242 | 0.427866 | 0.385707 | 0.711795 | 0.876019 | UP   | 213.4178 | 213.4168 | 213.4223 | 9.295817 | 9.061    |
| 12321 | M650T11_ | 1.045534 | 0.06424  | 0.385646 | 0.711824 | 0.876021 | UP   | 650.4175 | 650.4172 | 650.4179 | 11.49197 | 11.47593 |
| 12322 | M559T23_ | 1.073597 | 0.102452 | 0.383152 | 0.711852 | 0.876024 | UP   | 559.3879 | 559.387  | 559.3883 | 22.59683 | 22.55283 |
| 12323 | M351T10_ | 1.07447  | -0.10362 | -0.38275 | 0.711871 | 0.876026 | DOWN | 351.007  | 351.0068 | 351.0071 | 9.844033 | 9.73145  |
| 12324 | M414T22  | 1.145792 | -0.19634 | -0.38361 | 0.712089 | 0.876046 | DOWN | 414.2999 | 414.2994 | 414.3006 | 21.69533 | 21.66533 |
| 12325 | M162T10_ | 1.121274 | -0.16514 | -0.38586 | 0.712172 | 0.876054 | DOWN | 161.5111 | 161.511  | 161.5111 | 9.951283 | 9.827283 |
| 12326 | M378T9_5 | 1.152718 | 0.205039 | 0.388243 | 0.71219  | 0.876055 | UP   | 377.7876 | 377.7871 | 377.7879 | 9.063992 | 9.03845  |
| 12327 | M835T19_ | 1.316135 | 0.396308 | 0.382383 | 0.712197 | 0.876056 | UP   | 834.6428 | 834.6416 | 834.644  | 18.71867 | 18.7035  |
| 12328 | M320T10_ | 1.098213 | 0.135158 | 0.383457 | 0.712204 | 0.876057 | UP   | 319.5088 | 319.5085 | 319.5099 | 9.842    | 9.715683 |
| 12329 | M326T10_ | 1.041181 | -0.05822 | -0.39051 | 0.712262 | 0.876062 | DOWN | 326.0286 | 326.0283 | 326.0297 | 9.831142 | 9.715683 |
| 12330 | M442T10_ | 1.073663 | 0.102541 | 0.382617 | 0.712417 | 0.876077 | UP   | 442.3958 | 442.3954 | 442.3968 | 9.888083 | 9.6681   |
| 12331 | M253T11_ | 1.076983 | 0.106995 | 0.382843 | 0.712509 | 0.876085 | UP   | 253.1028 | 253.1019 | 253.1064 | 10.91349 | 10.88982 |
| 12332 | M422T26  | 1.070816 | -0.09871 | -0.38392 | 0.712514 | 0.876086 | DOWN | 422.2895 | 422.2894 | 422.2896 | 25.60458 | 25.54983 |
| 12333 | M686T10_ | 1.06347  | 0.08878  | 0.385153 | 0.712524 | 0.876087 | UP   | 685.5762 | 685.5758 | 685.5766 | 9.979342 | 9.8753   |
| 12334 | M465T10_ | 1.070462 | 0.098233 | 0.382509 | 0.712675 | 0.876101 | UP   | 464.8357 | 464.8342 | 464.836  | 10.17253 | 10.08517 |
| 12335 | M257T10_ | 1.099788 | 0.137225 | 0.381896 | 0.712685 | 0.876102 | UP   | 256.5949 | 256.5945 | 256.5952 | 9.958617 | 9.843367 |
| 12336 | M993T10  | 1.158205 | -0.21189 | -0.38237 | 0.712718 | 0.876105 | DOWN | 993.009  | 993.0073 | 993.0107 | 9.853633 | 9.746783 |
| 12337 | M358T22_ | 1.123038 | 0.167406 | 0.389389 | 0.712724 | 0.876105 | UP   | 357.9206 | 357.9201 | 357.9206 | 21.58383 | 21.55183 |
| 12338 | M699T11_ | 1.086356 | -0.1195  | -0.38219 | 0.712747 | 0.876107 | DOWN | 699.1839 | 699.1836 | 699.1843 | 10.892   | 10.8646  |
| 12339 | M663T10_ | 1.138245 | -0.18681 | -0.38607 | 0.712786 | 0.876111 | DOWN | 663.224  | 663.2154 | 663.2243 | 9.857983 | 9.840617 |
| 12340 | M198T10_ | 1.19371  | 0.255452 | 0.394477 | 0.712857 | 0.876118 | UP   | 197.8588 | 197.8586 | 197.859  | 9.830283 | 9.728083 |
| 12341 | M618T10_ | 1.075382 | 0.104849 | 0.384111 | 0.712945 | 0.876126 | UP   | 618.0945 | 618.094  | 618.0947 | 9.957333 | 9.843367 |
| 12342 | M605T36  | 1.116537 | 0.159031 | 0.381176 | 0.713001 | 0.876131 | UP   | 605.4234 | 605.423  | 605.4248 | 35.92433 | 35.89133 |
| 12343 | M157T11_ | 1.051259 | -0.07212 | -0.3864  | 0.713008 | 0.876132 | DOWN | 156.5988 | 156.5987 | 156.5989 | 10.89875 | 10.879   |
| 12344 | M229T30  | 1.141513 | -0.19095 | -0.38435 | 0.713062 | 0.876137 | DOWN | 229.2159 | 229.2158 | 229.2161 | 30.23792 | 30.22417 |
| 12345 | M1745T10 | 1.115739 | -0.158   | -0.38116 | 0.713087 | 0.876139 | DOWN | 1745.447 | 1745.443 | 1745.455 | 9.95385  | 9.843367 |
| 12346 | M478T20_ | 1.056945 | -0.0799  | -0.38129 | 0.713291 | 0.876158 | DOWN | 478.3994 | 478.3994 | 478.3998 | 20.07075 | 20.05017 |
| 12347 | M361T10_ | 1.034873 | -0.04945 | -0.38196 | 0.713307 | 0.87616  | DOWN | 360.7893 | 360.7891 | 360.7898 | 9.917167 | 9.811217 |
| 12348 | M1525T10 | 1.116461 | -0.15893 | -0.38447 | 0.713529 | 0.87618  | DOWN | 1524.88  | 1524.877 | 1524.882 | 10.47033 | 10.39298 |
| 12349 | M243T11_ | 1.069477 | 0.096906 | 0.382797 | 0.713636 | 0.87619  | UP   | 242.6091 | 242.609  | 242.6091 | 10.89875 | 10.879   |
| 12350 | M165T10_ | 1.093297 | -0.12869 | -0.38255 | 0.713887 | 0.876214 | DOWN | 165.3582 | 165.3581 | 165.3583 | 9.968992 | 9.859233 |
| 12351 | M386T10_ | 1.147832 | 0.198912 | 0.38011  | 0.713913 | 0.876216 | UP   | 386.3281 | 386.3277 | 386.3285 | 9.965717 | 9.843367 |
| 12352 | M214T9_6 | 1.097355 | -0.13403 | -0.3798  | 0.713981 | 0.876222 | DOWN | 213.7419 | 213.7413 | 213.7427 | 9.21755  | 9.175017 |
| 12353 | M351T10_ | 1.147207 | -0.19813 | -0.3916  | 0.71402  | 0.876226 | DOWN | 350.7261 | 350.7254 | 350.7316 | 9.880867 | 9.746783 |
| 12354 | M355T10_ | 1.031334 | -0.04451 | -0.37984 | 0.714094 | 0.876233 | DOWN | 354.8587 | 354.8583 | 354.859  | 9.830558 | 9.715683 |

|       |          |          |          |          |          |          |      |          |          |          |          |          |
|-------|----------|----------|----------|----------|----------|----------|------|----------|----------|----------|----------|----------|
| 12355 | M1074T10 | 1.106006 | 0.145359 | 0.379666 | 0.714125 | 0.876236 | UP   | 1074.372 | 1074.371 | 1074.372 | 9.984083 | 9.8753   |
| 12356 | M373T23_ | 1.108891 | -0.14912 | -0.38973 | 0.71426  | 0.876248 | DOWN | 372.6676 | 372.667  | 372.6679 | 22.69767 | 22.68367 |
| 12357 | M227T11_ | 1.063258 | -0.08849 | -0.37935 | 0.714308 | 0.876253 | DOWN | 227.4373 | 227.437  | 227.4374 | 10.89875 | 10.8646  |
| 12358 | M341T10_ | 1.036956 | -0.05235 | -0.38389 | 0.714466 | 0.876267 | DOWN | 340.9539 | 340.9536 | 340.9541 | 9.831142 | 9.715683 |
| 12359 | M571T11_ | 1.105619 | -0.14485 | -0.38105 | 0.714603 | 0.87628  | DOWN | 570.6856 | 570.6855 | 570.687  | 11.287   | 11.18767 |
| 12360 | M542T9_4 | 1.129171 | 0.175265 | 0.379093 | 0.714609 | 0.876281 | UP   | 542.2654 | 542.2641 | 542.2667 | 9.142767 | 8.87445  |
| 12361 | M426T11_ | 1.08609  | -0.11914 | -0.37937 | 0.714616 | 0.876281 | DOWN | 425.5089 | 425.5084 | 425.51   | 10.94208 | 10.879   |
| 12362 | M487T10_ | 1.049495 | -0.0697  | -0.38006 | 0.714646 | 0.876284 | DOWN | 487.3567 | 487.3565 | 487.3569 | 10.1599  | 10.06883 |
| 12363 | M174T10_ | 1.266448 | 0.340787 | 0.385395 | 0.714804 | 0.876299 | UP   | 173.9964 | 173.9899 | 173.9976 | 9.972758 | 9.853533 |
| 12364 | M390T11_ | 1.162981 | -0.21783 | -0.37979 | 0.714814 | 0.8763   | DOWN | 390.3241 | 390.3238 | 390.332  | 10.8926  | 10.82935 |
| 12365 | M448T11_ | 1.050564 | -0.07116 | -0.37865 | 0.714848 | 0.876303 | DOWN | 448.2635 | 448.2629 | 448.2638 | 10.90519 | 10.879   |
| 12366 | M795T24  | 1.068021 | -0.09494 | -0.3789  | 0.714893 | 0.876307 | DOWN | 794.5016 | 794.5013 | 794.5017 | 23.64242 | 23.5855  |
| 12367 | M415T41_ | 1.073708 | 0.102601 | 0.384103 | 0.714996 | 0.876317 | UP   | 415.2323 | 415.2321 | 415.2326 | 41.45983 | 41.22983 |
| 12368 | M907T11  | 1.079094 | -0.10982 | -0.38004 | 0.715203 | 0.876336 | DOWN | 906.68   | 906.6798 | 906.6802 | 11.06789 | 11.04953 |
| 12369 | M807T36  | 1.127998 | -0.17376 | -0.37823 | 0.715215 | 0.876337 | DOWN | 806.5756 | 806.5746 | 806.5765 | 35.74067 | 35.71767 |
| 12370 | M216T10_ | 1.113954 | -0.15569 | -0.37824 | 0.715303 | 0.876345 | DOWN | 215.6468 | 215.6468 | 215.647  | 9.8214   | 9.743667 |
| 12371 | M396T9_4 | 1.08132  | -0.11279 | -0.38087 | 0.715435 | 0.876357 | DOWN | 395.8259 | 395.825  | 395.8281 | 9.222942 | 9.129317 |
| 12372 | M228T9_6 | 1.173453 | -0.23076 | -0.37773 | 0.715461 | 0.87636  | DOWN | 227.8604 | 227.8582 | 227.8635 | 9.40325  | 9.132267 |
| 12373 | M343T33  | 1.091401 | 0.126182 | 0.377829 | 0.715497 | 0.876363 | UP   | 343.2591 | 343.2587 | 343.2598 | 32.90733 | 32.86383 |
| 12374 | M419T11_ | 1.122801 | 0.167102 | 0.389729 | 0.715558 | 0.876369 | UP   | 419.024  | 419.0186 | 419.0245 | 10.91784 | 10.87765 |
| 12375 | M520T42_ | 1.130148 | 0.176512 | 0.38852  | 0.715574 | 0.87637  | UP   | 520.3114 | 520.3112 | 520.3117 | 41.575   | 41.41667 |
| 12376 | M505T9_4 | 1.117096 | -0.15975 | -0.37927 | 0.715644 | 0.876377 | DOWN | 504.7756 | 504.7753 | 504.7759 | 9.297433 | 9.174883 |
| 12377 | M389T15  | 1.091391 | 0.126168 | 0.384349 | 0.715763 | 0.876388 | UP   | 389.2772 | 389.2766 | 389.2776 | 14.85364 | 14.83755 |
| 12378 | M189T9_1 | 1.235738 | 0.305373 | 0.377677 | 0.715828 | 0.876394 | UP   | 189.322  | 189.3217 | 189.3221 | 9.153592 | 9.111033 |
| 12379 | M462T11_ | 1.093658 | -0.12916 | -0.37827 | 0.715859 | 0.876397 | DOWN | 462.2445 | 462.2439 | 462.2452 | 10.9212  | 10.8646  |
| 12380 | M366T10_ | 1.136244 | -0.18427 | -0.37727 | 0.71589  | 0.876399 | DOWN | 365.7983 | 365.7969 | 365.7986 | 9.836367 | 9.715683 |
| 12381 | M345T9_7 | 1.100332 | -0.13794 | -0.38258 | 0.715915 | 0.876402 | DOWN | 344.8895 | 344.8893 | 344.8897 | 9.29345  | 9.234417 |
| 12382 | M228T10_ | 1.043178 | -0.06098 | -0.3771  | 0.715978 | 0.876408 | DOWN | 228.1594 | 228.1593 | 228.1595 | 9.962617 | 9.843367 |
| 12383 | M698T10_ | 1.064876 | -0.09069 | -0.37878 | 0.716049 | 0.876414 | DOWN | 698.3043 | 698.3032 | 698.3047 | 9.830558 | 9.699733 |
| 12384 | M384T10_ | 1.100702 | 0.138423 | 0.381649 | 0.71605  | 0.876414 | UP   | 384.2351 | 384.2347 | 384.2354 | 9.646267 | 9.541483 |
| 12385 | M398T9_9 | 1.118911 | -0.1621  | -0.37891 | 0.716072 | 0.876416 | DOWN | 398.3419 | 398.3405 | 398.3475 | 9.355917 | 9.26575  |
| 12386 | M377T9_3 | 1.20283  | 0.266432 | 0.378803 | 0.716121 | 0.876421 | UP   | 376.7824 | 376.7798 | 376.7867 | 9.347033 | 9.145433 |
| 12387 | M243T9_1 | 1.185535 | -0.24554 | -0.37721 | 0.716248 | 0.876433 | DOWN | 243.3708 | 243.367  | 243.3779 | 9.311883 | 9.0511   |
| 12388 | M385T9_4 | 1.133634 | 0.180955 | 0.382668 | 0.716263 | 0.876434 | UP   | 384.9164 | 384.9159 | 384.9176 | 8.868383 | 8.75965  |
| 12389 | M908T10_ | 1.142684 | -0.19243 | -0.37726 | 0.716289 | 0.876436 | DOWN | 908.4796 | 908.4756 | 908.4804 | 9.914217 | 9.811217 |

|       |           |          |          |          |          |          |      |          |          |          |          |          |
|-------|-----------|----------|----------|----------|----------|----------|------|----------|----------|----------|----------|----------|
| 12390 | M556T36   | 1.186467 | -0.24667 | -0.37752 | 0.716343 | 0.876441 | DOWN | 556.4416 | 556.4412 | 556.4421 | 36.0415  | 36.03517 |
| 12391 | M342T10_  | 1.152812 | 0.205158 | 0.376884 | 0.716399 | 0.876447 | UP   | 342.04   | 342.0399 | 342.0402 | 9.8207   | 9.699733 |
| 12392 | M209T44   | 1.097792 | 0.134605 | 0.389401 | 0.716413 | 0.876448 | UP   | 209.1533 | 209.1532 | 209.1534 | 43.51683 | 43.445   |
| 12393 | M183T9_2  | 1.188697 | 0.24938  | 0.382178 | 0.716433 | 0.87645  | UP   | 182.6782 | 182.678  | 182.6786 | 9.162658 | 9.1428   |
| 12394 | M286T9_3  | 1.161966 | -0.21657 | -0.3822  | 0.716479 | 0.876454 | DOWN | 286.244  | 286.2435 | 286.2443 | 8.70035  | 8.629617 |
| 12395 | M706T10_  | 1.174448 | 0.231983 | 0.379569 | 0.716545 | 0.87646  | UP   | 705.7602 | 705.7585 | 705.7609 | 9.8207   | 9.699733 |
| 12396 | M605T10_  | 1.254414 | -0.32701 | -0.37663 | 0.716576 | 0.876463 | DOWN | 604.6043 | 604.6041 | 604.6044 | 9.946467 | 9.843367 |
| 12397 | M1028T10_ | 1.08139  | -0.11289 | -0.38037 | 0.716646 | 0.876469 | DOWN | 1028.462 | 1028.461 | 1028.463 | 9.968992 | 9.8753   |
| 12398 | M277T10_  | 1.034649 | -0.04914 | -0.38045 | 0.716694 | 0.876474 | DOWN | 277.2294 | 277.2292 | 277.2295 | 9.8802   | 9.779267 |
| 12399 | M336T10_  | 1.04551  | -0.06421 | -0.38059 | 0.716743 | 0.876478 | DOWN | 335.8045 | 335.8043 | 335.8086 | 9.825492 | 9.715683 |
| 12400 | M966T11_  | 1.063424 | -0.08872 | -0.37611 | 0.716752 | 0.876479 | DOWN | 965.5434 | 965.5428 | 965.5445 | 10.89907 | 10.879   |
| 12401 | M562T40_  | 1.038544 | 0.054563 | 0.376295 | 0.716754 | 0.876479 | UP   | 562.3221 | 562.3219 | 562.3222 | 40.02133 | 39.863   |
| 12402 | M201T10_  | 1.27119  | -0.34618 | -0.37672 | 0.716762 | 0.87648  | DOWN | 200.6818 | 200.6815 | 200.6818 | 9.956867 | 9.843367 |
| 12403 | M387T10_  | 1.404342 | -0.48989 | -0.37668 | 0.716824 | 0.876486 | DOWN | 386.7581 | 386.7578 | 386.7638 | 9.964417 | 9.885167 |
| 12404 | M677T10_  | 1.054064 | 0.075963 | 0.382681 | 0.716826 | 0.876486 | UP   | 676.5609 | 676.5606 | 676.561  | 9.825767 | 9.715683 |
| 12405 | M453T9_2  | 1.146536 | 0.197281 | 0.376429 | 0.716905 | 0.876493 | UP   | 452.6282 | 452.6231 | 452.6324 | 9.22995  | 9.056733 |
| 12406 | M1001T10_ | 1.178202 | -0.23659 | -0.37657 | 0.716943 | 0.876497 | DOWN | 1001.47  | 1001.469 | 1001.47  | 9.923158 | 9.914217 |
| 12407 | M450T11_  | 1.091224 | 0.125947 | 0.380955 | 0.716977 | 0.8765   | UP   | 450.4136 | 450.4132 | 450.4143 | 10.89193 | 10.85018 |
| 12408 | M524T39_  | 1.087721 | -0.12131 | -0.37967 | 0.716999 | 0.876502 | DOWN | 524.306  | 524.3059 | 524.3063 | 38.5825  | 38.42433 |
| 12409 | M516T9_1  | 1.124143 | 0.168826 | 0.380196 | 0.717002 | 0.876502 | UP   | 516.1338 | 516.1331 | 516.134  | 9.231542 | 9.12675  |
| 12410 | M271T10_  | 1.102083 | 0.140233 | 0.376935 | 0.717115 | 0.876513 | UP   | 270.7523 | 270.7521 | 270.7527 | 9.829175 | 9.759383 |
| 12411 | M377T9_7  | 1.1186   | 0.161694 | 0.383952 | 0.717145 | 0.876515 | UP   | 377.4913 | 377.49   | 377.4935 | 9.174942 | 9.1587   |
| 12412 | M326T10_  | 1.123286 | -0.16773 | -0.37881 | 0.717172 | 0.876518 | DOWN | 325.7117 | 325.7115 | 325.7127 | 9.82645  | 9.715683 |
| 12413 | M804T10_  | 1.054765 | -0.07692 | -0.37537 | 0.717174 | 0.876518 | DOWN | 804.4651 | 804.4646 | 804.4661 | 10.04722 | 9.939683 |
| 12414 | M339T20_  | 1.201469 | 0.2648   | 0.375328 | 0.717177 | 0.876518 | UP   | 339.236  | 339.2355 | 339.2361 | 19.8685  | 19.8105  |
| 12415 | M589T9_3  | 1.14306  | -0.1929  | -0.37737 | 0.717298 | 0.876529 | DOWN | 588.7777 | 588.7775 | 588.7787 | 9.2796   | 9.234417 |
| 12416 | M574T17   | 1.112306 | -0.15355 | -0.37513 | 0.717323 | 0.876532 | DOWN | 574.3823 | 574.3821 | 574.3828 | 16.6508  | 16.59183 |
| 12417 | M251T11_  | 1.070055 | -0.09769 | -0.37693 | 0.717324 | 0.876532 | DOWN | 251.3942 | 251.3917 | 251.3945 | 10.90522 | 10.873   |
| 12418 | M399T39   | 1.134216 | -0.1817  | -0.3861  | 0.717336 | 0.876533 | DOWN | 399.2374 | 399.237  | 399.2505 | 39.34517 | 39.115   |
| 12419 | M274T10_  | 1.103677 | 0.142319 | 0.375283 | 0.717348 | 0.876534 | UP   | 274.4565 | 274.4563 | 274.4566 | 9.9847   | 9.859233 |
| 12420 | M529T11_  | 1.136451 | 0.184535 | 0.374938 | 0.717502 | 0.876548 | UP   | 529.0674 | 529.0671 | 529.0677 | 11.2385  | 11.19848 |
| 12421 | M480T11_  | 1.073932 | -0.1029  | -0.37587 | 0.717524 | 0.87655  | DOWN | 480.274  | 480.2736 | 480.2752 | 10.892   | 10.8646  |
| 12422 | M724T32   | 1.156654 | -0.20996 | -0.3748  | 0.717552 | 0.876553 | DOWN | 723.5882 | 723.588  | 723.5884 | 31.7605  | 31.753   |
| 12423 | M703T10_  | 1.153597 | 0.206139 | 0.377415 | 0.717576 | 0.876555 | UP   | 703.4247 | 703.4245 | 703.4252 | 9.7468   | 9.62055  |
| 12424 | M357T44_  | 1.051424 | 0.072345 | 0.374809 | 0.717595 | 0.876557 | UP   | 357.1906 | 357.1905 | 357.1907 | 43.74725 | 43.54567 |

|       |          |          |          |          |          |          |      |          |          |          |          |          |
|-------|----------|----------|----------|----------|----------|----------|------|----------|----------|----------|----------|----------|
| 12425 | M480T9_1 | 1.133069 | -0.18024 | -0.38142 | 0.717919 | 0.876587 | DOWN | 479.5001 | 479.4988 | 479.5048 | 9.235933 | 9.046783 |
| 12426 | M296T9_5 | 1.155057 | 0.207964 | 0.382728 | 0.718031 | 0.876597 | UP   | 296.2045 | 296.2041 | 296.2048 | 8.729958 | 8.658183 |
| 12427 | M734T10_ | 1.119569 | -0.16294 | -0.37415 | 0.718115 | 0.876605 | DOWN | 733.9088 | 733.9069 | 733.9092 | 9.772883 | 9.699733 |
| 12428 | M583T9_6 | 1.135372 | -0.18317 | -0.37396 | 0.718154 | 0.876608 | DOWN | 582.9756 | 582.9745 | 582.9758 | 9.1988   | 9.161683 |
| 12429 | M334T10_ | 1.116264 | -0.15868 | -0.37531 | 0.718172 | 0.87661  | DOWN | 333.8274 | 333.8272 | 333.8288 | 9.825492 | 9.699733 |
| 12430 | M755T31  | 1.074231 | -0.1033  | -0.37394 | 0.718195 | 0.876612 | DOWN | 754.5226 | 754.5219 | 754.5232 | 31.29517 | 31.23383 |
| 12431 | M439T11_ | 1.074933 | 0.104247 | 0.37934  | 0.718221 | 0.876614 | UP   | 439.2193 | 439.2192 | 439.2195 | 10.90659 | 10.89355 |
| 12432 | M1299T23 | 1.214921 | 0.280862 | 0.380376 | 0.718247 | 0.876617 | UP   | 1298.642 | 1298.641 | 1298.643 | 22.52333 | 22.4835  |
| 12433 | M437T10_ | 1.141434 | 0.190848 | 0.381931 | 0.718247 | 0.876617 | UP   | 437.1432 | 437.1429 | 437.1441 | 9.984083 | 9.885167 |
| 12434 | M392T17  | 1.043864 | -0.06193 | -0.38522 | 0.718271 | 0.876619 | DOWN | 392.2985 | 392.2981 | 392.2986 | 16.928   | 16.89883 |
| 12435 | M357T41_ | 1.042647 | 0.060251 | 0.380285 | 0.718319 | 0.876623 | UP   | 357.1906 | 357.1905 | 357.1908 | 40.9565  | 40.76933 |
| 12436 | M557T36  | 1.175715 | -0.23354 | -0.3755  | 0.718335 | 0.876625 | DOWN | 557.4453 | 557.4446 | 557.4463 | 36.05633 | 36.021   |
| 12437 | M263T9_1 | 1.139381 | -0.18825 | -0.3785  | 0.718391 | 0.87663  | DOWN | 263.0653 | 263.0651 | 263.0656 | 9.486892 | 9.284283 |
| 12438 | M564T11_ | 1.071244 | -0.09929 | -0.3736  | 0.718407 | 0.876632 | DOWN | 563.8089 | 563.8086 | 563.8093 | 10.52067 | 10.47223 |
| 12439 | M378T10_ | 1.133569 | 0.180872 | 0.38146  | 0.718506 | 0.876641 | UP   | 378.0068 | 378.0066 | 378.017  | 9.903092 | 9.79535  |
| 12440 | M220T9_1 | 1.154645 | -0.20745 | -0.37425 | 0.718609 | 0.87665  | DOWN | 220.1692 | 220.1627 | 220.1718 | 9.268717 | 9.103733 |
| 12441 | M642T10_ | 1.050174 | 0.070628 | 0.374311 | 0.718636 | 0.876653 | UP   | 642.1989 | 642.1926 | 642.2025 | 9.825492 | 9.464933 |
| 12442 | M199T9_9 | 1.197261 | -0.25974 | -0.37586 | 0.718685 | 0.876657 | DOWN | 199.2754 | 199.2741 | 199.2764 | 9.278717 | 9.1322   |
| 12443 | M535T30  | 1.091508 | 0.126322 | 0.372908 | 0.718914 | 0.876678 | UP   | 535.3731 | 535.3725 | 535.3744 | 30.26733 | 30.20833 |
| 12444 | M245T18  | 1.19439  | 0.256275 | 0.382832 | 0.718963 | 0.876683 | UP   | 245.0782 | 245.0779 | 245.0782 | 18.49017 | 18.46867 |
| 12445 | M226T9_3 | 1.173577 | -0.23091 | -0.37336 | 0.71897  | 0.876683 | DOWN | 226.0865 | 226.0845 | 226.0872 | 9.305817 | 9.061    |
| 12446 | M346T45  | 1.130397 | -0.17683 | -0.37497 | 0.718987 | 0.876685 | DOWN | 346.186  | 346.1859 | 346.1861 | 44.85408 | 44.65283 |
| 12447 | M375T11_ | 1.063798 | -0.08922 | -0.37578 | 0.719052 | 0.876691 | DOWN | 375.3692 | 375.369  | 375.3695 | 10.89923 | 10.88747 |
| 12448 | M730T10_ | 1.081912 | -0.11358 | -0.37703 | 0.71907  | 0.876692 | DOWN | 730.1012 | 730.0985 | 730.1017 | 9.830833 | 9.715683 |
| 12449 | M570T20  | 1.058815 | -0.08245 | -0.37297 | 0.719081 | 0.876693 | DOWN | 570.4209 | 570.4203 | 570.4213 | 20.49167 | 20.4765  |
| 12450 | M310T9_2 | 1.095749 | -0.13192 | -0.38008 | 0.719131 | 0.876698 | DOWN | 309.7081 | 309.699  | 309.7085 | 8.938183 | 8.7875   |
| 12451 | M361T10_ | 1.092552 | 0.127702 | 0.379591 | 0.719171 | 0.876702 | UP   | 361.354  | 361.3535 | 361.3556 | 9.910133 | 9.79535  |
| 12452 | M697T9_7 | 1.079899 | -0.1109  | -0.37798 | 0.719212 | 0.876705 | DOWN | 697.3907 | 697.3896 | 697.391  | 9.3332   | 9.234417 |
| 12453 | M1307T9  | 1.171888 | 0.228835 | 0.376236 | 0.719219 | 0.876706 | UP   | 1307.141 | 1307.141 | 1307.143 | 9.286433 | 9.22495  |
| 12454 | M262T31  | 1.083728 | 0.116002 | 0.37287  | 0.719348 | 0.876718 | UP   | 262.1435 | 262.1433 | 262.1441 | 31.10483 | 31.061   |
| 12455 | M740T9_1 | 1.204918 | -0.26893 | -0.37278 | 0.7194   | 0.876723 | DOWN | 739.698  | 739.6974 | 739.6984 | 9.363733 | 9.250817 |
| 12456 | M791T33  | 1.091684 | -0.12656 | -0.37271 | 0.71944  | 0.876726 | DOWN | 790.5525 | 790.5522 | 790.5533 | 33.34092 | 33.34033 |
| 12457 | M805T10_ | 1.143617 | 0.193604 | 0.381167 | 0.719577 | 0.876739 | UP   | 804.6159 | 804.6149 | 804.6166 | 9.942317 | 9.827283 |
| 12458 | M376T10_ | 1.143029 | 0.192861 | 0.372524 | 0.719577 | 0.876739 | UP   | 375.5241 | 375.5236 | 375.5242 | 9.960817 | 9.843367 |
| 12459 | M444T11_ | 1.133193 | 0.180393 | 0.37329  | 0.719658 | 0.876746 | UP   | 444.3523 | 444.3517 | 444.3527 | 10.8926  | 10.873   |

|       |          |          |          |          |          |          |      |          |          |          |          |          |
|-------|----------|----------|----------|----------|----------|----------|------|----------|----------|----------|----------|----------|
| 12460 | M475T10_ | 1.022945 | -0.03273 | -0.37392 | 0.719781 | 0.876758 | DOWN | 474.7399 | 474.7397 | 474.7401 | 9.847133 | 9.73145  |
| 12461 | M151T10_ | 1.258626 | -0.33185 | -0.37301 | 0.719786 | 0.876758 | DOWN | 150.821  | 150.8209 | 150.8286 | 9.8374   | 9.8161   |
| 12462 | M431T10_ | 1.132173 | 0.179095 | 0.383803 | 0.719786 | 0.876758 | UP   | 430.7884 | 430.788  | 430.7889 | 9.946367 | 9.859233 |
| 12463 | M228T10_ | 1.087527 | -0.12105 | -0.37175 | 0.719893 | 0.876768 | DOWN | 228.3544 | 228.3543 | 228.3545 | 9.915583 | 9.811217 |
| 12464 | M371T12  | 1.079341 | -0.11015 | -0.37254 | 0.719989 | 0.876777 | DOWN | 371.1464 | 371.1463 | 371.1466 | 11.67752 | 11.66018 |
| 12465 | M401T27_ | 1.175645 | -0.23345 | -0.37218 | 0.720127 | 0.876789 | DOWN | 401.0435 | 401.0433 | 401.0436 | 26.80283 | 26.78083 |
| 12466 | M681T25  | 1.076317 | -0.1061  | -0.37343 | 0.720228 | 0.876799 | DOWN | 680.5146 | 680.5144 | 680.5147 | 24.75817 | 24.6525  |
| 12467 | M509T9_2 | 1.17811  | -0.23647 | -0.37191 | 0.720234 | 0.876799 | DOWN | 509.1715 | 509.1697 | 509.1732 | 9.2585   | 9.0864   |
| 12468 | M216T10_ | 1.092964 | -0.12825 | -0.37208 | 0.720273 | 0.876803 | DOWN | 216.1666 | 216.1658 | 216.167  | 9.821383 | 9.816167 |
| 12469 | M332T30  | 1.079531 | -0.11041 | -0.37318 | 0.720492 | 0.876823 | DOWN | 332.3157 | 332.3156 | 332.3159 | 29.51258 | 29.48917 |
| 12470 | M298T17  | 1.094645 | 0.130463 | 0.372828 | 0.72057  | 0.87683  | UP   | 298.2738 | 298.2729 | 298.2743 | 17.30708 | 17.2925  |
| 12471 | M361T11_ | 1.05959  | -0.08351 | -0.37309 | 0.720589 | 0.876832 | DOWN | 361.2858 | 361.285  | 361.2869 | 10.9127  | 10.879   |
| 12472 | M247T19_ | 1.095359 | -0.1314  | -0.37034 | 0.720745 | 0.876846 | DOWN | 247.2166 | 247.2163 | 247.2169 | 18.77583 | 18.76217 |
| 12473 | M317T10_ | 1.098145 | 0.135069 | 0.37059  | 0.720777 | 0.876849 | UP   | 317.2904 | 317.2902 | 317.291  | 9.802992 | 9.715683 |
| 12474 | M754T10_ | 1.048545 | 0.068389 | 0.371703 | 0.720874 | 0.876858 | UP   | 754.2769 | 754.2713 | 754.2777 | 9.845483 | 9.715683 |
| 12475 | M756T9_2 | 1.1029   | 0.141301 | 0.376896 | 0.720951 | 0.876865 | UP   | 755.8212 | 755.8204 | 755.8216 | 9.145433 | 9.12675  |
| 12476 | M725T32  | 1.147268 | -0.1982  | -0.37011 | 0.720983 | 0.876868 | DOWN | 724.5917 | 724.5916 | 724.592  | 31.75433 | 31.75333 |
| 12477 | M1011T10 | 1.092079 | -0.12708 | -0.3783  | 0.721063 | 0.876875 | DOWN | 1010.582 | 1010.58  | 1010.584 | 9.999    | 9.9009   |
| 12478 | M257T9_4 | 1.13824  | 0.186805 | 0.369802 | 0.721163 | 0.876884 | UP   | 257.2514 | 257.2507 | 257.2521 | 9.161192 | 9.132267 |
| 12479 | M262T10_ | 1.064048 | -0.08956 | -0.36981 | 0.721207 | 0.876888 | DOWN | 261.8882 | 261.8773 | 261.8883 | 9.958617 | 9.843367 |
| 12480 | M341T11_ | 1.074689 | 0.103919 | 0.378602 | 0.721242 | 0.876891 | UP   | 341.2433 | 341.2433 | 341.2435 | 10.92598 | 10.90197 |
| 12481 | M311T10_ | 1.058128 | -0.08151 | -0.37073 | 0.721297 | 0.876896 | DOWN | 311.2884 | 311.2855 | 311.2886 | 9.956417 | 9.840617 |
| 12482 | M235T9_9 | 1.224421 | -0.2921  | -0.37127 | 0.7215   | 0.876915 | DOWN | 235.2112 | 235.2089 | 235.2121 | 9.388367 | 9.22495  |
| 12483 | M217T10_ | 1.044403 | -0.06268 | -0.37578 | 0.721532 | 0.876918 | DOWN | 216.8601 | 216.8599 | 216.8687 | 9.909433 | 9.79535  |
| 12484 | M428T11_ | 1.083221 | 0.115328 | 0.369075 | 0.721707 | 0.876934 | UP   | 427.5341 | 427.5285 | 427.5345 | 10.93097 | 10.89125 |
| 12485 | M359T10_ | 1.106555 | -0.14608 | -0.3717  | 0.72172  | 0.876935 | DOWN | 358.8584 | 358.8582 | 358.8657 | 9.87115  | 9.843367 |
| 12486 | M593T10_ | 1.289423 | -0.36673 | -0.369   | 0.721779 | 0.87694  | DOWN | 593.2484 | 593.2469 | 593.2491 | 9.872067 | 9.843367 |
| 12487 | M288T10_ | 1.08888  | -0.12284 | -0.36935 | 0.721798 | 0.876942 | DOWN | 287.9536 | 287.9532 | 287.9537 | 9.82645  | 9.715683 |
| 12488 | M791T9_2 | 1.259707 | -0.33309 | -0.3689  | 0.72185  | 0.876947 | DOWN | 790.7263 | 790.725  | 790.7274 | 9.313325 | 9.26575  |
| 12489 | M604T10_ | 1.19214  | 0.253553 | 0.377251 | 0.721928 | 0.876954 | UP   | 603.7041 | 603.7031 | 603.7086 | 9.8207   | 9.7124   |
| 12490 | M436T9_7 | 1.07295  | 0.101582 | 0.37189  | 0.721931 | 0.876954 | UP   | 435.8906 | 435.8897 | 435.8918 | 9.296133 | 9.129317 |
| 12491 | M477T11_ | 1.076994 | 0.10701  | 0.36925  | 0.721966 | 0.876957 | UP   | 476.565  | 476.5636 | 476.5653 | 10.89875 | 10.873   |
| 12492 | M1054T10 | 1.048103 | -0.06778 | -0.36871 | 0.721993 | 0.87696  | DOWN | 1054.127 | 1054.125 | 1054.129 | 9.84695  | 9.728083 |
| 12493 | M371T10_ | 1.124886 | -0.16978 | -0.37174 | 0.721994 | 0.87696  | DOWN | 371.251  | 371.2506 | 371.2512 | 10.28695 | 10.18238 |
| 12494 | M417T9_4 | 1.388936 | 0.47398  | 0.368574 | 0.722094 | 0.876969 | UP   | 416.8589 | 416.8583 | 416.8591 | 9.206    | 9.1445   |

|       |          |          |          |          |          |          |      |          |          |          |          |          |
|-------|----------|----------|----------|----------|----------|----------|------|----------|----------|----------|----------|----------|
| 12495 | M363T36  | 1.149534 | 0.20105  | 0.368375 | 0.722164 | 0.876975 | UP   | 363.3103 | 363.31   | 363.3109 | 36.30908 | 36.2275  |
| 12496 | M562T43_ | 1.092314 | 0.127387 | 0.380657 | 0.722245 | 0.876983 | UP   | 562.3219 | 562.3219 | 562.3221 | 43.0565  | 42.94167 |
| 12497 | M534T40_ | 1.080626 | -0.11187 | -0.36891 | 0.722246 | 0.876983 | DOWN | 534.2905 | 534.2904 | 534.291  | 39.51783 | 39.44583 |
| 12498 | M270T18  | 1.178783 | 0.237298 | 0.372385 | 0.722361 | 0.876993 | UP   | 270.15   | 270.1493 | 270.1503 | 18.2035  | 18.19433 |
| 12499 | M1181T10 | 1.099163 | 0.136405 | 0.372727 | 0.722368 | 0.876994 | UP   | 1180.824 | 1180.823 | 1180.826 | 9.8374   | 9.774967 |
| 12500 | M189T11_ | 1.102135 | -0.1403  | -0.36832 | 0.722382 | 0.876995 | DOWN | 188.693  | 188.6926 | 188.6934 | 10.90522 | 10.879   |
| 12501 | M409T11_ | 1.050333 | -0.07085 | -0.3728  | 0.722422 | 0.876999 | DOWN | 408.5148 | 408.5142 | 408.5153 | 10.92253 | 10.84487 |
| 12502 | M582T9_1 | 1.183111 | 0.242585 | 0.371793 | 0.722493 | 0.877005 | UP   | 581.515  | 581.5126 | 581.5207 | 9.1602   | 9.110833 |
| 12503 | M206T10_ | 1.055908 | -0.07848 | -0.3693  | 0.722564 | 0.877012 | DOWN | 206.4504 | 206.4503 | 206.4505 | 9.8207   | 9.715683 |
| 12504 | M312T11_ | 1.056098 | -0.07874 | -0.36811 | 0.722594 | 0.877014 | DOWN | 312.415  | 312.4149 | 312.4151 | 10.892   | 10.879   |
| 12505 | M433T10_ | 1.135595 | 0.183449 | 0.367822 | 0.722706 | 0.877025 | UP   | 433.1382 | 433.1377 | 433.1384 | 9.958617 | 9.843367 |
| 12506 | M364T9_1 | 1.09078  | 0.125361 | 0.36763  | 0.722732 | 0.877027 | UP   | 364.174  | 364.1732 | 364.1751 | 9.28995  | 9.098833 |
| 12507 | M951T10_ | 1.101391 | -0.13933 | -0.36776 | 0.722804 | 0.877033 | DOWN | 951.4011 | 951.3997 | 951.4026 | 9.846833 | 9.73145  |
| 12508 | M773T10_ | 1.080709 | -0.11198 | -0.36778 | 0.722909 | 0.877043 | DOWN | 773.4045 | 773.4034 | 773.4064 | 10.13963 | 10.06883 |
| 12509 | M347T11_ | 1.181402 | 0.2405   | 0.372005 | 0.722917 | 0.877044 | UP   | 347.0354 | 347.0352 | 347.0359 | 10.90548 | 10.88982 |
| 12510 | M1186T10 | 1.07827  | 0.108719 | 0.367336 | 0.722936 | 0.877045 | UP   | 1185.867 | 1185.866 | 1185.867 | 9.830558 | 9.715683 |
| 12511 | M486T11_ | 1.070617 | 0.098442 | 0.367557 | 0.723083 | 0.877059 | UP   | 486.3728 | 486.3724 | 486.3739 | 11.49677 | 11.47593 |
| 12512 | M248T11_ | 1.142637 | -0.19237 | -0.3712  | 0.72309  | 0.877059 | DOWN | 247.6786 | 247.6783 | 247.6787 | 10.93208 | 10.85018 |
| 12513 | M355T24  | 1.11825  | -0.16124 | -0.36735 | 0.723093 | 0.87706  | DOWN | 355.2881 | 355.2879 | 355.2882 | 23.74367 | 23.71683 |
| 12514 | M217T12  | 1.114943 | -0.15697 | -0.36694 | 0.72322  | 0.877071 | DOWN | 217.1777 | 217.1775 | 217.1778 | 11.55517 | 11.52653 |
| 12515 | M349T10_ | 1.073376 | -0.10216 | -0.36741 | 0.723279 | 0.877077 | DOWN | 348.7584 | 348.758  | 348.7586 | 9.626517 | 9.371417 |
| 12516 | M394T24_ | 1.120184 | -0.16374 | -0.36689 | 0.7233   | 0.877079 | DOWN | 394.2864 | 394.2863 | 394.2866 | 24.12733 | 24.11067 |
| 12517 | M239T10_ | 1.183003 | 0.242454 | 0.366771 | 0.723321 | 0.87708  | UP   | 239.334  | 239.334  | 239.3341 | 9.9351   | 9.827283 |
| 12518 | M563T11_ | 1.105876 | -0.14519 | -0.36808 | 0.723378 | 0.877086 | DOWN | 562.5354 | 562.535  | 562.5356 | 10.50608 | 10.45613 |
| 12519 | M410T10_ | 1.200875 | -0.26409 | -0.36703 | 0.723551 | 0.877101 | DOWN | 409.7861 | 409.7854 | 409.7863 | 9.925417 | 9.827283 |
| 12520 | M333T10_ | 1.02377  | 0.033892 | 0.370869 | 0.7236   | 0.877106 | UP   | 332.9368 | 332.9367 | 332.9376 | 9.847817 | 9.73145  |
| 12521 | M296T10_ | 1.055756 | -0.07828 | -0.36692 | 0.723742 | 0.877119 | DOWN | 296.3403 | 296.3401 | 296.3403 | 9.94405  | 9.853533 |
| 12522 | M494T10_ | 1.059473 | -0.08335 | -0.36645 | 0.72388  | 0.877131 | DOWN | 493.7859 | 493.7856 | 493.7865 | 9.8756   | 9.732983 |
| 12523 | M835T19_ | 1.269701 | 0.344489 | 0.366605 | 0.723964 | 0.877139 | UP   | 834.8429 | 834.8407 | 834.8441 | 18.73233 | 18.717   |
| 12524 | M682T10_ | 1.118655 | -0.16177 | -0.36782 | 0.723978 | 0.87714  | DOWN | 682.1096 | 682.109  | 682.1103 | 9.82645  | 9.7634   |
| 12525 | M1066T10 | 1.077767 | -0.10805 | -0.36768 | 0.724055 | 0.877147 | DOWN | 1065.871 | 1065.871 | 1065.872 | 9.960967 | 9.843367 |
| 12526 | M496T17_ | 1.129426 | 0.17559  | 0.366423 | 0.724114 | 0.877152 | UP   | 496.3262 | 496.3256 | 496.3269 | 17.4245  | 17.39267 |
| 12527 | M654T10_ | 1.105943 | 0.145276 | 0.366898 | 0.724182 | 0.877159 | UP   | 653.6721 | 653.6667 | 653.6727 | 9.948825 | 9.7124   |
| 12528 | M527T9_4 | 1.164642 | -0.21989 | -0.36912 | 0.724485 | 0.877186 | DOWN | 526.699  | 526.6934 | 526.7017 | 9.37735  | 9.098833 |
| 12529 | M1736T10 | 1.165424 | 0.220854 | 0.366904 | 0.72452  | 0.877189 | UP   | 1736.104 | 1736.103 | 1736.107 | 9.871467 | 9.830083 |

|       |          |          |          |          |          |          |      |          |          |          |          |          |
|-------|----------|----------|----------|----------|----------|----------|------|----------|----------|----------|----------|----------|
| 12530 | M1773T10 | 1.08602  | 0.119051 | 0.367432 | 0.724528 | 0.87719  | UP   | 1772.917 | 1772.913 | 1772.92  | 9.801833 | 9.7124   |
| 12531 | M484T9_5 | 1.136063 | -0.18404 | -0.36506 | 0.724528 | 0.87719  | DOWN | 484.3853 | 484.3848 | 484.3858 | 8.8806   | 8.7575   |
| 12532 | M946T10_ | 1.127717 | 0.173405 | 0.37337  | 0.724548 | 0.877192 | UP   | 945.6727 | 945.6716 | 945.6735 | 9.626517 | 9.52595  |
| 12533 | M299T40_ | 1.086304 | 0.119428 | 0.365029 | 0.724572 | 0.877194 | UP   | 299.1487 | 299.1484 | 299.1488 | 40.49617 | 40.30917 |
| 12534 | M476T20  | 1.160186 | -0.21436 | -0.36501 | 0.724591 | 0.877196 | DOWN | 475.933  | 475.9329 | 475.9333 | 19.93983 | 19.92517 |
| 12535 | M479T9_3 | 1.304649 | 0.383661 | 0.376182 | 0.724599 | 0.877196 | UP   | 478.7494 | 478.7482 | 478.7561 | 9.197983 | 9.018167 |
| 12536 | M448T9_4 | 1.172899 | -0.23008 | -0.36718 | 0.724599 | 0.877196 | DOWN | 447.9124 | 447.9123 | 447.9126 | 9.146383 | 9.079083 |
| 12537 | M265T10_ | 1.084626 | 0.117198 | 0.364803 | 0.724716 | 0.877207 | UP   | 265.3186 | 265.3185 | 265.3187 | 9.979342 | 9.8753   |
| 12538 | M178T10_ | 1.115468 | 0.157649 | 0.364753 | 0.72475  | 0.87721  | UP   | 178.3137 | 178.3135 | 178.3138 | 9.968992 | 9.859233 |
| 12539 | M406T10_ | 1.06989  | -0.09746 | -0.36628 | 0.724789 | 0.877213 | DOWN | 405.9354 | 405.9345 | 405.9357 | 9.914108 | 9.822117 |
| 12540 | M526T9_5 | 1.09237  | 0.127462 | 0.376579 | 0.724861 | 0.87722  | UP   | 526.2901 | 526.2898 | 526.2912 | 9.239133 | 9.1932   |
| 12541 | M1016T13 | 1.059341 | -0.08317 | -0.37062 | 0.724978 | 0.877231 | DOWN | 1016.461 | 1016.46  | 1016.461 | 13.40553 | 13.37595 |
| 12542 | M694T3_1 | 1.14793  | 0.199035 | 0.364417 | 0.725011 | 0.877233 | UP   | 694.4938 | 694.4936 | 694.4941 | 3.314717 | 3.0588   |
| 12543 | M396T11_ | 1.085352 | -0.11816 | -0.37063 | 0.725085 | 0.87724  | DOWN | 396.1613 | 396.1568 | 396.1617 | 10.90765 | 10.879   |
| 12544 | M710T10_ | 1.107065 | -0.14674 | -0.36427 | 0.725115 | 0.877243 | DOWN | 710.0612 | 710.0602 | 710.0618 | 9.949233 | 9.827283 |
| 12545 | M462T28_ | 1.178691 | -0.23719 | -0.36488 | 0.725191 | 0.87725  | DOWN | 462.3572 | 462.3569 | 462.3576 | 27.50475 | 27.47483 |
| 12546 | M331T17  | 1.08461  | 0.117177 | 0.366968 | 0.7252   | 0.877251 | UP   | 331.1902 | 331.1901 | 331.1904 | 17.03017 | 17       |
| 12547 | M1717T10 | 1.081375 | -0.11287 | -0.36682 | 0.725206 | 0.877251 | DOWN | 1716.744 | 1716.743 | 1716.745 | 9.814283 | 9.699733 |
| 12548 | M446T44_ | 1.117513 | -0.16029 | -0.37343 | 0.725433 | 0.877272 | DOWN | 446.2745 | 446.2743 | 446.2746 | 44.25758 | 44.13517 |
| 12549 | M368T11_ | 1.09539  | 0.131445 | 0.373423 | 0.725511 | 0.877279 | UP   | 367.5968 | 367.5966 | 367.5971 | 10.96015 | 10.92225 |
| 12550 | M554T9_6 | 1.27659  | 0.352295 | 0.373349 | 0.725633 | 0.87729  | UP   | 554.2054 | 554.2037 | 554.2126 | 9.1428   | 9.119933 |
| 12551 | M468T9_1 | 1.118902 | 0.162083 | 0.368348 | 0.725654 | 0.877292 | UP   | 468.2122 | 468.2117 | 468.213  | 9.231542 | 9.129317 |
| 12552 | M180T10_ | 1.17574  | -0.23357 | -0.3641  | 0.725677 | 0.877294 | DOWN | 179.8471 | 179.8469 | 179.8472 | 9.939233 | 9.827283 |
| 12553 | M493T9_6 | 1.095535 | 0.131635 | 0.367899 | 0.725734 | 0.877299 | UP   | 493.4759 | 493.4755 | 493.4876 | 9.3261   | 9.20785  |
| 12554 | M639T9_2 | 1.121278 | -0.16514 | -0.36364 | 0.725857 | 0.87731  | DOWN | 638.7619 | 638.7613 | 638.7626 | 9.311167 | 9.129317 |
| 12555 | M1026T16 | 1.07675  | -0.10668 | -0.37349 | 0.726007 | 0.877323 | DOWN | 1025.521 | 1025.521 | 1025.522 | 15.82213 | 15.7888  |
| 12556 | M211T11_ | 1.072211 | -0.10059 | -0.36335 | 0.726031 | 0.877326 | DOWN | 210.7702 | 210.7701 | 210.7703 | 10.892   | 10.873   |
| 12557 | M418T20  | 1.076596 | 0.106477 | 0.370907 | 0.726042 | 0.877327 | UP   | 417.7595 | 417.7592 | 417.7598 | 20.25217 | 20.23017 |
| 12558 | M337T9_4 | 1.149448 | -0.20094 | -0.36313 | 0.726061 | 0.877328 | DOWN | 336.6834 | 336.6805 | 336.6862 | 9.2033   | 9.09495  |
| 12559 | M516T11_ | 1.052471 | -0.07378 | -0.36307 | 0.726112 | 0.877333 | DOWN | 516.2895 | 516.2891 | 516.2898 | 10.892   | 10.879   |
| 12560 | M454T24  | 1.278249 | -0.35417 | -0.36296 | 0.72612  | 0.877334 | DOWN | 454.3461 | 454.3461 | 454.3462 | 24.376   | 24.2595  |
| 12561 | M685T10_ | 1.097162 | 0.133776 | 0.363607 | 0.726215 | 0.877342 | UP   | 685.3805 | 685.3789 | 685.3812 | 10.22237 | 10.13368 |
| 12562 | M209T10_ | 1.032925 | -0.04674 | -0.36679 | 0.726233 | 0.877344 | DOWN | 208.7861 | 208.786  | 208.7861 | 9.847133 | 9.73145  |
| 12563 | M454T9_8 | 1.227552 | -0.29578 | -0.37335 | 0.72628  | 0.877348 | DOWN | 453.7755 | 453.7709 | 453.7796 | 9.411458 | 9.3471   |
| 12564 | M825T25  | 1.089568 | -0.12376 | -0.36299 | 0.726288 | 0.877349 | DOWN | 824.5706 | 824.5701 | 824.571  | 25.34917 | 25.32883 |

|       |          |          |          |          |          |          |      |          |          |          |          |          |
|-------|----------|----------|----------|----------|----------|----------|------|----------|----------|----------|----------|----------|
| 12565 | M384T25  | 1.141117 | -0.19045 | -0.36273 | 0.726289 | 0.877349 | DOWN | 384.2952 | 384.2949 | 384.2954 | 24.53508 | 24.4775  |
| 12566 | M1746T10 | 1.128198 | -0.17402 | -0.36626 | 0.726306 | 0.87735  | DOWN | 1745.552 | 1745.549 | 1745.559 | 9.853633 | 9.73145  |
| 12567 | M462T11_ | 1.052384 | 0.073661 | 0.362863 | 0.72636  | 0.877355 | UP   | 462.4658 | 462.4657 | 462.4662 | 10.89875 | 10.879   |
| 12568 | M470T9_7 | 1.146608 | 0.197372 | 0.367408 | 0.726364 | 0.877356 | UP   | 470.3421 | 470.3418 | 470.3427 | 8.922033 | 8.863633 |
| 12569 | M167T9_2 | 1.171005 | -0.22775 | -0.37122 | 0.726488 | 0.877367 | DOWN | 166.5306 | 166.5306 | 166.5309 | 9.159717 | 9.079083 |
| 12570 | M398T11_ | 1.070194 | -0.09787 | -0.37289 | 0.726531 | 0.877371 | DOWN | 398.4868 | 398.4866 | 398.488  | 10.91813 | 10.88995 |
| 12571 | M415T11_ | 1.074374 | -0.1035  | -0.3631  | 0.726592 | 0.877376 | DOWN | 415.031  | 415.0266 | 415.0312 | 10.892   | 10.879   |
| 12572 | M619T10_ | 1.094185 | -0.12986 | -0.3623  | 0.726648 | 0.877381 | DOWN | 619.3411 | 619.3406 | 619.3416 | 10.07069 | 9.964133 |
| 12573 | M419T10_ | 1.162188 | 0.216843 | 0.362687 | 0.726773 | 0.877392 | UP   | 418.7645 | 418.7636 | 418.7649 | 9.956417 | 9.946367 |
| 12574 | M590T11_ | 1.131667 | 0.178449 | 0.373638 | 0.726825 | 0.877397 | UP   | 589.9143 | 589.9128 | 589.9152 | 10.53168 | 10.47223 |
| 12575 | M474T9_2 | 1.30946  | 0.388972 | 0.367312 | 0.726835 | 0.877398 | UP   | 473.7382 | 473.7376 | 473.7385 | 8.93015  | 8.863633 |
| 12576 | M1880T10 | 1.07619  | -0.10593 | -0.36283 | 0.72685  | 0.877399 | DOWN | 1880.46  | 1880.458 | 1880.463 | 9.942317 | 9.843367 |
| 12577 | M638T9_1 | 1.150289 | -0.202   | -0.36429 | 0.726914 | 0.877405 | DOWN | 637.5379 | 637.537  | 637.5393 | 8.963    | 8.9396   |
| 12578 | M560T11_ | 1.135591 | -0.18344 | -0.36181 | 0.726922 | 0.877406 | DOWN | 560.4521 | 560.4519 | 560.4525 | 10.8838  | 10.83572 |
| 12579 | M418T10_ | 1.097006 | 0.133572 | 0.369486 | 0.727027 | 0.877415 | UP   | 418.479  | 418.4787 | 418.4792 | 9.931875 | 9.843367 |
| 12580 | M876T10_ | 1.085553 | -0.11843 | -0.36504 | 0.727081 | 0.87742  | DOWN | 875.9854 | 875.9841 | 875.9862 | 10.41528 | 10.32768 |
| 12581 | M234T11_ | 1.072716 | 0.101268 | 0.366238 | 0.727098 | 0.877422 | UP   | 233.9058 | 233.9006 | 233.9108 | 10.92804 | 10.87487 |
| 12582 | M261T11_ | 1.118946 | -0.16214 | -0.36148 | 0.727104 | 0.877422 | DOWN | 260.7721 | 260.7719 | 260.7725 | 10.87708 | 10.8646  |
| 12583 | M1340T10 | 1.086176 | -0.11926 | -0.36177 | 0.727106 | 0.877422 | DOWN | 1339.845 | 1339.843 | 1339.848 | 9.924308 | 9.827283 |
| 12584 | M824T10_ | 1.081587 | -0.11315 | -0.36319 | 0.727128 | 0.877424 | DOWN | 824.4855 | 824.4845 | 824.4863 | 9.6129   | 9.510117 |
| 12585 | M296T11_ | 1.040723 | -0.05759 | -0.36176 | 0.727142 | 0.877426 | DOWN | 296.2001 | 296.1998 | 296.2002 | 10.90548 | 10.879   |
| 12586 | M924T10_ | 1.177704 | 0.235977 | 0.367747 | 0.72718  | 0.877429 | UP   | 924.4418 | 924.4408 | 924.4426 | 9.932    | 9.827283 |
| 12587 | M338T9_7 | 1.106388 | 0.145857 | 0.36388  | 0.727211 | 0.877432 | UP   | 338.1937 | 338.1937 | 338.1941 | 8.8316   | 8.54835  |
| 12588 | M605T9_2 | 1.145224 | -0.19563 | -0.36443 | 0.72746  | 0.877458 | DOWN | 604.7082 | 604.7076 | 604.7099 | 9.24215  | 9.098833 |
| 12589 | M348T10_ | 1.05985  | -0.08386 | -0.36406 | 0.727536 | 0.877466 | DOWN | 348.2104 | 348.2103 | 348.2106 | 9.8207   | 9.715683 |
| 12590 | M224T11_ | 1.127489 | -0.17311 | -0.36128 | 0.727563 | 0.877468 | DOWN | 224.2121 | 224.212  | 224.2123 | 11.38553 | 11.3369  |
| 12591 | M1036T18 | 1.157587 | -0.21112 | -0.36109 | 0.72759  | 0.877471 | DOWN | 1035.503 | 1035.503 | 1035.505 | 17.86375 | 17.84933 |
| 12592 | M583T9_8 | 1.04742  | -0.06684 | -0.36073 | 0.727648 | 0.877477 | DOWN | 583.3775 | 583.3759 | 583.3777 | 8.985492 | 8.892117 |
| 12593 | M628T37  | 1.077716 | -0.10798 | -0.3608  | 0.727678 | 0.87748  | DOWN | 628.4628 | 628.4626 | 628.4632 | 36.545   | 36.5385  |
| 12594 | M675T10_ | 1.027181 | -0.03869 | -0.36578 | 0.72771  | 0.877484 | DOWN | 675.4172 | 675.4166 | 675.418  | 9.856808 | 9.743667 |
| 12595 | M736T11  | 1.12212  | 0.166227 | 0.360651 | 0.727905 | 0.877504 | UP   | 735.9779 | 735.9774 | 735.9788 | 10.8926  | 10.89125 |
| 12596 | M564T44_ | 1.105069 | 0.144137 | 0.362112 | 0.728055 | 0.877519 | UP   | 564.3374 | 564.3373 | 564.3377 | 44.19267 | 43.94817 |
| 12597 | M392T19  | 1.043709 | -0.06172 | -0.36274 | 0.728094 | 0.877523 | DOWN | 391.5065 | 391.5063 | 391.5068 | 18.9655  | 18.95117 |
| 12598 | M491T11_ | 1.062351 | 0.08726  | 0.362824 | 0.728179 | 0.877532 | UP   | 491.279  | 491.2785 | 491.2793 | 10.90519 | 10.879   |
| 12599 | M225T11_ | 1.145728 | 0.196264 | 0.367484 | 0.728483 | 0.877564 | UP   | 225.1265 | 225.1205 | 225.1266 | 10.91734 | 10.879   |



|       |          |          |          |          |          |          |      |          |          |          |          |          |
|-------|----------|----------|----------|----------|----------|----------|------|----------|----------|----------|----------|----------|
| 12600 | M172T10_ | 1.127263 | 0.172824 | 0.359726 | 0.728487 | 0.877564 | UP   | 172.3481 | 172.3478 | 172.3482 | 9.967367 | 9.859233 |
| 12601 | M151T10_ | 1.111855 | -0.15297 | -0.36207 | 0.72869  | 0.877585 | DOWN | 151.0295 | 151.0294 | 151.0296 | 9.946467 | 9.843367 |
| 12602 | M197T9_2 | 1.099478 | -0.13682 | -0.36207 | 0.728758 | 0.877592 | DOWN | 196.9747 | 196.9745 | 196.9751 | 9.3471   | 9.29015  |
| 12603 | M415T9_1 | 1.181169 | -0.24022 | -0.36665 | 0.728765 | 0.877593 | DOWN | 415.409  | 415.4075 | 415.4113 | 9.194558 | 9.129317 |
| 12604 | M534T45  | 1.077056 | 0.107093 | 0.371617 | 0.728766 | 0.877593 | UP   | 534.3269 | 534.3267 | 534.3269 | 44.79667 | 44.72483 |
| 12605 | M686T10_ | 1.118178 | -0.16115 | -0.3616  | 0.728898 | 0.877607 | DOWN | 685.6948 | 685.6931 | 685.6959 | 9.944608 | 9.830283 |
| 12606 | M250T10_ | 1.123664 | -0.16821 | -0.36155 | 0.729045 | 0.877622 | DOWN | 249.8712 | 249.871  | 249.8713 | 9.95385  | 9.843367 |
| 12607 | M413T11_ | 1.077743 | 0.108013 | 0.358663 | 0.729133 | 0.877631 | UP   | 412.5302 | 412.5299 | 412.5317 | 10.92349 | 10.89125 |
| 12608 | M310T11_ | 1.056785 | -0.07968 | -0.35932 | 0.729154 | 0.877633 | DOWN | 310.0617 | 310.0615 | 310.0621 | 10.892   | 10.879   |
| 12609 | M458T9_2 | 1.051523 | -0.07248 | -0.35849 | 0.72927  | 0.877645 | DOWN | 457.8886 | 457.8882 | 457.8888 | 9.246483 | 9.129317 |
| 12610 | M957T9   | 1.157441 | -0.21094 | -0.359   | 0.729291 | 0.877647 | DOWN | 956.7498 | 956.7492 | 956.7505 | 9.352117 | 9.288883 |
| 12611 | M543T12_ | 1.096937 | 0.13348  | 0.360745 | 0.729309 | 0.877649 | UP   | 543.3796 | 543.3787 | 543.3798 | 11.62748 | 11.62172 |
| 12612 | M1108T10 | 1.073664 | 0.102543 | 0.358391 | 0.729341 | 0.877652 | UP   | 1108.091 | 1108.089 | 1108.092 | 9.969158 | 9.8753   |
| 12613 | M380T11_ | 1.288506 | -0.3657  | -0.35831 | 0.729387 | 0.877657 | DOWN | 379.9545 | 379.9542 | 379.9551 | 10.90197 | 10.879   |
| 12614 | M694T10_ | 1.051702 | 0.072726 | 0.36565  | 0.729519 | 0.877671 | UP   | 693.9244 | 693.9242 | 693.926  | 10.26148 | 10.19852 |
| 12615 | M344T10_ | 1.074101 | 0.103129 | 0.366338 | 0.72961  | 0.87768  | UP   | 344.128  | 344.1278 | 344.1285 | 9.8371   | 9.699733 |
| 12616 | M1821T10 | 1.111524 | -0.15254 | -0.35927 | 0.729748 | 0.877694 | DOWN | 1821.078 | 1821.074 | 1821.081 | 9.809    | 9.715683 |
| 12617 | M413T9_2 | 1.103103 | -0.14157 | -0.36591 | 0.729861 | 0.877706 | DOWN | 412.609  | 412.6077 | 412.6093 | 8.964883 | 8.88395  |
| 12618 | M227T11_ | 1.038686 | -0.05476 | -0.35957 | 0.729969 | 0.877717 | DOWN | 226.6937 | 226.6933 | 226.6938 | 10.91987 | 10.84487 |
| 12619 | M431T11_ | 1.052895 | -0.07436 | -0.35756 | 0.729981 | 0.877719 | DOWN | 431.045  | 431.0447 | 431.0459 | 10.89875 | 10.8646  |
| 12620 | M609T9_4 | 1.153341 | 0.205819 | 0.359391 | 0.730016 | 0.877722 | UP   | 609.2393 | 609.2349 | 609.2408 | 9.17485  | 9.09495  |
| 12621 | M370T10_ | 1.059718 | -0.08368 | -0.36281 | 0.730116 | 0.877732 | DOWN | 369.823  | 369.8224 | 369.8243 | 9.917167 | 9.811217 |
| 12622 | M255T10_ | 1.110937 | 0.151777 | 0.357233 | 0.730163 | 0.877737 | UP   | 254.6417 | 254.6416 | 254.6418 | 9.967533 | 9.859233 |
| 12623 | M853T25  | 1.084019 | 0.116391 | 0.357343 | 0.730184 | 0.877739 | UP   | 852.5433 | 852.5433 | 852.5436 | 25.49217 | 25.37617 |
| 12624 | M369T11_ | 1.300884 | 0.379492 | 0.357243 | 0.730207 | 0.877742 | UP   | 369.2766 | 369.2667 | 369.2791 | 10.9742  | 10.93097 |
| 12625 | M622T9_5 | 1.130434 | -0.17688 | -0.35792 | 0.730466 | 0.877768 | DOWN | 622.3584 | 622.3563 | 622.3592 | 8.998625 | 8.932833 |
| 12626 | M438T9_5 | 1.101318 | -0.13923 | -0.36004 | 0.73063  | 0.877785 | DOWN | 438.0928 | 438.0924 | 438.0941 | 8.885717 | 8.772383 |
| 12627 | M447T11_ | 1.073777 | 0.102694 | 0.357053 | 0.730639 | 0.877786 | UP   | 447.0833 | 447.0827 | 447.0837 | 10.892   | 10.879   |
| 12628 | M233T11_ | 1.181871 | -0.24107 | -0.35702 | 0.730876 | 0.877811 | DOWN | 233.1749 | 233.1744 | 233.1845 | 11.1166  | 10.82972 |
| 12629 | M685T10_ | 1.039917 | 0.056468 | 0.365195 | 0.730879 | 0.877811 | UP   | 684.6797 | 684.6792 | 684.6803 | 9.8592   | 9.73145  |
| 12630 | M358T10_ | 1.088544 | 0.1224   | 0.362222 | 0.730924 | 0.877816 | UP   | 357.5507 | 357.5504 | 357.5509 | 9.94785  | 9.827283 |
| 12631 | M1127T10 | 1.076095 | 0.105805 | 0.362961 | 0.730937 | 0.877817 | UP   | 1127.125 | 1127.124 | 1127.128 | 9.830458 | 9.73145  |
| 12632 | M220T9_9 | 1.079133 | -0.10987 | -0.35619 | 0.730938 | 0.877817 | DOWN | 219.9266 | 219.9261 | 219.9274 | 9.338858 | 9.11795  |
| 12633 | M728T10_ | 1.048647 | 0.06853  | 0.362496 | 0.730997 | 0.877823 | UP   | 727.8264 | 727.8257 | 727.827  | 9.830458 | 9.715683 |
| 12634 | M286T26  | 1.075083 | -0.10445 | -0.35619 | 0.731021 | 0.877826 | DOWN | 286.2739 | 286.2736 | 286.274  | 26.10683 | 26.08883 |

|       |          |          |          |          |          |          |      |          |          |          |          |          |
|-------|----------|----------|----------|----------|----------|----------|------|----------|----------|----------|----------|----------|
| 12635 | M413T11_ | 1.085427 | -0.11826 | -0.35599 | 0.731116 | 0.877835 | DOWN | 413.4963 | 413.4959 | 413.4979 | 10.93208 | 10.91642 |
| 12636 | M381T9_1 | 1.269651 | -0.34443 | -0.35632 | 0.731244 | 0.877849 | DOWN | 381.2726 | 381.2708 | 381.2751 | 9.133667 | 9.04725  |
| 12637 | M251T10_ | 1.099907 | -0.13738 | -0.35775 | 0.731333 | 0.877858 | DOWN | 250.5426 | 250.5424 | 250.5427 | 9.951283 | 9.843367 |
| 12638 | M316T28_ | 1.29971  | 0.37819  | 0.355533 | 0.731446 | 0.877869 | UP   | 316.2766 | 316.2748 | 316.285  | 28.113   | 28.09833 |
| 12639 | M552T17_ | 1.075378 | 0.104844 | 0.359262 | 0.731468 | 0.877872 | UP   | 552.4001 | 552.3999 | 552.4007 | 16.66527 | 16.57833 |
| 12640 | M759T10_ | 1.039401 | 0.055752 | 0.355511 | 0.731533 | 0.877878 | UP   | 759.4065 | 759.4056 | 759.4078 | 10.38962 | 10.32768 |
| 12641 | M735T10_ | 1.19474  | 0.256696 | 0.363424 | 0.731658 | 0.877891 | UP   | 735.0447 | 735.0441 | 735.0448 | 9.972917 | 9.8753   |
| 12642 | M507T10_ | 1.060553 | 0.084817 | 0.36329  | 0.731691 | 0.877895 | UP   | 506.7093 | 506.7088 | 506.7095 | 9.763242 | 9.636483 |
| 12643 | M538T11_ | 1.095925 | -0.13215 | -0.35524 | 0.731691 | 0.877895 | DOWN | 538.0957 | 538.0948 | 538.0965 | 10.94254 | 10.8937  |
| 12644 | M357T40_ | 1.090122 | 0.124489 | 0.356162 | 0.731777 | 0.877903 | UP   | 357.1906 | 357.1904 | 357.1907 | 40.4745  | 40.33967 |
| 12645 | M308T30  | 1.085655 | 0.118565 | 0.358335 | 0.731791 | 0.877905 | UP   | 308.2793 | 308.2792 | 308.2794 | 29.90658 | 29.90533 |
| 12646 | M201T10_ | 1.060029 | -0.0841  | -0.35545 | 0.73183  | 0.877909 | DOWN | 200.8862 | 200.8861 | 200.8864 | 9.8207   | 9.715683 |
| 12647 | M293T30_ | 1.071067 | 0.099049 | 0.354936 | 0.731838 | 0.87791  | UP   | 293.0384 | 293.0383 | 293.0386 | 29.83383 | 29.8195  |
| 12648 | M271T11_ | 1.090948 | -0.12558 | -0.3548  | 0.731938 | 0.87792  | DOWN | 271.3159 | 271.3156 | 271.3159 | 10.90584 | 10.88747 |
| 12649 | M374T10_ | 1.09427  | -0.12997 | -0.35508 | 0.731978 | 0.877924 | DOWN | 373.8336 | 373.8334 | 373.8337 | 9.944392 | 9.843367 |
| 12650 | M258T10_ | 1.060163 | 0.084286 | 0.35872  | 0.732017 | 0.877928 | UP   | 257.6887 | 257.6881 | 257.6893 | 9.823592 | 9.665433 |
| 12651 | M520T10_ | 1.097462 | 0.134171 | 0.360832 | 0.732129 | 0.877939 | UP   | 520.4219 | 520.4215 | 520.435  | 9.62495  | 9.388617 |
| 12652 | M600T9_2 | 1.088552 | 0.12241  | 0.354294 | 0.732276 | 0.877955 | UP   | 600.3834 | 600.382  | 600.3938 | 9.136725 | 8.86875  |
| 12653 | M620T10_ | 1.127782 | -0.17349 | -0.35425 | 0.732394 | 0.877967 | DOWN | 619.8428 | 619.842  | 619.8431 | 10.06125 | 9.98005  |
| 12654 | M1115T10 | 1.058419 | -0.08191 | -0.3651  | 0.732425 | 0.87797  | DOWN | 1115.497 | 1115.496 | 1115.498 | 9.754208 | 9.636483 |
| 12655 | M287T43  | 1.05589  | 0.078459 | 0.353743 | 0.732699 | 0.877998 | UP   | 287.1486 | 287.1486 | 287.1488 | 43.301   | 43.11433 |
| 12656 | M209T10_ | 1.23996  | 0.310294 | 0.355068 | 0.732791 | 0.878007 | UP   | 209.2127 | 209.2126 | 209.2129 | 9.971383 | 9.8753   |
| 12657 | M342T10_ | 1.303052 | -0.38189 | -0.35405 | 0.732892 | 0.878018 | DOWN | 341.7965 | 341.7957 | 341.7995 | 9.8207   | 9.715683 |
| 12658 | M564T42_ | 1.028608 | -0.04069 | -0.35343 | 0.732897 | 0.878018 | DOWN | 564.3012 | 564.3009 | 564.3014 | 42.14342 | 42.06433 |
| 12659 | M432T38  | 1.082163 | 0.113918 | 0.365716 | 0.732956 | 0.878024 | UP   | 432.2226 | 432.2224 | 432.2229 | 37.784   | 37.60417 |
| 12660 | M217T9_1 | 1.066097 | 0.092339 | 0.355653 | 0.732964 | 0.878025 | UP   | 216.6759 | 216.6757 | 216.676  | 9.29015  | 9.129317 |
| 12661 | M348T10_ | 1.098426 | -0.13544 | -0.35408 | 0.733101 | 0.878039 | DOWN | 347.7611 | 347.7498 | 347.7615 | 9.743667 | 9.447983 |
| 12662 | M654T10_ | 1.109911 | -0.15044 | -0.3532  | 0.733202 | 0.878049 | DOWN | 654.3505 | 654.3503 | 654.351  | 9.831242 | 9.743667 |
| 12663 | M615T11  | 1.099241 | -0.13651 | -0.35462 | 0.733216 | 0.878051 | DOWN | 615.3065 | 615.3053 | 615.307  | 10.70449 | 10.67523 |
| 12664 | M789T10_ | 1.153946 | 0.206576 | 0.35427  | 0.733308 | 0.87806  | UP   | 789.2731 | 789.2713 | 789.2741 | 9.972917 | 9.859233 |
| 12665 | M265T10_ | 1.115663 | -0.1579  | -0.35881 | 0.733338 | 0.878063 | DOWN | 264.7583 | 264.7581 | 264.7586 | 9.914217 | 9.731817 |
| 12666 | M357T43_ | 1.125684 | -0.1708  | -0.36531 | 0.733348 | 0.878064 | DOWN | 357.1905 | 357.1905 | 357.1906 | 42.75458 | 42.68283 |
| 12667 | M362T10_ | 1.041422 | 0.058555 | 0.352743 | 0.733394 | 0.878069 | UP   | 362.4468 | 362.4467 | 362.4469 | 9.923542 | 9.811217 |
| 12668 | M469T11_ | 1.067536 | 0.094285 | 0.353851 | 0.733433 | 0.878073 | UP   | 468.6611 | 468.6608 | 468.6613 | 10.892   | 10.879   |
| 12669 | M603T10_ | 1.112276 | -0.15352 | -0.35399 | 0.733537 | 0.878084 | DOWN | 603.3399 | 603.3396 | 603.3405 | 9.500008 | 9.432533 |

|       |          |          |          |          |          |          |      |          |          |          |          |          |
|-------|----------|----------|----------|----------|----------|----------|------|----------|----------|----------|----------|----------|
| 12670 | M732T11_ | 1.123131 | -0.16753 | -0.35253 | 0.733546 | 0.878085 | DOWN | 731.5693 | 731.5689 | 731.5697 | 10.84847 | 10.83252 |
| 12671 | M690T9_2 | 1.150067 | 0.201717 | 0.363868 | 0.733572 | 0.878087 | UP   | 689.787  | 689.7796 | 689.7878 | 9.264333 | 9.1036   |
| 12672 | M352T10_ | 1.226445 | -0.29448 | -0.35672 | 0.733594 | 0.87809  | DOWN | 351.9135 | 351.9127 | 351.9138 | 9.982183 | 9.885167 |
| 12673 | M257T9_3 | 1.068197 | -0.09518 | -0.35395 | 0.733609 | 0.878091 | DOWN | 257.1844 | 257.1843 | 257.1845 | 8.660375 | 8.55865  |
| 12674 | M365T11_ | 1.052604 | -0.07396 | -0.35285 | 0.733745 | 0.878105 | DOWN | 365.083  | 365.0828 | 365.0832 | 10.89875 | 10.879   |
| 12675 | M553T10_ | 1.068496 | -0.09558 | -0.35241 | 0.733754 | 0.878106 | DOWN | 553.3216 | 553.3211 | 553.3221 | 9.948875 | 9.843367 |
| 12676 | M208T9_6 | 1.144244 | 0.194395 | 0.352476 | 0.733821 | 0.878113 | UP   | 207.9876 | 207.9867 | 207.9891 | 9.24215  | 9.1322   |
| 12677 | M649T11  | 1.039134 | 0.055382 | 0.354747 | 0.733841 | 0.878115 | UP   | 649.4141 | 649.4139 | 649.4147 | 11.49197 | 11.47593 |
| 12678 | M491T13  | 1.075053 | -0.10441 | -0.35393 | 0.733851 | 0.878116 | DOWN | 491.3277 | 491.3275 | 491.3282 | 12.63128 | 12.61823 |
| 12679 | M520T44_ | 1.047589 | 0.067073 | 0.35249  | 0.733926 | 0.878123 | UP   | 520.3113 | 520.311  | 520.3114 | 44.375   | 44.33667 |
| 12680 | M385T9_3 | 1.067103 | 0.093699 | 0.351758 | 0.734175 | 0.878149 | UP   | 384.7718 | 384.7716 | 384.7728 | 8.702108 | 8.5728   |
| 12681 | M617T10_ | 1.134666 | 0.182268 | 0.361119 | 0.734215 | 0.878153 | UP   | 617.0278 | 617.0275 | 617.0303 | 9.98155  | 9.9009   |
| 12682 | M396T30  | 1.074639 | -0.10385 | -0.3561  | 0.734253 | 0.878157 | DOWN | 396.3317 | 396.3314 | 396.3319 | 30.16617 | 30.165   |
| 12683 | M559T12  | 1.083913 | 0.116249 | 0.351932 | 0.734258 | 0.878157 | UP   | 559.3829 | 559.3825 | 559.3836 | 11.72956 | 11.70973 |
| 12684 | M358T10_ | 1.098133 | 0.135053 | 0.351778 | 0.734375 | 0.878169 | UP   | 358.2526 | 358.248  | 358.2535 | 9.972917 | 9.715683 |
| 12685 | M543T13  | 1.040492 | -0.05727 | -0.35478 | 0.734414 | 0.878173 | DOWN | 543.3876 | 543.3873 | 543.388  | 12.62443 | 12.61638 |
| 12686 | M382T41_ | 1.097506 | 0.134229 | 0.352311 | 0.734618 | 0.878194 | UP   | 382.2433 | 382.243  | 382.2434 | 40.76225 | 40.6255  |
| 12687 | M562T40_ | 1.03586  | 0.050829 | 0.352404 | 0.734621 | 0.878194 | UP   | 562.322  | 562.3219 | 562.3223 | 39.5895  | 39.4315  |
| 12688 | M502T9_6 | 1.098419 | -0.13543 | -0.35671 | 0.734664 | 0.878199 | DOWN | 502.2703 | 502.2695 | 502.2708 | 9.160542 | 9.12675  |
| 12689 | M594T10_ | 1.071431 | -0.09954 | -0.351   | 0.734666 | 0.878199 | DOWN | 593.722  | 593.7214 | 593.7289 | 9.967367 | 9.859233 |
| 12690 | M254T10_ | 1.071298 | -0.09936 | -0.35102 | 0.734702 | 0.878203 | DOWN | 253.752  | 253.7518 | 253.7522 | 9.827158 | 9.6681   |
| 12691 | M349T10_ | 1.185605 | 0.245624 | 0.350913 | 0.734715 | 0.878204 | UP   | 349.2005 | 349.2004 | 349.2006 | 9.968992 | 9.960967 |
| 12692 | M350T39_ | 1.088104 | -0.12182 | -0.35932 | 0.734754 | 0.878208 | DOWN | 350.2172 | 350.217  | 350.2174 | 38.71933 | 38.61133 |
| 12693 | M237T40  | 1.072737 | -0.1013  | -0.36286 | 0.734786 | 0.878211 | DOWN | 237.1846 | 237.1844 | 237.1847 | 40.30917 | 40.1365  |
| 12694 | M343T10_ | 1.082895 | -0.11489 | -0.35271 | 0.734806 | 0.878213 | DOWN | 342.996  | 342.9958 | 342.996  | 9.977025 | 9.8753   |
| 12695 | M1562T10 | 1.08523  | 0.118    | 0.355724 | 0.734806 | 0.878213 | UP   | 1561.903 | 1561.898 | 1561.904 | 9.903283 | 9.8378   |
| 12696 | M224T10_ | 1.145942 | -0.19653 | -0.35241 | 0.734945 | 0.878227 | DOWN | 223.7198 | 223.7197 | 223.72   | 9.8214   | 9.728083 |
| 12697 | M649T10_ | 1.049254 | -0.06936 | -0.35106 | 0.73496  | 0.878229 | DOWN | 648.9474 | 648.9469 | 648.9485 | 9.864    | 9.73145  |
| 12698 | M298T9_1 | 1.11998  | 0.163473 | 0.352747 | 0.734971 | 0.87823  | UP   | 298.2014 | 298.2011 | 298.2015 | 9.0292   | 8.97035  |
| 12699 | M1752T10 | 1.073156 | 0.10186  | 0.352973 | 0.735075 | 0.878241 | UP   | 1752.164 | 1752.159 | 1752.165 | 9.9847   | 9.8753   |
| 12700 | M772T10_ | 1.071601 | 0.099767 | 0.360369 | 0.735091 | 0.878242 | UP   | 771.8088 | 771.8055 | 771.8103 | 9.823575 | 9.715683 |
| 12701 | M764T10_ | 1.082153 | -0.1139  | -0.36237 | 0.735113 | 0.878245 | DOWN | 764.0154 | 764.0141 | 764.0189 | 9.907858 | 9.822117 |
| 12702 | M1773T10 | 1.039645 | -0.05609 | -0.35756 | 0.735132 | 0.878246 | DOWN | 1772.528 | 1772.526 | 1772.539 | 9.8397   | 9.73145  |
| 12703 | M1697T10 | 1.096241 | -0.13257 | -0.35062 | 0.735137 | 0.878247 | DOWN | 1697.246 | 1697.24  | 1697.247 | 9.8374   | 9.747533 |
| 12704 | M441T30  | 1.086616 | -0.11984 | -0.35748 | 0.735161 | 0.878249 | DOWN | 441.3612 | 441.3608 | 441.3613 | 30.23158 | 30.22233 |

|       |          |          |          |          |          |          |      |          |          |          |          |          |
|-------|----------|----------|----------|----------|----------|----------|------|----------|----------|----------|----------|----------|
| 12705 | M466T22_ | 1.079304 | 0.110101 | 0.35997  | 0.735193 | 0.878253 | UP   | 466.1749 | 466.1748 | 466.1753 | 21.5445  | 21.49083 |
| 12706 | M261T10_ | 1.107474 | -0.14727 | -0.35042 | 0.735207 | 0.878254 | DOWN | 261.1267 | 261.1265 | 261.1269 | 9.958617 | 9.843367 |
| 12707 | M272T9_3 | 1.106429 | 0.14591  | 0.352328 | 0.73525  | 0.878258 | UP   | 272.2642 | 272.2642 | 272.2643 | 9.493292 | 9.432183 |
| 12708 | M405T17  | 1.066025 | -0.09224 | -0.35389 | 0.735302 | 0.878264 | DOWN | 405.3107 | 405.3105 | 405.3111 | 16.92817 | 16.88433 |
| 12709 | M555T28  | 1.094518 | 0.130295 | 0.36222  | 0.735374 | 0.878271 | UP   | 555.2773 | 555.2772 | 555.286  | 27.86283 | 27.6625  |
| 12710 | M468T36  | 1.121666 | -0.16564 | -0.35047 | 0.735374 | 0.878271 | DOWN | 468.389  | 468.3888 | 468.3891 | 36.213   | 36.18883 |
| 12711 | M433T10_ | 1.173889 | 0.231296 | 0.361215 | 0.735448 | 0.878279 | UP   | 432.9106 | 432.9105 | 432.9108 | 9.9754   | 9.8753   |
| 12712 | M529T30  | 1.071125 | -0.09913 | -0.3548  | 0.735457 | 0.87828  | DOWN | 529.4135 | 529.4131 | 529.4136 | 30.2805  | 30.266   |
| 12713 | M249T11_ | 1.072496 | -0.10097 | -0.34985 | 0.735506 | 0.878284 | DOWN | 248.7844 | 248.7843 | 248.785  | 10.90628 | 10.8646  |
| 12714 | M424T9_1 | 1.276754 | -0.35248 | -0.35235 | 0.735521 | 0.878286 | DOWN | 424.0349 | 424.0348 | 424.035  | 9.29015  | 9.207667 |
| 12715 | M855T34  | 1.170623 | -0.22728 | -0.35105 | 0.73564  | 0.878298 | DOWN | 854.5842 | 854.584  | 854.5847 | 34.08942 | 34.037   |
| 12716 | M436T10_ | 1.076694 | -0.10661 | -0.35006 | 0.735888 | 0.878323 | DOWN | 436.2208 | 436.2205 | 436.2211 | 9.9847   | 9.8753   |
| 12717 | M754T11_ | 1.061236 | -0.08575 | -0.35053 | 0.736062 | 0.878341 | DOWN | 754.0775 | 754.0772 | 754.0782 | 10.89308 | 10.88747 |
| 12718 | M235T9_8 | 1.346727 | -0.42946 | -0.34917 | 0.736118 | 0.878347 | DOWN | 235.1862 | 235.1849 | 235.1872 | 9.235933 | 9.146383 |
| 12719 | M382T9_3 | 1.114727 | -0.15669 | -0.35428 | 0.736192 | 0.878354 | DOWN | 381.7474 | 381.7469 | 381.7482 | 8.964883 | 8.85435  |
| 12720 | M351T10_ | 1.188364 | 0.248977 | 0.357302 | 0.736243 | 0.878359 | UP   | 350.6356 | 350.6354 | 350.6357 | 9.8161   | 9.728083 |
| 12721 | M348T9_4 | 1.135836 | 0.183754 | 0.348708 | 0.736378 | 0.878373 | UP   | 347.9717 | 347.9687 | 347.9746 | 9.146383 | 9.098833 |
| 12722 | M395T11_ | 1.082209 | 0.113979 | 0.349414 | 0.73643  | 0.878378 | UP   | 395.1045 | 395.1041 | 395.1067 | 10.93208 | 10.879   |
| 12723 | M251T10_ | 1.197788 | -0.26037 | -0.35197 | 0.736499 | 0.878385 | DOWN | 251.185  | 251.1849 | 251.1851 | 9.557608 | 9.288883 |
| 12724 | M677T10_ | 1.101776 | -0.13983 | -0.34912 | 0.736663 | 0.878402 | DOWN | 677.1888 | 677.1884 | 677.1896 | 9.934533 | 9.827283 |
| 12725 | M288T10_ | 1.072463 | 0.100928 | 0.352315 | 0.736713 | 0.878407 | UP   | 288.4516 | 288.4513 | 288.452  | 9.948875 | 9.843367 |
| 12726 | M213T12_ | 1.17891  | 0.237453 | 0.350764 | 0.736767 | 0.878413 | UP   | 213.1673 | 213.1672 | 213.1674 | 12.21274 | 12.19523 |
| 12727 | M261T20  | 1.122978 | -0.16733 | -0.34943 | 0.736767 | 0.878413 | DOWN | 261.2321 | 261.232  | 261.2325 | 19.7945  | 19.76683 |
| 12728 | M482T10_ | 1.094432 | -0.13018 | -0.34816 | 0.736772 | 0.878413 | DOWN | 482.4391 | 482.4384 | 482.4396 | 9.778967 | 9.665433 |
| 12729 | M652T10_ | 1.107529 | -0.14734 | -0.34803 | 0.736802 | 0.878416 | DOWN | 652.2868 | 652.2865 | 652.2876 | 9.647033 | 9.52595  |
| 12730 | M1300T10 | 1.053285 | 0.074896 | 0.348037 | 0.736809 | 0.878417 | UP   | 1299.529 | 1299.526 | 1299.531 | 9.999217 | 9.8914   |
| 12731 | M621T10_ | 1.162559 | 0.217304 | 0.350927 | 0.736826 | 0.878419 | UP   | 621.2516 | 621.2516 | 621.2561 | 9.82645  | 9.73145  |
| 12732 | M258T9_3 | 1.112208 | -0.15343 | -0.35095 | 0.736944 | 0.878431 | DOWN | 257.6505 | 257.6498 | 257.6515 | 9.197467 | 9.146383 |
| 12733 | M334T10_ | 1.117317 | -0.16004 | -0.34952 | 0.736986 | 0.878435 | DOWN | 333.9867 | 333.9863 | 333.9872 | 9.964092 | 9.859233 |
| 12734 | M488T10_ | 1.217412 | -0.28382 | -0.34778 | 0.737021 | 0.878438 | DOWN | 488.1071 | 488.1063 | 488.1073 | 9.915583 | 9.73145  |
| 12735 | M295T22_ | 1.201463 | 0.264792 | 0.359188 | 0.737066 | 0.878443 | UP   | 295.2459 | 295.2458 | 295.246  | 21.905   | 21.89467 |
| 12736 | M1105T10 | 1.069429 | -0.09684 | -0.35302 | 0.73719  | 0.878455 | DOWN | 1105.154 | 1105.151 | 1105.155 | 9.964092 | 9.859233 |
| 12737 | M550T9_1 | 1.07715  | -0.10722 | -0.34858 | 0.737278 | 0.878464 | DOWN | 549.5817 | 549.5805 | 549.5822 | 9.176533 | 9.129317 |
| 12738 | M278T10_ | 1.040161 | 0.056807 | 0.352573 | 0.737384 | 0.878475 | UP   | 277.7309 | 277.7307 | 277.731  | 9.8729   | 9.7634   |
| 12739 | M1209T10 | 1.095237 | 0.131244 | 0.349748 | 0.73743  | 0.87848  | UP   | 1208.753 | 1208.752 | 1208.754 | 9.979342 | 9.859233 |

|       |          |          |          |          |          |          |      |          |          |          |          |          |
|-------|----------|----------|----------|----------|----------|----------|------|----------|----------|----------|----------|----------|
| 12740 | M378T10_ | 1.038235 | -0.05413 | -0.34637 | 0.738002 | 0.878538 | DOWN | 377.5729 | 377.5726 | 377.573  | 9.918792 | 9.811217 |
| 12741 | M410T10_ | 1.0743   | -0.1034  | -0.35342 | 0.738042 | 0.878542 | DOWN | 409.8916 | 409.8913 | 409.8917 | 9.946467 | 9.859233 |
| 12742 | M740T11_ | 1.105844 | -0.14515 | -0.35411 | 0.738095 | 0.878547 | DOWN | 739.536  | 739.5265 | 739.5371 | 10.92425 | 10.87765 |
| 12743 | M359T42  | 1.032204 | 0.045728 | 0.357475 | 0.738124 | 0.87855  | UP   | 359.2063 | 359.2062 | 359.2064 | 41.86267 | 41.84833 |
| 12744 | M544T10_ | 1.074152 | -0.1032  | -0.35083 | 0.738144 | 0.878552 | DOWN | 544.3225 | 544.322  | 544.3235 | 10.30356 | 10.27583 |
| 12745 | M680T27_ | 1.120487 | -0.16413 | -0.34738 | 0.73824  | 0.878562 | DOWN | 679.5116 | 679.5111 | 679.5117 | 26.93275 | 26.69467 |
| 12746 | M617T35  | 1.234265 | 0.303652 | 0.357982 | 0.738261 | 0.878564 | UP   | 617.426  | 617.4258 | 617.4266 | 34.5285  | 34.45083 |
| 12747 | M343T11_ | 1.154581 | 0.20737  | 0.347236 | 0.73829  | 0.878567 | UP   | 343.238  | 343.2378 | 343.2388 | 11.27932 | 11.2423  |
| 12748 | M160T10_ | 1.105493 | -0.14469 | -0.35045 | 0.738357 | 0.878574 | DOWN | 159.7884 | 159.7883 | 159.7885 | 9.95825  | 9.843367 |
| 12749 | M729T10_ | 1.096153 | 0.132449 | 0.346175 | 0.738454 | 0.878583 | UP   | 729.0812 | 729.0798 | 729.0818 | 9.923125 | 9.827283 |
| 12750 | M672T10_ | 1.083278 | 0.115404 | 0.348686 | 0.738474 | 0.878585 | UP   | 671.8647 | 671.8643 | 671.8652 | 9.859983 | 9.759383 |
| 12751 | M315T28_ | 1.241448 | 0.312024 | 0.346545 | 0.738576 | 0.878596 | UP   | 315.1953 | 315.195  | 315.1958 | 28.19992 | 28.11283 |
| 12752 | M168T9_2 | 1.16145  | -0.21593 | -0.34678 | 0.738618 | 0.8786   | DOWN | 168.1026 | 168.1026 | 168.1029 | 9.140067 | 9.1178   |
| 12753 | M305T11_ | 1.071615 | 0.099787 | 0.351841 | 0.738636 | 0.878602 | UP   | 305.2817 | 305.2812 | 305.2835 | 10.91371 | 10.879   |
| 12754 | M1260T11 | 1.060926 | 0.085325 | 0.348008 | 0.738713 | 0.878609 | UP   | 1259.669 | 1259.667 | 1259.67  | 10.89875 | 10.879   |
| 12755 | M201T10_ | 1.062021 | -0.08681 | -0.34651 | 0.738791 | 0.878617 | DOWN | 201.1022 | 201.1021 | 201.1023 | 9.970617 | 9.8753   |
| 12756 | M533T10_ | 1.046312 | -0.06531 | -0.3453  | 0.738797 | 0.878618 | DOWN | 533.0892 | 533.0888 | 533.0902 | 9.931875 | 9.827283 |
| 12757 | M178T10_ | 1.119403 | -0.16273 | -0.35099 | 0.738893 | 0.878628 | DOWN | 177.7638 | 177.7576 | 177.7639 | 9.975217 | 9.853533 |
| 12758 | M219T11_ | 1.056372 | 0.079118 | 0.345324 | 0.738944 | 0.878633 | UP   | 218.662  | 218.6619 | 218.6621 | 11.49131 | 11.47593 |
| 12759 | M199T9_2 | 1.068722 | 0.095887 | 0.354256 | 0.73898  | 0.878636 | UP   | 198.7355 | 198.7351 | 198.7357 | 9.342208 | 9.219483 |
| 12760 | M1227T21 | 1.097373 | 0.134054 | 0.349788 | 0.739032 | 0.878642 | UP   | 1226.603 | 1226.601 | 1226.605 | 20.8025  | 20.76533 |
| 12761 | M220T11_ | 1.05301  | -0.07452 | -0.34506 | 0.739039 | 0.878642 | DOWN | 219.7728 | 219.7726 | 219.773  | 10.89875 | 10.879   |
| 12762 | M401T11_ | 1.296489 | 0.374611 | 0.344965 | 0.739054 | 0.878644 | UP   | 401.3068 | 401.3011 | 401.3099 | 10.93655 | 10.85838 |
| 12763 | M221T30_ | 1.027902 | 0.039703 | 0.344908 | 0.739135 | 0.878652 | UP   | 221.1171 | 221.117  | 221.1171 | 29.83392 | 29.8195  |
| 12764 | M591T10_ | 1.054861 | -0.07705 | -0.34561 | 0.739136 | 0.878652 | DOWN | 591.1774 | 591.1767 | 591.1779 | 9.958617 | 9.843367 |
| 12765 | M371T17  | 1.129707 | 0.175948 | 0.354826 | 0.739141 | 0.878653 | UP   | 371.24   | 371.2396 | 371.2402 | 16.8835  | 16.86967 |
| 12766 | M425T9   | 1.096396 | -0.13277 | -0.35273 | 0.739375 | 0.878676 | DOWN | 425.2921 | 425.2917 | 425.2924 | 9.317    | 9.234417 |
| 12767 | M464T37_ | 1.045761 | 0.064554 | 0.354747 | 0.739399 | 0.878679 | UP   | 464.285  | 464.2848 | 464.2853 | 37.25908 | 37.14417 |
| 12768 | M395T9_5 | 1.072649 | 0.101178 | 0.347425 | 0.739494 | 0.878688 | UP   | 395.1205 | 395.1194 | 395.125  | 9.259617 | 9.129317 |
| 12769 | M1395T11 | 1.131042 | -0.17765 | -0.34521 | 0.739544 | 0.878693 | DOWN | 1394.94  | 1394.939 | 1394.942 | 10.84581 | 10.8214  |
| 12770 | M303T10_ | 1.127553 | -0.1732  | -0.34795 | 0.739591 | 0.878698 | DOWN | 303.4805 | 303.4779 | 303.4808 | 9.842    | 9.811217 |
| 12771 | M627T10_ | 1.055125 | -0.07741 | -0.34412 | 0.739668 | 0.878706 | DOWN | 627.3562 | 627.354  | 627.3564 | 9.670342 | 9.319233 |
| 12772 | M329T15  | 1.041575 | -0.05877 | -0.35019 | 0.739668 | 0.878706 | DOWN | 329.2877 | 329.2874 | 329.288  | 15.16817 | 15.1023  |
| 12773 | M490T39_ | 1.035426 | 0.050224 | 0.346513 | 0.739672 | 0.878706 | UP   | 490.2644 | 490.2641 | 490.2647 | 38.74083 | 38.55367 |
| 12774 | M429T9_6 | 1.047822 | 0.067393 | 0.344202 | 0.73971  | 0.87871  | UP   | 429.2635 | 429.263  | 429.2637 | 9.240392 | 9.129317 |

|       |          |          |          |          |          |          |      |          |          |          |          |          |
|-------|----------|----------|----------|----------|----------|----------|------|----------|----------|----------|----------|----------|
| 12775 | M1308T10 | 1.073622 | -0.10249 | -0.34405 | 0.739742 | 0.878713 | DOWN | 1307.728 | 1307.725 | 1307.729 | 9.934533 | 9.827283 |
| 12776 | M406T9_1 | 1.046287 | 0.065279 | 0.343986 | 0.739757 | 0.878715 | UP   | 405.5241 | 405.5238 | 405.5242 | 8.817842 | 8.715883 |
| 12777 | M544T13  | 1.047463 | -0.0669  | -0.34732 | 0.739792 | 0.878718 | DOWN | 544.3909 | 544.3907 | 544.3913 | 12.61766 | 12.61627 |
| 12778 | M208T10_ | 1.058736 | 0.082342 | 0.344994 | 0.739822 | 0.878721 | UP   | 207.9586 | 207.9585 | 207.9587 | 9.956867 | 9.859233 |
| 12779 | M476T11_ | 1.122164 | -0.16628 | -0.34425 | 0.739923 | 0.878731 | DOWN | 476.1277 | 476.1273 | 476.1286 | 10.88982 | 10.84828 |
| 12780 | M355T44_ | 1.054266 | -0.07624 | -0.35015 | 0.739967 | 0.878736 | DOWN | 355.2113 | 355.2112 | 355.2115 | 43.82608 | 43.747   |
| 12781 | M162T11  | 1.060686 | -0.085   | -0.34407 | 0.740245 | 0.878764 | DOWN | 161.8772 | 161.8771 | 161.8773 | 10.89907 | 10.879   |
| 12782 | M259T10_ | 1.167296 | -0.22317 | -0.34373 | 0.74032  | 0.878771 | DOWN | 258.5864 | 258.5864 | 258.5866 | 9.746783 | 9.636483 |
| 12783 | M438T11_ | 1.088792 | 0.122729 | 0.343132 | 0.740344 | 0.878774 | UP   | 438.0747 | 438.0746 | 438.075  | 10.89875 | 10.879   |
| 12784 | M376T11_ | 1.183155 | 0.242639 | 0.344075 | 0.740352 | 0.878775 | UP   | 376.4751 | 376.4744 | 376.4754 | 10.8914  | 10.86008 |
| 12785 | M729T10_ | 1.07145  | 0.099565 | 0.351384 | 0.740354 | 0.878775 | UP   | 729.1328 | 729.1323 | 729.1331 | 9.910333 | 9.811217 |
| 12786 | M471T11_ | 1.11365  | 0.155296 | 0.348422 | 0.740552 | 0.878795 | UP   | 470.5389 | 470.5371 | 470.5399 | 10.91376 | 10.877   |
| 12787 | M1144T10 | 1.109126 | -0.14942 | -0.3426  | 0.740753 | 0.878815 | DOWN | 1144.225 | 1144.224 | 1144.226 | 9.986767 | 9.8753   |
| 12788 | M368T10_ | 1.057008 | -0.07999 | -0.34543 | 0.740917 | 0.878831 | DOWN | 368.2544 | 368.2542 | 368.2546 | 10.31728 | 10.26307 |
| 12789 | M448T10_ | 1.069006 | -0.09627 | -0.34264 | 0.740935 | 0.878833 | DOWN | 448.4317 | 448.4314 | 448.4322 | 9.972917 | 9.859233 |
| 12790 | M1265T11 | 1.067703 | 0.094511 | 0.34693  | 0.740978 | 0.878837 | UP   | 1265.257 | 1265.253 | 1265.258 | 10.93468 | 10.88982 |
| 12791 | M322T9_1 | 1.10951  | -0.14992 | -0.34206 | 0.74112  | 0.878852 | DOWN | 321.6504 | 321.65   | 321.6507 | 9.296458 | 9.219483 |
| 12792 | M262T14  | 1.117011 | 0.159644 | 0.346093 | 0.741139 | 0.878854 | UP   | 262.1126 | 262.1123 | 262.1128 | 13.97546 | 13.97437 |
| 12793 | M702T33  | 1.065405 | -0.0914  | -0.34259 | 0.741196 | 0.878859 | DOWN | 702.4999 | 702.4992 | 702.5    | 33.47033 | 33.45683 |
| 12794 | M835T33  | 1.12251  | -0.16673 | -0.34193 | 0.741216 | 0.878861 | DOWN | 834.579  | 834.5786 | 834.5809 | 33.28267 | 33.26833 |
| 12795 | M360T11_ | 1.251562 | 0.32373  | 0.342257 | 0.74122  | 0.878862 | UP   | 360.4498 | 360.4493 | 360.45   | 10.87708 | 10.8214  |
| 12796 | M269T11_ | 1.09096  | 0.125598 | 0.341828 | 0.741302 | 0.87887  | UP   | 269.1897 | 269.1896 | 269.19   | 11.25459 | 11.22177 |
| 12797 | M439T9_3 | 1.161003 | -0.21537 | -0.34285 | 0.741345 | 0.878874 | DOWN | 439.1799 | 439.1797 | 439.1803 | 9.008317 | 8.960667 |
| 12798 | M472T11_ | 1.069638 | 0.097122 | 0.348751 | 0.741438 | 0.878884 | UP   | 471.7152 | 471.7138 | 471.716  | 10.90551 | 10.879   |
| 12799 | M364T9_1 | 1.162157 | 0.216805 | 0.352499 | 0.741592 | 0.878899 | UP   | 364.1479 | 364.1473 | 364.1481 | 9.268917 | 9.219483 |
| 12800 | M206T9_1 | 1.163871 | -0.21893 | -0.35059 | 0.741599 | 0.8789   | DOWN | 205.8483 | 205.8458 | 205.8492 | 9.295167 | 9.0511   |
| 12801 | M343T10_ | 1.085451 | -0.11829 | -0.34466 | 0.741697 | 0.878909 | DOWN | 342.5045 | 342.5042 | 342.5046 | 9.985117 | 9.8753   |
| 12802 | M466T10_ | 1.028455 | -0.04048 | -0.34126 | 0.741714 | 0.878911 | DOWN | 466.3801 | 466.38   | 466.3804 | 9.816142 | 9.699733 |
| 12803 | M660T10_ | 1.086949 | -0.12028 | -0.34173 | 0.741718 | 0.878912 | DOWN | 660.3447 | 660.3444 | 660.3449 | 10.44611 | 10.40807 |
| 12804 | M1065T10 | 1.110794 | 0.151591 | 0.345102 | 0.741734 | 0.878913 | UP   | 1064.713 | 1064.711 | 1064.714 | 9.960967 | 9.853533 |
| 12805 | M492T9_6 | 1.244027 | 0.315017 | 0.346285 | 0.741786 | 0.878918 | UP   | 492.3523 | 492.3518 | 492.3525 | 9.174883 | 9.129317 |
| 12806 | M360T9_1 | 1.229823 | 0.298451 | 0.344036 | 0.741928 | 0.878933 | UP   | 360.2655 | 360.2651 | 360.2659 | 9.06855  | 9.00135  |
| 12807 | M716T9_1 | 1.115644 | -0.15788 | -0.34091 | 0.741955 | 0.878935 | DOWN | 715.8271 | 715.8265 | 715.8276 | 9.365833 | 9.1428   |
| 12808 | M594T9_3 | 1.068224 | -0.09521 | -0.34086 | 0.742012 | 0.878941 | DOWN | 594.2983 | 594.2901 | 594.2987 | 9.276833 | 9.1158   |
| 12809 | M197T10_ | 1.121692 | -0.16568 | -0.34102 | 0.742022 | 0.878942 | DOWN | 196.5493 | 196.5424 | 196.5496 | 9.902617 | 9.743767 |

|       |          |          |          |          |          |          |      |          |          |          |          |          |
|-------|----------|----------|----------|----------|----------|----------|------|----------|----------|----------|----------|----------|
| 12810 | M728T10_ | 1.031733 | 0.045069 | 0.34577  | 0.742042 | 0.878944 | UP   | 727.7738 | 727.7735 | 727.7743 | 9.825492 | 9.715683 |
| 12811 | M165T10_ | 1.150457 | 0.202207 | 0.340975 | 0.742107 | 0.878951 | UP   | 165.0792 | 165.0756 | 165.0795 | 9.954175 | 9.827283 |
| 12812 | M559T10_ | 1.138539 | 0.187184 | 0.345312 | 0.742113 | 0.878951 | UP   | 559.4625 | 559.462  | 559.4629 | 9.975217 | 9.859233 |
| 12813 | M608T35  | 1.074969 | 0.104295 | 0.352406 | 0.742131 | 0.878953 | UP   | 608.3641 | 608.3638 | 608.3645 | 35.27767 | 35.18417 |
| 12814 | M469T25  | 1.096784 | 0.133279 | 0.340598 | 0.742197 | 0.87896  | UP   | 469.1827 | 469.1823 | 469.1832 | 24.84783 | 24.84    |
| 12815 | M417T24  | 1.181053 | 0.240073 | 0.351047 | 0.74221  | 0.878961 | UP   | 417.2817 | 417.2815 | 417.2818 | 24.04158 | 24.00833 |
| 12816 | M577T18_ | 1.097404 | 0.134094 | 0.350089 | 0.742269 | 0.878967 | UP   | 577.3744 | 577.3743 | 577.3747 | 17.85508 | 17.54217 |
| 12817 | M1740T10 | 1.137788 | -0.18623 | -0.34088 | 0.742346 | 0.878974 | DOWN | 1740.205 | 1740.199 | 1740.212 | 9.816183 | 9.715683 |
| 12818 | M447T10_ | 1.078001 | -0.10836 | -0.34024 | 0.742474 | 0.878987 | DOWN | 447.2687 | 447.2682 | 447.2698 | 9.8207   | 9.699733 |
| 12819 | M520T38_ | 1.040764 | 0.057643 | 0.344028 | 0.742568 | 0.878997 | UP   | 520.2748 | 520.2747 | 520.2752 | 38.4675  | 38.266   |
| 12820 | M408T10_ | 1.075583 | -0.10512 | -0.34432 | 0.742604 | 0.879    | DOWN | 407.8306 | 407.8303 | 407.8325 | 9.902008 | 9.79535  |
| 12821 | M363T10_ | 1.074137 | -0.10318 | -0.3477  | 0.742657 | 0.879006 | DOWN | 362.5185 | 362.5184 | 362.519  | 9.994767 | 9.8753   |
| 12822 | M250T10_ | 1.102605 | -0.14092 | -0.34054 | 0.742822 | 0.879022 | DOWN | 250.3186 | 250.3183 | 250.3187 | 9.934533 | 9.827283 |
| 12823 | M354T10_ | 1.049455 | 0.06964  | 0.347078 | 0.742949 | 0.879035 | UP   | 354.4639 | 354.4638 | 354.4642 | 9.8207   | 9.699733 |
| 12824 | M622T31  | 1.186721 | 0.246981 | 0.339561 | 0.743053 | 0.879045 | UP   | 622.4432 | 622.4415 | 622.4438 | 31.436   | 31.36783 |
| 12825 | M471T10_ | 1.077588 | 0.107805 | 0.344081 | 0.743068 | 0.879047 | UP   | 470.6894 | 470.6888 | 470.6896 | 9.903017 | 9.827283 |
| 12826 | M708T10_ | 1.086235 | -0.11934 | -0.34548 | 0.743075 | 0.879047 | DOWN | 707.9755 | 707.9742 | 707.9784 | 9.95605  | 9.811217 |
| 12827 | M273T10_ | 1.104683 | 0.143632 | 0.339414 | 0.743082 | 0.879048 | UP   | 273.1718 | 273.1715 | 273.172  | 9.951283 | 9.843367 |
| 12828 | M442T36  | 1.162242 | -0.21691 | -0.34123 | 0.743083 | 0.879048 | DOWN | 442.416  | 442.4158 | 442.4167 | 35.94917 | 35.92017 |
| 12829 | M439T9_2 | 1.110618 | 0.151363 | 0.343986 | 0.743091 | 0.879049 | UP   | 439.1683 | 439.1681 | 439.1686 | 9.231542 | 9.12675  |
| 12830 | M241T11_ | 1.546392 | 0.628906 | 0.344885 | 0.743139 | 0.879054 | UP   | 241.2034 | 241.2033 | 241.2035 | 10.67538 | 10.64453 |
| 12831 | M289T10_ | 1.05515  | 0.077448 | 0.342777 | 0.743147 | 0.879055 | UP   | 288.6218 | 288.6216 | 288.6222 | 9.957333 | 9.843367 |
| 12832 | M173T9_4 | 1.123843 | -0.16844 | -0.33925 | 0.743158 | 0.879056 | DOWN | 172.9967 | 172.9964 | 172.9974 | 9.146875 | 9.126783 |
| 12833 | M295T7_2 | 1.152827 | 0.205177 | 0.340753 | 0.743221 | 0.879062 | UP   | 294.9385 | 294.9384 | 294.9386 | 6.663033 | 6.526633 |
| 12834 | M622T37_ | 1.055216 | -0.07754 | -0.34752 | 0.743257 | 0.879065 | DOWN | 622.3436 | 622.3434 | 622.3438 | 36.75692 | 36.64067 |
| 12835 | M702T11_ | 1.040967 | -0.05792 | -0.34079 | 0.743258 | 0.879066 | DOWN | 702.497  | 702.4969 | 702.4971 | 11.29896 | 11.20712 |
| 12836 | M1318T45 | 1.064267 | 0.08986  | 0.338971 | 0.743358 | 0.879076 | UP   | 1317.928 | 1317.927 | 1317.93  | 44.68267 | 44.65283 |
| 12837 | M182T9_4 | 1.142673 | -0.19241 | -0.34043 | 0.743385 | 0.879078 | DOWN | 181.9116 | 181.9111 | 181.9123 | 9.160617 | 9.064833 |
| 12838 | M547T9_4 | 1.152135 | 0.204309 | 0.33891  | 0.743412 | 0.879081 | UP   | 546.8629 | 546.8617 | 546.8634 | 8.853017 | 8.7891   |
| 12839 | M272T25  | 1.051067 | -0.07186 | -0.33937 | 0.743503 | 0.87909  | DOWN | 272.2945 | 272.2942 | 272.2946 | 24.76842 | 24.76717 |
| 12840 | M793T11_ | 1.074784 | -0.10405 | -0.33966 | 0.743505 | 0.87909  | DOWN | 793.4709 | 793.4691 | 793.4712 | 10.52483 | 10.47197 |
| 12841 | M416T42_ | 1.086551 | -0.11976 | -0.35024 | 0.743532 | 0.879093 | DOWN | 416.2641 | 416.2638 | 416.2641 | 41.74767 | 41.69    |
| 12842 | M193T10_ | 1.082448 | -0.1143  | -0.34063 | 0.743657 | 0.879105 | DOWN | 193.4192 | 193.419  | 193.4193 | 9.960817 | 9.859233 |
| 12843 | M334T9_3 | 1.100763 | -0.1385  | -0.3413  | 0.743663 | 0.879106 | DOWN | 334.0786 | 334.0781 | 334.0788 | 9.333667 | 9.250817 |
| 12844 | M420T10_ | 1.079145 | 0.109889 | 0.340523 | 0.743704 | 0.87911  | UP   | 419.6693 | 419.6692 | 419.6704 | 9.967367 | 9.8753   |

|       |          |          |          |          |          |          |      |          |          |          |          |          |
|-------|----------|----------|----------|----------|----------|----------|------|----------|----------|----------|----------|----------|
| 12845 | M323T10_ | 1.304213 | -0.38318 | -0.345   | 0.743726 | 0.879112 | DOWN | 323.2324 | 323.2321 | 323.2337 | 9.964133 | 9.728083 |
| 12846 | M171T10_ | 1.118594 | -0.16169 | -0.33929 | 0.743729 | 0.879113 | DOWN | 170.9728 | 170.9727 | 170.9729 | 9.82645  | 9.715683 |
| 12847 | M218T14  | 1.099226 | -0.13649 | -0.34508 | 0.743733 | 0.879113 | DOWN | 218.1536 | 218.1528 | 218.1538 | 14.06348 | 14.01913 |
| 12848 | M496T10_ | 1.085271 | -0.11805 | -0.33864 | 0.743768 | 0.879116 | DOWN | 496.0732 | 496.0732 | 496.0737 | 9.8374   | 9.79065  |
| 12849 | M431T10_ | 1.046496 | -0.06557 | -0.33994 | 0.743774 | 0.879117 | DOWN | 431.2472 | 431.2468 | 431.2517 | 9.62495  | 9.345767 |
| 12850 | M252T17  | 1.0432   | 0.061015 | 0.345407 | 0.743893 | 0.879131 | UP   | 252.2319 | 252.2318 | 252.232  | 17.351   | 17.334   |
| 12851 | M585T9_2 | 1.104141 | -0.14292 | -0.33935 | 0.743942 | 0.879136 | DOWN | 585.287  | 585.2862 | 585.2878 | 9.182825 | 9.11795  |
| 12852 | M504T9_2 | 1.126878 | -0.17233 | -0.33925 | 0.743997 | 0.879143 | DOWN | 503.5974 | 503.5968 | 503.6037 | 9.284283 | 9.22495  |
| 12853 | M1991T10 | 1.131178 | -0.17783 | -0.34142 | 0.744223 | 0.879169 | DOWN | 1991.06  | 1991.058 | 1991.062 | 9.830733 | 9.715683 |
| 12854 | M332T10_ | 1.046414 | 0.065454 | 0.338302 | 0.744502 | 0.879201 | UP   | 331.7564 | 331.7523 | 331.7567 | 9.880375 | 9.728083 |
| 12855 | M421T11_ | 1.075331 | -0.10478 | -0.33976 | 0.744527 | 0.879204 | DOWN | 420.9999 | 420.9997 | 421.0001 | 10.89945 | 10.879   |
| 12856 | M195T11_ | 1.252241 | -0.32451 | -0.3381  | 0.744739 | 0.879228 | DOWN | 195.0373 | 195.0373 | 195.0378 | 10.93622 | 10.879   |
| 12857 | M827T10_ | 1.115599 | 0.157819 | 0.343004 | 0.744746 | 0.879229 | UP   | 826.5744 | 826.5738 | 826.5746 | 10.10432 | 10.02042 |
| 12858 | M475T9_1 | 1.054363 | 0.076372 | 0.336947 | 0.744864 | 0.879243 | UP   | 475.3232 | 475.323  | 475.3234 | 9.206    | 9.11405  |
| 12859 | M311T9_1 | 1.116229 | -0.15863 | -0.34035 | 0.744884 | 0.879245 | DOWN | 310.5189 | 310.5186 | 310.5228 | 9.188783 | 9.110833 |
| 12860 | M288T10_ | 1.055914 | 0.078493 | 0.340718 | 0.74496  | 0.879254 | UP   | 287.9787 | 287.9784 | 287.979  | 9.944392 | 9.827283 |
| 12861 | M288T11_ | 1.222862 | 0.290262 | 0.341401 | 0.745027 | 0.879261 | UP   | 287.6082 | 287.6078 | 287.6083 | 10.95229 | 10.87487 |
| 12862 | M381T9_9 | 1.04246  | -0.05999 | -0.3372  | 0.745074 | 0.879267 | DOWN | 381.2564 | 381.2561 | 381.2566 | 8.847867 | 8.7575   |
| 12863 | M208T9_3 | 1.097518 | -0.13424 | -0.33854 | 0.745112 | 0.879271 | DOWN | 207.6979 | 207.6975 | 207.6984 | 9.3735   | 9.132267 |
| 12864 | M655T10_ | 1.087113 | 0.120502 | 0.336751 | 0.745117 | 0.879272 | UP   | 654.9687 | 654.9685 | 654.9689 | 9.958617 | 9.843367 |
| 12865 | M599T10_ | 1.060102 | -0.0842  | -0.34001 | 0.745142 | 0.879275 | DOWN | 599.3034 | 599.3029 | 599.3038 | 9.584833 | 9.49445  |
| 12866 | M419T15  | 1.349559 | 0.432489 | 0.339235 | 0.745281 | 0.879291 | UP   | 419.2171 | 419.2169 | 419.2177 | 14.93506 | 14.89615 |
| 12867 | M812T10_ | 1.114228 | -0.15604 | -0.33809 | 0.745335 | 0.879297 | DOWN | 812.4416 | 812.4413 | 812.442  | 9.968992 | 9.843367 |
| 12868 | M210T9_4 | 1.118552 | -0.16163 | -0.34758 | 0.745375 | 0.879301 | DOWN | 210.1101 | 210.11   | 210.1101 | 8.97505  | 8.9519   |
| 12869 | M684T9_2 | 1.154189 | -0.20688 | -0.33608 | 0.745511 | 0.879317 | DOWN | 684.0498 | 684.0484 | 684.0522 | 9.146383 | 9.079083 |
| 12870 | M298T31  | 1.0981   | -0.13501 | -0.33599 | 0.74555  | 0.879322 | DOWN | 298.3102 | 298.31   | 298.3103 | 30.85    | 30.82917 |
| 12871 | M629T37  | 1.06811  | -0.09506 | -0.3361  | 0.745669 | 0.879335 | DOWN | 629.4663 | 629.466  | 629.467  | 36.55042 | 36.5385  |
| 12872 | M423T9_2 | 1.180155 | -0.23898 | -0.34073 | 0.745778 | 0.879348 | DOWN | 422.7534 | 422.7534 | 422.754  | 9.2529   | 9.1587   |
| 12873 | M555T11_ | 1.070958 | -0.0989  | -0.34175 | 0.745788 | 0.879349 | DOWN | 555.4675 | 555.4671 | 555.4679 | 10.77258 | 10.74145 |
| 12874 | M533T9_1 | 1.107187 | -0.1469  | -0.33563 | 0.745802 | 0.87935  | DOWN | 532.8311 | 532.83   | 532.8324 | 9.333667 | 9.1158   |
| 12875 | M520T44_ | 1.051164 | -0.07199 | -0.33852 | 0.745895 | 0.879361 | DOWN | 520.2749 | 520.2746 | 520.275  | 44.2505  | 44.13517 |
| 12876 | M259T10_ | 1.047863 | -0.06745 | -0.33619 | 0.74598  | 0.879371 | DOWN | 259.2016 | 259.2015 | 259.2017 | 9.964092 | 9.843367 |
| 12877 | M310T9_4 | 1.147477 | -0.19846 | -0.33667 | 0.746035 | 0.879377 | DOWN | 309.9516 | 309.9413 | 309.9527 | 9.160633 | 9.12675  |
| 12878 | M791T10_ | 1.073822 | -0.10275 | -0.3435  | 0.746082 | 0.879383 | DOWN | 791.4526 | 791.4518 | 791.4532 | 9.649542 | 9.52595  |
| 12879 | M476T9_8 | 1.132053 | -0.17894 | -0.33498 | 0.746266 | 0.879404 | DOWN | 476.0178 | 476.0113 | 476.0189 | 9.285617 | 9.17485  |



|       |          |          |          |          |          |          |      |          |          |          |          |          |
|-------|----------|----------|----------|----------|----------|----------|------|----------|----------|----------|----------|----------|
| 12880 | M256T10_ | 1.146292 | 0.196974 | 0.336217 | 0.74634  | 0.879412 | UP   | 255.8241 | 255.8239 | 255.8243 | 9.9677   | 9.946367 |
| 12881 | M401T9_1 | 1.10516  | -0.14426 | -0.33633 | 0.746341 | 0.879412 | DOWN | 400.5149 | 400.5144 | 400.5163 | 9.320067 | 9.204617 |
| 12882 | M335T9_1 | 1.139207 | -0.18803 | -0.33563 | 0.746431 | 0.879422 | DOWN | 335.3608 | 335.3603 | 335.3658 | 9.276958 | 9.1503   |
| 12883 | M201T10_ | 1.082386 | -0.11421 | -0.3365  | 0.746475 | 0.879428 | DOWN | 200.7915 | 200.791  | 200.7918 | 9.852642 | 9.65225  |
| 12884 | M704T10_ | 1.018355 | -0.02624 | -0.33879 | 0.746479 | 0.879428 | DOWN | 703.5486 | 703.5483 | 703.5489 | 9.83135  | 9.715683 |
| 12885 | M672T36  | 1.075337 | -0.10479 | -0.33475 | 0.746491 | 0.879429 | DOWN | 672.4893 | 672.489  | 672.4896 | 36.32342 | 36.30683 |
| 12886 | M380T26  | 1.050808 | 0.0715   | 0.334799 | 0.746494 | 0.87943  | UP   | 380.2791 | 380.2789 | 380.2793 | 26.42    | 26.39083 |
| 12887 | M452T11_ | 1.064632 | -0.09036 | -0.33532 | 0.746579 | 0.87944  | DOWN | 451.5899 | 451.5894 | 451.5905 | 10.91864 | 10.87487 |
| 12888 | M815T10_ | 1.140852 | -0.19011 | -0.3344  | 0.746697 | 0.879453 | DOWN | 815.2444 | 815.2421 | 815.2446 | 9.893742 | 9.79535  |
| 12889 | M753T10_ | 1.142346 | 0.192    | 0.339357 | 0.746734 | 0.879457 | UP   | 752.7467 | 752.7465 | 752.7476 | 9.818525 | 9.77435  |
| 12890 | M385T14  | 1.084783 | 0.117407 | 0.342449 | 0.746735 | 0.879457 | UP   | 385.2813 | 385.2811 | 385.2816 | 13.69715 | 13.63873 |
| 12891 | M564T45_ | 1.055147 | 0.077445 | 0.334408 | 0.746737 | 0.879458 | UP   | 564.3013 | 564.3012 | 564.3015 | 44.705   | 44.59567 |
| 12892 | M495T9_7 | 1.163778 | -0.21882 | -0.33424 | 0.746791 | 0.879464 | DOWN | 494.8319 | 494.8311 | 494.8321 | 9.206033 | 9.174917 |
| 12893 | M337T10_ | 1.038174 | -0.05405 | -0.33509 | 0.746801 | 0.879465 | DOWN | 337.0228 | 337.0224 | 337.0229 | 9.740517 | 9.62055  |
| 12894 | M311T19_ | 1.04897  | -0.06897 | -0.33413 | 0.746953 | 0.879482 | DOWN | 310.7447 | 310.7445 | 310.7448 | 18.64258 | 18.62883 |
| 12895 | M577T9_5 | 1.169519 | 0.225915 | 0.33394  | 0.747046 | 0.879493 | UP   | 577.3726 | 577.3722 | 577.3734 | 8.886133 | 8.8398   |
| 12896 | M384T10_ | 1.132421 | 0.179411 | 0.33654  | 0.747155 | 0.879505 | UP   | 383.8052 | 383.8051 | 383.8056 | 9.716533 | 9.634283 |
| 12897 | M181T10_ | 1.120955 | 0.164728 | 0.335365 | 0.747208 | 0.879512 | UP   | 181.0963 | 181.0961 | 181.0964 | 9.967367 | 9.859233 |
| 12898 | M512T9_7 | 1.151163 | 0.203092 | 0.333715 | 0.747257 | 0.879517 | UP   | 512.4107 | 512.4102 | 512.4113 | 9.29015  | 9.175017 |
| 12899 | M376T20  | 1.041715 | -0.05896 | -0.33372 | 0.747344 | 0.879527 | DOWN | 376.3038 | 376.3037 | 376.3039 | 20.24517 | 20.23017 |
| 12900 | M969T9   | 1.209688 | -0.27463 | -0.33365 | 0.747589 | 0.879555 | DOWN | 968.5704 | 968.5694 | 968.5715 | 8.88325  | 8.83365  |
| 12901 | M397T11_ | 1.094767 | 0.130623 | 0.333858 | 0.747644 | 0.879561 | UP   | 397.3659 | 397.3609 | 397.3665 | 10.87765 | 10.87708 |
| 12902 | M567T20  | 1.069559 | -0.09702 | -0.33918 | 0.747729 | 0.879571 | DOWN | 567.4349 | 567.4345 | 567.4356 | 19.5195  | 19.5125  |
| 12903 | M1736T10 | 1.090314 | 0.124744 | 0.342574 | 0.747921 | 0.879593 | UP   | 1735.934 | 1735.931 | 1735.943 | 9.8397   | 9.73145  |
| 12904 | M231T13  | 1.12342  | 0.167897 | 0.337185 | 0.74796  | 0.879597 | UP   | 231.1932 | 231.1931 | 231.1934 | 12.7037  | 12.68958 |
| 12905 | M313T9_7 | 1.174147 | 0.231613 | 0.339312 | 0.747966 | 0.879598 | UP   | 313.1268 | 313.1261 | 313.1273 | 9.315217 | 9.232283 |
| 12906 | M253T11_ | 1.128542 | 0.17446  | 0.333778 | 0.747976 | 0.879599 | UP   | 253.1442 | 253.1439 | 253.1445 | 10.8957  | 10.82972 |
| 12907 | M654T11_ | 1.071857 | -0.10011 | -0.33286 | 0.747982 | 0.8796   | DOWN | 654.2845 | 654.2842 | 654.2851 | 11.47531 | 11.44683 |
| 12908 | M279T10_ | 1.027438 | -0.03905 | -0.34158 | 0.748065 | 0.879609 | DOWN | 278.67   | 278.6699 | 278.6701 | 9.933967 | 9.827283 |
| 12909 | M309T10_ | 1.082048 | 0.113765 | 0.332386 | 0.748205 | 0.879625 | UP   | 308.9792 | 308.9788 | 308.9793 | 9.950258 | 9.843367 |
| 12910 | M578T10_ | 1.26207  | 0.335792 | 0.33316  | 0.748311 | 0.879637 | UP   | 578.3633 | 578.3628 | 578.3698 | 9.994767 | 9.932567 |
| 12911 | M349T7   | 1.059868 | -0.08388 | -0.33381 | 0.748331 | 0.87964  | DOWN | 349.1829 | 349.1827 | 349.1832 | 6.976933 | 6.910217 |
| 12912 | M159T10_ | 1.085063 | -0.11778 | -0.33536 | 0.748346 | 0.879641 | DOWN | 159.0205 | 159.0205 | 159.0206 | 9.758283 | 9.636483 |
| 12913 | M335T12  | 1.049487 | 0.069684 | 0.333168 | 0.748358 | 0.879643 | UP   | 335.2021 | 335.2021 | 335.2024 | 12.25267 | 12.2372  |
| 12914 | M1290T26 | 1.131643 | -0.17842 | -0.33267 | 0.748369 | 0.879644 | DOWN | 1289.945 | 1289.945 | 1289.947 | 26.01083 | 25.90867 |

|       |          |          |          |          |          |          |      |          |          |          |          |          |
|-------|----------|----------|----------|----------|----------|----------|------|----------|----------|----------|----------|----------|
| 12915 | M261T10_ | 1.086745 | -0.12001 | -0.33205 | 0.748394 | 0.879647 | DOWN | 260.8551 | 260.8545 | 260.8552 | 9.945775 | 9.827283 |
| 12916 | M358T10_ | 1.079071 | -0.10979 | -0.33214 | 0.748423 | 0.87965  | DOWN | 358.3167 | 358.3165 | 358.3168 | 9.94785  | 9.843367 |
| 12917 | M387T11_ | 1.060275 | -0.08444 | -0.33626 | 0.748434 | 0.879651 | DOWN | 386.7109 | 386.7063 | 386.7114 | 10.90669 | 10.88995 |
| 12918 | M360T11_ | 1.068864 | -0.09608 | -0.33256 | 0.74866  | 0.879677 | DOWN | 360.0626 | 360.0624 | 360.0628 | 10.89133 | 10.8646  |
| 12919 | M453T9_1 | 1.268005 | 0.34256  | 0.332677 | 0.74867  | 0.879678 | UP   | 452.5449 | 452.5321 | 452.5462 | 9.224517 | 9.130683 |
| 12920 | M182T11_ | 1.062506 | -0.08747 | -0.33271 | 0.748734 | 0.879686 | DOWN | 182.4605 | 182.4604 | 182.4605 | 10.892   | 10.873   |
| 12921 | M1041T10 | 1.132012 | -0.17889 | -0.33193 | 0.748827 | 0.879696 | DOWN | 1041.005 | 1041.003 | 1041.006 | 9.91765  | 9.811217 |
| 12922 | M333T29  | 1.084261 | -0.11671 | -0.33493 | 0.748871 | 0.879701 | DOWN | 333.3189 | 333.3187 | 333.3191 | 28.70517 | 28.7     |
| 12923 | M599T9_3 | 1.108961 | -0.14921 | -0.332   | 0.748915 | 0.879706 | DOWN | 599.3905 | 599.3897 | 599.3907 | 8.917733 | 8.818733 |
| 12924 | M466T17  | 1.108535 | -0.14865 | -0.33142 | 0.748942 | 0.879709 | DOWN | 466.3157 | 466.3155 | 466.3158 | 17.2925  | 17.24667 |
| 12925 | M573T30  | 1.070144 | -0.0978  | -0.33492 | 0.748969 | 0.879712 | DOWN | 573.4399 | 573.4394 | 573.44   | 30.2805  | 30.266   |
| 12926 | M400T9_7 | 1.153865 | -0.20647 | -0.33186 | 0.748999 | 0.879716 | DOWN | 400.2207 | 400.2204 | 400.221  | 8.952283 | 8.9396   |
| 12927 | M580T9_2 | 1.131586 | 0.178346 | 0.331175 | 0.749066 | 0.879723 | UP   | 579.8651 | 579.8607 | 579.8706 | 9.2033   | 9.12675  |
| 12928 | M346T10_ | 1.121728 | 0.165723 | 0.330987 | 0.749203 | 0.879739 | UP   | 346.1459 | 346.1431 | 346.146  | 9.946467 | 9.827283 |
| 12929 | M534T41_ | 1.045449 | 0.064122 | 0.330934 | 0.749208 | 0.87974  | UP   | 534.2906 | 534.2903 | 534.291  | 41.38792 | 41.25833 |
| 12930 | M347T21_ | 1.111951 | -0.15309 | -0.33319 | 0.749229 | 0.879742 | DOWN | 347.1003 | 347.1    | 347.1006 | 20.6365  | 20.57667 |
| 12931 | M389T10_ | 1.054899 | -0.07711 | -0.33348 | 0.749237 | 0.879743 | DOWN | 389.2545 | 389.2542 | 389.2547 | 9.958617 | 9.843367 |
| 12932 | M360T11_ | 1.082035 | -0.11375 | -0.3332  | 0.749262 | 0.879746 | DOWN | 359.7534 | 359.7519 | 359.7544 | 10.91931 | 10.8914  |
| 12933 | M616T19  | 1.081966 | -0.11366 | -0.33139 | 0.749397 | 0.879761 | DOWN | 615.916  | 615.9154 | 615.9163 | 18.64183 | 18.629   |
| 12934 | M289T20_ | 1.082987 | -0.11502 | -0.33721 | 0.749441 | 0.879766 | DOWN | 289.1989 | 289.1988 | 289.1991 | 20.04108 | 20.02717 |
| 12935 | M315T11_ | 1.069786 | -0.09732 | -0.33174 | 0.74953  | 0.879776 | DOWN | 315.1318 | 315.1316 | 315.1319 | 10.8914  | 10.879   |
| 12936 | M420T10_ | 1.156298 | 0.209514 | 0.336474 | 0.749598 | 0.879784 | UP   | 419.5166 | 419.5164 | 419.5169 | 9.92625  | 9.827283 |
| 12937 | M1966T10 | 1.092477 | 0.127603 | 0.334999 | 0.749691 | 0.879795 | UP   | 1965.964 | 1965.961 | 1965.966 | 9.856867 | 9.787433 |
| 12938 | M1148T10 | 1.081523 | -0.11306 | -0.33038 | 0.749838 | 0.879811 | DOWN | 1147.973 | 1147.972 | 1147.974 | 9.5682   | 9.46325  |
| 12939 | M469T9_6 | 1.127346 | 0.172931 | 0.334633 | 0.749861 | 0.879814 | UP   | 469.2651 | 469.2643 | 469.266  | 9.250558 | 9.129317 |
| 12940 | M225T10_ | 1.285262 | -0.36206 | -0.33001 | 0.749988 | 0.879828 | DOWN | 224.5941 | 224.5938 | 224.5942 | 9.964092 | 9.859233 |
| 12941 | M504T43_ | 1.055726 | 0.078235 | 0.33524  | 0.750018 | 0.879832 | UP   | 504.2799 | 504.2798 | 504.2801 | 42.71133 | 42.582   |
| 12942 | M201T9_1 | 1.149966 | -0.20159 | -0.32977 | 0.75005  | 0.879835 | DOWN | 201.2119 | 201.211  | 201.2207 | 9.166033 | 9.1587   |
| 12943 | M774T10_ | 1.070168 | -0.09784 | -0.33009 | 0.75007  | 0.879838 | DOWN | 773.9346 | 773.9341 | 773.9358 | 10.44626 | 10.39197 |
| 12944 | M1037T32 | 1.135884 | -0.18382 | -0.33009 | 0.7501   | 0.879841 | DOWN | 1036.768 | 1036.767 | 1036.769 | 31.80333 | 31.75333 |
| 12945 | M221T9_1 | 1.246306 | -0.31766 | -0.33004 | 0.750112 | 0.879842 | DOWN | 220.5077 | 220.5073 | 220.5086 | 9.295292 | 9.103733 |
| 12946 | M299T40_ | 1.087555 | 0.121088 | 0.33601  | 0.75012  | 0.879843 | UP   | 299.185  | 299.1849 | 299.1852 | 39.71917 | 39.56083 |
| 12947 | M327T11_ | 1.107817 | 0.14772  | 0.331015 | 0.750123 | 0.879844 | UP   | 327.0542 | 327.0532 | 327.0558 | 10.92253 | 10.88982 |
| 12948 | M856T34  | 1.113825 | -0.15552 | -0.32969 | 0.750262 | 0.879859 | DOWN | 855.5875 | 855.5874 | 855.5876 | 34.076   | 34.04833 |
| 12949 | M212T9_1 | 1.429104 | -0.51511 | -0.33239 | 0.750326 | 0.879867 | DOWN | 212.266  | 212.2646 | 212.2677 | 9.295167 | 9.103733 |

|       |          |          |          |          |          |          |      |          |          |          |          |          |
|-------|----------|----------|----------|----------|----------|----------|------|----------|----------|----------|----------|----------|
| 12950 | M1010T10 | 1.124365 | 0.16911  | 0.333321 | 0.750351 | 0.87987  | UP   | 1010.215 | 1010.213 | 1010.216 | 9.849992 | 9.729367 |
| 12951 | M555T30  | 1.065255 | -0.0912  | -0.33217 | 0.750363 | 0.879871 | DOWN | 555.4098 | 555.4094 | 555.41   | 30.28092 | 30.266   |
| 12952 | M223T10_ | 1.046387 | 0.065416 | 0.329883 | 0.750376 | 0.879872 | UP   | 223.07   | 223.0698 | 223.0701 | 9.979667 | 9.8753   |
| 12953 | M1658T10 | 1.142347 | 0.192001 | 0.331729 | 0.750407 | 0.879877 | UP   | 1657.66  | 1657.658 | 1657.663 | 9.973467 | 9.859233 |
| 12954 | M293T11_ | 1.072197 | 0.10057  | 0.331145 | 0.750408 | 0.879877 | UP   | 293.222  | 293.2219 | 293.2222 | 10.96015 | 10.90785 |
| 12955 | M1091T10 | 1.064631 | 0.090354 | 0.329937 | 0.750552 | 0.879897 | UP   | 1090.739 | 1090.736 | 1090.74  | 9.819617 | 9.76065  |
| 12956 | M786T10_ | 1.163763 | 0.218798 | 0.330428 | 0.750657 | 0.879912 | UP   | 786.3675 | 786.3658 | 786.3681 | 9.979342 | 9.859233 |
| 12957 | M566T9_2 | 1.123215 | -0.16763 | -0.32908 | 0.750701 | 0.879918 | DOWN | 566.3317 | 566.3296 | 566.332  | 9.024133 | 8.94795  |
| 12958 | M327T10_ | 1.105748 | -0.14502 | -0.33852 | 0.750711 | 0.87992  | DOWN | 327.3488 | 327.3463 | 327.35   | 9.840617 | 9.73145  |
| 12959 | M580T20  | 1.071326 | -0.0994  | -0.32883 | 0.75073  | 0.879922 | DOWN | 580.3755 | 580.3743 | 580.3772 | 19.72317 | 19.685   |
| 12960 | M427T11_ | 1.100023 | -0.13753 | -0.33049 | 0.750786 | 0.87993  | DOWN | 426.8799 | 426.8796 | 426.8875 | 10.89308 | 10.873   |
| 12961 | M1894T10 | 1.163313 | -0.21824 | -0.32897 | 0.750835 | 0.879937 | DOWN | 1894.459 | 1894.453 | 1894.461 | 9.946467 | 9.853533 |
| 12962 | M679T10_ | 1.12659  | 0.171963 | 0.33254  | 0.750869 | 0.879942 | UP   | 678.9693 | 678.9633 | 678.9709 | 9.816133 | 9.7124   |
| 12963 | M348T10_ | 1.029806 | 0.042373 | 0.334991 | 0.750873 | 0.879942 | UP   | 347.6273 | 347.6271 | 347.6273 | 9.864467 | 9.73145  |
| 12964 | M210T9_3 | 1.11     | 0.15056  | 0.334982 | 0.750915 | 0.879948 | UP   | 209.8544 | 209.8544 | 209.8545 | 9.196525 | 9.11405  |
| 12965 | M517T36  | 1.099711 | -0.13712 | -0.32905 | 0.75097  | 0.879956 | DOWN | 517.3707 | 517.3701 | 517.3717 | 36.13633 | 36.126   |
| 12966 | M415T44  | 1.088563 | 0.122425 | 0.338111 | 0.751156 | 0.879982 | UP   | 415.2323 | 415.2322 | 415.2324 | 43.95667 | 43.74683 |
| 12967 | M584T9_1 | 1.148497 | -0.19975 | -0.33087 | 0.751166 | 0.879984 | DOWN | 583.717  | 583.7165 | 583.7183 | 9.146383 | 9.09495  |
| 12968 | M284T9_4 | 1.075948 | 0.105609 | 0.33233  | 0.751256 | 0.879996 | UP   | 283.9973 | 283.9973 | 283.9974 | 9.346    | 9.17485  |
| 12969 | M614T11_ | 1.139881 | 0.188883 | 0.329705 | 0.751306 | 0.880003 | UP   | 614.1395 | 614.1388 | 614.143  | 10.90553 | 10.8926  |
| 12970 | M537T10_ | 1.103806 | -0.14249 | -0.32825 | 0.751383 | 0.880014 | DOWN | 536.6593 | 536.6588 | 536.6611 | 9.975217 | 9.859233 |
| 12971 | M307T9_3 | 1.271957 | -0.34705 | -0.3297  | 0.751486 | 0.880029 | DOWN | 306.8009 | 306.8008 | 306.8011 | 9.333475 | 9.26575  |
| 12972 | M458T11_ | 1.094761 | -0.13062 | -0.32788 | 0.751581 | 0.880042 | DOWN | 458.0532 | 458.05   | 458.054  | 10.95835 | 10.90765 |
| 12973 | M520T41_ | 1.054779 | -0.07694 | -0.33742 | 0.751596 | 0.880044 | DOWN | 520.2749 | 520.2747 | 520.275  | 40.68117 | 40.62567 |
| 12974 | M214T9_4 | 1.115143 | -0.15723 | -0.33035 | 0.751656 | 0.880052 | DOWN | 213.6716 | 213.6707 | 213.6717 | 9.279417 | 9.1322   |
| 12975 | M528T10_ | 1.106074 | 0.145448 | 0.328578 | 0.751719 | 0.880061 | UP   | 527.7368 | 527.7363 | 527.7373 | 9.975217 | 9.8753   |
| 12976 | M201T9_1 | 1.199354 | 0.262258 | 0.327733 | 0.751751 | 0.880066 | UP   | 200.9565 | 200.9559 | 200.9572 | 9.132267 | 9.110833 |
| 12977 | M636T43_ | 1.03989  | -0.05643 | -0.33408 | 0.751912 | 0.880088 | DOWN | 636.3591 | 636.3589 | 636.3591 | 43.30133 | 43.2295  |
| 12978 | M335T10_ | 1.096892 | -0.13342 | -0.32799 | 0.751915 | 0.880089 | DOWN | 335.195  | 335.1948 | 335.1954 | 9.8207   | 9.715683 |
| 12979 | M371T10_ | 1.063837 | -0.08928 | -0.3338  | 0.751929 | 0.880091 | DOWN | 370.6248 | 370.6245 | 370.6289 | 9.978692 | 9.859667 |
| 12980 | M580T42_ | 1.043566 | -0.06152 | -0.33676 | 0.751935 | 0.880092 | DOWN | 580.3325 | 580.3323 | 580.3326 | 42.3375  | 42.17917 |
| 12981 | M725T31  | 1.130429 | -0.17687 | -0.32678 | 0.752234 | 0.880134 | DOWN | 724.5917 | 724.5915 | 724.5921 | 31.35033 | 31.34917 |
| 12982 | M450T9_1 | 1.141899 | -0.19143 | -0.32967 | 0.752242 | 0.880135 | DOWN | 450.4882 | 450.4879 | 450.4886 | 9.145908 | 9.10275  |
| 12983 | M421T10_ | 1.074934 | 0.104248 | 0.333801 | 0.752244 | 0.880135 | UP   | 420.6222 | 420.622  | 420.6224 | 9.916525 | 9.88865  |
| 12984 | M515T10_ | 1.044801 | 0.063228 | 0.328586 | 0.752302 | 0.880143 | UP   | 514.6395 | 514.6393 | 514.6402 | 10.48597 | 10.39197 |

|       |          |          |          |          |          |          |      |          |          |          |          |          |
|-------|----------|----------|----------|----------|----------|----------|------|----------|----------|----------|----------|----------|
| 12985 | M279T10_ | 1.08057  | -0.11179 | -0.32926 | 0.75247  | 0.880167 | DOWN | 278.562  | 278.5613 | 278.5622 | 9.914217 | 9.827283 |
| 12986 | M281T25  | 1.043981 | -0.0621  | -0.32955 | 0.752485 | 0.880169 | DOWN | 281.138  | 281.1379 | 281.1382 | 24.60708 | 24.59267 |
| 12987 | M1961T10 | 1.057131 | -0.08015 | -0.33027 | 0.752587 | 0.880183 | DOWN | 1961.043 | 1961.041 | 1961.044 | 9.831242 | 9.7124   |
| 12988 | M770T14  | 1.070071 | 0.097707 | 0.330838 | 0.75276  | 0.880207 | UP   | 769.5563 | 769.5559 | 769.5566 | 13.6973  | 13.67912 |
| 12989 | M637T11_ | 1.115752 | 0.158017 | 0.335986 | 0.752761 | 0.880207 | UP   | 637.1063 | 637.1055 | 637.1072 | 10.8823  | 10.8214  |
| 12990 | M398T10_ | 1.033508 | -0.04755 | -0.32619 | 0.752794 | 0.880212 | DOWN | 397.503  | 397.5027 | 397.5031 | 9.917167 | 9.811217 |
| 12991 | M279T32_ | 1.041427 | -0.05856 | -0.32737 | 0.752891 | 0.880226 | DOWN | 279.159  | 279.1587 | 279.159  | 32.46017 | 32.45933 |
| 12992 | M620T18  | 1.04343  | -0.06133 | -0.32693 | 0.753028 | 0.880245 | DOWN | 620.4823 | 620.4821 | 620.4824 | 18.01183 | 17.99367 |
| 12993 | M411T11_ | 1.15554  | 0.208567 | 0.325862 | 0.753154 | 0.880263 | UP   | 411.423  | 411.4222 | 411.4236 | 10.8926  | 10.8214  |
| 12994 | M313T10_ | 1.090279 | -0.1247  | -0.3262  | 0.753158 | 0.880263 | DOWN | 312.9523 | 312.9522 | 312.9524 | 9.931875 | 9.827283 |
| 12995 | M213T11_ | 1.058581 | -0.08213 | -0.32691 | 0.753224 | 0.880272 | DOWN | 213.3253 | 213.3252 | 213.3253 | 10.892   | 10.873   |
| 12996 | M760T32  | 1.147473 | -0.19846 | -0.32581 | 0.753267 | 0.880278 | DOWN | 759.5655 | 759.5643 | 759.5661 | 31.76767 | 31.73867 |
| 12997 | M318T11_ | 1.100207 | -0.13778 | -0.32885 | 0.753309 | 0.880284 | DOWN | 318.4277 | 318.4275 | 318.429  | 10.89815 | 10.89125 |
| 12998 | M782T10_ | 1.105867 | 0.145177 | 0.325223 | 0.753474 | 0.880307 | UP   | 782.2653 | 782.264  | 782.2657 | 9.958617 | 9.843367 |
| 12999 | M1718T10 | 1.092373 | -0.12747 | -0.33381 | 0.753482 | 0.880308 | DOWN | 1717.746 | 1717.745 | 1717.75  | 9.830833 | 9.715683 |
| 13000 | M324T10_ | 1.077597 | -0.10782 | -0.32509 | 0.753568 | 0.88032  | DOWN | 323.9986 | 323.9984 | 323.999  | 9.948875 | 9.843367 |
| 13001 | M615T45_ | 1.035887 | 0.050866 | 0.325831 | 0.753575 | 0.880321 | UP   | 614.9394 | 614.939  | 614.9398 | 44.98342 | 44.89717 |
| 13002 | M562T38_ | 1.030019 | -0.04267 | -0.32678 | 0.753612 | 0.880327 | DOWN | 562.322  | 562.3217 | 562.3225 | 37.6615  | 37.633   |
| 13003 | M1124T10 | 1.100781 | -0.13853 | -0.32695 | 0.753682 | 0.880336 | DOWN | 1124.301 | 1124.3   | 1124.302 | 9.970617 | 9.869467 |
| 13004 | M668T45_ | 1.070487 | -0.09827 | -0.32725 | 0.753712 | 0.88034  | DOWN | 668.4829 | 668.4824 | 668.4831 | 44.68892 | 44.6385  |
| 13005 | M393T9_2 | 1.167279 | -0.22315 | -0.32568 | 0.753734 | 0.880344 | DOWN | 392.5798 | 392.5795 | 392.58   | 9.26575  | 9.204617 |
| 13006 | M962T10_ | 1.101641 | -0.13965 | -0.32447 | 0.75392  | 0.88037  | DOWN | 962.1187 | 962.1168 | 962.1195 | 9.923067 | 9.859233 |
| 13007 | M225T45_ | 1.088969 | 0.122963 | 0.334534 | 0.753929 | 0.880371 | UP   | 225.1483 | 225.1481 | 225.1483 | 44.60967 | 44.59517 |
| 13008 | M216T9_2 | 1.055398 | -0.07779 | -0.32437 | 0.753976 | 0.880377 | DOWN | 215.9746 | 215.9745 | 215.9747 | 9.246483 | 9.129317 |
| 13009 | M378T25_ | 1.137181 | -0.18546 | -0.3252  | 0.75398  | 0.880378 | DOWN | 378.0732 | 378.0727 | 378.0734 | 25.26067 | 25.15783 |
| 13010 | M618T10_ | 1.051793 | -0.07285 | -0.32434 | 0.754021 | 0.880384 | DOWN | 617.6851 | 617.6846 | 617.6886 | 9.823575 | 9.699733 |
| 13011 | M750T30  | 1.069044 | -0.09632 | -0.32586 | 0.75406  | 0.880389 | DOWN | 749.5454 | 749.5449 | 749.5458 | 30.237   | 30.2235  |
| 13012 | M370T11_ | 1.055643 | 0.078122 | 0.327185 | 0.754172 | 0.880405 | UP   | 370.0558 | 370.0557 | 370.056  | 10.90519 | 10.879   |
| 13013 | M1038T10 | 1.232986 | -0.30216 | -0.32507 | 0.754205 | 0.880409 | DOWN | 1038.152 | 1038.151 | 1038.152 | 9.75805  | 9.62055  |
| 13014 | M500T9_6 | 1.140346 | -0.18947 | -0.32533 | 0.754221 | 0.880412 | DOWN | 499.8116 | 499.8112 | 499.812  | 9.039208 | 9.023483 |
| 13015 | M191T10_ | 1.095599 | 0.13172  | 0.3242   | 0.754245 | 0.880415 | UP   | 190.9952 | 190.9951 | 190.9953 | 9.951283 | 9.843367 |
| 13016 | M284T9_5 | 1.224765 | -0.29251 | -0.32701 | 0.754316 | 0.880425 | DOWN | 284.0408 | 284.0405 | 284.0414 | 9.073275 | 9.031633 |
| 13017 | M309T16  | 1.088005 | 0.121685 | 0.326079 | 0.75433  | 0.880427 | UP   | 309.2351 | 309.2349 | 309.2352 | 15.5625  | 15.54762 |
| 13018 | M338T10_ | 1.098277 | 0.135242 | 0.324073 | 0.754373 | 0.880433 | UP   | 337.5344 | 337.5339 | 337.5347 | 9.964092 | 9.859233 |
| 13019 | M657T10_ | 1.104234 | -0.14305 | -0.32457 | 0.754399 | 0.880436 | DOWN | 657.1991 | 657.1974 | 657.2007 | 9.852133 | 9.728083 |

|       |          |          |          |          |          |          |      |          |          |          |          |          |
|-------|----------|----------|----------|----------|----------|----------|------|----------|----------|----------|----------|----------|
| 13020 | M335T10_ | 1.100516 | -0.13818 | -0.32555 | 0.75446  | 0.880445 | DOWN | 334.6209 | 334.6205 | 334.6213 | 9.957333 | 9.843367 |
| 13021 | M447T11_ | 1.085172 | -0.11792 | -0.32848 | 0.75454  | 0.880456 | DOWN | 447.1748 | 447.1729 | 447.1758 | 10.93412 | 10.8926  |
| 13022 | M732T11_ | 1.083262 | -0.11538 | -0.32417 | 0.754647 | 0.880471 | DOWN | 732.0768 | 732.0758 | 732.0791 | 10.93415 | 10.87572 |
| 13023 | M206T9_9 | 1.219207 | -0.28594 | -0.32953 | 0.754665 | 0.880474 | DOWN | 205.8267 | 205.8263 | 205.8269 | 9.368883 | 9.346    |
| 13024 | M261T10_ | 1.035461 | -0.05027 | -0.3234  | 0.754777 | 0.880489 | DOWN | 260.7572 | 260.757  | 260.7573 | 9.967367 | 9.859233 |
| 13025 | M732T11_ | 1.089079 | -0.12311 | -0.32352 | 0.754952 | 0.880514 | DOWN | 731.7536 | 731.7532 | 731.7546 | 10.8914  | 10.879   |
| 13026 | M318T28_ | 1.09705  | 0.133629 | 0.323467 | 0.754984 | 0.880518 | UP   | 317.9598 | 317.9596 | 317.96   | 28.12758 | 28.12733 |
| 13027 | M386T10_ | 1.10168  | 0.139706 | 0.322969 | 0.755052 | 0.880527 | UP   | 385.899  | 385.8985 | 385.8995 | 9.967367 | 9.859233 |
| 13028 | M786T9_1 | 1.13987  | -0.18887 | -0.32369 | 0.755087 | 0.880532 | DOWN | 785.9752 | 785.9729 | 785.976  | 9.302667 | 9.234417 |
| 13029 | M727T10_ | 1.078165 | -0.10858 | -0.32702 | 0.755215 | 0.88055  | DOWN | 727.172  | 727.1717 | 727.1737 | 9.8233   | 9.772883 |
| 13030 | M635T10_ | 1.091119 | -0.12581 | -0.3227  | 0.755421 | 0.880579 | DOWN | 634.8279 | 634.8275 | 634.829  | 9.957333 | 9.843367 |
| 13031 | M478T44_ | 1.085404 | -0.11823 | -0.32644 | 0.755714 | 0.88062  | DOWN | 478.3006 | 478.3003 | 478.301  | 43.73275 | 43.373   |
| 13032 | M729T11_ | 1.044637 | -0.063   | -0.32193 | 0.755758 | 0.880626 | DOWN | 729.4892 | 729.4888 | 729.4897 | 10.53931 | 10.50338 |
| 13033 | M715T3   | 1.136394 | 0.184463 | 0.322128 | 0.755826 | 0.880635 | UP   | 715.4722 | 715.4718 | 715.4728 | 3.464783 | 3.257667 |
| 13034 | M771T14  | 1.064557 | 0.090253 | 0.326543 | 0.755874 | 0.880642 | UP   | 770.5598 | 770.5594 | 770.5601 | 13.6973  | 13.68268 |
| 13035 | M840T11_ | 1.07662  | -0.10651 | -0.32255 | 0.755947 | 0.880652 | DOWN | 839.9747 | 839.9743 | 839.975  | 10.66105 | 10.61512 |
| 13036 | M338T10_ | 1.040913 | 0.05785  | 0.324273 | 0.756035 | 0.880664 | UP   | 338.4454 | 338.4452 | 338.4456 | 9.954217 | 9.8753   |
| 13037 | M471T10_ | 1.056304 | -0.07903 | -0.32201 | 0.756124 | 0.880677 | DOWN | 470.6625 | 470.6614 | 470.6629 | 9.946467 | 9.843367 |
| 13038 | M401T11_ | 1.152888 | 0.205252 | 0.329208 | 0.75617  | 0.880683 | UP   | 400.8409 | 400.8343 | 400.8456 | 10.87487 | 10.85018 |
| 13039 | M472T10_ | 1.074772 | -0.10403 | -0.32143 | 0.756219 | 0.88069  | DOWN | 471.8198 | 471.8191 | 471.82   | 9.94785  | 9.843367 |
| 13040 | M324T10_ | 1.076135 | -0.10586 | -0.32136 | 0.756281 | 0.880698 | DOWN | 323.5339 | 323.5337 | 323.5342 | 9.94785  | 9.843367 |
| 13041 | M790T10_ | 1.078615 | -0.10918 | -0.32152 | 0.756305 | 0.880702 | DOWN | 790.319  | 790.3174 | 790.3217 | 9.900767 | 9.811217 |
| 13042 | M502T10_ | 1.080675 | 0.111932 | 0.321063 | 0.756456 | 0.880723 | UP   | 501.5121 | 501.5111 | 501.5125 | 9.958617 | 9.843367 |
| 13043 | M765T10_ | 1.070618 | -0.09844 | -0.32713 | 0.756459 | 0.880723 | DOWN | 764.6661 | 764.6658 | 764.6667 | 9.918833 | 9.811217 |
| 13044 | M349T10_ | 1.121591 | -0.16555 | -0.3226  | 0.756464 | 0.880724 | DOWN | 348.578  | 348.5777 | 348.5784 | 9.8207   | 9.699733 |
| 13045 | M294T10_ | 1.043315 | -0.06118 | -0.32094 | 0.756513 | 0.880731 | DOWN | 293.9928 | 293.9926 | 293.9929 | 9.930908 | 9.827283 |
| 13046 | M172T10_ | 1.092622 | -0.12779 | -0.32128 | 0.756639 | 0.880748 | DOWN | 171.7988 | 171.7988 | 171.8047 | 9.967367 | 9.853533 |
| 13047 | M697T10_ | 1.188033 | 0.248574 | 0.32976  | 0.756716 | 0.880759 | UP   | 696.6966 | 696.6961 | 696.697  | 9.830283 | 9.728083 |
| 13048 | M234T10_ | 1.100638 | -0.13834 | -0.32296 | 0.75673  | 0.880761 | DOWN | 234.169  | 234.1688 | 234.1691 | 9.977442 | 9.859233 |
| 13049 | M476T9_1 | 1.054098 | -0.07601 | -0.3205  | 0.756808 | 0.880772 | DOWN | 476.4004 | 476.4002 | 476.4006 | 9.285867 | 9.129317 |
| 13050 | M462T9_1 | 1.127574 | 0.173222 | 0.325974 | 0.756849 | 0.880777 | UP   | 461.8552 | 461.8548 | 461.8559 | 9.465    | 9.371417 |
| 13051 | M379T11_ | 1.082312 | 0.114117 | 0.322566 | 0.757089 | 0.880811 | UP   | 379.2917 | 379.2902 | 379.2932 | 10.94406 | 10.873   |
| 13052 | M359T9_6 | 1.145423 | -0.19588 | -0.32012 | 0.75719  | 0.880825 | DOWN | 359.2856 | 359.2798 | 359.2857 | 9.311058 | 9.07145  |
| 13053 | M336T24  | 1.111001 | -0.15186 | -0.32002 | 0.757192 | 0.880825 | DOWN | 335.6338 | 335.6336 | 335.634  | 24.36408 | 24.34433 |
| 13054 | M853T11  | 1.117005 | -0.15964 | -0.3204  | 0.757198 | 0.880826 | DOWN | 853.2766 | 853.2748 | 853.2773 | 10.9348  | 10.89355 |

|       |          |          |          |          |          |          |      |          |          |          |          |          |
|-------|----------|----------|----------|----------|----------|----------|------|----------|----------|----------|----------|----------|
| 13055 | M240T10_ | 1.097965 | -0.13483 | -0.32106 | 0.757261 | 0.880834 | DOWN | 240.1926 | 240.1925 | 240.1927 | 9.945258 | 9.827283 |
| 13056 | M707T33  | 1.064393 | -0.09003 | -0.32048 | 0.757261 | 0.880835 | DOWN | 707.4552 | 707.4548 | 707.4554 | 33.47033 | 33.4415  |
| 13057 | M497T9_7 | 1.04903  | 0.069056 | 0.319815 | 0.757315 | 0.880842 | UP   | 496.9669 | 496.9667 | 496.9673 | 9.269283 | 9.129317 |
| 13058 | M300T9_1 | 1.085099 | -0.11783 | -0.3198  | 0.757331 | 0.880844 | DOWN | 300.1988 | 300.1985 | 300.1989 | 8.939133 | 8.832317 |
| 13059 | M389T25  | 1.115116 | 0.157194 | 0.321593 | 0.757369 | 0.880849 | UP   | 389.2506 | 389.2503 | 389.2509 | 24.53367 | 24.50683 |
| 13060 | M415T9_7 | 1.047982 | 0.067613 | 0.319801 | 0.757369 | 0.880849 | UP   | 415.2183 | 415.2178 | 415.2234 | 9.278717 | 9.129317 |
| 13061 | M690T36  | 1.181463 | -0.24057 | -0.32044 | 0.757409 | 0.880855 | DOWN | 689.5243 | 689.5222 | 689.5247 | 35.7475  | 35.7185  |
| 13062 | M1484T10 | 1.044884 | -0.06334 | -0.32012 | 0.757481 | 0.880865 | DOWN | 1483.526 | 1483.525 | 1483.528 | 9.902008 | 9.779267 |
| 13063 | M480T42_ | 1.029746 | 0.042288 | 0.320056 | 0.757486 | 0.880866 | UP   | 480.2799 | 480.2795 | 480.2799 | 42.12167 | 42.0065  |
| 13064 | M773T10_ | 1.120446 | 0.164074 | 0.321474 | 0.757607 | 0.880882 | UP   | 773.2727 | 773.2721 | 773.2734 | 9.983467 | 9.859233 |
| 13065 | M349T11_ | 1.054203 | -0.07615 | -0.31957 | 0.75763  | 0.880886 | DOWN | 349.1647 | 349.1644 | 349.1651 | 11.02097 | 10.99687 |
| 13066 | M358T10_ | 1.065807 | -0.09195 | -0.32609 | 0.757881 | 0.88092  | DOWN | 358.2582 | 358.2579 | 358.2583 | 10.14543 | 10.05935 |
| 13067 | M328T11_ | 1.079927 | 0.110933 | 0.319716 | 0.757889 | 0.880921 | UP   | 327.8745 | 327.8745 | 327.8756 | 10.90548 | 10.86275 |
| 13068 | M329T10_ | 1.110632 | 0.151381 | 0.321045 | 0.757971 | 0.880933 | UP   | 329.1933 | 329.1932 | 329.1938 | 10.23213 | 10.18238 |
| 13069 | M818T11_ | 1.071736 | -0.09995 | -0.31926 | 0.757984 | 0.880935 | DOWN | 818.463  | 818.4616 | 818.4638 | 10.6101  | 10.53485 |
| 13070 | M317T21  | 1.119599 | 0.162983 | 0.319242 | 0.757986 | 0.880935 | UP   | 317.2043 | 317.2039 | 317.2044 | 20.69183 | 20.65117 |
| 13071 | M220T9_1 | 1.3132   | -0.39309 | -0.31969 | 0.758035 | 0.880942 | DOWN | 220.0992 | 220.0975 | 220.1    | 9.338567 | 9.160617 |
| 13072 | M423T10_ | 1.129704 | -0.17595 | -0.3189  | 0.758051 | 0.880944 | DOWN | 423.0789 | 423.0786 | 423.0797 | 9.996992 | 9.932567 |
| 13073 | M593T11_ | 1.067822 | -0.09467 | -0.3199  | 0.758392 | 0.880991 | DOWN | 593.3591 | 593.3582 | 593.3602 | 10.78556 | 10.73323 |
| 13074 | M682T10_ | 1.096863 | -0.13338 | -0.31877 | 0.758411 | 0.880994 | DOWN | 681.8433 | 681.8431 | 681.844  | 9.939008 | 9.827283 |
| 13075 | M449T11_ | 1.03879  | -0.0549  | -0.31851 | 0.75846  | 0.881    | DOWN | 449.3573 | 449.3568 | 449.3576 | 10.90519 | 10.879   |
| 13076 | M197T10_ | 1.036844 | 0.0522   | 0.318976 | 0.75846  | 0.881    | UP   | 197.2312 | 197.231  | 197.2315 | 9.84095  | 9.699733 |
| 13077 | M420T42_ | 1.070682 | -0.09853 | -0.3221  | 0.758507 | 0.881007 | DOWN | 420.2226 | 420.2225 | 420.2228 | 41.89875 | 41.834   |
| 13078 | M1030T10 | 1.063822 | -0.08926 | -0.3183  | 0.758667 | 0.881029 | DOWN | 1030.168 | 1030.167 | 1030.169 | 9.827158 | 9.6681   |
| 13079 | M492T9_7 | 1.088642 | 0.12253  | 0.319013 | 0.758746 | 0.88104  | UP   | 492.4297 | 492.4295 | 492.4299 | 9.285867 | 9.129317 |
| 13080 | M279T18  | 1.121138 | -0.16496 | -0.32134 | 0.758793 | 0.881046 | DOWN | 279.0931 | 279.0929 | 279.0931 | 17.58633 | 17.5555  |
| 13081 | M1744T10 | 1.115277 | -0.1574  | -0.31818 | 0.758812 | 0.881049 | DOWN | 1744.321 | 1744.32  | 1744.324 | 9.830733 | 9.715683 |
| 13082 | M521T9_1 | 1.130295 | -0.1767  | -0.31895 | 0.758878 | 0.881058 | DOWN | 521.3361 | 521.3358 | 521.3369 | 8.961583 | 8.872733 |
| 13083 | M1511T10 | 1.115325 | -0.15746 | -0.31769 | 0.758958 | 0.881069 | DOWN | 1510.698 | 1510.691 | 1510.701 | 9.90755  | 9.88865  |
| 13084 | M482T11_ | 1.141941 | 0.191488 | 0.318695 | 0.75909  | 0.881087 | UP   | 482.336  | 482.3352 | 482.3365 | 10.94853 | 10.84395 |
| 13085 | M1689T10 | 1.154157 | 0.20684  | 0.327588 | 0.75931  | 0.881118 | UP   | 1689.364 | 1689.362 | 1689.366 | 9.8207   | 9.728083 |
| 13086 | M230T13_ | 1.106168 | -0.14557 | -0.31739 | 0.759353 | 0.881124 | DOWN | 230.19   | 230.1898 | 230.1902 | 12.70418 | 12.68908 |
| 13087 | M569T9_1 | 1.089592 | -0.12379 | -0.32017 | 0.759362 | 0.881125 | DOWN | 569.0558 | 569.0556 | 569.0564 | 9.2873   | 9.191133 |
| 13088 | M313T44_ | 1.068282 | 0.095293 | 0.31767  | 0.759403 | 0.881131 | UP   | 313.1643 | 313.1642 | 313.1645 | 43.83333 | 43.54567 |
| 13089 | M655T11_ | 1.08927  | 0.123361 | 0.317215 | 0.759447 | 0.881137 | UP   | 655.1141 | 655.1136 | 655.1153 | 10.892   | 10.8646  |

|       |          |          |          |          |          |          |      |          |          |          |          |          |
|-------|----------|----------|----------|----------|----------|----------|------|----------|----------|----------|----------|----------|
| 13090 | M728T10_ | 1.079558 | 0.110441 | 0.317028 | 0.759522 | 0.881147 | UP   | 727.9319 | 727.9303 | 727.9325 | 10.36239 | 10.31147 |
| 13091 | M420T40_ | 1.062189 | -0.08704 | -0.32564 | 0.75953  | 0.881148 | DOWN | 420.2226 | 420.2225 | 420.2228 | 40.453   | 40.40967 |
| 13092 | M438T10  | 1.04605  | -0.06495 | -0.32148 | 0.759552 | 0.881151 | DOWN | 438.1733 | 438.1732 | 438.1735 | 9.989733 | 9.8914   |
| 13093 | M351T10_ | 1.113241 | -0.15477 | -0.31665 | 0.759657 | 0.881166 | DOWN | 350.7613 | 350.761  | 350.7688 | 9.946367 | 9.732983 |
| 13094 | M794T11_ | 1.057616 | -0.08082 | -0.32415 | 0.759707 | 0.881173 | DOWN | 793.9722 | 793.9714 | 793.973  | 10.53977 | 10.47197 |
| 13095 | M461T10_ | 1.056925 | 0.079873 | 0.318124 | 0.75979  | 0.881184 | UP   | 460.9399 | 460.9396 | 460.9407 | 9.9677   | 9.8753   |
| 13096 | M260T11_ | 1.06978  | -0.09731 | -0.31718 | 0.759799 | 0.881185 | DOWN | 259.9449 | 259.9448 | 259.9454 | 10.892   | 10.8646  |
| 13097 | M683T9_1 | 1.157925 | -0.21154 | -0.31634 | 0.759845 | 0.881192 | DOWN | 682.9644 | 682.9642 | 682.9652 | 9.333667 | 9.275917 |
| 13098 | M266T20  | 1.027316 | -0.03888 | -0.31644 | 0.759868 | 0.881195 | DOWN | 266.2476 | 266.2476 | 266.2477 | 20.24492 | 20.23017 |
| 13099 | M876T10_ | 1.071252 | 0.099297 | 0.321692 | 0.759877 | 0.881196 | UP   | 876.1877 | 876.1857 | 876.1887 | 9.903567 | 9.79535  |
| 13100 | M358T10_ | 1.140866 | 0.19013  | 0.318735 | 0.759916 | 0.881201 | UP   | 358.2351 | 358.2348 | 358.2399 | 9.832542 | 9.447617 |
| 13101 | M463T10_ | 1.076945 | 0.106945 | 0.32465  | 0.759944 | 0.881205 | UP   | 463.3511 | 463.3509 | 463.352  | 9.6293   | 9.510117 |
| 13102 | M337T10_ | 1.098075 | 0.134977 | 0.316447 | 0.759963 | 0.881208 | UP   | 336.6729 | 336.672  | 336.673  | 9.744917 | 9.62055  |
| 13103 | M637T9_1 | 1.057836 | -0.08112 | -0.32506 | 0.76007  | 0.881223 | DOWN | 636.5051 | 636.5048 | 636.5054 | 9.3471   | 9.17485  |
| 13104 | M270T9_3 | 1.143908 | 0.193971 | 0.32127  | 0.760088 | 0.881225 | UP   | 270.4424 | 270.4396 | 270.443  | 9.232283 | 9.160617 |
| 13105 | M355T19_ | 1.125219 | -0.17021 | -0.31799 | 0.760176 | 0.881237 | DOWN | 355.2378 | 355.2376 | 355.2382 | 19.43125 | 19.4     |
| 13106 | M476T11_ | 1.064494 | 0.090168 | 0.322991 | 0.760337 | 0.881259 | UP   | 476.3281 | 476.328  | 476.3283 | 11.28203 | 11.25038 |
| 13107 | M471T9_1 | 1.337065 | -0.41907 | -0.31547 | 0.760517 | 0.881284 | DOWN | 471.3732 | 471.3723 | 471.3852 | 8.930317 | 8.780767 |
| 13108 | M525T9_5 | 1.064286 | -0.08989 | -0.31551 | 0.760636 | 0.8813   | DOWN | 525.2879 | 525.2867 | 525.2884 | 8.96605  | 8.771083 |
| 13109 | M448T9_2 | 1.097857 | -0.13469 | -0.31566 | 0.760764 | 0.881318 | DOWN | 447.6975 | 447.697  | 447.6979 | 9.3385   | 9.219483 |
| 13110 | M429T11_ | 1.045483 | -0.06417 | -0.31521 | 0.760843 | 0.881329 | DOWN | 429.0087 | 429.0085 | 429.0093 | 10.892   | 10.8646  |
| 13111 | M330T11_ | 1.099689 | -0.13709 | -0.31631 | 0.760895 | 0.881336 | DOWN | 329.8784 | 329.8779 | 329.8785 | 10.9344  | 10.88747 |
| 13112 | M719T10_ | 1.041759 | -0.05902 | -0.31567 | 0.761032 | 0.881355 | DOWN | 719.0764 | 719.0754 | 719.0771 | 9.823575 | 9.715683 |
| 13113 | M457T15  | 1.059807 | -0.0838  | -0.31563 | 0.761215 | 0.88138  | DOWN | 457.3613 | 457.3607 | 457.3619 | 15.34678 | 15.30742 |
| 13114 | M761T32  | 1.229829 | 0.298458 | 0.314627 | 0.761316 | 0.881394 | UP   | 760.5688 | 760.5686 | 760.5696 | 31.7605  | 31.753   |
| 13115 | M176T10_ | 1.046834 | -0.06603 | -0.31546 | 0.761331 | 0.881396 | DOWN | 175.8122 | 175.8121 | 175.8124 | 9.834117 | 9.715683 |
| 13116 | M245T10_ | 1.16423  | -0.21938 | -0.31438 | 0.761361 | 0.8814   | DOWN | 244.6955 | 244.695  | 244.6956 | 9.987092 | 9.869467 |
| 13117 | M237T12_ | 1.106295 | 0.145736 | 0.321018 | 0.761404 | 0.881406 | UP   | 237.1095 | 237.1094 | 237.1096 | 11.59896 | 11.34412 |
| 13118 | M363T10_ | 1.218997 | 0.285694 | 0.314548 | 0.761506 | 0.88142  | UP   | 363.4549 | 363.4548 | 363.4553 | 9.8214   | 9.728083 |
| 13119 | M474T9_5 | 1.053139 | -0.0747  | -0.31404 | 0.761529 | 0.881423 | DOWN | 474.2495 | 474.2493 | 474.2497 | 9.285867 | 9.129317 |
| 13120 | M436T11_ | 1.047475 | -0.06692 | -0.31417 | 0.761657 | 0.881441 | DOWN | 436.3533 | 436.3532 | 436.3541 | 10.892   | 10.879   |
| 13121 | M482T9_2 | 1.17539  | 0.233139 | 0.317156 | 0.761701 | 0.881447 | UP   | 482.2651 | 482.2631 | 482.2655 | 9.01145  | 8.96815  |
| 13122 | M325T10_ | 1.085183 | -0.11794 | -0.3144  | 0.761729 | 0.881451 | DOWN | 325.3935 | 325.3932 | 325.3953 | 9.946467 | 9.827283 |
| 13123 | M368T11_ | 1.070348 | -0.09808 | -0.3138  | 0.761737 | 0.881452 | DOWN | 368.2882 | 368.288  | 368.2884 | 10.90628 | 10.8646  |
| 13124 | M391T9_7 | 1.116627 | -0.15915 | -0.314   | 0.761884 | 0.881472 | DOWN | 391.4943 | 391.4939 | 391.4949 | 9.253783 | 9.132267 |

|       |          |          |          |          |          |          |      |          |          |          |          |          |
|-------|----------|----------|----------|----------|----------|----------|------|----------|----------|----------|----------|----------|
| 13125 | M587T10_ | 1.078255 | 0.108698 | 0.313833 | 0.761957 | 0.881482 | UP   | 586.8343 | 586.8334 | 586.8349 | 9.695642 | 9.6628   |
| 13126 | M1064T10 | 1.064614 | -0.09033 | -0.31572 | 0.762006 | 0.881488 | DOWN | 1063.907 | 1063.906 | 1063.908 | 9.977442 | 9.859233 |
| 13127 | M701T16  | 1.079608 | -0.11051 | -0.31342 | 0.762048 | 0.881494 | DOWN | 701.4933 | 701.4931 | 701.4934 | 15.70095 | 15.54778 |
| 13128 | M729T10_ | 1.059325 | 0.083146 | 0.313395 | 0.762072 | 0.881498 | UP   | 729.4066 | 729.4061 | 729.4074 | 10.32456 | 10.26307 |
| 13129 | M836T10  | 1.082228 | -0.11401 | -0.31591 | 0.762147 | 0.881508 | DOWN | 836.3967 | 836.3962 | 836.3971 | 9.943183 | 9.827283 |
| 13130 | M657T19  | 1.063771 | 0.089187 | 0.320253 | 0.762215 | 0.881517 | UP   | 657.4352 | 657.4339 | 657.4358 | 18.64475 | 18.61417 |
| 13131 | M424T19  | 1.075858 | 0.105487 | 0.313176 | 0.762228 | 0.881519 | UP   | 424.3053 | 424.305  | 424.3057 | 18.81808 | 18.8015  |
| 13132 | M989T10  | 1.09033  | -0.12477 | -0.31452 | 0.762241 | 0.881521 | DOWN | 989.4815 | 989.4805 | 989.4823 | 9.75365  | 9.746783 |
| 13133 | M1740T10 | 1.136182 | 0.184194 | 0.323043 | 0.76232  | 0.881532 | UP   | 1740.029 | 1740.027 | 1740.04  | 9.8322   | 9.728083 |
| 13134 | M418T40  | 1.056349 | -0.07909 | -0.32254 | 0.762366 | 0.881538 | DOWN | 418.2795 | 418.2793 | 418.2796 | 40.30917 | 40.237   |
| 13135 | M648T9_4 | 1.160489 | -0.21473 | -0.31514 | 0.762445 | 0.881549 | DOWN | 648.1896 | 648.1881 | 648.1917 | 9.175692 | 9.09495  |
| 13136 | M513T11_ | 1.095169 | 0.131154 | 0.314351 | 0.762579 | 0.881567 | UP   | 512.9474 | 512.9471 | 512.9477 | 10.90657 | 10.879   |
| 13137 | M340T10_ | 1.033036 | 0.04689  | 0.317745 | 0.762622 | 0.881573 | UP   | 340.0669 | 340.0667 | 340.0671 | 9.823575 | 9.715683 |
| 13138 | M321T9_4 | 1.132836 | 0.179939 | 0.320236 | 0.762674 | 0.88158  | UP   | 321.1031 | 321.1027 | 321.1058 | 9.280767 | 9.1178   |
| 13139 | M365T10_ | 1.079754 | 0.110702 | 0.318926 | 0.762798 | 0.881597 | UP   | 364.8777 | 364.8774 | 364.8782 | 9.986767 | 9.8914   |
| 13140 | M374T11_ | 1.075437 | 0.104923 | 0.313039 | 0.762866 | 0.881606 | UP   | 373.5855 | 373.5849 | 373.5876 | 10.90522 | 10.879   |
| 13141 | M788T24_ | 1.109407 | -0.14979 | -0.31225 | 0.762928 | 0.881615 | DOWN | 787.5669 | 787.5663 | 787.5674 | 24.11675 | 24.0975  |
| 13142 | M471T10_ | 1.077304 | -0.10743 | -0.31228 | 0.76298  | 0.881622 | DOWN | 471.0031 | 471.0024 | 471.0034 | 9.95385  | 9.843367 |
| 13143 | M213T9_1 | 1.19021  | 0.251216 | 0.312675 | 0.76304  | 0.88163  | UP   | 212.9093 | 212.9082 | 212.9101 | 9.280767 | 9.18975  |
| 13144 | M160T10_ | 1.081798 | -0.11343 | -0.31446 | 0.763106 | 0.881639 | DOWN | 159.9027 | 159.8928 | 159.9028 | 9.95825  | 9.859233 |
| 13145 | M249T29  | 1.068152 | -0.09512 | -0.31344 | 0.763174 | 0.881649 | DOWN | 249.1846 | 249.1846 | 249.1847 | 28.99775 | 28.9815  |
| 13146 | M375T10_ | 1.083968 | -0.11632 | -0.3118  | 0.763195 | 0.881651 | DOWN | 375.2494 | 375.249  | 375.2495 | 9.973467 | 9.843367 |
| 13147 | M260T11_ | 1.247513 | -0.31905 | -0.3116  | 0.763406 | 0.88168  | DOWN | 260.1625 | 260.1623 | 260.1628 | 10.89125 | 10.87765 |
| 13148 | M354T9_2 | 1.095698 | 0.13185  | 0.31154  | 0.763438 | 0.881685 | UP   | 353.6653 | 353.6651 | 353.6655 | 8.878567 | 8.745033 |
| 13149 | M352T10_ | 1.092818 | -0.12805 | -0.31147 | 0.763441 | 0.881685 | DOWN | 351.501  | 351.4951 | 351.5013 | 9.848417 | 9.73145  |
| 13150 | M554T9_4 | 1.091104 | -0.12579 | -0.3115  | 0.763459 | 0.881687 | DOWN | 554.0557 | 554.0546 | 554.0561 | 9.075083 | 9.03845  |
| 13151 | M213T10_ | 1.065306 | -0.09127 | -0.31862 | 0.763496 | 0.881692 | DOWN | 212.6652 | 212.6651 | 212.6653 | 9.8322   | 9.699733 |
| 13152 | M752T10_ | 1.073759 | 0.10267  | 0.317968 | 0.763528 | 0.881697 | UP   | 751.7208 | 751.7202 | 751.7225 | 9.989733 | 9.8914   |
| 13153 | M334T11_ | 1.070285 | 0.097994 | 0.311324 | 0.763621 | 0.88171  | UP   | 333.695  | 333.6949 | 333.6952 | 11.48308 | 11.47298 |
| 13154 | M763T10_ | 1.068688 | -0.09584 | -0.31168 | 0.763693 | 0.881719 | DOWN | 762.94   | 762.9387 | 762.9406 | 10.17176 | 10.06883 |
| 13155 | M437T12  | 1.054108 | 0.076023 | 0.312282 | 0.763749 | 0.881727 | UP   | 437.2621 | 437.2619 | 437.2623 | 11.87345 | 11.85617 |
| 13156 | M227T10_ | 1.046863 | -0.06607 | -0.31293 | 0.763766 | 0.881729 | DOWN | 226.6384 | 226.6383 | 226.6385 | 9.915583 | 9.811217 |
| 13157 | M163T10_ | 1.069867 | -0.09743 | -0.31446 | 0.763817 | 0.881736 | DOWN | 162.8118 | 162.8114 | 162.8119 | 9.931442 | 9.79535  |
| 13158 | M760T10_ | 1.060624 | 0.084913 | 0.314473 | 0.763822 | 0.881737 | UP   | 759.9644 | 759.9629 | 759.9652 | 10.44888 | 10.42665 |
| 13159 | M271T26  | 1.093643 | -0.12914 | -0.31089 | 0.763901 | 0.881748 | DOWN | 271.2822 | 271.282  | 271.2824 | 25.75792 | 25.7305  |



|       |          |          |          |          |          |          |      |          |          |          |          |          |
|-------|----------|----------|----------|----------|----------|----------|------|----------|----------|----------|----------|----------|
| 13160 | M593T30  | 1.058174 | -0.08158 | -0.31326 | 0.763942 | 0.881753 | DOWN | 593.3653 | 593.3649 | 593.3657 | 30.27392 | 30.266   |
| 13161 | M710T10_ | 1.093366 | 0.128777 | 0.312337 | 0.763946 | 0.881754 | UP   | 710.3986 | 710.3982 | 710.3993 | 9.872883 | 9.766367 |
| 13162 | M755T10_ | 1.105703 | -0.14496 | -0.31247 | 0.764011 | 0.881763 | DOWN | 755.1458 | 755.145  | 755.1479 | 9.972917 | 9.859233 |
| 13163 | M357T30  | 1.067108 | 0.093706 | 0.315717 | 0.764162 | 0.881783 | UP   | 357.2609 | 357.2607 | 357.261  | 30.07908 | 30.06383 |
| 13164 | M227T23_ | 1.042548 | -0.06011 | -0.31248 | 0.764179 | 0.881786 | DOWN | 227.2003 | 227.2002 | 227.2003 | 23.03042 | 23.01583 |
| 13165 | M218T10_ | 1.166048 | -0.22163 | -0.31092 | 0.764239 | 0.881794 | DOWN | 218.2114 | 218.2114 | 218.2116 | 10.38894 | 10.32768 |
| 13166 | M416T42_ | 1.099782 | 0.137218 | 0.320897 | 0.76427  | 0.881798 | UP   | 416.2641 | 416.264  | 416.2641 | 42.3015  | 42.27983 |
| 13167 | M454T39_ | 1.029032 | -0.04129 | -0.31092 | 0.764271 | 0.881798 | DOWN | 454.2644 | 454.2641 | 454.2646 | 39.47458 | 39.34533 |
| 13168 | M251T9_1 | 1.180967 | -0.23997 | -0.31509 | 0.76452  | 0.881832 | DOWN | 250.6562 | 250.6554 | 250.6659 | 9.008417 | 8.90515  |
| 13169 | M1960T10 | 1.069834 | -0.09739 | -0.31286 | 0.764606 | 0.881844 | DOWN | 1959.688 | 1959.686 | 1959.691 | 9.970617 | 9.843367 |
| 13170 | M374T10_ | 1.063309 | 0.08856  | 0.31078  | 0.764683 | 0.881854 | UP   | 374.2514 | 374.2512 | 374.2517 | 9.514733 | 9.416817 |
| 13171 | M245T10_ | 1.070843 | -0.09875 | -0.30976 | 0.764707 | 0.881858 | DOWN | 245.083  | 245.0827 | 245.0834 | 9.94785  | 9.827283 |
| 13172 | M205T32  | 1.043616 | -0.06159 | -0.31072 | 0.764718 | 0.881859 | DOWN | 205.0858 | 205.0856 | 205.0858 | 32.46017 | 32.44517 |
| 13173 | M177T9_6 | 1.118867 | -0.16204 | -0.31071 | 0.764806 | 0.881871 | DOWN | 177.1086 | 177.1083 | 177.1088 | 9.175017 | 9.1175   |
| 13174 | M339T9_1 | 1.368742 | 0.45285  | 0.31947  | 0.764816 | 0.881873 | UP   | 338.5309 | 338.5308 | 338.5311 | 9.458267 | 9.432183 |
| 13175 | M919T11_ | 1.050186 | -0.07064 | -0.30998 | 0.764855 | 0.881878 | DOWN | 919.251  | 919.2505 | 919.252  | 10.93153 | 10.90785 |
| 13176 | M1807T10 | 1.091505 | -0.12632 | -0.3096  | 0.764926 | 0.881888 | DOWN | 1806.762 | 1806.759 | 1806.764 | 9.8207   | 9.715683 |
| 13177 | M328T35  | 1.117258 | -0.15996 | -0.31027 | 0.764974 | 0.881894 | DOWN | 328.3208 | 328.3206 | 328.321  | 34.52833 | 34.50783 |
| 13178 | M417T43_ | 1.06979  | -0.09733 | -0.30943 | 0.76511  | 0.881913 | DOWN | 417.248  | 417.2478 | 417.2482 | 42.59617 | 42.46683 |
| 13179 | M478T20_ | 1.092444 | -0.12756 | -0.30913 | 0.765298 | 0.881938 | DOWN | 478.3521 | 478.352  | 478.3525 | 19.94    | 19.90917 |
| 13180 | M465T11_ | 1.035875 | 0.05085  | 0.308979 | 0.765393 | 0.881951 | UP   | 464.8335 | 464.8331 | 464.8336 | 11.0838  | 11.0537  |
| 13181 | M608T37  | 1.090888 | 0.125503 | 0.319268 | 0.765426 | 0.881956 | UP   | 608.364  | 608.3638 | 608.3641 | 36.6635  | 36.5385  |
| 13182 | M163T10_ | 1.158889 | 0.212742 | 0.317356 | 0.765485 | 0.881964 | UP   | 162.539  | 162.5389 | 162.539  | 9.910375 | 9.843367 |
| 13183 | M343T11_ | 1.083287 | 0.115415 | 0.308713 | 0.765499 | 0.881966 | UP   | 343.1651 | 343.1645 | 343.1666 | 10.91849 | 10.89125 |
| 13184 | M573T9_3 | 1.07165  | 0.099834 | 0.308778 | 0.765538 | 0.881971 | UP   | 573.3673 | 573.3671 | 573.3681 | 8.84285  | 8.803967 |
| 13185 | M284T11_ | 1.090285 | -0.12471 | -0.31062 | 0.765601 | 0.881979 | DOWN | 283.5248 | 283.5247 | 283.5252 | 10.877   | 10.8646  |
| 13186 | M971T10  | 1.105584 | 0.144809 | 0.308883 | 0.765697 | 0.881992 | UP   | 970.7896 | 970.7855 | 970.79   | 9.979958 | 9.859233 |
| 13187 | M646T9_2 | 1.103387 | -0.14194 | -0.31666 | 0.765719 | 0.881995 | DOWN | 646.3647 | 646.3607 | 646.366  | 9.249433 | 9.1503   |
| 13188 | M841T11  | 1.099159 | 0.1364   | 0.309315 | 0.765816 | 0.882009 | UP   | 840.969  | 840.9687 | 840.9712 | 10.86854 | 10.83572 |
| 13189 | M323T10_ | 1.225254 | 0.293081 | 0.308429 | 0.765843 | 0.882012 | UP   | 323.4961 | 323.4959 | 323.4965 | 9.946467 | 9.634283 |
| 13190 | M656T10_ | 1.074555 | 0.103739 | 0.311425 | 0.765953 | 0.882027 | UP   | 655.6444 | 655.6435 | 655.6467 | 9.818433 | 9.715683 |
| 13191 | M716T3   | 1.119819 | 0.163265 | 0.30796  | 0.765984 | 0.882031 | UP   | 716.4757 | 716.4751 | 716.4765 | 3.471842 | 3.2419   |
| 13192 | M417T38  | 1.062403 | -0.08733 | -0.30827 | 0.766067 | 0.882043 | DOWN | 417.2479 | 417.2478 | 417.2485 | 38.20817 | 38.03567 |
| 13193 | M356T22  | 1.035348 | 0.050116 | 0.308271 | 0.766144 | 0.882053 | UP   | 356.3156 | 356.3154 | 356.3159 | 21.72425 | 21.7095  |
| 13194 | M706T10_ | 1.107327 | 0.147081 | 0.309544 | 0.766197 | 0.88206  | UP   | 706.3901 | 706.3892 | 706.3907 | 9.95825  | 9.843367 |

|       |          |          |          |          |          |          |      |          |          |          |          |          |
|-------|----------|----------|----------|----------|----------|----------|------|----------|----------|----------|----------|----------|
| 13195 | M882T10  | 1.049236 | -0.06934 | -0.30762 | 0.766238 | 0.882066 | DOWN | 882.4728 | 882.4716 | 882.4739 | 9.930908 | 9.811217 |
| 13196 | M304T11_ | 1.085445 | -0.11829 | -0.31499 | 0.76625  | 0.882068 | DOWN | 303.8756 | 303.8753 | 303.8768 | 10.91066 | 10.86253 |
| 13197 | M534T37  | 1.040562 | -0.05736 | -0.31787 | 0.766406 | 0.882089 | DOWN | 534.327  | 534.3267 | 534.3272 | 36.73517 | 36.68433 |
| 13198 | M479T9_5 | 1.062233 | -0.0871  | -0.30749 | 0.766441 | 0.882093 | DOWN | 478.9743 | 478.9739 | 478.9755 | 8.878825 | 8.7891   |
| 13199 | M308T10_ | 1.055877 | -0.07844 | -0.30869 | 0.766515 | 0.882104 | DOWN | 307.7138 | 307.7136 | 307.7139 | 10.39613 | 10.34372 |
| 13200 | M362T32  | 1.117505 | -0.16028 | -0.3072  | 0.766538 | 0.882107 | DOWN | 362.2973 | 362.2972 | 362.2974 | 31.7675  | 31.75333 |
| 13201 | M367T11_ | 1.063907 | -0.08937 | -0.30729 | 0.76661  | 0.882116 | DOWN | 367.4798 | 367.4757 | 367.4801 | 10.89907 | 10.873   |
| 13202 | M228T9_3 | 1.105591 | -0.14482 | -0.30696 | 0.766709 | 0.88213  | DOWN | 227.6767 | 227.6766 | 227.6768 | 9.356517 | 9.126783 |
| 13203 | M405T9_5 | 1.12042  | -0.16404 | -0.3072  | 0.766716 | 0.882131 | DOWN | 405.4772 | 405.4769 | 405.4774 | 9.275792 | 9.1587   |
| 13204 | M658T11_ | 1.056862 | -0.07979 | -0.30682 | 0.76682  | 0.882145 | DOWN | 658.3272 | 658.327  | 658.3277 | 10.71817 | 10.66012 |
| 13205 | M414T9_1 | 1.224062 | 0.291677 | 0.307309 | 0.766936 | 0.882161 | UP   | 414.472  | 414.4683 | 414.4745 | 9.20465  | 9.06315  |
| 13206 | M655T10_ | 1.10434  | -0.14319 | -0.30718 | 0.766967 | 0.882165 | DOWN | 655.3808 | 655.3799 | 655.3837 | 9.925433 | 9.8378   |
| 13207 | M659T10_ | 1.023584 | 0.03363  | 0.314441 | 0.767018 | 0.882172 | UP   | 658.5446 | 658.5441 | 658.5463 | 9.83135  | 9.715683 |
| 13208 | M552T10_ | 1.019668 | -0.0281  | -0.31268 | 0.767024 | 0.882173 | DOWN | 552.4484 | 552.4482 | 552.4485 | 9.886783 | 9.779267 |
| 13209 | M345T16  | 1.03844  | -0.05442 | -0.30733 | 0.767057 | 0.882177 | DOWN | 345.1541 | 345.154  | 345.1545 | 15.96322 | 15.93568 |
| 13210 | M321T27_ | 1.144745 | -0.19503 | -0.30864 | 0.767063 | 0.882178 | DOWN | 321.2369 | 321.2368 | 321.2374 | 26.80983 | 26.7685  |
| 13211 | M474T37_ | 1.094471 | -0.13023 | -0.309   | 0.767085 | 0.882181 | DOWN | 474.2695 | 474.2693 | 474.2696 | 36.92892 | 36.784   |
| 13212 | M458T9_8 | 1.071707 | -0.09991 | -0.30803 | 0.767098 | 0.882183 | DOWN | 458.2482 | 458.2462 | 458.2515 | 9.382183 | 9.249433 |
| 13213 | M432T20  | 1.197855 | 0.260453 | 0.306612 | 0.767108 | 0.882184 | UP   | 432.2693 | 432.2685 | 432.2696 | 20.24483 | 20.21633 |
| 13214 | M349T10_ | 1.079244 | -0.11002 | -0.30966 | 0.767276 | 0.882207 | DOWN | 348.8461 | 348.8458 | 348.8491 | 9.887133 | 9.830733 |
| 13215 | M531T10_ | 1.058443 | 0.081943 | 0.306415 | 0.767438 | 0.882229 | UP   | 530.8886 | 530.8885 | 530.8889 | 9.977025 | 9.859233 |
| 13216 | M261T10_ | 1.093331 | -0.12873 | -0.30686 | 0.767591 | 0.882249 | DOWN | 261.1707 | 261.1705 | 261.1709 | 9.965717 | 9.859233 |
| 13217 | M316T11_ | 1.046232 | -0.0652  | -0.306   | 0.767642 | 0.882256 | DOWN | 315.7022 | 315.702  | 315.7024 | 10.89875 | 10.879   |
| 13218 | M243T11_ | 1.063969 | -0.08946 | -0.3055  | 0.767786 | 0.882276 | DOWN | 242.7063 | 242.7062 | 242.7064 | 10.89875 | 10.879   |
| 13219 | M387T11_ | 1.039042 | -0.05525 | -0.30905 | 0.767787 | 0.882276 | DOWN | 387.249  | 387.2489 | 387.2491 | 10.64667 | 10.629   |
| 13220 | M315T10_ | 1.172006 | 0.22898  | 0.314829 | 0.767855 | 0.882285 | UP   | 314.8089 | 314.8027 | 314.809  | 9.977533 | 9.816167 |
| 13221 | M227T9_1 | 1.07408  | 0.103102 | 0.305288 | 0.76802  | 0.882307 | UP   | 227.1478 | 227.146  | 227.1487 | 9.3471   | 9.22495  |
| 13222 | M188T9_1 | 1.209072 | -0.2739  | -0.30528 | 0.768057 | 0.882312 | DOWN | 188.4589 | 188.4585 | 188.4599 | 9.166033 | 9.11795  |
| 13223 | M480T11_ | 1.043678 | -0.06168 | -0.30525 | 0.768143 | 0.882324 | DOWN | 479.8074 | 479.8069 | 479.8077 | 10.892   | 10.8646  |
| 13224 | M264T10_ | 1.216769 | -0.28306 | -0.30623 | 0.768147 | 0.882324 | DOWN | 263.539  | 263.5388 | 263.5393 | 9.508908 | 9.416817 |
| 13225 | M380T11_ | 1.058882 | 0.082542 | 0.305705 | 0.768208 | 0.882333 | UP   | 380.0967 | 380.0966 | 380.0976 | 10.892   | 10.879   |
| 13226 | M924T11_ | 1.054868 | 0.077062 | 0.306866 | 0.768299 | 0.882345 | UP   | 923.9526 | 923.9514 | 923.9533 | 10.89875 | 10.879   |
| 13227 | M300T10_ | 1.040577 | -0.05738 | -0.31068 | 0.768327 | 0.882349 | DOWN | 299.854  | 299.8536 | 299.8543 | 9.996883 | 9.8914   |
| 13228 | M448T9_6 | 1.051162 | -0.07199 | -0.30475 | 0.768347 | 0.882352 | DOWN | 448.4436 | 448.4434 | 448.4442 | 9.264692 | 9.129317 |
| 13229 | M252T10_ | 1.223369 | 0.29086  | 0.309031 | 0.76838  | 0.882356 | UP   | 252.1883 | 252.188  | 252.1902 | 9.611658 | 9.432533 |

|       |          |          |          |          |          |          |      |          |          |          |          |          |
|-------|----------|----------|----------|----------|----------|----------|------|----------|----------|----------|----------|----------|
| 13230 | M366T10_ | 1.054483 | 0.076537 | 0.304544 | 0.768524 | 0.882376 | UP   | 365.7579 | 365.7573 | 365.7583 | 9.970617 | 9.8753   |
| 13231 | M1410T10 | 1.135654 | 0.183523 | 0.3099   | 0.768525 | 0.882376 | UP   | 1409.964 | 1409.961 | 1409.971 | 9.900133 | 9.79535  |
| 13232 | M237T14  | 1.137802 | 0.186249 | 0.304474 | 0.76854  | 0.882378 | UP   | 237.1095 | 237.1094 | 237.1096 | 14.07782 | 14.00433 |
| 13233 | M583T9_3 | 1.073941 | -0.10291 | -0.31023 | 0.768574 | 0.882382 | DOWN | 582.7285 | 582.7276 | 582.7301 | 9.278717 | 9.204617 |
| 13234 | M373T13  | 1.132366 | 0.17934  | 0.304686 | 0.768596 | 0.882385 | UP   | 373.2195 | 373.2193 | 373.2204 | 12.69003 | 12.6599  |
| 13235 | M562T42_ | 1.104789 | 0.143772 | 0.304683 | 0.768626 | 0.882389 | UP   | 562.322  | 562.3218 | 562.3223 | 41.7905  | 41.51767 |
| 13236 | M455T9_1 | 1.261384 | -0.33501 | -0.30479 | 0.768636 | 0.882391 | DOWN | 455.2631 | 455.2627 | 455.2634 | 8.949317 | 8.924217 |
| 13237 | M291T22  | 1.21751  | 0.283934 | 0.30515  | 0.768697 | 0.882399 | UP   | 291.2718 | 291.2714 | 291.2721 | 22.18783 | 22.16767 |
| 13238 | M229T10_ | 1.071269 | -0.09932 | -0.30501 | 0.768733 | 0.882404 | DOWN | 229.1625 | 229.1613 | 229.1629 | 9.960892 | 9.859233 |
| 13239 | M673T36  | 1.061107 | -0.08557 | -0.3043  | 0.768747 | 0.882406 | DOWN | 673.4927 | 673.4925 | 673.493  | 36.32342 | 36.3045  |
| 13240 | M449T11_ | 1.224602 | -0.29231 | -0.31141 | 0.76885  | 0.882419 | DOWN | 449.2854 | 449.2848 | 449.2858 | 10.91878 | 10.879   |
| 13241 | M818T9   | 1.121615 | -0.16558 | -0.30717 | 0.768858 | 0.882421 | DOWN | 817.627  | 817.625  | 817.6277 | 8.959467 | 8.909    |
| 13242 | M488T43_ | 1.065858 | -0.09201 | -0.31413 | 0.768931 | 0.88243  | DOWN | 488.2849 | 488.2847 | 488.285  | 42.79767 | 42.7115  |
| 13243 | M283T11_ | 1.034084 | -0.04835 | -0.30568 | 0.76908  | 0.88245  | DOWN | 283.1504 | 283.1499 | 283.1507 | 10.90519 | 10.879   |
| 13244 | M216T10_ | 1.103046 | -0.14149 | -0.30493 | 0.769144 | 0.882459 | DOWN | 215.7658 | 215.7656 | 215.7658 | 9.965717 | 9.843367 |
| 13245 | M286T10_ | 1.05808  | 0.081449 | 0.309076 | 0.769259 | 0.882475 | UP   | 285.9372 | 285.9367 | 285.9376 | 9.975217 | 9.8753   |
| 13246 | M216T12_ | 1.19397  | 0.255767 | 0.306693 | 0.769262 | 0.882475 | UP   | 216.1955 | 216.1952 | 216.1958 | 11.963   | 11.94798 |
| 13247 | M225T10_ | 1.114009 | -0.15576 | -0.30567 | 0.769276 | 0.882477 | DOWN | 224.5428 | 224.5427 | 224.5428 | 9.917167 | 9.900133 |
| 13248 | M276T11_ | 1.056309 | -0.07903 | -0.30657 | 0.769464 | 0.882502 | DOWN | 276.1101 | 276.11   | 276.1103 | 10.87704 | 10.85018 |
| 13249 | M339T9_4 | 1.338481 | 0.420597 | 0.303262 | 0.769513 | 0.882509 | UP   | 339.0245 | 339.0235 | 339.0246 | 9.275917 | 9.145433 |
| 13250 | M1355T10 | 1.131826 | 0.178653 | 0.305925 | 0.769589 | 0.882519 | UP   | 1354.734 | 1354.733 | 1354.736 | 9.972917 | 9.8753   |
| 13251 | M246T10_ | 1.072152 | -0.10051 | -0.30319 | 0.769591 | 0.882519 | DOWN | 245.5879 | 245.5876 | 245.5883 | 9.94785  | 9.843367 |
| 13252 | M433T9_1 | 1.216046 | 0.282198 | 0.30426  | 0.769657 | 0.882528 | UP   | 433.2812 | 433.2806 | 433.2836 | 8.996883 | 8.734483 |
| 13253 | M235T10_ | 1.042074 | -0.05946 | -0.30393 | 0.769778 | 0.882545 | DOWN | 235.0107 | 235.0106 | 235.0108 | 9.935675 | 9.827283 |
| 13254 | M295T10_ | 1.055167 | -0.07747 | -0.30349 | 0.769805 | 0.882548 | DOWN | 294.6562 | 294.656  | 294.6563 | 9.943183 | 9.827283 |
| 13255 | M463T11_ | 1.091803 | 0.126713 | 0.305569 | 0.769811 | 0.882549 | UP   | 463.195  | 463.1946 | 463.1956 | 10.8926  | 10.879   |
| 13256 | M173T10_ | 1.072945 | 0.101577 | 0.302624 | 0.769916 | 0.882563 | UP   | 173.4252 | 173.4252 | 173.4254 | 9.82645  | 9.715683 |
| 13257 | M544T10_ | 1.062392 | 0.087316 | 0.307416 | 0.769916 | 0.882563 | UP   | 544.4658 | 544.4653 | 544.466  | 9.985733 | 9.8914   |
| 13258 | M704T11  | 1.070329 | 0.098054 | 0.302715 | 0.769985 | 0.882572 | UP   | 703.8142 | 703.814  | 703.8148 | 10.90659 | 10.86008 |
| 13259 | M394T9_1 | 1.110653 | -0.15141 | -0.30263 | 0.770024 | 0.882578 | DOWN | 394.2667 | 394.2662 | 394.269  | 8.832758 | 8.7575   |
| 13260 | M390T10_ | 1.088547 | 0.122403 | 0.303496 | 0.770067 | 0.882583 | UP   | 390.3115 | 390.3109 | 390.3118 | 10.42296 | 10.34372 |
| 13261 | M256T10_ | 1.109277 | 0.149619 | 0.306668 | 0.770089 | 0.882586 | UP   | 255.6146 | 255.614  | 255.6148 | 9.965892 | 9.843367 |
| 13262 | M249T10_ | 1.058162 | -0.08156 | -0.30249 | 0.770161 | 0.882596 | DOWN | 248.7025 | 248.7024 | 248.7026 | 9.77435  | 9.75365  |
| 13263 | M717T36  | 1.073371 | -0.10215 | -0.30226 | 0.770239 | 0.882607 | DOWN | 716.5156 | 716.5154 | 716.5159 | 36.1095  | 36.09967 |
| 13264 | M1692T10 | 1.216525 | -0.28277 | -0.30299 | 0.77038  | 0.882626 | DOWN | 1691.62  | 1691.619 | 1691.621 | 9.941642 | 9.843367 |

|       |          |          |          |          |          |          |      |          |          |          |          |          |
|-------|----------|----------|----------|----------|----------|----------|------|----------|----------|----------|----------|----------|
| 13265 | M331T10_ | 1.03666  | -0.05194 | -0.30494 | 0.770402 | 0.882629 | DOWN | 331.2547 | 331.2544 | 331.2548 | 9.872475 | 9.779267 |
| 13266 | M1138T11 | 1.04122  | 0.058275 | 0.302785 | 0.770521 | 0.882644 | UP   | 1137.617 | 1137.615 | 1137.618 | 10.90553 | 10.873   |
| 13267 | M326T10_ | 1.08522  | 0.117988 | 0.302171 | 0.770566 | 0.882651 | UP   | 326.2098 | 326.2095 | 326.2105 | 9.857275 | 9.715683 |
| 13268 | M255T11_ | 1.152563 | 0.204846 | 0.306835 | 0.770704 | 0.882669 | UP   | 255.1564 | 255.1563 | 255.1566 | 11.16458 | 11.10612 |
| 13269 | M814T11_ | 1.059795 | 0.083785 | 0.302652 | 0.770723 | 0.882672 | UP   | 813.5072 | 813.5068 | 813.5085 | 10.61192 | 10.54367 |
| 13270 | M428T10_ | 1.053701 | 0.075466 | 0.301428 | 0.770835 | 0.882687 | UP   | 428.049  | 428.0488 | 428.0492 | 9.968992 | 9.859233 |
| 13271 | M379T10_ | 1.113514 | 0.15512  | 0.302303 | 0.770992 | 0.882708 | UP   | 378.8427 | 378.8392 | 378.8428 | 9.886083 | 9.869467 |
| 13272 | M641T10_ | 1.061538 | 0.086157 | 0.304652 | 0.771021 | 0.882712 | UP   | 641.3546 | 641.3539 | 641.3551 | 10.09153 | 9.995817 |
| 13273 | M1312T9  | 1.099434 | -0.13676 | -0.30761 | 0.771108 | 0.88272  | DOWN | 1312.06  | 1312.059 | 1312.062 | 9.4148   | 9.2946   |
| 13274 | M635T10_ | 1.121463 | 0.165382 | 0.309358 | 0.771128 | 0.882726 | UP   | 635.0272 | 635.0265 | 635.0298 | 9.82645  | 9.73145  |
| 13275 | M245T10_ | 1.084735 | 0.117342 | 0.300576 | 0.771415 | 0.882765 | UP   | 245.2182 | 245.2115 | 245.2183 | 9.97385  | 9.859233 |
| 13276 | M389T10_ | 1.141378 | 0.190777 | 0.300891 | 0.77163  | 0.882793 | UP   | 388.5249 | 388.5246 | 388.5257 | 9.9081   | 9.79535  |
| 13277 | M839T10_ | 1.104552 | -0.14346 | -0.30036 | 0.771725 | 0.882806 | DOWN | 838.912  | 838.9107 | 838.9129 | 9.946467 | 9.843367 |
| 13278 | M306T11_ | 1.082328 | -0.11414 | -0.30013 | 0.771736 | 0.882808 | DOWN | 305.5118 | 305.5116 | 305.5121 | 10.86059 | 10.83417 |
| 13279 | M617T30  | 1.066281 | -0.09259 | -0.30236 | 0.771795 | 0.882816 | DOWN | 617.4663 | 617.4658 | 617.4664 | 30.27408 | 30.266   |
| 13280 | M306T11_ | 1.084503 | 0.117034 | 0.302806 | 0.771895 | 0.882829 | UP   | 306.2686 | 306.2683 | 306.2692 | 10.92595 | 10.8926  |
| 13281 | M514T10_ | 1.071416 | 0.099519 | 0.307438 | 0.77201  | 0.882844 | UP   | 514.3051 | 514.3041 | 514.3117 | 10.44215 | 10.3044  |
| 13282 | M534T10_ | 1.206287 | -0.27057 | -0.29975 | 0.772015 | 0.882845 | DOWN | 533.7542 | 533.7537 | 533.7548 | 9.946367 | 9.8753   |
| 13283 | M467T30  | 1.059212 | -0.08299 | -0.30384 | 0.772019 | 0.882846 | DOWN | 467.3573 | 467.357  | 467.3575 | 30.26625 | 30.2515  |
| 13284 | M644T10_ | 1.059558 | -0.08346 | -0.3     | 0.77202  | 0.882846 | DOWN | 644.0429 | 644.0386 | 644.044  | 9.818525 | 9.699733 |
| 13285 | M219T9_3 | 1.111306 | 0.152256 | 0.300009 | 0.772022 | 0.882846 | UP   | 218.7974 | 218.7966 | 218.7984 | 9.318625 | 9.250817 |
| 13286 | M478T42_ | 1.044372 | -0.06264 | -0.30701 | 0.772025 | 0.882846 | DOWN | 478.3005 | 478.3003 | 478.3008 | 41.74783 | 41.56083 |
| 13287 | M297T11_ | 1.052848 | -0.0743  | -0.30266 | 0.772093 | 0.882855 | DOWN | 296.8593 | 296.8588 | 296.8603 | 10.89904 | 10.879   |
| 13288 | M417T44  | 1.065304 | 0.091266 | 0.307684 | 0.772193 | 0.882869 | UP   | 417.2479 | 417.2477 | 417.2481 | 44.236   | 43.9915  |
| 13289 | M273T11_ | 1.063343 | 0.088607 | 0.299629 | 0.772244 | 0.882876 | UP   | 273.217  | 273.2168 | 273.2171 | 11.03033 | 11.0035  |
| 13290 | M400T10_ | 1.079811 | 0.110779 | 0.306989 | 0.772281 | 0.882881 | UP   | 400.2849 | 400.2843 | 400.2855 | 9.934533 | 9.827283 |
| 13291 | M465T10_ | 1.055661 | 0.078146 | 0.299298 | 0.772342 | 0.882889 | UP   | 464.7675 | 464.7673 | 464.7677 | 9.999517 | 9.8914   |
| 13292 | M645T10_ | 1.032075 | -0.04555 | -0.30673 | 0.772379 | 0.882894 | DOWN | 645.4316 | 645.4312 | 645.4318 | 10.41041 | 10.35992 |
| 13293 | M675T10_ | 1.047456 | -0.06689 | -0.29942 | 0.772379 | 0.882894 | DOWN | 674.5748 | 674.5738 | 674.5755 | 9.823575 | 9.728083 |
| 13294 | M309T11_ | 1.0608   | -0.08515 | -0.29982 | 0.772432 | 0.882901 | DOWN | 309.4071 | 309.4068 | 309.4072 | 10.8914  | 10.88995 |
| 13295 | M522T9_1 | 1.057774 | -0.08103 | -0.30088 | 0.772435 | 0.882901 | DOWN | 521.803  | 521.8019 | 521.8042 | 9.276658 | 9.129317 |
| 13296 | M1044T10 | 1.069217 | 0.096554 | 0.299238 | 0.77249  | 0.882909 | UP   | 1044.194 | 1044.194 | 1044.195 | 9.980992 | 9.8753   |
| 13297 | M578T40_ | 1.073754 | 0.102664 | 0.300918 | 0.772494 | 0.882909 | UP   | 578.3169 | 578.3167 | 578.3174 | 39.79133 | 39.70483 |
| 13298 | M476T9_1 | 1.199054 | 0.261897 | 0.299034 | 0.772565 | 0.882919 | UP   | 476.2163 | 476.2114 | 476.2176 | 9.153083 | 9.048117 |
| 13299 | M455T9_1 | 1.04686  | -0.06607 | -0.29961 | 0.772581 | 0.882921 | DOWN | 455.2823 | 455.2788 | 455.2831 | 9.215258 | 8.8978   |

|       |          |          |          |          |          |          |      |          |          |          |          |          |
|-------|----------|----------|----------|----------|----------|----------|------|----------|----------|----------|----------|----------|
| 13300 | M543T28  | 1.100019 | 0.137528 | 0.299252 | 0.772592 | 0.882922 | UP   | 543.3931 | 543.3924 | 543.3939 | 28.12733 | 28.0835  |
| 13301 | M283T11_ | 1.035912 | -0.0509  | -0.29884 | 0.772677 | 0.882934 | DOWN | 282.603  | 282.6025 | 282.6032 | 10.90519 | 10.879   |
| 13302 | M634T10_ | 1.028446 | -0.04047 | -0.30032 | 0.772727 | 0.88294  | DOWN | 634.2955 | 634.2952 | 634.2961 | 9.970617 | 9.8753   |
| 13303 | M356T12  | 1.155531 | 0.208556 | 0.308633 | 0.772747 | 0.882943 | UP   | 356.1807 | 356.18   | 356.1809 | 12.28068 | 12.22425 |
| 13304 | M524T10_ | 1.088349 | 0.122141 | 0.301071 | 0.772782 | 0.882948 | UP   | 523.8743 | 523.8736 | 523.8761 | 9.9014   | 9.79535  |
| 13305 | M1298T23 | 1.158798 | 0.212629 | 0.304718 | 0.772803 | 0.882951 | UP   | 1297.639 | 1297.638 | 1297.641 | 22.52433 | 22.508   |
| 13306 | M850T11_ | 1.078063 | 0.108442 | 0.299987 | 0.772828 | 0.882954 | UP   | 849.8878 | 849.8867 | 849.8889 | 10.879   | 10.85838 |
| 13307 | M1790T10 | 1.083177 | -0.11527 | -0.299   | 0.77293  | 0.882967 | DOWN | 1789.692 | 1789.689 | 1789.696 | 9.933967 | 9.827283 |
| 13308 | M284T10_ | 1.094757 | -0.13061 | -0.29861 | 0.77293  | 0.882968 | DOWN | 284.3439 | 284.3436 | 284.3439 | 9.944392 | 9.843367 |
| 13309 | M359T11_ | 1.062172 | 0.087018 | 0.298429 | 0.773021 | 0.88298  | UP   | 358.9698 | 358.9685 | 358.9708 | 10.94603 | 10.9049  |
| 13310 | M321T10_ | 1.062871 | -0.08797 | -0.29844 | 0.773022 | 0.88298  | DOWN | 320.5316 | 320.5314 | 320.5318 | 9.99435  | 9.8753   |
| 13311 | M446T38  | 1.105659 | -0.14491 | -0.30653 | 0.773093 | 0.882989 | DOWN | 446.2746 | 446.2743 | 446.2748 | 38.20133 | 37.93533 |
| 13312 | M754T21  | 1.064642 | -0.09037 | -0.29932 | 0.773167 | 0.882999 | DOWN | 753.5165 | 753.5161 | 753.5176 | 21.03617 | 20.9965  |
| 13313 | M420T40_ | 1.064982 | -0.09083 | -0.29836 | 0.773256 | 0.883011 | DOWN | 420.2226 | 420.2224 | 420.2229 | 40.12208 | 39.96383 |
| 13314 | M755T11  | 1.036436 | -0.05163 | -0.29821 | 0.773331 | 0.883021 | DOWN | 755.1754 | 755.1749 | 755.1761 | 10.892   | 10.879   |
| 13315 | M219T11_ | 1.041144 | 0.058169 | 0.297949 | 0.77352  | 0.883046 | UP   | 219.1636 | 219.1633 | 219.1637 | 11.49591 | 11.47298 |
| 13316 | M784T11_ | 1.05987  | -0.08389 | -0.29867 | 0.773554 | 0.883051 | DOWN | 783.9277 | 783.9271 | 783.9297 | 10.892   | 10.879   |
| 13317 | M167T10_ | 1.067454 | 0.094174 | 0.298634 | 0.773572 | 0.883053 | UP   | 167.2327 | 167.2326 | 167.2332 | 9.8322   | 9.699733 |
| 13318 | M570T30  | 1.059395 | 0.08324  | 0.297553 | 0.773625 | 0.88306  | UP   | 570.3787 | 570.3784 | 570.379  | 29.83383 | 29.8195  |
| 13319 | M236T11_ | 1.087359 | 0.120829 | 0.29737  | 0.773769 | 0.88308  | UP   | 235.9344 | 235.9338 | 235.9346 | 10.8914  | 10.8646  |
| 13320 | M616T10_ | 1.06657  | 0.092979 | 0.297987 | 0.77377  | 0.88308  | UP   | 616.162  | 616.1616 | 616.1629 | 9.967533 | 9.859233 |
| 13321 | M200T9_1 | 1.053142 | -0.0747  | -0.29731 | 0.773802 | 0.883084 | DOWN | 199.9903 | 199.9901 | 199.9906 | 9.393183 | 9.275917 |
| 13322 | M290T10_ | 1.08815  | -0.12188 | -0.29754 | 0.773825 | 0.883087 | DOWN | 289.9204 | 289.9202 | 289.9205 | 9.954767 | 9.843367 |
| 13323 | M676T10_ | 1.218928 | 0.285613 | 0.297162 | 0.773917 | 0.883099 | UP   | 676.239  | 676.2384 | 676.2393 | 9.956867 | 9.859233 |
| 13324 | M1777T10 | 1.026359 | 0.037536 | 0.303475 | 0.773927 | 0.883101 | UP   | 1776.75  | 1776.749 | 1776.753 | 9.830283 | 9.715683 |
| 13325 | M951T10_ | 1.086458 | -0.11963 | -0.30081 | 0.774034 | 0.883115 | DOWN | 950.7203 | 950.7199 | 950.7211 | 9.887117 | 9.7634   |
| 13326 | M892T10_ | 1.056729 | -0.07961 | -0.29716 | 0.774128 | 0.883127 | DOWN | 892.2033 | 892.2031 | 892.2037 | 9.945258 | 9.827283 |
| 13327 | M1062T10 | 1.121617 | -0.16558 | -0.30324 | 0.774215 | 0.883139 | DOWN | 1061.604 | 1061.603 | 1061.605 | 9.75365  | 9.746783 |
| 13328 | M259T11_ | 1.050974 | 0.071728 | 0.298937 | 0.774454 | 0.883171 | UP   | 258.722  | 258.7219 | 258.7221 | 10.90519 | 10.879   |
| 13329 | M300T10_ | 1.0747   | -0.10393 | -0.29679 | 0.77462  | 0.883193 | DOWN | 300.2531 | 300.2526 | 300.2535 | 10.43184 | 10.35992 |
| 13330 | M257T13  | 1.037156 | -0.05263 | -0.29892 | 0.77462  | 0.883193 | DOWN | 257.0571 | 257.0571 | 257.0573 | 13.02535 | 13.01045 |
| 13331 | M245T10_ | 1.063928 | -0.0894  | -0.29598 | 0.77479  | 0.883216 | DOWN | 244.8761 | 244.8661 | 244.8765 | 9.94785  | 9.843367 |
| 13332 | M175T10_ | 1.081346 | -0.11283 | -0.30193 | 0.774828 | 0.883221 | DOWN | 175.1679 | 175.1677 | 175.1685 | 9.9014   | 9.8378   |
| 13333 | M680T23_ | 1.055394 | -0.07778 | -0.29644 | 0.774924 | 0.883233 | DOWN | 679.5113 | 679.5111 | 679.5115 | 22.611   | 22.5715  |
| 13334 | M561T10_ | 1.050186 | -0.07064 | -0.30068 | 0.774926 | 0.883234 | DOWN | 561.3285 | 561.328  | 561.329  | 9.944392 | 9.827283 |

|       |          |          |          |          |          |          |      |          |          |          |          |          |
|-------|----------|----------|----------|----------|----------|----------|------|----------|----------|----------|----------|----------|
| 13335 | M857T10_ | 1.101335 | -0.13925 | -0.29627 | 0.774997 | 0.883243 | DOWN | 856.8432 | 856.8429 | 856.8436 | 9.963017 | 9.8914   |
| 13336 | M256T10_ | 1.073544 | 0.102382 | 0.295703 | 0.775147 | 0.883263 | UP   | 256.0557 | 256.0554 | 256.056  | 9.94785  | 9.843367 |
| 13337 | M662T10_ | 1.058967 | -0.08266 | -0.29547 | 0.775156 | 0.883264 | DOWN | 661.8162 | 661.8157 | 661.8178 | 9.847133 | 9.73145  |
| 13338 | M524T45  | 1.096454 | -0.13285 | -0.30523 | 0.775168 | 0.883266 | DOWN | 524.3061 | 524.3059 | 524.3063 | 44.72658 | 44.50883 |
| 13339 | M303T10_ | 1.116377 | -0.15882 | -0.29541 | 0.775205 | 0.883271 | DOWN | 302.6298 | 302.6297 | 302.6403 | 9.930975 | 9.869467 |
| 13340 | M701T11_ | 1.109893 | -0.15042 | -0.29751 | 0.775356 | 0.883291 | DOWN | 701.149  | 701.1487 | 701.1497 | 10.90785 | 10.88995 |
| 13341 | M266T11_ | 1.037713 | -0.05341 | -0.29608 | 0.775386 | 0.883295 | DOWN | 266.064  | 266.0639 | 266.0643 | 10.90551 | 10.88747 |
| 13342 | M323T10_ | 1.080453 | 0.111636 | 0.297353 | 0.775427 | 0.8833   | UP   | 323.1594 | 323.1591 | 323.1596 | 9.951283 | 9.859233 |
| 13343 | M412T11_ | 1.072625 | -0.10115 | -0.29575 | 0.775516 | 0.883312 | DOWN | 411.6995 | 411.6992 | 411.7018 | 10.93208 | 10.90548 |
| 13344 | M383T16_ | 1.069685 | 0.097186 | 0.296966 | 0.775518 | 0.883312 | UP   | 382.774  | 382.7733 | 382.7743 | 16.25353 | 16.19928 |
| 13345 | M353T14  | 1.053156 | -0.07472 | -0.29487 | 0.775611 | 0.883325 | DOWN | 352.7576 | 352.7572 | 352.7578 | 14.12187 | 14.10733 |
| 13346 | M686T11  | 1.086505 | -0.1197  | -0.29766 | 0.775616 | 0.883326 | DOWN | 686.1974 | 686.1966 | 686.1985 | 10.89193 | 10.879   |
| 13347 | M1738T10 | 1.083941 | 0.116286 | 0.294875 | 0.775883 | 0.883361 | UP   | 1738.459 | 1738.457 | 1738.461 | 9.972917 | 9.859233 |
| 13348 | M680T26_ | 1.068161 | 0.095129 | 0.296457 | 0.776013 | 0.883378 | UP   | 679.5115 | 679.5113 | 679.5118 | 26.283   | 26.10867 |
| 13349 | M399T31_ | 1.026007 | -0.03704 | -0.29588 | 0.776114 | 0.883392 | DOWN | 399.2502 | 399.2501 | 399.2504 | 31.13258 | 31.11883 |
| 13350 | M332T10_ | 1.074255 | -0.10334 | -0.30095 | 0.776264 | 0.883412 | DOWN | 331.6579 | 331.6576 | 331.6607 | 9.967367 | 9.859233 |
| 13351 | M250T10_ | 1.302575 | 0.381366 | 0.294154 | 0.776311 | 0.883418 | UP   | 249.8905 | 249.8904 | 249.8908 | 9.957333 | 9.869467 |
| 13352 | M709T10_ | 1.025717 | -0.03663 | -0.29576 | 0.776313 | 0.883418 | DOWN | 709.329  | 709.3289 | 709.3294 | 9.841442 | 9.73145  |
| 13353 | M197T10_ | 1.038995 | -0.05519 | -0.2951  | 0.776427 | 0.883433 | DOWN | 197.0104 | 197.0101 | 197.0108 | 9.8397   | 9.699733 |
| 13354 | M202T11_ | 1.042151 | 0.059565 | 0.293695 | 0.776481 | 0.88344  | UP   | 202.0371 | 202.037  | 202.0374 | 10.89875 | 10.879   |
| 13355 | M218T11_ | 1.046355 | -0.06537 | -0.29458 | 0.776621 | 0.883459 | DOWN | 218.4396 | 218.4396 | 218.4399 | 10.892   | 10.879   |
| 13356 | M464T11_ | 1.039507 | 0.055899 | 0.293758 | 0.776661 | 0.883464 | UP   | 463.8731 | 463.8729 | 463.8732 | 10.89875 | 10.879   |
| 13357 | M420T11_ | 1.089466 | 0.123621 | 0.29347  | 0.776712 | 0.883471 | UP   | 420.0902 | 420.0889 | 420.0951 | 10.90743 | 10.88995 |
| 13358 | M335T11_ | 1.084149 | 0.116563 | 0.298227 | 0.776787 | 0.883481 | UP   | 334.5424 | 334.5423 | 334.5436 | 10.93208 | 10.88747 |
| 13359 | M1486T10 | 1.105689 | 0.144946 | 0.293238 | 0.776924 | 0.883499 | UP   | 1486.168 | 1486.165 | 1486.17  | 9.964092 | 9.859233 |
| 13360 | M349T10_ | 1.019859 | -0.02837 | -0.29743 | 0.776969 | 0.883505 | DOWN | 348.6948 | 348.6947 | 348.6949 | 9.8397   | 9.73145  |
| 13361 | M354T3   | 1.11064  | 0.151391 | 0.294071 | 0.776969 | 0.883505 | UP   | 354.2383 | 354.238  | 354.2384 | 3.428308 | 3.2634   |
| 13362 | M369T9_2 | 1.110981 | 0.151834 | 0.293161 | 0.777066 | 0.883518 | UP   | 368.9058 | 368.9045 | 368.9062 | 9.146383 | 9.110833 |
| 13363 | M283T10_ | 1.100703 | 0.138425 | 0.294113 | 0.777252 | 0.883543 | UP   | 283.3324 | 283.3319 | 283.3324 | 9.505267 | 9.432183 |
| 13364 | M534T43_ | 1.056713 | -0.07958 | -0.29346 | 0.777288 | 0.883547 | DOWN | 534.2906 | 534.2903 | 534.2908 | 43.44508 | 43.2725  |
| 13365 | M206T9_1 | 1.117455 | 0.160217 | 0.292888 | 0.777329 | 0.883553 | UP   | 206.1334 | 206.1316 | 206.1347 | 9.313683 | 9.1503   |
| 13366 | M568T21  | 1.082419 | -0.11426 | -0.29689 | 0.777461 | 0.88357  | DOWN | 568.4053 | 568.4041 | 568.4064 | 20.54983 | 20.51917 |
| 13367 | M435T10_ | 1.116556 | -0.15906 | -0.29305 | 0.777491 | 0.883574 | DOWN | 435.2414 | 435.2296 | 435.2416 | 9.926125 | 9.827283 |
| 13368 | M418T21  | 1.184853 | 0.244708 | 0.292921 | 0.777525 | 0.883579 | UP   | 418.3081 | 418.3077 | 418.3092 | 21.23233 | 21.21217 |
| 13369 | M200T9_1 | 1.119215 | -0.16249 | -0.29222 | 0.777552 | 0.883582 | DOWN | 199.9036 | 199.9031 | 199.9043 | 9.175017 | 9.12675  |

|       |          |          |          |          |          |          |      |          |          |          |          |          |
|-------|----------|----------|----------|----------|----------|----------|------|----------|----------|----------|----------|----------|
| 13370 | M356T11  | 1.157882 | 0.211488 | 0.29497  | 0.777629 | 0.883592 | UP   | 356.1292 | 356.1287 | 356.1295 | 10.873   | 10.83252 |
| 13371 | M711T11_ | 1.085185 | -0.11794 | -0.29548 | 0.777698 | 0.883601 | DOWN | 711.3857 | 711.3853 | 711.3861 | 11.49677 | 11.47593 |
| 13372 | M413T20_ | 1.035105 | 0.049777 | 0.292969 | 0.777854 | 0.883622 | UP   | 413.3351 | 413.335  | 413.3353 | 20.24508 | 20.23017 |
| 13373 | M478T45_ | 1.047599 | 0.067087 | 0.292215 | 0.777874 | 0.883625 | UP   | 478.3007 | 478.3006 | 478.3008 | 44.83983 | 44.6385  |
| 13374 | M368T19_ | 1.067777 | -0.09461 | -0.29763 | 0.777966 | 0.883637 | DOWN | 367.7326 | 367.7323 | 367.7328 | 18.71817 | 18.704   |
| 13375 | M234T10_ | 1.076446 | 0.106276 | 0.296207 | 0.778055 | 0.883649 | UP   | 233.501  | 233.5007 | 233.5012 | 9.964092 | 9.859233 |
| 13376 | M543T12_ | 1.043587 | -0.06155 | -0.29145 | 0.778123 | 0.883658 | DOWN | 543.3753 | 543.375  | 543.3756 | 11.947   | 11.93353 |
| 13377 | M534T9_2 | 1.126902 | -0.17236 | -0.29347 | 0.778361 | 0.883689 | DOWN | 534.1111 | 534.1098 | 534.1124 | 9.2585   | 9.032567 |
| 13378 | M166T10_ | 1.087554 | -0.12109 | -0.29112 | 0.778391 | 0.883693 | DOWN | 165.7692 | 165.7691 | 165.7693 | 9.914217 | 9.811217 |
| 13379 | M1055T23 | 1.114119 | -0.1559  | -0.29229 | 0.778428 | 0.883698 | DOWN | 1054.709 | 1054.709 | 1054.711 | 22.65417 | 22.62483 |
| 13380 | M1227T10 | 1.065956 | -0.09215 | -0.29314 | 0.778506 | 0.883708 | DOWN | 1227.056 | 1227.053 | 1227.059 | 9.787433 | 9.696683 |
| 13381 | M240T10_ | 1.085301 | -0.1181  | -0.29126 | 0.778546 | 0.883713 | DOWN | 240.4033 | 240.4031 | 240.4033 | 9.939575 | 9.827283 |
| 13382 | M628T11_ | 1.039502 | -0.05589 | -0.29172 | 0.778548 | 0.883714 | DOWN | 628.4356 | 628.4354 | 628.436  | 11.48294 | 11.47298 |
| 13383 | M261T10_ | 1.183567 | 0.243141 | 0.298701 | 0.778581 | 0.883718 | UP   | 260.866  | 260.8658 | 260.8662 | 9.970617 | 9.885167 |
| 13384 | M340T10_ | 1.089538 | 0.123716 | 0.290772 | 0.778632 | 0.883725 | UP   | 339.5016 | 339.5013 | 339.5017 | 9.965717 | 9.843367 |
| 13385 | M438T11_ | 1.048134 | -0.06782 | -0.29096 | 0.778648 | 0.883727 | DOWN | 438.1281 | 438.1279 | 438.1285 | 10.892   | 10.879   |
| 13386 | M897T10_ | 1.048758 | -0.06868 | -0.29076 | 0.778692 | 0.883733 | DOWN | 897.2334 | 897.233  | 897.2339 | 9.93615  | 9.827283 |
| 13387 | M379T10_ | 1.031491 | 0.044731 | 0.294676 | 0.778799 | 0.883747 | UP   | 379.1819 | 379.1815 | 379.1821 | 9.902617 | 9.79535  |
| 13388 | M261T11_ | 1.10622  | 0.145639 | 0.290395 | 0.778941 | 0.883766 | UP   | 260.6883 | 260.6882 | 260.6884 | 10.87737 | 10.86008 |
| 13389 | M878T10_ | 1.067245 | 0.093892 | 0.297805 | 0.778961 | 0.883768 | UP   | 877.6558 | 877.6544 | 877.6565 | 9.95385  | 9.843367 |
| 13390 | M476T9_2 | 1.082805 | 0.114773 | 0.294739 | 0.779048 | 0.88378  | UP   | 476.4749 | 476.4737 | 476.4761 | 9.160617 | 8.980067 |
| 13391 | M685T10_ | 1.031037 | 0.044096 | 0.2903   | 0.779055 | 0.883781 | UP   | 684.6522 | 684.6495 | 684.6529 | 9.942317 | 9.728083 |
| 13392 | M676T10_ | 1.024558 | -0.035   | -0.29133 | 0.779196 | 0.883799 | DOWN | 675.5664 | 675.5661 | 675.5675 | 9.825492 | 9.715683 |
| 13393 | M423T11_ | 1.036456 | 0.051659 | 0.295869 | 0.779237 | 0.883805 | UP   | 423.2447 | 423.2446 | 423.2449 | 10.91373 | 10.89355 |
| 13394 | M438T11_ | 1.044592 | -0.06294 | -0.29016 | 0.779323 | 0.883816 | DOWN | 437.6429 | 437.6428 | 437.6437 | 10.89875 | 10.879   |
| 13395 | M497T9_4 | 1.111049 | 0.151922 | 0.291124 | 0.77938  | 0.883824 | UP   | 496.778  | 496.7778 | 496.7781 | 9.166033 | 9.129317 |
| 13396 | M412T9_5 | 1.218432 | 0.285025 | 0.289835 | 0.779417 | 0.883828 | UP   | 412.0954 | 412.093  | 412.0996 | 9.4925   | 9.398583 |
| 13397 | M684T10_ | 1.098471 | -0.1355  | -0.29045 | 0.779432 | 0.88383  | DOWN | 683.8611 | 683.8609 | 683.8614 | 9.956417 | 9.843367 |
| 13398 | M632T11_ | 1.067221 | -0.09386 | -0.29036 | 0.779497 | 0.883839 | DOWN | 632.0185 | 632.0183 | 632.0191 | 11.49657 | 11.47593 |
| 13399 | M344T10_ | 1.222395 | 0.289711 | 0.297332 | 0.779557 | 0.883847 | UP   | 344.253  | 344.2422 | 344.2536 | 9.799767 | 9.536783 |
| 13400 | M592T24  | 1.091845 | 0.126768 | 0.289539 | 0.779561 | 0.883847 | UP   | 592.3841 | 592.3838 | 592.3848 | 24.05217 | 24.03    |
| 13401 | M299T43_ | 1.049178 | 0.069259 | 0.289404 | 0.779635 | 0.883857 | UP   | 299.1486 | 299.1486 | 299.1488 | 43.30042 | 43.215   |
| 13402 | M704T10_ | 1.076313 | -0.1061  | -0.28941 | 0.779718 | 0.883868 | DOWN | 703.9398 | 703.9396 | 703.9401 | 9.945258 | 9.827283 |
| 13403 | M814T11_ | 1.054248 | 0.076215 | 0.293484 | 0.779737 | 0.883871 | UP   | 814.2399 | 814.2392 | 814.2402 | 10.90551 | 10.879   |
| 13404 | M333T10_ | 1.020646 | 0.029482 | 0.29583  | 0.779906 | 0.883893 | UP   | 332.78   | 332.7799 | 332.7806 | 9.847133 | 9.73145  |

|       |          |          |          |          |          |          |      |          |          |          |          |          |
|-------|----------|----------|----------|----------|----------|----------|------|----------|----------|----------|----------|----------|
| 13405 | M572T11_ | 1.113905 | -0.15563 | -0.28937 | 0.779918 | 0.883894 | DOWN | 572.3868 | 572.3855 | 572.3876 | 10.50444 | 10.41812 |
| 13406 | M843T11  | 1.08917  | 0.123229 | 0.289347 | 0.779971 | 0.883901 | UP   | 842.8343 | 842.8336 | 842.8351 | 10.89904 | 10.85018 |
| 13407 | M214T25_ | 1.042393 | -0.0599  | -0.28966 | 0.779976 | 0.883902 | DOWN | 214.2525 | 214.2525 | 214.2527 | 25.3035  | 25.28567 |
| 13408 | M263T9_2 | 1.169216 | -0.22554 | -0.28997 | 0.780052 | 0.883912 | DOWN | 263.0956 | 263.0954 | 263.096  | 9.429367 | 9.288883 |
| 13409 | M631T10_ | 1.093993 | -0.1296  | -0.28922 | 0.780112 | 0.88392  | DOWN | 631.4166 | 631.4165 | 631.4169 | 9.924717 | 9.827283 |
| 13410 | M539T9_2 | 1.056131 | -0.07879 | -0.29136 | 0.780119 | 0.883921 | DOWN | 539.3026 | 539.3024 | 539.3027 | 9.484417 | 9.38595  |
| 13411 | M500T9_5 | 1.072822 | -0.10141 | -0.29527 | 0.780129 | 0.883922 | DOWN | 499.8058 | 499.8052 | 499.8087 | 9.40175  | 9.324917 |
| 13412 | M534T30  | 1.064233 | 0.089813 | 0.296011 | 0.780188 | 0.88393  | UP   | 534.3691 | 534.369  | 534.3696 | 30.2805  | 30.266   |
| 13413 | M435T11_ | 1.076296 | 0.106076 | 0.29162  | 0.780463 | 0.883966 | UP   | 434.6199 | 434.6193 | 434.6203 | 10.94208 | 10.9049  |
| 13414 | M730T10_ | 1.083142 | -0.11522 | -0.29268 | 0.780495 | 0.88397  | DOWN | 729.9084 | 729.9081 | 729.909  | 10.32456 | 10.26307 |
| 13415 | M359T9_7 | 1.044416 | -0.0627  | -0.28899 | 0.78052  | 0.883973 | DOWN | 359.4829 | 359.4826 | 359.483  | 8.878567 | 8.7875   |
| 13416 | M420T10_ | 1.087615 | 0.121168 | 0.292705 | 0.780549 | 0.883977 | UP   | 419.8891 | 419.8887 | 419.8894 | 9.939575 | 9.827283 |
| 13417 | M436T9_5 | 1.105344 | 0.144496 | 0.288176 | 0.780922 | 0.884026 | UP   | 435.7835 | 435.7829 | 435.7838 | 8.825567 | 8.730433 |
| 13418 | M359T10_ | 1.083363 | -0.11552 | -0.2879  | 0.781065 | 0.884045 | DOWN | 359.4003 | 359.4002 | 359.4004 | 9.958617 | 9.843367 |
| 13419 | M425T10_ | 1.041092 | -0.0581  | -0.28791 | 0.781147 | 0.884056 | DOWN | 424.7885 | 424.7816 | 424.7888 | 10.16418 | 10.12287 |
| 13420 | M345T44  | 1.064264 | 0.089856 | 0.290374 | 0.781152 | 0.884056 | UP   | 345.1906 | 345.1903 | 345.1908 | 44.14967 | 43.77583 |
| 13421 | M437T9_7 | 1.094274 | 0.129974 | 0.290104 | 0.781213 | 0.884064 | UP   | 437.236  | 437.2353 | 437.2367 | 8.955933 | 8.7654   |
| 13422 | M706T10_ | 1.070973 | 0.098923 | 0.295754 | 0.78124  | 0.884068 | UP   | 705.5195 | 705.5078 | 705.5204 | 9.823575 | 9.715683 |
| 13423 | M610T21  | 1.08823  | -0.12198 | -0.28859 | 0.781297 | 0.884075 | DOWN | 610.3948 | 610.3939 | 610.396  | 21.3065  | 21.26983 |
| 13424 | M869T9   | 1.117092 | -0.15975 | -0.28702 | 0.781389 | 0.884088 | DOWN | 868.5538 | 868.5529 | 868.5547 | 8.798117 | 8.6529   |
| 13425 | M233T10_ | 1.077745 | -0.10802 | -0.28771 | 0.78141  | 0.88409  | DOWN | 233.0027 | 232.999  | 233.0069 | 9.910075 | 9.843367 |
| 13426 | M349T10_ | 1.044352 | -0.06261 | -0.29118 | 0.781449 | 0.884096 | DOWN | 348.7459 | 348.7458 | 348.7461 | 9.825492 | 9.715683 |
| 13427 | M353T33  | 1.11504  | 0.157095 | 0.286962 | 0.781583 | 0.884113 | UP   | 353.2922 | 353.2918 | 353.2925 | 32.79183 | 32.7485  |
| 13428 | M260T10_ | 1.139494 | 0.188393 | 0.290473 | 0.781603 | 0.884116 | UP   | 260.3022 | 260.3018 | 260.3023 | 9.975217 | 9.859233 |
| 13429 | M375T10_ | 1.136062 | 0.184041 | 0.289575 | 0.781726 | 0.884132 | UP   | 375.4942 | 375.4938 | 375.4953 | 9.952017 | 9.932    |
| 13430 | M753T10_ | 1.167206 | 0.22306  | 0.287441 | 0.781766 | 0.884137 | UP   | 753.2743 | 753.2712 | 753.2763 | 9.840617 | 9.758367 |
| 13431 | M224T10_ | 1.087208 | 0.120628 | 0.291936 | 0.781923 | 0.884158 | UP   | 223.6688 | 223.6685 | 223.6689 | 9.984083 | 9.8753   |
| 13432 | M1663T10 | 1.111764 | -0.15285 | -0.28686 | 0.781928 | 0.884158 | DOWN | 1662.722 | 1662.721 | 1662.723 | 9.964092 | 9.859233 |
| 13433 | M627T11  | 1.037857 | -0.05361 | -0.28719 | 0.781932 | 0.884159 | DOWN | 627.4324 | 627.432  | 627.4328 | 11.48533 | 11.47593 |
| 13434 | M353T10_ | 1.077983 | -0.10833 | -0.28607 | 0.782149 | 0.884187 | DOWN | 353.0261 | 353.026  | 353.0263 | 9.968992 | 9.859233 |
| 13435 | M299T41_ | 1.053625 | 0.075362 | 0.286786 | 0.78219  | 0.884193 | UP   | 299.1487 | 299.1486 | 299.1488 | 40.9855  | 40.8845  |
| 13436 | M257T10_ | 1.088138 | -0.12186 | -0.28616 | 0.782455 | 0.884227 | DOWN | 256.9339 | 256.9337 | 256.9339 | 9.95605  | 9.843367 |
| 13437 | M362T31  | 1.103319 | -0.14185 | -0.28535 | 0.782627 | 0.88425  | DOWN | 362.2973 | 362.2971 | 362.2975 | 31.3635  | 31.3495  |
| 13438 | M426T11_ | 1.054149 | 0.076078 | 0.286293 | 0.782663 | 0.884254 | UP   | 425.7832 | 425.783  | 425.7835 | 10.94161 | 10.90785 |
| 13439 | M360T17_ | 1.06866  | 0.095802 | 0.285278 | 0.782682 | 0.884257 | UP   | 359.7578 | 359.7572 | 359.7579 | 16.694   | 16.66575 |



|       |          |          |          |          |          |          |      |          |          |          |          |          |
|-------|----------|----------|----------|----------|----------|----------|------|----------|----------|----------|----------|----------|
| 13440 | M182T9_2 | 1.169102 | 0.225401 | 0.286158 | 0.782725 | 0.884263 | UP   | 181.6747 | 181.6743 | 181.6752 | 9.16835  | 9.103733 |
| 13441 | M161T10_ | 1.147441 | 0.198421 | 0.285636 | 0.782802 | 0.884273 | UP   | 161.4784 | 161.478  | 161.4784 | 9.778967 | 9.76065  |
| 13442 | M529T11_ | 1.061928 | -0.08669 | -0.28582 | 0.782885 | 0.884283 | DOWN | 529.3595 | 529.3591 | 529.3597 | 10.59197 | 10.55068 |
| 13443 | M542T11_ | 1.049913 | -0.07027 | -0.2862  | 0.783006 | 0.884299 | DOWN | 542.3391 | 542.339  | 542.3394 | 10.56108 | 10.53607 |
| 13444 | M733T10_ | 1.068906 | -0.09613 | -0.28486 | 0.783039 | 0.884304 | DOWN | 732.5887 | 732.5882 | 732.5893 | 9.956417 | 9.843367 |
| 13445 | M1840T10 | 1.084003 | 0.116368 | 0.285147 | 0.783085 | 0.88431  | UP   | 1840.061 | 1840.059 | 1840.062 | 9.972217 | 9.8753   |
| 13446 | M355T11_ | 1.041866 | 0.05917  | 0.285478 | 0.783099 | 0.884311 | UP   | 354.8569 | 354.8567 | 354.8571 | 10.89875 | 10.879   |
| 13447 | M343T14  | 1.089172 | -0.12323 | -0.28707 | 0.783331 | 0.884342 | DOWN | 342.7701 | 342.7697 | 342.7705 | 14.13675 | 14.07782 |
| 13448 | M861T11  | 1.061757 | -0.08645 | -0.28442 | 0.783482 | 0.884361 | DOWN | 861.486  | 861.4857 | 861.4864 | 10.73326 | 10.6937  |
| 13449 | M400T31  | 1.027998 | -0.03984 | -0.28532 | 0.783502 | 0.884364 | DOWN | 400.2537 | 400.2536 | 400.2539 | 31.12892 | 31.11883 |
| 13450 | M320T9_2 | 1.107386 | -0.14716 | -0.28433 | 0.783571 | 0.884373 | DOWN | 319.7741 | 319.7738 | 319.7743 | 8.985083 | 8.9396   |
| 13451 | M585T9_3 | 1.049283 | -0.0694  | -0.28405 | 0.783625 | 0.88438  | DOWN | 585.3745 | 585.3741 | 585.375  | 8.745917 | 8.63795  |
| 13452 | M725T10_ | 1.066978 | -0.09353 | -0.28669 | 0.783691 | 0.884389 | DOWN | 724.9534 | 724.9515 | 724.9536 | 10.32319 | 10.26307 |
| 13453 | M226T10_ | 1.094581 | -0.13038 | -0.29118 | 0.783756 | 0.884397 | DOWN | 225.9865 | 225.9841 | 225.9867 | 9.931875 | 9.8378   |
| 13454 | M520T30  | 1.143957 | 0.194032 | 0.286814 | 0.783764 | 0.884398 | UP   | 520.3395 | 520.3389 | 520.3399 | 30.42433 | 30.41017 |
| 13455 | M326T9_4 | 1.056137 | -0.0788  | -0.28417 | 0.783837 | 0.884408 | DOWN | 326.28   | 326.2799 | 326.2801 | 9.3241   | 9.129317 |
| 13456 | M342T10_ | 1.057117 | -0.08013 | -0.28432 | 0.783887 | 0.884414 | DOWN | 341.9462 | 341.9461 | 341.9465 | 9.956417 | 9.859233 |
| 13457 | M320T41_ | 1.121304 | -0.16518 | -0.28385 | 0.783891 | 0.884415 | DOWN | 320.1702 | 320.1701 | 320.1703 | 41.20117 | 40.9565  |
| 13458 | M683T20  | 1.067515 | 0.094257 | 0.284987 | 0.783913 | 0.884418 | UP   | 683.3727 | 683.3722 | 683.3732 | 19.63483 | 19.5695  |
| 13459 | M508T10_ | 1.201673 | 0.265045 | 0.283938 | 0.783917 | 0.884418 | UP   | 508.222  | 508.2214 | 508.2223 | 9.958492 | 9.859233 |
| 13460 | M187T41_ | 1.059511 | 0.083398 | 0.283734 | 0.78392  | 0.884419 | UP   | 187.0962 | 187.0962 | 187.0963 | 40.84517 | 40.62567 |
| 13461 | M454T9_9 | 1.08274  | -0.11469 | -0.28871 | 0.783944 | 0.884422 | DOWN | 453.8485 | 453.8469 | 453.8581 | 9.188783 | 9.095133 |
| 13462 | M409T24  | 1.118976 | -0.16218 | -0.28522 | 0.784119 | 0.884445 | DOWN | 409.1749 | 409.1746 | 409.1751 | 24.33267 | 24.318   |
| 13463 | M195T11_ | 1.10243  | 0.140687 | 0.287758 | 0.784154 | 0.884449 | UP   | 194.6725 | 194.6715 | 194.6731 | 10.90548 | 10.86275 |
| 13464 | M318T9_1 | 1.188274 | 0.248868 | 0.291541 | 0.784178 | 0.884452 | UP   | 318.4252 | 318.425  | 318.4257 | 9.468325 | 9.370583 |
| 13465 | M754T10_ | 1.102352 | 0.140585 | 0.289134 | 0.784315 | 0.88447  | UP   | 753.6043 | 753.6027 | 753.6075 | 9.942317 | 9.843367 |
| 13466 | M787T11_ | 1.0919   | -0.12684 | -0.28336 | 0.784344 | 0.884474 | DOWN | 787.4351 | 787.4346 | 787.4355 | 10.8926  | 10.85838 |
| 13467 | M552T14  | 1.060229 | 0.084375 | 0.282986 | 0.784377 | 0.884478 | UP   | 552.4155 | 552.4148 | 552.4166 | 13.99731 | 13.96093 |
| 13468 | M630T10_ | 1.07824  | 0.108678 | 0.283524 | 0.784397 | 0.884481 | UP   | 629.68   | 629.6793 | 629.6814 | 9.851058 | 9.65225  |
| 13469 | M394T21  | 1.057909 | -0.08121 | -0.28296 | 0.784423 | 0.884484 | DOWN | 394.2892 | 394.2886 | 394.2894 | 21.16442 | 21.15083 |
| 13470 | M264T9_5 | 1.15516  | 0.208092 | 0.287341 | 0.784694 | 0.884519 | UP   | 263.9529 | 263.9528 | 263.9533 | 9.3907   | 9.29015  |
| 13471 | M333T11_ | 1.044907 | -0.06337 | -0.28307 | 0.784727 | 0.884524 | DOWN | 333.0808 | 333.0805 | 333.0811 | 10.90197 | 10.879   |
| 13472 | M1730T10 | 1.11687  | 0.159462 | 0.286737 | 0.784832 | 0.884537 | UP   | 1730.446 | 1730.442 | 1730.451 | 9.842    | 9.758367 |
| 13473 | M315T31  | 1.056761 | 0.07965  | 0.282582 | 0.784877 | 0.884543 | UP   | 315.3082 | 315.3079 | 315.3091 | 31.066   | 31.0465  |
| 13474 | M477T7   | 1.108154 | 0.148158 | 0.282227 | 0.785002 | 0.88456  | UP   | 477.3309 | 477.3307 | 477.3313 | 6.93925  | 6.790933 |

|       |          |          |          |          |          |          |      |          |          |          |          |          |
|-------|----------|----------|----------|----------|----------|----------|------|----------|----------|----------|----------|----------|
| 13475 | M710T10_ | 1.037248 | -0.05276 | -0.28241 | 0.785023 | 0.884562 | DOWN | 709.7679 | 709.7676 | 709.7683 | 9.82645  | 9.699733 |
| 13476 | M699T10_ | 1.067345 | -0.09403 | -0.28211 | 0.785129 | 0.884576 | DOWN | 699.0575 | 699.0572 | 699.0577 | 9.94785  | 9.843367 |
| 13477 | M246T14  | 1.063875 | 0.089329 | 0.284748 | 0.785154 | 0.884579 | UP   | 246.0207 | 246.0206 | 246.0209 | 13.57331 | 13.5218  |
| 13478 | M367T9_3 | 1.099124 | -0.13635 | -0.28192 | 0.785159 | 0.88458  | DOWN | 366.9751 | 366.9736 | 366.9755 | 9.374617 | 9.1911   |
| 13479 | M701T12  | 1.046968 | 0.066217 | 0.283201 | 0.785239 | 0.88459  | UP   | 701.4934 | 701.4932 | 701.4936 | 12.24455 | 12.16562 |
| 13480 | M701T21_ | 1.106377 | -0.14584 | -0.28178 | 0.785267 | 0.884594 | DOWN | 701.4937 | 701.4932 | 701.4938 | 20.77783 | 20.5045  |
| 13481 | M403T45  | 1.05215  | -0.07334 | -0.28769 | 0.785287 | 0.884597 | DOWN | 403.2324 | 403.2321 | 403.2326 | 44.8685  | 44.75717 |
| 13482 | M1097T21 | 1.063449 | 0.088751 | 0.281993 | 0.785291 | 0.884597 | UP   | 1096.576 | 1096.574 | 1096.577 | 21.12217 | 20.93867 |
| 13483 | M504T41_ | 1.069857 | -0.09742 | -0.28967 | 0.785318 | 0.884601 | DOWN | 504.28   | 504.2797 | 504.2803 | 40.7695  | 40.72333 |
| 13484 | M266T9_2 | 1.097717 | -0.13451 | -0.28286 | 0.785474 | 0.884621 | DOWN | 266.2203 | 266.22   | 266.2204 | 8.978067 | 8.922033 |
| 13485 | M526T24_ | 1.086377 | -0.11953 | -0.28359 | 0.785544 | 0.88463  | DOWN | 526.0487 | 526.0479 | 526.0488 | 24.11342 | 24.07367 |
| 13486 | M913T11  | 1.069605 | 0.097078 | 0.281539 | 0.785579 | 0.884635 | UP   | 913.3586 | 913.3579 | 913.359  | 10.90659 | 10.8646  |
| 13487 | M356T10_ | 1.067282 | -0.09394 | -0.28863 | 0.785619 | 0.88464  | DOWN | 355.9955 | 355.9949 | 355.9957 | 9.839625 | 9.699733 |
| 13488 | M399T41  | 1.06212  | -0.08695 | -0.29038 | 0.785773 | 0.88466  | DOWN | 399.2373 | 399.2372 | 399.2375 | 41.1215  | 40.87017 |
| 13489 | M259T10_ | 1.083819 | -0.11612 | -0.28346 | 0.785813 | 0.884665 | DOWN | 258.707  | 258.7068 | 258.7071 | 9.983467 | 9.8753   |
| 13490 | M154T11_ | 1.13135  | -0.17805 | -0.28342 | 0.785867 | 0.884672 | DOWN | 154.0486 | 154.0485 | 154.0487 | 10.88413 | 10.85018 |
| 13491 | M496T9_1 | 1.050014 | 0.070409 | 0.281809 | 0.785887 | 0.884674 | UP   | 496.2792 | 496.2788 | 496.2794 | 9.35315  | 9.300733 |
| 13492 | M276T43_ | 1.02322  | -0.03312 | -0.28092 | 0.785916 | 0.884678 | DOWN | 276.1802 | 276.18   | 276.1803 | 42.9705  | 42.91283 |
| 13493 | M829T10_ | 1.072542 | -0.10103 | -0.28138 | 0.785961 | 0.884684 | DOWN | 828.5889 | 828.5878 | 828.5896 | 9.972483 | 9.859233 |
| 13494 | M528T10_ | 1.046436 | -0.06548 | -0.28084 | 0.785987 | 0.884687 | DOWN | 528.0089 | 528.0084 | 528.0094 | 9.949233 | 9.853533 |
| 13495 | M368T9_4 | 1.07634  | -0.10613 | -0.28327 | 0.7861   | 0.884702 | DOWN | 368.1719 | 368.1705 | 368.1729 | 9.189117 | 9.1445   |
| 13496 | M303T10_ | 1.083243 | 0.115357 | 0.284379 | 0.786196 | 0.884715 | UP   | 302.5641 | 302.564  | 302.5646 | 9.626517 | 9.510117 |
| 13497 | M311T38  | 1.027808 | 0.03957  | 0.280309 | 0.786355 | 0.884735 | UP   | 311.2943 | 311.2941 | 311.2945 | 38.36683 | 38.3665  |
| 13498 | M226T9_5 | 1.040862 | -0.05778 | -0.28025 | 0.78646  | 0.884749 | DOWN | 226.1911 | 226.191  | 226.1912 | 9.288817 | 9.129317 |
| 13499 | M809T10_ | 1.059406 | 0.083255 | 0.280109 | 0.786501 | 0.884754 | UP   | 809.4439 | 809.4434 | 809.4445 | 10.26696 | 10.19852 |
| 13500 | M570T11_ | 1.054819 | -0.077   | -0.2813  | 0.786574 | 0.884764 | DOWN | 569.5693 | 569.5689 | 569.5696 | 10.50608 | 10.45607 |
| 13501 | M196T10_ | 1.163244 | -0.21815 | -0.27986 | 0.786698 | 0.88478  | DOWN | 196.3455 | 196.3454 | 196.3456 | 9.967367 | 9.885167 |
| 13502 | M368T11_ | 1.08184  | 0.113488 | 0.280006 | 0.786718 | 0.884782 | UP   | 368.2724 | 368.2722 | 368.2725 | 11.12207 | 11.08157 |
| 13503 | M635T9_3 | 1.057627 | 0.080831 | 0.284009 | 0.78679  | 0.884792 | UP   | 635.4258 | 635.425  | 635.429  | 9.278717 | 9.129317 |
| 13504 | M210T10_ | 1.077131 | -0.10719 | -0.28482 | 0.786859 | 0.884801 | DOWN | 209.7494 | 209.7491 | 209.7562 | 9.869467 | 9.8207   |
| 13505 | M401T12  | 1.080656 | -0.11191 | -0.2838  | 0.786905 | 0.884807 | DOWN | 401.1901 | 401.1897 | 401.1909 | 11.61045 | 11.59755 |
| 13506 | M718T25  | 1.084018 | 0.116389 | 0.281143 | 0.786953 | 0.884813 | UP   | 718.4891 | 718.4887 | 718.4894 | 24.6525  | 24.651   |
| 13507 | M1414T10 | 1.062429 | 0.087367 | 0.282786 | 0.787061 | 0.884827 | UP   | 1414.225 | 1414.224 | 1414.225 | 9.960967 | 9.8753   |
| 13508 | M1366T45 | 1.065526 | -0.09157 | -0.27953 | 0.787095 | 0.884831 | DOWN | 1365.908 | 1365.903 | 1365.909 | 44.5955  | 44.52367 |
| 13509 | M795T10_ | 1.090492 | -0.12498 | -0.28074 | 0.787108 | 0.884833 | DOWN | 795.474  | 795.4737 | 795.4749 | 9.992233 | 9.859233 |

|       |          |          |          |          |          |          |      |          |          |          |          |          |
|-------|----------|----------|----------|----------|----------|----------|------|----------|----------|----------|----------|----------|
| 13510 | M277T11_ | 1.044643 | -0.06301 | -0.28062 | 0.787136 | 0.884836 | DOWN | 276.5087 | 276.5085 | 276.5089 | 10.90628 | 10.8646  |
| 13511 | M1872T10 | 1.052196 | -0.0734  | -0.28007 | 0.787162 | 0.88484  | DOWN | 1871.924 | 1871.923 | 1871.928 | 9.81635  | 9.715683 |
| 13512 | M384T10_ | 1.057986 | -0.08132 | -0.28407 | 0.78725  | 0.884851 | DOWN | 383.9525 | 383.9445 | 383.953  | 9.989483 | 9.830283 |
| 13513 | M354T10_ | 1.071473 | -0.0996  | -0.28037 | 0.787269 | 0.884854 | DOWN | 354.481  | 354.4805 | 354.4845 | 9.85045  | 9.715683 |
| 13514 | M509T9_1 | 1.068703 | 0.095861 | 0.287383 | 0.787276 | 0.884855 | UP   | 508.5584 | 508.5576 | 508.5587 | 9.275217 | 9.234417 |
| 13515 | M457T23  | 1.147342 | 0.198296 | 0.279035 | 0.787319 | 0.88486  | UP   | 457.1575 | 457.1572 | 457.1584 | 23.39367 | 23.32283 |
| 13516 | M612T10_ | 1.072637 | 0.101162 | 0.280011 | 0.787331 | 0.884862 | UP   | 612.3201 | 612.3191 | 612.3218 | 9.964092 | 9.859233 |
| 13517 | M638T10_ | 1.083053 | 0.115103 | 0.279318 | 0.787389 | 0.884869 | UP   | 638.1613 | 638.1607 | 638.1636 | 9.872933 | 9.743767 |
| 13518 | M675T10_ | 1.118406 | -0.16144 | -0.28062 | 0.787423 | 0.884874 | DOWN | 675.1131 | 675.1124 | 675.1135 | 9.8322   | 9.715683 |
| 13519 | M373T42_ | 1.093525 | 0.128986 | 0.278923 | 0.787487 | 0.884882 | UP   | 373.2218 | 373.2216 | 373.2219 | 42.03567 | 41.89167 |
| 13520 | M584T10_ | 1.11211  | 0.153299 | 0.280996 | 0.787505 | 0.884884 | UP   | 584.3567 | 584.3543 | 584.3604 | 9.702875 | 9.643967 |
| 13521 | M481T9_6 | 1.159115 | -0.21302 | -0.28389 | 0.787561 | 0.884891 | DOWN | 481.2614 | 481.2598 | 481.2621 | 9.024133 | 8.672483 |
| 13522 | M152T10_ | 1.119691 | -0.1631  | -0.27869 | 0.787575 | 0.884893 | DOWN | 151.9614 | 151.9614 | 151.9615 | 9.970617 | 9.916767 |
| 13523 | M258T11_ | 1.082438 | 0.114284 | 0.278851 | 0.787579 | 0.884894 | UP   | 258.4619 | 258.4611 | 258.4624 | 10.90669 | 10.88747 |
| 13524 | M1255T11 | 1.052768 | 0.074188 | 0.278484 | 0.787725 | 0.884913 | UP   | 1254.541 | 1254.54  | 1254.543 | 10.90343 | 10.89125 |
| 13525 | M1414T10 | 1.090487 | 0.124973 | 0.279103 | 0.787748 | 0.884916 | UP   | 1414.083 | 1414.082 | 1414.085 | 9.970617 | 9.859233 |
| 13526 | M616T18  | 1.078838 | -0.10948 | -0.28274 | 0.787808 | 0.884923 | DOWN | 615.9156 | 615.9149 | 615.9164 | 18.0195  | 17.98817 |
| 13527 | M167T9_1 | 1.058344 | 0.081808 | 0.282476 | 0.78783  | 0.884926 | UP   | 166.5121 | 166.5118 | 166.5122 | 9.3735   | 9.26575  |
| 13528 | M478T43_ | 1.035808 | 0.050756 | 0.285063 | 0.787847 | 0.884928 | UP   | 478.3005 | 478.3003 | 478.3008 | 43.12867 | 42.94167 |
| 13529 | M331T9_1 | 1.061765 | -0.08646 | -0.27851 | 0.787908 | 0.884936 | DOWN | 331.2901 | 331.2877 | 331.2904 | 9.481367 | 9.370583 |
| 13530 | M756T10_ | 1.069285 | 0.096646 | 0.27832  | 0.787951 | 0.884942 | UP   | 755.8783 | 755.8771 | 755.8787 | 9.94785  | 9.843367 |
| 13531 | M356T10_ | 1.109299 | -0.14965 | -0.2789  | 0.788135 | 0.884966 | DOWN | 355.5992 | 355.5978 | 355.6019 | 9.857683 | 9.715683 |
| 13532 | M388T9_2 | 1.198105 | -0.26075 | -0.27939 | 0.788178 | 0.884971 | DOWN | 388.3116 | 388.3114 | 388.312  | 9.2612   | 9.205717 |
| 13533 | M1028T10 | 1.106294 | -0.14573 | -0.27921 | 0.788185 | 0.884972 | DOWN | 1027.54  | 1027.538 | 1027.541 | 9.830083 | 9.636483 |
| 13534 | M431T11_ | 1.160567 | 0.21483  | 0.284181 | 0.788344 | 0.884993 | UP   | 431.2271 | 431.2247 | 431.2325 | 10.87572 | 10.83417 |
| 13535 | M479T20  | 1.090388 | -0.12484 | -0.27777 | 0.788405 | 0.885    | DOWN | 479.3555 | 479.3541 | 479.3557 | 19.94    | 19.7365  |
| 13536 | M318T10_ | 1.039535 | 0.055939 | 0.277595 | 0.78841  | 0.885001 | UP   | 318.1354 | 318.135  | 318.1356 | 9.964092 | 9.8753   |
| 13537 | M426T27_ | 1.0851   | -0.11783 | -0.27864 | 0.788434 | 0.885004 | DOWN | 426.0476 | 426.0474 | 426.0477 | 27.041   | 27.034   |
| 13538 | M469T11_ | 1.044849 | -0.06329 | -0.27797 | 0.788464 | 0.885008 | DOWN | 469.3177 | 469.3176 | 469.3189 | 10.91181 | 10.879   |
| 13539 | M683T10_ | 1.085222 | -0.11799 | -0.27883 | 0.788529 | 0.885016 | DOWN | 682.8516 | 682.8513 | 682.8525 | 9.943183 | 9.827283 |
| 13540 | M512T36  | 1.119771 | -0.1632  | -0.27768 | 0.788686 | 0.885037 | DOWN | 512.4152 | 512.415  | 512.4155 | 36.14542 | 36.11417 |
| 13541 | M378T10_ | 1.02719  | -0.0387  | -0.2774  | 0.788823 | 0.885054 | DOWN | 377.988  | 377.9878 | 377.9881 | 9.917167 | 9.811217 |
| 13542 | M602T10_ | 1.105138 | 0.144226 | 0.279258 | 0.788956 | 0.885072 | UP   | 601.8226 | 601.8222 | 601.8228 | 9.979342 | 9.859233 |
| 13543 | M394T9_7 | 1.070048 | -0.09768 | -0.27808 | 0.789128 | 0.885094 | DOWN | 394.213  | 394.2126 | 394.2133 | 8.870558 | 8.7891   |
| 13544 | M596T11_ | 1.057993 | 0.08133  | 0.276725 | 0.789134 | 0.885094 | UP   | 595.6062 | 595.6057 | 595.6077 | 10.86471 | 10.82935 |

|       |          |          |          |          |          |          |      |          |          |          |          |          |
|-------|----------|----------|----------|----------|----------|----------|------|----------|----------|----------|----------|----------|
| 13545 | M220T10_ | 1.037047 | -0.05248 | -0.27745 | 0.789187 | 0.885101 | DOWN | 220.0265 | 220.0262 | 220.0266 | 9.946467 | 9.827283 |
| 13546 | M571T10_ | 1.062049 | -0.08685 | -0.27915 | 0.78921  | 0.885104 | DOWN | 571.2712 | 571.2706 | 571.2723 | 9.960817 | 9.843367 |
| 13547 | M528T17_ | 1.071134 | -0.09914 | -0.27652 | 0.789224 | 0.885106 | DOWN | 528.3765 | 528.3762 | 528.377  | 17.044   | 17.00083 |
| 13548 | M452T10_ | 1.090555 | -0.12506 | -0.27823 | 0.78924  | 0.885108 | DOWN | 452.0776 | 452.0772 | 452.0778 | 9.958617 | 9.843367 |
| 13549 | M326T25  | 1.031244 | 0.044386 | 0.276741 | 0.789244 | 0.885109 | UP   | 326.196  | 326.1958 | 326.1961 | 24.6235  | 24.60867 |
| 13550 | M819T26  | 1.056112 | -0.07876 | -0.27642 | 0.789364 | 0.885124 | DOWN | 818.5838 | 818.5836 | 818.584  | 25.55033 | 25.544   |
| 13551 | M513T9_1 | 1.181163 | -0.24021 | -0.27694 | 0.789375 | 0.885126 | DOWN | 512.6098 | 512.6097 | 512.6102 | 9.294417 | 9.176533 |
| 13552 | M349T9_8 | 1.155158 | 0.20809  | 0.28175  | 0.789379 | 0.885126 | UP   | 348.7727 | 348.7723 | 348.7733 | 9.101208 | 9.0169   |
| 13553 | M817T11_ | 1.053317 | 0.074939 | 0.277168 | 0.789435 | 0.885133 | UP   | 817.4597 | 817.459  | 817.46   | 10.58094 | 10.55068 |
| 13554 | M722T10_ | 1.073812 | -0.10274 | -0.27613 | 0.789458 | 0.885136 | DOWN | 721.8922 | 721.8917 | 721.8933 | 10.05965 | 9.971833 |
| 13555 | M640T10_ | 1.035165 | 0.049861 | 0.276448 | 0.789485 | 0.88514  | UP   | 639.533  | 639.5323 | 639.5367 | 9.8397   | 9.715683 |
| 13556 | M383T9_3 | 1.107584 | -0.14742 | -0.27799 | 0.789616 | 0.885157 | DOWN | 382.8219 | 382.8213 | 382.8223 | 9.1587   | 9.110833 |
| 13557 | M223T11_ | 1.051117 | 0.071923 | 0.280251 | 0.789643 | 0.88516  | UP   | 222.6928 | 222.6926 | 222.693  | 10.91977 | 10.879   |
| 13558 | M357T14_ | 1.126    | -0.17121 | -0.27613 | 0.789651 | 0.885161 | DOWN | 357.2172 | 357.217  | 357.2257 | 13.88775 | 13.85835 |
| 13559 | M762T10_ | 1.082168 | -0.11392 | -0.27655 | 0.78966  | 0.885162 | DOWN | 762.4742 | 762.4741 | 762.4748 | 10.26718 | 10.19852 |
| 13560 | M480T40_ | 1.041882 | -0.05919 | -0.2762  | 0.7899   | 0.885193 | DOWN | 480.2799 | 480.2797 | 480.2803 | 39.92067 | 39.56083 |
| 13561 | M278T9_2 | 1.131822 | -0.17865 | -0.27551 | 0.789958 | 0.885201 | DOWN | 278.1855 | 278.1853 | 278.1859 | 8.955933 | 8.93705  |
| 13562 | M453T9_8 | 1.121282 | 0.16515  | 0.277178 | 0.790082 | 0.885217 | UP   | 452.9823 | 452.9786 | 452.9826 | 9.406667 | 9.175017 |
| 13563 | M440T9_1 | 1.10963  | -0.15008 | -0.27831 | 0.790178 | 0.885229 | DOWN | 439.6327 | 439.6318 | 439.6331 | 8.819425 | 8.772383 |
| 13564 | M615T10_ | 1.100013 | -0.13752 | -0.27664 | 0.79026  | 0.885239 | DOWN | 614.6945 | 614.6942 | 614.6947 | 9.970617 | 9.859233 |
| 13565 | M616T10_ | 1.071845 | -0.1001  | -0.27625 | 0.79042  | 0.88526  | DOWN | 615.9913 | 615.9883 | 615.9948 | 9.772125 | 9.46325  |
| 13566 | M505T10_ | 1.067966 | 0.094865 | 0.274886 | 0.790472 | 0.885267 | UP   | 505.3543 | 505.3537 | 505.3545 | 9.958617 | 9.843367 |
| 13567 | M658T10_ | 1.072786 | -0.10136 | -0.27476 | 0.790507 | 0.885271 | DOWN | 658.1107 | 658.1101 | 658.111  | 9.948875 | 9.843367 |
| 13568 | M472T24  | 1.095908 | -0.13213 | -0.27478 | 0.790549 | 0.885277 | DOWN | 472.3473 | 472.3471 | 472.3475 | 24.07825 | 24.04567 |
| 13569 | M349T11_ | 1.065264 | -0.09121 | -0.27478 | 0.790585 | 0.885281 | DOWN | 348.8939 | 348.8936 | 348.8942 | 10.89953 | 10.879   |
| 13570 | M686T9_4 | 1.111783 | 0.152875 | 0.275021 | 0.790635 | 0.885288 | UP   | 686.3949 | 686.3941 | 686.3953 | 8.873867 | 8.818733 |
| 13571 | M331T10_ | 1.101599 | 0.139599 | 0.274527 | 0.790638 | 0.885288 | UP   | 331.0706 | 331.0652 | 331.0709 | 9.857683 | 9.715683 |
| 13572 | M263T10_ | 1.055405 | -0.0778  | -0.27471 | 0.790733 | 0.8853   | DOWN | 263.2868 | 263.2866 | 263.287  | 9.787633 | 9.65225  |
| 13573 | M183T9_1 | 1.15283  | -0.20518 | -0.27442 | 0.790774 | 0.885306 | DOWN | 183.1915 | 183.1903 | 183.1927 | 9.278717 | 9.103733 |
| 13574 | M416T43_ | 1.077794 | 0.108082 | 0.27694  | 0.790787 | 0.885307 | UP   | 416.2276 | 416.2274 | 416.2278 | 43.15733 | 43.02783 |
| 13575 | M535T10_ | 1.046516 | -0.06559 | -0.27465 | 0.790954 | 0.885329 | DOWN | 534.7102 | 534.71   | 534.7112 | 9.945258 | 9.827283 |
| 13576 | M433T10_ | 1.094263 | -0.12996 | -0.27531 | 0.791077 | 0.885344 | DOWN | 433.03   | 433.0295 | 433.0303 | 9.918242 | 9.811217 |
| 13577 | M491T10_ | 1.10948  | -0.14988 | -0.27377 | 0.791245 | 0.885366 | DOWN | 491.1045 | 491.1032 | 491.1051 | 9.928667 | 9.822117 |
| 13578 | M464T9_1 | 1.066963 | -0.09351 | -0.27955 | 0.791358 | 0.88538  | DOWN | 463.7282 | 463.7276 | 463.7287 | 9.284683 | 9.22495  |
| 13579 | M449T9_9 | 1.054705 | -0.07684 | -0.27534 | 0.791424 | 0.885389 | DOWN | 449.498  | 449.4967 | 449.4985 | 9.320067 | 9.129317 |

|       |          |          |          |          |          |          |      |          |          |          |          |          |
|-------|----------|----------|----------|----------|----------|----------|------|----------|----------|----------|----------|----------|
| 13580 | M206T10_ | 1.115626 | -0.15785 | -0.27353 | 0.791516 | 0.885401 | DOWN | 205.5936 | 205.5792 | 205.5938 | 9.932    | 9.766367 |
| 13581 | M655T10_ | 1.106421 | -0.1459  | -0.27414 | 0.791561 | 0.885406 | DOWN | 654.6623 | 654.6618 | 654.6628 | 9.960467 | 9.932    |
| 13582 | M498T9_7 | 1.044414 | -0.06269 | -0.27409 | 0.79168  | 0.885422 | DOWN | 498.0364 | 498.0359 | 498.0374 | 9.240958 | 9.129317 |
| 13583 | M303T10_ | 1.033171 | -0.04708 | -0.27367 | 0.791945 | 0.885456 | DOWN | 303.2158 | 303.2065 | 303.216  | 9.915933 | 9.811217 |
| 13584 | M333T10_ | 1.013534 | -0.01939 | -0.27822 | 0.791993 | 0.885462 | DOWN | 333.4212 | 333.421  | 333.422  | 9.8397   | 9.73145  |
| 13585 | M397T30  | 1.073911 | -0.10287 | -0.2766  | 0.792038 | 0.885468 | DOWN | 397.335  | 397.3347 | 397.3362 | 30.16583 | 30.15133 |
| 13586 | M652T10_ | 1.072696 | -0.10124 | -0.27586 | 0.792104 | 0.885476 | DOWN | 652.3674 | 652.3664 | 652.3678 | 10.40425 | 10.34372 |
| 13587 | M896T27  | 1.091087 | 0.125766 | 0.273074 | 0.792209 | 0.885489 | UP   | 896.4126 | 896.4118 | 896.4144 | 27.138   | 27.11267 |
| 13588 | M243T10_ | 1.108801 | 0.149001 | 0.278093 | 0.79227  | 0.885497 | UP   | 243.3846 | 243.3843 | 243.3847 | 9.919675 | 9.811217 |
| 13589 | M337T10_ | 1.041696 | -0.05893 | -0.27229 | 0.792333 | 0.885505 | DOWN | 337.2129 | 337.2126 | 337.213  | 9.959533 | 9.843367 |
| 13590 | M288T25  | 1.066803 | -0.09329 | -0.27413 | 0.792341 | 0.885506 | DOWN | 288.2529 | 288.2528 | 288.2531 | 25.21767 | 25.19833 |
| 13591 | M424T11_ | 1.03315  | 0.04705  | 0.278478 | 0.792366 | 0.885509 | UP   | 424.2482 | 424.2481 | 424.2485 | 10.91978 | 10.89355 |
| 13592 | M1374T10 | 1.084664 | 0.117248 | 0.272181 | 0.792566 | 0.885535 | UP   | 1373.966 | 1373.965 | 1373.967 | 9.97155  | 9.8753   |
| 13593 | M226T10_ | 1.047858 | 0.067443 | 0.271888 | 0.792597 | 0.885539 | UP   | 225.792  | 225.7918 | 225.7923 | 9.903017 | 9.811217 |
| 13594 | M228T11_ | 1.064176 | 0.089737 | 0.27351  | 0.792627 | 0.885543 | UP   | 227.5696 | 227.5648 | 227.5698 | 10.89668 | 10.85018 |
| 13595 | M814T11_ | 1.060625 | 0.084915 | 0.273961 | 0.792678 | 0.885549 | UP   | 814.4617 | 814.4606 | 814.463  | 10.93208 | 10.84487 |
| 13596 | M724T31  | 1.103666 | -0.1423  | -0.27178 | 0.79268  | 0.88555  | DOWN | 723.5882 | 723.5878 | 723.5886 | 31.3495  | 31.33783 |
| 13597 | M578T11_ | 1.064456 | -0.09012 | -0.27179 | 0.792688 | 0.885551 | DOWN | 577.619  | 577.6173 | 577.6221 | 10.892   | 10.8646  |
| 13598 | M205T9_3 | 1.05408  | -0.07598 | -0.27237 | 0.792752 | 0.885559 | DOWN | 205.0601 | 205.0597 | 205.0605 | 9.3385   | 9.1587   |
| 13599 | M775T9   | 1.108036 | -0.14801 | -0.27734 | 0.792789 | 0.885564 | DOWN | 775.4466 | 775.4446 | 775.4468 | 9.495967 | 9.447983 |
| 13600 | M209T10_ | 1.050132 | -0.07057 | -0.27414 | 0.792793 | 0.885564 | DOWN | 209.2571 | 209.257  | 209.2571 | 9.84695  | 9.73145  |
| 13601 | M397T11_ | 1.054573 | 0.076659 | 0.275216 | 0.792901 | 0.885578 | UP   | 396.9562 | 396.9559 | 396.9563 | 10.89907 | 10.8646  |
| 13602 | M1343T10 | 1.059353 | -0.08318 | -0.27175 | 0.79294  | 0.885583 | DOWN | 1342.621 | 1342.616 | 1342.624 | 9.904767 | 9.827283 |
| 13603 | M194T9_7 | 1.145454 | 0.195919 | 0.276939 | 0.792966 | 0.885586 | UP   | 193.853  | 193.8528 | 193.8535 | 9.365833 | 9.20785  |
| 13604 | M1037T18 | 1.122732 | -0.16701 | -0.27249 | 0.79301  | 0.885592 | DOWN | 1036.506 | 1036.502 | 1036.506 | 17.8595  | 17.846   |
| 13605 | M408T10_ | 1.080281 | 0.111406 | 0.27431  | 0.793101 | 0.885604 | UP   | 407.7698 | 407.7698 | 407.77   | 9.88815  | 9.872067 |
| 13606 | M510T9_2 | 1.127602 | -0.17326 | -0.27288 | 0.793106 | 0.885604 | DOWN | 510.2095 | 510.2093 | 510.2101 | 9.283817 | 9.1602   |
| 13607 | M422T10_ | 1.083897 | -0.11623 | -0.27119 | 0.793145 | 0.885609 | DOWN | 421.8901 | 421.8892 | 421.8948 | 9.956417 | 9.843367 |
| 13608 | M438T9_7 | 1.055288 | -0.07764 | -0.27316 | 0.793198 | 0.885616 | DOWN | 438.2324 | 438.2318 | 438.2393 | 9.270483 | 9.103733 |
| 13609 | M697T11  | 1.057858 | 0.081146 | 0.2754   | 0.793231 | 0.88562  | UP   | 697.3974 | 697.3966 | 697.3984 | 10.82595 | 10.80222 |
| 13610 | M326T10_ | 1.042261 | -0.05972 | -0.27314 | 0.793275 | 0.885626 | DOWN | 326.2622 | 326.2619 | 326.2624 | 9.859408 | 9.73145  |
| 13611 | M457T11  | 1.070313 | 0.098033 | 0.274421 | 0.793329 | 0.885633 | UP   | 456.7395 | 456.7367 | 456.7409 | 10.90765 | 10.877   |
| 13612 | M401T10_ | 1.062332 | 0.087234 | 0.271097 | 0.793346 | 0.885635 | UP   | 401.2256 | 401.2254 | 401.2258 | 9.9351   | 9.827283 |
| 13613 | M705T10_ | 1.068718 | -0.09588 | -0.27187 | 0.793498 | 0.885654 | DOWN | 705.4097 | 705.4091 | 705.4101 | 9.802117 | 9.699733 |
| 13614 | M444T11_ | 1.049813 | -0.07013 | -0.27097 | 0.793522 | 0.885657 | DOWN | 444.1816 | 444.1815 | 444.182  | 10.89907 | 10.8646  |

|       |          |          |          |          |          |          |      |          |          |          |          |          |
|-------|----------|----------|----------|----------|----------|----------|------|----------|----------|----------|----------|----------|
| 13615 | M243T11_ | 1.044339 | -0.06259 | -0.2704  | 0.79371  | 0.885681 | DOWN | 242.9082 | 242.9081 | 242.9084 | 10.90519 | 10.879   |
| 13616 | M390T9_3 | 1.102273 | -0.14048 | -0.27392 | 0.793765 | 0.885688 | DOWN | 389.7485 | 389.7481 | 389.749  | 9.197983 | 9.111033 |
| 13617 | M461T11_ | 1.069473 | 0.0969   | 0.272917 | 0.793862 | 0.885701 | UP   | 461.3925 | 461.3915 | 461.3936 | 10.89953 | 10.88747 |
| 13618 | M424T30  | 1.062917 | -0.08803 | -0.27508 | 0.793885 | 0.885704 | DOWN | 424.3346 | 424.3343 | 424.3348 | 30.23767 | 30.2225  |
| 13619 | M552T10_ | 1.107029 | 0.146693 | 0.273712 | 0.793996 | 0.885718 | UP   | 551.8459 | 551.8452 | 551.8462 | 9.951283 | 9.8378   |
| 13620 | M416T9_3 | 1.088031 | -0.12172 | -0.27004 | 0.794024 | 0.885721 | DOWN | 415.9771 | 415.9767 | 415.9778 | 9.219375 | 9.129317 |
| 13621 | M731T11_ | 1.100779 | 0.138525 | 0.274388 | 0.794124 | 0.885734 | UP   | 731.3802 | 731.3789 | 731.3807 | 10.83252 | 10.8214  |
| 13622 | M352T11_ | 1.038181 | -0.05406 | -0.27355 | 0.794129 | 0.885735 | DOWN | 351.5998 | 351.5997 | 351.6001 | 10.89875 | 10.879   |
| 13623 | M521T9_8 | 1.065572 | 0.091628 | 0.269833 | 0.794133 | 0.885735 | UP   | 521.1731 | 521.1725 | 521.1735 | 9.3385   | 9.235933 |
| 13624 | M586T9_2 | 1.083703 | -0.11597 | -0.2698  | 0.794147 | 0.885737 | DOWN | 585.706  | 585.7002 | 585.7077 | 9.328967 | 9.204617 |
| 13625 | M265T10_ | 1.113727 | -0.1554  | -0.27003 | 0.794185 | 0.885742 | DOWN | 265.1026 | 265.1024 | 265.1041 | 9.714783 | 9.595733 |
| 13626 | M544T12  | 1.08444  | -0.11695 | -0.27063 | 0.794322 | 0.885759 | DOWN | 544.3785 | 544.3778 | 544.3903 | 11.94791 | 11.92938 |
| 13627 | M248T10_ | 1.087025 | 0.120386 | 0.2709   | 0.794336 | 0.885761 | UP   | 248.1786 | 248.1683 | 248.1788 | 9.7739   | 9.636483 |
| 13628 | M415T41_ | 1.022902 | -0.03267 | -0.2696  | 0.794419 | 0.885772 | DOWN | 415.2323 | 415.232  | 415.2325 | 40.94208 | 40.87033 |
| 13629 | M872T10  | 1.085524 | -0.11839 | -0.26937 | 0.794462 | 0.885777 | DOWN | 871.8176 | 871.8175 | 871.8181 | 9.979667 | 9.8914   |
| 13630 | M369T10_ | 1.041345 | -0.05845 | -0.26958 | 0.794528 | 0.885786 | DOWN | 369.4397 | 369.4394 | 369.4409 | 9.916617 | 9.811217 |
| 13631 | M765T36  | 1.100489 | -0.13815 | -0.26971 | 0.794564 | 0.88579  | DOWN | 765.4976 | 765.4961 | 765.4981 | 35.93467 | 35.86483 |
| 13632 | M692T11_ | 1.041714 | 0.05896  | 0.271225 | 0.794605 | 0.885795 | UP   | 691.5063 | 691.5042 | 691.5066 | 10.84733 | 10.78395 |
| 13633 | M1978T10 | 1.065666 | -0.09176 | -0.27146 | 0.794651 | 0.885801 | DOWN | 1978.358 | 1978.356 | 1978.361 | 9.840617 | 9.772833 |
| 13634 | M728T10_ | 1.081176 | -0.1126  | -0.26984 | 0.79474  | 0.885812 | DOWN | 727.6324 | 727.6319 | 727.6329 | 9.95385  | 9.843367 |
| 13635 | M193T11_ | 1.102556 | 0.140852 | 0.268967 | 0.794767 | 0.885816 | UP   | 193.0421 | 193.042  | 193.0421 | 10.88424 | 10.83572 |
| 13636 | M396T26  | 1.057242 | -0.08031 | -0.26948 | 0.794795 | 0.885819 | DOWN | 396.2508 | 396.2503 | 396.2515 | 26.34767 | 26.3215  |
| 13637 | M575T10_ | 1.114493 | -0.15639 | -0.26885 | 0.794942 | 0.885838 | DOWN | 574.9132 | 574.913  | 574.9135 | 9.934533 | 9.9174   |
| 13638 | M406T11_ | 1.053341 | 0.074973 | 0.271124 | 0.79495  | 0.885839 | UP   | 405.641  | 405.6405 | 405.6421 | 10.90765 | 10.87487 |
| 13639 | M271T11_ | 1.042097 | -0.05949 | -0.26981 | 0.794973 | 0.885842 | DOWN | 270.523  | 270.5229 | 270.5232 | 10.892   | 10.879   |
| 13640 | M400T10_ | 1.076559 | 0.106427 | 0.273541 | 0.794988 | 0.885844 | UP   | 400.3691 | 400.3688 | 400.3698 | 9.9351   | 9.827283 |
| 13641 | M481T11_ | 1.041531 | -0.05871 | -0.26865 | 0.795107 | 0.885859 | DOWN | 480.8998 | 480.8994 | 480.9    | 10.892   | 10.8646  |
| 13642 | M465T9   | 1.145088 | 0.195459 | 0.273988 | 0.795234 | 0.885875 | UP   | 464.8289 | 464.8288 | 464.829  | 9.30965  | 9.21385  |
| 13643 | M467T9_2 | 1.086585 | -0.1198  | -0.26877 | 0.795253 | 0.885878 | DOWN | 467.2631 | 467.2627 | 467.2634 | 8.94275  | 8.872733 |
| 13644 | M342T10_ | 1.034999 | 0.049629 | 0.274826 | 0.795272 | 0.88588  | UP   | 342.1712 | 342.1709 | 342.1713 | 9.8207   | 9.715683 |
| 13645 | M211T10_ | 1.040681 | -0.05753 | -0.27117 | 0.79534  | 0.885889 | DOWN | 211.019  | 211.0189 | 211.0268 | 9.828267 | 9.699733 |
| 13646 | M1820T10 | 1.080196 | -0.11129 | -0.26859 | 0.795342 | 0.885889 | DOWN | 1819.905 | 1819.902 | 1819.907 | 9.965892 | 9.859233 |
| 13647 | M295T21_ | 1.114585 | -0.15651 | -0.27583 | 0.795401 | 0.885896 | DOWN | 295.2459 | 295.2459 | 295.2463 | 20.85467 | 20.84967 |
| 13648 | M388T9_1 | 1.061129 | 0.0856   | 0.273084 | 0.795442 | 0.885902 | UP   | 388.2544 | 388.2542 | 388.2548 | 8.88765  | 8.832317 |
| 13649 | M425T10_ | 1.040447 | -0.0572  | -0.26819 | 0.795528 | 0.885913 | DOWN | 425.3012 | 425.3008 | 425.3014 | 10.48972 | 10.44008 |

|       |          |          |          |          |          |          |      |          |          |          |          |          |
|-------|----------|----------|----------|----------|----------|----------|------|----------|----------|----------|----------|----------|
| 13650 | M367T11_ | 1.068767 | 0.095948 | 0.267935 | 0.795729 | 0.885938 | UP   | 367.2691 | 367.2689 | 367.2693 | 11.09961 | 11.08157 |
| 13651 | M255T10_ | 1.065922 | -0.0921  | -0.26766 | 0.795733 | 0.885939 | DOWN | 255.4071 | 255.407  | 255.4072 | 9.960817 | 9.843367 |
| 13652 | M589T9_4 | 1.085925 | -0.11892 | -0.2681  | 0.795882 | 0.885958 | DOWN | 588.8818 | 588.881  | 588.8842 | 9.2939   | 9.234417 |
| 13653 | M297T10_ | 1.074698 | 0.103932 | 0.268283 | 0.795897 | 0.88596  | UP   | 297.2147 | 297.2076 | 297.2149 | 9.951442 | 9.843367 |
| 13654 | M592T10_ | 1.089716 | 0.123952 | 0.267506 | 0.795912 | 0.885961 | UP   | 592.135  | 592.1341 | 592.1358 | 9.915583 | 9.827283 |
| 13655 | M250T9_4 | 1.040636 | 0.057465 | 0.270338 | 0.795928 | 0.885963 | UP   | 250.0723 | 250.0722 | 250.0724 | 8.735275 | 8.63795  |
| 13656 | M633T11_ | 1.080371 | 0.111526 | 0.267436 | 0.795991 | 0.885971 | UP   | 633.0329 | 633.0323 | 633.0338 | 11.49152 | 11.46753 |
| 13657 | M517T9_1 | 1.135089 | -0.18281 | -0.27561 | 0.796012 | 0.885974 | DOWN | 516.976  | 516.9752 | 516.9765 | 9.37735  | 9.25985  |
| 13658 | M624T11_ | 1.039385 | -0.05573 | -0.26797 | 0.796018 | 0.885975 | DOWN | 623.8006 | 623.8003 | 623.801  | 11.49197 | 11.47593 |
| 13659 | M1043T10 | 1.085125 | -0.11786 | -0.26737 | 0.796033 | 0.885977 | DOWN | 1042.906 | 1042.905 | 1042.907 | 9.967367 | 9.8753   |
| 13660 | M455T10_ | 1.209397 | -0.27429 | -0.26839 | 0.796062 | 0.88598  | DOWN | 454.8696 | 454.8597 | 454.8698 | 9.731817 | 9.429367 |
| 13661 | M517T10_ | 1.037181 | -0.05267 | -0.26733 | 0.796142 | 0.885991 | DOWN | 517.3206 | 517.3203 | 517.321  | 9.514733 | 9.38595  |
| 13662 | M870T10_ | 1.164207 | 0.219348 | 0.268902 | 0.796208 | 0.885999 | UP   | 870.0242 | 870.0237 | 870.0244 | 9.992108 | 9.9754   |
| 13663 | M457T9_7 | 1.069274 | -0.09663 | -0.26727 | 0.796258 | 0.886005 | DOWN | 457.1817 | 457.1815 | 457.1819 | 9.232283 | 9.129317 |
| 13664 | M577T9_1 | 1.116675 | 0.15921  | 0.267068 | 0.796333 | 0.886015 | UP   | 576.8709 | 576.8701 | 576.8716 | 8.796533 | 8.745033 |
| 13665 | M256T25  | 1.038506 | -0.05451 | -0.26761 | 0.79637  | 0.88602  | DOWN | 256.2632 | 256.263  | 256.2633 | 24.69575 | 24.68133 |
| 13666 | M518T10_ | 1.098766 | -0.13588 | -0.26785 | 0.796374 | 0.88602  | DOWN | 518.3231 | 518.3166 | 518.3236 | 9.528008 | 9.40135  |
| 13667 | M315T10_ | 1.045084 | -0.06362 | -0.26738 | 0.796549 | 0.886042 | DOWN | 314.6888 | 314.6883 | 314.6894 | 9.977442 | 9.859233 |
| 13668 | M722T10_ | 1.059271 | -0.08307 | -0.2691  | 0.796576 | 0.886046 | DOWN | 722.003  | 722.0018 | 722.0033 | 9.9677   | 9.859233 |
| 13669 | M335T10_ | 1.086329 | -0.11946 | -0.26813 | 0.796597 | 0.886048 | DOWN | 335.4267 | 335.4263 | 335.4271 | 9.962617 | 9.843367 |
| 13670 | M207T11_ | 1.086082 | -0.11913 | -0.26667 | 0.796642 | 0.886054 | DOWN | 207.3179 | 207.3178 | 207.3189 | 10.92731 | 10.89125 |
| 13671 | M429T11_ | 1.046358 | -0.06538 | -0.26778 | 0.796699 | 0.886061 | DOWN | 429.0935 | 429.0932 | 429.0942 | 10.91977 | 10.8646  |
| 13672 | M620T23_ | 1.090011 | 0.124343 | 0.267044 | 0.796831 | 0.886078 | UP   | 619.7731 | 619.7717 | 619.7733 | 22.68383 | 22.62767 |
| 13673 | M295T30_ | 1.059191 | 0.082963 | 0.267519 | 0.79686  | 0.886082 | UP   | 295.3809 | 295.3808 | 295.3811 | 29.83383 | 29.8195  |
| 13674 | M368T10_ | 1.120061 | -0.16358 | -0.27242 | 0.796873 | 0.886083 | DOWN | 367.7639 | 367.7629 | 367.7697 | 9.790783 | 9.728817 |
| 13675 | M539T11_ | 1.044651 | -0.06302 | -0.26671 | 0.796892 | 0.886086 | DOWN | 539.3569 | 539.3557 | 539.3575 | 11.44833 | 11.43973 |
| 13676 | M458T9_5 | 1.146345 | -0.19704 | -0.26764 | 0.796925 | 0.88609  | DOWN | 458.0433 | 458.043  | 458.0436 | 9.061167 | 9.03845  |
| 13677 | M400T10_ | 1.07313  | 0.101825 | 0.267275 | 0.796927 | 0.88609  | UP   | 400.4317 | 400.4312 | 400.432  | 9.975217 | 9.859233 |
| 13678 | M718T36  | 1.06084  | -0.08521 | -0.2659  | 0.797042 | 0.886105 | DOWN | 717.5191 | 717.5188 | 717.5196 | 36.1095  | 36.08583 |
| 13679 | M429T10_ | 1.059088 | -0.08282 | -0.26591 | 0.797071 | 0.886108 | DOWN | 429.0782 | 429.0776 | 429.0792 | 9.948875 | 9.843367 |
| 13680 | M410T9_7 | 1.181021 | 0.240035 | 0.268741 | 0.797155 | 0.886119 | UP   | 410.307  | 410.3038 | 410.3098 | 9.294633 | 9.130683 |
| 13681 | M291T10_ | 1.054654 | 0.07677  | 0.267319 | 0.797189 | 0.886123 | UP   | 290.7824 | 290.7821 | 290.7827 | 9.954217 | 9.843367 |
| 13682 | M548T10_ | 1.042787 | 0.060445 | 0.268907 | 0.797216 | 0.886127 | UP   | 548.3222 | 548.3218 | 548.3223 | 9.944392 | 9.827283 |
| 13683 | M456T9_4 | 1.064758 | -0.09053 | -0.26601 | 0.797239 | 0.88613  | DOWN | 456.0667 | 456.066  | 456.0671 | 9.277017 | 9.1445   |
| 13684 | M651T10_ | 1.05412  | -0.07604 | -0.26574 | 0.797303 | 0.886138 | DOWN | 651.4697 | 651.469  | 651.4705 | 10.40055 | 10.34372 |

|       |          |          |          |          |          |          |      |          |          |          |          |          |
|-------|----------|----------|----------|----------|----------|----------|------|----------|----------|----------|----------|----------|
| 13685 | M244T22_ | 1.05189  | 0.072983 | 0.272396 | 0.797375 | 0.886147 | UP   | 244.2632 | 244.2631 | 244.2635 | 21.68567 | 21.68017 |
| 13686 | M624T19  | 1.090516 | -0.12501 | -0.26789 | 0.797408 | 0.886151 | DOWN | 623.978  | 623.9776 | 623.9786 | 18.63342 | 18.61683 |
| 13687 | M440T36  | 1.113729 | -0.1554  | -0.26543 | 0.797458 | 0.886157 | DOWN | 440.4095 | 440.4092 | 440.4097 | 35.94392 | 35.92017 |
| 13688 | M1805T10 | 1.133175 | -0.18037 | -0.26527 | 0.797522 | 0.886165 | DOWN | 1805.276 | 1805.274 | 1805.277 | 9.91045  | 9.827283 |
| 13689 | M411T10_ | 1.153936 | 0.206563 | 0.266966 | 0.797715 | 0.88619  | UP   | 411.4097 | 411.4096 | 411.4099 | 9.964092 | 9.843367 |
| 13690 | M1027T16 | 1.053408 | -0.07506 | -0.26487 | 0.797819 | 0.886203 | DOWN | 1026.523 | 1026.522 | 1026.524 | 15.84743 | 15.8193  |
| 13691 | M804T10_ | 1.075592 | -0.10513 | -0.26918 | 0.797845 | 0.886206 | DOWN | 804.2713 | 804.271  | 804.2719 | 9.983467 | 9.90755  |
| 13692 | M357T10_ | 1.075102 | 0.104474 | 0.269929 | 0.797855 | 0.886207 | UP   | 356.7032 | 356.7027 | 356.7054 | 9.83135  | 9.715683 |
| 13693 | M320T19  | 1.179111 | 0.2377   | 0.264879 | 0.797859 | 0.886208 | UP   | 320.2219 | 320.2209 | 320.2223 | 19.03883 | 18.98033 |
| 13694 | M161T10_ | 1.07473  | -0.10397 | -0.26933 | 0.797886 | 0.886211 | DOWN | 160.752  | 160.7518 | 160.752  | 9.970617 | 9.859233 |
| 13695 | M851T11_ | 1.05178  | -0.07283 | -0.27008 | 0.797971 | 0.886222 | DOWN | 851.2571 | 851.2567 | 851.2574 | 10.92528 | 10.89355 |
| 13696 | M1829T10 | 1.089815 | -0.12408 | -0.26464 | 0.797997 | 0.886226 | DOWN | 1828.719 | 1828.717 | 1828.721 | 9.972217 | 9.8753   |
| 13697 | M670T9_2 | 1.073614 | -0.10248 | -0.26489 | 0.798017 | 0.886228 | DOWN | 670.3965 | 670.3963 | 670.397  | 9.38665  | 9.275917 |
| 13698 | M195T9_8 | 1.103609 | 0.14223  | 0.264669 | 0.798059 | 0.886233 | UP   | 194.8588 | 194.8582 | 194.859  | 9.215117 | 9.1175   |
| 13699 | M361T11_ | 1.060075 | 0.084166 | 0.265142 | 0.798169 | 0.886247 | UP   | 361.4466 | 361.4463 | 361.4468 | 10.90659 | 10.8646  |
| 13700 | M1282T10 | 1.0581   | -0.08148 | -0.2646  | 0.798208 | 0.886252 | DOWN | 1282.336 | 1282.335 | 1282.341 | 9.900142 | 9.779267 |
| 13701 | M183T11  | 1.026333 | -0.0375  | -0.26423 | 0.798285 | 0.886262 | DOWN | 183.1571 | 183.1569 | 183.1571 | 10.90548 | 10.88995 |
| 13702 | M401T11_ | 1.110157 | 0.150764 | 0.264742 | 0.798337 | 0.886268 | UP   | 400.6859 | 400.6794 | 400.6902 | 10.95078 | 10.9049  |
| 13703 | M477T11_ | 1.055457 | 0.077868 | 0.265727 | 0.798471 | 0.886285 | UP   | 476.6185 | 476.6182 | 476.6187 | 10.89193 | 10.877   |
| 13704 | M315T10_ | 1.146385 | -0.19709 | -0.26405 | 0.798575 | 0.886298 | DOWN | 315.0049 | 315.0046 | 315.0083 | 9.997142 | 9.94405  |
| 13705 | M1990T10 | 1.105689 | 0.144945 | 0.265255 | 0.798583 | 0.886299 | UP   | 1989.747 | 1989.743 | 1989.751 | 9.956417 | 9.8753   |
| 13706 | M481T9_2 | 1.094937 | 0.130848 | 0.264189 | 0.798589 | 0.8863   | UP   | 480.5949 | 480.5921 | 480.5957 | 9.317    | 9.11795  |
| 13707 | M428T10_ | 1.060687 | -0.085   | -0.26697 | 0.798596 | 0.886301 | DOWN | 428.2123 | 428.2121 | 428.2125 | 9.764667 | 9.636483 |
| 13708 | M1072T10 | 1.050989 | 0.071747 | 0.264519 | 0.798787 | 0.886325 | UP   | 1072.474 | 1072.473 | 1072.475 | 9.972917 | 9.859233 |
| 13709 | M535T10_ | 1.135274 | -0.18304 | -0.2691  | 0.798809 | 0.886328 | DOWN | 535.3469 | 535.3458 | 535.3474 | 9.951283 | 9.853533 |
| 13710 | M249T11_ | 1.041372 | -0.05848 | -0.26455 | 0.798856 | 0.886334 | DOWN | 248.5759 | 248.5758 | 248.5762 | 10.892   | 10.879   |
| 13711 | M1566T10 | 1.054344 | 0.076345 | 0.263911 | 0.798858 | 0.886334 | UP   | 1565.561 | 1565.554 | 1565.565 | 9.904167 | 9.827283 |
| 13712 | M520T9_3 | 1.085763 | 0.118709 | 0.268948 | 0.798887 | 0.886338 | UP   | 519.7776 | 519.7774 | 519.7779 | 9.175017 | 9.12675  |
| 13713 | M262T10_ | 1.042484 | 0.060025 | 0.263773 | 0.798949 | 0.886346 | UP   | 262.2941 | 262.294  | 262.2943 | 9.914217 | 9.747533 |
| 13714 | M312T10_ | 1.046553 | 0.065645 | 0.264029 | 0.799038 | 0.886357 | UP   | 311.7635 | 311.7511 | 311.7637 | 9.818442 | 9.715683 |
| 13715 | M580T45  | 1.053547 | 0.075255 | 0.26377  | 0.799082 | 0.886362 | UP   | 580.3327 | 580.3325 | 580.3328 | 44.74817 | 44.60983 |
| 13716 | M166T10_ | 1.042649 | 0.060254 | 0.263163 | 0.799093 | 0.886364 | UP   | 165.6158 | 165.6157 | 165.6159 | 9.960817 | 9.859233 |
| 13717 | M483T10_ | 1.059171 | -0.08293 | -0.26591 | 0.799191 | 0.886376 | DOWN | 483.303  | 483.3018 | 483.3112 | 10.31875 | 9.952017 |
| 13718 | M478T23  | 1.062166 | -0.08701 | -0.26304 | 0.799215 | 0.886379 | DOWN | 478.352  | 478.3518 | 478.3522 | 22.78467 | 22.77    |
| 13719 | M423T9_1 | 1.0687   | -0.09586 | -0.26296 | 0.799287 | 0.886388 | DOWN | 422.5926 | 422.5922 | 422.5932 | 9.162767 | 9.0169   |



|       |          |          |          |          |          |          |      |          |          |          |          |          |
|-------|----------|----------|----------|----------|----------|----------|------|----------|----------|----------|----------|----------|
| 13720 | M313T25_ | 1.050992 | 0.071752 | 0.26284  | 0.799331 | 0.886394 | UP   | 313.2271 | 313.227  | 313.2272 | 25.18167 | 25.1605  |
| 13721 | M654T11_ | 1.054071 | 0.075972 | 0.26284  | 0.799395 | 0.886402 | UP   | 654.2439 | 654.2436 | 654.2445 | 11.49633 | 11.47298 |
| 13722 | M261T10_ | 1.073845 | -0.10279 | -0.26277 | 0.799461 | 0.88641  | DOWN | 260.6171 | 260.6168 | 260.6172 | 9.957333 | 9.843367 |
| 13723 | M633T11_ | 1.042863 | -0.06055 | -0.26318 | 0.799478 | 0.886412 | DOWN | 633.4218 | 633.4216 | 633.4231 | 10.892   | 10.8646  |
| 13724 | M636T40_ | 1.0464   | 0.065434 | 0.270901 | 0.799511 | 0.886417 | UP   | 636.3592 | 636.3589 | 636.3595 | 39.79108 | 39.77667 |
| 13725 | M539T13_ | 1.055086 | 0.07736  | 0.263241 | 0.799513 | 0.886417 | UP   | 539.3879 | 539.3877 | 539.3889 | 13.08453 | 13.06878 |
| 13726 | M502T9_3 | 1.097189 | -0.13381 | -0.26267 | 0.799532 | 0.886419 | DOWN | 501.9373 | 501.9345 | 501.9389 | 9.269633 | 9.160617 |
| 13727 | M479T30  | 1.187562 | -0.248   | -0.26261 | 0.799614 | 0.886429 | DOWN | 478.6759 | 478.6756 | 478.6762 | 29.5755  | 29.48917 |
| 13728 | M344T10_ | 1.028995 | -0.04124 | -0.26348 | 0.79968  | 0.886438 | DOWN | 344.3093 | 344.3091 | 344.3099 | 9.872475 | 9.747533 |
| 13729 | M178T9_8 | 1.11641  | 0.158867 | 0.26806  | 0.799694 | 0.886439 | UP   | 178.0911 | 178.0908 | 178.0914 | 9.160617 | 9.142767 |
| 13730 | M367T10_ | 1.093613 | 0.129102 | 0.263479 | 0.799703 | 0.886441 | UP   | 367.0579 | 367.0571 | 367.0648 | 9.968992 | 9.843367 |
| 13731 | M705T10_ | 1.064698 | 0.090444 | 0.266639 | 0.79973  | 0.886444 | UP   | 704.7645 | 704.7639 | 704.7651 | 9.857275 | 9.73145  |
| 13732 | M416T10_ | 1.085867 | 0.118847 | 0.26789  | 0.799942 | 0.886471 | UP   | 416.0299 | 416.0287 | 416.0299 | 9.920517 | 9.811217 |
| 13733 | M349T10_ | 1.065111 | -0.091   | -0.26261 | 0.799982 | 0.886476 | DOWN | 349.4499 | 349.4497 | 349.4501 | 9.830508 | 9.715683 |
| 13734 | M269T11_ | 1.0482   | 0.067914 | 0.262099 | 0.800047 | 0.886484 | UP   | 269.1833 | 269.1831 | 269.1835 | 10.91372 | 10.89125 |
| 13735 | M703T10_ | 1.015483 | 0.022167 | 0.265226 | 0.800057 | 0.886485 | UP   | 702.5431 | 702.5427 | 702.5434 | 9.8397   | 9.715683 |
| 13736 | M755T10_ | 1.080743 | -0.11202 | -0.2634  | 0.800092 | 0.88649  | DOWN | 754.5521 | 754.5488 | 754.5532 | 9.814142 | 9.715683 |
| 13737 | M419T9_2 | 1.056307 | 0.079029 | 0.261789 | 0.800177 | 0.8865   | UP   | 418.6308 | 418.6304 | 418.6309 | 9.365833 | 9.22495  |
| 13738 | M289T11_ | 1.042135 | -0.05954 | -0.26205 | 0.800268 | 0.886512 | DOWN | 288.7093 | 288.7091 | 288.7094 | 10.892   | 10.8646  |
| 13739 | M1483T10 | 1.105462 | 0.144649 | 0.26187  | 0.800282 | 0.886513 | UP   | 1482.932 | 1482.93  | 1482.933 | 9.967367 | 9.859233 |
| 13740 | M1393T10 | 1.078145 | -0.10855 | -0.26468 | 0.800313 | 0.886517 | DOWN | 1392.802 | 1392.801 | 1392.804 | 10.26148 | 10.19852 |
| 13741 | M1747T10 | 1.081834 | -0.11348 | -0.26148 | 0.800329 | 0.886519 | DOWN | 1747.14  | 1747.138 | 1747.14  | 9.909442 | 9.811217 |
| 13742 | M654T11_ | 1.052717 | -0.07412 | -0.26145 | 0.800401 | 0.886528 | DOWN | 653.9198 | 653.9195 | 653.9206 | 10.91378 | 10.89355 |
| 13743 | M260T10_ | 1.081567 | -0.11312 | -0.26535 | 0.800508 | 0.886542 | DOWN | 259.5874 | 259.5873 | 259.5876 | 9.9351   | 9.853533 |
| 13744 | M297T10_ | 1.061963 | -0.08673 | -0.26123 | 0.800671 | 0.886562 | DOWN | 297.1265 | 297.1263 | 297.1267 | 9.958617 | 9.843367 |
| 13745 | M166T9_4 | 1.151959 | -0.20409 | -0.26156 | 0.800674 | 0.886563 | DOWN | 166.0521 | 166.0519 | 166.0523 | 9.320783 | 9.26575  |
| 13746 | M637T10_ | 1.078466 | -0.10898 | -0.26145 | 0.800768 | 0.886575 | DOWN | 636.9347 | 636.9342 | 636.9359 | 9.958617 | 9.859233 |
| 13747 | M975T10  | 1.080095 | 0.111158 | 0.26204  | 0.800797 | 0.886578 | UP   | 974.7758 | 974.7737 | 974.7762 | 9.979342 | 9.8753   |
| 13748 | M243T10_ | 1.108054 | -0.14803 | -0.26074 | 0.800885 | 0.886589 | DOWN | 242.9476 | 242.9474 | 242.9477 | 9.960817 | 9.843367 |
| 13749 | M511T9_3 | 1.057705 | 0.080937 | 0.261345 | 0.80107  | 0.886612 | UP   | 511.2503 | 511.25   | 511.2546 | 9.321883 | 9.087183 |
| 13750 | M394T11_ | 1.046345 | -0.06536 | -0.26036 | 0.801194 | 0.886628 | DOWN | 394.2779 | 394.2774 | 394.279  | 10.89907 | 10.873   |
| 13751 | M680T41_ | 1.055821 | 0.078366 | 0.268777 | 0.801244 | 0.886634 | UP   | 680.3855 | 680.3852 | 680.3859 | 40.712   | 40.48183 |
| 13752 | M373T10_ | 1.061964 | -0.08674 | -0.26159 | 0.801249 | 0.886635 | DOWN | 373.4249 | 373.4244 | 373.4252 | 9.942317 | 9.827283 |
| 13753 | M516T11_ | 1.038264 | 0.054174 | 0.260221 | 0.801305 | 0.886642 | UP   | 516.1776 | 516.1773 | 516.1779 | 10.89875 | 10.879   |
| 13754 | M820T10_ | 1.059919 | -0.08395 | -0.26233 | 0.80136  | 0.886649 | DOWN | 820.4732 | 820.4716 | 820.4746 | 9.903567 | 9.806367 |

|       |          |          |          |          |          |          |      |          |          |          |          |          |
|-------|----------|----------|----------|----------|----------|----------|------|----------|----------|----------|----------|----------|
| 13755 | M427T11_ | 1.093759 | 0.129294 | 0.263685 | 0.801464 | 0.886662 | UP   | 426.7959 | 426.7956 | 426.7961 | 10.98193 | 10.95095 |
| 13756 | M476T10_ | 1.105367 | -0.14453 | -0.26008 | 0.80148  | 0.886664 | DOWN | 475.6523 | 475.6517 | 475.653  | 9.759167 | 9.729367 |
| 13757 | M243T11_ | 1.066822 | -0.09332 | -0.25985 | 0.801585 | 0.886677 | DOWN | 243.1884 | 243.188  | 243.1887 | 11.49637 | 11.46753 |
| 13758 | M393T9_9 | 1.064428 | 0.090079 | 0.260901 | 0.801641 | 0.886684 | UP   | 393.4413 | 393.4399 | 393.445  | 9.23515  | 9.07945  |
| 13759 | M385T11_ | 1.048427 | -0.06823 | -0.26447 | 0.801663 | 0.886687 | DOWN | 385.1987 | 385.1979 | 385.1988 | 11.232   | 11.2071  |
| 13760 | M183T9_1 | 1.095296 | 0.131321 | 0.260195 | 0.801681 | 0.886689 | UP   | 183.3401 | 183.3397 | 183.3405 | 9.1911   | 9.111033 |
| 13761 | M170T13  | 1.078497 | 0.109022 | 0.264442 | 0.801701 | 0.886692 | UP   | 170.1537 | 170.1536 | 170.1539 | 12.60213 | 12.5577  |
| 13762 | M372T14  | 1.034988 | -0.04961 | -0.26153 | 0.801716 | 0.886693 | DOWN | 372.2378 | 372.2375 | 372.2381 | 13.76625 | 13.75567 |
| 13763 | M706T10_ | 1.030352 | 0.043137 | 0.258798 | 0.802337 | 0.886771 | UP   | 706.4703 | 706.4701 | 706.471  | 9.848417 | 9.728083 |
| 13764 | M511T30  | 1.055677 | -0.07817 | -0.26114 | 0.80243  | 0.886783 | DOWN | 511.3835 | 511.3831 | 511.3836 | 30.28092 | 30.266   |
| 13765 | M164T10_ | 1.039833 | -0.05635 | -0.25998 | 0.802535 | 0.886796 | DOWN | 164.2406 | 164.2404 | 164.2407 | 9.831517 | 9.699733 |
| 13766 | M244T23  | 1.034613 | -0.04909 | -0.26219 | 0.802722 | 0.886819 | DOWN | 244.2632 | 244.2631 | 244.2633 | 23.09575 | 23.07417 |
| 13767 | M267T10_ | 1.068017 | 0.094934 | 0.258944 | 0.802821 | 0.886832 | UP   | 266.8079 | 266.8077 | 266.808  | 9.958617 | 9.859233 |
| 13768 | M549T11_ | 1.036699 | -0.052   | -0.25818 | 0.802864 | 0.886837 | DOWN | 549.1952 | 549.193  | 549.1954 | 10.91813 | 10.89355 |
| 13769 | M264T9_1 | 1.101033 | 0.138858 | 0.259651 | 0.802877 | 0.886839 | UP   | 263.5085 | 263.5084 | 263.5089 | 9.374383 | 9.288883 |
| 13770 | M749T10_ | 1.071351 | -0.09943 | -0.25935 | 0.802891 | 0.886841 | DOWN | 748.6212 | 748.6208 | 748.6226 | 9.8207   | 9.715683 |
| 13771 | M273T10_ | 1.206392 | 0.270699 | 0.258008 | 0.802938 | 0.886846 | UP   | 272.9282 | 272.928  | 272.9285 | 9.967367 | 9.859233 |
| 13772 | M840T15  | 1.0637   | 0.089091 | 0.257846 | 0.803037 | 0.886859 | UP   | 840.3918 | 840.3907 | 840.3931 | 15.48275 | 15.45273 |
| 13773 | M358T10_ | 1.08667  | 0.119914 | 0.258192 | 0.80311  | 0.886868 | UP   | 357.7986 | 357.7981 | 357.802  | 9.967367 | 9.816183 |
| 13774 | M797T10_ | 1.11024  | -0.15087 | -0.26115 | 0.803116 | 0.886869 | DOWN | 797.4491 | 797.4485 | 797.4496 | 9.967367 | 9.859233 |
| 13775 | M549T10_ | 1.050564 | 0.071164 | 0.262644 | 0.803134 | 0.886871 | UP   | 549.0152 | 549.0148 | 549.0155 | 9.946467 | 9.843367 |
| 13776 | M539T25  | 1.069727 | -0.09724 | -0.26244 | 0.803327 | 0.886895 | DOWN | 539.2093 | 539.2088 | 539.2098 | 24.60792 | 24.5795  |
| 13777 | M460T44_ | 1.108719 | 0.148894 | 0.257362 | 0.803403 | 0.886904 | UP   | 460.2901 | 460.29   | 460.2902 | 44.06333 | 43.84767 |
| 13778 | M827T10_ | 1.087094 | -0.12048 | -0.25818 | 0.803406 | 0.886905 | DOWN | 827.4102 | 827.4095 | 827.4115 | 9.956417 | 9.843367 |
| 13779 | M319T10_ | 1.08703  | 0.120392 | 0.261536 | 0.803419 | 0.886906 | UP   | 318.6746 | 318.6741 | 318.6756 | 9.830658 | 9.715683 |
| 13780 | M481T9_1 | 1.058188 | 0.081596 | 0.258434 | 0.803461 | 0.886912 | UP   | 480.522  | 480.5202 | 480.5228 | 9.328225 | 9.147367 |
| 13781 | M379T11_ | 1.058673 | 0.082257 | 0.259939 | 0.803517 | 0.886919 | UP   | 379.2957 | 379.2954 | 379.2957 | 10.50278 | 10.44008 |
| 13782 | M653T11_ | 1.088283 | -0.12205 | -0.25719 | 0.803531 | 0.886921 | DOWN | 652.7663 | 652.7655 | 652.7674 | 10.88747 | 10.86275 |
| 13783 | M415T39_ | 1.054774 | 0.076934 | 0.26479  | 0.803646 | 0.886935 | UP   | 415.2322 | 415.2321 | 415.2323 | 38.64    | 38.43867 |
| 13784 | M472T9_7 | 1.073438 | -0.10224 | -0.25776 | 0.803678 | 0.886939 | DOWN | 472.1858 | 472.1846 | 472.1862 | 9.220933 | 9.12675  |
| 13785 | M355T13  | 1.114844 | 0.156842 | 0.257789 | 0.803688 | 0.88694  | UP   | 355.2378 | 355.2376 | 355.2379 | 13.22953 | 13.21463 |
| 13786 | M467T9_3 | 1.0766   | 0.106482 | 0.258107 | 0.80391  | 0.886968 | UP   | 467.3216 | 467.3214 | 467.3225 | 9.160675 | 9.1322   |
| 13787 | M345T39  | 1.074924 | 0.104234 | 0.264606 | 0.803948 | 0.886972 | UP   | 345.1907 | 345.1905 | 345.1908 | 39.09317 | 39       |
| 13788 | M490T44_ | 1.095496 | -0.13158 | -0.25791 | 0.804275 | 0.887013 | DOWN | 490.2644 | 490.264  | 490.2646 | 44.40117 | 44.17233 |
| 13789 | M263T11_ | 1.062987 | 0.088123 | 0.256604 | 0.804308 | 0.887017 | UP   | 263.221  | 263.2205 | 263.2212 | 10.95444 | 10.90785 |

|       |          |          |          |          |          |          |      |          |          |          |          |          |
|-------|----------|----------|----------|----------|----------|----------|------|----------|----------|----------|----------|----------|
| 13790 | M435T9_2 | 1.114783 | 0.156762 | 0.256848 | 0.804316 | 0.887018 | UP   | 434.5948 | 434.5945 | 434.5991 | 9.49445  | 9.355317 |
| 13791 | M608T44  | 1.027125 | 0.038611 | 0.256154 | 0.80433  | 0.88702  | UP   | 608.3641 | 608.3638 | 608.3642 | 43.67483 | 43.54583 |
| 13792 | M259T21  | 1.045854 | 0.064682 | 0.256872 | 0.804395 | 0.887028 | UP   | 259.1689 | 259.1688 | 259.1689 | 20.7645  | 20.73817 |
| 13793 | M634T10_ | 1.069268 | -0.09662 | -0.25595 | 0.804486 | 0.887039 | DOWN | 633.9246 | 633.9241 | 633.9259 | 9.945258 | 9.827283 |
| 13794 | M416T11_ | 1.090398 | -0.12486 | -0.25724 | 0.80463  | 0.887057 | DOWN | 415.5183 | 415.5149 | 415.52   | 10.93655 | 10.82935 |
| 13795 | M272T11_ | 1.027592 | -0.03927 | -0.25728 | 0.804795 | 0.887078 | DOWN | 272.2582 | 272.2577 | 272.2583 | 10.63273 | 10.59933 |
| 13796 | M530T9_1 | 1.1033   | -0.14182 | -0.25551 | 0.804947 | 0.887097 | DOWN | 530.1198 | 530.1145 | 530.1209 | 9.262875 | 9.079083 |
| 13797 | M221T10_ | 1.046694 | -0.06584 | -0.25611 | 0.804964 | 0.887099 | DOWN | 220.8581 | 220.858  | 220.8666 | 9.900133 | 9.79535  |
| 13798 | M545T31  | 1.096441 | 0.132829 | 0.257562 | 0.805207 | 0.887129 | UP   | 545.3424 | 545.3423 | 545.3431 | 30.52367 | 30.4965  |
| 13799 | M177T9_1 | 1.103538 | -0.14214 | -0.25497 | 0.80522  | 0.887131 | DOWN | 176.6369 | 176.6367 | 176.6377 | 9.300125 | 9.132267 |
| 13800 | M329T22  | 1.0587   | 0.082294 | 0.259572 | 0.805247 | 0.887134 | UP   | 329.3161 | 329.3159 | 329.3165 | 21.99583 | 21.97233 |
| 13801 | M177T10_ | 1.111592 | 0.152627 | 0.255216 | 0.805256 | 0.887135 | UP   | 176.6345 | 176.6344 | 176.6346 | 9.894392 | 9.811217 |
| 13802 | M311T10_ | 1.040209 | 0.056873 | 0.259329 | 0.805379 | 0.887151 | UP   | 310.8951 | 310.8949 | 310.8952 | 9.933967 | 9.827283 |
| 13803 | M239T11_ | 1.149891 | 0.201497 | 0.254603 | 0.805545 | 0.887171 | UP   | 238.5555 | 238.5552 | 238.5562 | 10.92253 | 10.873   |
| 13804 | M315T9_7 | 1.139797 | -0.18878 | -0.25614 | 0.805555 | 0.887173 | DOWN | 315.3784 | 315.3782 | 315.3787 | 9.25985  | 9.18975  |
| 13805 | M1273T45 | 1.017927 | 0.025634 | 0.255622 | 0.805726 | 0.887194 | UP   | 1272.899 | 1272.898 | 1272.899 | 44.83967 | 44.82533 |
| 13806 | M473T10_ | 1.063514 | -0.08884 | -0.25419 | 0.805806 | 0.887204 | DOWN | 473.062  | 473.0614 | 473.0623 | 9.948875 | 9.843367 |
| 13807 | M609T11_ | 1.050931 | -0.07167 | -0.25423 | 0.805844 | 0.887208 | DOWN | 609.1828 | 609.1822 | 609.1835 | 10.88864 | 10.84487 |
| 13808 | M317T9_4 | 1.065646 | -0.09173 | -0.25409 | 0.805873 | 0.887212 | DOWN | 317.1447 | 317.1445 | 317.1448 | 8.653233 | 8.55865  |
| 13809 | M253T9_1 | 1.114601 | -0.15653 | -0.25406 | 0.805875 | 0.887212 | DOWN | 252.677  | 252.6769 | 252.6771 | 8.788667 | 8.682683 |
| 13810 | M1062T10 | 1.065267 | -0.09122 | -0.25402 | 0.805889 | 0.887214 | DOWN | 1061.946 | 1061.945 | 1061.948 | 9.967517 | 9.859233 |
| 13811 | M1057T10 | 1.063431 | -0.08873 | -0.2585  | 0.805929 | 0.887219 | DOWN | 1057.414 | 1057.412 | 1057.415 | 9.967367 | 9.859233 |
| 13812 | M616T30  | 1.04756  | -0.06703 | -0.25595 | 0.805943 | 0.887221 | DOWN | 616.4628 | 616.4623 | 616.463  | 30.27933 | 30.266   |
| 13813 | M720T10_ | 1.02737  | 0.038956 | 0.254135 | 0.805976 | 0.887225 | UP   | 720.1676 | 720.1663 | 720.1682 | 9.825767 | 9.715683 |
| 13814 | M784T11_ | 1.038107 | -0.05395 | -0.25627 | 0.806047 | 0.887234 | DOWN | 784.3428 | 784.3403 | 784.3434 | 10.88445 | 10.85838 |
| 13815 | M633T10_ | 1.059997 | -0.08406 | -0.25666 | 0.806129 | 0.887244 | DOWN | 633.2679 | 633.2679 | 633.268  | 9.816183 | 9.743667 |
| 13816 | M358T39  | 1.053763 | -0.07555 | -0.25526 | 0.80616  | 0.887248 | DOWN | 358.2222 | 358.2221 | 358.2225 | 38.9135  | 38.76967 |
| 13817 | M466T10_ | 1.014423 | 0.02066  | 0.258154 | 0.806185 | 0.887251 | UP   | 466.3127 | 466.3125 | 466.3128 | 9.807458 | 9.683817 |
| 13818 | M539T10_ | 1.039799 | -0.0563  | -0.2536  | 0.806228 | 0.887256 | DOWN | 538.7116 | 538.7112 | 538.7121 | 9.938142 | 9.843367 |
| 13819 | M836T33  | 1.078111 | 0.108505 | 0.255771 | 0.806233 | 0.887257 | UP   | 835.5823 | 835.5808 | 835.5833 | 33.30417 | 33.28217 |
| 13820 | M382T11_ | 1.04457  | -0.06291 | -0.25375 | 0.806254 | 0.887259 | DOWN | 381.8789 | 381.8787 | 381.8798 | 10.892   | 10.879   |
| 13821 | M215T11_ | 1.079511 | -0.11038 | -0.25588 | 0.80628  | 0.887263 | DOWN | 214.6031 | 214.6029 | 214.6041 | 10.93093 | 10.879   |
| 13822 | M673T11  | 1.032317 | -0.04589 | -0.25422 | 0.806395 | 0.887277 | DOWN | 673.394  | 673.3936 | 673.3944 | 10.89904 | 10.879   |
| 13823 | M300T10_ | 1.042298 | 0.059768 | 0.254208 | 0.8064   | 0.887277 | UP   | 299.9745 | 299.9742 | 299.9746 | 9.965892 | 9.843367 |
| 13824 | M307T10_ | 1.043052 | -0.06081 | -0.25493 | 0.806402 | 0.887278 | DOWN | 307.2122 | 307.2121 | 307.2123 | 10.39613 | 10.34372 |

|       |          |          |          |          |          |          |      |          |          |          |          |          |
|-------|----------|----------|----------|----------|----------|----------|------|----------|----------|----------|----------|----------|
| 13825 | M201T9_1 | 1.063537 | -0.08887 | -0.25325 | 0.806513 | 0.887291 | DOWN | 201.1683 | 201.1671 | 201.169  | 9.310917 | 9.132267 |
| 13826 | M638T11_ | 1.057196 | -0.08024 | -0.25327 | 0.806669 | 0.887311 | DOWN | 637.7154 | 637.715  | 637.717  | 10.86977 | 10.84395 |
| 13827 | M781T10_ | 1.051024 | -0.0718  | -0.25296 | 0.806719 | 0.887317 | DOWN | 781.4209 | 781.4197 | 781.4213 | 10.45607 | 10.39197 |
| 13828 | M422T11_ | 1.044438 | -0.06273 | -0.25304 | 0.806783 | 0.887325 | DOWN | 422.1618 | 422.1617 | 422.1621 | 10.892   | 10.879   |
| 13829 | M751T10_ | 1.048996 | 0.06901  | 0.255933 | 0.806793 | 0.887326 | UP   | 750.5564 | 750.5555 | 750.5579 | 9.969158 | 9.8753   |
| 13830 | M457T9_1 | 1.164006 | 0.219098 | 0.252502 | 0.807155 | 0.887371 | UP   | 457.3721 | 457.3696 | 457.3741 | 9.418275 | 9.129317 |
| 13831 | M677T9   | 1.053339 | -0.07497 | -0.25443 | 0.807194 | 0.887376 | DOWN | 677.0452 | 677.0447 | 677.047  | 9.485058 | 9.416817 |
| 13832 | M384T10_ | 1.071463 | -0.09958 | -0.25743 | 0.807228 | 0.88738  | DOWN | 383.8118 | 383.8116 | 383.8125 | 10.42468 | 10.37598 |
| 13833 | M168T10_ | 1.077752 | 0.108026 | 0.252438 | 0.807292 | 0.887388 | UP   | 167.9675 | 167.9674 | 167.9676 | 9.825492 | 9.715683 |
| 13834 | M575T10_ | 1.062071 | 0.08688  | 0.254339 | 0.80733  | 0.887393 | UP   | 575.307  | 575.3069 | 575.3073 | 9.970617 | 9.859233 |
| 13835 | M476T10_ | 1.013479 | -0.01932 | -0.25261 | 0.807396 | 0.887401 | DOWN | 475.7414 | 475.7411 | 475.7415 | 9.839008 | 9.73145  |
| 13836 | M313T10_ | 1.073802 | -0.10273 | -0.25284 | 0.807505 | 0.887414 | DOWN | 313.2657 | 313.2656 | 313.2659 | 9.94405  | 9.827283 |
| 13837 | M1235T45 | 1.01626  | 0.02327  | 0.252037 | 0.807689 | 0.887437 | UP   | 1234.832 | 1234.83  | 1234.832 | 44.98333 | 44.96917 |
| 13838 | M574T11_ | 1.090448 | -0.12492 | -0.25166 | 0.807695 | 0.887438 | DOWN | 574.1628 | 574.1622 | 574.1636 | 10.90012 | 10.83252 |
| 13839 | M532T10_ | 1.040352 | -0.05707 | -0.25144 | 0.807825 | 0.887454 | DOWN | 531.9016 | 531.901  | 531.9024 | 9.939575 | 9.827283 |
| 13840 | M705T10_ | 1.01761  | -0.02518 | -0.25659 | 0.807963 | 0.887471 | DOWN | 704.6044 | 704.6036 | 704.6049 | 9.85045  | 9.73145  |
| 13841 | M282T10_ | 1.057969 | -0.0813  | -0.2541  | 0.808013 | 0.887477 | DOWN | 282.0253 | 282.0252 | 282.0254 | 9.95165  | 9.843367 |
| 13842 | M387T10_ | 1.072752 | 0.101317 | 0.251077 | 0.808086 | 0.887486 | UP   | 386.9579 | 386.9574 | 386.96   | 9.872917 | 9.845483 |
| 13843 | M317T10_ | 1.020136 | -0.02876 | -0.25698 | 0.808171 | 0.887497 | DOWN | 317.2605 | 317.2602 | 317.2606 | 9.8207   | 9.715683 |
| 13844 | M201T10_ | 1.067409 | 0.094114 | 0.255436 | 0.808244 | 0.887506 | UP   | 201.2749 | 201.2748 | 201.275  | 9.8207   | 9.715683 |
| 13845 | M324T14  | 1.03984  | -0.05636 | -0.25133 | 0.808251 | 0.887507 | DOWN | 324.2895 | 324.2893 | 324.2897 | 13.50754 | 13.49257 |
| 13846 | M209T10_ | 1.062855 | 0.087945 | 0.253322 | 0.808368 | 0.887521 | UP   | 208.8562 | 208.8561 | 208.8562 | 9.8735   | 9.73145  |
| 13847 | M178T9_9 | 1.144634 | -0.19489 | -0.25679 | 0.808423 | 0.887528 | DOWN | 178.1079 | 178.1076 | 178.1085 | 9.302942 | 9.24215  |
| 13848 | M1421T10 | 1.055337 | 0.077704 | 0.251175 | 0.808705 | 0.887563 | UP   | 1420.798 | 1420.796 | 1420.799 | 10.07237 | 9.971833 |
| 13849 | M360T10_ | 1.050527 | 0.071114 | 0.253013 | 0.808747 | 0.887568 | UP   | 359.987  | 359.9867 | 359.9871 | 9.989733 | 9.8753   |
| 13850 | M473T10_ | 1.04613  | -0.06506 | -0.2576  | 0.808756 | 0.887569 | DOWN | 473.339  | 473.3387 | 473.3396 | 9.6293   | 9.510117 |
| 13851 | M334T11_ | 1.029264 | -0.04161 | -0.25155 | 0.80878  | 0.887572 | DOWN | 333.8981 | 333.8978 | 333.8991 | 10.90551 | 10.879   |
| 13852 | M478T40_ | 1.076673 | 0.10658  | 0.253238 | 0.808823 | 0.887577 | UP   | 478.3007 | 478.3004 | 478.3009 | 40.38108 | 40.122   |
| 13853 | M327T10_ | 1.027825 | 0.039594 | 0.250225 | 0.808833 | 0.887578 | UP   | 326.5428 | 326.5398 | 326.5439 | 9.830283 | 9.728083 |
| 13854 | M253T11_ | 1.043245 | -0.06108 | -0.25086 | 0.808848 | 0.88758  | DOWN | 253.456  | 253.4559 | 253.4562 | 10.892   | 10.879   |
| 13855 | M439T11_ | 1.036445 | -0.05164 | -0.2505  | 0.808854 | 0.887581 | DOWN | 438.6337 | 438.6335 | 438.6342 | 10.90553 | 10.88747 |
| 13856 | M477T10_ | 1.068529 | -0.09563 | -0.25032 | 0.80897  | 0.887595 | DOWN | 477.189  | 477.1887 | 477.1893 | 9.960967 | 9.8753   |
| 13857 | M337T9_1 | 1.080349 | -0.1115  | -0.24978 | 0.809049 | 0.887605 | DOWN | 337.0541 | 337.0527 | 337.0547 | 9.008317 | 8.922033 |
| 13858 | M363T10_ | 1.022995 | -0.0328  | -0.2525  | 0.809094 | 0.887611 | DOWN | 362.7086 | 362.7072 | 362.709  | 9.825492 | 9.699733 |
| 13859 | M377T10_ | 1.025708 | -0.03662 | -0.24942 | 0.809397 | 0.887648 | DOWN | 377.386  | 377.3857 | 377.3865 | 9.917167 | 9.811217 |

|       |          |          |          |          |          |          |      |          |          |          |          |          |
|-------|----------|----------|----------|----------|----------|----------|------|----------|----------|----------|----------|----------|
| 13860 | M289T24_ | 1.11439  | -0.15625 | -0.25244 | 0.809487 | 0.887659 | DOWN | 289.1754 | 289.1749 | 289.1756 | 24.20383 | 24.09867 |
| 13861 | M201T9_1 | 1.074894 | -0.10419 | -0.24914 | 0.809585 | 0.887671 | DOWN | 200.9363 | 200.9357 | 200.9372 | 9.162658 | 9.142767 |
| 13862 | M303T23  | 1.046864 | -0.06607 | -0.24907 | 0.80959  | 0.887672 | DOWN | 303.272  | 303.2717 | 303.2721 | 23.23317 | 23.205   |
| 13863 | M195T11_ | 1.028119 | -0.04001 | -0.25045 | 0.809636 | 0.887677 | DOWN | 195.351  | 195.3509 | 195.3515 | 10.91982 | 10.879   |
| 13864 | M568T9_5 | 1.070038 | 0.097662 | 0.250561 | 0.809867 | 0.887706 | UP   | 568.3674 | 568.367  | 568.3682 | 8.84285  | 8.802417 |
| 13865 | M285T9_1 | 1.133984 | -0.1814  | -0.24886 | 0.809899 | 0.88771  | DOWN | 284.5197 | 284.5171 | 284.5207 | 8.863633 | 8.749717 |
| 13866 | M390T10_ | 1.047533 | 0.066995 | 0.250882 | 0.809915 | 0.887712 | UP   | 390.0333 | 390.0327 | 390.0335 | 9.980992 | 9.856867 |
| 13867 | M200T9_1 | 1.284854 | 0.361605 | 0.24869  | 0.809974 | 0.887719 | UP   | 199.8392 | 199.8386 | 199.8418 | 9.197983 | 9.142767 |
| 13868 | M553T9_4 | 1.148189 | 0.199361 | 0.256468 | 0.809977 | 0.887719 | UP   | 552.9527 | 552.9504 | 552.9553 | 9.174967 | 9.12675  |
| 13869 | M597T10_ | 1.079695 | 0.110623 | 0.248581 | 0.809989 | 0.887721 | UP   | 596.5709 | 596.5703 | 596.5716 | 9.944392 | 9.843367 |
| 13870 | M567T10_ | 1.086363 | 0.119506 | 0.249086 | 0.810016 | 0.887724 | UP   | 567.0761 | 567.0753 | 567.0763 | 9.9847   | 9.8753   |
| 13871 | M359T10_ | 1.012675 | -0.01817 | -0.24969 | 0.810115 | 0.887736 | DOWN | 358.7683 | 358.7679 | 358.7684 | 9.534867 | 9.416817 |
| 13872 | M216T10_ | 1.078796 | 0.109422 | 0.252482 | 0.810175 | 0.887744 | UP   | 215.6249 | 215.6247 | 215.625  | 9.92825  | 9.827283 |
| 13873 | M469T10_ | 1.047662 | 0.067174 | 0.249011 | 0.810214 | 0.887748 | UP   | 468.7398 | 468.7396 | 468.74   | 9.972917 | 9.859233 |
| 13874 | M615T10_ | 1.042954 | -0.06068 | -0.25056 | 0.810238 | 0.887751 | DOWN | 615.4236 | 615.4233 | 615.4239 | 10.39613 | 10.34372 |
| 13875 | M381T9_1 | 1.087191 | 0.120605 | 0.252438 | 0.810239 | 0.887752 | UP   | 380.5    | 380.4997 | 380.5041 | 9.197983 | 9.174883 |
| 13876 | M616T10_ | 1.099439 | 0.136767 | 0.252338 | 0.810296 | 0.887759 | UP   | 615.5573 | 615.5569 | 615.558  | 9.972833 | 9.8753   |
| 13877 | M270T10_ | 1.065434 | -0.09144 | -0.24812 | 0.810317 | 0.887761 | DOWN | 269.8059 | 269.8057 | 269.806  | 9.75145  | 9.636483 |
| 13878 | M468T44  | 1.155568 | 0.208602 | 0.249888 | 0.810319 | 0.887761 | UP   | 468.2799 | 468.2796 | 468.2802 | 43.7705  | 43.6605  |
| 13879 | M630T10_ | 1.060563 | -0.08483 | -0.2481  | 0.810341 | 0.887764 | DOWN | 630.2046 | 630.2042 | 630.2049 | 9.956417 | 9.843367 |
| 13880 | M503T9_7 | 1.105322 | -0.14447 | -0.25149 | 0.810365 | 0.887767 | DOWN | 503.2663 | 503.2573 | 503.2675 | 9.18585  | 9.11795  |
| 13881 | M691T11_ | 1.036595 | 0.051853 | 0.248828 | 0.810371 | 0.887768 | UP   | 690.503  | 690.5022 | 690.5033 | 10.81    | 10.78395 |
| 13882 | M183T10_ | 1.072405 | 0.10085  | 0.248024 | 0.810402 | 0.887772 | UP   | 183.2478 | 183.2478 | 183.2479 | 9.967367 | 9.8914   |
| 13883 | M680T10_ | 1.087542 | 0.121071 | 0.249005 | 0.810421 | 0.887774 | UP   | 680.0984 | 680.0975 | 680.1112 | 9.830833 | 9.743667 |
| 13884 | M484T9_3 | 1.077474 | 0.107653 | 0.253824 | 0.810504 | 0.887784 | UP   | 484.2601 | 484.2599 | 484.2604 | 9.296458 | 9.234417 |
| 13885 | M338T10_ | 1.058967 | 0.082657 | 0.247846 | 0.810512 | 0.887785 | UP   | 338.1348 | 338.1343 | 338.1412 | 9.907917 | 9.728083 |
| 13886 | M691T3   | 1.126529 | -0.17188 | -0.24836 | 0.810597 | 0.887796 | DOWN | 691.4748 | 691.4746 | 691.4761 | 3.271417 | 2.8403   |
| 13887 | M463T27  | 1.197191 | -0.25965 | -0.24773 | 0.810611 | 0.887797 | DOWN | 463.2812 | 463.2807 | 463.2813 | 27.24817 | 27.22733 |
| 13888 | M322T11_ | 1.053694 | 0.075455 | 0.247833 | 0.810615 | 0.887798 | UP   | 322.4477 | 322.4473 | 322.448  | 10.90197 | 10.879   |
| 13889 | M470T11_ | 1.061768 | -0.08647 | -0.24764 | 0.810662 | 0.887804 | DOWN | 470.4436 | 470.443  | 470.4437 | 10.91674 | 10.89125 |
| 13890 | M592T43_ | 1.019683 | 0.02812  | 0.251257 | 0.810798 | 0.88782  | UP   | 592.3325 | 592.3322 | 592.3328 | 42.84817 | 42.78333 |
| 13891 | M837T30  | 1.059908 | -0.08394 | -0.24808 | 0.810829 | 0.887824 | DOWN | 836.5946 | 836.5941 | 836.595  | 30.19475 | 30.19367 |
| 13892 | M178T10_ | 1.065563 | 0.091616 | 0.247961 | 0.810868 | 0.887829 | UP   | 178.3385 | 178.3383 | 178.3387 | 9.977442 | 9.859233 |
| 13893 | M1844T10 | 1.051939 | -0.07305 | -0.24761 | 0.810901 | 0.887833 | DOWN | 1843.576 | 1843.574 | 1843.579 | 9.969158 | 9.843367 |
| 13894 | M401T10_ | 1.032466 | -0.04609 | -0.2473  | 0.810906 | 0.887834 | DOWN | 401.3041 | 401.3038 | 401.3043 | 9.531467 | 9.432183 |

|       |          |          |          |          |          |          |      |          |          |          |          |          |
|-------|----------|----------|----------|----------|----------|----------|------|----------|----------|----------|----------|----------|
| 13895 | M1167T9  | 1.11036  | -0.15103 | -0.2472  | 0.81098  | 0.887843 | DOWN | 1166.753 | 1166.753 | 1166.754 | 8.936617 | 8.892117 |
| 13896 | M600T36  | 1.125787 | -0.17093 | -0.24832 | 0.810998 | 0.887845 | DOWN | 600.4681 | 600.4677 | 600.4684 | 35.949   | 35.87683 |
| 13897 | M347T9_2 | 1.056264 | -0.07897 | -0.24719 | 0.811023 | 0.887848 | DOWN | 346.6285 | 346.6276 | 346.6314 | 9.175017 | 9.1587   |
| 13898 | M223T10_ | 1.023605 | -0.03366 | -0.2494  | 0.811147 | 0.887863 | DOWN | 223.2586 | 223.2531 | 223.2588 | 9.960967 | 9.7124   |
| 13899 | M852T10_ | 1.083588 | 0.115817 | 0.246592 | 0.811441 | 0.887899 | UP   | 852.4079 | 852.4074 | 852.4089 | 9.946367 | 9.859233 |
| 13900 | M785T10_ | 1.056748 | -0.07963 | -0.24813 | 0.811459 | 0.887901 | DOWN | 785.4548 | 785.4539 | 785.4556 | 10.21823 | 10.16598 |
| 13901 | M502T11  | 1.058854 | 0.082504 | 0.247841 | 0.811531 | 0.88791  | UP   | 502.3609 | 502.3602 | 502.3613 | 10.89193 | 10.85018 |
| 13902 | M390T10_ | 1.035401 | 0.05019  | 0.247502 | 0.811557 | 0.887913 | UP   | 389.8537 | 389.8535 | 389.8539 | 9.957333 | 9.843367 |
| 13903 | M473T10_ | 1.064719 | -0.09047 | -0.24707 | 0.811651 | 0.887925 | DOWN | 473.1692 | 473.1686 | 473.1694 | 9.958617 | 9.843367 |
| 13904 | M410T10_ | 1.053001 | -0.07451 | -0.24849 | 0.811666 | 0.887927 | DOWN | 409.571  | 409.5703 | 409.5716 | 9.932033 | 9.8753   |
| 13905 | M171T10_ | 1.049598 | -0.06984 | -0.24958 | 0.811695 | 0.88793  | DOWN | 170.7751 | 170.7751 | 170.7753 | 9.839008 | 9.715683 |
| 13906 | M325T9_9 | 1.103227 | -0.14173 | -0.24788 | 0.811749 | 0.887937 | DOWN | 325.2047 | 325.2045 | 325.2049 | 9.487467 | 9.432533 |
| 13907 | M432T11_ | 1.064212 | -0.08979 | -0.2477  | 0.811939 | 0.88796  | DOWN | 432.3422 | 432.342  | 432.3425 | 11.41418 | 11.38497 |
| 13908 | M227T11_ | 1.069848 | 0.097406 | 0.246609 | 0.811985 | 0.887966 | UP   | 226.9383 | 226.9379 | 226.9385 | 10.89691 | 10.84767 |
| 13909 | M335T10_ | 1.038902 | -0.05506 | -0.24619 | 0.812066 | 0.887976 | DOWN | 334.8485 | 334.8483 | 334.8487 | 9.8207   | 9.715683 |
| 13910 | M697T10_ | 1.05416  | -0.07609 | -0.25022 | 0.812073 | 0.887977 | DOWN | 696.9004 | 696.8991 | 696.9007 | 10.01897 | 9.923533 |
| 13911 | M344T9_5 | 1.124627 | -0.16945 | -0.24576 | 0.812078 | 0.887977 | DOWN | 344.1949 | 344.1945 | 344.2018 | 8.958758 | 8.90715  |
| 13912 | M1029T10 | 1.127889 | -0.17362 | -0.24595 | 0.812172 | 0.887989 | DOWN | 1029.068 | 1029.067 | 1029.071 | 9.82645  | 9.766367 |
| 13913 | M280T10_ | 1.058964 | 0.082653 | 0.24766  | 0.812188 | 0.887991 | UP   | 280.2587 | 280.2585 | 280.2589 | 9.984083 | 9.8753   |
| 13914 | M227T9_2 | 1.161634 | -0.21616 | -0.24571 | 0.812219 | 0.887995 | DOWN | 227.2981 | 227.298  | 227.2988 | 9.160042 | 9.132267 |
| 13915 | M731T11_ | 1.037504 | -0.05312 | -0.24579 | 0.812316 | 0.888006 | DOWN | 730.8207 | 730.8197 | 730.821  | 10.892   | 10.8646  |
| 13916 | M208T9_5 | 1.050124 | -0.07056 | -0.24574 | 0.812378 | 0.888014 | DOWN | 207.8993 | 207.8982 | 207.8999 | 9.364408 | 9.11795  |
| 13917 | M375T30_ | 1.109407 | -0.14979 | -0.24579 | 0.812424 | 0.88802  | DOWN | 374.9396 | 374.9392 | 374.9397 | 29.57975 | 29.55683 |
| 13918 | M448T10_ | 1.039655 | -0.05611 | -0.24533 | 0.812444 | 0.888022 | DOWN | 447.8046 | 447.8038 | 447.8052 | 9.802008 | 9.75365  |
| 13919 | M330T25_ | 1.035182 | 0.049884 | 0.245419 | 0.812507 | 0.88803  | UP   | 330.2999 | 330.2997 | 330.3002 | 25.36183 | 25.34317 |
| 13920 | M612T11_ | 1.045992 | 0.064872 | 0.245064 | 0.812578 | 0.888039 | UP   | 612.1037 | 612.1024 | 612.1063 | 10.92208 | 10.88995 |
| 13921 | M222T10_ | 1.073264 | -0.102   | -0.24508 | 0.812785 | 0.888064 | DOWN | 221.7123 | 221.7122 | 221.7124 | 9.89535  | 9.872067 |
| 13922 | M157T7   | 1.090814 | 0.125406 | 0.245556 | 0.812808 | 0.888067 | UP   | 157.0833 | 157.0832 | 157.0903 | 6.837425 | 6.6323   |
| 13923 | M884T9   | 1.050648 | -0.07128 | -0.24606 | 0.812826 | 0.888069 | DOWN | 883.5738 | 883.5728 | 883.5743 | 8.970075 | 8.878667 |
| 13924 | M246T9_4 | 1.093295 | 0.128683 | 0.24468  | 0.812891 | 0.888077 | UP   | 246.4375 | 246.4366 | 246.4383 | 9.275917 | 9.132267 |
| 13925 | M1208T26 | 1.085083 | 0.117806 | 0.248071 | 0.812918 | 0.88808  | UP   | 1207.59  | 1207.588 | 1207.591 | 25.5365  | 25.5355  |
| 13926 | M311T10_ | 1.095205 | 0.1312   | 0.245637 | 0.812929 | 0.888081 | UP   | 310.7881 | 310.7879 | 310.7888 | 9.946367 | 9.9009   |
| 13927 | M855T11  | 1.036055 | -0.0511  | -0.24462 | 0.812967 | 0.888086 | DOWN | 854.5994 | 854.5987 | 854.6005 | 10.89875 | 10.879   |
| 13928 | M432T25_ | 1.035937 | 0.050936 | 0.249475 | 0.812973 | 0.888087 | UP   | 432.2567 | 432.2564 | 432.2569 | 24.59367 | 24.551   |
| 13929 | M427T10_ | 1.073692 | -0.10258 | -0.24495 | 0.813041 | 0.888095 | DOWN | 426.6998 | 426.6994 | 426.7001 | 9.970617 | 9.843367 |

|       |          |          |          |          |          |          |      |          |          |          |          |          |
|-------|----------|----------|----------|----------|----------|----------|------|----------|----------|----------|----------|----------|
| 13930 | M1046T11 | 1.050123 | 0.070558 | 0.244598 | 0.813057 | 0.888097 | UP   | 1046.122 | 1046.122 | 1046.124 | 10.90669 | 10.88747 |
| 13931 | M778T10  | 1.048723 | -0.06863 | -0.24427 | 0.813169 | 0.888111 | DOWN | 778.3541 | 778.3534 | 778.3551 | 9.95385  | 9.843367 |
| 13932 | M435T10  | 1.215573 | -0.28164 | -0.24499 | 0.813267 | 0.888123 | DOWN | 435.3329 | 435.3328 | 435.333  | 10.07398 | 9.964133 |
| 13933 | M169T10  | 1.037632 | -0.0533  | -0.24782 | 0.81331  | 0.888128 | DOWN | 169.3625 | 169.3623 | 169.3628 | 9.834117 | 9.715683 |
| 13934 | M1300T9  | 1.110592 | 0.151329 | 0.244021 | 0.813365 | 0.888135 | UP   | 1300.405 | 1300.4   | 1300.413 | 9.299825 | 9.216183 |
| 13935 | M223T10  | 1.132029 | -0.17891 | -0.24398 | 0.813457 | 0.888146 | DOWN | 223.3615 | 223.3613 | 223.3617 | 9.946467 | 9.843367 |
| 13936 | M338T9_1 | 1.176404 | 0.234384 | 0.247981 | 0.813492 | 0.88815  | UP   | 338.4866 | 338.4863 | 338.4869 | 9.46855  | 9.416817 |
| 13937 | M1744T10 | 1.051318 | 0.072199 | 0.243866 | 0.813501 | 0.888151 | UP   | 1744.137 | 1744.133 | 1744.143 | 9.830833 | 9.7124   |
| 13938 | M839T10  | 1.054452 | 0.076494 | 0.243908 | 0.813561 | 0.888159 | UP   | 839.4443 | 839.4432 | 839.4467 | 10.35832 | 10.24687 |
| 13939 | M363T10  | 1.046335 | -0.06534 | -0.24528 | 0.813627 | 0.888167 | DOWN | 363.082  | 363.0802 | 363.0847 | 9.843367 | 9.699733 |
| 13940 | M443T36  | 1.012598 | 0.018062 | -0.24525 | 0.813759 | 0.888183 | UP   | 442.5622 | 442.5621 | 442.5626 | 35.9275  | 35.92017 |
| 13941 | M382T38  | 1.053995 | -0.07587 | -0.25133 | 0.813821 | 0.88819  | DOWN | 382.2432 | 382.2432 | 382.2435 | 37.6185  | 37.51783 |
| 13942 | M490T42  | 1.043257 | 0.061095 | 0.246543 | 0.813823 | 0.888191 | UP   | 490.2644 | 490.2642 | 490.2646 | 41.51033 | 41.43133 |
| 13943 | M229T10  | 1.095843 | -0.13204 | -0.24723 | 0.813871 | 0.888196 | DOWN | 229.2925 | 229.2919 | 229.2933 | 9.829083 | 9.7124   |
| 13944 | M508T43  | 1.068823 | -0.09602 | -0.24442 | 0.813989 | 0.888211 | DOWN | 508.2748 | 508.2746 | 508.2751 | 43.20067 | 42.94167 |
| 13945 | M252T10  | 1.060013 | -0.08408 | -0.24316 | 0.814004 | 0.888213 | DOWN | 252.0628 | 252.0626 | 252.0629 | 9.989483 | 9.8753   |
| 13946 | M359T10  | 1.07879  | -0.10941 | -0.24433 | 0.81417  | 0.888233 | DOWN | 359.2477 | 359.2471 | 359.2479 | 9.632083 | 9.510117 |
| 13947 | M214T24  | 1.045915 | 0.064766 | 0.242878 | 0.814297 | 0.888248 | UP   | 214.2525 | 214.2525 | 214.2527 | 24.1025  | 24.096   |
| 13948 | M207T10  | 1.046283 | -0.06527 | -0.24314 | 0.814389 | 0.88826  | DOWN | 207.4998 | 207.4996 | 207.4999 | 9.972917 | 9.859233 |
| 13949 | M319T10  | 1.025373 | -0.03615 | -0.24271 | 0.81444  | 0.888266 | DOWN | 318.5422 | 318.5366 | 318.5435 | 9.8322   | 9.431017 |
| 13950 | M534T10  | 1.101583 | -0.13958 | -0.24256 | 0.81445  | 0.888267 | DOWN | 534.0984 | 534.0974 | 534.099  | 9.956417 | 9.843367 |
| 13951 | M487T10  | 1.023039 | 0.032861 | 0.242587 | 0.814457 | 0.888268 | UP   | 486.9179 | 486.9175 | 486.918  | 9.818525 | 9.699733 |
| 13952 | M641T13  | 1.076453 | -0.10629 | -0.24393 | 0.81446  | 0.888268 | DOWN | 641.4486 | 641.4476 | 641.4492 | 12.52225 | 12.4856  |
| 13953 | M399T9_6 | 1.098118 | -0.13503 | -0.2427  | 0.814469 | 0.888269 | DOWN | 399.0577 | 399.0566 | 399.0593 | 9.365833 | 9.061    |
| 13954 | M518T42  | 1.09957  | 0.136939 | 0.243228 | 0.814498 | 0.888273 | UP   | 518.2955 | 518.2953 | 518.2959 | 41.58967 | 41.43467 |
| 13955 | M302T11  | 1.062471 | -0.08742 | -0.24385 | 0.814559 | 0.88828  | DOWN | 301.6415 | 301.6413 | 301.6416 | 10.8926  | 10.8646  |
| 13956 | M523T10  | 1.085429 | 0.118266 | 0.248076 | 0.814596 | 0.888285 | UP   | 523.476  | 523.4752 | 523.4773 | 9.952017 | 9.859233 |
| 13957 | M699T36  | 1.050336 | -0.07085 | -0.24246 | 0.814635 | 0.88829  | DOWN | 699.4894 | 699.4889 | 699.4898 | 36.10783 | 36.07867 |
| 13958 | M1039T11 | 1.047855 | 0.06744  | 0.242207 | 0.814834 | 0.888314 | UP   | 1038.947 | 1038.947 | 1038.95  | 10.892   | 10.879   |
| 13959 | M230T10  | 1.050324 | -0.07083 | -0.2467  | 0.814852 | 0.888316 | DOWN | 229.9506 | 229.9505 | 229.9596 | 9.910133 | 9.79535  |
| 13960 | M454T15  | 1.07726  | -0.10737 | -0.2476  | 0.815025 | 0.888337 | DOWN | 454.3459 | 454.3325 | 454.3462 | 15.06207 | 14.85378 |
| 13961 | M1500T10 | 1.081216 | -0.11265 | -0.24312 | 0.815032 | 0.888338 | DOWN | 1499.667 | 1499.665 | 1499.67  | 9.964092 | 9.859233 |
| 13962 | M545T10  | 1.046612 | -0.06573 | -0.24508 | 0.815133 | 0.88835  | DOWN | 545.4394 | 545.4388 | 545.44   | 9.5812   | 9.4632   |
| 13963 | M437T9_4 | 1.113069 | 0.154543 | 0.244513 | 0.81518  | 0.888356 | UP   | 437.0926 | 437.0921 | 437.0929 | 9.158892 | 9.126783 |
| 13964 | M452T11  | 1.043792 | 0.061834 | 0.244092 | 0.81521  | 0.88836  | UP   | 452.2343 | 452.2341 | 452.2345 | 10.89875 | 10.8646  |

|       |          |          |          |          |          |          |      |          |          |          |          |          |
|-------|----------|----------|----------|----------|----------|----------|------|----------|----------|----------|----------|----------|
| 13965 | M502T9_7 | 1.09474  | -0.13059 | -0.24153 | 0.815235 | 0.888363 | DOWN | 502.3506 | 502.35   | 502.3523 | 9.40325  | 9.129317 |
| 13966 | M680T10_ | 1.043421 | -0.06132 | -0.2424  | 0.81525  | 0.888365 | DOWN | 679.9214 | 679.9205 | 679.9217 | 9.82645  | 9.699733 |
| 13967 | M232T11_ | 1.033378 | -0.04737 | -0.24327 | 0.815382 | 0.888381 | DOWN | 231.7213 | 231.7211 | 231.7214 | 10.93153 | 10.8914  |
| 13968 | M431T17  | 1.033639 | -0.04773 | -0.24264 | 0.815391 | 0.888382 | DOWN | 431.2767 | 431.2765 | 431.277  | 17.16983 | 17.14683 |
| 13969 | M514T10_ | 1.111614 | -0.15266 | -0.24128 | 0.815411 | 0.888384 | DOWN | 514.3231 | 514.3221 | 514.3234 | 9.888317 | 9.681133 |
| 13970 | M254T23_ | 1.039007 | -0.05521 | -0.24417 | 0.815606 | 0.888408 | DOWN | 254.1535 | 254.1534 | 254.1537 | 22.69717 | 22.6705  |
| 13971 | M675T10_ | 1.045481 | 0.064167 | 0.24546  | 0.815622 | 0.88841  | UP   | 675.4814 | 675.4809 | 675.4821 | 10.24379 | 10.16598 |
| 13972 | M266T11_ | 1.11744  | 0.160197 | 0.240995 | 0.815644 | 0.888412 | UP   | 265.5956 | 265.5955 | 265.5962 | 10.93752 | 10.90785 |
| 13973 | M330T11_ | 1.055146 | -0.07744 | -0.24375 | 0.815665 | 0.888415 | DOWN | 329.9639 | 329.9632 | 329.966  | 10.91238 | 10.877   |
| 13974 | M375T11_ | 1.125352 | -0.17038 | -0.24115 | 0.815678 | 0.888417 | DOWN | 375.2872 | 375.2867 | 375.2877 | 10.96365 | 10.93208 |
| 13975 | M406T9_2 | 1.035883 | -0.05086 | -0.24111 | 0.815881 | 0.888441 | DOWN | 405.7749 | 405.7746 | 405.7752 | 8.817842 | 8.715883 |
| 13976 | M268T25  | 1.054096 | 0.076006 | 0.244454 | 0.815968 | 0.888452 | UP   | 268.263  | 268.2627 | 268.2632 | 25.18725 | 25.17083 |
| 13977 | M884T11_ | 1.038881 | -0.05503 | -0.2408  | 0.816055 | 0.888462 | DOWN | 883.7212 | 883.7209 | 883.724  | 10.89875 | 10.873   |
| 13978 | M235T9_1 | 1.100744 | -0.13848 | -0.24035 | 0.816137 | 0.888472 | DOWN | 235.2374 | 235.2357 | 235.2396 | 9.363217 | 9.132267 |
| 13979 | M284T10_ | 1.075747 | -0.10534 | -0.24654 | 0.816303 | 0.888492 | DOWN | 284.1852 | 284.1851 | 284.1855 | 9.596017 | 9.47865  |
| 13980 | M524T40_ | 1.031602 | 0.044886 | 0.246194 | 0.816367 | 0.8885   | UP   | 524.3061 | 524.3059 | 524.3062 | 40.29567 | 40.0935  |
| 13981 | M596T11_ | 1.044583 | 0.062927 | 0.240951 | 0.8164   | 0.888504 | UP   | 596.0164 | 596.0158 | 596.0182 | 10.89193 | 10.86008 |
| 13982 | M245T40  | 1.053986 | 0.075855 | 0.247155 | 0.816451 | 0.88851  | UP   | 245.138  | 245.138  | 245.1381 | 40.40967 | 40.1365  |
| 13983 | M196T10_ | 1.037605 | -0.05326 | -0.24005 | 0.816603 | 0.888529 | DOWN | 196.2546 | 196.2543 | 196.2547 | 9.972917 | 9.859233 |
| 13984 | M206T9_2 | 1.065281 | -0.09123 | -0.24058 | 0.816607 | 0.888529 | DOWN | 206.2633 | 206.2629 | 206.2637 | 9.365833 | 9.264333 |
| 13985 | M504T42_ | 1.061055 | -0.0855  | -0.24405 | 0.816711 | 0.888542 | DOWN | 504.2799 | 504.2797 | 504.28   | 41.87008 | 41.70433 |
| 13986 | M382T9_7 | 1.085028 | 0.117732 | 0.240847 | 0.816727 | 0.888544 | UP   | 381.9301 | 381.9282 | 381.9307 | 9.348233 | 9.250817 |
| 13987 | M250T11_ | 1.059973 | 0.084027 | 0.239864 | 0.816748 | 0.888546 | UP   | 249.5535 | 249.5533 | 249.5556 | 10.89907 | 10.873   |
| 13988 | M428T10_ | 1.055171 | -0.07748 | -0.24043 | 0.816754 | 0.888547 | DOWN | 428.2685 | 428.2681 | 428.2693 | 9.977442 | 9.859233 |
| 13989 | M638T10_ | 1.05525  | -0.07758 | -0.24264 | 0.816869 | 0.888561 | DOWN | 638.041  | 638.0406 | 638.0435 | 9.799667 | 9.747533 |
| 13990 | M323T9_4 | 1.100834 | -0.1386  | -0.23935 | 0.816906 | 0.888566 | DOWN | 322.9441 | 322.9434 | 322.9446 | 9.204617 | 9.0839   |
| 13991 | M199T9_1 | 1.084678 | -0.11727 | -0.24109 | 0.816931 | 0.888569 | DOWN | 198.6529 | 198.6527 | 198.6538 | 9.338375 | 9.275617 |
| 13992 | M347T10_ | 1.06371  | -0.0891  | -0.23952 | 0.816953 | 0.888571 | DOWN | 346.8791 | 346.8781 | 346.8793 | 9.830558 | 9.699733 |
| 13993 | M1413T10 | 1.076307 | -0.10609 | -0.23932 | 0.816964 | 0.888573 | DOWN | 1412.52  | 1412.514 | 1412.523 | 9.8734   | 9.79535  |
| 13994 | M749T10_ | 1.141677 | -0.19115 | -0.23952 | 0.816996 | 0.888576 | DOWN | 748.8335 | 748.8321 | 748.8343 | 9.799767 | 9.73145  |
| 13995 | M1725T10 | 1.023209 | -0.0331  | -0.23916 | 0.817072 | 0.888586 | DOWN | 1724.997 | 1724.995 | 1724.998 | 9.917167 | 9.811217 |
| 13996 | M706T10_ | 1.10711  | -0.1468  | -0.23935 | 0.817094 | 0.888588 | DOWN | 706.3362 | 706.336  | 706.3368 | 9.830283 | 9.743667 |
| 13997 | M309T9_1 | 1.074887 | -0.10418 | -0.23981 | 0.817196 | 0.888601 | DOWN | 308.8615 | 308.8596 | 308.8663 | 9.193675 | 9.095133 |
| 13998 | M1752T10 | 1.07436  | 0.103478 | 0.23879  | 0.817282 | 0.888611 | UP   | 1751.971 | 1751.965 | 1751.973 | 9.977042 | 9.8753   |
| 13999 | M976T10_ | 1.060934 | 0.085335 | 0.239517 | 0.817351 | 0.88862  | UP   | 976.4999 | 976.4978 | 976.5006 | 9.9945   | 9.8753   |



|       |          |          |          |          |          |          |      |          |          |          |          |          |
|-------|----------|----------|----------|----------|----------|----------|------|----------|----------|----------|----------|----------|
| 14000 | M378T10_ | 1.249415 | -0.32125 | -0.23926 | 0.817534 | 0.888642 | DOWN | 378.2155 | 378.2153 | 378.216  | 9.932017 | 9.843367 |
| 14001 | M1923T10 | 1.032791 | -0.04655 | -0.24388 | 0.817541 | 0.888642 | DOWN | 1922.515 | 1922.513 | 1922.516 | 9.996992 | 9.916767 |
| 14002 | M841T10_ | 1.074009 | -0.10301 | -0.24013 | 0.817652 | 0.888656 | DOWN | 841.358  | 841.3565 | 841.3589 | 9.531467 | 9.416817 |
| 14003 | M213T10_ | 1.059291 | -0.0831  | -0.23827 | 0.817788 | 0.888672 | DOWN | 213.1373 | 213.1373 | 213.1375 | 9.946892 | 9.853533 |
| 14004 | M300T19  | 1.060479 | -0.08472 | -0.23921 | 0.817852 | 0.88868  | DOWN | 300.2066 | 300.2063 | 300.2071 | 18.83383 | 18.80583 |
| 14005 | M337T9_5 | 1.041969 | -0.05931 | -0.23789 | 0.817948 | 0.888692 | DOWN | 336.7199 | 336.7192 | 336.7202 | 8.993033 | 8.89395  |
| 14006 | M485T7   | 1.141384 | 0.190785 | 0.243545 | 0.818222 | 0.888725 | UP   | 485.3575 | 485.3574 | 485.3578 | 6.69215  | 6.6335   |
| 14007 | M506T9_1 | 1.077728 | -0.10799 | -0.24062 | 0.81825  | 0.888728 | DOWN | 505.5365 | 505.5362 | 505.5377 | 9.320875 | 9.234417 |
| 14008 | M379T11_ | 1.06064  | -0.08493 | -0.23819 | 0.818315 | 0.888736 | DOWN | 378.8019 | 378.8013 | 378.8027 | 10.90375 | 10.8646  |
| 14009 | M297T10_ | 1.049947 | -0.07032 | -0.23735 | 0.818354 | 0.888741 | DOWN | 297.4166 | 297.4163 | 297.4168 | 9.94785  | 9.843367 |
| 14010 | M164T10_ | 1.086615 | 0.119841 | 0.240568 | 0.818401 | 0.888747 | UP   | 164.3863 | 164.3861 | 164.3863 | 9.953592 | 9.859233 |
| 14011 | M465T23_ | 1.072685 | 0.101226 | 0.237789 | 0.818406 | 0.888747 | UP   | 465.3317 | 465.3315 | 465.3322 | 22.68425 | 22.66967 |
| 14012 | M1729T10 | 1.028782 | -0.04094 | -0.23804 | 0.818486 | 0.888757 | DOWN | 1728.867 | 1728.866 | 1728.87  | 9.91875  | 9.827283 |
| 14013 | M480T44  | 1.068952 | -0.0962  | -0.24469 | 0.818506 | 0.888759 | DOWN | 480.2799 | 480.2796 | 480.2801 | 43.86208 | 43.57467 |
| 14014 | M163T14_ | 1.106378 | 0.145844 | 0.244026 | 0.81854  | 0.888763 | UP   | 163.0751 | 163.075  | 163.0752 | 14.00483 | 13.96063 |
| 14015 | M652T9_1 | 1.096595 | 0.133031 | 0.2404   | 0.818631 | 0.888774 | UP   | 651.5084 | 651.5002 | 651.512  | 9.148342 | 9.119933 |
| 14016 | M766T9_1 | 1.114197 | -0.156   | -0.23725 | 0.818643 | 0.888776 | DOWN | 766.4808 | 766.4791 | 766.4819 | 8.96925  | 8.94795  |
| 14017 | M378T25_ | 1.092846 | -0.12809 | -0.23734 | 0.818645 | 0.888776 | DOWN | 377.8726 | 377.8724 | 377.8728 | 25.27667 | 25.17267 |
| 14018 | M215T10_ | 1.092585 | 0.127745 | 0.239705 | 0.818701 | 0.888783 | UP   | 215.2841 | 215.2839 | 215.2842 | 9.972917 | 9.859233 |
| 14019 | M333T10_ | 1.216152 | -0.28232 | -0.23736 | 0.818784 | 0.888793 | DOWN | 333.2504 | 333.2492 | 333.2507 | 9.869467 | 9.743767 |
| 14020 | M397T10_ | 1.03641  | 0.051595 | 0.240723 | 0.818809 | 0.888796 | UP   | 396.8338 | 396.8332 | 396.8339 | 9.902617 | 9.79535  |
| 14021 | M350T10_ | 1.112133 | 0.15333  | 0.236703 | 0.818879 | 0.888804 | UP   | 349.5687 | 349.5654 | 349.569  | 9.8848   | 9.811217 |
| 14022 | M705T10_ | 1.056851 | -0.07977 | -0.23664 | 0.8189   | 0.888807 | DOWN | 704.9486 | 704.9483 | 704.9489 | 9.94785  | 9.843367 |
| 14023 | M655T10_ | 1.078824 | 0.10946  | 0.239739 | 0.818995 | 0.888818 | UP   | 655.4241 | 655.4233 | 655.4249 | 9.951283 | 9.843367 |
| 14024 | M798T21  | 1.036318 | -0.05147 | -0.24219 | 0.819122 | 0.888834 | DOWN | 797.5429 | 797.5419 | 797.5439 | 21.13658 | 21.13267 |
| 14025 | M276T41_ | 1.096052 | 0.132316 | 0.242888 | 0.81915  | 0.888837 | UP   | 276.1803 | 276.1802 | 276.1804 | 41.34483 | 41.15783 |
| 14026 | M1454T10 | 1.070636 | -0.09847 | -0.23746 | 0.819214 | 0.888845 | DOWN | 1453.762 | 1453.761 | 1453.766 | 9.872917 | 9.774967 |
| 14027 | M636T42  | 1.099008 | -0.1362  | -0.2411  | 0.819291 | 0.888854 | DOWN | 636.359  | 636.3586 | 636.3594 | 42.16467 | 41.80533 |
| 14028 | M310T10_ | 1.091556 | -0.12639 | -0.23614 | 0.819307 | 0.888856 | DOWN | 310.1546 | 310.1544 | 310.1549 | 9.564175 | 9.494117 |
| 14029 | M397T11_ | 1.052881 | -0.07434 | -0.23769 | 0.819321 | 0.888858 | DOWN | 397.0312 | 397.0309 | 397.0319 | 10.92253 | 10.89355 |
| 14030 | M389T22  | 1.095586 | 0.131703 | 0.242638 | 0.819339 | 0.88886  | UP   | 389.2198 | 389.2196 | 389.222  | 21.62367 | 21.5225  |
| 14031 | M750T11  | 1.06618  | 0.092451 | 0.236264 | 0.819398 | 0.888867 | UP   | 750.4098 | 750.4089 | 750.4134 | 10.892   | 10.73328 |
| 14032 | M151T10_ | 1.075692 | -0.10527 | -0.23641 | 0.819406 | 0.888868 | DOWN | 150.6813 | 150.6811 | 150.6813 | 9.943183 | 9.843367 |
| 14033 | M725T9_3 | 1.115476 | 0.15766  | 0.24057  | 0.819452 | 0.888873 | UP   | 725.2701 | 725.2682 | 725.2742 | 9.160617 | 9.145433 |
| 14034 | M622T9_3 | 1.10438  | 0.143237 | 0.23621  | 0.819472 | 0.888876 | UP   | 622.0076 | 622.005  | 622.0084 | 9.325333 | 9.275917 |

|       |          |          |          |          |          |          |      |          |          |          |          |          |
|-------|----------|----------|----------|----------|----------|----------|------|----------|----------|----------|----------|----------|
| 14035 | M420T39_ | 1.026864 | 0.038245 | 0.236111 | 0.819597 | 0.888891 | UP   | 420.2226 | 420.2224 | 420.223  | 39.22267 | 39.03383 |
| 14036 | M212T10_ | 1.090125 | 0.124493 | 0.235398 | 0.819849 | 0.888921 | UP   | 212.2094 | 212.2093 | 212.2225 | 9.8374   | 9.82645  |
| 14037 | M620T23_ | 1.093999 | -0.12961 | -0.23577 | 0.819878 | 0.888925 | DOWN | 620.1075 | 620.1065 | 620.1089 | 22.6975  | 22.64167 |
| 14038 | M357T10_ | 1.063503 | -0.08882 | -0.236   | 0.819881 | 0.888925 | DOWN | 357.4271 | 357.4269 | 357.4272 | 9.957333 | 9.843367 |
| 14039 | M1367T45 | 1.078484 | -0.109   | -0.23615 | 0.819891 | 0.888926 | DOWN | 1366.909 | 1366.909 | 1366.911 | 44.57383 | 44.5235  |
| 14040 | M581T10_ | 1.048266 | -0.068   | -0.2374  | 0.819911 | 0.888929 | DOWN | 581.4106 | 581.4104 | 581.4111 | 10.01897 | 9.939683 |
| 14041 | M260T10_ | 1.035288 | 0.050032 | 0.239345 | 0.819911 | 0.888929 | UP   | 259.8241 | 259.824  | 259.8241 | 9.994767 | 9.8914   |
| 14042 | M798T16  | 1.081482 | 0.113009 | 0.235392 | 0.820007 | 0.88894  | UP   | 797.5088 | 797.5074 | 797.5098 | 16.27145 | 16.24118 |
| 14043 | M666T10_ | 1.059218 | 0.082999 | 0.235026 | 0.820093 | 0.88895  | UP   | 666.4297 | 666.4295 | 666.4304 | 9.7852   | 9.65225  |
| 14044 | M825T10_ | 1.035806 | -0.05075 | -0.23514 | 0.82014  | 0.888956 | DOWN | 825.3905 | 825.3892 | 825.3911 | 9.930142 | 9.827283 |
| 14045 | M711T10_ | 1.080183 | -0.11128 | -0.2349  | 0.820187 | 0.888962 | DOWN | 711.1332 | 711.1319 | 711.1345 | 9.932    | 9.827283 |
| 14046 | M734T10_ | 1.065798 | -0.09193 | -0.23507 | 0.820196 | 0.888963 | DOWN | 733.5545 | 733.5541 | 733.5548 | 9.95385  | 9.843367 |
| 14047 | M1172T10 | 1.048094 | -0.06777 | -0.23838 | 0.820443 | 0.888993 | DOWN | 1172.14  | 1172.139 | 1172.141 | 9.830283 | 9.699733 |
| 14048 | M273T11_ | 1.039609 | -0.05604 | -0.23452 | 0.820493 | 0.888999 | DOWN | 273.4623 | 273.4623 | 273.4625 | 10.89125 | 10.8646  |
| 14049 | M708T10_ | 1.048222 | -0.06794 | -0.23474 | 0.820549 | 0.889005 | DOWN | 707.8947 | 707.8945 | 707.8954 | 10.25792 | 10.19852 |
| 14050 | M526T20  | 1.092399 | -0.1275  | -0.23758 | 0.820584 | 0.88901  | DOWN | 526.314  | 526.3139 | 526.3145 | 20.21608 | 20.19683 |
| 14051 | M348T9_1 | 1.092281 | -0.12734 | -0.23463 | 0.820593 | 0.889011 | DOWN | 347.6281 | 347.628  | 347.6282 | 8.963    | 8.892117 |
| 14052 | M646T9_4 | 1.1474   | -0.19837 | -0.23792 | 0.820599 | 0.889011 | DOWN | 646.4834 | 646.4802 | 646.4845 | 9.204617 | 9.12675  |
| 14053 | M391T9_5 | 1.086065 | -0.11911 | -0.23425 | 0.820688 | 0.889022 | DOWN | 391.1997 | 391.1905 | 391.2004 | 9.29345  | 9.1932   |
| 14054 | M485T10_ | 1.041013 | -0.05799 | -0.23465 | 0.820784 | 0.889034 | DOWN | 485.0908 | 485.0906 | 485.091  | 9.915933 | 9.811217 |
| 14055 | M757T10_ | 1.074736 | -0.10398 | -0.23518 | 0.820792 | 0.889035 | DOWN | 756.8041 | 756.8032 | 756.8061 | 9.968992 | 9.859233 |
| 14056 | M240T10_ | 1.118061 | 0.160999 | 0.236121 | 0.820798 | 0.889035 | UP   | 239.7086 | 239.7083 | 239.7089 | 9.979342 | 9.859233 |
| 14057 | M286T10_ | 1.081423 | -0.11293 | -0.23393 | 0.820947 | 0.889053 | DOWN | 285.8345 | 285.8341 | 285.8347 | 9.958617 | 9.843367 |
| 14058 | M332T10_ | 1.086576 | -0.11979 | -0.23543 | 0.820959 | 0.889055 | DOWN | 331.9542 | 331.9539 | 331.9547 | 9.886258 | 9.636483 |
| 14059 | M648T10_ | 1.097923 | -0.13478 | -0.23539 | 0.821068 | 0.889068 | DOWN | 647.695  | 647.6936 | 647.6954 | 9.760008 | 9.743767 |
| 14060 | M632T10_ | 1.113186 | -0.15469 | -0.23613 | 0.821192 | 0.889083 | DOWN | 631.8324 | 631.832  | 631.8328 | 9.960967 | 9.869467 |
| 14061 | M345T9_3 | 1.060981 | -0.0854  | -0.23482 | 0.82121  | 0.889085 | DOWN | 344.6241 | 344.6239 | 344.6247 | 8.908842 | 8.7891   |
| 14062 | M391T11_ | 1.033433 | 0.047445 | 0.233632 | 0.82124  | 0.889088 | UP   | 391.3215 | 391.3209 | 391.3221 | 11.3515  | 11.30818 |
| 14063 | M178T9_3 | 1.119037 | -0.16226 | -0.23506 | 0.821268 | 0.889092 | DOWN | 177.6325 | 177.6319 | 177.6328 | 9.1602   | 9.12675  |
| 14064 | M309T9_4 | 1.078472 | 0.108988 | 0.235309 | 0.821289 | 0.889094 | UP   | 309.4573 | 309.4545 | 309.4577 | 8.875708 | 8.7875   |
| 14065 | M845T11  | 1.038852 | -0.05499 | -0.23437 | 0.821444 | 0.889113 | DOWN | 844.9386 | 844.9381 | 844.9395 | 10.892   | 10.879   |
| 14066 | M539T9_1 | 1.045203 | 0.063783 | 0.23309  | 0.821563 | 0.889127 | UP   | 539.2676 | 539.2671 | 539.2682 | 9.017783 | 8.99315  |
| 14067 | M381T9_2 | 1.12913  | -0.17521 | -0.23792 | 0.821592 | 0.889131 | DOWN | 380.5537 | 380.5531 | 380.5561 | 9.1896   | 9.064833 |
| 14068 | M264T9_6 | 1.081793 | 0.113424 | 0.233672 | 0.821709 | 0.889145 | UP   | 264.1853 | 264.1852 | 264.1855 | 8.735017 | 8.629617 |
| 14069 | M536T42_ | 1.068402 | 0.095455 | 0.232593 | 0.82192  | 0.88917  | UP   | 536.3062 | 536.3061 | 536.3064 | 41.54617 | 41.35933 |

|       |          |          |          |          |          |          |      |          |          |          |          |          |
|-------|----------|----------|----------|----------|----------|----------|------|----------|----------|----------|----------|----------|
| 14070 | M880T22_ | 1.05501  | 0.077257 | 0.23337  | 0.822009 | 0.889181 | UP   | 879.6091 | 879.6081 | 879.6102 | 21.62283 | 21.59533 |
| 14071 | M336T10_ | 1.027127 | 0.038615 | 0.238626 | 0.822133 | 0.889196 | UP   | 335.727  | 335.7267 | 335.7276 | 9.8397   | 9.73145  |
| 14072 | M344T20  | 1.059615 | -0.08354 | -0.23358 | 0.822149 | 0.889198 | DOWN | 343.5744 | 343.5744 | 343.5748 | 20.28833 | 20.23017 |
| 14073 | M562T42_ | 1.070051 | 0.09768  | 0.2381   | 0.822157 | 0.889198 | UP   | 562.3219 | 562.3218 | 562.3223 | 42.15033 | 42.09283 |
| 14074 | M968T10_ | 1.0656   | 0.091665 | 0.232313 | 0.82219  | 0.889202 | UP   | 968.139  | 968.1378 | 968.1394 | 9.968992 | 9.859233 |
| 14075 | M540T10_ | 1.075688 | 0.10526  | 0.237191 | 0.822194 | 0.889203 | UP   | 540.4481 | 540.4477 | 540.4484 | 10.05251 | 9.955733 |
| 14076 | M172T10_ | 1.039206 | -0.05548 | -0.23296 | 0.822359 | 0.889223 | DOWN | 172.3376 | 172.3374 | 172.3376 | 9.830833 | 9.696683 |
| 14077 | M223T11_ | 1.041259 | -0.05833 | -0.23199 | 0.822388 | 0.889226 | DOWN | 223.2142 | 223.2141 | 223.2144 | 10.89875 | 10.879   |
| 14078 | M256T9   | 1.043358 | -0.06123 | -0.23285 | 0.82251  | 0.889241 | DOWN | 256.1904 | 256.1901 | 256.2014 | 9.49445  | 9.232283 |
| 14079 | M417T9_6 | 1.033826 | -0.04799 | -0.23151 | 0.822768 | 0.889272 | DOWN | 416.9749 | 416.9744 | 416.9756 | 9.273908 | 9.129317 |
| 14080 | M275T11_ | 1.049773 | -0.07008 | -0.23205 | 0.822858 | 0.889282 | DOWN | 275.4227 | 275.4215 | 275.423  | 10.93208 | 10.85018 |
| 14081 | M424T9_2 | 1.053821 | -0.07563 | -0.23695 | 0.822883 | 0.889285 | DOWN | 424.3836 | 424.383  | 424.3846 | 9.322983 | 9.234417 |
| 14082 | M653T10_ | 1.038462 | 0.054448 | 0.23336  | 0.822924 | 0.88929  | UP   | 652.9456 | 652.9402 | 652.9459 | 9.948825 | 9.840617 |
| 14083 | M852T10_ | 1.069247 | -0.09659 | -0.23389 | 0.822942 | 0.889292 | DOWN | 851.6308 | 851.6302 | 851.6321 | 9.915583 | 9.859667 |
| 14084 | M349T9_1 | 1.034121 | 0.048405 | 0.233746 | 0.823049 | 0.889305 | UP   | 349.1832 | 349.183  | 349.1833 | 8.7612   | 8.686867 |
| 14085 | M369T10_ | 1.057997 | 0.081335 | 0.235929 | 0.823161 | 0.889319 | UP   | 369.0386 | 369.0379 | 369.0397 | 9.948875 | 9.843367 |
| 14086 | M203T11_ | 1.041274 | -0.05835 | -0.23094 | 0.823453 | 0.889354 | DOWN | 203.3159 | 203.3159 | 203.3162 | 10.892   | 10.879   |
| 14087 | M364T9_2 | 1.079513 | -0.11038 | -0.23054 | 0.823462 | 0.889355 | DOWN | 363.739  | 363.7385 | 363.7396 | 8.957342 | 8.878667 |
| 14088 | M654T10_ | 1.061908 | -0.08666 | -0.23067 | 0.823515 | 0.889361 | DOWN | 653.8369 | 653.8367 | 653.8373 | 9.823575 | 9.699733 |
| 14089 | M456T10_ | 1.086304 | -0.11943 | -0.23142 | 0.823566 | 0.889367 | DOWN | 455.6214 | 455.6212 | 455.6216 | 9.967367 | 9.859233 |
| 14090 | M235T29  | 1.032675 | -0.04639 | -0.23105 | 0.82367  | 0.889379 | DOWN | 235.169  | 235.1689 | 235.1691 | 28.89283 | 28.8775  |
| 14091 | M359T43_ | 1.042149 | -0.05956 | -0.23718 | 0.823675 | 0.88938  | DOWN | 359.2062 | 359.2061 | 359.2064 | 42.52442 | 42.48117 |
| 14092 | M712T10_ | 1.057042 | 0.080032 | 0.230535 | 0.823718 | 0.889385 | UP   | 712.4741 | 712.4731 | 712.4745 | 10.45917 | 10.39298 |
| 14093 | M336T21  | 1.209744 | -0.2747  | -0.23041 | 0.823722 | 0.889386 | DOWN | 336.2336 | 336.2274 | 336.2337 | 21.35967 | 21.30467 |
| 14094 | M634T11_ | 1.035337 | -0.0501  | -0.23107 | 0.823875 | 0.889404 | DOWN | 634.3245 | 634.3242 | 634.3258 | 10.8906  | 10.85018 |
| 14095 | M659T10_ | 1.048151 | 0.067847 | 0.22981  | 0.824184 | 0.889441 | UP   | 659.1082 | 659.1078 | 659.1099 | 9.855658 | 9.747533 |
| 14096 | M293T10_ | 1.074269 | -0.10335 | -0.23093 | 0.824244 | 0.889448 | DOWN | 292.9432 | 292.9427 | 292.9433 | 9.972917 | 9.8753   |
| 14097 | M655T10_ | 1.086846 | -0.12015 | -0.23073 | 0.824319 | 0.889457 | DOWN | 655.1287 | 655.1282 | 655.1292 | 9.831517 | 9.7124   |
| 14098 | M248T11_ | 1.031418 | 0.044629 | 0.229298 | 0.824401 | 0.889467 | UP   | 248.1256 | 248.1255 | 248.1259 | 10.89875 | 10.879   |
| 14099 | M501T9_4 | 1.044108 | -0.06227 | -0.22902 | 0.824605 | 0.889491 | DOWN | 501.0248 | 501.0239 | 501.025  | 9.246042 | 9.1322   |
| 14100 | M454T9_2 | 1.073405 | -0.10219 | -0.22909 | 0.824605 | 0.889491 | DOWN | 454.4125 | 454.4015 | 454.4131 | 9.235933 | 9.142767 |
| 14101 | M529T21  | 1.215375 | -0.2814  | -0.22931 | 0.824632 | 0.889494 | DOWN | 529.3841 | 529.3836 | 529.3848 | 21.24067 | 21.23433 |
| 14102 | M369T16  | 1.049482 | 0.069677 | 0.231227 | 0.824729 | 0.889506 | UP   | 369.1883 | 369.1882 | 369.1884 | 15.62907 | 15.51095 |
| 14103 | M615T18  | 1.09119  | 0.125903 | 0.229781 | 0.824836 | 0.889519 | UP   | 615.0281 | 615.0279 | 615.0282 | 18.01175 | 17.98817 |
| 14104 | M617T11  | 1.066926 | 0.093461 | 0.22855  | 0.824973 | 0.889535 | UP   | 616.7049 | 616.7047 | 616.7056 | 10.8906  | 10.8646  |

|       |          |          |          |          |          |          |      |          |          |          |          |          |
|-------|----------|----------|----------|----------|----------|----------|------|----------|----------|----------|----------|----------|
| 14105 | M194T10_ | 1.112484 | 0.153784 | 0.228599 | 0.824996 | 0.889538 | UP   | 193.8512 | 193.851  | 193.8615 | 9.9014   | 9.758367 |
| 14106 | M464T10_ | 1.037692 | 0.053379 | 0.228681 | 0.825094 | 0.889549 | UP   | 464.3342 | 464.3341 | 464.3344 | 10.16706 | 10.08517 |
| 14107 | M445T11_ | 1.05469  | 0.076819 | 0.23023  | 0.82518  | 0.88956  | UP   | 444.8972 | 444.8965 | 444.8977 | 10.89907 | 10.879   |
| 14108 | M291T10_ | 1.052242 | 0.073466 | 0.230423 | 0.825386 | 0.889584 | UP   | 291.3831 | 291.3733 | 291.3833 | 9.959533 | 9.859233 |
| 14109 | M265T10_ | 1.046957 | 0.066203 | 0.228284 | 0.825422 | 0.889588 | UP   | 265.1662 | 265.1658 | 265.1667 | 9.987092 | 9.8753   |
| 14110 | M327T11_ | 1.048797 | 0.068735 | 0.230632 | 0.825462 | 0.889593 | UP   | 327.1361 | 327.1359 | 327.1371 | 10.90628 | 10.8646  |
| 14111 | M369T10_ | 1.033217 | -0.04714 | -0.22901 | 0.825474 | 0.889594 | DOWN | 369.0204 | 369.02   | 369.0214 | 9.902008 | 9.79535  |
| 14112 | M494T9_1 | 1.050088 | 0.07051  | 0.230512 | 0.825497 | 0.889597 | UP   | 493.5409 | 493.539  | 493.5412 | 9.411692 | 9.355317 |
| 14113 | M464T16  | 1.084103 | -0.1165  | -0.2332  | 0.825512 | 0.889599 | DOWN | 464.2903 | 464.29   | 464.2905 | 16.02326 | 15.99393 |
| 14114 | M232T11_ | 1.032264 | 0.045812 | 0.227563 | 0.825695 | 0.889621 | UP   | 232.1615 | 232.1615 | 232.1618 | 10.89875 | 10.879   |
| 14115 | M769T9   | 1.042148 | 0.05956  | 0.22779  | 0.825761 | 0.889629 | UP   | 768.5371 | 768.5368 | 768.5377 | 8.620783 | 8.53335  |
| 14116 | M752T10_ | 1.050672 | -0.07131 | -0.22792 | 0.825971 | 0.889654 | DOWN | 751.9218 | 751.9208 | 751.9225 | 10.40218 | 10.32768 |
| 14117 | M883T10_ | 1.070005 | -0.09762 | -0.22844 | 0.826041 | 0.889662 | DOWN | 883.2072 | 883.2059 | 883.2079 | 9.968992 | 9.859233 |
| 14118 | M639T10_ | 1.045334 | 0.063964 | 0.227451 | 0.826097 | 0.889669 | UP   | 639.3788 | 639.3784 | 639.38   | 10.10489 | 10.0118  |
| 14119 | M357T38_ | 1.038684 | -0.05476 | -0.2271  | 0.826219 | 0.889683 | DOWN | 357.1906 | 357.1905 | 357.1907 | 37.82    | 37.66183 |
| 14120 | M356T9_1 | 1.063262 | -0.0885  | -0.23009 | 0.826234 | 0.889685 | DOWN | 355.7805 | 355.7804 | 355.7809 | 9.178267 | 9.07945  |
| 14121 | M268T9_4 | 1.063539 | 0.088872 | 0.228223 | 0.826256 | 0.889688 | UP   | 268.1903 | 268.1901 | 268.1906 | 9.404008 | 9.355317 |
| 14122 | M290T24_ | 1.148321 | -0.19953 | -0.22658 | 0.826434 | 0.889709 | DOWN | 290.1785 | 290.1784 | 290.1787 | 24.19667 | 24.18633 |
| 14123 | M228T11_ | 1.047633 | 0.067134 | 0.226735 | 0.826441 | 0.889709 | UP   | 228.3659 | 228.3657 | 228.3666 | 10.9049  | 10.8646  |
| 14124 | M363T16  | 1.041809 | 0.05909  | 0.227614 | 0.82649  | 0.889715 | UP   | 363.184  | 363.1837 | 363.1842 | 15.96487 | 15.90587 |
| 14125 | M336T30  | 1.068781 | 0.095966 | 0.229814 | 0.826499 | 0.889716 | UP   | 336.2823 | 336.282  | 336.2824 | 30.09367 | 30.08117 |
| 14126 | M783T10_ | 1.056739 | -0.07962 | -0.22779 | 0.826543 | 0.889722 | DOWN | 783.4784 | 783.4778 | 783.4809 | 10.23269 | 10.05935 |
| 14127 | M376T9_2 | 1.091218 | 0.125939 | 0.228528 | 0.826627 | 0.889732 | UP   | 375.7669 | 375.7664 | 375.7676 | 8.809325 | 8.727567 |
| 14128 | M423T39  | 1.08357  | -0.11579 | -0.22814 | 0.826652 | 0.889735 | DOWN | 423.4024 | 423.402  | 423.4025 | 38.71217 | 38.69767 |
| 14129 | M772T10_ | 1.07128  | 0.099336 | 0.228491 | 0.826655 | 0.889735 | UP   | 771.9589 | 771.9578 | 771.9618 | 10.45554 | 10.40807 |
| 14130 | M798T30  | 1.04928  | -0.0694  | -0.22698 | 0.826702 | 0.88974  | DOWN | 797.5232 | 797.5228 | 797.5242 | 30.22167 | 30.18017 |
| 14131 | M830T10_ | 1.061219 | -0.08572 | -0.22622 | 0.826703 | 0.889741 | DOWN | 829.9825 | 829.9824 | 829.9841 | 10.27972 | 10.16598 |
| 14132 | M352T10_ | 1.053828 | -0.07564 | -0.22728 | 0.826769 | 0.889748 | DOWN | 351.8515 | 351.8511 | 351.8516 | 9.972917 | 9.859233 |
| 14133 | M731T10_ | 1.042933 | -0.06065 | -0.22936 | 0.826782 | 0.88975  | DOWN | 730.5101 | 730.5092 | 730.5107 | 9.816267 | 9.699733 |
| 14134 | M832T10_ | 1.059487 | -0.08337 | -0.2269  | 0.826808 | 0.889753 | DOWN | 831.9588 | 831.9585 | 831.9596 | 10.32011 | 10.24687 |
| 14135 | M1398T10 | 1.055255 | 0.077591 | 0.227262 | 0.826858 | 0.889759 | UP   | 1397.934 | 1397.928 | 1397.935 | 9.904767 | 9.843367 |
| 14136 | M324T10_ | 1.074564 | 0.103751 | 0.226028 | 0.826938 | 0.889768 | UP   | 323.5609 | 323.5606 | 323.5611 | 9.8207   | 9.699733 |
| 14137 | M629T11_ | 1.033662 | -0.04776 | -0.22623 | 0.826951 | 0.88977  | DOWN | 629.4388 | 629.4386 | 629.4393 | 11.48294 | 11.47298 |
| 14138 | M318T10_ | 1.084305 | 0.11677  | 0.227749 | 0.826955 | 0.88977  | UP   | 318.3043 | 318.3039 | 318.3044 | 9.979342 | 9.8753   |
| 14139 | M510T11_ | 1.037696 | -0.05338 | -0.22626 | 0.827063 | 0.889783 | DOWN | 509.8515 | 509.8496 | 509.852  | 10.87765 | 10.8214  |

|       |          |          |          |          |          |          |      |          |          |          |          |          |
|-------|----------|----------|----------|----------|----------|----------|------|----------|----------|----------|----------|----------|
| 14140 | M381T9_8 | 1.089821 | 0.124091 | 0.226568 | 0.827085 | 0.889786 | UP   | 381.1569 | 381.1556 | 381.1642 | 9.223808 | 9.1175   |
| 14141 | M477T10_ | 1.012583 | -0.01804 | -0.22654 | 0.827191 | 0.889798 | DOWN | 476.9169 | 476.9167 | 476.9172 | 9.839008 | 9.7124   |
| 14142 | M883T11_ | 1.062566 | 0.087553 | 0.227304 | 0.827515 | 0.889837 | UP   | 883.4992 | 883.4988 | 883.5    | 10.77638 | 10.75595 |
| 14143 | M599T10_ | 1.107775 | 0.147665 | 0.229402 | 0.82752  | 0.889837 | UP   | 598.5736 | 598.5732 | 598.5739 | 9.76065  | 9.65225  |
| 14144 | M283T10_ | 1.051525 | 0.072483 | 0.231178 | 0.827527 | 0.889838 | UP   | 283.477  | 283.4767 | 283.4771 | 9.976075 | 9.8753   |
| 14145 | M632T10_ | 1.064547 | -0.09024 | -0.22514 | 0.8276   | 0.889847 | DOWN | 631.998  | 631.9975 | 631.9996 | 9.945258 | 9.827283 |
| 14146 | M349T10_ | 1.013918 | -0.01994 | -0.22901 | 0.827616 | 0.889849 | DOWN | 349.0312 | 349.031  | 349.0313 | 9.8397   | 9.73145  |
| 14147 | M284T30  | 1.050592 | 0.071203 | 0.226525 | 0.82776  | 0.889866 | UP   | 284.2944 | 284.2943 | 284.2945 | 29.50483 | 29.49883 |
| 14148 | M490T11_ | 1.059201 | 0.082976 | 0.227408 | 0.827807 | 0.889871 | UP   | 490.1325 | 490.1317 | 490.1328 | 10.9049  | 10.8646  |
| 14149 | M479T21_ | 1.072839 | -0.10143 | -0.22477 | 0.827822 | 0.889873 | DOWN | 479.3555 | 479.3553 | 479.3558 | 21.4665  | 21.44967 |
| 14150 | M350T10_ | 1.044935 | -0.06341 | -0.22748 | 0.827919 | 0.889885 | DOWN | 350.2422 | 350.2421 | 350.2423 | 9.536542 | 9.432183 |
| 14151 | M539T20  | 1.061243 | -0.08576 | -0.22498 | 0.828015 | 0.889896 | DOWN | 539.3766 | 539.3758 | 539.3774 | 19.84283 | 19.82333 |
| 14152 | M289T24_ | 1.023463 | -0.03346 | -0.22749 | 0.828045 | 0.8899   | DOWN | 289.4288 | 289.4287 | 289.4289 | 24.05917 | 24.05367 |
| 14153 | M717T3   | 1.083925 | 0.116265 | 0.224443 | 0.828198 | 0.889918 | UP   | 717.4879 | 717.4872 | 717.488  | 3.479283 | 3.319    |
| 14154 | M637T28  | 1.032465 | -0.04609 | -0.22406 | 0.828336 | 0.889934 | DOWN | 636.9649 | 636.964  | 636.9658 | 28.35242 | 28.316   |
| 14155 | M194T9_4 | 1.162908 | -0.21774 | -0.22606 | 0.828389 | 0.88994  | DOWN | 193.7536 | 193.7529 | 193.7568 | 9.190317 | 9.061    |
| 14156 | M293T10_ | 1.089773 | 0.124028 | 0.226108 | 0.828407 | 0.889942 | UP   | 293.3314 | 293.3311 | 293.3315 | 9.972917 | 9.859233 |
| 14157 | M802T10  | 1.050778 | 0.071458 | 0.225617 | 0.828527 | 0.889957 | UP   | 801.697  | 801.6964 | 801.6973 | 9.970617 | 9.8914   |
| 14158 | M242T9_5 | 1.029497 | 0.04194  | 0.223891 | 0.828543 | 0.889958 | UP   | 242.1934 | 242.1918 | 242.1941 | 9.295817 | 9.1322   |
| 14159 | M1250T45 | 1.052697 | 0.07409  | 0.228473 | 0.828685 | 0.889975 | UP   | 1249.802 | 1249.801 | 1249.802 | 44.9835  | 44.88283 |
| 14160 | M264T9_3 | 1.068218 | 0.095206 | 0.22513  | 0.828712 | 0.889978 | UP   | 263.6838 | 263.6837 | 263.6843 | 8.745917 | 8.629617 |
| 14161 | M343T10_ | 1.125319 | 0.170334 | 0.226934 | 0.828745 | 0.889982 | UP   | 342.7402 | 342.7399 | 342.7408 | 9.823225 | 9.7124   |
| 14162 | M431T9_8 | 1.113745 | 0.155419 | 0.223425 | 0.828809 | 0.88999  | UP   | 431.0514 | 431.0508 | 431.0526 | 9.454217 | 9.358417 |
| 14163 | M360T31  | 1.091369 | -0.12614 | -0.23048 | 0.828946 | 0.890006 | DOWN | 360.1803 | 360.1803 | 360.1804 | 31.03133 | 31.02317 |
| 14164 | M477T10_ | 1.064341 | -0.08996 | -0.22369 | 0.828965 | 0.890008 | DOWN | 476.6897 | 476.6895 | 476.6898 | 9.958617 | 9.843367 |
| 14165 | M589T11_ | 1.078102 | 0.108493 | 0.228305 | 0.828969 | 0.890009 | UP   | 588.9113 | 588.9111 | 588.9115 | 10.5188  | 10.47223 |
| 14166 | M407T36  | 1.071585 | -0.09975 | -0.22313 | 0.829023 | 0.890015 | DOWN | 407.3363 | 407.336  | 407.3368 | 36.2665  | 36.237   |
| 14167 | M372T9_2 | 1.094749 | -0.1306  | -0.22307 | 0.829146 | 0.89003  | DOWN | 371.743  | 371.7428 | 371.7434 | 9.317    | 9.048117 |
| 14168 | M423T9_3 | 1.089994 | -0.12432 | -0.22296 | 0.829159 | 0.890031 | DOWN | 422.8499 | 422.8495 | 422.8501 | 9.44825  | 9.355317 |
| 14169 | M486T9_1 | 1.034482 | -0.04891 | -0.22822 | 0.829273 | 0.890045 | DOWN | 486.3711 | 486.3709 | 486.3714 | 9.320067 | 9.234417 |
| 14170 | M510T21  | 1.064328 | -0.08994 | -0.22363 | 0.829349 | 0.890054 | DOWN | 510.3184 | 510.3182 | 510.3187 | 21.21525 | 21.19383 |
| 14171 | M552T9_4 | 1.181782 | -0.24096 | -0.2227  | 0.829367 | 0.890056 | DOWN | 551.7895 | 551.7878 | 551.7978 | 9.470242 | 9.352117 |
| 14172 | M282T10_ | 1.039573 | -0.05599 | -0.22391 | 0.829527 | 0.890075 | DOWN | 282.1936 | 282.1935 | 282.1938 | 10.39613 | 10.34372 |
| 14173 | M543T9_1 | 1.065111 | 0.091004 | 0.222663 | 0.829537 | 0.890076 | UP   | 542.9654 | 542.9591 | 542.9724 | 9.219    | 9.07945  |
| 14174 | M567T9_3 | 1.066971 | -0.09352 | -0.22392 | 0.829593 | 0.890082 | DOWN | 567.3355 | 567.3347 | 567.3358 | 8.97035  | 8.8836   |

|       |          |          |          |          |          |          |      |          |          |          |          |          |
|-------|----------|----------|----------|----------|----------|----------|------|----------|----------|----------|----------|----------|
| 14175 | M190T10_ | 1.048339 | -0.06811 | -0.227   | 0.82961  | 0.890084 | DOWN | 190.0404 | 190.0403 | 190.0446 | 9.943183 | 9.8378   |
| 14176 | M481T20  | 1.134068 | 0.181507 | -0.2224  | 0.829614 | 0.890085 | UP   | 480.7897 | 480.7894 | 480.7899 | 19.926   | 19.90917 |
| 14177 | M863T11  | 1.035049 | 0.049699 | -0.22225 | 0.829689 | 0.890094 | UP   | 862.6752 | 862.6743 | 862.6767 | 11.41063 | 11.38497 |
| 14178 | M721T10_ | 1.082775 | 0.114733 | 0.222514 | 0.829702 | 0.890095 | UP   | 721.4023 | 721.4009 | 721.4031 | 9.857833 | 9.728083 |
| 14179 | M1145T11 | 1.034022 | -0.04827 | -0.22309 | 0.829706 | 0.890096 | DOWN | 1145.468 | 1145.468 | 1145.469 | 10.892   | 10.879   |
| 14180 | M350T9_4 | 1.097254 | 0.133898 | 0.225021 | 0.829739 | 0.8901   | UP   | 349.8965 | 349.8962 | 349.9088 | 9.244067 | 9.110833 |
| 14181 | M267T11_ | 1.062646 | -0.08766 | -0.22822 | 0.829742 | 0.8901   | DOWN | 267.1199 | 267.1194 | 267.1202 | 11.2194  | 11.0198  |
| 14182 | M429T9_8 | 1.075855 | 0.105484 | 0.22239  | 0.829918 | 0.890121 | UP   | 429.3956 | 429.3866 | 429.4007 | 9.290217 | 9.046783 |
| 14183 | M397T9_9 | 1.059384 | 0.083226 | 0.221932 | 0.82993  | 0.890122 | UP   | 397.4653 | 397.4631 | 397.4679 | 9.257325 | 9.146383 |
| 14184 | M698T9_2 | 1.061325 | 0.085867 | 0.226508 | 0.83003  | 0.890134 | UP   | 697.5421 | 697.5408 | 697.5428 | 9.096567 | 9.032567 |
| 14185 | M643T10_ | 1.107851 | -0.14776 | -0.22207 | 0.830041 | 0.890135 | DOWN | 643.078  | 643.0768 | 643.0816 | 9.801875 | 9.699733 |
| 14186 | M360T11_ | 1.097116 | 0.133716 | 0.222081 | 0.830242 | 0.890159 | UP   | 359.9312 | 359.931  | 359.9314 | 10.85018 | 10.84767 |
| 14187 | M547T9_1 | 1.08758  | -0.12112 | -0.2218  | 0.830338 | 0.89017  | DOWN | 546.5378 | 546.5351 | 546.5385 | 9.168892 | 9.1445   |
| 14188 | M376T10_ | 1.080443 | -0.11162 | -0.22167 | 0.83034  | 0.89017  | DOWN | 376.073  | 376.0729 | 376.0735 | 9.903017 | 9.811217 |
| 14189 | M457T31  | 1.084661 | 0.117245 | 0.225542 | 0.830542 | 0.890194 | UP   | 457.3037 | 457.3032 | 457.304  | 31.13267 | 31.10433 |
| 14190 | M200T9_6 | 1.070523 | -0.09832 | -0.22157 | 0.830543 | 0.890194 | DOWN | 199.6305 | 199.6303 | 199.6306 | 9.20785  | 9.132267 |
| 14191 | M270T26  | 1.055169 | -0.07747 | -0.22095 | 0.830676 | 0.89021  | DOWN | 270.2789 | 270.2788 | 270.2791 | 25.75258 | 25.7305  |
| 14192 | M290T9_5 | 1.071011 | -0.09897 | -0.22088 | 0.830913 | 0.890238 | DOWN | 290.1889 | 290.1888 | 290.1891 | 8.802542 | 8.712633 |
| 14193 | M437T7   | 1.094561 | -0.13035 | -0.22085 | 0.830913 | 0.890238 | DOWN | 437.2351 | 437.235  | 437.2355 | 7.364833 | 7.288367 |
| 14194 | M719T33  | 1.094503 | -0.13028 | -0.2266  | 0.830995 | 0.890248 | DOWN | 718.5312 | 718.5309 | 718.5319 | 32.95083 | 32.92183 |
| 14195 | M379T30  | 1.048199 | -0.06791 | -0.22342 | 0.831119 | 0.890262 | DOWN | 379.3052 | 379.3049 | 379.3053 | 30.16617 | 30.165   |
| 14196 | M622T41_ | 1.028068 | 0.039935 | 0.222562 | 0.83117  | 0.890268 | UP   | 622.3436 | 622.3432 | 622.3439 | 40.71183 | 40.61117 |
| 14197 | M202T11_ | 1.034216 | -0.04854 | -0.22134 | 0.831193 | 0.890271 | DOWN | 202.3679 | 202.3678 | 202.3681 | 10.892   | 10.879   |
| 14198 | M732T10_ | 1.05759  | -0.08078 | -0.22022 | 0.831227 | 0.890275 | DOWN | 732.4328 | 732.4323 | 732.4355 | 9.946467 | 9.824233 |
| 14199 | M270T24  | 1.064136 | -0.08968 | -0.22006 | 0.831347 | 0.890289 | DOWN | 270.2789 | 270.2787 | 270.279  | 24.49133 | 24.47817 |
| 14200 | M361T10_ | 1.147303 | 0.198246 | 0.220326 | 0.831474 | 0.890304 | UP   | 361.152  | 361.1519 | 361.1522 | 9.816183 | 9.699733 |
| 14201 | M329T10_ | 1.039436 | -0.0558  | -0.22049 | 0.831513 | 0.890308 | DOWN | 328.666  | 328.6657 | 328.6661 | 9.977442 | 9.859233 |
| 14202 | M391T19  | 1.044922 | 0.063395 | 0.221519 | 0.83152  | 0.890309 | UP   | 391.0566 | 391.0563 | 391.0569 | 18.96117 | 18.95117 |
| 14203 | M226T10_ | 1.068816 | 0.096014 | 0.219734 | 0.831586 | 0.890317 | UP   | 226.0796 | 226.0794 | 226.0797 | 9.975217 | 9.859233 |
| 14204 | M419T9_1 | 1.087428 | 0.12092  | 0.219852 | 0.831612 | 0.89032  | UP   | 418.5897 | 418.5891 | 418.5899 | 8.8978   | 8.877267 |
| 14205 | M810T10_ | 1.06339  | -0.08867 | -0.21968 | 0.831633 | 0.890322 | DOWN | 810.4473 | 810.4466 | 810.4482 | 10.23287 | 10.21468 |
| 14206 | M210T9_1 | 1.059833 | -0.08384 | -0.21985 | 0.83164  | 0.890323 | DOWN | 209.5186 | 209.5184 | 209.5187 | 9.365833 | 9.1445   |
| 14207 | M399T19  | 1.049528 | -0.06974 | -0.22448 | 0.831645 | 0.890324 | DOWN | 399.264  | 399.2635 | 399.2642 | 18.6895  | 18.6875  |
| 14208 | M262T10_ | 1.082135 | -0.11388 | -0.21959 | 0.831825 | 0.890345 | DOWN | 261.9216 | 261.9212 | 261.9217 | 9.958617 | 9.843367 |
| 14209 | M1134T10 | 1.06613  | -0.09238 | -0.22197 | 0.831831 | 0.890346 | DOWN | 1133.568 | 1133.567 | 1133.576 | 9.84695  | 9.728083 |

|       |          |          |          |          |          |          |      |          |          |          |          |          |
|-------|----------|----------|----------|----------|----------|----------|------|----------|----------|----------|----------|----------|
| 14210 | M340T10_ | 1.171666 | -0.22856 | -0.21937 | 0.831888 | 0.890352 | DOWN | 340.1956 | 340.1893 | 340.1998 | 9.843367 | 9.73145  |
| 14211 | M306T11_ | 1.038135 | 0.053994 | 0.219192 | 0.832034 | 0.89037  | UP   | 305.947  | 305.947  | 305.9474 | 10.9049  | 10.87708 |
| 14212 | M273T9_5 | 1.057609 | 0.080807 | 0.223307 | 0.832131 | 0.890381 | UP   | 273.1889 | 273.1887 | 273.1895 | 8.909325 | 8.858283 |
| 14213 | M424T11_ | 1.038534 | -0.05455 | -0.21914 | 0.832199 | 0.890389 | DOWN | 424.3318 | 424.3316 | 424.3321 | 10.892   | 10.879   |
| 14214 | M301T22  | 1.099219 | -0.13648 | -0.21908 | 0.832204 | 0.890389 | DOWN | 301.2846 | 301.2843 | 301.2851 | 21.8105  | 21.80283 |
| 14215 | M365T10_ | 1.045397 | -0.06405 | -0.22083 | 0.83229  | 0.8904   | DOWN | 365.439  | 365.4378 | 365.4395 | 9.80915  | 9.715683 |
| 14216 | M758T11_ | 1.03604  | 0.05108  | 0.218887 | 0.832433 | 0.890416 | UP   | 757.5692 | 757.5687 | 757.5698 | 10.90375 | 10.879   |
| 14217 | M1118T10 | 1.044853 | -0.0633  | -0.2215  | 0.832524 | 0.890427 | DOWN | 1118.103 | 1118.1   | 1118.106 | 9.759167 | 9.729367 |
| 14218 | M188T10_ | 1.06326  | 0.088494 | 0.218779 | 0.832583 | 0.890434 | UP   | 187.7219 | 187.7217 | 187.722  | 9.968992 | 9.859233 |
| 14219 | M1769T10 | 1.028406 | 0.04041  | 0.218422 | 0.832613 | 0.890437 | UP   | 1768.703 | 1768.7   | 1768.705 | 9.830083 | 9.7124   |
| 14220 | M863T26_ | 1.044738 | -0.06314 | -0.21889 | 0.832621 | 0.890438 | DOWN | 862.6098 | 862.6097 | 862.6102 | 25.57683 | 25.57283 |
| 14221 | M412T11_ | 1.118758 | -0.1619  | -0.2183  | 0.832661 | 0.890443 | DOWN | 412.4429 | 412.4423 | 412.4502 | 10.86338 | 10.8214  |
| 14222 | M265T10_ | 1.043544 | 0.061491 | 0.219451 | 0.832715 | 0.890449 | UP   | 265.4465 | 265.4463 | 265.4469 | 9.922825 | 9.75805  |
| 14223 | M639T10_ | 1.075554 | -0.10508 | -0.21826 | 0.832751 | 0.890454 | DOWN | 638.6637 | 638.6633 | 638.664  | 9.529783 | 9.416817 |
| 14224 | M216T11_ | 1.074395 | -0.10352 | -0.21802 | 0.832936 | 0.890475 | DOWN | 215.5423 | 215.5421 | 215.5428 | 10.90785 | 10.8937  |
| 14225 | M623T9_2 | 1.071002 | -0.09896 | -0.21815 | 0.832942 | 0.890476 | DOWN | 623.0882 | 623.0869 | 623.0923 | 9.302667 | 9.234417 |
| 14226 | M795T10_ | 1.04344  | 0.061347 | 0.218001 | 0.833019 | 0.890485 | UP   | 795.4171 | 795.4153 | 795.4183 | 10.23055 | 10.06883 |
| 14227 | M581T11_ | 1.084212 | 0.116647 | 0.217787 | 0.833076 | 0.890492 | UP   | 580.6694 | 580.6685 | 580.67   | 10.73087 | 10.6899  |
| 14228 | M384T11_ | 1.037265 | 0.052785 | 0.218451 | 0.833124 | 0.890497 | UP   | 384.2577 | 384.2572 | 384.258  | 10.91978 | 10.89355 |
| 14229 | M364T11_ | 1.073696 | 0.102586 | 0.221909 | 0.833133 | 0.890498 | UP   | 364.257  | 364.2566 | 364.2579 | 10.61045 | 10.5836  |
| 14230 | M490T13  | 1.035019 | -0.04966 | -0.21858 | 0.833183 | 0.890504 | DOWN | 490.3245 | 490.3243 | 490.3248 | 12.63143 | 12.61823 |
| 14231 | M301T9_3 | 1.105833 | -0.14513 | -0.21777 | 0.833221 | 0.890509 | DOWN | 301.2016 | 301.1902 | 301.2024 | 8.88325  | 8.847333 |
| 14232 | M420T10_ | 1.041469 | 0.05862  | 0.218128 | 0.833221 | 0.890509 | UP   | 420.0924 | 420.0916 | 420.0932 | 9.986767 | 9.8378   |
| 14233 | M188T10_ | 1.073781 | 0.102699 | 0.217719 | 0.83324  | 0.890511 | UP   | 187.8675 | 187.8673 | 187.8676 | 9.968992 | 9.859233 |
| 14234 | M352T41_ | 1.020542 | 0.029336 | 0.223529 | 0.833261 | 0.890513 | UP   | 352.1965 | 352.1963 | 352.1967 | 40.97075 | 40.755   |
| 14235 | M479T10_ | 1.047868 | -0.06746 | -0.21829 | 0.833319 | 0.89052  | DOWN | 479.3727 | 479.3717 | 479.3732 | 9.965792 | 9.8753   |
| 14236 | M392T10_ | 1.046248 | 0.065225 | 0.217533 | 0.833371 | 0.890526 | UP   | 391.6256 | 391.6253 | 391.6259 | 9.979325 | 9.859233 |
| 14237 | M1731T10 | 1.032233 | 0.045769 | 0.219575 | 0.833378 | 0.890527 | UP   | 1730.709 | 1730.697 | 1730.711 | 9.916525 | 9.811217 |
| 14238 | M271T11_ | 1.138069 | 0.186588 | 0.217365 | 0.8334   | 0.89053  | UP   | 270.842  | 270.8418 | 270.8428 | 10.92731 | 10.89125 |
| 14239 | M389T10_ | 1.067189 | 0.093815 | 0.217771 | 0.833418 | 0.890532 | UP   | 389.1791 | 389.1787 | 389.1793 | 9.960967 | 9.859233 |
| 14240 | M446T9_3 | 1.063797 | 0.089223 | 0.217274 | 0.833447 | 0.890535 | UP   | 445.9703 | 445.9698 | 445.9705 | 8.78005  | 8.682683 |
| 14241 | M879T33  | 1.073644 | -0.10252 | -0.21741 | 0.833532 | 0.890545 | DOWN | 878.6052 | 878.6047 | 878.6062 | 33.21067 | 33.19617 |
| 14242 | M218T11_ | 1.033538 | -0.04759 | -0.21813 | 0.83363  | 0.890556 | DOWN | 218.387  | 218.3869 | 218.3872 | 10.892   | 10.879   |
| 14243 | M261T9_4 | 1.039321 | -0.05564 | -0.21719 | 0.833638 | 0.890557 | DOWN | 261.1304 | 261.1303 | 261.1305 | 8.510033 | 8.443767 |
| 14244 | M306T9_4 | 1.230296 | -0.29901 | -0.21795 | 0.833661 | 0.89056  | DOWN | 306.3112 | 306.311  | 306.3113 | 9.075083 | 9.03845  |

|       |          |          |          |          |          |          |      |          |          |          |          |          |
|-------|----------|----------|----------|----------|----------|----------|------|----------|----------|----------|----------|----------|
| 14245 | M195T10_ | 1.056578 | -0.0794  | -0.21694 | 0.833682 | 0.890563 | DOWN | 195.4771 | 195.4768 | 195.4772 | 9.951283 | 9.843367 |
| 14246 | M173T10_ | 1.047476 | 0.066917 | 0.221572 | 0.834042 | 0.890605 | UP   | 172.9789 | 172.9787 | 172.979  | 9.809217 | 9.715683 |
| 14247 | M508T43_ | 1.030065 | 0.042735 | 0.218428 | 0.834042 | 0.890605 | UP   | 508.311  | 508.3109 | 508.3111 | 42.53883 | 42.49583 |
| 14248 | M1760T10 | 1.067241 | -0.09389 | -0.21668 | 0.834045 | 0.890605 | DOWN | 1760.128 | 1760.126 | 1760.129 | 9.831517 | 9.715683 |
| 14249 | M414T9_4 | 1.088679 | 0.122578 | 0.22177  | 0.834047 | 0.890605 | UP   | 413.7177 | 413.7171 | 413.7193 | 9.431517 | 9.328967 |
| 14250 | M595T9   | 1.045971 | -0.06484 | -0.21834 | 0.834086 | 0.89061  | DOWN | 595.4981 | 595.4975 | 595.4983 | 9.462608 | 9.416817 |
| 14251 | M703T10_ | 1.039034 | -0.05524 | -0.2164  | 0.834099 | 0.890611 | DOWN | 702.8851 | 702.8846 | 702.8854 | 9.951283 | 9.843367 |
| 14252 | M332T10_ | 1.014266 | -0.02044 | -0.22079 | 0.834398 | 0.890646 | DOWN | 332.1266 | 332.1265 | 332.1272 | 9.8397   | 9.73145  |
| 14253 | M382T18  | 1.048213 | -0.06793 | -0.21618 | 0.834424 | 0.890649 | DOWN | 381.7703 | 381.7701 | 381.7711 | 18.358   | 18.3405  |
| 14254 | M443T10_ | 1.011257 | 0.016149 | 0.219719 | 0.834578 | 0.890667 | UP   | 442.8356 | 442.8353 | 442.8364 | 9.7936   | 9.683817 |
| 14255 | M518T10_ | 1.05691  | -0.07985 | -0.21661 | 0.834593 | 0.890669 | DOWN | 517.7713 | 517.7713 | 517.7721 | 9.940783 | 9.853533 |
| 14256 | M757T10_ | 1.039041 | -0.05525 | -0.21613 | 0.834631 | 0.890673 | DOWN | 757.0551 | 757.054  | 757.0556 | 9.962617 | 9.859233 |
| 14257 | M663T34  | 1.041705 | 0.058947 | 0.216957 | 0.834642 | 0.890675 | UP   | 663.4292 | 663.4286 | 663.4297 | 33.54258 | 33.528   |
| 14258 | M227T10_ | 1.041122 | -0.05814 | -0.21714 | 0.834806 | 0.890694 | DOWN | 226.7888 | 226.7887 | 226.7888 | 9.8914   | 9.806367 |
| 14259 | M194T10_ | 1.063123 | 0.088309 | 0.215952 | 0.83487  | 0.890701 | UP   | 194.1901 | 194.1899 | 194.1905 | 10.27288 | 10.23087 |
| 14260 | M1299T10 | 1.042225 | -0.05967 | -0.21696 | 0.834915 | 0.890707 | DOWN | 1299.351 | 1299.349 | 1299.355 | 9.8207   | 9.699733 |
| 14261 | M439T44  | 1.021306 | 0.030416 | 0.217585 | 0.834954 | 0.890711 | UP   | 439.3778 | 439.3776 | 439.378  | 43.57442 | 43.528   |
| 14262 | M331T10_ | 1.062187 | 0.087038 | 0.218296 | 0.834992 | 0.890715 | UP   | 331.1222 | 331.122  | 331.1352 | 9.975308 | 9.8914   |
| 14263 | M272T10_ | 1.050799 | -0.07149 | -0.21941 | 0.835138 | 0.890733 | DOWN | 272.013  | 272.0128 | 272.0136 | 9.97155  | 9.859233 |
| 14264 | M370T9_4 | 1.0883   | 0.122077 | 0.215934 | 0.835302 | 0.890752 | UP   | 369.6432 | 369.6431 | 369.6434 | 9.382183 | 9.235933 |
| 14265 | M1969T10 | 1.064292 | 0.089894 | 0.214879 | 0.835349 | 0.890757 | UP   | 1968.674 | 1968.673 | 1968.679 | 9.830083 | 9.699733 |
| 14266 | M245T45_ | 1.016129 | -0.02308 | -0.21467 | 0.835397 | 0.890763 | DOWN | 245.138  | 245.138  | 245.1381 | 44.60267 | 44.53767 |
| 14267 | M378T10_ | 1.126807 | 0.17224  | 0.214856 | 0.835487 | 0.890773 | UP   | 377.9688 | 377.9688 | 377.9689 | 9.918833 | 9.8378   |
| 14268 | M498T22  | 1.075965 | -0.10563 | -0.21453 | 0.835569 | 0.890783 | DOWN | 497.8471 | 497.8463 | 497.8475 | 22.18442 | 22.1605  |
| 14269 | M1046T10 | 1.115701 | 0.157951 | 0.216717 | 0.835609 | 0.890787 | UP   | 1045.814 | 1045.813 | 1045.814 | 9.964092 | 9.869467 |
| 14270 | M294T9_2 | 1.096806 | -0.13331 | -0.21472 | 0.835648 | 0.890792 | DOWN | 293.6247 | 293.6239 | 293.6248 | 9.486908 | 9.432183 |
| 14271 | M520T10_ | 1.078082 | 0.108468 | 0.216317 | 0.835842 | 0.890815 | UP   | 520.0442 | 520.044  | 520.0449 | 9.960967 | 9.8753   |
| 14272 | M237T11_ | 1.043851 | -0.06192 | -0.21423 | 0.835863 | 0.890817 | DOWN | 237.3143 | 237.3142 | 237.3149 | 10.90519 | 10.879   |
| 14273 | M298T32  | 1.19581  | 0.257988 | 0.216722 | 0.835919 | 0.890823 | UP   | 298.3465 | 298.3463 | 298.3469 | 31.9545  | 31.91217 |
| 14274 | M505T10_ | 1.040401 | -0.05714 | -0.2144  | 0.835988 | 0.890832 | DOWN | 504.7121 | 504.7114 | 504.7125 | 9.979342 | 9.859233 |
| 14275 | M324T10_ | 1.06205  | -0.08685 | -0.2142  | 0.8362   | 0.890856 | DOWN | 324.4636 | 324.4633 | 324.4639 | 9.948875 | 9.843367 |
| 14276 | M171T10_ | 1.031966 | 0.045396 | 0.218878 | 0.836226 | 0.890859 | UP   | 170.5231 | 170.523  | 170.5233 | 9.8397   | 9.715683 |
| 14277 | M701T11_ | 1.044761 | -0.06317 | -0.21354 | 0.836265 | 0.890864 | DOWN | 701.3574 | 701.3572 | 701.3577 | 11.48922 | 11.45835 |
| 14278 | M908T10_ | 1.100187 | 0.137748 | 0.213456 | 0.836371 | 0.890876 | UP   | 908.2554 | 908.2542 | 908.2559 | 9.915583 | 9.79535  |
| 14279 | M214T9_2 | 1.076475 | 0.106315 | 0.213704 | 0.836506 | 0.890892 | UP   | 213.5552 | 213.5546 | 213.5555 | 9.278342 | 9.111033 |



|       |          |          |          |          |          |          |      |          |          |          |          |          |
|-------|----------|----------|----------|----------|----------|----------|------|----------|----------|----------|----------|----------|
| 14280 | M425T11_ | 1.030408 | 0.043216 | 0.218092 | 0.836518 | 0.890893 | UP   | 425.2512 | 425.2511 | 425.2514 | 10.90659 | 10.89355 |
| 14281 | M215T11_ | 1.065425 | -0.09143 | -0.21336 | 0.836582 | 0.8909   | DOWN | 215.3889 | 215.3887 | 215.3895 | 10.892   | 10.85018 |
| 14282 | M479T9_4 | 1.027772 | -0.03952 | -0.21309 | 0.836684 | 0.890912 | DOWN | 478.8228 | 478.8225 | 478.8229 | 9.29015  | 9.12675  |
| 14283 | M209T11_ | 1.039045 | 0.055257 | 0.212956 | 0.836972 | 0.890946 | UP   | 209.4204 | 209.4202 | 209.4205 | 10.92598 | 10.87487 |
| 14284 | M452T10_ | 1.145298 | -0.19572 | -0.21259 | 0.837013 | 0.890951 | DOWN | 452.2792 | 452.2778 | 452.2793 | 9.810125 | 9.696683 |
| 14285 | M307T10_ | 1.070849 | 0.098756 | 0.213719 | 0.837014 | 0.890951 | UP   | 306.8572 | 306.8569 | 306.8572 | 9.893283 | 9.779267 |
| 14286 | M397T10_ | 1.027978 | -0.03981 | -0.21498 | 0.837103 | 0.890961 | DOWN | 397.2419 | 397.2417 | 397.2421 | 9.930908 | 9.811217 |
| 14287 | M726T32  | 1.031999 | -0.04544 | -0.21243 | 0.837103 | 0.890961 | DOWN | 725.5954 | 725.5945 | 725.5955 | 31.76783 | 31.7675  |
| 14288 | M584T9_7 | 1.041112 | 0.058126 | 0.215956 | 0.837179 | 0.89097  | UP   | 584.3373 | 584.3326 | 584.3409 | 9.43325  | 9.1445   |
| 14289 | M1501T10 | 1.087157 | -0.12056 | -0.21384 | 0.837196 | 0.890972 | DOWN | 1500.731 | 1500.73  | 1500.732 | 9.958617 | 9.859233 |
| 14290 | M375T9_6 | 1.072742 | 0.101303 | 0.214048 | 0.837268 | 0.89098  | UP   | 375.323  | 375.3212 | 375.3258 | 9.174933 | 9.06855  |
| 14291 | M283T9_4 | 1.084059 | 0.116443 | 0.213342 | 0.837272 | 0.890981 | UP   | 283.3662 | 283.3659 | 283.3663 | 9.367317 | 9.288883 |
| 14292 | M351T11_ | 1.03185  | -0.04523 | -0.21299 | 0.837293 | 0.890983 | DOWN | 351.2802 | 351.28   | 351.2807 | 10.892   | 10.879   |
| 14293 | M369T10_ | 1.06428  | 0.089877 | 0.213769 | 0.837322 | 0.890986 | UP   | 369.0578 | 369.0571 | 369.0587 | 9.918833 | 9.811217 |
| 14294 | M461T25  | 1.052118 | -0.0733  | -0.21289 | 0.837411 | 0.890997 | DOWN | 461.3493 | 461.344  | 461.3496 | 24.609   | 24.3735  |
| 14295 | M160T10_ | 1.091011 | 0.125665 | 0.214721 | 0.837442 | 0.891    | UP   | 160.4434 | 160.438  | 160.4436 | 9.956417 | 9.827283 |
| 14296 | M913T10_ | 1.060734 | -0.08506 | -0.21264 | 0.837501 | 0.891007 | DOWN | 913.045  | 913.0435 | 913.0458 | 9.806892 | 9.65225  |
| 14297 | M527T11_ | 1.024754 | -0.03528 | -0.21278 | 0.837505 | 0.891008 | DOWN | 526.979  | 526.9785 | 526.9795 | 10.89355 | 10.88747 |
| 14298 | M323T10_ | 1.064961 | -0.0908  | -0.21238 | 0.837703 | 0.891031 | DOWN | 323.2942 | 323.294  | 323.2946 | 9.950258 | 9.843367 |
| 14299 | M548T44_ | 1.049239 | -0.06934 | -0.21438 | 0.837726 | 0.891033 | DOWN | 548.3061 | 548.3061 | 548.3067 | 43.96283 | 43.747   |
| 14300 | M660T10_ | 1.013464 | 0.019295 | 0.215096 | 0.837832 | 0.891046 | UP   | 659.501  | 659.5004 | 659.503  | 9.8397   | 9.715683 |
| 14301 | M652T10_ | 1.039592 | -0.05602 | -0.21133 | 0.837949 | 0.891059 | DOWN | 651.8294 | 651.8291 | 651.8295 | 9.962617 | 9.859233 |
| 14302 | M254T10_ | 1.059844 | 0.083851 | 0.217859 | 0.83804  | 0.89107  | UP   | 253.9429 | 253.9428 | 253.9431 | 9.73895  | 9.636483 |
| 14303 | M366T10_ | 1.095402 | -0.13146 | -0.21198 | 0.838098 | 0.891076 | DOWN | 365.7464 | 365.746  | 365.7466 | 9.958617 | 9.859233 |
| 14304 | M1486T10 | 1.071752 | -0.09997 | -0.21105 | 0.838267 | 0.891096 | DOWN | 1485.567 | 1485.559 | 1485.57  | 9.918833 | 9.827283 |
| 14305 | M341T11_ | 1.062242 | -0.08711 | -0.21376 | 0.838457 | 0.891118 | DOWN | 340.7607 | 340.7515 | 340.7608 | 11.04848 | 11.01617 |
| 14306 | M889T10  | 1.047811 | 0.067379 | 0.210586 | 0.838496 | 0.891122 | UP   | 889.2533 | 889.2527 | 889.255  | 9.933967 | 9.827283 |
| 14307 | M382T9_6 | 1.047613 | -0.06711 | -0.21153 | 0.838756 | 0.891152 | DOWN | 381.9144 | 381.9142 | 381.9151 | 8.923992 | 8.817367 |
| 14308 | M595T10_ | 1.080442 | -0.11162 | -0.21048 | 0.839015 | 0.891182 | DOWN | 594.6537 | 594.6534 | 594.6542 | 9.910375 | 9.843367 |
| 14309 | M229T9_5 | 1.043108 | 0.060888 | 0.21152  | 0.839179 | 0.891201 | UP   | 228.8078 | 228.8057 | 228.8082 | 9.445217 | 9.3261   |
| 14310 | M184T10_ | 1.09265  | 0.127831 | 0.2099   | 0.839186 | 0.891202 | UP   | 183.9249 | 183.9247 | 183.925  | 9.946467 | 9.827283 |
| 14311 | M461T30_ | 1.021646 | 0.030896 | 0.209503 | 0.839374 | 0.891224 | UP   | 461.3732 | 461.3727 | 461.3733 | 30.22283 | 30.19467 |
| 14312 | M309T10_ | 1.057572 | -0.08076 | -0.21222 | 0.839683 | 0.89126  | DOWN | 308.5681 | 308.568  | 308.5727 | 9.6293   | 9.52595  |
| 14313 | M335T11_ | 1.025061 | -0.03571 | -0.20904 | 0.839684 | 0.89126  | DOWN | 334.6011 | 334.6008 | 334.602  | 10.90519 | 10.879   |
| 14314 | M444T10_ | 1.090463 | 0.12494  | 0.208836 | 0.839849 | 0.891279 | UP   | 444.3388 | 444.3381 | 444.3394 | 10.20545 | 10.13518 |

|       |          |          |          |          |          |          |      |          |          |          |          |          |
|-------|----------|----------|----------|----------|----------|----------|------|----------|----------|----------|----------|----------|
| 14315 | M1757T10 | 1.058882 | 0.082542 | 0.210887 | 0.839909 | 0.891286 | UP   | 1756.897 | 1756.89  | 1756.899 | 9.968992 | 9.859233 |
| 14316 | M660T30  | 1.041792 | -0.05907 | -0.20987 | 0.839919 | 0.891287 | DOWN | 660.4892 | 660.4887 | 660.4894 | 30.26625 | 30.2515  |
| 14317 | M902T10_ | 1.070022 | -0.09764 | -0.20908 | 0.839938 | 0.891289 | DOWN | 902.493  | 902.492  | 902.4939 | 9.944392 | 9.843367 |
| 14318 | M201T10_ | 1.039004 | -0.0552  | -0.20944 | 0.839957 | 0.891291 | DOWN | 201.0473 | 201.0472 | 201.0473 | 9.830083 | 9.699733 |
| 14319 | M662T10_ | 1.076706 | 0.106624 | 0.208908 | 0.839974 | 0.891293 | UP   | 661.8593 | 661.8592 | 661.8597 | 9.842    | 9.802117 |
| 14320 | M259T11_ | 1.045355 | -0.06399 | -0.21002 | 0.839992 | 0.891295 | DOWN | 259.3114 | 259.3112 | 259.3116 | 10.93148 | 10.8926  |
| 14321 | M355T9_4 | 1.068418 | -0.09548 | -0.20838 | 0.840144 | 0.891313 | DOWN | 355.1985 | 355.1979 | 355.1994 | 9.365833 | 9.206    |
| 14322 | M645T11  | 1.045132 | 0.063686 | 0.208292 | 0.840223 | 0.891322 | UP   | 644.6376 | 644.6373 | 644.6383 | 11.49742 | 11.47593 |
| 14323 | M376T10_ | 1.041724 | 0.058973 | 0.208596 | 0.840251 | 0.891325 | UP   | 376.2203 | 376.2201 | 376.2206 | 9.554883 | 9.46325  |
| 14324 | M213T9_1 | 1.21024  | 0.275293 | 0.208202 | 0.840417 | 0.891344 | UP   | 213.2312 | 213.2305 | 213.2316 | 9.216183 | 9.158833 |
| 14325 | M249T9_2 | 1.032396 | 0.045997 | 0.211597 | 0.840426 | 0.891345 | UP   | 249.157  | 249.1569 | 249.1571 | 8.749758 | 8.6529   |
| 14326 | M322T10_ | 1.058971 | -0.08266 | -0.20839 | 0.840563 | 0.891361 | DOWN | 322.3225 | 322.3221 | 322.3231 | 9.964092 | 9.843367 |
| 14327 | M497T37  | 1.048136 | 0.067826 | 0.209228 | 0.840589 | 0.891364 | UP   | 497.3882 | 497.3872 | 497.3899 | 37.3885  | 37.3595  |
| 14328 | M788T10_ | 1.05396  | 0.075821 | 0.207842 | 0.840619 | 0.891368 | UP   | 788.4339 | 788.432  | 788.4347 | 10.23199 | 10.13887 |
| 14329 | M650T10_ | 1.0458   | 0.064607 | 0.210057 | 0.840704 | 0.891377 | UP   | 649.8987 | 649.898  | 649.8996 | 10.15397 | 10.08517 |
| 14330 | M426T10_ | 1.076503 | -0.10635 | -0.20771 | 0.840719 | 0.891379 | DOWN | 425.9762 | 425.9761 | 425.9766 | 9.504583 | 9.40135  |
| 14331 | M178T10_ | 1.0464   | 0.065434 | 0.208887 | 0.840766 | 0.891384 | UP   | 178.0613 | 178.0607 | 178.0614 | 9.91875  | 9.827283 |
| 14332 | M241T9_2 | 1.111254 | 0.152189 | 0.207351 | 0.840921 | 0.891402 | UP   | 240.7339 | 240.7337 | 240.7341 | 9.064833 | 9.03845  |
| 14333 | M965T10_ | 1.055855 | 0.078412 | 0.20741  | 0.841001 | 0.891412 | UP   | 964.5052 | 964.5042 | 964.5061 | 9.979342 | 9.859233 |
| 14334 | M169T10_ | 1.05519  | -0.0775  | -0.20731 | 0.841049 | 0.891417 | DOWN | 169.0624 | 169.0547 | 169.0626 | 9.8776   | 9.811217 |
| 14335 | M330T9_7 | 1.036084 | -0.05114 | -0.21005 | 0.841077 | 0.89142  | DOWN | 329.9764 | 329.9755 | 329.9765 | 8.884642 | 8.75965  |
| 14336 | M700T10_ | 1.012257 | 0.017575 | 0.210454 | 0.841093 | 0.891422 | UP   | 700.4424 | 700.4421 | 700.4427 | 9.825767 | 9.715683 |
| 14337 | M381T10_ | 1.099964 | 0.137457 | 0.207134 | 0.841113 | 0.891424 | UP   | 381.4863 | 381.4862 | 381.4864 | 9.946467 | 9.843367 |
| 14338 | M385T10_ | 1.029614 | -0.0421  | -0.209   | 0.84113  | 0.891426 | DOWN | 385.4859 | 385.4856 | 385.4862 | 9.972917 | 9.859233 |
| 14339 | M222T10_ | 1.070358 | -0.09809 | -0.20875 | 0.84135  | 0.891452 | DOWN | 221.9627 | 221.9624 | 221.9629 | 9.962617 | 9.843367 |
| 14340 | M520T43_ | 1.047044 | -0.06632 | -0.20997 | 0.841432 | 0.891461 | DOWN | 520.2747 | 520.2746 | 520.2751 | 43.15692 | 43.12867 |
| 14341 | M473T9_5 | 1.053484 | -0.07517 | -0.20695 | 0.841447 | 0.891463 | DOWN | 473.1082 | 473.1076 | 473.1085 | 9.229333 | 9.129317 |
| 14342 | M413T9_1 | 1.030549 | -0.04341 | -0.20652 | 0.841551 | 0.891475 | DOWN | 413.4681 | 413.4677 | 413.4693 | 9.2585   | 9.20785  |
| 14343 | M371T9_3 | 1.047773 | 0.067326 | 0.208568 | 0.841599 | 0.89148  | UP   | 371.2277 | 371.2274 | 371.2281 | 8.900825 | 8.7875   |
| 14344 | M573T10_ | 1.055453 | 0.077863 | 0.209406 | 0.841618 | 0.891482 | UP   | 572.7577 | 572.7573 | 572.758  | 9.965892 | 9.853533 |
| 14345 | M243T9_4 | 1.117104 | -0.15976 | -0.20823 | 0.841644 | 0.891485 | DOWN | 242.6133 | 242.6078 | 242.6149 | 9.220933 | 9.146383 |
| 14346 | M239T11_ | 1.024496 | -0.03491 | -0.20631 | 0.841706 | 0.891493 | DOWN | 238.5906 | 238.5904 | 238.5911 | 10.90519 | 10.879   |
| 14347 | M441T36  | 1.096452 | -0.13284 | -0.20643 | 0.841744 | 0.891497 | DOWN | 441.4128 | 441.4126 | 441.413  | 35.94392 | 35.92017 |
| 14348 | M570T10_ | 1.034241 | 0.048573 | 0.206666 | 0.841804 | 0.891504 | UP   | 569.623  | 569.6225 | 569.6235 | 9.954767 | 9.843367 |
| 14349 | M289T11_ | 1.048915 | -0.0689  | -0.20728 | 0.841853 | 0.891509 | DOWN | 288.9963 | 288.9962 | 288.9966 | 10.90442 | 10.85018 |

|       |          |          |          |          |          |          |      |          |          |          |          |          |
|-------|----------|----------|----------|----------|----------|----------|------|----------|----------|----------|----------|----------|
| 14350 | M316T28_ | 1.031084 | -0.04416 | -0.20828 | 0.841896 | 0.891514 | DOWN | 316.3207 | 316.3205 | 316.3209 | 28.12733 | 28.11333 |
| 14351 | M1037T10 | 1.088325 | -0.12211 | -0.20641 | 0.842012 | 0.891528 | DOWN | 1036.574 | 1036.573 | 1036.574 | 9.830917 | 9.77435  |
| 14352 | M679T34  | 1.134878 | -0.18254 | -0.2058  | 0.842159 | 0.891545 | DOWN | 679.4823 | 679.482  | 679.4827 | 34.393   | 34.36367 |
| 14353 | M749T10_ | 1.037224 | -0.05273 | -0.20574 | 0.842188 | 0.891548 | DOWN | 748.9426 | 748.9422 | 748.943  | 10.39556 | 10.34372 |
| 14354 | M1382T10 | 1.057197 | 0.080245 | 0.205719 | 0.842223 | 0.891552 | UP   | 1382.439 | 1382.438 | 1382.442 | 9.973517 | 9.8753   |
| 14355 | M455T10_ | 1.069895 | -0.09747 | -0.20654 | 0.842283 | 0.891559 | DOWN | 454.6141 | 454.6139 | 454.6142 | 9.964092 | 9.843367 |
| 14356 | M282T10_ | 1.06335  | 0.088617 | 0.205875 | 0.842348 | 0.891566 | UP   | 282.1671 | 282.1668 | 282.1673 | 9.6055   | 9.49445  |
| 14357 | M236T11_ | 1.031319 | -0.04449 | -0.20617 | 0.84246  | 0.891579 | DOWN | 236.4456 | 236.4455 | 236.4457 | 10.892   | 10.879   |
| 14358 | M1221T18 | 1.042226 | -0.05967 | -0.20676 | 0.842483 | 0.891582 | DOWN | 1220.562 | 1220.561 | 1220.564 | 18.078   | 18.05483 |
| 14359 | M324T10_ | 1.053075 | -0.07461 | -0.20566 | 0.84254  | 0.891588 | DOWN | 324.2998 | 324.2997 | 324.3002 | 9.957333 | 9.843367 |
| 14360 | M900T10_ | 1.040161 | -0.05681 | -0.20807 | 0.842698 | 0.891606 | DOWN | 900.4687 | 900.4681 | 900.4695 | 9.526775 | 9.4632   |
| 14361 | M379T9_4 | 1.080412 | 0.111581 | 0.205083 | 0.84273  | 0.89161  | UP   | 379.0177 | 379.013  | 379.0204 | 9.18975  | 9.1445   |
| 14362 | M243T11_ | 1.104059 | 0.142818 | 0.204943 | 0.842742 | 0.891611 | UP   | 242.7426 | 242.7425 | 242.7426 | 10.87708 | 10.85018 |
| 14363 | M271T24  | 1.072293 | -0.1007  | -0.20478 | 0.842879 | 0.891627 | DOWN | 271.2821 | 271.2819 | 271.2822 | 24.49217 | 24.47583 |
| 14364 | M350T10_ | 1.045477 | -0.06416 | -0.20521 | 0.843028 | 0.891644 | DOWN | 350.3872 | 350.3868 | 350.3884 | 9.956417 | 9.811217 |
| 14365 | M636T45  | 1.066114 | -0.09236 | -0.20575 | 0.843092 | 0.891652 | DOWN | 636.3592 | 636.3591 | 636.3594 | 44.76783 | 44.56667 |
| 14366 | M175T10_ | 1.066533 | -0.09293 | -0.20781 | 0.843097 | 0.891652 | DOWN | 174.9919 | 174.9918 | 174.9942 | 9.964092 | 9.859233 |
| 14367 | M331T10_ | 1.049785 | -0.07009 | -0.20846 | 0.843172 | 0.891661 | DOWN | 331.3677 | 331.3676 | 331.3678 | 9.91765  | 9.827283 |
| 14368 | M351T9_7 | 1.055055 | 0.077318 | 0.205415 | 0.843214 | 0.891666 | UP   | 350.8136 | 350.8131 | 350.8141 | 9.279617 | 9.22495  |
| 14369 | M253T11_ | 1.028632 | 0.040728 | 0.204262 | 0.843251 | 0.89167  | UP   | 252.8504 | 252.8502 | 252.8505 | 10.89875 | 10.879   |
| 14370 | M490T43  | 1.032283 | 0.045839 | 0.205652 | 0.843382 | 0.891685 | UP   | 490.2643 | 490.2643 | 490.2645 | 42.992   | 42.88417 |
| 14371 | M921T10_ | 1.043635 | 0.061617 | 0.204558 | 0.843391 | 0.891686 | UP   | 921.124  | 921.1228 | 921.1241 | 9.9351   | 9.896717 |
| 14372 | M199T11  | 1.054629 | -0.07674 | -0.20399 | 0.843577 | 0.891707 | DOWN | 198.7205 | 198.7204 | 198.7207 | 10.90553 | 10.88995 |
| 14373 | M417T11_ | 1.052027 | 0.073172 | 0.203859 | 0.843615 | 0.891712 | UP   | 416.5756 | 416.5754 | 416.5772 | 10.91734 | 10.88995 |
| 14374 | M360T9_4 | 1.11837  | 0.161398 | 0.205977 | 0.843729 | 0.891725 | UP   | 359.7637 | 359.7633 | 359.7642 | 9.06855  | 9.00135  |
| 14375 | M239T10_ | 1.083274 | 0.115398 | 0.204367 | 0.84382  | 0.891735 | UP   | 239.2217 | 239.2214 | 239.222  | 9.962617 | 9.843367 |
| 14376 | M422T10_ | 1.074126 | 0.103163 | 0.203873 | 0.843844 | 0.891738 | UP   | 422.2628 | 422.2622 | 422.2638 | 9.62495  | 9.540717 |
| 14377 | M563T11_ | 1.039946 | -0.05651 | -0.20645 | 0.843872 | 0.891741 | DOWN | 563.312  | 563.3108 | 563.3123 | 10.51713 | 10.48782 |
| 14378 | M385T11_ | 1.065577 | 0.091634 | 0.203901 | 0.843951 | 0.89175  | UP   | 385.2992 | 385.2988 | 385.2995 | 11.11333 | 11.08157 |
| 14379 | M636T10_ | 1.07221  | 0.100587 | 0.203842 | 0.84404  | 0.89176  | UP   | 636.0087 | 636.0085 | 636.009  | 9.938708 | 9.827283 |
| 14380 | M778T10_ | 1.050282 | -0.07078 | -0.20347 | 0.844047 | 0.891761 | DOWN | 778.0225 | 778.0217 | 778.0233 | 9.886083 | 9.779267 |
| 14381 | M261T11_ | 1.047651 | -0.06716 | -0.20306 | 0.844224 | 0.891781 | DOWN | 260.7287 | 260.7285 | 260.7288 | 10.892   | 10.873   |
| 14382 | M178T9_1 | 1.077992 | -0.10835 | -0.20313 | 0.844419 | 0.891804 | DOWN | 178.355  | 178.3546 | 178.3558 | 9.311883 | 9.146383 |
| 14383 | M652T12  | 1.041156 | 0.058186 | 0.203417 | 0.844571 | 0.891821 | UP   | 652.4238 | 652.4234 | 652.4241 | 11.50399 | 11.47593 |
| 14384 | M614T10_ | 1.04841  | 0.068202 | 0.203253 | 0.844586 | 0.891823 | UP   | 614.1967 | 614.1959 | 614.1988 | 9.965892 | 9.843367 |

|       |          |          |          |          |          |          |      |          |          |          |          |          |
|-------|----------|----------|----------|----------|----------|----------|------|----------|----------|----------|----------|----------|
| 14385 | M418T10_ | 1.053263 | 0.074866 | 0.202609 | 0.844681 | 0.891833 | UP   | 418.3221 | 418.3218 | 418.3223 | 9.972917 | 9.859233 |
| 14386 | M584T9_3 | 1.0432   | 0.061016 | 0.203118 | 0.844712 | 0.891837 | UP   | 583.8793 | 583.8779 | 583.8797 | 8.985492 | 8.892117 |
| 14387 | M318T11_ | 1.045398 | -0.06405 | -0.20233 | 0.844732 | 0.891839 | DOWN | 317.5796 | 317.5784 | 317.5801 | 10.9049  | 10.88747 |
| 14388 | M538T20  | 1.065399 | 0.091393 | 0.202452 | 0.844798 | 0.891847 | UP   | 538.3735 | 538.3732 | 538.3742 | 19.83083 | 19.78    |
| 14389 | M845T10_ | 1.036802 | 0.05214  | 0.203348 | 0.844847 | 0.891852 | UP   | 844.8851 | 844.8846 | 844.8856 | 9.951283 | 9.843367 |
| 14390 | M167T23  | 1.019571 | 0.027962 | 0.202917 | 0.84485  | 0.891853 | UP   | 167.07   | 167.0699 | 167.0701 | 22.8715  | 22.85683 |
| 14391 | M671T10_ | 1.068228 | -0.09522 | -0.2024  | 0.844922 | 0.891861 | DOWN | 671.1765 | 671.1758 | 671.177  | 9.8374   | 9.799767 |
| 14392 | M685T10_ | 1.077405 | 0.10756  | 0.202244 | 0.845032 | 0.891874 | UP   | 684.9588 | 684.9581 | 684.9597 | 9.830283 | 9.715683 |
| 14393 | M332T29  | 1.053602 | -0.07533 | -0.20406 | 0.845111 | 0.891883 | DOWN | 332.3157 | 332.3155 | 332.3158 | 28.70908 | 28.7     |
| 14394 | M819T11  | 1.027277 | -0.03882 | -0.20172 | 0.845268 | 0.8919   | DOWN | 818.5429 | 818.5422 | 818.5465 | 10.90628 | 10.873   |
| 14395 | M417T41_ | 1.047084 | -0.06638 | -0.2037  | 0.845315 | 0.891906 | DOWN | 417.248  | 417.2479 | 417.248  | 40.92067 | 40.78383 |
| 14396 | M786T11  | 1.034171 | 0.048475 | 0.201953 | 0.845415 | 0.891917 | UP   | 785.6289 | 785.6265 | 785.6298 | 10.8926  | 10.84395 |
| 14397 | M719T19  | 1.06288  | -0.08798 | -0.20131 | 0.845483 | 0.891925 | DOWN | 719.4509 | 719.45   | 719.4515 | 19.07483 | 19.053   |
| 14398 | M1131T9  | 1.080385 | -0.11155 | -0.20204 | 0.845502 | 0.891927 | DOWN | 1131.246 | 1131.243 | 1131.247 | 9.310283 | 9.160617 |
| 14399 | M271T11_ | 1.05428  | 0.076259 | 0.201446 | 0.845549 | 0.891933 | UP   | 270.7599 | 270.7597 | 270.76   | 10.892   | 10.8646  |
| 14400 | M291T10_ | 1.043348 | 0.061221 | 0.204464 | 0.845609 | 0.891939 | UP   | 290.502  | 290.5019 | 290.5023 | 9.977025 | 9.8753   |
| 14401 | M325T13  | 1.042027 | 0.059393 | 0.201414 | 0.845722 | 0.891952 | UP   | 325.2928 | 325.2922 | 325.2932 | 13.49317 | 13.47873 |
| 14402 | M245T16  | 1.032482 | -0.04612 | -0.20125 | 0.845829 | 0.891964 | DOWN | 245.1936 | 245.1935 | 245.1937 | 16.46776 | 16.41757 |
| 14403 | M219T11_ | 1.034426 | -0.04883 | -0.20248 | 0.846059 | 0.891991 | DOWN | 218.9631 | 218.963  | 218.9632 | 10.90519 | 10.879   |
| 14404 | M1837T10 | 1.03914  | 0.055391 | 0.200689 | 0.84613  | 0.891999 | UP   | 1837.277 | 1837.277 | 1837.279 | 9.9677   | 9.859233 |
| 14405 | M560T10_ | 1.082716 | -0.11466 | -0.20082 | 0.846266 | 0.892014 | DOWN | 560.3409 | 560.3363 | 560.3415 | 10.19571 | 10.08517 |
| 14406 | M621T11_ | 1.075518 | 0.105032 | 0.200654 | 0.846366 | 0.892026 | UP   | 621.3695 | 621.3684 | 621.37   | 10.90519 | 10.88747 |
| 14407 | M421T10_ | 1.052883 | 0.074345 | 0.200385 | 0.846382 | 0.892027 | UP   | 420.5796 | 420.5792 | 420.5801 | 9.972917 | 9.859233 |
| 14408 | M297T10_ | 1.035065 | -0.04972 | -0.20009 | 0.846404 | 0.89203  | DOWN | 296.8851 | 296.8848 | 296.8852 | 9.945258 | 9.843367 |
| 14409 | M845T10_ | 1.17628  | 0.234232 | 0.200199 | 0.846434 | 0.892033 | UP   | 844.9519 | 844.9514 | 844.9527 | 9.923592 | 9.811217 |
| 14410 | M310T10_ | 1.052922 | -0.0744  | -0.20012 | 0.846601 | 0.892052 | DOWN | 309.8933 | 309.8932 | 309.8935 | 9.903017 | 9.827283 |
| 14411 | M417T12_ | 1.060807 | 0.085163 | 0.199912 | 0.846613 | 0.892054 | UP   | 417.1632 | 417.1625 | 417.1636 | 12.13705 | 12.0908  |
| 14412 | M474T10_ | 1.057972 | -0.0813  | -0.20051 | 0.846634 | 0.892056 | DOWN | 473.9663 | 473.966  | 473.9665 | 9.958617 | 9.843367 |
| 14413 | M238T10_ | 1.083612 | 0.115848 | 0.201048 | 0.846636 | 0.892056 | UP   | 237.6724 | 237.6722 | 237.6726 | 9.9351   | 9.827283 |
| 14414 | M676T10_ | 1.047065 | -0.06635 | -0.19986 | 0.846654 | 0.892058 | DOWN | 676.193  | 676.1925 | 676.1936 | 9.951283 | 9.843367 |
| 14415 | M838T30  | 1.056959 | -0.07992 | -0.20073 | 0.846663 | 0.892059 | DOWN | 837.5981 | 837.5971 | 837.5995 | 30.209   | 30.17883 |
| 14416 | M1562T10 | 1.034182 | -0.04849 | -0.2002  | 0.846727 | 0.892067 | DOWN | 1562.063 | 1562.058 | 1562.066 | 9.903567 | 9.827283 |
| 14417 | M1569T10 | 1.062501 | -0.08746 | -0.20148 | 0.846801 | 0.892075 | DOWN | 1569.071 | 1569.066 | 1569.074 | 9.960817 | 9.79535  |
| 14418 | M338T9_3 | 1.067605 | 0.094378 | 0.199665 | 0.846837 | 0.892079 | UP   | 337.7329 | 337.7324 | 337.7396 | 9.351292 | 9.264333 |
| 14419 | M685T11  | 1.041417 | 0.058547 | 0.202948 | 0.846861 | 0.892082 | UP   | 684.9124 | 684.911  | 684.9166 | 10.94603 | 10.84767 |

|       |          |          |          |          |          |          |      |          |          |          |          |          |
|-------|----------|----------|----------|----------|----------|----------|------|----------|----------|----------|----------|----------|
| 14420 | M662T11_ | 1.036357 | 0.051522 | 0.199646 | 0.846862 | 0.892082 | UP   | 662.064  | 662.0621 | 662.0658 | 10.7223  | 10.7046  |
| 14421 | M343T7   | 1.060493 | -0.08473 | -0.19954 | 0.84688  | 0.892084 | DOWN | 342.8684 | 342.8682 | 342.8685 | 6.606917 | 6.531    |
| 14422 | M267T20  | 1.023191 | 0.033076 | 0.199596 | 0.846911 | 0.892087 | UP   | 267.2509 | 267.2507 | 267.251  | 20.24517 | 20.23017 |
| 14423 | M171T10_ | 1.078386 | 0.108874 | 0.200109 | 0.846919 | 0.892088 | UP   | 171.4095 | 171.4031 | 171.4103 | 9.952358 | 9.843367 |
| 14424 | M471T14  | 1.054964 | -0.07719 | -0.19936 | 0.847004 | 0.892098 | DOWN | 471.3686 | 471.3682 | 471.3694 | 14.13973 | 14.12182 |
| 14425 | M221T9_2 | 1.158831 | 0.21267  | 0.199187 | 0.847103 | 0.892109 | UP   | 220.5311 | 220.5299 | 220.5315 | 9.202433 | 9.111033 |
| 14426 | M677T10_ | 1.138676 | -0.18736 | -0.19933 | 0.847207 | 0.892121 | DOWN | 676.6577 | 676.6572 | 676.6582 | 9.830083 | 9.683817 |
| 14427 | M202T9_9 | 1.073884 | -0.10284 | -0.19906 | 0.847209 | 0.892121 | DOWN | 202.1075 | 202.1069 | 202.1076 | 8.939367 | 8.8622   |
| 14428 | M331T11_ | 1.039665 | 0.056119 | 0.199545 | 0.847253 | 0.892126 | UP   | 330.972  | 330.9713 | 330.9725 | 10.90522 | 10.879   |
| 14429 | M652T10_ | 1.040221 | -0.05689 | -0.19905 | 0.847292 | 0.892131 | DOWN | 652.4736 | 652.4728 | 652.4747 | 9.89445  | 9.779267 |
| 14430 | M213T9_9 | 1.10854  | 0.148661 | 0.200183 | 0.847324 | 0.892134 | UP   | 212.8611 | 212.855  | 212.8632 | 9.342833 | 9.132033 |
| 14431 | M652T9_4 | 1.145179 | 0.195574 | 0.201334 | 0.847335 | 0.892136 | UP   | 652.4328 | 652.4323 | 652.4334 | 9.415167 | 9.3261   |
| 14432 | M289T11_ | 1.191835 | 0.253185 | 0.199047 | 0.84738  | 0.892141 | UP   | 288.6621 | 288.662  | 288.6624 | 10.94853 | 10.88982 |
| 14433 | M466T11_ | 1.058467 | -0.08198 | -0.19879 | 0.847467 | 0.892151 | DOWN | 466.4698 | 466.4639 | 466.4705 | 10.90343 | 10.87765 |
| 14434 | M244T9_6 | 1.119039 | 0.162261 | 0.198618 | 0.847524 | 0.892157 | UP   | 244.1067 | 244.1031 | 244.1076 | 9.13445  | 9.1175   |
| 14435 | M334T10_ | 1.018099 | -0.02588 | -0.20361 | 0.847543 | 0.892159 | DOWN | 333.7498 | 333.7495 | 333.7504 | 9.8397   | 9.73145  |
| 14436 | M212T9_1 | 1.074245 | -0.10332 | -0.1985  | 0.847631 | 0.892169 | DOWN | 212.1744 | 212.1729 | 212.1753 | 9.3494   | 9.1322   |
| 14437 | M577T9_6 | 1.05878  | 0.082403 | 0.198572 | 0.847731 | 0.892181 | UP   | 577.4888 | 577.4886 | 577.4889 | 9.227808 | 9.064833 |
| 14438 | M292T10_ | 1.06141  | -0.08598 | -0.19947 | 0.847742 | 0.892182 | DOWN | 292.2854 | 292.285  | 292.2856 | 9.968992 | 9.859233 |
| 14439 | M667T10  | 1.032093 | -0.04557 | -0.20021 | 0.847865 | 0.892196 | DOWN | 667.3372 | 667.3371 | 667.3387 | 10.39007 | 10.34542 |
| 14440 | M350T40_ | 1.072711 | -0.10126 | -0.19953 | 0.847885 | 0.892198 | DOWN | 350.2171 | 350.2171 | 350.2172 | 40.35217 | 40.165   |
| 14441 | M621T30  | 1.03748  | 0.053084 | 0.201255 | 0.847957 | 0.892206 | UP   | 621.4183 | 621.4179 | 621.4185 | 30.27933 | 30.266   |
| 14442 | M382T39_ | 1.02308  | 0.032919 | 0.199113 | 0.847991 | 0.89221  | UP   | 382.2432 | 382.243  | 382.2436 | 38.7265  | 38.49667 |
| 14443 | M1107T29 | 1.00355  | 0.005113 | -0.19788 | 0.848086 | 0.892221 | UP   | 1106.784 | 1106.782 | 1106.784 | 28.74825 | 28.68917 |
| 14444 | M710T10_ | 1.045755 | -0.06455 | -0.19824 | 0.848121 | 0.892225 | DOWN | 710.2101 | 710.2098 | 710.2105 | 9.956417 | 9.859233 |
| 14445 | M404T11_ | 1.041553 | 0.058736 | 0.198902 | 0.848136 | 0.892227 | UP   | 404.1257 | 404.1256 | 404.1263 | 10.90522 | 10.879   |
| 14446 | M636T10_ | 1.023317 | -0.03325 | -0.20192 | 0.848147 | 0.892228 | DOWN | 635.8917 | 635.891  | 635.8945 | 9.8397   | 9.715683 |
| 14447 | M201T10_ | 1.04725  | -0.06661 | -0.19816 | 0.848154 | 0.892229 | DOWN | 201.2084 | 201.2083 | 201.2085 | 9.8207   | 9.715683 |
| 14448 | M295T30_ | 1.020709 | 0.029571 | 0.197936 | 0.848194 | 0.892233 | UP   | 295.2095 | 295.2094 | 295.2096 | 29.83392 | 29.81917 |
| 14449 | M507T10_ | 1.046062 | 0.064968 | 0.199185 | 0.848233 | 0.892238 | UP   | 507.3233 | 507.3116 | 507.3235 | 10.39823 | 10.31365 |
| 14450 | M401T9_2 | 1.083923 | 0.116262 | 0.197566 | 0.848318 | 0.892247 | UP   | 400.6426 | 400.642  | 400.6427 | 8.959467 | 8.924217 |
| 14451 | M342T11_ | 1.271063 | 0.346035 | 0.199659 | 0.848349 | 0.892251 | UP   | 342.2641 | 342.2634 | 342.2642 | 11.27619 | 11.24672 |
| 14452 | M217T7_1 | 1.099338 | -0.13663 | -0.19787 | 0.848389 | 0.892255 | DOWN | 216.9225 | 216.9223 | 216.9226 | 7.439608 | 7.212433 |
| 14453 | M271T11_ | 1.086264 | 0.119374 | 0.197441 | 0.848441 | 0.892261 | UP   | 271.2732 | 271.2729 | 271.2733 | 10.88995 | 10.83572 |
| 14454 | M334T12  | 1.022337 | 0.03187  | 0.197206 | 0.848632 | 0.892283 | UP   | 334.1987 | 334.1987 | 334.1988 | 12.25237 | 12.23755 |

|       |          |          |          |          |          |          |      |          |          |          |          |          |
|-------|----------|----------|----------|----------|----------|----------|------|----------|----------|----------|----------|----------|
| 14455 | M423T10_ | 1.20179  | 0.265185 | 0.197175 | 0.848696 | 0.89229  | UP   | 422.9905 | 422.9904 | 422.9906 | 9.505267 | 9.40135  |
| 14456 | M475T9_7 | 1.063343 | 0.088607 | 0.197988 | 0.84875  | 0.892296 | UP   | 475.035  | 475.033  | 475.044  | 9.342167 | 9.2946   |
| 14457 | M234T9_7 | 1.087087 | -0.12047 | -0.19695 | 0.848814 | 0.892303 | DOWN | 234.119  | 234.1098 | 234.1202 | 9.296325 | 9.1322   |
| 14458 | M744T9_1 | 1.113203 | -0.15472 | -0.19686 | 0.848848 | 0.892307 | DOWN | 743.7422 | 743.7412 | 743.7423 | 9.3332   | 9.234417 |
| 14459 | M535T11_ | 1.031281 | -0.04444 | -0.19775 | 0.848897 | 0.892313 | DOWN | 535.325  | 535.3246 | 535.3254 | 10.52067 | 10.51508 |
| 14460 | M715T10_ | 1.040038 | -0.05664 | -0.19846 | 0.84896  | 0.89232  | DOWN | 715.3723 | 715.3713 | 715.3727 | 9.54585  | 9.46325  |
| 14461 | M473T9_6 | 1.035078 | -0.04974 | -0.19678 | 0.849004 | 0.892325 | DOWN | 473.1835 | 473.1796 | 473.1854 | 9.311525 | 9.129317 |
| 14462 | M525T9_1 | 1.125371 | -0.1704  | -0.19758 | 0.849116 | 0.892338 | DOWN | 524.5398 | 524.5373 | 524.5444 | 9.147367 | 9.12675  |
| 14463 | M606T10_ | 1.067275 | 0.093932 | 0.200386 | 0.849185 | 0.892345 | UP   | 606.3857 | 606.385  | 606.387  | 9.660158 | 9.58735  |
| 14464 | M495T10_ | 1.048399 | -0.06819 | -0.1972  | 0.849195 | 0.892347 | DOWN | 494.9294 | 494.9284 | 494.9299 | 9.970617 | 9.8753   |
| 14465 | M665T10_ | 1.035204 | -0.04992 | -0.19857 | 0.849197 | 0.892347 | DOWN | 664.6471 | 664.6452 | 664.6475 | 9.970617 | 9.8914   |
| 14466 | M221T9_3 | 1.058085 | -0.08145 | -0.19929 | 0.849224 | 0.89235  | DOWN | 220.705  | 220.7043 | 220.7057 | 9.41815  | 9.310917 |
| 14467 | M278T30  | 1.016059 | -0.02298 | -0.19636 | 0.849227 | 0.89235  | DOWN | 278.1828 | 278.1827 | 278.1829 | 29.83383 | 29.81917 |
| 14468 | M270T11_ | 1.040765 | 0.057645 | 0.197351 | 0.849235 | 0.892351 | UP   | 269.6613 | 269.6612 | 269.6614 | 10.89875 | 10.873   |
| 14469 | M550T30  | 1.140678 | -0.18989 | -0.19639 | 0.849248 | 0.892353 | DOWN | 550.3428 | 550.3419 | 550.3438 | 30.27292 | 30.226   |
| 14470 | M355T10_ | 1.016389 | 0.023452 | 0.200333 | 0.849301 | 0.892359 | UP   | 355.3925 | 355.3921 | 355.3929 | 9.823575 | 9.715683 |
| 14471 | M367T10_ | 1.034302 | -0.04866 | -0.19647 | 0.849318 | 0.89236  | DOWN | 366.6787 | 366.6782 | 366.6789 | 9.968992 | 9.859233 |
| 14472 | M269T16  | 1.120594 | 0.164264 | 0.196192 | 0.849365 | 0.892366 | UP   | 269.1896 | 269.1893 | 269.1902 | 15.98338 | 15.93622 |
| 14473 | M199T9_7 | 1.076624 | -0.10651 | -0.19627 | 0.849404 | 0.89237  | DOWN | 199.2348 | 199.2339 | 199.2359 | 9.4023   | 9.23175  |
| 14474 | M678T10_ | 1.07328  | 0.102026 | 0.196119 | 0.849424 | 0.892372 | UP   | 677.8679 | 677.8619 | 677.8682 | 9.9926   | 9.802117 |
| 14475 | M1414T11 | 1.05564  | -0.07812 | -0.19599 | 0.849537 | 0.892385 | DOWN | 1414.183 | 1414.182 | 1414.185 | 10.879   | 10.86253 |
| 14476 | M618T30  | 1.04993  | 0.070293 | 0.199243 | 0.849542 | 0.892386 | UP   | 618.4688 | 618.4685 | 618.4695 | 30.2805  | 30.2235  |
| 14477 | M230T12_ | 1.038136 | 0.053995 | 0.200126 | 0.849579 | 0.89239  | UP   | 230.1749 | 230.1748 | 230.1749 | 12.16532 | 12.13862 |
| 14478 | M368T10_ | 1.068076 | 0.095015 | 0.196452 | 0.849663 | 0.892399 | UP   | 368.3165 | 368.3161 | 368.3183 | 9.968992 | 9.824233 |
| 14479 | M236T10_ | 1.048686 | -0.06858 | -0.19576 | 0.849689 | 0.892402 | DOWN | 235.9496 | 235.9495 | 235.9499 | 9.948875 | 9.843367 |
| 14480 | M608T10_ | 1.046947 | 0.066189 | 0.200031 | 0.849771 | 0.892412 | UP   | 608.2878 | 608.2861 | 608.2881 | 9.965892 | 9.843367 |
| 14481 | M215T9_5 | 1.049548 | -0.06977 | -0.19609 | 0.849832 | 0.892419 | DOWN | 215.1254 | 215.1251 | 215.1256 | 8.926    | 8.88765  |
| 14482 | M735T10_ | 1.054785 | -0.07695 | -0.19556 | 0.849849 | 0.89242  | DOWN | 734.8368 | 734.8364 | 734.8371 | 9.94785  | 9.843367 |
| 14483 | M480T45  | 1.026699 | -0.03801 | -0.20149 | 0.849864 | 0.892422 | DOWN | 480.28   | 480.2799 | 480.2802 | 44.55958 | 44.48033 |
| 14484 | M201T9_2 | 1.057858 | -0.08115 | -0.19666 | 0.849926 | 0.892429 | DOWN | 200.5774 | 200.5768 | 200.5779 | 9.365833 | 9.2946   |
| 14485 | M638T10_ | 1.023858 | 0.034015 | 0.199873 | 0.850044 | 0.892442 | UP   | 637.7496 | 637.749  | 637.7527 | 9.825492 | 9.715683 |
| 14486 | M186T8   | 1.053968 | 0.075832 | 0.195547 | 0.850125 | 0.892452 | UP   | 186.1849 | 186.1849 | 186.185  | 8.39415  | 8.224683 |
| 14487 | M675T10_ | 1.129872 | 0.176159 | 0.195914 | 0.850182 | 0.892458 | UP   | 675.4757 | 675.4755 | 675.4793 | 9.801833 | 9.5731   |
| 14488 | M519T11  | 1.032113 | -0.0456  | -0.1993  | 0.850204 | 0.892461 | DOWN | 519.2468 | 519.2465 | 519.247  | 10.892   | 10.879   |
| 14489 | M333T10_ | 1.055148 | -0.07745 | -0.19646 | 0.85064  | 0.89251  | DOWN | 332.7177 | 332.7173 | 332.7182 | 9.830283 | 9.715683 |

|       |          |          |          |          |          |          |      |          |          |          |          |          |
|-------|----------|----------|----------|----------|----------|----------|------|----------|----------|----------|----------|----------|
| 14490 | M373T9_5 | 1.055507 | -0.07794 | -0.19839 | 0.850827 | 0.892531 | DOWN | 373.2333 | 373.233  | 373.2337 | 9.21385  | 9.023483 |
| 14491 | M337T9_1 | 1.083829 | 0.116137 | 0.194393 | 0.851    | 0.89255  | UP   | 337.0418 | 337.0415 | 337.0419 | 9.332617 | 9.235933 |
| 14492 | M420T43_ | 1.0227   | 0.032383 | 0.194128 | 0.85103  | 0.892554 | UP   | 420.2226 | 420.2224 | 420.2227 | 42.91283 | 42.52433 |
| 14493 | M304T11_ | 1.089205 | 0.123276 | 0.195843 | 0.851031 | 0.892554 | UP   | 304.0083 | 304.0078 | 304.0157 | 10.90765 | 10.873   |
| 14494 | M763T36  | 1.031858 | 0.045245 | 0.193909 | 0.851088 | 0.89256  | UP   | 762.5483 | 762.548  | 762.5494 | 35.927   | 35.906   |
| 14495 | M417T19  | 1.024067 | -0.03431 | -0.19378 | 0.851174 | 0.89257  | DOWN | 417.2991 | 417.2988 | 417.2993 | 18.95683 | 18.95117 |
| 14496 | M760T10_ | 1.061487 | -0.08609 | -0.19465 | 0.851227 | 0.892576 | DOWN | 759.5469 | 759.5463 | 759.5498 | 9.972917 | 9.859233 |
| 14497 | M295T11_ | 1.064911 | -0.09073 | -0.19401 | 0.851309 | 0.892585 | DOWN | 294.8789 | 294.8779 | 294.8793 | 10.8926  | 10.85018 |
| 14498 | M397T31_ | 1.046157 | -0.0651  | -0.19488 | 0.851358 | 0.892591 | DOWN | 397.405  | 397.4049 | 397.4054 | 31.1215  | 31.09067 |
| 14499 | M319T10_ | 1.092502 | 0.127636 | 0.196392 | 0.851545 | 0.892612 | UP   | 319.254  | 319.2536 | 319.2551 | 9.534667 | 9.447617 |
| 14500 | M200T9_1 | 1.159807 | -0.21388 | -0.1934  | 0.85156  | 0.892613 | DOWN | 200.0731 | 200.0723 | 200.0741 | 9.206783 | 9.1175   |
| 14501 | M701T21_ | 1.09241  | -0.12751 | -0.19388 | 0.851695 | 0.892629 | DOWN | 701.4935 | 701.4931 | 701.4938 | 21.33658 | 21.09917 |
| 14502 | M853T10  | 1.044894 | -0.06336 | -0.19371 | 0.851734 | 0.892633 | DOWN | 853.4705 | 853.4692 | 853.4713 | 10.36157 | 10.32952 |
| 14503 | M362T11_ | 1.080108 | 0.111175 | 0.193129 | 0.851751 | 0.892635 | UP   | 362.0287 | 362.0285 | 362.0296 | 10.89839 | 10.87765 |
| 14504 | M414T9_1 | 1.033545 | 0.047602 | 0.19348  | 0.851783 | 0.892639 | UP   | 414.4036 | 414.4032 | 414.4136 | 9.250817 | 9.129317 |
| 14505 | M568T44  | 1.048625 | -0.0685  | -0.19497 | 0.851916 | 0.892653 | DOWN | 568.3325 | 568.3324 | 568.3327 | 44.26467 | 44.14967 |
| 14506 | M223T10_ | 1.049273 | -0.06939 | -0.19269 | 0.85202  | 0.892665 | DOWN | 223.3423 | 223.342  | 223.3423 | 9.853633 | 9.772833 |
| 14507 | M215T10_ | 1.040363 | -0.05709 | -0.19477 | 0.852078 | 0.892672 | DOWN | 214.6918 | 214.6915 | 214.6918 | 9.965717 | 9.843367 |
| 14508 | M635T10_ | 1.039479 | -0.05586 | -0.1926  | 0.852087 | 0.892673 | DOWN | 635.4784 | 635.4769 | 635.4804 | 9.830733 | 9.62055  |
| 14509 | M318T28_ | 1.031276 | 0.04443  | 0.193353 | 0.852092 | 0.892673 | UP   | 318.3274 | 318.3272 | 318.3275 | 28.12767 | 28.11283 |
| 14510 | M448T10_ | 1.047261 | 0.066621 | 0.192498 | 0.852221 | 0.892688 | UP   | 447.8951 | 447.8948 | 447.8955 | 9.964092 | 9.843367 |
| 14511 | M672T10_ | 1.023474 | 0.033474 | 0.192378 | 0.852296 | 0.892696 | UP   | 672.4681 | 672.4674 | 672.4691 | 10.26148 | 10.21468 |
| 14512 | M329T21_ | 1.059747 | 0.08372  | 0.192924 | 0.852423 | 0.89271  | UP   | 329.2796 | 329.2796 | 329.2799 | 21.37008 | 21.363   |
| 14513 | M566T44  | 1.046148 | 0.065086 | 0.197367 | 0.852459 | 0.892715 | UP   | 566.3169 | 566.3167 | 566.3171 | 44.40842 | 44.10667 |
| 14514 | M443T14  | 1.031287 | -0.04445 | -0.19279 | 0.852505 | 0.89272  | DOWN | 443.3263 | 443.326  | 443.3267 | 13.52847 | 13.49275 |
| 14515 | M404T9_3 | 1.056052 | 0.078681 | 0.1925   | 0.852632 | 0.892734 | UP   | 403.8621 | 403.8618 | 403.8627 | 8.963    | 8.892117 |
| 14516 | M330T9_6 | 1.073324 | 0.102085 | 0.197772 | 0.852712 | 0.892743 | UP   | 329.7428 | 329.7421 | 329.7432 | 9.279867 | 9.132267 |
| 14517 | M451T10_ | 1.068636 | 0.09577  | 0.19183  | 0.852713 | 0.892743 | UP   | 450.9266 | 450.9263 | 450.9267 | 9.960817 | 9.859233 |
| 14518 | M620T41  | 1.038168 | 0.05404  | 0.197731 | 0.852717 | 0.892743 | UP   | 620.3641 | 620.3639 | 620.3643 | 40.68317 | 40.53917 |
| 14519 | M537T10_ | 1.112677 | 0.154035 | 0.191969 | 0.852798 | 0.892753 | UP   | 536.6298 | 536.6295 | 536.6302 | 9.956867 | 9.8914   |
| 14520 | M556T11_ | 1.04203  | 0.059396 | 0.195922 | 0.852832 | 0.892756 | UP   | 555.5407 | 555.5382 | 555.5423 | 10.91797 | 10.8646  |
| 14521 | M337T9_1 | 1.075538 | -0.10506 | -0.19236 | 0.852965 | 0.892771 | DOWN | 337.0966 | 337.0956 | 337.1012 | 9.205717 | 9.110833 |
| 14522 | M195T9_3 | 1.151537 | -0.20356 | -0.19129 | 0.853162 | 0.892793 | DOWN | 194.6152 | 194.6146 | 194.6159 | 9.224517 | 9.132267 |
| 14523 | M310T9_5 | 1.075935 | 0.105591 | 0.195709 | 0.8532   | 0.892798 | UP   | 309.9907 | 309.9898 | 309.9942 | 9.202433 | 9.095133 |
| 14524 | M249T10_ | 1.089048 | 0.123067 | 0.191189 | 0.853213 | 0.892799 | UP   | 249.0994 | 249.0988 | 249.0995 | 9.960817 | 9.8753   |

|       |          |          |          |          |          |          |      |          |          |          |          |          |
|-------|----------|----------|----------|----------|----------|----------|------|----------|----------|----------|----------|----------|
| 14525 | M505T9_2 | 1.073332 | 0.102096 | 0.192119 | 0.853259 | 0.892804 | UP   | 504.6117 | 504.6099 | 504.6148 | 9.280767 | 9.174883 |
| 14526 | M725T9_1 | 1.077533 | -0.10773 | -0.19107 | 0.853329 | 0.892812 | DOWN | 724.5221 | 724.5216 | 724.5314 | 9.133667 | 9.1178   |
| 14527 | M377T10_ | 1.065565 | -0.09162 | -0.19491 | 0.853372 | 0.892817 | DOWN | 376.9717 | 376.9713 | 376.9741 | 9.924383 | 9.8378   |
| 14528 | M470T9_5 | 1.077368 | 0.107511 | 0.193732 | 0.853391 | 0.892819 | UP   | 470.238  | 470.2371 | 470.2384 | 9.286283 | 9.11405  |
| 14529 | M729T11_ | 1.04204  | -0.05941 | -0.1912  | 0.853598 | 0.892842 | DOWN | 729.4781 | 729.4778 | 729.4796 | 10.83252 | 10.8214  |
| 14530 | M251T9_4 | 1.05123  | 0.072078 | 0.190767 | 0.853637 | 0.892847 | UP   | 250.8463 | 250.846  | 250.8465 | 8.876975 | 8.712633 |
| 14531 | M211T10_ | 1.057438 | 0.080573 | 0.192151 | 0.853896 | 0.892876 | UP   | 210.6096 | 210.6019 | 210.6099 | 9.82925  | 9.699733 |
| 14532 | M430T10_ | 1.046913 | -0.06614 | -0.1912  | 0.853994 | 0.892887 | DOWN | 429.7399 | 429.7399 | 429.7403 | 9.75805  | 9.636483 |
| 14533 | M707T30  | 1.063195 | -0.08841 | -0.1915  | 0.854011 | 0.892889 | DOWN | 706.5218 | 706.5207 | 706.5223 | 30.26467 | 30.23717 |
| 14534 | M299T42_ | 1.020903 | 0.029846 | 0.190422 | 0.854181 | 0.892908 | UP   | 299.1487 | 299.1486 | 299.1489 | 41.9635  | 41.906   |
| 14535 | M401T18  | 1.05657  | 0.079388 | 0.192836 | 0.854225 | 0.892912 | UP   | 401.2643 | 401.2641 | 401.2759 | 17.975   | 17.845   |
| 14536 | M225T41  | 1.032491 | 0.046129 | 0.189754 | 0.854228 | 0.892913 | UP   | 225.1483 | 225.1481 | 225.1484 | 40.9565  | 40.84133 |
| 14537 | M462T10_ | 1.049991 | 0.070377 | 0.191018 | 0.854291 | 0.89292  | UP   | 462.3486 | 462.3484 | 462.349  | 9.633442 | 9.510117 |
| 14538 | M335T10_ | 1.050536 | -0.07113 | -0.19098 | 0.854296 | 0.89292  | DOWN | 334.9674 | 334.967  | 334.9675 | 9.970617 | 9.859233 |
| 14539 | M548T9_3 | 1.093164 | -0.12851 | -0.19183 | 0.854467 | 0.89294  | DOWN | 547.8689 | 547.8631 | 547.8696 | 9.190317 | 9.110833 |
| 14540 | M397T20  | 1.067939 | 0.09483  | 0.190358 | 0.854652 | 0.89296  | UP   | 396.5962 | 396.596  | 396.5964 | 20.24483 | 20.23017 |
| 14541 | M245T10_ | 1.05423  | 0.076189 | 0.189241 | 0.854683 | 0.892964 | UP   | 244.9121 | 244.9119 | 244.9123 | 9.972917 | 9.859233 |
| 14542 | M485T19  | 1.049888 | -0.07024 | -0.18947 | 0.854684 | 0.892964 | DOWN | 485.3925 | 485.392  | 485.3933 | 18.76875 | 18.74517 |
| 14543 | M241T10_ | 1.038205 | -0.05409 | -0.19149 | 0.854685 | 0.892964 | DOWN | 240.7884 | 240.7879 | 240.7888 | 9.967533 | 9.8753   |
| 14544 | M602T9_3 | 1.100563 | -0.13824 | -0.19031 | 0.854691 | 0.892965 | DOWN | 601.808  | 601.807  | 601.8085 | 9.161683 | 9.1158   |
| 14545 | M399T44_ | 1.012548 | -0.01799 | -0.19044 | 0.854695 | 0.892965 | DOWN | 399.2375 | 399.2371 | 399.2377 | 44.09233 | 43.89067 |
| 14546 | M341T10_ | 1.154374 | 0.207111 | 0.189238 | 0.854698 | 0.892965 | UP   | 340.566  | 340.5629 | 340.5666 | 9.80415  | 9.758367 |
| 14547 | M429T22_ | 1.063487 | -0.0888  | -0.18915 | 0.85471  | 0.892967 | DOWN | 428.7012 | 428.7008 | 428.7018 | 21.58017 | 21.5535  |
| 14548 | M646T11_ | 1.025199 | 0.035903 | 0.190153 | 0.854713 | 0.892967 | UP   | 645.5903 | 645.5899 | 645.5907 | 11.49657 | 11.47593 |
| 14549 | M376T11_ | 1.026674 | -0.03798 | -0.18912 | 0.854754 | 0.892972 | DOWN | 376.125  | 376.1249 | 376.1253 | 10.892   | 10.8646  |
| 14550 | M675T10_ | 1.076068 | -0.10577 | -0.18928 | 0.854824 | 0.89298  | DOWN | 674.5319 | 674.5308 | 674.5327 | 9.8207   | 9.715683 |
| 14551 | M634T11_ | 1.047066 | 0.066353 | 0.188842 | 0.854982 | 0.892997 | UP   | 633.7209 | 633.7201 | 633.7214 | 10.88982 | 10.83572 |
| 14552 | M438T9_4 | 1.052449 | -0.07375 | -0.19082 | 0.854994 | 0.892999 | DOWN | 437.8922 | 437.8921 | 437.8931 | 8.839967 | 8.75965  |
| 14553 | M363T11_ | 1.097766 | -0.13457 | -0.18908 | 0.85506  | 0.893006 | DOWN | 363.2885 | 363.2838 | 363.2938 | 11.24178 | 11.18397 |
| 14554 | M621T21_ | 1.053588 | 0.075311 | 0.190941 | 0.855205 | 0.893022 | UP   | 621.4184 | 621.418  | 621.4188 | 20.85958 | 20.83783 |
| 14555 | M350T9_9 | 1.033608 | 0.047688 | 0.19099  | 0.855234 | 0.893025 | UP   | 350.1866 | 350.1865 | 350.1869 | 8.757308 | 8.686867 |
| 14556 | M544T9_1 | 1.078424 | 0.108925 | 0.19007  | 0.855365 | 0.89304  | UP   | 544.217  | 544.2156 | 544.2175 | 9.212775 | 9.142767 |
| 14557 | M228T10_ | 1.035965 | 0.050975 | 0.188081 | 0.855496 | 0.893055 | UP   | 228.3142 | 228.3133 | 228.3144 | 9.831142 | 9.715683 |
| 14558 | M201T9_5 | 1.07738  | -0.10753 | -0.18793 | 0.855632 | 0.89307  | DOWN | 200.6411 | 200.6401 | 200.6422 | 9.235933 | 9.11795  |
| 14559 | M553T10_ | 1.047056 | 0.066339 | 0.191541 | 0.855651 | 0.893072 | UP   | 553.4172 | 553.4168 | 553.4177 | 9.939575 | 9.827283 |



|       |          |          |          |          |          |          |      |          |          |          |          |          |
|-------|----------|----------|----------|----------|----------|----------|------|----------|----------|----------|----------|----------|
| 14560 | M896T11_ | 1.063343 | -0.08861 | -0.19177 | 0.855717 | 0.893079 | DOWN | 896.3552 | 896.3548 | 896.357  | 10.93468 | 10.88747 |
| 14561 | M524T13  | 1.040622 | 0.057446 | 0.188665 | 0.855747 | 0.893083 | UP   | 524.1799 | 524.1792 | 524.1806 | 12.61823 | 12.6165  |
| 14562 | M350T10_ | 1.040575 | -0.05738 | -0.18885 | 0.855771 | 0.893085 | DOWN | 349.8842 | 349.8838 | 349.8857 | 9.968992 | 9.859233 |
| 14563 | M891T10_ | 1.087766 | -0.12137 | -0.18798 | 0.855772 | 0.893085 | DOWN | 891.1612 | 891.1606 | 891.1621 | 9.900833 | 9.874067 |
| 14564 | M403T9_3 | 1.051469 | -0.07241 | -0.18837 | 0.855917 | 0.893102 | DOWN | 402.9367 | 402.936  | 402.9369 | 9.434192 | 9.340183 |
| 14565 | M595T11_ | 1.049417 | 0.069588 | 0.187697 | 0.855938 | 0.893104 | UP   | 595.407  | 595.4064 | 595.4073 | 11.48899 | 11.48188 |
| 14566 | M593T10_ | 1.05628  | 0.078992 | 0.191444 | 0.855943 | 0.893105 | UP   | 592.95   | 592.9487 | 592.9504 | 9.887133 | 9.79535  |
| 14567 | M279T10_ | 1.093357 | 0.128765 | 0.18933  | 0.855948 | 0.893105 | UP   | 278.7257 | 278.7254 | 278.7261 | 9.9677   | 9.859233 |
| 14568 | M1845T10 | 1.039823 | -0.05634 | -0.18789 | 0.856015 | 0.893113 | DOWN | 1844.79  | 1844.787 | 1844.794 | 9.830083 | 9.7124   |
| 14569 | M422T12  | 1.050291 | -0.07079 | -0.18961 | 0.856031 | 0.893114 | DOWN | 422.1685 | 422.1681 | 422.1693 | 11.60201 | 11.59007 |
| 14570 | M201T9_1 | 1.057011 | 0.07999  | 0.187496 | 0.856042 | 0.893116 | UP   | 200.5116 | 200.5114 | 200.5125 | 9.330158 | 9.275917 |
| 14571 | M233T10_ | 1.059893 | -0.08392 | -0.18734 | 0.856092 | 0.893121 | DOWN | 233.4226 | 233.4224 | 233.4227 | 9.975217 | 9.8753   |
| 14572 | M602T10_ | 1.037202 | -0.0527  | -0.18733 | 0.856115 | 0.893124 | DOWN | 601.6684 | 601.668  | 601.6687 | 9.94785  | 9.843367 |
| 14573 | M346T11_ | 1.091391 | 0.126168 | 0.190679 | 0.856147 | 0.893127 | UP   | 346.2012 | 346.2009 | 346.2014 | 10.93382 | 10.90553 |
| 14574 | M387T10_ | 1.097109 | 0.133707 | 0.188325 | 0.85632  | 0.893147 | UP   | 387.265  | 387.2609 | 387.2707 | 9.970617 | 9.853533 |
| 14575 | M326T10_ | 1.055115 | -0.0774  | -0.18724 | 0.856395 | 0.893155 | DOWN | 326.3619 | 326.3618 | 326.3627 | 9.839008 | 9.79065  |
| 14576 | M567T9_4 | 1.030215 | 0.042946 | 0.187747 | 0.856543 | 0.893171 | UP   | 567.364  | 567.3636 | 567.3677 | 8.930317 | 8.803967 |
| 14577 | M929T23  | 1.19688  | 0.259279 | 0.186735 | 0.856583 | 0.893176 | UP   | 928.6543 | 928.654  | 928.6543 | 22.69883 | 22.69767 |
| 14578 | M168T10_ | 1.051835 | -0.07291 | -0.18977 | 0.856745 | 0.893194 | DOWN | 168.2116 | 168.2059 | 168.2117 | 9.942317 | 9.811217 |
| 14579 | M363T31  | 1.076879 | -0.10686 | -0.18644 | 0.856818 | 0.893202 | DOWN | 362.7991 | 362.7988 | 362.7994 | 31.35092 | 31.325   |
| 14580 | M310T10_ | 1.057858 | -0.08115 | -0.18659 | 0.856836 | 0.893204 | DOWN | 309.7389 | 309.7388 | 309.739  | 9.958617 | 9.843367 |
| 14581 | M324T10_ | 1.06031  | 0.084486 | 0.186339 | 0.857045 | 0.893227 | UP   | 323.5944 | 323.5942 | 323.5947 | 9.964167 | 9.843367 |
| 14582 | M1918T10 | 1.03435  | 0.048724 | 0.18697  | 0.857112 | 0.893235 | UP   | 1917.755 | 1917.754 | 1917.757 | 9.972917 | 9.8753   |
| 14583 | M184T10_ | 1.081448 | -0.11296 | -0.18589 | 0.857239 | 0.893249 | DOWN | 183.7842 | 183.784  | 183.7843 | 9.891175 | 9.811217 |
| 14584 | M327T10_ | 1.046251 | 0.065229 | 0.187867 | 0.857412 | 0.893268 | UP   | 327.0062 | 326.9997 | 327.0067 | 9.983467 | 9.840617 |
| 14585 | M712T10_ | 1.018825 | -0.02691 | -0.18736 | 0.857423 | 0.893269 | DOWN | 712.2828 | 712.2824 | 712.2833 | 9.8397   | 9.73145  |
| 14586 | M600T10_ | 1.032783 | -0.04654 | -0.18531 | 0.857604 | 0.893289 | DOWN | 599.8871 | 599.8865 | 599.8873 | 9.945258 | 9.843367 |
| 14587 | M847T11_ | 1.039397 | 0.055747 | 0.18562  | 0.857614 | 0.893291 | UP   | 847.4594 | 847.4592 | 847.46   | 10.67309 | 10.604   |
| 14588 | M432T23  | 1.0222   | -0.03168 | -0.18696 | 0.857617 | 0.893291 | DOWN | 432.2375 | 432.2374 | 432.2379 | 22.84317 | 22.82817 |
| 14589 | M244T24  | 1.0184   | -0.0263  | -0.18531 | 0.857734 | 0.893304 | DOWN | 244.2633 | 244.2632 | 244.2634 | 24.30433 | 24.29083 |
| 14590 | M537T10_ | 1.032282 | -0.04584 | -0.185   | 0.857844 | 0.893316 | DOWN | 536.7875 | 536.787  | 536.7887 | 9.924267 | 9.827283 |
| 14591 | M542T12  | 1.038004 | 0.053811 | 0.185785 | 0.857903 | 0.893323 | UP   | 542.3756 | 542.3753 | 542.3762 | 11.63592 | 11.61933 |
| 14592 | M1947T10 | 1.055469 | -0.07788 | -0.18864 | 0.857952 | 0.893328 | DOWN | 1946.623 | 1946.622 | 1946.629 | 9.821308 | 9.7124   |
| 14593 | M227T9_1 | 1.055606 | 0.078071 | 0.184918 | 0.857967 | 0.89333  | UP   | 226.5445 | 226.5414 | 226.5446 | 9.329083 | 9.17485  |
| 14594 | M630T37  | 1.040928 | 0.05787  | 0.18491  | 0.858033 | 0.893337 | UP   | 630.4687 | 630.4681 | 630.47   | 36.57583 | 36.55367 |

|       |          |          |          |          |          |          |      |          |          |          |          |          |
|-------|----------|----------|----------|----------|----------|----------|------|----------|----------|----------|----------|----------|
| 14595 | M532T38  | 1.051094 | 0.071891 | 0.190242 | 0.858164 | 0.893352 | UP   | 532.3114 | 532.3112 | 532.3115 | 37.59692 | 37.446   |
| 14596 | M200T9_2 | 1.065693 | 0.091792 | 0.187556 | 0.858171 | 0.893352 | UP   | 200.2828 | 200.2818 | 200.2832 | 9.387042 | 9.18975  |
| 14597 | M225T42_ | 1.03723  | -0.05274 | -0.18605 | 0.858226 | 0.893359 | DOWN | 225.1483 | 225.1481 | 225.1483 | 42.43833 | 42.4235  |
| 14598 | M351T11_ | 1.026321 | 0.037482 | 0.184521 | 0.85824  | 0.89336  | UP   | 350.5239 | 350.5238 | 350.5245 | 10.89875 | 10.879   |
| 14599 | M385T9_1 | 1.03921  | -0.05549 | -0.18472 | 0.85832  | 0.893369 | DOWN | 384.5819 | 384.5816 | 384.582  | 8.848167 | 8.75965  |
| 14600 | M627T10_ | 1.023346 | -0.03329 | -0.185   | 0.858477 | 0.893386 | DOWN | 627.2853 | 627.2849 | 627.2857 | 9.943183 | 9.827283 |
| 14601 | M355T42_ | 1.059878 | 0.083898 | 0.186219 | 0.858611 | 0.893401 | UP   | 355.2113 | 355.2111 | 355.2114 | 41.79783 | 41.71783 |
| 14602 | M338T10_ | 1.036218 | -0.05133 | -0.18406 | 0.858689 | 0.89341  | DOWN | 337.7832 | 337.7827 | 337.7833 | 9.972917 | 9.859233 |
| 14603 | M244T11_ | 1.070314 | -0.09803 | -0.18384 | 0.858744 | 0.893416 | DOWN | 244.2698 | 244.2696 | 244.2699 | 10.89133 | 10.86008 |
| 14604 | M316T15  | 1.160564 | -0.21483 | -0.1839  | 0.858785 | 0.893421 | DOWN | 316.1985 | 316.198  | 316.1988 | 15.41698 | 15.32358 |
| 14605 | M235T11_ | 1.028619 | -0.04071 | -0.18376 | 0.858787 | 0.893421 | DOWN | 235.1767 | 235.1763 | 235.177  | 11.49637 | 11.46817 |
| 14606 | M243T10_ | 1.044859 | -0.06331 | -0.18536 | 0.858836 | 0.893426 | DOWN | 243.0874 | 243.0871 | 243.0876 | 10.07923 | 9.971833 |
| 14607 | M371T9_2 | 1.081499 | -0.11303 | -0.18629 | 0.858856 | 0.893428 | DOWN | 370.9805 | 370.9805 | 370.9809 | 9.432533 | 9.38595  |
| 14608 | M493T9_3 | 1.053904 | -0.07574 | -0.18362 | 0.858882 | 0.893431 | DOWN | 493.2925 | 493.2911 | 493.2992 | 9.193283 | 9.102033 |
| 14609 | M277T20  | 1.069927 | 0.097512 | 0.184143 | 0.859002 | 0.893445 | UP   | 277.1766 | 277.1765 | 277.1769 | 20.339   | 20.20167 |
| 14610 | M398T10_ | 1.048649 | 0.068532 | 0.183666 | 0.859052 | 0.89345  | UP   | 398.3341 | 398.3334 | 398.3344 | 9.972917 | 9.859233 |
| 14611 | M328T10_ | 1.013948 | 0.019984 | 0.184035 | 0.85908  | 0.893453 | UP   | 327.5458 | 327.5457 | 327.5461 | 9.8207   | 9.715683 |
| 14612 | M174T10_ | 1.034909 | -0.0495  | -0.18415 | 0.859103 | 0.893456 | DOWN | 174.388  | 174.3874 | 174.3881 | 9.914108 | 9.811217 |
| 14613 | M315T44  | 1.022732 | 0.032429 | 0.187698 | 0.85918  | 0.893464 | UP   | 315.18   | 315.18   | 315.1801 | 44.21867 | 44.164   |
| 14614 | M402T30  | 1.049322 | 0.069458 | 0.186673 | 0.859221 | 0.893469 | UP   | 402.2901 | 402.2897 | 402.2903 | 30.152   | 30.15067 |
| 14615 | M478T10_ | 1.072506 | 0.100986 | 0.184687 | 0.859241 | 0.893471 | UP   | 477.9408 | 477.9403 | 477.9411 | 9.968992 | 9.859233 |
| 14616 | M1129T10 | 1.038603 | -0.05464 | -0.18317 | 0.859259 | 0.893473 | DOWN | 1129.364 | 1129.362 | 1129.37  | 9.79995  | 9.715683 |
| 14617 | M332T43  | 1.045668 | 0.064424 | 0.183769 | 0.85927  | 0.893474 | UP   | 332.1702 | 332.1701 | 332.1704 | 43.30125 | 42.99933 |
| 14618 | M455T15  | 1.053224 | 0.074813 | 0.185996 | 0.859313 | 0.893479 | UP   | 454.8501 | 454.8496 | 454.8507 | 15.18269 | 15.14695 |
| 14619 | M311T10_ | 1.090986 | 0.125633 | 0.187948 | 0.859318 | 0.89348  | UP   | 311.4668 | 311.4664 | 311.4674 | 9.77435  | 9.6681   |
| 14620 | M613T10_ | 1.050661 | 0.071298 | 0.184561 | 0.859323 | 0.89348  | UP   | 613.3368 | 613.336  | 613.3373 | 9.956417 | 9.859233 |
| 14621 | M219T11_ | 1.026077 | 0.037138 | 0.183009 | 0.859344 | 0.893483 | UP   | 218.7588 | 218.7587 | 218.7589 | 10.89875 | 10.879   |
| 14622 | M277T11_ | 1.028531 | -0.04059 | -0.18331 | 0.859365 | 0.893485 | DOWN | 276.769  | 276.7688 | 276.7691 | 10.892   | 10.8646  |
| 14623 | M427T9_3 | 1.065378 | -0.09137 | -0.18298 | 0.859371 | 0.893485 | DOWN | 427.2989 | 427.2978 | 427.2997 | 9.358417 | 9.280767 |
| 14624 | M273T25  | 1.023747 | -0.03386 | -0.18328 | 0.859398 | 0.893488 | DOWN | 273.2977 | 273.2975 | 273.2979 | 24.7685  | 24.76717 |
| 14625 | M398T42_ | 1.01056  | -0.01515 | -0.18766 | 0.859418 | 0.893491 | DOWN | 398.3626 | 398.3624 | 398.3628 | 41.61808 | 41.60383 |
| 14626 | M452T10_ | 1.018254 | -0.0261  | -0.1835  | 0.859422 | 0.893491 | DOWN | 452.3594 | 452.3592 | 452.3597 | 9.871467 | 9.7634   |
| 14627 | M684T10_ | 1.06494  | -0.09077 | -0.18345 | 0.859462 | 0.893496 | DOWN | 684.1788 | 684.1785 | 684.1796 | 9.944392 | 9.843367 |
| 14628 | M307T11  | 1.022585 | 0.03222  | 0.182827 | 0.859485 | 0.893498 | UP   | 306.8861 | 306.8858 | 306.8869 | 10.90519 | 10.879   |
| 14629 | M511T9_4 | 1.084453 | 0.116968 | 0.183922 | 0.85955  | 0.893505 | UP   | 511.289  | 511.2879 | 511.2895 | 8.97035  | 8.77435  |

|       |          |          |          |          |          |          |      |          |          |          |          |          |
|-------|----------|----------|----------|----------|----------|----------|------|----------|----------|----------|----------|----------|
| 14630 | M219T9_8 | 1.067716 | -0.09453 | -0.18298 | 0.859571 | 0.893508 | DOWN | 219.1331 | 219.1308 | 219.1341 | 9.399967 | 9.2585   |
| 14631 | M621T20  | 1.035234 | 0.049957 | 0.184665 | 0.859587 | 0.893509 | UP   | 621.4383 | 621.4373 | 621.4388 | 20.433   | 20.3745  |
| 14632 | M361T11_ | 1.028904 | 0.041108 | 0.183838 | 0.859666 | 0.893518 | UP   | 361.3509 | 361.3506 | 361.3521 | 10.90519 | 10.879   |
| 14633 | M592T10_ | 1.027689 | 0.039404 | 0.183277 | 0.859669 | 0.893518 | UP   | 592.3264 | 592.3259 | 592.3266 | 9.958617 | 9.843367 |
| 14634 | M609T9_2 | 1.064042 | -0.08956 | -0.18282 | 0.859761 | 0.893529 | DOWN | 608.7927 | 608.7887 | 608.7934 | 9.182067 | 9.1445   |
| 14635 | M773T10_ | 1.03492  | -0.04952 | -0.18253 | 0.859771 | 0.89353  | DOWN | 773.4334 | 773.4327 | 773.4341 | 10.45352 | 10.40807 |
| 14636 | M248T9_3 | 1.026907 | 0.038306 | 0.184557 | 0.85982  | 0.893535 | UP   | 248.2467 | 248.2466 | 248.2468 | 8.749758 | 8.6529   |
| 14637 | M406T44_ | 1.066619 | -0.09305 | -0.18234 | 0.859852 | 0.893539 | DOWN | 406.2069 | 406.2068 | 406.2071 | 44.20717 | 44.049   |
| 14638 | M761T36  | 1.044321 | -0.06256 | -0.18234 | 0.859889 | 0.893543 | DOWN | 760.5419 | 760.5415 | 760.5424 | 35.92033 | 35.895   |
| 14639 | M211T11_ | 1.039215 | -0.05549 | -0.18232 | 0.859908 | 0.893545 | DOWN | 211.0741 | 211.0738 | 211.0745 | 10.90659 | 10.873   |
| 14640 | M632T10_ | 1.038667 | 0.054733 | 0.182493 | 0.860198 | 0.893577 | UP   | 632.3148 | 632.3133 | 632.3152 | 9.984083 | 9.8753   |
| 14641 | M612T11_ | 1.035343 | -0.05011 | -0.18424 | 0.860331 | 0.893592 | DOWN | 612.3411 | 612.3405 | 612.3414 | 10.87708 | 10.86008 |
| 14642 | M166T10_ | 1.091416 | -0.1262  | -0.18257 | 0.860364 | 0.893595 | DOWN | 165.5734 | 165.5733 | 165.5738 | 9.960892 | 9.859233 |
| 14643 | M636T10_ | 1.131085 | 0.177708 | 0.184661 | 0.860424 | 0.893602 | UP   | 635.9339 | 635.932  | 635.9363 | 9.801833 | 9.7124   |
| 14644 | M161T9_2 | 1.098074 | 0.134975 | 0.18287  | 0.86043  | 0.893603 | UP   | 161.2492 | 161.2487 | 161.2498 | 9.348233 | 9.219483 |
| 14645 | M269T24  | 1.104582 | 0.1435   | 0.187422 | 0.86044  | 0.893604 | UP   | 269.2302 | 269.23   | 269.2302 | 23.52167 | 23.49717 |
| 14646 | M354T11_ | 1.032606 | -0.04629 | -0.18165 | 0.860483 | 0.893609 | DOWN | 354.2413 | 354.241  | 354.2416 | 10.892   | 10.873   |
| 14647 | M969T11_ | 1.036761 | -0.05208 | -0.18216 | 0.860507 | 0.893611 | DOWN | 969.2925 | 969.2918 | 969.2933 | 10.89728 | 10.879   |
| 14648 | M363T10_ | 1.152473 | 0.204733 | 0.183862 | 0.860512 | 0.893612 | UP   | 363.2601 | 363.2601 | 363.2603 | 9.816267 | 9.743667 |
| 14649 | M478T10_ | 1.054057 | -0.07595 | -0.18328 | 0.860513 | 0.893612 | DOWN | 477.7379 | 477.7374 | 477.738  | 9.513858 | 9.4632   |
| 14650 | M506T17  | 1.024249 | -0.03457 | -0.18175 | 0.860539 | 0.893615 | DOWN | 506.3946 | 506.3943 | 506.395  | 17.05192 | 17.0145  |
| 14651 | M310T11_ | 1.045217 | 0.063802 | 0.181444 | 0.860539 | 0.893615 | UP   | 310.086  | 310.0855 | 310.0867 | 10.93338 | 10.873   |
| 14652 | M373T19  | 1.060254 | 0.08441  | 0.184204 | 0.860791 | 0.893643 | UP   | 373.2677 | 373.2674 | 373.2679 | 19.47525 | 19.428   |
| 14653 | M308T10_ | 1.015867 | -0.02271 | -0.18378 | 0.860826 | 0.893646 | DOWN | 308.0766 | 308.0764 | 308.0768 | 9.901375 | 9.79535  |
| 14654 | M350T10_ | 1.03953  | -0.05593 | -0.181   | 0.860885 | 0.893653 | DOWN | 350.2061 | 350.2059 | 350.2064 | 9.8207   | 9.699733 |
| 14655 | M542T10_ | 1.075167 | -0.10456 | -0.18225 | 0.860987 | 0.893664 | DOWN | 542.3927 | 542.3925 | 542.3932 | 9.946367 | 9.8753   |
| 14656 | M623T18  | 1.048484 | 0.068304 | 0.180987 | 0.861021 | 0.893668 | UP   | 623.0729 | 623.0722 | 623.0733 | 18.02567 | 18.011   |
| 14657 | M1735T10 | 1.042809 | -0.06047 | -0.18583 | 0.861025 | 0.893668 | DOWN | 1734.79  | 1734.789 | 1734.796 | 9.929133 | 9.827283 |
| 14658 | M203T11_ | 1.065345 | 0.09132  | 0.18122  | 0.861039 | 0.89367  | UP   | 203.4536 | 203.4486 | 203.4537 | 10.89125 | 10.879   |
| 14659 | M386T14  | 1.038712 | 0.054795 | 0.18152  | 0.861088 | 0.893675 | UP   | 385.7832 | 385.7825 | 385.7834 | 13.68302 | 13.66818 |
| 14660 | M568T9_6 | 1.017664 | 0.025262 | 0.183301 | 0.861164 | 0.893684 | UP   | 568.4427 | 568.4418 | 568.4433 | 9.166542 | 9.0864   |
| 14661 | M302T22  | 1.02823  | 0.040163 | 0.182169 | 0.861215 | 0.893689 | UP   | 302.2686 | 302.2683 | 302.2686 | 22.15692 | 22.15217 |
| 14662 | M334T10_ | 1.08987  | -0.12416 | -0.18286 | 0.861406 | 0.89371  | DOWN | 334.172  | 334.1719 | 334.1725 | 9.816267 | 9.699733 |
| 14663 | M165T10_ | 1.092933 | 0.128205 | 0.180864 | 0.861528 | 0.893724 | UP   | 165.4531 | 165.4528 | 165.4532 | 9.946467 | 9.859233 |
| 14664 | M233T11_ | 1.027762 | -0.03951 | -0.18077 | 0.861612 | 0.893733 | DOWN | 232.569  | 232.5689 | 232.5693 | 10.892   | 10.879   |

|       |          |          |          |          |          |          |      |          |          |          |          |          |
|-------|----------|----------|----------|----------|----------|----------|------|----------|----------|----------|----------|----------|
| 14665 | M599T30  | 1.038407 | -0.05437 | -0.18114 | 0.861647 | 0.893737 | DOWN | 599.4363 | 599.4358 | 599.4367 | 30.27408 | 30.2515  |
| 14666 | M506T10_ | 1.050359 | 0.070883 | 0.179863 | 0.861882 | 0.893763 | UP   | 506.4542 | 506.4534 | 506.4546 | 9.968992 | 9.859233 |
| 14667 | M410T11_ | 1.030625 | -0.04352 | -0.1816  | 0.861921 | 0.893767 | DOWN | 410.3091 | 410.3085 | 410.3092 | 11.09573 | 11.06297 |
| 14668 | M311T24_ | 1.130487 | -0.17694 | -0.17989 | 0.861922 | 0.893767 | DOWN | 311.1573 | 311.1569 | 311.1578 | 24.20083 | 24.1705  |
| 14669 | M490T11_ | 1.026978 | 0.038405 | 0.179678 | 0.861967 | 0.893772 | UP   | 490.0287 | 490.0283 | 490.029  | 10.90519 | 10.879   |
| 14670 | M414T10_ | 1.038248 | -0.05415 | -0.17942 | 0.862076 | 0.893784 | DOWN | 414.2992 | 414.2989 | 414.2997 | 10.18999 | 10.10142 |
| 14671 | M380T24  | 1.026732 | -0.03806 | -0.18038 | 0.862203 | 0.893798 | DOWN | 380.2944 | 380.2942 | 380.2948 | 24.37767 | 24.34717 |
| 14672 | M1349T10 | 1.070919 | 0.098849 | 0.179363 | 0.862265 | 0.893805 | UP   | 1349.112 | 1349.111 | 1349.115 | 9.968992 | 9.859233 |
| 14673 | M896T10  | 1.026319 | -0.03748 | -0.1792  | 0.862269 | 0.893805 | DOWN | 895.7152 | 895.7149 | 895.7155 | 9.931875 | 9.827283 |
| 14674 | M567T10_ | 1.040234 | -0.05691 | -0.17914 | 0.862353 | 0.893815 | DOWN | 567.2983 | 567.297  | 567.2991 | 9.6694   | 9.541483 |
| 14675 | M369T9_4 | 1.045933 | -0.06479 | -0.18049 | 0.862356 | 0.893815 | DOWN | 369.2868 | 369.2866 | 369.2871 | 9.00395  | 8.978067 |
| 14676 | M155T10_ | 1.049776 | -0.07008 | -0.17949 | 0.862358 | 0.893815 | DOWN | 154.8502 | 154.8499 | 154.8552 | 9.932033 | 9.811217 |
| 14677 | M753T30  | 1.044946 | 0.063429 | 0.179951 | 0.862458 | 0.893826 | UP   | 753.4973 | 753.4966 | 753.4984 | 30.23733 | 30.20917 |
| 14678 | M372T11_ | 1.025787 | 0.036731 | 0.178745 | 0.862611 | 0.893843 | UP   | 372.2656 | 372.2652 | 372.266  | 10.89923 | 10.88747 |
| 14679 | M600T9_1 | 1.032409 | -0.04601 | -0.179   | 0.862688 | 0.893852 | DOWN | 600.2096 | 600.2084 | 600.2135 | 9.320067 | 9.219483 |
| 14680 | M245T24  | 1.022008 | -0.03141 | -0.17898 | 0.86269  | 0.893852 | DOWN | 245.2665 | 245.2665 | 245.2666 | 24.30658 | 24.28867 |
| 14681 | M354T10_ | 1.043205 | 0.061023 | 0.178617 | 0.862751 | 0.893858 | UP   | 354.0867 | 354.0789 | 354.087  | 9.830283 | 9.715683 |
| 14682 | M460T10_ | 1.111665 | 0.152722 | 0.178676 | 0.862875 | 0.893872 | UP   | 459.6686 | 459.6682 | 459.6691 | 9.9754   | 9.964417 |
| 14683 | M314T9_4 | 1.152022 | -0.20417 | -0.17823 | 0.863045 | 0.893891 | DOWN | 313.7425 | 313.7423 | 313.7426 | 9.3946   | 9.26575  |
| 14684 | M1023T18 | 1.033203 | -0.04712 | -0.18118 | 0.863182 | 0.893906 | DOWN | 1022.502 | 1022.502 | 1022.503 | 17.57133 | 17.5255  |
| 14685 | M242T11_ | 1.04499  | 0.063489 | 0.178182 | 0.863249 | 0.893913 | UP   | 242.4193 | 242.419  | 242.4196 | 10.9062  | 10.82935 |
| 14686 | M331T10_ | 1.097651 | 0.13442  | 0.177828 | 0.86328  | 0.893917 | UP   | 330.9823 | 330.9809 | 330.9824 | 9.946367 | 9.858833 |
| 14687 | M335T11_ | 1.030501 | 0.043345 | 0.181953 | 0.863292 | 0.893918 | UP   | 334.7609 | 334.7607 | 334.762  | 10.90551 | 10.88747 |
| 14688 | M489T9_1 | 1.066708 | 0.093165 | 0.179543 | 0.863294 | 0.893918 | UP   | 489.0482 | 489.0479 | 489.0484 | 9.33515  | 9.18975  |
| 14689 | M203T11_ | 1.028461 | -0.04049 | -0.17785 | 0.863368 | 0.893926 | DOWN | 203.0857 | 203.0856 | 203.0874 | 10.89875 | 10.873   |
| 14690 | M849T36  | 1.049523 | -0.06973 | -0.17769 | 0.863384 | 0.893928 | DOWN | 848.5947 | 848.5944 | 848.595  | 35.5745  | 35.56017 |
| 14691 | M357T43_ | 1.034568 | 0.049029 | 0.178296 | 0.863396 | 0.893929 | UP   | 357.1907 | 357.1906 | 357.1907 | 43.359   | 43.31567 |
| 14692 | M811T34  | 1.071699 | -0.0999  | -0.17769 | 0.863396 | 0.893929 | DOWN | 810.5579 | 810.5576 | 810.5581 | 34.13792 | 34.11683 |
| 14693 | M1571T10 | 1.05628  | -0.07899 | -0.17794 | 0.863412 | 0.893931 | DOWN | 1570.51  | 1570.509 | 1570.51  | 9.903567 | 9.79535  |
| 14694 | M357T14_ | 1.034785 | 0.049331 | 0.177525 | 0.863512 | 0.893942 | UP   | 357.2744 | 357.2742 | 357.2746 | 14.30473 | 14.2961  |
| 14695 | M704T33  | 1.035224 | -0.04994 | -0.17744 | 0.863595 | 0.893951 | DOWN | 703.5033 | 703.5026 | 703.5037 | 33.47033 | 33.45583 |
| 14696 | M274T10_ | 1.027467 | -0.03909 | -0.17734 | 0.86367  | 0.89396  | DOWN | 274.2241 | 274.2177 | 274.2245 | 9.884917 | 9.636567 |
| 14697 | M561T30_ | 1.052553 | -0.07389 | -0.17727 | 0.863724 | 0.893965 | DOWN | 561.4041 | 561.4038 | 561.4047 | 29.57617 | 29.57433 |
| 14698 | M221T10_ | 1.104369 | 0.143222 | 0.178087 | 0.863736 | 0.893967 | UP   | 221.4748 | 221.4747 | 221.4768 | 9.869467 | 9.816167 |
| 14699 | M680T45_ | 1.043518 | 0.061455 | 0.179112 | 0.863754 | 0.893969 | UP   | 680.3856 | 680.3851 | 680.3858 | 44.56683 | 44.4085  |

|       |          |          |          |          |          |          |      |          |          |          |          |          |
|-------|----------|----------|----------|----------|----------|----------|------|----------|----------|----------|----------|----------|
| 14700 | M1216T10 | 1.022814 | -0.03254 | -0.17761 | 0.863805 | 0.893974 | DOWN | 1215.694 | 1215.693 | 1215.695 | 10.03818 | 9.955733 |
| 14701 | M834T19_ | 1.129561 | 0.175762 | 0.17789  | 0.863876 | 0.893982 | UP   | 834.4421 | 834.4411 | 834.4427 | 18.72517 | 18.7035  |
| 14702 | M429T9_7 | 1.067343 | -0.09402 | -0.18177 | 0.86407  | 0.894003 | DOWN | 429.3269 | 429.3267 | 429.3276 | 9.225883 | 9.11405  |
| 14703 | M274T11_ | 1.067282 | -0.09394 | -0.17662 | 0.864199 | 0.894017 | DOWN | 274.287  | 274.2861 | 274.2874 | 10.8926  | 10.88995 |
| 14704 | M408T11_ | 1.051602 | -0.07259 | -0.17667 | 0.864206 | 0.894018 | DOWN | 408.4358 | 408.435  | 408.4362 | 10.92104 | 10.88995 |
| 14705 | M286T27  | 1.030879 | -0.04388 | -0.17684 | 0.864223 | 0.89402  | DOWN | 286.3101 | 286.3097 | 286.3104 | 26.526   | 26.52067 |
| 14706 | M215T11_ | 1.052042 | 0.073192 | 0.176655 | 0.864249 | 0.894023 | UP   | 215.0258 | 215.0256 | 215.0265 | 10.90553 | 10.88995 |
| 14707 | M199T9_3 | 1.062018 | -0.08681 | -0.17679 | 0.864257 | 0.894024 | DOWN | 198.924  | 198.9236 | 198.9247 | 9.369958 | 9.126783 |
| 14708 | M173T10_ | 1.057052 | 0.080047 | 0.17793  | 0.864266 | 0.894025 | UP   | 173.0386 | 173.0385 | 173.0387 | 9.82645  | 9.728083 |
| 14709 | M228T11_ | 1.03577  | -0.0507  | -0.17793 | 0.86447  | 0.894047 | DOWN | 227.9751 | 227.9749 | 227.9753 | 10.90197 | 10.8646  |
| 14710 | M446T41_ | 1.070022 | -0.09764 | -0.17657 | 0.864522 | 0.894053 | DOWN | 446.2383 | 446.238  | 446.2385 | 41.02833 | 40.7695  |
| 14711 | M369T10_ | 1.018324 | -0.0262  | -0.17634 | 0.864568 | 0.894058 | DOWN | 369.2386 | 369.2384 | 369.2386 | 9.954767 | 9.843367 |
| 14712 | M296T10_ | 1.061697 | 0.086372 | 0.178852 | 0.86458  | 0.894059 | UP   | 296.2139 | 296.2135 | 296.2143 | 9.975217 | 9.8753   |
| 14713 | M222T10_ | 1.05461  | 0.076709 | 0.177715 | 0.864728 | 0.894075 | UP   | 221.7758 | 221.7729 | 221.7759 | 9.951283 | 9.843367 |
| 14714 | M348T3_1 | 1.077439 | -0.10761 | -0.1761  | 0.864766 | 0.89408  | DOWN | 347.7504 | 347.7503 | 347.7505 | 3.36855  | 3.2634   |
| 14715 | M305T9_5 | 1.025533 | 0.036374 | 0.178893 | 0.864791 | 0.894082 | UP   | 305.1569 | 305.1568 | 305.1576 | 8.654933 | 8.5728   |
| 14716 | M484T23  | 1.039383 | -0.05573 | -0.17711 | 0.864794 | 0.894083 | DOWN | 483.8313 | 483.831  | 483.8319 | 22.50267 | 22.48783 |
| 14717 | M702T10_ | 1.033152 | 0.047052 | 0.176466 | 0.864804 | 0.894084 | UP   | 702.1109 | 702.1107 | 702.111  | 9.804217 | 9.699733 |
| 14718 | M678T11_ | 1.033783 | 0.047934 | 0.175856 | 0.864825 | 0.894086 | UP   | 678.4769 | 678.4765 | 678.477  | 10.90977 | 10.85838 |
| 14719 | M398T11_ | 1.044437 | -0.06273 | -0.17615 | 0.864846 | 0.894088 | DOWN | 397.9495 | 397.9433 | 397.95   | 10.89133 | 10.873   |
| 14720 | M253T11_ | 1.04126  | -0.05833 | -0.17607 | 0.864883 | 0.894092 | DOWN | 253.3522 | 253.3519 | 253.3528 | 10.92828 | 10.87765 |
| 14721 | M434T26  | 1.051461 | -0.0724  | -0.17661 | 0.86498  | 0.894103 | DOWN | 434.383  | 434.3827 | 434.3838 | 25.80683 | 25.782   |
| 14722 | M1508T11 | 1.026729 | -0.03806 | -0.17739 | 0.865006 | 0.894106 | DOWN | 1508.293 | 1508.292 | 1508.299 | 10.89875 | 10.879   |
| 14723 | M301T11_ | 1.025697 | -0.0366  | -0.17617 | 0.865034 | 0.894109 | DOWN | 300.8141 | 300.814  | 300.8142 | 10.90551 | 10.879   |
| 14724 | M1022T9  | 1.050304 | -0.07081 | -0.17588 | 0.865035 | 0.894109 | DOWN | 1021.864 | 1021.862 | 1021.865 | 9.49985  | 9.416817 |
| 14725 | M254T10_ | 1.070446 | 0.098212 | 0.176134 | 0.865069 | 0.894113 | UP   | 254.3825 | 254.3823 | 254.383  | 9.517967 | 9.4632   |
| 14726 | M421T11_ | 1.043976 | 0.062089 | 0.18078  | 0.865091 | 0.894115 | UP   | 421.1657 | 421.1653 | 421.1658 | 10.92731 | 10.879   |
| 14727 | M691T10  | 1.050132 | -0.07057 | -0.17584 | 0.865322 | 0.89414  | DOWN | 690.8201 | 690.8195 | 690.8221 | 9.82645  | 9.73145  |
| 14728 | M316T44  | 1.021343 | -0.03047 | -0.17486 | 0.865546 | 0.894165 | DOWN | 316.1752 | 316.1751 | 316.1755 | 43.86925 | 43.8045  |
| 14729 | M214T9_1 | 1.056023 | -0.07864 | -0.17519 | 0.865583 | 0.894169 | DOWN | 214.321  | 214.3202 | 214.3221 | 9.296708 | 9.132267 |
| 14730 | M1211T10 | 1.058305 | 0.081756 | 0.174849 | 0.865738 | 0.894186 | UP   | 1211.065 | 1211.063 | 1211.067 | 9.960817 | 9.859233 |
| 14731 | M631T10_ | 1.086154 | 0.119229 | 0.176316 | 0.865778 | 0.89419  | UP   | 630.9357 | 630.935  | 630.9367 | 9.979342 | 9.859233 |
| 14732 | M413T32_ | 1.061667 | -0.08633 | -0.17683 | 0.865814 | 0.894194 | DOWN | 413.3086 | 413.3083 | 413.3091 | 32.027   | 31.998   |
| 14733 | M524T39_ | 1.046885 | 0.066102 | 0.179883 | 0.865861 | 0.894199 | UP   | 524.3061 | 524.306  | 524.3063 | 39.23383 | 39.07183 |
| 14734 | M911T27  | 1.040155 | 0.056798 | 0.175905 | 0.865875 | 0.894201 | UP   | 910.5854 | 910.585  | 910.5857 | 27.26933 | 27.21333 |

|       |          |          |          |          |          |          |      |          |          |          |          |          |
|-------|----------|----------|----------|----------|----------|----------|------|----------|----------|----------|----------|----------|
| 14735 | M271T10_ | 1.038359 | -0.05431 | -0.17671 | 0.865915 | 0.894205 | DOWN | 271.1353 | 271.1349 | 271.1359 | 9.958617 | 9.843367 |
| 14736 | M1352T10 | 1.07164  | 0.099821 | 0.174724 | 0.865979 | 0.894212 | UP   | 1351.919 | 1351.917 | 1351.921 | 9.970617 | 9.859233 |
| 14737 | M615T21  | 1.050207 | -0.07067 | -0.17702 | 0.866117 | 0.894227 | DOWN | 615.4512 | 615.4501 | 615.4513 | 20.74033 | 20.73667 |
| 14738 | M357T10_ | 1.14015  | -0.18922 | -0.17479 | 0.866152 | 0.894231 | DOWN | 356.6875 | 356.6867 | 356.6879 | 9.8184   | 9.715683 |
| 14739 | M205T11_ | 1.024914 | -0.0355  | -0.1751  | 0.866158 | 0.894232 | DOWN | 204.6645 | 204.6644 | 204.6646 | 11.49505 | 11.47593 |
| 14740 | M346T9_1 | 1.054456 | -0.0765  | -0.17409 | 0.866177 | 0.894234 | DOWN | 345.5741 | 345.5737 | 345.5745 | 8.81705  | 8.715883 |
| 14741 | M765T10_ | 1.037516 | 0.053134 | 0.173718 | 0.866406 | 0.894259 | UP   | 765.4174 | 765.4162 | 765.4179 | 10.16138 | 10.06883 |
| 14742 | M706T11_ | 1.03687  | 0.052235 | 0.173764 | 0.86643  | 0.894261 | UP   | 705.7995 | 705.799  | 705.8001 | 10.90553 | 10.88747 |
| 14743 | M652T10_ | 1.028167 | -0.04008 | -0.1737  | 0.866438 | 0.894262 | DOWN | 651.5319 | 651.5312 | 651.5336 | 9.857275 | 9.699733 |
| 14744 | M378T9_1 | 1.042816 | -0.06048 | -0.17483 | 0.866497 | 0.894269 | DOWN | 378.3055 | 378.305  | 378.3076 | 9.175717 | 9.129317 |
| 14745 | M710T11_ | 1.051485 | -0.07243 | -0.17364 | 0.866523 | 0.894272 | DOWN | 710.0702 | 710.069  | 710.0711 | 10.877   | 10.83572 |
| 14746 | M1324T11 | 1.024173 | -0.03446 | -0.17357 | 0.866586 | 0.894279 | DOWN | 1323.847 | 1323.845 | 1323.85  | 10.89355 | 10.86008 |
| 14747 | M197T42_ | 1.074768 | 0.104026 | 0.177973 | 0.866591 | 0.894279 | UP   | 197.1533 | 197.1532 | 197.1534 | 41.71917 | 41.58967 |
| 14748 | M890T10_ | 1.052157 | -0.07335 | -0.17431 | 0.866615 | 0.894282 | DOWN | 890.1453 | 890.1446 | 890.1457 | 9.972917 | 9.8753   |
| 14749 | M244T11_ | 1.036211 | -0.05132 | -0.17348 | 0.86669  | 0.89429  | DOWN | 243.5041 | 243.5039 | 243.5042 | 10.90343 | 10.879   |
| 14750 | M554T10_ | 1.087293 | 0.120741 | 0.174915 | 0.866709 | 0.894292 | UP   | 554.4921 | 554.4913 | 554.4924 | 9.958217 | 9.8753   |
| 14751 | M1017T13 | 1.044931 | -0.06341 | -0.17514 | 0.866856 | 0.894308 | DOWN | 1017.463 | 1017.462 | 1017.464 | 13.40577 | 13.36075 |
| 14752 | M1280T10 | 1.030935 | -0.04395 | -0.17332 | 0.867063 | 0.894331 | DOWN | 1279.864 | 1279.861 | 1279.87  | 9.903567 | 9.79535  |
| 14753 | M655T10_ | 1.022632 | 0.032287 | 0.17523  | 0.867072 | 0.894332 | UP   | 655.4412 | 655.4408 | 655.4414 | 10.38894 | 10.32768 |
| 14754 | M553T10_ | 1.067426 | 0.094137 | 0.173392 | 0.867166 | 0.894342 | UP   | 553.2825 | 553.2817 | 553.2924 | 9.540717 | 9.22995  |
| 14755 | M554T10_ | 1.0496   | -0.06984 | -0.17634 | 0.867194 | 0.894345 | DOWN | 553.7535 | 553.7532 | 553.7544 | 9.93225  | 9.811217 |
| 14756 | M793T30  | 1.039361 | -0.0557  | -0.17369 | 0.867217 | 0.894347 | DOWN | 792.5684 | 792.5677 | 792.5688 | 30.21575 | 30.20833 |
| 14757 | M1565T10 | 1.030576 | -0.04345 | -0.17321 | 0.867247 | 0.894351 | DOWN | 1565.4   | 1565.395 | 1565.403 | 9.904767 | 9.827283 |
| 14758 | M500T10_ | 1.034655 | 0.049149 | 0.175837 | 0.86732  | 0.894359 | UP   | 500.1473 | 500.1471 | 500.1478 | 9.73455  | 9.636483 |
| 14759 | M211T10_ | 1.018617 | -0.02661 | -0.17348 | 0.867339 | 0.894361 | DOWN | 210.5078 | 210.5078 | 210.508  | 9.816183 | 9.715683 |
| 14760 | M590T11_ | 1.052357 | 0.073624 | 0.174827 | 0.867406 | 0.894368 | UP   | 589.9597 | 589.9594 | 589.9599 | 10.90788 | 10.879   |
| 14761 | M395T10_ | 1.055899 | -0.07847 | -0.17364 | 0.867429 | 0.89437  | DOWN | 395.1691 | 395.1689 | 395.1694 | 9.967367 | 9.853533 |
| 14762 | M283T10_ | 1.030405 | -0.04321 | -0.17299 | 0.867449 | 0.894373 | DOWN | 282.6953 | 282.6949 | 282.6957 | 10.40322 | 10.34372 |
| 14763 | M245T10_ | 1.041876 | 0.059184 | 0.173553 | 0.867567 | 0.894385 | UP   | 244.7674 | 244.7673 | 244.7772 | 9.95385  | 9.843367 |
| 14764 | M1798T10 | 1.037468 | 0.053067 | 0.175051 | 0.867638 | 0.894393 | UP   | 1798.111 | 1798.108 | 1798.114 | 9.830183 | 9.73145  |
| 14765 | M236T10_ | 1.115398 | 0.157559 | 0.172663 | 0.867726 | 0.894403 | UP   | 235.8679 | 235.8678 | 235.868  | 9.970617 | 9.916767 |
| 14766 | M586T9_1 | 1.062762 | -0.08782 | -0.1724  | 0.867799 | 0.894411 | DOWN | 585.604  | 585.5995 | 585.6047 | 9.175017 | 9.09495  |
| 14767 | M419T9_7 | 1.038242 | 0.054143 | 0.17244  | 0.868032 | 0.894436 | UP   | 419.003  | 418.9981 | 419.0062 | 9.252817 | 9.1011   |
| 14768 | M620T44_ | 1.014187 | -0.02032 | -0.17604 | 0.868034 | 0.894436 | DOWN | 620.3639 | 620.3638 | 620.364  | 43.71817 | 43.45933 |
| 14769 | M402T25  | 1.030056 | -0.04272 | -0.17219 | 0.868191 | 0.894453 | DOWN | 402.1179 | 402.1173 | 402.1187 | 25.15883 | 25.14433 |

|       |          |          |          |          |          |          |      |          |          |          |          |          |
|-------|----------|----------|----------|----------|----------|----------|------|----------|----------|----------|----------|----------|
| 14770 | M329T9_6 | 1.072601 | 0.101114 | 0.171326 | 0.86825  | 0.89446  | UP   | 329.3635 | 329.3561 | 329.3638 | 9.381058 | 9.250817 |
| 14771 | M264T10_ | 1.046743 | -0.06591 | -0.17122 | 0.868305 | 0.894466 | DOWN | 264.4155 | 264.412  | 264.4158 | 9.956417 | 9.759167 |
| 14772 | M301T11_ | 1.03714  | 0.05261  | 0.17144  | 0.868312 | 0.894467 | UP   | 300.864  | 300.8636 | 300.8646 | 10.90537 | 10.879   |
| 14773 | M464T10_ | 1.094755 | -0.13061 | -0.17205 | 0.868406 | 0.894477 | DOWN | 464.0038 | 464.0035 | 464.0048 | 9.752875 | 9.636483 |
| 14774 | M287T44_ | 1.015187 | -0.02175 | -0.17546 | 0.868465 | 0.894483 | DOWN | 287.1487 | 287.1485 | 287.1488 | 43.73267 | 43.55983 |
| 14775 | M512T10_ | 1.090284 | 0.124704 | 0.176011 | 0.868466 | 0.894483 | UP   | 512.3004 | 512.3    | 512.3011 | 9.900133 | 9.75365  |
| 14776 | M563T10_ | 1.033494 | 0.047531 | 0.174769 | 0.868473 | 0.894484 | UP   | 563.486  | 563.4858 | 563.4866 | 9.960967 | 9.843367 |
| 14777 | M749T10_ | 1.040029 | -0.05662 | -0.17083 | 0.8686   | 0.894498 | DOWN | 749.3094 | 749.3085 | 749.3097 | 9.948875 | 9.843367 |
| 14778 | M460T10_ | 1.029023 | -0.04128 | -0.17098 | 0.868723 | 0.894511 | DOWN | 459.6424 | 459.6416 | 459.6432 | 9.968992 | 9.859233 |
| 14779 | M646T11_ | 1.055907 | 0.078483 | 0.170625 | 0.868914 | 0.894532 | UP   | 645.6297 | 645.6295 | 645.6301 | 11.48533 | 11.47593 |
| 14780 | M722T9   | 1.081628 | -0.1132  | -0.17066 | 0.86894  | 0.894535 | DOWN | 722.4545 | 722.4535 | 722.4551 | 8.974042 | 8.922033 |
| 14781 | M243T10_ | 1.048525 | -0.06836 | -0.17032 | 0.86901  | 0.894542 | DOWN | 242.9253 | 242.9251 | 242.9253 | 9.984083 | 9.8753   |
| 14782 | M309T10_ | 1.050507 | 0.071086 | 0.173647 | 0.869083 | 0.89455  | UP   | 309.2273 | 309.2261 | 309.2274 | 10.17547 | 10.08517 |
| 14783 | M284T11_ | 1.038799 | -0.05492 | -0.1699  | 0.86934  | 0.894578 | DOWN | 284.3917 | 284.3915 | 284.3918 | 10.90785 | 10.877   |
| 14784 | M398T9_7 | 1.141349 | 0.19074  | 0.170175 | 0.869517 | 0.894597 | UP   | 398.2883 | 398.2863 | 398.2907 | 9.387158 | 9.16125  |
| 14785 | M393T10_ | 1.045091 | -0.06363 | -0.17273 | 0.869548 | 0.894601 | DOWN | 392.6065 | 392.6063 | 392.6074 | 9.894417 | 9.75365  |
| 14786 | M246T18  | 1.083114 | -0.11518 | -0.17157 | 0.86955  | 0.894601 | DOWN | 246.0813 | 246.0811 | 246.0815 | 18.49367 | 18.47117 |
| 14787 | M416T9_4 | 1.024744 | -0.03526 | -0.16957 | 0.869642 | 0.894611 | DOWN | 416.0373 | 416.0368 | 416.038  | 9.277017 | 9.129317 |
| 14788 | M277T11_ | 1.028311 | -0.04028 | -0.16947 | 0.869705 | 0.894618 | DOWN | 277.1906 | 277.1905 | 277.1909 | 10.90519 | 10.879   |
| 14789 | M352T11_ | 1.024024 | -0.03425 | -0.16983 | 0.869714 | 0.894619 | DOWN | 352.2115 | 352.2113 | 352.212  | 10.892   | 10.879   |
| 14790 | M821T10_ | 1.071712 | 0.099918 | 0.16936  | 0.869792 | 0.894627 | UP   | 820.72   | 820.7187 | 820.7205 | 9.953592 | 9.859233 |
| 14791 | M1099T10 | 1.037442 | -0.05303 | -0.16966 | 0.869797 | 0.894628 | DOWN | 1098.91  | 1098.91  | 1098.911 | 9.872067 | 9.856867 |
| 14792 | M163T10_ | 1.039656 | -0.05611 | -0.16974 | 0.869994 | 0.894649 | DOWN | 163.2503 | 163.2503 | 163.2504 | 9.95385  | 9.843367 |
| 14793 | M499T9_3 | 1.025249 | -0.03597 | -0.16938 | 0.870075 | 0.894658 | DOWN | 498.8642 | 498.863  | 498.8645 | 9.215258 | 9.129317 |
| 14794 | M385T9_1 | 1.036793 | 0.052128 | 0.169137 | 0.87011  | 0.894662 | UP   | 385.2734 | 385.2733 | 385.2736 | 8.652817 | 8.55865  |
| 14795 | M363T10_ | 1.034224 | 0.048549 | 0.169017 | 0.870205 | 0.894672 | UP   | 363.0993 | 363.0984 | 363.0997 | 9.8207   | 9.696683 |
| 14796 | M460T23  | 1.077077 | -0.10712 | -0.16869 | 0.870258 | 0.894678 | DOWN | 460.3416 | 460.3414 | 460.3418 | 22.74858 | 22.741   |
| 14797 | M213T9_2 | 1.108152 | 0.148156 | 0.169097 | 0.870282 | 0.89468  | UP   | 212.5388 | 212.537  | 212.5419 | 9.146383 | 9.023483 |
| 14798 | M269T11_ | 1.029682 | -0.0422  | -0.169   | 0.870343 | 0.894687 | DOWN | 269.4199 | 269.4171 | 269.4201 | 10.91098 | 10.879   |
| 14799 | M734T10_ | 1.085999 | 0.119023 | 0.169936 | 0.870359 | 0.894689 | UP   | 733.9187 | 733.9179 | 733.919  | 9.977042 | 9.859233 |
| 14800 | M383T44  | 1.008128 | 0.011678 | 0.170094 | 0.870808 | 0.894737 | UP   | 383.3517 | 383.3515 | 383.3519 | 43.7015  | 43.66067 |
| 14801 | M631T11  | 1.024226 | -0.03453 | -0.16882 | 0.870835 | 0.89474  | DOWN | 631.0959 | 631.0955 | 631.0962 | 11.49657 | 11.47593 |
| 14802 | M345T38  | 1.021087 | 0.030106 | 0.168974 | 0.870942 | 0.894752 | UP   | 345.1905 | 345.1904 | 345.1908 | 37.90617 | 37.84933 |
| 14803 | M680T27_ | 1.059615 | -0.08354 | -0.16776 | 0.870943 | 0.894752 | DOWN | 680.4063 | 680.4059 | 680.407  | 27.48183 | 27.45433 |
| 14804 | M502T10_ | 1.058813 | 0.082448 | 0.167757 | 0.871126 | 0.894772 | UP   | 501.7592 | 501.7584 | 501.7594 | 9.967367 | 9.859233 |

|       |          |          |          |          |          |          |      |          |          |          |          |          |
|-------|----------|----------|----------|----------|----------|----------|------|----------|----------|----------|----------|----------|
| 14805 | M274T10_ | 1.081818 | 0.113457 | 0.167897 | 0.871141 | 0.894773 | UP   | 274.0742 | 274.0741 | 274.0744 | 9.545975 | 9.447617 |
| 14806 | M352T10_ | 1.181234 | 0.240295 | 0.167937 | 0.871208 | 0.89478  | UP   | 351.6051 | 351.6047 | 351.6054 | 9.808333 | 9.732983 |
| 14807 | M748T33  | 1.043288 | -0.06114 | -0.16733 | 0.871266 | 0.894787 | DOWN | 747.5299 | 747.5291 | 747.5303 | 33.41233 | 33.398   |
| 14808 | M369T24  | 1.052682 | -0.07407 | -0.17192 | 0.871479 | 0.89481  | DOWN | 369.2714 | 369.2712 | 369.2716 | 24.09867 | 24.06933 |
| 14809 | M1837T10 | 1.080154 | 0.111237 | 0.167801 | 0.871523 | 0.894814 | UP   | 1837.393 | 1837.393 | 1837.397 | 9.888767 | 9.766367 |
| 14810 | M222T10_ | 1.041595 | 0.058794 | 0.167454 | 0.871601 | 0.894823 | UP   | 221.5862 | 221.5861 | 221.5863 | 9.9014   | 9.872067 |
| 14811 | M735T10_ | 1.122442 | -0.16664 | -0.16693 | 0.871606 | 0.894823 | DOWN | 734.7601 | 734.7598 | 734.7607 | 9.82645  | 9.772883 |
| 14812 | M607T25  | 1.037154 | -0.05263 | -0.16787 | 0.871711 | 0.894835 | DOWN | 607.4662 | 607.4658 | 607.4664 | 24.55767 | 24.53583 |
| 14813 | M217T10_ | 1.048032 | -0.06768 | -0.16741 | 0.871757 | 0.89484  | DOWN | 217.0011 | 216.9998 | 217.0019 | 9.830833 | 9.696683 |
| 14814 | M276T43_ | 1.022057 | -0.03148 | -0.16976 | 0.871775 | 0.894842 | DOWN | 276.1438 | 276.1437 | 276.144  | 42.5245  | 42.49567 |
| 14815 | M1818T10 | 1.139805 | 0.188788 | 0.168404 | 0.872123 | 0.894879 | UP   | 1818.403 | 1818.402 | 1818.404 | 9.824083 | 9.787433 |
| 14816 | M315T28_ | 1.041882 | 0.059192 | 0.167411 | 0.872168 | 0.894884 | UP   | 315.019  | 315.0188 | 315.0193 | 28.12733 | 28.113   |
| 14817 | M727T10_ | 1.060421 | 0.084637 | 0.166124 | 0.872184 | 0.894886 | UP   | 727.2733 | 727.2644 | 727.2738 | 9.946467 | 9.843367 |
| 14818 | M318T10_ | 1.023884 | -0.03405 | -0.16866 | 0.87237  | 0.894906 | DOWN | 318.0517 | 318.0512 | 318.063  | 9.983467 | 9.840617 |
| 14819 | M478T18_ | 1.019729 | -0.02819 | -0.16575 | 0.872477 | 0.894917 | DOWN | 478.3996 | 478.3994 | 478.3997 | 18.3005  | 18.27567 |
| 14820 | M417T12_ | 1.031025 | -0.04408 | -0.16946 | 0.872493 | 0.894919 | DOWN | 417.327  | 417.3265 | 417.3273 | 12.41563 | 12.39797 |
| 14821 | M407T11_ | 1.02095  | -0.02991 | -0.16623 | 0.872507 | 0.894921 | DOWN | 406.5826 | 406.5822 | 406.5836 | 10.89904 | 10.879   |
| 14822 | M1101T10 | 1.043815 | -0.06187 | -0.16596 | 0.872515 | 0.894921 | DOWN | 1100.723 | 1100.722 | 1100.723 | 9.967367 | 9.859233 |
| 14823 | M315T10_ | 1.034526 | -0.04897 | -0.16686 | 0.872542 | 0.894924 | DOWN | 315.4237 | 315.4235 | 315.4239 | 9.983467 | 9.8753   |
| 14824 | M206T9_1 | 1.104555 | 0.143465 | 0.165661 | 0.87255  | 0.894925 | UP   | 206.1127 | 206.1116 | 206.1132 | 9.174967 | 9.16125  |
| 14825 | M731T10_ | 1.057221 | -0.08028 | -0.16572 | 0.872589 | 0.894929 | DOWN | 731.1069 | 731.1063 | 731.1075 | 9.958617 | 9.843367 |
| 14826 | M534T39_ | 1.047932 | 0.067545 | 0.166062 | 0.872598 | 0.89493  | UP   | 534.2908 | 534.2904 | 534.2909 | 39.01417 | 38.89917 |
| 14827 | M577T9_2 | 1.063871 | -0.08932 | -0.16556 | 0.872609 | 0.894932 | DOWN | 576.9768 | 576.9758 | 576.9854 | 9.249433 | 9.174917 |
| 14828 | M311T23  | 1.069767 | -0.0973  | -0.16554 | 0.872637 | 0.894935 | DOWN | 310.5569 | 310.5568 | 310.5574 | 22.6985  | 22.6705  |
| 14829 | M194T9_2 | 1.083257 | -0.11538 | -0.16787 | 0.872669 | 0.894938 | DOWN | 193.7157 | 193.715  | 193.7162 | 9.175183 | 9.147367 |
| 14830 | M193T9_1 | 1.069996 | 0.097605 | 0.165921 | 0.872789 | 0.894951 | UP   | 192.6204 | 192.62   | 192.6206 | 9.320875 | 9.1428   |
| 14831 | M395T10_ | 1.064307 | -0.08991 | -0.1655  | 0.872792 | 0.894951 | DOWN | 395.1311 | 395.1309 | 395.1403 | 9.9149   | 9.806367 |
| 14832 | M656T10_ | 1.040653 | -0.05749 | -0.16541 | 0.872831 | 0.894955 | DOWN | 655.6869 | 655.6864 | 655.6901 | 9.823575 | 9.715683 |
| 14833 | M575T34  | 1.027765 | 0.03951  | 0.16779  | 0.87284  | 0.894957 | UP   | 575.3763 | 575.3758 | 575.3766 | 33.67225 | 33.65767 |
| 14834 | M334T24  | 1.039906 | -0.05645 | -0.16529 | 0.872908 | 0.894964 | DOWN | 334.266  | 334.2654 | 334.2668 | 24.3525  | 24.33233 |
| 14835 | M316T10_ | 1.029504 | -0.04195 | -0.16519 | 0.872921 | 0.894965 | DOWN | 316.2925 | 316.2923 | 316.2931 | 9.97155  | 9.859233 |
| 14836 | M725T10_ | 1.032148 | 0.04565  | 0.169027 | 0.873157 | 0.894991 | UP   | 724.9607 | 724.9604 | 724.9614 | 9.8207   | 9.699733 |
| 14837 | M1361T45 | 1.027125 | 0.038612 | 0.165285 | 0.873185 | 0.894994 | UP   | 1360.953 | 1360.953 | 1360.954 | 44.60225 | 44.56667 |
| 14838 | M322T10_ | 1.042655 | -0.06026 | -0.16509 | 0.87324  | 0.895    | DOWN | 321.5635 | 321.5631 | 321.5639 | 9.958617 | 9.843367 |
| 14839 | M571T10_ | 1.0413   | -0.05839 | -0.16524 | 0.873243 | 0.895    | DOWN | 571.3832 | 571.3825 | 571.3836 | 10.44717 | 10.42407 |



|       |          |          |          |          |          |          |      |          |          |          |          |          |
|-------|----------|----------|----------|----------|----------|----------|------|----------|----------|----------|----------|----------|
| 14840 | M286T29  | 1.030272 | -0.04303 | -0.16574 | 0.873293 | 0.895005 | DOWN | 286.3101 | 286.3099 | 286.3103 | 28.85858 | 28.84783 |
| 14841 | M205T11_ | 1.047416 | 0.066834 | 0.164404 | 0.873596 | 0.895038 | UP   | 204.9549 | 204.9548 | 204.9554 | 10.91948 | 10.8937  |
| 14842 | M390T9_2 | 1.031231 | -0.04437 | -0.16481 | 0.873751 | 0.895055 | DOWN | 389.5991 | 389.5989 | 389.5993 | 9.298683 | 9.092333 |
| 14843 | M261T10_ | 1.080447 | 0.111628 | 0.165369 | 0.873845 | 0.895065 | UP   | 260.5399 | 260.5396 | 260.54   | 9.977042 | 9.8753   |
| 14844 | M163T10_ | 1.057791 | -0.08105 | -0.16485 | 0.873857 | 0.895066 | DOWN | 163.0469 | 163.0468 | 163.0471 | 9.924308 | 9.811217 |
| 14845 | M780T11  | 1.040829 | -0.05773 | -0.16414 | 0.874045 | 0.895086 | DOWN | 780.3786 | 780.376  | 780.3806 | 10.91289 | 10.84395 |
| 14846 | M329T11_ | 1.044344 | -0.0626  | -0.16445 | 0.874049 | 0.895087 | DOWN | 329.2184 | 329.2172 | 329.2205 | 10.8926  | 10.873   |
| 14847 | M461T31  | 1.018002 | -0.02574 | -0.16368 | 0.87406  | 0.895088 | DOWN | 461.3732 | 461.3731 | 461.3733 | 31.18017 | 31.17583 |
| 14848 | M1485T10 | 1.037514 | -0.05313 | -0.1664  | 0.874121 | 0.895094 | DOWN | 1485.285 | 1485.283 | 1485.287 | 9.94405  | 9.8378   |
| 14849 | M501T10_ | 1.046337 | 0.065348 | 0.163638 | 0.874186 | 0.895101 | UP   | 500.6171 | 500.6164 | 500.6176 | 9.965717 | 9.843367 |
| 14850 | M538T9_5 | 1.133419 | 0.180681 | 0.16364  | 0.874337 | 0.895117 | UP   | 538.2064 | 538.2062 | 538.2068 | 9.3907   | 9.355317 |
| 14851 | M479T10_ | 1.085616 | -0.11851 | -0.16328 | 0.874367 | 0.895121 | DOWN | 479.4389 | 479.432  | 479.4398 | 9.519317 | 9.3907   |
| 14852 | M946T10_ | 1.032438 | 0.046055 | 0.165369 | 0.874483 | 0.895133 | UP   | 945.8908 | 945.8903 | 945.8913 | 9.845483 | 9.73145  |
| 14853 | M299T10_ | 1.035419 | -0.05021 | -0.16312 | 0.874625 | 0.895148 | DOWN | 299.2674 | 299.2671 | 299.2676 | 9.983467 | 9.8914   |
| 14854 | M679T10_ | 1.162853 | 0.217668 | 0.164114 | 0.874662 | 0.895152 | UP   | 678.6029 | 678.5934 | 678.6038 | 9.872933 | 9.7124   |
| 14855 | M635T10_ | 1.059843 | 0.083851 | 0.16284  | 0.874738 | 0.895161 | UP   | 635.3151 | 635.3148 | 635.3156 | 9.830833 | 9.715683 |
| 14856 | M285T7_2 | 1.052448 | -0.07375 | -0.16614 | 0.874768 | 0.895164 | DOWN | 284.9097 | 284.9096 | 284.9097 | 6.661967 | 6.5605   |
| 14857 | M228T9_1 | 1.087619 | 0.121173 | 0.162738 | 0.874772 | 0.895164 | UP   | 228.1667 | 228.159  | 228.1688 | 9.382183 | 9.1503   |
| 14858 | M290T11_ | 1.027604 | -0.03929 | -0.16279 | 0.874914 | 0.895179 | DOWN | 289.8065 | 289.8061 | 289.8068 | 10.91987 | 10.90553 |
| 14859 | M384T9_2 | 1.039277 | 0.05558  | 0.1628   | 0.874941 | 0.895182 | UP   | 383.9168 | 383.9166 | 383.9171 | 9.0274   | 8.892117 |
| 14860 | M360T11_ | 1.057022 | -0.08001 | -0.16323 | 0.874999 | 0.895189 | DOWN | 359.7753 | 359.775  | 359.7765 | 10.91152 | 10.8646  |
| 14861 | M576T9_3 | 1.057147 | 0.080177 | 0.164396 | 0.875008 | 0.895189 | UP   | 575.7386 | 575.7335 | 575.7398 | 9.276583 | 9.204617 |
| 14862 | M1971T10 | 1.050041 | 0.070446 | 0.162461 | 0.875135 | 0.895203 | UP   | 1971.357 | 1971.356 | 1971.361 | 9.857683 | 9.772883 |
| 14863 | M439T11_ | 1.028199 | -0.04012 | -0.16365 | 0.87514  | 0.895204 | DOWN | 438.873  | 438.8729 | 438.8746 | 10.90553 | 10.8926  |
| 14864 | M411T10_ | 1.075138 | 0.104522 | 0.162666 | 0.875169 | 0.895207 | UP   | 411.3276 | 411.3272 | 411.328  | 9.958617 | 9.843367 |
| 14865 | M705T30  | 1.035261 | -0.04999 | -0.16299 | 0.875196 | 0.89521  | DOWN | 704.5155 | 704.5149 | 704.5157 | 30.25242 | 30.237   |
| 14866 | M655T10_ | 1.110394 | -0.15107 | -0.16273 | 0.875196 | 0.89521  | DOWN | 654.6956 | 654.6952 | 654.6961 | 9.787433 | 9.715683 |
| 14867 | M208T9_7 | 1.043193 | -0.06101 | -0.16213 | 0.87529  | 0.89522  | DOWN | 208.0084 | 208.0083 | 208.0086 | 9.279417 | 9.142767 |
| 14868 | M253T10_ | 1.083099 | -0.11517 | -0.16332 | 0.875292 | 0.89522  | DOWN | 253.0184 | 253.0182 | 253.0185 | 9.84525  | 9.774967 |
| 14869 | M697T10_ | 1.053003 | -0.07451 | -0.16286 | 0.875299 | 0.895221 | DOWN | 696.6457 | 696.6453 | 696.6467 | 9.956417 | 9.843367 |
| 14870 | M488T44_ | 1.034382 | 0.048769 | 0.167045 | 0.875344 | 0.895226 | UP   | 488.285  | 488.2848 | 488.2852 | 44.26483 | 44.2215  |
| 14871 | M258T10_ | 1.036815 | -0.05216 | -0.16532 | 0.875394 | 0.895231 | DOWN | 257.9211 | 257.9208 | 257.9234 | 9.772833 | 9.746783 |
| 14872 | M1216T10 | 1.057815 | 0.081087 | 0.161862 | 0.875441 | 0.895236 | UP   | 1216.179 | 1216.178 | 1216.184 | 9.972917 | 9.859233 |
| 14873 | M398T44_ | 1.025832 | -0.03679 | -0.1622  | 0.875459 | 0.895238 | DOWN | 398.2381 | 398.238  | 398.2383 | 44.40867 | 44.1495  |
| 14874 | M379T9_7 | 1.072128 | 0.100477 | 0.162586 | 0.875469 | 0.895239 | UP   | 379.1227 | 379.1217 | 379.1265 | 9.235933 | 9.046783 |

|       |          |          |          |          |          |          |      |          |          |          |          |          |
|-------|----------|----------|----------|----------|----------|----------|------|----------|----------|----------|----------|----------|
| 14875 | M331T10_ | 1.02792  | -0.03973 | -0.16198 | 0.875554 | 0.895248 | DOWN | 331.1826 | 331.1824 | 331.1827 | 9.972917 | 9.859233 |
| 14876 | M377T10_ | 1.044875 | 0.06333  | 0.161991 | 0.875557 | 0.895248 | UP   | 376.6194 | 376.6191 | 376.6196 | 9.972917 | 9.859233 |
| 14877 | M216T10_ | 1.05023  | -0.07071 | -0.1621  | 0.875796 | 0.895274 | DOWN | 215.9451 | 215.9449 | 215.9453 | 9.968992 | 9.859233 |
| 14878 | M730T10_ | 1.044531 | -0.06286 | -0.16148 | 0.875845 | 0.895279 | DOWN | 729.8353 | 729.8347 | 729.8358 | 9.94785  | 9.843367 |
| 14879 | M1218T10 | 1.032618 | -0.04631 | -0.16153 | 0.875873 | 0.895282 | DOWN | 1217.676 | 1217.675 | 1217.677 | 9.97155  | 9.843367 |
| 14880 | M396T9_1 | 1.01981  | -0.0283  | -0.16249 | 0.875874 | 0.895282 | DOWN | 396.2189 | 396.2181 | 396.2192 | 9.051075 | 9.01555  |
| 14881 | M614T11_ | 1.027515 | -0.03916 | -0.16134 | 0.875962 | 0.895292 | DOWN | 613.9962 | 613.9954 | 614.0001 | 10.93097 | 10.90765 |
| 14882 | M350T10_ | 1.037203 | -0.0527  | -0.16154 | 0.876079 | 0.895304 | DOWN | 349.8672 | 349.8669 | 349.8675 | 9.91875  | 9.811217 |
| 14883 | M453T9_5 | 1.057435 | 0.080569 | 0.161669 | 0.876118 | 0.895308 | UP   | 452.8877 | 452.8863 | 452.8984 | 9.37135  | 9.048117 |
| 14884 | M505T11_ | 1.039511 | -0.0559  | -0.16537 | 0.876163 | 0.895313 | DOWN | 505.1789 | 505.1782 | 505.1797 | 10.89125 | 10.83417 |
| 14885 | M157T10_ | 1.093243 | 0.128613 | 0.16432  | 0.876175 | 0.895314 | UP   | 156.5358 | 156.5357 | 156.5359 | 9.946367 | 9.843367 |
| 14886 | M574T10_ | 1.034611 | -0.04909 | -0.16325 | 0.876321 | 0.89533  | DOWN | 574.2394 | 574.2389 | 574.2397 | 9.960417 | 9.859233 |
| 14887 | M325T10_ | 1.02077  | 0.029658 | 0.162586 | 0.876393 | 0.895338 | UP   | 325.2432 | 325.2429 | 325.2443 | 9.831242 | 9.715683 |
| 14888 | M282T10_ | 1.02669  | -0.038   | -0.16122 | 0.876411 | 0.89534  | DOWN | 281.6588 | 281.6587 | 281.659  | 9.903017 | 9.811217 |
| 14889 | M196T9_4 | 1.056676 | -0.07953 | -0.16114 | 0.876447 | 0.895344 | DOWN | 195.9037 | 195.9033 | 195.9043 | 9.280458 | 9.146383 |
| 14890 | M375T10_ | 1.031398 | -0.0446  | -0.16096 | 0.876491 | 0.895348 | DOWN | 375.1196 | 375.1174 | 375.1201 | 9.931108 | 9.811217 |
| 14891 | M178T10_ | 1.043538 | 0.061482 | 0.160523 | 0.876532 | 0.895353 | UP   | 178.026  | 178.0257 | 178.0262 | 9.968992 | 9.859233 |
| 14892 | M205T10_ | 1.077334 | -0.10747 | -0.16169 | 0.876549 | 0.895354 | DOWN | 205.2464 | 205.2435 | 205.2465 | 9.780258 | 9.665433 |
| 14893 | M490T9_1 | 1.046859 | 0.066067 | 0.161037 | 0.876581 | 0.895358 | UP   | 490.1696 | 490.1694 | 490.1699 | 9.285867 | 9.129317 |
| 14894 | M674T10_ | 1.025644 | -0.03653 | -0.16104 | 0.876586 | 0.895358 | DOWN | 674.3979 | 674.3974 | 674.3986 | 9.85525  | 9.747533 |
| 14895 | M364T32  | 1.063532 | 0.088863 | 0.16081  | 0.876599 | 0.89536  | UP   | 363.8021 | 363.8015 | 363.8028 | 31.76767 | 31.75333 |
| 14896 | M766T10_ | 1.043948 | 0.06205  | 0.160289 | 0.87664  | 0.895364 | UP   | 766.421  | 766.4199 | 766.4217 | 10.17403 | 10.05935 |
| 14897 | M1561T10 | 1.033432 | -0.04744 | -0.16046 | 0.876647 | 0.895365 | DOWN | 1560.933 | 1560.931 | 1560.938 | 9.931883 | 9.843367 |
| 14898 | M447T10_ | 1.02869  | -0.04081 | -0.16034 | 0.876652 | 0.895365 | DOWN | 447.3592 | 447.359  | 447.3596 | 9.979342 | 9.8753   |
| 14899 | M433T11_ | 1.030824 | -0.0438  | -0.16014 | 0.87675  | 0.895376 | DOWN | 433.4296 | 433.4274 | 433.4302 | 10.91784 | 10.879   |
| 14900 | M428T11_ | 1.023915 | 0.034095 | 0.160404 | 0.876849 | 0.895386 | UP   | 427.9882 | 427.9881 | 427.9889 | 10.892   | 10.8646  |
| 14901 | M411T10_ | 1.070332 | 0.098058 | 0.160402 | 0.876973 | 0.8954   | UP   | 410.7908 | 410.7903 | 410.7909 | 9.975217 | 9.859233 |
| 14902 | M295T12_ | 1.052055 | 0.07321  | 0.160045 | 0.87701  | 0.895404 | UP   | 295.2095 | 295.2092 | 295.2103 | 12.24952 | 12.16455 |
| 14903 | M243T11_ | 1.044647 | 0.063015 | 0.160258 | 0.877092 | 0.895412 | UP   | 242.8455 | 242.845  | 242.8497 | 10.92542 | 10.87487 |
| 14904 | M207T10_ | 1.013982 | -0.02003 | -0.1596  | 0.877159 | 0.89542  | DOWN | 206.6735 | 206.6734 | 206.6738 | 9.935675 | 9.827283 |
| 14905 | M719T16  | 1.029433 | 0.041851 | 0.15967  | 0.877161 | 0.89542  | UP   | 718.5478 | 718.5474 | 718.5485 | 16.28458 | 16.26397 |
| 14906 | M713T31  | 1.03614  | 0.051219 | 0.159564 | 0.877213 | 0.895425 | UP   | 712.5494 | 712.5489 | 712.5497 | 31.078   | 31.07483 |
| 14907 | M391T18  | 1.023592 | -0.03364 | -0.16043 | 0.877246 | 0.895429 | DOWN | 391.2951 | 391.295  | 391.2953 | 17.74867 | 17.72017 |
| 14908 | M292T45  | 1.019499 | -0.02786 | -0.16009 | 0.877323 | 0.895437 | DOWN | 292.1752 | 292.1751 | 292.1753 | 44.87567 | 44.83967 |
| 14909 | M503T10_ | 1.019813 | -0.02831 | -0.15926 | 0.877468 | 0.895453 | DOWN | 503.3565 | 503.3561 | 503.3568 | 10.15155 | 10.06883 |

|       |          |          |          |          |          |          |      |          |          |          |          |          |
|-------|----------|----------|----------|----------|----------|----------|------|----------|----------|----------|----------|----------|
| 14910 | M547T9_5 | 1.018234 | 0.02607  | 0.161877 | 0.87755  | 0.895461 | UP   | 546.918  | 546.9162 | 546.9188 | 9.18975  | 9.12675  |
| 14911 | M334T9_6 | 1.056791 | -0.07969 | -0.15904 | 0.877583 | 0.895465 | DOWN | 334.2128 | 334.2127 | 334.2228 | 8.984717 | 8.889467 |
| 14912 | M240T10_ | 1.033979 | 0.048206 | 0.160091 | 0.877588 | 0.895465 | UP   | 240.4992 | 240.4988 | 240.4998 | 9.967533 | 9.859233 |
| 14913 | M314T31  | 1.04271  | -0.06034 | -0.15901 | 0.877605 | 0.895467 | DOWN | 314.3051 | 314.3049 | 314.3053 | 31.03767 | 31.03133 |
| 14914 | M245T10_ | 1.037847 | -0.05359 | -0.15901 | 0.877621 | 0.895469 | DOWN | 245.3804 | 245.3801 | 245.3808 | 9.95385  | 9.843367 |
| 14915 | M308T9_3 | 1.062656 | -0.08768 | -0.15897 | 0.877747 | 0.895482 | DOWN | 307.9916 | 307.9909 | 307.9921 | 8.937675 | 8.892117 |
| 14916 | M335T9_9 | 1.047171 | -0.0665  | -0.15877 | 0.877828 | 0.895491 | DOWN | 334.9802 | 334.9801 | 334.9803 | 8.78005  | 8.672483 |
| 14917 | M329T10_ | 1.034387 | 0.048776 | 0.159035 | 0.877917 | 0.8955   | UP   | 329.4504 | 329.45   | 329.4506 | 9.984067 | 9.8753   |
| 14918 | M354T10_ | 1.013653 | -0.01956 | -0.15869 | 0.877926 | 0.895501 | DOWN | 353.7275 | 353.7274 | 353.7277 | 9.8207   | 9.699733 |
| 14919 | M1885T10 | 1.064079 | 0.089605 | 0.159636 | 0.877976 | 0.895507 | UP   | 1884.921 | 1884.918 | 1884.921 | 9.949233 | 9.9351   |
| 14920 | M261T10_ | 1.042911 | -0.06062 | -0.15857 | 0.877984 | 0.895508 | DOWN | 261.3655 | 261.3652 | 261.3657 | 9.94785  | 9.827283 |
| 14921 | M840T11_ | 1.046767 | 0.06594  | 0.158905 | 0.878082 | 0.895518 | UP   | 840.4761 | 840.4752 | 840.477  | 10.67552 | 10.61337 |
| 14922 | M347T10_ | 1.023823 | -0.03397 | -0.15968 | 0.878204 | 0.895531 | DOWN | 346.9125 | 346.9118 | 346.9127 | 9.823575 | 9.699733 |
| 14923 | M707T3   | 1.076552 | -0.10642 | -0.1585  | 0.878231 | 0.895534 | DOWN | 707.4698 | 707.4695 | 707.4699 | 3.325783 | 3.0588   |
| 14924 | M288T11_ | 1.025522 | -0.03636 | -0.15843 | 0.878235 | 0.895534 | DOWN | 288.4319 | 288.4318 | 288.4321 | 10.89875 | 10.8646  |
| 14925 | M893T9   | 1.089068 | -0.12309 | -0.15887 | 0.878268 | 0.895538 | DOWN | 892.5767 | 892.576  | 892.5769 | 9.29345  | 9.234417 |
| 14926 | M389T11_ | 1.022393 | 0.03195  | 0.158049 | 0.87835  | 0.895547 | UP   | 389.492  | 389.4918 | 389.4923 | 10.89875 | 10.879   |
| 14927 | M791T10_ | 1.056032 | -0.07865 | -0.15807 | 0.878355 | 0.895547 | DOWN | 791.002  | 791.0018 | 791.0022 | 9.893742 | 9.779267 |
| 14928 | M346T9_9 | 1.077003 | -0.10702 | -0.158   | 0.878377 | 0.895549 | DOWN | 346.3531 | 346.353  | 346.3544 | 9.330058 | 9.2585   |
| 14929 | M855T12  | 1.039688 | -0.05615 | -0.1601  | 0.878379 | 0.89555  | DOWN | 854.6056 | 854.6054 | 854.6059 | 12.10664 | 12.09243 |
| 14930 | M343T10_ | 1.079539 | -0.11042 | -0.15786 | 0.878509 | 0.895564 | DOWN | 342.547  | 342.545  | 342.5478 | 9.9009   | 9.728083 |
| 14931 | M444T11_ | 1.040893 | -0.05782 | -0.15806 | 0.878556 | 0.895569 | DOWN | 444.2656 | 444.2655 | 444.2657 | 10.91389 | 10.89125 |
| 14932 | M335T10_ | 1.146857 | 0.197685 | 0.157767 | 0.878581 | 0.895571 | UP   | 334.5814 | 334.581  | 334.5815 | 9.903017 | 9.79065  |
| 14933 | M732T11_ | 1.035529 | -0.05037 | -0.15771 | 0.878636 | 0.895577 | DOWN | 732.2649 | 732.2646 | 732.2654 | 10.90551 | 10.88747 |
| 14934 | M617T10_ | 1.054827 | -0.07701 | -0.15989 | 0.878642 | 0.895578 | DOWN | 616.6952 | 616.6937 | 616.6965 | 9.956417 | 9.843367 |
| 14935 | M468T30  | 1.034042 | -0.0483  | -0.15932 | 0.878668 | 0.89558  | DOWN | 468.3607 | 468.3602 | 468.3609 | 30.26608 | 30.25167 |
| 14936 | M298T30  | 1.055965 | -0.07856 | -0.15769 | 0.878697 | 0.895584 | DOWN | 298.3101 | 298.3092 | 298.3102 | 29.69067 | 29.67567 |
| 14937 | M162T10_ | 1.055938 | -0.07853 | -0.15805 | 0.878704 | 0.895584 | DOWN | 161.6273 | 161.6272 | 161.6274 | 9.948875 | 9.827283 |
| 14938 | M882T11_ | 1.04481  | -0.06324 | -0.15762 | 0.87871  | 0.895585 | DOWN | 881.5239 | 881.5225 | 881.5249 | 10.79763 | 10.73768 |
| 14939 | M1023T10 | 1.04565  | 0.0644   | 0.157563 | 0.878767 | 0.895591 | UP   | 1022.606 | 1022.606 | 1022.608 | 9.6501   | 9.52515  |
| 14940 | M404T38  | 1.013095 | 0.018769 | 0.157515 | 0.878769 | 0.895591 | UP   | 404.264  | 404.2637 | 404.2643 | 37.91367 | 37.64733 |
| 14941 | M423T21  | 1.028183 | 0.040097 | 0.158058 | 0.878898 | 0.895605 | UP   | 423.2799 | 423.2789 | 423.2805 | 20.99217 | 20.88583 |
| 14942 | M422T9_1 | 1.03959  | 0.056014 | 0.15717  | 0.879036 | 0.89562  | UP   | 422.0108 | 422.0104 | 422.0109 | 9.445092 | 9.355317 |
| 14943 | M197T10_ | 1.022864 | 0.032614 | 0.157607 | 0.879085 | 0.895625 | UP   | 196.698  | 196.6979 | 196.6984 | 9.857425 | 9.747533 |
| 14944 | M396T10_ | 1.04878  | -0.06871 | -0.15808 | 0.879187 | 0.895636 | DOWN | 395.614  | 395.6137 | 395.6197 | 9.967367 | 9.842    |

|       |          |          |          |          |          |          |      |          |          |          |          |          |
|-------|----------|----------|----------|----------|----------|----------|------|----------|----------|----------|----------|----------|
| 14945 | M291T9_3 | 1.06229  | -0.08718 | -0.15695 | 0.879192 | 0.895636 | DOWN | 290.6369 | 290.6365 | 290.6378 | 9.167275 | 9.1175   |
| 14946 | M423T26_ | 1.036792 | -0.05213 | -0.15691 | 0.879211 | 0.895638 | DOWN | 422.6241 | 422.624  | 422.6244 | 25.6015  | 25.52717 |
| 14947 | M446T41_ | 1.018886 | 0.026993 | 0.15976  | 0.87934  | 0.895652 | UP   | 446.2746 | 446.2745 | 446.2748 | 41.30883 | 41.20117 |
| 14948 | M283T13  | 1.080005 | -0.11104 | -0.15686 | 0.87938  | 0.895656 | DOWN | 283.2378 | 283.2377 | 283.2385 | 12.95202 | 12.9082  |
| 14949 | M308T10_ | 1.027818 | 0.039585 | 0.156488 | 0.879537 | 0.895673 | UP   | 307.843  | 307.8426 | 307.8431 | 9.968992 | 9.859233 |
| 14950 | M481T10_ | 1.041513 | -0.05868 | -0.15641 | 0.879725 | 0.895693 | DOWN | 481.2829 | 481.2826 | 481.283  | 9.962617 | 9.843367 |
| 14951 | M565T9_1 | 1.057071 | 0.080072 | 0.156914 | 0.87974  | 0.895694 | UP   | 565.2839 | 565.2826 | 565.2841 | 8.953917 | 8.788667 |
| 14952 | M613T10_ | 1.037301 | -0.05283 | -0.1562  | 0.879755 | 0.895696 | DOWN | 613.1778 | 613.1763 | 613.1795 | 9.960817 | 9.843367 |
| 14953 | M343T9_5 | 1.07782  | 0.108117 | 0.160245 | 0.879907 | 0.895712 | UP   | 343.2387 | 343.2386 | 343.2388 | 9.457083 | 9.401917 |
| 14954 | M395T11_ | 1.039682 | -0.05614 | -0.15632 | 0.879909 | 0.895712 | DOWN | 395.2904 | 395.2901 | 395.2907 | 11.26757 | 11.22767 |
| 14955 | M459T11_ | 1.084365 | -0.11685 | -0.15624 | 0.879926 | 0.895714 | DOWN | 459.3168 | 459.3163 | 459.3171 | 10.98885 | 10.91987 |
| 14956 | M614T21  | 1.02305  | -0.03288 | -0.15631 | 0.880032 | 0.895725 | DOWN | 614.4471 | 614.4468 | 614.4477 | 20.75842 | 20.73467 |
| 14957 | M351T11_ | 1.018648 | -0.02666 | -0.15635 | 0.880045 | 0.895727 | DOWN | 351.3429 | 351.3427 | 351.3435 | 10.91997 | 10.88747 |
| 14958 | M632T11_ | 1.026981 | -0.03841 | -0.1557  | 0.880129 | 0.895736 | DOWN | 632.108  | 632.1075 | 632.1084 | 11.48675 | 11.47298 |
| 14959 | M240T10_ | 1.052397 | -0.07368 | -0.15559 | 0.880265 | 0.89575  | DOWN | 239.9823 | 239.9821 | 239.9824 | 9.956417 | 9.843367 |
| 14960 | M344T9_4 | 1.062046 | -0.08685 | -0.15553 | 0.880418 | 0.895766 | DOWN | 344.1109 | 344.1108 | 344.1119 | 9.3332   | 9.032567 |
| 14961 | M707T10_ | 1.031365 | 0.044556 | 0.155363 | 0.880496 | 0.895775 | UP   | 707.393  | 707.3923 | 707.3941 | 10.26718 | 10.19852 |
| 14962 | M454T41  | 1.064997 | -0.09085 | -0.1593  | 0.880657 | 0.895792 | DOWN | 454.2643 | 454.2642 | 454.2643 | 40.719   | 40.66883 |
| 14963 | M190T10_ | 1.020831 | 0.029744 | 0.157535 | 0.880787 | 0.895805 | UP   | 190.2367 | 190.2365 | 190.2367 | 9.932033 | 9.827283 |
| 14964 | M461T11_ | 1.036021 | 0.051054 | 0.155126 | 0.880828 | 0.89581  | UP   | 461.243  | 461.2427 | 461.2437 | 10.93428 | 10.877   |
| 14965 | M480T20_ | 1.056566 | -0.07938 | -0.15493 | 0.880829 | 0.89581  | DOWN | 480.3586 | 480.3584 | 480.3588 | 19.93867 | 19.90917 |
| 14966 | M227T11_ | 1.035083 | 0.049747 | 0.155403 | 0.880895 | 0.895817 | UP   | 227.3802 | 227.38   | 227.3806 | 10.91386 | 10.88995 |
| 14967 | M267T10_ | 1.033633 | -0.04772 | -0.15474 | 0.88092  | 0.89582  | DOWN | 266.5159 | 266.5156 | 266.516  | 9.964092 | 9.859233 |
| 14968 | M350T10_ | 1.027544 | -0.0392  | -0.15487 | 0.880951 | 0.895823 | DOWN | 350.2375 | 350.2372 | 350.2376 | 9.968992 | 9.859233 |
| 14969 | M948T10  | 1.098696 | 0.135792 | 0.154836 | 0.880965 | 0.895824 | UP   | 948.3915 | 948.3908 | 948.3922 | 9.98005  | 9.8914   |
| 14970 | M296T10_ | 1.047522 | 0.066981 | 0.157095 | 0.880974 | 0.895825 | UP   | 295.8755 | 295.8753 | 295.8756 | 9.939575 | 9.827283 |
| 14971 | M848T11_ | 1.028577 | 0.04065  | 0.154836 | 0.88101  | 0.895829 | UP   | 848.0077 | 848.0067 | 848.0079 | 10.9049  | 10.879   |
| 14972 | M322T10_ | 1.052867 | 0.074323 | 0.154496 | 0.881062 | 0.895835 | UP   | 321.7638 | 321.7633 | 321.7642 | 9.967367 | 9.843367 |
| 14973 | M613T27  | 1.052489 | -0.07381 | -0.15527 | 0.881204 | 0.89585  | DOWN | 613.3324 | 613.3313 | 613.3329 | 27.04175 | 27.01317 |
| 14974 | M429T21  | 1.0444   | -0.06267 | -0.1559  | 0.88124  | 0.895854 | DOWN | 429.2246 | 429.2239 | 429.2251 | 20.88833 | 20.8255  |
| 14975 | M258T11_ | 1.02475  | -0.03527 | -0.15416 | 0.881298 | 0.89586  | DOWN | 258.3931 | 258.393  | 258.3934 | 10.892   | 10.879   |
| 14976 | M256T10_ | 1.0362   | -0.0513  | -0.15514 | 0.881375 | 0.895868 | DOWN | 255.6034 | 255.5926 | 255.6035 | 9.960817 | 9.859233 |
| 14977 | M233T11_ | 1.054044 | 0.075936 | 0.154391 | 0.881441 | 0.895875 | UP   | 232.5352 | 232.535  | 232.5355 | 10.91734 | 10.89125 |
| 14978 | M221T10_ | 1.099117 | 0.136344 | 0.154011 | 0.881575 | 0.895889 | UP   | 221.3143 | 221.3142 | 221.3144 | 9.92825  | 9.811217 |
| 14979 | M454T7   | 1.075709 | 0.105288 | 0.153712 | 0.88165  | 0.895897 | UP   | 454.2127 | 454.2121 | 454.2131 | 7.363633 | 7.288367 |

|       |          |          |          |          |          |          |      |          |          |          |          |          |
|-------|----------|----------|----------|----------|----------|----------|------|----------|----------|----------|----------|----------|
| 14980 | M562T11_ | 1.012734 | -0.01825 | -0.15451 | 0.881725 | 0.895905 | DOWN | 561.9154 | 561.9149 | 561.916  | 10.91403 | 10.873   |
| 14981 | M787T10_ | 1.022418 | 0.031986 | 0.154972 | 0.881754 | 0.895908 | UP   | 787.4309 | 787.4304 | 787.4313 | 10.23992 | 10.17868 |
| 14982 | M244T10_ | 1.056475 | -0.07926 | -0.15617 | 0.88176  | 0.895909 | DOWN | 244.4157 | 244.4155 | 244.416  | 9.945125 | 9.843367 |
| 14983 | M244T9_2 | 1.099393 | -0.13671 | -0.15364 | 0.881818 | 0.895915 | DOWN | 243.7114 | 243.7078 | 243.7121 | 9.1503   | 9.132267 |
| 14984 | M325T10_ | 1.044573 | -0.06291 | -0.15392 | 0.881825 | 0.895915 | DOWN | 324.7663 | 324.7615 | 324.7665 | 9.956417 | 9.729367 |
| 14985 | M490T10_ | 1.055534 | 0.077973 | 0.153661 | 0.881843 | 0.895917 | UP   | 489.8753 | 489.8749 | 489.8827 | 9.929783 | 9.7565   |
| 14986 | M150T10_ | 1.037275 | 0.052798 | 0.153456 | 0.88185  | 0.895918 | UP   | 150.4109 | 150.403  | 150.4113 | 9.830183 | 9.7124   |
| 14987 | M449T23  | 1.035124 | -0.0498  | -0.1537  | 0.881901 | 0.895923 | DOWN | 449.2205 | 449.2202 | 449.2219 | 22.9435  | 22.857   |
| 14988 | M596T10_ | 1.048695 | 0.068595 | 0.15334  | 0.881928 | 0.895926 | UP   | 595.7477 | 595.7472 | 595.7482 | 9.954767 | 9.843367 |
| 14989 | M727T10_ | 1.034413 | 0.048812 | 0.15351  | 0.881942 | 0.895928 | UP   | 727.1277 | 727.1269 | 727.1281 | 9.958617 | 9.859233 |
| 14990 | M563T18  | 1.051434 | 0.072359 | 0.153512 | 0.88195  | 0.895929 | UP   | 563.376  | 563.3759 | 563.3763 | 18.34167 | 18.25267 |
| 14991 | M411T9_6 | 1.090654 | -0.12519 | -0.15391 | 0.882026 | 0.895937 | DOWN | 411.2308 | 411.2276 | 411.2316 | 9.170475 | 9.03845  |
| 14992 | M344T10_ | 1.029285 | 0.041643 | 0.153549 | 0.88206  | 0.89594  | UP   | 344.3499 | 344.3494 | 344.3503 | 9.972917 | 9.859233 |
| 14993 | M1860T10 | 1.024792 | -0.03533 | -0.15319 | 0.882136 | 0.895948 | DOWN | 1860.322 | 1860.321 | 1860.333 | 9.828367 | 9.728083 |
| 14994 | M420T10_ | 1.056482 | 0.079268 | 0.154323 | 0.882146 | 0.895949 | UP   | 419.8315 | 419.8309 | 419.8323 | 9.968992 | 9.859233 |
| 14995 | M490T9_2 | 1.069128 | 0.096435 | 0.15305  | 0.882166 | 0.895951 | UP   | 490.2468 | 490.2464 | 490.2469 | 9.166033 | 9.12675  |
| 14996 | M685T10_ | 1.023217 | 0.033112 | 0.154925 | 0.882186 | 0.895954 | UP   | 684.5902 | 684.5895 | 684.591  | 9.816317 | 9.699733 |
| 14997 | M618T10_ | 1.03816  | -0.05403 | -0.15305 | 0.882189 | 0.895954 | DOWN | 617.8503 | 617.8499 | 617.8509 | 10.39613 | 10.34372 |
| 14998 | M1179T10 | 1.039438 | 0.055804 | 0.154321 | 0.882233 | 0.895958 | UP   | 1178.719 | 1178.715 | 1178.721 | 9.999108 | 9.8914   |
| 14999 | M516T10_ | 1.043021 | -0.06077 | -0.15304 | 0.882294 | 0.895965 | DOWN | 516.286  | 516.2827 | 516.2901 | 10.07391 | 9.932567 |
| 15000 | M299T11_ | 1.031942 | -0.04536 | -0.15298 | 0.882355 | 0.895971 | DOWN | 298.8676 | 298.8667 | 298.8678 | 10.87572 | 10.83572 |
| 15001 | M625T17  | 1.037125 | -0.05259 | -0.15328 | 0.88243  | 0.895979 | DOWN | 625.3303 | 625.3299 | 625.3308 | 17.278   | 17.16133 |
| 15002 | M342T10_ | 1.127317 | -0.17289 | -0.15308 | 0.882457 | 0.895982 | DOWN | 341.5071 | 341.5069 | 341.5077 | 9.95605  | 9.859233 |
| 15003 | M299T30_ | 1.050284 | -0.07078 | -0.15267 | 0.882511 | 0.895988 | DOWN | 299.3134 | 299.3133 | 299.3135 | 29.69067 | 29.67467 |
| 15004 | M776T10  | 1.027064 | -0.03853 | -0.15251 | 0.88256  | 0.895993 | DOWN | 776.1057 | 776.1051 | 776.1065 | 9.945258 | 9.843367 |
| 15005 | M229T9_8 | 1.042873 | 0.060563 | 0.153273 | 0.882601 | 0.895997 | UP   | 229.1816 | 229.1813 | 229.1818 | 8.769175 | 8.697767 |
| 15006 | M634T10_ | 1.046577 | -0.06568 | -0.15241 | 0.882703 | 0.896008 | DOWN | 633.9975 | 633.9972 | 633.9982 | 9.816167 | 9.715683 |
| 15007 | M252T11_ | 1.023485 | -0.03349 | -0.15296 | 0.882719 | 0.89601  | DOWN | 252.3884 | 252.3883 | 252.3886 | 10.892   | 10.879   |
| 15008 | M513T36  | 1.046547 | 0.065637 | 0.15225  | 0.88276  | 0.896014 | UP   | 513.4195 | 513.4185 | 513.4196 | 36.13633 | 36.07033 |
| 15009 | M264T9_2 | 1.134959 | 0.18264  | 0.152745 | 0.882766 | 0.896015 | UP   | 263.6661 | 263.6658 | 263.6662 | 8.91235  | 8.83365  |
| 15010 | M350T10_ | 1.038332 | -0.05427 | -0.1553  | 0.882808 | 0.896019 | DOWN | 349.7351 | 349.727  | 349.7354 | 9.829175 | 9.699733 |
| 15011 | M207T9_2 | 1.129148 | 0.175234 | 0.152566 | 0.88291  | 0.89603  | UP   | 206.6602 | 206.6593 | 206.6607 | 9.224517 | 9.132267 |
| 15012 | M588T11  | 1.04745  | 0.066881 | 0.154633 | 0.882983 | 0.896038 | UP   | 588.4096 | 588.4095 | 588.41   | 10.5188  | 10.47197 |
| 15013 | M290T15  | 1.039574 | 0.055992 | 0.15331  | 0.882997 | 0.896039 | UP   | 290.0995 | 290.0992 | 290.0998 | 14.67787 | 14.63255 |
| 15014 | M291T10_ | 1.029899 | 0.042503 | 0.152362 | 0.883065 | 0.896046 | UP   | 291.1989 | 291.1988 | 291.1991 | 10.39613 | 10.34372 |

|       |          |          |          |          |          |          |      |          |          |          |          |          |
|-------|----------|----------|----------|----------|----------|----------|------|----------|----------|----------|----------|----------|
| 15015 | M312T11_ | 1.05521  | 0.077531 | 0.152165 | 0.8832   | 0.896061 | UP   | 311.728  | 311.7279 | 311.7284 | 10.89355 | 10.873   |
| 15016 | M543T24_ | 1.020512 | -0.02929 | -0.15167 | 0.883283 | 0.896069 | DOWN | 542.8836 | 542.8823 | 542.8838 | 23.982   | 23.906   |
| 15017 | M417T10_ | 1.026745 | -0.03808 | -0.15167 | 0.883492 | 0.896091 | DOWN | 417.2457 | 417.2453 | 417.2465 | 9.979342 | 9.859233 |
| 15018 | M805T10_ | 1.032283 | 0.045839 | 0.151409 | 0.883544 | 0.896097 | UP   | 805.0625 | 805.0618 | 805.0631 | 9.951283 | 9.843367 |
| 15019 | M407T10_ | 1.022172 | -0.03164 | -0.15146 | 0.883602 | 0.896103 | DOWN | 406.8617 | 406.8612 | 406.8619 | 9.902008 | 9.79535  |
| 15020 | M366T10_ | 1.036072 | -0.05112 | -0.15091 | 0.883805 | 0.896124 | DOWN | 366.2822 | 366.2814 | 366.2959 | 9.9174   | 9.45945  |
| 15021 | M627T9_1 | 1.061165 | 0.08565  | 0.150921 | 0.883911 | 0.896136 | UP   | 626.8796 | 626.8792 | 626.8806 | 8.926842 | 8.877267 |
| 15022 | M658T10_ | 1.026101 | -0.03717 | -0.15096 | 0.883999 | 0.896145 | DOWN | 657.5913 | 657.5906 | 657.5934 | 9.84325  | 9.73145  |
| 15023 | M932T10_ | 1.033656 | 0.047756 | 0.152574 | 0.884131 | 0.896159 | UP   | 931.8465 | 931.8448 | 931.8475 | 9.944392 | 9.843367 |
| 15024 | M537T10_ | 1.022709 | 0.032395 | 0.150926 | 0.88419  | 0.896165 | UP   | 537.4008 | 537.3997 | 537.4015 | 9.91765  | 9.827283 |
| 15025 | M274T9_3 | 1.046781 | -0.06596 | -0.15042 | 0.884311 | 0.896178 | DOWN | 273.9346 | 273.9344 | 273.9347 | 8.811833 | 8.75965  |
| 15026 | M464T37_ | 1.017482 | 0.025003 | 0.154622 | 0.884424 | 0.896189 | UP   | 464.285  | 464.285  | 464.2853 | 36.871   | 36.7845  |
| 15027 | M596T10_ | 1.042459 | 0.05999  | 0.152786 | 0.884571 | 0.896205 | UP   | 595.6493 | 595.6489 | 595.6497 | 9.979667 | 9.8753   |
| 15028 | M1115T10 | 1.059284 | 0.08309  | 0.149894 | 0.884635 | 0.896212 | UP   | 1114.685 | 1114.685 | 1114.686 | 9.960967 | 9.8914   |
| 15029 | M393T20_ | 1.138786 | 0.187497 | 0.149823 | 0.884668 | 0.896215 | UP   | 393.2687 | 393.2591 | 393.2725 | 20.274   | 20.25933 |
| 15030 | M227T10_ | 1.047696 | -0.06722 | -0.15032 | 0.884737 | 0.896222 | DOWN | 227.4828 | 227.4827 | 227.4831 | 9.809233 | 9.743667 |
| 15031 | M206T10_ | 1.027973 | -0.0398  | -0.14995 | 0.884754 | 0.896224 | DOWN | 205.613  | 205.6129 | 205.6131 | 9.996992 | 9.8914   |
| 15032 | M407T10_ | 1.066033 | 0.092251 | 0.150421 | 0.884759 | 0.896225 | UP   | 407.0684 | 407.0679 | 407.0689 | 9.967367 | 9.843367 |
| 15033 | M309T11_ | 1.017228 | -0.02464 | -0.15145 | 0.88485  | 0.896234 | DOWN | 309.217  | 309.2169 | 309.2174 | 10.90785 | 10.90197 |
| 15034 | M333T23  | 1.030499 | -0.04334 | -0.14953 | 0.884866 | 0.896236 | DOWN | 333.319  | 333.3188 | 333.3198 | 23.14717 | 23.13267 |
| 15035 | M417T20_ | 1.018925 | -0.02705 | -0.14983 | 0.884891 | 0.896239 | DOWN | 417.299  | 417.2989 | 417.2992 | 20.24517 | 20.23017 |
| 15036 | M198T10_ | 1.022335 | -0.03187 | -0.14947 | 0.884969 | 0.896247 | DOWN | 197.5518 | 197.545  | 197.5519 | 9.825492 | 9.699733 |
| 15037 | M559T10_ | 1.022293 | -0.03181 | -0.14948 | 0.885007 | 0.896251 | DOWN | 558.9983 | 558.9974 | 558.9988 | 10.25792 | 10.23422 |
| 15038 | M497T10_ | 1.041586 | 0.058782 | 0.149918 | 0.885022 | 0.896252 | UP   | 496.8809 | 496.8804 | 496.8818 | 10.08529 | 9.988    |
| 15039 | M320T10_ | 1.051164 | -0.07199 | -0.14976 | 0.885086 | 0.896259 | DOWN | 320.1186 | 320.1186 | 320.1188 | 9.967367 | 9.8753   |
| 15040 | M974T10_ | 1.021683 | 0.030947 | 0.149445 | 0.885163 | 0.896267 | UP   | 974.0081 | 974.0073 | 974.0104 | 9.967367 | 9.8914   |
| 15041 | M368T10_ | 1.055111 | -0.07739 | -0.15015 | 0.885204 | 0.896272 | DOWN | 367.518  | 367.5177 | 367.5185 | 9.968992 | 9.859233 |
| 15042 | M295T10_ | 1.056702 | -0.07957 | -0.14983 | 0.885276 | 0.896279 | DOWN | 294.6357 | 294.6348 | 294.6359 | 9.500225 | 9.416817 |
| 15043 | M452T9_7 | 1.028261 | 0.040206 | 0.150018 | 0.885287 | 0.89628  | UP   | 452.4099 | 452.4095 | 452.4106 | 9.186542 | 9.12675  |
| 15044 | M202T10_ | 1.061549 | 0.086172 | 0.149227 | 0.885345 | 0.896286 | UP   | 201.9656 | 201.9654 | 201.9658 | 9.968992 | 9.859233 |
| 15045 | M230T11_ | 1.044007 | -0.06213 | -0.14886 | 0.88535  | 0.896287 | DOWN | 229.6279 | 229.6276 | 229.6286 | 10.89907 | 10.85018 |
| 15046 | M629T25_ | 1.02348  | -0.03348 | -0.14884 | 0.885486 | 0.896301 | DOWN | 628.7823 | 628.7807 | 628.783  | 25.20158 | 25.17267 |
| 15047 | M420T11_ | 1.025766 | -0.0367  | -0.14937 | 0.885513 | 0.896304 | DOWN | 419.576  | 419.5755 | 419.5763 | 10.90553 | 10.873   |
| 15048 | M244T9_3 | 1.066237 | -0.09253 | -0.14881 | 0.885562 | 0.896309 | DOWN | 243.7381 | 243.7343 | 243.7399 | 9.18975  | 9.11795  |
| 15049 | M1215T18 | 1.035511 | 0.050343 | 0.151932 | 0.885569 | 0.89631  | UP   | 1214.602 | 1214.601 | 1214.603 | 18.07867 | 18.05517 |

|       |          |          |          |          |          |          |      |          |          |          |          |          |
|-------|----------|----------|----------|----------|----------|----------|------|----------|----------|----------|----------|----------|
| 15050 | M725T10_ | 1.016408 | 0.02348  | 0.149761 | 0.885625 | 0.896316 | UP   | 725.0112 | 725.0099 | 725.012  | 9.8397   | 9.715683 |
| 15051 | M429T10_ | 1.048918 | -0.0689  | -0.14865 | 0.885681 | 0.896322 | DOWN | 428.6871 | 428.6869 | 428.6878 | 9.964092 | 9.843367 |
| 15052 | M181T9_1 | 1.092483 | -0.12761 | -0.14824 | 0.885838 | 0.896338 | DOWN | 181.1297 | 181.1294 | 181.1302 | 9.3683   | 9.275917 |
| 15053 | M696T3   | 1.073338 | -0.1021  | -0.14915 | 0.885866 | 0.896341 | DOWN | 695.5064 | 695.5062 | 695.5073 | 3.31915  | 3.2799   |
| 15054 | M529T11_ | 1.048848 | -0.06881 | -0.14817 | 0.885881 | 0.896343 | DOWN | 528.7327 | 528.7325 | 528.7333 | 11.22177 | 11.18047 |
| 15055 | M316T41  | 1.020179 | 0.028822 | 0.14837  | 0.885942 | 0.896349 | UP   | 316.1752 | 316.1751 | 316.1756 | 40.50333 | 40.28033 |
| 15056 | M241T10_ | 1.047755 | 0.067301 | 0.148221 | 0.885947 | 0.896349 | UP   | 241.4622 | 241.4619 | 241.4624 | 9.979342 | 9.8753   |
| 15057 | M323T10_ | 1.037071 | -0.05251 | -0.14806 | 0.885975 | 0.896352 | DOWN | 322.831  | 322.8308 | 322.8313 | 9.957333 | 9.843367 |
| 15058 | M678T10_ | 1.035602 | 0.050469 | 0.149685 | 0.885993 | 0.896354 | UP   | 678.4633 | 678.4623 | 678.4636 | 9.834558 | 9.696683 |
| 15059 | M633T10_ | 1.055398 | -0.07779 | -0.14809 | 0.886028 | 0.896358 | DOWN | 633.1888 | 633.1883 | 633.1902 | 9.95605  | 9.843367 |
| 15060 | M440T11_ | 1.038871 | -0.05502 | -0.14805 | 0.886043 | 0.89636  | DOWN | 440.3685 | 440.3684 | 440.3688 | 10.90522 | 10.879   |
| 15061 | M615T19  | 1.048956 | 0.068955 | 0.149764 | 0.886077 | 0.896363 | UP   | 615.028  | 615.0277 | 615.0286 | 18.6435  | 18.629   |
| 15062 | M196T10_ | 1.028355 | 0.040338 | 0.151067 | 0.886078 | 0.896363 | UP   | 196.4575 | 196.4574 | 196.4576 | 9.8207   | 9.715683 |
| 15063 | M1967T10 | 1.040903 | -0.05783 | -0.14787 | 0.886103 | 0.896366 | DOWN | 1966.626 | 1966.62  | 1966.629 | 9.946467 | 9.859233 |
| 15064 | M232T11_ | 1.035748 | -0.05067 | -0.14789 | 0.886123 | 0.896368 | DOWN | 231.8746 | 231.8743 | 231.8748 | 10.8914  | 10.879   |
| 15065 | M907T10  | 1.034457 | 0.048873 | 0.14985  | 0.886138 | 0.896369 | UP   | 906.6843 | 906.6829 | 906.6846 | 10.16158 | 9.864767 |
| 15066 | M313T9_8 | 1.021845 | -0.03118 | -0.14768 | 0.886253 | 0.896382 | DOWN | 313.1668 | 313.1665 | 313.1671 | 9.289892 | 9.129317 |
| 15067 | M317T28  | 1.024023 | -0.03425 | -0.14909 | 0.886311 | 0.896388 | DOWN | 317.3241 | 317.3239 | 317.3243 | 28.12742 | 28.11333 |
| 15068 | M893T35  | 1.0517   | 0.072723 | 0.14746  | 0.886455 | 0.896403 | UP   | 892.6209 | 892.6201 | 892.6219 | 35.43042 | 35.401   |
| 15069 | M258T9_4 | 1.08421  | 0.116645 | 0.147405 | 0.886462 | 0.896403 | UP   | 258.0307 | 258.0304 | 258.0308 | 9.064833 | 9.031633 |
| 15070 | M481T11_ | 1.021009 | 0.029995 | 0.147898 | 0.886517 | 0.896409 | UP   | 481.0187 | 481.0181 | 481.019  | 10.89875 | 10.8646  |
| 15071 | M899T10_ | 1.03413  | -0.04842 | -0.14795 | 0.886544 | 0.896412 | DOWN | 899.2489 | 899.2483 | 899.2495 | 9.960967 | 9.859233 |
| 15072 | M420T10_ | 1.029211 | 0.041539 | 0.14999  | 0.886549 | 0.896413 | UP   | 419.9349 | 419.9345 | 419.9351 | 9.939575 | 9.827283 |
| 15073 | M433T22  | 1.026177 | 0.037279 | 0.147584 | 0.886609 | 0.896419 | UP   | 433.3139 | 433.3133 | 433.3145 | 21.68233 | 21.65233 |
| 15074 | M541T12  | 1.02883  | -0.04101 | -0.14954 | 0.886613 | 0.896419 | DOWN | 541.372  | 541.3719 | 541.3721 | 11.63499 | 11.60717 |
| 15075 | M265T9_1 | 1.03609  | -0.05115 | -0.14977 | 0.886729 | 0.896431 | DOWN | 264.6675 | 264.667  | 264.6678 | 8.889467 | 8.847333 |
| 15076 | M503T10_ | 1.044716 | 0.063111 | 0.147053 | 0.886731 | 0.896432 | UP   | 503.0581 | 503.0577 | 503.0587 | 9.967367 | 9.859233 |
| 15077 | M569T9_3 | 1.058996 | -0.0827  | -0.14855 | 0.886739 | 0.896432 | DOWN | 569.2279 | 569.2269 | 569.2282 | 9.429367 | 9.38595  |
| 15078 | M224T7_1 | 1.037092 | 0.052544 | 0.147094 | 0.886749 | 0.896433 | UP   | 224.1619 | 224.1618 | 224.1619 | 6.750783 | 6.677617 |
| 15079 | M181T9_2 | 1.050046 | 0.070453 | 0.146921 | 0.886837 | 0.896443 | UP   | 181.4213 | 181.4211 | 181.4214 | 9.332142 | 9.126783 |
| 15080 | M391T17  | 1.018882 | 0.026987 | 0.148266 | 0.886887 | 0.896448 | UP   | 391.2951 | 391.2949 | 391.2953 | 16.91358 | 16.88433 |
| 15081 | M637T9_2 | 1.064363 | 0.08999  | 0.147838 | 0.886912 | 0.896451 | UP   | 636.9771 | 636.9767 | 636.9798 | 9.159725 | 9.133667 |
| 15082 | M250T7_2 | 1.053722 | -0.07549 | -0.14755 | 0.887001 | 0.89646  | DOWN | 250.1602 | 250.16   | 250.1677 | 7.056233 | 6.790933 |
| 15083 | M426T11_ | 1.028224 | 0.040155 | 0.146567 | 0.887104 | 0.896471 | UP   | 426.4298 | 426.4296 | 426.43   | 10.91152 | 10.879   |
| 15084 | M815T10_ | 1.034013 | -0.04825 | -0.14759 | 0.887164 | 0.896477 | DOWN | 814.8183 | 814.8173 | 814.8185 | 9.964092 | 9.859233 |

|       |          |          |          |          |          |          |      |          |          |          |          |          |
|-------|----------|----------|----------|----------|----------|----------|------|----------|----------|----------|----------|----------|
| 15085 | M317T9_7 | 1.056575 | -0.07939 | -0.14732 | 0.887171 | 0.896478 | DOWN | 317.463  | 317.4627 | 317.463  | 9.29345  | 9.250817 |
| 15086 | M257T10_ | 1.031956 | 0.045381 | 0.146804 | 0.887189 | 0.89648  | UP   | 256.7847 | 256.7844 | 256.7849 | 9.962617 | 9.859233 |
| 15087 | M315T25_ | 1.057598 | -0.08079 | -0.14627 | 0.887411 | 0.896503 | DOWN | 314.8944 | 314.8942 | 314.8946 | 25.257   | 25.20167 |
| 15088 | M524T43_ | 1.050624 | -0.07125 | -0.14949 | 0.887453 | 0.896507 | DOWN | 524.3061 | 524.3059 | 524.3063 | 42.7545  | 42.53883 |
| 15089 | M791T22  | 1.027031 | -0.03848 | -0.14632 | 0.887558 | 0.896518 | DOWN | 790.5524 | 790.552  | 790.5528 | 22.12858 | 22.117   |
| 15090 | M482T10_ | 1.059345 | 0.083172 | 0.146665 | 0.887651 | 0.896528 | UP   | 482.379  | 482.3774 | 482.3803 | 10.04175 | 9.859233 |
| 15091 | M518T9_1 | 1.051447 | -0.07238 | -0.14588 | 0.887772 | 0.89654  | DOWN | 517.8577 | 517.8567 | 517.8594 | 8.849475 | 8.730433 |
| 15092 | M478T21_ | 1.049837 | -0.07016 | -0.14582 | 0.887781 | 0.896541 | DOWN | 478.3521 | 478.3519 | 478.3524 | 21.46542 | 21.44967 |
| 15093 | M1285T10 | 1.034044 | -0.0483  | -0.14601 | 0.887824 | 0.896546 | DOWN | 1285.061 | 1285.057 | 1285.067 | 9.94405  | 9.8753   |
| 15094 | M730T11_ | 1.016125 | -0.02308 | -0.14663 | 0.887943 | 0.896558 | DOWN | 729.5256 | 729.5251 | 729.5257 | 10.61813 | 10.5836  |
| 15095 | M286T25  | 1.025388 | 0.03617  | 0.146429 | 0.88797  | 0.896561 | UP   | 286.2737 | 286.2735 | 286.274  | 25.16633 | 25.15567 |
| 15096 | M396T11_ | 1.02172  | 0.030999 | 0.145711 | 0.88804  | 0.896568 | UP   | 396.0478 | 396.0475 | 396.048  | 10.892   | 10.8646  |
| 15097 | M428T9_5 | 1.107202 | 0.146919 | 0.147581 | 0.888085 | 0.896573 | UP   | 428.2224 | 428.2165 | 428.2309 | 9.3907   | 9.191283 |
| 15098 | M313T22_ | 1.065133 | -0.09103 | -0.14594 | 0.88819  | 0.896584 | DOWN | 313.2198 | 313.2197 | 313.2202 | 22.05333 | 22.01333 |
| 15099 | M329T9_1 | 1.124608 | -0.16942 | -0.14526 | 0.888261 | 0.896592 | DOWN | 328.9413 | 328.9409 | 328.9414 | 9.088183 | 9.031633 |
| 15100 | M349T10_ | 1.022828 | -0.03256 | -0.14547 | 0.888325 | 0.896598 | DOWN | 348.8158 | 348.8154 | 348.816  | 9.979342 | 9.859233 |
| 15101 | M430T9_1 | 1.026224 | 0.037346 | 0.145073 | 0.888329 | 0.896599 | UP   | 429.5272 | 429.5262 | 429.5292 | 9.27355  | 9.129317 |
| 15102 | M539T10_ | 1.040132 | -0.05677 | -0.14526 | 0.888425 | 0.896609 | DOWN | 539.2216 | 539.2214 | 539.222  | 9.964092 | 9.8753   |
| 15103 | M684T18  | 1.043416 | 0.061314 | 0.145913 | 0.888436 | 0.89661  | UP   | 683.5108 | 683.5096 | 683.5109 | 18.066   | 18.0195  |
| 15104 | M399T10_ | 1.031314 | 0.044483 | 0.147408 | 0.888467 | 0.896613 | UP   | 398.9298 | 398.929  | 398.9303 | 9.944392 | 9.827283 |
| 15105 | M256T11_ | 1.037567 | -0.05321 | -0.14489 | 0.88849  | 0.896615 | DOWN | 255.5264 | 255.5262 | 255.5272 | 10.91734 | 10.87487 |
| 15106 | M340T10_ | 1.228092 | -0.29642 | -0.14491 | 0.888515 | 0.896618 | DOWN | 340.3256 | 340.317  | 340.3274 | 9.874067 | 9.77435  |
| 15107 | M399T11_ | 1.055013 | -0.07726 | -0.14473 | 0.888516 | 0.896618 | DOWN | 398.7954 | 398.7952 | 398.7956 | 10.89193 | 10.8646  |
| 15108 | M836T13  | 1.06079  | -0.08514 | -0.14576 | 0.888654 | 0.896633 | DOWN | 836.4493 | 836.4482 | 836.4503 | 13.1346  | 13.1129  |
| 15109 | M350T10_ | 1.025117 | 0.035788 | 0.144817 | 0.888872 | 0.896655 | UP   | 349.7524 | 349.7521 | 349.7529 | 9.823575 | 9.715683 |
| 15110 | M484T10_ | 1.028722 | -0.04085 | -0.14429 | 0.888924 | 0.896661 | DOWN | 483.6373 | 483.636  | 483.6377 | 9.962617 | 9.859233 |
| 15111 | M1718T10 | 1.024843 | 0.035403 | 0.145312 | 0.88893  | 0.896661 | UP   | 1718.247 | 1718.244 | 1718.252 | 9.829325 | 9.73145  |
| 15112 | M395T9_8 | 1.118611 | 0.161708 | 0.144052 | 0.889041 | 0.896673 | UP   | 395.2355 | 395.2341 | 395.2435 | 9.032083 | 8.8398   |
| 15113 | M737T9   | 1.082432 | -0.11428 | -0.14441 | 0.889046 | 0.896673 | DOWN | 736.7708 | 736.7696 | 736.7718 | 9.3332   | 9.234417 |
| 15114 | M1133T10 | 1.037631 | -0.05329 | -0.14394 | 0.889247 | 0.896694 | DOWN | 1133.469 | 1133.466 | 1133.473 | 9.825342 | 9.699733 |
| 15115 | M687T10_ | 1.040167 | -0.05682 | -0.14372 | 0.889281 | 0.896698 | DOWN | 687.3988 | 687.3983 | 687.4002 | 9.845208 | 9.746783 |
| 15116 | M243T27  | 1.077059 | -0.1071  | -0.14478 | 0.889287 | 0.896699 | DOWN | 243.1352 | 243.1351 | 243.1353 | 27.24867 | 27.22733 |
| 15117 | M1336T10 | 1.052256 | -0.07349 | -0.1442  | 0.889291 | 0.896699 | DOWN | 1336.183 | 1336.181 | 1336.186 | 9.967367 | 9.859233 |
| 15118 | M754T9   | 1.068274 | 0.095282 | 0.144119 | 0.889328 | 0.896703 | UP   | 753.669  | 753.667  | 753.6712 | 9.363217 | 9.0511   |
| 15119 | M893T11_ | 1.023817 | -0.03396 | -0.14344 | 0.889567 | 0.896728 | DOWN | 893.1415 | 893.1406 | 893.142  | 10.90628 | 10.8646  |



|       |          |          |          |          |          |          |      |          |          |          |          |          |
|-------|----------|----------|----------|----------|----------|----------|------|----------|----------|----------|----------|----------|
| 15120 | M371T11_ | 1.075661 | 0.105223 | 0.143658 | 0.889573 | 0.896728 | UP   | 371.0823 | 371.082  | 371.0836 | 10.91782 | 10.88747 |
| 15121 | M330T10_ | 1.062465 | -0.08741 | -0.14374 | 0.889636 | 0.896735 | DOWN | 330.4005 | 330.3897 | 330.401  | 9.960967 | 9.816167 |
| 15122 | M1377T10 | 1.026677 | -0.03798 | -0.14458 | 0.889644 | 0.896736 | DOWN | 1376.771 | 1376.769 | 1376.772 | 10.03167 | 9.923533 |
| 15123 | M377T11_ | 1.047618 | 0.067113 | 0.143226 | 0.889775 | 0.896749 | UP   | 377.4581 | 377.4564 | 377.459  | 10.90553 | 10.8926  |
| 15124 | M349T10_ | 1.008765 | -0.01259 | -0.14523 | 0.88997  | 0.89677  | DOWN | 348.8637 | 348.8636 | 348.8638 | 9.8397   | 9.73145  |
| 15125 | M340T10_ | 1.174961 | 0.232613 | 0.142783 | 0.889999 | 0.896773 | UP   | 340.422  | 340.4213 | 340.4349 | 9.863258 | 9.73145  |
| 15126 | M206T32  | 1.029176 | -0.04149 | -0.14379 | 0.890001 | 0.896773 | DOWN | 206.089  | 206.0889 | 206.0891 | 32.46017 | 32.44567 |
| 15127 | M536T10_ | 1.044254 | -0.06247 | -0.14395 | 0.890064 | 0.896779 | DOWN | 535.6683 | 535.668  | 535.6693 | 9.968992 | 9.859233 |
| 15128 | M152T10_ | 1.030809 | -0.04378 | -0.14262 | 0.890173 | 0.896791 | DOWN | 151.8121 | 151.8121 | 151.8124 | 9.970617 | 9.886083 |
| 15129 | M181T10_ | 1.054804 | -0.07698 | -0.14296 | 0.89031  | 0.896805 | DOWN | 180.6645 | 180.6642 | 180.6646 | 9.968992 | 9.869467 |
| 15130 | M483T10_ | 1.055719 | -0.07823 | -0.14257 | 0.890389 | 0.896813 | DOWN | 482.5628 | 482.5625 | 482.563  | 9.967367 | 9.8753   |
| 15131 | M703T10_ | 1.024901 | -0.03548 | -0.14285 | 0.890432 | 0.896818 | DOWN | 703.1638 | 703.1631 | 703.1641 | 9.830283 | 9.699733 |
| 15132 | M177T10_ | 1.03152  | 0.044771 | 0.142667 | 0.890456 | 0.89682  | UP   | 177.2636 | 177.2635 | 177.2637 | 9.8374   | 9.743767 |
| 15133 | M258T11_ | 1.046709 | -0.06586 | -0.14226 | 0.890497 | 0.896824 | DOWN | 257.6397 | 257.6395 | 257.6484 | 10.84487 | 10.82935 |
| 15134 | M431T9_4 | 1.047563 | 0.067037 | 0.143523 | 0.890508 | 0.896826 | UP   | 430.9248 | 430.9221 | 430.9274 | 9.2468   | 9.07525  |
| 15135 | M551T10_ | 1.043679 | 0.061679 | 0.144866 | 0.890542 | 0.896829 | UP   | 551.1468 | 551.1464 | 551.1473 | 9.945775 | 9.827283 |
| 15136 | M1242T10 | 1.032708 | -0.04643 | -0.14359 | 0.890558 | 0.896831 | DOWN | 1242.092 | 1242.09  | 1242.092 | 9.968992 | 9.853533 |
| 15137 | M406T43_ | 1.054471 | 0.076519 | 0.144326 | 0.890607 | 0.896836 | UP   | 406.207  | 406.2068 | 406.207  | 42.61083 | 42.4095  |
| 15138 | M331T11_ | 1.033354 | 0.047335 | 0.142504 | 0.890625 | 0.896838 | UP   | 330.7098 | 330.7093 | 330.7114 | 10.92208 | 10.8914  |
| 15139 | M195T10_ | 1.026095 | -0.03716 | -0.14245 | 0.890657 | 0.896841 | DOWN | 195.2016 | 195.2013 | 195.2018 | 9.917167 | 9.811217 |
| 15140 | M482T11_ | 1.03134  | 0.04452  | 0.143947 | 0.890683 | 0.896844 | UP   | 482.2865 | 482.2836 | 482.2871 | 10.93208 | 10.879   |
| 15141 | M813T21  | 1.021933 | -0.0313  | -0.14176 | 0.890781 | 0.896854 | DOWN | 812.535  | 812.5347 | 812.5352 | 21.42867 | 21.42067 |
| 15142 | M1610T10 | 1.07131  | 0.099376 | 0.141928 | 0.890802 | 0.896856 | UP   | 1610.368 | 1610.366 | 1610.37  | 9.931675 | 9.843367 |
| 15143 | M433T9_4 | 1.026064 | -0.03712 | -0.14168 | 0.890866 | 0.896863 | DOWN | 432.8503 | 432.8497 | 432.8513 | 9.28135  | 9.129317 |
| 15144 | M416T41_ | 1.013999 | -0.02006 | -0.14566 | 0.890997 | 0.896876 | DOWN | 416.2641 | 416.2639 | 416.2642 | 41.33033 | 41.28733 |
| 15145 | M460T11_ | 1.03917  | -0.05543 | -0.14104 | 0.891329 | 0.896911 | DOWN | 460.4121 | 460.4117 | 460.4137 | 10.93231 | 10.88747 |
| 15146 | M298T11_ | 1.017999 | -0.02574 | -0.14164 | 0.89133  | 0.896911 | DOWN | 298.2068 | 298.2066 | 298.2069 | 11.48993 | 11.47298 |
| 15147 | M854T10_ | 1.04559  | -0.06432 | -0.14256 | 0.891334 | 0.896911 | DOWN | 853.5272 | 853.5238 | 853.5292 | 9.952017 | 9.843367 |
| 15148 | M390T10_ | 1.06103  | 0.085466 | 0.141121 | 0.891346 | 0.896913 | UP   | 390.1201 | 390.1196 | 390.124  | 9.944742 | 9.859233 |
| 15149 | M1988T10 | 1.051532 | -0.07249 | -0.14349 | 0.891435 | 0.896922 | DOWN | 1988.344 | 1988.341 | 1988.349 | 9.8374   | 9.715683 |
| 15150 | M384T27  | 1.018508 | -0.02646 | -0.14074 | 0.891561 | 0.896935 | DOWN | 384.3468 | 384.3466 | 384.3469 | 26.83892 | 26.82383 |
| 15151 | M350T45_ | 1.026509 | -0.03775 | -0.14067 | 0.891608 | 0.89694  | DOWN | 350.2172 | 350.2171 | 350.2173 | 44.6385  | 44.55233 |
| 15152 | M297T10_ | 1.022127 | -0.03157 | -0.14109 | 0.891717 | 0.896951 | DOWN | 297.3267 | 297.3265 | 297.3268 | 9.970617 | 9.859233 |
| 15153 | M762T36  | 1.034136 | -0.04843 | -0.14051 | 0.891787 | 0.896958 | DOWN | 761.5454 | 761.545  | 761.546  | 35.92033 | 35.895   |
| 15154 | M862T11_ | 1.042134 | -0.05954 | -0.1406  | 0.891821 | 0.896962 | DOWN | 862.4889 | 862.4881 | 862.4908 | 10.76654 | 10.69123 |

|       |          |          |          |          |          |          |      |          |          |          |          |          |
|-------|----------|----------|----------|----------|----------|----------|------|----------|----------|----------|----------|----------|
| 15155 | M305T11_ | 1.029721 | 0.042253 | 0.141584 | 0.89202  | 0.896982 | UP   | 304.6183 | 304.6178 | 304.6201 | 10.92598 | 10.88747 |
| 15156 | M318T11_ | 1.033962 | -0.04818 | -0.14019 | 0.892046 | 0.896985 | DOWN | 318.3732 | 318.3726 | 318.3745 | 10.92487 | 10.87487 |
| 15157 | M606T10_ | 1.032416 | -0.04602 | -0.14251 | 0.892103 | 0.896991 | DOWN | 605.8836 | 605.8829 | 605.885  | 9.65565  | 9.52595  |
| 15158 | M172T10_ | 1.043629 | -0.06161 | -0.14069 | 0.892114 | 0.896992 | DOWN | 171.9263 | 171.926  | 171.9265 | 9.968992 | 9.859233 |
| 15159 | M238T9_1 | 1.098182 | -0.13512 | -0.14074 | 0.892115 | 0.896992 | DOWN | 237.8529 | 237.852  | 237.8534 | 9.280767 | 9.204617 |
| 15160 | M751T10_ | 1.031331 | 0.044507 | 0.140776 | 0.892144 | 0.896995 | UP   | 751.4203 | 751.4197 | 751.4205 | 10.38895 | 10.32768 |
| 15161 | M390T11_ | 1.020154 | -0.02879 | -0.14036 | 0.892149 | 0.896996 | DOWN | 389.6929 | 389.6926 | 389.6932 | 10.892   | 10.879   |
| 15162 | M554T11_ | 1.039308 | -0.05562 | -0.14109 | 0.892201 | 0.897001 | DOWN | 554.0387 | 554.0357 | 554.0394 | 10.92593 | 10.879   |
| 15163 | M454T10_ | 1.025087 | -0.03575 | -0.14232 | 0.892366 | 0.897018 | DOWN | 454.4367 | 454.4363 | 454.4368 | 9.866992 | 9.853633 |
| 15164 | M245T39_ | 1.040013 | 0.056601 | 0.143593 | 0.892507 | 0.897033 | UP   | 245.1381 | 245.1379 | 245.1382 | 39.44567 | 39.3595  |
| 15165 | M554T29_ | 1.045893 | 0.064735 | 0.140151 | 0.89254  | 0.897036 | UP   | 554.3961 | 554.3955 | 554.397  | 28.75283 | 28.70617 |
| 15166 | M228T25  | 1.025069 | -0.03572 | -0.13944 | 0.892553 | 0.897038 | DOWN | 228.2681 | 228.2679 | 228.2683 | 25.22333 | 25.20267 |
| 15167 | M520T9_5 | 1.121565 | 0.165513 | 0.141004 | 0.892558 | 0.897038 | UP   | 519.94   | 519.9392 | 519.9406 | 9.211342 | 9.06855  |
| 15168 | M492T9_1 | 1.033768 | 0.047913 | 0.139632 | 0.892583 | 0.897041 | UP   | 491.7944 | 491.7938 | 491.7957 | 9.150858 | 9.05865  |
| 15169 | M254T10_ | 1.037055 | -0.05249 | -0.14094 | 0.892774 | 0.897061 | DOWN | 253.6205 | 253.6202 | 253.6207 | 9.758283 | 9.636483 |
| 15170 | M952T10_ | 1.078735 | 0.109341 | 0.139915 | 0.892853 | 0.897069 | UP   | 952.3793 | 952.3782 | 952.3797 | 9.8374   | 9.830083 |
| 15171 | M1130T10 | 1.033979 | 0.048207 | 0.139889 | 0.893006 | 0.897084 | UP   | 1129.618 | 1129.616 | 1129.622 | 9.851025 | 9.73145  |
| 15172 | M365T9_5 | 1.041805 | 0.059086 | 0.140171 | 0.893038 | 0.897088 | UP   | 364.749  | 364.7478 | 364.7515 | 9.16125  | 9.111033 |
| 15173 | M482T11_ | 1.036131 | 0.051207 | 0.141959 | 0.893092 | 0.897093 | UP   | 482.217  | 482.2166 | 482.2291 | 10.87703 | 10.8214  |
| 15174 | M207T11_ | 1.041043 | -0.05803 | -0.13862 | 0.893296 | 0.897114 | DOWN | 207.4629 | 207.4627 | 207.4636 | 10.89875 | 10.89125 |
| 15175 | M382T10_ | 1.07135  | 0.09943  | 0.140242 | 0.89334  | 0.897119 | UP   | 381.7404 | 381.7401 | 381.7408 | 10.30302 | 10.23087 |
| 15176 | M682T10_ | 1.013484 | 0.019323 | 0.139485 | 0.893353 | 0.89712  | UP   | 682.4774 | 682.4768 | 682.4784 | 9.830558 | 9.715683 |
| 15177 | M758T10_ | 1.026803 | -0.03816 | -0.13821 | 0.893493 | 0.897135 | DOWN | 758.1805 | 758.1789 | 758.1807 | 9.968992 | 9.859233 |
| 15178 | M614T10_ | 1.02104  | -0.03004 | -0.13944 | 0.89351  | 0.897137 | DOWN | 614.4205 | 614.4202 | 614.4208 | 10.39613 | 10.34372 |
| 15179 | M153T9_2 | 1.051287 | 0.072156 | 0.1408   | 0.893513 | 0.897137 | UP   | 152.8081 | 152.8076 | 152.8083 | 9.275917 | 9.234417 |
| 15180 | M700T10_ | 1.011781 | -0.0169  | -0.1387  | 0.893518 | 0.897137 | DOWN | 700.012  | 700.0117 | 700.0123 | 9.858983 | 9.747533 |
| 15181 | M464T10_ | 1.031606 | 0.044892 | 0.139725 | 0.893549 | 0.897141 | UP   | 464.2464 | 464.2457 | 464.2468 | 9.849433 | 9.801833 |
| 15182 | M466T10_ | 1.00738  | 0.010607 | 0.141603 | 0.893563 | 0.897142 | UP   | 465.8114 | 465.8111 | 465.8116 | 9.818583 | 9.683817 |
| 15183 | M1151T10 | 1.028887 | -0.04108 | -0.13809 | 0.893709 | 0.897157 | DOWN | 1151.199 | 1151.198 | 1151.2   | 9.972917 | 9.859233 |
| 15184 | M1031T10 | 1.039702 | -0.05617 | -0.13942 | 0.893754 | 0.897162 | DOWN | 1031.151 | 1031.15  | 1031.153 | 9.968992 | 9.853533 |
| 15185 | M360T32  | 1.027103 | -0.03858 | -0.13907 | 0.893784 | 0.897165 | DOWN | 360.3106 | 360.3105 | 360.3108 | 32.30858 | 32.27183 |
| 15186 | M259T24_ | 1.059663 | -0.08361 | -0.13961 | 0.89379  | 0.897165 | DOWN | 259.1648 | 259.1647 | 259.1652 | 24.20383 | 24.18517 |
| 15187 | M258T9_5 | 1.121914 | 0.165962 | 0.137696 | 0.893893 | 0.897176 | UP   | 258.4318 | 258.4317 | 258.432  | 9.055958 | 9.046783 |
| 15188 | M706T30  | 1.028301 | -0.04026 | -0.13852 | 0.893947 | 0.897182 | DOWN | 705.519  | 705.5185 | 705.5192 | 30.25217 | 30.25117 |
| 15189 | M273T10_ | 1.027747 | 0.039485 | 0.137625 | 0.893966 | 0.897184 | UP   | 273.4273 | 273.4269 | 273.4275 | 9.968992 | 9.843367 |

|       |          |          |          |          |          |          |      |          |          |          |          |          |
|-------|----------|----------|----------|----------|----------|----------|------|----------|----------|----------|----------|----------|
| 15190 | M564T43_ | 1.031197 | 0.044319 | 0.139904 | 0.894015 | 0.897189 | UP   | 564.3012 | 564.3011 | 564.3015 | 43.27975 | 43.05683 |
| 15191 | M518T10_ | 1.020266 | -0.02894 | -0.14066 | 0.89409  | 0.897196 | DOWN | 518.4825 | 518.4819 | 518.4839 | 9.957333 | 9.843367 |
| 15192 | M507T11_ | 1.036547 | 0.051785 | 0.13833  | 0.894186 | 0.897206 | UP   | 506.5758 | 506.5754 | 506.5776 | 10.92378 | 10.87487 |
| 15193 | M683T10_ | 1.043145 | 0.06094  | 0.137969 | 0.894357 | 0.897224 | UP   | 682.6666 | 682.6658 | 682.6675 | 9.967367 | 9.843367 |
| 15194 | M613T10_ | 1.043072 | -0.06084 | -0.13774 | 0.894383 | 0.897227 | DOWN | 613.4802 | 613.4795 | 613.4804 | 9.968992 | 9.859233 |
| 15195 | M532T41_ | 1.029822 | 0.042395 | 0.139742 | 0.894407 | 0.897229 | UP   | 532.3112 | 532.311  | 532.3117 | 41.2155  | 41.086   |
| 15196 | M474T10_ | 1.027524 | 0.039172 | 0.140035 | 0.894636 | 0.897253 | UP   | 473.8405 | 473.8402 | 473.8414 | 9.633442 | 9.510117 |
| 15197 | M438T9_8 | 1.051324 | -0.07221 | -0.13684 | 0.894673 | 0.897257 | DOWN | 438.2392 | 438.2385 | 438.2395 | 8.941383 | 8.749883 |
| 15198 | M656T10_ | 1.022947 | -0.03273 | -0.13917 | 0.894678 | 0.897257 | DOWN | 656.3746 | 656.3731 | 656.375  | 9.964092 | 9.843367 |
| 15199 | M368T11_ | 1.036792 | 0.052126 | 0.13659  | 0.89474  | 0.897263 | UP   | 367.614  | 367.6135 | 367.6144 | 10.90765 | 10.879   |
| 15200 | M499T9_4 | 1.021991 | -0.03138 | -0.13708 | 0.894761 | 0.897266 | DOWN | 498.9432 | 498.9421 | 498.9451 | 9.197983 | 9.12675  |
| 15201 | M386T11_ | 1.028109 | 0.039993 | 0.136614 | 0.894773 | 0.897267 | UP   | 385.7605 | 385.7603 | 385.7607 | 10.8926  | 10.873   |
| 15202 | M506T23  | 1.037166 | 0.052646 | 0.136677 | 0.894815 | 0.897271 | UP   | 505.8446 | 505.8443 | 505.845  | 22.58133 | 22.55733 |
| 15203 | M695T10_ | 1.062486 | 0.087445 | 0.137042 | 0.89486  | 0.897276 | UP   | 694.8052 | 694.8039 | 694.8058 | 9.823575 | 9.681183 |
| 15204 | M376T10_ | 1.037295 | 0.052826 | 0.136525 | 0.894889 | 0.897279 | UP   | 375.6608 | 375.6606 | 375.661  | 9.968992 | 9.859233 |
| 15205 | M637T14  | 1.036861 | -0.05222 | -0.13635 | 0.894912 | 0.897281 | DOWN | 637.49   | 637.4891 | 637.4904 | 14.01934 | 13.96093 |
| 15206 | M463T10_ | 1.033895 | 0.04809  | 0.138326 | 0.89498  | 0.897288 | UP   | 462.8499 | 462.8497 | 462.8504 | 9.636225 | 9.510117 |
| 15207 | M207T9_2 | 1.060275 | 0.084439 | 0.138234 | 0.89513  | 0.897304 | UP   | 207.3459 | 207.3451 | 207.3467 | 9.311167 | 9.132267 |
| 15208 | M616T10_ | 1.036074 | -0.05113 | -0.13607 | 0.895176 | 0.897308 | DOWN | 615.9523 | 615.952  | 615.9527 | 9.816167 | 9.715683 |
| 15209 | M154T10_ | 1.063075 | 0.088243 | 0.135966 | 0.895247 | 0.897316 | UP   | 154.1894 | 154.1894 | 154.1896 | 9.946467 | 9.827283 |
| 15210 | M351T9_1 | 1.045023 | -0.06353 | -0.13598 | 0.895295 | 0.897321 | DOWN | 351.2708 | 351.2701 | 351.2736 | 9.160617 | 9.06855  |
| 15211 | M202T10_ | 1.041831 | 0.059121 | 0.138143 | 0.895301 | 0.897321 | UP   | 201.6202 | 201.6179 | 201.6205 | 9.946367 | 9.77355  |
| 15212 | M346T40  | 1.035611 | -0.05048 | -0.13541 | 0.895636 | 0.897356 | DOWN | 346.1859 | 346.1858 | 346.1861 | 40.07883 | 39.70483 |
| 15213 | M214T9_1 | 1.088932 | 0.122914 | 0.135529 | 0.895677 | 0.89736  | UP   | 214.0664 | 214.0658 | 214.0669 | 9.37135  | 9.1602   |
| 15214 | M266T10_ | 1.030931 | 0.043948 | 0.135417 | 0.895685 | 0.897361 | UP   | 266.27   | 266.2698 | 266.2702 | 9.967533 | 9.859233 |
| 15215 | M436T9_1 | 1.016286 | 0.023306 | 0.135391 | 0.8958   | 0.897373 | UP   | 436.482  | 436.4813 | 436.4834 | 9.190517 | 9.129317 |
| 15216 | M190T9_5 | 1.044638 | 0.063003 | 0.135368 | 0.895845 | 0.897377 | UP   | 190.1243 | 190.1242 | 190.1246 | 8.893    | 8.818733 |
| 15217 | M408T10_ | 1.015302 | -0.02191 | -0.13538 | 0.895881 | 0.897381 | DOWN | 407.9143 | 407.9138 | 407.9202 | 9.945775 | 9.843367 |
| 15218 | M665T10_ | 1.044212 | -0.06241 | -0.13508 | 0.895882 | 0.897381 | DOWN | 665.4964 | 665.4963 | 665.4982 | 9.702783 | 9.67075  |
| 15219 | M253T20  | 1.03291  | 0.046715 | 0.13769  | 0.895997 | 0.897393 | UP   | 253.1795 | 253.1794 | 253.1797 | 20.3745  | 20.36067 |
| 15220 | M770T10  | 1.041014 | -0.05799 | -0.13536 | 0.896048 | 0.897398 | DOWN | 769.6219 | 769.6216 | 769.6226 | 9.951283 | 9.843367 |
| 15221 | M448T11_ | 1.026658 | 0.037956 | 0.135412 | 0.896106 | 0.897404 | UP   | 448.0771 | 448.0766 | 448.0775 | 10.89875 | 10.879   |
| 15222 | M454T10_ | 1.034736 | 0.049262 | 0.138832 | 0.896155 | 0.897409 | UP   | 454.3454 | 454.3449 | 454.346  | 10.34318 | 10.00385 |
| 15223 | M406T10_ | 1.029714 | 0.042243 | 0.134762 | 0.896159 | 0.897409 | UP   | 405.6269 | 405.6265 | 405.627  | 9.972917 | 9.8753   |
| 15224 | M333T19_ | 1.053434 | 0.0751   | 0.134898 | 0.896164 | 0.89741  | UP   | 333.1671 | 333.1658 | 333.1675 | 18.90817 | 18.89217 |

|       |          |          |          |          |          |          |      |          |          |          |          |          |
|-------|----------|----------|----------|----------|----------|----------|------|----------|----------|----------|----------|----------|
| 15225 | M287T10_ | 1.05244  | -0.07374 | -0.13479 | 0.896166 | 0.89741  | DOWN | 286.9609 | 286.9609 | 286.9611 | 9.985117 | 9.960967 |
| 15226 | M227T13  | 1.053701 | -0.07547 | -0.1385  | 0.896185 | 0.897412 | DOWN | 227.1752 | 227.1646 | 227.1753 | 13.03286 | 12.98105 |
| 15227 | M548T40_ | 1.013784 | 0.019751 | 0.136054 | 0.896295 | 0.897423 | UP   | 548.3061 | 548.306  | 548.3068 | 40.06617 | 40.007   |
| 15228 | M220T11_ | 1.041282 | -0.05836 | -0.13481 | 0.896369 | 0.897431 | DOWN | 219.8557 | 219.8555 | 219.8558 | 10.892   | 10.87487 |
| 15229 | M219T10_ | 1.026882 | 0.03827  | 0.135609 | 0.896376 | 0.897432 | UP   | 218.662  | 218.6619 | 218.6621 | 10.42217 | 10.38893 |
| 15230 | M698T10_ | 1.029938 | 0.042558 | 0.136121 | 0.896462 | 0.897441 | UP   | 698.4452 | 698.4444 | 698.4474 | 9.825492 | 9.7124   |
| 15231 | M389T9_1 | 1.054726 | 0.076869 | 0.134344 | 0.896472 | 0.897442 | UP   | 388.8025 | 388.802  | 388.8026 | 9.289208 | 9.0637   |
| 15232 | M234T11_ | 1.025175 | -0.03587 | -0.13432 | 0.896534 | 0.897448 | DOWN | 233.6448 | 233.6446 | 233.6449 | 10.90553 | 10.879   |
| 15233 | M520T43_ | 1.026117 | -0.0372  | -0.13766 | 0.89662  | 0.897457 | DOWN | 520.275  | 520.2747 | 520.2752 | 43.44517 | 43.40183 |
| 15234 | M641T18  | 1.013111 | -0.01879 | -0.13601 | 0.89667  | 0.897462 | DOWN | 641.4609 | 641.4607 | 641.4611 | 18.01525 | 17.99367 |
| 15235 | M257T9_1 | 1.133112 | 0.180291 | 0.134119 | 0.896726 | 0.897468 | UP   | 256.8258 | 256.8257 | 256.8262 | 8.858283 | 8.818733 |
| 15236 | M668T9_1 | 1.035881 | 0.050858 | 0.134446 | 0.896735 | 0.897469 | UP   | 667.9506 | 667.9501 | 667.9512 | 8.743408 | 8.667783 |
| 15237 | M327T29_ | 1.042603 | -0.06019 | -0.13545 | 0.89676  | 0.897471 | DOWN | 327.0779 | 327.0776 | 327.0781 | 28.88558 | 28.8605  |
| 15238 | M1069T9  | 1.067686 | -0.09449 | -0.13432 | 0.896775 | 0.897473 | DOWN | 1069.344 | 1069.343 | 1069.346 | 9.059158 | 9.031633 |
| 15239 | M388T11_ | 1.018112 | -0.0259  | -0.13419 | 0.897234 | 0.89752  | DOWN | 388.204  | 388.2039 | 388.2042 | 10.89875 | 10.879   |
| 15240 | M193T9_8 | 1.056301 | 0.079021 | 0.133297 | 0.897262 | 0.897523 | UP   | 193.1765 | 193.1752 | 193.1775 | 9.338375 | 9.089733 |
| 15241 | M433T11_ | 1.075553 | -0.10508 | -0.13359 | 0.897304 | 0.897527 | DOWN | 433.2577 | 433.2546 | 433.2595 | 10.93655 | 10.87765 |
| 15242 | M447T10_ | 1.048585 | -0.06844 | -0.13399 | 0.897331 | 0.89753  | DOWN | 447.1571 | 447.157  | 447.1623 | 9.948875 | 9.843367 |
| 15243 | M388T17  | 1.022425 | 0.031995 | 0.13367  | 0.897421 | 0.897539 | UP   | 387.5871 | 387.5866 | 387.5872 | 16.51929 | 16.49078 |
| 15244 | M225T11_ | 1.034823 | 0.049384 | 0.133224 | 0.897447 | 0.897542 | UP   | 224.7876 | 224.7876 | 224.7877 | 10.90548 | 10.8926  |
| 15245 | M292T44_ | 1.030509 | 0.043358 | 0.133289 | 0.897546 | 0.897552 | UP   | 292.1752 | 292.175  | 292.1752 | 44.39383 | 44.2215  |
| 15246 | M1614T10 | 1.072216 | -0.1006  | -0.13294 | 0.897589 | 0.897556 | DOWN | 1614.028 | 1614.026 | 1614.029 | 9.946467 | 9.827283 |
| 15247 | M422T39  | 1.072657 | -0.10119 | -0.13309 | 0.89764  | 0.897561 | DOWN | 422.3988 | 422.3986 | 422.3993 | 38.71217 | 38.71183 |
| 15248 | M220T9_7 | 1.076077 | 0.105782 | 0.132981 | 0.897831 | 0.897581 | UP   | 219.8546 | 219.8523 | 219.8562 | 9.356617 | 9.111033 |
| 15249 | M356T10_ | 1.013558 | 0.019429 | 0.134432 | 0.898016 | 0.8976   | UP   | 356.1515 | 356.1511 | 356.1517 | 9.830183 | 9.715683 |
| 15250 | M317T10_ | 1.003361 | -0.00484 | -0.13458 | 0.898155 | 0.897614 | DOWN | 316.7417 | 316.7416 | 316.7425 | 9.973517 | 9.885167 |
| 15251 | M325T10_ | 1.099217 | -0.13648 | -0.1325  | 0.898281 | 0.897627 | DOWN | 324.9122 | 324.9113 | 324.9127 | 9.816242 | 9.729367 |
| 15252 | M208T10_ | 1.03631  | 0.051456 | 0.134485 | 0.898399 | 0.897639 | UP   | 208.4918 | 208.4917 | 208.4919 | 9.92825  | 9.827283 |
| 15253 | M497T11_ | 1.038269 | 0.054181 | 0.131999 | 0.898472 | 0.897647 | UP   | 497.0605 | 497.0586 | 497.0616 | 10.8926  | 10.8646  |
| 15254 | M452T9_1 | 1.044242 | -0.06246 | -0.13433 | 0.898477 | 0.897647 | DOWN | 451.5507 | 451.5502 | 451.5511 | 9.176533 | 9.129317 |
| 15255 | M195T23_ | 1.019034 | 0.027203 | 0.132936 | 0.898493 | 0.897649 | UP   | 195.174  | 195.1739 | 195.1741 | 22.8135  | 22.78483 |
| 15256 | M210T10_ | 1.14757  | -0.19858 | -0.13171 | 0.898495 | 0.897649 | DOWN | 210.0844 | 210.0841 | 210.0922 | 9.830558 | 9.816167 |
| 15257 | M634T10_ | 1.054239 | -0.0762  | -0.13166 | 0.898568 | 0.897656 | DOWN | 634.0912 | 634.0908 | 634.0924 | 9.960817 | 9.843367 |
| 15258 | M565T11  | 1.026169 | -0.03727 | -0.13416 | 0.898668 | 0.897667 | DOWN | 564.6764 | 564.6754 | 564.6769 | 10.68888 | 10.63083 |
| 15259 | M655T11_ | 1.026005 | -0.03704 | -0.1316  | 0.898707 | 0.89767  | DOWN | 655.2586 | 655.2583 | 655.259  | 11.47905 | 11.4686  |

|       |          |          |          |          |          |          |      |          |          |          |          |          |
|-------|----------|----------|----------|----------|----------|----------|------|----------|----------|----------|----------|----------|
| 15260 | M362T10_ | 1.039706 | 0.056175 | 0.13128  | 0.8988   | 0.89768  | UP   | 361.7588 | 361.7584 | 361.7592 | 9.9351   | 9.8378   |
| 15261 | M676T10_ | 1.043398 | -0.06129 | -0.13151 | 0.898996 | 0.8977   | DOWN | 675.8822 | 675.8815 | 675.8827 | 9.940783 | 9.843367 |
| 15262 | M263T16  | 1.037648 | -0.05332 | -0.13215 | 0.899042 | 0.897705 | DOWN | 263.2406 | 263.2405 | 263.2406 | 16.06687 | 16.05235 |
| 15263 | M636T10_ | 1.096697 | -0.13316 | -0.13109 | 0.899048 | 0.897705 | DOWN | 635.7657 | 635.7652 | 635.7682 | 9.801808 | 9.699733 |
| 15264 | M167T10_ | 1.029344 | 0.041725 | 0.13207  | 0.899119 | 0.897713 | UP   | 167.324  | 167.3237 | 167.3241 | 9.74925  | 9.636483 |
| 15265 | M351T10_ | 1.028499 | 0.040541 | 0.132091 | 0.899168 | 0.897718 | UP   | 351.0429 | 351.0422 | 351.043  | 9.7468   | 9.62055  |
| 15266 | M342T10_ | 1.024834 | 0.035391 | 0.130894 | 0.899196 | 0.897721 | UP   | 342.3335 | 342.3333 | 342.334  | 9.8207   | 9.715683 |
| 15267 | M245T9_3 | 1.03115  | -0.04425 | -0.13068 | 0.899305 | 0.897732 | DOWN | 244.9269 | 244.9248 | 244.928  | 9.279417 | 9.111033 |
| 15268 | M473T10_ | 1.052096 | 0.073266 | 0.131861 | 0.899447 | 0.897746 | UP   | 472.9811 | 472.9807 | 472.9817 | 9.955875 | 9.811217 |
| 15269 | M568T10_ | 1.085914 | 0.118909 | 0.132336 | 0.899494 | 0.897751 | UP   | 567.7347 | 567.7345 | 567.7348 | 9.956867 | 9.8753   |
| 15270 | M181T10_ | 1.056927 | -0.07988 | -0.13115 | 0.899512 | 0.897753 | DOWN | 181.2343 | 181.2341 | 181.2343 | 9.967367 | 9.859233 |
| 15271 | M315T10_ | 1.057437 | -0.08057 | -0.13037 | 0.899582 | 0.89776  | DOWN | 314.5628 | 314.5551 | 314.563  | 9.94405  | 9.840617 |
| 15272 | M731T10_ | 1.102616 | 0.140931 | 0.130247 | 0.899663 | 0.897768 | UP   | 731.2615 | 731.2609 | 731.2618 | 9.918242 | 9.811217 |
| 15273 | M253T9_2 | 1.043623 | -0.0616  | -0.13008 | 0.899717 | 0.897774 | DOWN | 252.738  | 252.7347 | 252.7386 | 9.280767 | 9.103733 |
| 15274 | M258T11_ | 1.018274 | 0.026126 | 0.130047 | 0.899743 | 0.897776 | UP   | 258.2041 | 258.2038 | 258.2042 | 10.93442 | 10.877   |
| 15275 | M812T11_ | 1.01838  | 0.026276 | 0.129992 | 0.899783 | 0.89778  | UP   | 811.5733 | 811.5726 | 811.574  | 10.892   | 10.879   |
| 15276 | M497T9_3 | 1.035849 | 0.050814 | 0.132747 | 0.899786 | 0.897781 | UP   | 496.717  | 496.7156 | 496.7173 | 9.168575 | 9.12675  |
| 15277 | M315T30  | 1.027696 | 0.039413 | 0.131374 | 0.899884 | 0.897791 | UP   | 315.1355 | 315.1352 | 315.1357 | 29.8195  | 29.7905  |
| 15278 | M645T10_ | 1.085951 | -0.11896 | -0.12991 | 0.899962 | 0.897799 | DOWN | 644.9685 | 644.9677 | 644.9697 | 9.8235   | 9.699733 |
| 15279 | M450T9_6 | 1.032032 | -0.04549 | -0.13055 | 0.900166 | 0.897819 | DOWN | 450.1168 | 450.1166 | 450.1171 | 9.277967 | 9.129317 |
| 15280 | M356T10_ | 1.013152 | -0.01885 | -0.13114 | 0.900167 | 0.89782  | DOWN | 356.3401 | 356.3394 | 356.3404 | 9.82645  | 9.715683 |
| 15281 | M194T11_ | 1.042229 | 0.059672 | 0.130093 | 0.900204 | 0.897823 | UP   | 194.3605 | 194.3604 | 194.3608 | 10.8926  | 10.89125 |
| 15282 | M217T10_ | 1.061171 | -0.08566 | -0.12939 | 0.900277 | 0.897831 | DOWN | 216.5258 | 216.5161 | 216.5268 | 9.836417 | 9.79535  |
| 15283 | M352T10_ | 1.034905 | -0.0495  | -0.12933 | 0.900357 | 0.897839 | DOWN | 352.2252 | 352.2248 | 352.2253 | 9.964092 | 9.843367 |
| 15284 | M442T13  | 1.036246 | 0.051366 | 0.129136 | 0.90046  | 0.897849 | UP   | 442.3373 | 442.3371 | 442.3376 | 12.71899 | 12.64618 |
| 15285 | M637T9_3 | 1.044109 | 0.062272 | 0.129159 | 0.900481 | 0.897852 | UP   | 637.0905 | 637.0858 | 637.0925 | 9.4098   | 9.064833 |
| 15286 | M463T9   | 1.020198 | -0.02885 | -0.13251 | 0.900581 | 0.897862 | DOWN | 462.6941 | 462.6937 | 462.6949 | 9.300733 | 9.234417 |
| 15287 | M986T10  | 1.026079 | 0.037142 | 0.12901  | 0.900694 | 0.897873 | UP   | 985.5087 | 985.5083 | 985.5093 | 9.872883 | 9.806367 |
| 15288 | M475T10_ | 1.057829 | 0.081107 | 0.129227 | 0.900771 | 0.897881 | UP   | 474.9652 | 474.9652 | 474.9656 | 9.946408 | 9.843367 |
| 15289 | M791T11_ | 1.04138  | -0.0585  | -0.12871 | 0.900772 | 0.897881 | DOWN | 791.4779 | 791.4771 | 791.4787 | 10.8926  | 10.8646  |
| 15290 | M428T10_ | 1.036096 | -0.05116 | -0.12869 | 0.900786 | 0.897883 | DOWN | 428.4024 | 428.4018 | 428.4032 | 9.949233 | 9.843367 |
| 15291 | M207T10_ | 1.094301 | 0.13001  | 0.128769 | 0.900889 | 0.897893 | UP   | 207.1064 | 207.1017 | 207.1102 | 9.836042 | 9.7124   |
| 15292 | M461T11_ | 1.018461 | -0.02639 | -0.12885 | 0.900967 | 0.897901 | DOWN | 461.3238 | 461.3236 | 461.3242 | 10.892   | 10.879   |
| 15293 | M363T9_2 | 1.043225 | 0.06105  | 0.129502 | 0.90106  | 0.89791  | UP   | 362.6271 | 362.627  | 362.6274 | 9.24215  | 9.234417 |
| 15294 | M166T10_ | 1.015574 | -0.02229 | -0.1314  | 0.901079 | 0.897912 | DOWN | 166.2534 | 166.2532 | 166.2553 | 9.880233 | 9.746783 |

|       |          |          |          |          |          |          |      |          |          |          |          |          |
|-------|----------|----------|----------|----------|----------|----------|------|----------|----------|----------|----------|----------|
| 15295 | M733T25  | 1.024921 | -0.03551 | -0.13017 | 0.901102 | 0.897915 | DOWN | 732.547  | 732.5468 | 732.5473 | 25.246   | 25.204   |
| 15296 | M599T10_ | 1.03278  | -0.04653 | -0.12852 | 0.901122 | 0.897917 | DOWN | 598.5882 | 598.5878 | 598.5886 | 9.872067 | 9.779267 |
| 15297 | M266T19  | 1.013886 | 0.019895 | 0.128963 | 0.901271 | 0.897932 | UP   | 266.2476 | 266.2475 | 266.2478 | 18.95217 | 18.951   |
| 15298 | M962T10_ | 1.027646 | 0.039343 | 0.129133 | 0.901272 | 0.897932 | UP   | 962.0586 | 962.0572 | 962.0607 | 9.97155  | 9.859233 |
| 15299 | M433T10_ | 1.037704 | 0.053395 | 0.127536 | 0.901701 | 0.897976 | UP   | 432.6286 | 432.6281 | 432.629  | 9.977442 | 9.859233 |
| 15300 | M619T10_ | 1.058286 | -0.08173 | -0.12743 | 0.901814 | 0.897987 | DOWN | 618.8638 | 618.8637 | 618.8648 | 10.39379 | 10.38782 |
| 15301 | M340T10_ | 1.033204 | 0.047125 | 0.129248 | 0.901891 | 0.897995 | UP   | 340.1139 | 340.1136 | 340.114  | 9.830283 | 9.743667 |
| 15302 | M293T10_ | 1.037369 | -0.05293 | -0.12747 | 0.90198  | 0.898004 | DOWN | 292.8908 | 292.8904 | 292.891  | 9.968992 | 9.8753   |
| 15303 | M1487T10 | 1.036321 | 0.051471 | 0.13028  | 0.902021 | 0.898008 | UP   | 1486.765 | 1486.763 | 1486.766 | 9.9468   | 9.827283 |
| 15304 | M914T11  | 1.040716 | 0.057577 | 0.126636 | 0.902381 | 0.898045 | UP   | 913.8046 | 913.8039 | 913.8056 | 10.8926  | 10.89125 |
| 15305 | M190T11_ | 1.034624 | -0.04911 | -0.12675 | 0.902527 | 0.898059 | DOWN | 190.3653 | 190.3651 | 190.3656 | 10.90785 | 10.90012 |
| 15306 | M169T9_1 | 1.038216 | -0.05411 | -0.12661 | 0.902606 | 0.898067 | DOWN | 168.7002 | 168.7    | 168.7004 | 9.245133 | 9.216183 |
| 15307 | M307T10_ | 1.02953  | 0.041986 | 0.126193 | 0.902703 | 0.898077 | UP   | 306.6201 | 306.6196 | 306.6203 | 9.977442 | 9.8753   |
| 15308 | M433T9_3 | 1.026667 | -0.03797 | -0.12715 | 0.902759 | 0.898083 | DOWN | 432.7862 | 432.7855 | 432.7874 | 9.222942 | 9.129317 |
| 15309 | M300T30_ | 1.024187 | -0.03448 | -0.12618 | 0.902807 | 0.898088 | DOWN | 300.3257 | 300.325  | 300.326  | 29.86267 | 29.86233 |
| 15310 | M347T10_ | 1.120834 | 0.164572 | 0.126238 | 0.902845 | 0.898092 | UP   | 346.5143 | 346.5099 | 346.515  | 9.830558 | 9.715683 |
| 15311 | M415T10_ | 1.019895 | -0.02842 | -0.12693 | 0.902925 | 0.8981   | DOWN | 414.5982 | 414.5977 | 414.5985 | 9.992125 | 9.8753   |
| 15312 | M385T10_ | 1.004731 | 0.00681  | -0.12686 | 0.90298  | 0.898105 | UP   | 384.6693 | 384.6692 | 384.6693 | 9.972833 | 9.9009   |
| 15313 | M443T10_ | 1.027499 | 0.039137 | 0.125808 | 0.90304  | 0.898112 | UP   | 443.1971 | 443.1965 | 443.1973 | 9.946467 | 9.843367 |
| 15314 | M501T10_ | 1.037784 | 0.053507 | 0.125933 | 0.90309  | 0.898117 | UP   | 500.594  | 500.5935 | 500.5954 | 9.979342 | 9.8753   |
| 15315 | M345T10_ | 1.05131  | 0.072187 | 0.125654 | 0.903116 | 0.898119 | UP   | 345.4391 | 345.4328 | 345.4394 | 9.831517 | 9.699733 |
| 15316 | M760T10_ | 1.028457 | -0.04048 | -0.12566 | 0.903198 | 0.898128 | DOWN | 759.5817 | 759.5806 | 759.5823 | 9.960817 | 9.859233 |
| 15317 | M345T43_ | 1.049577 | -0.06981 | -0.12547 | 0.903281 | 0.898136 | DOWN | 345.1906 | 345.1904 | 345.1907 | 42.92733 | 42.62517 |
| 15318 | M528T9_7 | 1.037852 | 0.053601 | 0.127599 | 0.903411 | 0.898149 | UP   | 528.2113 | 528.2081 | 528.2132 | 9.280767 | 9.133667 |
| 15319 | M1739T10 | 1.039206 | 0.055482 | 0.125564 | 0.903455 | 0.898154 | UP   | 1738.61  | 1738.607 | 1738.611 | 9.801833 | 9.715683 |
| 15320 | M261T10_ | 1.036009 | -0.05104 | -0.12535 | 0.903486 | 0.898157 | DOWN | 261.4095 | 261.4092 | 261.4096 | 9.948875 | 9.843367 |
| 15321 | M291T9_1 | 1.047854 | -0.06744 | -0.12522 | 0.903496 | 0.898158 | DOWN | 290.5234 | 290.5232 | 290.5235 | 8.802375 | 8.697767 |
| 15322 | M228T10_ | 1.033546 | -0.0476  | -0.12641 | 0.903591 | 0.898167 | DOWN | 227.9249 | 227.9162 | 227.926  | 9.830283 | 9.7124   |
| 15323 | M1833T10 | 1.046576 | 0.065677 | 0.124989 | 0.903616 | 0.89817  | UP   | 1832.947 | 1832.946 | 1832.949 | 9.870017 | 9.759383 |
| 15324 | M290T11_ | 1.025932 | -0.03694 | -0.12504 | 0.903637 | 0.898172 | DOWN | 289.8884 | 289.888  | 289.8885 | 10.93338 | 10.90197 |
| 15325 | M432T9_9 | 1.037852 | -0.0536  | -0.12584 | 0.903653 | 0.898174 | DOWN | 432.2807 | 432.2801 | 432.2809 | 8.959467 | 8.7654   |
| 15326 | M737T10_ | 1.027413 | 0.039017 | 0.125696 | 0.903658 | 0.898174 | UP   | 737.3222 | 737.3211 | 737.3223 | 9.994767 | 9.8914   |
| 15327 | M337T10_ | 1.022872 | -0.03263 | -0.12491 | 0.903678 | 0.898176 | DOWN | 337.0837 | 337.0837 | 337.0837 | 9.514733 | 9.416817 |
| 15328 | M428T9_8 | 1.047159 | 0.066481 | 0.126162 | 0.903729 | 0.898181 | UP   | 428.4062 | 428.4046 | 428.4068 | 9.20785  | 9.145433 |
| 15329 | M428T12_ | 1.02332  | -0.03326 | -0.12525 | 0.903754 | 0.898184 | DOWN | 428.3073 | 428.3072 | 428.3087 | 12.13315 | 12.09287 |

|       |          |          |          |          |          |          |      |          |          |          |          |          |
|-------|----------|----------|----------|----------|----------|----------|------|----------|----------|----------|----------|----------|
| 15330 | M881T30  | 1.036643 | -0.05192 | -0.12481 | 0.903759 | 0.898184 | DOWN | 880.6208 | 880.62   | 880.6213 | 30.17908 | 30.13633 |
| 15331 | M416T19  | 1.01409  | -0.02019 | -0.125   | 0.90381  | 0.898189 | DOWN | 416.2959 | 416.2957 | 416.2961 | 18.95142 | 18.943   |
| 15332 | M385T10_ | 1.052405 | -0.07369 | -0.12539 | 0.903906 | 0.898199 | DOWN | 385.2578 | 385.2575 | 385.2582 | 9.946417 | 9.843367 |
| 15333 | M679T10_ | 1.064189 | -0.08975 | -0.12462 | 0.903911 | 0.8982   | DOWN | 679.2884 | 679.2819 | 679.2924 | 9.872458 | 9.80755  |
| 15334 | M1647T10 | 1.030105 | -0.04279 | -0.12501 | 0.903977 | 0.898206 | DOWN | 1646.999 | 1646.997 | 1647.002 | 9.887133 | 9.79065  |
| 15335 | M718T10_ | 1.022279 | 0.031788 | 0.126216 | 0.903978 | 0.898206 | UP   | 718.1769 | 718.1758 | 718.1774 | 9.745858 | 9.62055  |
| 15336 | M427T11_ | 1.036792 | -0.05213 | -0.12443 | 0.90406  | 0.898215 | DOWN | 427.3115 | 427.3106 | 427.312  | 10.60347 | 10.52015 |
| 15337 | M247T19_ | 1.025895 | -0.03688 | -0.12457 | 0.904153 | 0.898224 | DOWN | 246.7112 | 246.711  | 246.7113 | 18.63125 | 18.62867 |
| 15338 | M796T11_ | 1.033297 | -0.04725 | -0.12418 | 0.904262 | 0.898235 | DOWN | 796.4497 | 796.4481 | 796.451  | 10.53152 | 10.47197 |
| 15339 | M380T10_ | 1.048037 | -0.06769 | -0.12413 | 0.904305 | 0.898239 | DOWN | 379.7137 | 379.7132 | 379.7139 | 9.918833 | 9.827283 |
| 15340 | M650T10_ | 1.02576  | -0.03669 | -0.12455 | 0.904308 | 0.89824  | DOWN | 649.8205 | 649.82   | 649.8209 | 9.965717 | 9.859233 |
| 15341 | M365T10_ | 1.042289 | 0.059756 | 0.126022 | 0.904311 | 0.89824  | UP   | 365.2254 | 365.2244 | 365.2256 | 9.830658 | 9.747533 |
| 15342 | M434T9_2 | 1.065055 | -0.09093 | -0.12602 | 0.904348 | 0.898244 | DOWN | 433.585  | 433.5842 | 433.5863 | 9.1602   | 9.1175   |
| 15343 | M243T43  | 1.008219 | 0.011809 | 0.126489 | 0.904379 | 0.898247 | UP   | 243.1223 | 243.1223 | 243.1224 | 43.01333 | 42.841   |
| 15344 | M487T11_ | 1.019779 | 0.028257 | 0.124831 | 0.904418 | 0.898251 | UP   | 487.1582 | 487.1576 | 487.1585 | 10.92538 | 10.879   |
| 15345 | M178T11_ | 1.032817 | -0.04658 | -0.12394 | 0.90442  | 0.898251 | DOWN | 177.8458 | 177.8456 | 177.8459 | 10.8926  | 10.8646  |
| 15346 | M294T30_ | 1.011718 | 0.016807 | 0.123925 | 0.904525 | 0.898262 | UP   | 294.2062 | 294.2061 | 294.2062 | 29.83392 | 29.8195  |
| 15347 | M555T39  | 1.038878 | -0.05503 | -0.12448 | 0.904621 | 0.898271 | DOWN | 555.4447 | 555.444  | 555.4455 | 39.15783 | 39.12133 |
| 15348 | M265T7   | 1.026957 | -0.03838 | -0.12427 | 0.904625 | 0.898272 | DOWN | 265.1308 | 265.1307 | 265.1311 | 7.0902   | 6.925867 |
| 15349 | M209T10_ | 1.033731 | 0.047861 | 0.123641 | 0.904712 | 0.898281 | UP   | 209.4561 | 209.4558 | 209.4564 | 9.847125 | 9.758367 |
| 15350 | M271T10_ | 1.054825 | 0.077004 | 0.123735 | 0.904716 | 0.898281 | UP   | 270.9389 | 270.9386 | 270.9389 | 9.971292 | 9.8753   |
| 15351 | M326T10_ | 1.016861 | -0.02412 | -0.12473 | 0.904967 | 0.898306 | DOWN | 325.8766 | 325.8763 | 325.8775 | 9.831142 | 9.715683 |
| 15352 | M178T10_ | 1.028963 | -0.04119 | -0.1234  | 0.905039 | 0.898314 | DOWN | 177.8918 | 177.8914 | 177.8979 | 9.979892 | 9.843367 |
| 15353 | M276T20  | 1.032681 | 0.046395 | 0.123104 | 0.905199 | 0.89833  | UP   | 276.1988 | 276.1986 | 276.1989 | 20.36775 | 20.36067 |
| 15354 | M686T10_ | 1.017398 | 0.024884 | 0.122813 | 0.905286 | 0.898339 | UP   | 685.9284 | 685.9277 | 685.9292 | 9.830558 | 9.699733 |
| 15355 | M576T10_ | 1.129876 | 0.176165 | 0.126129 | 0.905342 | 0.898344 | UP   | 576.0888 | 576.088  | 576.1    | 9.968992 | 9.874067 |
| 15356 | M232T10_ | 1.033383 | 0.047375 | 0.122706 | 0.905389 | 0.898349 | UP   | 231.9527 | 231.9518 | 231.9617 | 9.814925 | 9.7124   |
| 15357 | M157T10_ | 1.042253 | -0.05971 | -0.12315 | 0.905402 | 0.89835  | DOWN | 157.4347 | 157.4346 | 157.435  | 9.918242 | 9.811217 |
| 15358 | M523T10_ | 1.02838  | 0.040374 | 0.124765 | 0.905431 | 0.898353 | UP   | 522.5217 | 522.5214 | 522.5229 | 9.954217 | 9.843367 |
| 15359 | M382T40_ | 1.058116 | 0.081498 | 0.123184 | 0.905435 | 0.898354 | UP   | 382.2433 | 382.2431 | 382.2435 | 39.964   | 39.81983 |
| 15360 | M1133T10 | 1.02661  | 0.037889 | 0.123786 | 0.905452 | 0.898355 | UP   | 1133.151 | 1133.15  | 1133.153 | 9.839008 | 9.715683 |
| 15361 | M191T18  | 1.013167 | 0.018873 | 0.122823 | 0.905494 | 0.89836  | UP   | 191.1064 | 191.1063 | 191.1065 | 18.17283 | 18.16533 |
| 15362 | M906T10  | 1.027638 | 0.039332 | 0.123863 | 0.905535 | 0.898364 | UP   | 905.681  | 905.6807 | 905.6814 | 10.16706 | 10.08517 |
| 15363 | M347T10_ | 1.04524  | 0.063834 | 0.122606 | 0.905575 | 0.898368 | UP   | 347.2449 | 347.2401 | 347.2478 | 9.858833 | 9.715683 |
| 15364 | M175T10_ | 1.052091 | -0.07326 | -0.12372 | 0.905591 | 0.898369 | DOWN | 174.5601 | 174.5599 | 174.5602 | 9.967367 | 9.859233 |

|       |          |          |          |          |          |          |      |          |          |          |          |          |
|-------|----------|----------|----------|----------|----------|----------|------|----------|----------|----------|----------|----------|
| 15365 | M271T16_ | 1.071993 | 0.100295 | 0.123936 | 0.905876 | 0.898398 | UP   | 271.187  | 271.1867 | 271.1875 | 15.70625 | 15.67228 |
| 15366 | M212T9_1 | 1.032673 | -0.04638 | -0.12247 | 0.905907 | 0.898401 | DOWN | 211.6472 | 211.6464 | 211.6475 | 9.3332   | 9.219483 |
| 15367 | M234T11_ | 1.030754 | -0.0437  | -0.12219 | 0.905959 | 0.898406 | DOWN | 234.0931 | 234.0928 | 234.0934 | 10.89068 | 10.85018 |
| 15368 | M404T40_ | 1.012169 | 0.01745  | 0.123543 | 0.905967 | 0.898407 | UP   | 404.264  | 404.2638 | 404.2642 | 40.04367 | 39.92067 |
| 15369 | M498T11_ | 1.037811 | -0.05354 | -0.122   | 0.906127 | 0.898423 | DOWN | 498.4401 | 498.4379 | 498.4414 | 10.89953 | 10.8646  |
| 15370 | M154T10_ | 1.026211 | -0.03733 | -0.12349 | 0.906183 | 0.898429 | DOWN | 154.1043 | 154.1041 | 154.1043 | 9.920517 | 9.811217 |
| 15371 | M311T20  | 1.021669 | -0.03093 | -0.12421 | 0.906244 | 0.898435 | DOWN | 311.2689 | 311.2686 | 311.2692 | 19.78175 | 19.77183 |
| 15372 | M177T9_4 | 1.042188 | -0.05962 | -0.12161 | 0.906266 | 0.898437 | DOWN | 176.8811 | 176.8807 | 176.8818 | 9.190367 | 9.142767 |
| 15373 | M412T11_ | 1.040278 | 0.056969 | 0.123514 | 0.906284 | 0.898439 | UP   | 411.5403 | 411.5386 | 411.5423 | 10.879   | 10.84395 |
| 15374 | M505T10_ | 1.035972 | -0.05099 | -0.1215  | 0.906342 | 0.898445 | DOWN | 504.9933 | 504.993  | 504.9935 | 9.975217 | 9.8753   |
| 15375 | M351T16_ | 1.042444 | -0.05997 | -0.12135 | 0.906435 | 0.898454 | DOWN | 351.1777 | 351.1776 | 351.1778 | 15.61798 | 15.31108 |
| 15376 | M352T30  | 1.027245 | -0.03878 | -0.12284 | 0.906457 | 0.898457 | DOWN | 352.3056 | 352.3054 | 352.3057 | 30.08658 | 30.07833 |
| 15377 | M246T10_ | 1.049283 | 0.069403 | 0.12121  | 0.906514 | 0.898462 | UP   | 245.8838 | 245.8836 | 245.8839 | 9.941642 | 9.843367 |
| 15378 | M360T10_ | 1.020082 | 0.028686 | 0.123326 | 0.906521 | 0.898463 | UP   | 360.1362 | 360.136  | 360.1363 | 9.83535  | 9.715683 |
| 15379 | M207T10_ | 1.063258 | -0.08849 | -0.12119 | 0.906527 | 0.898464 | DOWN | 207.3309 | 207.3307 | 207.331  | 9.979342 | 9.8753   |
| 15380 | M435T9_7 | 1.01682  | 0.024064 | 0.121175 | 0.906553 | 0.898466 | UP   | 434.948  | 434.9473 | 434.9491 | 9.25985  | 9.16125  |
| 15381 | M916T11  | 1.052661 | -0.07404 | -0.12108 | 0.90663  | 0.898474 | DOWN | 915.7885 | 915.7863 | 915.789  | 10.8914  | 10.89125 |
| 15382 | M380T11_ | 1.019671 | -0.0281  | -0.12108 | 0.906667 | 0.898478 | DOWN | 380.1712 | 380.1711 | 380.1723 | 10.90628 | 10.879   |
| 15383 | M294T10_ | 1.018072 | -0.02584 | -0.12104 | 0.906759 | 0.898487 | DOWN | 294.4807 | 294.4804 | 294.4808 | 9.934533 | 9.827283 |
| 15384 | M584T9_6 | 1.058678 | -0.08226 | -0.12089 | 0.90678  | 0.898489 | DOWN | 584.236  | 584.2324 | 584.2428 | 9.213108 | 9.12675  |
| 15385 | M404T11_ | 1.02121  | -0.03028 | -0.12117 | 0.906785 | 0.89849  | DOWN | 403.754  | 403.7538 | 403.7543 | 10.89907 | 10.879   |
| 15386 | M259T11_ | 1.10955  | 0.149975 | 0.120561 | 0.907046 | 0.898516 | UP   | 259.1858 | 259.1818 | 259.1906 | 10.93517 | 10.873   |
| 15387 | M447T9_3 | 1.048112 | 0.067792 | 0.120342 | 0.907284 | 0.89854  | UP   | 447.1838 | 447.1835 | 447.1862 | 8.88395  | 8.86875  |
| 15388 | M865T22  | 1.038212 | -0.0541  | -0.12163 | 0.907314 | 0.898543 | DOWN | 864.6172 | 864.6156 | 864.6181 | 21.96617 | 21.93867 |
| 15389 | M538T12  | 1.025568 | -0.03642 | -0.122   | 0.907321 | 0.898543 | DOWN | 538.4042 | 538.4036 | 538.4052 | 11.71833 | 11.6929  |
| 15390 | M823T11  | 1.038707 | -0.05479 | -0.12046 | 0.90745  | 0.898556 | DOWN | 822.6041 | 822.6031 | 822.605  | 10.91213 | 10.83252 |
| 15391 | M401T31  | 1.035824 | 0.050779 | 0.119961 | 0.907485 | 0.89856  | UP   | 401.1083 | 401.108  | 401.1087 | 31.12442 | 31.11883 |
| 15392 | M213T9_1 | 1.050931 | -0.07167 | -0.11997 | 0.907499 | 0.898561 | DOWN | 213.1392 | 213.1379 | 213.142  | 9.311883 | 9.132267 |
| 15393 | M279T10_ | 1.036968 | 0.052372 | 0.120088 | 0.907549 | 0.898566 | UP   | 279.1735 | 279.1732 | 279.1736 | 9.970617 | 9.859233 |
| 15394 | M210T9_7 | 1.032805 | -0.04657 | -0.11987 | 0.907604 | 0.898572 | DOWN | 210.4435 | 210.4434 | 210.4435 | 9.197983 | 9.1445   |
| 15395 | M311T10_ | 1.011722 | 0.016813 | 0.119594 | 0.907786 | 0.89859  | UP   | 310.8515 | 310.8512 | 310.8628 | 9.931108 | 9.827283 |
| 15396 | M794T11_ | 1.044468 | -0.06277 | -0.11952 | 0.907835 | 0.898595 | DOWN | 793.5999 | 793.5995 | 793.6009 | 11.23607 | 11.20953 |
| 15397 | M923T11_ | 1.037849 | 0.053596 | 0.119433 | 0.907889 | 0.898601 | UP   | 922.8595 | 922.8586 | 922.8613 | 10.9098  | 10.8628  |
| 15398 | M323T9_8 | 1.110502 | 0.151212 | 0.119421 | 0.90795  | 0.898607 | UP   | 323.4721 | 323.4719 | 323.4726 | 8.817842 | 8.765117 |
| 15399 | M206T9_6 | 1.075369 | 0.104831 | 0.119579 | 0.90806  | 0.898618 | UP   | 205.6284 | 205.6237 | 205.6312 | 9.287617 | 9.13445  |



|       |          |          |          |          |          |          |      |          |          |          |          |          |
|-------|----------|----------|----------|----------|----------|----------|------|----------|----------|----------|----------|----------|
| 15400 | M495T9_1 | 1.052152 | 0.073343 | 0.119253 | 0.908062 | 0.898618 | UP   | 495.4924 | 495.49   | 495.4973 | 9.311167 | 9.064833 |
| 15401 | M244T27  | 1.078503 | 0.10903  | 0.120452 | 0.90809  | 0.898621 | UP   | 244.1385 | 244.1384 | 244.1391 | 27.23583 | 27.2155  |
| 15402 | M491T11_ | 1.045999 | -0.06488 | -0.12099 | 0.908134 | 0.898625 | DOWN | 491.3203 | 491.3196 | 491.3204 | 11.24875 | 11.20712 |
| 15403 | M523T10_ | 1.038521 | -0.05453 | -0.11874 | 0.908419 | 0.898654 | DOWN | 523.197  | 523.1957 | 523.1991 | 9.930658 | 9.779267 |
| 15404 | M219T11_ | 1.020216 | -0.02888 | -0.11858 | 0.908643 | 0.898676 | DOWN | 219.0455 | 219.0454 | 219.0457 | 10.892   | 10.873   |
| 15405 | M635T10_ | 1.055191 | -0.0775  | -0.1195  | 0.908761 | 0.898688 | DOWN | 634.9438 | 634.943  | 634.9452 | 9.840617 | 9.73145  |
| 15406 | M174T10_ | 1.032873 | -0.04666 | -0.12139 | 0.90883  | 0.898695 | DOWN | 173.8771 | 173.8771 | 173.8772 | 9.968992 | 9.8753   |
| 15407 | M418T10_ | 1.033567 | -0.04763 | -0.1195  | 0.908869 | 0.898699 | DOWN | 418.1312 | 418.1309 | 418.1315 | 9.972217 | 9.859233 |
| 15408 | M898T10  | 1.01866  | -0.02667 | -0.11815 | 0.908881 | 0.8987   | DOWN | 898.3121 | 898.3119 | 898.3124 | 9.939575 | 9.827283 |
| 15409 | M399T29  | 1.039313 | -0.05563 | -0.11812 | 0.908891 | 0.898701 | DOWN | 398.7914 | 398.7911 | 398.7916 | 28.56367 | 28.546   |
| 15410 | M188T10_ | 1.033094 | 0.046971 | 0.11834  | 0.908968 | 0.898709 | UP   | 187.5766 | 187.5763 | 187.5766 | 9.979342 | 9.8753   |
| 15411 | M394T9_1 | 1.069982 | 0.097587 | 0.120767 | 0.909077 | 0.89872  | UP   | 394.3649 | 394.3576 | 394.3661 | 9.18975  | 9.129317 |
| 15412 | M279T10_ | 1.039212 | -0.05549 | -0.11875 | 0.909104 | 0.898722 | DOWN | 279.197  | 279.1968 | 279.1972 | 9.919058 | 9.811217 |
| 15413 | M493T10_ | 1.046525 | -0.06561 | -0.11881 | 0.90911  | 0.898723 | DOWN | 492.6497 | 492.649  | 492.6504 | 9.816808 | 9.714783 |
| 15414 | M378T25_ | 1.038097 | 0.053941 | 0.117814 | 0.909146 | 0.898726 | UP   | 378.2733 | 378.273  | 378.2742 | 25.2425  | 25.12883 |
| 15415 | M357T10_ | 1.018768 | -0.02683 | -0.11983 | 0.909211 | 0.898733 | DOWN | 356.8772 | 356.8767 | 356.8778 | 9.823575 | 9.715683 |
| 15416 | M207T5   | 1.021211 | -0.03028 | -0.11782 | 0.909408 | 0.898753 | DOWN | 206.8936 | 206.8935 | 206.8937 | 5.37985  | 5.281783 |
| 15417 | M553T10_ | 1.034223 | 0.048547 | 0.1177   | 0.90948  | 0.89876  | UP   | 553.4515 | 553.4502 | 553.4549 | 9.823233 | 9.683817 |
| 15418 | M200T10_ | 1.040114 | 0.056741 | 0.117219 | 0.909611 | 0.898773 | UP   | 199.5108 | 199.5106 | 199.5137 | 9.82645  | 9.816167 |
| 15419 | M282T10_ | 1.025207 | 0.035915 | 0.118441 | 0.909636 | 0.898775 | UP   | 282.3787 | 282.3784 | 282.3788 | 9.887117 | 9.779267 |
| 15420 | M655T9_1 | 1.066478 | -0.09285 | -0.11666 | 0.910005 | 0.898812 | DOWN | 654.516  | 654.5154 | 654.5165 | 9.128733 | 9.09495  |
| 15421 | M784T10_ | 1.083975 | 0.116331 | 0.116818 | 0.91001  | 0.898813 | UP   | 784.0645 | 784.0621 | 784.065  | 9.964167 | 9.8753   |
| 15422 | M335T10_ | 1.013089 | 0.018761 | 0.11729  | 0.910231 | 0.898835 | UP   | 334.9909 | 334.9907 | 334.9912 | 9.8207   | 9.699733 |
| 15423 | M316T40  | 1.033912 | 0.048114 | 0.116313 | 0.910361 | 0.898848 | UP   | 316.1752 | 316.1752 | 316.1755 | 39.94933 | 39.7185  |
| 15424 | M389T11_ | 1.017308 | -0.02476 | -0.11639 | 0.910546 | 0.898866 | DOWN | 388.6092 | 388.6089 | 388.6094 | 10.892   | 10.879   |
| 15425 | M351T10_ | 1.020895 | 0.029834 | 0.116833 | 0.910594 | 0.898871 | UP   | 350.7441 | 350.7437 | 350.7442 | 9.514733 | 9.432183 |
| 15426 | M267T10_ | 1.023932 | 0.03412  | 0.116489 | 0.910687 | 0.89888  | UP   | 266.8533 | 266.8531 | 266.8534 | 9.969925 | 9.859233 |
| 15427 | M636T10_ | 1.033213 | -0.04714 | -0.11577 | 0.910786 | 0.89889  | DOWN | 636.027  | 636.0267 | 636.0283 | 9.948875 | 9.843367 |
| 15428 | M276T42  | 1.023455 | 0.033448 | 0.115751 | 0.910855 | 0.898897 | UP   | 276.1802 | 276.18   | 276.1804 | 42.496   | 42.1935  |
| 15429 | M307T24_ | 1.044648 | 0.063018 | 0.115851 | 0.910908 | 0.898903 | UP   | 307.2477 | 307.2473 | 307.2482 | 23.50883 | 23.49833 |
| 15430 | M513T10_ | 1.038432 | 0.054406 | 0.115796 | 0.910942 | 0.898906 | UP   | 513.0598 | 513.0595 | 513.0602 | 9.91765  | 9.903017 |
| 15431 | M423T11_ | 1.06497  | 0.090813 | 0.115729 | 0.910947 | 0.898907 | UP   | 423.4507 | 423.4448 | 423.4533 | 10.99687 | 10.88747 |
| 15432 | M416T9_6 | 1.015405 | 0.022055 | 0.1154   | 0.910978 | 0.89891  | UP   | 416.1532 | 416.1528 | 416.1537 | 9.24215  | 9.129317 |
| 15433 | M479T23  | 1.026024 | -0.03706 | -0.11562 | 0.911089 | 0.898921 | DOWN | 479.3552 | 479.3551 | 479.3557 | 22.78458 | 22.77    |
| 15434 | M275T11_ | 1.030008 | -0.04265 | -0.11552 | 0.911107 | 0.898922 | DOWN | 275.1015 | 275.0979 | 275.1018 | 10.88982 | 10.85018 |

|       |          |          |          |          |          |          |      |          |          |          |          |          |
|-------|----------|----------|----------|----------|----------|----------|------|----------|----------|----------|----------|----------|
| 15435 | M349T9_1 | 1.027788 | -0.03954 | -0.11533 | 0.91119  | 0.898931 | DOWN | 349.2179 | 349.2179 | 349.2179 | 9.29345  | 9.26575  |
| 15436 | M581T10_ | 1.07919  | 0.109949 | 0.115576 | 0.911211 | 0.898933 | UP   | 581.1923 | 581.1918 | 581.1927 | 9.94985  | 9.811217 |
| 15437 | M575T10_ | 1.044688 | 0.063072 | 0.11501  | 0.91129  | 0.898941 | UP   | 575.3402 | 575.339  | 575.3416 | 9.951283 | 9.8914   |
| 15438 | M171T10_ | 1.018692 | -0.02672 | -0.1156  | 0.911384 | 0.89895  | DOWN | 171.1491 | 171.149  | 171.1492 | 10.34871 | 10.14385 |
| 15439 | M188T11_ | 1.036708 | -0.05201 | -0.1148  | 0.911438 | 0.898955 | DOWN | 188.3704 | 188.3701 | 188.3704 | 10.8914  | 10.85018 |
| 15440 | M401T30  | 1.021688 | 0.030954 | 0.116678 | 0.911443 | 0.898956 | UP   | 401.2869 | 401.2866 | 401.2871 | 30.15142 | 30.15033 |
| 15441 | M374T10_ | 1.017654 | -0.02525 | -0.11617 | 0.91149  | 0.898961 | DOWN | 373.9898 | 373.9894 | 373.99   | 9.9351   | 9.811217 |
| 15442 | M342T10_ | 1.02194  | -0.03131 | -0.11482 | 0.911675 | 0.898979 | DOWN | 342.1872 | 342.187  | 342.1874 | 9.8207   | 9.715683 |
| 15443 | M428T10_ | 1.031046 | -0.04411 | -0.11454 | 0.911737 | 0.898985 | DOWN | 427.7677 | 427.7674 | 427.7682 | 9.964092 | 9.843367 |
| 15444 | M577T10_ | 1.021596 | -0.03083 | -0.11457 | 0.911853 | 0.898997 | DOWN | 576.9373 | 576.9369 | 576.9387 | 9.900133 | 9.79535  |
| 15445 | M657T11_ | 1.028244 | -0.04018 | -0.11482 | 0.911874 | 0.898999 | DOWN | 657.2083 | 657.2075 | 657.2097 | 10.90522 | 10.8646  |
| 15446 | M199T9_6 | 1.059646 | 0.083582 | 0.115659 | 0.911878 | 0.898999 | UP   | 199.2154 | 199.2143 | 199.2165 | 9.361175 | 9.25985  |
| 15447 | M459T9_4 | 1.078398 | 0.10889  | 0.115521 | 0.911994 | 0.899011 | UP   | 459.2798 | 459.2681 | 459.2807 | 9.042975 | 8.974933 |
| 15448 | M777T10_ | 1.060599 | 0.084879 | 0.114196 | 0.912006 | 0.899012 | UP   | 776.7944 | 776.7929 | 776.7975 | 9.9009   | 9.779267 |
| 15449 | M194T9_5 | 1.084335 | -0.11681 | -0.11398 | 0.912098 | 0.899021 | DOWN | 193.7723 | 193.7722 | 193.7726 | 9.137533 | 9.110833 |
| 15450 | M181T10_ | 1.045137 | 0.063692 | 0.114491 | 0.912129 | 0.899024 | UP   | 181.2597 | 181.2595 | 181.2597 | 9.968992 | 9.859233 |
| 15451 | M960T9_2 | 1.049161 | -0.06924 | -0.11388 | 0.912156 | 0.899027 | DOWN | 959.828  | 959.8272 | 959.8289 | 9.3907   | 9.288883 |
| 15452 | M483T10_ | 1.073274 | 0.102018 | 0.117352 | 0.912197 | 0.899031 | UP   | 482.846  | 482.8453 | 482.8473 | 9.967367 | 9.869467 |
| 15453 | M1939T11 | 1.019981 | 0.028542 | 0.113758 | 0.912289 | 0.89904  | UP   | 1938.879 | 1938.877 | 1938.881 | 10.89125 | 10.8646  |
| 15454 | M386T10_ | 1.046529 | -0.06561 | -0.11353 | 0.91241  | 0.899052 | DOWN | 385.5314 | 385.5312 | 385.5317 | 9.887133 | 9.859667 |
| 15455 | M385T9_6 | 1.042491 | 0.060035 | 0.115945 | 0.912453 | 0.899056 | UP   | 385.0274 | 385.027  | 385.0289 | 9.2248   | 9.129317 |
| 15456 | M251T10_ | 1.035228 | 0.049949 | 0.113449 | 0.912474 | 0.899059 | UP   | 251.0599 | 251.0597 | 251.0599 | 9.95385  | 9.843367 |
| 15457 | M343T10_ | 1.014332 | 0.02053  | 0.115889 | 0.912499 | 0.899061 | UP   | 342.6887 | 342.6884 | 342.6893 | 9.83135  | 9.715683 |
| 15458 | M331T10_ | 1.01604  | 0.022957 | 0.114555 | 0.912503 | 0.899061 | UP   | 331.0861 | 331.0858 | 331.0864 | 9.825767 | 9.699733 |
| 15459 | M670T15  | 1.027575 | -0.03924 | -0.11421 | 0.912507 | 0.899062 | DOWN | 670.4988 | 670.4981 | 670.4997 | 14.50139 | 14.42875 |
| 15460 | M387T10_ | 1.039475 | 0.055855 | 0.113974 | 0.912587 | 0.89907  | UP   | 386.679  | 386.6785 | 386.686  | 9.960817 | 9.816167 |
| 15461 | M238T10_ | 1.032032 | 0.045488 | 0.115964 | 0.912635 | 0.899075 | UP   | 238.2929 | 238.2925 | 238.2932 | 9.770733 | 9.665433 |
| 15462 | M419T30  | 1.037794 | -0.05352 | -0.11333 | 0.912701 | 0.899081 | DOWN | 418.8002 | 418.8    | 418.8003 | 30.18675 | 30.16583 |
| 15463 | M224T10_ | 1.038609 | 0.054653 | 0.114696 | 0.912737 | 0.899085 | UP   | 224.3688 | 224.3686 | 224.3713 | 9.960967 | 9.84525  |
| 15464 | M387T10_ | 1.173825 | 0.231217 | 0.113133 | 0.912781 | 0.899089 | UP   | 387.1541 | 387.1506 | 387.1601 | 9.922342 | 9.830283 |
| 15465 | M429T10_ | 1.038378 | -0.05433 | -0.11325 | 0.912835 | 0.899094 | DOWN | 428.9326 | 428.9324 | 428.933  | 9.968992 | 9.859233 |
| 15466 | M207T10_ | 1.010774 | 0.01546  | 0.114651 | 0.912856 | 0.899097 | UP   | 206.5056 | 206.5055 | 206.5058 | 9.886783 | 9.79535  |
| 15467 | M242T11_ | 1.135908 | 0.183846 | 0.114661 | 0.9129   | 0.899101 | UP   | 241.7052 | 241.705  | 241.7061 | 10.74635 | 10.64453 |
| 15468 | M697T9_1 | 1.038079 | -0.05392 | -0.11443 | 0.912915 | 0.899102 | DOWN | 696.5382 | 696.5374 | 696.5398 | 9.100808 | 9.0269   |
| 15469 | M1574T10 | 1.027928 | 0.039739 | 0.115469 | 0.912923 | 0.899103 | UP   | 1573.738 | 1573.737 | 1573.738 | 9.964167 | 9.8753   |

|       |          |          |          |          |          |          |      |          |          |          |          |          |
|-------|----------|----------|----------|----------|----------|----------|------|----------|----------|----------|----------|----------|
| 15470 | M261T14  | 1.036147 | 0.051229 | 0.11335  | 0.912992 | 0.89911  | UP   | 261.1095 | 261.1093 | 261.1097 | 14.00475 | 13.9753  |
| 15471 | M709T3   | 1.040706 | 0.057563 | 0.112735 | 0.913018 | 0.899113 | UP   | 709.4856 | 709.4851 | 709.4857 | 3.447017 | 3.296583 |
| 15472 | M417T11_ | 1.03052  | -0.04337 | -0.11298 | 0.91304  | 0.899115 | DOWN | 417.0579 | 417.0575 | 417.0587 | 10.89839 | 10.87765 |
| 15473 | M301T10_ | 1.038718 | 0.054803 | 0.112988 | 0.913227 | 0.899133 | UP   | 300.7134 | 300.7133 | 300.7139 | 9.903283 | 9.811217 |
| 15474 | M163T10_ | 1.018781 | -0.02684 | -0.11247 | 0.913336 | 0.899144 | DOWN | 162.9291 | 162.929  | 162.9293 | 9.967533 | 9.859233 |
| 15475 | M372T10_ | 1.030131 | 0.042827 | 0.11244  | 0.913411 | 0.899152 | UP   | 371.9698 | 371.9695 | 371.9701 | 9.972917 | 9.8753   |
| 15476 | M343T9_4 | 1.045157 | 0.063719 | 0.113621 | 0.913496 | 0.89916  | UP   | 343.199  | 343.1987 | 343.1993 | 8.914933 | 8.638817 |
| 15477 | M166T10_ | 1.022227 | 0.031716 | 0.113706 | 0.913502 | 0.899161 | UP   | 165.7587 | 165.7585 | 165.7588 | 9.967367 | 9.843367 |
| 15478 | M1973T10 | 1.015987 | 0.022883 | 0.112946 | 0.913586 | 0.899169 | UP   | 1973.387 | 1973.383 | 1973.395 | 9.831242 | 9.715683 |
| 15479 | M409T11_ | 1.0264   | -0.03759 | -0.11426 | 0.913704 | 0.899181 | DOWN | 409.2308 | 409.2307 | 409.2309 | 10.64663 | 10.629   |
| 15480 | M465T11_ | 1.021035 | -0.03003 | -0.11178 | 0.913757 | 0.899186 | DOWN | 465.0197 | 465.0191 | 465.0199 | 10.90522 | 10.879   |
| 15481 | M383T11_ | 1.016288 | -0.02331 | -0.11167 | 0.913836 | 0.899194 | DOWN | 382.6822 | 382.6821 | 382.6832 | 10.892   | 10.879   |
| 15482 | M818T11_ | 1.030685 | 0.043604 | 0.11179  | 0.913977 | 0.899208 | UP   | 817.9615 | 817.9609 | 817.9617 | 10.57698 | 10.55068 |
| 15483 | M621T10_ | 1.017948 | 0.025663 | 0.112842 | 0.914095 | 0.89922  | UP   | 621.2106 | 621.2097 | 621.2154 | 9.823575 | 9.715683 |
| 15484 | M611T10_ | 1.035518 | -0.05035 | -0.11165 | 0.914159 | 0.899226 | DOWN | 611.4886 | 611.488  | 611.4889 | 9.972917 | 9.8753   |
| 15485 | M362T10_ | 1.03483  | 0.049393 | 0.112068 | 0.914169 | 0.899227 | UP   | 361.7431 | 361.7426 | 361.7441 | 9.88865  | 9.811217 |
| 15486 | M358T10_ | 1.141244 | 0.190607 | 0.111803 | 0.914177 | 0.899228 | UP   | 358.2848 | 358.2819 | 358.2849 | 9.81635  | 9.673333 |
| 15487 | M625T10_ | 1.026213 | 0.03733  | 0.111389 | 0.914227 | 0.899233 | UP   | 625.0774 | 625.0757 | 625.0779 | 9.952017 | 9.843367 |
| 15488 | M346T11_ | 1.027257 | -0.0388  | -0.11152 | 0.914273 | 0.899237 | DOWN | 346.2933 | 346.2923 | 346.2936 | 10.892   | 10.85018 |
| 15489 | M367T10_ | 1.021254 | -0.03034 | -0.11115 | 0.914288 | 0.899239 | DOWN | 367.2396 | 367.239  | 367.2399 | 9.968992 | 9.859233 |
| 15490 | M256T10_ | 1.020938 | -0.0299  | -0.11089 | 0.914532 | 0.899263 | DOWN | 256.2875 | 256.2872 | 256.2879 | 9.962617 | 9.859233 |
| 15491 | M558T10_ | 1.043278 | 0.061123 | 0.114042 | 0.914638 | 0.899273 | UP   | 557.5516 | 557.5511 | 557.5518 | 9.956417 | 9.853533 |
| 15492 | M1037T10 | 1.044956 | 0.063442 | 0.110544 | 0.914744 | 0.899284 | UP   | 1037.186 | 1037.185 | 1037.187 | 9.970617 | 9.8753   |
| 15493 | M623T45  | 1.008813 | -0.01266 | -0.11068 | 0.914777 | 0.899287 | DOWN | 623.4524 | 623.4522 | 623.4529 | 44.98333 | 44.969   |
| 15494 | M236T9_4 | 1.074372 | -0.10349 | -0.11038 | 0.914831 | 0.899292 | DOWN | 235.6371 | 235.6349 | 235.6376 | 9.295167 | 9.111033 |
| 15495 | M410T10_ | 1.044572 | 0.062911 | 0.110678 | 0.914845 | 0.899294 | UP   | 410.3201 | 410.3177 | 410.3203 | 9.967367 | 9.843367 |
| 15496 | M594T10_ | 1.06574  | 0.091855 | 0.110483 | 0.914851 | 0.899294 | UP   | 593.5822 | 593.5817 | 593.5826 | 9.9351   | 9.9174   |
| 15497 | M758T11_ | 1.024959 | 0.035566 | 0.111211 | 0.914956 | 0.899305 | UP   | 758.1139 | 758.1134 | 758.1145 | 10.90553 | 10.879   |
| 15498 | M1932T9  | 1.036791 | -0.05213 | -0.11006 | 0.915083 | 0.899317 | DOWN | 1931.641 | 1931.637 | 1931.647 | 9.17485  | 9.11405  |
| 15499 | M355T41_ | 1.047247 | -0.0666  | -0.11156 | 0.915114 | 0.89932  | DOWN | 355.2113 | 355.2112 | 355.2114 | 40.82683 | 40.611   |
| 15500 | M214T10_ | 1.01762  | -0.0252  | -0.11119 | 0.915132 | 0.899322 | DOWN | 214.0582 | 214.0581 | 214.0583 | 9.902617 | 9.79535  |
| 15501 | M463T11_ | 1.015737 | -0.02253 | -0.11024 | 0.915136 | 0.899323 | DOWN | 462.7259 | 462.7256 | 462.7261 | 10.89875 | 10.879   |
| 15502 | M481T11_ | 1.038455 | -0.05444 | -0.11035 | 0.91514  | 0.899323 | DOWN | 480.7451 | 480.7449 | 480.7455 | 10.90765 | 10.89125 |
| 15503 | M305T10_ | 1.025265 | 0.035997 | 0.111254 | 0.915165 | 0.899325 | UP   | 304.7388 | 304.7364 | 304.7391 | 9.975142 | 9.840617 |
| 15504 | M353T43_ | 1.031995 | -0.04544 | -0.11042 | 0.915257 | 0.899335 | DOWN | 353.2321 | 353.2319 | 353.2321 | 43.40925 | 43.3995  |

|       |          |          |          |          |          |          |      |          |          |          |          |          |
|-------|----------|----------|----------|----------|----------|----------|------|----------|----------|----------|----------|----------|
| 15505 | M231T10_ | 1.048433 | 0.068235 | 0.111022 | 0.915394 | 0.899348 | UP   | 230.8227 | 230.8174 | 230.8231 | 9.933967 | 9.903017 |
| 15506 | M441T10_ | 1.005735 | 0.008251 | 0.111985 | 0.915419 | 0.899351 | UP   | 441.3696 | 441.3693 | 441.3705 | 9.807933 | 9.683817 |
| 15507 | M218T10_ | 1.037291 | 0.052821 | 0.110727 | 0.91544  | 0.899353 | UP   | 218.0094 | 218.0091 | 218.0095 | 9.975217 | 9.859233 |
| 15508 | M395T9_9 | 1.045726 | -0.0645  | -0.10954 | 0.915499 | 0.899359 | DOWN | 395.2981 | 395.2972 | 395.2993 | 9.221317 | 9.095133 |
| 15509 | M1508T10 | 1.018462 | -0.02639 | -0.11006 | 0.915542 | 0.899363 | DOWN | 1507.847 | 1507.845 | 1507.848 | 10.17529 | 10.07528 |
| 15510 | M401T9_3 | 1.018069 | -0.02584 | -0.11058 | 0.915546 | 0.899363 | DOWN | 401.0592 | 401.0585 | 401.0599 | 8.916317 | 8.832317 |
| 15511 | M155T10_ | 1.031149 | -0.04425 | -0.10954 | 0.915547 | 0.899363 | DOWN | 154.9591 | 154.9589 | 154.9642 | 9.94455  | 9.811217 |
| 15512 | M178T11_ | 1.027763 | -0.03951 | -0.11146 | 0.9156   | 0.899369 | DOWN | 177.8696 | 177.8693 | 177.87   | 10.90553 | 10.88995 |
| 15513 | M460T21  | 1.0285   | -0.04054 | -0.10925 | 0.915693 | 0.899378 | DOWN | 460.3416 | 460.3415 | 460.3419 | 20.75117 | 20.73817 |
| 15514 | M849T10_ | 1.02932  | 0.041692 | 0.109236 | 0.91579  | 0.899387 | UP   | 849.0172 | 849.0163 | 849.0178 | 10.36125 | 10.34472 |
| 15515 | M406T41  | 1.033703 | -0.04782 | -0.10912 | 0.915845 | 0.899393 | DOWN | 406.2069 | 406.2068 | 406.2072 | 41.086   | 40.8845  |
| 15516 | M342T10_ | 1.032041 | -0.0455  | -0.10954 | 0.915868 | 0.899395 | DOWN | 341.9114 | 341.9111 | 341.9116 | 9.951283 | 9.843367 |
| 15517 | M447T11_ | 1.017713 | 0.02533  | 0.109422 | 0.915897 | 0.899398 | UP   | 446.9929 | 446.9923 | 446.9933 | 10.89875 | 10.879   |
| 15518 | M1207T26 | 1.052531 | -0.07386 | -0.10943 | 0.915979 | 0.899406 | DOWN | 1206.585 | 1206.584 | 1206.586 | 25.52358 | 25.50783 |
| 15519 | M443T10_ | 1.018803 | 0.026875 | 0.109026 | 0.91599  | 0.899407 | UP   | 443.4124 | 443.4115 | 443.4125 | 9.960817 | 9.859233 |
| 15520 | M342T10_ | 1.036292 | -0.05143 | -0.10883 | 0.916044 | 0.899412 | DOWN | 342.3976 | 342.3974 | 342.3978 | 9.8214   | 9.715683 |
| 15521 | M1490T10 | 1.015186 | -0.02174 | -0.10881 | 0.916071 | 0.899415 | DOWN | 1489.709 | 1489.709 | 1489.711 | 9.9014   | 9.79535  |
| 15522 | M1358T10 | 1.083873 | 0.116196 | 0.109581 | 0.916146 | 0.899423 | UP   | 1358.417 | 1358.416 | 1358.418 | 9.960817 | 9.843367 |
| 15523 | M282T11_ | 1.022086 | -0.03152 | -0.10886 | 0.916224 | 0.89943  | DOWN | 282.1362 | 282.1355 | 282.1368 | 10.90548 | 10.873   |
| 15524 | M536T40_ | 1.033677 | 0.047785 | 0.108548 | 0.916289 | 0.899437 | UP   | 536.3061 | 536.306  | 536.3063 | 39.51767 | 39.17233 |
| 15525 | M424T11_ | 1.09835  | -0.13534 | -0.1085  | 0.91629  | 0.899437 | DOWN | 424.1604 | 424.1598 | 424.1609 | 10.90628 | 10.89355 |
| 15526 | M625T11_ | 1.018853 | -0.02695 | -0.10883 | 0.916307 | 0.899438 | DOWN | 624.7951 | 624.7949 | 624.7957 | 11.48533 | 11.47593 |
| 15527 | M451T9_3 | 1.040524 | -0.05731 | -0.10834 | 0.916399 | 0.899447 | DOWN | 450.6359 | 450.634  | 450.641  | 9.2402   | 9.03845  |
| 15528 | M209T11_ | 1.021356 | 0.030485 | 0.111213 | 0.916411 | 0.899449 | UP   | 209.1646 | 209.1646 | 209.1647 | 10.91983 | 10.90765 |
| 15529 | M266T10_ | 1.02243  | 0.032003 | 0.108629 | 0.916412 | 0.899449 | UP   | 266.0358 | 266.0356 | 266.0361 | 9.964092 | 9.859233 |
| 15530 | M490T25  | 1.027669 | -0.03938 | -0.10806 | 0.916636 | 0.899471 | DOWN | 489.8702 | 489.8696 | 489.8706 | 25.17083 | 25.146   |
| 15531 | M515T10_ | 1.018807 | -0.02688 | -0.10802 | 0.916773 | 0.899484 | DOWN | 514.6374 | 514.6367 | 514.6377 | 10.17253 | 10.08517 |
| 15532 | M675T10_ | 1.039368 | -0.05571 | -0.10783 | 0.916907 | 0.899498 | DOWN | 674.6227 | 674.6224 | 674.6234 | 9.830558 | 9.696683 |
| 15533 | M465T10_ | 1.019603 | 0.028007 | 0.107863 | 0.916973 | 0.899504 | UP   | 465.2432 | 465.2426 | 465.2435 | 9.914217 | 9.665433 |
| 15534 | M189T9_1 | 1.079651 | 0.110565 | 0.107966 | 0.917089 | 0.899516 | UP   | 189.0153 | 189.0146 | 189.0165 | 9.251492 | 9.11795  |
| 15535 | M360T10_ | 1.030966 | 0.043996 | 0.107433 | 0.917221 | 0.899528 | UP   | 359.5128 | 359.5124 | 359.5135 | 9.972917 | 9.859233 |
| 15536 | M258T24  | 1.010706 | -0.01536 | -0.10716 | 0.91731  | 0.899537 | DOWN | 258.2789 | 258.2787 | 258.2789 | 23.72542 | 23.71683 |
| 15537 | M320T43_ | 1.044658 | 0.06303  | 0.107024 | 0.917417 | 0.899548 | UP   | 320.1701 | 320.17   | 320.1703 | 43.31567 | 43.20033 |
| 15538 | M373T11_ | 1.019463 | -0.02781 | -0.10763 | 0.917454 | 0.899551 | DOWN | 372.6875 | 372.6869 | 372.6896 | 10.89875 | 10.879   |
| 15539 | M266T10_ | 1.021326 | -0.03044 | -0.10675 | 0.917789 | 0.899584 | DOWN | 265.5457 | 265.5454 | 265.5462 | 9.948875 | 9.843367 |

|       |          |          |          |          |          |          |      |          |          |          |          |          |
|-------|----------|----------|----------|----------|----------|----------|------|----------|----------|----------|----------|----------|
| 15540 | M273T45  | 1.02314  | 0.033003 | 0.108198 | 0.917809 | 0.899586 | UP   | 273.1693 | 273.1692 | 273.1694 | 44.82533 | 44.73917 |
| 15541 | M1309T9  | 1.006547 | -0.00941 | -0.10857 | 0.917974 | 0.899603 | DOWN | 1309.156 | 1309.152 | 1309.157 | 9.49445  | 9.40135  |
| 15542 | M461T11_ | 1.027323 | -0.03889 | -0.1064  | 0.918093 | 0.899614 | DOWN | 460.5058 | 460.5052 | 460.5073 | 10.94208 | 10.8926  |
| 15543 | M347T3   | 1.044261 | -0.06248 | -0.10616 | 0.918097 | 0.899615 | DOWN | 347.2487 | 347.2485 | 347.2487 | 3.466467 | 3.2799   |
| 15544 | M190T10_ | 1.014152 | -0.02027 | -0.10609 | 0.918134 | 0.899618 | DOWN | 190.1774 | 190.1731 | 190.1775 | 9.915933 | 9.811217 |
| 15545 | M430T10_ | 1.043895 | 0.061977 | 0.106207 | 0.918215 | 0.899626 | UP   | 430.2842 | 430.2804 | 430.2846 | 9.960817 | 9.697633 |
| 15546 | M495T10_ | 1.031179 | 0.044295 | 0.107144 | 0.918324 | 0.899637 | UP   | 494.8255 | 494.8253 | 494.8258 | 9.989483 | 9.8753   |
| 15547 | M539T10_ | 1.030486 | -0.04333 | -0.10639 | 0.91836  | 0.899641 | DOWN | 538.9412 | 538.9409 | 538.9414 | 9.977442 | 9.859233 |
| 15548 | M877T10_ | 1.013266 | 0.019013 | 0.105833 | 0.918404 | 0.899645 | UP   | 876.9845 | 876.983  | 876.9849 | 9.95385  | 9.859233 |
| 15549 | M448T11_ | 1.020235 | -0.0289  | -0.1076  | 0.918485 | 0.899653 | DOWN | 448.0408 | 448.0403 | 448.0417 | 10.92208 | 10.88747 |
| 15550 | M1752T10 | 1.028646 | -0.04075 | -0.1061  | 0.918528 | 0.899657 | DOWN | 1752.404 | 1752.402 | 1752.413 | 9.841308 | 9.774967 |
| 15551 | M350T38  | 1.028812 | -0.04098 | -0.10593 | 0.918626 | 0.899667 | DOWN | 350.2172 | 350.217  | 350.2174 | 37.77692 | 37.35967 |
| 15552 | M810T25  | 1.039018 | -0.05522 | -0.10542 | 0.918645 | 0.899669 | DOWN | 810.3757 | 810.3747 | 810.3771 | 25.27483 | 25.2165  |
| 15553 | M411T9_2 | 1.033985 | 0.048215 | 0.105631 | 0.918674 | 0.899671 | UP   | 410.6104 | 410.6099 | 410.6141 | 9.383233 | 9.09495  |
| 15554 | M385T9_9 | 1.032023 | -0.04548 | -0.10604 | 0.918753 | 0.899679 | DOWN | 385.2506 | 385.2504 | 385.2514 | 8.868383 | 8.77435  |
| 15555 | M572T10_ | 1.025608 | 0.036479 | 0.105439 | 0.918765 | 0.89968  | UP   | 571.8407 | 571.8402 | 571.841  | 9.979325 | 9.8753   |
| 15556 | M592T11_ | 1.039981 | -0.05656 | -0.10529 | 0.918831 | 0.899687 | DOWN | 592.0412 | 592.0408 | 592.0426 | 10.7664  | 10.74768 |
| 15557 | M615T10_ | 1.019275 | -0.02754 | -0.1051  | 0.918897 | 0.899693 | DOWN | 615.019  | 615.0179 | 615.0209 | 9.964092 | 9.859233 |
| 15558 | M316T9_2 | 1.017477 | -0.025   | -0.10551 | 0.918994 | 0.899703 | DOWN | 316.2119 | 316.2117 | 316.212  | 8.893558 | 8.803967 |
| 15559 | M181T10_ | 1.036458 | 0.051662 | 0.104919 | 0.919025 | 0.899706 | UP   | 180.984  | 180.9837 | 180.9841 | 9.968992 | 9.859233 |
| 15560 | M229T10_ | 1.061121 | -0.08559 | -0.10543 | 0.919267 | 0.89973  | DOWN | 229.0324 | 229.0323 | 229.0324 | 9.90185  | 9.806367 |
| 15561 | M524T41_ | 1.011948 | 0.017135 | 0.107658 | 0.919271 | 0.89973  | UP   | 524.3061 | 524.306  | 524.3062 | 40.88792 | 40.74067 |
| 15562 | M634T10_ | 1.019651 | 0.028076 | 0.104546 | 0.919423 | 0.899745 | UP   | 633.5857 | 633.5853 | 633.5861 | 9.972917 | 9.8753   |
| 15563 | M496T9_8 | 1.021815 | -0.03113 | -0.10467 | 0.919428 | 0.899745 | DOWN | 495.976  | 495.9745 | 495.9763 | 9.250817 | 9.1445   |
| 15564 | M1497T10 | 1.04421  | -0.06241 | -0.10549 | 0.919464 | 0.899749 | DOWN | 1497.448 | 1497.446 | 1497.449 | 9.956917 | 9.853533 |
| 15565 | M398T9_5 | 1.064992 | 0.090842 | 0.10425  | 0.919548 | 0.899757 | UP   | 398.1748 | 398.1736 | 398.1782 | 9.160617 | 9.142767 |
| 15566 | M568T10_ | 1.034904 | -0.0495  | -0.10467 | 0.919693 | 0.899771 | DOWN | 568.009  | 568.0086 | 568.0091 | 9.946367 | 9.827283 |
| 15567 | M778T10_ | 1.011218 | -0.01609 | -0.1053  | 0.919866 | 0.899788 | DOWN | 777.6581 | 777.657  | 777.6597 | 9.917167 | 9.811217 |
| 15568 | M815T11_ | 1.019822 | -0.02832 | -0.10461 | 0.919973 | 0.899799 | DOWN | 815.484  | 815.4838 | 815.4843 | 10.60297 | 10.55068 |
| 15569 | M166T10_ | 1.040531 | -0.05732 | -0.10475 | 0.919995 | 0.899801 | DOWN | 166.4398 | 166.4397 | 166.4398 | 9.81635  | 9.728083 |
| 15570 | M378T20  | 1.034679 | -0.04918 | -0.10375 | 0.920001 | 0.899802 | DOWN | 378.2636 | 378.2634 | 378.2641 | 19.92558 | 19.894   |
| 15571 | M410T10_ | 1.039201 | 0.055475 | 0.104051 | 0.92018  | 0.899819 | UP   | 409.8506 | 409.8502 | 409.8509 | 9.967367 | 9.859233 |
| 15572 | M1036T10 | 1.023288 | 0.033212 | 0.103971 | 0.920221 | 0.899823 | UP   | 1036.263 | 1036.262 | 1036.265 | 9.7877   | 9.6681   |
| 15573 | M1978T10 | 1.041118 | -0.05813 | -0.10334 | 0.920311 | 0.899832 | DOWN | 1977.904 | 1977.903 | 1977.906 | 9.915583 | 9.729367 |
| 15574 | M378T25_ | 1.04168  | -0.05891 | -0.10324 | 0.920341 | 0.899835 | DOWN | 377.6718 | 377.6716 | 377.672  | 25.26125 | 25.187   |

|       |           |          |          |          |          |          |      |          |          |          |          |          |
|-------|-----------|----------|----------|----------|----------|----------|------|----------|----------|----------|----------|----------|
| 15575 | M545T10_  | 1.044623 | 0.062982 | 0.103482 | 0.920351 | 0.899836 | UP   | 545.36   | 545.3591 | 545.3607 | 9.916225 | 9.853533 |
| 15576 | M684T11_  | 1.023845 | 0.033998 | 0.103212 | 0.920425 | 0.899843 | UP   | 683.7757 | 683.7751 | 683.7776 | 10.90012 | 10.82972 |
| 15577 | M1220T10_ | 1.01807  | -0.02584 | -0.10279 | 0.920689 | 0.899869 | DOWN | 1219.658 | 1219.656 | 1219.659 | 9.985117 | 9.8753   |
| 15578 | M367T10_  | 1.038169 | -0.05404 | -0.10285 | 0.920924 | 0.899892 | DOWN | 367.3894 | 367.3891 | 367.39   | 9.968992 | 9.859233 |
| 15579 | M914T9    | 1.056189 | 0.078868 | 0.102683 | 0.921062 | 0.899905 | UP   | 913.7849 | 913.7792 | 913.7857 | 9.120075 | 9.07945  |
| 15580 | M357T39   | 1.022765 | -0.03247 | -0.10229 | 0.92107  | 0.899906 | DOWN | 357.1905 | 357.1903 | 357.1908 | 38.6415  | 38.525   |
| 15581 | M261T10_  | 1.025953 | -0.03696 | -0.10225 | 0.921073 | 0.899907 | DOWN | 261.0936 | 261.0933 | 261.0937 | 9.939575 | 9.827283 |
| 15582 | M1150T11_ | 1.014182 | 0.020317 | 0.102237 | 0.921101 | 0.899909 | UP   | 1149.941 | 1149.941 | 1149.942 | 10.89875 | 10.879   |
| 15583 | M243T9_3  | 1.03546  | -0.05027 | -0.10236 | 0.921112 | 0.89991  | DOWN | 242.5843 | 242.5834 | 242.5852 | 9.280767 | 9.1322   |
| 15584 | M318T28_  | 1.021461 | -0.03063 | -0.10406 | 0.921154 | 0.899915 | DOWN | 317.6305 | 317.6303 | 317.6305 | 28.12733 | 28.113   |
| 15585 | M1107T10_ | 1.02463  | -0.0351  | -0.10218 | 0.92116  | 0.899915 | DOWN | 1107.234 | 1107.227 | 1107.236 | 9.95605  | 9.79535  |
| 15586 | M507T25   | 1.0305   | 0.043345 | 0.102237 | 0.921288 | 0.899928 | UP   | 507.3423 | 507.3419 | 507.3431 | 24.62267 | 24.59467 |
| 15587 | M472T25_  | 1.044206 | -0.06241 | -0.10194 | 0.921361 | 0.899935 | DOWN | 471.8379 | 471.8375 | 471.8385 | 25.246   | 25.20167 |
| 15588 | M176T10_  | 1.032758 | 0.046503 | 0.103019 | 0.921391 | 0.899938 | UP   | 176.2236 | 176.2233 | 176.2262 | 9.872917 | 9.843367 |
| 15589 | M406T18   | 1.024836 | -0.03539 | -0.10213 | 0.92144  | 0.899942 | DOWN | 406.3315 | 406.3312 | 406.3317 | 17.64258 | 17.61267 |
| 15590 | M386T10_  | 1.040979 | -0.05794 | -0.10254 | 0.921473 | 0.899946 | DOWN | 385.8201 | 385.8196 | 385.8202 | 9.967367 | 9.859233 |
| 15591 | M342T11_  | 1.025122 | 0.035796 | 0.101848 | 0.921477 | 0.899946 | UP   | 342.4737 | 342.4623 | 342.4754 | 10.93468 | 10.85018 |
| 15592 | M1002T11_ | 1.024843 | 0.035403 | 0.102173 | 0.921511 | 0.899949 | UP   | 1001.697 | 1001.696 | 1001.698 | 10.8926  | 10.879   |
| 15593 | M751T10_  | 1.01109  | -0.01591 | -0.1042  | 0.921523 | 0.899951 | DOWN | 750.9429 | 750.9396 | 750.944  | 9.825767 | 9.715683 |
| 15594 | M478T19   | 1.046118 | -0.06505 | -0.10207 | 0.92155  | 0.899953 | DOWN | 478.3523 | 478.3521 | 478.3524 | 18.64592 | 18.6435  |
| 15595 | M318T11_  | 1.021962 | -0.03134 | -0.10191 | 0.921644 | 0.899962 | DOWN | 318.2857 | 318.2851 | 318.2864 | 10.89875 | 10.89125 |
| 15596 | M1922T10  | 1.025163 | -0.03585 | -0.10229 | 0.921663 | 0.899964 | DOWN | 1922.293 | 1922.289 | 1922.293 | 9.983467 | 9.859233 |
| 15597 | M246T23   | 1.015953 | -0.02283 | -0.10209 | 0.921683 | 0.899966 | DOWN | 246.1848 | 246.1847 | 246.1849 | 22.53192 | 22.52367 |
| 15598 | M325T9_6  | 1.015205 | -0.02177 | -0.10373 | 0.921733 | 0.899971 | DOWN | 325.0217 | 325.0214 | 325.0223 | 8.82795  | 8.730433 |
| 15599 | M281T10_  | 1.030684 | 0.043602 | 0.101537 | 0.921787 | 0.899976 | UP   | 280.5244 | 280.5241 | 280.5246 | 9.979342 | 9.8753   |
| 15600 | M361T29   | 1.017248 | 0.024672 | 0.103104 | 0.921798 | 0.899977 | UP   | 361.3504 | 361.3503 | 361.3506 | 29.29092 | 29.27117 |
| 15601 | M580T44_  | 1.011664 | -0.01673 | -0.10117 | 0.921908 | 0.899988 | DOWN | 580.3327 | 580.3324 | 580.3328 | 44.35092 | 44.13517 |
| 15602 | M437T11_  | 1.016372 | -0.02343 | -0.10208 | 0.922012 | 0.899998 | DOWN | 437.4037 | 437.4035 | 437.4046 | 10.90519 | 10.88747 |
| 15603 | M679T10_  | 1.033917 | -0.04812 | -0.10146 | 0.92214  | 0.900011 | DOWN | 679.3287 | 679.3252 | 679.3317 | 9.707583 | 9.40135  |
| 15604 | M351T9_5  | 1.0482   | 0.067915 | 0.100837 | 0.922249 | 0.900021 | UP   | 350.7084 | 350.7078 | 350.709  | 9.23865  | 9.048117 |
| 15605 | M536T22_  | 1.036829 | 0.052178 | 0.100648 | 0.922307 | 0.900027 | UP   | 535.6246 | 535.6231 | 535.6255 | 21.59817 | 21.50033 |
| 15606 | M276T44_  | 1.03429  | 0.048641 | 0.101651 | 0.922381 | 0.900034 | UP   | 276.1439 | 276.1438 | 276.144  | 43.74717 | 43.47383 |
| 15607 | M478T44_  | 1.012088 | -0.01733 | -0.10048 | 0.922681 | 0.900064 | DOWN | 478.3006 | 478.3005 | 478.3008 | 44.31517 | 44.2215  |
| 15608 | M456T11_  | 1.0118   | 0.016925 | 0.10016  | 0.922712 | 0.900067 | UP   | 455.555  | 455.5547 | 455.5551 | 10.8914  | 10.8646  |
| 15609 | M422T11_  | 1.024748 | -0.03527 | -0.10025 | 0.922926 | 0.900088 | DOWN | 421.8062 | 421.8056 | 421.8064 | 10.90551 | 10.879   |

|       |          |          |          |          |          |          |      |          |          |          |          |          |
|-------|----------|----------|----------|----------|----------|----------|------|----------|----------|----------|----------|----------|
| 15610 | M770T9_2 | 1.037726 | -0.05343 | -0.09968 | 0.923051 | 0.9001   | DOWN | 770.1778 | 770.1674 | 770.1783 | 9.146383 | 9.110833 |
| 15611 | M448T11_ | 1.025545 | -0.03639 | -0.09961 | 0.923118 | 0.900106 | DOWN | 448.3553 | 448.3547 | 448.356  | 10.9161  | 10.879   |
| 15612 | M375T20  | 1.009943 | -0.01427 | -0.09937 | 0.923302 | 0.900124 | DOWN | 375.3005 | 375.3004 | 375.3007 | 20.24517 | 20.23017 |
| 15613 | M299T42_ | 1.015638 | -0.02239 | -0.10013 | 0.923363 | 0.90013  | DOWN | 299.185  | 299.1849 | 299.1851 | 42.12167 | 41.92017 |
| 15614 | M188T9_1 | 1.054256 | -0.07623 | -0.09979 | 0.923475 | 0.900141 | DOWN | 188.2458 | 188.2454 | 188.2461 | 9.171817 | 9.1587   |
| 15615 | M155T10_ | 1.023552 | 0.033584 | 0.099177 | 0.923505 | 0.900144 | UP   | 154.8003 | 154.8003 | 154.8004 | 9.951392 | 9.859233 |
| 15616 | M262T9_2 | 1.0241   | 0.034356 | 0.099066 | 0.923537 | 0.900147 | UP   | 262.245  | 262.2438 | 262.2472 | 9.237342 | 9.111033 |
| 15617 | M210T11_ | 1.032045 | 0.045505 | 0.099099 | 0.923574 | 0.900151 | UP   | 209.6224 | 209.6223 | 209.6228 | 10.89875 | 10.85018 |
| 15618 | M166T9_9 | 1.036983 | 0.052392 | 0.0992   | 0.923614 | 0.900155 | UP   | 166.3074 | 166.3045 | 166.3078 | 9.174917 | 9.145433 |
| 15619 | M271T9_5 | 1.028954 | -0.04118 | -0.099   | 0.923618 | 0.900155 | DOWN | 270.9059 | 270.9019 | 270.9071 | 9.311167 | 9.142767 |
| 15620 | M434T10_ | 1.028821 | 0.040992 | 0.098976 | 0.923644 | 0.900157 | UP   | 433.6485 | 433.6481 | 433.6489 | 9.972917 | 9.859233 |
| 15621 | M1348T10 | 1.039966 | 0.056537 | 0.099302 | 0.923873 | 0.90018  | UP   | 1348.205 | 1348.196 | 1348.209 | 9.939233 | 9.853533 |
| 15622 | M348T10_ | 1.006302 | -0.00906 | -0.10027 | 0.923921 | 0.900184 | DOWN | 348.3445 | 348.3443 | 348.3446 | 9.8397   | 9.73145  |
| 15623 | M261T7   | 1.024419 | -0.03481 | -0.09858 | 0.923969 | 0.900189 | DOWN | 261.1303 | 261.1302 | 261.1304 | 6.772533 | 6.691517 |
| 15624 | M576T9_4 | 1.038365 | 0.054313 | 0.098626 | 0.924015 | 0.900193 | UP   | 575.8372 | 575.8357 | 575.8388 | 9.145083 | 9.110833 |
| 15625 | M633T10_ | 1.024995 | -0.03562 | -0.09838 | 0.924051 | 0.900197 | DOWN | 633.0227 | 633.0224 | 633.024  | 9.939575 | 9.827283 |
| 15626 | M346T9_5 | 1.047014 | -0.06628 | -0.09879 | 0.924151 | 0.900207 | DOWN | 345.9051 | 345.8994 | 345.9054 | 9.373792 | 9.275917 |
| 15627 | M638T11_ | 1.019198 | 0.027435 | 0.09831  | 0.924242 | 0.900216 | UP   | 637.5091 | 637.5082 | 637.5096 | 10.88871 | 10.86253 |
| 15628 | M792T11  | 1.016355 | -0.0234  | -0.09816 | 0.924245 | 0.900216 | DOWN | 792.3453 | 792.3444 | 792.3475 | 10.90659 | 10.879   |
| 15629 | M206T9_3 | 1.038415 | -0.05438 | -0.09828 | 0.924317 | 0.900223 | DOWN | 205.563  | 205.5614 | 205.5639 | 9.38595  | 9.1322   |
| 15630 | M504T10_ | 1.025071 | 0.035724 | 0.098052 | 0.92435  | 0.900226 | UP   | 504.4257 | 504.4254 | 504.4267 | 9.977442 | 9.8753   |
| 15631 | M725T10_ | 1.021739 | 0.031027 | 0.098879 | 0.924367 | 0.900228 | UP   | 725.4544 | 725.4539 | 725.4557 | 10.32011 | 10.26307 |
| 15632 | M456T10_ | 1.011964 | -0.01716 | -0.09837 | 0.924427 | 0.900234 | DOWN | 456.1577 | 456.1575 | 456.1577 | 10.06476 | 10.04377 |
| 15633 | M357T38  | 1.015298 | -0.0219  | -0.09855 | 0.924511 | 0.900242 | DOWN | 357.1906 | 357.1904 | 357.1909 | 38.1795  | 38.0935  |
| 15634 | M456T9_3 | 1.014651 | -0.02098 | -0.09765 | 0.924685 | 0.900259 | DOWN | 456.003  | 456.0024 | 456.0031 | 9.277017 | 9.129317 |
| 15635 | M431T11_ | 1.008082 | -0.01161 | -0.09761 | 0.924729 | 0.900263 | DOWN | 431.2875 | 431.2873 | 431.2876 | 11.09236 | 11.08157 |
| 15636 | M512T19  | 1.033888 | 0.04808  | 0.097603 | 0.924758 | 0.900266 | UP   | 512.3567 | 512.3564 | 512.3577 | 18.8785  | 18.84883 |
| 15637 | M216T10_ | 1.031089 | -0.04417 | -0.0976  | 0.924972 | 0.900286 | DOWN | 216.1985 | 216.1984 | 216.2047 | 9.968992 | 9.859233 |
| 15638 | M400T10_ | 1.021731 | 0.031016 | 0.099643 | 0.92507  | 0.900296 | UP   | 400.2589 | 400.2587 | 400.2602 | 9.547133 | 9.523633 |
| 15639 | M448T10_ | 1.030384 | 0.043182 | 0.097218 | 0.925094 | 0.900298 | UP   | 447.687  | 447.6866 | 447.6872 | 9.964258 | 9.843367 |
| 15640 | M846T10_ | 1.031153 | -0.04426 | -0.09705 | 0.925119 | 0.900301 | DOWN | 845.5223 | 845.5217 | 845.5232 | 9.902117 | 9.79535  |
| 15641 | M674T10_ | 1.02941  | 0.041818 | 0.097207 | 0.925151 | 0.900304 | UP   | 673.9102 | 673.9087 | 673.9113 | 9.964167 | 9.960817 |
| 15642 | M787T11_ | 1.01798  | -0.02571 | -0.0969  | 0.925194 | 0.900308 | DOWN | 786.6699 | 786.6693 | 786.6717 | 10.892   | 10.879   |
| 15643 | M650T11_ | 1.073815 | -0.10275 | -0.09704 | 0.925268 | 0.900315 | DOWN | 650.3583 | 650.3575 | 650.3647 | 11.45298 | 11.41063 |
| 15644 | M409T9_3 | 1.025512 | 0.036344 | 0.096804 | 0.925311 | 0.900319 | UP   | 408.7167 | 408.7165 | 408.7299 | 9.064833 | 8.985083 |

|       |           |          |          |          |          |          |      |          |          |          |          |          |
|-------|-----------|----------|----------|----------|----------|----------|------|----------|----------|----------|----------|----------|
| 15645 | M796T11_  | 1.023977 | -0.03418 | -0.09721 | 0.925408 | 0.900329 | DOWN | 795.9482 | 795.9478 | 795.9495 | 10.51713 | 10.45613 |
| 15646 | M1087T10_ | 1.02134  | -0.03046 | -0.09673 | 0.925486 | 0.900336 | DOWN | 1086.765 | 1086.764 | 1086.765 | 9.82645  | 9.699733 |
| 15647 | M367T10_  | 1.035583 | -0.05044 | -0.09684 | 0.925535 | 0.900341 | DOWN | 366.5941 | 366.5937 | 366.5946 | 9.968992 | 9.859233 |
| 15648 | M358T9_2  | 1.032567 | -0.04624 | -0.09647 | 0.925619 | 0.900349 | DOWN | 357.8295 | 357.8293 | 357.8347 | 9.118742 | 9.048117 |
| 15649 | M655T10_  | 1.029042 | -0.0413  | -0.09676 | 0.925668 | 0.900354 | DOWN | 654.7817 | 654.7813 | 654.7845 | 9.830283 | 9.715683 |
| 15650 | M453T10_  | 1.07353  | -0.10236 | -0.09652 | 0.92571  | 0.900358 | DOWN | 452.8236 | 452.8123 | 452.8237 | 9.746142 | 9.62495  |
| 15651 | M273T10_  | 1.023075 | -0.03291 | -0.09682 | 0.925726 | 0.90036  | DOWN | 272.8026 | 272.8023 | 272.8031 | 9.9847   | 9.8753   |
| 15652 | M554T10_  | 1.042325 | -0.05981 | -0.09914 | 0.925734 | 0.90036  | DOWN | 554.1186 | 554.1184 | 554.1191 | 9.9351   | 9.853533 |
| 15653 | M794T30   | 1.024878 | 0.035453 | 0.096288 | 0.92578  | 0.900365 | UP   | 793.5718 | 793.5711 | 793.5722 | 30.222   | 30.19383 |
| 15654 | M301T10_  | 1.04159  | -0.05879 | -0.09614 | 0.925846 | 0.900371 | DOWN | 300.7409 | 300.7407 | 300.7409 | 9.914217 | 9.88865  |
| 15655 | M730T10_  | 1.014283 | 0.02046  | 0.095969 | 0.925943 | 0.900381 | UP   | 729.999  | 729.9982 | 729.9998 | 9.825492 | 9.699733 |
| 15656 | M504T11_  | 1.03084  | 0.04382  | 0.097028 | 0.926102 | 0.900396 | UP   | 503.925  | 503.922  | 503.9264 | 10.94208 | 10.88747 |
| 15657 | M255T10_  | 1.024193 | -0.03449 | -0.09567 | 0.926157 | 0.900401 | DOWN | 255.102  | 255.1016 | 255.1021 | 9.915933 | 9.811217 |
| 15658 | M505T9_6  | 1.025886 | 0.03687  | 0.095698 | 0.92619  | 0.900405 | UP   | 505.3295 | 505.3289 | 505.3296 | 9.085542 | 9.048117 |
| 15659 | M228T10_  | 1.045429 | 0.064094 | 0.09582  | 0.926382 | 0.900423 | UP   | 228.3791 | 228.3789 | 228.3792 | 9.970617 | 9.8914   |
| 15660 | M524T38   | 1.011647 | -0.01671 | -0.09561 | 0.926503 | 0.900435 | DOWN | 524.306  | 524.3059 | 524.3066 | 38.2085  | 37.96467 |
| 15661 | M449T9_2  | 1.025658 | -0.03655 | -0.09582 | 0.926517 | 0.900436 | DOWN | 448.5786 | 448.5775 | 448.5794 | 9.206233 | 9.129317 |
| 15662 | M428T12_  | 1.015418 | -0.02207 | -0.09694 | 0.926545 | 0.900439 | DOWN | 427.8054 | 427.8051 | 427.8056 | 12.0987  | 12.08183 |
| 15663 | M251T10_  | 1.008554 | 0.012289 | 0.09563  | 0.926567 | 0.900441 | UP   | 250.8847 | 250.8846 | 250.8849 | 9.746783 | 9.636483 |
| 15664 | M300T10_  | 1.013254 | 0.018996 | 0.095122 | 0.926653 | 0.900449 | UP   | 299.5604 | 299.5602 | 299.5605 | 9.957333 | 9.843367 |
| 15665 | M491T8    | 1.039601 | 0.05603  | 0.096235 | 0.926697 | 0.900454 | UP   | 491.3194 | 491.3193 | 491.3198 | 7.557142 | 7.2878   |
| 15666 | M300T10_  | 1.023141 | -0.033   | -0.09492 | 0.926716 | 0.900455 | DOWN | 300.4778 | 300.4774 | 300.4779 | 9.972483 | 9.859233 |
| 15667 | M446T9_4  | 1.030311 | 0.04308  | 0.094874 | 0.926794 | 0.900463 | UP   | 446.3045 | 446.2971 | 446.3051 | 8.80505  | 8.682683 |
| 15668 | M594T22   | 1.016313 | 0.023345 | 0.094627 | 0.926948 | 0.900478 | UP   | 594.4129 | 594.4125 | 594.4141 | 22.44883 | 22.4095  |
| 15669 | M601T36   | 1.052743 | -0.07415 | -0.09487 | 0.926978 | 0.900481 | DOWN | 601.4713 | 601.4708 | 601.4718 | 35.94917 | 35.92    |
| 15670 | M431T12   | 1.013343 | -0.01912 | -0.09459 | 0.927159 | 0.900498 | DOWN | 431.2877 | 431.2876 | 431.2879 | 11.97903 | 11.97343 |
| 15671 | M665T30   | 1.018442 | 0.026363 | 0.095599 | 0.927167 | 0.900499 | UP   | 665.4446 | 665.444  | 665.4451 | 30.26608 | 30.25233 |
| 15672 | M496T17_  | 1.029294 | -0.04166 | -0.09419 | 0.927282 | 0.90051  | DOWN | 496.3626 | 496.3625 | 496.3628 | 17.0595  | 17.0435  |
| 15673 | M461T23   | 1.04477  | -0.06319 | -0.09411 | 0.92734  | 0.900516 | DOWN | 461.3449 | 461.3447 | 461.3451 | 22.74858 | 22.741   |
| 15674 | M336T11_  | 1.010507 | -0.01508 | -0.09436 | 0.927402 | 0.900522 | DOWN | 336.2336 | 336.2334 | 336.2345 | 10.91987 | 10.84487 |
| 15675 | M201T10_  | 1.017632 | 0.025216 | 0.094403 | 0.927465 | 0.900528 | UP   | 201.33   | 201.3298 | 201.33   | 9.970617 | 9.8753   |
| 15676 | M755T10_  | 1.024233 | -0.03454 | -0.09431 | 0.927469 | 0.900528 | DOWN | 755.4831 | 755.482  | 755.4833 | 9.932417 | 9.8753   |
| 15677 | M356T10_  | 1.009821 | -0.0141  | -0.09475 | 0.927555 | 0.900537 | DOWN | 355.616  | 355.6154 | 355.6163 | 9.831142 | 9.715683 |
| 15678 | M168T23   | 1.02031  | 0.029007 | 0.094892 | 0.92756  | 0.900537 | UP   | 168.0733 | 168.0729 | 168.0736 | 22.88567 | 22.84267 |
| 15679 | M383T11_  | 1.018787 | -0.02685 | -0.0944  | 0.92767  | 0.900548 | DOWN | 383.1178 | 383.1176 | 383.1187 | 10.89875 | 10.879   |



|       |          |          |          |          |          |          |      |          |          |          |          |          |
|-------|----------|----------|----------|----------|----------|----------|------|----------|----------|----------|----------|----------|
| 15680 | M1675T10 | 1.08906  | 0.123084 | 0.094782 | 0.927692 | 0.90055  | UP   | 1674.825 | 1674.824 | 1674.827 | 9.970617 | 9.960817 |
| 15681 | M419T9_4 | 1.019822 | 0.028318 | 0.095454 | 0.927737 | 0.900554 | UP   | 418.747  | 418.7468 | 418.7471 | 9.311167 | 9.219483 |
| 15682 | M304T9_2 | 1.010931 | 0.015685 | -0.09526 | 0.927807 | 0.900561 | UP   | 304.3582 | 304.3579 | 304.3583 | 9.312075 | 9.250817 |
| 15683 | M226T9_6 | 1.060347 | 0.084536 | 0.093711 | 0.927878 | 0.900568 | UP   | 226.2118 | 226.2108 | 226.2122 | 9.40325  | 9.10275  |
| 15684 | M595T10_ | 1.022454 | 0.032037 | 0.094994 | 0.927884 | 0.900568 | UP   | 594.866  | 594.8652 | 594.8666 | 9.979667 | 9.8914   |
| 15685 | M152T10_ | 1.02379  | -0.03392 | -0.09338 | 0.927902 | 0.90057  | DOWN | 152.1073 | 152.1072 | 152.1075 | 9.948825 | 9.859233 |
| 15686 | M413T13  | 1.016544 | 0.023673 | 0.093508 | 0.927983 | 0.900578 | UP   | 413.277  | 413.2766 | 413.2773 | 13.11228 | 13.05443 |
| 15687 | M399T10_ | 1.017415 | -0.02491 | -0.09344 | 0.928023 | 0.900582 | DOWN | 398.5461 | 398.5457 | 398.5463 | 9.924267 | 9.827283 |
| 15688 | M290T22  | 1.058279 | 0.08172  | 0.093431 | 0.928108 | 0.90059  | UP   | 290.2686 | 290.2684 | 290.2689 | 22.18375 | 22.1665  |
| 15689 | M459T11_ | 1.030024 | 0.042678 | 0.093411 | 0.928197 | 0.900598 | UP   | 459.0263 | 459.0257 | 459.033  | 10.89125 | 10.877   |
| 15690 | M188T10_ | 1.029017 | 0.041267 | 0.092846 | 0.928338 | 0.900612 | UP   | 188.0334 | 188.0332 | 188.0335 | 9.968992 | 9.859233 |
| 15691 | M307T10_ | 1.021501 | 0.030691 | 0.092784 | 0.928407 | 0.900619 | UP   | 307.2707 | 307.2704 | 307.2708 | 9.971292 | 9.8753   |
| 15692 | M562T15  | 1.037067 | 0.052509 | 0.093024 | 0.928412 | 0.900619 | UP   | 562.3326 | 562.3318 | 562.3335 | 14.6037  | 14.51685 |
| 15693 | M295T11_ | 1.016478 | -0.02358 | -0.0927  | 0.928427 | 0.900621 | DOWN | 295.462  | 295.4612 | 295.4626 | 10.8926  | 10.88995 |
| 15694 | M288T23_ | 1.084305 | -0.11677 | -0.09255 | 0.928546 | 0.900632 | DOWN | 288.3194 | 288.3154 | 288.3222 | 22.89325 | 22.85683 |
| 15695 | M251T9_6 | 1.040187 | 0.056843 | 0.092568 | 0.928607 | 0.900638 | UP   | 251.4915 | 251.4883 | 251.4928 | 9.3471   | 9.26025  |
| 15696 | M505T11_ | 1.024104 | 0.034363 | 0.092448 | 0.928619 | 0.900639 | UP   | 505.1198 | 505.1177 | 505.121  | 10.90553 | 10.879   |
| 15697 | M206T9_1 | 1.038446 | 0.054426 | 0.092914 | 0.928712 | 0.900648 | UP   | 205.9773 | 205.9764 | 205.9778 | 9.37735  | 9.205717 |
| 15698 | M657T11_ | 1.015427 | -0.02209 | -0.0923  | 0.928747 | 0.900651 | DOWN | 657.4567 | 657.4563 | 657.457  | 11.41137 | 11.38072 |
| 15699 | M292T10_ | 1.031052 | -0.04412 | -0.09279 | 0.928908 | 0.900667 | DOWN | 291.8873 | 291.8868 | 291.8874 | 9.972917 | 9.859233 |
| 15700 | M623T11  | 1.020355 | -0.02907 | -0.09237 | 0.928919 | 0.900668 | DOWN | 622.8958 | 622.8956 | 622.8962 | 11.49657 | 11.47593 |
| 15701 | M373T44  | 1.007779 | -0.01118 | -0.09433 | 0.928928 | 0.900669 | DOWN | 373.2218 | 373.2217 | 373.222  | 44.164   | 43.94833 |
| 15702 | M430T44_ | 1.044319 | -0.06256 | -0.0939  | 0.929102 | 0.900686 | DOWN | 430.2432 | 430.2431 | 430.2435 | 43.819   | 43.67067 |
| 15703 | M416T9_9 | 1.027308 | -0.03887 | -0.09228 | 0.929168 | 0.900692 | DOWN | 416.3506 | 416.3441 | 416.3515 | 9.261033 | 9.12675  |
| 15704 | M212T10_ | 1.020506 | 0.029285 | 0.091715 | 0.929204 | 0.900695 | UP   | 212.1508 | 212.1505 | 212.1511 | 9.972917 | 9.859233 |
| 15705 | M225T22  | 1.014047 | -0.02012 | -0.09164 | 0.929239 | 0.900699 | DOWN | 225.0907 | 225.0906 | 225.0909 | 22.04633 | 21.98167 |
| 15706 | M472T10_ | 1.06646  | -0.09283 | -0.09226 | 0.92927  | 0.900702 | DOWN | 472.3729 | 472.3725 | 472.3731 | 9.994767 | 9.8914   |
| 15707 | M390T9_6 | 1.016017 | -0.02292 | -0.09388 | 0.929274 | 0.900702 | DOWN | 390.3435 | 390.3434 | 390.3437 | 9.29345  | 9.053483 |
| 15708 | M293T10_ | 1.030742 | -0.04368 | -0.09157 | 0.929291 | 0.900704 | DOWN | 292.5684 | 292.5675 | 292.5687 | 9.903017 | 9.811217 |
| 15709 | M1760T10 | 1.023583 | -0.03363 | -0.09209 | 0.929331 | 0.900708 | DOWN | 1759.598 | 1759.593 | 1759.6   | 9.964417 | 9.843367 |
| 15710 | M1001T10 | 1.02313  | 0.032989 | 0.092595 | 0.929336 | 0.900708 | UP   | 1001.103 | 1001.102 | 1001.104 | 9.772833 | 9.743767 |
| 15711 | M343T18  | 1.014793 | -0.02119 | -0.09173 | 0.929354 | 0.90071  | DOWN | 343.1877 | 343.1877 | 343.1879 | 17.74733 | 17.7355  |
| 15712 | M235T10_ | 1.018462 | 0.026392 | 0.09274  | 0.929369 | 0.900711 | UP   | 235.0479 | 235.0478 | 235.0479 | 9.895025 | 9.79535  |
| 15713 | M677T10_ | 1.07637  | 0.106174 | 0.091391 | 0.929446 | 0.900719 | UP   | 677.4653 | 677.4649 | 677.4668 | 9.830083 | 9.715683 |
| 15714 | M256T10_ | 1.11906  | 0.162287 | 0.091321 | 0.929516 | 0.900725 | UP   | 256.0965 | 256.0963 | 256.0987 | 9.770733 | 9.746783 |

|       |          |          |          |          |          |          |      |          |          |          |          |          |
|-------|----------|----------|----------|----------|----------|----------|------|----------|----------|----------|----------|----------|
| 15715 | M249T10_ | 1.026232 | -0.03736 | -0.09233 | 0.929539 | 0.900728 | DOWN | 248.7123 | 248.7122 | 248.7126 | 9.93355  | 9.714783 |
| 15716 | M281T45  | 1.033952 | -0.04817 | -0.09261 | 0.929603 | 0.900734 | DOWN | 281.1744 | 281.1743 | 281.1745 | 44.71767 | 44.538   |
| 15717 | M403T11_ | 1.014832 | 0.021241 | 0.091496 | 0.929607 | 0.900734 | UP   | 403.1965 | 403.1964 | 403.197  | 10.89875 | 10.879   |
| 15718 | M208T10_ | 1.032882 | 0.046675 | 0.091119 | 0.929658 | 0.900739 | UP   | 208.1518 | 208.1516 | 208.1519 | 9.932033 | 9.811217 |
| 15719 | M181T10_ | 1.034567 | -0.04903 | -0.09125 | 0.929764 | 0.900749 | DOWN | 180.9395 | 180.9392 | 180.9395 | 9.964092 | 9.859233 |
| 15720 | M442T11_ | 1.037689 | 0.053374 | 0.091191 | 0.929797 | 0.900753 | UP   | 442.4135 | 442.413  | 442.4138 | 10.89839 | 10.87765 |
| 15721 | M384T11_ | 1.02354  | -0.03357 | -0.09076 | 0.929938 | 0.900766 | DOWN | 384.2957 | 384.2956 | 384.2959 | 11.1244  | 11.09068 |
| 15722 | M213T9_3 | 1.053139 | 0.074696 | 0.090704 | 0.929958 | 0.900768 | UP   | 212.5863 | 212.5859 | 212.5869 | 9.295208 | 9.132267 |
| 15723 | M375T24  | 1.022954 | 0.032742 | 0.090698 | 0.929978 | 0.90077  | UP   | 375.2142 | 375.214  | 375.2145 | 23.74733 | 23.73417 |
| 15724 | M243T10_ | 1.030698 | -0.04362 | -0.09058 | 0.930051 | 0.900777 | DOWN | 243.1619 | 243.1617 | 243.162  | 9.958617 | 9.843367 |
| 15725 | M704T27  | 1.142197 | 0.191812 | 0.090519 | 0.930127 | 0.900784 | UP   | 703.7081 | 703.7069 | 703.7089 | 26.73917 | 26.69383 |
| 15726 | M423T11_ | 1.082962 | -0.11498 | -0.09048 | 0.930138 | 0.900785 | DOWN | 423.2226 | 423.2198 | 423.2287 | 10.94063 | 10.84828 |
| 15727 | M327T44_ | 1.014765 | 0.021146 | 0.090701 | 0.930144 | 0.900786 | UP   | 327.2163 | 327.2162 | 327.2166 | 43.934   | 43.7615  |
| 15728 | M348T10_ | 1.063834 | 0.089273 | 0.090392 | 0.930222 | 0.900793 | UP   | 347.7948 | 347.7946 | 347.7949 | 9.870017 | 9.747533 |
| 15729 | M485T10_ | 1.018057 | 0.025818 | 0.091293 | 0.930263 | 0.900797 | UP   | 485.3411 | 485.3409 | 485.3413 | 10.36782 | 10.31365 |
| 15730 | M446T9_1 | 1.02382  | 0.033963 | 0.090167 | 0.930373 | 0.900808 | UP   | 445.6359 | 445.6356 | 445.6361 | 8.772642 | 8.672483 |
| 15731 | M432T9_4 | 1.019265 | -0.02753 | -0.09095 | 0.930458 | 0.900816 | DOWN | 431.9174 | 431.9168 | 431.919  | 9.26575  | 9.129317 |
| 15732 | M588T10_ | 1.012013 | 0.017228 | 0.092017 | 0.930556 | 0.900825 | UP   | 588.0154 | 588.0154 | 588.0162 | 10.44737 | 10.42742 |
| 15733 | M242T9_4 | 1.029703 | 0.042229 | 0.090715 | 0.930565 | 0.900826 | UP   | 242.1752 | 242.175  | 242.1754 | 8.941383 | 8.909    |
| 15734 | M411T11_ | 1.010456 | 0.015006 | 0.089957 | 0.930617 | 0.900831 | UP   | 410.7181 | 410.7173 | 410.7186 | 10.90519 | 10.879   |
| 15735 | M361T14  | 1.020719 | -0.02959 | -0.09027 | 0.930634 | 0.900833 | DOWN | 361.4862 | 361.4855 | 361.4865 | 13.71013 | 13.62438 |
| 15736 | M731T10_ | 1.022963 | -0.03275 | -0.08975 | 0.930689 | 0.900838 | DOWN | 731.3129 | 731.3124 | 731.3132 | 9.939575 | 9.827283 |
| 15737 | M234T9_1 | 1.021991 | 0.031382 | 0.089599 | 0.930824 | 0.900851 | UP   | 234.2493 | 234.2478 | 234.2501 | 9.329492 | 9.1322   |
| 15738 | M418T10_ | 1.024692 | 0.035191 | 0.089605 | 0.930842 | 0.900853 | UP   | 417.8386 | 417.8379 | 417.8391 | 9.970617 | 9.859233 |
| 15739 | M281T44_ | 1.019965 | 0.02852  | 0.089765 | 0.930878 | 0.900856 | UP   | 281.1744 | 281.1743 | 281.1746 | 43.50283 | 43.1575  |
| 15740 | M183T9_6 | 1.045494 | 0.064185 | 0.090312 | 0.930948 | 0.900863 | UP   | 182.9522 | 182.9519 | 182.953  | 9.250817 | 9.147367 |
| 15741 | M343T11_ | 1.048988 | -0.069   | -0.08931 | 0.931125 | 0.90088  | DOWN | 343.1212 | 343.121  | 343.1215 | 10.87487 | 10.83572 |
| 15742 | M512T10_ | 1.009381 | 0.013471 | -0.09034 | 0.931161 | 0.900883 | UP   | 511.9632 | 511.963  | 511.9634 | 9.970617 | 9.8914   |
| 15743 | M665T10_ | 1.034927 | 0.049529 | 0.089086 | 0.931204 | 0.900888 | UP   | 665.2384 | 665.2379 | 665.239  | 9.787433 | 9.715683 |
| 15744 | M428T9_2 | 1.029147 | -0.04145 | -0.08905 | 0.931235 | 0.900891 | DOWN | 427.6226 | 427.6223 | 427.6233 | 9.324108 | 9.204617 |
| 15745 | M460T44_ | 1.010768 | -0.01545 | -0.08957 | 0.931342 | 0.900901 | DOWN | 460.2538 | 460.2535 | 460.2539 | 43.57267 | 43.31533 |
| 15746 | M908T10_ | 1.019878 | 0.028397 | 0.089734 | 0.931363 | 0.900903 | UP   | 907.6876 | 907.6845 | 907.6881 | 10.17253 | 10.08517 |
| 15747 | M380T30  | 1.022681 | -0.03236 | -0.08986 | 0.931381 | 0.900905 | DOWN | 380.3084 | 380.3081 | 380.3086 | 30.16583 | 30.165   |
| 15748 | M270T10_ | 1.028193 | 0.040111 | 0.089514 | 0.931396 | 0.900906 | UP   | 270.4767 | 270.4764 | 270.4769 | 9.979342 | 9.859233 |
| 15749 | M1968T10 | 1.01928  | -0.02755 | -0.08968 | 0.931491 | 0.900915 | DOWN | 1968.438 | 1968.436 | 1968.446 | 9.830283 | 9.699733 |

|       |          |          |          |          |          |          |      |          |          |          |          |          |
|-------|----------|----------|----------|----------|----------|----------|------|----------|----------|----------|----------|----------|
| 15750 | M496T9_7 | 1.013178 | -0.01889 | -0.08879 | 0.931504 | 0.900916 | DOWN | 495.8978 | 495.8976 | 495.898  | 9.277017 | 9.129317 |
| 15751 | M363T9_7 | 1.022772 | -0.03249 | -0.08872 | 0.931552 | 0.900921 | DOWN | 362.8824 | 362.8817 | 362.8829 | 8.953483 | 8.8398   |
| 15752 | M435T10_ | 1.029878 | 0.042473 | 0.088553 | 0.931616 | 0.900927 | UP   | 434.743  | 434.7424 | 434.7434 | 9.968992 | 9.859233 |
| 15753 | M234T10_ | 1.030317 | -0.04309 | -0.08864 | 0.931643 | 0.90093  | DOWN | 233.9533 | 233.9524 | 233.9663 | 9.842    | 9.7124   |
| 15754 | M307T9_1 | 1.022694 | 0.032375 | 0.08954  | 0.931684 | 0.900934 | UP   | 306.5348 | 306.5346 | 306.5355 | 9.317    | 9.234417 |
| 15755 | M445T10_ | 1.011526 | -0.01653 | -0.08845 | 0.931696 | 0.900935 | DOWN | 445.3906 | 445.39   | 445.3908 | 9.960817 | 9.843367 |
| 15756 | M341T10_ | 1.030247 | 0.04299  | 0.088403 | 0.931798 | 0.900945 | UP   | 341.2327 | 341.2292 | 341.2335 | 9.960817 | 9.885167 |
| 15757 | M708T10_ | 1.021303 | -0.03041 | -0.08832 | 0.931808 | 0.900946 | DOWN | 707.9258 | 707.9249 | 707.9269 | 9.95165  | 9.843367 |
| 15758 | M326T10_ | 1.010889 | -0.01562 | -0.08938 | 0.931843 | 0.900949 | DOWN | 326.3464 | 326.3461 | 326.3473 | 9.831142 | 9.715683 |
| 15759 | M362T24  | 1.029939 | 0.042558 | 0.088276 | 0.931845 | 0.900949 | UP   | 362.0908 | 362.0906 | 362.091  | 23.9525  | 23.906   |
| 15760 | M378T10_ | 1.010461 | -0.01501 | -0.08911 | 0.931986 | 0.900963 | DOWN | 378.385  | 378.3845 | 378.3851 | 9.924267 | 9.811217 |
| 15761 | M430T24  | 1.024117 | 0.034381 | 0.088188 | 0.931991 | 0.900963 | UP   | 429.783  | 429.7826 | 429.7834 | 24.43042 | 24.4045  |
| 15762 | M396T19  | 1.018386 | 0.026284 | 0.088285 | 0.932036 | 0.900967 | UP   | 395.5843 | 395.5841 | 395.5844 | 18.9655  | 18.951   |
| 15763 | M373T23_ | 1.023763 | -0.03388 | -0.08786 | 0.93215  | 0.900978 | DOWN | 373.269  | 373.2689 | 373.2691 | 22.53825 | 22.49417 |
| 15764 | M817T10_ | 1.018819 | 0.026897 | 0.088896 | 0.932159 | 0.900979 | UP   | 816.6231 | 816.6225 | 816.6244 | 9.959533 | 9.859233 |
| 15765 | M494T10_ | 1.029184 | -0.0415  | -0.0883  | 0.932178 | 0.900981 | DOWN | 494.2862 | 494.2856 | 494.2866 | 10.09898 | 10.07688 |
| 15766 | M347T10_ | 1.029277 | 0.041632 | 0.088214 | 0.932181 | 0.900981 | UP   | 347.4769 | 347.4766 | 347.4773 | 9.81635  | 9.766367 |
| 15767 | M244T10_ | 1.039266 | -0.05556 | 0.088124 | 0.932195 | 0.900983 | DOWN | 243.9842 | 243.9736 | 243.9843 | 9.948825 | 9.843367 |
| 15768 | M191T10_ | 1.020832 | -0.02975 | -0.08779 | 0.932212 | 0.900984 | DOWN | 190.8943 | 190.8942 | 190.8944 | 9.956417 | 9.843367 |
| 15769 | M360T10_ | 1.021564 | -0.03078 | -0.08788 | 0.932218 | 0.900985 | DOWN | 360.1191 | 360.118  | 360.1199 | 9.826792 | 9.699733 |
| 15770 | M551T11_ | 1.016156 | -0.02312 | -0.08769 | 0.932291 | 0.900992 | DOWN | 550.8024 | 550.7999 | 550.8035 | 10.91376 | 10.879   |
| 15771 | M272T11_ | 1.022933 | 0.032711 | 0.088955 | 0.932501 | 0.901012 | UP   | 271.5476 | 271.5473 | 271.548  | 10.88995 | 10.8646  |
| 15772 | M366T9_2 | 1.034204 | -0.04852 | -0.08738 | 0.932514 | 0.901013 | DOWN | 365.5684 | 365.5679 | 365.5751 | 9.250817 | 9.160617 |
| 15773 | M1561T10 | 1.016429 | -0.02351 | -0.0887  | 0.932518 | 0.901013 | DOWN | 1560.773 | 1560.77  | 1560.78  | 9.917167 | 9.79535  |
| 15774 | M297T11_ | 1.014936 | 0.021389 | 0.088402 | 0.932569 | 0.901018 | UP   | 297.4232 | 297.4231 | 297.4234 | 10.92598 | 10.873   |
| 15775 | M299T40_ | 1.021714 | 0.030992 | 0.087799 | 0.932578 | 0.901019 | UP   | 299.1487 | 299.1486 | 299.1489 | 40.05017 | 39.89183 |
| 15776 | M239T10_ | 1.034354 | 0.048729 | 0.08765  | 0.932685 | 0.901029 | UP   | 239.0126 | 239.0123 | 239.0129 | 9.962617 | 9.843367 |
| 15777 | M347T21_ | 1.031704 | -0.04503 | -0.08708 | 0.932792 | 0.90104  | DOWN | 347.3871 | 347.3867 | 347.3876 | 20.62308 | 20.62    |
| 15778 | M538T10_ | 1.046065 | -0.06497 | -0.087   | 0.932809 | 0.901041 | DOWN | 537.8815 | 537.8811 | 537.8818 | 9.983433 | 9.916767 |
| 15779 | M434T24  | 1.054082 | -0.07599 | -0.0873  | 0.932877 | 0.901048 | DOWN | 434.3075 | 434.3061 | 434.3082 | 23.93275 | 23.89133 |
| 15780 | M456T9_1 | 1.064124 | 0.089667 | 0.086864 | 0.933026 | 0.901062 | UP   | 456.4295 | 456.4293 | 456.4299 | 9.352117 | 9.324917 |
| 15781 | M331T10_ | 1.058129 | -0.08152 | -0.08681 | 0.933093 | 0.901068 | DOWN | 331.0548 | 331.0545 | 331.0548 | 9.816167 | 9.743667 |
| 15782 | M1126T10 | 1.055328 | 0.077692 | 0.088834 | 0.933195 | 0.901078 | UP   | 1126.437 | 1126.434 | 1126.438 | 9.970617 | 9.8753   |
| 15783 | M264T11_ | 1.012476 | 0.017888 | 0.086484 | 0.933213 | 0.90108  | UP   | 263.7836 | 263.7835 | 263.7836 | 10.8926  | 10.873   |
| 15784 | M716T10_ | 1.010738 | -0.01541 | -0.08631 | 0.933413 | 0.901099 | DOWN | 715.5094 | 715.5091 | 715.5096 | 10.13125 | 10.03658 |

|       |          |          |          |          |          |          |      |          |          |          |          |          |
|-------|----------|----------|----------|----------|----------|----------|------|----------|----------|----------|----------|----------|
| 15785 | M540T28  | 1.01889  | -0.027   | -0.08632 | 0.933496 | 0.901107 | DOWN | 540.4258 | 540.4251 | 540.4264 | 28.491   | 28.46133 |
| 15786 | M957T11  | 1.014073 | -0.02016 | -0.08631 | 0.933497 | 0.901107 | DOWN | 957.006  | 957.0053 | 957.0072 | 10.892   | 10.879   |
| 15787 | M283T11_ | 1.013461 | -0.01929 | -0.08596 | 0.933688 | 0.901125 | DOWN | 282.6953 | 282.6951 | 282.6955 | 11.49742 | 11.47298 |
| 15788 | M355T11_ | 1.020344 | -0.02906 | -0.08575 | 0.933819 | 0.901138 | DOWN | 355.1691 | 355.1688 | 355.1694 | 10.8926  | 10.88995 |
| 15789 | M1036T18 | 1.040356 | -0.05708 | -0.08601 | 0.933832 | 0.901139 | DOWN | 1036.172 | 1036.171 | 1036.172 | 17.8625  | 17.835   |
| 15790 | M263T10_ | 1.024368 | 0.034734 | 0.087452 | 0.933918 | 0.901147 | UP   | 263.016  | 263.0157 | 263.016  | 9.853633 | 9.747533 |
| 15791 | M210T10_ | 1.022371 | 0.031919 | 0.086007 | 0.933943 | 0.90115  | UP   | 210.4936 | 210.4936 | 210.4937 | 9.900133 | 9.806367 |
| 15792 | M785T10_ | 1.017267 | -0.0247  | -0.08741 | 0.933949 | 0.90115  | DOWN | 784.9532 | 784.9526 | 784.9543 | 10.22983 | 10.12287 |
| 15793 | M328T9_5 | 1.056844 | -0.07976 | -0.08552 | 0.933955 | 0.901151 | DOWN | 328.3231 | 328.323  | 328.3233 | 9.075083 | 9.023483 |
| 15794 | M293T10_ | 1.054693 | -0.07682 | -0.08553 | 0.933975 | 0.901153 | DOWN | 293.3567 | 293.3565 | 293.3568 | 9.967533 | 9.8914   |
| 15795 | M503T9_5 | 1.023678 | -0.03376 | -0.08666 | 0.934106 | 0.901165 | DOWN | 503.1057 | 503.1035 | 503.106  | 9.168575 | 9.12675  |
| 15796 | M342T16  | 1.020342 | -0.02905 | -0.08526 | 0.934247 | 0.901179 | DOWN | 341.7673 | 341.767  | 341.7674 | 16.17003 | 16.0965  |
| 15797 | M557T9_5 | 1.031947 | -0.04537 | -0.08539 | 0.93427  | 0.901181 | DOWN | 557.2051 | 557.2021 | 557.2073 | 9.2585   | 9.0637   |
| 15798 | M802T27_ | 1.007005 | 0.010071 | -0.08538 | 0.934371 | 0.90119  | UP   | 802.0847 | 802.0821 | 802.0855 | 26.767   | 26.70817 |
| 15799 | M476T22_ | 1.014919 | -0.02136 | -0.08511 | 0.934389 | 0.901192 | DOWN | 475.834  | 475.8338 | 475.8345 | 22.12792 | 22.1175  |
| 15800 | M1717T10 | 1.015413 | 0.022066 | 0.08619  | 0.934511 | 0.901204 | UP   | 1717.246 | 1717.244 | 1717.247 | 9.8207   | 9.7124   |
| 15801 | M854T12  | 1.014588 | -0.02089 | -0.08575 | 0.934579 | 0.90121  | DOWN | 853.6017 | 853.6012 | 853.6022 | 12.09976 | 12.06212 |
| 15802 | M207T9_5 | 1.03562  | -0.05049 | -0.08669 | 0.934672 | 0.901219 | DOWN | 206.7695 | 206.7688 | 206.7762 | 9.3919   | 9.132267 |
| 15803 | M423T11_ | 1.051148 | -0.07197 | -0.08472 | 0.934677 | 0.90122  | DOWN | 423.415  | 423.4095 | 423.4178 | 10.95122 | 10.80547 |
| 15804 | M804T11_ | 1.023625 | 0.033688 | 0.084494 | 0.934749 | 0.901226 | UP   | 804.0895 | 804.0889 | 804.0901 | 11.23607 | 11.19512 |
| 15805 | M244T10_ | 1.025604 | 0.036474 | 0.086479 | 0.934805 | 0.901232 | UP   | 243.9387 | 243.9283 | 243.9394 | 9.768233 | 9.636483 |
| 15806 | M178T10_ | 1.019004 | 0.02716  | 0.084261 | 0.935004 | 0.901251 | UP   | 178.204  | 178.2038 | 178.2102 | 9.979958 | 9.8753   |
| 15807 | M356T10_ | 1.060013 | -0.08408 | -0.08393 | 0.935178 | 0.901267 | DOWN | 356.358  | 356.3574 | 356.3584 | 9.8232   | 9.715683 |
| 15808 | M227T9_1 | 1.078153 | 0.108562 | 0.083901 | 0.935231 | 0.901272 | UP   | 227.2338 | 227.2257 | 227.2381 | 8.725033 | 8.624367 |
| 15809 | M501T41  | 1.013987 | 0.020039 | 0.083879 | 0.935246 | 0.901274 | UP   | 501.4849 | 501.4845 | 501.4864 | 40.56083 | 40.52483 |
| 15810 | M613T10_ | 1.012185 | -0.01747 | -0.08444 | 0.935285 | 0.901277 | DOWN | 613.4172 | 613.4169 | 613.4175 | 10.39613 | 10.34372 |
| 15811 | M295T9_3 | 1.045075 | -0.06361 | -0.08452 | 0.935293 | 0.901278 | DOWN | 294.6719 | 294.6714 | 294.672  | 9.306925 | 9.129317 |
| 15812 | M1567T10 | 1.029934 | -0.04255 | -0.08396 | 0.93531  | 0.90128  | DOWN | 1567.003 | 1567     | 1567.006 | 9.970617 | 9.859233 |
| 15813 | M813T10_ | 1.02619  | 0.037297 | 0.083609 | 0.935463 | 0.901294 | UP   | 812.9665 | 812.9646 | 812.9675 | 9.964092 | 9.859233 |
| 15814 | M304T9_1 | 1.069549 | -0.097   | -0.08355 | 0.935546 | 0.901302 | DOWN | 304.2074 | 304.2071 | 304.2079 | 9.077867 | 9.031633 |
| 15815 | M237T11_ | 1.012285 | -0.01762 | -0.0837  | 0.935569 | 0.901304 | DOWN | 237.4905 | 237.4904 | 237.4907 | 10.892   | 10.879   |
| 15816 | M1212T10 | 1.064103 | -0.08964 | -0.08423 | 0.935596 | 0.901307 | DOWN | 1212.113 | 1212.113 | 1212.115 | 9.964167 | 9.843367 |
| 15817 | M773T10_ | 1.028653 | -0.04076 | -0.08433 | 0.935669 | 0.901314 | DOWN | 773.4914 | 773.4912 | 773.4921 | 9.962617 | 9.859233 |
| 15818 | M342T10_ | 1.01075  | 0.015426 | 0.08474  | 0.935707 | 0.901318 | UP   | 342.0884 | 342.0881 | 342.0887 | 9.960417 | 9.8753   |
| 15819 | M433T9_9 | 1.030843 | 0.043825 | 0.083223 | 0.935758 | 0.901322 | UP   | 433.1172 | 433.1167 | 433.1179 | 9.202642 | 9.1175   |

|       |          |          |          |          |          |          |      |          |          |          |          |          |
|-------|----------|----------|----------|----------|----------|----------|------|----------|----------|----------|----------|----------|
| 15820 | M327T11_ | 1.023791 | 0.033921 | 0.083145 | 0.935806 | 0.901327 | UP   | 327.444  | 327.4437 | 327.4444 | 10.89728 | 10.879   |
| 15821 | M442T10_ | 1.011225 | -0.0161  | -0.08413 | 0.935826 | 0.901329 | DOWN | 442.3334 | 442.3328 | 442.3342 | 9.7881   | 9.681183 |
| 15822 | M647T11  | 1.019623 | 0.028036 | 0.084424 | 0.935856 | 0.901332 | UP   | 646.5847 | 646.5839 | 646.5852 | 11.49547 | 11.47298 |
| 15823 | M495T9_5 | 1.013426 | -0.01924 | -0.08303 | 0.935884 | 0.901334 | DOWN | 494.6819 | 494.6815 | 494.6821 | 9.277017 | 9.129317 |
| 15824 | M215T11_ | 1.011192 | -0.0171  | -0.08421 | 0.935888 | 0.901335 | DOWN | 214.7558 | 214.7549 | 214.7561 | 10.90765 | 10.87487 |
| 15825 | M214T10_ | 1.011168 | -0.01602 | -0.08291 | 0.935989 | 0.901344 | DOWN | 213.6794 | 213.6793 | 213.6795 | 9.872067 | 9.774967 |
| 15826 | M492T9_4 | 1.020197 | 0.028847 | 0.083294 | 0.936014 | 0.901347 | UP   | 492.301  | 492.3008 | 492.3029 | 9.365833 | 9.12675  |
| 15827 | M777T10_ | 1.015256 | -0.02184 | -0.08281 | 0.936044 | 0.90135  | DOWN | 777.3299 | 777.3293 | 777.3312 | 9.945775 | 9.843367 |
| 15828 | M378T23  | 1.036217 | -0.05133 | -0.08278 | 0.93607  | 0.901352 | DOWN | 378.2635 | 378.2633 | 378.2636 | 22.75583 | 22.741   |
| 15829 | M386T10_ | 1.025325 | -0.03608 | -0.08286 | 0.936103 | 0.901355 | DOWN | 386.0368 | 386.0365 | 386.0415 | 9.929783 | 9.822117 |
| 15830 | M848T10_ | 1.01799  | -0.02572 | -0.08319 | 0.936217 | 0.901366 | DOWN | 848.2532 | 848.2516 | 848.2543 | 9.949242 | 9.853533 |
| 15831 | M603T10_ | 1.023196 | -0.03308 | -0.08251 | 0.936292 | 0.901373 | DOWN | 602.5039 | 602.5037 | 602.5042 | 9.956417 | 9.843367 |
| 15832 | M291T10_ | 1.019754 | -0.02822 | -0.08416 | 0.936405 | 0.901384 | DOWN | 291.0631 | 291.0628 | 291.0632 | 9.975142 | 9.8753   |
| 15833 | M231T10_ | 1.009999 | -0.01435 | -0.08317 | 0.936406 | 0.901384 | DOWN | 231.1527 | 231.1526 | 231.1527 | 9.917167 | 9.811217 |
| 15834 | M1871T11 | 1.035505 | 0.050334 | 0.082796 | 0.936439 | 0.901387 | UP   | 1870.537 | 1870.532 | 1870.538 | 10.93913 | 10.91977 |
| 15835 | M438T12_ | 1.014236 | 0.020394 | 0.082677 | 0.936547 | 0.901397 | UP   | 438.2645 | 438.2644 | 438.2715 | 11.87443 | 11.86875 |
| 15836 | M241T10_ | 1.015333 | 0.021952 | 0.082207 | 0.936577 | 0.9014   | UP   | 240.6142 | 240.6141 | 240.6143 | 9.956417 | 9.843367 |
| 15837 | M286T30  | 1.017543 | 0.02509  | 0.083256 | 0.936679 | 0.90141  | UP   | 286.3103 | 286.31   | 286.3108 | 29.97833 | 29.97817 |
| 15838 | M511T9_1 | 1.11016  | -0.15077 | -0.08252 | 0.936684 | 0.90141  | DOWN | 510.7094 | 510.7089 | 510.7096 | 9.315033 | 9.29015  |
| 15839 | M401T11_ | 1.031717 | 0.045048 | 0.081977 | 0.936692 | 0.901411 | UP   | 400.8818 | 400.872  | 400.8851 | 10.95047 | 10.92208 |
| 15840 | M219T8   | 1.024139 | 0.034411 | 0.084098 | 0.93672  | 0.901414 | UP   | 218.9195 | 218.9194 | 218.9196 | 7.517417 | 7.395283 |
| 15841 | M318T10_ | 1.014035 | -0.02011 | -0.08193 | 0.936722 | 0.901414 | DOWN | 317.5953 | 317.595  | 317.5964 | 9.8214   | 9.699733 |
| 15842 | M450T44  | 1.006572 | 0.00945  | 0.083802 | 0.936739 | 0.901416 | UP   | 450.233  | 450.2329 | 450.2332 | 43.90517 | 43.76167 |
| 15843 | M271T11_ | 1.011032 | -0.01583 | -0.08175 | 0.936902 | 0.901431 | DOWN | 271.0358 | 271.0355 | 271.0359 | 10.89875 | 10.879   |
| 15844 | M437T11_ | 1.009818 | -0.0141  | -0.08222 | 0.936923 | 0.901433 | DOWN | 436.5915 | 436.5913 | 436.5922 | 10.90551 | 10.879   |
| 15845 | M829T10_ | 1.03231  | -0.04588 | -0.08176 | 0.937046 | 0.901445 | DOWN | 828.7287 | 828.7274 | 828.7296 | 9.954767 | 9.843367 |
| 15846 | M225T43_ | 1.005481 | -0.00789 | -0.08167 | 0.937069 | 0.901447 | DOWN | 225.1118 | 225.1117 | 225.1119 | 43.3425  | 43.22933 |
| 15847 | M498T9_3 | 1.022284 | 0.031796 | 0.083724 | 0.937069 | 0.901447 | UP   | 497.7115 | 497.7114 | 497.7116 | 9.16125  | 9.129317 |
| 15848 | M163T10_ | 1.014062 | -0.02015 | -0.08157 | 0.93709  | 0.901449 | DOWN | 163.0952 | 163.095  | 163.0953 | 9.97155  | 9.859233 |
| 15849 | M218T11_ | 1.019947 | 0.028494 | 0.081638 | 0.937147 | 0.901454 | UP   | 218.0687 | 218.0685 | 218.0689 | 10.90522 | 10.87708 |
| 15850 | M416T11_ | 1.020757 | 0.029639 | 0.082114 | 0.937155 | 0.901455 | UP   | 416.086  | 416.0858 | 416.0868 | 10.90785 | 10.82972 |
| 15851 | M254T10_ | 1.043145 | -0.06094 | -0.08104 | 0.93743  | 0.901481 | DOWN | 253.8868 | 253.8866 | 253.8903 | 9.834267 | 9.8161   |
| 15852 | M243T9_7 | 1.043352 | -0.06123 | -0.08116 | 0.937432 | 0.901481 | DOWN | 243.0075 | 243.0074 | 243.0076 | 9.432533 | 9.38595  |
| 15853 | M485T9_2 | 1.013938 | -0.01997 | -0.08246 | 0.937433 | 0.901481 | DOWN | 485.3679 | 485.3677 | 485.3697 | 9.311883 | 9.234417 |
| 15854 | M381T42  | 1.003129 | 0.004507 | 0.081051 | 0.937451 | 0.901483 | UP   | 381.3361 | 381.3359 | 381.3363 | 41.60383 | 41.58967 |

|       |          |          |          |          |          |          |      |          |          |          |          |          |
|-------|----------|----------|----------|----------|----------|----------|------|----------|----------|----------|----------|----------|
| 15855 | M633T10_ | 1.033089 | -0.04696 | -0.081   | 0.93757  | 0.901494 | DOWN | 633.1734 | 633.1723 | 633.1816 | 9.9009   | 9.445217 |
| 15856 | M351T11_ | 1.027971 | 0.0398   | 0.082298 | 0.937608 | 0.901498 | UP   | 351.2503 | 351.2502 | 351.2504 | 11.06392 | 11.03783 |
| 15857 | M277T30  | 1.006678 | -0.0096  | -0.0806  | 0.937759 | 0.901512 | DOWN | 277.1796 | 277.1795 | 277.1797 | 29.83383 | 29.8195  |
| 15858 | M1039T19 | 1.019489 | 0.027846 | 0.080637 | 0.937776 | 0.901514 | UP   | 1038.534 | 1038.533 | 1038.535 | 19.40883 | 19.372   |
| 15859 | M334T9_8 | 1.020034 | -0.02862 | -0.08051 | 0.937836 | 0.901519 | DOWN | 334.4786 | 334.4777 | 334.4787 | 8.806967 | 8.686867 |
| 15860 | M243T7   | 1.032942 | -0.04676 | -0.08205 | 0.937929 | 0.901528 | DOWN | 243.1829 | 243.1827 | 243.183  | 6.706117 | 6.648383 |
| 15861 | M323T11  | 1.019905 | -0.02844 | -0.07994 | 0.938307 | 0.901564 | DOWN | 323.4909 | 323.4908 | 323.4911 | 10.89953 | 10.89125 |
| 15862 | M417T9_1 | 1.027914 | -0.03972 | -0.08048 | 0.938595 | 0.901591 | DOWN | 417.1731 | 417.1668 | 417.1733 | 8.899467 | 8.597167 |
| 15863 | M508T45_ | 1.021609 | -0.03084 | -0.07983 | 0.938613 | 0.901593 | DOWN | 508.3111 | 508.3108 | 508.3114 | 44.77217 | 44.30783 |
| 15864 | M478T41_ | 1.013429 | -0.01925 | -0.0811  | 0.938728 | 0.901604 | DOWN | 478.3006 | 478.3003 | 478.301  | 41.25867 | 41.1005  |
| 15865 | M562T42_ | 1.015162 | 0.02171  | 0.079742 | 0.938752 | 0.901606 | UP   | 562.3219 | 562.3217 | 562.3221 | 42.43817 | 42.35183 |
| 15866 | M388T21  | 1.014394 | 0.020618 | 0.079385 | 0.938848 | 0.901615 | UP   | 387.7819 | 387.7809 | 387.7823 | 21.1015  | 21.08267 |
| 15867 | M464T11_ | 1.016955 | -0.02426 | -0.08    | 0.938885 | 0.901619 | DOWN | 463.7412 | 463.7409 | 463.7419 | 10.89193 | 10.84487 |
| 15868 | M240T10_ | 1.015653 | -0.02241 | -0.07947 | 0.938892 | 0.901619 | DOWN | 240.2981 | 240.2977 | 240.2987 | 9.97155  | 9.859233 |
| 15869 | M509T11_ | 1.009469 | -0.0136  | -0.07936 | 0.938916 | 0.901622 | DOWN | 508.6589 | 508.6579 | 508.6595 | 10.90657 | 10.879   |
| 15870 | M699T9_4 | 1.076378 | -0.10618 | -0.07908 | 0.938952 | 0.901625 | DOWN | 699.4064 | 699.4058 | 699.4088 | 9.098833 | 8.924217 |
| 15871 | M784T10_ | 1.023931 | -0.03412 | -0.07898 | 0.93899  | 0.901629 | DOWN | 783.5042 | 783.5028 | 783.5053 | 9.958617 | 9.843367 |
| 15872 | M452T9_3 | 1.025042 | 0.035683 | 0.079075 | 0.939027 | 0.901632 | UP   | 451.697  | 451.6954 | 451.6984 | 9.446008 | 9.204617 |
| 15873 | M245T10_ | 1.011238 | -0.01612 | -0.07871 | 0.939394 | 0.901667 | DOWN | 245.1859 | 245.1858 | 245.186  | 9.964092 | 9.843367 |
| 15874 | M540T10_ | 1.010726 | -0.01539 | -0.07851 | 0.939539 | 0.90168  | DOWN | 539.7103 | 539.7098 | 539.7117 | 9.934533 | 9.827283 |
| 15875 | M390T10_ | 1.016411 | -0.02348 | -0.07994 | 0.939638 | 0.90169  | DOWN | 390.2363 | 390.2359 | 390.2364 | 10.32433 | 10.25853 |
| 15876 | M335T30  | 1.017844 | 0.025516 | 0.079126 | 0.939659 | 0.901692 | UP   | 335.279  | 335.2788 | 335.2791 | 30.09342 | 30.07833 |
| 15877 | M243T10_ | 1.022806 | 0.032533 | 0.078626 | 0.93968  | 0.901694 | UP   | 243.1783 | 243.1782 | 243.1795 | 9.951283 | 9.920517 |
| 15878 | M452T9_9 | 1.024224 | 0.034532 | 0.079619 | 0.939711 | 0.901697 | UP   | 452.4803 | 452.4802 | 452.4812 | 9.18975  | 9.12675  |
| 15879 | M501T9_6 | 1.04206  | -0.05944 | -0.07858 | 0.939743 | 0.9017   | DOWN | 501.1844 | 501.1794 | 501.1876 | 9.324967 | 9.048117 |
| 15880 | M216T10_ | 1.023628 | -0.03369 | -0.07849 | 0.939761 | 0.901701 | DOWN | 216.3627 | 216.3625 | 216.3628 | 9.977442 | 9.8753   |
| 15881 | M960T10  | 1.030346 | -0.04313 | -0.07787 | 0.939849 | 0.90171  | DOWN | 960.2577 | 960.2573 | 960.2586 | 9.907917 | 9.859233 |
| 15882 | M239T9_1 | 1.018515 | 0.026467 | 0.077881 | 0.93996  | 0.90172  | UP   | 238.662  | 238.6617 | 238.6621 | 8.92085  | 8.730433 |
| 15883 | M763T10_ | 1.028364 | 0.040351 | 0.078094 | 0.940014 | 0.901725 | UP   | 763.4651 | 763.4649 | 763.4655 | 9.746783 | 9.665433 |
| 15884 | M302T32  | 1.033463 | 0.047486 | 0.079133 | 0.940106 | 0.901734 | UP   | 302.144  | 302.1437 | 302.1443 | 32.46025 | 32.43117 |
| 15885 | M519T10_ | 1.034977 | -0.0496  | -0.07781 | 0.940155 | 0.901739 | DOWN | 518.5135 | 518.5129 | 518.5155 | 9.96445  | 9.859233 |
| 15886 | M322T11_ | 1.011855 | -0.017   | -0.07773 | 0.940245 | 0.901747 | DOWN | 321.5135 | 321.5133 | 321.5139 | 10.892   | 10.879   |
| 15887 | M166T7   | 1.038022 | 0.053837 | 0.078083 | 0.940265 | 0.901749 | UP   | 166.0472 | 166.0471 | 166.0472 | 6.530858 | 6.396517 |
| 15888 | M649T10_ | 1.017034 | 0.024368 | 0.078623 | 0.940285 | 0.901751 | UP   | 648.6983 | 648.6975 | 648.6987 | 9.9754   | 9.8914   |
| 15889 | M242T10_ | 1.009415 | 0.01352  | 0.077577 | 0.940288 | 0.901751 | UP   | 242.1751 | 242.1749 | 242.1751 | 9.957333 | 9.843367 |

|       |          |          |          |          |          |          |      |          |          |          |          |          |
|-------|----------|----------|----------|----------|----------|----------|------|----------|----------|----------|----------|----------|
| 15890 | M415T12  | 1.015934 | 0.022806 | 0.07904  | 0.940326 | 0.901755 | UP   | 415.2802 | 415.2798 | 415.2803 | 11.87451 | 11.85617 |
| 15891 | M484T9_4 | 1.020459 | 0.029218 | 0.078395 | 0.940356 | 0.901757 | UP   | 484.3149 | 484.3133 | 484.3155 | 8.95245  | 8.89395  |
| 15892 | M264T9_4 | 1.024068 | 0.034311 | 0.077644 | 0.940449 | 0.901766 | UP   | 263.9346 | 263.9345 | 263.9347 | 8.735017 | 8.6152   |
| 15893 | M449T9_7 | 1.017028 | -0.02436 | -0.07688 | 0.940757 | 0.901795 | DOWN | 449.3625 | 449.362  | 449.3632 | 9.364642 | 9.1322   |
| 15894 | M497T9_5 | 1.032068 | -0.04554 | -0.07692 | 0.940804 | 0.9018   | DOWN | 496.7984 | 496.7947 | 496.7995 | 9.128033 | 9.106183 |
| 15895 | M1339T10 | 1.027383 | 0.038973 | 0.077129 | 0.940808 | 0.9018   | UP   | 1338.95  | 1338.949 | 1338.954 | 9.972917 | 9.859233 |
| 15896 | M540T11_ | 1.027237 | 0.038769 | 0.076678 | 0.940812 | 0.9018   | UP   | 539.7488 | 539.748  | 539.7489 | 10.87521 | 10.83572 |
| 15897 | M397T11_ | 1.015125 | -0.02166 | -0.07696 | 0.940851 | 0.901804 | DOWN | 396.5784 | 396.5781 | 396.5796 | 10.91263 | 10.88747 |
| 15898 | M363T9_1 | 1.020957 | 0.029922 | 0.0765   | 0.940948 | 0.901813 | UP   | 363.4054 | 363.404  | 363.4083 | 9.2033   | 9.147367 |
| 15899 | M224T7_2 | 1.047444 | 0.066873 | 0.076378 | 0.940996 | 0.901818 | UP   | 224.1619 | 224.1617 | 224.1713 | 7.317642 | 7.061517 |
| 15900 | M759T11_ | 1.012295 | 0.01763  | 0.07664  | 0.941013 | 0.901819 | UP   | 759.2547 | 759.2535 | 759.2556 | 10.8926  | 10.8646  |
| 15901 | M564T42_ | 1.008053 | -0.01157 | -0.07846 | 0.941059 | 0.901824 | DOWN | 564.3374 | 564.3373 | 564.3377 | 41.58292 | 41.2585  |
| 15902 | M391T9_4 | 1.018546 | -0.02651 | -0.07671 | 0.941144 | 0.901832 | DOWN | 391.0248 | 391.0242 | 391.0272 | 9.250133 | 9.142767 |
| 15903 | M953T11_ | 1.022967 | 0.03276  | 0.076504 | 0.941332 | 0.901849 | UP   | 953.3281 | 953.3268 | 953.3287 | 10.8852  | 10.86253 |
| 15904 | M271T11_ | 1.018749 | -0.0268  | -0.076   | 0.941367 | 0.901853 | DOWN | 270.5655 | 270.5652 | 270.5657 | 10.94208 | 10.89125 |
| 15905 | M597T10_ | 1.016275 | 0.023291 | 0.075801 | 0.941439 | 0.901859 | UP   | 597.2605 | 597.259  | 597.2607 | 9.977025 | 9.843367 |
| 15906 | M768T34  | 1.032785 | 0.046541 | 0.075947 | 0.941441 | 0.90186  | UP   | 767.5351 | 767.5346 | 767.5354 | 34.22383 | 34.19067 |
| 15907 | M320T22  | 1.013831 | -0.01982 | -0.07685 | 0.941525 | 0.901868 | DOWN | 320.2944 | 320.2942 | 320.2949 | 22.32958 | 22.31117 |
| 15908 | M156T10_ | 1.023875 | 0.03404  | 0.075635 | 0.941658 | 0.90188  | UP   | 156.0434 | 156.0433 | 156.0435 | 9.94785  | 9.827283 |
| 15909 | M1764T10 | 1.018172 | -0.02598 | -0.07591 | 0.941658 | 0.90188  | DOWN | 1764.119 | 1764.116 | 1764.121 | 9.830833 | 9.715683 |
| 15910 | M366T28  | 1.032613 | 0.046299 | 0.075398 | 0.941756 | 0.901889 | UP   | 366.2848 | 366.2846 | 366.285  | 28.24383 | 28.23    |
| 15911 | M677T10_ | 1.060893 | -0.08528 | -0.07528 | 0.941943 | 0.901907 | DOWN | 676.6441 | 676.6436 | 676.6444 | 9.857683 | 9.747533 |
| 15912 | M426T9_2 | 1.026769 | 0.038111 | 0.075166 | 0.941944 | 0.901907 | UP   | 426.2765 | 426.2761 | 426.2766 | 8.848167 | 8.742633 |
| 15913 | M804T16  | 1.017676 | -0.02528 | -0.07669 | 0.941946 | 0.901907 | DOWN | 804.4226 | 804.4222 | 804.4233 | 15.70177 | 15.65182 |
| 15914 | M271T10_ | 1.018768 | -0.02683 | -0.07508 | 0.941996 | 0.901912 | DOWN | 270.6181 | 270.6116 | 270.6182 | 9.9847   | 9.874317 |
| 15915 | M219T9_1 | 1.056186 | 0.078864 | 0.075228 | 0.942034 | 0.901915 | UP   | 219.4924 | 219.4909 | 219.4955 | 9.250817 | 9.023483 |
| 15916 | M189T9_1 | 1.022607 | -0.03225 | -0.07507 | 0.942063 | 0.901918 | DOWN | 189.0343 | 189.0337 | 189.0347 | 9.220208 | 9.146383 |
| 15917 | M288T23_ | 1.066772 | -0.09325 | -0.07499 | 0.94207  | 0.901919 | DOWN | 288.3036 | 288.3014 | 288.3068 | 22.87142 | 22.79933 |
| 15918 | M873T11  | 1.017237 | 0.024656 | 0.074518 | 0.942457 | 0.901955 | UP   | 872.6859 | 872.6825 | 872.6882 | 10.90548 | 10.8914  |
| 15919 | M239T10_ | 1.015684 | -0.02245 | -0.07468 | 0.942528 | 0.901962 | DOWN | 238.8484 | 238.8479 | 238.8487 | 9.914217 | 9.811217 |
| 15920 | M451T9_4 | 1.023953 | -0.03415 | -0.07444 | 0.942533 | 0.901962 | DOWN | 450.7037 | 450.7034 | 450.7057 | 9.240042 | 9.12675  |
| 15921 | M319T11_ | 1.017092 | 0.02445  | 0.07488  | 0.942676 | 0.901976 | UP   | 319.1369 | 319.1363 | 319.1378 | 10.89907 | 10.8646  |
| 15922 | M380T23  | 1.01839  | -0.02629 | -0.07418 | 0.942766 | 0.901984 | DOWN | 380.2791 | 380.279  | 380.2793 | 23.46533 | 23.4255  |
| 15923 | M252T11_ | 1.054435 | -0.07647 | -0.07416 | 0.942817 | 0.901989 | DOWN | 251.9279 | 251.9277 | 251.9281 | 10.91808 | 10.87765 |
| 15924 | M415T11_ | 1.022359 | -0.0319  | -0.07395 | 0.942887 | 0.901995 | DOWN | 414.9437 | 414.943  | 414.9441 | 10.90659 | 10.879   |

|       |          |          |          |          |          |          |      |          |          |          |          |          |
|-------|----------|----------|----------|----------|----------|----------|------|----------|----------|----------|----------|----------|
| 15925 | M610T10_ | 1.014165 | -0.02029 | -0.07424 | 0.942966 | 0.902003 | DOWN | 609.9061 | 609.9059 | 609.9065 | 10.39007 | 10.34372 |
| 15926 | M455T10_ | 1.028219 | -0.04015 | -0.07384 | 0.943062 | 0.902012 | DOWN | 455.4436 | 455.4432 | 455.4439 | 9.8887   | 9.746783 |
| 15927 | M613T11_ | 1.026878 | -0.03827 | -0.07367 | 0.943115 | 0.902017 | DOWN | 612.9067 | 612.9063 | 612.9072 | 10.87708 | 10.85018 |
| 15928 | M340T10_ | 1.066061 | -0.09229 | -0.07356 | 0.943171 | 0.902022 | DOWN | 340.3135 | 340.3018 | 340.3157 | 9.857167 | 9.746783 |
| 15929 | M423T11_ | 1.067815 | -0.09466 | -0.07353 | 0.943194 | 0.902024 | DOWN | 423.2113 | 423.201  | 423.2129 | 10.92083 | 10.8646  |
| 15930 | M732T11_ | 1.014625 | -0.02095 | -0.07364 | 0.943355 | 0.902039 | DOWN | 731.9395 | 731.9386 | 731.9399 | 10.89193 | 10.85018 |
| 15931 | M592T38  | 1.010538 | -0.01512 | -0.07541 | 0.943434 | 0.902047 | DOWN | 592.3325 | 592.3323 | 592.3329 | 37.97833 | 37.53233 |
| 15932 | M594T11_ | 1.010028 | 0.014395 | 0.073052 | 0.943564 | 0.902059 | UP   | 593.5271 | 593.5266 | 593.5293 | 10.90519 | 10.85018 |
| 15933 | M359T10_ | 1.055372 | -0.07775 | -0.07335 | 0.943569 | 0.902059 | DOWN | 358.6828 | 358.6825 | 358.683  | 9.994767 | 9.8914   |
| 15934 | M193T10_ | 1.039606 | 0.056036 | 0.073628 | 0.943577 | 0.90206  | UP   | 193.4602 | 193.4599 | 193.4674 | 9.841658 | 9.8207   |
| 15935 | M690T10_ | 1.016849 | -0.0241  | -0.07307 | 0.943632 | 0.902065 | DOWN | 690.3542 | 690.354  | 690.3546 | 9.617975 | 9.587217 |
| 15936 | M355T10_ | 1.008987 | -0.01291 | -0.07307 | 0.943689 | 0.902071 | DOWN | 355.2228 | 355.2195 | 355.2229 | 9.900733 | 9.699733 |
| 15937 | M709T10_ | 1.013556 | 0.019426 | 0.072898 | 0.943711 | 0.902073 | UP   | 708.9925 | 708.9919 | 708.9937 | 9.962617 | 9.843367 |
| 15938 | M546T10_ | 1.010696 | -0.01535 | -0.07302 | 0.943766 | 0.902078 | DOWN | 546.0745 | 546.0741 | 546.0751 | 9.985117 | 9.8753   |
| 15939 | M334T22  | 1.061865 | -0.0866  | -0.07281 | 0.94377  | 0.902078 | DOWN | 334.2373 | 334.2366 | 334.2379 | 22.27875 | 22.2315  |
| 15940 | M452T10_ | 1.048836 | 0.068789 | 0.073031 | 0.943934 | 0.902093 | UP   | 451.5343 | 451.534  | 451.5344 | 9.969925 | 9.859233 |
| 15941 | M228T10_ | 1.012745 | 0.018271 | 0.072562 | 0.943949 | 0.902095 | UP   | 227.5629 | 227.5628 | 227.563  | 9.873192 | 9.806367 |
| 15942 | M684T9_3 | 1.026868 | -0.03825 | -0.07252 | 0.943971 | 0.902097 | DOWN | 684.1764 | 684.1719 | 684.1812 | 9.221767 | 9.110833 |
| 15943 | M230T10_ | 1.010963 | -0.01573 | -0.07261 | 0.944076 | 0.902107 | DOWN | 229.6895 | 229.6852 | 229.6899 | 9.842183 | 9.827283 |
| 15944 | M478T41_ | 1.005767 | -0.0083  | -0.07339 | 0.944161 | 0.902115 | DOWN | 478.3006 | 478.3004 | 478.301  | 40.91333 | 40.68317 |
| 15945 | M387T18  | 1.020322 | -0.02902 | -0.07222 | 0.944203 | 0.902119 | DOWN | 387.2488 | 387.2486 | 387.2489 | 18.2775  | 18.26933 |
| 15946 | M426T34  | 1.029747 | -0.04229 | -0.07174 | 0.94459  | 0.902155 | DOWN | 426.3937 | 426.3933 | 426.3939 | 33.84583 | 33.8165  |
| 15947 | M171T10_ | 1.010091 | -0.01449 | -0.07213 | 0.944637 | 0.902159 | DOWN | 170.6491 | 170.649  | 170.6493 | 9.8397   | 9.715683 |
| 15948 | M328T15  | 1.006176 | -0.00888 | -0.07166 | 0.94475  | 0.90217  | DOWN | 328.2844 | 328.2843 | 328.2846 | 15.16129 | 15.1316  |
| 15949 | M335T11_ | 1.008001 | 0.011497 | 0.071511 | 0.94482  | 0.902176 | UP   | 335.4668 | 335.4665 | 335.4676 | 10.90551 | 10.879   |
| 15950 | M774T10_ | 1.013184 | 0.018897 | 0.071383 | 0.944845 | 0.902179 | UP   | 774.4367 | 774.4357 | 774.4374 | 10.45967 | 10.39197 |
| 15951 | M229T11_ | 1.02055  | 0.029347 | 0.07166  | 0.944937 | 0.902187 | UP   | 229.4436 | 229.4432 | 229.4437 | 10.91987 | 10.879   |
| 15952 | M508T9_1 | 1.009257 | 0.013294 | 0.071368 | 0.94494  | 0.902187 | UP   | 507.9815 | 507.981  | 507.9822 | 9.346658 | 9.283817 |
| 15953 | M283T22  | 1.046426 | 0.06547  | 0.071177 | 0.945021 | 0.902195 | UP   | 283.1666 | 283.1666 | 283.1672 | 22.024   | 21.9265  |
| 15954 | M1420T9  | 1.019698 | -0.02814 | -0.07085 | 0.945286 | 0.90222  | DOWN | 1419.812 | 1419.805 | 1419.813 | 9.481367 | 9.38665  |
| 15955 | M220T9_1 | 1.072215 | -0.10059 | -0.07091 | 0.945309 | 0.902222 | DOWN | 220.1228 | 220.121  | 220.1271 | 9.295167 | 9.159717 |
| 15956 | M550T10_ | 1.016563 | -0.0237  | -0.0715  | 0.945346 | 0.902225 | DOWN | 549.7091 | 549.7082 | 549.7097 | 9.951283 | 9.827283 |
| 15957 | M326T11_ | 1.021746 | 0.031037 | 0.07056  | 0.945512 | 0.902241 | UP   | 325.5478 | 325.5476 | 325.5483 | 10.873   | 10.82972 |
| 15958 | M335T9_4 | 1.019072 | 0.027256 | 0.070419 | 0.945629 | 0.902252 | UP   | 334.7292 | 334.7291 | 334.7295 | 8.78005  | 8.682683 |
| 15959 | M391T15_ | 1.054387 | -0.0764  | -0.07064 | 0.945689 | 0.902257 | DOWN | 391.3068 | 391.3064 | 391.3148 | 15.30765 | 15.29263 |



|       |          |          |          |          |          |          |      |          |          |          |          |          |
|-------|----------|----------|----------|----------|----------|----------|------|----------|----------|----------|----------|----------|
| 15960 | M659T9_2 | 1.036369 | -0.05154 | -0.07018 | 0.94581  | 0.902269 | DOWN | 658.8518 | 658.8515 | 658.8526 | 9.340908 | 9.234417 |
| 15961 | M755T10_ | 1.012713 | -0.01823 | -0.07016 | 0.945921 | 0.902279 | DOWN | 754.7042 | 754.7027 | 754.7045 | 9.962617 | 9.843367 |
| 15962 | M337T10_ | 1.030784 | 0.043742 | 0.070183 | 0.945967 | 0.902283 | UP   | 337.3962 | 337.3959 | 337.3965 | 9.958617 | 9.843367 |
| 15963 | M250T10_ | 1.070009 | 0.097623 | 0.070242 | 0.945978 | 0.902284 | UP   | 249.6479 | 249.6475 | 249.6481 | 9.956417 | 9.843367 |
| 15964 | M318T17  | 1.02396  | -0.03416 | -0.06969 | 0.946178 | 0.902303 | DOWN | 318.2788 | 318.2785 | 318.279  | 16.81158 | 16.797   |
| 15965 | M493T11_ | 1.021511 | 0.030705 | 0.06959  | 0.946312 | 0.902315 | UP   | 492.743  | 492.7386 | 492.7439 | 10.90553 | 10.89125 |
| 15966 | M206T9_1 | 1.034364 | -0.04874 | -0.07002 | 0.946362 | 0.90232  | DOWN | 205.956  | 205.9552 | 205.9563 | 9.18975  | 9.1175   |
| 15967 | M357T11_ | 1.011109 | 0.015938 | 0.069352 | 0.946468 | 0.90233  | UP   | 356.9677 | 356.9675 | 356.9684 | 10.892   | 10.8646  |
| 15968 | M974T10_ | 1.017591 | -0.02516 | -0.06922 | 0.946526 | 0.902335 | DOWN | 974.4149 | 974.414  | 974.4151 | 10.09898 | 10.00428 |
| 15969 | M209T10_ | 1.018155 | -0.02596 | -0.0702  | 0.946629 | 0.902345 | DOWN | 209.4743 | 209.4741 | 209.4744 | 9.972917 | 9.8753   |
| 15970 | M263T10_ | 1.024247 | -0.03456 | -0.06971 | 0.946702 | 0.902352 | DOWN | 263.0943 | 263.0942 | 263.0944 | 9.964167 | 9.8753   |
| 15971 | M172T10_ | 1.018502 | -0.02645 | -0.06899 | 0.946717 | 0.902353 | DOWN | 171.9501 | 171.95   | 171.9504 | 9.825767 | 9.715683 |
| 15972 | M480T9_4 | 1.022066 | -0.03149 | -0.06889 | 0.946768 | 0.902358 | DOWN | 479.9113 | 479.9108 | 479.9114 | 9.3771   | 9.249433 |
| 15973 | M396T9_1 | 1.016514 | -0.02363 | -0.06902 | 0.946807 | 0.902361 | DOWN | 396.1148 | 396.1144 | 396.1155 | 9.339583 | 9.24215  |
| 15974 | M453T9_9 | 1.031041 | 0.044102 | 0.068801 | 0.946845 | 0.902365 | UP   | 453.185  | 453.1787 | 453.1901 | 9.3261   | 9.219483 |
| 15975 | M408T10_ | 1.026848 | 0.038222 | 0.068735 | 0.947033 | 0.902383 | UP   | 408.1447 | 408.1442 | 408.1448 | 9.958617 | 9.843367 |
| 15976 | M1670T10 | 1.025029 | 0.035664 | 0.068919 | 0.947069 | 0.902386 | UP   | 1670.416 | 1670.416 | 1670.418 | 9.975217 | 9.859233 |
| 15977 | M445T30  | 1.013133 | -0.01882 | -0.06986 | 0.947155 | 0.902394 | DOWN | 445.3131 | 445.3128 | 445.3133 | 30.2315  | 30.2225  |
| 15978 | M532T42  | 1.019157 | 0.027377 | 0.069666 | 0.947203 | 0.902398 | UP   | 532.3112 | 532.3108 | 532.3116 | 42.136   | 41.77633 |
| 15979 | M644T10_ | 1.01048  | 0.015041 | 0.069243 | 0.947229 | 0.902401 | UP   | 644.3342 | 644.3337 | 644.3347 | 9.659383 | 9.5731   |
| 15980 | M564T42_ | 1.02648  | -0.03771 | -0.07041 | 0.94723  | 0.902401 | DOWN | 564.3012 | 564.3009 | 564.3015 | 41.84108 | 41.73333 |
| 15981 | M336T11_ | 1.022082 | -0.03151 | -0.06898 | 0.947259 | 0.902404 | DOWN | 336.1314 | 336.1291 | 336.1333 | 10.92253 | 10.83417 |
| 15982 | M512T30  | 1.01301  | -0.01865 | -0.06879 | 0.94729  | 0.902406 | DOWN | 512.3869 | 512.3861 | 512.387  | 30.2805  | 30.266   |
| 15983 | M264T11_ | 1.018829 | -0.02691 | -0.06821 | 0.947344 | 0.902411 | DOWN | 263.9049 | 263.9046 | 263.9051 | 10.86769 | 10.83572 |
| 15984 | M406T40_ | 1.021549 | 0.030759 | 0.067906 | 0.947577 | 0.902433 | UP   | 406.2069 | 406.2068 | 406.2071 | 40.02133 | 39.84917 |
| 15985 | M374T9_6 | 1.017716 | -0.02533 | -0.06776 | 0.947656 | 0.90244  | DOWN | 374.2364 | 374.2362 | 374.2367 | 9.317    | 9.262217 |
| 15986 | M1395T10 | 1.003768 | -0.00543 | 0.067972 | 0.947698 | 0.902444 | DOWN | 1394.98  | 1394.979 | 1394.983 | 9.931675 | 9.843367 |
| 15987 | M234T9_6 | 1.031006 | 0.044052 | 0.067763 | 0.947763 | 0.90245  | UP   | 233.9034 | 233.9023 | 233.9063 | 9.251742 | 9.160617 |
| 15988 | M239T11_ | 1.007058 | -0.01015 | -0.06797 | 0.947851 | 0.902459 | DOWN | 239.0503 | 239.0502 | 239.051  | 10.91987 | 10.84487 |
| 15989 | M583T10_ | 1.016126 | 0.023079 | 0.067663 | 0.947882 | 0.902461 | UP   | 583.269  | 583.2684 | 583.2697 | 9.983433 | 9.8753   |
| 15990 | M331T10_ | 1.011493 | -0.01649 | -0.06735 | 0.94806  | 0.902478 | DOWN | 330.7022 | 330.702  | 330.7023 | 9.967533 | 9.859233 |
| 15991 | M484T10_ | 1.010968 | -0.01574 | -0.06729 | 0.948066 | 0.902478 | DOWN | 484.4871 | 484.4867 | 484.4874 | 9.968992 | 9.859233 |
| 15992 | M368T10_ | 1.023638 | 0.033706 | 0.067518 | 0.948135 | 0.902485 | UP   | 368.0075 | 368.0072 | 368.0077 | 9.870017 | 9.766367 |
| 15993 | M425T13_ | 1.019811 | 0.028301 | 0.067018 | 0.948261 | 0.902497 | UP   | 425.3105 | 425.3103 | 425.311  | 12.7041  | 12.64618 |
| 15994 | M503T9_8 | 1.035766 | 0.050698 | 0.067116 | 0.948295 | 0.9025   | UP   | 503.3062 | 503.3044 | 503.3075 | 8.981917 | 8.88765  |

|       |           |          |          |          |          |          |      |          |          |          |          |          |
|-------|-----------|----------|----------|----------|----------|----------|------|----------|----------|----------|----------|----------|
| 15995 | M438T12_  | 1.01773  | 0.025355 | 0.066688 | 0.948468 | 0.902516 | UP   | 438.2946 | 438.2944 | 438.2952 | 12.09943 | 12.0789  |
| 15996 | M642T9_1  | 1.014726 | 0.02109  | 0.066656 | 0.948506 | 0.902519 | UP   | 641.6349 | 641.6279 | 641.6363 | 9.280767 | 9.12675  |
| 15997 | M418T9_2  | 1.033476 | 0.047505 | 0.066768 | 0.948555 | 0.902524 | UP   | 417.803  | 417.8025 | 417.8049 | 9.388367 | 9.129317 |
| 15998 | M401T11_  | 1.025348 | 0.036113 | 0.066605 | 0.948639 | 0.902532 | UP   | 400.8617 | 400.8518 | 400.8637 | 10.95222 | 10.8914  |
| 15999 | M477T10_  | 1.015303 | -0.02191 | -0.06631 | 0.9488   | 0.902547 | DOWN | 476.5615 | 476.5598 | 476.5618 | 9.788267 | 9.46925  |
| 16000 | M320T43_  | 1.029564 | 0.042034 | 0.065887 | 0.949092 | 0.902574 | UP   | 320.1702 | 320.17   | 320.1702 | 42.7835  | 42.5675  |
| 16001 | M1854T10_ | 1.0124   | -0.01778 | -0.06585 | 0.949115 | 0.902576 | DOWN | 1853.741 | 1853.737 | 1853.748 | 9.836042 | 9.715683 |
| 16002 | M567T10_  | 1.027049 | -0.03851 | -0.06583 | 0.949136 | 0.902578 | DOWN | 567.2443 | 567.2438 | 567.2448 | 9.946467 | 9.827283 |
| 16003 | M407T10_  | 1.009719 | -0.01395 | -0.06592 | 0.949204 | 0.902584 | DOWN | 407.3048 | 407.3043 | 407.305  | 9.902008 | 9.79535  |
| 16004 | M834T19_  | 1.005651 | -0.00813 | -0.0659  | 0.949304 | 0.902593 | DOWN | 834.2416 | 834.2406 | 834.2421 | 18.73167 | 18.71867 |
| 16005 | M1087T10_ | 1.01443  | 0.020669 | 0.065969 | 0.949523 | 0.902614 | UP   | 1086.67  | 1086.669 | 1086.672 | 9.82645  | 9.715683 |
| 16006 | M643T10_  | 1.012073 | 0.017313 | 0.06558  | 0.949568 | 0.902618 | UP   | 643.3303 | 643.3298 | 643.3312 | 9.683667 | 9.58735  |
| 16007 | M159T10_  | 1.041836 | 0.059129 | 0.066172 | 0.949595 | 0.90262  | UP   | 158.6517 | 158.6514 | 158.6517 | 9.8322   | 9.816167 |
| 16008 | M1985T10_ | 1.019085 | 0.027275 | 0.065855 | 0.949672 | 0.902627 | UP   | 1984.735 | 1984.733 | 1984.737 | 9.946467 | 9.859233 |
| 16009 | M327T10_  | 1.005663 | -0.00815 | -0.06647 | 0.949686 | 0.902629 | DOWN | 327.014  | 327.0137 | 327.0151 | 9.830558 | 9.715683 |
| 16010 | M404T11_  | 1.015799 | -0.02262 | -0.06505 | 0.949843 | 0.902643 | DOWN | 404.2031 | 404.2028 | 404.2077 | 10.90669 | 10.873   |
| 16011 | M806T36   | 1.015569 | -0.02229 | -0.06483 | 0.949911 | 0.902649 | DOWN | 805.5717 | 805.5714 | 805.5722 | 35.74708 | 35.71867 |
| 16012 | M727T10_  | 1.017356 | -0.02482 | -0.066   | 0.950068 | 0.902664 | DOWN | 726.7168 | 726.7136 | 726.7196 | 9.830558 | 9.715683 |
| 16013 | M340T10_  | 1.010931 | -0.01568 | -0.06454 | 0.950178 | 0.902674 | DOWN | 339.7905 | 339.7902 | 339.7906 | 9.95825  | 9.853533 |
| 16014 | M494T26   | 1.01575  | 0.022545 | 0.06558  | 0.950238 | 0.90268  | UP   | 494.4043 | 494.4041 | 494.4047 | 26.36433 | 26.3335  |
| 16015 | M464T20   | 1.011425 | -0.01639 | -0.06403 | 0.950647 | 0.902718 | DOWN | 464.4204 | 464.4201 | 464.4208 | 19.96908 | 19.94033 |
| 16016 | M231T10_  | 1.008315 | -0.01195 | -0.06387 | 0.950693 | 0.902722 | DOWN | 231.3471 | 231.347  | 231.3472 | 9.933    | 9.827283 |
| 16017 | M231T10_  | 1.012992 | -0.01862 | -0.06404 | 0.950716 | 0.902724 | DOWN | 230.5434 | 230.5433 | 230.5435 | 9.929783 | 9.827283 |
| 16018 | M544T11   | 1.018985 | -0.02713 | -0.06369 | 0.950836 | 0.902735 | DOWN | 543.6571 | 543.6556 | 543.6574 | 10.57914 | 10.53485 |
| 16019 | M150T32   | 1.009359 | -0.01344 | -0.06356 | 0.950907 | 0.902742 | DOWN | 150.0264 | 150.0263 | 150.0265 | 32.46017 | 32.45933 |
| 16020 | M337T9_9  | 1.025597 | -0.03646 | -0.06341 | 0.951072 | 0.902757 | DOWN | 336.9022 | 336.9017 | 336.9028 | 8.765242 | 8.667783 |
| 16021 | M490T30   | 1.011873 | 0.017029 | 0.064714 | 0.951169 | 0.902766 | UP   | 490.3426 | 490.3421 | 490.3431 | 30.26667 | 30.25233 |
| 16022 | M463T11_  | 1.014437 | 0.020679 | 0.06368  | 0.951215 | 0.90277  | UP   | 463.2385 | 463.2381 | 463.2387 | 10.91982 | 10.86275 |
| 16023 | M707T10_  | 1.007641 | -0.01098 | -0.06315 | 0.951316 | 0.902779 | DOWN | 706.9718 | 706.9709 | 706.972  | 9.81635  | 9.715683 |
| 16024 | M348T10_  | 1.004463 | 0.006424 | 0.064058 | 0.951375 | 0.902785 | UP   | 347.9941 | 347.994  | 347.9942 | 9.8397   | 9.73145  |
| 16025 | M592T42_  | 1.018218 | 0.026047 | 0.064484 | 0.951482 | 0.902795 | UP   | 592.3324 | 592.3323 | 592.3327 | 41.78283 | 41.69017 |
| 16026 | M963T10_  | 1.020853 | 0.029775 | 0.062761 | 0.951527 | 0.902799 | UP   | 962.7105 | 962.7096 | 962.7122 | 9.523383 | 9.416817 |
| 16027 | M318T11_  | 1.011914 | -0.01709 | -0.06274 | 0.951597 | 0.902805 | DOWN | 317.7209 | 317.7207 | 317.7222 | 10.90522 | 10.879   |
| 16028 | M309T10_  | 1.013194 | 0.01891  | 0.063465 | 0.951629 | 0.902808 | UP   | 308.9026 | 308.9023 | 308.9074 | 9.615617 | 9.1503   |
| 16029 | M426T9_1  | 1.020168 | -0.02881 | -0.06243 | 0.951753 | 0.90282  | DOWN | 425.7748 | 425.7744 | 425.775  | 8.85555  | 8.727567 |

|       |          |          |          |          |          |          |      |          |          |          |          |          |
|-------|----------|----------|----------|----------|----------|----------|------|----------|----------|----------|----------|----------|
| 16030 | M528T9_5 | 1.022406 | -0.03197 | -0.06245 | 0.951806 | 0.902824 | DOWN | 528.0396 | 528.0367 | 528.041  | 9.253508 | 9.129317 |
| 16031 | M610T10_ | 1.011198 | 0.017181 | 0.063045 | 0.95182  | 0.902826 | UP   | 609.8732 | 609.8728 | 609.8742 | 9.921917 | 9.811217 |
| 16032 | M408T11_ | 1.011052 | -0.01586 | -0.06269 | 0.951827 | 0.902826 | DOWN | 407.6056 | 407.6053 | 407.6073 | 10.91219 | 10.82972 |
| 16033 | M795T11_ | 1.020124 | 0.028744 | 0.06243  | 0.951871 | 0.90283  | UP   | 795.3462 | 795.334  | 795.3476 | 10.89355 | 10.86008 |
| 16034 | M419T10_ | 1.019372 | 0.027681 | 0.06244  | 0.95188  | 0.902831 | UP   | 419.2494 | 419.2441 | 419.2497 | 9.914217 | 9.811217 |
| 16035 | M436T11_ | 1.017488 | -0.02501 | -0.06242 | 0.951927 | 0.902836 | DOWN | 435.6002 | 435.5984 | 435.6022 | 10.94603 | 10.90548 |
| 16036 | M766T10_ | 1.020924 | -0.02988 | -0.06215 | 0.951984 | 0.902841 | DOWN | 766.4545 | 766.4529 | 766.457  | 9.946467 | 9.843367 |
| 16037 | M442T12  | 1.012912 | -0.01851 | -0.0624  | 0.952024 | 0.902845 | DOWN | 442.3141 | 442.3134 | 442.3148 | 12.30289 | 12.2663  |
| 16038 | M383T16_ | 1.012402 | 0.017782 | 0.062761 | 0.952102 | 0.902852 | UP   | 383.11   | 383.1098 | 383.1102 | 15.95777 | 15.92052 |
| 16039 | M406T10_ | 1.032655 | -0.04636 | -0.06214 | 0.952133 | 0.902855 | DOWN | 406.1455 | 406.1448 | 406.1458 | 9.967367 | 9.859233 |
| 16040 | M546T39_ | 1.016317 | 0.023351 | 0.062431 | 0.952154 | 0.902857 | UP   | 546.3268 | 546.3267 | 546.3273 | 38.64017 | 38.49617 |
| 16041 | M286T7_2 | 1.020276 | 0.028959 | 0.062505 | 0.952175 | 0.902859 | UP   | 286.2437 | 286.2435 | 286.2445 | 7.0112   | 6.954633 |
| 16042 | M329T9_5 | 1.023362 | -0.03332 | -0.06181 | 0.952274 | 0.902868 | DOWN | 329.3582 | 329.3578 | 329.3586 | 8.924217 | 8.892117 |
| 16043 | M479T9_6 | 1.01586  | 0.022701 | 0.062306 | 0.952276 | 0.902868 | UP   | 479.1928 | 479.1924 | 479.1957 | 9.419733 | 9.04725  |
| 16044 | M541T9_4 | 1.014118 | -0.02023 | -0.062   | 0.95237  | 0.902876 | DOWN | 540.6281 | 540.6278 | 540.6285 | 9.445092 | 9.355317 |
| 16045 | M375T10_ | 1.022873 | -0.03263 | -0.0618  | 0.95237  | 0.902876 | DOWN | 374.9511 | 374.9509 | 374.9514 | 9.918833 | 9.843367 |
| 16046 | M366T10_ | 1.022811 | 0.032539 | 0.061683 | 0.952506 | 0.902889 | UP   | 366.1424 | 366.1421 | 366.1447 | 9.960817 | 9.843367 |
| 16047 | M444T9_2 | 1.008649 | -0.01242 | -0.0627  | 0.952604 | 0.902898 | DOWN | 444.2697 | 444.2694 | 444.2698 | 9.300733 | 9.234417 |
| 16048 | M474T11_ | 1.010672 | 0.015315 | 0.061363 | 0.95267  | 0.902904 | UP   | 474.0359 | 474.0357 | 474.0361 | 10.89953 | 10.85018 |
| 16049 | M184T9_6 | 1.019122 | -0.02733 | -0.06206 | 0.952685 | 0.902905 | DOWN | 183.9476 | 183.9474 | 183.9489 | 9.175017 | 9.111033 |
| 16050 | M367T11_ | 1.01173  | 0.016824 | 0.061263 | 0.952687 | 0.902906 | UP   | 366.6668 | 366.6666 | 366.6671 | 10.8926  | 10.879   |
| 16051 | M401T10_ | 1.012137 | -0.0174  | -0.0613  | 0.952689 | 0.902906 | DOWN | 400.7382 | 400.7379 | 400.7388 | 9.909525 | 9.811217 |
| 16052 | M251T10_ | 1.046424 | -0.06547 | -0.06128 | 0.952709 | 0.902908 | DOWN | 250.5322 | 250.5321 | 250.5325 | 9.951283 | 9.859233 |
| 16053 | M1750T10 | 1.021765 | 0.031064 | 0.062203 | 0.952781 | 0.902914 | UP   | 1749.682 | 1749.681 | 1749.684 | 9.859983 | 9.7634   |
| 16054 | M316T7_2 | 1.014332 | 0.02053  | 0.061766 | 0.952871 | 0.902923 | UP   | 316.2114 | 316.2114 | 316.2117 | 6.982017 | 6.954633 |
| 16055 | M501T11_ | 1.013881 | -0.01989 | -0.06074 | 0.953071 | 0.902941 | DOWN | 501.2252 | 501.2232 | 501.2262 | 10.90765 | 10.85018 |
| 16056 | M1842T10 | 1.032295 | -0.04586 | -0.06106 | 0.953137 | 0.902947 | DOWN | 1842.092 | 1842.088 | 1842.092 | 9.970617 | 9.967367 |
| 16057 | M846T18  | 1.023927 | 0.034113 | 0.060573 | 0.953185 | 0.902951 | UP   | 845.6479 | 845.6464 | 845.6485 | 18.32425 | 18.30517 |
| 16058 | M422T11_ | 1.010232 | -0.01469 | -0.06062 | 0.953263 | 0.902959 | DOWN | 422.0835 | 422.0829 | 422.0838 | 10.90522 | 10.879   |
| 16059 | M219T11_ | 1.008401 | -0.01207 | -0.06068 | 0.953288 | 0.902961 | DOWN | 219.45   | 219.4499 | 219.4502 | 10.892   | 10.879   |
| 16060 | M446T30  | 1.013631 | 0.019533 | 0.061697 | 0.95334  | 0.902966 | UP   | 446.3164 | 446.3162 | 446.3166 | 30.2315  | 30.2225  |
| 16061 | M400T10_ | 1.027501 | 0.03914  | 0.060689 | 0.953383 | 0.90297  | UP   | 400.0181 | 400.018  | 400.0189 | 9.964417 | 9.8914   |
| 16062 | M1068T10 | 1.009597 | -0.01378 | -0.06032 | 0.953384 | 0.90297  | DOWN | 1067.583 | 1067.582 | 1067.584 | 9.637333 | 9.510117 |
| 16063 | M175T10_ | 1.024703 | 0.035206 | 0.060654 | 0.953431 | 0.902974 | UP   | 174.6907 | 174.6905 | 174.6907 | 9.967367 | 9.859233 |
| 16064 | M403T42_ | 1.011581 | 0.016611 | 0.061125 | 0.95359  | 0.902989 | UP   | 403.2323 | 403.232  | 403.2325 | 42.17925 | 42.04983 |

|       |          |          |          |          |          |          |      |          |          |          |          |          |
|-------|----------|----------|----------|----------|----------|----------|------|----------|----------|----------|----------|----------|
| 16065 | M1570T10 | 1.018672 | -0.02669 | -0.0603  | 0.953697 | 0.902998 | DOWN | 1570.21  | 1570.206 | 1570.212 | 9.970617 | 9.859233 |
| 16066 | M379T11_ | 1.009865 | 0.014162 | 0.059985 | 0.95371  | 0.903    | UP   | 379.2308 | 379.2307 | 379.2317 | 10.892   | 10.879   |
| 16067 | M327T10_ | 1.009361 | -0.01344 | -0.05993 | 0.95374  | 0.903002 | DOWN | 326.877  | 326.8769 | 326.8777 | 9.836042 | 9.715683 |
| 16068 | M196T9_2 | 1.023596 | 0.033647 | 0.059622 | 0.953938 | 0.903021 | UP   | 195.6387 | 195.6268 | 195.6398 | 9.329083 | 9.235933 |
| 16069 | M420T10_ | 1.020081 | -0.02868 | -0.05949 | 0.954065 | 0.903032 | DOWN | 420.1346 | 420.1255 | 420.1351 | 9.963017 | 9.8445   |
| 16070 | M581T11_ | 1.011224 | 0.016102 | 0.060302 | 0.954161 | 0.903041 | UP   | 581.3907 | 581.3903 | 581.3913 | 11.08603 | 11.06723 |
| 16071 | M207T9_3 | 1.028419 | -0.04043 | -0.05945 | 0.954166 | 0.903042 | DOWN | 206.7268 | 206.7264 | 206.7277 | 9.3494   | 9.18975  |
| 16072 | M328T10_ | 1.00742  | -0.01067 | -0.05958 | 0.954228 | 0.903047 | DOWN | 327.6222 | 327.622  | 327.6224 | 9.985733 | 9.8753   |
| 16073 | M367T10_ | 1.008033 | -0.01154 | -0.05971 | 0.954502 | 0.903072 | DOWN | 367.219  | 367.2188 | 367.2193 | 9.909492 | 9.79535  |
| 16074 | M303T24  | 1.019343 | 0.02764  | 0.059511 | 0.954549 | 0.903077 | UP   | 303.3003 | 303.2996 | 303.3003 | 24.18233 | 24.088   |
| 16075 | M527T9_5 | 1.011756 | 0.016862 | 0.059237 | 0.954549 | 0.903077 | UP   | 526.7839 | 526.7818 | 526.7847 | 9.214392 | 9.129317 |
| 16076 | M240T10_ | 1.029909 | 0.042516 | 0.059257 | 0.954581 | 0.90308  | UP   | 240.0921 | 240.0918 | 240.0922 | 9.622983 | 9.49445  |
| 16077 | M626T10_ | 1.018177 | 0.025988 | 0.058801 | 0.954607 | 0.903082 | UP   | 625.9948 | 625.9933 | 625.995  | 9.911767 | 9.79535  |
| 16078 | M775T10_ | 1.019179 | -0.02741 | -0.05954 | 0.95461  | 0.903082 | DOWN | 775.498  | 775.4972 | 775.4991 | 9.960467 | 9.859233 |
| 16079 | M328T21  | 1.010649 | -0.01528 | -0.05876 | 0.954622 | 0.903083 | DOWN | 328.2117 | 328.2116 | 328.2118 | 20.60667 | 20.591   |
| 16080 | M454T10_ | 1.011951 | 0.017139 | 0.059222 | 0.954677 | 0.903088 | UP   | 453.8448 | 453.8447 | 453.8451 | 10.16706 | 10.08517 |
| 16081 | M357T10_ | 1.00523  | 0.007525 | 0.059297 | 0.954775 | 0.903097 | UP   | 356.5143 | 356.5137 | 356.5146 | 9.825492 | 9.715683 |
| 16082 | M244T16  | 1.008202 | 0.011784 | 0.058338 | 0.955    | 0.903118 | UP   | 244.1905 | 244.1904 | 244.1906 | 16.46093 | 16.4323  |
| 16083 | M280T10_ | 1.020634 | -0.02946 | -0.05886 | 0.955025 | 0.90312  | DOWN | 279.5461 | 279.5457 | 279.5462 | 9.967367 | 9.859233 |
| 16084 | M252T9_1 | 1.013284 | 0.019039 | 0.058133 | 0.955151 | 0.903132 | UP   | 251.5206 | 251.5173 | 251.5275 | 9.333667 | 9.160617 |
| 16085 | M603T9_2 | 1.014661 | -0.021   | -0.05819 | 0.955206 | 0.903137 | DOWN | 603.3412 | 603.3411 | 603.3414 | 8.872733 | 8.802417 |
| 16086 | M637T30  | 1.00902  | -0.01295 | -0.0577  | 0.955407 | 0.903155 | DOWN | 637.392  | 637.3914 | 637.3924 | 30.28083 | 30.25167 |
| 16087 | M419T33  | 1.01639  | -0.02345 | -0.05814 | 0.955529 | 0.903166 | DOWN | 419.3131 | 419.313  | 419.3134 | 33.36917 | 33.35433 |
| 16088 | M623T10_ | 1.007157 | 0.010289 | 0.058186 | 0.955581 | 0.903171 | UP   | 623.4043 | 623.4039 | 623.4048 | 9.679933 | 9.5731   |
| 16089 | M400T9_9 | 1.016553 | -0.02369 | -0.05806 | 0.955755 | 0.903187 | DOWN | 400.4785 | 400.478  | 400.479  | 9.37735  | 9.219483 |
| 16090 | M270T10_ | 1.019705 | 0.028152 | 0.05817  | 0.955776 | 0.903189 | UP   | 270.2252 | 270.225  | 270.2253 | 9.9847   | 9.8753   |
| 16091 | M496T9_5 | 1.010086 | -0.01448 | -0.05715 | 0.955837 | 0.903195 | DOWN | 495.7469 | 495.7465 | 495.7475 | 9.273908 | 9.129317 |
| 16092 | M550T10_ | 1.014687 | 0.021034 | 0.05708  | 0.955889 | 0.903199 | UP   | 550.4048 | 550.4044 | 550.4051 | 10.44737 | 10.40807 |
| 16093 | M336T10_ | 1.031241 | 0.044381 | 0.058382 | 0.955908 | 0.903201 | UP   | 335.8397 | 335.839  | 335.841  | 9.816183 | 9.715683 |
| 16094 | M225T11_ | 1.018528 | 0.026486 | 0.05675  | 0.956141 | 0.903222 | UP   | 224.537  | 224.5367 | 224.537  | 10.8914  | 10.879   |
| 16095 | M471T9_1 | 1.041026 | -0.05801 | -0.05751 | 0.95619  | 0.903227 | DOWN | 471.4279 | 471.4271 | 471.4282 | 9.457083 | 9.311883 |
| 16096 | M219T11_ | 1.013245 | 0.018983 | 0.056713 | 0.956224 | 0.90323  | UP   | 219.1923 | 219.1919 | 219.1924 | 10.90553 | 10.88747 |
| 16097 | M386T11_ | 1.014331 | 0.020528 | 0.057306 | 0.956349 | 0.903241 | UP   | 386.202  | 386.2017 | 386.2023 | 11.22813 | 11.2071  |
| 16098 | M804T11_ | 1.016331 | 0.02337  | 0.05644  | 0.956486 | 0.903254 | UP   | 803.5882 | 803.5873 | 803.589  | 11.24152 | 11.19848 |
| 16099 | M200T9_1 | 1.019806 | -0.02829 | -0.05738 | 0.956502 | 0.903255 | DOWN | 200.0927 | 200.083  | 200.0935 | 9.227217 | 9.07145  |

|       |          |          |          |          |          |          |      |          |          |          |          |          |
|-------|----------|----------|----------|----------|----------|----------|------|----------|----------|----------|----------|----------|
| 16100 | M228T9_4 | 1.035964 | 0.050975 | 0.056331 | 0.956723 | 0.903276 | UP   | 227.8102 | 227.8098 | 227.8119 | 9.3522   | 9.1175   |
| 16101 | M1421T10 | 1.013891 | 0.019902 | -0.05699 | 0.956731 | 0.903276 | UP   | 1421.175 | 1421.175 | 1421.177 | 9.964167 | 9.859233 |
| 16102 | M265T10_ | 1.017106 | -0.02447 | -0.05639 | 0.956764 | 0.903279 | DOWN | 265.3465 | 265.3465 | 265.3466 | 9.76855  | 9.746783 |
| 16103 | M243T9_9 | 1.011708 | 0.016793 | 0.056077 | 0.956767 | 0.90328  | UP   | 243.1465 | 243.1463 | 243.1468 | 8.923883 | 8.832317 |
| 16104 | M513T10_ | 1.007392 | -0.01063 | -0.05649 | 0.956813 | 0.903284 | DOWN | 512.988  | 512.9868 | 512.9884 | 10.4121  | 10.39197 |
| 16105 | M370T9_6 | 1.012181 | 0.017468 | 0.055928 | 0.956935 | 0.903295 | UP   | 370.1761 | 370.1758 | 370.179  | 9.455075 | 9.355317 |
| 16106 | M484T12  | 1.018313 | 0.026181 | 0.055936 | 0.956962 | 0.903297 | UP   | 484.2264 | 484.2256 | 484.2267 | 12.16481 | 12.14723 |
| 16107 | M351T10_ | 1.069244 | -0.09659 | -0.05586 | 0.957075 | 0.903308 | DOWN | 351.2    | 351.1991 | 351.2073 | 9.568858 | 9.46855  |
| 16108 | M567T37  | 1.016109 | 0.023055 | 0.055784 | 0.957112 | 0.903311 | UP   | 567.4104 | 567.4088 | 567.4117 | 36.81367 | 36.741   |
| 16109 | M262T10_ | 1.024725 | 0.035237 | 0.055483 | 0.95714  | 0.903314 | UP   | 261.9633 | 261.963  | 261.9634 | 9.948825 | 9.843367 |
| 16110 | M579T10_ | 1.008544 | -0.01227 | -0.05574 | 0.957184 | 0.903318 | DOWN | 579.2057 | 579.2052 | 579.206  | 9.972483 | 9.8753   |
| 16111 | M421T9_1 | 1.014143 | 0.020261 | 0.055773 | 0.957229 | 0.903322 | UP   | 420.5132 | 420.5128 | 420.514  | 9.294408 | 9.129317 |
| 16112 | M523T9_5 | 1.020862 | 0.029788 | 0.05534  | 0.957233 | 0.903322 | UP   | 523.2974 | 523.2893 | 523.2992 | 9.1587   | 8.936617 |
| 16113 | M377T10_ | 1.014233 | -0.02039 | -0.0552  | 0.957389 | 0.903336 | DOWN | 377.2128 | 377.2124 | 377.2131 | 9.970617 | 9.859233 |
| 16114 | M610T10_ | 1.005793 | 0.008334 | 0.054978 | 0.957513 | 0.903348 | UP   | 609.5237 | 609.5231 | 609.5241 | 9.91875  | 9.827283 |
| 16115 | M614T10_ | 1.012036 | 0.01726  | 0.054994 | 0.957517 | 0.903348 | UP   | 614.1569 | 614.1564 | 614.1588 | 9.958617 | 9.843367 |
| 16116 | M287T41_ | 1.022035 | 0.031444 | 0.055871 | 0.957528 | 0.903349 | UP   | 287.1487 | 287.1485 | 287.1488 | 41.19392 | 41.12917 |
| 16117 | M460T40_ | 1.008627 | 0.012393 | 0.054905 | 0.957604 | 0.903356 | UP   | 460.2901 | 460.2901 | 460.2904 | 40.42417 | 40.381   |
| 16118 | M480T10_ | 1.017442 | 0.024946 | 0.055008 | 0.95763  | 0.903358 | UP   | 479.8985 | 479.8981 | 479.8988 | 9.968992 | 9.859233 |
| 16119 | M1667T10 | 1.021663 | 0.03092  | 0.054901 | 0.957632 | 0.903359 | UP   | 1666.564 | 1666.563 | 1666.566 | 9.977442 | 9.859233 |
| 16120 | M732T10_ | 1.020576 | -0.02938 | -0.05468 | 0.957908 | 0.903384 | DOWN | 732.2267 | 732.226  | 732.2273 | 9.967367 | 9.843367 |
| 16121 | M445T10_ | 1.021968 | 0.03135  | 0.054356 | 0.95802  | 0.903394 | UP   | 445.4059 | 445.405  | 445.4063 | 9.979325 | 9.859233 |
| 16122 | M249T10_ | 1.024501 | 0.034922 | 0.054775 | 0.958035 | 0.903395 | UP   | 249.281  | 249.2775 | 249.281  | 9.907917 | 9.65225  |
| 16123 | M462T30  | 1.038686 | -0.05476 | -0.05428 | 0.958044 | 0.903396 | DOWN | 462.2902 | 462.2895 | 462.2908 | 30.22342 | 30.18017 |
| 16124 | M361T11_ | 1.013029 | 0.018675 | 0.054646 | 0.958113 | 0.903402 | UP   | 360.5656 | 360.5655 | 360.5666 | 10.89875 | 10.879   |
| 16125 | M163T10_ | 1.012084 | -0.01733 | -0.05396 | 0.958293 | 0.903419 | DOWN | 163.181  | 163.1808 | 163.1811 | 9.970617 | 9.859233 |
| 16126 | M201T42  | 1.007877 | 0.01132  | 0.05387  | 0.958396 | 0.903428 | UP   | 201.1119 | 201.1118 | 201.112  | 42.208   | 42.04983 |
| 16127 | M434T9_1 | 1.019375 | -0.02768 | -0.05401 | 0.958398 | 0.903428 | DOWN | 434.2835 | 434.2826 | 434.2843 | 8.963    | 8.909    |
| 16128 | M417T29  | 1.075386 | 0.104854 | -0.05401 | 0.958408 | 0.903429 | UP   | 416.6205 | 416.62   | 416.621  | 28.9775  | 28.908   |
| 16129 | M198T10_ | 1.009547 | 0.013708 | 0.053919 | 0.958418 | 0.90343  | UP   | 197.8299 | 197.8297 | 197.83   | 9.972917 | 9.859233 |
| 16130 | M413T11_ | 1.016645 | 0.023816 | 0.054348 | 0.958445 | 0.903433 | UP   | 412.5828 | 412.5814 | 412.5841 | 10.93018 | 10.8926  |
| 16131 | M369T11_ | 1.047632 | -0.06713 | -0.05373 | 0.95847  | 0.903435 | DOWN | 369.209  | 369.2022 | 369.2123 | 10.95643 | 10.873   |
| 16132 | M812T34  | 1.020613 | -0.02944 | -0.05369 | 0.958504 | 0.903438 | DOWN | 811.5613 | 811.5609 | 811.5614 | 34.15592 | 34.13367 |
| 16133 | M542T28_ | 1.022871 | 0.032624 | 0.053852 | 0.958558 | 0.903443 | UP   | 542.3243 | 542.3239 | 542.3248 | 28.24317 | 28.21417 |
| 16134 | M520T10_ | 1.012311 | -0.01765 | -0.05361 | 0.958591 | 0.903446 | DOWN | 519.9331 | 519.9328 | 519.9333 | 9.9847   | 9.8753   |

|       |          |          |          |          |          |          |      |          |          |          |          |          |
|-------|----------|----------|----------|----------|----------|----------|------|----------|----------|----------|----------|----------|
| 16135 | M843T10_ | 1.002906 | -0.00419 | -0.05425 | 0.958742 | 0.90346  | DOWN | 842.7902 | 842.7898 | 842.7906 | 9.970617 | 9.8753   |
| 16136 | M508T40_ | 1.004065 | 0.005853 | 0.054298 | 0.958788 | 0.903464 | UP   | 508.2747 | 508.2745 | 508.2751 | 40.15083 | 40.02133 |
| 16137 | M538T10_ | 1.042221 | -0.05966 | -0.05332 | 0.958844 | 0.903469 | DOWN | 537.9735 | 537.9732 | 537.9742 | 9.967367 | 9.8914   |
| 16138 | M343T16  | 1.007853 | 0.011285 | 0.05343  | 0.958925 | 0.903476 | UP   | 343.1746 | 343.1745 | 343.1747 | 15.61598 | 15.59217 |
| 16139 | M455T9_4 | 1.023863 | -0.03402 | -0.05309 | 0.958974 | 0.903481 | DOWN | 454.6108 | 454.6105 | 454.6182 | 9.382183 | 9.314683 |
| 16140 | M524T9_8 | 1.010113 | 0.014516 | 0.053138 | 0.958984 | 0.903482 | UP   | 524.3692 | 524.3668 | 524.3697 | 9.255333 | 9.11405  |
| 16141 | M607T10_ | 1.022582 | -0.03222 | -0.05319 | 0.958985 | 0.903482 | DOWN | 606.5629 | 606.5624 | 606.5635 | 9.956242 | 9.827283 |
| 16142 | M521T30  | 1.02464  | -0.03512 | -0.05329 | 0.958986 | 0.903482 | DOWN | 521.3418 | 521.3407 | 521.3425 | 30.45133 | 30.42383 |
| 16143 | M454T39_ | 1.020177 | -0.02882 | -0.05446 | 0.959012 | 0.903484 | DOWN | 454.2645 | 454.2639 | 454.2646 | 38.66883 | 38.6545  |
| 16144 | M404T9_7 | 1.012276 | -0.0176  | -0.05318 | 0.959014 | 0.903484 | DOWN | 404.3692 | 404.369  | 404.3695 | 9.4498   | 9.355317 |
| 16145 | M317T10_ | 1.008947 | -0.01285 | -0.05301 | 0.959099 | 0.903492 | DOWN | 316.5961 | 316.5959 | 316.5968 | 9.972917 | 9.859233 |
| 16146 | M593T11_ | 1.015524 | 0.022224 | 0.053809 | 0.959106 | 0.903493 | UP   | 593.3872 | 593.3869 | 593.3883 | 10.53828 | 10.45613 |
| 16147 | M683T10_ | 1.015135 | -0.02167 | -0.05266 | 0.959299 | 0.90351  | DOWN | 682.9382 | 682.9377 | 682.9392 | 9.830733 | 9.715683 |
| 16148 | M191T11_ | 1.011303 | -0.01621 | -0.05267 | 0.959299 | 0.90351  | DOWN | 191.0215 | 191.0215 | 191.0218 | 10.90553 | 10.87765 |
| 16149 | M450T9_1 | 1.024041 | -0.03427 | -0.05265 | 0.959326 | 0.903513 | DOWN | 450.4886 | 450.4866 | 450.4897 | 9.442208 | 9.333267 |
| 16150 | M319T10_ | 1.010803 | 0.015502 | 0.052858 | 0.95935  | 0.903515 | UP   | 319.2011 | 319.2008 | 319.2022 | 9.8207   | 9.715683 |
| 16151 | M358T9_4 | 1.028034 | -0.03989 | -0.05265 | 0.959451 | 0.903524 | DOWN | 357.9161 | 357.916  | 357.9256 | 9.488133 | 9.046783 |
| 16152 | M301T11_ | 1.006987 | 0.010045 | 0.052516 | 0.959544 | 0.903532 | UP   | 301.4652 | 301.4651 | 301.4653 | 10.892   | 10.879   |
| 16153 | M464T44_ | 1.011469 | 0.016452 | 0.053007 | 0.959605 | 0.903538 | UP   | 464.2849 | 464.2847 | 464.2851 | 44.466   | 44.26467 |
| 16154 | M222T10_ | 1.009107 | 0.013079 | 0.052086 | 0.959773 | 0.903553 | UP   | 221.6026 | 221.6025 | 221.6027 | 9.888342 | 9.79535  |
| 16155 | M1491T10 | 1.019172 | -0.0274  | -0.05203 | 0.959778 | 0.903554 | DOWN | 1491.195 | 1491.194 | 1491.196 | 9.900767 | 9.79535  |
| 16156 | M357T11_ | 1.014308 | 0.020496 | 0.051963 | 0.959884 | 0.903563 | UP   | 357.2151 | 357.2144 | 357.2167 | 10.90785 | 10.873   |
| 16157 | M292T10_ | 1.017608 | -0.02518 | -0.05228 | 0.959889 | 0.903564 | DOWN | 291.605  | 291.6047 | 291.6052 | 9.967367 | 9.8753   |
| 16158 | M719T36  | 1.009934 | 0.014261 | 0.05198  | 0.959913 | 0.903566 | UP   | 718.5222 | 718.5215 | 718.5226 | 36.1115  | 36.1075  |
| 16159 | M328T9_3 | 1.020526 | -0.02931 | -0.05178 | 0.959978 | 0.903572 | DOWN | 328.1995 | 328.1991 | 328.1998 | 9.20585  | 9.048117 |
| 16160 | M288T23_ | 1.024087 | 0.034338 | 0.0518   | 0.960042 | 0.903578 | UP   | 288.4843 | 288.4775 | 288.4913 | 22.91458 | 22.84233 |
| 16161 | M252T11_ | 1.012803 | 0.018354 | 0.051932 | 0.960071 | 0.90358  | UP   | 252.0835 | 252.0832 | 252.0837 | 10.8926  | 10.879   |
| 16162 | M371T11_ | 1.010817 | -0.01552 | -0.05146 | 0.960294 | 0.903601 | DOWN | 370.9443 | 370.9441 | 370.9452 | 10.90802 | 10.87487 |
| 16163 | M299T22_ | 1.014235 | -0.02039 | -0.0512  | 0.96045  | 0.903615 | DOWN | 299.3057 | 299.3051 | 299.3059 | 21.95183 | 21.93    |
| 16164 | M850T10_ | 1.016411 | 0.023484 | 0.051228 | 0.960537 | 0.903623 | UP   | 849.7741 | 849.7738 | 849.7743 | 9.914217 | 9.79535  |
| 16165 | M574T10_ | 1.006141 | -0.00883 | -0.05091 | 0.960714 | 0.903639 | DOWN | 573.8828 | 573.8821 | 573.8832 | 9.92825  | 9.822117 |
| 16166 | M531T10_ | 1.019789 | -0.02827 | -0.05112 | 0.960767 | 0.903643 | DOWN | 531.4757 | 531.4752 | 531.4762 | 9.975217 | 9.8753   |
| 16167 | M1304T10 | 1.007176 | 0.010316 | 0.050606 | 0.960881 | 0.903654 | UP   | 1303.746 | 1303.745 | 1303.747 | 10.15733 | 10.07528 |
| 16168 | M775T10_ | 1.00032  | -0.00046 | -0.0509  | 0.960938 | 0.903659 | DOWN | 775.4054 | 775.4014 | 775.4111 | 9.82845  | 9.715683 |
| 16169 | M377T11_ | 1.008722 | 0.012529 | 0.050337 | 0.96109  | 0.903673 | UP   | 376.6159 | 376.6149 | 376.6172 | 10.91977 | 10.89125 |

|       |          |          |          |          |          |          |      |          |          |          |          |          |
|-------|----------|----------|----------|----------|----------|----------|------|----------|----------|----------|----------|----------|
| 16170 | M749T30  | 1.011816 | -0.01695 | -0.05069 | 0.961097 | 0.903673 | DOWN | 748.542  | 748.5412 | 748.5422 | 30.2375  | 30.2225  |
| 16171 | M441T11_ | 1.009663 | -0.01387 | -0.05032 | 0.961102 | 0.903674 | DOWN | 440.997  | 440.997  | 440.9975 | 10.90659 | 10.8646  |
| 16172 | M314T10_ | 1.012049 | -0.01728 | -0.05023 | 0.961202 | 0.903683 | DOWN | 313.7781 | 313.7779 | 313.7783 | 9.956417 | 9.843367 |
| 16173 | M1824T10 | 1.01273  | 0.01825  | 0.050058 | 0.961312 | 0.903693 | UP   | 1824.305 | 1824.304 | 1824.309 | 9.977442 | 9.859233 |
| 16174 | M286T10_ | 1.00645  | -0.00928 | -0.0504  | 0.961327 | 0.903694 | DOWN | 286.0979 | 286.0978 | 286.0979 | 9.945775 | 9.843367 |
| 16175 | M1039T22 | 1.012166 | 0.017446 | 0.050098 | 0.961419 | 0.903703 | UP   | 1038.716 | 1038.714 | 1038.716 | 22.2625  | 22.24833 |
| 16176 | M1867T10 | 1.005057 | 0.007278 | 0.050086 | 0.961456 | 0.903706 | UP   | 1866.953 | 1866.951 | 1866.96  | 9.828367 | 9.715683 |
| 16177 | M644T30  | 1.012905 | 0.018499 | 0.04994  | 0.961626 | 0.903721 | UP   | 644.4658 | 644.4647 | 644.4669 | 30.2405  | 30.19383 |
| 16178 | M655T10_ | 1.004436 | 0.006386 | 0.050752 | 0.961671 | 0.903725 | UP   | 654.8282 | 654.8279 | 654.8286 | 9.823575 | 9.715683 |
| 16179 | M805T36  | 1.012313 | -0.01766 | -0.04933 | 0.961863 | 0.903743 | DOWN | 804.5682 | 804.5678 | 804.5687 | 35.74675 | 35.71983 |
| 16180 | M1216T10 | 1.015794 | -0.02261 | -0.05032 | 0.961994 | 0.903755 | DOWN | 1216.266 | 1216.265 | 1216.268 | 9.983467 | 9.9009   |
| 16181 | M357T10_ | 1.019874 | -0.02839 | -0.04915 | 0.962008 | 0.903756 | DOWN | 357.1547 | 357.1545 | 357.1549 | 9.810767 | 9.715683 |
| 16182 | M431T9_2 | 1.008312 | 0.011942 | 0.049059 | 0.962079 | 0.903762 | UP   | 430.7677 | 430.7671 | 430.7688 | 9.25985  | 9.129317 |
| 16183 | M288T10_ | 1.02519  | 0.035892 | 0.049758 | 0.962158 | 0.903769 | UP   | 288.22   | 288.2096 | 288.2202 | 9.870333 | 9.747533 |
| 16184 | M368T10_ | 1.01913  | 0.027338 | 0.048869 | 0.962326 | 0.903785 | UP   | 367.917  | 367.9167 | 367.9177 | 9.958617 | 9.843367 |
| 16185 | M266T10_ | 1.010578 | 0.015181 | 0.048741 | 0.962344 | 0.903786 | UP   | 266.2814 | 266.2812 | 266.2816 | 9.958617 | 9.843367 |
| 16186 | M340T11_ | 1.009383 | -0.01347 | -0.04879 | 0.962473 | 0.903798 | DOWN | 339.8164 | 339.8162 | 339.8211 | 10.9212  | 10.879   |
| 16187 | M565T12  | 1.00867  | 0.012454 | 0.048554 | 0.962509 | 0.903801 | UP   | 565.357  | 565.3565 | 565.3577 | 11.95388 | 11.92938 |
| 16188 | M580T10_ | 1.008102 | -0.01164 | -0.04887 | 0.962552 | 0.903805 | DOWN | 580.4069 | 580.4064 | 580.4076 | 10.04697 | 9.955733 |
| 16189 | M262T10_ | 1.012759 | -0.01829 | -0.04839 | 0.962591 | 0.903809 | DOWN | 261.6047 | 261.6044 | 261.6048 | 9.944392 | 9.827283 |
| 16190 | M370T9_3 | 1.012162 | 0.01744  | 0.048448 | 0.962594 | 0.903809 | UP   | 369.5915 | 369.5903 | 369.5917 | 9.160933 | 9.126783 |
| 16191 | M661T30  | 1.010022 | -0.01439 | -0.04867 | 0.962622 | 0.903811 | DOWN | 661.4927 | 661.4921 | 661.4929 | 30.26617 | 30.2515  |
| 16192 | M546T11  | 1.006561 | 0.009434 | 0.048951 | 0.962757 | 0.903823 | UP   | 546.4017 | 546.4012 | 546.4027 | 10.54836 | 10.50403 |
| 16193 | M238T9_2 | 1.013471 | -0.0193  | -0.0482  | 0.962867 | 0.903833 | DOWN | 237.8758 | 237.8756 | 237.8761 | 9.326325 | 9.12675  |
| 16194 | M432T21_ | 1.014956 | -0.02142 | -0.04837 | 0.962873 | 0.903834 | DOWN | 432.0128 | 432.0123 | 432.0133 | 21.40767 | 21.34183 |
| 16195 | M365T11_ | 1.005196 | 0.007477 | 0.048213 | 0.962914 | 0.903838 | UP   | 364.7333 | 364.733  | 364.7342 | 10.91371 | 10.879   |
| 16196 | M363T11_ | 1.043367 | -0.06125 | -0.04796 | 0.962924 | 0.903839 | DOWN | 363.1992 | 363.1919 | 363.2054 | 11.24214 | 11.17827 |
| 16197 | M189T11_ | 1.013964 | -0.02001 | -0.04793 | 0.962947 | 0.903841 | DOWN | 188.7886 | 188.7885 | 188.7888 | 10.90537 | 10.85018 |
| 16198 | M541T11_ | 1.007302 | -0.0105  | -0.04791 | 0.962997 | 0.903845 | DOWN | 540.7511 | 540.7507 | 540.7514 | 10.892   | 10.8646  |
| 16199 | M326T10_ | 1.031832 | -0.04521 | -0.04782 | 0.963034 | 0.903848 | DOWN | 326.1941 | 326.1933 | 326.1948 | 9.796408 | 9.66805  |
| 16200 | M617T10_ | 1.00749  | -0.01077 | -0.04806 | 0.963076 | 0.903852 | DOWN | 616.9585 | 616.9581 | 616.9589 | 10.39613 | 10.34372 |
| 16201 | M538T13_ | 1.010277 | 0.014751 | 0.047858 | 0.963077 | 0.903852 | UP   | 538.3845 | 538.3844 | 538.3847 | 13.08369 | 13.06962 |
| 16202 | M475T9_6 | 1.017572 | -0.02513 | -0.0477  | 0.963125 | 0.903857 | DOWN | 475.02   | 475.0164 | 475.0285 | 9.174967 | 9.12675  |
| 16203 | M554T10_ | 1.016424 | 0.023502 | 0.048511 | 0.963192 | 0.903863 | UP   | 554.457  | 554.4563 | 554.4577 | 9.938142 | 9.827283 |
| 16204 | M619T34  | 1.009453 | 0.013574 | 0.048485 | 0.963192 | 0.903863 | UP   | 619.4029 | 619.4025 | 619.4032 | 33.60033 | 33.58633 |

|       |          |          |          |          |          |          |      |          |          |          |          |          |
|-------|----------|----------|----------|----------|----------|----------|------|----------|----------|----------|----------|----------|
| 16205 | M885T10_ | 1.02871  | -0.04084 | -0.04765 | 0.963204 | 0.903864 | DOWN | 885.2436 | 885.2434 | 885.2442 | 9.9677   | 9.90755  |
| 16206 | M624T10_ | 1.012891 | 0.018479 | 0.048047 | 0.963214 | 0.903865 | UP   | 623.8451 | 623.8447 | 623.8486 | 9.817017 | 9.699733 |
| 16207 | M389T10_ | 1.006532 | 0.009393 | 0.047985 | 0.963225 | 0.903866 | UP   | 389.0232 | 389.0229 | 389.0235 | 9.972917 | 9.859233 |
| 16208 | M202T9_6 | 1.013334 | -0.01911 | -0.04758 | 0.963232 | 0.903866 | DOWN | 201.8468 | 201.8463 | 201.8474 | 9.292008 | 9.18975  |
| 16209 | M727T10_ | 1.03956  | 0.055974 | 0.047772 | 0.9633   | 0.903872 | UP   | 726.8188 | 726.8182 | 726.8191 | 9.816242 | 9.7124   |
| 16210 | M836T22_ | 1.008307 | 0.011935 | 0.047215 | 0.963612 | 0.903901 | UP   | 835.5823 | 835.582  | 835.5828 | 21.538   | 21.49417 |
| 16211 | M705T10_ | 1.005113 | -0.00736 | -0.04725 | 0.963622 | 0.903902 | DOWN | 704.9159 | 704.9152 | 704.9165 | 10.27258 | 10.19852 |
| 16212 | M851T11_ | 1.007491 | -0.01077 | -0.04709 | 0.963741 | 0.903912 | DOWN | 851.4952 | 851.4945 | 851.4958 | 10.892   | 10.879   |
| 16213 | M620T45  | 1.0079   | 0.011352 | 0.04816  | 0.963868 | 0.903924 | UP   | 620.3641 | 620.3638 | 620.3644 | 44.847   | 44.75333 |
| 16214 | M397T37_ | 1.012784 | -0.01833 | -0.04674 | 0.963873 | 0.903924 | DOWN | 397.331  | 397.3308 | 397.3312 | 37.46042 | 37.44517 |
| 16215 | M640T9_2 | 1.023751 | -0.03386 | -0.04701 | 0.963896 | 0.903926 | DOWN | 639.9284 | 639.9277 | 639.9287 | 9.46855  | 9.416817 |
| 16216 | M286T9_1 | 1.01204  | 0.017266 | 0.047026 | 0.963976 | 0.903933 | UP   | 285.7424 | 285.7423 | 285.7425 | 8.719975 | 8.623117 |
| 16217 | M299T11_ | 1.006782 | -0.00975 | -0.0466  | 0.964103 | 0.903945 | DOWN | 298.7084 | 298.7083 | 298.7085 | 11.48993 | 11.47298 |
| 16218 | M1871T10 | 1.004787 | -0.00689 | -0.04672 | 0.964113 | 0.903946 | DOWN | 1871.303 | 1871.302 | 1871.305 | 9.830283 | 9.715683 |
| 16219 | M343T10_ | 1.00981  | -0.01408 | -0.04647 | 0.96422  | 0.903955 | DOWN | 342.5292 | 342.5289 | 342.5294 | 9.802117 | 9.715683 |
| 16220 | M353T10_ | 1.007191 | 0.010337 | 0.047319 | 0.964239 | 0.903957 | UP   | 352.6273 | 352.6271 | 352.6275 | 9.825767 | 9.699733 |
| 16221 | M566T11_ | 1.016958 | 0.02426  | 0.046156 | 0.964317 | 0.903964 | UP   | 565.9939 | 565.9923 | 565.9945 | 10.69022 | 10.63083 |
| 16222 | M1558T11 | 1.015676 | -0.02244 | -0.04609 | 0.964385 | 0.90397  | DOWN | 1557.64  | 1557.638 | 1557.643 | 10.87504 | 10.82972 |
| 16223 | M403T10_ | 1.018429 | 0.026346 | 0.045881 | 0.964564 | 0.903986 | UP   | 403.4766 | 403.4761 | 403.4768 | 9.95825  | 9.914217 |
| 16224 | M1281T10 | 1.013823 | -0.01981 | -0.04624 | 0.964727 | 0.904001 | DOWN | 1280.964 | 1280.96  | 1280.966 | 9.77345  | 9.65225  |
| 16225 | M356T9_2 | 1.014662 | 0.021    | 0.04543  | 0.964905 | 0.904017 | UP   | 355.8461 | 355.846  | 355.8463 | 9.252858 | 9.175017 |
| 16226 | M643T10_ | 1.013494 | -0.01934 | -0.04524 | 0.96514  | 0.904038 | DOWN | 642.5782 | 642.577  | 642.5815 | 9.842    | 9.715683 |
| 16227 | M642T11  | 1.011968 | -0.01716 | -0.04506 | 0.965168 | 0.904041 | DOWN | 642.163  | 642.1622 | 642.1632 | 10.8926  | 10.8646  |
| 16228 | M425T11_ | 1.006709 | -0.00965 | -0.04497 | 0.965242 | 0.904047 | DOWN | 425.3393 | 425.3391 | 425.3395 | 10.892   | 10.879   |
| 16229 | M895T10_ | 1.01542  | 0.022077 | 0.045293 | 0.965273 | 0.90405  | UP   | 894.785  | 894.7842 | 894.786  | 9.948875 | 9.843367 |
| 16230 | M414T9_1 | 1.017369 | 0.024843 | 0.04494  | 0.965352 | 0.904057 | UP   | 413.5974 | 413.5969 | 413.5999 | 9.189092 | 9.110833 |
| 16231 | M393T9_4 | 1.01045  | -0.015   | -0.04513 | 0.9654   | 0.904062 | DOWN | 392.8623 | 392.8617 | 392.8638 | 9.29345  | 9.09495  |
| 16232 | M465T10_ | 1.002247 | 0.003238 | 0.045582 | 0.965468 | 0.904068 | UP   | 465.2696 | 465.2694 | 465.2697 | 9.820192 | 9.683817 |
| 16233 | M324T11_ | 1.01777  | 0.025411 | 0.044702 | 0.965504 | 0.904071 | UP   | 324.217  | 324.2163 | 324.2177 | 10.90785 | 10.8937  |
| 16234 | M434T11_ | 1.01115  | 0.015997 | 0.044851 | 0.965508 | 0.904071 | UP   | 434.2562 | 434.2559 | 434.2566 | 10.91813 | 10.8214  |
| 16235 | M208T10_ | 1.010068 | 0.014452 | 0.044627 | 0.965515 | 0.904072 | UP   | 207.6691 | 207.6689 | 207.6691 | 9.968992 | 9.859233 |
| 16236 | M350T11_ | 1.009082 | -0.01304 | -0.04449 | 0.965607 | 0.90408  | DOWN | 349.7734 | 349.7732 | 349.7742 | 10.91813 | 10.89125 |
| 16237 | M452T10_ | 1.009798 | 0.014067 | 0.04497  | 0.965681 | 0.904087 | UP   | 452.2542 | 452.2538 | 452.2596 | 9.858675 | 9.747533 |
| 16238 | M767T34  | 1.017988 | 0.025721 | 0.044471 | 0.965743 | 0.904092 | UP   | 766.5315 | 766.5311 | 766.5318 | 34.22017 | 34.17983 |
| 16239 | M376T15_ | 1.023843 | 0.033995 | 0.044577 | 0.965747 | 0.904093 | UP   | 376.2116 | 376.2103 | 376.2118 | 14.53128 | 14.44353 |



|       |          |          |          |          |          |          |      |          |          |          |          |          |
|-------|----------|----------|----------|----------|----------|----------|------|----------|----------|----------|----------|----------|
| 16240 | M423T11_ | 1.006653 | 0.009566 | 0.044401 | 0.96581  | 0.904098 | UP   | 423.1616 | 423.1613 | 423.1683 | 10.90553 | 10.879   |
| 16241 | M200T10_ | 1.013899 | 0.019914 | 0.044421 | 0.965917 | 0.904108 | UP   | 199.5314 | 199.5313 | 199.5314 | 9.858833 | 9.774967 |
| 16242 | M215T11_ | 1.00785  | -0.01128 | -0.04496 | 0.965937 | 0.90411  | DOWN | 214.7699 | 214.7698 | 214.7706 | 10.91082 | 10.879   |
| 16243 | M259T9_3 | 1.011795 | -0.01692 | -0.04473 | 0.965965 | 0.904112 | DOWN | 259.2013 | 259.2012 | 259.2015 | 8.795142 | 8.701267 |
| 16244 | M328T10_ | 1.011281 | -0.01618 | -0.04401 | 0.965972 | 0.904113 | DOWN | 327.5306 | 327.5303 | 327.5316 | 9.82645  | 9.699733 |
| 16245 | M315T41_ | 1.010647 | 0.01528  | 0.044884 | 0.96603  | 0.904118 | UP   | 315.18   | 315.1799 | 315.1802 | 40.93783 | 40.6975  |
| 16246 | M631T10_ | 1.018895 | 0.027005 | 0.044029 | 0.966079 | 0.904123 | UP   | 631.2674 | 631.2671 | 631.2677 | 9.91765  | 9.811217 |
| 16247 | M321T31  | 1.014644 | -0.02097 | -0.04434 | 0.966148 | 0.904129 | DOWN | 321.2395 | 321.2391 | 321.2398 | 31.25592 | 31.234   |
| 16248 | M164T9   | 1.010593 | 0.015202 | 0.043809 | 0.96624  | 0.904137 | UP   | 164.1886 | 164.1883 | 164.1891 | 9.344258 | 9.234417 |
| 16249 | M902T10_ | 1.011454 | -0.01643 | -0.04475 | 0.966302 | 0.904143 | DOWN | 901.7951 | 901.7936 | 901.7959 | 9.972483 | 9.859233 |
| 16250 | M911T10_ | 1.015095 | 0.021615 | 0.043734 | 0.96639  | 0.90415  | UP   | 911.1817 | 911.18   | 911.1824 | 9.979342 | 9.8753   |
| 16251 | M697T18  | 1.022196 | -0.03167 | -0.04319 | 0.966659 | 0.904175 | DOWN | 696.7827 | 696.782  | 696.7835 | 18.26217 | 18.23833 |
| 16252 | M328T11_ | 1.006445 | 0.009268 | 0.043606 | 0.966798 | 0.904187 | UP   | 328.4752 | 328.4742 | 328.4778 | 10.94208 | 10.91977 |
| 16253 | M626T16  | 1.007546 | 0.010845 | 0.043067 | 0.966968 | 0.904202 | UP   | 626.3021 | 626.301  | 626.3029 | 16.34885 | 16.31547 |
| 16254 | M404T44_ | 1.006365 | -0.00915 | -0.04336 | 0.967059 | 0.90421  | DOWN | 404.2639 | 404.2638 | 404.264  | 44.24317 | 44.164   |
| 16255 | M608T36  | 1.004226 | -0.00608 | -0.04383 | 0.967063 | 0.904211 | DOWN | 608.3639 | 608.3638 | 608.3644 | 36.064   | 36.04133 |
| 16256 | M201T10_ | 1.009534 | 0.013689 | 0.042461 | 0.967173 | 0.904221 | UP   | 201.3798 | 201.3796 | 201.3798 | 9.967367 | 9.859233 |
| 16257 | M432T39  | 1.005501 | 0.007915 | 0.043616 | 0.967252 | 0.904228 | UP   | 432.2226 | 432.2225 | 432.2228 | 39.12208 | 39.04283 |
| 16258 | M224T10_ | 1.012875 | 0.018456 | 0.042234 | 0.967397 | 0.904241 | UP   | 223.8581 | 223.8578 | 223.8582 | 9.979342 | 9.8753   |
| 16259 | M412T11_ | 1.008618 | -0.01238 | -0.04236 | 0.9674   | 0.904241 | DOWN | 411.6208 | 411.6186 | 411.6212 | 10.95602 | 10.8926  |
| 16260 | M343T10_ | 1.006992 | -0.01005 | -0.04195 | 0.967568 | 0.904256 | DOWN | 342.5935 | 342.5887 | 342.5941 | 9.960967 | 9.78305  |
| 16261 | M187T9_7 | 1.019911 | 0.028443 | 0.042565 | 0.967586 | 0.904258 | UP   | 187.4622 | 187.462  | 187.463  | 9.279417 | 9.132267 |
| 16262 | M722T10_ | 1.005067 | -0.00729 | -0.04226 | 0.967645 | 0.904263 | DOWN | 721.9069 | 721.9054 | 721.9077 | 9.8397   | 9.699733 |
| 16263 | M650T10_ | 1.005153 | 0.007415 | 0.041846 | 0.967656 | 0.904264 | UP   | 650.2075 | 650.2069 | 650.2085 | 9.858258 | 9.73145  |
| 16264 | M431T10_ | 1.010729 | -0.0154  | -0.04176 | 0.967753 | 0.904272 | DOWN | 431.3577 | 431.3566 | 431.3654 | 9.784792 | 9.65225  |
| 16265 | M734T11_ | 1.010607 | -0.01522 | -0.0417  | 0.967789 | 0.904276 | DOWN | 734.3607 | 734.3584 | 734.3612 | 10.90657 | 10.8646  |
| 16266 | M532T41_ | 1.005894 | 0.008479 | 0.041908 | 0.967835 | 0.90428  | UP   | 532.3114 | 532.3111 | 532.3117 | 40.81267 | 40.55383 |
| 16267 | M407T10_ | 1.018172 | 0.025981 | 0.041841 | 0.967853 | 0.904281 | UP   | 406.6089 | 406.6082 | 406.6097 | 9.958617 | 9.843367 |
| 16268 | M617T10_ | 1.010673 | 0.015316 | 0.041844 | 0.967856 | 0.904282 | UP   | 616.5032 | 616.5026 | 616.5041 | 9.965892 | 9.843367 |
| 16269 | M1088T10 | 1.007378 | 0.010606 | 0.04165  | 0.967992 | 0.904294 | UP   | 1088.031 | 1088.03  | 1088.033 | 9.983433 | 9.8753   |
| 16270 | M401T11_ | 1.02003  | -0.02861 | -0.0413  | 0.968072 | 0.904301 | DOWN | 400.9257 | 400.9181 | 400.9288 | 10.92103 | 10.87487 |
| 16271 | M594T30  | 1.012628 | -0.0181  | -0.04157 | 0.96815  | 0.904308 | DOWN | 594.1607 | 594.1603 | 594.1614 | 29.62358 | 29.569   |
| 16272 | M483T10_ | 1.006796 | 0.009771 | 0.041029 | 0.968296 | 0.904321 | UP   | 482.9807 | 482.9797 | 482.9811 | 9.972917 | 9.859233 |
| 16273 | M330T9_1 | 1.025181 | 0.035879 | 0.041527 | 0.968428 | 0.904333 | UP   | 329.5015 | 329.4969 | 329.5017 | 9.008417 | 8.90715  |
| 16274 | M518T11_ | 1.010812 | -0.01551 | -0.04078 | 0.968474 | 0.904337 | DOWN | 518.3486 | 518.3478 | 518.3497 | 10.90519 | 10.87765 |

|       |          |          |          |          |          |          |      |          |          |          |          |          |
|-------|----------|----------|----------|----------|----------|----------|------|----------|----------|----------|----------|----------|
| 16275 | M243T45  | 1.005404 | 0.007775 | 0.041314 | 0.968519 | 0.904341 | UP   | 243.1587 | 243.1587 | 243.1588 | 44.64575 | 44.40833 |
| 16276 | M677T11_ | 1.007049 | -0.01013 | -0.04074 | 0.968527 | 0.904342 | DOWN | 677.4782 | 677.4779 | 677.4785 | 10.89193 | 10.8646  |
| 16277 | M782T10_ | 1.007909 | 0.011366 | 0.040848 | 0.968588 | 0.904347 | UP   | 782.1767 | 782.1742 | 782.1794 | 9.917208 | 9.827283 |
| 16278 | M377T10_ | 1.015447 | 0.022115 | 0.040449 | 0.968758 | 0.904362 | UP   | 376.899  | 376.895  | 376.8997 | 9.85925  | 9.636483 |
| 16279 | M1157T11 | 1.008883 | -0.01276 | -0.04145 | 0.968781 | 0.904364 | DOWN | 1156.842 | 1156.84  | 1156.843 | 10.51754 | 10.48782 |
| 16280 | M412T11_ | 1.008031 | -0.01154 | -0.04092 | 0.968828 | 0.904369 | DOWN | 411.6775 | 411.6766 | 411.678  | 10.90519 | 10.879   |
| 16281 | M1108T10 | 1.012486 | 0.017902 | 0.040127 | 0.968998 | 0.904384 | UP   | 1107.724 | 1107.723 | 1107.724 | 9.802992 | 9.699733 |
| 16282 | M852T10_ | 1.010407 | -0.01494 | -0.04045 | 0.969037 | 0.904387 | DOWN | 851.9967 | 851.9958 | 851.9968 | 10.3736  | 10.36838 |
| 16283 | M911T10_ | 1.009912 | -0.01423 | -0.04013 | 0.969083 | 0.904391 | DOWN | 911.361  | 911.3604 | 911.3617 | 9.967517 | 9.859233 |
| 16284 | M612T10_ | 1.016878 | 0.024146 | 0.03979  | 0.969236 | 0.904405 | UP   | 612.4785 | 612.4779 | 612.4809 | 9.91765  | 9.811217 |
| 16285 | M250T9_5 | 1.005713 | 0.008218 | 0.040182 | 0.969246 | 0.904406 | UP   | 250.1604 | 250.1603 | 250.1605 | 8.749758 | 8.63795  |
| 16286 | M310T10_ | 1.014028 | 0.020097 | 0.040638 | 0.969252 | 0.904406 | UP   | 310.2305 | 310.2304 | 310.2306 | 10.16231 | 10.08517 |
| 16287 | M322T9_3 | 1.016958 | -0.02426 | -0.04003 | 0.969316 | 0.904412 | DOWN | 321.7424 | 321.7418 | 321.7463 | 9.174967 | 9.110833 |
| 16288 | M230T11_ | 1.012316 | 0.01766  | 0.039522 | 0.969452 | 0.904424 | UP   | 230.0621 | 230.0617 | 230.063  | 10.8926  | 10.88995 |
| 16289 | M378T10_ | 1.015061 | -0.02157 | -0.03949 | 0.969553 | 0.904433 | DOWN | 378.3124 | 378.3121 | 378.3145 | 9.887133 | 9.779267 |
| 16290 | M507T11_ | 1.008317 | -0.01195 | -0.03936 | 0.969594 | 0.904437 | DOWN | 507.2326 | 507.2316 | 507.2333 | 10.91371 | 10.879   |
| 16291 | M756T10_ | 1.008636 | -0.01241 | -0.03903 | 0.969834 | 0.904458 | DOWN | 755.8241 | 755.8224 | 755.8246 | 9.960817 | 9.859233 |
| 16292 | M331T10_ | 1.007587 | -0.0109  | -0.03901 | 0.969864 | 0.904461 | DOWN | 331.0267 | 331.0255 | 331.0271 | 9.967367 | 9.859233 |
| 16293 | M486T10_ | 1.007994 | -0.01149 | -0.03881 | 0.970105 | 0.904482 | DOWN | 485.7794 | 485.7788 | 485.7799 | 9.972917 | 9.859233 |
| 16294 | M231T10_ | 1.013037 | -0.01869 | -0.03877 | 0.970161 | 0.904487 | DOWN | 231.4047 | 231.4044 | 231.4048 | 9.979342 | 9.8753   |
| 16295 | M470T10_ | 1.012289 | -0.01762 | -0.03871 | 0.970161 | 0.904487 | DOWN | 470.1898 | 470.1893 | 470.1902 | 9.94785  | 9.843367 |
| 16296 | M544T31  | 1.019878 | -0.0284  | -0.0385  | 0.970232 | 0.904494 | DOWN | 544.3395 | 544.3392 | 544.3397 | 30.52367 | 30.50817 |
| 16297 | M480T40_ | 1.009251 | -0.01329 | -0.03924 | 0.970249 | 0.904495 | DOWN | 480.2798 | 480.2796 | 480.2801 | 40.43867 | 40.36667 |
| 16298 | M313T43_ | 1.007719 | 0.011094 | 0.038879 | 0.9703   | 0.9045   | UP   | 313.2006 | 313.2005 | 313.2011 | 42.60367 | 42.40917 |
| 16299 | M570T9_2 | 1.016797 | -0.02403 | -0.03841 | 0.970313 | 0.904501 | DOWN | 570.4591 | 570.4563 | 570.4683 | 9.198483 | 9.01555  |
| 16300 | M196T9_5 | 1.011304 | -0.01622 | -0.03841 | 0.970341 | 0.904503 | DOWN | 195.9923 | 195.9922 | 195.9925 | 9.390175 | 9.235933 |
| 16301 | M403T11_ | 1.025631 | 0.036512 | 0.038392 | 0.970387 | 0.904508 | UP   | 403.4082 | 403.4077 | 403.4089 | 10.88943 | 10.8646  |
| 16302 | M354T11_ | 1.005807 | -0.00835 | -0.03838 | 0.97043  | 0.904511 | DOWN | 354.0892 | 354.089  | 354.0894 | 10.892   | 10.879   |
| 16303 | M1954T10 | 1.007774 | 0.011172 | 0.038188 | 0.97054  | 0.904521 | UP   | 1953.713 | 1953.712 | 1953.714 | 9.828483 | 9.699733 |
| 16304 | M455T10_ | 1.013412 | -0.01922 | -0.03839 | 0.970756 | 0.90454  | DOWN | 455.1629 | 455.1628 | 455.1631 | 9.972917 | 9.885167 |
| 16305 | M1853T10 | 1.008288 | 0.011907 | 0.038217 | 0.970774 | 0.904542 | UP   | 1853.349 | 1853.346 | 1853.356 | 9.8214   | 9.715683 |
| 16306 | M169T10_ | 1.012208 | 0.017506 | 0.037664 | 0.97089  | 0.904552 | UP   | 168.919  | 168.9189 | 168.9191 | 9.8374   | 9.715683 |
| 16307 | M454T11_ | 1.00789  | -0.01134 | -0.03767 | 0.970897 | 0.904553 | DOWN | 453.7712 | 453.771  | 453.7727 | 10.90765 | 10.8646  |
| 16308 | M515T11_ | 1.005432 | -0.00781 | -0.0378  | 0.97092  | 0.904555 | DOWN | 514.8309 | 514.8306 | 514.8313 | 10.892   | 10.879   |
| 16309 | M402T11_ | 1.019053 | 0.027229 | 0.037666 | 0.971055 | 0.904567 | UP   | 401.5062 | 401.5029 | 401.5162 | 10.91524 | 10.83417 |

|       |          |          |          |          |          |          |      |          |          |          |          |          |
|-------|----------|----------|----------|----------|----------|----------|------|----------|----------|----------|----------|----------|
| 16310 | M267T9_3 | 1.028066 | 0.039933 | 0.03739  | 0.97109  | 0.90457  | UP   | 267.0166 | 267.0156 | 267.0171 | 9.29345  | 9.111033 |
| 16311 | M357T11_ | 1.007452 | -0.01071 | -0.03741 | 0.971092 | 0.90457  | DOWN | 357.2818 | 357.2809 | 357.283  | 10.90765 | 10.8914  |
| 16312 | M441T10_ | 1.004277 | 0.006157 | 0.037588 | 0.971152 | 0.904576 | UP   | 440.8459 | 440.8451 | 440.8467 | 9.816317 | 9.699733 |
| 16313 | M262T10_ | 1.012862 | 0.018438 | 0.037219 | 0.971237 | 0.904583 | UP   | 262.1615 | 262.1612 | 262.1616 | 9.95385  | 9.843367 |
| 16314 | M427T10_ | 1.009191 | -0.0132  | -0.03711 | 0.971327 | 0.904591 | DOWN | 427.2004 | 427.1997 | 427.2022 | 9.967742 | 9.9009   |
| 16315 | M236T10_ | 1.010124 | -0.01453 | -0.03708 | 0.971328 | 0.904591 | DOWN | 235.7542 | 235.7447 | 235.7545 | 9.95385  | 9.827283 |
| 16316 | M704T10_ | 1.008865 | -0.01273 | -0.03743 | 0.971389 | 0.904597 | DOWN | 704.219  | 704.2187 | 704.2209 | 9.830283 | 9.699733 |
| 16317 | M267T10_ | 1.007781 | 0.011183 | 0.037134 | 0.971468 | 0.904604 | UP   | 266.5615 | 266.5612 | 266.5617 | 9.958617 | 9.859233 |
| 16318 | M155T10_ | 1.008116 | -0.01166 | -0.03705 | 0.971481 | 0.904605 | DOWN | 154.7462 | 154.746  | 154.7516 | 9.903017 | 9.811217 |
| 16319 | M403T10_ | 1.006362 | -0.00915 | -0.03669 | 0.971641 | 0.904619 | DOWN | 402.7535 | 402.7534 | 402.7537 | 9.967533 | 9.8914   |
| 16320 | M386T10_ | 1.017284 | -0.02472 | -0.03703 | 0.971808 | 0.904634 | DOWN | 385.742  | 385.7419 | 385.742  | 9.970617 | 9.951283 |
| 16321 | M571T11_ | 1.012494 | 0.017913 | 0.036431 | 0.971843 | 0.904637 | UP   | 570.8801 | 570.8795 | 570.8812 | 10.86253 | 10.83417 |
| 16322 | M1500T10 | 1.012867 | 0.018444 | 0.036462 | 0.971882 | 0.90464  | UP   | 1500.127 | 1500.126 | 1500.127 | 9.971292 | 9.859233 |
| 16323 | M489T11_ | 1.008792 | 0.012629 | 0.036335 | 0.971909 | 0.904643 | UP   | 488.7837 | 488.783  | 488.7842 | 10.92828 | 10.89125 |
| 16324 | M1385T10 | 1.006805 | 0.009784 | 0.036628 | 0.971929 | 0.904645 | UP   | 1385.479 | 1385.479 | 1385.48  | 9.800692 | 9.715683 |
| 16325 | M537T10_ | 1.028288 | 0.040245 | 0.036303 | 0.97193  | 0.904645 | UP   | 537.2682 | 537.2679 | 537.2686 | 9.903742 | 9.822117 |
| 16326 | M414T9_5 | 1.022722 | -0.03241 | -0.03625 | 0.971978 | 0.904649 | DOWN | 413.7769 | 413.775  | 413.7776 | 9.387158 | 9.235933 |
| 16327 | M413T9_4 | 1.012625 | 0.0181   | 0.036425 | 0.972006 | 0.904651 | UP   | 412.7262 | 412.7239 | 412.7291 | 9.2723   | 9.158833 |
| 16328 | M508T11_ | 1.007048 | -0.01013 | -0.03613 | 0.972077 | 0.904658 | DOWN | 508.0509 | 508.0507 | 508.0518 | 10.91264 | 10.873   |
| 16329 | M317T9_6 | 1.006188 | 0.0089   | 0.036069 | 0.972295 | 0.904677 | UP   | 317.2153 | 317.2151 | 317.2155 | 8.878875 | 8.803967 |
| 16330 | M499T10  | 1.010381 | -0.0149  | -0.03572 | 0.972448 | 0.904691 | DOWN | 499.297  | 499.2968 | 499.2974 | 9.772833 | 9.732983 |
| 16331 | M438T41_ | 1.009674 | 0.01389  | 0.036546 | 0.972454 | 0.904691 | UP   | 438.2693 | 438.2693 | 438.2694 | 40.74067 | 40.68117 |
| 16332 | M798T11  | 1.008721 | -0.01253 | -0.0356  | 0.972507 | 0.904696 | DOWN | 797.6616 | 797.661  | 797.662  | 10.87737 | 10.84487 |
| 16333 | M626T9_4 | 1.009418 | -0.01352 | -0.03593 | 0.972621 | 0.904706 | DOWN | 626.3779 | 626.3764 | 626.3791 | 8.91115  | 8.8486   |
| 16334 | M553T10_ | 1.009057 | 0.013008 | 0.036053 | 0.972672 | 0.90471  | UP   | 552.7154 | 552.7151 | 552.7162 | 9.932983 | 9.827283 |
| 16335 | M210T10_ | 1.002213 | -0.00319 | -0.03568 | 0.972673 | 0.904711 | DOWN | 210.1489 | 210.1487 | 210.1489 | 9.951283 | 9.843367 |
| 16336 | M298T10_ | 1.008417 | -0.01209 | -0.03524 | 0.972756 | 0.904718 | DOWN | 297.5048 | 297.5045 | 297.505  | 9.948875 | 9.843367 |
| 16337 | M347T10_ | 1.013954 | -0.01999 | -0.03549 | 0.972759 | 0.904718 | DOWN | 347.4283 | 347.428  | 347.4284 | 9.8063   | 9.715683 |
| 16338 | M485T10_ | 1.005956 | -0.00857 | -0.03554 | 0.972762 | 0.904718 | DOWN | 485.0628 | 485.0622 | 485.0632 | 9.968992 | 9.859233 |
| 16339 | M177T9_2 | 1.011947 | 0.017134 | 0.035261 | 0.972783 | 0.90472  | UP   | 176.6538 | 176.6533 | 176.6542 | 9.148342 | 9.111033 |
| 16340 | M538T9_3 | 1.015156 | 0.021702 | 0.035179 | 0.972837 | 0.904725 | UP   | 538.0938 | 538.0937 | 538.0941 | 9.443225 | 9.370583 |
| 16341 | M349T10_ | 1.003568 | 0.005138 | 0.035019 | 0.972926 | 0.904733 | UP   | 349.2149 | 349.2147 | 349.215  | 9.840717 | 9.699733 |
| 16342 | M201T10_ | 1.011066 | 0.015877 | 0.035083 | 0.97293  | 0.904733 | UP   | 200.8067 | 200.8065 | 200.8068 | 9.967367 | 9.859233 |
| 16343 | M318T9_1 | 1.007874 | 0.011315 | 0.034952 | 0.973015 | 0.904741 | UP   | 317.5026 | 317.5025 | 317.5032 | 9.311883 | 9.234417 |
| 16344 | M466T23_ | 1.014372 | -0.02059 | -0.03489 | 0.973027 | 0.904742 | DOWN | 465.5823 | 465.5821 | 465.5831 | 22.713   | 22.66917 |

|       |          |          |          |          |          |          |      |          |          |          |          |          |
|-------|----------|----------|----------|----------|----------|----------|------|----------|----------|----------|----------|----------|
| 16345 | M1043T11 | 1.00761  | 0.010937 | 0.034719 | 0.973159 | 0.904754 | UP   | 1043.133 | 1043.131 | 1043.135 | 10.89907 | 10.879   |
| 16346 | M839T9_1 | 1.015813 | 0.022635 | 0.035372 | 0.97322  | 0.904759 | UP   | 838.8311 | 838.8292 | 838.8361 | 9.42475  | 9.288883 |
| 16347 | M1121T10 | 1.00803  | -0.01154 | -0.03449 | 0.973405 | 0.904775 | DOWN | 1120.678 | 1120.677 | 1120.679 | 9.92825  | 9.827283 |
| 16348 | M241T10_ | 1.00672  | 0.009662 | 0.034629 | 0.973406 | 0.904775 | UP   | 241.343  | 241.3428 | 241.3431 | 9.9847   | 9.8753   |
| 16349 | M380T11_ | 1.007704 | -0.01107 | -0.03485 | 0.973499 | 0.904784 | DOWN | 379.7221 | 379.7218 | 379.7232 | 10.90519 | 10.879   |
| 16350 | M306T10_ | 1.004705 | -0.00677 | -0.03463 | 0.973502 | 0.904784 | DOWN | 306.3166 | 306.3164 | 306.3168 | 9.984083 | 9.8753   |
| 16351 | M1171T10 | 1.006991 | 0.010051 | 0.034353 | 0.973558 | 0.904789 | UP   | 1171.411 | 1171.41  | 1171.412 | 9.972917 | 9.8753   |
| 16352 | M190T13  | 1.010109 | 0.014512 | 0.034301 | 0.973662 | 0.904798 | UP   | 190.1224 | 190.1223 | 190.1226 | 12.93722 | 12.85008 |
| 16353 | M418T9_3 | 1.006104 | -0.00878 | -0.03391 | 0.973856 | 0.904815 | DOWN | 417.8598 | 417.8595 | 417.8605 | 9.2585   | 9.129317 |
| 16354 | M1988T10 | 1.005676 | 0.008166 | 0.034096 | 0.973924 | 0.904821 | UP   | 1987.883 | 1987.881 | 1987.887 | 9.856867 | 9.747533 |
| 16355 | M1046T10 | 1.006059 | 0.008715 | 0.033986 | 0.974003 | 0.904828 | UP   | 1046.226 | 1046.226 | 1046.227 | 9.823575 | 9.699733 |
| 16356 | M471T9_5 | 1.008626 | 0.012391 | 0.034025 | 0.974213 | 0.904847 | UP   | 471.1969 | 471.1966 | 471.1972 | 9.176533 | 9.12675  |
| 16357 | M210T11_ | 1.007263 | 0.01044  | 0.033584 | 0.974402 | 0.904864 | UP   | 210.0009 | 210.0008 | 210.0013 | 10.9344  | 10.89355 |
| 16358 | M445T10_ | 1.029647 | 0.042149 | 0.032996 | 0.974498 | 0.904872 | UP   | 445.1946 | 445.1938 | 445.1948 | 9.960967 | 9.8753   |
| 16359 | M299T44_ | 1.010171 | 0.014599 | 0.033523 | 0.974506 | 0.904873 | UP   | 299.185  | 299.1848 | 299.1852 | 43.9485  | 43.6175  |
| 16360 | M353T10_ | 1.010452 | 0.015001 | 0.033054 | 0.974521 | 0.904874 | UP   | 353.0954 | 353.0913 | 353.0956 | 9.967367 | 9.816183 |
| 16361 | M191T11_ | 1.007517 | -0.0108  | -0.03334 | 0.974617 | 0.904883 | DOWN | 191.351  | 191.351  | 191.3511 | 10.892   | 10.85018 |
| 16362 | M250T10_ | 1.022022 | 0.031427 | 0.032846 | 0.974629 | 0.904884 | UP   | 250.338  | 250.338  | 250.3381 | 9.914217 | 9.811217 |
| 16363 | M413T9_1 | 1.013205 | -0.01893 | -0.03254 | 0.974847 | 0.904903 | DOWN | 413.0761 | 413.0758 | 413.0762 | 9.1339   | 9.07945  |
| 16364 | M224T10_ | 1.011601 | 0.01664  | 0.032512 | 0.97486  | 0.904904 | UP   | 223.6228 | 223.6227 | 223.6236 | 9.823225 | 9.715683 |
| 16365 | M374T10_ | 1.005328 | 0.007667 | 0.032639 | 0.974862 | 0.904904 | UP   | 374.2219 | 374.2214 | 374.2222 | 9.956417 | 9.859233 |
| 16366 | M350T10_ | 1.01336  | 0.019147 | 0.032549 | 0.974882 | 0.904906 | UP   | 350.3606 | 350.3603 | 350.3608 | 9.968992 | 9.843367 |
| 16367 | M388T44_ | 1.007565 | -0.01087 | -0.03337 | 0.974904 | 0.904908 | DOWN | 388.2327 | 388.2326 | 388.2329 | 44.0635  | 44.03467 |
| 16368 | M745T10_ | 1.005083 | 0.007315 | 0.033073 | 0.974978 | 0.904914 | UP   | 745.3178 | 745.3147 | 745.3189 | 9.830783 | 9.715683 |
| 16369 | M727T10_ | 1.005161 | 0.007427 | 0.032594 | 0.975025 | 0.904919 | UP   | 726.9293 | 726.9288 | 726.9301 | 10.33764 | 10.26307 |
| 16370 | M415T19_ | 1.003457 | -0.00498 | -0.03233 | 0.975031 | 0.904919 | DOWN | 415.2925 | 415.2922 | 415.2927 | 18.95142 | 18.95083 |
| 16371 | M377T11_ | 1.004636 | 0.006673 | 0.032305 | 0.975064 | 0.904922 | UP   | 376.9656 | 376.9655 | 376.9659 | 10.892   | 10.8646  |
| 16372 | M325T9_2 | 1.005644 | -0.00812 | -0.03243 | 0.975085 | 0.904924 | DOWN | 324.6385 | 324.6382 | 324.6387 | 9.486892 | 9.416817 |
| 16373 | M223T10_ | 1.007265 | -0.01044 | -0.03256 | 0.97519  | 0.904933 | DOWN | 222.9029 | 222.9028 | 222.9033 | 9.856867 | 9.747533 |
| 16374 | M805T11  | 1.010799 | 0.015496 | 0.032097 | 0.975245 | 0.904938 | UP   | 804.5911 | 804.5899 | 804.592  | 11.23931 | 11.22427 |
| 16375 | M641T10_ | 1.021713 | -0.03099 | -0.0324  | 0.975334 | 0.904946 | DOWN | 640.6239 | 640.6226 | 640.6253 | 9.744917 | 9.4159   |
| 16376 | M250T11_ | 1.006781 | -0.00975 | -0.03179 | 0.975428 | 0.904954 | DOWN | 250.0101 | 250.0099 | 250.0104 | 10.90522 | 10.879   |
| 16377 | M501T10_ | 1.009429 | -0.01354 | -0.03215 | 0.97547  | 0.904958 | DOWN | 501.2284 | 501.228  | 501.2287 | 9.984083 | 9.8753   |
| 16378 | M704T9_1 | 1.026953 | 0.03837  | 0.031688 | 0.975524 | 0.904963 | UP   | 703.6919 | 703.691  | 703.6926 | 9.096242 | 9.06855  |
| 16379 | M391T12  | 1.008518 | 0.012237 | 0.031982 | 0.97559  | 0.904968 | UP   | 391.1996 | 391.1987 | 391.1998 | 11.57007 | 11.51945 |

|       |          |          |          |          |          |          |      |          |          |          |          |          |
|-------|----------|----------|----------|----------|----------|----------|------|----------|----------|----------|----------|----------|
| 16380 | M444T10_ | 1.009855 | 0.014149 | 0.031573 | 0.975598 | 0.904969 | UP   | 443.7244 | 443.7242 | 443.7247 | 9.897925 | 9.843367 |
| 16381 | M472T9_8 | 1.029249 | -0.04159 | -0.03151 | 0.97564  | 0.904973 | DOWN | 472.2609 | 472.2591 | 472.2633 | 9.365833 | 9.046783 |
| 16382 | M562T44_ | 1.003613 | 0.005203 | 0.032257 | 0.975713 | 0.904979 | UP   | 562.3219 | 562.3218 | 562.3224 | 43.85483 | 43.80467 |
| 16383 | M1012T10 | 1.004855 | -0.00699 | -0.0322  | 0.975724 | 0.90498  | DOWN | 1012.026 | 1012.024 | 1012.034 | 9.830833 | 9.728083 |
| 16384 | M576T9_7 | 1.007851 | -0.01128 | -0.03146 | 0.975933 | 0.904999 | DOWN | 576.369  | 576.3688 | 576.3698 | 8.813067 | 8.7575   |
| 16385 | M826T10_ | 1.012385 | 0.017758 | 0.031067 | 0.975997 | 0.905004 | UP   | 826.4027 | 826.4019 | 826.4033 | 9.953592 | 9.869467 |
| 16386 | M234T11_ | 1.005106 | 0.007347 | 0.03095  | 0.976195 | 0.905022 | UP   | 233.5132 | 233.5131 | 233.5135 | 10.892   | 10.879   |
| 16387 | M380T10_ | 1.008208 | -0.01179 | -0.03116 | 0.976245 | 0.905026 | DOWN | 380.408  | 380.4075 | 380.4083 | 9.972917 | 9.8753   |
| 16388 | M195T11_ | 1.003669 | 0.005283 | 0.030708 | 0.976257 | 0.905027 | UP   | 195.0113 | 195.0112 | 195.0117 | 10.90519 | 10.879   |
| 16389 | M399T11_ | 1.005431 | -0.00781 | -0.03093 | 0.97638  | 0.905038 | DOWN | 399.4791 | 399.4701 | 399.4795 | 10.90551 | 10.879   |
| 16390 | M1492T10 | 1.011457 | 0.016435 | 0.030473 | 0.976579 | 0.905056 | UP   | 1492.066 | 1492.06  | 1492.068 | 9.960817 | 9.859233 |
| 16391 | M580T17_ | 1.007164 | -0.0103  | -0.0306  | 0.976638 | 0.905061 | DOWN | 579.8743 | 579.873  | 579.8752 | 16.51967 | 16.50535 |
| 16392 | M380T27_ | 1.014668 | -0.02101 | -0.02981 | 0.976967 | 0.90509  | DOWN | 380.2555 | 380.2549 | 380.2558 | 27.16475 | 27.1435  |
| 16393 | M435T9_6 | 1.011919 | -0.01709 | -0.02967 | 0.977073 | 0.905099 | DOWN | 434.7889 | 434.7878 | 434.7916 | 9.346    | 9.12675  |
| 16394 | M774T10_ | 1.0106   | 0.015212 | 0.030156 | 0.977087 | 0.9051   | UP   | 774.495  | 774.4943 | 774.4955 | 9.964092 | 9.859233 |
| 16395 | M1127T10 | 1.008192 | 0.01177  | 0.029641 | 0.977159 | 0.905106 | UP   | 1127.476 | 1127.475 | 1127.478 | 9.84095  | 9.728083 |
| 16396 | M282T11_ | 1.004214 | -0.00607 | -0.0298  | 0.977189 | 0.905109 | DOWN | 282.1936 | 282.1935 | 282.1939 | 11.49131 | 11.47593 |
| 16397 | M259T11_ | 1.025858 | -0.03683 | -0.02945 | 0.977224 | 0.905112 | DOWN | 259.1618 | 259.161  | 259.1738 | 10.93208 | 10.90197 |
| 16398 | M396T20_ | 1.005403 | 0.007773 | 0.029636 | 0.977241 | 0.905114 | UP   | 395.5841 | 395.5841 | 395.5844 | 20.24492 | 20.23017 |
| 16399 | M291T9_6 | 1.012725 | -0.01824 | -0.02949 | 0.977281 | 0.905117 | DOWN | 290.8578 | 290.8575 | 290.8585 | 8.791683 | 8.712633 |
| 16400 | M684T10_ | 1.006755 | 0.009713 | 0.029359 | 0.977309 | 0.90512  | UP   | 683.9936 | 683.9923 | 684.0031 | 9.828367 | 9.699733 |
| 16401 | M355T43_ | 1.002175 | 0.003135 | 0.029998 | 0.977377 | 0.905126 | UP   | 355.2113 | 355.2112 | 355.2115 | 42.841   | 42.81217 |
| 16402 | M273T10_ | 1.0093   | 0.013355 | 0.029368 | 0.977426 | 0.90513  | UP   | 273.167  | 273.1669 | 273.167  | 9.519758 | 9.237017 |
| 16403 | M1136T9  | 1.011216 | -0.01609 | -0.0293  | 0.977451 | 0.905132 | DOWN | 1135.51  | 1135.509 | 1135.518 | 9.36515  | 9.295817 |
| 16404 | M502T10_ | 1.012545 | 0.017986 | 0.029222 | 0.977472 | 0.905134 | UP   | 501.9742 | 501.9682 | 501.9748 | 9.9677   | 9.869467 |
| 16405 | M342T10_ | 1.023114 | -0.03297 | -0.02907 | 0.977545 | 0.90514  | DOWN | 341.5234 | 341.5232 | 341.5238 | 9.956417 | 9.843367 |
| 16406 | M439T10_ | 1.005545 | 0.007977 | 0.029081 | 0.977576 | 0.905143 | UP   | 438.6928 | 438.6926 | 438.6929 | 9.977442 | 9.859233 |
| 16407 | M783T10_ | 1.008935 | -0.01283 | -0.02903 | 0.977577 | 0.905143 | DOWN | 782.9399 | 782.9379 | 782.9405 | 9.932033 | 9.811217 |
| 16408 | M474T43  | 1.006139 | 0.00883  | 0.029875 | 0.977579 | 0.905143 | UP   | 474.2694 | 474.2692 | 474.2696 | 42.99917 | 42.74033 |
| 16409 | M415T15  | 1.004279 | 0.006161 | 0.029416 | 0.977632 | 0.905148 | UP   | 415.2835 | 415.2831 | 415.2841 | 15.26215 | 15.24867 |
| 16410 | M285T9_4 | 1.006014 | -0.00865 | -0.02917 | 0.977701 | 0.905154 | DOWN | 285.2407 | 285.2406 | 285.2408 | 8.719975 | 8.629617 |
| 16411 | M718T10_ | 1.003927 | -0.00565 | -0.02906 | 0.977716 | 0.905155 | DOWN | 718.4915 | 718.4914 | 718.4917 | 9.544775 | 9.432183 |
| 16412 | M1460T11 | 1.005661 | -0.00814 | -0.02877 | 0.977783 | 0.905161 | DOWN | 1460.087 | 1460.086 | 1460.09  | 10.892   | 10.8646  |
| 16413 | M623T12_ | 1.006825 | -0.00981 | -0.02893 | 0.977785 | 0.905162 | DOWN | 623.3603 | 623.36   | 623.3617 | 11.59273 | 11.5607  |
| 16414 | M367T10_ | 1.01068  | 0.015327 | 0.028779 | 0.977789 | 0.905162 | UP   | 366.9915 | 366.9911 | 366.992  | 9.958617 | 9.843367 |

|       |          |          |          |          |          |          |      |          |          |          |          |          |
|-------|----------|----------|----------|----------|----------|----------|------|----------|----------|----------|----------|----------|
| 16415 | M383T10_ | 1.006518 | -0.00937 | -0.02882 | 0.97782  | 0.905165 | DOWN | 383.3037 | 383.3034 | 383.3056 | 9.729367 | 9.4632   |
| 16416 | M341T10_ | 1.002371 | 0.003417 | 0.028756 | 0.978016 | 0.905182 | UP   | 341.4567 | 341.4565 | 341.4569 | 9.831142 | 9.715683 |
| 16417 | M261T10_ | 1.020103 | 0.028714 | 0.028343 | 0.978093 | 0.905189 | UP   | 260.6281 | 260.6279 | 260.6282 | 9.949233 | 9.916767 |
| 16418 | M355T10_ | 1.00602  | -0.00866 | -0.02843 | 0.978143 | 0.905193 | DOWN | 354.8187 | 354.8181 | 354.8189 | 9.999    | 9.8753   |
| 16419 | M385T19  | 1.006071 | -0.00873 | -0.02854 | 0.978165 | 0.905195 | DOWN | 385.3422 | 385.342  | 385.3425 | 19.2665  | 19.23333 |
| 16420 | M324T9_4 | 1.006592 | -0.00948 | -0.02801 | 0.978369 | 0.905213 | DOWN | 323.7229 | 323.7114 | 323.7233 | 8.857533 | 8.643767 |
| 16421 | M983T10  | 1.005604 | 0.008062 | 0.028238 | 0.978405 | 0.905216 | UP   | 983.0509 | 983.0503 | 983.0511 | 9.9847   | 9.8914   |
| 16422 | M221T10_ | 1.008335 | -0.01198 | -0.02772 | 0.978594 | 0.905232 | DOWN | 221.2862 | 221.2812 | 221.2902 | 9.8235   | 9.696683 |
| 16423 | M754T10_ | 1.00371  | 0.005342 | 0.027665 | 0.978607 | 0.905234 | UP   | 754.4441 | 754.4388 | 754.4459 | 9.842    | 9.715683 |
| 16424 | M449T11_ | 1.007005 | -0.01007 | -0.02778 | 0.978643 | 0.905237 | DOWN | 449.1758 | 449.1747 | 449.1761 | 10.90537 | 10.879   |
| 16425 | M711T10_ | 1.005494 | -0.0079  | -0.0281  | 0.978647 | 0.905237 | DOWN | 711.2096 | 711.209  | 711.2099 | 9.80185  | 9.699733 |
| 16426 | M1413T10 | 1.010891 | 0.015628 | -0.02738 | 0.979061 | 0.905273 | UP   | 1412.969 | 1412.962 | 1412.971 | 9.94455  | 9.885167 |
| 16427 | M286T10_ | 1.005355 | 0.007706 | 0.02707  | 0.979132 | 0.90528  | UP   | 286.3235 | 286.323  | 286.3238 | 9.968992 | 9.859233 |
| 16428 | M416T11_ | 1.007898 | -0.01135 | -0.02702 | 0.979151 | 0.905281 | DOWN | 415.9098 | 415.9096 | 415.9102 | 10.88982 | 10.8214  |
| 16429 | M448T17  | 1.016596 | 0.023747 | 0.026973 | 0.979198 | 0.905285 | UP   | 448.3053 | 448.305  | 448.3059 | 17.29975 | 17.2335  |
| 16430 | M850T10_ | 1.004317 | -0.00621 | -0.02705 | 0.979215 | 0.905287 | DOWN | 849.6415 | 849.641  | 849.6421 | 9.934533 | 9.843367 |
| 16431 | M450T24  | 1.006477 | 0.009314 | 0.026747 | 0.979318 | 0.905296 | UP   | 450.3572 | 450.3569 | 450.3574 | 24.01633 | 24.00117 |
| 16432 | M427T9_1 | 1.011699 | 0.01678  | 0.0265   | 0.979535 | 0.905315 | UP   | 426.7778 | 426.7773 | 426.7787 | 8.85555  | 8.745033 |
| 16433 | M335T10_ | 1.003887 | 0.005597 | 0.026598 | 0.979553 | 0.905316 | UP   | 335.1303 | 335.1299 | 335.1307 | 9.831925 | 9.699733 |
| 16434 | M617T10_ | 1.005116 | -0.00736 | -0.02651 | 0.979586 | 0.905319 | DOWN | 616.8179 | 616.8172 | 616.821  | 9.825492 | 9.7124   |
| 16435 | M232T11_ | 1.003268 | 0.004707 | 0.026529 | 0.979732 | 0.905332 | UP   | 232.3491 | 232.349  | 232.3493 | 10.90519 | 10.879   |
| 16436 | M327T10_ | 1.004275 | 0.006154 | 0.02619  | 0.979803 | 0.905338 | UP   | 326.6138 | 326.6136 | 326.614  | 9.830283 | 9.715683 |
| 16437 | M561T10_ | 1.005678 | -0.00817 | -0.02602 | 0.979901 | 0.905347 | DOWN | 560.6711 | 560.671  | 560.6712 | 10.37437 | 10.29792 |
| 16438 | M1037T18 | 1.011394 | -0.01635 | -0.02599 | 0.979927 | 0.905349 | DOWN | 1036.84  | 1036.84  | 1036.841 | 17.864   | 17.8495  |
| 16439 | M386T10_ | 1.010734 | -0.0154  | -0.02597 | 0.980045 | 0.905359 | DOWN | 386.2492 | 386.2488 | 386.2495 | 9.958617 | 9.843367 |
| 16440 | M474T38  | 1.009613 | 0.013802 | 0.025919 | 0.980065 | 0.905361 | UP   | 474.2695 | 474.2692 | 474.2698 | 38.06433 | 37.74817 |
| 16441 | M596T11_ | 1.01231  | -0.01765 | -0.02579 | 0.980076 | 0.905362 | DOWN | 596.3241 | 596.324  | 596.3244 | 10.8646  | 10.86008 |
| 16442 | M335T11_ | 1.005664 | 0.008149 | 0.025747 | 0.980116 | 0.905366 | UP   | 335.3063 | 335.3057 | 335.307  | 10.92378 | 10.88995 |
| 16443 | M705T10_ | 1.013494 | 0.019338 | 0.025596 | 0.980227 | 0.905375 | UP   | 704.9903 | 704.9894 | 704.9921 | 9.762917 | 9.746783 |
| 16444 | M200T9_7 | 1.008095 | 0.011632 | 0.025466 | 0.98032  | 0.905383 | UP   | 199.7797 | 199.7683 | 199.7812 | 9.295167 | 9.142767 |
| 16445 | M219T10_ | 1.00713  | -0.01025 | -0.02573 | 0.980338 | 0.905385 | DOWN | 219.4739 | 219.4738 | 219.4739 | 9.9351   | 9.827283 |
| 16446 | M473T10_ | 1.031787 | 0.045145 | 0.025375 | 0.98038  | 0.905389 | UP   | 472.5272 | 472.5203 | 472.5314 | 9.532283 | 9.346    |
| 16447 | M324T10_ | 1.007672 | 0.011026 | 0.025253 | 0.980478 | 0.905397 | UP   | 323.7547 | 323.7542 | 323.7552 | 9.830658 | 9.77435  |
| 16448 | M631T28  | 1.007228 | -0.01039 | -0.02514 | 0.980565 | 0.905405 | DOWN | 631.4455 | 631.4449 | 631.4462 | 28.21533 | 28.157   |
| 16449 | M199T10_ | 1.01075  | -0.01543 | -0.02494 | 0.980753 | 0.905421 | DOWN | 199.286  | 199.2833 | 199.2862 | 9.8371   | 9.715683 |

|       |          |          |          |          |          |          |      |          |          |          |          |          |
|-------|----------|----------|----------|----------|----------|----------|------|----------|----------|----------|----------|----------|
| 16450 | M213T9_1 | 1.012154 | -0.01743 | -0.02484 | 0.980802 | 0.905426 | DOWN | 212.5168 | 212.5148 | 212.5182 | 9.2946   | 9.166033 |
| 16451 | M353T30  | 1.006652 | -0.00956 | -0.02509 | 0.980815 | 0.905427 | DOWN | 353.3089 | 353.3086 | 353.309  | 30.08658 | 30.07833 |
| 16452 | M334T10_ | 1.007664 | -0.01101 | -0.02472 | 0.980889 | 0.905433 | DOWN | 334.44   | 334.4384 | 334.4403 | 9.8371   | 9.715683 |
| 16453 | M310T9_6 | 1.006111 | 0.00879  | 0.024669 | 0.980924 | 0.905436 | UP   | 310.4695 | 310.469  | 310.4698 | 9.333667 | 9.275917 |
| 16454 | M729T10_ | 1.007176 | -0.01032 | -0.02461 | 0.980981 | 0.905441 | DOWN | 728.7214 | 728.7207 | 728.7217 | 9.94785  | 9.827283 |
| 16455 | M158T10_ | 1.013246 | 0.018985 | 0.024633 | 0.980994 | 0.905442 | UP   | 157.6946 | 157.6945 | 157.7058 | 9.8378   | 9.811217 |
| 16456 | M239T10_ | 1.011585 | -0.01662 | -0.0248  | 0.981011 | 0.905444 | DOWN | 239.1429 | 239.1427 | 239.143  | 9.959492 | 9.8914   |
| 16457 | M178T9_5 | 1.009936 | 0.014264 | 0.024454 | 0.981092 | 0.905451 | UP   | 177.8615 | 177.8614 | 177.8621 | 9.152608 | 9.1175   |
| 16458 | M215T10_ | 1.009119 | 0.013096 | 0.024331 | 0.981186 | 0.905459 | UP   | 214.7547 | 214.7545 | 214.7548 | 9.828267 | 9.8161   |
| 16459 | M438T11_ | 1.004034 | -0.00581 | -0.02433 | 0.981213 | 0.905462 | DOWN | 438.1691 | 438.1628 | 438.17   | 10.89308 | 10.877   |
| 16460 | M1055T10 | 1.019102 | 0.027299 | -0.0244  | 0.981269 | 0.905466 | UP   | 1054.759 | 1054.759 | 1054.759 | 9.964092 | 9.8753   |
| 16461 | M157T9_4 | 1.006525 | -0.00938 | -0.02426 | 0.981284 | 0.905468 | DOWN | 157.25   | 157.2497 | 157.2503 | 9.314442 | 9.219483 |
| 16462 | M176T9_5 | 1.007306 | -0.0105  | -0.02428 | 0.98131  | 0.90547  | DOWN | 176.3941 | 176.393  | 176.3944 | 9.197467 | 9.079083 |
| 16463 | M709T9_4 | 1.010982 | -0.01576 | -0.02418 | 0.981319 | 0.905471 | DOWN | 709.4556 | 709.4553 | 709.4567 | 8.939267 | 8.832317 |
| 16464 | M276T11_ | 1.006735 | 0.009684 | 0.023951 | 0.981485 | 0.905485 | UP   | 275.5394 | 275.5393 | 275.5395 | 10.84923 | 10.84395 |
| 16465 | M216T10_ | 1.010155 | 0.014576 | 0.023971 | 0.981501 | 0.905487 | UP   | 216.1246 | 216.1242 | 216.1247 | 9.9174   | 9.811217 |
| 16466 | M169T10_ | 1.003535 | -0.00509 | -0.02434 | 0.98161  | 0.905496 | DOWN | 169.2379 | 169.2378 | 169.2382 | 9.8397   | 9.715683 |
| 16467 | M533T30  | 1.004657 | 0.006703 | 0.024189 | 0.981674 | 0.905502 | UP   | 533.3653 | 533.3649 | 533.3655 | 30.2805  | 30.266   |
| 16468 | M698T10_ | 1.015915 | -0.02278 | -0.02378 | 0.981674 | 0.905502 | DOWN | 698.3989 | 698.3976 | 698.3995 | 9.84305  | 9.743667 |
| 16469 | M327T29_ | 1.004099 | -0.0059  | -0.02412 | 0.981873 | 0.905519 | DOWN | 327.2527 | 327.2526 | 327.2528 | 28.65942 | 28.58833 |
| 16470 | M289T11_ | 1.004017 | -0.00578 | -0.02342 | 0.981891 | 0.905521 | DOWN | 289.2745 | 289.2743 | 289.2746 | 10.892   | 10.8646  |
| 16471 | M734T10_ | 1.006122 | 0.008805 | 0.023393 | 0.981911 | 0.905522 | UP   | 733.7113 | 733.711  | 733.7116 | 9.943183 | 9.827283 |
| 16472 | M526T10_ | 1.008053 | 0.011572 | 0.023543 | 0.981921 | 0.905523 | UP   | 526.1476 | 526.1471 | 526.1491 | 9.979342 | 9.8753   |
| 16473 | M317T32  | 1.006367 | 0.009156 | 0.023364 | 0.981932 | 0.905524 | UP   | 317.1147 | 317.1144 | 317.1155 | 32.44583 | 32.43117 |
| 16474 | M624T11_ | 1.005983 | -0.00861 | -0.02336 | 0.981944 | 0.905525 | DOWN | 623.8882 | 623.8879 | 623.8886 | 11.48928 | 11.47298 |
| 16475 | M362T11_ | 1.003678 | 0.005297 | 0.023303 | 0.981981 | 0.905528 | UP   | 362.1425 | 362.1422 | 362.1436 | 10.892   | 10.879   |
| 16476 | M381T11_ | 1.003468 | -0.005   | -0.0233  | 0.981984 | 0.905529 | DOWN | 381.0218 | 381.0216 | 381.0227 | 10.892   | 10.879   |
| 16477 | M159T13  | 1.003506 | -0.00505 | -0.02339 | 0.98209  | 0.905538 | DOWN | 159.0802 | 159.0801 | 159.0803 | 13.02546 | 12.96833 |
| 16478 | M1319T9  | 1.008143 | 0.0117   | 0.023133 | 0.98214  | 0.905542 | UP   | 1319.04  | 1319.038 | 1319.043 | 9.361783 | 9.17485  |
| 16479 | M216T10_ | 1.007404 | -0.01064 | -0.0231  | 0.9822   | 0.905548 | DOWN | 215.5617 | 215.5615 | 215.5619 | 9.965717 | 9.843367 |
| 16480 | M245T10_ | 1.024302 | -0.03464 | -0.02285 | 0.982328 | 0.905559 | DOWN | 245.1728 | 245.1727 | 245.1737 | 9.934533 | 9.827283 |
| 16481 | M200T28  | 1.016905 | -0.02418 | -0.0227  | 0.982509 | 0.905574 | DOWN | 200.2006 | 200.2004 | 200.2007 | 27.59783 | 27.56833 |
| 16482 | M380T10_ | 1.016627 | 0.023791 | 0.022611 | 0.982516 | 0.905575 | UP   | 379.5824 | 379.582  | 379.5826 | 9.932033 | 9.827283 |
| 16483 | M334T10_ | 1.013337 | -0.01911 | -0.02266 | 0.982627 | 0.905585 | DOWN | 334.1104 | 334.1095 | 334.1112 | 9.81635  | 9.715683 |
| 16484 | M178T9_1 | 1.009254 | 0.013289 | 0.022641 | 0.982633 | 0.905585 | UP   | 178.3377 | 178.3376 | 178.3381 | 9.314408 | 9.132267 |

|       |          |          |          |          |          |          |      |          |          |          |          |          |
|-------|----------|----------|----------|----------|----------|----------|------|----------|----------|----------|----------|----------|
| 16485 | M900T34  | 1.012845 | 0.018413 | 0.022412 | 0.98272  | 0.905593 | UP   | 899.6141 | 899.6133 | 899.6144 | 34.00367 | 33.93183 |
| 16486 | M168T10_ | 1.005909 | -0.0085  | -0.02217 | 0.982857 | 0.905605 | DOWN | 168.0906 | 168.0885 | 168.0908 | 9.830833 | 9.715683 |
| 16487 | M497T17  | 1.006646 | 0.009556 | 0.022004 | 0.982991 | 0.905616 | UP   | 497.3659 | 497.3658 | 497.3661 | 17.0595  | 17.0435  |
| 16488 | M364T9_5 | 1.007017 | -0.01009 | -0.0219  | 0.983067 | 0.905623 | DOWN | 364.0267 | 364.0249 | 364.0298 | 9.182125 | 9.0839   |
| 16489 | M311T26  | 1.006459 | 0.009288 | 0.021848 | 0.983183 | 0.905633 | UP   | 311.3419 | 311.3416 | 311.3423 | 25.57992 | 25.56417 |
| 16490 | M172T10_ | 1.005463 | -0.00786 | -0.02166 | 0.983292 | 0.905642 | DOWN | 171.5304 | 171.5302 | 171.5367 | 9.97155  | 9.853533 |
| 16491 | M642T18_ | 1.002607 | 0.003756 | 0.021869 | 0.983324 | 0.905645 | UP   | 642.4644 | 642.464  | 642.4645 | 18.01525 | 17.99367 |
| 16492 | M661T10_ | 1.002062 | -0.00297 | -0.02152 | 0.983383 | 0.90565  | DOWN | 660.503  | 660.5024 | 660.5047 | 9.834117 | 9.715683 |
| 16493 | M398T10_ | 1.010018 | 0.014382 | 0.021496 | 0.983396 | 0.905652 | UP   | 398.374  | 398.3738 | 398.3742 | 9.972483 | 9.946367 |
| 16494 | M430T45  | 1.002467 | -0.00356 | -0.02153 | 0.983443 | 0.905656 | DOWN | 430.2433 | 430.2432 | 430.2436 | 44.854   | 44.739   |
| 16495 | M736T22  | 1.004674 | -0.00673 | -0.02139 | 0.983683 | 0.905676 | DOWN | 736.4595 | 736.4591 | 736.4598 | 21.73608 | 21.71267 |
| 16496 | M371T11_ | 1.005772 | -0.0083  | -0.02104 | 0.983731 | 0.905681 | DOWN | 371.1463 | 371.146  | 371.1465 | 11.03413 | 11.02038 |
| 16497 | M408T10_ | 1.007569 | -0.01088 | -0.02117 | 0.983733 | 0.905681 | DOWN | 407.6785 | 407.6781 | 407.6788 | 9.968992 | 9.859233 |
| 16498 | M913T10_ | 1.007523 | 0.010813 | 0.021413 | 0.983756 | 0.905683 | UP   | 912.7397 | 912.739  | 912.7404 | 9.979342 | 9.8753   |
| 16499 | M454T13  | 1.004312 | -0.00621 | -0.02083 | 0.983893 | 0.905695 | DOWN | 454.1034 | 454.1031 | 454.104  | 13.22232 | 13.2008  |
| 16500 | M520T9_8 | 1.005772 | -0.0083  | -0.02072 | 0.984012 | 0.905705 | DOWN | 520.4182 | 520.417  | 520.4213 | 9.34615  | 9.2946   |
| 16501 | M258T19  | 1.005741 | 0.008259 | 0.02068  | 0.984065 | 0.90571  | UP   | 258.1849 | 258.1845 | 258.1851 | 18.74617 | 18.73167 |
| 16502 | M243T9_1 | 1.009377 | 0.013465 | 0.02079  | 0.984096 | 0.905712 | UP   | 243.4011 | 243.3955 | 243.4013 | 9.277967 | 9.1322   |
| 16503 | M378T9_9 | 1.011394 | -0.01634 | -0.02053 | 0.984189 | 0.90572  | DOWN | 378.2924 | 378.2921 | 378.2926 | 9.333667 | 9.275917 |
| 16504 | M908T10_ | 1.007999 | -0.01149 | -0.02034 | 0.984326 | 0.905732 | DOWN | 907.5783 | 907.5779 | 907.579  | 9.979342 | 9.859233 |
| 16505 | M214T11_ | 1.005031 | 0.00724  | 0.020062 | 0.98449  | 0.905747 | UP   | 214.2423 | 214.242  | 214.243  | 10.8926  | 10.85018 |
| 16506 | M582T10  | 1.004308 | -0.0062  | -0.02043 | 0.98452  | 0.905749 | DOWN | 582.4726 | 582.4723 | 582.4734 | 9.969158 | 9.8753   |
| 16507 | M316T39_ | 1.002857 | 0.004117 | 0.020422 | 0.984646 | 0.90576  | UP   | 316.1752 | 316.175  | 316.1754 | 39.03833 | 38.95667 |
| 16508 | M466T19  | 1.004806 | -0.00692 | -0.02    | 0.984685 | 0.905763 | DOWN | 466.3058 | 466.3056 | 466.3061 | 18.85658 | 18.8455  |
| 16509 | M338T9_6 | 1.005687 | 0.008182 | 0.019914 | 0.984726 | 0.905767 | UP   | 338.1139 | 338.1134 | 338.1141 | 8.88575  | 8.84285  |
| 16510 | M254T10_ | 1.006494 | -0.00934 | -0.01975 | 0.984749 | 0.905769 | DOWN | 253.9642 | 253.9605 | 253.9645 | 9.946467 | 9.827283 |
| 16511 | M299T42_ | 1.004676 | -0.00673 | -0.02028 | 0.984749 | 0.905769 | DOWN | 299.1487 | 299.1486 | 299.1488 | 41.58967 | 41.51883 |
| 16512 | M372T11_ | 1.003674 | -0.00529 | -0.0197  | 0.984786 | 0.905772 | DOWN | 372.0199 | 372.0196 | 372.0202 | 10.89907 | 10.879   |
| 16513 | M730T10_ | 1.006526 | 0.009384 | 0.019782 | 0.984882 | 0.905781 | UP   | 729.9487 | 729.9465 | 729.9496 | 9.818525 | 9.696683 |
| 16514 | M420T20  | 1.021762 | 0.03106  | 0.019454 | 0.984958 | 0.905787 | UP   | 420.31   | 420.3097 | 420.3106 | 20.28817 | 20.23033 |
| 16515 | M203T20  | 1.002885 | -0.00416 | -0.01934 | 0.985043 | 0.905794 | DOWN | 203.1063 | 203.1063 | 203.1064 | 19.68767 | 19.6415  |
| 16516 | M172T9_3 | 1.00609  | 0.00876  | 0.019227 | 0.985196 | 0.905808 | UP   | 172.0565 | 172.0563 | 172.0568 | 9.175017 | 9.126783 |
| 16517 | M370T10_ | 1.002448 | -0.00353 | -0.01921 | 0.985197 | 0.905808 | DOWN | 370.2419 | 370.2419 | 370.242  | 9.959533 | 9.843367 |
| 16518 | M384T9_5 | 1.01036  | -0.01487 | -0.01953 | 0.985224 | 0.90581  | DOWN | 384.2503 | 384.2444 | 384.2511 | 9.078567 | 8.90715  |
| 16519 | M446T11_ | 1.003067 | -0.00442 | -0.01909 | 0.985235 | 0.905811 | DOWN | 445.9077 | 445.9071 | 445.9081 | 10.892   | 10.879   |



|       |          |          |          |          |          |          |      |          |          |          |          |          |
|-------|----------|----------|----------|----------|----------|----------|------|----------|----------|----------|----------|----------|
| 16520 | M271T11_ | 1.003019 | -0.00435 | -0.01926 | 0.985253 | 0.905813 | DOWN | 270.7993 | 270.7991 | 270.7995 | 10.90628 | 10.85838 |
| 16521 | M436T10_ | 1.007288 | -0.01048 | -0.01912 | 0.985323 | 0.905819 | DOWN | 435.8466 | 435.8463 | 435.8479 | 9.825392 | 9.729367 |
| 16522 | M1229T20 | 1.00702  | 0.010093 | 0.018966 | 0.985452 | 0.90583  | UP   | 1228.618 | 1228.616 | 1228.619 | 19.66908 | 19.6495  |
| 16523 | M272T26_ | 1.006054 | -0.00871 | -0.01878 | 0.985488 | 0.905833 | DOWN | 272.2854 | 272.2853 | 272.2856 | 25.748   | 25.72567 |
| 16524 | M419T9_5 | 1.005036 | -0.00725 | -0.01908 | 0.985579 | 0.905841 | DOWN | 418.8301 | 418.8297 | 418.8312 | 9.272133 | 9.189117 |
| 16525 | M220T10_ | 1.057155 | 0.080186 | 0.018929 | 0.985641 | 0.905846 | UP   | 220.0862 | 220.0772 | 220.0863 | 9.892133 | 9.82645  |
| 16526 | M360T10_ | 1.00364  | -0.00524 | -0.01855 | 0.985694 | 0.905851 | DOWN | 360.3736 | 360.3733 | 360.3739 | 9.979342 | 9.859233 |
| 16527 | M320T10_ | 1.005847 | 0.00841  | 0.01854  | 0.985696 | 0.905851 | UP   | 319.77   | 319.7644 | 319.7701 | 9.948875 | 9.64815  |
| 16528 | M403T9_4 | 1.005213 | 0.007501 | 0.018474 | 0.98572  | 0.905853 | UP   | 403.0095 | 403.0089 | 403.01   | 9.4098   | 9.370583 |
| 16529 | M352T9_5 | 1.005119 | -0.00737 | -0.01822 | 0.985908 | 0.905869 | DOWN | 352.2224 | 352.2223 | 352.2226 | 8.764617 | 8.623117 |
| 16530 | M364T9_8 | 1.012028 | -0.01725 | -0.01817 | 0.985958 | 0.905874 | DOWN | 364.0984 | 364.0981 | 364.099  | 9.250817 | 9.219483 |
| 16531 | M423T26_ | 1.004857 | -0.00699 | -0.01834 | 0.98596  | 0.905874 | DOWN | 422.9586 | 422.9578 | 422.9586 | 25.57883 | 25.57867 |
| 16532 | M522T9_6 | 1.007574 | -0.01089 | -0.01819 | 0.986065 | 0.905883 | DOWN | 522.4092 | 522.4078 | 522.4097 | 9.148833 | 9.1175   |
| 16533 | M635T10_ | 1.005348 | -0.0077  | -0.01803 | 0.986071 | 0.905883 | DOWN | 635.1207 | 635.1205 | 635.1218 | 9.94785  | 9.843367 |
| 16534 | M793T11_ | 1.005398 | 0.007767 | 0.017859 | 0.986202 | 0.905895 | UP   | 793.0986 | 793.0979 | 793.0991 | 11.23619 | 11.20953 |
| 16535 | M728T10_ | 1.006539 | -0.0094  | -0.01784 | 0.986209 | 0.905895 | DOWN | 728.2829 | 728.2823 | 728.2833 | 9.885075 | 9.636483 |
| 16536 | M321T10_ | 1.005183 | -0.00746 | -0.01745 | 0.986565 | 0.905926 | DOWN | 321.0068 | 321.0064 | 321.0073 | 9.958617 | 9.843367 |
| 16537 | M321T11_ | 1.004021 | -0.00579 | -0.01735 | 0.986587 | 0.905928 | DOWN | 320.5073 | 320.5069 | 320.5085 | 10.90551 | 10.879   |
| 16538 | M453T10_ | 1.00393  | -0.00566 | -0.01739 | 0.986642 | 0.905933 | DOWN | 452.6219 | 452.6212 | 452.622  | 9.972483 | 9.8753   |
| 16539 | M357T42_ | 1.00646  | 0.00929  | 0.017234 | 0.986672 | 0.905935 | UP   | 357.1906 | 357.1906 | 357.1907 | 42.30867 | 42.20783 |
| 16540 | M490T38  | 1.002759 | -0.00397 | -0.01712 | 0.986762 | 0.905943 | DOWN | 490.2644 | 490.2643 | 490.2645 | 37.82008 | 37.73383 |
| 16541 | M706T33  | 1.058704 | 0.082299 | -0.01715 | 0.986762 | 0.905943 | UP   | 705.5775 | 705.5775 | 705.5782 | 32.77767 | 32.7775  |
| 16542 | M680T45_ | 1.005311 | -0.00764 | -0.01753 | 0.986769 | 0.905944 | DOWN | 680.3854 | 680.3853 | 680.3857 | 44.96183 | 44.83967 |
| 16543 | M199T42  | 1.002016 | 0.002906 | 0.017145 | 0.986789 | 0.905945 | UP   | 199.1326 | 199.1326 | 199.1327 | 42.23667 | 42.179   |
| 16544 | M486T9_2 | 1.005094 | 0.007331 | 0.017331 | 0.986803 | 0.905947 | UP   | 486.4796 | 486.4793 | 486.4798 | 9.300733 | 9.22495  |
| 16545 | M349T10_ | 1.001126 | -0.00162 | -0.0173  | 0.986839 | 0.90595  | DOWN | 348.5124 | 348.5123 | 348.5125 | 9.8397   | 9.73145  |
| 16546 | M181T10_ | 1.006247 | 0.008985 | 0.017109 | 0.986845 | 0.90595  | UP   | 180.8019 | 180.8016 | 180.8019 | 9.968992 | 9.859233 |
| 16547 | M356T10_ | 1.002645 | -0.00381 | -0.01698 | 0.986895 | 0.905955 | DOWN | 356.2261 | 356.226  | 356.2262 | 9.964092 | 9.859233 |
| 16548 | M481T9_8 | 1.008403 | -0.01207 | -0.01717 | 0.987061 | 0.905969 | DOWN | 481.4504 | 481.4472 | 481.4548 | 9.440308 | 9.295817 |
| 16549 | M171T10_ | 1.003706 | 0.005337 | 0.016514 | 0.987229 | 0.905983 | UP   | 170.8465 | 170.8464 | 170.8467 | 9.8207   | 9.715683 |
| 16550 | M1493T10 | 1.005964 | -0.00858 | -0.01658 | 0.987479 | 0.906005 | DOWN | 1492.969 | 1492.968 | 1492.972 | 9.95165  | 9.853533 |
| 16551 | M345T43_ | 1.004093 | -0.00589 | -0.01628 | 0.987557 | 0.906012 | DOWN | 345.1906 | 345.1905 | 345.1908 | 43.445   | 43.215   |
| 16552 | M815T11_ | 1.005836 | -0.0084  | -0.01616 | 0.987596 | 0.906015 | DOWN | 815.0803 | 815.0792 | 815.0824 | 11.22677 | 11.18982 |
| 16553 | M377T10_ | 1.003731 | 0.005373 | 0.016155 | 0.987605 | 0.906016 | UP   | 376.9521 | 376.952  | 376.9522 | 9.887133 | 9.872067 |
| 16554 | M651T10_ | 1.00314  | -0.00452 | -0.01617 | 0.987674 | 0.906022 | DOWN | 651.49   | 651.4886 | 651.4904 | 10.28725 | 10.2024  |

|       |          |          |          |          |          |          |      |          |          |          |          |          |
|-------|----------|----------|----------|----------|----------|----------|------|----------|----------|----------|----------|----------|
| 16555 | M392T20_ | 1.00524  | 0.007539 | 0.015807 | 0.987841 | 0.906036 | UP   | 392.0513 | 392.051  | 392.0518 | 20.24492 | 20.21583 |
| 16556 | M939T11  | 1.003117 | -0.00449 | -0.01563 | 0.987915 | 0.906043 | DOWN | 939.3135 | 939.3124 | 939.3153 | 10.89875 | 10.8646  |
| 16557 | M541T10_ | 1.003664 | 0.005276 | 0.015695 | 0.987942 | 0.906045 | UP   | 541.0822 | 541.0816 | 541.083  | 9.9847   | 9.8753   |
| 16558 | M250T11_ | 1.001775 | -0.00256 | -0.01561 | 0.988014 | 0.906051 | DOWN | 249.5181 | 249.5179 | 249.5183 | 10.90519 | 10.879   |
| 16559 | M452T38  | 1.004857 | -0.00699 | -0.01546 | 0.988046 | 0.906054 | DOWN | 452.3578 | 452.3576 | 452.358  | 37.73383 | 37.73367 |
| 16560 | M324T11_ | 1.003959 | -0.0057  | -0.01513 | 0.988317 | 0.906077 | DOWN | 323.6792 | 323.6787 | 323.6793 | 10.89827 | 10.82935 |
| 16561 | M1267T10 | 1.003145 | -0.00453 | -0.01501 | 0.9884   | 0.906084 | DOWN | 1267.237 | 1267.231 | 1267.237 | 9.976033 | 9.8753   |
| 16562 | M675T9_1 | 1.065914 | 0.092091 | 0.014815 | 0.988548 | 0.906097 | UP   | 675.2209 | 675.2206 | 675.2218 | 9.46855  | 9.416817 |
| 16563 | M397T9_3 | 1.004334 | -0.00624 | -0.01477 | 0.988627 | 0.906104 | DOWN | 396.7007 | 396.6953 | 396.7038 | 9.244708 | 9.09495  |
| 16564 | M477T9_2 | 1.001717 | 0.002476 | 0.014538 | 0.988771 | 0.906116 | UP   | 476.5691 | 476.5685 | 476.5696 | 8.903533 | 8.730433 |
| 16565 | M585T9_1 | 1.004666 | -0.00672 | -0.0144  | 0.988876 | 0.906125 | DOWN | 585.183  | 585.178  | 585.1838 | 9.174967 | 9.12675  |
| 16566 | M316T11_ | 1.00253  | 0.003645 | 0.014335 | 0.988972 | 0.906134 | UP   | 316.0791 | 316.0781 | 316.0797 | 10.90683 | 10.80695 |
| 16567 | M427T12  | 1.002295 | -0.00331 | -0.01404 | 0.989152 | 0.906149 | DOWN | 427.3037 | 427.3034 | 427.3039 | 12.10025 | 12.0908  |
| 16568 | M202T8   | 1.005365 | -0.00772 | -0.01369 | 0.989479 | 0.906177 | DOWN | 202.1799 | 202.1691 | 202.1801 | 8.3059   | 8.175433 |
| 16569 | M338T10_ | 1.005929 | 0.008529 | 0.013585 | 0.989499 | 0.906179 | UP   | 338.4895 | 338.4864 | 338.4927 | 9.851867 | 9.699733 |
| 16570 | M631T10_ | 1.003539 | 0.005097 | 0.013534 | 0.989533 | 0.906182 | UP   | 631.1004 | 631.1    | 631.1015 | 9.943183 | 9.827283 |
| 16571 | M321T11_ | 1.002361 | 0.003402 | 0.013463 | 0.989591 | 0.906187 | UP   | 320.8512 | 320.8509 | 320.8517 | 10.89923 | 10.88747 |
| 16572 | M203T9_5 | 1.002221 | -0.0032  | -0.0133  | 0.989723 | 0.906198 | DOWN | 203.3296 | 203.3294 | 203.3298 | 9.285508 | 9.129317 |
| 16573 | M318T11_ | 1.003731 | -0.00537 | -0.0133  | 0.989811 | 0.906206 | DOWN | 317.6364 | 317.6361 | 317.6366 | 10.84847 | 10.84395 |
| 16574 | M478T38_ | 1.003409 | 0.004909 | 0.013377 | 0.989824 | 0.906207 | UP   | 478.3007 | 478.3006 | 478.3009 | 37.8205  | 37.63283 |
| 16575 | M288T23_ | 1.011349 | -0.01628 | -0.01305 | 0.98991  | 0.906214 | DOWN | 288.261  | 288.255  | 288.2639 | 22.93633 | 22.8425  |
| 16576 | M205T10_ | 1.002009 | 0.002895 | 0.013254 | 0.989921 | 0.906215 | UP   | 205.012  | 205.012  | 205.0198 | 9.816183 | 9.445217 |
| 16577 | M227T11_ | 1.001486 | -0.00214 | -0.01301 | 0.989941 | 0.906217 | DOWN | 227.1195 | 227.1192 | 227.1197 | 10.90519 | 10.879   |
| 16578 | M340T10_ | 1.017802 | -0.02546 | -0.01296 | 0.989977 | 0.90622  | DOWN | 339.8887 | 339.8816 | 339.894  | 9.864892 | 9.73145  |
| 16579 | M256T10_ | 1.00308  | 0.004437 | 0.013026 | 0.990033 | 0.906225 | UP   | 255.8649 | 255.8647 | 255.8651 | 9.88865  | 9.62055  |
| 16580 | M741T22  | 1.001824 | 0.00263  | 0.012864 | 0.99008  | 0.906229 | UP   | 741.4153 | 741.4149 | 741.4155 | 21.73783 | 21.68017 |
| 16581 | M478T10_ | 1.004097 | -0.0059  | -0.01289 | 0.990082 | 0.906229 | DOWN | 478.3155 | 478.3148 | 478.3161 | 10.41773 | 10.39197 |
| 16582 | M403T15_ | 1.005766 | -0.00829 | -0.01302 | 0.990084 | 0.906229 | DOWN | 403.2583 | 403.2544 | 403.2588 | 15.14124 | 15.08812 |
| 16583 | M413T11_ | 1.004433 | 0.006381 | 0.012847 | 0.990101 | 0.906231 | UP   | 412.6617 | 412.6597 | 412.6639 | 10.93906 | 10.84395 |
| 16584 | M550T10_ | 1.002164 | 0.003119 | 0.0129   | 0.990129 | 0.906233 | UP   | 550.0131 | 550.0128 | 550.0133 | 9.954767 | 9.843367 |
| 16585 | M434T10_ | 1.004212 | -0.00606 | -0.01273 | 0.990172 | 0.906237 | DOWN | 433.7194 | 433.7188 | 433.7197 | 9.968992 | 9.859233 |
| 16586 | M1794T10 | 1.004299 | -0.00619 | -0.0127  | 0.990241 | 0.906243 | DOWN | 1793.61  | 1793.609 | 1793.611 | 9.799767 | 9.728083 |
| 16587 | M747T9   | 1.009849 | -0.01414 | -0.01255 | 0.990295 | 0.906247 | DOWN | 746.5827 | 746.5817 | 746.5831 | 9.078567 | 9.048117 |
| 16588 | M402T9_1 | 1.003495 | -0.00503 | -0.0126  | 0.990296 | 0.906247 | DOWN | 401.5555 | 401.5548 | 401.5561 | 9.25985  | 9.129317 |
| 16589 | M682T11_ | 1.002044 | 0.002946 | 0.012478 | 0.99035  | 0.906252 | UP   | 681.5538 | 681.5536 | 681.5542 | 10.89193 | 10.8646  |

|       |          |          |          |          |          |          |      |          |          |          |          |          |
|-------|----------|----------|----------|----------|----------|----------|------|----------|----------|----------|----------|----------|
| 16590 | M1654T10 | 1.005072 | -0.0073  | -0.01244 | 0.990395 | 0.906256 | DOWN | 1653.849 | 1653.848 | 1653.852 | 9.956417 | 9.859233 |
| 16591 | M564T10_ | 1.035253 | 0.049984 | -0.01233 | 0.990468 | 0.906262 | UP   | 564.4692 | 564.469  | 564.4698 | 9.946367 | 9.885167 |
| 16592 | M744T9_4 | 1.005438 | 0.007824 | 0.012315 | 0.990482 | 0.906263 | UP   | 744.4365 | 744.4352 | 744.437  | 8.952283 | 8.8486   |
| 16593 | M411T10_ | 1.004129 | -0.00594 | -0.0123  | 0.990509 | 0.906266 | DOWN | 410.5532 | 410.5529 | 410.5535 | 9.933967 | 9.827283 |
| 16594 | M620T42  | 1.000902 | 0.001301 | 0.012382 | 0.990595 | 0.906273 | UP   | 620.3639 | 620.3637 | 620.3641 | 41.96358 | 41.93467 |
| 16595 | M245T10_ | 1.002927 | -0.00422 | -0.01235 | 0.990644 | 0.906277 | DOWN | 245.0783 | 245.0781 | 245.0786 | 10.33471 | 10.26307 |
| 16596 | M424T36  | 1.003948 | 0.005685 | 0.012013 | 0.990747 | 0.906286 | UP   | 424.3629 | 424.3625 | 424.3633 | 36.275   | 36.26567 |
| 16597 | M698T9_4 | 1.003754 | -0.00541 | -0.01145 | 0.991149 | 0.90632  | DOWN | 698.4848 | 698.4844 | 698.4849 | 9.191092 | 9.129317 |
| 16598 | M717T10_ | 1.001557 | -0.00224 | -0.01153 | 0.991166 | 0.906322 | DOWN | 717.488  | 717.4879 | 717.4882 | 9.550533 | 9.432183 |
| 16599 | M404T10_ | 1.00402  | -0.00579 | -0.0115  | 0.991224 | 0.906327 | DOWN | 403.5335 | 403.5333 | 403.534  | 9.830083 | 9.787433 |
| 16600 | M201T10_ | 1.00282  | 0.004063 | 0.011352 | 0.991241 | 0.906328 | UP   | 200.5647 | 200.5642 | 200.565  | 9.860817 | 9.728083 |
| 16601 | M189T9_2 | 1.007011 | -0.01008 | -0.01132 | 0.991254 | 0.906329 | DOWN | 188.6693 | 188.6688 | 188.6697 | 9.26575  | 9.160617 |
| 16602 | M300T10_ | 1.003484 | -0.00502 | -0.01134 | 0.991313 | 0.906334 | DOWN | 300.2211 | 300.2135 | 300.2213 | 9.52345  | 9.509533 |
| 16603 | M228T11_ | 1.001339 | 0.00193  | 0.011264 | 0.991327 | 0.906336 | UP   | 227.5138 | 227.5134 | 227.5139 | 10.90551 | 10.879   |
| 16604 | M406T13  | 1.002363 | 0.003405 | 0.011127 | 0.991403 | 0.906342 | UP   | 406.3061 | 406.3029 | 406.3066 | 12.76235 | 12.57265 |
| 16605 | M580T42_ | 1.001438 | 0.002073 | 0.010808 | 0.991673 | 0.906365 | UP   | 580.3326 | 580.3323 | 580.3328 | 41.8915  | 41.71867 |
| 16606 | M446T9_2 | 1.003989 | 0.005744 | 0.010852 | 0.991724 | 0.90637  | UP   | 445.738  | 445.7374 | 445.7395 | 9.230225 | 9.191133 |
| 16607 | M261T13_ | 1.003382 | -0.00487 | -0.01081 | 0.991726 | 0.90637  | DOWN | 261.1094 | 261.1093 | 261.1095 | 13.30228 | 13.2878  |
| 16608 | M469T9_3 | 1.002629 | 0.003788 | 0.010659 | 0.991787 | 0.906375 | UP   | 469.0115 | 469.0101 | 469.0123 | 9.313383 | 9.175017 |
| 16609 | M218T11_ | 1.007158 | -0.01029 | -0.0105  | 0.991883 | 0.906383 | DOWN | 218.0162 | 218.0161 | 218.0163 | 10.9361  | 10.879   |
| 16610 | M469T11_ | 1.002571 | 0.003705 | 0.01046  | 0.991953 | 0.906389 | UP   | 469.3383 | 469.3379 | 469.3448 | 11.23408 | 11.2174  |
| 16611 | M654T10_ | 1.001126 | -0.00162 | -0.01051 | 0.992039 | 0.906397 | DOWN | 653.6939 | 653.6932 | 653.6957 | 9.823575 | 9.715683 |
| 16612 | M444T10_ | 1.002141 | 0.003086 | 0.010295 | 0.992049 | 0.906397 | UP   | 443.6544 | 443.654  | 443.6547 | 9.918833 | 9.811217 |
| 16613 | M458T10_ | 1.00141  | -0.00203 | -0.00988 | 0.992364 | 0.906424 | DOWN | 458.2337 | 458.233  | 458.2343 | 9.779267 | 9.729367 |
| 16614 | M247T10_ | 1.00171  | -0.00247 | -0.00989 | 0.992366 | 0.906425 | DOWN | 246.807  | 246.8068 | 246.8071 | 9.932033 | 9.827283 |
| 16615 | M442T10_ | 1.000475 | 0.000685 | 0.010021 | 0.992401 | 0.906428 | UP   | 441.8702 | 441.87   | 441.871  | 9.820192 | 9.683817 |
| 16616 | M772T10_ | 1.004819 | -0.00694 | -0.00993 | 0.992459 | 0.906433 | DOWN | 771.7531 | 771.7491 | 771.7542 | 9.830733 | 9.73145  |
| 16617 | M577T30  | 1.001843 | 0.002657 | 0.009847 | 0.992504 | 0.906436 | UP   | 577.3918 | 577.3914 | 577.3919 | 30.2805  | 30.26683 |
| 16618 | M252T9_6 | 1.002982 | -0.0043  | -0.00969 | 0.992583 | 0.906443 | DOWN | 252.3494 | 252.3487 | 252.3507 | 9.234417 | 9.146383 |
| 16619 | M311T11_ | 1.00301  | -0.00434 | -0.00964 | 0.992593 | 0.906444 | DOWN | 310.7679 | 310.7597 | 310.7685 | 10.90553 | 10.71928 |
| 16620 | M293T10_ | 1.005993 | -0.00862 | -0.00963 | 0.992599 | 0.906444 | DOWN | 293.3757 | 293.3755 | 293.3831 | 9.977533 | 9.8914   |
| 16621 | M437T23  | 1.004118 | 0.005928 | 0.009625 | 0.992645 | 0.906448 | UP   | 437.1928 | 437.1924 | 437.1933 | 22.84942 | 22.81383 |
| 16622 | M215T10_ | 1.0027   | -0.00389 | -0.0095  | 0.992681 | 0.906452 | DOWN | 214.8698 | 214.8695 | 214.87   | 9.964092 | 9.843367 |
| 16623 | M273T37  | 1.002002 | 0.002885 | 0.009725 | 0.992702 | 0.906453 | UP   | 273.1693 | 273.1692 | 273.1695 | 37.23633 | 37.02933 |
| 16624 | M317T10_ | 1.001648 | -0.00238 | -0.00943 | 0.992733 | 0.906456 | DOWN | 317.0461 | 317.0457 | 317.0468 | 9.97155  | 9.859233 |

|       |          |          |          |          |          |          |      |          |          |          |          |          |
|-------|----------|----------|----------|----------|----------|----------|------|----------|----------|----------|----------|----------|
| 16625 | M413T9_8 | 1.002721 | -0.00392 | -0.00938 | 0.992881 | 0.906469 | DOWN | 412.9651 | 412.9641 | 412.9665 | 9.182317 | 9.12675  |
| 16626 | M529T11_ | 1.003225 | 0.004645 | 0.0092   | 0.992884 | 0.906469 | UP   | 529.1889 | 529.1884 | 529.1893 | 10.91926 | 10.82972 |
| 16627 | M1185T9  | 1.002828 | 0.004074 | 0.009196 | 0.992905 | 0.906471 | UP   | 1185.496 | 1185.495 | 1185.498 | 9.258358 | 9.06855  |
| 16628 | M454T39_ | 1.001533 | -0.00221 | -0.00917 | 0.99298  | 0.906477 | DOWN | 454.2644 | 454.2641 | 454.2647 | 39.03142 | 38.87033 |
| 16629 | M379T10_ | 1.003156 | -0.00455 | -0.00918 | 0.993006 | 0.906479 | DOWN | 379.3181 | 379.3173 | 379.3198 | 9.8235   | 9.715683 |
| 16630 | M1949T10 | 1.017879 | 0.025566 | 0.00926  | 0.99302  | 0.90648  | UP   | 1948.628 | 1948.625 | 1948.636 | 9.831142 | 9.728083 |
| 16631 | M375T19_ | 1.00101  | 0.001457 | 0.009005 | 0.993068 | 0.906485 | UP   | 375.3004 | 375.3002 | 375.3006 | 18.9655  | 18.95117 |
| 16632 | M438T9_3 | 1.00198  | -0.00285 | -0.0091  | 0.993084 | 0.906486 | DOWN | 437.6917 | 437.6909 | 437.6924 | 8.88395  | 8.772383 |
| 16633 | M788T10_ | 1.001091 | -0.00157 | -0.00895 | 0.99309  | 0.906486 | DOWN | 787.9322 | 787.9313 | 787.933  | 10.21166 | 10.13368 |
| 16634 | M353T11_ | 1.003375 | 0.004862 | 0.008867 | 0.993184 | 0.906494 | UP   | 352.9915 | 352.9911 | 352.9918 | 10.94208 | 10.8628  |
| 16635 | M313T9_3 | 1.002966 | 0.004272 | 0.008812 | 0.993223 | 0.906498 | UP   | 312.6332 | 312.633  | 312.6332 | 9.22495  | 9.174917 |
| 16636 | M399T10_ | 1.009369 | -0.01345 | -0.00883 | 0.993237 | 0.906499 | DOWN | 399.3507 | 399.3505 | 399.3608 | 9.977867 | 9.8914   |
| 16637 | M320T11_ | 1.001969 | -0.00284 | -0.0087  | 0.993274 | 0.906502 | DOWN | 319.7932 | 319.7927 | 319.7944 | 10.91381 | 10.87765 |
| 16638 | M558T10_ | 1.005278 | 0.007594 | 0.008705 | 0.993328 | 0.906507 | UP   | 557.9898 | 557.9892 | 557.9909 | 9.914108 | 9.874067 |
| 16639 | M520T45_ | 1.001388 | 0.002001 | 0.008522 | 0.993412 | 0.906514 | UP   | 520.3113 | 520.3111 | 520.3115 | 44.92483 | 44.76783 |
| 16640 | M208T10_ | 1.002282 | -0.00329 | -0.00856 | 0.993415 | 0.906514 | DOWN | 208.3914 | 208.3912 | 208.3915 | 9.933967 | 9.827283 |
| 16641 | M352T10_ | 1.002432 | -0.0035  | -0.0084  | 0.993511 | 0.906522 | DOWN | 351.5403 | 351.5398 | 351.5404 | 9.964092 | 9.843367 |
| 16642 | M508T11_ | 1.001977 | 0.00285  | 0.00841  | 0.993513 | 0.906522 | UP   | 508.2522 | 508.2519 | 508.2528 | 10.9049  | 10.85018 |
| 16643 | M1516T11 | 1.002155 | -0.00311 | -0.00839 | 0.9936   | 0.90653  | DOWN | 1515.619 | 1515.617 | 1515.621 | 10.8914  | 10.8646  |
| 16644 | M331T9_4 | 1.007126 | -0.01024 | -0.00813 | 0.993724 | 0.906541 | DOWN | 330.8922 | 330.8921 | 330.894  | 9.305225 | 9.234417 |
| 16645 | M213T10_ | 1.001262 | -0.00182 | -0.00816 | 0.99385  | 0.906551 | DOWN | 212.8407 | 212.8406 | 212.8408 | 9.823575 | 9.699733 |
| 16646 | M250T10_ | 1.007041 | 0.010122 | 0.007616 | 0.994111 | 0.906574 | UP   | 250.2772 | 250.2769 | 250.2774 | 9.964167 | 9.859233 |
| 16647 | M1949T10 | 1.001525 | -0.0022  | -0.00765 | 0.994163 | 0.906578 | DOWN | 1949.495 | 1949.493 | 1949.497 | 9.836142 | 9.699733 |
| 16648 | M262T10_ | 1.002187 | 0.003152 | 0.007426 | 0.994261 | 0.906586 | UP   | 261.6488 | 261.6485 | 261.6489 | 9.94785  | 9.827283 |
| 16649 | M1981T10 | 1.002058 | 0.002966 | 0.007342 | 0.994324 | 0.906592 | UP   | 1980.832 | 1980.831 | 1980.836 | 9.856867 | 9.7634   |
| 16650 | M1157T10 | 1.001957 | -0.00282 | -0.00706 | 0.994554 | 0.906611 | DOWN | 1156.639 | 1156.639 | 1156.641 | 9.701875 | 9.5889   |
| 16651 | M938T10  | 1.003268 | 0.004708 | 0.007052 | 0.994563 | 0.906612 | UP   | 938.0113 | 938.0103 | 938.0124 | 9.958617 | 9.843367 |
| 16652 | M734T23  | 1.002044 | -0.00295 | -0.00705 | 0.994582 | 0.906614 | DOWN | 734.49   | 734.4898 | 734.4911 | 23.133   | 23.08867 |
| 16653 | M795T11_ | 1.00157  | 0.002263 | 0.006765 | 0.994783 | 0.906631 | UP   | 795.4467 | 795.4462 | 795.4473 | 10.5189  | 10.47197 |
| 16654 | M1758T10 | 1.002556 | 0.003682 | 0.006712 | 0.994811 | 0.906633 | UP   | 1758.221 | 1758.22  | 1758.221 | 9.830283 | 9.73145  |
| 16655 | M616T10_ | 1.001351 | -0.00195 | -0.00668 | 0.994836 | 0.906635 | DOWN | 616.4269 | 616.4262 | 616.4277 | 10.40847 | 10.34372 |
| 16656 | M228T10_ | 1.000552 | -0.0008  | -0.00668 | 0.994892 | 0.90664  | DOWN | 228.2322 | 228.2321 | 228.2323 | 10.31737 | 10.26307 |
| 16657 | M810T36  | 1.001489 | -0.00215 | -0.00658 | 0.99494  | 0.906644 | DOWN | 809.5241 | 809.5222 | 809.526  | 35.7595  | 35.70583 |
| 16658 | M723T10_ | 1.001697 | -0.00245 | -0.00646 | 0.995005 | 0.90665  | DOWN | 722.9538 | 722.9526 | 722.9547 | 9.857275 | 9.715683 |
| 16659 | M1834T10 | 1.001562 | 0.002252 | 0.006392 | 0.995101 | 0.906658 | UP   | 1834.325 | 1834.323 | 1834.328 | 9.834117 | 9.699733 |

|       |          |          |          |          |          |          |      |          |          |          |          |          |
|-------|----------|----------|----------|----------|----------|----------|------|----------|----------|----------|----------|----------|
| 16660 | M1049T11 | 1.00125  | -0.0018  | -0.0063  | 0.995131 | 0.90666  | DOWN | 1049.47  | 1049.464 | 1049.471 | 10.892   | 10.63137 |
| 16661 | M263T11_ | 1.000744 | 0.001073 | 0.006153 | 0.995242 | 0.90667  | UP   | 263.262  | 263.2616 | 263.2622 | 10.90519 | 10.879   |
| 16662 | M361T10_ | 1.00126  | -0.00182 | -0.00608 | 0.995333 | 0.906678 | DOWN | 360.7429 | 360.7426 | 360.7431 | 9.983467 | 9.8753   |
| 16663 | M219T11_ | 1.001305 | 0.001881 | 0.00594  | 0.995407 | 0.906684 | UP   | 218.6865 | 218.6865 | 218.6866 | 10.90553 | 10.879   |
| 16664 | M387T10_ | 1.004798 | -0.00691 | -0.00572 | 0.995577 | 0.906698 | DOWN | 386.7987 | 386.7981 | 386.8055 | 9.915583 | 9.822117 |
| 16665 | M476T9_2 | 1.002897 | -0.00417 | -0.00576 | 0.995587 | 0.906699 | DOWN | 475.5798 | 475.572  | 475.5839 | 9.229333 | 9.126783 |
| 16666 | M221T30_ | 1.007829 | 0.011251 | 0.005594 | 0.995674 | 0.906706 | UP   | 221.1001 | 221.0984 | 221.1045 | 29.87008 | 29.76133 |
| 16667 | M1954T10 | 1.001122 | 0.001618 | 0.005585 | 0.995684 | 0.906707 | UP   | 1954.374 | 1954.371 | 1954.377 | 9.821308 | 9.73145  |
| 16668 | M752T10_ | 1.001003 | -0.00145 | -0.00561 | 0.995732 | 0.906711 | DOWN | 752.4234 | 752.4218 | 752.4244 | 10.4133  | 10.32952 |
| 16669 | M494T10_ | 1.001119 | -0.00161 | -0.00549 | 0.995763 | 0.906714 | DOWN | 494.3361 | 494.3352 | 494.3365 | 9.972917 | 9.859233 |
| 16670 | M569T9_8 | 1.001444 | -0.00208 | -0.00533 | 0.995885 | 0.906724 | DOWN | 569.4747 | 569.4745 | 569.4748 | 8.694433 | 8.63795  |
| 16671 | M639T10_ | 1.000567 | 0.000818 | 0.005253 | 0.995937 | 0.906729 | UP   | 638.6197 | 638.619  | 638.6227 | 9.830558 | 9.715683 |
| 16672 | M477T9_1 | 1.003069 | -0.00442 | -0.00525 | 0.995938 | 0.906729 | DOWN | 476.5483 | 476.5461 | 476.5495 | 9.22495  | 9.1602   |
| 16673 | M454T38  | 1.000682 | 0.000984 | 0.005268 | 0.995994 | 0.906734 | UP   | 454.2646 | 454.2641 | 454.2647 | 38.40967 | 38.338   |
| 16674 | M443T9   | 1.001842 | -0.00266 | -0.0051  | 0.996058 | 0.906739 | DOWN | 442.7914 | 442.7906 | 442.7917 | 8.963    | 8.892117 |
| 16675 | M324T11_ | 1.001555 | -0.00224 | -0.0051  | 0.996071 | 0.90674  | DOWN | 323.8821 | 323.8818 | 323.8825 | 10.90646 | 10.8926  |
| 16676 | M195T9_1 | 1.003586 | -0.00516 | -0.00506 | 0.99609  | 0.906742 | DOWN | 195.0606 | 195.0591 | 195.0633 | 9.272133 | 9.03845  |
| 16677 | M404T42_ | 1.000918 | -0.00132 | -0.00508 | 0.996104 | 0.906743 | DOWN | 404.264  | 404.2638 | 404.2641 | 42.4235  | 42.23667 |
| 16678 | M219T11_ | 1.000755 | 0.001089 | 0.005007 | 0.996138 | 0.906746 | UP   | 219.3674 | 219.3673 | 219.3676 | 10.892   | 10.879   |
| 16679 | M565T10_ | 1.00139  | 0.002004 | 0.004986 | 0.996146 | 0.906747 | UP   | 564.6618 | 564.6614 | 564.6621 | 9.9847   | 9.8753   |
| 16680 | M624T10_ | 1.000937 | -0.00135 | -0.0049  | 0.996237 | 0.906754 | DOWN | 623.8045 | 623.8037 | 623.8087 | 9.830458 | 9.7124   |
| 16681 | M391T20  | 1.000918 | 0.001323 | 0.004876 | 0.996243 | 0.906755 | UP   | 391.0565 | 391.0564 | 391.0567 | 20.245   | 20.23017 |
| 16682 | M548T43  | 1.000863 | -0.00124 | -0.00477 | 0.99632  | 0.906761 | DOWN | 548.3062 | 548.3061 | 548.3064 | 43.19333 | 42.91267 |
| 16683 | M403T44_ | 1.001372 | -0.00198 | -0.00464 | 0.996441 | 0.906772 | DOWN | 403.2323 | 403.2321 | 403.2326 | 44.02017 | 43.86233 |
| 16684 | M793T11_ | 1.001353 | 0.001951 | 0.004579 | 0.996465 | 0.906774 | UP   | 792.5969 | 792.5964 | 792.5972 | 11.24773 | 11.20953 |
| 16685 | M1220T18 | 1.000632 | -0.00091 | -0.00461 | 0.996528 | 0.906779 | DOWN | 1219.557 | 1219.557 | 1219.558 | 18.08533 | 18.05517 |
| 16686 | M719T10_ | 1.001126 | 0.001624 | 0.004459 | 0.996586 | 0.906784 | UP   | 719.415  | 719.4141 | 719.4155 | 10.05184 | 9.955733 |
| 16687 | M219T10_ | 1.001883 | 0.002714 | 0.004082 | 0.996846 | 0.906806 | UP   | 218.8398 | 218.8396 | 218.8398 | 9.967367 | 9.859233 |
| 16688 | M784T10_ | 1.000484 | 0.000698 | 0.004055 | 0.996865 | 0.906808 | UP   | 783.859  | 783.8585 | 783.8598 | 9.970617 | 9.885167 |
| 16689 | M568T10_ | 1.000866 | 0.001249 | 0.003984 | 0.996943 | 0.906814 | UP   | 568.0369 | 568.0365 | 568.0375 | 9.902617 | 9.79535  |
| 16690 | M306T15  | 1.001923 | -0.00277 | -0.00388 | 0.997088 | 0.906826 | DOWN | 306.2037 | 306.2034 | 306.2038 | 14.83908 | 14.79363 |
| 16691 | M198T11_ | 1.000583 | -0.00084 | -0.0037  | 0.997139 | 0.906831 | DOWN | 198.4997 | 198.4995 | 198.4998 | 10.8926  | 10.8646  |
| 16692 | M614T10_ | 1.000926 | 0.001335 | 0.003673 | 0.99716  | 0.906833 | UP   | 614.386  | 614.385  | 614.3925 | 10.04697 | 9.840617 |
| 16693 | M224T11_ | 1.000423 | 0.00061  | 0.003656 | 0.997173 | 0.906834 | UP   | 223.5235 | 223.5234 | 223.524  | 10.90519 | 10.879   |
| 16694 | M489T30  | 1.000658 | -0.00095 | -0.00374 | 0.997175 | 0.906834 | DOWN | 489.3392 | 489.3388 | 489.3393 | 30.26608 | 30.25233 |

|       |          |          |           |          |          |          |      |          |          |          |          |          |
|-------|----------|----------|-----------|----------|----------|----------|------|----------|----------|----------|----------|----------|
| 16695 | M259T11_ | 1.000876 | 0.001263  | 0.003635 | 0.997189 | 0.906835 | UP   | 259.4235 | 259.4234 | 259.4239 | 10.892   | 10.8646  |
| 16696 | M337T9_6 | 1.001178 | -0.0017   | -0.00367 | 0.997202 | 0.906836 | DOWN | 336.8249 | 336.8248 | 336.825  | 9.170325 | 9.130683 |
| 16697 | M239T11_ | 1.000932 | 0.001343  | 0.003603 | 0.997216 | 0.906837 | UP   | 238.8548 | 238.8545 | 238.8554 | 10.892   | 10.85018 |
| 16698 | M264T11_ | 1.000411 | 0.000593  | 0.003368 | 0.997415 | 0.906854 | UP   | 263.7541 | 263.7537 | 263.7543 | 10.90551 | 10.879   |
| 16699 | M389T10_ | 1.039878 | 0.056414  | 0.003163 | 0.997586 | 0.906869 | UP   | 389.4189 | 389.4186 | 389.4195 | 9.981567 | 9.960967 |
| 16700 | M1761T10 | 1.000724 | -0.00104  | -0.00313 | 0.997595 | 0.906869 | DOWN | 1760.95  | 1760.949 | 1760.95  | 9.977067 | 9.859233 |
| 16701 | M352T10_ | 1.000522 | -0.00075  | -0.00316 | 0.997598 | 0.90687  | DOWN | 351.8798 | 351.8796 | 351.8799 | 9.825492 | 9.7124   |
| 16702 | M239T10_ | 1.00072  | 0.001038  | 0.003054 | 0.997684 | 0.906877 | UP   | 239.0571 | 239.0568 | 239.0572 | 9.954217 | 9.843367 |
| 16703 | M161T9_1 | 1.032505 | 0.046148  | -0.003   | 0.997704 | 0.906879 | UP   | 161.0373 | 161.0372 | 161.0374 | 9.324708 | 9.26575  |
| 16704 | M318T9_2 | 1.000689 | -0.00099  | -0.00297 | 0.997716 | 0.90688  | DOWN | 317.521  | 317.5208 | 317.5211 | 8.863725 | 8.802417 |
| 16705 | M888T11_ | 1.000743 | 0.001072  | 0.002917 | 0.997747 | 0.906882 | UP   | 888.4204 | 888.4198 | 888.4251 | 10.91734 | 10.88995 |
| 16706 | M554T11_ | 1.000727 | 0.001049  | 0.002771 | 0.997858 | 0.906892 | UP   | 553.9131 | 553.912  | 553.9138 | 10.89907 | 10.88747 |
| 16707 | M316T10_ | 1.000879 | 0.001268  | 0.002681 | 0.997928 | 0.906898 | UP   | 315.9746 | 315.9742 | 315.9752 | 9.884917 | 9.811217 |
| 16708 | M485T11_ | 1.000424 | -0.00061  | -0.00265 | 0.997953 | 0.9069   | DOWN | 485.3692 | 485.3691 | 485.3696 | 11.48533 | 11.47593 |
| 16709 | M452T10_ | 1.000693 | -0.001    | -0.00255 | 0.998036 | 0.906907 | DOWN | 452.1785 | 452.1779 | 452.1838 | 9.903017 | 9.822117 |
| 16710 | M211T10_ | 1.000706 | 0.001018  | 0.0025   | 0.998067 | 0.906909 | UP   | 211.2945 | 211.2942 | 211.2945 | 9.823575 | 9.73145  |
| 16711 | M298T10_ | 1.000922 | 0.00133   | 0.002424 | 0.998126 | 0.906914 | UP   | 298.1768 | 298.1765 | 298.1769 | 9.948875 | 9.843367 |
| 16712 | M357T41_ | 1.000776 | -0.00112  | -0.00242 | 0.998156 | 0.906917 | DOWN | 357.1907 | 357.1906 | 357.1909 | 41.47558 | 41.388   |
| 16713 | M561T11  | 1.000517 | 0.000746  | 0.002357 | 0.998179 | 0.906919 | UP   | 561.0226 | 561.0224 | 561.023  | 10.9176  | 10.8888  |
| 16714 | M371T9_1 | 1.000648 | 0.000934  | 0.002225 | 0.998306 | 0.90693  | UP   | 370.9158 | 370.9154 | 370.9161 | 9.4592   | 9.355317 |
| 16715 | M562T11_ | 1.070198 | 0.097878  | 0.00213  | 0.998377 | 0.906936 | UP   | 562.1098 | 562.1088 | 562.1103 | 10.87487 | 10.85838 |
| 16716 | M410T19  | 1.000555 | 0.0008    | 0.002019 | 0.998447 | 0.906941 | UP   | 410.0301 | 410.0295 | 410.0303 | 18.588   | 18.57017 |
| 16717 | M728T10_ | 1.000183 | 0.000263  | 0.001993 | 0.998459 | 0.906942 | UP   | 727.8771 | 727.8754 | 727.8778 | 9.825492 | 9.715683 |
| 16718 | M1964T10 | 1.000244 | 0.000352  | 0.00179  | 0.998644 | 0.906958 | UP   | 1963.515 | 1963.513 | 1963.519 | 9.842908 | 9.73145  |
| 16719 | M456T10_ | 1.00034  | 0.000491  | 0.001676 | 0.998731 | 0.906965 | UP   | 456.2464 | 456.2455 | 456.2465 | 9.970617 | 9.8914   |
| 16720 | M359T24  | 1.000501 | 0.000722  | 0.001571 | 0.998803 | 0.906972 | UP   | 359.2401 | 359.2399 | 359.2402 | 23.75133 | 23.74233 |
| 16721 | M811T10_ | 1.00073  | 0.001053  | 0.00147  | 0.99887  | 0.906977 | UP   | 810.9267 | 810.9258 | 810.9272 | 9.970617 | 9.8753   |
| 16722 | M599T10_ | 1.000162 | -0.00023  | -0.00144 | 0.998887 | 0.906979 | DOWN | 598.8346 | 598.8343 | 598.8351 | 9.9149   | 9.811217 |
| 16723 | M342T38  | 1.000062 | -8.92E-05 | -0.00135 | 0.998971 | 0.906986 | DOWN | 342.3082 | 342.308  | 342.3084 | 37.69775 | 37.69017 |
| 16724 | M1066T10 | 1.000453 | -0.00065  | -0.00132 | 0.99899  | 0.906987 | DOWN | 1066.332 | 1066.33  | 1066.333 | 9.951283 | 9.714783 |
| 16725 | M402T11_ | 1.001132 | -0.00163  | -0.00127 | 0.999021 | 0.90699  | DOWN | 402.3026 | 402.2997 | 402.305  | 10.88236 | 10.83393 |
| 16726 | M428T9_1 | 1.000382 | -0.00055  | -0.00127 | 0.999035 | 0.906991 | DOWN | 427.5991 | 427.5987 | 427.5999 | 9.289925 | 9.18975  |
| 16727 | M397T10_ | 1.000369 | -0.00053  | -0.00119 | 0.999082 | 0.906995 | DOWN | 396.8192 | 396.819  | 396.8194 | 9.538267 | 9.416817 |
| 16728 | M856T10_ | 1.000327 | 0.000471  | 0.001201 | 0.999088 | 0.906996 | UP   | 855.5204 | 855.5192 | 855.5223 | 9.954217 | 9.843367 |
| 16729 | M381T11_ | 1.000191 | -0.00028  | -0.00105 | 0.999187 | 0.907004 | DOWN | 380.9507 | 380.9506 | 380.9516 | 10.892   | 10.879   |

|       |          |          |           |          |          |          |      |          |          |          |          |          |
|-------|----------|----------|-----------|----------|----------|----------|------|----------|----------|----------|----------|----------|
| 16730 | M238T11_ | 1.00012  | -0.00017  | -0.00101 | 0.999224 | 0.907007 | DOWN | 238.1671 | 238.167  | 238.1677 | 10.90551 | 10.879   |
| 16731 | M569T9_5 | 1.000616 | 0.000888  | 0.000887 | 0.999318 | 0.907015 | UP   | 569.3252 | 569.3251 | 569.3253 | 9.429367 | 9.370583 |
| 16732 | M260T11_ | 1.000122 | -0.00018  | -0.00085 | 0.999342 | 0.907017 | DOWN | 259.6823 | 259.6821 | 259.6823 | 10.892   | 10.879   |
| 16733 | M1420T10 | 1.000083 | 0.000119  | 0.00077  | 0.999405 | 0.907022 | UP   | 1419.664 | 1419.661 | 1419.664 | 9.932033 | 9.827283 |
| 16734 | M484T9_2 | 1.00014  | -0.0002   | -0.00073 | 0.999433 | 0.907025 | DOWN | 483.9809 | 483.9793 | 483.9813 | 8.977608 | 8.892117 |
| 16735 | M322T10_ | 1.000147 | 0.000213  | 0.000736 | 0.999434 | 0.907025 | UP   | 322.0365 | 322.0358 | 322.0369 | 9.924267 | 9.811217 |
| 16736 | M565T10_ | 1.000153 | -0.00022  | -0.0006  | 0.999534 | 0.907033 | DOWN | 564.8206 | 564.8202 | 564.8209 | 9.664767 | 9.541483 |
| 16737 | M331T10_ | 1.000083 | 0.00012   | 0.000393 | 0.999696 | 0.907047 | UP   | 331.0423 | 331.0421 | 331.0425 | 9.918833 | 9.811217 |
| 16738 | M383T10_ | 1.000068 | 9.79E-05  | 0.000386 | 0.999702 | 0.907047 | UP   | 383.3197 | 383.3196 | 383.3199 | 9.985733 | 9.8914   |
| 16739 | M484T10_ | 1.000072 | 0.000103  | 0.000331 | 0.999748 | 0.907051 | UP   | 484.3379 | 484.3377 | 484.338  | 10.37466 | 10.32768 |
| 16740 | M426T11_ | 1.000162 | 0.000234  | 0.000225 | 0.999827 | 0.907058 | UP   | 426.2838 | 426.2834 | 426.2853 | 10.93415 | 10.77772 |
| 16741 | M409T11_ | 1.000023 | 3.28E-05  | 0.000202 | 0.999846 | 0.90706  | UP   | 409.0697 | 409.0696 | 409.0755 | 10.90657 | 10.879   |
| 16742 | M507T17  | 1.000024 | -3.44E-05 | -0.00019 | 0.999853 | 0.90706  | DOWN | 507.3982 | 507.3978 | 507.3985 | 17.045   | 17.03033 |
| 16743 | M904T10  | 1.035774 | 0.050709  | 0.000167 | 0.999871 | 0.907062 | UP   | 904.0282 | 904.0276 | 904.0295 | 9.951392 | 9.859233 |

| rtmax    | npeaks | DMSO_Aq | 11oxoETE_maxint | mean1    | sd1      | mean2    | sd2      | Untreat1 | Untreat2 | Untreat3 | Untreat4 |          |
|----------|--------|---------|-----------------|----------|----------|----------|----------|----------|----------|----------|----------|----------|
| 9.659033 | 5      | 0       | 5               | 4449025  | 30561031 | 2604976  | 4310609  | 3088789  | 30961100 | 31545530 | 33994410 | 29296591 |
| 9.40135  | 6      | 0       | 5               | 1727247  | 15233735 | 1176732  | 3808250  | 2000885  | 17126982 | 15303381 | 14146480 | 15234130 |
| 43.33    | 8      | 0       | 5               | 1470469  | 19897893 | 577584   | 5122652  | 2657779  | 20308385 | 20573761 | 19364208 | 19253067 |
| 9.324967 | 6      | 5       | 1               | 394658.3 | 1392086  | 185576.4 | 678795.8 | 163413.3 | 1398178  | 1599845  | 1102867  | 1493275  |
| 10.25853 | 4      | 0       | 4               | 22817678 | 1.81E+08 | 28129560 | 21145032 | 45756321 | 2.24E+08 | 1.71E+08 | 1.77E+08 | 1.85E+08 |
| 21.8415  | 5      | 0       | 5               | 2021432  | 353565.3 | 44639.04 | 13562626 | 2711776  | 426341.7 | 329344   | 312264.3 | 363268.8 |
| 9.3735   | 3      | 0       | 3               | 381925   | 3514407  | 498536.5 | 1692236  | 196998.7 | 4164687  | 3235267  | 3844920  | 3426233  |
| 17.65867 | 3      | 0       | 3               | 401784.2 | 430524.1 | 58197.98 | 5331466  | 1117385  | 489551.8 | 416886.1 | 385471.8 | 367713.7 |
| 20.245   | 4      | 0       | 4               | 131047.8 | 550897.1 | 107433.7 | 183959.7 | 106508.7 | 574365.1 | 702896.8 | 431837.8 | 464609.8 |
| 9.370583 | 6      | 1       | 4               | 1076033  | 3915571  | 694476.1 | 1628590  | 710589.9 | 4808899  | 3620051  | 4021010  | 4190617  |
| 9.82645  | 4      | 4       | 0               | 4851155  | 5425110  | 5040665  | 19936308 | 3379456  | 1997459  | 14349760 | 3850103  | 3286106  |
| 21.11583 | 4      | 0       | 4               | 1933552  | 292356.7 | 19943.83 | 10787973 | 2802176  | 317258.8 | 269746.6 | 309054.7 | 282329.8 |
| 9.77345  | 4      | 3       | 1               | 665961.6 | 1628925  | 180080.8 | 1082389  | 68658.24 | 1634110  | 1937923  | 1495098  | 1542990  |
| 9.392767 | 4      | 4       | 0               | 494103.7 | 1027032  | 311348.7 | 123363.6 | 142574.2 | 974619.6 | 1016972  | 854219.2 | 740101.2 |
| 9.388367 | 10     | 5       | 5               | 1169871  | 3770858  | 495274.8 | 2196730  | 558633.7 | 4326908  | 4034456  | 3208091  | 3286882  |
| 9.445217 | 9      | 3       | 5               | 4595949  | 22331545 | 3203845  | 13059194 | 3064220  | 19560674 | 19651099 | 20982939 | 24938487 |
| 21.74    | 4      | 0       | 4               | 348920.3 | 212151.1 | 43368.57 | 2095348  | 579506.9 | 199582.7 | 149624.6 | 228151.2 | 268658.7 |
| 21.11817 | 3      | 0       | 3               | 496377.3 | 766313.3 | 33150.49 | 2812146  | 651311.8 | 793949.2 | 796140.6 | 760250.7 | 766924.8 |
| 12.36858 | 3      | 0       | 3               | 71009    | 63446.23 | 28484.74 | 224961.3 | 61424.86 | 31558.36 | 55196.19 | 109300.3 | 65154.07 |
| 9.856867 | 10     | 5       | 5               | 2439362  | 12636427 | 1291148  | 7805239  | 1914195  | 12536854 | 11786443 | 11071960 | 13488384 |
| 9.358417 | 5      | 1       | 4               | 4392405  | 43102299 | 7214311  | 16401548 | 10686764 | 39773128 | 35217146 | 40790343 | 45500759 |
| 20.78217 | 5      | 0       | 5               | 2870806  | 298616.3 | 22247.17 | 18799126 | 6080244  | 296077.7 | 330555.7 | 289191.9 | 306860.1 |
| 22.87133 | 6      | 1       | 5               | 200481.3 | 2128854  | 298085.1 | 1375648  | 231590.2 | 1604149  | 2220701  | 2209930  | 2344862  |
| 21.46183 | 5      | 0       | 5               | 2311349  | 680677   | 25142.39 | 20381649 | 6579944  | 653136   | 689836.9 | 655916.7 | 710688   |
| 8.8977   | 9      | 5       | 4               | 385645.3 | 2397526  | 571946.8 | 901510.3 | 543115.2 | 2561685  | 3099221  | 2564110  | 1543333  |
| 9.43325  | 10     | 5       | 4               | 498635.6 | 2772024  | 608900.1 | 1150479  | 615759.2 | 1998419  | 2626998  | 3268639  | 3496776  |
| 9.3141   | 5      | 0       | 4               | 4.71E+08 | 2.13E+09 | 2.53E+08 | 3.27E+08 | 7.21E+08 | 2.13E+09 | 2.1E+09  | 2.5E+09  | 2.15E+09 |
| 11.39828 | 9      | 5       | 4               | 170130.3 | 591606.5 | 51396.05 | 278266.2 | 127843.3 | 572625.9 | 591056.7 | 677996.5 | 542250   |
| 24.15683 | 5      | 0       | 5               | 1811574  | 318643   | 63434.03 | 11595530 | 4041079  | 353320   | 365524   | 344418   | 320970.5 |
| 9.46265  | 10     | 5       | 5               | 1246874  | 5056538  | 653999.3 | 3511915  | 494522.9 | 5838971  | 5697736  | 4671198  | 4534733  |
| 9.388367 | 9      | 5       | 4               | 1046035  | 3708649  | 563270.6 | 2328334  | 519586.4 | 4336488  | 4007447  | 2829402  | 3760567  |
| 21.56017 | 6      | 3       | 3               | 102439.3 | 549656.8 | 94106.82 | 327452.2 | 38044.09 | 629566.3 | 639352.1 | 577474.6 | 431815.5 |
| 10.31365 | 7      | 3       | 3               | 277663   | 1056271  | 40299.89 | 703779.4 | 143768.9 | 1024813  | 1042244  | 1094069  | 1103998  |
| 9.95825  | 4      | 1       | 3               | 2050352  | 4620265  | 1002029  | 1906184  | 1140607  | 6286354  | 3949738  | 4319288  | 4752020  |



|          |    |   |   |          |          |          |          |          |          |          |          |          |
|----------|----|---|---|----------|----------|----------|----------|----------|----------|----------|----------|----------|
| 9.830833 | 9  | 5 | 4 | 559762.8 | 1635226  | 144018.4 | 1961288  | 101170.6 | 1432566  | 1664105  | 1552982  | 1735664  |
| 21.50117 | 3  | 0 | 3 | 1211486  | 308782.4 | 37996.9  | 7914977  | 2891446  | 321998.3 | 340686.5 | 307116.5 | 329691   |
| 20.78217 | 5  | 0 | 5 | 807494.9 | 823589.9 | 48133.8  | 4380804  | 1363880  | 823648   | 815618.6 | 900724.9 | 809694.9 |
| 10.9645  | 4  | 3 | 1 | 312348.1 | 689739.9 | 145861.8 | 349352.9 | 125133.9 | 811436.3 | 595323.4 | 523391.5 | 649646.7 |
| 9.219483 | 3  | 0 | 3 | 10549683 | 60416094 | 4912332  | 20232241 | 16874301 | 66421741 | 60342006 | 61988728 | 60525415 |
| 9.46265  | 10 | 5 | 5 | 846927.6 | 2920872  | 344600.5 | 2000063  | 396139.9 | 3211450  | 3320407  | 2781141  | 2472548  |
| 23.249   | 4  | 0 | 4 | 88702.7  | 154594.9 | 39933.01 | 606832.1 | 185625.9 | 174436.5 | 214253.9 | 114705.4 | 129789.5 |
| 11.72232 | 8  | 4 | 4 | 144455.1 | 1301229  | 387113.7 | 450859.2 | 251573.5 | 1869802  | 932189.1 | 1518952  | 1040125  |
| 9.64815  | 4  | 3 | 1 | 464665.4 | 1258268  | 300667.4 | 566345.1 | 258551.7 | 1235317  | 1527445  | 1334104  | 1437094  |
| 9.41815  | 3  | 0 | 3 | 394637.7 | 1267622  | 143448.5 | 776176.8 | 226769.5 | 1023071  | 1382679  | 1279074  | 1359569  |
| 21.4725  | 4  | 0 | 4 | 554396.6 | 1787689  | 69419.86 | 5084810  | 1335328  | 1845687  | 1862387  | 1776659  | 1764341  |
| 20.0125  | 7  | 3 | 4 | 121749.1 | 544279.3 | 82408.42 | 328344.9 | 95691.39 | 584834.9 | 452911.2 | 464256.9 | 642932.7 |
| 21.8415  | 3  | 0 | 3 | 439769.3 | 836696.4 | 53836.67 | 3095152  | 919385.8 | 842412.6 | 896209.7 | 815897.6 | 757038   |
| 9.8322   | 7  | 3 | 4 | 752446.8 | 2794293  | 467080.8 | 1443554  | 627002.9 | 2697243  | 2618442  | 3611962  | 2609501  |
| 21.88483 | 5  | 0 | 4 | 1347801  | 840748.8 | 40645.05 | 8675100  | 3243687  | 897221.3 | 834686.5 | 786163   | 828803.4 |
| 9.328967 | 5  | 1 | 4 | 603867.6 | 4218452  | 1443966  | 1184430  | 776247.7 | 4629342  | 5903485  | 5029759  | 3238008  |
| 9.388367 | 10 | 5 | 5 | 1182937  | 3878658  | 597628   | 2514403  | 560595.1 | 3975122  | 4195813  | 3112644  | 3476119  |
| 26.9835  | 6  | 5 | 1 | 113957.6 | 335069.8 | 154911.8 | 678207.7 | 135972.4 | 221524.5 | 481655.2 | 122403   | 413684.4 |
| 9.93625  | 3  | 0 | 3 | 2489631  | 10314407 | 2333312  | 3882998  | 3039121  | 9061269  | 8541769  | 14290385 | 10473716 |
| 9.023433 | 4  | 3 | 1 | 178342.3 | 392558.7 | 107047.3 | 158046.5 | 93277.63 | 424198.7 | 487695.2 | 296155.6 | 263289.5 |
| 10.23515 | 6  | 4 | 2 | 332694.1 | 1006138  | 212285.1 | 555797   | 176168.8 | 1064132  | 1251001  | 1092402  | 681597.9 |
| 10.55887 | 4  | 3 | 1 | 86893.98 | 177992.8 | 39411.37 | 97670.36 | 27114.23 | 179089.1 | 192104.5 | 127435.7 | 158038.4 |
| 10.33295 | 4  | 3 | 1 | 355432.9 | 467774.4 | 369678.9 | 1314061  | 373241   | 888802.4 | 225324.3 | 159527.9 | 210754.3 |
| 9.487883 | 15 | 5 | 5 | 6940831  | 23714414 | 2661134  | 17636188 | 2695011  | 26530721 | 22452670 | 19851971 | 24086902 |
| 9.388367 | 10 | 5 | 5 | 1616657  | 6779774  | 692263.2 | 4702210  | 1031702  | 7564610  | 7181590  | 5718542  | 6665052  |
| 33.19617 | 3  | 0 | 3 | 83181.81 | 420446.8 | 36423.92 | 260687.3 | 79535.23 | 376758.4 | 450159.4 | 420429.9 | 392676.8 |
| 9.842    | 5  | 4 | 1 | 377734.8 | 1419738  | 203543.2 | 791568.6 | 318581.8 | 1744226  | 1445384  | 1230996  | 1264471  |
| 9.4775   | 8  | 3 | 5 | 1047010  | 4208482  | 1115965  | 1980201  | 802643.1 | 3760803  | 4270682  | 2908540  | 4138216  |
| 9.346    | 3  | 0 | 3 | 748041.8 | 7521471  | 1159994  | 3048126  | 2302157  | 7848770  | 5728569  | 8680353  | 8253918  |
| 10.63273 | 4  | 0 | 4 | 773921.1 | 2716775  | 437336.5 | 1369739  | 694854.9 | 3445543  | 2711774  | 2674247  | 2382152  |
| 9.438833 | 9  | 5 | 4 | 3489280  | 4998744  | 2380944  | 13524623 | 4440108  | 5090201  | 5927089  | 8331579  | 2039843  |
| 9.406667 | 5  | 1 | 4 | 2095918  | 14203863 | 5124552  | 4394586  | 2506596  | 16447890 | 5323028  | 18435021 | 15820796 |
| 9.522017 | 8  | 5 | 3 | 346833.2 | 815630.2 | 141039.8 | 415918.8 | 207845.1 | 876331.6 | 1016022  | 651875.5 | 721275.5 |
| 9.450483 | 7  | 2 | 4 | 1074613  | 4760527  | 1166101  | 1916701  | 1434173  | 4781838  | 5825690  | 3157667  | 4123832  |
| 17.60183 | 4  | 0 | 4 | 282134.4 | 387085.3 | 62356.35 | 1716570  | 642811   | 345880.7 | 479712   | 338818.1 | 347160.6 |

|          |    |   |   |          |          |          |          |          |          |          |          |          |
|----------|----|---|---|----------|----------|----------|----------|----------|----------|----------|----------|----------|
| 8.8977   | 10 | 5 | 5 | 519986.8 | 7121974  | 555821.9 | 2770771  | 2187463  | 7500553  | 7618517  | 6213532  | 7038503  |
| 9.649833 | 8  | 4 | 2 | 714829.3 | 1200862  | 112483.6 | 1706627  | 265518.2 | 1290115  | 1028841  | 1143739  | 1272416  |
| 9.1476   | 3  | 0 | 3 | 8165399  | 38047714 | 14266972 | 10718674 | 10336123 | 41675914 | 60411134 | 30910802 | 34629269 |
| 10.3061  | 7  | 3 | 4 | 840133.3 | 2347246  | 687512.3 | 1059158  | 429281   | 3365677  | 2579427  | 2312219  | 1911979  |
| 9.650367 | 9  | 5 | 4 | 1612678  | 6467989  | 585296   | 4277533  | 1173984  | 7263443  | 5637954  | 6313566  | 6621108  |
| 9.523383 | 4  | 0 | 4 | 1.41E+08 | 8.43E+08 | 63381790 | 1.56E+08 | 3.44E+08 | 9.35E+08 | 8.58E+08 | 8.45E+08 | 8.19E+08 |
| 9.56645  | 12 | 4 | 4 | 386795.5 | 1012034  | 200044.4 | 554078.6 | 229262.2 | 1124011  | 1032759  | 773275.1 | 859548.5 |
| 9.445217 | 12 | 5 | 5 | 2296752  | 27436780 | 4302753  | 17193517 | 5228861  | 26563781 | 23767684 | 24489394 | 27783203 |
| 10.03167 | 3  | 3 | 0 | 866796.9 | 2096130  | 515978.8 | 1089230  | 138929.1 | 1813003  | 2674872  | 1972793  | 2566670  |
| 10.52898 | 10 | 5 | 5 | 291782   | 1094760  | 265669.1 | 604794.2 | 135104.6 | 960627.4 | 1507921  | 1207173  | 945818.4 |
| 11.59415 | 6  | 1 | 4 | 133856.7 | 573099.2 | 115043.7 | 280033.7 | 155077.5 | 607833.4 | 605007.1 | 460275.9 | 460321.9 |
| 9.673333 | 10 | 5 | 5 | 733307.5 | 2591902  | 440628.1 | 1731815  | 372228.3 | 3118778  | 2697702  | 2044197  | 2245912  |
| 10.97857 | 10 | 5 | 5 | 402316.1 | 1663745  | 350652.3 | 1020459  | 198796.7 | 1926161  | 1961331  | 1459997  | 1146916  |
| 10.94538 | 5  | 5 | 0 | 435940.3 | 417536.6 | 178422.9 | 911086.5 | 266182.9 | 329253.7 | 291643.2 | 404939.7 | 333661.7 |
| 25.20317 | 8  | 5 | 3 | 164587.4 | 450406   | 154596.7 | 942569.4 | 268829.5 | 449913.3 | 498783.6 | 202189.7 | 626671.1 |
| 10.7349  | 6  | 4 | 2 | 160964.3 | 309809.8 | 130998.2 | 576128.9 | 124734.8 | 317362.2 | 255080.6 | 374219.5 | 476254.4 |
| 9.43325  | 5  | 1 | 4 | 684090.4 | 4188310  | 1060812  | 1843346  | 1183277  | 5238661  | 4561072  | 4694051  | 3979890  |
| 9.842    | 5  | 2 | 3 | 1104453  | 3514106  | 718458.3 | 2136110  | 585687.1 | 2720880  | 3232231  | 3998379  | 4497637  |
| 9.433    | 6  | 1 | 5 | 3236746  | 29667997 | 10449332 | 10315796 | 7263404  | 37445869 | 11460508 | 34832969 | 33751360 |
| 10.01477 | 10 | 5 | 5 | 910743.8 | 2539965  | 457008.1 | 1553585  | 491599.4 | 2730893  | 2852266  | 2771163  | 1737840  |
| 9.46265  | 10 | 5 | 5 | 813490.4 | 2958167  | 427903.5 | 1955209  | 524260.2 | 3325836  | 3479180  | 2729875  | 2794702  |
| 9.903567 | 8  | 5 | 3 | 1542475  | 2882328  | 875447.7 | 5045543  | 1163430  | 2287863  | 1778003  | 2862200  | 3655295  |
| 9.445217 | 12 | 5 | 5 | 34510636 | 4.41E+08 | 80315308 | 2.94E+08 | 56161108 | 4.41E+08 | 3.64E+08 | 3.69E+08 | 4.72E+08 |
| 9.4775   | 10 | 5 | 5 | 3869508  | 16778257 | 1596397  | 11840245 | 2765932  | 18579369 | 16757612 | 15652861 | 14797174 |
| 11.04868 | 9  | 5 | 4 | 910616.1 | 6701565  | 1303181  | 3984181  | 1362242  | 8000324  | 6679539  | 6776697  | 4578834  |
| 18.44917 | 5  | 0 | 5 | 400007.6 | 328117.8 | 57065.96 | 1776577  | 748994.2 | 389577.8 | 343845.8 | 279476.6 | 258041.4 |
| 10.16043 | 7  | 4 | 3 | 152518.3 | 463182.8 | 110746.9 | 237752.9 | 111240.8 | 425644   | 642643.4 | 491110.5 | 367307.9 |
| 10.77857 | 7  | 4 | 3 | 144666.7 | 511999.2 | 129014   | 272180.7 | 102931.2 | 679327.9 | 547978.8 | 390422.6 | 373245.5 |
| 9.94455  | 7  | 3 | 4 | 802211.1 | 2190317  | 350656.1 | 1130558  | 598944.9 | 2758133  | 1829571  | 1997358  | 2152010  |
| 9.507167 | 4  | 1 | 3 | 450957.1 | 2334859  | 312502.2 | 1409737  | 522367.9 | 2411926  | 2409938  | 1812780  | 2657780  |
| 13.25843 | 10 | 5 | 5 | 26370.69 | 137801.7 | 27163.46 | 88880.77 | 19117.62 | 162330.1 | 166072.5 | 123994.6 | 100989.4 |
| 9.450483 | 3  | 0 | 3 | 12137075 | 1.44E+08 | 16897023 | 41721052 | 56451784 | 1.59E+08 | 1.16E+08 | 1.49E+08 | 1.54E+08 |
| 9.62055  | 5  | 3 | 2 | 655161.8 | 2773478  | 622593.3 | 1189844  | 884594.4 | 3024707  | 3700311  | 2667587  | 2091848  |
| 9.43325  | 8  | 3 | 5 | 901963.7 | 6680110  | 2112587  | 2953165  | 899537.4 | 8090588  | 5332550  | 7427801  | 8839875  |
| 19.08267 | 9  | 4 | 5 | 166469.1 | 767760.6 | 92887.93 | 507832.6 | 147969.6 | 833174.5 | 799582.5 | 627733.6 | 723209.4 |

|          |    |   |   |          |          |          |          |          |          |          |          |          |
|----------|----|---|---|----------|----------|----------|----------|----------|----------|----------|----------|----------|
| 10.8914  | 3  | 0 | 3 | 382860.4 | 1057869  | 242708.5 | 521218.2 | 288542.7 | 1208047  | 1134994  | 679582.2 | 971144.6 |
| 9.999217 | 7  | 2 | 5 | 648870.1 | 1644686  | 508733.9 | 747309.5 | 196807.9 | 2260853  | 1387349  | 2001781  | 1607319  |
| 9.5876   | 10 | 5 | 5 | 529425.1 | 1909185  | 123161   | 1302698  | 342613.5 | 1999693  | 1832600  | 1760079  | 1889461  |
| 39.7335  | 7  | 3 | 4 | 326217.8 | 5175096  | 1220497  | 2977977  | 917134.3 | 7280916  | 4503428  | 4342947  | 4558534  |
| 30.32467 | 4  | 0 | 4 | 215210.5 | 1549592  | 78110.4  | 469208.4 | 583825.5 | 1563231  | 1419354  | 1601741  | 1616892  |
| 9.743767 | 3  | 0 | 3 | 23595562 | 1.34E+08 | 28866829 | 40896544 | 54055137 | 1.09E+08 | 1.79E+08 | 1.25E+08 | 1.13E+08 |
| 12.25275 | 9  | 5 | 4 | 326276.9 | 3148992  | 424375   | 1800050  | 781189.8 | 2765448  | 2796512  | 2971827  | 3587078  |
| 9.64815  | 4  | 4 | 0 | 122139.6 | 315885.1 | 86538.97 | 137991   | 92869.84 | 305396.7 | 298467.3 | 257171.5 | 253497.7 |
| 13.34628 | 6  | 3 | 3 | 121602.3 | 1655913  | 182161.4 | 806981.2 | 485208   | 1846339  | 1461133  | 1510195  | 1616855  |
| 42.17917 | 4  | 0 | 4 | 1512405  | 28968492 | 981622.1 | 10773810 | 9834844  | 29920007 | 27647273 | 29715290 | 28243978 |
| 9.655117 | 7  | 4 | 3 | 249528.7 | 843924.3 | 97131.83 | 572049   | 156895   | 879885.9 | 906401.6 | 786942.2 | 942434   |
| 41.25867 | 5  | 0 | 4 | 308490.3 | 4281071  | 124026.1 | 3430162  | 477435.5 | 4319139  | 4134587  | 4303570  | 4455228  |
| 42.74033 | 8  | 3 | 2 | 410221   | 4835598  | 932038.2 | 3227993  | 621571.6 | 5111883  | 3820880  | 5372204  | 3921504  |
| 9.1503   | 3  | 0 | 3 | 262409.5 | 1174444  | 218673.5 | 627066.6 | 315603.6 | 1305122  | 933304.8 | 1135506  | 1476488  |
| 9.46265  | 6  | 1 | 5 | 2388459  | 28155616 | 13680541 | 3367775  | 1603142  | 3908091  | 31280536 | 35864355 | 35737372 |
| 44.96917 | 5  | 0 | 4 | 1630679  | 29700347 | 955900.6 | 10831095 | 10394273 | 29629117 | 29417702 | 29060589 | 29042372 |
| 40.39533 | 7  | 0 | 4 | 1373090  | 24839298 | 264168.7 | 8789600  | 8796484  | 24911843 | 24625317 | 24653148 | 24738724 |
| 9.40615  | 4  | 3 | 1 | 349572.5 | 781211.9 | 129369.8 | 161132.6 | 360303.4 | 953730.1 | 837775.8 | 720938.8 | 607076.9 |
| 44.9835  | 16 | 4 | 4 | 476197.9 | 8723610  | 1421790  | 5652638  | 1695627  | 9897268  | 8410317  | 6923649  | 7983234  |
| 9.43325  | 9  | 3 | 5 | 567947.7 | 3722094  | 1202982  | 1640461  | 855516.6 | 5238215  | 3328368  | 4434197  | 3561560  |
| 8.911617 | 6  | 5 | 1 | 268962   | 597358.2 | 178678.8 | 217441.3 | 209434.5 | 449575.7 | 635687.6 | 459333.8 | 886509.1 |
| 9.516467 | 9  | 3 | 5 | 830280.6 | 9707954  | 1705814  | 4390815  | 3151665  | 11402894 | 8675561  | 10786476 | 10421983 |
| 12.48643 | 7  | 3 | 4 | 82675.68 | 228409.4 | 57732.78 | 130353.1 | 36859.97 | 156905.4 | 190817.8 | 294160.2 | 222298.6 |
| 9.664767 | 4  | 3 | 1 | 113455.7 | 287349.1 | 55270.17 | 137004.5 | 88923.55 | 265420.6 | 354798.5 | 327063.8 | 276188.1 |
| 9.3919   | 7  | 1 | 5 | 5723330  | 33607403 | 17416092 | 2641205  | 1779937  | 40320777 | 2920007  | 43699310 | 44309592 |
| 9.610767 | 10 | 5 | 5 | 3572202  | 14114346 | 2500493  | 9683582  | 2046638  | 16032100 | 16755633 | 10566471 | 12815971 |
| 24.58017 | 10 | 5 | 5 | 127544.4 | 521329.5 | 27564.18 | 672034.8 | 88635.36 | 535134.2 | 546583.5 | 474635.6 | 525963.2 |
| 9.514333 | 7  | 5 | 2 | 409941.5 | 876711.3 | 232937.2 | 279191.9 | 354377.3 | 937469.6 | 1145254  | 640089.8 | 1031553  |
| 42.74033 | 6  | 0 | 4 | 1477388  | 23847336 | 920731   | 8626156  | 8658887  | 23292485 | 24367336 | 22820016 | 23606013 |
| 11.6216  | 9  | 5 | 4 | 297357.2 | 2606640  | 484883   | 1620281  | 546019.6 | 3292870  | 2206851  | 2906452  | 2158644  |
| 40.88467 | 7  | 1 | 4 | 249168.9 | 4718204  | 841810   | 3261350  | 663099.6 | 4224460  | 6212780  | 4492117  | 4276950  |
| 10.96452 | 6  | 5 | 1 | 173864.4 | 377318.3 | 127078   | 135318.8 | 128576.7 | 419310.7 | 255156.9 | 298936.2 | 335772.7 |
| 9.856867 | 10 | 5 | 5 | 4742724  | 31507174 | 1364496  | 27454876 | 2466339  | 31592546 | 32324817 | 29232753 | 32766549 |
| 11.27298 | 10 | 5 | 5 | 254496.1 | 775429.4 | 183228   | 438624.2 | 172293.1 | 956519.3 | 676097.6 | 983777.4 | 685783.5 |
| 9.874317 | 3  | 0 | 3 | 6460036  | 43892186 | 9885696  | 18648790 | 15182104 | 48387923 | 27647479 | 53415720 | 47615634 |

|          |    |   |   |          |          |          |          |          |          |          |          |          |
|----------|----|---|---|----------|----------|----------|----------|----------|----------|----------|----------|----------|
| 10.9645  | 5  | 3 | 2 | 250222.1 | 588332.2 | 116144.1 | 370118.4 | 115382.6 | 756843.8 | 571145.4 | 610839.6 | 431950.6 |
| 43.57417 | 5  | 3 | 2 | 299595.6 | 3247446  | 829654.3 | 1877303  | 526867.1 | 2302436  | 4237723  | 3518141  | 3704452  |
| 12.22425 | 6  | 3 | 3 | 103837.1 | 687381   | 56126.44 | 365417.5 | 192945.9 | 732243.9 | 693701.3 | 611674   | 747160.5 |
| 10.96997 | 4  | 4 | 0 | 843648.5 | 1524555  | 960385   | 3551494  | 1171924  | 1109061  | 728365.3 | 937957.5 | 3102592  |
| 24.1605  | 5  | 0 | 5 | 507765.6 | 1123218  | 77165.18 | 2996795  | 1089252  | 1239766  | 1078455  | 1143151  | 1034772  |
| 8.94625  | 9  | 5 | 4 | 429361.8 | 1308114  | 197044   | 734240   | 354706   | 992299.4 | 1485490  | 1423909  | 1247187  |
| 10.76405 | 7  | 5 | 2 | 176305.8 | 536941.4 | 147778.4 | 295318.5 | 48863.32 | 778477   | 484385.5 | 558299.8 | 388906.5 |
| 9.616167 | 10 | 5 | 5 | 1086120  | 4265113  | 882163   | 2837975  | 516809.4 | 5139705  | 5042463  | 2970130  | 4125177  |
| 10.5972  | 4  | 3 | 1 | 71960.68 | 187041.3 | 50398.81 | 100809.1 | 40978.35 | 124814.5 | 188558.3 | 209103.6 | 156105.1 |
| 9.858833 | 8  | 4 | 4 | 1019504  | 4336726  | 774637.4 | 2850524  | 823668.4 | 4622383  | 4044680  | 3698587  | 3759426  |
| 9.887133 | 3  | 0 | 3 | 1277924  | 6954779  | 2187516  | 3441662  | 1161081  | 7694596  | 4038163  | 9793627  | 7574731  |
| 11.6196  | 10 | 5 | 5 | 321041.9 | 1801488  | 384475.6 | 1146147  | 310649.8 | 2446620  | 1697064  | 1827754  | 1480809  |
| 10.90765 | 4  | 1 | 3 | 442128.6 | 1292104  | 374252.2 | 676933.1 | 258556.2 | 1338455  | 922332.3 | 899582.4 | 1575854  |
| 41.762   | 11 | 3 | 4 | 310943.5 | 4644597  | 940242.7 | 2932521  | 912657.8 | 6034553  | 3684932  | 4736829  | 4902114  |
| 9.445217 | 13 | 5 | 5 | 1641680  | 14880237 | 4544515  | 6731272  | 4299858  | 20511849 | 17623322 | 15555475 | 11346298 |
| 10.67637 | 10 | 5 | 5 | 269618.3 | 1368214  | 198290.9 | 1004859  | 196832.7 | 1629388  | 1493709  | 1185185  | 1168716  |
| 9.644783 | 10 | 5 | 5 | 3775523  | 15934226 | 2236608  | 9132907  | 4284735  | 17731092 | 15706521 | 12276019 | 17741818 |
| 40.79817 | 6  | 3 | 2 | 379447.8 | 5300306  | 1332994  | 3178934  | 762036.4 | 5001702  | 7434955  | 5613556  | 4389578  |
| 9.46265  | 10 | 5 | 5 | 822409.7 | 2809777  | 506826.7 | 1912342  | 469753.2 | 3299203  | 3353059  | 2700114  | 2513731  |
| 8.8696   | 3  | 3 | 0 | 159687.6 | 370574.5 | 89907.99 | 140624.3 | 143677.9 | 375387.4 | 324088.5 | 474371.8 | 432909.7 |
| 10.32433 | 4  | 3 | 1 | 152528   | 465877   | 92966.74 | 319114.8 | 44543.55 | 416774.1 | 494605.4 | 351044   | 600591.4 |
| 17.32117 | 5  | 2 | 3 | 39658.85 | 167433.3 | 14395.04 | 100289.6 | 42038.43 | 185365.2 | 162435.8 | 150600.7 | 179165.3 |
| 9.295167 | 3  | 0 | 3 | 7806533  | 41887504 | 3850724  | 13172123 | 17610396 | 41828924 | 44438554 | 45784548 | 41625418 |
| 9.960817 | 9  | 5 | 4 | 617491.6 | 1610936  | 352862.3 | 973684.9 | 345694.3 | 2119968  | 1787354  | 1565191  | 1267543  |
| 9.447983 | 4  | 4 | 0 | 14503731 | 23854108 | 38319153 | 88856186 | 32193432 | 11320509 | 2465167  | 9590264  | 92074564 |
| 22.37867 | 7  | 5 | 2 | 1154703  | 14235425 | 2787359  | 9435136  | 2445343  | 13172485 | 14162104 | 16920394 | 10179763 |
| 9.433    | 5  | 1 | 4 | 13684848 | 84627734 | 48297331 | 6714963  | 12605175 | 1.26E+08 | 2042484  | 1.07E+08 | 1E+08    |
| 9.601917 | 10 | 5 | 5 | 5592283  | 21944645 | 2861834  | 16810349 | 2769730  | 19613665 | 26387603 | 19728627 | 20841050 |
| 9.68775  | 11 | 5 | 5 | 4674803  | 19301615 | 2417936  | 13066846 | 3933864  | 22003552 | 21588814 | 16356109 | 18491583 |
| 9.243433 | 3  | 3 | 0 | 643740.4 | 1314700  | 229668.1 | 567190.8 | 478123.6 | 1604423  | 1062311  | 1105806  | 1450465  |
| 9.23865  | 7  | 3 | 4 | 559771.6 | 1847769  | 433079.4 | 1153298  | 298029.3 | 1938535  | 1806638  | 1144931  | 2302791  |
| 9.40325  | 6  | 1 | 4 | 4418183  | 38338254 | 17912847 | 9197184  | 13255472 | 50474833 | 43671858 | 51751169 | 7880925  |
| 44.322   | 5  | 0 | 4 | 1455316  | 13959598 | 1138253  | 5457693  | 5274133  | 15093867 | 12683186 | 12869667 | 14175798 |
| 19.81117 | 3  | 0 | 3 | 899293.9 | 508477.1 | 43198.95 | 6440275  | 3602029  | 520594   | 534117.2 | 507747.4 | 435308.6 |
| 10.38125 | 10 | 5 | 5 | 740035.8 | 2332855  | 384475.4 | 1526363  | 492612.6 | 1854685  | 2896886  | 2416465  | 2355721  |

|          |    |   |   |          |          |          |          |          |          |          |          |          |
|----------|----|---|---|----------|----------|----------|----------|----------|----------|----------|----------|----------|
| 9.999217 | 7  | 3 | 4 | 503937.8 | 1399313  | 197710.1 | 1055292  | 183822.7 | 1478006  | 1520816  | 1568350  | 1353734  |
| 9.960467 | 5  | 3 | 2 | 478187.8 | 997284.2 | 264141.6 | 506128.4 | 281647.6 | 1255021  | 828256.5 | 1014507  | 1242795  |
| 9.43365  | 5  | 1 | 4 | 423657.1 | 2135742  | 765352.1 | 916514.2 | 534675.7 | 2759133  | 807022.9 | 2369526  | 2479015  |
| 43.75633 | 5  | 0 | 4 | 1557643  | 34767174 | 789578.5 | 14348554 | 12587738 | 35799081 | 33748696 | 34984020 | 35050830 |
| 9.856867 | 8  | 4 | 4 | 768122.8 | 3024239  | 367854.6 | 1852436  | 760583   | 3115613  | 2514257  | 3528512  | 3067653  |
| 9.406667 | 5  | 1 | 4 | 13320275 | 91888784 | 51163179 | 13125534 | 24013032 | 1.2E+08  | 1.2E+08  | 1.1E+08  | 1.09E+08 |
| 9.45945  | 8  | 4 | 3 | 1228513  | 8317561  | 2150302  | 3388819  | 3116061  | 11128585 | 8877390  | 9263522  | 5975230  |
| 8.94625  | 5  | 1 | 4 | 36316948 | 48807386 | 27022898 | 5682903  | 4226296  | 61957916 | 5437201  | 51773630 | 78036429 |
| 44.02017 | 10 | 2 | 5 | 547965.9 | 8147373  | 1692812  | 5271933  | 1525376  | 7626217  | 11011610 | 7815868  | 6488180  |
| 10.01477 | 11 | 5 | 5 | 270655.5 | 1065174  | 85988.73 | 822069.4 | 158427.6 | 1155015  | 1150644  | 964688.2 | 1002237  |
| 43.97717 | 7  | 3 | 4 | 370468.5 | 9051062  | 2637312  | 5016141  | 1297814  | 12882358 | 6493821  | 9361767  | 6638331  |
| 9.49445  | 4  | 3 | 1 | 247916   | 564781.9 | 238564.6 | 178076.3 | 189089.5 | 809136.1 | 802985.2 | 501575.1 | 453289.6 |
| 9.842    | 8  | 4 | 4 | 685788.9 | 2613482  | 385826.2 | 1940224  | 374062.3 | 3196094  | 2194080  | 2637870  | 2695641  |
| 10.95602 | 3  | 3 | 0 | 204826.6 | 479336.2 | 177288.4 | 209463.5 | 82135.12 | 459118.2 | 643404.3 | 423751.7 | 648993.5 |
| 9.37735  | 3  | 0 | 3 | 3067006  | 11289614 | 821850.1 | 4058835  | 4594032  | 10921487 | 11199692 | 12713377 | 10626836 |
| 9.43325  | 11 | 4 | 5 | 1303986  | 8270290  | 2744136  | 3363716  | 2808362  | 12578587 | 8617167  | 6588780  | 8230972  |
| 9.673333 | 10 | 5 | 5 | 1135429  | 4498002  | 632016.6 | 2887099  | 1050535  | 5216808  | 4548930  | 3641977  | 4954669  |
| 9.845483 | 8  | 4 | 4 | 1202272  | 4898632  | 649637.3 | 3351435  | 1004760  | 5147658  | 4351885  | 5912611  | 4686280  |
| 9.811217 | 6  | 3 | 2 | 488463.7 | 1187937  | 252049.3 | 752105.9 | 243432.3 | 815540.1 | 1236513  | 1511292  | 1122910  |
| 9.872883 | 3  | 0 | 3 | 6389892  | 42956528 | 8377083  | 19126057 | 15778196 | 45171080 | 30671718 | 53930848 | 43925216 |
| 40.597   | 7  | 4 | 2 | 346637.3 | 7143412  | 942897.6 | 5158703  | 1258252  | 6527445  | 6097168  | 8092735  | 6819098  |
| 26.02517 | 10 | 5 | 5 | 1442705  | 15312719 | 1991517  | 12069580 | 1691528  | 15875985 | 16244046 | 17349806 | 12081645 |
| 11.27298 | 9  | 5 | 4 | 125718.6 | 475285.4 | 119750   | 262831.7 | 123827.9 | 612009.4 | 469912.4 | 555716.8 | 439189.9 |
| 9.43325  | 6  | 4 | 2 | 393464.8 | 1786195  | 642287.8 | 818426.3 | 373775.2 | 2615884  | 1931561  | 995346.1 | 2080234  |
| 9.445217 | 6  | 2 | 4 | 509075.6 | 3364576  | 1093570  | 1537055  | 999835.7 | 4522625  | 4020005  | 2496377  | 1939998  |
| 9.487883 | 4  | 1 | 3 | 424669.9 | 3278406  | 338422.7 | 1744837  | 1018791  | 3545858  | 2818248  | 3528163  | 3014467  |
| 17.59967 | 5  | 0 | 5 | 366813.7 | 640626   | 73667.06 | 1977173  | 861950.1 | 690297.9 | 516943.1 | 668661.1 | 631212.4 |
| 21.58767 | 5  | 4 | 1 | 79192.62 | 555994.3 | 63075.99 | 438741.7 | 71482.06 | 594039.8 | 564674.1 | 498193.3 | 635657.7 |
| 9.644783 | 10 | 5 | 5 | 5668518  | 24464766 | 2972512  | 16290513 | 5485745  | 26316174 | 24468580 | 22408060 | 28284732 |
| 10.8914  | 3  | 0 | 3 | 152473.8 | 131348.8 | 114532.1 | 336657   | 122214.4 | 217216.6 | 279842.6 | 64215.43 | 95469.58 |
| 9.43325  | 10 | 5 | 4 | 734280.9 | 5904452  | 1122576  | 3320852  | 1702165  | 7293296  | 5394762  | 6795350  | 5515303  |
| 9.433    | 9  | 5 | 4 | 1768305  | 5366386  | 1565273  | 9945184  | 3088085  | 6138125  | 7403983  | 5649541  | 3511102  |
| 2.524867 | 5  | 3 | 2 | 571071.9 | 14310805 | 4615863  | 7302024  | 959351.4 | 8181288  | 11454630 | 18844818 | 14411790 |
| 9.928667 | 6  | 2 | 4 | 777471.1 | 1918072  | 239432.2 | 1247394  | 452409.4 | 2010577  | 1925702  | 2258093  | 1762077  |
| 10.95835 | 4  | 1 | 3 | 209643.4 | 592979   | 88333.31 | 420140.4 | 109145.7 | 556352.2 | 717371.5 | 556618.7 | 490618.7 |

|          |    |   |   |          |          |          |          |          |          |          |          |          |
|----------|----|---|---|----------|----------|----------|----------|----------|----------|----------|----------|----------|
| 9.46265  | 4  | 0 | 4 | 3413078  | 19023983 | 2591281  | 7646768  | 7652262  | 20262934 | 22194822 | 19713375 | 15527389 |
| 10.97242 | 3  | 0 | 3 | 216243.3 | 126610.6 | 88255.48 | 357241.7 | 155242.6 | 244010   | 111645.8 | 118363.2 | 159034.2 |
| 18.32183 | 6  | 5 | 1 | 130742.4 | 221449   | 105468.9 | 825053.5 | 401980.1 | 307569.3 | 350519.4 | 97545.89 | 154590.3 |
| 9.976317 | 4  | 3 | 1 | 423778.6 | 1057788  | 216289.4 | 424906.6 | 430742.2 | 1362077  | 1108681  | 811273.9 | 1115858  |
| 10.03035 | 10 | 5 | 5 | 838188.8 | 2954550  | 716836.3 | 1835790  | 563748.4 | 3929866  | 3043416  | 2429300  | 3266106  |
| 9.41815  | 5  | 1 | 3 | 1058135  | 6469744  | 933918.1 | 4387823  | 1380426  | 7154254  | 5071354  | 5937718  | 7039930  |
| 9.37735  | 9  | 4 | 5 | 981178.6 | 8868456  | 2119932  | 5289591  | 2062072  | 9610853  | 6502265  | 8288458  | 7841773  |
| 10.17547 | 7  | 5 | 2 | 397854.3 | 696577.5 | 225121.3 | 367884.5 | 114911.1 | 481259   | 1051736  | 743522.5 | 675883   |
| 9.3919   | 9  | 4 | 4 | 1099721  | 9538398  | 2271981  | 4892979  | 3040357  | 12325132 | 11079821 | 9261116  | 6458436  |
| 9.650367 | 8  | 5 | 3 | 473924.7 | 1301135  | 169844.4 | 688448.6 | 420797.7 | 1393550  | 1318402  | 1032224  | 1484575  |
| 10.93468 | 8  | 3 | 4 | 271296.3 | 1401494  | 223041.5 | 942847.2 | 301238.7 | 1282423  | 1239559  | 1257078  | 1460514  |
| 9.946367 | 8  | 3 | 2 | 2274136  | 3937839  | 387905   | 2627410  | 902100.7 | 4028889  | 3777802  | 4260392  | 3346411  |
| 9.8445   | 7  | 4 | 3 | 658091.6 | 1993509  | 462556.7 | 1264613  | 387064   | 2140857  | 1819785  | 2527848  | 2180783  |
| 30.42833 | 3  | 0 | 3 | 129906.4 | 988063.1 | 40924.33 | 489993   | 331698.4 | 966702.7 | 1033408  | 1024555  | 980478.9 |
| 9.45945  | 13 | 5 | 5 | 4063454  | 51251416 | 11235088 | 34626202 | 7193923  | 58195348 | 44009548 | 49755171 | 37999344 |
| 11.30483 | 6  | 4 | 2 | 136248.3 | 346217.6 | 124650   | 165778   | 54388.86 | 450664.9 | 485324.4 | 186432.6 | 342086.6 |
| 9.859983 | 6  | 2 | 4 | 1018024  | 3873947  | 1238484  | 2082176  | 607669.4 | 3622255  | 5601181  | 2674526  | 2838125  |
| 10.76405 | 13 | 5 | 5 | 626426   | 2516863  | 610029.8 | 1506645  | 585014.4 | 3424285  | 2615460  | 2264832  | 1747669  |
| 9.3494   | 5  | 2 | 3 | 631739.5 | 3662164  | 767931.9 | 2160154  | 976799.7 | 4442043  | 4260014  | 3543750  | 2491082  |
| 15.7312  | 6  | 3 | 3 | 33421.08 | 138563.2 | 25140.38 | 73950.68 | 44468.6  | 134117.1 | 141551.1 | 104843.9 | 136868   |
| 14.41662 | 4  | 1 | 3 | 37791.05 | 189542.7 | 19717.82 | 133054.7 | 39106.34 | 173974.1 | 193335   | 215275   | 198979.3 |
| 9.4925   | 6  | 1 | 4 | 768000.6 | 6395062  | 1106775  | 3622724  | 1905221  | 7665677  | 4794590  | 6210903  | 7180183  |
| 27.05617 | 4  | 1 | 3 | 132297.3 | 738584.9 | 142620.7 | 478992.1 | 163777.6 | 619825   | 734178.8 | 589149.5 | 812626.3 |
| 9.36565  | 7  | 3 | 3 | 1175492  | 2213197  | 991832.4 | 786430.7 | 405236.8 | 1543821  | 1876705  | 3956594  | 2020824  |
| 9.848417 | 8  | 5 | 3 | 483821.7 | 2178725  | 413901.8 | 1437279  | 464037   | 2686079  | 1652478  | 1948078  | 2485953  |
| 9.992233 | 7  | 4 | 3 | 1162094  | 1049522  | 470088.9 | 2383599  | 931362.1 | 1195159  | 293100.2 | 1502436  | 1319450  |
| 9.970617 | 10 | 5 | 4 | 321610   | 602355   | 235902   | 1110648  | 344253.1 | 745653.3 | 666043.6 | 882816.8 | 375157.1 |
| 10.07098 | 3  | 3 | 0 | 200699.4 | 387659.5 | 108135.5 | 181516.9 | 134273.7 | 259998.4 | 378656.5 | 505423.4 | 487519.2 |
| 9.531583 | 10 | 5 | 2 | 4097044  | 8498111  | 1745387  | 18925492 | 7175084  | 8861360  | 10762465 | 6969845  | 6536639  |
| 9.933967 | 9  | 4 | 4 | 1229208  | 3328065  | 519667.4 | 2465798  | 510068.3 | 2765955  | 4128813  | 3206685  | 3044222  |
| 10.46923 | 9  | 5 | 4 | 183835.6 | 648041.9 | 90852.46 | 444872.3 | 138796.3 | 643300.9 | 770780.5 | 700915.3 | 546245.5 |
| 9.701933 | 5  | 2 | 3 | 316536.8 | 1138914  | 359125.7 | 623499.9 | 197485.6 | 1438203  | 1569910  | 705262.6 | 925389   |
| 9.920517 | 6  | 2 | 4 | 2206319  | 9823738  | 1497639  | 6046873  | 2625436  | 9574229  | 7697978  | 9447399  | 11680831 |
| 26.02517 | 10 | 5 | 5 | 1524986  | 21765202 | 4490593  | 15285395 | 1221184  | 19810383 | 19355613 | 26268380 | 16658653 |
| 38.98533 | 5  | 1 | 4 | 387527   | 6183206  | 731962.2 | 3375930  | 1965985  | 7481592  | 5855121  | 5717233  | 5879442  |

|          |    |   |   |          |          |          |          |          |          |          |          |          |
|----------|----|---|---|----------|----------|----------|----------|----------|----------|----------|----------|----------|
| 9.840617 | 3  | 0 | 3 | 4414673  | 25681042 | 3095584  | 10901547 | 10292191 | 23361021 | 25444046 | 30614659 | 26184962 |
| 9.311883 | 4  | 1 | 3 | 3420696  | 13708371 | 7423923  | 3104768  | 2626357  | 20846631 | 1729534  | 16571776 | 17512762 |
| 9.49445  | 10 | 5 | 4 | 1113906  | 10530216 | 3062104  | 4827200  | 3701760  | 14202381 | 10906417 | 12670328 | 7161323  |
| 9.787633 | 5  | 4 | 1 | 613748   | 1626735  | 833526.5 | 2838459  | 537686.5 | 963237.9 | 1480295  | 1073644  | 3043967  |
| 13.74138 | 3  | 3 | 0 | 30417.47 | 109592.2 | 56018.94 | 28116.95 | 9611.131 | 65367.44 | 192128.2 | 143566.9 | 70486.72 |
| 22.92933 | 5  | 1 | 4 | 215109.5 | 1321478  | 459552.9 | 668311   | 237786.5 | 1587732  | 1551991  | 1565456  | 511303.6 |
| 10.94962 | 4  | 4 | 0 | 3.3E+08  | 4.9E+08  | 1.09E+09 | 2.03E+09 | 4.29E+08 | 2.43E+09 | 7222280  | 2246169  | 3912637  |
| 9.388367 | 6  | 4 | 2 | 470906.9 | 1300356  | 419436.6 | 706024.1 | 160529.7 | 1759288  | 1390595  | 668492.8 | 1544526  |
| 44.883   | 5  | 3 | 2 | 166850.9 | 1162711  | 268208.3 | 1552320  | 41621.06 | 801159.2 | 1431469  | 1370298  | 972816   |
| 9.523633 | 6  | 2 | 3 | 3019415  | 21670884 | 5584573  | 9910299  | 8031651  | 24950595 | 13076849 | 19014127 | 26465266 |
| 9.597067 | 8  | 4 | 4 | 1689751  | 10177884 | 2594635  | 4090004  | 4243138  | 10185502 | 11726663 | 12189625 | 11050585 |
| 41.10033 | 8  | 0 | 5 | 1446840  | 27233912 | 611804.3 | 10325956 | 11562774 | 26275929 | 27305683 | 27143437 | 27511082 |
| 10.6411  | 5  | 3 | 2 | 172692.8 | 691928.4 | 114835.5 | 507448.1 | 107855.1 | 551789.4 | 863470.6 | 726771   | 647082.3 |
| 8.981583 | 6  | 5 | 1 | 177284.3 | 469835   | 115876.9 | 257184   | 138579.1 | 488159.3 | 568686.7 | 316210.2 | 586389.3 |
| 24.92833 | 3  | 0 | 3 | 127390   | 1115820  | 51960.36 | 524460.6 | 407828.7 | 1157570  | 1030298  | 1117312  | 1116385  |
| 9.673333 | 10 | 5 | 5 | 1002627  | 4222289  | 434752.3 | 3081491  | 805931.9 | 4315673  | 4419383  | 3751787  | 4797531  |
| 11.66582 | 7  | 4 | 3 | 145877.3 | 705971.1 | 236224.3 | 362789.4 | 160257.2 | 882619.1 | 869492.3 | 473380   | 881723.6 |
| 9.858833 | 12 | 5 | 5 | 1217894  | 6009619  | 855699.8 | 3362761  | 1880531  | 5457027  | 4948029  | 5915647  | 6743628  |
| 9.979667 | 11 | 5 | 5 | 937447.4 | 4859119  | 1062522  | 3278307  | 804618.8 | 5763393  | 5371665  | 4075544  | 3397746  |
| 9.419733 | 3  | 3 | 0 | 25850342 | 38421528 | 36281662 | 90334706 | 8312738  | 18540232 | 78083336 | 77685786 | 6420568  |
| 42.03517 | 8  | 4 | 1 | 593983.5 | 5369879  | 2815166  | 9384781  | 1688351  | 3834589  | 10195935 | 3017871  | 4700338  |
| 10.4188  | 5  | 2 | 3 | 192875   | 749730   | 136581.8 | 437151.4 | 218276.3 | 591682.4 | 934800.4 | 645868.9 | 816864.1 |
| 9.092333 | 9  | 4 | 5 | 1191656  | 3864362  | 550772.8 | 2795612  | 718677.6 | 4205285  | 3832729  | 3621937  | 3111495  |
| 9.419733 | 8  | 4 | 4 | 960797.4 | 3828218  | 929082.5 | 2467456  | 672861   | 3402072  | 4349869  | 5209142  | 3123059  |
| 9.245983 | 7  | 3 | 4 | 1474347  | 11451715 | 3896588  | 5795790  | 2734120  | 5509858  | 10610252 | 16213543 | 12491194 |
| 9.092333 | 9  | 4 | 5 | 1246287  | 2851416  | 828799.8 | 1668675  | 530019.9 | 2719766  | 3045792  | 2059221  | 2267761  |
| 9.8322   | 9  | 5 | 4 | 1122629  | 4484793  | 412899.8 | 3611052  | 606265.4 | 4785487  | 4177636  | 4262017  | 4140459  |
| 21.58767 | 10 | 5 | 5 | 985947.2 | 15934275 | 3262641  | 9511457  | 4376317  | 13532656 | 15630405 | 15565835 | 13480066 |
| 9.8374   | 3  | 3 | 0 | 30286492 | 26710491 | 35964683 | 84092722 | 34281888 | 1642880  | 1380048  | 997625.4 | 77923266 |
| 9.64815  | 9  | 5 | 4 | 461489.4 | 1587650  | 242182.9 | 865119.4 | 520224.4 | 1980098  | 1350050  | 1567871  | 1434594  |
| 9.36565  | 6  | 5 | 1 | 374340.5 | 883443.3 | 204462.6 | 238512.6 | 465636.8 | 1021314  | 920052   | 603858.8 | 758259.7 |
| 9.872883 | 3  | 0 | 3 | 13458958 | 91705654 | 19337425 | 33682837 | 41914774 | 1.05E+08 | 58475064 | 92904823 | 96726940 |
| 11.27298 | 10 | 5 | 5 | 346221.8 | 1957734  | 520505.9 | 1176792  | 427270.9 | 1879399  | 1385302  | 1859792  | 2811680  |
| 10.16158 | 8  | 3 | 5 | 569573.4 | 3503398  | 1239272  | 1789149  | 544636.3 | 4487145  | 3249083  | 4313628  | 1455093  |
| 9.970617 | 4  | 3 | 1 | 365783   | 797922.9 | 225520.4 | 279438.7 | 368322   | 577060   | 815557.9 | 1020727  | 559537.9 |

|          |    |   |   |          |          |          |          |          |          |          |          |          |
|----------|----|---|---|----------|----------|----------|----------|----------|----------|----------|----------|----------|
| 20.63483 | 5  | 0 | 5 | 353155   | 234513.3 | 36256.26 | 1591731  | 950359.7 | 257100.7 | 252316   | 254980.1 | 171219.5 |
| 9.311417 | 3  | 3 | 0 | 352498.4 | 790935.2 | 196987.3 | 311075.2 | 343635.7 | 997425.3 | 995249.8 | 689085.7 | 716249.3 |
| 9.952017 | 11 | 5 | 5 | 5041650  | 19634737 | 5689814  | 11543064 | 3768699  | 24448031 | 17430417 | 10861727 | 21057580 |
| 9.43325  | 5  | 3 | 2 | 472308.1 | 3033167  | 833509.1 | 1504080  | 1023550  | 3592809  | 3673918  | 3442095  | 2773027  |
| 9.91875  | 3  | 3 | 0 | 3909622  | 11921574 | 7484754  | 23226329 | 6314794  | 11254159 | 11525630 | 7256238  | 5160183  |
| 9.295167 | 7  | 3 | 4 | 1351916  | 11960909 | 2597280  | 7325336  | 3065792  | 14787735 | 8500418  | 10351439 | 14060047 |
| 10.95835 | 3  | 0 | 3 | 6013886  | 19375779 | 4587397  | 6856580  | 9055903  | 26616484 | 19024359 | 17576910 | 14052670 |
| 30.28183 | 7  | 5 | 2 | 285042   | 618009.2 | 182071.1 | 1988394  | 975805.6 | 734959.5 | 842510.2 | 444417.4 | 644304.3 |
| 9.311883 | 5  | 1 | 3 | 348351.7 | 1486796  | 621489   | 611785.6 | 394852.4 | 875292.8 | 956097.2 | 2134967  | 2150500  |
| 9.445217 | 4  | 0 | 3 | 593897   | 2118492  | 510778.3 | 976227.4 | 814142.5 | 2365727  | 1877487  | 1453560  | 2083637  |
| 9.280767 | 4  | 3 | 1 | 292796.3 | 1366761  | 482042.9 | 626496.8 | 429832.8 | 1953217  | 1606020  | 1310292  | 1320685  |
| 15.57042 | 5  | 1 | 4 | 38398.31 | 283076.3 | 71738.2  | 184390.7 | 25656.74 | 397780.6 | 300843.3 | 257195.1 | 210259.5 |
| 9.37735  | 8  | 3 | 4 | 744088.4 | 8158550  | 1031349  | 4751437  | 2483389  | 9502329  | 7392288  | 8904785  | 7959706  |
| 9.7038   | 5  | 2 | 3 | 130366.5 | 541331   | 136167.8 | 354028.8 | 69602.47 | 553409.6 | 417113.6 | 651572.8 | 389905.3 |
| 9.983433 | 7  | 3 | 4 | 738776.8 | 3417929  | 655141.6 | 2389109  | 619027.7 | 2965002  | 3829043  | 2643021  | 4278332  |
| 23.8935  | 6  | 1 | 5 | 116487   | 1324265  | 591901.1 | 491329.8 | 62832.08 | 269603.4 | 1623478  | 1508322  | 1575137  |
| 9.479567 | 4  | 1 | 3 | 610828.5 | 3730283  | 1867831  | 1132518  | 409319.4 | 5083924  | 6147253  | 1988266  | 3486979  |
| 9.9677   | 7  | 4 | 3 | 718281.3 | 2265991  | 404463.1 | 1571419  | 453364.5 | 2079931  | 2537544  | 2792677  | 2161427  |
| 9.928667 | 5  | 3 | 2 | 696020.4 | 1812607  | 370337   | 968383.2 | 605951.4 | 2325441  | 1741546  | 2005028  | 1641151  |
| 13.37615 | 5  | 1 | 4 | 39084.36 | 160181.6 | 16284.06 | 102691   | 42007.72 | 174296.2 | 155109   | 177946   | 155746.5 |
| 9.328967 | 4  | 0 | 3 | 1375968  | 10933605 | 587297.4 | 4796431  | 4386937  | 11188614 | 10594595 | 10270589 | 10816649 |
| 9.421167 | 8  | 2 | 4 | 2099207  | 11311772 | 3663954  | 6276875  | 2020532  | 8778452  | 8613132  | 10916283 | 17590130 |
| 8.841533 | 4  | 3 | 1 | 136683.4 | 421540.4 | 171273.2 | 183150.3 | 107089.8 | 366570.2 | 616890.6 | 428819.7 | 528265.4 |
| 9.379233 | 8  | 5 | 3 | 741052.6 | 2182693  | 670434   | 969014.5 | 821818.9 | 2299197  | 2288106  | 1610983  | 1525361  |
| 20.3175  | 3  | 0 | 3 | 29553240 | 2.52E+08 | 38489472 | 87368835 | 1.21E+08 | 2.65E+08 | 3.08E+08 | 2.53E+08 | 2.05E+08 |
| 9.616167 | 9  | 5 | 4 | 701261.3 | 3171507  | 750569.3 | 2113691  | 514260.1 | 3144927  | 4183136  | 2736389  | 2229917  |
| 9.845483 | 10 | 5 | 5 | 1509527  | 7164141  | 1146559  | 5326161  | 1149578  | 7035490  | 5898316  | 7889307  | 8700809  |
| 21.42283 | 3  | 3 | 0 | 18540954 | 25658684 | 35944542 | 74448092 | 14911869 | 206239.6 | 51284720 | 76351908 | 216040.7 |
| 10.94443 | 5  | 1 | 4 | 1167884  | 3522897  | 1770081  | 1080607  | 1065932  | 574767.4 | 5329511  | 3812015  | 3693612  |
| 9.6501   | 8  | 5 | 3 | 473625.8 | 1602490  | 481039.9 | 904259.5 | 375186.7 | 1374612  | 1752131  | 1492138  | 2337610  |
| 42.35183 | 7  | 1 | 4 | 227021.5 | 3467937  | 451589.9 | 2185636  | 945772.5 | 3145907  | 3010621  | 3610066  | 4160490  |
| 9.487883 | 10 | 5 | 5 | 2789235  | 11322515 | 1653925  | 9067546  | 901038.6 | 10839552 | 9438129  | 10467267 | 12148423 |
| 14.25337 | 4  | 1 | 3 | 281959   | 3705854  | 1096120  | 2217227  | 559762.1 | 3484649  | 1978692  | 4258929  | 4900784  |
| 19.3595  | 3  | 3 | 0 | 291521.8 | 878898.2 | 468190.6 | 1804859  | 653654.9 | 555353.5 | 832234.4 | 335080.9 | 1167845  |
| 9.999217 | 7  | 3 | 4 | 414449.9 | 1813644  | 152094.5 | 1225951  | 433736.4 | 1939218  | 1841445  | 1597085  | 1961631  |



|          |    |   |   |          |          |          |          |          |          |          |          |          |
|----------|----|---|---|----------|----------|----------|----------|----------|----------|----------|----------|----------|
| 9.644783 | 10 | 5 | 5 | 3308662  | 12793465 | 2265654  | 7975261  | 3463137  | 13326312 | 12152338 | 9222743  | 15033091 |
| 9.40325  | 4  | 1 | 3 | 548711.8 | 3243432  | 837181.4 | 1885464  | 867181.9 | 3074105  | 2472464  | 4602214  | 3385311  |
| 11.08087 | 7  | 5 | 2 | 1071619  | 1477069  | 947662.2 | 4212752  | 2025649  | 2297463  | 1647071  | 227180   | 802321.7 |
| 40.755   | 6  | 1 | 3 | 430779   | 6506774  | 729710.7 | 4395726  | 1566846  | 6218940  | 6491958  | 6114985  | 5945087  |
| 9.346    | 6  | 3 | 3 | 1046035  | 4117550  | 1600814  | 1962937  | 725451.7 | 1964864  | 5631565  | 3183630  | 5683397  |
| 36.30967 | 7  | 2 | 5 | 105150.1 | 562991.1 | 102780.8 | 387557.2 | 117043.2 | 423849   | 506172.1 | 644481.9 | 677121.6 |
| 11.17508 | 10 | 5 | 5 | 750592.2 | 4399424  | 1012892  | 2944026  | 787109.8 | 5468824  | 2996150  | 5308034  | 4100441  |
| 18.673   | 5  | 3 | 2 | 42992.54 | 103122.4 | 30825.73 | 147297.5 | 23768.83 | 142061.1 | 86558.39 | 125803.7 | 96099.84 |
| 9.644783 | 9  | 5 | 4 | 1418429  | 5286697  | 925571.8 | 3175877  | 1548460  | 4966938  | 5137173  | 4056501  | 6551548  |
| 42.913   | 6  | 4 | 1 | 296401.4 | 3542679  | 294013.6 | 3120056  | 230535.1 | 3743179  | 3461953  | 3464390  | 3139792  |
| 8.816267 | 5  | 1 | 4 | 274215.3 | 1357843  | 766231.4 | 330670.7 | 275457.5 | 1822211  | 2175886  | 1570300  | 222365   |
| 12.37287 | 3  | 3 | 0 | 78587.97 | 192730.5 | 39508.24 | 376778.8 | 136633.7 | 222107.1 | 243530.7 | 186622.5 | 152567.8 |
| 9.46855  | 16 | 5 | 5 | 29114702 | 2.61E+08 | 57679730 | 1.44E+08 | 84565038 | 3.31E+08 | 2.91E+08 | 2.78E+08 | 1.89E+08 |
| 10.9645  | 9  | 3 | 5 | 513184.6 | 1432869  | 179800.1 | 982110.8 | 335061.3 | 1177393  | 1419220  | 1440942  | 1685295  |
| 11.27298 | 10 | 5 | 5 | 313787.6 | 2059232  | 274581.9 | 1350998  | 528448.6 | 2003082  | 1621803  | 2344156  | 2209026  |
| 11.26983 | 4  | 3 | 1 | 77872.84 | 361978.9 | 93912.54 | 228532   | 71846.8  | 388427.6 | 209985.7 | 400553.4 | 461172.6 |
| 9.845483 | 6  | 2 | 4 | 2302883  | 10082074 | 3393359  | 5557701  | 1198376  | 13966876 | 9053529  | 13381621 | 7199084  |
| 18.98017 | 3  | 3 | 0 | 47843752 | 1.06E+08 | 1.44E+08 | 2.98E+08 | 38644822 | 1739569  | 1316346  | 2.55E+08 | 2.71E+08 |
| 20.63417 | 3  | 3 | 0 | 132403.5 | 462662.6 | 349618.5 | 930329.3 | 100433.2 | 777334.9 | 105316.6 | 115998.6 | 839333.8 |
| 10.72028 | 10 | 5 | 5 | 272248.3 | 1098699  | 304132.6 | 650260.4 | 262869.9 | 781090.3 | 1368993  | 1279181  | 754076.6 |
| 9.610767 | 9  | 4 | 5 | 370076.1 | 972830.5 | 188390.8 | 651876.2 | 217808   | 1159629  | 1171049  | 940401.9 | 844331.6 |
| 10.97857 | 5  | 2 | 3 | 372527   | 1020577  | 216457.4 | 701410.4 | 187706   | 1312818  | 1145121  | 964943.9 | 744637.5 |
| 9.190317 | 4  | 3 | 1 | 286359.1 | 989655.5 | 530483.8 | 275547.4 | 308782   | 1045200  | 543450.3 | 1757033  | 1164368  |
| 9.3919   | 5  | 2 | 3 | 1419380  | 8355388  | 1985419  | 4956830  | 2316253  | 6640815  | 9333280  | 5849647  | 10386560 |
| 10.02372 | 7  | 4 | 3 | 847003.1 | 522174.9 | 393529.7 | 1535847  | 761024.1 | 553043.5 | 0        | 1054221  | 677788.6 |
| 9.915583 | 9  | 4 | 5 | 2622174  | 8442151  | 3156481  | 4220393  | 1759809  | 9042385  | 8781550  | 13229976 | 5415816  |
| 9.406667 | 5  | 2 | 3 | 599088.5 | 4156039  | 1959884  | 1563714  | 817328.8 | 2455041  | 2053506  | 6548055  | 5678074  |
| 9.447733 | 5  | 3 | 2 | 310283.8 | 1191038  | 441375.9 | 579001.7 | 314492.6 | 1855755  | 1431194  | 859539.3 | 956586.5 |
| 20.69683 | 4  | 0 | 4 | 302653.6 | 412882.9 | 42851.34 | 2086781  | 1236625  | 415178.5 | 423270.6 | 462942.5 | 344380.1 |
| 17.07333 | 3  | 0 | 3 | 31326.44 | 37554.24 | 10195.02 | 63919.97 | 19915.06 | 35474.57 | 23173.29 | 51236.46 | 41546.73 |
| 9.445217 | 10 | 5 | 4 | 1588547  | 10009544 | 3261127  | 5119071  | 3002926  | 14677914 | 11518536 | 9503653  | 6141738  |
| 9.842    | 3  | 3 | 0 | 2111864  | 4087155  | 3447428  | 9061443  | 2876068  | 9280733  | 5956260  | 1199600  | 2095505  |
| 9.976317 | 10 | 5 | 5 | 1626289  | 4778887  | 398946   | 3779629  | 756249   | 5415258  | 4661233  | 4798509  | 4700156  |
| 22.944   | 8  | 3 | 4 | 346836.6 | 3432415  | 167547.7 | 2887448  | 415952.8 | 3633697  | 3411864  | 3262978  | 3572677  |
| 9.605683 | 9  | 3 | 5 | 10549683 | 97230804 | 18290254 | 49979149 | 35912230 | 1.09E+08 | 96928182 | 66624771 | 1.13E+08 |

|          |    |   |   |          |          |          |          |          |          |          |          |          |
|----------|----|---|---|----------|----------|----------|----------|----------|----------|----------|----------|----------|
| 19.38733 | 9  | 5 | 4 | 43890.5  | 217981.9 | 57645.12 | 140783.3 | 35635.3  | 192270.4 | 261716.9 | 137184.7 | 282682   |
| 9.636567 | 6  | 4 | 2 | 292461.7 | 792714.7 | 109016.8 | 533962.2 | 195485.2 | 905467.7 | 766738.7 | 623642.1 | 800856.2 |
| 18.96567 | 3  | 3 | 0 | 20656424 | 50821198 | 69271719 | 1.42E+08 | 25262073 | 638661.3 | 364067.9 | 429367.1 | 1.17E+08 |
| 9.473717 | 4  | 1 | 3 | 785179.4 | 3399009  | 1033128  | 1676664  | 1177991  | 4411608  | 1686891  | 3699119  | 3865996  |
| 10.98385 | 8  | 5 | 3 | 360942.3 | 1060564  | 324542.3 | 1611838  | 382884.3 | 965609   | 1259730  | 578451.3 | 1434973  |
| 10.31255 | 4  | 4 | 0 | 117024.2 | 275513.7 | 76403.87 | 154573.3 | 80313.96 | 306531.3 | 267609.7 | 343896.2 | 147717.7 |
| 8.931783 | 4  | 1 | 3 | 159248.3 | 481775.5 | 153253.9 | 252967.3 | 143042.3 | 406537.1 | 662926   | 613794.7 | 432580.4 |
| 9.872917 | 8  | 4 | 4 | 1576119  | 6014526  | 718591.9 | 3929048  | 1604555  | 6906982  | 5199940  | 6114540  | 6463936  |
| 43.85633 | 5  | 1 | 3 | 552481.6 | 6688104  | 526113.3 | 4239079  | 1876515  | 6828170  | 5985147  | 6537660  | 7442488  |
| 9.522017 | 10 | 5 | 5 | 726904.1 | 1820578  | 343530.9 | 1318034  | 307143.4 | 2252453  | 2130341  | 1517569  | 1629309  |
| 20.24533 | 3  | 0 | 3 | 131047.8 | 350534.3 | 49917.65 | 189302   | 124307.4 | 343858.2 | 389301.3 | 289471.9 | 318806.8 |
| 9.554967 | 4  | 3 | 1 | 179545   | 463898.9 | 114461.2 | 220885.3 | 182633.6 | 396178   | 646253.1 | 482723.8 | 448678.6 |
| 9.568783 | 6  | 4 | 2 | 343020.8 | 750841   | 229167.4 | 405679.6 | 219433.3 | 925069   | 1025269  | 744557.9 | 586746.1 |
| 9.587217 | 5  | 3 | 2 | 214418.7 | 619019.9 | 120721.1 | 867488.5 | 186144.7 | 438761.6 | 771325   | 602068.8 | 667054.5 |
| 9.960817 | 12 | 5 | 5 | 5649572  | 21614765 | 4435156  | 12519715 | 6813270  | 25708209 | 16052380 | 17872535 | 22915826 |
| 9.460217 | 4  | 3 | 1 | 380539.9 | 1738258  | 586063.5 | 884796   | 522825.9 | 2320059  | 2051363  | 2023778  | 865973.7 |
| 9.673333 | 9  | 5 | 4 | 818724.4 | 2001219  | 507712.1 | 1328137  | 318659.8 | 2275731  | 2693233  | 1539895  | 1487456  |
| 38.3955  | 10 | 5 | 5 | 1012685  | 14194229 | 1792052  | 11850484 | 1018555  | 14889224 | 15606198 | 12656129 | 11929700 |
| 9.382183 | 9  | 4 | 4 | 1559500  | 4400945  | 2108637  | 1661393  | 523790.1 | 2653783  | 7817148  | 2672135  | 4241357  |
| 31.39267 | 10 | 5 | 5 | 437721.8 | 3218514  | 730175.3 | 2264261  | 125977.1 | 4473076  | 3043612  | 2603943  | 2840615  |
| 10.64708 | 8  | 5 | 3 | 169039.7 | 408389.8 | 147456   | 210077.5 | 102111.9 | 360803.7 | 632421.9 | 370522.8 | 230743.8 |
| 9.845483 | 8  | 4 | 4 | 1042830  | 3645678  | 321328.7 | 2757005  | 689060.3 | 3795169  | 4121609  | 3511538  | 3512909  |
| 36.1655  | 3  | 3 | 0 | 139412.3 | 492156.2 | 205051.6 | 801558.4 | 199973.6 | 464751.7 | 768740.3 | 625274.1 | 292680.4 |
| 9.4925   | 10 | 4 | 5 | 540788.8 | 3804780  | 1783812  | 1495155  | 913495.8 | 3035285  | 4155282  | 1177648  | 5813494  |
| 9.37735  | 7  | 2 | 4 | 701961.1 | 5938984  | 1369161  | 3048468  | 2189881  | 6999518  | 5165334  | 7184920  | 6407082  |
| 9.445217 | 13 | 5 | 5 | 1019654  | 11027993 | 2128162  | 7890514  | 1977100  | 12943632 | 10662593 | 11139718 | 12738621 |
| 30.266   | 4  | 4 | 0 | 140825.7 | 737100.3 | 316827.8 | 1146818  | 162462   | 616505.1 | 967594   | 1165247  | 414257.3 |
| 9.946367 | 11 | 5 | 5 | 2273740  | 6624870  | 1484684  | 4532472  | 1232111  | 6204673  | 6438533  | 5559111  | 5718643  |
| 9.388367 | 8  | 2 | 5 | 1631857  | 13756021 | 5921541  | 6128855  | 1751727  | 20434394 | 5860312  | 10004911 | 18097950 |
| 9.388367 | 4  | 1 | 3 | 549069.3 | 2403575  | 712732.9 | 1330496  | 695927.7 | 2555792  | 2471854  | 2540222  | 1244782  |
| 9.176533 | 4  | 1 | 3 | 489035.4 | 3989778  | 1192061  | 2210731  | 1142539  | 4546375  | 1902957  | 4842221  | 4506248  |
| 42.23683 | 3  | 0 | 3 | 290614.1 | 5416129  | 186463.2 | 4242217  | 905497.3 | 5286278  | 5268271  | 5716062  | 5333799  |
| 9.976317 | 8  | 5 | 3 | 834315.6 | 1451682  | 312339.6 | 2168175  | 551085.1 | 1452908  | 1690873  | 1827967  | 1118248  |
| 13.43468 | 5  | 3 | 2 | 193184.1 | 1272873  | 474392.9 | 660769.2 | 244193.9 | 1706478  | 1418008  | 1623831  | 1068578  |
| 42.74017 | 12 | 4 | 3 | 342455.7 | 4636058  | 1407727  | 2826717  | 432921   | 4850033  | 3340410  | 4504080  | 3592367  |

|          |    |   |   |          |          |          |          |          |          |          |          |          |
|----------|----|---|---|----------|----------|----------|----------|----------|----------|----------|----------|----------|
| 9.8445   | 5  | 2 | 3 | 671220.1 | 2937607  | 696052.5 | 1623826  | 974112   | 2056678  | 3777991  | 2581572  | 2782148  |
| 9.338567 | 10 | 5 | 5 | 795513   | 4553775  | 654498.6 | 3298160  | 935675.4 | 5559286  | 4742417  | 4122882  | 4480271  |
| 9.445217 | 5  | 1 | 4 | 1356979  | 12439073 | 2014305  | 7297130  | 3992782  | 13824166 | 9293884  | 11607413 | 13305564 |
| 11.97977 | 10 | 5 | 5 | 2390541  | 16278906 | 2556228  | 11614879 | 3425101  | 20207855 | 14057095 | 17485845 | 14997227 |
| 9.3919   | 4  | 1 | 3 | 2615205  | 10592930 | 5219653  | 3909168  | 2237799  | 1698674  | 10595456 | 14032737 | 14579309 |
| 18.1515  | 4  | 0 | 4 | 172983.9 | 72946.74 | 32215.66 | 533575   | 353156.1 | 36327.7  | 40272.59 | 105384.2 | 93770.08 |
| 10.10223 | 7  | 5 | 2 | 337265.6 | 1014761  | 379241.5 | 526760.4 | 193544.3 | 1240915  | 1525665  | 918279   | 850437.5 |
| 9.45945  | 9  | 3 | 5 | 2143849  | 13601109 | 7358525  | 4176759  | 2400667  | 9024963  | 7252301  | 8812976  | 19340306 |
| 9.365833 | 7  | 5 | 2 | 412196.1 | 1742238  | 621725.7 | 865304.7 | 525016.7 | 2311294  | 1216789  | 2382039  | 1790011  |
| 9.976317 | 11 | 5 | 5 | 1979047  | 4943150  | 1068036  | 3374327  | 1000207  | 4573237  | 3395648  | 4849794  | 5927412  |
| 9.473717 | 9  | 3 | 5 | 1291460  | 9528557  | 4271852  | 4078164  | 1885708  | 14584805 | 8409879  | 6667353  | 13315420 |
| 9.824233 | 12 | 5 | 5 | 536793.9 | 1629629  | 272091.5 | 1112056  | 387208.2 | 1800225  | 1649980  | 1255031  | 1487540  |
| 8.230333 | 5  | 3 | 2 | 389765.1 | 15868673 | 4374086  | 7665569  | 6120442  | 13151999 | 23077958 | 11969352 | 16519573 |
| 9.284283 | 9  | 5 | 4 | 529838.8 | 2036294  | 307879.6 | 1091886  | 742543.8 | 2490216  | 2132168  | 1653330  | 1911984  |
| 10.01545 | 3  | 3 | 0 | 146858.5 | 351807.6 | 75592.97 | 193858.7 | 121168.5 | 279302.5 | 349067.9 | 287489.2 | 378479.6 |
| 9.46265  | 6  | 4 | 2 | 450779.9 | 1301388  | 367135.2 | 689952.4 | 436180.9 | 1370647  | 1778221  | 1265463  | 1342581  |
| 15.76082 | 10 | 5 | 5 | 121243.4 | 1062122  | 195649.5 | 731676.3 | 238130.2 | 905072   | 1076955  | 1078863  | 879830.3 |
| 9.952017 | 11 | 4 | 4 | 1189952  | 1928905  | 203373.8 | 1655930  | 149781.2 | 2021149  | 2176958  | 1942340  | 1624249  |
| 9.379233 | 7  | 5 | 2 | 649158.1 | 1934905  | 248477   | 931078.2 | 792611.6 | 1865637  | 1847953  | 1883279  | 1714530  |
| 9.37735  | 9  | 4 | 4 | 676285.9 | 5187388  | 1076490  | 3256122  | 1431766  | 4947680  | 3826407  | 4707602  | 6634576  |
| 9.43325  | 6  | 3 | 3 | 514106.2 | 3971706  | 1060740  | 2545801  | 787712.4 | 4777462  | 5106639  | 3663150  | 3909374  |
| 42.07867 | 8  | 4 | 3 | 325461.1 | 4596242  | 584056.4 | 2954187  | 1298253  | 4575285  | 4519531  | 5035719  | 3681493  |
| 11.63327 | 10 | 5 | 5 | 454350.9 | 2518471  | 543097.2 | 1525504  | 741878.8 | 3216326  | 1998766  | 2663221  | 1938907  |
| 39.417   | 3  | 0 | 3 | 1472266  | 22721674 | 1113440  | 11703966 | 8596312  | 22515396 | 21661926 | 21705838 | 24143679 |
| 24.62183 | 5  | 1 | 4 | 441095.9 | 2069378  | 455519.9 | 1245767  | 613850.7 | 1367517  | 2264303  | 1901493  | 2554290  |
| 9.445217 | 8  | 3 | 5 | 544801.9 | 5637272  | 722762.8 | 3852353  | 1405821  | 6255451  | 6251435  | 4504544  | 5732668  |
| 9.406667 | 10 | 4 | 4 | 1580420  | 9153538  | 2252399  | 6230226  | 1436482  | 9758390  | 6676054  | 7327261  | 12347087 |
| 9.40325  | 9  | 4 | 4 | 964372.8 | 6930455  | 2117885  | 4048493  | 1664603  | 6142187  | 5867885  | 5465690  | 6520747  |
| 19.84017 | 10 | 5 | 5 | 320609.1 | 1173783  | 235088.9 | 1712046  | 421955.1 | 1186401  | 911071.3 | 1068242  | 1154735  |
| 9.684583 | 9  | 4 | 5 | 255529.5 | 1459553  | 502319.1 | 822073.3 | 267173   | 2141419  | 1673500  | 1530905  | 862418.3 |
| 9.659033 | 10 | 5 | 5 | 775523   | 3446523  | 673651.4 | 2250811  | 889602.3 | 2638336  | 3155398  | 3153506  | 4247935  |
| 10.57272 | 10 | 5 | 5 | 414592.5 | 1297330  | 421778.5 | 732953.3 | 314290.2 | 923558.9 | 1806824  | 1614793  | 1304004  |
| 9.842    | 8  | 5 | 3 | 1472099  | 6487745  | 1329488  | 3304394  | 2511428  | 7070823  | 6230030  | 4334868  | 6977847  |
| 9.544833 | 9  | 5 | 4 | 781954   | 1654711  | 446145.6 | 1045482  | 359691.2 | 1209955  | 1271475  | 1622310  | 1884509  |
| 9.445217 | 8  | 4 | 3 | 1131304  | 8130675  | 1655268  | 4922569  | 2462326  | 8218032  | 7614687  | 6527832  | 7406695  |

|          |    |   |   |          |          |          |          |          |          |          |          |          |
|----------|----|---|---|----------|----------|----------|----------|----------|----------|----------|----------|----------|
| 9.932033 | 6  | 3 | 3 | 1338724  | 2439765  | 697771.6 | 1502716  | 535667.5 | 2183913  | 2561181  | 2532488  | 3424434  |
| 9.392767 | 8  | 4 | 3 | 885311.7 | 2707044  | 944897.8 | 1416917  | 766289.2 | 3354273  | 2612860  | 1801646  | 1819800  |
| 12.631   | 3  | 0 | 3 | 8140619  | 51671018 | 4417562  | 19004190 | 25857019 | 55698145 | 54053438 | 47588299 | 46218658 |
| 10.0704  | 12 | 5 | 4 | 1168636  | 1515468  | 936987.9 | 3437143  | 1497763  | 3013612  | 1091866  | 1516689  | 1482205  |
| 9.4775   | 8  | 2 | 5 | 3563855  | 22899476 | 8772423  | 10755670 | 7460889  | 33014388 | 18866147 | 15681470 | 31728956 |
| 9.365833 | 4  | 4 | 0 | 1397872  | 2683609  | 3380220  | 7632863  | 3290319  | 1505473  | 1368669  | 952426.9 | 879916.9 |
| 9.9847   | 6  | 5 | 1 | 1838572  | 587513.9 | 314710   | 4333816  | 2963217  | 1147497  | 476266.3 | 467455.9 | 393307   |
| 9.824233 | 3  | 0 | 3 | 1066741  | 3385360  | 879666   | 2107449  | 844079.8 | 3054638  | 3990987  | 4469762  | 3215267  |
| 10.78937 | 8  | 5 | 3 | 135064.7 | 321926.9 | 96816.84 | 196789.3 | 64456.88 | 316378.9 | 460887.2 | 359657.6 | 268640.9 |
| 9.379233 | 4  | 3 | 1 | 409343.7 | 961320.1 | 455307.3 | 296941.1 | 441591.8 | 1157628  | 152252.8 | 1135352  | 1249836  |
| 28.6055  | 3  | 0 | 3 | 513390.4 | 3757901  | 167459.1 | 1449009  | 1828927  | 3747143  | 3661931  | 3739212  | 3603091  |
| 8.9256   | 8  | 5 | 3 | 276444.4 | 868522.7 | 447767.8 | 284288.2 | 313488.3 | 491119.3 | 979393.6 | 710057.4 | 1596694  |
| 9.979667 | 7  | 4 | 3 | 289636.2 | 913450.8 | 255444.9 | 495398.7 | 304271.2 | 621890.6 | 1233835  | 977932.7 | 686736.7 |
| 21.25633 | 3  | 0 | 3 | 81959.9  | 435099   | 85446.7  | 309119.2 | 85289.94 | 406954.8 | 548009.5 | 499686.8 | 347407.4 |
| 8.94605  | 4  | 1 | 3 | 362697   | 764060.8 | 324955.6 | 355413.9 | 184304.3 | 715871.6 | 979684.1 | 971440.2 | 937431.2 |
| 41.7475  | 3  | 0 | 3 | 1435515  | 27137020 | 467260.1 | 14063452 | 10389747 | 27415112 | 26579272 | 26698036 | 27365988 |
| 9.43325  | 5  | 3 | 2 | 1878254  | 12369515 | 3365439  | 8208250  | 1416960  | 13563756 | 15201151 | 12018439 | 14339015 |
| 9.419733 | 6  | 2 | 3 | 811643.6 | 6741705  | 1527654  | 3979763  | 2109865  | 8205633  | 5895211  | 7146198  | 7932135  |
| 11.17508 | 11 | 5 | 5 | 2540887  | 14117503 | 2467612  | 10214422 | 2803540  | 18093640 | 12391961 | 14895980 | 12169603 |
| 9.445217 | 11 | 5 | 5 | 900811.1 | 5404215  | 937253.4 | 3059379  | 1886518  | 5451172  | 6980451  | 4607754  | 5150468  |
| 9.856867 | 8  | 3 | 5 | 1762390  | 8820097  | 750557.2 | 6482654  | 1892921  | 9208763  | 8645670  | 8603978  | 9827304  |
| 11.59415 | 6  | 3 | 3 | 113116.8 | 519474.3 | 190733.8 | 281158.1 | 27729.33 | 775749.4 | 611675.4 | 262730.6 | 498253.2 |
| 10.01837 | 11 | 5 | 4 | 2167079  | 4609874  | 641078   | 3729966  | 545885.9 | 4791146  | 3852014  | 4051456  | 4976430  |
| 9.43325  | 6  | 3 | 3 | 399691.8 | 2149721  | 426377.8 | 1472490  | 489738.2 | 2741102  | 2037989  | 1555165  | 2157790  |
| 23.016   | 10 | 5 | 5 | 102038.8 | 339661.9 | 129052.3 | 571774.5 | 177946.7 | 206291.9 | 383602.2 | 461828.6 | 448671.2 |
| 9.952017 | 6  | 3 | 3 | 769084.6 | 2231399  | 647502   | 1304867  | 614045.7 | 2866743  | 1751129  | 2537429  | 1351713  |
| 9.61395  | 10 | 5 | 5 | 634929.6 | 2683583  | 439080.8 | 1997350  | 492413.2 | 2169514  | 3077084  | 2353693  | 2642567  |
| 9.842    | 5  | 5 | 0 | 537232   | 1644102  | 217830.1 | 763540.1 | 715657.5 | 1864948  | 1898561  | 1490701  | 1461536  |
| 9.601917 | 10 | 5 | 5 | 14478855 | 59027686 | 7256040  | 47246050 | 8668289  | 54275687 | 70420448 | 53113967 | 55273916 |
| 42.1795  | 6  | 4 | 2 | 220551.6 | 3150966  | 756573.1 | 2174486  | 528572.2 | 4076145  | 2092508  | 2765560  | 3533329  |
| 9.365833 | 4  | 3 | 1 | 298255.4 | 1285629  | 308318.4 | 619761.4 | 532175.1 | 1796003  | 962712.2 | 1184742  | 1270260  |
| 10.05535 | 8  | 5 | 3 | 1108227  | 603867.9 | 266234.2 | 2453322  | 1493522  | 371249.9 | 572673.6 | 732449.7 | 989886.7 |
| 9.328667 | 6  | 1 | 4 | 2009695  | 4586895  | 2782653  | 1135121  | 418186.8 | 7775441  | 1178127  | 6366697  | 5356665  |
| 9.445217 | 11 | 5 | 5 | 1435800  | 9497580  | 3143939  | 5187983  | 2721639  | 8911633  | 8560375  | 7734207  | 15001257 |
| 40.194   | 6  | 3 | 2 | 322884.1 | 4070718  | 542579.5 | 3372957  | 379736.8 | 4191735  | 3521492  | 3495946  | 4690376  |

|          |    |   |   |          |          |          |          |          |          |          |          |          |
|----------|----|---|---|----------|----------|----------|----------|----------|----------|----------|----------|----------|
| 24.5925  | 10 | 5 | 5 | 4371950  | 26818846 | 1475059  | 31279890 | 3652263  | 26987690 | 28702054 | 24566692 | 26784729 |
| 10.9645  | 5  | 4 | 1 | 1568078  | 2644948  | 2341523  | 7470402  | 3852857  | 1448610  | 1759602  | 1715236  | 6826206  |
| 9.43325  | 7  | 2 | 3 | 563079.5 | 3165330  | 859430.4 | 1616197  | 1201468  | 3887871  | 2768630  | 3933500  | 3355389  |
| 10.95835 | 6  | 4 | 2 | 375882.2 | 962932.8 | 288055.9 | 1604571  | 518740.4 | 1053549  | 1152570  | 809571.3 | 541603.8 |
| 39.01417 | 7  | 2 | 3 | 437035.2 | 5439912  | 1750665  | 2786989  | 1888988  | 4700674  | 5827054  | 4480492  | 8307280  |
| 22.1025  | 3  | 0 | 3 | 37447232 | 1.78E+08 | 17176748 | 66476120 | 91235966 | 1.89E+08 | 1.97E+08 | 1.62E+08 | 1.86E+08 |
| 9.840617 | 3  | 0 | 3 | 2360112  | 7154346  | 1151361  | 5390501  | 1268315  | 6421431  | 8229293  | 8391426  | 7010039  |
| 9.46265  | 12 | 5 | 4 | 706600.4 | 5552580  | 1087341  | 3303119  | 1804089  | 6761562  | 5725282  | 6150462  | 3884206  |
| 9.43325  | 8  | 4 | 4 | 512496.3 | 3119940  | 601698.8 | 1613852  | 1231517  | 3924698  | 3516092  | 3048861  | 2566936  |
| 16.50493 | 4  | 1 | 3 | 42985.92 | 159062.1 | 60477.82 | 85617.81 | 20929.09 | 262205.1 | 128351.3 | 133747.9 | 110029.7 |
| 10.95835 | 6  | 2 | 4 | 440416.4 | 1741347  | 730228.2 | 805664.4 | 515135.7 | 2266876  | 1350180  | 680395   | 1931840  |
| 8.791683 | 5  | 3 | 2 | 249661.6 | 841819.3 | 522945.9 | 206778.1 | 174436.5 | 614446.2 | 1192403  | 820760   | 1466621  |
| 9.41815  | 5  | 2 | 3 | 629022.6 | 4545905  | 1350363  | 2303712  | 1695088  | 5509167  | 4077215  | 5871611  | 4804565  |
| 8.98945  | 10 | 5 | 5 | 671268   | 2566658  | 199282.3 | 1661572  | 744057.1 | 2814925  | 2456798  | 2514959  | 2324916  |
| 9.431017 | 8  | 4 | 4 | 1222896  | 2799031  | 1062868  | 1506336  | 261227.2 | 2676227  | 1202546  | 2847603  | 3106709  |
| 9.431017 | 3  | 0 | 3 | 489256.2 | 2103224  | 861162.1 | 1022273  | 555427   | 1999806  | 1233251  | 1485395  | 2373884  |
| 10.94208 | 8  | 5 | 3 | 388543   | 788203.9 | 358398.2 | 1249600  | 260872   | 393459.5 | 469296.4 | 926707.4 | 886449.1 |
| 9.986767 | 5  | 1 | 4 | 5379817  | 17283120 | 9080673  | 5851419  | 5960077  | 21002775 | 1923941  | 18754613 | 25988911 |
| 19.98517 | 3  | 0 | 3 | 15234069 | 67779988 | 26751792 | 21508549 | 35668881 | 27539216 | 77243787 | 73504899 | 60216560 |
| 10.98385 | 5  | 4 | 1 | 59943296 | 43892009 | 95442207 | 2.27E+08 | 1.46E+08 | 2.15E+08 | 925721.1 | 1327144  | 1439439  |
| 9.314683 | 4  | 1 | 3 | 931478.1 | 6774595  | 2415114  | 3327109  | 2347734  | 8666323  | 6911042  | 2628792  | 7443552  |
| 9.379233 | 12 | 4 | 5 | 2597277  | 7891113  | 3975913  | 13386890 | 3596027  | 8395117  | 3956639  | 3832709  | 12857265 |
| 9.379233 | 13 | 5 | 5 | 2552857  | 8685777  | 4050839  | 15591805 | 5298306  | 8531705  | 6184930  | 3657175  | 14036531 |
| 9.4468   | 4  | 3 | 1 | 298252.1 | 1286024  | 224558.9 | 709040.2 | 474855.2 | 1240910  | 1408724  | 1468289  | 913575.5 |
| 10.02372 | 8  | 5 | 3 | 1492003  | 792969.4 | 286174.6 | 3035666  | 1836572  | 790073.7 | 671355.9 | 1146016  | 963330.4 |
| 9.84525  | 5  | 3 | 2 | 454841.7 | 1289958  | 395384.9 | 804033.4 | 222052.5 | 1306452  | 662147.1 | 1543553  | 1242317  |
| 11.26148 | 4  | 3 | 1 | 98599.35 | 216643.5 | 67794.34 | 101516.5 | 88385.65 | 211393.5 | 131751.4 | 318875.7 | 192913   |
| 9.983433 | 9  | 4 | 5 | 830641.8 | 1940173  | 189708.7 | 1452369  | 402171.6 | 2006851  | 2210573  | 1715884  | 1814033  |
| 9.4873   | 3  | 3 | 0 | 466703.3 | 657992.5 | 300529.1 | 247890.5 | 266218.1 | 818509.6 | 974548.2 | 174021.4 | 684308.3 |
| 10.24195 | 8  | 4 | 4 | 781878.6 | 2190374  | 804863.6 | 1188196  | 514245.9 | 3251172  | 2717240  | 2090803  | 1257624  |
| 9.842    | 8  | 4 | 4 | 1098153  | 5053275  | 812385   | 3081347  | 1627562  | 4857731  | 5099283  | 4003527  | 5029054  |
| 11.17828 | 7  | 4 | 3 | 167509.3 | 434769.5 | 58645.4  | 249203.3 | 154397.5 | 493244.4 | 361137.2 | 493812.7 | 397545.3 |
| 13.24483 | 10 | 5 | 5 | 313260.7 | 2100071  | 364424.2 | 1655829  | 197983.4 | 2690029  | 2153509  | 1730510  | 1907270  |
| 9.976317 | 7  | 4 | 3 | 344699.5 | 1015030  | 165736.6 | 624522.5 | 322028.3 | 1221752  | 959069.7 | 1139607  | 804614.1 |
| 9.559117 | 16 | 5 | 5 | 2431044  | 21079469 | 5116994  | 11510565 | 7626852  | 26192366 | 25667438 | 22001898 | 15403655 |

|          |    |   |   |          |          |          |          |          |          |          |          |          |
|----------|----|---|---|----------|----------|----------|----------|----------|----------|----------|----------|----------|
| 40.64    | 14 | 4 | 2 | 398715.6 | 3389827  | 1000362  | 4646621  | 675926.4 | 4542922  | 4085343  | 3128822  | 3252207  |
| 9.929783 | 5  | 3 | 2 | 1395942  | 2988277  | 196472.5 | 1382451  | 1325198  | 3292995  | 2889717  | 2801146  | 2887550  |
| 10.7349  | 4  | 4 | 0 | 149336.7 | 302035.5 | 146798.6 | 124025.9 | 78255.28 | 488447.8 | 410607.1 | 169135.3 | 154420.4 |
| 9.392767 | 7  | 5 | 2 | 770182.8 | 1623106  | 552201.4 | 911797.3 | 418896.8 | 2361784  | 1607501  | 1128459  | 1059976  |
| 9.644783 | 10 | 5 | 5 | 2465940  | 8675576  | 1205525  | 6152860  | 2061921  | 8827947  | 8684003  | 8476737  | 10390122 |
| 12.61743 | 6  | 2 | 4 | 59950.97 | 375257.9 | 104372.9 | 250019.6 | 47153.18 | 470052.8 | 459820.8 | 224846.1 | 313906.4 |
| 11.26148 | 5  | 3 | 2 | 56947.36 | 158787.8 | 44615.15 | 71374.34 | 70717.64 | 185173.3 | 136799   | 197744.2 | 183613.9 |
| 9.896717 | 5  | 3 | 2 | 5053736  | 6437796  | 1594239  | 3764874  | 2067522  | 8763642  | 4600246  | 5865310  | 5755685  |
| 11.76832 | 4  | 0 | 3 | 89420.82 | 429043.8 | 56590.86 | 206445.3 | 186143.2 | 410784.5 | 374672.2 | 404991.2 | 431190.2 |
| 12.25275 | 10 | 5 | 5 | 376057.6 | 4112112  | 479334.4 | 2580194  | 1283280  | 3697860  | 3625272  | 4012925  | 4599808  |
| 10.93415 | 5  | 1 | 4 | 236637.1 | 672383.4 | 243017.4 | 359353.6 | 186330   | 403002.9 | 990200.1 | 454151.3 | 739733   |
| 44.9835  | 9  | 4 | 5 | 188542.8 | 1070059  | 94415.59 | 1206118  | 96155.08 | 1175066  | 948382   | 1029137  | 1041878  |
| 9.311883 | 5  | 1 | 3 | 856854.8 | 5376593  | 1828950  | 2596786  | 2051063  | 7080693  | 2856196  | 6813568  | 6032265  |
| 9.16125  | 6  | 4 | 2 | 368130.5 | 1746701  | 382567.8 | 1052707  | 553985.4 | 1796861  | 1751918  | 1363356  | 2347808  |
| 8.926833 | 5  | 4 | 1 | 30180326 | 20213073 | 43612660 | 1.06E+08 | 70011034 | 715838.9 | 604336.9 | 425178.5 | 1091459  |
| 8.911617 | 9  | 5 | 4 | 1199237  | 3035305  | 1588094  | 1122884  | 831274.5 | 2171534  | 3128135  | 1835186  | 5745744  |
| 10.31835 | 4  | 3 | 1 | 98089.14 | 364646   | 96992.59 | 220145.7 | 105400.2 | 298248.5 | 536236.4 | 327007.9 | 324547.7 |
| 9.94455  | 4  | 3 | 1 | 718619.1 | 1528775  | 615584.9 | 2459099  | 687149.4 | 1188534  | 1125156  | 1012002  | 2455281  |
| 24.60717 | 5  | 3 | 2 | 110677   | 193267.6 | 69837.5  | 277703.2 | 39368.12 | 295107.9 | 233710.5 | 125691.4 | 147402   |
| 9.392767 | 6  | 2 | 4 | 1616543  | 10763265 | 4098630  | 5661549  | 2790055  | 13556829 | 8452394  | 8261004  | 16555846 |
| 20.274   | 3  | 0 | 3 | 320574.6 | 1596794  | 197150.7 | 708514.9 | 747577.2 | 1830857  | 1792927  | 1447477  | 1440892  |
| 9.644783 | 10 | 5 | 5 | 4697140  | 20074367 | 2535978  | 13749177 | 5313652  | 22335587 | 19944582 | 17680814 | 22928598 |
| 12.41195 | 4  | 1 | 3 | 74276.63 | 323688.2 | 72690.58 | 214894.4 | 80258.19 | 438168.6 | 339862.9 | 290060.5 | 244107.6 |
| 9.960467 | 8  | 5 | 3 | 846699.9 | 1052467  | 317279.3 | 1950401  | 758672.3 | 1398098  | 1307440  | 1094767  | 800802.5 |
| 15.31398 | 10 | 5 | 5 | 125229.5 | 849007.4 | 204983.8 | 605952.8 | 92893.49 | 854643.7 | 1144326  | 756958.9 | 585596.9 |
| 42.43817 | 6  | 3 | 3 | 423526.5 | 6709375  | 1121394  | 5384755  | 349245.8 | 7968316  | 5872415  | 7905701  | 5944979  |
| 9.473733 | 9  | 5 | 4 | 786730   | 2407405  | 247863.2 | 1543328  | 733233.9 | 2413812  | 2353901  | 2040737  | 2721046  |
| 9.343517 | 6  | 2 | 4 | 655831.1 | 5235741  | 3167138  | 1461775  | 305561.5 | 8976117  | 2974289  | 1357409  | 7680124  |
| 42.40917 | 5  | 2 | 3 | 387781.1 | 6248348  | 1599795  | 4354856  | 330592   | 7361573  | 5320288  | 8513943  | 5042626  |
| 30.31    | 7  | 2 | 5 | 307562.6 | 2426269  | 1500894  | 652439.4 | 336400.3 | 791334.9 | 3366267  | 782161.6 | 3507822  |
| 9.8322   | 4  | 3 | 1 | 474175.2 | 1103055  | 353492.8 | 447508.8 | 533498.6 | 1602068  | 1228917  | 1038082  | 630741.3 |
| 9.928667 | 7  | 4 | 3 | 1254602  | 3373905  | 391554.1 | 2162360  | 1030684  | 3705608  | 2923266  | 3362403  | 3057341  |
| 9.568567 | 20 | 5 | 5 | 7729703  | 62549197 | 12526897 | 37892002 | 20342838 | 54245834 | 75576364 | 75957870 | 48747254 |
| 9.88815  | 6  | 4 | 2 | 4311007  | 5185379  | 5253677  | 14572445 | 7583049  | 2930702  | 2335890  | 3669678  | 2454094  |
| 12.25275 | 10 | 5 | 5 | 473956.3 | 4990337  | 682801.8 | 3200340  | 1519711  | 4492712  | 4083257  | 5231004  | 5744162  |

|          |    |   |   |          |          |          |          |          |          |          |          |          |
|----------|----|---|---|----------|----------|----------|----------|----------|----------|----------|----------|----------|
| 10.94443 | 5  | 2 | 3 | 165498.5 | 371080.8 | 88647.87 | 615049.6 | 207466.1 | 461070.9 | 270151.8 | 462048.6 | 302157.5 |
| 10.33625 | 9  | 4 | 5 | 499362   | 980173.2 | 470075.8 | 429009.3 | 140139.4 | 1678021  | 1255665  | 613933.3 | 640701.2 |
| 10.32122 | 7  | 4 | 3 | 386515.7 | 1207647  | 547701.7 | 563316.1 | 117263.9 | 1936657  | 1649335  | 745620.5 | 787019.1 |
| 9.43325  | 7  | 5 | 2 | 463777.9 | 3355041  | 1552042  | 1538975  | 562884.2 | 4571483  | 2438769  | 5104384  | 3368456  |
| 18.23183 | 9  | 4 | 5 | 1340039  | 8061154  | 5725692  | 1318133  | 1030962  | 11499899 | 1426067  | 11527306 | 13549160 |
| 19.09717 | 10 | 5 | 5 | 329988.9 | 1839482  | 378223.2 | 1356189  | 298895.9 | 1832277  | 2062412  | 1300016  | 1702158  |
| 9.952017 | 10 | 5 | 5 | 2145454  | 5022126  | 555699.1 | 3000070  | 1729424  | 5651567  | 5533580  | 4939893  | 4421104  |
| 9.77345  | 4  | 3 | 1 | 519487.1 | 925611.5 | 76084.96 | 534491.3 | 333640.3 | 880409.3 | 924118.7 | 957137.5 | 833192.9 |
| 12.25173 | 11 | 5 | 5 | 739602.3 | 5102521  | 738261.1 | 3738546  | 1118316  | 6243538  | 4608234  | 5427046  | 4785562  |
| 9.421167 | 5  | 1 | 4 | 3413078  | 15868127 | 6510367  | 6494451  | 6851456  | 22486881 | 4985874  | 18186225 | 16695397 |
| 31.379   | 10 | 5 | 5 | 2672928  | 59725591 | 2331075  | 56614959 | 2091741  | 56041208 | 58900761 | 61154891 | 61854951 |
| 10.61757 | 5  | 4 | 1 | 110364.9 | 399956.5 | 109978.6 | 254548.7 | 96518.77 | 390594.1 | 390706.1 | 349521.1 | 287374.4 |
| 9.596017 | 10 | 5 | 5 | 495340.5 | 1971202  | 455668.1 | 1407714  | 322849.9 | 1690871  | 2345950  | 1347045  | 2034049  |
| 9.673333 | 10 | 5 | 5 | 2674467  | 7894109  | 1789384  | 5578529  | 1483698  | 8962965  | 10351929 | 5864716  | 6706783  |
| 7.348883 | 7  | 4 | 3 | 826768.6 | 23773988 | 15366192 | 5881862  | 5446003  | 46527650 | 9768859  | 25303471 | 28001106 |
| 28.19967 | 3  | 3 | 0 | 130095.5 | 196620   | 103894.2 | 341597.4 | 103290.1 | 138411   | 122179.6 | 277904.8 | 107585.4 |
| 21.77067 | 5  | 2 | 3 | 39659.66 | 167804.8 | 38247.57 | 120687.5 | 26805.76 | 143618.6 | 204807.4 | 120730.8 | 161539.2 |
| 11.27298 | 9  | 5 | 4 | 201070.6 | 637891.7 | 271953   | 297611.8 | 203450.3 | 566096   | 354138.8 | 611549   | 1090131  |
| 9.994767 | 8  | 5 | 3 | 261968.5 | 477243.9 | 121184.5 | 730868.2 | 213656.8 | 540497.6 | 570857.1 | 565516.8 | 418468.3 |
| 9.659033 | 10 | 5 | 5 | 1083175  | 4094794  | 839264.5 | 2916460  | 847344.9 | 3710631  | 3858377  | 3681176  | 5588653  |
| 9.684583 | 5  | 3 | 2 | 206327   | 814611.6 | 337485.1 | 410236.6 | 206989.8 | 1263470  | 750430   | 431381   | 586814.7 |
| 11.287   | 4  | 3 | 1 | 135411.4 | 422696.7 | 205664.3 | 183960.2 | 54952.67 | 713134.3 | 517286.9 | 378535.7 | 163256   |
| 37.40283 | 6  | 4 | 2 | 367412.4 | 6196975  | 735442.9 | 5342059  | 167863.2 | 5663694  | 5247076  | 7092468  | 6457564  |
| 9.541433 | 9  | 2 | 4 | 4958916  | 26028155 | 6696783  | 15509175 | 8221450  | 32854960 | 22968166 | 22939072 | 33227415 |
| 15.99403 | 10 | 5 | 5 | 1088265  | 11279426 | 1269395  | 9062399  | 1806520  | 13170596 | 11269505 | 9638319  | 10888464 |
| 39.82    | 7  | 3 | 4 | 357894.1 | 6308980  | 525363.7 | 5022504  | 1102931  | 6651802  | 6472181  | 5413213  | 6705741  |
| 10.7349  | 7  | 4 | 3 | 290403.9 | 773623.1 | 428001.2 | 275359.2 | 72162.44 | 1370965  | 1073150  | 554983.5 | 369680   |
| 11.17508 | 9  | 4 | 5 | 548827.8 | 3148273  | 783166.5 | 1807588  | 1087896  | 4181154  | 2466114  | 3405516  | 2265399  |
| 37.48917 | 3  | 3 | 0 | 493647.1 | 8574017  | 297431.4 | 8072194  | 405330.6 | 8765485  | 8258663  | 8511220  | 8980715  |
| 9.9677   | 10 | 5 | 5 | 2195810  | 7342234  | 1560460  | 5036317  | 1744068  | 7495506  | 6639139  | 6311812  | 6273330  |
| 10.13878 | 8  | 4 | 4 | 536358.9 | 1689417  | 366322.3 | 1202353  | 332414.8 | 1406454  | 2065440  | 1888052  | 1885115  |
| 9.8887   | 5  | 1 | 4 | 1116893  | 6252781  | 2754132  | 3061765  | 1188616  | 6624190  | 1716754  | 9039897  | 7616334  |
| 9.4159   | 4  | 1 | 3 | 5345196  | 25352713 | 6987078  | 13030406 | 10122834 | 28313317 | 12930738 | 28804377 | 27300645 |
| 7.252767 | 8  | 5 | 3 | 775423.3 | 9052429  | 1536822  | 5906740  | 2664220  | 10089486 | 9357249  | 7284526  | 7674428  |
| 9.445217 | 11 | 4 | 5 | 2864609  | 12103944 | 3675335  | 7264404  | 3278530  | 8035620  | 11583978 | 10293523 | 12708943 |

|          |    |   |   |          |          |          |          |          |          |          |          |          |
|----------|----|---|---|----------|----------|----------|----------|----------|----------|----------|----------|----------|
| 9.983433 | 10 | 5 | 5 | 1146131  | 3819360  | 328711.3 | 2994586  | 712305.7 | 4140870  | 3308706  | 3815980  | 3758264  |
| 41.22983 | 7  | 3 | 2 | 320844.9 | 4272909  | 968964.9 | 3061754  | 745700.5 | 5695796  | 3836151  | 4844198  | 3517185  |
| 9.445217 | 13 | 5 | 5 | 4324550  | 28299265 | 5516642  | 19764079 | 6674926  | 33803775 | 30490119 | 27044787 | 19407946 |
| 26.78117 | 9  | 5 | 4 | 630543   | 2079878  | 998791.2 | 3971628  | 1584556  | 3709728  | 1404686  | 1143094  | 2058375  |
| 22.799   | 8  | 5 | 3 | 795260.6 | 21077013 | 7272692  | 12710476 | 2309619  | 21689932 | 16267710 | 24436723 | 30887515 |
| 9.976317 | 5  | 4 | 1 | 860182.9 | 2367417  | 442264.3 | 1663349  | 559229.6 | 2082891  | 1776263  | 2410445  | 2825367  |
| 9.992233 | 4  | 3 | 1 | 759964.5 | 1061453  | 448506.7 | 1633130  | 368379.2 | 800645.9 | 599788.2 | 887257.4 | 1723244  |
| 9.914217 | 5  | 4 | 1 | 1632664  | 2607836  | 741548.7 | 4787840  | 1895112  | 3438158  | 2039798  | 3306075  | 2473000  |
| 9.43325  | 6  | 4 | 2 | 382708   | 2165011  | 823739   | 1133011  | 641870.5 | 1567675  | 3530303  | 1736454  | 2350342  |
| 10.97857 | 7  | 5 | 2 | 937530.2 | 575628.9 | 138992.1 | 3072499  | 2149708  | 651624.1 | 478051.4 | 456844.8 | 783684.4 |
| 20.3895  | 7  | 4 | 3 | 88358.93 | 422336.5 | 113299.8 | 279052.7 | 91159.16 | 249960.5 | 535267.9 | 371485.4 | 467188.1 |
| 25.20167 | 3  | 3 | 0 | 97092.65 | 370576.4 | 126172.3 | 520509.8 | 78614.81 | 472365.7 | 340715.1 | 529675.4 | 240471.3 |
| 11       | 10 | 5 | 5 | 1460591  | 5324667  | 1618034  | 3107621  | 1591411  | 6278897  | 7113779  | 4183831  | 3149524  |
| 9.848417 | 7  | 3 | 4 | 1463511  | 4435035  | 1645480  | 2523741  | 849492.3 | 4859273  | 2113114  | 4046749  | 6695053  |
| 10.99268 | 4  | 3 | 1 | 296975   | 1198545  | 273120.4 | 851272.3 | 224907.4 | 876939.5 | 1275186  | 967681.2 | 1330231  |
| 8.960667 | 10 | 5 | 5 | 1173812  | 3957727  | 592852.6 | 3020863  | 745457.7 | 3580875  | 4532777  | 3984834  | 3171620  |
| 8.803133 | 9  | 5 | 4 | 743846.2 | 12892887 | 2590620  | 9731803  | 1856795  | 9385744  | 16641990 | 12498860 | 13370542 |
| 9.6501   | 10 | 5 | 5 | 757879   | 4704047  | 922967   | 3388252  | 984179   | 5491272  | 5230693  | 4829899  | 3130326  |
| 9.858833 | 8  | 4 | 4 | 1561998  | 9256740  | 1158078  | 6914471  | 1997573  | 8923310  | 9023666  | 7816853  | 9513947  |
| 9.40325  | 10 | 5 | 5 | 3567146  | 15842964 | 3825561  | 11267961 | 2524870  | 15791954 | 13988106 | 11190453 | 16678330 |
| 6.882217 | 9  | 5 | 4 | 1509010  | 98245334 | 26364722 | 67741830 | 13545150 | 1.31E+08 | 84721086 | 78731229 | 74555180 |
| 9.999217 | 7  | 4 | 3 | 1064929  | 1082078  | 601799.7 | 2195237  | 935527.6 | 1175298  | 498215.1 | 2047773  | 1008357  |
| 9.920517 | 5  | 2 | 3 | 1369736  | 2542375  | 756655.7 | 1588924  | 611971.8 | 3317995  | 3281523  | 2091746  | 2442115  |
| 10.43932 | 7  | 4 | 2 | 152906.4 | 404665.3 | 107804.6 | 274314.4 | 75211.78 | 455354.6 | 533811.9 | 319449.2 | 445391.7 |
| 28.1855  | 3  | 3 | 0 | 22130550 | 48943350 | 67707729 | 1.28E+08 | 37667312 | 521295.1 | 1.4E+08  | 324408.5 | 1.03E+08 |
| 11.05325 | 8  | 5 | 3 | 952055.6 | 5812930  | 962727.7 | 4500948  | 945728.4 | 7288636  | 4983663  | 6179492  | 4994554  |
| 9.445217 | 13 | 5 | 4 | 849341.8 | 5381696  | 646597.2 | 4333432  | 847888.8 | 5192955  | 5786964  | 6243033  | 4569188  |
| 9.932033 | 3  | 0 | 3 | 4092827  | 9074441  | 2303640  | 5516962  | 2816091  | 9250955  | 11846991 | 10740648 | 6564025  |
| 9.388367 | 5  | 3 | 1 | 963115.1 | 4596496  | 1651912  | 2618855  | 1106580  | 4399310  | 3545573  | 3280338  | 7420046  |
| 9.609367 | 4  | 3 | 1 | 189677.5 | 490707.7 | 152760.4 | 254912.9 | 186672.8 | 477713.5 | 706191.8 | 422601.4 | 294922.1 |
| 9.82645  | 7  | 4 | 3 | 1911378  | 5410923  | 2040787  | 3036601  | 1137541  | 2869062  | 6392504  | 6235471  | 7813999  |
| 27.09967 | 9  | 5 | 4 | 322481.5 | 1145618  | 391290.3 | 2309043  | 1020901  | 1351178  | 904378.1 | 755028   | 1725200  |
| 9.3735   | 5  | 2 | 3 | 389856.5 | 3420101  | 776798.6 | 1833446  | 1360877  | 4172800  | 2956159  | 2409116  | 4198928  |
| 10.95055 | 5  | 4 | 1 | 241673.9 | 623028.3 | 137884.7 | 368983.8 | 213974.2 | 726224.8 | 782770.3 | 553773.6 | 435829.2 |
| 9.447733 | 14 | 5 | 5 | 4145740  | 45604631 | 7813877  | 34021501 | 8975525  | 56060808 | 44045359 | 51045762 | 38250923 |



|          |    |   |   |          |          |          |          |          |          |          |          |          |
|----------|----|---|---|----------|----------|----------|----------|----------|----------|----------|----------|----------|
| 9.40325  | 4  | 1 | 3 | 2734489  | 14995098 | 5611777  | 8348861  | 3576048  | 15618673 | 11326941 | 12784054 | 24457544 |
| 10.76405 | 10 | 5 | 5 | 598044.5 | 2434985  | 631734.3 | 1673032  | 442257.3 | 3368688  | 2534293  | 2460198  | 1628263  |
| 9.673333 | 9  | 5 | 4 | 806842.1 | 2280797  | 477049.1 | 1521729  | 611558.8 | 2468152  | 2416925  | 1792788  | 2913053  |
| 10.94208 | 8  | 3 | 5 | 333006.8 | 1106089  | 571545.2 | 457089.6 | 178990.1 | 1249472  | 928662.6 | 721732.9 | 601369.6 |
| 11.0035  | 3  | 3 | 0 | 665305.1 | 1662964  | 1610389  | 3504414  | 752422.6 | 3726351  | 563017.9 | 3061457  | 765565.1 |
| 9.554967 | 5  | 3 | 2 | 218576.4 | 434030.6 | 74446.59 | 168119.5 | 234668.4 | 375244.3 | 553024.4 | 377369.6 | 406401.4 |
| 9.62555  | 9  | 2 | 5 | 16238832 | 1.52E+08 | 1.21E+08 | 13505044 | 7808452  | 2.64E+08 | 2.19E+08 | 23056700 | 2.38E+08 |
| 9.77355  | 10 | 5 | 5 | 1441237  | 4529559  | 762138.6 | 2894616  | 1419485  | 4155124  | 5515134  | 5053939  | 4344016  |
| 8.981583 | 5  | 2 | 3 | 426625.7 | 713512.5 | 427073.4 | 230231.8 | 145553.5 | 956296.2 | 1317868  | 280189.2 | 633068   |
| 44.9835  | 7  | 2 | 3 | 533962.8 | 3301918  | 436443.3 | 1843217  | 1291116  | 2959297  | 2840574  | 3197978  | 3822039  |
| 10.03947 | 3  | 3 | 0 | 1773105  | 2126605  | 1410145  | 5194629  | 2672385  | 1541366  | 1290993  | 1527213  | 1634510  |
| 13.83868 | 10 | 5 | 5 | 235880.5 | 1806048  | 212101.1 | 1345831  | 400851   | 1493461  | 1950278  | 1695027  | 1874732  |
| 37.6905  | 5  | 2 | 3 | 325146.3 | 3562860  | 1792522  | 5693521  | 1206376  | 5067144  | 4626059  | 4631778  | 2667963  |
| 9.38065  | 6  | 1 | 4 | 1777047  | 10516944 | 3469802  | 5629393  | 3692826  | 12616595 | 10645307 | 4477863  | 12437718 |
| 9.419733 | 7  | 5 | 1 | 815728.3 | 1457320  | 905804.5 | 3407119  | 1698849  | 1141783  | 3028193  | 1283325  | 693268.1 |
| 10.24195 | 5  | 3 | 2 | 219823.8 | 618446.4 | 312269.9 | 265421.1 | 71442.37 | 998564   | 881496.7 | 546108.4 | 268965.5 |
| 10.16453 | 3  | 3 | 0 | 1254975  | 1125410  | 762664.6 | 2496945  | 1162109  | 855926.3 | 669560.7 | 1749665  | 2084631  |
| 9.473733 | 10 | 5 | 5 | 4879772  | 14224102 | 2114730  | 11726316 | 1395624  | 15515379 | 13829017 | 11502945 | 13266438 |
| 9.431017 | 9  | 4 | 3 | 704846.5 | 4929721  | 1324997  | 3314256  | 999547.7 | 6064727  | 6322743  | 3352912  | 3800281  |
| 9.56645  | 20 | 5 | 5 | 6550813  | 48097501 | 10010533 | 28907063 | 16498756 | 58074962 | 56589213 | 48366559 | 33553873 |
| 10.97857 | 10 | 5 | 5 | 945535.4 | 3687395  | 707497.9 | 2508527  | 979913.1 | 3314179  | 4433134  | 2785306  | 4372186  |
| 43.27233 | 6  | 4 | 1 | 723493.3 | 6683560  | 4335637  | 11761018 | 2761084  | 14081888 | 3400730  | 3695583  | 5879902  |
| 10.6311  | 7  | 4 | 3 | 163920.2 | 665386.8 | 153927.6 | 477625.3 | 117252.5 | 713673.4 | 817027.2 | 665667.9 | 408109.8 |
| 9.473717 | 10 | 5 | 5 | 2049006  | 6796242  | 1108865  | 5496429  | 712315.6 | 6549171  | 7702420  | 5345650  | 6292352  |
| 9.284283 | 8  | 5 | 3 | 534291   | 1802889  | 208771.4 | 1156170  | 575772.7 | 1924240  | 2070347  | 1813175  | 1538775  |
| 9.4468   | 6  | 2 | 4 | 559625.9 | 3463109  | 1794711  | 1440744  | 340011.1 | 5013660  | 2246362  | 3716319  | 5262789  |
| 10.25713 | 5  | 4 | 1 | 266688   | 609434.2 | 341007.1 | 225259.8 | 150642.5 | 1199834  | 485903.5 | 556999.6 | 322579.1 |
| 9.553017 | 9  | 3 | 5 | 15848287 | 82184959 | 46162810 | 28694947 | 27991430 | 1.32E+08 | 23273911 | 90661402 | 1.18E+08 |
| 44.52367 | 6  | 1 | 3 | 391581.5 | 5257510  | 308420.7 | 4334617  | 823366.2 | 5577941  | 4868864  | 4995161  | 5382121  |
| 44.03467 | 7  | 3 | 2 | 405325.9 | 4592872  | 1394152  | 6390742  | 1256762  | 2930367  | 5657766  | 5970169  | 3287657  |
| 26.07167 | 5  | 2 | 3 | 76890.95 | 253423.4 | 41197.91 | 171033.5 | 71803.59 | 227462.8 | 320659   | 218381.5 | 263481.3 |
| 9.691583 | 4  | 3 | 1 | 223503.5 | 533313.9 | 149971.6 | 303344.9 | 186067.8 | 481161.6 | 790662.5 | 428443.5 | 533087   |
| 15.10643 | 7  | 2 | 5 | 56905.25 | 366967.2 | 91066.7  | 240777.9 | 95671.56 | 300763.3 | 498404.6 | 329907.8 | 283082.1 |
| 16.14095 | 7  | 4 | 3 | 63361.8  | 408124.4 | 82768.64 | 286420.7 | 96396.24 | 451947.7 | 431757.7 | 373474.6 | 284053   |
| 11.13665 | 4  | 1 | 3 | 206174.4 | 496638.8 | 271755.1 | 192886.1 | 67439.89 | 868216   | 662894.6 | 250665.1 | 235386.3 |

|          |    |   |   |          |          |          |          |          |          |          |          |          |
|----------|----|---|---|----------|----------|----------|----------|----------|----------|----------|----------|----------|
| 10.94443 | 4  | 1 | 3 | 317656.4 | 213504.6 | 236392.6 | 564009.9 | 279058   | 174899.6 | 616666.3 | 0        | 102598.1 |
| 9.018167 | 8  | 4 | 4 | 450203.3 | 1246743  | 331536.3 | 848100.3 | 244769   | 1196497  | 1570964  | 1065935  | 816108.2 |
| 9.56645  | 19 | 5 | 5 | 16400841 | 1.43E+08 | 29121707 | 1.04E+08 | 29362360 | 1.79E+08 | 1.53E+08 | 1.51E+08 | 1E+08    |
| 9.40325  | 7  | 2 | 5 | 12582149 | 68213372 | 52951421 | 8732254  | 2896720  | 8060857  | 13543169 | 1.07E+08 | 1.17E+08 |
| 44.03467 | 9  | 2 | 5 | 282346.9 | 4746386  | 959341   | 3410924  | 1022126  | 3966321  | 4327938  | 4652988  | 6405875  |
| 9.45135  | 13 | 4 | 5 | 2744914  | 21329265 | 6054800  | 10411124 | 9385271  | 28977486 | 23129409 | 24151890 | 16102278 |
| 9.82645  | 4  | 3 | 1 | 485189.2 | 1039140  | 283518.7 | 564085.7 | 400489   | 979952.2 | 1423775  | 679863.3 | 913872.5 |
| 9.41815  | 3  | 0 | 3 | 1145171  | 3276263  | 473555.3 | 2388694  | 769824.7 | 3659777  | 2468076  | 3317345  | 3571767  |
| 43.6465  | 6  | 3 | 3 | 1072224  | 15424783 | 521163.5 | 14634510 | 641226.8 | 14996669 | 14836763 | 16140221 | 15562179 |
| 38.453   | 6  | 1 | 4 | 446207.6 | 7845012  | 310423.8 | 5919827  | 1726709  | 7558590  | 7809807  | 7771453  | 7711940  |
| 38.87017 | 10 | 5 | 5 | 681246.6 | 20669439 | 8134823  | 11603267 | 1346889  | 10889529 | 12755835 | 26969955 | 27323253 |
| 28.72267 | 7  | 2 | 5 | 408552.2 | 2945400  | 2181462  | 515767   | 382982.5 | 696435.4 | 421976.7 | 4578881  | 4428327  |
| 10.30302 | 6  | 5 | 1 | 233085.8 | 531102.1 | 327636.3 | 167101.7 | 69236.44 | 1048167  | 606812.8 | 275325.8 | 232049.5 |
| 44.98333 | 5  | 4 | 1 | 635164.9 | 4879590  | 3865230  | 9430734  | 2692294  | 2867885  | 11070176 | 1804244  | 2414310  |
| 9.8445   | 3  | 0 | 3 | 922297.8 | 2466402  | 768994.2 | 1474647  | 709346.8 | 1704016  | 1833500  | 3263064  | 3299459  |
| 9.960467 | 12 | 5 | 5 | 2917758  | 9243727  | 1677494  | 7381933  | 690019.5 | 10375987 | 10587793 | 8062909  | 6873488  |
| 20.17333 | 10 | 5 | 5 | 263189.8 | 1761418  | 383492.1 | 1275808  | 339046.5 | 1952248  | 2045504  | 1124391  | 1680920  |
| 9.473717 | 5  | 4 | 1 | 288204.3 | 950010.2 | 450218.8 | 412158.1 | 334679.2 | 552824.6 | 617252.9 | 840153   | 1071914  |
| 9.842    | 9  | 5 | 4 | 824668.1 | 3448103  | 358616.8 | 2120628  | 1200859  | 3831529  | 3401863  | 2870369  | 3604173  |
| 23.806   | 10 | 5 | 5 | 542619   | 4088804  | 572363.4 | 3124716  | 820154.4 | 4437778  | 4567709  | 3875194  | 3179600  |
| 10.35132 | 9  | 4 | 5 | 347899.2 | 1703419  | 648991.5 | 890052.9 | 559687.7 | 2529148  | 762348.3 | 1781641  | 1486914  |
| 44.72467 | 6  | 3 | 3 | 359729.2 | 3277267  | 54266.89 | 3550293  | 246707.1 | 3227942  | 3321584  | 3306416  | 3209333  |
| 22.9005  | 10 | 5 | 5 | 156599.9 | 901971.4 | 193002.2 | 640171.2 | 198479.8 | 811874.2 | 1185554  | 1015279  | 765360.6 |
| 10.0614  | 9  | 5 | 4 | 718550.3 | 1609631  | 462497.6 | 2147403  | 308437.6 | 1437688  | 2331793  | 1731946  | 1451440  |
| 28.0545  | 7  | 5 | 2 | 315066.3 | 569553.4 | 101132   | 2259503  | 1520020  | 716786.9 | 602097.9 | 442862.4 | 524113.9 |
| 9.95825  | 11 | 5 | 4 | 2606682  | 8321501  | 3145940  | 4597259  | 2279217  | 8128106  | 7523225  | 6520320  | 5732401  |
| 42.76917 | 8  | 3 | 1 | 310251.9 | 3975522  | 555463.8 | 3361015  | 240492.9 | 3534545  | 3558194  | 3766549  | 4153968  |
| 9.43325  | 9  | 5 | 3 | 1121347  | 8986769  | 1230127  | 6914725  | 1772133  | 10735870 | 9589917  | 8893303  | 8044346  |
| 9.770733 | 3  | 3 | 0 | 5526660  | 5054011  | 4829766  | 11863372 | 5358372  | 9898513  | 1691945  | 1458623  | 10767457 |
| 20.18783 | 10 | 5 | 5 | 359896.8 | 1612564  | 439241.8 | 1111385  | 269304.4 | 1724325  | 1977713  | 932504.5 | 1446937  |
| 12.2597  | 10 | 5 | 5 | 151110.9 | 728224.4 | 118104   | 547176.5 | 149799.6 | 637655.4 | 832543.1 | 622145.1 | 671447.6 |
| 9.398583 | 4  | 1 | 3 | 13816060 | 72429124 | 42132612 | 22899748 | 30132310 | 98341729 | 1E+08    | 94250670 | 668468.9 |
| 9.38595  | 3  | 0 | 3 | 2255056  | 11444509 | 1240510  | 5312539  | 5577155  | 13029361 | 9880125  | 12222223 | 11414892 |
| 9.949233 | 7  | 4 | 3 | 2014196  | 2256359  | 1595127  | 4344379  | 1543930  | 1862051  | 4761424  | 2774145  | 1052026  |
| 31.28017 | 10 | 5 | 5 | 1053032  | 22340930 | 1264336  | 19449851 | 2608126  | 23080196 | 21597276 | 22909898 | 20507585 |

|          |    |   |   |          |          |          |          |          |          |          |          |          |
|----------|----|---|---|----------|----------|----------|----------|----------|----------|----------|----------|----------|
| 9.45945  | 7  | 3 | 4 | 746001.3 | 3397406  | 1099770  | 1964562  | 1057168  | 3971512  | 2309890  | 4016073  | 2132878  |
| 9.38665  | 4  | 1 | 3 | 6305556  | 51352527 | 28658400 | 17604066 | 20927560 | 71731938 | 1953611  | 66710891 | 51096149 |
| 11.60568 | 8  | 4 | 4 | 109171   | 691581.2 | 160873.5 | 361805.7 | 295140.8 | 944957.6 | 553805.3 | 669958.8 | 556683.5 |
| 9.498117 | 3  | 3 | 0 | 251603.9 | 392192.5 | 243413.4 | 124682.5 | 105766.2 | 580851   | 609996.9 | 390197.2 | 379917.5 |
| 9.8445   | 4  | 1 | 3 | 2206709  | 7226146  | 2228943  | 3771064  | 2892658  | 8859252  | 3718569  | 7069937  | 7054814  |
| 41.3735  | 12 | 3 | 5 | 512034   | 9931095  | 4103151  | 5426592  | 1756804  | 9120519  | 4986878  | 8709511  | 10554509 |
| 9.859983 | 8  | 4 | 4 | 590418.8 | 2449696  | 690455.6 | 1464023  | 791641.3 | 2145380  | 1577519  | 2401335  | 3450158  |
| 9.986767 | 15 | 5 | 5 | 61054188 | 1.47E+08 | 40485972 | 88646681 | 46632826 | 1.9E+08  | 1.44E+08 | 83414130 | 1.43E+08 |
| 11.58417 | 4  | 3 | 1 | 108945.6 | 209748.9 | 109948.3 | 88337.89 | 54060.01 | 336650.4 | 232258.8 | 286932.1 | 88901.05 |
| 9.859983 | 7  | 4 | 3 | 918127.6 | 3011678  | 542217.6 | 1928772  | 969180.8 | 3276552  | 2846847  | 3701262  | 2998565  |
| 9.43325  | 7  | 4 | 3 | 609879.6 | 3558419  | 1702933  | 1701238  | 649273.7 | 6045547  | 3052908  | 2462831  | 4450647  |
| 9.3919   | 11 | 5 | 4 | 744667.8 | 4562010  | 1388591  | 2503919  | 1695581  | 4673015  | 4741221  | 4353197  | 6473406  |
| 10.16453 | 7  | 5 | 2 | 831068.8 | 2373751  | 998645.4 | 1287038  | 293377.2 | 2938491  | 3859984  | 1517114  | 1692000  |
| 9.644783 | 10 | 5 | 5 | 1289787  | 4756064  | 952791.8 | 3278458  | 1244049  | 5484989  | 5576116  | 3406343  | 4115217  |
| 44.07783 | 3  | 3 | 0 | 1641377  | 9105579  | 10247875 | 20309667 | 980743.4 | 1407014  | 19610127 | 2109224  | 21017428 |
| 9.8322   | 9  | 5 | 4 | 1244335  | 6328755  | 797368.7 | 4970728  | 1181948  | 5707455  | 5436998  | 7105185  | 7190926  |
| 9.488133 | 15 | 5 | 5 | 1354742  | 11728284 | 2163785  | 8817725  | 2250104  | 14226972 | 12834754 | 12246952 | 8550989  |
| 8.9256   | 7  | 5 | 2 | 580869.6 | 1423817  | 765875   | 577861.1 | 394724.9 | 629322.2 | 1722668  | 892571.6 | 2576109  |
| 11.27298 | 9  | 5 | 4 | 423516.8 | 1638351  | 484347.4 | 970129.6 | 527556   | 1576228  | 1183736  | 1494147  | 2463098  |
| 9.38065  | 6  | 3 | 2 | 1971463  | 9804983  | 4538047  | 4853216  | 1932537  | 11187146 | 5525353  | 7745669  | 17059578 |
| 9.554967 | 6  | 4 | 2 | 195441.5 | 421303.9 | 134599   | 179441.3 | 213485.5 | 635660.1 | 470343.7 | 308403.7 | 341414.2 |
| 10.63232 | 3  | 3 | 0 | 106985.7 | 276633   | 126572   | 138942.1 | 24566.51 | 140251.4 | 483702.6 | 261484   | 228463.5 |
| 9.559117 | 7  | 3 | 4 | 454880.4 | 1033253  | 394734.8 | 596030.8 | 212445.4 | 1377434  | 1406148  | 523865   | 723608.2 |
| 9.346    | 7  | 2 | 4 | 5723504  | 15142660 | 10231727 | 4040282  | 2483222  | 28406240 | 15188811 | 21700626 | 6317561  |
| 9.960467 | 7  | 4 | 3 | 762227.4 | 2094009  | 322890   | 1650253  | 350588.5 | 2475584  | 2253992  | 2186719  | 1911216  |
| 9.840617 | 10 | 5 | 5 | 864867.4 | 3916089  | 319760.1 | 3275876  | 576633   | 3919478  | 3751109  | 3485770  | 4315493  |
| 9.419733 | 10 | 5 | 5 | 2430438  | 5838473  | 1133820  | 4257456  | 1262764  | 5259993  | 4715846  | 5411414  | 6160819  |
| 9.976317 | 7  | 5 | 2 | 2483036  | 1764142  | 712397.1 | 5740912  | 3666427  | 1352131  | 1375502  | 1733382  | 3005279  |
| 9.3735   | 5  | 1 | 3 | 1437190  | 9848527  | 1708527  | 5887449  | 3623927  | 11487045 | 7096065  | 9518379  | 10933738 |
| 21.58033 | 5  | 1 | 3 | 66619.63 | 295922.2 | 78772.59 | 205746   | 53247.34 | 168224.1 | 367532.8 | 298546.5 | 291432.1 |
| 43.31583 | 7  | 3 | 3 | 224511   | 2762348  | 637315.2 | 3975718  | 1087341  | 3426141  | 2230383  | 3487638  | 2395851  |
| 10.13878 | 6  | 3 | 3 | 367811.7 | 458862.2 | 77662.41 | 789383.3 | 305781.3 | 560239.6 | 431282   | 458604.2 | 494147.1 |
| 26.34583 | 4  | 1 | 3 | 87765.3  | 323391.9 | 71894.24 | 223742   | 79606.53 | 272614.5 | 402175.5 | 228754.1 | 375598.4 |
| 9.4468   | 11 | 5 | 5 | 664368.7 | 4711720  | 1531383  | 2344600  | 2010362  | 5150971  | 6823187  | 5131169  | 3493480  |
| 9.392767 | 5  | 4 | 1 | 2782658  | 9589913  | 2879257  | 6015286  | 2557926  | 10502778 | 12951534 | 6644999  | 6530313  |

|          |    |   |   |          |          |          |          |          |          |          |          |          |
|----------|----|---|---|----------|----------|----------|----------|----------|----------|----------|----------|----------|
| 13.25862 | 9  | 4 | 5 | 91711.76 | 419349.4 | 147830.7 | 248212.3 | 106042.5 | 397801.9 | 415938.1 | 644159.2 | 228787.1 |
| 16.08187 | 3  | 3 | 0 | 41185.48 | 135728.1 | 20973.14 | 86899.22 | 44840.28 | 129320.9 | 135888.3 | 104544.8 | 149672.6 |
| 18.23283 | 9  | 5 | 4 | 1221605  | 7493691  | 5869115  | 1125742  | 321274.1 | 13344157 | 1605905  | 9561059  | 12071409 |
| 8.813383 | 5  | 4 | 1 | 226064.5 | 930452.5 | 754700   | 114193.5 | 118973.1 | 360194.4 | 1096719  | 666381.3 | 361001   |
| 41.7045  | 4  | 1 | 3 | 331067.9 | 5578565  | 837479.9 | 4635095  | 531595.2 | 5551229  | 5159354  | 7020799  | 5243930  |
| 9.445217 | 14 | 5 | 5 | 615655.6 | 5285052  | 1199188  | 3648520  | 1298271  | 6741138  | 5891154  | 5688667  | 4227737  |
| 9.3735   | 5  | 3 | 2 | 758579.5 | 1118249  | 459894.7 | 524793.4 | 447178.3 | 1741899  | 1403513  | 894305   | 989016.1 |
| 12.27392 | 6  | 3 | 3 | 82098.68 | 260073.6 | 79584.97 | 144254.8 | 95970.56 | 131422.8 | 236555.8 | 326462.8 | 311459.3 |
| 42.62533 | 5  | 3 | 1 | 274475.5 | 2788803  | 506188.9 | 2155634  | 460580.6 | 3202595  | 3462802  | 2377914  | 2423126  |
| 11.92818 | 4  | 1 | 3 | 256580.5 | 1915998  | 962794.7 | 725908.3 | 851914.3 | 2156165  | 206058.8 | 2341475  | 2440779  |
| 11.60763 | 7  | 3 | 4 | 127528.7 | 623579.7 | 150157.1 | 371868.3 | 220898   | 736364.5 | 498158.9 | 524590.4 | 528215.6 |
| 16.92483 | 9  | 5 | 4 | 387679.4 | 3277344  | 589976.1 | 2149560  | 1017892  | 2716463  | 3993380  | 2754893  | 3125893  |
| 9.40615  | 4  | 3 | 1 | 617176.9 | 2982284  | 1726957  | 1126196  | 584318.4 | 4915243  | 1080951  | 1628334  | 4610573  |
| 10.97857 | 3  | 3 | 0 | 832194.2 | 2140989  | 1476693  | 3904592  | 1193801  | 1790650  | 823032.6 | 3899574  | 3468077  |
| 10.02372 | 9  | 4 | 4 | 404268.3 | 449679.3 | 200063.4 | 855220.6 | 369386.7 | 521330   | 101610.5 | 615876.5 | 512532.1 |
| 10.008   | 7  | 5 | 2 | 2081471  | 736337.2 | 83126.54 | 3328944  | 2399602  | 693478.6 | 764008.5 | 808998   | 612452.2 |
| 9.964417 | 13 | 5 | 5 | 2240795  | 5019031  | 1484263  | 3388833  | 809942.9 | 5197811  | 4626790  | 4016251  | 3772272  |
| 10.94443 | 7  | 4 | 3 | 470722.7 | 608999   | 442358.5 | 1618176  | 929931.3 | 510336.7 | 469101.9 | 1382334  | 262935.3 |
| 8.981583 | 7  | 5 | 2 | 555513   | 993494.5 | 256451.8 | 701021.4 | 176596.8 | 1094596  | 1346545  | 702734.7 | 1034912  |
| 9.365833 | 6  | 2 | 3 | 643705.3 | 3070716  | 809456.6 | 2061165  | 736102.6 | 3407512  | 2824231  | 3545800  | 1772846  |
| 9.4468   | 11 | 4 | 4 | 711038.7 | 6313031  | 1374006  | 4514875  | 1387190  | 7418014  | 5359420  | 6729437  | 7623921  |
| 9.842    | 7  | 5 | 2 | 1428889  | 2479028  | 780804.9 | 5032682  | 2384076  | 2347381  | 2001791  | 1799781  | 2451336  |
| 9.445217 | 14 | 5 | 5 | 3158862  | 27947536 | 8170265  | 18399008 | 6215826  | 37010668 | 32224219 | 31353707 | 22291753 |
| 9.36565  | 7  | 5 | 2 | 571484.4 | 1093901  | 239609.1 | 585013.7 | 467658.5 | 1274086  | 1258891  | 1167891  | 688566.4 |
| 39.2445  | 6  | 2 | 3 | 392218.9 | 4144190  | 279981.2 | 5121327  | 913747.1 | 3686953  | 4087737  | 4292762  | 4406046  |
| 9.872917 | 8  | 4 | 4 | 1155047  | 4367966  | 1025247  | 3212803  | 674891.9 | 3294887  | 3698186  | 5962704  | 4600548  |
| 10.04033 | 4  | 3 | 1 | 1261149  | 3641577  | 1673995  | 1851120  | 402582.6 | 2704965  | 2877196  | 3311831  | 6603332  |
| 9.419733 | 5  | 2 | 3 | 823723.6 | 4494609  | 1691954  | 2579747  | 1144515  | 5555486  | 5661148  | 5704975  | 3667460  |
| 10.57323 | 10 | 5 | 5 | 423123.5 | 1625439  | 388573.3 | 1079194  | 448416.3 | 1176201  | 2123781  | 1856500  | 1310482  |
| 9.9677   | 5  | 1 | 4 | 748289.8 | 1645451  | 331738.6 | 1212763  | 335169.3 | 1655386  | 1973949  | 1885095  | 1124382  |
| 32.97967 | 3  | 3 | 0 | 337861.9 | 3859686  | 386301.9 | 3447697  | 126565.5 | 3361371  | 3649792  | 4328327  | 4147135  |
| 39.69033 | 10 | 3 | 3 | 314210.7 | 4358782  | 838967   | 5656648  | 1119376  | 5295026  | 3549376  | 4159456  | 3607177  |
| 9.857983 | 7  | 4 | 3 | 4048369  | 4672189  | 2533112  | 13204941 | 8007426  | 2645498  | 7350873  | 7405916  | 3747117  |
| 10.39408 | 5  | 3 | 2 | 246134.4 | 415864.8 | 191812.4 | 211049.4 | 30513.17 | 596128.4 | 648211.8 | 301967.7 | 227134.9 |
| 39.99283 | 5  | 3 | 2 | 301037   | 6173514  | 1492431  | 7896288  | 1106158  | 6189717  | 7705757  | 5411616  | 7464218  |

|          |    |   |   |          |          |          |          |          |          |          |          |          |
|----------|----|---|---|----------|----------|----------|----------|----------|----------|----------|----------|----------|
| 9.43325  | 11 | 5 | 4 | 777658.1 | 4414970  | 1462997  | 2435370  | 1588761  | 5708518  | 3892242  | 3638871  | 6151474  |
| 9.999217 | 7  | 4 | 3 | 950441.9 | 3464920  | 665758.2 | 2295082  | 1050058  | 3585307  | 2706240  | 3900368  | 2868968  |
| 11.71625 | 10 | 5 | 5 | 3594509  | 15635239 | 5498186  | 28715925 | 12184961 | 13469023 | 14106725 | 12286697 | 25396859 |
| 10.58813 | 5  | 3 | 2 | 96530.07 | 239972   | 80216.21 | 152891.8 | 42179.05 | 316879.4 | 307369.2 | 118990.2 | 214656.9 |
| 26.42133 | 7  | 3 | 4 | 99134.59 | 483713.2 | 171682   | 286451.4 | 125257.8 | 715922.3 | 430841   | 494586   | 242023.6 |
| 10.77503 | 8  | 3 | 5 | 762315.6 | 794643.6 | 304903.8 | 467809.1 | 134543.6 | 932744.5 | 653806.7 | 574985.7 | 545299.6 |
| 10.93618 | 7  | 2 | 5 | 401124.5 | 1387940  | 949842.7 | 374828.1 | 142350.8 | 508047.2 | 419370.4 | 1563934  | 1740999  |
| 9.40325  | 6  | 3 | 3 | 478634.7 | 1327175  | 420195   | 878850.9 | 166418.5 | 951708   | 1359079  | 1569414  | 877611.3 |
| 11.27517 | 7  | 4 | 2 | 221506.2 | 419030.5 | 177160.9 | 230001.2 | 21061.26 | 692088.7 | 203172.2 | 369139   | 384777.8 |
| 9.388367 | 8  | 3 | 4 | 663039.8 | 6193109  | 1297037  | 4238266  | 1675632  | 6847732  | 6287824  | 7032357  | 3928173  |
| 10.90553 | 3  | 0 | 3 | 1481207  | 4568185  | 1674720  | 1872544  | 2369704  | 3380044  | 7090348  | 3005606  | 3983179  |
| 29.155   | 3  | 0 | 3 | 167095.5 | 1357897  | 83525.7  | 827367.7 | 498835.6 | 1414580  | 1218965  | 1365488  | 1430910  |
| 17.176   | 5  | 0 | 5 | 593224.8 | 227183.9 | 77104.93 | 2333593  | 1975791  | 193210.3 | 344310.7 | 152814.8 | 181935.6 |
| 23.61433 | 9  | 4 | 5 | 155513.2 | 587811.2 | 143721.8 | 382728.9 | 171507.1 | 724577.8 | 735763.3 | 440322.8 | 445507.6 |
| 9.976317 | 9  | 5 | 4 | 1084157  | 3893061  | 561191.6 | 2469356  | 1337259  | 3938412  | 4212112  | 3507324  | 3194195  |
| 9.568567 | 15 | 5 | 5 | 1758172  | 11915649 | 1847783  | 8379744  | 3244385  | 14241983 | 12514341 | 11979164 | 9114240  |
| 9.43325  | 5  | 2 | 3 | 4262831  | 28381057 | 7047729  | 19730378 | 6342289  | 34242298 | 28650793 | 27827433 | 34206179 |
| 9.859983 | 5  | 2 | 3 | 777787.3 | 3100206  | 532610.8 | 2349310  | 625360.4 | 3366033  | 2428355  | 3470858  | 3605047  |
| 9.379233 | 7  | 5 | 2 | 548603.1 | 1383307  | 357922.6 | 669785   | 658667.9 | 1958937  | 1367297  | 1007785  | 1184333  |
| 9.887133 | 10 | 5 | 5 | 3870021  | 22417339 | 1203858  | 16744608 | 5361857  | 21225904 | 22291306 | 22267828 | 21873463 |
| 17.00133 | 10 | 5 | 5 | 94093.3  | 930687.9 | 169305.5 | 703885.3 | 182698.8 | 1038070  | 683231.4 | 1059239  | 823977.2 |
| 9.473717 | 5  | 2 | 3 | 1222787  | 8200842  | 1239050  | 5018861  | 2996989  | 9450170  | 6358677  | 7554179  | 8809708  |
| 36.92883 | 6  | 3 | 3 | 1144786  | 22814441 | 506188.5 | 21838739 | 897845.2 | 23251850 | 22831000 | 23282188 | 22045574 |
| 9.365833 | 5  | 3 | 2 | 3556033  | 13680817 | 2795690  | 10023441 | 2888741  | 10717628 | 12180056 | 16727378 | 16619391 |
| 9.379233 | 5  | 4 | 1 | 337471.2 | 670530.3 | 233321.5 | 278209.1 | 351452.2 | 873423.4 | 817935.7 | 668669.6 | 279339.1 |
| 9.856867 | 6  | 3 | 3 | 638068.3 | 1439216  | 688570.9 | 2388603  | 781599.7 | 1385045  | 479719.3 | 1554042  | 2415803  |
| 9.994767 | 6  | 4 | 2 | 1631233  | 817311.8 | 444355.8 | 2103678  | 1216466  | 1546469  | 915568.6 | 656047.5 | 501546.1 |
| 9.3735   | 10 | 5 | 5 | 2887722  | 10395008 | 1472477  | 8185776  | 1905420  | 10249850 | 10446628 | 8087189  | 12064584 |
| 9.93625  | 8  | 4 | 4 | 2406474  | 5844142  | 933549.5 | 4519591  | 1111713  | 6746198  | 4604286  | 6553955  | 5128004  |
| 13.46332 | 3  | 3 | 0 | 72718.69 | 320617.8 | 181582.9 | 599676.8 | 243297.8 | 154131.8 | 438696   | 409740.4 | 98446.65 |
| 10.00098 | 5  | 3 | 2 | 232014.2 | 609075.2 | 129856.7 | 298419.3 | 292343.2 | 440624.6 | 731236.5 | 589761.1 | 537888.8 |
| 8.97505  | 9  | 3 | 5 | 372739.5 | 1016819  | 280755   | 671933.7 | 255208.3 | 1006402  | 1479603  | 763920.3 | 1009725  |
| 9.379233 | 7  | 5 | 2 | 3149360  | 2586075  | 1602571  | 12960395 | 9825789  | 2752527  | 1108268  | 1259018  | 2717929  |
| 9.379233 | 9  | 5 | 4 | 638722.8 | 2061149  | 347007.3 | 1154664  | 856726.7 | 2382443  | 1551025  | 2119633  | 1895798  |
| 9.94455  | 6  | 4 | 2 | 1457391  | 2048759  | 1249470  | 3562281  | 1098906  | 1538911  | 1352467  | 1676311  | 1403611  |

|          |    |   |   |          |          |          |          |          |          |          |          |          |
|----------|----|---|---|----------|----------|----------|----------|----------|----------|----------|----------|----------|
| 10.14893 | 4  | 3 | 1 | 180704.4 | 361847.9 | 94114.95 | 224446.6 | 117298.5 | 300682.6 | 511999.9 | 268232.3 | 377746.7 |
| 12.61693 | 3  | 0 | 3 | 67030.84 | 486941.8 | 40303.16 | 309778.2 | 168233.7 | 545690.2 | 454318.9 | 449205.2 | 477090   |
| 9.799767 | 3  | 3 | 0 | 2994104  | 5298040  | 2210412  | 9368237  | 3731555  | 4759805  | 5093820  | 8528304  | 5739823  |
| 9.842    | 10 | 5 | 5 | 631448.8 | 2558759  | 486735.3 | 2034894  | 259437.7 | 2196967  | 1901760  | 2742742  | 2938732  |
| 9.858833 | 10 | 5 | 5 | 17070030 | 89804898 | 7676926  | 73979778 | 14739788 | 77643347 | 88138131 | 97268983 | 90854524 |
| 9.379233 | 8  | 5 | 3 | 642277.5 | 1839184  | 267524.7 | 1092160  | 708010.7 | 2138430  | 1890063  | 1616902  | 1513959  |
| 9.445217 | 14 | 5 | 5 | 1283165  | 11344005 | 2070608  | 8317812  | 2588678  | 13622487 | 12385654 | 11869156 | 8155607  |
| 9.508883 | 16 | 5 | 5 | 1415287  | 9399804  | 1996925  | 5476626  | 3637533  | 11330991 | 11139570 | 9265722  | 6422680  |
| 10.47023 | 3  | 0 | 3 | 75942.81 | 53984.51 | 48479.49 | 119639.8 | 53728.5  | 32222.22 | 99321.39 | 27384.54 | 0        |
| 9.45945  | 10 | 5 | 4 | 805615.3 | 5382582  | 1597447  | 2442974  | 2701144  | 6355246  | 7658274  | 4863708  | 3807806  |
| 24.59417 | 10 | 5 | 5 | 923158.6 | 4496474  | 385404.9 | 5524114  | 974784.2 | 4540418  | 5097005  | 4067471  | 4278463  |
| 15.16133 | 8  | 5 | 3 | 924920   | 610029.5 | 582686.2 | 5927292  | 5045186  | 890057.8 | 258361.2 | 1502950  | 95831.99 |
| 9.40325  | 5  | 1 | 4 | 449562   | 4328953  | 866940.5 | 2991958  | 1173426  | 5341655  | 4046683  | 4682695  | 4557661  |
| 10.4842  | 7  | 4 | 3 | 260562.7 | 745174.9 | 188397.4 | 534604.3 | 129079.5 | 518532.5 | 1033301  | 660235.1 | 764013   |
| 9.445217 | 13 | 5 | 5 | 1107160  | 10189207 | 2008021  | 7011618  | 2820346  | 12043098 | 11962779 | 10562222 | 7350796  |
| 9.929783 | 5  | 3 | 2 | 804540.9 | 1428994  | 363542.6 | 682057.5 | 699264   | 1672891  | 1559897  | 1591296  | 1535576  |
| 9.445217 | 13 | 5 | 4 | 740411.5 | 6191471  | 1098713  | 4269793  | 1755111  | 7742671  | 6610121  | 6056610  | 4751766  |
| 11.87742 | 7  | 5 | 2 | 62239.48 | 232034.5 | 113516.5 | 417025.9 | 165992.9 | 228374.4 | 399329.8 | 275494.5 | 118243   |
| 31.45017 | 10 | 5 | 5 | 1184742  | 9991132  | 1640160  | 8237281  | 867745.5 | 12824449 | 8951566  | 8776226  | 9636198  |
| 9.960467 | 5  | 2 | 3 | 1264705  | 3062426  | 761505.1 | 1973099  | 928620   | 3526378  | 3096907  | 3850735  | 1847287  |
| 9.554967 | 8  | 5 | 3 | 443817.5 | 1057445  | 213035.3 | 583864.4 | 447063.2 | 1077715  | 1416748  | 905632.4 | 904560.2 |
| 43.30133 | 4  | 3 | 1 | 396224.3 | 6727410  | 1793217  | 4831288  | 833220.5 | 7582506  | 5397511  | 5405296  | 9496730  |
| 9.46265  | 11 | 4 | 4 | 592707   | 5391043  | 1161715  | 3607012  | 1571411  | 6861261  | 5314855  | 3615232  | 5533991  |
| 43.53133 | 6  | 3 | 2 | 313915.1 | 6496814  | 1448505  | 4821322  | 1141477  | 6634196  | 6110247  | 8876227  | 5048413  |
| 10.91813 | 6  | 2 | 4 | 268355   | 698156.6 | 404251   | 275630   | 92565.15 | 760223.7 | 1362682  | 429777.1 | 344105.5 |
| 17.8785  | 5  | 0 | 5 | 720337.1 | 199017.9 | 41201.63 | 2784404  | 2462242  | 259053.2 | 217271.6 | 152399.6 | 173746.2 |
| 10.3771  | 6  | 4 | 1 | 6.8E+08  | 6.76E+08 | 1.48E+09 | 2.61E+09 | 1.56E+09 | 28698207 | 6336985  | 19060131 | 3.32E+09 |
| 37.71917 | 10 | 5 | 5 | 2377288  | 38495304 | 2628117  | 35548759 | 1861396  | 43037512 | 36985982 | 36581295 | 38398969 |
| 19.37283 | 5  | 3 | 2 | 57709.29 | 320551.8 | 135129.1 | 179378.3 | 45803    | 403592.8 | 468497.3 | 290821.2 | 327441.2 |
| 9.559567 | 14 | 5 | 5 | 5978576  | 53920936 | 18223254 | 34088064 | 11175596 | 59017063 | 44370139 | 54989849 | 31075216 |
| 13.47807 | 4  | 1 | 3 | 24439    | 62887.48 | 29308.53 | 99187.76 | 27661.04 | 95628.81 | 57115.54 | 34668.99 | 35821    |
| 9.992233 | 7  | 5 | 2 | 1093621  | 859887.3 | 330265.6 | 2080264  | 1169442  | 611284.4 | 1304417  | 1125313  | 626241.8 |
| 9.061    | 9  | 5 | 4 | 738276.9 | 2207892  | 414600   | 1525942  | 616765.7 | 2683293  | 2045243  | 2603943  | 1737186  |
| 9.365833 | 4  | 3 | 1 | 438392.1 | 2255314  | 849418.2 | 1226825  | 764502.1 | 3224684  | 3125946  | 1660186  | 1460637  |
| 9.976317 | 10 | 5 | 5 | 4409960  | 13228328 | 1282083  | 11003913 | 2039706  | 15437412 | 12825820 | 13156732 | 12467328 |

|          |    |   |   |          |          |          |          |          |          |          |          |          |
|----------|----|---|---|----------|----------|----------|----------|----------|----------|----------|----------|----------|
| 9.531467 | 3  | 3 | 0 | 176590.2 | 344136.6 | 200829.6 | 134922.8 | 65595.21 | 519538.3 | 442191.5 | 376178.2 | 382774.9 |
| 10.29105 | 6  | 3 | 3 | 172181.4 | 572109.8 | 63916.25 | 461198.8 | 101841   | 596850   | 602130.2 | 578628.9 | 621805.8 |
| 9.9677   | 7  | 4 | 3 | 894117.9 | 1973412  | 473207.3 | 1067905  | 847105.4 | 2480951  | 2174925  | 1890858  | 2104252  |
| 9.475667 | 12 | 5 | 5 | 1909769  | 5238402  | 2967861  | 9102081  | 3123806  | 3110539  | 9938356  | 6097729  | 2525277  |
| 9.40325  | 6  | 3 | 3 | 360287.6 | 2395335  | 870896.7 | 1424654  | 613763.9 | 2876506  | 1218564  | 3230223  | 2921843  |
| 9.56645  | 8  | 2 | 5 | 3156537  | 11748356 | 8308837  | 3120855  | 1969989  | 19225097 | 3692181  | 1866393  | 15760482 |
| 20.62117 | 3  | 0 | 3 | 79939.16 | 290543.1 | 40059.08 | 541778.2 | 241722.7 | 285467.7 | 291853.1 | 354745.9 | 275209   |
| 9.636567 | 4  | 3 | 1 | 154365.8 | 368564.1 | 152636.5 | 195927.7 | 114190.1 | 404748.3 | 114661.9 | 430021.3 | 522292.8 |
| 18.263   | 3  | 3 | 0 | 101141.5 | 431172.5 | 250069.4 | 172073.8 | 71701.49 | 782949.5 | 176326.1 | 382312.5 | 577287.6 |
| 9.3919   | 6  | 2 | 3 | 4540199  | 20382776 | 6931393  | 13144933 | 2999081  | 26004261 | 12324911 | 13545839 | 23301057 |
| 9.009533 | 6  | 3 | 2 | 384661.5 | 1528934  | 992510.3 | 2842219  | 1079986  | 1697167  | 569481   | 2644003  | 2287781  |
| 11       | 10 | 5 | 5 | 767676.4 | 2866636  | 546976.5 | 1995286  | 785789.3 | 2328149  | 2744891  | 2389691  | 3340682  |
| 10.45545 | 10 | 5 | 5 | 84062.12 | 244772.1 | 68514.12 | 331942.2 | 69321.32 | 339899.1 | 211210.1 | 293953.2 | 194401.3 |
| 9.9014   | 10 | 5 | 5 | 8345916  | 22733622 | 7990575  | 31553622 | 5456135  | 24336804 | 20010086 | 11587206 | 33659183 |
| 40.05    | 6  | 3 | 3 | 326443.3 | 3654923  | 692351.8 | 5166744  | 1439575  | 4122622  | 3832138  | 4071268  | 3806488  |
| 11.73008 | 7  | 2 | 5 | 122829.7 | 439510.7 | 137540.4 | 660669   | 200307.8 | 206796.1 | 540839.9 | 428336.5 | 532690.5 |
| 9.952017 | 10 | 5 | 5 | 8474260  | 24357536 | 2418548  | 19563907 | 4524174  | 27730425 | 26113555 | 22849356 | 22314709 |
| 10.94443 | 7  | 2 | 5 | 3210870  | 10160661 | 5885056  | 4067079  | 1116352  | 11957416 | 17582046 | 4291953  | 4003804  |
| 9.8322   | 3  | 3 | 0 | 4128154  | 6553636  | 7033473  | 14231890 | 4583941  | 1710428  | 9864042  | 1820033  | 1895094  |
| 9.45945  | 5  | 3 | 2 | 370972.7 | 987622.3 | 344142.4 | 603353.8 | 249303.9 | 1360510  | 867590.7 | 558846.1 | 1321509  |
| 37.79117 | 4  | 1 | 3 | 380049.5 | 7917675  | 1232134  | 6349269  | 1256996  | 10118664 | 7423553  | 7426283  | 7354362  |
| 9.848417 | 9  | 5 | 4 | 1037445  | 5929690  | 470685.2 | 5299980  | 526068.3 | 5685486  | 6004633  | 5627250  | 5609572  |
| 12.26695 | 7  | 4 | 3 | 113075.3 | 454689.6 | 197504.1 | 231137.3 | 150962.7 | 457405.4 | 196199.2 | 371832.1 | 735821.6 |
| 10.02372 | 10 | 5 | 5 | 280744.7 | 1160326  | 164931.2 | 842482.5 | 300161.8 | 1217981  | 1262029  | 990067.4 | 983987.8 |
| 9.498117 | 7  | 4 | 3 | 427549.6 | 801068   | 291120.8 | 2255279  | 1410998  | 690126.8 | 686109.9 | 1313375  | 587122.3 |
| 10.05535 | 8  | 5 | 3 | 956252.8 | 600915   | 228931   | 1384424  | 761422.8 | 489292.5 | 592971.6 | 521181.9 | 992880.7 |
| 8.981583 | 8  | 5 | 3 | 292594.1 | 1096419  | 180116.5 | 663588.1 | 417420.9 | 1111004  | 1295930  | 1192604  | 814074.3 |
| 9.960467 | 4  | 3 | 1 | 445036.8 | 1113889  | 103132.7 | 605716.6 | 493857.2 | 1141812  | 1075899  | 1016612  | 1279584  |
| 9.93625  | 10 | 5 | 5 | 13979296 | 54078935 | 10444952 | 38885088 | 13351734 | 65740319 | 58118302 | 40178296 | 46499216 |
| 9.8322   | 9  | 5 | 4 | 2486381  | 7360925  | 1429313  | 4540194  | 2677479  | 5732155  | 6549701  | 9344656  | 8229950  |
| 10.99268 | 5  | 4 | 1 | 13144583 | 8568230  | 15311894 | 35858244 | 25521693 | 1347083  | 3007494  | 1857825  | 711174.1 |
| 9.43325  | 7  | 2 | 3 | 1726713  | 10209531 | 3077808  | 6218265  | 3270913  | 12716009 | 8477581  | 13308459 | 10671172 |
| 9.979667 | 7  | 4 | 3 | 440052.7 | 848725.9 | 368217.9 | 1240114  | 212441.1 | 1101348  | 232948.4 | 1107055  | 784713.6 |
| 8.911617 | 8  | 4 | 4 | 664134.9 | 1869392  | 1053491  | 747598.4 | 618032.5 | 1483513  | 1723254  | 1027378  | 3700117  |
| 42.58217 | 5  | 4 | 1 | 729265.2 | 4635975  | 3142174  | 8333541  | 2721159  | 10050346 | 2642525  | 2383924  | 4525306  |

|          |    |   |   |          |          |          |          |          |          |          |          |          |
|----------|----|---|---|----------|----------|----------|----------|----------|----------|----------|----------|----------|
| 9.3735   | 7  | 2 | 5 | 4010310  | 25425427 | 21680897 | 3115047  | 1818286  | 1541794  | 3549565  | 49006418 | 40339448 |
| 10.9645  | 5  | 3 | 2 | 959655.6 | 2512392  | 464569.9 | 1797327  | 645304.4 | 2403583  | 3093986  | 2792300  | 1860739  |
| 10.05535 | 7  | 4 | 3 | 203261.3 | 679442.7 | 83947.57 | 425938.8 | 247049.2 | 663125.5 | 597886.8 | 777230.3 | 602971.7 |
| 9.848417 | 9  | 5 | 4 | 5097255  | 16389047 | 3356502  | 12232904 | 3278219  | 17741245 | 11019245 | 16029471 | 20109314 |
| 9.915583 | 7  | 4 | 3 | 7669280  | 14559131 | 5218964  | 24679524 | 9624710  | 12932287 | 17696981 | 18915497 | 17114828 |
| 9.655117 | 8  | 4 | 4 | 1450206  | 8354627  | 2504302  | 5342141  | 2303025  | 11059723 | 9562826  | 6823932  | 4804578  |
| 38.65467 | 4  | 3 | 1 | 303049.9 | 4736777  | 359504   | 4341740  | 252785.3 | 4314765  | 4844430  | 4540390  | 5273478  |
| 11.71625 | 10 | 5 | 5 | 1141584  | 4035600  | 1256393  | 7479164  | 3356980  | 3769806  | 3761889  | 2910239  | 6193967  |
| 22.92917 | 3  | 3 | 0 | 60094.6  | 214477.2 | 128069.9 | 348491.2 | 67487.99 | 93218    | 131973.3 | 370491.8 | 141872.5 |
| 42.59633 | 8  | 4 | 4 | 345168.1 | 5415792  | 1397292  | 3936853  | 813574.9 | 5049203  | 4844531  | 4014071  | 5435062  |
| 9.445217 | 5  | 2 | 3 | 672269.4 | 4038829  | 805740.6 | 2543902  | 1419388  | 4958207  | 2883491  | 4096393  | 4573889  |
| 11.46817 | 4  | 3 | 1 | 97620.96 | 224780.9 | 73956.48 | 129248.3 | 79073.96 | 297653.9 | 272872.9 | 112220.3 | 192742.3 |
| 9.960467 | 7  | 4 | 3 | 751135.3 | 1418019  | 309329.9 | 925665.3 | 452588.8 | 1835825  | 1266103  | 1466813  | 1518751  |
| 9.999217 | 9  | 3 | 5 | 1276552  | 4293899  | 2361074  | 1875504  | 947891.3 | 7819715  | 5222609  | 1619022  | 3039209  |
| 10.10048 | 4  | 3 | 1 | 285223.1 | 975114.6 | 164932.4 | 690199.3 | 267392.8 | 946223.7 | 846091.4 | 954321.7 | 1258025  |
| 9.37735  | 6  | 2 | 4 | 2317445  | 12428756 | 7210921  | 4966043  | 3525962  | 19983487 | 4935533  | 19125115 | 5369363  |
| 20.8125  | 3  | 3 | 0 | 138993.4 | 493704.9 | 344686.5 | 850574.1 | 169714.3 | 265519.5 | 298713.2 | 817275.8 | 172370.4 |
| 10.17355 | 9  | 5 | 4 | 442760.3 | 1178732  | 612070.8 | 556090.4 | 152665.1 | 1230735  | 2209269  | 650283.6 | 924569.6 |
| 21.251   | 4  | 1 | 3 | 51734    | 188071.3 | 37327.41 | 146104.2 | 28987.63 | 136583.5 | 241850.3 | 182956.9 | 189377.1 |
| 10.93618 | 7  | 4 | 3 | 181062.8 | 746944.6 | 222897.1 | 478682.5 | 207970.1 | 804788.1 | 978547.9 | 539915.6 | 487230.3 |
| 9.928667 | 7  | 3 | 4 | 930452   | 2591222  | 507878.8 | 1785011  | 742994.3 | 3381881  | 2480707  | 2347911  | 2719071  |
| 9.365833 | 7  | 4 | 3 | 1545369  | 2566077  | 1550016  | 6019558  | 3360918  | 1535769  | 2576401  | 1780026  | 1694298  |
| 9.983433 | 10 | 5 | 5 | 1809988  | 3725153  | 1556266  | 2122723  | 739693.3 | 5639790  | 5053502  | 2251956  | 2329806  |
| 9.445217 | 8  | 4 | 4 | 1241136  | 7824851  | 2454188  | 4572720  | 2763132  | 9369037  | 8051459  | 8488887  | 9628292  |
| 9.310917 | 8  | 5 | 3 | 2711599  | 2348004  | 1192351  | 8292442  | 5868251  | 1023508  | 1459625  | 4088585  | 2616892  |
| 10.9645  | 10 | 5 | 5 | 1311622  | 4598310  | 1122713  | 3124027  | 1249429  | 4958426  | 6186599  | 3541511  | 4814053  |
| 9.37735  | 5  | 2 | 3 | 624883.3 | 3774110  | 1773498  | 1975397  | 633497.2 | 5788521  | 4350637  | 2671886  | 1316874  |
| 9.538267 | 10 | 4 | 5 | 2414891  | 12029351 | 4215143  | 6457891  | 4743717  | 15359669 | 11522513 | 8765786  | 17197833 |
| 11.43992 | 3  | 3 | 0 | 74168.51 | 233528.8 | 46059.1  | 182809.1 | 33862.01 | 293243.9 | 240816.4 | 194559   | 181072.9 |
| 9.43325  | 6  | 3 | 3 | 911525.7 | 5480879  | 1824725  | 3209369  | 1843139  | 3226453  | 5589280  | 7652532  | 6792433  |
| 10.95835 | 5  | 2 | 3 | 201462   | 362121.7 | 113365.8 | 613681.5 | 245696   | 292853.1 | 320904.1 | 270165.8 | 374004   |
| 9.46265  | 9  | 4 | 5 | 1047669  | 6378746  | 1894866  | 4103800  | 1779866  | 5730147  | 5174982  | 5872389  | 5383920  |
| 11.39828 | 7  | 4 | 3 | 128024.9 | 547734.8 | 118330.4 | 382454.6 | 145944.3 | 603748.5 | 644751.5 | 624730.4 | 507133.9 |
| 9.479567 | 12 | 5 | 4 | 3050258  | 5189382  | 2362027  | 16186210 | 10896079 | 8898616  | 5044104  | 5667476  | 2904235  |
| 10.33625 | 10 | 5 | 5 | 426899   | 2075021  | 568001.3 | 1465128  | 380003.7 | 1872002  | 2660559  | 2664219  | 1797916  |



|          |    |   |   |          |          |          |          |          |          |          |          |          |
|----------|----|---|---|----------|----------|----------|----------|----------|----------|----------|----------|----------|
| 8.93965  | 7  | 5 | 2 | 633454   | 1376433  | 965967.6 | 387928.8 | 453215.1 | 808090.7 | 1378248  | 1110908  | 3015713  |
| 9.983433 | 11 | 5 | 5 | 883345.9 | 3211941  | 1744215  | 1438225  | 738955.2 | 4804232  | 4421278  | 993891.8 | 4161369  |
| 8.911617 | 9  | 5 | 4 | 2410466  | 6209155  | 3973774  | 2195782  | 1337552  | 4074804  | 5666078  | 3438038  | 13163718 |
| 9.830833 | 6  | 2 | 4 | 748956.7 | 2677611  | 842014.3 | 1505698  | 1035358  | 2129564  | 4130570  | 2162502  | 2278752  |
| 10.20467 | 6  | 3 | 2 | 1885688  | 2854358  | 1746779  | 1094480  | 349293   | 1708431  | 2221153  | 1916472  | 5933351  |
| 9.952017 | 10 | 5 | 5 | 5708271  | 23986948 | 2467550  | 20074315 | 3640221  | 25857107 | 22387066 | 21466124 | 22942998 |
| 9.43325  | 6  | 3 | 3 | 789576.9 | 3616434  | 902091.5 | 2159482  | 1362829  | 4747262  | 3474355  | 3852316  | 3762609  |
| 13.78528 | 8  | 5 | 3 | 118717.3 | 491250.7 | 190411.2 | 960049.2 | 462334.4 | 701811.8 | 243813.9 | 639556.7 | 510574.9 |
| 9.964417 | 9  | 4 | 4 | 2191050  | 5215115  | 1801151  | 3199105  | 1419428  | 5566070  | 4257976  | 8214473  | 3821671  |
| 9.960467 | 6  | 5 | 1 | 644152.9 | 1227926  | 204684.7 | 711395.1 | 510256   | 1527957  | 949815.1 | 1216322  | 1218814  |
| 9.983433 | 10 | 5 | 5 | 1129948  | 5134344  | 705692.1 | 3986533  | 1076484  | 5399926  | 5550707  | 4784689  | 4082014  |
| 9.431017 | 5  | 1 | 3 | 2672617  | 16073968 | 5152780  | 9084071  | 6100518  | 20205024 | 7369016  | 16012550 | 17247967 |
| 9.7038   | 7  | 2 | 5 | 229865.7 | 1052647  | 244880.5 | 665715   | 360267.3 | 1438647  | 856666.1 | 1026254  | 1109357  |
| 9.00395  | 5  | 4 | 1 | 243589.2 | 546471.1 | 216374.8 | 327499.7 | 88768.27 | 656523.6 | 739651.5 | 351769.5 | 275360.1 |
| 9.392767 | 10 | 5 | 5 | 1296472  | 4064241  | 715247.7 | 2743400  | 1273025  | 4887710  | 4049157  | 3485684  | 3239803  |
| 10.57323 | 8  | 4 | 3 | 407408.2 | 610063.3 | 362017   | 246209.6 | 62793.8  | 1098549  | 890347.2 | 338860.8 | 291599.7 |
| 11.26148 | 4  | 3 | 1 | 92923.78 | 187706.3 | 82782.73 | 77260.54 | 95619.04 | 161159.6 | 120247.9 | 275606.8 | 275645   |
| 9.5021   | 11 | 4 | 5 | 1510975  | 12390289 | 2745946  | 7339366  | 4870595  | 15200798 | 12757499 | 14174630 | 8088246  |
| 11       | 5  | 2 | 3 | 235120.6 | 774168.8 | 129792.7 | 539994.8 | 225351.2 | 626643.5 | 807348.2 | 649149   | 882847.5 |
| 9.992233 | 6  | 4 | 2 | 779096.1 | 809579.4 | 299497.5 | 1402511  | 578159.9 | 685837   | 1226497  | 921532.8 | 800748.5 |
| 9.644783 | 4  | 0 | 4 | 2917568  | 12242029 | 5259480  | 5416951  | 5817826  | 11499785 | 6806489  | 8155265  | 15011006 |
| 9.762917 | 5  | 3 | 2 | 759778.1 | 1777276  | 263346.6 | 1512386  | 99062.74 | 1749038  | 2160421  | 1853159  | 1686900  |
| 37.00033 | 3  | 3 | 0 | 3128087  | 37037126 | 41143206 | 78362810 | 1314687  | 9086359  | 6242768  | 81118289 | 83039838 |
| 9.644783 | 6  | 1 | 5 | 509789.1 | 575667.7 | 230715.8 | 2340373  | 1760047  | 843332.8 | 641284.7 | 501385.4 | 224909.4 |
| 9.673333 | 10 | 5 | 5 | 1294258  | 3937059  | 1253317  | 2577295  | 903083   | 4649397  | 4833684  | 2196988  | 4986333  |
| 8.93965  | 10 | 5 | 5 | 654703.3 | 2994951  | 469828   | 2174462  | 786492.9 | 3017697  | 3762161  | 2672245  | 2961984  |
| 8.981583 | 5  | 3 | 2 | 264319.8 | 532211.6 | 77044.84 | 340512.6 | 190387.5 | 516273.4 | 531296.8 | 413181.9 | 606811.1 |
| 11.17508 | 10 | 5 | 5 | 1595245  | 9979089  | 2326126  | 6315514  | 3429982  | 11152395 | 7871681  | 9249523  | 8173739  |
| 42.12083 | 7  | 4 | 2 | 441691.5 | 6378841  | 1869427  | 4485975  | 850331.5 | 5059173  | 5165375  | 9582916  | 5673348  |
| 9.8374   | 5  | 4 | 1 | 3067331  | 3791471  | 4501318  | 9974100  | 5479603  | 1941782  | 2076687  | 1592499  | 11832723 |
| 43.71833 | 3  | 3 | 0 | 1682916  | 15954725 | 18600361 | 34581518 | 1227167  | 2078145  | 35113974 | 2590036  | 37502634 |
| 9.328967 | 4  | 1 | 3 | 722546.8 | 6387689  | 752168.5 | 4372786  | 2009797  | 6654314  | 5304640  | 7387495  | 6260508  |
| 29.05767 | 5  | 2 | 3 | 202903.9 | 1194760  | 203336.8 | 883697   | 289097.6 | 1307143  | 1339792  | 1145170  | 858830.2 |
| 9.445217 | 8  | 2 | 5 | 805633.6 | 5358653  | 1868336  | 3483836  | 732484.9 | 7797333  | 4028765  | 6426823  | 3100473  |
| 9.9677   | 5  | 1 | 3 | 11809328 | 42627561 | 24559506 | 15479496 | 19061364 | 53107955 | 35839599 | 64480928 | 56807386 |

|          |    |   |   |          |          |          |          |          |          |          |          |          |
|----------|----|---|---|----------|----------|----------|----------|----------|----------|----------|----------|----------|
| 9.41815  | 8  | 4 | 3 | 451429   | 2223169  | 717642   | 1379356  | 657951.8 | 2616436  | 2617370  | 2730039  | 2148459  |
| 9.8322   | 5  | 2 | 3 | 710705.1 | 1847781  | 288081   | 1411793  | 404112.2 | 2017119  | 1837155  | 2235951  | 1612797  |
| 9.40325  | 5  | 1 | 3 | 591680.5 | 4469875  | 1750488  | 2325710  | 1752757  | 6124069  | 1768685  | 5433765  | 5315017  |
| 10.43932 | 10 | 5 | 5 | 417387.4 | 1714100  | 436105   | 1169878  | 452829.6 | 1476317  | 2372975  | 1905860  | 1256796  |
| 8.93965  | 9  | 5 | 4 | 1629988  | 4100967  | 2324533  | 1729341  | 1200627  | 2784160  | 4426019  | 2835077  | 8024715  |
| 10.37347 | 4  | 3 | 1 | 187097.1 | 668123.1 | 126072.4 | 454280   | 204681.2 | 780565.1 | 638529.3 | 515855.3 | 813429   |
| 10.97242 | 9  | 4 | 5 | 244421.7 | 948128.1 | 280443.3 | 655350.1 | 172130.7 | 765465.8 | 1419752  | 722581   | 862027.3 |
| 10.58813 | 8  | 4 | 4 | 1008655  | 6218115  | 1360177  | 4663517  | 1167015  | 8302010  | 6150984  | 6183426  | 4489620  |
| 9.43325  | 7  | 2 | 3 | 1401086  | 9699425  | 4448029  | 5035534  | 2802984  | 13817981 | 7014770  | 13664091 | 10512913 |
| 9.45945  | 13 | 5 | 5 | 8165952  | 83850154 | 25072088 | 58651753 | 10788116 | 91761294 | 74495305 | 80719519 | 51902286 |
| 11.39828 | 4  | 4 | 0 | 242739.2 | 2771207  | 1098562  | 1665917  | 484145.6 | 2764690  | 2051108  | 2545890  | 4626470  |
| 11.01378 | 3  | 0 | 3 | 958874.4 | 4948435  | 1004731  | 2509101  | 2432953  | 4775565  | 6286166  | 3661196  | 4483292  |
| 10.16453 | 4  | 3 | 1 | 163356   | 488617.1 | 111612.4 | 268118.2 | 216569.2 | 613675.3 | 554863.5 | 359257.7 | 382982.9 |
| 10.00385 | 7  | 4 | 3 | 410487.9 | 1434175  | 181117.2 | 1175688  | 235115.4 | 1372827  | 1243410  | 1363567  | 1725917  |
| 10.58813 | 8  | 4 | 4 | 441980.5 | 1049794  | 693229.5 | 360690.8 | 150826.2 | 2087899  | 1323491  | 480977.5 | 386640.9 |
| 9.45945  | 11 | 5 | 5 | 6476187  | 83865625 | 14815617 | 62766281 | 19191241 | 82083340 | 72350158 | 70919439 | 86257923 |
| 9.023433 | 9  | 5 | 4 | 559932.9 | 1315679  | 243476.3 | 857311.4 | 448124.7 | 1161302  | 1495975  | 1302417  | 1008910  |
| 10.77503 | 10 | 5 | 5 | 263487.3 | 895754.9 | 277290.6 | 616150.7 | 131875.6 | 693971.3 | 1260209  | 1090847  | 843282.9 |
| 39.8055  | 10 | 3 | 3 | 265112.6 | 2510295  | 349419   | 3067138  | 527758.3 | 2287559  | 2455949  | 2782454  | 2938036  |
| 10.70375 | 7  | 3 | 4 | 219936.5 | 768864.7 | 94940.18 | 527308.7 | 242072   | 680314.7 | 824413.3 | 851320.1 | 836620.4 |
| 10.9645  | 4  | 3 | 1 | 396702   | 1023658  | 432240.6 | 580408.9 | 242381.8 | 1664235  | 868026.3 | 1257238  | 658492.1 |
| 9.992233 | 4  | 3 | 1 | 713177.4 | 1558843  | 406649.2 | 2304956  | 728072.6 | 1293892  | 1083383  | 1456917  | 1975597  |
| 10.95602 | 7  | 3 | 4 | 310032.3 | 907832.9 | 365773.3 | 545162.6 | 95218.12 | 734986.1 | 754890.3 | 548788.6 | 1006855  |
| 10.5677  | 3  | 3 | 0 | 73818.49 | 140469.5 | 53594.77 | 87268.94 | 18094.57 | 166386.7 | 131046.6 | 203366.5 | 143327.2 |
| 12.41208 | 9  | 4 | 5 | 360277.4 | 2715325  | 832613.5 | 4181355  | 1423144  | 2784585  | 2264241  | 2120592  | 4134777  |
| 9.284283 | 7  | 4 | 3 | 359106.7 | 1206279  | 82815.88 | 789121.5 | 421290.9 | 1230672  | 1221264  | 1112373  | 1323847  |
| 9.994767 | 9  | 5 | 4 | 751173.4 | 891126.7 | 376071.5 | 1650600  | 751266.7 | 1156806  | 1217538  | 1117946  | 511975.7 |
| 10.6411  | 6  | 4 | 2 | 169259.5 | 762159.6 | 409971   | 1285678  | 448934.1 | 652903.4 | 1411550  | 335230.9 | 863645.7 |
| 10.01477 | 9  | 5 | 3 | 3413119  | 2324017  | 1128458  | 6391353  | 4108569  | 1568809  | 1881606  | 4078099  | 2786047  |
| 9.00395  | 10 | 5 | 5 | 778500.6 | 3168210  | 891525.9 | 2242591  | 549180.4 | 3526543  | 3751259  | 2849258  | 1758022  |
| 9.43325  | 7  | 2 | 4 | 754419.9 | 5288247  | 1094427  | 3187324  | 2067504  | 6571969  | 3798622  | 5130313  | 6115544  |
| 42.66833 | 14 | 1 | 4 | 261579.9 | 2367406  | 442979.3 | 3186062  | 801648.5 | 2666414  | 1594821  | 2646379  | 2495275  |
| 9.174883 | 4  | 3 | 1 | 447436   | 1368013  | 607194.8 | 613184.1 | 634112.5 | 1160049  | 428278.9 | 1697750  | 2006272  |
| 9.842    | 9  | 5 | 4 | 576325.9 | 2071988  | 241895.4 | 1318778  | 760603.6 | 2315882  | 1748485  | 1927016  | 2293089  |
| 9.419733 | 5  | 3 | 2 | 582093.1 | 1429687  | 720149.2 | 593063.5 | 654171.1 | 2195705  | 2073599  | 1314014  | 449299   |

|          |    |   |   |          |          |          |          |          |          |          |          |          |
|----------|----|---|---|----------|----------|----------|----------|----------|----------|----------|----------|----------|
| 9.830833 | 6  | 5 | 1 | 474510.8 | 1764672  | 243877   | 913373.4 | 863135.6 | 2018213  | 1588947  | 1665526  | 1517767  |
| 9.979667 | 4  | 3 | 1 | 269262.3 | 666499.1 | 170914.4 | 332236.8 | 331089.2 | 513956.8 | 559240.5 | 599766.1 | 719521.1 |
| 9.416767 | 6  | 2 | 4 | 699403.1 | 3941038  | 1005727  | 2629567  | 1149713  | 2288590  | 3747491  | 4250720  | 4678550  |
| 9.009533 | 6  | 5 | 1 | 674368.3 | 1254534  | 488835.1 | 703982.5 | 413819.9 | 1243376  | 1183543  | 1094129  | 2044963  |
| 9.420133 | 6  | 3 | 2 | 1332855  | 6302625  | 2848197  | 9288731  | 1888946  | 3580306  | 8153864  | 8858341  | 8073744  |
| 11.25905 | 10 | 5 | 5 | 536158.5 | 2577634  | 440383.5 | 1760443  | 805138.6 | 2954580  | 2318237  | 2986657  | 2675207  |
| 9.43325  | 7  | 4 | 2 | 430878.5 | 2870497  | 690805.4 | 1913332  | 870066.1 | 2015616  | 3191052  | 3640791  | 3228999  |
| 9.488133 | 7  | 5 | 2 | 3218292  | 5668700  | 3303586  | 18794000 | 13341989 | 7311320  | 7531552  | 274156.6 | 8429950  |
| 22.18783 | 10 | 5 | 5 | 206610   | 1156130  | 278085.4 | 836487.2 | 249194.4 | 913032.9 | 1494630  | 883389.2 | 1093911  |
| 9.009533 | 9  | 5 | 4 | 625435.9 | 1606754  | 187166.3 | 1175454  | 434281.2 | 1700857  | 1717010  | 1335415  | 1493200  |
| 9.433    | 6  | 3 | 3 | 1166532  | 9716952  | 1737417  | 7511191  | 1905157  | 6896068  | 9900211  | 11387361 | 9558106  |
| 9.419733 | 9  | 3 | 5 | 10662576 | 61150518 | 21954483 | 37132497 | 17213467 | 67216250 | 57320288 | 66800568 | 87320195 |
| 9.992233 | 10 | 5 | 5 | 1108425  | 4506096  | 753431.2 | 3442686  | 978129.5 | 4959114  | 5504498  | 4169731  | 4357092  |
| 9.431017 | 9  | 4 | 5 | 1023881  | 10856573 | 1417192  | 7691318  | 3184916  | 12502023 | 12019125 | 9755217  | 10811144 |
| 10.9645  | 10 | 5 | 5 | 444380.9 | 2751166  | 571953.9 | 2128664  | 443117.9 | 3100260  | 2920970  | 2132242  | 2180795  |
| 9.842    | 4  | 3 | 1 | 1381855  | 1951609  | 879524.5 | 3159678  | 1098772  | 2211868  | 1252518  | 1966441  | 1057336  |
| 11.5404  | 6  | 4 | 2 | 1448944  | 487779.2 | 402914.5 | 2193442  | 1740576  | 230486.3 | 220634.8 | 1191517  | 413505.3 |
| 9.392767 | 9  | 5 | 4 | 1470583  | 4891188  | 1264920  | 3447683  | 1121150  | 5777899  | 5101762  | 3539600  | 3656288  |
| 9.3919   | 8  | 3 | 4 | 584156.9 | 2795318  | 1000843  | 1796403  | 483972.9 | 2403139  | 3693965  | 2992082  | 1269098  |
| 9.636567 | 4  | 4 | 0 | 362732   | 644824.1 | 351517.5 | 279298.4 | 228919   | 838516.3 | 331247.4 | 566191.7 | 1151835  |
| 9.8374   | 3  | 3 | 0 | 3.18E+08 | 1.21E+09 | 1.7E+09  | 2.88E+09 | 4.39E+08 | 3.53E+09 | 2.54E+09 | 2991979  | 2105520  |
| 21.00683 | 8  | 5 | 3 | 386811.4 | 3043704  | 279107.5 | 2525230  | 513764.6 | 3418557  | 2743160  | 2879023  | 2931474  |
| 9.929783 | 5  | 3 | 2 | 2700147  | 5776335  | 980108.2 | 3522184  | 2279562  | 5723846  | 5200133  | 5009108  | 5488202  |
| 9.4925   | 14 | 5 | 5 | 1091201  | 11420095 | 3762091  | 7031702  | 3524221  | 9017182  | 10992407 | 11952843 | 7683711  |
| 10.03947 | 9  | 5 | 4 | 257558.1 | 816550.1 | 212836.5 | 588578.6 | 157925.2 | 777604.6 | 1102528  | 949903.1 | 564034.9 |
| 22.9435  | 5  | 4 | 1 | 352029.4 | 1202077  | 702338.1 | 2041253  | 693038.7 | 986870.8 | 1377388  | 1100622  | 304303.9 |
| 9.40325  | 7  | 2 | 5 | 673436.8 | 6366021  | 1590023  | 3580502  | 2742163  | 8393310  | 4485524  | 5894450  | 7575168  |
| 10.97857 | 9  | 4 | 4 | 219023.5 | 797317.4 | 285099.6 | 507607.5 | 165776.5 | 460482.2 | 959002.3 | 940168.2 | 526588   |
| 9.960467 | 3  | 3 | 0 | 499045.7 | 697414   | 351743.1 | 312487.1 | 280932.9 | 1013033  | 189353.2 | 1012139  | 760012.3 |
| 11.01617 | 3  | 3 | 0 | 1568078  | 4316420  | 4145926  | 8489242  | 2256173  | 8637864  | 8931701  | 2279842  | 1508782  |
| 11.02063 | 4  | 1 | 3 | 1018113  | 4196145  | 1636102  | 2253197  | 1599476  | 1398087  | 5528308  | 4179541  | 4890701  |
| 9.445217 | 13 | 5 | 5 | 1843654  | 13778960 | 3010914  | 9443781  | 4060494  | 16743766 | 15509146 | 14886636 | 9086485  |
| 10.5677  | 8  | 5 | 3 | 191759.7 | 714714.7 | 268016.2 | 452665.5 | 96526.79 | 366581.6 | 1086895  | 824688.7 | 590516.1 |
| 9.49445  | 4  | 3 | 1 | 324287.7 | 444142.9 | 107405.1 | 267485.7 | 172314.7 | 515375.2 | 529712.4 | 472155.6 | 440854.7 |
| 11.1891  | 4  | 3 | 1 | 91790.77 | 271449.6 | 153459.1 | 121429.3 | 55691.33 | 300496.5 | 522815.2 | 226914.1 | 139945.8 |

|          |    |   |   |          |          |          |          |          |          |          |          |          |
|----------|----|---|---|----------|----------|----------|----------|----------|----------|----------|----------|----------|
| 11.1891  | 6  | 4 | 2 | 142177.5 | 452673.2 | 284334.2 | 175529.3 | 91713.02 | 864682.3 | 629639.1 | 231994.3 | 214696.1 |
| 27.34033 | 7  | 4 | 3 | 170603.9 | 417408.2 | 256288.4 | 752667.4 | 300018.5 | 788839.1 | 177925   | 572210.5 | 308277.8 |
| 9.681483 | 4  | 3 | 1 | 28298606 | 11397796 | 15501733 | 43336119 | 32277222 | 2497208  | 6339800  | 3422049  | 38981838 |
| 9.43325  | 5  | 3 | 2 | 259930   | 1239049  | 551674.1 | 624146.8 | 469894.6 | 981363.3 | 2178672  | 783353.2 | 1257902  |
| 9.379233 | 7  | 4 | 3 | 353704.7 | 903718.9 | 100402.1 | 464538.8 | 452513.5 | 988959.8 | 899236.8 | 733377.5 | 946567.3 |
| 20.17333 | 10 | 5 | 5 | 1661835  | 12825908 | 2872390  | 9593806  | 2508074  | 14021675 | 15232643 | 8393557  | 11539330 |
| 10.008   | 7  | 4 | 3 | 362519.9 | 1218016  | 135726.1 | 835309.1 | 393051.2 | 1171678  | 1394385  | 1183132  | 1038743  |
| 10.19555 | 4  | 3 | 1 | 234427.6 | 728004.3 | 406191.2 | 310281.3 | 261416.5 | 612332.4 | 417647.6 | 660188.7 | 1435211  |
| 20.043   | 3  | 0 | 3 | 284916.5 | 636811.3 | 162679.7 | 337924.6 | 298577.7 | 523434.5 | 520662.1 | 717775.4 | 535133   |
| 9.659033 | 5  | 3 | 2 | 1471025  | 5229047  | 1273899  | 3097045  | 2096365  | 5048966  | 5193931  | 4539889  | 4011831  |
| 9.45945  | 8  | 3 | 3 | 425786   | 3325580  | 1186900  | 2034373  | 948599.7 | 5029037  | 2838376  | 3666971  | 3310338  |
| 18.1965  | 10 | 5 | 5 | 66389.1  | 353018.3 | 74133.1  | 259592.8 | 81979.61 | 295129.9 | 422786.3 | 379065.6 | 255421   |
| 42.13583 | 11 | 4 | 3 | 455943.6 | 4682567  | 1645512  | 6353257  | 995712.5 | 6832953  | 3758901  | 5884200  | 2775158  |
| 9.522017 | 9  | 5 | 4 | 906596.9 | 2889813  | 717390.8 | 2152745  | 463547   | 2949829  | 3769933  | 2938881  | 3023189  |
| 9.9014   | 4  | 0 | 4 | 7465919  | 14050762 | 11040407 | 3367136  | 2071111  | 10034223 | 33722339 | 9614054  | 7480096  |
| 10.9645  | 9  | 4 | 5 | 559689   | 1042245  | 231835.5 | 1644228  | 618935.9 | 1224969  | 713914.7 | 1142884  | 1241734  |
| 9.37735  | 7  | 3 | 3 | 887501.1 | 4560284  | 1370254  | 3159639  | 866765.8 | 6560687  | 5378813  | 3363602  | 3535988  |
| 31.26783 | 10 | 5 | 5 | 619255.6 | 3915949  | 1041168  | 2903326  | 392772.9 | 5619972  | 3525453  | 2870697  | 3506669  |
| 11.26338 | 10 | 5 | 5 | 6463158  | 33393875 | 5883085  | 23397179 | 9889032  | 39650569 | 28164972 | 38654382 | 33750499 |
| 12.26728 | 6  | 4 | 2 | 82089.27 | 570888.4 | 110133.1 | 378425.9 | 191389   | 533888.4 | 416805.9 | 555653.6 | 704798   |
| 9.460217 | 5  | 4 | 1 | 1349149  | 2510588  | 3251564  | 6866938  | 3984912  | 1190411  | 1071202  | 8324115  | 1071730  |
| 12.49958 | 5  | 3 | 2 | 623023.9 | 6423950  | 806030.2 | 4874468  | 1562569  | 7744851  | 5814728  | 6147837  | 6600952  |
| 9.8445   | 9  | 5 | 4 | 1588087  | 8319884  | 518529.5 | 5801909  | 2605752  | 9060744  | 8043890  | 7689930  | 8261047  |
| 18.96567 | 5  | 1 | 4 | 268884.6 | 1446643  | 189512.7 | 1126332  | 316818.1 | 1583791  | 1622561  | 1183513  | 1313463  |
| 10.11782 | 4  | 3 | 1 | 1.19E+09 | 7.01E+08 | 1.19E+09 | 2.37E+09 | 1.57E+09 | 561828.5 | 7.6E+08  | 892519   | 2586449  |
| 9.388367 | 5  | 2 | 3 | 617678.4 | 7105614  | 1154692  | 5840567  | 951935.5 | 8882709  | 5843367  | 6496748  | 7474169  |
| 9.536783 | 9  | 5 | 4 | 417085.2 | 1018483  | 337629.2 | 637778.5 | 300119.8 | 1370911  | 1318517  | 788007.4 | 1030639  |
| 10.97857 | 10 | 5 | 5 | 4037010  | 28803154 | 5479751  | 22317074 | 5430296  | 26911413 | 27874190 | 22743031 | 37688194 |
| 9.379233 | 7  | 5 | 2 | 449112.7 | 1170691  | 383230.5 | 585062.3 | 566671.2 | 1390253  | 848611.8 | 874657.3 | 1003589  |
| 9.473733 | 6  | 4 | 1 | 1198979  | 2260658  | 2021661  | 5340756  | 2980990  | 1773086  | 5819303  | 1515387  | 1403260  |
| 9.523633 | 4  | 1 | 3 | 447665.1 | 1202426  | 608170.2 | 569603.4 | 424809   | 2062366  | 1586638  | 968848.7 | 813716   |
| 41.71883 | 8  | 2 | 3 | 238228.5 | 3177489  | 449099.9 | 2498084  | 656194.4 | 3363301  | 3749127  | 3258674  | 2549339  |
| 11.06905 | 7  | 5 | 2 | 377146.8 | 1372797  | 374589.9 | 895567.2 | 425845.6 | 2029756  | 1131223  | 1298856  | 1263549  |
| 9.216183 | 6  | 5 | 1 | 444828.3 | 1224066  | 544948.7 | 628948   | 447772.6 | 1773069  | 601070.6 | 687104.7 | 1637684  |
| 10.57323 | 10 | 5 | 5 | 379125.2 | 1726561  | 236654   | 1483210  | 157414.2 | 1895990  | 2023901  | 1649314  | 1419833  |

|          |    |   |   |          |          |          |          |          |          |          |          |          |
|----------|----|---|---|----------|----------|----------|----------|----------|----------|----------|----------|----------|
| 10.03947 | 6  | 4 | 2 | 203154.4 | 567905.8 | 95691.33 | 351862   | 221800.8 | 422615.6 | 678881.1 | 549050.6 | 621263.2 |
| 9.064833 | 5  | 3 | 2 | 269580.2 | 761604   | 469453.1 | 309818.2 | 79730.54 | 1229117  | 1315466  | 453112.1 | 346233.5 |
| 36.5825  | 7  | 2 | 3 | 367847.4 | 6105114  | 533141.7 | 4484487  | 1681015  | 6922432  | 6095503  | 6062996  | 6017295  |
| 10.9645  | 5  | 4 | 1 | 313059.1 | 947094.8 | 347795.4 | 571594.4 | 276975.1 | 1474015  | 1126979  | 654612.7 | 704816.8 |
| 10.008   | 6  | 4 | 2 | 261470.7 | 837563.8 | 151657.7 | 479412.5 | 368877.6 | 694056.6 | 810628.3 | 698453.2 | 951006.3 |
| 8.859667 | 8  | 3 | 5 | 288994.5 | 3870976  | 713170.4 | 5695441  | 1886164  | 3281412  | 4029126  | 4077188  | 3090836  |
| 10.94443 | 3  | 0 | 3 | 248145.8 | 1341143  | 455549.7 | 792856   | 469038.5 | 1170624  | 1641300  | 808472.2 | 1126743  |
| 9.40255  | 7  | 2 | 4 | 748041.8 | 4488031  | 2253446  | 2263721  | 1167280  | 6360449  | 2270042  | 1830824  | 6387889  |
| 10.37908 | 3  | 3 | 0 | 180607.6 | 398695.4 | 268419.7 | 139907.5 | 93946.67 | 728885.3 | 652852.2 | 200849.4 | 186195.3 |
| 9.3919   | 3  | 0 | 3 | 330635.8 | 1530553  | 917212.5 | 621219.6 | 498409.6 | 2396593  | 2200311  | 1976820  | 500335.7 |
| 9.45945  | 13 | 5 | 5 | 8142568  | 83073066 | 25520544 | 58314284 | 10739504 | 92169900 | 70713639 | 80670131 | 51643157 |
| 9.952017 | 10 | 5 | 5 | 2078365  | 7396994  | 476377.2 | 4988692  | 2510108  | 8005904  | 6834325  | 7527121  | 7002307  |
| 10.97857 | 5  | 3 | 2 | 289882.2 | 666994.7 | 163701.5 | 883465.7 | 198555.2 | 863988.8 | 635967.3 | 516665.8 | 808678.9 |
| 9.388367 | 6  | 3 | 3 | 436936.9 | 1550177  | 572148.4 | 915033.6 | 495443   | 1758622  | 1500907  | 826254.1 | 2371069  |
| 10.96278 | 5  | 3 | 2 | 222639.3 | 724858.9 | 86085.53 | 541219.6 | 188460.4 | 710742   | 594241.8 | 719902.9 | 823731.7 |
| 9.445217 | 7  | 4 | 2 | 654038.4 | 4949412  | 1222787  | 3562915  | 1115817  | 6194631  | 6042178  | 4383574  | 3243066  |
| 20.1875  | 8  | 4 | 4 | 334713.2 | 1626577  | 437694.7 | 1182535  | 277269.3 | 1958927  | 1949184  | 907553.6 | 1530688  |
| 9.36565  | 4  | 3 | 0 | 1.74E+08 | 5.63E+08 | 7.7E+08  | 1.3E+09  | 2.17E+08 | 4461136  | 1.29E+09 | 4715387  | 1.52E+09 |
| 9.460217 | 7  | 2 | 5 | 841702.6 | 4558485  | 2158613  | 2470567  | 882322.2 | 6918962  | 1925937  | 5281163  | 5993376  |
| 9.859983 | 7  | 4 | 3 | 1013439  | 3022943  | 716518.9 | 1750330  | 1281022  | 3151099  | 2442204  | 3458537  | 2162523  |
| 9.912633 | 7  | 4 | 3 | 1121914  | 3081779  | 2040586  | 5048674  | 767591.6 | 1902630  | 3797995  | 3987574  | 5490375  |
| 7.26575  | 3  | 3 | 0 | 833121.7 | 20422293 | 6889762  | 12889618 | 5749558  | 25219104 | 19667499 | 20072196 | 9650010  |
| 9.952017 | 10 | 5 | 3 | 3874045  | 6280529  | 1262816  | 4460695  | 1739817  | 5498024  | 6934016  | 4952728  | 5887502  |
| 9.840617 | 8  | 5 | 3 | 1029518  | 2020897  | 468207.7 | 3245868  | 1272350  | 1576861  | 1793685  | 2789557  | 2099661  |
| 9.328967 | 6  | 2 | 4 | 1160020  | 5388488  | 3855802  | 1695860  | 594856.2 | 1416930  | 8279013  | 8595521  | 7701538  |
| 9.972483 | 10 | 5 | 5 | 1351246  | 3088632  | 933310.1 | 2123369  | 649938.9 | 4595785  | 3340063  | 2777314  | 2313353  |
| 11.04953 | 6  | 2 | 4 | 1536181  | 5176028  | 2569812  | 2405229  | 2066798  | 2729662  | 7809583  | 6639542  | 6585752  |
| 31.2235  | 9  | 5 | 4 | 211939.2 | 947636.1 | 328025   | 627337.2 | 158808.1 | 1505760  | 743393.5 | 684478.2 | 858587.3 |
| 9.992233 | 7  | 4 | 3 | 533642.3 | 479453.8 | 278647.1 | 897406   | 405722.2 | 758086.3 | 47675.72 | 679448.5 | 508053.6 |
| 9.568567 | 7  | 4 | 2 | 1225170  | 2195634  | 2005347  | 5449405  | 3225482  | 5342749  | 603750.5 | 1781431  | 2813546  |
| 9.853633 | 8  | 5 | 3 | 855949   | 1667322  | 639619.7 | 2634857  | 942157   | 1323079  | 882501.1 | 1645287  | 2588564  |
| 21.10133 | 8  | 4 | 4 | 362495.4 | 1469233  | 564187.1 | 906064.2 | 330382.5 | 2288778  | 869536.4 | 1134984  | 1775101  |
| 9.338567 | 10 | 5 | 4 | 782842.3 | 4668111  | 1111756  | 3586676  | 517300.4 | 5676105  | 5689776  | 4145611  | 4773421  |
| 9.928667 | 8  | 4 | 3 | 794151.8 | 1449081  | 444203.1 | 751596.3 | 686726.5 | 2091052  | 1681995  | 1368182  | 1028250  |
| 10.00385 | 8  | 4 | 4 | 313446.2 | 837160   | 179832   | 559877.2 | 271730.4 | 627528.4 | 741336.1 | 852627.4 | 851876.1 |

|          |    |   |   |          |          |          |          |          |          |          |          |          |
|----------|----|---|---|----------|----------|----------|----------|----------|----------|----------|----------|----------|
| 10.07683 | 6  | 3 | 3 | 1326650  | 3684576  | 2122970  | 1652091  | 688394.4 | 1520862  | 4644067  | 3521260  | 6762502  |
| 31.4365  | 10 | 5 | 5 | 429859.8 | 3060687  | 728083.3 | 2244213  | 653072   | 4227222  | 2884203  | 2213160  | 2991832  |
| 8.981583 | 9  | 5 | 4 | 722343.8 | 2226729  | 714326.6 | 1303237  | 842532.3 | 2442426  | 2732141  | 2239314  | 1002627  |
| 10.57323 | 9  | 4 | 5 | 927777.9 | 4487975  | 1106958  | 3320186  | 837828.2 | 4094481  | 5580076  | 2752164  | 4968070  |
| 9.858833 | 9  | 4 | 5 | 1090942  | 5138609  | 581933.9 | 4124881  | 1021776  | 5581629  | 4443176  | 4599195  | 5347133  |
| 8.859667 | 5  | 2 | 3 | 125875.6 | 710436   | 291321.9 | 417607   | 180164.8 | 631154.6 | 1219855  | 501167.7 | 652424.5 |
| 11.03478 | 10 | 5 | 5 | 2693619  | 12039974 | 1866640  | 9649311  | 2170197  | 14428977 | 12785234 | 10135459 | 10142269 |
| 9.30295  | 7  | 3 | 4 | 611072.1 | 1943397  | 544169.5 | 1231687  | 654729.8 | 1927510  | 2874703  | 1673895  | 1753973  |
| 42.76917 | 9  | 3 | 4 | 321461.1 | 4705759  | 2041525  | 2640336  | 1309937  | 3928638  | 5307447  | 2928374  | 7988628  |
| 10.94443 | 5  | 1 | 4 | 233515.7 | 693510.1 | 176907.5 | 481231.2 | 183954.1 | 788070.4 | 958542.5 | 541105.1 | 615516.3 |
| 9.43325  | 5  | 3 | 2 | 443244.6 | 2990708  | 784057.1 | 1765902  | 1209224  | 2755551  | 3471636  | 3375056  | 3631197  |
| 9.880683 | 9  | 4 | 5 | 3585151  | 9686837  | 3021710  | 6276796  | 2769857  | 5821043  | 14135523 | 8489241  | 9707327  |
| 9.8322   | 8  | 4 | 4 | 799308.1 | 3595098  | 552508.9 | 2281718  | 1367745  | 3772367  | 2686275  | 4179685  | 3743211  |
| 9.445217 | 7  | 4 | 3 | 515002.7 | 3928388  | 1869382  | 1870676  | 1613187  | 5687447  | 5921405  | 3481155  | 3066832  |
| 9.4925   | 6  | 1 | 4 | 1060110  | 10128861 | 2188970  | 6794607  | 3272160  | 11772905 | 7812942  | 11514627 | 11884360 |
| 9.887133 | 9  | 5 | 4 | 1444256  | 3192462  | 630236.4 | 4593185  | 1453541  | 3159374  | 3937874  | 3674649  | 2802721  |
| 17.26333 | 3  | 0 | 3 | 73271.05 | 59745.28 | 27753.77 | 238291.6 | 187811.1 | 70798.32 | 92946.94 | 32566.2  | 73253.73 |
| 9.392767 | 9  | 4 | 5 | 4540199  | 18306888 | 6704411  | 11575021 | 4196659  | 17662533 | 14905213 | 11397545 | 29264575 |
| 9.858833 | 9  | 5 | 4 | 999626   | 4498199  | 639723.3 | 3526461  | 954231.2 | 4333549  | 4232671  | 3680909  | 5337941  |
| 10.94208 | 3  | 3 | 0 | 1407517  | 2048606  | 2067662  | 4022104  | 730555   | 478969.5 | 670913.5 | 470426   | 4375981  |
| 9.880683 | 7  | 5 | 2 | 7278046  | 3543055  | 2534332  | 17922157 | 15140113 | 2991471  | 1896263  | 2312103  | 8021757  |
| 11.1329  | 9  | 5 | 4 | 494236.8 | 2473050  | 363453.7 | 1764077  | 729011.9 | 2739495  | 2772069  | 2012154  | 2146816  |
| 9.3735   | 5  | 1 | 4 | 3866990  | 31450335 | 15637451 | 15435110 | 10765858 | 43350196 | 4445590  | 39121576 | 38390442 |
| 9.419733 | 11 | 4 | 5 | 1640006  | 8395987  | 2962633  | 4890948  | 3013017  | 5980382  | 7975319  | 8779256  | 13223959 |
| 9.229717 | 4  | 3 | 1 | 622716.8 | 1262405  | 395561.3 | 715811.4 | 519693.4 | 1336754  | 1323779  | 675510   | 1196139  |
| 9.976317 | 10 | 5 | 5 | 1581732  | 4701632  | 421466.4 | 3581783  | 1174228  | 5360918  | 4746361  | 4717153  | 4427803  |
| 9.94455  | 5  | 2 | 3 | 1346510  | 1182522  | 763547.2 | 1986074  | 582861.1 | 1511600  | 83782.17 | 1344189  | 2121157  |
| 9.431017 | 13 | 5 | 5 | 801380.3 | 5936545  | 1060180  | 4405440  | 1482468  | 4696217  | 6663245  | 7114767  | 4963789  |
| 39.201   | 14 | 5 | 4 | 369490   | 8501988  | 3641385  | 4799369  | 2442887  | 5429059  | 7288979  | 14012339 | 10236148 |
| 10.9645  | 10 | 5 | 5 | 515009.2 | 1650964  | 281355.6 | 1156605  | 502579.6 | 1829026  | 1419236  | 1322088  | 2000209  |
| 43.86233 | 4  | 1 | 3 | 220263.1 | 1253221  | 515905.4 | 1933808  | 634272.7 | 335173.2 | 1462972  | 1420004  | 1482799  |
| 9.94455  | 8  | 4 | 4 | 1861876  | 5359434  | 1035749  | 3891704  | 1414159  | 4612769  | 4835246  | 5643005  | 4650776  |
| 12.2226  | 3  | 0 | 3 | 67817.02 | 376471.4 | 58980.16 | 263493.4 | 116316.1 | 438552.1 | 407274   | 365414.5 | 282446.1 |
| 10.9645  | 10 | 5 | 5 | 364639.9 | 1226812  | 183251.3 | 1010020  | 187224.5 | 1488614  | 1319326  | 1184337  | 1129193  |
| 11.63327 | 8  | 4 | 4 | 83643.04 | 365442   | 62254.83 | 256852.6 | 110409.1 | 465461.1 | 379030.9 | 302521.8 | 334157.3 |

|          |    |   |   |          |          |          |          |          |          |          |          |          |
|----------|----|---|---|----------|----------|----------|----------|----------|----------|----------|----------|----------|
| 39.604   | 7  | 3 | 4 | 401076.8 | 5981478  | 921123.8 | 4469241  | 1520893  | 5293577  | 6946217  | 5287288  | 7033053  |
| 18.56783 | 4  | 1 | 3 | 144031.9 | 719948.9 | 310744.1 | 353417.1 | 315973.5 | 801305.8 | 192486   | 755167.2 | 836632   |
| 9.392767 | 6  | 4 | 1 | 381467.4 | 1736766  | 479112.5 | 1056713  | 656393.9 | 2436095  | 1210462  | 1866851  | 1796492  |
| 10.16043 | 7  | 4 | 3 | 434069.6 | 1439549  | 662726   | 812638.2 | 163351.1 | 2128693  | 2065536  | 1233806  | 544015.5 |
| 15.18045 | 10 | 5 | 5 | 1811350  | 22395673 | 4319262  | 15430052 | 6980965  | 29351207 | 17748794 | 20662856 | 21246733 |
| 10.95602 | 8  | 5 | 3 | 545803.1 | 490149.9 | 111711   | 1278494  | 833599.6 | 499683.2 | 665724.8 | 478600.6 | 446989.5 |
| 9.43325  | 6  | 4 | 2 | 463490   | 2642437  | 537194.8 | 1654820  | 1013283  | 3230637  | 2970877  | 2767117  | 2388931  |
| 2.80655  | 3  | 3 | 0 | 187214.1 | 1771751  | 1060643  | 673607.9 | 774223.7 | 0        | 2677136  | 1705707  | 2012149  |
| 44.45183 | 6  | 1 | 3 | 381828.6 | 2397540  | 793772.9 | 3844933  | 1484971  | 2467106  | 2850957  | 2817101  | 2845410  |
| 9.43325  | 13 | 5 | 5 | 1455032  | 11811965 | 2246532  | 8696830  | 2987384  | 14641817 | 13005450 | 12201308 | 8946957  |
| 10.24195 | 5  | 2 | 3 | 275933.6 | 512244.3 | 137004   | 650771.1 | 91673.66 | 296503   | 458878.2 | 623242.2 | 612135.3 |
| 9.858833 | 8  | 4 | 4 | 1107212  | 3800662  | 529411   | 2799663  | 1033767  | 4180639  | 4517977  | 3603396  | 3255140  |
| 9.864767 | 10 | 5 | 5 | 2868381  | 10915363 | 2393941  | 13864673 | 2653428  | 10141656 | 8608991  | 9657467  | 14818498 |
| 9.43325  | 5  | 2 | 3 | 334282.2 | 1853593  | 396272.3 | 1199817  | 661168.8 | 2489526  | 1767954  | 1725844  | 1406959  |
| 29.863   | 7  | 2 | 5 | 44310.09 | 127584.6 | 79869.38 | 211037.7 | 60763.8  | 117816.7 | 83049.97 | 70922.28 | 99190.8  |
| 9.295167 | 7  | 3 | 4 | 1110191  | 7910895  | 3328235  | 4463049  | 2461356  | 8992004  | 2333557  | 8572012  | 8372088  |
| 9.94455  | 4  | 3 | 1 | 9674362  | 4236343  | 6160345  | 15406477 | 11486149 | 1380746  | 2499388  | 1443423  | 15193889 |
| 9.845483 | 10 | 5 | 5 | 875983.9 | 4511310  | 286120.9 | 3389403  | 1191794  | 4453264  | 4103558  | 4444581  | 4853677  |
| 10.99115 | 5  | 1 | 3 | 1536181  | 7686496  | 3061879  | 4211821  | 2902595  | 8751173  | 10122872 | 2548634  | 7344350  |
| 12.32473 | 8  | 5 | 3 | 95461.45 | 492685.9 | 162489.7 | 768043.6 | 280248.3 | 213797   | 569729.3 | 508697.7 | 632365.1 |
| 9.842    | 10 | 5 | 5 | 2749820  | 13303086 | 1749102  | 11596265 | 967768.2 | 16023614 | 13848781 | 12006517 | 11640944 |
| 44.696   | 7  | 3 | 2 | 563979.1 | 11349471 | 3540018  | 8010315  | 1149446  | 9013981  | 8758111  | 10637056 | 10886646 |
| 10.11782 | 4  | 3 | 1 | 1010102  | 9212029  | 2255113  | 6828062  | 1790509  | 10393260 | 11742167 | 9748441  | 5816198  |
| 9.976317 | 5  | 4 | 1 | 758273.8 | 1218188  | 334866.9 | 1907081  | 719605.9 | 971855.7 | 904302   | 1147057  | 1327733  |
| 9.8322   | 9  | 5 | 4 | 762271.8 | 3221220  | 459457.2 | 2621367  | 561973.9 | 3019252  | 2959270  | 2796446  | 3383013  |
| 11.02755 | 4  | 1 | 3 | 8910135  | 25390897 | 16640574 | 8828690  | 10481026 | 46999190 | 27198294 | 33242763 | 3162882  |
| 24.6235  | 5  | 1 | 4 | 10374775 | 39071054 | 21707702 | 11719562 | 25095292 | 546724.7 | 52167870 | 48206593 | 44660239 |
| 8.827383 | 8  | 4 | 4 | 1079449  | 3403430  | 1369976  | 1768219  | 1441345  | 2078519  | 5190871  | 3342820  | 4314350  |
| 9.659033 | 5  | 3 | 2 | 217390.3 | 679119.2 | 229801.5 | 440739.5 | 172039.9 | 736695.6 | 805880.2 | 740432.3 | 275295.6 |
| 11.287   | 6  | 3 | 3 | 89289.86 | 288257.6 | 91730.89 | 200037.9 | 45196.03 | 267406.7 | 228885.7 | 327329.5 | 425719.9 |
| 9.4468   | 9  | 5 | 4 | 377594.5 | 2775330  | 946059.5 | 1615756  | 1044185  | 3155991  | 4069586  | 2956569  | 1895239  |
| 9.328967 | 4  | 1 | 3 | 523303.4 | 2310103  | 398292.2 | 1450041  | 902806.2 | 2343577  | 2056870  | 2352618  | 2923978  |
| 41.84833 | 5  | 0 | 3 | 285021.3 | 3416679  | 115854.9 | 3135451  | 297128.8 | 3297133  | 3409994  | 3434126  | 3599781  |
| 23.01617 | 3  | 3 | 0 | 73672.23 | 129856.2 | 59789.23 | 189711.3 | 39050.59 | 205848.2 | 149254.4 | 49020.56 | 95123.27 |
| 20.73483 | 3  | 0 | 3 | 162652.5 | 643664.5 | 179222.6 | 390159.3 | 246863.6 | 473782.2 | 794331.3 | 483887.1 | 600167.8 |

|          |    |   |   |          |          |          |          |          |          |          |          |          |
|----------|----|---|---|----------|----------|----------|----------|----------|----------|----------|----------|----------|
| 9.445217 | 11 | 4 | 5 | 1422936  | 10063468 | 2067778  | 6331815  | 3850180  | 12930939 | 10817008 | 10307699 | 7505180  |
| 10.52875 | 4  | 4 | 0 | 201126.2 | 411749.3 | 282451.9 | 145942.1 | 93042.33 | 730274.2 | 678332.1 | 215688.3 | 89803.06 |
| 8.9256   | 9  | 5 | 4 | 1451056  | 3805001  | 2322443  | 1526549  | 1364770  | 1979081  | 3815763  | 2652091  | 7789731  |
| 23.81317 | 5  | 4 | 1 | 433847.3 | 939248.6 | 1634806  | 2763711  | 1504874  | 146882.7 | 298682.3 | 3861991  | 195156.1 |
| 24.60933 | 10 | 5 | 5 | 414156.1 | 3770061  | 318199.2 | 3465141  | 154389.4 | 3923236  | 3889964  | 3341249  | 4140466  |
| 25.60983 | 3  | 0 | 3 | 52350.76 | 364754.9 | 40821.61 | 246475.5 | 125824.6 | 302238.3 | 400763   | 354561.4 | 364622.4 |
| 9.93625  | 6  | 2 | 3 | 2410509  | 7878263  | 2282312  | 5660148  | 1261030  | 9015123  | 6897865  | 11043962 | 7450497  |
| 9.856867 | 10 | 5 | 5 | 1660442  | 7827395  | 639302.4 | 6934555  | 866721   | 7555993  | 7001212  | 8624050  | 7662700  |
| 9.554967 | 10 | 3 | 4 | 1409320  | 5653969  | 965515.2 | 3556660  | 2207396  | 7192089  | 5797463  | 4577440  | 5367225  |
| 9.4468   | 6  | 4 | 2 | 408787   | 2075124  | 937313.1 | 1058880  | 806099.9 | 3086646  | 3081411  | 1686726  | 1266952  |
| 10.22883 | 5  | 3 | 2 | 295473.8 | 747777   | 363883.1 | 1232622  | 461352.5 | 1054976  | 881368.4 | 1080941  | 419646.5 |
| 9.445217 | 12 | 5 | 5 | 1.27E+09 | 1.43E+10 | 3.92E+09 | 1.04E+10 | 2.47E+09 | 9.24E+09 | 1.35E+10 | 1.3E+10  | 1.59E+10 |
| 18.51267 | 10 | 5 | 5 | 745776.4 | 6665576  | 2179663  | 4594064  | 965244.1 | 6644267  | 5372222  | 3900515  | 9530930  |
| 9.43325  | 10 | 5 | 4 | 1102562  | 9412233  | 1936719  | 6236702  | 3231912  | 11747799 | 10494332 | 9971157  | 7142262  |
| 10.98605 | 3  | 0 | 3 | 2716434  | 14847564 | 2615675  | 7782749  | 7515412  | 16756259 | 17475868 | 12457152 | 11676898 |
| 7.470967 | 4  | 3 | 1 | 2043143  | 20476017 | 14123554 | 7271361  | 2268788  | 5887682  | 5852620  | 27986251 | 37625764 |
| 9.960817 | 9  | 5 | 4 | 1729077  | 5508304  | 1374739  | 3641295  | 1794920  | 7230280  | 6371949  | 3872777  | 4432319  |
| 21.58767 | 9  | 4 | 5 | 94699.65 | 463468.6 | 58365.22 | 345932.9 | 123196.2 | 426116.2 | 466648.3 | 554105.1 | 400511.9 |
| 33.1095  | 8  | 5 | 3 | 92539.98 | 526458.8 | 72029.83 | 435021.2 | 84940.26 | 540676.5 | 533845.4 | 507787.7 | 625350.4 |
| 9.219483 | 12 | 5 | 5 | 1609177  | 6339378  | 1131873  | 4472350  | 1904969  | 6249028  | 8071166  | 6674843  | 5510123  |
| 9.68775  | 5  | 2 | 3 | 175640.1 | 384400.2 | 111768.1 | 217699.3 | 165999.8 | 468379.5 | 516379.9 | 382629.8 | 241558.5 |
| 10.97857 | 5  | 3 | 2 | 522117.3 | 1249138  | 449508.2 | 1836339  | 554620.6 | 835866.3 | 1786434  | 1413697  | 730660   |
| 9.856867 | 10 | 5 | 5 | 988981.2 | 3820643  | 739036.6 | 2534416  | 1325887  | 3643059  | 3243286  | 4632232  | 4553745  |
| 9.522017 | 13 | 4 | 5 | 589281.5 | 2135286  | 861994.4 | 1261787  | 604060.5 | 1899382  | 1586786  | 1156368  | 3243553  |
| 43.8765  | 4  | 1 | 3 | 587447.8 | 7252438  | 721012   | 5219419  | 2169489  | 7922124  | 7151867  | 7378061  | 7730820  |
| 9.392767 | 10 | 5 | 5 | 1698741  | 4863409  | 1002704  | 3444274  | 1391722  | 5421384  | 5081861  | 3786861  | 3904728  |
| 9.992233 | 5  | 2 | 3 | 556107   | 548601   | 193465.7 | 759563.7 | 170299   | 554997.5 | 506292.2 | 723419   | 711178.6 |
| 41.33083 | 6  | 3 | 3 | 290556.3 | 4175785  | 1377478  | 2887724  | 438198.5 | 2864568  | 5305263  | 3273294  | 3454470  |
| 9.9677   | 9  | 4 | 5 | 2273673  | 7476398  | 1652557  | 5284910  | 2091381  | 8834165  | 6538554  | 5166980  | 7685555  |
| 10.94603 | 3  | 3 | 0 | 260722.1 | 500176.6 | 229867.4 | 258275.3 | 184029.1 | 372915.4 | 906574.9 | 435578   | 355392.8 |
| 9.960467 | 6  | 5 | 1 | 583274.4 | 1276458  | 235992   | 802710.9 | 497836.8 | 1541592  | 1464492  | 1187059  | 948012.4 |
| 8.917333 | 5  | 3 | 2 | 296314   | 529679.6 | 371454.6 | 180836.2 | 141039.5 | 432834.8 | 583929.1 | 597548.4 | 1034086  |
| 9.896717 | 3  | 3 | 0 | 10809870 | 10472376 | 11014674 | 22555190 | 9858312  | 4093838  | 2394389  | 23618785 | 986765.8 |
| 9.992233 | 7  | 4 | 3 | 340425.6 | 1024318  | 116095.6 | 614790.1 | 439280.3 | 1166442  | 982220.3 | 959912.9 | 889976.1 |
| 10.03947 | 3  | 3 | 0 | 2902259  | 901250.5 | 1507057  | 3329172  | 2474735  | 295606.1 | 32843.68 | 291221.2 | 297066.2 |



|          |    |   |   |          |          |          |          |          |          |          |          |          |
|----------|----|---|---|----------|----------|----------|----------|----------|----------|----------|----------|----------|
| 9.845483 | 10 | 5 | 5 | 1073846  | 5434978  | 332527.3 | 4115514  | 1416984  | 5060482  | 5151313  | 5501136  | 5875847  |
| 9.41815  | 3  | 0 | 3 | 341772.2 | 249194.3 | 303324.9 | 691110.2 | 438701.4 | 761005.1 | 82497.62 | 125116.9 | 0        |
| 43.18617 | 7  | 3 | 3 | 422192.6 | 5869637  | 763020.5 | 5159318  | 182990.4 | 6315332  | 5649514  | 6831559  | 4800843  |
| 10.94443 | 10 | 5 | 5 | 754502.8 | 1749115  | 567543   | 1195933  | 333217.1 | 1485903  | 2077269  | 1731444  | 980488.5 |
| 9.43325  | 12 | 5 | 4 | 2548396  | 16338466 | 2823063  | 10691657 | 5942442  | 18672476 | 19256534 | 14580221 | 12503349 |
| 17.39433 | 9  | 4 | 5 | 526677.4 | 2871445  | 677065   | 4091329  | 1270990  | 1888060  | 3452377  | 3464619  | 3058129  |
| 9.371417 | 6  | 2 | 4 | 973314.3 | 7064970  | 5313416  | 2129986  | 596717.4 | 10857236 | 1116556  | 1374751  | 10947406 |
| 9.35985  | 11 | 5 | 5 | 808733.8 | 4458053  | 1154232  | 3161140  | 1097885  | 5939585  | 5297109  | 4276790  | 3621670  |
| 9.445217 | 8  | 4 | 4 | 578148.4 | 3973517  | 982272.5 | 2642459  | 1289700  | 3918682  | 5268496  | 4580544  | 2820846  |
| 9.445217 | 13 | 5 | 5 | 1123578  | 9078378  | 1954284  | 5823239  | 3350894  | 11586579 | 10038008 | 9533713  | 6832184  |
| 10.95835 | 9  | 5 | 4 | 193506.2 | 593063.4 | 171595   | 812098.7 | 206024.5 | 871325.4 | 544443.7 | 599970.4 | 545359   |
| 9.872883 | 4  | 1 | 3 | 1126299  | 1799279  | 290495.4 | 2802665  | 1080100  | 1837762  | 2023810  | 1627029  | 2108767  |
| 12.96833 | 6  | 2 | 4 | 1129246  | 8186428  | 7273674  | 1391817  | 2685787  | 254866.8 | 13261341 | 13104278 | 14107495 |
| 10.97857 | 5  | 4 | 1 | 393093.6 | 2521092  | 159993.3 | 2122923  | 426120.2 | 2474240  | 2578563  | 2419717  | 2363369  |
| 9.983433 | 10 | 5 | 5 | 1019184  | 4562492  | 590691.4 | 3429193  | 1192109  | 5164180  | 4467279  | 4422665  | 3694404  |
| 9.888767 | 6  | 1 | 4 | 4599465  | 15434554 | 8230782  | 5692561  | 8711928  | 17651037 | 23554616 | 16285287 | 18112356 |
| 19.94083 | 7  | 3 | 4 | 99396.47 | 467925.1 | 198312   | 253710.4 | 172846.1 | 485021   | 575604.5 | 206892   | 351660.1 |
| 12.0494  | 10 | 5 | 5 | 4151418  | 15988357 | 13912163 | 3100196  | 1137371  | 8250505  | 5052693  | 24254262 | 5825877  |
| 42.9415  | 6  | 4 | 1 | 701668.7 | 5454432  | 4179865  | 10143131 | 3981927  | 12865056 | 2842804  | 4369800  | 3787600  |
| 9.295167 | 6  | 2 | 4 | 1521371  | 13131805 | 4151222  | 8263759  | 4325179  | 15437889 | 6205468  | 16420622 | 15200326 |
| 9.554967 | 6  | 4 | 2 | 321019.3 | 788567.3 | 206055   | 456670.5 | 340615.5 | 1092739  | 896280.1 | 627781.5 | 598463.9 |
| 10.98385 | 5  | 3 | 2 | 187994.5 | 570262.8 | 195133.9 | 353651.9 | 182113.6 | 351918.5 | 509336.6 | 445523.5 | 728961.8 |
| 9.388367 | 8  | 4 | 4 | 1080218  | 3174701  | 831751.3 | 2245746  | 787881.8 | 3484489  | 3482098  | 1696620  | 3708796  |
| 9.106183 | 5  | 2 | 3 | 812228.1 | 2103434  | 1093229  | 948904   | 903510   | 3312916  | 888335.3 | 3104082  | 1190622  |
| 10.6471  | 9  | 4 | 5 | 171243.6 | 623073.5 | 205730.5 | 411464.5 | 157148.6 | 336456.8 | 836669.6 | 691622.1 | 489628.4 |
| 10.4704  | 6  | 3 | 3 | 134970   | 645247.4 | 157663.5 | 442988.3 | 192030.3 | 541188.8 | 898314.3 | 690519.7 | 590757.3 |
| 9.976317 | 8  | 5 | 3 | 299742.6 | 1042230  | 241538.9 | 619918.7 | 440999.1 | 1372445  | 932006.4 | 1066484  | 1122290  |
| 15.18045 | 10 | 5 | 5 | 931611   | 8979101  | 2422096  | 6060904  | 2664448  | 12194031 | 6132314  | 10037342 | 9467794  |
| 10.95055 | 6  | 4 | 1 | 17802954 | 16970203 | 26127599 | 49038581 | 29700883 | 7771394  | 5275327  | 2896344  | 63606843 |
| 11.70247 | 4  | 4 | 0 | 91415.01 | 366185.3 | 230856.2 | 152872.7 | 67001.77 | 698841.7 | 368822.2 | 116220   | 188636   |
| 9.8322   | 9  | 5 | 4 | 1172341  | 7148356  | 507319.1 | 4976654  | 2354882  | 7283835  | 6395346  | 6915770  | 7693139  |
| 11.26338 | 10 | 5 | 5 | 2905822  | 13632919 | 2960874  | 9312628  | 4339089  | 16699449 | 11303980 | 16262480 | 13905884 |
| 39.46017 | 4  | 3 | 1 | 378186.5 | 6686440  | 2161046  | 4357313  | 1893976  | 10499664 | 6267859  | 5268432  | 5710567  |
| 23.103   | 9  | 5 | 4 | 2999251  | 23916719 | 3129136  | 19146489 | 4855989  | 24956285 | 23859305 | 18948452 | 27561099 |
| 9.45135  | 7  | 4 | 3 | 638752.4 | 7679564  | 1039491  | 5113216  | 2765312  | 8689690  | 6070863  | 7808598  | 8456096  |

|          |    |   |   |          |          |          |          |          |          |          |          |          |
|----------|----|---|---|----------|----------|----------|----------|----------|----------|----------|----------|----------|
| 20.77783 | 4  | 1 | 3 | 144050.8 | 490372.7 | 237921.2 | 259097.1 | 145675.9 | 333751.9 | 651958.3 | 200205.4 | 473414   |
| 10.02372 | 8  | 5 | 3 | 4204155  | 813807.2 | 230071.5 | 6633990  | 6321812  | 757274.7 | 562850.6 | 1076886  | 1030126  |
| 9.992233 | 10 | 5 | 5 | 1080823  | 4509676  | 899672.8 | 3494957  | 877178.6 | 4466746  | 4301168  | 4202598  | 3576072  |
| 10.58813 | 4  | 3 | 1 | 228159.1 | 600201.4 | 409868.1 | 223141.8 | 85430.03 | 1219004  | 776262.9 | 379038.1 | 164062.8 |
| 9.842    | 9  | 5 | 4 | 1065432  | 4638353  | 1076800  | 2943482  | 1741523  | 5352599  | 3727798  | 3264058  | 5126453  |
| 9.392767 | 8  | 5 | 3 | 792348.9 | 2050609  | 839287.9 | 1096279  | 832774.9 | 2551602  | 1889041  | 1492704  | 1109755  |
| 14.06348 | 10 | 5 | 5 | 1045912  | 5938068  | 1585666  | 4070722  | 1683385  | 8086660  | 4313599  | 7025230  | 5533644  |
| 9.9014   | 6  | 3 | 3 | 2773859  | 5151406  | 1223509  | 3746102  | 1239468  | 6928635  | 4500288  | 5861893  | 4560261  |
| 9.43325  | 8  | 5 | 3 | 20764854 | 10984663 | 7838153  | 87784115 | 83538178 | 2155571  | 18344856 | 5925596  | 8472840  |
| 19.7075  | 7  | 1 | 5 | 97932.34 | 371204.4 | 110461.3 | 210839.2 | 161480.8 | 358262.6 | 363727.6 | 250487.5 | 551433.5 |
| 41.79083 | 5  | 2 | 3 | 333900.6 | 5415398  | 424353.5 | 4558446  | 914425.4 | 5341442  | 5633743  | 6024654  | 5115952  |
| 10.36388 | 5  | 3 | 2 | 378412.3 | 905710   | 541017.5 | 408819.8 | 122637.5 | 1695838  | 1146970  | 359616   | 472908.6 |
| 14.37043 | 5  | 2 | 3 | 2393452  | 32355071 | 5363547  | 17686110 | 15899968 | 29932075 | 41430647 | 27302939 | 31434858 |
| 31.2925  | 10 | 5 | 5 | 709802.9 | 6028967  | 1332781  | 4758553  | 730986   | 8213664  | 5684695  | 4788866  | 5230935  |
| 9.433    | 5  | 4 | 1 | 1.77E+08 | 3.29E+08 | 7.29E+08 | 1.12E+09 | 6.48E+08 | 4908842  | 3206054  | 1.63E+09 | 2041557  |
| 8.911617 | 3  | 3 | 0 | 161897.1 | 238641.6 | 151809.7 | 97417.21 | 64617.58 | 56282.98 | 320235.8 | 182656.2 | 452760.4 |
| 44.9835  | 10 | 3 | 4 | 441640.8 | 4706128  | 2435342  | 6972594  | 1052092  | 3742319  | 7044202  | 1426662  | 4116286  |
| 9.311883 | 4  | 1 | 3 | 472769   | 4002249  | 475957.2 | 2345648  | 1805589  | 4106152  | 3379943  | 4591768  | 4247777  |
| 40.75483 | 10 | 3 | 2 | 525183.9 | 5987178  | 2842170  | 3292923  | 1513599  | 3901790  | 3275352  | 7233542  | 10287597 |
| 9.445217 | 9  | 5 | 4 | 544803.6 | 1838205  | 377668.4 | 1409687  | 375675.8 | 1755514  | 2253016  | 1353602  | 1645038  |
| 15.69645 | 3  | 0 | 3 | 363692.3 | 1269084  | 302787.4 | 599063.1 | 721572   | 1306440  | 1039918  | 1431883  | 1661666  |
| 9.392767 | 9  | 5 | 4 | 1610659  | 5362243  | 1385975  | 3310647  | 2084575  | 6030074  | 4887924  | 4168133  | 4267827  |
| 9.830733 | 4  | 1 | 3 | 524127.2 | 1792401  | 625667.6 | 1044172  | 687036.1 | 1730013  | 1070022  | 1981402  | 1447272  |
| 9.960817 | 6  | 4 | 2 | 655236.4 | 848271.3 | 288024.5 | 487951.8 | 341133.8 | 750664.6 | 626041.3 | 876410.6 | 1332929  |
| 10.02372 | 8  | 5 | 3 | 1066191  | 866354   | 242502.2 | 1687317  | 895323   | 853782.7 | 693242.2 | 1157768  | 1052854  |
| 9.93625  | 10 | 5 | 5 | 8830153  | 27308300 | 4996933  | 19916864 | 7516004  | 29230809 | 32882039 | 22331246 | 21737642 |
| 9.999217 | 3  | 0 | 3 | 327950.1 | 169632.3 | 163103.5 | 561278.4 | 424018.8 | 0        | 0        | 326225.7 | 322834.4 |
| 9.992233 | 7  | 4 | 3 | 443302.3 | 1209686  | 276574.5 | 887803.4 | 289685.3 | 1633530  | 1336705  | 981286   | 1103399  |
| 9.842    | 10 | 5 | 5 | 1336052  | 3449343  | 1598126  | 1987833  | 356729.5 | 2075113  | 2246913  | 5289377  | 5087429  |
| 11.4384  | 5  | 3 | 1 | 118230.7 | 339030.9 | 145727.2 | 203127.1 | 67262.48 | 580946.1 | 322190.3 | 342520.4 | 226500.1 |
| 9.874317 | 6  | 3 | 3 | 862455.8 | 3527510  | 856471   | 2592336  | 789095.1 | 4152403  | 2121956  | 3461572  | 3630356  |
| 11.27517 | 8  | 4 | 4 | 156514.6 | 482964.1 | 219037.1 | 277764.4 | 107635.7 | 368953.8 | 502455.1 | 255691   | 837641.7 |
| 9.3735   | 7  | 2 | 4 | 1894518  | 13451351 | 5863202  | 7226225  | 5054282  | 20685668 | 5532425  | 10077019 | 16672507 |
| 9.445217 | 11 | 5 | 4 | 3431545  | 28601958 | 8242784  | 19582699 | 7639302  | 35207550 | 37507552 | 29600998 | 22748781 |
| 31.22067 | 5  | 2 | 3 | 71272.86 | 297349.5 | 106876.7 | 195112.6 | 62212.71 | 451442.1 | 284737.6 | 166618.1 | 243816.4 |

|          |    |   |   |          |          |          |          |          |          |          |          |          |
|----------|----|---|---|----------|----------|----------|----------|----------|----------|----------|----------|----------|
| 9.999217 | 9  | 5 | 4 | 413237.3 | 1668061  | 120473.3 | 1386419  | 305314   | 1607504  | 1868088  | 1629312  | 1680166  |
| 9.507167 | 4  | 1 | 3 | 3272174  | 11231519 | 4569857  | 6183877  | 4325614  | 3307074  | 11468567 | 13813248 | 13083600 |
| 10.008   | 11 | 5 | 5 | 1403686  | 5994640  | 1023378  | 4576556  | 1416445  | 4291093  | 6213230  | 5981543  | 6985637  |
| 8.911617 | 8  | 5 | 3 | 930639.6 | 2435683  | 1503879  | 1024321  | 758080.5 | 1224108  | 2120098  | 2059495  | 5049618  |
| 9.40615  | 12 | 4 | 5 | 1792354  | 14588946 | 4585031  | 9668896  | 4072123  | 21378544 | 15731624 | 15053320 | 11171062 |
| 10.16938 | 9  | 5 | 4 | 348420.1 | 835905.3 | 452487.5 | 418995.2 | 180239.1 | 1560401  | 975836.7 | 580840.9 | 422170.4 |
| 9.522017 | 10 | 5 | 5 | 549425.8 | 1258766  | 436023.4 | 851984.7 | 209765   | 1724834  | 1747436  | 956271.5 | 921793.5 |
| 9.3735   | 9  | 4 | 4 | 803931.8 | 4524221  | 1801868  | 2600300  | 1583569  | 5778811  | 4444457  | 3986451  | 1869622  |
| 10.99775 | 6  | 2 | 4 | 471419   | 1273644  | 704579.3 | 630596   | 203334.8 | 1584030  | 2145033  | 374121.7 | 757620.3 |
| 37.71917 | 10 | 5 | 5 | 1763567  | 29757214 | 1346045  | 27764682 | 2038607  | 30579451 | 29879336 | 27861990 | 29111837 |
| 10.03947 | 8  | 5 | 3 | 3709771  | 660892.4 | 194765   | 5151644  | 4932552  | 538773.7 | 759111.3 | 855867.9 | 768389.4 |
| 10.10223 | 8  | 5 | 3 | 360953.7 | 786331.9 | 145254.4 | 424209.6 | 395081   | 571256   | 907770.2 | 885077.4 | 866321.1 |
| 9.55155  | 5  | 2 | 3 | 391768.3 | 548577.8 | 95462.26 | 353998.7 | 209890.4 | 687903.8 | 608173.9 | 491621.8 | 486747.5 |
| 8.657767 | 6  | 5 | 1 | 2255304  | 15180755 | 13945052 | 2493170  | 3433528  | 7732490  | 19954096 | 6686002  | 3957041  |
| 23.10317 | 5  | 2 | 3 | 87643.82 | 488226.6 | 173015.9 | 308459.2 | 142219.2 | 571337.5 | 718774.3 | 273494.6 | 372902.6 |
| 9.976317 | 10 | 5 | 5 | 1580468  | 4713471  | 450175.6 | 4002149  | 741287.4 | 5391441  | 4660112  | 4882919  | 4362068  |
| 10.29105 | 10 | 5 | 5 | 4526482  | 22816603 | 6553574  | 14874261 | 7451429  | 30247669 | 24513441 | 19995486 | 13111460 |
| 10.97242 | 7  | 3 | 4 | 217294.1 | 618753   | 125423.4 | 494731.9 | 87898.99 | 748406   | 753828.4 | 513401.5 | 493956.8 |
| 44.9835  | 8  | 3 | 3 | 341731.3 | 5870437  | 3622113  | 2572728  | 1102602  | 3449255  | 3278821  | 3018604  | 10451230 |
| 10.08658 | 7  | 4 | 3 | 860236.4 | 1748093  | 565865.9 | 2307283  | 396334.3 | 2522442  | 1591373  | 1576585  | 1011364  |
| 9.523633 | 8  | 3 | 4 | 2741143  | 11977134 | 6331654  | 5468032  | 5090828  | 8666546  | 17178773 | 4634956  | 19878476 |
| 11.26148 | 7  | 4 | 3 | 129063.8 | 392739.5 | 157453.3 | 209705.5 | 167276.8 | 176691.1 | 388727.6 | 591698.5 | 482869.7 |
| 9.40615  | 8  | 5 | 3 | 743561.3 | 1593149  | 249155.2 | 904823.9 | 756545.4 | 1796143  | 1675818  | 1194344  | 1517761  |
| 41.6325  | 9  | 3 | 4 | 430655.2 | 5105426  | 2424397  | 9743897  | 4996633  | 6065665  | 6582804  | 811418.8 | 5683982  |
| 9.522017 | 10 | 5 | 5 | 955658.3 | 3001596  | 665954.5 | 2178857  | 785794.6 | 3397201  | 3735107  | 2974168  | 2936463  |
| 9.445217 | 11 | 5 | 5 | 1.41E+08 | 1.89E+09 | 3.24E+08 | 1.46E+09 | 4.21E+08 | 1.92E+09 | 1.51E+09 | 1.68E+09 | 1.97E+09 |
| 10.77503 | 10 | 5 | 5 | 2131915  | 11264759 | 4744498  | 5594412  | 5298262  | 16620128 | 7760556  | 15918306 | 6241739  |
| 15.18045 | 10 | 5 | 5 | 314521.2 | 3352269  | 731072.3 | 2164216  | 1251150  | 4406954  | 2422716  | 2990123  | 3437610  |
| 9.388367 | 10 | 4 | 5 | 668975.4 | 6394308  | 1142678  | 4848037  | 1546360  | 7695085  | 6821034  | 6192416  | 4596072  |
| 43.28667 | 6  | 3 | 2 | 335468.2 | 5353614  | 1583961  | 6897792  | 1061102  | 6807657  | 5650540  | 4051598  | 6866561  |
| 9.714167 | 8  | 5 | 3 | 658916.6 | 1102693  | 272347   | 691813.4 | 425811.9 | 1352393  | 1435927  | 960985.9 | 936282.4 |
| 9.43325  | 8  | 4 | 4 | 568404   | 2881943  | 912328.8 | 1945856  | 732704.8 | 3160344  | 2844740  | 1529411  | 4071491  |
| 10.70568 | 4  | 3 | 1 | 202342.4 | 401696.5 | 212987.7 | 200516   | 120807.9 | 694450.8 | 528257.6 | 262428.3 | 158902.5 |
| 13.7122  | 10 | 5 | 5 | 468771.5 | 3941580  | 760850.4 | 3084154  | 764033.8 | 4681623  | 4540999  | 3090820  | 3165533  |
| 9.859983 | 3  | 0 | 3 | 4806764  | 19579779 | 4366341  | 10541545 | 9819950  | 22240773 | 11947275 | 20328088 | 20841071 |

|          |    |   |   |          |          |          |          |          |          |          |          |          |
|----------|----|---|---|----------|----------|----------|----------|----------|----------|----------|----------|----------|
| 10.58813 | 3  | 3 | 0 | 236894.1 | 523701.4 | 388156.1 | 173001.8 | 70607.07 | 1196694  | 460738.3 | 344624.1 | 206125.8 |
| 9.392767 | 12 | 5 | 4 | 597872.5 | 3540669  | 1018970  | 2103633  | 1461917  | 2235633  | 3009229  | 3876135  | 4972569  |
| 9.433    | 9  | 4 | 5 | 12514048 | 26063214 | 8045016  | 50741232 | 27257432 | 22316738 | 28336282 | 28082296 | 14940017 |
| 13.47832 | 6  | 2 | 4 | 291016.3 | 2357603  | 2049096  | 492794.9 | 750157.2 | 73535.33 | 3599257  | 170769.9 | 3830367  |
| 9.872067 | 3  | 3 | 0 | 8368740  | 16091821 | 14128279 | 34676327 | 18413982 | 7499484  | 20060654 | 39251706 | 7404270  |
| 39.71917 | 4  | 3 | 0 | 280929.1 | 3037366  | 585098.8 | 2509378  | 87736.61 | 2564258  | 2663138  | 2806983  | 4007311  |
| 10.93618 | 12 | 5 | 5 | 263646.2 | 1104806  | 246717   | 1538357  | 463682   | 1441540  | 1180954  | 1097167  | 1047304  |
| 9.392767 | 10 | 5 | 5 | 2033804  | 6189384  | 1134868  | 4228799  | 2092837  | 7190093  | 6684181  | 4980166  | 4950277  |
| 15.41187 | 5  | 4 | 1 | 175520.8 | 533838.3 | 545927.3 | 1174993  | 594461.4 | 292693.9 | 152405.4 | 1485980  | 486581.4 |
| 25.4215  | 5  | 4 | 1 | 106958.5 | 368212.6 | 312194   | 684909.9 | 244161.1 | 270441.8 | 906684.4 | 198688.1 | 344074.9 |
| 9.37735  | 6  | 2 | 4 | 11705892 | 84014851 | 64474672 | 25893560 | 12867905 | 1.31E+08 | 19689732 | 1.28E+08 | 1.33E+08 |
| 9.514333 | 14 | 5 | 5 | 2670893  | 9863750  | 2989947  | 6029696  | 3759639  | 10081011 | 9754918  | 6024715  | 9083000  |
| 30.569   | 7  | 5 | 2 | 1396489  | 6722155  | 5091056  | 2131859  | 1132217  | 3550845  | 1358198  | 14555843 | 5801454  |
| 9.983433 | 9  | 4 | 5 | 786054.1 | 3037160  | 665704.5 | 2095557  | 961697.7 | 3625858  | 3832312  | 2471057  | 2891902  |
| 35.96833 | 8  | 5 | 3 | 367237.3 | 773147.8 | 607085.4 | 1909102  | 1226816  | 373431.3 | 303427.9 | 397058.9 | 1693140  |
| 9.94455  | 3  | 3 | 0 | 1551749  | 2581159  | 957990   | 1494727  | 979669.4 | 3300024  | 3795370  | 2461973  | 1775689  |
| 9.848417 | 8  | 5 | 3 | 749221.6 | 2400582  | 329153.5 | 2827235  | 420965.8 | 2571926  | 2431821  | 2653592  | 2515743  |
| 9.928667 | 6  | 5 | 1 | 596113.4 | 1320500  | 182381.8 | 730019.3 | 654243.8 | 1525402  | 1397162  | 1422996  | 1106850  |
| 9.872933 | 9  | 5 | 4 | 1253701  | 3112888  | 406962.4 | 3929406  | 888226.7 | 3722803  | 2709076  | 3189988  | 2769585  |
| 43.90517 | 6  | 3 | 1 | 365756.3 | 5629932  | 1008141  | 4618765  | 764189.3 | 7411390  | 4925781  | 5295343  | 5322638  |
| 9.8374   | 7  | 4 | 3 | 1084796  | 4938070  | 755606.3 | 2929340  | 2218530  | 5517523  | 4618286  | 3802550  | 5669912  |
| 9.992233 | 8  | 4 | 4 | 503112.9 | 906599.7 | 128626.4 | 646656.9 | 283103.1 | 1112829  | 846049.6 | 852868.6 | 940837.5 |
| 20.38917 | 4  | 1 | 3 | 126618.5 | 478269.7 | 170028.1 | 287836.6 | 169990.2 | 192280.3 | 586498   | 449579.5 | 580907   |
| 9.859983 | 10 | 5 | 5 | 4345863  | 22218804 | 2694398  | 17188342 | 5438498  | 22452167 | 20621814 | 18555291 | 25166473 |
| 9.03715  | 9  | 5 | 4 | 1234412  | 3872113  | 1455271  | 2434630  | 1047302  | 4451061  | 5370806  | 4553663  | 3392217  |
| 10.95835 | 8  | 3 | 5 | 1041200  | 4562363  | 1077098  | 3381880  | 1029967  | 4778971  | 5200479  | 2979401  | 4085198  |
| 11.81697 | 6  | 2 | 3 | 485394.5 | 4308284  | 910944.4 | 3060239  | 1262762  | 5609376  | 3285281  | 4169294  | 3713896  |
| 10.44062 | 12 | 5 | 5 | 1762767  | 6904131  | 937720.2 | 5554092  | 1389438  | 6875220  | 7832673  | 7675343  | 5492679  |
| 9.976317 | 8  | 5 | 3 | 667591.7 | 2154826  | 130669.8 | 1905234  | 270626.4 | 2367150  | 2110244  | 2076742  | 2035456  |
| 9.952017 | 5  | 1 | 4 | 2085146  | 3509181  | 2036378  | 1630947  | 984571.6 | 5865127  | 314149.3 | 4067538  | 4138151  |
| 10.00098 | 5  | 2 | 3 | 349357.4 | 383762.6 | 112142.3 | 703544.9 | 354096.4 | 274972.5 | 555956.6 | 407826.9 | 293054.3 |
| 10.94443 | 4  | 1 | 3 | 175579.9 | 220644.5 | 68256.13 | 434538   | 237376.3 | 185633.2 | 331795.9 | 160431.6 | 187159.1 |
| 10.008   | 10 | 4 | 4 | 392803.3 | 1412649  | 446407.7 | 861343.2 | 531748.8 | 1147703  | 1460674  | 1031211  | 2159101  |
| 9.43325  | 9  | 3 | 5 | 1945477  | 9106922  | 2180117  | 5968149  | 3234032  | 6709006  | 10898959 | 9475113  | 11449099 |
| 22.35333 | 5  | 2 | 3 | 81965.53 | 344778.2 | 73881.21 | 233200.2 | 116523   | 295118.8 | 447602.8 | 393398.7 | 268878.5 |

|          |    |   |   |          |          |          |          |          |          |          |          |          |
|----------|----|---|---|----------|----------|----------|----------|----------|----------|----------|----------|----------|
| 9.845483 | 8  | 5 | 3 | 1069560  | 4311200  | 381762.9 | 2844311  | 1631901  | 4889868  | 4283578  | 3882891  | 4081945  |
| 9.46265  | 6  | 4 | 2 | 451300.2 | 1170150  | 420818.5 | 626197.1 | 538146   | 1354057  | 1487272  | 1497439  | 1004780  |
| 8.9256   | 9  | 5 | 4 | 2288458  | 5745378  | 3755307  | 2308686  | 1682516  | 3468553  | 4954830  | 3894154  | 12392582 |
| 13.71187 | 3  | 0 | 3 | 63042.23 | 316705   | 112298.1 | 211232.4 | 63952.85 | 373107.6 | 454088.8 | 211730.9 | 190370.5 |
| 9.903567 | 9  | 4 | 4 | 1184055  | 2501638  | 603922.5 | 4415479  | 2127058  | 3330790  | 2290106  | 2926619  | 1944733  |
| 9.487883 | 8  | 3 | 3 | 609386.5 | 6454980  | 954753.2 | 4051772  | 2657230  | 7781635  | 5713867  | 5882900  | 5737761  |
| 8.949567 | 8  | 4 | 4 | 86455.83 | 628834.1 | 272480.8 | 1054720  | 448891.9 | 474603.1 | 1061253  | 686428.5 | 345794.8 |
| 8.93965  | 7  | 5 | 2 | 330033.2 | 769159.8 | 520801   | 292507.1 | 236538.8 | 499989.8 | 402560.6 | 424644.4 | 1632744  |
| 9.445217 | 14 | 5 | 5 | 3561067  | 21380801 | 8765133  | 13399779 | 3697845  | 24527312 | 15231345 | 18481414 | 35143274 |
| 9.4925   | 8  | 2 | 5 | 3413431  | 20987221 | 18176612 | 4691377  | 2291406  | 23996476 | 2426308  | 22370540 | 48876550 |
| 10.05528 | 4  | 4 | 0 | 1178917  | 2230722  | 1487033  | 897911.1 | 144922.7 | 1249613  | 744780.2 | 2060283  | 4590440  |
| 9.530583 | 9  | 4 | 5 | 1315362  | 6107176  | 4037839  | 2424655  | 1759682  | 2472705  | 3448693  | 4452899  | 12385546 |
| 9.992233 | 6  | 3 | 3 | 469273.4 | 888322.5 | 192790.3 | 644440   | 239380.8 | 616137.2 | 1059385  | 825016.6 | 1088433  |
| 43.96267 | 5  | 4 | 1 | 424856   | 8537155  | 1749222  | 6968892  | 405126.8 | 9495162  | 8954673  | 10716659 | 6956685  |
| 9.840617 | 9  | 5 | 4 | 763381.6 | 3134222  | 417364   | 2462099  | 714385.2 | 3410223  | 3026255  | 3511456  | 3260317  |
| 11.89172 | 7  | 4 | 3 | 113980.3 | 324326.3 | 124243.7 | 482692.9 | 156184   | 506173.6 | 195488.3 | 234251.5 | 302375   |
| 30.31033 | 9  | 5 | 4 | 248539.1 | 1013517  | 226773.6 | 1411369  | 429021.5 | 860203.1 | 1406585  | 858163.3 | 972010.6 |
| 22.94367 | 4  | 3 | 1 | 71804.73 | 163820.8 | 31749.89 | 132487.9 | 23148.88 | 211125.8 | 137016.9 | 176932.4 | 160037.3 |
| 10.818   | 3  | 0 | 3 | 3654483  | 44922082 | 9450184  | 31316147 | 14082998 | 58294119 | 48650819 | 39091323 | 33498955 |
| 44.9835  | 12 | 5 | 2 | 357169.1 | 5206549  | 1843761  | 3556776  | 334877.2 | 5181239  | 8257876  | 3861061  | 3636850  |
| 9.888767 | 10 | 5 | 5 | 4157885  | 24660486 | 3361939  | 18890464 | 6207022  | 27811483 | 28225397 | 22796932 | 24148419 |
| 10.36622 | 9  | 5 | 4 | 279763.2 | 1182203  | 345548.2 | 861413.6 | 185477.1 | 963615.2 | 1076334  | 1686571  | 1364327  |
| 26.02467 | 5  | 4 | 1 | 374548.9 | 1153929  | 1811489  | 3025947  | 1525006  | 166645.3 | 354921.5 | 4387910  | 373996.8 |
| 33.832   | 8  | 3 | 5 | 284577.8 | 2225142  | 1736779  | 672831.5 | 264433.1 | 921028.3 | 831937   | 4116012  | 1124488  |
| 11.01378 | 9  | 4 | 5 | 741599.8 | 3214370  | 656874.3 | 2264606  | 985583.3 | 2569334  | 3328792  | 2660035  | 3309113  |
| 8.97505  | 10 | 5 | 5 | 653426.3 | 2594750  | 564112.5 | 2061613  | 341619.5 | 2879710  | 2866707  | 2636863  | 1610933  |
| 9.840617 | 7  | 4 | 3 | 1504938  | 2727065  | 1559287  | 4750688  | 2018614  | 2477925  | 2005956  | 2293439  | 1432760  |
| 9.856867 | 5  | 2 | 3 | 1096574  | 1801174  | 486911.6 | 3109509  | 1455813  | 2282622  | 1446166  | 2097974  | 2043895  |
| 9.595733 | 5  | 3 | 2 | 487440.6 | 1300288  | 361863   | 788447   | 527956.9 | 1519087  | 1395625  | 1258869  | 1626483  |
| 9.7144   | 8  | 5 | 3 | 622828.6 | 1128401  | 476082.8 | 695798.4 | 206285.9 | 1585392  | 1709259  | 807212.3 | 755578.8 |
| 13.09965 | 10 | 5 | 5 | 62193.53 | 307141.3 | 47717.41 | 245616.1 | 61232.27 | 294953.1 | 258491.7 | 268388.3 | 365045.7 |
| 9.3919   | 5  | 3 | 2 | 854739.4 | 5564098  | 1783365  | 3499949  | 1921482  | 8134736  | 5942993  | 5926467  | 3487333  |
| 11.3515  | 3  | 0 | 3 | 120854.2 | 620081.9 | 67547.95 | 486289.4 | 146647.7 | 702250.6 | 663743.4 | 573734.4 | 534047.8 |
| 9.457083 | 5  | 3 | 2 | 886135.9 | 4395370  | 1707840  | 2662834  | 1370889  | 6815857  | 3922807  | 2286302  | 3726395  |
| 38.928   | 3  | 3 | 0 | 690927   | 9015608  | 5700706  | 14103804 | 371250.3 | 15449545 | 4041468  | 5251517  | 15017050 |

|          |    |   |   |          |          |          |          |          |          |          |          |          |
|----------|----|---|---|----------|----------|----------|----------|----------|----------|----------|----------|----------|
| 10.13345 | 7  | 4 | 3 | 275215.7 | 632719.1 | 174872.4 | 413535.5 | 215159.5 | 802713.7 | 620256.2 | 808157.8 | 406842.5 |
| 42.5245  | 9  | 2 | 5 | 443589.9 | 4627214  | 1983239  | 6573699  | 1430511  | 5975758  | 1150720  | 4876046  | 5588081  |
| 9.856867 | 10 | 5 | 5 | 4988771  | 29771070 | 4793095  | 22552322 | 7588223  | 27145311 | 23127815 | 30006346 | 34224578 |
| 9.999217 | 17 | 5 | 5 | 892528.4 | 3642281  | 1049149  | 2560659  | 881674.6 | 1829031  | 4129392  | 3695353  | 4099182  |
| 9.406667 | 11 | 4 | 5 | 1022785  | 8597490  | 2347386  | 6107883  | 2118922  | 10119531 | 7234390  | 8108521  | 5798329  |
| 9.872917 | 8  | 4 | 4 | 1376159  | 3842173  | 920720.6 | 5179681  | 1393091  | 3460526  | 3877115  | 3839582  | 5278372  |
| 41.64733 | 5  | 3 | 1 | 323749.1 | 4989718  | 1375172  | 3759911  | 385332.7 | 5177569  | 4355053  | 7306441  | 3981220  |
| 9.559117 | 17 | 5 | 5 | 21598816 | 1.63E+08 | 30532799 | 1.12E+08 | 54875670 | 1.95E+08 | 1.85E+08 | 1.65E+08 | 1.18E+08 |
| 9.999217 | 10 | 5 | 5 | 356425.6 | 1478283  | 254795.4 | 1059971  | 448253.2 | 1386913  | 1519188  | 1540066  | 1122068  |
| 20.869   | 3  | 0 | 3 | 2252356  | 23157935 | 477228.1 | 14222868 | 10024044 | 23085576 | 23263911 | 22419171 | 23734263 |
| 9.8445   | 6  | 2 | 4 | 1538664  | 4891979  | 2961840  | 2244870  | 868685.1 | 1416203  | 1974344  | 7330721  | 6265493  |
| 10.96997 | 9  | 5 | 4 | 755505.2 | 2884878  | 536293.1 | 2220975  | 649317.5 | 2323006  | 3307571  | 2551954  | 3586650  |
| 32.83533 | 6  | 3 | 3 | 80103.01 | 259510.9 | 50958.46 | 202274.9 | 52202.6  | 290283.9 | 284943.1 | 204437.4 | 312608.7 |
| 16.36015 | 6  | 3 | 3 | 321779.4 | 1226570  | 693132.9 | 601142   | 284057.9 | 1301319  | 2389756  | 896322.2 | 917870.8 |
| 9.992233 | 10 | 5 | 5 | 879300.9 | 2765920  | 219015   | 2159669  | 678055   | 2850246  | 2383783  | 2835012  | 2942732  |
| 9.382183 | 8  | 2 | 4 | 1419380  | 4173292  | 2849823  | 1635345  | 701948.5 | 1591243  | 7019386  | 6248240  | 693180.7 |
| 9.5876   | 9  | 5 | 4 | 1311071  | 4063509  | 911009.8 | 2930610  | 1113185  | 4227977  | 5409224  | 3003292  | 3480432  |
| 9.071467 | 5  | 3 | 2 | 682359.5 | 1095295  | 225678.6 | 773428.2 | 334960.2 | 1418583  | 940652.1 | 1037839  | 858302.6 |
| 11.27298 | 8  | 5 | 3 | 129658   | 701081.4 | 119898.4 | 593805.8 | 41419.58 | 845496.3 | 551947.2 | 630937.2 | 680706.3 |
| 10.008   | 8  | 5 | 3 | 529179.3 | 883103   | 245116.1 | 1262030  | 402810.6 | 979040.3 | 913274.1 | 1216106  | 737005.7 |
| 8.911617 | 6  | 5 | 1 | 712924.9 | 1789291  | 1006757  | 823161.9 | 676685.9 | 1365885  | 2092488  | 847446.9 | 3400130  |
| 9.681133 | 5  | 3 | 2 | 587811.5 | 229535.1 | 135799.2 | 783182.9 | 623488   | 427960.5 | 298652.1 | 192785.3 | 142711.5 |
| 25.30583 | 6  | 2 | 4 | 252581.3 | 1187211  | 244430.5 | 856341.9 | 338779.9 | 918183.7 | 1576417  | 1228638  | 1119706  |
| 10.72028 | 4  | 4 | 0 | 157794   | 311436.4 | 201079   | 132869.8 | 46119.07 | 627994.4 | 388693.7 | 162954.5 | 147464.2 |
| 9.845483 | 6  | 3 | 3 | 941653.4 | 3752347  | 930888.4 | 2352408  | 1481248  | 4548414  | 3557324  | 4634400  | 3687797  |
| 9.976317 | 7  | 4 | 3 | 885520.4 | 1092252  | 514207.5 | 567855.5 | 425806.5 | 639971.3 | 1317776  | 672394.8 | 1872113  |
| 21.60833 | 6  | 3 | 3 | 206341.4 | 1298731  | 404595.5 | 808076.2 | 477205.7 | 972054.4 | 1345855  | 967274.5 | 1251160  |
| 18.34933 | 4  | 1 | 3 | 212733.9 | 1300289  | 663436.7 | 571889.6 | 654503.5 | 1744317  | 1480401  | 1618164  | 1531512  |
| 9.999217 | 8  | 4 | 4 | 844776.1 | 1682218  | 352494   | 1048086  | 693415.8 | 2118754  | 1878661  | 1770442  | 1323127  |
| 11.44292 | 11 | 5 | 5 | 109119.7 | 398790.7 | 146239.4 | 262163.6 | 86931.21 | 475410.7 | 523957.4 | 170403.2 | 336288.9 |
| 9.986767 | 6  | 3 | 3 | 1767702  | 4492666  | 1139099  | 3003662  | 1507127  | 6378143  | 4129436  | 4633725  | 3884648  |
| 10.95055 | 5  | 2 | 3 | 139252.6 | 422244.7 | 69381.42 | 486169.1 | 37911.4  | 394543.1 | 453536.4 | 378236.3 | 356561.5 |
| 9.94455  | 6  | 4 | 2 | 808339.1 | 1714415  | 214509.4 | 1971287  | 248700.8 | 1553847  | 1461446  | 2009891  | 1771673  |
| 10.94443 | 4  | 1 | 3 | 628625.3 | 1281673  | 328410.5 | 939021.5 | 290720.6 | 1713594  | 1500074  | 913994.6 | 1245298  |
| 11.287   | 5  | 4 | 1 | 108355.6 | 368181.2 | 188177.6 | 591116.9 | 214437.3 | 328948   | 242671.1 | 674456.1 | 196096   |

|          |    |   |   |          |          |          |          |          |          |          |          |          |
|----------|----|---|---|----------|----------|----------|----------|----------|----------|----------|----------|----------|
| 21.2385  | 10 | 5 | 5 | 590548.6 | 4159245  | 1183523  | 3007051  | 856816.3 | 4531831  | 5089505  | 2635380  | 3208597  |
| 9.787633 | 8  | 5 | 3 | 1539168  | 2368599  | 206523   | 1762364  | 684012.9 | 2067124  | 2526934  | 2295638  | 2590617  |
| 9.3735   | 8  | 4 | 3 | 471863.8 | 3527671  | 852447.3 | 2363154  | 1204155  | 4606203  | 3565247  | 4058659  | 2931726  |
| 9.920517 | 6  | 4 | 2 | 1.76E+08 | 99141264 | 2.15E+08 | 5.38E+08 | 4.88E+08 | 3387423  | 4.85E+08 | 2654305  | 2337665  |
| 31.23933 | 10 | 5 | 5 | 343527.7 | 2072653  | 648359.4 | 1499210  | 173746.6 | 3160033  | 1940057  | 1490663  | 1694810  |
| 9.445217 | 7  | 3 | 3 | 925048.8 | 5029400  | 2127809  | 2944044  | 1582798  | 5859826  | 3586320  | 2130178  | 7404240  |
| 9.859983 | 9  | 5 | 4 | 1267987  | 5799397  | 382512.7 | 4313329  | 1685007  | 6153521  | 5956215  | 5180850  | 5700100  |
| 9.845483 | 10 | 5 | 5 | 5787287  | 33902874 | 4578010  | 25718241 | 9003272  | 30988614 | 28000347 | 33723270 | 38392029 |
| 10.95602 | 4  | 1 | 3 | 397840   | 1544058  | 747666.9 | 860169.3 | 400422.5 | 1992182  | 2100281  | 303584.9 | 1380010  |
| 9.601917 | 8  | 4 | 4 | 586500.4 | 3178666  | 841837.9 | 2393067  | 513427.3 | 4239274  | 3352765  | 3302435  | 1890528  |
| 9.568567 | 7  | 5 | 2 | 229414.3 | 1072443  | 331064.3 | 748986.2 | 245546.6 | 1501954  | 1036955  | 1271343  | 639352.9 |
| 41.14367 | 4  | 1 | 3 | 301215.1 | 6431914  | 859211.7 | 5434204  | 953621.8 | 6158712  | 5902267  | 7955279  | 5977840  |
| 10.9645  | 9  | 4 | 5 | 254589.2 | 920174.3 | 358216.8 | 600405   | 148640.5 | 843315.5 | 993681.5 | 639693   | 624474.4 |
| 9.920517 | 10 | 5 | 5 | 13887342 | 92233273 | 12639820 | 67061678 | 28041943 | 89515786 | 73231835 | 92159764 | 99057616 |
| 10.66002 | 10 | 5 | 5 | 422064.8 | 1677456  | 441684.3 | 1259560  | 290484.4 | 1405075  | 2258232  | 2044000  | 1397959  |
| 9.848417 | 10 | 5 | 5 | 1434719  | 6844495  | 574889.7 | 5279151  | 1771558  | 6930375  | 6711470  | 6163492  | 6675626  |
| 9.888767 | 10 | 5 | 5 | 9231814  | 52437749 | 4429104  | 45037284 | 8081479  | 52357752 | 47627152 | 52011340 | 50568419 |
| 9.920517 | 6  | 4 | 2 | 13182860 | 13702959 | 15137176 | 40074574 | 28978833 | 3794337  | 40291869 | 11622738 | 6891381  |
| 9.8322   | 9  | 5 | 4 | 560373.3 | 2556324  | 517904.5 | 1624794  | 1028164  | 3056756  | 2589228  | 2829211  | 2612515  |
| 9.949233 | 5  | 3 | 2 | 377000.1 | 920112.7 | 154161.2 | 508475.8 | 465952.9 | 1163179  | 913645.4 | 940960   | 825780.4 |
| 9.392767 | 6  | 4 | 2 | 413634.9 | 888634.9 | 422817.8 | 437312.7 | 399785.7 | 1029423  | 1379875  | 230460.4 | 800647.7 |
| 9.845483 | 8  | 4 | 4 | 531060.3 | 1939835  | 335494.9 | 1494418  | 458676.7 | 1819139  | 1970456  | 1587878  | 1834390  |
| 30.20833 | 4  | 3 | 1 | 71033.88 | 313442.3 | 100920.1 | 405432.5 | 53654.43 | 383518.5 | 280441.1 | 410230.1 | 155923.4 |
| 9.872933 | 9  | 5 | 4 | 3380246  | 12333275 | 1567364  | 8176009  | 4707524  | 10762955 | 13051734 | 11794684 | 14699978 |
| 9.986767 | 10 | 5 | 5 | 26971084 | 51792345 | 22470732 | 29459678 | 17747826 | 78277253 | 69912348 | 41426434 | 46845428 |
| 9.473717 | 12 | 5 | 5 | 1978383  | 15635617 | 4122846  | 10409719 | 5280052  | 15169398 | 10107174 | 21563600 | 14652295 |
| 21.7165  | 9  | 4 | 3 | 18540954 | 2.07E+08 | 74471824 | 1.41E+08 | 23194307 | 1.59E+08 | 3.03E+08 | 2.72E+08 | 1.47E+08 |
| 27.34567 | 9  | 5 | 4 | 688421.5 | 2374541  | 1208524  | 3892899  | 1527799  | 4260388  | 1745260  | 1146136  | 2796542  |
| 39.77667 | 10 | 2 | 3 | 441160.3 | 1543217  | 105093.3 | 7512687  | 6810089  | 1448495  | 1706319  | 1554763  | 1451889  |
| 8.917333 | 5  | 3 | 2 | 296130.6 | 676704.4 | 548328.4 | 192677.1 | 186063.6 | 609495.4 | 1579797  | 507743.4 | 599780.9 |
| 10.51392 | 8  | 5 | 3 | 492104.8 | 1032230  | 675701.6 | 440197.7 | 108017   | 1940066  | 1548500  | 531472.8 | 399460.6 |
| 9.445217 | 14 | 5 | 5 | 876409.6 | 6571380  | 1278656  | 4489561  | 2269788  | 7991388  | 7616309  | 6471205  | 4829777  |
| 9.317    | 8  | 4 | 4 | 815448.3 | 2385445  | 1069576  | 1394392  | 642276.5 | 4119294  | 2083329  | 1516691  | 1572326  |
| 39.2875  | 5  | 1 | 3 | 358388.2 | 4272956  | 228007.1 | 3618243  | 744239.4 | 4128266  | 4147052  | 4189781  | 4675304  |
| 13.15673 | 5  | 1 | 4 | 375151.1 | 22160.96 | 31004.86 | 1464248  | 1648204  | 0        | 7618.198 | 17740.68 | 8977.788 |

|          |    |   |   |          |          |          |          |          |          |          |          |          |
|----------|----|---|---|----------|----------|----------|----------|----------|----------|----------|----------|----------|
| 9.365833 | 7  | 2 | 4 | 623368.6 | 5441849  | 936174.6 | 3892549  | 1697389  | 6336211  | 5535948  | 6271562  | 4111069  |
| 8.97505  | 5  | 3 | 2 | 400723.8 | 887874.2 | 464277   | 448103.2 | 313317.4 | 767327.7 | 731772   | 626211.5 | 1709278  |
| 40.43967 | 4  | 3 | 1 | 213397.6 | 3225907  | 698091.8 | 2616264  | 103603.7 | 4445976  | 2921093  | 2905048  | 3138759  |
| 22.828   | 10 | 5 | 5 | 4264035  | 39284811 | 2895282  | 44303321 | 5541854  | 38397224 | 42958308 | 36436736 | 36956362 |
| 44.9835  | 5  | 3 | 2 | 265767.2 | 1659788  | 629105   | 2303902  | 545037.8 | 1687343  | 1950562  | 2179906  | 1902292  |
| 9.3494   | 7  | 4 | 3 | 722749   | 6669326  | 1269874  | 4327571  | 2605867  | 7430861  | 5182109  | 7768556  | 7573536  |
| 10.01837 | 5  | 3 | 2 | 571077.1 | 1188576  | 695311.4 | 569899.4 | 300555.8 | 1454301  | 215845.7 | 1177074  | 973912.5 |
| 9.976317 | 6  | 4 | 2 | 451654.7 | 993867.3 | 301563.9 | 619699   | 376273.6 | 1030870  | 533967.2 | 958757.6 | 1073258  |
| 9.45945  | 5  | 1 | 4 | 423980.8 | 2436222  | 449821.9 | 1403099  | 1169680  | 2805105  | 2696948  | 1752859  | 2724705  |
| 10.61192 | 9  | 5 | 4 | 664493.6 | 7201119  | 2134318  | 4524517  | 2708725  | 6754949  | 9429393  | 8446086  | 3826743  |
| 9.848417 | 9  | 5 | 4 | 1721269  | 7502853  | 700726.6 | 5418932  | 2379285  | 7381487  | 6429834  | 8159754  | 8104769  |
| 9.989483 | 10 | 5 | 5 | 1302330  | 4601667  | 897752.2 | 3305537  | 1382259  | 5241870  | 3717912  | 4066682  | 4141323  |
| 10.23568 | 3  | 3 | 0 | 179651.1 | 328667.9 | 130942.6 | 202147.3 | 95948.38 | 106456.7 | 331133.3 | 429325.4 | 419653   |
| 11.09082 | 3  | 3 | 0 | 244550.1 | 393899.9 | 295463.2 | 135776.7 | 72323.68 | 848886.4 | 514901.1 | 212333.3 | 105066.1 |
| 9.912633 | 7  | 4 | 3 | 6359663  | 2936703  | 1586486  | 8685572  | 6582033  | 3126752  | 5577034  | 2316152  | 2173503  |
| 9.845483 | 7  | 3 | 4 | 451783.2 | 1653671  | 528156.8 | 1161218  | 336034.8 | 1838113  | 1251985  | 2206633  | 2014164  |
| 11.98077 | 10 | 5 | 5 | 172456.3 | 914957.6 | 170591.5 | 665996.7 | 267001.9 | 1198789  | 903425.1 | 753177.8 | 901127.9 |
| 11.80168 | 10 | 5 | 5 | 66241.15 | 232595.1 | 99276.2  | 144253.3 | 45180.65 | 274419.6 | 370798.2 | 243809.1 | 127994.3 |
| 9.445217 | 13 | 5 | 4 | 1232545  | 7711185  | 1187738  | 6341951  | 1324068  | 8615812  | 8591958  | 6839817  | 6055887  |
| 9.976317 | 4  | 1 | 3 | 566589.9 | 254647.7 | 275789.7 | 784197.4 | 594641.2 | 692255.9 | 0        | 350133.7 | 113218.9 |
| 22.091   | 3  | 3 | 0 | 37447232 | 96011414 | 1.31E+08 | 2.1E+08  | 30975227 | 2.39E+08 | 2.39E+08 | 571903.7 | 751406.7 |
| 9.328967 | 5  | 1 | 3 | 486636.7 | 3125769  | 1358068  | 1809561  | 1016840  | 3968730  | 768811   | 4026604  | 3669071  |
| 9.43325  | 6  | 4 | 2 | 487612.7 | 3471135  | 372914.3 | 2410896  | 1214036  | 3640616  | 3726447  | 3673482  | 3492793  |
| 9.93625  | 10 | 5 | 5 | 3151419  | 11798271 | 2162102  | 8630864  | 3407400  | 14310038 | 11783605 | 8886632  | 10622431 |
| 9.41815  | 7  | 3 | 3 | 1031847  | 6487905  | 1683474  | 4714238  | 1578246  | 9013780  | 5279115  | 7360219  | 5803971  |
| 11.60508 | 8  | 5 | 3 | 119193   | 478045.2 | 112337.1 | 345382.6 | 130600.2 | 519950.1 | 481914   | 285115.1 | 533485.4 |
| 10.94962 | 5  | 4 | 1 | 1.55E+09 | 2.37E+09 | 5.23E+09 | 7.85E+09 | 4.85E+09 | 1.17E+10 | 32603451 | 55985381 | 29298056 |
| 39.1725  | 8  | 3 | 3 | 403698.3 | 8928687  | 1814725  | 6810376  | 2070587  | 7874947  | 7929052  | 12070026 | 8933987  |
| 19.432   | 7  | 4 | 3 | 106205.4 | 309776.5 | 80805.59 | 427378   | 126458.6 | 336873.2 | 286086.8 | 323900.9 | 411621.7 |
| 9.859983 | 9  | 5 | 4 | 1234194  | 5918818  | 708838.6 | 4092275  | 2089942  | 6316109  | 4808384  | 6698336  | 5952913  |
| 9.992233 | 6  | 4 | 1 | 1256270  | 1794887  | 893067.1 | 2666369  | 688393   | 755257.2 | 1703089  | 1133649  | 2859974  |
| 21.5825  | 9  | 4 | 5 | 155448.2 | 1076340  | 140046.2 | 717454.2 | 410797.8 | 1193695  | 1257808  | 961832   | 1012916  |
| 10.95835 | 5  | 1 | 3 | 551162   | 1858673  | 313277.1 | 1208293  | 736999.9 | 2080682  | 1375280  | 2168750  | 1912686  |
| 9.541433 | 6  | 3 | 3 | 259111.9 | 600509.7 | 177876.6 | 389232.9 | 209315.6 | 813164.3 | 697840.2 | 373263.7 | 650795.7 |
| 9.856867 | 10 | 5 | 5 | 2747002  | 12696969 | 2024836  | 10091281 | 2691457  | 14738878 | 14081158 | 10324431 | 10733085 |



|          |    |   |   |          |          |          |          |          |          |          |          |          |
|----------|----|---|---|----------|----------|----------|----------|----------|----------|----------|----------|----------|
| 24.87017 | 8  | 5 | 2 | 96356.82 | 372072.4 | 162825.3 | 558680.6 | 180742.7 | 317385.5 | 567768.9 | 510189.6 | 174507.9 |
| 42.16417 | 5  | 4 | 1 | 389822.4 | 5273977  | 1205389  | 6541895  | 1134547  | 4498703  | 4140412  | 6299014  | 6830458  |
| 43.04233 | 5  | 3 | 1 | 205413.2 | 2275861  | 740027.6 | 3474063  | 1322636  | 1249563  | 2432914  | 2910854  | 2976920  |
| 9.999517 | 7  | 4 | 3 | 954259.9 | 1768994  | 972552.8 | 864379.4 | 630521.9 | 2196449  | 817407.5 | 663814.6 | 2854252  |
| 10.01545 | 11 | 4 | 4 | 1281040  | 2975397  | 866420.5 | 1834387  | 1193148  | 3755875  | 1565780  | 2858587  | 3108885  |
| 21.7095  | 9  | 4 | 3 | 4039614  | 37006554 | 14467233 | 24442681 | 4304998  | 28112970 | 54058803 | 24612536 | 51468207 |
| 9.976317 | 9  | 5 | 4 | 888537.5 | 3076624  | 483505.2 | 2319026  | 831856   | 3584335  | 2510626  | 2807996  | 2899943  |
| 12.27392 | 10 | 5 | 5 | 167977.3 | 1273729  | 263611.7 | 823427.4 | 501652.4 | 989217.2 | 1226344  | 1136231  | 1689673  |
| 23.42417 | 3  | 3 | 0 | 172594.4 | 470632.5 | 482952.6 | 888448.9 | 111403   | 142992.7 | 95234.75 | 950285.3 | 118814.1 |
| 9.616167 | 7  | 3 | 4 | 522637   | 1762039  | 731832.1 | 1128560  | 205368.6 | 790723.3 | 2123165  | 1315190  | 2684327  |
| 9.061    | 10 | 5 | 5 | 1094169  | 3465565  | 537450.7 | 2771346  | 722453.7 | 4017845  | 3887963  | 3518057  | 2685818  |
| 9.713983 | 7  | 4 | 3 | 677734.6 | 1311869  | 181392.5 | 1062628  | 265381.9 | 1424528  | 1530783  | 1184755  | 1079375  |
| 35.13833 | 4  | 1 | 3 | 117898.6 | 650214.5 | 319084.5 | 368273.5 | 147225.2 | 497358.6 | 534892   | 283525.2 | 1099189  |
| 10.99268 | 5  | 1 | 4 | 1259140  | 4756823  | 1774139  | 2845234  | 1767640  | 1832793  | 6636724  | 5263866  | 4796267  |
| 9.406667 | 12 | 4 | 5 | 1230282  | 8946774  | 2369980  | 6211372  | 2680785  | 8780572  | 11150579 | 11535770 | 6931143  |
| 9.992233 | 10 | 5 | 5 | 910913.9 | 2434230  | 424205.2 | 1762153  | 741884.1 | 2403771  | 1753453  | 2547570  | 2554531  |
| 9.673333 | 10 | 5 | 5 | 362801.3 | 1236609  | 192507.6 | 851960.8 | 437263.3 | 1567362  | 1172617  | 1232987  | 1112428  |
| 9.088183 | 8  | 5 | 3 | 5474886  | 23673836 | 4468943  | 14927163 | 9929197  | 26098652 | 28593712 | 21591870 | 17066408 |
| 9.3141   | 5  | 1 | 4 | 876828.3 | 7331284  | 933409.9 | 4553124  | 3213245  | 7045347  | 5828035  | 7731141  | 7929774  |
| 9.445217 | 9  | 5 | 4 | 428569.5 | 1955286  | 623538.5 | 1352740  | 475067.5 | 2180242  | 2862950  | 1412612  | 1334562  |
| 8.798117 | 3  | 3 | 0 | 455612.1 | 908923.5 | 528270.5 | 415109.1 | 356375.8 | 753355.3 | 1068451  | 1020201  | 1575047  |
| 20.62683 | 5  | 4 | 1 | 277503.6 | 795674.8 | 1032321  | 1813699  | 836549.2 | 122244.8 | 256304.5 | 2574333  | 200820.8 |
| 9.498117 | 7  | 4 | 3 | 1090581  | 1647156  | 2086652  | 4336794  | 2805822  | 5370068  | 703078   | 909198.1 | 764454.4 |
| 9.554967 | 18 | 5 | 5 | 2773313  | 22827364 | 4624897  | 17660899 | 4955513  | 28548355 | 24844954 | 23646929 | 16153957 |
| 15.07222 | 4  | 1 | 3 | 511986.9 | 4400190  | 2026071  | 2637407  | 762467   | 7411541  | 3670150  | 2024882  | 5212745  |
| 10.58733 | 5  | 2 | 3 | 695754.2 | 4546045  | 1088507  | 3032551  | 1623326  | 5719172  | 4340594  | 4301656  | 2959726  |
| 9.392767 | 10 | 5 | 5 | 5176142  | 15813341 | 3172154  | 11772598 | 4197097  | 18023177 | 15846348 | 12573781 | 12820691 |
| 9.573333 | 4  | 3 | 1 | 588522.8 | 2332933  | 1241948  | 1147778  | 911404.7 | 3844667  | 2950570  | 1289583  | 834771.8 |
| 9.659033 | 4  | 1 | 3 | 231194.3 | 865099.3 | 149903.5 | 633357.7 | 255351.2 | 929003.6 | 1028182  | 951903.3 | 743110.2 |
| 8.9256   | 9  | 5 | 4 | 1691524  | 4362053  | 2526331  | 2060370  | 1516992  | 2647649  | 4195851  | 3170030  | 8763776  |
| 9.952017 | 10 | 5 | 5 | 5691329  | 22331137 | 4578111  | 16232627 | 6452308  | 26177135 | 18297867 | 17141096 | 22634085 |
| 11.39648 | 4  | 3 | 1 | 65928132 | 35079199 | 47827214 | 1.18E+08 | 93749902 | 72141212 | 937465.5 | 1E+08    | 139003.4 |
| 10.97857 | 8  | 2 | 5 | 419131.3 | 1425981  | 1098279  | 482561.9 | 133154.7 | 303713.3 | 2538300  | 266356.8 | 1623826  |
| 10.008   | 8  | 5 | 3 | 1235660  | 1056578  | 214698.5 | 2884393  | 2128468  | 879967   | 1266492  | 1310524  | 954069.5 |
| 9.392767 | 10 | 5 | 5 | 5020326  | 15708930 | 3163162  | 11725265 | 4120837  | 17529966 | 15657981 | 12642857 | 12719409 |

|          |    |   |   |          |          |          |          |          |          |          |          |          |
|----------|----|---|---|----------|----------|----------|----------|----------|----------|----------|----------|----------|
| 9.4775   | 13 | 5 | 5 | 3350941  | 24376212 | 4125766  | 15854108 | 9747933  | 28767475 | 19110192 | 23738525 | 28256793 |
| 9.445217 | 7  | 1 | 4 | 1863774  | 11806819 | 5908379  | 5978642  | 4829498  | 15190345 | 1645230  | 16413841 | 13713395 |
| 9.8322   | 9  | 5 | 4 | 689481.6 | 2961267  | 266767.8 | 1972151  | 1151054  | 2855860  | 2715808  | 2760361  | 3135397  |
| 11.08352 | 7  | 3 | 4 | 264337.6 | 1664250  | 847416   | 934525.9 | 237164.8 | 962794.5 | 2909243  | 2174408  | 1050774  |
| 24.28833 | 9  | 5 | 4 | 1413239  | 8921601  | 2161700  | 5791736  | 3407253  | 12055230 | 7976420  | 9296535  | 6131143  |
| 10.33355 | 9  | 5 | 4 | 333803.1 | 858958.4 | 149922.7 | 709021   | 127560.9 | 1014478  | 876561.3 | 791587.8 | 639828.7 |
| 9.379233 | 10 | 5 | 5 | 909289.9 | 2948560  | 501674.4 | 1991718  | 1090094  | 3460669  | 2517151  | 2465208  | 2800855  |
| 27.96683 | 10 | 5 | 5 | 4470632  | 27001721 | 6328218  | 21256224 | 3799189  | 28804368 | 25870818 | 22338771 | 21061678 |
| 9.93625  | 11 | 5 | 5 | 1668480  | 7163621  | 2189374  | 5230909  | 1072911  | 6238254  | 5282181  | 9259457  | 5268326  |
| 9.445217 | 14 | 5 | 5 | 7468010  | 55791830 | 9613930  | 43457796 | 12919764 | 47662745 | 64031168 | 63357619 | 43321314 |
| 9.445217 | 9  | 4 | 4 | 1507459  | 8222020  | 2524243  | 5325166  | 2856629  | 9413692  | 8773526  | 8451390  | 10534603 |
| 9.379233 | 7  | 5 | 2 | 521738.4 | 1463362  | 405317.3 | 710477.9 | 855866.6 | 2097919  | 1599392  | 1206311  | 1344479  |
| 25.41967 | 7  | 4 | 3 | 365276.5 | 1089256  | 722057   | 1918998  | 819278.6 | 1053225  | 388102.4 | 709640.3 | 1005462  |
| 9.582167 | 7  | 4 | 3 | 2559156  | 12937400 | 1353860  | 9619841  | 3840890  | 13210483 | 14144225 | 10721341 | 13861742 |
| 10.24195 | 4  | 1 | 3 | 181929.6 | 141251.5 | 79484.47 | 271264.1 | 145495.3 | 208839.3 | 234073.1 | 77097.81 | 133982.8 |
| 10.7349  | 5  | 4 | 1 | 184341.6 | 558668.3 | 376101.6 | 236359.4 | 92004.59 | 1018507  | 917369.5 | 280000.6 | 254781.9 |
| 12.70477 | 8  | 5 | 3 | 383178.8 | 1468645  | 1250918  | 2825186  | 1280467  | 2952277  | 158296   | 2235565  | 1808126  |
| 9.874317 | 8  | 4 | 4 | 1044243  | 2945271  | 704211.4 | 2237469  | 610685.1 | 3821576  | 2082134  | 2620179  | 2703487  |
| 9.730633 | 10 | 5 | 5 | 2385168  | 5594457  | 1940823  | 3896838  | 876390   | 8419982  | 6757150  | 3885367  | 4128149  |
| 10.80745 | 6  | 4 | 2 | 240487.3 | 636803.2 | 424198.4 | 273511.5 | 105927   | 1191032  | 942510.2 | 263341.2 | 218425.1 |
| 10.42575 | 7  | 3 | 4 | 244245   | 1223279  | 266010.2 | 951877.8 | 239443.4 | 997310.1 | 1625984  | 1363316  | 1061032  |
| 10.9645  | 10 | 5 | 5 | 6789322  | 29533714 | 5279379  | 22635886 | 7299568  | 28244901 | 31993969 | 21812376 | 36177923 |
| 10.97242 | 3  | 0 | 3 | 401635.7 | 1320859  | 308421.1 | 856349.8 | 512604.6 | 1402943  | 1740594  | 978073.4 | 1057725  |
| 21.8195  | 7  | 3 | 4 | 420589.5 | 4326975  | 1226187  | 3240140  | 639704.5 | 3017801  | 3092181  | 5082375  | 4671091  |
| 10.72028 | 9  | 5 | 4 | 202266.3 | 780750.5 | 258061.2 | 558945.6 | 84594.03 | 1114440  | 579743   | 1005013  | 620049.7 |
| 10.11782 | 7  | 3 | 4 | 670706.1 | 1655037  | 743045.7 | 1018836  | 203161.7 | 1755498  | 2896462  | 1048876  | 1385059  |
| 31.33717 | 10 | 5 | 5 | 1154111  | 8738232  | 2372301  | 6711789  | 601156.3 | 12714240 | 7950045  | 6441492  | 7840286  |
| 9.4775   | 6  | 1 | 4 | 500110.8 | 4414351  | 1055047  | 3105781  | 1358185  | 4755974  | 2800206  | 5267643  | 5300111  |
| 27.96817 | 10 | 5 | 5 | 777265.4 | 3261864  | 968563.7 | 2387012  | 579280.7 | 3485111  | 3045188  | 2479206  | 2479019  |
| 9.952017 | 10 | 5 | 5 | 8465042  | 30078211 | 3437729  | 25140024 | 5402954  | 35037915 | 28707290 | 27076554 | 27375131 |
| 42.36633 | 10 | 3 | 4 | 376546.7 | 3989430  | 481334   | 4919931  | 1067117  | 3619013  | 4459663  | 3482062  | 3855619  |
| 39.57533 | 4  | 1 | 3 | 281818.8 | 5415558  | 817104.5 | 4165251  | 1389197  | 4616116  | 5348343  | 5136743  | 5184171  |
| 9.8445   | 5  | 2 | 3 | 1905910  | 6359482  | 1990584  | 4120780  | 2194613  | 5188729  | 5662738  | 9045530  | 7745161  |
| 9.3919   | 6  | 3 | 3 | 572281.1 | 4427493  | 1177468  | 2530417  | 2128879  | 4783319  | 2684761  | 5532720  | 5316930  |
| 11.07685 | 5  | 4 | 1 | 239180   | 475820.2 | 374170.4 | 157529.4 | 43482.78 | 1128538  | 302976.5 | 405592.9 | 183642   |

|          |    |   |   |          |          |          |          |          |          |          |          |          |
|----------|----|---|---|----------|----------|----------|----------|----------|----------|----------|----------|----------|
| 9.445217 | 12 | 5 | 4 | 555938.6 | 4946514  | 1535494  | 3070519  | 1936165  | 5798694  | 6894158  | 5213639  | 3151325  |
| 9.536783 | 15 | 5 | 5 | 1186504  | 1321495  | 736253.1 | 2218023  | 923994.8 | 1363371  | 1113337  | 770560.1 | 796232.3 |
| 22.8425  | 3  | 0 | 3 | 39929.86 | 151058.6 | 44473.39 | 235044.2 | 96227.61 | 206045.8 | 170057.8 | 115740.8 | 96143.48 |
| 9.616167 | 10 | 5 | 5 | 1056163  | 3571112  | 686637.3 | 2541981  | 1139278  | 3649934  | 4513369  | 3287541  | 2636915  |
| 9.4468   | 12 | 5 | 5 | 737902.6 | 6218862  | 1937400  | 3989235  | 2226856  | 7685382  | 6817599  | 7929072  | 5438605  |
| 9.952017 | 10 | 5 | 5 | 4319681  | 15768523 | 3003938  | 11281005 | 4970956  | 19278670 | 17528493 | 11916486 | 13505086 |
| 9.976317 | 8  | 4 | 4 | 1015111  | 1022757  | 449835.2 | 2164940  | 1333947  | 855945.2 | 417105.2 | 1642826  | 1195571  |
| 10.43382 | 6  | 3 | 3 | 94830.68 | 432074.9 | 168445.2 | 288628.8 | 44071.05 | 526111.1 | 511973.5 | 163176.3 | 583125.7 |
| 10.72028 | 4  | 3 | 1 | 81996.13 | 212919   | 76282.28 | 145665.5 | 39613.38 | 144606   | 285666.9 | 258156.8 | 117241.7 |
| 14.50237 | 7  | 3 | 4 | 57365.05 | 394868.3 | 86645.77 | 265675.7 | 143186.5 | 350152.3 | 448904   | 293896.6 | 367498.5 |
| 10.94835 | 4  | 1 | 3 | 1188064  | 5211362  | 2414760  | 2652379  | 2390811  | 6018335  | 7144591  | 1081530  | 5229925  |
| 16.56375 | 5  | 4 | 1 | 58590.46 | 187711.8 | 107187.7 | 300861.3 | 105292.9 | 136658.1 | 62693.76 | 187075.3 | 353871.8 |
| 13.77065 | 5  | 3 | 2 | 64567.63 | 395408.8 | 152450   | 256996.9 | 95360.04 | 545002.2 | 543312   | 396125.6 | 292369.5 |
| 43.3585  | 9  | 3 | 2 | 230619.3 | 2731169  | 1267759  | 4000453  | 1107071  | 1131796  | 1936596  | 3998911  | 2587808  |
| 9.46265  | 13 | 5 | 5 | 572369.1 | 5943998  | 709184.5 | 3976587  | 2306346  | 7119305  | 5569459  | 6055538  | 5312416  |
| 10.58257 | 8  | 5 | 3 | 248190.5 | 890625   | 244630.5 | 678854.9 | 105896.7 | 881361.2 | 781876.1 | 1310062  | 795178.2 |
| 9.766367 | 11 | 5 | 5 | 9247442  | 24462451 | 1659846  | 21258108 | 3691640  | 25209497 | 25502994 | 21555391 | 24633638 |
| 10.64708 | 10 | 5 | 5 | 346103.3 | 1376191  | 393513.5 | 1011809  | 270148.2 | 1376080  | 2005579  | 1214788  | 1351751  |
| 9.431017 | 8  | 4 | 4 | 575847.1 | 3760011  | 1224179  | 2547054  | 1042835  | 3306061  | 4452928  | 3949861  | 1936214  |
| 11.60508 | 10 | 5 | 5 | 323621.5 | 2447734  | 448467.2 | 1575612  | 1005778  | 2978062  | 1778945  | 2598120  | 2278557  |
| 40.71183 | 10 | 4 | 3 | 395556.9 | 7439583  | 4156476  | 3919488  | 144790.5 | 4362586  | 7747547  | 5466146  | 14522636 |
| 9.949233 | 10 | 5 | 4 | 13298968 | 3993924  | 1241048  | 28483039 | 28918183 | 3357744  | 5032839  | 4450228  | 4996108  |
| 9.845483 | 10 | 5 | 5 | 1768810  | 10063674 | 1273275  | 7642922  | 2787455  | 9238139  | 8579064  | 9766318  | 11603422 |
| 9.932033 | 10 | 5 | 5 | 721069.1 | 2499319  | 301348.6 | 3044014  | 624119.9 | 2784896  | 2440008  | 2568882  | 2690209  |
| 9.43325  | 7  | 3 | 4 | 2774619  | 17979936 | 4148509  | 12262219 | 6225885  | 15328179 | 13467133 | 22467816 | 22294845 |
| 31.1395  | 7  | 3 | 4 | 35909.62 | 112737   | 88433.12 | 194656   | 61118.39 | 115612.7 | 79875.31 | 98033.76 | 14709.93 |
| 8.8977   | 10 | 5 | 5 | 303193.8 | 4320518  | 1057013  | 6221045  | 2178507  | 3472379  | 5946234  | 4390445  | 3287344  |
| 9.976317 | 10 | 5 | 5 | 4498705  | 13264117 | 1263526  | 11344037 | 2145331  | 15250382 | 12677422 | 13621900 | 11924799 |
| 9.845483 | 9  | 5 | 4 | 893568.9 | 3589469  | 212274.4 | 2697577  | 1055258  | 3758938  | 3768907  | 3277860  | 3467069  |
| 9.88815  | 9  | 5 | 4 | 1268406  | 3061093  | 726353.9 | 4540913  | 1718866  | 4156942  | 2485850  | 2558223  | 3455668  |
| 44.07783 | 8  | 4 | 3 | 304222   | 6264719  | 2333189  | 4292004  | 521691   | 3227863  | 9381470  | 7430233  | 5048507  |
| 9.8322   | 9  | 5 | 4 | 1177896  | 5675744  | 959413.8 | 4513932  | 1206426  | 5060500  | 4672262  | 6385799  | 6960555  |
| 9.40325  | 5  | 2 | 3 | 370177.8 | 1693885  | 306383   | 1188479  | 574234.7 | 2082653  | 1853667  | 1274316  | 1714412  |
| 9.960467 | 8  | 4 | 4 | 522897.7 | 1521927  | 204624.6 | 1239485  | 308845.5 | 1797076  | 1681362  | 1422142  | 1341186  |
| 9.82645  | 6  | 3 | 3 | 739227.4 | 2825109  | 548664.8 | 2047835  | 856459.3 | 2342363  | 3537339  | 3068948  | 2970771  |

|          |    |   |   |          |          |          |          |          |          |          |          |          |
|----------|----|---|---|----------|----------|----------|----------|----------|----------|----------|----------|----------|
| 3.672567 | 4  | 1 | 3 | 59915.69 | 736031.2 | 500592   | 1260507  | 489728.6 | 2685.475 | 553499.4 | 1305261  | 755813.2 |
| 10.49903 | 4  | 3 | 1 | 132917.5 | 445509.9 | 89536.27 | 314418.8 | 145731   | 323339   | 550069.5 | 389930.5 | 467256   |
| 9.43325  | 5  | 3 | 2 | 413513   | 2915078  | 1212281  | 1553918  | 1351930  | 2448966  | 2353274  | 4247796  | 4089896  |
| 9.465    | 14 | 5 | 5 | 2969342  | 28092909 | 3878141  | 17916595 | 11983395 | 32145553 | 24936059 | 27132850 | 24072480 |
| 9.481367 | 8  | 3 | 5 | 5444464  | 31208918 | 25705225 | 9543881  | 3791076  | 23077223 | 15884267 | 50200227 | 2045363  |
| 18.26783 | 4  | 0 | 4 | 209713.5 | 111280.8 | 18187.06 | 964008.4 | 1012290  | 117813.9 | 99190.68 | 85800.37 | 125512.8 |
| 9.568567 | 8  | 4 | 4 | 270402.1 | 536204.2 | 183276.1 | 369342.5 | 119665.3 | 383728   | 853031.8 | 459721.5 | 514873   |
| 41.302   | 6  | 4 | 2 | 305065   | 5089215  | 1596089  | 3698070  | 797551.7 | 7007058  | 6062029  | 5291125  | 4152345  |
| 9.388367 | 12 | 5 | 5 | 824038.6 | 7263865  | 1616687  | 5300027  | 2047882  | 8942769  | 7211427  | 8810736  | 5997672  |
| 9.845483 | 10 | 5 | 5 | 1962975  | 11423362 | 1318489  | 8807012  | 3040690  | 10424765 | 10031858 | 11047436 | 12642975 |
| 10.00385 | 10 | 5 | 5 | 805642.8 | 2569206  | 337524.4 | 2051338  | 582389.3 | 3033181  | 2721769  | 2118273  | 2479714  |
| 9.856867 | 10 | 5 | 5 | 1280291  | 7072371  | 741752.7 | 5750985  | 1520548  | 7549554  | 7378032  | 6198706  | 6372047  |
| 10.97857 | 3  | 3 | 0 | 645220.3 | 919270.4 | 565342.7 | 1568346  | 655859.3 | 554559.1 | 572759.7 | 1653605  | 414839.6 |
| 8.9256   | 9  | 5 | 4 | 1246475  | 3081081  | 2046984  | 1309366  | 959280.8 | 1786822  | 3308018  | 1678167  | 6553917  |
| 10.046   | 12 | 5 | 5 | 2320288  | 12544292 | 3082918  | 9256570  | 3134869  | 17272424 | 12421971 | 12829477 | 8756206  |
| 9.40255  | 10 | 5 | 3 | 6429149  | 5781153  | 2949144  | 15036350 | 10956187 | 8766302  | 6172140  | 8330979  | 1905572  |
| 10.97857 | 4  | 1 | 3 | 314762.9 | 1433791  | 541557.8 | 922400.9 | 408667.5 | 1228443  | 1905051  | 921987.7 | 1001440  |
| 9.9351   | 7  | 4 | 3 | 930227.8 | 2162239  | 843934.9 | 1407680  | 507582.9 | 2712975  | 1629804  | 1009396  | 3109949  |
| 9.577683 | 4  | 3 | 1 | 364244   | 751482.3 | 288318.3 | 410957.2 | 350420.4 | 1043157  | 634149.8 | 873830.6 | 898676.2 |
| 9.595733 | 7  | 5 | 2 | 354558.8 | 863750   | 350835.1 | 526105.4 | 280917.7 | 889796.6 | 942569.1 | 681535.5 | 1376374  |
| 9.36565  | 8  | 4 | 3 | 870657.1 | 1841274  | 1373476  | 3267466  | 1325060  | 4021700  | 1287073  | 854237.9 | 713647.7 |
| 9.392767 | 10 | 5 | 5 | 1827385  | 5952492  | 1193622  | 4207956  | 1944891  | 7055225  | 6550007  | 4586051  | 4736060  |
| 33.15283 | 4  | 1 | 3 | 100182.3 | 770381.9 | 162434.7 | 540757.1 | 253935.3 | 484293.8 | 868134.8 | 871837.3 | 819770.9 |
| 10.97857 | 10 | 5 | 5 | 779551.9 | 3049287  | 455358.3 | 2430499  | 676594.3 | 2745560  | 2983407  | 2552928  | 3246158  |
| 10.58813 | 3  | 3 | 0 | 118302.2 | 244823.8 | 108740.4 | 149219.6 | 59231.15 | 374420.3 | 347061.2 | 205250.7 | 147692.1 |
| 10.99268 | 9  | 5 | 3 | 6479373  | 1911355  | 285706   | 13970363 | 14356885 | 2111580  | 2107090  | 1513157  | 1700879  |
| 38.9135  | 7  | 2 | 3 | 365245.8 | 4298657  | 779474.7 | 2764842  | 1785865  | 5666436  | 4027322  | 3941930  | 4134997  |
| 10.67637 | 7  | 4 | 3 | 222746.4 | 510612.2 | 325604   | 236532.9 | 76238.26 | 1002296  | 665119.9 | 398869.3 | 283020.2 |
| 12.98132 | 10 | 5 | 5 | 207685.8 | 1131772  | 234372.6 | 713119.4 | 483316   | 1295770  | 757970.7 | 1103868  | 1140926  |
| 9.845483 | 8  | 4 | 4 | 841205.3 | 4400096  | 1075023  | 3408386  | 751973.6 | 3212303  | 3281893  | 4932241  | 5516164  |
| 9.960467 | 6  | 4 | 2 | 511451.5 | 1133113  | 279283.9 | 785024.9 | 369015.9 | 1406384  | 1407259  | 1004844  | 753437   |
| 10.94443 | 3  | 0 | 3 | 147092.8 | 152760.9 | 80881.34 | 311587.2 | 185113.4 | 129389.9 | 211185.7 | 77696.72 | 83961.71 |
| 28.21417 | 10 | 5 | 5 | 259117   | 1858666  | 371736.7 | 1492855  | 318282.8 | 1964660  | 2387328  | 1625681  | 1405756  |
| 16.38833 | 3  | 0 | 3 | 419245.8 | 19438.55 | 33054.97 | 1322210  | 1554172  | 0        | 7004.473 | 6060.489 | 5764.613 |
| 44.60983 | 7  | 3 | 3 | 330127.6 | 4718125  | 1451486  | 3498135  | 345589.2 | 3949017  | 3818803  | 3884274  | 7234360  |

|          |    |   |   |          |          |          |          |          |          |          |          |          |
|----------|----|---|---|----------|----------|----------|----------|----------|----------|----------|----------|----------|
| 9.8445   | 5  | 2 | 3 | 3496455  | 8418917  | 5524844  | 3680989  | 2434628  | 11693707 | 2036963  | 13272343 | 12318707 |
| 41.7475  | 10 | 3 | 5 | 316768.9 | 5064877  | 998871.7 | 3851883  | 1273272  | 6703457  | 4720656  | 5095101  | 4795885  |
| 9.659033 | 10 | 5 | 5 | 1029186  | 3807269  | 817369.1 | 2794468  | 1073525  | 4495582  | 4604547  | 3132105  | 4026033  |
| 10.30302 | 6  | 4 | 2 | 291638.4 | 913874.3 | 496718.5 | 489955.1 | 205635.1 | 1576090  | 1279595  | 618843.1 | 375641.3 |
| 10.11782 | 9  | 5 | 4 | 733038.1 | 2084500  | 1083212  | 1161289  | 438927.8 | 2467416  | 3707656  | 858586.5 | 1465346  |
| 10.9645  | 10 | 5 | 5 | 244444   | 1137500  | 147258.3 | 858110.8 | 325390.6 | 1302593  | 1114042  | 986642.5 | 1007699  |
| 9.887133 | 6  | 3 | 3 | 846027.6 | 2301945  | 997074.5 | 1339385  | 815097.2 | 2118657  | 1015674  | 2473598  | 3792563  |
| 9.3919   | 5  | 3 | 2 | 403828.3 | 2898056  | 1227795  | 1448449  | 1502019  | 4531728  | 1264475  | 3574877  | 2610875  |
| 9.946367 | 9  | 3 | 5 | 1854635  | 7070892  | 1987970  | 5089415  | 1768140  | 4044505  | 6202315  | 7625900  | 8673891  |
| 9.960817 | 3  | 0 | 3 | 293291.8 | 167271.1 | 232910.1 | 451412.3 | 299661.9 | 183741.5 | 0        | 561012.2 | 0        |
| 9.992233 | 8  | 5 | 3 | 21766106 | 1210831  | 484349.5 | 21540279 | 24334315 | 1648762  | 451460.2 | 1486308  | 1449459  |
| 44.00583 | 10 | 5 | 5 | 1223998  | 26766977 | 9897585  | 18496600 | 1042750  | 29967518 | 42751739 | 19373066 | 21847049 |
| 9.071517 | 5  | 3 | 2 | 314013.4 | 815183.7 | 326768   | 536345.5 | 139812.1 | 795683.1 | 825611.7 | 1327398  | 700874.6 |
| 9.527817 | 12 | 5 | 5 | 907230   | 1455034  | 336396.4 | 4022951  | 3074323  | 1501129  | 1621632  | 941186.9 | 1367511  |
| 9.488133 | 16 | 5 | 5 | 2989034  | 26052793 | 6841556  | 19455250 | 5612395  | 34525343 | 28303951 | 29398078 | 19347319 |
| 9.999217 | 4  | 1 | 3 | 1390192  | 4070319  | 1978231  | 2019457  | 1928255  | 7121048  | 3098626  | 1790616  | 3866281  |
| 9.37735  | 8  | 4 | 2 | 2001090  | 11213450 | 2663277  | 8764105  | 1876815  | 12368031 | 12420613 | 9123783  | 7823325  |
| 10.29105 | 11 | 5 | 5 | 836273.9 | 4277660  | 1015015  | 3002894  | 1365809  | 5514458  | 4662785  | 4015757  | 2746296  |
| 10.97857 | 9  | 5 | 3 | 1497997  | 682429.5 | 219009.6 | 3431635  | 3296241  | 786631.4 | 996980.8 | 640274.6 | 562577.8 |
| 9.445217 | 12 | 5 | 4 | 1782387  | 16735912 | 4751488  | 11442444 | 5308688  | 22272093 | 18299629 | 19538458 | 12190033 |
| 9.473733 | 8  | 5 | 3 | 485805.4 | 1360364  | 393422.2 | 979134.8 | 327726.8 | 1757799  | 1801305  | 1112159  | 1189747  |
| 9.445217 | 6  | 2 | 4 | 394774.1 | 1873286  | 405943.7 | 1126493  | 870894.1 | 1292609  | 2287011  | 1677667  | 2207562  |
| 9.67     | 7  | 3 | 4 | 242155.9 | 1211201  | 306880.6 | 922907.3 | 234212.5 | 1661609  | 1331104  | 1152907  | 843432.1 |
| 39.9925  | 3  | 0 | 3 | 555299.6 | 7939867  | 341593.5 | 6794572  | 1371036  | 7785536  | 8213711  | 7408502  | 8126085  |
| 25.69517 | 10 | 5 | 5 | 871027.1 | 4404923  | 1021373  | 5641337  | 1306743  | 2983050  | 5667003  | 4007530  | 5033582  |
| 37.344   | 8  | 2 | 3 | 402758   | 7891177  | 2856734  | 5175634  | 2265594  | 6614943  | 6304634  | 12986125 | 6620123  |
| 9.494433 | 4  | 3 | 1 | 363538.5 | 392243.8 | 154684.2 | 213567.6 | 184173.2 | 536971.3 | 482901.5 | 477540   | 169252.3 |
| 9.992233 | 11 | 5 | 5 | 1978285  | 4638103  | 961388.2 | 3552829  | 1103774  | 5096948  | 4423703  | 3730654  | 3874775  |
| 9.999217 | 3  | 0 | 3 | 417480.9 | 135355.2 | 114607.4 | 499413.8 | 436264.6 | 0        | 92993.59 | 310710.3 | 165447.3 |
| 10.95835 | 9  | 5 | 4 | 357345.8 | 1053686  | 101535.1 | 1306541  | 301490.3 | 1127565  | 1032852  | 884570.7 | 1113862  |
| 9.9677   | 10 | 5 | 5 | 1927140  | 7320407  | 945521.6 | 5481325  | 2163449  | 8733497  | 6260373  | 6734825  | 7643561  |
| 16.0501  | 7  | 5 | 2 | 174644.8 | 1557105  | 300448.7 | 1121524  | 491561.1 | 1649429  | 1832221  | 1220545  | 1827249  |
| 9.445217 | 6  | 3 | 3 | 541147.6 | 2807670  | 553575.6 | 2217113  | 576664.4 | 3100772  | 3083764  | 2766097  | 3223096  |
| 9.979667 | 8  | 5 | 3 | 493487.3 | 929440.1 | 305108.1 | 1370493  | 497523.5 | 1059501  | 838072   | 1282823  | 463811   |
| 9.842    | 6  | 2 | 4 | 1334665  | 2394463  | 638339.9 | 3508769  | 1298508  | 3322365  | 2008397  | 2537415  | 1624893  |

|          |    |   |   |          |          |          |          |          |          |          |          |          |
|----------|----|---|---|----------|----------|----------|----------|----------|----------|----------|----------|----------|
| 10.6624  | 5  | 1 | 4 | 179217.6 | 491760.1 | 170230.2 | 344633.3 | 89016.97 | 257218.8 | 586994.7 | 497147.2 | 412367.9 |
| 9.392767 | 10 | 5 | 5 | 5055794  | 15635421 | 3066461  | 11841534 | 4069605  | 17643350 | 15858682 | 12538755 | 12635430 |
| 9.5876   | 6  | 3 | 3 | 538540.8 | 1824209  | 774736.9 | 1089212  | 616862   | 3104224  | 1358557  | 1672383  | 1103665  |
| 8.931817 | 10 | 5 | 5 | 689349.3 | 3019576  | 431530.7 | 2129505  | 1053598  | 3423684  | 3129053  | 3414328  | 2590067  |
| 9.445217 | 8  | 4 | 4 | 868195.7 | 4270183  | 1200342  | 2840354  | 1507090  | 3122510  | 5332647  | 5653429  | 4151014  |
| 20.54767 | 3  | 3 | 0 | 34273.64 | 80673.84 | 27799.4  | 54972.38 | 20404.97 | 66394.64 | 106860.8 | 59404.22 | 56154.15 |
| 8.9256   | 9  | 5 | 4 | 1816179  | 4312743  | 3032479  | 1736077  | 1366898  | 2718010  | 2636318  | 3052962  | 9706981  |
| 40.49617 | 7  | 3 | 3 | 266123.2 | 4921456  | 1223469  | 3762483  | 973286.8 | 4594003  | 4053735  | 7079693  | 4492883  |
| 9.392767 | 9  | 5 | 4 | 725357.7 | 2126611  | 583435.1 | 1413751  | 762491.7 | 2669736  | 2367796  | 1608981  | 1399583  |
| 9.970617 | 6  | 4 | 2 | 2130739  | 1802119  | 1151092  | 4635317  | 3389729  | 1472289  | 3557626  | 1890517  | 1736254  |
| 9.842    | 9  | 5 | 4 | 1315717  | 5856982  | 229666.8 | 4341786  | 1831779  | 5961935  | 6212172  | 5661786  | 5742014  |
| 9.530583 | 7  | 3 | 4 | 879719.4 | 2153108  | 457033.4 | 1589573  | 605908.3 | 1569505  | 2143385  | 1929416  | 2797237  |
| 8.978067 | 4  | 3 | 1 | 243904.4 | 560087.9 | 393904.5 | 223193.7 | 193361.6 | 768205.1 | 883338.7 | 856164.4 | 292731.3 |
| 9.68775  | 7  | 3 | 4 | 774576   | 1565192  | 1088434  | 653878.7 | 396109.7 | 2128532  | 3117026  | 1436510  | 463376.8 |
| 10.01477 | 7  | 4 | 3 | 324700.3 | 701931.8 | 267728.5 | 445884.3 | 219825.4 | 761637.1 | 494687.8 | 509364.7 | 1141504  |
| 9.976317 | 9  | 5 | 3 | 807036.1 | 1007434  | 237099.8 | 1509634  | 597722.7 | 1193469  | 1322791  | 894476.4 | 849318.5 |
| 9.415167 | 5  | 4 | 1 | 1553622  | 2800254  | 2493076  | 6154215  | 3730073  | 2018853  | 1185976  | 7206655  | 1472896  |
| 9.388367 | 5  | 4 | 1 | 636064   | 1054957  | 341710.7 | 518057   | 619385.4 | 1402985  | 1076626  | 591791.9 | 850113.3 |
| 19.88283 | 5  | 3 | 2 | 89118.03 | 292622.8 | 55577.82 | 196854.1 | 112054.1 | 226919.5 | 261585.2 | 275505.3 | 337295.8 |
| 9.445217 | 14 | 5 | 5 | 1453232  | 13059552 | 3842537  | 9270700  | 3429542  | 17584772 | 14592385 | 14964693 | 9747802  |
| 9.976317 | 9  | 5 | 4 | 649099.9 | 2023806  | 180537.8 | 1556611  | 561784   | 2244860  | 1797982  | 1893517  | 2138337  |
| 31.3215  | 9  | 4 | 5 | 265914.1 | 2199662  | 721583.8 | 1602140  | 190886.9 | 3350227  | 2198296  | 1382281  | 2167485  |
| 9.43325  | 7  | 4 | 3 | 492700.7 | 1648319  | 295458.6 | 1200321  | 514126.2 | 1479292  | 2046975  | 1767726  | 1265816  |
| 22.56683 | 8  | 4 | 4 | 173091.7 | 1549162  | 387078.5 | 1050911  | 547325.3 | 1090244  | 2093578  | 1492598  | 1324093  |
| 23.08917 | 8  | 5 | 3 | 636859   | 4701540  | 704202.2 | 3829169  | 943943.9 | 3574768  | 4767320  | 4615951  | 5424849  |
| 9.388367 | 5  | 3 | 2 | 418477.5 | 2042436  | 716264.6 | 1250935  | 803781.3 | 1869975  | 2404539  | 2860542  | 2136144  |
| 10.9645  | 5  | 4 | 1 | 150373.1 | 389618.2 | 102107   | 232172.5 | 181383.4 | 483554.3 | 344607.8 | 313732.1 | 291897.5 |
| 9.388367 | 10 | 5 | 5 | 12281706 | 48723324 | 4472396  | 39735414 | 10686195 | 52428475 | 45988204 | 42665634 | 49126764 |
| 10.97242 | 7  | 2 | 5 | 1434163  | 5567894  | 705939   | 4157715  | 1675933  | 5656454  | 6522577  | 5302684  | 5770966  |
| 9.36565  | 7  | 4 | 3 | 516454.8 | 1168146  | 272679.1 | 686680.1 | 565918   | 1629648  | 1174139  | 1096200  | 992610.6 |
| 9.43325  | 5  | 2 | 3 | 1567642  | 12438629 | 4432615  | 7979539  | 4155577  | 16942576 | 9959801  | 14006900 | 15292012 |
| 44.9835  | 14 | 4 | 4 | 358033   | 3067015  | 787915.5 | 5430983  | 2857168  | 2491512  | 2086903  | 3297713  | 3368569  |
| 40.8845  | 8  | 2 | 5 | 396549.9 | 6452692  | 847718.6 | 4609933  | 2203822  | 5044211  | 7056240  | 6861293  | 7025641  |
| 9.358417 | 6  | 3 | 3 | 291141.6 | 1367309  | 683964.7 | 714980.6 | 562841.3 | 2148372  | 1986418  | 1185464  | 984691.3 |
| 12.98252 | 9  | 5 | 4 | 115357.1 | 785339.5 | 125098.6 | 587479.4 | 229218.5 | 990455.4 | 708697.4 | 773847.5 | 788806.8 |

|          |    |   |   |          |          |          |          |          |          |          |          |          |
|----------|----|---|---|----------|----------|----------|----------|----------|----------|----------|----------|----------|
| 15.6697  | 8  | 4 | 4 | 61216.67 | 309192.9 | 137579.8 | 180871.7 | 106132.1 | 409048.7 | 346578.8 | 455524.3 | 130499.4 |
| 11.01157 | 10 | 5 | 5 | 246188.5 | 748064   | 342884.3 | 1088312  | 312032.1 | 1009887  | 624801.2 | 359126.8 | 553943   |
| 9.903567 | 10 | 5 | 5 | 963558.8 | 3213779  | 610394.6 | 2589448  | 593708.9 | 3000663  | 2537110  | 4160310  | 3396945  |
| 10.94443 | 3  | 0 | 3 | 147335.4 | 269832.5 | 83935.87 | 458242.7 | 225902.5 | 304972.1 | 375281.2 | 160000   | 213892.5 |
| 9.392767 | 10 | 5 | 5 | 2142861  | 7079651  | 1340737  | 4986802  | 2422255  | 8283878  | 7609467  | 5792990  | 5495103  |
| 10.45433 | 5  | 3 | 2 | 276461.6 | 742034   | 450055.8 | 370797.4 | 111774.4 | 1428683  | 940327.4 | 425156   | 320828.1 |
| 9.872883 | 10 | 5 | 5 | 2985506  | 13733619 | 1134139  | 10378402 | 4060542  | 14081417 | 12406122 | 14721267 | 14798847 |
| 9.554967 | 6  | 4 | 2 | 273155.9 | 649155   | 206401.1 | 371366.8 | 310757.5 | 482179.5 | 971408.7 | 487248.1 | 573597.1 |
| 11.287   | 5  | 3 | 2 | 95040.62 | 324486.6 | 56582.92 | 225729.3 | 116335.5 | 261056.3 | 281974.4 | 362001.5 | 318530.3 |
| 9.356517 | 6  | 4 | 1 | 5.26E+09 | 1.16E+10 | 2.59E+10 | 3.63E+10 | 2.14E+10 | 39873037 | 44843438 | 50151442 | 21113042 |
| 9.845483 | 8  | 4 | 4 | 1065845  | 5062285  | 621719   | 3559243  | 1811470  | 5202291  | 4090480  | 4973581  | 5248127  |
| 44.43717 | 4  | 4 | 0 | 295560.2 | 3541709  | 1018656  | 2706154  | 105551   | 5289611  | 3535626  | 2729814  | 3120848  |
| 13.0989  | 9  | 5 | 4 | 188029.5 | 908486.1 | 331622.9 | 1219539  | 262605   | 1467161  | 787783.6 | 589761.9 | 801357.2 |
| 12.27392 | 8  | 5 | 3 | 74976.94 | 366492.5 | 104749.9 | 233220.2 | 146687.5 | 222526.4 | 315945.6 | 361384.3 | 484448.4 |
| 22.03    | 10 | 5 | 5 | 123702.6 | 777609.1 | 210006.2 | 548880.1 | 231783   | 1105086  | 694708.4 | 687627.2 | 845656   |
| 9.872067 | 3  | 3 | 0 | 530209.3 | 1293287  | 381790.6 | 800383.1 | 546014.6 | 1475265  | 827280.5 | 1828939  | 1083222  |
| 9.960467 | 6  | 4 | 2 | 456735.2 | 885467.7 | 257021.4 | 668606.9 | 120192.1 | 1279965  | 992122.3 | 640522.3 | 804360   |
| 9.40255  | 8  | 3 | 4 | 578107.4 | 5818766  | 1300113  | 3886301  | 2226344  | 7206516  | 6334158  | 6306278  | 3764829  |
| 11.68858 | 3  | 3 | 0 | 153391.4 | 330376.1 | 338806   | 53168    | 18576.38 | 439817   | 190538.2 | 874135.9 | 64187.6  |
| 9.842    | 5  | 3 | 2 | 1195370  | 4606055  | 1221847  | 3292311  | 1320697  | 5977637  | 3096675  | 5748745  | 4131290  |
| 9.94455  | 8  | 5 | 3 | 719493.1 | 1673550  | 253617.3 | 1244787  | 504738.6 | 1865342  | 1533323  | 1972250  | 1656967  |
| 11.01378 | 4  | 1 | 3 | 384520.1 | 1703418  | 601719.6 | 1120345  | 523486.6 | 2238552  | 2096130  | 1754723  | 701166.3 |
| 11.63327 | 7  | 5 | 2 | 106513.2 | 406899.3 | 64950.94 | 272392   | 161572.7 | 463457.1 | 455183.4 | 404411.4 | 300495.5 |
| 9.848417 | 10 | 5 | 5 | 1497289  | 6499337  | 569880.6 | 5185589  | 1587462  | 6359195  | 5859868  | 7082061  | 7103522  |
| 18.51533 | 7  | 4 | 3 | 62063.99 | 372893.6 | 102000.2 | 286430.6 | 50938.41 | 319580.7 | 310230.5 | 273974.8 | 511744.7 |
| 9.842    | 8  | 4 | 4 | 817142.7 | 3205398  | 636572.6 | 2340678  | 976585.3 | 2901297  | 2561363  | 4195073  | 2926441  |
| 24.68067 | 7  | 4 | 3 | 145480.9 | 219660   | 66590.12 | 384145.2 | 199373.6 | 157200.3 | 330319.3 | 215755.9 | 180278.6 |
| 10.01477 | 9  | 4 | 5 | 495252   | 1566253  | 356341.2 | 1181008  | 390423   | 1416595  | 1470065  | 1206409  | 2154886  |
| 9.8207   | 3  | 3 | 0 | 2302954  | 3285803  | 3463802  | 6584947  | 2897777  | 9384154  | 2779624  | 1659726  | 1167637  |
| 9.61395  | 10 | 5 | 5 | 1454633  | 5835253  | 741340   | 4939559  | 970504.1 | 5314281  | 6998020  | 5205371  | 5530902  |
| 9.928667 | 5  | 4 | 1 | 1869141  | 3732080  | 221540.4 | 2262078  | 1801820  | 3708158  | 3576373  | 4069282  | 3502655  |
| 9.999217 | 10 | 5 | 5 | 2537168  | 5244006  | 1803695  | 3279306  | 2004591  | 8343338  | 3802736  | 4240900  | 5150449  |
| 9.967367 | 12 | 5 | 5 | 1138733  | 4832403  | 1565068  | 3401774  | 1159670  | 4791255  | 3658997  | 3336786  | 7307712  |
| 9.976317 | 10 | 5 | 5 | 4342409  | 13023207 | 1149242  | 11253345 | 2061079  | 14861044 | 13009040 | 13136739 | 11965393 |
| 9.3494   | 5  | 4 | 1 | 470981.8 | 1631369  | 551403.4 | 911986.6 | 804158   | 1712794  | 2074978  | 1515610  | 2103344  |

|          |    |   |   |          |          |          |          |          |          |          |          |          |
|----------|----|---|---|----------|----------|----------|----------|----------|----------|----------|----------|----------|
| 42.81217 | 6  | 4 | 2 | 396023   | 5626570  | 1649122  | 3980300  | 1549973  | 4775611  | 4314970  | 8255267  | 6234717  |
| 9.976317 | 8  | 5 | 3 | 907942.8 | 1012024  | 550238.4 | 1784496  | 882749.5 | 901999.5 | 216453.1 | 1567375  | 1500404  |
| 10.89355 | 3  | 0 | 3 | 505531.6 | 1398116  | 709687.1 | 753905.3 | 515017.9 | 697472.1 | 1949476  | 755556.7 | 1297382  |
| 28.37367 | 4  | 1 | 3 | 86031.23 | 807004   | 247838.8 | 549571.2 | 252898.7 | 921918   | 378075.1 | 913331.8 | 822421.1 |
| 9.8322   | 8  | 5 | 3 | 2360112  | 6974730  | 834588   | 6062383  | 935926.2 | 6556560  | 5831916  | 8035023  | 7391946  |
| 44.94033 | 7  | 3 | 3 | 265012.5 | 1906477  | 737071.5 | 2727970  | 854274.9 | 2271642  | 2498424  | 2034941  | 627615.2 |
| 23.16083 | 8  | 3 | 5 | 300774.7 | 1204313  | 990404.9 | 393709.5 | 273636.9 | 2420800  | 2111957  | 249826.5 | 731011.3 |
| 21.1955  | 5  | 4 | 1 | 403026.5 | 1840923  | 1683445  | 3260462  | 826222   | 413961.1 | 3128247  | 225204.2 | 4039839  |
| 27.37    | 5  | 3 | 2 | 198792.3 | 433621.9 | 257211   | 796751.9 | 416360.9 | 310424.4 | 740544.1 | 670873.2 | 295080.5 |
| 9.992233 | 9  | 5 | 4 | 360536.8 | 1136031  | 113980.8 | 822456.8 | 382899.7 | 1191947  | 1042728  | 1113389  | 1028532  |
| 16.54873 | 6  | 2 | 4 | 64636.73 | 319953.9 | 101688.9 | 205150.2 | 120547.5 | 343303.6 | 463805.6 | 183829.8 | 327987.8 |
| 9.972483 | 8  | 4 | 4 | 1061236  | 2754925  | 1010188  | 1764176  | 917517.4 | 3113059  | 3902985  | 3169898  | 2350207  |
| 9.928667 | 4  | 3 | 1 | 586948.6 | 1091612  | 271490.5 | 615847.7 | 566635.7 | 1204287  | 1328206  | 923992.4 | 1302085  |
| 9.976317 | 10 | 5 | 5 | 1440919  | 4486393  | 350382.5 | 3567175  | 1122162  | 5013392  | 4535349  | 4547716  | 4213160  |
| 9.559117 | 8  | 4 | 4 | 265510   | 673325.1 | 125219.5 | 443734.7 | 274873.2 | 664179.2 | 887742.5 | 583534.8 | 646656.6 |
| 34.9195  | 10 | 5 | 5 | 1115750  | 21100024 | 2527774  | 18425040 | 2687633  | 21996163 | 24487956 | 17780138 | 21564229 |
| 41.5175  | 6  | 3 | 2 | 285934.1 | 4446172  | 1565544  | 3161660  | 526031.8 | 3735524  | 2885842  | 6762453  | 3558106  |
| 9.445217 | 8  | 1 | 4 | 1132459  | 4679374  | 971861.3 | 3243918  | 1666554  | 5728777  | 5378870  | 3755007  | 4971781  |
| 10.05268 | 4  | 1 | 3 | 329964.2 | 729460.4 | 139819.4 | 589754.6 | 132721.8 | 789491.1 | 528138.5 | 674118.1 | 751395   |
| 18.385   | 5  | 4 | 1 | 289895.4 | 1094583  | 442034.6 | 2231620  | 1388667  | 1046568  | 850649.5 | 816803.1 | 889389.2 |
| 9.848417 | 9  | 5 | 4 | 5747458  | 33098911 | 2744868  | 27935016 | 6201723  | 31344129 | 29934258 | 32717603 | 34555843 |
| 14.06322 | 12 | 5 | 5 | 1560139  | 14115128 | 1370739  | 12134813 | 2291352  | 12084032 | 15588889 | 13453253 | 14588606 |
| 11.34257 | 3  | 3 | 0 | 119378.6 | 373545.4 | 264033.1 | 156000.5 | 100829.4 | 730411.9 | 565909.1 | 205483.9 | 100477.6 |
| 9.36515  | 10 | 5 | 3 | 1085494  | 1863594  | 1081074  | 5123318  | 4000397  | 1035215  | 1089870  | 1759843  | 1735632  |
| 12.32473 | 5  | 4 | 1 | 86209.65 | 182729.5 | 98796.94 | 308992.9 | 141155.3 | 126005.5 | 123236.5 | 89638.42 | 316670.2 |
| 8.9343   | 4  | 1 | 3 | 241865   | 660006.3 | 366576.7 | 345232.3 | 211799.7 | 1081302  | 912460.8 | 658331   | 511645   |
| 22.103   | 3  | 3 | 0 | 27833982 | 25654724 | 35837823 | 55479143 | 15995312 | 251382.9 | 50606790 | 231395.8 | 76594458 |
| 9.992233 | 10 | 5 | 5 | 714698.4 | 2991160  | 188796.4 | 2429408  | 689455.7 | 3120666  | 2855704  | 3106988  | 2726455  |
| 9.43325  | 11 | 5 | 4 | 2112671  | 11001319 | 4122145  | 7618979  | 1464580  | 7799487  | 10087329 | 9078870  | 18201067 |
| 9.473733 | 6  | 4 | 2 | 261755.4 | 955263   | 414208.3 | 536299.6 | 404906   | 625644.7 | 438533.7 | 1019510  | 1328315  |
| 12.2954  | 9  | 5 | 4 | 105061.9 | 238828.6 | 64017.37 | 534953.7 | 365230.2 | 163801.6 | 340904   | 228271.5 | 237547.8 |
| 9.445217 | 11 | 4 | 5 | 1492747  | 10456732 | 2025997  | 7058117  | 4039614  | 12362018 | 12120437 | 9517177  | 7456651  |
| 9.853633 | 9  | 5 | 4 | 1463805  | 4624873  | 1143982  | 6503195  | 2226428  | 5168183  | 3511476  | 4242650  | 6346097  |
| 9.43325  | 6  | 3 | 2 | 865304.4 | 4918103  | 2864318  | 2463934  | 1641613  | 7914224  | 4202649  | 7641844  | 3717408  |
| 9.45945  | 8  | 2 | 5 | 3112255  | 26839609 | 5504009  | 17488535 | 11141491 | 30012235 | 17691170 | 31675598 | 26109413 |



|          |    |   |   |          |          |          |          |          |          |          |          |          |
|----------|----|---|---|----------|----------|----------|----------|----------|----------|----------|----------|----------|
| 9.928667 | 9  | 5 | 4 | 2011924  | 5045658  | 863933.1 | 3896567  | 1304051  | 6283225  | 4886527  | 4163743  | 4385462  |
| 12.1081  | 8  | 5 | 3 | 509696.5 | 9028008  | 4343390  | 5183539  | 2937650  | 9291122  | 5465175  | 7635787  | 6386409  |
| 15.08792 | 7  | 5 | 2 | 282980   | 252607.3 | 37352.75 | 1005694  | 931875.3 | 232456.1 | 208344.7 | 244674.5 | 272414.4 |
| 9.8322   | 8  | 4 | 4 | 716537.4 | 2274323  | 691276   | 1579624  | 669042.5 | 2853880  | 2268282  | 1153073  | 2838292  |
| 9.388617 | 10 | 5 | 5 | 5683288  | 24545843 | 7477067  | 17030025 | 7245044  | 27465043 | 16766620 | 18175962 | 25113156 |
| 9.419733 | 11 | 5 | 4 | 1409716  | 9833054  | 2047871  | 7304353  | 2799919  | 11599893 | 11393479 | 9340821  | 6550402  |
| 9.379233 | 7  | 5 | 2 | 1595332  | 1805146  | 719772.8 | 3337395  | 1864828  | 1859800  | 1423453  | 1008478  | 1793597  |
| 9.43325  | 10 | 5 | 5 | 2481916  | 13041757 | 3842062  | 8138915  | 5499216  | 16788568 | 15681880 | 14782036 | 9973772  |
| 43.3445  | 8  | 3 | 2 | 328293.6 | 3996445  | 840167.6 | 3300220  | 369358   | 4129927  | 3513658  | 3476518  | 3450111  |
| 38.32367 | 10 | 2 | 5 | 270423.2 | 4204462  | 1184099  | 2824126  | 1489527  | 6108546  | 4609829  | 3556672  | 3277938  |
| 8.9536   | 7  | 5 | 2 | 436670.8 | 959782.2 | 799297.8 | 299502   | 338148.9 | 574941.7 | 123222.5 | 1024935  | 2257237  |
| 9.43325  | 7  | 4 | 3 | 712077.5 | 3034055  | 572737.5 | 1987697  | 1259660  | 2990748  | 3749102  | 2710451  | 3422848  |
| 9.848417 | 9  | 5 | 4 | 2223170  | 12510891 | 1085081  | 9958283  | 3123544  | 11802845 | 11552151 | 11999194 | 13028135 |
| 27.01267 | 10 | 5 | 5 | 215551.7 | 932584.1 | 316803.6 | 664433.9 | 170351.1 | 542836.9 | 1290467  | 910770.5 | 714924.8 |
| 9.4468   | 7  | 4 | 3 | 977305.7 | 1949147  | 1046182  | 3279021  | 1490986  | 846996   | 2465324  | 3477507  | 1719702  |
| 9.830833 | 5  | 2 | 3 | 964301.6 | 2170917  | 1552862  | 905154   | 508999.7 | 3216747  | 1157628  | 793785   | 1306243  |
| 36.42433 | 4  | 0 | 3 | 269132.5 | 2325731  | 90259.91 | 2658452  | 411462.6 | 2341760  | 2409298  | 2172851  | 2335713  |
| 9.45945  | 10 | 3 | 4 | 632551.3 | 4499441  | 1355007  | 2961530  | 1639725  | 3387767  | 3409904  | 6645355  | 4130357  |
| 9.992233 | 8  | 5 | 3 | 21819286 | 1348521  | 310046.8 | 27322484 | 32237719 | 1453806  | 1099442  | 1574961  | 1665459  |
| 11.04868 | 4  | 1 | 3 | 1.4E+08  | 7.78E+08 | 4.47E+08 | 3.24E+08 | 4.46E+08 | 992093.5 | 1.14E+09 | 9.21E+08 | 8.7E+08  |
| 11.16097 | 4  | 3 | 1 | 157422.1 | 333413.1 | 225169.4 | 148641.5 | 88310.03 | 692989.5 | 407697.4 | 241477.5 | 139177.5 |
| 27.73117 | 7  | 4 | 3 | 350737.3 | 978993.2 | 644042.4 | 1830635  | 969698.6 | 1991010  | 991263.5 | 245775.4 | 999087.3 |
| 11.48157 | 3  | 3 | 0 | 110766.1 | 245868.4 | 248010   | 46050.41 | 37313.33 | 676762.2 | 239018.5 | 94709.28 | 98529.61 |
| 9.416767 | 13 | 5 | 5 | 880013.8 | 7895333  | 2510346  | 5303447  | 2583680  | 10936093 | 8062095  | 9712679  | 5437313  |
| 41.57517 | 5  | 3 | 1 | 208346.8 | 2051982  | 275088.4 | 1541455  | 617305   | 2406006  | 2166779  | 2058438  | 1654348  |
| 10.8888  | 3  | 0 | 3 | 109256   | 82850.57 | 106994.6 | 190155.1 | 103920.7 | 16728.17 | 178517.2 | 0        | 0        |
| 9.392767 | 8  | 4 | 4 | 706931.1 | 1931878  | 631172   | 1254080  | 698290.6 | 2676039  | 2179553  | 1007543  | 1651430  |
| 9.4468   | 8  | 4 | 4 | 963318.2 | 7881417  | 2748804  | 4903115  | 3088639  | 9434289  | 8434539  | 9741421  | 8742900  |
| 9.35985  | 8  | 3 | 5 | 3552365  | 12998541 | 9980395  | 4935769  | 2420682  | 25862039 | 8334887  | 5345515  | 21457130 |
| 14.0634  | 10 | 5 | 5 | 1435157  | 12753630 | 2298668  | 8644610  | 4952726  | 16203129 | 10194565 | 11191428 | 12985752 |
| 9.840617 | 6  | 2 | 3 | 739591.7 | 783513.2 | 610873.8 | 1758281  | 1158196  | 1388063  | 225795.2 | 1452562  | 662498.4 |
| 9.445217 | 13 | 5 | 5 | 6121936  | 55970219 | 13081410 | 39013000 | 19216181 | 71480672 | 64054739 | 59254325 | 40723500 |
| 9.516467 | 12 | 5 | 5 | 2445576  | 15273126 | 7470820  | 9203300  | 2428962  | 9316981  | 9899007  | 10493219 | 25100148 |
| 11.17508 | 8  | 3 | 5 | 86011.26 | 303759.4 | 74514.38 | 231375.7 | 67602.7  | 334409.2 | 359426.7 | 277505.5 | 362266.5 |
| 10.9645  | 9  | 5 | 4 | 264130.8 | 949762.1 | 240310.5 | 693490.8 | 263006.6 | 1000114  | 1201911  | 587041.8 | 1105377  |

|          |    |   |   |          |          |          |          |          |          |          |          |          |
|----------|----|---|---|----------|----------|----------|----------|----------|----------|----------|----------|----------|
| 41.54633 | 10 | 4 | 3 | 359066   | 4540556  | 2380670  | 2613824  | 696745.6 | 6147587  | 3213729  | 5433088  | 6856176  |
| 9.960467 | 8  | 5 | 3 | 512411   | 1328169  | 237354   | 1116154  | 169961   | 1627727  | 1490204  | 1327852  | 1058990  |
| 9.43325  | 5  | 4 | 1 | 456953.6 | 1935122  | 519359.1 | 2688198  | 881061.8 | 1418355  | 2795826  | 1798820  | 1706922  |
| 9.872883 | 10 | 5 | 5 | 1384198  | 7282432  | 541984.6 | 5807871  | 1822265  | 7744346  | 7440292  | 6685492  | 6732450  |
| 28.23    | 10 | 5 | 5 | 281797.8 | 1809559  | 455412.4 | 1438848  | 162510   | 1927990  | 2381067  | 1317822  | 1373183  |
| 9.840617 | 8  | 5 | 3 | 1797893  | 8349857  | 1066741  | 7038700  | 1460561  | 6841592  | 7791356  | 8517103  | 9041850  |
| 9.43325  | 9  | 5 | 3 | 538715.3 | 1577721  | 791009.8 | 3480071  | 2342500  | 1098104  | 2926355  | 1650684  | 1156507  |
| 9.830283 | 11 | 5 | 4 | 303709   | 794360.9 | 157956.2 | 503112.1 | 353092.2 | 768709.4 | 1045180  | 752114.6 | 797021   |
| 9.554967 | 11 | 5 | 4 | 9880963  | 11634014 | 11964565 | 43641621 | 39570460 | 8892508  | 14263109 | 30944433 | 1327463  |
| 9.858833 | 6  | 2 | 4 | 1246913  | 4694125  | 1966244  | 2863143  | 1611058  | 6455737  | 2074466  | 6310668  | 5454548  |
| 9.447983 | 14 | 5 | 5 | 3384418  | 27417858 | 5890085  | 19968609 | 8396606  | 34324787 | 30877255 | 28320725 | 19064184 |
| 9.920517 | 10 | 5 | 5 | 1604716  | 5622987  | 813604   | 4773440  | 860207.7 | 6747822  | 6039508  | 5597978  | 5036252  |
| 41.10017 | 9  | 3 | 3 | 235599.2 | 1845233  | 858435.1 | 2624384  | 652117.8 | 2267539  | 2215720  | 2729807  | 1477078  |
| 42.97017 | 5  | 3 | 2 | 327519.4 | 3403337  | 1110886  | 2451713  | 667020   | 4683950  | 4544915  | 2636270  | 2443503  |
| 21.49583 | 4  | 1 | 3 | 105450.4 | 403513   | 119966.8 | 261868   | 155260.5 | 429033.7 | 536757.5 | 235531.9 | 334287.9 |
| 23.0595  | 5  | 3 | 1 | 113973.2 | 477551.1 | 252741.9 | 689955.1 | 134905.9 | 140743.2 | 616140   | 669592.1 | 687966.7 |
| 9.45945  | 12 | 5 | 4 | 1114669  | 6156507  | 1499864  | 4192960  | 2240675  | 7549851  | 7753629  | 6164292  | 4732665  |
| 10.94443 | 4  | 3 | 1 | 549723.3 | 1318462  | 772837.5 | 1963212  | 389902   | 552239.7 | 1241435  | 1778201  | 640969.5 |
| 44.13533 | 11 | 4 | 5 | 311093.8 | 3206756  | 1553218  | 5835719  | 3162177  | 2951051  | 2655244  | 4924442  | 1031715  |
| 9.845483 | 9  | 5 | 4 | 5653026  | 32596518 | 3501210  | 28121623 | 5070260  | 31676177 | 28593235 | 31927156 | 38227776 |
| 10.75735 | 6  | 4 | 2 | 197472.3 | 471746.8 | 331167.8 | 203373.5 | 111679.3 | 894953.5 | 709484.8 | 135717.8 | 172605.5 |
| 9.388367 | 8  | 4 | 3 | 1036236  | 2050015  | 978207   | 4571981  | 3120108  | 1489751  | 2824222  | 1585085  | 1020820  |
| 22.40783 | 8  | 4 | 4 | 290331.2 | 2307562  | 657768.2 | 1757466  | 341062.3 | 1614215  | 3203486  | 1982900  | 1959723  |
| 9.845483 | 10 | 5 | 5 | 731074.6 | 3240105  | 232273.2 | 2510897  | 906111.4 | 3016309  | 3305118  | 3046894  | 3592471  |
| 9.445217 | 13 | 5 | 4 | 603259.4 | 4766815  | 1299798  | 3395300  | 1404965  | 6383826  | 5890515  | 3873131  | 4276918  |
| 43.1     | 7  | 1 | 4 | 371740.8 | 4841032  | 1056636  | 6619480  | 2140046  | 5004096  | 5602225  | 3039793  | 5619306  |
| 9.989483 | 9  | 3 | 5 | 2344202  | 6018273  | 1786939  | 3664261  | 2696920  | 6515936  | 3449029  | 6824337  | 8146595  |
| 26.43333 | 10 | 5 | 5 | 603509.6 | 2770293  | 1561131  | 1514420  | 420203.4 | 5166392  | 3130798  | 1160326  | 1636669  |
| 43.54583 | 15 | 3 | 5 | 464071.3 | 11522641 | 6794997  | 5852109  | 3496281  | 8755675  | 23031316 | 11507318 | 8963204  |
| 20.8275  | 5  | 4 | 1 | 481218   | 1909183  | 3448106  | 5163645  | 2949805  | 394227.4 | 396114   | 316021.5 | 362481.4 |
| 9.419733 | 8  | 4 | 4 | 1722218  | 14693300 | 4071397  | 10659888 | 3900460  | 17592765 | 15253436 | 15485022 | 17462571 |
| 37.94917 | 3  | 3 | 0 | 209550.6 | 1751124  | 519826.5 | 1335201  | 84716.9  | 2042046  | 1315249  | 1448152  | 1420946  |
| 42.69717 | 5  | 3 | 2 | 321406.6 | 3911573  | 1602392  | 2543276  | 962269.6 | 6543023  | 3106047  | 3005349  | 4304096  |
| 9.848417 | 9  | 5 | 4 | 2889283  | 13257709 | 2158407  | 9304793  | 4809426  | 13527430 | 11179797 | 10902379 | 15460687 |
| 9.93625  | 6  | 2 | 4 | 3387901  | 7825035  | 6412646  | 2572167  | 2777446  | 10998695 | 1798451  | 16695672 | 1552621  |

|          |    |   |   |          |          |          |          |          |          |          |          |          |
|----------|----|---|---|----------|----------|----------|----------|----------|----------|----------|----------|----------|
| 10.02372 | 5  | 3 | 2 | 440446.7 | 312394.9 | 191005.8 | 542676.5 | 256318.3 | 378047.8 | 0        | 509911.5 | 380640.5 |
| 10.95055 | 6  | 3 | 3 | 266509   | 735696.3 | 145326   | 531924.3 | 238278.4 | 837334.9 | 903414.9 | 627009.8 | 552166.2 |
| 9.388367 | 8  | 3 | 5 | 1907965  | 15048325 | 4492913  | 10055113 | 5333403  | 16582150 | 7157582  | 17019039 | 16095666 |
| 24.95733 | 6  | 3 | 3 | 371796.8 | 691965.7 | 333130.9 | 1483495  | 980467.3 | 1084453  | 561699.5 | 971332.4 | 576390.3 |
| 11.27298 | 10 | 5 | 5 | 973777.9 | 3467776  | 898005.6 | 2144153  | 1565466  | 4382298  | 2521864  | 3956812  | 3997466  |
| 31.48117 | 10 | 5 | 5 | 849585.4 | 6976149  | 1432715  | 5806345  | 604388.3 | 9107184  | 7304034  | 5429575  | 5906057  |
| 9.840617 | 10 | 5 | 5 | 4158282  | 22875314 | 611174.9 | 19295555 | 4486449  | 23577289 | 21980374 | 23155978 | 23074193 |
| 9.1503   | 6  | 2 | 4 | 1654419  | 8750546  | 1261501  | 10837142 | 2515596  | 8635414  | 10009713 | 6887550  | 8389754  |
| 16.433   | 6  | 3 | 3 | 557608.8 | 5672384  | 3346615  | 2968777  | 1176097  | 4849347  | 11384741 | 2841456  | 5467283  |
| 9.3919   | 13 | 5 | 5 | 794509.4 | 6461728  | 2318476  | 3822626  | 2861962  | 9380355  | 7397317  | 7270999  | 4667869  |
| 39.3595  | 6  | 3 | 1 | 512439.3 | 6912545  | 1321772  | 5838730  | 522324.1 | 6384847  | 6301004  | 7584231  | 5446998  |
| 8.9536   | 7  | 4 | 3 | 471745   | 1001076  | 685032.9 | 434910.9 | 334038.3 | 690332.7 | 1188587  | 553840.2 | 2117761  |
| 10.02372 | 7  | 5 | 2 | 1308365  | 414702.8 | 136258.1 | 1318652  | 1134328  | 319725.9 | 372306.8 | 601691.1 | 506624.8 |
| 43.2725  | 7  | 2 | 4 | 312138.9 | 6433040  | 1927947  | 4697621  | 1454131  | 5709755  | 5284645  | 9868248  | 5690099  |
| 27.34117 | 5  | 3 | 2 | 174824.6 | 443513.9 | 404050.7 | 120325.4 | 99034.08 | 281645.8 | 628078.1 | 1063065  | 158979.2 |
| 9.999217 | 6  | 3 | 3 | 742383.3 | 2863372  | 497459.1 | 1844089  | 1255199  | 2325752  | 3116879  | 2369586  | 3039982  |
| 40.89883 | 6  | 3 | 2 | 331759.5 | 4203556  | 1882832  | 5893767  | 1408651  | 5022761  | 4490276  | 904657.3 | 5564259  |
| 10.01477 | 4  | 1 | 3 | 1769270  | 2869426  | 2024818  | 1184818  | 1051180  | 5339819  | 493318.1 | 3513551  | 3907930  |
| 9.406667 | 12 | 5 | 5 | 7401389  | 65495349 | 22727500 | 44414858 | 18768117 | 65617631 | 60488934 | 60861922 | 38835050 |
| 12.06353 | 3  | 3 | 0 | 131495.9 | 337287.2 | 372833   | 40736.34 | 8636.362 | 152701.1 | 88224.08 | 376874   | 98025.12 |
| 9.960817 | 4  | 3 | 1 | 445971.3 | 717841.7 | 469024.5 | 315001.1 | 296551.4 | 948284.5 | 1347398  | 715594.3 | 112023.4 |
| 9.43325  | 13 | 5 | 4 | 3845205  | 3363623  | 1217418  | 14736312 | 14301008 | 4727899  | 4547828  | 2978240  | 1984737  |
| 9.8322   | 9  | 5 | 4 | 691410.1 | 2300224  | 502437.7 | 1548823  | 894096   | 2825609  | 1794005  | 2390463  | 2726852  |
| 9.406667 | 4  | 0 | 3 | 538434.3 | 3917775  | 759661.1 | 2764908  | 1375496  | 4116678  | 2606682  | 4202936  | 4582794  |
| 9.9847   | 6  | 3 | 3 | 321029.1 | 883556.9 | 295540.8 | 487906   | 459199.8 | 1141034  | 1149761  | 925554.3 | 759554.5 |
| 9.872883 | 10 | 5 | 5 | 2347053  | 11100708 | 1937665  | 8283195  | 3336251  | 10158079 | 9868638  | 9395380  | 14083840 |
| 9.904767 | 10 | 5 | 5 | 2195249  | 9617882  | 1787946  | 8017698  | 1332927  | 9300953  | 7214685  | 11369366 | 11401121 |
| 9.5415   | 13 | 5 | 4 | 3200456  | 24170147 | 4837683  | 15189301 | 11004339 | 25617316 | 19197592 | 31380488 | 24329372 |
| 44.96767 | 7  | 4 | 3 | 321799.4 | 5254376  | 2388482  | 3229428  | 1425153  | 8902628  | 4207304  | 4626485  | 2525305  |
| 9.972483 | 9  | 5 | 4 | 1449417  | 3508928  | 843162.1 | 2351134  | 1354549  | 4565968  | 3705090  | 3578041  | 3483714  |
| 9.992233 | 10 | 5 | 5 | 1061205  | 4846838  | 1160174  | 3738733  | 1038776  | 4382478  | 5312208  | 4205932  | 3694319  |
| 9.379233 | 6  | 4 | 2 | 1120164  | 1979696  | 622470.9 | 1128350  | 995434.7 | 2166640  | 1954209  | 1442853  | 1407247  |
| 9.896717 | 5  | 3 | 2 | 2058798  | 3878580  | 1173026  | 2908067  | 597103.7 | 4104663  | 5750674  | 3742262  | 2847255  |
| 9.419733 | 7  | 2 | 5 | 915334.4 | 8485898  | 3303673  | 4813701  | 3953315  | 10989492 | 6765673  | 10573531 | 10652500 |
| 44.696   | 8  | 2 | 4 | 271592.5 | 2510892  | 1114647  | 4689890  | 2685786  | 2881665  | 2895285  | 552612.8 | 2861531  |

|          |    |   |   |          |          |          |          |          |          |          |          |          |
|----------|----|---|---|----------|----------|----------|----------|----------|----------|----------|----------|----------|
| 9.365833 | 9  | 3 | 4 | 5710185  | 24701580 | 25598377 | 4392766  | 3061035  | 3625136  | 47287592 | 57272650 | 11206934 |
| 41.61817 | 8  | 1 | 3 | 380109.7 | 5419489  | 1169482  | 4338088  | 966490.7 | 7462192  | 4770396  | 5200851  | 5095356  |
| 9.388617 | 10 | 5 | 5 | 5723504  | 24661942 | 7546232  | 17184267 | 7344449  | 27891920 | 16020787 | 18588157 | 25941402 |
| 9.856867 | 10 | 5 | 5 | 6241367  | 38515300 | 4607292  | 30302384 | 10045147 | 35686997 | 32311856 | 38800290 | 43103655 |
| 9.842    | 10 | 5 | 5 | 1379805  | 5806911  | 452946.7 | 4393917  | 1773340  | 6234844  | 6099661  | 5111336  | 5610408  |
| 12.41208 | 10 | 5 | 5 | 806051.5 | 6106359  | 2062315  | 8323687  | 2339214  | 5954448  | 5233933  | 4573182  | 9688081  |
| 20.35283 | 8  | 4 | 4 | 241616.3 | 1875720  | 613934.4 | 1381490  | 224769.1 | 1365934  | 1965177  | 1261993  | 1987483  |
| 9.527817 | 11 | 5 | 5 | 2502652  | 9996633  | 2197981  | 7546113  | 2646455  | 11519730 | 10836072 | 10927976 | 10586633 |
| 9.311883 | 6  | 2 | 4 | 449878.3 | 3170568  | 1184030  | 2015408  | 1116130  | 4086500  | 1651646  | 2473746  | 4572583  |
| 9.799767 | 7  | 4 | 3 | 1741903  | 2104901  | 817400.1 | 1366156  | 633829.2 | 2330227  | 3224042  | 2357069  | 1431308  |
| 10.9645  | 6  | 4 | 2 | 253463.4 | 769322.5 | 111938.5 | 627133.5 | 162981.1 | 854534.6 | 915299.3 | 682875.2 | 654511.3 |
| 9.388617 | 10 | 5 | 5 | 5655686  | 24590125 | 7316646  | 17242676 | 7333418  | 27608293 | 16706020 | 18426794 | 25411375 |
| 10.05805 | 5  | 2 | 3 | 1327141  | 877396.5 | 644928.4 | 3660534  | 3508377  | 892840   | 263385   | 1875630  | 1001713  |
| 9.388617 | 10 | 5 | 5 | 1430492  | 5402492  | 1890734  | 3571907  | 1755414  | 6208658  | 3561013  | 3860123  | 5181795  |
| 8.9256   | 3  | 3 | 0 | 142122.9 | 224109.8 | 182720.2 | 78347.26 | 52897.67 | 57459.43 | 312175.9 | 23677.63 | 460882.1 |
| 9.4468   | 4  | 3 | 1 | 391413.3 | 1650564  | 319818.4 | 970620   | 844086   | 1606501  | 1604743  | 1906164  | 1971459  |
| 7.035967 | 3  | 3 | 0 | 56431.2  | 347918.5 | 85952.82 | 207114   | 170791.9 | 309165.6 | 411522.8 | 213697.7 | 404626.6 |
| 9.960467 | 10 | 5 | 5 | 1688685  | 6177800  | 688636.8 | 5116002  | 1276593  | 7254282  | 6036438  | 5888862  | 5393285  |
| 19.74333 | 10 | 5 | 5 | 3204624  | 13709115 | 2723020  | 10935889 | 2808712  | 12409411 | 17287151 | 10466292 | 12744508 |
| 14.19495 | 6  | 4 | 2 | 57807.8  | 217648   | 100059.2 | 351628.3 | 156327.6 | 269286.7 | 348401   | 132591.8 | 104510.2 |
| 10.44062 | 10 | 5 | 5 | 1657311  | 4831309  | 3179569  | 8510679  | 4066521  | 2247336  | 3666169  | 4167597  | 10371425 |
| 9.864767 | 8  | 5 | 3 | 1391696  | 1779035  | 686561.9 | 3611744  | 2298122  | 1222151  | 1454540  | 1230820  | 2222132  |
| 9.379233 | 11 | 5 | 5 | 964705.3 | 3134220  | 457621   | 2232075  | 1116111  | 3688827  | 3109172  | 2598735  | 2788836  |
| 13.74132 | 5  | 4 | 1 | 674227.1 | 2127461  | 2566773  | 98955.93 | 41458.96 | 6335131  | 161799.4 | 2617733  | 124164.5 |
| 9.37735  | 8  | 4 | 3 | 2615205  | 8988999  | 3309026  | 5850437  | 2938625  | 9313866  | 5072445  | 11545306 | 6244560  |
| 10.08665 | 6  | 1 | 4 | 305530.9 | 331125.7 | 267233.4 | 565232.7 | 187797   | 595309.7 | 465099   | 505000.7 | 90219.22 |
| 9.275917 | 4  | 3 | 1 | 350297.3 | 696793.4 | 355997.1 | 330057.4 | 376241   | 1172548  | 876422.4 | 621685.6 | 599430.8 |
| 8.911617 | 6  | 5 | 1 | 185522.6 | 473688.7 | 188056.5 | 304996.2 | 143686.9 | 340420.8 | 798075.5 | 462499.7 | 350851   |
| 10.96452 | 3  | 3 | 0 | 3258031  | 6766997  | 8884464  | 13931168 | 3588140  | 20428661 | 433678.2 | 11206721 | 764804.3 |
| 17.60083 | 7  | 3 | 4 | 62170.56 | 196862.4 | 60475.66 | 147806.7 | 26615.48 | 255042.2 | 165239.2 | 200306.9 | 111924.8 |
| 10.36622 | 7  | 3 | 4 | 330756.8 | 814312   | 611319.3 | 332058.5 | 28671.42 | 1634488  | 1270208  | 383559.7 | 202595   |
| 9.964417 | 13 | 5 | 5 | 2254504  | 5554937  | 2519896  | 3537442  | 899140.9 | 5557077  | 3228563  | 5158577  | 4075377  |
| 21.55233 | 11 | 5 | 5 | 4084892  | 19522528 | 11821022 | 9844339  | 5747827  | 37273479 | 20888133 | 8680593  | 8669458  |
| 14.40023 | 5  | 3 | 2 | 128351.7 | 1050971  | 96696.49 | 878829.6 | 211565.3 | 1020064  | 1218109  | 1029829  | 966586.9 |
| 44.72483 | 10 | 5 | 5 | 809370.8 | 9883755  | 495918.6 | 9193876  | 815297.8 | 9296426  | 9919999  | 9469692  | 10354783 |

|          |    |   |   |          |          |          |          |          |          |          |          |          |
|----------|----|---|---|----------|----------|----------|----------|----------|----------|----------|----------|----------|
| 10.44888 | 8  | 4 | 4 | 265215.6 | 717239.4 | 285728.9 | 452867.2 | 239476.7 | 800671.8 | 902813.2 | 1035481  | 347924.5 |
| 10.03947 | 12 | 5 | 5 | 5721320  | 33574029 | 4129688  | 26208303 | 9056257  | 31376507 | 28986485 | 31596046 | 37823878 |
| 9.912633 | 4  | 3 | 1 | 1081629  | 1886799  | 749252.1 | 1171636  | 678422.6 | 2689501  | 740440.1 | 1666830  | 2368388  |
| 9.92825  | 6  | 4 | 1 | 935806.5 | 2037762  | 306968.7 | 1447125  | 731285.3 | 2083948  | 1913826  | 2539272  | 1921084  |
| 10.80745 | 3  | 3 | 0 | 186358.8 | 470760.6 | 339026.4 | 202882.9 | 69660.93 | 881520.6 | 794555.9 | 290311.1 | 186300.9 |
| 9.859983 | 6  | 3 | 3 | 569792.2 | 3116617  | 1103922  | 2025805  | 1080315  | 3756809  | 1519165  | 2401282  | 3918404  |
| 9.960467 | 7  | 4 | 3 | 2704718  | 1707123  | 1183056  | 2992572  | 1378208  | 3429133  | 196212.2 | 2105833  | 1350186  |
| 16.35912 | 7  | 3 | 4 | 115138   | 845347.2 | 446329.9 | 450203.9 | 329312.8 | 1061422  | 629907.2 | 566814.2 | 442288.5 |
| 42.35183 | 7  | 3 | 4 | 385040.3 | 5760389  | 807602.9 | 4752693  | 1155936  | 5562612  | 5155392  | 5112752  | 5880422  |
| 9.845483 | 8  | 4 | 4 | 1200834  | 3852823  | 1190294  | 2737575  | 1035063  | 5066261  | 2023686  | 4493791  | 4308092  |
| 10.94853 | 4  | 0 | 3 | 11517217 | 24767657 | 18087104 | 9029770  | 12562642 | 10984737 | 52195026 | 9222516  | 17879441 |
| 9.473733 | 9  | 5 | 3 | 2430958  | 14762775 | 1800229  | 9709771  | 6375985  | 17183296 | 15519987 | 15034351 | 13542289 |
| 9.986767 | 10 | 5 | 5 | 7082125  | 14987740 | 4899699  | 10384520 | 4295421  | 18107447 | 18850750 | 16310586 | 15026119 |
| 21.711   | 9  | 4 | 5 | 439549.7 | 3291684  | 1819241  | 1748488  | 1136682  | 2054199  | 6464298  | 2896628  | 2908772  |
| 9.146383 | 6  | 3 | 2 | 740836.8 | 4195093  | 1573008  | 2903455  | 807953.1 | 3757862  | 2279588  | 3308809  | 5869202  |
| 39.79133 | 3  | 0 | 3 | 470542   | 6332650  | 102131.7 | 5064914  | 1613301  | 6291690  | 6189515  | 6466604  | 6371088  |
| 9.999217 | 4  | 1 | 3 | 295745.3 | 790079.8 | 251468.6 | 525432.3 | 278554.7 | 500521.9 | 535319.9 | 941422.3 | 941401   |
| 9.507167 | 12 | 5 | 5 | 2656140  | 31616680 | 9660560  | 23234321 | 6683057  | 36601204 | 15783472 | 29179390 | 36923469 |
| 25.21983 | 6  | 4 | 2 | 3039297  | 1874759  | 2221293  | 8387820  | 8238281  | 1321558  | 738846.1 | 1085504  | 5801522  |
| 18.32183 | 10 | 5 | 5 | 181922.6 | 1006414  | 324649.6 | 709293   | 266929   | 1350387  | 646693.4 | 1258219  | 1091615  |
| 10.97857 | 9  | 5 | 4 | 311072.3 | 1363238  | 349660.3 | 906997.7 | 532743   | 1232861  | 1245261  | 992421.2 | 1418914  |
| 9.46265  | 8  | 4 | 4 | 593353.6 | 3354606  | 1501869  | 1934867  | 1341897  | 1427242  | 2395282  | 3392926  | 4372992  |
| 9.979667 | 9  | 4 | 5 | 612972   | 1284720  | 583143.7 | 812319.7 | 266896.9 | 1180194  | 991938.8 | 1261653  | 728522.2 |
| 10.74945 | 9  | 4 | 5 | 223616.8 | 813428.8 | 260228.5 | 584665.6 | 189393.5 | 907648.1 | 1142457  | 854037   | 730678.8 |
| 9.392767 | 10 | 5 | 5 | 1377826  | 5270779  | 1922333  | 3470645  | 1680319  | 5672746  | 3467663  | 3654387  | 5329871  |
| 10.92208 | 8  | 4 | 4 | 170053.1 | 560946.8 | 252448.4 | 346638.2 | 160074.1 | 845009.3 | 444506.5 | 223316.6 | 519015.2 |
| 9.4468   | 6  | 4 | 2 | 429617.2 | 1702134  | 688531   | 925225   | 857576.3 | 1822797  | 2789233  | 1536018  | 926508   |
| 9.859983 | 7  | 3 | 4 | 1454341  | 3896331  | 1428007  | 2432679  | 1514410  | 5239505  | 2072112  | 2660049  | 4650288  |
| 9.445217 | 6  | 3 | 3 | 844801.2 | 5338560  | 867970.7 | 3961412  | 1680418  | 4648926  | 5720354  | 4988578  | 4654238  |
| 9.392767 | 7  | 5 | 2 | 732635.7 | 1352913  | 416736.6 | 816716.5 | 625150.1 | 1774257  | 1618985  | 856237.8 | 956315.6 |
| 44.75333 | 6  | 2 | 4 | 338005.9 | 4913221  | 2474927  | 2902038  | 1191509  | 3288252  | 3996816  | 4062938  | 3912190  |
| 9.9014   | 9  | 4 | 4 | 840578.9 | 2549399  | 573851.4 | 3823655  | 1601893  | 2863531  | 3182760  | 1928041  | 2821146  |
| 9.856867 | 10 | 5 | 5 | 14804468 | 96845950 | 4542195  | 90628372 | 7377156  | 1.04E+08 | 95387680 | 92741790 | 93758717 |
| 8.806967 | 5  | 3 | 2 | 113281   | 282728.3 | 146935.3 | 132615.7 | 155055.4 | 339303.9 | 420641.8 | 339968.2 | 277650.7 |
| 10.03947 | 8  | 5 | 3 | 221463.3 | 625454.7 | 149508.2 | 393379.4 | 282533.1 | 492694.3 | 849342   | 698973.8 | 579879.1 |

|          |    |   |   |          |          |          |          |          |          |          |          |          |
|----------|----|---|---|----------|----------|----------|----------|----------|----------|----------|----------|----------|
| 9.522017 | 6  | 3 | 3 | 509345   | 963875.3 | 421986.6 | 611784.2 | 247409.8 | 1278189  | 588029.2 | 1105754  | 1397454  |
| 9.859983 | 10 | 5 | 5 | 3308072  | 14515151 | 975304.2 | 12496431 | 2531238  | 14226497 | 13394863 | 15577545 | 15487730 |
| 9.920517 | 7  | 3 | 4 | 1221416  | 2774433  | 879640.3 | 1796926  | 1072471  | 3088534  | 2355592  | 3095384  | 1505596  |
| 9.536783 | 7  | 4 | 3 | 606455.9 | 1290551  | 351556.2 | 1877675  | 722529.7 | 1207106  | 1438154  | 1190159  | 831760.8 |
| 10.94962 | 4  | 3 | 1 | 1.51E+08 | 2.77E+08 | 3.82E+08 | 6.51E+08 | 3.71E+08 | 373708.6 | 1832901  | 6.07E+08 | 522678.9 |
| 9.8322   | 9  | 5 | 4 | 1331695  | 6335356  | 909545.9 | 4599738  | 2164499  | 5887823  | 5167013  | 7177471  | 7328567  |
| 10.94208 | 4  | 1 | 3 | 226546.2 | 276466.2 | 109296.5 | 408766.1 | 151290.5 | 175286.2 | 321463.3 | 446546   | 212190.9 |
| 9.392767 | 5  | 3 | 2 | 852154.5 | 793885.4 | 597118.8 | 1326694  | 461067   | 703071   | 741984.4 | 544922.8 | 190795.5 |
| 41.2875  | 13 | 4 | 4 | 281591.4 | 5275467  | 1192951  | 4181011  | 1000210  | 6138945  | 5499702  | 3960702  | 6642442  |
| 9.445217 | 11 | 5 | 4 | 1121202  | 6264878  | 2088059  | 4168612  | 2143124  | 7487872  | 7027806  | 6181616  | 7915971  |
| 9.132467 | 11 | 5 | 5 | 1476766  | 4985348  | 1027173  | 3493016  | 1802722  | 4898695  | 6771094  | 4263806  | 4609515  |
| 9.8374   | 9  | 5 | 4 | 3274147  | 16694789 | 1306290  | 12424698 | 5450479  | 17212451 | 15042396 | 15611620 | 17491968 |
| 39.69033 | 6  | 3 | 2 | 353330   | 6530661  | 966674.2 | 5497592  | 1111950  | 5987584  | 6330784  | 6188942  | 8234445  |
| 9.929783 | 11 | 5 | 5 | 11116453 | 67474599 | 4962446  | 51718490 | 20108034 | 67489148 | 61002553 | 64821631 | 70020185 |
| 9.419733 | 8  | 3 | 4 | 1445055  | 7940372  | 2593806  | 5291711  | 2755953  | 5014706  | 5306510  | 10613167 | 9611912  |
| 9.94405  | 4  | 3 | 1 | 1539603  | 2530392  | 1335187  | 1363480  | 972503.2 | 3725559  | 3844005  | 2691802  | 756049.4 |
| 9.636567 | 10 | 5 | 5 | 1180366  | 4982498  | 891386.1 | 3510742  | 1815908  | 5089179  | 5094890  | 5080878  | 6067597  |
| 9.3735   | 8  | 4 | 4 | 637070.6 | 5586696  | 434750.1 | 4260566  | 1692349  | 6066229  | 4875033  | 5632533  | 5670876  |
| 21.06033 | 7  | 3 | 3 | 341571.3 | 4456376  | 1487402  | 3272856  | 591407.6 | 5003738  | 4108600  | 3954337  | 2591280  |
| 10.008   | 7  | 4 | 3 | 4589747  | 2147408  | 2192149  | 6716619  | 5757466  | 925019.7 | 5958857  | 1674225  | 1697057  |
| 11.92417 | 3  | 3 | 0 | 84933.52 | 198996.4 | 146256.3 | 85017.92 | 19504.79 | 442441   | 220370.1 | 85963.01 | 95303.63 |
| 27.96683 | 10 | 5 | 5 | 3369022  | 22527657 | 5204739  | 18262307 | 2809152  | 24716807 | 20997215 | 18430254 | 17981162 |
| 43.24383 | 12 | 2 | 4 | 195000.4 | 2015473  | 400184.2 | 2496723  | 552224.2 | 1925354  | 1870966  | 1968917  | 2689864  |
| 9.976317 | 6  | 5 | 1 | 1258038  | 759823.7 | 141288.4 | 1286582  | 674874   | 749267.7 | 763635   | 780908.7 | 553685.8 |
| 10.64708 | 7  | 3 | 4 | 420558.9 | 807622.4 | 587813.5 | 347382.7 | 160044.4 | 1677104  | 1129179  | 472295.8 | 231211.9 |
| 9.433    | 18 | 5 | 5 | 695313.6 | 1716867  | 461871.4 | 1268886  | 445491.9 | 2021146  | 1981580  | 1407680  | 1057202  |
| 9.8322   | 4  | 3 | 1 | 545752.8 | 994878.9 | 532889.7 | 534185.9 | 376584.8 | 1403930  | 1619232  | 600342.7 | 344529   |
| 10.96997 | 5  | 3 | 2 | 180910.4 | 564092.6 | 153248.3 | 431921.4 | 107446.8 | 716775.2 | 500224.7 | 333074.6 | 596022.1 |
| 9.856867 | 10 | 5 | 5 | 4913706  | 29469931 | 3581937  | 23169848 | 7853149  | 27163909 | 24979924 | 29109007 | 33274187 |
| 10.00385 | 9  | 5 | 4 | 304575.6 | 798852.7 | 233384   | 524573.3 | 312294.2 | 1003585  | 424528.1 | 723530.8 | 930617.6 |
| 9.842    | 5  | 2 | 3 | 579363.6 | 1814808  | 321705.7 | 1277440  | 666283.5 | 2062586  | 1824124  | 1865615  | 1271940  |
| 9.311883 | 4  | 1 | 3 | 3426702  | 26503469 | 15886112 | 11111815 | 15314255 | 37210211 | 36189726 | 37853357 | 1456215  |
| 21.2385  | 10 | 5 | 5 | 709795.8 | 5280740  | 1560820  | 3977031  | 954484.9 | 5885115  | 6356946  | 3538266  | 3701871  |
| 10.10432 | 11 | 5 | 5 | 265318.7 | 653223   | 146821.1 | 1031460  | 482358.4 | 440967.4 | 636482.8 | 816754.8 | 763439.4 |
| 31.07633 | 9  | 5 | 4 | 496038.7 | 1151773  | 787823.3 | 2721234  | 1979066  | 1311806  | 996000   | 107257.8 | 2304636  |

|          |    |   |   |          |          |          |          |          |          |          |          |          |
|----------|----|---|---|----------|----------|----------|----------|----------|----------|----------|----------|----------|
| 9.536783 | 10 | 4 | 4 | 668061.2 | 6552670  | 2028473  | 4035147  | 2933335  | 9115898  | 6524542  | 7954626  | 4290712  |
| 8.66735  | 3  | 3 | 0 | 212235.4 | 499065.3 | 346914.2 | 207902.6 | 218329.5 | 442517.7 | 936161   | 698294.3 | 408406.1 |
| 12.63082 | 4  | 1 | 3 | 52470.19 | 145394.3 | 43702.53 | 107758.5 | 30654.88 | 168718.1 | 209138.3 | 101393.3 | 133050.3 |
| 9.979667 | 7  | 3 | 4 | 2049106  | 15275459 | 5875070  | 10300988 | 3853158  | 17777077 | 6003147  | 16224978 | 21926857 |
| 19.23333 | 5  | 3 | 2 | 68610.92 | 207486.7 | 110817.4 | 310058.5 | 96623.49 | 245607.4 | 66983.9  | 125513.3 | 253758.8 |
| 9.840617 | 10 | 5 | 5 | 3988813  | 21819081 | 597482.8 | 18254620 | 4593660  | 22419074 | 20979108 | 22027544 | 22233866 |
| 9.853633 | 9  | 5 | 4 | 2128105  | 4542907  | 1500765  | 7259139  | 3404156  | 5780479  | 5629967  | 4231519  | 4980645  |
| 11.26338 | 10 | 5 | 5 | 15670602 | 1.1E+08  | 11582188 | 85738832 | 30265392 | 1.16E+08 | 88997345 | 1.13E+08 | 1.16E+08 |
| 9.82645  | 5  | 4 | 1 | 585360.1 | 2006659  | 827108.9 | 1348551  | 353022.3 | 1723494  | 1730227  | 2272482  | 3263957  |
| 9.45135  | 11 | 5 | 5 | 8882216  | 87052203 | 22451368 | 53845211 | 40539534 | 1.11E+08 | 97732896 | 1E+08    | 62473342 |
| 9.4925   | 8  | 2 | 5 | 1352859  | 10082266 | 2838032  | 5579105  | 5561610  | 10706179 | 5358381  | 9848888  | 12435918 |
| 9.830833 | 9  | 5 | 4 | 2801900  | 12441950 | 930575.2 | 8513697  | 5059061  | 12710485 | 11918141 | 11118373 | 13475462 |
| 9.1322   | 10 | 5 | 5 | 545216.4 | 1410707  | 307820   | 1143668  | 222849.5 | 1562712  | 1533703  | 998146.7 | 1195664  |
| 44.98333 | 12 | 5 | 3 | 2929564  | 3874234  | 1502015  | 19320460 | 19942707 | 2429597  | 3038567  | 3236049  | 6220272  |
| 9.431017 | 8  | 5 | 3 | 393046.8 | 2993076  | 846591   | 1911971  | 1274655  | 3906362  | 3525642  | 3111592  | 1705186  |
| 9.848417 | 9  | 5 | 4 | 1965242  | 10499021 | 1796843  | 8947106  | 1282743  | 7953330  | 9405788  | 11045730 | 11763092 |
| 9.406667 | 4  | 1 | 3 | 864438.8 | 3597593  | 1821740  | 2144508  | 811841.8 | 4466758  | 775970.7 | 5075288  | 4898379  |
| 9.392767 | 10 | 5 | 5 | 12366885 | 44549415 | 7007446  | 34735520 | 11873654 | 51299805 | 47689754 | 37464567 | 36556476 |
| 9.2585   | 13 | 5 | 5 | 1194966  | 3632359  | 447889.7 | 2910810  | 894577.5 | 3527197  | 3566797  | 2973347  | 3981897  |
| 9.445217 | 8  | 3 | 5 | 1584735  | 7361359  | 6403866  | 2399754  | 1140412  | 2734590  | 1577442  | 3914096  | 15087914 |
| 20.8275  | 8  | 4 | 4 | 108969.5 | 691261.6 | 232856.5 | 483915.4 | 184370.3 | 608741.1 | 805083.3 | 1043006  | 504094.6 |
| 9.9014   | 7  | 4 | 3 | 2766993  | 9108887  | 2754020  | 6582981  | 2364475  | 8950499  | 5391519  | 12718968 | 7932791  |
| 9.419733 | 9  | 5 | 3 | 681039.6 | 4715330  | 2073844  | 2764853  | 1893061  | 7009938  | 5646341  | 5491358  | 3824120  |
| 42.75483 | 5  | 3 | 2 | 1091784  | 21344165 | 1788742  | 19940309 | 642110.9 | 23928703 | 20024603 | 21364498 | 19369052 |
| 9.362817 | 4  | 1 | 3 | 2014428  | 5315561  | 1389575  | 3631153  | 1957789  | 6400843  | 5692641  | 6097402  | 2913976  |
| 10.94208 | 4  | 3 | 1 | 326752.5 | 813587.9 | 206341.2 | 628282.8 | 167797.2 | 801626.8 | 1104863  | 646696.5 | 597454.3 |
| 11.49535 | 10 | 5 | 5 | 314244.1 | 1112275  | 387066.3 | 751832   | 345518.7 | 1635726  | 1350592  | 730961.3 | 762811.2 |
| 10.008   | 9  | 5 | 4 | 565799.7 | 1919371  | 325423.6 | 1333111  | 737413.2 | 1937446  | 1356269  | 2086450  | 2049806  |
| 14.5462  | 4  | 0 | 4 | 957181.4 | 67526.22 | 111000.8 | 3886390  | 4949492  | 37936.33 | 28886.1  | 0        | 6676.994 |
| 40.53933 | 9  | 4 | 4 | 348876.5 | 4706388  | 1118276  | 7443756  | 3508841  | 5243951  | 3981692  | 4975159  | 3231617  |
| 9.37735  | 6  | 3 | 3 | 350398.5 | 2615056  | 1091352  | 1454755  | 1264803  | 4092825  | 3143794  | 1985298  | 2618241  |
| 25.045   | 4  | 3 | 1 | 94545.09 | 327993.1 | 235684.2 | 139131.7 | 114095.4 | 631247.1 | 533735.3 | 133946   | 152567.1 |
| 10.9744  | 4  | 3 | 1 | 1464655  | 3067111  | 2655766  | 5932209  | 3152455  | 6256058  | 1394954  | 5662175  | 839644.1 |
| 10.00998 | 9  | 5 | 4 | 519258.3 | 726871.9 | 240312.9 | 1180269  | 573288.9 | 879460.5 | 991226.4 | 818591.1 | 477708.7 |
| 9.40325  | 6  | 3 | 3 | 889112   | 4737056  | 1447928  | 3341667  | 1399317  | 6455571  | 5180070  | 2967779  | 3533666  |

|          |    |   |   |          |          |          |          |          |          |          |          |          |
|----------|----|---|---|----------|----------|----------|----------|----------|----------|----------|----------|----------|
| 22.98717 | 5  | 1 | 3 | 264351.7 | 1881673  | 624199   | 1187744  | 777103.7 | 2060361  | 770219.7 | 2174944  | 2220875  |
| 26.9115  | 7  | 3 | 4 | 251473.8 | 1252380  | 769948.7 | 638993.5 | 353713   | 633243.4 | 1493122  | 316879.2 | 1599751  |
| 44.46617 | 4  | 3 | 1 | 388947   | 6786852  | 1810406  | 4912780  | 2007243  | 4722020  | 5820248  | 8555230  | 8830401  |
| 9.840617 | 8  | 5 | 3 | 2354797  | 1962822  | 420154.3 | 6440509  | 5811042  | 2369437  | 1744732  | 2284183  | 2068402  |
| 9.845483 | 10 | 5 | 5 | 1755737  | 7510970  | 2233493  | 5281108  | 2318810  | 7107546  | 6480837  | 5075704  | 11075660 |
| 9.43325  | 8  | 5 | 3 | 505345.2 | 3874062  | 1100948  | 2570853  | 1504689  | 4622357  | 4666027  | 4610240  | 2221962  |
| 12.14965 | 5  | 4 | 1 | 74898.81 | 193213   | 101319.8 | 113904.8 | 36242.04 | 264484   | 330326.7 | 125494.6 | 86111.82 |
| 9.481367 | 8  | 3 | 4 | 479349.2 | 1501406  | 1321768  | 2591627  | 787947.5 | 751682.6 | 382133.3 | 3023521  | 492385.3 |
| 9.840617 | 8  | 5 | 3 | 6047834  | 1928101  | 439596.5 | 15702449 | 17891581 | 2117730  | 1580895  | 2002993  | 2520553  |
| 9.887133 | 8  | 4 | 4 | 1024171  | 3446617  | 1007331  | 2357451  | 1203114  | 2797599  | 1989407  | 4208618  | 4241323  |
| 9.343517 | 4  | 1 | 3 | 841702.6 | 4551564  | 2063938  | 2722561  | 1628213  | 6504692  | 1117325  | 5683214  | 4937199  |
| 9.842    | 5  | 2 | 3 | 3163054  | 8833333  | 2164123  | 6679127  | 2238227  | 10785399 | 5307403  | 9915928  | 9853012  |
| 7.394517 | 8  | 5 | 3 | 1468554  | 81405821 | 6284046  | 71111263 | 12856866 | 79124596 | 86051978 | 72695216 | 80385942 |
| 9.445217 | 9  | 5 | 3 | 888475.8 | 4185635  | 1710206  | 2558096  | 1614791  | 3216180  | 5075816  | 2237664  | 6634092  |
| 18.74667 | 3  | 3 | 0 | 76299.33 | 155140.5 | 84945.27 | 223369.5 | 42739.63 | 269366.8 | 208086.1 | 55271.86 | 141151.9 |
| 10.38125 | 8  | 4 | 4 | 342860.5 | 915736.7 | 561269.8 | 481719.8 | 137645   | 1793912  | 1164518  | 517246.4 | 513522.2 |
| 9.858833 | 7  | 3 | 4 | 1420381  | 4541508  | 1003312  | 5599266  | 1151416  | 5219251  | 2958920  | 4119916  | 5255544  |
| 9.445217 | 5  | 0 | 4 | 2112671  | 16338330 | 8187036  | 9703907  | 4421533  | 14436699 | 11643418 | 12168543 | 30862276 |
| 9.932033 | 3  | 0 | 3 | 1043318  | 387376.8 | 380746.4 | 1456148  | 1379445  | 891479.6 | 155714.6 | 0        | 204617.6 |
| 22.11767 | 9  | 4 | 5 | 653564.8 | 1323652  | 299830.6 | 2528344  | 1562946  | 1577900  | 1296181  | 1396956  | 824470.7 |
| 9.840617 | 4  | 1 | 3 | 9436009  | 33527851 | 18152733 | 16285760 | 17109831 | 38211095 | 40378716 | 1544696  | 46686291 |
| 8.799267 | 8  | 5 | 3 | 954731.6 | 2276126  | 1330785  | 1131921  | 957605.7 | 1170584  | 4335914  | 2636464  | 2177891  |
| 9.346    | 4  | 1 | 3 | 443811.3 | 1938502  | 550436   | 1153434  | 960835.2 | 1307295  | 1985708  | 2691745  | 2192681  |
| 11.42608 | 7  | 5 | 2 | 380217.8 | 776598   | 295272.2 | 1310707  | 675943.8 | 1095080  | 1100049  | 530066.4 | 622157.8 |
| 8.826967 | 5  | 1 | 3 | 216362.3 | 705374.1 | 348874   | 411099   | 234366.4 | 1101251  | 216210.7 | 952646.7 | 722863.5 |
| 9.392767 | 8  | 5 | 3 | 849601.8 | 2042453  | 475062   | 1317618  | 898910.8 | 2292989  | 2579592  | 1595587  | 1488849  |
| 11.26338 | 10 | 5 | 5 | 65928132 | 4.8E+08  | 49859192 | 3.78E+08 | 1.31E+08 | 5.06E+08 | 3.91E+08 | 4.95E+08 | 5.07E+08 |
| 9.362817 | 7  | 3 | 4 | 360642.9 | 2778749  | 1050222  | 1674495  | 1204665  | 3826925  | 2976789  | 2935017  | 3141949  |
| 10.25713 | 8  | 3 | 5 | 275213.5 | 888034.1 | 124157.7 | 727140.3 | 192806.4 | 996671.2 | 722926.1 | 984718.1 | 789055.8 |
| 10.23043 | 9  | 5 | 4 | 446414.6 | 1698572  | 168311.9 | 1396665  | 382418.6 | 1674224  | 1629380  | 1990373  | 1559860  |
| 10.45667 | 7  | 3 | 4 | 449123.6 | 1110031  | 830420.6 | 471213.2 | 178438.3 | 2419449  | 1315336  | 607306.8 | 259891.8 |
| 9.3919   | 5  | 2 | 3 | 568816.1 | 4359650  | 2071098  | 2594272  | 1456071  | 5760997  | 899004.4 | 5919241  | 4034712  |
| 9.840617 | 10 | 5 | 5 | 4606698  | 24683536 | 1158138  | 19730803 | 6448180  | 25179023 | 23244755 | 25558433 | 25785853 |
| 9.40325  | 4  | 1 | 3 | 4290241  | 41148618 | 17490171 | 21392633 | 22497894 | 55992679 | 11289229 | 48700311 | 48542004 |
| 9.845483 | 10 | 5 | 5 | 1299362  | 6220535  | 981955.6 | 5454748  | 362337.4 | 5743974  | 4800419  | 6850005  | 7309094  |



|          |    |   |   |          |          |          |          |          |          |          |          |          |
|----------|----|---|---|----------|----------|----------|----------|----------|----------|----------|----------|----------|
| 3.65805  | 9  | 3 | 5 | 231335.4 | 3368499  | 1957555  | 5799901  | 2878335  | 2436.501 | 3322587  | 4249297  | 4724546  |
| 11.97977 | 6  | 4 | 2 | 80934.34 | 238363.3 | 119794.5 | 145908.7 | 32848.46 | 429790.1 | 159763.5 | 236947.5 | 247359   |
| 9.8322   | 9  | 5 | 4 | 704392.9 | 3445950  | 397069.2 | 2550269  | 1152440  | 3232479  | 2969586  | 3440051  | 4034758  |
| 15.50667 | 11 | 5 | 5 | 202412.7 | 1782107  | 296171.1 | 1423821  | 420447.6 | 2216500  | 1678315  | 1469809  | 1936817  |
| 9.392767 | 8  | 5 | 3 | 821172.9 | 1365931  | 475352.5 | 717632.6 | 788478.3 | 1567449  | 1587606  | 904832.9 | 836812.9 |
| 9.928667 | 8  | 5 | 3 | 30636390 | 2216434  | 594239.1 | 40867498 | 50507094 | 2739621  | 2138748  | 2887748  | 1828936  |
| 41.02833 | 8  | 3 | 3 | 277342.1 | 3176712  | 477830.3 | 2641213  | 608093.6 | 2982296  | 4000562  | 2766901  | 3115369  |
| 10.9645  | 9  | 5 | 4 | 254801.5 | 1448684  | 415342.6 | 953771.1 | 577707.3 | 1718438  | 1512531  | 954360   | 1107191  |
| 9.845483 | 5  | 2 | 3 | 2766757  | 8037881  | 1835108  | 5803119  | 2630377  | 9348579  | 5447282  | 7592831  | 7605065  |
| 43.53133 | 5  | 2 | 3 | 391264.9 | 4095212  | 721655.5 | 4677405  | 390106.2 | 4588718  | 2884256  | 4619029  | 4392095  |
| 9.445217 | 12 | 5 | 4 | 1318210  | 7826861  | 1524365  | 5409266  | 3025178  | 9118871  | 8497242  | 6417051  | 5963778  |
| 11.26148 | 3  | 3 | 0 | 15670602 | 32872753 | 44576345 | 69981008 | 28682997 | 76697317 | 344029   | 135186   | 86418083 |
| 9.245983 | 4  | 1 | 3 | 23378860 | 56873457 | 59769959 | 10657851 | 18746681 | 62264636 | 19648148 | 45685970 | 1.55E+08 |
| 9.983433 | 10 | 5 | 5 | 2395701  | 6463012  | 972900   | 4592242  | 2389304  | 7994867  | 6827823  | 5770356  | 5635310  |
| 10.9645  | 7  | 3 | 4 | 415140.3 | 1839116  | 374652   | 1284897  | 686479   | 1796306  | 2030243  | 1298129  | 1758568  |
| 9.420133 | 8  | 3 | 3 | 2818645  | 6620269  | 2964810  | 11408667 | 6012846  | 4306339  | 8115316  | 10468718 | 7126778  |
| 9.473717 | 7  | 3 | 3 | 408476.6 | 1196747  | 487180.3 | 2308184  | 1434056  | 1090735  | 1685013  | 599290.3 | 904581.1 |
| 9.858833 | 5  | 3 | 2 | 845086.3 | 3023002  | 1900171  | 1457084  | 1169514  | 4730568  | 4546661  | 529421   | 3819358  |
| 42.27983 | 13 | 4 | 4 | 417598.2 | 4534544  | 2164004  | 6287066  | 1209021  | 5343603  | 5552189  | 6152855  | 751881   |
| 9.912633 | 8  | 4 | 2 | 702734.9 | 2053884  | 316990.9 | 1333729  | 929347.7 | 1559986  | 2018971  | 2214120  | 2415906  |
| 23.132   | 3  | 3 | 0 | 12879605 | 1.49E+08 | 46504846 | 1.1E+08  | 31523820 | 1.62E+08 | 2.24E+08 | 1.12E+08 | 1.36E+08 |
| 10.30302 | 9  | 4 | 5 | 397551.7 | 1084908  | 757519.3 | 503516.7 | 177634.9 | 2061728  | 1657535  | 594194.2 | 229962.4 |
| 9.842    | 7  | 4 | 3 | 690270.2 | 3005627  | 658112   | 2406554  | 569380.2 | 2719204  | 2173564  | 3946138  | 2924792  |
| 10.008   | 9  | 5 | 4 | 345988.8 | 622797.9 | 164347.1 | 844427.3 | 269664.2 | 722558.5 | 808190.3 | 498743.3 | 409298.5 |
| 24.31067 | 8  | 5 | 3 | 162833.5 | 927630.2 | 287150.7 | 611111.9 | 357649   | 1422892  | 803035   | 730434.2 | 754058.1 |
| 9.992233 | 10 | 5 | 5 | 921936.1 | 2784024  | 366367.5 | 2199002  | 734910.6 | 3115322  | 2235332  | 2746742  | 2696584  |
| 9.845483 | 6  | 3 | 3 | 671059.8 | 2333265  | 545960.6 | 1671476  | 780833.5 | 2349613  | 1698948  | 2977023  | 2753330  |
| 9.887133 | 10 | 5 | 5 | 1844178  | 8539659  | 2981426  | 6178010  | 1425568  | 9049429  | 6794988  | 5507272  | 13314477 |
| 9.018167 | 9  | 5 | 4 | 603673.7 | 1720515  | 293172.4 | 1262395  | 573947.1 | 1743715  | 1986748  | 1871579  | 1224094  |
| 9.544833 | 10 | 5 | 5 | 2159210  | 6525638  | 788867.4 | 4828586  | 2188158  | 6892951  | 7463316  | 6143483  | 5392197  |
| 9.445217 | 8  | 4 | 4 | 670701   | 5132660  | 1055165  | 3709843  | 1733665  | 6064140  | 6264507  | 5210006  | 4123709  |
| 11       | 10 | 5 | 5 | 1069541  | 5069201  | 506314.4 | 4003713  | 1372591  | 4840565  | 5536704  | 4792904  | 4505875  |
| 9.379233 | 4  | 3 | 1 | 465831.8 | 814003.6 | 691284.7 | 255312.5 | 386275.6 | 1109944  | 159726.6 | 0        | 1248440  |
| 10.49903 | 6  | 4 | 2 | 307793.6 | 858821.8 | 288042.4 | 598623.6 | 245420.1 | 641959.2 | 1357889  | 836331.9 | 701175   |
| 10.93208 | 5  | 1 | 4 | 1097268  | 4549569  | 2584283  | 2288910  | 2016126  | 4268474  | 6704967  | 4114495  | 607818.7 |

|          |    |   |   |          |          |          |          |          |          |          |          |          |
|----------|----|---|---|----------|----------|----------|----------|----------|----------|----------|----------|----------|
| 9.46265  | 10 | 5 | 5 | 1979412  | 7106914  | 1637571  | 5656519  | 1324772  | 9158322  | 8613027  | 5806509  | 5902296  |
| 44.96917 | 7  | 2 | 3 | 458080.1 | 6155958  | 2794693  | 3906190  | 1529617  | 5428616  | 3137026  | 5706688  | 10763223 |
| 9.554967 | 15 | 5 | 5 | 3616722  | 6253542  | 1888789  | 17695877 | 15013926 | 9412766  | 6353143  | 5313624  | 5688801  |
| 9.840617 | 4  | 1 | 3 | 9338012  | 41355558 | 23245824 | 19643679 | 21497211 | 49324371 | 42102576 | 1567232  | 60863735 |
| 15.45333 | 7  | 5 | 2 | 79553.59 | 293458.5 | 145951.3 | 516447.8 | 278930.5 | 500379.7 | 93305.25 | 288910.2 | 258390.4 |
| 9.445217 | 14 | 5 | 5 | 3316150  | 28643994 | 8481223  | 21140173 | 6850058  | 39038662 | 32390756 | 32037358 | 20316968 |
| 9.94455  | 9  | 5 | 4 | 1077927  | 2636684  | 433732   | 1998979  | 792763.8 | 3408492  | 2456605  | 2393247  | 2415302  |
| 9.848417 | 10 | 5 | 5 | 965140.2 | 4203530  | 383894.6 | 3850639  | 342436.9 | 3864206  | 3889170  | 4184123  | 4812688  |
| 44.95467 | 4  | 1 | 3 | 380209.6 | 2484869  | 854693.8 | 3341557  | 912216.9 | 963809.5 | 2934084  | 2831749  | 2739011  |
| 9.362817 | 6  | 4 | 2 | 800114.6 | 3341030  | 1029074  | 2449622  | 780917.7 | 4405778  | 2214311  | 3530831  | 2331440  |
| 9.392767 | 10 | 5 | 5 | 5736029  | 25305424 | 8323274  | 17360465 | 8087271  | 28167919 | 18154294 | 17444620 | 24970060 |
| 16.28612 | 5  | 2 | 3 | 140783.8 | 238590.1 | 176852   | 101583.3 | 65733.34 | 235752.7 | 160067.4 | 17266.97 | 499795.7 |
| 12.98207 | 10 | 5 | 5 | 101231   | 504380.7 | 178182.7 | 335589.2 | 170383.1 | 697485.9 | 565118.4 | 293853.7 | 339968   |
| 10.96997 | 9  | 4 | 5 | 1199507  | 3692829  | 1394226  | 2623482  | 398261.1 | 6001887  | 3672655  | 2621397  | 3610529  |
| 10.94443 | 4  | 0 | 4 | 379111.9 | 940747.3 | 489725.2 | 548464.6 | 262420.3 | 606344.9 | 1659128  | 411377.9 | 870918.3 |
| 9.05635  | 10 | 5 | 5 | 1245389  | 8002809  | 2748213  | 5802300  | 1469567  | 8245540  | 12347327 | 7331562  | 4788060  |
| 43.04233 | 12 | 4 | 4 | 331295   | 4444056  | 1528937  | 2682092  | 2047522  | 4614433  | 3638379  | 7021879  | 3207669  |
| 9.859983 | 10 | 5 | 5 | 766829.8 | 3659965  | 175321.4 | 2825146  | 1098097  | 3750914  | 3730324  | 3468976  | 3484003  |
| 9.912633 | 6  | 4 | 2 | 1449080  | 3005925  | 782294.4 | 1807853  | 1504274  | 3343075  | 2745080  | 1854914  | 3116716  |
| 9.203483 | 5  | 3 | 2 | 732905.5 | 5031164  | 1305821  | 3338970  | 2051785  | 3658181  | 3664206  | 6076457  | 5359610  |
| 10.5297  | 4  | 3 | 1 | 249798.2 | 505332.3 | 386254   | 208392.3 | 126620   | 1141152  | 541622.1 | 325539.9 | 121929.6 |
| 41.0285  | 4  | 1 | 3 | 272988.4 | 5005066  | 669983   | 3883753  | 1424960  | 4521216  | 5092176  | 6118705  | 4478322  |
| 44.9835  | 4  | 1 | 3 | 134241.3 | 308894.3 | 55511.19 | 368872.9 | 67610.23 | 312498.1 | 349668.3 | 212478.1 | 334471.4 |
| 16.0528  | 6  | 4 | 2 | 135719.6 | 721821.5 | 266230.8 | 514718.1 | 110197.4 | 953459   | 437003.7 | 930289.3 | 860073.8 |
| 44.9835  | 7  | 3 | 3 | 432551.8 | 3148516  | 358455   | 4974014  | 2404065  | 2832794  | 3075273  | 3191265  | 2904998  |
| 20.187   | 10 | 5 | 5 | 444080.4 | 2287315  | 658143.3 | 1737659  | 443806.2 | 2490508  | 2883920  | 1298704  | 1969285  |
| 9.26575  | 10 | 5 | 4 | 2959580  | 24769043 | 3443645  | 19370097 | 6809865  | 26518225 | 24318259 | 27163544 | 26898741 |
| 9.297883 | 4  | 1 | 3 | 448826.9 | 462518.3 | 428592.4 | 1131166  | 842876.6 | 337175.4 | 258447.1 | 0        | 584707.2 |
| 9.445217 | 13 | 5 | 5 | 1190445  | 10586831 | 2391474  | 8410557  | 2100269  | 13101284 | 12613012 | 10889752 | 7605174  |
| 38.9135  | 7  | 4 | 2 | 259710.1 | 4666554  | 2609555  | 2624485  | 1169739  | 5899205  | 2605113  | 8689843  | 2768583  |
| 9.433    | 6  | 2 | 4 | 4596306  | 34287751 | 24387109 | 13403157 | 18059474 | 56226841 | 6581978  | 8934832  | 48621699 |
| 28.21417 | 8  | 4 | 4 | 83704.88 | 398403.8 | 140201.4 | 284405.7 | 83767.08 | 415409.7 | 565519.9 | 215855.7 | 305194.6 |
| 9.406667 | 11 | 4 | 5 | 2120027  | 7505522  | 3936526  | 4371114  | 2068530  | 7723289  | 4413142  | 10632321 | 2766077  |
| 10.68927 | 5  | 3 | 2 | 124295.3 | 688529   | 269334.5 | 397231.5 | 329168.8 | 1031681  | 569391.1 | 844593.6 | 322946.1 |
| 9.4775   | 8  | 3 | 4 | 1064441  | 3397564  | 1586156  | 5489772  | 2554962  | 3032600  | 3771050  | 1180790  | 3397472  |

|          |    |   |   |          |          |          |          |          |          |          |          |          |
|----------|----|---|---|----------|----------|----------|----------|----------|----------|----------|----------|----------|
| 10.95055 | 6  | 4 | 2 | 137040.6 | 468391.6 | 199374   | 309958.1 | 103627.5 | 739433   | 462022.6 | 298822.4 | 259254.2 |
| 24.33417 | 10 | 5 | 5 | 2895984  | 6425612  | 871205.7 | 13610949 | 9488791  | 7352829  | 7395826  | 5777060  | 5932479  |
| 27.89583 | 6  | 3 | 3 | 127888.9 | 361221.7 | 119722.1 | 528905.6 | 207762.2 | 517109.3 | 432208.4 | 369934.7 | 234295.8 |
| 9.382183 | 7  | 2 | 4 | 620065.4 | 2806190  | 1094550  | 1720317  | 1156485  | 3452786  | 2935252  | 3048333  | 922367.1 |
| 39.24417 | 6  | 3 | 1 | 315273.9 | 4334414  | 1250727  | 3380569  | 336769.4 | 3540176  | 4050104  | 6541031  | 3912162  |
| 9.415167 | 6  | 4 | 2 | 497481.9 | 1127095  | 491839.5 | 604934.8 | 584268   | 1368489  | 1480491  | 1527573  | 883232.3 |
| 9.9014   | 9  | 4 | 5 | 2476969  | 3578292  | 1112763  | 5018619  | 1754272  | 3445106  | 2446455  | 4913372  | 2576497  |
| 12.06563 | 3  | 3 | 0 | 80382.07 | 188636.5 | 169242.9 | 60376.96 | 31930.01 | 72326.51 | 118982.7 | 125338.3 | 138452.7 |
| 9.352183 | 12 | 5 | 5 | 1330556  | 8025947  | 2056845  | 5870938  | 2402405  | 10494794 | 8564870  | 7753158  | 8491807  |
| 18.006   | 3  | 0 | 3 | 543684.8 | 2072438  | 345370.7 | 3666686  | 2109515  | 2595582  | 2104421  | 1776011  | 1741731  |
| 10.01545 | 11 | 5 | 2 | 1839439  | 1194216  | 742221.7 | 3621693  | 3202167  | 1198966  | 464176.3 | 451958.9 | 2074278  |
| 9.655117 | 5  | 3 | 2 | 2183632  | 911723.4 | 377631.3 | 3711405  | 3712149  | 564721.3 | 601951.9 | 790272.5 | 1165770  |
| 10.97242 | 5  | 3 | 2 | 1026377  | 2032768  | 388675.9 | 2569209  | 665702.6 | 2541228  | 1878928  | 1687242  | 2346534  |
| 9.842    | 8  | 5 | 3 | 1852361  | 8058690  | 1325958  | 6184888  | 2336868  | 7995927  | 8350736  | 6120972  | 7983039  |
| 9.636567 | 9  | 5 | 4 | 6911640  | 15121886 | 7615568  | 41305755 | 34603801 | 19067744 | 22486256 | 9025904  | 5050562  |
| 10.008   | 9  | 5 | 4 | 275111.7 | 805072.4 | 69552.72 | 686071.1 | 152710.7 | 753360.6 | 921796.9 | 779082   | 813975.6 |
| 18.51133 | 10 | 5 | 5 | 969884.8 | 8608107  | 2799125  | 6458307  | 1045029  | 8534996  | 6906756  | 5182484  | 12470116 |
| 10.81488 | 6  | 2 | 4 | 174758.2 | 501335   | 276949.2 | 286653.2 | 118849.1 | 757481   | 282036.4 | 132910.6 | 701711.1 |
| 20.476   | 6  | 2 | 4 | 542527.7 | 2356113  | 634418.9 | 1798268  | 517048.2 | 2221710  | 3468098  | 2180195  | 1915940  |
| 9.999217 | 10 | 5 | 5 | 456344.9 | 890025.2 | 283244.9 | 1238471  | 419542.6 | 964925.5 | 1225013  | 1065538  | 618910.1 |
| 9.992233 | 9  | 5 | 4 | 810965.2 | 1017418  | 119499.3 | 1337615  | 421378.2 | 1048891  | 1186050  | 1046046  | 921950.5 |
| 9.277967 | 4  | 4 | 0 | 778146.4 | 909696.5 | 424266.5 | 1635969  | 932382.5 | 958359.2 | 1573850  | 925991   | 472774.7 |
| 9.8322   | 9  | 5 | 4 | 1165536  | 6177126  | 181631.6 | 5665217  | 674541.7 | 6392748  | 5963217  | 6089328  | 6101222  |
| 9.920517 | 10 | 5 | 5 | 2160873  | 9371486  | 1257679  | 7919218  | 1708279  | 9319441  | 7698685  | 10583164 | 10609453 |
| 24.6235  | 10 | 5 | 5 | 183191.5 | 634860.5 | 252449.6 | 911527.3 | 317527.4 | 843027   | 842754   | 767691   | 366971.1 |
| 11.70247 | 10 | 5 | 5 | 3424849  | 16299029 | 5399107  | 26196739 | 12791497 | 14057792 | 14851051 | 11558208 | 25587188 |
| 10.00998 | 5  | 2 | 3 | 609742.4 | 540752.8 | 394527.9 | 945861.5 | 446974.4 | 958438.9 | 0        | 391942.8 | 456883.7 |
| 30.253   | 5  | 4 | 1 | 215895.9 | 678329.1 | 653763   | 1302629  | 647869.3 | 229769.2 | 542131.5 | 388521   | 1830961  |
| 9.992233 | 6  | 4 | 2 | 350784.4 | 947463.1 | 149544.1 | 571869.3 | 493753.3 | 936206.4 | 1081963  | 779683   | 824654.2 |
| 9.392767 | 10 | 5 | 5 | 12473419 | 44443726 | 6979054  | 34750662 | 12067493 | 51229507 | 47646365 | 37372880 | 36493711 |
| 9.951283 | 10 | 5 | 4 | 1951083  | 6304637  | 2194618  | 4348071  | 1862595  | 8325488  | 4601572  | 4500236  | 5057941  |
| 9.994767 | 9  | 5 | 4 | 433561.1 | 822745.8 | 373317.4 | 1191943  | 396266.9 | 1046044  | 1211282  | 990314.4 | 544461.9 |
| 10.95602 | 11 | 5 | 4 | 348609.4 | 1029313  | 258844.6 | 763356.6 | 293998.4 | 1275785  | 1124552  | 1187275  | 623921.2 |
| 9.445217 | 14 | 5 | 5 | 2889535  | 25975649 | 7239920  | 19767889 | 5501421  | 34356057 | 28692946 | 29961277 | 19532188 |
| 23.84967 | 10 | 5 | 5 | 21778250 | 1.24E+08 | 17882624 | 1.03E+08 | 24847758 | 1.41E+08 | 1.28E+08 | 95680453 | 1.36E+08 |

|          |    |   |   |          |          |          |          |          |          |          |          |          |
|----------|----|---|---|----------|----------|----------|----------|----------|----------|----------|----------|----------|
| 9.35985  | 5  | 3 | 1 | 1190779  | 1769742  | 1249597  | 4503402  | 3577588  | 993220.5 | 1927366  | 3801755  | 567898.9 |
| 10.38125 | 10 | 5 | 5 | 613416.6 | 1424727  | 902033.1 | 733522.5 | 334176.5 | 2820079  | 1844114  | 684603.4 | 830060.4 |
| 9.999217 | 5  | 2 | 3 | 844564.5 | 512621.7 | 328987.5 | 1196247  | 892519.2 | 773240.8 | 0        | 705977.1 | 719599   |
| 9.989483 | 10 | 4 | 5 | 4473928  | 3589765  | 1528035  | 8840770  | 6954625  | 5158910  | 1359562  | 2735811  | 4462741  |
| 9.864767 | 10 | 5 | 5 | 9374500  | 41964291 | 2261425  | 35560874 | 8457512  | 41007284 | 39000849 | 44076560 | 44395122 |
| 21.12383 | 10 | 5 | 5 | 209061.1 | 776711.4 | 158315.2 | 612592.9 | 182884.9 | 988990.2 | 824097.6 | 755358.7 | 547794.9 |
| 44.98333 | 5  | 3 | 2 | 228975.5 | 3065597  | 1312200  | 2051849  | 560500.9 | 2399053  | 5403449  | 2589675  | 2603301  |
| 10.9645  | 8  | 4 | 4 | 224285.9 | 865621.2 | 231140   | 1081647  | 220064.4 | 1045029  | 750216.2 | 810282.2 | 573976.4 |
| 9.999517 | 5  | 2 | 3 | 433494.9 | 402179.6 | 264774.1 | 860941.1 | 591699.8 | 740178   | 509507.1 | 494253   | 103624.5 |
| 10.008   | 9  | 5 | 4 | 624508.4 | 726516.1 | 257610.4 | 1013903  | 334295.1 | 833061.2 | 928558.8 | 971050.5 | 465930   |
| 9.960817 | 9  | 5 | 4 | 867582.6 | 3233612  | 846986.4 | 2229355  | 1199461  | 4150907  | 3975593  | 3287407  | 2316321  |
| 42.49567 | 3  | 0 | 3 | 257198.4 | 5806566  | 160862.1 | 4965343  | 1120115  | 5752179  | 6074908  | 5767804  | 5642510  |
| 9.445217 | 10 | 5 | 5 | 1584263  | 13094189 | 5003959  | 7618218  | 6315786  | 11677257 | 7261468  | 10269035 | 16488777 |
| 9.840617 | 7  | 4 | 3 | 3128950  | 3713979  | 4135266  | 8678236  | 5960990  | 1799251  | 1521030  | 2637632  | 1545165  |
| 8.8398   | 4  | 1 | 3 | 324547.4 | 1065226  | 660312.6 | 1741073  | 749035.7 | 1393559  | 114592.8 | 732109.7 | 1255562  |
| 42.56767 | 14 | 3 | 4 | 370137   | 9427770  | 4283929  | 5998151  | 2484219  | 7735447  | 7701594  | 6698839  | 7961548  |
| 9.538267 | 14 | 5 | 5 | 27400260 | 52057410 | 24821402 | 1.2E+08  | 90251207 | 53713340 | 89190543 | 50479919 | 47379249 |
| 9.999217 | 3  | 0 | 3 | 361261.3 | 190874.6 | 157965.5 | 515279   | 424804.6 | 274792.1 | 0        | 403931.7 | 86272.58 |
| 9.992233 | 7  | 4 | 3 | 2375973  | 1198250  | 294490.7 | 4755536  | 4750743  | 1425939  | 1520304  | 799441.6 | 1020559  |
| 9.684583 | 7  | 4 | 3 | 207997.6 | 504991.6 | 137902.6 | 338943.8 | 199887.7 | 662263.6 | 646233.3 | 381597.3 | 437745   |
| 7.333667 | 9  | 4 | 5 | 137127.5 | 879980.6 | 203403.5 | 685276.4 | 204414.6 | 976228.9 | 1166882  | 842472.9 | 787081.9 |
| 9.994767 | 12 | 5 | 5 | 2964303  | 4720514  | 821822.3 | 3477014  | 1581034  | 6024965  | 4785656  | 3859174  | 4216722  |
| 9.500733 | 8  | 3 | 4 | 400373.2 | 2703969  | 1299949  | 1442842  | 1341187  | 3353736  | 2082758  | 4474944  | 2577461  |
| 24.20733 | 5  | 2 | 3 | 68521.65 | 293593   | 85058.94 | 219949.9 | 67405.4  | 353024.5 | 340063.6 | 153506.2 | 349671.8 |
| 12.05365 | 10 | 5 | 5 | 6551056  | 22295215 | 21497587 | 6097727  | 5552812  | 11083426 | 5811333  | 28713647 | 8606836  |
| 9.4925   | 4  | 3 | 1 | 353441.8 | 833462.5 | 513209   | 409113.8 | 348800.6 | 1041409  | 270028.7 | 466713.6 | 808887.8 |
| 20.18683 | 10 | 5 | 5 | 644705.1 | 3279668  | 732031.5 | 2652707  | 562442.6 | 3438100  | 3772969  | 2206194  | 2927619  |
| 9.999217 | 9  | 5 | 4 | 377916   | 756641.9 | 319593   | 1051588  | 297982.8 | 1021375  | 1135390  | 737017.6 | 440166.5 |
| 9.928667 | 5  | 3 | 2 | 670688.1 | 1362765  | 278900.7 | 896479   | 601326.5 | 1372649  | 1683986  | 1023465  | 1151568  |
| 39.23    | 6  | 3 | 3 | 253659.3 | 2160002  | 447265.5 | 2803811  | 812537.2 | 2224683  | 2613738  | 1890655  | 2528701  |
| 9.848417 | 9  | 5 | 4 | 6364033  | 32493157 | 4007001  | 26118789 | 8173031  | 30216519 | 33128368 | 27775111 | 32830689 |
| 9.952017 | 4  | 0 | 3 | 393619.9 | 106713.4 | 97776.67 | 331248   | 296117.5 | 206148.5 | 214623.3 | 45037.3  | 0        |
| 9.992233 | 10 | 5 | 5 | 959681.8 | 2767584  | 292830.7 | 2327311  | 560077.7 | 2985932  | 2259769  | 2936900  | 2855604  |
| 17.545   | 9  | 4 | 5 | 210805.9 | 994646.8 | 235875.6 | 789563.2 | 189896.5 | 707905.9 | 1213457  | 789224.5 | 1211609  |
| 24.60933 | 8  | 3 | 5 | 268658.1 | 697080.2 | 763604.9 | 126503   | 26121.94 | 191081.7 | 151125.5 | 1591466  | 80907.29 |

|          |    |   |   |          |          |          |          |          |          |          |          |          |
|----------|----|---|---|----------|----------|----------|----------|----------|----------|----------|----------|----------|
| 43.44483 | 14 | 5 | 4 | 328255.1 | 4754867  | 1928582  | 3232738  | 1048815  | 6354501  | 7116180  | 2683507  | 3232457  |
| 10.16938 | 7  | 4 | 2 | 254701   | 888393.5 | 340046.7 | 622745.2 | 171785.4 | 663107.7 | 1356854  | 954638.1 | 998315.2 |
| 43.0855  | 4  | 1 | 3 | 290569.7 | 4296875  | 111651.6 | 3556063  | 992404.1 | 4398492  | 4314276  | 4349263  | 4315578  |
| 8.8977   | 3  | 3 | 0 | 141099   | 185320   | 87959.49 | 73125.98 | 138154.9 | 194640.8 | 193255.6 | 317995   | 79086.97 |
| 9.8887   | 10 | 5 | 5 | 2470054  | 7390087  | 1197319  | 5131415  | 2954157  | 7481245  | 8175539  | 8896323  | 6173016  |
| 9.840617 | 10 | 5 | 5 | 4141586  | 22856813 | 579474.5 | 19296096 | 4771443  | 23429277 | 22083484 | 22972540 | 23346814 |
| 9.872917 | 10 | 5 | 5 | 9477095  | 39885197 | 5846364  | 32430658 | 9185384  | 41135582 | 38845749 | 44220004 | 44856409 |
| 10.9645  | 10 | 5 | 5 | 1287002  | 6766424  | 766654.1 | 5870976  | 1071856  | 7163196  | 7551358  | 5939332  | 5944708  |
| 10.51392 | 9  | 5 | 4 | 354388.9 | 853028.3 | 333807.2 | 585539.5 | 199931.6 | 642070   | 1419779  | 893178.2 | 655944.2 |
| 9.473717 | 4  | 1 | 3 | 1839164  | 12248313 | 4603050  | 7532469  | 5274764  | 4126278  | 14071012 | 13227947 | 14487875 |
| 9.640367 | 10 | 5 | 5 | 2412991  | 9498424  | 1010518  | 7871910  | 2096414  | 9053376  | 11269146 | 8954538  | 8833983  |
| 9.523633 | 11 | 4 | 5 | 4185468  | 15443250 | 8313380  | 8480222  | 6008708  | 30219296 | 12264007 | 10638103 | 11083760 |
| 8.845933 | 4  | 3 | 1 | 305434.9 | 673148.3 | 557343.8 | 252170.3 | 185446.3 | 469568.3 | 1479682  | 969373.7 | 394697.7 |
| 16.96833 | 5  | 3 | 2 | 33035.97 | 140960.8 | 59577.72 | 96221.75 | 16480.76 | 78542.39 | 106345.2 | 110578   | 199052.7 |
| 11.71625 | 10 | 5 | 5 | 953260.1 | 4322385  | 1311382  | 7170371  | 3764194  | 3800823  | 3580125  | 3361223  | 6587440  |
| 37.60417 | 6  | 3 | 2 | 348311.4 | 7334052  | 2010426  | 5775460  | 971544.9 | 6624749  | 6284985  | 6796371  | 6069756  |
| 9.445217 | 12 | 5 | 5 | 1879907  | 18761579 | 4320684  | 13555290 | 6316506  | 20866341 | 20558683 | 20916364 | 20425217 |
| 10.95602 | 9  | 5 | 4 | 206419.5 | 981299.3 | 200567.6 | 683748.8 | 379680.3 | 952017.2 | 1193621  | 785683.9 | 791848.9 |
| 10.71398 | 5  | 2 | 3 | 128386.2 | 587343.4 | 193705.5 | 427958.5 | 131716.1 | 818867.3 | 774132.7 | 494329.2 | 420681   |
| 21.6875  | 3  | 3 | 0 | 102245   | 288058.5 | 191715.2 | 442120.1 | 117466.5 | 99009.62 | 528089.7 | 458403.3 | 186174.1 |
| 9.986767 | 11 | 5 | 5 | 7186377  | 25952431 | 4178749  | 20835838 | 6244693  | 28535837 | 31985844 | 22996397 | 24124874 |
| 43.51367 | 12 | 5 | 3 | 279483.9 | 3506570  | 432545.1 | 5121840  | 2164059  | 3266566  | 3580551  | 4186163  | 3035796  |
| 9.8322   | 8  | 5 | 3 | 8253704  | 2702661  | 837768.8 | 19568894 | 22684430 | 2411596  | 1626563  | 2445073  | 3216326  |
| 39.01417 | 9  | 5 | 3 | 2891408  | 4988272  | 642152.7 | 27873909 | 30783245 | 4922644  | 5375385  | 5857917  | 4271055  |
| 9.392767 | 10 | 5 | 5 | 12456177 | 44276744 | 7051770  | 34712782 | 12000577 | 51189113 | 47650254 | 36858186 | 36494750 |
| 9.9677   | 10 | 5 | 5 | 1890411  | 6759264  | 1038979  | 5727403  | 1131699  | 8125481  | 7566382  | 6390838  | 5723889  |
| 10.95835 | 6  | 2 | 4 | 366198.6 | 1358675  | 215731.9 | 1576466  | 241866.5 | 1025140  | 1515905  | 1266098  | 1440791  |
| 14.67813 | 5  | 2 | 3 | 269526.6 | 372141.3 | 171666   | 229238   | 122268.2 | 198040   | 349203.7 | 658949.3 | 307874.2 |
| 11.67402 | 5  | 3 | 2 | 48527.06 | 131736   | 41594.88 | 99939.17 | 17551.72 | 127091   | 196013   | 88933.49 | 103399.5 |
| 21.10917 | 8  | 5 | 3 | 103542.2 | 352058.5 | 121101.9 | 447721.4 | 67876.29 | 552995.1 | 301867.1 | 313440.3 | 232787.5 |
| 9.992233 | 8  | 5 | 3 | 1899332  | 905661.6 | 161436.3 | 3487320  | 3474905  | 858152.8 | 653610.3 | 954404.9 | 982958.6 |
| 9.640367 | 10 | 5 | 5 | 12320390 | 51131126 | 6506900  | 41636159 | 12097528 | 51581317 | 61726176 | 44204796 | 48600247 |
| 9.392767 | 9  | 5 | 4 | 689899.4 | 1507195  | 449078.1 | 1008621  | 586267.4 | 1639620  | 1636574  | 1107079  | 1027374  |
| 39.892   | 6  | 2 | 3 | 364959.6 | 8724928  | 584705.7 | 7107575  | 2159513  | 8692173  | 8544795  | 8487461  | 9716984  |
| 42.582   | 5  | 0 | 3 | 213269.2 | 2288146  | 152600.6 | 2044034  | 315447.7 | 2218626  | 2282225  | 2276355  | 2126412  |

|          |    |   |   |          |          |          |          |          |          |          |          |          |
|----------|----|---|---|----------|----------|----------|----------|----------|----------|----------|----------|----------|
| 9.960467 | 7  | 3 | 4 | 783069.9 | 1795175  | 338215.1 | 1279611  | 661866.5 | 2233543  | 2062503  | 1508813  | 1695056  |
| 9.445217 | 14 | 5 | 5 | 2086446  | 17603265 | 4720679  | 13594880 | 3603143  | 23046838 | 19377771 | 20259712 | 13189477 |
| 20.97733 | 5  | 2 | 3 | 265177.9 | 1478696  | 357370.7 | 1196258  | 201770.2 | 1261308  | 1954121  | 1749835  | 1323741  |
| 9.527817 | 7  | 4 | 3 | 430460.7 | 973588.1 | 398504.5 | 623347.5 | 336069.5 | 1453773  | 1306203  | 769778.6 | 852177.2 |
| 44.02033 | 5  | 2 | 3 | 544352.9 | 5904857  | 1405445  | 4200857  | 2079312  | 6995587  | 3938618  | 4884155  | 6799721  |
| 9.40325  | 6  | 3 | 3 | 891263.9 | 5964173  | 1692436  | 4161978  | 2078195  | 5532513  | 5313354  | 3772770  | 7015432  |
| 40.64017 | 6  | 3 | 2 | 333845   | 4863425  | 1686129  | 3335785  | 1533904  | 3920848  | 3809222  | 5253996  | 3675320  |
| 16.27145 | 10 | 5 | 5 | 384468.8 | 2599699  | 582457.8 | 2107587  | 439324.9 | 2088643  | 3051626  | 1853601  | 2928972  |
| 10.39612 | 3  | 0 | 3 | 224649.1 | 967153.7 | 265652.2 | 740317.8 | 207342.3 | 886835   | 829841.3 | 1375452  | 1061681  |
| 23.84967 | 10 | 5 | 5 | 4150258  | 21359841 | 3457375  | 17523086 | 4527095  | 24337644 | 21789392 | 15881841 | 24213085 |
| 9.912633 | 8  | 5 | 3 | 2675592  | 2371580  | 508002.6 | 7298929  | 6651339  | 2371890  | 1954523  | 1780641  | 2901950  |
| 10.96015 | 9  | 5 | 3 | 1531142  | 1548086  | 764247.2 | 2499059  | 1172355  | 2684188  | 1652204  | 1688026  | 1035098  |
| 9.94405  | 9  | 5 | 3 | 1879427  | 3051140  | 1728999  | 7035543  | 5306402  | 1699356  | 2905326  | 4921605  | 4673159  |
| 10.97857 | 6  | 2 | 4 | 1407846  | 2221348  | 1625782  | 903670.9 | 1057024  | 598257.2 | 4188589  | 476674.7 | 3069244  |
| 9.856867 | 10 | 5 | 5 | 4110182  | 18865050 | 2032032  | 15324078 | 4634775  | 18122735 | 18110693 | 16934175 | 18876734 |
| 9.903567 | 9  | 3 | 4 | 1025213  | 1581957  | 381887.9 | 2326153  | 982931.8 | 2169637  | 1705476  | 1515399  | 1332158  |
| 10.05535 | 8  | 4 | 4 | 1050937  | 1577169  | 784166.9 | 3158761  | 2093525  | 651092.8 | 1566609  | 1967891  | 2656435  |
| 9.5876   | 10 | 5 | 5 | 6823948  | 25056592 | 3728077  | 18927126 | 7974958  | 28206809 | 28955441 | 20793010 | 21613026 |
| 10.008   | 8  | 5 | 3 | 278060.5 | 872899.8 | 173224.5 | 596753.4 | 358014.8 | 902102.1 | 750302.7 | 709248.1 | 852551.3 |
| 9.856867 | 10 | 5 | 5 | 5542225  | 32842032 | 4039330  | 26090903 | 8803618  | 30376203 | 27999640 | 31822677 | 36900175 |
| 10.42742 | 6  | 4 | 2 | 445653.7 | 658143   | 378689   | 366927   | 178719.4 | 1182411  | 920750.3 | 502901.3 | 286553.1 |
| 9.365833 | 4  | 3 | 1 | 474792.3 | 1753109  | 710465.1 | 1078829  | 716815.9 | 2562115  | 1905467  | 2132820  | 1468521  |
| 9.82645  | 3  | 3 | 0 | 2189757  | 4830106  | 3714899  | 8169177  | 3336219  | 10909555 | 5674299  | 2895822  | 3154337  |
| 11.01378 | 10 | 5 | 5 | 1137667  | 5683759  | 891095.3 | 4288413  | 1806091  | 6566862  | 4748368  | 4833865  | 5692083  |
| 9.9174   | 8  | 2 | 5 | 956251.8 | 2527569  | 552658   | 1890853  | 765813.4 | 2574089  | 3448930  | 2097874  | 2114961  |
| 9.41815  | 5  | 3 | 2 | 414479.3 | 1809459  | 1005218  | 993783.6 | 661525.2 | 3087890  | 2706215  | 1047458  | 993090.3 |
| 10.28787 | 7  | 3 | 3 | 245523.2 | 751759.5 | 270651.9 | 527242   | 193961.6 | 897730.3 | 896306.1 | 1007738  | 344431.7 |
| 9.431017 | 6  | 3 | 3 | 711710   | 2078082  | 1285837  | 1025443  | 877519.1 | 2743337  | 569107.2 | 951360.5 | 2478872  |
| 10.95835 | 6  | 3 | 3 | 206656.3 | 615830.7 | 227380.5 | 997156.1 | 498422.6 | 865413.5 | 832312.7 | 585868.3 | 426598.4 |
| 9.365833 | 8  | 4 | 3 | 980834.3 | 6662565  | 1379208  | 4479104  | 2834609  | 6600193  | 6705741  | 8787227  | 6270294  |
| 8.657767 | 10 | 5 | 5 | 2485392  | 30590397 | 5845477  | 24208340 | 7504756  | 27809991 | 39384593 | 26213378 | 25827901 |
| 31.78217 | 5  | 3 | 2 | 79639.54 | 348723.5 | 114011.6 | 435627.6 | 50037.62 | 436389.1 | 203001.2 | 442581.2 | 248287.6 |
| 44.14967 | 9  | 2 | 3 | 230673   | 2390147  | 583501.7 | 1731940  | 786073   | 2118521  | 2568568  | 2273630  | 1713753  |
| 9.857683 | 6  | 4 | 2 | 1082587  | 2775793  | 1488615  | 4331096  | 1785881  | 1568133  | 4401074  | 1094401  | 2653264  |
| 9.864767 | 7  | 4 | 3 | 919866.7 | 4889439  | 503794.9 | 3493028  | 1876085  | 5516393  | 4887781  | 4296897  | 4505284  |

|          |    |   |   |          |          |          |          |          |          |          |          |          |
|----------|----|---|---|----------|----------|----------|----------|----------|----------|----------|----------|----------|
| 12.04982 | 8  | 5 | 3 | 1308994  | 3673916  | 4134604  | 623066.4 | 75254.88 | 1354037  | 780259.9 | 4964988  | 877784.6 |
| 9.976317 | 3  | 3 | 0 | 345848.4 | 705167.9 | 151723.7 | 452897.8 | 329607.2 | 855739.5 | 809647.3 | 755741.1 | 620296.6 |
| 10.38125 | 10 | 5 | 5 | 272476.7 | 1644214  | 647110.9 | 1149482  | 294728.8 | 1433469  | 2585236  | 1980032  | 1290083  |
| 9.5812   | 10 | 5 | 5 | 984237.6 | 4858303  | 1333220  | 3705117  | 1091738  | 6901046  | 4308541  | 4459557  | 3342374  |
| 9.445217 | 10 | 4 | 5 | 20195992 | 1.28E+08 | 94672013 | 57614359 | 29736945 | 1.05E+08 | 92013645 | 89795118 | 59821270 |
| 11.88527 | 6  | 3 | 3 | 94949.23 | 500137.3 | 137719.4 | 363443.3 | 151861.3 | 621342   | 633731.8 | 330391.2 | 383794.5 |
| 31.38    | 10 | 5 | 5 | 1509755  | 10393891 | 3056554  | 8119966  | 849388.9 | 15626839 | 9187803  | 7691995  | 9310886  |
| 9.983433 | 4  | 1 | 3 | 514321.8 | 495927.8 | 276991.5 | 874692.8 | 480803.1 | 131152.1 | 850786.5 | 510695.1 | 647906.9 |
| 16.27145 | 10 | 5 | 5 | 441665   | 3208489  | 552894.2 | 2652047  | 625163.8 | 2827621  | 3365913  | 2479111  | 3501872  |
| 10.02372 | 10 | 5 | 5 | 202053.9 | 629414.6 | 40872.77 | 526360.7 | 138372.5 | 593326.9 | 600115.8 | 696410.5 | 632600.2 |
| 14.07785 | 10 | 5 | 5 | 330409   | 2374392  | 429875.1 | 1618075  | 995701.4 | 2962072  | 1949979  | 1963493  | 2414016  |
| 9.392767 | 9  | 5 | 4 | 1268934  | 3150308  | 649922.4 | 2266907  | 1120602  | 3487512  | 3507716  | 2379443  | 2536128  |
| 11.27298 | 10 | 5 | 5 | 139284.3 | 920588.9 | 104303.2 | 705198.7 | 286875.3 | 999015.7 | 737757.2 | 969560.1 | 946925.4 |
| 36.33867 | 9  | 4 | 5 | 116589.7 | 410807.3 | 115385.2 | 617354   | 272407.1 | 350717.8 | 574468.1 | 361849.1 | 286106.9 |
| 9.433    | 5  | 2 | 3 | 1728172  | 9611889  | 5054730  | 5350291  | 3860988  | 15815739 | 3306869  | 7149756  | 13596575 |
| 44.45167 | 9  | 3 | 4 | 429775.6 | 7830452  | 2254703  | 5565531  | 2543314  | 7550307  | 7338442  | 6179625  | 6362994  |
| 40.42433 | 6  | 2 | 3 | 312791.3 | 3109813  | 1293094  | 4867482  | 2230597  | 3542571  | 3797840  | 3778206  | 804482.2 |
| 9.45945  | 8  | 2 | 4 | 1182576  | 7181450  | 4969600  | 3102185  | 3468927  | 1804780  | 10912505 | 11304157 | 10179273 |
| 9.82645  | 4  | 3 | 1 | 570322.3 | 1592351  | 726215.6 | 941493.9 | 654081.8 | 843814.9 | 2163708  | 2267161  | 1910816  |
| 10.92225 | 4  | 1 | 3 | 1055671  | 2987627  | 745179.5 | 1811866  | 1531020  | 3958319  | 3210752  | 3014413  | 1885651  |
| 15.54172 | 5  | 2 | 3 | 120843.5 | 1037783  | 234489.3 | 851738.3 | 141409.2 | 869297.2 | 1248987  | 750506.5 | 1028697  |
| 9.848417 | 10 | 5 | 5 | 14693438 | 71199057 | 1543767  | 57425131 | 18718812 | 71548692 | 68542589 | 71461107 | 72533347 |
| 8.855567 | 8  | 5 | 3 | 379564.3 | 835900.7 | 578452.9 | 394592.8 | 265882.4 | 420002.4 | 1498398  | 1421571  | 556168.8 |
| 9.431017 | 14 | 4 | 5 | 803129.6 | 7230502  | 1657874  | 5222005  | 2474880  | 7581309  | 5747167  | 9938252  | 6664549  |
| 9.43325  | 6  | 4 | 2 | 280193.5 | 1237044  | 214435.9 | 934700.5 | 387064.1 | 1271105  | 1397545  | 977989.6 | 1478840  |
| 10.29105 | 10 | 5 | 5 | 1247025  | 6048779  | 1523027  | 4675203  | 1394388  | 7923982  | 6773007  | 6295835  | 3875446  |
| 9.392767 | 9  | 5 | 4 | 1102096  | 2649978  | 621198.1 | 1803390  | 1076768  | 2985297  | 3022062  | 1925624  | 2038845  |
| 11.147   | 10 | 5 | 5 | 1423956  | 7565875  | 552691.3 | 6483587  | 1439737  | 7636988  | 8345269  | 7068004  | 7002707  |
| 9.431017 | 6  | 1 | 3 | 3182473  | 17396841 | 8241949  | 9361900  | 8841874  | 22197067 | 3227968  | 17065235 | 22864350 |
| 9.43325  | 6  | 3 | 3 | 795990.9 | 6579136  | 2123607  | 4694905  | 1875557  | 7779590  | 6657953  | 7716874  | 7858213  |
| 9.644783 | 10 | 5 | 5 | 1113953  | 3519861  | 887101.5 | 2504908  | 1227780  | 2655083  | 4605858  | 2631985  | 3529135  |
| 21.8975  | 5  | 3 | 1 | 490728   | 3974329  | 1308288  | 2975979  | 617819.3 | 2857178  | 4706514  | 5928418  | 3109729  |
| 8.803133 | 8  | 4 | 4 | 796139.6 | 2459621  | 1643232  | 1188930  | 865494.5 | 1101535  | 4883824  | 2659399  | 2884625  |
| 9.398167 | 4  | 1 | 3 | 2543887  | 16110192 | 7666702  | 7475480  | 10392496 | 20235001 | 12827161 | 4424585  | 23978859 |
| 26.91233 | 4  | 1 | 3 | 178854.1 | 2206291  | 675581.9 | 1473955  | 866159   | 2561919  | 2512826  | 999789.1 | 2505010  |

|          |    |   |   |          |          |          |          |          |          |          |          |          |
|----------|----|---|---|----------|----------|----------|----------|----------|----------|----------|----------|----------|
| 9.858833 | 8  | 4 | 4 | 1177911  | 6013929  | 1438957  | 4942562  | 483251.7 | 5713357  | 3632554  | 6622186  | 7028046  |
| 8.857667 | 4  | 3 | 1 | 307649.8 | 616754.5 | 658399.8 | 131783.9 | 153082.6 | 451703.4 | 278674.6 | 635881.5 | 1717513  |
| 9.445217 | 14 | 5 | 5 | 3623112  | 28343688 | 4885501  | 22688015 | 6896458  | 25688347 | 33192730 | 33482588 | 22267344 |
| 44.9835  | 7  | 3 | 4 | 133356.3 | 247866   | 62821.95 | 328289   | 101271.4 | 258544.1 | 323840.5 | 165617.2 | 285197   |
| 9.45945  | 8  | 4 | 4 | 869223.7 | 5854298  | 3716395  | 3096975  | 1176791  | 4587669  | 4134611  | 5182976  | 12349211 |
| 22.36417 | 8  | 4 | 3 | 49162.14 | 264377.8 | 73530.99 | 190883.8 | 82987.01 | 310746.6 | 155872.1 | 310823.5 | 220149.5 |
| 10.02963 | 6  | 2 | 4 | 2173120  | 6846216  | 4967301  | 3018289  | 2587267  | 12483676 | 1429567  | 9624634  | 8907356  |
| 9.7565   | 9  | 5 | 4 | 2772221  | 3619090  | 1040367  | 6805002  | 4325027  | 5321175  | 3492168  | 3709097  | 2682219  |
| 9.421167 | 11 | 5 | 5 | 1662444  | 14017048 | 5719595  | 8138450  | 6769361  | 20136385 | 14748109 | 18321378 | 10902720 |
| 9.82645  | 5  | 2 | 3 | 768105.6 | 2455978  | 714364.7 | 1657265  | 961543.5 | 2042850  | 1465531  | 3106821  | 3134592  |
| 11.96588 | 10 | 5 | 5 | 2057950  | 14207727 | 2663172  | 9793584  | 5820841  | 16951898 | 10902468 | 13300724 | 12939970 |
| 9.388367 | 10 | 5 | 5 | 2152250  | 8605922  | 2882969  | 5824558  | 3061297  | 9678853  | 5443659  | 6216724  | 9062204  |
| 9.856867 | 11 | 5 | 5 | 6941068  | 38150845 | 4010997  | 29288410 | 11936154 | 39654484 | 43300465 | 34206081 | 33937948 |
| 9.4468   | 9  | 4 | 4 | 1474347  | 8569734  | 4433755  | 4960184  | 3076084  | 3866328  | 4745811  | 14069817 | 8205155  |
| 9.45945  | 8  | 4 | 3 | 880013.8 | 5728703  | 3480140  | 3178940  | 581868.2 | 11399044 | 3046803  | 2869497  | 4987061  |
| 9.522017 | 7  | 5 | 2 | 602686.3 | 1381431  | 567146.5 | 2365457  | 1304967  | 2271104  | 892901.6 | 1002099  | 1133554  |
| 9.445217 | 14 | 5 | 5 | 3663436  | 27239841 | 4933149  | 21813899 | 6494745  | 25379367 | 32085409 | 30829622 | 19715547 |
| 9.952017 | 10 | 5 | 5 | 715635   | 2608092  | 316779.6 | 2268128  | 402190.5 | 3120123  | 2647445  | 2418970  | 2292260  |
| 21.05033 | 7  | 4 | 3 | 322112.2 | 1899089  | 456612   | 1512049  | 362590.4 | 1742479  | 2599883  | 2088277  | 1614960  |
| 9.999217 | 6  | 3 | 3 | 590656.8 | 779062.8 | 429232.1 | 436761   | 274517   | 1264727  | 107672.4 | 980802.5 | 839971.5 |
| 9.888767 | 5  | 1 | 4 | 7611449  | 16701300 | 11412365 | 7357795  | 8109216  | 13833192 | 34642174 | 15288267 | 16784339 |
| 10.28787 | 4  | 3 | 1 | 213735.3 | 449353.6 | 204995.7 | 290787.7 | 111308.2 | 207743.2 | 766594   | 370085   | 488494.5 |
| 9.45945  | 8  | 4 | 3 | 846735   | 3417907  | 2026133  | 1847223  | 1118699  | 1559239  | 4981754  | 2335368  | 2057178  |
| 11.09082 | 5  | 3 | 2 | 223848.3 | 255936.3 | 104171.8 | 156317.6 | 109135.5 | 215137.2 | 321030.4 | 375722.1 | 103967.8 |
| 9.845483 | 8  | 3 | 4 | 1154456  | 4456139  | 1780471  | 2806138  | 1754544  | 6165891  | 3079854  | 5385128  | 5586015  |
| 9.8445   | 4  | 1 | 3 | 941250.6 | 3137957  | 554650.8 | 2104986  | 1379803  | 3518639  | 2472532  | 2685011  | 3219063  |
| 9.568567 | 15 | 5 | 5 | 30842502 | 2.29E+08 | 44747682 | 1.79E+08 | 60423255 | 2.77E+08 | 2.58E+08 | 2.35E+08 | 1.61E+08 |
| 9.43325  | 7  | 5 | 2 | 412090.6 | 1477740  | 394714.1 | 1087230  | 439985   | 1886010  | 1000932  | 1155061  | 1517595  |
| 10.7349  | 6  | 5 | 1 | 823224.1 | 3765690  | 1201537  | 2697761  | 1081515  | 4676673  | 5243493  | 3553740  | 3093656  |
| 9.983433 | 10 | 5 | 5 | 1075421  | 4907932  | 734642.4 | 3954516  | 1209816  | 5832041  | 4258107  | 4366689  | 4515116  |
| 9.445217 | 12 | 5 | 5 | 6730107  | 72227590 | 24165078 | 53834933 | 11704917 | 53479413 | 70785543 | 66843353 | 56499793 |
| 24.08283 | 6  | 2 | 4 | 131494.9 | 475334.5 | 361963.4 | 206898.4 | 124139.8 | 282595.2 | 537773.5 | 204970   | 269674.6 |
| 11.74603 | 3  | 0 | 3 | 3616543  | 622241   | 217081.4 | 10302522 | 13277546 | 771466   | 840620.9 | 406669.6 | 372282.5 |
| 31.39317 | 6  | 3 | 3 | 205592.9 | 1668861  | 223234.3 | 1399780  | 334461.5 | 2014047  | 1723108  | 1554809  | 1634589  |
| 10.008   | 9  | 5 | 4 | 755109.1 | 1027801  | 401091.6 | 1475871  | 541405.9 | 1224641  | 1539810  | 1120376  | 707367.4 |



|          |    |   |   |          |          |          |          |          |          |          |          |          |
|----------|----|---|---|----------|----------|----------|----------|----------|----------|----------|----------|----------|
| 22.91483 | 4  | 3 | 1 | 352029.4 | 962633.1 | 888800.2 | 1707518  | 685415.2 | 1836622  | 321189.7 | 2030072  | 304001.3 |
| 27.54833 | 7  | 4 | 3 | 229858.6 | 620032.9 | 505484   | 1060943  | 435342.8 | 1387723  | 231093.9 | 223401.9 | 877930.3 |
| 12.04927 | 5  | 4 | 1 | 841741.5 | 2449204  | 2447589  | 663425.5 | 292872.2 | 1126501  | 508600.4 | 3694632  | 732316   |
| 7.64755  | 9  | 5 | 4 | 1154025  | 8803620  | 2046462  | 5889596  | 3774613  | 9542330  | 7332241  | 6844460  | 8335688  |
| 20.70583 | 4  | 1 | 3 | 82506.77 | 355467.8 | 287336.8 | 143648.5 | 85902.5  | 208613.8 | 215546   | 868738.7 | 244279.8 |
| 21.05433 | 5  | 2 | 3 | 77974.01 | 275777.9 | 81875.15 | 206639.5 | 64694.02 | 319070.7 | 313046.4 | 344972.3 | 262339.7 |
| 10.32433 | 7  | 4 | 3 | 247463.6 | 975490.6 | 201395.7 | 701658.7 | 351834.5 | 848036.2 | 738785.4 | 1156491  | 924887   |
| 9.691583 | 6  | 4 | 2 | 279850.5 | 448575.1 | 197620.4 | 620011.4 | 168275.4 | 628311.3 | 155291.7 | 626789.3 | 371275.6 |
| 9.340183 | 7  | 3 | 3 | 1489108  | 9007199  | 2282080  | 7096833  | 1761622  | 12621878 | 9622375  | 8528097  | 6883225  |
| 41.89167 | 9  | 3 | 3 | 280667.3 | 2675405  | 1133998  | 4031680  | 1685763  | 3199322  | 706075.8 | 2789459  | 3555316  |
| 9.93625  | 10 | 5 | 5 | 21707994 | 71840023 | 10432691 | 56280215 | 20346556 | 81050617 | 81426365 | 57634445 | 64733293 |
| 9.91765  | 9  | 5 | 4 | 1130883  | 2942770  | 460433.9 | 2143534  | 1064802  | 3370945  | 3080554  | 2161830  | 2970568  |
| 10.95602 | 5  | 2 | 3 | 188868.6 | 311617.8 | 203434.1 | 524118.1 | 249140.9 | 222269.2 | 624526.7 | 404846.4 | 172939.4 |
| 9.40615  | 6  | 4 | 2 | 1876721  | 15838858 | 3328044  | 11641511 | 5306605  | 11958490 | 15351772 | 21129223 | 15922915 |
| 9.445217 | 11 | 5 | 4 | 1194514  | 11333076 | 2564916  | 7709603  | 4701609  | 13776531 | 13862418 | 11625532 | 8709392  |
| 9.992233 | 10 | 5 | 5 | 503406   | 1528336  | 203622.2 | 1218690  | 406669.3 | 1669409  | 1773393  | 1554489  | 1311677  |
| 9.4468   | 9  | 4 | 4 | 980117.5 | 3498099  | 1190539  | 2248372  | 1472319  | 2269310  | 5380840  | 3231019  | 3788776  |
| 11.36835 | 6  | 4 | 2 | 159461.5 | 508161.8 | 281509.2 | 294874.9 | 135935.9 | 962222   | 533789.3 | 334503.8 | 226348.6 |
| 9.43325  | 14 | 5 | 5 | 1728333  | 13001884 | 3956371  | 8843607  | 4903644  | 16998132 | 16355218 | 13747083 | 9973950  |
| 9.678733 | 8  | 5 | 3 | 967374.8 | 1471510  | 688355.2 | 2468874  | 1301133  | 1024045  | 2670387  | 1257919  | 1018816  |
| 9.43325  | 7  | 3 | 4 | 727027.9 | 3646266  | 1500966  | 2471647  | 898889.3 | 2178162  | 6058675  | 3981452  | 3236354  |
| 10.9645  | 10 | 5 | 5 | 354199.9 | 1958851  | 258104.6 | 1712414  | 271953.1 | 2132463  | 2176757  | 1686997  | 1666873  |
| 9.915583 | 7  | 5 | 2 | 9966088  | 1744438  | 340570   | 22591558 | 28725757 | 2087870  | 1417579  | 1407126  | 2097100  |
| 23.79867 | 10 | 5 | 5 | 344386.4 | 2312901  | 322059.3 | 1757809  | 740496.1 | 2503890  | 2571776  | 2264600  | 1774158  |
| 9.999217 | 10 | 5 | 5 | 846087.6 | 3203115  | 569102.1 | 2363821  | 1098362  | 3080628  | 3068756  | 2785228  | 2884664  |
| 25.6375  | 6  | 4 | 2 | 330429.5 | 1305687  | 1338781  | 2520749  | 1275791  | 108193.5 | 739131.7 | 807810.5 | 3578650  |
| 9.976317 | 10 | 5 | 5 | 2889379  | 10983458 | 3101979  | 8591484  | 1713610  | 10533755 | 10346381 | 9422778  | 16303484 |
| 9.91765  | 9  | 4 | 5 | 7885394  | 19308133 | 10479837 | 34554745 | 19922949 | 32717505 | 23980808 | 10554023 | 6978555  |
| 27.96683 | 10 | 5 | 5 | 535446.4 | 2542907  | 797659.6 | 1926399  | 447718   | 2564363  | 2369450  | 1974558  | 1920223  |
| 10.38125 | 7  | 5 | 2 | 194081.1 | 553210.4 | 165141   | 390045.8 | 185347.2 | 387572   | 633358.8 | 790169.2 | 415809.6 |
| 9.392767 | 10 | 5 | 5 | 4527620  | 14945976 | 2725147  | 11485800 | 4398204  | 17559823 | 16341078 | 12195160 | 11810042 |
| 10.0614  | 8  | 4 | 4 | 581112.8 | 1758821  | 120926.8 | 1384753  | 512851.9 | 1738602  | 1936115  | 1655812  | 1646410  |
| 9.406667 | 9  | 3 | 5 | 7247313  | 21385116 | 27396148 | 1538244  | 1174335  | 52548597 | 891439.5 | 50196590 | 2526441  |
| 9.388617 | 5  | 2 | 3 | 670171   | 1351707  | 127384.5 | 1075568  | 374854.2 | 1471167  | 1385733  | 1222561  | 1212055  |
| 9.992233 | 3  | 3 | 0 | 238964.1 | 397993.4 | 241366.5 | 209628.7 | 143894.4 | 581815.7 | 0        | 390127.2 | 419207.8 |

|          |    |   |   |          |          |          |          |          |          |          |          |          |
|----------|----|---|---|----------|----------|----------|----------|----------|----------|----------|----------|----------|
| 9.421167 | 7  | 3 | 4 | 3107705  | 21984143 | 22106337 | 5948635  | 2796193  | 48613026 | 2178942  | 8030621  | 43343712 |
| 9.43325  | 7  | 4 | 3 | 343587.6 | 1910253  | 611897   | 1090479  | 1056371  | 1674463  | 1393563  | 2919054  | 2031667  |
| 9.840617 | 9  | 5 | 4 | 1040850  | 3576254  | 675636.1 | 2857005  | 856911   | 3548244  | 3451867  | 4158919  | 4191064  |
| 10.01545 | 7  | 3 | 4 | 300848.8 | 428733.5 | 221117.5 | 620516.2 | 190648.2 | 413240.1 | 56842.69 | 587302   | 596558.3 |
| 23.16167 | 10 | 5 | 5 | 656690.6 | 4812534  | 611542   | 4111545  | 864197.7 | 5132683  | 5518534  | 3877189  | 4856606  |
| 33.8165  | 6  | 2 | 4 | 259704.6 | 1702834  | 459151.3 | 1326289  | 337612.3 | 1989275  | 967404.3 | 1534737  | 2040714  |
| 42.22233 | 8  | 3 | 4 | 299086.3 | 5225036  | 1361395  | 4204845  | 610576.2 | 5036701  | 7340287  | 3584911  | 5375488  |
| 9.976317 | 9  | 5 | 4 | 683860.4 | 1971295  | 338832.6 | 1517932  | 584787.9 | 2137092  | 1383270  | 2243760  | 2062245  |
| 11.02063 | 6  | 4 | 2 | 1377366  | 2068671  | 1391868  | 3496511  | 1669612  | 1123508  | 2128043  | 4457704  | 1230511  |
| 9.527817 | 6  | 5 | 1 | 733634.9 | 551498.4 | 97225.24 | 356766.5 | 263800.4 | 518145   | 671872.6 | 418096.3 | 615535.5 |
| 24.1025  | 4  | 1 | 3 | 37747364 | 1.97E+08 | 1.1E+08  | 89418625 | 1.22E+08 | 2.42E+08 | 346475   | 2.53E+08 | 2.38E+08 |
| 9.994767 | 10 | 4 | 4 | 931220.3 | 831032.8 | 397473.2 | 1146661  | 260002.9 | 916047.3 | 387877.1 | 988680.9 | 493458.6 |
| 20.23033 | 6  | 3 | 3 | 169460.6 | 980198.6 | 107113   | 725488.1 | 347974.9 | 1029863  | 959628.4 | 828253.8 | 962980.1 |
| 9.538267 | 11 | 4 | 5 | 1643908  | 7180314  | 4162495  | 4041799  | 2004889  | 4810285  | 8417631  | 11895523 | 9482178  |
| 9.445217 | 14 | 5 | 5 | 1447477  | 12914552 | 3826388  | 9691310  | 3068338  | 17472387 | 14487438 | 14660537 | 9765965  |
| 11.25905 | 6  | 4 | 2 | 150495.8 | 466475.3 | 51214.17 | 332391.6 | 183796.6 | 395898.8 | 455647.9 | 514369.4 | 518853   |
| 22.2535  | 6  | 3 | 3 | 276631.1 | 1572356  | 383556.2 | 1267224  | 253444.2 | 1207429  | 2208403  | 1613341  | 1403092  |
| 10.58813 | 10 | 5 | 5 | 553642.1 | 2102916  | 641675.7 | 1597585  | 405680.9 | 1689406  | 3185577  | 2126025  | 1578321  |
| 21.39367 | 10 | 5 | 5 | 892696.1 | 2998743  | 2216242  | 1378404  | 673501.3 | 6543392  | 2927118  | 1024532  | 1235306  |
| 24.82567 | 4  | 3 | 1 | 316992.9 | 921273.7 | 1079019  | 141979.2 | 85719.42 | 2771047  | 970582   | 210335.4 | 222885   |
| 11.27725 | 10 | 5 | 5 | 1759931  | 9021681  | 1183363  | 6513457  | 3413303  | 9360134  | 7051104  | 10085725 | 9699499  |
| 8.981583 | 8  | 3 | 5 | 447693.9 | 1277137  | 609762.2 | 767334.5 | 479366.3 | 1138140  | 515611.1 | 1469727  | 1083234  |
| 10.93468 | 5  | 4 | 1 | 357506.1 | 977646.4 | 237049.1 | 1446389  | 635578.6 | 894615.8 | 813908.9 | 1275997  | 727442.9 |
| 9.445217 | 14 | 5 | 5 | 2099207  | 10658659 | 4192600  | 7519917  | 1906309  | 8917934  | 10493132 | 9869473  | 17618799 |
| 28.2735  | 5  | 4 | 1 | 65892.09 | 360269.7 | 145985.4 | 240279.5 | 108997.9 | 414148.4 | 564627.7 | 200998.7 | 238962.5 |
| 9.872883 | 10 | 5 | 5 | 1595303  | 7967465  | 739066.7 | 6907282  | 1389932  | 8245084  | 7876251  | 7355532  | 9084244  |
| 39.27317 | 6  | 3 | 2 | 310723.8 | 5890865  | 2514178  | 8002119  | 2005620  | 7383530  | 8098460  | 3761338  | 7596916  |
| 26.023   | 8  | 4 | 4 | 99913.88 | 555818.4 | 240160   | 378435.9 | 92942.65 | 324712.5 | 959238.3 | 502521.4 | 544407.2 |
| 9.992233 | 5  | 3 | 2 | 322072.9 | 585580.3 | 292573.9 | 343662.3 | 222989.3 | 631691.9 | 81046.51 | 820903.7 | 749349.1 |
| 9.94455  | 7  | 4 | 3 | 1001524  | 1681410  | 314943.2 | 1395162  | 304727   | 2165862  | 1621416  | 1781009  | 1344464  |
| 12.11005 | 7  | 4 | 3 | 64901.01 | 150089   | 36708.79 | 212871.9 | 84274.39 | 174150.3 | 90375    | 139453.3 | 167710.5 |
| 9.8322   | 9  | 5 | 4 | 945130.4 | 5191347  | 716013.2 | 3771409  | 1927912  | 4992871  | 4493779  | 4930971  | 5141760  |
| 9.392767 | 10 | 5 | 5 | 4625165  | 14961801 | 2731196  | 11508375 | 4412380  | 17628576 | 16451045 | 12215719 | 11810075 |
| 9.933967 | 8  | 5 | 3 | 1630886  | 1297465  | 280548.6 | 3784739  | 3450102  | 1215851  | 1755238  | 1242432  | 988538.5 |
| 9.744917 | 3  | 0 | 3 | 717681.5 | 2779516  | 400330.7 | 1841502  | 1284826  | 2899084  | 2331594  | 2578613  | 2693640  |

|          |    |   |   |          |          |          |          |          |          |          |          |          |
|----------|----|---|---|----------|----------|----------|----------|----------|----------|----------|----------|----------|
| 10.23043 | 5  | 2 | 3 | 278492.6 | 653534.7 | 298910.2 | 931650.6 | 303779.5 | 1074851  | 438355.9 | 866782.6 | 452877.3 |
| 9.388367 | 10 | 5 | 5 | 2264438  | 8666889  | 3041125  | 5869323  | 3021666  | 9822340  | 5502443  | 5924420  | 9193884  |
| 9.8445   | 10 | 5 | 5 | 1270562  | 6950324  | 968207.4 | 5599178  | 1766543  | 8059606  | 7284098  | 5821757  | 6056642  |
| 9.445217 | 5  | 2 | 3 | 313503.8 | 1634361  | 817909.8 | 971711.5 | 586099.8 | 945425.2 | 787513.6 | 2482300  | 2492363  |
| 10.16938 | 10 | 5 | 5 | 1802538  | 7868448  | 1185367  | 6624554  | 1483505  | 8853842  | 9146078  | 6830247  | 6484972  |
| 10.58813 | 4  | 1 | 3 | 204618.4 | 654147.8 | 275482.9 | 442497.6 | 155808.5 | 246295.8 | 777836.5 | 983325   | 710857.2 |
| 9.106183 | 9  | 5 | 4 | 512083.1 | 1531156  | 259891.4 | 1071974  | 619664.6 | 1725674  | 1784442  | 1382168  | 1606850  |
| 9.348233 | 5  | 3 | 2 | 533064.4 | 635191.7 | 350460   | 334448   | 298583.1 | 801017.6 | 1023501  | 570288.7 | 698082.5 |
| 14.07797 | 11 | 5 | 5 | 157189.3 | 1114695  | 304849.2 | 763250.2 | 437553.1 | 1517570  | 762826.2 | 1329006  | 1029403  |
| 9.701933 | 5  | 3 | 2 | 224704.3 | 512306.1 | 86275.8  | 347187.7 | 224268.5 | 562171.7 | 587926.5 | 521038.6 | 524207.9 |
| 10.95835 | 10 | 5 | 5 | 197927.2 | 873326.7 | 171647.6 | 731310   | 132162.9 | 1018517  | 1049056  | 711468.8 | 677515.2 |
| 10.9645  | 8  | 4 | 4 | 2086134  | 10262885 | 1861280  | 8917803  | 416621.7 | 10882130 | 9273412  | 8460688  | 13204806 |
| 10.90802 | 6  | 3 | 3 | 190630.1 | 630159.6 | 281867.2 | 398163.4 | 214169.3 | 920218.5 | 693143.9 | 367409.2 | 305208.8 |
| 31.45083 | 10 | 5 | 5 | 283649.1 | 2497950  | 638367.5 | 2021099  | 297024.8 | 3530900  | 2155433  | 1833728  | 2438936  |
| 9.842    | 8  | 5 | 3 | 30377220 | 1691330  | 477627.4 | 58282887 | 78825716 | 1687326  | 1749188  | 1166774  | 1415207  |
| 40.78383 | 6  | 2 | 4 | 347227.3 | 2804785  | 1260894  | 3800807  | 827715.9 | 3109880  | 3144979  | 654257.8 | 4000665  |
| 9.4775   | 10 | 5 | 5 | 2620863  | 10081699 | 376675.7 | 8590267  | 2070842  | 10574994 | 10123042 | 10251266 | 9578297  |
| 9.856867 | 10 | 5 | 5 | 7123831  | 42937197 | 5138934  | 31434346 | 15784394 | 39873160 | 36853547 | 41418208 | 48130633 |
| 9.946467 | 10 | 5 | 5 | 2599099  | 10229803 | 1788257  | 8701648  | 1514858  | 11314058 | 9356612  | 7524693  | 11938147 |
| 11.18008 | 7  | 4 | 3 | 112605.2 | 303738.3 | 167223.3 | 166390.2 | 126696.7 | 562765.7 | 295559.3 | 308212.7 | 98367.04 |
| 10.04167 | 3  | 3 | 0 | 1216651  | 2345881  | 2021348  | 894289.1 | 239720.9 | 1856256  | 1558486  | 1734910  | 5871360  |
| 9.119933 | 8  | 4 | 4 | 578148.9 | 1847249  | 322848.8 | 1269690  | 782477.3 | 1794949  | 2354869  | 1859067  | 1767405  |
| 9.842    | 9  | 5 | 4 | 1528490  | 4902153  | 1074750  | 3346560  | 2055780  | 4964095  | 4639577  | 3249611  | 5605642  |
| 9.960467 | 6  | 3 | 3 | 486385.6 | 959659.7 | 466757.9 | 1358800  | 396741.3 | 1662657  | 419204   | 732600.6 | 1117450  |
| 10.9645  | 10 | 5 | 5 | 305511   | 1374744  | 256627.6 | 1113582  | 307598.9 | 1659373  | 1554923  | 1183712  | 1042943  |
| 34.11883 | 9  | 5 | 4 | 777349.4 | 17117334 | 2986703  | 14604482 | 2432224  | 17706348 | 17655785 | 20937085 | 12616815 |
| 9.952017 | 10 | 5 | 5 | 629640.1 | 2005998  | 394436.8 | 1581862  | 514800   | 2473172  | 2216620  | 2139278  | 1519767  |
| 24.60933 | 3  | 0 | 3 | 29737.5  | 41853.26 | 23956.51 | 95473.55 | 73668.85 | 71560.43 | 62332.3  | 25959.18 | 15956.38 |
| 9.94455  | 11 | 5 | 4 | 1168390  | 2372345  | 743591.2 | 2947578  | 446495.4 | 3059131  | 3187990  | 1759622  | 1537914  |
| 9.392767 | 9  | 5 | 4 | 671185.9 | 2065032  | 1000176  | 1316211  | 484939.3 | 2102974  | 1746349  | 845629.1 | 2013156  |
| 10.01477 | 3  | 0 | 3 | 335267.4 | 199146.8 | 57583.55 | 504277.2 | 425229   | 242348.1 | 176046.9 | 110697.8 | 252089.9 |
| 42.395   | 10 | 4 | 3 | 380759.2 | 5519389  | 1089068  | 8308389  | 3854062  | 4341328  | 4756737  | 5210692  | 6370603  |
| 8.93965  | 6  | 5 | 1 | 558111.3 | 1279843  | 868802.8 | 645298.7 | 312929.2 | 629685.6 | 843306.1 | 998076.5 | 2797821  |
| 10.95835 | 4  | 1 | 3 | 1226370  | 3562456  | 1935537  | 1822690  | 1855441  | 4633468  | 5423803  | 356049.7 | 3865214  |
| 30.16817 | 3  | 0 | 3 | 78364.89 | 292694.3 | 23737.09 | 215115   | 107883.8 | 291929.1 | 327153   | 278794.3 | 264403.2 |

|          |    |   |   |          |          |          |          |          |          |          |          |          |
|----------|----|---|---|----------|----------|----------|----------|----------|----------|----------|----------|----------|
| 22.95817 | 3  | 3 | 0 | 117523.9 | 281531.8 | 263507.8 | 473812.4 | 95298.75 | 115568.1 | 82456.63 | 77114.59 | 623896.9 |
| 9.40255  | 9  | 5 | 4 | 668143.9 | 1642184  | 393075   | 1071741  | 756944.9 | 2110445  | 1971182  | 1467830  | 1148908  |
| 11.39828 | 8  | 5 | 3 | 482184.5 | 5010489  | 1345217  | 3463688  | 1940301  | 7257186  | 3754745  | 4601594  | 4347099  |
| 10.23043 | 10 | 5 | 5 | 255676.7 | 556112.9 | 212794   | 714991.7 | 103428.7 | 692139.9 | 492216.4 | 839379   | 291391.8 |
| 9.9677   | 8  | 5 | 3 | 6771089  | 1536216  | 233153.2 | 9698343  | 11436217 | 1772709  | 1490783  | 1603328  | 1653723  |
| 9.673333 | 8  | 3 | 5 | 271868.8 | 1291121  | 220567.9 | 934608.1 | 480675.6 | 1203441  | 1407853  | 944608.1 | 1412273  |
| 9.8322   | 7  | 4 | 3 | 1278969  | 4739931  | 1708069  | 2895603  | 2256203  | 4119570  | 2230194  | 4883318  | 5730501  |
| 10.10223 | 6  | 2 | 4 | 518948.2 | 1697260  | 356897.5 | 1335079  | 428764.9 | 2086849  | 1282778  | 2057398  | 1533718  |
| 9.915583 | 5  | 2 | 3 | 1386792  | 3741800  | 814732.8 | 2207615  | 2097594  | 4277246  | 2669354  | 3085219  | 4145069  |
| 16.94267 | 8  | 3 | 5 | 75111.95 | 331379.3 | 119454.4 | 233866.9 | 90127.9  | 511565.8 | 228690.4 | 387846.9 | 295245.9 |
| 15.4474  | 10 | 5 | 5 | 321106.9 | 1773523  | 652304.7 | 1154717  | 698959.4 | 2322650  | 1076998  | 1955033  | 2420467  |
| 43.91967 | 6  | 4 | 1 | 659799.3 | 6693112  | 2657612  | 9700618  | 3755372  | 4877848  | 11079923 | 6144448  | 4384510  |
| 9.406667 | 6  | 3 | 3 | 410694.2 | 2255860  | 1340917  | 1276180  | 515167.3 | 1424252  | 3986552  | 2527998  | 2841879  |
| 9.915583 | 6  | 4 | 2 | 1537717  | 2089245  | 1204568  | 5922551  | 5342585  | 1731712  | 4224628  | 1339233  | 1462416  |
| 9.845483 | 8  | 5 | 3 | 627498.6 | 2474820  | 406711.9 | 2015521  | 573200.2 | 1941426  | 2231268  | 2498347  | 2722191  |
| 10.008   | 7  | 5 | 2 | 406546.2 | 549142.3 | 110484.1 | 734234.3 | 250808.1 | 629850.1 | 390678.1 | 567368.7 | 665792.9 |
| 9.992233 | 3  | 3 | 0 | 6342427  | 23486389 | 20217269 | 38558496 | 9827682  | 8676817  | 7651375  | 48502841 | 42474819 |
| 24.79633 | 4  | 3 | 1 | 285343.5 | 659670.9 | 855159.9 | 50132.84 | 46960.67 | 2081055  | 847157.1 | 164644.9 | 56199.5  |
| 9.920517 | 10 | 5 | 5 | 2200992  | 5330302  | 929111.2 | 4196676  | 1453293  | 6752983  | 5212255  | 4274376  | 4839118  |
| 9.946467 | 5  | 1 | 4 | 618978.4 | 378108.9 | 705381.7 | 1366120  | 1307752  | 0        | 1622770  | 267774.5 | 0        |
| 10.9645  | 10 | 5 | 5 | 223851.5 | 1107376  | 223355.1 | 904042.7 | 221706.6 | 1288315  | 1286968  | 855599.1 | 872372   |
| 9.3735   | 4  | 1 | 3 | 525720.8 | 4935778  | 1564459  | 3331852  | 1916133  | 6869551  | 3168854  | 5683293  | 5466476  |
| 9.77355  | 4  | 1 | 3 | 536530   | 690908.2 | 404508   | 1014195  | 285768.3 | 963112.2 | 0        | 858808.2 | 963646.3 |
| 9.45135  | 5  | 3 | 2 | 499363.8 | 942626.5 | 320648.2 | 576320.6 | 460045.3 | 1041659  | 997996.5 | 1068617  | 1216679  |
| 9.830283 | 8  | 3 | 5 | 840061.9 | 1506224  | 333912.1 | 2053616  | 741091.1 | 1516229  | 1147612  | 1496615  | 1329641  |
| 9.992233 | 8  | 5 | 3 | 1506494  | 931709.3 | 183069.4 | 2317265  | 1945404  | 932081.9 | 624780.8 | 1107536  | 1011076  |
| 9.2529   | 5  | 4 | 1 | 1063051  | 3446485  | 3576232  | 6261054  | 2387070  | 1144431  | 9788376  | 2192359  | 2358424  |
| 43.977   | 8  | 2 | 4 | 397206.5 | 7012612  | 1010367  | 4957381  | 2831423  | 6468853  | 6101978  | 7828397  | 8353929  |
| 13.15802 | 6  | 1 | 5 | 50937.79 | 313095.7 | 76021.34 | 231322.4 | 100277.5 | 214532.8 | 271012.7 | 392671   | 302192.3 |
| 11.68858 | 4  | 3 | 1 | 93674.38 | 257293.3 | 187456.8 | 118030.2 | 89912.56 | 585139.3 | 210837.7 | 114075.6 | 167446.6 |
| 9.859983 | 8  | 4 | 4 | 2614536  | 4944764  | 3467895  | 2444185  | 1067816  | 2439140  | 10992219 | 4404968  | 3922199  |
| 9.972483 | 12 | 5 | 4 | 5574494  | 11413621 | 4622252  | 7148411  | 4724315  | 15788914 | 6864455  | 6632473  | 11601232 |
| 21.86017 | 3  | 3 | 0 | 357563.4 | 1326590  | 1374557  | 2315757  | 403665   | 2835630  | 657076.6 | 244771.3 | 100052.7 |
| 10.01545 | 6  | 3 | 3 | 336078.2 | 309998.5 | 219132.2 | 595534.9 | 373243.8 | 182639.1 | 0        | 499393.7 | 515044.1 |
| 9.388617 | 9  | 5 | 4 | 702918.7 | 1606274  | 455860.7 | 1064269  | 691261.9 | 1963408  | 2059120  | 1300641  | 981255.3 |

|          |    |   |   |          |          |          |          |          |          |          |          |          |
|----------|----|---|---|----------|----------|----------|----------|----------|----------|----------|----------|----------|
| 9.856867 | 10 | 5 | 5 | 7064919  | 42303455 | 6406872  | 33603030 | 11474127 | 39623727 | 33284595 | 41729138 | 48561053 |
| 9.445217 | 14 | 5 | 5 | 5881420  | 34911857 | 6612596  | 25487225 | 12541323 | 40163365 | 40205441 | 33073971 | 24312464 |
| 16.27145 | 9  | 5 | 4 | 191368   | 1346741  | 218533.7 | 1130010  | 254383.4 | 1196290  | 1493503  | 1052380  | 1406918  |
| 10.008   | 8  | 3 | 5 | 2108708  | 1738299  | 919745   | 3319254  | 2154553  | 2381781  | 131807.6 | 2217268  | 1834921  |
| 9.45945  | 9  | 5 | 3 | 1.28E+08 | 10029367 | 1867015  | 6.47E+08 | 8.97E+08 | 12367081 | 10955128 | 8012783  | 10584280 |
| 9.46265  | 5  | 2 | 3 | 573372.6 | 4416340  | 1021005  | 3327965  | 1331356  | 5537388  | 4204689  | 2929370  | 4209955  |
| 43.93417 | 4  | 1 | 3 | 258848.4 | 2390887  | 1195705  | 3288294  | 627493.5 | 3089420  | 2523551  | 3115723  | 2931446  |
| 9.986767 | 7  | 5 | 2 | 836110.7 | 854418.9 | 595754.2 | 418854   | 244244.4 | 1911095  | 576310.1 | 692807.7 | 614301.5 |
| 31.26383 | 10 | 5 | 5 | 201968.6 | 1336124  | 527847.6 | 958573.4 | 125039.5 | 2180756  | 1217059  | 735573.6 | 1177600  |
| 9.392767 | 10 | 5 | 5 | 3240121  | 10417099 | 1759859  | 8087074  | 3060067  | 11838046 | 11600337 | 8745123  | 8256995  |
| 10.38125 | 10 | 5 | 5 | 203571   | 1143725  | 408040.7 | 734839.2 | 483753.9 | 820742.1 | 1677378  | 1420475  | 698140.9 |
| 9.655967 | 11 | 5 | 5 | 10786513 | 39762130 | 3833309  | 33413814 | 8629417  | 45416345 | 40601652 | 40278891 | 37051086 |
| 43.68967 | 5  | 4 | 1 | 275022.2 | 7164044  | 1431897  | 6145141  | 214615.8 | 6994875  | 6323529  | 6271950  | 6555764  |
| 10.4309  | 4  | 1 | 3 | 6009143  | 947836.5 | 432065.2 | 20138470 | 27048075 | 1426452  | 257499.8 | 992993   | 918929.5 |
| 9.40325  | 10 | 5 | 5 | 2615205  | 8947603  | 3401532  | 5852494  | 3395367  | 9731683  | 5549341  | 6105573  | 9313884  |
| 10.9645  | 8  | 3 | 5 | 362793.4 | 1116622  | 240678.9 | 920648.7 | 182969.3 | 1504692  | 1187575  | 1014604  | 906981.5 |
| 10.69952 | 9  | 5 | 4 | 384560.3 | 1243149  | 520487.4 | 842954.3 | 317274.4 | 886586.1 | 1945188  | 1658089  | 897149.6 |
| 9.762917 | 5  | 4 | 1 | 57660144 | 28206713 | 58399165 | 88344231 | 72427896 | 2462912  | 1540574  | 1.33E+08 | 2625911  |
| 9.888767 | 10 | 5 | 5 | 4567181  | 31411426 | 2051219  | 26320815 | 7095652  | 32494100 | 29807342 | 29025996 | 31605958 |
| 19.969   | 4  | 3 | 1 | 25306070 | 34372682 | 46723286 | 90092063 | 71386937 | 289306.3 | 856763.2 | 93514502 | 76770447 |
| 19.90917 | 4  | 1 | 3 | 96212.94 | 463112.2 | 111431.9 | 324177   | 180332.5 | 418622.3 | 344850.4 | 558037.6 | 391213.9 |
| 24.33717 | 10 | 5 | 5 | 1220532  | 2191555  | 384552.4 | 4909171  | 3831545  | 2747637  | 2423443  | 2033270  | 1927788  |
| 9.009533 | 7  | 4 | 3 | 425264.7 | 852417.4 | 265693.6 | 601058.3 | 286352.3 | 587675.7 | 988607   | 702442.9 | 734332.9 |
| 12.5142  | 5  | 4 | 1 | 283368   | 2697112  | 632523.8 | 1886038  | 1060526  | 3650140  | 2337255  | 2098396  | 2380424  |
| 10.07098 | 12 | 5 | 5 | 5644370  | 30629088 | 2619423  | 19668597 | 15429697 | 32165761 | 30007967 | 26950756 | 30093222 |
| 13.2448  | 9  | 5 | 4 | 139056.5 | 652710.5 | 155129   | 517237.2 | 142557.9 | 823363.7 | 816832.7 | 497704.3 | 565659.5 |
| 10.32788 | 11 | 5 | 5 | 932006.2 | 3195326  | 888987   | 2387243  | 889708.6 | 2328957  | 4696054  | 3109858  | 2936106  |
| 9.45945  | 10 | 4 | 4 | 694050.9 | 3423075  | 1245924  | 2071681  | 1674896  | 3964293  | 5176933  | 3373682  | 1902498  |
| 9.56645  | 7  | 4 | 3 | 1173842  | 2396986  | 402806.6 | 1690201  | 969281.3 | 1830383  | 2570895  | 2150014  | 2590032  |
| 9.43325  | 8  | 3 | 4 | 2282355  | 11061092 | 3289761  | 7687854  | 4069031  | 8134497  | 10636479 | 13893816 | 14952559 |
| 10.97242 | 7  | 3 | 4 | 442825.6 | 2176461  | 444111.7 | 1700040  | 588452.3 | 1881592  | 2511240  | 1559020  | 2320465  |
| 9.856867 | 10 | 5 | 5 | 13002858 | 55210994 | 5114128  | 49896866 | 6465388  | 62827052 | 55686231 | 49436481 | 56328379 |
| 21.1225  | 6  | 3 | 3 | 85860.46 | 240189.6 | 93972.17 | 160673.6 | 80418.44 | 375822.9 | 285759.2 | 185786.3 | 132907.5 |
| 21.39367 | 10 | 5 | 5 | 855849.8 | 2753915  | 2051080  | 1267038  | 805241.1 | 5956776  | 2811719  | 903010.7 | 1013059  |
| 9.527817 | 7  | 5 | 2 | 285455.5 | 567991.9 | 135403.5 | 358576.9 | 283947.8 | 521653.9 | 803760.5 | 455894.2 | 524516.6 |

|          |    |   |   |          |          |          |          |          |          |          |          |          |
|----------|----|---|---|----------|----------|----------|----------|----------|----------|----------|----------|----------|
| 9.979667 | 12 | 5 | 5 | 2578121  | 12206819 | 2119583  | 8840358  | 4579590  | 10825755 | 12031770 | 10647506 | 11673101 |
| 9.887133 | 7  | 3 | 4 | 1586109  | 5235161  | 1407184  | 3925422  | 1479494  | 6196490  | 2787937  | 5824795  | 6042662  |
| 9.43325  | 10 | 4 | 5 | 942510.7 | 3742439  | 951566.5 | 2637580  | 1409660  | 2618934  | 3896098  | 4392777  | 4867092  |
| 10.44062 | 7  | 4 | 3 | 215312.7 | 523374.8 | 473151.8 | 188839.1 | 64720.97 | 1324494  | 466694.7 | 319518   | 75864.76 |
| 10.98385 | 3  | 3 | 0 | 231576.4 | 454906.5 | 164159.5 | 328129.6 | 104404.1 | 697284.4 | 518014.6 | 346701.8 | 272912.9 |
| 9.55155  | 7  | 4 | 3 | 304160.8 | 750983.5 | 64410.59 | 476500.5 | 387876.3 | 795182.7 | 809675.3 | 723830.6 | 774723   |
| 9.636567 | 9  | 5 | 4 | 752177.4 | 2582375  | 299333   | 2047603  | 736781.9 | 3078576  | 2346328  | 2625717  | 2495946  |
| 25.188   | 10 | 5 | 5 | 1434032  | 5571095  | 1577648  | 7794557  | 2977664  | 5509383  | 3916262  | 4196457  | 7639314  |
| 11.7572  | 3  | 0 | 3 | 50443.21 | 54893.75 | 31356.43 | 136824.9 | 114997.7 | 24876.62 | 21286.82 | 65349.64 | 95256.36 |
| 19.74333 | 10 | 5 | 5 | 969692.6 | 3678853  | 720375.7 | 3019848  | 734944.7 | 3376536  | 4672003  | 2929781  | 3241486  |
| 10.94443 | 8  | 4 | 4 | 582696.6 | 3169792  | 503556.7 | 2577546  | 760276.4 | 3240672  | 2846241  | 2808595  | 2935573  |
| 9.840617 | 3  | 0 | 3 | 1630886  | 5128897  | 656089   | 3618285  | 2112964  | 4620831  | 6057191  | 5153690  | 4405231  |
| 9.3919   | 9  | 5 | 3 | 547325.8 | 3825033  | 1225323  | 2820974  | 966715.3 | 3526619  | 2060018  | 4481224  | 5359493  |
| 9.3919   | 8  | 4 | 3 | 753985.6 | 9064879  | 2106721  | 6762010  | 2879015  | 11741339 | 9552977  | 9540802  | 5922073  |
| 10.2666  | 5  | 3 | 2 | 200198.6 | 321952   | 166505.2 | 563646.1 | 325687.4 | 609150   | 192673.4 | 273372.1 | 226278.3 |
| 10.80745 | 3  | 3 | 0 | 217590.8 | 406941.9 | 329719.7 | 173745.2 | 60841.11 | 958139.4 | 454912.9 | 140275.5 | 206407.3 |
| 9.419733 | 6  | 4 | 2 | 1776856  | 2798635  | 2905397  | 7811291  | 6898695  | 7761737  | 741573.3 | 2663767  | 2135390  |
| 9.960467 | 5  | 3 | 2 | 521808   | 1037942  | 419125.4 | 700823.4 | 313254   | 1620314  | 714503.6 | 1308955  | 622927.4 |
| 9.91875  | 6  | 4 | 2 | 1393628  | 2587101  | 400434.6 | 1666586  | 1289007  | 3109795  | 2531330  | 2098572  | 2346728  |
| 11.27517 | 5  | 3 | 2 | 262880.3 | 712214.1 | 533999.4 | 1254917  | 655755.2 | 1439570  | 385985.7 | 402428.4 | 216536.9 |
| 9.40325  | 8  | 5 | 3 | 1338168  | 5198002  | 2116067  | 8964794  | 5200615  | 5625905  | 2547680  | 4154278  | 5368125  |
| 9.582167 | 11 | 4 | 5 | 3303437  | 8533221  | 5210215  | 4545348  | 3215694  | 10484936 | 8776218  | 8196312  | 14776412 |
| 9.857983 | 5  | 4 | 1 | 527404.3 | 1950294  | 512528   | 1264217  | 912713.4 | 2146688  | 1415964  | 1646748  | 2734053  |
| 9.419733 | 10 | 5 | 3 | 4735240  | 8752621  | 2952769  | 23909477 | 21504540 | 7914176  | 12849987 | 10520790 | 5338589  |
| 9.979667 | 8  | 5 | 3 | 2408818  | 963440.3 | 302963.2 | 2299188  | 1893884  | 1294935  | 1195624  | 771365.4 | 556944.9 |
| 17.9245  | 8  | 5 | 3 | 52795.52 | 190301.7 | 23634.04 | 258194.5 | 95765.94 | 167494.4 | 194934.2 | 201390.5 | 221634.6 |
| 9.9898   | 12 | 5 | 5 | 1777648  | 9089835  | 549751.2 | 7314297  | 2509600  | 9967725  | 9248924  | 8888638  | 8779546  |
| 9.527817 | 7  | 2 | 5 | 14478855 | 22372299 | 27973520 | 2659789  | 3999504  | 810625.3 | 66055823 | 34020280 | 10539065 |
| 9.842    | 9  | 5 | 4 | 830537.3 | 4984266  | 975433   | 4089796  | 1004891  | 4728531  | 3760072  | 4687964  | 5335477  |
| 12.0494  | 9  | 5 | 4 | 1425309  | 3886501  | 4550514  | 684741.4 | 454294.2 | 1499760  | 518293.3 | 4857745  | 1111046  |
| 20.954   | 7  | 3 | 4 | 770976.7 | 368331.3 | 163880.2 | 3554937  | 4533512  | 420182.5 | 506925.1 | 200631.6 | 525997.4 |
| 10.90802 | 7  | 4 | 3 | 247456.2 | 626171.9 | 289925.3 | 402926   | 185304.6 | 782543.1 | 1006735  | 309654.8 | 370238.5 |
| 41.28733 | 19 | 5 | 5 | 334082   | 6442882  | 3828478  | 3741533  | 760691.2 | 3101808  | 12710809 | 6685131  | 3613541  |
| 8.798117 | 3  | 3 | 0 | 275602.1 | 586566.4 | 401795.8 | 288492   | 209702.9 | 440362.5 | 527510.4 | 475586.4 | 1273163  |
| 23.81317 | 7  | 4 | 3 | 371675.7 | 608083.9 | 159918.4 | 1153309  | 772503.5 | 375298.3 | 664381.8 | 793786.4 | 675619.2 |

|          |    |   |   |          |          |          |          |          |          |          |          |          |
|----------|----|---|---|----------|----------|----------|----------|----------|----------|----------|----------|----------|
| 9.8445   | 9  | 5 | 4 | 1058890  | 4316723  | 1290245  | 2924419  | 1739679  | 3084480  | 4572708  | 3527947  | 3996090  |
| 9.840617 | 10 | 5 | 5 | 4646904  | 25005782 | 1179199  | 20216152 | 6799680  | 25408084 | 23397573 | 25697452 | 26312479 |
| 9.857683 | 5  | 3 | 2 | 2247223  | 7468474  | 1967631  | 5630874  | 2103213  | 8785134  | 4325735  | 9381227  | 7098399  |
| 18.6895  | 8  | 3 | 5 | 365020.6 | 1261205  | 1207083  | 412435.1 | 170600.7 | 2124933  | 567881.4 | 2954000  | 320654.3 |
| 9.8887   | 7  | 3 | 4 | 690182.8 | 2551126  | 976639.9 | 1702601  | 903052.8 | 2412505  | 1320334  | 3838113  | 3149791  |
| 9.8374   | 6  | 3 | 3 | 5552123  | 12089670 | 12450111 | 3327677  | 2072985  | 28917885 | 21974913 | 2275224  | 3604170  |
| 10.49903 | 7  | 4 | 3 | 553706.1 | 5382036  | 1166903  | 4316037  | 1197953  | 7045931  | 5618477  | 5479346  | 3827589  |
| 9.858833 | 10 | 5 | 5 | 2937032  | 13246295 | 1015912  | 11261952 | 2767945  | 13508317 | 12452390 | 11933867 | 14112962 |
| 22.49467 | 5  | 3 | 2 | 2058687  | 62642591 | 35028980 | 38063673 | 3203424  | 1.23E+08 | 41251855 | 43062166 | 43347733 |
| 9.4925   | 13 | 4 | 5 | 2786682  | 19086955 | 11654188 | 10754584 | 4090391  | 24887221 | 7575166  | 12099939 | 14308080 |
| 10.2456  | 6  | 4 | 2 | 258199.5 | 706947.6 | 246891.2 | 528433.6 | 103373.5 | 1012575  | 716813.9 | 588742   | 850049.1 |
| 29.89167 | 6  | 4 | 2 | 20411024 | 19865944 | 43736148 | 70920318 | 65862305 | 147606.7 | 182372.2 | 98103084 | 381308.5 |
| 9.994767 | 9  | 4 | 5 | 1708841  | 3886098  | 1266501  | 2976153  | 488240.7 | 5618736  | 3510089  | 4521351  | 2224823  |
| 9.964417 | 5  | 2 | 3 | 716937.5 | 1537363  | 477293.9 | 2033821  | 611272.6 | 2241119  | 1289202  | 1147536  | 1188050  |
| 42.68283 | 6  | 3 | 3 | 259365.4 | 4067306  | 1138068  | 4929433  | 681914.9 | 3115809  | 5025885  | 2570866  | 4748166  |
| 9.960467 | 10 | 5 | 5 | 672940.6 | 2128447  | 384844.7 | 1698859  | 545990.3 | 2560833  | 2470146  | 2076106  | 1654636  |
| 9.559117 | 11 | 5 | 4 | 1227377  | 1972859  | 687266.4 | 3406567  | 2009937  | 3030371  | 2210802  | 1646338  | 1225371  |
| 9.856867 | 10 | 5 | 5 | 12342762 | 73888758 | 13161478 | 57812066 | 21044884 | 76345554 | 74708655 | 51761441 | 80240080 |
| 9.992233 | 9  | 3 | 5 | 4714501  | 9137725  | 5744152  | 5016543  | 2189012  | 6563757  | 7556753  | 16131494 | 13630756 |
| 24.06833 | 4  | 1 | 3 | 92958.23 | 541956.8 | 121603.8 | 723793.5 | 247773.8 | 699024.2 | 444831.5 | 584124.9 | 395888.5 |
| 9.43325  | 11 | 3 | 5 | 1979313  | 12542135 | 3644416  | 7776099  | 6344553  | 15069975 | 11691978 | 14141205 | 15267745 |
| 9.38065  | 8  | 4 | 4 | 624035.9 | 3749422  | 1290654  | 2552404  | 1368502  | 3500598  | 3430167  | 4677946  | 1900037  |
| 9.379233 | 4  | 3 | 1 | 351489.7 | 587811   | 405067.1 | 267589.1 | 290862.5 | 851164   | 129872.7 | 255957.2 | 597496.3 |
| 29.83383 | 6  | 2 | 4 | 39378.66 | 100445.7 | 56563.77 | 160328.5 | 74482.89 | 113742.3 | 59412.56 | 43728.94 | 97096.37 |
| 9.8322   | 9  | 5 | 4 | 1149909  | 6261634  | 290092.8 | 5787509  | 653359.2 | 6463737  | 6375610  | 5757402  | 6282129  |
| 9.557333 | 12 | 5 | 5 | 2168302  | 13955220 | 3188890  | 11273111 | 2747331  | 15344761 | 14301929 | 11465982 | 18340781 |
| 39.3595  | 5  | 3 | 1 | 419699.2 | 6212716  | 1769675  | 4973269  | 187026   | 5592138  | 9337915  | 4954709  | 5501620  |
| 43.50267 | 16 | 4 | 3 | 382924.4 | 5631505  | 2050326  | 4119249  | 1055564  | 4596606  | 5043920  | 7285064  | 8132347  |
| 30.29583 | 6  | 2 | 4 | 612890.1 | 5673786  | 4456140  | 2140913  | 3244671  | 9148700  | 1119217  | 8907274  | 483800.3 |
| 41.11483 | 6  | 3 | 2 | 485250.8 | 5087788  | 2092740  | 6587745  | 804795.4 | 7340850  | 3860332  | 4418033  | 7192779  |
| 9.979667 | 7  | 4 | 3 | 832564.2 | 987786   | 294894.5 | 1792537  | 1141124  | 1412536  | 820049.5 | 631391.6 | 976864.7 |
| 10.69117 | 4  | 3 | 1 | 156353   | 286579.5 | 168233.6 | 166131.8 | 63890.9  | 429574.1 | 471989.5 | 101002.8 | 132258.2 |
| 9.918833 | 10 | 5 | 5 | 1343361  | 3954217  | 524993.9 | 3438054  | 617757.2 | 4592818  | 3778332  | 3171910  | 4132105  |
| 9.43325  | 10 | 5 | 5 | 612563   | 4844501  | 1078003  | 3145040  | 2336153  | 4827087  | 5628044  | 6169398  | 4014125  |
| 9.3471   | 5  | 1 | 3 | 1.71E+08 | 7.87E+08 | 5.03E+08 | 3.37E+08 | 4.99E+08 | 5017051  | 5.85E+08 | 1.18E+09 | 1.21E+09 |

|          |    |   |   |          |          |          |          |          |          |          |          |          |
|----------|----|---|---|----------|----------|----------|----------|----------|----------|----------|----------|----------|
| 39.6905  | 7  | 3 | 4 | 299858.6 | 4440531  | 3066187  | 2255884  | 1074213  | 2306640  | 9755382  | 4335297  | 3081227  |
| 9.348233 | 5  | 2 | 3 | 412255   | 1119489  | 743308.6 | 575199.1 | 364634.2 | 1514620  | 2153246  | 1060869  | 287735.4 |
| 9.691583 | 8  | 4 | 4 | 240425.2 | 673104.7 | 130082.4 | 537211.2 | 168420.9 | 551826.1 | 877045.6 | 722549.5 | 596696.4 |
| 10.9645  | 10 | 5 | 5 | 2834569  | 20872888 | 2275814  | 17872165 | 4013368  | 22386900 | 21109142 | 18634962 | 18543584 |
| 9.94455  | 4  | 3 | 1 | 18048162 | 7010966  | 7279422  | 15848878 | 11590208 | 1898528  | 1752587  | 1619838  | 13328500 |
| 31.33783 | 10 | 5 | 5 | 383007.7 | 2775415  | 701514.2 | 2267455  | 312840.1 | 4007947  | 2660547  | 2430229  | 2292624  |
| 10.94208 | 8  | 4 | 4 | 169204.4 | 909614.8 | 347433.6 | 617213.2 | 301653.4 | 836419.1 | 1199297  | 669489.6 | 511783.5 |
| 9.445217 | 8  | 5 | 2 | 1372417  | 5176037  | 2843770  | 7929732  | 3270524  | 3586464  | 7038437  | 1712619  | 4618705  |
| 10.49903 | 3  | 3 | 0 | 214734.9 | 310362.5 | 279631.5 | 114171.7 | 59984.92 | 779214.2 | 355594   | 182281.6 | 116042.1 |
| 28.4895  | 6  | 3 | 3 | 286031.4 | 2498376  | 955015.9 | 1755563  | 654296.8 | 1611063  | 3064061  | 1339723  | 3011795  |
| 9.91875  | 9  | 3 | 4 | 1092725  | 4038479  | 3192552  | 1790514  | 845158.4 | 9484507  | 4178677  | 1500187  | 2477091  |
| 9.840617 | 10 | 5 | 5 | 1351753  | 6904742  | 351548   | 5833750  | 1525408  | 7239307  | 7014432  | 7165980  | 6715206  |
| 9.616167 | 6  | 3 | 3 | 592904.1 | 972481.6 | 394021.2 | 674836.2 | 237798.8 | 1470178  | 486991.8 | 685139.2 | 1017330  |
| 27.23183 | 10 | 5 | 5 | 8882610  | 77956850 | 12775112 | 66245471 | 13347538 | 67518096 | 94809892 | 64074533 | 77262719 |
| 43.6895  | 7  | 2 | 3 | 360809.1 | 2705039  | 1197409  | 3713104  | 1043793  | 4255894  | 2525595  | 920187.7 | 2796342  |
| 9.460217 | 8  | 4 | 4 | 30135374 | 5.12E+08 | 75926275 | 3.52E+08 | 2.26E+08 | 5.34E+08 | 4.4E+08  | 4.34E+08 | 5.38E+08 |
| 10.11545 | 10 | 5 | 4 | 649261.4 | 1684357  | 836733.6 | 1089573  | 296027.8 | 2790268  | 2208298  | 1097909  | 707313.9 |
| 39.53217 | 6  | 3 | 2 | 343011.3 | 5546514  | 1548122  | 4345602  | 1054150  | 3312359  | 5287246  | 5298389  | 7512455  |
| 9.999217 | 10 | 5 | 5 | 1209714  | 3269830  | 749910.2 | 3955248  | 780948.4 | 2736305  | 2967023  | 2689696  | 4494482  |
| 26.08733 | 5  | 2 | 3 | 304114.4 | 3123101  | 1302785  | 1922304  | 1378641  | 2281588  | 3966986  | 1512189  | 3067148  |
| 9.9677   | 10 | 5 | 5 | 1842685  | 5377433  | 889189.8 | 3883654  | 2075859  | 6385697  | 5965121  | 4283722  | 4637266  |
| 9.37735  | 9  | 3 | 4 | 1156722  | 10374080 | 2650808  | 8354528  | 1679609  | 12906109 | 11158220 | 8555153  | 6740002  |
| 44.63867 | 9  | 2 | 3 | 889890.8 | 8352993  | 3014873  | 4848032  | 4555622  | 4987075  | 10045369 | 10389241 | 5175626  |
| 8.813067 | 4  | 3 | 1 | 314682.5 | 473916.2 | 477373.6 | 137232.2 | 144753.6 | 435693.2 | 402842.8 | 260366.6 | 1270678  |
| 44.581   | 8  | 2 | 4 | 264034.8 | 3978470  | 309502.9 | 3490926  | 673320.8 | 3572866  | 3865592  | 4093695  | 4416030  |
| 10.71398 | 5  | 2 | 3 | 17256098 | 1.69E+08 | 81910862 | 1.11E+08 | 23042025 | 1.68E+08 | 1.44E+08 | 1.05E+08 | 1.19E+08 |
| 15.31398 | 10 | 5 | 5 | 7318258  | 77495964 | 13330794 | 65450166 | 13598984 | 84039173 | 91857942 | 70203910 | 58121034 |
| 24.59467 | 5  | 3 | 2 | 303228.1 | 957971.9 | 1178088  | 138823.8 | 55202.53 | 2942792  | 1107078  | 209568.6 | 78289.26 |
| 23.10367 | 3  | 3 | 0 | 145504.2 | 654922   | 399069.1 | 940328.4 | 159846.7 | 959797.4 | 417916.1 | 1075572  | 101121.1 |
| 43.79017 | 4  | 3 | 1 | 503818.8 | 6752576  | 1118881  | 5920662  | 628084.6 | 8617008  | 6849785  | 5740080  | 6125631  |
| 8.8316   | 6  | 2 | 4 | 613782   | 2304130  | 1273786  | 1252014  | 1063432  | 1355757  | 4054866  | 2786382  | 2518548  |
| 10.98385 | 6  | 1 | 5 | 653421.9 | 1785384  | 748991.7 | 1114436  | 752297.4 | 2380053  | 2671118  | 809698.1 | 1417991  |
| 9.379233 | 13 | 5 | 5 | 1355111  | 4706600  | 672806.8 | 3640208  | 1475299  | 5712576  | 4089991  | 4222111  | 4454805  |
| 10.31835 | 8  | 4 | 4 | 453851.4 | 1564706  | 283567.5 | 1300415  | 307021.1 | 1428099  | 1847092  | 1713200  | 1698541  |
| 9.1932   | 9  | 4 | 4 | 4558744  | 14846755 | 8393172  | 7652191  | 7683439  | 16503683 | 26344485 | 16500671 | 11593118 |



|          |    |   |   |          |          |          |          |          |          |          |          |          |
|----------|----|---|---|----------|----------|----------|----------|----------|----------|----------|----------|----------|
| 10.8914  | 3  | 0 | 3 | 619683.3 | 1725827  | 889928.4 | 951091.6 | 843077   | 794781.9 | 2392906  | 943245.5 | 1659193  |
| 9.445217 | 15 | 5 | 5 | 1275562  | 10806774 | 3059471  | 7933559  | 3359650  | 14199063 | 12736058 | 11874224 | 8187777  |
| 28.47617 | 8  | 3 | 5 | 627310.4 | 1585860  | 1610461  | 461598.1 | 329004   | 3330862  | 141613.4 | 3332379  | 782971.8 |
| 11.78607 | 10 | 5 | 5 | 645366.8 | 1010051  | 238070.3 | 1948863  | 1347543  | 1306887  | 1048475  | 690578   | 1134320  |
| 9.37735  | 5  | 3 | 2 | 473411.5 | 3189763  | 1601089  | 1776533  | 1564051  | 4556488  | 4778114  | 3607627  | 1512896  |
| 10.03947 | 6  | 3 | 3 | 1281341  | 868447.6 | 644561.4 | 1878866  | 1398024  | 424083.8 | 509611.5 | 1990566  | 822151.5 |
| 9.431017 | 9  | 4 | 4 | 1959630  | 7134175  | 1204872  | 4786805  | 3310582  | 7184399  | 6855646  | 5534268  | 7183442  |
| 8.868383 | 5  | 3 | 2 | 524880.8 | 837536   | 810754.1 | 270219.6 | 205915.7 | 628571.8 | 613064.2 | 677022.7 | 2214576  |
| 10.58813 | 8  | 5 | 3 | 189890.6 | 415221.1 | 83106.15 | 318160.3 | 126813.6 | 512698.9 | 494037.7 | 338086.2 | 342767.2 |
| 11.71625 | 10 | 5 | 5 | 527829.9 | 1947969  | 552003.9 | 3241435  | 1840412  | 2030101  | 1751821  | 1508978  | 2867898  |
| 9.91875  | 7  | 4 | 3 | 938532.3 | 2475812  | 730038.1 | 1544235  | 1246937  | 2876448  | 2222524  | 1862925  | 1865027  |
| 9.992233 | 10 | 5 | 5 | 968581.6 | 3841964  | 862828.9 | 3044468  | 924793.7 | 4074807  | 5083646  | 3924035  | 3349736  |
| 42.841   | 9  | 3 | 3 | 235589.8 | 1470629  | 505019.2 | 1866679  | 364452.7 | 1624996  | 1660513  | 1755295  | 572437.1 |
| 9.928667 | 4  | 3 | 1 | 972656.5 | 1456231  | 536555.9 | 893583.6 | 706305.9 | 2013952  | 1993712  | 1323663  | 786864   |
| 27.52617 | 10 | 5 | 5 | 1438900  | 5057586  | 2174898  | 7492656  | 3141314  | 3910392  | 4217125  | 3281732  | 8764532  |
| 10.98605 | 10 | 5 | 5 | 334435.8 | 1773188  | 281735.2 | 1324312  | 623518.5 | 1947898  | 1935595  | 1571147  | 1381107  |
| 10.49903 | 6  | 5 | 1 | 171013.3 | 447540.7 | 100249.9 | 331151.1 | 152050.1 | 470240.8 | 546636.4 | 357722.2 | 328386.4 |
| 9.3919   | 4  | 1 | 3 | 6261381  | 2695928  | 1237266  | 24973088 | 32175148 | 775500.3 | 2494989  | 3675442  | 3892766  |
| 9.952017 | 10 | 5 | 5 | 2484462  | 8475147  | 1250435  | 7238125  | 1505934  | 10092355 | 9124111  | 7037711  | 7425087  |
| 43.3875  | 7  | 3 | 3 | 355307.8 | 3541345  | 1391682  | 5167300  | 2128597  | 3932745  | 4729646  | 3727286  | 4173209  |
| 9.989483 | 5  | 2 | 3 | 6706083  | 28128897 | 14758970 | 15067015 | 14564352 | 12842990 | 12098147 | 37228413 | 34184599 |
| 9.460217 | 6  | 4 | 1 | 560757.2 | 1261387  | 485565.8 | 2047524  | 1095143  | 1065565  | 1730811  | 1820128  | 731633   |
| 9.888767 | 10 | 5 | 5 | 5515436  | 32827396 | 4225521  | 23843642 | 12763198 | 30208017 | 28129154 | 31217905 | 37135426 |
| 9.887133 | 8  | 3 | 5 | 1.99E+08 | 5.4E+08  | 6.86E+08 | 65448199 | 17759244 | 1.57E+09 | 9.18E+08 | 71098510 | 70525778 |
| 10.95055 | 9  | 5 | 4 | 372885.7 | 2235884  | 444613.5 | 1794125  | 540082.2 | 2577569  | 2446168  | 1674760  | 1843691  |
| 7.34645  | 8  | 3 | 3 | 218630.8 | 6768634  | 3633694  | 11029424 | 5596305  | 6720915  | 4333756  | 2130397  | 10235145 |
| 9.419733 | 5  | 4 | 1 | 696707.8 | 2204439  | 1139667  | 1310209  | 830241.1 | 3948901  | 1756316  | 2148604  | 2351930  |
| 12.41192 | 6  | 4 | 2 | 94341.99 | 459266.5 | 315716.1 | 798319.8 | 431788.6 | 302741.8 | 357547.6 | 187848.2 | 997886.7 |
| 9.856867 | 10 | 5 | 5 | 697842.3 | 3221792  | 216347.5 | 2781790  | 625018.8 | 3360355  | 3175975  | 3430494  | 3267197  |
| 9.842    | 9  | 5 | 4 | 1970316  | 7993556  | 910637.3 | 6294784  | 2400960  | 8375553  | 7798712  | 7736223  | 9266482  |
| 10.45545 | 4  | 1 | 3 | 150145.6 | 238034.9 | 63092.2  | 293714.9 | 62250.56 | 190344.4 | 347477.3 | 202080.7 | 220391.6 |
| 9.541433 | 8  | 3 | 4 | 1533976  | 2929927  | 2056107  | 6610923  | 5187932  | 5798451  | 4290638  | 2072131  | 790761.6 |
| 9.445217 | 9  | 4 | 4 | 1345371  | 12206807 | 2422966  | 9277897  | 3888202  | 14586746 | 13587103 | 12492606 | 8228431  |
| 11.16645 | 9  | 5 | 4 | 461178.8 | 1862129  | 671392.2 | 1251352  | 703304.7 | 2678076  | 2133676  | 1694069  | 848950.8 |
| 9.845483 | 7  | 4 | 3 | 1746706  | 6551909  | 1930187  | 4833913  | 1939819  | 7608044  | 3830945  | 8968383  | 5814428  |

|          |    |   |   |          |          |          |          |          |          |          |          |          |
|----------|----|---|---|----------|----------|----------|----------|----------|----------|----------|----------|----------|
| 9.460217 | 8  | 5 | 3 | 872443.5 | 1249017  | 431475.1 | 2741679  | 2153510  | 1945086  | 1324798  | 913072.6 | 1183647  |
| 9.460217 | 13 | 5 | 5 | 662553.2 | 4943603  | 2059537  | 3165997  | 1942206  | 5853233  | 6594168  | 5075781  | 5807968  |
| 21.25283 | 10 | 5 | 5 | 111485.6 | 641260.5 | 284171.8 | 440983.9 | 102614.6 | 456214.1 | 944436.6 | 473835.9 | 376416.7 |
| 9.684583 | 7  | 4 | 3 | 223544.6 | 559432.2 | 197000.7 | 404666.2 | 145021.6 | 756442.7 | 706189.4 | 472900.1 | 595607.1 |
| 17.19067 | 8  | 3 | 5 | 63237.07 | 269054.1 | 62776.77 | 215616.6 | 57446.21 | 325527.8 | 218146.5 | 191407.3 | 279056   |
| 14.69105 | 11 | 4 | 3 | 379130   | 3971730  | 3666887  | 1417373  | 1008377  | 1466483  | 974511   | 9431457  | 1905622  |
| 10.01477 | 3  | 0 | 3 | 2728190  | 6198905  | 3270175  | 3085509  | 3724803  | 10070409 | 2013671  | 8762383  | 5838666  |
| 9.744917 | 10 | 5 | 5 | 1400439  | 3063599  | 1085208  | 2267203  | 592809.2 | 4509261  | 3947508  | 2302533  | 2402109  |
| 9.3735   | 6  | 3 | 3 | 399534.3 | 1357855  | 547249.5 | 883885.4 | 521068.8 | 1360410  | 2043863  | 1427323  | 1445307  |
| 9.8322   | 7  | 5 | 2 | 1143728  | 2304040  | 686105.9 | 3198109  | 1211144  | 2470707  | 2847167  | 2708367  | 2369912  |
| 9.8322   | 5  | 3 | 2 | 1204591  | 1648077  | 833844.1 | 900458.3 | 852360.7 | 2180481  | 2634192  | 1189630  | 504340.1 |
| 9.392767 | 10 | 5 | 5 | 4460603  | 14958293 | 2897941  | 11600606 | 4413826  | 17937950 | 16575342 | 12152530 | 11550552 |
| 30.5805  | 7  | 3 | 4 | 1547140  | 11083301 | 10390318 | 3877360  | 2446781  | 4425686  | 2959620  | 28885952 | 9477382  |
| 9.976317 | 9  | 5 | 4 | 3291940  | 1640454  | 584717.3 | 5667129  | 5844824  | 1813395  | 2081224  | 2179327  | 1371392  |
| 10.9645  | 10 | 5 | 5 | 54864748 | 3.76E+08 | 44700896 | 3.26E+08 | 64651822 | 4.02E+08 | 4.07E+08 | 3.24E+08 | 3.3E+08  |
| 43.89083 | 5  | 2 | 3 | 205478.7 | 1114371  | 379811.7 | 756100.5 | 426505.9 | 858226   | 852068.2 | 823509   | 1395489  |
| 9.9898   | 8  | 3 | 5 | 8067024  | 24113889 | 5198440  | 16134637 | 11110019 | 27022839 | 21849213 | 21744467 | 31587141 |
| 44.72483 | 6  | 2 | 4 | 372758.3 | 4352650  | 1025459  | 3580584  | 645779.4 | 5035945  | 4553807  | 2549815  | 4695690  |
| 9.842    | 10 | 5 | 5 | 1671929  | 6634169  | 2271504  | 4771376  | 1907330  | 6208413  | 5341181  | 4672398  | 10494846 |
| 40.95667 | 6  | 4 | 1 | 465947.7 | 9748172  | 4918558  | 6350428  | 918701.3 | 8834131  | 9374035  | 18101573 | 6941998  |
| 10.30302 | 5  | 3 | 2 | 213786.5 | 534946.9 | 420404.8 | 244111.5 | 88642.96 | 1130373  | 795686.6 | 276204.4 | 96525.2  |
| 11.02755 | 10 | 5 | 5 | 431622.5 | 2977900  | 365052.2 | 2407992  | 795571.8 | 2870612  | 2808384  | 2641563  | 2974862  |
| 12.50037 | 7  | 4 | 3 | 97592.05 | 923363.5 | 107701.3 | 794140.6 | 171868.8 | 831573.6 | 1057423  | 880103.3 | 828651.1 |
| 9.465    | 12 | 5 | 5 | 1237175  | 9016372  | 1220822  | 6352682  | 3811627  | 8041357  | 9922856  | 7524139  | 9186624  |
| 9.659033 | 7  | 4 | 3 | 351667.5 | 1308761  | 170107   | 921094   | 555733.7 | 1221496  | 1326177  | 1121477  | 1296448  |
| 11.74603 | 10 | 5 | 5 | 248004.8 | 1368065  | 281540.1 | 1046533  | 421454.3 | 1696442  | 1535490  | 985611.1 | 1192013  |
| 9.601917 | 5  | 3 | 1 | 422831.8 | 532100   | 181276   | 272928.3 | 357720.7 | 708521.2 | 742363.3 | 340022.1 | 422982.9 |
| 9.379233 | 7  | 4 | 3 | 562351.3 | 1478841  | 902074.1 | 744434.2 | 744674.8 | 2028636  | 328667.9 | 756451.2 | 1798854  |
| 28.27233 | 5  | 3 | 2 | 39669.55 | 136011.7 | 40819.03 | 176119.5 | 49161.86 | 101345.6 | 133934.6 | 92456.55 | 163166   |
| 22.181   | 7  | 3 | 3 | 221069.2 | 1050624  | 510469.3 | 623250.9 | 452429.4 | 785450.5 | 1195703  | 517873   | 900588.9 |
| 11.27298 | 10 | 5 | 5 | 284504.3 | 1295414  | 406286.6 | 949278.3 | 375188.9 | 1113221  | 1053208  | 1166775  | 2018556  |
| 9.701933 | 11 | 5 | 5 | 1794740  | 4575913  | 984929.3 | 3777413  | 805036.6 | 4113164  | 6123623  | 4968113  | 3951304  |
| 10.008   | 7  | 5 | 2 | 263030.5 | 794977.2 | 190752.8 | 548054.7 | 335110.5 | 937578.5 | 630579   | 652295.6 | 697912.1 |
| 18.54067 | 8  | 4 | 4 | 69359.44 | 348971.7 | 151250.6 | 243926.8 | 41939.07 | 458854.7 | 237836.1 | 201870   | 554370.5 |
| 10.95055 | 7  | 3 | 4 | 264500.3 | 1183128  | 169079.6 | 977569.7 | 275016.7 | 1275232  | 1290558  | 1024809  | 977569.2 |

|          |    |   |   |          |          |          |          |          |          |          |          |          |
|----------|----|---|---|----------|----------|----------|----------|----------|----------|----------|----------|----------|
| 8.642033 | 8  | 4 | 4 | 931042   | 11766106 | 3774537  | 9092265  | 1569430  | 10635187 | 14738560 | 7761738  | 9072593  |
| 9.374083 | 9  | 5 | 4 | 487171.9 | 1151850  | 262755.1 | 750381.9 | 560361.4 | 1586301  | 995970.5 | 921349.4 | 1061375  |
| 26.76717 | 5  | 3 | 2 | 357107.6 | 710609.7 | 478033.7 | 1381757  | 925702.6 | 552962.3 | 163128   | 1289163  | 422655.9 |
| 9.992233 | 10 | 5 | 5 | 742540.4 | 2920672  | 174618.4 | 2407952  | 741699.2 | 2996855  | 2691868  | 3128448  | 2795320  |
| 9.960817 | 10 | 5 | 5 | 2804306  | 9856408  | 1752449  | 8085968  | 2209780  | 10747541 | 12506498 | 8707416  | 9038214  |
| 9.93625  | 10 | 5 | 5 | 14501188 | 49338431 | 4034480  | 41155640 | 11697935 | 52904470 | 54099743 | 44656263 | 46755894 |
| 9.856867 | 10 | 5 | 5 | 2208878  | 12266810 | 1138340  | 9759725  | 3598005  | 11703422 | 11140651 | 11706014 | 12779151 |
| 10.96278 | 3  | 0 | 3 | 877264.1 | 3937305  | 902767.6 | 2665756  | 1755485  | 3509549  | 5427169  | 3345060  | 3257320  |
| 11.97977 | 10 | 5 | 5 | 669320.1 | 4531574  | 841173.6 | 3193392  | 1878339  | 5614341  | 3513984  | 4307444  | 4082112  |
| 9.541433 | 8  | 3 | 4 | 2784826  | 14109792 | 7072656  | 8350119  | 5878877  | 12395957 | 3200816  | 22069244 | 17841562 |
| 9.904767 | 7  | 4 | 3 | 757580.6 | 1094938  | 484087.5 | 2044499  | 1355799  | 1166099  | 318883.5 | 1650191  | 1242341  |
| 9.94455  | 11 | 5 | 5 | 12813098 | 33960593 | 11012474 | 23863891 | 11836401 | 49203295 | 40150253 | 23323876 | 23924143 |
| 9.960467 | 7  | 4 | 3 | 3750146  | 3688156  | 4125978  | 8720647  | 6751158  | 2142653  | 1843098  | 1868961  | 1527443  |
| 8.8977   | 5  | 3 | 2 | 740280.1 | 1515263  | 1257915  | 642605.8 | 360666.1 | 581437.6 | 1530069  | 940470.9 | 3678331  |
| 9.559117 | 9  | 5 | 4 | 497162.3 | 1193445  | 283591.5 | 811575.6 | 523720.1 | 1240104  | 1596651  | 929300.6 | 913600.3 |
| 10.95835 | 5  | 1 | 4 | 658806.7 | 1482528  | 412490.4 | 1942003  | 600100.1 | 2095336  | 1617935  | 1132516  | 1077352  |
| 10.02963 | 10 | 5 | 5 | 1229212  | 4096134  | 806610.7 | 3445815  | 654379.1 | 4491993  | 3260145  | 3790727  | 5298274  |
| 20.97733 | 10 | 5 | 5 | 845865.9 | 4562009  | 1154676  | 3733908  | 556086.5 | 3685801  | 6368905  | 4833838  | 4462535  |
| 9.903567 | 4  | 3 | 1 | 1557634  | 3113542  | 499383.6 | 2006446  | 1592031  | 3746772  | 2670247  | 2699186  | 2907026  |
| 9.365833 | 7  | 4 | 2 | 800897.5 | 5537436  | 918721.7 | 4124189  | 1978860  | 6272551  | 4744915  | 5263929  | 4683540  |
| 39.89183 | 3  | 0 | 3 | 334647.2 | 6176762  | 248131.7 | 4817747  | 1982192  | 6085423  | 5950423  | 6326168  | 6534965  |
| 9.770733 | 5  | 4 | 1 | 1071749  | 2011225  | 417513.4 | 1304432  | 999966.1 | 1736607  | 2398866  | 1880533  | 1543430  |
| 9.4873   | 5  | 4 | 1 | 969359.1 | 2806462  | 2286951  | 5052307  | 2768675  | 6493161  | 2632334  | 3044184  | 1255077  |
| 10.90197 | 7  | 4 | 3 | 411686.5 | 543617.3 | 297024.8 | 970725.5 | 593022.9 | 371042.3 | 517595.4 | 1055674  | 312373.5 |
| 10.00098 | 10 | 5 | 4 | 1052664  | 1170009  | 219759.2 | 2333260  | 1697702  | 1259037  | 1051347  | 1418891  | 1266776  |
| 9.992233 | 10 | 5 | 5 | 759661.6 | 2951524  | 354061.3 | 2471389  | 660592   | 3017669  | 2584931  | 3178597  | 2595518  |
| 38.92783 | 12 | 2 | 5 | 475417   | 5289278  | 1091254  | 3953596  | 1797634  | 4719676  | 6767687  | 6128083  | 4521612  |
| 9.36565  | 5  | 4 | 1 | 847152.4 | 1554214  | 571958.6 | 983298   | 711030.5 | 949753.9 | 1609927  | 1578623  | 1183132  |
| 9.544833 | 10 | 5 | 5 | 1400583  | 4323567  | 1522900  | 3197302  | 903440.9 | 5587068  | 6181803  | 2804562  | 2958430  |
| 10.94962 | 6  | 4 | 2 | 171439   | 627327.2 | 219708.9 | 789509.6 | 129108.4 | 878855.1 | 376400.2 | 715174.4 | 416927.4 |
| 11.147   | 4  | 4 | 0 | 71046.67 | 195228.7 | 32497.27 | 148318.9 | 65228.72 | 241073.7 | 196476.1 | 149612   | 190075.2 |
| 9.842    | 9  | 5 | 4 | 2141385  | 10368593 | 1500949  | 8288904  | 2873315  | 9626387  | 9050396  | 9568677  | 10800680 |
| 9.992233 | 6  | 3 | 3 | 774405.5 | 827279.5 | 562777.4 | 1613626  | 1087970  | 972967.6 | 1551152  | 1061722  | 106040.2 |
| 10.71765 | 5  | 1 | 4 | 3386208  | 4387159  | 748635.7 | 15385882 | 16090529 | 4790722  | 5435687  | 3678357  | 3698569  |
| 9.43325  | 13 | 5 | 5 | 823076.3 | 6082239  | 1758863  | 4285430  | 2267380  | 8124899  | 7100172  | 6581903  | 4839865  |

|          |    |   |   |          |          |          |          |          |          |          |          |          |
|----------|----|---|---|----------|----------|----------|----------|----------|----------|----------|----------|----------|
| 9.5876   | 10 | 5 | 5 | 14188077 | 60203759 | 8953286  | 47018634 | 18393104 | 68539039 | 65938755 | 50906404 | 50056917 |
| 9.848417 | 6  | 3 | 3 | 1367732  | 5242078  | 636752.5 | 4172841  | 1513930  | 4688210  | 4697016  | 5669798  | 6129837  |
| 10.9645  | 4  | 4 | 0 | 479577.4 | 1057290  | 311888.3 | 795685.3 | 280908.2 | 1403268  | 1144425  | 1245578  | 617588.8 |
| 37.76233 | 5  | 3 | 2 | 230423.5 | 1152458  | 520472.4 | 1555693  | 375860.8 | 1642290  | 1099396  | 1251812  | 298209.9 |
| 26.99833 | 10 | 5 | 5 | 748768.2 | 5069222  | 808893   | 4267208  | 996587.3 | 4324136  | 5981571  | 4720596  | 4421083  |
| 24.7685  | 4  | 3 | 1 | 370819   | 963397   | 1313928  | 65792.24 | 78277.08 | 3138097  | 1270695  | 185831.2 | 0        |
| 9.475667 | 15 | 5 | 5 | 1756613  | 15256937 | 2740060  | 11716769 | 4833301  | 14147973 | 14943718 | 20051796 | 13683873 |
| 9.94455  | 10 | 5 | 5 | 2030940  | 4122530  | 523679.8 | 3558788  | 729366.7 | 4913719  | 4061165  | 4194230  | 3987149  |
| 10.86275 | 5  | 2 | 3 | 192486.2 | 678540.2 | 176014.6 | 511470.5 | 202249.7 | 773352   | 752146.1 | 611281.8 | 404491.1 |
| 9.460217 | 9  | 4 | 4 | 549112.8 | 1897540  | 724877.9 | 2613411  | 888949.4 | 2338496  | 2926463  | 1507436  | 1119400  |
| 10.008   | 9  | 5 | 4 | 1309538  | 840034.8 | 266892   | 1965769  | 1644592  | 995693.7 | 969141.3 | 1081569  | 730496.4 |
| 37.182   | 3  | 0 | 3 | 431556   | 707118   | 354097   | 4051476  | 4900379  | 1222729  | 672342   | 535546.8 | 272115.2 |
| 11.74603 | 10 | 5 | 5 | 3347766  | 21709782 | 2320198  | 19187933 | 3279490  | 21874306 | 25240780 | 19813128 | 19427776 |
| 10.01545 | 9  | 4 | 5 | 319391.3 | 774261.4 | 97988.63 | 1003310  | 331327   | 655874.4 | 774489.7 | 699574   | 860230.5 |
| 9.379233 | 8  | 5 | 3 | 1496857  | 2943532  | 1583861  | 1830123  | 644273.5 | 3444192  | 2533137  | 770759.8 | 2817306  |
| 10.008   | 8  | 5 | 3 | 1060288  | 620621.7 | 107354.7 | 1065396  | 650161.9 | 695485.6 | 657833.9 | 709952   | 446268.6 |
| 9.960967 | 12 | 5 | 4 | 2072142  | 2384590  | 925699.8 | 5733295  | 4889479  | 2612406  | 846164   | 2525099  | 2579308  |
| 9.3919   | 11 | 5 | 4 | 1416780  | 13228067 | 3978109  | 9237468  | 5006559  | 17600803 | 8156470  | 16714331 | 12934510 |
| 14.31217 | 10 | 5 | 5 | 1492536  | 3530710  | 975858   | 7102412  | 5221673  | 4743998  | 3973918  | 2985023  | 2192371  |
| 9.8445   | 5  | 3 | 2 | 884532.5 | 3280300  | 1066879  | 2386278  | 965816.4 | 4199035  | 1623615  | 4248195  | 3187523  |
| 9.93625  | 11 | 5 | 5 | 13743727 | 89658074 | 15576042 | 66645610 | 32244784 | 88794684 | 64728748 | 92522178 | 94910619 |
| 9.848417 | 10 | 5 | 5 | 1706299  | 6967710  | 590796.9 | 5695202  | 1838206  | 7348886  | 6903449  | 6054405  | 6923290  |
| 9.4468   | 6  | 4 | 2 | 414988.2 | 1493676  | 404728.3 | 1056808  | 567943.3 | 1706036  | 1968800  | 927528.1 | 1264937  |
| 9.388367 | 10 | 5 | 5 | 1547368  | 6686904  | 711347.9 | 5286814  | 2013615  | 7812423  | 6358972  | 6012712  | 6931460  |
| 44.52367 | 8  | 4 | 4 | 925439.1 | 19179417 | 4824619  | 15894468 | 346193   | 27799110 | 16801484 | 17205496 | 16771154 |
| 11.27298 | 10 | 5 | 5 | 335113   | 1131641  | 354037.8 | 699623.4 | 584273.4 | 1587552  | 968212   | 1370277  | 1051573  |
| 9.365833 | 8  | 5 | 3 | 446171.6 | 2862651  | 786477.3 | 1951576  | 1214595  | 3345725  | 3464883  | 2495191  | 3365545  |
| 9.445217 | 14 | 5 | 5 | 2192443  | 16512868 | 5308259  | 12089393 | 4755679  | 22291379 | 19607931 | 18625711 | 12588905 |
| 7.394767 | 10 | 5 | 5 | 2695543  | 50433650 | 11597544 | 35894190 | 19811968 | 45888745 | 58840312 | 32106901 | 55905990 |
| 9.9014   | 10 | 5 | 5 | 4401511  | 21759774 | 3964334  | 16688882 | 6941318  | 21868072 | 18450638 | 17397219 | 27002176 |
| 35.919   | 3  | 3 | 0 | 124417.5 | 459672.3 | 220555.7 | 634282.7 | 173013.5 | 433502.1 | 235558.3 | 362732.6 | 825622.2 |
| 9.94455  | 6  | 3 | 3 | 1008077  | 2366166  | 612516.5 | 1882241  | 477674.6 | 2738122  | 2560234  | 2514186  | 2732971  |
| 9.46265  | 10 | 5 | 5 | 1233410  | 4828251  | 572416.6 | 3805865  | 1463567  | 5340574  | 5100645  | 5065918  | 4761383  |
| 9.840617 | 10 | 5 | 5 | 3342011  | 16600917 | 2019513  | 12523006 | 5883640  | 15592118 | 14762031 | 15236048 | 17939449 |
| 9.445217 | 14 | 5 | 5 | 1302812  | 11477143 | 3064245  | 9030269  | 2467622  | 14878814 | 12933086 | 13079761 | 8711560  |

|          |    |   |   |          |          |          |          |          |          |          |          |          |
|----------|----|---|---|----------|----------|----------|----------|----------|----------|----------|----------|----------|
| 9.37735  | 5  | 2 | 3 | 3795656  | 22227925 | 12564172 | 12427342 | 9439599  | 8516196  | 9954658  | 25123727 | 30785220 |
| 16.46058 | 7  | 4 | 3 | 49380.88 | 130484.1 | 41600    | 178199.5 | 63545.48 | 81246.26 | 89794.89 | 166707.4 | 163972.4 |
| 9.3735   | 6  | 3 | 3 | 728643.1 | 4026909  | 1263681  | 2752529  | 1610835  | 5204139  | 3824694  | 4648031  | 1944087  |
| 9.840617 | 5  | 3 | 2 | 1498574  | 1539653  | 368289.3 | 4161721  | 3857176  | 1574248  | 1771907  | 1810873  | 1637420  |
| 37.12983 | 9  | 2 | 3 | 419631.8 | 6692531  | 2455579  | 4644175  | 2212016  | 11056429 | 5581170  | 5160162  | 5913378  |
| 41.6325  | 7  | 4 | 1 | 511520.7 | 6575246  | 2408884  | 4932074  | 447307.1 | 4688342  | 5411947  | 10471808 | 4978214  |
| 22.76917 | 4  | 1 | 3 | 71240.39 | 203037.3 | 69220.86 | 152653.9 | 39002.77 | 128324.4 | 300408.9 | 239738.4 | 151062.9 |
| 23.747   | 9  | 5 | 4 | 242658   | 903906.4 | 448439.4 | 560684.4 | 316588.9 | 1311838  | 1003509  | 1312000  | 300602.2 |
| 9.858833 | 8  | 5 | 3 | 519798.9 | 2305735  | 584595.8 | 1840891  | 466089.1 | 2433321  | 2379412  | 1609007  | 1946372  |
| 9.392767 | 10 | 5 | 5 | 3180099  | 10292231 | 1795364  | 8187282  | 2824373  | 11812438 | 11464556 | 8412385  | 8251277  |
| 9.445217 | 13 | 5 | 5 | 1667150  | 15208339 | 3923373  | 12394698 | 2015104  | 17966469 | 15028422 | 10051182 | 19962636 |
| 9.431017 | 10 | 4 | 4 | 523119.9 | 3869234  | 728655.1 | 2765824  | 1556513  | 3372766  | 4718519  | 4141287  | 4222659  |
| 10.94835 | 3  | 0 | 3 | 832194.2 | 3368185  | 431829.2 | 1994624  | 2011775  | 3144840  | 4054152  | 3055784  | 3051627  |
| 9.4925   | 7  | 2 | 4 | 686178   | 6850811  | 1635725  | 5097570  | 2282507  | 7684528  | 4167141  | 6615401  | 8429884  |
| 20.28833 | 3  | 3 | 0 | 98372.27 | 242719.9 | 188659.3 | 374734.4 | 77057.77 | 425321.5 | 106017.5 | 470945.2 | 124091.1 |
| 9.392767 | 10 | 5 | 5 | 4388080  | 33498643 | 7481127  | 26719870 | 8001734  | 46031064 | 30023723 | 26258845 | 33166732 |
| 9.856867 | 7  | 4 | 3 | 725185.1 | 1491665  | 1031504  | 2278515  | 721742.3 | 870225.8 | 1391173  | 1120063  | 788689.3 |
| 9.952017 | 5  | 1 | 3 | 477540.1 | 722720.4 | 421185.3 | 1138557  | 520721.2 | 279847.5 | 255939.1 | 962612.5 | 1140451  |
| 9.952017 | 4  | 1 | 3 | 282106.4 | 346078.7 | 337310   | 610946.8 | 259884.6 | 0        | 769795.5 | 481870.9 | 478727.1 |
| 9.999217 | 3  | 0 | 3 | 999389.6 | 1303222  | 801028.2 | 736744   | 369170.5 | 2223681  | 129878.9 | 1409586  | 1776831  |
| 9.986767 | 6  | 3 | 2 | 592771.1 | 1867677  | 829213.2 | 1070854  | 982608.9 | 1872626  | 450801.4 | 2111939  | 2424734  |
| 9.872883 | 10 | 5 | 5 | 2933694  | 14021385 | 876981.7 | 11346793 | 3918039  | 14245427 | 13071574 | 14833175 | 14833171 |
| 9.976317 | 4  | 3 | 1 | 791226.7 | 378423.8 | 355187.2 | 713646.8 | 408588.7 | 665019.6 | 500596.1 | 726503.4 | 0        |
| 43.416   | 3  | 3 | 0 | 225003.7 | 3273005  | 529950.8 | 2912821  | 83777.52 | 2969029  | 4212356  | 2970893  | 3076322  |
| 17.16983 | 10 | 5 | 5 | 226545.5 | 1204863  | 271719.3 | 981676.3 | 237074.5 | 1613171  | 1321007  | 1091581  | 905049.9 |
| 9.64815  | 3  | 3 | 0 | 217065.6 | 358641   | 80076.84 | 238895.6 | 168972.2 | 414276.5 | 248546.5 | 421427.7 | 411293.7 |
| 8.857667 | 3  | 3 | 0 | 204913.9 | 339277.7 | 209288   | 173971.4 | 164859   | 321530.6 | 326519.4 | 251847.5 | 681202.9 |
| 9.992233 | 9  | 5 | 4 | 386151.1 | 1291710  | 468138.9 | 892461   | 445943.9 | 1262326  | 1204122  | 862171.4 | 1048130  |
| 13.24403 | 10 | 5 | 5 | 10684810 | 1.02E+08 | 11750688 | 91970241 | 11150538 | 1.16E+08 | 1.12E+08 | 89893307 | 92355143 |
| 10.57272 | 4  | 1 | 3 | 183701.8 | 326421.2 | 80925.48 | 262350.2 | 64235.92 | 208305.5 | 418724.6 | 364010.9 | 287050.1 |
| 9.928667 | 9  | 5 | 4 | 1183896  | 2964532  | 693764.5 | 2225424  | 962885.1 | 4069733  | 3201940  | 2540502  | 2354065  |
| 15.31398 | 10 | 5 | 5 | 1802032  | 17218631 | 3458146  | 14229702 | 3389434  | 18784798 | 20965854 | 15349041 | 12186499 |
| 9.445217 | 6  | 3 | 3 | 543479.3 | 4720760  | 752836.3 | 3727200  | 1376046  | 5681122  | 5280554  | 4323359  | 3810693  |
| 9.848417 | 9  | 4 | 5 | 941086.6 | 3638360  | 1225621  | 2665027  | 981896.9 | 3612221  | 2631338  | 2725484  | 5676023  |
| 9.912633 | 10 | 5 | 5 | 2379448  | 12504478 | 1352380  | 11226037 | 1564152  | 10981166 | 11338006 | 13569410 | 14085161 |

|          |    |   |   |          |          |          |          |          |          |          |          |          |
|----------|----|---|---|----------|----------|----------|----------|----------|----------|----------|----------|----------|
| 9.388367 | 6  | 3 | 3 | 819367.4 | 8057140  | 377326.9 | 7255369  | 1164782  | 8574585  | 7716903  | 7773056  | 7887444  |
| 9.976317 | 9  | 4 | 5 | 426067.1 | 1104835  | 208716.6 | 880068   | 294308.1 | 1156249  | 1345733  | 1228459  | 973644.6 |
| 9.162767 | 8  | 4 | 3 | 1115602  | 6392553  | 3128421  | 3660731  | 3134418  | 8711354  | 9842561  | 7143118  | 2968237  |
| 9.983433 | 10 | 5 | 5 | 856749.9 | 3728691  | 421138.6 | 3185580  | 749246.1 | 4260736  | 3986444  | 3517286  | 3167501  |
| 9.872883 | 10 | 5 | 5 | 1909471  | 10656458 | 885750.7 | 8500693  | 3150862  | 10135722 | 9594212  | 10448173 | 11338805 |
| 9.34115  | 3  | 3 | 0 | 12787816 | 7524505  | 8819266  | 27581244 | 29258398 | 14538215 | 1263851  | 1304812  | 1062627  |
| 10.91673 | 7  | 3 | 4 | 334967.5 | 1181709  | 322628   | 906047.9 | 309685.6 | 1504844  | 980537.1 | 925976.6 | 934648.4 |
| 13.04047 | 6  | 4 | 1 | 52908.7  | 204434.8 | 54525.8  | 145712.3 | 77039.74 | 238033.3 | 171114.5 | 124322.9 | 239427.2 |
| 9.523633 | 13 | 5 | 5 | 5129618  | 37689392 | 13754956 | 27350467 | 9249114  | 51989019 | 47597716 | 42720055 | 23902315 |
| 10.95055 | 9  | 4 | 5 | 256838   | 1140746  | 418083.8 | 802046   | 355572.3 | 1738986  | 1379536  | 726384.5 | 821605.2 |
| 9.721317 | 7  | 4 | 3 | 871953.4 | 1796813  | 965917.5 | 1085694  | 594988.1 | 3382829  | 1549919  | 1712726  | 744468.2 |
| 9.40615  | 8  | 5 | 3 | 513938.9 | 1143671  | 319965.1 | 679273.3 | 655283.4 | 1237745  | 1554629  | 841445.9 | 797452.3 |
| 9.379233 | 3  | 3 | 0 | 1662444  | 2574628  | 2285813  | 4455893  | 2022411  | 962601.8 | 5809173  | 552596.8 | 4129087  |
| 9.568567 | 8  | 5 | 3 | 1643948  | 10690032 | 1167201  | 9113034  | 2200615  | 10755976 | 11992187 | 9911739  | 9176563  |
| 9.8887   | 9  | 4 | 4 | 3556530  | 10241548 | 3657782  | 7622205  | 1931014  | 10929793 | 6473413  | 16130357 | 9170155  |
| 9.379233 | 3  | 3 | 0 | 1293096  | 4561890  | 3408819  | 7940693  | 4272078  | 8464856  | 7998249  | 2648184  | 2576246  |
| 38.55383 | 5  | 2 | 3 | 323303   | 5272960  | 1505942  | 4219342  | 654060.4 | 4354496  | 4727972  | 4536318  | 7949079  |
| 9.392767 | 10 | 5 | 5 | 97662128 | 3E+08    | 57981809 | 2.37E+08 | 81898866 | 3.35E+08 | 3.19E+08 | 2.38E+08 | 2.41E+08 |
| 43.12867 | 15 | 5 | 4 | 339394.4 | 4046385  | 667069.5 | 3345309  | 912173   | 4642666  | 4614396  | 3239013  | 3428496  |
| 9.445217 | 10 | 5 | 3 | 1134433  | 6862036  | 1265679  | 5149771  | 2391058  | 8091986  | 7332697  | 6224022  | 4970249  |
| 9.388367 | 11 | 5 | 5 | 2282379  | 8571494  | 2968720  | 5952600  | 3050236  | 9615971  | 5681813  | 5795340  | 8955192  |
| 26.083   | 5  | 3 | 2 | 53667.5  | 148435.9 | 58427.86 | 104404   | 39873.13 | 94080.49 | 172039.3 | 238384.4 | 106573.9 |
| 20.2735  | 5  | 3 | 2 | 123382.9 | 369511.4 | 151925.2 | 245043.8 | 133301.5 | 577275.2 | 453566.3 | 181365.5 | 291973.1 |
| 9.3919   | 6  | 2 | 4 | 886707.3 | 5802964  | 3310778  | 3538884  | 1004125  | 1737688  | 6980626  | 7865341  | 9481907  |
| 17.0445  | 5  | 3 | 2 | 1414758  | 1308025  | 1579192  | 4474053  | 4605244  | 203446.1 | 3185299  | 152901.2 | 116541.2 |
| 9.640367 | 10 | 5 | 5 | 843047.1 | 2380598  | 1200446  | 1475051  | 825013.7 | 3098874  | 1825704  | 1028026  | 4071532  |
| 9.856867 | 10 | 5 | 5 | 2799553  | 10731547 | 2316859  | 13683713 | 4080533  | 11685627 | 11463840 | 10502000 | 13078108 |
| 9.999217 | 10 | 5 | 5 | 935598.8 | 2244085  | 719410.9 | 1652889  | 636604.8 | 2201130  | 1958453  | 1809031  | 3493642  |
| 10.008   | 6  | 4 | 2 | 249996.4 | 605607.3 | 286008.3 | 338823.2 | 325735.5 | 615100.1 | 825457.9 | 649315.8 | 122967.6 |
| 10.9645  | 9  | 5 | 4 | 1389482  | 6574228  | 1140900  | 5014038  | 2186416  | 6971596  | 7652016  | 5256716  | 5461285  |
| 29.22367 | 5  | 1 | 4 | 150633.8 | 119126.2 | 30591.33 | 402499.7 | 420837.5 | 95482.39 | 120387.8 | 82090.02 | 144053   |
| 9.445217 | 11 | 5 | 5 | 1261131  | 11529311 | 2796926  | 7955891  | 4946731  | 14430896 | 13848409 | 12101369 | 8192146  |
| 43.61767 | 13 | 4 | 5 | 330145.1 | 6210363  | 4438106  | 3146253  | 1674039  | 3965853  | 14134112 | 4003295  | 4653736  |
| 15.59935 | 7  | 3 | 4 | 56475.79 | 251507.2 | 48178.02 | 193177.8 | 79764.66 | 255764.6 | 270606.6 | 170653.9 | 261395.3 |
| 24.69583 | 3  | 3 | 0 | 458966.7 | 1368742  | 1852682  | 121396.2 | 168547.3 | 4462811  | 1720640  | 258265.7 | 10979.92 |

|          |    |   |   |          |          |          |          |          |          |          |          |          |
|----------|----|---|---|----------|----------|----------|----------|----------|----------|----------|----------|----------|
| 9.859983 | 5  | 2 | 3 | 6897081  | 24455190 | 19654326 | 9865814  | 12733852 | 30849345 | 2690716  | 44394329 | 4527278  |
| 18.76067 | 9  | 5 | 4 | 883080.4 | 5146910  | 923167   | 4127877  | 1356992  | 5107769  | 5855523  | 5089972  | 3675645  |
| 11.34412 | 5  | 4 | 1 | 110904.8 | 335600   | 224952.6 | 181945.5 | 70174.2  | 717076.8 | 355905.4 | 211017.9 | 232617.3 |
| 8.67205  | 5  | 3 | 2 | 990657.1 | 15879949 | 4692696  | 11835954 | 4628957  | 16424771 | 23690615 | 12299650 | 12360432 |
| 9.419733 | 3  | 3 | 0 | 500070.6 | 746238.4 | 237983   | 360448.6 | 553848.8 | 671130.7 | 1009487  | 379680.8 | 809738   |
| 9.4468   | 8  | 5 | 3 | 619991.1 | 2712066  | 926708.3 | 1771510  | 1210372  | 3650324  | 3644073  | 2675409  | 1751774  |
| 10.77503 | 10 | 5 | 5 | 367869.3 | 1005407  | 358628   | 748643.9 | 193803.9 | 766729.9 | 1553931  | 1150448  | 904679.8 |
| 24.609   | 7  | 4 | 3 | 108821.4 | 285838.4 | 82960.83 | 406536.9 | 171148.2 | 217407.8 | 413951.2 | 277353.8 | 209981.4 |
| 9.392767 | 5  | 3 | 2 | 593867.6 | 1107380  | 335580.8 | 616370.7 | 696840.7 | 1576083  | 1247222  | 787086.3 | 780105.1 |
| 9.872883 | 11 | 5 | 5 | 2235883  | 11532525 | 705810.3 | 8604672  | 4343263  | 12154477 | 11856027 | 10362629 | 11876428 |
| 9.93625  | 10 | 5 | 5 | 4155467  | 8726176  | 820068.3 | 7205281  | 2208647  | 9469411  | 8325040  | 7837417  | 8279287  |
| 9.388617 | 10 | 5 | 5 | 45759112 | 1.75E+08 | 58721036 | 1.26E+08 | 52985580 | 1.9E+08  | 1.18E+08 | 1.26E+08 | 1.75E+08 |
| 8.837567 | 5  | 3 | 2 | 318399.1 | 757536   | 685648.9 | 284065.4 | 265853.4 | 464890   | 959991.4 | 540834.3 | 1821964  |
| 10.00098 | 12 | 5 | 4 | 1945788  | 5368041  | 1721904  | 7512034  | 2957700  | 7716582  | 3357664  | 6042354  | 4044703  |
| 44.9835  | 8  | 2 | 3 | 334354.4 | 4751911  | 2361101  | 3144715  | 686031.1 | 8968844  | 3577537  | 3838514  | 3552126  |
| 10.03947 | 9  | 4 | 4 | 974603.8 | 835885.9 | 640787.6 | 1612367  | 1064365  | 461895.4 | 649630.1 | 804941.9 | 1935274  |
| 9.445217 | 9  | 4 | 4 | 1503041  | 9764635  | 1978788  | 6942563  | 3992980  | 12079653 | 9668379  | 8862882  | 7030869  |
| 9.40255  | 9  | 5 | 4 | 701456.2 | 2459207  | 874101.9 | 1742641  | 774218.8 | 3291199  | 1396155  | 1652489  | 2828700  |
| 8.8977   | 4  | 3 | 1 | 503593.5 | 6375819  | 1646809  | 4598838  | 2350445  | 5606476  | 8493989  | 7752274  | 4729300  |
| 10.01545 | 8  | 4 | 4 | 813972.4 | 555013   | 115827.4 | 980841.7 | 631585.7 | 396638.9 | 657653.6 | 544657.7 | 499301.1 |
| 10.20467 | 8  | 4 | 4 | 563664.5 | 1277471  | 263628.2 | 1586945  | 421514   | 1010269  | 1382014  | 1684541  | 1148268  |
| 11.38433 | 6  | 4 | 2 | 105085.2 | 258604   | 86496.3  | 190903   | 68119.8  | 272170.5 | 401567.1 | 204498.1 | 183610.2 |
| 10.0614  | 6  | 4 | 2 | 387142.4 | 952591.7 | 476808.8 | 593716.1 | 330565.3 | 1416761  | 1493065  | 767334.8 | 416794   |
| 11.53673 | 3  | 3 | 0 | 93037.1  | 327741   | 106574.7 | 590043   | 386795.8 | 411772.5 | 181780.6 | 248326.7 | 378774   |
| 10.01477 | 13 | 5 | 5 | 442269.4 | 809730.8 | 391986.1 | 541130.3 | 139680.3 | 1486131  | 801580.9 | 656454.4 | 573868.8 |
| 7.288367 | 6  | 3 | 2 | 606023.6 | 4894486  | 4676999  | 1654774  | 1954421  | 7798717  | 1512423  | 774293.9 | 2717033  |
| 9.388367 | 5  | 3 | 2 | 741959   | 3809613  | 1740900  | 5323477  | 1759384  | 4151128  | 6217165  | 2747774  | 1613386  |
| 9.8887   | 6  | 4 | 2 | 836635.8 | 3424569  | 910741.9 | 4118095  | 659343.2 | 4665481  | 3713557  | 2325991  | 2764760  |
| 9.976317 | 6  | 3 | 3 | 569128.1 | 599277.4 | 263451.8 | 1111379  | 748112.7 | 715185.5 | 1002099  | 513336.8 | 361812.5 |
| 9.874317 | 5  | 1 | 4 | 1286570  | 1990086  | 461479.9 | 2959033  | 1421378  | 2057918  | 1262282  | 1974634  | 2116588  |
| 9.36565  | 7  | 5 | 2 | 694965.1 | 1241650  | 295642.1 | 896916   | 469376.1 | 1705871  | 1191333  | 884850.1 | 1176717  |
| 10.55887 | 10 | 5 | 5 | 11149794 | 1725702  | 389702.4 | 35576379 | 50574725 | 2087703  | 1809173  | 1440256  | 1212574  |
| 9.93625  | 10 | 5 | 5 | 5134625  | 21218859 | 3600638  | 16666169 | 6325760  | 24316595 | 17391691 | 17880814 | 21227697 |
| 10.74945 | 5  | 4 | 1 | 187526   | 625768.8 | 392586.9 | 320906.7 | 303286   | 1079065  | 393164.8 | 1016584  | 412775.8 |
| 9.840617 | 10 | 5 | 5 | 956281   | 4543134  | 267390.6 | 4197407  | 482767.4 | 4434007  | 4548830  | 4731427  | 4157924  |

|          |    |   |   |          |          |          |          |          |          |          |          |          |
|----------|----|---|---|----------|----------|----------|----------|----------|----------|----------|----------|----------|
| 9.41815  | 7  | 4 | 3 | 1111039  | 9521295  | 2156062  | 7975046  | 1205152  | 6309340  | 8973855  | 9357698  | 11124775 |
| 10.02372 | 8  | 5 | 3 | 258574.4 | 759379.9 | 299628.2 | 505580.6 | 287604   | 486740.9 | 1031280  | 581871.6 | 562626.5 |
| 10.95835 | 9  | 4 | 5 | 601186.6 | 1779849  | 309516.1 | 1435782  | 461978.9 | 2155881  | 2032547  | 1617528  | 1400310  |
| 9.848417 | 5  | 3 | 2 | 693793.4 | 1300959  | 817299.3 | 1962890  | 709044   | 1980885  | 405643.4 | 1775701  | 1929243  |
| 9.9677   | 10 | 5 | 5 | 1095664  | 3129755  | 787394.9 | 2520072  | 604231.3 | 3350009  | 3125005  | 2071066  | 4242406  |
| 9.842    | 5  | 3 | 2 | 1135469  | 4367143  | 1301209  | 3126184  | 1554324  | 5394542  | 2500056  | 5786457  | 3921480  |
| 22.47367 | 9  | 5 | 4 | 3636050  | 25268747 | 10558219 | 17862267 | 5105349  | 23011364 | 43598884 | 16387746 | 21874656 |
| 9.379233 | 4  | 3 | 1 | 433027.1 | 751125.2 | 606770.3 | 290207.2 | 438653.6 | 1393532  | 259013.4 | 0        | 860317.4 |
| 9.67     | 10 | 5 | 5 | 881317.6 | 4422812  | 1733637  | 2983602  | 1596841  | 6130216  | 4302639  | 2748048  | 2694058  |
| 43.73267 | 7  | 3 | 2 | 391616.8 | 4972060  | 1315477  | 4038098  | 696185.7 | 7078655  | 4190889  | 5442175  | 4217389  |
| 8.799267 | 6  | 5 | 1 | 88098.87 | 331468.4 | 141830.6 | 197484.1 | 166976.2 | 341648.6 | 545688.9 | 201025   | 203742.8 |
| 9.43325  | 7  | 4 | 2 | 413513   | 2199829  | 906011.8 | 1320293  | 1114665  | 2204682  | 2889492  | 1617882  | 3253224  |
| 9.992233 | 9  | 5 | 4 | 1074714  | 3729423  | 461999.5 | 2711441  | 1500241  | 3445030  | 4214730  | 3092387  | 3812475  |
| 9.317    | 4  | 3 | 1 | 349927.7 | 649920.6 | 253871.6 | 346578.6 | 417194.7 | 898991.1 | 711477.7 | 755069.2 | 659387.8 |
| 24.4635  | 4  | 3 | 1 | 407133.2 | 1125439  | 1559451  | 84807.21 | 81872.23 | 3825065  | 1102127  | 350712.5 | 50540.36 |
| 10.44062 | 6  | 2 | 4 | 205090.7 | 934960.4 | 202257.2 | 685040.3 | 346784.4 | 926990.5 | 942036.9 | 1219915  | 648061   |
| 9.91875  | 7  | 5 | 2 | 3027992  | 2791213  | 1094272  | 5732329  | 4367223  | 3591944  | 2393555  | 1389529  | 2416709  |
| 8.981583 | 9  | 5 | 4 | 576254.4 | 1932824  | 579928.3 | 1333156  | 786103.5 | 1983733  | 2522445  | 1321226  | 1361334  |
| 9.972483 | 5  | 3 | 2 | 326782.4 | 695124.5 | 224845.2 | 427042.8 | 368901.5 | 357567.6 | 697834.2 | 622902.2 | 888642.5 |
| 10.9645  | 4  | 1 | 3 | 539190.4 | 1628719  | 216679.6 | 1282207  | 500888.9 | 1580096  | 1724779  | 1919780  | 1328700  |
| 10.95602 | 7  | 3 | 4 | 823515.9 | 2796872  | 832868.9 | 2183639  | 539062.2 | 2307900  | 4126961  | 1929539  | 2726790  |
| 10.80383 | 9  | 5 | 4 | 213125   | 766907.4 | 268407.9 | 550447.1 | 232043.4 | 641942.8 | 1240384  | 697473.8 | 579350.6 |
| 9.920517 | 11 | 5 | 5 | 11954934 | 49909213 | 5796203  | 44515680 | 6678736  | 52332876 | 39769582 | 54375229 | 52019580 |
| 9.928667 | 11 | 4 | 4 | 1705280  | 3733583  | 443109.5 | 2987642  | 1084116  | 3810399  | 3286680  | 4446953  | 3484668  |
| 9.888767 | 10 | 5 | 5 | 1134426  | 3690465  | 743068.6 | 3035668  | 777365.4 | 3269113  | 2929034  | 3380505  | 4089649  |
| 27.72483 | 11 | 5 | 5 | 6237571  | 31027092 | 10294195 | 41963403 | 14515759 | 25287289 | 29206426 | 22263000 | 48611862 |
| 9.460217 | 7  | 4 | 3 | 657234.4 | 4258581  | 1372330  | 3130437  | 1243444  | 5589379  | 4619314  | 4365208  | 4774411  |
| 10.38852 | 6  | 3 | 3 | 214412.2 | 812127.3 | 140066.4 | 687640.9 | 148951.9 | 887742.4 | 974017   | 779093.5 | 599092.4 |
| 9.36565  | 4  | 3 | 1 | 487546.9 | 873189.4 | 391679.9 | 548479.3 | 361800.3 | 1187263  | 451094.8 | 445332.1 | 1069708  |
| 15.55905 | 9  | 3 | 4 | 407908.9 | 5163906  | 1737434  | 3817316  | 1351546  | 8214521  | 4900203  | 4259521  | 3989142  |
| 9.516467 | 6  | 3 | 3 | 1101122  | 2891844  | 2477608  | 1230916  | 527166.2 | 1456437  | 684879.6 | 2951485  | 7049803  |
| 10.9742  | 7  | 4 | 3 | 406237.7 | 971788.4 | 434033.5 | 1366055  | 480388.6 | 840763.7 | 662992.9 | 946167.8 | 688735.3 |
| 10.95835 | 4  | 1 | 3 | 878174.6 | 2607741  | 1540939  | 1519638  | 803598.3 | 2859070  | 4785909  | 2267092  | 469538.5 |
| 10.37908 | 5  | 4 | 1 | 115403.3 | 234565.9 | 92465.34 | 156541.3 | 88876.14 | 340933.6 | 311665.1 | 201791.2 | 111718.6 |
| 9.872883 | 10 | 5 | 5 | 2835362  | 13851537 | 1579674  | 11253856 | 3771461  | 12355769 | 14071780 | 15657589 | 15051383 |



|          |    |   |   |          |          |          |          |          |          |          |          |          |
|----------|----|---|---|----------|----------|----------|----------|----------|----------|----------|----------|----------|
| 10.94443 | 4  | 0 | 4 | 282472.3 | 812891.3 | 352669   | 567651.5 | 163084.6 | 747384.5 | 1377874  | 449109.2 | 617644.4 |
| 10.51423 | 10 | 5 | 5 | 1676431  | 16934159 | 6645164  | 11361442 | 6304964  | 25154725 | 19769270 | 18091877 | 7285326  |
| 9.928667 | 9  | 5 | 4 | 2002142  | 4945105  | 906322   | 3895978  | 1435139  | 6229370  | 4988491  | 3879797  | 4331665  |
| 9.9847   | 4  | 1 | 3 | 602204.1 | 954972.9 | 610126.9 | 543014.7 | 179843.6 | 1579218  | 195698.8 | 1331835  | 1253325  |
| 9.864767 | 6  | 3 | 3 | 2268018  | 1910488  | 785886.5 | 5693642  | 5670219  | 1043488  | 1616952  | 1807639  | 1900323  |
| 9.4468   | 7  | 4 | 2 | 541598.3 | 1775765  | 573448   | 2370978  | 783643.9 | 1005507  | 1897052  | 2606213  | 1710053  |
| 28.7     | 8  | 4 | 4 | 229213.9 | 410018   | 132424.5 | 760657.3 | 521631   | 535294.2 | 405188.6 | 297924.7 | 261225   |
| 9.840617 | 10 | 5 | 5 | 5630280  | 27678007 | 2674945  | 23312656 | 6335338  | 31406880 | 28936898 | 25700250 | 24641593 |
| 10.94208 | 4  | 3 | 1 | 375231.7 | 634637.5 | 450631.2 | 1032741  | 474818.7 | 201163.2 | 400255.6 | 333737.7 | 1188494  |
| 11.36005 | 4  | 3 | 1 | 83232.42 | 200802.6 | 95924.18 | 133117.6 | 49983.66 | 323490.9 | 271054.6 | 188638.4 | 97568.82 |
| 15.36577 | 3  | 3 | 0 | 3986856  | 7758845  | 10750065 | 15008233 | 3088746  | 83230    | 22838806 | 182314   | 146994.1 |
| 9.8207   | 5  | 4 | 1 | 1230517  | 2209355  | 974773.7 | 3278757  | 1439005  | 1557031  | 2390775  | 1904081  | 3811503  |
| 25.2625  | 3  | 3 | 0 | 414520.8 | 1202489  | 1581490  | 149329.3 | 161040.8 | 3841408  | 1495114  | 98827.03 | 106517.6 |
| 9.983433 | 3  | 0 | 3 | 343394.5 | 226970.7 | 296079.9 | 582764.9 | 492127.5 | 739637.7 | 69289.11 | 203292   | 0        |
| 9.089733 | 10 | 5 | 5 | 5300082  | 27444815 | 4724276  | 21514425 | 8287599  | 28168754 | 35291877 | 24332104 | 23577856 |
| 9.1932   | 8  | 5 | 2 | 396256.5 | 1023136  | 966629.6 | 368529.5 | 314295.9 | 802710.3 | 2724294  | 727165.8 | 483384.6 |
| 9.328967 | 7  | 4 | 3 | 843668.5 | 8596501  | 2653913  | 6165939  | 2987011  | 10020527 | 4255083  | 9098391  | 11240921 |
| 9.4775   | 11 | 5 | 5 | 2976130  | 25845744 | 5993046  | 18892848 | 9533062  | 33397437 | 18827870 | 30058861 | 25518091 |
| 19.869   | 6  | 2 | 3 | 169543.1 | 691092.4 | 241205.1 | 433884.6 | 342925.8 | 685316.1 | 949271.5 | 440485.1 | 463011.9 |
| 9.538267 | 7  | 3 | 3 | 3905724  | 44250414 | 27785929 | 22471906 | 22448409 | 54937990 | 1930267  | 31059337 | 65174286 |
| 9.300733 | 4  | 3 | 1 | 584620.1 | 1216693  | 666031.1 | 745908.8 | 353961.9 | 2382427  | 773275.8 | 1144700  | 858428.9 |
| 9.949233 | 11 | 5 | 4 | 1307276  | 3482235  | 809398.2 | 2888353  | 523253.6 | 4661189  | 2525741  | 3303390  | 3836427  |
| 10.64708 | 8  | 5 | 3 | 356314.8 | 1452269  | 345063.5 | 1110122  | 441973.7 | 1005302  | 1857978  | 1738263  | 1338730  |
| 9.644783 | 3  | 0 | 3 | 1896616  | 392617.2 | 182214.2 | 5273788  | 7349117  | 312499   | 194740.5 | 684434.1 | 354231.7 |
| 9.445217 | 14 | 5 | 5 | 1925866  | 13796740 | 3863777  | 10369187 | 4115865  | 18015536 | 16554491 | 14899018 | 10238438 |
| 9.379233 | 9  | 5 | 4 | 482621.8 | 1170012  | 312844.4 | 879768.4 | 360584.4 | 1615311  | 985561.3 | 928847.6 | 935650.6 |
| 9.392767 | 10 | 5 | 5 | 3937944  | 15775864 | 5790462  | 10807385 | 5787054  | 16860238 | 11248789 | 10625642 | 15122400 |
| 9.93625  | 10 | 5 | 5 | 33572832 | 1.27E+08 | 24128923 | 1.03E+08 | 32430482 | 1.55E+08 | 1.36E+08 | 95861045 | 1.09E+08 |
| 9.960467 | 8  | 4 | 4 | 1418772  | 2974630  | 1357523  | 1760712  | 1468054  | 3505133  | 4773929  | 3193057  | 1172255  |
| 12.64667 | 10 | 5 | 5 | 2865535  | 22299458 | 3341524  | 19029539 | 4198066  | 25952823 | 24651469 | 18661306 | 18908352 |
| 39.8055  | 5  | 5 | 0 | 298657.6 | 5296168  | 1768075  | 4120111  | 223118.7 | 5393853  | 6393432  | 7581488  | 3478608  |
| 44.42267 | 6  | 3 | 3 | 345883.4 | 4080337  | 1812080  | 2709713  | 1317965  | 2842827  | 3130681  | 4276891  | 7159072  |
| 9.445217 | 6  | 3 | 2 | 683522.8 | 2245039  | 432694.7 | 1475909  | 1127274  | 2129424  | 1795581  | 2506333  | 2854698  |
| 9.912633 | 11 | 5 | 5 | 3537398  | 16590861 | 3908692  | 19543089 | 2831905  | 19342639 | 11276933 | 19979297 | 18773725 |
| 9.845483 | 9  | 5 | 4 | 2880341  | 16464682 | 1832437  | 13262057 | 4690913  | 14605642 | 14851264 | 16452738 | 17400200 |

|          |    |   |   |          |          |          |          |          |          |          |          |          |
|----------|----|---|---|----------|----------|----------|----------|----------|----------|----------|----------|----------|
| 18.99483 | 9  | 5 | 4 | 238826.1 | 472879.3 | 267401.3 | 925399.5 | 661098.4 | 943191.3 | 286449   | 395633.6 | 332493.7 |
| 10.01837 | 10 | 5 | 5 | 465059.3 | 1431495  | 304083.9 | 1050517  | 533781.4 | 1818611  | 1532718  | 1371400  | 978150   |
| 9.848417 | 10 | 5 | 5 | 2251169  | 7137341  | 429316.1 | 9067782  | 2902444  | 6697318  | 7449975  | 7720986  | 6933336  |
| 42.75467 | 7  | 3 | 4 | 435150.6 | 7228210  | 1600809  | 5294389  | 2687573  | 6953575  | 5984397  | 5449004  | 8988913  |
| 9.960467 | 10 | 5 | 5 | 1690775  | 6442279  | 816869.3 | 5544400  | 1214065  | 7695689  | 6812506  | 6092493  | 5688527  |
| 9.37735  | 6  | 2 | 3 | 610653.4 | 5186975  | 1432880  | 3881426  | 1605464  | 6155310  | 2798058  | 6040152  | 6053386  |
| 43.77583 | 10 | 5 | 5 | 1278754  | 29105014 | 2125104  | 25013894 | 6035615  | 25790958 | 30920898 | 30537453 | 30067886 |
| 13.2733  | 10 | 5 | 5 | 1129278  | 8913812  | 1044424  | 8021485  | 1038249  | 9416172  | 10513364 | 8130515  | 8068192  |
| 7.563483 | 9  | 5 | 4 | 13071265 | 3.75E+08 | 2.01E+08 | 2.18E+08 | 1.64E+08 | 2.03E+08 | 5.35E+08 | 4.23E+08 | 1.31E+08 |
| 9.40255  | 13 | 5 | 4 | 3315479  | 24575014 | 4322191  | 18132294 | 9304082  | 23718881 | 20346415 | 31839246 | 24180667 |
| 9.398167 | 12 | 5 | 5 | 12787816 | 22894601 | 6120647  | 52398735 | 44436341 | 13230573 | 27087989 | 25984796 | 20445540 |
| 9.94455  | 6  | 3 | 3 | 805997.4 | 1467841  | 432581.6 | 1005936  | 618959.6 | 1646027  | 1686277  | 1976579  | 1029112  |
| 10.68927 | 6  | 3 | 3 | 122102.7 | 474123.3 | 199878.4 | 331753   | 113523.8 | 352435.5 | 816443.5 | 456752.3 | 313947.1 |
| 9.960467 | 13 | 5 | 5 | 2464879  | 4847289  | 531161.8 | 5720071  | 1274268  | 4501334  | 4848438  | 4586435  | 5765501  |
| 9.888767 | 11 | 5 | 5 | 2588468  | 14624718 | 1485090  | 11070372 | 5301273  | 13466096 | 12953928 | 14448325 | 15863540 |
| 14.7953  | 6  | 3 | 3 | 54682.59 | 337039   | 97418.08 | 253652.4 | 97458.82 | 471108   | 215364.5 | 280665.7 | 381798.3 |
| 43.474   | 7  | 3 | 2 | 489712.9 | 10883746 | 2368046  | 8166295  | 3733739  | 10042783 | 9008253  | 15006460 | 10512518 |
| 9.8445   | 5  | 3 | 2 | 646107.6 | 1771108  | 373496   | 1241203  | 761207.3 | 2179205  | 1504404  | 2150078  | 1654656  |
| 8.94625  | 10 | 5 | 5 | 1817853  | 8209537  | 1176604  | 7028263  | 1544238  | 8864903  | 9770820  | 8212522  | 7421497  |
| 9.856867 | 10 | 5 | 5 | 1425375  | 7704282  | 1099735  | 5898260  | 2639159  | 7703982  | 6988197  | 6280194  | 8719546  |
| 11.45398 | 7  | 4 | 3 | 88408.94 | 281987.1 | 62150.09 | 209044   | 100939.2 | 325576.6 | 205655.5 | 257429.7 | 362978.6 |
| 39.74783 | 4  | 3 | 1 | 442534.2 | 7572463  | 3682558  | 5096501  | 1159633  | 6124246  | 5596554  | 5905215  | 6086858  |
| 10.02372 | 9  | 5 | 4 | 699798.1 | 825794.7 | 158587   | 1057690  | 334820.8 | 794926.6 | 1056803  | 850541.9 | 612399.8 |
| 17.366   | 6  | 4 | 2 | 525734.1 | 3400634  | 1538103  | 2312879  | 846331.7 | 3210207  | 5749469  | 2389894  | 1770963  |
| 10.008   | 8  | 5 | 3 | 2759974  | 1211751  | 365698.3 | 4289532  | 4654955  | 1402737  | 1674136  | 1301177  | 820407.5 |
| 11.27517 | 10 | 5 | 5 | 567926.6 | 2846795  | 1210218  | 1976660  | 729874.8 | 3246716  | 1445332  | 2147759  | 4645725  |
| 9.45945  | 4  | 0 | 4 | 1240037  | 8556082  | 1551902  | 5623340  | 4336821  | 8534603  | 6858029  | 7612275  | 8812505  |
| 9.8322   | 5  | 3 | 2 | 3047747  | 1932674  | 1214921  | 4651069  | 4053764  | 1285467  | 1129849  | 3896553  | 2328392  |
| 9.419733 | 12 | 5 | 4 | 690963   | 5278532  | 1074119  | 3990648  | 1794642  | 6645983  | 5878558  | 4728094  | 3835850  |
| 25.08867 | 3  | 3 | 0 | 216907.9 | 577695.7 | 819071.8 | 36638.16 | 46786.57 | 1961364  | 689739   | 144312.1 | 0        |
| 13.27422 | 9  | 5 | 4 | 45626.21 | 215169.7 | 21616.6  | 174635.4 | 59938.11 | 217121.9 | 246585.4 | 222435.6 | 194941.5 |
| 9.37735  | 9  | 3 | 5 | 1121972  | 8092944  | 3561235  | 5098485  | 3451213  | 4771363  | 12996868 | 4430894  | 8939140  |
| 11.48157 | 5  | 4 | 1 | 118498.1 | 258701.1 | 122612.3 | 173918.3 | 57774.32 | 445347.4 | 275681.8 | 130044.7 | 168078.5 |
| 9.95825  | 5  | 3 | 2 | 430889.2 | 973179   | 396968.1 | 613927.7 | 442594   | 1209367  | 421967.7 | 693640.9 | 1359406  |
| 9.94455  | 9  | 5 | 4 | 1937349  | 6702378  | 2051374  | 4663679  | 2660222  | 6483608  | 5751321  | 4686391  | 6459356  |

|          |    |   |   |          |          |          |          |          |          |          |          |          |
|----------|----|---|---|----------|----------|----------|----------|----------|----------|----------|----------|----------|
| 13.2733  | 10 | 5 | 5 | 296030.8 | 2264711  | 367026   | 1981861  | 287754.6 | 2544647  | 2769092  | 1997440  | 1984223  |
| 10.9645  | 5  | 4 | 1 | 440102.3 | 940353.5 | 190012.4 | 1255410  | 461952   | 1085915  | 1062930  | 830381.3 | 656815.8 |
| 9.445217 | 16 | 5 | 5 | 1383799  | 8946892  | 2878522  | 6351524  | 3190891  | 12041737 | 11255769 | 9260040  | 7035877  |
| 7.124633 | 4  | 3 | 1 | 3281278  | 7821897  | 6960633  | 3181494  | 1782743  | 5712787  | 3047616  | 90942.47 | 15094655 |
| 35.42783 | 4  | 3 | 1 | 291177   | 1374271  | 1451162  | 415308.8 | 191141.6 | 3926881  | 1002277  | 305119.6 | 753246.4 |
| 9.856867 | 7  | 4 | 3 | 728472   | 2370359  | 924337.5 | 3024536  | 517926.8 | 2380265  | 1207964  | 2465750  | 2033313  |
| 9.8322   | 9  | 5 | 4 | 999573.6 | 5247391  | 741658.1 | 3971242  | 1878722  | 4954417  | 4887755  | 4863853  | 4958883  |
| 9.964417 | 10 | 5 | 5 | 1238567  | 3462878  | 1216805  | 4295220  | 523056.3 | 5101087  | 3147719  | 4214257  | 1965661  |
| 20.97733 | 10 | 5 | 5 | 141586.1 | 942497.9 | 251182.2 | 745305.7 | 207965.9 | 774477.5 | 1277600  | 1147229  | 776692.9 |
| 10.00385 | 10 | 5 | 5 | 1013412  | 889991.8 | 306040.5 | 1715227  | 1240034  | 1198930  | 727747.4 | 1009386  | 1075712  |
| 43.70383 | 4  | 1 | 3 | 445782.6 | 8343560  | 354799.9 | 8051514  | 329694.7 | 7873813  | 8861665  | 8401017  | 8238035  |
| 9.824233 | 7  | 4 | 3 | 3177906  | 2899104  | 2602266  | 5640089  | 3678887  | 1812955  | 1411299  | 2232082  | 7519341  |
| 10.02372 | 8  | 5 | 3 | 198690.3 | 692663.6 | 221910.9 | 472710.4 | 287457.9 | 650152.4 | 803450.1 | 415545.8 | 591786.1 |
| 9.848417 | 9  | 5 | 4 | 3343855  | 13240235 | 809805.9 | 10449995 | 4214698  | 13368285 | 13234592 | 12354423 | 12747106 |
| 9.976317 | 10 | 5 | 5 | 694865.1 | 2389673  | 363047.1 | 1951952  | 612954.6 | 2505943  | 2563851  | 2338766  | 1794468  |
| 9.8322   | 5  | 3 | 2 | 664832.9 | 2416165  | 896738.3 | 1638255  | 929515.1 | 1379870  | 1586003  | 3298805  | 3216684  |
| 8.768417 | 4  | 3 | 1 | 288756.9 | 519270.1 | 359849   | 232560.1 | 310478.9 | 520144.8 | 726001.6 | 394907.5 | 955296.6 |
| 9.992233 | 10 | 5 | 5 | 867939.1 | 3529296  | 513949.9 | 3113363  | 460486.1 | 3195665  | 4009746  | 3228406  | 3053142  |
| 9.445217 | 6  | 2 | 4 | 2983714  | 22830778 | 12122278 | 13737236 | 8800377  | 18479506 | 4073573  | 27392598 | 28623247 |
| 9.5415   | 10 | 4 | 4 | 908898.1 | 3487639  | 2632004  | 6070568  | 3361593  | 996934.4 | 1930386  | 5154022  | 7273455  |
| 34.4075  | 7  | 3 | 2 | 304588.7 | 3477813  | 255348.5 | 3920286  | 653012.7 | 3026789  | 3642549  | 3608624  | 3532616  |
| 10.03947 | 5  | 4 | 1 | 4.7E+08  | 3.32E+08 | 7.3E+08  | 1.18E+09 | 1.17E+09 | 4742307  | 3208955  | 8157521  | 1.64E+09 |
| 9.972483 | 5  | 3 | 2 | 342836.8 | 886223.6 | 364458.4 | 519938.5 | 482529.2 | 1169228  | 616863.9 | 1296416  | 428747.4 |
| 10.008   | 6  | 3 | 3 | 381494.1 | 624190.3 | 400119.8 | 999165.8 | 475596   | 708479.6 | 1120470  | 858467.4 | 209288.7 |
| 9.853633 | 9  | 5 | 4 | 578435.6 | 2182284  | 669389.6 | 1707836  | 383117.1 | 2465174  | 1677620  | 1538435  | 2036985  |
| 9.928667 | 10 | 5 | 5 | 1701160  | 3564391  | 208861.6 | 2838930  | 1097272  | 3936953  | 3490105  | 3483003  | 3459693  |
| 9.566767 | 15 | 5 | 5 | 868549.3 | 7319775  | 1257341  | 5909260  | 1939115  | 7443295  | 8599541  | 8423621  | 5672991  |
| 9.379233 | 9  | 5 | 4 | 1790576  | 4772186  | 1288026  | 3693738  | 1247676  | 5841375  | 4948312  | 3490456  | 3408662  |
| 10.24195 | 9  | 5 | 4 | 567960.6 | 1352707  | 781694.8 | 835145.9 | 171889.6 | 2466607  | 1778464  | 1070879  | 448430.1 |
| 20.288   | 8  | 3 | 5 | 504144.6 | 1612502  | 1905275  | 359062.2 | 173990.1 | 4100870  | 233832.7 | 316110.2 | 168071.7 |
| 9.494433 | 4  | 3 | 1 | 271916.6 | 403883.9 | 162319.9 | 237984.2 | 220550.6 | 350029.2 | 677531.7 | 289322.8 | 418149.8 |
| 9.9677   | 10 | 5 | 5 | 701041.4 | 2429748  | 971757.2 | 1625223  | 919786   | 3156556  | 3665800  | 2173012  | 1260591  |
| 44.96767 | 9  | 3 | 4 | 420733.3 | 6380060  | 1409568  | 5329019  | 1008707  | 6085416  | 6247981  | 8030593  | 7246355  |
| 10.95835 | 4  | 1 | 3 | 1967596  | 7982509  | 4420162  | 4283107  | 4283473  | 10067258 | 12268173 | 7516038  | 683562.8 |
| 9.859983 | 9  | 3 | 5 | 3044551  | 9043354  | 5964564  | 5053992  | 1924691  | 19531767 | 7129919  | 4993422  | 7779850  |

|          |    |   |   |          |          |          |          |          |          |          |          |          |
|----------|----|---|---|----------|----------|----------|----------|----------|----------|----------|----------|----------|
| 28.77517 | 6  | 4 | 2 | 225851.7 | 1172419  | 719477.9 | 642997.2 | 491257.6 | 552402.8 | 1545837  | 394325   | 1228527  |
| 9.840617 | 5  | 3 | 2 | 2526954  | 6364762  | 4925509  | 11250073 | 6415245  | 13611849 | 9054497  | 3426636  | 4308360  |
| 39.50033 | 7  | 2 | 3 | 445441.2 | 5986423  | 1081908  | 4730374  | 1748725  | 5512257  | 6652226  | 6257677  | 7139402  |
| 9.976317 | 10 | 5 | 5 | 672156.1 | 2105854  | 225909.9 | 1717918  | 573899.7 | 2380119  | 2262821  | 2128641  | 1897509  |
| 9.014483 | 5  | 4 | 1 | 441300.8 | 636091.8 | 537744.7 | 1668011  | 1538413  | 511519.5 | 694058.9 | 1524915  | 294874.6 |
| 21.22417 | 9  | 5 | 4 | 1059516  | 4770347  | 1288262  | 3831376  | 850975.6 | 4116288  | 6832622  | 5198103  | 4063705  |
| 43.18617 | 7  | 2 | 3 | 270256   | 3139148  | 1232101  | 4252985  | 1385177  | 1079246  | 3561913  | 4386540  | 3430022  |
| 12.15013 | 5  | 3 | 2 | 77417.85 | 298157.8 | 128923   | 207073.4 | 73551.75 | 181540.9 | 435749.1 | 319724.7 | 149247.8 |
| 9.933967 | 13 | 5 | 5 | 2216429  | 2983143  | 283412.3 | 5690363  | 4126211  | 2905204  | 2941318  | 3412531  | 3029775  |
| 10.99775 | 7  | 4 | 3 | 289259.7 | 1338458  | 324230   | 1018652  | 419351.1 | 1530998  | 1165434  | 989817.6 | 1801165  |
| 42.69717 | 12 | 3 | 4 | 294691.3 | 5232850  | 1822899  | 3744692  | 1679777  | 5344433  | 5408367  | 5168224  | 2550653  |
| 9.616167 | 10 | 5 | 5 | 1298280  | 4720626  | 1073934  | 3682581  | 1347826  | 4955686  | 5221379  | 4126696  | 6054055  |
| 9.473717 | 8  | 3 | 5 | 1802537  | 5104791  | 4422693  | 2169394  | 1219734  | 11397926 | 2511841  | 8141124  | 1782592  |
| 9.859983 | 4  | 1 | 3 | 715635   | 2657618  | 555051.6 | 1827880  | 1212187  | 2978690  | 3453359  | 2430310  | 2056726  |
| 9.9014   | 9  | 5 | 4 | 933324.5 | 2897133  | 718890.9 | 4270743  | 2050018  | 3904364  | 2272464  | 3284360  | 2841073  |
| 12.31053 | 9  | 4 | 5 | 174631.8 | 1229348  | 193553   | 968452   | 375817.1 | 1191338  | 1028453  | 1090135  | 1325725  |
| 10.94208 | 9  | 5 | 4 | 195105   | 578479.7 | 192796.8 | 769198.6 | 250862   | 579817.6 | 811302.2 | 388381   | 387088.2 |
| 9.43325  | 5  | 2 | 3 | 858867.1 | 6610108  | 1948653  | 4833087  | 2228944  | 7828264  | 8213955  | 6344726  | 7305902  |
| 9.379233 | 5  | 4 | 1 | 435470.2 | 964556.5 | 371518.7 | 606177.2 | 465510.5 | 1406710  | 973428.9 | 824125.4 | 429410   |
| 9.103733 | 10 | 5 | 5 | 3298570  | 13496890 | 1803432  | 11765368 | 2243399  | 13452388 | 16121356 | 11842717 | 11818506 |
| 15.5695  | 10 | 5 | 5 | 1287525  | 12026176 | 2244971  | 10210531 | 2031395  | 10209268 | 14361543 | 9335692  | 12161680 |
| 9.8445   | 9  | 5 | 4 | 2124460  | 10194794 | 1278865  | 7996758  | 3259135  | 9117940  | 8947848  | 9856328  | 11235147 |
| 9.56645  | 13 | 4 | 5 | 4399675  | 40376438 | 9489480  | 26685951 | 19936372 | 53300579 | 27939835 | 38932593 | 36614514 |
| 11.08157 | 4  | 3 | 1 | 17802954 | 21180617 | 15462975 | 39760184 | 26174012 | 37732673 | 11279221 | 38323731 | 11213488 |
| 29.86267 | 4  | 3 | 1 | 253881.2 | 521801.5 | 532968.6 | 940661.7 | 450048.1 | 107785   | 64697.2  | 1208649  | 979404.1 |
| 41.84833 | 7  | 3 | 1 | 374825.2 | 3654849  | 1923396  | 2392811  | 271230.3 | 3044972  | 1811278  | 2689760  | 3905951  |
| 39.3595  | 5  | 1 | 3 | 287683.4 | 3379802  | 1464222  | 4530905  | 1238165  | 4019015  | 3887385  | 767155.5 | 4180812  |
| 9.624117 | 10 | 5 | 3 | 714361.9 | 1395204  | 389024.8 | 1091026  | 324400.1 | 1004843  | 1833786  | 1698071  | 988073.2 |
| 9.3735   | 6  | 3 | 3 | 706862.7 | 4393341  | 1208393  | 3364357  | 1222013  | 5478219  | 4995121  | 2991637  | 3179327  |
| 9.673333 | 10 | 5 | 5 | 1259661  | 3964877  | 1094897  | 3130271  | 851171.7 | 5060901  | 5259887  | 3240731  | 3171650  |
| 9.960467 | 8  | 5 | 3 | 2161821  | 1367436  | 370116.6 | 2911342  | 2352424  | 1851079  | 1576875  | 1223361  | 870775   |
| 9.848417 | 10 | 5 | 5 | 5047042  | 28203089 | 6144279  | 22161969 | 7939293  | 20700742 | 22963479 | 29491767 | 33828598 |
| 9.994767 | 17 | 5 | 5 | 1194903  | 3162162  | 2206975  | 1514684  | 1608120  | 4908397  | 1032111  | 831480.1 | 5698429  |
| 14.2529  | 7  | 5 | 2 | 57639.06 | 180223.8 | 83987.22 | 292656.9 | 162086   | 239056.9 | 127388.5 | 83132.27 | 161014.3 |
| 22.6985  | 5  | 2 | 3 | 51957.12 | 203693.5 | 49357.86 | 167811.4 | 32657.4  | 204278.2 | 278168.6 | 141799.7 | 185269.9 |

|          |    |   |   |          |          |          |          |          |          |          |          |          |
|----------|----|---|---|----------|----------|----------|----------|----------|----------|----------|----------|----------|
| 9.103733 | 10 | 5 | 5 | 1301555  | 4880562  | 589151.2 | 4180661  | 984613.5 | 5391349  | 5572292  | 4796933  | 4231529  |
| 19.8395  | 6  | 5 | 1 | 71741.89 | 266677.1 | 74965.64 | 340012.1 | 96179.01 | 319586.9 | 159128.2 | 223824.9 | 343032.5 |
| 9.992233 | 9  | 5 | 4 | 2399847  | 5441721  | 2976644  | 8080043  | 3249456  | 7510809  | 9299800  | 5188475  | 2844475  |
| 19.77183 | 12 | 5 | 5 | 346113.4 | 4961099  | 1429965  | 3082044  | 2702042  | 6612965  | 4572429  | 4947627  | 2833176  |
| 9.872883 | 9  | 5 | 4 | 2102067  | 3412903  | 503643.9 | 6304257  | 4417758  | 3047655  | 3072908  | 3142297  | 4229657  |
| 9.445217 | 8  | 3 | 4 | 1902604  | 5860496  | 3254112  | 3511247  | 2096041  | 3150572  | 6584820  | 6150478  | 10768293 |
| 9.67     | 10 | 5 | 5 | 1466612  | 8064008  | 2351673  | 6152537  | 2161622  | 11222909 | 9053594  | 7180419  | 4842060  |
| 9.842    | 6  | 3 | 3 | 3320290  | 10602713 | 1530182  | 7930349  | 3976080  | 12620238 | 9655881  | 10694268 | 8658663  |
| 33.75967 | 9  | 4 | 5 | 185371.2 | 917568.1 | 178365.7 | 722924.4 | 267429.1 | 1071430  | 653982.5 | 897386.1 | 870134.6 |
| 9.840617 | 4  | 1 | 3 | 551005.9 | 704719.2 | 557689.7 | 1319377  | 847286.4 | 1476414  | 253663.8 | 1092938  | 497180.4 |
| 9.986767 | 7  | 4 | 3 | 1709265  | 4298457  | 806998.3 | 3163610  | 1650616  | 4371321  | 5215121  | 4877420  | 3202668  |
| 25.54833 | 9  | 4 | 5 | 122683.4 | 669386.9 | 182976.1 | 486151   | 243494.8 | 611246.7 | 581658.4 | 592349.3 | 566287   |
| 10.008   | 6  | 2 | 4 | 460918.5 | 593718.7 | 419592.2 | 1017718  | 565923.4 | 686267.6 | 72760.9  | 1226595  | 453852.6 |
| 9.992233 | 8  | 5 | 3 | 3586086  | 969212.7 | 287820   | 4841415  | 5932845  | 869376.5 | 1439245  | 832654.1 | 687283.7 |
| 10.008   | 9  | 5 | 4 | 368224.8 | 1120966  | 234530.4 | 820721.4 | 430316   | 1104405  | 1229368  | 910969.5 | 899942.5 |
| 12.6321  | 10 | 5 | 5 | 8140619  | 75966859 | 7834142  | 66926483 | 12649860 | 79848694 | 84117637 | 67021356 | 68130288 |
| 10.51392 | 9  | 5 | 4 | 249245.5 | 854654.9 | 238472.2 | 641277.6 | 265668.1 | 467902.1 | 1102171  | 945878.1 | 938493.9 |
| 9.162767 | 3  | 0 | 3 | 196182.4 | 899688.9 | 464236.9 | 548298.1 | 356303.3 | 1313820  | 1342741  | 1019037  | 371343.5 |
| 9.445217 | 11 | 4 | 5 | 1222315  | 8932606  | 2696793  | 6420456  | 3215668  | 12979311 | 9479505  | 9291241  | 6568059  |
| 9.920517 | 10 | 5 | 5 | 6253410  | 14966189 | 2199696  | 12059734 | 4193163  | 18403104 | 14929124 | 12682842 | 13484917 |
| 9.8445   | 10 | 5 | 5 | 3027543  | 9915168  | 565940.2 | 11895231 | 3021629  | 10879705 | 9660184  | 9900124  | 9418907  |
| 9.859983 | 9  | 4 | 5 | 4157175  | 6564371  | 5054688  | 3227681  | 1384261  | 4656876  | 15527823 | 4541035  | 4902441  |
| 41.56067 | 6  | 2 | 4 | 2915194  | 28963051 | 22797491 | 11800836 | 17241029 | 4038564  | 45403380 | 3943518  | 45999780 |
| 8.981583 | 10 | 5 | 5 | 515858.4 | 1503161  | 505966.1 | 1084458  | 486297.8 | 1304083  | 2045387  | 1363986  | 831001.4 |
| 10.96278 | 6  | 1 | 4 | 220068.8 | 836309.6 | 246881.9 | 613632.1 | 279394.1 | 868777.1 | 614769.6 | 700106.1 | 751748.7 |
| 10.13345 | 8  | 5 | 3 | 294632.1 | 1732607  | 757851.6 | 1142991  | 630546.5 | 2328961  | 2069977  | 951770.9 | 879469.1 |
| 42.208   | 8  | 4 | 3 | 312127   | 3429815  | 1270358  | 4414408  | 1046768  | 1723069  | 3330642  | 5305355  | 3316419  |
| 9.445217 | 6  | 3 | 3 | 574811.6 | 1932569  | 517079.7 | 1297852  | 903877.9 | 2063305  | 2163256  | 2507294  | 1124877  |
| 9.21385  | 5  | 1 | 4 | 1716780  | 11926334 | 1966663  | 5909562  | 9175286  | 13436632 | 10207309 | 13483204 | 13110007 |
| 9.848417 | 7  | 3 | 4 | 1024298  | 1888256  | 1107312  | 1105266  | 657913.3 | 1125851  | 3798201  | 1273402  | 1343090  |
| 9.946467 | 9  | 5 | 4 | 1497512  | 5011564  | 990682.6 | 3906177  | 1537595  | 6216315  | 5637674  | 4139589  | 3875502  |
| 9.4775   | 9  | 5 | 4 | 684170.4 | 5147475  | 2175246  | 3172058  | 2497190  | 6142243  | 1607871  | 5644712  | 4933361  |
| 9.064833 | 6  | 4 | 2 | 383753.7 | 739047   | 387969   | 479370.6 | 149757   | 691804   | 611678.1 | 272302.3 | 776789.6 |
| 9.93625  | 11 | 5 | 5 | 7281556  | 39159086 | 1367681  | 34010247 | 7883467  | 39656359 | 38597883 | 37079712 | 40617585 |
| 9.856867 | 3  | 0 | 3 | 1199201  | 2280630  | 686417.9 | 1521153  | 1053930  | 2485730  | 1610121  | 3369168  | 1885489  |

|          |    |   |   |          |          |          |          |          |          |          |          |          |
|----------|----|---|---|----------|----------|----------|----------|----------|----------|----------|----------|----------|
| 10.16938 | 10 | 5 | 5 | 2441597  | 9806938  | 1684386  | 8183595  | 2128397  | 11975614 | 10606850 | 8375785  | 7860179  |
| 9.392767 | 9  | 5 | 4 | 962947   | 2334447  | 601733.4 | 1605251  | 1037392  | 2525111  | 2795913  | 1496422  | 1937770  |
| 10.9645  | 5  | 2 | 3 | 517585.1 | 1327919  | 360156.7 | 970207.6 | 476338.7 | 1669386  | 1734426  | 899384.8 | 1202411  |
| 11.42608 | 10 | 5 | 5 | 2197470  | 4098359  | 871751.1 | 7290177  | 4889492  | 5078723  | 4917065  | 3128918  | 3434096  |
| 24.95633 | 4  | 4 | 0 | 300567.8 | 724084.7 | 1036055  | 50722.87 | 67923.36 | 2514018  | 733225.3 | 119663.8 | 53354.09 |
| 9.960467 | 7  | 3 | 4 | 941872.3 | 1742564  | 951923.8 | 1031597  | 708519   | 1287556  | 1026437  | 1273352  | 3381039  |
| 23.716   | 8  | 5 | 3 | 122733   | 963285.9 | 123206.3 | 846259.3 | 152463.6 | 910566.7 | 1142102  | 827762.3 | 1029455  |
| 9.2612   | 6  | 4 | 2 | 444228.5 | 1851002  | 870411.2 | 1204398  | 637278.6 | 2403654  | 760894.5 | 2324442  | 2692488  |
| 9.856867 | 10 | 5 | 5 | 1804021  | 8714734  | 3083454  | 6611136  | 1480872  | 7573945  | 7256893  | 6038177  | 13952934 |
| 31.42167 | 10 | 5 | 5 | 1604062  | 11240628 | 2860989  | 9301756  | 1297009  | 15955738 | 10043932 | 8449490  | 10162227 |
| 9.903567 | 8  | 5 | 3 | 2022149  | 2321836  | 1275152  | 3632479  | 1774675  | 2982456  | 1842383  | 1053098  | 1517166  |
| 9.840617 | 10 | 5 | 5 | 4458198  | 22240093 | 2789690  | 16958445 | 7952746  | 20629692 | 19531864 | 20844958 | 23886264 |
| 9.204617 | 6  | 2 | 4 | 15295273 | 78070407 | 65837159 | 32938691 | 33012565 | 2126348  | 12835421 | 1.44E+08 | 1.23E+08 |
| 9.970617 | 7  | 5 | 1 | 620342.7 | 912853.1 | 387960.9 | 1244841  | 402039.2 | 1144991  | 570702.7 | 482238.8 | 1406250  |
| 24.4635  | 5  | 3 | 2 | 394158.7 | 1152501  | 1625737  | 97607.17 | 124028.2 | 3926031  | 1289842  | 272962   | 27256.19 |
| 18.585   | 3  | 0 | 3 | 480443.6 | 24962.29 | 16970.76 | 1125496  | 1697870  | 16956.5  | 28013.32 | 37921.6  | 0        |
| 9.416767 | 8  | 3 | 5 | 2510136  | 12893758 | 12655416 | 4683770  | 1113240  | 27193854 | 3212832  | 26291257 | 3323263  |
| 22.45267 | 10 | 5 | 5 | 608064.1 | 2750984  | 699496.2 | 2179771  | 660398.6 | 2001238  | 3849944  | 2837345  | 2327010  |
| 9.842    | 9  | 5 | 4 | 1160472  | 4147599  | 524991.1 | 3717519  | 499102.3 | 4947461  | 4052657  | 4317831  | 3565551  |
| 9.976317 | 6  | 4 | 2 | 341187.6 | 724368.7 | 108800.8 | 952721.9 | 346315.2 | 700300.8 | 757560.7 | 687667   | 886384   |
| 19.562   | 10 | 5 | 5 | 290442.2 | 882464.1 | 283166.5 | 678648.3 | 186109.3 | 931564.2 | 1145861  | 655326   | 528569.8 |
| 39.73367 | 11 | 5 | 3 | 2757134  | 5215635  | 1145370  | 21485598 | 25112791 | 6450686  | 5463200  | 3396977  | 5768932  |
| 24.58017 | 4  | 3 | 1 | 395355.5 | 1169980  | 1591081  | 138411.9 | 137111.4 | 3901669  | 1234799  | 279352.2 | 58266.42 |
| 9.82645  | 4  | 3 | 1 | 491944.2 | 1395262  | 574124.6 | 931596.9 | 529416.7 | 1235703  | 604104.6 | 1895690  | 2017445  |
| 10.94443 | 3  | 0 | 3 | 226881.5 | 539347.3 | 162926.6 | 671748.2 | 152354.3 | 702414.4 | 701448.6 | 344642.3 | 415412   |
| 9.379233 | 10 | 5 | 4 | 1049878  | 3056556  | 1546538  | 1919143  | 1103931  | 2597892  | 615477.4 | 3617109  | 3809163  |
| 9.94455  | 12 | 5 | 5 | 1709100  | 2947184  | 948250.5 | 6192559  | 4984912  | 2327165  | 3044115  | 4548009  | 2580801  |
| 9.912633 | 10 | 5 | 5 | 71339656 | 8.2E+08  | 69980932 | 7.25E+08 | 1.39E+08 | 8.63E+08 | 7.9E+08  | 7.43E+08 | 7.86E+08 |
| 9.4925   | 10 | 5 | 5 | 2212439  | 6366659  | 934212.6 | 4899378  | 2183505  | 7228242  | 7474385  | 5599426  | 5441205  |
| 9.942317 | 4  | 3 | 1 | 678320.4 | 1299940  | 524211   | 816966.9 | 621223.1 | 1188430  | 1301701  | 795652.8 | 2174376  |
| 24.84117 | 3  | 3 | 0 | 447751.5 | 1093621  | 1513885  | 113372.1 | 132897.1 | 3704303  | 1084806  | 177994.5 | 36519.87 |
| 9.245983 | 12 | 5 | 4 | 1652852  | 24701135 | 8872002  | 18384348 | 5603392  | 30573658 | 36933256 | 15031194 | 21394406 |
| 9.8322   | 9  | 5 | 4 | 856243.2 | 3688783  | 389641.4 | 2945568  | 1123745  | 4038035  | 3756566  | 3949129  | 3653004  |
| 8.981583 | 8  | 5 | 3 | 983665.8 | 2263023  | 1574950  | 3886583  | 2212208  | 4156775  | 286788.5 | 2193900  | 3437417  |
| 9.994767 | 8  | 5 | 3 | 1310593  | 696836.8 | 384858.7 | 1954989  | 1934404  | 892018.9 | 1204214  | 749736   | 252850.4 |

|          |    |   |   |          |          |          |          |          |          |          |          |          |
|----------|----|---|---|----------|----------|----------|----------|----------|----------|----------|----------|----------|
| 21.68383 | 5  | 1 | 4 | 10637388 | 6577234  | 7575415  | 29336157 | 34953294 | 3411665  | 20116683 | 2936231  | 2831717  |
| 9.830833 | 4  | 1 | 3 | 1558751  | 7216256  | 1847178  | 5351751  | 2519667  | 8565634  | 5733862  | 9671071  | 6729320  |
| 9.93625  | 10 | 5 | 5 | 4161069  | 15604804 | 3417686  | 11983232 | 4990119  | 14751683 | 21279986 | 13695691 | 12430854 |
| 42.97017 | 4  | 1 | 3 | 376464.3 | 10981296 | 9120020  | 4987297  | 2820080  | 6674569  | 27293354 | 6863375  | 6987304  |
| 9.379233 | 6  | 3 | 3 | 492458.6 | 2164943  | 1284810  | 1171080  | 1073265  | 1109625  | 692775.3 | 2577371  | 2546032  |
| 10.95602 | 7  | 4 | 3 | 264937.3 | 620493.7 | 217815.5 | 394064.6 | 309858.6 | 914403.1 | 703799.7 | 503627.9 | 333948.9 |
| 9.4468   | 9  | 5 | 3 | 1322633  | 1573797  | 927732.5 | 4944024  | 5191792  | 2415139  | 2502215  | 1328344  | 241146.8 |
| 11.32867 | 9  | 4 | 5 | 213556.6 | 472911.1 | 368937.6 | 820021.2 | 453072.7 | 353425.5 | 429582.1 | 317908.3 | 1108147  |
| 41.79067 | 14 | 5 | 3 | 317829.9 | 4293652  | 901238.5 | 3058703  | 1810533  | 3075141  | 3642487  | 4827977  | 5246858  |
| 2.353733 | 5  | 2 | 3 | 65318.86 | 1105180  | 303203.8 | 1791329  | 1046913  | 1525804  | 1084029  | 1252729  | 734275.8 |
| 9.88815  | 5  | 2 | 3 | 1676674  | 2446248  | 1084932  | 4206976  | 2634592  | 4031264  | 1117747  | 1844975  | 2547328  |
| 12.58817 | 5  | 3 | 2 | 113478.8 | 464418   | 74074.68 | 654474.5 | 291129.2 | 435505.3 | 585965.5 | 461363.4 | 385592.3 |
| 9.93625  | 6  | 3 | 2 | 1965658  | 3553910  | 2566982  | 5407813  | 1729546  | 2262514  | 4450447  | 7623399  | 2252283  |
| 9.208217 | 9  | 5 | 4 | 3044129  | 8890397  | 3476632  | 6309543  | 2584231  | 13647359 | 10418573 | 8333387  | 4200423  |
| 27.26983 | 10 | 5 | 5 | 1418751  | 7260419  | 4462321  | 4307039  | 1616624  | 4318935  | 5353797  | 4946676  | 6577411  |
| 9.3919   | 5  | 2 | 3 | 659504.6 | 5372447  | 4185509  | 2543973  | 1944197  | 8370741  | 541636.1 | 9379625  | 1176628  |
| 9.975217 | 11 | 5 | 5 | 16355930 | 1.04E+08 | 5818973  | 91527093 | 19430128 | 1.09E+08 | 1.07E+08 | 97674446 | 98266620 |
| 9.328967 | 6  | 4 | 2 | 588133.2 | 3137197  | 1436035  | 2103656  | 957109.1 | 4237001  | 2426069  | 4921076  | 2754937  |
| 9.972483 | 8  | 3 | 3 | 1145054  | 2114384  | 1068318  | 1304970  | 845808.8 | 2782924  | 470135   | 2274815  | 1795171  |
| 9.419733 | 4  | 3 | 1 | 549203.6 | 1197392  | 490080.9 | 1714850  | 713691.2 | 1191006  | 858817   | 2030406  | 824848.7 |
| 24.78283 | 5  | 2 | 3 | 223934.3 | 973569.2 | 613515.8 | 541337.2 | 373467.4 | 589836.5 | 1223774  | 234754   | 979965   |
| 8.88765  | 6  | 3 | 3 | 103996.8 | 224871.5 | 124548.4 | 133783.8 | 88301.79 | 225809.7 | 316228.5 | 372746.5 | 143479.6 |
| 10.14725 | 10 | 5 | 5 | 1626040  | 727731.3 | 82256.27 | 5475763  | 7364204  | 709828   | 829807.3 | 786103.8 | 619327.7 |
| 38.69767 | 5  | 1 | 3 | 341923.8 | 3646770  | 1915187  | 2371417  | 768783.7 | 2526611  | 2794416  | 2980092  | 7059614  |
| 10.008   | 11 | 5 | 5 | 1580952  | 3363937  | 945021.5 | 2399174  | 1314145  | 3452113  | 4892405  | 3091242  | 2337835  |
| 6.516267 | 7  | 3 | 3 | 1631487  | 18014242 | 6541148  | 52798172 | 53854065 | 12829290 | 15871687 | 22742407 | 26861706 |
| 25.33483 | 7  | 4 | 3 | 713420.4 | 4371619  | 1182888  | 3458595  | 988195.8 | 3115466  | 6204406  | 4783964  | 3857194  |
| 9.8374   | 9  | 5 | 4 | 723034.5 | 2880748  | 544780.2 | 2132429  | 1100269  | 3210205  | 3161444  | 1947338  | 2847044  |
| 8.860183 | 4  | 3 | 1 | 176908.6 | 417103.8 | 147802.6 | 531407.1 | 124118.5 | 502055.1 | 419145.7 | 595812.6 | 364645.8 |
| 13.71207 | 10 | 5 | 5 | 1153825  | 10903940 | 2224555  | 9171149  | 1903525  | 12571731 | 12728080 | 8921224  | 8073815  |
| 9.8445   | 9  | 5 | 4 | 2174869  | 10539996 | 1360534  | 8349627  | 3282929  | 9724289  | 9222453  | 9745072  | 11799267 |
| 9.94455  | 9  | 5 | 4 | 673067.7 | 1744305  | 236765.4 | 1382544  | 539388.3 | 2015807  | 1864260  | 1467846  | 1523884  |
| 9.04395  | 6  | 3 | 3 | 140330.7 | 401185.9 | 146168.8 | 276965.8 | 151218.9 | 487438.1 | 490452.2 | 421030   | 462527   |
| 11.74925 | 10 | 5 | 5 | 171445.1 | 383441.8 | 213630.9 | 716231.6 | 497229.4 | 492525.1 | 250762   | 167568.4 | 305977.3 |
| 9.928667 | 10 | 5 | 5 | 3539846  | 10098259 | 2025017  | 8104837  | 2674923  | 13246836 | 9281952  | 7909468  | 9311749  |

|          |    |   |   |          |          |          |          |          |          |          |          |          |
|----------|----|---|---|----------|----------|----------|----------|----------|----------|----------|----------|----------|
| 9.830733 | 7  | 2 | 4 | 2258023  | 6459939  | 2493825  | 4504000  | 2172259  | 7493450  | 4054589  | 8742473  | 3514797  |
| 10.94443 | 6  | 3 | 3 | 256659.8 | 434190.4 | 160075.3 | 952762.7 | 800120.6 | 428274.5 | 568538.2 | 391688.9 | 589862.7 |
| 3.57485  | 6  | 2 | 3 | 98743.72 | 1595256  | 940515.4 | 930409.3 | 586034.6 | 0        | 1883943  | 1862860  | 1728243  |
| 10.61757 | 8  | 4 | 4 | 264051.4 | 817153   | 178389.5 | 659042.3 | 199486.5 | 581387.1 | 1077723  | 835757.1 | 759946.4 |
| 10.36388 | 7  | 3 | 4 | 201806.2 | 558902.1 | 93839.7  | 414579   | 215509.4 | 443384.9 | 490358.3 | 599627.1 | 579335.9 |
| 9.5812   | 8  | 4 | 3 | 318602.6 | 590337.7 | 261060.7 | 401127.6 | 180341.9 | 351304.6 | 1010143  | 409074.5 | 534097.4 |
| 9.864767 | 10 | 5 | 5 | 2970305  | 14606075 | 3401175  | 11346783 | 4320030  | 12379277 | 13749773 | 12131279 | 20468072 |
| 9.928667 | 10 | 5 | 5 | 4077937  | 8865467  | 1026869  | 7123579  | 2625459  | 10528304 | 8200222  | 8119039  | 8280774  |
| 9.8374   | 3  | 3 | 0 | 2037901  | 2960845  | 1692116  | 4082305  | 653039.3 | 5723237  | 3207097  | 1870545  | 2606985  |
| 10.9645  | 10 | 5 | 5 | 684989.8 | 3399981  | 260121.1 | 3017022  | 569295   | 3524189  | 3627536  | 3054248  | 3192156  |
| 9.311883 | 6  | 4 | 2 | 1034034  | 2628279  | 1788528  | 3873915  | 1038272  | 1960606  | 3121502  | 1237434  | 1295889  |
| 9.392767 | 8  | 5 | 3 | 1947066  | 2226554  | 759976.4 | 5466390  | 5018212  | 3098780  | 1382853  | 1565200  | 2226728  |
| 9.960467 | 7  | 4 | 3 | 3027992  | 1089175  | 234482.1 | 3681162  | 4027314  | 1467307  | 1052529  | 847580.2 | 960987.2 |
| 17.307   | 9  | 4 | 5 | 238085.8 | 1308758  | 304121.1 | 921802.4 | 562854   | 1437539  | 1696946  | 1308604  | 1236273  |
| 9.43325  | 11 | 5 | 3 | 783365.1 | 5621863  | 1064868  | 4493584  | 1563933  | 6697231  | 6379343  | 5463572  | 3954386  |
| 9.445217 | 11 | 5 | 5 | 1505560  | 5308687  | 1801757  | 3636717  | 2178886  | 6370905  | 7740839  | 3279168  | 5188553  |
| 9.464933 | 6  | 2 | 4 | 4040007  | 21366785 | 16050423 | 9344067  | 12400092 | 39095809 | 8988160  | 31152115 | 520784   |
| 10.008   | 10 | 5 | 5 | 1794880  | 2411524  | 1070784  | 3558417  | 1595887  | 2999045  | 3919638  | 1364183  | 1487163  |
| 11.27298 | 10 | 5 | 5 | 12428851 | 49030089 | 8032043  | 33068400 | 24331424 | 55725371 | 35682262 | 51848804 | 54090989 |
| 9.880683 | 8  | 3 | 5 | 5023837  | 13485692 | 16285270 | 2981079  | 2537742  | 1784548  | 19511573 | 3361069  | 3215801  |
| 35.191   | 5  | 1 | 3 | 246230.9 | 729578.4 | 281243.6 | 1903653  | 1820564  | 232451.5 | 782122.5 | 897233.2 | 863399.2 |
| 39.374   | 5  | 2 | 3 | 539039.8 | 8435850  | 1576771  | 6282709  | 3173025  | 9697538  | 6083828  | 9246426  | 7545001  |
| 24.68133 | 3  | 3 | 0 | 426999.2 | 1061972  | 1390384  | 168604.2 | 69138.84 | 3399322  | 1287295  | 308937.4 | 72779.55 |
| 15.65857 | 10 | 5 | 5 | 497507.3 | 2903280  | 992947.4 | 1987756  | 1190477  | 4357970  | 3284213  | 2663828  | 1686072  |
| 10.95055 | 10 | 5 | 5 | 263599.7 | 1553679  | 276847.4 | 1263695  | 400958.5 | 1642037  | 1972298  | 1302248  | 1308305  |
| 9.848417 | 10 | 5 | 5 | 15051247 | 71179322 | 1776445  | 59305040 | 18466038 | 71865818 | 68125151 | 71321154 | 71888215 |
| 9.392767 | 10 | 5 | 5 | 3265206  | 10375791 | 1839577  | 8328909  | 2887868  | 11958092 | 11464058 | 8452885  | 8288616  |
| 9.864767 | 10 | 5 | 5 | 2770318  | 11565890 | 1005131  | 9901014  | 2510332  | 10758360 | 12010277 | 11476222 | 10551123 |
| 9.362817 | 5  | 2 | 3 | 1779147  | 8400088  | 6356110  | 3979334  | 3700866  | 1963610  | 12103008 | 14085120 | 12831358 |
| 12.18938 | 3  | 3 | 0 | 116686.6 | 174155.8 | 142603.1 | 80628.01 | 48142.24 | 279715.2 | 117834.3 | 0        | 356813   |
| 43.07117 | 6  | 3 | 3 | 389753.1 | 2607742  | 1621747  | 3915480  | 1517081  | 3449459  | 4371893  | 897917.5 | 3458681  |
| 9.960467 | 4  | 4 | 0 | 644864.8 | 1190840  | 465511.5 | 772449.1 | 535613.2 | 1138233  | 998890.7 | 910137.7 | 2005941  |
| 9.920517 | 10 | 5 | 5 | 821600.8 | 3051428  | 531809.5 | 2595865  | 562014.9 | 2988981  | 2641803  | 3033714  | 3944138  |
| 9.914217 | 6  | 4 | 2 | 2711228  | 6378689  | 1917506  | 4736771  | 2026348  | 6185019  | 5832256  | 4879724  | 5305325  |
| 13.96913 | 10 | 5 | 5 | 297620.4 | 2429189  | 366532.2 | 2039048  | 543228.3 | 2355577  | 2999513  | 2043952  | 2212092  |



|          |    |   |   |          |          |          |          |          |          |          |          |          |
|----------|----|---|---|----------|----------|----------|----------|----------|----------|----------|----------|----------|
| 42.1215  | 5  | 3 | 1 | 310540.3 | 7954314  | 1707938  | 6454340  | 1889730  | 10677957 | 8383934  | 7090154  | 6218730  |
| 9.928667 | 9  | 4 | 5 | 1602889  | 3201373  | 582488.5 | 2734735  | 537629.9 | 3801370  | 2963096  | 3722341  | 3133809  |
| 10.95602 | 4  | 4 | 0 | 1923233  | 3897521  | 5197910  | 562760.1 | 193675.9 | 970347.6 | 447529.1 | 4739895  | 682620.9 |
| 10.93618 | 9  | 5 | 4 | 212741.4 | 987431.6 | 414119.9 | 688763.5 | 284218.2 | 1138853  | 1359355  | 571132.1 | 518162   |
| 9.473733 | 10 | 5 | 5 | 763927.3 | 1570039  | 418238.4 | 1244141  | 361941.9 | 1618225  | 1669667  | 928466.8 | 1539489  |
| 9.419733 | 7  | 5 | 2 | 597658.8 | 779715.6 | 221284.2 | 453155.1 | 487286.9 | 912571.5 | 1080390  | 608625.1 | 538719.3 |
| 10.16043 | 8  | 4 | 4 | 196976   | 939441.1 | 379548.6 | 681170.2 | 194956.7 | 1557830  | 1036810  | 667405   | 794697.5 |
| 18.36583 | 6  | 3 | 3 | 74063.93 | 287090.2 | 77903.89 | 216133.9 | 91766.73 | 343017.9 | 324653.3 | 181620.3 | 227728.6 |
| 9.929783 | 10 | 5 | 5 | 6133547  | 27091699 | 1452169  | 23078890 | 6200767  | 25894039 | 25502713 | 27960952 | 27080312 |
| 9.94455  | 10 | 5 | 5 | 6606684  | 24128810 | 3404472  | 21490126 | 2909663  | 29553714 | 24227621 | 21040910 | 21424186 |
| 10.97242 | 10 | 5 | 5 | 2662532  | 13075954 | 1763042  | 10916958 | 3127481  | 14608344 | 14842849 | 11368327 | 11101046 |
| 9.859667 | 7  | 3 | 4 | 499877.1 | 1830291  | 347130.2 | 1250114  | 877237.4 | 1970810  | 1504652  | 2332058  | 1507182  |
| 9.887133 | 7  | 3 | 4 | 706720.3 | 1304445  | 319106.1 | 2418234  | 1729090  | 1718039  | 968597   | 996568.4 | 1386396  |
| 10.03947 | 8  | 3 | 4 | 524132.5 | 655070.4 | 356559.2 | 411593.7 | 188837.8 | 532560.6 | 194410   | 658510.9 | 1182912  |
| 14.40023 | 7  | 5 | 2 | 224969.2 | 2125899  | 414360.1 | 1790823  | 391694.5 | 2399856  | 2449632  | 1595803  | 1757710  |
| 28.33167 | 10 | 5 | 5 | 150165   | 1099204  | 167209.1 | 970971   | 139463.1 | 1067446  | 1254749  | 1078864  | 846398.5 |
| 10.23043 | 5  | 3 | 2 | 264538.2 | 601143.3 | 440136.5 | 316824.1 | 101279.6 | 1263934  | 813712.8 | 408211   | 159116   |
| 9.8322   | 8  | 4 | 4 | 591819.3 | 2171301  | 639877.9 | 1522008  | 890239.1 | 2839115  | 1767517  | 1668572  | 1679286  |
| 9.992233 | 10 | 5 | 5 | 3383356  | 11460723 | 2212360  | 9359761  | 2792095  | 12167082 | 14874405 | 10268209 | 9069953  |
| 9.431017 | 11 | 4 | 5 | 483721.9 | 3646739  | 920407.3 | 2895278  | 889167.2 | 3510940  | 4506407  | 4685127  | 2772781  |
| 9.920517 | 10 | 5 | 5 | 2237981  | 5299985  | 733703.7 | 4267630  | 1534349  | 6367423  | 5131346  | 4435461  | 4938296  |
| 9.928667 | 9  | 5 | 4 | 1834525  | 3698862  | 124648.4 | 3091284  | 947078.7 | 3862161  | 3686056  | 3762382  | 3527114  |
| 10.18477 | 7  | 5 | 2 | 617790   | 1300463  | 550594.9 | 936754.9 | 219353.6 | 1687083  | 1990752  | 1146026  | 577201.4 |
| 9.392767 | 9  | 5 | 4 | 2216974  | 8754290  | 3308053  | 6336426  | 2402238  | 9694445  | 6097162  | 5652693  | 8461777  |
| 9.840617 | 10 | 5 | 5 | 3874787  | 21845561 | 549897.9 | 17323752 | 7064458  | 22503905 | 21165724 | 21925118 | 22207644 |
| 9.9677   | 10 | 5 | 5 | 887625.1 | 3490602  | 659747.6 | 2643141  | 1242660  | 3580853  | 3891999  | 2835838  | 2820566  |
| 24.78267 | 5  | 4 | 1 | 487367.5 | 1171250  | 1715817  | 74077.82 | 72940.85 | 4141354  | 1164458  | 250257.2 | 48112.91 |
| 13.28915 | 9  | 3 | 4 | 71381.09 | 285521.2 | 127529.3 | 203019.1 | 33757.21 | 305249   | 72949.5  | 411614.4 | 344893.3 |
| 9.445217 | 11 | 5 | 5 | 733068.9 | 6120081  | 2301441  | 4209228  | 2307985  | 8856732  | 7817080  | 6235163  | 3366796  |
| 9.920517 | 10 | 5 | 5 | 6219296  | 14833149 | 2185071  | 11733157 | 4620778  | 18083542 | 14888600 | 12420349 | 13312003 |
| 9.928667 | 4  | 3 | 1 | 1118939  | 2482962  | 462874.1 | 1588291  | 1370389  | 1903382  | 2327513  | 2279687  | 2864344  |
| 9.388367 | 6  | 3 | 3 | 552209.3 | 1635731  | 562574.8 | 1098693  | 717822.2 | 1629394  | 1357509  | 1019925  | 1636486  |
| 9.994767 | 5  | 4 | 1 | 280435.2 | 512688.7 | 142714.2 | 329295.3 | 269289.3 | 485036.5 | 703157.9 | 544521.5 | 304755.1 |
| 9.874317 | 6  | 2 | 4 | 2061786  | 7549015  | 2521383  | 4756910  | 3959261  | 8254536  | 3855064  | 8244821  | 6673662  |
| 9.6315   | 13 | 5 | 5 | 35363628 | 1.04E+08 | 21989190 | 81454038 | 30740301 | 1.19E+08 | 1.13E+08 | 80337492 | 80111898 |

|          |    |   |   |          |          |          |          |          |          |          |          |          |
|----------|----|---|---|----------|----------|----------|----------|----------|----------|----------|----------|----------|
| 9.976317 | 9  | 5 | 4 | 1164317  | 4309106  | 1076481  | 3359221  | 1209797  | 4696270  | 4411050  | 3146400  | 3442535  |
| 12.48578 | 4  | 1 | 3 | 82753.2  | 446098.4 | 110564.5 | 367053.7 | 74570.91 | 570481.3 | 520569.4 | 397527.6 | 286608.3 |
| 9.999217 | 6  | 3 | 3 | 1080800  | 2897228  | 903592   | 1999552  | 1223984  | 3858038  | 1875075  | 1988368  | 3356989  |
| 9.912633 | 7  | 4 | 3 | 1676025  | 4803843  | 1303640  | 3073642  | 2556588  | 5810776  | 3504822  | 3820058  | 4365957  |
| 9.880683 | 10 | 5 | 5 | 1809254  | 6389271  | 908996.4 | 5614284  | 961459.9 | 6161278  | 5690433  | 7922950  | 5747883  |
| 9.568567 | 8  | 4 | 4 | 532153.2 | 825760.6 | 344327.4 | 1124149  | 375268.4 | 969739.3 | 218951.9 | 939931.9 | 924319.9 |
| 44.78217 | 7  | 2 | 4 | 88156.83 | 372421.3 | 72408.21 | 300306.6 | 98565.53 | 331670   | 286272.8 | 456993.9 | 437409.8 |
| 9.333267 | 7  | 2 | 4 | 3414515  | 19610213 | 18223603 | 7843192  | 4853406  | 21992765 | 5717815  | 4949868  | 49612140 |
| 24.95533 | 7  | 4 | 3 | 2458093  | 7038315  | 10222380 | 518721.8 | 353264.3 | 24687654 | 7206086  | 1287304  | 461490.1 |
| 9.445217 | 11 | 5 | 5 | 2263498  | 22038172 | 4739619  | 15978871 | 8906221  | 27529774 | 25740906 | 22142907 | 16218015 |
| 8.961583 | 7  | 4 | 3 | 250870.4 | 664017.8 | 149993.2 | 536833.5 | 157312.7 | 688654   | 868879.4 | 709576.3 | 587780.4 |
| 9.976317 | 10 | 5 | 5 | 1539269  | 4691703  | 378487.4 | 3818109  | 1351749  | 5183774  | 4278774  | 4837878  | 4340700  |
| 9.3494   | 6  | 3 | 2 | 586952.9 | 6010180  | 1384301  | 4512157  | 2115129  | 7416168  | 6629421  | 6645301  | 3854539  |
| 24.537   | 7  | 5 | 2 | 146527.7 | 740103.4 | 199595   | 597318.5 | 135952.2 | 510586.9 | 892120.5 | 753548.6 | 570470.6 |
| 9.856867 | 10 | 5 | 5 | 4140248  | 19030560 | 1846650  | 15873367 | 4813100  | 18909587 | 18281147 | 17163367 | 18691921 |
| 9.3919   | 3  | 0 | 3 | 324713.1 | 1632264  | 277893.5 | 1246085  | 576222.4 | 1776390  | 1409200  | 2053552  | 1494882  |
| 10.37908 | 7  | 4 | 3 | 261674.6 | 464297.6 | 382837   | 218907.4 | 77715.17 | 915722.2 | 831660.5 | 71649.49 | 215539   |
| 9.983433 | 6  | 3 | 3 | 2657663  | 5643253  | 3069460  | 3108065  | 3068055  | 10425957 | 5298605  | 6482030  | 2821468  |
| 38.2805  | 4  | 3 | 1 | 235091.2 | 1549726  | 1087276  | 2564443  | 1346618  | 2134430  | 1996017  | 2803091  | 346123.8 |
| 24.63617 | 4  | 3 | 1 | 722257.6 | 1810643  | 2659003  | 117666   | 150722.2 | 6398804  | 1859518  | 407312.6 | 71694.15 |
| 9.979667 | 10 | 4 | 5 | 463057.9 | 641741.7 | 338542.4 | 905988.3 | 299361.8 | 767531.1 | 61695.84 | 950965.5 | 718192.6 |
| 9.840617 | 10 | 5 | 5 | 1791893  | 8431909  | 1009251  | 7537429  | 1149651  | 7978022  | 7473410  | 9426553  | 9608520  |
| 22.0015  | 7  | 5 | 2 | 297878.4 | 1735353  | 651087.9 | 1271826  | 437840.4 | 1488540  | 2894607  | 1498282  | 1340175  |
| 10.60298 | 6  | 4 | 2 | 220928.2 | 581196.9 | 205592.4 | 434416.4 | 139764.2 | 310232.9 | 483997.8 | 541318.5 | 811338.2 |
| 10.58733 | 4  | 3 | 1 | 110029   | 237226   | 159631.4 | 133835.5 | 49842.57 | 125075.5 | 503172.5 | 204326.9 | 105247.5 |
| 22.55467 | 7  | 3 | 4 | 86019.59 | 252910.9 | 93846.03 | 186349.8 | 62228.71 | 323327   | 294666   | 135557.6 | 169649.8 |
| 9.392767 | 10 | 5 | 5 | 3877269  | 15321092 | 5689240  | 10614512 | 5714424  | 16568369 | 10777894 | 10289530 | 14622565 |
| 25.03083 | 5  | 4 | 1 | 2106258  | 5908386  | 8426709  | 549037.9 | 314386   | 20389809 | 6304555  | 1051669  | 466409   |
| 9.544833 | 5  | 3 | 2 | 265015.6 | 541816.7 | 162731.9 | 367342.9 | 246269.5 | 615624.4 | 794607.7 | 413461.6 | 427685.1 |
| 9.655967 | 6  | 4 | 2 | 284697.3 | 647766.2 | 172953.5 | 813571.2 | 223552.9 | 571140.1 | 697366.7 | 560693.9 | 484328.1 |
| 9.999217 | 10 | 5 | 5 | 942057.6 | 2596336  | 651462.9 | 1971306  | 843132.9 | 2971804  | 1919687  | 2573297  | 2035365  |
| 9.47865  | 4  | 3 | 1 | 1951257  | 6567191  | 6665363  | 12148393 | 6858809  | 13395685 | 1082774  | 14300394 | 2019414  |
| 9.896717 | 5  | 3 | 2 | 2062382  | 3370704  | 1307716  | 5689293  | 3551432  | 3130415  | 2154869  | 4959484  | 4481547  |
| 16.54873 | 5  | 4 | 1 | 633541.8 | 2885049  | 2166793  | 1416115  | 1149459  | 2838532  | 6202360  | 3199643  | 1881907  |
| 37.66167 | 5  | 2 | 3 | 400781.3 | 4708597  | 847893.3 | 6068334  | 2066980  | 3200078  | 5066378  | 4962722  | 5104362  |

|          |    |   |   |          |          |          |          |          |          |          |          |          |
|----------|----|---|---|----------|----------|----------|----------|----------|----------|----------|----------|----------|
| 10.97857 | 7  | 4 | 3 | 1237394  | 2884602  | 1269158  | 4327839  | 2074909  | 2373037  | 1574236  | 4693500  | 3663160  |
| 27.27117 | 10 | 5 | 5 | 9932109  | 60067828 | 31138966 | 39956671 | 9337729  | 37980938 | 46220338 | 44546783 | 57210369 |
| 9.840617 | 10 | 5 | 5 | 2415805  | 14882116 | 1342253  | 13952810 | 804256.7 | 15029918 | 14004737 | 13535869 | 14813677 |
| 18.224   | 4  | 0 | 3 | 10218004 | 173184.5 | 116768.6 | 33284226 | 52138543 | 127430.3 | 345790.1 | 91107.23 | 64442.19 |
| 9.445217 | 9  | 5 | 4 | 1285842  | 10844210 | 3092365  | 7663263  | 4430105  | 14123684 | 13399782 | 11184671 | 8700017  |
| 9.933967 | 9  | 3 | 5 | 1010723  | 3154760  | 422998.3 | 2548526  | 910771.6 | 2788774  | 2678337  | 3446658  | 3672967  |
| 9.514733 | 5  | 4 | 1 | 301117.9 | 441174.4 | 329443.4 | 198234.5 | 251233.3 | 675508.8 | 842289.9 | 393124   | 294949   |
| 19.92633 | 10 | 5 | 5 | 117842.3 | 417621.1 | 164761.8 | 301378.3 | 107832.1 | 428884.9 | 601004.3 | 155055.5 | 409257.6 |
| 9.018167 | 8  | 4 | 4 | 269425.3 | 573243.9 | 131653.9 | 698818.2 | 169357.9 | 367764   | 576493.3 | 710670   | 660930.3 |
| 9.859983 | 10 | 5 | 5 | 5685218  | 29663105 | 2467298  | 24902612 | 7346759  | 28130235 | 26098705 | 30711703 | 31678290 |
| 9.840617 | 3  | 0 | 3 | 3081318  | 14953811 | 3192835  | 10752757 | 6244090  | 15562958 | 9513257  | 17693337 | 16745777 |
| 10.20467 | 7  | 4 | 3 | 382152.6 | 1012669  | 350501.7 | 711789.7 | 379668.4 | 566280.6 | 1508235  | 1125446  | 1033488  |
| 24.88533 | 7  | 5 | 2 | 126755.4 | 613134.9 | 222222.6 | 352014.9 | 379584.8 | 866733.8 | 696799.7 | 285682   | 705558.5 |
| 9.445217 | 8  | 5 | 3 | 462273.5 | 3377770  | 1038380  | 2580027  | 890968.1 | 4170787  | 4270649  | 3048389  | 3663428  |
| 11.12262 | 4  | 1 | 3 | 1141682  | 3670908  | 2264777  | 2145518  | 1172710  | 6281249  | 3543729  | 144373.4 | 4786753  |
| 9.928667 | 6  | 3 | 3 | 740854.2 | 1577177  | 550456.2 | 1149985  | 484733.1 | 1795788  | 806193   | 2319661  | 1497069  |
| 9.903567 | 6  | 2 | 3 | 1544440  | 1896310  | 597803.8 | 4266293  | 3726337  | 2760500  | 1568137  | 1818496  | 1185583  |
| 10.008   | 10 | 5 | 5 | 346818.2 | 723887   | 95179.43 | 973485.7 | 390055.7 | 825121.1 | 673016.9 | 783582.4 | 585850.4 |
| 28.30267 | 5  | 2 | 3 | 306775.8 | 1946245  | 376923.6 | 1544787  | 568094.5 | 1803041  | 1428289  | 2404435  | 2204196  |
| 9.445217 | 13 | 5 | 5 | 4247660  | 33210594 | 6170108  | 28079537 | 6306837  | 28745770 | 37645576 | 39965422 | 25134463 |
| 10.9645  | 10 | 5 | 5 | 322161.8 | 1564023  | 239841.6 | 1307054  | 364370.9 | 1714156  | 1743897  | 1320346  | 1284113  |
| 9.8322   | 9  | 5 | 4 | 749504   | 3153702  | 497806.3 | 2445987  | 1065916  | 2746834  | 2615733  | 3077024  | 3730294  |
| 9.129317 | 8  | 5 | 3 | 320694.7 | 1146434  | 691390.2 | 681504   | 356643.9 | 878896.2 | 920071.5 | 656265.7 | 2368127  |
| 10.99775 | 7  | 4 | 2 | 67568536 | 58580298 | 1.29E+08 | 1.97E+08 | 1.97E+08 | 2.89E+08 | 1620896  | 572987.4 | 1389463  |
| 9.505267 | 11 | 5 | 5 | 2751835  | 6584746  | 2019805  | 15141248 | 13479653 | 9513185  | 6903033  | 5790511  | 3943718  |
| 10.008   | 5  | 3 | 2 | 329393.8 | 904990.7 | 63868.35 | 665064.5 | 377580.4 | 856789.9 | 878549.4 | 992709   | 845944.5 |
| 27.26983 | 10 | 5 | 5 | 3662892  | 26004917 | 11247099 | 18774684 | 3345077  | 17685129 | 21695113 | 20444918 | 24567585 |
| 42.91283 | 7  | 1 | 4 | 311037.8 | 3799440  | 340955.3 | 4381179  | 893263.4 | 4045131  | 3644872  | 3267201  | 4029411  |
| 18.7895  | 4  | 3 | 1 | 111380.8 | 254750.3 | 236387.2 | 102335.1 | 75927.28 | 273789.6 | 174762.3 | 19283.05 | 645217.5 |
| 9.848417 | 10 | 5 | 5 | 5310334  | 24053649 | 751371.5 | 20264019 | 5979748  | 25008795 | 23047079 | 23849895 | 24540874 |
| 9.830833 | 8  | 5 | 3 | 545592.9 | 2068713  | 591543.7 | 1671203  | 306055.2 | 1799926  | 1673056  | 1744894  | 3100299  |
| 9.960467 | 5  | 3 | 2 | 1059383  | 1963572  | 662613.9 | 1433669  | 627703.6 | 2580647  | 2380660  | 2368488  | 1276075  |
| 9.992233 | 9  | 4 | 5 | 836115.3 | 2633905  | 504607.3 | 2011016  | 918345.3 | 3094868  | 2992576  | 2861180  | 1913325  |
| 9.994767 | 9  | 5 | 4 | 815094.1 | 924469.6 | 433366.1 | 1924952  | 1561349  | 1093775  | 1564041  | 879667.9 | 641414.3 |
| 11.27298 | 10 | 5 | 5 | 26379936 | 1.09E+08 | 18015451 | 74635974 | 52910701 | 1.24E+08 | 78506161 | 1.16E+08 | 1.19E+08 |

|          |    |   |   |          |          |          |          |          |          |          |          |          |
|----------|----|---|---|----------|----------|----------|----------|----------|----------|----------|----------|----------|
| 26.382   | 9  | 5 | 3 | 379074.3 | 314303.9 | 186597.5 | 1474220  | 1832725  | 164977.2 | 230643.7 | 345593   | 204609.5 |
| 10.00998 | 9  | 5 | 4 | 760713.7 | 792614.1 | 282421.2 | 1387895  | 925876.8 | 1058361  | 1121000  | 684912   | 476321.4 |
| 9.522017 | 8  | 5 | 3 | 588183.4 | 1811186  | 328058.6 | 1308592  | 764950.1 | 1513972  | 2296336  | 1875608  | 1873144  |
| 26.33217 | 6  | 3 | 3 | 114461.8 | 462229   | 239721.3 | 260258.3 | 252206.4 | 396888.7 | 415823.2 | 221356.6 | 411323.6 |
| 22.0365  | 9  | 5 | 4 | 850712.2 | 3315671  | 2138846  | 1809103  | 1413275  | 3827084  | 4266899  | 6133733  | 1055786  |
| 9.268917 | 4  | 3 | 1 | 921550.8 | 989875.9 | 364309.5 | 658207.8 | 438434.8 | 560545.8 | 1337097  | 700523.1 | 984188.9 |
| 24.05483 | 10 | 5 | 5 | 802654.3 | 1512090  | 648048.6 | 2721022  | 1869294  | 1069273  | 1174703  | 1826202  | 982684.4 |
| 9.21385  | 5  | 2 | 3 | 23378860 | 66366303 | 75572027 | 17601593 | 25132610 | 79038587 | 1119457  | 58969295 | 1.87E+08 |
| 9.904767 | 5  | 2 | 3 | 711873.9 | 2039171  | 715959.8 | 1566296  | 325814.7 | 2091315  | 3160047  | 1960684  | 1186822  |
| 25.08867 | 5  | 4 | 1 | 793436.7 | 2208646  | 3268321  | 144481.2 | 166894.9 | 7896935  | 2069299  | 282474.7 | 198168.6 |
| 9.920517 | 6  | 3 | 3 | 1120530  | 2464329  | 896092.2 | 1882693  | 334562.5 | 3631981  | 1331860  | 2022007  | 3047043  |
| 21.09467 | 6  | 4 | 2 | 1020048  | 5582948  | 1549164  | 4503764  | 981729.6 | 5353238  | 8026394  | 5878040  | 4742204  |
| 10.008   | 7  | 4 | 3 | 668493.5 | 658816.8 | 355722.3 | 1154392  | 746869.6 | 891633.6 | 1064941  | 750500.6 | 369992.4 |
| 9.887133 | 8  | 4 | 4 | 2404167  | 4991108  | 1315200  | 7246803  | 3473453  | 5637532  | 4363725  | 6253434  | 5709304  |
| 17.73233 | 10 | 5 | 5 | 354327.4 | 3327021  | 1499197  | 2155453  | 1354103  | 5885410  | 3466098  | 2416826  | 2428669  |
| 9.559117 | 9  | 5 | 4 | 720500.2 | 4075189  | 1591997  | 2843664  | 1404139  | 5662246  | 4340948  | 3508821  | 1643083  |
| 24.59467 | 4  | 3 | 1 | 390721.9 | 1172170  | 1685364  | 108786   | 83205.53 | 4059282  | 1279438  | 244879.1 | 42200.05 |
| 9.356517 | 5  | 3 | 1 | 1062928  | 5410052  | 3994040  | 2728345  | 2084986  | 5207445  | 1168491  | 3121539  | 11766021 |
| 19.40867 | 4  | 3 | 1 | 118643.4 | 243592.3 | 160018.5 | 428538.8 | 269343   | 130384.9 | 190814.3 | 497322.6 | 296139.6 |
| 9.856867 | 5  | 2 | 3 | 2443499  | 3325818  | 2096976  | 1999392  | 303435.4 | 3057331  | 6962312  | 1956381  | 1867967  |
| 10.68888 | 3  | 0 | 3 | 361681.1 | 5111491  | 720927   | 4244196  | 1275283  | 5080646  | 6330112  | 4910053  | 4436737  |
| 13.46348 | 6  | 2 | 4 | 77374.49 | 232328   | 65870.03 | 365556.3 | 207350.8 | 242328.5 | 314821.3 | 247896.8 | 225035.9 |
| 9.55155  | 9  | 5 | 4 | 954247.8 | 2716663  | 614675.3 | 2080813  | 896104.8 | 2551212  | 3315251  | 1931541  | 2419763  |
| 30.09367 | 4  | 3 | 1 | 418912.8 | 1462625  | 1753582  | 2807670  | 1518331  | 88624.38 | 3179728  | 184293.8 | 3572255  |
| 10.9645  | 10 | 5 | 5 | 1255601  | 6569986  | 677659.9 | 5824016  | 1073417  | 6996539  | 6879058  | 5882110  | 5809531  |
| 7.1613   | 8  | 5 | 3 | 1165553  | 15276522 | 3018719  | 10801669 | 6812134  | 16761506 | 19198851 | 11477627 | 13220174 |
| 41.34483 | 3  | 0 | 3 | 1489838  | 17349910 | 320493.4 | 12588606 | 7561789  | 17088828 | 17286971 | 17722283 | 17010370 |
| 10.42575 | 10 | 5 | 5 | 1899146  | 9613233  | 1104995  | 11687865 | 3221437  | 11325952 | 10055043 | 9232650  | 8862596  |
| 10.01477 | 3  | 0 | 3 | 637322.5 | 1904084  | 969642.8 | 1258543  | 483181.7 | 2412376  | 366322.7 | 2958593  | 1778748  |
| 9.8322   | 8  | 4 | 4 | 2546081  | 8324650  | 1734404  | 5969703  | 3546363  | 8428848  | 8746620  | 5916143  | 7804450  |
| 10.01837 | 9  | 3 | 3 | 1732186  | 5477315  | 3368851  | 2944530  | 2782079  | 9173198  | 658974.5 | 4687601  | 4691444  |
| 25.04533 | 7  | 4 | 2 | 1261113  | 2957658  | 4465328  | 148342.2 | 176330.4 | 10707370 | 2854304  | 400552.8 | 97686.43 |
| 9.00395  | 10 | 5 | 5 | 641974.4 | 2198439  | 664897.5 | 1707179  | 523489.1 | 1943698  | 2887456  | 1578557  | 1648110  |
| 9.40255  | 5  | 1 | 3 | 1876708  | 11699296 | 6739754  | 6950374  | 4532669  | 1962353  | 19270550 | 16061023 | 12617371 |
| 11.52603 | 7  | 4 | 3 | 218605.7 | 372883.2 | 161182.9 | 785533.6 | 649055.4 | 394819.3 | 291779.5 | 140750.3 | 535070.4 |

|          |    |   |   |          |          |          |          |          |          |          |          |          |
|----------|----|---|---|----------|----------|----------|----------|----------|----------|----------|----------|----------|
| 9.8322   | 6  | 3 | 3 | 470761.7 | 1185283  | 539039.5 | 1562161  | 351834.1 | 1610833  | 279917.3 | 1349118  | 1137467  |
| 43.08533 | 10 | 1 | 5 | 315639.7 | 2588338  | 1185867  | 4686223  | 3249988  | 474092.3 | 3253630  | 3117597  | 3116868  |
| 10.94208 | 4  | 3 | 1 | 213180.3 | 563895.7 | 226229.6 | 716691.9 | 125066.1 | 376469.8 | 470462.1 | 413529.8 | 629053.4 |
| 9.999217 | 6  | 3 | 3 | 587111.1 | 560240.2 | 431009.7 | 954556   | 526847.3 | 1174307  | 0        | 705655.9 | 385999.7 |
| 9.888767 | 10 | 5 | 5 | 6063823  | 36563594 | 5448007  | 29144698 | 11198384 | 36001388 | 28903663 | 34678921 | 40019078 |
| 22.50917 | 10 | 5 | 5 | 776555.5 | 8192759  | 4173046  | 5496304  | 1565531  | 4387494  | 5825405  | 7029833  | 15125139 |
| 9.952017 | 10 | 5 | 5 | 1298335  | 4546355  | 645316.3 | 3945631  | 811469   | 5482066  | 4876859  | 4372003  | 4165442  |
| 11.45655 | 5  | 3 | 2 | 106981.2 | 305301.3 | 174940.7 | 189424.1 | 85317.45 | 548310.9 | 433630.1 | 171265.4 | 206311.9 |
| 44.394   | 12 | 4 | 3 | 247610.4 | 2706002  | 466284.6 | 2312620  | 497141.4 | 2466045  | 3519321  | 2661748  | 2507330  |
| 24.94183 | 4  | 3 | 1 | 502390.3 | 935938.5 | 1344899  | 90910.12 | 102471.5 | 3246919  | 989620.2 | 212822.6 | 12042.49 |
| 9.848417 | 3  | 3 | 0 | 649829.7 | 994632   | 361994.8 | 599211.3 | 570151.9 | 1120460  | 1319729  | 1196259  | 941372.4 |
| 10.16453 | 9  | 5 | 4 | 347102.8 | 1178190  | 182220.6 | 1014464  | 216716   | 1279087  | 1125625  | 1296313  | 880408.4 |
| 38.28033 | 8  | 4 | 1 | 288146.7 | 3894068  | 806332.9 | 3378849  | 247741.3 | 3016952  | 3553394  | 5158636  | 4110547  |
| 9.445217 | 13 | 5 | 5 | 18463906 | 1.83E+08 | 61596098 | 1.42E+08 | 27519728 | 1.39E+08 | 1.89E+08 | 1.88E+08 | 1.18E+08 |
| 7.8452   | 4  | 1 | 3 | 2614986  | 65843085 | 8067484  | 75357398 | 14001634 | 52709365 | 69397110 | 67107890 | 65582212 |
| 42.35183 | 9  | 2 | 5 | 329373   | 3667970  | 491454.3 | 4913545  | 1963094  | 2885537  | 3640742  | 3662260  | 3973879  |
| 21.22733 | 6  | 2 | 4 | 107485.1 | 540086.7 | 66816.16 | 462613.8 | 113570.6 | 585597.4 | 448585.1 | 545280.1 | 503237.6 |
| 40.12217 | 6  | 3 | 2 | 324995.9 | 5001965  | 1025695  | 4282695  | 683001.8 | 4442500  | 4738167  | 3945070  | 6628005  |
| 9.874067 | 5  | 4 | 1 | 3979685  | 9224305  | 7444544  | 15345151 | 7568456  | 8771885  | 4707233  | 22175739 | 4372811  |
| 9.903567 | 6  | 4 | 2 | 1332455  | 2871818  | 1087715  | 1808026  | 1474293  | 3835602  | 2347830  | 1514794  | 2534541  |
| 10.008   | 10 | 5 | 5 | 804967.5 | 2075541  | 324005.9 | 2479950  | 602540.6 | 2445711  | 2134884  | 2312620  | 1764548  |
| 21.51017 | 5  | 4 | 1 | 646710.5 | 775305.6 | 747860.4 | 1976798  | 1851183  | 2054131  | 569877.3 | 206057.9 | 290357.6 |
| 24.69517 | 6  | 4 | 2 | 907759.2 | 2516708  | 3738479  | 170634.4 | 219466.5 | 8965144  | 2580027  | 295078.2 | 71362.65 |
| 24.7825  | 7  | 4 | 3 | 2479707  | 6967089  | 9454179  | 1033459  | 644639.2 | 23232330 | 7370883  | 1067775  | 1651168  |
| 22.32067 | 7  | 4 | 3 | 3611130  | 29877757 | 4229376  | 24815921 | 7481912  | 30060121 | 34924460 | 32801553 | 24341046 |
| 9.089733 | 10 | 5 | 5 | 3375921  | 18335674 | 3271304  | 14412012 | 5803063  | 19685563 | 23509702 | 16030237 | 16218455 |
| 9.845483 | 4  | 1 | 3 | 2682425  | 7800458  | 1439415  | 5955551  | 2764245  | 8480849  | 6711339  | 6959697  | 6820357  |
| 9.392767 | 8  | 5 | 3 | 776755.5 | 2140660  | 558652.1 | 1303279  | 1282735  | 2337991  | 2844529  | 1658813  | 1487197  |
| 41.86267 | 14 | 4 | 5 | 337011.3 | 5468036  | 4135438  | 2836555  | 1193125  | 5880346  | 4077064  | 1929757  | 12394579 |
| 9.989483 | 10 | 5 | 5 | 1222960  | 3034428  | 1075492  | 2130500  | 1142544  | 4326302  | 3934534  | 2797591  | 1756671  |
| 9.888767 | 7  | 3 | 4 | 870351.4 | 4237517  | 127940.2 | 4047312  | 291150.8 | 4313037  | 4379724  | 4194138  | 4256335  |
| 9.845483 | 5  | 2 | 3 | 1345362  | 4995627  | 1299203  | 3891055  | 1410113  | 5757882  | 4566444  | 6773189  | 3392876  |
| 10.97857 | 5  | 4 | 1 | 682171.8 | 999944.4 | 483896.4 | 1450267  | 610350.2 | 611941.8 | 1681214  | 524134.7 | 892604.8 |
| 9.530583 | 14 | 5 | 5 | 6784890  | 66643989 | 59772014 | 28927762 | 12845714 | 35963127 | 26807647 | 45048127 | 1.72E+08 |
| 9.445217 | 14 | 5 | 5 | 577629.1 | 5293779  | 1148982  | 4432621  | 952400.5 | 6696463  | 5414223  | 6081785  | 4197288  |

|          |    |   |   |          |          |          |          |          |          |          |          |          |
|----------|----|---|---|----------|----------|----------|----------|----------|----------|----------|----------|----------|
| 42.9705  | 7  | 2 | 4 | 372139.9 | 5796961  | 386245.9 | 5080672  | 1117571  | 5674988  | 5702049  | 5519315  | 5612085  |
| 8.99545  | 8  | 5 | 3 | 317089.1 | 799893.1 | 138017.1 | 547171.3 | 394041.6 | 937931.5 | 855553.1 | 602517.2 | 714903.7 |
| 9.848417 | 9  | 5 | 4 | 1113381  | 3546543  | 650541.3 | 2953903  | 794397.7 | 4025220  | 2502607  | 3445722  | 3613230  |
| 9.317    | 5  | 2 | 3 | 93689736 | 2.33E+08 | 1.98E+08 | 83406741 | 1.69E+08 | 4.18E+08 | 3.18E+08 | 25261849 | 14580917 |
| 10.03947 | 7  | 4 | 3 | 394456.1 | 476749   | 298545.6 | 795859.4 | 459018   | 442700.1 | 0        | 625822.1 | 799779.9 |
| 9.559117 | 4  | 3 | 1 | 244267.5 | 711530.2 | 522168.8 | 368154.4 | 247715.5 | 979375.7 | 590048.2 | 582920.3 | 0        |
| 9.986767 | 6  | 4 | 2 | 2151005  | 1353886  | 719246.6 | 2779594  | 2235002  | 2582910  | 821096.7 | 1008179  | 961883.4 |
| 9.295817 | 5  | 4 | 1 | 12074389 | 30838603 | 36694850 | 56726305 | 25311988 | 1351417  | 27184424 | 94293871 | 18611113 |
| 24.9285  | 5  | 4 | 1 | 1198633  | 3387119  | 5001221  | 258960.9 | 281506.2 | 12008525 | 3494999  | 472523   | 87091.31 |
| 9.920517 | 3  | 0 | 3 | 1827276  | 560440.5 | 466562   | 1797120  | 1958363  | 646945.3 | 0        | 1276191  | 377857.3 |
| 24.869   | 7  | 4 | 3 | 2699121  | 7323796  | 10687122 | 639091.9 | 621142.8 | 25784186 | 7396220  | 778263.1 | 500816.1 |
| 26.46233 | 8  | 5 | 3 | 266000.4 | 1245995  | 393528.2 | 964772.5 | 284238.5 | 946868.1 | 1925016  | 1145704  | 1006783  |
| 27.08517 | 6  | 3 | 3 | 457802.2 | 1637559  | 961913.8 | 2404150  | 924074.6 | 2371691  | 603577.9 | 2165679  | 2468961  |
| 9.46265  | 10 | 5 | 5 | 1271931  | 4671924  | 764404.1 | 3765018  | 1342937  | 5555049  | 5160188  | 4889907  | 3941956  |
| 44.23617 | 7  | 3 | 4 | 365572   | 7665485  | 2910406  | 5597699  | 2063283  | 8381123  | 4014872  | 11699061 | 8375062  |
| 9.929783 | 10 | 5 | 5 | 6229057  | 27010903 | 1365673  | 22984285 | 6395001  | 26080701 | 25324639 | 28171781 | 26918794 |
| 10.00385 | 9  | 5 | 4 | 353295.8 | 1178896  | 242474.4 | 920821.9 | 371299   | 1268258  | 796831.6 | 1432100  | 1108300  |
| 9.842    | 9  | 5 | 4 | 1182639  | 5857227  | 1080665  | 5143825  | 533282.3 | 4980852  | 4653825  | 6768465  | 7127805  |
| 42.82667 | 6  | 4 | 1 | 459368.3 | 6439415  | 941161.7 | 8042823  | 2493298  | 6107023  | 6761369  | 4978717  | 6937030  |
| 10.95602 | 4  | 3 | 1 | 235473   | 538198.1 | 257375   | 355233.4 | 183064.8 | 837722.9 | 776181.1 | 471595.4 | 262096.2 |
| 9.392767 | 13 | 5 | 5 | 3538430  | 35025878 | 11554576 | 25710280 | 11389517 | 48960427 | 31225675 | 45249498 | 27461656 |
| 24.489   | 5  | 3 | 2 | 530081.4 | 1258057  | 1891505  | 76099.88 | 125822.3 | 4540305  | 1206110  | 150196.3 | 30140.66 |
| 9.859983 | 10 | 5 | 5 | 1350335  | 7047554  | 645171.5 | 5656207  | 2192660  | 7698129  | 7186831  | 7077196  | 7303268  |
| 9.932033 | 9  | 5 | 4 | 822181.8 | 1982485  | 732038.9 | 1345941  | 831165.4 | 3033606  | 2152861  | 1257394  | 1309621  |
| 9.445217 | 12 | 5 | 5 | 3652162  | 37926356 | 13368556 | 27685413 | 11782093 | 51912071 | 43274754 | 45822864 | 29675712 |
| 9.41815  | 8  | 4 | 4 | 1419380  | 5572048  | 2176980  | 4016559  | 1578334  | 7731364  | 2952242  | 3731830  | 5886363  |
| 9.445217 | 14 | 5 | 5 | 1687358  | 16181707 | 5092820  | 12141857 | 4857457  | 22169925 | 19266672 | 17494525 | 12153501 |
| 8.811533 | 5  | 4 | 1 | 389812   | 623347.5 | 550904.7 | 259273.3 | 275430.9 | 336201.4 | 1152071  | 1256130  | 372335.1 |
| 10.95835 | 5  | 3 | 2 | 258582   | 794306.5 | 169592.5 | 1062841  | 415388.3 | 697809   | 713290.1 | 1095697  | 714170.2 |
| 10.008   | 6  | 3 | 3 | 331502.3 | 553572.1 | 153004.1 | 666034.1 | 121186.2 | 564964.7 | 602132.8 | 383859.1 | 776271.7 |
| 9.872917 | 4  | 1 | 3 | 1215802  | 5809321  | 2226104  | 3883625  | 2506989  | 8126863  | 5723564  | 6601902  | 6446814  |
| 9.874317 | 9  | 5 | 4 | 4443272  | 13041002 | 3835917  | 19018279 | 9235439  | 6509037  | 14834637 | 16493451 | 14020975 |
| 31.16317 | 6  | 2 | 4 | 202910.8 | 984880.3 | 694753.4 | 468492.6 | 568028.6 | 1586735  | 1484544  | 248342.1 | 1398101  |
| 9.43325  | 5  | 3 | 2 | 599439.4 | 3049620  | 806193.5 | 2121123  | 1368178  | 3634739  | 3725790  | 2469275  | 1924425  |
| 10.02372 | 6  | 3 | 3 | 302174.8 | 387350.9 | 242995.4 | 556878   | 162001.5 | 499600   | 0        | 639573.2 | 468320.1 |

|          |    |   |   |          |          |          |          |          |          |          |          |          |
|----------|----|---|---|----------|----------|----------|----------|----------|----------|----------|----------|----------|
| 10.008   | 7  | 3 | 4 | 318224.7 | 395088.7 | 179870.7 | 714873.8 | 499631.1 | 364952.8 | 274901.8 | 699053.8 | 248042.9 |
| 7.440633 | 12 | 5 | 4 | 1695669  | 17623809 | 7507510  | 11535391 | 7510602  | 12999934 | 27454345 | 11616332 | 12065160 |
| 10.55813 | 10 | 5 | 5 | 15981492 | 3231956  | 663531.8 | 46772549 | 69855911 | 3593412  | 3294345  | 2845353  | 2354150  |
| 9.8445   | 6  | 4 | 2 | 491041.2 | 1810594  | 513117.5 | 1098675  | 1086560  | 1388801  | 1561140  | 1498536  | 1961513  |
| 9.960817 | 10 | 5 | 5 | 5094999  | 19481040 | 3264383  | 16131170 | 4773435  | 21666825 | 24014318 | 16211080 | 17183895 |
| 24.59267 | 5  | 3 | 2 | 1929996  | 5535032  | 6961873  | 1193497  | 485570.4 | 17688898 | 5111938  | 1840074  | 1650090  |
| 10.9645  | 10 | 5 | 5 | 3.44E+08 | 2.43E+09 | 2.56E+08 | 2.15E+09 | 4.07E+08 | 2.52E+09 | 2.58E+09 | 2.17E+09 | 2.15E+09 |
| 10.008   | 6  | 3 | 3 | 753489.2 | 496893.6 | 230094.8 | 1066517  | 903519.3 | 745014   | 410267.9 | 740810   | 271466.9 |
| 9.952017 | 10 | 5 | 5 | 1116818  | 2838883  | 670392.8 | 2377272  | 425039.2 | 3622948  | 3465583  | 2374050  | 2114192  |
| 9.912633 | 10 | 5 | 5 | 7.48E+08 | 8.64E+09 | 6.26E+08 | 7.7E+09  | 1.46E+09 | 8.98E+09 | 8.19E+09 | 8.24E+09 | 8.22E+09 |
| 9.949233 | 10 | 5 | 5 | 4310543  | 13149149 | 2799039  | 11224711 | 1764167  | 17329391 | 14368652 | 12639477 | 10420657 |
| 10.95055 | 6  | 2 | 4 | 490769.4 | 1812309  | 1083246  | 1067366  | 683492   | 1221158  | 556999.7 | 1838711  | 1976876  |
| 10.55813 | 10 | 5 | 5 | 13425182 | 7499118  | 1067145  | 45262348 | 60643484 | 7378639  | 8597628  | 7113789  | 5976017  |
| 13.7122  | 10 | 5 | 5 | 766104.1 | 7529339  | 1553793  | 6210740  | 1697380  | 8732134  | 8548086  | 5890990  | 5768340  |
| 9.778967 | 3  | 3 | 0 | 521550.3 | 953698.6 | 436463.6 | 586335.9 | 469785.1 | 974327   | 291038.4 | 1108063  | 897765.9 |
| 9.886433 | 11 | 5 | 5 | 1329330  | 5971338  | 1724351  | 7222260  | 1323509  | 5560979  | 6780724  | 3129694  | 7115476  |
| 9.40615  | 13 | 5 | 5 | 2986534  | 29993865 | 9078744  | 21985364 | 10611031 | 40579354 | 25908618 | 38853797 | 23811566 |
| 10.02372 | 6  | 3 | 3 | 802254.9 | 1087313  | 1034617  | 1958083  | 1114813  | 482745.8 | 452492.7 | 927877.2 | 666576.1 |
| 9.4775   | 6  | 3 | 3 | 555887.3 | 1296781  | 480614.2 | 882590.4 | 540238.7 | 1502400  | 1608362  | 1604399  | 1302585  |
| 8.967683 | 9  | 5 | 4 | 736965.9 | 2021802  | 376127.3 | 1611260  | 598229.2 | 2144313  | 2618961  | 1705807  | 1900426  |
| 10.008   | 9  | 5 | 4 | 438193.8 | 565238.5 | 76256.4  | 762794.8 | 314274.6 | 626408.5 | 525122.8 | 630818.2 | 592120   |
| 9.94455  | 6  | 3 | 3 | 568380.7 | 1518093  | 481445.7 | 1039881  | 674678.2 | 2104731  | 1955365  | 1174026  | 1032681  |
| 11.48217 | 4  | 3 | 1 | 138377.5 | 387721.2 | 313894.5 | 191886.4 | 44849.72 | 923587.9 | 250255.8 | 140112.8 | 224603.5 |
| 25.1885  | 5  | 4 | 1 | 698455.6 | 1727248  | 2546681  | 142744.5 | 162966.1 | 6101154  | 1859030  | 250821.4 | 98919.26 |
| 9.616167 | 10 | 5 | 5 | 1940833  | 6368410  | 1452309  | 4999135  | 1889117  | 7813109  | 8073300  | 5035911  | 5550796  |
| 10.68888 | 7  | 4 | 3 | 1070444  | 700037.2 | 383142.8 | 2316421  | 2592699  | 576540.8 | 599012.4 | 585004.9 | 374407.4 |
| 9.544833 | 6  | 2 | 3 | 4449025  | 9281363  | 4378589  | 5852097  | 4101987  | 12217285 | 5751613  | 14475692 | 3977280  |
| 9.94455  | 3  | 3 | 0 | 638375.3 | 1357283  | 72424.63 | 993721.4 | 583932.2 | 1332921  | 1275174  | 1325203  | 1465408  |
| 9.40325  | 5  | 2 | 3 | 3011849  | 19809360 | 6960081  | 13492136 | 8547763  | 24806560 | 16023218 | 23885411 | 25035783 |
| 9.445217 | 8  | 3 | 3 | 870411.6 | 5001932  | 2122079  | 3092851  | 2570311  | 5320631  | 2881117  | 7328536  | 6722468  |
| 9.644783 | 10 | 5 | 5 | 711952.9 | 1781661  | 1228780  | 997738.9 | 449516.4 | 1306054  | 1128695  | 858237   | 3909698  |
| 24.754   | 5  | 4 | 1 | 1242140  | 3073370  | 4568962  | 235798.6 | 279244.8 | 10900501 | 3378208  | 534319.9 | 107210.2 |
| 9.8322   | 9  | 5 | 4 | 3423707  | 16988847 | 2052646  | 13193170 | 5972644  | 15941598 | 15430387 | 15560012 | 17751614 |
| 24.86883 | 7  | 4 | 3 | 127680.5 | 478289.8 | 307604.6 | 271484.1 | 176864.3 | 244403.5 | 628345.6 | 81984.99 | 598065.2 |
| 24.0985  | 8  | 3 | 5 | 456799.8 | 2854969  | 339901.4 | 2543689  | 423812.5 | 2714389  | 3460636  | 2661403  | 2694649  |

|          |    |   |   |          |          |          |          |          |          |          |          |          |
|----------|----|---|---|----------|----------|----------|----------|----------|----------|----------|----------|----------|
| 19.438   | 9  | 4 | 5 | 297449.2 | 1778889  | 314081.7 | 1366038  | 628484.4 | 2162019  | 2024393  | 1475613  | 1470225  |
| 9.975217 | 5  | 3 | 2 | 2692512  | 4495543  | 1112896  | 6626279  | 3362140  | 4004976  | 4482539  | 5936362  | 2978551  |
| 22.92933 | 4  | 1 | 3 | 66478.3  | 281084.3 | 107472.1 | 192290.7 | 112532.5 | 346208.3 | 92738.08 | 291607.4 | 333947.1 |
| 9.311883 | 5  | 3 | 2 | 625717.8 | 1890439  | 655255.3 | 3364847  | 2343435  | 1050024  | 2514576  | 1982999  | 1402128  |
| 40.525   | 7  | 3 | 1 | 270368.6 | 3319770  | 287002.9 | 3109712  | 228338.3 | 3360415  | 3190590  | 3138945  | 3802421  |
| 10.0926  | 7  | 4 | 3 | 371968.5 | 947721   | 486461.8 | 643264.4 | 113869.9 | 1625332  | 1227667  | 472147   | 524069.8 |
| 41.48867 | 6  | 3 | 1 | 355871.8 | 7455255  | 2993697  | 5514266  | 1351171  | 11914464 | 5954070  | 4042154  | 6693355  |
| 9.858833 | 10 | 5 | 5 | 1504882  | 2724042  | 739332.6 | 5246416  | 4047233  | 3933623  | 2210181  | 2168160  | 2389048  |
| 39.43133 | 4  | 1 | 3 | 294651.6 | 4934484  | 576377.9 | 6233689  | 2066259  | 3908507  | 5104336  | 5195772  | 5198884  |
| 9.920517 | 10 | 5 | 5 | 3595778  | 9626569  | 1356911  | 7843679  | 2716842  | 11098288 | 9112244  | 7754373  | 9373056  |
| 24.709   | 5  | 4 | 1 | 376734.4 | 972436.8 | 1439000  | 80741.05 | 65085.01 | 3471346  | 932172.1 | 183355.8 | 36809.38 |
| 9.928667 | 6  | 3 | 3 | 2631945  | 3081441  | 2377197  | 1519681  | 1199242  | 1147130  | 1020688  | 5851879  | 1934376  |
| 9.9847   | 7  | 4 | 3 | 1457125  | 1049362  | 306759   | 2257879  | 1943483  | 1406820  | 1169784  | 1126336  | 964642.1 |
| 9.888767 | 4  | 1 | 3 | 4616301  | 20517789 | 8613293  | 12650129 | 10730803 | 28661188 | 17562984 | 24276641 | 25196990 |
| 36.9045  | 7  | 3 | 3 | 337457.3 | 6325358  | 3998043  | 3843281  | 549225.8 | 4154312  | 13464210 | 4692643  | 4528256  |
| 9.853633 | 7  | 4 | 3 | 1388467  | 2471669  | 1502697  | 4395728  | 2923555  | 1157949  | 4850224  | 1443990  | 1908945  |
| 9.9014   | 4  | 1 | 3 | 13128333 | 52195334 | 27256616 | 30126680 | 27551013 | 9721345  | 39651158 | 71420929 | 70335424 |
| 22.36317 | 6  | 3 | 3 | 237509.8 | 1478537  | 342995.8 | 1224832  | 282348.4 | 1163710  | 2040215  | 1548013  | 1344125  |
| 24.8545  | 6  | 4 | 2 | 1369852  | 3503110  | 5237328  | 261167.8 | 288321.9 | 12562067 | 3504487  | 563492.5 | 68077.7  |
| 9.406667 | 8  | 3 | 4 | 897435.8 | 6838355  | 1658523  | 5050447  | 2613850  | 7566323  | 5132459  | 4971682  | 8388005  |
| 10.00385 | 11 | 5 | 5 | 56390216 | 3.14E+08 | 60449307 | 2.51E+08 | 91256363 | 2.81E+08 | 3.21E+08 | 2.29E+08 | 3.56E+08 |
| 9.009533 | 4  | 1 | 3 | 261393.9 | 267292.7 | 266122   | 478368   | 258412.8 | 33605.66 | 207698   | 81664.03 | 311828.6 |
| 16.27145 | 10 | 5 | 5 | 1651363  | 14778095 | 2462157  | 12805714 | 2440825  | 12838667 | 16380629 | 11591472 | 15657459 |
| 9.8445   | 10 | 5 | 5 | 6166609  | 32109363 | 4237488  | 26597920 | 8406628  | 34789231 | 34203790 | 26240163 | 29106464 |
| 9.392767 | 9  | 5 | 4 | 1192868  | 3257962  | 687276.3 | 2520879  | 1076723  | 3658648  | 3743196  | 2738683  | 2314205  |
| 9.8322   | 9  | 5 | 4 | 576941.3 | 2140588  | 399173.6 | 1548635  | 919181   | 2036834  | 1917616  | 1682575  | 2360920  |
| 10.02372 | 9  | 5 | 4 | 1430281  | 836298.2 | 224290   | 1995456  | 1871584  | 917045.5 | 583821.9 | 1124107  | 922113.4 |
| 14.47295 | 3  | 0 | 3 | 3094217  | 1230634  | 150500.9 | 11406383 | 16478432 | 1196713  | 1277358  | 1428447  | 1239256  |
| 44.98333 | 12 | 4 | 3 | 381680.3 | 2871777  | 1841607  | 4044719  | 707794.5 | 4767863  | 748340   | 3879245  | 1042509  |
| 9.983433 | 10 | 5 | 5 | 462176.7 | 1681415  | 330503.2 | 1369635  | 434013.9 | 1898635  | 2053473  | 1735318  | 1215652  |
| 9.992233 | 8  | 3 | 5 | 298221.6 | 874304.6 | 287486.4 | 670396.2 | 210512.8 | 821326.7 | 1323731  | 876865.4 | 522825.9 |
| 29.22367 | 10 | 5 | 5 | 477307.5 | 1754327  | 1185471  | 999451.7 | 457024.2 | 1616790  | 3773093  | 1291878  | 653332.9 |
| 10.02372 | 8  | 4 | 4 | 727087.3 | 576837.7 | 371853.6 | 1328412  | 1194996  | 758755.8 | 38589.87 | 1009565  | 680279.3 |
| 9.999217 | 6  | 3 | 3 | 717503.9 | 666201.6 | 385580.2 | 926127.9 | 230875.2 | 906802.2 | 0        | 919546   | 668797.1 |
| 9.872883 | 10 | 5 | 5 | 16280191 | 77984694 | 10621800 | 67428667 | 15050048 | 88018578 | 72761894 | 73217852 | 65702673 |



|          |    |   |   |          |          |          |          |          |          |          |          |          |
|----------|----|---|---|----------|----------|----------|----------|----------|----------|----------|----------|----------|
| 10.008   | 7  | 4 | 3 | 506275.1 | 745390.1 | 418042.3 | 1159255  | 589167.1 | 1055715  | 1249254  | 748511.1 | 250568.4 |
| 9.976317 | 10 | 5 | 5 | 1724442  | 6119273  | 2243279  | 4639314  | 1193535  | 6616014  | 6499112  | 5063939  | 9258936  |
| 9.888767 | 10 | 5 | 5 | 6307849  | 33015519 | 4468904  | 25669428 | 11536900 | 36456849 | 35414346 | 27538822 | 28819625 |
| 10.51508 | 8  | 4 | 4 | 308146   | 1084722  | 415288.5 | 793016.9 | 294763.2 | 998471.5 | 1783056  | 1021673  | 668689.4 |
| 9.920517 | 11 | 5 | 5 | 5105112  | 11047243 | 2292760  | 7687182  | 5220079  | 12341428 | 10041185 | 7538317  | 12009338 |
| 9.964417 | 4  | 4 | 0 | 512256.5 | 828448.9 | 496808.6 | 476361.5 | 363884   | 1005508  | 60713.27 | 672195.3 | 1024235  |
| 10.26505 | 4  | 3 | 1 | 253698.7 | 690056.3 | 311822.3 | 486592.8 | 154940.8 | 630698.3 | 962683.4 | 1034298  | 274970   |
| 10.80383 | 4  | 1 | 3 | 65352.8  | 206104.1 | 14104.48 | 170553.4 | 57046.69 | 222698.6 | 191556.8 | 200817   | 195986.4 |
| 22.65317 | 9  | 4 | 5 | 279101.3 | 1816679  | 544338   | 1449592  | 328797.8 | 1139703  | 2638681  | 1939998  | 1679324  |
| 9.392767 | 10 | 5 | 5 | 3818292  | 15177118 | 5785546  | 10579535 | 5676609  | 16486197 | 10356826 | 9831777  | 15069465 |
| 9.56645  | 18 | 5 | 5 | 8984816  | 73032939 | 16860034 | 51188836 | 33414025 | 61147741 | 85431539 | 95352528 | 55165747 |
| 3.65805  | 7  | 3 | 4 | 148137.1 | 2429411  | 1395362  | 3734732  | 1815215  | 0        | 3264728  | 3389297  | 2565062  |
| 20.864   | 6  | 4 | 2 | 125589.9 | 183038.3 | 85427.77 | 302850.1 | 185442.3 | 171768.4 | 145413.3 | 73663.55 | 301931.6 |
| 9.830833 | 6  | 2 | 4 | 636842.8 | 1343160  | 448654.6 | 1685343  | 402724.8 | 1197159  | 909275.8 | 1602354  | 1015149  |
| 9.8322   | 8  | 5 | 3 | 1816031  | 1658349  | 159644.6 | 4007363  | 3812730  | 1727683  | 1751568  | 1530881  | 1829995  |
| 11.99367 | 7  | 4 | 3 | 122799.5 | 536610.4 | 116321.3 | 420302.5 | 166602.6 | 397642.2 | 672419.5 | 606074.5 | 435109.9 |
| 10.9645  | 7  | 4 | 3 | 205997.1 | 747742.1 | 83035.67 | 618196.1 | 202915.7 | 612722.9 | 728944.4 | 825746.1 | 781306.5 |
| 20.28833 | 5  | 2 | 3 | 267963.8 | 595757.5 | 351292.6 | 366488.1 | 175847.8 | 183326.8 | 1147981  | 582294.1 | 460427.1 |
| 10.95055 | 9  | 5 | 4 | 177946   | 762501   | 165613.9 | 613108.4 | 203857.6 | 851653.6 | 1003582  | 592407.6 | 651696.8 |
| 9.673333 | 6  | 2 | 4 | 3664429  | 8847755  | 9918553  | 2488330  | 4269667  | 9762053  | 608138.9 | 8841250  | 24718289 |
| 9.903567 | 5  | 3 | 2 | 1191173  | 1471204  | 505047.8 | 2577333  | 1769275  | 1003916  | 1065750  | 2252273  | 1624911  |
| 44.36533 | 11 | 5 | 4 | 338760.6 | 10567446 | 4922570  | 7139139  | 3413922  | 15345673 | 6112870  | 4454006  | 13220370 |
| 27.31667 | 5  | 1 | 4 | 10815764 | 146666.7 | 133299.4 | 31599395 | 51107485 | 384292.9 | 79341.11 | 92099.56 | 74635.56 |
| 9.406667 | 5  | 2 | 3 | 409264.7 | 2448511  | 1355301  | 1561658  | 694231.9 | 3365752  | 3995875  | 1614502  | 2654659  |
| 9.872883 | 10 | 5 | 5 | 5228849  | 27389598 | 4256477  | 22093634 | 8061165  | 27946442 | 24807929 | 22712104 | 27488390 |
| 9.523633 | 9  | 5 | 4 | 1011497  | 1542269  | 629488.5 | 3478387  | 3126775  | 2256810  | 2012513  | 1218128  | 677261.4 |
| 9.67     | 5  | 2 | 3 | 354551.1 | 952513.1 | 580973.1 | 528345   | 469101.2 | 1620770  | 332659.3 | 715123.4 | 1518770  |
| 9.94455  | 8  | 5 | 3 | 2322495  | 7804893  | 2302087  | 11221570 | 5334920  | 4608612  | 7510614  | 8031188  | 7776200  |
| 9.848417 | 9  | 5 | 4 | 1836383  | 6952885  | 3186667  | 4977121  | 702605.4 | 6728970  | 6008149  | 5831639  | 12328538 |
| 9.559117 | 9  | 5 | 4 | 453835.4 | 1147555  | 275923.7 | 842793.8 | 452113.7 | 1057575  | 1599482  | 964513.5 | 911997   |
| 9.886083 | 4  | 3 | 1 | 2983746  | 10840653 | 5557187  | 14800560 | 4189629  | 8406685  | 5625276  | 17020081 | 16632255 |
| 9.864767 | 10 | 5 | 5 | 3239746  | 22103767 | 2592276  | 18300697 | 5938366  | 21196814 | 19240967 | 20870638 | 23222030 |
| 24.84117 | 4  | 3 | 1 | 379217.3 | 847191.4 | 1259196  | 73532.3  | 86332.25 | 3024817  | 845140.5 | 172902.5 | 0        |
| 9.284283 | 10 | 5 | 5 | 1281145  | 4550228  | 1335244  | 3391828  | 1549704  | 4853504  | 6688920  | 4153225  | 3198373  |
| 9.992233 | 9  | 5 | 4 | 567179.7 | 608400.4 | 133854   | 977937.8 | 596533.1 | 658635.8 | 706338.5 | 745048.6 | 453387.3 |

|          |    |   |   |          |          |          |          |          |          |          |          |          |
|----------|----|---|---|----------|----------|----------|----------|----------|----------|----------|----------|----------|
| 9.864767 | 10 | 5 | 5 | 8943709  | 59288605 | 6919409  | 48950054 | 16177968 | 56167699 | 52419347 | 55766294 | 62115088 |
| 28.67333 | 3  | 0 | 3 | 61061.43 | 93112.52 | 26193.09 | 145676   | 84008.94 | 66211.02 | 132520   | 89680.62 | 74175.47 |
| 9.445217 | 5  | 2 | 3 | 2251784  | 12221294 | 2953378  | 9321939  | 4141514  | 15748952 | 8315644  | 12728566 | 14017515 |
| 27.96683 | 10 | 5 | 5 | 528905.9 | 2889648  | 844656   | 2305266  | 577900.1 | 3075037  | 2793838  | 2194036  | 2157603  |
| 11.8416  | 4  | 3 | 1 | 85092.88 | 304748.2 | 167328.4 | 200668.9 | 45330.17 | 483729   | 454939.5 | 304845.4 | 100148.5 |
| 9.673333 | 7  | 3 | 4 | 522679.2 | 1830276  | 496097   | 1457782  | 432933.1 | 2606225  | 1873776  | 1287903  | 1846508  |
| 9.498117 | 6  | 4 | 1 | 5445264  | 2780244  | 3585415  | 9616768  | 10908412 | 9100492  | 2228286  | 753364.8 | 731643.5 |
| 9.2033   | 8  | 4 | 4 | 662436.7 | 1643152  | 715981.1 | 2224571  | 739663.4 | 996787.5 | 2829414  | 1347617  | 1288253  |
| 10.14543 | 10 | 5 | 5 | 636842.8 | 1718832  | 523454   | 1291454  | 546494.1 | 1369911  | 2578634  | 1777106  | 1620866  |
| 6.996867 | 5  | 2 | 3 | 12191684 | 3.06E+08 | 1.97E+08 | 1.8E+08  | 87387099 | 6.43E+08 | 2.3E+08  | 1.53E+08 | 1.97E+08 |
| 36.95717 | 6  | 3 | 1 | 311484.7 | 4601146  | 1087711  | 5437831  | 1005833  | 5086091  | 5731670  | 5142275  | 4070995  |
| 10.99268 | 5  | 3 | 2 | 212637.2 | 606904.3 | 171984.6 | 454428.3 | 207335.6 | 612664   | 651025.5 | 578555.9 | 836241.6 |
| 9.856867 | 10 | 5 | 5 | 1715110  | 7320766  | 896148.4 | 8673493  | 2122714  | 6854222  | 6102162  | 7289566  | 8312677  |
| 9.853633 | 8  | 5 | 3 | 1561619  | 1970136  | 656803.9 | 4474517  | 4068608  | 1770261  | 1670432  | 1781358  | 1500916  |
| 40.48267 | 5  | 4 | 1 | 314886.6 | 2604121  | 1289315  | 1757844  | 691398.8 | 2997679  | 1538828  | 3990589  | 985428.4 |
| 13.4763  | 10 | 5 | 5 | 390045.2 | 1300100  | 797007.8 | 2083689  | 1122180  | 515484.3 | 1016234  | 1030177  | 2631179  |
| 24.71    | 6  | 4 | 2 | 1887383  | 6504930  | 8538025  | 1272684  | 409990.3 | 21142329 | 7055312  | 1237516  | 1341514  |
| 9.904767 | 9  | 4 | 5 | 6673955  | 7303698  | 7225768  | 2867529  | 834186.6 | 3633171  | 20103896 | 4669788  | 5377580  |
| 9.295167 | 5  | 2 | 3 | 2659862  | 17424906 | 15262407 | 7243064  | 8980430  | 30508495 | 793532.9 | 32721302 | 2037801  |
| 9.40325  | 5  | 2 | 3 | 1833759  | 9088945  | 5337195  | 5209177  | 4296883  | 2475913  | 4570586  | 14177242 | 13790460 |
| 9.872917 | 4  | 1 | 3 | 6825096  | 10106672 | 8468287  | 4672910  | 3848193  | 4889082  | 24148711 | 4806636  | 4593179  |
| 8.955933 | 4  | 3 | 1 | 219615.3 | 661088.2 | 495026.2 | 351832.6 | 156618   | 1089433  | 1256576  | 503429.7 | 82855.6  |
| 9.960467 | 6  | 4 | 2 | 991757.8 | 1071578  | 351441.5 | 1941565  | 1404133  | 1164127  | 528665.8 | 1384774  | 1344154  |
| 10.008   | 8  | 4 | 4 | 384015.2 | 1203285  | 420887   | 839654   | 486923.7 | 840864.1 | 1468685  | 994033.4 | 900289.9 |
| 9.445217 | 12 | 5 | 4 | 815828.4 | 5352966  | 1728736  | 3993795  | 1679246  | 7832984  | 6137983  | 5292159  | 3592523  |
| 39.86317 | 11 | 4 | 5 | 343331.7 | 5192977  | 2043285  | 3931817  | 436986.3 | 1971832  | 7139801  | 5096560  | 4988010  |
| 24.609   | 9  | 5 | 4 | 179022.2 | 608054   | 86553.28 | 975473.2 | 598370.7 | 709681.3 | 674248.7 | 612297.4 | 507276.6 |
| 43.11433 | 4  | 3 | 1 | 376415.3 | 6042484  | 818892.5 | 6625642  | 623018.1 | 6534797  | 6451432  | 5588698  | 6810383  |
| 9.976317 | 6  | 3 | 1 | 740157.6 | 1911745  | 763885.3 | 1310626  | 744398.6 | 1942595  | 608234.5 | 2098124  | 2522903  |
| 9.830833 | 6  | 3 | 3 | 869902.7 | 3266654  | 1109501  | 2267493  | 1374960  | 3533101  | 1633911  | 3917730  | 4492440  |
| 32.287   | 10 | 5 | 5 | 570623.1 | 3413443  | 912260.5 | 2591590  | 1131221  | 2853338  | 4259057  | 2124870  | 3653626  |
| 40.94233 | 5  | 2 | 3 | 288648.8 | 4291508  | 1691025  | 3255174  | 194581.4 | 3229277  | 3796447  | 3498542  | 3639864  |
| 10.93208 | 5  | 2 | 3 | 459462.6 | 1215066  | 702978.4 | 721161.4 | 513192.1 | 1434812  | 2246016  | 1266005  | 475240.6 |
| 9.992233 | 10 | 5 | 5 | 409146.5 | 1481900  | 151677.9 | 1202201  | 446847.3 | 1466442  | 1619444  | 1616208  | 1248918  |
| 10.00998 | 10 | 5 | 5 | 716695.4 | 938106.4 | 414533.8 | 1663937  | 1155868  | 1084064  | 1517649  | 989453.4 | 436110.4 |

|          |    |   |   |          |          |          |          |          |          |          |          |          |
|----------|----|---|---|----------|----------|----------|----------|----------|----------|----------|----------|----------|
| 10.95055 | 9  | 5 | 4 | 218023.2 | 910510.4 | 238105.6 | 724046.3 | 230127   | 1094934  | 1166103  | 756427.3 | 590319.1 |
| 11.72885 | 7  | 2 | 5 | 149170.7 | 504192.4 | 158121.4 | 868032.6 | 587205.2 | 521251.3 | 329038.8 | 365979.6 | 707291.4 |
| 9.856867 | 10 | 5 | 5 | 2103434  | 10486070 | 1279071  | 7985201  | 4010470  | 9409006  | 9198919  | 10208103 | 11524802 |
| 9.992233 | 16 | 5 | 5 | 510280.3 | 1911315  | 961176.8 | 1254840  | 635127.9 | 2311110  | 731243.4 | 2684031  | 2794276  |
| 35.99767 | 10 | 5 | 5 | 248381.4 | 1622810  | 263652   | 1905123  | 417987.4 | 2014025  | 1508720  | 1299946  | 1587814  |
| 38.81283 | 12 | 3 | 3 | 325851.4 | 4517931  | 1862658  | 3162111  | 1516532  | 4178230  | 3894255  | 2818980  | 3985876  |
| 9.840617 | 8  | 4 | 4 | 2245032  | 5005472  | 3251671  | 7834890  | 3823971  | 5615668  | 10416708 | 2851447  | 3582349  |
| 10.91673 | 7  | 4 | 3 | 226389.3 | 459011.9 | 95450.11 | 669219   | 339092.6 | 428989.4 | 575509.2 | 494737.9 | 479235.2 |
| 16.69483 | 7  | 5 | 2 | 934654.9 | 246517.9 | 113021.3 | 1858610  | 2640549  | 414837.2 | 209435.9 | 304022.4 | 140523   |
| 9.445217 | 8  | 4 | 3 | 450672.8 | 2610367  | 1083582  | 1665145  | 1280601  | 3592337  | 3874548  | 1617056  | 2409805  |
| 9.952017 | 10 | 5 | 5 | 1037354  | 4098473  | 1007507  | 3450483  | 482926.4 | 5237098  | 4378847  | 3211784  | 2894952  |
| 9.904767 | 8  | 3 | 5 | 1666018  | 6721311  | 3367799  | 4515456  | 1831147  | 6487316  | 3071012  | 5297339  | 12192562 |
| 25.994   | 9  | 5 | 4 | 421878   | 1510323  | 580066.6 | 2550282  | 1663284  | 2536917  | 1231324  | 1174669  | 1213081  |
| 7.524417 | 8  | 4 | 2 | 1216499  | 9078287  | 8058297  | 3930276  | 3658290  | 5788915  | 4921080  | 4393963  | 6893890  |
| 9.932033 | 10 | 5 | 5 | 5277417  | 11877758 | 3106116  | 8297492  | 5417420  | 16578449 | 9431687  | 8769867  | 11809910 |
| 10.29105 | 10 | 5 | 5 | 5899603  | 30522244 | 7459637  | 24369804 | 8012789  | 40455717 | 33237202 | 29979737 | 19834152 |
| 9.874067 | 6  | 2 | 3 | 1813149  | 484467.4 | 145052.4 | 2989703  | 4109001  | 470871.4 | 633522.9 | 337104.5 | 349047.5 |
| 9.952017 | 10 | 5 | 5 | 3130118  | 12698981 | 2165772  | 10218069 | 3749431  | 15144167 | 13769706 | 10399101 | 10416441 |
| 9.346    | 6  | 4 | 2 | 807255.9 | 4690146  | 1176937  | 3181421  | 2331630  | 4555685  | 4070606  | 3187255  | 6226853  |
| 10.36865 | 6  | 5 | 1 | 358055.7 | 768404.6 | 307482.8 | 573054   | 133013.2 | 414660.1 | 1015195  | 478791.1 | 1088412  |
| 10.51392 | 9  | 5 | 4 | 421571.2 | 1645292  | 530146.1 | 1276697  | 377732   | 1250531  | 2494899  | 1813585  | 1224001  |
| 10.95835 | 5  | 1 | 4 | 600177.3 | 2195403  | 1204944  | 1333188  | 940626   | 424427.4 | 3791115  | 2294558  | 1996627  |
| 10.14385 | 5  | 2 | 3 | 4616856  | 15472885 | 11453690 | 7721714  | 7368829  | 3957413  | 2658833  | 26897114 | 24585958 |
| 11.30818 | 7  | 3 | 4 | 2227321  | 899633.6 | 325298.4 | 5345614  | 7295757  | 1005779  | 1240260  | 1141804  | 557959.2 |
| 9.999217 | 10 | 5 | 5 | 915657.3 | 2962627  | 119461   | 2443160  | 849894.9 | 3047437  | 2835898  | 3068199  | 2829166  |
| 10.90765 | 4  | 0 | 4 | 166730.4 | 179879.9 | 112998.3 | 285705.4 | 149518.6 | 90984.24 | 312603.5 | 45658.37 | 183510.2 |
| 9.975217 | 8  | 4 | 4 | 573112.3 | 1443786  | 797300.2 | 909984.4 | 490071.7 | 1673116  | 365602.8 | 998306.2 | 2472775  |
| 9.445217 | 12 | 5 | 4 | 726695.3 | 5598123  | 1269887  | 4573935  | 1310850  | 7070375  | 6288680  | 5744909  | 3695863  |
| 38.38117 | 9  | 2 | 3 | 387847.7 | 5156296  | 441724.7 | 3995745  | 1886906  | 4433706  | 5245881  | 5089828  | 5531266  |
| 9.840617 | 10 | 5 | 5 | 1726544  | 8288617  | 349318.1 | 6923025  | 2233503  | 8852339  | 8072739  | 8398961  | 8116812  |
| 9.445217 | 14 | 5 | 5 | 2678247  | 20026612 | 5753151  | 15009636 | 6819887  | 26438432 | 23545577 | 22110823 | 15109174 |
| 16.41748 | 6  | 3 | 3 | 1006244  | 428227.2 | 398964.8 | 3329566  | 4761697  | 834686.8 | 155029.9 | 138038.1 | 119184.1 |
| 19.11083 | 4  | 3 | 1 | 1338285  | 2206780  | 3355902  | 165032   | 97730    | 525763.2 | 117702.2 | 2254639  | 135441.6 |
| 9.91875  | 9  | 5 | 4 | 2023938  | 4441324  | 564934.3 | 3406340  | 1661540  | 4813409  | 3691073  | 3985853  | 4757269  |
| 9.374083 | 9  | 5 | 4 | 699997.8 | 1563742  | 254349   | 1087972  | 764757.7 | 1935722  | 1522380  | 1227379  | 1619231  |

|          |    |   |   |          |          |          |          |          |          |          |          |          |
|----------|----|---|---|----------|----------|----------|----------|----------|----------|----------|----------|----------|
| 9.94455  | 13 | 5 | 5 | 4572475  | 4137526  | 1761552  | 7542748  | 5484195  | 4700968  | 5483507  | 2580591  | 1986825  |
| 9.023433 | 6  | 3 | 3 | 262314   | 758502.1 | 373392.6 | 507595.6 | 234849.1 | 847701.6 | 956084.6 | 222610.5 | 572827   |
| 10.16938 | 8  | 4 | 4 | 157934.3 | 493256.7 | 142737   | 401806.6 | 67968.92 | 327089.9 | 589986.1 | 652989.1 | 534527.7 |
| 26.02517 | 10 | 5 | 5 | 177213.4 | 1231649  | 320226.1 | 955221.1 | 374161.3 | 941126.5 | 1751971  | 1244031  | 997506.1 |
| 9.3261   | 6  | 2 | 3 | 926809.1 | 5719961  | 2388880  | 3904496  | 2187259  | 3382220  | 2960991  | 7213052  | 6804948  |
| 9.445217 | 13 | 5 | 5 | 3414515  | 21347373 | 8480868  | 15379051 | 6337676  | 24832456 | 15590976 | 18160766 | 34501535 |
| 9.858833 | 9  | 5 | 4 | 4386736  | 17323580 | 1879184  | 13730362 | 5788781  | 15837548 | 17637247 | 15122275 | 19811066 |
| 9.2033   | 4  | 3 | 1 | 442425.1 | 1235414  | 656653.5 | 767596.9 | 509777.4 | 1196333  | 608330.2 | 704439.9 | 1426852  |
| 9.903567 | 4  | 3 | 1 | 2101813  | 4535498  | 590825.5 | 3194419  | 2176352  | 5406423  | 4361514  | 4843527  | 4094869  |
| 10.95055 | 6  | 2 | 4 | 1307328  | 3838870  | 1095400  | 2793380  | 1495413  | 4267129  | 5436689  | 2884620  | 2765286  |
| 10.9645  | 10 | 5 | 5 | 784752.9 | 3754110  | 253650.3 | 3310501  | 711119.6 | 3900065  | 3789118  | 3405169  | 3615662  |
| 9.365833 | 7  | 4 | 3 | 513713   | 2126728  | 1118647  | 1351889  | 794470.8 | 2695983  | 3346382  | 2583557  | 1485274  |
| 9.43325  | 7  | 3 | 4 | 738965.1 | 4529851  | 3255576  | 2219480  | 2500065  | 2632904  | 2198009  | 8110596  | 8041936  |
| 27.51817 | 10 | 5 | 5 | 625318.9 | 4850787  | 2009483  | 6340418  | 1737230  | 3373428  | 4792889  | 3690240  | 4079067  |
| 43.90517 | 14 | 3 | 4 | 246888.4 | 3881954  | 1496772  | 2717797  | 1443169  | 3403021  | 2899866  | 6061670  | 2348297  |
| 9.445217 | 13 | 5 | 5 | 2521462  | 14868226 | 2873950  | 11609477 | 4935559  | 16542417 | 16452310 | 13329339 | 10553116 |
| 9.994767 | 8  | 5 | 3 | 576947.2 | 1730909  | 390561.7 | 1327513  | 595115.3 | 2104728  | 1917682  | 1805097  | 1075471  |
| 9.976317 | 6  | 4 | 2 | 589781.3 | 943942.9 | 520942.6 | 550699.3 | 470879.6 | 1021227  | 80858.49 | 916364   | 1311366  |
| 9.853633 | 5  | 3 | 2 | 3128495  | 3420569  | 2418443  | 6258342  | 4333231  | 4564672  | 1296863  | 1881766  | 2226483  |
| 19.15483 | 6  | 4 | 2 | 3102483  | 5363157  | 8297043  | 327435   | 158629.7 | 1208230  | 340502.5 | 5144012  | 348745.2 |
| 10.02372 | 7  | 4 | 3 | 755272.1 | 904859.9 | 613699.7 | 1422808  | 691853.5 | 574441.3 | 689550.1 | 814697.7 | 467601   |
| 7.440633 | 10 | 5 | 5 | 5326003  | 82900988 | 11191045 | 72928518 | 13803377 | 83540049 | 88431119 | 75573179 | 69065040 |
| 21.91383 | 3  | 0 | 3 | 15788154 | 93759.37 | 67221.95 | 43363095 | 71322151 | 97827.6  | 63852.63 | 53960.25 | 44645.05 |
| 9.967367 | 6  | 3 | 3 | 1132428  | 1758288  | 625350.9 | 3007453  | 2020070  | 2173112  | 2425131  | 792438.4 | 1637433  |
| 9.8445   | 6  | 4 | 2 | 6031652  | 8179263  | 13651927 | 20002615 | 16090826 | 1434518  | 1669366  | 2341585  | 2871243  |
| 21.7255  | 3  | 0 | 3 | 5809887  | 364146.6 | 50285.56 | 14934146 | 24023854 | 366621.5 | 370691.4 | 332920.7 | 441747.7 |
| 10.64595 | 8  | 4 | 4 | 304652   | 952359.8 | 123692.5 | 755167.9 | 314427.8 | 805001.6 | 963274.9 | 1098185  | 852651   |
| 9.419733 | 10 | 5 | 5 | 2162678  | 5772172  | 1735503  | 4263246  | 2058959  | 7796098  | 7408464  | 4127343  | 5283028  |
| 9.848417 | 8  | 4 | 4 | 2026572  | 10515443 | 1696646  | 9336354  | 1224880  | 10150555 | 7961457  | 10688894 | 11160249 |
| 21.60133 | 4  | 3 | 1 | 58906.42 | 172376.3 | 62802.57 | 132765.8 | 26420.93 | 138151.1 | 255683.8 | 136450.8 | 109726.7 |
| 9.324917 | 8  | 3 | 4 | 8664181  | 39741414 | 51698598 | 8085285  | 11829015 | 4004742  | 934243.7 | 1.12E+08 | 4265238  |
| 9.433    | 10 | 4 | 4 | 1242774  | 7868898  | 3213378  | 5646029  | 2284413  | 4834308  | 5159433  | 7136018  | 12380316 |
| 24.33267 | 5  | 4 | 1 | 363175   | 961466.6 | 1328885  | 155794.6 | 48659.07 | 3227575  | 1080973  | 120683   | 105243.6 |
| 9.8445   | 9  | 5 | 4 | 876678.4 | 3374977  | 536475.7 | 2517516  | 1368323  | 3712123  | 3576604  | 2841550  | 2775503  |
| 9.856867 | 6  | 3 | 3 | 2243332  | 2043137  | 379348.7 | 5568577  | 5812837  | 2177639  | 1807560  | 1520302  | 2224615  |

|          |    |   |   |          |          |          |          |          |          |          |          |          |
|----------|----|---|---|----------|----------|----------|----------|----------|----------|----------|----------|----------|
| 9.842    | 8  | 3 | 5 | 17831916 | 26940665 | 38646455 | 3514622  | 1461195  | 93073417 | 29902518 | 4488347  | 3513979  |
| 10.97857 | 9  | 5 | 3 | 751669   | 2404171  | 763127.1 | 2934774  | 553457.6 | 2386369  | 1374651  | 2192233  | 3498257  |
| 9.856867 | 10 | 5 | 5 | 2904902  | 14080716 | 1955089  | 11099507 | 4739744  | 12646728 | 11878397 | 13838685 | 15385997 |
| 9.379233 | 10 | 5 | 5 | 1269542  | 4481897  | 658141.1 | 3749244  | 1107696  | 5550135  | 4157097  | 3892597  | 4153018  |
| 15.89097 | 8  | 5 | 3 | 283338.9 | 2807865  | 418022.8 | 2143778  | 1060253  | 3499088  | 2605445  | 2902160  | 2490659  |
| 44.9835  | 8  | 3 | 2 | 401192   | 5709367  | 2257546  | 4337756  | 322009.6 | 3536538  | 4559330  | 4798126  | 9334416  |
| 9.91875  | 9  | 4 | 5 | 1982908  | 4372804  | 1829042  | 7679339  | 5329722  | 7008975  | 3053460  | 4508543  | 4991531  |
| 21.80583 | 7  | 5 | 2 | 130208.1 | 815869.7 | 264414.7 | 644250.8 | 141967.4 | 526021.1 | 691814.3 | 823341.2 | 798168.3 |
| 9.872067 | 4  | 3 | 1 | 749965   | 2207242  | 669609.4 | 1565662  | 923684.1 | 1921993  | 2486725  | 1451694  | 3209742  |
| 42.20783 | 11 | 3 | 3 | 336714.1 | 7773582  | 5968708  | 4133413  | 1226950  | 4458026  | 5478896  | 5829384  | 4697747  |
| 9.544833 | 7  | 4 | 3 | 841128.8 | 2172509  | 878227.7 | 1388420  | 1090698  | 1974253  | 1159631  | 1647440  | 2696368  |
| 9.43325  | 7  | 3 | 4 | 1354572  | 8237871  | 8410502  | 3054353  | 2559661  | 17378529 | 17461650 | 1116616  | 3063252  |
| 12.73297 | 7  | 3 | 1 | 237258.6 | 1813187  | 208252.3 | 2922744  | 1830042  | 2033821  | 1567905  | 1698452  | 2027371  |
| 24.856   | 3  | 3 | 0 | 393307.5 | 925797.5 | 1389829  | 84695.64 | 81460.13 | 3353560  | 829375.3 | 123990   | 88412.98 |
| 29.87717 | 4  | 3 | 1 | 20909956 | 29248285 | 40075549 | 60042959 | 37973583 | 67093794 | 78739276 | 90133.24 | 157796.7 |
| 9.388367 | 10 | 5 | 5 | 2601128  | 8519710  | 3431058  | 5755355  | 3576929  | 9343616  | 4250474  | 6406573  | 9265497  |
| 11.77347 | 10 | 5 | 5 | 7343768  | 5750684  | 427814.8 | 22198815 | 27200610 | 5221102  | 6147738  | 5965153  | 5359972  |
| 9.872917 | 10 | 5 | 5 | 9837867  | 58664712 | 3935660  | 49093965 | 15640018 | 58581816 | 54540403 | 55632645 | 60099869 |
| 21.91383 | 3  | 0 | 3 | 15707217 | 509439.3 | 11348.66 | 43856257 | 71703295 | 527128.6 | 504924.3 | 500183.8 | 514133   |
| 43.22933 | 7  | 3 | 2 | 415620.9 | 3748216  | 1820192  | 5568399  | 2670373  | 5641696  | 3957582  | 4226251  | 4199081  |
| 38.17967 | 4  | 0 | 3 | 331207.8 | 3049058  | 98192.48 | 3369203  | 526410.4 | 3050708  | 2963151  | 2992279  | 3024670  |
| 10.92208 | 10 | 5 | 5 | 308960.3 | 1044235  | 335888.7 | 809154.1 | 250701.8 | 1338419  | 775288.1 | 773381.5 | 859730.1 |
| 10.94443 | 6  | 2 | 4 | 4599072  | 8091274  | 6890667  | 3153068  | 5517528  | 13713470 | 973325.8 | 508335.8 | 10516541 |
| 9.94455  | 10 | 5 | 5 | 5977582  | 21996876 | 2359679  | 19724647 | 3285100  | 25593464 | 22876023 | 21311914 | 19427012 |
| 10.78937 | 11 | 5 | 5 | 3037329  | 5625856  | 1003962  | 8495301  | 4709091  | 5675093  | 6862918  | 6015961  | 5473826  |
| 9.487467 | 11 | 4 | 5 | 594072.4 | 11193865 | 13343020 | 3084857  | 2418102  | 3479643  | 733541.7 | 1325405  | 30344965 |
| 11.3298  | 9  | 5 | 3 | 14064015 | 1.91E+08 | 23389643 | 1.68E+08 | 33691850 | 1.94E+08 | 2.2E+08  | 1.77E+08 | 1.6E+08  |
| 11.7811  | 6  | 2 | 4 | 2191664  | 178594.4 | 275324.6 | 4923882  | 7854394  | 47009.26 | 132373.2 | 18612.31 | 30377.72 |
| 27.28433 | 10 | 5 | 5 | 1322199  | 8233378  | 4208476  | 5639172  | 1338684  | 4857797  | 6970299  | 6062438  | 7767980  |
| 9.219483 | 7  | 5 | 2 | 82491880 | 3460217  | 2663727  | 1.07E+08 | 1.71E+08 | 4663370  | 346541.8 | 7017595  | 3907264  |
| 9.900133 | 9  | 3 | 5 | 11094877 | 25440051 | 34297556 | 4669843  | 4410567  | 79169572 | 40656174 | 2455834  | 3554079  |
| 10.21522 | 10 | 5 | 5 | 435117.5 | 2085733  | 358742.5 | 1651755  | 670665.4 | 1565221  | 2457158  | 2390407  | 2029906  |
| 9.398583 | 7  | 4 | 3 | 1293247  | 2453266  | 1474235  | 4742804  | 3659908  | 992541.5 | 1685363  | 2573918  | 2140917  |
| 40.70933 | 7  | 3 | 4 | 322126.8 | 4520261  | 769223.3 | 4046432  | 242615.6 | 3731036  | 4445487  | 5798446  | 4410164  |
| 9.445217 | 5  | 4 | 1 | 3435116  | 5794090  | 8201271  | 12417011 | 8615485  | 1601872  | 3423318  | 20385296 | 1180520  |

|          |    |   |   |          |          |          |          |          |          |          |          |          |
|----------|----|---|---|----------|----------|----------|----------|----------|----------|----------|----------|----------|
| 9.93625  | 10 | 5 | 5 | 3498419  | 12527326 | 1870775  | 11121966 | 1693131  | 13909559 | 14686924 | 12449320 | 9952907  |
| 9.992233 | 4  | 4 | 0 | 424599.5 | 761844.3 | 215713.6 | 446234.2 | 501785.6 | 1026963  | 948620.9 | 683099   | 524601.2 |
| 9.595733 | 9  | 5 | 4 | 1540502  | 4337574  | 1573177  | 3198194  | 1302020  | 5617857  | 4023757  | 2361630  | 6211264  |
| 8.949567 | 5  | 1 | 4 | 257604.4 | 491184.8 | 319654.6 | 286965.9 | 157745   | 622090.7 | 961219.3 | 199489.2 | 473939.6 |
| 9.946467 | 4  | 1 | 3 | 718860   | 269000.5 | 407305.5 | 1426531  | 1903016  | 0        | 978922   | 0        | 175909.7 |
| 9.40615  | 7  | 5 | 2 | 433753.2 | 925354.1 | 279020   | 663455   | 375514.4 | 1365160  | 1006165  | 704657.1 | 681145.6 |
| 9.93625  | 9  | 4 | 5 | 2346883  | 5634647  | 1021806  | 4692993  | 1338440  | 7169758  | 6187539  | 4838336  | 4837558  |
| 9.848417 | 9  | 5 | 4 | 3894755  | 15732715 | 2138504  | 12143997 | 5779846  | 15794968 | 15204500 | 12811567 | 16058688 |
| 10.66002 | 9  | 5 | 4 | 351311   | 1241548  | 393543.6 | 938592   | 376553.7 | 922738.9 | 1738102  | 1561062  | 1143877  |
| 9.388367 | 12 | 5 | 4 | 701292.1 | 2853648  | 987592.1 | 1946653  | 1287744  | 2625863  | 3685800  | 1503158  | 2500480  |
| 9.03715  | 9  | 5 | 4 | 442830.9 | 1080729  | 191348.8 | 822898.9 | 406293.2 | 1318033  | 1121679  | 1153430  | 801336   |
| 17.95233 | 3  | 0 | 3 | 4341277  | 54543.18 | 66185.68 | 12322474 | 20356051 | 24484.26 | 24820.09 | 12276.17 | 39455.39 |
| 9.311883 | 6  | 4 | 2 | 1232545  | 3372539  | 2668717  | 5185975  | 1816614  | 3298295  | 645556.2 | 3278327  | 7722463  |
| 36.30967 | 6  | 3 | 2 | 306369.4 | 5153792  | 444176.4 | 5791354  | 1012922  | 4412151  | 5576989  | 5163514  | 5229753  |
| 18.96567 | 9  | 4 | 5 | 104809.1 | 797073.5 | 135709.8 | 700480.2 | 107408.6 | 907801.1 | 887825.2 | 638494.9 | 659208.6 |
| 8.964883 | 7  | 3 | 3 | 85489.75 | 934585   | 252772.7 | 640459.5 | 451990   | 1020570  | 1271556  | 957396.6 | 843531.6 |
| 9.992233 | 6  | 4 | 2 | 289930.7 | 734874.9 | 214137.8 | 517792.8 | 321352.7 | 878507.5 | 944728.4 | 836785   | 458841   |
| 9.40615  | 9  | 5 | 4 | 3136300  | 9103715  | 2959537  | 7078092  | 2071824  | 7368799  | 10451727 | 7017597  | 6963946  |
| 9.848417 | 9  | 5 | 4 | 5916961  | 30178237 | 6196580  | 23858686 | 9375800  | 29818524 | 26085324 | 23299487 | 32294854 |
| 10.9645  | 5  | 2 | 3 | 703337.8 | 1851488  | 870938.9 | 1305522  | 369086.7 | 1268212  | 3091176  | 826509.8 | 2174697  |
| 26.34583 | 5  | 2 | 3 | 170050   | 1356909  | 635631.3 | 888104.7 | 553557.3 | 1183037  | 1515348  | 499401.9 | 1321973  |
| 24.9575  | 3  | 3 | 0 | 279285.6 | 676930.4 | 1016080  | 64837.12 | 66514.4  | 2442722  | 637061.4 | 123826.7 | 0        |
| 9.887133 | 9  | 5 | 4 | 2356882  | 5491534  | 2207671  | 8213307  | 4235595  | 5895626  | 3365184  | 8065681  | 7043152  |
| 9.845483 | 5  | 2 | 3 | 770126.6 | 2073643  | 937505.5 | 1361355  | 875521.6 | 813799.8 | 3334600  | 1614909  | 2410397  |
| 9.431017 | 7  | 5 | 2 | 514468.9 | 1059761  | 329634.7 | 617843.7 | 697186.8 | 1335836  | 1446786  | 879136   | 645876.7 |
| 9.46265  | 4  | 1 | 3 | 433400.7 | 2544335  | 530654   | 1830770  | 1126845  | 3004856  | 2581520  | 3088199  | 1830303  |
| 10.9645  | 10 | 5 | 5 | 1.77E+08 | 1.26E+09 | 1.39E+08 | 1.14E+09 | 1.74E+08 | 1.35E+09 | 1.37E+09 | 1.12E+09 | 1.1E+09  |
| 27.96683 | 10 | 5 | 5 | 4653628  | 32306804 | 7225779  | 27498354 | 4557792  | 34843142 | 31375308 | 26749263 | 25259610 |
| 23.30567 | 3  | 0 | 3 | 14131843 | 478019.4 | 253050.8 | 35021524 | 57455269 | 474064.1 | 411894.6 | 312421.4 | 282365.1 |
| 10.80383 | 10 | 5 | 5 | 283985.7 | 340481.5 | 120574.9 | 564354.5 | 363991.4 | 199850.5 | 431020.3 | 496355.4 | 299577.5 |
| 11.75993 | 4  | 0 | 4 | 5595424  | 813101.4 | 278543.7 | 14646735 | 23013536 | 1002116  | 838257.8 | 576002.5 | 494786.6 |
| 10.73323 | 10 | 4 | 5 | 423915.7 | 4831911  | 1300843  | 3172392  | 2602234  | 4183066  | 5628421  | 3464373  | 4197032  |
| 27.26983 | 10 | 5 | 5 | 4144444  | 19878710 | 12908099 | 11985134 | 3809146  | 10992389 | 14309180 | 12915078 | 18785899 |
| 9.310917 | 4  | 3 | 1 | 480363.7 | 2447442  | 997988.7 | 1760000  | 719825.2 | 2920946  | 1668652  | 3670063  | 2775431  |
| 11.09082 | 9  | 5 | 4 | 18529292 | 2.33E+08 | 48940592 | 1.95E+08 | 49361971 | 2.73E+08 | 2.57E+08 | 2.02E+08 | 1.62E+08 |

|          |    |   |   |          |          |          |          |          |          |          |          |          |
|----------|----|---|---|----------|----------|----------|----------|----------|----------|----------|----------|----------|
| 9.999217 | 4  | 1 | 3 | 646620.3 | 206590.6 | 246740.9 | 675986.4 | 765154.2 | 0        | 634303.4 | 165396.2 | 119983.3 |
| 9.858833 | 8  | 5 | 3 | 678823.6 | 2776702  | 577080.5 | 2427873  | 111182.1 | 3136409  | 3054791  | 2345237  | 3351002  |
| 9.992233 | 10 | 5 | 5 | 616829.3 | 2279789  | 170842.7 | 1952147  | 534451.9 | 2350656  | 2127359  | 2539561  | 2241338  |
| 9.975217 | 7  | 4 | 3 | 2877216  | 1483019  | 729212   | 6121755  | 7715579  | 1606591  | 402800.9 | 2111189  | 2145410  |
| 9.842    | 5  | 3 | 2 | 754673.8 | 2810875  | 646750.6 | 2007463  | 1255804  | 3649256  | 1882463  | 2997877  | 2577128  |
| 10.9645  | 10 | 5 | 5 | 72145144 | 5.02E+08 | 58840186 | 4.5E+08  | 73152129 | 5.44E+08 | 5.52E+08 | 4.39E+08 | 4.37E+08 |
| 9.946467 | 10 | 5 | 5 | 2885103  | 11644441 | 1339106  | 10325709 | 1941138  | 13553738 | 12087506 | 11500603 | 9880020  |
| 25.4475  | 4  | 1 | 3 | 76220.57 | 347848.9 | 132876.6 | 247089.9 | 124257.6 | 284008.9 | 550292   | 384877.3 | 193807.6 |
| 9.976317 | 10 | 5 | 5 | 1442529  | 3507795  | 1369235  | 5563896  | 3297591  | 4357336  | 5242801  | 3337020  | 1658672  |
| 9.388367 | 10 | 5 | 5 | 18227480 | 63638402 | 23084258 | 46273239 | 21214124 | 68305608 | 43574458 | 42884215 | 64064414 |
| 10.95835 | 5  | 1 | 4 | 468218.1 | 1480966  | 446130.7 | 1152683  | 389419.2 | 2021233  | 1805414  | 1370976  | 877692.1 |
| 44.5955  | 8  | 2 | 3 | 547623.2 | 6064361  | 1881060  | 4430512  | 2264549  | 7177938  | 5251257  | 3118435  | 7193883  |
| 9.845483 | 8  | 3 | 4 | 1644398  | 9165261  | 605278.5 | 7674392  | 2456868  | 8849910  | 8385194  | 9054700  | 9673183  |
| 16.50535 | 3  | 3 | 0 | 8005429  | 28883317 | 22890905 | 15106930 | 3227372  | 15485700 | 48169632 | 6869162  | 15383602 |
| 9.886083 | 7  | 4 | 3 | 1210225  | 2300059  | 1006999  | 4128143  | 2976382  | 3848286  | 1455603  | 2770850  | 1844367  |
| 9.976317 | 9  | 5 | 4 | 2896873  | 7970003  | 3095342  | 11071194 | 4598312  | 10015783 | 11626705 | 6103166  | 3824320  |
| 9.416767 | 9  | 5 | 4 | 1736863  | 5374779  | 1100179  | 3581485  | 2898835  | 6389177  | 6465553  | 4449561  | 4053158  |
| 9.568567 | 16 | 5 | 5 | 1080156  | 10047518 | 2645132  | 8144930  | 2182142  | 13185369 | 11864189 | 10362242 | 6757544  |
| 9.379233 | 10 | 5 | 5 | 1273121  | 4357653  | 553485.9 | 3471531  | 1430446  | 5151260  | 3592471  | 4368490  | 4270263  |
| 9.840617 | 11 | 5 | 5 | 1615907  | 8334338  | 194762.8 | 7048868  | 2141665  | 8580320  | 8152839  | 8412197  | 8408233  |
| 9.975217 | 9  | 5 | 4 | 1621832  | 6238398  | 1483454  | 4773885  | 2161149  | 8132991  | 7470539  | 5029698  | 4835254  |
| 9.976317 | 7  | 4 | 3 | 661732.5 | 633631.7 | 155410   | 1327410  | 1154512  | 606257.2 | 861790.7 | 593223   | 432385.8 |
| 9.445217 | 14 | 5 | 5 | 2907065  | 28773059 | 8187634  | 23261340 | 5492131  | 38349654 | 31480434 | 33445007 | 21623582 |
| 9.041133 | 5  | 2 | 3 | 184470.5 | 392058.9 | 201895.7 | 251073.9 | 153659   | 531720.7 | 611515   | 395941.5 | 331969.6 |
| 9.872883 | 10 | 5 | 5 | 27871380 | 2E+08    | 21483549 | 1.67E+08 | 53719161 | 1.9E+08  | 1.77E+08 | 1.93E+08 | 2.09E+08 |
| 21.6835  | 6  | 4 | 2 | 551361.4 | 700975.5 | 1203560  | 1736242  | 1430308  | 216486.9 | 114669.7 | 187215.3 | 2852736  |
| 10.96997 | 9  | 5 | 4 | 394011.1 | 1379867  | 336887.9 | 1742543  | 550959.5 | 1500537  | 1294008  | 879006.5 | 1422394  |
| 31.02367 | 8  | 5 | 3 | 3393341  | 20502650 | 16124334 | 10805192 | 2571685  | 12624846 | 10304404 | 48866891 | 12489851 |
| 10.95055 | 8  | 5 | 3 | 482763.8 | 513541   | 139145.2 | 1194312  | 1134222  | 640199.2 | 687383.1 | 435063.8 | 388810.9 |
| 9.983433 | 10 | 5 | 5 | 1145323  | 4862054  | 711499.5 | 4082942  | 1189159  | 5808534  | 5318490  | 4335565  | 4063621  |
| 9.976317 | 3  | 3 | 0 | 312259.9 | 804544.4 | 132549.9 | 544455.5 | 425956.2 | 763728.7 | 762508.2 | 877221.3 | 634259   |
| 20.85467 | 3  | 0 | 3 | 9175705  | 1442710  | 85434.95 | 26092859 | 41180250 | 1493889  | 1488827  | 1302087  | 1421148  |
| 18.44233 | 3  | 0 | 3 | 68924.35 | 390312.3 | 151389.2 | 274094.2 | 146041.2 | 283276.1 | 492211   | 193724.5 | 417550   |
| 9.147367 | 3  | 3 | 0 | 355089.2 | 978496.1 | 381573.3 | 679393.1 | 384103.1 | 1245275  | 522618.3 | 1106514  | 1386623  |
| 9.94455  | 10 | 5 | 5 | 14612143 | 53113456 | 5688911  | 47799537 | 7678824  | 62046000 | 54224999 | 52211651 | 46835701 |

|          |    |   |   |          |          |          |          |          |          |          |          |          |
|----------|----|---|---|----------|----------|----------|----------|----------|----------|----------|----------|----------|
| 9.95825  | 4  | 1 | 3 | 3626476  | 7378058  | 3938505  | 4174905  | 4252403  | 10174630 | 1411810  | 11451483 | 6023637  |
| 11.15248 | 9  | 5 | 4 | 947114.8 | 4437462  | 1494976  | 3146216  | 1790047  | 5997548  | 4728161  | 4632768  | 1949825  |
| 9.952017 | 10 | 5 | 5 | 8469980  | 27824218 | 4559135  | 23853674 | 5532987  | 35517117 | 26090164 | 26696063 | 27410707 |
| 9.388617 | 7  | 3 | 3 | 419267.3 | 3775806  | 568885.4 | 2493723  | 2112312  | 3948555  | 4689569  | 3397410  | 3287921  |
| 13.27422 | 7  | 3 | 4 | 280593.6 | 770320.7 | 157591   | 1209889  | 728237.7 | 791704.2 | 775656.8 | 512036.6 | 834468.9 |
| 9.43325  | 14 | 5 | 5 | 1301077  | 9682122  | 7174328  | 4845629  | 4860120  | 16436580 | 14646459 | 13453224 | 1092516  |
| 10.90393 | 5  | 3 | 2 | 155741.6 | 461000.6 | 126032.1 | 340050.7 | 176932.5 | 316966   | 449671.4 | 415110.5 | 460869.2 |
| 8.967683 | 5  | 3 | 2 | 284197.5 | 585261.6 | 226235.1 | 359496.3 | 335289.5 | 612272   | 946897.7 | 358568.8 | 438273.8 |
| 10.9645  | 9  | 5 | 4 | 417937.8 | 1400498  | 270783.5 | 1666851  | 393529.6 | 1564246  | 1255412  | 1130818  | 1260300  |
| 12.6321  | 10 | 5 | 5 | 2548234  | 21183985 | 2735914  | 18532324 | 3895733  | 22530904 | 23940761 | 18069408 | 18415978 |
| 41.34483 | 8  | 2 | 4 | 299674.1 | 3329589  | 970907.6 | 4092360  | 983183.8 | 3586432  | 1614578  | 3928882  | 3625933  |
| 9.93625  | 10 | 4 | 5 | 2967156  | 12441866 | 6363877  | 8363754  | 3391333  | 8462481  | 8104108  | 10843559 | 11250142 |
| 9.061    | 10 | 5 | 5 | 15393168 | 97009415 | 21681388 | 77498722 | 27722213 | 1.01E+08 | 1.33E+08 | 83757928 | 87732074 |
| 9.914217 | 9  | 4 | 5 | 4511550  | 4942204  | 2106044  | 11645387 | 11140862 | 5201543  | 3601330  | 4717589  | 8331429  |
| 9.374083 | 6  | 2 | 4 | 381066   | 436648.5 | 479457.7 | 856945.3 | 589010.3 | 1074827  | 0        | 0        | 781455.8 |
| 29.37167 | 8  | 5 | 3 | 129976.8 | 457779.1 | 112979.3 | 545377.8 | 111646.2 | 494889.2 | 521609   | 344441.9 | 336142.5 |
| 10.53607 | 3  | 0 | 3 | 118617.6 | 428848.7 | 212485.7 | 298907.5 | 70916.36 | 315960.8 | 702250.5 | 610479   | 229601.5 |
| 10.008   | 6  | 2 | 4 | 1002532  | 401850.6 | 418443.4 | 1576276  | 1948907  | 785840.4 | 916837.9 | 189812.7 | 0        |
| 23.04517 | 4  | 3 | 1 | 229532.6 | 580183.2 | 608586.1 | 1016307  | 501589.7 | 152822.7 | 1302997  | 84772.29 | 174697.8 |
| 9.29345  | 4  | 3 | 1 | 470813   | 733953.6 | 736608.8 | 241631.2 | 485331.7 | 1141475  | 1691178  | 837114.9 | 0        |
| 9.9677   | 10 | 5 | 5 | 2385700  | 7498699  | 1422219  | 5704273  | 2827454  | 8751389  | 7963083  | 5617113  | 6407914  |
| 8.855567 | 6  | 4 | 2 | 2830663  | 2541767  | 4525705  | 8905078  | 10180426 | 436621.5 | 716816.2 | 10620334 | 853395   |
| 9.40255  | 9  | 5 | 4 | 827072.9 | 1901821  | 580998.2 | 1328899  | 848788.2 | 2317906  | 2549485  | 1261412  | 1331049  |
| 9.872883 | 10 | 5 | 5 | 22223624 | 1.58E+08 | 17313614 | 1.31E+08 | 42541821 | 1.5E+08  | 1.39E+08 | 1.51E+08 | 1.66E+08 |
| 9.9677   | 10 | 5 | 5 | 1110288  | 4108118  | 497819.1 | 3489577  | 972875.3 | 4879560  | 4218291  | 4102260  | 3654020  |
| 9.920517 | 11 | 5 | 5 | 6120841  | 36773314 | 5208290  | 28718085 | 13027395 | 36216807 | 28636793 | 36731872 | 39753959 |
| 9.554967 | 11 | 5 | 4 | 11172536 | 19597041 | 11646325 | 45891102 | 43444618 | 20180270 | 5106400  | 14278908 | 21491801 |
| 9.43325  | 6  | 2 | 4 | 1721978  | 11362320 | 7107867  | 6699895  | 4341838  | 18509043 | 2276984  | 14838399 | 15847305 |
| 9.856867 | 10 | 5 | 5 | 51843412 | 3.17E+08 | 43686354 | 2.59E+08 | 92349212 | 3.29E+08 | 3.15E+08 | 2.45E+08 | 3.39E+08 |
| 40.1365  | 7  | 3 | 2 | 349911.5 | 5560410  | 1255495  | 4249374  | 1983361  | 5122710  | 6172223  | 5503114  | 3809507  |
| 10.9645  | 6  | 4 | 2 | 192911.6 | 556884.7 | 135159.8 | 402169.2 | 239703.2 | 728184.7 | 643389.2 | 505848.2 | 375191.1 |
| 9.992233 | 7  | 4 | 3 | 432811.3 | 1183493  | 386247.3 | 693636.7 | 773950.5 | 1397678  | 1670541  | 890549.6 | 710562.9 |
| 10.29457 | 5  | 4 | 1 | 165791.6 | 315634.3 | 91123.28 | 392437.9 | 105344   | 259848.8 | 238102.4 | 446839   | 258066.1 |
| 24.675   | 8  | 4 | 4 | 90752.8  | 276370.6 | 135524   | 395558.3 | 167968.5 | 390260.1 | 287848.3 | 221663   | 75397.86 |
| 9.507167 | 8  | 5 | 3 | 432086   | 772722.6 | 296847.8 | 1385309  | 1010009  | 920367.1 | 678982.3 | 511179.1 | 536008.5 |



|          |    |   |   |          |          |          |          |          |          |          |          |          |
|----------|----|---|---|----------|----------|----------|----------|----------|----------|----------|----------|----------|
| 21.56017 | 7  | 3 | 4 | 109252.6 | 368129.6 | 151781.6 | 269141.9 | 90687.01 | 473342.7 | 460736.1 | 500966.5 | 212611.7 |
| 17.91867 | 3  | 0 | 3 | 148034.1 | 295636.2 | 28936.87 | 568653.2 | 457922.8 | 296249.9 | 284257.6 | 339735.4 | 297932.3 |
| 18.04183 | 3  | 3 | 0 | 103549.9 | 392189.7 | 266104.4 | 232648.2 | 49754.65 | 840383.4 | 231676.1 | 252963.6 | 203505.7 |
| 10.9645  | 6  | 4 | 2 | 1161262  | 1396021  | 1123878  | 2593952  | 1826234  | 967882.9 | 1080773  | 648975.2 | 3386419  |
| 9.55155  | 10 | 5 | 5 | 985000.7 | 2659812  | 572161.2 | 2026634  | 974841.9 | 2579685  | 3200760  | 1866651  | 2422187  |
| 9.445217 | 14 | 5 | 5 | 1845285  | 13045050 | 3668864  | 9998517  | 4144870  | 16590412 | 16158363 | 14083943 | 9857463  |
| 42.1065  | 4  | 1 | 3 | 279490.5 | 3446744  | 915484.4 | 2859820  | 501415.8 | 5078374  | 3101443  | 3119415  | 3012043  |
| 10.008   | 10 | 5 | 5 | 1894516  | 2182167  | 1117956  | 3600754  | 2245652  | 2728814  | 3814594  | 1929770  | 1459570  |
| 9.40325  | 7  | 2 | 4 | 2452421  | 18483716 | 13835725 | 8327004  | 12214016 | 29619860 | 3381077  | 3365380  | 29235727 |
| 10.94443 | 5  | 3 | 2 | 287494.7 | 377687   | 234639.4 | 540205.9 | 177112.5 | 201500   | 724812.8 | 446186.6 | 390871.6 |
| 10.22237 | 3  | 0 | 3 | 3385035  | 79878.4  | 45647.88 | 10263275 | 17110319 | 42803.72 | 69878.21 | 50626.47 | 78723.79 |
| 9.40325  | 5  | 2 | 3 | 401922.5 | 2331673  | 809656   | 1734232  | 724073.4 | 3174972  | 3013034  | 2438055  | 1745615  |
| 24.841   | 8  | 4 | 4 | 5904591  | 1.47E+08 | 64834949 | 2.5E+08  | 1.67E+08 | 95407600 | 1.63E+08 | 2.51E+08 | 92778568 |
| 42.20817 | 5  | 1 | 3 | 372867.4 | 5962927  | 1789578  | 4673214  | 1511592  | 9164038  | 5176583  | 5130107  | 5167159  |
| 9.864767 | 7  | 5 | 2 | 1236699  | 6043273  | 1176222  | 5043597  | 1384786  | 4246160  | 5600686  | 6251051  | 7037180  |
| 27.26983 | 10 | 5 | 5 | 502895.8 | 2015885  | 1737572  | 976487.8 | 319006.4 | 914878.2 | 1180208  | 1265625  | 1628267  |
| 9.979667 | 7  | 3 | 3 | 2733032  | 3992696  | 2691484  | 9381237  | 8898469  | 8457334  | 2220664  | 3188793  | 1730504  |
| 9.994767 | 8  | 5 | 3 | 727087.3 | 771057.3 | 401067.1 | 1463513  | 1134368  | 889929.6 | 1392488  | 551796.1 | 338352.8 |
| 10.11545 | 4  | 3 | 1 | 156932.6 | 339770.5 | 127137.3 | 236686.3 | 138173.3 | 348427.5 | 552381.3 | 298535.6 | 222633.4 |
| 9.5021   | 10 | 5 | 5 | 2155156  | 6376780  | 918335.1 | 5100888  | 2050569  | 7257912  | 7469513  | 5982265  | 5580869  |
| 43.41633 | 5  | 1 | 3 | 294512.9 | 3392468  | 1148288  | 4670398  | 1976761  | 3591997  | 1373639  | 4191239  | 3904243  |
| 9.392767 | 10 | 5 | 5 | 1299016  | 3321150  | 699972.9 | 2623603  | 1045438  | 4323028  | 2980616  | 2499030  | 3126476  |
| 9.582167 | 3  | 3 | 0 | 149122.2 | 349333.2 | 128829.5 | 203608.9 | 226425.4 | 463074.9 | 454429.9 | 145646.1 | 361787.6 |
| 9.929783 | 5  | 3 | 2 | 908901.7 | 2083020  | 196691   | 1549558  | 890525.8 | 2388309  | 2060016  | 1932923  | 2138895  |
| 41.086   | 4  | 1 | 3 | 287973.2 | 3723116  | 1694686  | 2704498  | 433072.7 | 2807356  | 6740329  | 3144229  | 3122214  |
| 44.98333 | 8  | 3 | 3 | 373097.1 | 1900228  | 420113.7 | 4758070  | 4810034  | 2290503  | 2272346  | 2005892  | 1349430  |
| 10.49953 | 9  | 4 | 5 | 289944.6 | 955491.4 | 181916.2 | 824057   | 155703.4 | 1169302  | 700558.8 | 1070184  | 972594.8 |
| 10.008   | 6  | 3 | 2 | 1127380  | 1389252  | 771223.5 | 4905800  | 5913680  | 738641   | 754993.7 | 2302329  | 2145560  |
| 10.48497 | 7  | 3 | 4 | 177328.4 | 678493.8 | 298838.1 | 493830.8 | 127471.2 | 518453.6 | 1063090  | 933307.2 | 394865.1 |
| 9.920517 | 10 | 5 | 5 | 1593734  | 9002984  | 905280   | 7079346  | 3193320  | 9440926  | 8673159  | 7914267  | 8683514  |
| 9.976317 | 7  | 4 | 2 | 1240155  | 1106868  | 235600.4 | 1839683  | 1228277  | 1274073  | 1134121  | 1248811  | 1180122  |
| 32.15733 | 8  | 5 | 3 | 374823.5 | 271501.5 | 96337.9  | 1095783  | 1390057  | 386937.9 | 311285.8 | 145290.9 | 202840.7 |
| 9.830833 | 8  | 4 | 4 | 1232887  | 2267829  | 797451.7 | 3425435  | 1875734  | 2383654  | 931362.4 | 2903923  | 2850529  |
| 10.5972  | 6  | 2 | 4 | 1541861  | 409600.4 | 210356.8 | 4209675  | 6416253  | 595160.2 | 205149.9 | 159121   | 514727.4 |
| 9.398583 | 5  | 2 | 3 | 372692.9 | 1617035  | 913305.4 | 963700   | 765408.1 | 2666241  | 1785372  | 2276941  | 747055.7 |

|          |    |   |   |          |          |          |          |          |          |          |          |          |
|----------|----|---|---|----------|----------|----------|----------|----------|----------|----------|----------|----------|
| 9.43325  | 5  | 4 | 1 | 862423   | 3262151  | 1321040  | 2253145  | 1287609  | 4025131  | 4714946  | 3639264  | 2591840  |
| 10.55887 | 3  | 3 | 0 | 1694597  | 308801.6 | 127204.9 | 2162559  | 3130552  | 155774.8 | 436263.1 | 444249.1 | 235452.9 |
| 9.445217 | 10 | 4 | 4 | 1894135  | 6895928  | 2149930  | 4689715  | 3351097  | 4657152  | 6166336  | 5699571  | 7786521  |
| 12.4996  | 10 | 5 | 5 | 150238   | 858647.6 | 199552   | 656432.5 | 306005.5 | 1021084  | 890495   | 689606.6 | 619100.2 |
| 10.008   | 5  | 3 | 2 | 1069340  | 784624.3 | 212074.7 | 1121919  | 551757.3 | 508545.7 | 883100.8 | 608630.3 | 977181.3 |
| 9.888767 | 10 | 5 | 5 | 12683750 | 86848071 | 7990917  | 73539430 | 21848991 | 88729921 | 80432733 | 77373972 | 90471311 |
| 9.853633 | 9  | 5 | 4 | 2008517  | 10688055 | 2549799  | 8998265  | 1684620  | 10503723 | 9870846  | 6981053  | 12553939 |
| 15.5695  | 10 | 5 | 5 | 290235.5 | 2434597  | 467516.4 | 2097603  | 400595.9 | 2164441  | 2905749  | 1836849  | 2365290  |
| 23.98183 | 3  | 3 | 0 | 18242610 | 1.36E+08 | 62469198 | 96447654 | 31136318 | 2.1E+08  | 1.9E+08  | 1.19E+08 | 63947236 |
| 9.55155  | 8  | 5 | 3 | 329022.6 | 720515.2 | 59720.52 | 502974.3 | 366110.1 | 690729.4 | 686962.6 | 670630.6 | 736169.7 |
| 9.928667 | 6  | 3 | 3 | 1051096  | 2181546  | 329055   | 1897053  | 401651.5 | 2562811  | 2339602  | 2328081  | 1893815  |
| 9.842    | 9  | 5 | 4 | 1624676  | 7627871  | 341691.4 | 6213696  | 2383407  | 8084558  | 7527717  | 7795796  | 7568978  |
| 16.694   | 8  | 5 | 3 | 50396.87 | 107699.4 | 39867.42 | 142257.2 | 48906.28 | 173760.8 | 108081.2 | 102598.7 | 83583.36 |
| 28.28817 | 10 | 5 | 5 | 1188656  | 6887345  | 1887860  | 5459935  | 1808121  | 7452199  | 9282556  | 4740422  | 5204042  |
| 9.94455  | 10 | 5 | 5 | 5902469  | 22063687 | 2591123  | 19905508 | 2977719  | 25983201 | 23006733 | 21385898 | 19138175 |
| 9.976317 | 10 | 5 | 5 | 600510.2 | 1848614  | 348270.4 | 1509526  | 506883.6 | 2277296  | 1858220  | 2100242  | 1503684  |
| 9.967367 | 5  | 2 | 3 | 777958.9 | 719256.9 | 434634.1 | 1312165  | 956115.8 | 1393873  | 231982   | 491647.3 | 667051.1 |
| 10.97928 | 4  | 1 | 3 | 3.3E+08  | 1.52E+09 | 8.72E+08 | 7.69E+08 | 1.05E+09 | 2.02E+09 | 1174017  | 1.62E+09 | 1.8E+09  |
| 20.27433 | 11 | 5 | 5 | 448739.6 | 2699975  | 515047.7 | 2312402  | 488634.8 | 3101475  | 3103579  | 1950040  | 2378218  |
| 9.421167 | 12 | 5 | 4 | 1248693  | 11210429 | 3858991  | 8829069  | 1680645  | 7672401  | 11341015 | 12063266 | 7848647  |
| 7.633617 | 8  | 5 | 3 | 462027.3 | 3975816  | 833148.7 | 2895580  | 1730560  | 4947433  | 3834350  | 2885007  | 3563624  |
| 9.918833 | 6  | 3 | 3 | 1288218  | 3354807  | 1759385  | 2272775  | 740682.3 | 6256824  | 2384047  | 2032550  | 3786465  |
| 9.914217 | 10 | 5 | 5 | 868039.1 | 3778984  | 834941   | 4744402  | 1515896  | 4321550  | 3591971  | 4575771  | 3964501  |
| 10.63232 | 6  | 5 | 1 | 1866745  | 2952739  | 4026822  | 574948.5 | 100942.7 | 836285.6 | 402180.5 | 3598971  | 199962.2 |
| 9.920517 | 5  | 2 | 3 | 790228.6 | 2646266  | 671345.1 | 2150284  | 612233.2 | 2636302  | 2418191  | 1901461  | 3734753  |
| 23.04483 | 10 | 5 | 5 | 103465.1 | 493521.7 | 221949.2 | 360625.1 | 58932.31 | 399415.6 | 804483.5 | 643963   | 336392.1 |
| 9.479567 | 12 | 4 | 5 | 914390.8 | 5000919  | 2518156  | 3061461  | 2510357  | 8142391  | 1137450  | 5651119  | 4768621  |
| 9.949233 | 6  | 3 | 3 | 1128803  | 1335234  | 277432.4 | 1907260  | 952318.2 | 1680266  | 1032111  | 1513516  | 1082104  |
| 9.554967 | 7  | 5 | 2 | 313016.9 | 547367.9 | 108747   | 392934.4 | 250497.8 | 512013.6 | 738508.7 | 526098.3 | 477016.7 |
| 9.445217 | 14 | 5 | 5 | 1680660  | 11155932 | 3544894  | 8419967  | 3550817  | 14781103 | 13669575 | 12133384 | 9102597  |
| 9.992233 | 9  | 5 | 4 | 855147.4 | 2844888  | 827928.3 | 2160386  | 941488.5 | 2629293  | 2364167  | 2489842  | 2425700  |
| 9.920517 | 10 | 5 | 5 | 6269910  | 14875522 | 2163815  | 12158916 | 4334787  | 18351789 | 14660276 | 12680078 | 13564942 |
| 9.986767 | 10 | 5 | 4 | 2600718  | 5994710  | 808884   | 4748573  | 2038482  | 6353968  | 4845173  | 5486054  | 6823517  |
| 9.864767 | 10 | 5 | 5 | 2627236  | 11984386 | 4168847  | 8941607  | 3701016  | 10727777 | 9736546  | 8684081  | 19184191 |
| 43.93383 | 8  | 4 | 3 | 318934.4 | 3276146  | 1501244  | 6514097  | 5402621  | 4846874  | 3462434  | 778581.7 | 3623898  |

|          |    |   |   |          |          |          |          |          |          |          |          |          |
|----------|----|---|---|----------|----------|----------|----------|----------|----------|----------|----------|----------|
| 10.9645  | 9  | 5 | 4 | 1719943  | 800269.4 | 280445.4 | 3018561  | 3756758  | 959584.8 | 652667.9 | 1141932  | 833651.9 |
| 9.824233 | 3  | 0 | 3 | 1095624  | 1059428  | 684729.7 | 2204889  | 1886692  | 1517777  | 0        | 1730672  | 1236380  |
| 9.40615  | 6  | 4 | 2 | 689268.9 | 1967273  | 752746.1 | 1257832  | 1049232  | 3043497  | 1020258  | 1553768  | 2111964  |
| 9.554967 | 13 | 4 | 5 | 3229098  | 15726042 | 9248647  | 9857548  | 5019269  | 14584632 | 17990962 | 26975721 | 1396536  |
| 18.9675  | 7  | 5 | 2 | 98400.25 | 231219.7 | 76669.72 | 181146.8 | 48175.81 | 281070.3 | 290201.1 | 110556.4 | 198928.8 |
| 10.97857 | 8  | 4 | 4 | 639654.1 | 1617161  | 560556.3 | 2231234  | 953772.7 | 1786576  | 2484680  | 1065826  | 1210456  |
| 9.392767 | 9  | 5 | 4 | 1003216  | 2306392  | 687619.7 | 1659867  | 955477.2 | 2785746  | 2675476  | 1480912  | 1645451  |
| 10.13878 | 7  | 3 | 4 | 320557.2 | 865186.7 | 228881   | 664991.6 | 285709.9 | 770164.5 | 555795   | 1127384  | 822423.7 |
| 14.82345 | 9  | 4 | 5 | 75255.88 | 482048.8 | 148940   | 332415.8 | 226864.8 | 635999.7 | 500429.8 | 237106.4 | 486254.3 |
| 9.392767 | 4  | 4 | 0 | 661066   | 2230202  | 1504992  | 3235086  | 1035752  | 1471567  | 1867693  | 4874368  | 1151157  |
| 10.93468 | 6  | 4 | 2 | 140882.4 | 339271.8 | 93261.27 | 459834.2 | 193539.1 | 338500.9 | 457497.5 | 403784.6 | 255171.9 |
| 9.976317 | 4  | 3 | 1 | 333752.2 | 537604   | 196107.2 | 286148.2 | 403193.7 | 674533.6 | 780806.6 | 489013.2 | 275360.8 |
| 9.40255  | 6  | 3 | 2 | 1953628  | 3222556  | 1139174  | 4972585  | 2867328  | 3289226  | 3554254  | 2042659  | 2313542  |
| 10.14725 | 10 | 5 | 5 | 413993.9 | 3404681  | 900921.4 | 2704246  | 918641.6 | 4371249  | 3511326  | 4052214  | 2096409  |
| 24.05483 | 5  | 2 | 3 | 75467.49 | 101945.5 | 70425.12 | 180441.3 | 122632.6 | 32296.68 | 101056.3 | 144820.7 | 35882.67 |
| 10.02372 | 5  | 4 | 1 | 816923.9 | 572443.2 | 185862.7 | 1208282  | 1073592  | 482561   | 510876.4 | 354224.6 | 829262.9 |
| 9.392767 | 10 | 5 | 5 | 1559104  | 5251009  | 2330721  | 3767424  | 1298977  | 5404262  | 3625427  | 3037636  | 5173986  |
| 42.5675  | 10 | 2 | 3 | 266229.2 | 3087724  | 1058636  | 2448844  | 358573.1 | 2781546  | 4919213  | 2650115  | 2189122  |
| 9.346    | 5  | 2 | 3 | 298127.6 | 1938715  | 951397.7 | 1256536  | 813234.5 | 1699333  | 863772.9 | 3010754  | 2843825  |
| 10.64708 | 5  | 2 | 3 | 168543.6 | 1094061  | 132606.2 | 1289105  | 318572   | 1245068  | 993292.7 | 1158396  | 921280.5 |
| 10.53828 | 8  | 5 | 3 | 139018.7 | 372499.6 | 173303   | 550945.2 | 273231.5 | 662098.2 | 279030.4 | 330868   | 378508.9 |
| 40.02133 | 7  | 3 | 3 | 335676   | 5160508  | 1355007  | 4287314  | 809525.4 | 5042349  | 5237526  | 3931530  | 7377859  |
| 9.976317 | 9  | 5 | 4 | 3423401  | 1968765  | 568184.6 | 4586649  | 4436829  | 2459690  | 1583089  | 2599217  | 1942591  |
| 9.447733 | 10 | 3 | 5 | 758529.3 | 7056104  | 1083826  | 5898451  | 1791924  | 7907385  | 5587937  | 7668269  | 6208826  |
| 17.998   | 3  | 3 | 0 | 68135.56 | 191137.5 | 90797.74 | 249969.6 | 55696.3  | 150630.3 | 321703.8 | 104274.9 | 131494.7 |
| 10.9645  | 10 | 5 | 5 | 33885044 | 2.57E+08 | 26509626 | 2.33E+08 | 34879006 | 2.74E+08 | 2.77E+08 | 2.29E+08 | 2.26E+08 |
| 10.02372 | 10 | 5 | 5 | 491637.3 | 1053674  | 378193.5 | 1451580  | 613740   | 943514.1 | 1419376  | 831131.2 | 603482.7 |
| 27.863   | 4  | 1 | 3 | 74737.91 | 291991.1 | 22532.45 | 217989.3 | 125113.2 | 279338.9 | 299713.1 | 259518.9 | 305343   |
| 10.50412 | 4  | 0 | 4 | 1777099  | 114138.6 | 71004.11 | 4436982  | 7353901  | 224448.6 | 133656   | 34532.89 | 92103.76 |
| 16.14043 | 3  | 0 | 3 | 10493019 | 1539961  | 193874.9 | 36240963 | 59036534 | 1705840  | 1444279  | 1619736  | 1684141  |
| 9.43325  | 9  | 5 | 2 | 3426702  | 21948301 | 7362679  | 26946596 | 5410943  | 18856787 | 30670138 | 27391648 | 20898404 |
| 9.928667 | 10 | 5 | 5 | 1712573  | 3773465  | 264352.5 | 3040830  | 1236028  | 4212283  | 3600869  | 3570358  | 3658440  |
| 9.445217 | 9  | 5 | 4 | 430683.9 | 1988881  | 674181.6 | 1392085  | 861701.3 | 2768935  | 922248.1 | 2122125  | 2211122  |
| 9.522017 | 10 | 5 | 4 | 599326   | 2416210  | 443580   | 3299448  | 1475619  | 2521586  | 2392403  | 2152635  | 1920124  |
| 10.2666  | 5  | 3 | 2 | 308756.6 | 491966.6 | 99530.66 | 672641.5 | 300462.2 | 558763.3 | 460422.9 | 330871.9 | 542658.9 |

|          |    |   |   |          |          |          |          |          |          |          |          |          |
|----------|----|---|---|----------|----------|----------|----------|----------|----------|----------|----------|----------|
| 9.3735   | 5  | 2 | 3 | 824063.1 | 3459506  | 1532078  | 2208194  | 1718825  | 1925360  | 1800998  | 5263760  | 4334861  |
| 9.6501   | 5  | 3 | 2 | 631705.4 | 1892353  | 476515.8 | 1404680  | 747119.5 | 1797263  | 1743747  | 2247936  | 2446510  |
| 10.94443 | 3  | 0 | 3 | 131730.8 | 370509.8 | 124547.1 | 477082.6 | 151035.5 | 358086.9 | 581097.5 | 255940.8 | 350232.5 |
| 11.92417 | 5  | 4 | 1 | 83699.11 | 307333.9 | 211923.8 | 432348.3 | 32940.08 | 106494.5 | 574420.2 | 244090.5 | 484677   |
| 37.17283 | 10 | 3 | 3 | 314353.9 | 5730347  | 2490716  | 4254108  | 548152.7 | 5744970  | 4712649  | 4175901  | 10016763 |
| 13.43408 | 7  | 5 | 2 | 263749.2 | 3684478  | 376383   | 2867447  | 1370345  | 4122870  | 3495644  | 3261972  | 3501373  |
| 24.08817 | 3  | 0 | 3 | 17563272 | 272313.3 | 169383.5 | 46510328 | 78771804 | 423183   | 159001.4 | 141008.8 | 149588.8 |
| 10.9645  | 7  | 5 | 2 | 462340.9 | 1274967  | 361570.3 | 999893.5 | 355280.6 | 1545818  | 1687184  | 1266681  | 776462   |
| 9.348233 | 5  | 2 | 3 | 652184.5 | 949325   | 668529.3 | 500512.1 | 475398.5 | 873672   | 1879704  | 923462.2 | 1069787  |
| 9.445217 | 12 | 5 | 5 | 7148847  | 72047750 | 23311910 | 57803336 | 9756292  | 55018947 | 66235354 | 69674218 | 57028211 |
| 10.57323 | 10 | 5 | 5 | 515017.6 | 1912769  | 580056.9 | 1500556  | 488025.4 | 1533536  | 2710843  | 2349781  | 1421987  |
| 9.842    | 8  | 4 | 4 | 537175.9 | 1550867  | 400622.5 | 1117732  | 674456.9 | 1760883  | 1811820  | 1182902  | 1058294  |
| 9.960467 | 9  | 5 | 4 | 1317908  | 2823406  | 768464.6 | 2059426  | 1160499  | 3975557  | 2625820  | 2196398  | 2135760  |
| 10.99268 | 8  | 5 | 3 | 219258.2 | 680033.7 | 233564.4 | 858259.6 | 231111.1 | 530573   | 935992.3 | 678348.5 | 377767.1 |
| 44.9835  | 10 | 2 | 4 | 322771.9 | 3020889  | 1104981  | 2233614  | 936556.2 | 2271494  | 2274971  | 3444940  | 4783779  |
| 9.845483 | 9  | 5 | 4 | 1671492  | 7951742  | 1047650  | 7162621  | 1009268  | 8389282  | 8135017  | 6410948  | 7584680  |
| 23.906   | 6  | 4 | 2 | 41575.33 | 127964   | 41834.56 | 159051.8 | 39154.48 | 141219.7 | 155326.7 | 175092.1 | 82462.87 |
| 9.419733 | 8  | 4 | 4 | 915458.8 | 7136766  | 3332550  | 4891192  | 2404688  | 11952373 | 5089285  | 8728648  | 6538277  |
| 9.857683 | 10 | 5 | 5 | 5653920  | 12905729 | 3388634  | 10527903 | 2761097  | 16641815 | 16452269 | 10592909 | 9499835  |
| 10.94208 | 6  | 3 | 3 | 242340.9 | 513455.3 | 119485.2 | 657002.6 | 228825.8 | 650512.3 | 632874.3 | 460600.9 | 428027.5 |
| 9.508883 | 15 | 5 | 5 | 3334014  | 23433370 | 4823073  | 18701633 | 7161692  | 20308612 | 29083755 | 28255508 | 19014727 |
| 9.960467 | 5  | 4 | 1 | 9737165  | 3873024  | 5923889  | 11861492 | 12968569 | 1450734  | 1143978  | 1375980  | 930731.9 |
| 9.63045  | 10 | 5 | 5 | 1566396  | 5394995  | 1843558  | 4087763  | 1546533  | 5966253  | 5817677  | 3897621  | 7961985  |
| 9.872883 | 6  | 3 | 3 | 1477079  | 2371816  | 777660.3 | 3725696  | 2250668  | 2197366  | 1193605  | 2355290  | 2879213  |
| 10.008   | 7  | 3 | 4 | 519262.5 | 467365   | 374566.6 | 922123.6 | 726873.2 | 624476.4 | 960427.9 | 568133.4 | 117329.9 |
| 11.88527 | 5  | 1 | 4 | 59874.59 | 83555.47 | 63603.04 | 160791   | 123482.9 | 28646.28 | 43770.23 | 59351.52 | 187328.8 |
| 9.421167 | 9  | 3 | 5 | 2065996  | 13844672 | 8841984  | 8565700  | 2639660  | 13547156 | 10952441 | 5546545  | 28792539 |
| 9.41815  | 6  | 3 | 2 | 369013.4 | 1797111  | 499850.8 | 1302737  | 751297.5 | 1306571  | 2063604  | 2375320  | 1238773  |
| 10.04377 | 10 | 5 | 5 | 1010189  | 2523606  | 999827.7 | 1875327  | 625992.2 | 3970858  | 3119167  | 1780272  | 1597714  |
| 5.485267 | 6  | 3 | 2 | 1382309  | 16484769 | 9729238  | 24296235 | 10636207 | 20602043 | 24773324 | 21186155 | 39749.96 |
| 26.898   | 6  | 2 | 4 | 61836.82 | 239221.8 | 41306.25 | 178932.9 | 98910.87 | 284412.8 | 255489   | 175915.3 | 256092.1 |
| 9.616167 | 7  | 3 | 4 | 270999.3 | 1322100  | 254043.1 | 960844.7 | 591103.7 | 1358989  | 1715711  | 1337884  | 1067118  |
| 25.341   | 3  | 3 | 0 | 571788.4 | 574020.7 | 933171.1 | 27538.01 | 40617.3  | 2220879  | 411966.8 | 101809.5 | 0        |
| 9.3919   | 5  | 4 | 1 | 1431675  | 4314284  | 2179672  | 7369176  | 4991103  | 5907828  | 2855872  | 3465439  | 7255933  |
| 9.541433 | 7  | 4 | 3 | 305639   | 670058.7 | 136499   | 477764.2 | 314438.5 | 742933.7 | 700106.1 | 459699.4 | 628142.4 |

|          |    |   |   |          |          |          |          |          |          |          |          |          |
|----------|----|---|---|----------|----------|----------|----------|----------|----------|----------|----------|----------|
| 9.872883 | 10 | 5 | 5 | 6811527  | 23565173 | 6447181  | 32795792 | 15121199 | 25518615 | 26406753 | 28641672 | 24949213 |
| 9.848417 | 7  | 3 | 4 | 4102173  | 8153022  | 8915029  | 2925130  | 939071.1 | 3228413  | 6592567  | 3458812  | 3576526  |
| 9.45945  | 13 | 5 | 5 | 24426260 | 2.17E+08 | 83206663 | 1.66E+08 | 34391608 | 1.48E+08 | 2.15E+08 | 2.24E+08 | 1.47E+08 |
| 9.664033 | 4  | 3 | 1 | 470807.4 | 508457.7 | 211244.2 | 370967.1 | 135064.2 | 360801.6 | 413938.2 | 409357   | 878726.2 |
| 8.97505  | 10 | 5 | 5 | 924592.2 | 3911406  | 1077621  | 2985342  | 1323036  | 4750704  | 4947799  | 4256334  | 3176583  |
| 9.856867 | 9  | 5 | 4 | 968740.5 | 3457119  | 1578638  | 2463632  | 853652.5 | 3396915  | 2413804  | 2784033  | 6195430  |
| 9.960467 | 5  | 3 | 2 | 3306569  | 6762891  | 4264154  | 9876879  | 3860528  | 3236924  | 4948170  | 5510436  | 5954404  |
| 9.94405  | 7  | 4 | 2 | 1692530  | 3536523  | 1160828  | 5058965  | 2468451  | 2741461  | 3210074  | 3525608  | 5518731  |
| 24.17483 | 6  | 2 | 4 | 1422001  | 9020266  | 1631774  | 10346871 | 1827513  | 11063156 | 9666636  | 8304831  | 6691766  |
| 10.97857 | 10 | 5 | 5 | 2646794  | 18739480 | 4886171  | 15724125 | 2310137  | 16868314 | 17286299 | 14669271 | 27231513 |
| 9.856867 | 10 | 5 | 5 | 2950794  | 14366819 | 1778604  | 11151041 | 5369940  | 13273197 | 12367863 | 13821530 | 15662526 |
| 9.374083 | 5  | 2 | 3 | 699726.6 | 3519041  | 1458246  | 2638028  | 554950.3 | 5775136  | 2072703  | 2461750  | 3346529  |
| 9.419733 | 14 | 5 | 5 | 1018548  | 7571646  | 1527171  | 6382993  | 1580460  | 5883529  | 8703871  | 9140436  | 6010861  |
| 10.9645  | 5  | 4 | 1 | 415452.8 | 944237.9 | 477474.4 | 593104.6 | 439513.7 | 1174310  | 1534201  | 1100905  | 524511.2 |
| 9.8322   | 9  | 5 | 4 | 1338648  | 4110127  | 1035203  | 3091295  | 1549142  | 4795873  | 5186950  | 3109711  | 2902760  |
| 42.63967 | 7  | 2 | 3 | 471864   | 7909025  | 3990438  | 10332668 | 1626739  | 866204.7 | 10232748 | 10097341 | 9766963  |
| 17.074   | 3  | 0 | 3 | 4785073  | 689539.9 | 107487.8 | 13051287 | 21151032 | 597002.7 | 854352.9 | 636914.6 | 618373.1 |
| 10.2456  | 7  | 4 | 3 | 216825   | 597268.9 | 144277.6 | 490063.1 | 136085.4 | 552800.9 | 478724.1 | 827230.7 | 485979.6 |
| 10.97242 | 4  | 1 | 3 | 160437.1 | 184945.6 | 74636.37 | 402374.9 | 369169.9 | 220857.6 | 220771.3 | 262844.4 | 145094.7 |
| 22.92883 | 10 | 5 | 5 | 16100702 | 1.79E+08 | 10560708 | 1.65E+08 | 22442686 | 1.87E+08 | 1.93E+08 | 1.72E+08 | 1.74E+08 |
| 9.864767 | 10 | 5 | 5 | 5094463  | 34610626 | 3896151  | 27948122 | 11099242 | 33082353 | 30436260 | 32954381 | 35930058 |
| 9.932033 | 10 | 5 | 5 | 880669.3 | 3367318  | 855290.7 | 2718698  | 842185.6 | 4455396  | 3410368  | 2256118  | 2854683  |
| 9.333267 | 4  | 3 | 1 | 1340631  | 4423619  | 3754483  | 7952717  | 5282441  | 1925994  | 1316735  | 1818159  | 8486926  |
| 25.10217 | 4  | 1 | 3 | 14152856 | 2083836  | 1118421  | 37527618 | 60691147 | 2540061  | 84444.94 | 2581454  | 2648722  |
| 10.95055 | 6  | 3 | 3 | 267208.8 | 730298.6 | 148436.2 | 530718.7 | 325308.2 | 818358.3 | 778097.1 | 613665.8 | 541373.2 |
| 9.992233 | 8  | 5 | 3 | 358994.5 | 1101453  | 221078.6 | 843995.2 | 410208.8 | 1144349  | 1038533  | 1444171  | 1040561  |
| 9.445217 | 14 | 5 | 5 | 3730981  | 25735388 | 7301401  | 20055170 | 7576868  | 33556072 | 30719173 | 27870359 | 20620355 |
| 9.960467 | 6  | 4 | 2 | 1413458  | 1547858  | 427878.2 | 2189112  | 1058617  | 1817604  | 1446611  | 1904434  | 1723673  |
| 9.976317 | 7  | 4 | 3 | 3184501  | 2413675  | 2469244  | 6074725  | 6039944  | 1482716  | 1232902  | 1554018  | 986110   |
| 11.8026  | 8  | 4 | 4 | 61979.67 | 160128.9 | 50322.33 | 199699.7 | 53331.5  | 129630   | 104807.8 | 150942.7 | 179871.8 |
| 9.94455  | 10 | 5 | 5 | 14563338 | 53092175 | 5713900  | 47908170 | 7652372  | 61990869 | 54530944 | 52026414 | 46840817 |
| 25.17083 | 6  | 4 | 2 | 1282048  | 3290576  | 4626796  | 588971   | 369306.7 | 11251596 | 3489769  | 597769.1 | 473324.1 |
| 24.359   | 5  | 4 | 1 | 501165.1 | 793872.9 | 1207157  | 89204.81 | 88183.55 | 2878259  | 814907.3 | 102337.7 | 31958.29 |
| 10.94443 | 5  | 1 | 4 | 283246.2 | 316059.8 | 307131.6 | 551967.5 | 311367.4 | 335899.1 | 838342.2 | 81337.2  | 132319.4 |
| 10.03947 | 9  | 5 | 4 | 261216.4 | 1029076  | 248064.5 | 809198.1 | 321022.7 | 781385.8 | 1411129  | 845048.3 | 1010723  |

|          |    |   |   |          |          |          |          |          |          |          |          |          |
|----------|----|---|---|----------|----------|----------|----------|----------|----------|----------|----------|----------|
| 9.43325  | 6  | 3 | 3 | 435351   | 1750384  | 642615.2 | 1261597  | 639168.2 | 1942803  | 2767812  | 1204613  | 1593367  |
| 10.70568 | 10 | 5 | 5 | 300765.5 | 646950.5 | 246165.5 | 478728.1 | 189057.5 | 608606   | 1018782  | 655665   | 624230.4 |
| 9.8322   | 9  | 5 | 4 | 601066.8 | 2104174  | 570631   | 1530946  | 881025.2 | 1960784  | 1205527  | 2178764  | 2567732  |
| 12.2663  | 6  | 3 | 3 | 109601   | 407745   | 108511.5 | 293110.1 | 178846   | 507824.1 | 383571.6 | 239472.2 | 498184.8 |
| 9.4098   | 3  | 3 | 0 | 1321562  | 4273760  | 3659611  | 6424579  | 756671.3 | 8753330  | 2048584  | 705986.3 | 7665550  |
| 16.57823 | 3  | 0 | 3 | 6181496  | 44662.15 | 39195.58 | 18061948 | 30918158 | 24407.47 | 53873.02 | 21947.33 | 13769.64 |
| 9.40615  | 12 | 5 | 4 | 4053325  | 40195021 | 9745950  | 32586630 | 10206618 | 53287316 | 36784756 | 47473850 | 31913780 |
| 9.8322   | 9  | 5 | 4 | 1619621  | 7525863  | 316684.1 | 6931162  | 998874.4 | 8018984  | 7525096  | 7539173  | 7395429  |
| 9.858833 | 10 | 5 | 5 | 2207743  | 8432185  | 2477071  | 6414313  | 2801920  | 7361140  | 7521711  | 5461292  | 11768051 |
| 40.0645  | 3  | 3 | 0 | 313969.8 | 2230999  | 794800.6 | 2695254  | 95511.03 | 1007562  | 2844189  | 2618562  | 2831744  |
| 20.85467 | 3  | 0 | 3 | 14817783 | 69166.23 | 35219.71 | 45457759 | 77917012 | 90632.19 | 46316.86 | 48605.78 | 39423.72 |
| 10.08538 | 6  | 3 | 3 | 991705.7 | 2458018  | 871650.4 | 1852173  | 704327.7 | 2392437  | 2094636  | 2055703  | 3968048  |
| 9.616167 | 10 | 5 | 5 | 6567792  | 21783801 | 4614484  | 17488953 | 6425710  | 25555651 | 27885119 | 18945151 | 17588031 |
| 10.008   | 10 | 5 | 5 | 1922447  | 5742065  | 1889053  | 7200765  | 1940564  | 4113674  | 8958460  | 5022178  | 4870872  |
| 41.273   | 5  | 3 | 2 | 368576.1 | 5103025  | 195720.8 | 6135183  | 1768864  | 4941170  | 4917854  | 5282317  | 5034365  |
| 21.0655  | 9  | 4 | 5 | 430646.8 | 2210690  | 592488.9 | 1836152  | 337568.3 | 2081254  | 3243910  | 2075603  | 1770756  |
| 8.9536   | 3  | 3 | 0 | 161802.2 | 433592.2 | 290303   | 255081.3 | 138555.2 | 399552.3 | 474110.9 | 153071.2 | 900811   |
| 22.50883 | 9  | 5 | 4 | 282997.2 | 1711110  | 453335.6 | 1394432  | 372112.2 | 1144712  | 1531155  | 1757428  | 1728190  |
| 10.98605 | 4  | 3 | 1 | 138814.4 | 261260.1 | 119326.6 | 346561.9 | 103907   | 236880.4 | 356162.3 | 97419.17 | 218040.2 |
| 12.5159  | 10 | 5 | 5 | 203257.3 | 1160467  | 246703.8 | 914978.7 | 377090.1 | 1326065  | 1293113  | 831887.4 | 963491.3 |
| 10.9645  | 9  | 5 | 4 | 484502.1 | 1177846  | 177358.6 | 1773151  | 1017457  | 1218381  | 1440780  | 1116884  | 951889.5 |
| 9.992233 | 15 | 5 | 4 | 930033.6 | 2982180  | 1197640  | 2061173  | 1222456  | 3939402  | 893842   | 3477138  | 3220883  |
| 20.53433 | 3  | 0 | 3 | 4188018  | 29801.53 | 28582.25 | 17548455 | 30122386 | 29572.9  | 20566.77 | 11606.24 | 8496.29  |
| 9.967367 | 9  | 5 | 4 | 2152949  | 6587411  | 2410804  | 5093010  | 1227723  | 7899015  | 6315231  | 3571176  | 5295252  |
| 29.43883 | 3  | 0 | 3 | 15474106 | 318940.5 | 244392.3 | 41234925 | 70370635 | 599808.6 | 148961.8 | 211575.4 | 72640.8  |
| 10.97242 | 10 | 5 | 5 | 482636.4 | 2449962  | 326407.1 | 2108320  | 533276.2 | 2737391  | 2376546  | 2125632  | 2168309  |
| 10.95055 | 10 | 5 | 5 | 992393.5 | 6201604  | 1737521  | 5007569  | 1368197  | 7889526  | 7456581  | 4316882  | 4342136  |
| 10.9645  | 6  | 3 | 3 | 586388.9 | 1624209  | 543488   | 1210977  | 543760   | 2302122  | 1982459  | 1034706  | 1130377  |
| 10.28787 | 5  | 4 | 1 | 270895.4 | 814267.6 | 392282.3 | 579159.8 | 146900.1 | 329582.3 | 1245491  | 866448.3 | 1124702  |
| 10.9645  | 11 | 5 | 5 | 1890723  | 12754586 | 1504110  | 11484768 | 1815255  | 13181800 | 13864300 | 10433889 | 12160919 |
| 9.419733 | 7  | 4 | 3 | 1157374  | 6673465  | 1642881  | 5178484  | 2223662  | 7727982  | 7971553  | 7742609  | 4254799  |
| 9.848417 | 10 | 5 | 5 | 5281261  | 24488551 | 588473   | 20949801 | 6085810  | 25031734 | 23600136 | 24783004 | 24840191 |
| 9.3332   | 4  | 4 | 0 | 3767221  | 3140641  | 2533930  | 16168806 | 22397372 | 1422319  | 1054760  | 2569052  | 3269512  |
| 9.845483 | 9  | 4 | 5 | 1036226  | 5213390  | 1220221  | 3981197  | 1907783  | 6844634  | 3894909  | 4111399  | 5484343  |
| 9.677883 | 4  | 3 | 1 | 313537.2 | 353093.2 | 87905.82 | 280921.8 | 101436.1 | 253380.9 | 294218.6 | 481386.2 | 385313.5 |

|          |    |   |   |          |          |          |          |          |          |          |          |          |
|----------|----|---|---|----------|----------|----------|----------|----------|----------|----------|----------|----------|
| 9.914217 | 7  | 3 | 4 | 1405670  | 4220707  | 1392833  | 5369382  | 1619416  | 4348775  | 5519891  | 2451816  | 5589089  |
| 9.842    | 10 | 5 | 5 | 1230151  | 7043368  | 769535.6 | 5933185  | 1837288  | 7592873  | 7445567  | 6107146  | 6318553  |
| 10.47023 | 5  | 2 | 3 | 166235.4 | 313573.7 | 45376.98 | 407208.3 | 158686.7 | 394013.1 | 297502   | 282954.7 | 297183.8 |
| 9.848417 | 9  | 5 | 4 | 3563467  | 13351627 | 3042081  | 16510402 | 4933528  | 12977129 | 14369770 | 11452353 | 17944579 |
| 9.445217 | 14 | 5 | 5 | 2703699  | 17614247 | 5074678  | 13887471 | 4737286  | 22230022 | 22087500 | 18862490 | 14276780 |
| 7.455967 | 7  | 3 | 3 | 759361.4 | 29613001 | 24067568 | 15068091 | 10147308 | 25238155 | 23562501 | 71240037 | 18576185 |
| 24.783   | 9  | 5 | 4 | 165980.2 | 777876.1 | 318691.1 | 439200.3 | 532644.9 | 851434   | 967244.8 | 275572.9 | 1102535  |
| 43.0855  | 5  | 0 | 3 | 351607.1 | 3813196  | 306581.8 | 4958332  | 1966270  | 3774426  | 4301403  | 3877447  | 3551137  |
| 9.992233 | 9  | 5 | 4 | 770703.8 | 2515663  | 673316.4 | 1927576  | 859164.3 | 2972488  | 3337706  | 2586389  | 1759393  |
| 9.842    | 5  | 2 | 3 | 1373833  | 1330350  | 525815.7 | 3143470  | 3110929  | 1069427  | 1031248  | 1184395  | 1101153  |
| 9.986767 | 5  | 2 | 3 | 328167.8 | 594537.5 | 226228.8 | 456015.4 | 107744   | 387502.2 | 421619.8 | 947433.5 | 548685.3 |
| 10.008   | 9  | 5 | 4 | 1637398  | 1270856  | 397074.1 | 1831761  | 927152.5 | 1327175  | 1698429  | 1015887  | 735995.8 |
| 9.092333 | 10 | 5 | 5 | 1160065  | 4160101  | 340281.3 | 3677529  | 798015.7 | 4267738  | 4393118  | 3789051  | 4535260  |
| 10.99152 | 10 | 5 | 5 | 1669172  | 1312004  | 205655.2 | 3492243  | 3760418  | 1142469  | 1629439  | 1362583  | 1306076  |
| 9.46265  | 8  | 5 | 3 | 402767.5 | 2595743  | 1025934  | 1787052  | 1104396  | 2510747  | 1432011  | 2063461  | 2786483  |
| 10.93618 | 8  | 3 | 4 | 141312.4 | 321450.4 | 121569   | 423067.4 | 144798.1 | 463478.3 | 413465.5 | 165909.7 | 242179.3 |
| 9.43325  | 13 | 5 | 5 | 1931190  | 16289305 | 4853654  | 13209959 | 2882340  | 22170321 | 17680535 | 18901159 | 12357322 |
| 9.8445   | 10 | 5 | 5 | 1524958  | 6364213  | 2348235  | 4796697  | 1707440  | 5846994  | 4682084  | 4177237  | 10066839 |
| 10.03658 | 4  | 1 | 3 | 7.48E+08 | 3.34E+09 | 2.16E+09 | 1.65E+09 | 2.28E+09 | 4.88E+09 | 2.26E+09 | 4.75E+09 | 4.79E+09 |
| 10.02372 | 8  | 5 | 3 | 266336   | 927890.3 | 161892.6 | 710254.6 | 357956.6 | 846438.8 | 897388   | 913838   | 779782.2 |
| 13.24403 | 10 | 5 | 5 | 3124020  | 27820153 | 3714512  | 25153699 | 3304355  | 32875263 | 30445630 | 24202886 | 24950873 |
| 11.97977 | 9  | 4 | 5 | 161488.4 | 752425.6 | 137970.4 | 542088.2 | 350713.6 | 940711.2 | 689460.5 | 593727.1 | 695003.4 |
| 21.91383 | 3  | 0 | 3 | 3074798  | 8013.33  | 8170.49  | 7954810  | 13728765 | 19275.24 | 10853.22 | 0        | 0        |
| 9.903567 | 9  | 5 | 4 | 9775370  | 5345241  | 1881479  | 20127563 | 25513574 | 6676207  | 4294698  | 7728128  | 5028471  |
| 9.45945  | 9  | 4 | 4 | 712301.6 | 4076410  | 1737960  | 2737526  | 1795949  | 3725519  | 6160043  | 5497918  | 1941592  |
| 9.94455  | 10 | 5 | 5 | 7262426  | 30117363 | 5039326  | 24514651 | 8926581  | 36110354 | 33067264 | 25209739 | 24582989 |
| 10.9645  | 10 | 5 | 5 | 917641.3 | 4177307  | 284174.1 | 3701518  | 799373.6 | 4246261  | 4551816  | 3922944  | 3864322  |
| 10.78937 | 9  | 4 | 5 | 255785.1 | 530579.8 | 309590.9 | 341433.3 | 146574.7 | 987319   | 626430.1 | 405806.6 | 145636   |
| 11.92472 | 7  | 4 | 3 | 82086.34 | 253590.1 | 38715.73 | 294168.8 | 63724.55 | 273707.7 | 260294.4 | 245174.6 | 295893.1 |
| 9.999217 | 11 | 5 | 5 | 1064483  | 5717094  | 899642.9 | 4360581  | 2260548  | 5057807  | 4975516  | 5881835  | 5480262  |
| 9.9014   | 10 | 5 | 5 | 1812430  | 6239663  | 2312315  | 7794210  | 1726266  | 5032640  | 4871082  | 3880134  | 8312168  |
| 19.11217 | 9  | 5 | 4 | 1748340  | 11737113 | 2453116  | 9353035  | 3658056  | 15545905 | 9688686  | 9736724  | 11039260 |
| 9.859983 | 8  | 4 | 4 | 2326607  | 11527664 | 3195188  | 9336915  | 2530640  | 13267860 | 5844001  | 13193650 | 12405987 |
| 9.55155  | 11 | 5 | 4 | 615149.8 | 862106.9 | 253616.1 | 1576624  | 1225034  | 745729   | 1126378  | 678550.5 | 615767.6 |
| 8.8977   | 8  | 5 | 3 | 833125   | 1841907  | 1388858  | 997907.7 | 631799.4 | 662163.5 | 2033431  | 1404971  | 4148346  |

|          |    |   |   |          |          |          |          |          |          |          |          |          |
|----------|----|---|---|----------|----------|----------|----------|----------|----------|----------|----------|----------|
| 9.45945  | 11 | 5 | 5 | 9286724  | 43675899 | 30146893 | 72415000 | 43807630 | 11100902 | 26469396 | 29382231 | 78955714 |
| 43.22917 | 10 | 3 | 2 | 346448.4 | 3270298  | 1568120  | 2111693  | 1492601  | 4674254  | 1602117  | 1529170  | 4414103  |
| 9.447733 | 9  | 3 | 5 | 898652.1 | 7509186  | 2547487  | 5587071  | 2533356  | 9426185  | 3214096  | 7166580  | 8775702  |
| 44.8685  | 7  | 3 | 4 | 101738.2 | 610186.6 | 164103.2 | 729107   | 149798.5 | 670430.4 | 829623.7 | 408965.7 | 492313.1 |
| 9.93625  | 4  | 1 | 3 | 3132818  | 6122537  | 5402679  | 2667874  | 3365499  | 13912054 | 1121490  | 843554.8 | 7591099  |
| 10.94443 | 10 | 5 | 5 | 962508   | 1885454  | 754283.9 | 2782357  | 1451348  | 1512008  | 3155042  | 1895466  | 1193836  |
| 9.609367 | 9  | 5 | 4 | 745725.2 | 2279800  | 676559.4 | 1822818  | 514403.7 | 2781065  | 3198621  | 1830609  | 1617800  |
| 44.71033 | 10 | 5 | 5 | 1716569  | 24872806 | 429300.5 | 24413190 | 727195.9 | 25060452 | 25246847 | 24153432 | 25078432 |
| 9.129317 | 3  | 3 | 0 | 251908.3 | 727374.1 | 958199.8 | 172797.1 | 95602.81 | 436454.7 | 455513.5 | 246099.8 | 2419315  |
| 10.21867 | 3  | 0 | 3 | 3128908  | 89249.74 | 43277.45 | 8593111  | 14722736 | 127109.2 | 50740.7  | 56091.6  | 68045.07 |
| 10.97857 | 9  | 4 | 5 | 585316.9 | 2551969  | 559097   | 2090708  | 654922.2 | 2850819  | 3189787  | 2647631  | 2361560  |
| 22.18217 | 6  | 3 | 3 | 108709.7 | 548911.5 | 321679.4 | 336515.9 | 227501.6 | 392961.2 | 1069875  | 282737.2 | 353797.7 |
| 9.979667 | 9  | 4 | 4 | 819588.4 | 1713933  | 495631.3 | 2154945  | 653851.3 | 1722649  | 1394796  | 1189908  | 2490269  |
| 10.008   | 9  | 5 | 4 | 583876.4 | 933112.5 | 411390.1 | 1297129  | 538338.5 | 1021335  | 1559701  | 935983.2 | 476726.8 |
| 9.872917 | 6  | 3 | 3 | 1154069  | 3692070  | 1933361  | 2163432  | 2105450  | 1880010  | 1338349  | 5547871  | 4936428  |
| 40.12233 | 5  | 2 | 3 | 389072.6 | 5488771  | 594576.5 | 4876316  | 959730.9 | 5551369  | 5553244  | 4530740  | 6171589  |
| 9.912633 | 11 | 5 | 5 | 1486664  | 2981930  | 948202.5 | 5603057  | 4500465  | 2549063  | 4454903  | 3364645  | 2069713  |
| 13.77065 | 5  | 3 | 0 | 367321.6 | 4328065  | 1591235  | 6029751  | 2693981  | 2855628  | 5491622  | 6275172  | 2650737  |
| 26.17283 | 3  | 0 | 3 | 5951891  | 677718.4 | 95690.25 | 17475221 | 29097999 | 514731.7 | 763887.5 | 696325.8 | 689556.5 |
| 9.932033 | 10 | 5 | 5 | 1810971  | 5252085  | 960852.8 | 4533670  | 940183.6 | 6705160  | 5534299  | 5232153  | 4517407  |
| 10.99268 | 3  | 3 | 0 | 298046.3 | 560852.1 | 158292.4 | 409358.8 | 231789.9 | 645117.5 | 486754.2 | 416053.6 | 797881.2 |
| 43.43067 | 6  | 2 | 3 | 214992.8 | 2229857  | 413650.9 | 2926913  | 1175026  | 2394147  | 2344812  | 2261102  | 2620066  |
| 9.43325  | 8  | 3 | 3 | 385548.6 | 2243868  | 643943.8 | 1733852  | 704462.4 | 3063528  | 2021778  | 2629510  | 2143039  |
| 9.970617 | 9  | 5 | 4 | 1471395  | 1811543  | 655206.6 | 2266931  | 542536.2 | 2577532  | 1408573  | 2050787  | 2114340  |
| 44.006   | 6  | 2 | 3 | 377664.6 | 3932322  | 298327.9 | 4464455  | 900834.7 | 3432501  | 3917576  | 4185068  | 4125699  |
| 9.43325  | 6  | 2 | 4 | 13816060 | 72166612 | 37255620 | 46234549 | 31007547 | 1.06E+08 | 21595072 | 1.02E+08 | 87080598 |
| 9.842    | 10 | 5 | 5 | 6082522  | 39486882 | 3744363  | 37232798 | 1606045  | 38857850 | 34959096 | 37433388 | 41515115 |
| 9.856867 | 9  | 4 | 5 | 1124868  | 5324531  | 877907   | 4346573  | 1566054  | 5852151  | 5056300  | 4126467  | 5139406  |
| 9.872917 | 9  | 5 | 4 | 3502437  | 13893178 | 2194253  | 15543137 | 2178498  | 15687872 | 11819110 | 11195120 | 15491946 |
| 10.94443 | 3  | 0 | 3 | 341945.8 | 197437.7 | 221967.7 | 881886.5 | 1179396  | 0        | 474368.1 | 0        | 123238.5 |
| 9.91765  | 7  | 4 | 3 | 967556.2 | 2017055  | 571021.9 | 1302850  | 1168858  | 2763107  | 2393612  | 1338262  | 1642456  |
| 9.859983 | 9  | 5 | 4 | 871195.8 | 4202190  | 657434.3 | 3240054  | 1606037  | 3999163  | 3256697  | 4187080  | 4542704  |
| 9.994767 | 9  | 5 | 4 | 748396.1 | 881376.4 | 453582.6 | 1386586  | 809476.1 | 1140199  | 1355924  | 1115726  | 459174.2 |
| 9.848417 | 10 | 5 | 5 | 1570679  | 6408666  | 959183.2 | 5193579  | 1993193  | 6504136  | 5079674  | 7234440  | 7367446  |
| 9.992233 | 10 | 5 | 5 | 769220   | 2871555  | 291285.1 | 2417625  | 762132.7 | 2935062  | 2464626  | 3131610  | 2691133  |



|          |    |   |   |          |          |          |          |          |          |          |          |          |
|----------|----|---|---|----------|----------|----------|----------|----------|----------|----------|----------|----------|
| 9.40615  | 6  | 2 | 3 | 1593640  | 5589559  | 3031894  | 3658704  | 1878570  | 5289085  | 2893023  | 3787773  | 10695179 |
| 21.55233 | 5  | 2 | 3 | 743037.2 | 806131.1 | 431014.6 | 1786297  | 1678800  | 556888.7 | 1531242  | 489560.7 | 581082.7 |
| 9.912633 | 10 | 5 | 5 | 3.18E+08 | 3.61E+09 | 3.04E+08 | 3.23E+09 | 6.1E+08  | 3.78E+09 | 3.45E+09 | 3.28E+09 | 3.47E+09 |
| 11.77342 | 5  | 1 | 4 | 1901897  | 232489.2 | 63983.82 | 3318601  | 5359065  | 148572.7 | 272961.4 | 257409.2 | 183001.3 |
| 28.01083 | 5  | 3 | 2 | 113703.3 | 393590.8 | 255181.6 | 643615.3 | 386931.4 | 803877.6 | 251594.3 | 130597.3 | 428310   |
| 9.4468   | 8  | 4 | 4 | 344511.9 | 1346571  | 992047.3 | 740919.5 | 484266.6 | 1315904  | 2885915  | 188266.8 | 885848.7 |
| 26.83917 | 5  | 1 | 4 | 202755.5 | 1314694  | 911046.1 | 741296   | 534810   | 567593.4 | 1764067  | 164289.1 | 1732211  |
| 10.94443 | 8  | 4 | 4 | 210121.7 | 510272.3 | 143564.3 | 823699.2 | 536282.7 | 507085.8 | 756916   | 445879.8 | 447396.5 |
| 10.9645  | 9  | 5 | 4 | 626872.9 | 2959242  | 541819.4 | 2294758  | 1085342  | 3134933  | 3440272  | 2280498  | 2495341  |
| 3.643383 | 8  | 3 | 5 | 157140.6 | 2764253  | 2063638  | 4176204  | 1645371  | 0        | 3215480  | 5620105  | 3158603  |
| 9.392767 | 10 | 5 | 5 | 3170336  | 9175277  | 4455306  | 6174764  | 3394467  | 11106671 | 5014423  | 4451104  | 10216757 |
| 10.97857 | 5  | 3 | 2 | 160702.7 | 525067.9 | 126992.2 | 387344.9 | 219587.2 | 396541.1 | 709230.2 | 598503.1 | 473775.9 |
| 12.9528  | 8  | 4 | 2 | 310184.1 | 2232988  | 964222.4 | 3504987  | 2100949  | 1209729  | 1810279  | 2043097  | 3798942  |
| 9.684583 | 6  | 2 | 4 | 2080297  | 950529.8 | 243055.9 | 4644512  | 6417835  | 570751.9 | 909292.1 | 1162360  | 1163800  |
| 9.94405  | 8  | 3 | 4 | 2314734  | 4605651  | 611422.1 | 3751262  | 1421252  | 5661017  | 4235299  | 4351537  | 4181659  |
| 9.929783 | 5  | 3 | 2 | 944201.2 | 1954374  | 200783.5 | 1472754  | 827125.8 | 2064731  | 1934235  | 2032582  | 1616811  |
| 9.842    | 9  | 5 | 4 | 5425658  | 23302629 | 3559422  | 19162279 | 6706069  | 21739698 | 22032361 | 18844499 | 26661105 |
| 9.0035   | 4  | 1 | 3 | 119116.7 | 218221.5 | 96348.98 | 133710.9 | 125100.7 | 243352.3 | 314650.9 | 267724.2 | 203825.4 |
| 9.032133 | 6  | 3 | 3 | 288528.9 | 708725.1 | 305695.2 | 489902.5 | 273952.8 | 865554.4 | 702666.2 | 959904.7 | 828135   |
| 44.22167 | 7  | 3 | 2 | 172491   | 1094709  | 725024.2 | 1657392  | 768060.6 | 1052599  | 2278628  | 522395.3 | 486311.7 |
| 9.864767 | 10 | 5 | 5 | 51052612 | 2.26E+08 | 51786450 | 1.83E+08 | 61275652 | 2.24E+08 | 1.63E+08 | 1.94E+08 | 2.48E+08 |
| 9.976317 | 9  | 5 | 4 | 631919.3 | 1079863  | 306439   | 804066.8 | 413517   | 1238076  | 1439773  | 1203080  | 769506.1 |
| 28.272   | 10 | 5 | 5 | 193827.2 | 1365223  | 345535   | 1135498  | 253561.1 | 1646450  | 1786953  | 1181048  | 944362.4 |
| 9.4468   | 11 | 5 | 5 | 1170171  | 8444526  | 2934359  | 5688301  | 4208907  | 8868097  | 12506887 | 9654416  | 5403440  |
| 10.94443 | 8  | 4 | 4 | 330861.7 | 547634.8 | 171296.5 | 1163013  | 1065179  | 544829.1 | 747879.8 | 609149.4 | 276822.3 |
| 12.98207 | 10 | 5 | 5 | 412415.3 | 3592515  | 496401   | 2706609  | 1504826  | 4332006  | 3084840  | 3276896  | 3436995  |
| 9.844033 | 8  | 4 | 4 | 1245872  | 4325636  | 1335510  | 5121400  | 528219.6 | 5129343  | 3031046  | 5499710  | 5249071  |
| 9.536783 | 11 | 5 | 4 | 1639583  | 5211999  | 2519231  | 7416969  | 3265729  | 9400737  | 4879571  | 2941431  | 3607557  |
| 10.47137 | 5  | 2 | 3 | 255878.6 | 1233016  | 465834.6 | 950423   | 220528.6 | 1285779  | 1843864  | 1423969  | 593031.5 |
| 9.912633 | 9  | 4 | 4 | 4474915  | 3015583  | 875555.3 | 7959258  | 8591505  | 1925515  | 2217228  | 3630150  | 3813323  |
| 20.31717 | 8  | 4 | 4 | 144018.6 | 478831.9 | 200251.2 | 334035.8 | 184333.8 | 611443.2 | 721054.4 | 281132.8 | 511449   |
| 9.488133 | 8  | 4 | 3 | 782904.4 | 3772414  | 1817575  | 2663196  | 904488.1 | 3089123  | 6106689  | 1633620  | 5157628  |
| 10.0118  | 5  | 3 | 1 | 1.71E+09 | 4.04E+09 | 5.5E+09  | 7.81E+09 | 4.47E+09 | 1.06E+10 | 36204596 | 29209908 | 9.49E+09 |
| 9.960817 | 10 | 5 | 5 | 1461519  | 4751433  | 988352.9 | 3977975  | 1067737  | 6393942  | 3812399  | 4363235  | 4341458  |
| 19.05283 | 5  | 3 | 2 | 5186182  | 42361884 | 7915811  | 34462802 | 12356459 | 53421489 | 35201199 | 35406312 | 40426216 |

|          |    |   |   |          |          |          |          |          |          |          |          |          |
|----------|----|---|---|----------|----------|----------|----------|----------|----------|----------|----------|----------|
| 9.43325  | 11 | 5 | 4 | 4426741  | 45512303 | 10944228 | 33637150 | 19009507 | 57780175 | 49890891 | 51984764 | 33567618 |
| 15.31398 | 10 | 5 | 5 | 3986856  | 42444063 | 6046035  | 36461709 | 9334995  | 47015649 | 49694065 | 42427626 | 35301496 |
| 9.848417 | 8  | 4 | 4 | 2075227  | 4812131  | 4877965  | 1992390  | 972788.8 | 1592960  | 2592389  | 13455273 | 3051266  |
| 9.928667 | 9  | 5 | 4 | 2632903  | 9304793  | 2898058  | 6755056  | 3795485  | 10083814 | 7571765  | 6272678  | 8763454  |
| 9.445217 | 13 | 5 | 5 | 3512427  | 21523281 | 8705380  | 15745199 | 6402349  | 25115286 | 16340999 | 18619052 | 34834918 |
| 44.72483 | 10 | 5 | 5 | 7116735  | 1.27E+08 | 2579029  | 1.25E+08 | 3702150  | 1.26E+08 | 1.31E+08 | 1.23E+08 | 1.27E+08 |
| 12.65987 | 5  | 3 | 2 | 46238.9  | 198258.9 | 145272.5 | 296283.8 | 112471.9 | 349361.7 | 98480.81 | 69709.7  | 110139.2 |
| 9.880683 | 10 | 5 | 5 | 2836062  | 18638338 | 1893620  | 16330946 | 3782815  | 17375464 | 16013916 | 19829977 | 20621566 |
| 9.94455  | 10 | 5 | 5 | 1799368  | 7161800  | 1115574  | 6335213  | 1086114  | 8829149  | 7793068  | 6512046  | 6242719  |
| 8.709167 | 3  | 3 | 0 | 59722.88 | 235699.4 | 103805.7 | 162365.5 | 90925.21 | 108712.7 | 372939.6 | 305723.4 | 198422.1 |
| 9.636567 | 9  | 5 | 4 | 1050504  | 3811404  | 906789.4 | 2915176  | 1399902  | 3348632  | 4273562  | 4004065  | 4899813  |
| 9.089733 | 5  | 2 | 3 | 5472344  | 30101469 | 7546041  | 25422890 | 4198375  | 40668888 | 34169546 | 22305792 | 29455294 |
| 10.44062 | 10 | 5 | 5 | 3154492  | 14413780 | 1954822  | 12653975 | 2652459  | 15349226 | 16259725 | 12906633 | 11786757 |
| 9.842    | 9  | 5 | 4 | 922451.9 | 4047720  | 883011.3 | 3221327  | 1266284  | 4837638  | 4248407  | 2917069  | 3354064  |
| 10.97857 | 9  | 5 | 4 | 812775.3 | 1086821  | 151800.6 | 1442269  | 612786.2 | 1279542  | 956242.9 | 911867.4 | 1165696  |
| 9.960817 | 6  | 3 | 3 | 615450.3 | 2700873  | 1503007  | 1498472  | 1693529  | 3602224  | 2184776  | 1222235  | 1639270  |
| 37.54667 | 6  | 4 | 1 | 409470.9 | 8283633  | 3324448  | 6360150  | 750973.4 | 6929778  | 3992938  | 9129290  | 13105372 |
| 9.992233 | 9  | 5 | 4 | 638158.7 | 1950676  | 391586.9 | 1539969  | 653203.8 | 2324087  | 2139161  | 2174404  | 1358186  |
| 9.853633 | 5  | 3 | 1 | 661684.9 | 2155757  | 873693.3 | 2813277  | 879593.4 | 2976342  | 1490543  | 1570587  | 3237462  |
| 9.445217 | 14 | 5 | 5 | 3414490  | 25516031 | 5627653  | 18699424 | 11179353 | 22621759 | 31570718 | 31679387 | 20543883 |
| 10.97857 | 10 | 4 | 5 | 192642.5 | 662033   | 291530   | 489537.9 | 110824.3 | 678975.7 | 763276.2 | 489065.9 | 303416   |
| 10.44062 | 10 | 5 | 5 | 569553.9 | 2449098  | 401242   | 2065378  | 593305.9 | 2065733  | 3100655  | 2249776  | 2291406  |
| 9.94455  | 9  | 5 | 4 | 818741.3 | 2997812  | 410906   | 2284565  | 1214815  | 3454228  | 3301530  | 2754229  | 2437817  |
| 20.953   | 5  | 3 | 0 | 9859769  | 36670591 | 21774100 | 23648600 | 9376382  | 21314053 | 62838743 | 57375368 | 25938381 |
| 10.01837 | 4  | 1 | 3 | 852513.1 | 210722.2 | 218782.4 | 530060.4 | 536876.2 | 0        | 554324.1 | 97518.38 | 290293.9 |
| 9.972483 | 10 | 5 | 5 | 3650393  | 13072528 | 3285741  | 10275030 | 4106734  | 17085139 | 15718883 | 11637939 | 8981317  |
| 41.3645  | 4  | 3 | 1 | 304627.4 | 5567747  | 371023.7 | 4867772  | 1198309  | 5087640  | 5401027  | 5917968  | 5465356  |
| 9.348233 | 5  | 3 | 2 | 1522249  | 1539462  | 1923341  | 427218.2 | 444840   | 1127390  | 4896309  | 862604.8 | 811004.1 |
| 9.979667 | 9  | 5 | 4 | 373894.5 | 1060618  | 311023.2 | 772638.4 | 440258.9 | 1436464  | 1344085  | 957428.5 | 787301.9 |
| 39.489   | 8  | 2 | 3 | 366602.8 | 6267450  | 671510   | 7538478  | 2177038  | 5641508  | 6955238  | 6789177  | 6473844  |
| 10.01837 | 8  | 4 | 4 | 506590.5 | 805190   | 207157.6 | 590228   | 341422.7 | 677644.8 | 809224.5 | 539567.9 | 1067231  |
| 9.01065  | 7  | 3 | 4 | 219599.1 | 1553091  | 626413.3 | 1141298  | 450346   | 2297800  | 1717732  | 1827774  | 1286236  |
| 42.98483 | 6  | 3 | 2 | 358401.5 | 4348493  | 2152982  | 6977458  | 4323195  | 5280697  | 5025686  | 903799.8 | 6619592  |
| 9.445217 | 13 | 5 | 5 | 3413431  | 20187479 | 7267881  | 15375563 | 5356497  | 23740049 | 17351857 | 17363295 | 30739272 |
| 9.859983 | 8  | 4 | 4 | 1214356  | 4594369  | 209522   | 3809722  | 1366647  | 4385637  | 4718395  | 4636189  | 4377088  |

|          |    |   |   |          |          |          |          |          |          |          |          |          |
|----------|----|---|---|----------|----------|----------|----------|----------|----------|----------|----------|----------|
| 9.319233 | 9  | 4 | 5 | 1014076  | 3653451  | 2803911  | 2032162  | 667493.8 | 3733130  | 2133727  | 2040720  | 1872942  |
| 28.17167 | 10 | 5 | 5 | 220929.8 | 1507562  | 354730.8 | 1288577  | 195123.9 | 1597079  | 1931663  | 1115266  | 1169227  |
| 9.445217 | 10 | 4 | 5 | 1837811  | 10747126 | 7860387  | 5868430  | 4455710  | 6796465  | 5630603  | 7303307  | 9412049  |
| 35.39883 | 3  | 3 | 0 | 410262.5 | 5647553  | 830533.7 | 5162957  | 257161.4 | 5433969  | 5235268  | 7120015  | 5316570  |
| 10.008   | 10 | 5 | 5 | 510946.5 | 796436.3 | 181800.9 | 1138516  | 586376.4 | 794480.8 | 774800   | 684557.7 | 629606.7 |
| 10.49363 | 5  | 2 | 3 | 147639.9 | 530745.5 | 226142.9 | 366803.4 | 211557   | 906997   | 521953.2 | 504552   | 404848.4 |
| 18.05667 | 5  | 4 | 1 | 1433956  | 4954788  | 3571238  | 2819716  | 1559138  | 10466190 | 3596649  | 4782841  | 636055   |
| 9.064833 | 9  | 5 | 4 | 350748.8 | 850404   | 180840.5 | 588274.4 | 441150.9 | 971014.5 | 743656.3 | 1032563  | 590409.9 |
| 9.967367 | 10 | 5 | 5 | 2611982  | 2435615  | 915940.2 | 3289264  | 1310670  | 2880914  | 3447084  | 1378400  | 2920273  |
| 9.8207   | 7  | 3 | 2 | 263989.3 | 397457.3 | 344265.5 | 188074.7 | 172961.3 | 365924.5 | 329476.1 | 986287.7 | 120997.2 |
| 23.1755  | 9  | 4 | 5 | 377321.5 | 4135251  | 1459891  | 3219334  | 876092   | 3960682  | 4159685  | 3466713  | 2580917  |
| 9.93625  | 9  | 4 | 5 | 9880648  | 12402281 | 6436252  | 8653403  | 1941125  | 10600093 | 23709739 | 7849591  | 9030482  |
| 9.933967 | 4  | 4 | 0 | 729311.4 | 1275539  | 493767   | 816008.1 | 705412.4 | 1877172  | 1628986  | 1304728  | 744087.4 |
| 9.92825  | 11 | 5 | 5 | 7640815  | 38958447 | 4748704  | 34832947 | 6141088  | 45988541 | 40236041 | 37618394 | 38031636 |
| 29.84833 | 10 | 5 | 5 | 205471   | 1094043  | 177650.5 | 1233915  | 195633.7 | 994451.4 | 1251799  | 833146.6 | 1157882  |
| 9.40615  | 9  | 5 | 4 | 1751932  | 5482520  | 1404781  | 3828872  | 2707862  | 7037490  | 6828984  | 4273224  | 4016500  |
| 9.4468   | 5  | 1 | 4 | 719964.1 | 3497020  | 799883.5 | 2488436  | 1670524  | 3649441  | 4192187  | 4022166  | 3456715  |
| 10.02372 | 9  | 5 | 4 | 2176150  | 717432.6 | 165514.3 | 1502430  | 1371896  | 691740.7 | 892186.9 | 743958.9 | 806077.4 |
| 9.0258   | 8  | 4 | 4 | 207225.5 | 815943.1 | 257702.9 | 602080.8 | 310533.1 | 617859.5 | 470713.2 | 1069423  | 982866   |
| 19.00933 | 9  | 5 | 4 | 1104102  | 546137.7 | 366162.9 | 1656241  | 1932071  | 1104450  | 348951.9 | 723494.9 | 344966.9 |
| 9.976317 | 6  | 3 | 3 | 671863.3 | 1110351  | 303602.8 | 1635588  | 897498.4 | 906259.5 | 1600453  | 1160277  | 824217   |
| 9.853633 | 10 | 5 | 5 | 16560601 | 36205431 | 5924529  | 53649119 | 30347889 | 35389090 | 39990778 | 26343441 | 41133387 |
| 10.90802 | 8  | 4 | 4 | 289238.3 | 564649   | 336561.9 | 365073.7 | 136829.1 | 818891.2 | 1027372  | 285421.8 | 362649.6 |
| 38.899   | 8  | 4 | 1 | 468176.6 | 10498215 | 2820819  | 7921909  | 3931692  | 10130394 | 12921408 | 13242280 | 9938838  |
| 25.10333 | 4  | 3 | 1 | 1680783  | 4351542  | 6391841  | 706668.5 | 193364.6 | 15457267 | 4126757  | 880668.9 | 130097.6 |
| 9.55155  | 9  | 5 | 4 | 651633.1 | 1694896  | 386914.7 | 1234668  | 756028.9 | 1561480  | 2264931  | 1290847  | 1463801  |
| 10.9645  | 10 | 5 | 5 | 493757.5 | 2667775  | 339329.2 | 2362199  | 463906.6 | 2770648  | 3063061  | 2322977  | 2305526  |
| 9.842    | 7  | 3 | 4 | 1017905  | 1388108  | 596003.6 | 960069.5 | 548850.9 | 2306722  | 1638991  | 963178.8 | 847997.9 |
| 38.2085  | 10 | 5 | 5 | 382750.5 | 2895743  | 190930.1 | 3192864  | 504551.8 | 2751367  | 2655600  | 3012475  | 2935233  |
| 9.845483 | 5  | 2 | 3 | 3403732  | 5527306  | 3984636  | 3118356  | 1953604  | 4049629  | 12606742 | 4061163  | 2956442  |
| 10.97857 | 4  | 3 | 1 | 2789874  | 5854349  | 7213776  | 10994733 | 6531755  | 517359.9 | 741949.9 | 11994773 | 710002.3 |
| 9.554967 | 9  | 5 | 4 | 363579.9 | 852776.8 | 132908   | 663252.8 | 319395.7 | 878283.7 | 1064303  | 760852.9 | 724160.6 |
| 9.870017 | 9  | 5 | 4 | 1146579  | 4512011  | 899852.3 | 5116058  | 698984.2 | 4583619  | 4578080  | 3170340  | 4520476  |
| 11.04868 | 7  | 4 | 3 | 537923   | 2054794  | 310312   | 1775487  | 424548.6 | 1984194  | 1663531  | 2527614  | 2007579  |
| 9.445217 | 8  | 5 | 3 | 341882.7 | 2709689  | 727746.2 | 1894197  | 1326635  | 3176623  | 3421055  | 3048284  | 2205470  |

|          |    |   |   |          |          |          |          |          |          |          |          |          |
|----------|----|---|---|----------|----------|----------|----------|----------|----------|----------|----------|----------|
| 9.538267 | 6  | 3 | 3 | 309147.4 | 795875.4 | 336544.7 | 555057.7 | 308182.6 | 1164191  | 1145699  | 578486.7 | 439709.7 |
| 17.77717 | 6  | 4 | 2 | 155074.6 | 406555.8 | 420745.2 | 729661.3 | 445075.7 | 206532.3 | 250076.6 | 263697.5 | 156976.1 |
| 9.673333 | 10 | 5 | 5 | 3998661  | 12270665 | 3573304  | 9883623  | 2743922  | 16033823 | 16217206 | 10301123 | 8699286  |
| 23.4505  | 10 | 5 | 5 | 257763.3 | 1414369  | 403510.1 | 1138231  | 331743.3 | 861463.1 | 1870164  | 1397563  | 1215344  |
| 10.30302 | 5  | 3 | 2 | 334842.5 | 495762.9 | 233887.5 | 355135.4 | 111120   | 708595.7 | 790893.3 | 310144.3 | 336395.1 |
| 9.174967 | 3  | 3 | 0 | 517362.4 | 2098716  | 2674816  | 571313.1 | 401341.1 | 738076.7 | 904042.2 | 944136.8 | 6879860  |
| 10.77857 | 4  | 3 | 1 | 219659.3 | 415307.6 | 228396.2 | 276835.6 | 115749.9 | 762308.1 | 526432.3 | 306714.1 | 201667.1 |
| 9.8207   | 5  | 2 | 3 | 964330.5 | 2194090  | 741270.4 | 1752224  | 328785.9 | 3256378  | 2098639  | 1241641  | 1910220  |
| 6.93925  | 3  | 3 | 0 | 8625575  | 38990700 | 58744630 | 5589069  | 2659426  | 829794.9 | 4510194  | 1.4E+08  | 41974414 |
| 9.544833 | 10 | 5 | 5 | 3193649  | 9347068  | 1869046  | 7583116  | 2738953  | 11803456 | 10599194 | 8241658  | 8984047  |
| 10.19555 | 5  | 1 | 3 | 233972.6 | 93884.38 | 106940.1 | 268446.8 | 298312.8 | 274893.3 | 0        | 33597.73 | 71202.58 |
| 11.01157 | 9  | 4 | 5 | 519026.8 | 2554224  | 766036.6 | 2101856  | 310480.4 | 2759754  | 2665241  | 1437693  | 3556732  |
| 9.445217 | 14 | 5 | 5 | 8051170  | 57006276 | 16089396 | 44620845 | 17145961 | 74727663 | 67794660 | 61757662 | 44203878 |
| 30.25033 | 10 | 5 | 5 | 418495.9 | 3596267  | 612181.3 | 3079423  | 762929.9 | 2593802  | 3663304  | 3852949  | 3624673  |
| 9.4925   | 13 | 5 | 5 | 9060087  | 1.06E+08 | 71940836 | 64370176 | 15900270 | 53745210 | 59506026 | 71306536 | 2.26E+08 |
| 9.928667 | 6  | 3 | 3 | 775715.6 | 1704781  | 301063.6 | 1474005  | 318487.8 | 1931681  | 1982091  | 1843428  | 1447834  |
| 22.92883 | 10 | 5 | 5 | 84037280 | 9.46E+08 | 57106715 | 8.75E+08 | 1.18E+08 | 9.83E+08 | 1.03E+09 | 8.99E+08 | 9.28E+08 |
| 9.41815  | 6  | 4 | 2 | 474348   | 1013793  | 612392   | 604089.4 | 474487.7 | 1597209  | 1360067  | 142303.6 | 611445.4 |
| 10.71398 | 8  | 4 | 4 | 145589.1 | 415367.3 | 98064.41 | 345844.5 | 88312.74 | 540292.1 | 468225.9 | 421635.8 | 362644.2 |
| 9.392767 | 9  | 5 | 4 | 975651.1 | 2144406  | 663852.5 | 1499517  | 1012685  | 2353255  | 2697573  | 1127832  | 1854932  |
| 9.872883 | 8  | 3 | 5 | 6756489  | 10912075 | 13245897 | 3324476  | 2796236  | 1939857  | 2243064  | 1708770  | 31445860 |
| 10.43932 | 7  | 5 | 1 | 198906   | 483321.3 | 137144.4 | 352886.3 | 203489.7 | 410557   | 668715.6 | 367353.5 | 379836.6 |
| 9.992233 | 9  | 5 | 4 | 595612.5 | 1908421  | 274277.7 | 1607458  | 489133.6 | 2233669  | 2051657  | 1967689  | 1518378  |
| 9.69995  | 8  | 5 | 3 | 305230.8 | 761711.4 | 187593.2 | 620932.5 | 190924.7 | 531333.3 | 890696.5 | 792966.1 | 612909.4 |
| 9.920517 | 10 | 5 | 5 | 2335440  | 5042037  | 686122.9 | 4325835  | 1150234  | 6021277  | 4511062  | 4741982  | 5488123  |
| 9.842    | 10 | 5 | 5 | 1705895  | 8859638  | 471578.2 | 7562399  | 2266701  | 9531322  | 9111593  | 8785814  | 8370081  |
| 44.9835  | 5  | 3 | 2 | 342607.9 | 2150845  | 520419.1 | 1748955  | 559517   | 1727380  | 2225881  | 1861728  | 3022596  |
| 10.00385 | 7  | 2 | 4 | 4195884  | 7470718  | 3970840  | 4740360  | 3330798  | 11498045 | 822801.9 | 8005490  | 8825737  |
| 22.059   | 5  | 3 | 2 | 1208870  | 12917066 | 2244991  | 10834363 | 3223137  | 10073624 | 13825680 | 14366162 | 11034920 |
| 10.9645  | 5  | 3 | 2 | 482027.8 | 1158073  | 333026.7 | 841434.5 | 494617.5 | 1393082  | 1514577  | 1268262  | 768691.6 |
| 10.46372 | 6  | 2 | 4 | 158541   | 390555.4 | 73705.6  | 324403.2 | 101023.9 | 363682.3 | 418812.9 | 485037   | 284797.3 |
| 9.445217 | 10 | 5 | 4 | 2326035  | 22863157 | 4909012  | 18211334 | 7262096  | 27804078 | 26756031 | 24430896 | 18031613 |
| 9.864767 | 10 | 5 | 5 | 6537805  | 36040790 | 9605603  | 30316493 | 4373473  | 35145748 | 30102205 | 26843288 | 51799415 |
| 9.949233 | 7  | 4 | 3 | 1310985  | 4136252  | 679551.3 | 3098882  | 1769285  | 5049073  | 3926000  | 4050119  | 3206626  |
| 11.47593 | 3  | 0 | 3 | 32222.36 | 44481.28 | 27127.88 | 67076.53 | 33225.27 | 62352.07 | 44623.59 | 0        | 45561.41 |

|          |    |   |   |          |          |          |          |          |          |          |          |          |
|----------|----|---|---|----------|----------|----------|----------|----------|----------|----------|----------|----------|
| 9.40615  | 9  | 5 | 4 | 1744438  | 5172291  | 1138509  | 3556159  | 2737820  | 6129562  | 6461453  | 4159109  | 3915542  |
| 9.640367 | 7  | 4 | 3 | 256224.3 | 595079.9 | 168196.9 | 451363.6 | 214449.3 | 569928.5 | 871935.2 | 559783.9 | 561766.7 |
| 9.445217 | 10 | 4 | 4 | 2337824  | 8702798  | 1438071  | 6429809  | 3888876  | 6515304  | 10431622 | 8595267  | 8581934  |
| 9.886083 | 9  | 3 | 5 | 856424.6 | 3075678  | 776423.4 | 2551749  | 621067.3 | 3990266  | 2747063  | 1955066  | 3527638  |
| 9.857683 | 6  | 4 | 2 | 1074186  | 3133803  | 1152039  | 3977538  | 1120415  | 4043192  | 1794867  | 4553953  | 2939798  |
| 10.9645  | 10 | 5 | 5 | 1286938  | 6174184  | 1181245  | 5177948  | 1476683  | 7027309  | 7359405  | 5058709  | 4769707  |
| 10.9645  | 10 | 5 | 5 | 1157752  | 5487766  | 949096.7 | 4573980  | 1437168  | 6411010  | 5971486  | 4449178  | 4475854  |
| 6.947217 | 10 | 5 | 5 | 2735904  | 86860767 | 37044982 | 1.16E+08 | 40735813 | 74880229 | 1.51E+08 | 63580292 | 84291501 |
| 9.952017 | 10 | 5 | 5 | 2361460  | 6638585  | 954869.5 | 5237368  | 2385971  | 7239514  | 7535147  | 5576804  | 5627048  |
| 13.82417 | 9  | 4 | 5 | 68490.62 | 429757.7 | 156827.5 | 331785.3 | 96369.23 | 186413.2 | 527569.7 | 390190.7 | 448486.2 |
| 9.379233 | 9  | 5 | 4 | 8801059  | 9374032  | 3654695  | 23944702 | 25666982 | 13198492 | 13493827 | 7336669  | 6080413  |
| 9.379233 | 7  | 4 | 3 | 1821246  | 3778764  | 2474715  | 2258804  | 1400384  | 4663148  | 3881236  | 0        | 3512223  |
| 10.95835 | 7  | 3 | 4 | 685539.5 | 2294799  | 709247.3 | 2753886  | 501683.4 | 2252165  | 1711940  | 1514543  | 2805691  |
| 9.77345  | 5  | 2 | 3 | 1395211  | 2926866  | 2366908  | 1567739  | 648569.4 | 1256583  | 7102935  | 2326272  | 1929407  |
| 9.933967 | 7  | 5 | 2 | 1015490  | 2332069  | 216458.3 | 1615548  | 1261166  | 2335905  | 2576459  | 2044849  | 2202536  |
| 15.54172 | 10 | 5 | 5 | 572469.4 | 4608354  | 988024.9 | 3960244  | 732461.6 | 4057964  | 5592262  | 3241415  | 4669103  |
| 10.01837 | 9  | 5 | 4 | 399763.2 | 1149066  | 336778.7 | 802466.7 | 557775.8 | 814328.4 | 1418684  | 914797   | 1007869  |
| 9.848417 | 10 | 5 | 5 | 4462915  | 26088315 | 3736629  | 20400575 | 9736889  | 27013417 | 23197053 | 22649850 | 25612078 |
| 18.83417 | 6  | 4 | 2 | 107729.7 | 289675.8 | 185573.6 | 470742.6 | 286937.1 | 153571.1 | 260115   | 599990.5 | 141209.8 |
| 9.88815  | 9  | 5 | 4 | 3860291  | 3830987  | 1275052  | 8277937  | 7840813  | 4971511  | 1651565  | 4417523  | 4112026  |
| 11.3298  | 9  | 4 | 4 | 10399783 | 93922105 | 85958901 | 44951818 | 18708420 | 52367598 | 56686074 | 47498117 | 2.47E+08 |
| 9.994767 | 5  | 4 | 1 | 252785.7 | 676930.8 | 156286   | 506647.2 | 278147.4 | 581451.7 | 875690.1 | 814697.3 | 533512.1 |
| 14.45873 | 3  | 3 | 0 | 17362844 | 3.93E+08 | 83433422 | 3.37E+08 | 65272536 | 3.45E+08 | 5.13E+08 | 2.93E+08 | 4.25E+08 |
| 12.82123 | 5  | 2 | 3 | 61837.06 | 296314.9 | 49850.77 | 256940.4 | 56296.18 | 250645   | 348905.6 | 346411.9 | 245969.7 |
| 10.9645  | 10 | 5 | 5 | 353445.4 | 1889524  | 256420.2 | 1680306  | 305848.5 | 2065819  | 2080958  | 1617458  | 1600153  |
| 9.8445   | 11 | 5 | 5 | 948920.1 | 4960791  | 218108.8 | 4489212  | 823965.9 | 5204066  | 5064350  | 5023123  | 4628174  |
| 40.15083 | 6  | 3 | 1 | 432851   | 5975704  | 1611608  | 5062422  | 260582.6 | 8274582  | 4130166  | 6861101  | 5401822  |
| 9.857683 | 10 | 5 | 5 | 1505392  | 8720763  | 991908   | 6723349  | 3481897  | 8889960  | 8355535  | 7381956  | 8854448  |
| 9.840617 | 9  | 5 | 3 | 7974716  | 907476.4 | 245909.7 | 15060577 | 25114014 | 1086736  | 775717.6 | 1199409  | 895176.4 |
| 9.842    | 9  | 5 | 4 | 1427407  | 7128573  | 781536.6 | 5822354  | 2255390  | 8126925  | 6920748  | 6120354  | 7663507  |
| 9.960467 | 7  | 5 | 2 | 417485.2 | 872523.1 | 210549.1 | 565227.6 | 524960.5 | 1125889  | 1072380  | 676048.6 | 772643.1 |
| 9.994767 | 9  | 5 | 4 | 1248967  | 1413213  | 505848.8 | 2456756  | 1821691  | 1692197  | 1985829  | 1613987  | 778045.7 |
| 10.96715 | 4  | 1 | 3 | 366128.5 | 1769747  | 682582.2 | 1126669  | 1009086  | 2093382  | 2160764  | 2203803  | 579815.9 |
| 9.88815  | 8  | 4 | 4 | 1327280  | 2534113  | 1449228  | 4139537  | 2636220  | 4893543  | 1480304  | 2826474  | 1310051  |
| 23.29117 | 3  | 0 | 3 | 2834179  | 53221.04 | 28536.37 | 6138188  | 10802475 | 73159.91 | 20936.37 | 31242.52 | 89687.4  |

|          |    |   |   |          |          |          |          |          |          |          |          |          |
|----------|----|---|---|----------|----------|----------|----------|----------|----------|----------|----------|----------|
| 21.44967 | 3  | 0 | 3 | 120086.3 | 295349.6 | 26676.38 | 466620.1 | 303634.1 | 339663.3 | 272818.3 | 297769.9 | 277067.1 |
| 9.45945  | 8  | 3 | 5 | 1537187  | 14249410 | 3123735  | 10752136 | 5756489  | 17464093 | 16275742 | 15068334 | 9552314  |
| 9.8322   | 9  | 5 | 4 | 758952.1 | 3396093  | 556453   | 2557386  | 1437728  | 3273663  | 2518494  | 3836174  | 3902946  |
| 9.842    | 8  | 5 | 3 | 1319799  | 1772667  | 324350.2 | 3076983  | 2307000  | 2211550  | 1972344  | 1746403  | 1475985  |
| 9.992233 | 10 | 5 | 4 | 2316203  | 864146.5 | 382064.6 | 2468551  | 2838912  | 975114.1 | 1324107  | 1066878  | 378217.5 |
| 11.72435 | 7  | 4 | 3 | 9172402  | 1.71E+08 | 51196727 | 1.4E+08  | 27841614 | 1.85E+08 | 2.54E+08 | 1.35E+08 | 1.28E+08 |
| 9.94455  | 3  | 3 | 0 | 2069941  | 4391873  | 4367818  | 7327408  | 3506551  | 1647306  | 6464468  | 11157030 | 1621191  |
| 9.920517 | 9  | 5 | 4 | 2114787  | 5163106  | 838550.2 | 4228923  | 1537034  | 6488911  | 4860967  | 4353007  | 4679127  |
| 20.86667 | 3  | 0 | 3 | 2986534  | 136752.3 | 94308.62 | 7231419  | 12603722 | 90540.48 | 303617.6 | 85082.8  | 85710.94 |
| 9.864767 | 10 | 5 | 5 | 8033054  | 46144062 | 13255875 | 37994029 | 7702777  | 42775791 | 38663989 | 35650330 | 69015831 |
| 20.25967 | 10 | 5 | 5 | 2287489  | 16804404 | 2894348  | 14600670 | 3071801  | 18512419 | 19388162 | 13230260 | 14112793 |
| 9.986767 | 11 | 5 | 5 | 5140313  | 14056871 | 3646497  | 11289308 | 3847586  | 19254594 | 12459382 | 10659625 | 11500017 |
| 9.992233 | 4  | 3 | 1 | 309328.8 | 593919.6 | 342575.4 | 347367.2 | 325073   | 875284.4 | 0        | 755244.3 | 675195.7 |
| 36.353   | 4  | 1 | 3 | 236502.7 | 1939344  | 275133.8 | 1630418  | 509377   | 1979024  | 1918960  | 1492119  | 2221253  |
| 25.38067 | 3  | 3 | 0 | 300941.8 | 456557.5 | 791092.6 | 11451.05 | 20746.32 | 1865357  | 224294.9 | 64593.05 | 24044.32 |
| 9.554967 | 7  | 4 | 3 | 256203.7 | 624535.9 | 150083.6 | 449746.5 | 290303.4 | 635896.7 | 801728.7 | 485295.5 | 462092.9 |
| 9.419733 | 9  | 4 | 4 | 909004.3 | 8457278  | 3693169  | 5996147  | 2902213  | 11465521 | 8939268  | 10677676 | 9068972  |
| 23.29117 | 3  | 0 | 3 | 3466888  | 16654.27 | 14104.46 | 7348140  | 13033798 | 14675.41 | 9269.611 | 0        | 21870.03 |
| 10.00998 | 9  | 5 | 4 | 1318257  | 762274.9 | 197966   | 1532591  | 1363895  | 635242.4 | 1025043  | 828981.4 | 508350.8 |
| 42.62517 | 8  | 5 | 3 | 2768110  | 5570832  | 4540518  | 16791095 | 19730379 | 2590673  | 13576469 | 3225224  | 4678618  |
| 9.43325  | 11 | 4 | 5 | 2784826  | 7326682  | 7654317  | 3004416  | 1104354  | 2357432  | 3992455  | 20668013 | 6790512  |
| 8.899467 | 4  | 3 | 1 | 3199545  | 2206835  | 2332585  | 6540653  | 7545692  | 621419.6 | 573952.4 | 392272   | 4163588  |
| 9.8445   | 10 | 5 | 5 | 18808852 | 97601786 | 9175304  | 85916681 | 19708645 | 1.08E+08 | 1.03E+08 | 88200681 | 87741003 |
| 9.445217 | 8  | 5 | 3 | 477282.5 | 1810608  | 897585.7 | 1182185  | 803113.2 | 1639633  | 3284123  | 907926.5 | 1358306  |
| 9.445217 | 12 | 5 | 4 | 1106093  | 6341701  | 2021032  | 4611075  | 2614922  | 8201982  | 8255657  | 6790111  | 4009049  |
| 11.00657 | 4  | 3 | 1 | 63962048 | 1.28E+08 | 1.79E+08 | 2.54E+08 | 1.61E+08 | 486815.8 | 1060687  | 307809.4 | 2.63E+08 |
| 23.8855  | 7  | 4 | 3 | 205822.1 | 1311186  | 169724.6 | 1101774  | 351664.2 | 1428989  | 1536659  | 1139592  | 1169096  |
| 22.14483 | 4  | 3 | 1 | 266250.4 | 1613955  | 511654.3 | 1304090  | 276361.4 | 1186962  | 2434912  | 1786651  | 1314976  |
| 10.8937  | 10 | 4 | 5 | 302219.9 | 940821   | 361657.2 | 653159.3 | 415935.3 | 385436.4 | 1317601  | 1194974  | 954625.7 |
| 9.379233 | 7  | 4 | 3 | 589474.3 | 1651836  | 806719.1 | 1060563  | 797747.4 | 2609266  | 446919.3 | 1404038  | 1740371  |
| 9.8374   | 11 | 5 | 5 | 805169.3 | 3308969  | 743109.9 | 2621608  | 1075164  | 3565468  | 3369283  | 3211691  | 4225324  |
| 9.992233 | 10 | 5 | 5 | 697328.9 | 3011893  | 220263.3 | 2531941  | 842108.2 | 3170427  | 3014838  | 3011152  | 2652236  |
| 9.915583 | 8  | 3 | 5 | 1636744  | 5619253  | 4428042  | 3114519  | 841858   | 1467093  | 1904974  | 6045170  | 12464561 |
| 9.976317 | 10 | 5 | 5 | 1202051  | 4540870  | 594239.8 | 3944944  | 958385.5 | 5104877  | 5024467  | 4461340  | 3617740  |
| 9.848417 | 10 | 5 | 5 | 1151382  | 4722277  | 1843200  | 3527082  | 1340242  | 4578779  | 2481693  | 3722495  | 7369170  |

|          |    |   |   |          |          |          |          |          |          |          |          |          |
|----------|----|---|---|----------|----------|----------|----------|----------|----------|----------|----------|----------|
| 11.03478 | 4  | 1 | 3 | 117839.3 | 277575.3 | 138326.6 | 472462.5 | 333103.2 | 286826.5 | 359136.8 | 124735.1 | 159399.1 |
| 9.928667 | 10 | 5 | 5 | 2642572  | 3601216  | 1228533  | 6638530  | 5351417  | 2385267  | 2835474  | 5514514  | 4028623  |
| 9.4873   | 7  | 4 | 3 | 25588826 | 5610845  | 10878902 | 26446468 | 36396213 | 524080.3 | 727429.2 | 25065940 | 1181864  |
| 11.5505  | 5  | 2 | 3 | 88608.13 | 335741.3 | 83593.15 | 262830.9 | 111335.6 | 356417.3 | 218607.4 | 359752.5 | 444774.7 |
| 44.5955  | 4  | 3 | 1 | 632116.1 | 3906808  | 2897354  | 5652382  | 1526046  | 2164853  | 6788871  | 529873.1 | 2984076  |
| 10.43932 | 8  | 3 | 5 | 185549   | 612484.4 | 226033.4 | 471063.4 | 144231   | 596702.9 | 921461.2 | 720085.4 | 320566.1 |
| 11.00657 | 5  | 2 | 3 | 1322092  | 5678245  | 3177745  | 3451182  | 2858753  | 1463311  | 3587513  | 6592186  | 7173112  |
| 9.856867 | 10 | 5 | 5 | 2119388  | 10846036 | 2500386  | 8283030  | 4150887  | 9747121  | 9060654  | 8938117  | 11585389 |
| 10.97242 | 6  | 2 | 4 | 246180.5 | 941846.3 | 416795.8 | 659130.3 | 346281.7 | 1505428  | 435106   | 1030806  | 643200.6 |
| 41.71917 | 4  | 3 | 1 | 426024.8 | 4583659  | 522374.8 | 4280428  | 199850.9 | 4544892  | 5141011  | 3754530  | 4591140  |
| 9.311883 | 8  | 4 | 4 | 624807.2 | 3311541  | 1626943  | 2294517  | 1037179  | 5393942  | 1298895  | 2250603  | 3266840  |
| 9.856867 | 9  | 4 | 5 | 2058633  | 2458257  | 977862.8 | 4216550  | 3066338  | 2640963  | 959691.8 | 2203494  | 3595315  |
| 10.7188  | 6  | 1 | 4 | 14347740 | 3687672  | 834302.8 | 35987748 | 57639132 | 4154917  | 4544843  | 2759371  | 2822162  |
| 9.979667 | 10 | 5 | 5 | 436997   | 1953220  | 348454.7 | 1623236  | 522303.3 | 2241645  | 2368569  | 1855627  | 1514616  |
| 9.488133 | 11 | 5 | 5 | 3007830  | 17396453 | 11968003 | 9706566  | 8494840  | 25883124 | 31103802 | 597047.6 | 17549270 |
| 9.964417 | 7  | 2 | 3 | 946477.8 | 1788667  | 930617.4 | 1209167  | 585920.5 | 2162037  | 338608   | 1813363  | 1736663  |
| 9.858833 | 9  | 4 | 5 | 2235188  | 10741871 | 3492469  | 8578032  | 2151854  | 12589399 | 7435129  | 8646412  | 15963962 |
| 10.44062 | 8  | 5 | 3 | 159067.2 | 545358.4 | 188530.6 | 689369.1 | 202971.8 | 555971.2 | 796804.1 | 648395.2 | 390861.4 |
| 10.22632 | 10 | 5 | 5 | 452356   | 1932175  | 878808   | 1416599  | 385130.1 | 867188.1 | 3075823  | 2331006  | 2125878  |
| 41.81967 | 8  | 2 | 3 | 390310.5 | 6627115  | 1792485  | 5468458  | 1301403  | 7169887  | 8585149  | 6649987  | 3701168  |
| 10.01545 | 5  | 3 | 2 | 934080   | 2683805  | 1832986  | 4190146  | 2236882  | 5704166  | 3135412  | 1275412  | 1645650  |
| 10.93618 | 8  | 4 | 3 | 245087.9 | 869434   | 467504.4 | 544262.8 | 415432.5 | 1259245  | 1048914  | 402748.5 | 334904.4 |
| 39.0775  | 4  | 3 | 1 | 192975.8 | 2160108  | 235469.3 | 2336736  | 245314.9 | 1880836  | 2042154  | 2471395  | 2324085  |
| 9.352183 | 8  | 3 | 4 | 553522.6 | 2778058  | 467167.2 | 2095077  | 1175399  | 1965305  | 2829905  | 3116724  | 2934916  |
| 9.447733 | 8  | 4 | 4 | 591680.5 | 3616365  | 3072122  | 1836662  | 1176698  | 8487404  | 1213578  | 2036548  | 1534945  |
| 10.95835 | 10 | 5 | 5 | 567727.3 | 2894805  | 996792.4 | 2245112  | 743938.3 | 3904759  | 3469952  | 1596155  | 2082229  |
| 9.379233 | 6  | 4 | 2 | 384895.7 | 660651.7 | 281168.9 | 360205.5 | 493238.6 | 977068.1 | 214305.1 | 775265.1 | 710887.3 |
| 36.2665  | 4  | 1 | 3 | 65753.86 | 221751.5 | 108585.6 | 310062.1 | 130381.6 | 316647.7 | 59732.71 | 201861.9 | 203101.3 |
| 9.975217 | 4  | 1 | 3 | 873314.9 | 607599.5 | 283992.1 | 1097444  | 854289.7 | 627503.8 | 961994.6 | 759573.6 | 476818.1 |
| 9.853633 | 10 | 5 | 5 | 2070887  | 9690809  | 3641669  | 7210473  | 3081216  | 7996345  | 9475720  | 5613883  | 15475934 |
| 9.43325  | 11 | 5 | 4 | 2210339  | 11578145 | 4257504  | 8769671  | 3302409  | 13531688 | 10427890 | 10976939 | 17264335 |
| 24.08817 | 3  | 0 | 3 | 3561757  | 24032.78 | 25483.7  | 8452316  | 15075619 | 11038.91 | 23657.44 | 0        | 18737.29 |
| 10.2666  | 10 | 5 | 5 | 463092.6 | 1694586  | 318423.2 | 1389137  | 487097.8 | 1761202  | 1882102  | 2074318  | 1479839  |
| 9.918833 | 6  | 2 | 3 | 2679194  | 8685923  | 3943028  | 6217866  | 2559818  | 10417813 | 4170342  | 4808364  | 11128180 |
| 10.008   | 8  | 5 | 3 | 1419767  | 770748   | 121696.7 | 1812066  | 1861778  | 891569.4 | 645040.3 | 738287.3 | 673040.6 |

|          |    |   |   |          |          |          |          |          |          |          |          |          |
|----------|----|---|---|----------|----------|----------|----------|----------|----------|----------|----------|----------|
| 9.445217 | 14 | 5 | 5 | 1145224  | 9651047  | 3040824  | 7595329  | 2526946  | 12499848 | 12112599 | 10614167 | 7564478  |
| 10.9645  | 10 | 5 | 5 | 56776676 | 3.95E+08 | 47606564 | 3.57E+08 | 56254814 | 4.29E+08 | 4.33E+08 | 3.45E+08 | 3.4E+08  |
| 28.9205  | 6  | 2 | 4 | 103432.2 | 631040   | 127576   | 500023.3 | 213430.7 | 490638.2 | 606691.4 | 576287.3 | 646695.3 |
| 10.94443 | 10 | 5 | 5 | 658669   | 2416283  | 607582.3 | 1948815  | 665945.8 | 2458387  | 2735946  | 1920843  | 1735366  |
| 44.88283 | 8  | 4 | 4 | 315056.8 | 3115463  | 98107.27 | 2893346  | 392518.2 | 2961448  | 3150448  | 3081391  | 3173653  |
| 9.317167 | 5  | 2 | 3 | 604214.7 | 1099150  | 287566.1 | 1487852  | 665164.9 | 752091.3 | 1218870  | 1498112  | 1118448  |
| 9.864767 | 9  | 5 | 4 | 5239731  | 11165590 | 2489605  | 17077079 | 10463502 | 11742308 | 7033549  | 13027542 | 13127074 |
| 9.992233 | 13 | 4 | 5 | 612134.9 | 2109173  | 877908.9 | 1517890  | 724497.6 | 2229609  | 670768   | 2657430  | 2045381  |
| 14.18633 | 8  | 4 | 4 | 62236.75 | 382992.4 | 56935.04 | 305487.2 | 132804.5 | 308812.4 | 425941.2 | 334849.6 | 431377   |
| 9.976317 | 10 | 4 | 5 | 1146131  | 1961808  | 1577968  | 1061301  | 497942.1 | 1344133  | 1531238  | 1017737  | 4763109  |
| 22.07717 | 9  | 4 | 5 | 739352.1 | 2829092  | 966134.3 | 2246017  | 531172.5 | 2081334  | 4392203  | 3136664  | 2322960  |
| 41.97783 | 8  | 2 | 4 | 422362   | 6292715  | 778368.4 | 8121895  | 3238946  | 6727384  | 6917459  | 5684251  | 5238905  |
| 9.445217 | 14 | 5 | 5 | 3780232  | 26247934 | 7525003  | 20716755 | 7586323  | 34155237 | 31649547 | 28314443 | 21042915 |
| 9.45945  | 8  | 2 | 5 | 1078484  | 4082448  | 2770437  | 2270816  | 2109718  | 2386904  | 7122502  | 6727119  | 740005.4 |
| 9.445217 | 14 | 5 | 5 | 3549217  | 25802791 | 5481656  | 21528128 | 6167949  | 23108174 | 31998399 | 31465183 | 20720477 |
| 13.62435 | 12 | 5 | 5 | 845616.1 | 19424567 | 7325992  | 14870789 | 4669962  | 9253469  | 25614176 | 14727696 | 21194645 |
| 22.94333 | 10 | 5 | 5 | 1113322  | 9532202  | 1083243  | 8578658  | 1476272  | 10308069 | 10620636 | 9374306  | 9523443  |
| 9.904767 | 10 | 5 | 5 | 4515602  | 30669316 | 2055902  | 25805313 | 8623709  | 32265651 | 29474230 | 28173312 | 30215630 |
| 9.559117 | 9  | 5 | 4 | 423517.9 | 1013525  | 247512.5 | 822690.2 | 273235.6 | 952546.3 | 1420714  | 884936.6 | 771835   |
| 9.8322   | 7  | 3 | 4 | 54347956 | 1.29E+08 | 1.7E+08  | 30923074 | 62214644 | 5089467  | 4475681  | 3.3E+08  | 2.98E+08 |
| 10.95602 | 8  | 4 | 4 | 432486.1 | 1684515  | 429387.3 | 1222892  | 762700.7 | 1429563  | 2161181  | 1226658  | 1480276  |
| 9.960817 | 5  | 0 | 4 | 13838498 | 635149.2 | 1150336  | 25757633 | 45096799 | 112211.6 | 2692440  | 89722.4  | 121824.2 |
| 20.24783 | 4  | 3 | 1 | 65411532 | 2.05E+08 | 2.82E+08 | 3.93E+08 | 2.29E+08 | 5.74E+08 | 2089537  | 4.44E+08 | 1222531  |
| 9.870017 | 5  | 3 | 2 | 4937849  | 16091650 | 6889646  | 20150125 | 3262553  | 9578107  | 16203613 | 9728004  | 26042078 |
| 9.94455  | 10 | 5 | 5 | 3016046  | 10374137 | 1921521  | 9063010  | 1649077  | 12690932 | 10381123 | 7865917  | 9222731  |
| 7.303317 | 7  | 4 | 3 | 321666.8 | 1992028  | 341369.7 | 2924883  | 1660958  | 2140934  | 2442944  | 1572079  | 1747009  |
| 9.388367 | 7  | 4 | 3 | 712402.8 | 2626214  | 889718.5 | 1783082  | 1345893  | 1691445  | 3568082  | 3587806  | 2218191  |
| 9.887133 | 9  | 5 | 4 | 4381179  | 9163216  | 1655658  | 13124549 | 7032794  | 11423533 | 8744808  | 10224352 | 8124532  |
| 9.92825  | 7  | 3 | 3 | 949021.9 | 1278679  | 239171   | 1737965  | 809259.7 | 1316408  | 1419668  | 1182177  | 1549674  |
| 44.49183 | 4  | 1 | 3 | 373399   | 5706254  | 354626.3 | 6298176  | 1035267  | 6078836  | 5795717  | 5860070  | 5665642  |
| 9.856867 | 8  | 4 | 4 | 2483036  | 4290011  | 2554381  | 7445687  | 5356489  | 1970123  | 2735969  | 4029787  | 4156044  |
| 9.714167 | 6  | 5 | 1 | 327616.8 | 626440.2 | 263555.6 | 461201.9 | 175044.7 | 892387.9 | 866248   | 396839.7 | 316952.4 |
| 10.94443 | 10 | 5 | 5 | 189436.5 | 524814.3 | 105001.2 | 678872   | 266861.5 | 686443   | 568828.5 | 492249   | 437420.8 |
| 11.7856  | 10 | 5 | 5 | 892715.9 | 1266899  | 356295.3 | 2660559  | 2494787  | 1643533  | 1200690  | 704166.6 | 1473835  |
| 10.74768 | 3  | 0 | 3 | 632548   | 1843096  | 419861.8 | 3071754  | 2192137  | 1769190  | 2527186  | 1429984  | 1600313  |



|          |    |   |   |          |          |          |          |          |          |          |          |          |
|----------|----|---|---|----------|----------|----------|----------|----------|----------|----------|----------|----------|
| 9.445217 | 11 | 5 | 5 | 551451.8 | 4023663  | 1369911  | 2851921  | 1794562  | 4347804  | 5204002  | 5221900  | 1993984  |
| 41.97783 | 5  | 4 | 1 | 373062.4 | 3888440  | 1077620  | 4546028  | 637813.3 | 4300006  | 4627973  | 1990003  | 4111367  |
| 9.4468   | 14 | 5 | 5 | 1305140  | 9978275  | 2800039  | 8056596  | 2443837  | 12948532 | 11783972 | 11089789 | 7630896  |
| 11.27298 | 10 | 5 | 5 | 143747.5 | 902963.6 | 97962.88 | 741966.2 | 281503.6 | 982610.8 | 732436.6 | 921834.5 | 941707.1 |
| 8.98945  | 8  | 3 | 5 | 306713.6 | 797285.2 | 412745.5 | 1052720  | 261428.9 | 940084.7 | 1177327  | 1117513  | 547041.7 |
| 9.842    | 10 | 5 | 5 | 1816397  | 7752697  | 1018026  | 6508261  | 2112245  | 9131527  | 8318336  | 7746010  | 6936847  |
| 10.008   | 9  | 5 | 4 | 817392.5 | 894943.5 | 279036.9 | 1577456  | 1214742  | 1076021  | 648331.1 | 1291345  | 674880.8 |
| 10.07098 | 9  | 5 | 4 | 836917.4 | 2465077  | 392425.3 | 2749020  | 386091.1 | 2730589  | 2842507  | 2469194  | 2452740  |
| 9.8445   | 7  | 3 | 4 | 1358413  | 5846069  | 1792806  | 4223796  | 2552662  | 6376770  | 5429169  | 3321495  | 8300811  |
| 9.445217 | 5  | 3 | 2 | 1037247  | 5217061  | 1493531  | 4051540  | 1692624  | 4030837  | 5529812  | 6284992  | 6888759  |
| 9.999217 | 10 | 5 | 5 | 764926.6 | 2469934  | 224552.2 | 1986200  | 858294.6 | 2403242  | 2795839  | 2306914  | 2248877  |
| 9.870017 | 4  | 1 | 3 | 1647327  | 825375.5 | 559778.6 | 3457268  | 4727404  | 845769.6 | 662534.5 | 1505361  | 1113212  |
| 9.952017 | 8  | 5 | 3 | 1534226  | 2032630  | 522946.8 | 3046110  | 1791266  | 1891219  | 2387347  | 2661487  | 1926188  |
| 9.999217 | 10 | 5 | 5 | 819732.9 | 3168289  | 734167.4 | 2479657  | 1099415  | 3519372  | 3351283  | 2417273  | 2436610  |
| 9.370583 | 7  | 4 | 2 | 9541049  | 23328523 | 47204932 | 68279718 | 72139692 | 2376796  | 590049.2 | 2783232  | 3139476  |
| 20.3025  | 4  | 3 | 1 | 92688.28 | 357068   | 147771.1 | 481422.1 | 189498.5 | 129307.8 | 345475.9 | 342942.3 | 445006.1 |
| 9.856867 | 9  | 5 | 4 | 2170628  | 1646989  | 682664.8 | 4844671  | 5746690  | 2757098  | 1682356  | 1509785  | 1370227  |
| 9.9014   | 9  | 5 | 4 | 7108252  | 6919000  | 2620036  | 15324863 | 15056146 | 7559142  | 3587918  | 9865411  | 8693696  |
| 10.58257 | 5  | 4 | 1 | 255024.3 | 1262461  | 340807.8 | 944776.7 | 506443   | 1692757  | 1117419  | 1100451  | 865753.3 |
| 9.856867 | 9  | 5 | 4 | 4961660  | 2889178  | 181352.6 | 8258382  | 9681775  | 2777067  | 2855211  | 3114733  | 3028044  |
| 9.04395  | 4  | 3 | 1 | 354783.8 | 550211.9 | 354699.4 | 319345.4 | 270464.6 | 323686.2 | 1136630  | 580203.2 | 230486.5 |
| 9.949233 | 13 | 5 | 5 | 1728379  | 3275643  | 320444.8 | 4274333  | 1789160  | 3177575  | 3612101  | 3596799  | 3114680  |
| 10.008   | 13 | 5 | 4 | 1531277  | 3753777  | 1493394  | 6135477  | 4168959  | 4743431  | 1220861  | 3809140  | 4041751  |
| 8.774517 | 8  | 4 | 4 | 647417.6 | 1624965  | 1255549  | 861722.1 | 740624.7 | 689035.2 | 3690933  | 1338353  | 1804749  |
| 9.976317 | 4  | 3 | 1 | 343982.3 | 529622.7 | 504673.4 | 227283.4 | 275898   | 903948.2 | 1075925  | 668240.6 | 0        |
| 9.949233 | 10 | 5 | 3 | 1186720  | 2935837  | 1489062  | 4037191  | 1536598  | 1420995  | 2019865  | 5274601  | 3343400  |
| 10.16938 | 10 | 5 | 5 | 558283.1 | 1711564  | 831084.7 | 1233079  | 332476.9 | 2859349  | 2218789  | 1531505  | 789758.4 |
| 9.88815  | 4  | 1 | 3 | 1037927  | 1520802  | 792114.4 | 3065470  | 2737166  | 1786232  | 790949.5 | 2772300  | 1251063  |
| 10.01837 | 10 | 5 | 5 | 587532.8 | 2245656  | 69577.63 | 1839967  | 731188.7 | 2238602  | 2130556  | 2297655  | 2301965  |
| 12.45587 | 10 | 5 | 5 | 414778.3 | 2785808  | 581526   | 2257088  | 836685.6 | 3380311  | 3044858  | 2184042  | 2141104  |
| 44.466   | 7  | 1 | 4 | 264034.8 | 2700737  | 1259725  | 3410296  | 349096.9 | 459582.1 | 3056860  | 3246449  | 3411232  |
| 15.72875 | 5  | 3 | 1 | 1529414  | 14907775 | 8964591  | 9849280  | 2603388  | 14426723 | 5838638  | 29862220 | 12812471 |
| 19.05383 | 7  | 4 | 2 | 47843752 | 53640971 | 1.19E+08 | 1.48E+08 | 1.39E+08 | 370873.1 | 222029.7 | 467002.6 | 228268.6 |
| 9.8887   | 7  | 3 | 4 | 24280826 | 50653979 | 66055069 | 13007383 | 23269044 | 1.35E+08 | 1.1E+08  | 2538424  | 3538816  |
| 9.419733 | 7  | 3 | 3 | 865304.4 | 5870603  | 2543992  | 4091809  | 2341505  | 7670137  | 4875973  | 7067742  | 7888087  |

|          |    |   |   |          |          |          |          |          |          |          |          |          |
|----------|----|---|---|----------|----------|----------|----------|----------|----------|----------|----------|----------|
| 9.872883 | 10 | 5 | 5 | 1280880  | 7125996  | 694777.4 | 5778140  | 2389166  | 7712107  | 7403337  | 6157622  | 6645933  |
| 13.7122  | 10 | 5 | 5 | 1997061  | 20116574 | 3936892  | 17104511 | 4332907  | 23298431 | 22493514 | 15951866 | 15684166 |
| 9.445217 | 14 | 5 | 5 | 1320424  | 9033926  | 2848143  | 6907070  | 2999288  | 12050585 | 11019534 | 9757673  | 7286123  |
| 9.842    | 9  | 5 | 4 | 843101.1 | 3095066  | 211187.4 | 2764251  | 579329.6 | 3332314  | 3313724  | 2988790  | 2889530  |
| 14.98788 | 8  | 4 | 3 | 80156.98 | 329330.2 | 102556.3 | 259631.3 | 88407.06 | 454439.6 | 202151.2 | 335414.7 | 255911.2 |
| 9.445217 | 14 | 5 | 5 | 11639758 | 92591743 | 28838049 | 72566311 | 26162360 | 1.23E+08 | 1.11E+08 | 1.04E+08 | 70583280 |
| 9.946467 | 10 | 5 | 5 | 5860330  | 21582259 | 2931970  | 18797762 | 4482089  | 26279602 | 22577567 | 19562724 | 19242850 |
| 10.9645  | 10 | 5 | 5 | 6010403  | 41719523 | 4411970  | 37641836 | 6501386  | 44201647 | 45468519 | 37529586 | 36339619 |
| 9.93625  | 10 | 5 | 5 | 3189173  | 12346055 | 1981069  | 10267515 | 3442661  | 14340098 | 12944083 | 9998724  | 10517112 |
| 9.858833 | 5  | 1 | 4 | 1552801  | 5036648  | 2323777  | 3530943  | 1759638  | 4654396  | 1670635  | 7921866  | 6312771  |
| 9.43325  | 7  | 4 | 3 | 620572.7 | 5030146  | 1037496  | 4155974  | 1338833  | 5720977  | 4778418  | 4397206  | 6420427  |
| 10.9645  | 10 | 5 | 5 | 5868117  | 38282825 | 3432997  | 34625839 | 6079533  | 40099322 | 40284971 | 35433253 | 33845820 |
| 10.98605 | 10 | 5 | 5 | 333643   | 1258397  | 372849.4 | 942505.7 | 485338.7 | 1062874  | 784587.6 | 1265251  | 1397468  |
| 13.59513 | 10 | 5 | 5 | 568416.7 | 10591434 | 4601449  | 7334821  | 4359435  | 11567213 | 12751567 | 3353827  | 9619029  |
| 29.0825  | 4  | 3 | 1 | 254947.9 | 870437.3 | 807408.1 | 1415872  | 686859.3 | 169105.3 | 585719.1 | 1765766  | 131906.6 |
| 9.999217 | 11 | 5 | 5 | 478574.1 | 2128879  | 277262.5 | 1802539  | 553570   | 2443675  | 2377382  | 1910178  | 1816146  |
| 9.859983 | 9  | 5 | 4 | 2286056  | 10691853 | 2047214  | 7745988  | 5127431  | 10063295 | 8813935  | 9272070  | 11406153 |
| 9.952017 | 4  | 1 | 3 | 3.18E+08 | 8.06E+08 | 4.68E+08 | 4.22E+08 | 5.8E+08  | 1.23E+09 | 1659024  | 9.19E+08 | 9.53E+08 |
| 9.673333 | 9  | 4 | 5 | 493789.4 | 1479494  | 533362.5 | 1174048  | 205544.2 | 1902626  | 2122174  | 1452000  | 1015174  |
| 9.568567 | 4  | 3 | 1 | 575292.6 | 1533343  | 1036797  | 2479455  | 1503277  | 1944910  | 544153.2 | 2332629  | 2537967  |
| 10.01523 | 12 | 4 | 4 | 970617.8 | 3182106  | 3149421  | 1418112  | 783843.7 | 800894.1 | 4315789  | 983699.8 | 1592236  |
| 9.445217 | 14 | 5 | 5 | 2883645  | 21971976 | 6465822  | 17324441 | 6337173  | 28842223 | 27130986 | 23380155 | 16010376 |
| 12.48505 | 10 | 5 | 5 | 162131.9 | 965582   | 281959.2 | 732407.7 | 354131.9 | 1020613  | 1232806  | 697417   | 646825.3 |
| 37.41633 | 5  | 3 | 2 | 405092.9 | 7309742  | 1265580  | 5731553  | 2703438  | 7181781  | 8815738  | 5463031  | 8092806  |
| 25.41017 | 5  | 2 | 3 | 283237.7 | 1388548  | 414330.6 | 1101423  | 375359.9 | 838148.7 | 1949080  | 1466316  | 1171922  |
| 8.6027   | 7  | 3 | 4 | 625614.1 | 6085864  | 1900354  | 4817266  | 1572181  | 6054106  | 8856795  | 4106638  | 4574470  |
| 9.976317 | 5  | 3 | 2 | 482809.2 | 920570.3 | 337357.9 | 617357.4 | 479424.5 | 1265081  | 1182315  | 1011678  | 662952.6 |
| 9.845483 | 10 | 5 | 5 | 3293365  | 17356224 | 3300364  | 13717333 | 6107317  | 17622740 | 16749615 | 13039592 | 17071662 |
| 9.859983 | 8  | 4 | 4 | 1276552  | 3484353  | 2172935  | 2236824  | 872848.1 | 6931481  | 936387.2 | 2784328  | 3353982  |
| 9.952017 | 10 | 5 | 5 | 1931830  | 6959997  | 773974.3 | 5535498  | 2527194  | 7757643  | 7107151  | 6251277  | 6064751  |
| 9.445217 | 14 | 5 | 5 | 2083666  | 16695293 | 5351288  | 12732502 | 5577632  | 22207582 | 20692354 | 17864030 | 13570589 |
| 9.8322   | 9  | 5 | 4 | 811266   | 4070637  | 414056.2 | 3640534  | 712849.2 | 3729164  | 3636052  | 4000007  | 4402133  |
| 10.47023 | 10 | 5 | 5 | 897794.4 | 4080647  | 589453.2 | 3566073  | 804665.6 | 4590831  | 4457930  | 3361436  | 3519145  |
| 9.912633 | 10 | 5 | 5 | 7225418  | 64178640 | 4396186  | 57284466 | 12114986 | 58624382 | 67663520 | 60218317 | 67667222 |
| 9.845483 | 8  | 4 | 4 | 1835151  | 4512001  | 1005549  | 3774839  | 1028370  | 3681434  | 6228846  | 3918268  | 4288900  |

|          |    |   |   |          |          |          |          |          |          |          |          |          |
|----------|----|---|---|----------|----------|----------|----------|----------|----------|----------|----------|----------|
| 9.976317 | 9  | 5 | 4 | 503146.1 | 1634022  | 304922.3 | 1366909  | 418382.7 | 1821162  | 1096871  | 1819437  | 1701607  |
| 9.979667 | 6  | 4 | 2 | 8830153  | 3702858  | 6941162  | 10093768 | 10214169 | 606562.7 | 589905.2 | 16117969 | 441769.7 |
| 10.9645  | 10 | 5 | 5 | 226507.3 | 1149251  | 206455.9 | 896439.5 | 432711.3 | 1344579  | 1322847  | 844341.2 | 1057291  |
| 9.445217 | 6  | 3 | 3 | 831921.6 | 2939152  | 765972.2 | 1983446  | 1640301  | 3018723  | 3354511  | 2041720  | 2339901  |
| 22.175   | 3  | 0 | 3 | 116361.1 | 412627.5 | 225395.7 | 265759.8 | 175010.5 | 337323.4 | 626250.7 | 150093.2 | 280739.9 |
| 9.4925   | 10 | 5 | 5 | 2215008  | 6444962  | 1011319  | 5183477  | 2165090  | 7253044  | 7691517  | 6247245  | 5762477  |
| 9.064833 | 6  | 4 | 2 | 690432.4 | 2208130  | 848744.6 | 1673302  | 592198.6 | 1914991  | 3709499  | 1837784  | 1952360  |
| 24.359   | 6  | 4 | 2 | 800599.6 | 2447001  | 3118052  | 722837   | 368692.1 | 7861917  | 2300968  | 298253.1 | 1062417  |
| 9.91875  | 7  | 3 | 4 | 554775.7 | 1105574  | 509973.5 | 1454167  | 450032.2 | 1102047  | 345226   | 1754853  | 1032449  |
| 9.295817 | 5  | 3 | 1 | 374108.5 | 1557345  | 620293.4 | 1030263  | 815323.7 | 1503987  | 791285.8 | 1400258  | 2518834  |
| 10.57323 | 10 | 5 | 5 | 21410016 | 1.22E+08 | 19106326 | 1.06E+08 | 22931724 | 1.32E+08 | 1.38E+08 | 1.03E+08 | 98818525 |
| 10.95055 | 7  | 3 | 4 | 640545.6 | 1586119  | 519307.9 | 2027236  | 682345.1 | 2449579  | 1584536  | 1126680  | 1241555  |
| 18.10967 | 10 | 5 | 5 | 803297.4 | 5926196  | 1092381  | 4555125  | 2360266  | 6923486  | 4089097  | 5966155  | 6528836  |
| 9.975217 | 13 | 5 | 5 | 5745294  | 12974970 | 5262085  | 9695179  | 3552022  | 14520028 | 10554968 | 6726990  | 12171273 |
| 9.9014   | 10 | 5 | 5 | 3435284  | 18889866 | 1851580  | 17218785 | 2658064  | 17954471 | 16387584 | 20546292 | 20840408 |
| 9.8322   | 7  | 4 | 3 | 843800.5 | 2648904  | 842712.9 | 1886453  | 1214312  | 3433974  | 2463345  | 1885578  | 1838116  |
| 41.97783 | 7  | 5 | 2 | 376873   | 5499242  | 1948930  | 4317178  | 1175629  | 8358851  | 4601737  | 3108766  | 6163038  |
| 9.932033 | 10 | 5 | 5 | 1849885  | 5252129  | 989815   | 4546209  | 962791.2 | 6758740  | 5555889  | 5199290  | 4442425  |
| 27.26983 | 10 | 5 | 5 | 329536.3 | 1260618  | 986437.7 | 710817.3 | 244117.9 | 632063.7 | 854889.8 | 763785.6 | 1048027  |
| 10.96997 | 10 | 5 | 4 | 652346.1 | 1821578  | 676268.5 | 2742376  | 1602845  | 1127741  | 1462727  | 1976811  | 2899735  |
| 9.445217 | 14 | 5 | 5 | 15607412 | 1.12E+08 | 31990907 | 89567009 | 28889975 | 1.47E+08 | 1.32E+08 | 1.23E+08 | 86922456 |
| 11.02755 | 10 | 4 | 5 | 688916.8 | 1672746  | 1304378  | 938793.7 | 416607.5 | 4003449  | 1156379  | 1031534  | 1024807  |
| 9.856867 | 10 | 5 | 5 | 6775723  | 20671306 | 2265394  | 27805515 | 12900292 | 24536154 | 19342795 | 20411870 | 20296598 |
| 10.9645  | 10 | 5 | 5 | 751299.9 | 3759286  | 648954.4 | 3199534  | 875302.6 | 4224051  | 4389586  | 3177287  | 2954601  |
| 42.27983 | 3  | 0 | 3 | 290969   | 3959466  | 208664.1 | 4230362  | 469372.7 | 4046560  | 4244240  | 3711595  | 3807041  |
| 9.842    | 10 | 5 | 5 | 28813094 | 1.42E+08 | 16956659 | 1.22E+08 | 34910222 | 1.6E+08  | 1.53E+08 | 1.25E+08 | 1.23E+08 |
| 9.445217 | 10 | 5 | 5 | 2983485  | 23058187 | 7291069  | 17017709 | 9261717  | 29241507 | 31886831 | 21706259 | 17044966 |
| 9.507167 | 6  | 3 | 3 | 946284.3 | 870756.9 | 408031.7 | 1920507  | 1892770  | 772848.1 | 1378685  | 1161305  | 705632.3 |
| 27.94    | 10 | 5 | 5 | 120529.4 | 622188.9 | 368942.2 | 418640.2 | 56977.37 | 701580.3 | 836217   | 222317.6 | 271187.5 |
| 15.4474  | 11 | 5 | 5 | 791838.3 | 5065313  | 1196971  | 3720312  | 2280906  | 6849655  | 3796788  | 4529293  | 4505148  |
| 28.28817 | 10 | 5 | 5 | 775908.2 | 3814929  | 801412.2 | 3065185  | 1212901  | 3358651  | 4921568  | 3000880  | 3417119  |
| 9.22995  | 5  | 3 | 2 | 5619814  | 3711226  | 3988389  | 7397537  | 5938331  | 529866.7 | 3003925  | 460544   | 4369228  |
| 10.84353 | 7  | 3 | 4 | 132122.3 | 252083.5 | 135191.4 | 346583.5 | 126611.5 | 101848.8 | 450557.9 | 317110.2 | 211280.9 |
| 42.99917 | 10 | 4 | 5 | 354228   | 4563283  | 2025162  | 2567387  | 3282880  | 7438639  | 2485144  | 2821384  | 4624299  |
| 8.855567 | 6  | 4 | 2 | 658216.7 | 1610659  | 1022899  | 928785.6 | 856656.7 | 1185491  | 3390363  | 1503010  | 1142495  |

|          |    |   |   |          |          |          |          |          |          |          |          |          |
|----------|----|---|---|----------|----------|----------|----------|----------|----------|----------|----------|----------|
| 19.578   | 7  | 4 | 3 | 233063.8 | 1415691  | 1107917  | 2332224  | 1406727  | 1192991  | 1098660  | 1209652  | 298729.8 |
| 10.51423 | 10 | 5 | 5 | 982065.3 | 3402532  | 983325.6 | 2713048  | 927938   | 4839393  | 3997139  | 2559237  | 2680844  |
| 9.94405  | 9  | 5 | 4 | 14640679 | 3932020  | 1244900  | 15480176 | 21038922 | 5130571  | 4231022  | 5027888  | 2401499  |
| 9.445217 | 9  | 4 | 4 | 913016.3 | 3172773  | 1102630  | 2265100  | 1389749  | 3377452  | 4993715  | 2646329  | 2194557  |
| 9.40615  | 7  | 4 | 3 | 556852.6 | 1351884  | 519302.4 | 843763.6 | 834654.7 | 1883613  | 1879402  | 862119.5 | 826659.4 |
| 9.992233 | 9  | 5 | 4 | 328354.5 | 1039062  | 242036.6 | 750342.3 | 495323.2 | 1319904  | 1142158  | 867683.9 | 717300.5 |
| 9.40325  | 8  | 3 | 5 | 1767069  | 9436675  | 6176642  | 5700949  | 3733318  | 10066027 | 3247549  | 17277265 | 13287577 |
| 15.54172 | 4  | 1 | 3 | 73602.61 | 563075.8 | 105897.1 | 430156.1 | 229790.6 | 690096.5 | 548500.1 | 435482.4 | 492819.1 |
| 10.008   | 9  | 5 | 4 | 868496.8 | 923389.3 | 271970.1 | 1551093  | 1130524  | 823948.5 | 938368.4 | 1382057  | 788087.2 |
| 9.445217 | 15 | 5 | 5 | 15319700 | 1.09E+08 | 32076236 | 86114225 | 32587776 | 1.43E+08 | 1.32E+08 | 1.2E+08  | 84346464 |
| 9.880683 | 7  | 3 | 4 | 2121370  | 2377962  | 1291673  | 6569292  | 7600807  | 3362065  | 1862546  | 1764026  | 4039943  |
| 9.94455  | 5  | 2 | 3 | 991176.8 | 2037127  | 654870.5 | 1477180  | 875244.8 | 2885661  | 2498356  | 1546689  | 1306137  |
| 20.51567 | 10 | 5 | 5 | 191478.2 | 1005607  | 215186.6 | 860712.6 | 185459.4 | 1009166  | 1236725  | 980748.8 | 667070.6 |
| 10.008   | 8  | 3 | 3 | 4555935  | 4422917  | 3773129  | 2332681  | 854006.9 | 554027   | 2663161  | 6572560  | 9917964  |
| 9.43325  | 10 | 5 | 5 | 1363196  | 7106286  | 1932468  | 9783313  | 4686905  | 9135688  | 6688792  | 8991224  | 4658578  |
| 9.448983 | 8  | 4 | 4 | 4954114  | 24499499 | 15205486 | 14376420 | 12738269 | 37045323 | 34079712 | 757715.6 | 32746171 |
| 10.02372 | 7  | 4 | 3 | 1037423  | 787877.4 | 485346.4 | 1769337  | 1762453  | 594696.3 | 588989.9 | 766048   | 1619021  |
| 10.008   | 8  | 5 | 3 | 372624.3 | 728845.1 | 161920.4 | 579224.5 | 241765.2 | 835767.2 | 619024.5 | 892716.4 | 504188.5 |
| 16.27145 | 10 | 5 | 5 | 3663681  | 32465199 | 4873005  | 28838764 | 5198540  | 28452253 | 35836271 | 26284834 | 34137284 |
| 10.9645  | 9  | 4 | 5 | 608325.3 | 1564946  | 610899   | 1146206  | 550598.8 | 1338701  | 2655425  | 1285716  | 1231372  |
| 25.69517 | 8  | 3 | 5 | 73650.38 | 278388.2 | 75369.26 | 355187.4 | 127908   | 212243.6 | 373908.4 | 244284.8 | 344189.8 |
| 9.976317 | 5  | 2 | 3 | 434914.5 | 1089581  | 86165.08 | 845555.3 | 442550.8 | 1037519  | 1207827  | 1060757  | 995148.7 |
| 10.94443 | 8  | 4 | 4 | 284691.8 | 508523.2 | 159754.5 | 960061.6 | 818900.2 | 620243.1 | 668326.2 | 578359.4 | 316308.8 |
| 9.960467 | 9  | 5 | 4 | 1066884  | 3944134  | 423977.4 | 3170600  | 1384231  | 4448911  | 3975534  | 3756628  | 3341256  |
| 9.445217 | 13 | 5 | 4 | 1491668  | 9185488  | 2942254  | 7133449  | 2762477  | 12033831 | 11428368 | 10142391 | 7228730  |
| 9.280767 | 5  | 4 | 1 | 1493366  | 2719659  | 1616167  | 4957081  | 3925496  | 5400633  | 1320948  | 1645822  | 2361352  |
| 9.999217 | 10 | 5 | 5 | 444814.6 | 1676144  | 74899.18 | 1471527  | 371011.1 | 1667727  | 1676332  | 1661169  | 1583162  |
| 9.392767 | 9  | 5 | 4 | 1098589  | 2654660  | 739514   | 1967896  | 1113677  | 2990069  | 3081234  | 1898868  | 1838602  |
| 9.859983 | 8  | 4 | 4 | 1409206  | 5247149  | 1506585  | 4187709  | 1440467  | 2658541  | 5185427  | 5983048  | 6189947  |
| 9.328967 | 5  | 3 | 2 | 600772.8 | 1631075  | 501938.2 | 2454900  | 1466376  | 1242746  | 1695475  | 2469678  | 1466266  |
| 44.25017 | 11 | 3 | 4 | 433536.7 | 3189015  | 1467232  | 4809648  | 2753024  | 3243911  | 3080711  | 5293052  | 1147130  |
| 10.71398 | 5  | 4 | 1 | 92235.96 | 257132.1 | 99331.61 | 182163   | 109005.9 | 213476.5 | 363069.1 | 364115.3 | 189351.5 |
| 10.47023 | 10 | 5 | 5 | 339023.9 | 1147758  | 236089.3 | 950914.4 | 305062.2 | 1433166  | 971940.9 | 1050920  | 916522.2 |
| 19.68067 | 3  | 0 | 3 | 1259404  | 272028.4 | 61390.52 | 3152015  | 5274087  | 312603.1 | 263884.1 | 254667.9 | 184033.5 |
| 10.09898 | 9  | 5 | 4 | 2089480  | 2560274  | 1280563  | 5508657  | 5332239  | 3175977  | 2851995  | 3107280  | 3372262  |

|          |    |   |   |          |          |          |          |          |          |          |          |          |
|----------|----|---|---|----------|----------|----------|----------|----------|----------|----------|----------|----------|
| 9.912633 | 10 | 5 | 5 | 2.66E+08 | 2.41E+09 | 2.63E+08 | 2.24E+09 | 2.32E+08 | 2.77E+09 | 2.6E+09  | 2.14E+09 | 2.33E+09 |
| 9.928667 | 10 | 5 | 5 | 2090160  | 4294459  | 708624.6 | 3727885  | 858728.7 | 5291087  | 4290625  | 4640170  | 3625632  |
| 25.1565  | 10 | 5 | 5 | 18357718 | 49282940 | 88988329 | 706591.4 | 542106.5 | 17024272 | 984662.1 | 2.08E+08 | 5176013  |
| 9.659033 | 7  | 4 | 3 | 379650.5 | 1352782  | 817539.8 | 837463   | 590541.4 | 2503501  | 940294.5 | 1017067  | 449573.3 |
| 3.58705  | 5  | 3 | 2 | 76948.88 | 1140997  | 693925.2 | 1712437  | 881635.2 | 0        | 975111.6 | 1647733  | 1640667  |
| 9.872917 | 10 | 5 | 5 | 9488435  | 58570523 | 3467343  | 49856331 | 15807590 | 57879188 | 55456426 | 56081245 | 59277987 |
| 9.559117 | 10 | 5 | 5 | 10954808 | 39995735 | 6240118  | 32085249 | 13769054 | 40131093 | 50100236 | 39347367 | 37099765 |
| 43.58867 | 6  | 3 | 1 | 752109.8 | 4636115  | 3323611  | 6604592  | 1852695  | 4108227  | 2695687  | 8196246  | 7755660  |
| 29.20317 | 10 | 5 | 5 | 2698266  | 12930858 | 8172016  | 8289780  | 3313396  | 12893939 | 26301197 | 10238001 | 4110735  |
| 9.406667 | 6  | 2 | 3 | 574192.8 | 2036384  | 1446419  | 1224764  | 500416.4 | 259840.4 | 733192.9 | 2726747  | 3533514  |
| 11.68858 | 3  | 3 | 0 | 99826.29 | 247746.7 | 203157.4 | 135963.1 | 40827.24 | 587537.1 | 279951   | 93166.02 | 115936.8 |
| 39.8775  | 9  | 2 | 4 | 341104.9 | 4673113  | 1795866  | 6330396  | 2690218  | 5058271  | 4998079  | 5041420  | 1691620  |
| 9.445217 | 14 | 5 | 5 | 7956717  | 56902082 | 16963453 | 44565855 | 17439692 | 74696221 | 69085654 | 61249427 | 45982949 |
| 10.5972  | 6  | 2 | 4 | 213936.1 | 436357.3 | 152473.8 | 322806.2 | 163939.6 | 343822.8 | 279406.9 | 360556.7 | 622936   |
| 25.116   | 3  | 3 | 0 | 251457   | 554684.4 | 966141.9 | 27843.84 | 27244.92 | 2278126  | 216116.5 | 116192.1 | 15355.14 |
| 9.960467 | 10 | 5 | 5 | 3323580  | 13700475 | 4331232  | 11047165 | 2831919  | 13738763 | 14834639 | 9219613  | 20263833 |
| 10.9645  | 9  | 5 | 4 | 197471.6 | 1035519  | 336603.8 | 794439.5 | 336046.6 | 1252074  | 1050054  | 682944.3 | 725846.9 |
| 9.8322   | 5  | 3 | 2 | 484626   | 1274353  | 632086.6 | 763295.3 | 781736.3 | 1700863  | 1629690  | 791180.1 | 413713.9 |
| 9.295167 | 5  | 2 | 3 | 5428070  | 22665368 | 19579933 | 10349565 | 14102382 | 35214399 | 39881038 | 1506426  | 1115645  |
| 11.27298 | 10 | 5 | 5 | 1505708  | 4892153  | 1836730  | 3306001  | 2509545  | 6722416  | 2134559  | 6048277  | 5544997  |
| 9.896717 | 3  | 3 | 0 | 3084236  | 2787747  | 2152296  | 4773345  | 3225670  | 1529403  | 680834   | 4875455  | 5341255  |
| 9.856867 | 10 | 5 | 5 | 5898345  | 31861282 | 3124891  | 25777039 | 10962926 | 32615543 | 31876796 | 28145741 | 30144604 |
| 9.5021   | 8  | 3 | 4 | 1728172  | 10671219 | 5460367  | 7060176  | 4559610  | 16915758 | 6744428  | 11699678 | 14392193 |
| 9.68775  | 7  | 3 | 4 | 554859.4 | 2238748  | 1025357  | 1617414  | 643618   | 3461547  | 2904809  | 1165045  | 2456259  |
| 9.842    | 3  | 3 | 0 | 1175586  | 2055634  | 845962.2 | 2802976  | 1195207  | 2789965  | 1019710  | 2738802  | 2460965  |
| 9.4775   | 7  | 4 | 3 | 766796.3 | 5982847  | 5045383  | 3191576  | 1358513  | 4574928  | 1864268  | 3006915  | 14585889 |
| 9.445217 | 14 | 5 | 5 | 22426412 | 1.82E+08 | 51902706 | 1.48E+08 | 42692122 | 2.4E+08  | 2.1E+08  | 2.04E+08 | 1.37E+08 |
| 9.994767 | 4  | 3 | 1 | 2657572  | 1922458  | 1999507  | 3672037  | 2791327  | 3911577  | 493881.4 | 4303085  | 419649.2 |
| 35.98083 | 4  | 3 | 0 | 428739.6 | 7697747  | 2907866  | 6113455  | 271109.7 | 12893018 | 6500997  | 6157744  | 6414049  |
| 10.9645  | 10 | 5 | 5 | 772342.2 | 3777709  | 632982.8 | 3214110  | 905701.4 | 4284293  | 4376622  | 3106828  | 3089860  |
| 9.46925  | 14 | 5 | 5 | 2597298  | 15625233 | 3014572  | 11669493 | 6938378  | 17850625 | 17722742 | 14001367 | 11057073 |
| 11.05832 | 5  | 3 | 2 | 17802954 | 24095293 | 20553233 | 40092273 | 23977436 | 42058751 | 17725382 | 5438696  | 5792581  |
| 40.0645  | 8  | 2 | 3 | 280106.6 | 2584905  | 373935.4 | 3682973  | 2004559  | 3048190  | 2701276  | 2738151  | 2358239  |
| 35.50033 | 10 | 5 | 5 | 422781.2 | 1922019  | 1867646  | 818263.5 | 1046366  | 5133092  | 1233357  | 249929   | 1427029  |
| 9.840617 | 3  | 0 | 3 | 645730.9 | 209159.4 | 86024.14 | 677967.7 | 860489   | 125437.3 | 286745.3 | 132755.7 | 189899.7 |

|          |    |   |   |          |          |          |          |          |          |          |          |          |
|----------|----|---|---|----------|----------|----------|----------|----------|----------|----------|----------|----------|
| 9.82645  | 9  | 5 | 4 | 2703523  | 12381348 | 2210938  | 10228209 | 3569506  | 10403263 | 11748494 | 10600717 | 13475758 |
| 9.983433 | 7  | 3 | 4 | 681805.5 | 2378147  | 462975.6 | 2083801  | 347684.4 | 2399350  | 1605134  | 2445677  | 2822039  |
| 9.94455  | 9  | 5 | 3 | 1425070  | 5608218  | 529110.8 | 4779931  | 1477809  | 4729012  | 5573284  | 6027535  | 5701750  |
| 36.684   | 3  | 3 | 0 | 335305.1 | 4397778  | 1077814  | 3808027  | 190989.8 | 6181832  | 4169239  | 4042959  | 4328902  |
| 9.992233 | 6  | 2 | 4 | 600301.2 | 380594.9 | 503355.7 | 876378   | 824857.7 | 657004.2 | 1137696  | 0        | 0        |
| 9.972483 | 11 | 5 | 5 | 4827516  | 11934457 | 2383280  | 9634813  | 3803695  | 13698162 | 15120427 | 11083964 | 10293554 |
| 9.992233 | 9  | 5 | 4 | 996367.3 | 2572510  | 1007904  | 1757572  | 1251897  | 3616439  | 3393972  | 1080479  | 2346880  |
| 10.27612 | 9  | 5 | 4 | 405159.7 | 2159123  | 456920.2 | 1750353  | 658885.6 | 1716581  | 2850754  | 2281189  | 2169924  |
| 9.992233 | 10 | 5 | 5 | 933697.1 | 2333512  | 361361.7 | 1914340  | 723260.5 | 2648706  | 2053721  | 2697802  | 2390683  |
| 9.994767 | 7  | 4 | 3 | 792509.7 | 1207111  | 334749.5 | 1724303  | 922503.1 | 1224854  | 1616155  | 943801.3 | 810807.5 |
| 10.008   | 7  | 4 | 3 | 288545.6 | 781534   | 238223.2 | 586369.9 | 302187.3 | 541666.7 | 832353.1 | 652525.5 | 717336.8 |
| 9.960467 | 5  | 3 | 2 | 409978.1 | 901027.3 | 289944.2 | 670030   | 352056.9 | 1191871  | 1193279  | 877890.3 | 554124.6 |
| 10.95055 | 5  | 2 | 3 | 205486.6 | 627010.9 | 232586.7 | 482794   | 161342.8 | 873753.5 | 861440.6 | 343851.7 | 547541.7 |
| 15.70235 | 8  | 4 | 3 | 585070.5 | 4108671  | 1276694  | 3094484  | 1543402  | 2230699  | 4847737  | 4595037  | 3435607  |
| 8.995417 | 5  | 2 | 3 | 159038.3 | 1199783  | 375387.9 | 957247.3 | 296549   | 963757.9 | 1803800  | 1332168  | 963865.3 |
| 44.14967 | 8  | 3 | 3 | 233123.2 | 3571121  | 1051545  | 2543530  | 1708025  | 2956480  | 5145956  | 3161192  | 4085184  |
| 9.91875  | 7  | 4 | 3 | 686519.4 | 1679944  | 194198.2 | 1370002  | 554445.1 | 1896962  | 1766134  | 1732828  | 1379161  |
| 9.886083 | 6  | 3 | 3 | 1369830  | 2478393  | 1190247  | 4306409  | 3261451  | 2044225  | 1792679  | 4381971  | 1352599  |
| 10.008   | 5  | 2 | 3 | 650153.8 | 825856.6 | 442838   | 1270627  | 745048.9 | 582564.1 | 226964.9 | 1373560  | 865344.3 |
| 9.952017 | 4  | 1 | 3 | 2314042  | 2555945  | 1315585  | 1799053  | 627375.9 | 1726183  | 917985   | 4341778  | 2641979  |
| 24.27117 | 4  | 3 | 1 | 355824.2 | 757972   | 967566.8 | 231975.3 | 89362.85 | 2461757  | 598623.9 | 359463.4 | 208275.5 |
| 9.392767 | 8  | 5 | 3 | 919586.8 | 1969075  | 584110.9 | 1314103  | 1124755  | 2322221  | 2375227  | 1198073  | 1484745  |
| 10.00385 | 10 | 5 | 5 | 1156033  | 2590281  | 352462.5 | 2077059  | 911975.4 | 2930467  | 2305933  | 2737113  | 2848279  |
| 9.43325  | 5  | 3 | 2 | 314975.2 | 2463254  | 972175   | 1816964  | 829836.7 | 3634047  | 2323960  | 3028560  | 2295671  |
| 9.992233 | 3  | 3 | 0 | 277970.2 | 446185.5 | 271869.5 | 250304.3 | 277056.7 | 595409.9 | 0        | 612152.5 | 373520   |
| 9.55155  | 9  | 5 | 4 | 884769.4 | 2581751  | 665611.7 | 1957522  | 1025668  | 2169625  | 3168831  | 1903831  | 2253759  |
| 35.32683 | 4  | 4 | 0 | 256753.8 | 870579.9 | 1183646  | 222403.5 | 247673   | 2955957  | 630503.1 | 52870.25 | 379290.2 |
| 9.43325  | 7  | 4 | 3 | 361893.3 | 2091432  | 653420.8 | 1403708  | 1166558  | 2394172  | 3105169  | 1721007  | 1574838  |
| 9.983433 | 10 | 5 | 5 | 1202718  | 4123190  | 938746.4 | 3331929  | 1246011  | 4920241  | 5199633  | 3890583  | 2896178  |
| 9.858833 | 10 | 5 | 5 | 2924247  | 10071081 | 1853262  | 12879866 | 5011404  | 10386482 | 7376888  | 12060294 | 11349224 |
| 43.891   | 6  | 2 | 3 | 323273.1 | 4838317  | 1217383  | 5581140  | 799332.7 | 5692469  | 5296901  | 5799097  | 4561990  |
| 14.31187 | 9  | 5 | 4 | 522218.9 | 3888756  | 1388542  | 2878764  | 1442631  | 5815120  | 4666164  | 3419145  | 2188291  |
| 10.97857 | 5  | 3 | 2 | 263014.8 | 853413.9 | 94882.49 | 708193.8 | 259371.8 | 815968.2 | 914442.9 | 752323.9 | 986138.5 |
| 42.62533 | 4  | 0 | 4 | 319393.8 | 3258064  | 227010.7 | 3582231  | 575616.4 | 3424700  | 3482185  | 3178737  | 2910841  |
| 19.5635  | 5  | 3 | 2 | 193107.4 | 1216485  | 382263.3 | 1831269  | 1102330  | 1343404  | 1598359  | 573541.2 | 1273815  |

|          |    |   |   |          |          |          |          |          |          |          |          |          |
|----------|----|---|---|----------|----------|----------|----------|----------|----------|----------|----------|----------|
| 9.447733 | 9  | 5 | 4 | 1364488  | 5101544  | 1299322  | 4338741  | 713622   | 5600628  | 5853238  | 5832683  | 5422124  |
| 9.880683 | 5  | 4 | 1 | 1924658  | 2779844  | 1287392  | 5667988  | 5258775  | 1948504  | 2288753  | 5038946  | 2589891  |
| 10.008   | 8  | 3 | 5 | 708351.9 | 1260667  | 725296.7 | 1719168  | 540078.8 | 1755330  | 0        | 1375490  | 1736334  |
| 9.870017 | 6  | 3 | 3 | 1001675  | 3782348  | 739500.8 | 4786950  | 1775982  | 4824212  | 3764187  | 2981452  | 4137518  |
| 9.856867 | 10 | 5 | 5 | 1.22E+08 | 8.21E+08 | 92286630 | 7.02E+08 | 2.09E+08 | 8.23E+08 | 7.85E+08 | 7.15E+08 | 8.15E+08 |
| 9.952017 | 10 | 5 | 5 | 6806989  | 25795905 | 2923761  | 21201848 | 8227778  | 29113460 | 25874079 | 23287119 | 22480685 |
| 9.992233 | 8  | 5 | 3 | 335698.5 | 1226504  | 267384.1 | 908124.3 | 553422.8 | 1503925  | 1435167  | 863153.7 | 1051298  |
| 9.445217 | 8  | 5 | 2 | 417711.1 | 2854261  | 1002272  | 2125599  | 1042645  | 4370057  | 3098197  | 1905860  | 2913601  |
| 9.976317 | 10 | 5 | 5 | 1705411  | 5603465  | 1177074  | 4382363  | 2068162  | 6285391  | 7060740  | 4851930  | 4065320  |
| 9.63045  | 7  | 4 | 3 | 237540.8 | 880686.3 | 288567.2 | 614946.6 | 435001.6 | 1181277  | 1177344  | 683211   | 546976.1 |
| 9.56645  | 4  | 1 | 3 | 244994.9 | 574883   | 247399.1 | 406957.1 | 223167.6 | 307831.9 | 891533.8 | 617058.1 | 345622.9 |
| 9.872883 | 10 | 5 | 5 | 23170314 | 1.6E+08  | 23053801 | 1.34E+08 | 45711460 | 1.54E+08 | 1.32E+08 | 1.5E+08  | 1.74E+08 |
| 9.952017 | 10 | 5 | 5 | 5526538  | 20041859 | 2267788  | 16480888 | 6383600  | 22578248 | 20329437 | 18020929 | 17443878 |
| 9.94405  | 5  | 1 | 4 | 449862.8 | 749537.4 | 440405.9 | 1000025  | 195345.3 | 796636.7 | 0        | 1109455  | 1029435  |
| 10.88747 | 4  | 1 | 3 | 160315.5 | 642306.4 | 389936   | 409145.6 | 236703.1 | 377391.8 | 871335.9 | 254173.3 | 504298.9 |
| 27.31667 | 4  | 0 | 3 | 2077253  | 22641.98 | 10708.37 | 4994651  | 9187463  | 20873.19 | 10902.65 | 18264.43 | 23259.39 |
| 21.35717 | 4  | 3 | 1 | 105684.4 | 458538.3 | 190650   | 565933.9 | 76940.65 | 731366.3 | 587803.4 | 314143.4 | 319916.5 |
| 9.8445   | 10 | 5 | 5 | 3293554  | 5055046  | 992203.5 | 7376366  | 4238064  | 6056636  | 5528651  | 5066666  | 5207443  |
| 10.72028 | 9  | 5 | 4 | 306516.5 | 1036994  | 430435.1 | 761274.1 | 334853.7 | 824390.6 | 1648899  | 1307932  | 593588.5 |
| 9.928667 | 10 | 5 | 5 | 2303016  | 5010234  | 453964.5 | 4069304  | 1711720  | 5612062  | 4742828  | 4715135  | 4601486  |
| 44.9835  | 5  | 4 | 1 | 156600.2 | 490377.7 | 158518.3 | 584492.7 | 93184.13 | 663619.8 | 314136.1 | 467170.2 | 642326.8 |
| 10.9645  | 10 | 5 | 5 | 478396.5 | 2379775  | 346464   | 2115146  | 394644.3 | 2590717  | 2703664  | 1978365  | 2029588  |
| 20.92133 | 5  | 2 | 3 | 103629.3 | 275986.8 | 143249.3 | 186897.3 | 101748.9 | 224037.5 | 428349.3 | 140464.7 | 157185.5 |
| 9.93625  | 4  | 1 | 3 | 725012.2 | 631383.4 | 307380.9 | 1205088  | 1039726  | 633493.2 | 826054.5 | 1032762  | 328524   |
| 10.9645  | 10 | 5 | 5 | 9662417  | 64573577 | 8037457  | 58243689 | 9647552  | 69106381 | 71965508 | 55721402 | 55961473 |
| 9.886083 | 10 | 5 | 5 | 7257711  | 14065528 | 3865707  | 24965134 | 20002955 | 17006816 | 11019097 | 10940689 | 19345341 |
| 9.473733 | 5  | 3 | 2 | 524782.1 | 730890.5 | 593807.1 | 1168108  | 634660.1 | 266654.9 | 0        | 904323.4 | 1008601  |
| 22.92917 | 4  | 3 | 1 | 185060.5 | 704582   | 623297.3 | 1094503  | 452404.1 | 214493.8 | 311874.5 | 1448660  | 227901   |
| 9.920517 | 10 | 5 | 5 | 5238327  | 12263303 | 3125300  | 9486298  | 4498729  | 16322989 | 10436671 | 8542499  | 11540673 |
| 9.9677   | 3  | 0 | 3 | 751958.9 | 475876.9 | 334248.7 | 1291946  | 1494218  | 680612   | 128704.6 | 207207.8 | 428688.5 |
| 9.960817 | 10 | 5 | 5 | 2321875  | 7983389  | 1216686  | 6715215  | 2156697  | 10010437 | 7117670  | 8163058  | 7056480  |
| 27.89583 | 6  | 3 | 3 | 605197.4 | 2321129  | 2632942  | 894857.8 | 318140.1 | 7022749  | 1121965  | 1406692  | 1002709  |
| 9.845483 | 10 | 5 | 5 | 905634.4 | 3486687  | 418712.1 | 2897727  | 1048588  | 3429566  | 4005143  | 2926331  | 3771057  |
| 9.94455  | 6  | 3 | 3 | 801503.5 | 1713706  | 398916.2 | 1279797  | 745126.4 | 2070823  | 1874496  | 1812211  | 1781972  |
| 9.536783 | 9  | 5 | 4 | 311468   | 704519.3 | 148680.2 | 522774.2 | 318458.2 | 715797.7 | 883718.7 | 525513.7 | 589068.2 |

|          |    |   |   |          |          |          |          |          |          |          |          |          |
|----------|----|---|---|----------|----------|----------|----------|----------|----------|----------|----------|----------|
| 10.01477 | 6  | 4 | 2 | 1132971  | 501259.6 | 226801.7 | 1259017  | 1396135  | 704343.1 | 191820.9 | 741326.1 | 467491.4 |
| 44.423   | 10 | 5 | 4 | 2695622  | 4425952  | 1211136  | 16342801 | 22072522 | 6436700  | 3848493  | 4125843  | 4475289  |
| 9.94455  | 10 | 5 | 5 | 5841850  | 21967727 | 2576460  | 19859408 | 3294012  | 26075918 | 22496175 | 21447287 | 19337922 |
| 25.1325  | 9  | 5 | 4 | 17518678 | 46049944 | 84205639 | 619439.1 | 404392.1 | 14732005 | 981299.9 | 1.96E+08 | 4587361  |
| 9.4468   | 10 | 5 | 5 | 9900710  | 25767348 | 14397685 | 44809501 | 33723579 | 33714103 | 25798491 | 45050769 | 8776532  |
| 24.94283 | 4  | 3 | 1 | 375159.5 | 926107.7 | 1121195  | 319923.1 | 122664.7 | 2902134  | 690902.6 | 153886.8 | 403785.7 |
| 12.07693 | 5  | 3 | 2 | 344150.5 | 2741547  | 448930.5 | 2208061  | 931739.6 | 2876237  | 2369499  | 2502327  | 2490550  |
| 9.970617 | 10 | 5 | 5 | 3843498  | 7134597  | 2643536  | 8625414  | 1118151  | 9316371  | 9298027  | 7932178  | 6088377  |
| 9.848417 | 9  | 5 | 4 | 17879458 | 96458724 | 13306637 | 80722368 | 27464467 | 90177016 | 95998606 | 78446278 | 1.04E+08 |
| 39.892   | 5  | 2 | 3 | 857478.8 | 12717207 | 5733008  | 7952461  | 7512204  | 7149162  | 16652508 | 5775226  | 17117974 |
| 9.842    | 10 | 5 | 5 | 1791760  | 10735140 | 1874811  | 8606632  | 3690388  | 9750080  | 8689633  | 10071643 | 11676098 |
| 26.0825  | 8  | 4 | 4 | 298438.8 | 2865746  | 1441632  | 1933208  | 1163936  | 2090334  | 3853475  | 925925.1 | 2868888  |
| 9.999217 | 7  | 4 | 3 | 429131.6 | 609360.2 | 127312.4 | 826039.8 | 392142.1 | 619006.3 | 514092.1 | 820192.7 | 587838.1 |
| 16.9425  | 7  | 3 | 4 | 223860   | 434211   | 431453.9 | 194975.1 | 149716.3 | 211556.5 | 1090188  | 135368.1 | 655398.4 |
| 16.41835 | 4  | 3 | 1 | 646359.5 | 5527523  | 4216291  | 3087192  | 2205320  | 4276416  | 12876058 | 4383118  | 4042563  |
| 9.63045  | 10 | 4 | 5 | 2548571  | 5802530  | 1872550  | 9545475  | 6833199  | 8274438  | 5860500  | 5827740  | 3000649  |
| 10.45433 | 8  | 5 | 3 | 141436.5 | 401387.4 | 225554   | 268896.4 | 128692.2 | 234541   | 792302.9 | 366396.6 | 263569.2 |
| 9.856867 | 9  | 4 | 5 | 883045.5 | 5497393  | 509767.1 | 4620940  | 1589673  | 5845430  | 5193603  | 5490721  | 4836233  |
| 9.3735   | 7  | 4 | 3 | 1227086  | 11673340 | 2654617  | 9244936  | 3996359  | 11974702 | 12357150 | 14491148 | 7276035  |
| 10.69117 | 10 | 5 | 5 | 471614   | 2131939  | 365528.9 | 1794489  | 557107.8 | 2265738  | 2663711  | 1887518  | 1714801  |
| 12.79203 | 7  | 4 | 3 | 76256.82 | 271967.6 | 98460.92 | 337746.5 | 86720.29 | 222824.6 | 436329.9 | 274031.5 | 178210   |
| 10.94443 | 8  | 4 | 4 | 221710.4 | 670647.5 | 221974.7 | 547857.2 | 75727.92 | 419608.9 | 820113.7 | 456394.6 | 917872.7 |
| 9.972483 | 10 | 4 | 4 | 1923299  | 3720961  | 2013465  | 2432446  | 1586393  | 4266620  | 2180890  | 2017973  | 3197704  |
| 9.62495  | 4  | 1 | 3 | 17535818 | 54062492 | 29678034 | 33325120 | 28886703 | 70964228 | 58696829 | 2610492  | 61235619 |
| 17.19    | 9  | 5 | 4 | 142930.1 | 966881.4 | 419163.6 | 723087.3 | 227606.3 | 904724.3 | 545947.6 | 806499.9 | 908490.6 |
| 9.975217 | 11 | 5 | 4 | 1276552  | 5240270  | 2775035  | 3207700  | 2962877  | 6331719  | 644749.1 | 5114341  | 6083442  |
| 9.93625  | 10 | 5 | 5 | 1203030  | 3391477  | 930627.7 | 2786154  | 767564.7 | 4681070  | 3512589  | 2312673  | 2692771  |
| 9.994767 | 12 | 5 | 5 | 614575.7 | 1501800  | 490615.3 | 1915081  | 658307.2 | 1675895  | 2216954  | 1239920  | 909115.5 |
| 9.842    | 10 | 5 | 5 | 5253739  | 19194865 | 3482213  | 15368124 | 6615180  | 22430468 | 22109312 | 15559078 | 15372544 |
| 10.94443 | 7  | 4 | 3 | 824319.8 | 1103939  | 492221.8 | 1786902  | 1220076  | 983696.5 | 1557817  | 1652269  | 491102.9 |
| 40.68317 | 8  | 2 | 4 | 484751.5 | 6572837  | 885023.6 | 5661466  | 1553932  | 7247115  | 5473861  | 6862337  | 5810461  |
| 9.960467 | 10 | 4 | 4 | 2300462  | 7685796  | 2515493  | 9275488  | 1914482  | 4699467  | 9490592  | 5174772  | 9611561  |
| 11.55027 | 10 | 5 | 5 | 321465.7 | 785978.1 | 361392.7 | 1169173  | 657771.8 | 1008111  | 1108486  | 203698.1 | 683748.2 |
| 17.94783 | 3  | 0 | 3 | 1968576  | 31134.87 | 14308.19 | 6418368  | 11883057 | 41732.09 | 7909.139 | 27827.35 | 35279.08 |
| 9.972483 | 3  | 0 | 3 | 990831.8 | 1789475  | 900478.4 | 1144997  | 921100.2 | 2711940  | 338379.6 | 1813326  | 1760034  |



|          |    |   |   |          |          |          |          |          |          |          |          |          |
|----------|----|---|---|----------|----------|----------|----------|----------|----------|----------|----------|----------|
| 22.55233 | 8  | 5 | 3 | 34446944 | 1083066  | 483719.1 | 73431864 | 1.35E+08 | 953761   | 1682090  | 786855.9 | 517983.7 |
| 41.99233 | 13 | 4 | 4 | 303882.1 | 3482263  | 1907158  | 5275154  | 2983091  | 6149873  | 884007.3 | 3569966  | 2828448  |
| 9.975217 | 9  | 5 | 4 | 1210787  | 2653383  | 1155007  | 1835653  | 1157292  | 4242007  | 2514732  | 1198986  | 2073387  |
| 9.8445   | 10 | 5 | 5 | 1433433  | 6057867  | 2397945  | 4550116  | 1800143  | 5676208  | 5312729  | 2980650  | 9572944  |
| 9.842    | 10 | 5 | 5 | 1364498  | 5056912  | 645636.2 | 4159775  | 1604215  | 5956282  | 5280262  | 5160441  | 4595557  |
| 9.3919   | 10 | 4 | 5 | 3255551  | 27754332 | 8934723  | 20948656 | 10242594 | 35955798 | 12433360 | 29597456 | 30349960 |
| 9.992233 | 5  | 3 | 2 | 395193.5 | 601469.8 | 150869.8 | 835312.1 | 422090   | 654815.8 | 718106.8 | 739510.4 | 383809.3 |
| 9.856867 | 10 | 5 | 5 | 1837848  | 8633489  | 3324141  | 6671637  | 1961288  | 7211017  | 7226317  | 5917799  | 14359607 |
| 9.43325  | 12 | 5 | 5 | 4735240  | 41535193 | 14758164 | 30267475 | 16989837 | 54446018 | 51707848 | 48929595 | 32695998 |
| 9.208217 | 5  | 3 | 2 | 5723393  | 1305707  | 680725   | 11090019 | 18211788 | 336033.6 | 2260605  | 1332521  | 1281554  |
| 9.559117 | 9  | 5 | 4 | 646065.6 | 1505267  | 275798.9 | 1151813  | 626571.8 | 1564713  | 1930790  | 1313761  | 1217252  |
| 9.419733 | 7  | 4 | 3 | 708860.8 | 3733597  | 974908.7 | 2734237  | 1704261  | 4890320  | 4206262  | 3653262  | 3678143  |
| 9.992233 | 9  | 5 | 4 | 2158239  | 2412578  | 1273896  | 3656861  | 2096740  | 4564075  | 1185476  | 2242449  | 1888610  |
| 11.53673 | 4  | 1 | 3 | 190171.1 | 832520   | 269370.6 | 658311.9 | 219835.9 | 1170189  | 772819.8 | 942491.5 | 432012.6 |
| 9.95825  | 6  | 3 | 3 | 485452.4 | 1007434  | 216600.2 | 653082.4 | 642577.8 | 1021091  | 944523   | 956178.1 | 761177   |
| 28.28817 | 9  | 5 | 4 | 110911.1 | 600653.3 | 150308.5 | 472024.4 | 206919.9 | 416941.5 | 794736   | 499217.7 | 598662.5 |
| 9.3907   | 5  | 1 | 3 | 1063051  | 3884101  | 1848854  | 2533192  | 1972527  | 5151470  | 5103725  | 675214.6 | 4349491  |
| 9.40255  | 10 | 5 | 5 | 1133086  | 3188383  | 742765.1 | 2517187  | 1104055  | 3841202  | 3657786  | 2589235  | 2197288  |
| 7.252767 | 5  | 4 | 1 | 1075734  | 21266575 | 17538560 | 11468021 | 7096155  | 49422608 | 9313544  | 12478785 | 7810912  |
| 9.45945  | 13 | 5 | 5 | 8099221  | 86129180 | 34248294 | 66701226 | 16032146 | 62254369 | 88639501 | 83774269 | 54236031 |
| 9.983467 | 6  | 4 | 2 | 266094.9 | 653771.5 | 226042.7 | 467073.8 | 295747.6 | 322608.6 | 562880.5 | 679389   | 791931.9 |
| 9.994767 | 9  | 5 | 4 | 1541601  | 848915.9 | 194699.5 | 1156938  | 558034   | 755774.8 | 1103960  | 925725.2 | 582051.8 |
| 10.95602 | 6  | 2 | 4 | 195297.2 | 319364.8 | 237517.1 | 484286.1 | 229834   | 246894.2 | 733248.7 | 285729.9 | 182949.6 |
| 10.9645  | 10 | 5 | 5 | 3648398  | 18100082 | 3164204  | 15833175 | 3260214  | 20366312 | 21224851 | 14700165 | 14695483 |
| 10.18005 | 5  | 4 | 1 | 173775.6 | 454941.4 | 169676.1 | 330691.5 | 182243.9 | 371300.5 | 232582   | 522888.3 | 460458.3 |
| 21.66933 | 7  | 3 | 3 | 92202.68 | 447391.3 | 55280.01 | 351808   | 174226   | 472668.6 | 427827.7 | 515184.5 | 366454.7 |
| 9.4873   | 8  | 5 | 3 | 987491.9 | 2294426  | 1071000  | 4382636  | 3828172  | 2683283  | 3355184  | 3126858  | 1239820  |
| 10.00098 | 5  | 2 | 3 | 194316.9 | 276347.7 | 222052   | 408240.7 | 136637.5 | 119893.1 | 0        | 286005.5 | 546071.8 |
| 9.392767 | 10 | 5 | 5 | 1239628  | 3191731  | 775467.5 | 2512569  | 1106007  | 3887351  | 3776952  | 2386061  | 2314994  |
| 8.841533 | 8  | 5 | 3 | 292301.6 | 863094.1 | 644734.7 | 457301.1 | 489998.3 | 308867.6 | 1937716  | 838497.5 | 811712.9 |
| 43.66083 | 11 | 4 | 3 | 405715.6 | 7418732  | 1353491  | 6057563  | 2318232  | 6380380  | 6448336  | 9370969  | 8311593  |
| 9.903567 | 9  | 5 | 4 | 1025587  | 2851979  | 478200.6 | 2523795  | 452134   | 2532390  | 2246048  | 2961918  | 3484204  |
| 38.2085  | 6  | 2 | 3 | 346739.8 | 4349273  | 2058592  | 5658517  | 1613617  | 5711819  | 5763592  | 5720348  | 1132539  |
| 9.976317 | 10 | 5 | 5 | 1879993  | 7082579  | 571826.9 | 5872239  | 2227919  | 7715552  | 6651327  | 6359469  | 7520050  |
| 26.72267 | 6  | 4 | 2 | 247853.8 | 527949.7 | 688174.7 | 1047541  | 781785.6 | 163436.8 | 292845.7 | 1754875  | 169073.5 |

|          |    |   |   |          |          |          |          |          |          |          |          |          |
|----------|----|---|---|----------|----------|----------|----------|----------|----------|----------|----------|----------|
| 22.14483 | 10 | 5 | 5 | 496483.8 | 1844322  | 884652.5 | 1352152  | 350219.5 | 1183418  | 3362381  | 1817751  | 1576509  |
| 22.75617 | 6  | 2 | 4 | 249371.7 | 2114494  | 679337.6 | 1527631  | 951652.2 | 1634169  | 2483315  | 1478037  | 1858212  |
| 9.822117 | 5  | 1 | 3 | 12907576 | 270191.7 | 428370.3 | 25613221 | 47370324 | 65179.26 | 1031224  | 39372.07 | 165252.6 |
| 16.99717 | 10 | 5 | 5 | 77499.69 | 387941.4 | 119689.8 | 313951.5 | 86210.78 | 431798.9 | 267382.8 | 415479.4 | 273099.3 |
| 10.03947 | 7  | 5 | 2 | 500152.6 | 633856.1 | 261910.3 | 1039771  | 735899.4 | 463336.2 | 474872.6 | 834219.9 | 991300.5 |
| 25.3765  | 5  | 3 | 2 | 377163.1 | 696523.9 | 289890.7 | 1483510  | 1458555  | 804968.6 | 335464.4 | 441472.6 | 957731.3 |
| 9.460217 | 5  | 4 | 1 | 359660.1 | 2376930  | 1150710  | 1541744  | 1219244  | 3130845  | 3958557  | 1933678  | 1777005  |
| 27.54967 | 9  | 5 | 4 | 668974   | 2801603  | 1436119  | 3867523  | 1585560  | 5076950  | 2183358  | 1282747  | 3164822  |
| 25.1325  | 9  | 5 | 4 | 21051648 | 57897355 | 1.05E+08 | 1743605  | 2729458  | 25076313 | 1177065  | 2.45E+08 | 4678657  |
| 9.4632   | 15 | 5 | 5 | 2034416  | 17381353 | 3464079  | 15017694 | 3246104  | 14603974 | 19788365 | 21843134 | 13572903 |
| 9.445217 | 14 | 5 | 5 | 15265870 | 1.09E+08 | 32038867 | 87335771 | 30681576 | 1.43E+08 | 1.32E+08 | 1.2E+08  | 84686182 |
| 9.856867 | 10 | 5 | 5 | 13468097 | 90829328 | 11207431 | 76331998 | 25873135 | 92176919 | 89209977 | 77293353 | 87258505 |
| 43.25817 | 6  | 3 | 3 | 320679.8 | 4100318  | 1231639  | 3178573  | 1382161  | 5312665  | 3012290  | 5447542  | 3872688  |
| 9.912633 | 9  | 5 | 4 | 2950927  | 6870815  | 2331987  | 4870038  | 3243298  | 7967539  | 6789852  | 3296354  | 6651323  |
| 21.96867 | 10 | 5 | 5 | 175973.5 | 812236.4 | 141362.9 | 911151   | 139915.4 | 981294.7 | 859213.5 | 590926   | 823651   |
| 12.6321  | 9  | 5 | 4 | 1175283  | 10372284 | 1540526  | 8340870  | 3635620  | 11972031 | 8843851  | 8657115  | 10803922 |
| 38.5105  | 5  | 3 | 1 | 368517.6 | 6447968  | 2441306  | 5111630  | 788524.6 | 5336490  | 5638800  | 6065894  | 10693881 |
| 9.445217 | 12 | 5 | 5 | 3121037  | 23541326 | 4195417  | 18159558 | 9603604  | 26734679 | 24272230 | 21854537 | 27634406 |
| 43.73267 | 6  | 3 | 2 | 250616.3 | 3236243  | 1011030  | 3788812  | 318749.3 | 3839724  | 4117458  | 2588442  | 1774206  |
| 9.655117 | 12 | 5 | 5 | 4825136  | 20744468 | 8758904  | 29266342 | 14441819 | 31598777 | 22832600 | 13251545 | 10479657 |
| 10.02372 | 8  | 4 | 4 | 320301.6 | 877017.5 | 210330.7 | 693986.6 | 298685.2 | 608857   | 1059971  | 761972.5 | 838781.3 |
| 16.02337 | 10 | 5 | 5 | 137714.2 | 955819.4 | 285494   | 745368   | 312644   | 1170678  | 734875.4 | 1038270  | 1250302  |
| 9.3261   | 3  | 3 | 0 | 2398540  | 8506824  | 7020695  | 12543125 | 3729461  | 17405831 | 3170662  | 5269653  | 14627354 |
| 9.960467 | 8  | 4 | 4 | 577260.5 | 1470860  | 218576.7 | 1291151  | 286117.7 | 1631434  | 1729689  | 1451311  | 1365806  |
| 43.54567 | 6  | 3 | 2 | 293524   | 5105434  | 1974881  | 4035273  | 520227   | 4601009  | 7569432  | 6202382  | 2273250  |
| 10.95055 | 10 | 5 | 5 | 1087489  | 6639077  | 1733789  | 5244566  | 2195054  | 8283456  | 7578159  | 4536923  | 5001399  |
| 6.89925  | 4  | 1 | 3 | 72148.48 | 318572.4 | 137391.3 | 221638.3 | 138620.6 | 379952.2 | 378328.8 | 73080.96 | 389941.5 |
| 9.94455  | 9  | 5 | 4 | 753666.6 | 2808987  | 527533.2 | 2279932  | 904890.5 | 3427712  | 2886960  | 2355581  | 2192825  |
| 37.7485  | 8  | 3 | 1 | 421304.6 | 7604652  | 2879390  | 5879977  | 1870047  | 6790616  | 6488478  | 12499787 | 7325788  |
| 8.94605  | 5  | 2 | 3 | 514516.6 | 843397.4 | 829194   | 400344.2 | 87620.86 | 908001.2 | 2261762  | 350650.5 | 373299   |
| 10.9645  | 10 | 5 | 5 | 66559964 | 4.66E+08 | 55073715 | 4.23E+08 | 67009151 | 5.06E+08 | 5.11E+08 | 4.09E+08 | 4.04E+08 |
| 9.842    | 10 | 5 | 5 | 1344968  | 5610387  | 763173   | 4631373  | 1750205  | 6336464  | 6305522  | 4926332  | 4703432  |
| 10.95055 | 10 | 4 | 5 | 1791659  | 2941535  | 3813100  | 902714.3 | 484407   | 1670041  | 1496413  | 845059.5 | 9734178  |
| 9.3494   | 10 | 4 | 4 | 516363.2 | 2711641  | 1597721  | 1751170  | 1055342  | 4606724  | 3141340  | 308175.2 | 3323314  |
| 10.49953 | 9  | 5 | 4 | 223703.9 | 726319.1 | 176021   | 609261.1 | 156699   | 670773.8 | 907343.6 | 643185.4 | 504808.3 |

|          |    |   |   |          |          |          |          |          |          |          |          |          |
|----------|----|---|---|----------|----------|----------|----------|----------|----------|----------|----------|----------|
| 42.0785  | 11 | 4 | 5 | 2872283  | 15344355 | 20061794 | 4644812  | 1461883  | 5568323  | 51029398 | 4098429  | 9874992  |
| 18.17283 | 4  | 1 | 3 | 84710.85 | 483893.6 | 155631.3 | 338211.3 | 244675.7 | 667592.7 | 491122.7 | 517711.2 | 506960.6 |
| 9.445217 | 14 | 5 | 4 | 922947   | 6337088  | 2078022  | 5065243  | 1467024  | 8101836  | 8184449  | 7196624  | 4168441  |
| 9.960467 | 10 | 5 | 5 | 780231.2 | 2649543  | 548402.2 | 2231341  | 638403.3 | 3390162  | 3020203  | 2379521  | 2016423  |
| 9.856867 | 10 | 5 | 5 | 13458958 | 91781294 | 9958916  | 77309747 | 26222905 | 92667974 | 90029122 | 80691412 | 87798739 |
| 22.92883 | 7  | 3 | 4 | 88557.18 | 265355.7 | 133617.4 | 169330.2 | 140035.8 | 389322.4 | 170089   | 431136.5 | 151141.1 |
| 9.348233 | 9  | 4 | 4 | 744929.4 | 4914897  | 3265403  | 3037021  | 1753694  | 768753.7 | 2134750  | 6221765  | 7381940  |
| 9.93625  | 10 | 5 | 5 | 13931811 | 55402257 | 8815845  | 46459300 | 15364809 | 65582707 | 57915574 | 45412658 | 47069134 |
| 9.915583 | 11 | 5 | 5 | 1206864  | 1993447  | 414858.9 | 3173838  | 2199580  | 2298762  | 1800311  | 2397115  | 2097402  |
| 10.008   | 9  | 5 | 4 | 1456796  | 1077084  | 308364.3 | 1776801  | 1298234  | 1160716  | 1507111  | 1081484  | 653395.3 |
| 9.508883 | 5  | 4 | 1 | 832221.5 | 662313.5 | 388166.6 | 391624.2 | 384188.9 | 597774   | 572220.7 | 435592.6 | 370137.1 |
| 29.84833 | 10 | 5 | 5 | 1911900  | 7815657  | 619604   | 10395997 | 4832935  | 7981650  | 8147755  | 6791336  | 7754658  |
| 9.61185  | 4  | 1 | 3 | 286652.9 | 595900.6 | 455893.5 | 338923.5 | 215208.4 | 594878.7 | 146361.4 | 315062.2 | 1337716  |
| 9.41815  | 9  | 5 | 4 | 2410960  | 16915601 | 3065495  | 13507826 | 5975262  | 16267029 | 15519773 | 17638413 | 13463955 |
| 11.30818 | 10 | 5 | 5 | 2392276  | 1528109  | 279958.9 | 6181822  | 8747341  | 1818722  | 1711705  | 1286768  | 1177170  |
| 28.83433 | 5  | 1 | 4 | 201194.5 | 661955.2 | 282852.3 | 455871.1 | 304903.2 | 832886.1 | 777277.7 | 158575.3 | 786977.1 |
| 9.976317 | 10 | 5 | 5 | 28206742 | 33268576 | 8710949  | 43240207 | 17585531 | 47296968 | 33388419 | 33702071 | 25652839 |
| 10.9645  | 5  | 4 | 1 | 281126.1 | 657653.5 | 170572.2 | 506933.2 | 248749.5 | 818351.7 | 813648.3 | 574037.7 | 414491.2 |
| 9.88815  | 4  | 1 | 3 | 721296.9 | 1693617  | 917739.5 | 2628616  | 1611391  | 1511243  | 447371.4 | 2622728  | 2573685  |
| 9.94455  | 10 | 5 | 5 | 1932918  | 7950285  | 1213372  | 6605283  | 2359294  | 9232277  | 8197617  | 6627793  | 6748227  |
| 41.1415  | 4  | 3 | 1 | 359317.7 | 6200359  | 1066617  | 5624886  | 272657   | 7757717  | 6010050  | 6424098  | 6026955  |
| 10.02372 | 9  | 5 | 4 | 247999.8 | 792598.8 | 118707.1 | 626196   | 301193.7 | 685062.4 | 678699.2 | 768697.8 | 891163.9 |
| 10.98605 | 10 | 5 | 5 | 1339403  | 4992736  | 897325.5 | 4002743  | 1735291  | 4000289  | 6255860  | 4601171  | 4563430  |
| 9.4873   | 7  | 4 | 3 | 2338536  | 1550919  | 634137.4 | 2591706  | 1907007  | 1413753  | 1583026  | 1274712  | 2589994  |
| 10.97857 | 8  | 4 | 4 | 895983.8 | 5247763  | 552417.7 | 4661984  | 1018831  | 4807190  | 5441008  | 5097375  | 4780472  |
| 42.65383 | 5  | 4 | 1 | 276234.5 | 4129409  | 935276.2 | 3622906  | 266141.9 | 3922750  | 4696621  | 3113757  | 5428658  |
| 10.85018 | 3  | 0 | 3 | 141433.3 | 464226.8 | 136522.4 | 371727.2 | 127491.6 | 423539.8 | 591859.8 | 372849.2 | 311123.3 |
| 9.728817 | 3  | 0 | 3 | 12178726 | 1492584  | 565562.6 | 24880644 | 44015581 | 916750.6 | 2433004  | 1268421  | 1381370  |
| 9.8322   | 9  | 5 | 4 | 1506922  | 4963185  | 1333685  | 4002211  | 1410283  | 6366866  | 6302162  | 3966105  | 3444644  |
| 10.94962 | 5  | 3 | 2 | 251402.5 | 1125452  | 300811.5 | 865598.5 | 425360   | 1047651  | 908134.4 | 817645.5 | 1300094  |
| 9.992233 | 11 | 5 | 4 | 539031.1 | 1124239  | 469757.7 | 845007.2 | 300084   | 601831.7 | 959824.9 | 1572218  | 1664100  |
| 32.11367 | 10 | 5 | 5 | 2609708  | 3417374  | 595143.2 | 8669471  | 9881586  | 3797978  | 4269224  | 3152379  | 2870146  |
| 9.983433 | 9  | 4 | 5 | 889615.8 | 2546571  | 382759.9 | 1907375  | 1173365  | 2787749  | 2766785  | 2858884  | 2362836  |
| 9.9847   | 5  | 2 | 3 | 499724   | 649272.4 | 440906.8 | 922228.4 | 326496.1 | 1328456  | 107145.8 | 627837.8 | 678809.7 |
| 28.2445  | 5  | 3 | 2 | 142683.8 | 932082.6 | 409377.9 | 622324.8 | 472916.1 | 798438.1 | 1095341  | 412359.5 | 833894.3 |

|          |    |   |   |          |          |          |          |          |          |          |          |          |
|----------|----|---|---|----------|----------|----------|----------|----------|----------|----------|----------|----------|
| 10.008   | 5  | 2 | 3 | 466464.4 | 444487.2 | 287364.4 | 713275.6 | 453404.3 | 782148.4 | 0        | 561616.7 | 389551.3 |
| 9.840617 | 10 | 5 | 5 | 915489.3 | 3907538  | 373054.9 | 3487460  | 740305.9 | 4557231  | 3856985  | 3673740  | 3797754  |
| 44.10633 | 6  | 2 | 3 | 360765   | 5720285  | 2645384  | 4165450  | 1616192  | 10326500 | 4810215  | 4934879  | 5004412  |
| 39.77667 | 7  | 3 | 2 | 403713.1 | 4693709  | 440568.1 | 5617196  | 1714334  | 5167199  | 4180165  | 4292612  | 5037360  |
| 9.43325  | 12 | 5 | 4 | 550824.3 | 4594231  | 1553799  | 3435577  | 1751777  | 5690473  | 6128911  | 4957176  | 3959512  |
| 11       | 5  | 1 | 4 | 661975.6 | 2201591  | 966734.1 | 1622522  | 639518.5 | 2318727  | 3736178  | 1210639  | 1580234  |
| 44.375   | 4  | 1 | 3 | 287638.7 | 3814486  | 1134177  | 4555892  | 978081.4 | 1789350  | 4361647  | 4325185  | 4207994  |
| 9.856867 | 10 | 5 | 5 | 4359871  | 25856315 | 3917940  | 20468957 | 9753099  | 23949550 | 24089880 | 22283132 | 26684660 |
| 9.992233 | 9  | 5 | 4 | 846694.1 | 2776389  | 370583.3 | 2371363  | 710209.7 | 3157175  | 2922705  | 3016923  | 2269218  |
| 9.91875  | 7  | 4 | 3 | 6316654  | 4547287  | 4898379  | 9179569  | 7845766  | 2842267  | 2703124  | 13278688 | 1997255  |
| 9.388367 | 10 | 5 | 5 | 1559500  | 6576905  | 527083.1 | 5348637  | 2288116  | 7490062  | 6308492  | 6171287  | 6535596  |
| 42.323   | 6  | 2 | 4 | 319981.4 | 3551077  | 1555899  | 5029821  | 2509367  | 4406152  | 798386.8 | 4472800  | 4195677  |
| 9.842    | 9  | 5 | 4 | 1134606  | 4228829  | 760916.1 | 3090531  | 2077257  | 3821858  | 4313626  | 3665918  | 3824435  |
| 37.2695  | 11 | 1 | 4 | 329157   | 3018408  | 720453.8 | 2457987  | 872690.3 | 4283127  | 2546596  | 2583894  | 2816094  |
| 9.960467 | 10 | 5 | 5 | 2406441  | 7836294  | 1344246  | 6894453  | 1352433  | 9814024  | 7960779  | 6645294  | 6524112  |
| 9.842    | 9  | 5 | 4 | 787257.8 | 3122396  | 577624.3 | 2668155  | 712298.3 | 2950030  | 3715250  | 2251883  | 3564618  |
| 9.3919   | 8  | 3 | 4 | 615626.8 | 5131693  | 1831207  | 4126446  | 691762.7 | 7113676  | 4745665  | 5449617  | 2250764  |
| 27.14117 | 5  | 3 | 2 | 88384.27 | 271949.4 | 101168.6 | 378138.6 | 184926.9 | 211050.7 | 240243.3 | 153911.8 | 384634.4 |
| 18.30633 | 3  | 3 | 0 | 990427.4 | 169350.1 | 42745.75 | 1876792  | 3223177  | 202740.8 | 180377.8 | 144806.8 | 210756.3 |
| 9.929783 | 8  | 4 | 4 | 833526.3 | 1980667  | 384248.1 | 1491872  | 878694.2 | 2216515  | 2365119  | 1690066  | 1463427  |
| 29.87717 | 10 | 5 | 5 | 824482.9 | 1848130  | 1778922  | 3511201  | 2811527  | 1248916  | 1230938  | 831562.8 | 5013002  |
| 10.02372 | 10 | 5 | 5 | 489120   | 738393.7 | 207265   | 1004817  | 479659.3 | 757255.2 | 1040828  | 696505   | 738732.6 |
| 30.28383 | 8  | 4 | 4 | 209855.1 | 1205182  | 443741.2 | 963680.2 | 149222.8 | 1173799  | 1869213  | 642236.8 | 1055513  |
| 9.445217 | 9  | 3 | 5 | 17828904 | 80928172 | 52435183 | 48881737 | 37539452 | 1.38E+08 | 94568878 | 1.11E+08 | 1918660  |
| 22.958   | 3  | 3 | 0 | 229532.6 | 652259   | 458342.6 | 905469.9 | 188351   | 257033.9 | 1085064  | 378619.3 | 1214163  |
| 9.952017 | 10 | 5 | 5 | 5562742  | 20596300 | 2492245  | 16961605 | 6630072  | 23362543 | 21268131 | 18277242 | 17719730 |
| 9.853633 | 8  | 4 | 4 | 853192.8 | 3081169  | 778890.1 | 2366024  | 1203064  | 3618930  | 1879664  | 2703473  | 3668698  |
| 9.45945  | 7  | 3 | 3 | 695125.1 | 2683259  | 1150535  | 1910612  | 1062737  | 2313961  | 3418243  | 3416096  | 815302.6 |
| 9.559117 | 13 | 4 | 5 | 1016068  | 8422527  | 3510271  | 5986581  | 3476719  | 14443105 | 5954092  | 8383155  | 7289096  |
| 22.7265  | 10 | 5 | 5 | 238531.2 | 1181885  | 191333.3 | 1014306  | 277392.1 | 1339376  | 1361780  | 1171233  | 884770.1 |
| 9.929783 | 8  | 5 | 3 | 2038071  | 3195528  | 1439254  | 6239026  | 5668371  | 3004114  | 2633105  | 3532790  | 5370074  |
| 33.513   | 6  | 4 | 2 | 97303.29 | 238085.8 | 119863.6 | 332330.2 | 148210.2 | 347994.7 | 381116   | 112077   | 152286.5 |
| 9.912633 | 7  | 4 | 3 | 1898668  | 2156320  | 1385669  | 3711510  | 2749217  | 2395924  | 745589.2 | 1484029  | 1758622  |
| 22.56617 | 9  | 5 | 4 | 137889.7 | 808137.9 | 528556.8 | 522677.4 | 157230.8 | 990758.1 | 770523.8 | 129939.9 | 584517   |
| 9.872917 | 10 | 5 | 5 | 23016688 | 1.44E+08 | 9478716  | 1.23E+08 | 39888932 | 1.43E+08 | 1.35E+08 | 1.38E+08 | 1.46E+08 |

|          |    |   |   |          |          |          |          |          |          |          |          |          |
|----------|----|---|---|----------|----------|----------|----------|----------|----------|----------|----------|----------|
| 9.43325  | 6  | 3 | 3 | 485442.7 | 1710087  | 738890.4 | 1309559  | 239907.5 | 1638135  | 710538.4 | 2009514  | 2725352  |
| 9.872883 | 9  | 5 | 4 | 3143776  | 2560294  | 1284806  | 5560694  | 5610216  | 2951403  | 1750595  | 3860119  | 3482853  |
| 9.864767 | 7  | 4 | 3 | 425065   | 1330181  | 260661.1 | 1073928  | 440821.6 | 1251096  | 1555674  | 929189.1 | 1353851  |
| 9.46265  | 7  | 5 | 2 | 739797.4 | 2586777  | 682872.9 | 2093011  | 733871.9 | 1949313  | 3432383  | 2997263  | 2715642  |
| 9.976317 | 9  | 4 | 5 | 569996.2 | 1185899  | 284031.9 | 981252.5 | 303425.3 | 1214813  | 1200058  | 794305   | 1592087  |
| 33.77317 | 7  | 4 | 3 | 105633.4 | 651706.4 | 248865.3 | 499500.7 | 180017.1 | 1016597  | 394639.2 | 741593.8 | 450667.5 |
| 30.2805  | 10 | 5 | 5 | 799425.5 | 5264477  | 467094.5 | 4600284  | 1212141  | 4734919  | 5768464  | 5046781  | 5024659  |
| 9.340183 | 4  | 3 | 1 | 5265070  | 10106048 | 11776709 | 17650770 | 9759211  | 29020905 | 2058609  | 2785383  | 14347174 |
| 32.05633 | 4  | 1 | 3 | 877225.4 | 5929617  | 389699.3 | 7298502  | 2579703  | 6392371  | 5391807  | 6049692  | 5696572  |
| 12.28138 | 3  | 3 | 0 | 1938205  | 42727679 | 17949542 | 32828769 | 7438929  | 43655258 | 32284473 | 27814372 | 73080919 |
| 11.74925 | 6  | 3 | 3 | 1711041  | 485835.1 | 502762.1 | 3599931  | 5889313  | 1065667  | 1000657  | 63852.24 | 96960.88 |
| 9.960817 | 10 | 5 | 5 | 4008752  | 10709500 | 2293154  | 9437692  | 1004700  | 13466957 | 12339539 | 7650389  | 9528995  |
| 9.979667 | 5  | 3 | 2 | 6502188  | 2332080  | 1145340  | 10545851 | 15541414 | 1961652  | 3694562  | 1368601  | 1239613  |
| 20.31717 | 4  | 3 | 1 | 65411532 | 1.98E+08 | 2.74E+08 | 3.73E+08 | 2.23E+08 | 5.59E+08 | 1947167  | 4.3E+08  | 312541.6 |
| 9.872917 | 10 | 5 | 5 | 2695557  | 5717885  | 1598858  | 8705877  | 5552332  | 5457575  | 4401068  | 4007804  | 7580999  |
| 9.840617 | 6  | 3 | 3 | 1041214  | 2466387  | 928695.5 | 1786815  | 1021698  | 2806724  | 1617207  | 3684543  | 2774112  |
| 9.0511   | 8  | 3 | 5 | 4987233  | 4638096  | 4698032  | 2121461  | 1207604  | 12997913 | 1769843  | 3048856  | 2558807  |
| 10.95055 | 6  | 3 | 3 | 141343.2 | 501632.4 | 279498.5 | 337183.7 | 175827.3 | 623829.8 | 517483.1 | 232207   | 238631   |
| 9.915583 | 5  | 2 | 3 | 567117.1 | 1874481  | 617271.3 | 1329620  | 908202.1 | 985001.9 | 1892892  | 1786085  | 2717864  |
| 9.4468   | 6  | 4 | 2 | 2597298  | 5529354  | 5664189  | 9606048  | 6054396  | 3537224  | 4148668  | 3100205  | 15491680 |
| 9.887133 | 8  | 4 | 4 | 3075099  | 12516256 | 4354062  | 15222362 | 3326413  | 19082044 | 9907848  | 8344557  | 10562829 |
| 9.445217 | 10 | 5 | 3 | 453086.8 | 4278867  | 978177.8 | 3493493  | 1255118  | 5667627  | 4686508  | 4187851  | 3058718  |
| 9.530583 | 10 | 5 | 5 | 1056223  | 3809536  | 658466.6 | 3302703  | 790578   | 4644809  | 4267715  | 3705704  | 3447451  |
| 9.392767 | 9  | 5 | 4 | 2083248  | 5094570  | 1133870  | 3938382  | 2013260  | 5759371  | 5823836  | 3952464  | 3778485  |
| 9.55155  | 10 | 5 | 5 | 952111.4 | 2602898  | 626000.8 | 2030834  | 966389.9 | 2293126  | 3254583  | 1863286  | 2343083  |
| 39.97817 | 5  | 1 | 4 | 329395.8 | 4071294  | 613190.1 | 3654779  | 585614.3 | 5134350  | 3908150  | 3888296  | 3881405  |
| 10.94208 | 5  | 3 | 2 | 754163.4 | 1772605  | 656387.3 | 1310953  | 672733.2 | 2070095  | 2736076  | 1562289  | 1482275  |
| 10.67448 | 10 | 5 | 5 | 615946   | 3273019  | 551866.7 | 2838468  | 688129.7 | 2579221  | 2883301  | 3514991  | 3400243  |
| 17.45233 | 5  | 2 | 3 | 117926.4 | 788825.2 | 252643.9 | 611975   | 256712.5 | 956317.2 | 489871.5 | 582809.1 | 1096310  |
| 38.2085  | 5  | 3 | 1 | 338174.6 | 5006348  | 2326599  | 3778481  | 226372.7 | 3764468  | 9070470  | 4855625  | 3699560  |
| 11.76832 | 9  | 5 | 4 | 287705.8 | 3175644  | 732217.6 | 2693753  | 652609.3 | 3075318  | 3997007  | 2152067  | 2898898  |
| 17.60183 | 3  | 0 | 3 | 119841.9 | 595527.8 | 59108.58 | 497665.6 | 181153.3 | 547938.8 | 533791.7 | 681802.4 | 616806.8 |
| 9.848417 | 5  | 2 | 3 | 1695617  | 995188.9 | 850188.6 | 2920107  | 3610647  | 2291217  | 312672.3 | 265062.7 | 732652.3 |
| 9.419733 | 7  | 4 | 3 | 3584627  | 5956347  | 4192966  | 3467218  | 2758126  | 6448508  | 3202750  | 5902217  | 12582927 |
| 42.1505  | 4  | 1 | 3 | 194058.8 | 2158971  | 478601.3 | 2992168  | 1547246  | 2394041  | 2410605  | 2218059  | 1318085  |

|          |    |   |   |          |          |          |          |          |          |          |          |          |
|----------|----|---|---|----------|----------|----------|----------|----------|----------|----------|----------|----------|
| 10.36622 | 5  | 2 | 3 | 3184430  | 581451.8 | 172391.4 | 1581424  | 1896633  | 746180.7 | 622579.6 | 529641.8 | 698720.1 |
| 9.999217 | 11 | 5 | 5 | 653949.6 | 2116002  | 376608.8 | 1703715  | 729754.4 | 2226260  | 2700413  | 1696948  | 1972943  |
| 10.58813 | 9  | 5 | 4 | 308608.3 | 1205133  | 225597.7 | 1463440  | 460827.3 | 1169212  | 1579804  | 967845.3 | 1139305  |
| 18.87783 | 10 | 5 | 5 | 185985   | 911914.7 | 304218.9 | 667708.2 | 391438.5 | 1384866  | 810630.4 | 597638.9 | 749355.8 |
| 17.07417 | 4  | 1 | 3 | 530987.7 | 3074860  | 1230046  | 2078928  | 1603810  | 2396560  | 4015249  | 2332752  | 1893303  |
| 9.07525  | 10 | 5 | 5 | 8165399  | 48248887 | 12427487 | 38580142 | 15232740 | 51752965 | 68010844 | 42328160 | 43414938 |
| 10.94443 | 6  | 3 | 3 | 664654.3 | 2381494  | 580348.7 | 1601503  | 1421314  | 2309843  | 1919989  | 2035637  | 2262813  |
| 9.920517 | 8  | 4 | 4 | 718448.8 | 2063653  | 509105.8 | 1705055  | 524813.8 | 1381648  | 2798141  | 2172486  | 2043387  |
| 9.858833 | 9  | 4 | 5 | 1010303  | 3414328  | 1739958  | 2455925  | 738424.4 | 1854024  | 3082331  | 2369888  | 6325260  |
| 9.856867 | 10 | 5 | 5 | 3121956  | 13793364 | 357698.4 | 11655610 | 4058143  | 13959146 | 13522382 | 14221249 | 13928443 |
| 9.840617 | 6  | 4 | 2 | 1102192  | 3193048  | 1055441  | 4166676  | 1653912  | 2888820  | 2641260  | 2991793  | 5036861  |
| 12.41208 | 10 | 5 | 5 | 616346.8 | 3887685  | 1541133  | 5551067  | 2938839  | 3654336  | 3087022  | 2567455  | 6529494  |
| 10.45545 | 7  | 3 | 4 | 78903.66 | 242646.1 | 88980.54 | 304019.4 | 88137.44 | 383642.5 | 160339.9 | 180823.3 | 219831.1 |
| 9.388367 | 4  | 1 | 3 | 570018.6 | 425236.2 | 402555.8 | 854652.3 | 757587.4 | 1046302  | 153271.9 | 512257.1 | 414349.5 |
| 10.97857 | 10 | 5 | 5 | 2099463  | 9189217  | 1134509  | 8400425  | 1142861  | 8163416  | 10106503 | 7770575  | 9757723  |
| 38.89917 | 5  | 2 | 3 | 395082.3 | 5603782  | 751684.2 | 5092517  | 724158.8 | 5283400  | 5771503  | 5067830  | 6843913  |
| 37.15283 | 6  | 2 | 4 | 374214.9 | 5344876  | 1494534  | 4540777  | 473313.9 | 4026143  | 4713725  | 5225798  | 4855770  |
| 9.659033 | 6  | 2 | 4 | 279290.3 | 393859.8 | 237686.2 | 621175.1 | 390953.8 | 574582   | 37292.52 | 415204.7 | 307117.1 |
| 9.888767 | 9  | 5 | 4 | 5897695  | 25862824 | 8421800  | 20349135 | 7460202  | 17625412 | 21711472 | 21260521 | 30290880 |
| 44.049   | 4  | 1 | 3 | 265013.9 | 2885309  | 174351.8 | 3454130  | 1077130  | 2739316  | 2761448  | 2981954  | 3145979  |
| 9.92825  | 7  | 3 | 3 | 2086256  | 3119448  | 1227059  | 6012247  | 5446472  | 3610595  | 2322524  | 3606868  | 4592644  |
| 9.999217 | 10 | 5 | 5 | 2090638  | 4706050  | 1606508  | 3428997  | 2042968  | 7008013  | 4523020  | 2641250  | 5281507  |
| 9.94455  | 5  | 3 | 2 | 891265.2 | 1756993  | 418990.6 | 1342666  | 719280.4 | 1832202  | 2160485  | 1833143  | 1912015  |
| 9.903283 | 10 | 5 | 5 | 1692468  | 3985652  | 1387149  | 6517092  | 4725568  | 4204394  | 4185151  | 5972727  | 3402606  |
| 9.94405  | 6  | 4 | 2 | 768479.6 | 1425760  | 453648.5 | 1032005  | 656380.9 | 1968707  | 1674342  | 985780.8 | 925002.1 |
| 9.445217 | 14 | 5 | 5 | 3688438  | 26402071 | 7212282  | 21047546 | 8217718  | 33629305 | 31821781 | 28661201 | 21214283 |
| 9.522017 | 10 | 5 | 5 | 913104.9 | 2736818  | 914418.4 | 2185055  | 645858.2 | 2889176  | 3617888  | 3121119  | 2862365  |
| 9.9677   | 10 | 5 | 5 | 5187698  | 11214043 | 2080563  | 8552813  | 4838143  | 13455501 | 10187418 | 9408786  | 9533954  |
| 9.8322   | 8  | 4 | 4 | 817880.6 | 2719322  | 329947.2 | 2134750  | 1090390  | 2235302  | 2676926  | 2783950  | 3160676  |
| 9.419733 | 10 | 5 | 3 | 1639629  | 10937714 | 2723609  | 8922267  | 3086987  | 13343077 | 10844592 | 11234687 | 12825718 |
| 9.842    | 10 | 5 | 5 | 1984673  | 9833729  | 1104129  | 7982342  | 3443485  | 10615707 | 10201574 | 8634188  | 8698962  |
| 10.76405 | 4  | 3 | 1 | 94028.13 | 184873.8 | 59198.81 | 152818.1 | 21317.4  | 171913.5 | 282110.9 | 193098   | 143577.6 |
| 10.38125 | 10 | 5 | 5 | 2544171  | 9806540  | 1154976  | 8797710  | 1687548  | 9310498  | 11744549 | 9909824  | 9288260  |
| 10.15407 | 10 | 5 | 5 | 318503.7 | 1164411  | 469789.3 | 890940.8 | 289160   | 1248579  | 1212440  | 1860004  | 903729   |
| 25.2465  | 3  | 3 | 0 | 748695.7 | 2067395  | 2763311  | 618478.6 | 70825.84 | 6882601  | 1899882  | 673668.4 | 655652.4 |

|          |    |   |   |          |          |          |          |          |          |          |          |          |
|----------|----|---|---|----------|----------|----------|----------|----------|----------|----------|----------|----------|
| 9.544833 | 10 | 4 | 3 | 1322633  | 2594938  | 1233151  | 5666126  | 5798109  | 2197479  | 3148791  | 2297831  | 4326580  |
| 21.3515  | 4  | 1 | 3 | 258060.8 | 1742811  | 367032.9 | 1518041  | 272619.4 | 1454073  | 2323772  | 1699417  | 1412088  |
| 10.095   | 14 | 5 | 5 | 2521017  | 3377456  | 1828405  | 5222763  | 3225241  | 3946835  | 2765997  | 5507238  | 4059722  |
| 10.008   | 9  | 5 | 4 | 313524.2 | 958663.4 | 282953   | 731355.8 | 366492.1 | 957685.4 | 1275160  | 769812.1 | 598352.1 |
| 9.999217 | 10 | 5 | 5 | 664969.3 | 2809279  | 182208.5 | 2388593  | 793017.2 | 2905962  | 2523601  | 2837162  | 2771335  |
| 9.880683 | 4  | 3 | 1 | 7824031  | 28261547 | 20172533 | 39353814 | 8711549  | 19843925 | 15130859 | 55508065 | 43102067 |
| 8.845217 | 7  | 3 | 4 | 310508.7 | 718211.5 | 133448.9 | 1064598  | 654765.3 | 737603.2 | 940059.1 | 676335.6 | 621318.8 |
| 9.912633 | 9  | 5 | 4 | 1670256  | 3471054  | 790397.1 | 2644836  | 1456292  | 4375242  | 3114853  | 2357408  | 3476143  |
| 9.848417 | 9  | 4 | 5 | 3033255  | 7460099  | 2199198  | 10101686 | 4770051  | 7592095  | 3862199  | 9442555  | 9024364  |
| 10.70375 | 8  | 4 | 4 | 198704.6 | 678534.8 | 168914   | 565392.2 | 158368.9 | 876499.5 | 780409.7 | 718432.2 | 559934.6 |
| 31.13717 | 6  | 4 | 2 | 426232.2 | 3173302  | 726064.1 | 3724547  | 861178.3 | 2314545  | 3149454  | 2664593  | 4137269  |
| 9.872883 | 10 | 5 | 5 | 9814596  | 45510851 | 7414952  | 36346702 | 16616562 | 50637572 | 50128940 | 36979089 | 37876192 |
| 10.9645  | 10 | 5 | 5 | 726587.2 | 4735849  | 732123   | 4045106  | 1187433  | 5034534  | 5617160  | 3928418  | 4021955  |
| 31.11867 | 7  | 4 | 3 | 418054.2 | 4128515  | 419616.5 | 3749099  | 643633.5 | 4200390  | 4282480  | 3457084  | 4601656  |
| 8.902983 | 6  | 4 | 2 | 99313.44 | 205027.7 | 52386.19 | 168548.9 | 53253.72 | 177339.2 | 294308.2 | 197823.8 | 159010   |
| 7.252767 | 3  | 3 | 0 | 848083   | 27820708 | 11070952 | 20796129 | 9130142  | 26275872 | 29367712 | 45494649 | 21888987 |
| 9.979667 | 9  | 5 | 4 | 6258224  | 1109601  | 373530.8 | 3686737  | 4916930  | 1479709  | 1463273  | 1029685  | 584727.1 |
| 23.39567 | 6  | 4 | 2 | 48161.9  | 188598.3 | 64458.97 | 148559.6 | 50172.96 | 165692   | 172022.7 | 291148.1 | 197777.8 |
| 9.43325  | 4  | 3 | 1 | 418541.4 | 1788494  | 1155934  | 2434252  | 572733.9 | 1110752  | 697828.2 | 3100777  | 2983441  |
| 9.830833 | 4  | 1 | 3 | 2047611  | 1783028  | 710807.7 | 3324050  | 2903912  | 1832115  | 1084836  | 2959452  | 1583026  |
| 9.887133 | 10 | 5 | 5 | 22171718 | 37230527 | 5023320  | 68983103 | 60584507 | 38997820 | 43453334 | 29834339 | 38384154 |
| 9.573333 | 10 | 5 | 5 | 6612566  | 19896831 | 4248110  | 16381082 | 5764889  | 22152426 | 24889389 | 15728284 | 15190512 |
| 9.07525  | 5  | 2 | 3 | 294280.4 | 579253.8 | 383448.9 | 369187.6 | 162148.7 | 601291   | 1063229  | 767447.7 | 428411.7 |
| 9.933967 | 9  | 5 | 4 | 1777564  | 3693521  | 791372.9 | 5611629  | 3626116  | 4610882  | 3543048  | 3589030  | 4202139  |
| 9.03715  | 6  | 5 | 1 | 536972.4 | 1407308  | 318702   | 1104256  | 522762.3 | 1383111  | 1866174  | 1415860  | 1405749  |
| 11.02755 | 6  | 2 | 4 | 23092196 | 55111224 | 53597229 | 20879426 | 45059319 | 1.18E+08 | 95260521 | 799313.7 | 61172962 |
| 9.952017 | 10 | 5 | 5 | 6322780  | 20196703 | 3816474  | 16009667 | 7463896  | 23509737 | 19506091 | 15919700 | 17339758 |
| 11.09688 | 7  | 3 | 4 | 325414.9 | 948871.3 | 927606.1 | 459143.2 | 187188.7 | 443351.3 | 498992.2 | 2595972  | 477114   |
| 18.59967 | 3  | 0 | 3 | 942795.1 | 296064.6 | 62273.81 | 2357139  | 3940317  | 401364.5 | 293698.2 | 264229   | 239569.4 |
| 17.644   | 6  | 3 | 3 | 124203.7 | 780010.6 | 129784.8 | 624995.2 | 280186.4 | 957906.8 | 704449.5 | 637042.7 | 866487.6 |
| 14.15043 | 10 | 5 | 5 | 265356.8 | 2068123  | 460734.5 | 1694373  | 607627.8 | 2552956  | 2308888  | 1585414  | 1563555  |
| 9.445217 | 14 | 5 | 5 | 8084854  | 56097452 | 17139683 | 44201257 | 17356891 | 73998643 | 68779900 | 60852519 | 43263137 |
| 37.00033 | 7  | 1 | 3 | 321382.6 | 3268036  | 690361.1 | 3718915  | 613809.4 | 3659506  | 2039620  | 3542673  | 3476333  |
| 9.392767 | 10 | 5 | 5 | 15952531 | 46397317 | 9315783  | 36644631 | 17242790 | 52487706 | 52783403 | 36543493 | 35901130 |
| 10.9645  | 10 | 5 | 5 | 469334.6 | 2574017  | 336993.7 | 2311337  | 418319.8 | 2763956  | 2961341  | 2164795  | 2281934  |

|          |    |   |   |          |          |          |          |          |          |          |          |          |
|----------|----|---|---|----------|----------|----------|----------|----------|----------|----------|----------|----------|
| 9.435733 | 6  | 1 | 4 | 716087.2 | 1639666  | 653831.2 | 1269040  | 357742.9 | 1809998  | 1399633  | 2702168  | 1114855  |
| 41.07167 | 9  | 3 | 2 | 307735.4 | 3096659  | 1317244  | 3823785  | 602342.2 | 750136.2 | 3828284  | 3494929  | 3718705  |
| 22.104   | 10 | 5 | 5 | 37447232 | 2.77E+08 | 31107465 | 3.04E+08 | 45549448 | 2.73E+08 | 2.97E+08 | 2.35E+08 | 2.63E+08 |
| 9.8445   | 9  | 5 | 4 | 2137692  | 10019629 | 1624031  | 8080790  | 3507752  | 9247061  | 7808761  | 9873037  | 11315310 |
| 9.983433 | 7  | 4 | 3 | 434228.2 | 771019.9 | 229011.7 | 977136.6 | 350052   | 1150818  | 718161.1 | 723916   | 734474.6 |
| 10.64708 | 10 | 5 | 5 | 411745.1 | 1727225  | 354812.1 | 1453022  | 434742.6 | 1386184  | 2129759  | 2090834  | 1551122  |
| 9.952017 | 10 | 5 | 5 | 2385987  | 7427760  | 1560778  | 5849137  | 2771314  | 8742883  | 8083280  | 5838422  | 5658157  |
| 30.32733 | 3  | 0 | 3 | 9914519  | 350490.6 | 201448.6 | 47331720 | 89945882 | 583846.9 | 242025.7 | 223931.9 | 151214.3 |
| 9.55155  | 9  | 5 | 4 | 666864.6 | 1762325  | 386514.5 | 1372707  | 683686.2 | 1760641  | 2242163  | 1288523  | 1492916  |
| 15.35868 | 10 | 5 | 5 | 680226.8 | 5284972  | 834944.2 | 4684324  | 906454.8 | 6129594  | 6199215  | 4906691  | 4327101  |
| 8.99545  | 9  | 5 | 4 | 1042051  | 7637904  | 1664003  | 5936541  | 2995373  | 6356965  | 10337898 | 8125181  | 6897283  |
| 9.36565  | 10 | 5 | 4 | 496612.9 | 2350894  | 751762.3 | 1838667  | 735195.3 | 3468672  | 2327124  | 2568639  | 1921770  |
| 9.8445   | 9  | 5 | 4 | 987579.8 | 4105267  | 893925.5 | 3414908  | 1094966  | 4634842  | 4589068  | 3024944  | 3269097  |
| 18.01267 | 10 | 5 | 5 | 109109.5 | 532222.5 | 85294.15 | 446772.4 | 149797.1 | 649498.5 | 547453.3 | 429788   | 471526.1 |
| 9.324967 | 5  | 3 | 1 | 1527340  | 1478968  | 1687102  | 589469.6 | 353593.5 | 877702.6 | 786444.6 | 751375.5 | 4486127  |
| 10.98605 | 5  | 1 | 4 | 280855.9 | 632946   | 290154.7 | 478048.6 | 89153.51 | 729539.3 | 1047279  | 469256.4 | 274023   |
| 10.71765 | 5  | 2 | 3 | 294593.9 | 599008.1 | 318664   | 419343   | 170694.8 | 1015382  | 327939.5 | 866250.9 | 355153.7 |
| 21.26517 | 9  | 4 | 5 | 573250.9 | 3116807  | 909651.6 | 2592116  | 548716.4 | 2316399  | 4561573  | 3434350  | 2539934  |
| 21.09367 | 4  | 3 | 1 | 103312.4 | 381801.8 | 254352.7 | 240734.3 | 122499.6 | 648120.7 | 265758.4 | 107239   | 657581.7 |
| 14.89767 | 10 | 5 | 5 | 72399.58 | 599194.5 | 128714.1 | 472321.9 | 221772.1 | 726176.5 | 688086.8 | 396305.7 | 570399.3 |
| 9.640367 | 7  | 3 | 4 | 195172.2 | 498561.1 | 116199.6 | 389360   | 188470.3 | 618920.3 | 431355.9 | 549555.9 | 562638.5 |
| 9.94455  | 5  | 3 | 2 | 965075.5 | 1827521  | 537233.9 | 1443976  | 576815.3 | 2176112  | 2398167  | 2039076  | 1369900  |
| 9.559117 | 9  | 5 | 4 | 592313.9 | 1457393  | 358746.1 | 1124871  | 571691.2 | 1382635  | 1991627  | 1190109  | 1102558  |
| 11.44292 | 9  | 5 | 4 | 200703.5 | 869472.4 | 159174.5 | 743535.8 | 203001.9 | 828234   | 971266.6 | 642911   | 842533   |
| 10.03947 | 7  | 4 | 3 | 427741.9 | 495835.3 | 229657.5 | 783316.3 | 524771.1 | 432242.7 | 189675.6 | 701563.5 | 747282.5 |
| 9.191283 | 9  | 5 | 4 | 4374397  | 9294002  | 2393199  | 20095111 | 20661283 | 10300162 | 5855406  | 7786691  | 11406223 |
| 23.39617 | 5  | 2 | 3 | 92467.7  | 185864.1 | 39806.62 | 299294.7 | 215962.3 | 173272.8 | 224197.7 | 160952.7 | 230666.7 |
| 24.68117 | 7  | 3 | 4 | 127094.6 | 721481.1 | 385401.9 | 465539.4 | 358230.7 | 1019325  | 426987   | 522987.4 | 1243471  |
| 9.205717 | 4  | 3 | 1 | 3652509  | 9808091  | 3993740  | 22262083 | 23744929 | 6880661  | 9966438  | 9132556  | 6589962  |
| 9.94455  | 8  | 5 | 3 | 1431748  | 3400137  | 903309.1 | 2551348  | 1466415  | 3731213  | 2901129  | 3008121  | 2541076  |
| 27.34033 | 9  | 5 | 4 | 1125599  | 3942798  | 1425798  | 5934427  | 3681434  | 6167624  | 3116681  | 2491864  | 4412027  |
| 9.333667 | 5  | 4 | 1 | 347377.7 | 598681.9 | 347300.4 | 376424.4 | 296486.1 | 847806.1 | 833908.2 | 648095.2 | 663599.9 |
| 13.11377 | 9  | 5 | 4 | 335093.6 | 2536603  | 387234.6 | 2288759  | 330839.7 | 2542821  | 2961119  | 2214522  | 2088633  |
| 10.95055 | 9  | 4 | 3 | 215453.6 | 571977.2 | 122967   | 419040.6 | 279313.2 | 764382.8 | 565803.3 | 438843.1 | 499108.4 |
| 9.507167 | 7  | 2 | 3 | 531352.6 | 1581538  | 1823256  | 623753.8 | 361435.7 | 555241.1 | 597334.5 | 771101   | 4814020  |



|          |    |   |   |          |          |          |          |          |          |          |          |          |
|----------|----|---|---|----------|----------|----------|----------|----------|----------|----------|----------|----------|
| 10.9645  | 10 | 5 | 5 | 452076.6 | 1244074  | 209638.3 | 1078332  | 267564.6 | 1403012  | 1480830  | 1262728  | 1101277  |
| 9.979667 | 9  | 5 | 4 | 1002101  | 1840414  | 858771.5 | 2781104  | 1685830  | 2746924  | 2704408  | 1415538  | 783001.9 |
| 10.17587 | 3  | 0 | 3 | 1022422  | 825498.5 | 678702.3 | 464023.3 | 209381.2 | 1983149  | 229131.8 | 479970.3 | 762759.4 |
| 28.37317 | 3  | 3 | 0 | 726872.1 | 906168.3 | 425440.1 | 2653338  | 3345003  | 649735.4 | 1217407  | 399664.9 | 813576.5 |
| 9.845483 | 8  | 4 | 4 | 1540729  | 4608464  | 3085726  | 2923229  | 1330956  | 1621463  | 1299699  | 8514454  | 6031871  |
| 10.02372 | 7  | 3 | 4 | 997049.9 | 799796.9 | 255688.6 | 1555252  | 1441253  | 806955.4 | 468152.1 | 954759.1 | 1122345  |
| 11.96257 | 4  | 3 | 1 | 323697   | 206417.5 | 46329.23 | 703364.8 | 954368.4 | 236694.5 | 220209.3 | 164351.7 | 258835   |
| 26.526   | 10 | 5 | 5 | 3023515  | 50352313 | 6653950  | 42623892 | 13988894 | 51538760 | 60025963 | 41499651 | 50278257 |
| 9.507167 | 11 | 4 | 4 | 987969.6 | 5158597  | 2446338  | 3562911  | 2191109  | 8846269  | 3731637  | 2586206  | 4409625  |
| 10.94208 | 10 | 5 | 5 | 290486.1 | 1664528  | 463541.8 | 1352567  | 444989.2 | 2023303  | 1938692  | 1154372  | 1162795  |
| 16.16765 | 5  | 3 | 2 | 405411.5 | 1231229  | 1945727  | 216911.4 | 185942.3 | 171228.7 | 649509.2 | 197460.3 | 4694252  |
| 10.9645  | 10 | 5 | 5 | 259924.5 | 1124083  | 175971.3 | 947759   | 310544   | 1360578  | 1119920  | 944547.1 | 966746.4 |
| 10.9645  | 10 | 5 | 5 | 505531.6 | 2517876  | 459662   | 2072902  | 776996.2 | 2637959  | 2770314  | 1948591  | 2156057  |
| 9.311883 | 4  | 3 | 1 | 652157.3 | 1863245  | 1122308  | 2930916  | 1855842  | 2944757  | 511525.9 | 1507369  | 3103339  |
| 8.872967 | 4  | 3 | 1 | 170140.1 | 362149.7 | 109005.3 | 280805.1 | 127077.2 | 452297.2 | 266358.1 | 462684.1 | 403069.6 |
| 9.338567 | 9  | 5 | 4 | 4383485  | 11368712 | 5194125  | 8178401  | 3987286  | 8236383  | 8270826  | 8930160  | 10960362 |
| 9.976317 | 10 | 5 | 5 | 1242444  | 4595339  | 579492   | 3990133  | 1076388  | 5100657  | 5160362  | 4695298  | 3818025  |
| 9.8445   | 9  | 5 | 4 | 2545165  | 13180378 | 1874285  | 11123395 | 3693663  | 13363868 | 13034549 | 11155056 | 12184294 |
| 9.983433 | 10 | 5 | 5 | 1355293  | 4986116  | 750839.1 | 4051916  | 1709538  | 5331626  | 5910224  | 4564218  | 3952185  |
| 9.431017 | 6  | 3 | 3 | 1145424  | 9598417  | 5217417  | 6147792  | 4834383  | 6579284  | 5872692  | 4991967  | 15623405 |
| 25.71117 | 4  | 4 | 0 | 6528527  | 20322671 | 9870123  | 14235941 | 7674213  | 23617470 | 34818008 | 19870976 | 8637496  |
| 19.0535  | 5  | 2 | 3 | 1198631  | 8028347  | 2010196  | 6356795  | 2773231  | 10974495 | 6170863  | 6563703  | 7263013  |
| 9.845483 | 5  | 2 | 3 | 1984080  | 4006387  | 1268764  | 2799584  | 2099325  | 4398758  | 5431445  | 3627527  | 2046935  |
| 9.9677   | 10 | 5 | 5 | 563825.6 | 1556629  | 365027.1 | 1276784  | 445201.1 | 1840565  | 1884960  | 1717946  | 1071552  |
| 9.920517 | 11 | 5 | 5 | 2386512  | 4954656  | 755933.3 | 3765616  | 2224116  | 5931986  | 4696805  | 4635040  | 5490244  |
| 30.29317 | 9  | 4 | 5 | 284722.4 | 1513742  | 309370.7 | 1161846  | 636069   | 1668547  | 1949689  | 1451302  | 1136955  |
| 9.979667 | 9  | 5 | 4 | 736549.1 | 2208991  | 381512.3 | 1684811  | 970151.3 | 2570223  | 2381351  | 2109826  | 1593147  |
| 10.17547 | 6  | 4 | 2 | 263152.3 | 575702.6 | 321925   | 391890.9 | 188631.4 | 721808.6 | 230688.2 | 1010531  | 288544.4 |
| 13.85822 | 4  | 3 | 0 | 1311259  | 33522287 | 7682629  | 28379509 | 7316623  | 40559124 | 23058155 | 29427621 | 41284502 |
| 10.58813 | 8  | 4 | 4 | 581020   | 2367314  | 681761.1 | 1980006  | 389936.3 | 1926490  | 2274774  | 1558555  | 3263726  |
| 11.18537 | 3  | 3 | 0 | 150171.8 | 533634.9 | 131635   | 451385   | 106400.1 | 535807.1 | 614245.3 | 514367.8 | 328066.9 |
| 9.8322   | 9  | 5 | 4 | 1248937  | 3841927  | 974393.3 | 2948611  | 1539074  | 4294329  | 5037762  | 3106279  | 2609265  |
| 10.08658 | 10 | 5 | 5 | 770459.5 | 2634656  | 466504.6 | 2353438  | 339386.7 | 2093234  | 3162656  | 2577633  | 3052536  |
| 19.47583 | 10 | 5 | 5 | 483856.4 | 2751465  | 518158.8 | 2126407  | 1140902  | 3500620  | 2435934  | 2171164  | 2643621  |
| 9.929783 | 9  | 5 | 4 | 940778.5 | 2398092  | 785374.4 | 1697767  | 1195884  | 2923349  | 1988721  | 1550020  | 2044289  |

|          |    |   |   |          |          |          |          |          |          |          |          |          |
|----------|----|---|---|----------|----------|----------|----------|----------|----------|----------|----------|----------|
| 9.856867 | 9  | 5 | 4 | 1848177  | 7961152  | 2009312  | 6656714  | 1790304  | 7092564  | 5386135  | 9597019  | 10357361 |
| 14.8537  | 3  | 0 | 3 | 2351804  | 1134743  | 159457.2 | 7860118  | 12961960 | 1374228  | 1143358  | 934440.9 | 1072011  |
| 9.64815  | 4  | 3 | 1 | 574830.5 | 478891.5 | 94241.13 | 816446.4 | 647616.4 | 589842.7 | 447925.8 | 517200.7 | 336701.7 |
| 43.07117 | 8  | 2 | 5 | 321900.7 | 3947357  | 243952.1 | 3038745  | 1744362  | 4188628  | 3647026  | 3743266  | 3997197  |
| 9.845483 | 4  | 1 | 3 | 5554354  | 9325254  | 8853030  | 4422576  | 4387155  | 5350642  | 25058145 | 7016242  | 4278672  |
| 9.88815  | 5  | 2 | 3 | 1472877  | 4406283  | 960135.7 | 5157417  | 1212446  | 5066957  | 2897554  | 4047115  | 5251754  |
| 43.0425  | 3  | 3 | 0 | 378235.5 | 7295573  | 3263503  | 8992071  | 342169.4 | 9007272  | 4151563  | 10321512 | 9610107  |
| 9.920517 | 10 | 5 | 5 | 12764485 | 86086933 | 5372836  | 71193522 | 28488555 | 88804965 | 82082528 | 79750702 | 86518393 |
| 10.94443 | 4  | 1 | 3 | 440610.8 | 838311.3 | 185231.7 | 678947.3 | 268913.3 | 1067369  | 813490.8 | 917634.7 | 559301.3 |
| 9.3919   | 8  | 3 | 4 | 1795513  | 8549635  | 7436689  | 4513789  | 3127171  | 3324949  | 3720592  | 3370542  | 19891494 |
| 9.77345  | 14 | 5 | 5 | 1001217  | 2947720  | 628232.6 | 2426524  | 866391.6 | 3043343  | 3279891  | 2294028  | 2351303  |
| 9.976317 | 9  | 4 | 5 | 932274.8 | 1366855  | 574464.9 | 2204855  | 1562490  | 1049612  | 2193688  | 1032551  | 1731218  |
| 10.95055 | 11 | 5 | 5 | 285868.3 | 1503181  | 464970.3 | 1208335  | 392383.7 | 2002125  | 1824491  | 1131900  | 908581.5 |
| 9.960467 | 10 | 5 | 5 | 1853195  | 7522742  | 953443.3 | 6650478  | 1504717  | 8826573  | 8001519  | 7559394  | 6453711  |
| 9.888767 | 10 | 5 | 5 | 1299831  | 7770749  | 1154377  | 6161611  | 2990036  | 7219072  | 6423506  | 7400428  | 8405834  |
| 36.6125  | 8  | 3 | 2 | 327938.8 | 3756036  | 1918262  | 4847140  | 1116344  | 445976   | 4271832  | 4411794  | 5449691  |
| 11.03478 | 10 | 5 | 5 | 8526241  | 36593301 | 6777718  | 31699873 | 7506384  | 45843081 | 33009484 | 31795547 | 30593575 |
| 12.0789  | 6  | 4 | 2 | 310375   | 2066512  | 364059.8 | 1570895  | 919172.9 | 2339341  | 1698113  | 1852151  | 1885302  |
| 9.147367 | 3  | 3 | 0 | 2311483  | 3455019  | 3776741  | 5949649  | 3513831  | 753194.7 | 4939494  | 1176320  | 9460266  |
| 9.976317 | 10 | 5 | 5 | 668409.3 | 1654651  | 262763.6 | 1418599  | 405106.6 | 2059255  | 1663117  | 1708130  | 1440213  |
| 10.95055 | 4  | 3 | 1 | 544932.5 | 1203571  | 337919.8 | 911866.2 | 493568.4 | 1419451  | 1566481  | 1050830  | 703873.4 |
| 26.78083 | 4  | 1 | 3 | 109300.6 | 590039.2 | 392073   | 346042.7 | 315629.7 | 507101.5 | 1047765  | 142348.2 | 939067.2 |
| 44.40867 | 9  | 2 | 3 | 284630.3 | 2406298  | 680979.7 | 3999973  | 3042272  | 2171278  | 2686496  | 3028194  | 2818395  |
| 10.95602 | 8  | 3 | 5 | 370882.3 | 1324338  | 500417.5 | 1013408  | 401170.6 | 1699150  | 1840069  | 610134.8 | 1049655  |
| 18.98017 | 4  | 3 | 1 | 53210.1  | 317446.4 | 60546.41 | 265042.7 | 88823.02 | 227514.7 | 383740.3 | 325269.3 | 293773.6 |
| 9.915583 | 6  | 3 | 3 | 1331424  | 3156112  | 1687687  | 4255228  | 1523372  | 5040522  | 3124397  | 721810.7 | 2512521  |
| 9.992233 | 10 | 5 | 5 | 2869971  | 3158418  | 943201   | 4090317  | 1645223  | 2175747  | 3831031  | 4447285  | 2657790  |
| 9.9677   | 10 | 5 | 5 | 6195048  | 21885990 | 4675428  | 17896268 | 6734112  | 24944579 | 27327032 | 18604161 | 15806103 |
| 9.419733 | 8  | 5 | 2 | 463717.6 | 2839952  | 1211176  | 1971967  | 1327861  | 3799350  | 2399764  | 4339870  | 1348007  |
| 10.14225 | 10 | 5 | 5 | 965391.3 | 3810264  | 997410.7 | 4670976  | 1459499  | 3494493  | 4831088  | 4602700  | 3799196  |
| 11.74603 | 10 | 5 | 5 | 897590.9 | 4511542  | 678119.4 | 3979315  | 864681.3 | 4434509  | 5595939  | 3852214  | 4052695  |
| 9.206    | 5  | 2 | 3 | 5520188  | 15238258 | 12846211 | 7075305  | 10968678 | 23463870 | 726175.6 | 23373713 | 26842619 |
| 9.864767 | 9  | 4 | 5 | 6125728  | 42465837 | 5560751  | 35610763 | 12609683 | 38318502 | 42759984 | 44211581 | 36408559 |
| 10.8914  | 5  | 2 | 3 | 130749.2 | 589436.5 | 314254   | 409103.5 | 193033.1 | 519480.8 | 754593.4 | 364374.3 | 264644.7 |
| 10.10223 | 10 | 5 | 5 | 853285   | 2344835  | 1191833  | 1697896  | 519713.2 | 4220434  | 2757755  | 1753867  | 1177147  |

|          |    |   |   |          |          |          |          |          |          |          |          |          |
|----------|----|---|---|----------|----------|----------|----------|----------|----------|----------|----------|----------|
| 9.64815  | 9  | 5 | 4 | 614380.3 | 1804625  | 800648.2 | 1328119  | 567040.1 | 2525536  | 2491545  | 963515.6 | 927747   |
| 9.295167 | 6  | 2 | 4 | 963914.6 | 3928770  | 701885.5 | 3535783  | 382097.1 | 4345508  | 4890173  | 3812637  | 3120580  |
| 9.840617 | 10 | 5 | 5 | 1419711  | 6696511  | 338079.6 | 5901482  | 1522306  | 7178001  | 6647266  | 6782244  | 6235738  |
| 9.929783 | 4  | 3 | 1 | 883939.1 | 1216744  | 334213.5 | 768924   | 832225   | 1239075  | 1082181  | 770083.8 | 1305791  |
| 10.15407 | 10 | 5 | 5 | 388473.1 | 1347387  | 344277.5 | 1110061  | 352244.3 | 1095934  | 1798279  | 1551882  | 1350572  |
| 9.93625  | 10 | 5 | 5 | 3147494  | 11181345 | 2233490  | 9153545  | 3507550  | 13900905 | 12182470 | 8659071  | 9086196  |
| 9.915583 | 12 | 5 | 5 | 1373683  | 4262639  | 1067058  | 3650495  | 657451.3 | 3058906  | 3284576  | 5003842  | 5512951  |
| 10.96997 | 10 | 5 | 5 | 1.61E+09 | 1.07E+10 | 1.49E+09 | 9.56E+09 | 1.74E+09 | 1.16E+10 | 1.16E+10 | 8.66E+09 | 9.49E+09 |
| 8.931783 | 5  | 3 | 2 | 426625.7 | 829081.5 | 343247.9 | 613891.7 | 284408.6 | 832719.6 | 1379052  | 838883.3 | 476723.9 |
| 12.0215  | 6  | 3 | 3 | 1079753  | 8083932  | 1293946  | 7045741  | 1710719  | 8450471  | 9294695  | 6582701  | 6854197  |
| 9.91875  | 10 | 5 | 4 | 4218712  | 5530974  | 1250377  | 9500414  | 7647998  | 6005737  | 4285206  | 5954900  | 7159932  |
| 9.416767 | 4  | 0 | 3 | 6053212  | 211821.5 | 387399.5 | 14455809 | 27616960 | 0        | 0        | 0        | 166372.9 |
| 9.8445   | 9  | 5 | 4 | 1175601  | 2909283  | 379691.4 | 3479304  | 1071003  | 3326262  | 3179893  | 2342169  | 2830526  |
| 9.43325  | 7  | 2 | 3 | 3983998  | 23738359 | 11763031 | 15549377 | 12282199 | 33373264 | 13639900 | 31728792 | 31518128 |
| 9.388367 | 10 | 5 | 5 | 1871923  | 8115089  | 2250197  | 6471175  | 2563336  | 10525431 | 10499360 | 6529050  | 5770513  |
| 9.4468   | 5  | 3 | 1 | 3538823  | 8346259  | 6234990  | 13154451 | 7765375  | 3227889  | 3908524  | 14373952 | 15900598 |
| 9.445217 | 11 | 5 | 5 | 617839.4 | 4738321  | 1326814  | 3798684  | 1431519  | 6253112  | 5816968  | 4780268  | 3654388  |
| 10.94443 | 6  | 2 | 4 | 232191.5 | 415283.8 | 304891.7 | 631546.8 | 329923.3 | 299503.8 | 946175.6 | 371669.4 | 176256.5 |
| 9.3919   | 7  | 3 | 2 | 577808.6 | 5014363  | 873082.7 | 4068602  | 1710345  | 4594835  | 4287174  | 6404670  | 4455724  |
| 14.64863 | 10 | 5 | 5 | 206798.8 | 2312208  | 431323.3 | 2015637  | 440214   | 2188540  | 2095823  | 2125451  | 2071431  |
| 9.445217 | 14 | 5 | 5 | 18202100 | 1.74E+08 | 57887931 | 1.35E+08 | 55936900 | 2.37E+08 | 2E+08    | 2.03E+08 | 1.35E+08 |
| 10.97857 | 6  | 3 | 3 | 287074.7 | 800695.4 | 445254.1 | 1220060  | 734712.2 | 1240365  | 1303908  | 543032.8 | 307553.9 |
| 9.664767 | 3  | 3 | 0 | 4258294  | 2703642  | 2153774  | 7192340  | 8580676  | 5645787  | 688767.6 | 4107124  | 778964.8 |
| 42.48133 | 7  | 4 | 3 | 360899.3 | 5654961  | 1943669  | 7110588  | 2312283  | 6593884  | 3611859  | 7878638  | 6592572  |
| 9.93625  | 10 | 5 | 5 | 13897499 | 55139371 | 8959035  | 46464478 | 15321868 | 65612257 | 57777133 | 44974771 | 46710793 |
| 11.08292 | 6  | 4 | 2 | 15809392 | 18544964 | 27797039 | 40790983 | 36702656 | 5193557  | 68186823 | 5269204  | 8914244  |
| 9.979667 | 7  | 4 | 3 | 773869.6 | 844583.7 | 301093.2 | 1388700  | 1035440  | 729625.5 | 925738.7 | 1181053  | 390090.9 |
| 9.840617 | 3  | 0 | 3 | 1961865  | 1263714  | 216583.1 | 3874086  | 5068342  | 1297609  | 939973.5 | 1548785  | 1251967  |
| 9.445217 | 14 | 5 | 5 | 4163892  | 33202312 | 6025251  | 29178591 | 5809717  | 28623023 | 37976759 | 40340338 | 26099869 |
| 7.239667 | 5  | 4 | 1 | 309626   | 3887657  | 1200207  | 2994877  | 1413235  | 4189851  | 5376581  | 2523508  | 2807651  |
| 10.9645  | 10 | 5 | 5 | 704498.3 | 3228866  | 609392.3 | 2677285  | 956277.5 | 3357748  | 3795157  | 2502743  | 2687382  |
| 9.6501   | 6  | 3 | 3 | 173360.8 | 300474.4 | 118371.3 | 386418.3 | 133851.5 | 435940.5 | 244936.6 | 353979.8 | 340637.1 |
| 9.928667 | 10 | 5 | 5 | 2617774  | 6065521  | 562361.5 | 5175886  | 1682077  | 6603187  | 5364438  | 6043078  | 6641474  |
| 14.20985 | 10 | 5 | 5 | 90926.98 | 537281.3 | 219417.6 | 368165   | 273985   | 718921.9 | 738457.7 | 243409.3 | 372819.8 |
| 10.94443 | 5  | 2 | 3 | 331557.7 | 430488.2 | 198156.8 | 1003876  | 1106792  | 309031.5 | 770766.2 | 429911.2 | 284569   |

|          |    |   |   |          |          |          |          |          |          |          |          |          |
|----------|----|---|---|----------|----------|----------|----------|----------|----------|----------|----------|----------|
| 42.71167 | 10 | 4 | 3 | 326514.3 | 3343853  | 842303.9 | 2893730  | 326964.5 | 3784809  | 4543420  | 3185684  | 2803667  |
| 21.80583 | 9  | 5 | 4 | 305888.6 | 1571633  | 360048.4 | 1351428  | 281239.9 | 1127938  | 2115620  | 1641935  | 1542276  |
| 9.338567 | 9  | 5 | 4 | 1063814  | 2523003  | 925857.2 | 1865058  | 1009516  | 2516813  | 2208866  | 1546323  | 2295406  |
| 10.95055 | 5  | 2 | 3 | 468202   | 1332847  | 564666.8 | 981513.7 | 462642   | 1255567  | 692043.5 | 1001705  | 1542261  |
| 8.989067 | 5  | 2 | 3 | 197658.4 | 464922.3 | 150836.1 | 352594.1 | 178370.6 | 606521.1 | 511691.9 | 424072.5 | 223504.2 |
| 9.9014   | 8  | 3 | 5 | 3419722  | 18589157 | 3400293  | 16312427 | 3308747  | 16539877 | 14971550 | 23467808 | 20540426 |
| 23.0595  | 10 | 5 | 5 | 151601.7 | 764266.2 | 269339.1 | 620131.1 | 107099.8 | 891341.3 | 1058091  | 356642.8 | 654070.5 |
| 10.9645  | 10 | 5 | 5 | 498790.7 | 1848372  | 365602.1 | 1541363  | 519231.9 | 2259876  | 2183602  | 1441159  | 1557192  |
| 9.842    | 8  | 5 | 3 | 5002283  | 3496641  | 1151180  | 9081940  | 10844255 | 4796079  | 4402315  | 2146538  | 2519692  |
| 9.972483 | 9  | 4 | 4 | 1187658  | 2311562  | 1195282  | 1545826  | 1055870  | 2512084  | 269535.4 | 2530535  | 2857818  |
| 9.900133 | 12 | 5 | 5 | 2829678  | 4336971  | 1319575  | 7215920  | 5530498  | 5547022  | 3590755  | 5894981  | 3812220  |
| 9.582167 | 13 | 5 | 5 | 1165792  | 7692386  | 4571966  | 10221873 | 2392568  | 7809878  | 13074432 | 10303561 | 905617.7 |
| 9.896717 | 10 | 5 | 5 | 18464214 | 71465461 | 6689958  | 96142137 | 47842889 | 80363438 | 62550145 | 71201744 | 68423517 |
| 24.1465  | 5  | 3 | 2 | 248037.3 | 891117.8 | 552663.2 | 1460780  | 1024646  | 705652.9 | 1131653  | 85261.57 | 1581350  |
| 9.507167 | 12 | 5 | 4 | 1477519  | 2751433  | 741028.2 | 3252980  | 738250   | 4050710  | 2493097  | 2483753  | 2176369  |
| 7.318367 | 6  | 4 | 2 | 972896.7 | 47577083 | 15754549 | 34085050 | 23024555 | 62110291 | 59286753 | 53730926 | 37775954 |
| 9.93625  | 10 | 5 | 5 | 33390086 | 1.3E+08  | 20717287 | 1.1E+08  | 35547944 | 1.54E+08 | 1.36E+08 | 1.07E+08 | 1.1E+08  |
| 9.8322   | 5  | 3 | 2 | 29597324 | 8821555  | 8453006  | 33163233 | 47074727 | 2625366  | 1519327  | 17644420 | 18416211 |
| 10.00385 | 10 | 5 | 4 | 1518364  | 1725315  | 1756959  | 822295.8 | 139347.9 | 4866585  | 921551   | 1007017  | 855966.5 |
| 11.15797 | 6  | 3 | 2 | 3404769  | 4319250  | 3284687  | 6905173  | 4251203  | 1755242  | 181308.7 | 6436080  | 8106358  |
| 9.992233 | 9  | 5 | 4 | 1112056  | 4027152  | 1311837  | 3175860  | 1196905  | 4026005  | 3168856  | 3070902  | 3596300  |
| 9.445217 | 8  | 4 | 4 | 672499.9 | 2923226  | 705375.3 | 2199028  | 1302891  | 3866449  | 2188738  | 3454662  | 2601734  |
| 9.992233 | 5  | 2 | 3 | 3052148  | 5596554  | 5450039  | 2667286  | 2309116  | 724083.4 | 992283.4 | 14158011 | 6331709  |
| 9.960467 | 7  | 3 | 4 | 1165485  | 1680149  | 609691.7 | 2375931  | 1276588  | 2425170  | 1639835  | 2045425  | 1480088  |
| 9.445217 | 6  | 3 | 3 | 844110.5 | 4782643  | 2138333  | 3639252  | 861171.5 | 2120124  | 5642886  | 6246460  | 6984214  |
| 19.796   | 10 | 5 | 5 | 496074.6 | 4090883  | 660626.6 | 3638162  | 676289.9 | 3316724  | 4828323  | 3926994  | 3664125  |
| 9.40255  | 9  | 5 | 4 | 2353615  | 6434573  | 1508002  | 4745722  | 3090284  | 7558299  | 7573067  | 4761038  | 4805434  |
| 9.896717 | 10 | 5 | 5 | 5099810  | 11107625 | 2956341  | 16881442 | 11071816 | 10261715 | 11376689 | 8449087  | 16032141 |
| 9.522017 | 5  | 1 | 4 | 411346   | 429607.4 | 232989.6 | 1036524  | 1173183  | 589609.7 | 583661.1 | 624147.8 | 192947.2 |
| 9.976317 | 5  | 3 | 2 | 9540260  | 4716998  | 7215347  | 12153976 | 13402230 | 1173293  | 3195551  | 519155.3 | 1198377  |
| 9.790617 | 6  | 2 | 4 | 1476100  | 1607868  | 719987.9 | 2970027  | 2609256  | 1762944  | 515183.2 | 2468940  | 1881878  |
| 9.896717 | 10 | 5 | 5 | 4717100  | 27035286 | 1573319  | 24181937 | 5455781  | 27611429 | 25075190 | 26614111 | 29337991 |
| 9.460217 | 8  | 3 | 5 | 379597   | 1695483  | 737515.2 | 2465592  | 1391824  | 2281767  | 2597530  | 1608480  | 1114965  |
| 13.75603 | 8  | 3 | 4 | 79664.56 | 493277.3 | 181567.1 | 376802.5 | 161679.3 | 737275.3 | 588801.1 | 267995.1 | 381709.3 |
| 9.433    | 12 | 5 | 5 | 3251478  | 21557978 | 6025136  | 17479338 | 6027130  | 15154809 | 21876323 | 17435874 | 30846218 |

|          |    |   |   |          |          |          |          |          |          |          |          |          |
|----------|----|---|---|----------|----------|----------|----------|----------|----------|----------|----------|----------|
| 38.84467 | 5  | 2 | 3 | 466681.8 | 8650743  | 5319669  | 5914762  | 709696.9 | 18140836 | 6336301  | 6679516  | 6465813  |
| 10.008   | 7  | 4 | 3 | 248956.3 | 639300.1 | 195484.3 | 490148.8 | 241672.7 | 724148   | 866624.8 | 667727.6 | 336394.4 |
| 3.303783 | 4  | 3 | 1 | 182898.3 | 1030253  | 763361   | 610593.4 | 390014.1 | 0        | 2058247  | 763775.2 | 1394369  |
| 9.559117 | 20 | 5 | 5 | 14174422 | 83590120 | 47245344 | 52008554 | 46111277 | 1.32E+08 | 8061621  | 1.1E+08  | 75839144 |
| 10.57323 | 10 | 5 | 5 | 1095535  | 5481559  | 945612.5 | 4902554  | 748953.7 | 6054264  | 6596172  | 4727552  | 4306978  |
| 10.58813 | 10 | 5 | 5 | 495981.2 | 1891431  | 374247.7 | 1576554  | 535354.4 | 2478656  | 1960636  | 1499662  | 1653941  |
| 10.57323 | 10 | 5 | 5 | 8067538  | 41516925 | 7445046  | 36331022 | 7881575  | 45005625 | 48577124 | 33971063 | 33006546 |
| 9.445217 | 10 | 5 | 5 | 2001858  | 16112719 | 5464488  | 12049303 | 6487997  | 21322751 | 20906577 | 16369771 | 8100629  |
| 9.999217 | 9  | 5 | 4 | 544263.1 | 854533.4 | 201603.7 | 1160611  | 580095.8 | 996106.9 | 987704.5 | 1018938  | 660876.8 |
| 10.35132 | 10 | 5 | 5 | 846102.9 | 3248429  | 415499.7 | 2887262  | 622303.6 | 3130790  | 3959363  | 3063340  | 2880436  |
| 9.365833 | 4  | 4 | 0 | 1656487  | 1716473  | 950264.9 | 6597803  | 9518329  | 2908531  | 2479573  | 1506862  | 987379.2 |
| 9.94455  | 8  | 4 | 3 | 787003.8 | 2122420  | 622919.6 | 1509091  | 1096340  | 1594669  | 1413767  | 2916263  | 2196582  |
| 10.1265  | 4  | 3 | 1 | 208926.1 | 410518   | 261009.7 | 271228.5 | 105265.8 | 120388.2 | 788371.4 | 483670   | 213324   |
| 38.48183 | 5  | 1 | 4 | 313866.8 | 5165772  | 598849.7 | 7601352  | 4743412  | 5315343  | 5498987  | 5226518  | 5652185  |
| 20.24783 | 10 | 5 | 5 | 72175008 | 6.28E+08 | 81785130 | 5.72E+08 | 82361828 | 6.87E+08 | 7.04E+08 | 5.28E+08 | 5.51E+08 |
| 9.859983 | 10 | 5 | 5 | 9148330  | 19275379 | 3898998  | 32717088 | 26142487 | 21335070 | 19635491 | 13834080 | 24122613 |
| 9.848417 | 9  | 5 | 4 | 2217226  | 10257297 | 1704755  | 7537018  | 5176946  | 10633264 | 10400633 | 7966839  | 9618379  |
| 10.15407 | 8  | 5 | 3 | 234897.4 | 840553.3 | 277052.6 | 1171959  | 613979.8 | 986264.8 | 717775.3 | 640634.5 | 1256992  |
| 9.896717 | 8  | 4 | 4 | 16683920 | 16242221 | 21669951 | 42947033 | 49666046 | 4903173  | 54712460 | 10096236 | 8183881  |
| 9.392767 | 10 | 5 | 5 | 3825302  | 9259274  | 2358607  | 7052393  | 3896120  | 10371247 | 10991129 | 6752658  | 6674438  |
| 9.976317 | 5  | 3 | 2 | 515189.6 | 1217204  | 524270.6 | 889757   | 439784.7 | 1628070  | 1702457  | 1122709  | 1243551  |
| 9.859667 | 6  | 3 | 3 | 904390.8 | 3308338  | 741898.6 | 2345042  | 1803312  | 3723029  | 2583181  | 3458358  | 2531691  |
| 44.9835  | 5  | 1 | 4 | 106758.8 | 156188.7 | 60393.65 | 200500.5 | 70303.99 | 243089.4 | 94340.33 | 125529.9 | 192584.6 |
| 9.842    | 8  | 5 | 3 | 758273.8 | 1658476  | 411574.3 | 2140681  | 891625.5 | 2097869  | 2068586  | 1527807  | 1156088  |
| 11.01617 | 7  | 2 | 4 | 19831438 | 46810379 | 39728155 | 23234908 | 28805089 | 81601198 | 3840620  | 66940804 | 3552932  |
| 10.17355 | 12 | 4 | 4 | 802618   | 1296286  | 1059352  | 739795   | 352586.5 | 1111303  | 579043.1 | 575147.7 | 3133285  |
| 10.95835 | 5  | 2 | 3 | 196636.8 | 440980.6 | 146371.7 | 588934.2 | 266561.6 | 473356.2 | 681957.6 | 316902.4 | 371021   |
| 9.538267 | 11 | 4 | 5 | 17107334 | 50714725 | 48231240 | 25526225 | 14475829 | 1183899  | 49375512 | 1.3E+08  | 46570987 |
| 10.00385 | 10 | 5 | 5 | 610835.4 | 2219419  | 180888.5 | 1914873  | 582173.8 | 2257039  | 2003164  | 2464182  | 2084853  |
| 9.845483 | 8  | 5 | 3 | 1516553  | 5964909  | 1271912  | 4333603  | 3052346  | 4933281  | 4602838  | 5854002  | 6768481  |
| 9.03715  | 10 | 4 | 4 | 225884.6 | 1061690  | 374794.3 | 753398.8 | 521114   | 898988.7 | 1167621  | 1516140  | 517459.2 |
| 9.960467 | 10 | 5 | 5 | 705241.6 | 2033116  | 269218.4 | 1738844  | 538743.2 | 2428242  | 1923022  | 2182870  | 1864320  |
| 10.9645  | 6  | 3 | 3 | 301269.1 | 783106.5 | 283975.5 | 609311.4 | 226442.8 | 1278713  | 693671.4 | 710445.4 | 552909.8 |
| 10.9645  | 8  | 5 | 3 | 231901   | 1095387  | 468606.8 | 823839.1 | 313706.1 | 1209804  | 836900.5 | 734607.4 | 827780.9 |
| 9.824233 | 3  | 0 | 3 | 1146018  | 1119621  | 547917.3 | 2019786  | 1719569  | 1440407  | 292154.3 | 1444446  | 1592126  |

|          |    |   |   |          |          |          |          |          |          |          |          |          |
|----------|----|---|---|----------|----------|----------|----------|----------|----------|----------|----------|----------|
| 9.392767 | 9  | 5 | 4 | 1904638  | 4972580  | 1140842  | 3967054  | 1746908  | 5667539  | 5839718  | 3643849  | 3812243  |
| 9.856867 | 10 | 5 | 5 | 61973140 | 4.06E+08 | 44981530 | 3.44E+08 | 1.17E+08 | 4.06E+08 | 3.88E+08 | 3.61E+08 | 3.94E+08 |
| 22.94333 | 10 | 5 | 5 | 196930.5 | 1588214  | 360631.5 | 1900177  | 538514.7 | 2128350  | 1302744  | 1675956  | 1216188  |
| 10.94443 | 10 | 5 | 5 | 1606364  | 7745582  | 1633636  | 6412228  | 2248446  | 7612398  | 9203498  | 6100826  | 6206274  |
| 10.95835 | 10 | 5 | 5 | 2310240  | 6604842  | 1862864  | 5167989  | 2357351  | 7213428  | 9311691  | 4287289  | 6502574  |
| 9.146383 | 6  | 5 | 1 | 411947.7 | 1368572  | 600303   | 895552.1 | 784893.5 | 1890095  | 612532   | 826180.5 | 1726276  |
| 18.26967 | 5  | 0 | 5 | 875008.1 | 7467959  | 542323.5 | 10167733 | 5281254  | 8036551  | 7601231  | 7088094  | 6741601  |
| 16.0528  | 9  | 5 | 4 | 569416.4 | 3722043  | 949309.5 | 2939502  | 1326409  | 4814809  | 2694993  | 4406376  | 3897558  |
| 9.986767 | 9  | 4 | 5 | 1027670  | 1910422  | 724093.8 | 1436073  | 683086.8 | 2186940  | 1612526  | 1243910  | 3045319  |
| 23.77817 | 4  | 3 | 1 | 61890.07 | 212236.9 | 41604.72 | 246663.9 | 58460.04 | 246973   | 228475.7 | 160313.9 | 175582.2 |
| 9.983433 | 10 | 5 | 5 | 752943.3 | 2628501  | 1072256  | 1859708  | 1204617  | 3620658  | 3832277  | 2223524  | 1287094  |
| 38.3955  | 7  | 3 | 2 | 363372.7 | 5743630  | 511190.4 | 5155146  | 1088305  | 6480449  | 5361286  | 5183716  | 5742505  |
| 16.98667 | 5  | 2 | 3 | 31344.16 | 116938.9 | 26848.93 | 99784.83 | 23964.12 | 155690.8 | 133795.9 | 104779.3 | 93509.21 |
| 10.9645  | 10 | 5 | 5 | 1447318  | 6249546  | 690563.6 | 6959375  | 1286870  | 5977695  | 7465369  | 5739545  | 6008928  |
| 17.4245  | 9  | 4 | 5 | 130455.7 | 801375.4 | 345215.2 | 557124.3 | 378975.6 | 1267800  | 566321.9 | 874896.6 | 924616.1 |
| 10.9198  | 5  | 1 | 4 | 366662.9 | 636846.3 | 215828.3 | 818139.2 | 309948.1 | 692892   | 684855.9 | 360585.6 | 511130.5 |
| 15.84837 | 10 | 5 | 5 | 209334.3 | 1408124  | 216551.7 | 1227173  | 308797.9 | 1674143  | 1226304  | 1377550  | 1583032  |
| 9.3494   | 11 | 5 | 5 | 500744.4 | 4378149  | 1499529  | 3126783  | 2134370  | 6280804  | 3819185  | 5343125  | 4079869  |
| 10.44215 | 8  | 4 | 4 | 215425   | 700741.9 | 99013.87 | 605399.7 | 170344.4 | 640039.3 | 748290.4 | 732643.1 | 564727.4 |
| 9.933967 | 6  | 3 | 3 | 1350794  | 3555061  | 1060121  | 2583775  | 1712012  | 4555747  | 2843829  | 3603372  | 2176048  |
| 9.523383 | 17 | 5 | 5 | 5752677  | 36677981 | 8206005  | 43794943 | 12322482 | 27922698 | 45190407 | 31269299 | 33379459 |
| 9.46265  | 10 | 5 | 5 | 1270787  | 4706459  | 717027.6 | 3877135  | 1535845  | 5497642  | 5131159  | 4908498  | 4316955  |
| 9.976317 | 10 | 5 | 5 | 1217723  | 4593913  | 469282.6 | 4072337  | 960012.4 | 4879976  | 5049658  | 4708752  | 3840583  |
| 9.445217 | 14 | 5 | 5 | 5684322  | 29336982 | 8977914  | 22354154 | 11531507 | 36713299 | 39023488 | 30434396 | 22265824 |
| 11.74397 | 7  | 5 | 2 | 84050.72 | 250170.2 | 130336.4 | 324623.3 | 83182.65 | 299808   | 400725.7 | 78723.33 | 316457.4 |
| 10.94962 | 4  | 3 | 1 | 51493324 | 1.01E+08 | 1.42E+08 | 1.91E+08 | 1.24E+08 | 680467.1 | 1076557  | 1.98E+08 | 862167   |
| 9.93625  | 10 | 5 | 5 | 33265898 | 1.3E+08  | 20728573 | 1.1E+08  | 35609150 | 1.54E+08 | 1.36E+08 | 1.07E+08 | 1.1E+08  |
| 42.76917 | 6  | 3 | 1 | 258575.5 | 3927804  | 1778675  | 3013361  | 362145   | 3299329  | 3621461  | 2561530  | 7034328  |
| 9.445217 | 7  | 3 | 3 | 1145544  | 3055205  | 1534356  | 4210958  | 1876010  | 2145221  | 920930.8 | 4240358  | 4655978  |
| 17.31917 | 5  | 2 | 3 | 455180.3 | 6185052  | 2425074  | 4556786  | 2416453  | 6673288  | 10118421 | 3942556  | 4642111  |
| 10.71928 | 12 | 5 | 5 | 1776487  | 7108399  | 1367604  | 6100671  | 1613707  | 7479316  | 8317836  | 5621857  | 5707455  |
| 9.55155  | 9  | 5 | 4 | 641251.4 | 1522681  | 344940.8 | 1149261  | 684978   | 1611608  | 1992062  | 1232952  | 1135706  |
| 10.95055 | 7  | 3 | 4 | 297713.4 | 739480.6 | 251969.6 | 567245.1 | 260172.1 | 1036300  | 963853.4 | 486123.7 | 517664.5 |
| 15.86305 | 3  | 3 | 0 | 161913.2 | 1578922  | 286219.7 | 1355129  | 371078.1 | 2045627  | 1314387  | 1508927  | 1627419  |
| 10.9645  | 7  | 4 | 3 | 383537.9 | 1024050  | 277069.4 | 1229282  | 329894.5 | 949861.7 | 1135676  | 870031.1 | 722766.8 |

|          |    |   |   |          |          |          |          |          |          |          |          |          |
|----------|----|---|---|----------|----------|----------|----------|----------|----------|----------|----------|----------|
| 14.07785 | 9  | 5 | 4 | 173052.8 | 1177917  | 200565.3 | 1057270  | 153713.2 | 1023751  | 1482633  | 993987.9 | 1124252  |
| 10.95835 | 10 | 5 | 5 | 250548.5 | 1304257  | 295046.2 | 1125667  | 230292.5 | 1408266  | 1733096  | 1147440  | 945659.2 |
| 30.23783 | 3  | 0 | 3 | 78063.28 | 302617.5 | 56079.99 | 268493.2 | 44434.85 | 372102.8 | 338179.3 | 278208   | 298630.4 |
| 9.859983 | 10 | 5 | 5 | 1852924  | 5226880  | 1397404  | 7315866  | 3981639  | 6488588  | 4091928  | 6482466  | 3440494  |
| 9.858833 | 7  | 4 | 3 | 1377006  | 5083517  | 1660513  | 3981494  | 1618952  | 4922542  | 2791432  | 6921000  | 6436255  |
| 9.976317 | 9  | 5 | 4 | 993572.7 | 2338914  | 338744.6 | 2810925  | 894740.8 | 2895339  | 2069942  | 2227202  | 2407751  |
| 10.95835 | 9  | 4 | 4 | 242340.9 | 702904.5 | 197059.9 | 1038897  | 645766.7 | 1034747  | 690433.2 | 596291.7 | 670877.1 |
| 9.388367 | 8  | 3 | 4 | 1152171  | 11312632 | 3595523  | 8770950  | 3957174  | 16915958 | 10591720 | 10966999 | 6878196  |
| 11.26148 | 6  | 4 | 2 | 65928132 | 59959072 | 1.28E+08 | 1.76E+08 | 2.04E+08 | 2.9E+08  | 3933456  | 1201798  | 341537.2 |
| 18.92217 | 10 | 5 | 5 | 674443.1 | 4438928  | 1655395  | 3350486  | 1583842  | 3914258  | 5901575  | 3357868  | 2591123  |
| 11.48308 | 4  | 1 | 3 | 2065310  | 600322.4 | 272136.2 | 3830742  | 6352555  | 736229.7 | 712410.6 | 758776.7 | 677712.3 |
| 9.431017 | 10 | 5 | 5 | 1021607  | 2162714  | 1216983  | 3059986  | 1441300  | 991312.6 | 3909395  | 2898597  | 1730755  |
| 14.54613 | 7  | 4 | 3 | 79429.84 | 545411.8 | 196308.8 | 423607.5 | 164376.3 | 715873.9 | 424127.7 | 573346.7 | 737753.3 |
| 9.928667 | 8  | 4 | 4 | 34772236 | 21865321 | 10603730 | 80239730 | 1.15E+08 | 14589271 | 20456518 | 36294680 | 28215993 |
| 40.7405  | 11 | 2 | 4 | 305177.3 | 4464465  | 785964.4 | 5410210  | 1766618  | 5051802  | 5078848  | 4200093  | 3208604  |
| 9.111033 | 3  | 3 | 0 | 271372.4 | 624753.3 | 300156.4 | 383637   | 406182.2 | 677014.5 | 268420.1 | 822007.7 | 983167.5 |
| 9.976317 | 6  | 3 | 2 | 364660.9 | 770471   | 172717.7 | 538064.2 | 439632.7 | 810109   | 960113   | 635019.7 | 551740.7 |
| 9.952017 | 10 | 5 | 5 | 1878229  | 6398220  | 1235063  | 5256319  | 2025794  | 7856952  | 6947610  | 5046935  | 5166997  |
| 9.859983 | 10 | 5 | 5 | 14239396 | 76052612 | 9222796  | 64807480 | 21045524 | 72139491 | 74318640 | 69767946 | 71741326 |
| 9.872883 | 4  | 0 | 4 | 4492989  | 10230570 | 3738174  | 6257641  | 7280226  | 9169612  | 16080885 | 10865531 | 5870809  |
| 14.39982 | 7  | 4 | 3 | 411809.7 | 224129.3 | 70942.95 | 1603405  | 2716287  | 236722.8 | 327273.6 | 194228.3 | 229976.6 |
| 8.983883 | 6  | 4 | 2 | 1083190  | 1433893  | 2155460  | 2813956  | 1951526  | 132922.8 | 1075432  | 160024.6 | 5228432  |
| 9.392767 | 9  | 5 | 4 | 1826024  | 3586758  | 1177720  | 2677062  | 1504894  | 3735193  | 4260387  | 2278387  | 2556686  |
| 9.952017 | 10 | 5 | 5 | 7135768  | 28707287 | 4356154  | 25558923 | 4998981  | 34521699 | 31655546 | 27779736 | 23828009 |
| 9.5021   | 10 | 5 | 5 | 2224618  | 6271519  | 920040.3 | 5140605  | 2120801  | 7288269  | 7247549  | 5831731  | 5504521  |
| 35.35867 | 4  | 3 | 1 | 159915   | 578768.9 | 724035.9 | 208783.7 | 126943.3 | 93645.75 | 185918.7 | 31630.72 | 1734272  |
| 9.91875  | 9  | 5 | 4 | 2592713  | 5917471  | 1114580  | 4810409  | 2002719  | 6483300  | 4860080  | 4833420  | 5958796  |
| 20.47567 | 6  | 4 | 2 | 160345.5 | 431158.1 | 124771.6 | 649028.8 | 420175.3 | 295513.8 | 525910.1 | 363670.7 | 374743   |
| 9.859983 | 10 | 5 | 5 | 3731467  | 2836210  | 789738   | 8001439  | 10169935 | 2903044  | 2796758  | 3558910  | 3379077  |
| 42.5245  | 3  | 0 | 3 | 331372.2 | 4565029  | 220929.2 | 3643291  | 1811426  | 4338658  | 4830607  | 4624042  | 4335424  |
| 10.9645  | 10 | 5 | 5 | 853770.4 | 4161744  | 722391.6 | 3448479  | 1289501  | 4165553  | 4719137  | 3394887  | 3500542  |
| 9.920517 | 11 | 5 | 5 | 1794110  | 10336771 | 880786.2 | 8576154  | 3417092  | 9803054  | 11455875 | 10690101 | 10574678 |
| 43.17183 | 4  | 1 | 3 | 373807.8 | 5555880  | 143150.6 | 4988044  | 1115935  | 5499385  | 5803981  | 5547295  | 5478516  |
| 31.49367 | 7  | 3 | 4 | 1274326  | 9316266  | 8259428  | 4907369  | 3644774  | 2996256  | 6183911  | 2710904  | 22373165 |
| 9.8322   | 8  | 5 | 3 | 775431.6 | 2681952  | 771985.5 | 1979719  | 1242991  | 3326344  | 2789785  | 1846875  | 1930854  |

|          |    |   |   |          |          |          |          |          |          |          |          |          |
|----------|----|---|---|----------|----------|----------|----------|----------|----------|----------|----------|----------|
| 9.82645  | 6  | 4 | 2 | 1026315  | 2933495  | 1236199  | 4033462  | 1933819  | 5035356  | 1995991  | 2189266  | 2428573  |
| 10.99268 | 9  | 4 | 5 | 430571.6 | 2895414  | 824126.2 | 2418383  | 563658   | 3416396  | 2650379  | 2581547  | 1845253  |
| 12.42808 | 10 | 5 | 5 | 477186.1 | 2925328  | 1327317  | 4289731  | 2490287  | 3063699  | 2612676  | 1975913  | 5129955  |
| 9.3919   | 9  | 4 | 4 | 990599.3 | 4306182  | 3081255  | 2670183  | 1299413  | 2043277  | 9635259  | 3264154  | 4107233  |
| 9.976317 | 10 | 5 | 5 | 2490080  | 5263219  | 1469790  | 4181875  | 1741795  | 7739296  | 4467051  | 5343911  | 4782870  |
| 9.91875  | 8  | 4 | 4 | 1391225  | 2696021  | 410321.2 | 2365337  | 559902.7 | 3174822  | 2853321  | 2409971  | 2892725  |
| 9.94455  | 10 | 5 | 5 | 1399339  | 4338639  | 597126.1 | 3856052  | 818149.2 | 5214952  | 4352273  | 4243560  | 3533051  |
| 10.95055 | 9  | 5 | 4 | 452678.6 | 2831042  | 761642.7 | 2246523  | 965831.9 | 3157120  | 3101099  | 1937404  | 2174096  |
| 9.845483 | 10 | 4 | 5 | 853828.5 | 3327938  | 1275492  | 2629279  | 680294.6 | 3094399  | 2239526  | 2870481  | 5535960  |
| 23.9805  | 4  | 1 | 3 | 136193.7 | 473521.5 | 289276.2 | 301732.6 | 215807.5 | 274492.2 | 695982.2 | 137251.6 | 425477.8 |
| 9.445217 | 14 | 5 | 5 | 1963692  | 13161473 | 4052838  | 10368055 | 4287820  | 17002806 | 16554169 | 14349287 | 10082176 |
| 10.66002 | 6  | 2 | 4 | 77002.62 | 188385.5 | 66145.65 | 141132.7 | 74650.17 | 289593.9 | 179801   | 205867.8 | 113122.8 |
| 10.36388 | 4  | 3 | 1 | 173961.6 | 436229.7 | 241354.6 | 305968.8 | 117383.3 | 346041.2 | 843356.4 | 424000.2 | 204664.4 |
| 9.94455  | 10 | 5 | 5 | 1087115  | 2877764  | 889545.8 | 2372919  | 566014.1 | 3277414  | 2109731  | 2123273  | 4218910  |
| 10.9645  | 10 | 5 | 5 | 263241.1 | 1116703  | 228203.2 | 939693.3 | 294553.3 | 1290562  | 1279800  | 858022.2 | 875699.8 |
| 9.275617 | 4  | 1 | 3 | 434043.3 | 238433.7 | 240373.8 | 489112.3 | 459479.5 | 274819.3 | 160882.8 | 0        | 631059   |
| 9.445217 | 13 | 5 | 4 | 2584974  | 15142500 | 5476778  | 21249311 | 11326978 | 9234822  | 20146685 | 20361135 | 9557578  |
| 12.85108 | 8  | 4 | 4 | 306162   | 592147.5 | 110176.8 | 1064056  | 929621.8 | 698460.6 | 663086.5 | 452978.6 | 495235.1 |
| 10.95835 | 10 | 5 | 5 | 1028574  | 6543507  | 1668052  | 5404179  | 1737484  | 8063201  | 7544831  | 4492726  | 4985285  |
| 9.416767 | 4  | 0 | 3 | 6024099  | 14884.86 | 33283.56 | 13954821 | 27552299 | 0        | 0        | 74424.3  | 0        |
| 9.960467 | 8  | 4 | 4 | 1209225  | 2067939  | 672823.8 | 1636402  | 615868.3 | 1957893  | 2964818  | 2530364  | 1450468  |
| 9.880683 | 10 | 5 | 5 | 46661912 | 89492461 | 16701591 | 1.55E+08 | 1.29E+08 | 1.03E+08 | 80155639 | 1.05E+08 | 93351494 |
| 9.9677   | 10 | 5 | 5 | 1630168  | 1543036  | 139831.2 | 2605289  | 2098334  | 1704822  | 1495213  | 1594066  | 1331052  |
| 9.960467 | 9  | 5 | 4 | 3604294  | 1446104  | 399715.1 | 4212482  | 5464479  | 1802054  | 1744139  | 1541068  | 1330553  |
| 9.960467 | 10 | 5 | 5 | 8709958  | 23586216 | 4285048  | 19070847 | 8302204  | 25992188 | 27408345 | 18945559 | 18903183 |
| 9.43325  | 12 | 5 | 5 | 732697.4 | 5954794  | 1794520  | 4741738  | 1834592  | 4513241  | 6499480  | 8690667  | 5850912  |
| 10.94443 | 7  | 3 | 4 | 227988.2 | 576798.1 | 195870.6 | 743161.8 | 288634.4 | 884884.4 | 658830.9 | 420633.8 | 454351.6 |
| 9.960467 | 4  | 1 | 3 | 2022433  | 3339154  | 1119842  | 5130875  | 3451470  | 1806241  | 3564384  | 4587932  | 4094711  |
| 9.9677   | 4  | 1 | 3 | 37949968 | 65954183 | 46130957 | 37269201 | 39288456 | 1.18E+08 | 25920890 | 13978225 | 1.05E+08 |
| 10.95835 | 6  | 3 | 3 | 154898.3 | 243872.5 | 128955.6 | 368519.7 | 225053.9 | 116852.8 | 280470.5 | 433689.1 | 257715.3 |
| 9.93625  | 10 | 5 | 5 | 3102579  | 12377904 | 2133586  | 10366889 | 3608022  | 14828784 | 12968247 | 10023152 | 10292118 |
| 10.9645  | 9  | 5 | 4 | 491290.8 | 2812412  | 783765.9 | 2259229  | 868744.9 | 3175841  | 2742147  | 2040316  | 2154849  |
| 37.10133 | 5  | 3 | 2 | 212359.3 | 1506025  | 436580.3 | 1204476  | 465412.4 | 818007.2 | 1512934  | 1433787  | 1884861  |
| 14.341   | 5  | 3 | 2 | 173754.3 | 995155.5 | 1130507  | 1660269  | 824682.5 | 240438.3 | 2303020  | 145181.4 | 2159828  |
| 11.63542 | 8  | 3 | 5 | 131631.4 | 1278643  | 331986.3 | 1066932  | 300661.1 | 1496906  | 1655756  | 838064.5 | 1051384  |



|          |    |   |   |          |          |          |          |          |          |          |          |          |
|----------|----|---|---|----------|----------|----------|----------|----------|----------|----------|----------|----------|
| 9.701933 | 4  | 3 | 1 | 312877.7 | 291815   | 132753.3 | 398817.9 | 181879   | 371408.6 | 275949.3 | 207623.7 | 133806.9 |
| 9.983433 | 9  | 4 | 5 | 857373.9 | 3864396  | 540669.9 | 3371795  | 875857.5 | 4374226  | 3990594  | 3328562  | 3265982  |
| 10.9645  | 10 | 5 | 5 | 304026.4 | 1551556  | 323783.8 | 1263819  | 507703.6 | 1779211  | 1880043  | 1193452  | 1216142  |
| 9.43325  | 12 | 5 | 5 | 3978087  | 32795920 | 11497052 | 25462352 | 10423716 | 44291673 | 39478505 | 37852491 | 26489779 |
| 9.975217 | 10 | 5 | 5 | 2295421  | 3107068  | 874151.9 | 4522201  | 2730718  | 3903068  | 2098875  | 2575492  | 4129847  |
| 10.95835 | 10 | 5 | 5 | 435556   | 1318031  | 424939.9 | 1027427  | 445259.4 | 1457624  | 1925562  | 970648.5 | 1376177  |
| 9.45945  | 11 | 5 | 5 | 3198507  | 28758602 | 2688494  | 24521716 | 8165932  | 33311502 | 28755315 | 27182710 | 26472323 |
| 9.960467 | 10 | 5 | 5 | 1672618  | 5953263  | 574529.2 | 5366673  | 1073837  | 6712853  | 5675892  | 6382391  | 5680612  |
| 10.98385 | 7  | 2 | 5 | 551002.2 | 2205361  | 634408   | 1863627  | 310422.5 | 2725062  | 2708052  | 1168449  | 2135764  |
| 25.89433 | 6  | 3 | 3 | 385404.5 | 3707525  | 887337.6 | 3101546  | 927902.1 | 2828215  | 5054548  | 3310263  | 4120360  |
| 21.39367 | 4  | 3 | 1 | 96613.18 | 269859.7 | 150565.5 | 193357.2 | 25686.33 | 529176.5 | 217356.4 | 241312.6 | 225301.1 |
| 9.912633 | 5  | 4 | 1 | 1857962  | 2449244  | 1134336  | 3461944  | 1791787  | 2027752  | 1755623  | 4452849  | 1806288  |
| 9.61185  | 7  | 4 | 2 | 41834592 | 36961127 | 72871316 | 88370764 | 80938798 | 1.67E+08 | 1758762  | 5389356  | 4871856  |
| 10.77857 | 10 | 5 | 5 | 315655.7 | 953178   | 329937   | 743262   | 298223.1 | 596092   | 1321259  | 1272073  | 697866.6 |
| 9.498117 | 12 | 5 | 4 | 6459272  | 2746879  | 2671320  | 12708431 | 19664414 | 853739   | 7147432  | 3159909  | 2048195  |
| 18.02717 | 7  | 3 | 4 | 115787.8 | 440802.5 | 287841.4 | 774711.3 | 625444.7 | 114660.4 | 675193   | 137561.7 | 646625.1 |
| 9.421167 | 9  | 4 | 5 | 924166.2 | 6363129  | 7392312  | 2537546  | 2367209  | 5056928  | 980214   | 2795298  | 19320117 |
| 9.992233 | 10 | 5 | 5 | 906048.9 | 2852276  | 421390.7 | 2392549  | 853113   | 3354441  | 2940510  | 3101397  | 2298604  |
| 9.842    | 9  | 5 | 4 | 1260566  | 2111564  | 487680.7 | 2958726  | 1643695  | 2438771  | 2354400  | 1964158  | 2480873  |
| 10.9645  | 10 | 5 | 5 | 388148.8 | 1718979  | 120865.6 | 1393503  | 640117.8 | 1781267  | 1653613  | 1562664  | 1717609  |
| 9.460217 | 8  | 5 | 3 | 677509   | 2719240  | 895154.7 | 1999423  | 1225568  | 3261265  | 3587471  | 3197286  | 2045482  |
| 12.01133 | 4  | 3 | 1 | 218562.8 | 1027364  | 1008792  | 510656.6 | 260612.4 | 182993.5 | 654230.5 | 570661.6 | 967698.4 |
| 9.40255  | 10 | 5 | 5 | 4191297  | 30961480 | 6385743  | 25330929 | 9940668  | 39791676 | 25929251 | 24099433 | 30489379 |
| 40.81267 | 6  | 4 | 2 | 389034   | 6017621  | 1525353  | 9949295  | 7731960  | 6698601  | 3431615  | 5999367  | 7370295  |
| 10.9645  | 10 | 5 | 5 | 273117.3 | 1518153  | 476027   | 1180605  | 534905   | 1986640  | 1462799  | 1027026  | 1088313  |
| 9.887133 | 9  | 4 | 4 | 950560.1 | 2715114  | 758719.1 | 3712093  | 1898599  | 3386605  | 1434365  | 2754710  | 2845717  |
| 9.3494   | 5  | 2 | 3 | 337145   | 2076269  | 941653.9 | 1416109  | 1037538  | 2552505  | 2055986  | 3073552  | 2146243  |
| 9.392767 | 10 | 5 | 5 | 5632681  | 15814992 | 3645869  | 12407003 | 6128170  | 18575686 | 18556402 | 11841574 | 11804404 |
| 9.9014   | 10 | 5 | 4 | 4644312  | 8173403  | 1868207  | 14645362 | 12792016 | 7484036  | 6595772  | 10136984 | 10208587 |
| 10.97857 | 10 | 5 | 5 | 3188969  | 21507489 | 2418181  | 19415869 | 3673369  | 23894572 | 22518114 | 18617818 | 19229658 |
| 10.57272 | 4  | 1 | 3 | 211350.7 | 116182.4 | 51045.48 | 261936.9 | 287527   | 29066.97 | 160573.8 | 137480.8 | 136374.6 |
| 44.5955  | 8  | 2 | 4 | 320769.3 | 6781551  | 3765758  | 4858028  | 938074   | 5519278  | 5427489  | 4292354  | 5207114  |
| 10.97242 | 5  | 1 | 4 | 142961.6 | 346693.2 | 124540   | 483327.4 | 254445.4 | 516956   | 431020.7 | 274593   | 300672.2 |
| 9.9677   | 10 | 5 | 5 | 1371209  | 5116143  | 1266549  | 3963520  | 2059140  | 5343294  | 6867380  | 4318070  | 3534858  |
| 41.50333 | 9  | 3 | 3 | 389443.4 | 3970366  | 1372176  | 4735984  | 833196.8 | 4181068  | 1591113  | 5014275  | 4304570  |

|          |    |   |   |          |          |          |          |          |          |          |          |          |
|----------|----|---|---|----------|----------|----------|----------|----------|----------|----------|----------|----------|
| 9.88815  | 6  | 3 | 3 | 7431259  | 12991947 | 8222634  | 8137338  | 6152382  | 5272215  | 25412847 | 6862872  | 10706834 |
| 9.388617 | 7  | 2 | 4 | 41122052 | 5096701  | 2795966  | 3.07E+08 | 6E+08    | 5825695  | 2648563  | 5483220  | 2320082  |
| 9.88815  | 7  | 5 | 2 | 1365271  | 6364406  | 1836802  | 7779145  | 2368685  | 4743044  | 4466668  | 6474510  | 7219667  |
| 9.94455  | 10 | 5 | 5 | 8982709  | 30557948 | 4813198  | 25338341 | 9711548  | 36548943 | 33002439 | 25318306 | 25940143 |
| 9.379233 | 7  | 5 | 2 | 533639.2 | 1139833  | 487099.7 | 784920.1 | 575479.3 | 1941214  | 959833.1 | 752005.9 | 803091   |
| 10.44215 | 4  | 4 | 0 | 237565.3 | 391255.8 | 339856.7 | 217967.7 | 83887.81 | 983235.6 | 335491.1 | 294531.2 | 207069.9 |
| 22.0905  | 10 | 5 | 5 | 1191436  | 6873940  | 2734329  | 4775453  | 3509385  | 3818211  | 9100371  | 7808388  | 4107232  |
| 12.98252 | 10 | 5 | 5 | 357221.4 | 2308970  | 406793.8 | 1936315  | 668208   | 2995494  | 1934884  | 2101487  | 2223995  |
| 9.650367 | 3  | 3 | 0 | 218743.5 | 766237.7 | 258104.3 | 559308.1 | 353719.8 | 982360.4 | 332403   | 906628.8 | 871421.7 |
| 9.856867 | 10 | 5 | 5 | 1.5E+08  | 9.88E+08 | 1.1E+08  | 8.37E+08 | 2.9E+08  | 9.86E+08 | 9.48E+08 | 8.82E+08 | 9.53E+08 |
| 9.952017 | 10 | 5 | 5 | 1830409  | 6860014  | 1143790  | 6046747  | 1297923  | 8643876  | 7333692  | 6347208  | 5843646  |
| 9.445217 | 14 | 5 | 5 | 2021949  | 16656370 | 5313359  | 13162878 | 5207551  | 22020274 | 20617311 | 18016551 | 13496933 |
| 25.1305  | 5  | 4 | 1 | 3783000  | 8698866  | 16942996 | 192729.4 | 32436.53 | 2061853  | 249465.2 | 38971692 | 377442.8 |
| 10.94443 | 3  | 0 | 3 | 832941.5 | 850106   | 291336   | 2192604  | 2666947  | 770182.9 | 1138700  | 657572.4 | 515975.1 |
| 30.266   | 9  | 4 | 5 | 150496   | 817743.6 | 614133.9 | 497621.8 | 233929.9 | 556780.4 | 602295.7 | 597086.5 | 423821.9 |
| 9.43325  | 10 | 5 | 4 | 851514.1 | 4908744  | 1191960  | 4242322  | 736181.5 | 5503969  | 6485696  | 5087146  | 3887662  |
| 9.43325  | 14 | 5 | 5 | 9739802  | 99635662 | 29974944 | 81723593 | 23365830 | 1.34E+08 | 1.1E+08  | 1.18E+08 | 68297537 |
| 43.35883 | 5  | 3 | 2 | 423820.3 | 5857939  | 812751.6 | 5359283  | 681050.9 | 5368154  | 6494763  | 6899002  | 5585773  |
| 10.57323 | 10 | 5 | 5 | 30112410 | 1.76E+08 | 27480555 | 1.56E+08 | 33562329 | 1.91E+08 | 2.02E+08 | 1.49E+08 | 1.44E+08 |
| 9.541433 | 10 | 5 | 4 | 533464   | 1586805  | 543901.8 | 1171620  | 693767   | 2150032  | 2067030  | 1080435  | 975599.7 |
| 9.872883 | 10 | 5 | 5 | 1570286  | 9014656  | 1114147  | 7336015  | 3247673  | 8934346  | 9130404  | 7634527  | 8653418  |
| 9.999217 | 10 | 5 | 5 | 1437330  | 5111734  | 803987.4 | 4178148  | 1759761  | 5425819  | 6162499  | 4661795  | 4037087  |
| 9.840617 | 7  | 3 | 4 | 1124907  | 1500121  | 517125.9 | 3257732  | 3486884  | 1782716  | 948890.4 | 2236860  | 1395716  |
| 21.12383 | 10 | 5 | 5 | 156394.4 | 603721.5 | 292331.6 | 451240.5 | 113582   | 949245.4 | 277980.9 | 707195.1 | 763491.4 |
| 9.554967 | 8  | 5 | 3 | 589889.3 | 1485323  | 336191.7 | 1119017  | 684098.1 | 1428894  | 1994852  | 1242551  | 1147524  |
| 9.992233 | 5  | 3 | 2 | 610894.6 | 534559.7 | 419996.4 | 877495.4 | 592437.8 | 640595.5 | 1161692  | 549643.2 | 58254.2  |
| 9.857683 | 7  | 3 | 4 | 854763.9 | 2783050  | 568896.3 | 1960733  | 1587465  | 2874740  | 1878663  | 2810501  | 2893545  |
| 10.008   | 9  | 5 | 4 | 2794138  | 600988.1 | 88375.45 | 1865145  | 2521916  | 660546.7 | 700112.6 | 573099.8 | 470258.5 |
| 21.22417 | 5  | 3 | 2 | 650092.3 | 216326.1 | 17714.07 | 1165591  | 1894802  | 188416.5 | 226938.1 | 213417.3 | 235117.8 |
| 9.445217 | 11 | 5 | 5 | 2844890  | 21963563 | 6902391  | 16107730 | 10279803 | 29038203 | 29279647 | 20349869 | 16751091 |
| 10.68888 | 6  | 3 | 3 | 235717.8 | 831253.1 | 264093.3 | 648089.6 | 288064.2 | 1074381  | 675095.9 | 581955   | 1157530  |
| 10.95055 | 4  | 3 | 1 | 218528.4 | 427575.4 | 116109.7 | 340833.5 | 143577.7 | 475368.1 | 584595.8 | 432161   | 272669.5 |
| 10.008   | 7  | 4 | 3 | 501739.2 | 1054369  | 340276.1 | 1362051  | 551764.7 | 1325407  | 628492.8 | 1178773  | 759441.9 |
| 10.008   | 9  | 5 | 4 | 997011   | 773862.8 | 171632.2 | 1001351  | 436288.8 | 733108.5 | 1012896  | 534290.7 | 774692.2 |
| 14.384   | 4  | 3 | 1 | 2142960  | 313561.4 | 337191.9 | 2661567  | 4684804  | 724647.1 | 65475.49 | 78958.61 | 60699.07 |

|          |    |   |   |          |          |          |          |          |          |          |          |          |
|----------|----|---|---|----------|----------|----------|----------|----------|----------|----------|----------|----------|
| 9.348233 | 6  | 4 | 2 | 432796   | 1017892  | 377271.2 | 647709.5 | 678381.5 | 1536378  | 970746.8 | 1128202  | 968891   |
| 9.43325  | 8  | 5 | 3 | 692264.9 | 2443069  | 1092622  | 3860320  | 2712986  | 1395714  | 3112398  | 1848701  | 4025691  |
| 9.84525  | 7  | 3 | 3 | 987279.2 | 2773253  | 832076   | 2016988  | 1358938  | 2254598  | 1605383  | 3289336  | 3662753  |
| 10.45545 | 10 | 5 | 5 | 1993179  | 7084228  | 973053.8 | 7878182  | 1374240  | 8804313  | 6658840  | 6890591  | 6578576  |
| 10.00385 | 10 | 5 | 5 | 3015352  | 5594000  | 2910661  | 10038941 | 8628235  | 8238254  | 1372328  | 7848718  | 3884205  |
| 10.58813 | 10 | 5 | 5 | 402028.4 | 1303467  | 349522.9 | 1006965  | 521129   | 1716334  | 1587651  | 1112350  | 859535.2 |
| 9.992233 | 13 | 5 | 4 | 2022823  | 5004931  | 3301285  | 3297311  | 1183829  | 4398337  | 2848953  | 3576550  | 3375127  |
| 9.392767 | 9  | 5 | 4 | 568752.5 | 1336632  | 422856.4 | 970574.2 | 648240.7 | 1465492  | 1701160  | 874634.1 | 901526.9 |
| 9.93625  | 10 | 5 | 5 | 15560560 | 54230205 | 10712950 | 45163595 | 15931291 | 68290668 | 58471466 | 42640045 | 44296814 |
| 9.43325  | 6  | 2 | 3 | 502375.6 | 4875801  | 917206.7 | 4235279  | 1015030  | 5495287  | 4857368  | 4934896  | 5720371  |
| 10.97857 | 9  | 5 | 4 | 1280462  | 3520684  | 1354906  | 4775863  | 2270269  | 3589155  | 3766248  | 1503330  | 5309821  |
| 9.976317 | 9  | 5 | 4 | 1069593  | 3689822  | 771182.1 | 2877276  | 1512820  | 3991570  | 3033642  | 3508526  | 3040928  |
| 8.960333 | 5  | 2 | 3 | 262144.4 | 557849.2 | 302879.7 | 381997.8 | 218597.2 | 751245.1 | 933373.1 | 431676   | 529598.1 |
| 18.321   | 4  | 1 | 3 | 146381.8 | 1251686  | 122006.5 | 998156.9 | 499763.2 | 1367656  | 1249443  | 1066482  | 1219480  |
| 10.97857 | 10 | 5 | 5 | 285468   | 902998.2 | 154866   | 1018735  | 192121.1 | 966734.3 | 679883.5 | 1013765  | 1046972  |
| 10.00998 | 9  | 5 | 4 | 2089591  | 2532648  | 1233202  | 4285575  | 3388807  | 3240739  | 2693792  | 4037018  | 1833524  |
| 8.967683 | 8  | 5 | 3 | 300865.4 | 942764.9 | 340019.7 | 669147.6 | 471581.6 | 608802.9 | 1007616  | 1282911  | 569242.3 |
| 41.53183 | 7  | 3 | 3 | 298386.1 | 4233664  | 609387.2 | 3635982  | 1097271  | 3848077  | 5228676  | 3662281  | 4115950  |
| 9.840617 | 10 | 5 | 5 | 3503797  | 16727772 | 3123442  | 13191291 | 6668116  | 16276897 | 15396303 | 12547270 | 18762334 |
| 9.08685  | 8  | 4 | 4 | 455195.6 | 1411170  | 702188.6 | 990347.9 | 558653.5 | 1317200  | 2091292  | 2108875  | 1077415  |
| 38.13633 | 8  | 1 | 5 | 327914.8 | 5063673  | 326510.2 | 5984784  | 1829751  | 5042945  | 5237422  | 5351187  | 5172129  |
| 9.8445   | 7  | 3 | 4 | 1156108  | 2974153  | 1003103  | 2414563  | 625514.5 | 4305013  | 3741928  | 2260062  | 1969002  |
| 9.573333 | 10 | 5 | 5 | 22303130 | 86331419 | 13456974 | 71561140 | 27725156 | 89746370 | 1.03E+08 | 71829836 | 73262729 |
| 9.296133 | 5  | 2 | 3 | 11508048 | 59245837 | 52523862 | 28590389 | 38687895 | 1.1E+08  | 2726000  | 1975797  | 93417764 |
| 25.11783 | 5  | 4 | 1 | 4103660  | 10108511 | 19963246 | 138687.3 | 178051.9 | 2988177  | 98736.31 | 45758497 | 210000.5 |
| 11.13867 | 4  | 3 | 1 | 91234.83 | 188830.3 | 99929.6  | 136655.8 | 40992.51 | 236705.4 | 248086.3 | 137220.7 | 283412.5 |
| 9.8322   | 9  | 5 | 4 | 2782608  | 9829050  | 2531330  | 7361728  | 4527641  | 7441647  | 9174035  | 8034571  | 10733589 |
| 9.842    | 9  | 5 | 4 | 2145387  | 10880603 | 1087758  | 8954836  | 3777794  | 10161274 | 11308149 | 9349792  | 11910919 |
| 9.46925  | 7  | 4 | 3 | 41834592 | 27737495 | 53085849 | 94604665 | 1.28E+08 | 2244112  | 5323389  | 1.23E+08 | 7432915  |
| 10.008   | 10 | 5 | 5 | 1087258  | 2176911  | 945307.8 | 2870921  | 1141927  | 2071386  | 3835191  | 1733991  | 1648002  |
| 9.7565   | 5  | 2 | 3 | 1432705  | 1767348  | 995212.7 | 2281881  | 366410.7 | 2293601  | 0        | 2134204  | 2055131  |
| 10.32433 | 7  | 4 | 3 | 726614.2 | 2765691  | 1111596  | 2160361  | 620933.1 | 1955223  | 3800342  | 3674757  | 1264536  |
| 9.94455  | 7  | 3 | 4 | 1126099  | 2233253  | 933069.2 | 1631158  | 889861.6 | 3284643  | 3207786  | 1556980  | 1386363  |
| 10.90553 | 4  | 1 | 3 | 305621.4 | 357674   | 165186.3 | 564377.8 | 395482.5 | 376115.2 | 629119.5 | 266946.8 | 198682.2 |
| 10.97857 | 8  | 4 | 4 | 1175060  | 3598529  | 1135208  | 2862870  | 1092797  | 3811063  | 4789606  | 3004095  | 1967111  |

|          |    |   |   |          |          |          |          |          |          |          |          |          |
|----------|----|---|---|----------|----------|----------|----------|----------|----------|----------|----------|----------|
| 9.11795  | 5  | 3 | 2 | 613115.2 | 1322706  | 432028.1 | 1053365  | 381602.8 | 1680591  | 1620710  | 802710.5 | 901152.5 |
| 9.976317 | 10 | 5 | 4 | 2694245  | 11535948 | 2424791  | 9064670  | 4584407  | 10786433 | 8113332  | 11449674 | 12624012 |
| 41.89183 | 6  | 3 | 3 | 518541.8 | 5961101  | 2466647  | 7223705  | 790409.7 | 8635143  | 2904559  | 8293049  | 5489509  |
| 9.840617 | 5  | 2 | 3 | 1123292  | 1779067  | 691728.1 | 3127738  | 2659766  | 1292910  | 1472983  | 2995988  | 1486598  |
| 9.842    | 10 | 5 | 5 | 1859271  | 9321910  | 1351633  | 7590957  | 3322361  | 9866128  | 9683981  | 7599062  | 8392506  |
| 9.842    | 6  | 2 | 4 | 1252203  | 2914828  | 1773907  | 1830893  | 1493123  | 3589465  | 1314812  | 5418487  | 1111291  |
| 11       | 10 | 5 | 5 | 1024671  | 4509399  | 922915.8 | 3535854  | 1818649  | 5262541  | 5507243  | 3272738  | 3950092  |
| 9.40615  | 6  | 4 | 2 | 334800.2 | 2204075  | 1249294  | 1549349  | 539324.6 | 3123310  | 687109.4 | 2816007  | 3363637  |
| 9.842    | 9  | 5 | 4 | 1021657  | 4888759  | 1274690  | 3642496  | 2293308  | 4743551  | 4731053  | 3746100  | 4179264  |
| 9.888767 | 10 | 5 | 5 | 11763963 | 69683111 | 4438817  | 63711196 | 11529152 | 69353063 | 63471404 | 73385617 | 74447801 |
| 14.6632  | 3  | 3 | 0 | 46076.08 | 350329.5 | 189445.9 | 447005.8 | 58401.64 | 604526.2 | 141063.9 | 189390.7 | 372831.3 |
| 33.80417 | 10 | 5 | 5 | 302588.8 | 2210709  | 492105.4 | 1909888  | 415655.8 | 2642236  | 1879673  | 1509252  | 2522367  |
| 9.896717 | 10 | 5 | 5 | 12655863 | 69374921 | 3463237  | 61888964 | 14830727 | 70446740 | 64518780 | 68193334 | 74039488 |
| 10.96997 | 6  | 4 | 2 | 1173653  | 2082663  | 2589650  | 3872989  | 2834463  | 6706424  | 851845.9 | 702026.3 | 1087103  |
| 9.43325  | 9  | 4 | 4 | 2674511  | 14574021 | 5784936  | 11409960 | 3340013  | 24369374 | 14731880 | 12477367 | 11792333 |
| 9.952017 | 10 | 5 | 5 | 1041246  | 3158097  | 499370.5 | 2771111  | 658785.5 | 3796090  | 3532808  | 3075098  | 2619156  |
| 9.848417 | 5  | 3 | 2 | 485123.2 | 1056620  | 491892.8 | 672191.4 | 657453.2 | 1630780  | 1280738  | 590551   | 493309.9 |
| 9.946467 | 10 | 5 | 5 | 2798037  | 11449319 | 1339689  | 10398224 | 1801087  | 13418142 | 11586009 | 11500287 | 9679588  |
| 9.840617 | 10 | 5 | 5 | 6460381  | 7680913  | 557767.4 | 15361808 | 15428455 | 7780922  | 7544695  | 7977490  | 6811133  |
| 38.0655  | 10 | 4 | 1 | 450396.8 | 7853891  | 1869736  | 6409304  | 2457095  | 7521272  | 9591806  | 5100620  | 7440761  |
| 21.21    | 9  | 5 | 4 | 115062.7 | 436123.7 | 105187.7 | 629575.7 | 381468.6 | 371899.8 | 612968.1 | 448107.1 | 395645   |
| 9.933967 | 7  | 4 | 3 | 1645385  | 1626532  | 1148816  | 2842756  | 2278938  | 938330.7 | 3656161  | 1197134  | 1377666  |
| 9.864767 | 10 | 5 | 5 | 4065710  | 27609707 | 3044780  | 23028776 | 8936654  | 25611314 | 24845336 | 26494255 | 28687835 |
| 9.830833 | 7  | 4 | 3 | 588692.9 | 1798167  | 571220.2 | 1176715  | 1170452  | 1722768  | 2069961  | 1196051  | 1376221  |
| 8.859667 | 9  | 4 | 5 | 1724503  | 17309790 | 5167218  | 24996440 | 14987483 | 16950554 | 26314126 | 14129969 | 15100389 |
| 9.91875  | 10 | 4 | 3 | 2990291  | 2871140  | 648457.6 | 6325613  | 6931510  | 2116696  | 3812823  | 2439404  | 2923565  |
| 42.208   | 8  | 2 | 4 | 386209.3 | 5061001  | 608977.9 | 6252528  | 2357534  | 4044961  | 5508566  | 4963186  | 5296104  |
| 10.57323 | 10 | 5 | 5 | 374392.2 | 1638666  | 366452.9 | 1355236  | 483096.8 | 1709797  | 2019328  | 1197042  | 1323658  |
| 44.11467 | 9  | 1 | 4 | 360418.8 | 5259813  | 555551.1 | 6293281  | 2041046  | 5250843  | 4312828  | 5703160  | 5446302  |
| 14.31217 | 10 | 5 | 5 | 428424.2 | 692656.3 | 375427.8 | 1425557  | 1450330  | 1000437  | 820045.6 | 155112.7 | 462210.5 |
| 9.544833 | 8  | 3 | 5 | 2062520  | 1340600  | 581926.3 | 2763047  | 2832995  | 2262692  | 876058   | 1353885  | 807288.8 |
| 9.858833 | 10 | 5 | 5 | 13232470 | 13518590 | 2589600  | 30568018 | 34257860 | 14407678 | 13302005 | 16603022 | 13809883 |
| 9.023433 | 9  | 5 | 2 | 245024   | 699923.8 | 457143.7 | 435105.2 | 333742.3 | 586865.4 | 1476395  | 698021.5 | 395910.4 |
| 9.310917 | 5  | 4 | 1 | 971231.8 | 3990161  | 2848116  | 6386014  | 4237123  | 3048758  | 2596666  | 3288459  | 9009612  |
| 9.903567 | 6  | 2 | 3 | 2577593  | 2481566  | 1126912  | 5933011  | 6904441  | 3512459  | 1599376  | 3773093  | 1244949  |

|          |    |   |   |          |          |          |          |          |          |          |          |          |
|----------|----|---|---|----------|----------|----------|----------|----------|----------|----------|----------|----------|
| 10.5005  | 10 | 5 | 5 | 792019.9 | 2265844  | 992549.4 | 1751339  | 398343.1 | 1983406  | 3902014  | 2420422  | 1405860  |
| 9.507167 | 11 | 5 | 5 | 1182343  | 3732667  | 1585980  | 2587681  | 1878534  | 4885970  | 1681539  | 2456905  | 4302600  |
| 14.50163 | 10 | 5 | 5 | 106351.5 | 864358.8 | 137485.2 | 722102.6 | 265995.6 | 913091.2 | 1080183  | 804041.1 | 729386.5 |
| 9.979667 | 10 | 5 | 5 | 1957037  | 2612434  | 1285855  | 4332316  | 3330101  | 3892882  | 3761832  | 2862157  | 1290281  |
| 10.02372 | 11 | 5 | 3 | 724596.6 | 1025571  | 131233.8 | 1461328  | 872836.5 | 944854.1 | 874394.4 | 1018849  | 1070699  |
| 10.95055 | 9  | 5 | 4 | 954874.2 | 2944137  | 529071.6 | 4091934  | 2281479  | 3332636  | 3640822  | 2646311  | 2344667  |
| 9.859983 | 4  | 1 | 3 | 760680.7 | 2491947  | 820312.7 | 1789501  | 1251378  | 3078560  | 1313420  | 2090587  | 2598570  |
| 9.986767 | 7  | 3 | 4 | 582058.6 | 1349502  | 477046.4 | 956862.3 | 689416.7 | 1347865  | 2019241  | 1278585  | 677817.3 |
| 9.4468   | 5  | 3 | 2 | 272658.3 | 1020565  | 296671   | 612014.3 | 793582.9 | 932777.7 | 1065214  | 1488064  | 678465.5 |
| 9.94455  | 10 | 5 | 5 | 8910066  | 30618133 | 4862314  | 25407293 | 9813432  | 36649860 | 32895625 | 25497161 | 25730615 |
| 10.95602 | 8  | 4 | 4 | 2002978  | 6604429  | 1891650  | 5299886  | 2073448  | 8628736  | 3805954  | 7835965  | 6993323  |
| 44.9835  | 5  | 3 | 1 | 409707.1 | 4767364  | 2062809  | 3739648  | 265273.5 | 3072387  | 3721710  | 8225624  | 5055590  |
| 9.976317 | 3  | 3 | 0 | 627185   | 807820.1 | 211934.4 | 554464.3 | 484980.7 | 725602   | 972164   | 1008040  | 848234.8 |
| 17.307   | 9  | 4 | 5 | 353772   | 2310547  | 1020595  | 1663634  | 947178.3 | 1879588  | 4052774  | 2206187  | 2028161  |
| 10.008   | 9  | 5 | 4 | 5471937  | 1087028  | 271341.5 | 2748732  | 3344167  | 1368776  | 772256.4 | 1360038  | 1046756  |
| 23.44367 | 6  | 4 | 2 | 133926.6 | 476380   | 336958.5 | 712875.2 | 381255.9 | 265337.4 | 532380.2 | 163996.9 | 1026054  |
| 9.842    | 6  | 3 | 3 | 2152632  | 2013378  | 1153932  | 4700191  | 5355830  | 1221104  | 2321925  | 2341699  | 3588323  |
| 10.9645  | 6  | 4 | 2 | 173179.3 | 448692.2 | 59464.06 | 382435   | 125673.8 | 522327   | 470579.3 | 455989.1 | 359179.9 |
| 9.531467 | 14 | 5 | 5 | 4823838  | 16811815 | 2144160  | 11815171 | 9963371  | 14191762 | 16845827 | 15214479 | 19236708 |
| 9.856867 | 10 | 5 | 5 | 3065192  | 9342375  | 391121.7 | 11867288 | 5084586  | 9636335  | 9452477  | 9731172  | 8791197  |
| 9.18195  | 4  | 3 | 1 | 9836108  | 7895318  | 4285020  | 34219186 | 53003676 | 5081279  | 12670482 | 3964203  | 12439140 |
| 44.9835  | 8  | 4 | 4 | 191621.4 | 1137925  | 104006.8 | 1217071  | 134277   | 1103416  | 1162926  | 1108695  | 1298448  |
| 9.568567 | 6  | 5 | 1 | 335337.3 | 564055.9 | 186824   | 684537.1 | 180295   | 480872.5 | 890788.4 | 492471.3 | 532977.8 |
| 29.834   | 5  | 2 | 3 | 113070.4 | 449234.7 | 109993.5 | 382855.1 | 91042.81 | 287021   | 420152   | 436522.2 | 562723.4 |
| 27.92233 | 7  | 3 | 4 | 96403.26 | 213841.6 | 131387.7 | 347338.1 | 249411.6 | 420385.5 | 131355.1 | 76148.99 | 204314.8 |
| 20.87283 | 10 | 5 | 5 | 1195522  | 4478953  | 731073.2 | 3942795  | 891956   | 5713542  | 4203976  | 3843276  | 4518849  |
| 9.986767 | 3  | 0 | 3 | 310242.4 | 454792.1 | 194402.3 | 585363.6 | 203665.9 | 323048.6 | 297803   | 349233.1 | 752664.1 |
| 9.392767 | 7  | 3 | 4 | 1759054  | 1870868  | 1541824  | 1096595  | 368289.7 | 4605231  | 1418623  | 1338361  | 913953   |
| 10.00998 | 11 | 5 | 4 | 7247522  | 3118058  | 582397.9 | 10449599 | 14803777 | 3530760  | 3574286  | 3390437  | 2902928  |
| 11.68858 | 7  | 3 | 4 | 59223.38 | 260931.8 | 64780.01 | 223088.3 | 49089.45 | 277747.4 | 365317.1 | 201738   | 239426.1 |
| 9.40325  | 6  | 2 | 3 | 872523.1 | 7632550  | 2488739  | 5645780  | 3456989  | 10593102 | 8653478  | 5897346  | 4337509  |
| 9.912633 | 9  | 5 | 4 | 1455392  | 7089861  | 771456.3 | 6378568  | 1300882  | 7667840  | 6091530  | 7674652  | 7596860  |
| 8.980067 | 7  | 4 | 3 | 283637.6 | 705692.6 | 349287.5 | 487287.4 | 316086.3 | 1009628  | 764982.7 | 803369.3 | 846965.9 |
| 9.952017 | 10 | 5 | 5 | 1639598  | 5980562  | 1036970  | 4887828  | 2059128  | 7326914  | 6404023  | 4879984  | 4984873  |
| 9.859983 | 10 | 5 | 5 | 7798675  | 11681359 | 2262327  | 20557341 | 17872339 | 11787290 | 9803830  | 14777604 | 12817937 |

|          |    |   |   |          |          |          |          |          |          |          |          |          |
|----------|----|---|---|----------|----------|----------|----------|----------|----------|----------|----------|----------|
| 9.40325  | 12 | 5 | 5 | 1285635  | 11353539 | 2555084  | 9495017  | 3082530  | 14619690 | 10202050 | 13531063 | 9496500  |
| 32.0995  | 3  | 0 | 3 | 171827.7 | 248848.1 | 71966.33 | 411671.5 | 325262.3 | 296207.7 | 334139.1 | 248757.1 | 147832.9 |
| 35.54633 | 4  | 3 | 1 | 227469.4 | 608339.5 | 860127.6 | 179641.1 | 153075.8 | 2128290  | 239470.8 | 18299.84 | 266852.6 |
| 10.85773 | 6  | 4 | 2 | 222920.4 | 555998.1 | 44515.02 | 652441.6 | 192451.8 | 495552.8 | 606666   | 531844.5 | 589492.7 |
| 9.536783 | 13 | 5 | 4 | 1296094  | 4043258  | 1721828  | 5940281  | 3602959  | 5233133  | 5684339  | 2013085  | 2356866  |
| 9.946467 | 8  | 4 | 4 | 3414052  | 5895288  | 3107218  | 4302101  | 1153633  | 5277928  | 4739833  | 4267173  | 3822885  |
| 15.92152 | 9  | 2 | 4 | 1711233  | 1831118  | 512071   | 6683970  | 9808636  | 2325463  | 1366442  | 2099444  | 2168004  |
| 10.45433 | 10 | 5 | 5 | 717391.4 | 2473678  | 561320.3 | 1969323  | 916965.4 | 2967926  | 2180697  | 1820605  | 3147707  |
| 9.379233 | 3  | 3 | 0 | 334032.7 | 576149   | 398494.3 | 362721.8 | 213300.1 | 1128371  | 254462.1 | 127394.9 | 657248.6 |
| 9.999217 | 7  | 3 | 4 | 742295   | 750041.1 | 235116.6 | 1144834  | 780376.9 | 777586.2 | 848849   | 1027891  | 708729.5 |
| 15.8469  | 10 | 5 | 5 | 516992.6 | 3254305  | 532320.8 | 2857487  | 668762   | 4061172  | 3009718  | 3215255  | 3369649  |
| 9.445217 | 14 | 5 | 5 | 969985.6 | 5989387  | 1881841  | 4519171  | 2538636  | 7899131  | 7100436  | 6861967  | 4729422  |
| 9.5021   | 12 | 5 | 5 | 9239760  | 41792785 | 8455199  | 33493003 | 15442169 | 47088272 | 43706464 | 45744815 | 45602409 |
| 9.992233 | 7  | 3 | 4 | 482875.4 | 791452.9 | 616836.8 | 1126134  | 354987.5 | 1091071  | 1677028  | 708276.1 | 110448.3 |
| 10.95602 | 5  | 2 | 3 | 239717.8 | 908421.2 | 189385.7 | 778180.7 | 208118.4 | 1053435  | 982299.5 | 657018.8 | 761505.9 |
| 9.842    | 10 | 5 | 5 | 3703131  | 7168258  | 2657604  | 5503859  | 2423848  | 9236477  | 10250745 | 4900861  | 4118132  |
| 10.008   | 8  | 5 | 3 | 274061.4 | 781845.3 | 266483.6 | 608397.9 | 263912.8 | 555918.1 | 1111759  | 640411.5 | 573123   |
| 19.9985  | 4  | 3 | 1 | 47304.28 | 164100.7 | 64521.03 | 127869.6 | 43136.43 | 175592.6 | 259931.1 | 80745.69 | 159225.3 |
| 42.43817 | 4  | 3 | 1 | 526320.6 | 10408395 | 12647543 | 4132616  | 1764248  | 5505581  | 4743160  | 32756714 | 7245361  |
| 9.207667 | 5  | 3 | 1 | 541648.1 | 2097177  | 806588   | 1573489  | 795187.8 | 937696.7 | 2489225  | 3130919  | 1972912  |
| 35.124   | 4  | 3 | 1 | 241822   | 635981.3 | 763284.7 | 258903.2 | 37142.27 | 1998782  | 327840.5 | 351542.8 | 269733.8 |
| 9.5876   | 8  | 4 | 4 | 397463.3 | 965107.1 | 154663   | 859476.1 | 168079.6 | 1121394  | 1074999  | 883213.6 | 1006183  |
| 8.694517 | 5  | 3 | 2 | 467669.7 | 1031668  | 795112.9 | 584251.7 | 536629.4 | 522632.9 | 1960359  | 1696272  | 924118.8 |
| 9.93625  | 10 | 5 | 5 | 15576398 | 54459829 | 10777857 | 45502441 | 15899767 | 68192493 | 59736756 | 42879288 | 44168356 |
| 10.008   | 9  | 5 | 4 | 4759969  | 830424.2 | 348171.4 | 3049675  | 4489031  | 1160260  | 1122817  | 950351.1 | 438994.8 |
| 10.95602 | 8  | 5 | 3 | 222539.5 | 745607.1 | 151006.5 | 548169.1 | 383971.7 | 979498.4 | 629809.3 | 685662.4 | 622157   |
| 9.45945  | 9  | 5 | 4 | 2181199  | 5869586  | 2132288  | 10742191 | 9758662  | 6959165  | 4921700  | 8200477  | 6584071  |
| 9.536783 | 13 | 5 | 4 | 7397074  | 14714382 | 8696164  | 28547472 | 27311698 | 24378760 | 19477295 | 15607243 | 1212356  |
| 9.928667 | 11 | 5 | 5 | 7904219  | 25685278 | 7749874  | 35946634 | 19982838 | 17921454 | 30473325 | 33470143 | 29795030 |
| 33.746   | 10 | 5 | 5 | 869751.4 | 6017947  | 1642969  | 5132430  | 920534.4 | 8283623  | 5333722  | 3785659  | 6320679  |
| 9.856867 | 10 | 5 | 5 | 11300581 | 49619766 | 5267227  | 44873300 | 8660077  | 57300633 | 50821739 | 43174077 | 50135769 |
| 10.70568 | 10 | 5 | 5 | 319220.4 | 1197906  | 348786.7 | 969712.2 | 349844.9 | 855540.5 | 1722059  | 1373388  | 1014604  |
| 9.992233 | 5  | 2 | 3 | 382412.9 | 623532.7 | 213966.7 | 877512.2 | 488867   | 816441.1 | 275564.3 | 772309.5 | 590088.7 |
| 9.952017 | 10 | 5 | 5 | 7202701  | 28825035 | 4412761  | 25771542 | 4918325  | 34781066 | 31835143 | 27600592 | 23982434 |
| 10.008   | 9  | 5 | 4 | 2927296  | 2837191  | 1227109  | 4738661  | 3752193  | 2717573  | 2677433  | 1500924  | 4847634  |

|          |    |   |   |          |          |          |          |          |          |          |          |          |
|----------|----|---|---|----------|----------|----------|----------|----------|----------|----------|----------|----------|
| 9.928667 | 7  | 3 | 4 | 734409.6 | 1453782  | 376633.6 | 1208245  | 375553.6 | 1937075  | 1614839  | 1457608  | 1350849  |
| 11.88527 | 6  | 3 | 3 | 802224.4 | 1617573  | 1051642  | 1024187  | 720221   | 3066943  | 1018949  | 455546.4 | 2305203  |
| 27.759   | 7  | 4 | 3 | 157717.1 | 576049.9 | 296688.4 | 843837.4 | 489342.3 | 1000890  | 604056.1 | 223800.1 | 670117.6 |
| 9.655117 | 8  | 4 | 4 | 830562.8 | 3307618  | 908703.4 | 2499610  | 1470375  | 4222062  | 3703907  | 2980482  | 1888736  |
| 9.8322   | 9  | 5 | 4 | 1304975  | 5732897  | 972450.7 | 4916172  | 1458671  | 7118717  | 6240643  | 5291170  | 4585494  |
| 9.80755  | 10 | 5 | 5 | 2842840  | 4824965  | 1281961  | 7581113  | 5520461  | 3824680  | 4758610  | 6256801  | 5956117  |
| 9.3471   | 7  | 4 | 3 | 884129.3 | 1397681  | 1328782  | 3084580  | 3277996  | 873677   | 923858.6 | 3732169  | 397396.8 |
| 9.673333 | 13 | 5 | 5 | 786939.9 | 1044643  | 323483.9 | 1808468  | 1534085  | 1047558  | 1430560  | 1228379  | 948029.7 |
| 10.49953 | 6  | 3 | 3 | 242601.3 | 439070.9 | 267600.2 | 304350.8 | 78714.86 | 215804.2 | 876441.6 | 437759.7 | 226240.9 |
| 10.57357 | 5  | 3 | 2 | 346864.1 | 1541940  | 889253.3 | 1050090  | 566371.7 | 2869470  | 2035067  | 891492.7 | 1114627  |
| 10.9645  | 10 | 5 | 5 | 2073285  | 9807971  | 2382079  | 8231896  | 2450494  | 11890890 | 12326586 | 7119959  | 7634857  |
| 10.10048 | 10 | 5 | 5 | 1206814  | 3837118  | 988110.4 | 4494521  | 1027384  | 3767197  | 4541114  | 4869644  | 3693044  |
| 9.859983 | 4  | 1 | 3 | 565707.7 | 2497274  | 1341947  | 1646984  | 1264171  | 3382884  | 1067258  | 3787524  | 1021821  |
| 9.673333 | 8  | 4 | 4 | 549210.6 | 2855764  | 674882.3 | 2247301  | 1112986  | 3635502  | 3089814  | 3238900  | 2022017  |
| 10.9645  | 10 | 5 | 5 | 692285.9 | 2884330  | 496449.3 | 2531531  | 580734.2 | 3689933  | 2683026  | 2434088  | 2605134  |
| 24.39183 | 6  | 3 | 3 | 130722.9 | 572461.4 | 305453.3 | 392661.5 | 240208.8 | 500677.1 | 455596.3 | 289957.1 | 522035.8 |
| 9.960817 | 6  | 3 | 3 | 502551.6 | 1768595  | 515459.9 | 1284409  | 896108.1 | 1852118  | 924972.3 | 2121000  | 2233998  |
| 20.24783 | 10 | 5 | 5 | 18615648 | 1.6E+08  | 22073433 | 1.45E+08 | 21625782 | 1.76E+08 | 1.8E+08  | 1.33E+08 | 1.39E+08 |
| 9.4468   | 7  | 2 | 4 | 515126.8 | 1590456  | 517284.1 | 1255503  | 510953.6 | 2041289  | 864017.3 | 1227206  | 1950801  |
| 10.008   | 8  | 5 | 3 | 333298.8 | 757264.8 | 148910.5 | 571028.5 | 361825.7 | 804305.5 | 544007.1 | 931084.4 | 680103   |
| 10.9645  | 10 | 5 | 5 | 694445.9 | 3439314  | 305606.5 | 3129597  | 583255.7 | 3745891  | 3103471  | 3203345  | 3377067  |
| 12.26695 | 10 | 5 | 5 | 497150.4 | 3314861  | 572169.9 | 2826779  | 878673.2 | 3861205  | 3715873  | 2703101  | 2688997  |
| 31.13717 | 4  | 3 | 1 | 170589.3 | 653614.3 | 569075.7 | 992081.4 | 461762   | 196770   | 1230611  | 1283750  | 84538.68 |
| 9.56645  | 9  | 4 | 3 | 3269691  | 12024914 | 6421547  | 17228146 | 9191022  | 14393091 | 10878001 | 1393858  | 17333940 |
| 10.97242 | 5  | 2 | 3 | 4496923  | 1953726  | 1370367  | 8130582  | 12525668 | 348894.4 | 589299.7 | 2942342  | 2683622  |
| 11.26338 | 10 | 5 | 5 | 3203438  | 10186536 | 2034169  | 7150061  | 5993429  | 11844770 | 6803940  | 11123192 | 11345933 |
| 24.16133 | 9  | 5 | 4 | 527345.4 | 3847854  | 1711609  | 2791988  | 1523283  | 2636215  | 5157653  | 1773497  | 3768445  |
| 19.19917 | 3  | 3 | 0 | 932805.1 | 93793.57 | 17990.15 | 1238497  | 2329193  | 78023.93 | 103719.1 | 100093.9 | 72263.03 |
| 9.858833 | 10 | 5 | 5 | 7843811  | 11979502 | 2039257  | 20674889 | 17643509 | 12233190 | 11025843 | 14811134 | 12552317 |
| 9.3735   | 7  | 4 | 3 | 437781.9 | 1057899  | 253790.3 | 901548.4 | 225513.9 | 1363212  | 988228.1 | 731909.9 | 946200.8 |
| 28.54917 | 5  | 3 | 2 | 136279   | 371267.7 | 334669.1 | 549374.4 | 179110.7 | 105841.3 | 92397.58 | 698533.9 | 188974   |
| 22.92883 | 10 | 5 | 5 | 209261.3 | 1702396  | 386736.8 | 2030503  | 590757.8 | 2262402  | 1421243  | 1809974  | 1264875  |
| 8.902983 | 5  | 1 | 4 | 3421525  | 710417.4 | 760211.5 | 7798519  | 14428449 | 520682.9 | 2053971  | 456431.7 | 236101.8 |
| 9.94455  | 10 | 5 | 5 | 1905273  | 6420939  | 1089270  | 5285647  | 2154701  | 7993690  | 6807469  | 5387340  | 5398494  |
| 11.37373 | 10 | 5 | 5 | 285126.6 | 993388.4 | 137291.2 | 794553.7 | 392413.1 | 1046326  | 927124.2 | 890408.9 | 892114.6 |

|          |    |   |   |          |          |          |          |          |          |          |          |          |
|----------|----|---|---|----------|----------|----------|----------|----------|----------|----------|----------|----------|
| 18.49667 | 4  | 0 | 3 | 10862974 | 54883.26 | 79756.15 | 97769290 | 1.99E+08 | 60148.2  | 9096.391 | 6973.406 | 6593.546 |
| 19.01233 | 6  | 4 | 2 | 301044.1 | 2426291  | 1457354  | 3414446  | 1579497  | 2961188  | 2030206  | 4684701  | 1426150  |
| 9.842    | 6  | 3 | 3 | 835061.6 | 1352059  | 738204.6 | 2135934  | 1493043  | 1277550  | 658819.1 | 1696696  | 2425405  |
| 9.388367 | 9  | 3 | 4 | 2705556  | 19103656 | 5973128  | 15412078 | 5362292  | 20417417 | 23942902 | 15443590 | 10748553 |
| 9.392767 | 9  | 5 | 4 | 1193916  | 2714238  | 676606.1 | 2025275  | 1302415  | 3010179  | 3102762  | 1955011  | 2039781  |
| 9.912633 | 9  | 5 | 4 | 1712206  | 4709637  | 1206251  | 3444085  | 2407033  | 5748278  | 3840049  | 3300423  | 4545394  |
| 42.86967 | 7  | 2 | 3 | 318770.5 | 3701495  | 1687282  | 4666217  | 1229646  | 4497031  | 732985.1 | 4134022  | 4224520  |
| 9.388367 | 10 | 5 | 5 | 1654150  | 6586072  | 603477.8 | 5402652  | 2375799  | 7401435  | 5905681  | 6079850  | 6815393  |
| 9.601917 | 5  | 1 | 3 | 3536944  | 372199.7 | 220427.6 | 4842220  | 9121058  | 422986.3 | 670529.5 | 458537.2 | 138517.6 |
| 9.3735   | 5  | 3 | 2 | 387930   | 2002327  | 1171605  | 1259791  | 1115473  | 2926390  | 3503013  | 1418685  | 1499627  |
| 9.346    | 6  | 4 | 2 | 304918.2 | 1231178  | 340827.2 | 882082.2 | 661764.5 | 1168656  | 1037420  | 1743321  | 1356404  |
| 8.813383 | 8  | 5 | 3 | 853866.4 | 2719596  | 1744365  | 1704768  | 1344336  | 929570.3 | 5492835  | 2841989  | 2736891  |
| 9.872883 | 10 | 5 | 5 | 5162818  | 33550111 | 2323020  | 28247409 | 10700367 | 33764983 | 31362271 | 33269406 | 37335384 |
| 9.91765  | 10 | 5 | 5 | 1301664  | 3552775  | 956556.8 | 2840744  | 1214892  | 4408360  | 3166274  | 2430028  | 3072017  |
| 9.983467 | 8  | 4 | 4 | 2929152  | 1076446  | 384410.7 | 2688375  | 3280711  | 1353839  | 754667.2 | 642493.9 | 1547865  |
| 9.45945  | 9  | 4 | 5 | 556017.1 | 2589313  | 1043329  | 3782670  | 2304118  | 2809350  | 3652730  | 3469440  | 1334751  |
| 26.6405  | 7  | 4 | 3 | 412607.1 | 305774.9 | 77930.36 | 934953.6 | 1283906  | 317832   | 312837.2 | 390887.8 | 329226.3 |
| 26.36783 | 10 | 5 | 5 | 161020.3 | 757696.3 | 192140.7 | 586224.1 | 315004.1 | 577660.8 | 1036473  | 621709.9 | 680514.5 |
| 43.07117 | 9  | 3 | 3 | 374674.9 | 5726739  | 2948592  | 4264782  | 674222.8 | 5223298  | 5166488  | 1512790  | 7241873  |
| 9.40325  | 6  | 2 | 4 | 4796949  | 28240627 | 15253707 | 19292441 | 12071865 | 7909641  | 15915066 | 37480135 | 38233562 |
| 11.52297 | 7  | 2 | 5 | 99288.74 | 328906   | 83505.06 | 271478.1 | 93250.75 | 443710.4 | 388745   | 284657.6 | 282042.4 |
| 9.9847   | 5  | 2 | 3 | 390098.2 | 412054.6 | 282672.9 | 621409.8 | 356759   | 141803.4 | 87492.05 | 672209.1 | 673087.5 |
| 9.915583 | 10 | 5 | 5 | 4385408  | 12815556 | 2357510  | 17961926 | 10384000 | 11412394 | 13091182 | 16199999 | 13445700 |
| 9.9754   | 3  | 0 | 3 | 1347636  | 216774.4 | 105141   | 2203336  | 4059825  | 151625.9 | 284633.5 | 344562.8 | 224066.3 |
| 27.10217 | 9  | 5 | 4 | 1865800  | 6108916  | 2154620  | 9264076  | 6253049  | 9463000  | 5191630  | 3572782  | 6302376  |
| 9.4925   | 6  | 2 | 4 | 865090.6 | 1528529  | 944162.1 | 3319886  | 3599283  | 1108944  | 805371.4 | 980319.1 | 1620159  |
| 28.4025  | 5  | 1 | 4 | 144236.5 | 1238377  | 718443.9 | 818620.7 | 562960   | 686619.5 | 1486912  | 346351.9 | 1529059  |
| 9.994767 | 6  | 3 | 3 | 232748.1 | 714268.7 | 143925.2 | 606394   | 185163.7 | 882773.9 | 593375   | 780196.1 | 536965.7 |
| 22.56617 | 10 | 5 | 5 | 489909.1 | 2327216  | 770494.7 | 1919996  | 405462.9 | 1703981  | 3637752  | 2360379  | 2030572  |
| 9.946467 | 7  | 3 | 4 | 1551128  | 1283255  | 720847   | 2369996  | 2158729  | 1759241  | 254359.7 | 2061991  | 1454386  |
| 9.94455  | 10 | 5 | 5 | 21762316 | 76625988 | 11458254 | 63829437 | 24663260 | 90966767 | 81411039 | 64817799 | 64892379 |
| 40.62467 | 10 | 2 | 3 | 272115.1 | 3545974  | 390362.4 | 3072709  | 922223.4 | 2852207  | 3666398  | 3783773  | 3692860  |
| 44.696   | 4  | 1 | 3 | 431672.2 | 6447436  | 2940415  | 8947981  | 4531002  | 7598073  | 7355554  | 1213837  | 8085489  |
| 9.979667 | 7  | 4 | 3 | 6321395  | 5349886  | 8320796  | 10724512 | 8274290  | 3227643  | 463924.5 | 2633213  | 366028.8 |
| 9.9014   | 10 | 5 | 5 | 11584845 | 62241499 | 7223398  | 51519006 | 21285398 | 59027491 | 53974557 | 59400006 | 66288444 |



|          |    |   |   |          |          |          |          |          |          |          |          |          |
|----------|----|---|---|----------|----------|----------|----------|----------|----------|----------|----------|----------|
| 39.23017 | 4  | 3 | 1 | 376573   | 4731338  | 974386.7 | 5350461  | 936862.9 | 4841053  | 3062292  | 5052017  | 5605619  |
| 10.93618 | 10 | 5 | 5 | 261190.1 | 1224861  | 383021.6 | 956499.4 | 442514.2 | 1604662  | 1508077  | 660315.3 | 1036339  |
| 9.845483 | 9  | 5 | 4 | 960583.1 | 4897038  | 1052685  | 3793966  | 2105559  | 4597236  | 4657567  | 3882819  | 4661348  |
| 10.16938 | 6  | 4 | 2 | 270545.2 | 780700.1 | 233809.3 | 910526.2 | 155607.4 | 822758.4 | 652618.8 | 814077.4 | 1121660  |
| 9.952017 | 10 | 5 | 5 | 2276553  | 8540569  | 1234559  | 7689816  | 1386715  | 10456572 | 8896089  | 8361007  | 7296230  |
| 9.3332   | 5  | 3 | 2 | 416911.8 | 2005062  | 584764.4 | 1574108  | 733946.7 | 2101490  | 1972310  | 2908245  | 1328918  |
| 9.94455  | 6  | 3 | 3 | 23362784 | 3.15E+08 | 7670134  | 2.95E+08 | 41879285 | 3.1E+08  | 3.05E+08 | 3.24E+08 | 3.16E+08 |
| 11.99367 | 10 | 5 | 5 | 645158.3 | 4144250  | 571316.9 | 3672201  | 847387.4 | 4431207  | 4857012  | 3537703  | 3580209  |
| 9.473733 | 5  | 3 | 2 | 755649.9 | 1397174  | 416838.9 | 997533.3 | 749644.9 | 990220.8 | 1540654  | 925054   | 1677289  |
| 9.858833 | 10 | 5 | 5 | 984448.7 | 3721977  | 477663.8 | 3192940  | 1019607  | 4176303  | 3674408  | 4021267  | 3796241  |
| 9.874317 | 9  | 5 | 4 | 2169956  | 1949005  | 792113.8 | 5311061  | 6861265  | 1162936  | 1581336  | 2857505  | 2742910  |
| 9.9677   | 10 | 5 | 5 | 8216549  | 26174174 | 5098284  | 21138154 | 9510420  | 29424426 | 25023617 | 19844846 | 23648046 |
| 41.43133 | 6  | 2 | 3 | 298622.8 | 4336620  | 1259178  | 5149031  | 1251559  | 5923730  | 4315958  | 4686821  | 2413059  |
| 10.83632 | 5  | 3 | 2 | 134529.5 | 299992.9 | 105222.6 | 239317.7 | 79694.35 | 222544.4 | 323185.9 | 456755.5 | 185800.2 |
| 9.983433 | 10 | 5 | 5 | 1272869  | 4369755  | 1316423  | 3522934  | 1301266  | 5975973  | 5522176  | 3948204  | 2961244  |
| 19.78133 | 4  | 3 | 1 | 80190.38 | 315972.1 | 217304.5 | 439311.7 | 156679.4 | 549223.9 | 544331.6 | 94904.21 | 148114   |
| 16.15475 | 4  | 3 | 1 | 349763   | 1061929  | 1591045  | 283020.5 | 176150.5 | 197129   | 625833.8 | 246063.2 | 3892549  |
| 41.40233 | 6  | 4 | 2 | 286865.6 | 4423125  | 1585892  | 3380560  | 1637281  | 7168172  | 4236045  | 3443581  | 4011217  |
| 9.845483 | 9  | 5 | 4 | 2286918  | 8985942  | 2330406  | 7306540  | 2827930  | 8359659  | 10963773 | 8318668  | 5750732  |
| 9.872883 | 10 | 5 | 5 | 23264244 | 1.57E+08 | 24768211 | 1.34E+08 | 42475181 | 1.43E+08 | 1.31E+08 | 1.47E+08 | 1.72E+08 |
| 13.44963 | 5  | 1 | 4 | 311392.8 | 121950.9 | 44957.68 | 656734.6 | 1095941  | 58508.44 | 181307.4 | 138632.6 | 106192   |
| 17.454   | 6  | 3 | 3 | 351981.6 | 3810408  | 574390.5 | 3143148  | 1297475  | 4148800  | 3284498  | 4571966  | 3826599  |
| 9.933967 | 7  | 4 | 3 | 3533737  | 4016750  | 2379292  | 9674465  | 11483745 | 7910010  | 3850635  | 4146849  | 2049684  |
| 41.4315  | 7  | 4 | 1 | 420875.4 | 5144984  | 1128370  | 4593648  | 110633.6 | 3532403  | 5199486  | 6495731  | 4681432  |
| 9.979667 | 13 | 5 | 4 | 3270708  | 4858339  | 1612452  | 3551832  | 2334820  | 6105836  | 2486941  | 3937044  | 5506755  |
| 41.8055  | 11 | 5 | 3 | 380094.8 | 7838819  | 3215073  | 6001174  | 2382476  | 7265013  | 5017930  | 10042329 | 12142185 |
| 9.979667 | 5  | 3 | 2 | 336165.8 | 663890.6 | 377075.8 | 411196.8 | 404840   | 704643.2 | 185757.4 | 629010   | 564059.6 |
| 25.40583 | 5  | 3 | 2 | 118722.3 | 588901.1 | 209412.9 | 468190.6 | 159446.2 | 459566.7 | 865691.6 | 673272.7 | 317932.4 |
| 9.928667 | 8  | 4 | 4 | 1585087  | 3156334  | 424817.5 | 2808896  | 623613.6 | 3382622  | 2912021  | 3712693  | 3166940  |
| 25.36183 | 6  | 2 | 4 | 235943.6 | 1445951  | 342461.4 | 1228578  | 330821.2 | 1002355  | 1931797  | 1577634  | 1315232  |
| 9.11405  | 4  | 1 | 3 | 377614.6 | 622267.5 | 487572.2 | 381732.3 | 110441.7 | 251480.6 | 301784.9 | 342213.3 | 1391257  |
| 9.596017 | 8  | 5 | 3 | 3044391  | 4098510  | 3505809  | 7412841  | 6218009  | 1737345  | 3031793  | 2161241  | 10267083 |
| 10.9645  | 10 | 5 | 5 | 1068812  | 4918921  | 1011636  | 4329871  | 793955.3 | 5827073  | 6013541  | 4059486  | 3764817  |
| 9.946467 | 10 | 5 | 5 | 920862.5 | 3555000  | 562925.5 | 3259808  | 289816.6 | 4253986  | 3984520  | 3514467  | 3033231  |
| 25.11783 | 4  | 4 | 0 | 1618201  | 3461568  | 7065541  | 21330.45 | 7671.495 | 515267   | 40711.98 | 16094535 | 125615.1 |

|          |    |   |   |          |          |          |          |          |          |          |          |          |
|----------|----|---|---|----------|----------|----------|----------|----------|----------|----------|----------|----------|
| 10.00998 | 9  | 5 | 4 | 2077155  | 932582.7 | 400017.6 | 3442924  | 5149495  | 895591.3 | 1581544  | 885061.3 | 483060.2 |
| 9.920517 | 10 | 5 | 5 | 66672316 | 2.45E+08 | 55281411 | 2.04E+08 | 69455121 | 3.02E+08 | 2.47E+08 | 1.77E+08 | 2.03E+08 |
| 9.311883 | 8  | 3 | 3 | 365855.9 | 833577   | 819472   | 417012.8 | 330269.2 | 488460.5 | 965964.6 | 512882   | 2173692  |
| 22.62483 | 10 | 5 | 5 | 208593.9 | 1575506  | 396915.8 | 1327740  | 370811.8 | 1191872  | 2212717  | 1601512  | 1299340  |
| 9.419733 | 10 | 5 | 4 | 2068644  | 10716479 | 2427201  | 8412054  | 4334169  | 13148750 | 13171686 | 10384356 | 7685376  |
| 25.304   | 6  | 3 | 3 | 18357718 | 40569314 | 79884311 | 1709096  | 347454.5 | 12658886 | 2046910  | 1.83E+08 | 1994544  |
| 9.392767 | 10 | 5 | 4 | 13445310 | 9954523  | 2760269  | 51986591 | 86391239 | 6203594  | 10409128 | 13750746 | 10616702 |
| 29.936   | 9  | 5 | 4 | 351039.2 | 662208.4 | 281716.2 | 1320866  | 1339443  | 269356.9 | 834841.4 | 622148.1 | 571164.4 |
| 9.999217 | 10 | 5 | 5 | 2272921  | 8343062  | 1784576  | 6827716  | 2762644  | 10503222 | 9796880  | 7809675  | 6121061  |
| 9.952017 | 10 | 5 | 5 | 9396954  | 33524818 | 5735190  | 30170004 | 4576649  | 42296019 | 36155656 | 31000088 | 28102093 |
| 24.71    | 9  | 5 | 4 | 55540.06 | 331448.5 | 59379.65 | 285116.7 | 81753.21 | 274037   | 397502.3 | 266576   | 377663.7 |
| 9.859983 | 10 | 5 | 5 | 1534112  | 9354847  | 1152474  | 10420755 | 1992880  | 9701002  | 8991756  | 7523924  | 10306651 |
| 10.90802 | 10 | 5 | 5 | 262070.5 | 844945.3 | 250084.6 | 701457.4 | 188837   | 1158140  | 935026.2 | 563397.4 | 614839.2 |
| 9.8445   | 9  | 5 | 4 | 9477902  | 39144825 | 5444846  | 35340778 | 6313017  | 35798437 | 34125836 | 35751927 | 45906165 |
| 9.392767 | 6  | 4 | 2 | 496483.9 | 769111.1 | 399621.9 | 450741   | 567075.7 | 911645.5 | 1157585  | 569745.6 | 171536   |
| 9.0258   | 4  | 1 | 3 | 114797.7 | 448688.9 | 295781.3 | 281100.5 | 214888   | 702921.1 | 805017.8 | 372452.3 | 251450.6 |
| 9.94455  | 6  | 3 | 3 | 1227740  | 905786.6 | 622729.8 | 1446115  | 992606.5 | 1251646  | 0        | 1566498  | 1146498  |
| 22.65633 | 7  | 4 | 3 | 1841685  | 1216839  | 2423730  | 4348635  | 6182881  | 152947.8 | 63479.1  | 115763.3 | 5551611  |
| 10.01477 | 9  | 4 | 5 | 1181050  | 4496659  | 1183780  | 3401149  | 2049578  | 4442497  | 2847022  | 4147780  | 4951750  |
| 9.952017 | 10 | 5 | 5 | 1570739  | 4875679  | 905960.6 | 3995184  | 1666569  | 5907487  | 5612724  | 4223626  | 3757637  |
| 9.362817 | 6  | 4 | 2 | 483110.3 | 942838.7 | 662895.4 | 529783   | 618363.7 | 1789857  | 856741.5 | 1286163  | 781431.8 |
| 9.857983 | 6  | 3 | 3 | 2178460  | 5501612  | 5428874  | 8453592  | 3394848  | 14910647 | 4554248  | 3981431  | 3045796  |
| 28.7015  | 6  | 3 | 3 | 115691.6 | 486098.7 | 282639.3 | 330127.4 | 187602.7 | 242170.2 | 573790.8 | 135555   | 716523.1 |
| 9.8322   | 6  | 5 | 1 | 566772.8 | 1119779  | 286990   | 1350205  | 412066.3 | 1392520  | 1361374  | 926373.2 | 1191471  |
| 9.445217 | 14 | 5 | 5 | 1280222  | 12186142 | 3221343  | 10209752 | 2905122  | 16218255 | 12472790 | 14292490 | 9186155  |
| 9.992233 | 9  | 5 | 4 | 1548948  | 1571826  | 665634   | 2591792  | 2042336  | 786016.5 | 1639878  | 2580613  | 1638618  |
| 10.03947 | 9  | 5 | 4 | 250015.8 | 818562.7 | 208330.7 | 648756.8 | 305682.1 | 563437.6 | 657781.8 | 859022.5 | 933655.1 |
| 9.8374   | 9  | 5 | 4 | 1869721  | 7767907  | 1081293  | 6772519  | 1862038  | 7011510  | 7540600  | 6520295  | 8942907  |
| 41.1145  | 7  | 4 | 3 | 372992.9 | 4811427  | 1041001  | 6257522  | 2877198  | 5202260  | 5869881  | 3192335  | 5357731  |
| 9.118517 | 8  | 5 | 3 | 1121383  | 1202190  | 354396.9 | 2264992  | 2175094  | 1823878  | 1001284  | 1060138  | 971980.7 |
| 42.3375  | 5  | 4 | 0 | 465891.2 | 6791738  | 6085402  | 3836746  | 209747.1 | 17353978 | 5859587  | 4589054  | 4355474  |
| 10.70568 | 10 | 5 | 5 | 343993.9 | 1291422  | 398959.8 | 1075363  | 246457.8 | 1186979  | 1878781  | 1491363  | 1011855  |
| 10.008   | 10 | 5 | 5 | 378520.8 | 999957.1 | 397084.6 | 791567.3 | 209818.4 | 745308.9 | 1696887  | 949832.9 | 823122.6 |
| 10.9645  | 9  | 5 | 4 | 962695.3 | 4371131  | 833647.5 | 3507901  | 1658124  | 4904751  | 4616155  | 3358700  | 3656536  |
| 9.4159   | 7  | 4 | 3 | 579883.6 | 812620.5 | 413930.2 | 1206104  | 742715.6 | 1012816  | 227669.8 | 851092.5 | 638148.2 |

|          |    |   |   |          |          |          |          |          |          |          |          |          |
|----------|----|---|---|----------|----------|----------|----------|----------|----------|----------|----------|----------|
| 10.008   | 7  | 4 | 3 | 334852.5 | 721425.1 | 196455.6 | 882852.5 | 292099.7 | 902536.2 | 882936.5 | 766411   | 623402.6 |
| 10.9645  | 5  | 3 | 2 | 193304.3 | 576220.8 | 124675.4 | 489105.6 | 145267.2 | 651282.6 | 737236.4 | 473967.9 | 584159.7 |
| 10.95055 | 8  | 4 | 4 | 549266.8 | 1238548  | 358191.4 | 1541464  | 553855.5 | 1697185  | 1543957  | 991999   | 1066088  |
| 30.195   | 7  | 4 | 3 | 103434.5 | 533000   | 242895.7 | 402284.3 | 146741.1 | 913627.1 | 592130.1 | 489838.1 | 275065.6 |
| 10.95055 | 5  | 3 | 2 | 687233.9 | 1715638  | 585133.9 | 2168239  | 799172   | 2110878  | 2500173  | 1355429  | 1048735  |
| 9.67     | 4  | 0 | 4 | 4388772  | 1464669  | 832278.3 | 8269974  | 14029133 | 1791737  | 2750300  | 1219423  | 869886.5 |
| 9.994767 | 9  | 5 | 4 | 7817009  | 1191876  | 778688.9 | 6234435  | 10392045 | 1725733  | 2178005  | 1197060  | 478667.1 |
| 10.95055 | 10 | 5 | 5 | 242348.9 | 1143543  | 215854.9 | 943057.2 | 376823.8 | 1229436  | 1329018  | 1002530  | 837312.1 |
| 9.976317 | 4  | 1 | 3 | 332191.8 | 366487.2 | 191117.4 | 552730.3 | 354250.9 | 525227   | 46113.22 | 428295.1 | 347615.2 |
| 16.08207 | 4  | 3 | 0 | 31398.15 | 141037.7 | 27815.86 | 113622.3 | 52271.58 | 188851.9 | 134258.9 | 116197   | 135636.4 |
| 9.856867 | 7  | 4 | 3 | 2232396  | 3458203  | 1230618  | 5274828  | 3641816  | 4194650  | 2574019  | 4695801  | 4055200  |
| 44.47717 | 6  | 1 | 4 | 352557.7 | 4344877  | 208853.2 | 6637203  | 4733007  | 4362448  | 4049317  | 4273139  | 4418464  |
| 10.44215 | 5  | 3 | 2 | 161618.8 | 383094.4 | 93243.76 | 307792.9 | 135691.8 | 307375   | 369206.2 | 530943   | 302514.8 |
| 9.848417 | 10 | 5 | 5 | 4232248  | 24182944 | 1716690  | 21280624 | 5867321  | 26518441 | 23820603 | 22288011 | 23001811 |
| 35.45383 | 10 | 5 | 5 | 434175.4 | 6905965  | 800437.3 | 6277064  | 1120875  | 8170884  | 6806834  | 6895791  | 5950582  |
| 9.9014   | 10 | 5 | 5 | 11021927 | 18354024 | 4530171  | 30814867 | 25560692 | 15461918 | 18982217 | 22612652 | 22514452 |
| 9.45945  | 4  | 3 | 1 | 438016.9 | 1439759  | 625619.3 | 998785.4 | 742075.3 | 2484148  | 1407454  | 1347595  | 1125029  |
| 9.992233 | 11 | 5 | 5 | 1441912  | 3079173  | 507157.2 | 4868096  | 3681117  | 3718825  | 3198181  | 2846107  | 2361914  |
| 9.4925   | 6  | 2 | 3 | 972326.3 | 5798315  | 7769070  | 2014349  | 1302529  | 2608874  | 1294541  | 2418393  | 19648914 |
| 9.976317 | 5  | 2 | 3 | 558078.8 | 931216.9 | 295948.7 | 756954.7 | 243757.8 | 1075102  | 1277401  | 748663.7 | 1031612  |
| 42.97017 | 5  | 3 | 1 | 388912.5 | 4557167  | 762630.6 | 4183081  | 180942.8 | 4259132  | 4631722  | 4771984  | 5606931  |
| 9.43325  | 9  | 4 | 4 | 784122.1 | 5584308  | 1517875  | 4297621  | 2361356  | 5063210  | 7551237  | 6610061  | 3652496  |
| 9.856867 | 10 | 5 | 5 | 1289765  | 7110804  | 1156129  | 5796200  | 2571980  | 7171893  | 6829404  | 5873447  | 6684180  |
| 9.659033 | 10 | 5 | 5 | 333251.6 | 821033   | 146213.9 | 725479.3 | 151985.7 | 967483.1 | 917167.8 | 641847.8 | 687580   |
| 9.946467 | 10 | 5 | 5 | 5870042  | 20738809 | 2181930  | 18543081 | 4214367  | 23088599 | 22564812 | 17995564 | 19118106 |
| 9.874317 | 9  | 4 | 5 | 6099460  | 24551710 | 8707463  | 30579929 | 10041909 | 30223160 | 10952665 | 24814910 | 33710234 |
| 9.388617 | 10 | 4 | 5 | 2365331  | 9963851  | 9315012  | 5391224  | 2342044  | 10054867 | 25926718 | 2875980  | 4525915  |
| 9.856867 | 10 | 5 | 5 | 61875420 | 4.04E+08 | 48551403 | 3.45E+08 | 1.18E+08 | 4.07E+08 | 3.91E+08 | 3.48E+08 | 3.94E+08 |
| 9.856867 | 10 | 5 | 5 | 5702806  | 6121956  | 1456408  | 13530221 | 15306447 | 7388084  | 7249169  | 6347262  | 5844957  |
| 9.559117 | 9  | 5 | 4 | 955020.7 | 6005899  | 1482272  | 4989362  | 1683132  | 7891153  | 6411369  | 5582620  | 3817765  |
| 9.9014   | 10 | 5 | 5 | 15783371 | 80003015 | 9278663  | 66179334 | 27802256 | 75685396 | 69466419 | 76769064 | 84538034 |
| 10.008   | 9  | 4 | 5 | 658025.8 | 2355395  | 296770.7 | 1975288  | 755115.3 | 2369018  | 2832526  | 2239177  | 2025287  |
| 10.49953 | 10 | 5 | 5 | 2882869  | 13364608 | 1671620  | 11902690 | 2714545  | 13892353 | 15893993 | 12141347 | 11634332 |
| 14.84005 | 9  | 5 | 4 | 217148.7 | 888479.3 | 911458.1 | 435719.6 | 300085.5 | 2287873  | 1295470  | 219838.7 | 90731.49 |
| 7.121733 | 8  | 5 | 3 | 198894.7 | 8850538  | 4113315  | 11371374 | 3749247  | 5397919  | 7332409  | 5590180  | 15081114 |

|          |    |   |   |          |          |          |          |          |          |          |          |          |
|----------|----|---|---|----------|----------|----------|----------|----------|----------|----------|----------|----------|
| 24.1315  | 3  | 0 | 3 | 10046560 | 609120.7 | 28688    | 63529497 | 1.3E+08  | 613102.7 | 590925.7 | 640254.1 | 570389.6 |
| 9.2585   | 6  | 3 | 3 | 2860539  | 1884400  | 1134719  | 5488760  | 7423674  | 544316.5 | 1436333  | 2320925  | 1547852  |
| 9.49445  | 11 | 5 | 5 | 1526581  | 10894523 | 4719411  | 7925253  | 4559252  | 7453738  | 17630294 | 13912539 | 8930991  |
| 9.94455  | 4  | 1 | 3 | 1245531  | 827750.1 | 574477   | 1422137  | 1148397  | 1282126  | 0        | 1357303  | 1010282  |
| 9.8445   | 10 | 5 | 5 | 6147862  | 32446905 | 5399580  | 27675909 | 8893328  | 37477673 | 35942647 | 26089951 | 27100162 |
| 9.94455  | 4  | 3 | 1 | 923917.3 | 2440135  | 560849.9 | 2163312  | 166191.7 | 2282636  | 2022045  | 3326169  | 2620590  |
| 44.48033 | 10 | 3 | 3 | 267465.4 | 2913312  | 1326274  | 2182035  | 899518.4 | 2114219  | 2356716  | 2944911  | 1961345  |
| 42.04983 | 9  | 3 | 4 | 459789.9 | 9963584  | 4821053  | 7553996  | 1756492  | 8158494  | 5562778  | 18215851 | 8665587  |
| 9.915583 | 9  | 5 | 4 | 13128333 | 41244177 | 7133915  | 35174836 | 11189639 | 41210496 | 34795396 | 33486588 | 48818808 |
| 9.559117 | 8  | 5 | 3 | 377536.3 | 906971.6 | 253747.2 | 668535.1 | 451909.7 | 922743.2 | 1299939  | 599095.3 | 817785.8 |
| 21.0215  | 10 | 5 | 5 | 405990.7 | 3739681  | 717808.6 | 3214082  | 909141.9 | 2947779  | 3783669  | 3405044  | 3675149  |
| 43.14317 | 4  | 3 | 1 | 903367.2 | 6364615  | 5557334  | 9795624  | 5164098  | 1814546  | 12194549 | 2252461  | 2885669  |
| 24.58017 | 6  | 5 | 1 | 76795.3  | 222081.4 | 92363.19 | 162926.9 | 92747.13 | 176245.4 | 309887.1 | 219606.4 | 93874.42 |
| 9.1476   | 4  | 3 | 1 | 1567943  | 608835.1 | 279397.8 | 1217786  | 1247881  | 464737.8 | 316053.6 | 769931.3 | 480467.4 |
| 9.857683 | 5  | 3 | 2 | 1014826  | 2429417  | 1007136  | 4006229  | 3188401  | 3540459  | 1368862  | 2170946  | 1636283  |
| 15.30743 | 10 | 5 | 5 | 155519.6 | 1107933  | 198677.2 | 956427.6 | 267916.5 | 1292637  | 1310387  | 955188.3 | 864271.7 |
| 9.371417 | 4  | 3 | 1 | 1078484  | 1691858  | 1492564  | 3432103  | 3429346  | 813271.9 | 589871   | 4150166  | 833590.7 |
| 9.992233 | 10 | 5 | 5 | 933766.4 | 2796818  | 154776.4 | 2375791  | 867211.3 | 2918060  | 2551901  | 2803791  | 2770669  |
| 11.2071  | 6  | 4 | 2 | 3006456  | 3925322  | 4998887  | 6855074  | 4111059  | 1343108  | 1831465  | 12547088 | 3794252  |
| 25.214   | 11 | 5 | 5 | 1233573  | 9089006  | 1164826  | 8188689  | 1603343  | 7141837  | 10088231 | 9113720  | 9226138  |
| 9.419733 | 7  | 2 | 4 | 89719936 | 2854091  | 2245084  | 2.09E+08 | 4.29E+08 | 3411272  | 1127297  | 2540257  | 796657.1 |
| 14.64855 | 5  | 2 | 3 | 403035.3 | 1861310  | 466569.6 | 2766531  | 1850257  | 1630476  | 1649528  | 2629416  | 1953179  |
| 9.568567 | 17 | 5 | 5 | 831356.9 | 4712811  | 3127764  | 2939687  | 2343482  | 1731774  | 2197257  | 9546869  | 5449939  |
| 40.78383 | 11 | 3 | 5 | 482084   | 8176921  | 2164583  | 7113975  | 603010.7 | 7558709  | 12025107 | 6895905  | 7129206  |
| 9.522017 | 10 | 5 | 5 | 845602.4 | 1983951  | 357656.8 | 1598822  | 751383.4 | 2383678  | 2323471  | 1758757  | 1890907  |
| 9.960817 | 10 | 5 | 5 | 2647791  | 9859778  | 2065137  | 8499799  | 2193757  | 12460120 | 11625680 | 9120579  | 7880675  |
| 9.857983 | 3  | 3 | 0 | 511018.1 | 2214150  | 478398.3 | 2606448  | 716367.1 | 2296417  | 1471751  | 2803403  | 2312059  |
| 38.25167 | 5  | 3 | 2 | 400023.2 | 7125664  | 1616684  | 6219368  | 1171255  | 5928253  | 6949782  | 6241683  | 9936692  |
| 10.008   | 8  | 4 | 4 | 357171.8 | 981004   | 434365.9 | 722177.8 | 373629.7 | 1079993  | 342416.3 | 987287.8 | 935531.7 |
| 9.842    | 8  | 5 | 3 | 1141868  | 4021233  | 746694   | 3192371  | 1625380  | 4052638  | 4279002  | 3138035  | 3541617  |
| 9.9351   | 6  | 3 | 3 | 1639662  | 4312915  | 1190837  | 5295969  | 1800987  | 6368363  | 4056176  | 3865272  | 4003794  |
| 9.914217 | 6  | 4 | 2 | 2089069  | 3192205  | 1621215  | 5920330  | 5550043  | 2084383  | 2922978  | 4527695  | 5140316  |
| 9.43325  | 8  | 5 | 3 | 897658.8 | 3607201  | 1306356  | 2598003  | 1800598  | 4489620  | 3500135  | 1606890  | 5021126  |
| 9.872883 | 9  | 5 | 4 | 2193803  | 3266986  | 504609.6 | 5023355  | 3636180  | 3069890  | 3542889  | 3271059  | 3896405  |
| 9.976317 | 10 | 5 | 5 | 1026384  | 3558030  | 315851.2 | 3108679  | 905019.4 | 3815562  | 3845198  | 3693980  | 3225863  |

|          |    |   |   |          |          |          |          |          |          |          |          |          |
|----------|----|---|---|----------|----------|----------|----------|----------|----------|----------|----------|----------|
| 10.70315 | 10 | 5 | 5 | 363051.1 | 1609215  | 228370.3 | 1348619  | 513343.8 | 1750839  | 1708669  | 1432966  | 1307080  |
| 10.46923 | 10 | 5 | 5 | 527887.6 | 1511990  | 384373.6 | 1788519  | 476008.2 | 991492.2 | 1972362  | 1517040  | 1770362  |
| 9.94455  | 9  | 5 | 4 | 1146086  | 3239236  | 895440.9 | 2517520  | 1311431  | 4057610  | 4162613  | 3008112  | 1988705  |
| 10.94443 | 6  | 3 | 3 | 164388.9 | 279508.1 | 126663.3 | 421081.3 | 278212.6 | 422182.6 | 295868.6 | 378110.1 | 168576.7 |
| 22.1605  | 3  | 0 | 3 | 131478.6 | 799695.5 | 69961.2  | 618048.3 | 374823.5 | 871875.8 | 755497.4 | 766133.9 | 727409   |
| 41.08583 | 4  | 3 | 1 | 401312.8 | 5411021  | 2527604  | 6668130  | 911174.4 | 7316051  | 975558.8 | 5979095  | 6439770  |
| 10.97857 | 7  | 4 | 3 | 2399725  | 6063977  | 2015084  | 4523299  | 2738969  | 7945621  | 7749025  | 6186497  | 2986057  |
| 9.886433 | 10 | 5 | 5 | 6933663  | 4180455  | 619565.9 | 12531509 | 17377399 | 3780142  | 3412506  | 4107008  | 4868903  |
| 9.93625  | 8  | 4 | 2 | 2367290  | 1518260  | 452045.6 | 2032365  | 1013091  | 1463048  | 936759.1 | 1451743  | 1534841  |
| 22.51083 | 8  | 5 | 3 | 129265.3 | 378024.5 | 195350.2 | 612198.2 | 464657.7 | 191786.6 | 182724.8 | 404300.4 | 645166.3 |
| 9.976317 | 8  | 5 | 3 | 1256086  | 1642821  | 536026.2 | 2590634  | 1935437  | 2180421  | 1779723  | 2095171  | 1047576  |
| 10.9645  | 9  | 5 | 4 | 286215.7 | 957313.4 | 126337.2 | 787502.2 | 340920.1 | 1132071  | 932841.7 | 795477.3 | 906309.3 |
| 9.842    | 9  | 5 | 4 | 954875.5 | 2203753  | 317817.1 | 2943198  | 1523610  | 2448954  | 2545199  | 2201994  | 1743571  |
| 9.460217 | 5  | 4 | 1 | 14784515 | 1437283  | 542948.3 | 9165022  | 16093506 | 1454159  | 1901448  | 2015152  | 1093382  |
| 9.45945  | 12 | 5 | 5 | 7082048  | 77898166 | 21310713 | 64970016 | 19217778 | 82814799 | 71307031 | 73854711 | 51463180 |
| 9.992233 | 7  | 4 | 3 | 778032.9 | 1309310  | 617061.8 | 1924559  | 1187712  | 839289   | 1306582  | 801565   | 2330426  |
| 10.008   | 9  | 5 | 4 | 1625835  | 1968548  | 1094169  | 1331086  | 893294.4 | 753993.6 | 3671672  | 1483138  | 1669124  |
| 9.842    | 6  | 4 | 2 | 445089.6 | 1399643  | 364366.6 | 1053744  | 661085.3 | 1312614  | 1259889  | 1464517  | 987327.9 |
| 9.8374   | 9  | 5 | 4 | 1037506  | 3650141  | 1084523  | 2734845  | 1694106  | 4199619  | 4137694  | 2528262  | 2487802  |
| 9.94455  | 10 | 5 | 5 | 21875620 | 77029371 | 11547432 | 64334455 | 24932342 | 91529155 | 81759595 | 65084669 | 65276840 |
| 9.433    | 5  | 3 | 2 | 698192.4 | 4982677  | 795132.3 | 4361513  | 1117337  | 4870063  | 4063722  | 4437765  | 6028024  |
| 9.94455  | 10 | 5 | 5 | 9756349  | 33734158 | 5418553  | 30507848 | 4683609  | 41852336 | 36743611 | 30882236 | 29368144 |
| 10.56485 | 7  | 3 | 4 | 733271.5 | 2440352  | 1056558  | 4012655  | 3184494  | 3008652  | 2464290  | 3105143  | 3018010  |
| 9.992233 | 9  | 5 | 4 | 5069300  | 918205.7 | 354546.9 | 4398699  | 7253472  | 1062041  | 1371049  | 895420.2 | 394761.6 |
| 9.9014   | 10 | 5 | 5 | 6817759  | 4522799  | 2781803  | 16216519 | 24307202 | 4172484  | 1229494  | 7983750  | 6612915  |
| 10.94443 | 4  | 1 | 3 | 513222.5 | 1546585  | 424558.2 | 1282269  | 406357.7 | 1798438  | 2110177  | 1233395  | 1535991  |
| 24.1575  | 5  | 4 | 1 | 88213.59 | 310401.4 | 143349.4 | 458601   | 288424.2 | 230050.6 | 531960.8 | 337494.3 | 302914.3 |
| 9.830833 | 6  | 3 | 3 | 2114024  | 8615469  | 2790810  | 7202114  | 1246196  | 11338788 | 5445562  | 11070625 | 5931191  |
| 9.55155  | 9  | 5 | 4 | 418699.6 | 975340.5 | 155727.9 | 739743.8 | 478101.7 | 947399.4 | 1233983  | 852365.1 | 856660.5 |
| 9.8445   | 9  | 5 | 4 | 669727   | 2832591  | 654026.5 | 2230915  | 1143262  | 3038434  | 3379735  | 2037554  | 2246864  |
| 9.903567 | 11 | 5 | 4 | 5373715  | 5020407  | 1058458  | 9573563  | 9473582  | 5290613  | 4417324  | 6554474  | 5116168  |
| 10.9645  | 10 | 5 | 5 | 728974.6 | 3238393  | 549727.1 | 2793265  | 813502.9 | 3249906  | 4071075  | 2674097  | 2817636  |
| 9.896717 | 7  | 4 | 2 | 1.37E+08 | 1.99E+08 | 4.29E+08 | 4.95E+08 | 4.99E+08 | 6265353  | 9671218  | 9963420  | 9.67E+08 |
| 9.55155  | 7  | 4 | 3 | 221175.9 | 483424.6 | 106903.7 | 356120.5 | 253090.3 | 505458.5 | 636083.9 | 376095   | 385967.2 |
| 44.049   | 7  | 1 | 4 | 317510.5 | 2462247  | 150724   | 3305187  | 1756623  | 2464872  | 2312878  | 2541717  | 2669052  |

|          |    |   |   |          |          |          |          |          |          |          |          |          |
|----------|----|---|---|----------|----------|----------|----------|----------|----------|----------|----------|----------|
| 9.348233 | 5  | 3 | 2 | 382064.2 | 710710.3 | 475654.4 | 400641.3 | 499808   | 1330996  | 669569.4 | 825365.6 | 727620.2 |
| 9.857983 | 4  | 3 | 1 | 12360756 | 33563091 | 35524417 | 53865254 | 27647407 | 72682965 | 11959023 | 4826108  | 72052737 |
| 14.31255 | 10 | 5 | 5 | 2067584  | 6435097  | 2440708  | 10337246 | 7949637  | 8827114  | 6995196  | 3410497  | 4392643  |
| 14.06323 | 7  | 4 | 2 | 67413.75 | 220382.2 | 186918.2 | 342041.7 | 195920.1 | 537796.9 | 221054.6 | 123994.8 | 58861.16 |
| 9.903567 | 7  | 4 | 3 | 2478280  | 2163888  | 530905.6 | 5511783  | 6981393  | 2406319  | 2596886  | 2562362  | 1896904  |
| 9.999217 | 10 | 5 | 5 | 3155581  | 10463910 | 2281517  | 8111868  | 4582905  | 10833950 | 13008720 | 8290006  | 7947751  |
| 9.94405  | 10 | 5 | 5 | 2833168  | 3836169  | 1154252  | 5591330  | 3567512  | 2989127  | 5481719  | 4623315  | 3159813  |
| 9.920517 | 4  | 1 | 3 | 1602889  | 2623190  | 1841529  | 1652569  | 1068194  | 4486084  | 150989.6 | 3714261  | 3539088  |
| 9.3735   | 6  | 2 | 3 | 719634.6 | 4518205  | 1385526  | 3522535  | 1724072  | 2796159  | 3948362  | 6313239  | 5488775  |
| 9.328967 | 7  | 3 | 4 | 538579.1 | 3391101  | 1698540  | 2298105  | 1744711  | 3394839  | 2497606  | 1402078  | 5979818  |
| 9.952017 | 10 | 5 | 5 | 2758947  | 9288797  | 1224291  | 8501163  | 1257064  | 11220169 | 9554670  | 9180808  | 8260102  |
| 9.7565   | 3  | 0 | 3 | 1028389  | 871342.7 | 536459.9 | 1203004  | 508002.8 | 1049695  | 0        | 1444117  | 1042836  |
| 10.95835 | 5  | 2 | 3 | 263436.7 | 833024.3 | 255024.5 | 706830.3 | 90782.45 | 842781.2 | 1112887  | 492775   | 678505.3 |
| 10.9645  | 10 | 5 | 5 | 620011.5 | 3198598  | 516777.3 | 2685071  | 994632.9 | 3260157  | 3545363  | 2587644  | 2775316  |
| 10.474   | 7  | 4 | 3 | 232785.9 | 248889.9 | 55552.49 | 517471.6 | 560168   | 187831.6 | 266397   | 333782.2 | 239365.5 |
| 10.9645  | 10 | 5 | 5 | 605492.3 | 2617341  | 484812.7 | 2991389  | 671897   | 3421816  | 2402327  | 2479753  | 2140668  |
| 22.5555  | 6  | 3 | 3 | 69514.63 | 275018.4 | 139573.9 | 196980.3 | 102262.8 | 159934.2 | 320838.6 | 133540.8 | 279499   |
| 9.419733 | 10 | 5 | 4 | 2375107  | 3527599  | 777585.7 | 8202378  | 9764354  | 4218184  | 3829815  | 2310627  | 3224855  |
| 9.3735   | 6  | 2 | 4 | 1890962  | 8389623  | 6123460  | 4878172  | 4838302  | 12953939 | 1909811  | 12974786 | 12648482 |
| 9.610767 | 6  | 4 | 2 | 3976001  | 1368141  | 469758.6 | 4012882  | 5523340  | 1693364  | 1931911  | 1104668  | 743908.8 |
| 9.03715  | 5  | 3 | 2 | 315668.3 | 646187.2 | 270245.2 | 407696.7 | 449788.3 | 1022930  | 663990.5 | 729166.4 | 527793.6 |
| 9.952017 | 10 | 5 | 5 | 1013685  | 3200395  | 475024.2 | 2831174  | 666324.9 | 3910657  | 3396914  | 3134033  | 2811380  |
| 9.071517 | 10 | 5 | 5 | 6764770  | 21144545 | 6032336  | 16290837 | 8884548  | 20953630 | 30044757 | 23021356 | 17688726 |
| 19.5635  | 8  | 4 | 4 | 67468.07 | 228344   | 56380.99 | 271389.3 | 77106.47 | 245001.2 | 307201   | 201455.2 | 233665.2 |
| 30.266   | 8  | 4 | 4 | 111052.5 | 381073.3 | 196925   | 536007.3 | 281175.6 | 190505.6 | 679767   | 373642.9 | 220138.6 |
| 28.2735  | 10 | 5 | 5 | 137359.5 | 815382.6 | 227953.1 | 686061.9 | 175098.4 | 976817.6 | 1038262  | 496407.8 | 663897.4 |
| 9.445217 | 7  | 3 | 3 | 353606.4 | 1174932  | 544723.9 | 907256.6 | 179381.6 | 1426249  | 1530640  | 1723985  | 714136.9 |
| 10.9645  | 8  | 4 | 4 | 395176.7 | 1335028  | 177969.4 | 1130980  | 405181.1 | 1488871  | 1500425  | 1336510  | 1064587  |
| 15.43272 | 10 | 5 | 5 | 468167.6 | 3240567  | 777225.4 | 2582338  | 1227258  | 4323850  | 2143170  | 3310717  | 3339128  |
| 9.848417 | 6  | 4 | 2 | 2505429  | 2027174  | 667736   | 4795798  | 5779832  | 1533599  | 1617502  | 2414222  | 1547372  |
| 19.82367 | 4  | 3 | 1 | 114962.8 | 621221.1 | 248088.5 | 440034.6 | 317585.2 | 620249.9 | 608806.1 | 468405.9 | 381155.7 |
| 9.856867 | 7  | 4 | 3 | 2911563  | 4726655  | 4770684  | 7450924  | 3739236  | 2862009  | 1989135  | 2984342  | 2564809  |
| 17.14683 | 7  | 3 | 4 | 118449.8 | 496264.3 | 375190.7 | 304554.1 | 184969   | 986713.3 | 83756.4  | 251216.9 | 381879.4 |
| 10.9645  | 9  | 5 | 4 | 199808.6 | 887490.2 | 167446.3 | 727856.8 | 307458.8 | 937840.5 | 1122549  | 775096.6 | 685297.8 |
| 10.45433 | 10 | 5 | 5 | 540407.4 | 1683341  | 506794.1 | 1363639  | 503384.2 | 1812465  | 1279381  | 1178289  | 2452965  |

|          |    |   |   |          |          |          |          |          |          |          |          |          |
|----------|----|---|---|----------|----------|----------|----------|----------|----------|----------|----------|----------|
| 9.840617 | 6  | 3 | 3 | 646458.8 | 2139875  | 924941.1 | 1637342  | 618485   | 1701532  | 1269180  | 3347972  | 2899998  |
| 9.845483 | 10 | 5 | 5 | 16032590 | 21315339 | 2781988  | 37231774 | 33314570 | 24668887 | 20684829 | 20852726 | 23061342 |
| 23.79867 | 10 | 5 | 5 | 3852619  | 35014171 | 2799650  | 31578602 | 6886795  | 35985398 | 37753771 | 34379005 | 30495553 |
| 10.14212 | 9  | 4 | 5 | 3514319  | 5432385  | 3112777  | 7499734  | 3411339  | 8471731  | 7069904  | 6275624  | 5005953  |
| 9.928667 | 10 | 5 | 5 | 2001957  | 4072193  | 391903.6 | 3682936  | 756613.3 | 4606652  | 3993587  | 4224435  | 4007376  |
| 9.416767 | 5  | 0 | 4 | 35688480 | 1005036  | 462404   | 81104106 | 1.68E+08 | 1426135  | 1184614  | 1199914  | 225639.6 |
| 15.9794  | 7  | 3 | 4 | 212980.9 | 1986939  | 781881.9 | 1505782  | 738305.2 | 2117466  | 1764617  | 2530478  | 765723.3 |
| 10.008   | 8  | 5 | 3 | 2022378  | 764226.6 | 274917.3 | 1798182  | 2160256  | 1012904  | 1047141  | 775999.3 | 412933   |
| 9.8887   | 10 | 5 | 5 | 4222088  | 13715534 | 4671606  | 17086970 | 5884600  | 14699702 | 7744098  | 17027544 | 18929024 |
| 9.859983 | 9  | 5 | 4 | 3270546  | 3284924  | 1221582  | 6181661  | 6016390  | 4235746  | 1413930  | 3949975  | 4150565  |
| 10.95055 | 9  | 4 | 5 | 291415.1 | 1424005  | 333242.4 | 1143484  | 523352.7 | 1877259  | 1485985  | 1065631  | 1128566  |
| 9.960467 | 10 | 5 | 5 | 2444798  | 9669224  | 1315796  | 8646378  | 1852587  | 11450015 | 10291034 | 9845700  | 8307414  |
| 9.45945  | 14 | 5 | 5 | 23378860 | 1.47E+08 | 53878296 | 1.07E+08 | 71554594 | 1.71E+08 | 1.13E+08 | 1.26E+08 | 2.29E+08 |
| 39.01417 | 7  | 2 | 4 | 353308.1 | 5047417  | 2549264  | 3829326  | 282660.5 | 3724196  | 3822861  | 3832952  | 9592406  |
| 29.05717 | 10 | 5 | 5 | 3431641  | 28084914 | 6916056  | 23664739 | 7067471  | 31756834 | 33558680 | 21391147 | 19785422 |
| 10.95835 | 10 | 5 | 5 | 719932.9 | 4781587  | 808582.4 | 4112810  | 1240884  | 5031562  | 5786279  | 3851495  | 4060022  |
| 9.40615  | 6  | 3 | 3 | 322958.2 | 1764620  | 1093031  | 1179189  | 695278.9 | 2287772  | 3177815  | 577346.3 | 2029570  |
| 10.9645  | 9  | 5 | 4 | 456379.5 | 2021218  | 405252.7 | 1570701  | 893475.3 | 2355628  | 1986443  | 1422617  | 1905309  |
| 31.238   | 8  | 5 | 3 | 132883.2 | 636781.3 | 293934.2 | 483698.9 | 164350.4 | 981409.5 | 562757.9 | 262836.3 | 493301.8 |
| 9.952017 | 10 | 5 | 5 | 1832146  | 6283130  | 1197319  | 5610844  | 899022.4 | 8104888  | 6839323  | 5868609  | 5243153  |
| 9.4925   | 5  | 3 | 2 | 471094.7 | 1299783  | 358372.1 | 1059532  | 400291.9 | 1904915  | 1302432  | 1198626  | 1113425  |
| 10.9645  | 10 | 5 | 5 | 4191385  | 19919723 | 3464520  | 17255341 | 4807641  | 22692412 | 23441117 | 16177151 | 16335111 |
| 9.464933 | 10 | 5 | 4 | 7257609  | 19185534 | 10604767 | 42117844 | 47558534 | 28994193 | 22769486 | 28394435 | 8419497  |
| 10.63152 | 3  | 3 | 0 | 192382.5 | 528873.7 | 398948.2 | 724909   | 137128.7 | 205829.7 | 946363.4 | 979783.8 | 310773.1 |
| 10.00998 | 6  | 4 | 2 | 1961832  | 973746.6 | 935076.5 | 1962621  | 1946775  | 2621549  | 645159.1 | 771297.5 | 345789.3 |
| 9.928667 | 10 | 5 | 5 | 1942326  | 3843781  | 568020.1 | 3486134  | 564106.1 | 4647197  | 3850459  | 3989049  | 3655585  |
| 10.008   | 9  | 5 | 4 | 262606.9 | 762205.1 | 193375.1 | 643561.2 | 181941.5 | 681878.5 | 773136.1 | 1065787  | 753324.3 |
| 10.00998 | 10 | 5 | 5 | 1146827  | 2980628  | 946894.1 | 4178565  | 2413663  | 4099012  | 3183100  | 3539654  | 1712685  |
| 9.08685  | 10 | 5 | 5 | 54922184 | 2.11E+08 | 35756541 | 1.76E+08 | 67932540 | 2.01E+08 | 2.72E+08 | 2.08E+08 | 1.8E+08  |
| 10.94853 | 4  | 1 | 3 | 49008784 | 1.46E+08 | 98245171 | 75353079 | 1.25E+08 | 1.46E+08 | 438772.1 | 1.42E+08 | 1.67E+08 |
| 39.93483 | 4  | 3 | 1 | 326623.3 | 3469628  | 1793654  | 4390776  | 930227.9 | 937503.5 | 4085304  | 5663805  | 4113415  |
| 9.920517 | 10 | 5 | 5 | 66436300 | 2.44E+08 | 55188304 | 2.04E+08 | 68939074 | 3.01E+08 | 2.45E+08 | 1.75E+08 | 2.03E+08 |
| 9.93625  | 10 | 4 | 5 | 2671329  | 9415488  | 2641160  | 7131945  | 4305254  | 13875516 | 9084697  | 7437481  | 7424662  |
| 10.05535 | 7  | 4 | 3 | 254164.5 | 529169.3 | 58443.07 | 588056.5 | 115106.7 | 485305.1 | 454141.9 | 553881.9 | 599320   |
| 9.949233 | 9  | 5 | 4 | 3075978  | 8586314  | 1920824  | 6914212  | 3159773  | 10709956 | 9127439  | 6512716  | 6635278  |

|          |    |   |   |          |          |          |          |          |          |          |          |          |
|----------|----|---|---|----------|----------|----------|----------|----------|----------|----------|----------|----------|
| 9.999217 | 7  | 3 | 4 | 701584.5 | 1058304  | 330258.1 | 880581.2 | 215322.4 | 953986.7 | 1069519  | 726569.9 | 1606120  |
| 9.859983 | 6  | 4 | 2 | 555725.1 | 2447368  | 562988.6 | 1774990  | 1348260  | 1861289  | 2339641  | 2588470  | 2115411  |
| 10.008   | 6  | 3 | 3 | 792100.1 | 721967.6 | 353361.6 | 1209130  | 990448.4 | 947663.5 | 1049363  | 904053.2 | 492099.5 |
| 9.8445   | 10 | 5 | 5 | 7321042  | 10456845 | 1718903  | 17547810 | 14869205 | 11125062 | 9935301  | 12521600 | 10832949 |
| 10.78937 | 7  | 3 | 4 | 156788.8 | 396570.8 | 206459.1 | 289821.1 | 112091.2 | 125242.3 | 706707.6 | 392313.5 | 372875.9 |
| 6.751067 | 6  | 3 | 3 | 975193.4 | 37839580 | 16151665 | 29076140 | 10883114 | 35465681 | 40368182 | 13385967 | 58304028 |
| 9.91875  | 8  | 4 | 4 | 1999459  | 4334185  | 626361.1 | 3340494  | 2039693  | 5229312  | 4620756  | 3601914  | 3953388  |
| 9.220933 | 6  | 4 | 2 | 1679446  | 6028695  | 5427290  | 10950083 | 9410795  | 3662873  | 1216240  | 6143510  | 3898904  |
| 9.94455  | 10 | 5 | 5 | 5837420  | 20612793 | 2422902  | 17205676 | 6940923  | 22991369 | 20501776 | 17987658 | 18461709 |
| 21.76517 | 9  | 5 | 4 | 210904.9 | 550823.6 | 241268   | 835328.7 | 569970.1 | 712250.3 | 203683.5 | 766096.1 | 676573.4 |
| 9.853633 | 9  | 5 | 4 | 1954024  | 5135874  | 1005683  | 7399100  | 4709681  | 5305393  | 4563292  | 3748676  | 5746254  |
| 9.845483 | 10 | 5 | 5 | 5423805  | 31151370 | 6524550  | 25046846 | 11767107 | 27952141 | 25575123 | 26980587 | 33899504 |
| 10.95602 | 5  | 4 | 1 | 146833.3 | 399755.1 | 146412.4 | 315179.1 | 119987.9 | 543255.5 | 553576.7 | 336227.2 | 354017.6 |
| 10.008   | 9  | 5 | 4 | 691106   | 826086.3 | 116660.1 | 1240353  | 868476.3 | 936178.2 | 887152.3 | 899131.5 | 662536.8 |
| 9.970617 | 9  | 3 | 4 | 1023419  | 1231483  | 586256.7 | 937625.3 | 258901.7 | 1158413  | 814910   | 1914518  | 1730889  |
| 28.62017 | 10 | 5 | 5 | 633439.6 | 2888409  | 364526.5 | 3484575  | 1226867  | 2954148  | 3158738  | 2673729  | 2380130  |
| 17.23433 | 3  | 3 | 0 | 506465.3 | 3220521  | 1333557  | 2353999  | 1414872  | 2148592  | 4862169  | 2920938  | 1831814  |
| 30.296   | 10 | 5 | 5 | 349616.6 | 1460609  | 298602.4 | 1860730  | 812727.7 | 1662393  | 1869688  | 1382264  | 1212599  |
| 9.983433 | 10 | 5 | 5 | 858101   | 3715724  | 332816.3 | 3399201  | 613006.9 | 4282195  | 3691277  | 3653147  | 3512931  |
| 10.96997 | 6  | 3 | 3 | 163575.9 | 501501.1 | 194367   | 357490.5 | 256530.7 | 222141.3 | 410729.8 | 530218.2 | 618699.3 |
| 10.48497 | 10 | 5 | 5 | 2462704  | 2562897  | 534416.4 | 4610348  | 4297974  | 3490375  | 2554714  | 2243262  | 2271936  |
| 9.536783 | 9  | 5 | 4 | 697215.4 | 2014825  | 730191.4 | 1516880  | 844780.1 | 2286091  | 2874141  | 2204839  | 1808739  |
| 9.887133 | 10 | 5 | 5 | 12848772 | 8743181  | 1992181  | 26216544 | 36800298 | 9609019  | 8482357  | 11119019 | 8829161  |
| 10.96278 | 6  | 4 | 2 | 233663.2 | 753137.2 | 200626.6 | 582342   | 321653.3 | 524736.1 | 1048188  | 737276.4 | 627142.9 |
| 9.55155  | 8  | 5 | 3 | 288109.3 | 612210.3 | 183305.4 | 423648.5 | 371214.8 | 581141.5 | 935736.8 | 522260.9 | 501653.9 |
| 9.992233 | 9  | 5 | 4 | 1162857  | 3729645  | 443724.9 | 3230415  | 996468.1 | 3871528  | 3207207  | 3704564  | 3478811  |
| 10.03947 | 10 | 5 | 5 | 345467.3 | 975517.5 | 96635.84 | 837432.5 | 282301.8 | 939081   | 984441.7 | 857370.1 | 1123778  |
| 9.975217 | 3  | 0 | 3 | 1439398  | 621583.6 | 1037086  | 2630064  | 4169972  | 229772.3 | 2467803  | 264247.8 | 0        |
| 10.9645  | 10 | 5 | 5 | 430350.6 | 2129466  | 879456.4 | 1653787  | 591155   | 2395373  | 1322104  | 1335914  | 2144903  |
| 9.840617 | 11 | 5 | 5 | 3043161  | 10267391 | 1487608  | 8969100  | 2464864  | 11163790 | 12349094 | 9809533  | 9413128  |
| 9.856867 | 5  | 3 | 2 | 1040595  | 858359.5 | 688893.8 | 1911960  | 2164555  | 1287671  | 279231.3 | 1620914  | 1103981  |
| 10.07098 | 9  | 4 | 5 | 1538457  | 1394041  | 380947.9 | 2978551  | 3333017  | 1054377  | 1604817  | 1424687  | 1898640  |
| 9.392767 | 10 | 5 | 5 | 4397467  | 33219216 | 7519967  | 27986018 | 9019715  | 45848679 | 29727893 | 25963759 | 32493523 |
| 9.886083 | 10 | 5 | 5 | 4960784  | 11884837 | 2976277  | 17822674 | 12347353 | 12710601 | 7429107  | 11830588 | 15740379 |
| 9.93625  | 10 | 5 | 5 | 14402875 | 55605191 | 12417715 | 46542640 | 16058265 | 68560471 | 58787366 | 40684256 | 44617655 |



|          |    |   |   |          |          |          |          |          |          |          |          |          |
|----------|----|---|---|----------|----------|----------|----------|----------|----------|----------|----------|----------|
| 9.379233 | 9  | 5 | 4 | 764740.1 | 2258145  | 399793.2 | 1831725  | 845487.4 | 2852073  | 1893616  | 2237522  | 1897351  |
| 9.840617 | 8  | 4 | 4 | 475780.2 | 1284382  | 394460.5 | 1566110  | 493519.1 | 1520276  | 1679231  | 1147621  | 1404904  |
| 10.99268 | 8  | 5 | 2 | 155423.5 | 440002.5 | 133528.5 | 360899.1 | 117332.7 | 461748.7 | 324217.8 | 317006.9 | 451667.6 |
| 18.92217 | 10 | 5 | 5 | 3976003  | 35622221 | 10099320 | 29136877 | 10525086 | 33356789 | 44329223 | 31669154 | 21961893 |
| 9.999217 | 10 | 5 | 5 | 1492003  | 5071553  | 842922.5 | 4194546  | 1732557  | 5505197  | 6102602  | 4597747  | 3914466  |
| 25.289   | 4  | 3 | 1 | 130597.5 | 674136.7 | 412124.6 | 881052.7 | 188999.5 | 619169.6 | 1259165  | 594518.4 | 112523.5 |
| 9.388367 | 7  | 3 | 4 | 1624454  | 6914540  | 5931494  | 3716666  | 3961391  | 2190967  | 4297745  | 14789247 | 11618133 |
| 10.97242 | 6  | 2 | 4 | 311888   | 2214401  | 170742.2 | 2094126  | 209255.2 | 2336783  | 2304056  | 2016318  | 2042709  |
| 21.051   | 10 | 5 | 5 | 272826.1 | 1415688  | 269239   | 1205497  | 384979.5 | 1760478  | 1623600  | 1275954  | 1101840  |
| 9.8445   | 7  | 3 | 4 | 720043.3 | 2076918  | 710116.1 | 1552759  | 935964.1 | 2870354  | 2100120  | 1234700  | 1507762  |
| 10.15645 | 6  | 4 | 2 | 437522.8 | 789798.1 | 416091.5 | 1061122  | 447052.4 | 1160978  | 569742.9 | 1051876  | 1002886  |
| 9.856867 | 6  | 3 | 3 | 1829897  | 2189689  | 1224459  | 4308248  | 4388550  | 3676556  | 1428094  | 3333603  | 1529810  |
| 10.16453 | 11 | 5 | 5 | 54416468 | 1.02E+08 | 15771503 | 1.75E+08 | 1.55E+08 | 1.07E+08 | 96818996 | 1.21E+08 | 1.06E+08 |
| 9.284283 | 6  | 3 | 3 | 603108.7 | 1470495  | 584549.5 | 1069697  | 686027.3 | 2348137  | 1795936  | 998900.2 | 1123248  |
| 9.064833 | 9  | 4 | 5 | 723962.4 | 2219358  | 784640.9 | 1819968  | 399278.3 | 2374668  | 3444523  | 1667672  | 1424377  |
| 10.8937  | 5  | 2 | 3 | 248117.3 | 465852.3 | 291447.3 | 307212   | 202057.4 | 177010.1 | 845980   | 315478.8 | 704539.2 |
| 25.40533 | 5  | 1 | 4 | 102016.7 | 395647.8 | 73590.45 | 299176   | 196386.6 | 357685.8 | 519578.3 | 382297.7 | 327343.3 |
| 10.9645  | 7  | 4 | 3 | 212760.4 | 728392.1 | 197719.2 | 582052.4 | 261884.9 | 835595.7 | 728379.7 | 690593.6 | 428137.3 |
| 10.00998 | 10 | 5 | 5 | 865641.5 | 1036308  | 383894.2 | 1454602  | 833962.7 | 1187431  | 1440123  | 1288032  | 719223.1 |
| 10.60298 | 9  | 5 | 4 | 252706.6 | 713475.6 | 196743.2 | 549152.6 | 308921.6 | 610351.1 | 667324.8 | 601253.4 | 625955.4 |
| 9.859983 | 9  | 4 | 5 | 2798655  | 12589051 | 2499754  | 9633150  | 5957959  | 12250846 | 10556627 | 10387554 | 13224176 |
| 25.11783 | 4  | 4 | 0 | 3614202  | 8367086  | 16355901 | 637956.6 | 32656.25 | 1799489  | 676804.7 | 37608798 | 399333.5 |
| 11.01378 | 10 | 5 | 5 | 252505.3 | 1480452  | 520574.5 | 1133181  | 583795.7 | 1882456  | 1715628  | 743664.3 | 1130720  |
| 40.971   | 6  | 3 | 2 | 231720   | 2626479  | 420082.1 | 2852701  | 281106.2 | 2196374  | 3265785  | 2614716  | 2742871  |
| 21.30933 | 10 | 5 | 5 | 224950.4 | 1226853  | 376725.9 | 1031178  | 216135.2 | 853511.7 | 1832880  | 1291930  | 999009.1 |
| 9.379233 | 7  | 4 | 3 | 762928.9 | 1941251  | 1344859  | 1189332  | 1020140  | 2395827  | 155061.6 | 1075676  | 2459141  |
| 38.74083 | 7  | 3 | 4 | 273571.9 | 1602408  | 899027.9 | 1094300  | 703954.7 | 2644254  | 245407.3 | 2113864  | 1616631  |
| 39.02867 | 8  | 2 | 4 | 321946.2 | 5570337  | 2621494  | 4167996  | 1712705  | 4875573  | 4475953  | 4656309  | 3656994  |
| 9.1476   | 5  | 3 | 2 | 371073.7 | 797160.2 | 243867   | 1212162  | 860536.8 | 511210.6 | 1134140  | 821549.2 | 899313.9 |
| 10.9645  | 9  | 4 | 5 | 3134390  | 5440902  | 6991473  | 2137070  | 362390   | 2445355  | 2796328  | 2086706  | 1942556  |
| 9.848417 | 9  | 5 | 4 | 7262677  | 4479138  | 1168113  | 14192077 | 20552704 | 2828019  | 4652430  | 4065639  | 4815622  |
| 9.3494   | 3  | 3 | 0 | 1196269  | 3992277  | 1486636  | 6428412  | 5043205  | 3111627  | 4899877  | 5991858  | 2207865  |
| 9.310917 | 3  | 3 | 0 | 1454595  | 5649949  | 6001862  | 9000952  | 4540803  | 13571495 | 1242137  | 890507.5 | 1886375  |
| 9.915583 | 10 | 5 | 5 | 8011537  | 18831317 | 7095572  | 29660485 | 22335781 | 10311720 | 20689751 | 25985895 | 24669080 |
| 10.95055 | 10 | 5 | 5 | 490666.7 | 3004426  | 838835.9 | 2502657  | 759629.4 | 3808201  | 3501510  | 2041346  | 2151115  |

|          |    |   |   |          |          |          |          |          |          |          |          |          |
|----------|----|---|---|----------|----------|----------|----------|----------|----------|----------|----------|----------|
| 9.960467 | 10 | 5 | 5 | 1977496  | 7779030  | 978008.2 | 6872412  | 1757552  | 9160458  | 8163995  | 7862760  | 6694327  |
| 10.008   | 6  | 3 | 3 | 2848564  | 936825.4 | 522534.8 | 2615038  | 3537533  | 1233403  | 378667   | 697169   | 1692229  |
| 9.37735  | 9  | 4 | 4 | 659971.6 | 3679440  | 1667520  | 2543701  | 1943203  | 2588922  | 1461947  | 3870337  | 4991683  |
| 9.874317 | 5  | 2 | 3 | 1098316  | 2523445  | 1248984  | 1694168  | 1393277  | 2594759  | 748925.3 | 2147052  | 4188466  |
| 9.527817 | 8  | 4 | 3 | 1639306  | 12766463 | 11085906 | 7207863  | 5177324  | 5071686  | 7628175  | 9945866  | 32330059 |
| 9.473717 | 6  | 4 | 2 | 410998.1 | 1536923  | 522876.3 | 1079184  | 875162   | 1742548  | 2123444  | 1847016  | 942859.3 |
| 9.983433 | 9  | 4 | 5 | 1544513  | 1368897  | 1136820  | 822582.1 | 306831.2 | 1010420  | 956465.1 | 3373535  | 538470.6 |
| 10.9742  | 11 | 5 | 5 | 2245766  | 13091129 | 3144860  | 11213992 | 2840266  | 14268848 | 15737718 | 11640503 | 8281608  |
| 9.848417 | 9  | 5 | 4 | 2531403  | 8773890  | 2165965  | 11583103 | 5731860  | 7686728  | 6763503  | 8500245  | 8486585  |
| 9.992233 | 9  | 5 | 4 | 726271.4 | 1839183  | 430721.9 | 1538488  | 523337   | 2577195  | 1627003  | 1861043  | 1596509  |
| 9.960467 | 10 | 5 | 5 | 1743969  | 5911992  | 598512.7 | 5357036  | 1077261  | 6846283  | 5799008  | 6101148  | 5428069  |
| 9.94455  | 5  | 3 | 2 | 842750.1 | 1395551  | 548910.7 | 1007750  | 679920.4 | 1994074  | 1919378  | 1331424  | 801029.3 |
| 9.992233 | 11 | 5 | 5 | 1037620  | 1408858  | 332985   | 2282111  | 1837876  | 1751729  | 1598880  | 1585728  | 996179.6 |
| 10.57323 | 10 | 5 | 5 | 1063436  | 5165436  | 957938.6 | 4368730  | 1501406  | 5803000  | 5818132  | 4279091  | 3970779  |
| 10.00098 | 10 | 5 | 5 | 847064.5 | 1060097  | 295969.9 | 1518628  | 948289.3 | 1114674  | 1378214  | 1266252  | 905176.8 |
| 21.60133 | 4  | 3 | 1 | 56519.71 | 168340.1 | 40188.94 | 138878.2 | 52729.83 | 151073.8 | 200565.7 | 168046   | 110925.7 |
| 9.952017 | 5  | 1 | 4 | 3343855  | 2709617  | 1982863  | 1680501  | 1146331  | 6180412  | 1678252  | 2015892  | 2389867  |
| 9.840617 | 3  | 0 | 3 | 1351563  | 681347.6 | 316284.4 | 2350193  | 3534836  | 887541.8 | 669891.8 | 1052138  | 225235.6 |
| 28.04017 | 8  | 4 | 4 | 165628.1 | 622423.2 | 312608.9 | 862411.4 | 438945.2 | 1004488  | 563009.3 | 143746.2 | 693716.2 |
| 9.872933 | 10 | 5 | 5 | 43800892 | 91778887 | 13636690 | 1.51E+08 | 1.25E+08 | 96443452 | 87451628 | 1.08E+08 | 96038151 |
| 9.388367 | 8  | 5 | 2 | 2386275  | 5866302  | 1525180  | 10368169 | 9496135  | 7585904  | 6299328  | 6840090  | 4705983  |
| 9.856867 | 7  | 4 | 3 | 1246442  | 1234122  | 629288.3 | 2465588  | 2574763  | 2024915  | 524143.8 | 658008.7 | 1485317  |
| 9.856867 | 9  | 5 | 4 | 15397191 | 3061208  | 728575.1 | 19025854 | 33895580 | 4223633  | 3288401  | 2707431  | 2714743  |
| 44.95483 | 5  | 4 | 0 | 269650.3 | 5063084  | 583706.5 | 4781135  | 180769.2 | 5966060  | 4589739  | 5081629  | 4505337  |
| 9.445217 | 14 | 5 | 5 | 42102660 | 3.75E+08 | 72620750 | 3.24E+08 | 89119951 | 3.11E+08 | 4.39E+08 | 4.58E+08 | 2.98E+08 |
| 8.87445  | 7  | 3 | 4 | 506971.3 | 1486686  | 384569.9 | 1263806  | 324654.8 | 1369663  | 1514569  | 2114800  | 1080578  |
| 9.67     | 4  | 1 | 3 | 266394.8 | 229523.1 | 107442.1 | 449414.1 | 460853.3 | 206214.2 | 414998   | 215426.3 | 149570.2 |
| 27.72483 | 5  | 2 | 3 | 38410632 | 1616498  | 1265580  | 1.03E+08 | 2.17E+08 | 2645066  | 2355503  | 90840.18 | 389691.7 |
| 9.888767 | 10 | 5 | 5 | 2842224  | 13726099 | 1859478  | 11918972 | 3552019  | 15187294 | 15125095 | 11150822 | 12345557 |
| 12.54345 | 9  | 4 | 5 | 99687.28 | 378969   | 129575.2 | 296979.7 | 132891.7 | 537840.7 | 316454.7 | 288868.8 | 253625.3 |
| 10.95055 | 10 | 5 | 5 | 1677496  | 10364635 | 2767257  | 8784144  | 2254997  | 12981327 | 12292422 | 7375110  | 7359918  |
| 9.729367 | 14 | 5 | 4 | 1275052  | 7504459  | 2565430  | 5834125  | 2778830  | 10013514 | 9614663  | 8174105  | 5615885  |
| 9.498117 | 10 | 4 | 5 | 923152.2 | 6437251  | 2606425  | 4773179  | 2722309  | 9399451  | 7605556  | 7513273  | 2756382  |
| 31.3095  | 7  | 3 | 4 | 515228.2 | 1512385  | 1136650  | 2572209  | 2067184  | 1422015  | 387689.7 | 1461188  | 3388589  |
| 9.94455  | 10 | 5 | 5 | 7283980  | 30329501 | 5216130  | 25692032 | 8941694  | 36245536 | 33133283 | 25176015 | 24481019 |

|          |    |   |   |          |          |          |          |          |          |          |          |          |
|----------|----|---|---|----------|----------|----------|----------|----------|----------|----------|----------|----------|
| 9.514333 | 10 | 5 | 4 | 836646.7 | 2647587  | 959492.9 | 1932606  | 1294893  | 2544940  | 3530373  | 3374518  | 2677826  |
| 9.93625  | 10 | 5 | 5 | 3027992  | 12754190 | 2478714  | 10691622 | 3901032  | 15451863 | 13966153 | 10236661 | 9993812  |
| 9.933967 | 14 | 5 | 4 | 1508341  | 3055750  | 1392756  | 4017449  | 1670397  | 3722862  | 4669522  | 1874792  | 1341699  |
| 10.9645  | 10 | 5 | 5 | 4613265  | 20891775 | 3400372  | 18276387 | 4805000  | 25312099 | 20806455 | 17771294 | 17435949 |
| 16.25792 | 5  | 3 | 2 | 438005.5 | 651892.4 | 684688.7 | 1315468  | 1305388  | 126119.2 | 179442   | 1505279  | 1288577  |
| 43.54567 | 6  | 3 | 3 | 401464.5 | 5718954  | 1327116  | 7898832  | 4536656  | 6059988  | 6132858  | 5430144  | 3674085  |
| 9.872883 | 3  | 0 | 3 | 1404554  | 4095663  | 376965.5 | 2815611  | 2711992  | 4097427  | 4039491  | 4697926  | 3983690  |
| 9.8322   | 4  | 3 | 1 | 726018.2 | 1292022  | 691055.4 | 874215.9 | 647362   | 2213813  | 1738272  | 1048843  | 1020796  |
| 11.75717 | 7  | 3 | 4 | 257485.7 | 2391058  | 465736.1 | 2140980  | 314897.9 | 2317400  | 2632199  | 1670539  | 2410677  |
| 18.60233 | 5  | 3 | 2 | 165242.2 | 680212.1 | 199925.2 | 548800   | 220696.2 | 628647   | 838743.8 | 861969.6 | 366479.9 |
| 10.47023 | 9  | 5 | 4 | 184340.9 | 658781.1 | 121788.6 | 747192.3 | 158239.7 | 800041.6 | 747522.6 | 512295   | 674271.2 |
| 9.904767 | 4  | 1 | 3 | 2861950  | 1854914  | 954784.3 | 7915063  | 12890308 | 1783145  | 963420.2 | 3411165  | 1911128  |
| 9.388367 | 5  | 2 | 3 | 3218292  | 27092243 | 9344723  | 20317595 | 12120160 | 35000292 | 14943888 | 34418228 | 19195473 |
| 9.856867 | 10 | 5 | 5 | 6115747  | 3444351  | 544320.2 | 11186908 | 16487823 | 4183202  | 3572751  | 3205126  | 3559473  |
| 9.445217 | 12 | 5 | 5 | 2004699  | 18840331 | 5900473  | 15339435 | 5305789  | 20447637 | 16478713 | 17333144 | 12025235 |
| 9.992233 | 7  | 4 | 3 | 760226.8 | 774421.3 | 233860.6 | 953765.9 | 329519.4 | 738437.7 | 1119359  | 631661.4 | 870623.1 |
| 9.8322   | 9  | 5 | 4 | 1540832  | 6177005  | 961704.1 | 4861723  | 2708152  | 5635275  | 5745666  | 5367549  | 6369676  |
| 42.51017 | 9  | 4 | 3 | 283583.8 | 4356768  | 2368489  | 3141720  | 1315024  | 4144457  | 8464564  | 3300225  | 2504966  |
| 9.392767 | 6  | 4 | 2 | 584647.1 | 1015109  | 685305.3 | 615100.5 | 593226.5 | 1297142  | 1247024  | 0        | 722909.8 |
| 9.992233 | 6  | 4 | 2 | 409535.6 | 847934.5 | 189959.7 | 640319.3 | 417444.9 | 985774.5 | 1094695  | 638878   | 708511.2 |
| 43.60317 | 10 | 2 | 3 | 542094.4 | 6117679  | 1299713  | 5180314  | 1673501  | 6628771  | 7288499  | 6193968  | 6575280  |
| 9.9677   | 10 | 5 | 5 | 1349770  | 5892062  | 1212059  | 4778844  | 2167801  | 5105814  | 4567927  | 5720665  | 6372579  |
| 9.94455  | 10 | 5 | 5 | 7321777  | 30390378 | 5042317  | 25760642 | 9014983  | 36301096 | 32874941 | 25508642 | 24722958 |
| 9.972483 | 9  | 5 | 4 | 3913663  | 1896109  | 972483.8 | 5157080  | 6917403  | 2629303  | 3123858  | 1707233  | 752999.4 |
| 12.1213  | 10 | 5 | 5 | 116303.2 | 477376.8 | 38693.68 | 579862.7 | 216741.1 | 534010.6 | 479032   | 426897   | 483471.4 |
| 9.848417 | 8  | 5 | 3 | 2289640  | 11207252 | 2879419  | 9671240  | 1908236  | 12376169 | 10231217 | 7200709  | 15053259 |
| 10.94443 | 10 | 5 | 5 | 312546.8 | 1717292  | 497064.5 | 1430105  | 420299.2 | 2281953  | 2047909  | 1172507  | 1224295  |
| 26.30333 | 3  | 0 | 3 | 4053979  | 3547800  | 268557.6 | 11837606 | 17682822 | 3257302  | 3519143  | 3514912  | 3459024  |
| 10.02372 | 9  | 5 | 4 | 657323.4 | 490963.1 | 220796.7 | 695553.1 | 399771.7 | 305724   | 492503.1 | 607683.3 | 793545.6 |
| 9.431017 | 8  | 5 | 3 | 524444.6 | 2871190  | 1237512  | 1981723  | 1588285  | 2043129  | 4790238  | 3449445  | 2158523  |
| 14.86828 | 6  | 3 | 2 | 260127.6 | 3244153  | 821688.6 | 2660352  | 1035903  | 4571422  | 2420499  | 3092982  | 3364307  |
| 9.979667 | 9  | 5 | 4 | 387939.3 | 1081134  | 196742.7 | 878615.1 | 404160.1 | 1388272  | 1119476  | 1024662  | 852738.9 |
| 9.522017 | 7  | 4 | 3 | 694631.1 | 1648227  | 908573.6 | 1099568  | 853337.5 | 2116804  | 378419.2 | 1146948  | 1869073  |
| 27.22717 | 8  | 5 | 3 | 1757252  | 12811732 | 3681173  | 10576470 | 3500003  | 16016554 | 16598459 | 7897752  | 13055253 |
| 10.08665 | 4  | 3 | 1 | 579687.4 | 1059844  | 311749.5 | 802618.7 | 487161.6 | 1192640  | 921548.5 | 1364241  | 582779.9 |

|          |    |   |   |          |          |          |          |          |          |          |          |          |
|----------|----|---|---|----------|----------|----------|----------|----------|----------|----------|----------|----------|
| 9.9351   | 8  | 5 | 3 | 616075.4 | 1454368  | 369916.1 | 1118513  | 653600.9 | 1769076  | 1868591  | 973410.9 | 1244752  |
| 9.859983 | 10 | 5 | 5 | 17301896 | 61971607 | 4239951  | 78317357 | 34771821 | 60763348 | 63056677 | 68559830 | 60315237 |
| 22.0635  | 9  | 4 | 5 | 629871.6 | 1363439  | 2417729  | 230746.1 | 91751.7  | 168835.9 | 5681663  | 308470.5 | 163435.8 |
| 10.95055 | 10 | 5 | 5 | 526859.8 | 3071587  | 896274.6 | 2552296  | 765583   | 3945342  | 3570309  | 2085007  | 2119277  |
| 9.992233 | 9  | 5 | 4 | 2227901  | 2353738  | 829431.9 | 3520823  | 2414135  | 3049359  | 3261024  | 2380374  | 1297765  |
| 10.95055 | 6  | 2 | 4 | 389699.7 | 1770634  | 851616.2 | 1294848  | 660363.6 | 1773581  | 2693538  | 540719.9 | 1427526  |
| 9.554967 | 8  | 5 | 3 | 320371.2 | 665151.8 | 202854   | 441374.1 | 451655.5 | 632220.5 | 1021485  | 524567.7 | 567982.2 |
| 10.03947 | 8  | 5 | 3 | 669584.4 | 679542   | 120572.3 | 1067168  | 823535.2 | 555777.8 | 600805.9 | 819418.4 | 797766.1 |
| 9.352117 | 5  | 3 | 2 | 1223339  | 3254981  | 2036950  | 2104541  | 1629642  | 2547688  | 6075447  | 1493715  | 4656586  |
| 22.75567 | 10 | 5 | 5 | 200610.3 | 1240448  | 441086.5 | 1022176  | 196702.5 | 1098947  | 1786554  | 1507789  | 1189734  |
| 9.859983 | 9  | 5 | 4 | 2960335  | 2370405  | 684631.6 | 5119347  | 5853715  | 2340893  | 1721926  | 3158073  | 2958624  |
| 11.03413 | 5  | 2 | 3 | 14778409 | 36858300 | 28390436 | 21110190 | 21589778 | 8884331  | 3331808  | 63499362 | 54001837 |
| 10.51828 | 5  | 2 | 3 | 85367.8  | 221293.8 | 93754.66 | 167515.2 | 78215.62 | 203822.7 | 244868.3 | 185057.5 | 108822.5 |
| 18.02733 | 9  | 5 | 4 | 2570139  | 7867378  | 1321270  | 13204477 | 11367678 | 9644637  | 8457880  | 6683049  | 6447175  |
| 9.3919   | 5  | 2 | 3 | 607586.6 | 1372891  | 1048517  | 861882.5 | 404858.5 | 3200449  | 557508.1 | 1125272  | 850707.2 |
| 17.12683 | 3  | 3 | 0 | 518072.7 | 2839722  | 1118547  | 2120379  | 1194688  | 2098667  | 4057120  | 2493703  | 1581843  |
| 40.87733 | 7  | 5 | 2 | 7067299  | 18328109 | 37806158 | 642430.6 | 374882.8 | 85954437 | 1472731  | 1829844  | 1577294  |
| 9.55155  | 10 | 5 | 5 | 596490.6 | 1607431  | 298175.5 | 1362207  | 464894.9 | 1427344  | 2109900  | 1385905  | 1465985  |
| 9.842    | 9  | 5 | 4 | 1932476  | 9781344  | 2822352  | 7794304  | 3518497  | 10066204 | 8056375  | 6023022  | 11615982 |
| 10.008   | 10 | 5 | 5 | 16881776 | 17460490 | 6363388  | 23797410 | 12602801 | 11624375 | 26446842 | 21806788 | 14000957 |
| 9.445217 | 14 | 5 | 5 | 1.98E+08 | 1.52E+09 | 4.67E+08 | 1.25E+09 | 4.27E+08 | 1.99E+09 | 1.84E+09 | 1.72E+09 | 1.15E+09 |
| 9.94455  | 10 | 5 | 5 | 8251925  | 24838558 | 4438478  | 19723405 | 10401641 | 29426639 | 21989383 | 19926568 | 23225869 |
| 9.848417 | 9  | 5 | 4 | 3351781  | 11453975 | 3948018  | 8589499  | 5159104  | 9374774  | 13887623 | 7007799  | 10038475 |
| 9.3919   | 7  | 4 | 3 | 311685.8 | 1252872  | 684059.7 | 830743.4 | 675575.8 | 1077822  | 1854135  | 2006587  | 991080.1 |
| 43.28667 | 4  | 3 | 1 | 306271.4 | 5018806  | 3200949  | 3509850  | 594123.7 | 3553245  | 4232937  | 10677680 | 3757042  |
| 9.447733 | 14 | 5 | 5 | 9464182  | 71099042 | 15875728 | 60855054 | 17095162 | 98290891 | 66726422 | 56640891 | 65238240 |
| 18.02583 | 9  | 5 | 4 | 345534.6 | 2392475  | 465806.3 | 2106080  | 456940.9 | 3033178  | 2523821  | 1903025  | 1967753  |
| 10.00998 | 9  | 5 | 4 | 6299084  | 1230159  | 843223.5 | 7743600  | 13930786 | 1669560  | 2458269  | 1010207  | 353594.4 |
| 41.0715  | 4  | 3 | 1 | 226883.9 | 2732965  | 525970.2 | 2351077  | 688815.1 | 2054669  | 3507567  | 2565853  | 2857954  |
| 9.972483 | 10 | 5 | 5 | 1096749  | 2908347  | 869461.7 | 2306689  | 1056518  | 3959781  | 3668456  | 2706836  | 2147305  |
| 9.872883 | 10 | 5 | 5 | 6899590  | 25762801 | 1904348  | 32999877 | 15438601 | 25276638 | 26430968 | 28596800 | 25043368 |
| 9.845483 | 7  | 3 | 4 | 392832.8 | 1348611  | 365752.6 | 1101908  | 426167.1 | 1429413  | 1126915  | 1543872  | 852484.3 |
| 9.842    | 9  | 5 | 4 | 2779878  | 5521291  | 2055566  | 4322518  | 1796321  | 7195658  | 7886074  | 4063512  | 2995930  |
| 9.856867 | 10 | 5 | 5 | 15600003 | 1.15E+08 | 2044274  | 1.1E+08  | 12520882 | 1.16E+08 | 1.13E+08 | 1.17E+08 | 1.17E+08 |
| 9.8322   | 8  | 4 | 4 | 786935.6 | 2330643  | 436256.7 | 2056841  | 446522.2 | 2429924  | 1686094  | 2656547  | 2761033  |

|          |    |   |   |          |          |          |          |          |          |          |          |          |
|----------|----|---|---|----------|----------|----------|----------|----------|----------|----------|----------|----------|
| 9.830283 | 6  | 3 | 3 | 885704.6 | 3308979  | 976364.9 | 2670895  | 1078031  | 2378901  | 4953138  | 2921245  | 3002172  |
| 9.992233 | 13 | 5 | 5 | 2153906  | 5168490  | 2550801  | 3898435  | 1219177  | 4990193  | 3613207  | 3507982  | 4121592  |
| 9.872917 | 10 | 5 | 5 | 17266336 | 62175634 | 4297008  | 78505831 | 34862124 | 61285025 | 63068383 | 68834748 | 60538668 |
| 9.445217 | 14 | 5 | 5 | 9966833  | 95282660 | 28631715 | 79798877 | 20272813 | 1.29E+08 | 1.05E+08 | 1.11E+08 | 64226329 |
| 10.98385 | 4  | 3 | 1 | 468218.1 | 812356.8 | 489160.9 | 1199063  | 725127.6 | 1441686  | 421432.9 | 498427.4 | 458434.5 |
| 9.8445   | 9  | 5 | 4 | 941915.5 | 4206604  | 938746.3 | 3341605  | 1697300  | 4080500  | 3754964  | 3417653  | 3954877  |
| 9.856867 | 10 | 5 | 5 | 1.48E+08 | 9.79E+08 | 1.17E+08 | 8.38E+08 | 2.91E+08 | 9.85E+08 | 8.98E+08 | 8.84E+08 | 9.55E+08 |
| 9.365833 | 10 | 5 | 4 | 813188.3 | 8080508  | 1258567  | 6615919  | 2988270  | 8050688  | 6259345  | 9579837  | 7661094  |
| 10.97857 | 7  | 4 | 3 | 279136.6 | 879538.2 | 254255.8 | 731612.6 | 221536.5 | 628636.5 | 1206325  | 820061.8 | 1077696  |
| 9.8374   | 9  | 5 | 4 | 1211399  | 4462144  | 1416888  | 3311179  | 2180970  | 4367447  | 4734718  | 2227069  | 4844432  |
| 9.856867 | 10 | 5 | 5 | 5766054  | 6150450  | 1167148  | 12860554 | 14366974 | 7589963  | 6516832  | 6340676  | 5931512  |
| 10.95055 | 10 | 5 | 5 | 400205.1 | 2452760  | 644728   | 2079282  | 556063.8 | 3129603  | 2759172  | 1759437  | 1765592  |
| 9.856867 | 10 | 5 | 5 | 5628562  | 30259039 | 4276017  | 24868034 | 11100261 | 30978051 | 29962821 | 25337868 | 28138047 |
| 35.9635  | 5  | 4 | 1 | 150941   | 724200.8 | 483020   | 953643.2 | 128825.3 | 1224713  | 931951.9 | 290429.9 | 132130.4 |
| 10.95055 | 10 | 5 | 5 | 1661247  | 10351360 | 2782578  | 8790099  | 2209246  | 13063022 | 12348657 | 7468547  | 7241626  |
| 9.933967 | 5  | 2 | 3 | 999233.5 | 1232085  | 576282.2 | 2293198  | 2236932  | 1602819  | 314133.9 | 1803791  | 1322746  |
| 8.960667 | 7  | 2 | 5 | 128776.7 | 320636.8 | 144328.1 | 397437.1 | 96881.35 | 457690.4 | 425712.5 | 194117.4 | 386944.5 |
| 9.960467 | 5  | 3 | 2 | 468028   | 773508.8 | 413939.5 | 508902.4 | 439926.6 | 1008054  | 1230681  | 953888.6 | 272071.6 |
| 9.952017 | 10 | 5 | 5 | 4313705  | 16254702 | 2444380  | 13514318 | 5570446  | 18921461 | 17478673 | 13878840 | 13435943 |
| 9.976317 | 5  | 3 | 2 | 805728.6 | 1791390  | 1371910  | 1085272  | 801300.7 | 606023.7 | 972183.8 | 3575912  | 2960573  |
| 10.55813 | 6  | 3 | 3 | 346864.1 | 3045662  | 707955.7 | 2538171  | 912069.5 | 3366581  | 3512846  | 3715650  | 2023653  |
| 10.9645  | 10 | 5 | 5 | 1551894  | 6976098  | 1319393  | 5980563  | 1834596  | 7867154  | 8176376  | 5437100  | 5649337  |
| 9.992233 | 8  | 5 | 3 | 535652.3 | 965710.2 | 391922.7 | 1216350  | 417148.6 | 951975.4 | 1412702  | 823558.3 | 400726.5 |
| 9.912633 | 6  | 4 | 2 | 14101519 | 11687462 | 16308809 | 22614461 | 18853367 | 6006864  | 3918099  | 40814565 | 3882132  |
| 9.992233 | 10 | 5 | 5 | 832788   | 2646705  | 467773.3 | 2190934  | 906291.2 | 3154915  | 2908680  | 2825244  | 1990103  |
| 9.406667 | 9  | 3 | 4 | 10806607 | 29557194 | 21089578 | 19020119 | 10446589 | 57844512 | 45777768 | 11327558 | 12047200 |
| 10.02372 | 9  | 5 | 4 | 354860.9 | 1119819  | 116156.9 | 939409.2 | 377606.2 | 1058343  | 1278793  | 1207589  | 1032303  |
| 10.95055 | 9  | 5 | 4 | 173990.8 | 958465.4 | 241918.9 | 801135.5 | 265589.6 | 890984.7 | 1340694  | 791831.6 | 734890.6 |
| 12.82142 | 5  | 3 | 2 | 241498.9 | 480910.2 | 143148.6 | 807327.8 | 693075.2 | 357931.7 | 345794.1 | 510788.5 | 699066.3 |
| 9.392767 | 10 | 5 | 5 | 10772250 | 27970516 | 6568787  | 22104186 | 11444281 | 30710183 | 32017567 | 20755542 | 21236121 |
| 11.287   | 7  | 4 | 3 | 87709.95 | 361990.6 | 158173.9 | 275714.5 | 115849.4 | 288623.9 | 409930   | 484457.3 | 504112.6 |
| 9.903283 | 6  | 2 | 4 | 3192375  | 8091085  | 5991627  | 4458652  | 5747733  | 1368200  | 11357239 | 1774022  | 12798240 |
| 9.912633 | 9  | 5 | 4 | 2578373  | 5783514  | 2371051  | 4030999  | 3203844  | 6768997  | 3709474  | 3328500  | 5988590  |
| 21.50117 | 5  | 2 | 3 | 69854.29 | 317946.4 | 63740.23 | 242977   | 153509.4 | 373332.8 | 265627   | 245359.9 | 315551.1 |
| 22.92883 | 10 | 5 | 5 | 224601.6 | 729456.8 | 243625   | 1018719  | 592954.2 | 925061.3 | 792121.6 | 857268.3 | 764845.4 |

|          |    |   |   |          |          |          |          |          |          |          |          |          |
|----------|----|---|---|----------|----------|----------|----------|----------|----------|----------|----------|----------|
| 40.453   | 8  | 2 | 4 | 364521.8 | 2787074  | 922847.3 | 3353430  | 908404.9 | 1229253  | 2913355  | 3030092  | 3696362  |
| 10.95835 | 9  | 4 | 5 | 6420137  | 9136590  | 15998626 | 1688670  | 433911.9 | 2257296  | 2539342  | 1240813  | 37742632 |
| 9.8887   | 7  | 4 | 2 | 835251.7 | 2404680  | 1061866  | 1743969  | 1074587  | 1485178  | 4078661  | 1602209  | 2098955  |
| 9.374083 | 7  | 3 | 4 | 1087240  | 1382467  | 841552.2 | 950160.4 | 490306.3 | 319744.5 | 1777695  | 642461.7 | 2018675  |
| 10.9645  | 9  | 5 | 4 | 320327   | 1963670  | 367032.4 | 1621163  | 675895.2 | 1804505  | 2244267  | 1632850  | 1678865  |
| 9.848417 | 6  | 3 | 3 | 628745.1 | 2466692  | 852504.2 | 1921861  | 908269.8 | 1959686  | 1558334  | 2901401  | 3716976  |
| 9.994767 | 5  | 3 | 2 | 279266.1 | 725561.1 | 277944.4 | 502272.1 | 422596.4 | 567892   | 1187041  | 602211.7 | 494455.9 |
| 10.05528 | 4  | 3 | 1 | 489189.6 | 642242.3 | 295145.3 | 497452.9 | 128324.1 | 990755.2 | 327090.3 | 716315.9 | 347275.1 |
| 9.329083 | 6  | 3 | 3 | 4912389  | 29799907 | 18894179 | 19475712 | 13963278 | 13948946 | 28596244 | 52165166 | 45323588 |
| 10.15407 | 9  | 5 | 4 | 400555.1 | 1204104  | 198646.1 | 1340635  | 240266.6 | 1301490  | 1017320  | 1503800  | 1071220  |
| 9.445217 | 14 | 5 | 5 | 10051467 | 95427200 | 28846372 | 79886513 | 20384705 | 1.3E+08  | 1.05E+08 | 1.11E+08 | 64218214 |
| 43.819   | 9  | 4 | 3 | 245064.6 | 3008728  | 1083367  | 2472871  | 506197.5 | 4867108  | 2116002  | 2389476  | 2816410  |
| 10.00998 | 10 | 5 | 5 | 887160.2 | 3068595  | 582140.7 | 3694619  | 1268677  | 3728851  | 3002641  | 3558862  | 2734584  |
| 10.05535 | 7  | 4 | 3 | 329178.6 | 443153   | 145651   | 622395.7 | 369313.8 | 374204.7 | 587018   | 551164.3 | 476203.9 |
| 9.392767 | 10 | 4 | 4 | 1719261  | 5872190  | 4104231  | 9699096  | 7559492  | 5837263  | 4234855  | 12892829 | 2454756  |
| 9.928667 | 9  | 5 | 4 | 2448263  | 2793363  | 557450   | 4074910  | 2727124  | 3582803  | 3030271  | 2348648  | 2816185  |
| 9.999217 | 9  | 4 | 5 | 894279.3 | 4354281  | 709657.9 | 3513869  | 1724642  | 4499962  | 3132294  | 4458926  | 4748009  |
| 6.780067 | 9  | 4 | 3 | 978503.1 | 36404410 | 23617558 | 23963694 | 15407270 | 31267034 | 16271526 | 65732420 | 55951746 |
| 9.392767 | 10 | 5 | 5 | 11221272 | 28739893 | 6775277  | 22740184 | 11709325 | 32073495 | 32986953 | 20789108 | 22172785 |
| 9.872917 | 10 | 5 | 5 | 5722938  | 7198716  | 1256868  | 14115470 | 14854678 | 8715023  | 8154755  | 6163042  | 7187852  |
| 10.008   | 10 | 5 | 5 | 1790596  | 2413241  | 880659.9 | 3493799  | 2226444  | 3328174  | 2671195  | 3091379  | 1600821  |
| 10.9645  | 5  | 4 | 1 | 303285.8 | 655317.2 | 217273.7 | 773516.1 | 158789   | 758683.1 | 812534.8 | 615717.7 | 797257.9 |
| 10.008   | 5  | 2 | 3 | 4644563  | 8974464  | 8578752  | 4545878  | 5149440  | 638882.7 | 18986613 | 703531   | 8118109  |
| 9.986767 | 10 | 4 | 5 | 1610166  | 7135274  | 1468523  | 6150924  | 1706569  | 8860636  | 6290397  | 5161183  | 7212760  |
| 17.10317 | 6  | 2 | 4 | 140905.4 | 319071.5 | 101442.1 | 560656.9 | 514844.6 | 375711.5 | 378814.2 | 141241.7 | 370691.9 |
| 9.58245  | 5  | 2 | 3 | 838925.2 | 4526756  | 1535184  | 3286908  | 2355622  | 6568759  | 4467888  | 2920519  | 3197496  |
| 28.27483 | 9  | 5 | 4 | 562999.3 | 857532.3 | 269667.7 | 2468146  | 3461580  | 621782.7 | 1304995  | 722689.6 | 735596.6 |
| 9.992233 | 9  | 5 | 4 | 563195.9 | 1443924  | 623544.7 | 1813024  | 570333.8 | 1533388  | 2336411  | 1650802  | 874370.6 |
| 18.57017 | 4  | 3 | 1 | 51429916 | 1.21E+08 | 2.57E+08 | 1227359  | 121322.1 | 1245416  | 1315600  | 5.8E+08  | 19390328 |
| 10.95835 | 6  | 3 | 3 | 441696.4 | 505857.3 | 106225.7 | 689979.7 | 388658.9 | 499547.9 | 645759.4 | 356855.8 | 553580.4 |
| 12.54438 | 6  | 3 | 3 | 213241   | 713120.6 | 388639.9 | 1038356  | 625357.3 | 563215.2 | 1246755  | 473507.8 | 302589.8 |
| 9.992233 | 7  | 3 | 4 | 856034.9 | 800704   | 362910   | 1561434  | 1616739  | 839747.3 | 1288104  | 985070.1 | 421678.2 |
| 11.5372  | 4  | 1 | 3 | 121969.6 | 523130.8 | 263546.9 | 361036.9 | 261669.7 | 702467.7 | 487975.7 | 625660.1 | 80804.38 |
| 10.9645  | 10 | 5 | 5 | 1798888  | 8240686  | 1734324  | 7026175  | 2165976  | 9747987  | 9696272  | 6050383  | 6726352  |
| 9.992233 | 10 | 5 | 5 | 838812.5 | 3003249  | 156106.3 | 2654042  | 743491.2 | 2920047  | 3218544  | 3052023  | 3025658  |

|          |    |   |   |          |          |          |          |          |          |          |          |          |
|----------|----|---|---|----------|----------|----------|----------|----------|----------|----------|----------|----------|
| 9.523633 | 8  | 4 | 4 | 1053288  | 1098912  | 415273.9 | 2406689  | 2800817  | 1266660  | 1412658  | 813972.8 | 519631.4 |
| 10.008   | 9  | 5 | 4 | 482587.2 | 996574   | 220705.3 | 1255293  | 531033.7 | 886528.3 | 875426.6 | 1369226  | 1023779  |
| 15.99403 | 10 | 5 | 5 | 1218462  | 10908218 | 2553392  | 9028601  | 3442208  | 12975603 | 9822080  | 11745204 | 13021677 |
| 10.95835 | 5  | 1 | 4 | 561273.9 | 1525154  | 467413.6 | 1245931  | 436844   | 1868455  | 2127641  | 1190654  | 1002335  |
| 9.960467 | 3  | 3 | 0 | 366347.8 | 522506.6 | 429852.1 | 288422.5 | 316191   | 868040.9 | 839182.8 | 796632.5 | 0        |
| 10.94208 | 7  | 4 | 3 | 472929.2 | 1278299  | 158903.4 | 1511054  | 487223.7 | 1193955  | 1391567  | 1183030  | 1124683  |
| 9.46265  | 10 | 5 | 4 | 1361963  | 10737509 | 9673994  | 6117736  | 3139771  | 4415489  | 3161956  | 7292120  | 26982888 |
| 9.864767 | 10 | 5 | 5 | 11763749 | 27833584 | 2214123  | 37929088 | 21700904 | 29679635 | 27503774 | 30001224 | 27509624 |
| 9.999517 | 4  | 3 | 1 | 894937.6 | 708709.3 | 381184.5 | 1808403  | 2354374  | 768448.6 | 523988.5 | 352602.9 | 1337184  |
| 9.507167 | 6  | 3 | 3 | 631279.2 | 668859.3 | 305478.8 | 1134270  | 977187.4 | 937049.6 | 563066.7 | 937224.7 | 703830.1 |
| 9.992233 | 9  | 4 | 5 | 1702331  | 2641485  | 2501395  | 1465435  | 571594.9 | 1810467  | 1647755  | 1671052  | 7080586  |
| 28.12733 | 7  | 3 | 4 | 123761.1 | 503249   | 256833.8 | 747592.5 | 486298.6 | 787550.2 | 309458.6 | 199454.1 | 733252.5 |
| 9.398583 | 9  | 4 | 4 | 854614.4 | 3747689  | 2171584  | 5069081  | 2116565  | 3386920  | 5592118  | 6299177  | 2313095  |
| 9.365833 | 5  | 3 | 2 | 643077.9 | 2929041  | 1338194  | 2041468  | 1532730  | 2328508  | 4223651  | 2629814  | 1156989  |
| 9.844033 | 9  | 5 | 4 | 1020930  | 3399776  | 1024991  | 2592877  | 1523264  | 3843009  | 2759348  | 3261499  | 4894243  |
| 26.91133 | 5  | 2 | 3 | 273442.4 | 1624821  | 451603.3 | 1376265  | 344648.4 | 1146647  | 2351285  | 1527373  | 1410638  |
| 10.43382 | 13 | 5 | 5 | 2477655  | 6551720  | 1980366  | 8121813  | 2972463  | 9597168  | 6740443  | 6554531  | 5687544  |
| 10.51508 | 6  | 3 | 3 | 342914.7 | 726833.6 | 417055.9 | 526997.8 | 145873.9 | 425346   | 1458159  | 556951.6 | 657528.9 |
| 9.857683 | 10 | 5 | 5 | 3274581  | 7450661  | 1047549  | 10236737 | 5964749  | 6872324  | 6324633  | 8740084  | 8378660  |
| 9.999217 | 5  | 3 | 2 | 277338.4 | 482497.6 | 113873.1 | 337818.1 | 300072.9 | 620815.7 | 508260.9 | 533375.2 | 431500.5 |
| 11.49785 | 3  | 0 | 3 | 18513106 | 287739.7 | 65549.72 | 47033555 | 1.01E+08 | 365106.7 | 223894.6 | 217606.3 | 298666.1 |
| 10.9645  | 6  | 2 | 4 | 267384.2 | 733399.5 | 232045.8 | 581862   | 259074.9 | 609117   | 941374.8 | 389437.2 | 816095   |
| 9.928667 | 7  | 4 | 3 | 1134902  | 2539815  | 435617.9 | 1973711  | 1177129  | 2837662  | 2843070  | 2827142  | 1870695  |
| 9.40615  | 7  | 3 | 4 | 883046.6 | 1286154  | 307890.6 | 1074469  | 375085   | 921992.7 | 1011571  | 1624811  | 1511905  |
| 29.29317 | 9  | 5 | 4 | 232831.4 | 1585196  | 323775.3 | 1373170  | 363601.1 | 1754010  | 1951400  | 1240718  | 1245079  |
| 9.94455  | 9  | 5 | 4 | 1421463  | 1553280  | 360384   | 1889251  | 667005.5 | 1763551  | 995715.8 | 1615988  | 1940509  |
| 9.994767 | 9  | 5 | 4 | 625536.1 | 962745.4 | 340695.3 | 1261610  | 584813.1 | 1017399  | 1505136  | 916464.4 | 605793.8 |
| 9.3735   | 8  | 4 | 4 | 466332.2 | 2327207  | 751157.5 | 1809937  | 917980.2 | 2377698  | 2035377  | 1866410  | 3603047  |
| 9.541433 | 8  | 3 | 4 | 1364772  | 9770283  | 7294141  | 6325430  | 2013255  | 16424605 | 3258497  | 13424744 | 15137146 |
| 25.76133 | 5  | 3 | 2 | 81178.22 | 305913.1 | 146185.2 | 406488.4 | 178419.2 | 269548.1 | 179886.8 | 163667.1 | 486862.5 |
| 9.419733 | 11 | 5 | 4 | 1159854  | 9967101  | 2299862  | 11409501 | 2388125  | 12521039 | 10860714 | 11377213 | 7381023  |
| 9.8445   | 8  | 4 | 4 | 1024706  | 4666633  | 1446686  | 3621444  | 1905338  | 4609952  | 2308565  | 5034133  | 6227489  |
| 9.960467 | 16 | 5 | 5 | 1769064  | 3953233  | 876586.4 | 4627344  | 1264015  | 4388801  | 4010358  | 2445174  | 4247722  |
| 40.87733 | 5  | 4 | 1 | 12505607 | 33719143 | 68927575 | 1821353  | 313265.7 | 1.57E+08 | 2913054  | 3527120  | 2723112  |
| 9.872917 | 10 | 5 | 5 | 6107732  | 6546203  | 1616084  | 14171217 | 16438014 | 7183483  | 6470270  | 8205637  | 6987486  |

|          |    |   |   |          |          |          |          |          |          |          |          |          |
|----------|----|---|---|----------|----------|----------|----------|----------|----------|----------|----------|----------|
| 11.53673 | 5  | 4 | 1 | 59355692 | 1.18E+08 | 2.52E+08 | 1247495  | 1762993  | 1346805  | 355279.5 | 5.69E+08 | 17658916 |
| 10.94208 | 9  | 4 | 5 | 9023233  | 23989335 | 37684178 | 6542239  | 2268066  | 7343672  | 9670696  | 4630786  | 6976481  |
| 10.95602 | 7  | 4 | 3 | 337827.3 | 1043459  | 146132.2 | 1174737  | 258655.2 | 930120.1 | 857059   | 1075783  | 1199830  |
| 9.840617 | 4  | 1 | 3 | 5290215  | 18230339 | 9816530  | 11397324 | 12217276 | 21686215 | 15642148 | 21861266 | 2875446  |
| 9.952017 | 5  | 2 | 3 | 964451.8 | 1414922  | 916064.6 | 942110.4 | 560675.4 | 2462196  | 0        | 1816101  | 1617704  |
| 10.9645  | 10 | 5 | 5 | 6901262  | 47415713 | 5942637  | 43285884 | 7380014  | 49160702 | 52442212 | 41525255 | 40735668 |
| 9.896717 | 10 | 5 | 5 | 4357345  | 27421228 | 1848923  | 25346297 | 4256161  | 27364652 | 25137271 | 28969383 | 29512069 |
| 9.845483 | 9  | 5 | 4 | 1113445  | 4516041  | 1330264  | 3414264  | 2123879  | 4393173  | 4869432  | 2354005  | 5035336  |
| 11.65013 | 10 | 5 | 5 | 361687   | 2259612  | 523541.1 | 1954639  | 466652.6 | 2777170  | 2352346  | 1638293  | 1799392  |
| 9.976317 | 14 | 5 | 5 | 899707.3 | 5076023  | 1438013  | 4067788  | 1811947  | 3245305  | 6218320  | 5595929  | 6450756  |
| 9.928667 | 10 | 5 | 5 | 2060643  | 4180056  | 538127.1 | 3751244  | 816344.2 | 4912558  | 4145215  | 4460184  | 3870105  |
| 9.842    | 10 | 5 | 5 | 1132661  | 5221437  | 1125432  | 4143068  | 2157461  | 5802778  | 5637403  | 3529502  | 4716841  |
| 43.18617 | 11 | 4 | 5 | 2923987  | 18553368 | 28882302 | 5189277  | 2072468  | 4850730  | 70104630 | 7069194  | 2918980  |
| 9.979667 | 9  | 5 | 4 | 620263.3 | 1726586  | 767082.8 | 1230819  | 844490.8 | 2171815  | 2300753  | 1446915  | 498250   |
| 10.008   | 10 | 5 | 5 | 739526.8 | 2072470  | 383288   | 2710189  | 1351275  | 2134051  | 2596144  | 1967880  | 1529521  |
| 10.9645  | 10 | 5 | 5 | 699202.2 | 3282327  | 520061   | 2893182  | 723048.5 | 3625219  | 3774496  | 2765612  | 2673497  |
| 10.9645  | 8  | 5 | 3 | 1301436  | 943215.2 | 251298.4 | 1600506  | 1411630  | 1018599  | 1225188  | 550234.4 | 1039590  |
| 9.95825  | 12 | 5 | 5 | 2255877  | 8153011  | 1219753  | 6701072  | 3002681  | 9459629  | 9163560  | 8169985  | 7485111  |
| 9.445217 | 7  | 4 | 3 | 623024.6 | 2616663  | 978502.2 | 1852634  | 1446081  | 2985714  | 4130266  | 2373135  | 1797290  |
| 19.8975  | 6  | 3 | 3 | 2443346  | 35057708 | 4507725  | 29442465 | 11674010 | 41793150 | 31350661 | 30537935 | 35242372 |
| 9.912633 | 6  | 4 | 2 | 2119267  | 1866504  | 922259.5 | 3155729  | 2706473  | 1996051  | 805492.6 | 1152387  | 2244443  |
| 9.928667 | 9  | 5 | 3 | 1028759  | 3177341  | 618314.8 | 2751958  | 757870   | 2355177  | 2729438  | 3712908  | 3763800  |
| 9.447733 | 8  | 4 | 4 | 1573236  | 4814279  | 1281632  | 7852749  | 6520435  | 3822141  | 5212067  | 5840942  | 6061042  |
| 43.3995  | 5  | 1 | 3 | 421480.3 | 7955995  | 193422.7 | 7357069  | 1291043  | 8024448  | 7615668  | 7992502  | 8066276  |
| 34.5865  | 6  | 3 | 3 | 1609025  | 2680936  | 593769   | 7731530  | 10941376 | 3510300  | 2838902  | 2368371  | 2774887  |
| 44.98333 | 9  | 2 | 3 | 531252.1 | 5954005  | 1738808  | 4813771  | 1969206  | 3763247  | 7007724  | 6805466  | 4450842  |
| 9.856867 | 10 | 5 | 5 | 79556760 | 4.47E+08 | 61014518 | 3.82E+08 | 1.34E+08 | 4.8E+08  | 4.72E+08 | 3.74E+08 | 3.93E+08 |
| 22.72717 | 7  | 4 | 3 | 67501.29 | 177276.9 | 61426.88 | 143488.7 | 47484.33 | 198970.8 | 227676.1 | 84221.83 | 147736.8 |
| 42.69717 | 7  | 3 | 3 | 349340.6 | 3444342  | 1618154  | 4343979  | 1289292  | 4215715  | 4568868  | 3952214  | 589108.2 |
| 10.02372 | 10 | 3 | 4 | 3130464  | 467112.7 | 274885.5 | 2714726  | 4870833  | 677615   | 0        | 658479.8 | 522016.4 |
| 9.284283 | 10 | 5 | 5 | 1099768  | 4417807  | 926613.8 | 3509920  | 1829125  | 5721473  | 3824969  | 3730678  | 5080873  |
| 9.43325  | 9  | 5 | 4 | 1868945  | 2753024  | 1026979  | 6000759  | 7006594  | 3428633  | 3805207  | 1920389  | 1421910  |
| 41.60367 | 5  | 2 | 3 | 343431.8 | 3282219  | 1345576  | 4178435  | 1566462  | 4306715  | 3552925  | 3877162  | 3747668  |
| 9.896717 | 5  | 4 | 1 | 3516973  | 4936442  | 2480676  | 8222487  | 6878632  | 4272373  | 3071443  | 3862426  | 9292508  |
| 9.41815  | 6  | 4 | 2 | 331560.7 | 1359910  | 711558   | 950863.5 | 618690.4 | 1172255  | 2306545  | 1871759  | 613969.8 |



|          |    |   |   |          |          |          |          |          |          |          |          |          |
|----------|----|---|---|----------|----------|----------|----------|----------|----------|----------|----------|----------|
| 8.955933 | 6  | 4 | 2 | 2997773  | 19027588 | 10873912 | 12391692 | 10784419 | 16077128 | 34533438 | 22581983 | 17353720 |
| 9.928667 | 10 | 5 | 5 | 2313932  | 4708484  | 561452.7 | 4236220  | 918389.4 | 5452273  | 4561093  | 5098216  | 4370104  |
| 10.94443 | 4  | 1 | 3 | 188994.5 | 527284.5 | 111082.5 | 466858.4 | 83244.29 | 598907.9 | 659848.6 | 434374.4 | 394735.2 |
| 9.929783 | 8  | 3 | 3 | 476839.2 | 836034.4 | 471308.8 | 1103268  | 396319.6 | 966894.1 | 0        | 1059014  | 1020237  |
| 9.67     | 10 | 5 | 5 | 2656859  | 14237498 | 2593599  | 12037529 | 4289394  | 13488853 | 17482554 | 11201822 | 12710546 |
| 10.02372 | 6  | 3 | 3 | 296758   | 700310.9 | 383562   | 450679   | 429648.4 | 635331   | 242454.7 | 466316.7 | 949351.9 |
| 9.856867 | 10 | 5 | 5 | 3564013  | 5578864  | 235563.2 | 9571529  | 8668155  | 5701340  | 5603864  | 5652203  | 5765589  |
| 9.952017 | 10 | 5 | 5 | 2719305  | 9236996  | 1275709  | 8403830  | 1438846  | 11182050 | 9697111  | 9029105  | 7968725  |
| 10.98605 | 10 | 5 | 5 | 777536.4 | 2762239  | 379791.9 | 2309996  | 938443.8 | 2261251  | 2734848  | 2983090  | 3254504  |
| 10.008   | 9  | 5 | 4 | 313848.2 | 702896.5 | 183006.7 | 840116.7 | 256428.1 | 626913.2 | 476264.4 | 969363.4 | 670116.8 |
| 10.95055 | 5  | 1 | 4 | 246968.8 | 440543.7 | 361162.7 | 651461   | 326768.6 | 894711.6 | 765613.2 | 117551.8 | 185853.4 |
| 9.3919   | 5  | 2 | 3 | 421105.6 | 3168563  | 1713398  | 2311704  | 917049   | 1661100  | 1090110  | 5027294  | 4351571  |
| 9.928667 | 6  | 4 | 2 | 980033.4 | 2502206  | 700896.3 | 1845965  | 1313571  | 3456263  | 2526155  | 1757554  | 1899479  |
| 23.407   | 5  | 3 | 2 | 280772.2 | 2184813  | 333148.2 | 1847575  | 685089.8 | 1925915  | 2432150  | 2243658  | 1766730  |
| 9.928667 | 5  | 2 | 3 | 2179365  | 1130914  | 475359.9 | 2021751  | 1905047  | 1663644  | 1109027  | 1503703  | 476713   |
| 11.19273 | 8  | 4 | 4 | 1550077  | 608657.1 | 184134.9 | 4777805  | 9062489  | 833572.1 | 774259.9 | 511161.7 | 513014.3 |
| 12.29577 | 9  | 4 | 5 | 148839.7 | 665057.9 | 619694.4 | 376800.6 | 128933.5 | 385368   | 484892.6 | 377946.4 | 309162.9 |
| 10.9645  | 10 | 5 | 5 | 1234033  | 6067210  | 1123066  | 5266399  | 1462805  | 7108640  | 7109302  | 4739021  | 5047196  |
| 40.496   | 7  | 2 | 3 | 366154.4 | 9494171  | 5837983  | 6349595  | 4266859  | 19899113 | 7279262  | 6034239  | 7156208  |
| 27.70617 | 3  | 0 | 3 | 14132515 | 313660.2 | 59516.85 | 44188815 | 95408433 | 321848.5 | 266811.8 | 263820.2 | 410384.3 |
| 10.02372 | 9  | 5 | 4 | 2392234  | 792845.3 | 197284.2 | 2356170  | 3396678  | 728024   | 1039302  | 928344.6 | 529172   |
| 9.856867 | 8  | 3 | 5 | 1255567  | 2643725  | 984756.3 | 4428431  | 3814012  | 3021932  | 1475237  | 4065645  | 2601065  |
| 10.9645  | 9  | 5 | 4 | 342427.9 | 2040557  | 354618   | 1649865  | 804461.5 | 2053684  | 2048560  | 1642006  | 1860002  |
| 11.67478 | 9  | 5 | 4 | 107057.8 | 726849.5 | 217995.8 | 863641.5 | 229381.6 | 813685.8 | 1066690  | 647449.2 | 568237.5 |
| 44.98333 | 6  | 3 | 1 | 247466.3 | 2515080  | 533459.2 | 2263093  | 169524.1 | 3383421  | 1926667  | 2497227  | 2425326  |
| 10.9645  | 10 | 5 | 5 | 444857.9 | 1715502  | 373669.6 | 1456385  | 466807.6 | 2095620  | 2052685  | 1689008  | 1195422  |
| 9.886083 | 8  | 5 | 3 | 1971959  | 3581972  | 795773   | 5939930  | 5099827  | 3697245  | 2643888  | 3994111  | 4619637  |
| 10.8926  | 4  | 1 | 3 | 138030.4 | 305271.6 | 112746.2 | 393559.4 | 168284.3 | 279029.6 | 314512.4 | 168289.9 | 283639.1 |
| 9.8322   | 9  | 5 | 4 | 888218.7 | 2675367  | 515564.6 | 2377435  | 457282.7 | 2952530  | 3381894  | 2328576  | 2070436  |
| 9.845483 | 10 | 5 | 5 | 890614.4 | 4312268  | 899394.9 | 3685704  | 1132479  | 3570366  | 3457157  | 3991130  | 5346288  |
| 9.262217 | 4  | 1 | 3 | 716777.5 | 5195482  | 1647138  | 3990234  | 2234475  | 6715372  | 3573012  | 3255918  | 6393602  |
| 21.267   | 5  | 3 | 2 | 41439.9  | 132377.1 | 41623.49 | 107162   | 40948.54 | 93473.87 | 189502.1 | 90028.85 | 150310.4 |
| 9.93625  | 10 | 5 | 5 | 2545329  | 6224727  | 1898344  | 4848226  | 2542012  | 6755453  | 5030574  | 4155079  | 6060108  |
| 10.03947 | 6  | 4 | 2 | 24123076 | 6627320  | 13281981 | 22933441 | 34045421 | 455635.8 | 420266.5 | 999758.5 | 878452.2 |
| 9.374083 | 3  | 0 | 3 | 9604230  | 0        | 0        | 38935715 | 84822855 | 0        | 0        | 0        | 0        |

|          |    |   |   |          |          |          |          |          |          |          |          |          |
|----------|----|---|---|----------|----------|----------|----------|----------|----------|----------|----------|----------|
| 9.388367 | 6  | 3 | 2 | 539232.8 | 3672761  | 795153.3 | 3213879  | 704230   | 4403163  | 4306033  | 2783722  | 2847427  |
| 9.8887   | 8  | 4 | 4 | 930872.9 | 3276877  | 342017.5 | 2878267  | 827898.9 | 2869439  | 2962599  | 3396936  | 3639826  |
| 9.859983 | 6  | 4 | 2 | 1847360  | 1815609  | 525485.6 | 3831375  | 4375960  | 1927883  | 1742721  | 2134804  | 2314717  |
| 9.596017 | 3  | 0 | 3 | 12942673 | 584495.8 | 262074.7 | 13668310 | 28515831 | 842134.7 | 799749   | 660549.7 | 362775.8 |
| 9.842    | 10 | 5 | 5 | 17754230 | 24838598 | 3629903  | 40006863 | 32961367 | 26906278 | 22961483 | 28769247 | 26015562 |
| 17.512   | 3  | 3 | 0 | 22455300 | 1.48E+08 | 1.18E+08 | 93341002 | 14946574 | 97315468 | 3.54E+08 | 87702251 | 1.36E+08 |
| 10.73262 | 5  | 3 | 2 | 153946.8 | 500383   | 192813   | 406875.3 | 85501.98 | 504894.5 | 724005.4 | 625092.2 | 221788.5 |
| 39.3595  | 5  | 1 | 3 | 412893.4 | 5476713  | 760820.8 | 6183818  | 1418118  | 5382539  | 5712160  | 4236604  | 6260117  |
| 8.826967 | 8  | 4 | 4 | 272939.4 | 494269.4 | 293224.2 | 327779.4 | 250220.4 | 552846.8 | 786753.9 | 579781.1 | 551965.3 |
| 39.57533 | 7  | 2 | 4 | 427098.3 | 4234836  | 1953450  | 5243598  | 1240585  | 5155733  | 743604.9 | 5218843  | 5045753  |
| 9.848417 | 10 | 5 | 5 | 1253162  | 8147815  | 1329943  | 6678137  | 3036164  | 7667783  | 8319800  | 7081401  | 7296672  |
| 9.999217 | 9  | 4 | 5 | 2223395  | 2922574  | 2856286  | 1557398  | 1106270  | 1855301  | 2591296  | 1539612  | 7891295  |
| 9.494433 | 4  | 3 | 1 | 467797.5 | 1261281  | 661491.6 | 1709383  | 798907   | 1286627  | 724120.2 | 1059256  | 854820.1 |
| 9.445217 | 8  | 4 | 4 | 518439.1 | 3571202  | 823978.4 | 2964927  | 1130123  | 4450363  | 4472901  | 3175528  | 2795387  |
| 10.95602 | 9  | 5 | 4 | 517268.8 | 1953076  | 359968.3 | 1610178  | 691762.9 | 2030076  | 2235343  | 1589847  | 1567266  |
| 9.857683 | 10 | 5 | 5 | 4.93E+09 | 3.81E+10 | 3.26E+09 | 3.55E+10 | 4.81E+09 | 4.06E+10 | 3.92E+10 | 3.43E+10 | 3.49E+10 |
| 10.02372 | 8  | 5 | 3 | 637145.2 | 565423.6 | 134167   | 883976.8 | 688263.2 | 566582.4 | 605354   | 720393.2 | 583953.9 |
| 9.856867 | 10 | 5 | 5 | 12462990 | 33858351 | 5137343  | 49226728 | 33335388 | 39488797 | 38762529 | 27633064 | 30761110 |
| 9.37735  | 5  | 3 | 2 | 3413793  | 5289260  | 6324298  | 2339754  | 1635173  | 1528520  | 16180681 | 2175067  | 1106564  |
| 9.888767 | 6  | 2 | 3 | 3226153  | 8238105  | 6801632  | 4827863  | 3780887  | 7505726  | 19306443 | 2493951  | 2903565  |
| 20.8275  | 10 | 5 | 5 | 1960331  | 16257680 | 2593836  | 13537284 | 5585661  | 18386639 | 12774562 | 14933199 | 19163137 |
| 9.554967 | 10 | 5 | 4 | 7808746  | 4101198  | 4423974  | 13737076 | 20794649 | 725915   | 2459585  | 5529570  | 11173706 |
| 25.33483 | 6  | 3 | 3 | 509586.6 | 1837794  | 1179835  | 1255761  | 599664.8 | 3406853  | 1687268  | 310136.3 | 1282543  |
| 9.80755  | 9  | 5 | 4 | 2303842  | 4343553  | 1654794  | 5418024  | 1864602  | 4723326  | 1628483  | 4126266  | 5877216  |
| 9.379233 | 8  | 4 | 4 | 1024934  | 2513050  | 1279236  | 1806809  | 1018371  | 2549882  | 1683085  | 1160882  | 2656705  |
| 10.9645  | 10 | 5 | 5 | 4159639  | 20094564 | 3207208  | 17615147 | 4725496  | 23349985 | 22227665 | 16386083 | 16927232 |
| 9.018167 | 7  | 3 | 4 | 366892.5 | 517713.3 | 271943.3 | 670759.2 | 227865.9 | 650306   | 909522.9 | 459871.4 | 363591.5 |
| 9.94455  | 10 | 5 | 5 | 6765181  | 23555818 | 3620975  | 21495590 | 3118171  | 29412456 | 24757455 | 21217740 | 21413638 |
| 34.60083 | 10 | 5 | 5 | 5179111  | 11384627 | 3954254  | 30464400 | 41585142 | 18028964 | 11584045 | 7755679  | 9879106  |
| 44.83967 | 10 | 5 | 5 | 969789.7 | 14724570 | 681509.7 | 15160235 | 747347   | 15690397 | 14255973 | 14023578 | 14515591 |
| 10.96997 | 5  | 2 | 3 | 1109996  | 4200590  | 1851839  | 2977582  | 2149308  | 6028730  | 6177781  | 2032089  | 3842527  |
| 9.856867 | 10 | 5 | 5 | 3622409  | 4165897  | 840660   | 8015621  | 8389635  | 5378338  | 4689820  | 3812022  | 3447598  |
| 9.845483 | 4  | 1 | 3 | 1409415  | 3988332  | 1929022  | 2949400  | 1430505  | 4990306  | 1426151  | 4799994  | 6148217  |
| 9.912633 | 10 | 5 | 5 | 12417884 | 61016552 | 6849495  | 50810445 | 21709762 | 55995760 | 53692117 | 58930418 | 67830612 |
| 9.976317 | 8  | 5 | 3 | 475203.7 | 1204855  | 257796.5 | 942222.8 | 537281.8 | 1633179  | 989514.8 | 1039995  | 1118881  |

|          |    |   |   |          |          |          |          |          |          |          |          |          |
|----------|----|---|---|----------|----------|----------|----------|----------|----------|----------|----------|----------|
| 31.7245  | 7  | 3 | 4 | 436564.3 | 2437921  | 2645624  | 1158238  | 1170347  | 643493.2 | 1489371  | 104215.4 | 6641354  |
| 9.264333 | 6  | 3 | 3 | 313845   | 1121972  | 610964.8 | 745945.1 | 624618   | 573413.1 | 1047802  | 722417.5 | 1130857  |
| 24.609   | 10 | 5 | 5 | 2968372  | 21035572 | 3007325  | 23099638 | 3721395  | 25175352 | 23169693 | 19339172 | 17995410 |
| 9.960467 | 5  | 3 | 2 | 684589.2 | 1164511  | 190512.9 | 968611.2 | 401520.7 | 1324895  | 1130347  | 1381135  | 913736.6 |
| 9.8445   | 9  | 5 | 4 | 2449423  | 13400050 | 1998241  | 11480197 | 3888504  | 14013892 | 13316749 | 11104627 | 12189436 |
| 10.8507  | 8  | 3 | 5 | 194235.1 | 581422.8 | 283501.2 | 446584.4 | 106472.6 | 205953.2 | 971695.3 | 507532.2 | 508506.6 |
| 10.97242 | 10 | 5 | 5 | 590823.6 | 2911889  | 542336.2 | 2438114  | 939637.2 | 2927469  | 3321703  | 2375332  | 2369869  |
| 9.853633 | 9  | 5 | 4 | 2211117  | 11325918 | 2351067  | 10059540 | 1747810  | 11681709 | 11425564 | 7401210  | 12535051 |
| 9.40615  | 8  | 5 | 3 | 831655.1 | 2072359  | 478662.8 | 1474027  | 1256799  | 2488647  | 2463842  | 1508464  | 1602426  |
| 9.928667 | 9  | 4 | 5 | 2199018  | 4449079  | 610379.1 | 4012265  | 806224.8 | 5190020  | 4174159  | 5004392  | 4072100  |
| 10.00385 | 9  | 4 | 5 | 919641.4 | 1044898  | 1172688  | 507763.5 | 98686.79 | 3137777  | 465638   | 427004.8 | 629845.9 |
| 9.960817 | 9  | 5 | 4 | 1881110  | 3778227  | 1382124  | 2891046  | 1529904  | 4907074  | 1547622  | 3803849  | 3679319  |
| 9.880683 | 10 | 5 | 5 | 12888382 | 30672818 | 4827990  | 47496802 | 36645830 | 32156564 | 28915483 | 36174864 | 32749396 |
| 9.642433 | 5  | 3 | 2 | 189888.6 | 381888.5 | 274223.4 | 239381.2 | 180704.5 | 737007.8 | 584530   | 336918.7 | 133265.5 |
| 9.346    | 8  | 5 | 3 | 822195.6 | 6421783  | 2459079  | 4672859  | 3219809  | 6959909  | 2343741  | 8742514  | 7786117  |
| 9.857683 | 10 | 5 | 5 | 75958856 | 5.02E+08 | 45627577 | 4.59E+08 | 88268931 | 5.39E+08 | 5.21E+08 | 4.47E+08 | 4.6E+08  |
| 10.00385 | 7  | 2 | 5 | 270179   | 916909.3 | 273980.3 | 764906.4 | 222189.2 | 913759.5 | 541586.4 | 1002797  | 1296872  |
| 9.920517 | 4  | 1 | 3 | 1042535  | 2141112  | 1283576  | 1443964  | 981384.5 | 2315336  | 290248.1 | 2090982  | 2098729  |
| 10.32433 | 6  | 3 | 3 | 131834.3 | 584440.6 | 103584.2 | 519954.8 | 108574   | 501930.5 | 699235.3 | 482528.1 | 690398.3 |
| 9.40255  | 3  | 0 | 3 | 12629142 | 49610.07 | 68358.26 | 29813724 | 65177026 | 0        | 134812   | 0        | 0        |
| 9.4925   | 10 | 4 | 4 | 1848292  | 5144782  | 3127293  | 7114583  | 3352843  | 3234244  | 944140.2 | 5313942  | 8382145  |
| 9.8445   | 9  | 4 | 5 | 5028281  | 6640130  | 9735867  | 2187978  | 818557.5 | 2747005  | 2406955  | 24011365 | 1129394  |
| 9.864767 | 10 | 5 | 5 | 22467822 | 47115181 | 3814656  | 74810816 | 60612947 | 47015524 | 44757134 | 50200638 | 51433746 |
| 9.49445  | 4  | 1 | 3 | 615578.2 | 1024430  | 544166   | 714635.2 | 472480.8 | 1656383  | 458622.6 | 448685.2 | 1321863  |
| 9.960467 | 10 | 5 | 5 | 1084328  | 4236490  | 681906.3 | 3787266  | 791763.7 | 5045729  | 4717724  | 4314143  | 3426694  |
| 10.70315 | 10 | 5 | 5 | 2041521  | 8756412  | 1789677  | 7236132  | 2999990  | 10059102 | 10293746 | 6815355  | 6793720  |
| 9.872917 | 10 | 5 | 5 | 8046906  | 59025460 | 5974664  | 55242492 | 6474619  | 56427597 | 49852429 | 63019916 | 64602001 |
| 22.94333 | 10 | 5 | 5 | 177398.4 | 1934099  | 109278.8 | 1806297  | 267254   | 2032483  | 2071809  | 1836369  | 1864615  |
| 9.999517 | 10 | 5 | 5 | 606278.9 | 1705006  | 401325.4 | 2004933  | 566500.6 | 1422104  | 2255687  | 1867191  | 1223353  |
| 13.41838 | 4  | 1 | 3 | 778748   | 3626886  | 603047.3 | 7418160  | 8298871  | 3445188  | 3635194  | 2985482  | 4616622  |
| 10.008   | 9  | 5 | 4 | 827718.7 | 1182540  | 449762.5 | 1572943  | 775419.9 | 1181737  | 1856468  | 1080572  | 595749.5 |
| 9.538267 | 12 | 5 | 5 | 3108265  | 9843585  | 5439538  | 14005620 | 7939777  | 11165407 | 427296.4 | 12041296 | 11100099 |
| 9.46265  | 9  | 5 | 4 | 1820809  | 2064053  | 1294163  | 6275812  | 9187713  | 3882888  | 926979.4 | 2709714  | 767717.4 |
| 9.856867 | 14 | 5 | 5 | 8353666  | 11987497 | 1462187  | 21170130 | 20107423 | 12344471 | 10698147 | 13671846 | 12961021 |
| 9.3919   | 8  | 4 | 3 | 1398828  | 10130174 | 5231129  | 7463033  | 3218138  | 15507917 | 3141934  | 12631213 | 13224077 |

|          |    |   |   |          |          |          |          |          |          |          |          |          |
|----------|----|---|---|----------|----------|----------|----------|----------|----------|----------|----------|----------|
| 11       | 4  | 1 | 3 | 254608.5 | 1550717  | 373838.1 | 1254270  | 573230.3 | 1592678  | 1892311  | 1067081  | 1283219  |
| 11.64247 | 4  | 3 | 1 | 107099.4 | 333204.2 | 155900.1 | 239559.8 | 152828.8 | 195858.6 | 415337.5 | 285182   | 563671.8 |
| 9.16125  | 3  | 3 | 0 | 1632543  | 1113376  | 662692.7 | 3483501  | 5176763  | 1118089  | 478487.3 | 1300152  | 2116215  |
| 33.3695  | 8  | 4 | 4 | 1477020  | 2058083  | 1545107  | 5302387  | 7027813  | 1695967  | 891544.6 | 658799.6 | 4474176  |
| 10.93412 | 4  | 1 | 3 | 261843.2 | 748807.5 | 215080.6 | 569032.4 | 353719.2 | 487090   | 767133.3 | 595421.5 | 863639.9 |
| 9.845483 | 10 | 5 | 5 | 6916290  | 39931599 | 8645324  | 32173027 | 15557964 | 35525096 | 31838193 | 35467292 | 43402542 |
| 9.2468   | 6  | 3 | 3 | 22517406 | 3294597  | 1419927  | 23261910 | 43810528 | 2889226  | 1198974  | 3540415  | 5095039  |
| 10.68888 | 3  | 0 | 3 | 164649.4 | 223000   | 23887.38 | 355290.8 | 289862.7 | 194499.9 | 246104.7 | 215057.6 | 249471.9 |
| 9.609367 | 5  | 3 | 2 | 914085.5 | 510875.3 | 122699.4 | 1798965  | 2826420  | 627392.9 | 443761   | 649194.7 | 468917.1 |
| 9.960467 | 3  | 3 | 0 | 355321.5 | 708956.3 | 184669.2 | 461250.7 | 525615.4 | 872791.8 | 910383   | 712449.4 | 546868   |
| 9.983433 | 10 | 5 | 5 | 401576.3 | 1455478  | 271956.4 | 1270871  | 332813.2 | 1379603  | 1802182  | 1675472  | 1187387  |
| 9.9014   | 5  | 2 | 3 | 594369.4 | 949034.9 | 530727.6 | 1459176  | 1038497  | 1358472  | 127338.1 | 1254031  | 1306877  |
| 11       | 10 | 5 | 5 | 737843.1 | 2811687  | 730693.3 | 2290317  | 966389.7 | 1657990  | 2569342  | 3025100  | 3380043  |
| 11.82952 | 9  | 4 | 5 | 238394.7 | 2163814  | 397541.2 | 1921692  | 401696.1 | 1985455  | 2546487  | 1692838  | 2610620  |
| 24.609   | 10 | 5 | 5 | 2374044  | 7119098  | 2126088  | 10298926 | 6804251  | 10429916 | 7852575  | 6614233  | 5172146  |
| 12.98183 | 3  | 0 | 3 | 17250900 | 940863.2 | 86326.81 | 40297820 | 86481724 | 977784   | 788430.8 | 957876.4 | 996032.1 |
| 22.294   | 7  | 4 | 3 | 68919.46 | 170634.5 | 98276.01 | 118733.4 | 69608.28 | 93207.32 | 342182.2 | 128121.3 | 150750.1 |
| 9.106183 | 10 | 5 | 5 | 1459273  | 5127539  | 1349443  | 4336134  | 1262947  | 4832848  | 6141922  | 5473405  | 2939338  |
| 22.24833 | 5  | 3 | 2 | 186936.1 | 1644511  | 708176.6 | 1309555  | 264712   | 1111135  | 2774910  | 1876896  | 1381139  |
| 9.77355  | 10 | 5 | 5 | 8771388  | 16082051 | 3763003  | 22272821 | 13321491 | 22536112 | 15921170 | 14410286 | 14633445 |
| 9.842    | 6  | 3 | 3 | 1454341  | 2839530  | 1449135  | 2021560  | 1242594  | 3444684  | 783389.3 | 4583228  | 3294307  |
| 9.999217 | 8  | 4 | 4 | 272343.1 | 503205   | 231921.8 | 643761.7 | 232637.6 | 610079.9 | 750601.4 | 618264.7 | 366388.8 |
| 13.97527 | 8  | 5 | 3 | 73385.81 | 421089.8 | 54467.43 | 384095.7 | 66880.35 | 465637.8 | 440647.8 | 329224.4 | 453343.6 |
| 10.37908 | 7  | 5 | 2 | 195875.6 | 479402.2 | 220940.4 | 370640.6 | 115432.6 | 537479.2 | 826279.9 | 391251   | 238512.2 |
| 17.045   | 6  | 2 | 4 | 48335.84 | 211867.9 | 95650.72 | 164183.7 | 53610.56 | 362881.8 | 199972.1 | 107470.4 | 161736.3 |
| 9.43325  | 5  | 2 | 3 | 2056724  | 22726131 | 4924289  | 19774393 | 4833111  | 29446549 | 22585533 | 19780406 | 25182844 |
| 10.02372 | 9  | 4 | 5 | 333238.4 | 811321   | 212626.5 | 683522.2 | 209851   | 665540.2 | 1133597  | 906433.4 | 605535.6 |
| 9.40325  | 6  | 4 | 2 | 11049844 | 27353701 | 48600921 | 54761169 | 41608412 | 1227685  | 20657475 | 1044983  | 1.13E+08 |
| 9.992233 | 8  | 4 | 4 | 1697077  | 1436323  | 544247.9 | 2015781  | 1202239  | 960803.9 | 1645048  | 1133480  | 2296112  |
| 9.888767 | 5  | 1 | 4 | 1457697  | 7008873  | 3910609  | 4850017  | 3171146  | 2321305  | 4293898  | 11584683 | 10278827 |
| 10.10223 | 13 | 5 | 5 | 13336467 | 36473986 | 21097951 | 75322120 | 84048820 | 65995361 | 48797730 | 30461444 | 24841425 |
| 9.419733 | 13 | 5 | 5 | 2218081  | 17738192 | 4126027  | 15504996 | 3167675  | 14198505 | 20620612 | 23065977 | 13407124 |
| 38.45317 | 3  | 3 | 0 | 222649.2 | 3026088  | 980599.5 | 2578839  | 116057.9 | 2567198  | 2662158  | 2373490  | 2766557  |
| 9.370583 | 5  | 2 | 3 | 915001.1 | 603879.7 | 123409.7 | 3367863  | 6081350  | 431079.9 | 542103.3 | 759094.5 | 642349.3 |
| 9.888767 | 10 | 5 | 5 | 946317.4 | 4343847  | 679910.7 | 3769694  | 1137138  | 3609668  | 3647921  | 4711788  | 5126231  |

|          |    |   |   |          |          |          |          |          |          |          |          |          |
|----------|----|---|---|----------|----------|----------|----------|----------|----------|----------|----------|----------|
| 11.287   | 6  | 3 | 3 | 133049.6 | 376110.7 | 287830.3 | 540125.5 | 252999.1 | 868872.5 | 347595   | 165773.9 | 174052.1 |
| 9.992233 | 5  | 2 | 3 | 492651.7 | 551323.7 | 481531   | 848348.5 | 500697   | 1098886  | 71886.85 | 978918.1 | 88872.63 |
| 9.573333 | 7  | 3 | 4 | 4.31E+08 | 2.97E+08 | 6.04E+08 | 22942391 | 8219396  | 29549801 | 1.38E+09 | 23289656 | 26380964 |
| 12.64667 | 10 | 5 | 5 | 702544.6 | 3991159  | 913309.4 | 3443083  | 900842.2 | 4787507  | 4824590  | 2923501  | 3114332  |
| 9.848417 | 10 | 5 | 5 | 4225820  | 7949567  | 1004229  | 11472289 | 7725612  | 8284560  | 7521582  | 9130879  | 8341032  |
| 9.856867 | 10 | 5 | 5 | 2424530  | 4665340  | 710096.3 | 6683055  | 4414628  | 5204162  | 4797828  | 5345399  | 4397996  |
| 10.95835 | 4  | 1 | 3 | 510820   | 1531083  | 634233.7 | 1092072  | 804814.7 | 1814791  | 2179850  | 482376.1 | 1612442  |
| 9.55155  | 4  | 1 | 3 | 323757.3 | 826555.8 | 188239.4 | 703984.2 | 216265.8 | 883209.4 | 745047.2 | 613569.9 | 774836.6 |
| 9.514333 | 9  | 5 | 4 | 535396.8 | 1037278  | 369236.5 | 757017.6 | 536587.8 | 1114419  | 1486782  | 1245918  | 777996.8 |
| 9.616167 | 9  | 5 | 4 | 865466.6 | 2028748  | 518489.3 | 1654234  | 702062.9 | 2058320  | 1996515  | 1630386  | 1583384  |
| 9.983433 | 9  | 4 | 5 | 1412439  | 2563122  | 1785199  | 1656045  | 1105407  | 2047912  | 2552443  | 1619897  | 5590425  |
| 9.856867 | 10 | 5 | 5 | 4.62E+08 | 2.62E+09 | 3.93E+08 | 2.29E+09 | 6.73E+08 | 2.82E+09 | 2.75E+09 | 2.17E+09 | 2.27E+09 |
| 9.8322   | 9  | 5 | 4 | 737742.4 | 2733330  | 793445.4 | 2091279  | 1258324  | 3354461  | 2919324  | 2022037  | 1794545  |
| 10.95602 | 9  | 5 | 4 | 208931.9 | 801206.9 | 213672.3 | 665112.6 | 236406   | 917622.2 | 1078867  | 528539.3 | 668885.4 |
| 10.61667 | 4  | 1 | 3 | 36485428 | 3.51E+08 | 30954466 | 5.1E+08  | 3.49E+08 | 3.73E+08 | 3.64E+08 | 3.7E+08  | 3.5E+08  |
| 9.960967 | 6  | 2 | 3 | 942371.3 | 1679366  | 211686.4 | 1493077  | 373958   | 1620047  | 1637255  | 2016638  | 1688704  |
| 9.976317 | 4  | 3 | 1 | 5044634  | 5422959  | 6669490  | 8978399  | 4922764  | 590590.6 | 803200.1 | 696038.2 | 14789322 |
| 16.4913  | 9  | 5 | 4 | 164976.1 | 1368404  | 309090.2 | 1527310  | 201163.4 | 1176924  | 1139091  | 1181141  | 1481425  |
| 9.824233 | 9  | 5 | 4 | 1443145  | 2193870  | 656973.3 | 3446564  | 2720244  | 2851906  | 1224895  | 2698308  | 2298806  |
| 9.388367 | 4  | 3 | 1 | 2011791  | 9863249  | 8955717  | 14397412 | 5471963  | 21116784 | 5130095  | 3208602  | 17914158 |
| 8.902983 | 6  | 2 | 4 | 205315.4 | 356045.1 | 303463.1 | 513716.8 | 205521.2 | 210434.6 | 889486.6 | 264946.5 | 279349   |
| 9.460217 | 6  | 4 | 2 | 370318.1 | 1151141  | 728683   | 686400.5 | 808799.8 | 1071091  | 482782.8 | 772734.9 | 1046432  |
| 19.92667 | 9  | 5 | 4 | 401909.4 | 2569528  | 437576.3 | 2064854  | 1061001  | 3223073  | 2283995  | 2078112  | 2567444  |
| 9.38065  | 7  | 3 | 4 | 783163.8 | 2743114  | 2022598  | 1760153  | 992395.2 | 1021857  | 5047773  | 4810967  | 1030936  |
| 9.986767 | 7  | 4 | 3 | 590193.8 | 870481.4 | 387331.7 | 1240011  | 755372.4 | 1323966  | 1213989  | 810217   | 528978.3 |
| 9.848417 | 7  | 5 | 2 | 1987388  | 2652422  | 1067613  | 3886951  | 2597118  | 3901731  | 2304007  | 1988331  | 3631283  |
| 9.736117 | 8  | 3 | 4 | 292491.3 | 671657.4 | 312193.8 | 488990   | 293284.7 | 763301.9 | 190329   | 620012   | 734633.8 |
| 11.13867 | 10 | 5 | 5 | 4664334  | 25696336 | 5573557  | 21330156 | 8478586  | 30472040 | 29330238 | 20267050 | 18994303 |
| 9.903567 | 10 | 5 | 5 | 1469072  | 2870071  | 782969.3 | 3650407  | 1608840  | 3552952  | 1918846  | 3767074  | 2754223  |
| 14.0342  | 9  | 5 | 4 | 2451582  | 13001382 | 4287465  | 22641867 | 21054164 | 12183280 | 9159161  | 11831210 | 11459564 |
| 9.93625  | 7  | 3 | 3 | 1303524  | 1971130  | 676164.7 | 2682655  | 1479800  | 2630566  | 2632955  | 1591980  | 1929251  |
| 10.83632 | 6  | 2 | 4 | 204205.2 | 441715.2 | 150322.5 | 343343.1 | 174724.6 | 374073.5 | 667639.4 | 521422.7 | 315744.8 |
| 22.71267 | 5  | 4 | 1 | 2348147  | 8496380  | 10454926 | 3560078  | 4030419  | 3416488  | 26552293 | 2634077  | 1352636  |
| 9.856867 | 10 | 5 | 5 | 16296526 | 1.04E+08 | 5167015  | 1E+08    | 8543313  | 1.12E+08 | 1.02E+08 | 98164805 | 1.02E+08 |
| 26.00567 | 8  | 4 | 4 | 242570.1 | 2099058  | 717438.9 | 1683502  | 659829.9 | 1416278  | 3293147  | 1838201  | 1790220  |

|          |    |   |   |          |          |          |          |          |          |          |          |          |
|----------|----|---|---|----------|----------|----------|----------|----------|----------|----------|----------|----------|
| 30.30917 | 7  | 3 | 4 | 96066.48 | 371544.1 | 65434.49 | 443330.7 | 150236.3 | 341568.4 | 477768.4 | 324116   | 323371.3 |
| 42.0065  | 5  | 2 | 3 | 820073.9 | 14452838 | 7165450  | 9958351  | 7741984  | 10812008 | 19074810 | 18991970 | 3479420  |
| 10.9645  | 5  | 2 | 3 | 488077.1 | 1304024  | 551895.7 | 988640.4 | 492953.6 | 1841788  | 1947965  | 730281   | 983991.8 |
| 9.4468   | 12 | 5 | 5 | 1524422  | 9735581  | 2995423  | 7234216  | 4965029  | 10374652 | 11307813 | 13462549 | 7629026  |
| 9.912633 | 8  | 5 | 3 | 1782295  | 4601157  | 1420779  | 3395051  | 2405401  | 5732675  | 3572953  | 2879545  | 4554874  |
| 9.856867 | 10 | 5 | 5 | 1591012  | 3893810  | 611085.3 | 5189054  | 2828076  | 3780198  | 4966582  | 3535264  | 3490961  |
| 9.856867 | 8  | 4 | 4 | 4832548  | 2805583  | 648349.9 | 9266693  | 14278056 | 2851138  | 2289239  | 3906244  | 2452430  |
| 10.95055 | 6  | 3 | 3 | 248867.3 | 586664.5 | 283908.5 | 442647.1 | 176897.2 | 853501.5 | 899452.4 | 231528.3 | 506501.5 |
| 9.856867 | 10 | 5 | 5 | 2634497  | 11708930 | 4432812  | 9624148  | 1663275  | 10269148 | 9513355  | 8130275  | 19370441 |
| 10.22632 | 10 | 5 | 5 | 6059847  | 28966219 | 4563500  | 39140331 | 22253208 | 36198966 | 29833246 | 24280932 | 28367239 |
| 9.93625  | 10 | 5 | 5 | 14165867 | 55262837 | 12288486 | 46745564 | 15712542 | 68230595 | 58364925 | 40539456 | 44377908 |
| 9.392767 | 5  | 3 | 2 | 1083864  | 10627692 | 5959997  | 7555119  | 3963518  | 6266756  | 5104301  | 18592593 | 15280568 |
| 24.0245  | 4  | 1 | 3 | 210546.5 | 1085302  | 612117.4 | 739392.4 | 533725   | 516511.1 | 1201767  | 396347.1 | 1522250  |
| 9.401917 | 3  | 3 | 0 | 335051.2 | 566179.6 | 363552.9 | 367406   | 291373.5 | 1144025  | 554303.3 | 512085.4 | 136027.1 |
| 9.992233 | 8  | 4 | 4 | 1747169  | 718084.6 | 139536.4 | 1354515  | 1404713  | 828777.2 | 584729.1 | 840100.3 | 550040.6 |
| 9.994767 | 5  | 3 | 2 | 420169   | 778674.9 | 206339.4 | 574710.8 | 421037.4 | 931529.9 | 974645.5 | 873832.6 | 578119.4 |
| 9.848417 | 9  | 5 | 4 | 3085325  | 14060904 | 3080203  | 11271982 | 5658900  | 12036541 | 11865999 | 12385264 | 14904524 |
| 10.9645  | 10 | 5 | 5 | 282472.3 | 1034926  | 308774.7 | 835148.4 | 353312   | 1361336  | 1362316  | 867207.9 | 688510.2 |
| 9.311883 | 7  | 4 | 3 | 592269.4 | 4150823  | 2167005  | 3002856  | 1585012  | 5193031  | 747137   | 3357011  | 6230616  |
| 9.5876   | 9  | 4 | 5 | 458183.1 | 1306269  | 130067.4 | 1107846  | 428292.4 | 1311655  | 1198032  | 1316096  | 1192310  |
| 10.008   | 9  | 5 | 4 | 17531416 | 1124195  | 304720.6 | 17354490 | 35924179 | 1083087  | 1594805  | 1216800  | 822025.5 |
| 9.976317 | 7  | 4 | 3 | 2723727  | 1641112  | 852198.8 | 3458302  | 3974756  | 1460713  | 542036   | 2902494  | 1841484  |
| 39.4025  | 4  | 3 | 1 | 376763.6 | 3825406  | 1434483  | 3177193  | 70512.19 | 3363786  | 5855109  | 3412995  | 4484564  |
| 9.856867 | 7  | 4 | 3 | 2210678  | 1635374  | 785558.4 | 4545045  | 6419463  | 2233769  | 2330953  | 1617074  | 1634913  |
| 10.01477 | 4  | 3 | 1 | 380021.2 | 387541.4 | 311068.2 | 236493.2 | 155799.5 | 859196.4 | 0        | 446141   | 296315.8 |
| 25.0725  | 9  | 4 | 5 | 773510.9 | 1347503  | 1941920  | 469590.4 | 153590.4 | 4810492  | 252115.5 | 681927.5 | 479047.6 |
| 10.9645  | 10 | 5 | 5 | 593358.8 | 2667050  | 612688.3 | 2294333  | 627881.9 | 3234558  | 3293095  | 2175808  | 1928847  |
| 9.928667 | 10 | 5 | 5 | 1887488  | 3736510  | 343000.4 | 3448611  | 574116.4 | 4292106  | 3585079  | 3835746  | 3519624  |
| 9.340183 | 8  | 3 | 4 | 1574074  | 1211830  | 129972.5 | 3483128  | 5032239  | 1422970  | 1219695  | 1193133  | 1147156  |
| 9.887133 | 10 | 5 | 5 | 9138996  | 54482283 | 2810835  | 51583131 | 6036197  | 51980165 | 53594875 | 54772701 | 52895877 |
| 10.91673 | 3  | 0 | 3 | 414926.8 | 1178234  | 307975.1 | 826201.5 | 743127.4 | 1130620  | 1579668  | 992724.3 | 804768.8 |
| 9.392767 | 9  | 5 | 4 | 2518649  | 2069025  | 655678.5 | 4175585  | 4645358  | 2454477  | 2517208  | 1283642  | 1431619  |
| 10.05535 | 8  | 5 | 3 | 451363.9 | 539677.6 | 149577   | 1206014  | 1473168  | 406968.4 | 597029   | 440819.5 | 774507.8 |
| 11.01378 | 10 | 5 | 5 | 796907.3 | 2308587  | 406805.6 | 1862469  | 937385.3 | 2902961  | 2253485  | 2417533  | 1779925  |
| 9.93625  | 10 | 5 | 5 | 25123442 | 87461292 | 13980824 | 80077712 | 10180431 | 1.09E+08 | 94323965 | 81392006 | 74905124 |

|          |    |   |   |          |          |          |          |          |          |          |          |          |
|----------|----|---|---|----------|----------|----------|----------|----------|----------|----------|----------|----------|
| 28.20067 | 5  | 2 | 3 | 20043580 | 97133551 | 89401399 | 48554643 | 70859378 | 1.73E+08 | 1.73E+08 | 424457.7 | 1.38E+08 |
| 9.979667 | 7  | 4 | 3 | 617278.3 | 778901.1 | 236510   | 1477706  | 1540101  | 1108326  | 469641.9 | 879292.8 | 685155.4 |
| 9.338567 | 9  | 5 | 4 | 1099384  | 2643165  | 1138910  | 1989856  | 1034116  | 2495308  | 1471233  | 1832529  | 3050089  |
| 11.5253  | 4  | 3 | 1 | 37089940 | 75861585 | 1.63E+08 | 2190290  | 4306191  | 789488.1 | 464684.9 | 3.68E+08 | 9375892  |
| 11.59172 | 3  | 3 | 0 | 92631.38 | 207637.8 | 146053.1 | 140784.1 | 34740.46 | 398666.1 | 305871.6 | 24674.43 | 159923.4 |
| 9.445217 | 8  | 3 | 4 | 805897.5 | 5712616  | 4628271  | 3476892  | 2258314  | 10863369 | 10401607 | 3788179  | 2788686  |
| 9.659033 | 9  | 4 | 5 | 752493.1 | 1719276  | 943484.1 | 2719123  | 2092128  | 1786479  | 2397021  | 1291527  | 364115.8 |
| 44.53567 | 11 | 3 | 4 | 252525   | 2986781  | 240630.5 | 3583957  | 1313173  | 3334805  | 2990445  | 3047084  | 2675970  |
| 9.56645  | 7  | 4 | 3 | 350110.8 | 771186.8 | 287591.7 | 584751.6 | 331491.7 | 525830.5 | 1174196  | 521323.9 | 673178.7 |
| 35.11367 | 5  | 3 | 2 | 310929.3 | 2526599  | 1144754  | 1981246  | 503826.9 | 2025327  | 1737037  | 1379831  | 3543980  |
| 28.142   | 9  | 5 | 4 | 113222.7 | 688358.7 | 180822.9 | 585775.3 | 160241.1 | 859591.7 | 673857.8 | 552289   | 474891.8 |
| 12.6321  | 10 | 5 | 5 | 280790.4 | 1724068  | 344546.5 | 1506657  | 379061.9 | 1961124  | 2038971  | 1169651  | 1647488  |
| 35.68917 | 10 | 3 | 3 | 307067.2 | 7990966  | 3684025  | 6175360  | 2035288  | 2877797  | 8467129  | 13255551 | 7722753  |
| 40.0645  | 9  | 1 | 4 | 330297.2 | 4746796  | 1081616  | 4172042  | 805671.4 | 3993981  | 4573797  | 6638733  | 4399354  |
| 9.983433 | 15 | 5 | 5 | 667284.4 | 1595087  | 433486.7 | 1944768  | 690620.4 | 1095411  | 1542351  | 2277266  | 1417515  |
| 9.374083 | 6  | 3 | 3 | 318357.4 | 695523.3 | 352134.3 | 498558.8 | 301909.5 | 1201282  | 561513.6 | 240155.5 | 661873.6 |
| 9.840617 | 6  | 3 | 3 | 578811.8 | 1534604  | 565677.8 | 1995339  | 912760.3 | 1241939  | 1059771  | 2299693  | 1973691  |
| 9.541433 | 3  | 3 | 0 | 505060.1 | 1488749  | 435766.2 | 1114403  | 752958.2 | 2223116  | 1148855  | 1436462  | 1465078  |
| 9.55155  | 5  | 2 | 3 | 295222.1 | 605073.1 | 171564.9 | 462289.9 | 284749.3 | 624009.7 | 894529   | 535220.8 | 474299.3 |
| 16.476   | 10 | 5 | 5 | 624355.5 | 2669406  | 1410240  | 1882593  | 1203223  | 2719916  | 5019823  | 2427639  | 1728855  |
| 9.872883 | 10 | 5 | 5 | 14571787 | 54819037 | 16750735 | 63415994 | 11117915 | 59423047 | 49357252 | 29243037 | 73859003 |
| 9.858833 | 9  | 4 | 5 | 3821107  | 9487139  | 10026629 | 4938966  | 1711969  | 6554580  | 4275869  | 27339324 | 5157044  |
| 10.9645  | 9  | 5 | 4 | 498891.3 | 2235371  | 447988.3 | 1815744  | 861470.8 | 2218911  | 2162153  | 1794906  | 2019502  |
| 9.94405  | 3  | 0 | 3 | 2450670  | 4706721  | 2614410  | 3305921  | 2001147  | 6576926  | 368361.3 | 4899018  | 6938902  |
| 9.858833 | 10 | 5 | 5 | 38798036 | 83421271 | 9998243  | 1.29E+08 | 1.01E+08 | 87571340 | 79611620 | 95691206 | 85424557 |
| 9.946367 | 11 | 5 | 5 | 2679590  | 10095068 | 2443036  | 7973552  | 4282346  | 7881560  | 8185686  | 9461513  | 11128844 |
| 10.008   | 17 | 5 | 5 | 916499.2 | 4368769  | 1354213  | 3400304  | 1827079  | 5458839  | 2040720  | 4407001  | 5024993  |
| 9.970617 | 9  | 5 | 4 | 1476333  | 3373305  | 1079948  | 2467984  | 1810733  | 3131776  | 5153980  | 3200420  | 2203970  |
| 9.4468   | 8  | 5 | 3 | 1222182  | 3880121  | 1478155  | 5623966  | 3704635  | 5508982  | 4167836  | 5020069  | 2223119  |
| 10.58813 | 6  | 3 | 3 | 236973.1 | 972777.3 | 304717.8 | 808405.4 | 238029.3 | 579001.7 | 1316187  | 1239273  | 909695   |
| 10.008   | 5  | 3 | 2 | 338216.8 | 581089.6 | 288209.9 | 774796.1 | 353610.9 | 636467.6 | 161875.3 | 954106.4 | 492034.5 |
| 9.311883 | 5  | 2 | 3 | 379220.5 | 3249079  | 1573092  | 2268673  | 1697697  | 4607661  | 947244.7 | 3943359  | 4432166  |
| 10.95055 | 10 | 5 | 5 | 686118.3 | 3738534  | 1114923  | 3139915  | 860607.3 | 4799703  | 4475460  | 2605130  | 2458149  |
| 25.36367 | 7  | 2 | 5 | 627874.4 | 3663376  | 932911.3 | 3085293  | 996908.4 | 2828543  | 5188315  | 3871896  | 3137694  |
| 9.872883 | 10 | 5 | 5 | 1569443  | 8278890  | 830642.5 | 7444784  | 1736754  | 8307741  | 7611668  | 9214221  | 8965550  |

|          |    |   |   |          |          |          |          |          |          |          |          |          |
|----------|----|---|---|----------|----------|----------|----------|----------|----------|----------|----------|----------|
| 10.97857 | 9  | 5 | 4 | 10403612 | 1.16E+08 | 9896596  | 1.07E+08 | 19519596 | 1.19E+08 | 1.25E+08 | 1.05E+08 | 1.07E+08 |
| 9.731817 | 8  | 4 | 4 | 6833212  | 1086485  | 450634.2 | 6613128  | 12290474 | 1717162  | 1299767  | 1043343  | 838596.7 |
| 9.949233 | 9  | 5 | 4 | 869394.9 | 3054827  | 464465.4 | 2584425  | 980987.4 | 3453704  | 3444296  | 2792313  | 2376604  |
| 19.60683 | 6  | 4 | 2 | 1021485  | 2273903  | 4186177  | 387545.8 | 455717.1 | 9748855  | 728571.7 | 277014.6 | 70256.71 |
| 20.90317 | 10 | 5 | 5 | 679741.8 | 2988351  | 545346.2 | 2533399  | 910764.5 | 3351677  | 3245433  | 2369768  | 2435684  |
| 10.9645  | 10 | 5 | 5 | 20658268 | 1.41E+08 | 15854404 | 1.29E+08 | 21978165 | 1.52E+08 | 1.54E+08 | 1.23E+08 | 1.24E+08 |
| 9.4775   | 5  | 4 | 1 | 4981576  | 13149073 | 9266549  | 19133056 | 10671671 | 29633737 | 10615896 | 8218061  | 9035832  |
| 10.95055 | 4  | 3 | 1 | 234801.9 | 506317.1 | 235181.4 | 389343.5 | 138224.5 | 726984   | 735295.7 | 491726.1 | 401188.5 |
| 8.827383 | 8  | 4 | 4 | 373176.6 | 2711348  | 824400.4 | 2304073  | 468969   | 3484060  | 3434265  | 2352378  | 1501148  |
| 9.596017 | 10 | 5 | 5 | 2404626  | 25249056 | 3267860  | 21992340 | 6780613  | 21114876 | 25773641 | 23458820 | 26004110 |
| 18.864   | 8  | 5 | 3 | 4246513  | 457227.5 | 181565.3 | 9959343  | 21159895 | 695332.5 | 251310   | 586568.4 | 337778.6 |
| 10.07237 | 9  | 5 | 3 | 21217906 | 1213656  | 1076205  | 23889137 | 50501490 | 1087566  | 1161184  | 647132.9 | 3003183  |
| 9.886433 | 8  | 3 | 4 | 516943.8 | 695478.8 | 526222.7 | 1101988  | 794683.6 | 756876.7 | 1191275  | 1191708  | 337534.7 |
| 9.445217 | 13 | 5 | 4 | 1298403  | 6782369  | 1710936  | 5776628  | 1653628  | 8455537  | 8551516  | 6734830  | 5172525  |
| 9.914217 | 8  | 3 | 3 | 2454831  | 5445557  | 579192.5 | 5937783  | 991497.8 | 5821640  | 5113046  | 6283100  | 4995138  |
| 12.92323 | 5  | 4 | 1 | 78647.29 | 203262.5 | 89405.68 | 317058.9 | 244225.2 | 234535.6 | 321227.1 | 121549.4 | 233230.2 |
| 9.464933 | 5  | 3 | 1 | 3637775  | 9612160  | 9756436  | 14334974 | 4970016  | 22057490 | 3392962  | 2836883  | 1486364  |
| 9.94455  | 4  | 3 | 1 | 1123057  | 1269740  | 946621.4 | 773459.2 | 683971.5 | 1850260  | 2631370  | 676989.9 | 338587.5 |
| 10.02372 | 9  | 5 | 4 | 3744608  | 872605.4 | 350699.1 | 4090889  | 7169541  | 622726.8 | 1378873  | 569040.5 | 696257.2 |
| 9.445217 | 12 | 4 | 5 | 3.11E+08 | 1.28E+09 | 2.73E+09 | 51829225 | 16039409 | 46444985 | 61374806 | 66284451 | 6.16E+09 |
| 9.859983 | 10 | 5 | 5 | 1.01E+08 | 2.29E+08 | 24999586 | 3.43E+08 | 2.54E+08 | 2.42E+08 | 2.19E+08 | 2.58E+08 | 2.33E+08 |
| 11.5505  | 10 | 5 | 5 | 145414.6 | 576637.4 | 195800.9 | 699679.1 | 215494.5 | 592303.7 | 709828.8 | 264432.5 | 547510.4 |
| 21.72433 | 10 | 5 | 5 | 3044071  | 1435702  | 1459069  | 6699943  | 11689672 | 1388703  | 684401.4 | 3964159  | 398790.5 |
| 22.56617 | 10 | 5 | 5 | 1440594  | 7001083  | 2949851  | 5572684  | 1513883  | 7289953  | 7651786  | 3259334  | 5540980  |
| 30.60617 | 9  | 5 | 4 | 3160622  | 31702338 | 38894890 | 14223926 | 3686057  | 10362738 | 7743847  | 99298166 | 10452193 |
| 9.845483 | 7  | 4 | 3 | 640849.6 | 1529089  | 202914   | 1938350  | 900623.6 | 1658842  | 1426255  | 1774128  | 1251228  |
| 10.95055 | 5  | 3 | 2 | 645500.2 | 1342004  | 872699.5 | 2192044  | 1766174  | 533708.1 | 919877.8 | 1972034  | 2547107  |
| 20.76667 | 10 | 5 | 5 | 577244.2 | 2819489  | 1905052  | 1741922  | 1696861  | 1818697  | 1984595  | 641165.9 | 4734246  |
| 44.98333 | 6  | 2 | 4 | 354699.7 | 2642623  | 804034.5 | 3463598  | 1719744  | 1231776  | 2866186  | 3260518  | 2954896  |
| 10.98605 | 4  | 1 | 3 | 1185298  | 5100369  | 2363540  | 3423360  | 3171172  | 5534283  | 7961217  | 5202882  | 5425502  |
| 15.31398 | 10 | 5 | 5 | 887877.6 | 7614356  | 1481724  | 6470326  | 2241317  | 8471211  | 9554257  | 7649609  | 5828738  |
| 9.842    | 5  | 3 | 2 | 458721.2 | 1111340  | 548803.1 | 798349.5 | 498555.4 | 1607943  | 280743.2 | 1587060  | 1166733  |
| 9.859983 | 10 | 5 | 5 | 1.12E+08 | 2.44E+08 | 26840825 | 3.63E+08 | 2.65E+08 | 2.57E+08 | 2.32E+08 | 2.77E+08 | 2.5E+08  |
| 9.952017 | 4  | 1 | 3 | 425234   | 586419.5 | 336089.4 | 801152.1 | 381668.3 | 496319.2 | 45618.59 | 900078.2 | 709422.8 |
| 24.7825  | 8  | 5 | 3 | 63469.67 | 220980.7 | 48908.77 | 266444.9 | 93715.49 | 295304.8 | 167882.3 | 216345.1 | 189602.8 |



|          |    |   |   |          |          |          |          |          |          |          |          |          |
|----------|----|---|---|----------|----------|----------|----------|----------|----------|----------|----------|----------|
| 43.7035  | 4  | 1 | 3 | 414428.9 | 5275517  | 380986.7 | 6990999  | 3819681  | 5416326  | 4601143  | 5537918  | 5397376  |
| 9.41815  | 9  | 5 | 4 | 11648375 | 3596041  | 1013545  | 30050217 | 59076064 | 3159146  | 4710305  | 3671461  | 4312258  |
| 38.78667 | 6  | 2 | 3 | 385765   | 7841441  | 2391123  | 9612799  | 3418965  | 3588414  | 9276377  | 8884521  | 8901065  |
| 10.94208 | 4  | 3 | 1 | 228869.5 | 602294.8 | 256296.1 | 749855.6 | 238157.4 | 331188.1 | 1024465  | 530849.1 | 525402.7 |
| 9.544833 | 4  | 1 | 3 | 4355286  | 1047764  | 716666.2 | 5203082  | 9267158  | 1108412  | 683938.8 | 760040   | 2254539  |
| 39.7335  | 5  | 1 | 3 | 323171.8 | 5611589  | 183734.5 | 4993081  | 1375228  | 5518560  | 5456011  | 5633652  | 5529892  |
| 9.949233 | 7  | 2 | 4 | 1233469  | 1383669  | 823273.3 | 2146128  | 1571687  | 1926377  | 0        | 2084297  | 1479511  |
| 9.229717 | 7  | 4 | 3 | 3166244  | 2067093  | 2234883  | 5294847  | 7012822  | 727144.7 | 1299292  | 916851.1 | 6037404  |
| 9.43325  | 6  | 2 | 4 | 913907.8 | 4258134  | 2979400  | 2668492  | 2288701  | 6229001  | 6064476  | 6963852  | 1128526  |
| 10.38125 | 10 | 5 | 5 | 480200.1 | 2800315  | 825933.5 | 2316637  | 796897.5 | 2929480  | 3967210  | 3037110  | 1789510  |
| 9.37735  | 7  | 3 | 3 | 541475.3 | 3572383  | 2316279  | 2472984  | 1048207  | 2168736  | 7139760  | 2714429  | 1310835  |
| 9.664033 | 8  | 5 | 3 | 550767   | 671119.5 | 156304   | 1100624  | 953196.1 | 810781.3 | 831732.1 | 450901.7 | 612097.1 |
| 9.4468   | 6  | 4 | 2 | 430688.4 | 1487381  | 781063.8 | 1022542  | 779201.1 | 2748947  | 856016.3 | 918956.6 | 1206434  |
| 9.872917 | 9  | 5 | 4 | 1956844  | 11867348 | 1017936  | 10799542 | 2250229  | 11530246 | 10395311 | 11843136 | 12481479 |
| 9.43325  | 9  | 4 | 5 | 11012085 | 46741450 | 54847915 | 21738801 | 14482400 | 14864819 | 20169487 | 1.43E+08 | 40665101 |
| 9.856867 | 10 | 5 | 5 | 1685791  | 7927516  | 1822411  | 6975678  | 1313239  | 7558093  | 7336919  | 5406485  | 10106786 |
| 9.392767 | 7  | 4 | 3 | 827695.7 | 1333248  | 328014.7 | 982091.4 | 742292.8 | 1527298  | 1622182  | 947556.9 | 1005545  |
| 10.9645  | 10 | 5 | 5 | 797189.2 | 1745961  | 461603.1 | 2196489  | 938939.4 | 2399213  | 2040814  | 1393315  | 1584224  |
| 9.992233 | 5  | 2 | 3 | 468216.3 | 541964.7 | 349992.5 | 888057   | 722912.2 | 661566.8 | 972579.6 | 703397.8 | 112106.8 |
| 11.28397 | 4  | 3 | 1 | 203631.3 | 882953.6 | 452795.8 | 1091733  | 150267.9 | 838876.9 | 1011952  | 1252438  | 125773.4 |
| 9.856867 | 10 | 5 | 5 | 1292152  | 3769385  | 714704   | 4781945  | 2199358  | 4246794  | 4680755  | 2836988  | 3615981  |
| 9.872883 | 10 | 5 | 5 | 4138426  | 26412833 | 4703907  | 22034261 | 9050086  | 25961854 | 22039648 | 22068431 | 28963189 |
| 9.992233 | 10 | 4 | 4 | 8047628  | 8397859  | 16227311 | 1141503  | 635652.9 | 1132051  | 1386519  | 1561568  | 492074.8 |
| 22.45067 | 5  | 2 | 3 | 100466.4 | 516639.4 | 179094.1 | 407770.5 | 186668.7 | 276503.9 | 763881.1 | 591244.8 | 458450.1 |
| 9.992233 | 10 | 5 | 5 | 472771.8 | 1986713  | 267784.6 | 1728690  | 537184.3 | 2270426  | 2094255  | 1873448  | 1580036  |
| 9.311417 | 7  | 3 | 4 | 1315252  | 1747663  | 779068.1 | 2115915  | 345175.7 | 1645553  | 1414286  | 995711.4 | 1621734  |
| 9.23175  | 5  | 3 | 2 | 1160065  | 1685614  | 353465.8 | 2290259  | 1328031  | 1700911  | 1709749  | 1267342  | 1519912  |
| 10.9645  | 9  | 5 | 4 | 340154.8 | 1923023  | 544635.1 | 1567068  | 646288.9 | 2117957  | 1931782  | 1245422  | 1622857  |
| 10.03947 | 7  | 3 | 4 | 581473.2 | 636252.5 | 165241.9 | 971472.4 | 741210   | 469899.7 | 661156   | 569897.4 | 574426.4 |
| 9.929783 | 9  | 4 | 5 | 4129314  | 7879363  | 483003.8 | 6665110  | 2697891  | 8338313  | 7971605  | 7063597  | 7929326  |
| 9.932033 | 6  | 2 | 4 | 641423.6 | 1296150  | 320744.5 | 1144403  | 144426.2 | 1498732  | 1338980  | 930338.4 | 1019029  |
| 10.95055 | 10 | 5 | 5 | 788679.3 | 4539460  | 1356153  | 3782045  | 1184006  | 5920541  | 5421145  | 3087307  | 3077139  |
| 9.43325  | 6  | 5 | 1 | 466953   | 2016522  | 802685   | 1369149  | 1293851  | 1754009  | 1326134  | 2951148  | 2786570  |
| 10.97857 | 10 | 5 | 5 | 657713.1 | 1513225  | 513440.9 | 2332072  | 1794784  | 1180269  | 2323560  | 1652512  | 1401669  |
| 9.992233 | 10 | 5 | 5 | 603697.3 | 2334790  | 133547.5 | 2080808  | 560833.4 | 2425134  | 2113164  | 2414410  | 2417128  |

|          |    |   |   |          |          |          |          |          |          |          |          |          |
|----------|----|---|---|----------|----------|----------|----------|----------|----------|----------|----------|----------|
| 9.95825  | 9  | 5 | 3 | 2385250  | 1993790  | 720195   | 4094523  | 4680944  | 2277863  | 710904.1 | 2426053  | 2298144  |
| 10.008   | 8  | 5 | 3 | 1283946  | 775700.8 | 276762.2 | 1692203  | 2045440  | 589453.2 | 592487.8 | 684959.7 | 756796.2 |
| 9.061    | 7  | 4 | 3 | 515877.8 | 1941371  | 1033422  | 2837491  | 1828548  | 2364330  | 671430.3 | 2135421  | 1212047  |
| 9.445217 | 14 | 5 | 5 | 2908122  | 28891667 | 8500898  | 24568954 | 5639708  | 38965810 | 31813229 | 33432600 | 21648190 |
| 9.915583 | 10 | 5 | 5 | 2942373  | 5259578  | 2133167  | 7501294  | 4743181  | 4155970  | 4207522  | 7758199  | 7276126  |
| 9.933967 | 6  | 4 | 2 | 1748957  | 2750730  | 385458   | 1992099  | 1677745  | 2637512  | 2375464  | 2743450  | 2600037  |
| 9.9014   | 10 | 5 | 5 | 4176968  | 21326098 | 3708317  | 17753000 | 7456738  | 20581042 | 16086724 | 20475964 | 23534677 |
| 9.872883 | 10 | 5 | 5 | 3162691  | 17177162 | 6028131  | 14058743 | 4253719  | 15191749 | 12596228 | 12947853 | 27279589 |
| 21.64033 | 5  | 1 | 4 | 5018635  | 15433156 | 13831490 | 26636646 | 22452335 | 10563189 | 40102901 | 9747077  | 9082638  |
| 9.858833 | 10 | 5 | 5 | 1558142  | 9986486  | 753290.9 | 10773836 | 1665284  | 9503891  | 8922730  | 10753994 | 10456363 |
| 9.94455  | 8  | 4 | 4 | 6019685  | 5185330  | 1117918  | 14356379 | 20562588 | 5783451  | 4058637  | 6839088  | 4578907  |
| 19.95467 | 4  | 1 | 3 | 107505.5 | 355143.8 | 144094.6 | 251987.7 | 197472.7 | 184282.7 | 534625.9 | 302048.1 | 282942.2 |
| 18.40483 | 4  | 3 | 1 | 18950806 | 99318452 | 1.22E+08 | 45001585 | 10895088 | 39258669 | 3.17E+08 | 50065715 | 54605734 |
| 11.16645 | 6  | 2 | 4 | 72666.95 | 132117.8 | 98350.32 | 242671.9 | 236222.9 | 298660   | 141091.1 | 56020.26 | 73997.18 |
| 40.424   | 5  | 2 | 3 | 308548.1 | 4840350  | 1513172  | 4122290  | 707769.9 | 4610096  | 7335497  | 4332729  | 4695982  |
| 10.95055 | 10 | 5 | 5 | 301713.1 | 1693497  | 572951.7 | 1389790  | 437710.3 | 2225870  | 2013850  | 1114324  | 1030323  |
| 10.00098 | 10 | 5 | 4 | 2.54E+08 | 5829614  | 2821393  | 2.6E+08  | 5.71E+08 | 5273727  | 4722889  | 5029434  | 3411747  |
| 9.856867 | 9  | 4 | 5 | 3555998  | 8644306  | 11933770 | 3307432  | 1536951  | 3395066  | 3086989  | 3044565  | 3708187  |
| 9.992233 | 10 | 5 | 5 | 1308771  | 4464639  | 745732.9 | 3828418  | 1295219  | 4672835  | 5523997  | 4171152  | 3478433  |
| 10.02372 | 9  | 5 | 4 | 328364.9 | 991253.4 | 335430.2 | 773515.6 | 395248.1 | 842005.1 | 1316568  | 855311.4 | 582177.1 |
| 10.96715 | 7  | 2 | 4 | 301739.5 | 907044   | 194032.2 | 760103.1 | 288266.8 | 601636.7 | 1031854  | 1022356  | 824980.8 |
| 9.45945  | 12 | 5 | 4 | 36697308 | 23450338 | 8658588  | 99154894 | 1.7E+08  | 25216358 | 31503510 | 29743198 | 20985065 |
| 10.95602 | 9  | 5 | 4 | 97756328 | 2295218  | 885624.2 | 1.15E+08 | 2.53E+08 | 1084499  | 1711961  | 3006870  | 3182162  |
| 18.39967 | 6  | 3 | 3 | 330352.1 | 4520352  | 1556652  | 3745024  | 957435.1 | 4836809  | 4917437  | 3443937  | 2675667  |
| 9.4468   | 7  | 4 | 3 | 1411284  | 10786498 | 2185512  | 12147630 | 2399852  | 13539391 | 12421009 | 10124719 | 8064120  |
| 9.4925   | 10 | 5 | 5 | 1625490  | 4109615  | 670472.9 | 3303642  | 1736659  | 4693214  | 4903517  | 3751819  | 3300304  |
| 9.949233 | 8  | 5 | 3 | 11664494 | 5242591  | 1593937  | 14608922 | 21020605 | 6258277  | 6154568  | 6571874  | 4397823  |
| 10.41105 | 11 | 5 | 3 | 561089.4 | 4903804  | 976020.8 | 4299322  | 1061188  | 5647367  | 3887759  | 5419361  | 3799950  |
| 9.568567 | 9  | 5 | 4 | 1733474  | 6189604  | 914379.8 | 5220729  | 2057350  | 7252356  | 7007505  | 5996934  | 5550785  |
| 9.960467 | 9  | 5 | 4 | 855795.7 | 2195503  | 453579.6 | 1745358  | 946505.6 | 1825750  | 2541945  | 2054951  | 1761188  |
| 10.21522 | 10 | 5 | 5 | 3934061  | 9531949  | 3287874  | 12685956 | 6593191  | 13794903 | 9274762  | 9998618  | 10014408 |
| 9.9847   | 9  | 4 | 5 | 1.48E+08 | 2.07E+08 | 4.51E+08 | 6301248  | 2625287  | 1.01E+09 | 7840351  | 6243912  | 5863044  |
| 10.9645  | 10 | 5 | 5 | 248466.4 | 985387.7 | 216077.4 | 846866.7 | 249885.8 | 1174028  | 1244433  | 848000.9 | 737905.5 |
| 42.913   | 6  | 1 | 4 | 443573.8 | 5561902  | 739747.4 | 6548281  | 2146550  | 5691791  | 5904763  | 5915243  | 6040040  |
| 9.816167 | 6  | 4 | 2 | 263957.7 | 534464.4 | 278732   | 397427.6 | 162500.1 | 811422.2 | 410607.7 | 301157.3 | 290779.2 |

|          |    |   |   |          |          |          |          |          |          |          |          |          |
|----------|----|---|---|----------|----------|----------|----------|----------|----------|----------|----------|----------|
| 9.952017 | 10 | 5 | 5 | 4367567  | 16476359 | 2401094  | 13820663 | 5678642  | 19256135 | 17467170 | 14102348 | 13810712 |
| 20.85467 | 3  | 0 | 3 | 3830499  | 4569258  | 208912   | 11900119 | 16501638 | 4668933  | 4400231  | 4303884  | 4806001  |
| 9.8887   | 7  | 2 | 5 | 2507123  | 7215758  | 6315162  | 3981348  | 4357060  | 1971549  | 3979224  | 2356173  | 16001398 |
| 9.976317 | 10 | 5 | 5 | 11815617 | 12936515 | 4421003  | 17061405 | 8593414  | 20212452 | 14023514 | 9443076  | 10509707 |
| 9.9014   | 10 | 5 | 5 | 10953292 | 23331297 | 4014361  | 36940457 | 30504426 | 23449596 | 21182623 | 28362639 | 25704588 |
| 41.8915  | 5  | 3 | 1 | 437243.2 | 9795834  | 1907473  | 8766711  | 1543031  | 9430951  | 12629641 | 10172635 | 9421579  |
| 9.856867 | 10 | 5 | 5 | 2868218  | 16370376 | 2597949  | 13717508 | 5614232  | 14632155 | 16010492 | 13308520 | 18189158 |
| 19.44583 | 9  | 4 | 5 | 1349718  | 20613268 | 5654399  | 14241400 | 13663803 | 15823456 | 23447897 | 23990228 | 26402261 |
| 9.8445   | 10 | 5 | 5 | 20892560 | 88984803 | 23786180 | 72340209 | 31672994 | 95831673 | 1.02E+08 | 58334096 | 71552544 |
| 9.4775   | 8  | 5 | 3 | 693977.5 | 1264089  | 448379.9 | 925919.1 | 664744   | 1378970  | 1754311  | 1569961  | 953799.2 |
| 9.523633 | 8  | 3 | 5 | 2385406  | 12195475 | 3807171  | 7638662  | 9836719  | 15488350 | 5837619  | 13833297 | 11681864 |
| 10.95055 | 10 | 5 | 5 | 758017   | 5002468  | 1294773  | 4329351  | 940629.5 | 6250919  | 5850842  | 3703699  | 3502955  |
| 9.445217 | 6  | 3 | 3 | 550712.4 | 2233313  | 706537.7 | 1749599  | 910578.3 | 2314938  | 3175057  | 1619128  | 1462021  |
| 9.976317 | 14 | 5 | 5 | 2497067  | 6567957  | 1559614  | 7640333  | 2023920  | 4726495  | 7613873  | 8618076  | 6297533  |
| 9.872933 | 4  | 3 | 0 | 4360263  | 6130539  | 6913342  | 9432521  | 3465322  | 1181323  | 13189277 | 1124774  | 960318.2 |
| 27.9075  | 9  | 5 | 4 | 357902.2 | 1366816  | 644220.3 | 1920053  | 1132791  | 2347699  | 1264120  | 604300.9 | 1531784  |
| 9.960467 | 6  | 4 | 2 | 420050.8 | 791136   | 379679.8 | 599008.9 | 251682.1 | 666231.8 | 657750.4 | 516489.1 | 1461208  |
| 9.146383 | 9  | 5 | 4 | 753095.9 | 350007   | 120233.2 | 1884823  | 3457836  | 493083.7 | 464470.1 | 251085.5 | 301405.9 |
| 10.93618 | 6  | 3 | 3 | 161267.2 | 544593.5 | 314902.5 | 397177.3 | 136057.2 | 994434.8 | 727032   | 281079.1 | 251630.3 |
| 10.98605 | 4  | 1 | 3 | 681504.6 | 1817875  | 713108.6 | 1375078  | 782865.6 | 2645548  | 2401344  | 1581715  | 868062.9 |
| 13.72648 | 5  | 2 | 3 | 284615.9 | 2659290  | 401419.3 | 3482445  | 1831956  | 2954548  | 2647657  | 3157693  | 2229248  |
| 9.554967 | 8  | 5 | 3 | 208967   | 427865.5 | 125324.6 | 291155.3 | 292360.8 | 445197.6 | 639492.4 | 360884.1 | 355056.5 |
| 9.93625  | 10 | 5 | 5 | 2545473  | 9629764  | 1538891  | 8253937  | 2845832  | 11447526 | 10270234 | 8021249  | 8019590  |
| 11.51172 | 3  | 0 | 3 | 3965433  | 466800   | 65246.25 | 9269501  | 19848846 | 429172.3 | 399968.5 | 568568.4 | 487964.1 |
| 9.842    | 10 | 5 | 5 | 1352288  | 5047230  | 1953231  | 7048156  | 4243293  | 4355584  | 5749240  | 2931106  | 4151501  |
| 9.920517 | 7  | 4 | 3 | 1414595  | 3594329  | 1384617  | 2883229  | 970327.8 | 3868621  | 2753643  | 5908624  | 2759896  |
| 9.536783 | 9  | 5 | 4 | 274166.1 | 681862.4 | 179632.2 | 552764.6 | 249273.5 | 504851.2 | 900653.3 | 528044.2 | 638051.5 |
| 10.008   | 7  | 4 | 3 | 236012.8 | 512755.5 | 120782.9 | 398786.4 | 238471.1 | 503563.9 | 591354.3 | 499962.8 | 325820.5 |
| 9.445217 | 9  | 5 | 4 | 606954.1 | 2153552  | 1257811  | 1497224  | 929156.5 | 3928966  | 865660.1 | 2748814  | 1075016  |
| 10.2013  | 9  | 4 | 5 | 346886.7 | 1555230  | 645506.7 | 1909324  | 547864.4 | 1727188  | 1096029  | 2409728  | 754290.7 |
| 9.94455  | 7  | 3 | 4 | 1481256  | 3660032  | 3197104  | 2148824  | 1506774  | 1788567  | 1325917  | 8867148  | 1689597  |
| 9.554967 | 7  | 5 | 2 | 337825.8 | 724908.9 | 148210.2 | 571222.1 | 326800.4 | 802880.8 | 943804.1 | 611847.3 | 587206.8 |
| 9.928667 | 6  | 4 | 2 | 515328.3 | 1185684  | 210629.6 | 840068   | 763967.8 | 1524479  | 1254229  | 1091849  | 1024993  |
| 10.9645  | 10 | 5 | 5 | 1522750  | 6581488  | 1726388  | 5561631  | 1728615  | 7247693  | 6042326  | 4567521  | 5889278  |
| 10.51392 | 5  | 2 | 3 | 288994.5 | 1904345  | 587779.5 | 1496509  | 775383.6 | 1237315  | 2195915  | 2035267  | 1392204  |

|          |    |   |   |          |          |          |          |          |          |          |          |          |
|----------|----|---|---|----------|----------|----------|----------|----------|----------|----------|----------|----------|
| 9.967367 | 10 | 5 | 5 | 1652247  | 2054447  | 473728   | 2782134  | 1604132  | 2227083  | 2587161  | 1294744  | 2133868  |
| 9.622983 | 10 | 5 | 5 | 1381445  | 3776366  | 1362697  | 3017913  | 1200409  | 4631220  | 4025010  | 2635668  | 5427952  |
| 26.82483 | 7  | 4 | 3 | 206665.2 | 1435785  | 1020244  | 945062.4 | 540608   | 593452.5 | 1734799  | 180977.4 | 2040333  |
| 9.994767 | 10 | 5 | 5 | 1130224  | 1779974  | 1064186  | 2941285  | 2488796  | 2467213  | 3258881  | 1481524  | 709589.6 |
| 10.02372 | 10 | 5 | 5 | 1120122  | 857034.5 | 119957.5 | 1823298  | 2181194  | 729536.9 | 774649.1 | 812537.3 | 974696.9 |
| 10.95602 | 6  | 4 | 2 | 213794.4 | 637067   | 352430.6 | 471936.3 | 156466.7 | 552570.1 | 485100   | 320833.1 | 586418.7 |
| 9.920517 | 10 | 5 | 5 | 1861682  | 11949767 | 872869.5 | 10303501 | 3662845  | 12321275 | 12922850 | 10845022 | 11232571 |
| 9.554967 | 8  | 3 | 5 | 487167.4 | 1410586  | 603148   | 1053552  | 607558.6 | 1906812  | 2187532  | 1168631  | 981634.4 |
| 10.95602 | 9  | 5 | 4 | 238209.5 | 1026587  | 166344.2 | 860582.2 | 351434.9 | 1222455  | 1187062  | 881323.2 | 881131.8 |
| 10.1999  | 10 | 5 | 5 | 1162120  | 6587833  | 1099685  | 5934315  | 1116689  | 6255401  | 8304444  | 5896883  | 5512427  |
| 8.931817 | 10 | 5 | 5 | 983430.3 | 3336876  | 797693.1 | 2813050  | 967342   | 3036093  | 4514756  | 3510683  | 3303857  |
| 13.12793 | 6  | 4 | 1 | 304156.5 | 1681166  | 917161.4 | 2342390  | 1282174  | 1958975  | 1878857  | 2739342  | 224160   |
| 10.9645  | 10 | 5 | 5 | 9532182  | 61042815 | 8083932  | 55842977 | 9475492  | 65946143 | 68315012 | 51413657 | 53117201 |
| 10.95055 | 10 | 5 | 5 | 797644.3 | 4654925  | 1324304  | 3929640  | 1124500  | 5930465  | 5481174  | 3220665  | 3219903  |
| 9.857683 | 10 | 5 | 5 | 2736715  | 12762873 | 4360548  | 10679541 | 2232401  | 12484733 | 8240674  | 10773593 | 19934134 |
| 9.43325  | 12 | 5 | 4 | 1068617  | 8854476  | 2617077  | 7577130  | 1505958  | 11309097 | 9856106  | 10934036 | 6686884  |
| 10.97857 | 10 | 5 | 5 | 306869.2 | 1106741  | 233837.2 | 937895.5 | 327705.1 | 1109829  | 1399856  | 995827   | 786802.3 |
| 9.37735  | 8  | 3 | 4 | 622407.4 | 4377095  | 2737760  | 3001025  | 1789327  | 7955710  | 2724219  | 5574217  | 799033.3 |
| 9.102033 | 4  | 3 | 1 | 1463998  | 565864.6 | 318903.6 | 2621401  | 4642231  | 984829.9 | 810542.6 | 262711.1 | 300413   |
| 9.445217 | 7  | 3 | 3 | 1551973  | 7746098  | 1574515  | 5872338  | 4059664  | 9054027  | 7194901  | 6685880  | 6063203  |
| 41.05717 | 4  | 0 | 3 | 338306.9 | 3229102  | 197760.2 | 3607970  | 844155.3 | 3097390  | 3388597  | 3409503  | 3297398  |
| 40.28033 | 8  | 4 | 3 | 306639.2 | 7771575  | 4514245  | 5625211  | 2247699  | 15701056 | 5848592  | 4604956  | 7014644  |
| 9.08685  | 10 | 5 | 5 | 26784152 | 98756250 | 19344707 | 81834395 | 34953934 | 95890544 | 1.31E+08 | 98583238 | 85673504 |
| 43.47383 | 8  | 4 | 2 | 339409.7 | 4907260  | 1486596  | 4243924  | 278505.7 | 7263834  | 3321017  | 5111122  | 4776654  |
| 9.43325  | 6  | 3 | 3 | 719964.1 | 1912442  | 1021739  | 1404145  | 642641.8 | 1613404  | 838531.7 | 3261415  | 2670446  |
| 9.840617 | 7  | 3 | 4 | 1831174  | 894861.9 | 230051.8 | 2250079  | 3061586  | 681428.8 | 668779.4 | 977365.3 | 924215.8 |
| 9.331383 | 4  | 3 | 1 | 3019415  | 10314643 | 12916962 | 17769707 | 12389581 | 1406233  | 20490255 | 796169.2 | 1026748  |
| 27.89267 | 7  | 4 | 3 | 95238.95 | 487920.8 | 212096.1 | 382065.9 | 135260.2 | 239560.8 | 550149.3 | 365778.9 | 480891.6 |
| 9.93625  | 10 | 5 | 5 | 2266404  | 4702351  | 547251.9 | 4261264  | 892428.9 | 5639113  | 4250984  | 4454464  | 4699848  |
| 10.008   | 7  | 3 | 4 | 814457.1 | 1034411  | 377224.8 | 1432924  | 852462.9 | 1227387  | 1443135  | 1216735  | 532150   |
| 9.93625  | 4  | 1 | 3 | 838526.8 | 998582.4 | 536267.4 | 1330575  | 589726.7 | 1009094  | 1861837  | 1023335  | 530210.3 |
| 10.9645  | 10 | 5 | 5 | 209481.4 | 990496.4 | 244897.7 | 864070.5 | 176619.3 | 1186344  | 1311043  | 833699   | 741587.2 |
| 9.3919   | 12 | 5 | 5 | 1159607  | 9752205  | 2257790  | 8152377  | 3084793  | 8530892  | 11598666 | 12737245 | 8123539  |
| 10.91673 | 3  | 0 | 3 | 111768   | 151909.2 | 84539.78 | 217826.2 | 131991.2 | 272750.7 | 41011.7  | 115893.2 | 159948   |
| 10.9645  | 10 | 5 | 5 | 11606659 | 77668127 | 8667200  | 71555790 | 11761753 | 83349171 | 85838947 | 67760975 | 68785170 |

|          |    |   |   |          |          |          |          |          |          |          |          |          |
|----------|----|---|---|----------|----------|----------|----------|----------|----------|----------|----------|----------|
| 9.888767 | 9  | 4 | 5 | 1314507  | 6498250  | 825479   | 5397169  | 2412869  | 6303921  | 5323680  | 6284325  | 7219471  |
| 34.65033 | 5  | 2 | 3 | 4663040  | 9442418  | 2314143  | 28309836 | 42691598 | 11029850 | 8732353  | 6638157  | 12488718 |
| 28.83467 | 10 | 5 | 5 | 8220166  | 40254016 | 12229043 | 52738358 | 26586445 | 52806727 | 35982485 | 22867459 | 51077076 |
| 42.12167 | 7  | 2 | 3 | 348794.8 | 4554466  | 672337.5 | 5055115  | 986654.5 | 4883043  | 3378868  | 4759797  | 5062545  |
| 9.0511   | 10 | 5 | 5 | 2288742  | 8528877  | 3746703  | 6612700  | 2625504  | 11473694 | 11401529 | 10224727 | 6787927  |
| 9.992233 | 6  | 3 | 3 | 395203.3 | 892543.8 | 494282.3 | 657516.1 | 248778.7 | 767809.3 | 254357.2 | 889811.5 | 1636825  |
| 9.544833 | 11 | 4 | 5 | 649856.1 | 1265390  | 298604.8 | 1734874  | 1039818  | 1679028  | 1396958  | 1071697  | 1275312  |
| 34.00367 | 6  | 4 | 2 | 313395.3 | 2953230  | 1840255  | 2026808  | 1220268  | 5855837  | 2784627  | 988285.2 | 3252756  |
| 22.91483 | 6  | 2 | 4 | 37696.93 | 155814.9 | 96660.88 | 213761.4 | 100348.9 | 283183.4 | 69744.64 | 200016.2 | 49293.53 |
| 9.392767 | 9  | 5 | 4 | 1782090  | 3021060  | 1191138  | 2185052  | 1607224  | 3243768  | 3794813  | 1654984  | 1962390  |
| 11.30077 | 7  | 3 | 4 | 231911.1 | 638100.6 | 266900.6 | 486958.7 | 246893.1 | 952252.4 | 564896.6 | 375260   | 412860   |
| 9.174967 | 8  | 4 | 4 | 8690667  | 3558209  | 3349048  | 20782110 | 38990141 | 3146387  | 9237851  | 3221484  | 805131.8 |
| 9.9014   | 10 | 4 | 5 | 61704548 | 77967055 | 1.6E+08  | 7450233  | 3741189  | 9475879  | 3.64E+08 | 6400515  | 3689592  |
| 22.75567 | 8  | 3 | 5 | 4993052  | 21039826 | 2361994  | 18960639 | 4315858  | 20815382 | 20794138 | 18316019 | 24837430 |
| 10.9645  | 5  | 3 | 2 | 452098.7 | 1149147  | 563462.2 | 1506769  | 649377.6 | 702954.2 | 803697.1 | 854526.6 | 2062920  |
| 9.856867 | 5  | 3 | 2 | 2125960  | 2595320  | 705955   | 2982267  | 605634.7 | 1677571  | 3082641  | 2853327  | 3326631  |
| 22.9145  | 5  | 2 | 3 | 57328.04 | 107266.6 | 42285.6  | 156758.1 | 107421.4 | 156837.1 | 104883.2 | 126014.4 | 107194.3 |
| 10.008   | 9  | 5 | 4 | 5552886  | 1781134  | 305008.2 | 4617212  | 6430111  | 2097793  | 1919017  | 1857029  | 1285271  |
| 9.188783 | 9  | 5 | 4 | 5621127  | 5521488  | 3040780  | 11324452 | 12972364 | 2670803  | 9935208  | 7121865  | 4891950  |
| 9.992233 | 6  | 3 | 3 | 590850.3 | 780945.6 | 383083.9 | 1146539  | 771686.5 | 1151902  | 1111493  | 844331.6 | 250857.3 |
| 9.45945  | 10 | 4 | 5 | 636765.2 | 4552785  | 1509314  | 3657600  | 1538624  | 5965728  | 5767103  | 5097148  | 3363959  |
| 10.95602 | 10 | 5 | 5 | 336759.7 | 1425098  | 553453.3 | 1110215  | 517914.4 | 2042906  | 1962366  | 875939.1 | 935383.6 |
| 9.4925   | 11 | 5 | 4 | 1681883  | 3265306  | 1346596  | 5020732  | 3848844  | 2890577  | 5598940  | 2300679  | 2420164  |
| 9.438833 | 5  | 4 | 1 | 540539.6 | 2901634  | 4006441  | 1125632  | 607696.8 | 838190.6 | 856227.5 | 1230552  | 10050032 |
| 20.259   | 10 | 5 | 5 | 155610.9 | 1254174  | 203767.3 | 1141908  | 177314.7 | 1434414  | 1421674  | 1006222  | 1064489  |
| 9.374083 | 9  | 5 | 4 | 1993444  | 4769005  | 1380277  | 3654403  | 2265550  | 5198133  | 3507737  | 3606045  | 4647849  |
| 9.994767 | 8  | 5 | 3 | 651149.1 | 768418.4 | 452442.2 | 1127668  | 726657   | 866139.8 | 1471776  | 743682.9 | 300914   |
| 10.67637 | 8  | 5 | 3 | 92983.68 | 394358.2 | 47890.59 | 447160.3 | 114027.6 | 333389   | 432502.8 | 451450   | 386033.1 |
| 9.460217 | 7  | 3 | 3 | 2317445  | 10236684 | 2935004  | 8006413  | 4446944  | 8114613  | 14510555 | 8796327  | 12044309 |
| 21.051   | 9  | 5 | 4 | 90747.6  | 366166.1 | 135665.6 | 300227.6 | 78328.68 | 501874.8 | 425257.7 | 399836.3 | 141298.9 |
| 39.6615  | 7  | 3 | 2 | 323166.2 | 4667400  | 2004146  | 3771389  | 482457.3 | 4123410  | 3954980  | 8158143  | 3011011  |
| 10.49953 | 10 | 5 | 5 | 550609.2 | 2213212  | 716473.4 | 1790285  | 725424.6 | 1545183  | 3392406  | 2291796  | 1783250  |
| 24.16133 | 9  | 5 | 4 | 676100.1 | 4594170  | 1887009  | 3501417  | 1839214  | 3161237  | 6110957  | 2378230  | 4497031  |
| 10.9645  | 10 | 5 | 5 | 208391.5 | 843110.4 | 193405.5 | 716640.6 | 234973.5 | 976237.2 | 1117557  | 702852.6 | 685179.6 |
| 9.842    | 9  | 5 | 4 | 7371804  | 2630463  | 352498.4 | 10524874 | 17942718 | 2731931  | 2354088  | 2492428  | 2373216  |

|          |    |   |   |          |          |          |          |          |          |          |          |          |
|----------|----|---|---|----------|----------|----------|----------|----------|----------|----------|----------|----------|
| 9.842    | 9  | 5 | 4 | 6272510  | 20910332 | 9018080  | 25850337 | 7762505  | 23397732 | 17737638 | 7049799  | 30543859 |
| 29.05717 | 10 | 5 | 5 | 17225122 | 1.47E+08 | 34507097 | 1.27E+08 | 34155707 | 1.66E+08 | 1.74E+08 | 1.15E+08 | 1.05E+08 |
| 10.92253 | 9  | 5 | 4 | 712513.6 | 896365.9 | 271169.6 | 1296526  | 886484   | 1149129  | 690747.9 | 651784.9 | 762002.7 |
| 9.56645  | 19 | 5 | 5 | 8406142  | 83041632 | 23599328 | 70418139 | 19137968 | 1.08E+08 | 90681909 | 1.01E+08 | 57151418 |
| 10.9645  | 10 | 5 | 5 | 769111.9 | 3687987  | 675542.3 | 3220781  | 896596.6 | 4149067  | 4390101  | 2834383  | 3118881  |
| 9.856867 | 10 | 5 | 5 | 8586623  | 42039151 | 3846883  | 38070358 | 8511306  | 47048313 | 44857058 | 39015064 | 37982015 |
| 42.51    | 4  | 3 | 1 | 285193.8 | 8578637  | 591183.7 | 7979463  | 1281665  | 9145658  | 7773920  | 8831976  | 8143847  |
| 9.445217 | 14 | 5 | 5 | 10290014 | 95167530 | 29877765 | 80112523 | 20222472 | 1.3E+08  | 1.06E+08 | 1.12E+08 | 64440114 |
| 22.29133 | 5  | 4 | 1 | 98608.47 | 388765.4 | 171611.9 | 304968.7 | 102304.4 | 173453.6 | 647956.1 | 408809.9 | 326648.4 |
| 10.95055 | 10 | 5 | 5 | 2050619  | 12262158 | 3601559  | 10290644 | 3107967  | 15745355 | 14824826 | 8447808  | 8305109  |
| 9.999217 | 8  | 4 | 4 | 764759.8 | 1167375  | 395279.1 | 1523706  | 747029.9 | 1287088  | 1564669  | 1326093  | 513826.7 |
| 9.960467 | 15 | 5 | 5 | 683305   | 1578223  | 797795.6 | 2059353  | 845174.7 | 2575256  | 762495.9 | 2266335  | 1011253  |
| 9.507167 | 9  | 5 | 4 | 3103546  | 16911726 | 5088224  | 12010745 | 10407979 | 16554115 | 20889762 | 8358885  | 20448440 |
| 10.008   | 6  | 4 | 2 | 278172.3 | 589706   | 354598.5 | 362991.6 | 416541.8 | 559624.3 | 259249.8 | 345923.2 | 617255.3 |
| 10.97242 | 10 | 5 | 5 | 359878.4 | 1754252  | 376579.7 | 1513207  | 443239.5 | 1804145  | 2033902  | 1174298  | 1635679  |
| 24.797   | 6  | 3 | 3 | 60101.2  | 264743.1 | 87973.17 | 223144.8 | 44213.45 | 211122.9 | 342182.1 | 166688.1 | 371556.6 |
| 37.19283 | 9  | 3 | 3 | 355608.3 | 5981312  | 963428.2 | 5523433  | 499681.9 | 7330301  | 5490157  | 4941525  | 6598623  |
| 9.992233 | 12 | 5 | 4 | 627574.3 | 1011638  | 359715.5 | 1275792  | 521730.6 | 1442349  | 1172048  | 769776   | 1142663  |
| 9.8445   | 9  | 5 | 4 | 5277782  | 2912052  | 657085.1 | 8242392  | 12134664 | 3345353  | 3400776  | 3029784  | 1781422  |
| 9.896717 | 10 | 5 | 5 | 10848491 | 23266466 | 3857267  | 36640001 | 30341192 | 23093865 | 21004401 | 28085445 | 25836109 |
| 10.08658 | 14 | 5 | 4 | 992410.1 | 4456873  | 1031533  | 3422599  | 2211924  | 4590536  | 3702415  | 3154024  | 5665222  |
| 9.5876   | 5  | 3 | 2 | 388695   | 589178.4 | 234325   | 1161353  | 1292472  | 473151.7 | 968183.4 | 585888.5 | 579326.1 |
| 9.616167 | 4  | 1 | 3 | 299424.1 | 1017300  | 294444.8 | 793190.9 | 448830.2 | 1205982  | 543926.7 | 1138421  | 927241.6 |
| 9.601917 | 14 | 5 | 4 | 1975775  | 3058696  | 1580227  | 4891720  | 3994454  | 3802629  | 4849268  | 2856945  | 575635.7 |
| 9.88815  | 6  | 4 | 2 | 5924105  | 10546514 | 17246506 | 20847893 | 17962580 | 41350646 | 2233145  | 4374700  | 2894902  |
| 10.79303 | 9  | 5 | 4 | 180297.6 | 555246.7 | 162609.9 | 464499.2 | 147096.6 | 348321   | 561173.1 | 801976.9 | 510098.9 |
| 9.536783 | 6  | 4 | 1 | 577513   | 712970.7 | 374596.3 | 1417923  | 1582684  | 845682.7 | 903024.2 | 540405.9 | 1120829  |
| 15.78935 | 5  | 4 | 1 | 266754.5 | 5410075  | 4307598  | 3453157  | 1516051  | 3754648  | 3542460  | 4416715  | 12997790 |
| 9.536783 | 4  | 1 | 3 | 275349.4 | 711707.4 | 393895.8 | 513546.6 | 266051.8 | 1010179  | 558091.5 | 1074359  | 809830.4 |
| 14.61932 | 8  | 4 | 4 | 235702.8 | 2591563  | 757379.4 | 2193455  | 589115.6 | 3801158  | 2682571  | 2488658  | 1774469  |
| 10.84643 | 10 | 5 | 5 | 1366519  | 4362407  | 828764.7 | 3636692  | 1513951  | 4928007  | 5326016  | 3347047  | 3695616  |
| 10.02372 | 7  | 4 | 3 | 622435.4 | 850130.3 | 718534.4 | 1306737  | 836990.8 | 505235.3 | 608792.8 | 2124952  | 619242.9 |
| 9.842    | 9  | 5 | 4 | 1062136  | 1489955  | 607224.8 | 1174975  | 454501   | 1823754  | 2368235  | 1030098  | 892821   |
| 10.02372 | 6  | 4 | 2 | 398946.6 | 940662.1 | 409125.5 | 641880   | 589859.5 | 367980.7 | 985981.6 | 1184186  | 736220.9 |
| 9.845483 | 6  | 3 | 3 | 770903.9 | 3219237  | 847797.8 | 2560832  | 1329594  | 3648190  | 2120994  | 4186287  | 2567668  |

|          |    |   |   |          |          |          |          |          |          |          |          |          |
|----------|----|---|---|----------|----------|----------|----------|----------|----------|----------|----------|----------|
| 9.655117 | 6  | 3 | 3 | 1165596  | 537127.6 | 138866.4 | 1502024  | 2199009  | 548257.3 | 558287.9 | 671308.1 | 304387.8 |
| 9.08685  | 8  | 4 | 4 | 13922591 | 7708708  | 5467443  | 36647087 | 65910758 | 8406938  | 16115842 | 8274502  | 2061184  |
| 9.976317 | 7  | 4 | 3 | 585558.1 | 944541.7 | 301973.2 | 625340.1 | 688932   | 1106842  | 1280194  | 875270.2 | 476168.3 |
| 9.928667 | 9  | 5 | 4 | 3017509  | 8121242  | 2252038  | 6513411  | 3146013  | 9731479  | 7462225  | 5341625  | 7052798  |
| 9.840617 | 9  | 5 | 4 | 1760836  | 7310668  | 1065564  | 6614516  | 1300866  | 7181355  | 5765287  | 7348876  | 7497926  |
| 26.05383 | 10 | 5 | 5 | 541652.6 | 3247244  | 475129.1 | 2930352  | 599544.1 | 2506883  | 3487452  | 3468777  | 3063084  |
| 9.67     | 3  | 0 | 3 | 518110.8 | 1347372  | 776216.5 | 918504.8 | 688611.6 | 2101268  | 243027.2 | 1160131  | 1145847  |
| 9.842    | 9  | 5 | 4 | 816456.1 | 1889059  | 508386   | 2476941  | 1283243  | 2566489  | 2237883  | 1462477  | 1375377  |
| 10.9645  | 10 | 5 | 5 | 1651195  | 7580190  | 1769363  | 6584800  | 1636138  | 9385590  | 9137417  | 5818709  | 5672027  |
| 31.011   | 6  | 2 | 4 | 1184789  | 5281084  | 5629991  | 2771150  | 1438392  | 2583364  | 2350960  | 15316969 | 2582360  |
| 9.992233 | 9  | 5 | 4 | 1487414  | 2816157  | 948166   | 3532849  | 1435655  | 3430814  | 4008259  | 2494143  | 1530076  |
| 10.94443 | 5  | 3 | 2 | 349389   | 730614.7 | 303844.8 | 901199.1 | 279777.9 | 926081.7 | 1097849  | 546106.5 | 328609.7 |
| 9.932033 | 8  | 4 | 4 | 2628593  | 4604274  | 1026315  | 3789685  | 1659022  | 5476569  | 5845240  | 3962096  | 4325879  |
| 9.4925   | 6  | 4 | 2 | 517830.6 | 2875922  | 4154164  | 1052883  | 413588.2 | 951477.6 | 617583.8 | 1075769  | 10288160 |
| 9.433    | 5  | 1 | 3 | 276378.3 | 471272.5 | 300875.1 | 776017.3 | 654729.2 | 607684.2 | 766109.6 | 361539.3 | 621029.3 |
| 9.93625  | 10 | 5 | 5 | 24944596 | 87058476 | 13883881 | 79928283 | 10132489 | 1.08E+08 | 93815584 | 80672592 | 74701807 |
| 9.999517 | 13 | 4 | 4 | 1813149  | 1660007  | 879768.9 | 3211911  | 3485307  | 1868778  | 655280.9 | 2592969  | 2354100  |
| 9.40615  | 8  | 4 | 3 | 597469.9 | 4993703  | 957111.1 | 3900738  | 2385089  | 5637262  | 4963100  | 6202840  | 3830550  |
| 9.573333 | 6  | 3 | 3 | 434011.1 | 1204195  | 531039.4 | 848744.4 | 675099.8 | 1162075  | 899555.7 | 1199843  | 682695.2 |
| 9.071517 | 9  | 5 | 4 | 1700682  | 4190178  | 1904236  | 3093576  | 1854882  | 4705285  | 5798520  | 5775951  | 3398235  |
| 31.42367 | 4  | 3 | 1 | 323725.3 | 1219208  | 1460672  | 569753.1 | 357318.5 | 173815.1 | 616012.6 | 108839   | 3608320  |
| 10.9645  | 10 | 5 | 5 | 5624156  | 27591846 | 5718107  | 23943051 | 6734790  | 33304514 | 32915308 | 22148611 | 21292250 |
| 12.00158 | 3  | 0 | 3 | 54689    | 179783.6 | 47777.68 | 145167.7 | 68344.31 | 148640.1 | 193645.3 | 145241.7 | 153576.4 |
| 9.856867 | 10 | 5 | 5 | 3798176  | 6519621  | 1055033  | 10283978 | 8574909  | 8095803  | 6584682  | 5983574  | 6696994  |
| 10.9645  | 10 | 5 | 5 | 1739188  | 8240684  | 1673577  | 7169458  | 1982809  | 9791770  | 9818301  | 6635667  | 6344864  |
| 38.22283 | 5  | 3 | 1 | 226032   | 3754657  | 1806046  | 2958666  | 315612.9 | 3075220  | 3575763  | 2895353  | 2339707  |
| 9.684583 | 7  | 3 | 4 | 252150   | 741342.4 | 216365.9 | 601593.3 | 260289.4 | 959214   | 983409.4 | 640047.7 | 504492.4 |
| 9.82645  | 6  | 4 | 2 | 907498.2 | 2395444  | 1415854  | 1715243  | 798151.5 | 1009361  | 4449596  | 2685074  | 2733698  |
| 9.9847   | 5  | 2 | 3 | 745467.1 | 403499   | 259902.8 | 834948.9 | 968011.7 | 0        | 496562.6 | 694100.6 | 497319.3 |
| 24.47583 | 5  | 3 | 2 | 1319434  | 4297426  | 5168362  | 1907912  | 2278894  | 13332052 | 3817400  | 2073090  | 1064421  |
| 9.856867 | 10 | 5 | 5 | 750731.8 | 3589541  | 396330.5 | 3208566  | 813127   | 3879402  | 3927327  | 3636122  | 2935621  |
| 9.992233 | 8  | 4 | 4 | 373134.6 | 1174140  | 255925   | 968376.8 | 421810.2 | 1167683  | 1511631  | 1044063  | 838144.2 |
| 11.06905 | 9  | 5 | 4 | 1253801  | 1170136  | 714108.5 | 2495796  | 2987500  | 2175089  | 1518772  | 695636.5 | 1115804  |
| 9.999217 | 10 | 5 | 5 | 828883.8 | 2859818  | 806781.4 | 2300931  | 1082947  | 3889861  | 3467048  | 2646899  | 1908747  |
| 9.975217 | 10 | 3 | 5 | 1698385  | 3295125  | 926414.8 | 2819587  | 678905.2 | 3042810  | 1859600  | 4174845  | 3376583  |

|          |    |   |   |          |          |          |          |          |          |          |          |          |
|----------|----|---|---|----------|----------|----------|----------|----------|----------|----------|----------|----------|
| 10.80745 | 7  | 4 | 3 | 195469.9 | 384884   | 177121.4 | 300776.3 | 94048.06 | 271028.5 | 610980.9 | 156246.7 | 477404.8 |
| 14.89615 | 3  | 0 | 3 | 1333997  | 246866.3 | 11627.56 | 3130133  | 6602710  | 242632.1 | 241926   | 236591.9 | 246497   |
| 9.872933 | 6  | 4 | 2 | 1673358  | 3273952  | 1160006  | 5056764  | 3988456  | 4601529  | 2599316  | 3154962  | 1780570  |
| 9.40255  | 7  | 3 | 3 | 602256.4 | 3818163  | 1791061  | 2821817  | 1626059  | 1009204  | 3737464  | 3952253  | 4447527  |
| 9.268717 | 6  | 2 | 4 | 504945.6 | 2862341  | 1009337  | 1943562  | 1943589  | 2145292  | 1860507  | 2893865  | 4458561  |
| 9.374083 | 9  | 5 | 4 | 728672.7 | 1691069  | 263943.4 | 1289545  | 898166.4 | 2072710  | 1346298  | 1656857  | 1609200  |
| 9.964417 | 10 | 5 | 5 | 902329.7 | 1781884  | 766508.8 | 2364580  | 1174864  | 1309389  | 2944154  | 2192924  | 1207300  |
| 9.960817 | 10 | 5 | 5 | 1746732  | 6649890  | 1173428  | 5960385  | 1196086  | 7959369  | 7778490  | 6425620  | 5446838  |
| 9.842    | 10 | 5 | 5 | 13092214 | 19598508 | 3039707  | 31337165 | 26809671 | 20726997 | 18734434 | 23380789 | 20069717 |
| 22.33733 | 6  | 4 | 2 | 840498.6 | 6526602  | 1012907  | 8298780  | 3990176  | 7991138  | 6648658  | 5141925  | 6368888  |
| 10.91407 | 7  | 4 | 3 | 178581.1 | 688751.2 | 350682.4 | 511528   | 245052.1 | 463833.3 | 852237.1 | 401568   | 494713.5 |
| 9.848417 | 10 | 5 | 5 | 822413.1 | 4315620  | 687204.5 | 3741901  | 1190385  | 4232942  | 4696680  | 4037216  | 3394793  |
| 9.853633 | 6  | 3 | 3 | 3680984  | 4537168  | 2753596  | 8280352  | 8321253  | 7940377  | 1518047  | 2693130  | 3659964  |
| 14.76612 | 4  | 3 | 1 | 92200.87 | 761388.5 | 123683   | 624896.6 | 297750.5 | 928900.8 | 784214.4 | 592064.4 | 707770.7 |
| 10.9645  | 10 | 5 | 5 | 786599.8 | 3745778  | 666515.6 | 3289750  | 880379.3 | 4332354  | 4357524  | 2969663  | 3106198  |
| 9.8445   | 13 | 5 | 5 | 1255262  | 2936647  | 799324.9 | 3742826  | 1738071  | 3782986  | 3779615  | 2697122  | 2110536  |
| 10.9645  | 9  | 4 | 5 | 840592.8 | 1190787  | 652136.6 | 1837968  | 1391972  | 1592301  | 1810440  | 1303214  | 1124383  |
| 9.655117 | 6  | 4 | 2 | 350271.7 | 1621916  | 583769.2 | 1356248  | 226002.3 | 2106714  | 1728283  | 1664825  | 628885.3 |
| 9.856867 | 10 | 5 | 5 | 3153779  | 11805785 | 2366856  | 9632236  | 4612872  | 14043471 | 13886306 | 9352303  | 9243383  |
| 9.887133 | 3  | 0 | 3 | 1020641  | 3101094  | 710319.7 | 2571285  | 1062564  | 2530090  | 3362439  | 3864081  | 3559621  |
| 9.45945  | 7  | 3 | 4 | 62551908 | 2.1E+08  | 2.82E+08 | 74996611 | 1.59E+08 | 6753976  | 5769011  | 4.73E+08 | 5.62E+08 |
| 10.95835 | 10 | 5 | 5 | 3378098  | 14778064 | 3475241  | 12330511 | 4794563  | 17180682 | 16869955 | 9813177  | 12424829 |
| 10.95602 | 8  | 4 | 4 | 354540.5 | 668441.6 | 379200.7 | 1152010  | 1070688  | 570680.9 | 1284588  | 744841.4 | 411409.2 |
| 22.95817 | 4  | 3 | 1 | 88671.8  | 234830.8 | 152036   | 324587.5 | 156911.6 | 121630.3 | 110806.7 | 407327.2 | 139888.8 |
| 25.95717 | 10 | 5 | 5 | 391075.5 | 4171532  | 1338964  | 3474664  | 1031742  | 3236571  | 6444986  | 4260906  | 3682500  |
| 9.94455  | 5  | 3 | 2 | 1808024  | 3392181  | 1305255  | 2662818  | 1203173  | 4545367  | 4724819  | 3594899  | 2211890  |
| 10.9645  | 10 | 5 | 5 | 749546.4 | 4646245  | 733155.7 | 4065386  | 1190249  | 4332176  | 5602266  | 4055737  | 3993055  |
| 17.14633 | 4  | 1 | 3 | 65000.64 | 267910.9 | 82935.41 | 218874.1 | 85902.34 | 387594.4 | 154179.2 | 273461.1 | 253296.2 |
| 9.8374   | 9  | 5 | 4 | 500894.6 | 1861391  | 438751.2 | 1512490  | 716020.6 | 2004396  | 1863153  | 1138836  | 1976283  |
| 9.979667 | 9  | 5 | 4 | 932380.3 | 3075502  | 660964.8 | 2495932  | 1219998  | 3480861  | 2567983  | 2842862  | 2463339  |
| 10.95835 | 9  | 4 | 5 | 412804.8 | 1262956  | 436207.7 | 992992.1 | 491364.1 | 1308064  | 1865764  | 771620.3 | 1451151  |
| 43.12867 | 12 | 4 | 4 | 380065.8 | 5632497  | 1398076  | 4607573  | 2045881  | 7059828  | 6503090  | 5242362  | 5913760  |
| 11.01157 | 5  | 2 | 3 | 1038785  | 4680101  | 2737290  | 2996790  | 3050331  | 6470046  | 7076205  | 1011598  | 2493381  |
| 10.95835 | 10 | 5 | 5 | 1085660  | 6282097  | 1375332  | 5345708  | 1808829  | 7311483  | 6502573  | 4833411  | 4908509  |
| 9.856867 | 10 | 5 | 5 | 1108043  | 4463715  | 418186.9 | 4043782  | 906825   | 4574129  | 4115472  | 4554193  | 5060369  |



|          |    |   |   |          |          |          |          |          |          |          |          |          |
|----------|----|---|---|----------|----------|----------|----------|----------|----------|----------|----------|----------|
| 10.008   | 10 | 5 | 5 | 658371.5 | 2487990  | 473963.9 | 2097775  | 809347.7 | 2838413  | 3005458  | 2533037  | 1820286  |
| 9.864767 | 10 | 5 | 5 | 1938793  | 8335918  | 1893406  | 6725364  | 3368914  | 5732768  | 7158121  | 8684327  | 9766005  |
| 9.874317 | 10 | 5 | 5 | 9280853  | 15350030 | 8499755  | 25933941 | 23436383 | 18128378 | 5110607  | 23518993 | 22393242 |
| 8.97505  | 10 | 5 | 5 | 913717.9 | 2202177  | 497025.9 | 1809405  | 805346.6 | 1868671  | 2765377  | 2090630  | 1623345  |
| 9.992233 | 9  | 5 | 4 | 324894.8 | 1023097  | 105523.2 | 814639.7 | 472829.6 | 1050203  | 992333   | 929057.9 | 951024.1 |
| 10.95835 | 10 | 5 | 5 | 660641.6 | 3617683  | 1000119  | 3018056  | 1065754  | 4376515  | 4420518  | 2413546  | 2643078  |
| 9.392767 | 10 | 5 | 5 | 4068475  | 9478726  | 2506787  | 7500294  | 4056729  | 10880545 | 11305500 | 6709293  | 6793687  |
| 9.952017 | 6  | 3 | 3 | 959478.6 | 2225884  | 1030413  | 1610088  | 1091852  | 2758638  | 584509.3 | 2368017  | 2083901  |
| 10.95835 | 7  | 3 | 4 | 1109996  | 3064054  | 1115141  | 2338433  | 1368817  | 1704462  | 4668622  | 3232344  | 2389811  |
| 9.845483 | 8  | 5 | 3 | 1768401  | 7358877  | 1115663  | 6284124  | 2308145  | 5933942  | 7218617  | 8805929  | 8061286  |
| 9.568567 | 9  | 5 | 4 | 4069319  | 2950917  | 1286990  | 5928243  | 6783800  | 4369101  | 3539849  | 3247264  | 2672827  |
| 9.964417 | 9  | 5 | 4 | 14663473 | 15390233 | 3789629  | 22975547 | 17224806 | 19992544 | 13977623 | 18861361 | 11924983 |
| 9.22495  | 7  | 4 | 2 | 5510121  | 3324509  | 1306217  | 17311217 | 32169092 | 3054298  | 1986417  | 2507086  | 5359276  |
| 9.522017 | 8  | 4 | 4 | 563133.3 | 627954.5 | 278365.7 | 1243256  | 1400831  | 672218.3 | 940570.2 | 211911   | 524458.4 |
| 10.94443 | 4  | 3 | 1 | 258223.7 | 610576.9 | 329107.5 | 785444.1 | 270032.1 | 813370.9 | 129479.7 | 904951.5 | 410341.2 |
| 9.445217 | 11 | 5 | 4 | 1217871  | 10744015 | 2350874  | 9281293  | 2680557  | 13258071 | 12722867 | 11019178 | 7897843  |
| 9.536783 | 7  | 4 | 3 | 438332.1 | 1280704  | 318577.7 | 985368.2 | 630161   | 1301154  | 1620038  | 921841   | 995973.9 |
| 28.8515  | 7  | 3 | 4 | 229179.8 | 1475479  | 1241580  | 857637.3 | 834401.7 | 380610.2 | 1578977  | 51996.9  | 2768291  |
| 9.986767 | 9  | 5 | 4 | 11857048 | 1995778  | 623870.7 | 9475433  | 17217867 | 2628718  | 2536114  | 2107666  | 1239316  |
| 23.00167 | 4  | 3 | 1 | 80525.13 | 252554.1 | 206047.6 | 361057.5 | 165386.8 | 131463.3 | 505138.8 | 92572.3  | 447574.7 |
| 9.419733 | 5  | 3 | 1 | 11172536 | 15742665 | 19863225 | 32292343 | 34517189 | 32279799 | 639358.2 | 2120163  | 42045290 |
| 10.49953 | 10 | 5 | 5 | 12899567 | 66116124 | 8576716  | 60442000 | 10827861 | 68435880 | 76285886 | 59477857 | 55308565 |
| 9.960467 | 6  | 4 | 2 | 480670   | 1127849  | 253477.1 | 793082.9 | 746369.3 | 1329133  | 1348303  | 1166398  | 723824.4 |
| 9.856867 | 5  | 2 | 3 | 1041977  | 2369364  | 1080961  | 3600334  | 2708829  | 3939969  | 1795775  | 1870398  | 1252840  |
| 10.51423 | 7  | 4 | 3 | 158029   | 1000471  | 390905.5 | 792322.3 | 323548.4 | 1438980  | 1285547  | 1076617  | 522862.2 |
| 8.816267 | 4  | 1 | 3 | 53537900 | 2.45E+08 | 1.55E+08 | 1.38E+08 | 2.1E+08  | 3.71E+08 | 680436.9 | 3.77E+08 | 2.77E+08 |
| 9.976317 | 9  | 5 | 4 | 2858711  | 1604970  | 447184.7 | 3216298  | 3698366  | 1963256  | 1356082  | 1966816  | 1798074  |
| 9.992233 | 8  | 4 | 4 | 438560.5 | 1177696  | 220695.3 | 974755.7 | 433043.5 | 1217313  | 1509666  | 1032977  | 929403.1 |
| 10.35132 | 10 | 5 | 5 | 2101778  | 8122494  | 358007.6 | 7589792  | 1197405  | 7746214  | 8625466  | 8158509  | 8268710  |
| 15.61447 | 10 | 4 | 5 | 533913.7 | 4626439  | 780793.2 | 4155163  | 846146.6 | 4926359  | 5225522  | 3943039  | 3652780  |
| 9.932033 | 4  | 3 | 1 | 2324750  | 3193405  | 2050164  | 2029973  | 1970136  | 5633536  | 0        | 3867666  | 2914426  |
| 10.9645  | 10 | 5 | 5 | 397248.3 | 1843114  | 279711.1 | 2235458  | 879218.4 | 1663744  | 2188583  | 1624053  | 1632910  |
| 9.874317 | 9  | 5 | 4 | 5539910  | 3287128  | 579506.7 | 5560541  | 5224559  | 2622121  | 2799371  | 3746129  | 3959459  |
| 9.992233 | 5  | 4 | 1 | 2030398  | 737584.4 | 235648   | 1437201  | 1604166  | 1086052  | 738528.4 | 799443.3 | 610341.8 |
| 10.48597 | 7  | 3 | 4 | 184775.1 | 623726.1 | 182126.7 | 532658.3 | 125260.8 | 783773.8 | 592668.5 | 693878.6 | 322473.9 |

|          |    |   |   |          |          |          |          |          |          |          |          |          |
|----------|----|---|---|----------|----------|----------|----------|----------|----------|----------|----------|----------|
| 9.856867 | 10 | 5 | 5 | 2319598  | 13142372 | 2263370  | 11734368 | 2589822  | 14006480 | 12393939 | 9553376  | 14510475 |
| 10.67637 | 10 | 5 | 5 | 561564.1 | 3569188  | 655557.4 | 3146345  | 796782.5 | 4086024  | 4013187  | 2915212  | 2791258  |
| 21.57383 | 10 | 5 | 5 | 1686795  | 1643916  | 1332558  | 4061215  | 5486242  | 3461349  | 963651.4 | 2645146  | 729931.5 |
| 9.536783 | 6  | 4 | 2 | 524101   | 1258722  | 610943.8 | 860664   | 754798.6 | 1364547  | 2041642  | 1284337  | 1275968  |
| 9.253783 | 10 | 4 | 5 | 1420004  | 2149887  | 571480.1 | 3381883  | 2810412  | 3070767  | 1882983  | 1618503  | 1868117  |
| 10.02372 | 7  | 4 | 3 | 820499.3 | 1327738  | 1110360  | 1997443  | 1203334  | 589837.6 | 858069.5 | 3284786  | 1119749  |
| 10.95055 | 6  | 4 | 2 | 183737.5 | 532875.9 | 213660.9 | 405004.1 | 228362.4 | 782022   | 741949.4 | 412671.1 | 312671.7 |
| 9.992233 | 7  | 4 | 3 | 2358509  | 1809895  | 2406937  | 3180780  | 2335086  | 659321.5 | 835046.9 | 900365.1 | 6108245  |
| 9.40615  | 9  | 5 | 4 | 695910.8 | 1971109  | 769205.6 | 1546443  | 697504.5 | 2107228  | 2231384  | 1279652  | 1180879  |
| 14.69268 | 9  | 5 | 4 | 181096.8 | 946221.9 | 328330.3 | 785963.8 | 206579.6 | 782441.5 | 996056.2 | 661793.5 | 797813.6 |
| 23.82233 | 7  | 4 | 3 | 131607.5 | 236296.5 | 113090.3 | 404629.1 | 378992.3 | 430503   | 221680.2 | 172986.8 | 143090.9 |
| 9.845483 | 10 | 5 | 5 | 5290215  | 24793564 | 4943967  | 19547856 | 11472132 | 24719888 | 23594323 | 19236147 | 23619829 |
| 10.9645  | 10 | 5 | 5 | 395844.2 | 1886424  | 387326.8 | 1654780  | 413732.3 | 2319975  | 2206661  | 1497648  | 1489668  |
| 10.97857 | 11 | 5 | 4 | 1150167  | 888414.5 | 233606.2 | 1926163  | 2389585  | 940131.3 | 539012.8 | 910508.4 | 1192144  |
| 39.96383 | 4  | 1 | 3 | 480905.6 | 4326724  | 520342.1 | 3830363  | 1068541  | 4416143  | 4614064  | 4578366  | 4617377  |
| 42.496   | 4  | 3 | 1 | 373999.2 | 6149435  | 1949519  | 5303293  | 173316.6 | 5889279  | 9552056  | 5522427  | 4884968  |
| 10.9307  | 4  | 1 | 3 | 192423.4 | 249771.9 | 234533.9 | 364372.8 | 148474.5 | 143011.9 | 665402.1 | 97759.1  | 156039.9 |
| 10.68888 | 8  | 3 | 5 | 130525.9 | 425597.7 | 128168.4 | 358007.5 | 104074.7 | 244486.2 | 411562.4 | 508929.9 | 382725.8 |
| 9.487883 | 15 | 5 | 5 | 1380011  | 11472351 | 1279000  | 14323788 | 6518165  | 10503751 | 11878486 | 9774259  | 12631472 |
| 9.388617 | 10 | 5 | 5 | 1519029  | 4681575  | 2095415  | 3634136  | 1447837  | 5052140  | 3190300  | 2667474  | 4483800  |
| 9.999217 | 10 | 5 | 5 | 2921852  | 14407109 | 1696606  | 11723488 | 6067368  | 14479021 | 14573051 | 13271908 | 12643334 |
| 9.435733 | 5  | 2 | 3 | 1276395  | 4976890  | 1848919  | 3731858  | 2410580  | 5493113  | 4967143  | 2388848  | 4510521  |
| 20.70633 | 6  | 3 | 2 | 115808.7 | 667467.7 | 244981.6 | 499660.6 | 327847.1 | 601132.9 | 796131.4 | 395652.8 | 523932.9 |
| 9.219483 | 5  | 2 | 3 | 2607480  | 1480371  | 500666.8 | 8051449  | 15189183 | 1993125  | 1013488  | 1895967  | 901372.9 |
| 10.7349  | 6  | 3 | 3 | 677723.2 | 2969950  | 1518068  | 2271764  | 695222.3 | 2819189  | 3033420  | 5417255  | 2246690  |
| 10.9645  | 10 | 5 | 5 | 584745.2 | 2858434  | 540769.4 | 2403935  | 954691.8 | 2882211  | 3252289  | 2267976  | 2374555  |
| 10.008   | 5  | 3 | 2 | 425857.7 | 925531   | 516925.1 | 599407.7 | 608166.2 | 975892   | 170619.7 | 1080682  | 799339.6 |
| 10.70315 | 9  | 5 | 4 | 310809.8 | 1323479  | 341187.3 | 1146463  | 265695.5 | 822814.2 | 1706183  | 1565655  | 1294108  |
| 10.03658 | 13 | 5 | 5 | 1024708  | 3320083  | 898732.9 | 2795319  | 920748.5 | 3837227  | 4341721  | 2677383  | 2128686  |
| 9.992233 | 9  | 4 | 5 | 19024410 | 13934906 | 25564115 | 2881972  | 1011819  | 2571597  | 3259216  | 2934016  | 59645294 |
| 9.9677   | 11 | 5 | 5 | 2812001  | 11641870 | 1623700  | 10321752 | 2751534  | 12567743 | 13506196 | 11311223 | 9171403  |
| 10.008   | 9  | 5 | 4 | 1070548  | 1035449  | 231231.9 | 1797294  | 1754871  | 1142447  | 994679.5 | 1324760  | 1021775  |
| 9.544833 | 9  | 4 | 5 | 769928.7 | 1549264  | 1264151  | 984221.8 | 436161.2 | 1244134  | 3786093  | 902013   | 1068238  |
| 9.4468   | 6  | 5 | 1 | 672331.5 | 4088232  | 517790   | 3258161  | 1880993  | 3356964  | 4762012  | 4168810  | 3880557  |
| 9.960817 | 10 | 5 | 5 | 2587660  | 10753181 | 2360709  | 9028343  | 3472733  | 13033516 | 12690553 | 9287713  | 7453075  |

|          |    |   |   |          |          |          |          |          |          |          |          |          |
|----------|----|---|---|----------|----------|----------|----------|----------|----------|----------|----------|----------|
| 11.02545 | 8  | 4 | 3 | 1192863  | 2238448  | 1689599  | 3321304  | 2043632  | 1511091  | 1847149  | 1009083  | 5210913  |
| 9.43325  | 10 | 5 | 4 | 2763018  | 17134936 | 5907104  | 13401764 | 6982640  | 25572018 | 18211534 | 18480559 | 13502392 |
| 9.842    | 10 | 5 | 5 | 668720.1 | 2146397  | 723892.7 | 2514783  | 533855.8 | 2172639  | 2495799  | 1470788  | 1438511  |
| 10.31835 | 8  | 5 | 3 | 478273.1 | 1406097  | 202466.9 | 1256056  | 303780.2 | 1291633  | 1195276  | 1694161  | 1318054  |
| 18.90883 | 4  | 3 | 1 | 1131101  | 3585369  | 4611676  | 5889303  | 3202176  | 8149579  | 173064.7 | 454722.2 | 56127.46 |
| 22.22617 | 10 | 5 | 5 | 166597.9 | 975594.8 | 406397.5 | 779581.3 | 246383   | 634139   | 1668865  | 974107.9 | 832470.6 |
| 14.7653  | 4  | 0 | 3 | 3541233  | 9426692  | 9588718  | 5246588  | 1799474  | 5247954  | 4855853  | 26537072 | 6169063  |
| 9.896717 | 7  | 3 | 4 | 2493586  | 5544027  | 2375453  | 4075632  | 2706899  | 5916742  | 1895248  | 5610985  | 5740578  |
| 9.992233 | 7  | 3 | 4 | 461308.8 | 649838.8 | 401209.4 | 1023865  | 804847.7 | 961781.7 | 1068280  | 763559.9 | 193987.2 |
| 12.38413 | 4  | 3 | 1 | 60790.1  | 149261.8 | 49866.29 | 119972.2 | 51799.67 | 211186.6 | 134629.7 | 162916   | 74890.12 |
| 18.64583 | 10 | 5 | 5 | 12175650 | 60392303 | 27781088 | 47953871 | 9925032  | 1.09E+08 | 56447539 | 44128110 | 39997821 |
| 9.701933 | 9  | 4 | 5 | 505400.3 | 1449770  | 210209.5 | 1318468  | 243895   | 1592309  | 1642793  | 1562004  | 1282090  |
| 9.999517 | 5  | 3 | 2 | 2071907  | 702078.7 | 145024.5 | 1757450  | 2442892  | 831691.4 | 542771.4 | 595626.4 | 873472.3 |
| 9.77355  | 4  | 1 | 3 | 1274921  | 1168222  | 750938.7 | 2238265  | 2413116  | 1674765  | 0        | 1924623  | 1290682  |
| 9.992233 | 4  | 3 | 1 | 968216.1 | 997659.4 | 345400   | 650334.3 | 757257.1 | 586276.4 | 660230.7 | 1248416  | 1186678  |
| 9.994767 | 5  | 2 | 3 | 547651.7 | 417590.3 | 267792.5 | 911388   | 1126793  | 0        | 384711.5 | 679566.6 | 623622.9 |
| 9.5812   | 16 | 5 | 5 | 6483121  | 58277272 | 12387125 | 44314593 | 30889541 | 49351674 | 68432168 | 74193248 | 45788213 |
| 13.87285 | 3  | 3 | 0 | 209451   | 1654417  | 164230.5 | 2538171  | 2045140  | 1374376  | 1701839  | 1720261  | 1670827  |
| 9.8322   | 6  | 3 | 3 | 554394.3 | 1382011  | 261612.5 | 1082018  | 665099.5 | 1685750  | 1637628  | 1238180  | 1106614  |
| 9.856867 | 10 | 5 | 5 | 3219846  | 11211972 | 2316256  | 9196941  | 4280611  | 13176134 | 13285243 | 8381739  | 9097593  |
| 9.887133 | 10 | 5 | 5 | 3931603  | 9171293  | 1393120  | 13623417 | 10271784 | 9736727  | 9172360  | 10594456 | 9487687  |
| 9.328967 | 7  | 4 | 3 | 764571.5 | 3817961  | 877300.4 | 2871069  | 2085437  | 4037198  | 2334371  | 3845951  | 4615638  |
| 8.93965  | 10 | 5 | 5 | 361076   | 2442054  | 854669.8 | 1920611  | 953759.7 | 3066317  | 3545704  | 2235967  | 1919512  |
| 9.56645  | 7  | 4 | 3 | 345259.9 | 766764.5 | 243214.8 | 653623.6 | 123021.4 | 700515.6 | 1143537  | 513444.9 | 627572.3 |
| 9.986767 | 10 | 5 | 5 | 4195858  | 4007745  | 1020649  | 5776900  | 4031083  | 4839033  | 3900467  | 4255871  | 4732099  |
| 9.992233 | 13 | 5 | 4 | 14833368 | 6622644  | 2301659  | 13370429 | 15559942 | 6859328  | 5010761  | 5066681  | 5657229  |
| 9.4775   | 5  | 2 | 3 | 412844.1 | 1207804  | 603654.9 | 928899.8 | 292521   | 1023272  | 983830.2 | 2196471  | 580361.9 |
| 42.74017 | 6  | 3 | 3 | 329606.5 | 3675721  | 2064348  | 4588621  | 624202.3 | 4499451  | 2973175  | 589823.8 | 4169010  |
| 18.39967 | 3  | 3 | 0 | 69570856 | 3.57E+08 | 3.96E+08 | 1.86E+08 | 46829058 | 1.59E+08 | 1.06E+09 | 2E+08    | 2.16E+08 |
| 8.961583 | 4  | 3 | 1 | 143902.2 | 506531.6 | 268766.6 | 356149.7 | 253978.8 | 692583.2 | 704484.9 | 671336.1 | 368847.5 |
| 9.544833 | 15 | 5 | 5 | 6593370  | 6272502  | 1477064  | 10968253 | 10843007 | 8110185  | 7384232  | 6188892  | 4824504  |
| 9.983433 | 5  | 3 | 2 | 422506.6 | 811873   | 408587.4 | 606861.1 | 290112.2 | 703889.3 | 196739.2 | 1272636  | 1067563  |
| 8.99545  | 3  | 3 | 0 | 179708.1 | 438515.4 | 189196.4 | 316751.9 | 231284.2 | 418361.4 | 763863.2 | 330941.6 | 393672   |
| 40.2515  | 12 | 4 | 5 | 2918336  | 10934564 | 16035682 | 4011494  | 1360182  | 4003277  | 4625719  | 819469.8 | 39430022 |
| 21.409   | 5  | 4 | 1 | 117300.1 | 263770   | 59267.8  | 347255.4 | 188447.2 | 215049.2 | 313975.2 | 274467.6 | 190717.1 |

|          |    |   |   |          |          |          |          |          |          |          |          |          |
|----------|----|---|---|----------|----------|----------|----------|----------|----------|----------|----------|----------|
| 9.992233 | 10 | 5 | 5 | 855903.3 | 2890735  | 448970.6 | 2474726  | 896427.8 | 3397041  | 3075062  | 3130649  | 2312640  |
| 9.43325  | 6  | 4 | 2 | 503481.4 | 2955353  | 1223688  | 2155214  | 1534914  | 2454729  | 4807009  | 3566658  | 2049391  |
| 9.858833 | 10 | 5 | 5 | 1755326  | 11095187 | 1439586  | 9420943  | 3723007  | 10083211 | 9871555  | 10454262 | 11752344 |
| 9.559117 | 8  | 4 | 4 | 4617352  | 5539755  | 9449399  | 1449941  | 1270101  | 1160203  | 2003337  | 22427183 | 1210681  |
| 9.972483 | 6  | 4 | 2 | 925581.8 | 1091227  | 1041867  | 614683.7 | 472344.7 | 2824583  | 70317.71 | 1036052  | 957683.2 |
| 12.26695 | 9  | 5 | 4 | 197877.5 | 683429   | 124685.2 | 943644.3 | 597234.9 | 787963.8 | 789235.6 | 593567.9 | 511990.1 |
| 9.872933 | 5  | 3 | 2 | 1087847  | 3189629  | 1834177  | 4272599  | 1933972  | 1595642  | 3298961  | 2379262  | 2386010  |
| 10.93618 | 5  | 2 | 3 | 153669.9 | 623598.4 | 268347.2 | 487784.7 | 196652.8 | 962393   | 635825   | 275459   | 461060.4 |
| 9.684583 | 10 | 5 | 5 | 4258294  | 3377182  | 1265568  | 7376015  | 9245350  | 4786204  | 4148314  | 1879944  | 2213606  |
| 24.76817 | 9  | 4 | 5 | 78296.01 | 341973.4 | 53035.82 | 278327.5 | 142141.5 | 329869.3 | 392053.4 | 263650.1 | 390854   |
| 9.568567 | 4  | 3 | 1 | 204542.6 | 435624   | 132349   | 297333.5 | 304144.6 | 621581.1 | 469322.7 | 256527.5 | 388406.7 |
| 41.4885  | 7  | 2 | 3 | 412366   | 4865892  | 765769.4 | 4433009  | 742143.8 | 6186890  | 4582651  | 4669908  | 4192370  |
| 9.45945  | 7  | 3 | 4 | 735827.8 | 4113675  | 1568366  | 3208597  | 1584970  | 2499608  | 5671676  | 4587790  | 2405595  |
| 19.62267 | 7  | 4 | 3 | 3525247  | 8307827  | 15459650 | 1628754  | 2078440  | 35947390 | 2204488  | 1487627  | 875063.3 |
| 9.992233 | 14 | 4 | 5 | 6343973  | 1423883  | 428365.5 | 8860370  | 17296381 | 1783537  | 747921.6 | 1749818  | 1563000  |
| 10.9645  | 10 | 5 | 5 | 516491   | 2493997  | 515767.2 | 2086004  | 849297.7 | 2599339  | 2812292  | 1939373  | 1995811  |
| 9.43325  | 10 | 5 | 4 | 1774370  | 3320202  | 1134187  | 5701392  | 5475206  | 2637164  | 3496150  | 4788661  | 3846873  |
| 34.53717 | 4  | 1 | 3 | 219345.5 | 327770.8 | 171555.1 | 942304   | 1424184  | 607120.1 | 371157.5 | 185691.9 | 211935.1 |
| 9.857683 | 7  | 4 | 3 | 1763571  | 1860225  | 265841.2 | 3209470  | 3133294  | 1828289  | 1791801  | 2287387  | 1553441  |
| 9.912633 | 6  | 4 | 2 | 1616144  | 2797393  | 705399.3 | 2131045  | 1444727  | 3728299  | 2955176  | 2799222  | 2754255  |
| 18.64583 | 10 | 5 | 5 | 29763672 | 1.63E+08 | 75380319 | 1.3E+08  | 24800091 | 2.94E+08 | 1.52E+08 | 1.21E+08 | 1.07E+08 |
| 9.536783 | 7  | 4 | 3 | 575034.7 | 1770584  | 687534.5 | 1381525  | 669126.7 | 1905699  | 2493875  | 1831327  | 1990459  |
| 24.18933 | 9  | 5 | 4 | 4429279  | 1533421  | 566253.7 | 14058025 | 29147824 | 1285981  | 1081213  | 1209363  | 2485646  |
| 9.842    | 10 | 5 | 5 | 1449502  | 4418149  | 1157359  | 5484796  | 2304107  | 5607426  | 5675528  | 3125485  | 3727775  |
| 10.45545 | 10 | 5 | 5 | 40026280 | 1.77E+08 | 27753737 | 1.93E+08 | 27047168 | 2.26E+08 | 1.71E+08 | 1.64E+08 | 1.6E+08  |
| 10.51713 | 4  | 1 | 3 | 141035.2 | 310845.5 | 99186.51 | 241922.5 | 136980.1 | 258529.9 | 229729.9 | 475753.3 | 329350.7 |
| 9.992233 | 7  | 4 | 3 | 1107315  | 1265656  | 388366.1 | 1747299  | 1081207  | 772858.2 | 1556834  | 1030759  | 1734143  |
| 9.55155  | 14 | 5 | 5 | 680531.9 | 3821742  | 1479863  | 4930281  | 2271402  | 4184024  | 2208611  | 6096407  | 3715013  |
| 16.73867 | 9  | 5 | 4 | 94930.61 | 477530.9 | 183180.6 | 383280.2 | 142111   | 564421.1 | 489235.9 | 209010.3 | 421084.5 |
| 9.933967 | 8  | 3 | 4 | 5588352  | 13857554 | 6149838  | 18571790 | 9738058  | 18619459 | 10673255 | 21945590 | 10804888 |
| 9.77345  | 7  | 4 | 2 | 863750.3 | 2345839  | 535366.3 | 1927203  | 870212.2 | 1619248  | 2189250  | 2169268  | 2850195  |
| 13.71213 | 9  | 5 | 4 | 116950.8 | 661981   | 150382.5 | 577402.5 | 144875.4 | 846210.2 | 772180.4 | 523897.3 | 502919   |
| 10.97857 | 10 | 5 | 5 | 1083368  | 2057039  | 978651.6 | 3249664  | 2674382  | 2156430  | 837815   | 3191071  | 2773999  |
| 10.95835 | 10 | 5 | 5 | 512124.1 | 2691226  | 698687   | 2322269  | 582108.1 | 3538436  | 2699358  | 1879810  | 2132858  |
| 9.874317 | 10 | 5 | 5 | 1.08E+08 | 2.4E+08  | 66689641 | 3.59E+08 | 2.72E+08 | 2.84E+08 | 2.47E+08 | 2.95E+08 | 2.49E+08 |

|          |    |   |   |          |          |          |          |          |          |          |          |          |
|----------|----|---|---|----------|----------|----------|----------|----------|----------|----------|----------|----------|
| 9.348233 | 5  | 3 | 2 | 436211.2 | 2489966  | 1372470  | 1749584  | 1205882  | 2108280  | 993707.6 | 1493288  | 4039352  |
| 24.968   | 5  | 4 | 1 | 134144.2 | 429705.4 | 237244.1 | 309636.6 | 175553.1 | 838673.2 | 424281.4 | 287373.3 | 340817   |
| 9.3735   | 8  | 4 | 3 | 2161672  | 3102817  | 1451873  | 7801235  | 10902676 | 3320570  | 3999565  | 4893661  | 1926303  |
| 11.64913 | 10 | 5 | 5 | 1699431  | 10705519 | 2153869  | 9451059  | 2228388  | 12684562 | 11515703 | 8277397  | 8522140  |
| 9.952017 | 10 | 5 | 5 | 2328241  | 8282556  | 1090434  | 7593859  | 1302354  | 10154661 | 8057662  | 8175473  | 7471499  |
| 9.983433 | 10 | 5 | 5 | 8261528  | 23837306 | 4403120  | 19216681 | 10203834 | 29662584 | 23844942 | 17281708 | 23763376 |
| 9.874317 | 10 | 5 | 5 | 2126452  | 7981051  | 1257167  | 9701179  | 3894641  | 9285217  | 6931003  | 6753512  | 9344629  |
| 9.992233 | 9  | 5 | 4 | 456944.4 | 1045227  | 346100.2 | 872557   | 245556.5 | 1112949  | 443383   | 1180480  | 1159519  |
| 9.856867 | 10 | 5 | 5 | 1870166  | 9520581  | 1473229  | 8054805  | 3216072  | 10672490 | 9819304  | 7346479  | 8815298  |
| 9.77355  | 5  | 3 | 2 | 830797   | 1215079  | 165733.8 | 1131141  | 123429.3 | 1386938  | 1250569  | 1200197  | 945161.1 |
| 10.05535 | 12 | 4 | 5 | 392682.3 | 856344.7 | 522460.5 | 1109752  | 335088.5 | 1468740  | 317599.6 | 1169672  | 1018901  |
| 10.95835 | 3  | 0 | 3 | 501971.2 | 393488.1 | 232946.3 | 804011.5 | 942561.6 | 173098.8 | 752941.2 | 359503.9 | 468624   |
| 10.9645  | 10 | 5 | 5 | 683627.1 | 3100739  | 625374.4 | 2725568  | 685423.1 | 3346970  | 3874832  | 2438043  | 2473925  |
| 11.01378 | 6  | 3 | 3 | 153131.6 | 411236   | 129235.9 | 339576   | 121339.8 | 263947   | 410211.4 | 448536.3 | 329703.8 |
| 9.445217 | 14 | 5 | 5 | 1674775  | 11762596 | 3313378  | 9747051  | 3722621  | 15232987 | 13369639 | 13466691 | 9673603  |
| 10.95835 | 6  | 3 | 3 | 264496   | 845073.6 | 171827.2 | 931393.7 | 124987.8 | 1090295  | 778489.8 | 617562.4 | 886480.6 |
| 9.94455  | 10 | 5 | 5 | 2815780  | 11134778 | 1834109  | 10060873 | 1923622  | 13504785 | 12531026 | 10618724 | 9096660  |
| 12.4426  | 5  | 3 | 2 | 179092.8 | 260317.2 | 79398.7  | 537669.8 | 645402.2 | 245828.9 | 312066.7 | 168178.7 | 209227.5 |
| 13.03922 | 10 | 5 | 5 | 928979.2 | 11121976 | 2813471  | 9813138  | 1486765  | 13941687 | 13788318 | 7286239  | 10810474 |
| 9.842    | 5  | 3 | 2 | 498183.8 | 1320995  | 487110.6 | 1651144  | 651790.2 | 1050563  | 1398933  | 2034085  | 1396773  |
| 9.365833 | 6  | 3 | 3 | 410855.9 | 2593027  | 1351281  | 1919916  | 958089   | 3309275  | 3319216  | 3941524  | 1722151  |
| 10.008   | 8  | 5 | 3 | 1679791  | 776566.3 | 178382.9 | 1817601  | 2429745  | 826774.1 | 731222.2 | 755308.8 | 537661.5 |
| 8.98945  | 10 | 5 | 5 | 390707.8 | 936207.6 | 456165.7 | 1261427  | 657046.3 | 959429.3 | 1645022  | 953590.3 | 716862.4 |
| 10.008   | 10 | 5 | 5 | 854015.8 | 989881.8 | 327644.6 | 1413159  | 957000.7 | 1158853  | 1098971  | 1356333  | 820871.8 |
| 10.9645  | 6  | 2 | 4 | 187029   | 467425.4 | 213694.1 | 608371.5 | 274562.9 | 598172.5 | 721441.3 | 489491.1 | 358350.8 |
| 9.992233 | 10 | 5 | 5 | 2219834  | 2694961  | 1262901  | 4201440  | 3384441  | 3356701  | 3889682  | 3573002  | 1376252  |
| 9.946467 | 12 | 5 | 4 | 1089469  | 2824806  | 1251694  | 2030751  | 1512842  | 3453464  | 1708887  | 1271890  | 3586284  |
| 10.2608  | 10 | 5 | 5 | 5809550  | 23269207 | 4475728  | 19418991 | 8245136  | 24945987 | 27360509 | 18583945 | 18366588 |
| 9.992233 | 6  | 4 | 2 | 3863553  | 1873623  | 2639267  | 3391311  | 2679577  | 805423.4 | 620841.7 | 735578.3 | 6592688  |
| 22.8425  | 7  | 3 | 4 | 132516   | 795092.2 | 90532.51 | 866157.4 | 148667   | 782007.5 | 895746.4 | 828138.3 | 650772.6 |
| 9.887133 | 9  | 4 | 5 | 31347538 | 59607314 | 90645652 | 20575571 | 15181443 | 17336674 | 2.22E+08 | 24969706 | 22144738 |
| 19.91217 | 3  | 3 | 0 | 56945.45 | 107878.2 | 75543.2  | 64943.11 | 75001.41 | 91419.76 | 228623.1 | 115728   | 80340.54 |
| 9.912633 | 9  | 5 | 4 | 1426648  | 2919396  | 744946.6 | 2524414  | 633629.8 | 4051762  | 3189750  | 2090048  | 2710938  |
| 9.976317 | 10 | 5 | 5 | 1761844  | 2920973  | 1733684  | 4087825  | 2300881  | 4971354  | 3933761  | 2874512  | 354219   |
| 9.853633 | 10 | 5 | 5 | 2663061  | 10864639 | 3966653  | 8595891  | 3990477  | 10674977 | 8266895  | 5931435  | 13721773 |

|          |    |   |   |          |          |          |          |          |          |          |          |          |
|----------|----|---|---|----------|----------|----------|----------|----------|----------|----------|----------|----------|
| 9.406667 | 12 | 5 | 4 | 4102910  | 6272343  | 844548.2 | 15824989 | 22355211 | 7479251  | 6289872  | 5331447  | 6615664  |
| 10.03947 | 10 | 5 | 5 | 1284465  | 1898121  | 672794.3 | 3020761  | 2579508  | 1905828  | 2353971  | 2418190  | 2057658  |
| 10.9645  | 6  | 2 | 4 | 176424.2 | 598140.1 | 116977.9 | 671517.3 | 139077   | 725995.1 | 686757.7 | 522557.4 | 614001.9 |
| 18.864   | 10 | 5 | 5 | 2079908  | 13472108 | 2882710  | 24605498 | 25988972 | 17700958 | 13854804 | 10277343 | 11349453 |
| 17.58517 | 4  | 3 | 1 | 427330.7 | 3639464  | 910660.2 | 3067210  | 1086120  | 5158392  | 2774223  | 3148344  | 3498978  |
| 9.328967 | 6  | 3 | 3 | 3972934  | 1331470  | 522029.9 | 7553238  | 14574102 | 769332.1 | 1298004  | 1607502  | 2059449  |
| 26.21633 | 5  | 2 | 3 | 95189.16 | 487164.7 | 290762.3 | 340639   | 215665.6 | 449373.9 | 840655.8 | 144280.3 | 284137.7 |
| 9.842    | 10 | 5 | 5 | 1274713  | 6754012  | 1771611  | 5978396  | 536625.8 | 5192698  | 4536102  | 7922809  | 7598606  |
| 10.05528 | 11 | 5 | 5 | 2902151  | 6515278  | 4156871  | 8641277  | 3225735  | 8772225  | 11677697 | 7220376  | 1061411  |
| 9.992233 | 10 | 5 | 5 | 814959.7 | 2564744  | 468032.1 | 2232379  | 673105.4 | 3165186  | 2659639  | 2784354  | 1966043  |
| 9.848417 | 10 | 5 | 5 | 1458263  | 6132054  | 1469054  | 5327074  | 1355487  | 6367997  | 3670712  | 7300131  | 7206259  |
| 9.56645  | 14 | 5 | 4 | 789527.1 | 4950324  | 2634585  | 3614781  | 1994141  | 7311736  | 5938927  | 613572.5 | 4464838  |
| 16.27147 | 10 | 5 | 5 | 237814.4 | 1646090  | 368146.9 | 1832905  | 279642.8 | 2000072  | 1663030  | 1236416  | 1313363  |
| 9.338567 | 9  | 5 | 4 | 1056730  | 2582260  | 1056354  | 1989404  | 1026820  | 2684969  | 1871683  | 1516236  | 2579355  |
| 9.992233 | 10 | 5 | 5 | 2263739  | 7451667  | 1428060  | 6367946  | 2250987  | 8703561  | 8713892  | 7909031  | 5534106  |
| 9.992233 | 6  | 4 | 2 | 374934.3 | 862052.6 | 411959.3 | 594831.5 | 518640   | 845578.6 | 1174419  | 497267   | 424505.6 |
| 20.27433 | 5  | 3 | 2 | 97338.95 | 477044.9 | 110789.7 | 380555.2 | 207994.3 | 603158.1 | 428167.2 | 329827.4 | 454234.3 |
| 35.25733 | 4  | 3 | 0 | 380654.9 | 5593839  | 2751473  | 4420739  | 146635.8 | 10440588 | 3569525  | 4796007  | 4642980  |
| 9.419733 | 4  | 3 | 1 | 1906168  | 3962047  | 3930728  | 6454320  | 4773594  | 819273.9 | 8085488  | 8436441  | 1125769  |
| 9.872917 | 10 | 5 | 5 | 6295257  | 46038558 | 4694477  | 43332802 | 4818925  | 44244765 | 38698807 | 48677850 | 50512325 |
| 9.3919   | 11 | 5 | 4 | 2461238  | 15600662 | 2591973  | 12916237 | 5961934  | 11789926 | 15216128 | 19013801 | 15639346 |
| 9.4468   | 6  | 4 | 2 | 624959.8 | 1934434  | 828908.7 | 2366409  | 679596.5 | 2400830  | 2735674  | 2461666  | 1044135  |
| 9.419733 | 10 | 5 | 3 | 1438823  | 13116501 | 5155697  | 9384125  | 7632274  | 19032928 | 13939428 | 16925953 | 8338560  |
| 10.9645  | 10 | 5 | 5 | 504842.9 | 2366618  | 506886.8 | 2052501  | 593208.8 | 2759354  | 2893688  | 1815430  | 1847686  |
| 9.842    | 7  | 3 | 4 | 2377408  | 1474234  | 458477.4 | 3963742  | 5838618  | 1437097  | 1358220  | 2242715  | 1014765  |
| 43.114   | 12 | 2 | 4 | 322883   | 3542080  | 501942.2 | 4439750  | 2075256  | 3247046  | 4411909  | 3200205  | 3525951  |
| 9.952017 | 10 | 5 | 5 | 1192617  | 3395373  | 430474.4 | 3069204  | 678414.6 | 4007667  | 3610235  | 3354519  | 3070626  |
| 9.3494   | 5  | 4 | 0 | 678264.8 | 4304863  | 1119163  | 3602964  | 1337312  | 5207854  | 3227920  | 5768461  | 3834948  |
| 21.1365  | 7  | 4 | 3 | 1281118  | 25609310 | 5177432  | 22045468 | 7142411  | 29678428 | 24750829 | 18875955 | 31751629 |
| 27.1985  | 9  | 4 | 5 | 963975.7 | 9582847  | 1460381  | 8783416  | 1350468  | 7754076  | 10113311 | 8854773  | 9518572  |
| 9.94455  | 5  | 2 | 3 | 616155.9 | 1102659  | 396323.6 | 875773.8 | 402385.8 | 1235242  | 1621250  | 1239080  | 628202.2 |
| 9.94455  | 6  | 3 | 3 | 499722   | 1318719  | 413441.1 | 1106891  | 324627.1 | 1890623  | 1374761  | 1341016  | 1259693  |
| 10.00385 | 9  | 5 | 4 | 388051   | 1097400  | 340120.3 | 845413.2 | 520373.8 | 1297298  | 742600.5 | 872737.9 | 991904   |
| 20.90683 | 3  | 0 | 3 | 14131322 | 3112624  | 272881.5 | 28303691 | 59221893 | 3219414  | 2779363  | 2924507  | 3484327  |
| 9.864767 | 10 | 5 | 5 | 6794758  | 31808188 | 2885254  | 29027357 | 6120851  | 31796305 | 28704142 | 29164895 | 34473113 |

|          |    |   |   |          |          |          |          |          |          |          |          |          |
|----------|----|---|---|----------|----------|----------|----------|----------|----------|----------|----------|----------|
| 9.856867 | 5  | 3 | 2 | 1633337  | 1528568  | 473291.9 | 3558347  | 4759667  | 1700794  | 938150   | 1685073  | 1180333  |
| 10.02372 | 7  | 3 | 4 | 288934.8 | 549267.1 | 295151.1 | 709845   | 269598.3 | 692535   | 62907.19 | 812337.8 | 686686.9 |
| 8.97505  | 10 | 5 | 5 | 1395267  | 5207834  | 963367.1 | 4517731  | 1408314  | 5003666  | 5765511  | 4813078  | 3962967  |
| 21.167   | 10 | 5 | 5 | 4910856  | 18821573 | 3162070  | 20891410 | 4053215  | 15643835 | 22491067 | 21752892 | 16115002 |
| 44.37983 | 11 | 3 | 3 | 290588.4 | 3531461  | 693912.7 | 3215649  | 333141.2 | 4448306  | 2565863  | 3417995  | 3360535  |
| 18.26783 | 8  | 4 | 4 | 1830152  | 17924148 | 2996491  | 15019413 | 6405726  | 21712470 | 14163074 | 15788381 | 18415232 |
| 44.9525  | 6  | 2 | 3 | 341303.6 | 3412268  | 1306119  | 4023613  | 740054.5 | 1230491  | 3840232  | 4725477  | 3460959  |
| 9.43325  | 12 | 5 | 4 | 1979125  | 18507724 | 3186565  | 15406878 | 6844641  | 22262899 | 20031498 | 18588885 | 13611636 |
| 23.842   | 10 | 5 | 5 | 728838.6 | 6393600  | 868725   | 5925755  | 776921.9 | 6193586  | 6763128  | 6230165  | 5204086  |
| 9.912633 | 9  | 5 | 4 | 4129333  | 9000123  | 3185607  | 6695767  | 4726518  | 10518457 | 7149800  | 5531761  | 8106336  |
| 35.58483 | 10 | 5 | 5 | 520907   | 2559371  | 2222517  | 1490781  | 1423983  | 6316769  | 1409353  | 627612.7 | 1798580  |
| 9.507167 | 6  | 4 | 2 | 607953.2 | 1076693  | 1148132  | 1650995  | 845222.3 | 684311.5 | 473247.5 | 532144.9 | 567857.5 |
| 9.928667 | 5  | 4 | 1 | 909090.4 | 1853169  | 247479.7 | 1487868  | 839903.8 | 2004290  | 2211919  | 1721065  | 1712453  |
| 36.2665  | 6  | 4 | 1 | 301542   | 4741914  | 464538.8 | 5074190  | 679414.3 | 5114355  | 4565628  | 4485799  | 4212429  |
| 10.9645  | 10 | 5 | 5 | 450633.5 | 1954253  | 312971.3 | 1682913  | 587205.9 | 2264379  | 2061644  | 1662623  | 1582180  |
| 10.9645  | 7  | 3 | 4 | 880881.7 | 1260134  | 384736.9 | 1908430  | 1500056  | 1774698  | 1334466  | 1432761  | 911232   |
| 9.43325  | 11 | 5 | 4 | 4068984  | 33143226 | 13553049 | 25555507 | 13226695 | 47049860 | 41377699 | 38707443 | 24712118 |
| 10.69952 | 7  | 4 | 3 | 105536.9 | 310756.6 | 122889.6 | 242704.2 | 117222.9 | 408097.5 | 364691.6 | 182562.7 | 174069.2 |
| 10.9645  | 10 | 5 | 5 | 213820.9 | 740940   | 240842.4 | 622807.2 | 166512.6 | 1014181  | 993943.4 | 555841.9 | 591549.2 |
| 11.42608 | 10 | 5 | 5 | 3901344  | 7650332  | 1954522  | 12342882 | 10964882 | 9452223  | 8731366  | 4996194  | 6158522  |
| 9.992233 | 7  | 4 | 3 | 1114150  | 1959536  | 641529.9 | 2482533  | 1115794  | 1326496  | 1847931  | 1760977  | 1819256  |
| 9.640367 | 10 | 5 | 5 | 830075.1 | 3230604  | 618297.9 | 2742818  | 1031436  | 2658482  | 4228520  | 3200813  | 2780896  |
| 10.189   | 7  | 3 | 4 | 2504766  | 2164107  | 161384.9 | 5840107  | 8666847  | 2410823  | 2077485  | 2140123  | 2210006  |
| 9.544833 | 9  | 5 | 4 | 496966.6 | 1120337  | 273480.6 | 859862.6 | 574184.3 | 1287411  | 1510981  | 888076.3 | 880981.3 |
| 10.01477 | 7  | 3 | 4 | 2256003  | 3590070  | 4198907  | 1660240  | 2177181  | 10052045 | 771791.5 | 5681384  | 770982.2 |
| 9.976317 | 9  | 5 | 4 | 1942737  | 2964146  | 445817.9 | 3562143  | 1368251  | 3191428  | 2330254  | 3484002  | 3087629  |
| 21.66567 | 4  | 3 | 1 | 132146.1 | 389970   | 195163.4 | 285666.9 | 172223.7 | 95698.61 | 441309.9 | 319480.4 | 479456   |
| 9.721317 | 6  | 3 | 3 | 396667.3 | 730432.7 | 402175.9 | 550034.3 | 175927   | 1070016  | 1256555  | 469012.1 | 383904.2 |
| 9.447983 | 13 | 5 | 5 | 1325645  | 10352015 | 5926044  | 13796668 | 6236061  | 10409707 | 441104.5 | 16103611 | 11790455 |
| 9.929783 | 18 | 5 | 5 | 2056865  | 3378397  | 1895078  | 5842440  | 5626852  | 2192350  | 2289205  | 6530148  | 3792952  |
| 10.21522 | 8  | 5 | 3 | 208351.5 | 611686.2 | 176092.6 | 527828.1 | 109176.2 | 658567.2 | 582937.3 | 884459.6 | 419910   |
| 27.46017 | 4  | 0 | 3 | 233857.5 | 2686191  | 63106.83 | 3309978  | 1471019  | 2742633  | 2699349  | 2677335  | 2728785  |
| 9.842    | 9  | 5 | 4 | 784762.1 | 3209979  | 404726.1 | 2900252  | 649720.1 | 3644576  | 3356097  | 3487240  | 2775969  |
| 9.103733 | 10 | 5 | 5 | 2543811  | 11473983 | 2029990  | 10133848 | 2647230  | 13111531 | 14152695 | 10330296 | 9509719  |
| 9.960467 | 11 | 5 | 5 | 499809.7 | 1522407  | 214698.5 | 1323957  | 435738.6 | 1828584  | 1611069  | 1465338  | 1247514  |

|          |    |   |   |          |          |          |          |          |          |          |          |          |
|----------|----|---|---|----------|----------|----------|----------|----------|----------|----------|----------|----------|
| 10.9645  | 5  | 3 | 2 | 360005   | 810304.1 | 301965.7 | 634078.7 | 320630.7 | 1014392  | 1234553  | 686648.6 | 573002   |
| 9.976317 | 6  | 3 | 3 | 1271756  | 1138415  | 255381.1 | 1841050  | 1647993  | 1011371  | 984211.8 | 912299.7 | 1248707  |
| 19.7075  | 3  | 0 | 3 | 117701.5 | 192792.5 | 52368.49 | 163860.9 | 49877.61 | 144158.1 | 157572.4 | 170153.8 | 270341.1 |
| 9.45945  | 7  | 2 | 3 | 1631857  | 10631314 | 6279714  | 7400951  | 5044698  | 17120231 | 5720357  | 14472998 | 13492438 |
| 9.328967 | 6  | 4 | 2 | 1189304  | 1790649  | 759105.7 | 4125763  | 5485446  | 1711232  | 752472.1 | 1556732  | 2821960  |
| 9.983433 | 10 | 5 | 5 | 1152964  | 4125901  | 783051.6 | 3540866  | 1218918  | 4630650  | 5018486  | 3836478  | 2978776  |
| 39.22983 | 4  | 1 | 3 | 367233.8 | 5161293  | 562099.3 | 5958939  | 1834100  | 4317816  | 4881272  | 5693513  | 5367788  |
| 10.47023 | 10 | 5 | 5 | 486076.3 | 1565371  | 198607.7 | 1366203  | 443260.8 | 1599653  | 1889861  | 1508683  | 1379186  |
| 11.53673 | 9  | 4 | 5 | 87317.87 | 320238.6 | 109891.8 | 259093.4 | 106359.1 | 492679.8 | 343991.8 | 282791   | 285597.9 |
| 8.10225  | 9  | 5 | 4 | 2509209  | 1.44E+08 | 43107470 | 1.18E+08 | 50835073 | 1.56E+08 | 1.13E+08 | 1.75E+08 | 87265725 |
| 10.90275 | 3  | 0 | 3 | 188041.8 | 535768.3 | 319577   | 396127.6 | 106798.2 | 262058   | 989154.5 | 303103.1 | 371862.8 |
| 10.94443 | 6  | 4 | 2 | 201402.6 | 518821.8 | 254921.9 | 746710.1 | 497897.3 | 929282   | 499228.3 | 374513.8 | 254370.8 |
| 9.91875  | 6  | 4 | 2 | 1691220  | 5477621  | 1014299  | 4093360  | 3178084  | 4087047  | 5056205  | 5506018  | 5915260  |
| 10.95055 | 4  | 3 | 1 | 482130.3 | 694245.6 | 188344.7 | 563250.4 | 265932.7 | 1025550  | 605841.1 | 650134.5 | 558709.6 |
| 10.9645  | 10 | 5 | 5 | 953006.4 | 4365675  | 883979.9 | 3881408  | 829345.7 | 5095109  | 5502481  | 3751465  | 3474860  |
| 9.845483 | 5  | 2 | 3 | 852826.8 | 2259880  | 543153.2 | 1768181  | 1077687  | 2510140  | 1895135  | 2160427  | 1677060  |
| 9.992233 | 10 | 5 | 5 | 882965   | 3141933  | 210973.8 | 2785878  | 826929.2 | 3212597  | 3213758  | 3419222  | 2894018  |
| 9.856867 | 10 | 5 | 5 | 1624579  | 7522128  | 1229084  | 6561008  | 2035698  | 6883165  | 6722073  | 8610116  | 9066749  |
| 8.995417 | 6  | 3 | 3 | 188780.8 | 308938.6 | 213394   | 653773.7 | 799607.6 | 188846.4 | 639340.6 | 409551.2 | 146367.7 |
| 9.94455  | 8  | 4 | 4 | 789879.1 | 2348940  | 490641.4 | 1881481  | 1034304  | 3076759  | 1759344  | 2495631  | 2314804  |
| 10.008   | 9  | 5 | 4 | 378686.3 | 1398359  | 239297.3 | 1152306  | 550607.2 | 1458635  | 1778143  | 1298486  | 1146576  |
| 12.63278 | 10 | 5 | 5 | 189740   | 1325209  | 290468.3 | 1132990  | 381656.5 | 1678974  | 1595720  | 1060764  | 1097900  |
| 18.96583 | 10 | 5 | 5 | 1335735  | 9373373  | 2303723  | 8264096  | 1509661  | 10993068 | 10784516 | 6823062  | 6897679  |
| 10.9645  | 10 | 5 | 5 | 1699390  | 7778245  | 1473018  | 6786308  | 1987153  | 9129080  | 9185072  | 6056429  | 6431446  |
| 19.05333 | 3  | 3 | 0 | 413318.1 | 2395344  | 639318.7 | 1977915  | 823245.6 | 3323852  | 1772777  | 1964382  | 2148297  |
| 9.999517 | 10 | 5 | 4 | 307350.7 | 876586.3 | 145770.7 | 696196   | 411758.2 | 950709.5 | 894684.7 | 826877.6 | 660650.8 |
| 9.842    | 9  | 5 | 4 | 11824061 | 3479154  | 846192.4 | 14254053 | 25493064 | 4708086  | 3638007  | 3198718  | 2361165  |
| 9.45945  | 10 | 4 | 5 | 10099843 | 36992697 | 52404013 | 14461558 | 13075834 | 13551726 | 2407792  | 1.3E+08  | 21154722 |
| 9.842    | 6  | 3 | 3 | 4228229  | 2431695  | 734922.9 | 6326636  | 9202624  | 3175945  | 1601686  | 2890509  | 2809760  |
| 10.26505 | 6  | 4 | 2 | 187494.2 | 708066.8 | 161769.7 | 582516.3 | 265577.2 | 606537.3 | 952794.1 | 786554.6 | 640499.8 |
| 10.008   | 9  | 5 | 4 | 1133466  | 1884903  | 235230.9 | 2552495  | 1571095  | 2021544  | 2048685  | 2050025  | 1510342  |
| 9.56645  | 5  | 2 | 3 | 948384.4 | 5007504  | 3350318  | 3411268  | 2111819  | 4289241  | 898983.4 | 5221978  | 10213658 |
| 9.842    | 5  | 3 | 2 | 714506.3 | 835548.6 | 688623.6 | 1351276  | 1079330  | 1343123  | 0        | 1345180  | 1321267  |
| 9.992233 | 10 | 5 | 5 | 5697343  | 6206241  | 1708048  | 7856863  | 3665572  | 4406682  | 7652302  | 8358748  | 5096147  |
| 9.887133 | 10 | 5 | 5 | 2558234  | 12881987 | 1144075  | 14460452 | 3635005  | 12407639 | 11772259 | 14482374 | 13654139 |



|          |    |   |   |          |          |          |          |          |          |          |          |          |
|----------|----|---|---|----------|----------|----------|----------|----------|----------|----------|----------|----------|
| 36.3385  | 7  | 3 | 2 | 256588.9 | 3142869  | 1661553  | 3858657  | 447711   | 4687462  | 2747559  | 3779089  | 447035   |
| 10.008   | 8  | 5 | 3 | 573119.8 | 1975923  | 186538.8 | 1630683  | 805865.7 | 2079395  | 2050576  | 2004885  | 1648073  |
| 9.960467 | 10 | 5 | 5 | 1702526  | 5917183  | 639827.7 | 5402980  | 1099923  | 6914378  | 5741758  | 6096661  | 5615155  |
| 9.9847   | 4  | 1 | 3 | 286431.6 | 461942.6 | 190843.6 | 628497.8 | 363370.8 | 486586.8 | 158162.9 | 647150   | 592819.2 |
| 9.912633 | 8  | 4 | 4 | 2055547  | 3059428  | 1061784  | 4944461  | 4397047  | 2381810  | 2471905  | 4634510  | 3671360  |
| 14.31217 | 10 | 5 | 5 | 3354823  | 11418802 | 3977779  | 16787856 | 12361472 | 14891590 | 12463601 | 6513501  | 8006977  |
| 9.994767 | 8  | 4 | 4 | 1035467  | 1117790  | 501985.9 | 1444478  | 645241.3 | 977150.8 | 1542255  | 797438.3 | 542455.8 |
| 9.999217 | 9  | 5 | 4 | 3758927  | 1180388  | 257282   | 4277237  | 7344108  | 1501910  | 1188623  | 1320992  | 1069592  |
| 9.507167 | 4  | 3 | 1 | 8600908  | 21502848 | 28848653 | 36348153 | 23487189 | 870719.1 | 467811.4 | 43949718 | 60880847 |
| 9.842    | 6  | 5 | 1 | 484161.5 | 1521219  | 369127.4 | 1304888  | 398518.8 | 1566702  | 1982613  | 1732628  | 1279133  |
| 9.856867 | 10 | 5 | 5 | 1911562  | 9349188  | 1440965  | 7834729  | 3409177  | 9659515  | 9672699  | 7732152  | 8258634  |
| 9.853633 | 9  | 5 | 4 | 4860050  | 11520073 | 2355258  | 15803267 | 10006999 | 12123425 | 10516492 | 7950121  | 13195305 |
| 37.84867 | 7  | 3 | 2 | 320820.3 | 3955618  | 896690.6 | 3526687  | 579861.8 | 3224292  | 3773218  | 3222756  | 5393483  |
| 9.388367 | 7  | 3 | 4 | 1291460  | 9109615  | 4086665  | 6814811  | 4069432  | 14818677 | 5529194  | 5786308  | 7512349  |
| 36.65567 | 6  | 3 | 3 | 364379.8 | 7912839  | 4010987  | 6172384  | 1291669  | 6538502  | 4808629  | 6748465  | 6518254  |
| 10.95602 | 10 | 5 | 5 | 431768.1 | 2460556  | 730838.7 | 2096749  | 542516.3 | 3314579  | 2716888  | 1652571  | 1742412  |
| 9.348233 | 6  | 4 | 2 | 433974.3 | 928800.2 | 614978   | 562748.2 | 683838   | 1538344  | 1404445  | 992226.8 | 708985.9 |
| 9.896717 | 4  | 3 | 1 | 1078671  | 1400746  | 1127483  | 823008.6 | 909932.3 | 2594525  | 0        | 492803.1 | 1603374  |
| 9.859983 | 10 | 5 | 5 | 2916038  | 10633920 | 1390068  | 12904227 | 5288314  | 10517199 | 9698153  | 12531954 | 11411120 |
| 22.69817 | 9  | 4 | 5 | 977374.6 | 2547500  | 5057426  | 416631.2 | 277201   | 184101.6 | 226010   | 420397.3 | 11593047 |
| 9.992233 | 8  | 4 | 4 | 264164.5 | 677512.6 | 126357.9 | 584668.6 | 193801.5 | 783210.7 | 718492   | 770542.6 | 475107.4 |
| 9.872933 | 5  | 3 | 2 | 1925204  | 2488452  | 1182929  | 4302954  | 4215470  | 4381823  | 2864841  | 1670745  | 1490496  |
| 10.92828 | 10 | 5 | 5 | 547639.4 | 2158035  | 581613.4 | 1848156  | 517859.2 | 3007344  | 2073150  | 1568440  | 1708915  |
| 8.911617 | 8  | 5 | 3 | 2115402  | 3441155  | 174353.5 | 8086481  | 11035791 | 3607308  | 3438744  | 3588224  | 3395415  |
| 9.976317 | 9  | 5 | 4 | 1114295  | 4159274  | 607895.7 | 3381605  | 1787108  | 4451597  | 4452498  | 3550277  | 3487052  |
| 10.008   | 10 | 5 | 5 | 426278   | 619509   | 226066   | 800871.1 | 389005.3 | 637058.4 | 1000362  | 550688.3 | 451704.8 |
| 10.008   | 10 | 5 | 5 | 1036863  | 2621948  | 1043749  | 3550155  | 2038955  | 3407791  | 3702765  | 2966686  | 1579283  |
| 9.848417 | 10 | 5 | 5 | 760467.5 | 3706903  | 157847.4 | 3181895  | 1242233  | 3728861  | 3888560  | 3755173  | 3707703  |
| 14.44357 | 8  | 4 | 3 | 76367.7  | 428552.5 | 152677.3 | 495130.4 | 53720.78 | 394324.2 | 648169.9 | 221678.5 | 419165.6 |
| 11.12052 | 7  | 3 | 4 | 572335.9 | 1214803  | 286321.5 | 2506833  | 3063647  | 1646340  | 1102037  | 866200.9 | 1170511  |
| 9.388367 | 5  | 2 | 3 | 1110052  | 6931627  | 3483402  | 4818372  | 4010131  | 10937736 | 3131015  | 3646473  | 9591372  |
| 10.35905 | 10 | 4 | 5 | 464011.3 | 1656781  | 291488.3 | 1405061  | 549812.6 | 1670608  | 2061661  | 1358905  | 1396725  |
| 9.473717 | 9  | 4 | 3 | 1610816  | 14786440 | 4310275  | 12344824 | 4381800  | 15042515 | 14975125 | 13494314 | 9202458  |
| 24.609   | 8  | 4 | 4 | 105021.2 | 260759.7 | 119580.9 | 349998.5 | 187553.5 | 430270.4 | 339211.9 | 150318.7 | 173883   |
| 9.960467 | 7  | 3 | 4 | 1292620  | 2894582  | 878726   | 2448274  | 695060.1 | 3276572  | 3299175  | 3858343  | 2418375  |

|          |    |   |   |          |          |          |          |          |          |          |          |          |
|----------|----|---|---|----------|----------|----------|----------|----------|----------|----------|----------|----------|
| 9.960467 | 13 | 5 | 5 | 816943.8 | 2014730  | 883975.8 | 2396944  | 277492.1 | 1205965  | 1124856  | 2146250  | 2332218  |
| 9.960817 | 9  | 5 | 4 | 839253.8 | 2587526  | 439235.2 | 2087078  | 1140031  | 2713124  | 2895058  | 2729679  | 1812198  |
| 9.8374   | 5  | 3 | 2 | 498971.5 | 1997742  | 496523.9 | 1782652  | 160759.1 | 1727757  | 1443887  | 1769916  | 2495385  |
| 10.98385 | 5  | 2 | 3 | 381865.2 | 527256.3 | 216409.9 | 960346.4 | 1017589  | 776297.7 | 555739.3 | 634832.6 | 473947.2 |
| 9.858833 | 9  | 4 | 5 | 951191.3 | 4728627  | 1065065  | 3763707  | 2130330  | 4923220  | 3125351  | 5392336  | 5879282  |
| 9.960467 | 6  | 4 | 2 | 838639.2 | 1335918  | 836310.6 | 1768432  | 695064.5 | 1256830  | 1276332  | 895340.1 | 2726903  |
| 9.856867 | 10 | 5 | 5 | 11588699 | 78925858 | 9820464  | 69321342 | 21480735 | 75977556 | 74421245 | 70686035 | 77668483 |
| 10.03947 | 8  | 4 | 4 | 843522.2 | 2132347  | 657012.7 | 1672636  | 944605.4 | 1192510  | 1745502  | 2429952  | 2452399  |
| 10.90275 | 3  | 0 | 3 | 510707.8 | 1375161  | 536917.1 | 990735.6 | 797369.8 | 848555.3 | 1887626  | 1014507  | 1108204  |
| 9.992233 | 5  | 3 | 2 | 872622.6 | 664518.8 | 236646.8 | 1185523  | 1228191  | 866424.3 | 732109.8 | 895473.8 | 407002.7 |
| 10.16453 | 9  | 4 | 5 | 575369.1 | 1816270  | 571537   | 1553898  | 310968.5 | 1142660  | 2503887  | 2313716  | 1530501  |
| 27.57967 | 9  | 5 | 4 | 579688.7 | 2598937  | 1148669  | 3550367  | 2063902  | 4291934  | 2083848  | 1193786  | 2982687  |
| 9.856867 | 9  | 4 | 5 | 21778502 | 30418062 | 52452394 | 8316544  | 6209283  | 7298268  | 5700996  | 8603485  | 6260650  |
| 10.96015 | 4  | 3 | 1 | 1855823  | 4354863  | 1796458  | 3551571  | 828215   | 6797837  | 5340629  | 3748937  | 2044039  |
| 10.93618 | 10 | 5 | 5 | 245633   | 857899.6 | 202814.9 | 705577.5 | 321575.2 | 1034406  | 697839.6 | 739552.7 | 698417.3 |
| 25.39233 | 6  | 3 | 3 | 178487.8 | 1013772  | 241902.3 | 877513.7 | 244095.3 | 741089.1 | 1378627  | 1083291  | 867019.9 |
| 25.96767 | 10 | 5 | 5 | 350692.2 | 3102348  | 950609   | 2572121  | 940724   | 2306863  | 4752152  | 2816877  | 2726564  |
| 9.856867 | 5  | 2 | 3 | 1284238  | 1740873  | 575067.4 | 3301438  | 3694761  | 2190096  | 2011569  | 1557039  | 2132468  |
| 9.992233 | 8  | 4 | 4 | 2212615  | 6050755  | 2298067  | 4962059  | 1451771  | 8605356  | 7819774  | 2749884  | 5380832  |
| 10.95602 | 11 | 5 | 5 | 209570.4 | 968592.1 | 225823.4 | 786931.6 | 391421.2 | 970567.9 | 1083960  | 741435.8 | 765581.9 |
| 9.842    | 9  | 5 | 4 | 7262677  | 2770877  | 308275.9 | 10278980 | 17893714 | 3021162  | 2498406  | 2477127  | 2697482  |
| 26.375   | 7  | 3 | 4 | 109706.7 | 385844.9 | 86847.6  | 300395.6 | 191609.3 | 320611.2 | 509377.8 | 291807.4 | 379500.7 |
| 9.976317 | 10 | 5 | 5 | 3412100  | 2261018  | 673413.6 | 4564084  | 5466929  | 2632263  | 2541265  | 2924977  | 1985089  |
| 9.864767 | 10 | 5 | 5 | 23495274 | 55525486 | 7862461  | 81898222 | 62593273 | 55924968 | 50698906 | 65493597 | 60140881 |
| 9.992233 | 11 | 5 | 5 | 422277.8 | 921318.9 | 212866   | 1062782  | 284574.2 | 1002749  | 953965.7 | 901041.7 | 583953.4 |
| 21.0655  | 9  | 5 | 4 | 148499.4 | 694096.3 | 254599.4 | 934987.7 | 537056.4 | 951142.7 | 835792.8 | 841015.5 | 384702.1 |
| 9.392767 | 10 | 5 | 5 | 10949182 | 27644663 | 6591476  | 22344242 | 11423922 | 30935494 | 31420502 | 20216884 | 20989042 |
| 8.974933 | 5  | 4 | 1 | 274950.4 | 428323.7 | 339008.4 | 266318.8 | 222057   | 545692.8 | 916996.6 | 402221.7 | 276707.5 |
| 10.9645  | 10 | 5 | 5 | 426441.7 | 1932342  | 308169.3 | 1662542  | 593188.6 | 2101732  | 2340688  | 1682268  | 1583828  |
| 9.531467 | 5  | 3 | 2 | 186654.8 | 357899   | 218214.1 | 236960.8 | 213486.1 | 583314.1 | 463202.8 | 378827.2 | 364150.7 |
| 9.856867 | 10 | 5 | 5 | 5367965  | 25586402 | 4891034  | 20695463 | 11001411 | 25390215 | 25827651 | 20195775 | 23148131 |
| 10.03947 | 8  | 5 | 3 | 557128.3 | 1000954  | 566955.2 | 736864.2 | 333995.9 | 622364.3 | 749431.6 | 674613.8 | 1986753  |
| 7.53665  | 5  | 2 | 3 | 814960.4 | 8278195  | 2332974  | 11852048 | 8337807  | 8314227  | 5399353  | 11764966 | 7208840  |
| 9.445217 | 6  | 3 | 3 | 787773.5 | 3570502  | 1428301  | 2751144  | 1496264  | 4169060  | 4984714  | 1259875  | 3261961  |
| 44.10667 | 13 | 4 | 3 | 396932.1 | 6617210  | 1397464  | 9526647  | 6861468  | 5132636  | 7850829  | 6155478  | 5628434  |

|          |    |   |   |          |          |          |          |          |          |          |          |          |
|----------|----|---|---|----------|----------|----------|----------|----------|----------|----------|----------|----------|
| 9.903567 | 10 | 5 | 5 | 3289737  | 9374134  | 2033824  | 7934172  | 2981982  | 11904831 | 9863925  | 9591916  | 6236642  |
| 9.976317 | 10 | 5 | 5 | 935279   | 3603278  | 629499   | 2983408  | 1392239  | 3927076  | 4333190  | 3346563  | 2673764  |
| 43.07083 | 18 | 5 | 5 | 286888.5 | 5084578  | 1573028  | 4207013  | 1561964  | 4231797  | 6987840  | 3291533  | 4441633  |
| 9.992233 | 6  | 4 | 1 | 2351376  | 2708260  | 2300698  | 4015063  | 2367055  | 1422750  | 2033700  | 6801484  | 1775143  |
| 9.94455  | 10 | 5 | 5 | 4740475  | 18756251 | 2903082  | 17271888 | 2359808  | 23031887 | 20349133 | 17636040 | 15954829 |
| 14.3401  | 8  | 3 | 5 | 85056.85 | 105647.3 | 44066.11 | 207170.2 | 240093.7 | 90802.9  | 123679.6 | 57303.29 | 84264.56 |
| 9.864767 | 10 | 5 | 5 | 21350104 | 98418411 | 19846283 | 83615850 | 31251002 | 93178691 | 80847357 | 79394871 | 1.18E+08 |
| 9.859983 | 9  | 5 | 4 | 3450503  | 8652523  | 1615807  | 13160846 | 10697091 | 8490237  | 7746244  | 10905332 | 9442296  |
| 12.48635 | 7  | 4 | 3 | 116429.3 | 702795.3 | 156414.3 | 617320.7 | 148926.4 | 661690.6 | 829031.6 | 571849.8 | 549576.8 |
| 10.95835 | 4  | 1 | 3 | 387297   | 459041.9 | 198976.2 | 897496.9 | 1036355  | 319425.2 | 643300.3 | 377326.9 | 698437.9 |
| 11.64913 | 10 | 5 | 5 | 854326.4 | 3670825  | 657953.6 | 3304914  | 649868.7 | 4156361  | 4436075  | 2752447  | 3428481  |
| 21.99567 | 10 | 5 | 5 | 709516.9 | 4388410  | 1634788  | 3628441  | 959386.1 | 3525513  | 6902295  | 5011731  | 3821845  |
| 10.01477 | 5  | 2 | 3 | 373868.3 | 373053   | 219924.2 | 580246.1 | 462714.6 | 0        | 467343.3 | 461769.8 | 566762.2 |
| 9.445217 | 14 | 5 | 5 | 43035568 | 3.75E+08 | 81464510 | 3.28E+08 | 85998656 | 3E+08    | 4.4E+08  | 4.69E+08 | 2.87E+08 |
| 10.95055 | 10 | 5 | 5 | 2018593  | 11817148 | 3582719  | 9905790  | 3240286  | 15039969 | 14526545 | 7915761  | 7944012  |
| 33.68667 | 10 | 5 | 5 | 1277419  | 10252849 | 2906028  | 8927572  | 1550821  | 14352704 | 9402131  | 6262416  | 10780266 |
| 9.976317 | 10 | 5 | 5 | 1153479  | 4654197  | 650136.1 | 4075040  | 1280895  | 5107577  | 5320450  | 4564433  | 3637820  |
| 9.352183 | 10 | 5 | 4 | 1575744  | 8918902  | 2212022  | 7221711  | 3621825  | 11564935 | 8850036  | 8666293  | 9970256  |
| 9.976317 | 9  | 5 | 4 | 1335654  | 3686530  | 1228292  | 2845408  | 1722482  | 4754815  | 5057167  | 2452474  | 2465155  |
| 9.5876   | 5  | 2 | 3 | 6058565  | 3038189  | 2138112  | 10850352 | 18612059 | 3348793  | 1232036  | 558345.6 | 4364097  |
| 9.872917 | 10 | 5 | 5 | 23270060 | 1.4E+08  | 14805070 | 1.23E+08 | 39888684 | 1.43E+08 | 1.23E+08 | 1.29E+08 | 1.46E+08 |
| 10.95055 | 10 | 5 | 5 | 326631.1 | 1897235  | 597324.7 | 1594797  | 475132.3 | 2455587  | 2215999  | 1308991  | 1193306  |
| 10.008   | 8  | 5 | 3 | 269794.8 | 671787.6 | 112477.6 | 551901.7 | 272674.3 | 654487.8 | 868063.3 | 588439.7 | 635424   |
| 9.416767 | 9  | 5 | 4 | 2518649  | 2035621  | 703949.8 | 3932213  | 4505672  | 2651433  | 2937248  | 1422499  | 1532404  |
| 39.89267 | 6  | 3 | 3 | 94836.64 | 433169.5 | 105600.4 | 488789.6 | 92901.38 | 419387.3 | 580017.6 | 328121   | 494738   |
| 9.43325  | 10 | 5 | 5 | 4805340  | 32846476 | 8566606  | 25125643 | 17132882 | 32034139 | 45512346 | 35571836 | 22494092 |
| 19.60583 | 6  | 4 | 2 | 1188394  | 2688683  | 4712483  | 714633.2 | 411176.4 | 11115409 | 711389.4 | 434728.7 | 470019.1 |
| 9.845483 | 7  | 4 | 3 | 1054967  | 3605378  | 965053.8 | 2926075  | 1408494  | 3808528  | 2694135  | 2666511  | 3873893  |
| 25.37567 | 3  | 0 | 3 | 462468.2 | 2533284  | 641407.5 | 2169069  | 662422.5 | 1980138  | 3625725  | 2485937  | 2180143  |
| 10.95055 | 10 | 5 | 5 | 348759   | 1935519  | 564133.1 | 1668271  | 361693.5 | 2454465  | 2313577  | 1349765  | 1295536  |
| 9.858833 | 10 | 5 | 5 | 9067224  | 22561640 | 3086151  | 33309807 | 25615340 | 22801947 | 20905065 | 26299213 | 24453171 |
| 9.912633 | 5  | 3 | 2 | 1002397  | 2472595  | 486148.2 | 1910817  | 1289690  | 2975458  | 2062014  | 2933208  | 2478018  |
| 9.976317 | 9  | 5 | 4 | 646717.8 | 2135376  | 465154.8 | 1796285  | 712962.8 | 2679574  | 2589359  | 1915632  | 1668842  |
| 9.379233 | 14 | 4 | 5 | 12190843 | 20531878 | 29848291 | 8047588  | 2081253  | 9898237  | 73843762 | 6349476  | 5476614  |
| 43.35883 | 11 | 3 | 4 | 341205   | 7313005  | 6562775  | 4563866  | 726970.4 | 4237377  | 18988695 | 5516570  | 3659195  |

|          |    |   |   |          |          |          |          |          |          |          |          |          |
|----------|----|---|---|----------|----------|----------|----------|----------|----------|----------|----------|----------|
| 18.8015  | 10 | 5 | 5 | 386195.2 | 1854879  | 563293.8 | 1573487  | 433426.2 | 2710783  | 2042892  | 1460008  | 1270813  |
| 9.992233 | 9  | 5 | 4 | 727026.4 | 2485256  | 467337.5 | 2087944  | 873168.5 | 2982986  | 2757404  | 2678615  | 1844710  |
| 9.999217 | 4  | 1 | 3 | 659230.6 | 951390.1 | 565546.7 | 679548.1 | 385162.8 | 791573.9 | 1444677  | 640102.8 | 264520   |
| 8.967683 | 10 | 5 | 5 | 1652317  | 6491478  | 2050730  | 5255277  | 2366942  | 6916376  | 9437962  | 6940905  | 5059816  |
| 10.98385 | 7  | 4 | 3 | 245452.6 | 1008624  | 471188.2 | 781801.3 | 322745.1 | 975660.9 | 1180534  | 472149.8 | 712103.5 |
| 10.03947 | 10 | 5 | 5 | 1601645  | 1416623  | 550378.3 | 2018358  | 1376005  | 987239.1 | 1216371  | 2381088  | 1227465  |
| 10.00385 | 12 | 5 | 4 | 1625547  | 2903832  | 1588738  | 1905609  | 1963839  | 4266505  | 456358.2 | 2465533  | 2995562  |
| 9.536783 | 5  | 3 | 2 | 252074.2 | 490352.3 | 330853.5 | 316754.6 | 289980.5 | 845624.5 | 766736.2 | 536184.9 | 108866.4 |
| 9.976317 | 7  | 4 | 3 | 399487.7 | 798491   | 370337.1 | 1064844  | 558371.4 | 1081178  | 1195388  | 832720.5 | 275418   |
| 8.97505  | 8  | 3 | 5 | 132020.1 | 349442.3 | 38630.15 | 377660.3 | 59488.04 | 363894.6 | 372657.5 | 381289   | 344610.3 |
| 37.02933 | 8  | 4 | 4 | 1497549  | 9272670  | 4807708  | 7102498  | 2467957  | 6314168  | 6222306  | 4986960  | 13186603 |
| 9.9014   | 7  | 2 | 4 | 1447859  | 2738889  | 718835.3 | 3285801  | 1169025  | 3409702  | 2107304  | 2235468  | 2316450  |
| 9.858833 | 10 | 5 | 5 | 1877658  | 5338342  | 1262557  | 7062293  | 4019690  | 6550361  | 4697101  | 6315622  | 3482024  |
| 9.856867 | 3  | 0 | 3 | 1124161  | 2169376  | 946548.7 | 2738457  | 1088974  | 2085439  | 898438.6 | 3528841  | 1929031  |
| 9.845483 | 10 | 5 | 5 | 1302293  | 6599765  | 1087205  | 7274170  | 1318348  | 5249697  | 7498763  | 7583735  | 7035807  |
| 8.93965  | 9  | 5 | 4 | 1695266  | 14887166 | 5260096  | 11551091 | 6609055  | 21646421 | 14273494 | 17532907 | 7412001  |
| 20.63683 | 5  | 4 | 1 | 14335409 | 26025282 | 56965998 | 54196570 | 42747620 | 932928.8 | 1.28E+08 | 315785   | 389301.7 |
| 36.15083 | 6  | 2 | 4 | 228028.3 | 1168664  | 290223.2 | 1386500  | 464096.1 | 960162.8 | 1329506  | 763366.4 | 1376127  |
| 9.487883 | 9  | 3 | 4 | 844738.2 | 1371420  | 444823.3 | 1132850  | 411345.3 | 1602700  | 1791713  | 1490027  | 632297.7 |
| 9.9677   | 10 | 5 | 5 | 3116288  | 9056325  | 2473686  | 7172333  | 4034403  | 11126065 | 8991367  | 7020186  | 6239857  |
| 9.43325  | 13 | 5 | 5 | 1818354  | 14731885 | 3127566  | 13036136 | 2963177  | 14024918 | 17129434 | 18770236 | 12150280 |
| 9.992233 | 8  | 4 | 4 | 1018804  | 1243897  | 540668.5 | 2120287  | 2064366  | 1152781  | 1109426  | 1145168  | 2141094  |
| 9.856867 | 5  | 1 | 4 | 1787261  | 1627970  | 809109.5 | 3573865  | 4634516  | 2403903  | 262720.3 | 1903958  | 1901674  |
| 13.44873 | 10 | 5 | 5 | 669264.2 | 8195748  | 918575.8 | 6692255  | 3543971  | 9544101  | 7768125  | 7220974  | 7763115  |
| 9.840617 | 10 | 5 | 5 | 2190768  | 4561441  | 1664818  | 3681636  | 1491289  | 5891228  | 6422912  | 3400108  | 2441021  |
| 38.95667 | 5  | 3 | 2 | 674587.3 | 7169100  | 4014725  | 9015224  | 2301334  | 4796954  | 11085200 | 6682638  | 11261682 |
| 9.419733 | 4  | 3 | 1 | 1.8E+08  | 5.61E+08 | 7.6E+08  | 9.31E+08 | 5.48E+08 | 3929044  | 2261263  | 1.36E+09 | 1.43E+09 |
| 9.40255  | 10 | 5 | 5 | 2641814  | 19123351 | 4296811  | 15768736 | 7243929  | 23913276 | 16679905 | 13793185 | 18158094 |
| 31.49533 | 5  | 3 | 2 | 322793.8 | 1783915  | 2182358  | 843644.1 | 757558.3 | 278830   | 814383.7 | 21799.97 | 5274410  |
| 9.684583 | 10 | 5 | 5 | 1435228  | 5826464  | 760921.7 | 5181433  | 1421970  | 6366255  | 6745234  | 5900765  | 5051681  |
| 29.04283 | 3  | 3 | 0 | 36684.23 | 143576.8 | 68092.4  | 109326.5 | 53933.09 | 234071.3 | 166028.2 | 72224.33 | 78639.34 |
| 10.18005 | 5  | 3 | 2 | 186290.7 | 277327.9 | 182173.3 | 396810.4 | 241680   | 447860.9 | 0        | 397886.7 | 192577.4 |
| 10.73262 | 4  | 1 | 3 | 126280.6 | 286489.5 | 149526.9 | 220120   | 69841.09 | 178516.2 | 529685.1 | 307789.7 | 153787.9 |
| 9.93625  | 4  | 3 | 1 | 4718427  | 13351184 | 2587306  | 15799322 | 5512119  | 15281001 | 15191740 | 10681542 | 15243356 |
| 25.99433 | 9  | 4 | 5 | 109689.7 | 800792.1 | 336428.3 | 620742.9 | 310743.1 | 316139.8 | 1261395  | 868425.8 | 788191.6 |

|          |    |   |   |          |          |          |          |          |          |          |          |          |
|----------|----|---|---|----------|----------|----------|----------|----------|----------|----------|----------|----------|
| 10.95602 | 4  | 3 | 1 | 615149.8 | 1236264  | 358102.8 | 936566.9 | 659130.9 | 1107333  | 1664771  | 964264.6 | 1567688  |
| 9.40255  | 10 | 5 | 5 | 1808751  | 4389664  | 1164758  | 3469451  | 1995795  | 4988070  | 5206582  | 3160154  | 3098375  |
| 9.992233 | 10 | 5 | 5 | 1476279  | 1948177  | 486035.6 | 3027046  | 2569803  | 2120975  | 2498051  | 2247252  | 1462529  |
| 8.911617 | 10 | 5 | 5 | 6611223  | 8973759  | 3154573  | 18019572 | 21636876 | 8567410  | 14307204 | 8759654  | 6471347  |
| 10.94443 | 5  | 2 | 3 | 130145.8 | 404772.1 | 62464.77 | 472792.4 | 156119.1 | 416127.9 | 469996.2 | 405671.9 | 301915.6 |
| 10.49953 | 8  | 5 | 3 | 5120534  | 2431078  | 1073704  | 6984933  | 10929904 | 3110995  | 1084879  | 2440207  | 3789416  |
| 10.9645  | 10 | 5 | 5 | 1288418  | 5928569  | 1122087  | 5191823  | 1493246  | 6966120  | 6922050  | 4607397  | 4875301  |
| 9.887133 | 9  | 4 | 5 | 58208700 | 1.09E+08 | 2.31E+08 | 12659803 | 13790083 | 6694243  | 2811997  | 5.22E+08 | 6482140  |
| 9.986767 | 8  | 3 | 5 | 963719.9 | 1755052  | 777162.4 | 2515185  | 1722401  | 2278431  | 2850143  | 1410081  | 1038077  |
| 9.912633 | 11 | 5 | 4 | 1056922  | 2712700  | 553147.4 | 2219525  | 1100550  | 3466304  | 2622152  | 1925322  | 2674664  |
| 9.43325  | 13 | 5 | 4 | 2065996  | 10488888 | 4432695  | 8570222  | 1668173  | 8246631  | 10027423 | 9452036  | 18072470 |
| 9.82645  | 4  | 3 | 1 | 887205.8 | 3011260  | 1049620  | 2259260  | 1583549  | 2923943  | 1390363  | 3062085  | 3395083  |
| 9.4468   | 6  | 3 | 3 | 322671.5 | 1304083  | 571263.6 | 932022.4 | 751833.6 | 1443130  | 1550008  | 387900.7 | 1219637  |
| 20.40217 | 9  | 5 | 4 | 489258.9 | 2355222  | 1161892  | 1579841  | 1585804  | 2661109  | 3448194  | 3395497  | 1301415  |
| 21.11583 | 6  | 4 | 2 | 138550.8 | 782868.7 | 394118.5 | 997892.8 | 380594.5 | 932933.5 | 1396738  | 399251.8 | 557496.9 |
| 9.904767 | 10 | 5 | 5 | 1183215  | 7593540  | 1239295  | 6283759  | 2999707  | 7098234  | 7767507  | 6423346  | 7038128  |
| 9.872933 | 10 | 5 | 5 | 1163318  | 4150987  | 495698.4 | 4978652  | 1957959  | 4766691  | 3983324  | 3588814  | 3852304  |
| 19.68633 | 8  | 4 | 4 | 224069.3 | 2141357  | 829328.5 | 1701425  | 754339   | 3017782  | 2653887  | 1792913  | 893918.3 |
| 41.94917 | 5  | 3 | 1 | 207614.8 | 2597665  | 558232   | 2339253  | 334636.2 | 2808519  | 2293762  | 2601318  | 3385891  |
| 9.992233 | 10 | 5 | 5 | 576379.9 | 2233537  | 146482.4 | 1983339  | 592759   | 2409914  | 2101101  | 2357453  | 2211806  |
| 9.856867 | 10 | 5 | 5 | 944680.5 | 5483051  | 745675   | 6036570  | 1181470  | 5427097  | 4227398  | 5879708  | 6125493  |
| 9.992233 | 9  | 5 | 4 | 2093218  | 1344768  | 600846.3 | 1853225  | 1124238  | 1677539  | 2167283  | 1089816  | 589235.7 |
| 10.9645  | 10 | 5 | 5 | 1707295  | 7855056  | 1395288  | 6925196  | 1903485  | 9235674  | 9116533  | 6283927  | 6529649  |
| 9.392767 | 9  | 5 | 4 | 1214723  | 2624908  | 676282.9 | 2031420  | 1322511  | 3229069  | 2735344  | 1950475  | 1898936  |
| 9.999217 | 8  | 4 | 4 | 3058032  | 979917.7 | 305513.9 | 3225949  | 5411577  | 1238951  | 1127272  | 1134446  | 926781.8 |
| 10.95055 | 10 | 5 | 5 | 785810.2 | 4982688  | 1306852  | 4349350  | 933988.6 | 6158931  | 5868684  | 3526074  | 3594103  |
| 9.856867 | 10 | 5 | 5 | 10910768 | 26287632 | 2889474  | 37937132 | 28012881 | 27702585 | 25492007 | 29876813 | 26307419 |
| 10.9645  | 10 | 5 | 5 | 249169.4 | 1225824  | 542976.1 | 952891.1 | 432857.4 | 1736166  | 1252450  | 529012.6 | 847589.7 |
| 9.844033 | 4  | 3 | 1 | 861032.8 | 1803960  | 686650.2 | 2476046  | 1525810  | 2039613  | 1350044  | 1498116  | 2900729  |
| 9.992233 | 9  | 5 | 4 | 1096788  | 1129056  | 212725.2 | 1822479  | 1665014  | 1144196  | 1150522  | 1168385  | 794535.4 |
| 10.008   | 8  | 5 | 3 | 2495738  | 966139.8 | 508875.6 | 2297573  | 3189063  | 551208.5 | 968049.9 | 1478530  | 1462425  |
| 9.960467 | 6  | 4 | 2 | 8401896  | 5633157  | 10541881 | 12066692 | 12549178 | 1044238  | 716069.9 | 1257587  | 24486006 |
| 9.94455  | 12 | 5 | 5 | 2281429  | 3334508  | 526558.3 | 5214465  | 4519027  | 3491066  | 3043491  | 3588499  | 3955991  |
| 9.975217 | 12 | 5 | 4 | 1022546  | 1782143  | 885559.1 | 2570508  | 1762821  | 2187005  | 826757.2 | 1005064  | 1909725  |
| 9.912633 | 9  | 5 | 4 | 1364169  | 3544844  | 1058210  | 2991567  | 933697.4 | 4302915  | 3247116  | 2242239  | 3026709  |

|          |    |   |   |          |          |          |          |          |          |          |          |          |
|----------|----|---|---|----------|----------|----------|----------|----------|----------|----------|----------|----------|
| 32.287   | 10 | 5 | 5 | 278298.4 | 1659346  | 511196.3 | 1369957  | 533607.3 | 1388649  | 2273927  | 942121.2 | 1774614  |
| 9.983433 | 10 | 5 | 5 | 505026.5 | 1881475  | 403619.2 | 1591009  | 614662.1 | 1962894  | 2496488  | 1823864  | 1389731  |
| 9.928667 | 10 | 5 | 5 | 1391865  | 3052658  | 820796.4 | 2638192  | 664753.6 | 4350713  | 3365180  | 2355831  | 2528061  |
| 9.848417 | 7  | 4 | 3 | 1235065  | 5224556  | 908893.2 | 4283377  | 2156415  | 5444216  | 3665455  | 5788049  | 5934034  |
| 12.74778 | 10 | 5 | 5 | 4341850  | 27768122 | 14709651 | 43642831 | 36552140 | 45597353 | 35419321 | 13471421 | 11637296 |
| 44.1065  | 9  | 3 | 2 | 607904.4 | 9160714  | 3132914  | 7829858  | 937864.5 | 8320967  | 8352072  | 14676278 | 7262724  |
| 21.39367 | 8  | 4 | 4 | 475606.2 | 1736960  | 570667.8 | 1458302  | 419936.2 | 1134195  | 2632680  | 1721266  | 1376605  |
| 21.89467 | 8  | 5 | 3 | 242931.2 | 2082901  | 549365.6 | 1826259  | 345723   | 1906506  | 2756867  | 2535566  | 1426834  |
| 9.848417 | 9  | 4 | 5 | 1290748  | 5117662  | 1968061  | 4119246  | 1616238  | 5259468  | 4293960  | 2589847  | 7997955  |
| 10.6311  | 4  | 3 | 1 | 4622783  | 8299344  | 10650069 | 13624537 | 8412493  | 544528.6 | 681085.9 | 20789098 | 19105034 |
| 9.874317 | 8  | 4 | 4 | 5131835  | 3937353  | 1386049  | 8830468  | 11780413 | 4238785  | 2045252  | 5528927  | 4797283  |
| 9.392767 | 9  | 5 | 4 | 1831465  | 4297163  | 1141709  | 3381027  | 2006323  | 4924759  | 4925568  | 2913700  | 3242160  |
| 37.48767 | 4  | 1 | 3 | 378849.2 | 6646884  | 191163.5 | 6161924  | 1163375  | 6815361  | 6441561  | 6882753  | 6557192  |
| 9.920517 | 10 | 5 | 5 | 3283345  | 12574260 | 4156365  | 9870998  | 5486595  | 15472022 | 11287418 | 7526453  | 10573696 |
| 9.078567 | 9  | 5 | 4 | 890135.3 | 1819676  | 593724.8 | 1390408  | 911453.7 | 1695713  | 2011823  | 1116861  | 1561481  |
| 10.00998 | 7  | 4 | 3 | 270031.7 | 716082.8 | 174890.3 | 617949   | 179946.4 | 625543.7 | 925262.5 | 757266.1 | 468950.9 |
| 9.864767 | 10 | 5 | 5 | 23518346 | 55537997 | 7642337  | 81485772 | 62480814 | 55807997 | 51034588 | 65253492 | 60002864 |
| 10.92828 | 10 | 5 | 5 | 522230.6 | 2126674  | 620193.4 | 1818265  | 483212.3 | 3024870  | 2144841  | 1461064  | 1642830  |
| 10.94443 | 3  | 0 | 3 | 1357487  | 1774696  | 817733.9 | 1231660  | 1115041  | 1642156  | 3160755  | 1102634  | 1243849  |
| 10.95055 | 10 | 5 | 5 | 232517.5 | 1237306  | 278172   | 1075214  | 307491.8 | 1400875  | 1547679  | 920127.8 | 967165.2 |
| 9.61395  | 5  | 2 | 3 | 2838695  | 791602.9 | 403390.6 | 1736457  | 2266989  | 393813.1 | 862839.5 | 637578.3 | 614528.7 |
| 10.37347 | 11 | 5 | 5 | 5464838  | 23955929 | 5005053  | 21184515 | 5032966  | 27998724 | 29034912 | 19952268 | 17593248 |
| 10.95055 | 10 | 5 | 5 | 1134249  | 7424548  | 1411599  | 6579544  | 1638448  | 8196717  | 9140413  | 6085903  | 5855497  |
| 10.19555 | 9  | 5 | 4 | 583825.6 | 1921828  | 732725.2 | 1556994  | 575984.6 | 1262819  | 2884784  | 2126427  | 2221991  |
| 44.98333 | 6  | 3 | 2 | 360845.4 | 5868163  | 1949321  | 7186589  | 2735168  | 5920761  | 5686189  | 4238003  | 9088671  |
| 10.94208 | 5  | 2 | 3 | 177585.3 | 684074.7 | 113956.6 | 565976.4 | 271565.3 | 633117.1 | 841501   | 610254.1 | 571360.2 |
| 10.02372 | 10 | 5 | 5 | 545318.9 | 1086313  | 216641.5 | 1319693  | 539251.6 | 1055005  | 1004646  | 1344879  | 1240044  |
| 9.853633 | 10 | 5 | 5 | 781257.8 | 2771749  | 799874.1 | 3248926  | 924008.8 | 2407923  | 2287355  | 1916505  | 3553316  |
| 13.21498 | 6  | 4 | 2 | 388997.9 | 2797476  | 346030.1 | 2221505  | 1371849  | 3242872  | 2508877  | 2495394  | 2651631  |
| 10.008   | 11 | 5 | 4 | 5290170  | 1754287  | 1436632  | 5373381  | 8713436  | 909083.6 | 468171.1 | 1468255  | 1762217  |
| 9.872933 | 5  | 3 | 2 | 928946.2 | 1338157  | 611702.7 | 2107900  | 1806127  | 1244628  | 926702.9 | 2411193  | 999684.1 |
| 9.992233 | 5  | 2 | 3 | 964016.4 | 948345.3 | 311308.7 | 1306936  | 835293.3 | 660451.7 | 1237633  | 1139204  | 1140468  |
| 40.09333 | 6  | 3 | 2 | 335109.9 | 4397837  | 225002.9 | 4657314  | 604619.2 | 4469078  | 4383701  | 4380340  | 4691193  |
| 7.592067 | 6  | 3 | 3 | 685580   | 5617563  | 3034084  | 4062633  | 2584012  | 4846280  | 1953947  | 3877443  | 8108316  |
| 10.64595 | 9  | 5 | 2 | 137446.1 | 258816.8 | 74550.28 | 293626.6 | 47672.5  | 230062.1 | 260869.5 | 381843.3 | 239161   |

|          |    |   |   |          |          |          |          |          |          |          |          |          |
|----------|----|---|---|----------|----------|----------|----------|----------|----------|----------|----------|----------|
| 9.559567 | 9  | 4 | 4 | 1032374  | 3338953  | 1466769  | 2339911  | 2085109  | 3425894  | 1225573  | 5173194  | 2823169  |
| 9.994767 | 13 | 5 | 5 | 1369358  | 2718708  | 1120333  | 3970540  | 2910856  | 3931881  | 3265913  | 3344068  | 1447059  |
| 10.49953 | 10 | 5 | 5 | 562280.9 | 1641951  | 766340.4 | 1272497  | 551129.4 | 1421275  | 2836874  | 1687775  | 713467.3 |
| 9.419733 | 6  | 3 | 2 | 429451.4 | 1910255  | 812287   | 1476354  | 763584.1 | 1785931  | 1395715  | 2756037  | 2707428  |
| 17.33633 | 4  | 3 | 1 | 506397.4 | 3395212  | 1104442  | 2625137  | 1624584  | 2382668  | 4917697  | 3513536  | 2267261  |
| 10.189   | 7  | 5 | 2 | 342374   | 790293.3 | 488674.8 | 573716.2 | 242417   | 1519083  | 1028037  | 378537.8 | 364372   |
| 16.30165 | 10 | 5 | 5 | 1439084  | 8079488  | 3009245  | 6759749  | 1388596  | 10214739 | 12170443 | 6960518  | 6088455  |
| 9.311883 | 4  | 3 | 1 | 631337.8 | 1178871  | 854145.2 | 2055843  | 2021394  | 2641341  | 1239639  | 705848.7 | 637667.4 |
| 9.992233 | 9  | 5 | 4 | 958479.1 | 1067237  | 375751.7 | 1740211  | 1610973  | 1077101  | 1196003  | 1545720  | 1012373  |
| 9.392767 | 4  | 3 | 1 | 608236.6 | 817598.2 | 559071   | 1601162  | 1855751  | 1354387  | 863015.5 | 136737.1 | 371144.6 |
| 9.3919   | 10 | 4 | 4 | 2432301  | 6688335  | 7093952  | 3718884  | 1761928  | 4056940  | 1350436  | 2460804  | 18854117 |
| 11.02755 | 7  | 2 | 5 | 278933.8 | 872013.9 | 281644   | 668662   | 434844.7 | 1219781  | 1041392  | 913482.6 | 663128.6 |
| 9.842    | 9  | 5 | 4 | 3438175  | 4863937  | 1092536  | 7838942  | 7188024  | 5276709  | 6421298  | 3452259  | 4462196  |
| 9.992233 | 7  | 4 | 3 | 500152.6 | 837528.9 | 268174.1 | 1115798  | 642571.9 | 894150.2 | 1125286  | 1011649  | 442410.6 |
| 10.97857 | 9  | 5 | 4 | 223305.4 | 735620   | 215916.8 | 886759.8 | 319621.5 | 816920.1 | 524162.6 | 951099.2 | 899217.7 |
| 9.992233 | 8  | 4 | 4 | 289825.2 | 931863.5 | 284766.6 | 791506.8 | 219795.6 | 980837.6 | 1149033  | 870169.2 | 476014.1 |
| 18.12217 | 6  | 3 | 3 | 65959.28 | 291881.6 | 88117.6  | 220396   | 158198   | 295301.7 | 336119.6 | 141810.7 | 317352.5 |
| 10.95835 | 10 | 5 | 5 | 712559.2 | 3618524  | 717036   | 3241066  | 653910.8 | 4087866  | 4477488  | 2926412  | 2843771  |
| 9.928667 | 5  | 2 | 3 | 31243246 | 37509084 | 33322388 | 20518109 | 28186467 | 2159525  | 1791136  | 49776753 | 62610339 |
| 9.43325  | 6  | 4 | 2 | 835862.3 | 5270676  | 938259.6 | 4193464  | 2515648  | 6373503  | 6050361  | 4333326  | 4366877  |
| 9.976317 | 12 | 4 | 4 | 790222.1 | 2058065  | 915531.3 | 1423638  | 1337128  | 2593647  | 1308704  | 862464.8 | 2560555  |
| 8.859667 | 10 | 5 | 5 | 4031363  | 15447197 | 6663216  | 20224314 | 10199101 | 13296688 | 26463162 | 16552084 | 9873389  |
| 9.445217 | 8  | 5 | 3 | 628491.2 | 3879647  | 1027861  | 3093806  | 1712795  | 4909946  | 4554325  | 3671225  | 4010574  |
| 9.559117 | 9  | 5 | 4 | 553589.8 | 1132946  | 343837   | 1649863  | 1230169  | 1526119  | 1416422  | 892450   | 708715.8 |
| 9.840617 | 5  | 2 | 3 | 3875824  | 4484014  | 1917027  | 8272544  | 9106323  | 4980709  | 2165115  | 5633674  | 6760401  |
| 9.8374   | 8  | 4 | 4 | 657388.3 | 1506256  | 395654.5 | 1746838  | 475077.6 | 1317555  | 2034166  | 1182953  | 1176417  |
| 9.928667 | 9  | 5 | 4 | 2237853  | 4603340  | 1401545  | 3699707  | 1845900  | 5598970  | 6412011  | 3692046  | 2959502  |
| 10.9645  | 10 | 5 | 5 | 627992.6 | 2132875  | 674685.7 | 1726213  | 798759.1 | 3031021  | 2598647  | 1636833  | 1403529  |
| 10.9645  | 10 | 5 | 5 | 386095   | 1737455  | 324377.8 | 1553768  | 344140.3 | 2263850  | 1780431  | 1473375  | 1471659  |
| 9.94405  | 6  | 2 | 3 | 4850524  | 27026536 | 14670156 | 20007681 | 10372753 | 42760030 | 29158924 | 38551243 | 17023880 |
| 21.64233 | 7  | 4 | 3 | 249995.3 | 1432836  | 459199.1 | 1156807  | 541338.7 | 1063897  | 1724948  | 1278961  | 1013529  |
| 10.008   | 9  | 5 | 4 | 615921.1 | 2252461  | 388123.9 | 1906358  | 782626.3 | 2552965  | 2617861  | 2273635  | 1642225  |
| 9.9014   | 5  | 3 | 2 | 715449   | 1413102  | 1047092  | 883838.9 | 869359.7 | 2137346  | 0        | 798340.2 | 1500741  |
| 9.859983 | 9  | 5 | 4 | 3103321  | 13215320 | 1266316  | 10684473 | 6094198  | 13299633 | 11748538 | 12684462 | 15207225 |
| 38.38117 | 5  | 3 | 1 | 419358.8 | 4455124  | 1061600  | 4945537  | 661155.3 | 5226680  | 3210081  | 3392579  | 5059055  |

|          |    |   |   |          |          |          |          |          |          |          |          |          |
|----------|----|---|---|----------|----------|----------|----------|----------|----------|----------|----------|----------|
| 12.32467 | 5  | 2 | 3 | 62440.32 | 449145.5 | 107314.9 | 376223.5 | 152886.8 | 323953.9 | 446659.3 | 491341.9 | 380188.3 |
| 9.041133 | 7  | 4 | 3 | 459016.7 | 1218441  | 604975.2 | 853509.6 | 718568.7 | 1437614  | 1555857  | 1642088  | 1294976  |
| 9.976317 | 9  | 5 | 4 | 953207.4 | 3838344  | 845535.2 | 3311701  | 1057770  | 4307138  | 4935363  | 3887968  | 2776441  |
| 9.928667 | 7  | 4 | 3 | 1247247  | 2665327  | 1061374  | 1829638  | 1841290  | 2369643  | 2190984  | 2443050  | 1810203  |
| 30.5635  | 8  | 4 | 4 | 2359255  | 80704979 | 24430600 | 1.04E+08 | 53952669 | 75473255 | 57421630 | 64812951 | 1.2E+08  |
| 22.07717 | 5  | 3 | 2 | 273082   | 886585.1 | 58630.71 | 1135102  | 604785.8 | 841866   | 981442.3 | 889387   | 886032.2 |
| 8.964883 | 6  | 4 | 2 | 398780.9 | 767238.9 | 261221.4 | 947295.7 | 380192.5 | 1070319  | 997764   | 447216.6 | 697350.5 |
| 9.845483 | 5  | 2 | 3 | 8554426  | 16953841 | 16580159 | 8863254  | 12542082 | 5073506  | 4511544  | 35005006 | 35224690 |
| 10.008   | 6  | 3 | 3 | 192502.8 | 494731   | 129866.8 | 420390   | 141092.3 | 596364.4 | 659687.2 | 461989.8 | 350355.7 |
| 26.34667 | 5  | 2 | 3 | 108705   | 390886.6 | 210441.9 | 274399.1 | 214664.1 | 249111.7 | 525061.6 | 173934.6 | 320460.2 |
| 9.880683 | 9  | 4 | 5 | 1.3E+08  | 2.77E+08 | 4.93E+08 | 74367598 | 53378603 | 49134307 | 49944828 | 64644471 | 62369228 |
| 9.8322   | 8  | 5 | 3 | 959205.2 | 2969435  | 910896.8 | 2308405  | 1423230  | 4034515  | 3649039  | 1875075  | 2248300  |
| 37.2695  | 7  | 3 | 2 | 296368.4 | 2860597  | 1161709  | 3635268  | 1614223  | 2740546  | 4481591  | 2796615  | 3069400  |
| 9.840617 | 5  | 2 | 3 | 2320234  | 3040417  | 958568.3 | 5708957  | 6476630  | 1500649  | 3014305  | 3741386  | 3941088  |
| 9.853633 | 5  | 3 | 1 | 716819.1 | 1211703  | 293217.1 | 1698780  | 1168282  | 1133930  | 1621506  | 1064550  | 1375366  |
| 26.4355  | 8  | 4 | 4 | 358211.3 | 792921   | 597282.5 | 1358000  | 1294547  | 940985   | 232827   | 1702090  | 810053.5 |
| 9.960467 | 10 | 5 | 5 | 1332228  | 4981932  | 806616.5 | 4179536  | 1851649  | 5556276  | 5026887  | 3973133  | 4409514  |
| 10.97242 | 10 | 5 | 5 | 1176940  | 5636770  | 1229881  | 4653332  | 2180096  | 6140098  | 6569881  | 3975288  | 4714752  |
| 9.433    | 5  | 3 | 2 | 97140440 | 53872879 | 84546443 | 1.34E+08 | 1.84E+08 | 2515158  | 64389219 | 3542434  | 1.97E+08 |
| 9.856867 | 10 | 5 | 5 | 9880424  | 47086380 | 7899610  | 40114854 | 15792264 | 51516350 | 49753344 | 37440410 | 40405255 |
| 9.992233 | 9  | 5 | 4 | 729186.3 | 2511829  | 467840.3 | 2191929  | 674635.6 | 2981759  | 2700132  | 2818872  | 1857363  |
| 10.9645  | 10 | 5 | 5 | 194523   | 772631.4 | 276365.1 | 647923   | 156492.8 | 993484.8 | 1139918  | 510781.9 | 613808.4 |
| 12.30202 | 7  | 5 | 2 | 68218.98 | 260084.1 | 145931.4 | 321604.5 | 46833.9  | 153273.6 | 443431.9 | 288001.6 | 77618.19 |
| 9.992233 | 10 | 5 | 5 | 881050.4 | 2432517  | 605339.3 | 2046185  | 789272.9 | 2457971  | 1453403  | 2997461  | 2390528  |
| 9.960467 | 10 | 5 | 4 | 1318766  | 3285013  | 594782   | 2560883  | 1708330  | 3575446  | 2597465  | 2774246  | 3434830  |
| 9.9677   | 10 | 5 | 5 | 1999185  | 7102882  | 2195570  | 5833302  | 2435696  | 9036213  | 6279477  | 3753609  | 7467117  |
| 17.545   | 10 | 5 | 5 | 6880394  | 50059028 | 5596876  | 45935512 | 8939547  | 42168595 | 53984643 | 46165598 | 54881421 |
| 9.842    | 9  | 5 | 4 | 1849757  | 9996040  | 2442870  | 8230717  | 3805509  | 9529081  | 8502471  | 7065011  | 11783382 |
| 9.43325  | 3  | 3 | 0 | 558230.4 | 1072027  | 339031.3 | 1423232  | 816167.5 | 1016441  | 1408451  | 655100.5 | 856865.9 |
| 12.74955 | 7  | 3 | 4 | 866470.9 | 4015461  | 1228351  | 6565534  | 6170553  | 5718194  | 4360894  | 2612008  | 3045319  |
| 8.874167 | 8  | 4 | 4 | 434305.5 | 951987   | 391254.8 | 1313325  | 826681.1 | 598998.7 | 1607345  | 985138.4 | 763725.2 |
| 10.9645  | 10 | 5 | 5 | 4149555  | 19522339 | 2879765  | 17333962 | 4797223  | 21701980 | 22039463 | 16297624 | 16483796 |
| 9.8322   | 5  | 2 | 3 | 606606.6 | 1742617  | 838218.4 | 1189006  | 1152786  | 1636495  | 437220   | 2663664  | 1736347  |
| 24.50367 | 10 | 5 | 5 | 1213187  | 5269406  | 1361051  | 4656710  | 768276.8 | 4949435  | 5606072  | 3940497  | 4414361  |
| 8.9256   | 10 | 5 | 5 | 64718664 | 9.26E+08 | 1.68E+08 | 6.85E+08 | 5.76E+08 | 1E+09    | 1.15E+09 | 9.02E+08 | 6.92E+08 |



|          |    |   |   |          |          |          |          |          |          |          |          |          |
|----------|----|---|---|----------|----------|----------|----------|----------|----------|----------|----------|----------|
| 9.94455  | 8  | 3 | 4 | 2048750  | 4170953  | 1608593  | 6541816  | 5672829  | 2625372  | 3215569  | 6793883  | 3825795  |
| 10.20467 | 11 | 5 | 5 | 37298128 | 2.3E+08  | 30882575 | 2.84E+08 | 1.31E+08 | 2.78E+08 | 2.35E+08 | 1.93E+08 | 2.25E+08 |
| 9.864767 | 9  | 4 | 4 | 958899.2 | 2710219  | 558812.4 | 3590010  | 2112443  | 2152701  | 3152093  | 2720104  | 3370269  |
| 9.976317 | 9  | 5 | 4 | 683253.6 | 1549053  | 484294.6 | 1160002  | 866290.5 | 1948882  | 2059102  | 1531841  | 858353.9 |
| 9.856867 | 12 | 5 | 5 | 1284024  | 7097423  | 1967578  | 6165621  | 1370138  | 6550641  | 6374262  | 4473861  | 8727355  |
| 31.48117 | 9  | 5 | 4 | 189198.6 | 1354418  | 388000.6 | 1188937  | 149643.2 | 2009986  | 1397896  | 1068174  | 1106910  |
| 10.9645  | 5  | 3 | 2 | 366338.2 | 913536   | 339304.1 | 757381.9 | 212316.3 | 966610.3 | 1481862  | 752834.9 | 720276.5 |
| 9.460217 | 9  | 4 | 5 | 652119.3 | 2639679  | 1653886  | 1936399  | 621973   | 2201829  | 674038.8 | 4703449  | 3942906  |
| 37.11917 | 6  | 5 | 1 | 280487.7 | 1195004  | 462629.6 | 1504073  | 648360.2 | 973286.6 | 1192462  | 620488.8 | 1875329  |
| 9.311883 | 6  | 4 | 2 | 415370   | 3011133  | 1484711  | 2231343  | 1370590  | 3470622  | 534994.8 | 3769401  | 4384750  |
| 25.61483 | 6  | 5 | 1 | 71146.39 | 199626.7 | 41573.56 | 234364.8 | 78154.82 | 152623.1 | 247798   | 203516.2 | 162778.1 |
| 38.79833 | 3  | 0 | 3 | 458904.8 | 4231322  | 212000.2 | 5198953  | 2368238  | 3981059  | 4456508  | 4085291  | 4193442  |
| 9.903283 | 10 | 5 | 4 | 1868629  | 3883718  | 1724283  | 6117449  | 5313291  | 2502707  | 3533595  | 6096353  | 5200394  |
| 9.979667 | 10 | 5 | 5 | 2122124  | 2514470  | 1193097  | 3981670  | 3476780  | 3299483  | 3691907  | 3126620  | 1261155  |
| 9.932    | 9  | 4 | 5 | 2372948  | 5719693  | 2689533  | 4448341  | 1868008  | 5178246  | 1388896  | 8410484  | 7174883  |
| 24.65233 | 7  | 3 | 4 | 285057.7 | 925996.3 | 991425.9 | 474866.2 | 593866.8 | 1988743  | 160304.4 | 107662.3 | 2026413  |
| 9.508883 | 3  | 0 | 3 | 2114571  | 1312450  | 1413979  | 4987000  | 8953185  | 634364.6 | 147596.9 | 366115.5 | 1871892  |
| 11.01378 | 7  | 4 | 3 | 306355.1 | 411804.9 | 189681.2 | 564991   | 342174.2 | 400248.1 | 721681.7 | 227029.8 | 295155.2 |
| 14.15043 | 7  | 3 | 2 | 392509.4 | 1706079  | 557136.1 | 2255163  | 1271919  | 1031219  | 1553795  | 2434524  | 2092677  |
| 9.872883 | 10 | 5 | 5 | 2177431  | 3236438  | 1086642  | 5170169  | 4672676  | 3818378  | 2345472  | 4710853  | 3261083  |
| 37.31633 | 6  | 3 | 1 | 348823.3 | 5233235  | 1132985  | 4735133  | 566641.3 | 7016468  | 4976066  | 4991492  | 3882067  |
| 9.999217 | 8  | 3 | 5 | 1072181  | 1813973  | 524386.5 | 1377090  | 983045.8 | 1355232  | 2168104  | 1143218  | 2284012  |
| 10.95055 | 10 | 5 | 5 | 1011067  | 6102005  | 1686219  | 5253310  | 1409735  | 7616272  | 7200899  | 4265712  | 4264601  |
| 22.828   | 8  | 5 | 3 | 109370.1 | 467283.5 | 150419.1 | 581454.1 | 251087.3 | 445395.2 | 553621.1 | 498467.2 | 223221   |
| 9.8322   | 9  | 5 | 4 | 4343901  | 3528734  | 377251   | 7624120  | 10054811 | 3340325  | 3262603  | 3169691  | 3896280  |
| 9.992233 | 6  | 3 | 2 | 423789.8 | 666222.4 | 302782   | 900217.4 | 517604.3 | 1073144  | 290446.7 | 803080.2 | 698566.3 |
| 9.857683 | 10 | 5 | 5 | 37197120 | 1.08E+08 | 14559774 | 1.48E+08 | 97892428 | 1.22E+08 | 1.26E+08 | 98814085 | 97457967 |
| 10.32788 | 9  | 4 | 5 | 333770.2 | 1231756  | 315138.3 | 1062669  | 305738.7 | 1166762  | 1736411  | 1282377  | 898302.8 |
| 10.44215 | 10 | 5 | 5 | 491808.7 | 1423599  | 368730.7 | 1253739  | 234440.6 | 1433602  | 1673568  | 1889876  | 1068550  |
| 10.95055 | 9  | 5 | 4 | 232416   | 787321.2 | 215298   | 645352.2 | 297107.7 | 1041685  | 963227.1 | 541033.6 | 773391.7 |
| 9.976317 | 3  | 3 | 0 | 474205.8 | 599577.5 | 553353   | 350142   | 320358.1 | 1073215  | 1057970  | 866702.9 | 0        |
| 9.388617 | 8  | 3 | 4 | 837634.8 | 7717883  | 1464598  | 6572679  | 2543560  | 9766150  | 5883216  | 7410072  | 7086899  |
| 9.872883 | 10 | 5 | 5 | 2029826  | 5447109  | 285832.8 | 7643159  | 5395484  | 5931101  | 5406160  | 5348217  | 5379625  |
| 9.103733 | 10 | 5 | 5 | 1666276  | 9603751  | 2689938  | 8214888  | 2402811  | 10444688 | 13887689 | 8736204  | 7660424  |
| 9.93625  | 9  | 5 | 4 | 2135779  | 11817870 | 3207464  | 9622292  | 4671050  | 8742657  | 8111701  | 12929358 | 14082973 |

|          |    |   |   |          |          |          |          |          |          |          |          |          |
|----------|----|---|---|----------|----------|----------|----------|----------|----------|----------|----------|----------|
| 9.992233 | 9  | 5 | 4 | 383429.8 | 1316156  | 230915   | 1063230  | 594776.5 | 1297000  | 1478840  | 1280413  | 962792.2 |
| 17.45383 | 6  | 2 | 4 | 104920.5 | 524789.7 | 171727.6 | 444854.1 | 113885.7 | 619186.7 | 644452.8 | 525238.2 | 228162.3 |
| 9.928667 | 8  | 4 | 4 | 2243651  | 4835425  | 1212806  | 4256030  | 879721.8 | 5229551  | 4265386  | 6758519  | 4260748  |
| 10.9645  | 9  | 5 | 4 | 605351.2 | 2694957  | 488971.9 | 2362047  | 706987.5 | 3081974  | 3092770  | 2097388  | 2231384  |
| 9.960467 | 5  | 3 | 2 | 478723.7 | 794684.8 | 439469.2 | 1197921  | 926636   | 1404674  | 166709.3 | 795932.5 | 857603.2 |
| 9.516467 | 7  | 4 | 3 | 411400.8 | 735794.7 | 132014.8 | 974445.3 | 578476.6 | 664816.3 | 686861   | 616399.6 | 756984.9 |
| 9.94455  | 10 | 5 | 3 | 745866.2 | 1753805  | 385383   | 2543797  | 1921827  | 1125205  | 2085968  | 1923747  | 1656227  |
| 9.983433 | 10 | 5 | 5 | 1343052  | 4271596  | 1105243  | 3608711  | 1319136  | 5876764  | 4768628  | 3954477  | 2949625  |
| 10.9645  | 10 | 5 | 5 | 317765.1 | 1268864  | 349378.3 | 1074570  | 365061.9 | 1621910  | 1545857  | 927975.1 | 870433.2 |
| 10.90765 | 4  | 1 | 3 | 156073.8 | 313037.8 | 144546.5 | 384604.2 | 116569.6 | 201726.7 | 462545.6 | 179125.3 | 246181.3 |
| 9.659033 | 8  | 5 | 2 | 408307.6 | 1331697  | 183036.5 | 1112355  | 520571.1 | 1074210  | 1518878  | 1277479  | 1289124  |
| 9.976317 | 10 | 5 | 5 | 1055408  | 2684438  | 866485.6 | 2278468  | 590598.5 | 2373920  | 2347183  | 1730625  | 4033286  |
| 9.999217 | 10 | 5 | 5 | 581442.1 | 2180243  | 492919   | 1820231  | 785310.7 | 2198424  | 2909311  | 1842677  | 1627455  |
| 10.54425 | 8  | 4 | 3 | 195007.7 | 802977   | 369309.1 | 632881.2 | 236293.6 | 332725.3 | 678569.6 | 1338173  | 934541.9 |
| 9.505267 | 9  | 4 | 3 | 1218579  | 8383871  | 1568827  | 6620354  | 4164272  | 9088594  | 9036224  | 7183105  | 6373279  |
| 9.896717 | 4  | 3 | 1 | 65650388 | 1.37E+08 | 1.77E+08 | 2.22E+08 | 1.33E+08 | 5629059  | 7579381  | 9274229  | 3.21E+08 |
| 10.93412 | 5  | 2 | 3 | 269616.2 | 718498   | 220095.8 | 571387.8 | 310602.1 | 503492.7 | 643087.2 | 557427.8 | 1027881  |
| 10.474   | 10 | 5 | 5 | 1635990  | 5669557  | 1172021  | 4436090  | 2893235  | 7711168  | 5286548  | 4880834  | 4935258  |
| 9.920517 | 10 | 5 | 5 | 846051.7 | 4330872  | 548695.7 | 3679070  | 1547443  | 4366342  | 3625564  | 4253797  | 4245707  |
| 9.460217 | 10 | 4 | 4 | 957010.6 | 3636641  | 1161539  | 2961405  | 1318664  | 2997476  | 2915895  | 5692350  | 3270303  |
| 9.8322   | 8  | 4 | 4 | 628211.6 | 1648052  | 442980.5 | 1298954  | 779360.1 | 2045704  | 2016067  | 1120497  | 1225104  |
| 10.008   | 9  | 5 | 4 | 387457.4 | 1010921  | 250690.3 | 836528.6 | 374545.6 | 903904.3 | 919768.8 | 970441.1 | 812829.2 |
| 10.95835 | 6  | 3 | 3 | 255458.8 | 486006.4 | 163146.9 | 391927.4 | 182648.6 | 669871.3 | 474115.6 | 613137.3 | 412696.3 |
| 9.903283 | 10 | 5 | 4 | 1299542  | 4246589  | 1665695  | 3461324  | 1165499  | 2823732  | 5503561  | 2324377  | 4391003  |
| 9.088183 | 4  | 3 | 1 | 303118.1 | 958164.6 | 175947.5 | 765548.3 | 454243.2 | 959855   | 659819.3 | 1105457  | 1064213  |
| 9.554967 | 10 | 4 | 3 | 371611.2 | 498408.7 | 196949.4 | 703709   | 481586.3 | 633415.9 | 734414.4 | 492689.9 | 230679.5 |
| 10.30302 | 10 | 5 | 5 | 470693.5 | 2206152  | 714402.7 | 2563277  | 594102.1 | 2373636  | 3332842  | 2013298  | 1879501  |
| 23.13167 | 8  | 4 | 4 | 384198.5 | 638213.6 | 332569.1 | 1354206  | 1748090  | 1177093  | 273037.2 | 505384.1 | 627410.6 |
| 10.21522 | 10 | 5 | 5 | 428085.2 | 1425625  | 256391.9 | 1758705  | 797108.5 | 1437368  | 1806158  | 1474128  | 1301428  |
| 9.388367 | 12 | 4 | 5 | 3007845  | 19750630 | 6474007  | 15885408 | 7699478  | 28217929 | 16749191 | 24207340 | 11801343 |
| 16.94217 | 7  | 4 | 2 | 311103.4 | 3902054  | 2354820  | 2830059  | 1446409  | 4658311  | 3395885  | 7589782  | 1928032  |
| 9.36565  | 4  | 3 | 1 | 307437.4 | 579550   | 608113.4 | 284443.3 | 466868.2 | 840453.9 | 0        | 0        | 618768.6 |
| 9.392767 | 7  | 4 | 3 | 381745.1 | 1194303  | 645018   | 907839.6 | 352791.7 | 1516295  | 757798.3 | 576032.8 | 961014.9 |
| 39.7335  | 8  | 1 | 4 | 410662.6 | 3887539  | 235591.4 | 4423325  | 1310403  | 3892667  | 3581096  | 4206287  | 3993555  |
| 10.97857 | 9  | 5 | 4 | 234099.3 | 761990.3 | 122792.9 | 626470.1 | 320218.3 | 801041.5 | 768433.7 | 649215.8 | 647703.8 |

|          |    |   |   |          |          |          |          |          |          |          |          |          |
|----------|----|---|---|----------|----------|----------|----------|----------|----------|----------|----------|----------|
| 9.994767 | 5  | 4 | 1 | 1267381  | 878399.5 | 570475.3 | 1369801  | 1120989  | 563493.7 | 731441.4 | 1872107  | 451044   |
| 10.97857 | 10 | 5 | 4 | 240962.5 | 823775.7 | 252134.6 | 1047689  | 513769.7 | 728902.9 | 829866.4 | 1192850  | 870381.1 |
| 9.970617 | 4  | 4 | 0 | 1028081  | 2485812  | 1549443  | 3351699  | 1643061  | 5069027  | 2743896  | 1827358  | 1548528  |
| 9.445217 | 10 | 5 | 4 | 10427671 | 14556720 | 4629695  | 43878970 | 72315348 | 20182444 | 17364491 | 15525710 | 10584058 |
| 10.50412 | 3  | 0 | 3 | 3149167  | 7290312  | 2642982  | 15421458 | 19978472 | 10359429 | 3219848  | 8261777  | 8015558  |
| 10.95835 | 10 | 5 | 5 | 501276.6 | 1979687  | 473977.9 | 1714292  | 504718   | 2444751  | 2404554  | 1487080  | 1480835  |
| 10.008   | 8  | 4 | 4 | 2896312  | 1171963  | 643443.6 | 2886229  | 4205826  | 959440.9 | 332266   | 2095168  | 1386789  |
| 9.960467 | 9  | 4 | 5 | 555245.9 | 1493713  | 491107.2 | 1249956  | 402456   | 2134544  | 857848.8 | 1802176  | 1284609  |
| 9.858833 | 10 | 5 | 5 | 9041700  | 22389693 | 3609537  | 32964336 | 25983834 | 22433482 | 19981041 | 27264449 | 24249108 |
| 9.992233 | 9  | 5 | 4 | 549150.1 | 891688.7 | 148990.9 | 1087189  | 468954.4 | 905409.4 | 998342.6 | 881824.8 | 647984.2 |
| 9.616167 | 8  | 4 | 4 | 399562   | 1693854  | 656611.2 | 1336139  | 664091.8 | 2770493  | 1251455  | 1179756  | 1412231  |
| 11.45398 | 6  | 3 | 3 | 91442.64 | 274931.7 | 66727.52 | 244387.2 | 42234.45 | 232428.9 | 386501.4 | 256094.1 | 280959.1 |
| 9.856867 | 10 | 5 | 5 | 18194318 | 93401977 | 8918356  | 1.03E+08 | 22124412 | 1.03E+08 | 93934098 | 78947526 | 94814619 |
| 9.992233 | 5  | 3 | 2 | 580467.3 | 913591.3 | 487303.1 | 578473.5 | 719084.4 | 1203304  | 1500661  | 973521.7 | 246531   |
| 12.00767 | 10 | 5 | 5 | 247632.7 | 645508.5 | 181892.4 | 964686.6 | 776626.4 | 743595.9 | 909525.6 | 520581.4 | 458802.8 |
| 18.45683 | 8  | 5 | 3 | 500674   | 3207710  | 598679.7 | 4675600  | 3602612  | 4015167  | 3109752  | 2465038  | 2892653  |
| 9.976317 | 7  | 3 | 4 | 1342804  | 1752142  | 967988.6 | 1272914  | 791005.9 | 911128.6 | 3384676  | 1487604  | 1199945  |
| 9.992233 | 6  | 3 | 3 | 1850030  | 2635032  | 2928051  | 1387238  | 1229991  | 533507.7 | 621606.9 | 6905658  | 611263.3 |
| 29.76167 | 5  | 3 | 2 | 413662.2 | 1496713  | 1733651  | 2357345  | 1426945  | 3133822  | 171508.2 | 285656.3 | 3636702  |
| 37.14417 | 8  | 5 | 3 | 732996   | 13066569 | 906486.3 | 12684172 | 344551.4 | 13251872 | 11950252 | 12343440 | 13653473 |
| 9.840617 | 7  | 2 | 3 | 666725.2 | 611940.9 | 114453   | 921724.7 | 761876.6 | 571282.8 | 781800.4 | 465803.6 | 606389.1 |
| 36.95717 | 4  | 3 | 0 | 388553.9 | 4543598  | 396274.1 | 4376954  | 145596.2 | 4598384  | 4563622  | 4554421  | 5057982  |
| 10.97857 | 7  | 3 | 4 | 195739   | 749398.4 | 243032.7 | 936559.3 | 417576.4 | 699125.8 | 999917.9 | 713204   | 387903.3 |
| 9.94455  | 5  | 2 | 3 | 840586.4 | 1009812  | 493206   | 1312444  | 616721.2 | 1323371  | 1443837  | 1317368  | 614646   |
| 9.014483 | 7  | 4 | 3 | 3236838  | 10776766 | 5200441  | 7668220  | 6234288  | 11768019 | 17307735 | 11561326 | 10459084 |
| 10.97857 | 10 | 5 | 5 | 483804.8 | 1484841  | 389311.5 | 1767770  | 620846.9 | 1453162  | 2150844  | 1269164  | 1158171  |
| 22.727   | 6  | 3 | 3 | 333568.9 | 2067233  | 763693.1 | 1617812  | 892398.8 | 1386624  | 2118431  | 1397169  | 2181361  |
| 12.39797 | 9  | 4 | 5 | 242041.5 | 1061548  | 273939.3 | 878657.2 | 388882.7 | 1456781  | 1036914  | 995065.7 | 694209.2 |
| 9.992233 | 10 | 5 | 5 | 870621.6 | 2697728  | 436723   | 2338169  | 815826.9 | 3151402  | 2747353  | 3068947  | 2129261  |
| 24.609   | 6  | 3 | 3 | 39182.66 | 88361.71 | 54178.32 | 128941.4 | 89982.63 | 153103.1 | 62699.02 | 124381.6 | 13571.3  |
| 10.9645  | 10 | 5 | 5 | 1528976  | 7197990  | 1366601  | 6326428  | 1816792  | 8473793  | 8477366  | 5656425  | 5880077  |
| 24.06667 | 7  | 4 | 3 | 123664.1 | 291646.4 | 100379.1 | 453150.5 | 392950.8 | 360418.2 | 248641.2 | 167321.6 | 259037.6 |
| 18.96583 | 10 | 5 | 5 | 12295775 | 1.03E+08 | 17144944 | 95178037 | 12496279 | 1.13E+08 | 1.18E+08 | 84495369 | 84778103 |
| 10.97857 | 6  | 4 | 2 | 354771.1 | 739648.5 | 470955.1 | 995115.3 | 475482.8 | 1446639  | 182211.5 | 755075.5 | 479991.8 |
| 9.4925   | 10 | 3 | 5 | 747740.1 | 5635935  | 1460419  | 4661134  | 2075978  | 4459655  | 3818578  | 6106532  | 7366790  |

|          |    |   |   |          |          |          |          |          |          |          |          |          |
|----------|----|---|---|----------|----------|----------|----------|----------|----------|----------|----------|----------|
| 12.31038 | 3  | 3 | 0 | 60193.94 | 204191.7 | 93838.33 | 158227.6 | 74995.63 | 126963   | 98510.6  | 204997.3 | 322704.1 |
| 9.445217 | 14 | 5 | 5 | 4609379  | 42705382 | 8872739  | 38030282 | 8444198  | 36450032 | 50354115 | 53517874 | 33006069 |
| 9.3735   | 5  | 1 | 3 | 523536.8 | 285963.2 | 531720.7 | 580642.3 | 559765.1 | 206186.5 | 0        | 0        | 0        |
| 9.092333 | 5  | 3 | 2 | 575649.4 | 1951835  | 1437056  | 1269609  | 1048197  | 498649.6 | 1304922  | 2210950  | 1463688  |
| 9.904767 | 4  | 1 | 3 | 1090954  | 1013970  | 322093.2 | 1446488  | 1043341  | 1173218  | 612463.9 | 1334101  | 1222917  |
| 40.03567 | 4  | 0 | 3 | 273034   | 4447378  | 129367.3 | 4799457  | 868073.9 | 4586968  | 4395562  | 4585472  | 4344323  |
| 9.8445   | 10 | 5 | 5 | 3514881  | 14656338 | 2151631  | 13112057 | 3382188  | 17508483 | 16356168 | 13752509 | 12726125 |
| 9.976317 | 10 | 5 | 5 | 1579078  | 6094003  | 1090283  | 5083223  | 2350051  | 6644841  | 7231982  | 5609125  | 4444034  |
| 17.2485  | 3  | 3 | 0 | 1072564  | 7627102  | 3506166  | 5758383  | 3422194  | 3493884  | 12197522 | 7263987  | 5237828  |
| 9.527817 | 8  | 5 | 3 | 1009545  | 2226693  | 112983.4 | 1851500  | 927356.6 | 2143112  | 2352859  | 2329192  | 2213843  |
| 7.2228   | 5  | 2 | 3 | 103623   | 609025.4 | 206717   | 457336.3 | 334789.3 | 730567.4 | 509334.5 | 351140.9 | 566019.4 |
| 9.856867 | 7  | 4 | 3 | 1416193  | 1808796  | 536181.5 | 2997681  | 2923206  | 2111442  | 1267127  | 2229387  | 2252606  |
| 9.976317 | 10 | 5 | 5 | 1188606  | 4239463  | 811848.8 | 3676743  | 1218169  | 4623572  | 5312107  | 3816589  | 3163500  |
| 9.920517 | 9  | 4 | 5 | 2920173  | 11745209 | 6783569  | 8964828  | 1663529  | 8992067  | 5146303  | 11185669 | 10239228 |
| 30.209   | 5  | 3 | 2 | 93950.46 | 401538.2 | 246369.8 | 293483   | 129867.5 | 689046.3 | 640845.8 | 231692.6 | 151283.4 |
| 9.713983 | 6  | 3 | 2 | 4763188  | 7426736  | 6664139  | 4405074  | 4130708  | 10224951 | 447181   | 16604805 | 8419662  |
| 9.362817 | 7  | 3 | 4 | 579318.9 | 4576340  | 725201.5 | 3788976  | 1869072  | 5447559  | 3459880  | 4468960  | 4642060  |
| 9.206    | 5  | 3 | 1 | 1888571  | 9254019  | 7784430  | 13684725 | 8620938  | 18397458 | 1008467  | 16710037 | 4682276  |
| 10.94443 | 5  | 3 | 2 | 242712.6 | 464149.4 | 75095.03 | 578895.2 | 279006.5 | 436006   | 575788.4 | 491671.1 | 443150.7 |
| 9.976317 | 12 | 5 | 5 | 8132663  | 20936792 | 6611218  | 17604144 | 5706519  | 24719236 | 30647348 | 17388936 | 17411773 |
| 41.9045  | 5  | 1 | 3 | 440284.4 | 6294859  | 359479.5 | 7114966  | 2018934  | 5789247  | 6709648  | 6367296  | 6508739  |
| 41.8915  | 6  | 3 | 3 | 280458.6 | 4594212  | 408459.8 | 3774870  | 2011818  | 4284451  | 4214403  | 5232365  | 4716331  |
| 9.960467 | 9  | 5 | 4 | 1615705  | 1645479  | 410849.8 | 2158513  | 1234330  | 2108312  | 2045478  | 1544255  | 1283506  |
| 9.929783 | 6  | 4 | 2 | 709411.8 | 1544228  | 166972   | 1311021  | 565192.4 | 1551893  | 1718681  | 1276614  | 1533340  |
| 33.74517 | 10 | 5 | 5 | 408061.3 | 2464260  | 761776.4 | 2143818  | 295357   | 3381285  | 2447947  | 1357200  | 2908857  |
| 9.567617 | 11 | 4 | 5 | 2964202  | 10316508 | 13713504 | 4756847  | 2318804  | 7118739  | 5982541  | 2644784  | 34483319 |
| 31.36383 | 4  | 3 | 1 | 88452.3  | 401083.8 | 106439.6 | 356241.9 | 41970.75 | 580311.1 | 376376.3 | 309999.5 | 403102.3 |
| 7.488017 | 10 | 4 | 3 | 27256060 | 3.77E+08 | 2.7E+08  | 2.65E+08 | 88123843 | 7.66E+08 | 2.08E+08 | 5.58E+08 | 1.7E+08  |
| 9.329083 | 8  | 4 | 4 | 988207.6 | 5661631  | 2479480  | 4242188  | 2781271  | 1624042  | 5484743  | 5954839  | 8114057  |
| 10.95835 | 10 | 5 | 5 | 193957.9 | 1015159  | 407018.2 | 824939.6 | 284723.8 | 1477484  | 1086244  | 620272.5 | 572850.2 |
| 9.979667 | 9  | 5 | 4 | 1298812  | 1244993  | 517807.2 | 1654457  | 925244.1 | 2117775  | 1237237  | 1111830  | 766934   |
| 9.559117 | 9  | 5 | 4 | 403703.9 | 962176.9 | 223399.8 | 781332.9 | 411091.8 | 978842.7 | 1247735  | 827035.3 | 671769.5 |
| 9.30295  | 11 | 5 | 5 | 825983.1 | 6658725  | 2372881  | 7652484  | 886538.8 | 5998614  | 10281466 | 5685732  | 3926637  |
| 9.992233 | 10 | 5 | 5 | 1490254  | 4586334  | 1373847  | 3668002  | 1967040  | 4150642  | 6943873  | 4353335  | 3340906  |
| 9.960467 | 5  | 3 | 2 | 683545.3 | 1125751  | 496366.5 | 834411.5 | 582153.8 | 1699256  | 1216193  | 1481927  | 590730.4 |

|          |    |   |   |          |          |          |          |          |          |          |          |          |
|----------|----|---|---|----------|----------|----------|----------|----------|----------|----------|----------|----------|
| 42.251   | 5  | 3 | 1 | 338770.4 | 7034967  | 3298832  | 5613977  | 1580350  | 12285739 | 6432258  | 6669860  | 6666922  |
| 22.0635  | 7  | 4 | 3 | 259509.5 | 1204939  | 512785.8 | 993792.7 | 149507.2 | 824403.3 | 2086104  | 1193731  | 1033193  |
| 9.975217 | 10 | 5 | 5 | 4486713  | 8430493  | 1134516  | 6649394  | 4347986  | 9850431  | 7789905  | 9039163  | 8569593  |
| 9.445217 | 13 | 5 | 5 | 10899182 | 56812194 | 15338530 | 47605686 | 18671272 | 43730566 | 49145258 | 56424141 | 82995274 |
| 9.856867 | 7  | 4 | 3 | 1119408  | 1715537  | 811841.9 | 2586381  | 2071261  | 1119991  | 1915470  | 2712418  | 2145372  |
| 10.008   | 9  | 5 | 4 | 358657.1 | 1024562  | 275435.9 | 818769.2 | 458581.5 | 970483.8 | 1292919  | 699512.4 | 838361.8 |
| 10.00998 | 10 | 5 | 5 | 482593.7 | 793906.6 | 330747.4 | 1042082  | 553897.4 | 938374.2 | 1271391  | 786054.5 | 493657   |
| 9.4468   | 6  | 2 | 4 | 752772.9 | 5777712  | 2407607  | 4526779  | 2243535  | 5963275  | 6589729  | 7036659  | 7679429  |
| 9.473717 | 6  | 3 | 3 | 525720.8 | 3837052  | 1182693  | 3001597  | 1830519  | 5928270  | 3597334  | 3161307  | 3340171  |
| 9.960817 | 10 | 4 | 5 | 23016688 | 39400527 | 67433970 | 12161585 | 10599409 | 1.6E+08  | 7922330  | 11110187 | 11788266 |
| 9.949233 | 9  | 5 | 4 | 951390.3 | 2893520  | 502703.3 | 2326447  | 1357157  | 2883978  | 2971785  | 2522397  | 2403951  |
| 9.856867 | 10 | 5 | 5 | 1311507  | 2046251  | 502202.2 | 3396465  | 3345241  | 1765233  | 2584974  | 1463142  | 1857760  |
| 10.0044  | 10 | 5 | 4 | 2020834  | 5549250  | 2979370  | 4318446  | 946456.7 | 5930379  | 2242240  | 3196916  | 6613276  |
| 9.507167 | 11 | 4 | 5 | 931369.1 | 6913090  | 3120796  | 5153455  | 3424360  | 6191643  | 2950436  | 11663566 | 6592565  |
| 10.93618 | 7  | 4 | 3 | 261903.3 | 617442   | 180426.7 | 730593.3 | 235880   | 907296.5 | 622724.2 | 419810.6 | 603038.6 |
| 9.999    | 5  | 3 | 2 | 1233224  | 578857.7 | 323072.1 | 1382668  | 1990132  | 647466.8 | 176154.3 | 918774.4 | 835816.5 |
| 9.40615  | 9  | 5 | 4 | 804469.8 | 1975066  | 637027.9 | 1518027  | 1007788  | 2633461  | 2701371  | 1429262  | 1476753  |
| 9.853633 | 7  | 4 | 3 | 1071701  | 4125258  | 1764946  | 3181883  | 1750591  | 2455789  | 2649435  | 3584435  | 6420392  |
| 9.976317 | 10 | 5 | 5 | 1366112  | 6774322  | 1142434  | 6178543  | 1076390  | 7429637  | 8008806  | 7077256  | 5056897  |
| 9.976317 | 9  | 5 | 4 | 3322800  | 2318221  | 802384.8 | 4566511  | 5576701  | 2935667  | 2434341  | 3158792  | 1873975  |
| 9.986767 | 10 | 5 | 5 | 2111356  | 2626320  | 1310147  | 4050265  | 3398345  | 3599116  | 3695615  | 3436878  | 1358759  |
| 9.872883 | 10 | 5 | 5 | 4023036  | 27760682 | 3252064  | 24274100 | 8311527  | 25745835 | 24615392 | 26781282 | 28763444 |
| 44.2215  | 7  | 4 | 2 | 259688.6 | 3279939  | 2005603  | 2445387  | 715160.1 | 1682667  | 6785036  | 2485012  | 2695209  |
| 26.08067 | 10 | 5 | 5 | 3597127  | 44558208 | 18591342 | 34716346 | 18102829 | 32315081 | 58061155 | 20566738 | 45522746 |
| 9.992233 | 10 | 5 | 5 | 1184533  | 3878934  | 953080.5 | 3323716  | 1109127  | 3621919  | 5404514  | 4087585  | 2910783  |
| 9.457083 | 4  | 3 | 1 | 1453232  | 3228117  | 3514120  | 4980790  | 2992718  | 765156.3 | 405657.7 | 935522.9 | 6182091  |
| 9.960467 | 12 | 5 | 4 | 760403.1 | 2984214  | 1244944  | 2212189  | 1603022  | 2940120  | 1241277  | 2902287  | 3080076  |
| 10.02372 | 7  | 4 | 3 | 297540.8 | 506058.8 | 296227.7 | 692870.3 | 391649.9 | 536612.7 | 26890.24 | 738941.7 | 760490   |
| 10.90553 | 4  | 1 | 3 | 239944.1 | 492272.2 | 95156.68 | 575727.5 | 193745.3 | 428880.8 | 512776   | 389222.8 | 492741.4 |
| 9.243433 | 7  | 3 | 4 | 20390378 | 1.14E+08 | 1.26E+08 | 58585322 | 72121149 | 2.78E+08 | 30585325 | 20975765 | 2.22E+08 |
| 39.12933 | 8  | 2 | 3 | 334135.2 | 5627056  | 933939.9 | 6401101  | 1777520  | 6368407  | 6302455  | 4511630  | 6248935  |
| 9.983433 | 7  | 4 | 3 | 435020.6 | 1068234  | 343198.2 | 808017.6 | 584857.5 | 1489832  | 1170657  | 1215783  | 865925.5 |
| 11.01378 | 5  | 3 | 2 | 242367.7 | 752679.3 | 351022.9 | 997026   | 534610.5 | 1151883  | 570827.5 | 336041.2 | 1083612  |
| 9.3907   | 5  | 2 | 3 | 3089723  | 16562744 | 13819354 | 10036241 | 10151604 | 2218921  | 19316577 | 2330261  | 32176351 |
| 9.1172   | 6  | 2 | 3 | 821808   | 1195573  | 493520.6 | 2333244  | 2819667  | 1672897  | 1445111  | 1532320  | 714330.6 |

|          |    |   |   |          |          |          |          |          |          |          |          |          |
|----------|----|---|---|----------|----------|----------|----------|----------|----------|----------|----------|----------|
| 9.061    | 9  | 4 | 5 | 628149.1 | 2461515  | 1256545  | 1683531  | 1616811  | 2124629  | 4389540  | 2775670  | 2043229  |
| 9.992233 | 10 | 5 | 5 | 805180.8 | 2709901  | 384014.8 | 2352123  | 839577.1 | 3105200  | 2896965  | 2941971  | 2221723  |
| 28.52417 | 5  | 2 | 3 | 288654.4 | 1391330  | 1016733  | 851626.7 | 999702   | 2072287  | 332820.8 | 2225875  | 227430.7 |
| 9.348233 | 5  | 3 | 2 | 335715.3 | 638276.4 | 509504.4 | 373975.4 | 477316.3 | 1214496  | 1017856  | 708054.7 | 250974.7 |
| 9.848417 | 9  | 5 | 4 | 1079438  | 5111793  | 1335529  | 4055905  | 2402033  | 4312664  | 4519726  | 4116795  | 5230546  |
| 34.50717 | 8  | 4 | 4 | 1477504  | 4208022  | 1344965  | 8636443  | 11033788 | 5937670  | 4427560  | 2362036  | 4782063  |
| 9.848417 | 8  | 4 | 4 | 3177336  | 8977486  | 2462912  | 7437994  | 3219699  | 7986518  | 5135620  | 11285061 | 10305010 |
| 9.473733 | 7  | 3 | 4 | 732648.4 | 1377629  | 724367.1 | 1030066  | 559922.5 | 1554993  | 2153260  | 204060.7 | 1308780  |
| 44.32217 | 8  | 2 | 3 | 285696.4 | 3797232  | 1025185  | 3288321  | 867851.1 | 3459181  | 2991703  | 3512156  | 3430111  |
| 10.01837 | 8  | 4 | 4 | 677735.9 | 609382.4 | 248247.9 | 1079908  | 1162659  | 393574.4 | 600453.4 | 939316.2 | 763503.2 |
| 10.008   | 9  | 5 | 4 | 335098.4 | 872621.3 | 235184.2 | 978537.8 | 146576   | 934085.8 | 965056.9 | 738124.4 | 554175.1 |
| 9.9677   | 10 | 5 | 5 | 3766040  | 15228068 | 2588395  | 13052032 | 5022246  | 16691150 | 17745022 | 13871441 | 11362748 |
| 9.4775   | 8  | 5 | 3 | 837496.1 | 5172914  | 5619659  | 2917473  | 742980.2 | 3559671  | 2052013  | 1633589  | 15107395 |
| 9.856867 | 10 | 5 | 5 | 1.36E+08 | 7.69E+08 | 1.64E+08 | 6.65E+08 | 2.17E+08 | 6.81E+08 | 7.83E+08 | 5.62E+08 | 8.13E+08 |
| 9.8445   | 4  | 1 | 3 | 9043305  | 26198730 | 16190312 | 17280591 | 17146096 | 40949411 | 9749448  | 35532484 | 7480203  |
| 10.97857 | 9  | 5 | 4 | 676467.2 | 1537373  | 204100.8 | 2164970  | 1564521  | 1525176  | 1410755  | 1892087  | 1403744  |
| 9.842    | 8  | 5 | 3 | 1731206  | 2643267  | 678778.7 | 3612698  | 2371081  | 3553559  | 3063284  | 2302210  | 2489442  |
| 44.03467 | 20 | 5 | 5 | 323463   | 4148251  | 826493.8 | 3620745  | 1116474  | 3984368  | 4827535  | 2778620  | 4616242  |
| 9.38595  | 5  | 2 | 3 | 1280038  | 924267.7 | 389572.3 | 3006701  | 5210505  | 666791.6 | 471958.1 | 847893.7 | 1420624  |
| 9.43325  | 11 | 5 | 4 | 2514675  | 11803624 | 6697643  | 17218816 | 12410681 | 18207903 | 14011504 | 15798132 | 9866299  |
| 9.872883 | 5  | 2 | 3 | 57545112 | 3.08E+08 | 2.8E+08  | 1.7E+08  | 2.31E+08 | 5.08E+08 | 2264788  | 5.36E+08 | 4.93E+08 |
| 10.9645  | 10 | 5 | 5 | 548789.6 | 2046847  | 446771.2 | 1780791  | 542657.3 | 2584529  | 2376345  | 1676524  | 1533679  |
| 9.3494   | 5  | 2 | 3 | 317023.4 | 1517986  | 993792.6 | 1063781  | 659467.5 | 2460348  | 711419.9 | 2689694  | 1167725  |
| 9.8322   | 9  | 5 | 4 | 997250.3 | 4612778  | 806951.6 | 3841067  | 1823104  | 4993731  | 4934893  | 3707430  | 3843377  |
| 9.295167 | 5  | 2 | 3 | 523264.3 | 4135229  | 1064890  | 3263154  | 2005020  | 4864649  | 2923686  | 5245260  | 4565175  |
| 9.976317 | 5  | 3 | 2 | 1391332  | 886033.8 | 548937.2 | 1551610  | 1612485  | 1155645  | 1541067  | 1078129  | 474489.2 |
| 44.351   | 3  | 0 | 3 | 354865.5 | 4156397  | 106916   | 3889524  | 664258.4 | 4174962  | 3989340  | 4191671  | 4283070  |
| 10.00998 | 7  | 1 | 3 | 1709265  | 3751506  | 2532761  | 2567248  | 1819832  | 6455141  | 1854332  | 5798160  | 523326.8 |
| 24.47783 | 10 | 5 | 5 | 1207602  | 7222887  | 593691.6 | 6637666  | 1388638  | 6841131  | 8234339  | 6799283  | 7262017  |
| 10.9645  | 10 | 5 | 5 | 536040   | 2278724  | 625602.2 | 1982249  | 469126.3 | 2863805  | 2887983  | 1661119  | 1600325  |
| 10.9645  | 10 | 5 | 5 | 498307.7 | 2275214  | 494916.4 | 1979877  | 603728.5 | 2798939  | 2710348  | 1796197  | 1742413  |
| 9.992233 | 9  | 5 | 4 | 315547.1 | 918217.5 | 159302.6 | 748401.2 | 406917.9 | 895161.5 | 1106450  | 934496.5 | 671255.5 |
| 24.856   | 4  | 4 | 0 | 16569118 | 1.17E+08 | 32290361 | 1E+08    | 30556276 | 1.54E+08 | 1.07E+08 | 1.46E+08 | 76603622 |
| 9.880683 | 5  | 3 | 2 | 705820.4 | 2163923  | 871197.1 | 1546940  | 1364788  | 2622301  | 1299193  | 2402177  | 1246180  |
| 41.93483 | 7  | 2 | 3 | 362737.8 | 5264392  | 1149731  | 8626466  | 8391210  | 6249448  | 6032636  | 6016980  | 3909314  |

|          |    |   |   |          |          |          |          |          |          |          |          |          |
|----------|----|---|---|----------|----------|----------|----------|----------|----------|----------|----------|----------|
| 9.460217 | 8  | 4 | 4 | 492337.5 | 2678695  | 1114944  | 1926601  | 1634479  | 3012577  | 4298133  | 2734269  | 2003956  |
| 9.859983 | 7  | 3 | 4 | 828678.8 | 2293759  | 843485.6 | 2870763  | 1260888  | 1326466  | 1444018  | 3050230  | 2987611  |
| 21.57383 | 10 | 5 | 5 | 9700164  | 15077399 | 10270617 | 29581029 | 35521386 | 29179952 | 11153900 | 22268141 | 7990107  |
| 40.40967 | 5  | 2 | 3 | 459232.3 | 7126878  | 1179469  | 7834767  | 1453421  | 7319518  | 7799617  | 7567071  | 7893399  |
| 9.920517 | 10 | 5 | 5 | 9265245  | 46619817 | 3869749  | 42138986 | 10826648 | 50169021 | 42588404 | 43538134 | 51158870 |
| 9.4468   | 12 | 5 | 5 | 911746.4 | 4584687  | 628969.1 | 3682945  | 2210569  | 3999310  | 4804205  | 5559107  | 4449053  |
| 9.992233 | 9  | 5 | 4 | 1236747  | 2459681  | 497235.1 | 3083161  | 1516067  | 2823251  | 2895345  | 2284206  | 1677879  |
| 10.9645  | 8  | 3 | 5 | 321840   | 915887.4 | 439049   | 1159432  | 473000.3 | 1562093  | 1054748  | 770902   | 363124.1 |
| 9.848417 | 10 | 5 | 5 | 11821816 | 35916245 | 4321162  | 42507959 | 16210509 | 38887665 | 36887517 | 39706849 | 35262574 |
| 18.64583 | 9  | 5 | 4 | 58738.26 | 197404   | 63359.56 | 170488.8 | 29161.27 | 284425.6 | 213617.6 | 144237.6 | 126861.5 |
| 9.5021   | 10 | 5 | 5 | 1651746  | 3927514  | 733714.6 | 3193472  | 1747844  | 4509696  | 4907926  | 3368086  | 3562081  |
| 17.545   | 10 | 5 | 5 | 2099856  | 12973439 | 1737229  | 11731241 | 2760198  | 10728884 | 14383242 | 11526467 | 14532287 |
| 9.507167 | 15 | 5 | 5 | 11020477 | 33975239 | 18941431 | 57207452 | 56437715 | 36994361 | 2573528  | 32851184 | 47435493 |
| 31.17617 | 8  | 4 | 4 | 234901.3 | 2013653  | 675103.6 | 1707082  | 440346.1 | 1030133  | 1876654  | 1862597  | 2596014  |
| 9.398583 | 8  | 4 | 2 | 328510   | 1634584  | 677463.4 | 1242968  | 785765.1 | 1607588  | 1214578  | 2668271  | 884029.8 |
| 9.992233 | 9  | 5 | 4 | 506628.2 | 968950   | 378985.2 | 1174435  | 391633.6 | 907913.7 | 1592123  | 941520.7 | 562419.7 |
| 10.9645  | 9  | 5 | 4 | 785341.4 | 2801270  | 459196.2 | 2318878  | 1155645  | 3345275  | 3045770  | 2163115  | 2540115  |
| 9.445217 | 9  | 5 | 4 | 762572.8 | 5482996  | 2130734  | 4186299  | 2687982  | 7295276  | 8255071  | 3651469  | 3951927  |
| 9.445217 | 5  | 2 | 3 | 6653022  | 43231442 | 23079029 | 32822219 | 14673268 | 57194146 | 7976473  | 31831829 | 55811374 |
| 9.264333 | 5  | 2 | 3 | 883543.9 | 1062936  | 588683.9 | 3234957  | 5439768  | 778235.4 | 309926.6 | 1269590  | 1896845  |
| 9.992233 | 9  | 5 | 4 | 717552.9 | 2337581  | 438053.6 | 1866337  | 1132223  | 2883872  | 2466093  | 2267937  | 1671232  |
| 16.50567 | 10 | 5 | 5 | 420172.6 | 3297358  | 700099.4 | 3665540  | 681303.9 | 3222556  | 2297933  | 3434116  | 3267103  |
| 9.983433 | 10 | 5 | 5 | 2032744  | 6648652  | 1336719  | 5481741  | 2725283  | 7165726  | 7907514  | 5502706  | 4958243  |
| 9.830833 | 5  | 2 | 3 | 2243332  | 1559305  | 531326.4 | 3371509  | 4538650  | 994632.9 | 1294459  | 1312860  | 1872954  |
| 24.609   | 10 | 5 | 5 | 979707.7 | 3019481  | 878943.8 | 3602091  | 1260614  | 4161533  | 3729263  | 2532048  | 2098840  |
| 9.970617 | 6  | 3 | 3 | 875660.5 | 1207676  | 531970.4 | 2116467  | 2248381  | 1720614  | 738405.7 | 883341.4 | 1850041  |
| 9.928667 | 10 | 5 | 5 | 1217929  | 5523976  | 1724379  | 4375288  | 2490704  | 6283949  | 4105135  | 3464858  | 6055451  |
| 8.8696   | 10 | 5 | 5 | 738690.6 | 3777873  | 867084.5 | 3127858  | 1467317  | 3663087  | 5167012  | 3593839  | 2765705  |
| 9.976317 | 6  | 3 | 3 | 654022.1 | 1469003  | 782025.6 | 1871409  | 727548.8 | 1177034  | 570218.2 | 2033473  | 1061569  |
| 9.842    | 10 | 5 | 5 | 2907366  | 5708202  | 2143742  | 4636966  | 1865776  | 7864534  | 7856519  | 4319677  | 3038200  |
| 10.10793 | 11 | 5 | 5 | 583673.9 | 1775396  | 689658.1 | 1436213  | 577274.3 | 2216943  | 2769241  | 1420502  | 1306337  |
| 9.845483 | 6  | 3 | 3 | 1706450  | 2086252  | 467935.5 | 1624528  | 1099650  | 2797599  | 1832334  | 1666136  | 1814445  |
| 40.53917 | 9  | 4 | 4 | 345619.8 | 4725047  | 1677505  | 5743592  | 2113146  | 2889797  | 6673024  | 4556873  | 6178166  |
| 9.992233 | 10 | 5 | 5 | 1198450  | 3822006  | 685793.1 | 3221271  | 1405298  | 4511806  | 4445021  | 3893899  | 2966246  |
| 9.88815  | 9  | 4 | 3 | 6428363  | 4157936  | 2869487  | 7079902  | 6988057  | 4300627  | 2190028  | 9030874  | 2062687  |

|          |    |   |   |          |          |          |          |          |          |          |          |          |
|----------|----|---|---|----------|----------|----------|----------|----------|----------|----------|----------|----------|
| 44.9835  | 10 | 3 | 4 | 372199.6 | 6469923  | 2404799  | 5472783  | 906929.9 | 3985374  | 5470090  | 10307199 | 5527766  |
| 19.44583 | 9  | 4 | 5 | 102003.3 | 376228.6 | 96713.89 | 301004.6 | 171654.6 | 494750   | 414872.8 | 367040   | 228617.5 |
| 9.983433 | 10 | 5 | 5 | 1504651  | 6061481  | 906303.9 | 5138955  | 2206742  | 6450670  | 7012251  | 5538380  | 4752260  |
| 9.419733 | 3  | 3 | 0 | 758085.8 | 2428854  | 719276.2 | 1816327  | 1426067  | 2583965  | 1920002  | 2567468  | 3470252  |
| 8.97505  | 10 | 5 | 5 | 1056034  | 4192632  | 827252.3 | 3831267  | 458923.4 | 5101711  | 3737414  | 4184323  | 3074198  |
| 10.008   | 8  | 4 | 4 | 344983.4 | 784361.2 | 396008.3 | 949614.8 | 160310.8 | 1065216  | 110126.2 | 1059568  | 768960.2 |
| 9.976317 | 7  | 3 | 4 | 1621547  | 3447239  | 2875811  | 2195187  | 1570724  | 1274536  | 1392698  | 1552624  | 7459809  |
| 11.23632 | 8  | 4 | 3 | 251193.5 | 598098.2 | 327841.9 | 437772.7 | 271305.5 | 845789.9 | 961350   | 614086.5 | 425771.8 |
| 9.842    | 9  | 5 | 4 | 1950767  | 6055968  | 1652199  | 5177584  | 1651474  | 7723344  | 7652082  | 4722109  | 4103629  |
| 9.976317 | 10 | 5 | 4 | 1528270  | 4522691  | 2047260  | 3613638  | 1234497  | 3909105  | 1778798  | 3830728  | 6848966  |
| 23.4215  | 10 | 5 | 5 | 211428.5 | 1309617  | 319484.9 | 1010089  | 709810.8 | 1756388  | 1142616  | 1417313  | 898944.7 |
| 28.1425  | 8  | 4 | 4 | 48179.73 | 209497.1 | 97678.41 | 268443.6 | 122251.9 | 275556.5 | 172313.5 | 205952.5 | 70173.69 |
| 10.9645  | 10 | 5 | 5 | 404182.2 | 1192983  | 525323.9 | 1465921  | 501676.1 | 1890586  | 1571772  | 1050900  | 818231.5 |
| 9.976317 | 7  | 4 | 3 | 2312127  | 796470.9 | 234393.2 | 1618299  | 2064565  | 1022546  | 1071725  | 660622.1 | 675547.2 |
| 9.94455  | 9  | 5 | 4 | 863699.6 | 2427167  | 565176.6 | 1976471  | 1036964  | 3090430  | 2922235  | 1800395  | 1990263  |
| 12.04982 | 3  | 3 | 0 | 241436.2 | 1060314  | 617428.9 | 1328106  | 333036   | 1509553  | 1460187  | 693404.2 | 143832.1 |
| 9.343517 | 9  | 4 | 5 | 5619603  | 14609440 | 8818537  | 23506725 | 21307509 | 8977445  | 18252878 | 27430060 | 13832229 |
| 9.992233 | 5  | 3 | 2 | 869658.3 | 529460.2 | 417572.2 | 1037832  | 1239832  | 621169.6 | 1129271  | 582262.3 | 0        |
| 44.83983 | 5  | 3 | 2 | 219535.4 | 2817555  | 37132.83 | 2857355  | 95982.55 | 2868563  | 2813075  | 2827030  | 2764699  |
| 42.56767 | 6  | 3 | 3 | 338377.9 | 5465148  | 2228150  | 4532623  | 944092   | 4442412  | 4262009  | 4462742  | 9440364  |
| 9.983433 | 4  | 1 | 3 | 519564.2 | 372885.6 | 167786.1 | 758966.1 | 965915   | 333101.1 | 301642.7 | 592283.8 | 479856.3 |
| 22.33567 | 6  | 4 | 2 | 109505.5 | 321793.5 | 35886.4  | 267488.4 | 134211.1 | 336483.7 | 319993   | 273182   | 308580.5 |
| 9.992233 | 9  | 5 | 4 | 926369.5 | 2992745  | 511200.3 | 2421294  | 1384671  | 3545665  | 3012447  | 2946836  | 2182409  |
| 9.845483 | 9  | 5 | 4 | 1493290  | 7133589  | 1427748  | 5611016  | 3673604  | 6788887  | 6811094  | 5597370  | 6981592  |
| 9.979667 | 11 | 5 | 5 | 1519590  | 1853872  | 506397.8 | 2908625  | 2635912  | 2158712  | 2259072  | 2223350  | 1471349  |
| 18.982   | 5  | 2 | 3 | 39435572 | 95901002 | 89793910 | 52770581 | 71347607 | 1.71E+08 | 1.82E+08 | 139924.4 | 1.25E+08 |
| 10.008   | 14 | 5 | 5 | 1096788  | 2028521  | 568264.6 | 2606776  | 1388880  | 2188081  | 2675162  | 2342378  | 1715799  |
| 20.97733 | 6  | 4 | 2 | 51437.33 | 202968.1 | 52384.28 | 176056.7 | 49046.9  | 157549   | 285590.9 | 222009.1 | 183293.7 |
| 35.18167 | 8  | 4 | 4 | 3019610  | 7174266  | 9003982  | 3519226  | 2652438  | 1628812  | 2458004  | 874691.9 | 22327638 |
| 31.50833 | 7  | 4 | 3 | 1033946  | 6628734  | 6859684  | 3833010  | 2168258  | 422437.5 | 3988766  | 2074659  | 17341966 |
| 9.514333 | 4  | 3 | 1 | 664696.8 | 898433.7 | 455821.3 | 538344.8 | 828963.6 | 1158409  | 627126.4 | 1577227  | 508200.9 |
| 9.920517 | 9  | 4 | 4 | 2532588  | 3297911  | 3985837  | 1715066  | 458109.4 | 1285874  | 10360342 | 1007961  | 1385014  |
| 9.473717 | 7  | 3 | 3 | 839620.1 | 2281727  | 1068439  | 3634033  | 3314484  | 1413493  | 1745133  | 3865679  | 1485222  |
| 9.94455  | 9  | 5 | 4 | 6282248  | 20606049 | 3951187  | 17841544 | 6148448  | 23467805 | 20753589 | 15914530 | 17522189 |
| 10.008   | 8  | 5 | 3 | 312624.1 | 682959.4 | 139860.7 | 592374.9 | 195480.5 | 801635.1 | 633621.2 | 850483.4 | 617490.7 |



|          |    |   |   |          |          |          |          |          |          |          |          |          |
|----------|----|---|---|----------|----------|----------|----------|----------|----------|----------|----------|----------|
| 10.95602 | 5  | 2 | 3 | 1185298  | 2886686  | 1293347  | 2202259  | 1289435  | 3242400  | 4754031  | 1959736  | 1408482  |
| 9.392767 | 8  | 4 | 4 | 737391.2 | 1510440  | 525043.4 | 1161841  | 760397   | 1901812  | 1771279  | 955979.3 | 928052.9 |
| 9.514733 | 8  | 4 | 4 | 1732152  | 5647032  | 4661042  | 7724078  | 2891940  | 10713974 | 2134395  | 10344134 | 612674.1 |
| 10.01837 | 11 | 5 | 5 | 1876749  | 7050640  | 684015.9 | 9544574  | 6285728  | 7725819  | 7442010  | 7455930  | 6401504  |
| 9.976317 | 9  | 5 | 4 | 734106.6 | 1340235  | 229302.2 | 1744668  | 1007634  | 1542601  | 1399593  | 1557320  | 1146032  |
| 9.13445  | 5  | 3 | 2 | 1310622  | 670246   | 314149.8 | 2095968  | 3598269  | 677574.7 | 610879.2 | 396105.8 | 470820.7 |
| 10.95055 | 10 | 5 | 5 | 1130125  | 7324659  | 1410062  | 6531171  | 1579090  | 8118729  | 8998838  | 5955679  | 5764735  |
| 37.41717 | 5  | 1 | 3 | 316665.8 | 3551165  | 1543765  | 4200557  | 696390   | 4229737  | 4256846  | 4397802  | 4074189  |
| 9.960467 | 9  | 5 | 4 | 1761000  | 6601151  | 951442.8 | 5726676  | 2074365  | 6470729  | 8196943  | 5984851  | 5778415  |
| 28.17083 | 8  | 4 | 4 | 1561370  | 24544005 | 5870164  | 22025861 | 3023704  | 33147481 | 20587056 | 19183132 | 27996657 |
| 10.9645  | 10 | 5 | 5 | 500640.1 | 2355734  | 570276.8 | 2057838  | 554670.4 | 2912022  | 2879534  | 1785109  | 1739305  |
| 9.379233 | 9  | 5 | 4 | 1339236  | 4104874  | 1652303  | 3133184  | 1996157  | 4647235  | 1528641  | 3626569  | 4810961  |
| 9.992233 | 9  | 4 | 5 | 546005.8 | 1224843  | 579011.4 | 1507323  | 482102.2 | 1483259  | 1949767  | 1427181  | 582670.5 |
| 9.842    | 9  | 5 | 4 | 2471800  | 4810099  | 1861636  | 3810571  | 1914937  | 6144530  | 7068092  | 3349554  | 2608845  |
| 9.912633 | 10 | 5 | 5 | 5272115  | 10278628 | 1976198  | 8527475  | 4133523  | 10740802 | 9895780  | 7480194  | 10271937 |
| 20.888   | 10 | 5 | 5 | 2828529  | 14661973 | 2282650  | 12680386 | 4660781  | 16169805 | 16000435 | 12273261 | 12091571 |
| 44.89233 | 10 | 5 | 5 | 455264.7 | 4700692  | 376115.9 | 4175650  | 1297379  | 4624891  | 4818993  | 4208430  | 5243886  |
| 35.43067 | 10 | 5 | 5 | 3066380  | 60038375 | 9474562  | 55526901 | 7402430  | 54113126 | 74402542 | 64451706 | 50822642 |
| 9.250817 | 4  | 3 | 1 | 822285.1 | 468321.4 | 337751.9 | 1024629  | 1385324  | 580584.9 | 863396.7 | 632567.8 | 265057.8 |
| 9.976317 | 8  | 4 | 4 | 1087927  | 1865980  | 844180.6 | 2500689  | 1447388  | 2381843  | 3004737  | 1039246  | 1813628  |
| 9.45945  | 11 | 5 | 5 | 784647.9 | 2751491  | 1704226  | 3580815  | 1412956  | 3790036  | 5213307  | 1237073  | 1432194  |
| 43.6465  | 10 | 2 | 3 | 278245.8 | 3196910  | 858622.8 | 2594126  | 1346488  | 4488334  | 2655155  | 2541576  | 2623556  |
| 9.992233 | 11 | 5 | 5 | 1245162  | 2233738  | 558241   | 3235718  | 2502697  | 2654434  | 2771445  | 2467857  | 1552178  |
| 39.23017 | 4  | 3 | 1 | 828171.9 | 10977432 | 6982113  | 14442645 | 6081301  | 17945259 | 5140872  | 5470822  | 7144762  |
| 9.445217 | 6  | 2 | 3 | 1629412  | 8258668  | 3310663  | 5760423  | 5704279  | 9334896  | 4506118  | 9882107  | 5220547  |
| 9.845483 | 5  | 2 | 3 | 13897499 | 14406535 | 22035733 | 5406809  | 7507174  | 4660254  | 53631914 | 8139326  | 2804410  |
| 21.051   | 10 | 5 | 5 | 617540.4 | 3577387  | 1061421  | 2874253  | 1537743  | 5070199  | 3491904  | 3660351  | 2072869  |
| 9.864767 | 10 | 5 | 5 | 41128812 | 1.77E+08 | 9967431  | 2.03E+08 | 65693988 | 1.86E+08 | 1.74E+08 | 1.86E+08 | 1.78E+08 |
| 44.66733 | 6  | 3 | 1 | 421162.3 | 6960131  | 2125463  | 7832765  | 778262   | 8847702  | 4259166  | 8400930  | 8217972  |
| 9.994767 | 14 | 5 | 5 | 636682.4 | 1286495  | 428663.4 | 1762879  | 1159597  | 1105187  | 1976658  | 970175   | 1421762  |
| 9.933967 | 7  | 4 | 3 | 1642764  | 3661917  | 211015.3 | 4358917  | 1760595  | 3308461  | 3644625  | 3813497  | 3717250  |
| 19.84017 | 6  | 3 | 3 | 892542.4 | 568318.6 | 542538.4 | 1404368  | 2078723  | 141540.8 | 255213.2 | 1346442  | 930649.5 |
| 17.32833 | 8  | 5 | 3 | 162218.7 | 655992.9 | 277637.3 | 822304.6 | 346672.3 | 666646.1 | 229927.8 | 988083   | 778058.8 |
| 42.68283 | 7  | 2 | 5 | 399170   | 5753698  | 2791770  | 7696351  | 4333244  | 7060559  | 7189673  | 6740452  | 7009593  |
| 11.38433 | 6  | 3 | 3 | 84969.95 | 297118.8 | 27945.49 | 263737.9 | 81795.21 | 277994.2 | 261547.9 | 313573.7 | 300573.6 |

|          |    |   |   |          |          |          |          |          |          |          |          |          |
|----------|----|---|---|----------|----------|----------|----------|----------|----------|----------|----------|----------|
| 9.999217 | 4  | 1 | 3 | 426917.4 | 705932.4 | 422524.4 | 507316.9 | 319559.4 | 1059672  | 86590.5  | 804943   | 1090651  |
| 9.94455  | 5  | 2 | 3 | 1482131  | 3625785  | 2235274  | 2533015  | 1881489  | 1808616  | 1249974  | 6867701  | 3905180  |
| 9.960467 | 10 | 5 | 5 | 1029523  | 2455528  | 454777.6 | 2170806  | 608097.5 | 2464719  | 3173663  | 2494046  | 1981102  |
| 9.5876   | 4  | 1 | 3 | 143273.4 | 377497.9 | 122181.7 | 319468.6 | 95267.34 | 436689.1 | 179723.3 | 445646.1 | 342109.8 |
| 9.8445   | 9  | 5 | 4 | 1518400  | 3810546  | 333629.5 | 4510351  | 1757704  | 3774174  | 3720041  | 4362365  | 3741130  |
| 10.97857 | 10 | 5 | 5 | 3086434  | 4105330  | 1206822  | 7363825  | 8219593  | 3569103  | 5603964  | 4688164  | 4270433  |
| 44.50933 | 6  | 3 | 1 | 228422.9 | 3269590  | 1558067  | 3883786  | 76179.78 | 2393459  | 964679.1 | 4235719  | 4027947  |
| 9.960467 | 10 | 5 | 5 | 11899916 | 10009518 | 2403520  | 17392357 | 18657326 | 12419528 | 10725662 | 11684359 | 8717341  |
| 9.904767 | 10 | 5 | 5 | 3444101  | 16294765 | 3237824  | 13032088 | 7870507  | 15144283 | 14810421 | 13370470 | 16390696 |
| 9.928667 | 7  | 3 | 4 | 778179.3 | 1937762  | 520849.7 | 1617748  | 677569.7 | 2513294  | 2269237  | 1603904  | 1222053  |
| 10.70315 | 10 | 5 | 5 | 4087649  | 18486335 | 3449350  | 15760787 | 6311691  | 22033356 | 20509345 | 14935105 | 14624818 |
| 9.842    | 6  | 2 | 4 | 704530.1 | 1395838  | 873684.2 | 1755216  | 333107.2 | 2412169  | 0        | 1430224  | 1493336  |
| 25.39233 | 10 | 5 | 5 | 233106.1 | 1482762  | 558290.2 | 1233575  | 355037.5 | 1129850  | 2461034  | 1300638  | 1131162  |
| 19.05333 | 8  | 4 | 4 | 232088.6 | 1513851  | 367619.9 | 1301529  | 433653.7 | 1704639  | 1193401  | 1964286  | 1082217  |
| 43.445   | 10 | 5 | 4 | 288937.8 | 4993346  | 1711841  | 4245735  | 992029   | 5706876  | 2695614  | 4011135  | 7191684  |
| 9.848417 | 9  | 5 | 4 | 1539981  | 5875633  | 1466029  | 5015905  | 1773630  | 6069705  | 6739910  | 4010523  | 4863340  |
| 9.94455  | 5  | 3 | 2 | 1026572  | 1760447  | 509712.7 | 1473587  | 575786.5 | 2056303  | 2086620  | 2243668  | 1185249  |
| 10.95055 | 10 | 5 | 5 | 393657.1 | 2233296  | 689070.8 | 1907969  | 530945.6 | 2986867  | 2609216  | 1550419  | 1451404  |
| 9.94405  | 10 | 4 | 4 | 1820897  | 1597636  | 422015   | 2546177  | 2390285  | 1471708  | 2121160  | 975773.6 | 1782539  |
| 9.40255  | 8  | 4 | 4 | 1754411  | 3291537  | 1086962  | 2660561  | 1294552  | 4686024  | 3797462  | 1762644  | 2861991  |
| 21.21    | 9  | 4 | 5 | 92849.84 | 382836   | 97010.56 | 442023.4 | 125085.9 | 342009.3 | 517882.3 | 321370.1 | 448390.1 |
| 9.523383 | 12 | 5 | 4 | 3129901  | 23676217 | 5047482  | 19550872 | 9639363  | 30477143 | 25629055 | 19259922 | 18121359 |
| 10.86045 | 9  | 5 | 4 | 866556.7 | 1932348  | 610733.6 | 2639678  | 1733080  | 2343175  | 2656615  | 1968687  | 1110843  |
| 9.536783 | 8  | 4 | 4 | 646376.7 | 1134699  | 477711.3 | 928741.4 | 261090.2 | 1594764  | 1660222  | 549385.8 | 900663.6 |
| 11.22153 | 11 | 5 | 5 | 366076.2 | 1294415  | 373897.9 | 1030427  | 593974.8 | 1112589  | 1786945  | 1288803  | 797645.9 |
| 9.848417 | 9  | 5 | 4 | 5732221  | 28691748 | 5825136  | 22939392 | 13875656 | 28903163 | 28771516 | 21484895 | 26680312 |
| 10.99268 | 9  | 4 | 5 | 699877.4 | 1566145  | 686491.3 | 2230988  | 1599994  | 1068804  | 2669671  | 1162644  | 1808757  |
| 9.983433 | 10 | 5 | 5 | 3148053  | 11067250 | 2750597  | 8938975  | 4917041  | 13461870 | 13084377 | 9041773  | 7275035  |
| 9.43325  | 5  | 3 | 2 | 2258313  | 7015836  | 3753126  | 9447464  | 5301550  | 1847258  | 10283340 | 11068878 | 6264204  |
| 9.952017 | 10 | 5 | 5 | 2909696  | 11151638 | 1899017  | 10165117 | 1849910  | 13728167 | 12486057 | 10621417 | 9390222  |
| 8.842333 | 5  | 3 | 2 | 317115.3 | 712989.1 | 275812.6 | 931361.4 | 507676.2 | 642333.6 | 984717.8 | 850101.5 | 817279.9 |
| 9.406667 | 6  | 3 | 3 | 614638.8 | 1932754  | 1170478  | 2609540  | 1388864  | 3506887  | 2736616  | 1671118  | 719589.4 |
| 10.03947 | 8  | 5 | 3 | 193784.3 | 463126.8 | 107569.8 | 397414.5 | 139337.9 | 356598.4 | 516525.2 | 397783.5 | 624338.1 |
| 9.979667 | 9  | 5 | 4 | 1070854  | 3604337  | 764821.2 | 2924476  | 1617047  | 4372501  | 3954749  | 3139763  | 2503626  |
| 9.992233 | 7  | 4 | 3 | 774735.3 | 959381.3 | 420729.2 | 1370926  | 992689.9 | 1028386  | 1343734  | 1355427  | 672464.9 |

|          |    |   |   |          |          |          |          |          |          |          |          |          |
|----------|----|---|---|----------|----------|----------|----------|----------|----------|----------|----------|----------|
| 9.857683 | 7  | 3 | 4 | 1238551  | 8121636  | 1397751  | 6992959  | 2636797  | 6995654  | 9726266  | 7564327  | 6808475  |
| 9.856867 | 10 | 5 | 5 | 3397931  | 21844462 | 2390165  | 18978645 | 7056564  | 21783709 | 21474186 | 19015706 | 21306890 |
| 9.842    | 9  | 5 | 4 | 1731206  | 6503774  | 1203393  | 5365589  | 2733906  | 6811462  | 7263039  | 4893219  | 5684744  |
| 9.946467 | 10 | 5 | 5 | 2890019  | 4185230  | 1106434  | 5663328  | 3666672  | 5455675  | 5076592  | 4228665  | 3248146  |
| 9.1445   | 3  | 3 | 0 | 879686.2 | 2913217  | 1058148  | 3853408  | 2237182  | 2008132  | 3235824  | 4394746  | 3155204  |
| 9.5021   | 15 | 5 | 5 | 3127995  | 23794460 | 2861079  | 26580355 | 6718899  | 22749004 | 24323651 | 19445865 | 25667264 |
| 9.870017 | 8  | 4 | 4 | 868625.7 | 1817698  | 402988.8 | 1618416  | 352687.7 | 2108697  | 1108521  | 1965723  | 1910442  |
| 9.972483 | 7  | 3 | 4 | 1925697  | 2618306  | 1699532  | 1870266  | 1034955  | 4750815  | 2869921  | 1019815  | 3653591  |
| 9.475667 | 7  | 3 | 3 | 568191.9 | 1464147  | 989886.5 | 959297.1 | 929563   | 2854713  | 1066691  | 867286.5 | 431424.2 |
| 9.845483 | 5  | 2 | 3 | 1090319  | 2547890  | 956739.1 | 1966460  | 1231302  | 3286325  | 1067446  | 3439698  | 2230238  |
| 9.960817 | 9  | 5 | 4 | 1882710  | 7202454  | 837574   | 6572122  | 1449064  | 8333192  | 6160593  | 6644695  | 7539505  |
| 9.573333 | 10 | 5 | 5 | 2362935  | 7770078  | 1513828  | 6704213  | 2403695  | 8888816  | 9037197  | 6129094  | 6105494  |
| 43.76167 | 10 | 4 | 4 | 363270.9 | 5580238  | 2265628  | 7778277  | 5304809  | 6285290  | 7657700  | 7409042  | 4208038  |
| 9.972483 | 11 | 5 | 4 | 5169925  | 10524390 | 3370323  | 8590252  | 3961158  | 13187491 | 6136940  | 7716002  | 12107171 |
| 24.68    | 8  | 4 | 4 | 209491.2 | 981572.3 | 362022.5 | 689866   | 682449.1 | 923968.6 | 1198361  | 536553.4 | 1467296  |
| 9.77355  | 6  | 1 | 4 | 608234.8 | 1070644  | 460469.3 | 1278872  | 313168.8 | 1274897  | 296359.1 | 1413031  | 1005929  |
| 21.91383 | 5  | 2 | 3 | 545427   | 4871969  | 928815.2 | 4026538  | 2023369  | 5512138  | 3620917  | 4258619  | 5902578  |
| 9.94455  | 10 | 5 | 5 | 5149797  | 19171131 | 3789319  | 17436539 | 2687261  | 24166937 | 22130606 | 17672694 | 15382144 |
| 21.1525  | 10 | 5 | 5 | 1454048  | 4185028  | 775531.3 | 4695226  | 1124122  | 3454976  | 5168708  | 4832347  | 3534159  |
| 21.22733 | 3  | 0 | 3 | 81838.95 | 134642.1 | 48927.9  | 164097.5 | 62213.38 | 111002.7 | 70672.14 | 129077.3 | 197859.2 |
| 9.43325  | 5  | 2 | 3 | 858196.7 | 5321626  | 3178677  | 3686766  | 3051080  | 7366989  | 2221922  | 7874722  | 7653062  |
| 9.346    | 8  | 5 | 3 | 1601580  | 7868778  | 4268823  | 5789629  | 3619094  | 6155938  | 1458411  | 10989707 | 12188319 |
| 21.57383 | 6  | 4 | 2 | 79137.95 | 357757.7 | 90570.15 | 275765.8 | 196306.3 | 402509.6 | 359284.5 | 337289.1 | 222266.5 |
| 9.856867 | 10 | 5 | 5 | 3510552  | 10717032 | 633540.6 | 12384138 | 4233780  | 10495269 | 10913095 | 11246772 | 11210070 |
| 40.49617 | 11 | 5 | 2 | 299797.8 | 4728302  | 2915719  | 3577246  | 518670.4 | 3431002  | 9886303  | 2741431  | 3706423  |
| 10.9645  | 10 | 5 | 5 | 383316.9 | 1754015  | 440103   | 1547426  | 338812.9 | 2164911  | 2230329  | 1336469  | 1301910  |
| 44.96917 | 10 | 4 | 3 | 340401.9 | 4793167  | 2451213  | 3684377  | 1679944  | 4276423  | 973481.3 | 4861260  | 7104501  |
| 37.7915  | 4  | 1 | 3 | 270329.6 | 3575531  | 195720.8 | 3468851  | 211021.3 | 3547986  | 3794773  | 3632538  | 3638561  |
| 9.43325  | 6  | 5 | 1 | 670546.4 | 4166955  | 860953.4 | 3363405  | 1935115  | 4895701  | 3750948  | 4792146  | 4543598  |
| 10.98605 | 3  | 0 | 3 | 338866.4 | 1029329  | 246852.6 | 914642.1 | 184857.4 | 1183507  | 1341724  | 759207.9 | 808381   |
| 9.888767 | 10 | 5 | 5 | 4014883  | 18296235 | 5328141  | 15603696 | 4946477  | 10046215 | 18248919 | 17798229 | 20882245 |
| 35.45383 | 5  | 2 | 3 | 131527   | 534369.8 | 258915.2 | 420558.4 | 159592.5 | 730577.2 | 461933.6 | 170192.6 | 831888.2 |
| 8.981583 | 3  | 3 | 0 | 184753.4 | 308491.3 | 201658.2 | 195028.3 | 230448.3 | 194072.3 | 621743.3 | 158115.8 | 166664.1 |
| 9.845483 | 5  | 3 | 2 | 509624.4 | 1593505  | 795767.1 | 1203325  | 689529   | 1917049  | 201436.2 | 2093229  | 1679215  |
| 9.864767 | 10 | 5 | 5 | 5365828  | 27276896 | 8742500  | 23610732 | 4211940  | 26216710 | 20597972 | 22750523 | 42472864 |

|          |    |   |   |          |          |          |          |          |          |          |          |          |
|----------|----|---|---|----------|----------|----------|----------|----------|----------|----------|----------|----------|
| 9.508883 | 5  | 2 | 3 | 761325.1 | 2203004  | 659012.9 | 1753046  | 1009440  | 2818044  | 1629126  | 1387297  | 2769502  |
| 9.915583 | 10 | 5 | 4 | 1224230  | 3165021  | 1018858  | 2668101  | 872030.6 | 2490085  | 4173500  | 2255002  | 2535264  |
| 9.4098   | 10 | 3 | 4 | 13544292 | 51235000 | 61790456 | 23904142 | 39179351 | 7097463  | 9863976  | 2247213  | 1.09E+08 |
| 12.09287 | 4  | 3 | 1 | 88080.48 | 178020.4 | 47012.56 | 218330.3 | 95915.78 | 181192.3 | 104120.9 | 192177.4 | 178296.7 |
| 10.008   | 7  | 4 | 3 | 742827.2 | 650010.5 | 373781.2 | 1105101  | 1128606  | 949831.9 | 112710.8 | 1000352  | 753512.9 |
| 9.94455  | 9  | 5 | 4 | 1319586  | 3423106  | 1222930  | 2923682  | 475052.2 | 4677262  | 4370902  | 2280459  | 1986729  |
| 9.983433 | 10 | 5 | 5 | 2284219  | 8304896  | 1944972  | 7083639  | 2649493  | 10457129 | 9889228  | 7598018  | 5585837  |
| 22.58033 | 8  | 4 | 4 | 113214.3 | 346556.6 | 154191.7 | 281035.5 | 81034.3  | 390712.8 | 335806.5 | 215901.6 | 206454.4 |
| 9.859983 | 10 | 5 | 5 | 1.07E+08 | 2.36E+08 | 28081390 | 3.47E+08 | 2.84E+08 | 2.51E+08 | 2.26E+08 | 2.7E+08  | 2.39E+08 |
| 9.4925   | 8  | 3 | 4 | 1126511  | 4171895  | 2770759  | 3038805  | 1094050  | 7928503  | 1284780  | 4347317  | 1689312  |
| 9.999217 | 6  | 2 | 4 | 411319.8 | 623995.1 | 334067.6 | 806441.5 | 362915.9 | 666468   | 821283.6 | 1044787  | 221443.5 |
| 9.964417 | 8  | 4 | 4 | 1275414  | 2338589  | 678366.6 | 1937834  | 842047.8 | 2351061  | 3178359  | 2809738  | 1539606  |
| 10.02372 | 8  | 4 | 4 | 735451.3 | 688925.8 | 108173.5 | 1128229  | 1124048  | 723428.3 | 591985.3 | 777141.4 | 794577.7 |
| 9.346    | 5  | 2 | 3 | 848259.2 | 1984927  | 583278.1 | 1573389  | 935506.8 | 2102658  | 1645712  | 2148016  | 2789890  |
| 9.8445   | 10 | 5 | 5 | 1930446  | 5282699  | 1445003  | 6186331  | 1959112  | 5784845  | 2905305  | 6715645  | 5889101  |
| 9.9677   | 10 | 5 | 5 | 3785379  | 15257921 | 2563583  | 13045043 | 5281295  | 16636178 | 17805141 | 13775376 | 11514749 |
| 10.99775 | 10 | 5 | 5 | 1010814  | 7200238  | 545393.9 | 8037819  | 2107618  | 7475652  | 6589723  | 6847591  | 7108008  |
| 9.536783 | 7  | 4 | 3 | 433272.8 | 1073485  | 562480.2 | 768336.6 | 604836.5 | 1007858  | 1855798  | 980863.3 | 1233633  |
| 12.30202 | 5  | 1 | 4 | 321710.3 | 2051046  | 597919.8 | 1696871  | 746861.4 | 2708857  | 2256938  | 1999851  | 1087019  |
| 10.67483 | 6  | 3 | 3 | 93039.13 | 210776.8 | 44279.95 | 178496.4 | 74192.65 | 151463.5 | 271523.5 | 225750.7 | 214316.4 |
| 10.02372 | 9  | 5 | 4 | 284944.5 | 1135540  | 183047.6 | 970371.4 | 397360   | 944606.7 | 1350470  | 1041354  | 1029140  |
| 10.70315 | 10 | 5 | 5 | 761980.6 | 3443071  | 690449.3 | 2979765  | 1036267  | 4218779  | 3795366  | 2940332  | 2525120  |
| 9.989483 | 9  | 4 | 5 | 773330.4 | 854297.7 | 164065.3 | 1496550  | 1644684  | 1108758  | 897402.7 | 812294.8 | 668890.7 |
| 13.6214  | 8  | 4 | 4 | 117993   | 320713   | 163186.8 | 449352.8 | 301717.7 | 541331.9 | 346277.8 | 274670.1 | 88269.46 |
| 9.541433 | 9  | 4 | 4 | 417316.3 | 1233914  | 372463.7 | 1522940  | 675480.1 | 1371033  | 1652947  | 1447351  | 752069.5 |
| 10.6849  | 10 | 5 | 5 | 226309.7 | 1179268  | 262154.4 | 1035401  | 288201.3 | 1254134  | 1286584  | 860491.6 | 976613.8 |
| 10.00385 | 9  | 5 | 4 | 2392318  | 1320839  | 153215.2 | 3168536  | 4744562  | 1394718  | 1215399  | 1185082  | 1254673  |
| 9.44825  | 9  | 4 | 4 | 6121936  | 21757233 | 24011910 | 33162450 | 19342736 | 24204842 | 6923087  | 6182729  | 8841940  |
| 9.297883 | 5  | 3 | 2 | 627384.9 | 1919253  | 1481419  | 2612705  | 1146144  | 3120548  | 634822   | 698585.2 | 3864514  |
| 11.287   | 6  | 5 | 1 | 96461.93 | 221855.4 | 129976.1 | 162809.8 | 91761.48 | 431868.8 | 264581.1 | 152900.9 | 129296.8 |
| 9.842    | 10 | 5 | 5 | 3595300  | 9076033  | 703319.2 | 12018297 | 7544970  | 9943209  | 8559494  | 8743680  | 9718504  |
| 32.83517 | 5  | 2 | 3 | 227914.1 | 1536247  | 302824.9 | 1301805  | 548206.9 | 1447385  | 1610649  | 1057804  | 1743991  |
| 10.008   | 10 | 5 | 5 | 548323.9 | 1783427  | 289428.2 | 1596395  | 412704.3 | 1909823  | 2067699  | 1972156  | 1376418  |
| 9.856867 | 10 | 5 | 5 | 1166279  | 2350601  | 697264.3 | 3497260  | 2898498  | 3030758  | 2719321  | 2486842  | 2317205  |
| 9.392767 | 11 | 5 | 4 | 3476793  | 33955312 | 9277507  | 27426587 | 14870763 | 45117811 | 29880054 | 42708015 | 26748673 |

|          |    |   |   |          |          |          |          |          |          |          |          |          |
|----------|----|---|---|----------|----------|----------|----------|----------|----------|----------|----------|----------|
| 9.992233 | 10 | 5 | 5 | 1319944  | 4085365  | 750053.3 | 3565365  | 1178714  | 4703477  | 4224869  | 4070948  | 2827083  |
| 9.445217 | 6  | 2 | 4 | 2618849  | 18268489 | 14628476 | 10927144 | 13504759 | 2463934  | 2105957  | 29444907 | 30063745 |
| 9.840617 | 10 | 5 | 5 | 1528285  | 6266932  | 794597.1 | 5831211  | 874441.1 | 6780993  | 7213564  | 5454687  | 5445122  |
| 9.979667 | 9  | 5 | 4 | 1053588  | 3905683  | 1027620  | 3117076  | 1841499  | 4533734  | 4447091  | 3132339  | 2511814  |
| 9.93625  | 10 | 5 | 5 | 2516436  | 9452910  | 1466189  | 8321438  | 2645864  | 10862899 | 10154886 | 7779595  | 7964369  |
| 10.52898 | 10 | 5 | 5 | 283977.9 | 953305.8 | 174190.4 | 790788.7 | 393884.9 | 925284.8 | 1030933  | 694719.2 | 944097.7 |
| 24.88533 | 7  | 3 | 4 | 271058.2 | 1570401  | 1515816  | 854688.5 | 1207180  | 3137394  | 395155.4 | 349854   | 3311627  |
| 9.949233 | 10 | 5 | 5 | 1258692  | 3761051  | 1302761  | 3049790  | 1425201  | 4322178  | 2692288  | 2694603  | 3332478  |
| 9.994767 | 10 | 5 | 5 | 1113986  | 1939295  | 773854.5 | 2609315  | 1606633  | 2269483  | 2961017  | 2138226  | 1151024  |
| 10.95055 | 10 | 5 | 5 | 990404.5 | 6132658  | 1721636  | 5334104  | 1307832  | 7835225  | 7282743  | 4306341  | 4246070  |
| 9.94455  | 7  | 3 | 3 | 5618784  | 3732753  | 735452.6 | 8667674  | 12704837 | 2947478  | 3908796  | 4008160  | 4731634  |
| 27.26983 | 8  | 3 | 4 | 178535.6 | 690536.4 | 521118.6 | 425249.6 | 498546.2 | 1317365  | 165767.1 | 341894.2 | 449130.3 |
| 9.609367 | 5  | 4 | 1 | 277163.2 | 1190541  | 425369.8 | 1004074  | 266834.3 | 1748332  | 839015.5 | 1070997  | 779072.3 |
| 26.02    | 5  | 2 | 3 | 70626.47 | 221239.5 | 166583.6 | 147529.9 | 108509.3 | 142468.6 | 508893   | 80967.97 | 183680   |
| 9.43325  | 11 | 5 | 4 | 1595479  | 8023959  | 3537950  | 6431415  | 2453263  | 5935363  | 8023854  | 8875773  | 13344295 |
| 9.4468   | 6  | 4 | 2 | 349416.9 | 1685609  | 554598.6 | 1309862  | 848612.4 | 2318621  | 2245444  | 1454789  | 1213838  |
| 9.896717 | 4  | 3 | 1 | 1646355  | 2812313  | 885946.2 | 2285015  | 1123673  | 3791202  | 1381384  | 2823207  | 2897983  |
| 9.864767 | 10 | 5 | 5 | 23595562 | 1.61E+08 | 23377588 | 1.41E+08 | 48893525 | 1.57E+08 | 1.69E+08 | 1.39E+08 | 1.43E+08 |
| 9.8322   | 5  | 3 | 2 | 2483036  | 4526934  | 1029129  | 5968033  | 3632754  | 5303843  | 4465152  | 2878478  | 4505714  |
| 8.93965  | 4  | 3 | 1 | 30844842 | 1.2E+08  | 1.65E+08 | 2.01E+08 | 1.46E+08 | 3.25E+08 | 553765.8 | 400472.7 | 2.74E+08 |
| 9.880683 | 10 | 5 | 5 | 23447096 | 49602677 | 9645547  | 72899091 | 59702430 | 46890852 | 48706564 | 57983423 | 59098248 |
| 39.3595  | 9  | 2 | 5 | 300351.9 | 3647507  | 946880.7 | 3022044  | 1400915  | 3084085  | 3198491  | 3115949  | 3527108  |
| 9.928667 | 10 | 5 | 5 | 930167.4 | 3568860  | 792422.6 | 4270447  | 1693549  | 4092127  | 2687311  | 4249229  | 4095573  |
| 10.13878 | 7  | 2 | 5 | 281262   | 831149   | 137721.3 | 694739.3 | 334509.9 | 634632.4 | 835001   | 1005614  | 897830.9 |
| 15.54118 | 5  | 1 | 4 | 93231.22 | 850627.4 | 139630.1 | 724233.3 | 306186.1 | 980059.2 | 796246.5 | 746601.2 | 1018469  |
| 10.45545 | 8  | 3 | 5 | 94461.44 | 236899.3 | 80261.94 | 288502   | 114336.5 | 369504.1 | 199610   | 232032   | 155074.2 |
| 9.94455  | 7  | 5 | 2 | 708460.8 | 1418979  | 308978.6 | 1237759  | 383522.1 | 1782144  | 1177737  | 1729294  | 1235060  |
| 10.95835 | 10 | 5 | 5 | 602690.8 | 2520630  | 772788   | 2854611  | 459340.9 | 3529828  | 1567058  | 2028610  | 2490108  |
| 8.859667 | 10 | 5 | 5 | 2077254  | 8259892  | 3517874  | 10753262 | 5728088  | 7028332  | 13725962 | 9692059  | 5440491  |
| 9.43325  | 5  | 3 | 1 | 849114.2 | 3508577  | 762321.4 | 3116881  | 747194.4 | 2189062  | 3621516  | 3967868  | 4082836  |
| 9.94455  | 9  | 5 | 4 | 594421.2 | 1217273  | 174610.5 | 1022241  | 484663.3 | 1401783  | 1181160  | 1397573  | 1046679  |
| 12.35387 | 6  | 2 | 4 | 43651.34 | 213713.8 | 35696.61 | 191470.5 | 48656.85 | 197577   | 208803.6 | 171098.8 | 223521.7 |
| 44.98283 | 8  | 4 | 3 | 370199.7 | 3354387  | 1177494  | 3873541  | 762472.7 | 3481819  | 3797639  | 1301855  | 4201212  |
| 9.896717 | 10 | 5 | 5 | 1.4E+08  | 8.97E+08 | 73540896 | 1.03E+09 | 3.47E+08 | 1.01E+09 | 8.09E+08 | 8.77E+08 | 9.19E+08 |
| 9.858833 | 10 | 5 | 5 | 1857333  | 6803365  | 1368044  | 5799623  | 2331496  | 7475327  | 6288535  | 5551142  | 8867802  |

|          |    |   |   |          |          |          |          |          |          |          |          |          |
|----------|----|---|---|----------|----------|----------|----------|----------|----------|----------|----------|----------|
| 9.856867 | 10 | 5 | 5 | 2585656  | 14153580 | 2280175  | 12238334 | 4588377  | 15427650 | 14449927 | 11141184 | 12756605 |
| 9.311883 | 6  | 3 | 3 | 279873.5 | 528111.3 | 318945.9 | 851203.6 | 795787.6 | 925181.8 | 52676.49 | 470098.7 | 523712.3 |
| 9.388367 | 6  | 4 | 2 | 653840.9 | 5365296  | 954929.3 | 4636411  | 1711189  | 4649049  | 6644329  | 6028833  | 4360720  |
| 25.9965  | 7  | 3 | 4 | 177936.9 | 1268335  | 327826.3 | 1077910  | 401544.3 | 1018758  | 1841837  | 1131008  | 1209812  |
| 12.52975 | 9  | 5 | 4 | 68727.33 | 326024.1 | 65691.61 | 269795.2 | 135254.8 | 348518.3 | 381612.1 | 295420.2 | 226121.2 |
| 9.999217 | 8  | 4 | 4 | 1141185  | 3287736  | 1411262  | 2609242  | 1194101  | 3356154  | 1088022  | 4375988  | 2974108  |
| 9.976317 | 8  | 4 | 4 | 873616.3 | 943183.5 | 277407.6 | 1218141  | 675784.8 | 826973   | 1309675  | 706024.6 | 708951   |
| 9.554967 | 9  | 4 | 3 | 11937659 | 31457520 | 18327760 | 41731911 | 21178345 | 30109885 | 40432664 | 50826415 | 1808453  |
| 9.032133 | 4  | 1 | 3 | 332998.6 | 579996.4 | 415297.3 | 403375.4 | 230798.6 | 1118578  | 831410.4 | 322418.8 | 567290.3 |
| 9.536783 | 9  | 4 | 5 | 670955.8 | 2077036  | 791668.5 | 1660504  | 816079   | 2244265  | 2913825  | 2348888  | 2106540  |
| 10.9645  | 9  | 5 | 4 | 351609.3 | 1973176  | 407770.1 | 1728212  | 527355.1 | 2356992  | 2318114  | 1660718  | 1437516  |
| 9.94455  | 4  | 1 | 3 | 6468311  | 11957196 | 7566113  | 7534691  | 9374516  | 1121314  | 7730839  | 20261171 | 14358389 |
| 9.929783 | 9  | 4 | 5 | 1610942  | 2936398  | 480017.3 | 4287527  | 3479943  | 2399172  | 2439647  | 3321161  | 3378292  |
| 44.014   | 8  | 3 | 3 | 376622   | 6647763  | 3172945  | 5408285  | 632825   | 4679679  | 5669152  | 12279728 | 5065425  |
| 9.964417 | 9  | 5 | 4 | 3471260  | 2002999  | 715087.1 | 4203096  | 5672037  | 2929781  | 1320456  | 2605068  | 1578622  |
| 30.579   | 10 | 5 | 5 | 3748184  | 25748172 | 29065551 | 14326039 | 7116453  | 16262515 | 12174623 | 77508316 | 8749891  |
| 21.44967 | 10 | 4 | 4 | 1162402  | 12200970 | 9928805  | 8273925  | 2830018  | 29663103 | 6629033  | 5603377  | 10194216 |
| 10.2456  | 10 | 5 | 5 | 2865468  | 10197999 | 1991737  | 8635183  | 3699548  | 10592842 | 11927790 | 8283976  | 7967330  |
| 9.445217 | 13 | 5 | 5 | 2443564  | 21325774 | 4540166  | 18908468 | 4793524  | 17935276 | 24986348 | 27100815 | 16580668 |
| 9.960467 | 6  | 3 | 3 | 576436.2 | 675362.1 | 281079.9 | 927242.1 | 611474.4 | 1068772  | 333742.9 | 627555.5 | 818723.7 |
| 9.45945  | 7  | 4 | 2 | 323155.2 | 1002994  | 361212.2 | 811652.6 | 377870.8 | 1207440  | 1144914  | 478103.2 | 801989.3 |
| 7.1613   | 9  | 4 | 5 | 91901976 | 6.71E+09 | 1.51E+09 | 5.72E+09 | 2.23E+09 | 7.6E+09  | 7.42E+09 | 7.27E+09 | 7.25E+09 |
| 10.29457 | 5  | 3 | 2 | 211465.1 | 409219.4 | 184001.3 | 303468.2 | 222191.1 | 212364.2 | 709817.2 | 384620   | 405550   |
| 9.960467 | 8  | 4 | 4 | 1061633  | 3962445  | 1506820  | 4907409  | 2081200  | 2364534  | 3376055  | 5655956  | 2943634  |
| 10.008   | 7  | 4 | 3 | 786001   | 1524753  | 383711.4 | 1874093  | 850476.7 | 1455919  | 2081166  | 1093349  | 1705133  |
| 9.992233 | 7  | 4 | 3 | 1127762  | 985184   | 293348   | 1416011  | 1093196  | 1059512  | 882920.8 | 1008426  | 1392301  |
| 9.976317 | 9  | 5 | 4 | 3421406  | 1828438  | 570570   | 3656702  | 4719989  | 2159927  | 1198386  | 2529152  | 1961644  |
| 9.840617 | 5  | 2 | 3 | 616598.6 | 2181207  | 639157.3 | 1720007  | 1070168  | 2237016  | 1833978  | 2892998  | 2647557  |
| 9.310917 | 5  | 4 | 1 | 898790.2 | 1120680  | 625406.2 | 3501016  | 6156248  | 1251519  | 2162707  | 691042.1 | 769211.1 |
| 12.67512 | 5  | 2 | 3 | 103547.1 | 848872.7 | 589096.2 | 592820.4 | 365327.9 | 358948.3 | 614777.4 | 614006.2 | 790534.6 |
| 10.008   | 10 | 5 | 5 | 1881820  | 2692360  | 1137606  | 3603015  | 2169210  | 3342887  | 3875833  | 3282371  | 1663074  |
| 9.856867 | 10 | 5 | 5 | 650846.1 | 2747034  | 645922.5 | 2414974  | 639153.5 | 3614475  | 2927027  | 2821496  | 2539036  |
| 44.62433 | 6  | 1 | 4 | 317155.6 | 3083658  | 180745   | 4129979  | 2712441  | 3235927  | 2975714  | 3214413  | 3174184  |
| 9.684583 | 10 | 5 | 5 | 7807130  | 35969217 | 5361955  | 31853235 | 9719418  | 37603409 | 44583577 | 32771920 | 31210375 |
| 9.986767 | 6  | 3 | 3 | 335099.5 | 600203.4 | 353742.9 | 405466.6 | 398307.5 | 995771.4 | 849346.3 | 453700.2 | 89927.76 |

|          |    |   |   |          |          |          |          |          |          |          |          |          |
|----------|----|---|---|----------|----------|----------|----------|----------|----------|----------|----------|----------|
| 42.59633 | 14 | 3 | 5 | 475676.5 | 4003961  | 1756446  | 5568900  | 3804841  | 4621735  | 5904276  | 4915630  | 3193184  |
| 32.46033 | 10 | 5 | 5 | 1424775  | 6746459  | 1381831  | 8514778  | 4461661  | 5456414  | 6280600  | 6625125  | 6274431  |
| 9.900133 | 9  | 5 | 4 | 2478423  | 10599905 | 2781852  | 11862492 | 2023711  | 11680464 | 12394001 | 13078987 | 6177857  |
| 9.872917 | 10 | 5 | 5 | 2593377  | 12520611 | 1136974  | 13661248 | 2819215  | 11401931 | 12172485 | 12995913 | 14257482 |
| 10.9645  | 5  | 3 | 2 | 296145.3 | 823956.5 | 215368.8 | 734255.3 | 108483.2 | 988720.8 | 1000460  | 472818.5 | 872980.4 |
| 9.419733 | 7  | 4 | 3 | 333859.5 | 1643910  | 780249.4 | 1148650  | 1100075  | 2137390  | 2758156  | 877074.5 | 1288681  |
| 10.9645  | 10 | 5 | 5 | 1273967  | 5872656  | 1412066  | 5116877  | 1512776  | 6833963  | 7274380  | 4215813  | 4496747  |
| 9.842    | 9  | 5 | 4 | 1170731  | 4993047  | 964988.9 | 4341934  | 1481571  | 4598840  | 4259917  | 4427794  | 5039347  |
| 10.01837 | 10 | 5 | 5 | 409774.1 | 862581.6 | 285559.1 | 723116.9 | 253329.8 | 1283309  | 916609.1 | 623247.3 | 569866.3 |
| 9.232283 | 5  | 4 | 1 | 324627.9 | 1447397  | 874622.9 | 977661.6 | 943215   | 891278.3 | 776765.3 | 864417.6 | 2754393  |
| 10.8795  | 10 | 5 | 5 | 12981214 | 78691922 | 11537568 | 71150153 | 16963785 | 92121575 | 83174304 | 66691687 | 66502003 |
| 20.8275  | 7  | 4 | 3 | 220094.9 | 1423021  | 289192.2 | 1200736  | 525658   | 1778886  | 1047189  | 1239384  | 1602890  |
| 10.95055 | 10 | 5 | 5 | 330505.2 | 1450080  | 539538.3 | 1198629  | 425316.9 | 2086816  | 1597304  | 993824.3 | 798665.3 |
| 9.365833 | 3  | 3 | 0 | 412786.6 | 2125855  | 1062131  | 1608758  | 935995.7 | 3012827  | 2392258  | 3115267  | 1490401  |
| 23.409   | 8  | 4 | 4 | 100568   | 482286.7 | 226549.6 | 354199.2 | 267471.3 | 321918.1 | 859307.4 | 379462.6 | 324415.1 |
| 9.932033 | 10 | 5 | 5 | 38286384 | 1.45E+08 | 22250780 | 1.35E+08 | 16071672 | 1.79E+08 | 1.53E+08 | 1.29E+08 | 1.24E+08 |
| 9.856867 | 10 | 5 | 5 | 3250836  | 21669493 | 2386344  | 18879200 | 7004305  | 21725971 | 21214862 | 18920610 | 21000202 |
| 28.84917 | 8  | 4 | 4 | 326377.5 | 2489356  | 1397813  | 1822903  | 1171407  | 1635524  | 3086424  | 592363.5 | 2929017  |
| 9.951283 | 10 | 5 | 5 | 892835.7 | 2503241  | 666440.8 | 2890670  | 823729.9 | 3179365  | 1462897  | 2808290  | 2799575  |
| 9.994767 | 7  | 4 | 3 | 689404.7 | 579417.9 | 247463.8 | 946246.9 | 934210.3 | 164680.8 | 599868.2 | 602971.6 | 805107.7 |
| 22.27717 | 8  | 4 | 4 | 56636    | 305886.2 | 102045.5 | 257737.5 | 83302.17 | 210218   | 422942.6 | 202235.8 | 298687.6 |
| 9.976317 | 10 | 5 | 5 | 3852588  | 5815368  | 1201330  | 7922667  | 5403252  | 6507098  | 7065730  | 6446785  | 4630383  |
| 9.568567 | 14 | 5 | 5 | 2903826  | 10671373 | 5139501  | 16283553 | 14017130 | 9384007  | 2531092  | 14403200 | 15467188 |
| 9.848417 | 10 | 5 | 5 | 5733779  | 12941705 | 828941   | 16347472 | 8840587  | 13251343 | 11963874 | 12499551 | 14161938 |
| 8.917333 | 7  | 4 | 3 | 1645232  | 20621921 | 2701807  | 23994228 | 8514662  | 17009869 | 20362135 | 20249064 | 24606644 |
| 18.864   | 7  | 4 | 3 | 106248.5 | 328103.5 | 175258.3 | 410856   | 143642.5 | 206655.9 | 492574.8 | 112314   | 315561.4 |
| 10.96997 | 10 | 5 | 4 | 703777.9 | 2152505  | 801802   | 1781746  | 621189.7 | 1414275  | 1394122  | 1972710  | 2907279  |
| 9.544833 | 9  | 4 | 5 | 725135.7 | 2007991  | 894318.9 | 1560669  | 841345.9 | 2404646  | 2835408  | 2300229  | 1998925  |
| 9.976317 | 8  | 4 | 4 | 646433   | 1538951  | 603642.3 | 1969519  | 1000973  | 1973589  | 2175951  | 1747020  | 918354.6 |
| 9.93625  | 10 | 5 | 5 | 2524622  | 9400822  | 1585760  | 8195399  | 2851514  | 11096052 | 10052947 | 7852844  | 7579210  |
| 10.95835 | 6  | 3 | 3 | 327410.1 | 772504.6 | 103244.5 | 1006969  | 605706.7 | 703179.3 | 925683.4 | 715056.1 | 832510.8 |
| 9.8322   | 8  | 4 | 4 | 1690700  | 3254544  | 3063198  | 2052336  | 839278.4 | 2137533  | 1933407  | 1166746  | 8674937  |
| 9.929783 | 11 | 5 | 5 | 6015507  | 24964408 | 4504290  | 20985783 | 9699157  | 23259196 | 25024482 | 31920022 | 19501857 |
| 9.445217 | 14 | 5 | 5 | 13818403 | 1.1E+08  | 26303043 | 97185528 | 21460178 | 1.08E+08 | 1.37E+08 | 1.35E+08 | 88558587 |
| 9.929783 | 9  | 5 | 4 | 1946705  | 3946292  | 479734.4 | 3641553  | 680481.6 | 4450503  | 4060783  | 4093908  | 3974128  |

|          |    |   |   |          |          |          |          |          |          |          |          |          |
|----------|----|---|---|----------|----------|----------|----------|----------|----------|----------|----------|----------|
| 9.872917 | 5  | 2 | 3 | 785368.3 | 2177301  | 670833.1 | 1723518  | 1038350  | 2016368  | 1409358  | 3258875  | 2139493  |
| 9.445217 | 14 | 5 | 5 | 42313164 | 3.61E+08 | 82749736 | 3.15E+08 | 94825908 | 2.85E+08 | 4.4E+08  | 4.52E+08 | 2.78E+08 |
| 42.74017 | 4  | 3 | 1 | 430459.8 | 5546126  | 440675.8 | 5307902  | 484005.5 | 5677567  | 4795807  | 5864673  | 5538251  |
| 9.952017 | 10 | 5 | 5 | 1479483  | 5355916  | 935606.6 | 4841336  | 1059457  | 6446941  | 6183777  | 5217318  | 4361309  |
| 41.10033 | 6  | 1 | 3 | 269244.2 | 4008693  | 824051.6 | 3357336  | 1556625  | 5469762  | 3688647  | 3470999  | 3643889  |
| 9.856867 | 10 | 5 | 5 | 13806231 | 65958301 | 13348240 | 53314155 | 31166067 | 65182067 | 64357239 | 51658691 | 60769050 |
| 10.91673 | 6  | 2 | 4 | 155737.6 | 295363.3 | 145732   | 368729.2 | 139397.6 | 519802.1 | 195190.4 | 356494.6 | 245213.5 |
| 10.09898 | 9  | 4 | 5 | 1307098  | 7242742  | 2577007  | 8616797  | 2761050  | 9517621  | 7813110  | 9501337  | 5902768  |
| 10.9645  | 10 | 5 | 5 | 604093.3 | 2782639  | 496600.1 | 2563767  | 331682.2 | 3130114  | 3380352  | 2370626  | 2202560  |
| 38.25167 | 9  | 3 | 3 | 336845.8 | 6442545  | 4117200  | 4849471  | 741523.1 | 3786627  | 5515014  | 13676516 | 5287225  |
| 9.8322   | 9  | 5 | 4 | 676698.4 | 2070531  | 454025.4 | 1742946  | 765819.7 | 1906607  | 1992471  | 1649854  | 1957416  |
| 10.9645  | 10 | 5 | 5 | 1982661  | 9112035  | 1803178  | 8148975  | 1939539  | 10926976 | 10741720 | 7601112  | 6940312  |
| 14.10702 | 9  | 4 | 5 | 103824.3 | 423151.2 | 433727.3 | 253756.7 | 110091.1 | 205104.2 | 227195.1 | 318968.1 | 1192843  |
| 9.93625  | 4  | 1 | 3 | 2238823  | 3943803  | 2238215  | 2904830  | 1764819  | 5929113  | 154580.1 | 4581969  | 5097650  |
| 10.45545 | 10 | 5 | 5 | 14281105 | 57715137 | 8658279  | 62527129 | 9999917  | 73079537 | 55745074 | 53525099 | 53087627 |
| 9.932033 | 10 | 5 | 5 | 37947380 | 1.45E+08 | 22076365 | 1.35E+08 | 15822440 | 1.79E+08 | 1.53E+08 | 1.28E+08 | 1.24E+08 |
| 9.94405  | 12 | 4 | 5 | 5526660  | 12710136 | 3790827  | 16714684 | 10007145 | 12515431 | 18304688 | 13660900 | 11127859 |
| 3.65805  | 9  | 3 | 5 | 466180   | 8461159  | 5868573  | 11389326 | 5521894  | 0        | 10713021 | 16104592 | 6836328  |
| 9.856867 | 3  | 0 | 3 | 580722.4 | 1448634  | 563607   | 1862841  | 974253   | 1983185  | 900088.3 | 1877916  | 786320.8 |
| 9.904767 | 6  | 3 | 2 | 1066741  | 1774423  | 626819.2 | 2897957  | 2894421  | 1421251  | 1850865  | 2835382  | 1445119  |
| 9.93625  | 10 | 5 | 5 | 8336099  | 28681229 | 3601606  | 26627628 | 4347463  | 32382729 | 31047334 | 24510156 | 25145452 |
| 9.9014   | 11 | 5 | 5 | 2294996  | 6614971  | 2278120  | 8861098  | 5579121  | 4004352  | 9078777  | 6548552  | 8702308  |
| 7.303317 | 9  | 5 | 4 | 1851320  | 7751239  | 1720690  | 13081777 | 13873413 | 7088256  | 10007063 | 6114704  | 6424826  |
| 9.845483 | 9  | 5 | 4 | 2080637  | 6272221  | 2195816  | 7433735  | 2328451  | 8252840  | 4214024  | 5970193  | 8803404  |
| 11.87367 | 4  | 0 | 4 | 335704.9 | 361307.1 | 72988.24 | 755700.6 | 1029721  | 362890.6 | 253911.1 | 364587.4 | 365109.5 |
| 28.28767 | 7  | 3 | 4 | 84286.46 | 289687.9 | 123850.2 | 225621.4 | 125986.2 | 230561.3 | 476981.1 | 159427.2 | 236833.4 |
| 10.4842  | 10 | 5 | 5 | 3361815  | 3686870  | 940076.8 | 6420435  | 7115717  | 4950698  | 4431684  | 3033391  | 2871990  |
| 22.9725  | 5  | 3 | 2 | 227096.4 | 1233438  | 675613.5 | 941218.9 | 424706.5 | 846575   | 1661239  | 805022.1 | 641514   |
| 9.992233 | 9  | 5 | 4 | 452078.3 | 965008.1 | 160108.7 | 1172697  | 528679   | 1004385  | 826990.8 | 1181354  | 1024914  |
| 9.93625  | 10 | 5 | 5 | 2094609  | 13670934 | 2988604  | 11674631 | 4569717  | 10484555 | 10693438 | 14457394 | 15456388 |
| 9.976317 | 5  | 3 | 2 | 1179043  | 1449525  | 730724.2 | 1981321  | 1250642  | 921457.2 | 1142945  | 750997.6 | 2439419  |
| 31.147   | 9  | 5 | 4 | 285031.3 | 951286.7 | 346053.1 | 1165601  | 475648.7 | 575701.3 | 1388703  | 897056.4 | 679490.6 |
| 9.979667 | 5  | 3 | 2 | 3278372  | 5888347  | 6794033  | 3113605  | 3149230  | 14563725 | 1290332  | 11953649 | 758419.6 |
| 9.928667 | 9  | 5 | 4 | 2942060  | 7794932  | 2099872  | 6105932  | 4068599  | 9060835  | 6940130  | 5237765  | 7070363  |
| 9.840617 | 6  | 3 | 3 | 1511518  | 1446584  | 442867   | 2849966  | 3657863  | 1910669  | 1657653  | 1116482  | 1696020  |



|          |    |   |   |          |          |          |          |          |          |          |          |          |
|----------|----|---|---|----------|----------|----------|----------|----------|----------|----------|----------|----------|
| 10.32122 | 9  | 4 | 5 | 369157.9 | 1729990  | 479694.8 | 1456043  | 582296.2 | 1798118  | 2335330  | 1596755  | 1899004  |
| 16.25713 | 10 | 5 | 5 | 1290776  | 11203064 | 1598321  | 12513286 | 3169886  | 12703996 | 10519866 | 9744837  | 9915916  |
| 10.31835 | 8  | 5 | 3 | 494486.7 | 974968.3 | 645539.9 | 713064.5 | 285950.4 | 236031.9 | 1997889  | 874050.2 | 729241.3 |
| 7.168783 | 5  | 4 | 1 | 776537.4 | 9879563  | 5129330  | 12456738 | 4927422  | 7750760  | 5707301  | 16493063 | 5278499  |
| 9.842    | 6  | 3 | 3 | 852826.8 | 2090669  | 687274.3 | 1654928  | 978308.9 | 2072440  | 2987869  | 2539738  | 1443601  |
| 9.856867 | 9  | 4 | 5 | 699258.9 | 2352604  | 232452.6 | 2627767  | 696883.8 | 2513078  | 2505181  | 2054247  | 2147796  |
| 9.952017 | 11 | 5 | 5 | 718131.9 | 3173468  | 635132.6 | 2743007  | 991684.1 | 3467178  | 3349218  | 2059332  | 3649621  |
| 9.36565  | 6  | 3 | 3 | 628626.4 | 1121100  | 758223   | 744061.3 | 712941   | 1505365  | 0        | 685247.5 | 1613851  |
| 10.9645  | 10 | 5 | 5 | 388829.4 | 1629410  | 438952.7 | 1397329  | 466626.7 | 2122391  | 1925631  | 1188243  | 1151461  |
| 9.999217 | 6  | 3 | 3 | 71702552 | 86808102 | 1.2E+08  | 35822842 | 69564162 | 2563915  | 2062769  | 1.66E+08 | 2582264  |
| 9.406667 | 6  | 3 | 2 | 462745   | 3573464  | 1348880  | 2821432  | 1575679  | 4003217  | 1415622  | 4403609  | 4842389  |
| 10.02372 | 6  | 3 | 3 | 579907.4 | 690752.5 | 208312.4 | 1047883  | 921783.3 | 658505   | 358149.4 | 704546.5 | 873383.1 |
| 10.9645  | 10 | 5 | 5 | 474415.7 | 2241258  | 313320.2 | 2438054  | 440408.8 | 2244666  | 2739319  | 2247055  | 2076812  |
| 10.95055 | 10 | 5 | 5 | 705279.6 | 4424180  | 867818.4 | 3968233  | 912260.6 | 4895509  | 5474114  | 3646437  | 3417350  |
| 9.582167 | 7  | 3 | 4 | 190124.5 | 542172.1 | 188766.3 | 444476.9 | 192802.1 | 609872   | 349851.4 | 583001.4 | 802908.9 |
| 9.848417 | 8  | 4 | 4 | 585812.3 | 1070022  | 392529.9 | 1438167  | 911289.1 | 1290547  | 1441295  | 1285436  | 496641.2 |
| 9.992233 | 10 | 5 | 5 | 785021.8 | 2669176  | 470162.9 | 2271314  | 969545.5 | 3120893  | 2896435  | 2966362  | 2002557  |
| 9.842    | 10 | 5 | 5 | 2345934  | 14633987 | 1432611  | 14007234 | 948618.3 | 14143381 | 13509831 | 13525909 | 15054580 |
| 9.536783 | 10 | 5 | 5 | 1475212  | 4397364  | 723845.6 | 3747953  | 1598072  | 4666406  | 5201099  | 4068875  | 4729690  |
| 10.95055 | 6  | 3 | 3 | 329421.7 | 753040.2 | 356395   | 596945.6 | 237032.1 | 1092769  | 1163854  | 530059.6 | 356964.5 |
| 9.904767 | 9  | 5 | 4 | 6268284  | 3949400  | 2284044  | 9250975  | 13790455 | 2118789  | 2367930  | 4542492  | 7670835  |
| 9.999217 | 6  | 2 | 4 | 239287.7 | 346625.9 | 234104.9 | 467712.5 | 239119.6 | 299397.1 | 732692.1 | 374300.5 | 160998.3 |
| 9.887133 | 9  | 5 | 4 | 1525589  | 4525530  | 1982456  | 5838918  | 3006595  | 4504670  | 2294439  | 6869098  | 6099260  |
| 9.904767 | 10 | 5 | 5 | 4465906  | 21528878 | 4702385  | 17230395 | 10610650 | 19868548 | 19329011 | 17488681 | 21397269 |
| 10.95055 | 10 | 5 | 5 | 301154.7 | 1745480  | 512717.2 | 1530405  | 283847.5 | 2244763  | 2087637  | 1270723  | 1119116  |
| 25.27517 | 9  | 5 | 4 | 238919.5 | 2266135  | 922633.2 | 1851402  | 671722.6 | 1219007  | 3078122  | 1470106  | 2289840  |
| 9.853633 | 9  | 5 | 4 | 997520.9 | 4578366  | 1150306  | 3761625  | 1914077  | 3998120  | 4159203  | 3190198  | 5732384  |
| 10.95055 | 10 | 5 | 5 | 1503221  | 8876863  | 1825220  | 7840573  | 2205033  | 9984292  | 10966225 | 7037501  | 6888698  |
| 9.445217 | 12 | 5 | 5 | 1726421  | 10440223 | 2206364  | 13862246 | 8820329  | 8076535  | 13064243 | 12155367 | 10478809 |
| 10.44062 | 5  | 3 | 2 | 249245.5 | 449091.5 | 313602   | 607243.4 | 305290.2 | 352076   | 995440.2 | 408705.2 | 255253.8 |
| 10.00998 | 6  | 3 | 3 | 7467974  | 10127293 | 3804960  | 21435380 | 29555800 | 6425712  | 9181770  | 15050017 | 13075254 |
| 41.4625  | 7  | 4 | 2 | 222751.5 | 2188085  | 1065507  | 2595199  | 116674.7 | 3214929  | 2288762  | 2573957  | 386735.6 |
| 10.95835 | 9  | 5 | 4 | 239731   | 520656.8 | 220799.3 | 626006   | 189981.4 | 599631.6 | 863104.5 | 469707.4 | 347272.5 |
| 31.17633 | 6  | 4 | 2 | 19142386 | 7560781  | 16336371 | 17220992 | 21062222 | 364019.1 | 147468.8 | 210469.1 | 298149.5 |
| 10.95835 | 10 | 5 | 5 | 2065755  | 11991569 | 3377633  | 10250460 | 3438824  | 15955171 | 12745469 | 8463730  | 8550528  |

|          |    |   |   |          |          |          |          |          |          |          |          |          |
|----------|----|---|---|----------|----------|----------|----------|----------|----------|----------|----------|----------|
| 9.872917 | 7  | 3 | 4 | 1010524  | 3654846  | 1826471  | 2811054  | 1446270  | 1211423  | 4040453  | 3444289  | 3271155  |
| 9.522017 | 8  | 4 | 4 | 925754.6 | 600705.8 | 359346.1 | 1878222  | 3344938  | 915836.9 | 962753.7 | 76914.73 | 526383.7 |
| 24.73917 | 10 | 5 | 5 | 1153064  | 6578949  | 761609.7 | 7289704  | 1762772  | 5479708  | 7422898  | 6359580  | 7161853  |
| 37.2735  | 9  | 2 | 3 | 306791.8 | 6782253  | 2138852  | 8551667  | 4305299  | 4342267  | 8447618  | 8228633  | 8350860  |
| 8.960667 | 6  | 2 | 4 | 235522.1 | 460161.6 | 300442.7 | 602967.5 | 256466.3 | 246294.3 | 416023.4 | 181842.2 | 513740.8 |
| 7.068383 | 6  | 4 | 2 | 97698616 | 1.07E+09 | 5.49E+08 | 8.38E+08 | 3.29E+08 | 1.09E+09 | 7.18E+08 | 2.01E+09 | 8.44E+08 |
| 9.864767 | 10 | 5 | 5 | 23676616 | 1.61E+08 | 23692218 | 1.41E+08 | 49143456 | 1.56E+08 | 1.69E+08 | 1.39E+08 | 1.44E+08 |
| 9.896717 | 4  | 3 | 1 | 2354723  | 3096071  | 2267113  | 4557689  | 3321496  | 3037796  | 895061.3 | 6895806  | 2117410  |
| 23.05933 | 7  | 3 | 4 | 92418.29 | 470482   | 279449.3 | 358022.4 | 119688.2 | 566787.2 | 489401.4 | 286030.8 | 140186.7 |
| 9.979667 | 7  | 4 | 3 | 2563732  | 950767.2 | 444840.4 | 1904213  | 2484071  | 1368816  | 1473043  | 769374.1 | 463823.6 |
| 9.023433 | 5  | 3 | 2 | 263293.9 | 819784.5 | 139162   | 675735.5 | 362176.7 | 996353.8 | 684631.9 | 849184.5 | 895392.8 |
| 9.888767 | 10 | 5 | 5 | 2822893  | 15832353 | 2317254  | 13798227 | 5007087  | 17122061 | 15423006 | 13172734 | 14377701 |
| 10.95055 | 10 | 5 | 5 | 1632611  | 10068172 | 2574879  | 8839789  | 2222709  | 12223357 | 12130338 | 7150957  | 7384959  |
| 9.858833 | 10 | 5 | 5 | 4154274  | 14870985 | 2627834  | 15971917 | 1465179  | 14574612 | 14860192 | 10726436 | 17570096 |
| 10.9645  | 6  | 3 | 3 | 576510   | 873277.5 | 265313.2 | 1147413  | 689348.8 | 1071959  | 1094313  | 461906.5 | 759622.9 |
| 9.8322   | 9  | 5 | 4 | 3762795  | 4194219  | 654009.8 | 6733245  | 6663511  | 4947260  | 4661237  | 3530788  | 3509284  |
| 9.842    | 10 | 5 | 5 | 1212174  | 3078899  | 1096869  | 3874067  | 1881463  | 4127410  | 3978978  | 3344583  | 2408155  |
| 9.983433 | 10 | 5 | 5 | 1989966  | 6534721  | 1258237  | 5402110  | 2800521  | 7125957  | 7903988  | 5590988  | 4864302  |
| 9.857983 | 8  | 5 | 3 | 3084727  | 3981534  | 1196567  | 6078879  | 5442038  | 4552060  | 4214490  | 4923867  | 4320112  |
| 9.842    | 7  | 5 | 2 | 796531.1 | 3434869  | 353971   | 3128921  | 751842.6 | 3681956  | 3338021  | 2911054  | 3829730  |
| 9.842    | 9  | 5 | 4 | 1032341  | 5035263  | 1214225  | 4270679  | 1723982  | 4863110  | 4632259  | 3898573  | 4677096  |
| 44.9835  | 7  | 5 | 2 | 127433.2 | 362027.2 | 131468.7 | 307328.7 | 70962.69 | 420036.6 | 542427.6 | 194339.8 | 290563.9 |
| 3.62865  | 7  | 2 | 5 | 217698   | 3914292  | 2251531  | 5070233  | 2283861  | 2927.984 | 5572811  | 5174917  | 4139579  |
| 42.0065  | 4  | 1 | 3 | 248905.8 | 4914445  | 117619.4 | 4382587  | 1397483  | 4943198  | 4855981  | 5063465  | 4959117  |
| 9.4775   | 12 | 5 | 5 | 7904557  | 43308816 | 21874870 | 60914632 | 42714361 | 46252403 | 8736688  | 38336545 | 58815477 |
| 10.95835 | 6  | 3 | 3 | 303174.6 | 700333.8 | 172075.9 | 786152.9 | 164551.8 | 912237.3 | 811464.3 | 516472.7 | 536678.3 |
| 10.03947 | 9  | 5 | 4 | 223238.3 | 609889.8 | 119163   | 495307.6 | 286007.6 | 576918.7 | 737439.7 | 500025.6 | 500792.8 |
| 44.9835  | 12 | 2 | 4 | 265172.1 | 3075430  | 349654.9 | 2502946  | 1482790  | 3160914  | 2596739  | 3526018  | 2891972  |
| 10.9645  | 10 | 5 | 5 | 594707.9 | 1992319  | 453928.2 | 1735753  | 546955.9 | 2625383  | 1619602  | 1712194  | 1681388  |
| 23.05933 | 8  | 4 | 4 | 406869.9 | 1496676  | 205377.1 | 2219213  | 1896534  | 1457989  | 1579062  | 1741447  | 1180810  |
| 9.473733 | 5  | 2 | 3 | 4294331  | 6024236  | 5769077  | 3466182  | 4067051  | 711250   | 5663061  | 8824157  | 14273131 |
| 9.840617 | 10 | 5 | 5 | 2108851  | 8577959  | 808754.6 | 9598563  | 2611621  | 9143344  | 7856477  | 9544975  | 8678574  |
| 10.98605 | 10 | 5 | 5 | 873489.2 | 4754961  | 1222360  | 3939252  | 1883153  | 4307651  | 5019412  | 3719600  | 3968967  |
| 10.97857 | 10 | 5 | 5 | 265169.2 | 954091.1 | 123408.9 | 1110724  | 401053.7 | 838623   | 1143737  | 993909.5 | 939147.8 |
| 9.9677   | 10 | 5 | 5 | 3790109  | 15167511 | 2630002  | 13025381 | 5214016  | 16714710 | 17823206 | 13691220 | 11321823 |

|          |    |   |   |          |          |          |          |          |          |          |          |          |
|----------|----|---|---|----------|----------|----------|----------|----------|----------|----------|----------|----------|
| 9.933967 | 10 | 5 | 5 | 30030278 | 2.37E+08 | 81817679 | 2.05E+08 | 29929111 | 2.17E+08 | 1.98E+08 | 1.9E+08  | 3.82E+08 |
| 15.60347 | 7  | 3 | 4 | 159451.5 | 1198075  | 136005.9 | 1017397  | 464008.5 | 1247332  | 1298784  | 1178346  | 1295057  |
| 9.379233 | 9  | 5 | 4 | 1037152  | 2422603  | 1345901  | 1751703  | 1287927  | 2651211  | 1109579  | 1417355  | 2400753  |
| 10.10793 | 10 | 5 | 5 | 7352751  | 39059426 | 5203028  | 35456060 | 8426551  | 37048395 | 48169521 | 38218909 | 35238506 |
| 9.842    | 9  | 5 | 4 | 960318.3 | 2725351  | 703929.3 | 3209777  | 1130632  | 3749026  | 2816220  | 2924449  | 2176770  |
| 9.992233 | 10 | 5 | 5 | 905330.8 | 2815658  | 519499.7 | 2406571  | 989189.4 | 3284127  | 3193270  | 3056810  | 2087279  |
| 9.848417 | 9  | 5 | 4 | 1404147  | 8749746  | 913958.5 | 8001775  | 1822790  | 8794464  | 9145402  | 7521885  | 8317346  |
| 9.994767 | 10 | 5 | 5 | 1297983  | 1875597  | 582298.9 | 2313263  | 1047088  | 2341319  | 2387236  | 2070656  | 1013448  |
| 10.42442 | 5  | 2 | 3 | 224700.8 | 931571.2 | 883698.2 | 584671.7 | 296630.6 | 2110144  | 1628491  | 168289.5 | 220780.8 |
| 10.13878 | 7  | 2 | 3 | 1009980  | 729062.3 | 172212.1 | 1652013  | 2429592  | 889343.9 | 501671.5 | 889426.9 | 757154.6 |
| 9.929783 | 7  | 4 | 3 | 1648782  | 5550338  | 1593039  | 4617243  | 2035951  | 3361238  | 5230399  | 4944126  | 6972512  |
| 9.328967 | 7  | 4 | 3 | 600596.6 | 5178791  | 1602706  | 4277029  | 1921232  | 6356683  | 2479942  | 4948164  | 6144711  |
| 9.887133 | 9  | 5 | 4 | 699537.1 | 2259147  | 711105   | 1822183  | 977112   | 1964498  | 2748356  | 1568813  | 1766399  |
| 29.92117 | 10 | 5 | 5 | 3183972  | 14042391 | 3742716  | 18546235 | 11507158 | 8932049  | 16511837 | 15739719 | 11313248 |
| 9.516467 | 10 | 5 | 5 | 21276312 | 65583657 | 8002543  | 57674616 | 19847938 | 75816066 | 72213161 | 62875221 | 58591068 |
| 10.008   | 6  | 4 | 2 | 262256.8 | 617389.8 | 116599.2 | 484729   | 337527.4 | 550137   | 790296.2 | 686225.6 | 529814   |
| 9.445217 | 5  | 2 | 3 | 657577.1 | 2675866  | 1090572  | 2149838  | 972773   | 3852019  | 3382448  | 1539697  | 3110430  |
| 44.58117 | 6  | 2 | 3 | 454667.5 | 5460571  | 869880.7 | 6289322  | 2070847  | 6965146  | 4767857  | 5354268  | 5000635  |
| 9.348233 | 6  | 4 | 2 | 492891.3 | 881666.1 | 543887   | 567442.3 | 681008.2 | 1449354  | 1170275  | 890462.5 | 898238.8 |
| 13.63877 | 6  | 4 | 2 | 270757.2 | 663729.9 | 1144467  | 225677.7 | 211934.2 | 2705446  | 106631.4 | 163106.4 | 58794.82 |
| 10.93208 | 5  | 2 | 3 | 343261   | 1286874  | 423099.5 | 1087829  | 355669.6 | 1345582  | 1998862  | 1059108  | 958774.8 |
| 9.976317 | 10 | 5 | 5 | 3827693  | 5136862  | 1691801  | 7391424  | 5803679  | 6229884  | 6820343  | 5654996  | 4418031  |
| 10.9645  | 5  | 4 | 1 | 1020688  | 2648455  | 1854932  | 3566427  | 1755965  | 2043754  | 5953131  | 1616755  | 1712899  |
| 44.72483 | 6  | 3 | 1 | 248785.2 | 2911140  | 805279.1 | 2575664  | 445248.6 | 1812904  | 3254047  | 2666869  | 4007145  |
| 10.94208 | 5  | 2 | 3 | 313637   | 1279394  | 494479.5 | 1052798  | 388539.7 | 1275648  | 1586972  | 533492.6 | 1161798  |
| 10.9645  | 9  | 5 | 4 | 367949.6 | 1907156  | 493030.6 | 1643518  | 543126.2 | 1874021  | 2247278  | 1152390  | 1826406  |
| 9.9847   | 7  | 4 | 3 | 780253.7 | 799187.3 | 242394.4 | 1250077  | 1176444  | 740980.5 | 617179.8 | 1160975  | 911929.7 |
| 9.371417 | 11 | 5 | 5 | 11272773 | 22779828 | 8819690  | 45830596 | 60546407 | 23861411 | 9050125  | 20271070 | 29962154 |
| 15.29923 | 5  | 3 | 2 | 16231.48 | 58407.81 | 23122.56 | 46576.67 | 23467.83 | 56039    | 48450.17 | 61820.15 | 31380.98 |
| 9.415167 | 7  | 3 | 3 | 1159725  | 1595952  | 876556.3 | 3384916  | 4679891  | 1053162  | 1334230  | 3108594  | 949077.7 |
| 9.872917 | 10 | 5 | 5 | 9088280  | 7588405  | 997450.2 | 16384183 | 23237353 | 7896153  | 7458593  | 7729775  | 8806630  |
| 3.295283 | 3  | 0 | 3 | 57125.54 | 619021.2 | 351866.6 | 447557.9 | 322583.9 | 0        | 878063.9 | 769266.7 | 710061   |
| 10.97857 | 7  | 3 | 4 | 1197081  | 3141570  | 2765380  | 1944367  | 1813962  | 1148091  | 7079530  | 1251609  | 1173386  |
| 18.9655  | 10 | 5 | 5 | 47843752 | 4.17E+08 | 64865914 | 3.88E+08 | 47018011 | 4.71E+08 | 4.65E+08 | 3.56E+08 | 3.37E+08 |
| 10.9645  | 7  | 4 | 3 | 230480.4 | 849882.9 | 262094.8 | 702020.7 | 316779.4 | 1041637  | 1127281  | 688739.6 | 486530.1 |

|          |    |   |   |          |          |          |          |          |          |          |          |          |
|----------|----|---|---|----------|----------|----------|----------|----------|----------|----------|----------|----------|
| 9.298683 | 7  | 4 | 3 | 309771   | 1026356  | 416807.1 | 765580.6 | 589877.4 | 1504602  | 1262400  | 542683.7 | 1184859  |
| 21.22417 | 10 | 5 | 5 | 327744.5 | 1624515  | 388123.6 | 1438910  | 341165.3 | 1346917  | 2215000  | 1818941  | 1442772  |
| 9.960467 | 7  | 4 | 2 | 628219.9 | 1977816  | 1030779  | 2509690  | 1064996  | 791534.3 | 1071057  | 2723031  | 2124050  |
| 9.94455  | 9  | 5 | 4 | 757785.8 | 2112238  | 727868.8 | 1708225  | 857140.1 | 2909086  | 2680862  | 1867164  | 1065641  |
| 10.95055 | 9  | 4 | 5 | 174925.5 | 651348.5 | 242772.1 | 542405.6 | 180171.2 | 840922.1 | 925826.2 | 356898.7 | 674700.4 |
| 9.47865  | 12 | 5 | 5 | 715590.3 | 5289192  | 1509330  | 4391682  | 1983863  | 6464066  | 7263656  | 4830610  | 3904577  |
| 15.52565 | 10 | 5 | 5 | 137142.5 | 893418.4 | 208273.2 | 699937.9 | 483435.6 | 1223149  | 809511.2 | 743191.8 | 721904.9 |
| 43.30117 | 5  | 3 | 2 | 374502   | 4830012  | 2104438  | 5945766  | 2289355  | 5208325  | 1270478  | 4938406  | 6076294  |
| 19.6435  | 10 | 5 | 5 | 225395.7 | 884616.3 | 305347.5 | 1061003  | 383939.6 | 917408.8 | 797078.6 | 598302.8 | 720426.2 |
| 10.97857 | 10 | 5 | 4 | 265658.8 | 1142584  | 447082.5 | 898749.1 | 511458.4 | 1133954  | 474172   | 1099280  | 1289031  |
| 9.8445   | 10 | 5 | 5 | 1966663  | 5539182  | 1142960  | 6613567  | 2690023  | 6682382  | 5832996  | 6293299  | 5100496  |
| 10.008   | 7  | 3 | 4 | 26725388 | 30640545 | 44994663 | 12025325 | 24307266 | 968718.8 | 1384651  | 47761877 | 1.03E+08 |
| 9.345767 | 4  | 0 | 4 | 853983.3 | 774942.3 | 361883.7 | 1518717  | 1950469  | 470307.4 | 1230038  | 918962.7 | 345015.3 |
| 9.132467 | 7  | 4 | 3 | 267799.3 | 700508   | 409607.8 | 497528   | 391223.5 | 942990.6 | 1111718  | 880665.8 | 461222.2 |
| 10.9645  | 10 | 5 | 5 | 886832.4 | 1697874  | 345141.7 | 2339595  | 1678937  | 1769097  | 2193174  | 1790655  | 1376769  |
| 10.05535 | 9  | 5 | 4 | 245102.8 | 723838.1 | 154367.1 | 848397.9 | 304532.9 | 517792.3 | 780952.9 | 929411.1 | 641966.4 |
| 9.445217 | 14 | 5 | 5 | 2512846  | 21362205 | 4659071  | 19039936 | 4505741  | 18261807 | 25600894 | 27050949 | 16610255 |
| 8.902983 | 10 | 5 | 5 | 1374643  | 6731322  | 1982995  | 5474542  | 2866600  | 7967052  | 8545627  | 7958030  | 4953692  |
| 23.0305  | 5  | 4 | 1 | 251384.6 | 623608.2 | 406488.2 | 846687.8 | 470876.3 | 290198.7 | 539365.2 | 389712.4 | 578096.1 |
| 10.9645  | 6  | 4 | 2 | 827606.9 | 877671.5 | 228498   | 1588034  | 1875234  | 1014218  | 522383.3 | 966324.2 | 788362.6 |
| 8.163983 | 10 | 5 | 5 | 1483543  | 83690980 | 54458795 | 1.13E+08 | 60941717 | 1.33E+08 | 1.31E+08 | 68209969 | 86733457 |
| 9.445217 | 7  | 3 | 4 | 1341219  | 6201685  | 2091643  | 4945761  | 2798597  | 4665142  | 6181223  | 8177359  | 8353238  |
| 44.9835  | 6  | 3 | 3 | 312991.3 | 1460484  | 492662.5 | 1658518  | 223338.4 | 1871162  | 631224.6 | 1426125  | 1613536  |
| 10.95055 | 10 | 5 | 5 | 1375632  | 8023681  | 2096446  | 7018652  | 1864748  | 10473286 | 8625271  | 5998390  | 5695540  |
| 12.44123 | 9  | 5 | 4 | 276740.2 | 1526140  | 705544   | 1901850  | 776516.7 | 1561120  | 940153.6 | 1176252  | 2724364  |
| 9.460217 | 10 | 4 | 5 | 483779.1 | 1600600  | 563220   | 2457404  | 2230076  | 1616012  | 2445344  | 1753879  | 998964.2 |
| 10.008   | 10 | 5 | 5 | 508489.4 | 1747944  | 380398   | 1536612  | 450767.2 | 1919059  | 2201791  | 1916769  | 1350709  |
| 9.979667 | 7  | 3 | 4 | 1229171  | 797029.3 | 348706.3 | 1168691  | 946109.1 | 1340793  | 892729   | 605283.2 | 423913.5 |
| 8.931817 | 10 | 5 | 5 | 666495.3 | 2411075  | 789996.9 | 2719843  | 273782.7 | 2737169  | 3102955  | 2836095  | 2276769  |
| 9.960467 | 7  | 4 | 3 | 1064929  | 1545967  | 644864.9 | 2150373  | 1517031  | 1982293  | 2329714  | 957801.1 | 1625723  |
| 10.92208 | 5  | 3 | 2 | 99601.62 | 251231.1 | 165410.8 | 182247.7 | 94318.53 | 459527.9 | 354416   | 73060.69 | 98617.37 |
| 9.859983 | 10 | 5 | 5 | 1.71E+09 | 1.3E+10  | 1.51E+09 | 1.23E+10 | 1.44E+09 | 1.44E+10 | 1.38E+10 | 1.07E+10 | 1.24E+10 |
| 10.70568 | 10 | 5 | 5 | 245554.9 | 1032050  | 241815   | 901481.1 | 273437.5 | 820504.4 | 1310841  | 1268950  | 947241.6 |
| 9.56645  | 6  | 4 | 2 | 227301   | 452635.6 | 68351.62 | 335960.3 | 305343.6 | 479476.1 | 555084.8 | 430998.3 | 374224.5 |
| 9.445217 | 10 | 5 | 4 | 2978845  | 5583226  | 2461789  | 11546816 | 15730120 | 8383671  | 5819570  | 7463150  | 3725748  |

|          |    |   |   |          |          |          |          |          |          |          |          |          |
|----------|----|---|---|----------|----------|----------|----------|----------|----------|----------|----------|----------|
| 9.992233 | 12 | 5 | 5 | 3168772  | 5842248  | 1293519  | 6953657  | 2757496  | 7243267  | 5452499  | 4044657  | 5515157  |
| 9.41815  | 9  | 4 | 4 | 2165910  | 5502472  | 2209966  | 10680628 | 13654039 | 4880137  | 5293617  | 6331935  | 8537875  |
| 9.379233 | 17 | 5 | 5 | 1250538  | 2729484  | 2477975  | 4321292  | 3664914  | 5803394  | 3159770  | 310543.7 | 126856.1 |
| 27.6395  | 9  | 4 | 5 | 87310.35 | 287648.1 | 58706.72 | 323969.2 | 82343.67 | 364585.8 | 321568.9 | 255456.1 | 212361.1 |
| 11.19403 | 7  | 3 | 4 | 283245.7 | 417817   | 232293.2 | 321009.2 | 132631.9 | 361623.2 | 800009.4 | 449947.3 | 265688.4 |
| 10.95055 | 8  | 4 | 4 | 733681.1 | 928942.1 | 473837.5 | 1492929  | 1451573  | 1432244  | 1419697  | 753636.8 | 657453.6 |
| 9.952017 | 3  | 0 | 3 | 795912.7 | 554812.1 | 416872.7 | 1052053  | 1280228  | 936882.6 | 0        | 796692.2 | 820610.1 |
| 10.008   | 9  | 5 | 4 | 690484.2 | 2144579  | 380875   | 1931488  | 458183.6 | 1549131  | 2545985  | 2378167  | 2192750  |
| 9.464933 | 10 | 5 | 4 | 4487199  | 12856003 | 11051354 | 19364529 | 14420767 | 18875387 | 24528435 | 853980.6 | 1184567  |
| 43.44517 | 5  | 4 | 1 | 449052.5 | 7636108  | 2206270  | 6454958  | 2464901  | 4107964  | 10006165 | 8763099  | 7911407  |
| 43.77583 | 5  | 1 | 3 | 339896.5 | 5941640  | 1049285  | 6745309  | 1953601  | 6380603  | 6289170  | 4115756  | 6132309  |
| 24.72467 | 10 | 5 | 5 | 26061372 | 2.06E+08 | 24182407 | 1.89E+08 | 40165982 | 1.94E+08 | 2.33E+08 | 1.71E+08 | 2.21E+08 |
| 9.992233 | 9  | 5 | 4 | 707996.3 | 2360879  | 265988.7 | 2044428  | 815354.1 | 2589031  | 2453797  | 2545924  | 1934623  |
| 9.419733 | 8  | 4 | 3 | 2251784  | 7850615  | 5013954  | 10113648 | 3850825  | 15637605 | 4869053  | 10007476 | 5404659  |
| 17.75783 | 6  | 3 | 3 | 387614.7 | 3364573  | 245648.8 | 2856771  | 1338259  | 3307822  | 3173749  | 3563453  | 3672644  |
| 9.992233 | 10 | 5 | 5 | 2851186  | 7198365  | 2822662  | 9456081  | 5541337  | 9153119  | 10421282 | 7877370  | 4111819  |
| 9.887133 | 10 | 5 | 5 | 5011324  | 13778920 | 2431612  | 18392817 | 12137465 | 13533292 | 11168917 | 16796252 | 15655253 |
| 9.960467 | 3  | 3 | 0 | 555283.1 | 994615.2 | 368540.1 | 755245.5 | 554981   | 1360844  | 1421648  | 820152.4 | 734783.3 |
| 9.960467 | 7  | 5 | 2 | 551198.9 | 1267586  | 284828   | 1144127  | 192647.1 | 1591543  | 1516675  | 1170731  | 897667.2 |
| 9.952017 | 10 | 5 | 5 | 5684544  | 18394404 | 6141971  | 14998196 | 7266267  | 25902945 | 12504009 | 12421653 | 23279586 |
| 38.856   | 5  | 1 | 3 | 336448.3 | 4834754  | 410388.8 | 5415932  | 1514583  | 5209184  | 4602290  | 4925867  | 5189370  |
| 9.4925   | 13 | 5 | 5 | 907588.8 | 5824993  | 2533985  | 8014147  | 5453164  | 6362248  | 1998690  | 8917553  | 6688693  |
| 9.952017 | 12 | 5 | 5 | 2401819  | 4834234  | 285846.7 | 4416072  | 1091458  | 4525345  | 4553625  | 5166849  | 4895401  |
| 10.28195 | 5  | 3 | 2 | 99427.52 | 269159.1 | 71299.53 | 200373.3 | 174020.1 | 333997.8 | 328579.3 | 232290.3 | 164546.7 |
| 9.541433 | 9  | 5 | 4 | 559470.8 | 1604976  | 644036.3 | 1256795  | 733973.4 | 2170732  | 2199033  | 1173889  | 723510.3 |
| 40.81267 | 10 | 5 | 5 | 1317997  | 26810743 | 1916951  | 25418925 | 3346226  | 23682520 | 26997650 | 28504582 | 26649976 |
| 8.9256   | 9  | 5 | 4 | 139055   | 1970792  | 278459.5 | 1714682  | 644246.7 | 2017902  | 2283250  | 2066062  | 1964501  |
| 9.830083 | 7  | 5 | 2 | 588105.8 | 1142293  | 190174.8 | 1356324  | 550153.2 | 966208.8 | 1051858  | 1211646  | 1442413  |
| 9.5812   | 8  | 4 | 4 | 1971312  | 12356684 | 2908967  | 14464913 | 5068854  | 12497812 | 7671862  | 12047797 | 14706487 |
| 10.16453 | 6  | 3 | 3 | 1359873  | 498748.7 | 185136.5 | 1557085  | 2818792  | 801193.2 | 418820.6 | 534868   | 416813.8 |
| 9.912633 | 10 | 5 | 5 | 5050993  | 24068397 | 3431887  | 30454327 | 16820984 | 24021124 | 27611314 | 26234350 | 23868064 |
| 39.31633 | 4  | 1 | 3 | 375769.4 | 6125864  | 210964.5 | 8229689  | 5608904  | 6204502  | 6136531  | 5819504  | 6399184  |
| 10.9645  | 10 | 5 | 5 | 314896.2 | 1282875  | 334489.6 | 1103667  | 375847.4 | 1483951  | 1757030  | 1028027  | 952330.6 |
| 41.719   | 8  | 2 | 4 | 398509.3 | 5341177  | 1150289  | 5857423  | 874954.6 | 3407912  | 5918771  | 5307880  | 6393296  |
| 10.9645  | 10 | 5 | 5 | 1118716  | 6151123  | 1312040  | 5373367  | 1737177  | 6435571  | 6666304  | 4858178  | 4857312  |

|          |    |   |   |          |          |          |          |          |          |          |          |          |
|----------|----|---|---|----------|----------|----------|----------|----------|----------|----------|----------|----------|
| 9.297883 | 5  | 3 | 2 | 970663.6 | 1327252  | 763134.7 | 3483492  | 5723543  | 1706823  | 1047742  | 550416.7 | 867261.5 |
| 10.49953 | 10 | 5 | 5 | 10926851 | 51768350 | 4150276  | 55590923 | 9630461  | 53854252 | 57140398 | 50523313 | 45938015 |
| 9.568567 | 8  | 4 | 4 | 335281.8 | 611518.4 | 166970.7 | 499641.7 | 263029.1 | 548199.5 | 758185.9 | 445129.7 | 487413.5 |
| 9.176533 | 7  | 4 | 3 | 30916182 | 2.32E+08 | 1E+08    | 1.83E+08 | 93031969 | 1.76E+08 | 1.24E+08 | 2.31E+08 | 2.36E+08 |
| 9.992233 | 8  | 4 | 4 | 887229.4 | 1073051  | 513397.3 | 1493877  | 1041540  | 1002357  | 1542328  | 1610784  | 379516.5 |
| 9.419733 | 7  | 5 | 2 | 637606.4 | 1942462  | 1086366  | 2586489  | 1440713  | 1405360  | 3819299  | 1295029  | 1950537  |
| 10.008   | 9  | 5 | 4 | 2262817  | 2708103  | 561027.6 | 2980355  | 520907   | 2763272  | 3286252  | 2567826  | 1836888  |
| 9.976317 | 10 | 5 | 5 | 757266.7 | 2542017  | 403783.2 | 2259596  | 673737.5 | 2832078  | 2922070  | 2526591  | 1891376  |
| 35.191   | 6  | 3 | 3 | 1500963  | 2712992  | 3741979  | 1276538  | 1079190  | 342611.7 | 862334.4 | 16852.03 | 8979885  |
| 10.9645  | 10 | 5 | 5 | 1602065  | 7161136  | 1384767  | 6344499  | 1822999  | 8483088  | 8480482  | 5615482  | 5841038  |
| 11.17508 | 10 | 5 | 5 | 179091   | 601503.2 | 256495.4 | 494409.1 | 151208.3 | 936542.2 | 231377.6 | 664102.9 | 518398.3 |
| 9.856867 | 10 | 5 | 5 | 5052165  | 10546423 | 1183703  | 14561543 | 10689876 | 11883856 | 11031195 | 9610258  | 9028241  |
| 9.268717 | 7  | 3 | 4 | 1440290  | 3037256  | 1206717  | 2571748  | 381418.4 | 4960801  | 2214655  | 1935643  | 2695234  |
| 9.9351   | 12 | 5 | 4 | 2541993  | 856399.3 | 408224   | 1515185  | 1731496  | 784476.8 | 1385248  | 1009774  | 258011.1 |
| 10.9645  | 4  | 3 | 1 | 243470   | 670001.2 | 139867.7 | 583395.2 | 198042   | 756761.1 | 724179.8 | 453891.7 | 612034.1 |
| 9.9677   | 10 | 5 | 5 | 2805425  | 11425330 | 1731428  | 10272291 | 2711674  | 12418855 | 13552519 | 11092077 | 8917301  |
| 9.43325  | 14 | 5 | 3 | 454215.7 | 1310003  | 496490.7 | 1622711  | 720304.4 | 1456844  | 2119350  | 1024837  | 1012921  |
| 9.45945  | 12 | 5 | 5 | 8235892  | 82319466 | 26539801 | 69739794 | 23417520 | 90993926 | 73311681 | 79837806 | 47319975 |
| 11.51172 | 8  | 4 | 4 | 195049.6 | 513147.7 | 320471.1 | 678411.5 | 337492.6 | 732613.8 | 942714.1 | 145827.1 | 414177.3 |
| 8.841533 | 4  | 3 | 1 | 264117.3 | 381162.7 | 136307.2 | 289884.5 | 215158.8 | 306720.1 | 618496.7 | 370936.1 | 323426.5 |
| 24.57767 | 10 | 5 | 5 | 462858.1 | 2938076  | 524848.6 | 2526204  | 1012543  | 3316161  | 3141220  | 2370067  | 2386063  |
| 9.522017 | 6  | 4 | 2 | 712512.1 | 1821207  | 1198828  | 1246825  | 1085222  | 2424743  | 154533.5 | 1058528  | 2310901  |
| 9.912633 | 10 | 5 | 5 | 17874680 | 91956966 | 33692020 | 79057394 | 9484317  | 84949133 | 71790229 | 69360495 | 1.51E+08 |
| 9.40325  | 6  | 3 | 3 | 3946539  | 23673809 | 17658252 | 15508261 | 14684088 | 44635316 | 14436881 | 14609649 | 40188094 |
| 9.858833 | 9  | 5 | 4 | 2093953  | 2770575  | 918330.8 | 4881947  | 5605729  | 2394733  | 2579076  | 2838324  | 4258516  |
| 10.94443 | 10 | 5 | 5 | 571329   | 1503501  | 588654.9 | 1875061  | 857666.9 | 2088096  | 2136751  | 1394230  | 857309.3 |
| 9.848417 | 10 | 5 | 5 | 21519348 | 83539045 | 4354018  | 93351150 | 26046890 | 90495204 | 83805828 | 83707316 | 79960157 |
| 18.84933 | 10 | 5 | 5 | 119339.8 | 547465.5 | 182347.9 | 622769.3 | 103068.1 | 570646.8 | 735929.2 | 447149.6 | 290944.3 |
| 9.856867 | 10 | 5 | 5 | 19439928 | 1.05E+08 | 16720505 | 92330075 | 32143369 | 1.14E+08 | 1.13E+08 | 84701131 | 90882970 |
| 9.842    | 9  | 5 | 4 | 935759.2 | 3271706  | 926085.4 | 2591138  | 1652029  | 3322359  | 3619117  | 1813982  | 3244364  |
| 3.630783 | 7  | 3 | 4 | 115883.8 | 2210582  | 1465859  | 2911350  | 1326207  | 7162.27  | 1791833  | 3961602  | 2402190  |
| 31.2915  | 4  | 3 | 1 | 85962.95 | 489312   | 178228.5 | 420251.6 | 62777.16 | 690322.8 | 637146   | 493307.4 | 348510.7 |
| 15.58085 | 10 | 5 | 5 | 859891.5 | 6527441  | 1217563  | 5758373  | 1780089  | 8300549  | 6697027  | 6876303  | 5311485  |
| 9.999217 | 10 | 5 | 5 | 1950151  | 7840287  | 1038062  | 6773067  | 2737289  | 7908777  | 9045451  | 8401455  | 6269047  |
| 9.920517 | 10 | 5 | 5 | 1581619  | 8374089  | 1040385  | 7546339  | 2046562  | 8821175  | 6976836  | 7573353  | 9290703  |

|          |    |   |   |          |          |          |          |          |          |          |          |          |
|----------|----|---|---|----------|----------|----------|----------|----------|----------|----------|----------|----------|
| 9.952017 | 6  | 4 | 2 | 3823050  | 5253033  | 8708628  | 9697603  | 9033214  | 951673.7 | 1607647  | 1433250  | 20825309 |
| 10.95835 | 9  | 4 | 5 | 308786.5 | 821039.3 | 371115.7 | 665663.9 | 224840.4 | 891516   | 915665.8 | 1354900  | 409494.3 |
| 10.39823 | 5  | 3 | 2 | 235353.9 | 628356.2 | 182713.9 | 556443.7 | 76240.33 | 636809.6 | 909598.8 | 528283.5 | 418706.3 |
| 9.8445   | 9  | 5 | 4 | 1230378  | 4708562  | 1639330  | 3980369  | 1228061  | 4958324  | 4193849  | 3514528  | 7429571  |
| 9.976317 | 3  | 3 | 0 | 2267311  | 1578745  | 278413.9 | 3038076  | 3908331  | 1663942  | 1750202  | 1261350  | 1901362  |
| 9.40325  | 6  | 4 | 2 | 496032.7 | 2648016  | 1162390  | 3145480  | 769762.1 | 2751070  | 3069756  | 2759100  | 3911469  |
| 9.864767 | 10 | 5 | 5 | 41014548 | 1.77E+08 | 9707878  | 2.01E+08 | 64555873 | 1.86E+08 | 1.72E+08 | 1.85E+08 | 1.78E+08 |
| 9.582167 | 10 | 5 | 5 | 884571.7 | 3598562  | 513444.4 | 3247812  | 835622.6 | 4120793  | 4195978  | 3229246  | 3282453  |
| 10.9645  | 10 | 5 | 5 | 672695.3 | 3009523  | 680492.1 | 2675166  | 655251.5 | 3331486  | 3684009  | 2376169  | 2185080  |
| 9.976317 | 7  | 4 | 3 | 508952.9 | 970122.5 | 402341.6 | 744479.4 | 492919.4 | 1570648  | 949674   | 1104400  | 531444.3 |
| 9.920517 | 9  | 4 | 5 | 2235577  | 10259536 | 1805958  | 8463724  | 4594560  | 8594464  | 8138051  | 11773556 | 10725611 |
| 10.79303 | 10 | 5 | 5 | 2927657  | 7321412  | 385310.5 | 9621287  | 6164910  | 7524055  | 7742192  | 6796094  | 7054455  |
| 34.7235  | 4  | 3 | 0 | 301480.5 | 5527717  | 3017752  | 4402752  | 163744.7 | 3210206  | 4436216  | 10818105 | 4818420  |
| 9.197983 | 9  | 4 | 5 | 465405.2 | 1136953  | 541871.5 | 1470510  | 765392.5 | 1177754  | 1708637  | 348710.5 | 901381.2 |
| 10.0926  | 13 | 5 | 4 | 343498.3 | 991189.7 | 268306.3 | 1148720  | 353557.3 | 1085446  | 1016461  | 921323.1 | 597363.4 |
| 9.13445  | 8  | 4 | 3 | 53537900 | 99678595 | 2.22E+08 | 2.41E+08 | 3.3E+08  | 263697.8 | 572800.2 | 393757.6 | 4.97E+08 |
| 9.328967 | 4  | 3 | 1 | 844801.2 | 3819877  | 3011691  | 5125929  | 2101081  | 2235665  | 602774   | 2194656  | 6778060  |
| 10.52333 | 9  | 4 | 4 | 249335.8 | 720904.6 | 28063.15 | 670595.8 | 133396.1 | 709418.2 | 754991.7 | 679862   | 731059.9 |
| 9.960467 | 10 | 5 | 5 | 4023203  | 11343490 | 3736895  | 13372677 | 4349057  | 14052735 | 16528022 | 8381994  | 8284053  |
| 8.87445  | 6  | 4 | 2 | 563026.4 | 714951.4 | 696404   | 435402.6 | 342291.4 | 318697.3 | 768359.5 | 630346.3 | 1845609  |
| 9.960467 | 10 | 5 | 5 | 12334095 | 9751763  | 2584410  | 16863167 | 19007849 | 12082088 | 10457232 | 12012677 | 8011518  |
| 9.983433 | 10 | 5 | 5 | 594266.6 | 2016645  | 584626.5 | 1688774  | 717880.4 | 2629854  | 2594859  | 1894530  | 1294677  |
| 9.872883 | 10 | 5 | 5 | 1303962  | 6327991  | 1661384  | 5295976  | 2380127  | 5598649  | 6404660  | 4130475  | 6855280  |
| 9.856867 | 5  | 3 | 2 | 1154097  | 1124444  | 387904.9 | 2219045  | 2927058  | 1109540  | 619927.1 | 1686094  | 1227383  |
| 9.507167 | 6  | 4 | 1 | 494557.1 | 2065977  | 786488.9 | 1594763  | 1069527  | 2304268  | 1780760  | 2506815  | 853096.5 |
| 11       | 10 | 5 | 5 | 609044.6 | 3448208  | 715039.2 | 2864965  | 1453279  | 3693028  | 2617507  | 3187219  | 3212698  |
| 9.684583 | 10 | 5 | 5 | 455025   | 2138640  | 957189.1 | 1737028  | 591477.2 | 3131417  | 2743963  | 2515206  | 818615   |
| 13.42002 | 10 | 5 | 5 | 271639.2 | 1297854  | 368420.4 | 1736387  | 1142234  | 1271312  | 1765110  | 1400078  | 738234.5 |
| 10.02372 | 10 | 5 | 5 | 348709   | 996818.5 | 130339.5 | 853254   | 371725.6 | 983132.4 | 1144947  | 1023817  | 789481.3 |
| 8.343533 | 6  | 5 | 1 | 3197370  | 53017084 | 32696605 | 88032766 | 90447812 | 94006126 | 23974232 | 49419588 | 19646070 |
| 9.10275  | 4  | 3 | 1 | 2308536  | 5029174  | 4886072  | 3181632  | 1154025  | 8426305  | 11469195 | 565166   | 327937.5 |
| 21.64233 | 10 | 5 | 5 | 251939.5 | 1240037  | 272630.8 | 1078334  | 365531.8 | 954700.5 | 1678962  | 1287684  | 1120445  |
| 9.842    | 10 | 5 | 5 | 1645348  | 6715355  | 707892.7 | 6031672  | 1747841  | 6691960  | 7253004  | 7387953  | 6650202  |
| 9.992233 | 5  | 3 | 2 | 768001.8 | 764413.2 | 129031.3 | 1169036  | 1084069  | 801940.4 | 971990.2 | 719794.6 | 666589.3 |
| 10.95835 | 10 | 5 | 5 | 351924.6 | 2287749  | 456294.2 | 2059085  | 459767.2 | 2847853  | 2235993  | 1931114  | 1777309  |

|          |    |   |   |          |          |          |          |          |          |          |          |          |
|----------|----|---|---|----------|----------|----------|----------|----------|----------|----------|----------|----------|
| 10.93208 | 7  | 3 | 4 | 470273.6 | 1439110  | 653062.6 | 1185056  | 251489.1 | 1474917  | 2300613  | 881063.8 | 724717.2 |
| 38.82733 | 9  | 3 | 2 | 404694   | 5315847  | 1673022  | 7987324  | 7071183  | 2753306  | 4468676  | 6313355  | 6461516  |
| 20.40217 | 8  | 5 | 3 | 218177.3 | 922925.7 | 459230.8 | 640765.4 | 649206.4 | 920661.7 | 1281150  | 1469857  | 536677   |
| 9.856867 | 4  | 1 | 3 | 1938659  | 1384838  | 701048.8 | 3248362  | 4988313  | 2049814  | 1649341  | 1878684  | 986956.6 |
| 9.406667 | 5  | 1 | 4 | 651097.6 | 1320588  | 362186.1 | 1791076  | 1234142  | 1061875  | 1099937  | 1315718  | 1944694  |
| 9.5021   | 15 | 5 | 5 | 3021960  | 23364168 | 3012014  | 26088226 | 6914437  | 22025094 | 23256159 | 19289347 | 24977457 |
| 9.920517 | 10 | 5 | 5 | 2254581  | 6874768  | 1906872  | 7771620  | 1678746  | 7092182  | 5923115  | 5129937  | 10047487 |
| 9.960467 | 10 | 5 | 5 | 1154809  | 4204259  | 224633.9 | 3905785  | 784051.2 | 4151295  | 4517772  | 4343304  | 4032517  |
| 9.5021   | 11 | 5 | 5 | 1170557  | 2839566  | 725073.6 | 2329025  | 1233028  | 3639167  | 3552912  | 2616703  | 2385412  |
| 9.903567 | 8  | 4 | 3 | 1205171  | 3123981  | 278064.9 | 3811411  | 1839732  | 2945167  | 3478887  | 3348728  | 3024801  |
| 9.392767 | 9  | 5 | 4 | 891169.3 | 1816372  | 527109.1 | 1389625  | 1064705  | 2283503  | 2245313  | 1312209  | 1185563  |
| 42.09283 | 3  | 0 | 3 | 306529.1 | 4821957  | 97715.93 | 4538319  | 760582.1 | 4956590  | 4820526  | 4792839  | 4852987  |
| 40.0645  | 5  | 4 | 1 | 327187.6 | 5608200  | 1336618  | 5110977  | 122696.7 | 7372532  | 6541637  | 4265138  | 4461490  |
| 9.986767 | 5  | 3 | 2 | 2384181  | 2468838  | 2191356  | 1555101  | 1332316  | 6194411  | 824624.1 | 2071422  | 902622.2 |
| 26.1095  | 10 | 5 | 5 | 2716721  | 35237635 | 14770123 | 27890843 | 14708437 | 26104298 | 45312123 | 15942382 | 35842360 |
| 9.874317 | 10 | 4 | 5 | 1.26E+08 | 1.43E+08 | 2.88E+08 | 35163013 | 41256041 | 18836128 | 6.59E+08 | 15385016 | 14693100 |
| 9.999517 | 5  | 3 | 2 | 2197515  | 2010654  | 1397220  | 3166874  | 2897691  | 4290371  | 755853.2 | 1051586  | 1737644  |
| 9.445217 | 14 | 5 | 5 | 17004510 | 1.62E+08 | 45985356 | 1.35E+08 | 60631704 | 1.45E+08 | 2.06E+08 | 2.14E+08 | 1.38E+08 |
| 9.507167 | 11 | 5 | 5 | 1449327  | 10751125 | 5952377  | 7918049  | 5400264  | 13372039 | 8539525  | 5088927  | 6892741  |
| 9.915583 | 6  | 3 | 2 | 1009997  | 2546253  | 1215303  | 1989818  | 1004172  | 1334286  | 1959429  | 4549206  | 2620173  |
| 25.1015  | 7  | 3 | 4 | 264333.2 | 1548281  | 1551130  | 893361.2 | 994538.6 | 3098648  | 405964.7 | 535009.6 | 3384780  |
| 10.008   | 9  | 5 | 4 | 325304.4 | 1211423  | 152527.7 | 1071625  | 356028.5 | 1130467  | 1090403  | 1203588  | 1158552  |
| 9.992233 | 10 | 5 | 5 | 2242044  | 7399825  | 1425282  | 6410323  | 2383683  | 8829709  | 8570587  | 7729564  | 5542103  |
| 9.992233 | 8  | 4 | 4 | 760415.4 | 933524.5 | 373304.8 | 1278285  | 879024.6 | 1273990  | 1199504  | 1130014  | 602077.1 |
| 10.95055 | 10 | 5 | 5 | 366344.8 | 2405602  | 492521.3 | 2171919  | 444008.8 | 2961364  | 2749600  | 1943518  | 1844856  |
| 17.08867 | 6  | 2 | 3 | 215002.8 | 885136.8 | 692509.1 | 566141.7 | 581649.6 | 240383.7 | 62916.61 | 1423445  | 1579184  |
| 9.970617 | 7  | 4 | 3 | 709151.8 | 1183296  | 595009.4 | 1439363  | 409658.3 | 1752494  | 263645.9 | 1359430  | 1586830  |
| 20.45117 | 10 | 5 | 5 | 2657176  | 20764421 | 3236012  | 18040220 | 6852208  | 23543097 | 16191956 | 19056418 | 23966190 |
| 29.83417 | 6  | 2 | 4 | 195687.1 | 1356484  | 365573.6 | 1125121  | 540578.2 | 1620818  | 944217.1 | 1617023  | 1632234  |
| 10.97857 | 10 | 5 | 5 | 2829447  | 20004179 | 2973159  | 18222629 | 4066058  | 22741894 | 20083586 | 16092907 | 18105781 |
| 9.840617 | 10 | 5 | 5 | 2140955  | 1590706  | 336995.5 | 2934140  | 3615944  | 2159208  | 1585724  | 1509634  | 1285867  |
| 9.516467 | 10 | 5 | 5 | 5084394  | 14854292 | 2213509  | 13060726 | 4484007  | 16940820 | 17356048 | 14368724 | 13211703 |
| 9.960467 | 9  | 5 | 4 | 813302.3 | 2044563  | 421332.6 | 2230752  | 316723.1 | 2584073  | 1987572  | 2224201  | 1426892  |
| 9.205717 | 5  | 3 | 2 | 1247227  | 1755655  | 428104.2 | 2917371  | 3119220  | 1957764  | 1355971  | 1281369  | 2293887  |
| 9.3494   | 3  | 3 | 0 | 275459.8 | 1556994  | 757103.9 | 1192684  | 706191.8 | 2299653  | 1804438  | 2153231  | 945921.6 |



|          |    |   |   |          |          |          |          |          |          |          |          |          |
|----------|----|---|---|----------|----------|----------|----------|----------|----------|----------|----------|----------|
| 21.39367 | 7  | 4 | 3 | 131391.1 | 296987.5 | 297122.1 | 177791.1 | 149905.8 | 796750.2 | 286259.5 | 69388.68 | 73337.56 |
| 9.979667 | 7  | 4 | 3 | 1239273  | 878461.5 | 348363   | 1553197  | 1802035  | 1404910  | 945861.6 | 856407.5 | 451539.9 |
| 11.04868 | 5  | 3 | 2 | 468291.7 | 445638.6 | 87867.51 | 888538.3 | 1194643  | 349844.5 | 403812.8 | 482087.7 | 578414.6 |
| 9.8322   | 4  | 3 | 1 | 354110.7 | 786694.4 | 240400.9 | 574393.7 | 539110.3 | 945390.5 | 969796.1 | 846678.3 | 375866.2 |
| 9.9174   | 6  | 2 | 4 | 2794494  | 5866631  | 5718916  | 3451666  | 3703314  | 5832275  | 15742524 | 2484814  | 3339938  |
| 44.9835  | 6  | 4 | 2 | 390821.5 | 2624434  | 2485230  | 1666888  | 903272.4 | 1428736  | 2023908  | 7029222  | 1084912  |
| 12.01873 | 10 | 5 | 5 | 235324   | 451955.7 | 149906.1 | 686763.5 | 623945.6 | 434539.7 | 691944.7 | 323223   | 330825.5 |
| 10.95055 | 10 | 5 | 5 | 551310.8 | 3575716  | 683418.2 | 3254893  | 605064   | 3903653  | 4450187  | 2977585  | 2796261  |
| 9.994767 | 5  | 3 | 2 | 311267   | 611065.4 | 225718.2 | 458126.6 | 367165.7 | 918713.7 | 626147.3 | 724655.6 | 413270   |
| 9.507167 | 5  | 2 | 3 | 1484039  | 593114.8 | 394811.3 | 1399624  | 2160138  | 957855.1 | 952874.3 | 545104.2 | 509740.6 |
| 9.856867 | 10 | 5 | 5 | 2022889  | 3869997  | 255199.3 | 5884158  | 5445907  | 3832565  | 3918151  | 4215338  | 3884493  |
| 9.40255  | 5  | 2 | 3 | 11535511 | 51712753 | 38105885 | 33751833 | 34083279 | 86372994 | 8315019  | 67770657 | 13132011 |
| 9.976317 | 14 | 5 | 3 | 1394778  | 2736758  | 695645   | 2292865  | 1044475  | 1884558  | 2720091  | 2271136  | 3178243  |
| 9.8322   | 6  | 4 | 2 | 1118771  | 2339214  | 1138428  | 1684745  | 1469953  | 2384966  | 2633697  | 1116440  | 1513470  |
| 9.964417 | 8  | 3 | 4 | 1520156  | 3153745  | 2480328  | 2109450  | 1597829  | 7540454  | 1700744  | 2476493  | 1672530  |
| 9.848417 | 9  | 5 | 4 | 2410573  | 3663116  | 183813.4 | 5922190  | 6114804  | 3511381  | 3624407  | 3506785  | 3722348  |
| 9.929783 | 5  | 2 | 3 | 5954179  | 19486634 | 5182090  | 15897457 | 8684843  | 21052018 | 10910873 | 20936892 | 19634068 |
| 9.896717 | 10 | 5 | 5 | 17920240 | 1.92E+08 | 17681588 | 1.76E+08 | 40497694 | 1.96E+08 | 2.01E+08 | 1.72E+08 | 1.75E+08 |
| 42.79783 | 7  | 3 | 2 | 257260   | 3629295  | 1023522  | 3247400  | 191573.8 | 3528441  | 3554690  | 2252703  | 5138537  |
| 10.94853 | 5  | 3 | 2 | 203303.7 | 627734.8 | 314078.3 | 760229.4 | 204212.6 | 283876.1 | 349297.5 | 680265.9 | 782734.4 |
| 10.008   | 7  | 4 | 3 | 4056327  | 3321497  | 2281021  | 2444794  | 828236.6 | 2462090  | 2799764  | 1078314  | 7158715  |
| 10.72028 | 8  | 3 | 3 | 160558.7 | 453451.4 | 262279.9 | 347238.7 | 142373.7 | 184796.2 | 779907   | 546752.8 | 573212   |
| 8.874167 | 8  | 3 | 5 | 200265.1 | 523186   | 188462.4 | 418745.8 | 229993.7 | 546776.1 | 687547.4 | 306983.8 | 353792.1 |
| 16.79617 | 5  | 3 | 2 | 91699.47 | 404715.8 | 113556.8 | 356877.1 | 73648.28 | 341233.7 | 499701.2 | 240777.6 | 432965.8 |
| 9.295167 | 8  | 4 | 3 | 453856.8 | 2533694  | 1186303  | 1886626  | 1411660  | 2851036  | 566243.1 | 3749454  | 2544362  |
| 9.840617 | 10 | 5 | 5 | 5020975  | 24660200 | 2675406  | 23293906 | 2836454  | 28174909 | 26300278 | 22465516 | 21698527 |
| 28.8185  | 9  | 5 | 4 | 913282.6 | 7271985  | 4003848  | 5467448  | 3221977  | 4565910  | 8981358  | 1860336  | 9051562  |
| 23.99617 | 6  | 3 | 3 | 146948.8 | 381723.4 | 195662   | 268705.4 | 255164.7 | 239757.5 | 475754.3 | 135676.3 | 427752.7 |
| 28.80467 | 8  | 4 | 4 | 537471.3 | 4522916  | 2513966  | 3420698  | 1871680  | 2963392  | 5140569  | 1251444  | 5427953  |
| 42.582   | 7  | 4 | 2 | 415733.1 | 5815057  | 4216452  | 7389256  | 885198   | 3807214  | 927481.3 | 11993243 | 4629838  |
| 9.992233 | 8  | 5 | 3 | 1405289  | 1047203  | 255069.8 | 1232811  | 456460.6 | 1055862  | 606498.9 | 1190920  | 1148208  |
| 10.9645  | 10 | 5 | 5 | 349106.8 | 1275585  | 321593.4 | 1106298  | 360962.1 | 1846850  | 1070183  | 1163572  | 1134720  |
| 10.99268 | 10 | 5 | 5 | 535235   | 3658010  | 589719.7 | 3333901  | 712117.2 | 2700383  | 4104816  | 3567758  | 3751662  |
| 9.547133 | 5  | 3 | 2 | 876232.9 | 4417319  | 2703324  | 5713556  | 2532588  | 3564379  | 5071635  | 237509.1 | 5892376  |
| 10.49953 | 8  | 5 | 3 | 21759584 | 16665234 | 6029933  | 33954622 | 46726554 | 20478912 | 8665945  | 17340090 | 23911034 |

|          |    |   |   |          |          |          |          |          |          |          |          |          |
|----------|----|---|---|----------|----------|----------|----------|----------|----------|----------|----------|----------|
| 8.874167 | 10 | 5 | 5 | 6834337  | 27183078 | 11373861 | 34430152 | 17129823 | 22747841 | 46160582 | 28974541 | 18296088 |
| 10.36388 | 6  | 3 | 3 | 247612.6 | 355090.3 | 108416.3 | 436850   | 202981   | 434859.7 | 192114.4 | 462842.1 | 375835.6 |
| 10.95835 | 5  | 2 | 3 | 363150.7 | 922819.3 | 254518   | 773134.4 | 342060.2 | 1119211  | 1168893  | 1024071  | 619898.5 |
| 9.559117 | 8  | 4 | 4 | 279942.5 | 570618.4 | 203827.2 | 446181.4 | 289325.2 | 693426.9 | 835335.9 | 465486.5 | 552097.7 |
| 9.419733 | 6  | 4 | 1 | 784647.9 | 2352300  | 1745301  | 3267368  | 1948957  | 2000041  | 5287042  | 2394729  | 1022178  |
| 9.175017 | 4  | 3 | 1 | 410047.1 | 1770355  | 934538   | 2466777  | 1725869  | 1583498  | 660160.8 | 1503471  | 3234900  |
| 9.960467 | 6  | 4 | 2 | 677969.4 | 1235869  | 356939.2 | 1011497  | 528156.4 | 1733816  | 1220173  | 1424938  | 887150.9 |
| 9.928667 | 7  | 3 | 4 | 752814.3 | 1614657  | 355909.5 | 1385028  | 546079.6 | 1985150  | 1846167  | 1759948  | 1153000  |
| 30.3085  | 9  | 5 | 4 | 782214   | 5026641  | 716044.8 | 4519104  | 1242755  | 5155298  | 6058516  | 5223893  | 4281155  |
| 9.856867 | 10 | 5 | 5 | 1333989  | 6464350  | 1114442  | 5500017  | 2459499  | 6705836  | 7082452  | 5059627  | 5640166  |
| 10.9645  | 10 | 5 | 5 | 1556094  | 7268587  | 1677311  | 6403062  | 1822502  | 8514821  | 8806483  | 5175507  | 5757837  |
| 8.964883 | 7  | 4 | 3 | 14658796 | 2.3E+08  | 48743510 | 1.85E+08 | 1.15E+08 | 1.7E+08  | 2.96E+08 | 2.59E+08 | 2.12E+08 |
| 9.858833 | 10 | 5 | 5 | 20179278 | 1.07E+08 | 20807784 | 95483517 | 25478912 | 1.19E+08 | 1.01E+08 | 72943300 | 1.21E+08 |
| 41.359   | 6  | 3 | 1 | 287619.8 | 4462312  | 816245.2 | 4157661  | 185968.5 | 4428627  | 5670131  | 3367215  | 4386038  |
| 10.03947 | 8  | 5 | 3 | 636847.4 | 772396.7 | 238084.9 | 1158935  | 1035429  | 725164.4 | 849089.4 | 743126.7 | 1102277  |
| 9.992233 | 9  | 5 | 4 | 1166019  | 1949666  | 1024910  | 1472647  | 901864.2 | 1148273  | 2489603  | 644517.9 | 3143736  |
| 9.659033 | 10 | 5 | 5 | 5498906  | 35992213 | 20873707 | 24519805 | 25301788 | 57611976 | 29637330 | 16022879 | 18031788 |
| 9.976317 | 9  | 5 | 4 | 747054.2 | 1536818  | 1008964  | 1111232  | 667400.1 | 680925.1 | 1239674  | 1116406  | 1365272  |
| 9.976317 | 13 | 5 | 5 | 2292670  | 6323651  | 2172970  | 5303198  | 1955531  | 5348999  | 6216102  | 6207479  | 3990763  |
| 28.45183 | 4  | 1 | 3 | 40258.4  | 81609.17 | 34701.83 | 98830.15 | 35114.16 | 97613.58 | 115524.3 | 36108.04 | 53608.71 |
| 10.32122 | 10 | 5 | 5 | 466337.6 | 1503819  | 217020.8 | 1351648  | 372344.7 | 1740293  | 1731218  | 1374285  | 1273046  |
| 9.920517 | 8  | 3 | 4 | 1976607  | 4142214  | 2143045  | 3231245  | 1463403  | 4823754  | 1883956  | 7475038  | 3544050  |
| 9.976317 | 10 | 5 | 5 | 854219.5 | 3597108  | 788177.2 | 3171161  | 931120.5 | 4112089  | 4536949  | 3623227  | 2510868  |
| 24.14833 | 6  | 3 | 3 | 328274   | 2067857  | 774287.4 | 1651355  | 907625.9 | 1688784  | 2322450  | 1268225  | 1780522  |
| 28.404   | 6  | 3 | 3 | 579662.6 | 5671790  | 2828665  | 4396080  | 2309869  | 3512615  | 6909762  | 2052100  | 6847074  |
| 11.49785 | 9  | 5 | 4 | 130029.6 | 614013.7 | 212078.1 | 479477.8 | 319018.2 | 872001.9 | 753146.6 | 497924.2 | 330273.6 |
| 9.853633 | 5  | 3 | 2 | 8672575  | 5100096  | 5377489  | 12569900 | 19926124 | 1377600  | 1511524  | 1250788  | 13113447 |
| 9.41815  | 6  | 2 | 3 | 2120027  | 11548932 | 7506130  | 8182403  | 6048534  | 12658384 | 1392546  | 13840287 | 8110725  |
| 43.76167 | 9  | 4 | 0 | 289311.6 | 4042737  | 2623918  | 3079811  | 156925.1 | 2190409  | 8414699  | 2000334  | 4399657  |
| 9.992233 | 7  | 4 | 3 | 330632.7 | 930174.6 | 126327.7 | 758081.5 | 458746.8 | 903534.8 | 1135144  | 888774.3 | 790915   |
| 9.976317 | 10 | 5 | 5 | 3838783  | 5648649  | 1428780  | 7638679  | 5311048  | 6455050  | 7107853  | 6433869  | 4363811  |
| 10.9645  | 10 | 5 | 5 | 345466.5 | 1457328  | 204433.6 | 1321769  | 326760.3 | 1605752  | 1660461  | 1231746  | 1244245  |
| 9.929783 | 10 | 4 | 5 | 2272800  | 4919806  | 795206.6 | 5963072  | 2776173  | 3780404  | 4484457  | 5496751  | 5093922  |
| 9.9754   | 5  | 1 | 3 | 2909350  | 3471995  | 2755140  | 2263068  | 2090701  | 3542763  | 493715.2 | 3767879  | 7776991  |
| 10.95835 | 3  | 0 | 3 | 354966.6 | 458335.1 | 202384.7 | 784389.6 | 875539.6 | 472605.4 | 503013.7 | 573197.9 | 629634.5 |

|          |    |   |   |          |          |          |          |          |          |          |          |          |
|----------|----|---|---|----------|----------|----------|----------|----------|----------|----------|----------|----------|
| 9.43365  | 5  | 3 | 1 | 1688849  | 6252077  | 6865511  | 9322358  | 5498205  | 1439755  | 566092.8 | 2189361  | 15827665 |
| 10.93208 | 5  | 2 | 3 | 884065   | 2853550  | 717854.2 | 2481609  | 790392.9 | 2341612  | 4059355  | 2347597  | 2570427  |
| 9.856867 | 10 | 5 | 5 | 16238852 | 1E+08    | 15120602 | 90640174 | 22817249 | 1.09E+08 | 1.05E+08 | 78976014 | 91001596 |
| 10.95835 | 5  | 2 | 3 | 359063.1 | 883624.2 | 211642   | 1054272  | 432167.1 | 944357.4 | 1197433  | 732566   | 651023   |
| 9.992233 | 5  | 3 | 2 | 673770.5 | 761651.7 | 402808.3 | 986633.8 | 503854.5 | 731500.6 | 1423965  | 531118.7 | 755326.6 |
| 9.992233 | 10 | 5 | 5 | 1821770  | 2726782  | 1186916  | 3629426  | 2260092  | 3339775  | 4076533  | 3257798  | 1631704  |
| 21.8195  | 4  | 3 | 1 | 89933.29 | 165676   | 52682.33 | 259159.9 | 252074.6 | 204909.8 | 176694.5 | 195759.6 | 73985.92 |
| 9.40615  | 6  | 3 | 3 | 440388.1 | 918562.8 | 201111.5 | 671940.4 | 654666.5 | 990526.5 | 1108665  | 577299   | 979002.3 |
| 8.94625  | 8  | 4 | 4 | 378056.1 | 839990.9 | 350100.7 | 1023406  | 393923   | 1033852  | 1316532  | 655407   | 788820.2 |
| 9.986767 | 6  | 2 | 4 | 679844.5 | 764949.8 | 434114.9 | 1169814  | 1048941  | 722626.1 | 178356.4 | 783947.1 | 1402759  |
| 10.9645  | 10 | 5 | 5 | 534614.5 | 2111509  | 392714.4 | 1870102  | 567417.1 | 2000267  | 2090852  | 1750318  | 1938490  |
| 10.01477 | 10 | 5 | 5 | 1147335  | 3025669  | 1024262  | 2456055  | 1274111  | 4155238  | 3790677  | 3186291  | 1683769  |
| 10.9645  | 10 | 5 | 5 | 314311.2 | 1352871  | 285076.1 | 1206932  | 308142.1 | 1493398  | 1710112  | 1223651  | 952850.3 |
| 10.9645  | 9  | 5 | 4 | 157560.1 | 435210   | 140257.4 | 534643.7 | 245157   | 521311.1 | 641356.3 | 326986.2 | 351390.3 |
| 24.72467 | 10 | 5 | 5 | 49340.5  | 230491.7 | 85615.07 | 277189.3 | 103266   | 241278.6 | 193663.9 | 200749.3 | 145674.4 |
| 44.581   | 5  | 2 | 3 | 227036.2 | 2844980  | 739403.4 | 3171546  | 575310.3 | 2973069  | 3164553  | 3219560  | 1542236  |
| 9.536783 | 10 | 5 | 5 | 1544222  | 4438374  | 656244.8 | 3785357  | 1705715  | 4686220  | 5127973  | 4400248  | 4613140  |
| 9.4775   | 12 | 5 | 5 | 1129040  | 5836452  | 2158744  | 7459571  | 4061071  | 5917730  | 3011061  | 4604990  | 7039330  |
| 10.95055 | 10 | 5 | 5 | 236498.1 | 834352.1 | 214119.7 | 719168.5 | 252581.3 | 1008469  | 916467.5 | 637757.3 | 1034644  |
| 9.40325  | 6  | 4 | 2 | 825704.8 | 1010887  | 145477.2 | 1329454  | 864256.5 | 1111074  | 989072.1 | 769173.6 | 1127023  |
| 9.8445   | 9  | 5 | 4 | 2520538  | 4929240  | 971182.1 | 7135689  | 5990957  | 4774395  | 4678607  | 3809374  | 4895498  |
| 8.911617 | 10 | 5 | 5 | 1769374  | 8601994  | 2807396  | 6964758  | 3763282  | 9879660  | 11620259 | 10029584 | 6827928  |
| 9.94455  | 9  | 5 | 4 | 1496279  | 3411568  | 1348242  | 2658602  | 1691774  | 4561806  | 4821632  | 3591939  | 1748380  |
| 9.9014   | 10 | 5 | 5 | 954804.1 | 3874009  | 1736198  | 3092231  | 1427334  | 4518314  | 872501.2 | 4921154  | 5111581  |
| 37.96417 | 5  | 3 | 0 | 316501.5 | 4890958  | 1498389  | 5440680  | 182600.5 | 5468576  | 2214146  | 5679508  | 5568625  |
| 9.887133 | 10 | 5 | 5 | 6.41E+08 | 4.16E+09 | 3.01E+08 | 4.7E+09  | 1.46E+09 | 4.43E+09 | 4.55E+09 | 3.97E+09 | 3.94E+09 |
| 39.96517 | 7  | 2 | 4 | 365947.1 | 4626643  | 572275.8 | 5131655  | 1302176  | 4402296  | 5021884  | 4907386  | 5080032  |
| 10.01477 | 10 | 5 | 5 | 293515.6 | 862520.4 | 78531.9  | 950676.6 | 233229.6 | 918599.1 | 930713.6 | 876616.8 | 852927.6 |
| 9.857683 | 9  | 5 | 4 | 14094366 | 60525811 | 15994066 | 69883521 | 21582200 | 59318096 | 44044275 | 45782348 | 78590253 |
| 40.75483 | 7  | 3 | 3 | 413288.9 | 5160209  | 3372578  | 6968255  | 3967580  | 838612.7 | 4786438  | 10296686 | 4623003  |
| 9.986767 | 5  | 3 | 2 | 276183.2 | 569607.1 | 253115.5 | 399993.5 | 412696.1 | 168116.8 | 867976.7 | 636045.8 | 565991.6 |
| 9.8322   | 5  | 3 | 2 | 520909   | 1444831  | 189967.5 | 1313282  | 323242.4 | 1488125  | 1428429  | 1339644  | 1737038  |
| 9.419733 | 4  | 3 | 1 | 611622.5 | 2087723  | 828457.7 | 1698525  | 756777.2 | 1582241  | 2822669  | 1003029  | 2966692  |
| 9.872933 | 10 | 5 | 5 | 3423301  | 6527462  | 831336.1 | 8351849  | 4960478  | 6309326  | 5414151  | 6828414  | 7696889  |
| 10.008   | 10 | 5 | 5 | 406756.6 | 1225391  | 158363.7 | 1020009  | 549111.5 | 1369378  | 1148449  | 1419541  | 1064314  |

|          |    |   |   |          |          |          |          |          |          |          |          |          |
|----------|----|---|---|----------|----------|----------|----------|----------|----------|----------|----------|----------|
| 42.12167 | 5  | 3 | 1 | 707823.5 | 9491626  | 6060067  | 12216923 | 4988165  | 15140964 | 3623942  | 14943102 | 2565681  |
| 8.344283 | 7  | 4 | 3 | 807536.6 | 19161140 | 19625271 | 11807466 | 5867240  | 9668563  | 10922456 | 10366634 | 10589778 |
| 10.00098 | 8  | 4 | 4 | 330148.5 | 691596.1 | 173719.9 | 802994.6 | 267347.9 | 502116.8 | 899592.7 | 723193   | 806709.2 |
| 9.392767 | 8  | 4 | 4 | 772796.4 | 1331175  | 789897.6 | 999906.7 | 526005.1 | 2059170  | 135008.6 | 1430228  | 1037702  |
| 9.445217 | 7  | 4 | 3 | 1148071  | 2716517  | 1348695  | 2049598  | 1374065  | 4984703  | 2597455  | 2564928  | 1495247  |
| 10.39823 | 10 | 5 | 5 | 274017.2 | 734853.2 | 317771.1 | 601170   | 214356   | 789833   | 1212131  | 776214.7 | 389446.5 |
| 9.40175  | 9  | 4 | 3 | 1489327  | 9440848  | 3287333  | 7525961  | 4417691  | 8117176  | 4587814  | 10885999 | 13329768 |
| 9.999217 | 10 | 5 | 5 | 841551.3 | 2990271  | 298078.4 | 2868089  | 181900.2 | 3218787  | 3149480  | 2835259  | 2537218  |
| 9.729367 | 16 | 5 | 5 | 5.05E+08 | 3.9E+09  | 2.21E+09 | 4.76E+09 | 1.03E+09 | 3.37E+09 | 5.37E+09 | 6.38E+09 | 3.78E+09 |
| 9.701933 | 9  | 4 | 5 | 547406   | 1489086  | 415819.2 | 1294158  | 379199.9 | 1257571  | 2137916  | 1671707  | 1145925  |
| 9.4873   | 11 | 4 | 5 | 1741755  | 5095480  | 7926173  | 2195802  | 984139.1 | 1271084  | 2049014  | 1169624  | 19260052 |
| 10.45433 | 4  | 3 | 1 | 116911.3 | 220614   | 89511.46 | 184164.4 | 53134.44 | 288027.5 | 189806.7 | 202272.9 | 97349.2  |
| 21.167   | 6  | 2 | 4 | 134553.8 | 298310.7 | 92495.4  | 356221   | 137957   | 276800.1 | 435481.7 | 179759.1 | 278728.3 |
| 37.3885  | 6  | 3 | 1 | 432436.4 | 9868786  | 3779769  | 8410027  | 1628417  | 16153447 | 6817579  | 6991948  | 9692310  |
| 31.42217 | 7  | 3 | 4 | 2333654  | 14679712 | 16104148 | 8497472  | 6625230  | 2878517  | 9186637  | 774111.2 | 39971154 |
| 10.9645  | 10 | 5 | 5 | 518678.7 | 2495203  | 356711.5 | 3045708  | 1485864  | 2886653  | 2835721  | 2259555  | 2072272  |
| 9.8322   | 5  | 4 | 1 | 1331540  | 1352029  | 403217.2 | 2079086  | 1972296  | 1496693  | 1001166  | 1958601  | 1322468  |
| 9.976317 | 10 | 5 | 5 | 1151492  | 2110501  | 510138.5 | 2600706  | 1281947  | 2108308  | 2574251  | 2597887  | 1898808  |
| 9.856867 | 10 | 5 | 5 | 13810800 | 64032833 | 16064709 | 52094843 | 29950058 | 64936788 | 63354814 | 43323939 | 60267375 |
| 9.283817 | 10 | 5 | 5 | 467106.3 | 2387542  | 781844   | 2004509  | 784274.1 | 3359424  | 2758415  | 2301015  | 2291633  |
| 9.224517 | 3  | 3 | 0 | 275133.3 | 1217482  | 557723.2 | 898489.6 | 730727.1 | 2005862  | 851991.1 | 1426073  | 1252599  |
| 9.979667 | 11 | 5 | 5 | 5689764  | 11523513 | 5771849  | 8848916  | 5142991  | 18257318 | 15547271 | 9178589  | 3390534  |
| 43.93383 | 12 | 4 | 3 | 283441.1 | 4586419  | 2230461  | 3707917  | 1120631  | 8418141  | 2590587  | 4169680  | 4040729  |
| 38.2805  | 7  | 3 | 2 | 378640.2 | 5732981  | 1126843  | 6175352  | 555262.7 | 6232860  | 5428218  | 3944585  | 6163075  |
| 10.97242 | 9  | 4 | 5 | 1249944  | 3521180  | 459297.1 | 2941373  | 1552531  | 4099110  | 3891130  | 3063858  | 3128451  |
| 9.856867 | 7  | 3 | 4 | 671368.2 | 2223582  | 426022.7 | 2742539  | 1386813  | 2088047  | 2042298  | 2943875  | 2214884  |
| 9.928667 | 7  | 4 | 3 | 1192369  | 2523385  | 1191917  | 1724491  | 1952933  | 2507166  | 2327192  | 1466422  | 1794056  |
| 19.14367 | 9  | 5 | 4 | 239897.3 | 325020.7 | 205993.6 | 539727.5 | 567260.6 | 655718.2 | 155299.7 | 393593.8 | 194144   |
| 10.9645  | 10 | 5 | 5 | 3599381  | 10078970 | 3589187  | 8250216  | 3890709  | 10995043 | 15667411 | 6559819  | 9730524  |
| 9.952017 | 10 | 5 | 5 | 1026981  | 3334901  | 886939.6 | 2870059  | 1011020  | 4375122  | 4146919  | 3121122  | 2422835  |
| 24.84    | 9  | 4 | 5 | 78123.9  | 297426   | 96495.25 | 247753.4 | 106578.8 | 356097.5 | 316913.9 | 207819   | 190614.7 |
| 10.9645  | 10 | 5 | 5 | 2026449  | 9437594  | 2168014  | 8465967  | 1785723  | 11721944 | 11450599 | 7516141  | 7021583  |
| 9.93625  | 10 | 5 | 5 | 8228286  | 34003131 | 5790661  | 31445453 | 4591986  | 42098921 | 37620441 | 30158319 | 27859606 |
| 9.352183 | 7  | 5 | 1 | 439516.7 | 1334465  | 598633.8 | 1022021  | 678575.6 | 2239539  | 1171718  | 1118054  | 1520215  |
| 33.36933 | 8  | 4 | 4 | 205072   | 688296.4 | 694696.5 | 412685.5 | 368504.1 | 268519.3 | 329893.8 | 50174.17 | 1724771  |

|          |    |   |   |          |          |          |          |          |          |          |          |          |
|----------|----|---|---|----------|----------|----------|----------|----------|----------|----------|----------|----------|
| 42.697   | 8  | 2 | 4 | 345168.1 | 5132269  | 939111   | 4593896  | 1239178  | 5577823  | 5646007  | 5425339  | 3458429  |
| 9.983433 | 4  | 1 | 3 | 1659842  | 3333462  | 2055436  | 2216090  | 2495914  | 6082598  | 1209828  | 4232219  | 1375036  |
| 10.97242 | 5  | 1 | 4 | 264120.4 | 459085.5 | 205457.6 | 704723.4 | 657037.6 | 639068.7 | 716665.6 | 346990.8 | 248499.1 |
| 9.023433 | 10 | 5 | 5 | 757021.5 | 2422603  | 667913.4 | 2129835  | 520261.5 | 2341586  | 3131262  | 2055846  | 1548141  |
| 9.960817 | 11 | 5 | 5 | 5665009  | 19123021 | 7621616  | 15508880 | 7198168  | 26108982 | 17547197 | 6638986  | 22974711 |
| 10.95055 | 10 | 5 | 5 | 831723.4 | 4410235  | 1340933  | 3793215  | 1183860  | 5945840  | 4718804  | 3086895  | 2955613  |
| 10.95835 | 10 | 5 | 5 | 1504276  | 8791017  | 1719255  | 7811009  | 2252768  | 10072710 | 10521316 | 7067546  | 6845568  |
| 9.848417 | 10 | 5 | 5 | 2423475  | 14551507 | 2832413  | 12477999 | 5210256  | 12241191 | 11998870 | 13783609 | 15989648 |
| 25.54833 | 5  | 4 | 1 | 158909.1 | 1023213  | 350709.9 | 847187.8 | 371468.7 | 647171.7 | 1560201  | 853246.3 | 898695.1 |
| 9.270733 | 10 | 5 | 5 | 1114324  | 4256343  | 663966.4 | 3489570  | 2048882  | 5352068  | 3857168  | 3822454  | 4425594  |
| 10.97242 | 10 | 5 | 5 | 2087388  | 3375053  | 425624.6 | 5558601  | 6018018  | 2754372  | 3945868  | 3373672  | 3478895  |
| 10.9645  | 10 | 5 | 5 | 236840.2 | 1270445  | 280280.5 | 1157937  | 159335.5 | 1478787  | 1549822  | 915276.1 | 1034109  |
| 10.97857 | 10 | 5 | 5 | 539365.4 | 2801513  | 747130.7 | 2471771  | 594775.1 | 2727938  | 2831824  | 1909730  | 2564034  |
| 9.859983 | 9  | 5 | 4 | 870435.7 | 4241395  | 780342.5 | 3468437  | 2038717  | 4016526  | 3554235  | 3626602  | 4575028  |
| 9.697633 | 7  | 5 | 2 | 198324.6 | 522468.4 | 131433   | 445905.9 | 178126.4 | 531742.5 | 611613.5 | 683500.8 | 419914.3 |
| 9.960467 | 7  | 4 | 3 | 1296997  | 2059169  | 678729.7 | 1680455  | 861624.2 | 2644916  | 2879448  | 1921907  | 1385940  |
| 43.08517 | 9  | 2 | 3 | 397502.8 | 3355418  | 2208510  | 5732244  | 6319161  | 2307917  | 2595881  | 7299154  | 2294704  |
| 9.856867 | 10 | 5 | 5 | 1234538  | 6132228  | 1048893  | 5452792  | 1650568  | 6862394  | 6443511  | 4781521  | 5312577  |
| 42.53883 | 13 | 3 | 2 | 245042.7 | 2579277  | 1105085  | 3011279  | 544042.1 | 2853126  | 2733132  | 662571.3 | 3279843  |
| 9.903567 | 9  | 4 | 5 | 3868708  | 5592113  | 6283188  | 3299254  | 1024276  | 2927066  | 16787782 | 3635343  | 2430947  |
| 9.103733 | 9  | 4 | 5 | 451951.4 | 1159863  | 166444   | 1008250  | 396262.3 | 975147   | 1424817  | 1099091  | 1113999  |
| 9.362817 | 9  | 5 | 4 | 1002196  | 6608495  | 2577448  | 5112034  | 3478861  | 6204036  | 2341221  | 8028480  | 8903864  |
| 9.3735   | 5  | 2 | 3 | 3951334  | 9021181  | 5750519  | 6395189  | 5004804  | 3950533  | 3705002  | 7602034  | 13108112 |
| 10.95835 | 10 | 5 | 5 | 195038.2 | 710325.4 | 206572.4 | 612998.8 | 193176.3 | 967996.2 | 880461.6 | 537623.5 | 502203.4 |
| 38.16533 | 7  | 2 | 3 | 442209.5 | 6354691  | 1987385  | 5593810  | 842892.8 | 6601732  | 3116119  | 8578778  | 6803118  |
| 9.983433 | 4  | 1 | 3 | 2750988  | 3732492  | 1976038  | 2501745  | 2951214  | 5260027  | 479404.9 | 3899299  | 5366350  |
| 9.43325  | 12 | 4 | 5 | 4406048  | 17790227 | 22883231 | 9267150  | 7041906  | 57716556 | 15347969 | 7499009  | 1123149  |
| 9.983433 | 10 | 5 | 5 | 595319.3 | 2453780  | 498009.8 | 2138086  | 762332.3 | 2763020  | 2970162  | 2600557  | 1707339  |
| 9.311417 | 5  | 3 | 2 | 3236744  | 5749174  | 7139502  | 3080090  | 2345028  | 12041086 | 14936307 | 581601.9 | 718648.5 |
| 9.999217 | 5  | 4 | 1 | 806500.5 | 1686682  | 559820.8 | 2088578  | 1007761  | 1286104  | 1852947  | 1653207  | 1103459  |
| 9.009533 | 10 | 5 | 5 | 7305357  | 49677298 | 10775532 | 54837857 | 10450503 | 52586927 | 65970433 | 49770538 | 38556270 |
| 9.992233 | 10 | 5 | 5 | 577919   | 2232021  | 138053.6 | 2002002  | 627055.4 | 2316937  | 2076703  | 2425272  | 2168541  |
| 23.70233 | 5  | 3 | 2 | 95917.78 | 243291.1 | 38711.82 | 307018.6 | 173680.9 | 263906.5 | 225665.5 | 201519.1 | 299842.9 |
| 7.333667 | 9  | 5 | 4 | 1075569  | 6317984  | 1203239  | 5277690  | 2704715  | 5059903  | 7102428  | 5606737  | 5818371  |
| 38.46733 | 5  | 3 | 1 | 833250.6 | 7371764  | 4394848  | 9355418  | 3731558  | 11713669 | 5733262  | 4176583  | 2853629  |

|          |    |   |   |          |          |          |          |          |          |          |          |          |
|----------|----|---|---|----------|----------|----------|----------|----------|----------|----------|----------|----------|
| 9.473717 | 8  | 4 | 4 | 1086904  | 2954755  | 993729   | 2510132  | 825621.1 | 2866764  | 3791739  | 1870743  | 2119641  |
| 9.538267 | 7  | 4 | 3 | 1467510  | 3159375  | 4048512  | 5821631  | 6518377  | 2395461  | 1659359  | 936851.8 | 517704.9 |
| 9.205717 | 4  | 3 | 1 | 392793.9 | 799941.2 | 322070   | 1163480  | 972873.7 | 763588.4 | 511683.5 | 673674.8 | 699102   |
| 11.43992 | 9  | 5 | 4 | 842769.5 | 1388614  | 356110.2 | 2276994  | 2444014  | 1652435  | 1724389  | 926213.6 | 1094531  |
| 10.93468 | 6  | 3 | 3 | 166436.3 | 413419.1 | 106877.9 | 562575.3 | 404252.7 | 473285.3 | 560893.3 | 290715   | 341766.9 |
| 10.95835 | 10 | 5 | 5 | 527161.1 | 3547928  | 634965.9 | 3228817  | 678330   | 3841036  | 4381602  | 3027602  | 2810436  |
| 9.960817 | 5  | 2 | 3 | 2267311  | 2225122  | 1548599  | 3565536  | 3488602  | 4797332  | 981966.9 | 2425703  | 1128032  |
| 9.874317 | 10 | 5 | 5 | 1709911  | 7113304  | 735335.2 | 6418428  | 1829527  | 6874619  | 6118835  | 8098357  | 7478007  |
| 9.992233 | 8  | 4 | 4 | 490740.6 | 1354316  | 425854.8 | 1062067  | 725537.3 | 1669741  | 1859704  | 1203579  | 771006.5 |
| 9.9677   | 9  | 5 | 4 | 3470520  | 5140922  | 877908.1 | 5762801  | 1557098  | 5218958  | 4277105  | 6144944  | 5837638  |
| 9.43325  | 7  | 4 | 3 | 576129.4 | 3195253  | 459822.3 | 2613052  | 1570791  | 3380108  | 2758243  | 2743447  | 3837654  |
| 9.43325  | 7  | 4 | 3 | 733067.9 | 2968943  | 937137   | 2462058  | 1137658  | 2824273  | 2721623  | 2391943  | 4599825  |
| 9.976317 | 4  | 3 | 1 | 3802510  | 2741535  | 2523253  | 4875775  | 5538034  | 1063256  | 1071038  | 813855.9 | 6434184  |
| 10.9645  | 10 | 5 | 5 | 311394.8 | 1699025  | 415310.4 | 1491862  | 437902.4 | 2030522  | 2125858  | 1268856  | 1253019  |
| 9.9677   | 7  | 3 | 4 | 2007069  | 3814372  | 1488483  | 3008629  | 1810288  | 5936219  | 4281639  | 2422244  | 4078243  |
| 9.887133 | 6  | 3 | 3 | 1846390  | 4287598  | 2537613  | 6445793  | 5606271  | 8114033  | 3932705  | 3961973  | 4437417  |
| 41.37333 | 6  | 2 | 3 | 425863.5 | 7677707  | 2680216  | 6534030  | 1956203  | 5115842  | 6715090  | 12228762 | 7112389  |
| 9.119933 | 6  | 3 | 3 | 2483304  | 8390956  | 5916696  | 5743757  | 4934246  | 1375340  | 6301540  | 16041818 | 5453915  |
| 10.9645  | 10 | 5 | 5 | 1946371  | 9182424  | 2074122  | 8231011  | 1838296  | 10932513 | 11500014 | 7234229  | 6953851  |
| 14.95637 | 7  | 4 | 1 | 268405.3 | 3284305  | 976745.8 | 4039093  | 1929016  | 3766408  | 4783667  | 2665236  | 2713363  |
| 9.9014   | 8  | 3 | 5 | 1343436  | 5878563  | 1615160  | 5204790  | 1094302  | 6252082  | 4253912  | 6954295  | 7766732  |
| 9.46265  | 5  | 3 | 2 | 1124679  | 1031423  | 492962.1 | 1977032  | 2593370  | 610402.9 | 1256952  | 1763220  | 583565.8 |
| 9.328967 | 5  | 4 | 1 | 314316.7 | 939368.2 | 496716.4 | 1334993  | 1017435  | 1252856  | 518486.3 | 1633197  | 816651.8 |
| 22.77133 | 7  | 4 | 3 | 238210   | 787984.1 | 1093104  | 1369666  | 1294899  | 2721526  | 209029   | 228190   | 194995.3 |
| 9.406667 | 10 | 4 | 5 | 543274.1 | 4707384  | 806123.4 | 3759428  | 2550260  | 4310364  | 3638847  | 5654802  | 4600319  |
| 27.74417 | 9  | 5 | 4 | 445507.4 | 2206470  | 1109947  | 2981969  | 1939706  | 3958872  | 1746189  | 957418.7 | 2389992  |
| 10.95602 | 10 | 5 | 5 | 404335.6 | 2256719  | 828112.5 | 1837435  | 901123.7 | 2970132  | 2754248  | 1096244  | 1666413  |
| 9.40615  | 9  | 5 | 4 | 843884.8 | 2188448  | 576989.4 | 1764003  | 1075671  | 2812723  | 2721575  | 1720685  | 1526517  |
| 20.85467 | 3  | 0 | 3 | 2938533  | 9500185  | 3895964  | 14577463 | 13756771 | 7951662  | 14100912 | 13117731 | 7119281  |
| 9.45945  | 10 | 5 | 5 | 2742398  | 13123756 | 3874366  | 10373951 | 6911639  | 15176193 | 11574076 | 8972489  | 18791188 |
| 9.983433 | 5  | 3 | 2 | 632108.9 | 1351327  | 526809.4 | 1133805  | 346593.4 | 1052912  | 837555.8 | 1043800  | 2044688  |
| 9.992233 | 10 | 5 | 5 | 2251717  | 7996255  | 1753125  | 6879701  | 2719404  | 8936062  | 10146253 | 7582152  | 5426151  |
| 9.9677   | 6  | 3 | 3 | 1780236  | 2595948  | 842264.5 | 2120029  | 1101021  | 1796683  | 1974751  | 2288494  | 3124083  |
| 9.928667 | 9  | 5 | 4 | 1045391  | 2270893  | 504165.1 | 1990251  | 644094.6 | 2688734  | 2809621  | 1840344  | 1670104  |
| 9.94455  | 5  | 3 | 2 | 1010632  | 1891924  | 534086.5 | 1651140  | 457168.9 | 2190065  | 2458464  | 2170409  | 1311065  |

|          |    |   |   |          |          |          |          |          |          |          |          |          |
|----------|----|---|---|----------|----------|----------|----------|----------|----------|----------|----------|----------|
| 10.13878 | 9  | 4 | 5 | 665739.3 | 828572.7 | 224070.5 | 1335291  | 1398290  | 794912.4 | 968107.8 | 450265.3 | 964018.5 |
| 10.15407 | 10 | 5 | 5 | 578857   | 1147367  | 327361.6 | 1404714  | 662392.2 | 1665468  | 1175773  | 1065841  | 765416.4 |
| 11.64913 | 10 | 5 | 5 | 3759319  | 22105941 | 2905065  | 20457054 | 3827189  | 24327768 | 24884572 | 17804800 | 20670933 |
| 10.95835 | 10 | 5 | 5 | 503674.1 | 2958448  | 870222.7 | 2554569  | 798217   | 3551613  | 3611575  | 1895581  | 2123694  |
| 10.94853 | 6  | 3 | 3 | 674030.6 | 1597763  | 168411.1 | 1871475  | 749913.2 | 1762003  | 1344081  | 1736308  | 1543891  |
| 10.03947 | 9  | 5 | 4 | 377529.2 | 799009.3 | 157701.4 | 950343   | 401247.2 | 653828.4 | 805338.5 | 1061914  | 764804.5 |
| 21.3655  | 6  | 4 | 2 | 696518.8 | 4785545  | 1136564  | 4310318  | 786301.7 | 3675212  | 6386115  | 4393988  | 3957020  |
| 10.34868 | 9  | 5 | 4 | 172883.9 | 531986.7 | 130047   | 442418.6 | 223899.5 | 597473.9 | 705346.2 | 548394.4 | 419528.1 |
| 9.992233 | 10 | 5 | 5 | 2501276  | 2921823  | 833118.7 | 4169686  | 3410233  | 3533568  | 3336308  | 3654387  | 2313528  |
| 11.63327 | 6  | 3 | 3 | 368174.6 | 2487544  | 289704.1 | 2228929  | 679856.9 | 2446999  | 2778711  | 2122296  | 2311067  |
| 10.97242 | 11 | 5 | 5 | 211649   | 1016063  | 496329.2 | 769406   | 524085.5 | 1571821  | 1417931  | 413257   | 628079.9 |
| 9.976317 | 8  | 4 | 4 | 735797.8 | 1395455  | 763666.4 | 1857942  | 1107451  | 1254742  | 1222690  | 2721830  | 962642   |
| 9.976317 | 10 | 5 | 5 | 1732324  | 6603780  | 1178135  | 5975925  | 1407216  | 7330335  | 8022167  | 6668345  | 4966496  |
| 9.952017 | 10 | 5 | 5 | 1689670  | 5087911  | 904341.5 | 4405694  | 1744384  | 6039005  | 5892461  | 4181266  | 4145219  |
| 9.840617 | 10 | 5 | 5 | 2118680  | 3223531  | 448198.9 | 4911585  | 4691723  | 2836560  | 3070276  | 3860601  | 3506582  |
| 11.5505  | 4  | 1 | 3 | 57879.01 | 204982   | 40410.87 | 188603.7 | 25008.74 | 200419.2 | 216894.8 | 142161.3 | 253746.8 |
| 10.90802 | 5  | 2 | 3 | 156220.2 | 583468.1 | 139489.3 | 466312   | 305772.7 | 606781   | 726972.5 | 352898.3 | 587981.7 |
| 11.30077 | 8  | 5 | 3 | 79674.95 | 300760.4 | 109320.1 | 251171.1 | 95575.46 | 248291.5 | 174019.1 | 308637   | 470829.5 |
| 11.04138 | 10 | 5 | 5 | 442077.8 | 2545432  | 796897.7 | 2147095  | 852838.2 | 2289803  | 2501051  | 2543371  | 1594824  |
| 9.946467 | 12 | 5 | 5 | 2096197  | 4411880  | 2068426  | 5766731  | 3343771  | 2811768  | 4573405  | 7242088  | 5381711  |
| 29.9215  | 10 | 5 | 5 | 756314.5 | 2761722  | 862912.2 | 3484506  | 1886673  | 2003460  | 3229599  | 2799954  | 1850653  |
| 9.18195  | 6  | 4 | 2 | 15561064 | 33571151 | 70330482 | 67877453 | 71931459 | 1.59E+08 | 1824899  | 3611818  | 975317.8 |
| 9.66805  | 8  | 5 | 3 | 371457.9 | 1579879  | 382217.6 | 1887964  | 799269.3 | 2072919  | 1255252  | 1588667  | 1823025  |
| 9.904767 | 7  | 3 | 4 | 812760.3 | 1843021  | 564414.6 | 2292504  | 1163703  | 1437649  | 1844399  | 2805071  | 1444255  |
| 9.507167 | 5  | 2 | 3 | 1546699  | 621652.7 | 208474.3 | 1431415  | 2253211  | 575618.1 | 902057.1 | 354460.3 | 740946.9 |
| 9.8322   | 6  | 3 | 3 | 639605.4 | 2118082  | 665428.7 | 1774219  | 757048.5 | 1844316  | 1261278  | 2973926  | 2565214  |
| 28.2585  | 6  | 2 | 4 | 56970.94 | 253684.7 | 112904.6 | 211082.4 | 45732.52 | 417781.1 | 110132.1 | 234645.7 | 213618   |
| 9.928667 | 7  | 4 | 3 | 1207331  | 1882536  | 921088.8 | 1373003  | 1172357  | 2781580  | 321394.2 | 2082109  | 2087529  |
| 9.999217 | 6  | 2 | 4 | 646532.6 | 1098683  | 699098.6 | 1405348  | 563354.9 | 1661039  | 0        | 1243251  | 1703199  |
| 9.8887   | 10 | 5 | 5 | 2455595  | 8326698  | 1718042  | 6820852  | 3960858  | 8014030  | 9014483  | 5482068  | 9343860  |
| 9.559117 | 9  | 5 | 4 | 327638.8 | 710235.7 | 218218.1 | 568525.1 | 349419.1 | 647748.9 | 1094003  | 643756.7 | 617572.1 |
| 9.856867 | 10 | 5 | 5 | 2802781  | 6786414  | 1459270  | 8809046  | 5528066  | 7944641  | 6851468  | 8186536  | 6415638  |
| 8.985083 | 6  | 2 | 3 | 172085   | 283047.2 | 191392.6 | 366759.9 | 153246   | 143155   | 471255   | 467435.2 | 290101.3 |
| 9.951283 | 11 | 5 | 3 | 1706831  | 2723523  | 312583.6 | 2305181  | 1141626  | 2769617  | 2181183  | 2978997  | 2856641  |
| 20.76767 | 6  | 2 | 4 | 1155254  | 11889172 | 1747950  | 10160334 | 4616567  | 13909696 | 10046421 | 10062390 | 12561502 |

|          |    |   |   |          |          |          |          |          |          |          |          |          |
|----------|----|---|---|----------|----------|----------|----------|----------|----------|----------|----------|----------|
| 9.840617 | 10 | 5 | 5 | 8771441  | 45077447 | 10880278 | 38173628 | 16902858 | 48768559 | 42775991 | 28634931 | 46647783 |
| 42.6395  | 4  | 3 | 1 | 365148.2 | 3364928  | 868186   | 3052315  | 122141.9 | 4254005  | 3162812  | 3210672  | 4103066  |
| 9.992233 | 9  | 5 | 4 | 520805.9 | 1851456  | 275329.6 | 1643088  | 535221.4 | 2168043  | 1928755  | 2008476  | 1474466  |
| 24.07233 | 5  | 3 | 2 | 98636.97 | 213487.6 | 76177.73 | 305737.6 | 250546.6 | 128227.6 | 253139.1 | 257829.8 | 135369.1 |
| 9.421167 | 7  | 4 | 3 | 941858.4 | 5956507  | 7640911  | 3072470  | 3148087  | 1823952  | 1273104  | 2831972  | 19459065 |
| 18.327   | 6  | 4 | 2 | 258275.1 | 2178638  | 341264.4 | 1909661  | 696599.5 | 2316485  | 1984579  | 2470139  | 1675941  |
| 9.864767 | 10 | 5 | 5 | 1759398  | 9598230  | 730391.2 | 8484915  | 3057758  | 9482548  | 8707895  | 9360920  | 9720611  |
| 10.33625 | 10 | 5 | 5 | 1232255  | 6019764  | 2392018  | 4780960  | 2739922  | 8057168  | 9002668  | 5181937  | 4369965  |
| 9.392767 | 9  | 5 | 4 | 1937185  | 4373343  | 1299932  | 3528173  | 2088649  | 4736627  | 5299607  | 2993488  | 3029025  |
| 10.01523 | 10 | 5 | 5 | 10074008 | 17160466 | 4936239  | 26589793 | 26079315 | 17210877 | 19958117 | 23056519 | 15673125 |
| 10.94208 | 4  | 3 | 1 | 324295.3 | 445025.7 | 73696.64 | 558034.2 | 310592.9 | 494017.7 | 534532   | 450210.5 | 351231.1 |
| 9.232283 | 11 | 5 | 5 | 13316722 | 55844984 | 37731043 | 80437848 | 60837633 | 48944258 | 1.01E+08 | 88041093 | 29602815 |
| 40.23717 | 5  | 1 | 3 | 246227.5 | 2845836  | 284041   | 2617446  | 594155.2 | 2769723  | 2455613  | 3205354  | 2777403  |
| 8.888317 | 7  | 4 | 3 | 264314.6 | 2074011  | 1032884  | 1622621  | 828751.5 | 3422285  | 2666007  | 2015337  | 729820   |
| 20.51567 | 10 | 5 | 5 | 1594248  | 9369603  | 1113929  | 8547827  | 2102177  | 8193852  | 10575874 | 8538699  | 9023081  |
| 9.951283 | 9  | 5 | 4 | 656683.6 | 2078447  | 551111.5 | 1768082  | 723675.7 | 2658330  | 2439425  | 1603259  | 1390585  |
| 9.433    | 4  | 1 | 3 | 663641.6 | 2025725  | 224046.7 | 1643552  | 1054627  | 1935569  | 2067053  | 2193276  | 2245498  |
| 10.9645  | 7  | 4 | 3 | 340884.5 | 1185532  | 320946   | 984618.3 | 490635.6 | 1550029  | 1417725  | 878285.1 | 829902.2 |
| 10.9645  | 10 | 5 | 5 | 1611079  | 7442263  | 1438609  | 6582415  | 2062259  | 8533774  | 8587593  | 5599664  | 6172222  |
| 41.2155  | 5  | 2 | 3 | 454925.4 | 12034456 | 2607517  | 14183574 | 5616949  | 8230334  | 13938108 | 13844676 | 13785508 |
| 9.840617 | 7  | 4 | 3 | 812887.6 | 2163200  | 476057.4 | 1800944  | 933208.4 | 2270165  | 1586199  | 2699293  | 2499341  |
| 9.858833 | 10 | 5 | 5 | 7397248  | 30495762 | 3330229  | 35020154 | 12384353 | 30193805 | 28206013 | 35108858 | 32287200 |
| 9.388617 | 9  | 5 | 4 | 2525098  | 2764764  | 1153983  | 6127049  | 9367477  | 3062032  | 1480054  | 1845466  | 3038092  |
| 43.8475  | 6  | 2 | 3 | 885152.4 | 13170856 | 8630809  | 8911241  | 9086357  | 3010794  | 18258529 | 4546028  | 20592870 |
| 9.994767 | 4  | 3 | 1 | 202904.4 | 373749.8 | 225442.6 | 274877   | 182940.6 | 0        | 547781.9 | 354953.7 | 550437.7 |
| 10.31255 | 10 | 4 | 4 | 800627.8 | 2132886  | 1035421  | 2595461  | 881551.8 | 1642760  | 3483279  | 2321157  | 703234.3 |
| 9.43325  | 8  | 3 | 4 | 4185376  | 12308563 | 2207370  | 10143584 | 5792198  | 10399990 | 10591375 | 15669983 | 13325169 |
| 10.94208 | 9  | 5 | 4 | 173211.6 | 862188.2 | 207939.1 | 736797.2 | 302143.1 | 1130921  | 722192.9 | 744399.9 | 673404.2 |
| 8.949567 | 6  | 3 | 3 | 256837.7 | 842660.2 | 782970.4 | 542853.4 | 367597.1 | 816668.3 | 2199561  | 442764.5 | 469361.6 |
| 8.91745  | 8  | 4 | 4 | 135618.2 | 257719   | 60703.71 | 321923.2 | 173065.4 | 290554.1 | 290113.9 | 308720.3 | 239952.8 |
| 9.856867 | 10 | 5 | 5 | 15940813 | 39507699 | 10518087 | 34725026 | 9351877  | 49125829 | 51057331 | 31264047 | 27338451 |
| 9.976317 | 5  | 3 | 2 | 329561.7 | 610825.4 | 428179   | 432008   | 301488.1 | 881271.8 | 1127746  | 688717.1 | 98831.55 |
| 10.01837 | 9  | 4 | 5 | 439678.8 | 792447.2 | 362025.4 | 1021648  | 562967.9 | 933804.5 | 340600.7 | 1156003  | 477364.5 |
| 10.9645  | 10 | 5 | 5 | 2509076  | 12334422 | 2723691  | 11076301 | 2510955  | 14707374 | 15349400 | 9902294  | 9328556  |
| 9.431017 | 4  | 1 | 3 | 434957.5 | 1856001  | 886943.3 | 2524644  | 1721939  | 1965437  | 739938   | 2769911  | 1177937  |



|          |    |   |   |          |          |          |          |          |          |          |          |          |
|----------|----|---|---|----------|----------|----------|----------|----------|----------|----------|----------|----------|
| 10.9645  | 10 | 5 | 5 | 1259140  | 6013769  | 1189758  | 5464095  | 1097584  | 7054545  | 7268864  | 5010543  | 4605314  |
| 9.864767 | 10 | 5 | 5 | 5007937  | 24448835 | 2486259  | 25725108 | 2817007  | 23876873 | 21855771 | 23425720 | 28525050 |
| 9.8445   | 9  | 5 | 4 | 3762795  | 4892437  | 1374696  | 8004365  | 8656739  | 5429256  | 3693517  | 6471485  | 5642222  |
| 9.859983 | 8  | 4 | 4 | 2716809  | 10484962 | 4409892  | 8102854  | 5443031  | 10611195 | 5880357  | 6523777  | 13082058 |
| 10.9645  | 10 | 5 | 5 | 1240518  | 5926979  | 1226182  | 5414520  | 867545.5 | 6936184  | 7332509  | 4919398  | 4511075  |
| 10.72837 | 4  | 3 | 1 | 358195   | 357220   | 71114.91 | 584371   | 634469.2 | 335503.3 | 295688.8 | 318164.8 | 359349.1 |
| 9.856867 | 7  | 4 | 3 | 1294935  | 1614907  | 826850.6 | 2730685  | 3059706  | 1706182  | 1328928  | 3004260  | 1036548  |
| 9.536783 | 10 | 5 | 5 | 10349099 | 33881829 | 6771160  | 29184974 | 11875766 | 42744024 | 39124471 | 30731380 | 30334140 |
| 10.86045 | 10 | 5 | 5 | 2209887  | 7774085  | 1858934  | 9006217  | 3077432  | 8991060  | 9488005  | 8860734  | 6041780  |
| 9.972483 | 8  | 3 | 5 | 1202075  | 2527665  | 1094332  | 2030333  | 975303   | 4047214  | 983181   | 2735186  | 2302099  |
| 10.90012 | 7  | 4 | 3 | 155291.4 | 352658.3 | 130585.5 | 290805.5 | 127389.9 | 436973.1 | 286258.5 | 268973.6 | 231389.9 |
| 9.56645  | 4  | 3 | 1 | 490901.5 | 676134.9 | 334840.1 | 485150.7 | 450239.2 | 593689   | 584433   | 454520.8 | 482967   |
| 9.778967 | 5  | 3 | 2 | 2987431  | 2258224  | 696249.7 | 2958327  | 1882791  | 1467461  | 2609168  | 3218757  | 1740582  |
| 10.9645  | 10 | 5 | 5 | 1063501  | 2175109  | 909268.4 | 2839150  | 1702324  | 3090237  | 3233851  | 1569884  | 1339471  |
| 18.02733 | 5  | 1 | 3 | 407251.8 | 4324019  | 779770.7 | 3863460  | 1104885  | 4307970  | 4783795  | 3093229  | 5162488  |
| 19.35833 | 6  | 4 | 2 | 169387.7 | 477822.6 | 623305.6 | 768955.3 | 591911.5 | 228589.6 | 234768.1 | 168453.5 | 165976   |
| 9.952017 | 10 | 5 | 5 | 1828062  | 6322004  | 1033467  | 5412210  | 2412673  | 7641934  | 6697582  | 5156632  | 5389728  |
| 9.992233 | 10 | 5 | 5 | 2222341  | 2545719  | 754774.8 | 3694682  | 3173533  | 3095510  | 2787512  | 3302311  | 2042880  |
| 26.1525  | 10 | 5 | 5 | 854250.3 | 9739209  | 4523911  | 7632533  | 4271875  | 6428604  | 12721373 | 4021209  | 10413554 |
| 9.914217 | 6  | 2 | 3 | 666269.4 | 584201.6 | 692977.7 | 1073329  | 1245490  | 405217   | 1644242  | 0        | 0        |
| 9.999217 | 10 | 5 | 5 | 2293081  | 7557719  | 1550623  | 6522063  | 2598675  | 9106262  | 9030907  | 7547027  | 5544180  |
| 9.93625  | 10 | 5 | 5 | 2657663  | 5182205  | 2020870  | 4236716  | 1928445  | 7575697  | 7166787  | 4152697  | 3539103  |
| 5.57725  | 4  | 3 | 1 | 291903.3 | 3751145  | 1188384  | 3068968  | 1618084  | 3501566  | 5231238  | 4697707  | 2407408  |
| 9.189117 | 4  | 3 | 1 | 816884.3 | 1340179  | 719825.5 | 2385658  | 2884990  | 1102488  | 384246.6 | 1307460  | 2371240  |
| 9.8445   | 10 | 5 | 5 | 1058047  | 2979242  | 801279.6 | 3492342  | 1272168  | 4172030  | 3409245  | 2642752  | 2436181  |
| 14.399   | 11 | 5 | 5 | 1180692  | 10615222 | 2470950  | 8977089  | 4107142  | 12687001 | 11329549 | 7812434  | 8198270  |
| 9.976317 | 6  | 4 | 2 | 453926.4 | 859442.7 | 498830.5 | 580738.4 | 652887.9 | 1159833  | 48706.79 | 887410.3 | 845020.6 |
| 32.157   | 6  | 3 | 3 | 105151.5 | 317037.3 | 136671.2 | 244333.2 | 165579.9 | 159504.8 | 324863.9 | 215008.5 | 505127.3 |
| 12.52878 | 10 | 5 | 5 | 171945.9 | 979565.6 | 201255.1 | 863008.9 | 278049.9 | 892672.3 | 1211558  | 843182.7 | 772716.3 |
| 7.318367 | 7  | 4 | 3 | 312524.5 | 1380886  | 366851   | 2215714  | 2333152  | 1475748  | 1760034  | 986818.3 | 1003956  |
| 8.9536   | 10 | 5 | 5 | 496975.4 | 3165750  | 726951.2 | 2807657  | 770893.7 | 3652778  | 4073240  | 3126451  | 2230029  |
| 28.62167 | 5  | 2 | 3 | 68331.63 | 284254.5 | 122138.8 | 226625.3 | 119032.2 | 332307.2 | 98924.55 | 413166.1 | 344838.1 |
| 9.979667 | 8  | 5 | 3 | 2311761  | 1000855  | 238380.5 | 1469835  | 1307283  | 1202979  | 1284591  | 968485   | 741962.2 |
| 44.9835  | 11 | 4 | 3 | 376556   | 3666372  | 2192542  | 4624918  | 1791593  | 413692   | 4805575  | 2414782  | 5100969  |
| 9.62555  | 4  | 1 | 3 | 477737.3 | 1260299  | 555212.2 | 954241.2 | 712476.3 | 1860430  | 1086370  | 799962.8 | 1838677  |

|          |    |   |   |          |          |          |          |          |          |          |          |          |
|----------|----|---|---|----------|----------|----------|----------|----------|----------|----------|----------|----------|
| 10.9645  | 10 | 5 | 5 | 1571702  | 7427832  | 1470185  | 6820040  | 1021161  | 8408122  | 9254089  | 6326474  | 5657969  |
| 9.43325  | 6  | 3 | 3 | 1223953  | 7144584  | 2974543  | 5878089  | 2266282  | 3948393  | 9010763  | 9200029  | 9714903  |
| 9.67     | 9  | 5 | 4 | 535783.9 | 2452179  | 955911.1 | 1963614  | 1085674  | 2575490  | 2477463  | 2015276  | 1291195  |
| 9.976317 | 4  | 3 | 1 | 1109912  | 2331968  | 1697122  | 3130118  | 1647366  | 949212.6 | 383132.8 | 3939194  | 4127165  |
| 9.431017 | 10 | 5 | 4 | 6581487  | 19022783 | 5397498  | 27200099 | 22661886 | 15457823 | 18190988 | 23645347 | 25302746 |
| 9.872917 | 10 | 5 | 5 | 3496773  | 8741128  | 1542751  | 12697081 | 11091067 | 9037028  | 7825205  | 10724242 | 9425617  |
| 9.8445   | 10 | 5 | 5 | 3228226  | 15419212 | 1709479  | 14432556 | 2356959  | 17350706 | 17128083 | 14412599 | 13574711 |
| 9.859983 | 8  | 4 | 4 | 1408835  | 4355005  | 1657429  | 5491923  | 2887319  | 3908813  | 1862366  | 6250076  | 4407878  |
| 9.857683 | 10 | 5 | 5 | 6150483  | 40148669 | 6485056  | 35205431 | 12863898 | 37269340 | 42201169 | 34444878 | 36277355 |
| 9.992233 | 7  | 3 | 4 | 403777.5 | 675820.5 | 239858.2 | 786095.6 | 222186.8 | 971519.8 | 784971.1 | 763487.4 | 399528.8 |
| 8.98945  | 10 | 5 | 5 | 547540.3 | 1727657  | 586378.6 | 1501920  | 299199.6 | 2256794  | 2458119  | 1179929  | 1436574  |
| 9.088183 | 9  | 5 | 4 | 31875860 | 1.07E+08 | 24877381 | 90864239 | 39803461 | 1.44E+08 | 94356562 | 90133533 | 85377133 |
| 9.445217 | 13 | 5 | 5 | 2500943  | 21110865 | 4879089  | 18911883 | 4324503  | 17952478 | 25503524 | 26742952 | 15369295 |
| 18.06967 | 7  | 3 | 4 | 79591.2  | 614259.1 | 374914.4 | 450003.2 | 310215.8 | 656576   | 146186.2 | 338396.4 | 867279.9 |
| 9.845483 | 7  | 4 | 3 | 1343478  | 1572063  | 273483   | 2450292  | 2471033  | 1978219  | 1421191  | 1301212  | 1442067  |
| 9.419733 | 14 | 5 | 5 | 1900462  | 9865867  | 2898042  | 13064382 | 8729356  | 9003521  | 13533972 | 12247796 | 7636924  |
| 9.91875  | 6  | 2 | 3 | 492082.9 | 605367.4 | 435198.9 | 891436.2 | 718794.4 | 0        | 297349.6 | 830656.3 | 883255.2 |
| 9.856867 | 9  | 5 | 4 | 862024.5 | 2187350  | 286165.6 | 1855072  | 910180.4 | 2225767  | 1869092  | 2623810  | 2214008  |
| 9.872883 | 9  | 4 | 5 | 13458958 | 29833805 | 42658711 | 14542095 | 8660427  | 1.06E+08 | 8845071  | 12556725 | 11799355 |
| 10.03947 | 8  | 4 | 4 | 475114.3 | 543386   | 316172.9 | 819518.3 | 735951.4 | 465275   | 156605.9 | 880033.9 | 855102.1 |
| 8.903533 | 5  | 3 | 2 | 429233.4 | 966693.9 | 373455.6 | 764819   | 467103.7 | 1074744  | 1491231  | 1030852  | 728363.4 |
| 9.842    | 10 | 5 | 5 | 1855507  | 9273909  | 1799255  | 8298990  | 2259279  | 10363516 | 10609043 | 6970084  | 7686277  |
| 9.249433 | 3  | 0 | 3 | 555128.2 | 1862214  | 284312.5 | 1562758  | 814898.3 | 2103425  | 1810337  | 1479026  | 2179185  |
| 9.912633 | 9  | 5 | 4 | 1792345  | 5030785  | 1480377  | 4234118  | 1839874  | 5799910  | 4163642  | 3315540  | 4746505  |
| 10.28192 | 11 | 5 | 5 | 3098454  | 9111415  | 2511111  | 7976504  | 2247874  | 10784130 | 11841085 | 10020937 | 6317208  |
| 10.9645  | 10 | 5 | 5 | 225360.7 | 781828   | 388331   | 932603   | 210025.5 | 1453723  | 552016.1 | 497779.9 | 756550.7 |
| 9.071467 | 5  | 2 | 3 | 708372.3 | 1060786  | 706400.5 | 774492.8 | 462186.5 | 720299.2 | 517867.1 | 823443.7 | 949986.2 |
| 10.23043 | 10 | 5 | 5 | 517340   | 1225079  | 461475.2 | 1014029  | 424596.1 | 1190967  | 2001600  | 958002.2 | 809384   |
| 9.56645  | 9  | 5 | 4 | 1164549  | 1272477  | 271456.5 | 1855261  | 1634653  | 1216961  | 1747989  | 1100959  | 1096896  |
| 41.80533 | 6  | 3 | 2 | 326444.5 | 2937318  | 1734038  | 2253855  | 1011456  | 1948401  | 1266833  | 1928941  | 4263299  |
| 9.93625  | 4  | 1 | 3 | 465981.8 | 650418.9 | 334279.4 | 787674.1 | 229487.3 | 678529   | 132550.3 | 1067925  | 663401.8 |
| 32.1715  | 5  | 2 | 3 | 158956.4 | 1146541  | 509589.3 | 939165.8 | 338981   | 294332   | 1353139  | 1486369  | 1531324  |
| 23.99617 | 10 | 5 | 5 | 357462   | 2291009  | 362807.4 | 2443751  | 270104.3 | 2101115  | 2786163  | 1954284  | 2050421  |
| 9.94455  | 5  | 4 | 1 | 783783.4 | 1462706  | 357641.9 | 1113586  | 944234.9 | 1432016  | 1044648  | 1368632  | 2033899  |
| 10.7349  | 7  | 5 | 2 | 19658522 | 2.62E+08 | 33675790 | 2.44E+08 | 40420945 | 2.63E+08 | 3.16E+08 | 2.57E+08 | 2.24E+08 |

|          |    |   |   |          |          |          |          |          |          |          |          |          |
|----------|----|---|---|----------|----------|----------|----------|----------|----------|----------|----------|----------|
| 9.379233 | 5  | 3 | 1 | 1.27E+09 | 2.66E+09 | 3.63E+09 | 4.13E+09 | 2.34E+09 | 12437046 | 13921239 | 6.88E+09 | 6.39E+09 |
| 9.932033 | 10 | 5 | 5 | 7035555  | 15215168 | 4682674  | 13148665 | 3967118  | 17721122 | 18174590 | 8077612  | 12863081 |
| 9.992233 | 9  | 5 | 4 | 1461734  | 1661594  | 589518.4 | 2603811  | 2626142  | 1642375  | 2289255  | 2213709  | 1174922  |
| 10.90765 | 3  | 0 | 3 | 268890.6 | 451804.8 | 127747.2 | 552014.6 | 263190.5 | 440274.5 | 514077.8 | 278792.4 | 403719.2 |
| 9.983467 | 9  | 5 | 4 | 1689847  | 7295883  | 3212060  | 6137760  | 832487.3 | 9014956  | 7538825  | 2218411  | 10805703 |
| 25.56467 | 6  | 3 | 3 | 272034.8 | 994551.8 | 277898.6 | 866217.1 | 261814.6 | 858810.8 | 1465096  | 891906.1 | 752798.7 |
| 44.46583 | 4  | 3 | 1 | 676540.1 | 8866989  | 4407973  | 10735656 | 3359040  | 12958048 | 3527150  | 7080192  | 13896917 |
| 9.983433 | 10 | 5 | 5 | 1148688  | 4158451  | 868371.2 | 3638736  | 1268418  | 4387753  | 5364477  | 3715247  | 3021838  |
| 9.842    | 10 | 5 | 5 | 1492838  | 5352946  | 593058.9 | 4778124  | 1555639  | 5735433  | 4790894  | 5462988  | 6069672  |
| 9.979667 | 7  | 4 | 3 | 2432087  | 959589.7 | 470848   | 1801277  | 2355571  | 1268690  | 1603377  | 863812.4 | 518918.8 |
| 9.952017 | 10 | 5 | 5 | 2694909  | 8223271  | 1681045  | 7453186  | 1558406  | 11051223 | 8236372  | 6819236  | 7893567  |
| 10.9645  | 6  | 3 | 3 | 390700.2 | 1146070  | 346256.1 | 1346873  | 483793.5 | 1117156  | 1723769  | 914797.2 | 1130677  |
| 9.992233 | 10 | 5 | 5 | 2222048  | 2656393  | 776497.4 | 3800804  | 3184691  | 3310948  | 2886015  | 3374433  | 2111690  |
| 22.03767 | 7  | 4 | 3 | 181080.2 | 572961.4 | 442997.2 | 377211.3 | 377984.3 | 629034   | 560478.3 | 1280028  | 198082.8 |
| 8.855567 | 7  | 3 | 4 | 1194476  | 4051336  | 1554116  | 5414980  | 3649807  | 3763395  | 6596648  | 4257215  | 2927858  |
| 9.445217 | 6  | 4 | 2 | 1160843  | 3270397  | 413298.5 | 2637080  | 1765309  | 2847484  | 2831552  | 3693596  | 3354478  |
| 9.388367 | 6  | 2 | 4 | 717645   | 8433032  | 1977441  | 7299879  | 2717134  | 6146767  | 7287503  | 10697483 | 10299819 |
| 18.13133 | 5  | 1 | 4 | 114281.6 | 1111584  | 181275.5 | 897392.1 | 589764.5 | 1364401  | 876580.4 | 1086853  | 1038674  |
| 24.59417 | 4  | 1 | 3 | 48739.03 | 133953.9 | 7101.545 | 119167.7 | 41558.03 | 129279.8 | 141534.1 | 139559.6 | 134931.1 |
| 10.03258 | 7  | 4 | 3 | 1869687  | 9492755  | 1999495  | 7647227  | 4973192  | 12813361 | 7877857  | 8154381  | 8809640  |
| 9.848417 | 9  | 5 | 4 | 1149605  | 3873796  | 712813.7 | 4612493  | 2015248  | 3819668  | 4010881  | 3106607  | 3445188  |
| 19.44683 | 10 | 5 | 5 | 664842.4 | 6981029  | 3983297  | 5400280  | 2428946  | 13689505 | 4711257  | 7619599  | 4525955  |
| 10.69117 | 7  | 3 | 4 | 180903.6 | 894660.1 | 512536.6 | 705119.8 | 200590.5 | 1665258  | 915017.1 | 1022281  | 531192.5 |
| 9.41815  | 10 | 5 | 4 | 918102.1 | 6249340  | 2190347  | 5147526  | 2446756  | 5512916  | 5396546  | 5060974  | 5123056  |
| 9.896717 | 10 | 5 | 5 | 2744179  | 15917508 | 2477277  | 13990846 | 5067996  | 17359352 | 15497167 | 13060419 | 14340871 |
| 10.9645  | 10 | 5 | 5 | 513320.5 | 2162951  | 551719   | 1912867  | 501595.8 | 2681007  | 2735772  | 1683214  | 1537870  |
| 10.97857 | 8  | 4 | 4 | 379176.7 | 1353775  | 487676.9 | 1167636  | 244671.4 | 2016454  | 1441316  | 796769.9 | 960867.7 |
| 24.47783 | 10 | 5 | 5 | 146247.4 | 743983.8 | 129765.3 | 661160.5 | 207539   | 779984.1 | 770378.2 | 766355.4 | 876629.6 |
| 9.856867 | 10 | 5 | 5 | 10383171 | 50258562 | 1799267  | 56410250 | 17411879 | 53190203 | 48926369 | 50775557 | 49008975 |
| 9.992233 | 9  | 5 | 4 | 1244876  | 3595268  | 879028.6 | 2906830  | 1813929  | 3910883  | 4858505  | 3042921  | 2551241  |
| 10.95055 | 10 | 5 | 5 | 1505804  | 8792760  | 1905085  | 7833265  | 2134839  | 9842968  | 11146705 | 6922550  | 6761030  |
| 22.13917 | 10 | 5 | 5 | 286307.9 | 726384.9 | 325319.7 | 602541   | 160908.6 | 582203.8 | 1268542  | 765111.1 | 584700.4 |
| 9.992233 | 8  | 4 | 4 | 417916.8 | 880305   | 165663.6 | 768204.4 | 285972   | 885540.9 | 1061914  | 705986   | 1026198  |
| 9.914217 | 7  | 4 | 3 | 1301328  | 3702892  | 965682.9 | 4425713  | 1888772  | 5037115  | 4275397  | 2680611  | 3565694  |
| 29.9205  | 8  | 4 | 4 | 326415   | 1095734  | 300458.1 | 1493224  | 1103599  | 958074.8 | 1243695  | 1183117  | 654557.8 |

|          |    |   |   |          |          |          |          |          |          |          |          |          |
|----------|----|---|---|----------|----------|----------|----------|----------|----------|----------|----------|----------|
| 9.972483 | 7  | 3 | 4 | 571387.3 | 850449.8 | 484004.8 | 1137156  | 699484.8 | 1493247  | 1147894  | 714605.8 | 232149.6 |
| 9.992233 | 9  | 5 | 4 | 408999   | 1033142  | 209752.7 | 913944.6 | 285715.8 | 1015611  | 1393439  | 971941.1 | 857158.4 |
| 9.858833 | 10 | 5 | 5 | 6663769  | 4562160  | 598306.8 | 9016464  | 12655946 | 5097082  | 3876685  | 4699476  | 5141893  |
| 9.568567 | 16 | 5 | 5 | 7936870  | 38014371 | 33144184 | 23308618 | 28775230 | 3668100  | 77077679 | 3399965  | 48301721 |
| 9.999217 | 4  | 1 | 3 | 254810.1 | 373178.8 | 244415.4 | 496231.8 | 274308   | 310628.6 | 108890   | 694918.6 | 551320.2 |
| 9.530583 | 14 | 5 | 5 | 1426094  | 6122237  | 3516956  | 9003825  | 7665122  | 8210637  | 10825902 | 2013091  | 3661416  |
| 9.874317 | 10 | 5 | 5 | 1467189  | 5179935  | 981512.1 | 5786607  | 1507222  | 6893693  | 4766946  | 4507250  | 5085197  |
| 9.512983 | 7  | 2 | 5 | 11012085 | 75532668 | 58592221 | 52181588 | 36729138 | 2192923  | 21655728 | 1.12E+08 | 1.21E+08 |
| 9.848417 | 9  | 5 | 4 | 975799.6 | 3982049  | 878652.4 | 3296362  | 1810829  | 3394412  | 4025585  | 2997329  | 4197557  |
| 10.24195 | 5  | 1 | 4 | 112932.5 | 244344.2 | 135137   | 371025.2 | 343474.3 | 245871.9 | 112013   | 270327.6 | 139647.2 |
| 9.55155  | 7  | 4 | 3 | 465259.1 | 1443768  | 690859.9 | 1762733  | 658192.8 | 1367044  | 1274965  | 839094.1 | 1111334  |
| 9.992233 | 8  | 4 | 4 | 933766.4 | 1661555  | 976040   | 1289550  | 494805   | 1312945  | 1697984  | 1155662  | 3315021  |
| 31.13783 | 10 | 5 | 5 | 1941346  | 8124746  | 1139614  | 10132599 | 5648497  | 7348454  | 9308961  | 8461129  | 6569432  |
| 9.388617 | 9  | 5 | 4 | 738859.1 | 1316596  | 321234.8 | 1101864  | 548049.9 | 1579880  | 1184088  | 1127672  | 965863.2 |
| 9.856867 | 10 | 5 | 5 | 11006010 | 73526482 | 8338438  | 65000302 | 23340668 | 72482604 | 71583181 | 66083665 | 69700901 |
| 9.4468   | 5  | 2 | 3 | 889785.4 | 3825667  | 1972781  | 2984881  | 1552868  | 1389801  | 4443476  | 5320244  | 5853719  |
| 40.4675  | 4  | 1 | 3 | 100881.5 | 742929.3 | 132100.3 | 650832.9 | 237798.7 | 676301.8 | 602920.1 | 742195.9 | 956747.1 |
| 22.72667 | 6  | 4 | 2 | 636757.2 | 1426787  | 770500.4 | 2545171  | 3129512  | 714954.7 | 1973324  | 547087.5 | 1596160  |
| 9.864767 | 9  | 5 | 4 | 944308.6 | 2915924  | 1211148  | 2386973  | 1018073  | 1376460  | 2180591  | 2858971  | 3738960  |
| 9.999217 | 12 | 5 | 5 | 808350.6 | 2491680  | 542885.1 | 2129465  | 925049.5 | 3042940  | 2828378  | 2641735  | 1656137  |
| 9.43325  | 6  | 4 | 2 | 768381.3 | 6241107  | 1346094  | 5557058  | 1543327  | 6902742  | 6045861  | 6031214  | 7942483  |
| 9.848417 | 9  | 4 | 5 | 947743.4 | 5115911  | 451056   | 4678243  | 1193407  | 5046589  | 4710029  | 5326799  | 4716629  |
| 9.912633 | 11 | 5 | 5 | 3917643  | 19553959 | 4901578  | 17182390 | 5145147  | 15897276 | 22191580 | 12990303 | 21941197 |
| 8.960667 | 8  | 3 | 5 | 247036.2 | 772137.7 | 209752.1 | 622734.5 | 388273.7 | 1122140  | 588220.4 | 636226.5 | 776149.8 |
| 9.8322   | 4  | 3 | 1 | 743039.1 | 1629534  | 673161.9 | 1990452  | 843633.3 | 2207271  | 870273.8 | 1631621  | 1053584  |
| 10.18683 | 5  | 3 | 2 | 896950.8 | 1500015  | 535604.2 | 1138860  | 926298.1 | 1486246  | 1062296  | 1303330  | 2418639  |
| 9.36565  | 4  | 3 | 1 | 438265.5 | 773701.6 | 345278.1 | 570736.9 | 496909.7 | 892341.8 | 454928.1 | 362662.2 | 1027054  |
| 10.9645  | 8  | 4 | 4 | 275932.4 | 1040549  | 263398.7 | 857627.7 | 472816.2 | 1287794  | 1365055  | 880753.1 | 815958.5 |
| 9.9677   | 10 | 5 | 5 | 6216171  | 21924559 | 4660165  | 18897962 | 7680533  | 24997464 | 27611508 | 18972494 | 15897805 |
| 9.365833 | 6  | 4 | 2 | 485992.3 | 2659400  | 1157255  | 2076407  | 1309376  | 2181332  | 4490846  | 2731668  | 2560069  |
| 9.9677   | 10 | 5 | 5 | 2347472  | 8897735  | 1735528  | 7700132  | 3091358  | 10356152 | 10628788 | 7866089  | 6489855  |
| 10.0614  | 11 | 5 | 5 | 2342303  | 7899503  | 2285682  | 8891635  | 1899215  | 10186843 | 9431047  | 8386086  | 4365730  |
| 10.58813 | 10 | 5 | 5 | 1468808  | 5753167  | 1173568  | 5010522  | 1871333  | 7303964  | 6558355  | 4679366  | 4621817  |
| 11.17508 | 10 | 5 | 5 | 1482173  | 1966576  | 500237.6 | 3065765  | 3116711  | 2661619  | 1516873  | 1851733  | 1517967  |
| 9.530583 | 10 | 5 | 5 | 14940258 | 12486347 | 3155240  | 22700329 | 29089168 | 17097757 | 14113981 | 9364426  | 10120554 |

|          |    |   |   |          |          |          |          |          |          |          |          |          |
|----------|----|---|---|----------|----------|----------|----------|----------|----------|----------|----------|----------|
| 25.39117 | 9  | 5 | 4 | 2752238  | 8677119  | 3015987  | 11429973 | 7474844  | 13633266 | 6752089  | 6307556  | 7278183  |
| 10.30947 | 5  | 1 | 3 | 215779.2 | 566630.9 | 292535.2 | 456201.7 | 142931   | 1052761  | 565141.2 | 498593.3 | 272965   |
| 10.25713 | 10 | 5 | 5 | 325648   | 1011244  | 199361.8 | 928686.4 | 145588   | 930888.3 | 1236150  | 1206494  | 786176.9 |
| 10.44215 | 11 | 5 | 5 | 625260.6 | 3100504  | 872982.9 | 2595077  | 1232678  | 2633061  | 4616610  | 3057778  | 2489063  |
| 10.92208 | 9  | 4 | 5 | 343523.6 | 1273449  | 430940.8 | 1084412  | 369459.5 | 1655023  | 1034719  | 777216.2 | 1109880  |
| 44.22167 | 18 | 5 | 4 | 327136.1 | 3256087  | 615323.2 | 3581182  | 757229.6 | 3462817  | 3258711  | 4127839  | 2463144  |
| 9.243433 | 7  | 5 | 1 | 618748.5 | 865199.2 | 538377.5 | 645133.3 | 378714.1 | 1512005  | 241694.1 | 1126477  | 1071856  |
| 10.008   | 3  | 3 | 0 | 1267476  | 1627667  | 1237798  | 2209589  | 1237513  | 407926.6 | 595539.3 | 3404297  | 1474017  |
| 17.36583 | 9  | 5 | 4 | 129020.6 | 302021.3 | 27787.1  | 475917.7 | 497526.2 | 295209.1 | 337449.8 | 311272.5 | 260902.5 |
| 9.976317 | 9  | 5 | 4 | 2152139  | 6707585  | 1423141  | 5819683  | 2232972  | 7126131  | 8157437  | 5701860  | 4786201  |
| 9.928667 | 5  | 3 | 2 | 984687.3 | 1775594  | 740552.7 | 1344721  | 1055173  | 1737210  | 674908.6 | 2559602  | 1563902  |
| 10.9645  | 9  | 5 | 4 | 375882.2 | 1307076  | 304513   | 1170549  | 275409.7 | 1781183  | 1413918  | 1054337  | 1235115  |
| 10.83317 | 7  | 4 | 3 | 159485.8 | 388237.1 | 195314   | 314152.3 | 99488.8  | 310303.3 | 734287.3 | 297312   | 337058.9 |
| 9.960467 | 6  | 4 | 2 | 519640.7 | 1115987  | 313125   | 1262149  | 308848.6 | 942337.5 | 1489605  | 1340998  | 701617.6 |
| 22.944   | 9  | 5 | 4 | 142814   | 557897.5 | 203482.5 | 484655.7 | 63752.93 | 825120.5 | 343956.1 | 363432.9 | 646637.5 |
| 9.845483 | 7  | 4 | 3 | 1453961  | 5302033  | 2477141  | 4309920  | 1625049  | 5404985  | 1985336  | 8966943  | 5060814  |
| 10.78937 | 8  | 3 | 5 | 233411.9 | 676215.4 | 322662.3 | 552570.8 | 174175.2 | 544896.8 | 1199091  | 768842.6 | 432662.2 |
| 9.992233 | 10 | 5 | 5 | 717290.6 | 2254573  | 492996.3 | 1936339  | 810147.8 | 2674423  | 2581515  | 2581811  | 1768376  |
| 9.842    | 6  | 3 | 3 | 1454639  | 2262281  | 2422126  | 1378482  | 913833.8 | 1538868  | 6563898  | 1382811  | 1023562  |
| 10.95055 | 10 | 5 | 5 | 931488.7 | 3402775  | 879139.9 | 4173000  | 2086990  | 3785529  | 4742602  | 3053392  | 2510015  |
| 11.26338 | 6  | 4 | 2 | 1373751  | 2417413  | 3622576  | 4024911  | 3205103  | 8890619  | 652013.2 | 885934.3 | 625223.1 |
| 8.855567 | 4  | 4 | 0 | 279401.7 | 594155.1 | 486371   | 410184.6 | 244845.3 | 438455.9 | 1375139  | 155055.4 | 726791.8 |
| 9.673333 | 10 | 5 | 5 | 1511907  | 4499247  | 536783.7 | 5280543  | 2199170  | 5159503  | 4566796  | 4705173  | 4374227  |
| 11.87125 | 10 | 5 | 5 | 232152.5 | 420595.8 | 333547.5 | 678960   | 687237.7 | 109586.8 | 348900.4 | 169487.1 | 936542.2 |
| 42.06417 | 4  | 1 | 3 | 336764.3 | 3018146  | 260039.5 | 3913120  | 2558768  | 3436173  | 2796803  | 2872505  | 3102692  |
| 24.609   | 10 | 5 | 5 | 11762378 | 93269547 | 18532395 | 1.01E+08 | 14547017 | 1.23E+08 | 98358188 | 83357732 | 76478875 |
| 9.089733 | 7  | 3 | 4 | 551213.2 | 1446598  | 266709   | 1258253  | 491896.4 | 1374589  | 1770452  | 1675846  | 1261674  |
| 9.992233 | 7  | 4 | 3 | 347428.6 | 870981.1 | 195696   | 711134.6 | 429390.1 | 918709.2 | 750769.2 | 867644.7 | 650459.9 |
| 10.90802 | 6  | 3 | 3 | 194166   | 473266.8 | 190473.3 | 376693.8 | 219815.2 | 715298   | 485744.1 | 185019   | 453193   |
| 9.419733 | 7  | 4 | 3 | 580208   | 1887450  | 801652.1 | 1396528  | 1230477  | 3066095  | 1058860  | 2314288  | 1572642  |
| 9.08685  | 10 | 5 | 5 | 4073804  | 13551365 | 3725184  | 11035377 | 6501440  | 12040468 | 19663991 | 14439806 | 10824857 |
| 10.21522 | 6  | 2 | 4 | 173219.2 | 510352.3 | 232726.5 | 421926.4 | 121241.7 | 546578.4 | 273877.8 | 865336.5 | 329474.5 |
| 7.278817 | 5  | 3 | 1 | 75763.51 | 247860.5 | 85752.99 | 281864.3 | 54577.19 | 315890.9 | 335007.1 | 118506.7 | 242880.2 |
| 9.3735   | 5  | 2 | 3 | 1170991  | 811175.2 | 706537.1 | 1413877  | 1630068  | 929042.5 | 1055051  | 1798915  | 0        |
| 9.872067 | 7  | 3 | 2 | 931610.6 | 2022514  | 829170.8 | 2835806  | 2236521  | 1754310  | 1449889  | 2041107  | 3436598  |

|          |    |   |   |          |          |          |          |          |          |          |          |          |
|----------|----|---|---|----------|----------|----------|----------|----------|----------|----------|----------|----------|
| 10.13878 | 9  | 4 | 5 | 408822.2 | 1147886  | 295182.6 | 971895   | 436923.1 | 1460812  | 1458387  | 1063937  | 906725   |
| 10.008   | 9  | 5 | 4 | 1804504  | 4627707  | 1645613  | 5795968  | 3057743  | 6020308  | 5641574  | 5676796  | 3529961  |
| 24.1715  | 10 | 5 | 5 | 503259.6 | 4640168  | 1856708  | 3716932  | 2073603  | 3543948  | 5904146  | 2400780  | 4292249  |
| 10.01837 | 7  | 3 | 4 | 713901.9 | 755432.9 | 171575.9 | 1155186  | 1140254  | 650352.8 | 850864.3 | 929823.1 | 836803.4 |
| 9.94455  | 10 | 5 | 5 | 1035973  | 3232247  | 865132.8 | 2898623  | 488410.9 | 4132868  | 4137392  | 2825772  | 2201556  |
| 9.07525  | 10 | 5 | 5 | 2582049  | 11240142 | 4249156  | 9180970  | 4529762  | 11827133 | 18262811 | 9513105  | 9365037  |
| 9.9014   | 5  | 2 | 3 | 949176.8 | 2541351  | 625325.2 | 1999724  | 1468882  | 2304788  | 1580518  | 2907058  | 2727662  |
| 9.872883 | 10 | 5 | 5 | 2096716  | 10990348 | 1124593  | 10402609 | 1367256  | 10610078 | 9770071  | 12392063 | 11938465 |
| 10.95835 | 8  | 3 | 5 | 165150   | 463556.7 | 179859.5 | 597323.9 | 353842.7 | 756952.7 | 459531.9 | 283086   | 360111.9 |
| 9.952017 | 6  | 3 | 3 | 1039089  | 5876961  | 1797661  | 4728113  | 2924813  | 3612530  | 5654715  | 7068488  | 4867603  |
| 9.416767 | 7  | 4 | 2 | 648339.9 | 2435126  | 1650978  | 1829432  | 673580.5 | 1794321  | 719834.6 | 3203122  | 4917254  |
| 9.856867 | 10 | 5 | 5 | 1864593  | 7915024  | 468490.1 | 8711528  | 2259232  | 7821543  | 7251028  | 7770815  | 8343639  |
| 10.05535 | 9  | 4 | 5 | 2494795  | 4343193  | 1153038  | 3715615  | 1495838  | 3735775  | 3728361  | 4308205  | 3597137  |
| 9.84525  | 4  | 1 | 3 | 1175823  | 1512503  | 477139.3 | 2525150  | 2886754  | 1519506  | 754889.4 | 2076166  | 1632718  |
| 10.008   | 9  | 5 | 4 | 314803.6 | 610756.8 | 157784   | 750885.6 | 381525.7 | 612028.6 | 486186.4 | 845210.9 | 662224.3 |
| 10.93618 | 7  | 4 | 3 | 161087.3 | 658068.1 | 289241.9 | 531546.5 | 249060.1 | 857214.2 | 908276.7 | 321062.5 | 364726.7 |
| 10.33625 | 10 | 5 | 5 | 4278806  | 23644797 | 8876198  | 19415238 | 9187643  | 31455891 | 34218538 | 20633612 | 18704667 |
| 9.655117 | 8  | 5 | 3 | 258018.8 | 774980.3 | 235509.4 | 643076.2 | 319389   | 511695.4 | 1135576  | 752817.1 | 835375.7 |
| 32.48833 | 5  | 3 | 2 | 305547   | 914215   | 913105   | 1377216  | 1058025  | 1712840  | 162157.3 | 111384.5 | 2067313  |
| 9.872917 | 10 | 5 | 5 | 1695379  | 9596009  | 768766.9 | 8604980  | 2784565  | 9372711  | 8694126  | 9364711  | 9760807  |
| 9.203483 | 4  | 1 | 3 | 1576239  | 2126619  | 947068.6 | 3311363  | 3323803  | 2774023  | 1204326  | 1987042  | 3385667  |
| 9.983433 | 10 | 5 | 5 | 756559.8 | 3280014  | 659372.6 | 2783057  | 1320167  | 3597409  | 3847740  | 2940239  | 2282120  |
| 9.22495  | 4  | 3 | 1 | 245745.4 | 1113894  | 509192.5 | 783939.8 | 845069.2 | 1603461  | 724730.8 | 1732803  | 800223.6 |
| 9.94455  | 9  | 5 | 4 | 928285.8 | 2808873  | 724052   | 2340604  | 1198771  | 3706476  | 3461035  | 2460528  | 2101046  |
| 10.9645  | 9  | 5 | 4 | 240291.4 | 1002444  | 216085.3 | 838737   | 435437.3 | 1063562  | 1242921  | 745729   | 809275   |
| 9.43325  | 9  | 5 | 4 | 4432193  | 4464832  | 1599309  | 8578897  | 11775621 | 4635018  | 5129097  | 6378000  | 4169452  |
| 9.952017 | 10 | 5 | 5 | 1417447  | 4372975  | 748413   | 3985723  | 898040.8 | 5430195  | 4725108  | 4329162  | 3510612  |
| 42.03567 | 7  | 3 | 3 | 329422.2 | 5271019  | 348072.8 | 5034978  | 612708.2 | 5086987  | 5317401  | 5457398  | 4792411  |
| 9.268717 | 9  | 4 | 5 | 995676   | 1134138  | 327682.5 | 1687355  | 1571571  | 1690229  | 934876.6 | 1036858  | 867588   |
| 9.40255  | 10 | 5 | 5 | 2734523  | 6073507  | 1505957  | 4872009  | 3227191  | 8231663  | 6765813  | 4219388  | 5558072  |
| 9.992233 | 7  | 4 | 3 | 935555.3 | 983480.2 | 391106.6 | 1527604  | 1535644  | 1054934  | 926834.9 | 1610493  | 709633.9 |
| 9.976317 | 9  | 5 | 4 | 1260934  | 1533680  | 200493   | 1866466  | 945332   | 1627627  | 1361346  | 1801253  | 1567095  |
| 9.986767 | 6  | 2 | 4 | 268104.2 | 702831.9 | 97341.5  | 577885.6 | 351433.6 | 740232   | 855310.8 | 667518.8 | 620044.2 |
| 9.887133 | 6  | 3 | 3 | 2302954  | 4062012  | 3222666  | 5929199  | 4603296  | 2386146  | 2782168  | 9430110  | 4494338  |
| 9.40325  | 9  | 5 | 3 | 300007.5 | 1561284  | 645358.5 | 1270529  | 597958.8 | 1242238  | 2590266  | 1756584  | 1278206  |

|          |    |   |   |          |          |          |          |          |          |          |          |          |
|----------|----|---|---|----------|----------|----------|----------|----------|----------|----------|----------|----------|
| 9.858833 | 9  | 5 | 4 | 2910079  | 3722250  | 497926   | 6161455  | 7019965  | 4178511  | 3949501  | 4026086  | 3504404  |
| 9.473717 | 6  | 4 | 2 | 301812.8 | 1042833  | 396815   | 755581.4 | 758358.1 | 649872.8 | 868670.4 | 851455.2 | 1667859  |
| 11.17508 | 4  | 1 | 3 | 74565.81 | 142896.6 | 114108.3 | 230355.6 | 233581.9 | 304397.2 | 150266.8 | 13148.37 | 187934.5 |
| 9.445217 | 8  | 4 | 4 | 713620   | 4140280  | 1264957  | 3569110  | 1178394  | 5592407  | 4769951  | 4724464  | 2819460  |
| 10.9645  | 10 | 5 | 5 | 1896714  | 4761755  | 1570667  | 5787984  | 2641234  | 6285254  | 6637976  | 3720805  | 3298428  |
| 9.1172   | 8  | 4 | 4 | 718104.3 | 1256190  | 787393.8 | 890684.7 | 777607.1 | 1447822  | 2432708  | 1231416  | 863871.7 |
| 9.45945  | 6  | 4 | 2 | 387039.6 | 1420354  | 712201.2 | 1054816  | 845280.4 | 1902678  | 2380893  | 594857.8 | 1083062  |
| 10.49953 | 10 | 5 | 5 | 2578942  | 9632374  | 854381   | 10628495 | 2789321  | 10164415 | 10665357 | 9757031  | 8535842  |
| 31.2965  | 8  | 5 | 3 | 151701.3 | 846467.8 | 167536.6 | 746493.5 | 249659   | 635684.8 | 1104922  | 825463.4 | 821967.5 |
| 9.18975  | 6  | 3 | 3 | 2001016  | 2832106  | 1605868  | 6177207  | 9564482  | 2039529  | 800017.7 | 2394694  | 4614448  |
| 20.9505  | 4  | 3 | 1 | 357396.7 | 1447057  | 1649091  | 2127868  | 1224027  | 278742.7 | 3244313  | 3262429  | 225731.2 |
| 44.9835  | 5  | 1 | 4 | 282554.7 | 2491194  | 638492.7 | 2767596  | 539848.7 | 1362729  | 2807066  | 2604197  | 2841074  |
| 10.00385 | 9  | 5 | 4 | 2103892  | 1197369  | 174905.1 | 1667393  | 1348826  | 1388094  | 1113246  | 1119301  | 992823.3 |
| 22.36317 | 9  | 5 | 4 | 529233.1 | 3643808  | 665396   | 3281754  | 867327   | 3091221  | 4645158  | 3892303  | 3014005  |
| 9.5415   | 14 | 5 | 5 | 3617001  | 34764028 | 13126004 | 29948684 | 5534261  | 23456622 | 34153321 | 38437749 | 22863484 |
| 9.507933 | 12 | 4 | 5 | 4441158  | 16745407 | 17441571 | 10358834 | 7235705  | 46473054 | 15726034 | 1929139  | 12631875 |
| 9.975217 | 10 | 5 | 5 | 10991459 | 6634907  | 2181277  | 10051278 | 9705118  | 9116834  | 7705826  | 7518865  | 5158481  |
| 9.392767 | 9  | 5 | 4 | 858620.9 | 2102899  | 670312   | 1635064  | 1226619  | 2423766  | 3008726  | 1485629  | 1406349  |
| 9.40325  | 11 | 5 | 5 | 1163738  | 5329390  | 1978302  | 6804786  | 3924765  | 4673847  | 3416065  | 7934515  | 6856711  |
| 24.1315  | 7  | 3 | 4 | 245999.9 | 762336.3 | 676848.1 | 458429.8 | 624312.6 | 309588.3 | 1489515  | 1516877  | 248672   |
| 9.830833 | 5  | 3 | 2 | 1069944  | 4582040  | 1498838  | 3824734  | 1735273  | 5920409  | 5078301  | 2368041  | 3778044  |
| 10.9645  | 10 | 5 | 5 | 9104461  | 20732786 | 4718843  | 26713502 | 16848462 | 26042828 | 25534680 | 18938371 | 16622480 |
| 9.848417 | 10 | 5 | 5 | 1492590  | 6943533  | 1972117  | 6186260  | 1117174  | 4912061  | 4895093  | 8443466  | 9143480  |
| 9.992233 | 10 | 5 | 5 | 2308519  | 2637329  | 862855.7 | 3796138  | 3276008  | 3301424  | 2906388  | 3517335  | 1883194  |
| 11.3027  | 5  | 2 | 3 | 134408.2 | 515053.1 | 318650.9 | 395216.4 | 161969.7 | 884351.6 | 195276.2 | 172915.1 | 599538.1 |
| 10.40908 | 12 | 4 | 5 | 1879294  | 14379035 | 4205145  | 12228838 | 4974896  | 17396822 | 12440289 | 19583523 | 8887893  |
| 10.01477 | 8  | 4 | 4 | 2353755  | 1305788  | 1905971  | 636031.4 | 421372.7 | 4711800  | 566316.2 | 354770.9 | 508136.4 |
| 10.9645  | 5  | 2 | 3 | 201237.9 | 623416.6 | 189472.4 | 498182.1 | 324402.1 | 870666.9 | 776140.5 | 441172.3 | 481191.9 |
| 10.92208 | 10 | 5 | 5 | 342750.3 | 1232074  | 389257.1 | 1028794  | 477228   | 1481898  | 838470.5 | 916958.4 | 1158078  |
| 10.97857 | 10 | 5 | 5 | 319089.6 | 787293.5 | 297620.9 | 987507.7 | 521282.6 | 751193.1 | 1302684  | 712131.9 | 591269.5 |
| 9.379233 | 15 | 5 | 5 | 2569879  | 8760938  | 3308897  | 11282314 | 6749523  | 8547282  | 9843641  | 4359647  | 13439753 |
| 32.12817 | 7  | 4 | 3 | 506722.4 | 2090004  | 1880659  | 3074481  | 2315611  | 649854.8 | 882051.6 | 5301745  | 1543415  |
| 9.93625  | 10 | 5 | 5 | 3760075  | 11968831 | 2277687  | 10498831 | 3783998  | 11962938 | 15552443 | 9232915  | 11361426 |
| 9.568567 | 19 | 5 | 5 | 20983892 | 1.37E+08 | 81461496 | 1.03E+08 | 60454295 | 2.06E+08 | 2016315  | 1.88E+08 | 1.24E+08 |
| 29.60117 | 5  | 2 | 3 | 527189.3 | 1886330  | 1953814  | 1131837  | 1146617  | 538632.4 | 1429201  | 67756.7  | 4996601  |

|          |    |   |   |          |          |          |          |          |          |          |          |          |
|----------|----|---|---|----------|----------|----------|----------|----------|----------|----------|----------|----------|
| 35.61633 | 6  | 3 | 3 | 272239.8 | 862501.4 | 970689   | 486059.6 | 580644.1 | 2540332  | 344393   | 212413.2 | 349888   |
| 9.473733 | 11 | 5 | 4 | 6343666  | 10586081 | 3463741  | 20240921 | 27797860 | 14132457 | 13150337 | 11636478 | 8028877  |
| 9.49445  | 9  | 5 | 3 | 1670467  | 2849069  | 991592   | 5035733  | 6279253  | 3701406  | 2857364  | 2037108  | 1696458  |
| 9.523383 | 14 | 5 | 5 | 14852465 | 90001423 | 18906150 | 1.12E+08 | 61689793 | 81880008 | 93523594 | 1.21E+08 | 76659108 |
| 9.999517 | 6  | 3 | 3 | 266213.3 | 642157.5 | 222125.8 | 515929.7 | 310384.8 | 318026.1 | 654916.4 | 647198.8 | 645005.2 |
| 9.365833 | 5  | 4 | 1 | 374543.8 | 1477931  | 423834.7 | 1265696  | 485418   | 1531153  | 1970663  | 1765247  | 1208274  |
| 9.43325  | 9  | 5 | 3 | 1994001  | 12843789 | 3455823  | 16188183 | 9262087  | 10689184 | 15797886 | 17291467 | 9566907  |
| 9.516467 | 8  | 4 | 4 | 471951.4 | 977819.3 | 319438   | 807707.7 | 404787.6 | 1043454  | 1492307  | 885778.5 | 809852.1 |
| 18.07117 | 6  | 3 | 2 | 9247617  | 91737416 | 18096739 | 1.49E+08 | 1.64E+08 | 79129725 | 67196268 | 96574626 | 1.09E+08 |
| 9.960467 | 4  | 3 | 1 | 565196.8 | 858321.1 | 364392.2 | 659187.5 | 480674.7 | 1173634  | 1277628  | 828250.5 | 447788.8 |
| 9.859983 | 10 | 5 | 5 | 5112209  | 26504433 | 1729367  | 23598657 | 8301536  | 27726719 | 25700953 | 26135203 | 28680294 |
| 10.9645  | 10 | 5 | 5 | 463412.8 | 2115417  | 594347.2 | 1901875  | 210692.8 | 2409673  | 2659814  | 1801852  | 1222850  |
| 43.9915  | 8  | 4 | 3 | 323618.9 | 4891112  | 2278034  | 5706134  | 767771.9 | 7983237  | 4406459  | 4918327  | 1638554  |
| 10.92208 | 6  | 3 | 3 | 113857.4 | 378910.6 | 224311.7 | 297574.8 | 88366.43 | 475626.2 | 335640.4 | 307776.8 | 83764.41 |
| 9.960467 | 6  | 3 | 3 | 3913663  | 2334727  | 1272595  | 4410254  | 5929450  | 1656421  | 1693586  | 1068319  | 4201990  |
| 10.9645  | 10 | 5 | 5 | 910432.4 | 5940269  | 971004.1 | 5401717  | 1311582  | 6560632  | 6957334  | 5030032  | 4783204  |
| 27.33133 | 6  | 3 | 3 | 255957.7 | 1686446  | 1368265  | 2246251  | 1002758  | 1163119  | 2984806  | 299388.5 | 3299700  |
| 9.338567 | 9  | 5 | 4 | 1003278  | 2406337  | 968714.4 | 1976261  | 879679.6 | 2214303  | 1609371  | 1602348  | 2659485  |
| 9.075083 | 6  | 2 | 3 | 809215.8 | 1385212  | 1012365  | 995875   | 588945.7 | 1153060  | 433132.5 | 1199016  | 1029880  |
| 9.8378   | 10 | 5 | 4 | 3347836  | 16398046 | 4835636  | 13783300 | 6294541  | 16243468 | 19785788 | 16899231 | 8414951  |
| 9.842    | 8  | 4 | 4 | 725064.6 | 2571348  | 517932.8 | 2353481  | 412210.3 | 2149780  | 1951988  | 2623093  | 2966505  |
| 9.9014   | 10 | 5 | 5 | 19691126 | 57382027 | 6590842  | 75613793 | 52646331 | 57602662 | 50291885 | 66830020 | 60020197 |
| 9.929783 | 5  | 2 | 3 | 463855.7 | 1047765  | 264969   | 786470.2 | 726956   | 1109493  | 1399399  | 1155056  | 731198.1 |
| 9.992233 | 10 | 5 | 5 | 2309479  | 7420242  | 1419689  | 6521245  | 2310869  | 8575576  | 8773401  | 7894229  | 5594363  |
| 10.00098 | 10 | 5 | 5 | 768001.8 | 896497   | 282729.5 | 1204955  | 865566.9 | 1017235  | 1250714  | 980893.5 | 706645.6 |
| 9.848417 | 9  | 5 | 4 | 6687757  | 33499200 | 6224790  | 29643860 | 9841085  | 35641752 | 24655118 | 29557411 | 38875124 |
| 9.253783 | 10 | 5 | 5 | 2208846  | 5726337  | 2659111  | 4726714  | 1386513  | 9256787  | 3505294  | 4297885  | 3683619  |
| 9.992233 | 9  | 5 | 4 | 391404.8 | 1134799  | 322672.1 | 956833   | 433536   | 1477739  | 1355748  | 1185493  | 656311.2 |
| 9.4468   | 8  | 5 | 3 | 720741   | 3793810  | 1600886  | 3054243  | 1588023  | 4802187  | 6012576  | 3411669  | 2127848  |
| 9.915583 | 3  | 0 | 3 | 729604.4 | 1088048  | 308867.6 | 1506161  | 1189034  | 1474266  | 1269008  | 940464.3 | 1090238  |
| 9.948333 | 9  | 4 | 4 | 1346758  | 6075797  | 1887865  | 5004816  | 2645062  | 3814957  | 4217410  | 7401640  | 7346456  |
| 9.840617 | 10 | 5 | 5 | 3317042  | 6251450  | 1273959  | 9025820  | 7997151  | 7498076  | 6673315  | 7230522  | 5312676  |
| 10.95055 | 10 | 5 | 5 | 411296.9 | 2421866  | 675765.4 | 2126536  | 594708.2 | 3099878  | 2841109  | 1709559  | 1677262  |
| 10.31255 | 7  | 3 | 4 | 189321.5 | 392859.2 | 143550.4 | 330337.4 | 125338.3 | 151484.6 | 390210.7 | 527732.2 | 449733.9 |
| 34.41217 | 10 | 5 | 5 | 4109696  | 16111465 | 7957975  | 25581328 | 26769050 | 28672464 | 15326771 | 9106083  | 17877313 |



|          |    |   |   |          |          |          |          |          |          |          |          |          |
|----------|----|---|---|----------|----------|----------|----------|----------|----------|----------|----------|----------|
| 10.95835 | 6  | 2 | 4 | 1109983  | 3296651  | 1592626  | 2592568  | 1440362  | 3252585  | 5320398  | 882532.9 | 3262865  |
| 15.18045 | 9  | 5 | 4 | 396745.3 | 1039059  | 294643   | 2142348  | 3198832  | 1447306  | 740832.5 | 964661.3 | 1227988  |
| 9.960467 | 10 | 5 | 5 | 4489913  | 17047619 | 2897381  | 15583902 | 3393683  | 19363691 | 20297919 | 16634515 | 13021523 |
| 39.1435  | 3  | 3 | 0 | 290243.5 | 3817705  | 2810359  | 2849226  | 232065.5 | 2983889  | 3014251  | 3191406  | 1255064  |
| 9.43325  | 8  | 4 | 4 | 618162.4 | 2826965  | 1901255  | 2108754  | 1027490  | 3130224  | 1754795  | 6012847  | 1347510  |
| 9.8322   | 6  | 4 | 2 | 993251.4 | 1936761  | 963394.5 | 2461975  | 1274996  | 1218878  | 2023585  | 1686510  | 3547595  |
| 9.992233 | 9  | 5 | 4 | 325958.2 | 862644.7 | 212457.8 | 964962.7 | 229057.1 | 956690.9 | 1089401  | 799711.7 | 529894.5 |
| 10.8937  | 5  | 2 | 3 | 171008.9 | 540153.7 | 239799.8 | 432296.3 | 225820.4 | 396181.9 | 854420.6 | 267105.8 | 467655.1 |
| 9.9014   | 7  | 3 | 4 | 3364980  | 3018315  | 1696251  | 5482277  | 7041812  | 2241251  | 4164174  | 1841342  | 5407399  |
| 9.1428   | 3  | 3 | 0 | 2498392  | 4320819  | 2721122  | 5831994  | 3704920  | 3741014  | 3813978  | 4594604  | 8510081  |
| 9.992233 | 3  | 3 | 0 | 245066.3 | 572167.4 | 294501.9 | 449531.3 | 229981.5 | 839886.8 | 92824.66 | 691177.8 | 502219.1 |
| 9.93625  | 10 | 5 | 5 | 8195118  | 33720964 | 5625491  | 31389913 | 4333566  | 41532149 | 37307556 | 30409238 | 27551121 |
| 9.460217 | 6  | 2 | 4 | 3790111  | 18772077 | 4628481  | 15661875 | 8164062  | 23330581 | 18096711 | 16843671 | 23218089 |
| 9.992233 | 9  | 5 | 4 | 1152500  | 4193424  | 1218431  | 3532907  | 1600811  | 4014190  | 4200005  | 3189318  | 3331713  |
| 21.491   | 10 | 5 | 5 | 633448.6 | 4233777  | 720055.1 | 3917857  | 642310.7 | 3586597  | 5392048  | 3997333  | 3764895  |
| 9.960467 | 10 | 5 | 5 | 1224884  | 3853264  | 722547.5 | 3462346  | 946528   | 4174520  | 4802674  | 3822086  | 2836925  |
| 9.979667 | 6  | 3 | 3 | 1450366  | 747007.1 | 361554.6 | 1559690  | 2348885  | 644139.1 | 455858.5 | 1259054  | 969399.1 |
| 9.842    | 9  | 5 | 4 | 537975.9 | 2067286  | 415791.7 | 1897159  | 309007.3 | 2064515  | 1797283  | 1699311  | 2014879  |
| 9.912633 | 9  | 5 | 4 | 1686554  | 4716328  | 1399147  | 4005651  | 1658450  | 5935776  | 3692055  | 3142624  | 4439274  |
| 9.872883 | 10 | 5 | 5 | 6597077  | 46782032 | 5492086  | 44173329 | 5783779  | 44077460 | 38547747 | 49796509 | 52333075 |
| 9.11795  | 9  | 4 | 5 | 704517   | 2159270  | 864120.4 | 1847134  | 345720.4 | 2658086  | 2760292  | 2733666  | 1890182  |
| 9.8887   | 11 | 5 | 5 | 1730592  | 5112636  | 1400520  | 4173375  | 2466606  | 3406388  | 6093990  | 3958423  | 6713159  |
| 9.992233 | 10 | 5 | 5 | 2382653  | 2749781  | 859097.8 | 3864500  | 3174381  | 3373011  | 3234827  | 3491247  | 2009251  |
| 24.68117 | 10 | 5 | 5 | 570219.5 | 3569136  | 680706.9 | 3238716  | 747216.9 | 3244610  | 4446546  | 2641175  | 3603656  |
| 9.960817 | 4  | 1 | 3 | 480835.1 | 1261747  | 356745.1 | 1048122  | 542070.5 | 978031.3 | 1128760  | 1881114  | 1102380  |
| 10.008   | 8  | 5 | 3 | 2148534  | 971471.5 | 514938.9 | 1876274  | 2608362  | 868376.5 | 600155.4 | 1491391  | 1514753  |
| 10.9645  | 10 | 5 | 5 | 1967596  | 9617839  | 2164832  | 8676340  | 1902017  | 11542077 | 11911416 | 7685886  | 7163843  |
| 26.066   | 6  | 3 | 3 | 88681.39 | 280268.5 | 170717   | 214759.2 | 101204   | 213095.7 | 585394.6 | 194424.8 | 207763.9 |
| 9.983467 | 6  | 3 | 3 | 1444999  | 1150749  | 471906.4 | 1893857  | 2135995  | 1843155  | 520044.1 | 1040816  | 1187493  |
| 11.16645 | 7  | 3 | 4 | 489331.5 | 680331.3 | 87109.74 | 944731.7 | 768752.6 | 613766.5 | 767395.8 | 585549   | 660032.7 |
| 9.9677   | 10 | 5 | 5 | 1599522  | 3290022  | 690597.3 | 2883738  | 1025676  | 3962202  | 2504611  | 3657165  | 2583423  |
| 10.008   | 7  | 4 | 3 | 1896791  | 1645397  | 2172117  | 2864084  | 3015730  | 708774.9 | 979753.7 | 613183.2 | 411525.5 |
| 9.979667 | 10 | 5 | 5 | 559645.8 | 2276275  | 409316.3 | 1998001  | 735164.7 | 2311626  | 2757081  | 2218218  | 1641370  |
| 10.97857 | 9  | 5 | 3 | 220689.6 | 716451   | 194271.3 | 624866   | 202527.6 | 769475.9 | 846897.6 | 918535   | 434306.3 |
| 9.379233 | 5  | 3 | 2 | 2512206  | 2978270  | 984019.1 | 5134805  | 6248537  | 2609125  | 2883844  | 4564865  | 1878189  |

|          |    |   |   |          |          |          |          |          |          |          |          |          |
|----------|----|---|---|----------|----------|----------|----------|----------|----------|----------|----------|----------|
| 9.9847   | 4  | 1 | 3 | 4827727  | 2435044  | 2083890  | 6952461  | 13088159 | 3416442  | 246141.1 | 2832861  | 5198902  |
| 9.445217 | 6  | 2 | 3 | 1853924  | 6663754  | 1828064  | 5464454  | 3139999  | 4346748  | 6683616  | 7160127  | 9314937  |
| 11.07845 | 6  | 2 | 4 | 1464655  | 3892462  | 2167445  | 2510772  | 3588810  | 6166741  | 1172198  | 5022029  | 5085196  |
| 9.447733 | 10 | 3 | 4 | 3113869  | 15650726 | 11526615 | 11002826 | 8264542  | 27470034 | 5029066  | 7214161  | 9742354  |
| 10.96997 | 5  | 2 | 3 | 343236.5 | 1137326  | 373447   | 911608.9 | 576363.7 | 858204.1 | 1669213  | 920394.6 | 1392663  |
| 21.8975  | 10 | 5 | 5 | 579841.6 | 5212653  | 1194727  | 4710866  | 965259.7 | 4751375  | 6928932  | 5842713  | 3835734  |
| 9.406667 | 7  | 3 | 3 | 4618780  | 10889162 | 3633923  | 19024189 | 23604318 | 14626140 | 5396633  | 10906175 | 13652786 |
| 33.37033 | 9  | 5 | 4 | 180473.9 | 573311.6 | 322295.6 | 706022.5 | 246619.8 | 857970.4 | 322673.5 | 169274.9 | 899645.5 |
| 9.498117 | 16 | 5 | 5 | 2831549  | 17161837 | 10856552 | 13015756 | 6351099  | 29038942 | 646668   | 24500290 | 15543756 |
| 10.57323 | 10 | 5 | 5 | 1738795  | 7863240  | 1616824  | 6948353  | 2277650  | 8622441  | 8837523  | 6306261  | 5973445  |
| 10.9645  | 6  | 3 | 3 | 470572.7 | 856065.5 | 292979.6 | 1102179  | 677833.1 | 780292.4 | 1083488  | 1076429  | 380120.6 |
| 9.56645  | 8  | 3 | 4 | 3182473  | 15964741 | 9778497  | 11551701 | 9374923  | 26336874 | 19997551 | 21116140 | 1666106  |
| 9.7565   | 7  | 4 | 3 | 654773.6 | 722039   | 234850.2 | 899645.8 | 481233   | 519995.4 | 1110456  | 653580.7 | 570101.9 |
| 9.67     | 6  | 4 | 2 | 274924.8 | 903626.2 | 446433.6 | 725764.9 | 308915.2 | 1486764  | 871776.2 | 533461.5 | 424012.9 |
| 9.457083 | 4  | 3 | 1 | 481251.3 | 1064385  | 233681.9 | 927778.8 | 345024.4 | 1365428  | 1030017  | 1233783  | 884073.7 |
| 2.6517   | 6  | 2 | 4 | 272103.6 | 13754927 | 11827870 | 18050482 | 5162613  | 2428259  | 1867718  | 13074066 | 27125679 |
| 10.008   | 6  | 4 | 2 | 307587.3 | 535630.8 | 202673.7 | 680130.9 | 387249.4 | 640519.6 | 755608.8 | 639092.8 | 286271.1 |
| 14.84005 | 5  | 3 | 2 | 60301.65 | 165349.8 | 186748.9 | 99716.65 | 56130.24 | 469511.8 | 221317.2 | 33738.69 | 36566.28 |
| 22.104   | 10 | 5 | 5 | 6957043  | 50092495 | 5243184  | 53457478 | 8784680  | 49671615 | 54657147 | 42452418 | 48342941 |
| 10.95602 | 10 | 5 | 5 | 226961.1 | 1047434  | 241396.8 | 939130.1 | 229126.6 | 1158269  | 1355019  | 850726.5 | 759202   |
| 10.9645  | 10 | 5 | 5 | 700120   | 3308950  | 718482   | 2988635  | 672967.7 | 3972490  | 4037687  | 2666740  | 2486822  |
| 10.97857 | 10 | 5 | 5 | 2982421  | 18975455 | 5095613  | 16952152 | 3500874  | 23521015 | 18457451 | 16359741 | 12142055 |
| 10.95835 | 8  | 3 | 4 | 791006.9 | 1888418  | 920073.2 | 2435926  | 1394723  | 280783.9 | 2221534  | 2303507  | 2045117  |
| 9.94455  | 10 | 5 | 5 | 3210911  | 4459548  | 1024161  | 6027750  | 4522350  | 5634293  | 5031620  | 4842750  | 3585589  |
| 10.95835 | 10 | 5 | 5 | 230046.3 | 1173218  | 236275.7 | 1069556  | 213954.8 | 1312077  | 1426139  | 916322   | 925551.5 |
| 9.946467 | 4  | 1 | 3 | 1002101  | 2049258  | 468287.5 | 2744773  | 2004613  | 1791680  | 1698357  | 2602198  | 2513154  |
| 18.7475  | 10 | 5 | 5 | 2201557  | 15555672 | 2523913  | 13396469 | 5980246  | 19171972 | 13111821 | 13233757 | 15695332 |
| 10.9645  | 10 | 5 | 5 | 911392.3 | 4229456  | 806313.1 | 3789876  | 1079842  | 4171460  | 5207878  | 3318043  | 3588878  |
| 18.45317 | 5  | 3 | 2 | 9723597  | 68962696 | 12770537 | 85804514 | 48326835 | 57769648 | 87568192 | 76722138 | 63049401 |
| 9.880683 | 10 | 5 | 5 | 9258740  | 17551441 | 4216871  | 26239989 | 25265101 | 15861827 | 14634845 | 19357614 | 24079048 |
| 9.856867 | 10 | 5 | 5 | 1079350  | 4921976  | 1128484  | 4245963  | 1729582  | 6071048  | 6078158  | 3555250  | 4199313  |
| 10.94853 | 5  | 2 | 3 | 231945.1 | 882310.6 | 384423.2 | 727472.3 | 278133.8 | 611345.7 | 867037.4 | 544093.9 | 871964.9 |
| 9.920517 | 10 | 5 | 5 | 4915972  | 11691816 | 5804656  | 8859790  | 6500880  | 14177268 | 8416887  | 5602630  | 9786182  |
| 9.4468   | 11 | 5 | 5 | 1904879  | 12638343 | 4969596  | 9939653  | 6621732  | 14246631 | 16146694 | 17996100 | 7807575  |
| 9.4468   | 9  | 5 | 4 | 1390398  | 2703629  | 1021646  | 4800386  | 6099932  | 1120246  | 3251538  | 3686101  | 3177950  |

|          |    |   |   |          |          |          |          |          |          |          |          |          |
|----------|----|---|---|----------|----------|----------|----------|----------|----------|----------|----------|----------|
| 10.07528 | 11 | 5 | 5 | 8686403  | 23158811 | 8988785  | 30415005 | 19955952 | 30264147 | 33213390 | 19501586 | 22198667 |
| 20.782   | 6  | 4 | 2 | 188629.9 | 862461.6 | 266170.3 | 714882.6 | 366067.2 | 902244.3 | 1217202  | 672319.7 | 982671   |
| 24.63633 | 5  | 2 | 3 | 37572.53 | 83793.65 | 54942.06 | 121712.9 | 101238   | 169148   | 47336.63 | 75867.57 | 27545.67 |
| 9.976317 | 10 | 5 | 5 | 4736724  | 6910627  | 2958862  | 9103814  | 5945355  | 9164178  | 9879150  | 7976927  | 4098117  |
| 7.333667 | 10 | 5 | 5 | 3196969  | 23788202 | 3598686  | 20348460 | 9662794  | 19891628 | 27052856 | 21598870 | 22267276 |
| 28.30267 | 9  | 5 | 4 | 119451   | 410054.6 | 166890.6 | 331271   | 176289.5 | 575840.5 | 549184.4 | 209678.6 | 260437.4 |
| 15.58545 | 10 | 5 | 5 | 249964   | 1925727  | 324150.4 | 1730843  | 499963   | 2384318  | 1983412  | 2030684  | 1578503  |
| 44.50917 | 9  | 5 | 4 | 101883.8 | 483472.5 | 74663.96 | 419576.9 | 177293.5 | 581055.7 | 392780   | 517339.9 | 498965.3 |
| 9.992233 | 8  | 4 | 4 | 581967.8 | 1378420  | 410806.1 | 1151880  | 560881   | 1511139  | 1930023  | 1459451  | 1159630  |
| 9.8322   | 6  | 3 | 3 | 656709.4 | 1309412  | 668086.1 | 1003277  | 666439.6 | 1807579  | 2136115  | 1235005  | 501995.8 |
| 9.856867 | 10 | 5 | 5 | 11094877 | 73381948 | 8314363  | 65139694 | 23255766 | 72404718 | 71863218 | 65742930 | 69406773 |
| 24.6235  | 9  | 4 | 5 | 460366   | 1435320  | 356435.9 | 1877240  | 1266810  | 1957567  | 1309001  | 1376823  | 984526.2 |
| 10.97857 | 9  | 5 | 4 | 191727.3 | 676603   | 273435.4 | 785781.4 | 193530.7 | 541283   | 804602   | 360040.6 | 602207.7 |
| 9.858833 | 10 | 5 | 5 | 26803038 | 1.52E+08 | 12316400 | 1.45E+08 | 17171695 | 1.68E+08 | 1.59E+08 | 1.35E+08 | 1.48E+08 |
| 9.55155  | 9  | 5 | 4 | 286973   | 645514.6 | 145967.8 | 540055.9 | 284941.4 | 620330   | 876649.3 | 484178.5 | 577686.3 |
| 9.9847   | 11 | 5 | 5 | 1168750  | 4185344  | 844849.6 | 3796416  | 852673.8 | 5095185  | 4433466  | 4541906  | 4016165  |
| 10.04033 | 5  | 3 | 2 | 533040.6 | 1596466  | 533938.3 | 1320339  | 661988.4 | 931612.4 | 1541074  | 2304349  | 1914167  |
| 9.68775  | 9  | 5 | 4 | 575057.8 | 2098058  | 643495.8 | 1795014  | 678749.2 | 1550487  | 2634423  | 2190241  | 2784567  |
| 9.920517 | 3  | 0 | 3 | 1796987  | 1070320  | 732553.5 | 2425831  | 3945219  | 1327842  | 0        | 2029912  | 1035938  |
| 9.992233 | 8  | 4 | 4 | 407109.9 | 801318.9 | 243090.3 | 638208.2 | 433626.6 | 918302.7 | 1069210  | 691986   | 888275.5 |
| 26.0395  | 10 | 5 | 5 | 890549.4 | 9648456  | 4433626  | 7695972  | 4082974  | 6864503  | 13018426 | 4271730  | 8950556  |
| 9.952017 | 10 | 5 | 5 | 1465007  | 5178658  | 863874.3 | 4735791  | 1057632  | 6349004  | 5795077  | 4863333  | 4279483  |
| 20.99967 | 6  | 4 | 2 | 52776.2  | 225331.2 | 105360.5 | 288271   | 161637   | 127379.4 | 400495.5 | 172662.6 | 190134.5 |
| 11.3403  | 7  | 4 | 3 | 24299956 | 5.61E+08 | 56038119 | 5.24E+08 | 99943362 | 6.22E+08 | 6.23E+08 | 5.26E+08 | 5.18E+08 |
| 19.69517 | 5  | 1 | 4 | 126886.5 | 471731.4 | 182413.3 | 399123.1 | 128625.9 | 452657.7 | 409032.5 | 339071.8 | 788964.4 |
| 9.3735   | 6  | 2 | 4 | 1171932  | 6665589  | 2749149  | 5381850  | 2860392  | 2630622  | 5118674  | 9390855  | 7935496  |
| 37.02933 | 8  | 4 | 4 | 369506.2 | 2378732  | 1188183  | 1944170  | 571865.9 | 1595936  | 1536840  | 1445203  | 3356304  |
| 9.983433 | 3  | 0 | 3 | 899620.9 | 1729877  | 1111646  | 1232962  | 1060284  | 3112700  | 139808.6 | 2314426  | 1752922  |
| 42.27983 | 5  | 2 | 3 | 2874653  | 21693139 | 15934017 | 14169615 | 16941824 | 3596610  | 33679517 | 34383155 | 31851813 |
| 10.9645  | 10 | 5 | 5 | 1080175  | 2157808  | 840074.8 | 2785431  | 1711076  | 3042006  | 3097721  | 1622383  | 1370949  |
| 10.95095 | 6  | 2 | 3 | 383117.2 | 1015183  | 426909.6 | 773367.2 | 608989.5 | 614869.7 | 1226883  | 739373.6 | 835068.6 |
| 10.96997 | 8  | 5 | 3 | 269361.3 | 1040430  | 307607.3 | 856897.5 | 471886.4 | 996169.2 | 794698   | 723890.8 | 1217190  |
| 21.75167 | 10 | 5 | 5 | 429510.7 | 2415753  | 1037923  | 1899015  | 1213182  | 2424813  | 698799.7 | 3056805  | 3385695  |
| 10.9645  | 10 | 5 | 5 | 1495873  | 2796788  | 721943.7 | 3713305  | 2640411  | 3462226  | 3636846  | 2640277  | 2091227  |
| 10.008   | 6  | 3 | 3 | 287719.7 | 622947.3 | 156593.2 | 525134   | 255611.1 | 708686.6 | 485627   | 819655.4 | 656808.7 |

|          |    |   |   |          |          |          |          |          |          |          |          |          |
|----------|----|---|---|----------|----------|----------|----------|----------|----------|----------|----------|----------|
| 9.94455  | 10 | 5 | 5 | 3913663  | 6256925  | 1367413  | 8019581  | 5082301  | 7694248  | 7081227  | 6880331  | 5117362  |
| 9.976317 | 16 | 5 | 4 | 1116606  | 1597624  | 587818.4 | 1272172  | 812352.1 | 2569342  | 1324405  | 1600063  | 1004694  |
| 9.041133 | 6  | 3 | 3 | 336514.3 | 534099   | 340702   | 385777.6 | 307496.7 | 627019.9 | 998049.2 | 414607.3 | 570848.9 |
| 9.960817 | 8  | 4 | 4 | 542574.3 | 1302740  | 391000.7 | 1059157  | 636345.1 | 1476281  | 1474729  | 1006695  | 796873.3 |
| 9.43325  | 7  | 3 | 3 | 1765847  | 12185094 | 3357595  | 10627245 | 3466511  | 11656014 | 10646212 | 14519325 | 16350890 |
| 9.992233 | 10 | 5 | 5 | 740390.9 | 5318601  | 307546.9 | 5015047  | 860648.6 | 5771710  | 5306095  | 4973388  | 5427677  |
| 9.992233 | 10 | 5 | 5 | 2451214  | 2693910  | 801065   | 3900425  | 3505941  | 3500809  | 3079717  | 3220839  | 1907110  |
| 12.22317 | 4  | 3 | 1 | 371158   | 3108112  | 1400197  | 3879491  | 1924486  | 2856413  | 2032069  | 5480405  | 3058944  |
| 42.74017 | 5  | 2 | 3 | 213617.5 | 2759498  | 430125.9 | 2539108  | 528875.9 | 2847165  | 2879126  | 2832198  | 2039177  |
| 21.697   | 6  | 4 | 2 | 130150   | 486985.3 | 182238.3 | 404735.2 | 178272.5 | 387446.8 | 784043   | 538762.1 | 340694.1 |
| 10.008   | 10 | 5 | 4 | 719037.1 | 1177270  | 427112.8 | 974348.6 | 461536.8 | 693720.4 | 1159056  | 830418   | 1514496  |
| 10.01477 | 10 | 5 | 5 | 692039.8 | 2322733  | 735723.8 | 2003527  | 660987.4 | 2950599  | 2852831  | 1264269  | 1845992  |
| 10.22632 | 7  | 4 | 3 | 385108.1 | 898392.3 | 480260.5 | 731422.9 | 140186.6 | 296889.3 | 1405630  | 1211987  | 1089651  |
| 31.2965  | 10 | 5 | 5 | 722238.3 | 4719248  | 670620.7 | 4171963  | 1519000  | 3910557  | 5640687  | 4257757  | 4788472  |
| 10.00998 | 3  | 3 | 0 | 434895.5 | 720050   | 495025.6 | 525554.1 | 338031.4 | 1420531  | 156553   | 828083.6 | 342285.9 |
| 9.0035   | 8  | 4 | 4 | 2167853  | 3996713  | 2328787  | 6679321  | 7704058  | 4200458  | 6509261  | 5952159  | 2209586  |
| 25.89433 | 5  | 4 | 0 | 18345608 | 1.5E+08  | 1.5E+08  | 98558823 | 32388136 | 26864372 | 4.1E+08  | 1.32E+08 | 83128490 |
| 10.64557 | 7  | 3 | 4 | 251228.4 | 514025.1 | 148885   | 442087.4 | 166093   | 535749.4 | 654675.6 | 640725.9 | 442209.4 |
| 9.419733 | 10 | 5 | 5 | 1478937  | 5170226  | 2904597  | 6991137  | 4779905  | 9162757  | 6848998  | 4806322  | 1895446  |
| 9.36565  | 4  | 3 | 1 | 555265.6 | 1130160  | 783181.2 | 737662.8 | 930486.3 | 1569044  | 299212.2 | 254630.9 | 1748930  |
| 9.856867 | 10 | 5 | 5 | 3826927  | 20436691 | 936280.9 | 22354078 | 5621819  | 22045497 | 20221565 | 20274189 | 20030436 |
| 9.976317 | 11 | 4 | 4 | 449346.7 | 1115529  | 312384.2 | 901299.6 | 576165.3 | 1568187  | 1274344  | 904542.1 | 782049.5 |
| 9.900133 | 9  | 4 | 5 | 3773755  | 5389858  | 2898873  | 8742564  | 9636166  | 5129503  | 4481124  | 10032705 | 5254658  |
| 9.314683 | 8  | 4 | 3 | 1219836  | 2319300  | 423912.1 | 1957655  | 1011399  | 2323942  | 2539550  | 2169212  | 1714030  |
| 9.93625  | 4  | 1 | 3 | 816323.8 | 1642546  | 765713.8 | 1994671  | 780313.7 | 2163680  | 441259   | 1335312  | 1980132  |
| 9.976317 | 7  | 4 | 3 | 584243.1 | 1162649  | 353330.4 | 1006402  | 332324.5 | 1189424  | 1413662  | 1007590  | 1550767  |
| 9.66805  | 6  | 4 | 2 | 406704.8 | 1817279  | 1217413  | 1289247  | 1096984  | 2901635  | 1715890  | 1016951  | 296788   |
| 8.89395  | 11 | 5 | 5 | 2543274  | 16923046 | 3890223  | 14573352 | 6099966  | 16249436 | 22756135 | 14633654 | 12598657 |
| 9.946467 | 9  | 5 | 4 | 928343.6 | 2910105  | 901131   | 2471348  | 1021260  | 4001227  | 3370833  | 1999107  | 1953256  |
| 28.54317 | 10 | 5 | 5 | 4153194  | 50599564 | 24475459 | 40095954 | 21540572 | 32025081 | 59890505 | 19728263 | 60537549 |
| 9.582167 | 7  | 5 | 2 | 409001   | 2082405  | 918987.4 | 1609705  | 1141323  | 2944503  | 2050253  | 1414264  | 958812   |
| 9.541433 | 8  | 3 | 4 | 4361428  | 18567541 | 5153090  | 15451784 | 8097842  | 14803247 | 17209745 | 23718708 | 24195206 |
| 9.445217 | 7  | 4 | 3 | 1463593  | 6418522  | 2511655  | 5393750  | 1941611  | 9700349  | 7999580  | 5017950  | 3271720  |
| 22.11983 | 5  | 4 | 1 | 52857.02 | 157995.8 | 48122.73 | 186231.9 | 72620.38 | 206867.1 | 96802.1  | 121608.5 | 199954.1 |
| 9.536783 | 5  | 3 | 2 | 556671.8 | 923673.7 | 436493   | 757700.9 | 264922.6 | 1225062  | 1280158  | 1178677  | 643999   |

|          |    |   |   |          |          |          |          |          |          |          |          |          |
|----------|----|---|---|----------|----------|----------|----------|----------|----------|----------|----------|----------|
| 9.960467 | 10 | 5 | 5 | 6298372  | 18781651 | 2101364  | 16269432 | 7247139  | 20802972 | 20799763 | 15927421 | 17616590 |
| 10.57323 | 10 | 5 | 5 | 8592889  | 43592589 | 6275476  | 40221919 | 8340976  | 47499442 | 51651288 | 39256419 | 35942919 |
| 9.842    | 4  | 3 | 1 | 982205.2 | 3315597  | 1708511  | 4094854  | 1716925  | 5777366  | 3911288  | 2658393  | 3102475  |
| 19.12583 | 3  | 3 | 0 | 380932.9 | 1707251  | 448208.7 | 2243132  | 1546257  | 2127063  | 952594   | 1716250  | 1821981  |
| 10.9645  | 10 | 5 | 5 | 3236932  | 14963962 | 3564400  | 13314570 | 3685850  | 18279790 | 18679253 | 11767804 | 10990662 |
| 19.85467 | 4  | 3 | 1 | 102252.7 | 451936.8 | 297394.5 | 586653.4 | 295029.6 | 836372.3 | 249195.5 | 334388   | 146913.4 |
| 10.95602 | 8  | 4 | 4 | 330314.7 | 1237009  | 126886.9 | 1081956  | 448100.9 | 1083335  | 1364261  | 1132496  | 1352961  |
| 9.858833 | 10 | 5 | 5 | 1479037  | 9232241  | 640907.5 | 9780188  | 1535898  | 9630917  | 8183091  | 9701561  | 9593669  |
| 9.960467 | 7  | 4 | 3 | 1262432  | 1992563  | 954592.2 | 1607376  | 716346.4 | 2793231  | 3105680  | 1956640  | 1039209  |
| 9.952017 | 10 | 5 | 5 | 3211527  | 12165395 | 1751739  | 10709576 | 4066373  | 14066137 | 13865627 | 10536996 | 10413097 |
| 9.221317 | 3  | 3 | 0 | 1345702  | 3489897  | 2979117  | 4979023  | 3539159  | 1420815  | 6827654  | 6671990  | 1420151  |
| 9.976317 | 8  | 4 | 4 | 583314.3 | 1720755  | 535446.6 | 1361487  | 964201.7 | 2006623  | 2384494  | 1718496  | 950599   |
| 36.23683 | 6  | 2 | 4 | 239740   | 697602.4 | 789662.8 | 423740.6 | 234915   | 329172.7 | 463233.3 | 318172.2 | 2104480  |
| 9.46325  | 9  | 4 | 4 | 2675492  | 16597708 | 7617400  | 13393916 | 6408732  | 13194675 | 4730743  | 22789944 | 20865490 |
| 9.992233 | 7  | 3 | 4 | 531484.3 | 585929.9 | 362369.7 | 762095.5 | 410908   | 830691.5 | 0        | 930045.5 | 626913.2 |
| 9.912633 | 10 | 5 | 5 | 12374587 | 71042086 | 25877198 | 62029227 | 8318894  | 60099986 | 59094173 | 52082912 | 1.16E+08 |
| 10.97857 | 4  | 3 | 1 | 1353125  | 2319952  | 1028746  | 2844628  | 1264505  | 4009904  | 1216211  | 1972851  | 2129600  |
| 9.983433 | 10 | 5 | 5 | 774737.9 | 2118556  | 256605.4 | 1982221  | 336304.3 | 2421177  | 2337043  | 1965121  | 1806394  |
| 9.992233 | 6  | 3 | 3 | 442052.2 | 780755.6 | 345443.8 | 936279.8 | 339240.6 | 725464.8 | 323144   | 1291318  | 827658.1 |
| 9.856867 | 3  | 0 | 3 | 2520538  | 4818934  | 1201920  | 7024766  | 6476784  | 5026273  | 2910159  | 4842819  | 5072741  |
| 9.992233 | 9  | 5 | 4 | 800623.8 | 2655868  | 737042.9 | 2229698  | 1092842  | 3619274  | 3170524  | 2296954  | 1761002  |
| 9.161683 | 3  | 3 | 0 | 255915.8 | 547948.5 | 338534.4 | 368175.6 | 443492   | 898004.4 | 875154.2 | 146712.5 | 531865.9 |
| 39.40267 | 5  | 1 | 3 | 312112.6 | 3570899  | 158009.4 | 4014257  | 1310099  | 3517055  | 3480674  | 3851011  | 3526449  |
| 37.029   | 4  | 3 | 0 | 417578.6 | 5189570  | 1436899  | 5680072  | 298415.2 | 3620581  | 5836093  | 3725679  | 6823587  |
| 24.6525  | 4  | 3 | 1 | 216213.2 | 888636.6 | 875785.6 | 1229422  | 587007   | 167663.1 | 312373.3 | 1708573  | 1972839  |
| 10.98605 | 10 | 5 | 5 | 3897083  | 15554530 | 4063508  | 13215083 | 5992951  | 18819583 | 17861070 | 9032529  | 14148306 |
| 9.912633 | 10 | 5 | 5 | 57545112 | 6.59E+08 | 56254934 | 6.21E+08 | 1.02E+08 | 6.83E+08 | 6.42E+08 | 6.02E+08 | 6.24E+08 |
| 40.30917 | 4  | 0 | 4 | 328571.6 | 6095866  | 315603.8 | 5606773  | 1430750  | 5855538  | 5680699  | 6240304  | 6443183  |
| 10.67637 | 9  | 4 | 5 | 187183.3 | 829392   | 110777.3 | 904654.2 | 203018.6 | 730750   | 978498.6 | 834984   | 889457.1 |
| 39.24433 | 8  | 2 | 5 | 412028   | 5618590  | 428360.3 | 4942295  | 1979988  | 5509004  | 5081845  | 6108005  | 5998733  |
| 21.73783 | 10 | 5 | 5 | 2101171  | 13368920 | 5713202  | 10827696 | 5484902  | 13299129 | 4159257  | 16742461 | 19230423 |
| 42.53883 | 11 | 4 | 1 | 215525.3 | 2452275  | 2141395  | 1724925  | 374671   | 239511.1 | 5836403  | 1595088  | 1517522  |
| 9.872917 | 10 | 5 | 5 | 6149424  | 25627301 | 3378208  | 27838773 | 5916878  | 22164334 | 23096768 | 25054224 | 30548431 |
| 18.995   | 8  | 4 | 4 | 206555.6 | 383848.4 | 254087.4 | 587271.6 | 566900.5 | 813229.6 | 232330.3 | 219714.8 | 420548.4 |
| 15.7312  | 6  | 4 | 2 | 46461.44 | 248504.7 | 112062.7 | 204819.9 | 76035.06 | 428817.1 | 183142.4 | 286018.5 | 186720.5 |

|          |    |   |   |          |          |          |          |          |          |          |          |          |
|----------|----|---|---|----------|----------|----------|----------|----------|----------|----------|----------|----------|
| 10.92208 | 5  | 3 | 2 | 147439.6 | 365052.2 | 153123   | 296842.1 | 147893   | 581779.9 | 347992.3 | 200768.9 | 250124   |
| 10.008   | 10 | 5 | 5 | 479779.5 | 1136001  | 429588.7 | 1385804  | 644482.9 | 1368651  | 1744911  | 1078711  | 708728.1 |
| 10.45545 | 7  | 3 | 4 | 93976.12 | 191187.4 | 121699   | 248356.9 | 130538.5 | 367736.5 | 228025.9 | 84615.24 | 68304.69 |
| 10.9645  | 10 | 5 | 5 | 542192.4 | 2689609  | 571211.3 | 2471704  | 358476.8 | 3375682  | 3218558  | 2250410  | 2127343  |
| 13.27447 | 13 | 5 | 5 | 657119.2 | 1037733  | 447649.6 | 1612313  | 1672358  | 1733612  | 976143.4 | 578483.6 | 1159126  |
| 9.975217 | 10 | 5 | 5 | 11765279 | 6544151  | 1885678  | 9925516  | 9960426  | 8040256  | 6917563  | 8178617  | 6024011  |
| 10.95835 | 10 | 5 | 5 | 312630.5 | 1457609  | 257594.3 | 1294720  | 432923.3 | 1544443  | 1809236  | 1203679  | 1202969  |
| 40.30917 | 6  | 3 | 1 | 316435.6 | 5059976  | 1783646  | 5908336  | 1961406  | 5148770  | 7713297  | 2808187  | 4321454  |
| 10.02372 | 9  | 5 | 4 | 257524.2 | 936835.3 | 210393.9 | 789439.6 | 402036.6 | 783374.4 | 801454.4 | 765871.7 | 1177811  |
| 9.872883 | 10 | 5 | 5 | 7857239  | 25095772 | 4757635  | 29382528 | 12165321 | 28324773 | 26365650 | 30183061 | 22129369 |
| 9.445217 | 9  | 5 | 4 | 1481809  | 8371449  | 2472794  | 7006902  | 3451316  | 9049370  | 10265549 | 10924849 | 5193583  |
| 9.960467 | 8  | 4 | 4 | 2430804  | 5171987  | 2230406  | 4239716  | 1870358  | 7651852  | 1677708  | 5324726  | 4846332  |
| 40.74067 | 7  | 2 | 5 | 396758.5 | 8242898  | 6029537  | 6064885  | 2884532  | 5839261  | 5244801  | 19021815 | 5635272  |
| 9.392767 | 8  | 5 | 3 | 802369.9 | 1776291  | 531719.9 | 1325921  | 1269194  | 2510861  | 2175515  | 1416251  | 1350965  |
| 10.9645  | 9  | 5 | 3 | 284010.8 | 790811   | 83536.66 | 861714.8 | 199945.3 | 722986.3 | 910772.8 | 704326.3 | 787333.1 |
| 9.431017 | 14 | 5 | 5 | 972426.8 | 7389941  | 1683151  | 6639815  | 1635716  | 6351199  | 8658536  | 9660211  | 5713124  |
| 9.43325  | 12 | 4 | 5 | 3317825  | 9296326  | 2877535  | 7778340  | 3760557  | 7186417  | 8662958  | 11348942 | 13092471 |
| 26.34667 | 6  | 4 | 2 | 262054.3 | 1704881  | 991220.2 | 1314422  | 703894   | 884224.3 | 2209517  | 681084.2 | 1648076  |
| 29.84867 | 7  | 4 | 3 | 20909956 | 18710113 | 41319942 | 42382405 | 60927221 | 291292.9 | 92625442 | 202843.9 | 196366.4 |
| 9.999217 | 10 | 5 | 5 | 867352.6 | 2497952  | 598782.6 | 2148728  | 905162.2 | 3192514  | 2853011  | 2552165  | 1619296  |
| 10.94208 | 10 | 5 | 5 | 379320.8 | 2093759  | 625916.9 | 1818412  | 592463.9 | 2627639  | 2668075  | 1486656  | 1364621  |
| 30.266   | 8  | 4 | 4 | 257640.3 | 1866952  | 218106.1 | 2095452  | 658571.5 | 1805774  | 2250371  | 1742498  | 1720732  |
| 9.976317 | 5  | 2 | 3 | 3412100  | 1427813  | 676651.1 | 3327848  | 5646725  | 912215.3 | 928977.8 | 2453597  | 1785766  |
| 9.374083 | 6  | 3 | 3 | 684131.6 | 1058830  | 528137.7 | 840661.7 | 431492.4 | 1410229  | 318867.4 | 728303.6 | 1222286  |
| 9.445217 | 7  | 5 | 2 | 910984.1 | 5785995  | 2001152  | 4437284  | 3654350  | 7264062  | 8121686  | 6033625  | 3941768  |
| 10.008   | 8  | 5 | 3 | 1547108  | 2529190  | 1356123  | 3204454  | 1618906  | 3017059  | 4707638  | 1628984  | 1682687  |
| 9.544833 | 12 | 5 | 5 | 574916   | 2804549  | 1155952  | 3924842  | 3209776  | 3908053  | 3927853  | 2934284  | 1815869  |
| 9.848417 | 10 | 5 | 5 | 4604366  | 14344078 | 2741559  | 16973545 | 7527221  | 16754654 | 17423833 | 10761204 | 13153029 |
| 25.08883 | 5  | 3 | 2 | 70388.5  | 316461.9 | 145716.5 | 264763.7 | 61835.31 | 288887   | 464069.9 | 186115.4 | 171050.8 |
| 10.008   | 10 | 5 | 5 | 1134804  | 2066891  | 542742.5 | 2566915  | 1425807  | 2204642  | 2759419  | 2307535  | 1686926  |
| 9.94455  | 6  | 3 | 3 | 1296604  | 2853869  | 1324276  | 2254621  | 1331429  | 903918.9 | 2259231  | 3759377  | 4263196  |
| 9.845483 | 9  | 5 | 4 | 3384385  | 9196596  | 3780627  | 6899379  | 6050208  | 9093764  | 9786486  | 5320272  | 6645964  |
| 10.9645  | 10 | 5 | 5 | 379109.8 | 1842513  | 384837.9 | 1669584  | 381760.4 | 2218813  | 2195215  | 1520424  | 1374604  |
| 9.536783 | 10 | 5 | 5 | 1439032  | 4332361  | 967570.8 | 3676631  | 1781184  | 4744169  | 5155651  | 4571616  | 4531477  |
| 14.92695 | 3  | 3 | 0 | 163454.2 | 580085.2 | 336999.5 | 714315.9 | 249295.4 | 122754.1 | 709593.4 | 373335.6 | 701218.8 |

|          |    |   |   |          |          |          |          |          |          |          |          |          |
|----------|----|---|---|----------|----------|----------|----------|----------|----------|----------|----------|----------|
| 10.9645  | 9  | 5 | 4 | 694154.8 | 1641459  | 494928   | 2028352  | 1080884  | 2008778  | 1968844  | 1858333  | 814732.3 |
| 9.992233 | 10 | 5 | 5 | 776688.2 | 3230660  | 382676.2 | 2963396  | 731225.1 | 2993506  | 3778570  | 3173538  | 2792484  |
| 9.872917 | 6  | 2 | 4 | 1117678  | 3554815  | 1054134  | 3018143  | 1307559  | 4719218  | 2920827  | 4492698  | 3424590  |
| 9.4775   | 6  | 2 | 3 | 1308542  | 2679598  | 868949.4 | 4396795  | 5088210  | 2390966  | 2699986  | 1691261  | 2542954  |
| 10.93618 | 7  | 4 | 3 | 219582.7 | 467268.2 | 225873.6 | 351390.6 | 283707.6 | 712078.8 | 614450.4 | 123081.2 | 405461.6 |
| 9.8322   | 7  | 3 | 4 | 711216   | 1832791  | 631582.9 | 1447972  | 1015707  | 1778200  | 2428692  | 1064544  | 1388785  |
| 22.90033 | 10 | 5 | 5 | 337167.1 | 2115493  | 633220.3 | 1870800  | 424936.4 | 1694073  | 1764483  | 1911219  | 1977598  |
| 10.9645  | 7  | 4 | 3 | 199432.5 | 548694.7 | 197301.8 | 684463.9 | 370780.2 | 803674.5 | 612399.2 | 565322.2 | 503810.4 |
| 9.43325  | 9  | 5 | 2 | 588897.3 | 4885668  | 1206914  | 5321245  | 589787.6 | 6421045  | 5067249  | 5520086  | 3343073  |
| 9.856867 | 10 | 5 | 5 | 2049676  | 4448821  | 313761.2 | 6097877  | 4930355  | 4776404  | 4793195  | 4130316  | 4227540  |
| 26.78117 | 9  | 5 | 4 | 3097592  | 11491156 | 4913593  | 15459413 | 11162841 | 19858893 | 9502968  | 6910338  | 10586014 |
| 9.445217 | 14 | 5 | 5 | 2399676  | 23160588 | 6665672  | 20443722 | 5296101  | 30794905 | 26277687 | 26436078 | 15590466 |
| 9.43325  | 6  | 5 | 1 | 675458   | 1929981  | 788853.8 | 1505843  | 1067001  | 3027970  | 1974126  | 1019167  | 1353183  |
| 34.7235  | 4  | 3 | 1 | 315232.4 | 4289879  | 2448640  | 5133872  | 775223.9 | 7307227  | 4788655  | 3672494  | 599116.9 |
| 38.81283 | 8  | 3 | 2 | 237519.6 | 3325696  | 2245369  | 2574798  | 168992.4 | 2780532  | 6899835  | 2956865  | 3303455  |
| 9.983433 | 10 | 5 | 5 | 1733222  | 5604382  | 1145776  | 4777947  | 2281938  | 6198897  | 7073359  | 4987911  | 4070656  |
| 10.94443 | 8  | 5 | 3 | 241312   | 894526.8 | 200927.7 | 785225.2 | 276683   | 772980.9 | 1127848  | 704795.5 | 1096660  |
| 9.392767 | 9  | 5 | 4 | 1698958  | 3079044  | 1067599  | 2528125  | 1357381  | 2961415  | 3960157  | 1852474  | 2272036  |
| 24.8405  | 6  | 3 | 3 | 215768.1 | 1169569  | 686993.6 | 883354   | 578785   | 431215.8 | 1601573  | 478825.1 | 1366599  |
| 9.05635  | 8  | 4 | 4 | 291941.3 | 964533.3 | 612570.4 | 717776   | 472055.1 | 1138290  | 1822171  | 1052202  | 630167   |
| 7.486567 | 6  | 4 | 2 | 726524.3 | 17480136 | 9357397  | 13281193 | 9310603  | 2395853  | 23849679 | 26263799 | 15867427 |
| 9.979667 | 6  | 3 | 3 | 1986172  | 1427392  | 814864.6 | 2569440  | 3360589  | 1972486  | 461160.6 | 2480938  | 1351349  |
| 26.08067 | 10 | 5 | 5 | 3027295  | 35445196 | 14927783 | 28696275 | 15078047 | 24919825 | 46545744 | 16357440 | 36902476 |
| 9.857683 | 5  | 2 | 3 | 1196897  | 1757841  | 372705.2 | 2716956  | 2860238  | 2012769  | 1367024  | 2009190  | 2066218  |
| 9.842    | 9  | 5 | 4 | 2435967  | 9430344  | 1828012  | 8310693  | 2969418  | 10231852 | 9987813  | 6991863  | 8254801  |
| 44.09217 | 4  | 3 | 1 | 386680.9 | 5846990  | 1690274  | 5282541  | 108738.1 | 4634087  | 5283302  | 5061335  | 8822134  |
| 9.416767 | 10 | 2 | 5 | 4561544  | 13246840 | 5127029  | 18717608 | 15867643 | 21735753 | 12492223 | 12557467 | 7823862  |
| 10.008   | 8  | 5 | 3 | 341449.7 | 643961.2 | 142206.6 | 515576.9 | 366828.1 | 809205.6 | 659368.3 | 695698   | 418980.7 |
| 10.008   | 7  | 5 | 2 | 371621.8 | 822341.2 | 87913.57 | 665919.3 | 463805.6 | 956491.8 | 817011.8 | 845986.3 | 727289   |
| 9.853633 | 5  | 1 | 3 | 1638590  | 1550512  | 672794.7 | 2956652  | 4183502  | 1388357  | 1852598  | 2132687  | 1928856  |
| 9.419733 | 13 | 5 | 5 | 8981698  | 81766954 | 22192330 | 72803827 | 17263858 | 1.08E+08 | 85923395 | 95994474 | 55696486 |
| 9.976317 | 8  | 4 | 4 | 698916.3 | 1844293  | 445361   | 1585714  | 673763.6 | 2136652  | 2484647  | 1605679  | 1501547  |
| 22.90033 | 10 | 5 | 5 | 2993488  | 30037652 | 5255760  | 27858467 | 4386483  | 25894758 | 27154593 | 29460965 | 28557692 |
| 9.93625  | 8  | 4 | 4 | 3093750  | 5459850  | 1337349  | 4634964  | 2194786  | 6932009  | 4236490  | 4009599  | 5483867  |
| 10.95055 | 8  | 4 | 4 | 212823.1 | 789380.2 | 451000   | 610465.6 | 333206.6 | 1219244  | 471859.9 | 313344.4 | 628257.3 |

|          |    |   |   |          |          |          |          |          |          |          |          |          |
|----------|----|---|---|----------|----------|----------|----------|----------|----------|----------|----------|----------|
| 10.98605 | 5  | 2 | 3 | 301718.7 | 584237.8 | 183234.3 | 703521.4 | 322457.4 | 514396.4 | 802122.5 | 354912   | 739014.9 |
| 9.859983 | 10 | 5 | 5 | 6643112  | 8472135  | 1426864  | 13438505 | 14866441 | 10138471 | 7012312  | 9447370  | 8771951  |
| 9.887133 | 6  | 3 | 3 | 1351168  | 5041166  | 1540529  | 5602173  | 807898.4 | 2508536  | 4759351  | 6466702  | 5699580  |
| 22.92883 | 10 | 5 | 5 | 184877.4 | 2011808  | 169916.5 | 1909396  | 270668   | 2152776  | 2221490  | 1902852  | 1963654  |
| 9.9677   | 10 | 5 | 5 | 2980893  | 11397920 | 1706439  | 10326096 | 2871989  | 12291795 | 13269049 | 11039006 | 8724475  |
| 21.30933 | 8  | 4 | 4 | 118602.7 | 559310.8 | 179323.6 | 479844.6 | 174791.4 | 447124.1 | 818248.1 | 664929.3 | 487866.9 |
| 9.992233 | 10 | 5 | 5 | 2299700  | 2585622  | 723791.2 | 3774441  | 3526216  | 2730757  | 3081417  | 3377756  | 2164305  |
| 10.008   | 10 | 5 | 5 | 1059233  | 2054114  | 585571.7 | 2531190  | 1349672  | 2232801  | 2774091  | 2323983  | 1651114  |
| 21.98783 | 6  | 2 | 4 | 2214411  | 11637722 | 1040581  | 10745053 | 2542763  | 10009629 | 12544047 | 11412123 | 11687449 |
| 37.93517 | 6  | 1 | 3 | 402860.1 | 4960654  | 1715142  | 4108779  | 2061827  | 4308650  | 3863492  | 8001930  | 4150514  |
| 9.904767 | 10 | 5 | 5 | 2087163  | 5476101  | 1523963  | 4792960  | 1522395  | 6589036  | 7110375  | 4355311  | 3479341  |
| 10.95055 | 10 | 5 | 5 | 212398.6 | 695025.6 | 233128   | 606357.8 | 150288.5 | 864296.7 | 1001575  | 454016.7 | 510107.3 |
| 9.3494   | 4  | 3 | 1 | 307510.9 | 1650839  | 604224.2 | 1328435  | 812780.9 | 2520514  | 1088457  | 1279044  | 1331361  |
| 9.93625  | 10 | 5 | 5 | 3551274  | 12899815 | 3152896  | 11292568 | 3954772  | 16671809 | 13455240 | 8779598  | 10767799 |
| 9.419733 | 9  | 4 | 4 | 1324779  | 2344540  | 1338709  | 3876046  | 4477674  | 3564932  | 560713.7 | 3727815  | 2286508  |
| 9.514733 | 6  | 4 | 2 | 1105251  | 4255293  | 3141591  | 6247272  | 5360277  | 7116689  | 4216240  | 7573630  | 341167   |
| 38.75533 | 6  | 4 | 2 | 453996.8 | 4132394  | 2262603  | 4937044  | 1033143  | 6275757  | 5224476  | 4544184  | 325079.2 |
| 9.37735  | 7  | 3 | 4 | 2043663  | 4596450  | 2208270  | 7226483  | 7709051  | 8258343  | 4108770  | 3448576  | 2467957  |
| 9.94405  | 3  | 0 | 3 | 1620941  | 3016221  | 857490.9 | 2483721  | 1424557  | 4127562  | 1956172  | 3285197  | 2377158  |
| 10.97857 | 7  | 5 | 2 | 264645.2 | 1041277  | 227060.2 | 1159220  | 293431.9 | 1079695  | 1369003  | 849021.6 | 803892.8 |
| 9.8445   | 5  | 3 | 2 | 1526971  | 5396701  | 2156574  | 4573669  | 1411513  | 4473759  | 3276887  | 8398540  | 6874200  |
| 9.994767 | 9  | 5 | 4 | 334634.3 | 1117840  | 252963.6 | 953970.5 | 443825.6 | 1243754  | 1308839  | 1298901  | 715792.8 |
| 25.7095  | 10 | 5 | 5 | 502116.3 | 2587856  | 350033.6 | 2301046  | 813138.6 | 2422406  | 2934645  | 2075052  | 2642781  |
| 9.9351   | 5  | 3 | 2 | 707904.9 | 2055884  | 1006957  | 1703563  | 403875.7 | 3742014  | 1115330  | 1675462  | 1631662  |
| 10.9645  | 10 | 5 | 5 | 2683864  | 12931438 | 2945231  | 11709860 | 2480714  | 15597772 | 16194023 | 10468905 | 9637513  |
| 10.9645  | 10 | 5 | 5 | 441682.2 | 1990101  | 442980.2 | 1758726  | 577789.7 | 2459209  | 2377168  | 1476510  | 1603652  |
| 10.03947 | 5  | 2 | 3 | 584150.4 | 319382.7 | 233401.4 | 483523.8 | 453687.3 | 362949.4 | 0        | 609245.1 | 434594.3 |
| 11.67165 | 5  | 4 | 1 | 171101.5 | 557634.6 | 343911.9 | 428155.1 | 214544.2 | 375711.6 | 465427.3 | 627425.4 | 1110224  |
| 11.52297 | 6  | 3 | 3 | 49683.01 | 76281.49 | 49371.49 | 104172.3 | 72332.74 | 108639.3 | 52322.25 | 0        | 111982.7 |
| 10.45545 | 8  | 4 | 4 | 207540.4 | 607872.9 | 160691.2 | 535891   | 160982.9 | 854358.3 | 410493.8 | 576388.1 | 564229.9 |
| 9.976317 | 9  | 5 | 4 | 2678806  | 7477543  | 2101310  | 6363770  | 2807895  | 10427862 | 7626184  | 8125436  | 4739154  |
| 9.856867 | 10 | 5 | 5 | 79870696 | 5.21E+08 | 30230717 | 5.05E+08 | 41125725 | 5.63E+08 | 5.29E+08 | 5.04E+08 | 4.83E+08 |
| 10.03947 | 9  | 5 | 4 | 420271.9 | 533902.4 | 163695.4 | 772162.4 | 706551.5 | 400455   | 600220.6 | 687754.4 | 660169.4 |
| 9.928667 | 4  | 3 | 1 | 2385987  | 2107326  | 1694586  | 3037067  | 2385615  | 1307482  | 764567.8 | 5043775  | 1480289  |
| 11.80168 | 6  | 4 | 2 | 45994.24 | 150317.3 | 54132.95 | 175131.9 | 56843.69 | 81044.98 | 170639.1 | 158295.1 | 117856.1 |



|          |    |   |   |          |          |          |          |          |          |          |          |          |
|----------|----|---|---|----------|----------|----------|----------|----------|----------|----------|----------|----------|
| 29.5905  | 6  | 3 | 3 | 266873.7 | 1145371  | 1522711  | 602342.9 | 725318.6 | 153277.4 | 308132.3 | 11929.32 | 3605447  |
| 9.433    | 8  | 3 | 4 | 594770.7 | 3968911  | 1719279  | 5064632  | 2965822  | 1765123  | 5232307  | 2446566  | 5302128  |
| 43.41617 | 4  | 1 | 3 | 467987.1 | 5622860  | 457762.2 | 5225006  | 1140276  | 6021629  | 5411311  | 6034804  | 4945642  |
| 9.960817 | 10 | 5 | 5 | 2655035  | 12330147 | 2915320  | 11183315 | 2137537  | 15725279 | 14872729 | 11415457 | 8688881  |
| 9.9847   | 6  | 3 | 3 | 294731.8 | 488746.7 | 317136.7 | 629462.6 | 312856.1 | 384318.4 | 0        | 767999.5 | 758110   |
| 21.22417 | 9  | 4 | 5 | 134509.8 | 737235.6 | 282990.7 | 625059.4 | 212557.2 | 710278.6 | 1179965  | 757080.8 | 638431.8 |
| 9.4925   | 9  | 5 | 4 | 555774.5 | 1370595  | 235265.9 | 1147951  | 644346.8 | 1664467  | 1530375  | 1275995  | 1325423  |
| 9.845483 | 9  | 5 | 4 | 1406105  | 4735318  | 2031956  | 3490027  | 3335490  | 4259885  | 4286331  | 3358353  | 3483560  |
| 10.9645  | 10 | 5 | 5 | 1996722  | 9578276  | 2157879  | 8672951  | 1884962  | 11548402 | 11824238 | 7616184  | 7164816  |
| 9.338567 | 4  | 1 | 3 | 399090.7 | 261789.5 | 507363.8 | 479391.5 | 466358.7 | 0        | 0        | 0        | 146699.5 |
| 9.994767 | 9  | 5 | 4 | 1240895  | 1456294  | 808730.7 | 1943962  | 1299873  | 1754630  | 2689678  | 1023440  | 579121.2 |
| 9.842    | 10 | 5 | 5 | 1397579  | 4085596  | 625208.4 | 4795596  | 2085349  | 4732374  | 4792210  | 3644435  | 3496795  |
| 9.8887   | 9  | 4 | 5 | 2521843  | 6845571  | 1563032  | 5618084  | 3474754  | 7617602  | 5294620  | 5343399  | 8964020  |
| 9.992233 | 9  | 5 | 4 | 511790.3 | 1059106  | 222631.2 | 1288352  | 668816.6 | 1253607  | 1333180  | 988487.5 | 836252.6 |
| 9.9677   | 11 | 5 | 5 | 3735810  | 9217690  | 3515058  | 7716008  | 3206302  | 12147791 | 13579011 | 8040108  | 5228112  |
| 9.929783 | 5  | 3 | 2 | 684416.1 | 805741.1 | 482582.6 | 999716.8 | 378362.1 | 1439710  | 411716.9 | 1136311  | 294262.1 |
| 9.5021   | 10 | 5 | 5 | 2520388  | 5510998  | 840000.2 | 4984923  | 1419600  | 6358218  | 5900812  | 5893641  | 5198438  |
| 9.872883 | 10 | 5 | 5 | 4242749  | 20835875 | 3742822  | 18593414 | 5971386  | 19048600 | 18494505 | 16941394 | 24791586 |
| 14.34133 | 7  | 3 | 4 | 72578.3  | 157129.2 | 74643.13 | 252571.7 | 282325.2 | 254704   | 132743   | 117506.7 | 69502.65 |
| 10.008   | 10 | 5 | 5 | 1024459  | 2118068  | 524849.9 | 2583942  | 1341167  | 2269991  | 2752319  | 2399693  | 1700585  |
| 9.972483 | 5  | 2 | 3 | 303280.1 | 722161.7 | 308067.9 | 556916.9 | 421138.7 | 241129.9 | 583473.4 | 940265.3 | 942721.1 |
| 9.473733 | 9  | 5 | 3 | 1133548  | 3305919  | 955953.9 | 2749453  | 1467345  | 3025339  | 2538805  | 4203381  | 4423023  |
| 10.9645  | 10 | 5 | 5 | 245819.9 | 1417246  | 397166   | 1234301  | 422968.6 | 1514092  | 1898122  | 865972.1 | 1196550  |
| 9.8322   | 9  | 5 | 4 | 520040.6 | 2178345  | 613267   | 1745674  | 1203234  | 1908566  | 2878437  | 1589343  | 1718263  |
| 9.447733 | 8  | 4 | 4 | 2232377  | 9096703  | 9532696  | 12754012 | 6485613  | 16681157 | 21982914 | 2625258  | 2242285  |
| 9.82645  | 5  | 3 | 2 | 943988   | 2293444  | 1121265  | 1729566  | 1389805  | 1542296  | 1514556  | 3828825  | 3156983  |
| 9.43325  | 10 | 5 | 4 | 651793.1 | 4255703  | 1813133  | 3446689  | 1818083  | 6837421  | 4930965  | 4010987  | 1903459  |
| 9.46925  | 9  | 4 | 5 | 543893.1 | 848029.8 | 197249.3 | 989117.5 | 393695.9 | 1066259  | 1030297  | 828906.6 | 686462.5 |
| 9.659033 | 6  | 4 | 2 | 425153.2 | 1019755  | 367734.8 | 799120.6 | 588721.3 | 1073218  | 450977   | 1126342  | 979517.8 |
| 9.94455  | 10 | 5 | 5 | 3275698  | 4516809  | 1280514  | 6050667  | 4530515  | 6197667  | 4998753  | 4869695  | 3584876  |
| 10.1999  | 7  | 4 | 3 | 315636   | 784940.9 | 327635.6 | 935798.2 | 349939.3 | 895139.7 | 641980.5 | 1306197  | 594442.4 |
| 24.7245  | 10 | 5 | 5 | 52386.21 | 259974.3 | 61292.2  | 296553.7 | 97630.95 | 264928.5 | 226874.8 | 245622.8 | 201229.5 |
| 26.08067 | 10 | 5 | 5 | 1157814  | 13708265 | 6356798  | 10976821 | 5922469  | 9394009  | 17585453 | 5762971  | 14043903 |
| 7.578517 | 5  | 3 | 2 | 719520.4 | 3637014  | 3237605  | 2292756  | 2788637  | 6459129  | 147734.5 | 204639   | 4791060  |
| 9.864767 | 9  | 5 | 4 | 3446951  | 14426114 | 3809217  | 11577661 | 8040013  | 13786837 | 14004082 | 8821616  | 16375750 |

|          |    |   |   |          |          |          |          |          |          |          |          |          |
|----------|----|---|---|----------|----------|----------|----------|----------|----------|----------|----------|----------|
| 9.8445   | 8  | 4 | 4 | 2095598  | 4155391  | 922696.6 | 5383203  | 3653073  | 4497154  | 4510208  | 5323829  | 3393734  |
| 10.40908 | 9  | 4 | 5 | 180444.2 | 784673.2 | 145541.5 | 672597.2 | 317976.1 | 654704.6 | 771383.2 | 726686.4 | 736890.1 |
| 9.507167 | 10 | 5 | 3 | 3132079  | 12764680 | 6118100  | 16681756 | 10694155 | 19084908 | 2678991  | 14802113 | 12530050 |
| 24.5505  | 8  | 5 | 3 | 254063.1 | 1031308  | 351246.9 | 748602.2 | 807483.2 | 844939.2 | 859301.3 | 753197.6 | 1622750  |
| 9.976317 | 10 | 5 | 5 | 1552513  | 5512890  | 1219392  | 4707073  | 2218211  | 6219615  | 6949017  | 4669175  | 3906762  |
| 23.5275  | 7  | 4 | 3 | 381568.3 | 1633588  | 1251779  | 1170548  | 750148.3 | 479473.5 | 2997761  | 810822.7 | 888701.2 |
| 10.008   | 9  | 5 | 4 | 378975.4 | 872539.2 | 157810.8 | 961328.3 | 232485.3 | 819771.5 | 903636.7 | 807200.7 | 706507   |
| 18.99467 | 5  | 2 | 3 | 100055.9 | 259110.7 | 50458.97 | 217739.6 | 118531.3 | 271679   | 277786.9 | 288407.2 | 169735.3 |
| 44.4085  | 4  | 3 | 1 | 307027.7 | 5257097  | 984977.2 | 5587491  | 240750.6 | 5341821  | 4661858  | 4081979  | 5500895  |
| 9.91765  | 7  | 3 | 4 | 1210556  | 2580640  | 959586.4 | 2106710  | 1162161  | 3467649  | 2327399  | 1458594  | 1972104  |
| 9.842    | 3  | 3 | 0 | 1558467  | 2858865  | 2169241  | 3848079  | 2285133  | 680212.3 | 1025137  | 4578940  | 2403869  |
| 9.512983 | 8  | 4 | 3 | 2281150  | 2440506  | 1652361  | 4389914  | 5771630  | 361416.7 | 2177163  | 4430693  | 3736080  |
| 9.388617 | 9  | 5 | 4 | 1505398  | 4918697  | 2357970  | 4061509  | 1305044  | 5353672  | 3265771  | 2477171  | 4923362  |
| 10.00998 | 8  | 4 | 4 | 366405.3 | 768268.8 | 397989.3 | 928563.6 | 318330.8 | 1194608  | 122026.6 | 885033.9 | 907116.9 |
| 30.29483 | 9  | 4 | 5 | 156737.1 | 640235.4 | 91494.61 | 544376.3 | 281733   | 713934   | 652932.3 | 724084.2 | 498676.7 |
| 9.976317 | 10 | 5 | 5 | 12861138 | 14819954 | 4645142  | 18642035 | 10965833 | 21752568 | 12773029 | 17353974 | 11345715 |
| 9.554967 | 9  | 5 | 3 | 10474281 | 35354171 | 32272248 | 48318556 | 25659701 | 67096068 | 64892801 | 1750016  | 41184275 |
| 9.3141   | 4  | 1 | 3 | 555608.8 | 3358008  | 1274567  | 2743051  | 1487549  | 4064510  | 1182568  | 4189257  | 3245516  |
| 9.848417 | 10 | 5 | 5 | 2071206  | 7725320  | 440077   | 6934488  | 2380416  | 7828364  | 7739221  | 7743467  | 7043606  |
| 10.02372 | 4  | 1 | 3 | 750522.9 | 636315.2 | 242710.6 | 874040   | 695554.4 | 411880.3 | 436076.5 | 679447.9 | 1014862  |
| 9.992233 | 5  | 3 | 2 | 906736.6 | 1345326  | 565551.3 | 1699855  | 964873.7 | 1229281  | 1887498  | 1947182  | 1033040  |
| 9.40615  | 10 | 5 | 5 | 2061458  | 10651500 | 4632492  | 8001689  | 7000733  | 14671982 | 10594614 | 12513550 | 12700337 |
| 33.67217 | 7  | 3 | 4 | 132304.7 | 843703.6 | 313140.4 | 714973.2 | 265128.1 | 912665.5 | 511590.5 | 1043017  | 532541.4 |
| 10.95835 | 5  | 2 | 3 | 347891.4 | 800493.9 | 162365   | 921788.9 | 343417   | 774687.1 | 855020.7 | 580363.1 | 763848.1 |
| 7.217967 | 10 | 4 | 2 | 509153.7 | 9480364  | 5771579  | 7478164  | 2379154  | 11403529 | 4600565  | 18743267 | 6172884  |
| 9.904767 | 6  | 2 | 3 | 5469072  | 9077481  | 2264476  | 17781652 | 26447975 | 9848725  | 7157674  | 12685278 | 7538986  |
| 9.88815  | 10 | 5 | 5 | 1.61E+09 | 1.01E+10 | 6.25E+08 | 1.13E+10 | 3.72E+09 | 1.06E+10 | 1.08E+10 | 9.58E+09 | 1.01E+10 |
| 10.9645  | 10 | 5 | 5 | 4827385  | 13133412 | 2150477  | 16251218 | 9342874  | 16103953 | 14579270 | 12501675 | 11347504 |
| 9.983433 | 6  | 3 | 3 | 742769.5 | 1602950  | 305208.6 | 1429033  | 459618.8 | 2057624  | 1689296  | 1598529  | 1419609  |
| 10.95055 | 10 | 5 | 5 | 937006.3 | 3407443  | 927691.3 | 4129778  | 2061769  | 3909348  | 4778145  | 3008168  | 2487827  |
| 10.9645  | 10 | 5 | 5 | 481785.7 | 1951877  | 505149   | 1749855  | 399434   | 2411801  | 2455073  | 1529440  | 1341429  |
| 10.008   | 10 | 5 | 5 | 538218.6 | 1869863  | 340726.7 | 1685896  | 475923.2 | 2138634  | 2217384  | 1974554  | 1493517  |
| 9.842    | 9  | 5 | 4 | 1623191  | 7032893  | 1793675  | 5708651  | 3750542  | 7123451  | 7065674  | 5110447  | 5990075  |
| 10.32788 | 7  | 4 | 3 | 154363.9 | 398322   | 153001.8 | 346410.8 | 50316.83 | 460173.1 | 630694.3 | 362161.8 | 244695.2 |
| 9.90755  | 7  | 3 | 3 | 4621717  | 9508082  | 9445607  | 14026127 | 10919989 | 3842912  | 10053061 | 4645814  | 3296178  |

|          |    |   |   |          |          |          |          |          |          |          |          |          |
|----------|----|---|---|----------|----------|----------|----------|----------|----------|----------|----------|----------|
| 9.874317 | 6  | 3 | 3 | 1320339  | 3908605  | 965213   | 3375732  | 1393069  | 4140560  | 3482434  | 5256144  | 4042642  |
| 9.853633 | 10 | 5 | 5 | 2453390  | 9923642  | 2518597  | 8468947  | 3870921  | 10130412 | 9979974  | 5730832  | 12003466 |
| 9.460217 | 6  | 3 | 3 | 423168.5 | 833112.7 | 399553   | 668718.1 | 341345.6 | 919568.9 | 162223   | 816547.2 | 1141620  |
| 43.04233 | 4  | 3 | 1 | 322425.4 | 3686686  | 3236864  | 2626165  | 108316.9 | 2310150  | 2548431  | 1358210  | 9392240  |
| 10.95602 | 10 | 5 | 5 | 196216.6 | 576771   | 216800.4 | 651823.6 | 89721.08 | 776311.3 | 724123.4 | 591690.1 | 221503.4 |
| 9.999217 | 10 | 5 | 5 | 2278871  | 7447826  | 1562506  | 6483327  | 2624722  | 8834459  | 9029572  | 7514825  | 5326078  |
| 9.41815  | 12 | 5 | 4 | 2543589  | 21723860 | 3040247  | 19287055 | 6999920  | 21960342 | 22170295 | 26321172 | 19989690 |
| 9.234417 | 5  | 3 | 2 | 669229.4 | 4920152  | 2186705  | 4036493  | 1785937  | 5395700  | 1393730  | 7399735  | 5482745  |
| 10.38337 | 10 | 5 | 5 | 434526.4 | 1261725  | 443422.5 | 1450380  | 409791.1 | 891841.8 | 1607490  | 1822145  | 803511.6 |
| 9.840617 | 10 | 5 | 5 | 784023.6 | 3266031  | 607037   | 3009255  | 553970.7 | 3771756  | 3524930  | 2284784  | 3087218  |
| 9.7565   | 11 | 5 | 5 | 1026684  | 1197445  | 417056.7 | 1416336  | 560002.5 | 1597846  | 1654087  | 823607.2 | 768219.1 |
| 11.54093 | 6  | 3 | 3 | 103534.9 | 306162.2 | 111103.3 | 258637.9 | 103948.2 | 469092.8 | 246987.3 | 233582.9 | 372957.2 |
| 9.507167 | 11 | 4 | 3 | 987966.2 | 4104871  | 2591308  | 6071175  | 5604543  | 3520206  | 4846689  | 3763658  | 602877.1 |
| 10.9645  | 10 | 5 | 5 | 1122344  | 7270160  | 1325181  | 6555964  | 1850870  | 7526965  | 9170959  | 5965562  | 6043766  |
| 44.9835  | 6  | 1 | 3 | 367892.2 | 5085168  | 333816.4 | 4751313  | 983248.5 | 5163188  | 4513529  | 5173505  | 5180698  |
| 9.951283 | 9  | 5 | 3 | 1241213  | 3362413  | 601294.5 | 2733478  | 1859006  | 4058532  | 2747994  | 2745351  | 3456807  |
| 35.298   | 5  | 2 | 3 | 91271.2  | 510509.1 | 205714.5 | 425027.3 | 180502.7 | 529648.7 | 547573.8 | 450332.8 | 798768.1 |
| 9.43325  | 9  | 3 | 4 | 2145595  | 7153427  | 4795839  | 9109250  | 4020458  | 8759443  | 2413394  | 1825345  | 12559436 |
| 42.43833 | 6  | 4 | 2 | 313276   | 3507694  | 1358694  | 4012939  | 854222   | 3994872  | 4288055  | 4333709  | 3814452  |
| 10.72028 | 7  | 4 | 3 | 1.71E+08 | 1.34E+09 | 5.52E+08 | 1.58E+09 | 5.07E+08 | 1.98E+09 | 1.49E+09 | 5.1E+08  | 1.15E+09 |
| 10.02372 | 9  | 5 | 4 | 275195   | 764222.6 | 131885.6 | 633611.5 | 384672.2 | 907634.2 | 606851.7 | 662920.8 | 761280.4 |
| 10.9645  | 10 | 5 | 5 | 390530.4 | 1745245  | 375062.5 | 1583651  | 357379.3 | 2068971  | 2105933  | 1468562  | 1251451  |
| 16.56375 | 10 | 5 | 5 | 237346.4 | 1722397  | 441816.6 | 1542722  | 368358.1 | 1932406  | 1510894  | 1196318  | 1614671  |
| 9.972483 | 9  | 5 | 4 | 1156750  | 2914205  | 644844.9 | 2510282  | 1106344  | 3498139  | 3704013  | 2354645  | 2671384  |
| 9.992233 | 9  | 5 | 4 | 934389.1 | 2908231  | 1017140  | 2418237  | 1195255  | 3275007  | 4316614  | 3013162  | 1620442  |
| 9.830283 | 8  | 4 | 4 | 4035738  | 2219406  | 1457903  | 4911440  | 8155110  | 1259244  | 4792060  | 1529224  | 1585362  |
| 9.952017 | 9  | 5 | 4 | 662070.9 | 1738386  | 327152   | 1493216  | 698724.1 | 2058405  | 1208867  | 1714221  | 1948567  |
| 10.1999  | 8  | 4 | 4 | 425849.6 | 617779.9 | 252679   | 831641.8 | 620357.2 | 393045.3 | 827683.9 | 792260.8 | 295432.9 |
| 10.008   | 9  | 4 | 5 | 816923.9 | 963103.6 | 195583.1 | 1245784  | 851176.7 | 1119135  | 1116086  | 1048436  | 665368.6 |
| 9.848417 | 6  | 4 | 2 | 426885.8 | 1440928  | 380759.7 | 1640082  | 510313.3 | 1155783  | 1209219  | 1200079  | 2043219  |
| 9.0258   | 5  | 1 | 4 | 208041.4 | 207214.8 | 195585.1 | 295475.7 | 204845.1 | 208015.9 | 389821.7 | 23610.11 | 414626.5 |
| 9.3735   | 4  | 1 | 3 | 1396071  | 1478648  | 304764.1 | 2616126  | 3474656  | 1421781  | 1065237  | 1356396  | 1833612  |
| 27.23    | 9  | 4 | 5 | 338234.7 | 1260440  | 1442816  | 777952.3 | 394950   | 949855.1 | 3811745  | 374356.2 | 679514.6 |
| 9.976317 | 9  | 5 | 4 | 2527684  | 4438840  | 1282194  | 5915121  | 4400656  | 4448186  | 4408248  | 3045756  | 3798005  |
| 10.97857 | 8  | 4 | 4 | 576750.4 | 2314239  | 646417.3 | 2012461  | 721034.5 | 2131568  | 2211333  | 1720663  | 2087228  |

|          |    |   |   |          |          |          |          |          |          |          |          |          |
|----------|----|---|---|----------|----------|----------|----------|----------|----------|----------|----------|----------|
| 12.25335 | 5  | 4 | 1 | 78494.39 | 293549.5 | 176350   | 224662.8 | 132137.9 | 96402.35 | 262753.1 | 310349.9 | 575202   |
| 9.94455  | 10 | 5 | 5 | 13111880 | 23356871 | 5169644  | 28609982 | 15530036 | 29970004 | 26680699 | 23536130 | 18976424 |
| 9.960467 | 10 | 5 | 5 | 9546735  | 36357228 | 7893014  | 32018536 | 11383654 | 41675063 | 45325540 | 31093785 | 25842534 |
| 10.9645  | 6  | 3 | 3 | 376403.1 | 894532.9 | 327281.2 | 737354.5 | 383505.9 | 959331.5 | 1385161  | 798196   | 479414.6 |
| 10.03947 | 10 | 5 | 3 | 701318.3 | 1148607  | 435109.9 | 1323221  | 352055.2 | 1755883  | 655153.1 | 835335.1 | 1364463  |
| 10.9645  | 10 | 5 | 5 | 399638.1 | 1277892  | 332939.2 | 1129295  | 341944.8 | 1670687  | 1488016  | 1026536  | 857186.3 |
| 9.01065  | 5  | 3 | 2 | 361069.2 | 681534.5 | 487487.9 | 486482.8 | 391413.8 | 1310212  | 883736.9 | 746173   | 467550.6 |
| 9.964417 | 11 | 3 | 4 | 1084328  | 2651483  | 1697768  | 1888446  | 1767744  | 4586865  | 599392   | 4229446  | 2008264  |
| 10.95602 | 7  | 4 | 3 | 396104   | 1144240  | 433550.2 | 935442.5 | 510869.7 | 775844.9 | 1229397  | 1163034  | 740935.7 |
| 9.920517 | 5  | 1 | 3 | 614326.8 | 660584.4 | 593179   | 1031834  | 1019383  | 1085743  | 1450737  | 522052.9 | 80806.36 |
| 9.872883 | 10 | 5 | 5 | 2133840  | 5950841  | 941851.6 | 7714357  | 5355081  | 5944247  | 6273880  | 6621197  | 6577190  |
| 10.03258 | 7  | 4 | 3 | 3617827  | 7380902  | 6621604  | 5104017  | 2680421  | 18773145 | 3575305  | 2450745  | 4771673  |
| 9.960467 | 5  | 3 | 2 | 1078368  | 1634460  | 737144.8 | 1261048  | 943094.9 | 2424554  | 2388999  | 1438053  | 832835.8 |
| 9.859983 | 8  | 3 | 5 | 946357.3 | 3914871  | 1107498  | 3396577  | 1243258  | 3133623  | 3623136  | 2859746  | 4333538  |
| 9.3919   | 6  | 5 | 1 | 558159.5 | 1406696  | 660511.8 | 2163553  | 2259426  | 2297602  | 1552616  | 1618942  | 1011241  |
| 9.979667 | 4  | 1 | 3 | 373948.4 | 827855.8 | 352179.7 | 666840.6 | 379373.2 | 850859.6 | 378163.9 | 1329812  | 651337.5 |
| 9.55155  | 6  | 4 | 2 | 314695.9 | 607448.2 | 164311.4 | 519684.6 | 227861.6 | 566696.4 | 868261.9 | 529837.9 | 431011.1 |
| 9.93625  | 10 | 5 | 5 | 2490328  | 7896598  | 2052123  | 6828438  | 2739025  | 10946776 | 7097269  | 6543646  | 8975514  |
| 9.887133 | 10 | 5 | 5 | 2873905  | 15461990 | 1207291  | 16844018 | 4126402  | 15752077 | 14298914 | 16699603 | 16461870 |
| 11.01378 | 3  | 0 | 3 | 187082.4 | 229494.6 | 193168.7 | 295247.3 | 70975.21 | 58599.58 | 542661.8 | 87496.13 | 199239.6 |
| 9.856867 | 10 | 5 | 5 | 5170454  | 26594097 | 1164963  | 28499903 | 5773811  | 28491173 | 26695544 | 26076853 | 25376628 |
| 10.96    | 9  | 5 | 4 | 945158.3 | 1909591  | 1285794  | 2457408  | 1204099  | 3197579  | 3247021  | 1778700  | 798271.7 |
| 9.960467 | 9  | 5 | 4 | 1036493  | 1936379  | 708083.6 | 1617601  | 741388.1 | 2495100  | 2869503  | 1640598  | 1238673  |
| 31.42217 | 8  | 4 | 4 | 124031.2 | 431834.9 | 159071   | 528790.1 | 264573.4 | 325079.2 | 559374.3 | 209410.7 | 489358   |
| 10.21522 | 3  | 0 | 3 | 88138    | 163955.2 | 89128.81 | 263046.1 | 295489.8 | 311678.1 | 136931.1 | 173612.9 | 116578.9 |
| 11.53673 | 10 | 5 | 5 | 470245.3 | 2348235  | 424533.4 | 2607249  | 707330.7 | 2863727  | 2462928  | 1683899  | 2358155  |
| 9.644783 | 9  | 5 | 4 | 633816.5 | 2324945  | 316119.1 | 2020662  | 898091.8 | 2031243  | 2681730  | 2161852  | 2652949  |
| 9.960467 | 10 | 5 | 5 | 1639563  | 2066760  | 674344.3 | 2786685  | 2142569  | 2638937  | 2476500  | 2535030  | 1504286  |
| 10.98385 | 5  | 2 | 3 | 3404769  | 15278607 | 8324419  | 11934931 | 6794332  | 20894347 | 22599462 | 6348212  | 6054856  |
| 44.9835  | 10 | 3 | 2 | 421174.2 | 5326469  | 821935.5 | 5041537  | 362050.1 | 5274275  | 6510441  | 4984430  | 4272447  |
| 41.8195  | 4  | 1 | 3 | 223898.9 | 2974648  | 120065.8 | 3060812  | 244771.6 | 2820986  | 2890152  | 3119766  | 2993563  |
| 9.664033 | 9  | 5 | 4 | 479723.8 | 1578496  | 223847.4 | 1367723  | 621528.7 | 1683244  | 1739300  | 1187632  | 1602588  |
| 9.554967 | 9  | 5 | 4 | 347046.5 | 838762   | 378042.6 | 1062960  | 607925.1 | 624298   | 1422316  | 562195.2 | 564065.4 |
| 10.10793 | 15 | 5 | 5 | 1367949  | 4520541  | 619815.6 | 3829058  | 2066142  | 4990064  | 5246364  | 4149453  | 3713439  |
| 9.976317 | 9  | 5 | 4 | 1227131  | 4903518  | 1286259  | 4141303  | 2066784  | 5230791  | 6836965  | 4284911  | 3360803  |

|          |    |   |   |          |          |          |          |          |          |          |          |          |
|----------|----|---|---|----------|----------|----------|----------|----------|----------|----------|----------|----------|
| 10.43382 | 8  | 4 | 4 | 152802.2 | 369799.2 | 54036.28 | 421756.4 | 153643.6 | 394068.6 | 297525.5 | 423099.2 | 328342.3 |
| 9.43325  | 9  | 5 | 4 | 503583.7 | 3112963  | 1507316  | 2460576  | 1468173  | 4617086  | 4617952  | 3112458  | 1476795  |
| 24.75383 | 9  | 5 | 4 | 87206.4  | 303786.4 | 175095   | 242567.9 | 83124.97 | 174894   | 286439.1 | 172630.7 | 600665.8 |
| 9.870017 | 6  | 3 | 3 | 1173979  | 2067023  | 877692.6 | 2882681  | 2405308  | 913841.4 | 1658730  | 2968537  | 2923475  |
| 11.8155  | 6  | 4 | 2 | 100287.6 | 358201.5 | 157655.1 | 294536.2 | 131140.6 | 537871.7 | 487164.7 | 286480.3 | 146739.9 |
| 44.72467 | 4  | 3 | 1 | 124298.5 | 909770.7 | 108019   | 976139.2 | 182307.1 | 1051507  | 865774.1 | 781258.9 | 863274.8 |
| 10.84643 | 5  | 3 | 2 | 154640   | 259113.9 | 77305.99 | 332804   | 217922.1 | 234763   | 205099.2 | 183780.8 | 297834.6 |
| 25.89433 | 6  | 4 | 1 | 7261227  | 55947304 | 56936838 | 36885125 | 17595969 | 9541577  | 1.54E+08 | 49235604 | 28270487 |
| 10.95055 | 6  | 2 | 4 | 151874.8 | 390718.6 | 272047.1 | 297862.6 | 106972.6 | 841275.1 | 415143.9 | 339167.8 | 170747.2 |
| 9.092333 | 5  | 3 | 2 | 600244.4 | 2652429  | 1647134  | 1962497  | 1497762  | 562761.3 | 3128119  | 3527665  | 1406204  |
| 10.50403 | 9  | 4 | 4 | 757969.1 | 2583943  | 414591.2 | 2337273  | 671250.8 | 2995401  | 3042327  | 2320629  | 2446296  |
| 32.04167 | 8  | 4 | 4 | 432706.3 | 2601861  | 1628745  | 1969386  | 1219023  | 1499380  | 2655142  | 499978.5 | 4105392  |
| 10.4842  | 10 | 5 | 5 | 2512863  | 25495018 | 7755561  | 22217415 | 7194774  | 28492132 | 32179258 | 31614502 | 14083772 |
| 28.404   | 9  | 5 | 4 | 2231302  | 23161981 | 12137551 | 18358174 | 9592854  | 12327718 | 29059509 | 8321345  | 29787096 |
| 9.896717 | 6  | 3 | 3 | 2320234  | 1755060  | 590921.2 | 3080779  | 4057878  | 2388009  | 786390.5 | 1826865  | 1792613  |
| 9.872933 | 10 | 5 | 5 | 5510723  | 48829901 | 3340104  | 46351594 | 7106589  | 51640829 | 49778250 | 44013305 | 46902350 |
| 10.9645  | 10 | 5 | 5 | 401138.5 | 1705997  | 442287.5 | 1504955  | 475116.8 | 2063151  | 2225938  | 1302654  | 1234953  |
| 10.97857 | 10 | 5 | 5 | 298292.1 | 1955499  | 507516   | 1745111  | 451284.3 | 1225536  | 2510911  | 1831733  | 1850545  |
| 19.12583 | 7  | 3 | 4 | 1089727  | 3262875  | 931199.6 | 4736063  | 4479709  | 3899288  | 2771127  | 4523223  | 2209523  |
| 9.848417 | 9  | 5 | 4 | 1502021  | 6349141  | 2105046  | 7577036  | 3322344  | 6280125  | 5622598  | 4045649  | 6016630  |
| 9.960467 | 10 | 5 | 5 | 2338445  | 8767013  | 2072563  | 7687819  | 2786625  | 9719186  | 11489504 | 7430971  | 6123950  |
| 9.0292   | 6  | 4 | 2 | 3652509  | 17147169 | 10361079 | 25749329 | 25091396 | 28186099 | 7251397  | 13680935 | 8436766  |
| 42.99917 | 9  | 2 | 4 | 216787.8 | 2563114  | 866718.8 | 3730026  | 3529424  | 2076828  | 4102152  | 2107109  | 2347501  |
| 31.29133 | 9  | 5 | 4 | 437466.5 | 2371188  | 1350435  | 1888842  | 734799.7 | 1133062  | 2868462  | 732850.6 | 3565225  |
| 9.447983 | 4  | 1 | 3 | 20983892 | 71383492 | 47172547 | 46947321 | 62974331 | 92404537 | 635654   | 50061346 | 91492942 |
| 9.94455  | 10 | 5 | 5 | 1878739  | 7817786  | 1231774  | 6962785  | 2424262  | 9252694  | 8508210  | 6730377  | 6346900  |
| 42.99933 | 5  | 3 | 2 | 315384.4 | 2820560  | 1623726  | 2191637  | 1210563  | 3215829  | 2618700  | 704195.7 | 5199974  |
| 9.6315   | 10 | 4 | 3 | 949710.8 | 7860695  | 2361634  | 6967086  | 1634639  | 11108788 | 8264017  | 8826799  | 5586383  |
| 9.983433 | 10 | 5 | 5 | 1E+08    | 5.09E+08 | 95838200 | 5.69E+08 | 1.64E+08 | 5.94E+08 | 6.03E+08 | 5.3E+08  | 4.33E+08 |
| 10.03258 | 13 | 5 | 5 | 2482390  | 9232695  | 4532320  | 6908933  | 5964360  | 10124589 | 10945750 | 10100925 | 1510607  |
| 9.1476   | 6  | 3 | 3 | 3102621  | 10242982 | 5925374  | 14113896 | 10840019 | 5474301  | 17895546 | 14585186 | 9292198  |
| 9.960467 | 9  | 5 | 4 | 852668.3 | 2132214  | 421728.5 | 2423266  | 825221.1 | 2579662  | 1432962  | 2243361  | 2204799  |
| 9.91875  | 5  | 2 | 3 | 3095188  | 11041748 | 8998311  | 7689749  | 5921548  | 22457632 | 12347296 | 2225268  | 1792118  |
| 10.9645  | 5  | 3 | 2 | 207883.4 | 377898.3 | 166492   | 310471.9 | 140782.3 | 345263.6 | 670513.5 | 312549.6 | 302700.6 |
| 9.133667 | 13 | 5 | 5 | 3963782  | 7108135  | 3597713  | 12448965 | 16249469 | 7635955  | 12191195 | 8417065  | 3686254  |

|          |    |   |   |          |          |          |          |          |          |          |          |          |
|----------|----|---|---|----------|----------|----------|----------|----------|----------|----------|----------|----------|
| 10.95055 | 10 | 5 | 5 | 1667415  | 4583361  | 1083917  | 5829839  | 3750355  | 5680217  | 5804610  | 4156222  | 3506266  |
| 10.94208 | 4  | 3 | 1 | 159992.3 | 374063.1 | 100813.2 | 325336   | 121074.6 | 288404.6 | 371693.3 | 292259.5 | 380886   |
| 9.840617 | 4  | 1 | 3 | 1077174  | 3216133  | 1473417  | 2673815  | 927689.6 | 4791330  | 2373688  | 1176132  | 4358029  |
| 9.960467 | 15 | 5 | 5 | 1723197  | 4562798  | 2485134  | 3680935  | 1322077  | 3028667  | 1453472  | 7101593  | 7033195  |
| 11.52297 | 10 | 5 | 5 | 14148008 | 88157505 | 12124292 | 80828764 | 20128906 | 1.07E+08 | 83464704 | 80299876 | 76954094 |
| 9.538267 | 10 | 5 | 4 | 2905821  | 4653043  | 1503961  | 7271472  | 8004460  | 3913605  | 6359907  | 2458585  | 5169104  |
| 9.932033 | 10 | 5 | 5 | 3311366  | 12591455 | 2569838  | 11278176 | 3372529  | 15458955 | 13208187 | 9681727  | 10161564 |
| 10.00098 | 8  | 4 | 4 | 375269.8 | 762554.1 | 300157.9 | 886784.1 | 267675.5 | 1012188  | 824733.8 | 1044522  | 604230.6 |
| 9.903567 | 9  | 4 | 4 | 1190772  | 2840417  | 825622.6 | 3619111  | 2310517  | 4236686  | 2530768  | 2795054  | 2581508  |
| 9.433    | 6  | 3 | 3 | 865655.9 | 4670428  | 2005450  | 3856776  | 1706352  | 7625635  | 3132280  | 4493784  | 2603215  |
| 9.5812   | 6  | 2 | 4 | 617993.6 | 5373374  | 751959.8 | 4901099  | 1312029  | 6131524  | 5779200  | 5494034  | 4146854  |
| 9.848417 | 10 | 5 | 5 | 3044899  | 9473176  | 1815704  | 10956241 | 4332615  | 9917920  | 8973101  | 11553058 | 10244710 |
| 9.8445   | 9  | 5 | 4 | 985037.9 | 3303738  | 917433   | 2741295  | 1553083  | 4422402  | 3775860  | 2030074  | 2813573  |
| 10.39612 | 10 | 5 | 5 | 818759   | 3209069  | 626019   | 3546518  | 890216.8 | 2473055  | 3871019  | 3853709  | 2992204  |
| 9.932033 | 7  | 3 | 4 | 722100.1 | 1583614  | 596888.3 | 1958405  | 1042246  | 801146   | 2206492  | 1809335  | 1119427  |
| 9.697633 | 5  | 4 | 1 | 178594.6 | 317016   | 58984.23 | 276329.1 | 115713   | 291704.8 | 378536   | 366825.6 | 233321.4 |
| 9.994767 | 7  | 3 | 4 | 377080.3 | 554044.5 | 116372.2 | 694095.8 | 423255.7 | 655424.3 | 685071.3 | 520301.1 | 508804.8 |
| 9.94455  | 4  | 1 | 3 | 437816.1 | 658310.7 | 404162.6 | 832064.1 | 393109.9 | 1184591  | 72040.63 | 803728.3 | 552704.7 |
| 10.9645  | 10 | 5 | 5 | 1569900  | 7150638  | 1625366  | 6427573  | 1692558  | 8692830  | 8770268  | 5596274  | 5383141  |
| 22.55267 | 8  | 4 | 4 | 159186.8 | 701199.3 | 240832.5 | 616138.3 | 126427   | 460603.9 | 1072664  | 783074.7 | 653115.3 |
| 9.928667 | 8  | 5 | 3 | 2725333  | 6091316  | 667072.7 | 5245708  | 2563743  | 6815481  | 5363882  | 5434034  | 6226416  |
| 10.95602 | 10 | 5 | 5 | 386529.8 | 1419208  | 357068.5 | 1275799  | 297544.9 | 1933110  | 1634338  | 1206020  | 1058528  |
| 10.90012 | 6  | 3 | 3 | 128204   | 316720.1 | 106735.4 | 274663.3 | 84671.42 | 433669.9 | 432544.5 | 249698.7 | 222700.1 |
| 28.02567 | 5  | 1 | 3 | 3137020  | 42678958 | 4402825  | 52907123 | 31509516 | 41461471 | 39466217 | 39818850 | 42388344 |
| 10.94208 | 9  | 4 | 5 | 356676.7 | 1606059  | 416591.5 | 1392297  | 552293.3 | 2117422  | 1984294  | 1251544  | 1236529  |
| 10.9645  | 10 | 5 | 5 | 2393758  | 11465652 | 2573111  | 10401357 | 2307482  | 13819912 | 14223652 | 9227801  | 8580103  |
| 9.928667 | 9  | 4 | 5 | 788844.5 | 2642320  | 896873.8 | 2231420  | 988504.9 | 1738992  | 1973246  | 3471829  | 3717273  |
| 10.96997 | 7  | 4 | 3 | 310620.1 | 1071028  | 372148.4 | 880779.5 | 491149.1 | 954686.3 | 788772.7 | 714406.7 | 1293043  |
| 9.848417 | 10 | 5 | 5 | 914353.3 | 3384765  | 522919.6 | 3143622  | 583545.4 | 3922716  | 2639999  | 3676132  | 3626429  |
| 9.840617 | 5  | 3 | 2 | 852610.6 | 2089459  | 1283238  | 1575248  | 1067769  | 1399907  | 4069965  | 2453366  | 1848207  |
| 9.37735  | 7  | 3 | 4 | 1561096  | 7592596  | 6520949  | 4875584  | 5955074  | 3221612  | 3660720  | 12491351 | 2023674  |
| 9.8322   | 9  | 5 | 4 | 761603.4 | 3073298  | 421932.5 | 2809427  | 735506.3 | 3520816  | 3496184  | 2890077  | 2907646  |
| 9.976317 | 7  | 4 | 3 | 314807.7 | 853047   | 61273.2  | 699835.6 | 473024.1 | 843011.4 | 871445.7 | 907050.8 | 891566.9 |
| 9.842    | 4  | 3 | 1 | 3485050  | 7113435  | 6552992  | 9696683  | 5228907  | 1807737  | 12064785 | 3257112  | 2313541  |
| 10.9645  | 10 | 5 | 5 | 7980122  | 36660432 | 8508543  | 32952446 | 8549662  | 44282771 | 45783270 | 28891647 | 27293037 |

|          |    |   |   |          |          |          |          |          |          |          |          |          |
|----------|----|---|---|----------|----------|----------|----------|----------|----------|----------|----------|----------|
| 44.9835  | 8  | 3 | 3 | 390255.9 | 5947706  | 6150189  | 3718877  | 3700559  | 484027.4 | 3527148  | 3202586  | 6184927  |
| 10.9645  | 10 | 5 | 5 | 477752.7 | 2102103  | 373518   | 1899952  | 536853.5 | 2414330  | 2436689  | 1675251  | 1725443  |
| 9.582167 | 5  | 3 | 1 | 6305556  | 16393822 | 20356786 | 23812443 | 12553846 | 40476229 | 1494815  | 36794317 | 2568458  |
| 9.960467 | 5  | 3 | 2 | 451258.1 | 755477.2 | 560917.6 | 513647   | 552036.8 | 1348650  | 1209457  | 818539.3 | 0        |
| 9.94455  | 4  | 3 | 1 | 561148   | 875424.9 | 478305.9 | 662622.8 | 500770.7 | 1228432  | 128464.2 | 1348542  | 888610.1 |
| 11.00657 | 8  | 4 | 4 | 232906.6 | 1027383  | 399372   | 864252.6 | 349346.9 | 1402469  | 529108.5 | 1042410  | 732932.4 |
| 10.008   | 10 | 5 | 5 | 1074118  | 1979706  | 748431.9 | 2479401  | 1417524  | 2210435  | 2694541  | 2526392  | 1596969  |
| 10.54388 | 9  | 4 | 5 | 391369.3 | 1405934  | 474549.1 | 1607638  | 453920.6 | 661591.1 | 1939054  | 1534462  | 1593201  |
| 10.008   | 10 | 5 | 5 | 1063818  | 2043597  | 587778.3 | 2521146  | 1401834  | 2147447  | 2756087  | 2425080  | 1461837  |
| 22.757   | 9  | 5 | 4 | 282257.5 | 2033335  | 978437.2 | 1605851  | 990214.1 | 1327789  | 2641431  | 790416.5 | 2194285  |
| 9.848417 | 9  | 5 | 4 | 6009007  | 28155517 | 7849974  | 32070507 | 10004677 | 29893871 | 15474246 | 28445258 | 37075350 |
| 9.842    | 9  | 5 | 4 | 1004058  | 4474834  | 1312147  | 3641130  | 2338389  | 3843703  | 3396881  | 3821777  | 4628705  |
| 9.3735   | 7  | 4 | 3 | 573401.4 | 1231756  | 700462.2 | 902101.4 | 812285.2 | 1988779  | 1787207  | 1126791  | 1040868  |
| 9.887133 | 6  | 2 | 4 | 13236113 | 48944330 | 39739567 | 33361419 | 31366435 | 98149874 | 51039318 | 10718401 | 8167695  |
| 9.858833 | 10 | 5 | 5 | 1990830  | 13202420 | 744022.8 | 13992343 | 2380673  | 12952752 | 12212102 | 14124273 | 13729453 |
| 9.830833 | 9  | 5 | 4 | 1008727  | 4118431  | 454959.9 | 3926416  | 429385.9 | 3631475  | 3640896  | 4484688  | 4575192  |
| 39.46017 | 6  | 4 | 1 | 454444.9 | 6535843  | 2371706  | 5762440  | 501861.7 | 10481537 | 6119567  | 4051624  | 5870754  |
| 9.43325  | 12 | 5 | 4 | 1771714  | 6338516  | 1959603  | 8178585  | 5494383  | 6246828  | 9002785  | 7476365  | 4677059  |
| 9.960467 | 10 | 5 | 5 | 1465939  | 5165530  | 1228043  | 4454935  | 1941003  | 5742405  | 6803052  | 4350439  | 3636814  |
| 9.8374   | 9  | 5 | 4 | 665500.4 | 2170752  | 671474.1 | 2450446  | 616326.4 | 2153057  | 2321666  | 1252568  | 2002311  |
| 31.26383 | 10 | 5 | 5 | 1121629  | 18303613 | 654510.1 | 18860757 | 1647013  | 17611481 | 17847591 | 18145321 | 18684740 |
| 10.94208 | 8  | 4 | 4 | 166387.3 | 269115.3 | 122811.6 | 346978.1 | 218628.9 | 50379.67 | 337589.8 | 305916.8 | 327551.5 |
| 10.95055 | 9  | 5 | 4 | 373334.3 | 2196693  | 537683.5 | 1946522  | 612873.5 | 2511054  | 2343436  | 1645113  | 1638722  |
| 9.986767 | 5  | 2 | 3 | 1965242  | 6375579  | 5370170  | 4330309  | 3908549  | 9668002  | 5166241  | 1895113  | 13902937 |
| 9.177967 | 6  | 3 | 3 | 398999.9 | 1713325  | 856751.5 | 1397790  | 556057.2 | 2815349  | 1945642  | 1970194  | 508019.6 |
| 10.96452 | 5  | 3 | 1 | 3252647  | 6650273  | 8644613  | 9901571  | 6045310  | 19924711 | 469485.5 | 11005373 | 907185.3 |
| 9.554967 | 7  | 4 | 3 | 254185.2 | 461591.6 | 155509.7 | 347957.8 | 329023.4 | 551723   | 189300.6 | 547967.6 | 474705.9 |
| 9.8445   | 5  | 3 | 2 | 1204510  | 4737927  | 1078181  | 4013540  | 2063617  | 4998448  | 4909677  | 6066264  | 4644442  |
| 10.97857 | 7  | 5 | 2 | 375743.3 | 1046972  | 217339.7 | 1187531  | 396956.5 | 1019298  | 1074451  | 882915.4 | 1400227  |
| 8.874167 | 10 | 5 | 5 | 1252996  | 3735534  | 1905551  | 4877940  | 3160542  | 3347389  | 6966063  | 3685200  | 2203098  |
| 10.97857 | 10 | 5 | 5 | 328192.7 | 1697668  | 604600.2 | 1438346  | 592212   | 2053073  | 1624652  | 1042894  | 1238703  |
| 9.976317 | 7  | 3 | 4 | 633979.4 | 1501998  | 837894.8 | 1887977  | 940055.1 | 2234761  | 2302573  | 1738770  | 679019.9 |
| 11.03783 | 9  | 5 | 3 | 16051358 | 22961713 | 9290876  | 33574132 | 32201524 | 27698189 | 34729698 | 13092877 | 13945123 |
| 9.848417 | 10 | 5 | 5 | 882776.8 | 3320035  | 1881687  | 4043286  | 1413054  | 5782362  | 2725387  | 2399906  | 4642193  |
| 36.617   | 6  | 2 | 3 | 397872.8 | 8030560  | 1822957  | 9757493  | 5172999  | 9276046  | 7695539  | 4976528  | 9150626  |

|          |    |   |   |          |          |          |          |          |          |          |          |          |
|----------|----|---|---|----------|----------|----------|----------|----------|----------|----------|----------|----------|
| 10.42575 | 8  | 4 | 4 | 8519984  | 9754681  | 20907030 | 18976745 | 21697150 | 226791.9 | 47151305 | 305626.4 | 861392.1 |
| 10.95055 | 5  | 3 | 2 | 1028591  | 2150327  | 868049.6 | 1721463  | 1095804  | 2318005  | 3457394  | 2240705  | 1516969  |
| 11.16097 | 10 | 5 | 5 | 5849226  | 25632351 | 10056390 | 33364886 | 22614305 | 40798762 | 28401408 | 13906909 | 20283676 |
| 9.999217 | 10 | 5 | 5 | 1006494  | 4289906  | 1015060  | 3759300  | 1396408  | 3983424  | 5980818  | 3843983  | 3306345  |
| 9.992233 | 10 | 5 | 5 | 688840.6 | 5089791  | 55518.61 | 4844816  | 762979.6 | 5095109  | 5065098  | 5032136  | 5180269  |
| 9.4468   | 5  | 3 | 2 | 2593114  | 3987935  | 3020237  | 8451552  | 13712779 | 6904145  | 2298668  | 7494608  | 2523653  |
| 42.75483 | 9  | 4 | 2 | 415069.1 | 6702654  | 2311313  | 7825777  | 2843368  | 10014924 | 5063647  | 8163996  | 5711029  |
| 9.992233 | 5  | 3 | 2 | 372401.3 | 678494.3 | 284480.2 | 852076.8 | 483835.8 | 652474   | 1076802  | 720101.7 | 275326.8 |
| 9.972483 | 3  | 0 | 3 | 346256.7 | 722788.2 | 356082.3 | 844939   | 162990.1 | 965099.9 | 155073.7 | 1077074  | 719030.1 |
| 12.69123 | 6  | 3 | 3 | 56555.54 | 261699.2 | 92304.79 | 223942.1 | 81879.76 | 391854.9 | 153330.4 | 313295.1 | 220439.7 |
| 36.56817 | 4  | 1 | 3 | 364261.9 | 6702731  | 1224959  | 7427707  | 2004289  | 4515754  | 7377714  | 7176061  | 7231542  |
| 9.983433 | 10 | 5 | 5 | 1477428  | 4623805  | 1156405  | 3995268  | 1685493  | 5700714  | 5816373  | 4676603  | 3278450  |
| 9.976317 | 10 | 5 | 5 | 1496398  | 5757989  | 1167435  | 4951518  | 2318404  | 6486319  | 6744621  | 5237970  | 3943278  |
| 10.008   | 9  | 5 | 4 | 453503.6 | 874652.1 | 243450.4 | 1030009  | 438808.8 | 929151.8 | 1181034  | 1004829  | 665979.8 |
| 9.27445  | 8  | 5 | 3 | 1114154  | 1099890  | 243004.4 | 1993357  | 2784360  | 903965.3 | 1284100  | 1156311  | 794958.5 |
| 9.992233 | 7  | 4 | 3 | 1434071  | 1677718  | 1238113  | 2423663  | 2074552  | 1296762  | 1847112  | 1005954  | 3718831  |
| 9.994767 | 9  | 5 | 4 | 985016.1 | 985590.1 | 257378.1 | 1229301  | 731622.7 | 907071.9 | 1439931  | 907404.5 | 805341.2 |
| 9.445217 | 6  | 3 | 3 | 1292519  | 5748929  | 3142399  | 4388765  | 3154195  | 5222873  | 1519347  | 8078298  | 4416160  |
| 9.960817 | 10 | 5 | 5 | 3891738  | 5351646  | 1443119  | 7127637  | 5426543  | 5869321  | 7366646  | 5583237  | 4222443  |
| 9.94455  | 10 | 5 | 5 | 13358791 | 23581326 | 5039306  | 28686949 | 15421902 | 30070235 | 26611871 | 24029912 | 19047952 |
| 9.4925   | 12 | 4 | 5 | 1103165  | 5605323  | 1475060  | 6772382  | 3436038  | 5868113  | 3814817  | 4390242  | 6668222  |
| 9.67     | 10 | 5 | 5 | 6223129  | 31731907 | 6916038  | 28567070 | 7712299  | 31519621 | 35793178 | 26110584 | 24203281 |
| 9.979667 | 10 | 5 | 5 | 891820.2 | 3553061  | 359154.7 | 3297682  | 739585.1 | 4083139  | 3591836  | 3583475  | 3090646  |
| 25.293   | 4  | 3 | 1 | 490460.4 | 1859886  | 1648726  | 1300981  | 699724.1 | 4676983  | 1271688  | 1534911  | 1488058  |
| 20.21633 | 4  | 3 | 1 | 93842.96 | 458393.7 | 291360.1 | 561526.9 | 162731   | 293780.6 | 799418.9 | 161880.7 | 743205.4 |
| 10.97857 | 5  | 3 | 2 | 862521.7 | 1473976  | 552379.9 | 2017530  | 1639374  | 1176073  | 2423661  | 1497579  | 1111645  |
| 34.47967 | 8  | 4 | 4 | 183457   | 755140.9 | 376934.7 | 609631.4 | 289754.2 | 439789.3 | 663504.4 | 380851.6 | 1058643  |
| 13.69748 | 3  | 3 | 0 | 146490   | 543490.1 | 347242.4 | 428788.3 | 111204.6 | 1133435  | 527905.2 | 249233.7 | 467529.8 |
| 9.522017 | 9  | 5 | 4 | 845443.3 | 1965304  | 414910.6 | 1716800  | 691289.3 | 2419906  | 2309114  | 1716475  | 1965103  |
| 9.992233 | 10 | 5 | 5 | 799119.2 | 3106068  | 123649.1 | 2951423  | 473724.7 | 2976899  | 3282272  | 3118530  | 3152146  |
| 10.008   | 10 | 5 | 5 | 683135.3 | 1159659  | 160420.3 | 1310961  | 455020.3 | 1150673  | 1400595  | 1202224  | 970842   |
| 43.25817 | 5  | 3 | 2 | 643353.5 | 7185094  | 4635554  | 8980901  | 3605915  | 4268209  | 11905954 | 3083374  | 4109348  |
| 9.659033 | 10 | 5 | 5 | 2002022  | 10524715 | 2757126  | 9164217  | 3494401  | 10127267 | 12522385 | 7691294  | 8185837  |
| 9.9847   | 6  | 4 | 2 | 745565.3 | 1288575  | 598289   | 1607324  | 850660.3 | 1558774  | 1681573  | 1662498  | 1283200  |
| 18.6895  | 3  | 0 | 3 | 113209.3 | 207565.1 | 71332.35 | 164483.7 | 120322.7 | 140689   | 226083.2 | 225358.1 | 136957.8 |



|          |    |   |   |          |          |          |          |          |          |          |          |          |
|----------|----|---|---|----------|----------|----------|----------|----------|----------|----------|----------|----------|
| 10.9645  | 10 | 5 | 5 | 2524052  | 11637836 | 2864573  | 10426660 | 2754753  | 14143979 | 14633170 | 8960674  | 8434763  |
| 9.842    | 9  | 5 | 4 | 3184329  | 6282412  | 2223226  | 5307641  | 2299938  | 8282650  | 8755298  | 4556362  | 3704224  |
| 9.848417 | 10 | 5 | 5 | 833793.9 | 4227633  | 922101.2 | 3712592  | 1402157  | 4787973  | 4570735  | 4172339  | 2661927  |
| 9.00395  | 7  | 4 | 3 | 443385.1 | 1339313  | 484797.9 | 1144381  | 416469.9 | 1424895  | 2136288  | 1006448  | 1198151  |
| 10.16938 | 10 | 5 | 5 | 833229.6 | 2648762  | 416724.5 | 2415881  | 634379.8 | 2830007  | 3241282  | 2561577  | 2121883  |
| 9.840617 | 9  | 5 | 4 | 1269108  | 2447491  | 998485.3 | 3167810  | 2096335  | 3687056  | 3179311  | 2409521  | 1330251  |
| 9.9677   | 10 | 5 | 5 | 1742524  | 6770397  | 1122315  | 6222022  | 1402664  | 7577490  | 8123969  | 6725289  | 5315768  |
| 9.872933 | 10 | 5 | 5 | 2380957  | 16436959 | 2151800  | 15582672 | 1793217  | 16071961 | 12881591 | 17340662 | 18381347 |
| 9.857683 | 5  | 3 | 2 | 14794243 | 15610770 | 17041753 | 23738728 | 20491452 | 2573632  | 19811766 | 43695952 | 6108398  |
| 9.830833 | 8  | 5 | 3 | 852944.7 | 2518749  | 413509.9 | 2842514  | 954982.3 | 2851137  | 2906162  | 2687568  | 2068562  |
| 11.16645 | 12 | 5 | 5 | 425976.3 | 1135945  | 378917.7 | 960751.9 | 432453.1 | 1811803  | 927749   | 959163.7 | 972796.4 |
| 40.66867 | 7  | 4 | 3 | 645019   | 6490100  | 2331281  | 5304627  | 3102527  | 7538392  | 8389136  | 3380919  | 4653458  |
| 9.960467 | 4  | 3 | 1 | 2135469  | 2260814  | 1958281  | 3329205  | 2886642  | 1188140  | 990865   | 5391962  | 757254.3 |
| 10.01545 | 3  | 3 | 0 | 134277.9 | 239623.4 | 162160.6 | 170553.1 | 158744.6 | 182252.6 | 0        | 279595.6 | 438296.6 |
| 10.95055 | 10 | 5 | 5 | 799498.6 | 1707771  | 559464.4 | 2088568  | 1097074  | 2368246  | 2265897  | 1285967  | 1376123  |
| 9.912633 | 10 | 5 | 5 | 2452374  | 12700722 | 1809500  | 11150068 | 4628814  | 10415977 | 11709369 | 12311389 | 14421562 |
| 9.858833 | 8  | 4 | 4 | 7640815  | 6853810  | 4603701  | 12353239 | 16845314 | 5804989  | 14767672 | 5013040  | 5928639  |
| 9.522017 | 8  | 4 | 3 | 5147588  | 4588927  | 7600842  | 10491086 | 17405594 | 779564.9 | 18137017 | 539624.4 | 1271133  |
| 18.45383 | 7  | 3 | 4 | 191585.5 | 898605.6 | 249021.4 | 750498.7 | 412706.8 | 1175523  | 580139.7 | 1118887  | 861424.3 |
| 9.845483 | 7  | 3 | 4 | 869546.7 | 2506697  | 1002307  | 2131337  | 709154.2 | 3120577  | 901384.4 | 2233111  | 3447117  |
| 13.18658 | 5  | 3 | 2 | 57446.59 | 99204.97 | 40992.12 | 130869.8 | 93350.15 | 93924.07 | 74248.38 | 61904.06 | 98343.1  |
| 10.93468 | 4  | 3 | 1 | 171253.3 | 455396.3 | 110258.7 | 552367.5 | 290670.3 | 342427.6 | 453720.6 | 350545   | 545391.9 |
| 9.729367 | 11 | 5 | 3 | 2584974  | 13075892 | 3697578  | 18266325 | 16030355 | 16772859 | 15920085 | 13377303 | 11826026 |
| 23.46817 | 7  | 5 | 2 | 100683.9 | 256688.6 | 64986.64 | 294370.4 | 104302   | 160907.6 | 316480.4 | 303166.9 | 282498.3 |
| 9.992233 | 9  | 5 | 4 | 543696   | 1259443  | 357255.7 | 1500668  | 695107.4 | 1587703  | 942501   | 1498173  | 1461578  |
| 41.15783 | 12 | 4 | 5 | 335706   | 5904609  | 1834759  | 7478570  | 4708850  | 4009759  | 6016089  | 4502465  | 8685372  |
| 34.4995  | 10 | 5 | 5 | 5224856  | 15361694 | 5791768  | 25079631 | 30193964 | 24585826 | 13570624 | 9263190  | 16669697 |
| 9.960467 | 10 | 5 | 5 | 9579438  | 36360151 | 8065307  | 32054150 | 11564741 | 41516108 | 45634186 | 31283707 | 25434761 |
| 9.544833 | 7  | 4 | 3 | 467237.9 | 1298017  | 339099.3 | 1165824  | 271301.7 | 1776484  | 1374603  | 1108121  | 1362851  |
| 9.379233 | 14 | 5 | 4 | 1509930  | 4008167  | 3560862  | 5772314  | 4568695  | 2343840  | 10300123 | 1903214  | 2135487  |
| 9.11405  | 3  | 3 | 0 | 317555.3 | 596811.7 | 611243.9 | 807520.6 | 303148.5 | 0        | 588200.3 | 0        | 1370193  |
| 9.992233 | 10 | 5 | 5 | 2273955  | 2739760  | 766966.9 | 3778269  | 3206376  | 3272004  | 2930858  | 3576055  | 2202352  |
| 10.31835 | 6  | 4 | 2 | 243313.3 | 720972.1 | 206583.5 | 595049.7 | 354298.5 | 742075.7 | 993377.3 | 794069.8 | 646097.8 |
| 10.33625 | 8  | 5 | 3 | 255914.6 | 1209947  | 287220.3 | 1052907  | 426186.5 | 1071570  | 1238337  | 1674931  | 1156554  |
| 9.275617 | 6  | 2 | 4 | 567227.3 | 2042146  | 431003.5 | 1609464  | 1314659  | 2396536  | 1551190  | 2504318  | 2113664  |

|          |    |   |   |          |          |          |          |          |          |          |          |          |
|----------|----|---|---|----------|----------|----------|----------|----------|----------|----------|----------|----------|
| 10.95602 | 10 | 5 | 5 | 248529.4 | 861658.4 | 302736.7 | 737291.3 | 275951   | 1064495  | 1159753  | 669762.6 | 431441.9 |
| 10.9645  | 10 | 4 | 5 | 201559.7 | 714844.1 | 254060.6 | 893247.5 | 519081.6 | 1138722  | 712547.7 | 685676.3 | 500415.8 |
| 9.94455  | 10 | 5 | 5 | 5177935  | 21103826 | 3742245  | 19637833 | 3041820  | 25890637 | 24170046 | 19637171 | 17149604 |
| 9.840617 | 5  | 3 | 2 | 663939.5 | 517697.1 | 714395.3 | 890029.3 | 990956.8 | 206357.1 | 293423.7 | 68440.84 | 233151.8 |
| 9.559117 | 20 | 5 | 5 | 16438147 | 1.09E+08 | 67759930 | 82947506 | 50675541 | 1.79E+08 | 2435407  | 1.54E+08 | 1.02E+08 |
| 9.3919   | 10 | 4 | 4 | 1783358  | 7166672  | 1809864  | 8835905  | 5039393  | 6058207  | 8754439  | 7868818  | 4555823  |
| 9.983433 | 10 | 5 | 5 | 4.7E+08  | 2.45E+09 | 4.44E+08 | 2.71E+09 | 7.47E+08 | 2.84E+09 | 2.88E+09 | 2.54E+09 | 2.11E+09 |
| 9.445217 | 5  | 3 | 2 | 439282.7 | 1752821  | 167043.8 | 1407776  | 1078286  | 1838386  | 1918435  | 1656728  | 1508536  |
| 9.976317 | 3  | 3 | 0 | 525585.8 | 639823   | 413337   | 837182.8 | 501382.4 | 685866.5 | 0        | 759593.4 | 1146280  |
| 10.95055 | 10 | 5 | 5 | 817935.9 | 4799747  | 1326326  | 4318938  | 845284.3 | 6398689  | 5436362  | 3248989  | 3610193  |
| 9.992233 | 9  | 5 | 4 | 1152642  | 3984674  | 994701.9 | 3501813  | 1239306  | 3726858  | 4467787  | 3147996  | 3113307  |
| 26.56867 | 5  | 3 | 2 | 166728.6 | 607195.7 | 430347.9 | 466330.6 | 132568.5 | 1320408  | 556539.9 | 377560.5 | 594594.3 |
| 9.8322   | 6  | 3 | 3 | 3274581  | 8231593  | 1666605  | 10237637 | 6172934  | 7451182  | 6437887  | 9513961  | 10427481 |
| 9.684583 | 11 | 5 | 4 | 2096877  | 12963892 | 3928600  | 10597736 | 6648790  | 16956002 | 16107270 | 13784832 | 10325741 |
| 9.388617 | 8  | 5 | 3 | 760533.3 | 1282238  | 566166.8 | 1650328  | 1055135  | 1673487  | 811745.3 | 747518.2 | 1123740  |
| 28.46167 | 7  | 3 | 4 | 342346.3 | 2646228  | 1446182  | 2074399  | 1207384  | 1466096  | 3157356  | 896624.1 | 3253098  |
| 9.840617 | 10 | 5 | 5 | 2752056  | 5273364  | 2043062  | 4400136  | 2033000  | 6784827  | 7649774  | 3714802  | 2762863  |
| 9.05635  | 9  | 4 | 4 | 380472.7 | 2034551  | 662566.7 | 1786677  | 473347.6 | 1860615  | 3096840  | 1767183  | 2132087  |
| 9.473733 | 12 | 4 | 5 | 994211.9 | 1865546  | 1038918  | 1506177  | 533724.6 | 3066322  | 266166.4 | 1877911  | 1710253  |
| 14.09268 | 5  | 2 | 3 | 36208.54 | 273535.8 | 69446.98 | 239064.3 | 89742.32 | 228653.7 | 358720.8 | 181642.5 | 310410.1 |
| 10.9645  | 9  | 5 | 4 | 173632.4 | 804972.1 | 240452.1 | 669764   | 372089.3 | 832209.7 | 1013119  | 479588.7 | 653404.1 |
| 9.970617 | 9  | 5 | 4 | 4032969  | 2063813  | 729424.5 | 3357557  | 4038372  | 2587328  | 2420113  | 2407984  | 2107447  |
| 9.8322   | 7  | 3 | 4 | 671368.2 | 1347899  | 305580   | 1606415  | 775126.5 | 1321748  | 1726909  | 1348106  | 1460204  |
| 9.9677   | 10 | 5 | 5 | 2533865  | 3299651  | 841414.4 | 3972954  | 2005104  | 4232184  | 3256825  | 4044681  | 2668294  |
| 33.557   | 6  | 3 | 3 | 122407.2 | 631856.2 | 201740.7 | 545702.8 | 200749.6 | 795368.1 | 305278.6 | 676769.7 | 791954.4 |
| 26.72267 | 9  | 4 | 4 | 485439.6 | 2887496  | 1386454  | 3545961  | 1671989  | 3486426  | 1630598  | 5021174  | 2383159  |
| 9.856867 | 10 | 5 | 5 | 5258310  | 28553020 | 7247752  | 24026260 | 12873193 | 26454491 | 25241006 | 21676255 | 28698031 |
| 9.739017 | 8  | 5 | 3 | 399677   | 983961.3 | 344065.2 | 830877.9 | 370559.3 | 1124940  | 1495175  | 872082.9 | 843848.4 |
| 9.992233 | 9  | 5 | 4 | 792701.9 | 1005157  | 629358.8 | 1346489  | 927656.4 | 1264566  | 1942002  | 903109.2 | 334885.9 |
| 9.960467 | 9  | 5 | 4 | 1059602  | 4076074  | 534638.6 | 3674476  | 1186201  | 4460613  | 4048041  | 3602025  | 3517160  |
| 38.6545  | 10 | 2 | 4 | 384048.5 | 5332901  | 2004342  | 4632269  | 1098696  | 3319244  | 5010929  | 8705190  | 4788087  |
| 8.93965  | 7  | 4 | 3 | 213470.8 | 485751.6 | 256094.2 | 389065.7 | 189404.7 | 658166   | 836786.3 | 308899.7 | 217470.2 |
| 9.507167 | 6  | 3 | 3 | 1404022  | 679059.8 | 373925.3 | 1383240  | 2204257  | 1000919  | 1154493  | 339813.5 | 380540.6 |
| 20.64883 | 6  | 3 | 3 | 80022.04 | 344165.2 | 263510.6 | 449770.5 | 228862.3 | 115318.5 | 160165.2 | 703234.6 | 196200   |
| 44.13533 | 6  | 2 | 3 | 277434.1 | 3602613  | 514298.7 | 4000539  | 1182281  | 3621474  | 3717759  | 3805544  | 2746229  |

|          |    |   |   |          |          |          |          |          |          |          |          |          |
|----------|----|---|---|----------|----------|----------|----------|----------|----------|----------|----------|----------|
| 9.848417 | 6  | 3 | 3 | 1212731  | 1424295  | 625956.2 | 1911381  | 1448533  | 1172568  | 2400304  | 1672202  | 1031177  |
| 9.9014   | 6  | 2 | 3 | 472644.5 | 1601138  | 524206   | 1344769  | 665037.3 | 946206.9 | 1603579  | 1624481  | 2401391  |
| 23.8935  | 7  | 3 | 4 | 4728624  | 1.75E+08 | 70218449 | 2.02E+08 | 55883526 | 67134678 | 2.33E+08 | 1.69E+08 | 2.42E+08 |
| 9.431017 | 7  | 3 | 3 | 684168.5 | 1703543  | 974517.4 | 2172603  | 1205998  | 2832293  | 1791180  | 625129   | 2454459  |
| 9.221317 | 5  | 3 | 2 | 609123.9 | 981967.8 | 519070.5 | 1602812  | 1918223  | 1469467  | 309344.5 | 1379453  | 1197592  |
| 40.32533 | 5  | 2 | 3 | 347451.3 | 5802995  | 2963860  | 6750759  | 562916   | 757651.4 | 6388152  | 6530924  | 6708600  |
| 20.26667 | 9  | 5 | 4 | 435261.3 | 1507751  | 373884.4 | 1329254  | 456669.4 | 1802703  | 2005559  | 1143969  | 1293973  |
| 9.348233 | 4  | 3 | 1 | 939012.8 | 1216902  | 1019008  | 863045.2 | 545659.6 | 1134929  | 2933642  | 818393.3 | 970667.3 |
| 9.960817 | 12 | 5 | 5 | 58050580 | 1.38E+08 | 45688814 | 1.19E+08 | 43207993 | 2.09E+08 | 1.51E+08 | 91729710 | 1.09E+08 |
| 37.92133 | 5  | 2 | 3 | 162863.4 | 632937.3 | 467366.1 | 455345.9 | 354287.7 | 102969.5 | 921448.2 | 143048.8 | 1031747  |
| 10.9645  | 10 | 5 | 5 | 3345410  | 15368217 | 3721317  | 13814518 | 3556886  | 18759233 | 19363286 | 12042491 | 11260836 |
| 9.66805  | 10 | 5 | 5 | 1409399  | 2891063  | 859166   | 3793912  | 2769649  | 2665765  | 4087026  | 2156225  | 2100920  |
| 20.40383 | 4  | 3 | 1 | 1144914  | 12505187 | 2180017  | 10881802 | 4802335  | 14970422 | 10586189 | 9854597  | 13628697 |
| 9.994767 | 9  | 5 | 4 | 586583.4 | 863550.8 | 215610.8 | 976860.1 | 305244.6 | 1116317  | 821664.6 | 1056387  | 690219.5 |
| 9.94455  | 9  | 5 | 4 | 3041089  | 8119795  | 1528620  | 6907067  | 3622380  | 10480792 | 8079554  | 6368854  | 7313999  |
| 9.992233 | 10 | 5 | 5 | 807644.4 | 2664084  | 358392.6 | 2407261  | 755389.1 | 3041062  | 2861977  | 2834423  | 2177854  |
| 31.81033 | 5  | 2 | 3 | 401335.8 | 2020434  | 1621366  | 1370506  | 1416875  | 708112.2 | 2283351  | 329650.2 | 4417885  |
| 9.992233 | 6  | 3 | 3 | 742980.9 | 647496.4 | 267730.8 | 956681.4 | 954912.9 | 689498.6 | 481247.3 | 839493.4 | 943892.5 |
| 10.98605 | 9  | 4 | 5 | 254502.5 | 867385.1 | 186110.4 | 1047049  | 548263.8 | 608583.1 | 783664.2 | 954254.6 | 884905.3 |
| 9.853633 | 8  | 4 | 4 | 597412.9 | 3086288  | 429533.3 | 2668386  | 1276206  | 3272561  | 3023690  | 2453373  | 3631713  |
| 9.842    | 9  | 5 | 4 | 1401268  | 7977836  | 2006939  | 6593619  | 4045648  | 7456160  | 8574137  | 5866460  | 6880626  |
| 9.976317 | 7  | 4 | 3 | 597413.5 | 1037153  | 600247.4 | 1295236  | 610745.8 | 1371589  | 1801823  | 1109175  | 287790.1 |
| 10.95835 | 7  | 4 | 3 | 2351610  | 2991536  | 5054720  | 5177896  | 5203969  | 12028201 | 464693.1 | 779812.9 | 956481.1 |
| 15.45367 | 5  | 2 | 3 | 116551.5 | 592616.3 | 350797.8 | 442545.9 | 353459.6 | 937468.9 | 765057.5 | 819846.8 | 306334   |
| 9.416767 | 10 | 4 | 5 | 1586356  | 8230963  | 2231896  | 7039424  | 3238079  | 6043028  | 6278461  | 8070023  | 11393900 |
| 15.63648 | 7  | 4 | 3 | 129765.9 | 977273.9 | 276759.4 | 866996.4 | 239105   | 1220094  | 1163733  | 556045.7 | 840604.4 |
| 10.79018 | 3  | 3 | 0 | 138754.6 | 458611.6 | 189108.7 | 390818.3 | 118394.6 | 393843.2 | 759669.4 | 454743.7 | 239462   |
| 21.6835  | 4  | 3 | 1 | 777504.6 | 3754247  | 4528070  | 5424703  | 3151915  | 8866149  | 584442.5 | 8558316  | 385074.7 |
| 9.398583 | 11 | 4 | 5 | 3251431  | 17837724 | 13168784 | 26669211 | 25707161 | 32759479 | 2699549  | 5721262  | 27085216 |
| 9.960467 | 6  | 4 | 2 | 605361.1 | 1213474  | 453332.2 | 1006861  | 514865.1 | 1129920  | 903056.9 | 1501228  | 1827946  |
| 11.5397  | 10 | 5 | 5 | 150742.2 | 521593.2 | 135924.6 | 421735.5 | 295794.6 | 712335.6 | 489789.5 | 413972.7 | 387285.9 |
| 9.992233 | 9  | 5 | 4 | 732989.7 | 2483355  | 384443.7 | 2092270  | 1201045  | 2849428  | 2610817  | 2472686  | 1839281  |
| 33.12383 | 5  | 2 | 3 | 91846.75 | 214181.1 | 171744.1 | 293621.1 | 200210.3 | 518334.8 | 110496.6 | 161395.6 | 117617.4 |
| 26.42133 | 9  | 5 | 4 | 2916224  | 13343137 | 4841694  | 17437648 | 12365678 | 21503169 | 11316274 | 8708658  | 13079727 |
| 15.01477 | 10 | 5 | 5 | 505875.1 | 710981.3 | 761704.3 | 1352964  | 1938542  | 1828666  | 291802.7 | 1177286  | 131028.6 |

|          |    |   |   |          |          |          |          |          |          |          |          |          |
|----------|----|---|---|----------|----------|----------|----------|----------|----------|----------|----------|----------|
| 9.3332   | 5  | 2 | 3 | 94774368 | 5.88E+08 | 4.51E+08 | 4.25E+08 | 2.89E+08 | 9.81E+08 | 7.27E+08 | 17994287 | 2.09E+08 |
| 12.68958 | 8  | 5 | 3 | 624473.1 | 2579405  | 1089077  | 3766731  | 3666712  | 1076207  | 2313888  | 3388445  | 2253259  |
| 10.30302 | 8  | 5 | 3 | 252473.8 | 598670.3 | 98536.91 | 696511.1 | 300222.9 | 628022.3 | 562825.5 | 622936.6 | 455722.2 |
| 9.507167 | 13 | 5 | 5 | 3569418  | 10295193 | 2156678  | 16510542 | 19681354 | 10489264 | 7667937  | 13631419 | 10095424 |
| 9.848417 | 4  | 3 | 1 | 842105.8 | 2780483  | 277301.4 | 2337098  | 1391751  | 2884422  | 2648817  | 3077801  | 2367563  |
| 10.95835 | 10 | 5 | 5 | 1016576  | 3814231  | 649880.8 | 3499370  | 819002.2 | 3610509  | 4858552  | 3086956  | 3652877  |
| 10.9645  | 10 | 5 | 5 | 465451.9 | 2117153  | 488021.8 | 1902285  | 522568.7 | 2637129  | 2600573  | 1709176  | 1590441  |
| 9.8445   | 10 | 5 | 5 | 1637762  | 4942086  | 1602220  | 5640042  | 1682118  | 2890880  | 4473611  | 5346349  | 7311396  |
| 28.41833 | 8  | 4 | 4 | 396041.8 | 4416028  | 2097379  | 3553938  | 1958401  | 2741092  | 5178564  | 1785662  | 5475125  |
| 28.528   | 10 | 5 | 5 | 6254443  | 80541358 | 36658820 | 65379326 | 34700597 | 53618245 | 95586587 | 33404395 | 94866653 |
| 14.86972 | 7  | 5 | 2 | 389374.8 | 5767853  | 1567567  | 4622155  | 3398505  | 6935651  | 4094207  | 4611762  | 7812631  |
| 26.12683 | 10 | 5 | 5 | 487034.4 | 2199544  | 907816.4 | 1872484  | 586700.3 | 1249908  | 2179909  | 1765677  | 2119547  |
| 23.41033 | 4  | 4 | 0 | 44527.74 | 146582.8 | 55725.88 | 165443.9 | 26448.19 | 193694.8 | 95024.61 | 150121.2 | 85674.03 |
| 9.983433 | 10 | 5 | 5 | 790222   | 2115917  | 634925.7 | 1812504  | 784223.3 | 2665755  | 2767874  | 2229117  | 1396234  |
| 25.454   | 10 | 5 | 5 | 94079.48 | 478738.5 | 158010.3 | 418818.5 | 121094.2 | 245292.1 | 533104.2 | 503083   | 433935   |
| 9.158833 | 3  | 3 | 0 | 1096046  | 1870955  | 889675.7 | 3247117  | 4321913  | 1724316  | 1014261  | 2985182  | 2578075  |
| 10.95602 | 7  | 4 | 3 | 598638.9 | 890313   | 511564.7 | 1259017  | 1092173  | 670714.7 | 910617.3 | 332120.4 | 1716094  |
| 9.541433 | 10 | 3 | 5 | 18544062 | 39321565 | 35537298 | 54564880 | 36328980 | 1815265  | 4051821  | 50602037 | 83904435 |
| 37.30217 | 5  | 2 | 3 | 369424.7 | 5684272  | 1320186  | 5105386  | 1408593  | 3485427  | 6345726  | 5421880  | 6657191  |
| 10.9645  | 10 | 5 | 5 | 2435040  | 11418966 | 2611946  | 10380336 | 2271644  | 13684433 | 14328669 | 9181744  | 8471918  |
| 22.61083 | 10 | 5 | 5 | 221475.6 | 992188.4 | 358815.4 | 865051.8 | 218536.9 | 503390.4 | 1515933  | 958564.4 | 1009285  |
| 10.9645  | 10 | 5 | 5 | 2506150  | 11554627 | 2857217  | 10361952 | 2769573  | 14117711 | 14574265 | 8876834  | 8432244  |
| 9.880683 | 10 | 5 | 5 | 6906003  | 19622711 | 2570817  | 23765324 | 13041437 | 20770077 | 16005659 | 20976499 | 22369441 |
| 11.52297 | 10 | 5 | 5 | 820644.1 | 4713172  | 891677.2 | 4214832  | 1388289  | 5920337  | 4550816  | 3617641  | 4240904  |
| 9.190317 | 5  | 4 | 1 | 1368735  | 2468231  | 812818.3 | 3416243  | 2948882  | 2218435  | 1247584  | 2631047  | 3445205  |
| 9.976317 | 11 | 4 | 5 | 445959.3 | 1513550  | 373848.7 | 1972243  | 1430672  | 1478152  | 1584428  | 942356.7 | 1985145  |
| 8.961583 | 6  | 3 | 3 | 159977.3 | 563678.2 | 297539.6 | 407709.7 | 423913.8 | 491323.6 | 962782.4 | 689071.9 | 526894.5 |
| 41.93483 | 5  | 2 | 3 | 340219.2 | 5545657  | 660277.3 | 5064828  | 1429516  | 5506344  | 4888575  | 5164372  | 5543902  |
| 9.903567 | 5  | 3 | 2 | 1250654  | 2540031  | 1392992  | 1934036  | 1467179  | 3343437  | 735071.6 | 1830821  | 2422778  |
| 9.106183 | 10 | 5 | 5 | 2092088  | 7551630  | 1652512  | 6901881  | 1402047  | 7777370  | 10303083 | 6252187  | 7033507  |
| 10.00385 | 8  | 4 | 4 | 918759.4 | 1606400  | 1895563  | 996492.6 | 538433   | 4935128  | 401565   | 454762.2 | 1264634  |
| 9.976317 | 6  | 4 | 2 | 1564900  | 2692596  | 1271875  | 3346809  | 1764157  | 3033102  | 2902642  | 2002979  | 1055472  |
| 9.992233 | 10 | 5 | 5 | 518820.1 | 1339937  | 453820   | 1600905  | 734760.2 | 1221483  | 1960208  | 1640425  | 1019098  |
| 10.95055 | 10 | 5 | 5 | 632549.4 | 3558339  | 958146.1 | 3162404  | 910965.4 | 4801969  | 3480695  | 2690254  | 2596496  |
| 9.40325  | 10 | 5 | 5 | 8460175  | 30545075 | 11071835 | 25385432 | 13173200 | 36550591 | 15795748 | 22459253 | 35104082 |

|          |    |   |   |          |          |          |          |          |          |          |          |          |
|----------|----|---|---|----------|----------|----------|----------|----------|----------|----------|----------|----------|
| 9.845483 | 9  | 5 | 4 | 1448991  | 2721611  | 308507.8 | 3443222  | 2288903  | 3008135  | 3023698  | 2560031  | 2295881  |
| 9.362817 | 6  | 3 | 3 | 334487.4 | 1842255  | 1052070  | 1376147  | 1146616  | 3405267  | 644107.3 | 1522565  | 2291694  |
| 35.44233 | 7  | 4 | 3 | 534088   | 8931918  | 1494120  | 8254810  | 1695516  | 9440173  | 6305098  | 9542645  | 9324384  |
| 10.9645  | 10 | 5 | 5 | 289490   | 1002274  | 255064.3 | 1184559  | 540621.9 | 935325.6 | 1442038  | 977540.8 | 852362.8 |
| 31.3945  | 7  | 4 | 3 | 89261.29 | 352839   | 193711.9 | 287115.9 | 95385.41 | 695496.4 | 227843.5 | 307249.3 | 276192.1 |
| 9.994767 | 9  | 5 | 4 | 700724.1 | 969343.5 | 348197.2 | 1220212  | 745568.5 | 1254968  | 1379071  | 959735   | 614376.6 |
| 10.95602 | 9  | 5 | 4 | 769157.7 | 2002870  | 548710.6 | 2347685  | 996511   | 2473261  | 2682102  | 1844272  | 1454950  |
| 9.445217 | 6  | 3 | 3 | 987789.1 | 4612627  | 3838249  | 3198984  | 2715145  | 1163621  | 3174230  | 8450533  | 8989890  |
| 9.928667 | 9  | 5 | 4 | 3009866  | 3844658  | 493637.5 | 4248068  | 1221100  | 4675564  | 3840974  | 3681994  | 3648418  |
| 10.9645  | 10 | 5 | 5 | 322255.3 | 1156889  | 571768.9 | 960534.5 | 302984.1 | 1944328  | 1446481  | 712502.7 | 519508.7 |
| 17.38633 | 7  | 3 | 4 | 256426.9 | 2119651  | 552210.7 | 2352110  | 546969.2 | 1288496  | 2753592  | 2195158  | 2419187  |
| 9.8322   | 5  | 3 | 2 | 1837506  | 1808416  | 1692430  | 1273275  | 300314.2 | 1231526  | 4827808  | 1106937  | 931064.7 |
| 9.94455  | 10 | 5 | 5 | 1070596  | 3878353  | 658137.7 | 3567473  | 802393.7 | 4648890  | 4448757  | 3637252  | 3054079  |
| 9.379233 | 10 | 5 | 5 | 2082514  | 7778362  | 976662.8 | 6882341  | 2747119  | 9098061  | 6541534  | 7502394  | 7400921  |
| 9.960467 | 10 | 5 | 5 | 3783690  | 6432210  | 1329342  | 7970957  | 4796620  | 7882627  | 6013087  | 7397520  | 6399356  |
| 10.9645  | 10 | 5 | 5 | 1290457  | 5954396  | 1216974  | 5449007  | 1173516  | 7069534  | 7228378  | 4955767  | 4519708  |
| 23.1765  | 6  | 3 | 2 | 49262.23 | 158057.1 | 37281.36 | 138816.3 | 52110.94 | 124858.5 | 182377.9 | 125524.6 | 147535.7 |
| 10.94443 | 10 | 5 | 5 | 387301.3 | 1934868  | 498584.4 | 1722634  | 505700.1 | 2329265  | 2219898  | 1479146  | 1310742  |
| 9.960467 | 10 | 5 | 5 | 3750374  | 6591052  | 1025167  | 8096471  | 4741978  | 7846022  | 6588945  | 7330968  | 5813584  |
| 8.874167 | 8  | 4 | 4 | 195792.3 | 629190.1 | 267131.3 | 844071.8 | 650131.5 | 721041.7 | 833893   | 762507   | 664183   |
| 9.864767 | 10 | 5 | 5 | 16348627 | 84825063 | 8509465  | 91590325 | 20438906 | 80455541 | 77962672 | 86423503 | 98982622 |
| 10.95055 | 10 | 5 | 5 | 973755.4 | 5779736  | 1353444  | 5257241  | 1102599  | 7353715  | 6813300  | 4376051  | 4440713  |
| 10.95055 | 10 | 5 | 5 | 961644.3 | 3393568  | 949712.4 | 4089272  | 2077535  | 3835887  | 4842995  | 3029013  | 2551649  |
| 9.976317 | 7  | 4 | 3 | 408641.2 | 877706.6 | 117897.3 | 768695.8 | 335080.2 | 897930.2 | 774804.4 | 1067675  | 861192.4 |
| 10.211   | 5  | 2 | 3 | 554664   | 1215008  | 319491.3 | 978986.1 | 706279.4 | 656697.5 | 1427698  | 1401993  | 1250707  |
| 12.33035 | 6  | 5 | 1 | 56013.46 | 228943.5 | 78764.11 | 266133.7 | 96256.86 | 100453.7 | 294205   | 219653.6 | 239408.3 |
| 9.983467 | 10 | 5 | 5 | 678987.9 | 2225023  | 783652.9 | 1932447  | 582780.4 | 2725986  | 3250307  | 1514901  | 1418857  |
| 9.928667 | 11 | 5 | 5 | 8231373  | 34649361 | 9689225  | 38812169 | 10032548 | 23951559 | 42518140 | 42772262 | 39721541 |
| 9.864767 | 10 | 5 | 5 | 1718150  | 11472654 | 505250.4 | 12039750 | 1768466  | 11617440 | 10646187 | 11986268 | 11416727 |
| 9.856867 | 7  | 4 | 3 | 1252149  | 1826867  | 761189.3 | 2478466  | 1989240  | 2126989  | 1332363  | 2862747  | 1933340  |
| 9.0511   | 10 | 5 | 4 | 2300958  | 3955076  | 2642809  | 6768854  | 8752897  | 4226433  | 7527790  | 5233230  | 1810843  |
| 10.91673 | 10 | 5 | 5 | 258767.9 | 1055153  | 414217.6 | 900846.1 | 307084.7 | 1429327  | 1227851  | 796587.8 | 459304.5 |
| 9.659033 | 10 | 5 | 5 | 673952.8 | 2461075  | 540464   | 2272256  | 317211.8 | 2534239  | 3340163  | 2185586  | 1916103  |
| 9.37735  | 9  | 3 | 5 | 660474.6 | 5381347  | 2423220  | 4493835  | 1703916  | 1367958  | 5524539  | 6949959  | 7593033  |
| 9.8322   | 9  | 5 | 4 | 1596355  | 5170992  | 653663.1 | 5907824  | 2301041  | 4796635  | 4327157  | 5929227  | 5697788  |

|          |    |   |   |          |          |          |          |          |          |          |          |          |
|----------|----|---|---|----------|----------|----------|----------|----------|----------|----------|----------|----------|
| 9.26025  | 8  | 4 | 4 | 999028.4 | 1904724  | 1031779  | 2816733  | 2796897  | 2997422  | 1312189  | 3017633  | 1392825  |
| 9.406667 | 6  | 2 | 3 | 2019734  | 4131393  | 1570778  | 6337946  | 6960875  | 6080342  | 4484700  | 4488762  | 3869672  |
| 9.93625  | 11 | 5 | 5 | 1824801  | 7700131  | 1608096  | 7021906  | 1611625  | 7860596  | 6400437  | 9264524  | 9232717  |
| 9.976317 | 10 | 5 | 5 | 1056277  | 2549872  | 840298.6 | 2981523  | 1172214  | 2794473  | 3794539  | 2580970  | 1618433  |
| 9.507167 | 7  | 4 | 3 | 1813173  | 6981079  | 6006276  | 9572906  | 6294747  | 17299613 | 6112684  | 4802885  | 5061211  |
| 9.43325  | 4  | 3 | 1 | 632896.8 | 2201026  | 1096619  | 2576318  | 584762.5 | 3434079  | 1648218  | 3278329  | 948616   |
| 9.864767 | 7  | 4 | 3 | 950429.9 | 3161714  | 794636   | 2434157  | 2240710  | 2702548  | 2664836  | 3350464  | 2613139  |
| 9.976317 | 10 | 5 | 5 | 887229.4 | 1526231  | 497556.8 | 1900337  | 1126091  | 1944567  | 1958869  | 1749808  | 1008382  |
| 9.328967 | 5  | 2 | 3 | 417422.7 | 3287293  | 1226720  | 2717815  | 1464657  | 4330979  | 2999129  | 3194518  | 4475595  |
| 10.008   | 8  | 5 | 3 | 547851.5 | 749136.5 | 229165.4 | 913695.7 | 491844.6 | 782609.8 | 1107671  | 749635.3 | 593923.6 |
| 10.03947 | 7  | 3 | 4 | 453358.8 | 539974.3 | 288470.8 | 735874.6 | 579835.2 | 400403.3 | 788597.8 | 646841.6 | 761283.8 |
| 11.95212 | 6  | 4 | 2 | 72576.38 | 409104.3 | 196206.2 | 488930.6 | 182888.6 | 67844.8  | 508771.1 | 416824.3 | 516342.3 |
| 11.86875 | 10 | 5 | 5 | 615647.1 | 4903873  | 621508.7 | 4295820  | 1884908  | 4564361  | 4865832  | 4244576  | 5899883  |
| 9.8322   | 9  | 5 | 4 | 802305.7 | 2764260  | 821626.9 | 2415431  | 836505.8 | 2904368  | 3311462  | 1762994  | 2105945  |
| 43.93383 | 7  | 2 | 4 | 864081.8 | 9054558  | 5779108  | 6977164  | 3834417  | 2969917  | 12512630 | 13597504 | 2522474  |
| 10.95835 | 10 | 5 | 5 | 397685   | 1795600  | 403703.4 | 1626851  | 398526.6 | 1915975  | 2375829  | 1617724  | 1276858  |
| 10.9645  | 7  | 4 | 3 | 607660.4 | 1967094  | 313590.1 | 2139231  | 481273.4 | 1869796  | 2370787  | 1734441  | 2216645  |
| 37.80567 | 7  | 1 | 4 | 313179.4 | 4043777  | 189307.2 | 5921376  | 6030246  | 3846085  | 3919406  | 4051616  | 4341190  |
| 9.983433 | 5  | 2 | 3 | 778870.2 | 1358438  | 386559.8 | 1090123  | 798051.8 | 1898457  | 1133817  | 1626656  | 1148464  |
| 10.9645  | 6  | 4 | 2 | 196590.8 | 715145.7 | 126974.1 | 628709.5 | 256157.5 | 692367.8 | 885325.8 | 618937.4 | 578997.6 |
| 18.09233 | 6  | 3 | 3 | 189026.7 | 889622.3 | 160643.8 | 719255.9 | 531490.1 | 1035118  | 903297.2 | 813319.9 | 657644   |
| 10.9645  | 10 | 5 | 5 | 245907.3 | 1001176  | 258329.5 | 895207   | 245526   | 1190834  | 1325295  | 761236.6 | 740062.1 |
| 9.842    | 10 | 5 | 5 | 1423338  | 5731028  | 957516.9 | 5185488  | 1546258  | 6017830  | 5147413  | 6914469  | 6139449  |
| 10.008   | 9  | 5 | 4 | 319707.8 | 939510.5 | 276979.7 | 784873.4 | 435374.2 | 1004404  | 1142414  | 1025347  | 453183.1 |
| 32.04183 | 9  | 5 | 4 | 2699658  | 18564404 | 11725470 | 14313237 | 8045396  | 9837580  | 19161619 | 3927365  | 29826256 |
| 9.872883 | 7  | 4 | 3 | 3265701  | 16569494 | 6914112  | 14117349 | 4378213  | 15132702 | 9477180  | 12558151 | 27537174 |
| 32.04183 | 9  | 5 | 4 | 1428423  | 7219955  | 5126855  | 5390779  | 3323056  | 3945669  | 6486291  | 891108.4 | 12835762 |
| 10.9645  | 10 | 5 | 5 | 594872.6 | 1382311  | 271944.2 | 1671212  | 901966.3 | 1545401  | 1666499  | 1517359  | 1109385  |
| 9.522017 | 11 | 5 | 5 | 2172030  | 15714991 | 8689636  | 12097379 | 8526694  | 20069408 | 11475930 | 8052575  | 10056743 |
| 8.9256   | 9  | 4 | 5 | 568963.9 | 2173962  | 872975.4 | 1762061  | 1073737  | 2941634  | 3104886  | 2090881  | 1740744  |
| 10.08658 | 8  | 3 | 5 | 308063.7 | 829024   | 178232.4 | 747564   | 208090.4 | 573216.3 | 965992.4 | 876001.4 | 1002941  |
| 10.02372 | 7  | 3 | 4 | 462854.4 | 736534.6 | 254258.2 | 904244.8 | 494594.2 | 814625.3 | 1096348  | 717954.4 | 658711.4 |
| 9.94455  | 7  | 4 | 3 | 2348093  | 1928088  | 572744.8 | 2684525  | 2389312  | 2782000  | 2098009  | 1927856  | 1539224  |
| 33.45533 | 3  | 3 | 0 | 266908.1 | 4586158  | 1346957  | 4158956  | 338116.7 | 4406227  | 4329977  | 3303868  | 6866352  |
| 28.274   | 10 | 5 | 5 | 448518.6 | 1437684  | 493499.1 | 1781260  | 1024300  | 946917.6 | 1809869  | 1170763  | 1156496  |

|          |    |   |   |          |          |          |          |          |          |          |          |          |
|----------|----|---|---|----------|----------|----------|----------|----------|----------|----------|----------|----------|
| 9.328967 | 11 | 5 | 5 | 917296.8 | 1487728  | 490591.1 | 1824031  | 1000006  | 2330924  | 1453698  | 1343039  | 1088844  |
| 9.992233 | 9  | 5 | 4 | 874247.6 | 1076646  | 185002.6 | 1513708  | 1399393  | 1141259  | 1023437  | 1131737  | 1293051  |
| 41.4745  | 13 | 4 | 2 | 316019.4 | 4460450  | 3478146  | 3328695  | 1311928  | 10236499 | 3948494  | 3868863  | 801505.2 |
| 10.02372 | 5  | 2 | 3 | 485262.8 | 477028.7 | 268267.3 | 638423.6 | 466119.4 | 572434.3 | 0        | 643543.5 | 597769.6 |
| 9.856867 | 10 | 5 | 5 | 2816820  | 12761153 | 2176661  | 11819869 | 2307649  | 15571402 | 14649145 | 11423318 | 10917507 |
| 9.9677   | 7  | 3 | 3 | 1749270  | 3201134  | 3570865  | 1943849  | 2211891  | 8730609  | 454109.2 | 1115621  | 816632.1 |
| 9.903567 | 9  | 5 | 4 | 1056507  | 2218062  | 851691.8 | 1807391  | 1087625  | 2874695  | 2830492  | 1367149  | 1207799  |
| 10.94962 | 8  | 4 | 4 | 1343699  | 2292032  | 3342831  | 1205510  | 1267148  | 8254380  | 616071.7 | 606477.4 | 750382.4 |
| 10.8507  | 10 | 5 | 5 | 314562.3 | 801138.7 | 132874.3 | 980252.6 | 567597.1 | 600550.7 | 792993.9 | 768887.5 | 932667.6 |
| 9.853633 | 5  | 3 | 1 | 690720.8 | 1924220  | 573852.6 | 2294628  | 1090568  | 2276690  | 1928333  | 1415667  | 2679469  |
| 10.98605 | 5  | 2 | 3 | 707285.3 | 1647155  | 289419.1 | 1842578  | 580851.9 | 2036875  | 1655113  | 1421081  | 1319201  |
| 9.338567 | 10 | 5 | 5 | 8210769  | 20959955 | 9204182  | 17364734 | 7893301  | 19324714 | 13487962 | 13754367 | 22210263 |
| 36.81383 | 9  | 5 | 4 | 220492.5 | 1414306  | 406509.1 | 1264305  | 298639.6 | 1407670  | 1102011  | 942064.6 | 1927018  |
| 10.008   | 9  | 5 | 4 | 648232.3 | 2263278  | 467704.9 | 1966612  | 870349   | 2358857  | 2912444  | 2215473  | 1599141  |
| 9.840617 | 9  | 4 | 5 | 885183   | 4125918  | 1063063  | 3772178  | 495291.2 | 3255598  | 3025394  | 3922074  | 5483090  |
| 9.041133 | 8  | 4 | 4 | 418802.8 | 2876762  | 2050130  | 2142393  | 1367239  | 3859136  | 6012635  | 1992009  | 1297699  |
| 10.008   | 8  | 4 | 4 | 1293186  | 1395906  | 752765.4 | 1913213  | 1544166  | 1102169  | 2049212  | 961463.9 | 2317083  |
| 26.08067 | 10 | 5 | 5 | 2259565  | 27286822 | 12310147 | 22232780 | 11829491 | 18946754 | 36380751 | 11394706 | 28269602 |
| 9.842    | 5  | 3 | 2 | 1041500  | 1612925  | 660689.1 | 2162041  | 1685602  | 1935568  | 953815.7 | 2460567  | 1780639  |
| 44.56483 | 8  | 3 | 4 | 498104.6 | 9391707  | 2236544  | 8615308  | 1316430  | 9123582  | 6085340  | 11256404 | 8820812  |
| 43.3585  | 6  | 3 | 3 | 351073.6 | 3550770  | 1457937  | 4027538  | 592826.9 | 3542972  | 1239284  | 3447496  | 4434757  |
| 31.59483 | 10 | 5 | 5 | 608120.9 | 3421971  | 899583   | 2961020  | 1262128  | 2919220  | 3326735  | 2291255  | 3968168  |
| 10.9645  | 10 | 5 | 5 | 705229.3 | 3233589  | 751627.8 | 2930312  | 696047.1 | 3876137  | 4049120  | 2599756  | 2352220  |
| 24.00117 | 6  | 2 | 3 | 98740.59 | 540123.9 | 295074.8 | 418922.7 | 283937.4 | 369366.7 | 902199.9 | 149160.3 | 727232.9 |
| 18.64583 | 10 | 5 | 5 | 5924318  | 39142448 | 7486679  | 42086084 | 6535832  | 51544426 | 39517921 | 36950864 | 31679486 |
| 12.25225 | 6  | 3 | 3 | 51691.68 | 174754.9 | 59618.54 | 153832.7 | 36865.18 | 202493.5 | 180311.6 | 179732.3 | 76057.17 |
| 9.234417 | 4  | 3 | 1 | 1345702  | 4270138  | 3070203  | 5905942  | 4557983  | 2291579  | 8175473  | 3255793  | 6737368  |
| 9.972483 | 7  | 3 | 4 | 2623433  | 2901789  | 4179535  | 1523879  | 1832662  | 1023158  | 1480469  | 723578.2 | 10361829 |
| 9.983433 | 10 | 5 | 5 | 2632078  | 8310819  | 2233081  | 7165882  | 3141865  | 10374990 | 10681766 | 8261039  | 5645742  |
| 10.008   | 9  | 5 | 4 | 1515785  | 3342160  | 1576823  | 2679597  | 1593179  | 2780244  | 4965313  | 2062037  | 1818748  |
| 28.24317 | 7  | 3 | 4 | 119259.3 | 401746.7 | 289162.6 | 527255   | 310881.2 | 764199.2 | 335846.5 | 83272.1  | 633024.7 |
| 9.842    | 9  | 5 | 4 | 2410573  | 6663043  | 1092197  | 8499473  | 5873005  | 5701774  | 5873385  | 6122163  | 7418284  |
| 10.25713 | 8  | 5 | 3 | 277901.1 | 1502333  | 252531.5 | 1295612  | 634636.4 | 1105486  | 1442435  | 1780597  | 1609667  |
| 10.9645  | 10 | 5 | 5 | 902008.8 | 4097376  | 992593.7 | 3675613  | 1025752  | 4987511  | 5128434  | 3182996  | 2984617  |
| 9.903567 | 9  | 5 | 4 | 1365508  | 3007735  | 978315.1 | 2615817  | 895413.8 | 4149410  | 2833998  | 1734030  | 2518076  |

|          |    |   |   |          |          |          |          |          |          |          |          |          |
|----------|----|---|---|----------|----------|----------|----------|----------|----------|----------|----------|----------|
| 31.51067 | 9  | 5 | 4 | 4702408  | 35605923 | 35363139 | 23720542 | 17820023 | 8101142  | 27277122 | 1859914  | 87958059 |
| 9.329083 | 6  | 3 | 3 | 4818561  | 21192876 | 18521482 | 14203210 | 14644376 | 6256171  | 9877906  | 6977486  | 41725043 |
| 9.859983 | 10 | 5 | 5 | 7384622  | 30047253 | 2179397  | 34323093 | 13726681 | 31048371 | 28733355 | 29691668 | 33202848 |
| 9.960467 | 10 | 5 | 5 | 9540260  | 36059045 | 7852508  | 31953926 | 11378154 | 41350038 | 45336430 | 30731107 | 25893408 |
| 31.1615  | 5  | 3 | 2 | 134329.6 | 500146.9 | 139512.6 | 597779.9 | 293299.5 | 606043.4 | 415274.1 | 493450   | 665161   |
| 9.840617 | 10 | 5 | 5 | 1213948  | 2584337  | 984417.1 | 3326269  | 2255530  | 3844693  | 3270649  | 2518712  | 1790984  |
| 9.277967 | 5  | 3 | 2 | 1327849  | 5142849  | 2208277  | 6974617  | 5641196  | 6771390  | 5112255  | 1710096  | 7361371  |
| 19.444   | 10 | 5 | 5 | 3535276  | 66632389 | 32501459 | 55973743 | 13915522 | 94635991 | 70875754 | 1.01E+08 | 33430776 |
| 9.523633 | 13 | 5 | 5 | 7974406  | 17350910 | 15126689 | 23436838 | 14031335 | 23964773 | 34068022 | 1462531  | 1141114  |
| 9.983433 | 10 | 5 | 5 | 1004372  | 3045762  | 900423.8 | 2583006  | 1275699  | 3850163  | 4063752  | 2901523  | 1950964  |
| 9.445217 | 10 | 3 | 4 | 2001002  | 15357476 | 10998838 | 19462114 | 8469325  | 26204371 | 1863133  | 23309309 | 5396198  |
| 20.64883 | 5  | 2 | 3 | 212791.8 | 1035199  | 495697.2 | 834871.7 | 464579.7 | 283042   | 1499824  | 915198.7 | 1011145  |
| 9.932033 | 10 | 5 | 5 | 3855907  | 14724129 | 3223021  | 13095147 | 4459077  | 18462516 | 15079453 | 11010411 | 11927815 |
| 8.995417 | 7  | 4 | 3 | 302730   | 444363.3 | 275204.5 | 812074.4 | 1171145  | 503057.8 | 863410.1 | 382377.6 | 366170.3 |
| 9.68775  | 10 | 5 | 4 | 316256.8 | 1586310  | 359287.4 | 1355624  | 682766.8 | 1919918  | 1338343  | 1997581  | 1178225  |
| 9.842    | 10 | 5 | 5 | 1131335  | 5242202  | 1010928  | 4750654  | 1320432  | 5630269  | 6180345  | 3938573  | 4407051  |
| 14.63397 | 6  | 3 | 3 | 65266.31 | 361917.4 | 59868.15 | 307383.1 | 169835.4 | 325715.1 | 460063   | 374062.5 | 340708.9 |
| 9.431017 | 11 | 5 | 4 | 1412513  | 6712764  | 2278161  | 5742845  | 2376355  | 6288045  | 7303073  | 5501914  | 4217217  |
| 9.4468   | 10 | 3 | 4 | 4290241  | 15435342 | 13656281 | 10715858 | 8048754  | 31951393 | 9374529  | 1307502  | 27998310 |
| 9.960467 | 4  | 3 | 1 | 597720.6 | 840272.7 | 427954.6 | 634939.5 | 547847   | 1398155  | 927847.2 | 1038603  | 514177.1 |
| 9.976317 | 6  | 3 | 3 | 745481.9 | 1469261  | 328447.5 | 1728056  | 793622.6 | 1171038  | 1249294  | 1367954  | 1564491  |
| 9.983433 | 9  | 5 | 4 | 474268.9 | 1157773  | 216026.9 | 971971   | 575601.2 | 1296822  | 805138.2 | 1174538  | 1364198  |
| 43.9915  | 8  | 3 | 4 | 287715   | 4159379  | 1280205  | 3725283  | 689180.9 | 5491485  | 3844196  | 2244209  | 5161021  |
| 10.94208 | 6  | 3 | 3 | 180477.8 | 564928.8 | 114484.9 | 471227   | 288805   | 541027.3 | 587069.1 | 556274.1 | 410079.7 |
| 9.3919   | 6  | 3 | 3 | 294957.9 | 1461710  | 601426.1 | 1241251  | 440776.2 | 2393122  | 1442534  | 1204761  | 747909.3 |
| 9.845483 | 9  | 5 | 4 | 655074.1 | 2381339  | 632524   | 2068289  | 849633.5 | 2528453  | 2614102  | 2445057  | 1316310  |
| 9.960467 | 6  | 3 | 3 | 796425.6 | 1147300  | 520007.1 | 889913.8 | 698878.6 | 1586934  | 1794512  | 942065.3 | 845641.7 |
| 9.979667 | 9  | 5 | 4 | 647704.8 | 1274900  | 415556.7 | 1455954  | 453153.5 | 1475747  | 1727742  | 1205570  | 615433.2 |
| 9.928667 | 6  | 4 | 2 | 2188053  | 4997940  | 907028.5 | 4198117  | 2487284  | 6253403  | 4479277  | 5664862  | 4384407  |
| 29.86267 | 4  | 1 | 3 | 264690.1 | 1498948  | 597878.3 | 1177004  | 907337.6 | 1761069  | 1871760  | 1768102  | 438214.6 |
| 9.388367 | 5  | 2 | 3 | 1874172  | 3502160  | 2932126  | 2465796  | 1905764  | 3763118  | 1665411  | 3164637  | 8266927  |
| 9.262217 | 7  | 4 | 3 | 6963816  | 21047077 | 18534559 | 31520849 | 30025809 | 10754510 | 54102078 | 13103240 | 14788776 |
| 9.848417 | 10 | 5 | 5 | 2082236  | 7829202  | 1181220  | 6950397  | 2678062  | 7856277  | 8953948  | 5921874  | 7764214  |
| 9.932033 | 9  | 5 | 4 | 1635619  | 4988915  | 1578659  | 4300890  | 1724931  | 6955129  | 6359141  | 4278567  | 3306844  |
| 10.8937  | 6  | 3 | 3 | 129999.7 | 484997.7 | 112158.3 | 424974   | 168841.3 | 397834.6 | 551293.7 | 554108   | 333625.5 |



|          |    |   |   |          |          |          |          |          |          |          |          |          |
|----------|----|---|---|----------|----------|----------|----------|----------|----------|----------|----------|----------|
| 10.95602 | 9  | 5 | 4 | 219913.3 | 986819.8 | 100435.6 | 863367.4 | 392828.5 | 983264.9 | 985747.4 | 884330   | 930618.8 |
| 9.419733 | 14 | 5 | 5 | 4218483  | 31380055 | 18409524 | 24556237 | 14007655 | 47051266 | 40423417 | 40921379 | 27490366 |
| 36.81383 | 10 | 5 | 5 | 2083699  | 16201784 | 4891795  | 14320964 | 4109484  | 17295932 | 13444481 | 9709148  | 22678218 |
| 9.912633 | 3  | 3 | 0 | 1153368  | 1483844  | 758729.6 | 1171753  | 742601.5 | 2003893  | 159966.3 | 1582185  | 1939184  |
| 10.7338  | 4  | 1 | 3 | 50246.24 | 174151.4 | 26461.83 | 202202   | 88609.38 | 217869.7 | 159288.9 | 167029.9 | 177101.5 |
| 10.97242 | 8  | 3 | 5 | 188177.9 | 506365.2 | 163991.6 | 574441.3 | 163590   | 502004.4 | 651515.7 | 395101   | 299678.3 |
| 9.445217 | 5  | 2 | 3 | 1625957  | 4675724  | 2610871  | 7142223  | 7728840  | 7299422  | 981048.9 | 3179240  | 6733012  |
| 9.56645  | 6  | 4 | 2 | 974672.2 | 915603.9 | 282130.5 | 1320327  | 1296784  | 1172069  | 1152136  | 522403.8 | 729539.1 |
| 9.5876   | 6  | 3 | 2 | 467671.2 | 1375395  | 838953.1 | 1080316  | 537981.8 | 2233661  | 741245.8 | 632307.3 | 931404   |
| 38.84167 | 6  | 3 | 2 | 263389.3 | 2409291  | 508899.7 | 2591838  | 350461.9 | 2505930  | 2556184  | 2501821  | 1555707  |
| 9.55155  | 9  | 5 | 4 | 399420   | 914472.8 | 255726.3 | 767102.5 | 425892.3 | 867288.1 | 1310578  | 601069.4 | 854255.8 |
| 9.976317 | 5  | 3 | 2 | 455918   | 946027.7 | 255450.7 | 847401.9 | 217335.4 | 1123067  | 1308621  | 779777.7 | 780036.3 |
| 10.76073 | 5  | 2 | 3 | 182505.6 | 385763.6 | 116522.2 | 329065.8 | 153159.9 | 266127.2 | 575392.3 | 386257.5 | 322651.3 |
| 10.9645  | 10 | 5 | 5 | 1144931  | 5490562  | 1154099  | 5085584  | 734957.5 | 6409434  | 6839442  | 4569559  | 4143071  |
| 26.78367 | 5  | 3 | 2 | 157987.9 | 1088506  | 316373.4 | 1243113  | 418771.7 | 965053.1 | 1317482  | 768232.7 | 874116.6 |
| 10.96    | 10 | 5 | 5 | 319886.5 | 1107291  | 298154.9 | 963399.8 | 387500.9 | 1384833  | 1477339  | 857090   | 914098.9 |
| 9.858833 | 10 | 5 | 5 | 3526786  | 24784479 | 3315562  | 22128018 | 8200902  | 24861200 | 23799111 | 21696423 | 23214073 |
| 9.840617 | 10 | 5 | 5 | 4064219  | 11353073 | 1658828  | 12929470 | 4950997  | 13035593 | 11538896 | 12607967 | 10710521 |
| 25.57883 | 5  | 4 | 1 | 311678.5 | 502515.4 | 230255.8 | 724999.2 | 699702.9 | 551739.9 | 675651.2 | 615072.7 | 99559.48 |
| 10.9645  | 10 | 5 | 5 | 706380.6 | 3285913  | 720939.6 | 2969566  | 801397.2 | 3691214  | 4026630  | 2413196  | 2616768  |
| 9.8374   | 6  | 5 | 1 | 642134.2 | 1786690  | 626407.8 | 2037602  | 582252   | 1805301  | 767099.4 | 2478820  | 1903054  |
| 35.474   | 6  | 2 | 3 | 315155.2 | 6030815  | 1773036  | 5439794  | 887586.5 | 8104444  | 5955648  | 6446731  | 3214055  |
| 10.94443 | 10 | 5 | 5 | 576510   | 1682275  | 624042.1 | 2117997  | 1318834  | 2515326  | 2157662  | 1378938  | 1037214  |
| 9.419733 | 7  | 4 | 2 | 445411.4 | 1851807  | 1046105  | 2215231  | 642940.6 | 1293987  | 2623659  | 1516692  | 3206718  |
| 10.92208 | 10 | 5 | 5 | 382860.4 | 1303273  | 486880.4 | 1109534  | 446193.1 | 1857930  | 950019.7 | 840402.9 | 1068391  |
| 9.8322   | 5  | 3 | 2 | 461161.4 | 903281.1 | 510256.1 | 703681.2 | 449923.8 | 1209992  | 1523975  | 639550   | 202440.2 |
| 11.5666  | 3  | 0 | 3 | 81207.73 | 181809.6 | 49654.18 | 207103.4 | 70037.36 | 151254.9 | 155764.2 | 240921.9 | 131805.2 |
| 10.68888 | 3  | 0 | 3 | 87976.23 | 89632.5  | 71231.84 | 114822   | 47022.24 | 18339.1  | 164097.7 | 93386.41 | 16779.39 |
| 37.08683 | 10 | 5 | 5 | 885943.8 | 7453268  | 2344703  | 6597435  | 1722288  | 6602031  | 6094562  | 4793555  | 10382565 |
| 22.02283 | 7  | 2 | 5 | 324648.8 | 2737540  | 592123.4 | 2519910  | 444229.8 | 2145968  | 3313186  | 2423706  | 3435454  |
| 24.6235  | 7  | 3 | 4 | 180505.3 | 543270.2 | 571406.5 | 330670.4 | 444533.6 | 122418.1 | 131753.8 | 1175112  | 123807.8 |
| 9.346    | 6  | 3 | 2 | 324442.9 | 1202048  | 580703.2 | 949749.6 | 635923   | 1356272  | 744279.3 | 2149323  | 954364.2 |
| 9.983433 | 10 | 5 | 5 | 653132.8 | 2322319  | 541074.2 | 2034989  | 810698.1 | 2911997  | 2411055  | 2550752  | 1449322  |
| 22.049   | 3  | 0 | 3 | 72578.9  | 194238.9 | 123665.9 | 152750.6 | 64848.44 | 91009.46 | 394400.4 | 192163.5 | 201348.9 |
| 9.859983 | 8  | 4 | 4 | 1331114  | 4832790  | 2056332  | 3989741  | 2016797  | 5185866  | 1250553  | 5888523  | 5429378  |

|          |    |   |   |          |          |          |          |          |          |          |          |          |
|----------|----|---|---|----------|----------|----------|----------|----------|----------|----------|----------|----------|
| 9.311883 | 7  | 4 | 3 | 652083.9 | 1421866  | 635106.9 | 1960762  | 1679235  | 1416753  | 409019.4 | 1459561  | 2141866  |
| 9.93625  | 6  | 2 | 4 | 916693.6 | 2394072  | 1334297  | 1910981  | 960848.1 | 3078880  | 395580.8 | 3444553  | 3397546  |
| 9.43325  | 7  | 4 | 2 | 892134.4 | 1801801  | 880017.2 | 2488121  | 2119204  | 2728184  | 1194551  | 845788.5 | 2734251  |
| 9.976317 | 10 | 5 | 5 | 1599646  | 4758424  | 773405.8 | 5400722  | 1998447  | 5116995  | 5797113  | 4884644  | 4062828  |
| 9.992233 | 10 | 5 | 5 | 2141893  | 2598258  | 750064   | 3545211  | 3034440  | 3263116  | 2985722  | 3154706  | 1958975  |
| 10.08658 | 10 | 4 | 4 | 2461400  | 2815140  | 1679489  | 2157632  | 1492685  | 5779031  | 1827955  | 1890270  | 2049448  |
| 39.4315  | 7  | 4 | 1 | 283712.6 | 5162329  | 2685021  | 4319152  | 769984.2 | 3583671  | 3400094  | 4090348  | 9854108  |
| 9.514733 | 6  | 2 | 4 | 9591031  | 18184970 | 10488364 | 36005818 | 57689483 | 26738523 | 16759981 | 21984415 | 665203.5 |
| 9.5812   | 9  | 5 | 4 | 638186.5 | 1491796  | 385157   | 1245594  | 735792.1 | 1917733  | 1864539  | 1088226  | 1167554  |
| 9.278717 | 7  | 3 | 4 | 844409.6 | 2573303  | 813398.5 | 2278599  | 589810.3 | 3773753  | 2118123  | 2738040  | 1590566  |
| 13.04075 | 10 | 5 | 5 | 1430088  | 6481328  | 2047321  | 8958151  | 7934792  | 7985795  | 9078030  | 4598256  | 6308727  |
| 39.57533 | 5  | 3 | 1 | 240449.4 | 3671107  | 730116   | 3443023  | 192487   | 3742923  | 2794643  | 3622556  | 4802192  |
| 21.20317 | 6  | 2 | 4 | 546544.2 | 4086733  | 919221.6 | 3499722  | 1755548  | 5062586  | 2669381  | 3809331  | 4650311  |
| 25.39233 | 6  | 3 | 3 | 103017.1 | 467163.2 | 159449.6 | 411572   | 101273.2 | 555244.3 | 620375.4 | 220920.2 | 399578.9 |
| 10.9645  | 10 | 5 | 5 | 221980.7 | 1096850  | 215343.8 | 996804.7 | 265775.2 | 1211990  | 1211538  | 958476.3 | 790592.3 |
| 12.26695 | 10 | 5 | 5 | 3349426  | 27139876 | 4027593  | 25001748 | 6061566  | 31109641 | 29491965 | 22779955 | 22792817 |
| 9.445217 | 6  | 3 | 3 | 375613.1 | 1339471  | 487881.2 | 1540291  | 485380.7 | 1494475  | 1597638  | 1930677  | 898614.3 |
| 10.02372 | 11 | 5 | 5 | 1018741  | 1119973  | 279558.8 | 1336235  | 669076.6 | 935361.7 | 1285763  | 868704.9 | 979848.2 |
| 9.416817 | 6  | 3 | 3 | 3441438  | 3364146  | 1809960  | 8703669  | 17441029 | 5192338  | 1247123  | 3721889  | 4934276  |
| 10.98385 | 7  | 4 | 3 | 258368.1 | 780933.8 | 221479.4 | 660261.6 | 345642.7 | 770327.9 | 911557.9 | 462934   | 709168.6 |
| 9.9677   | 10 | 5 | 5 | 1185305  | 4559813  | 1053123  | 3919774  | 1894287  | 5002533  | 5880748  | 4073959  | 3071511  |
| 30.09383 | 10 | 5 | 5 | 334073.7 | 1725248  | 464740.1 | 1506322  | 587463.5 | 1131603  | 1631905  | 1938898  | 1546505  |
| 10.008   | 19 | 5 | 5 | 1096402  | 3608160  | 1324711  | 4119363  | 1146250  | 4043489  | 2667034  | 2373272  | 3273461  |
| 10.9645  | 10 | 5 | 5 | 693352.8 | 3198493  | 585733.7 | 2925402  | 728604.5 | 3700385  | 3859277  | 2513362  | 2735695  |
| 10.9645  | 5  | 2 | 3 | 258604.3 | 730811.3 | 357896.6 | 587358.3 | 337617.5 | 651203.6 | 1331803  | 440495.5 | 485178.3 |
| 9.856867 | 10 | 5 | 5 | 18930050 | 92809292 | 17904230 | 84661670 | 21421788 | 1.09E+08 | 1.02E+08 | 63804723 | 87813698 |
| 9.992233 | 7  | 4 | 3 | 309944.8 | 750523.9 | 256415.2 | 879245.9 | 357212.1 | 722246.1 | 1088984  | 915612.8 | 451878.6 |
| 10.5005  | 8  | 3 | 3 | 196820.7 | 483291.8 | 120693.9 | 433935   | 118841.7 | 359551.1 | 440188.1 | 501336.9 | 435826.4 |
| 10.22632 | 3  | 3 | 0 | 196277   | 469074.7 | 268007.1 | 381259.8 | 125455.5 | 237015.3 | 886337.7 | 271523.2 | 575867.6 |
| 9.999217 | 8  | 4 | 4 | 1066962  | 768325.4 | 174892.6 | 1095406  | 1064101  | 1014317  | 648379.7 | 592480.2 | 705791.2 |
| 9.960467 | 9  | 4 | 5 | 1262920  | 2830919  | 1291007  | 2298654  | 1292913  | 2564913  | 2335635  | 2190083  | 1957645  |
| 9.999217 | 9  | 5 | 4 | 403272.1 | 832748.2 | 292785.1 | 976092.6 | 393246.9 | 1091745  | 810793.1 | 1166352  | 572136.4 |
| 9.848417 | 9  | 5 | 4 | 3719665  | 15029089 | 4230613  | 12212162 | 8521760  | 15171159 | 14364151 | 10281915 | 13498318 |
| 9.960817 | 9  | 4 | 4 | 5907872  | 5278112  | 9144051  | 2426333  | 2451517  | 1296136  | 1238442  | 1112182  | 21634847 |
| 9.912633 | 10 | 5 | 5 | 3300272  | 17607814 | 2918488  | 18742935 | 2578722  | 18786033 | 20029973 | 18704847 | 17959009 |

|          |    |   |   |          |          |          |          |          |          |          |          |          |
|----------|----|---|---|----------|----------|----------|----------|----------|----------|----------|----------|----------|
| 31.45167 | 8  | 4 | 4 | 3162816  | 22030512 | 23229642 | 14336247 | 11680825 | 3677579  | 15139558 | 1214037  | 56893817 |
| 10.9645  | 10 | 5 | 5 | 6479373  | 30588518 | 6575115  | 28027714 | 5829373  | 37086783 | 37375333 | 24476600 | 23718828 |
| 9.43325  | 8  | 5 | 3 | 1456611  | 3924713  | 636059   | 4798844  | 2822709  | 4425220  | 4373147  | 4283851  | 3572477  |
| 9.7038   | 3  | 0 | 3 | 392991.5 | 730490.1 | 275291.8 | 904209.4 | 519733   | 680149   | 575576.7 | 1207240  | 673686.2 |
| 10.92828 | 9  | 5 | 4 | 187370   | 707430   | 125401.8 | 797418.6 | 275911.2 | 547131.1 | 866625.1 | 700139.2 | 634896.5 |
| 9.994767 | 6  | 4 | 2 | 1505080  | 1740677  | 1388518  | 2297261  | 1313641  | 1212147  | 3779139  | 2522911  | 456114.7 |
| 9.999217 | 10 | 5 | 5 | 724815.3 | 2396605  | 517597.5 | 2064114  | 999088.8 | 2352352  | 3006501  | 2559102  | 1581870  |
| 10.02372 | 10 | 5 | 5 | 256938.2 | 946197.1 | 172836.2 | 843951.6 | 301209.3 | 900428.9 | 1196793  | 881138.4 | 733841.5 |
| 9.365833 | 8  | 3 | 4 | 579066.1 | 4603179  | 1827951  | 3757018  | 2253487  | 6123563  | 2894139  | 4698565  | 2634897  |
| 10.008   | 8  | 4 | 4 | 693826.5 | 906393.3 | 396355.7 | 1133379  | 662636.6 | 1187970  | 1288271  | 1084244  | 579945.9 |
| 38.55383 | 4  | 0 | 3 | 318054   | 4626093  | 175838.9 | 5111760  | 1589365  | 4412948  | 4653008  | 4482342  | 4756344  |
| 10.9645  | 10 | 5 | 5 | 6649867  | 31072739 | 6381692  | 28633457 | 5420103  | 38072780 | 36771860 | 24914446 | 24477595 |
| 28.28817 | 10 | 5 | 5 | 2683336  | 13775259 | 4017455  | 16320330 | 7634096  | 9645468  | 16085860 | 11766050 | 11765144 |
| 10.008   | 6  | 2 | 4 | 247836.6 | 596309   | 262902   | 482140.2 | 291374.9 | 710797   | 838484.3 | 705927.4 | 158243.8 |
| 9.976317 | 6  | 3 | 3 | 1587582  | 1517996  | 823137.7 | 2308112  | 2508097  | 1014181  | 1364531  | 636989.7 | 2773714  |
| 10.96997 | 10 | 5 | 5 | 2945210  | 18649118 | 5092747  | 16832578 | 3567059  | 24545975 | 17742974 | 15743013 | 12243417 |
| 9.976317 | 10 | 5 | 5 | 697408.3 | 1781767  | 700195   | 1520272  | 562036.8 | 2386156  | 2519410  | 1819859  | 870499.3 |
| 9.45945  | 9  | 3 | 4 | 854168.2 | 6879548  | 2130120  | 5906744  | 2575908  | 8333165  | 9694981  | 6617076  | 4962169  |
| 10.93208 | 8  | 4 | 4 | 307377.5 | 733955.4 | 267862.8 | 857957.6 | 331256   | 336400.1 | 602311.8 | 804231   | 937173.4 |
| 9.43325  | 6  | 4 | 2 | 490809.1 | 2105579  | 1022167  | 2661610  | 1600923  | 1775602  | 1284540  | 2332410  | 3775522  |
| 21.6455  | 6  | 3 | 3 | 71817.84 | 291030.1 | 33935.56 | 245366.7 | 147816.1 | 259522   | 250437.6 | 313517.5 | 326550.3 |
| 9.338567 | 11 | 5 | 5 | 1358204  | 8678282  | 2292718  | 7457216  | 3491833  | 11438453 | 8703041  | 8495046  | 9612280  |
| 9.964417 | 7  | 3 | 3 | 3478990  | 2781766  | 558891.9 | 3488289  | 2282711  | 2904345  | 1866841  | 3354665  | 2741433  |
| 41.31633 | 9  | 1 | 4 | 264383.8 | 1732053  | 1136924  | 2458640  | 2189504  | 3763548  | 1263283  | 1188225  | 1156095  |
| 9.976317 | 9  | 5 | 4 | 817503   | 3276173  | 539442.4 | 2834855  | 1382912  | 3489667  | 3953484  | 2912404  | 2571945  |
| 11.16645 | 7  | 2 | 4 | 335092.4 | 730824.6 | 238161.1 | 1036224  | 987581.6 | 1033805  | 476473.1 | 558047   | 664773.2 |
| 41.47433 | 6  | 1 | 3 | 393083.8 | 6410722  | 515311   | 5832848  | 1857361  | 6320417  | 5985817  | 6574907  | 7212699  |
| 9.880683 | 9  | 5 | 4 | 1951076  | 4884035  | 1565131  | 4151356  | 1974733  | 5033898  | 3016658  | 3741545  | 6982575  |
| 9.43325  | 6  | 3 | 2 | 811433.1 | 4014541  | 1780594  | 3326521  | 1564632  | 2934712  | 3988380  | 5902659  | 5578534  |
| 9.91875  | 10 | 5 | 5 | 11857048 | 75605862 | 46514610 | 60400542 | 22128908 | 54949249 | 40814960 | 44344748 | 1.53E+08 |
| 9.994767 | 10 | 5 | 4 | 2180324  | 3665921  | 1179796  | 3112266  | 1495663  | 5037624  | 4794895  | 3263810  | 2461988  |
| 9.445217 | 13 | 5 | 5 | 9592098  | 49872918 | 11057542 | 62234566 | 39750541 | 42091233 | 54165761 | 67483203 | 42448815 |
| 20.26667 | 9  | 4 | 5 | 61610.56 | 351615.5 | 167426.1 | 404278.5 | 55984.35 | 549073.5 | 241931.2 | 486705.6 | 145256.7 |
| 9.859983 | 10 | 5 | 4 | 2804836  | 10973936 | 4628799  | 8675812  | 6394471  | 8501853  | 7346955  | 7947836  | 12739613 |
| 9.874317 | 9  | 4 | 5 | 1066766  | 1575799  | 769431.1 | 2315280  | 2355742  | 927501.7 | 1579576  | 1760609  | 2756436  |

|          |    |   |   |          |          |          |          |          |          |          |          |          |
|----------|----|---|---|----------|----------|----------|----------|----------|----------|----------|----------|----------|
| 35.6755  | 10 | 5 | 5 | 735164.4 | 3650816  | 2875024  | 2567548  | 2379214  | 8499403  | 2702292  | 886824.6 | 2652915  |
| 9.983433 | 10 | 5 | 5 | 823760.1 | 2749292  | 788637.8 | 2350441  | 1119340  | 3819503  | 3155872  | 2751373  | 1805400  |
| 31.42083 | 5  | 3 | 2 | 273405.4 | 2206249  | 611386.2 | 2009508  | 260149   | 2938930  | 2391046  | 1974709  | 2426902  |
| 27.405   | 9  | 5 | 4 | 47171.83 | 185106.6 | 33721.79 | 209662.5 | 75893.99 | 212974.5 | 184248.5 | 161070.5 | 143687.8 |
| 10.008   | 15 | 5 | 5 | 1309737  | 3618256  | 1791145  | 2888490  | 1769946  | 808282.1 | 4940955  | 2929555  | 5121920  |
| 11.26148 | 9  | 5 | 4 | 393954.3 | 1174580  | 190240.2 | 946596.8 | 736111.6 | 1026065  | 965616.5 | 1279936  | 1435103  |
| 9.061    | 8  | 4 | 4 | 1232384  | 3702720  | 1385983  | 3201930  | 1021155  | 4665216  | 5141565  | 3996544  | 3051140  |
| 9.994767 | 4  | 1 | 3 | 2024440  | 879135.4 | 321528.2 | 1419695  | 1765618  | 1187879  | 503644.5 | 1217866  | 856015.1 |
| 10.9645  | 8  | 5 | 3 | 780701.4 | 823875   | 177765.3 | 964352   | 439549.6 | 1125728  | 708852.8 | 774445.6 | 683851.4 |
| 10.95602 | 9  | 5 | 4 | 264191.3 | 960572.2 | 292136.6 | 861041.1 | 174664.7 | 944892.7 | 1430438  | 694351.4 | 740460.9 |
| 10.008   | 5  | 4 | 1 | 295726.5 | 485666.6 | 271571.9 | 356873.5 | 350842.2 | 591073.6 | 43932.49 | 774245.3 | 462915.2 |
| 43.56    | 7  | 3 | 3 | 357879.2 | 6347011  | 5126076  | 4744324  | 1608557  | 2058350  | 4587752  | 4517501  | 5323625  |
| 3.5906   | 3  | 0 | 3 | 166173.3 | 1830767  | 1682162  | 1231141  | 1191508  | 38308.43 | 4388725  | 2503864  | 918109.2 |
| 9.857683 | 5  | 2 | 3 | 1180380  | 2803281  | 1213505  | 3297159  | 1199666  | 4504383  | 1253832  | 2548822  | 2341942  |
| 10.92208 | 9  | 5 | 4 | 314261.4 | 1406650  | 458576.4 | 1187110  | 601345.9 | 1732654  | 1713825  | 771677.6 | 1063061  |
| 9.992233 | 10 | 5 | 5 | 1179193  | 3933132  | 1084265  | 3306165  | 1849259  | 4516895  | 5530069  | 3560775  | 2891419  |
| 7.44795  | 9  | 5 | 4 | 1439516  | 82911385 | 45460159 | 64510479 | 44459278 | 1.16E+08 | 1.15E+08 | 1.13E+08 | 54870126 |
| 25.37617 | 5  | 3 | 2 | 47772.91 | 197918.4 | 76286.84 | 170355.4 | 56446.94 | 160542.9 | 253461.5 | 302719.3 | 125189.1 |
| 10.96997 | 6  | 3 | 3 | 344285.4 | 736519.7 | 269437.3 | 634658.5 | 226028.8 | 756956.6 | 951014.2 | 470895.1 | 1045918  |
| 9.4925   | 9  | 4 | 5 | 3828317  | 14314817 | 6379684  | 20307237 | 19097847 | 13591583 | 5239593  | 11964700 | 20937627 |
| 10.95835 | 10 | 5 | 5 | 727235.4 | 4351104  | 879165   | 3973055  | 966582.1 | 4715230  | 5514317  | 3448186  | 3493064  |
| 11.03033 | 7  | 5 | 2 | 174697.1 | 854032.8 | 536818.3 | 1045950  | 384886.1 | 1476836  | 380116.1 | 871598.5 | 257945.7 |
| 9.960467 | 6  | 3 | 3 | 1284060  | 1978786  | 957803.1 | 2426653  | 1212265  | 2968478  | 2930431  | 1765462  | 764131.6 |
| 9.77345  | 5  | 3 | 2 | 655540.9 | 851632.7 | 555987.9 | 1044985  | 362828.4 | 1168773  | 0        | 895170.7 | 717491.5 |
| 9.842    | 4  | 3 | 1 | 733373.8 | 1788475  | 937170.4 | 2099395  | 496260   | 1968374  | 768375.7 | 3103873  | 1004520  |
| 9.856867 | 10 | 5 | 5 | 1974644  | 6561397  | 1888046  | 5500783  | 3106315  | 7161310  | 7336341  | 4301974  | 5028559  |
| 10.9645  | 8  | 4 | 4 | 4922784  | 13529966 | 2596357  | 16468846 | 9488539  | 16171808 | 16436695 | 12581973 | 11394817 |
| 41.38833 | 4  | 3 | 0 | 342073   | 2522019  | 1503400  | 2066592  | 128542.5 | 2333352  | 2388950  | 2222967  | 746099.7 |
| 9.21755  | 11 | 5 | 5 | 923074.7 | 4527758  | 1618922  | 5425116  | 2617530  | 2758845  | 6140713  | 6208327  | 4384492  |
| 9.933967 | 8  | 4 | 4 | 2657850  | 6046564  | 1148507  | 5282334  | 2333759  | 6138470  | 4990330  | 7966729  | 5633271  |
| 10.25103 | 9  | 5 | 4 | 224546.8 | 672422.2 | 178669.9 | 581674.9 | 256218.7 | 611682.1 | 834046.1 | 886101.9 | 478086.5 |
| 9.946467 | 10 | 5 | 5 | 4446031  | 38208151 | 2003823  | 36175032 | 6523706  | 39666655 | 40317003 | 36154053 | 36015827 |
| 9.352183 | 12 | 5 | 5 | 10697517 | 61419292 | 12780724 | 54560959 | 19795521 | 75752498 | 64118940 | 58758533 | 67084324 |
| 9.856867 | 10 | 5 | 5 | 3168615  | 16233656 | 3348406  | 14664994 | 4257894  | 17406162 | 16034417 | 11745217 | 15066476 |
| 9.554967 | 9  | 4 | 3 | 705024.1 | 3738069  | 2318376  | 4526484  | 1388666  | 4723309  | 6313239  | 1324370  | 5090053  |

|          |    |   |   |          |          |          |          |          |          |          |          |          |
|----------|----|---|---|----------|----------|----------|----------|----------|----------|----------|----------|----------|
| 10.95602 | 8  | 5 | 3 | 207519.8 | 1012076  | 368441.7 | 866475.3 | 343822   | 567209   | 1582200  | 871184.4 | 1026063  |
| 10.008   | 10 | 5 | 5 | 917440.1 | 1075500  | 430054.4 | 1421475  | 1087892  | 1353248  | 1613880  | 1117624  | 609513.4 |
| 9.8445   | 5  | 3 | 2 | 2437239  | 6425976  | 3027137  | 5250721  | 2717579  | 8477803  | 4739464  | 7915584  | 1916573  |
| 9.856867 | 10 | 5 | 5 | 12058387 | 30873034 | 8652401  | 27658328 | 6970859  | 38727371 | 41293695 | 25875290 | 21401104 |
| 9.949233 | 9  | 5 | 4 | 957330.9 | 2857766  | 748837.5 | 2478639  | 1070347  | 3835154  | 3433795  | 2420268  | 2033451  |
| 9.928667 | 8  | 5 | 3 | 2030398  | 1724795  | 673026.5 | 2401388  | 2172076  | 2671673  | 1971098  | 1722314  | 1399380  |
| 44.96917 | 5  | 3 | 0 | 303185.1 | 4348275  | 3782391  | 3204592  | 280183.4 | 3091499  | 3773671  | 717046.4 | 10768103 |
| 9.858833 | 10 | 5 | 5 | 3527692  | 24797587 | 3210822  | 22207413 | 8153025  | 24798729 | 24009057 | 22083445 | 22866044 |
| 8.888567 | 6  | 2 | 4 | 161209.2 | 440263.6 | 104425.1 | 524670.9 | 265750.8 | 464567.1 | 606284   | 424106   | 348879.4 |
| 10.9645  | 10 | 5 | 5 | 1550166  | 7377349  | 1531270  | 6713037  | 1716746  | 8724469  | 9009466  | 5967723  | 5675556  |
| 9.541433 | 8  | 3 | 4 | 11705892 | 44926048 | 50455986 | 61363993 | 24256073 | 1769325  | 20786778 | 93496900 | 1.05E+08 |
| 10.9645  | 10 | 5 | 5 | 1188594  | 5920023  | 1195191  | 5487368  | 897757.9 | 6818556  | 7329444  | 5001747  | 4479775  |
| 9.994767 | 9  | 5 | 4 | 522411   | 905567.2 | 154897.5 | 1013613  | 333522.1 | 946971.9 | 1131641  | 872841.2 | 702974.2 |
| 9.4925   | 9  | 4 | 5 | 1776195  | 4045547  | 1006473  | 3451880  | 1768265  | 4927406  | 5268642  | 3582620  | 3553083  |
| 38.772   | 7  | 2 | 3 | 350547.3 | 3585815  | 445117.9 | 3921377  | 1048207  | 4291041  | 3577570  | 3279928  | 3140204  |
| 9.999217 | 10 | 5 | 5 | 1140033  | 2970675  | 1164895  | 2455491  | 1352128  | 3985553  | 4192270  | 3073581  | 1519277  |
| 9.842    | 7  | 5 | 2 | 752308.3 | 1706522  | 709083.2 | 2015137  | 800685.9 | 1480477  | 1918574  | 799358.3 | 1589208  |
| 28.43283 | 9  | 5 | 4 | 598110.1 | 7166522  | 3490435  | 5814850  | 3126813  | 4431843  | 8681916  | 2718368  | 8752913  |
| 9.508883 | 9  | 5 | 4 | 3430448  | 6237291  | 2650318  | 10396242 | 13630642 | 7135698  | 2791413  | 7263342  | 4428431  |
| 9.419733 | 5  | 2 | 3 | 465994.2 | 732495.2 | 603376.4 | 520858.3 | 410679.5 | 1404346  | 197317   | 0        | 983494.4 |
| 9.536783 | 4  | 1 | 3 | 2838374  | 10873749 | 4283300  | 7962718  | 8952957  | 14523265 | 12958467 | 12477938 | 3583627  |
| 21.09467 | 6  | 4 | 2 | 140017.9 | 926481   | 298174.8 | 824208   | 186819.9 | 757670.4 | 1383816  | 1038911  | 837713.8 |
| 9.516467 | 15 | 5 | 5 | 2960614  | 22507803 | 2759699  | 24553987 | 6382008  | 21359498 | 22530559 | 18654565 | 24021741 |
| 9.844033 | 7  | 4 | 3 | 540432.1 | 1445981  | 272231.9 | 1622101  | 536893   | 1736719  | 1115936  | 1341360  | 1720033  |
| 9.946467 | 10 | 5 | 5 | 3630568  | 6012047  | 1340621  | 7229301  | 3886018  | 7539341  | 6876907  | 6279770  | 5181761  |
| 10.03947 | 8  | 5 | 3 | 589823.4 | 619536.9 | 202906.4 | 693870.6 | 158407.1 | 284032.6 | 580819.5 | 758075.9 | 694625.6 |
| 9.94455  | 3  | 3 | 0 | 3423301  | 1876545  | 1157912  | 2933925  | 3378300  | 1033183  | 1379824  | 2681956  | 3488021  |
| 9.858833 | 9  | 5 | 4 | 2269254  | 10199374 | 3152144  | 8586916  | 4589274  | 10074312 | 9019984  | 5811951  | 11843385 |
| 9.992233 | 7  | 3 | 4 | 1507072  | 2197303  | 1818250  | 1591376  | 1006442  | 1000727  | 1079838  | 914048.5 | 5097451  |
| 10.008   | 10 | 5 | 5 | 623719.3 | 2248938  | 472489.4 | 1963815  | 856086.6 | 2394007  | 2845776  | 2325684  | 1544029  |
| 9.840617 | 8  | 5 | 3 | 881931.8 | 3060703  | 702076.1 | 2696456  | 1042850  | 3660109  | 2455904  | 3518445  | 3518172  |
| 10.95602 | 8  | 5 | 3 | 2245766  | 5627958  | 1713000  | 7024148  | 4412666  | 6212402  | 8237081  | 4432599  | 3866265  |
| 24.63633 | 6  | 2 | 4 | 148789.1 | 1188556  | 483765.8 | 979437.6 | 541382.7 | 1010297  | 1514362  | 1544115  | 1459119  |
| 9.986767 | 9  | 4 | 5 | 688818.4 | 1565827  | 901841.3 | 1255955  | 572108.1 | 3002967  | 1514051  | 1703804  | 858441.9 |
| 20.24783 | 10 | 5 | 5 | 143668.5 | 1215335  | 200745.9 | 1140139  | 166628.9 | 1421357  | 1426134  | 987361.2 | 1073422  |

|          |    |   |   |          |          |          |          |          |          |          |          |          |
|----------|----|---|---|----------|----------|----------|----------|----------|----------|----------|----------|----------|
| 9.874067 | 7  | 4 | 3 | 858090   | 3301711  | 1237976  | 2708636  | 1638956  | 5498217  | 3022037  | 2666599  | 2623977  |
| 9.864767 | 10 | 5 | 5 | 5235314  | 33154538 | 1719485  | 34952980 | 5807369  | 32563590 | 30638221 | 35168365 | 34197311 |
| 9.874317 | 5  | 3 | 2 | 1127083  | 2363574  | 1495592  | 1876152  | 733617.3 | 2432936  | 1853023  | 1759769  | 914889.4 |
| 10.95835 | 5  | 2 | 3 | 392262.9 | 764018.8 | 180175.6 | 1029103  | 868844.6 | 822470.1 | 588724.3 | 635581.2 | 1043393  |
| 31.00517 | 10 | 5 | 5 | 1264781  | 33422246 | 12065393 | 38269653 | 11758905 | 23172259 | 24801168 | 44791409 | 48252738 |
| 11.8399  | 7  | 3 | 4 | 598400.1 | 8388679  | 736034   | 7609207  | 2520307  | 7284225  | 8618490  | 8194150  | 8545807  |
| 20.8125  | 11 | 5 | 5 | 764288.7 | 3024087  | 486388   | 2633327  | 1234751  | 2751594  | 3633221  | 3466477  | 2664908  |
| 9.856867 | 6  | 1 | 5 | 800340.4 | 1321482  | 315603.8 | 1873899  | 1819868  | 1222546  | 1786496  | 1489884  | 1029728  |
| 9.43325  | 7  | 3 | 3 | 6147949  | 15533048 | 7836974  | 24185731 | 28060020 | 21439594 | 16783605 | 21270872 | 15910515 |
| 43.3875  | 9  | 1 | 3 | 240781.4 | 2302038  | 1097310  | 1835220  | 1196420  | 1850393  | 1775736  | 1848707  | 4263790  |
| 9.43325  | 8  | 4 | 3 | 467926.8 | 1639142  | 717464.9 | 1400498  | 397048.7 | 1244625  | 917499.8 | 1328410  | 1986496  |
| 21.8195  | 7  | 4 | 3 | 92406.35 | 275826.3 | 92918.52 | 241337.3 | 75596.09 | 123413.5 | 326264.6 | 286306.3 | 274317.6 |
| 39.748   | 7  | 3 | 3 | 616152.8 | 6415872  | 2345039  | 5259602  | 3247584  | 6359373  | 8530880  | 5087679  | 3267766  |
| 9.55155  | 5  | 3 | 2 | 191426.7 | 384190.8 | 242519.4 | 473540.5 | 193647.7 | 551681.1 | 285653   | 531566.1 | 552053.7 |
| 22.92917 | 5  | 3 | 2 | 236447.4 | 1890146  | 412151.6 | 1739197  | 323891.6 | 1432960  | 1448774  | 2234979  | 2125573  |
| 10.93468 | 4  | 3 | 1 | 271692.2 | 492801.2 | 112745.1 | 418715.4 | 227367.8 | 534005.8 | 483358.5 | 597199   | 304533.5 |
| 9.859983 | 10 | 5 | 5 | 2092853  | 8857760  | 897041.6 | 9931803  | 3501654  | 8852696  | 8516768  | 10034721 | 9270558  |
| 22.74167 | 6  | 4 | 2 | 294308.8 | 1816200  | 668538.2 | 1504086  | 853586.6 | 1316686  | 2605699  | 1067835  | 1691948  |
| 10.95602 | 9  | 4 | 5 | 215501.8 | 823537.9 | 323180.4 | 697137.3 | 298734.2 | 918411.6 | 870277.6 | 569269.2 | 470232.4 |
| 9.684583 | 10 | 5 | 5 | 4275733  | 15603584 | 2991658  | 17484253 | 5722609  | 17452575 | 18560267 | 17048229 | 13483185 |
| 18.64583 | 10 | 5 | 5 | 2075682  | 12396261 | 2810195  | 13453540 | 2373590  | 16975125 | 12487054 | 11772196 | 9363100  |
| 10.97242 | 10 | 5 | 5 | 286942.6 | 1191685  | 358573.8 | 1011743  | 510278.1 | 1700164  | 1412429  | 1010281  | 808090.4 |
| 9.445217 | 9  | 5 | 4 | 21326396 | 2.88E+08 | 1.73E+08 | 3.61E+08 | 1.87E+08 | 1.97E+08 | 2.65E+08 | 2.51E+08 | 1.42E+08 |
| 9.856867 | 10 | 5 | 5 | 1223319  | 5251354  | 523601.1 | 4857173  | 1238347  | 5353268  | 4782895  | 5873114  | 5596843  |
| 11.52297 | 10 | 5 | 5 | 52783.54 | 170650.9 | 64826.05 | 199601.1 | 77158.99 | 252223.2 | 201241.9 | 86652.93 | 126840.1 |
| 9.960467 | 10 | 5 | 5 | 3667081  | 6689264  | 1142344  | 8162531  | 4823605  | 7983407  | 6831828  | 7447941  | 6110814  |
| 10.97857 | 10 | 5 | 5 | 279909.9 | 1006754  | 149484.8 | 911317.5 | 291660.6 | 996178.2 | 811364.3 | 958224.7 | 1043572  |
| 9.507167 | 16 | 5 | 5 | 10185041 | 32297992 | 16030634 | 48614047 | 52789723 | 34608516 | 6340269  | 30004279 | 43390093 |
| 9.979667 | 9  | 5 | 4 | 386315.5 | 1084596  | 360171.1 | 929002.6 | 405279.9 | 1599913  | 1183867  | 877778   | 638250.2 |
| 9.40325  | 9  | 3 | 4 | 1359700  | 4892459  | 1272951  | 6986723  | 6910476  | 5029112  | 6536646  | 5640106  | 3672907  |
| 9.2612   | 4  | 3 | 1 | 307510.9 | 1158004  | 453589.5 | 936521.7 | 621496.1 | 1080450  | 1330995  | 913915.2 | 1830831  |
| 9.928667 | 5  | 3 | 2 | 644390.6 | 1131770  | 606268   | 870287   | 681043.9 | 1582256  | 74915.97 | 1231049  | 1462580  |
| 9.8445   | 4  | 3 | 1 | 2046351  | 1979174  | 728135.2 | 2871514  | 2918968  | 1852202  | 1380571  | 2486396  | 2944260  |
| 10.03947 | 18 | 5 | 5 | 1187304  | 2901552  | 1563609  | 2265393  | 1576377  | 4557727  | 1036682  | 2015849  | 2405794  |
| 9.8322   | 9  | 5 | 4 | 1088235  | 2680838  | 648764.6 | 3375513  | 2257574  | 2016125  | 2375096  | 2540742  | 2730166  |

|          |    |   |   |          |          |          |          |          |          |          |          |          |
|----------|----|---|---|----------|----------|----------|----------|----------|----------|----------|----------|----------|
| 30.253   | 6  | 3 | 3 | 75666.75 | 191930.4 | 78197.7  | 239771.5 | 145106.7 | 289862.6 | 162950.2 | 259904.3 | 127598.2 |
| 9.928667 | 3  | 3 | 0 | 1464827  | 2306603  | 1293180  | 1764222  | 1384997  | 3033724  | 0        | 2887795  | 2760668  |
| 9.983433 | 10 | 5 | 5 | 1477979  | 4589561  | 1163698  | 4004700  | 1667152  | 5715584  | 5721366  | 4688204  | 3209266  |
| 10.67028 | 8  | 4 | 4 | 1668933  | 865160   | 1033365  | 2016858  | 3756133  | 612532.2 | 393186.6 | 265186.1 | 355361.4 |
| 9.992233 | 10 | 5 | 5 | 1899332  | 6575527  | 1580578  | 7287770  | 1918375  | 6098672  | 9139207  | 6953294  | 5261862  |
| 10.95835 | 8  | 4 | 4 | 1027599  | 3071842  | 1190286  | 3483937  | 795216.8 | 1312637  | 3641484  | 2388499  | 3892142  |
| 9.842    | 10 | 5 | 5 | 6112752  | 38058627 | 3265793  | 36945586 | 2058264  | 38113925 | 33427994 | 36515326 | 41357917 |
| 37.82    | 7  | 3 | 1 | 352698.6 | 4061785  | 242766.5 | 3928513  | 393007.9 | 4012619  | 3746807  | 4033671  | 4425828  |
| 40.12217 | 5  | 1 | 3 | 371073.9 | 7025724  | 2023683  | 6058514  | 2696400  | 10641014 | 6017848  | 6104694  | 6071191  |
| 10.9645  | 10 | 5 | 5 | 940451.6 | 4458896  | 1074212  | 4082967  | 746575.1 | 5512328  | 5545688  | 3334101  | 3429561  |
| 10.98605 | 10 | 5 | 5 | 323426   | 2091127  | 523437.7 | 1884973  | 496088.7 | 2603724  | 1685652  | 1683468  | 1763152  |
| 9.43325  | 5  | 3 | 2 | 1009140  | 1463652  | 676150.1 | 1943007  | 1499934  | 1759127  | 2056071  | 547174.1 | 2002400  |
| 43.28683 | 5  | 1 | 3 | 263305.8 | 2384615  | 319535.8 | 2272655  | 223347.7 | 2067637  | 2920724  | 2345839  | 2331572  |
| 9.999217 | 9  | 5 | 4 | 843813.7 | 1117442  | 710009.3 | 1428722  | 825307.5 | 1428981  | 2136947  | 1112227  | 431436.8 |
| 9.8445   | 10 | 5 | 5 | 2782575  | 7223036  | 996996.1 | 8949703  | 5725936  | 8839270  | 6353182  | 6847670  | 7483299  |
| 9.527817 | 8  | 5 | 3 | 494076.9 | 875344.4 | 286572.9 | 661159.9 | 675775.8 | 1251872  | 942969.8 | 1005531  | 576596.4 |
| 9.296133 | 4  | 3 | 1 | 66985840 | 1.49E+08 | 1.99E+08 | 2.26E+08 | 1.81E+08 | 3.79E+08 | 3.56E+08 | 4475994  | 2439007  |
| 8.99545  | 9  | 5 | 4 | 228313.8 | 675062.3 | 604249.2 | 481824   | 275526.4 | 449566.9 | 1719272  | 471260.7 | 157066.9 |
| 25.21983 | 8  | 4 | 4 | 530617.6 | 2695708  | 679856.7 | 2418206  | 695266.8 | 2332997  | 3302509  | 3239847  | 2910822  |
| 10.97857 | 8  | 5 | 3 | 263042.8 | 711966.6 | 232445.5 | 837187.9 | 368102.7 | 922516.2 | 387725.2 | 577847.7 | 930653.5 |
| 9.848417 | 10 | 5 | 5 | 6170792  | 30890790 | 7528855  | 26776500 | 12155232 | 29129996 | 30504486 | 21597604 | 30624209 |
| 9.904767 | 10 | 5 | 5 | 15037487 | 76332994 | 12172238 | 92329998 | 52723702 | 81708725 | 62252244 | 88908395 | 84394222 |
| 10.95055 | 10 | 5 | 5 | 252512.1 | 1429737  | 349721   | 1293364  | 325872.6 | 1822808  | 1682670  | 1078342  | 1054547  |
| 9.536783 | 7  | 4 | 3 | 395418.8 | 860438.5 | 367198.2 | 687450.5 | 480500.1 | 733571.8 | 1438995  | 989679   | 609159.8 |
| 9.541433 | 6  | 3 | 3 | 294501.8 | 421135.7 | 279062.8 | 317987.1 | 229407.9 | 491052.4 | 782656.3 | 98736.91 | 184911.9 |
| 9.960467 | 7  | 3 | 4 | 577450.1 | 1687399  | 522807.1 | 1421239  | 767122   | 2061653  | 2145454  | 1453643  | 883318.6 |
| 41.07133 | 8  | 3 | 5 | 311307.3 | 3409606  | 1275100  | 4798657  | 4545766  | 3715087  | 3441111  | 1327506  | 3757112  |
| 10.02372 | 8  | 5 | 3 | 393034   | 680745.7 | 107645.7 | 806597.8 | 413366.7 | 616522.9 | 793495.6 | 792722.6 | 645735.7 |
| 26.91233 | 6  | 2 | 4 | 365241.7 | 2617831  | 1521394  | 2083472  | 1082858  | 1591348  | 3498832  | 482876.6 | 3390281  |
| 10.00385 | 11 | 5 | 5 | 1698008  | 2343446  | 893198   | 2012179  | 742437.3 | 3843358  | 1640407  | 2376322  | 2154279  |
| 9.904767 | 10 | 5 | 5 | 3433001  | 4837621  | 966272.9 | 5511265  | 2110660  | 5857697  | 4567487  | 5706028  | 4556434  |
| 40.35217 | 5  | 4 | 0 | 323987.1 | 3546250  | 2144306  | 2907268  | 130750.4 | 1703218  | 2924562  | 5714675  | 1473703  |
| 9.976317 | 10 | 5 | 5 | 491378.1 | 1445116  | 134364   | 1315571  | 420928.6 | 1408635  | 1563269  | 1518865  | 1227036  |
| 10.9645  | 10 | 5 | 5 | 351417.7 | 1229952  | 382970.7 | 1074013  | 391746.4 | 1649704  | 1632903  | 1001196  | 834521.5 |
| 9.388367 | 6  | 4 | 2 | 1280719  | 6166164  | 3634482  | 7743331  | 4176664  | 5937426  | 4815738  | 4619166  | 3055797  |

|          |    |   |   |          |          |          |          |          |          |          |          |          |
|----------|----|---|---|----------|----------|----------|----------|----------|----------|----------|----------|----------|
| 21.80583 | 10 | 5 | 5 | 1148607  | 2262455  | 615385.1 | 3522608  | 4206450  | 1331274  | 2167214  | 2857918  | 2168753  |
| 9.932033 | 9  | 5 | 4 | 1089416  | 2380247  | 555753.7 | 2083566  | 872552.1 | 2891768  | 3060566  | 2128233  | 1856421  |
| 44.62383 | 10 | 4 | 3 | 412378   | 5151642  | 1051440  | 4451479  | 2178706  | 5464526  | 4664532  | 4177534  | 4612544  |
| 9.864767 | 9  | 5 | 4 | 2342023  | 4656001  | 1085757  | 6319128  | 5524005  | 4352906  | 5240678  | 5577149  | 5218676  |
| 44.91167 | 7  | 4 | 3 | 208667.2 | 1358264  | 152170.7 | 1421800  | 163546.2 | 1534873  | 1196962  | 1343204  | 1490783  |
| 10.95055 | 7  | 3 | 4 | 272091.1 | 743927.4 | 406709.2 | 591983.7 | 345981.3 | 1190287  | 1115418  | 227717.4 | 514237.4 |
| 9.999217 | 8  | 4 | 4 | 772374.3 | 919434.9 | 572016.1 | 1248893  | 993632.9 | 1356221  | 1359625  | 1266111  | 141157.8 |
| 9.92825  | 5  | 2 | 3 | 22196140 | 51304141 | 52815245 | 31902052 | 43086231 | 1.04E+08 | 33668946 | 1.11E+08 | 5294613  |
| 22.929   | 6  | 3 | 3 | 81941.73 | 222809.8 | 67948.64 | 269775.6 | 147335.7 | 292105.1 | 182766.4 | 275733.4 | 235969   |
| 9.8322   | 9  | 5 | 4 | 696484.8 | 2270432  | 821114.8 | 1826517  | 1313921  | 1797339  | 1719515  | 1848322  | 2305820  |
| 40.16717 | 9  | 5 | 4 | 991083.3 | 2510239  | 3646729  | 1409846  | 807826.2 | 432724.7 | 434151.5 | 167027.1 | 8756427  |
| 10.9645  | 10 | 5 | 5 | 7993841  | 36298053 | 7915134  | 32943782 | 8756309  | 44609730 | 43184373 | 28977834 | 27385400 |
| 41.51733 | 9  | 4 | 3 | 231294.6 | 3325496  | 3143616  | 2377237  | 700757.3 | 586852.4 | 8702642  | 1747808  | 2616703  |
| 9.55155  | 6  | 3 | 3 | 667012.6 | 518078.7 | 370661.3 | 852616.8 | 1084559  | 587590.1 | 1000509  | 708245.9 | 162232.1 |
| 10.008   | 10 | 5 | 4 | 403485   | 1158435  | 323909.8 | 981508.3 | 525884.1 | 1265510  | 1618569  | 882901.2 | 815080.2 |
| 44.92617 | 6  | 3 | 1 | 321614.7 | 3440014  | 273594.3 | 3351268  | 141552.3 | 3335068  | 3050966  | 3679792  | 3720805  |
| 10.93208 | 6  | 3 | 3 | 998433.2 | 1209219  | 414128.2 | 1538682  | 1055010  | 1108734  | 1877083  | 893335   | 1305352  |
| 11.97977 | 6  | 2 | 4 | 84155.14 | 158655.2 | 126198.6 | 217526.8 | 163838.6 | 379155.7 | 106445.8 | 89166.92 | 145643.3 |
| 10.94443 | 4  | 1 | 3 | 752237.5 | 2299988  | 589988.5 | 1946428  | 1079093  | 2440664  | 1858088  | 2246243  | 1732022  |
| 25.3055  | 6  | 3 | 3 | 158517.7 | 649313   | 411760   | 834278.9 | 503724.6 | 230766.2 | 829162   | 188031.7 | 919013.9 |
| 9.853633 | 9  | 5 | 4 | 1000475  | 4697819  | 988352.7 | 4140917  | 1672211  | 4628659  | 4598605  | 3144954  | 5555442  |
| 10.9645  | 10 | 5 | 5 | 3027086  | 13770815 | 3328494  | 12425830 | 3375321  | 16846560 | 17238649 | 10835752 | 10003891 |
| 9.960467 | 5  | 3 | 2 | 307179.8 | 866970.3 | 183903.3 | 791916.3 | 190363.8 | 1039290  | 1061276  | 673285.7 | 868148.8 |
| 10.9645  | 10 | 5 | 5 | 3283810  | 14725183 | 3178944  | 13329476 | 3751103  | 17848572 | 17685815 | 11799733 | 11101969 |
| 19.84017 | 5  | 2 | 3 | 120207.5 | 480514.9 | 319239.8 | 349366.2 | 334732.7 | 764098.8 | 760242.9 | 154829.8 | 601163.9 |
| 8.79615  | 5  | 2 | 3 | 139349.4 | 284626.2 | 251491.5 | 414433.7 | 379168.5 | 161733   | 677240.2 | 328274.8 | 255882.9 |
| 43.1575  | 4  | 1 | 3 | 337776.5 | 4949681  | 908225.8 | 5620892  | 2133537  | 5311294  | 5398953  | 5558957  | 3348746  |
| 36.252   | 7  | 4 | 3 | 215994.6 | 869941.7 | 617059.5 | 1134015  | 697475.2 | 940070.7 | 1886420  | 325121.4 | 455332.6 |
| 10.03035 | 10 | 5 | 5 | 988805.5 | 2890139  | 744080.2 | 2456388  | 1317248  | 3167245  | 3908156  | 2613503  | 1877761  |
| 9.992233 | 7  | 4 | 3 | 1172140  | 1211191  | 550377.1 | 1547834  | 1034537  | 955185.6 | 1865026  | 1628366  | 1129625  |
| 10.9645  | 10 | 5 | 5 | 745360.6 | 3543998  | 768889.7 | 3250724  | 692547.3 | 4294626  | 4279517  | 2834723  | 2678331  |
| 9.992233 | 4  | 3 | 1 | 210865.4 | 396581.8 | 246692   | 291572.7 | 276431.8 | 642312.8 | 0        | 478052.5 | 339831.7 |
| 10.9307  | 4  | 1 | 3 | 366338.2 | 773722.1 | 460643.9 | 614599.6 | 316017.6 | 400733.4 | 1481269  | 463277.9 | 524640.1 |
| 24.16133 | 9  | 5 | 4 | 1004803  | 8151280  | 3711762  | 6701628  | 3524457  | 5111540  | 10225598 | 3709365  | 8955522  |
| 22.394   | 5  | 4 | 1 | 170806.2 | 484987.9 | 181334.1 | 414946.9 | 168127.9 | 744709.4 | 238033.4 | 435832.2 | 505188.1 |



|          |    |   |   |          |          |          |          |          |          |          |          |          |
|----------|----|---|---|----------|----------|----------|----------|----------|----------|----------|----------|----------|
| 10.21522 | 10 | 5 | 5 | 12984959 | 43097705 | 10927596 | 47819281 | 12593043 | 61421550 | 43374034 | 41099745 | 34820938 |
| 9.845483 | 7  | 3 | 4 | 1412618  | 3611015  | 1473028  | 4338945  | 2093780  | 1856564  | 2371642  | 5244606  | 3805658  |
| 26.32033 | 5  | 3 | 2 | 235072.6 | 2175991  | 449633.6 | 1960248  | 612511.6 | 1804348  | 2950331  | 1935960  | 2087043  |
| 9.979667 | 10 | 5 | 5 | 924747.3 | 2222635  | 1083775  | 2750431  | 1509077  | 3079183  | 3273716  | 2620672  | 1217034  |
| 10.95835 | 10 | 5 | 5 | 300060.2 | 1493138  | 560273.6 | 1307234  | 330902.3 | 2161169  | 1841466  | 963859.1 | 869290   |
| 9.536783 | 8  | 5 | 3 | 552980.8 | 1701243  | 671835.1 | 1432310  | 673176.5 | 1939073  | 2400492  | 1745962  | 1833231  |
| 9.992233 | 5  | 3 | 2 | 690938.5 | 447653.1 | 316810.1 | 771949.1 | 1065892  | 702385.3 | 581463.2 | 718601   | 235816.3 |
| 32.489   | 5  | 1 | 4 | 121689.9 | 580346.9 | 32989.48 | 527139   | 178113.8 | 623181.1 | 590859.9 | 592154.6 | 556311.1 |
| 44.98333 | 10 | 3 | 4 | 311045.7 | 2845607  | 1242149  | 3354353  | 1303193  | 3605134  | 3697654  | 2359425  | 868829.6 |
| 21.53917 | 5  | 2 | 3 | 580716.8 | 2989296  | 428063.8 | 2767741  | 650718.2 | 2606290  | 3524911  | 2907351  | 2573067  |
| 9.4468   | 7  | 5 | 2 | 907218.9 | 2031198  | 573181.6 | 2907863  | 2932955  | 2623704  | 2589476  | 1309510  | 1955424  |
| 9.904767 | 7  | 3 | 4 | 1895031  | 3418069  | 3219805  | 2456910  | 599455   | 1572423  | 9155062  | 1860752  | 2250681  |
| 10.97857 | 9  | 5 | 4 | 267384.2 | 769004.4 | 98813.93 | 714558.1 | 163431.8 | 660612.8 | 860961.8 | 762930.3 | 683921.6 |
| 9.9014   | 6  | 2 | 4 | 1490235  | 3636363  | 641748.2 | 3362432  | 726560.3 | 3690487  | 2739382  | 4546085  | 3673746  |
| 9.379233 | 8  | 4 | 4 | 812569.3 | 2022583  | 1076036  | 1593562  | 1072541  | 2442930  | 273628.4 | 1833511  | 2458574  |
| 24.28883 | 5  | 3 | 2 | 205755.9 | 930781.6 | 831698.1 | 1223264  | 611205.5 | 183360   | 397569.2 | 403140.6 | 1762124  |
| 11.52297 | 7  | 4 | 3 | 102926.3 | 298808   | 140348.5 | 355133.6 | 141887.9 | 334337.3 | 376026.8 | 56195.41 | 317520.4 |
| 10.97857 | 6  | 3 | 3 | 181661   | 577483.6 | 145577.7 | 713763.8 | 446197.9 | 807180   | 533901.4 | 488467.8 | 435463   |
| 10.61757 | 5  | 3 | 2 | 184637.5 | 1074507  | 414586.7 | 889404   | 507039.1 | 605105.7 | 1727222  | 1097606  | 873023.1 |
| 44.4085  | 8  | 4 | 3 | 417656.2 | 6561456  | 1111758  | 7352923  | 2515376  | 6831874  | 4838423  | 7873420  | 6924116  |
| 18.31267 | 3  | 3 | 0 | 99854.95 | 240776.3 | 105892.9 | 181110   | 180531   | 326797.4 | 201239.7 | 371044.7 | 193019   |
| 10.96997 | 7  | 4 | 3 | 303460.4 | 1057131  | 412331.7 | 862791.6 | 549068.1 | 602233.6 | 1055685  | 837822.3 | 1081282  |
| 10.9645  | 10 | 5 | 5 | 1542620  | 7330741  | 1663236  | 6697004  | 1509684  | 8833458  | 9113475  | 5871251  | 5460697  |
| 9.431017 | 6  | 2 | 3 | 517648.2 | 1204196  | 223234.7 | 1542785  | 1134652  | 1228944  | 1377605  | 1293210  | 816178   |
| 9.970617 | 8  | 5 | 3 | 758123.6 | 764872.2 | 365139.8 | 1055242  | 937002   | 840226.7 | 458811   | 1350599  | 705389.1 |
| 11.61345 | 3  | 3 | 0 | 60194.73 | 140337.4 | 27765.97 | 157579.1 | 53518.45 | 149695.1 | 179283.9 | 140198.5 | 103616.8 |
| 9.872883 | 10 | 5 | 5 | 15403427 | 76582650 | 10590725 | 72867841 | 7758325  | 84979239 | 74084956 | 61549183 | 88367529 |
| 9.559117 | 16 | 5 | 5 | 579590.8 | 1748425  | 363293.4 | 1566205  | 530378.4 | 1526912  | 1440565  | 1826200  | 1602697  |
| 18.70233 | 5  | 3 | 2 | 1780065  | 16657691 | 3001147  | 14486702 | 6924484  | 21000566 | 14314724 | 13667721 | 16092664 |
| 9.092333 | 10 | 5 | 5 | 350008.1 | 1273793  | 397213   | 1124854  | 348009.2 | 1389361  | 1802186  | 1166626  | 702906.9 |
| 9.960467 | 10 | 5 | 5 | 4503418  | 16937369 | 2955412  | 15612200 | 3646437  | 18979022 | 20513094 | 16551324 | 12881004 |
| 9.960467 | 10 | 5 | 5 | 2714741  | 5012961  | 825788.2 | 6064414  | 3506944  | 6078834  | 5038589  | 5468984  | 4543820  |
| 9.964417 | 6  | 3 | 3 | 836670.1 | 1134418  | 479746.6 | 896269.7 | 690886.5 | 1494877  | 1752813  | 1008135  | 587931   |
| 10.02372 | 10 | 5 | 3 | 495150.8 | 1109398  | 214684   | 938241.9 | 553822.8 | 1144521  | 1009481  | 1090342  | 860409.9 |
| 9.994767 | 9  | 4 | 5 | 347737.8 | 749479.2 | 261790.7 | 869456.1 | 335269.9 | 1070655  | 870925.3 | 829559.4 | 569409.1 |

|          |    |   |   |          |          |          |          |          |          |          |          |          |
|----------|----|---|---|----------|----------|----------|----------|----------|----------|----------|----------|----------|
| 9.508883 | 5  | 3 | 2 | 278584.8 | 357325.1 | 309922.7 | 239078   | 283741   | 559094.8 | 757966.9 | 347184.1 | 122379.6 |
| 9.859983 | 10 | 5 | 5 | 2664969  | 11529685 | 5524112  | 9714392  | 3198744  | 9231214  | 9320616  | 6429975  | 20791091 |
| 10.94208 | 8  | 4 | 4 | 213121.4 | 540347.4 | 244979.1 | 440732.6 | 255699.1 | 377804.8 | 948072.3 | 367782.8 | 417481.7 |
| 9.856867 | 5  | 1 | 3 | 418033.6 | 323421.7 | 176484.4 | 631187.5 | 1037357  | 516084.3 | 44903.83 | 317597   | 316067.3 |
| 14.09268 | 10 | 5 | 5 | 83153.53 | 338371   | 137977.5 | 423850.9 | 265896.5 | 159926.8 | 283302.6 | 322432   | 533485.8 |
| 10.1999  | 10 | 5 | 5 | 803149.8 | 1643096  | 487998.4 | 1898379  | 757366.5 | 1256630  | 2360955  | 1842504  | 1609270  |
| 9.9677   | 5  | 3 | 2 | 881301.5 | 1063600  | 536773   | 1258373  | 436004   | 1354785  | 161419.6 | 1279688  | 1006974  |
| 22.45267 | 7  | 5 | 2 | 305637.8 | 1152616  | 449517.4 | 972802.5 | 455206.1 | 739183.4 | 1903831  | 1190539  | 942430   |
| 10.008   | 9  | 5 | 4 | 686156.7 | 1251213  | 486682.7 | 1494298  | 709162   | 1391318  | 1979192  | 970296.4 | 686926.5 |
| 10.9645  | 10 | 5 | 5 | 389822.8 | 1562868  | 275205.4 | 1430565  | 379517.2 | 1745590  | 1876939  | 1260209  | 1291909  |
| 10.14385 | 9  | 4 | 5 | 613978.1 | 2995854  | 605605.4 | 2707762  | 822351.3 | 3030251  | 3389029  | 3604272  | 2927553  |
| 9.976317 | 10 | 5 | 5 | 1460174  | 6605209  | 1221050  | 6030894  | 1630334  | 7268302  | 8087382  | 6835434  | 4941626  |
| 9.93625  | 10 | 5 | 5 | 3835113  | 14710005 | 3201761  | 13145168 | 4524055  | 18148802 | 15462472 | 10823650 | 11963006 |
| 9.992233 | 6  | 3 | 3 | 1116764  | 817483.4 | 435417.4 | 1125755  | 983907   | 478987.1 | 632192.9 | 785783.6 | 1571752  |
| 15.58085 | 10 | 5 | 5 | 659989.8 | 5248094  | 1576310  | 4701374  | 1126715  | 6784272  | 6190245  | 4260813  | 2985139  |
| 10.60208 | 4  | 1 | 3 | 80515.68 | 159111.4 | 39938.19 | 190588.2 | 101916.6 | 89032.39 | 182461.3 | 172792.9 | 165870.9 |
| 9.872917 | 10 | 5 | 5 | 1435444  | 8258612  | 2540093  | 7059488  | 3413069  | 5974327  | 8026317  | 5762151  | 9832720  |
| 9.730633 | 10 | 5 | 5 | 428837.1 | 1284331  | 369559.3 | 1146620  | 321728.5 | 1526609  | 1646382  | 1382824  | 1156344  |
| 9.40325  | 8  | 4 | 4 | 2787099  | 21095595 | 7249909  | 18269909 | 6978348  | 13701510 | 17508866 | 24437932 | 32068967 |
| 21.68017 | 5  | 3 | 2 | 159128.6 | 975707.3 | 796778.5 | 1308169  | 875515.7 | 261794.1 | 1968659  | 334101.9 | 624818.9 |
| 11.45655 | 10 | 5 | 5 | 940745.6 | 4223486  | 1028190  | 3632086  | 1811098  | 4321684  | 4087033  | 2868764  | 4084819  |
| 9.946467 | 11 | 5 | 4 | 890019.9 | 2855416  | 785401.2 | 2456504  | 1173636  | 3382187  | 3263355  | 2070256  | 1945220  |
| 9.4159   | 6  | 3 | 3 | 1303986  | 8998022  | 5544592  | 6979602  | 4560845  | 17687833 | 4553938  | 6250475  | 5163805  |
| 10.9645  | 9  | 5 | 4 | 373181.5 | 2082715  | 797355.2 | 1807067  | 565331.9 | 2668611  | 2551875  | 968924.6 | 1504850  |
| 9.912633 | 5  | 3 | 2 | 2347472  | 3647041  | 747767   | 3081274  | 1824419  | 3876028  | 3695376  | 4737331  | 2793033  |
| 10.95055 | 9  | 5 | 4 | 315136   | 1044655  | 403997.5 | 1237517  | 552717.4 | 1654071  | 911246.3 | 708055.6 | 709759.8 |
| 10.94443 | 7  | 4 | 3 | 2681305  | 3661114  | 6746158  | 6345512  | 6785668  | 603661.2 | 678434.8 | 774067.3 | 521548.8 |
| 9.842    | 6  | 3 | 3 | 1064869  | 3099466  | 627236.3 | 2905307  | 253942.9 | 3824966  | 2574471  | 2321665  | 3395861  |
| 27.96683 | 5  | 3 | 2 | 222062.9 | 735288.9 | 756940.8 | 1044005  | 798766   | 205253.5 | 117786.6 | 1310397  | 1774831  |
| 9.677883 | 8  | 3 | 3 | 324267.9 | 1131778  | 227108.2 | 1252382  | 361216.3 | 1004452  | 1343367  | 864357.2 | 1392241  |
| 9.43325  | 5  | 4 | 1 | 902234.2 | 5025770  | 1608970  | 5622027  | 1388520  | 3679658  | 6204045  | 7019284  | 4983028  |
| 10.9645  | 10 | 5 | 5 | 490657.6 | 2156923  | 493392.9 | 1988071  | 339842.6 | 2648779  | 2642500  | 1829494  | 1533948  |
| 23.674   | 4  | 4 | 0 | 90104.82 | 709518.3 | 312028.7 | 833478.2 | 313530.9 | 1150967  | 569946.8 | 567866.1 | 362770   |
| 22.78467 | 5  | 3 | 2 | 88641.77 | 301301.6 | 146008.5 | 372631.1 | 207090.1 | 127274.1 | 260690.9 | 326498.9 | 264188.2 |
| 9.856867 | 10 | 5 | 5 | 21247982 | 91156513 | 27790141 | 75579842 | 47501034 | 95038688 | 96401231 | 51399938 | 84145188 |

|          |    |   |   |          |          |          |          |          |          |          |          |          |
|----------|----|---|---|----------|----------|----------|----------|----------|----------|----------|----------|----------|
| 9.94455  | 10 | 5 | 5 | 951989.8 | 3298946  | 947449.2 | 2928575  | 922517.7 | 4305178  | 4251269  | 3149778  | 2471795  |
| 23.16133 | 6  | 4 | 2 | 846115.9 | 2688075  | 3531824  | 1500426  | 2291359  | 112030.4 | 8406576  | 935559.5 | 187477.7 |
| 9.419733 | 10 | 5 | 3 | 1776610  | 7358678  | 3155246  | 9126989  | 5393304  | 11199707 | 9136284  | 8223278  | 4386524  |
| 10.5005  | 3  | 3 | 0 | 116430.7 | 255944.6 | 101160.1 | 296470.7 | 103519.2 | 390057.3 | 331185.3 | 170168   | 160297.3 |
| 15.58085 | 10 | 5 | 5 | 2249264  | 18759810 | 5300661  | 16913102 | 3881274  | 24367129 | 21248208 | 15114894 | 11456830 |
| 9.559117 | 7  | 4 | 3 | 411072.5 | 1510224  | 655344.8 | 1294229  | 392917.9 | 2021666  | 2106310  | 1794015  | 652397.9 |
| 10.95602 | 9  | 5 | 4 | 397754.9 | 1122158  | 302760.2 | 961111   | 483702.5 | 1222788  | 1271456  | 719858.5 | 914808   |
| 37.40283 | 10 | 5 | 5 | 441409.7 | 3084993  | 1123147  | 2611480  | 1264104  | 2083646  | 2327399  | 2396525  | 4320820  |
| 10.70568 | 10 | 5 | 5 | 365887.2 | 1163736  | 398683.1 | 1024640  | 293763.4 | 1099584  | 1763067  | 1323468  | 868796.7 |
| 10.9645  | 9  | 5 | 4 | 187300.4 | 580698.5 | 162581.9 | 488422.1 | 282820.1 | 831091.7 | 568469.3 | 541467.2 | 377407.7 |
| 18.11517 | 8  | 4 | 4 | 84976.47 | 261861.7 | 82914.34 | 216288.9 | 138405.2 | 302283.2 | 380420.3 | 191352.2 | 255862.5 |
| 9.8445   | 7  | 3 | 4 | 1055188  | 3635282  | 1521434  | 3159570  | 684455.4 | 3724969  | 1842642  | 6027661  | 3095237  |
| 9.960817 | 10 | 5 | 5 | 2085689  | 5525336  | 2056080  | 4872179  | 1027728  | 7107246  | 8222234  | 4589634  | 3274804  |
| 12.26695 | 10 | 5 | 5 | 800543.4 | 5250286  | 935269   | 4808107  | 1267135  | 6151567  | 6047882  | 4425324  | 4110470  |
| 9.859667 | 4  | 1 | 3 | 1244465  | 1538231  | 822211.7 | 2295886  | 2501858  | 1706966  | 945606.2 | 2159911  | 2418725  |
| 10.94443 | 6  | 2 | 4 | 899199.1 | 1896294  | 1123080  | 1396320  | 1387136  | 2259154  | 954108.2 | 490885.6 | 2687300  |
| 9.94455  | 10 | 5 | 5 | 942018.3 | 2952036  | 724830   | 3198226  | 490708.4 | 3944754  | 3389410  | 2877675  | 2284062  |
| 9.40325  | 4  | 3 | 1 | 1863774  | 10891571 | 8276234  | 13867185 | 6662803  | 6862517  | 5736532  | 19796807 | 19744048 |
| 10.9645  | 10 | 5 | 5 | 577789.6 | 2059571  | 531764.7 | 2342592  | 851868.1 | 2594467  | 2665864  | 1839051  | 1549506  |
| 39.863   | 4  | 3 | 0 | 260015.8 | 3500119  | 3131678  | 2585550  | 121723.6 | 2609342  | 2777965  | 499984.3 | 2783934  |
| 38.46733 | 5  | 2 | 3 | 2971409  | 30095915 | 23949884 | 20752108 | 23343833 | 47115142 | 4179082  | 48600735 | 3561296  |
| 24.72467 | 10 | 5 | 5 | 4730767  | 36570885 | 4575410  | 34019297 | 7796091  | 34280117 | 41403099 | 29859815 | 39494819 |
| 9.94455  | 10 | 5 | 5 | 13821657 | 24828746 | 4755788  | 29637518 | 16003736 | 30724662 | 25716496 | 27428940 | 21573948 |
| 9.536783 | 5  | 3 | 2 | 490654.8 | 832368.7 | 592295.3 | 601861.6 | 574740.5 | 793695.1 | 1292263  | 1492309  | 583576.6 |
| 31.29517 | 8  | 4 | 4 | 256242.5 | 940790.9 | 661779.5 | 715817.1 | 451103.4 | 460439.5 | 716151.2 | 243716.6 | 1611809  |
| 9.40135  | 9  | 4 | 4 | 828215.9 | 2885065  | 1608531  | 2306969  | 1298574  | 1836417  | 1936677  | 4706139  | 1388970  |
| 9.8445   | 9  | 5 | 4 | 1410729  | 4557626  | 1345235  | 4031017  | 1323315  | 4295494  | 4021178  | 4840310  | 6641658  |
| 24.16133 | 10 | 5 | 5 | 888319.8 | 8424741  | 3475788  | 6967552  | 3895155  | 5950728  | 10035938 | 3991180  | 9351670  |
| 9.40615  | 9  | 5 | 4 | 790963.8 | 1794800  | 643200.5 | 1456618  | 1016695  | 2597110  | 2374156  | 1219534  | 1293107  |
| 24.04    | 7  | 4 | 3 | 284773.2 | 1561185  | 724694.8 | 1256882  | 815013.2 | 1302174  | 2227081  | 481680.8 | 1582307  |
| 9.874317 | 5  | 3 | 2 | 1332450  | 3737741  | 2223084  | 4757175  | 2889056  | 2882415  | 1928466  | 2255311  | 4235371  |
| 9.992233 | 9  | 5 | 4 | 904274.7 | 3130696  | 541393   | 2814755  | 979636.3 | 3537109  | 3551736  | 3133781  | 2222947  |
| 9.933967 | 9  | 4 | 5 | 2325023  | 4773030  | 7330746  | 2603896  | 1620613  | 1339219  | 1296346  | 17872361 | 1267736  |
| 21.77867 | 10 | 5 | 5 | 586931.3 | 5608351  | 1245416  | 5174936  | 921554.6 | 5062021  | 6829959  | 6922300  | 4018563  |
| 42.48117 | 6  | 3 | 3 | 333114.3 | 6545519  | 4188528  | 5317647  | 602800.7 | 662786.7 | 5421973  | 11260296 | 5517386  |

|          |    |   |   |          |          |          |          |          |          |          |          |          |
|----------|----|---|---|----------|----------|----------|----------|----------|----------|----------|----------|----------|
| 13.08332 | 4  | 3 | 1 | 5579470  | 44454822 | 6513084  | 56599075 | 41372475 | 54790881 | 45210825 | 39923642 | 37994662 |
| 9.872917 | 10 | 5 | 5 | 17304622 | 47613636 | 10552624 | 57747380 | 33701753 | 48478019 | 38347941 | 61448986 | 53633033 |
| 9.6501   | 10 | 5 | 5 | 569456.3 | 1952916  | 346604.3 | 1776957  | 522972.3 | 1468539  | 2134632  | 1998760  | 1783150  |
| 9.992233 | 9  | 4 | 5 | 982262.1 | 1106884  | 326399   | 1501258  | 1328250  | 966735.6 | 1489365  | 1198578  | 1252936  |
| 9.856867 | 10 | 5 | 5 | 2251827  | 9664937  | 1038187  | 9031880  | 1985230  | 10625864 | 10185105 | 10172755 | 9334411  |
| 10.9645  | 9  | 4 | 5 | 1977912  | 7260664  | 2214523  | 6381234  | 2251729  | 8858159  | 10199412 | 6202870  | 4727878  |
| 18.64583 | 9  | 4 | 5 | 288985   | 1492589  | 492523.7 | 1648715  | 249811.1 | 2212221  | 823643.2 | 1521565  | 1430997  |
| 9.94455  | 10 | 5 | 5 | 12264147 | 48753070 | 10319957 | 45106762 | 8010681  | 61988807 | 57635125 | 39920931 | 40426578 |
| 9.845483 | 9  | 5 | 4 | 1010163  | 4638504  | 1086016  | 3907341  | 2339824  | 4154718  | 3821846  | 3834332  | 4999675  |
| 10.21522 | 10 | 5 | 5 | 6590953  | 20566457 | 5308521  | 22837179 | 6184766  | 29458718 | 20469522 | 19911592 | 16299429 |
| 9.568567 | 6  | 3 | 2 | 1.27E+09 | 2.46E+09 | 3.46E+09 | 3.9E+09  | 3.84E+09 | 7.3E+09  | 4.97E+09 | 9025077  | 2145555  |
| 9.903567 | 8  | 3 | 4 | 11859752 | 41184545 | 52792081 | 23069139 | 37645934 | 1279677  | 3654048  | 92585833 | 3377871  |
| 9.872917 | 6  | 3 | 3 | 4047246  | 10398299 | 3701302  | 8674038  | 4948582  | 14746034 | 4947382  | 11532421 | 11947524 |
| 9.859983 | 10 | 5 | 5 | 1263684  | 7470466  | 1458929  | 6698961  | 2333629  | 7676053  | 6262910  | 5728653  | 8514218  |
| 10.45667 | 5  | 3 | 2 | 131767.9 | 169186.5 | 96023.23 | 210088.8 | 111318.4 | 72494.9  | 289447.3 | 68772.24 | 211750.4 |
| 11.52297 | 10 | 5 | 5 | 922136   | 4901953  | 1333088  | 4308197  | 1664313  | 6116354  | 4115689  | 2985825  | 5990117  |
| 9.4925   | 15 | 5 | 5 | 2520809  | 17572327 | 8286743  | 21996127 | 13435169 | 25437966 | 12222038 | 22885186 | 21574021 |
| 9.95825  | 10 | 5 | 5 | 1083708  | 3623439  | 895748.3 | 3292976  | 781267.8 | 4537682  | 4539535  | 3325432  | 2488790  |
| 9.848417 | 9  | 5 | 4 | 1491395  | 5944835  | 1468613  | 6636428  | 1998720  | 5196429  | 4727995  | 5654503  | 5665785  |
| 9.992233 | 10 | 5 | 5 | 558777.6 | 1553348  | 128344.6 | 1733835  | 613227.3 | 1734787  | 1512783  | 1633938  | 1454968  |
| 9.94455  | 10 | 5 | 5 | 6079728  | 11197951 | 2775703  | 13329575 | 6968977  | 14479787 | 13147435 | 11601560 | 8703035  |
| 9.8445   | 9  | 5 | 4 | 1157603  | 2926214  | 519097.3 | 3364944  | 1449127  | 3590932  | 2848609  | 2162399  | 3138965  |
| 10.92208 | 8  | 4 | 4 | 136360.3 | 448460.3 | 268561.4 | 351641.2 | 221654.4 | 537323.2 | 478819.8 | 74331.19 | 344374   |
| 12.2223  | 5  | 4 | 1 | 76306.05 | 289300.1 | 145061.6 | 238473.4 | 110824.9 | 241046.9 | 276788.3 | 79062.72 | 405236.6 |
| 44.55233 | 8  | 1 | 4 | 238081.9 | 2907725  | 169506.3 | 2599984  | 1052432  | 3147970  | 3021063  | 2808113  | 2813844  |
| 9.8374   | 9  | 5 | 4 | 896838.2 | 3379403  | 873826.5 | 3805716  | 1253607  | 3229009  | 3280876  | 2049145  | 4221332  |
| 9.986767 | 5  | 2 | 3 | 43032984 | 46724552 | 43055094 | 31369618 | 34566403 | 1.06E+08 | 3718825  | 42831941 | 71312452 |
| 9.508883 | 13 | 5 | 5 | 22626386 | 1.93E+08 | 50370431 | 1.62E+08 | 96053088 | 1.79E+08 | 2.31E+08 | 2.58E+08 | 1.54E+08 |
| 10.97857 | 10 | 5 | 5 | 568262   | 2339377  | 532203.1 | 2097868  | 685873.5 | 2097986  | 3060060  | 1795911  | 2012374  |
| 9.43325  | 10 | 4 | 5 | 5025903  | 11749076 | 17538982 | 6507904  | 5334882  | 42947504 | 5350028  | 6026626  | 1355396  |
| 19.24217 | 3  | 3 | 0 | 93715.18 | 167824   | 54396.81 | 147404.3 | 49547.07 | 138881.1 | 169828.7 | 127189.6 | 142195.9 |
| 10.01477 | 4  | 1 | 3 | 41314136 | 40793331 | 28767899 | 27524499 | 38022037 | 68711571 | 507706.9 | 41444223 | 67132625 |
| 20.50483 | 8  | 4 | 4 | 77145.12 | 218200   | 150583.3 | 173743.5 | 35925.67 | 173257.1 | 143361.3 | 188877.2 | 104198.8 |
| 9.932033 | 5  | 3 | 2 | 764710.4 | 1348289  | 374632.1 | 1116824  | 731966.5 | 1656934  | 850299.2 | 1576948  | 1041332  |
| 11.16097 | 10 | 5 | 5 | 27916936 | 1.6E+08  | 55382553 | 1.96E+08 | 1.13E+08 | 2.43E+08 | 1.75E+08 | 94719951 | 1.31E+08 |

|          |    |   |   |          |          |          |          |          |          |          |          |          |
|----------|----|---|---|----------|----------|----------|----------|----------|----------|----------|----------|----------|
| 9.93625  | 10 | 5 | 5 | 2378007  | 5303312  | 824732.4 | 4879053  | 1275548  | 5932028  | 4449173  | 5135386  | 6363217  |
| 19.67867 | 10 | 5 | 5 | 823937.4 | 5171571  | 439046.5 | 4471118  | 2392133  | 5656928  | 4702762  | 4725584  | 5275428  |
| 44.049   | 5  | 2 | 3 | 296132.6 | 3056187  | 802497   | 3322300  | 513428.6 | 3120033  | 4222931  | 2994983  | 1960045  |
| 9.8445   | 9  | 5 | 4 | 607683.6 | 2394497  | 479777.4 | 2017613  | 1238351  | 2170406  | 2196543  | 1817791  | 2894825  |
| 9.94455  | 10 | 5 | 5 | 6126230  | 11068314 | 2763358  | 13183724 | 6929916  | 14348434 | 13202430 | 11108554 | 8761604  |
| 40.38267 | 11 | 2 | 4 | 324379.3 | 4221456  | 998717.7 | 3282054  | 3138041  | 5915371  | 3588826  | 3565437  | 3696566  |
| 9.848417 | 8  | 4 | 4 | 1122808  | 3362331  | 1571013  | 2714744  | 1728997  | 4628314  | 802564.4 | 3042509  | 3773490  |
| 9.976317 | 10 | 5 | 5 | 821800   | 2044275  | 714093.7 | 2400144  | 1058138  | 2347779  | 3068463  | 2053281  | 1426823  |
| 9.885167 | 11 | 5 | 5 | 8048096  | 33453125 | 18449967 | 38958623 | 5603208  | 42964966 | 689821.8 | 40600990 | 44415346 |
| 10.70375 | 4  | 3 | 1 | 103406.4 | 320492.2 | 49182.45 | 295189   | 76174.83 | 247667.1 | 359367.9 | 368378.6 | 298184.1 |
| 9.983433 | 10 | 5 | 5 | 821370.5 | 2230262  | 798726.4 | 1850374  | 1108077  | 2829958  | 3199112  | 2161122  | 1230900  |
| 10.57323 | 10 | 5 | 5 | 5885273  | 28476578 | 4630531  | 26275823 | 6417998  | 31424553 | 34476757 | 25639028 | 22742364 |
| 26.898   | 9  | 5 | 4 | 342797.5 | 2065402  | 1510731  | 1562644  | 985008.2 | 916946.2 | 3408074  | 456248.8 | 1673523  |
| 9.94455  | 7  | 4 | 3 | 1036114  | 2157079  | 935875   | 1772028  | 1028454  | 2992999  | 3306216  | 1756517  | 1549781  |
| 9.960467 | 4  | 1 | 3 | 676921.7 | 761372.6 | 300182.2 | 865107.6 | 222050   | 888365.6 | 265725.2 | 743192.5 | 1063171  |
| 10.008   | 8  | 5 | 3 | 829798.2 | 1867147  | 332752.6 | 1651341  | 690755   | 2029964  | 2299717  | 1533551  | 1531657  |
| 23.81317 | 8  | 5 | 3 | 490118.9 | 660461.7 | 194954.8 | 1005386  | 1182753  | 417516.2 | 853502.8 | 709438.4 | 497611.5 |
| 9.856867 | 5  | 3 | 2 | 2275330  | 6050912  | 6719568  | 8486720  | 5673128  | 1246665  | 10346844 | 1601853  | 1215481  |
| 20.33133 | 9  | 5 | 4 | 450079.4 | 3250138  | 1716229  | 2731116  | 636070.3 | 2616364  | 3539610  | 1529144  | 2521854  |
| 43.78483 | 7  | 3 | 3 | 366387.7 | 5689837  | 1561529  | 6323402  | 1675681  | 6103275  | 2947556  | 6060292  | 6730562  |
| 10.9645  | 10 | 5 | 5 | 287898.8 | 1121291  | 223672.4 | 1009891  | 332163   | 1411961  | 1195069  | 919586.9 | 872202.1 |
| 10.008   | 6  | 3 | 3 | 2881584  | 1083049  | 664758.3 | 2010607  | 3165616  | 1274509  | 210224.2 | 1568813  | 1778360  |
| 9.859983 | 5  | 4 | 1 | 599693.3 | 2133989  | 493183.2 | 1883013  | 754895   | 1827585  | 2635447  | 2678884  | 1595339  |
| 9.992233 | 9  | 4 | 3 | 703604.7 | 972931   | 598352   | 1262806  | 854919.7 | 1398577  | 1752777  | 895597.4 | 394469.3 |
| 9.856867 | 10 | 5 | 5 | 1565906  | 7080606  | 1214302  | 6661952  | 896179.3 | 6124368  | 5588411  | 7969871  | 8472881  |
| 10.9645  | 10 | 5 | 5 | 524776.4 | 2262828  | 464961.9 | 2068575  | 526674   | 2932597  | 2289516  | 2282009  | 2186986  |
| 9.999217 | 8  | 4 | 4 | 919294   | 1334880  | 585648.9 | 1600173  | 757706.2 | 1440996  | 2141684  | 1102521  | 1455127  |
| 7.59775  | 5  | 3 | 2 | 813318.6 | 19450210 | 2294914  | 25212278 | 19882834 | 18827817 | 19980853 | 20358891 | 15940278 |
| 9.983433 | 10 | 5 | 5 | 582034.9 | 2420445  | 451680   | 2178269  | 742096.8 | 2446978  | 3058301  | 2300039  | 1797712  |
| 18.44233 | 4  | 1 | 3 | 112573.1 | 607343.7 | 367282.5 | 483935.4 | 249911.6 | 413556.2 | 723532.5 | 244209.2 | 467472.4 |
| 9.406667 | 9  | 4 | 4 | 3061203  | 10640976 | 3116466  | 13189494 | 8443825  | 15908487 | 10339972 | 7629249  | 9538903  |
| 9.94455  | 5  | 3 | 2 | 1488235  | 2854071  | 1125334  | 2415103  | 1123771  | 3957213  | 3868908  | 3075284  | 1814578  |
| 42.48133 | 7  | 3 | 3 | 377066.2 | 5459549  | 934308.3 | 6023102  | 1783678  | 5392418  | 5973662  | 4051558  | 6564033  |
| 9.8445   | 8  | 4 | 4 | 715923.4 | 2280626  | 527370.3 | 2116066  | 256733.9 | 1996844  | 1512689  | 2801055  | 2423315  |
| 9.986767 | 9  | 5 | 4 | 1072866  | 2581046  | 981361.6 | 2119922  | 1344128  | 3792294  | 3338503  | 2311128  | 2116115  |

|          |    |   |   |          |          |          |          |          |          |          |          |          |
|----------|----|---|---|----------|----------|----------|----------|----------|----------|----------|----------|----------|
| 9.853633 | 10 | 5 | 5 | 5619126  | 29237182 | 7675495  | 25425041 | 11385820 | 26370885 | 26928872 | 19193115 | 35200067 |
| 9.853633 | 3  | 3 | 0 | 495436.8 | 1621995  | 1187580  | 1237449  | 702248.9 | 1472600  | 524427.3 | 1112443  | 3643078  |
| 10.96997 | 5  | 2 | 3 | 272747.3 | 642036.3 | 200570.9 | 904973   | 897475.3 | 972556.1 | 624388.6 | 554574.9 | 625000.7 |
| 9.94455  | 10 | 5 | 5 | 28183854 | 56062994 | 12242721 | 65114119 | 29669477 | 71098894 | 64823007 | 56527382 | 44987359 |
| 9.554967 | 9  | 5 | 4 | 473352.5 | 1057170  | 148300   | 932613.5 | 414143   | 1115901  | 1261192  | 946231.7 | 1078900  |
| 9.392767 | 4  | 3 | 1 | 458329.2 | 878732.9 | 187425.7 | 1137327  | 884226   | 825592.5 | 758487.2 | 1087927  | 1059358  |
| 9.445217 | 8  | 5 | 3 | 729924.8 | 2128316  | 536479.2 | 2622941  | 1657868  | 2945868  | 2384847  | 1623936  | 1830058  |
| 15.54132 | 5  | 3 | 2 | 237495.3 | 811888.8 | 767786.8 | 1141865  | 915265.9 | 359066.4 | 57935.33 | 1484643  | 375584.3 |
| 9.8445   | 9  | 5 | 4 | 968392.3 | 2874527  | 1107736  | 2477907  | 913109.1 | 3691065  | 4279149  | 2388283  | 1493641  |
| 10.02372 | 5  | 3 | 2 | 326313.3 | 656514.8 | 376754.9 | 506589.3 | 391956.4 | 535140.4 | 105663.1 | 798289.1 | 711006.1 |
| 10.21522 | 10 | 5 | 5 | 1432288  | 4674436  | 1205817  | 5150407  | 1235668  | 6655500  | 4840500  | 4394074  | 3594799  |
| 9.568567 | 14 | 5 | 4 | 9974757  | 34902053 | 30365176 | 23867930 | 26024686 | 55045477 | 1502046  | 52810995 | 2283092  |
| 12.61743 | 10 | 5 | 5 | 477213.4 | 2827450  | 268150.4 | 3282478  | 1565545  | 2861914  | 3187633  | 2695573  | 2467173  |
| 8.99545  | 5  | 4 | 1 | 168463.5 | 640392   | 323549.3 | 494926   | 415380.2 | 462087.5 | 1176842  | 710390.1 | 390174.9 |
| 10.008   | 14 | 5 | 5 | 20379276 | 37828848 | 6653830  | 40378345 | 6428212  | 44892818 | 27437165 | 38152002 | 42031957 |
| 10.95602 | 9  | 5 | 4 | 192412.3 | 1002571  | 380873.2 | 866004.2 | 316264.6 | 1312980  | 1194598  | 547399   | 633447.1 |
| 10.9645  | 8  | 5 | 3 | 359816.2 | 1138564  | 237192.3 | 1020176  | 355212.8 | 1453018  | 854131.2 | 1049440  | 1034760  |
| 9.43325  | 6  | 3 | 3 | 803844.4 | 3563740  | 1592188  | 2973961  | 1430532  | 5574945  | 3841259  | 2270500  | 4453499  |
| 9.952017 | 9  | 4 | 5 | 1691320  | 3204100  | 1392800  | 2658301  | 1410012  | 4621762  | 4775878  | 2510351  | 2341670  |
| 9.880683 | 10 | 5 | 5 | 2346861  | 12635746 | 1863362  | 11576692 | 3313121  | 10010112 | 12092969 | 12196654 | 14433492 |
| 9.992233 | 10 | 5 | 5 | 2288657  | 7593898  | 1726235  | 6655829  | 2898121  | 8985890  | 9538637  | 7577977  | 5347938  |
| 9.55155  | 3  | 0 | 3 | 648077.6 | 625382.3 | 520643.5 | 812330.5 | 434565.3 | 522721.5 | 44887.84 | 326885.2 | 828246.6 |
| 9.382183 | 5  | 2 | 3 | 328319.5 | 980600.4 | 175355.1 | 1144848  | 552472.7 | 1228636  | 885611.6 | 1040907  | 759782.7 |
| 10.02372 | 7  | 4 | 3 | 271622.5 | 664314.5 | 225959.8 | 548514.2 | 351256.2 | 473876   | 389434.4 | 803719.8 | 727617.3 |
| 10.45545 | 9  | 4 | 5 | 373866.3 | 774054.9 | 234520.8 | 933762.8 | 518935.9 | 1015912  | 895618.3 | 898918.5 | 607131.5 |
| 10.35132 | 10 | 5 | 5 | 7025100  | 28489613 | 2241110  | 27200079 | 4050397  | 27782737 | 32275647 | 26692572 | 28624858 |
| 9.522017 | 10 | 5 | 5 | 824209.8 | 1793747  | 533683.7 | 1548470  | 710159.2 | 2204130  | 2439506  | 1381097  | 1769098  |
| 10.95055 | 10 | 5 | 5 | 3252647  | 16649946 | 4943424  | 14934169 | 3769643  | 22772636 | 18700054 | 12013986 | 11119031 |
| 9.40615  | 5  | 3 | 2 | 2311483  | 9709086  | 8633039  | 12892305 | 7693793  | 18898739 | 3749019  | 2982400  | 19419488 |
| 9.616167 | 9  | 5 | 4 | 471403.8 | 2153342  | 511780.8 | 1901126  | 754270.9 | 1998960  | 1880970  | 2515389  | 1546757  |
| 9.8374   | 9  | 5 | 4 | 3454930  | 14427262 | 2631304  | 13470966 | 2267831  | 13886923 | 10698713 | 13711387 | 17450960 |
| 9.960467 | 4  | 3 | 1 | 1219808  | 971413.4 | 253320.2 | 1187568  | 722320.8 | 956335   | 860294   | 971741.5 | 1377996  |
| 10.97857 | 8  | 5 | 3 | 333474.4 | 1015499  | 326606.6 | 1140360  | 315420.7 | 1014017  | 634506.8 | 836489.5 | 1510546  |
| 9.9677   | 10 | 5 | 5 | 1140994  | 3813500  | 744952   | 3485641  | 928019.1 | 4073731  | 4949544  | 3491908  | 2975655  |
| 10.9645  | 10 | 5 | 5 | 1574065  | 7265617  | 1631958  | 6617726  | 1700213  | 8799090  | 8877692  | 5815085  | 5378341  |

|          |    |   |   |          |          |          |          |          |          |          |          |          |
|----------|----|---|---|----------|----------|----------|----------|----------|----------|----------|----------|----------|
| 9.979667 | 9  | 5 | 4 | 1146827  | 3114991  | 705122.9 | 3767231  | 2195759  | 3028424  | 3298625  | 2516056  | 2510671  |
| 9.864767 | 10 | 5 | 5 | 1662083  | 7485612  | 792998.9 | 7936819  | 1415809  | 7588884  | 8320617  | 7124006  | 8066315  |
| 10.8914  | 3  | 0 | 3 | 329161.8 | 659469.7 | 444469.3 | 495770.9 | 396195.5 | 251956.7 | 1268953  | 378510.8 | 406887.6 |
| 10.95055 | 8  | 5 | 3 | 158771.3 | 513111.8 | 179131.8 | 456115.5 | 99681.73 | 660381   | 721995.6 | 380385.3 | 300264.6 |
| 11.34627 | 10 | 5 | 5 | 295479.7 | 1245388  | 256720.4 | 1146681  | 251380.8 | 1518963  | 1489673  | 1082266  | 927351   |
| 10.1999  | 10 | 5 | 5 | 1618497  | 6323648  | 1171297  | 5746248  | 1731031  | 7831401  | 7070914  | 5241366  | 5105998  |
| 9.976317 | 9  | 5 | 4 | 612501.4 | 1230557  | 219502.6 | 1496907  | 911593.6 | 1527375  | 1365345  | 1170879  | 961737.2 |
| 9.864767 | 10 | 5 | 5 | 25434520 | 1.8E+08  | 18233165 | 1.88E+08 | 24780534 | 1.91E+08 | 1.75E+08 | 1.5E+08  | 1.96E+08 |
| 16.13528 | 5  | 2 | 3 | 103424   | 340198.3 | 161277.7 | 417342.4 | 228651.2 | 130067.7 | 460178.5 | 410445.6 | 208095   |
| 20.45117 | 7  | 4 | 3 | 345358.1 | 2063536  | 399833.6 | 1800444  | 853151.5 | 2435733  | 1565740  | 1750727  | 2454766  |
| 9.976317 | 11 | 5 | 5 | 978881.7 | 2657590  | 774783   | 3072879  | 1284290  | 2823012  | 3559760  | 3182361  | 1952752  |
| 9.960467 | 9  | 5 | 4 | 920986.3 | 2539630  | 348919.8 | 2211623  | 1108064  | 2777207  | 2842622  | 2440281  | 1978782  |
| 9.4775   | 6  | 3 | 3 | 587083.1 | 1316935  | 857963.2 | 1038575  | 525240.9 | 1772229  | 2295264  | 1682731  | 533894.5 |
| 9.416817 | 5  | 3 | 2 | 2279126  | 5801061  | 4208412  | 8589494  | 9056582  | 9818691  | 2139301  | 7410836  | 9106000  |
| 10.94208 | 10 | 5 | 5 | 388864   | 2119798  | 547191.7 | 1866356  | 740570.3 | 2924578  | 2418666  | 1586822  | 1751436  |
| 9.7038   | 9  | 5 | 4 | 325650.7 | 1124839  | 194627.3 | 1010532  | 362455.9 | 925881.1 | 1020318  | 1358618  | 1011484  |
| 10.9645  | 3  | 3 | 0 | 232682.2 | 515016.3 | 300167.1 | 403455   | 274471.2 | 926685.7 | 685918.5 | 499730.4 | 248426.4 |
| 8.643667 | 10 | 5 | 5 | 2070197  | 56847100 | 16440428 | 50435763 | 16629104 | 32022713 | 48237153 | 69220271 | 64559202 |
| 9.304717 | 5  | 2 | 3 | 616031.8 | 2062911  | 1167167  | 1603267  | 1203497  | 3045844  | 639616.3 | 2045577  | 3376229  |
| 9.67     | 6  | 4 | 2 | 321893.2 | 418825.9 | 132534.8 | 609560.1 | 657392.1 | 492227.7 | 444003.4 | 247991.5 | 327585.3 |
| 10.14893 | 10 | 5 | 5 | 638937.1 | 3013375  | 1235597  | 2624581  | 657329.6 | 2232424  | 4020326  | 3915140  | 3681131  |
| 9.992233 | 6  | 3 | 3 | 728807.1 | 1046078  | 368421   | 1297848  | 822642.1 | 917687.1 | 1152932  | 1626152  | 873029.8 |
| 42.165   | 5  | 2 | 3 | 400557.3 | 4653973  | 3092763  | 3662788  | 1803233  | 3602463  | 2686097  | 3210358  | 10144255 |
| 39.573   | 5  | 1 | 3 | 301042.2 | 5393857  | 1464916  | 5864012  | 859622.6 | 2790370  | 5864041  | 5894955  | 6182132  |
| 31.195   | 4  | 1 | 3 | 19142386 | 19408159 | 18004126 | 11501104 | 22483287 | 40139745 | 2686246  | 3176791  | 14360356 |
| 28.42217 | 9  | 5 | 4 | 3493637  | 39862059 | 20970574 | 32390207 | 17386372 | 22372318 | 49484432 | 13525117 | 50561994 |
| 12.49958 | 5  | 1 | 4 | 218809.3 | 2330790  | 283590.9 | 2086458  | 821109   | 2819781  | 2179973  | 2158425  | 2338389  |
| 9.964417 | 10 | 5 | 5 | 2275997  | 7062479  | 2205096  | 6133543  | 2573457  | 8606681  | 9079768  | 8259043  | 4333834  |
| 9.445217 | 5  | 2 | 3 | 881100.8 | 1797695  | 623027.3 | 1434423  | 1152021  | 1782933  | 2267650  | 809409.5 | 1738071  |
| 9.8322   | 9  | 5 | 4 | 1175838  | 2674036  | 272551.8 | 3221894  | 1903689  | 2782507  | 2478708  | 3005159  | 2784006  |
| 10.008   | 8  | 5 | 3 | 293120   | 1004137  | 310332.5 | 862893.1 | 410292   | 901791.4 | 1309359  | 791468.6 | 665291.9 |
| 9.857683 | 9  | 5 | 4 | 2213843  | 9949362  | 1880424  | 8686946  | 4119583  | 8550363  | 9816349  | 9168388  | 8998224  |
| 9.8161   | 6  | 3 | 3 | 830676.8 | 1695820  | 850912.7 | 2269383  | 1872968  | 1329223  | 2273557  | 906312.1 | 1080168  |
| 8.344283 | 9  | 4 | 5 | 1823631  | 66276089 | 30418517 | 83323735 | 53572780 | 46187308 | 50828974 | 1.18E+08 | 48121761 |
| 9.363217 | 8  | 3 | 3 | 452921.5 | 768553   | 301641.3 | 990953.8 | 735827.6 | 952768   | 466357.7 | 712902   | 523313.1 |

|          |    |   |   |          |          |          |          |          |          |          |          |          |
|----------|----|---|---|----------|----------|----------|----------|----------|----------|----------|----------|----------|
| 9.9677   | 10 | 5 | 5 | 8681482  | 21597970 | 8054751  | 17845487 | 11034102 | 27528458 | 32202749 | 18479615 | 12424442 |
| 9.94455  | 10 | 5 | 5 | 13604206 | 25252085 | 4757642  | 29908399 | 15816631 | 31454168 | 26020195 | 26816666 | 23496246 |
| 10.8914  | 3  | 0 | 3 | 279387.8 | 365992   | 193471.4 | 466229.3 | 307953.8 | 236718.1 | 442917.1 | 181268.4 | 304429.4 |
| 9.4925   | 5  | 3 | 2 | 386313   | 658167.3 | 249855.6 | 855629.7 | 659509.2 | 528556.8 | 894924.8 | 644047.2 | 905194.5 |
| 10.57323 | 9  | 5 | 4 | 960664.4 | 2123965  | 515247.1 | 2514033  | 1296486  | 2368638  | 2883737  | 1806645  | 1570596  |
| 10.16938 | 9  | 5 | 4 | 440669.7 | 1993099  | 454770.9 | 1783178  | 615730.1 | 1447115  | 2208374  | 1999708  | 2618971  |
| 9.960467 | 9  | 5 | 4 | 782724.6 | 2085321  | 568736.2 | 1891092  | 422245.5 | 2750486  | 2644262  | 1808077  | 1528688  |
| 9.864767 | 10 | 5 | 5 | 3837314  | 17024038 | 671612.1 | 17375358 | 1083900  | 16263317 | 17184122 | 16567650 | 18017839 |
| 9.4098   | 6  | 2 | 4 | 1083728  | 3130201  | 1067749  | 4553573  | 4914170  | 3951244  | 3940198  | 1745416  | 3807760  |
| 9.43325  | 7  | 4 | 3 | 553390.4 | 1354442  | 171770.4 | 1169047  | 634542.2 | 1260798  | 1121455  | 1525457  | 1349749  |
| 9.830833 | 9  | 5 | 4 | 601344.3 | 1666919  | 634582.8 | 1872139  | 390549.1 | 989476.9 | 1008353  | 2397188  | 1996166  |
| 9.36565  | 4  | 3 | 1 | 368923.2 | 432969.1 | 395543.3 | 275160.8 | 421405   | 696747.7 | 0        | 0        | 731213.7 |
| 10.96997 | 9  | 5 | 4 | 221678   | 620337.7 | 213975.6 | 520070   | 296676.4 | 527570.8 | 954558.3 | 371107.1 | 642759.8 |
| 9.986767 | 7  | 3 | 4 | 308757.3 | 514090.2 | 265439.6 | 618765.1 | 277430.6 | 147166   | 454973.2 | 888696.3 | 571838.4 |
| 9.920517 | 10 | 5 | 5 | 4049225  | 9405206  | 3374680  | 7974621  | 4011444  | 11337327 | 7509445  | 5662558  | 8312919  |
| 12.28138 | 4  | 3 | 1 | 44998.96 | 100372.7 | 17714.77 | 84640.13 | 53282.7  | 121474.6 | 114223.3 | 87320.53 | 99619.24 |
| 9.94455  | 10 | 5 | 5 | 12327558 | 50449337 | 9062692  | 47318855 | 7006606  | 61983497 | 57785152 | 47351151 | 40600651 |
| 9.94455  | 10 | 5 | 5 | 28187844 | 56199103 | 12116094 | 65163254 | 29807912 | 71274608 | 64745023 | 56432266 | 45348911 |
| 10.95835 | 10 | 5 | 5 | 338030   | 1411892  | 202149   | 1299330  | 355063.8 | 1721829  | 1493724  | 1218027  | 1270913  |
| 36.52833 | 7  | 3 | 2 | 295333.6 | 3065162  | 2224417  | 3701470  | 295280.6 | 3937457  | 5821330  | 1585872  | 128184.3 |
| 9.94455  | 10 | 5 | 5 | 5100805  | 20967729 | 3826990  | 19619249 | 3129336  | 25867736 | 24125514 | 19478403 | 17046600 |
| 9.536783 | 6  | 3 | 3 | 1128682  | 805880.8 | 427654.7 | 1264968  | 1575627  | 775220.8 | 1204836  | 1271499  | 447848.3 |
| 9.856867 | 10 | 5 | 5 | 685137.6 | 2554920  | 288732.1 | 2890779  | 1157273  | 2547374  | 2266133  | 2662862  | 2316990  |
| 10.008   | 5  | 2 | 3 | 465633.3 | 387715.4 | 244673.7 | 515560.9 | 396107.4 | 506893.5 | 0        | 653526   | 435313.1 |
| 44.88283 | 6  | 3 | 3 | 157620.4 | 1115518  | 229895.2 | 985289.6 | 413042.9 | 802180.7 | 1369524  | 1243788  | 1203273  |
| 9.856867 | 10 | 5 | 5 | 4733643  | 20147130 | 5643224  | 16899963 | 10339467 | 20091494 | 20124896 | 14096175 | 17212168 |
| 10.9645  | 6  | 3 | 3 | 282457.5 | 700560.1 | 349617.6 | 807836.7 | 166999.1 | 1091638  | 1062886  | 412708.5 | 549879   |
| 9.858833 | 8  | 4 | 4 | 3780396  | 9479028  | 9080963  | 6765799  | 3515249  | 6382838  | 5721115  | 25668425 | 4323101  |
| 9.979667 | 8  | 4 | 4 | 1029920  | 1679114  | 1020254  | 2022643  | 734159.6 | 3093834  | 791826.8 | 2386030  | 823794.4 |
| 9.162767 | 9  | 4 | 4 | 4858276  | 34547861 | 17120396 | 27788421 | 17995495 | 50863289 | 52774613 | 33494130 | 15336281 |
| 35.49733 | 5  | 3 | 1 | 335502.6 | 5125038  | 1836415  | 5746900  | 1348426  | 3088893  | 5021859  | 8088587  | 4388227  |
| 9.445217 | 13 | 5 | 5 | 1245575  | 9841902  | 3749328  | 8638137  | 2281226  | 13139318 | 13026851 | 11195807 | 7080569  |
| 16.72417 | 9  | 4 | 5 | 141448.8 | 695986.9 | 515765.5 | 547139.8 | 117913.1 | 723842.5 | 1575103  | 487480.9 | 307816.9 |
| 22.8715  | 10 | 5 | 5 | 1225448  | 7381623  | 1831301  | 8031226  | 1534417  | 10132216 | 8259231  | 6622933  | 5507523  |
| 9.887133 | 10 | 5 | 5 | 2646915  | 13056964 | 1181445  | 14301511 | 4280950  | 12770608 | 11619973 | 14680868 | 13736881 |



|          |    |   |   |          |          |          |          |          |          |          |          |          |
|----------|----|---|---|----------|----------|----------|----------|----------|----------|----------|----------|----------|
| 9.445217 | 10 | 5 | 4 | 1805787  | 10265860 | 2511841  | 13257479 | 10353695 | 13135197 | 12093085 | 10736912 | 7468131  |
| 3.57485  | 3  | 0 | 3 | 189306.1 | 2812553  | 1607663  | 2223061  | 1459481  | 88317.22 | 3920609  | 3994874  | 2715575  |
| 9.903567 | 6  | 2 | 3 | 2252649  | 3034530  | 1610321  | 3920206  | 2798233  | 3790671  | 306333.9 | 4466775  | 3587909  |
| 9.8445   | 7  | 3 | 4 | 1142145  | 4942359  | 768620   | 4372365  | 1904960  | 5465294  | 3862736  | 5393854  | 5592736  |
| 10.57323 | 4  | 3 | 1 | 133214.4 | 281014.5 | 71976.61 | 238061.6 | 138469.1 | 224159.6 | 254050.2 | 396036   | 304440.5 |
| 15.83335 | 6  | 4 | 2 | 137915.2 | 1540791  | 338483.9 | 1395160  | 415384.7 | 1267298  | 1897604  | 1283647  | 1331950  |
| 9.929783 | 8  | 4 | 4 | 1808224  | 2626746  | 697499.8 | 2229374  | 1267592  | 3252455  | 3421272  | 2549504  | 1867326  |
| 9.43325  | 9  | 5 | 3 | 831856.3 | 3910461  | 2240980  | 3183041  | 1436478  | 348111.4 | 5160545  | 4289804  | 6259480  |
| 9.311883 | 4  | 3 | 1 | 388313   | 2083295  | 1390662  | 1600530  | 1105071  | 3705660  | 621969.5 | 3032548  | 2379844  |
| 10.98385 | 10 | 5 | 5 | 839513.3 | 2490076  | 901110.2 | 2123632  | 1006130  | 1848315  | 1923601  | 1784736  | 3141209  |
| 10.95055 | 8  | 4 | 4 | 265713.3 | 869817.2 | 141717.2 | 778341.4 | 299766.6 | 994425.7 | 1011933  | 897185.9 | 740326.4 |
| 10.95055 | 10 | 5 | 5 | 268216.5 | 1623258  | 481159.4 | 1458592  | 367708.2 | 2055046  | 1889899  | 1044935  | 1158946  |
| 10.9645  | 10 | 5 | 5 | 1479916  | 6161017  | 929339.7 | 6554333  | 1111669  | 6744919  | 7258113  | 4815774  | 5844672  |
| 9.392767 | 5  | 3 | 2 | 661377.1 | 760830.8 | 705086.6 | 529238.7 | 473118.9 | 828273.6 | 1044440  | 0        | 178070.9 |
| 9.388617 | 5  | 3 | 2 | 485935.8 | 897755.8 | 866332.6 | 617063.3 | 552913.3 | 1173429  | 141795.5 | 0        | 1039425  |
| 44.96917 | 5  | 3 | 2 | 458080.1 | 4824144  | 2055933  | 5426579  | 666751.1 | 1181704  | 5311772  | 5769284  | 5745045  |
| 9.845483 | 8  | 4 | 4 | 2462643  | 6386438  | 3607190  | 8146400  | 5354548  | 4468162  | 4199977  | 5538805  | 4950755  |
| 9.979667 | 8  | 5 | 3 | 446844.2 | 1180457  | 357089.3 | 1009872  | 514559.8 | 1141998  | 973665.4 | 1173862  | 840520.3 |
| 10.008   | 6  | 3 | 3 | 289096.6 | 530906.6 | 252231.2 | 659517.6 | 397786.9 | 597669.1 | 786633.5 | 737713   | 236401.1 |
| 10.10223 | 9  | 5 | 4 | 445596.5 | 1856289  | 376385.2 | 1649941  | 653134.4 | 1575718  | 1705269  | 2266744  | 2251851  |
| 44.9835  | 5  | 2 | 3 | 152783   | 772897.9 | 67681.83 | 732747.4 | 129595.9 | 729363.2 | 830970.5 | 675015.6 | 813691.5 |
| 9.311883 | 5  | 3 | 2 | 758450.5 | 3991293  | 2122811  | 3218055  | 1909285  | 2544894  | 2324009  | 6607904  | 2481533  |
| 9.949233 | 10 | 5 | 5 | 945011.3 | 3412143  | 463448.5 | 3223842  | 518298.1 | 3898114  | 3804761  | 3467630  | 2823667  |
| 9.5021   | 15 | 5 | 5 | 1356351  | 11067725 | 1621407  | 11982739 | 2920879  | 10483525 | 11608632 | 8654626  | 11574117 |
| 18.71667 | 5  | 2 | 3 | 16808756 | 74244588 | 69774733 | 48289694 | 65783632 | 1.49E+08 | 401299   | 375748.4 | 97781616 |
| 42.63967 | 6  | 2 | 4 | 316466.8 | 3876690  | 649004.1 | 3480031  | 1289902  | 3467512  | 3260146  | 3902887  | 4940837  |
| 9.999217 | 10 | 5 | 5 | 968779.8 | 3179789  | 951332.8 | 2762997  | 1207534  | 3612543  | 4502853  | 3068820  | 1959065  |
| 9.842    | 7  | 4 | 3 | 1021337  | 1964266  | 228687.4 | 2281375  | 1107461  | 1982264  | 1968029  | 1915552  | 1656714  |
| 9.976317 | 10 | 5 | 5 | 845167.4 | 3626101  | 847784.2 | 3299311  | 861262.1 | 4383717  | 4461547  | 3636721  | 2426147  |
| 9.3735   | 3  | 0 | 3 | 483506.3 | 701265.1 | 334464.7 | 939985.2 | 797294.6 | 1154582  | 862383.2 | 740348.6 | 396186.8 |
| 9.382183 | 8  | 5 | 2 | 1565779  | 4525189  | 2585685  | 6259582  | 5740505  | 7193604  | 1889488  | 6867864  | 4815051  |
| 9.857683 | 10 | 5 | 5 | 1109926  | 4023862  | 370530.2 | 3587385  | 1516265  | 4580164  | 4029292  | 3540921  | 3943646  |
| 11.16645 | 6  | 2 | 4 | 125737.6 | 457272.7 | 178768.3 | 381503.5 | 215628.1 | 408523   | 285594.5 | 331359.3 | 530063.7 |
| 26.33467 | 6  | 2 | 4 | 115743.5 | 476960.4 | 166785.1 | 421709.6 | 116684.8 | 388490.6 | 740626.1 | 408017.1 | 315380   |
| 9.445217 | 13 | 4 | 5 | 417038.5 | 1866745  | 1815467  | 1304184  | 963410.4 | 495061.8 | 1053719  | 4652469  | 2728194  |

|          |    |   |   |          |          |          |          |          |          |          |          |          |
|----------|----|---|---|----------|----------|----------|----------|----------|----------|----------|----------|----------|
| 10.008   | 9  | 5 | 4 | 280325   | 757461.7 | 186766.9 | 656751.6 | 318402.6 | 940658.9 | 789586.4 | 923233.2 | 517731.6 |
| 43.028   | 9  | 3 | 3 | 260259.4 | 3100176  | 654329.8 | 3614354  | 1739688  | 2914049  | 3212318  | 2331595  | 2921585  |
| 10.99268 | 10 | 5 | 5 | 710399.1 | 3989686  | 1255511  | 3577060  | 856436.6 | 2613418  | 4049823  | 2962718  | 5712500  |
| 9.830833 | 5  | 2 | 3 | 3828491  | 7155557  | 4509485  | 5034072  | 6390142  | 12016776 | 2508663  | 5987464  | 3491338  |
| 9.960467 | 10 | 5 | 5 | 4064930  | 12122874 | 3177076  | 13598282 | 4418737  | 13973898 | 16421423 | 11990279 | 8694956  |
| 9.43325  | 7  | 5 | 2 | 1568381  | 3410353  | 464522   | 4154061  | 2612423  | 3829676  | 3689217  | 2712168  | 3163304  |
| 9.536783 | 6  | 2 | 3 | 835264.2 | 4584010  | 2137004  | 3705955  | 2451192  | 7139304  | 2422129  | 2832448  | 6502770  |
| 10.008   | 10 | 5 | 5 | 370934.1 | 1200514  | 176477.6 | 1077007  | 412406.4 | 1291741  | 1447319  | 1139755  | 980604.1 |
| 9.904767 | 10 | 4 | 5 | 1261754  | 4597761  | 1738969  | 4084447  | 652025.3 | 4240729  | 2919338  | 7018331  | 5673702  |
| 10.9645  | 10 | 5 | 5 | 542510.8 | 2404560  | 522245.8 | 2176991  | 660153.9 | 1991979  | 3065785  | 2076864  | 2012223  |
| 10.008   | 10 | 5 | 5 | 633925.7 | 2255448  | 464072.3 | 1999930  | 813945.7 | 2455505  | 2825505  | 2329524  | 1573883  |
| 9.3494   | 3  | 3 | 0 | 838029.4 | 3976640  | 2758541  | 4933002  | 2216976  | 6872801  | 770797.9 | 2770736  | 2593135  |
| 9.914217 | 11 | 5 | 5 | 4899870  | 23370169 | 5807521  | 20591433 | 8443581  | 18070712 | 21944732 | 18040833 | 28029983 |
| 23.6005  | 10 | 5 | 5 | 500912.1 | 2261633  | 472886.1 | 1966326  | 968440.5 | 2791722  | 2698014  | 1837166  | 1771535  |
| 10.44888 | 5  | 4 | 1 | 170109   | 499201.9 | 65508.25 | 436965.3 | 214371.7 | 443460.7 | 455924.5 | 583999.5 | 555777.2 |
| 9.328967 | 6  | 3 | 3 | 1232152  | 6753794  | 6597630  | 4675720  | 3828818  | 1882855  | 15893792 | 2851247  | 1493518  |
| 9.40325  | 7  | 3 | 4 | 9240629  | 36515994 | 39083732 | 22190570 | 36002545 | 9038184  | 2647231  | 73622227 | 84254697 |
| 9.601917 | 10 | 5 | 5 | 921727.3 | 3181912  | 789237.7 | 2801089  | 1162429  | 2289482  | 3597176  | 2840995  | 2858881  |
| 43.86233 | 5  | 2 | 3 | 390442.5 | 4708872  | 810449   | 4434612  | 610283.4 | 5063323  | 4388251  | 5410566  | 5245545  |
| 15.50667 | 10 | 5 | 5 | 379851.2 | 2776944  | 599171   | 2438077  | 1088326  | 3522151  | 2643027  | 2287593  | 2161062  |
| 8.888317 | 5  | 2 | 3 | 215780.4 | 610595   | 155555.9 | 508253.1 | 339024.3 | 701724.8 | 679016.1 | 667107.4 | 671780.9 |
| 9.960467 | 10 | 5 | 5 | 4428126  | 16567420 | 3093788  | 15171668 | 4133398  | 18763791 | 20468027 | 15215636 | 12588344 |
| 20.84283 | 4  | 3 | 1 | 93907.86 | 275946   | 176583.5 | 218369   | 118008.6 | 171821.6 | 357154.5 | 192414   | 111630.4 |
| 10.9645  | 10 | 5 | 5 | 11115044 | 49118173 | 11983747 | 44442538 | 12552086 | 61873110 | 61046029 | 38857771 | 36420629 |
| 9.858833 | 9  | 5 | 4 | 986572.3 | 4344794  | 1054356  | 3794054  | 1730194  | 4189457  | 3155067  | 3888645  | 4478318  |
| 19.37283 | 6  | 3 | 3 | 111155.1 | 235528.5 | 67242.03 | 322505   | 304348.1 | 269278.8 | 123904.1 | 269766.8 | 291716.2 |
| 10.94853 | 3  | 0 | 3 | 151389.5 | 350114.7 | 144332.9 | 427633.8 | 245648.4 | 314478.4 | 587635.4 | 277142.3 | 208174   |
| 11.52297 | 10 | 5 | 5 | 5092247  | 30685728 | 4174226  | 28355347 | 7463855  | 36866838 | 28802501 | 29184409 | 25987474 |
| 9.853633 | 10 | 5 | 4 | 560788.1 | 2339392  | 1009399  | 2012739  | 657478.6 | 3084517  | 752559.7 | 1954901  | 2725904  |
| 9.94455  | 11 | 4 | 4 | 1203943  | 2045988  | 275975.9 | 1913233  | 405273.2 | 2080931  | 2053806  | 1661729  | 1996055  |
| 10.01477 | 9  | 3 | 5 | 1556860  | 7194691  | 1704756  | 6600852  | 1394151  | 6400278  | 7526267  | 4710932  | 9100116  |
| 9.992233 | 10 | 5 | 5 | 5390865  | 13017738 | 4432730  | 15410651 | 7600638  | 14788567 | 16770215 | 16714371 | 10021884 |
| 9.979667 | 10 | 5 | 5 | 960751.9 | 2543068  | 638032.6 | 2969702  | 1418640  | 2995073  | 3149473  | 2862720  | 1806051  |
| 25.0145  | 8  | 3 | 5 | 165300.8 | 849756.1 | 100375.6 | 791034   | 190393.9 | 758818   | 988517.5 | 844067.7 | 751693.2 |
| 9.94455  | 10 | 5 | 5 | 1907123  | 3921594  | 1628110  | 3356573  | 1319336  | 5630904  | 5717099  | 3244882  | 2493901  |

|          |    |   |   |          |          |          |          |          |          |          |          |          |
|----------|----|---|---|----------|----------|----------|----------|----------|----------|----------|----------|----------|
| 42.12183 | 6  | 3 | 2 | 340564.8 | 4143402  | 1778007  | 4645743  | 238649.8 | 5087732  | 4509660  | 4854316  | 5262287  |
| 38.19433 | 5  | 2 | 3 | 96514.66 | 462397.2 | 50574.28 | 519832   | 200310.9 | 453231.5 | 496618.8 | 510255.1 | 381066.5 |
| 9.237017 | 5  | 4 | 1 | 772749.3 | 4254227  | 1813044  | 3588167  | 1686437  | 6626797  | 3469765  | 4003326  | 5310012  |
| 9.840617 | 4  | 1 | 3 | 767335.2 | 1472830  | 646237.3 | 1781963  | 943225.8 | 912780.9 | 956757.5 | 2418225  | 1231446  |
| 9.928667 | 7  | 3 | 4 | 875192.9 | 1673462  | 389038.7 | 1523952  | 397414.5 | 1866831  | 2213995  | 1562770  | 1175591  |
| 23.81833 | 6  | 3 | 3 | 138370.9 | 281240.4 | 39523.73 | 403853.3 | 435785.2 | 250109.7 | 345461.1 | 258161.3 | 293151.3 |
| 8.970583 | 6  | 3 | 2 | 3129197  | 17702159 | 9523335  | 13913388 | 10388510 | 15222907 | 31100613 | 23067106 | 12365522 |
| 44.9835  | 10 | 5 | 3 | 297569.1 | 4670586  | 2978813  | 3602398  | 2627407  | 1701221  | 2484192  | 9157287  | 4127180  |
| 9.91875  | 6  | 4 | 2 | 902288.9 | 3682114  | 1640017  | 4328638  | 1760313  | 5726719  | 1743143  | 2771285  | 3172347  |
| 10.94208 | 6  | 4 | 2 | 620463.4 | 785436.4 | 720869.8 | 1041058  | 619677.6 | 453867.6 | 628385   | 399628.3 | 382159.7 |
| 9.960817 | 10 | 5 | 5 | 627797.5 | 1371196  | 428128.4 | 1543776  | 478528.1 | 1728498  | 1849896  | 1335790  | 805630   |
| 9.840617 | 8  | 4 | 4 | 1230856  | 2348658  | 341530.3 | 3191415  | 2993748  | 2115944  | 2037050  | 2362750  | 2909193  |
| 9.392767 | 7  | 5 | 2 | 831493.7 | 2151384  | 1118117  | 1754704  | 964510.4 | 3597099  | 2062388  | 1526916  | 725854.3 |
| 18.64583 | 10 | 5 | 5 | 1993763  | 7168116  | 1579762  | 6545021  | 1701427  | 9049271  | 8183995  | 6151842  | 5085283  |
| 9.952017 | 5  | 2 | 3 | 2692512  | 4031956  | 2118851  | 5147604  | 3533079  | 7310469  | 3208848  | 2434689  | 2258921  |
| 9.960467 | 10 | 5 | 5 | 4599465  | 16917543 | 2887475  | 15655195 | 3701387  | 19039213 | 20164143 | 16900490 | 12829471 |
| 9.975217 | 4  | 1 | 3 | 409895.3 | 441397.5 | 383217.8 | 638174.9 | 618552.8 | 260899.7 | 999169.2 | 677274   | 127068   |
| 9.840617 | 9  | 4 | 5 | 1829585  | 8046777  | 2352709  | 7325938  | 1220349  | 8098176  | 4277418  | 9893249  | 10159286 |
| 9.887133 | 10 | 5 | 5 | 718619.1 | 3570528  | 368022.1 | 3874545  | 1042052  | 4158794  | 3218241  | 3313080  | 3530821  |
| 24.66033 | 9  | 5 | 4 | 1340791  | 5767872  | 1484461  | 7168455  | 4852576  | 8333914  | 4907684  | 4696828  | 5184598  |
| 10.01477 | 9  | 4 | 5 | 355648.5 | 871369   | 280479.5 | 774395.7 | 227577.5 | 1014848  | 1249821  | 879915.2 | 535112   |
| 9.45945  | 12 | 5 | 4 | 6325048  | 53235232 | 16506938 | 45660037 | 22812682 | 70244891 | 64779086 | 59304611 | 39868226 |
| 10.37437 | 5  | 3 | 2 | 150543.9 | 232557.4 | 97596.31 | 191850.5 | 116206.7 | 229939.8 | 305049.3 | 352570.6 | 123359   |
| 10.95602 | 6  | 2 | 4 | 341818.8 | 666949.5 | 356163.3 | 786553.5 | 266726.7 | 725319.1 | 1243737  | 519270   | 299331.2 |
| 9.912633 | 11 | 5 | 5 | 1662047  | 5542052  | 3745620  | 4394368  | 1956253  | 3654860  | 3419574  | 3209700  | 12067298 |
| 9.960467 | 9  | 5 | 4 | 2986567  | 4621369  | 393948.4 | 6022107  | 5001199  | 4354146  | 4217744  | 5238713  | 4692363  |
| 10.94443 | 7  | 2 | 5 | 716487.6 | 1716872  | 521852.9 | 2032591  | 1037381  | 2554673  | 1617285  | 1168828  | 1449945  |
| 40.62567 | 4  | 0 | 3 | 292457.8 | 3453731  | 160777.8 | 3294038  | 555610.3 | 3369965  | 3216415  | 3510349  | 3555258  |
| 9.3919   | 7  | 3 | 3 | 1248065  | 9143316  | 3338989  | 7709446  | 4172349  | 7557292  | 4438063  | 12972073 | 11435030 |
| 9.379233 | 4  | 3 | 1 | 380121   | 778229   | 419467.6 | 632164.7 | 347649.1 | 955496.8 | 320002.1 | 334689.8 | 1180732  |
| 10.01545 | 6  | 3 | 3 | 1511867  | 1764066  | 1730794  | 1195310  | 1214014  | 4361127  | 759089.1 | 600349.4 | 2729268  |
| 9.979667 | 9  | 5 | 4 | 1343067  | 3990619  | 960437.8 | 3390236  | 1986440  | 4842080  | 4903069  | 3847292  | 2548455  |
| 10.03947 | 7  | 4 | 3 | 1323710  | 1520630  | 1263627  | 1052872  | 1206888  | 458968.9 | 638205.5 | 807138   | 2379953  |
| 9.999217 | 3  | 0 | 3 | 398994.7 | 577670.1 | 371314.6 | 463879.8 | 195207.7 | 970913.1 | 73260.06 | 729843.7 | 800509.1 |
| 9.999217 | 8  | 4 | 4 | 426889.1 | 886165.1 | 287340.9 | 705172.6 | 600311.9 | 1097921  | 1273147  | 787561   | 657000.4 |

|          |    |   |   |          |          |          |          |          |          |          |          |          |
|----------|----|---|---|----------|----------|----------|----------|----------|----------|----------|----------|----------|
| 8.91745  | 5  | 2 | 3 | 336930.1 | 524550.4 | 295530.6 | 419450   | 258736.2 | 392150.9 | 1043622  | 485986.3 | 338004.9 |
| 44.30767 | 7  | 3 | 2 | 304544.6 | 4598396  | 1481474  | 4097388  | 1139308  | 3928148  | 3640511  | 4134072  | 7226949  |
| 13.44877 | 10 | 5 | 5 | 544849.7 | 7788400  | 1307280  | 7018208  | 2522876  | 9862287  | 6281144  | 7454013  | 7422967  |
| 43.60333 | 5  | 4 | 1 | 336860.5 | 4691153  | 2554928  | 5655234  | 2550184  | 7161459  | 4692300  | 893672.5 | 3819862  |
| 10.008   | 9  | 4 | 5 | 2287902  | 6379265  | 2111997  | 5620549  | 1898665  | 3501457  | 8041919  | 8782261  | 5387815  |
| 9.857683 | 14 | 5 | 5 | 1011392  | 3253419  | 626334.7 | 2943577  | 967066.3 | 2911415  | 4335592  | 3262235  | 2862375  |
| 9.964417 | 9  | 5 | 4 | 1210699  | 1966993  | 780574.9 | 1645915  | 913207.4 | 2543108  | 3053778  | 1420077  | 1374733  |
| 9.858833 | 6  | 3 | 3 | 1227608  | 4750987  | 1548108  | 4065906  | 2036598  | 6380532  | 2735624  | 3523331  | 5731880  |
| 9.928667 | 10 | 5 | 5 | 1799176  | 3776298  | 399734.8 | 3520145  | 853926.9 | 4067788  | 3780901  | 4077365  | 3855356  |
| 10.9307  | 3  | 0 | 3 | 173577.1 | 451135.3 | 146207.4 | 512278   | 175908   | 682610   | 409428.5 | 471169.7 | 283878   |
| 9.880683 | 7  | 4 | 3 | 2115889  | 5020936  | 2333045  | 4072930  | 2674475  | 3925938  | 3278823  | 7972781  | 7063384  |
| 17.23433 | 7  | 3 | 4 | 395798.8 | 2778564  | 1262478  | 2334622  | 1080829  | 4796346  | 3227419  | 1930242  | 2160933  |
| 44.14967 | 7  | 2 | 4 | 323618.9 | 4631643  | 615170.9 | 5413553  | 2761820  | 5054035  | 4937403  | 4456014  | 3627936  |
| 34.5865  | 7  | 4 | 3 | 152521.5 | 455230.7 | 329376.9 | 348350   | 224177.9 | 387745.1 | 358320.2 | 43980.28 | 536656.9 |
| 10.008   | 6  | 3 | 3 | 305532.2 | 520453   | 299070.8 | 406961.4 | 302722.7 | 631286   | 59233.09 | 624730.1 | 429490.5 |
| 9.946467 | 4  | 1 | 3 | 380323.6 | 735520.1 | 298452.4 | 633045.1 | 240853.7 | 366094   | 897436.3 | 1127792  | 536704   |
| 9.976317 | 10 | 5 | 5 | 2225035  | 5891833  | 2972961  | 7149456  | 3649906  | 7940068  | 9606655  | 6012391  | 2816165  |
| 24.16133 | 9  | 5 | 4 | 560849.1 | 4709669  | 1926568  | 3958400  | 2054824  | 3377037  | 5778274  | 2430323  | 4658660  |
| 9.999217 | 9  | 5 | 4 | 780556.8 | 860572.2 | 354348.1 | 1134791  | 939386.1 | 1135528  | 1153266  | 1045954  | 591494   |
| 9.94455  | 10 | 5 | 5 | 1060052  | 3787742  | 920687.4 | 3318508  | 1483008  | 4456210  | 4602519  | 3115230  | 2516629  |
| 9.912633 | 10 | 5 | 5 | 1400964  | 7315214  | 703401.4 | 7666888  | 1104328  | 7871674  | 7518598  | 6144635  | 7226071  |
| 11.99488 | 6  | 3 | 3 | 119738.8 | 217472.1 | 58720.7  | 300577.4 | 294976.8 | 231021   | 261337.3 | 201701.7 | 123955.9 |
| 9.3735   | 7  | 4 | 3 | 600557.8 | 1165264  | 783643.6 | 856692.3 | 852651.4 | 1867806  | 1890448  | 1183446  | 884620.2 |
| 9.840617 | 7  | 4 | 3 | 1115178  | 1760518  | 1264464  | 2306938  | 1609285  | 1239326  | 1756511  | 962936.9 | 903222.1 |
| 9.994767 | 8  | 4 | 4 | 406935.4 | 1036947  | 278621.9 | 916503.9 | 354896   | 1087979  | 1071651  | 1381993  | 603761.5 |
| 10.44062 | 10 | 5 | 5 | 882204.3 | 3894368  | 513029.5 | 3620316  | 879941.2 | 4172729  | 4520790  | 3246076  | 3511435  |
| 26.203   | 6  | 4 | 2 | 112922.7 | 588951.2 | 434299.5 | 714682.5 | 152716.4 | 222802.7 | 473183.5 | 737233.7 | 241300.6 |
| 18.97067 | 5  | 3 | 2 | 44259.7  | 196376.7 | 133740.6 | 235007.2 | 45875.66 | 357520.1 | 64943.44 | 271350.2 | 51288.04 |
| 9.8374   | 9  | 5 | 4 | 3755370  | 6492250  | 2993519  | 5430412  | 2635099  | 8850175  | 9711740  | 3926033  | 2888966  |
| 12.4996  | 6  | 3 | 3 | 98148.02 | 276616   | 116951.5 | 368799.5 | 317226.8 | 92952.09 | 306641.7 | 345566   | 242355.8 |
| 9.999217 | 7  | 3 | 4 | 792182   | 1018146  | 432155.8 | 1283035  | 879959.5 | 1327733  | 1377629  | 1274364  | 436683.6 |
| 9.976317 | 10 | 5 | 5 | 1104459  | 2224100  | 567369.5 | 2564006  | 1124296  | 2599878  | 2636130  | 2638180  | 1826774  |
| 9.103733 | 9  | 5 | 4 | 531881.4 | 1104966  | 359446.7 | 975344.3 | 329136.6 | 768475.3 | 1663856  | 912293.6 | 926304.6 |
| 9.976317 | 7  | 4 | 3 | 1246959  | 1783701  | 937949   | 1430635  | 940247.1 | 2784168  | 2740108  | 1594602  | 950182.6 |
| 9.848417 | 10 | 5 | 5 | 17576980 | 51390365 | 4790869  | 59812820 | 30113843 | 57743094 | 52743394 | 47011587 | 53256307 |

|          |    |   |   |          |          |          |          |          |          |          |          |          |
|----------|----|---|---|----------|----------|----------|----------|----------|----------|----------|----------|----------|
| 9.45945  | 5  | 2 | 3 | 297717.9 | 1031784  | 284900.3 | 1273246  | 837555.1 | 1089159  | 1359439  | 998723.6 | 1130560  |
| 9.994767 | 10 | 4 | 5 | 1484465  | 2901855  | 494974.2 | 2714240  | 503470.7 | 3591967  | 3156444  | 2705382  | 2773100  |
| 10.97857 | 6  | 4 | 2 | 265165   | 734309.9 | 93490.59 | 642439.5 | 322151.8 | 825490.6 | 833379.1 | 615163   | 706159.6 |
| 10.97857 | 10 | 5 | 5 | 1070299  | 2303878  | 559331.8 | 2986862  | 2420076  | 2228853  | 2004971  | 2979059  | 2725613  |
| 9.374083 | 7  | 4 | 3 | 762806.8 | 1550574  | 1002295  | 1181713  | 961166.8 | 2205294  | 169020.6 | 884916.5 | 1880470  |
| 9.858833 | 10 | 5 | 5 | 8791686  | 19282529 | 4541558  | 24631403 | 18933858 | 21135635 | 19362245 | 23632787 | 20635396 |
| 10.96452 | 6  | 2 | 3 | 406181.7 | 742985.6 | 360150   | 610704.7 | 343990.9 | 467200   | 466380.3 | 681287   | 755154   |
| 9.82645  | 12 | 5 | 5 | 1277189  | 2704829  | 612304.9 | 2316246  | 1301485  | 3130393  | 3426912  | 2721204  | 2367177  |
| 9.166033 | 7  | 3 | 4 | 819430.8 | 735046.1 | 1134351  | 1493313  | 2561501  | 2756267  | 209062.1 | 343264   | 289901.1 |
| 41.24433 | 3  | 3 | 0 | 264770.9 | 2861399  | 1057714  | 2563829  | 227954   | 2794786  | 1751298  | 2728062  | 4603250  |
| 10.43932 | 5  | 3 | 2 | 147733.8 | 179046.4 | 115870.7 | 222273   | 114398.2 | 199152.7 | 350208.7 | 61721.18 | 80819.89 |
| 9.568567 | 5  | 3 | 2 | 261327.8 | 474562.9 | 177000   | 374906.3 | 325755.2 | 626277.1 | 686697.3 | 409620.9 | 260272   |
| 9.43325  | 8  | 4 | 4 | 8595510  | 16906250 | 6640478  | 28312919 | 40820681 | 14509694 | 19860455 | 25473760 | 17184981 |
| 21.64033 | 7  | 3 | 4 | 391151.9 | 1589832  | 299341.2 | 1464328  | 364999.1 | 1164157  | 1912621  | 1800044  | 1428745  |
| 22.1645  | 4  | 1 | 3 | 151817.4 | 757310.7 | 379754.8 | 638261.2 | 231099.3 | 519439.7 | 742428   | 365711.8 | 797435.8 |
| 8.9256   | 10 | 5 | 5 | 8650605  | 1.3E+08  | 14596732 | 1.14E+08 | 55778182 | 1.3E+08  | 1.49E+08 | 1.38E+08 | 1.22E+08 |
| 9.554967 | 12 | 4 | 4 | 3953488  | 9042383  | 9698277  | 12634867 | 9448897  | 24712041 | 1521344  | 7041337  | 907884.1 |
| 24.609   | 10 | 5 | 5 | 4223200  | 32496151 | 4718719  | 34255325 | 4659457  | 39589777 | 34911912 | 29260517 | 28184440 |
| 9.568567 | 16 | 5 | 5 | 3329393  | 15673061 | 8856342  | 12413474 | 8518163  | 24368750 | 1263412  | 19480680 | 13964360 |
| 9.4775   | 10 | 5 | 5 | 2508611  | 10661507 | 8157697  | 13334201 | 5839060  | 5715582  | 2899739  | 6783687  | 15152439 |
| 9.999217 | 10 | 4 | 4 | 514131.4 | 1087439  | 678017.1 | 843284.6 | 622353.5 | 2176447  | 523235.2 | 1154319  | 513168.1 |
| 28.41833 | 8  | 4 | 4 | 387492   | 3543412  | 1977335  | 2858023  | 1659108  | 2270779  | 4558705  | 808353.2 | 4321550  |
| 42.323   | 6  | 3 | 2 | 301612.2 | 2250977  | 1216960  | 2625704  | 686607.8 | 705988.5 | 2521014  | 1673955  | 4018451  |
| 9.992233 | 7  | 3 | 4 | 368470.9 | 818491.6 | 472630.3 | 970580.4 | 319201.4 | 980709.8 | 130500.2 | 1430185  | 865005   |
| 40.53917 | 8  | 2 | 4 | 401347.8 | 6029968  | 890780.2 | 6592589  | 1887025  | 6219755  | 6377423  | 6852733  | 4508697  |
| 10.95055 | 10 | 5 | 5 | 1947490  | 5092221  | 1590403  | 5977300  | 2890510  | 6484566  | 7066684  | 4484791  | 3484129  |
| 10.008   | 8  | 5 | 3 | 269935   | 630496.7 | 162608.8 | 556310.1 | 226351.9 | 611716   | 638079.3 | 892854.5 | 554836.8 |
| 24.609   | 10 | 5 | 5 | 15469554 | 1.26E+08 | 17153613 | 1.32E+08 | 16072936 | 1.51E+08 | 1.35E+08 | 1.15E+08 | 1.08E+08 |
| 9.992233 | 15 | 5 | 5 | 1266424  | 1277250  | 998830.6 | 1632996  | 896316.7 | 673608.2 | 3047172  | 922793.9 | 732638.7 |
| 9.976317 | 10 | 5 | 5 | 749885.5 | 3231728  | 701574   | 2917440  | 951113.1 | 3508644  | 4238746  | 2929217  | 2350538  |
| 8.963    | 5  | 3 | 2 | 276426.1 | 1048310  | 672617.7 | 1313610  | 741275.3 | 1474934  | 1789348  | 1201810  | 689570   |
| 12.60128 | 6  | 3 | 3 | 97012.17 | 393222.9 | 168341.6 | 453477.6 | 152796   | 600794.3 | 440409.6 | 154936.1 | 310398.7 |
| 8.963    | 3  | 3 | 0 | 195861.8 | 271841.7 | 227703.8 | 172931   | 294622.3 | 186478.4 | 641254.1 | 287016.8 | 218784.7 |
| 10.52875 | 7  | 4 | 3 | 205420.3 | 334769.1 | 109193.2 | 396579.3 | 202852.9 | 165534   | 393989.4 | 419941.8 | 410365   |
| 10.00998 | 7  | 4 | 3 | 944940.7 | 998314.9 | 509461   | 1284884  | 939105.7 | 1086824  | 1762132  | 1078444  | 478262.8 |

|          |    |   |   |          |          |          |          |          |          |          |          |          |
|----------|----|---|---|----------|----------|----------|----------|----------|----------|----------|----------|----------|
| 9.4925   | 13 | 5 | 5 | 1205981  | 8194485  | 4050358  | 9985859  | 5389409  | 8648800  | 1831057  | 7203076  | 11389319 |
| 9.498117 | 6  | 3 | 3 | 8895634  | 7530182  | 3038234  | 13238349 | 20509498 | 5940108  | 6633955  | 12943803 | 6063581  |
| 9.445217 | 14 | 5 | 5 | 93054280 | 6.22E+08 | 1.34E+08 | 7.42E+08 | 4.2E+08  | 5.25E+08 | 6.74E+08 | 8.34E+08 | 5.35E+08 |
| 9.960467 | 10 | 5 | 5 | 3318264  | 8128920  | 1614219  | 9240103  | 3782808  | 9855110  | 8893459  | 8965731  | 7022846  |
| 10.94443 | 10 | 5 | 5 | 1366573  | 6401028  | 2005049  | 5755540  | 1363623  | 8871082  | 7523200  | 4465194  | 4230970  |
| 26.83917 | 5  | 4 | 1 | 129116.1 | 454266.1 | 295442.4 | 564752.1 | 294932.5 | 136308.8 | 550086.2 | 169655.3 | 586259.9 |
| 9.8374   | 6  | 3 | 3 | 941142.4 | 2744316  | 978831.8 | 2218762  | 1703532  | 3199449  | 3251498  | 1917895  | 1519679  |
| 28.41833 | 9  | 5 | 4 | 1392471  | 14729383 | 8372457  | 11918859 | 6488624  | 7193986  | 17982958 | 4797090  | 19252524 |
| 9.880683 | 10 | 5 | 5 | 4887644  | 17900006 | 2981670  | 16402323 | 4759353  | 15651661 | 17277831 | 21145127 | 20836670 |
| 10.9645  | 10 | 5 | 5 | 457503.3 | 1808296  | 451907.3 | 1646291  | 413350.9 | 2242214  | 2304971  | 1504278  | 1279156  |
| 10.38125 | 10 | 5 | 5 | 11080735 | 50158480 | 3803976  | 47874428 | 7610865  | 50111622 | 56717568 | 48038565 | 47363635 |
| 9.960467 | 8  | 4 | 4 | 1890068  | 3418573  | 1299160  | 2918290  | 1376085  | 5026003  | 4510711  | 2923740  | 2703111  |
| 9.507167 | 9  | 3 | 5 | 19845612 | 1.46E+08 | 71618606 | 1.17E+08 | 81580971 | 1.86E+08 | 46597411 | 1E+08    | 1.7E+08  |
| 9.932567 | 11 | 5 | 5 | 2735185  | 10287312 | 5654429  | 8367489  | 4541377  | 11689350 | 742902.3 | 10114046 | 14110563 |
| 9.856867 | 7  | 2 | 5 | 633477.1 | 1775415  | 764894.5 | 2005767  | 392431   | 2496159  | 478960.8 | 1848896  | 1961445  |
| 10.97242 | 10 | 5 | 5 | 493099.8 | 1818915  | 556745.4 | 1598740  | 620393.3 | 2656453  | 2120513  | 1369079  | 1535544  |
| 19.068   | 8  | 5 | 3 | 237821.2 | 1515673  | 360016.3 | 1677022  | 491015.7 | 2031823  | 1104829  | 1327392  | 1408247  |
| 36.35283 | 8  | 5 | 3 | 121066.9 | 497037.6 | 256544.9 | 602578.5 | 306064.2 | 839436.5 | 312658.7 | 192475.7 | 504988.5 |
| 9.8207   | 5  | 2 | 3 | 1432145  | 2056326  | 697984.3 | 2792139  | 2608963  | 2747343  | 2737296  | 1107311  | 1751507  |
| 9.960467 | 10 | 5 | 5 | 4341253  | 16445718 | 3073125  | 15090557 | 4095534  | 18348698 | 20412074 | 15222463 | 12371437 |
| 10.95055 | 10 | 5 | 5 | 712406.4 | 1600402  | 491538.7 | 1907607  | 1034453  | 2150555  | 2125305  | 1286750  | 1218692  |
| 10.9645  | 10 | 5 | 5 | 424564.9 | 1953086  | 368501.7 | 1790217  | 492967.6 | 2236696  | 2285834  | 1499268  | 1614078  |
| 9.8445   | 10 | 5 | 5 | 1594129  | 5489816  | 1642409  | 4844384  | 1813251  | 6987149  | 6826473  | 3380142  | 4115648  |
| 24.609   | 10 | 5 | 5 | 439630.8 | 1519397  | 590568   | 1746244  | 625714.6 | 2332328  | 1904986  | 1270554  | 853928.2 |
| 22.79933 | 7  | 4 | 3 | 129145.2 | 500677.4 | 197167.5 | 422097.5 | 223311   | 647806.8 | 424350.7 | 186892.8 | 617356   |
| 28.41833 | 10 | 5 | 5 | 192580.7 | 820458.1 | 314929.3 | 949709.5 | 375056.5 | 854352.1 | 881999.4 | 566400.6 | 503120.6 |
| 9.856867 | 10 | 5 | 5 | 2302883  | 13059978 | 1522742  | 11815778 | 4341488  | 13237317 | 12111155 | 11643345 | 12750028 |
| 9.845483 | 7  | 4 | 3 | 493044.9 | 1763529  | 633898.1 | 1570074  | 353030   | 2048893  | 908816.5 | 1871864  | 2575989  |
| 9.431017 | 14 | 5 | 5 | 17139976 | 1.42E+08 | 33495484 | 1.28E+08 | 42440599 | 1.22E+08 | 1.59E+08 | 1.93E+08 | 1.21E+08 |
| 9.928667 | 9  | 5 | 4 | 1836300  | 2479528  | 391377.1 | 2998217  | 1859257  | 3102614  | 2539187  | 2399107  | 2306903  |
| 9.880683 | 10 | 5 | 5 | 2111864  | 7679778  | 3936033  | 9052996  | 3411037  | 7096040  | 5637077  | 5889183  | 14605006 |
| 9.960467 | 8  | 4 | 4 | 1786708  | 3512242  | 1284356  | 3033924  | 1283741  | 4931224  | 4663395  | 3248767  | 2873626  |
| 10.22043 | 12 | 5 | 5 | 4136958  | 12208622 | 3216944  | 13686131 | 4563310  | 14021623 | 16487299 | 12328548 | 8605599  |
| 9.992233 | 5  | 3 | 2 | 261068.3 | 474815.3 | 261282.6 | 563375.9 | 210721.9 | 807923   | 607927.6 | 459933.4 | 103680.8 |
| 10.95835 | 10 | 5 | 5 | 267194.1 | 560060.5 | 64632.76 | 727976.4 | 609007.6 | 638549.6 | 604296   | 554861.4 | 530099.7 |

|          |    |   |   |          |          |          |          |          |          |          |          |          |
|----------|----|---|---|----------|----------|----------|----------|----------|----------|----------|----------|----------|
| 9.5812   | 8  | 3 | 4 | 4492843  | 17805532 | 15591294 | 12243556 | 14245712 | 2027678  | 12744590 | 34086910 | 34615788 |
| 11.52297 | 10 | 5 | 5 | 836556.3 | 4411284  | 971675.3 | 4015355  | 1145645  | 5787109  | 4241639  | 3350553  | 3738887  |
| 9.999217 | 9  | 5 | 4 | 359440.3 | 1116186  | 175655.6 | 1010290  | 355122.9 | 1046410  | 1288206  | 1081456  | 875698.7 |
| 6.779883 | 13 | 5 | 5 | 3013405  | 1.33E+08 | 59844600 | 1.09E+08 | 64375748 | 82049701 | 54616377 | 1.7E+08  | 1.87E+08 |
| 9.94455  | 10 | 5 | 5 | 12344055 | 50213124 | 9208003  | 47148805 | 7078247  | 61993776 | 57478716 | 47233206 | 39985267 |
| 10.95055 | 10 | 5 | 5 | 3266996  | 17256510 | 5371089  | 15567952 | 3427713  | 23141987 | 21482486 | 12203400 | 11222389 |
| 9.43325  | 7  | 3 | 3 | 10143820 | 13530693 | 5961686  | 20875366 | 26310003 | 21979923 | 15439934 | 13102099 | 11536204 |
| 9.842    | 9  | 5 | 4 | 740281.3 | 2669906  | 677542.2 | 2428348  | 620042.7 | 2301122  | 2016199  | 2249408  | 3557219  |
| 10.9645  | 8  | 4 | 4 | 156902.8 | 478187.6 | 149229.2 | 534779.9 | 155099.6 | 548266   | 686284   | 294112.5 | 395421.3 |
| 10.9645  | 11 | 5 | 5 | 3865369  | 15158731 | 3958008  | 13869663 | 2861024  | 18156961 | 17465580 | 8445036  | 14793797 |
| 18.0495  | 10 | 5 | 5 | 221526.9 | 1377425  | 178241.3 | 1271960  | 352905.3 | 1691239  | 1313205  | 1311696  | 1245161  |
| 9.8445   | 7  | 2 | 3 | 2271630  | 6314928  | 4135375  | 5037754  | 2464552  | 1450185  | 7623378  | 10606484 | 2458760  |
| 9.986767 | 10 | 5 | 5 | 467765.3 | 1773177  | 585853.3 | 1563909  | 539137.7 | 2179059  | 2429292  | 1907179  | 1324356  |
| 9.960467 | 9  | 5 | 4 | 768916.7 | 1745246  | 507410.6 | 1472110  | 894184.1 | 2280509  | 2281856  | 1603972  | 1314872  |
| 10.99268 | 6  | 2 | 4 | 1388975  | 3327277  | 1774505  | 2740432  | 1346023  | 1727891  | 6133744  | 2017101  | 2910153  |
| 9.9677   | 10 | 5 | 5 | 1109496  | 3687178  | 803710.9 | 3323117  | 1121796  | 4246831  | 4747330  | 3452626  | 2737459  |
| 36.35283 | 6  | 4 | 2 | 120389.3 | 600760.2 | 321046   | 705877.9 | 236448.4 | 845601.2 | 386131.7 | 403381.5 | 1040250  |
| 9.445217 | 9  | 5 | 4 | 544740.1 | 4232232  | 685368.5 | 3669963  | 1970281  | 3805263  | 4646962  | 5213897  | 3534144  |
| 9.856867 | 7  | 4 | 3 | 1253418  | 2043286  | 889353.9 | 2441584  | 1221654  | 1729544  | 2043921  | 3563644  | 1551799  |
| 10.03947 | 5  | 3 | 2 | 650975.8 | 840372   | 661328.1 | 1101050  | 739972.1 | 390973.2 | 195510.8 | 509147   | 1498796  |
| 16.72417 | 10 | 5 | 5 | 254152   | 935344   | 298503   | 1074039  | 432524.1 | 1209870  | 477394.5 | 835292.2 | 974260.4 |
| 9.445217 | 14 | 5 | 5 | 2365331  | 18919881 | 3848198  | 17389036 | 4379390  | 15485619 | 21368154 | 23182179 | 14289065 |
| 10.89355 | 5  | 1 | 4 | 142831.3 | 297963.1 | 139139.7 | 353706.1 | 160291   | 319996.9 | 435653.8 | 122694.3 | 189212.3 |
| 9.992233 | 10 | 5 | 5 | 1415528  | 2838732  | 1179535  | 3366129  | 1617696  | 3596781  | 4287335  | 3021795  | 1684114  |
| 9.133667 | 10 | 5 | 5 | 1859654  | 3556367  | 2956130  | 2614035  | 2003141  | 1754120  | 2158489  | 1519012  | 3737252  |
| 10.9645  | 10 | 5 | 5 | 677820.3 | 2713540  | 612522.3 | 2954767  | 685160   | 3387218  | 3363558  | 2312349  | 2114620  |
| 10.10048 | 10 | 5 | 5 | 829096.8 | 3031912  | 953982.1 | 2735186  | 591033.2 | 2436385  | 4172751  | 3497023  | 3319593  |
| 11.52297 | 10 | 5 | 5 | 5351858  | 28019700 | 4879105  | 30636482 | 8582377  | 34990257 | 31335362 | 24098796 | 24772729 |
| 9.976317 | 8  | 4 | 4 | 508676.4 | 1074544  | 422167.9 | 897678   | 524672.3 | 1214866  | 1678216  | 706530.1 | 638887.4 |
| 9.507167 | 5  | 3 | 2 | 1463927  | 687816.6 | 480142.4 | 1321747  | 2284380  | 1205320  | 1082477  | 562955.7 | 588329.5 |
| 9.790617 | 7  | 3 | 4 | 1321412  | 2168695  | 910809.3 | 2455807  | 595428.7 | 2290601  | 2347101  | 3394129  | 1956258  |
| 9.872883 | 10 | 5 | 5 | 2149794  | 10020516 | 1856059  | 9427773  | 1270803  | 7318294  | 9147741  | 10986544 | 12155517 |
| 8.042883 | 5  | 3 | 1 | 7199369  | 1.4E+08  | 84955907 | 1.64E+08 | 9051386  | 290072.6 | 1.77E+08 | 1.89E+08 | 2.12E+08 |
| 21.0655  | 10 | 5 | 5 | 136809.9 | 557599   | 167766.8 | 505866.9 | 100970.8 | 431143.9 | 827464.9 | 585984.1 | 535738.7 |
| 10.00998 | 7  | 5 | 2 | 427045.9 | 703136.9 | 154573.5 | 531780.7 | 614367.1 | 851784.7 | 786465.3 | 801917.7 | 505553.7 |

|          |    |   |   |          |          |          |          |          |          |          |          |          |
|----------|----|---|---|----------|----------|----------|----------|----------|----------|----------|----------|----------|
| 9.999217 | 10 | 5 | 5 | 3817488  | 10165460 | 2618984  | 8699864  | 4868163  | 12319228 | 13167242 | 9309963  | 6635255  |
| 33.68667 | 10 | 5 | 5 | 315384.7 | 2157337  | 586594.8 | 1967524  | 420998.9 | 2854558  | 2000197  | 1263996  | 2384508  |
| 10.43932 | 5  | 3 | 2 | 181342.7 | 607639.6 | 147156.3 | 543024.4 | 197261.4 | 496621.6 | 729466.4 | 756444.7 | 416990.6 |
| 9.999217 | 7  | 4 | 3 | 357449   | 785654.9 | 127248.7 | 861719.5 | 256636.4 | 764184.2 | 701755.5 | 985317.2 | 819002.2 |
| 9.989483 | 7  | 3 | 4 | 233422.5 | 561267.1 | 267527   | 458862.6 | 285930   | 959845   | 649729.4 | 433362.3 | 242516.1 |
| 9.9677   | 10 | 5 | 5 | 1694340  | 6621507  | 1098332  | 6153490  | 1408085  | 7694367  | 7761487  | 6391110  | 5208014  |
| 9.37735  | 5  | 2 | 3 | 1802898  | 1883486  | 1032146  | 3116794  | 4442112  | 2610736  | 3340898  | 1223042  | 1194038  |
| 9.9677   | 9  | 4 | 5 | 961182.6 | 1929105  | 1402290  | 1515609  | 674791   | 4424235  | 1539333  | 1228208  | 1299544  |
| 10.97242 | 10 | 5 | 5 | 538868.9 | 2531149  | 950004.8 | 2196021  | 860642   | 3432735  | 1665766  | 1966668  | 1903629  |
| 41.086   | 6  | 3 | 3 | 315059.4 | 4906505  | 1375682  | 5342909  | 931148.8 | 6472367  | 5596364  | 4032623  | 3006502  |
| 9.245983 | 4  | 1 | 3 | 309940.9 | 1089613  | 928144.3 | 1396671  | 716549.2 | 404051.4 | 2623064  | 1306015  | 632150.5 |
| 10.9645  | 10 | 5 | 5 | 402449.2 | 1526182  | 463256.7 | 1348882  | 496189   | 2040452  | 1992604  | 1161599  | 1054285  |
| 8.73905  | 3  | 3 | 0 | 121885.5 | 181348.1 | 161674.1 | 120713.3 | 166716.4 | 120916.5 | 371957.6 | 333602.7 | 67559.12 |
| 10.01477 | 9  | 5 | 4 | 313542   | 706041.7 | 137195.4 | 809746.1 | 362856.8 | 725896.2 | 921411.7 | 677791   | 658656.2 |
| 9.416767 | 5  | 1 | 4 | 362329.5 | 547572.6 | 361987.7 | 691913.9 | 417378.9 | 856487.9 | 0        | 797716.8 | 723815   |
| 11       | 10 | 5 | 5 | 282564.4 | 1572849  | 113128.7 | 1426137  | 530725.4 | 1411472  | 1666344  | 1617767  | 1500286  |
| 29.84833 | 10 | 5 | 5 | 468539   | 3883084  | 530776.2 | 4135293  | 800160.3 | 3888885  | 3904511  | 3220476  | 3708078  |
| 7.375417 | 11 | 5 | 4 | 232239.4 | 8484397  | 3156385  | 10205222 | 5700753  | 10796780 | 4646030  | 5440070  | 10941436 |
| 10.44062 | 4  | 1 | 3 | 172830.3 | 310680.6 | 92585.13 | 264998.1 | 146971   | 255628.5 | 185207.2 | 320552.6 | 375331.4 |
| 9.9677   | 3  | 0 | 3 | 409517.1 | 617839.1 | 402818.1 | 767140.5 | 406482.9 | 359309.4 | 67831.94 | 1082606  | 837717.8 |
| 9.999217 | 10 | 5 | 5 | 911980.3 | 3398377  | 784893.6 | 3008702  | 1256659  | 3794108  | 4386685  | 3442226  | 2291037  |
| 9.992233 | 10 | 5 | 5 | 1100676  | 1885109  | 546049.2 | 2267231  | 1326340  | 1458704  | 1494403  | 2773855  | 2030634  |
| 9.994767 | 10 | 5 | 5 | 536094   | 1452656  | 618503.2 | 1684489  | 638788.4 | 1854176  | 2234334  | 1433465  | 670498.4 |
| 10.96997 | 3  | 3 | 0 | 326193.3 | 726513.5 | 268502.5 | 633804.1 | 232674.9 | 829599.5 | 1094442  | 456097.3 | 469479   |
| 9.932033 | 10 | 5 | 5 | 1835885  | 4808019  | 1142142  | 4395578  | 1094698  | 6426320  | 5284095  | 4887287  | 3677812  |
| 9.4468   | 10 | 5 | 5 | 1911471  | 6659989  | 2281700  | 9899846  | 11771016 | 8829749  | 8220289  | 7823168  | 3790676  |
| 3.62175  | 4  | 1 | 3 | 752308.7 | 3261982  | 6685557  | 1390011  | 1988584  | 12260.69 | 15217642 | 303782.3 | 485525.5 |
| 24.25667 | 9  | 4 | 5 | 203583.3 | 915295.1 | 222127.7 | 708181.1 | 739422.4 | 734640   | 1226514  | 784747.2 | 1074703  |
| 9.964417 | 8  | 5 | 3 | 2564712  | 4117647  | 2550955  | 4892269  | 1465553  | 5029146  | 5176721  | 1479380  | 1545152  |
| 9.956417 | 6  | 4 | 2 | 1194016  | 2169376  | 1081298  | 2651623  | 1493232  | 2295754  | 2031850  | 1678641  | 3882367  |
| 9.365833 | 6  | 3 | 3 | 487993.1 | 2290337  | 1021503  | 2602845  | 606949   | 2075439  | 1618641  | 3315655  | 1077382  |
| 9.960467 | 6  | 3 | 3 | 1232778  | 1846563  | 996966.3 | 1499445  | 883906.1 | 2542894  | 3112622  | 1826690  | 896538.2 |
| 9.4925   | 11 | 5 | 5 | 1205397  | 7692562  | 3689433  | 9467087  | 5677323  | 7060374  | 2063459  | 7299147  | 10841208 |
| 9.8322   | 10 | 5 | 4 | 1070405  | 2746011  | 1186134  | 3955714  | 4346391  | 2455991  | 2937505  | 1629149  | 2026886  |
| 9.507167 | 7  | 4 | 3 | 7087250  | 17519217 | 18662701 | 25405545 | 23782905 | 50024452 | 2240678  | 10781529 | 11100938 |



|          |    |   |   |          |          |          |          |          |          |          |          |          |
|----------|----|---|---|----------|----------|----------|----------|----------|----------|----------|----------|----------|
| 9.40325  | 10 | 5 | 5 | 1922492  | 5376886  | 226096   | 5014100  | 1324233  | 5206002  | 5202294  | 5230271  | 5589620  |
| 20.37517 | 5  | 2 | 3 | 425374.8 | 2306216  | 401705.4 | 3084987  | 2851960  | 2862763  | 2202891  | 1776107  | 2201345  |
| 9.859983 | 7  | 4 | 3 | 1368347  | 4099686  | 1888138  | 3440012  | 1691958  | 3175238  | 4838261  | 1667638  | 4082274  |
| 9.983433 | 9  | 5 | 4 | 509625.5 | 1499353  | 397793.3 | 1337789  | 476189.3 | 2089964  | 1511671  | 1627148  | 1115632  |
| 9.886433 | 5  | 2 | 3 | 51166572 | 2.36E+08 | 2.25E+08 | 1.59E+08 | 1.91E+08 | 7127554  | 2.65E+08 | 4333378  | 4.89E+08 |
| 9.903567 | 7  | 3 | 4 | 2242836  | 5795181  | 2349686  | 7156429  | 4596327  | 7927310  | 3344840  | 8419505  | 3645179  |
| 9.928667 | 5  | 4 | 1 | 674467.6 | 1329827  | 162594.6 | 1200927  | 455574.5 | 1358823  | 1499883  | 1432965  | 1079507  |
| 7.333667 | 10 | 5 | 5 | 458513.3 | 3679179  | 342344.6 | 3525219  | 480530.2 | 3424697  | 4097376  | 3450727  | 3415858  |
| 9.979667 | 4  | 1 | 3 | 1186069  | 983395.4 | 341961.5 | 1481666  | 1817443  | 1329950  | 885492.7 | 1323149  | 531835   |
| 10.96997 | 6  | 4 | 2 | 242301   | 632517   | 123201.9 | 680126.5 | 135604.7 | 622097.1 | 464860.6 | 620972.2 | 642515.4 |
| 43.819   | 7  | 4 | 1 | 394885.7 | 5046388  | 1341899  | 4681262  | 154359.8 | 7133964  | 3422065  | 5110885  | 4605103  |
| 10.94208 | 7  | 3 | 4 | 333298.9 | 993175.4 | 258346.3 | 833606   | 546130.5 | 633910.1 | 962449.7 | 886178.1 | 1209979  |
| 9.744917 | 7  | 3 | 4 | 2615051  | 1626139  | 760148.2 | 2734125  | 4042689  | 2614910  | 1724655  | 871591.9 | 868486.6 |
| 9.992233 | 10 | 5 | 5 | 1353899  | 3228395  | 443080   | 2882065  | 1223211  | 3798038  | 2877740  | 3604545  | 3028922  |
| 20.18783 | 6  | 3 | 3 | 58051.89 | 298784.2 | 116387.1 | 266035   | 39593.97 | 431228.8 | 406541.8 | 170337.2 | 276724.9 |
| 11       | 8  | 3 | 4 | 578826.4 | 2056053  | 660041.2 | 1805483  | 705719   | 1985124  | 3183739  | 1456609  | 1859100  |
| 8.93965  | 9  | 5 | 4 | 1740329  | 12867883 | 6111286  | 10827917 | 4933082  | 19662752 | 17757086 | 13107031 | 4884150  |
| 9.856867 | 9  | 4 | 5 | 766365.6 | 2361227  | 1146802  | 1987764  | 864544.3 | 1994719  | 1407008  | 1691936  | 2410792  |
| 10.94443 | 8  | 4 | 4 | 206809.2 | 626766.6 | 280242.1 | 792380.5 | 563698.2 | 439457.1 | 831197.8 | 997111.4 | 544937.8 |
| 9.365833 | 7  | 4 | 2 | 1506222  | 3924625  | 2485778  | 5105372  | 3783989  | 3459245  | 3054309  | 3029273  | 1842345  |
| 44.68183 | 9  | 3 | 3 | 334215.8 | 3176229  | 1416659  | 3575699  | 506817.7 | 4702907  | 3376416  | 3416522  | 3546216  |
| 13.46417 | 7  | 4 | 3 | 55438.59 | 289954   | 101070.6 | 255767.8 | 84687.07 | 380509.3 | 378649.9 | 326737.3 | 189193.8 |
| 9.9677   | 10 | 5 | 5 | 1003937  | 3353739  | 473992.7 | 2968966  | 1368489  | 3783194  | 2638232  | 3109935  | 3653873  |
| 9.896717 | 10 | 5 | 5 | 2222878  | 10110486 | 1319087  | 9303153  | 2768859  | 9197406  | 8426076  | 11723630 | 10920706 |
| 10.99268 | 10 | 5 | 5 | 1097166  | 7439728  | 317526   | 8066044  | 2306263  | 7925828  | 7168081  | 7516443  | 7144259  |
| 9.999217 | 10 | 5 | 5 | 417682.7 | 1781002  | 478694.1 | 1564316  | 682142.3 | 2153801  | 2256488  | 1693009  | 1043951  |
| 15.97982 | 10 | 5 | 5 | 1007012  | 6637366  | 3983739  | 5394276  | 2628997  | 2367994  | 7789075  | 12333058 | 3328117  |
| 10.9645  | 8  | 3 | 5 | 202515.7 | 566091.8 | 258593.6 | 660537   | 257617.4 | 919024.5 | 759808.6 | 369906.9 | 443269.5 |
| 30.32367 | 5  | 3 | 2 | 175687.8 | 657136.4 | 488676.2 | 830862.8 | 460642.4 | 1147242  | 224009.2 | 420921.9 | 269494   |
| 33.9175  | 10 | 5 | 5 | 347600   | 1851760  | 289196.3 | 2053840  | 708312.1 | 1543684  | 2303334  | 1676747  | 1915383  |
| 7.11425  | 5  | 2 | 3 | 202555.9 | 14714803 | 2136766  | 13675846 | 3369171  | 15365605 | 16551039 | 14714155 | 15856633 |
| 9.681483 | 8  | 5 | 2 | 374075.6 | 1141742  | 635459.3 | 951811.1 | 351725.8 | 1852490  | 1588155  | 657636.6 | 330910.9 |
| 9.8322   | 5  | 3 | 2 | 439911   | 1275967  | 434012.9 | 1415821  | 320051.8 | 1767674  | 634414.3 | 1078424  | 1468907  |
| 10.9645  | 10 | 5 | 5 | 719151.8 | 3067056  | 254330.2 | 2876823  | 672696.2 | 3282144  | 2947067  | 3189325  | 3240775  |
| 9.174917 | 4  | 3 | 1 | 220868.5 | 532680.2 | 210719.7 | 400849.4 | 455098   | 836719.4 | 413549.7 | 510483.5 | 620511.9 |

|          |    |   |   |          |          |          |          |          |          |          |          |          |
|----------|----|---|---|----------|----------|----------|----------|----------|----------|----------|----------|----------|
| 10.9645  | 10 | 5 | 5 | 920606.3 | 4555537  | 988359.2 | 4255454  | 590580.2 | 5380990  | 5656889  | 3706999  | 3419863  |
| 43.628   | 12 | 3 | 3 | 257824.6 | 4403533  | 1804083  | 3718637  | 1944239  | 3459053  | 7400899  | 3716078  | 4652968  |
| 9.976317 | 8  | 4 | 4 | 454849.2 | 1203356  | 228777   | 1065531  | 472942.4 | 1541502  | 1256420  | 1089562  | 921874.2 |
| 9.848417 | 10 | 5 | 5 | 5310990  | 25775626 | 3324722  | 24326105 | 4500782  | 28437623 | 29198995 | 21634364 | 23018973 |
| 9.856867 | 10 | 5 | 5 | 8036084  | 33243927 | 9939550  | 28102992 | 17029556 | 32997005 | 35731432 | 19353438 | 31065002 |
| 11.13662 | 9  | 5 | 4 | 143485.8 | 360599.9 | 65191.06 | 392868.3 | 105489.7 | 282468.1 | 375094.2 | 457076.1 | 364649.9 |
| 9.017783 | 4  | 3 | 1 | 351277.8 | 811756.5 | 359213.3 | 693217.7 | 284929.9 | 868328.4 | 1373216  | 818293.6 | 463325.7 |
| 9.089733 | 5  | 4 | 1 | 431331.7 | 621879.6 | 416437.3 | 769973   | 395032   | 791307   | 1037710  | 868942.1 | 411438.8 |
| 10.9645  | 10 | 5 | 5 | 1208993  | 5706978  | 1339350  | 5257554  | 1110353  | 6858735  | 7095780  | 4478296  | 4170714  |
| 28.33167 | 10 | 5 | 5 | 289196.7 | 1961717  | 333464.6 | 1855480  | 238984   | 2194955  | 2416506  | 1708881  | 1632452  |
| 18.8635  | 11 | 5 | 5 | 1872777  | 8142860  | 2199268  | 7219556  | 2816705  | 6437771  | 11344506 | 8659708  | 5740588  |
| 9.960467 | 10 | 5 | 5 | 2372756  | 8742930  | 1933919  | 7836037  | 2913284  | 9844928  | 11199412 | 7589853  | 6219453  |
| 15.18045 | 5  | 3 | 2 | 225916.5 | 526927.1 | 204617   | 839498.4 | 1150897  | 820010.1 | 300503.2 | 487812.1 | 393996   |
| 11.00657 | 8  | 4 | 3 | 1967611  | 3392018  | 2876466  | 4504901  | 3218175  | 2190788  | 1859556  | 1585297  | 8466945  |
| 9.94455  | 5  | 4 | 1 | 798647.4 | 1682738  | 213069.4 | 1479001  | 737164.7 | 1945914  | 1828886  | 1641806  | 1602081  |
| 9.419733 | 6  | 2 | 3 | 750932.2 | 4249436  | 1808635  | 3692978  | 1150524  | 7271302  | 2642162  | 3094174  | 4093417  |
| 9.864767 | 10 | 5 | 5 | 1334523  | 5655700  | 520871.4 | 6300426  | 2360812  | 6367206  | 5998642  | 5324750  | 5506233  |
| 9.845483 | 10 | 5 | 5 | 1581433  | 7654362  | 1201617  | 7135119  | 1609500  | 9145292  | 8373276  | 6095987  | 6884170  |
| 9.992233 | 9  | 5 | 4 | 375953.7 | 904560.2 | 107622.4 | 1062364  | 580863.9 | 939788.9 | 899992.6 | 725326.7 | 1009724  |
| 41.47433 | 7  | 4 | 3 | 324958.7 | 5107838  | 1399988  | 4699673  | 689469.4 | 3049534  | 5041019  | 6915679  | 5640752  |
| 43.4595  | 10 | 3 | 4 | 396262   | 6684349  | 687895.6 | 5843669  | 3079216  | 7325796  | 6518559  | 5932757  | 6170052  |
| 10.28787 | 4  | 3 | 1 | 270600.8 | 405736.3 | 292396.4 | 326414.9 | 52656.79 | 847728.4 | 542561.6 | 305432.7 | 125516.3 |
| 21.5735  | 8  | 4 | 4 | 107624.7 | 471807.1 | 406386.5 | 659714   | 601649.7 | 533709.4 | 255103.4 | 1154542  | 254337.3 |
| 41.63267 | 9  | 5 | 4 | 709455.1 | 10657339 | 1020616  | 10283232 | 1035518  | 12035971 | 11166285 | 10355862 | 10437973 |
| 9.972483 | 10 | 4 | 5 | 580398.3 | 1676467  | 722550.1 | 1420773  | 682187.9 | 2577986  | 1289021  | 2125093  | 1675120  |
| 8.79615  | 4  | 3 | 1 | 132756.8 | 209506.6 | 101532.3 | 278877   | 243845.3 | 332304   | 275972.4 | 186395.7 | 187261.9 |
| 9.56645  | 3  | 0 | 3 | 137784.2 | 180723.1 | 89836.58 | 217011.2 | 108545.9 | 163076.3 | 71116.18 | 156307.4 | 319245.2 |
| 41.35917 | 6  | 2 | 4 | 398329.3 | 5163948  | 2700705  | 5930205  | 1103382  | 5494246  | 5293520  | 8119691  | 6146841  |
| 9.379233 | 5  | 3 | 2 | 596153.3 | 986612.8 | 243007.7 | 808516.3 | 631849.9 | 1124036  | 599836   | 1128055  | 895825.3 |
| 9.976317 | 5  | 3 | 2 | 1612614  | 2038717  | 1497518  | 2690776  | 2035566  | 1004278  | 1300582  | 935456.4 | 4477368  |
| 10.008   | 8  | 4 | 4 | 878626.9 | 1014915  | 583893.5 | 1301209  | 937876.5 | 1246200  | 1788962  | 1177980  | 461721.1 |
| 9.853633 | 10 | 5 | 5 | 6998997  | 32794146 | 5113956  | 35256268 | 8015738  | 30223725 | 34392826 | 25821016 | 39529035 |
| 9.915583 | 5  | 2 | 3 | 1052557  | 2377923  | 563194.9 | 2094021  | 938455.9 | 3087773  | 1963352  | 2658006  | 2507995  |
| 23.11783 | 10 | 5 | 5 | 1442962  | 13843865 | 1927195  | 12814919 | 3456823  | 10698456 | 15282201 | 14843890 | 13290773 |
| 8.9536   | 4  | 4 | 0 | 219275.4 | 699442.2 | 402092.6 | 553960.2 | 398464.4 | 663565.6 | 1383628  | 639599.5 | 388050   |

|          |    |   |   |          |          |          |          |          |          |          |          |          |
|----------|----|---|---|----------|----------|----------|----------|----------|----------|----------|----------|----------|
| 8.97505  | 7  | 4 | 3 | 141777.3 | 375992.9 | 134362.5 | 324727.7 | 147395.1 | 526033.8 | 460178.4 | 255980.4 | 423021.3 |
| 9.960467 | 10 | 5 | 5 | 1587582  | 3336759  | 696355   | 3877325  | 1930814  | 4016737  | 3805446  | 3658303  | 2793305  |
| 30.09567 | 10 | 5 | 5 | 1146155  | 4834735  | 1025489  | 5661691  | 2964867  | 3618979  | 5271644  | 5553783  | 3859961  |
| 9.992233 | 17 | 5 | 5 | 927661.9 | 3053994  | 919133.3 | 2692764  | 1063255  | 3913547  | 4160442  | 2684606  | 2205029  |
| 9.999217 | 3  | 0 | 3 | 1121374  | 1866257  | 1131420  | 1429154  | 1270440  | 3238196  | 134775.2 | 2344652  | 1760593  |
| 16.30165 | 9  | 5 | 4 | 198474.4 | 784329.2 | 392610.5 | 663188.4 | 255748.8 | 999566.7 | 1357916  | 646172.3 | 386634.9 |
| 9.983433 | 10 | 5 | 5 | 998925.1 | 2505989  | 1345344  | 3025128  | 1508380  | 3738552  | 4043329  | 2306040  | 1134800  |
| 19.95433 | 5  | 3 | 2 | 199377.9 | 471856.5 | 376763.8 | 349139.7 | 292285.2 | 189932.1 | 708380.6 | 1023147  | 203175   |
| 44.26467 | 3  | 3 | 0 | 376040.3 | 5111321  | 2111914  | 4545410  | 140951.7 | 4035433  | 4662739  | 3421765  | 4661350  |
| 9.999217 | 10 | 5 | 5 | 680766.4 | 1707616  | 618721.2 | 1953826  | 732195.3 | 2566800  | 2140052  | 1104975  | 1415778  |
| 10.9645  | 10 | 5 | 5 | 2871970  | 11433724 | 2503981  | 12627217 | 3883791  | 14243874 | 14085787 | 9577625  | 9312732  |
| 9.874317 | 5  | 2 | 3 | 662529.5 | 2151876  | 1038984  | 1749940  | 1173014  | 1128407  | 3425436  | 2855010  | 2266782  |
| 43.41617 | 8  | 3 | 4 | 323641.2 | 4206350  | 605013.4 | 4595314  | 1360943  | 5238292  | 4058590  | 3664584  | 4147599  |
| 9.4468   | 9  | 5 | 4 | 424310.6 | 2052514  | 832755   | 1715061  | 1017364  | 2669923  | 3163575  | 1594165  | 1151381  |
| 9.992233 | 6  | 4 | 2 | 599363.3 | 1039646  | 287996.3 | 804803.7 | 845164.5 | 1354720  | 851125.8 | 1267263  | 1065575  |
| 9.856867 | 10 | 5 | 5 | 4343901  | 15875204 | 2653236  | 17877380 | 7153520  | 18648013 | 18688433 | 12933461 | 14102544 |
| 42.22267 | 5  | 3 | 1 | 313443.3 | 2632332  | 1319249  | 2278877  | 126906.8 | 2341422  | 4132299  | 2374947  | 3589684  |
| 9.445217 | 14 | 5 | 5 | 743012.8 | 6614760  | 2032281  | 5970855  | 1462016  | 9024242  | 7478949  | 7588458  | 4485484  |
| 43.58883 | 5  | 1 | 4 | 388701.2 | 6952708  | 244243   | 8139080  | 4438209  | 6834006  | 6962261  | 7365352  | 6737292  |
| 10.95055 | 8  | 4 | 4 | 172258.5 | 758690   | 234865.5 | 673689.6 | 234552.8 | 1118397  | 877915.1 | 617591.1 | 583909.1 |
| 10.97242 | 7  | 4 | 3 | 263168.3 | 826840.5 | 162584.8 | 898467.9 | 226160.6 | 776899.5 | 941369.4 | 652302.7 | 718083.2 |
| 9.992233 | 10 | 5 | 5 | 597171.9 | 1151843  | 318457.3 | 1376643  | 798596.6 | 1441316  | 1361411  | 1340599  | 861731.9 |
| 9.37735  | 10 | 5 | 4 | 3530140  | 35528614 | 12714243 | 31706719 | 7577384  | 49352937 | 40359446 | 43623653 | 24256244 |
| 9.874317 | 6  | 4 | 2 | 973943.1 | 2721939  | 1038601  | 2260474  | 1465150  | 2064378  | 1399818  | 2838404  | 3214785  |
| 10.474   | 3  | 0 | 3 | 299693.7 | 290729.9 | 84972.4  | 450953.9 | 596778.2 | 228228.3 | 432812.9 | 282724.3 | 222066.7 |
| 9.960467 | 10 | 5 | 5 | 1620091  | 2205670  | 466167.2 | 2750731  | 2007367  | 2521584  | 2138313  | 2819622  | 1863888  |
| 22.71267 | 5  | 3 | 2 | 105159.9 | 166978.6 | 91871.6  | 134746.5 | 86241.45 | 37519.53 | 294583.5 | 166372.2 | 187123.3 |
| 9.912633 | 8  | 4 | 3 | 636277.8 | 2499291  | 607347.5 | 2239718  | 809427.4 | 1987328  | 2509444  | 2654636  | 3423896  |
| 9.983467 | 6  | 3 | 3 | 690470.1 | 770865.9 | 230440.6 | 1120782  | 1299100  | 699011.8 | 735539.8 | 1025266  | 952641.9 |
| 9.845483 | 9  | 5 | 4 | 1221578  | 4717968  | 1074054  | 4249985  | 1473685  | 4106849  | 4253412  | 3576554  | 6190190  |
| 21.64233 | 8  | 4 | 4 | 281786   | 1556692  | 617349.5 | 1307912  | 750415.8 | 850237.9 | 1790217  | 1205799  | 1464420  |
| 31.307   | 10 | 5 | 5 | 1890746  | 11983768 | 2006255  | 10817356 | 4023698  | 9671773  | 14759229 | 10570015 | 11910502 |
| 10.05535 | 5  | 3 | 2 | 490428.5 | 430772.1 | 180514.6 | 668191.6 | 878571.2 | 500264.2 | 132109   | 615648.4 | 476930   |
| 10.97242 | 6  | 3 | 3 | 275759.7 | 722475.7 | 151862.6 | 633574.1 | 307330.7 | 707379.8 | 973989.9 | 713567.1 | 646151.3 |
| 10.9645  | 7  | 3 | 4 | 209916.1 | 765931.2 | 326869.6 | 656309.6 | 278144.3 | 1135344  | 980012.9 | 275497   | 729951.7 |

|          |    |   |   |          |          |          |          |          |          |          |          |          |
|----------|----|---|---|----------|----------|----------|----------|----------|----------|----------|----------|----------|
| 10.97857 | 7  | 3 | 4 | 1690216  | 2557779  | 2739836  | 1808061  | 795470.2 | 1476064  | 7263284  | 971790   | 2569225  |
| 10.9645  | 9  | 5 | 4 | 161709   | 776533.5 | 359566.8 | 649907.7 | 342139.1 | 1010593  | 659400.8 | 335650   | 620866.6 |
| 9.447733 | 13 | 5 | 5 | 1429511  | 11756229 | 1879793  | 10832350 | 3061283  | 12716900 | 11399975 | 14412429 | 10723193 |
| 10.9645  | 10 | 5 | 5 | 1197081  | 5755911  | 1356182  | 5307600  | 1114554  | 6997630  | 7204226  | 4557896  | 4245330  |
| 10.95055 | 10 | 5 | 5 | 954116.7 | 5691106  | 1357079  | 5222759  | 1236760  | 7252545  | 6736958  | 4265544  | 4357180  |
| 9.419733 | 6  | 3 | 3 | 907293.3 | 5099252  | 2227414  | 4198711  | 2734196  | 4558896  | 4586824  | 7378446  | 7069086  |
| 9.859983 | 6  | 3 | 3 | 909184.6 | 2082655  | 849750.3 | 1754622  | 965239   | 2392062  | 771312   | 2949254  | 2545796  |
| 9.41815  | 8  | 4 | 3 | 849739.3 | 3971248  | 2032354  | 3299606  | 1671110  | 3909685  | 1933007  | 1981273  | 6158431  |
| 9.93625  | 10 | 5 | 5 | 15933654 | 61703118 | 9490977  | 58655539 | 7216888  | 76703027 | 64675074 | 54980238 | 53077143 |
| 10.95055 | 6  | 3 | 3 | 934320.2 | 2560213  | 898290.1 | 2257434  | 776525   | 3480022  | 3450662  | 1577704  | 1771609  |
| 9.994767 | 7  | 3 | 3 | 984373.6 | 1032709  | 867997.5 | 1442337  | 1340276  | 2502287  | 292193.3 | 497847.8 | 916604.9 |
| 44.22167 | 3  | 3 | 0 | 93849.13 | 171183   | 51766.79 | 192098.9 | 63550.65 | 144995.6 | 147478.9 | 177675.7 | 258027.1 |
| 9.8322   | 4  | 3 | 1 | 576201.9 | 1077650  | 386287.8 | 1196684  | 257847.4 | 1498656  | 1313672  | 833660.9 | 540155.6 |
| 10.9645  | 10 | 5 | 5 | 950209.8 | 4569670  | 978800.7 | 4279111  | 562601.8 | 5370670  | 5689427  | 3678480  | 3501477  |
| 10.01477 | 7  | 5 | 2 | 409893.3 | 661069.5 | 203011.5 | 823686.4 | 588329   | 709435.6 | 752861.9 | 912849.2 | 548433.3 |
| 10.00385 | 13 | 5 | 5 | 20008186 | 84031125 | 53854078 | 65827101 | 46944102 | 92957550 | 2056691  | 64299309 | 1.23E+08 |
| 9.986767 | 10 | 5 | 5 | 1172783  | 2412075  | 1011974  | 2892551  | 1577268  | 3255421  | 3329125  | 2828737  | 1304141  |
| 10.94443 | 10 | 5 | 5 | 1379415  | 6469822  | 2092192  | 5834490  | 1326341  | 8810415  | 8014206  | 4436788  | 4165899  |
| 9.071517 | 10 | 5 | 5 | 706685.5 | 1763262  | 598837.5 | 2337215  | 2104978  | 2438400  | 2325504  | 1619925  | 1363698  |
| 10.00998 | 7  | 3 | 4 | 1176579  | 1512212  | 1048960  | 1217169  | 436395.4 | 882079.5 | 1218876  | 3168633  | 472750.5 |
| 8.600883 | 10 | 5 | 5 | 1547412  | 31634414 | 13155082 | 35881508 | 10211442 | 52202119 | 24492823 | 36476030 | 18765868 |
| 9.887133 | 9  | 4 | 5 | 3493739  | 6728899  | 2914984  | 9198301  | 8986258  | 5769857  | 3606862  | 9868200  | 9751548  |
| 10.01477 | 10 | 5 | 5 | 723260.7 | 2416162  | 762733.7 | 2134756  | 801614.1 | 2832921  | 2861053  | 1440102  | 1767606  |
| 10.9645  | 8  | 5 | 3 | 849071.3 | 2694923  | 1123382  | 3078395  | 1006314  | 3259574  | 2845499  | 3103063  | 735225.9 |
| 10.97857 | 10 | 5 | 5 | 1637214  | 7509617  | 1890937  | 8623883  | 3882346  | 9473150  | 8917058  | 5964239  | 5111622  |
| 9.960467 | 8  | 4 | 4 | 730579   | 1162028  | 326661.4 | 1339772  | 608896.7 | 1278875  | 1359478  | 1146997  | 606695.2 |
| 43.81883 | 6  | 1 | 4 | 282346.9 | 4253417  | 460892   | 3676265  | 2146367  | 3575052  | 4028347  | 4671282  | 4648436  |
| 25.97967 | 9  | 5 | 4 | 2609274  | 11424604 | 4615044  | 14300067 | 10119448 | 19497510 | 9189792  | 8027698  | 9699205  |
| 10.95055 | 7  | 4 | 3 | 312890.8 | 1251588  | 515668.7 | 1089378  | 372905.9 | 2133634  | 1211763  | 950522.3 | 827713.2 |
| 40.40983 | 7  | 2 | 4 | 356297.3 | 3447328  | 1549581  | 4026554  | 1674986  | 720704.8 | 3770594  | 4036783  | 4162897  |
| 11.22177 | 12 | 5 | 5 | 3445091  | 16142267 | 2557630  | 15071924 | 3338963  | 18480834 | 19119730 | 14243234 | 13341192 |
| 10.57323 | 7  | 5 | 2 | 170852.8 | 401483.7 | 79527.35 | 378465.6 | 40938.41 | 356440.9 | 410436.4 | 479966.6 | 470096.2 |
| 9.933967 | 9  | 5 | 4 | 1479506  | 4640873  | 1701652  | 4023320  | 1742015  | 6591401  | 5364316  | 3878525  | 2128426  |
| 40.122   | 5  | 3 | 2 | 550361.1 | 5296927  | 1845542  | 5792285  | 393899.7 | 5725849  | 6172321  | 2081856  | 6758092  |
| 9.43325  | 8  | 4 | 4 | 1705131  | 5380178  | 5440821  | 7144898  | 4324807  | 2952029  | 2733249  | 858380.9 | 14595138 |

|          |    |   |   |          |          |          |          |          |          |          |          |          |
|----------|----|---|---|----------|----------|----------|----------|----------|----------|----------|----------|----------|
| 9.516467 | 10 | 5 | 5 | 1157722  | 2523403  | 623026.5 | 2167809  | 1234970  | 2947301  | 2992129  | 2841904  | 2316838  |
| 10.95835 | 8  | 3 | 5 | 311801   | 845449.1 | 244013.3 | 978757.8 | 458585.7 | 874442.5 | 1227070  | 655745.3 | 860107.8 |
| 9.992233 | 9  | 5 | 4 | 858154.1 | 2588765  | 641695.4 | 2292238  | 970132.1 | 3174874  | 3241517  | 2620187  | 1766960  |
| 10.01477 | 10 | 5 | 5 | 618035.3 | 2071851  | 362639.2 | 1835218  | 841265.4 | 2110256  | 2481348  | 2051808  | 1493962  |
| 44.22167 | 7  | 2 | 5 | 254193.2 | 3339234  | 1108841  | 3761107  | 1241849  | 3999023  | 1453110  | 3863812  | 4139507  |
| 9.842    | 5  | 2 | 3 | 1053101  | 3464575  | 715324.3 | 3120345  | 1143337  | 4154381  | 3181922  | 4174046  | 3333027  |
| 9.445217 | 7  | 3 | 4 | 4230664  | 13194987 | 13589830 | 8910839  | 9976081  | 4070517  | 1692970  | 28892685 | 27161932 |
| 9.848417 | 10 | 5 | 5 | 1059853  | 2947376  | 498118.8 | 3249996  | 1064996  | 2538174  | 3566626  | 3342890  | 2418998  |
| 9.992233 | 10 | 5 | 5 | 12173424 | 40902853 | 12152368 | 47507759 | 22728718 | 52316824 | 51953279 | 43143594 | 32301068 |
| 20.46733 | 10 | 5 | 5 | 446001.3 | 1976042  | 792160.5 | 1693162  | 788996.4 | 924269.6 | 2044244  | 1738083  | 2040679  |
| 11.06158 | 7  | 4 | 3 | 1814084  | 3859124  | 2831260  | 5156036  | 4236874  | 3816251  | 4954911  | 7880253  | 2275809  |
| 9.43325  | 8  | 3 | 4 | 1326035  | 6819005  | 3514418  | 5670741  | 2861227  | 6844897  | 2369590  | 9833726  | 10647959 |
| 9.999    | 12 | 5 | 5 | 1444278  | 1931137  | 582064.2 | 2093163  | 232483.7 | 1945422  | 2561190  | 2040428  | 2129691  |
| 26.0825  | 5  | 2 | 3 | 102593.1 | 447905.6 | 281887.5 | 553160.3 | 306016.5 | 326104.9 | 860751.7 | 109928.6 | 378540.4 |
| 10.95055 | 10 | 5 | 5 | 3273534  | 17388525 | 5372955  | 15768922 | 3394340  | 23332228 | 21587571 | 12334764 | 11378084 |
| 10.95055 | 10 | 5 | 5 | 749380.6 | 3403984  | 830084.4 | 3841335  | 1494528  | 3867061  | 4608670  | 2989282  | 2519197  |
| 9.94455  | 6  | 4 | 2 | 1071614  | 8954069  | 3338090  | 7871872  | 2665401  | 4838065  | 8057948  | 8501606  | 14104139 |
| 10.96997 | 8  | 4 | 4 | 244656.1 | 764882.2 | 377266.4 | 896001   | 355795.8 | 924343.7 | 551997.7 | 465492.2 | 524935.9 |
| 11.60778 | 10 | 5 | 5 | 343065.2 | 1861383  | 720593.8 | 1604854  | 714560.4 | 672654   | 1781923  | 2069748  | 2229119  |
| 9.66805  | 5  | 3 | 2 | 423271.6 | 1506720  | 1134415  | 1095910  | 1163721  | 2637140  | 1146993  | 608535.6 | 361027.5 |
| 9.4632   | 14 | 5 | 5 | 12030651 | 1.14E+08 | 33784126 | 1.01E+08 | 39550032 | 1.57E+08 | 1.16E+08 | 1.35E+08 | 78725556 |
| 9.4925   | 9  | 4 | 4 | 1012841  | 8791029  | 3558248  | 7584150  | 3180525  | 6648207  | 4247331  | 10775153 | 8860277  |
| 10.95835 | 10 | 5 | 5 | 311606   | 1250722  | 517094.2 | 1106417  | 212809.8 | 1866378  | 1343872  | 952566.9 | 541103.3 |
| 10.03947 | 6  | 3 | 3 | 285295.1 | 576419.9 | 367382.1 | 694016.4 | 283706.8 | 764049.8 | 93839.56 | 590276.8 | 376312.2 |
| 8.271783 | 8  | 5 | 3 | 1457828  | 24170782 | 9872530  | 35606333 | 42647409 | 26022703 | 10721688 | 35971525 | 18312200 |
| 9.3494   | 8  | 3 | 3 | 651014   | 1944707  | 941112.8 | 2336914  | 1229190  | 1227019  | 1777455  | 3206860  | 938925.9 |
| 9.992233 | 9  | 5 | 4 | 1761146  | 3278027  | 1342721  | 3851531  | 1820269  | 4294499  | 5009809  | 2941163  | 1790874  |
| 9.960467 | 9  | 4 | 5 | 1066962  | 1947613  | 1003715  | 2324887  | 1105558  | 2631619  | 3232453  | 1814887  | 707207.8 |
| 9.859983 | 10 | 5 | 5 | 3032568  | 7958355  | 775879.1 | 9324512  | 5150242  | 8117447  | 7569620  | 7115168  | 9182186  |
| 14.94357 | 8  | 4 | 4 | 45860.45 | 152303.1 | 42240.42 | 165509.1 | 30461.19 | 219892.7 | 125723.1 | 122192   | 168020.9 |
| 10.9645  | 10 | 5 | 5 | 5417315  | 24557501 | 5400144  | 22683724 | 5090242  | 30141030 | 30036837 | 19404281 | 19212107 |
| 24.1465  | 8  | 4 | 3 | 35616664 | 39412634 | 87422007 | 72946413 | 99883442 | 1.96E+08 | 154322.5 | 378962.8 | 397046.7 |
| 9.960467 | 10 | 5 | 5 | 1388766  | 2269689  | 361902.4 | 2807247  | 2021085  | 2670547  | 2368839  | 2393963  | 2225004  |
| 8.8977   | 6  | 4 | 2 | 446852.4 | 979608.8 | 568716.2 | 763453.2 | 639500.1 | 716823   | 1907934  | 1109511  | 460085.8 |
| 7.559717 | 10 | 5 | 5 | 2921921  | 1.8E+08  | 89286833 | 1.45E+08 | 1.08E+08 | 2.69E+08 | 2.47E+08 | 1.11E+08 | 2.11E+08 |

|          |    |   |   |          |          |          |          |          |          |          |          |          |
|----------|----|---|---|----------|----------|----------|----------|----------|----------|----------|----------|----------|
| 9.445217 | 7  | 3 | 3 | 645267.4 | 2600934  | 656245.6 | 2222501  | 1323866  | 2041686  | 2269419  | 2927721  | 3602001  |
| 10.93618 | 7  | 3 | 4 | 148605.3 | 374568.4 | 131253   | 435794   | 202182.6 | 586649.4 | 280396.5 | 383107.7 | 252203.9 |
| 10.9645  | 10 | 5 | 5 | 2686780  | 12072465 | 2761014  | 11117415 | 2589875  | 14706372 | 15000246 | 9123155  | 9567792  |
| 10.9645  | 10 | 5 | 5 | 251292.7 | 1022400  | 233315.1 | 950306.3 | 162866.9 | 1318434  | 1213957  | 774744.3 | 861838.1 |
| 9.983433 | 10 | 5 | 5 | 753663.8 | 2426095  | 942868   | 2076366  | 1017014  | 3929163  | 2618980  | 2254360  | 1849016  |
| 9.928667 | 11 | 3 | 4 | 706075.4 | 2308929  | 1238828  | 1874244  | 1200678  | 1896566  | 1241060  | 3488920  | 3761153  |
| 10.008   | 10 | 5 | 5 | 1030123  | 1136171  | 509197.1 | 1405316  | 924939.7 | 1237579  | 1951292  | 1056812  | 664213.8 |
| 10.9645  | 10 | 5 | 5 | 1536936  | 7245352  | 1690480  | 6685439  | 1439380  | 8643019  | 9133330  | 5707538  | 5366292  |
| 10.52898 | 10 | 5 | 5 | 168099.9 | 857579.9 | 171121.3 | 789044.6 | 210972.1 | 692278.6 | 1087957  | 986052.3 | 733454.7 |
| 24.04183 | 7  | 3 | 4 | 71334.18 | 193870.8 | 91855.24 | 226994.2 | 94145.24 | 58597.32 | 229152.4 | 144744.8 | 286792.9 |
| 9.43325  | 8  | 5 | 3 | 885437.9 | 5593686  | 1739527  | 6162157  | 1433620  | 7948110  | 5457435  | 6164426  | 3120532  |
| 11.63327 | 10 | 5 | 5 | 1214156  | 6214732  | 1957764  | 5403819  | 2545989  | 8629598  | 6535433  | 5853028  | 3232181  |
| 23.14617 | 6  | 2 | 4 | 87879.3  | 309168.8 | 46059.6  | 284615.8 | 84629.13 | 246879.3 | 344377.6 | 305593.1 | 362468   |
| 9.43325  | 6  | 4 | 2 | 689283.6 | 2572650  | 444993.6 | 2189851  | 1410649  | 2517224  | 2227028  | 3339882  | 2472809  |
| 9.77355  | 5  | 3 | 2 | 12712506 | 13260311 | 15884919 | 18866124 | 15609348 | 2007191  | 27799206 | 1735435  | 33262969 |
| 10.008   | 10 | 5 | 5 | 919625.8 | 1165396  | 184150.1 | 1529642  | 1380371  | 1126045  | 1145007  | 1437974  | 1194499  |
| 18.666   | 7  | 4 | 3 | 608456.1 | 891877.3 | 1116734  | 1337746  | 1371547  | 432837.9 | 501981   | 2883992  | 363261.2 |
| 44.006   | 9  | 4 | 4 | 308481.3 | 6663211  | 3379294  | 5699206  | 1678872  | 8461645  | 8034122  | 823479.8 | 6794903  |
| 10.9645  | 10 | 5 | 5 | 891212.5 | 3975058  | 942313.3 | 3622185  | 1038365  | 4875221  | 4914821  | 3056716  | 2970962  |
| 9.80755  | 6  | 3 | 3 | 979356.5 | 2600300  | 2007890  | 3269941  | 1745782  | 1159982  | 3533949  | 1334192  | 1249963  |
| 9.40325  | 11 | 3 | 5 | 1609740  | 7687165  | 1204840  | 6583398  | 4090264  | 9246017  | 7879834  | 7096029  | 6030698  |
| 9.388617 | 7  | 4 | 3 | 1576629  | 2197549  | 797556.8 | 1805107  | 1325523  | 2924365  | 2561654  | 964650.7 | 1848159  |
| 9.530583 | 18 | 5 | 5 | 58810544 | 1.59E+08 | 26134089 | 2.18E+08 | 2.24E+08 | 1.6E+08  | 1.3E+08  | 1.36E+08 | 1.89E+08 |
| 10.95055 | 10 | 5 | 5 | 830611.3 | 4405736  | 1377893  | 3986495  | 923103.6 | 6020796  | 5286241  | 3184898  | 2791711  |
| 10.008   | 9  | 5 | 4 | 906543.8 | 2775992  | 581306.9 | 2409481  | 1308528  | 2831019  | 3435484  | 2585774  | 1905531  |
| 9.43325  | 6  | 3 | 2 | 464157.8 | 3328260  | 1551167  | 2892817  | 700889.4 | 3176114  | 2541875  | 4374684  | 5259521  |
| 10.94443 | 8  | 3 | 4 | 1.51E+09 | 3.92E+09 | 5.37E+09 | 2.12E+09 | 4.71E+09 | 1.06E+10 | 21305279 | 19722314 | 8.94E+09 |
| 10.95055 | 10 | 5 | 5 | 856716.1 | 4404351  | 1334694  | 3997758  | 898548.4 | 5950271  | 5209409  | 3166169  | 2864237  |
| 9.830833 | 6  | 4 | 2 | 2151436  | 1670540  | 1272388  | 2528746  | 3094106  | 3942934  | 1098669  | 1014466  | 1216147  |
| 9.960467 | 10 | 5 | 4 | 3094490  | 7539371  | 5758028  | 5714586  | 4393629  | 11362938 | 1652075  | 926192.2 | 10887591 |
| 32.22933 | 4  | 1 | 3 | 629346.3 | 2419910  | 975383.4 | 3029424  | 2173996  | 1936966  | 2128378  | 2008196  | 4156297  |
| 10.008   | 10 | 5 | 5 | 656206.9 | 2330979  | 492313.1 | 2095520  | 789008.8 | 2500551  | 2964725  | 2419284  | 1626511  |
| 9.960467 | 4  | 3 | 1 | 499987.7 | 794387.2 | 233590.7 | 643246.6 | 541948.2 | 1122541  | 866209.3 | 809142.5 | 684991.1 |
| 9.1172   | 5  | 3 | 2 | 431740.2 | 777027   | 559490.4 | 613150.6 | 322826   | 1614327  | 954302.1 | 394120.7 | 166658.7 |
| 44.193   | 7  | 1 | 4 | 255132.6 | 2187385  | 1338694  | 1615247  | 1833407  | 1612989  | 1688140  | 1628706  | 4575945  |

|          |    |   |   |          |          |          |          |          |          |          |          |          |
|----------|----|---|---|----------|----------|----------|----------|----------|----------|----------|----------|----------|
| 35.61867 | 5  | 3 | 1 | 322965.5 | 5753877  | 2392510  | 5125410  | 259376.8 | 5295601  | 3150887  | 5362374  | 9693490  |
| 10.02372 | 10 | 5 | 5 | 387124.4 | 953262   | 129394.2 | 1083099  | 484550.3 | 1057445  | 813362.5 | 922350   | 1115747  |
| 10.6019  | 10 | 5 | 5 | 410433.6 | 1423054  | 314485   | 1301651  | 367069.6 | 1706462  | 1793893  | 1280179  | 1052047  |
| 7.3845   | 3  | 3 | 0 | 699257.8 | 16396492 | 10678768 | 13152798 | 7151205  | 17316635 | 3937335  | 11051759 | 16808096 |
| 9.94455  | 10 | 5 | 5 | 16765516 | 32924945 | 6859671  | 37470722 | 16377433 | 41405934 | 36790575 | 34319791 | 27633853 |
| 9.728817 | 16 | 5 | 5 | 90680888 | 6.11E+08 | 1.23E+08 | 7.22E+08 | 4.09E+08 | 5.45E+08 | 6.55E+08 | 8.08E+08 | 5.2E+08  |
| 29.76133 | 10 | 5 | 5 | 1486572  | 6318683  | 1352781  | 7558267  | 4606303  | 4652869  | 6298489  | 6765814  | 5600700  |
| 9.8322   | 9  | 5 | 4 | 733992.2 | 2233373  | 690192.6 | 1957821  | 852791.1 | 2781695  | 2739903  | 1326884  | 1651498  |
| 10.9645  | 9  | 4 | 5 | 756809.7 | 1602213  | 291440.5 | 1870555  | 997901.9 | 1698147  | 1948062  | 1757756  | 1238964  |
| 10.46372 | 10 | 5 | 5 | 568923.8 | 1350352  | 615187.5 | 1558523  | 557585.4 | 2391782  | 1305094  | 1270878  | 873106.3 |
| 29.67417 | 8  | 3 | 4 | 243522.9 | 1328839  | 1043557  | 1023518  | 604742.4 | 164267.6 | 1455694  | 383269.2 | 2568388  |
| 10.9645  | 10 | 5 | 5 | 896007.2 | 4020444  | 990772.6 | 3665764  | 1010918  | 4878899  | 5094175  | 3150872  | 2890828  |
| 10.008   | 10 | 5 | 5 | 422199.4 | 1316065  | 162117.5 | 1415930  | 356498.8 | 1369045  | 1356056  | 1516712  | 1262412  |
| 10.9645  | 10 | 5 | 5 | 13231178 | 40435303 | 10789419 | 45999912 | 19151452 | 52253143 | 51740083 | 34928943 | 29107196 |
| 10.9645  | 4  | 3 | 1 | 330620.5 | 814511.9 | 172741   | 728934.4 | 291212.1 | 1020021  | 874172.4 | 674505.5 | 600059   |
| 10.95835 | 5  | 3 | 2 | 2336859  | 4504811  | 4685968  | 6036592  | 3923193  | 11278032 | 1977702  | 1388930  | 388432.4 |
| 9.976317 | 10 | 5 | 5 | 878781.1 | 3360334  | 697506   | 2990614  | 1281711  | 3777214  | 4034178  | 2905828  | 2367969  |
| 9.976317 | 10 | 5 | 5 | 4010191  | 11590207 | 3349120  | 10269653 | 4065934  | 14529845 | 15226222 | 11690349 | 7655993  |
| 10.9645  | 10 | 5 | 5 | 277027.3 | 1694803  | 375744.2 | 1559179  | 390346.6 | 1856882  | 2115448  | 1365077  | 1236040  |
| 9.853633 | 10 | 5 | 5 | 6222673  | 30788479 | 7883825  | 27918331 | 8326784  | 37321536 | 35643363 | 18988839 | 26354728 |
| 9.338567 | 10 | 5 | 5 | 3951334  | 7532156  | 4831897  | 5941163  | 4122395  | 5789171  | 2851341  | 4377001  | 9810886  |
| 11.52297 | 6  | 3 | 3 | 126337.9 | 246270.5 | 83293.91 | 285973   | 133593   | 263623.4 | 382544.6 | 201413.1 | 170066.3 |
| 20.46733 | 6  | 3 | 3 | 116652.7 | 741419.1 | 314451.8 | 635394.1 | 283839.3 | 858510.7 | 1134201  | 846418.2 | 551184.1 |
| 11.52297 | 10 | 5 | 5 | 225156.8 | 826904.1 | 195498.1 | 723197.1 | 359984.1 | 1118987  | 833437.2 | 568779.5 | 812776.2 |
| 9.842    | 10 | 5 | 5 | 6756275  | 26477380 | 8366760  | 22980993 | 11147795 | 30666674 | 30427309 | 14173330 | 21972075 |
| 39.345   | 4  | 0 | 4 | 346408.8 | 4306013  | 114886.3 | 4401420  | 353224.7 | 4432465  | 4150213  | 4285166  | 4257500  |
| 10.95835 | 4  | 1 | 3 | 210968.7 | 383503.8 | 101907.5 | 443610.8 | 213460.4 | 339803.2 | 550595.5 | 403154.8 | 335376.7 |
| 9.840617 | 10 | 5 | 5 | 1311615  | 3300927  | 1389181  | 2830329  | 1269394  | 4197103  | 4558648  | 1670466  | 1912508  |
| 41.60383 | 4  | 1 | 3 | 268909.8 | 2947736  | 740711.9 | 3676365  | 2727853  | 1636896  | 3149396  | 3186977  | 3379863  |
| 12.00917 | 5  | 2 | 3 | 139701.4 | 654809.1 | 225484.3 | 577216.7 | 213287.2 | 718023.9 | 906462.6 | 288771.4 | 660974.3 |
| 10.9645  | 10 | 5 | 5 | 257381.9 | 822105.1 | 273555   | 737286.9 | 198513.7 | 1142574  | 1053871  | 608968   | 511148.2 |
| 9.559117 | 4  | 3 | 1 | 241515.2 | 742820.6 | 737260.9 | 533701.4 | 368758.2 | 712804.4 | 257273.3 | 827031.4 | 0        |
| 10.97857 | 10 | 5 | 5 | 995551.5 | 3474950  | 479591.5 | 2945012  | 1995299  | 3544478  | 3862323  | 3997007  | 2903563  |
| 10.9645  | 8  | 3 | 5 | 184177   | 947142.9 | 337817.4 | 844392.6 | 230372.7 | 1020956  | 1053316  | 365027.6 | 1048085  |
| 9.848417 | 10 | 5 | 5 | 15914257 | 80279928 | 17224712 | 71363631 | 30792491 | 72572721 | 76432926 | 65735371 | 76589457 |

|          |    |   |   |          |          |          |          |          |          |          |          |          |
|----------|----|---|---|----------|----------|----------|----------|----------|----------|----------|----------|----------|
| 10.00998 | 9  | 5 | 4 | 602740.4 | 912804.8 | 378045.4 | 1103173  | 652574.9 | 938183.2 | 1470094  | 946468.1 | 418369.2 |
| 10.95055 | 7  | 3 | 4 | 670773.6 | 1786477  | 658092.2 | 2010505  | 608973.3 | 2447484  | 2444376  | 1127441  | 1132091  |
| 9.915583 | 10 | 5 | 5 | 75465288 | 5.03E+08 | 38376807 | 5.63E+08 | 2.29E+08 | 5.16E+08 | 4.77E+08 | 5.61E+08 | 4.97E+08 |
| 30.27883 | 10 | 5 | 5 | 9654195  | 77229317 | 10356307 | 70497571 | 24324589 | 70056714 | 89420823 | 77593849 | 64186035 |
| 9.994767 | 10 | 5 | 5 | 586661.3 | 1436493  | 585053.8 | 1674878  | 751839.6 | 1754898  | 2227058  | 1406868  | 724472.2 |
| 7.998367 | 9  | 4 | 4 | 509153.7 | 15185296 | 5463745  | 20800081 | 21101543 | 8359396  | 23586035 | 13780671 | 14741563 |
| 10.9645  | 10 | 5 | 5 | 6365207  | 29813606 | 5624412  | 27747071 | 6073672  | 35601492 | 34877276 | 24659053 | 23458086 |
| 44.9835  | 5  | 3 | 2 | 193056.1 | 630744.8 | 95900.44 | 596776.5 | 96631.27 | 493067.4 | 741871.6 | 693199.1 | 634452.5 |
| 9.979667 | 9  | 5 | 4 | 2111597  | 3785580  | 2066756  | 4339718  | 624645   | 6752958  | 4876021  | 3333788  | 1543422  |
| 9.960467 | 7  | 4 | 3 | 1556075  | 1334698  | 843261.3 | 1735181  | 1351376  | 1844945  | 0        | 2227306  | 1342546  |
| 19.16433 | 4  | 3 | 1 | 130068   | 441568.8 | 243748.4 | 363448.2 | 195938.7 | 114682   | 664240.5 | 275997.3 | 483164.1 |
| 20.7695  | 3  | 0 | 3 | 231281   | 494785.7 | 98250.99 | 592503.7 | 367156.3 | 554016.2 | 545730.9 | 591627.9 | 420455.6 |
| 9.964417 | 9  | 5 | 4 | 684528.3 | 1874326  | 573281.2 | 2066671  | 516515.6 | 2271609  | 2587320  | 1613225  | 1118310  |
| 9.928667 | 10 | 5 | 5 | 1.82E+08 | 1.24E+09 | 84986813 | 1.39E+09 | 5.42E+08 | 1.31E+09 | 1.19E+09 | 1.35E+09 | 1.23E+09 |
| 9.992233 | 5  | 2 | 3 | 565514.3 | 741890.7 | 473737.8 | 964982.1 | 752221.4 | 1294784  | 159930.6 | 1162313  | 548192.8 |
| 20.274   | 5  | 3 | 2 | 131047.8 | 327880.7 | 185419.8 | 399737.3 | 220616.9 | 194914.8 | 291333.1 | 506265.4 | 531586.7 |
| 42.02117 | 8  | 5 | 2 | 323171.8 | 5099502  | 1341562  | 4574106  | 1625300  | 6986854  | 3435748  | 5037391  | 4366042  |
| 10.95835 | 7  | 3 | 4 | 536040   | 1875918  | 639488.9 | 1648888  | 650281.8 | 2612753  | 1239012  | 1428076  | 1588288  |
| 9.999217 | 10 | 4 | 5 | 4225473  | 2888768  | 4029773  | 1827396  | 864719.8 | 1229890  | 1423620  | 1208018  | 10070795 |
| 9.07525  | 10 | 5 | 5 | 13514216 | 73740330 | 24162671 | 65071652 | 25090616 | 79636988 | 1.11E+08 | 69155523 | 63916382 |
| 10.9645  | 10 | 5 | 5 | 3066508  | 13388411 | 3619924  | 12156173 | 3377824  | 16312114 | 17335676 | 9334377  | 9994534  |
| 9.992233 | 8  | 4 | 4 | 327879.1 | 787453.5 | 209682   | 881396.6 | 311383.4 | 932140.2 | 809555.8 | 1008169  | 717491.9 |
| 9.388367 | 5  | 3 | 2 | 1022785  | 9487783  | 1478649  | 8438052  | 3851930  | 9452406  | 9163584  | 7515954  | 9645166  |
| 30.295   | 8  | 4 | 4 | 189817.9 | 1007425  | 215452.4 | 867174.4 | 509302.7 | 690580.4 | 922046.8 | 1016814  | 1184470  |
| 41.12917 | 9  | 4 | 2 | 302804.2 | 4784687  | 3007700  | 4002503  | 326116.5 | 4090280  | 5965031  | 4182894  | 8962125  |
| 10.94443 | 10 | 5 | 5 | 1343705  | 6433153  | 2043144  | 5823478  | 1328012  | 8662613  | 7989598  | 4380133  | 4227232  |
| 9.445217 | 13 | 5 | 5 | 3019055  | 21547790 | 9239166  | 18818362 | 5784905  | 30903308 | 29568867 | 20800404 | 18271114 |
| 9.77355  | 5  | 2 | 3 | 432143.8 | 593972.1 | 246368.9 | 686554.7 | 279455.2 | 605279.6 | 466245.7 | 314849.5 | 604376   |
| 44.27917 | 6  | 3 | 1 | 433894.6 | 5737033  | 3835421  | 4729761  | 811252.7 | 5698027  | 894023.7 | 5323744  | 5129335  |
| 11.6196  | 9  | 4 | 5 | 113549.2 | 309709.2 | 88602.81 | 265260.7 | 153481.6 | 306721.7 | 455287.6 | 301557.3 | 265903.8 |
| 8.845933 | 5  | 3 | 2 | 1097104  | 3887992  | 4042384  | 5549862  | 5311707  | 1109015  | 1353159  | 952710.6 | 5941820  |
| 19.22767 | 6  | 3 | 3 | 58465.31 | 243990.7 | 116772.5 | 209061.5 | 76905.44 | 291542   | 249805.1 | 177643.6 | 95946.53 |
| 41.47433 | 5  | 1 | 3 | 189118.4 | 2418235  | 183402   | 2313740  | 371926.3 | 2170913  | 2377433  | 2660221  | 2519056  |
| 9.986767 | 10 | 5 | 5 | 600350.5 | 1555988  | 689233.3 | 1823905  | 828948.1 | 1895093  | 2410440  | 1773430  | 771903.5 |
| 9.03715  | 5  | 3 | 2 | 146330.8 | 328332.7 | 168904.2 | 265624.3 | 187770.3 | 391487.3 | 292868.8 | 51348.7  | 476160.2 |



|          |    |   |   |          |          |          |          |          |          |          |          |          |
|----------|----|---|---|----------|----------|----------|----------|----------|----------|----------|----------|----------|
| 10.9645  | 10 | 5 | 5 | 510820   | 2472699  | 451021.9 | 2294970  | 554731.8 | 2914841  | 2920555  | 1913448  | 2148959  |
| 9.507167 | 6  | 3 | 2 | 427836.6 | 690513   | 178751.6 | 832124.6 | 526691.4 | 855775.3 | 861342.9 | 711888.8 | 570794   |
| 10.95835 | 8  | 4 | 4 | 1242185  | 3700385  | 500980.3 | 4052547  | 1294403  | 3259451  | 3647164  | 4306956  | 4109163  |
| 9.67     | 7  | 3 | 4 | 390445.1 | 983518.6 | 520050.8 | 830618.1 | 321497.3 | 1303091  | 1709571  | 393311.3 | 771405.1 |
| 9.63045  | 8  | 5 | 3 | 477467.2 | 1754364  | 877665   | 2040105  | 744386.6 | 2587782  | 2456991  | 2079579  | 657892.6 |
| 9.840617 | 7  | 4 | 3 | 365832.8 | 1069570  | 197312.1 | 929271.2 | 516532.7 | 1421600  | 977333.1 | 973836.1 | 1005884  |
| 9.473733 | 8  | 4 | 4 | 567757.6 | 1419019  | 143242   | 1315669  | 381416.1 | 1258365  | 1569229  | 1572070  | 1340392  |
| 10.9645  | 10 | 5 | 5 | 8997111  | 37256927 | 8310386  | 34304664 | 8538113  | 47226328 | 43445661 | 29060437 | 28821648 |
| 9.887133 | 10 | 5 | 5 | 35963592 | 1.96E+08 | 10934284 | 2.06E+08 | 37311491 | 1.99E+08 | 1.82E+08 | 1.97E+08 | 2.11E+08 |
| 10.9645  | 10 | 5 | 5 | 1329717  | 5938165  | 1214200  | 5524730  | 1144593  | 7224012  | 7098946  | 4763257  | 4707635  |
| 9.433    | 6  | 3 | 2 | 1035472  | 3490929  | 1719860  | 4276172  | 2637567  | 2163614  | 2197119  | 5109963  | 2368305  |
| 10.9645  | 10 | 5 | 5 | 1188169  | 5693101  | 1356618  | 5258256  | 1109777  | 6982584  | 7085249  | 4367774  | 4278563  |
| 30.29583 | 9  | 5 | 4 | 222367.6 | 1311443  | 486802.1 | 1491256  | 538154.1 | 820911.9 | 1866302  | 775111.1 | 1533844  |
| 10.9645  | 10 | 5 | 5 | 325850   | 1492231  | 309838.4 | 1397144  | 224127.1 | 1712725  | 1846636  | 1262253  | 1099086  |
| 9.992233 | 10 | 5 | 5 | 2965281  | 9335966  | 2105562  | 8168413  | 4144652  | 10226438 | 12466378 | 8798905  | 6967876  |
| 10.97242 | 9  | 5 | 4 | 797849.9 | 2666456  | 604761.7 | 2366708  | 1035171  | 2502796  | 3520644  | 2704494  | 1833305  |
| 8.964883 | 9  | 4 | 5 | 412488.7 | 664274.3 | 366936.3 | 1009020  | 1300875  | 407173.1 | 1228421  | 843310.4 | 466033.6 |
| 9.976317 | 10 | 5 | 5 | 847003.1 | 2479699  | 803403.6 | 2130047  | 1153169  | 3035823  | 3541132  | 2315635  | 1575924  |
| 14.9415  | 3  | 3 | 0 | 34823.16 | 110540.3 | 15956.29 | 100645.1 | 35853.4  | 103007.5 | 128508.8 | 121217.1 | 112270.9 |
| 9.864767 | 9  | 5 | 4 | 520288.9 | 2227990  | 267993.9 | 2034815  | 713820.8 | 1914474  | 2538620  | 2472186  | 2150645  |
| 10.9645  | 10 | 5 | 5 | 240970.1 | 1062349  | 273146.4 | 970983.2 | 248065.8 | 1176486  | 1415584  | 902746.5 | 1117987  |
| 11.26148 | 5  | 3 | 2 | 55307.09 | 100962.3 | 47146.7  | 73868.21 | 96913.32 | 123707.2 | 59274.65 | 163787.1 | 108400.5 |
| 44.43733 | 6  | 1 | 3 | 425672.9 | 3446980  | 1198989  | 2993525  | 1383665  | 3026091  | 2802979  | 5586740  | 2942475  |
| 9.999217 | 4  | 1 | 3 | 1128064  | 1833110  | 758652.6 | 1519286  | 1011261  | 1970521  | 521729   | 1961018  | 2364246  |
| 11.39828 | 9  | 5 | 4 | 546999.4 | 5867516  | 1938995  | 4924501  | 3241231  | 8711694  | 4462467  | 7077628  | 4571998  |
| 16.25587 | 5  | 3 | 1 | 2415095  | 15866047 | 5416471  | 14129265 | 4449492  | 15579769 | 11859569 | 14109886 | 25208734 |
| 9.523383 | 15 | 5 | 5 | 14297608 | 89032149 | 18723649 | 1.06E+08 | 62063397 | 81184592 | 93850977 | 1.2E+08  | 75890643 |
| 9.960467 | 8  | 4 | 4 | 624759   | 1986728  | 611360   | 1692130  | 1010008  | 2387610  | 2734713  | 1831247  | 1131374  |
| 9.4468   | 7  | 4 | 3 | 382639.6 | 1777593  | 959710.3 | 1391747  | 1226533  | 2378057  | 2972079  | 709150.1 | 918686.1 |
| 9.976317 | 10 | 5 | 5 | 1514664  | 4568037  | 1202078  | 4087664  | 1522374  | 5824206  | 5721208  | 4529449  | 3208777  |
| 9.388367 | 5  | 3 | 2 | 942542.1 | 3267534  | 657849.6 | 2906789  | 1281441  | 2233106  | 3122564  | 3695628  | 3347797  |
| 9.992233 | 7  | 3 | 4 | 311219.9 | 604547.5 | 305177.3 | 736468.4 | 435316.9 | 839313.2 | 977229.7 | 593293.1 | 288071.1 |
| 9.952017 | 6  | 4 | 2 | 642896.3 | 1363927  | 722349.6 | 1088742  | 847166.8 | 1831338  | 89343.43 | 1653672  | 1737319  |
| 9.445217 | 14 | 5 | 5 | 64717792 | 5.89E+08 | 1.4E+08  | 5.38E+08 | 1.48E+08 | 4.64E+08 | 7.03E+08 | 7.71E+08 | 4.77E+08 |
| 43.91967 | 8  | 4 | 2 | 353759.5 | 5350587  | 1328817  | 4979465  | 652661.8 | 6025524  | 7364304  | 4316009  | 4762375  |

|          |    |   |   |          |          |          |          |          |          |          |          |          |
|----------|----|---|---|----------|----------|----------|----------|----------|----------|----------|----------|----------|
| 9.856867 | 10 | 5 | 5 | 13204598 | 46061068 | 4589312  | 51786684 | 21934242 | 52756513 | 46456983 | 42088793 | 47552598 |
| 9.848417 | 10 | 5 | 5 | 849116.3 | 2832959  | 706779.7 | 2557132  | 863355.8 | 3287011  | 2894072  | 2217316  | 2045287  |
| 10.95055 | 9  | 5 | 4 | 583193.9 | 1566501  | 541343.2 | 1807213  | 804526.4 | 2228182  | 2011040  | 1350038  | 1338514  |
| 23.01583 | 3  | 3 | 0 | 116046.6 | 371323.7 | 164964.7 | 449640.8 | 268028.1 | 323471.7 | 588184.2 | 138091.3 | 442649.4 |
| 10.9645  | 8  | 4 | 4 | 490911.1 | 1444194  | 356994.9 | 1256079  | 662893.4 | 1793746  | 1511445  | 1024919  | 1123499  |
| 9.388617 | 8  | 4 | 4 | 885893.6 | 1775213  | 974175.6 | 1425432  | 1030600  | 2570565  | 2742149  | 313065.7 | 1474138  |
| 10.94443 | 10 | 5 | 5 | 406048.1 | 2169853  | 614619.9 | 1958421  | 597882.3 | 2817823  | 2485979  | 1536620  | 1486971  |
| 9.498117 | 7  | 4 | 2 | 1058496  | 3022923  | 2003112  | 4280569  | 4587150  | 2448333  | 2365831  | 6152160  | 714838.7 |
| 9.392767 | 7  | 4 | 3 | 563748.9 | 881081.2 | 548622.1 | 683191.5 | 585859.2 | 1423238  | 994376.4 | 0        | 775473.7 |
| 9.970617 | 6  | 2 | 4 | 2331274  | 3967787  | 2801907  | 2930890  | 3136589  | 6248018  | 1271535  | 4457557  | 6987945  |
| 9.93625  | 10 | 5 | 5 | 4474317  | 16843994 | 2009906  | 15828850 | 3545917  | 20072201 | 17255949 | 16052012 | 14754863 |
| 8.9256   | 6  | 4 | 2 | 222864.1 | 551061.3 | 87282.85 | 602065.5 | 183997.8 | 493654.3 | 578987.6 | 429394.4 | 617357.7 |
| 26.81033 | 8  | 4 | 4 | 183964.8 | 1382330  | 955424.7 | 1092162  | 679829.2 | 536540.1 | 1890977  | 186977.4 | 1956060  |
| 31.39633 | 7  | 3 | 4 | 424584   | 6918923  | 1208521  | 6580337  | 612456.5 | 6238221  | 6324579  | 6400219  | 6561274  |
| 9.999517 | 5  | 3 | 2 | 1260564  | 831737.4 | 610761   | 1010926  | 384924.3 | 1901279  | 424618.3 | 455999   | 678945.3 |
| 9.859983 | 10 | 5 | 5 | 2113027  | 11588024 | 1815694  | 10496601 | 3958133  | 12198410 | 10814539 | 9368267  | 11287840 |
| 9.976317 | 11 | 5 | 5 | 1211825  | 3878780  | 711686.6 | 3583632  | 958989   | 4231727  | 4783364  | 3915348  | 2882112  |
| 9.311883 | 6  | 3 | 3 | 1929382  | 12290730 | 10808295 | 9180358  | 6292560  | 30488958 | 2851324  | 7828514  | 7154343  |
| 11.7446  | 10 | 5 | 5 | 82640.8  | 334275.6 | 121896.9 | 286969.9 | 148143.7 | 518553.8 | 180958.7 | 292201.6 | 348167.4 |
| 9.659033 | 10 | 5 | 5 | 882086.6 | 2757883  | 300317.5 | 2529017  | 855995.8 | 3042955  | 2932570  | 2282348  | 2659181  |
| 17.88017 | 9  | 5 | 4 | 649518.5 | 2556117  | 1902690  | 2009972  | 1099510  | 2346720  | 1625049  | 603965.5 | 5679947  |
| 9.976317 | 10 | 5 | 5 | 830654.1 | 2199117  | 589439   | 2511535  | 1106769  | 2661469  | 2756452  | 2433522  | 1462422  |
| 9.415167 | 5  | 3 | 2 | 1732152  | 5208506  | 5603038  | 6815237  | 3224376  | 11336733 | 776938.1 | 1527553  | 1059443  |
| 9.992233 | 11 | 4 | 5 | 437715.8 | 878199.4 | 178897.9 | 1141927  | 1018417  | 748968.7 | 1150414  | 927092.7 | 872862.4 |
| 8.93965  | 9  | 5 | 4 | 2822883  | 7808631  | 4433485  | 9533149  | 5418037  | 7022229  | 15391317 | 7175061  | 3980054  |
| 9.447983 | 12 | 5 | 4 | 1731726  | 18173805 | 5414904  | 16254559 | 5620154  | 25192050 | 18682069 | 21153323 | 14281834 |
| 9.992233 | 10 | 5 | 5 | 792378.7 | 1565637  | 856378.2 | 1835468  | 682911.8 | 809972.8 | 2484007  | 2481644  | 1247898  |
| 9.3494   | 7  | 4 | 2 | 508970.4 | 2796282  | 1396430  | 2234760  | 1800452  | 3851127  | 805370.5 | 4019445  | 3422898  |
| 10.29105 | 10 | 5 | 5 | 605710.2 | 2203890  | 458793.1 | 2391271  | 606081.4 | 2293199  | 2831399  | 2350522  | 1620598  |
| 20.043   | 9  | 4 | 5 | 3515359  | 26879667 | 2802762  | 24402636 | 9385556  | 30162515 | 25083469 | 23051285 | 28150827 |
| 31.28017 | 4  | 3 | 1 | 150729.8 | 844560.4 | 322566.6 | 738292.8 | 287640   | 1236112  | 1011072  | 857309.6 | 748998.8 |
| 9.297883 | 3  | 3 | 0 | 454428.6 | 757950.4 | 239599.3 | 552355.4 | 777577.6 | 591643.5 | 1128801  | 548631.5 | 861869.2 |
| 10.94443 | 6  | 2 | 4 | 977345.4 | 2591970  | 949992.6 | 2293776  | 752526.1 | 3812262  | 3134982  | 1606461  | 1677593  |
| 9.983433 | 11 | 5 | 5 | 734361.3 | 2494853  | 383529.5 | 2914239  | 1608889  | 2779814  | 2876616  | 2377270  | 1906571  |
| 41.20117 | 9  | 1 | 3 | 379659.6 | 4731409  | 710480.5 | 4200279  | 1990257  | 4699134  | 4469521  | 4444866  | 5943388  |

|          |    |   |   |          |          |          |          |          |          |          |          |          |
|----------|----|---|---|----------|----------|----------|----------|----------|----------|----------|----------|----------|
| 10.9645  | 8  | 3 | 5 | 850189.9 | 2392804  | 763111.4 | 2085054  | 992118.7 | 1851193  | 2483409  | 1523557  | 2605338  |
| 11.29373 | 8  | 3 | 5 | 176732.9 | 473832.5 | 127716.7 | 551049.9 | 281809   | 361735.4 | 321850.1 | 497316.9 | 600737.3 |
| 10.95835 | 10 | 5 | 5 | 523792.1 | 1374110  | 293729.6 | 1497227  | 405171.5 | 1489209  | 1029501  | 1178379  | 1381330  |
| 9.912633 | 7  | 4 | 3 | 1222030  | 3082844  | 919552.9 | 2580665  | 1800070  | 2218954  | 2104746  | 4297876  | 3453282  |
| 9.203483 | 4  | 1 | 3 | 919178.7 | 922477   | 580766   | 1325471  | 1501111  | 1221132  | 1565722  | 1213372  | 277059   |
| 9.880683 | 10 | 5 | 5 | 1321071  | 6715338  | 1020047  | 7136711  | 1378700  | 6502638  | 6033027  | 5528472  | 7950480  |
| 9.960467 | 10 | 5 | 5 | 1895189  | 3821302  | 839276.8 | 4413880  | 2212122  | 4595496  | 4167492  | 4478788  | 3139276  |
| 10.97857 | 6  | 3 | 3 | 484107.5 | 1236468  | 616284.3 | 1034003  | 551250.5 | 1229007  | 2259362  | 970993.8 | 1107617  |
| 26.27867 | 4  | 3 | 1 | 67249.88 | 310960.8 | 78760.49 | 351763.5 | 144717.9 | 219543.5 | 413107.4 | 247325.6 | 320490   |
| 9.859983 | 10 | 5 | 5 | 1319799  | 4786537  | 529136   | 5571029  | 3047453  | 5474672  | 5204047  | 4210885  | 4509820  |
| 10.96997 | 8  | 4 | 4 | 397706   | 1150979  | 544571.7 | 974541.4 | 472073.7 | 784649.7 | 755286.8 | 783699   | 1467728  |
| 9.554967 | 16 | 5 | 5 | 6758126  | 59381308 | 34993606 | 48398869 | 27987939 | 98253716 | 8085887  | 85148586 | 53921212 |
| 9.338567 | 6  | 3 | 3 | 561588.6 | 828378.8 | 624178.7 | 621861.1 | 568334.4 | 0        | 641882.1 | 818562.1 | 945560.2 |
| 9.43325  | 7  | 3 | 4 | 3488847  | 13001613 | 4222421  | 17154967 | 15920710 | 11282022 | 15706621 | 15277864 | 16397742 |
| 42.04967 | 5  | 1 | 3 | 260876.2 | 5771544  | 1006799  | 5346945  | 1405823  | 6391308  | 6218104  | 6053789  | 3983241  |
| 9.932033 | 7  | 3 | 4 | 1389074  | 3046107  | 962679.6 | 3998025  | 3650522  | 4035523  | 1718481  | 3925433  | 2624130  |
| 9.9847   | 10 | 5 | 5 | 3604612  | 6933909  | 3223149  | 5763836  | 3536166  | 9861181  | 8128598  | 7748048  | 7524713  |
| 29.9215  | 10 | 5 | 5 | 555482.8 | 2279736  | 741773.2 | 2699395  | 1519112  | 1628151  | 2668001  | 2170392  | 1587377  |
| 23.3515  | 4  | 1 | 3 | 98379.11 | 314821.6 | 101930   | 371232.7 | 203377   | 184139.2 | 330072.6 | 278294.2 | 315407.4 |
| 10.00998 | 5  | 3 | 2 | 822621.6 | 1720148  | 823275.8 | 2041118  | 1020928  | 2212138  | 641981.1 | 2517236  | 2184360  |
| 26.02467 | 9  | 5 | 4 | 203738.6 | 761125.7 | 195039.7 | 894345.2 | 496681.5 | 999501.4 | 683417.3 | 748613.4 | 489350.5 |
| 28.31717 | 5  | 1 | 4 | 101206.3 | 360407   | 229751.7 | 457845.1 | 324024.7 | 674613.2 | 247428.3 | 61374.7  | 461512.9 |
| 30.89133 | 9  | 4 | 5 | 374835.3 | 1768660  | 638960.6 | 1525161  | 763798.9 | 1546190  | 1550572  | 1114628  | 1811372  |
| 14.53105 | 10 | 5 | 5 | 158535.1 | 683443.7 | 174877.9 | 761164.4 | 263589.2 | 539809.8 | 701749.2 | 473534.9 | 827508.2 |
| 9.960467 | 6  | 3 | 3 | 983033.9 | 1331827  | 615445.7 | 1797372  | 1755110  | 1305303  | 546480   | 1208769  | 1327364  |
| 10.9645  | 10 | 5 | 5 | 638898.8 | 3033280  | 541177.6 | 2823806  | 663923.1 | 3541584  | 3580168  | 2384552  | 2594910  |
| 9.93625  | 5  | 2 | 3 | 1284634  | 1135188  | 474540.9 | 1456539  | 1197593  | 1553163  | 1564046  | 1278618  | 515054.7 |
| 9.842    | 8  | 5 | 3 | 617812.9 | 1844251  | 188622.2 | 1987648  | 541444.3 | 1596502  | 1832701  | 1785678  | 2119049  |
| 9.864767 | 6  | 4 | 2 | 714844.2 | 1975212  | 919913.6 | 2234757  | 510490.5 | 2978667  | 1616094  | 1630007  | 804574.4 |
| 11.30818 | 5  | 3 | 2 | 251651.3 | 802231.2 | 131805.8 | 1026815  | 877594.8 | 1011669  | 851450.3 | 738629.3 | 712952.6 |
| 44.26467 | 5  | 2 | 3 | 576299.3 | 8606651  | 2186826  | 7708438  | 2949283  | 10016057 | 10087393 | 5120720  | 10049230 |
| 10.94443 | 5  | 3 | 2 | 343193.8 | 1003847  | 144979.1 | 910782.7 | 344986.9 | 1000875  | 1100973  | 762065.2 | 1026293  |
| 10.9645  | 10 | 5 | 5 | 270173.8 | 954540.7 | 224693.3 | 875781.2 | 232347.4 | 1052140  | 1263715  | 762947.2 | 710982.4 |
| 8.801817 | 10 | 5 | 5 | 478002   | 2722311  | 695939   | 2408139  | 1075095  | 2716421  | 3742442  | 2117535  | 2044801  |
| 10.02963 | 5  | 1 | 4 | 610500.6 | 1476482  | 523342.5 | 1282014  | 601800.9 | 2083320  | 1436797  | 1834472  | 1305132  |

|          |    |   |   |          |          |          |          |          |          |          |          |          |
|----------|----|---|---|----------|----------|----------|----------|----------|----------|----------|----------|----------|
| 10.93618 | 7  | 4 | 3 | 211056.6 | 894628.2 | 361560   | 776873.7 | 320349.7 | 1328472  | 1006882  | 613760.8 | 439506.5 |
| 10.77167 | 5  | 2 | 3 | 4915497  | 5576846  | 5818465  | 3614371  | 5570755  | 14678801 | 1233165  | 1037832  | 8024392  |
| 9.856867 | 10 | 5 | 5 | 2564649  | 12645117 | 3899492  | 11449082 | 2961702  | 15897254 | 11846263 | 11546086 | 7095378  |
| 9.999217 | 10 | 5 | 5 | 3817083  | 9138243  | 3478974  | 7830248  | 4086376  | 12289533 | 12787207 | 4891980  | 6469255  |
| 9.992233 | 10 | 5 | 5 | 357758.2 | 1231530  | 398856.7 | 1080244  | 475494.1 | 1230618  | 1879824  | 1066537  | 799957.2 |
| 10.95055 | 6  | 2 | 4 | 361676.8 | 1011189  | 604484.8 | 810153.7 | 562295.6 | 398592.3 | 378479   | 1186986  | 1342011  |
| 9.992233 | 8  | 4 | 4 | 1482496  | 1884639  | 1704382  | 1415238  | 837986.3 | 1092268  | 1951979  | 713493.1 | 4809841  |
| 10.008   | 9  | 5 | 4 | 955707.1 | 1351213  | 398268.6 | 1507501  | 502154.8 | 1431807  | 1851568  | 1207682  | 771012.8 |
| 9.880683 | 10 | 5 | 5 | 1961832  | 7571648  | 3757064  | 8847170  | 3657128  | 6749152  | 4747095  | 7137599  | 14044547 |
| 9.994767 | 10 | 5 | 5 | 498105.1 | 997080.4 | 402848.6 | 1175995  | 610041.3 | 1100685  | 1484358  | 1235612  | 589885   |
| 10.9645  | 10 | 5 | 5 | 482640.5 | 1804582  | 528291.4 | 1642028  | 406628.4 | 2474567  | 2240523  | 1381752  | 1282274  |
| 9.94455  | 8  | 5 | 3 | 701754.7 | 1360649  | 414575.8 | 1176466  | 628273.7 | 1889599  | 1714522  | 1181920  | 972134.4 |
| 44.36533 | 14 | 2 | 5 | 379849.3 | 4524096  | 721582.4 | 3706713  | 3171731  | 5795865  | 4131885  | 4180292  | 4413987  |
| 9.30295  | 10 | 5 | 4 | 854748.3 | 2206611  | 991740.7 | 2748395  | 1961208  | 2163540  | 1397650  | 2347340  | 1336468  |
| 9.514733 | 8  | 2 | 4 | 619240.4 | 1465811  | 288082.9 | 1828588  | 1413255  | 1767284  | 1146459  | 1689886  | 1178827  |
| 9.419733 | 12 | 5 | 5 | 3789997  | 39273568 | 10304908 | 43169325 | 12255314 | 51729987 | 40672182 | 46304071 | 29070797 |
| 10.05805 | 11 | 5 | 5 | 5276210  | 33392098 | 1628378  | 34913553 | 5855053  | 32890268 | 31019307 | 35227027 | 34551101 |
| 9.94455  | 11 | 5 | 5 | 1587398  | 3165437  | 372551.4 | 2928206  | 881914.6 | 3470727  | 2701439  | 3157050  | 2907918  |
| 23.26217 | 10 | 5 | 5 | 3983910  | 18012185 | 3719765  | 16682169 | 4014951  | 14520790 | 19451356 | 15108165 | 17298909 |
| 9.8445   | 7  | 4 | 3 | 619434.1 | 2198515  | 525419.1 | 1863892  | 1244101  | 2459039  | 1601438  | 2290102  | 2887345  |
| 9.522017 | 8  | 4 | 4 | 710038.9 | 3585436  | 1273345  | 3147188  | 1278526  | 5793209  | 2720476  | 3469382  | 2751515  |
| 9.8445   | 10 | 5 | 5 | 4722321  | 19824047 | 5849043  | 16901668 | 10369109 | 19775478 | 19947597 | 13052667 | 17317540 |
| 10.96997 | 6  | 4 | 2 | 712559.2 | 1387110  | 1805600  | 1947914  | 1432615  | 197560.2 | 4579222  | 483174.9 | 926046.8 |
| 20.17333 | 13 | 5 | 5 | 782999   | 4740588  | 952828.7 | 4252599  | 1742816  | 5058619  | 6156135  | 4519339  | 3575712  |
| 10.04747 | 5  | 4 | 1 | 565280.1 | 1276966  | 580108.3 | 1096112  | 465959.9 | 2159734  | 558348.3 | 1319187  | 1056872  |
| 33.61483 | 10 | 5 | 5 | 1761932  | 11972608 | 3544293  | 10896318 | 2644967  | 16677909 | 11142740 | 6829049  | 12888834 |
| 9.842    | 8  | 5 | 3 | 1284238  | 1589062  | 253456.6 | 2097284  | 2001618  | 1759959  | 1144237  | 1724762  | 1627205  |
| 9.8322   | 7  | 3 | 4 | 879171.6 | 1362757  | 358026.1 | 1777492  | 1615409  | 1512914  | 1604840  | 1396235  | 737684.1 |
| 9.43325  | 5  | 4 | 1 | 384578   | 1104555  | 597346.2 | 798457.5 | 1095494  | 1089706  | 1766319  | 333583.8 | 726669.4 |
| 10.9645  | 10 | 5 | 5 | 298033.8 | 1161940  | 254950.3 | 1280957  | 415158.5 | 1487389  | 1377697  | 1057433  | 918528.7 |
| 9.992233 | 6  | 4 | 2 | 717864.1 | 1963682  | 276787.8 | 1764880  | 752205.8 | 1955713  | 2401888  | 1714061  | 2007048  |
| 9.859983 | 10 | 5 | 5 | 3496455  | 13029210 | 1919697  | 12112328 | 3222170  | 14293767 | 12978491 | 11884004 | 15426499 |
| 18.11517 | 10 | 4 | 4 | 14338886 | 49200409 | 88813669 | 25002519 | 42137414 | 6643326  | 2.08E+08 | 5049972  | 9126927  |
| 10.02372 | 5  | 3 | 2 | 1186204  | 1150344  | 1507653  | 1774912  | 2079878  | 342928.2 | 379422   | 3832108  | 448309.2 |
| 9.328967 | 5  | 3 | 2 | 368524   | 2124187  | 856236.7 | 1780698  | 1125585  | 2453079  | 1574008  | 3477720  | 1714035  |

|          |    |   |   |          |          |          |          |          |          |          |          |          |
|----------|----|---|---|----------|----------|----------|----------|----------|----------|----------|----------|----------|
| 10.97857 | 7  | 4 | 3 | 339000.3 | 1017972  | 417802.6 | 898537.9 | 254049.3 | 1089436  | 1679853  | 548820.2 | 881352   |
| 9.856867 | 10 | 5 | 5 | 3959682  | 21255167 | 5233150  | 18580426 | 9579207  | 20043524 | 18041664 | 16198319 | 22306788 |
| 9.848417 | 9  | 5 | 4 | 1999986  | 9767139  | 2702328  | 10520985 | 1469486  | 7205498  | 10648218 | 6674311  | 11477889 |
| 43.89083 | 8  | 4 | 3 | 357721.1 | 6519605  | 1770174  | 7708788  | 4469506  | 7523150  | 4615510  | 8528049  | 4690155  |
| 9.840617 | 5  | 2 | 3 | 1949918  | 3625882  | 745996   | 4788463  | 4569622  | 4556944  | 3419489  | 3856265  | 2512971  |
| 9.379233 | 7  | 4 | 3 | 650285.5 | 1527920  | 784212   | 1261469  | 772222.3 | 2230456  | 273467.8 | 1353864  | 1668498  |
| 30.35167 | 7  | 3 | 4 | 164504.4 | 664326.8 | 190829.6 | 571531.1 | 328130.1 | 472910   | 942089.5 | 504501.6 | 743654.7 |
| 9.419733 | 8  | 5 | 3 | 2717311  | 8994221  | 3052616  | 10332056 | 4568300  | 12316282 | 9659637  | 10813807 | 7767459  |
| 9.94455  | 10 | 5 | 5 | 16732421 | 32822158 | 6820374  | 37233921 | 16508115 | 41139886 | 36697583 | 34366020 | 27555243 |
| 9.93625  | 10 | 5 | 5 | 2778415  | 11186388 | 701463.5 | 10240487 | 3707828  | 10544178 | 10917715 | 11354382 | 12325759 |
| 10.97242 | 5  | 2 | 3 | 142753   | 349325.5 | 138308.8 | 427310.3 | 285703.3 | 521094.3 | 454141.8 | 249822   | 188512.8 |
| 9.842    | 6  | 4 | 2 | 711693.3 | 2065489  | 1136804  | 1667597  | 1188816  | 1654229  | 1370927  | 3811476  | 950306.7 |
| 10.008   | 10 | 5 | 5 | 487472.7 | 1015631  | 125946.1 | 1140223  | 483306.2 | 1168154  | 974742.1 | 1091570  | 1008898  |
| 14.01255 | 3  | 0 | 3 | 39309.84 | 120579.5 | 39156.63 | 107829.5 | 35322.6  | 77546.72 | 183605.6 | 122703.8 | 104054.8 |
| 10.9645  | 8  | 5 | 3 | 872341.8 | 1996792  | 758617.4 | 2473147  | 1778179  | 1999433  | 2782949  | 2595860  | 877427.6 |
| 9.976317 | 5  | 3 | 2 | 1129967  | 1309491  | 754273.6 | 1051030  | 758371.4 | 1554563  | 2467645  | 1150096  | 493449.3 |
| 11.17828 | 8  | 3 | 5 | 322232.7 | 324856.7 | 138667.7 | 456129.1 | 508659.5 | 538741.8 | 301189.8 | 157744.2 | 348048.8 |
| 10.32122 | 9  | 5 | 4 | 1507022  | 7425097  | 2658342  | 6424246  | 3170929  | 10136277 | 10204582 | 6635442  | 5945738  |
| 9.445217 | 8  | 4 | 4 | 1110052  | 7031919  | 2194787  | 6042667  | 3423136  | 9508174  | 8150067  | 6832389  | 7078594  |
| 9.830833 | 8  | 5 | 3 | 1006464  | 3747385  | 1282543  | 3237749  | 1668456  | 3945223  | 5848816  | 2644001  | 2839612  |
| 9.3919   | 7  | 3 | 4 | 1325195  | 5300160  | 785323.7 | 7006855  | 6755279  | 4959393  | 6148861  | 5276691  | 5927584  |
| 9.88815  | 10 | 5 | 5 | 875954.1 | 3965478  | 625217.3 | 4451091  | 1857534  | 3894988  | 3421698  | 4927689  | 4163355  |
| 10.69952 | 9  | 5 | 4 | 353363.3 | 1413815  | 357097.4 | 1272134  | 463720.1 | 1579430  | 1652244  | 1102475  | 964618.1 |
| 9.3494   | 4  | 3 | 1 | 387755.6 | 2362366  | 1389380  | 2788404  | 1083010  | 1309473  | 3888229  | 1705781  | 1069126  |
| 9.976317 | 10 | 5 | 5 | 1743713  | 3530291  | 1167209  | 4096299  | 2008917  | 4432999  | 4732954  | 3896344  | 2283080  |
| 6.838417 | 6  | 3 | 3 | 2696220  | 1E+08    | 44184358 | 1.16E+08 | 46351122 | 1.13E+08 | 1.67E+08 | 82128728 | 93214998 |
| 10.97857 | 5  | 3 | 2 | 240345   | 598928.8 | 287390.3 | 523429.8 | 103953.5 | 737049.5 | 1019512  | 272651   | 461076.3 |
| 9.388367 | 8  | 4 | 4 | 8420777  | 7343938  | 9751236  | 14461032 | 27111294 | 3628485  | 2002231  | 24747571 | 3551304  |
| 9.904767 | 10 | 5 | 5 | 10409129 | 45721138 | 4780315  | 43521304 | 7685725  | 52163386 | 46684727 | 46158654 | 44801468 |
| 43.35867 | 14 | 5 | 4 | 371259.6 | 5352275  | 2187691  | 4720323  | 1410108  | 3494898  | 4430288  | 3472479  | 7204084  |
| 10.97857 | 10 | 5 | 5 | 2151156  | 12548103 | 1958641  | 11772741 | 2541006  | 12983827 | 15645483 | 10404875 | 11886099 |
| 44.62417 | 8  | 4 | 3 | 330091.6 | 4951709  | 1021804  | 4564036  | 1239129  | 6008709  | 5263088  | 3979529  | 5738115  |
| 9.061    | 10 | 5 | 5 | 6720059  | 34639991 | 12977470 | 30127774 | 13493646 | 38145772 | 54821384 | 32075902 | 27572222 |
| 11.52312 | 6  | 3 | 3 | 113034.5 | 266319.8 | 48649.54 | 243424.2 | 80663.31 | 237907.2 | 297967.7 | 220736.7 | 239100.9 |
| 26.0395  | 7  | 5 | 2 | 204558.8 | 2001693  | 941127.2 | 1687444  | 902928.5 | 1260863  | 2604163  | 906787.8 | 2038760  |

|          |    |   |   |          |          |          |          |          |          |          |          |          |
|----------|----|---|---|----------|----------|----------|----------|----------|----------|----------|----------|----------|
| 9.94455  | 5  | 2 | 3 | 1381552  | 1072529  | 732119.2 | 1403661  | 1151786  | 1748653  | 0        | 1689031  | 1219614  |
| 26.0395  | 10 | 5 | 5 | 695095.9 | 6798464  | 2618815  | 5830036  | 3045866  | 5116217  | 10115806 | 3398334  | 7191339  |
| 10.94962 | 6  | 3 | 3 | 276825.6 | 1155775  | 538808.1 | 1015905  | 171160.2 | 1136670  | 634839.9 | 717337.4 | 1314422  |
| 9.928667 | 10 | 5 | 4 | 3435864  | 16736699 | 5066653  | 14501193 | 7708174  | 14230822 | 12849620 | 12846056 | 24455492 |
| 20.05633 | 9  | 4 | 5 | 747228.4 | 3253593  | 587246.3 | 3758671  | 1952761  | 3440966  | 3450230  | 4021770  | 2838425  |
| 10.00385 | 5  | 2 | 3 | 187061.3 | 337683.3 | 224610.8 | 272846   | 145200.1 | 211677.2 | 61265.56 | 294128.4 | 624587.5 |
| 21.2265  | 6  | 3 | 3 | 199713   | 776108.3 | 593569.7 | 1029800  | 864126.1 | 576275.6 | 1562557  | 250830.2 | 259092.5 |
| 10.00098 | 10 | 5 | 5 | 1017508  | 2657533  | 1192363  | 3111047  | 1455495  | 2976119  | 4343566  | 2954267  | 1564115  |
| 33.54333 | 10 | 5 | 5 | 417706   | 3031134  | 962505   | 2739741  | 728733.2 | 4114433  | 2980640  | 1523834  | 3537688  |
| 39.05733 | 9  | 3 | 4 | 311128.8 | 5362689  | 3499704  | 4431834  | 1461300  | 4381025  | 11297745 | 4894289  | 4244073  |
| 30.209   | 7  | 3 | 4 | 210706.7 | 817470.6 | 713777.5 | 600970.4 | 544481.2 | 1542395  | 469829.2 | 191545.8 | 245785.1 |
| 9.032483 | 9  | 4 | 5 | 610035.4 | 1299360  | 185706.8 | 1226811  | 236946.1 | 1363195  | 1567218  | 1275094  | 1061144  |
| 20.85783 | 10 | 5 | 5 | 289184.3 | 863441.7 | 274585.5 | 784398.4 | 176746.1 | 1306229  | 676094.3 | 736302.6 | 951005.8 |
| 19.446   | 6  | 4 | 2 | 413318.1 | 5425638  | 2947910  | 6505254  | 3383796  | 10506069 | 5503508  | 3504614  | 3724704  |
| 12.4135  | 10 | 5 | 5 | 985182   | 7067500  | 2445765  | 8309299  | 4482859  | 6771716  | 5764823  | 4953819  | 11245744 |
| 10.95835 | 10 | 5 | 5 | 519921.8 | 2192358  | 552282.9 | 2017120  | 475263.1 | 2706614  | 2722457  | 1716841  | 1529325  |
| 42.12183 | 7  | 4 | 2 | 308893.2 | 5434833  | 2233132  | 4842727  | 918047.7 | 4680039  | 7683640  | 3053524  | 7910278  |
| 9.3735   | 4  | 3 | 1 | 683870.3 | 3242224  | 638947.5 | 2966355  | 946235.6 | 4285798  | 2780238  | 3417404  | 2946005  |
| 9.91875  | 8  | 4 | 4 | 1358537  | 2940038  | 1158531  | 2504487  | 1391744  | 2636168  | 2124587  | 3718034  | 1705720  |
| 9.331383 | 9  | 5 | 4 | 2819031  | 4016075  | 3329685  | 3112159  | 1627826  | 2854046  | 1523411  | 1955421  | 4027291  |
| 9.8445   | 10 | 5 | 5 | 1537182  | 4944285  | 1023923  | 5573965  | 2360112  | 6174337  | 5889271  | 4367465  | 3847035  |
| 10.02042 | 5  | 1 | 3 | 1.82E+08 | 4.34E+08 | 2.72E+08 | 2.98E+08 | 4.9E+08  | 4.53E+08 | 1642088  | 6.38E+08 | 6.88E+08 |
| 10.01333 | 7  | 4 | 3 | 7.48E+08 | 1.58E+09 | 3.51E+09 | 2.84E+09 | 3.88E+09 | 7.86E+09 | 5230932  | 16361179 | 9087543  |
| 42.395   | 5  | 3 | 2 | 302774.8 | 4638290  | 1171492  | 4201018  | 1391301  | 5973060  | 3769038  | 5868289  | 3758317  |
| 9.447733 | 5  | 2 | 3 | 640572.5 | 4566900  | 3293314  | 3579459  | 2440060  | 1119463  | 1213326  | 8040211  | 7382206  |
| 41.87717 | 9  | 3 | 2 | 238116   | 2838077  | 743237.3 | 3055126  | 506037.1 | 2911615  | 2685543  | 2030853  | 4035054  |
| 9.55155  | 9  | 4 | 5 | 436449.5 | 979016.3 | 240368.1 | 857029.5 | 440850.1 | 1113527  | 1287583  | 953458.7 | 892703.9 |
| 10.94962 | 5  | 3 | 2 | 15615686 | 16934242 | 24579335 | 25506772 | 25901067 | 20374411 | 2893287  | 1603170  | 1296681  |
| 9.999217 | 10 | 5 | 5 | 453881.5 | 857201.4 | 342683.4 | 984286.3 | 403033.4 | 1130125  | 1227754  | 923201.3 | 533266   |
| 10.97857 | 10 | 5 | 5 | 1971586  | 8002613  | 1366938  | 7598078  | 974771.4 | 7342506  | 9590205  | 6036979  | 8761780  |
| 9.40255  | 8  | 4 | 4 | 708828   | 1174312  | 426178.7 | 962434.9 | 762519.1 | 1378890  | 1564269  | 746607.4 | 681172.4 |
| 9.716267 | 4  | 1 | 3 | 8397830  | 30069078 | 17272363 | 21882571 | 29073397 | 36611219 | 28346127 | 942670   | 40843931 |
| 9.338567 | 7  | 4 | 3 | 629513.8 | 990110.4 | 738368.5 | 764460.5 | 579953.1 | 138400.7 | 788884.1 | 861194.1 | 989494.5 |
| 26.29733 | 6  | 4 | 2 | 265354.1 | 2492157  | 930614   | 2178250  | 920794   | 1967233  | 4109868  | 1824032  | 2147396  |
| 9.8445   | 6  | 3 | 3 | 505346.9 | 1142563  | 502754.2 | 992643.1 | 367966.6 | 1388026  | 1739446  | 785686.4 | 481902.1 |

|          |    |   |   |          |          |          |          |          |          |          |          |          |
|----------|----|---|---|----------|----------|----------|----------|----------|----------|----------|----------|----------|
| 9.9677   | 10 | 5 | 5 | 3315293  | 18365608 | 2721006  | 17060792 | 4653011  | 22544663 | 19005063 | 17929171 | 15187068 |
| 9.992233 | 9  | 4 | 5 | 1091740  | 1854240  | 831944.1 | 1594026  | 695700.6 | 1681807  | 2243616  | 1465320  | 3040484  |
| 10.99268 | 7  | 4 | 3 | 412948.2 | 1306287  | 611404   | 1478404  | 364492.8 | 1345484  | 2276937  | 1004819  | 628231.6 |
| 12.42698 | 10 | 5 | 5 | 419593.4 | 2772049  | 1292351  | 3364589  | 2085515  | 2781632  | 2339898  | 1304896  | 4847346  |
| 41.86267 | 8  | 3 | 4 | 320020.8 | 4990044  | 1993411  | 6013206  | 3718831  | 5447913  | 5574695  | 4953822  | 1763326  |
| 9.842    | 7  | 3 | 4 | 672357.2 | 1970082  | 1025447  | 1600160  | 1154187  | 1768647  | 641818.9 | 1758262  | 2192767  |
| 11.3403  | 5  | 3 | 2 | 255276.6 | 884448.3 | 580487.7 | 1135324  | 865026.6 | 1347959  | 507163.4 | 1643634  | 630495.6 |
| 9.979667 | 8  | 5 | 3 | 389516.3 | 1307832  | 439908.6 | 1074206  | 856156.2 | 1725765  | 1736682  | 926975.1 | 790349.6 |
| 9.8322   | 8  | 5 | 3 | 917986.1 | 3089302  | 1683900  | 2477055  | 1923073  | 1442569  | 1883133  | 2382686  | 4456074  |
| 20.15883 | 10 | 5 | 5 | 271466.1 | 1401517  | 428822.3 | 1272292  | 325570.7 | 964028.8 | 2032153  | 1064948  | 1580215  |
| 44.351   | 9  | 5 | 2 | 420331.9 | 3968471  | 1838081  | 4484221  | 1086504  | 4498902  | 4116726  | 5667987  | 4715159  |
| 9.992233 | 9  | 5 | 4 | 665685.3 | 2512471  | 601086.5 | 2241924  | 947924.5 | 2422846  | 3363609  | 2318197  | 1721836  |
| 9.9847   | 11 | 5 | 5 | 2945125  | 11160856 | 1897539  | 10509756 | 1950572  | 13288026 | 12183242 | 11760032 | 10137070 |
| 8.731583 | 4  | 1 | 3 | 63557.27 | 142051.5 | 82727.55 | 110973.2 | 99996.16 | 135948.1 | 278578.5 | 70900.83 | 143070   |
| 9.999217 | 10 | 5 | 5 | 680467.8 | 2050479  | 538330.3 | 1861779  | 576790.1 | 2585968  | 2166255  | 2518585  | 1408860  |
| 9.887133 | 9  | 4 | 5 | 4300904  | 5311696  | 3973032  | 8246798  | 11299981 | 4175219  | 3420820  | 3829166  | 2775735  |
| 9.67     | 9  | 5 | 4 | 446837.3 | 898719   | 274916.6 | 810025.6 | 248875.9 | 1035060  | 1217771  | 1016894  | 653631.9 |
| 9.37735  | 9  | 5 | 4 | 884310.1 | 3744163  | 1447924  | 4970335  | 4773148  | 1504750  | 4264392  | 4126216  | 3397740  |
| 9.842    | 9  | 4 | 5 | 903727.1 | 2895307  | 694383.7 | 2656176  | 719882.4 | 3684784  | 2495441  | 3120473  | 3260910  |
| 44.9835  | 7  | 3 | 4 | 594099.6 | 4038565  | 2149760  | 4617254  | 1027261  | 794119.5 | 3106341  | 5820823  | 4512119  |
| 8.902983 | 8  | 5 | 3 | 206688.9 | 580537.6 | 364739.3 | 681127.4 | 199865.8 | 652332.1 | 1175643  | 475570.3 | 343912.2 |
| 10.90553 | 3  | 0 | 3 | 167371.2 | 274563.4 | 76762.24 | 327614.8 | 202929.3 | 215539.1 | 394743.9 | 234725.4 | 220153.6 |
| 9.920517 | 5  | 3 | 2 | 753239.2 | 2355885  | 1437594  | 2793621  | 1127678  | 3868115  | 1281991  | 1451538  | 1192432  |
| 39.791   | 6  | 3 | 2 | 546576.2 | 7982667  | 2142249  | 8541087  | 790037.3 | 9225136  | 9590031  | 5999911  | 5321759  |
| 9.94405  | 12 | 5 | 5 | 6350802  | 30091340 | 16337567 | 34417079 | 6967139  | 35500009 | 1194167  | 38906890 | 40428017 |
| 10.01477 | 10 | 5 | 5 | 1002907  | 2891561  | 776031.1 | 2505444  | 1397416  | 3287205  | 3997951  | 2542631  | 1967382  |
| 9.872917 | 10 | 5 | 5 | 2716757  | 15540769 | 1700752  | 16493202 | 3538119  | 15610526 | 13208685 | 15867795 | 17948405 |
| 9.94455  | 10 | 5 | 5 | 1891347  | 7544640  | 1373180  | 6831829  | 2606840  | 9016489  | 8286714  | 6286122  | 5886849  |
| 37.18483 | 6  | 2 | 3 | 333474.6 | 5380028  | 2229312  | 4754705  | 1327404  | 4938976  | 3159265  | 9140156  | 4755649  |
| 9.848417 | 9  | 5 | 4 | 786855   | 3300175  | 1303790  | 2760410  | 1834467  | 4727882  | 4573530  | 2566547  | 1739359  |
| 9.8322   | 7  | 3 | 4 | 442661.7 | 1035886  | 372578.9 | 1148297  | 285683.2 | 1543430  | 1202934  | 957777   | 530573.3 |
| 9.976317 | 8  | 3 | 5 | 994173   | 1435304  | 634210.2 | 1163411  | 938144.2 | 1625419  | 2327807  | 1280136  | 1372845  |
| 9.338567 | 5  | 3 | 2 | 669022.5 | 1627596  | 566193.3 | 1431312  | 595975.7 | 1734817  | 774522.2 | 2022156  | 1399702  |
| 9.3735   | 8  | 4 | 4 | 1004045  | 9097675  | 1786442  | 8196989  | 3272795  | 6352324  | 8950157  | 9407135  | 9447568  |
| 18.646   | 5  | 2 | 3 | 64953.16 | 271671.7 | 88359.96 | 234846.9 | 125625.2 | 397942.3 | 218873.2 | 282902.5 | 163046   |

|          |    |   |   |          |          |          |          |          |          |          |          |          |
|----------|----|---|---|----------|----------|----------|----------|----------|----------|----------|----------|----------|
| 10.00385 | 8  | 4 | 4 | 221167.7 | 729366.2 | 272513.5 | 642959.3 | 238183.1 | 371499.1 | 926026.6 | 672546.6 | 611097.7 |
| 10.96015 | 5  | 3 | 2 | 972705.9 | 2509839  | 1112010  | 2194132  | 700684.3 | 3828131  | 3000566  | 2552975  | 793048.5 |
| 9.979667 | 10 | 5 | 4 | 1883564  | 7551448  | 990081.8 | 9457333  | 7635274  | 8103452  | 8690582  | 7916432  | 6712712  |
| 9.845483 | 9  | 5 | 4 | 741028.8 | 3223097  | 747454.1 | 2839720  | 1401565  | 3117145  | 3029826  | 2920355  | 2545985  |
| 39.63283 | 7  | 2 | 4 | 333085.9 | 4112284  | 1365949  | 3599525  | 1659163  | 6228054  | 4063024  | 4039637  | 3819386  |
| 23.0885  | 10 | 5 | 5 | 3643222  | 14261909 | 16788971 | 9134175  | 13407574 | 6519217  | 43154745 | 5047221  | 2105687  |
| 10.474   | 11 | 5 | 5 | 1039153  | 3268394  | 646123.3 | 3546324  | 964387.5 | 3767872  | 4114074  | 3066327  | 2622382  |
| 28.836   | 6  | 3 | 3 | 570064.3 | 4280845  | 3181833  | 3346653  | 2270812  | 1672439  | 4390434  | 524042.4 | 7424593  |
| 10.45545 | 9  | 5 | 4 | 1279136  | 3148794  | 740429.8 | 3566042  | 1558679  | 4076528  | 3741457  | 2978571  | 2331329  |
| 44.466   | 4  | 3 | 1 | 421162.3 | 5545510  | 3193066  | 6348373  | 674711.8 | 9993299  | 1427076  | 3804086  | 6185108  |
| 10.9645  | 6  | 3 | 3 | 470273.6 | 1915257  | 524325.1 | 1744815  | 488426.3 | 1491283  | 1716060  | 1611789  | 1955012  |
| 9.840617 | 8  | 3 | 5 | 740536.2 | 1578679  | 625230.4 | 1416972  | 223036.8 | 2330134  | 2099485  | 1169095  | 840856.2 |
| 26.9265  | 9  | 5 | 4 | 597542.2 | 4072228  | 2587098  | 3305368  | 1906422  | 2362080  | 5645184  | 536455   | 4877576  |
| 31.7245  | 4  | 3 | 1 | 298791.4 | 1951400  | 1330341  | 1612195  | 393343.3 | 1841027  | 520714.6 | 1807267  | 4131806  |
| 10.10793 | 10 | 5 | 5 | 2188125  | 8715887  | 1957988  | 9649659  | 3362266  | 8020409  | 11314530 | 9763819  | 8390465  |
| 44.98333 | 5  | 2 | 3 | 439150.9 | 2690867  | 724259.6 | 2437420  | 782604.7 | 3086201  | 3288381  | 2431709  | 3114144  |
| 26.83933 | 6  | 4 | 2 | 90446.56 | 282099.2 | 156830.9 | 229371.9 | 156970.5 | 172571.2 | 467987.3 | 87041.33 | 283393   |
| 9.3735   | 6  | 2 | 4 | 446237.2 | 4324899  | 677631.3 | 3891275  | 1654828  | 4505407  | 3166624  | 4360142  | 4703599  |
| 28.849   | 8  | 4 | 4 | 2250680  | 19002672 | 15044105 | 14714940 | 9749484  | 5028793  | 21642962 | 1800893  | 33382268 |
| 9.8445   | 4  | 1 | 3 | 1083028  | 3949608  | 1409472  | 3445348  | 1585704  | 5289970  | 1587303  | 4674075  | 4110471  |
| 33.91733 | 10 | 5 | 5 | 1874944  | 12687210 | 2457801  | 13820646 | 4042503  | 11929843 | 16476104 | 9843402  | 11842030 |
| 21.99567 | 8  | 5 | 3 | 130294.7 | 556580.3 | 139444   | 490973.1 | 235444.8 | 530591.9 | 702310   | 361775.8 | 507221.5 |
| 9.650367 | 10 | 5 | 5 | 399480.3 | 1770080  | 812645.6 | 1549588  | 424315.7 | 2725799  | 2331680  | 1595762  | 608393.5 |
| 30.237   | 5  | 3 | 2 | 425695.7 | 4196045  | 3425176  | 5430263  | 3910908  | 8082348  | 1734356  | 1526895  | 7807064  |
| 9.262217 | 8  | 4 | 4 | 8555431  | 42678946 | 20222095 | 55138039 | 47395140 | 47851185 | 12709300 | 33778564 | 53879237 |
| 9.999217 | 8  | 4 | 4 | 1021167  | 1224137  | 591333.7 | 1496554  | 973716.5 | 1725784  | 1936648  | 1066363  | 864048.9 |
| 9.960467 | 5  | 3 | 2 | 692009.6 | 1085816  | 329544.3 | 1217950  | 447101.4 | 1391642  | 1152750  | 1275694  | 537988.3 |
| 12.39772 | 8  | 4 | 4 | 272225.3 | 1533644  | 501532   | 1348599  | 597336.8 | 2180704  | 1618159  | 1382940  | 802248.5 |
| 9.992233 | 10 | 5 | 5 | 1804105  | 3381300  | 1525885  | 2937957  | 1068408  | 3171225  | 6010163  | 2759600  | 2060277  |
| 9.01065  | 5  | 3 | 2 | 631712.4 | 986080.5 | 581432.9 | 1597419  | 2431437  | 1238990  | 1808488  | 973371.8 | 608414.1 |
| 9.976317 | 10 | 5 | 5 | 1111578  | 2171926  | 934339.7 | 2612256  | 1587205  | 2883721  | 3141802  | 2462865  | 1270521  |
| 29.615   | 8  | 5 | 3 | 445047.4 | 2577759  | 1670711  | 2076587  | 1290356  | 1235081  | 2832401  | 509789.6 | 4012969  |
| 9.43325  | 8  | 4 | 3 | 498744.8 | 3349956  | 1507826  | 2765191  | 1947907  | 5203846  | 3358705  | 2595938  | 4291325  |
| 40.71183 | 5  | 4 | 1 | 275725.6 | 3828148  | 578895.8 | 3975758  | 181903.3 | 4565396  | 3997826  | 3429603  | 4063903  |
| 9.445217 | 11 | 5 | 5 | 1516292  | 9451977  | 3050428  | 8130141  | 4635816  | 10544877 | 13323382 | 10563901 | 5594848  |



|          |    |   |   |          |          |          |          |          |          |          |          |          |
|----------|----|---|---|----------|----------|----------|----------|----------|----------|----------|----------|----------|
| 9.8445   | 10 | 5 | 5 | 4212633  | 13812858 | 641920.6 | 15310030 | 6053573  | 14898127 | 13692289 | 13724829 | 13195811 |
| 9.45945  | 13 | 5 | 4 | 674768.3 | 4684949  | 2367182  | 3821662  | 2770433  | 6503166  | 7045970  | 4952598  | 3798452  |
| 9.481367 | 17 | 5 | 5 | 2232087  | 14669451 | 9085763  | 12043567 | 6271061  | 24419036 | 22834450 | 2963632  | 9097055  |
| 9.976317 | 6  | 3 | 3 | 1338475  | 3980710  | 1324858  | 3631480  | 587704.2 | 5713722  | 2826832  | 2504785  | 4659063  |
| 32.05617 | 7  | 4 | 3 | 205875.8 | 1045932  | 833662   | 812875.3 | 508914.2 | 473948.7 | 775660.5 | 136795.6 | 1822781  |
| 9.93625  | 10 | 5 | 5 | 4444355  | 16002002 | 2745204  | 14604825 | 5146232  | 20132614 | 17510493 | 14021073 | 13863184 |
| 9.992233 | 10 | 5 | 5 | 486877.7 | 1421859  | 382460   | 1243396  | 642312.4 | 1758468  | 1734560  | 1514698  | 838647.8 |
| 9.388367 | 10 | 5 | 5 | 3575648  | 9335198  | 3691937  | 7915495  | 4714431  | 10430051 | 4364565  | 6761667  | 11786601 |
| 9.8887   | 9  | 4 | 5 | 14320778 | 67341260 | 21629320 | 60157261 | 21336059 | 33751684 | 67018760 | 65490876 | 78149812 |
| 9.976317 | 5  | 3 | 2 | 650112.1 | 1020890  | 390919.8 | 1152816  | 398111.8 | 957625.4 | 882972.9 | 725148.1 | 1703701  |
| 10.008   | 5  | 3 | 2 | 422825.8 | 787449.2 | 280237.4 | 602124.4 | 714104.3 | 562126.7 | 459863.9 | 783172.4 | 1086094  |
| 10.03947 | 8  | 4 | 4 | 1191589  | 1348454  | 1611238  | 2015773  | 2302729  | 391949.8 | 695142   | 4219743  | 681084.6 |
| 16.50507 | 3  | 0 | 3 | 70580.51 | 159616.4 | 54142.49 | 196025.5 | 140683.4 | 179818.7 | 81907.63 | 161454.5 | 144288.2 |
| 11.52297 | 9  | 4 | 5 | 295608.9 | 519724   | 363839.3 | 714604.2 | 727292.3 | 604658.9 | 1108429  | 175155.6 | 317387.4 |
| 10.95835 | 10 | 5 | 5 | 3721946  | 13909824 | 3433111  | 12758371 | 3461263  | 14796415 | 18239914 | 9078791  | 12268544 |
| 9.976317 | 10 | 5 | 5 | 2201785  | 9143342  | 2116435  | 8384281  | 2415953  | 10385669 | 12004869 | 8814504  | 6565919  |
| 9.976317 | 8  | 4 | 4 | 900121.4 | 1093078  | 564403.3 | 945558.9 | 238170.1 | 1057975  | 1055602  | 2028540  | 551654.2 |
| 9.536783 | 5  | 2 | 3 | 843318.1 | 1739670  | 1101241  | 1373649  | 1090606  | 3383619  | 2365121  | 947299.2 | 862394.5 |
| 26.19983 | 10 | 5 | 5 | 353836   | 1711863  | 865627.2 | 1471290  | 520209.3 | 1752922  | 1882351  | 638280.5 | 1293658  |
| 9.859983 | 10 | 5 | 5 | 7221812  | 42316753 | 8580987  | 45064220 | 7857545  | 45236357 | 40773942 | 28471562 | 51216398 |
| 9.952017 | 11 | 5 | 5 | 1041501  | 3888604  | 1011291  | 3591842  | 739780.5 | 5518166  | 4071070  | 3733862  | 3109074  |
| 9.419733 | 6  | 3 | 2 | 539451.8 | 2963847  | 1420505  | 2568273  | 863362.6 | 4243716  | 3430774  | 4133811  | 2049847  |
| 10.008   | 10 | 5 | 5 | 531711.4 | 1740644  | 389657.6 | 1609693  | 395240   | 1815160  | 2207914  | 1938197  | 1182428  |
| 9.872067 | 10 | 5 | 5 | 1631801  | 6362933  | 1344534  | 6812323  | 1349185  | 6663696  | 6200891  | 7385276  | 7424829  |
| 9.856867 | 10 | 5 | 5 | 1441474  | 7553008  | 777130.5 | 7234065  | 1099054  | 6986459  | 7260192  | 8593212  | 8137361  |
| 9.9677   | 5  | 2 | 3 | 529841   | 441938.9 | 369547.1 | 600205.9 | 555503.1 | 173773.9 | 77717.28 | 514367.4 | 1021641  |
| 9.999217 | 10 | 5 | 5 | 1015327  | 3252026  | 996530.7 | 2871748  | 1264459  | 3756655  | 4626434  | 3110141  | 1996367  |
| 42.841   | 5  | 4 | 0 | 302870.3 | 3376410  | 1432351  | 3023736  | 149317.2 | 2618470  | 2137477  | 3515472  | 5780447  |
| 9.920517 | 10 | 5 | 5 | 3335640  | 10674427 | 4263954  | 8998345  | 5666838  | 12595700 | 8020858  | 6336272  | 9316185  |
| 23.747   | 9  | 5 | 4 | 225898.9 | 961636.7 | 179952.9 | 906022.8 | 152377.7 | 678954.9 | 1107701  | 896915.6 | 1018539  |
| 9.960467 | 9  | 5 | 4 | 1194249  | 3900608  | 587755.1 | 3728765  | 427713.6 | 4687739  | 3494563  | 3333950  | 3633495  |
| 8.12655  | 11 | 5 | 4 | 786996.8 | 25085714 | 13938265 | 20149098 | 15641853 | 5983238  | 36603519 | 37334111 | 15051963 |
| 9.40175  | 5  | 3 | 2 | 536692.1 | 1324229  | 790402.3 | 1112907  | 397332.7 | 1213492  | 466283.4 | 1977125  | 683851.2 |
| 10.95055 | 10 | 5 | 5 | 13144583 | 40769758 | 10354985 | 45929707 | 19023776 | 51272764 | 52432128 | 35894102 | 29963925 |
| 9.041133 | 4  | 1 | 3 | 191979.7 | 769472.1 | 307571.6 | 647113.9 | 417173.5 | 440111.9 | 1096095  | 964578.4 | 904231.7 |

|          |    |   |   |          |          |          |          |          |          |          |          |          |
|----------|----|---|---|----------|----------|----------|----------|----------|----------|----------|----------|----------|
| 9.992233 | 9  | 5 | 4 | 546794.6 | 1475969  | 391616.6 | 1681288  | 766682.7 | 1657597  | 1826613  | 1790020  | 1072244  |
| 9.976317 | 9  | 5 | 4 | 1868265  | 1866666  | 531072.7 | 2132392  | 981784.4 | 2096692  | 929932.9 | 2224207  | 2108253  |
| 10.9645  | 9  | 5 | 4 | 435487   | 1286315  | 723956.6 | 1495732  | 511359.2 | 1903744  | 2198999  | 920716.7 | 516261.9 |
| 28.79767 | 3  | 3 | 0 | 125661.9 | 495372.9 | 449425.9 | 367599.7 | 299372.6 | 127402.2 | 455232.2 | 0        | 853882.9 |
| 20.071   | 5  | 3 | 2 | 90015.59 | 417541.4 | 196152.3 | 478102.7 | 166386.8 | 399878   | 616032.8 | 277580.4 | 180581   |
| 8.981583 | 9  | 5 | 4 | 294453.1 | 687237.9 | 244137.1 | 589787.1 | 332928.2 | 941437.1 | 667546.7 | 813397.9 | 291904.2 |
| 44.33667 | 10 | 3 | 3 | 268011.5 | 2504421  | 1070277  | 2803277  | 666674.5 | 2848150  | 2611062  | 3690666  | 762528.2 |
| 9.858833 | 10 | 5 | 5 | 5674583  | 27452201 | 2728659  | 29406252 | 7639803  | 27542071 | 25523537 | 31263094 | 28655561 |
| 9.56645  | 6  | 5 | 1 | 531531.2 | 684758.1 | 173597   | 909212.5 | 905596   | 753441.4 | 950491.7 | 589896.4 | 626298.6 |
| 9.864767 | 10 | 5 | 5 | 1985629  | 13586722 | 706987.6 | 14176779 | 2336833  | 13435975 | 12698010 | 14488374 | 14082427 |
| 9.810767 | 6  | 4 | 2 | 767095.1 | 2172683  | 600580.6 | 1755443  | 1627610  | 2163402  | 1782477  | 2076587  | 3181529  |
| 10.99268 | 9  | 5 | 4 | 212154.7 | 940500.2 | 429746.2 | 803783.2 | 392046.1 | 789248.6 | 791037.6 | 555038.1 | 890198.2 |
| 9.392767 | 9  | 5 | 4 | 1640099  | 3097904  | 1182142  | 4279836  | 4730913  | 3342265  | 2097709  | 1999095  | 3130100  |
| 9.8887   | 11 | 5 | 5 | 1885905  | 3970906  | 715133.1 | 4566614  | 2361664  | 4624862  | 4813304  | 3307345  | 3800762  |
| 9.8322   | 5  | 3 | 2 | 730659.8 | 1649087  | 504560.1 | 1395962  | 937965.2 | 1998429  | 1444316  | 1076556  | 1396706  |
| 9.2585   | 4  | 3 | 0 | 414301.2 | 1250310  | 495015.9 | 1026641  | 805133.9 | 1724324  | 614177.6 | 1675382  | 1379171  |
| 39.60417 | 4  | 3 | 1 | 324763.2 | 4854673  | 1056397  | 4590227  | 283229.6 | 4297637  | 3406876  | 5094508  | 5266870  |
| 40.194   | 5  | 3 | 2 | 270650.1 | 1018287  | 803322   | 802176.2 | 427837.9 | 1224883  | 127858.8 | 1217506  | 2151843  |
| 9.94455  | 9  | 4 | 5 | 2084957  | 4110281  | 1800328  | 3570509  | 1427182  | 6021780  | 5952843  | 2988191  | 3566672  |
| 9.928667 | 6  | 4 | 2 | 1298749  | 6462671  | 1022657  | 5838505  | 2402977  | 6591538  | 6279487  | 4920762  | 6770023  |
| 9.842    | 9  | 5 | 4 | 931879.8 | 3872571  | 1188447  | 3320614  | 2008061  | 3926781  | 3917743  | 2131181  | 3898559  |
| 9.445217 | 12 | 5 | 5 | 2853543  | 18444706 | 7979131  | 15666060 | 8763444  | 25811100 | 23857908 | 21439227 | 14900515 |
| 36.56867 | 9  | 5 | 4 | 109192.8 | 548653.8 | 257481.3 | 476372   | 166113.9 | 530922.5 | 587602.2 | 189268.6 | 913975.5 |
| 9.716267 | 6  | 4 | 2 | 695872.7 | 689768.1 | 308612.6 | 998158   | 1238342  | 1202354  | 739084.7 | 577058.1 | 432001.8 |
| 38.82717 | 6  | 3 | 2 | 315844.7 | 7125028  | 1434897  | 6698705  | 1112447  | 6497270  | 9108534  | 7526518  | 7295744  |
| 9.857683 | 10 | 5 | 5 | 1113235  | 3837907  | 1280372  | 3433955  | 1154418  | 4681886  | 4923845  | 1689072  | 4057799  |
| 9.36565  | 5  | 3 | 2 | 533687.8 | 857098.8 | 810121.9 | 1122061  | 790068.8 | 1200916  | 0        | 0        | 1320060  |
| 10.96    | 9  | 4 | 4 | 264172.8 | 760241.6 | 313571.8 | 648432.8 | 359825.7 | 1145912  | 1028334  | 627313.1 | 598285.7 |
| 10.10142 | 4  | 1 | 3 | 4.7E+08  | 1.63E+09 | 9.85E+08 | 1.18E+09 | 1.63E+09 | 2.48E+09 | 7412643  | 2.34E+09 | 1.77E+09 |
| 10.95835 | 10 | 5 | 5 | 209593.8 | 1191909  | 249278.4 | 1118571  | 188287.6 | 1327236  | 1534992  | 1017495  | 905909.2 |
| 10.5677  | 6  | 3 | 3 | 109271.4 | 257734.5 | 107610.3 | 223699.3 | 97738.31 | 191420.7 | 229535.2 | 208631.6 | 210371.8 |
| 9.976317 | 9  | 5 | 4 | 1010081  | 1312590  | 425704.9 | 1590304  | 1080823  | 1806157  | 1309995  | 1602590  | 1136843  |
| 9.840617 | 6  | 3 | 3 | 1100789  | 3471852  | 1368543  | 3021652  | 1352036  | 2875549  | 2630806  | 5272685  | 4539038  |
| 10.9645  | 10 | 5 | 5 | 377552.3 | 1837219  | 416548.4 | 1716137  | 303662.7 | 2280564  | 2204706  | 1508410  | 1333376  |
| 10.9645  | 10 | 5 | 5 | 7539668  | 21747433 | 4685326  | 24958611 | 12571446 | 26309963 | 27280812 | 19391922 | 17218122 |

|          |    |   |   |          |          |          |          |          |          |          |          |          |
|----------|----|---|---|----------|----------|----------|----------|----------|----------|----------|----------|----------|
| 9.933967 | 9  | 4 | 4 | 2047866  | 5841563  | 730029   | 6332412  | 1917789  | 6398301  | 5663380  | 5920895  | 4696394  |
| 9.880683 | 7  | 5 | 1 | 1110010  | 2268448  | 653962.9 | 1945760  | 1196769  | 2046119  | 1899621  | 2313630  | 3370325  |
| 9.36515  | 5  | 4 | 1 | 932184.5 | 3292360  | 3038592  | 4392926  | 3587913  | 1968735  | 2461444  | 1568518  | 8695452  |
| 9.992233 | 8  | 5 | 3 | 343384.8 | 739477.9 | 283854.9 | 629320.5 | 374389.4 | 983918.5 | 1091275  | 627304.4 | 430214.3 |
| 28.836   | 6  | 2 | 4 | 164254.2 | 1111120  | 888392.6 | 861334.3 | 581454.1 | 371586.3 | 1297463  | 14642.02 | 1857322  |
| 40.51033 | 5  | 2 | 3 | 2991102  | 28114884 | 22875789 | 20676415 | 22140858 | 45376361 | 1621323  | 43237601 | 4586892  |
| 29.299   | 10 | 5 | 5 | 1687818  | 9838216  | 3673256  | 8723449  | 3035996  | 9168471  | 12469878 | 5771882  | 7158958  |
| 9.220933 | 6  | 3 | 3 | 2711435  | 15760825 | 16416428 | 11269874 | 9656209  | 35089039 | 2544366  | 7283209  | 32028073 |
| 36.7645  | 6  | 3 | 1 | 394869.9 | 4996918  | 1065272  | 5426519  | 1490901  | 4484272  | 6782286  | 3976930  | 4779556  |
| 9.960467 | 4  | 3 | 1 | 784276.3 | 995475.9 | 378869.1 | 832629.3 | 580518.3 | 1370901  | 1296263  | 992703.6 | 899568.3 |
| 10.96997 | 5  | 3 | 2 | 341473.3 | 608433.9 | 391211.8 | 731178   | 351194.6 | 242409.8 | 362724.9 | 531776.7 | 656805.3 |
| 9.976317 | 10 | 5 | 5 | 1087927  | 2140088  | 305566.4 | 2447079  | 1238236  | 2480074  | 2285657  | 2301146  | 1846025  |
| 40.81267 | 5  | 2 | 3 | 308665.9 | 3487361  | 1254976  | 3170683  | 419907.9 | 3029436  | 2887189  | 5728759  | 2950473  |
| 10.95602 | 5  | 3 | 2 | 1024701  | 1992359  | 1673433  | 2555487  | 1740097  | 766369.1 | 911891.3 | 651599   | 3613084  |
| 9.904767 | 10 | 5 | 5 | 2125526  | 7890042  | 799655.5 | 7508599  | 1407603  | 7181227  | 7251342  | 8459345  | 8993475  |
| 40.53917 | 5  | 0 | 3 | 345364.6 | 4467935  | 158913.7 | 4973148  | 2077960  | 4568375  | 4295968  | 4650796  | 4516474  |
| 13.33123 | 7  | 2 | 4 | 45885.32 | 169477.1 | 32958.55 | 151609.4 | 67954.39 | 119268.7 | 156103.5 | 182488.9 | 184829   |
| 9.994767 | 10 | 5 | 5 | 677312   | 1773459  | 846967.2 | 2074745  | 975881.6 | 2045332  | 3012203  | 1806796  | 817080.2 |
| 38.66883 | 6  | 2 | 3 | 387830.2 | 4726029  | 2357956  | 5408201  | 1717479  | 4826883  | 4779790  | 1381497  | 8046252  |
| 18.01267 | 5  | 3 | 2 | 142705.1 | 296432.5 | 204569.8 | 242888.3 | 96470.62 | 388928.4 | 156577.4 | 80614.56 | 257622   |
| 10.008   | 7  | 3 | 4 | 267585.4 | 535417.7 | 84741.79 | 484838.3 | 195586.4 | 539282.8 | 632888.5 | 499396   | 413938.7 |
| 9.447617 | 8  | 3 | 4 | 12252288 | 49167364 | 56808877 | 32424174 | 43766254 | 1494387  | 9303929  | 12804803 | 1.16E+08 |
| 9.914217 | 9  | 3 | 5 | 1089066  | 2259541  | 975405.3 | 2937934  | 2673738  | 3710881  | 1926434  | 2585197  | 2006562  |
| 9.983467 | 6  | 3 | 3 | 196232.2 | 418687.5 | 171691.7 | 475717   | 174663.9 | 137199.8 | 587541.8 | 495335.2 | 394002.7 |
| 10.95835 | 10 | 5 | 5 | 534462.9 | 2698034  | 671658   | 2496827  | 541395.2 | 3070568  | 3618007  | 2203932  | 1940709  |
| 10.9645  | 4  | 3 | 1 | 260510.9 | 755211.5 | 244720   | 684107.7 | 181181.1 | 603479.6 | 1162474  | 568771.8 | 802883.9 |
| 17.58367 | 9  | 4 | 5 | 95204.23 | 537547   | 91219.31 | 506706.8 | 96105.63 | 637556.2 | 550814.9 | 392076.7 | 580347.3 |
| 41.8915  | 9  | 3 | 4 | 384539.1 | 4422003  | 1724497  | 4878381  | 876657.5 | 1722597  | 5669906  | 5408987  | 3661920  |
| 24.0985  | 10 | 5 | 5 | 45742084 | 3.88E+08 | 26659613 | 3.73E+08 | 58124240 | 3.83E+08 | 4.33E+08 | 3.67E+08 | 3.69E+08 |
| 9.68775  | 7  | 4 | 3 | 457944   | 421646.1 | 94028.47 | 488762.1 | 265501.8 | 444334.9 | 468641.3 | 541537.6 | 314637   |
| 9.856867 | 10 | 5 | 5 | 3505310  | 22501360 | 3155807  | 20510335 | 7770453  | 21784292 | 21216289 | 19903184 | 21612562 |
| 10.9645  | 10 | 5 | 5 | 521167.7 | 1935793  | 716334.1 | 1717167  | 607122.6 | 2749396  | 2642193  | 1363779  | 1221958  |
| 9.858833 | 7  | 4 | 3 | 6308464  | 3866447  | 1782722  | 5141125  | 5044923  | 3022772  | 2623743  | 3880882  | 2864084  |
| 20.26667 | 10 | 5 | 5 | 29553240 | 2.68E+08 | 30368684 | 2.56E+08 | 41831217 | 2.86E+08 | 3.02E+08 | 2.73E+08 | 2.24E+08 |
| 9.9677   | 10 | 5 | 5 | 13707545 | 34069385 | 10013646 | 29853226 | 14995111 | 42936847 | 45660552 | 30754210 | 21613974 |

|          |    |   |   |          |          |          |          |          |          |          |          |          |
|----------|----|---|---|----------|----------|----------|----------|----------|----------|----------|----------|----------|
| 9.93625  | 10 | 5 | 5 | 22178828 | 86409990 | 17684886 | 81827868 | 7894304  | 1.1E+08  | 98699846 | 73152718 | 68506298 |
| 22.71217 | 8  | 5 | 3 | 431364.2 | 3247594  | 1478782  | 2767068  | 1445086  | 2537995  | 3914849  | 1563000  | 2793983  |
| 9.94455  | 10 | 5 | 5 | 2618710  | 10010141 | 1967402  | 9425568  | 1559213  | 12289092 | 11778455 | 9538370  | 7699189  |
| 9.853633 | 6  | 4 | 2 | 890196.3 | 3049343  | 1773749  | 2432875  | 1971530  | 1885812  | 1373259  | 2166854  | 4312120  |
| 9.9677   | 10 | 5 | 5 | 2371386  | 6007766  | 1918160  | 5169084  | 3027591  | 7618928  | 8206723  | 5316395  | 3462288  |
| 12.67565 | 8  | 3 | 4 | 442870.7 | 8081426  | 2793775  | 7331670  | 1542583  | 6261718  | 8845951  | 12245197 | 8132783  |
| 11.25905 | 8  | 4 | 3 | 152572.1 | 772857.1 | 227646.3 | 685016.3 | 300622.6 | 981335.9 | 501196.1 | 871597.4 | 555520.4 |
| 14.32722 | 8  | 4 | 4 | 64194.28 | 330034   | 183376.7 | 272742.9 | 164858.1 | 347714.9 | 314510.3 | 108776.9 | 614222.7 |
| 9.999217 | 10 | 5 | 5 | 917484.1 | 3250795  | 666371.5 | 2948963  | 1103379  | 3730852  | 4027489  | 3203202  | 2322797  |
| 10.9645  | 10 | 5 | 5 | 440863.6 | 1413984  | 317986.8 | 1576155  | 611809.3 | 1791897  | 1704655  | 1328077  | 1119615  |
| 9.929783 | 4  | 0 | 3 | 1202051  | 1838266  | 1122595  | 1418003  | 1415915  | 724148.4 | 3733859  | 1536130  | 1589026  |
| 10.008   | 9  | 5 | 4 | 623763.7 | 1822845  | 265742.6 | 1642998  | 709508.7 | 2078875  | 1934919  | 1967720  | 1405417  |
| 10.94443 | 6  | 3 | 3 | 175011.4 | 390429.3 | 163330.3 | 457409.8 | 236319.7 | 428618.9 | 533498.7 | 413026.3 | 466673.3 |
| 9.91875  | 9  | 5 | 4 | 2240829  | 5069488  | 521341.2 | 5673306  | 2462945  | 5501222  | 4854439  | 5007932  | 5639504  |
| 10.95602 | 10 | 5 | 5 | 312625.4 | 1319623  | 332009.6 | 1213415  | 315178   | 1552105  | 1771453  | 1056034  | 998039.6 |
| 10.25    | 11 | 5 | 4 | 608694.8 | 1992210  | 503011   | 1751344  | 895723.9 | 1188938  | 2388349  | 2359436  | 2204850  |
| 10.98605 | 10 | 5 | 5 | 302620.4 | 1317237  | 349065   | 1198424  | 374899.9 | 1650908  | 1553260  | 976951.5 | 904008.5 |
| 10.0044  | 8  | 3 | 5 | 2057838  | 2566371  | 1283797  | 2012369  | 1995478  | 3021284  | 4321733  | 2643479  | 2006752  |
| 9.9014   | 10 | 5 | 5 | 1098724  | 5870312  | 1013100  | 5419220  | 1642552  | 5249980  | 5236351  | 7178216  | 6739810  |
| 25.2895  | 4  | 1 | 3 | 73146.02 | 302596.9 | 235131.1 | 234689.3 | 172854.1 | 106953.4 | 449298.2 | 17311.89 | 359921.3 |
| 9.992233 | 12 | 5 | 4 | 901333.1 | 2584164  | 1467670  | 2068284  | 1670620  | 1621776  | 705962.5 | 2575115  | 4234904  |
| 9.075083 | 5  | 2 | 3 | 790525.8 | 1120716  | 1089099  | 814753   | 732411.3 | 793267.3 | 364521.8 | 404235.2 | 1037941  |
| 9.56645  | 7  | 4 | 3 | 265394.3 | 518616.4 | 263223.4 | 412454.4 | 372403.9 | 558034.6 | 898347.7 | 532390.4 | 439077.1 |
| 10.92208 | 8  | 4 | 4 | 172984.2 | 503097.2 | 234915.6 | 424751.1 | 243055.3 | 716354.6 | 494154.4 | 211920.2 | 338410.7 |
| 11.10482 | 5  | 4 | 1 | 276097.8 | 418526.5 | 191799.6 | 355300.8 | 194009.3 | 704608.1 | 352168   | 228853.8 | 292878   |
| 10.02372 | 8  | 5 | 3 | 231001.6 | 664768.3 | 82099.25 | 614500.2 | 196273.9 | 573229.9 | 781555.5 | 639478.8 | 618404   |
| 10.01545 | 4  | 3 | 1 | 695307.1 | 1316671  | 330382.3 | 1107719  | 819436.2 | 1564804  | 952531.6 | 973190.4 | 1643622  |
| 9.976317 | 10 | 5 | 5 | 1283946  | 4554588  | 1172692  | 4018756  | 1969564  | 5094773  | 6104332  | 3648286  | 3161073  |
| 12.32473 | 10 | 5 | 5 | 132367.9 | 682172.2 | 133585.4 | 635641.1 | 149914   | 703085   | 896202   | 666292.8 | 593707   |
| 10.95055 | 10 | 5 | 5 | 2350665  | 12270028 | 2849443  | 11369948 | 2647950  | 14394593 | 15616042 | 9834829  | 8987294  |
| 9.845483 | 9  | 5 | 4 | 987290.3 | 3771040  | 998127   | 3229126  | 2079520  | 3727143  | 4089907  | 2545685  | 3264318  |
| 9.40255  | 8  | 3 | 3 | 795211.3 | 2266777  | 1258250  | 1728471  | 1939505  | 3631467  | 1249757  | 1078733  | 1772770  |
| 9.401917 | 12 | 5 | 5 | 82491880 | 2.76E+08 | 1.26E+08 | 3.6E+08  | 3.3E+08  | 2.69E+08 | 4.6E+08  | 3.21E+08 | 2.05E+08 |
| 10.94208 | 9  | 5 | 4 | 251762.1 | 1409361  | 418384.7 | 1269674  | 435533   | 918925.3 | 1814722  | 1016895  | 1531327  |
| 10.9645  | 10 | 5 | 5 | 1128897  | 5413485  | 1127894  | 5092346  | 799890.2 | 6371379  | 6675959  | 4493783  | 4097773  |

|          |    |   |   |          |          |          |          |          |          |          |          |          |
|----------|----|---|---|----------|----------|----------|----------|----------|----------|----------|----------|----------|
| 8.859667 | 10 | 5 | 5 | 411746.7 | 1384552  | 668521   | 1600199  | 650240.6 | 1220245  | 2533383  | 828315.9 | 1029415  |
| 10.95055 | 5  | 3 | 2 | 629282.2 | 1687400  | 278791.8 | 1511115  | 692905.5 | 1725125  | 1949564  | 1235853  | 1650641  |
| 9.960467 | 6  | 4 | 2 | 577366.3 | 1648910  | 465728.1 | 1453503  | 699337.9 | 1988264  | 2051585  | 1513774  | 1785850  |
| 9.858833 | 9  | 4 | 5 | 14086510 | 27325711 | 18777124 | 22421620 | 9169003  | 20541854 | 60478214 | 20937840 | 20856104 |
| 44.9835  | 4  | 3 | 1 | 138774.4 | 323776   | 103541   | 365486   | 146880.3 | 422305.2 | 288723.9 | 194412.9 | 437468.5 |
| 9.952017 | 10 | 5 | 5 | 5687234  | 12359408 | 2584064  | 13833451 | 5713295  | 15384635 | 13935520 | 12970663 | 10499514 |
| 9.856867 | 6  | 3 | 3 | 656972.3 | 2190303  | 606559.3 | 2389205  | 611031.4 | 1511924  | 1586458  | 2689063  | 2795530  |
| 23.03067 | 6  | 3 | 2 | 352029.4 | 848468.2 | 641129   | 1052782  | 609113.8 | 1443580  | 461444.8 | 1642404  | 410227.1 |
| 9.445217 | 7  | 3 | 4 | 387918.6 | 1816645  | 492394.9 | 1542004  | 1061641  | 2239389  | 1485797  | 2225418  | 1125171  |
| 9.91765  | 4  | 1 | 3 | 947183.7 | 1697610  | 372888.9 | 1426203  | 1084996  | 1437858  | 2301978  | 1528452  | 1410575  |
| 10.95835 | 9  | 5 | 4 | 282764.9 | 867231.3 | 155818.8 | 933191.4 | 237445.9 | 937480.3 | 1095510  | 753227.8 | 704079.8 |
| 9.992233 | 5  | 2 | 3 | 764926.6 | 1454364  | 819994.3 | 1182109  | 848033.8 | 479929.8 | 643854.6 | 2040735  | 1951193  |
| 10.35132 | 5  | 3 | 2 | 151496.8 | 291332.1 | 106385.2 | 332537.9 | 142756.8 | 242140.8 | 427408.2 | 376540.8 | 171624.2 |
| 9.983433 | 5  | 2 | 3 | 1175774  | 1622175  | 959760   | 2011892  | 1380522  | 3032267  | 768177.8 | 920277.7 | 1213620  |
| 9.856867 | 7  | 3 | 4 | 894194.1 | 1358116  | 419643.8 | 1763723  | 1652996  | 1389796  | 1118596  | 825599.8 | 1518064  |
| 9.848417 | 7  | 3 | 4 | 1320339  | 3185580  | 1983882  | 2674224  | 902821.6 | 1275510  | 2643301  | 6113948  | 4194984  |
| 9.983433 | 10 | 5 | 5 | 4859722  | 13398637 | 4693399  | 11659900 | 5881444  | 17377316 | 19127032 | 12273445 | 8277887  |
| 26.83917 | 8  | 4 | 4 | 512887.5 | 3193478  | 2247555  | 2543060  | 1690091  | 1175014  | 3621202  | 550705.6 | 5269606  |
| 9.999217 | 5  | 1 | 4 | 427627   | 1196415  | 386522.1 | 1084313  | 292536.1 | 1476947  | 1254373  | 1607180  | 639961.5 |
| 7.56495  | 5  | 3 | 2 | 3328084  | 17614128 | 16264859 | 12278469 | 16459636 | 28685909 | 55216.34 | 17408.62 | 25939714 |
| 9.999517 | 4  | 1 | 3 | 5574494  | 9730907  | 7682748  | 7660123  | 4483635  | 19524842 | 2242834  | 1816790  | 14230104 |
| 9.992233 | 9  | 5 | 4 | 1125273  | 3358396  | 1104434  | 2991351  | 1146558  | 3163811  | 5069824  | 2837718  | 2103685  |
| 10.14543 | 5  | 4 | 1 | 342266.7 | 794159.3 | 332951.7 | 914484.4 | 401159.4 | 625000.7 | 1290998  | 930916.1 | 418046.3 |
| 18.6355  | 10 | 5 | 5 | 442581.2 | 1664202  | 347172.4 | 1509787  | 566600.2 | 1362916  | 2116859  | 1883741  | 1292389  |
| 10.9645  | 10 | 5 | 5 | 2529993  | 11384718 | 3142905  | 10406339 | 2850946  | 14175467 | 14598779 | 7842821  | 8448133  |
| 10.9645  | 10 | 5 | 5 | 1210588  | 4914619  | 1202577  | 5332463  | 1355322  | 6247801  | 6173327  | 3783467  | 3988466  |
| 9.983433 | 12 | 5 | 5 | 5683269  | 15172921 | 4546506  | 13218754 | 7089850  | 19020889 | 20408474 | 14127877 | 9274280  |
| 10.95835 | 9  | 4 | 5 | 175066.2 | 517691.8 | 137559.8 | 570519.2 | 182551.1 | 565556.4 | 728952.2 | 479484.1 | 369110.1 |
| 10.9645  | 5  | 2 | 3 | 204704   | 320039.4 | 137021.6 | 389965.5 | 266450.3 | 483721.6 | 405545.7 | 120814.4 | 300430.1 |
| 10.03947 | 10 | 5 | 5 | 746611.2 | 2084214  | 672042.6 | 2335676  | 857886.4 | 1789459  | 1512099  | 1545082  | 2549217  |
| 10.008   | 9  | 5 | 4 | 649564.7 | 1046121  | 392083.4 | 1224700  | 661458.6 | 1250589  | 1537710  | 1150625  | 652221.7 |
| 7.56495  | 5  | 3 | 2 | 12948258 | 76116399 | 69634831 | 53464665 | 69579917 | 1.25E+08 | 791920.1 | 598470   | 1.12E+08 |
| 10.98385 | 6  | 3 | 3 | 230289.8 | 587722   | 262875.2 | 689086   | 351863.9 | 269425.7 | 756620.4 | 528496.4 | 938310.7 |
| 10.97857 | 6  | 3 | 3 | 229224.5 | 778605.3 | 131997.9 | 884646.7 | 428858.4 | 979389.1 | 616975.6 | 804410.5 | 730638.3 |
| 9.880683 | 9  | 5 | 4 | 951259.5 | 4687107  | 1400375  | 4169668  | 1755530  | 4311855  | 3085219  | 3753062  | 6025661  |

|          |    |   |   |          |          |          |          |          |          |          |          |          |
|----------|----|---|---|----------|----------|----------|----------|----------|----------|----------|----------|----------|
| 9.419733 | 6  | 4 | 2 | 622090   | 2286389  | 810810.7 | 2013594  | 865893.4 | 1029347  | 3173613  | 2035095  | 2653048  |
| 6.887817 | 7  | 2 | 3 | 870783.4 | 29455681 | 9593167  | 24399553 | 19432701 | 27799342 | 45567674 | 29541662 | 22045835 |
| 19.4015  | 4  | 4 | 0 | 38116.34 | 192530.4 | 43589.71 | 181825.1 | 12044.09 | 230014.9 | 224847.5 | 190495.7 | 120894.8 |
| 9.979667 | 6  | 3 | 3 | 496154.3 | 1208364  | 458009.3 | 1089851  | 218760.5 | 1442314  | 1488829  | 1609185  | 499539.9 |
| 10.95055 | 8  | 4 | 4 | 438907   | 610978.7 | 236999.4 | 817854.8 | 841730.6 | 410712.8 | 769014.5 | 906658.1 | 342747   |
| 9.40615  | 9  | 5 | 4 | 1582623  | 2905782  | 1131939  | 2427262  | 1731809  | 3316647  | 3889222  | 1517118  | 1887882  |
| 13.44963 | 5  | 3 | 2 | 382316.7 | 4031812  | 1238527  | 4748549  | 2802726  | 5726655  | 2450256  | 4644373  | 3917214  |
| 9.8322   | 7  | 4 | 3 | 588105.8 | 1682194  | 587843.5 | 1471189  | 704137.9 | 1478999  | 1409369  | 1445430  | 1347055  |
| 10.9645  | 10 | 5 | 5 | 834817.4 | 4236814  | 1109210  | 3922619  | 790155.3 | 5366289  | 4979110  | 3124921  | 2970970  |
| 9.960467 | 9  | 5 | 4 | 1309888  | 1971212  | 913592.1 | 2220411  | 569257.1 | 2788833  | 2938985  | 2035713  | 950620.1 |
| 11.25067 | 12 | 5 | 5 | 13286900 | 40673838 | 10932133 | 45828825 | 19342774 | 52370358 | 52397770 | 35076738 | 29152233 |
| 9.992233 | 10 | 5 | 5 | 770717.7 | 2440284  | 537750.3 | 2174850  | 1007859  | 2984370  | 2956472  | 2433149  | 1772967  |
| 9.960467 | 10 | 5 | 5 | 1304659  | 4159116  | 832902.7 | 3825543  | 1183089  | 4825598  | 5281548  | 3550160  | 3613180  |
| 9.295167 | 7  | 4 | 3 | 971294   | 4738256  | 1229282  | 4048119  | 2688908  | 3849268  | 6747811  | 3770445  | 5027667  |
| 10.008   | 9  | 5 | 4 | 302001.1 | 865134.9 | 138087.3 | 762501.9 | 413593.5 | 654062.9 | 961670.3 | 951002.9 | 793977.3 |
| 10.008   | 5  | 3 | 2 | 293394.4 | 715898.5 | 228120.8 | 611748.2 | 387485.8 | 908193.5 | 336551.1 | 756628.1 | 702716   |
| 9.853633 | 9  | 5 | 4 | 1034385  | 4610348  | 999861.6 | 4117115  | 1873453  | 4422423  | 3898444  | 3471453  | 5427867  |
| 9.842    | 6  | 4 | 2 | 2505782  | 3955372  | 5330524  | 5428155  | 3504481  | 1441454  | 1665351  | 13453352 | 950580.3 |
| 10.00998 | 5  | 3 | 2 | 244461.7 | 459221.3 | 181940.5 | 369142.8 | 342519.6 | 287111.4 | 761695.7 | 357233.5 | 460728.6 |
| 9.976317 | 7  | 4 | 3 | 502499   | 1038654  | 354865   | 1213787  | 665643.4 | 1196778  | 1325784  | 1358412  | 629679.8 |
| 9.177967 | 5  | 3 | 2 | 2362427  | 5841933  | 2328190  | 6931924  | 4087968  | 4841767  | 9609460  | 5327708  | 6072670  |
| 9.457083 | 4  | 1 | 3 | 686704.1 | 1321811  | 797852.1 | 1829747  | 2017040  | 749020.2 | 835121.5 | 927799.1 | 1428172  |
| 11       | 7  | 3 | 4 | 1148089  | 3348913  | 1738792  | 2719530  | 2118925  | 5729658  | 1286997  | 4432980  | 2733730  |
| 10.01837 | 8  | 4 | 4 | 778210.2 | 1442633  | 1388291  | 1075816  | 757980.9 | 3899068  | 522715.6 | 893986.5 | 807054.4 |
| 9.541433 | 10 | 4 | 5 | 19165440 | 69075067 | 45068016 | 55715679 | 36840946 | 59962736 | 1.01E+08 | 1920285  | 1.19E+08 |
| 9.956417 | 4  | 3 | 1 | 1020070  | 1187636  | 659158   | 1388894  | 580758.3 | 2187835  | 1283987  | 555489.5 | 1287722  |
| 28.83467 | 10 | 5 | 5 | 2115963  | 8083349  | 2780960  | 9587083  | 5837292  | 10689330 | 6853857  | 4258739  | 10889794 |
| 28.84783 | 9  | 5 | 4 | 2538899  | 20838121 | 16377502 | 16294522 | 11010604 | 6377204  | 23494761 | 1540975  | 35803435 |
| 10.9645  | 10 | 5 | 5 | 606385.8 | 1802656  | 585635.8 | 1590579  | 716030.5 | 2592961  | 2225227  | 1540779  | 1172319  |
| 40.23717 | 15 | 5 | 3 | 357765.2 | 5669287  | 4230873  | 4649082  | 808141.9 | 2015037  | 5470873  | 3872999  | 4076396  |
| 10.97857 | 10 | 5 | 5 | 193978.5 | 847193.3 | 72072.6  | 880434.9 | 124468.9 | 855695.9 | 729781.8 | 895895.3 | 840311.6 |
| 10.95055 | 10 | 5 | 5 | 200322.7 | 800575   | 213005.7 | 867108.4 | 197870.5 | 1079994  | 968369.7 | 707299.8 | 579339.3 |
| 10.95055 | 8  | 4 | 4 | 310248.5 | 1140192  | 505078.6 | 997573.7 | 360928.2 | 1386833  | 1663855  | 801432.8 | 435803.8 |
| 9.992233 | 10 | 5 | 5 | 688720.6 | 1770328  | 754787.7 | 2044474  | 928257.1 | 2149293  | 2611695  | 2147448  | 1039263  |
| 22.18067 | 4  | 3 | 1 | 94703.47 | 436546.3 | 139963.2 | 514831.8 | 306228.4 | 315341.9 | 673699.1 | 353588.1 | 419518.6 |

|          |    |   |   |          |          |          |          |          |          |          |          |          |
|----------|----|---|---|----------|----------|----------|----------|----------|----------|----------|----------|----------|
| 9.268717 | 5  | 2 | 3 | 497377.9 | 671599.7 | 329863.3 | 784852.1 | 369427.8 | 1100623  | 824028   | 692760.6 | 218759.5 |
| 8.7536   | 4  | 4 | 0 | 333538.3 | 659860.9 | 522538.1 | 497309.8 | 482245.6 | 390946.6 | 1418614  | 416620.5 | 957626.9 |
| 10.00998 | 10 | 5 | 5 | 597690.8 | 935285.7 | 426408.8 | 1096507  | 559600.9 | 1055730  | 1524368  | 1058942  | 477560.6 |
| 10.01837 | 10 | 5 | 5 | 1505649  | 4593353  | 2309539  | 3849626  | 2293884  | 5688547  | 671858.8 | 4356458  | 6197751  |
| 9.920517 | 11 | 5 | 5 | 2250572  | 9335968  | 1406622  | 8112579  | 5010261  | 7890178  | 7986664  | 10000622 | 11205011 |
| 9.840617 | 10 | 5 | 5 | 1156620  | 2687310  | 894138.3 | 2423612  | 727618.3 | 3717363  | 3570746  | 2119561  | 1760850  |
| 10.9645  | 8  | 3 | 5 | 1127715  | 2995273  | 856347   | 2630066  | 1337732  | 4336175  | 2963624  | 2830267  | 1947531  |
| 9.419733 | 8  | 4 | 4 | 1658514  | 2770622  | 808352.3 | 2410721  | 1337489  | 3186053  | 3257315  | 1343416  | 2911701  |
| 9.960817 | 9  | 4 | 5 | 2456921  | 3418987  | 1239444  | 4096938  | 2645851  | 3729320  | 2749048  | 5266027  | 3410785  |
| 31.78217 | 9  | 5 | 4 | 975274.1 | 6042000  | 4103937  | 4884419  | 2942803  | 3291025  | 4521807  | 1620802  | 10101179 |
| 9.684583 | 16 | 5 | 5 | 16460352 | 1.17E+08 | 14356629 | 1.12E+08 | 18521340 | 1.16E+08 | 1.38E+08 | 1.1E+08  | 99993566 |
| 10.9645  | 10 | 5 | 5 | 887939.1 | 2153709  | 836144   | 2503890  | 1274834  | 2987303  | 3111559  | 1614464  | 1293724  |
| 10.01545 | 5  | 2 | 3 | 325934.3 | 770997.5 | 368597.1 | 659575.6 | 319469.8 | 822891.8 | 163963.8 | 1038894  | 1086737  |
| 9.94455  | 7  | 4 | 3 | 2251227  | 1511812  | 519234.6 | 1911514  | 1625268  | 1866928  | 1775760  | 1809683  | 1485507  |
| 9.541433 | 8  | 5 | 3 | 436652.2 | 1035368  | 464632.5 | 813050.4 | 843840.6 | 1252377  | 1526488  | 640138.8 | 448753.6 |
| 18.137   | 9  | 4 | 4 | 199598.7 | 1085105  | 332936.3 | 969558.5 | 381267.8 | 779417.4 | 1266623  | 887389.9 | 909820   |
| 10.95602 | 5  | 3 | 2 | 260583   | 963696.8 | 272079.8 | 846902.8 | 429509.6 | 546609.7 | 1239650  | 884513.6 | 1161770  |
| 9.388617 | 9  | 5 | 4 | 744929.4 | 2342279  | 1236187  | 1995011  | 877939.4 | 2434013  | 1045651  | 1387483  | 2654265  |
| 9.8322   | 5  | 3 | 2 | 836635.8 | 2300013  | 813351.8 | 2045347  | 765436.7 | 1597813  | 3013937  | 1388113  | 3201029  |
| 9.379233 | 4  | 3 | 1 | 922543.3 | 1775329  | 945919.4 | 2038203  | 650499.6 | 1036019  | 2360470  | 3034707  | 726081.2 |
| 9.983433 | 10 | 5 | 5 | 826040.5 | 3491840  | 731229   | 3173334  | 1178819  | 3873079  | 4502166  | 3204121  | 2565310  |
| 10.03035 | 6  | 2 | 4 | 56329048 | 66268079 | 79819088 | 39995491 | 83248866 | 3755706  | 17190086 | 1.58E+08 | 3564074  |
| 9.960467 | 10 | 5 | 5 | 2359912  | 8782279  | 2315554  | 7836835  | 3418559  | 10456079 | 11404874 | 7483864  | 5611803  |
| 10.008   | 10 | 5 | 5 | 470797.8 | 1044435  | 224992.1 | 1176642  | 523500.6 | 1139918  | 1212222  | 1249615  | 892045.8 |
| 9.089733 | 10 | 5 | 5 | 7949224  | 40566931 | 7781236  | 38016675 | 8053039  | 41814500 | 51392765 | 32109234 | 33996402 |
| 41.90583 | 7  | 3 | 2 | 611382.6 | 6573102  | 2005840  | 5865824  | 2367857  | 7824953  | 6979509  | 3049266  | 7186771  |
| 9.994767 | 10 | 5 | 5 | 1679429  | 2612630  | 1633791  | 3197449  | 1977577  | 3274046  | 4915161  | 2776683  | 951521   |
| 10.01477 | 10 | 5 | 5 | 964210.6 | 3381949  | 859830.2 | 3023039  | 1310282  | 3625561  | 4650527  | 3415644  | 2393856  |
| 9.55155  | 10 | 5 | 5 | 1829113  | 7252341  | 2148801  | 6641673  | 1592810  | 9081741  | 9665691  | 7247065  | 5533782  |
| 10.008   | 10 | 5 | 5 | 1043655  | 2048155  | 567293.3 | 2407764  | 1439825  | 2188392  | 2784543  | 2307216  | 1562014  |
| 9.392767 | 12 | 5 | 5 | 2569692  | 18105977 | 3201283  | 16009915 | 8426682  | 18279162 | 18433413 | 13380120 | 18028207 |
| 39.37383 | 5  | 2 | 3 | 334989.3 | 5789262  | 3302186  | 4936366  | 1665662  | 4501414  | 11689838 | 4110525  | 4222071  |
| 19.43117 | 3  | 0 | 3 | 245354.4 | 1356925  | 374452.2 | 1136212  | 875964.7 | 1894153  | 1019331  | 1591872  | 1205377  |
| 9.111033 | 4  | 4 | 0 | 343247.8 | 547096.5 | 265674.7 | 476897.8 | 151053.8 | 407964.4 | 383062.4 | 973469.2 | 332713   |
| 9.992233 | 8  | 5 | 3 | 539134.4 | 2110564  | 308946.5 | 2015648  | 280631.5 | 2495205  | 2375349  | 2008835  | 1877929  |

|          |    |   |   |          |          |          |          |          |          |          |          |          |
|----------|----|---|---|----------|----------|----------|----------|----------|----------|----------|----------|----------|
| 9.530583 | 8  | 5 | 3 | 291523.7 | 605682.4 | 191358.4 | 540570.6 | 213084.4 | 546472.7 | 886409.3 | 439160.9 | 446053.9 |
| 10.94443 | 5  | 2 | 3 | 142186.7 | 419316.1 | 61582.74 | 496849.8 | 323980.5 | 497715.1 | 428570.5 | 343418.2 | 374017   |
| 20.274   | 5  | 4 | 1 | 50082.82 | 179379.4 | 43179.82 | 193018.4 | 41699.81 | 160180.5 | 251055.8 | 185993.6 | 158840.2 |
| 10.008   | 8  | 5 | 3 | 278583.4 | 701002.1 | 229638.3 | 615273.3 | 298329.1 | 597977.8 | 974145   | 488917   | 522168.9 |
| 10.9645  | 10 | 5 | 5 | 609672.1 | 2800150  | 557128.8 | 2995871  | 656449.4 | 3383749  | 3377354  | 2432570  | 2160536  |
| 9.999217 | 10 | 5 | 5 | 1016996  | 3066959  | 834737.3 | 2691399  | 1410788  | 3268636  | 4374845  | 2645948  | 2157867  |
| 9.842    | 4  | 1 | 3 | 1335260  | 3524343  | 1804284  | 3049133  | 1017492  | 4080949  | 1708837  | 6043921  | 3960066  |
| 10.008   | 9  | 5 | 4 | 402476.4 | 1111186  | 245052.9 | 972545.4 | 547951.4 | 1286829  | 767682.9 | 1373332  | 1159420  |
| 9.903567 | 5  | 3 | 2 | 697444.8 | 1452350  | 843704.1 | 1203873  | 695737.2 | 1764938  | 505296.3 | 983954.4 | 1287829  |
| 26.82483 | 8  | 4 | 4 | 1220113  | 10227734 | 5000837  | 8944443  | 2461429  | 3321860  | 10989298 | 7458401  | 13206940 |
| 9.94455  | 9  | 5 | 4 | 944293.4 | 2793008  | 761464.3 | 2583452  | 513755.3 | 3545159  | 3533875  | 2622861  | 1743788  |
| 9.655117 | 7  | 4 | 3 | 2739747  | 4566218  | 4212740  | 3395217  | 2940416  | 2542937  | 2458898  | 2994365  | 2741736  |
| 19.501   | 6  | 2 | 3 | 787126.1 | 7490606  | 2642957  | 8742100  | 4774852  | 6451611  | 5672723  | 11590293 | 5140481  |
| 43.02817 | 10 | 4 | 3 | 368654.8 | 6351997  | 3697614  | 5468972  | 698458.5 | 12835245 | 3897606  | 4816165  | 4341784  |
| 9.392767 | 8  | 5 | 3 | 960786.5 | 6444794  | 2892297  | 5566667  | 2571443  | 11003416 | 5239381  | 3506874  | 5116914  |
| 9.976317 | 8  | 4 | 4 | 507833.6 | 1096864  | 494810.6 | 904640.1 | 685001.1 | 1472938  | 1663011  | 1034069  | 405399.9 |
| 9.853633 | 9  | 5 | 4 | 1410229  | 6640657  | 2013007  | 5789291  | 3141983  | 6898026  | 7659215  | 3786353  | 5739818  |
| 9.992233 | 4  | 3 | 1 | 753278.7 | 1221126  | 845724.2 | 1524808  | 1037197  | 620191   | 878959.6 | 1995332  | 2246091  |
| 10.9645  | 5  | 2 | 3 | 226230.1 | 468999.7 | 304671.9 | 382853.4 | 225808   | 845211.6 | 561615   | 136261.3 | 175997.5 |
| 5.623083 | 4  | 1 | 3 | 773831.1 | 12238868 | 2964281  | 11181261 | 3602479  | 13768443 | 13278224 | 10040811 | 15715926 |
| 9.431017 | 8  | 4 | 3 | 2410046  | 11777724 | 6674000  | 13485566 | 3279321  | 13685351 | 11111179 | 6898970  | 5121089  |
| 9.856867 | 10 | 5 | 5 | 13361300 | 63289585 | 2701929  | 66081051 | 11639796 | 67964904 | 62506856 | 62296457 | 60962170 |
| 10.49903 | 9  | 5 | 4 | 508177.3 | 687375.7 | 265948.3 | 933846.4 | 1022870  | 1012519  | 830136.8 | 360065.4 | 476011.6 |
| 9.976317 | 10 | 5 | 5 | 2173989  | 6168928  | 2366447  | 7038822  | 3018148  | 8040522  | 8783344  | 6555028  | 3881910  |
| 9.976317 | 4  | 3 | 1 | 656196.4 | 946129.4 | 592631.1 | 1092617  | 222762   | 744944.3 | 371552.4 | 1613189  | 1540552  |
| 38.95667 | 4  | 0 | 3 | 220046.1 | 2647424  | 85537.16 | 2570420  | 319164.1 | 2646910  | 2547012  | 2751221  | 2581159  |
| 9.992233 | 10 | 5 | 5 | 845619.9 | 1896741  | 785720.5 | 2181899  | 982302   | 2059304  | 3116245  | 1893699  | 1256951  |
| 9.5021   | 6  | 3 | 3 | 2935306  | 11539826 | 2151335  | 13528495 | 8255258  | 11946903 | 8218364  | 13343352 | 13407780 |
| 9.992233 | 7  | 4 | 3 | 829983.8 | 833105.3 | 437892.2 | 1006534  | 625185   | 965921.3 | 109731.8 | 840450.4 | 957429.2 |
| 9.55155  | 8  | 4 | 4 | 340112.9 | 839381   | 190635.6 | 901366.4 | 196936.3 | 932088.9 | 1070910  | 910412.3 | 642968.7 |
| 9.655117 | 9  | 5 | 4 | 502716.6 | 2265697  | 745497.2 | 1995616  | 930411.6 | 1947355  | 2884759  | 2099242  | 1276132  |
| 9.49445  | 9  | 5 | 4 | 946958.2 | 3020573  | 775305   | 3781037  | 3167770  | 3084714  | 4280695  | 2404201  | 2365048  |
| 9.787633 | 8  | 4 | 4 | 1034606  | 1646858  | 819182.7 | 1368039  | 921165.7 | 2125570  | 2850200  | 926011.4 | 1279092  |
| 10.22043 | 10 | 5 | 5 | 464136.8 | 2506793  | 821125.3 | 2796115  | 980401.6 | 2658745  | 3107951  | 3425155  | 1861071  |
| 9.900133 | 5  | 2 | 3 | 928956.9 | 1239848  | 586553.3 | 1388507  | 273822.4 | 1678918  | 257265.3 | 1510024  | 1608439  |



|          |    |   |   |          |          |          |          |          |          |          |          |          |
|----------|----|---|---|----------|----------|----------|----------|----------|----------|----------|----------|----------|
| 9.473733 | 11 | 4 | 5 | 9223339  | 51559541 | 33498492 | 65422643 | 50962714 | 10805190 | 21426421 | 86943886 | 73634636 |
| 9.842    | 8  | 5 | 3 | 1270635  | 2471530  | 529677.7 | 3101443  | 2644440  | 2876280  | 1649136  | 2959559  | 2580264  |
| 10.01837 | 9  | 4 | 5 | 612396.5 | 1248503  | 810796.3 | 1028490  | 528970.4 | 2615303  | 833746.1 | 1186986  | 1110722  |
| 13.60975 | 5  | 2 | 3 | 25874.64 | 105655.7 | 37491.02 | 95535.09 | 24008.65 | 68917.24 | 165509.7 | 86679.94 | 116263.4 |
| 9.994767 | 10 | 5 | 5 | 823209.9 | 2503116  | 634278.4 | 2761919  | 947142.4 | 3308776  | 1912077  | 3061160  | 2095525  |
| 10.03947 | 18 | 5 | 5 | 1406150  | 2909529  | 1570561  | 2386328  | 1704492  | 4296027  | 923770.4 | 1833649  | 2898431  |
| 9.986767 | 9  | 5 | 4 | 817309.4 | 1850618  | 879247.6 | 1604198  | 640692.4 | 1908565  | 3307891  | 1279663  | 1067442  |
| 9.94455  | 5  | 2 | 3 | 3302890  | 6278435  | 4080608  | 4969104  | 4126185  | 2049948  | 2037696  | 10129287 | 6967784  |
| 9.856867 | 7  | 5 | 2 | 1362030  | 1929898  | 349125.6 | 2524990  | 2519845  | 1353970  | 2030025  | 1907697  | 2075601  |
| 9.858833 | 10 | 5 | 5 | 2356633  | 16027970 | 1879226  | 16725658 | 2447501  | 16729879 | 15387076 | 13297704 | 18412772 |
| 9.362817 | 5  | 3 | 2 | 379450.6 | 674837.5 | 437194.1 | 517233.6 | 543910.4 | 1120930  | 784400   | 947788.2 | 0        |
| 9.508883 | 5  | 0 | 3 | 2213980  | 1037469  | 1567591  | 656021.7 | 514698.8 | 269458.3 | 82102.9  | 196645.7 | 847792.2 |
| 11.35787 | 6  | 4 | 2 | 174981.9 | 380956.6 | 108150.8 | 438839.2 | 228590.1 | 255408.9 | 483513   | 444179.6 | 449440.8 |
| 10.9645  | 4  | 3 | 1 | 292103.4 | 688861.1 | 205815   | 596325.2 | 351077.8 | 872175.6 | 893856   | 557205.8 | 412981.8 |
| 9.45945  | 6  | 2 | 4 | 906596.9 | 976415.5 | 382436.7 | 1376831  | 1678779  | 1285148  | 1130838  | 1207023  | 336245.4 |
| 9.964417 | 4  | 3 | 1 | 932834.1 | 2126611  | 941910.6 | 2476077  | 1228012  | 2617970  | 938353.6 | 3406557  | 1626332  |
| 9.992233 | 6  | 4 | 2 | 386683.1 | 539725.7 | 260330.3 | 646643.7 | 393732.1 | 674489.8 | 830846.7 | 577333.4 | 135718.5 |
| 9.960817 | 5  | 2 | 3 | 476202.3 | 657615.5 | 501822.3 | 823185.7 | 537794.5 | 1098581  | 1162427  | 758323.4 | 121929.7 |
| 7.86735  | 5  | 3 | 2 | 6068022  | 30707973 | 31001696 | 21196680 | 28726048 | 34653511 | 49899.34 | 14681.65 | 47180935 |
| 10.9645  | 5  | 2 | 3 | 228338.1 | 392140.6 | 197761.6 | 473445.8 | 299873.9 | 610985.4 | 567373.6 | 383570.3 | 157808.8 |
| 9.392767 | 10 | 5 | 5 | 2577419  | 20107334 | 4370854  | 17841559 | 8913525  | 25957180 | 18691109 | 14559480 | 18567833 |
| 28.83467 | 8  | 4 | 4 | 723390.6 | 5412636  | 4178112  | 4264153  | 2893867  | 1535878  | 5942603  | 710037   | 9384535  |
| 10.97242 | 10 | 5 | 5 | 738863.8 | 4503662  | 925647.5 | 4131287  | 1363586  | 5148331  | 4871473  | 3076080  | 4097916  |
| 18.00517 | 10 | 5 | 5 | 116328.9 | 412789.2 | 94379.2  | 474797.5 | 252774.7 | 294977.7 | 459763.8 | 327466.2 | 496809.8 |
| 44.466   | 12 | 3 | 3 | 260803.4 | 2937457  | 1780727  | 2384197  | 1699670  | 1028755  | 3164003  | 5814085  | 2316530  |
| 9.9677   | 10 | 5 | 5 | 5842075  | 14009378 | 4262417  | 12296093 | 6274077  | 17201839 | 19328508 | 12785656 | 8614182  |
| 10.97857 | 10 | 5 | 5 | 809711.6 | 3855673  | 663931.5 | 3506786  | 1378090  | 4210427  | 3946166  | 3215775  | 3178155  |
| 9.976317 | 10 | 5 | 5 | 968797.1 | 3625201  | 323531.8 | 3418136  | 842079   | 3825426  | 3849876  | 3902339  | 3323627  |
| 23.99617 | 15 | 5 | 5 | 580370.8 | 2728486  | 691524.2 | 3229868  | 2064687  | 2362134  | 2526692  | 1900447  | 3229632  |
| 10.94443 | 10 | 5 | 5 | 255331.3 | 1120416  | 473294.3 | 1278043  | 518043.8 | 1838836  | 1266272  | 602626.9 | 823688.5 |
| 9.816317 | 4  | 1 | 3 | 624562.4 | 405372.2 | 639115.1 | 593269.6 | 538661.7 | 0        | 1526198  | 271454.5 | 0        |
| 22.92933 | 10 | 5 | 5 | 35896.02 | 240523.4 | 22674.78 | 224609   | 65381.92 | 212431.2 | 275721.8 | 235392.6 | 239853.4 |
| 14.70722 | 8  | 5 | 3 | 53737.68 | 228674.5 | 80829.32 | 261361.6 | 120190.7 | 100010.1 | 269176.5 | 206148   | 258473.5 |
| 9.559567 | 7  | 3 | 4 | 2849314  | 5301726  | 2261968  | 4360218  | 3502852  | 4512619  | 7664902  | 1872924  | 6854393  |
| 9.976317 | 6  | 4 | 2 | 309385   | 662324.7 | 339014.6 | 538395.9 | 434673.6 | 888466.4 | 62256.45 | 821906   | 763861.7 |

|          |    |   |   |          |          |          |          |          |          |          |          |          |
|----------|----|---|---|----------|----------|----------|----------|----------|----------|----------|----------|----------|
| 9.976317 | 10 | 5 | 5 | 950186.8 | 2247579  | 889405.4 | 2604700  | 1310949  | 2934184  | 3104445  | 2565876  | 1565812  |
| 9.976317 | 7  | 4 | 3 | 357909.7 | 988330.2 | 406870.9 | 825725.4 | 595794.8 | 1355902  | 1461834  | 837655.2 | 498507.3 |
| 8.93965  | 10 | 5 | 5 | 1829771  | 8259924  | 1255830  | 7745077  | 1906064  | 9011753  | 9465230  | 8982425  | 7218602  |
| 9.4925   | 9  | 4 | 4 | 3200487  | 24859322 | 15340309 | 20387934 | 12707261 | 11030556 | 17143614 | 21300046 | 23943352 |
| 25.59717 | 5  | 2 | 3 | 173308.2 | 914911.9 | 265350.1 | 820647.6 | 325363.7 | 647782.7 | 1296889  | 740939   | 817266.3 |
| 9.9677   | 5  | 3 | 2 | 675487.9 | 1097014  | 370183.9 | 921235.3 | 681083.5 | 1545670  | 989352.1 | 1370246  | 979596.8 |
| 9.896717 | 8  | 3 | 5 | 6344213  | 28535630 | 12138210 | 32484704 | 12769813 | 26019054 | 17810486 | 23139216 | 49369284 |
| 9.275617 | 5  | 3 | 2 | 751748.3 | 1310092  | 432376.2 | 1596217  | 1170840  | 2062244  | 1274590  | 1046221  | 1017859  |
| 22.987   | 5  | 3 | 2 | 79092320 | 2.94E+08 | 4.02E+08 | 4.19E+08 | 3.84E+08 | 7.51E+08 | 551515.1 | 575227.7 | 7.17E+08 |
| 10.97857 | 10 | 5 | 5 | 1054421  | 2261794  | 267212   | 2906406  | 2757391  | 2064242  | 1934290  | 2276372  | 2583429  |
| 28.36033 | 6  | 2 | 4 | 83213.27 | 286303.9 | 80583    | 252237.1 | 127644.7 | 397070.6 | 320062.6 | 189931   | 294773.9 |
| 10.98385 | 9  | 5 | 3 | 300949   | 1011297  | 383840.5 | 1127514  | 348690.9 | 1099491  | 825244.1 | 459933.5 | 1462783  |
| 26.81067 | 7  | 3 | 4 | 700693.9 | 4192528  | 2936753  | 3369199  | 2190006  | 1823379  | 4678758  | 710605.2 | 5841933  |
| 30.296   | 10 | 5 | 5 | 328272   | 1609255  | 489015.6 | 1394795  | 813993   | 1650188  | 2300026  | 1532437  | 923088   |
| 28.577   | 4  | 3 | 1 | 72125.31 | 261284.2 | 123795.5 | 222473.7 | 121362.1 | 131102.5 | 400615.4 | 198185.3 | 189506.5 |
| 9.092333 | 10 | 5 | 5 | 22462240 | 66442138 | 35296693 | 88812440 | 91221001 | 68258516 | 1.16E+08 | 77653968 | 48876399 |
| 9.992233 | 10 | 5 | 5 | 2081767  | 2670301  | 959727.2 | 3420219  | 3118835  | 3646116  | 2810397  | 3477704  | 2033445  |
| 21.42167 | 6  | 3 | 3 | 141185.4 | 922576.4 | 264223.6 | 1009388  | 284094.2 | 1275338  | 911689.9 | 690267.4 | 650161.4 |
| 19.35783 | 3  | 3 | 0 | 63172.58 | 140209.8 | 64633.7  | 124821.9 | 16715.74 | 129187.5 | 240269.6 | 135521.1 | 136747.7 |
| 9.960467 | 6  | 4 | 2 | 790250.1 | 1263870  | 552003.4 | 1480541  | 790575.5 | 2187420  | 880463.2 | 1337479  | 844920.2 |
| 9.43325  | 6  | 3 | 3 | 1391183  | 5916435  | 5331743  | 4427672  | 3947710  | 2246905  | 2153536  | 12452257 | 10999723 |
| 23.7115  | 10 | 5 | 5 | 327721.9 | 1963885  | 408400.9 | 2081769  | 331822.6 | 1900497  | 2581749  | 1915016  | 1436141  |
| 9.559117 | 7  | 3 | 4 | 537503.3 | 818973   | 306205.4 | 922424.9 | 346389.5 | 764739.9 | 1263776  | 402025.3 | 837770.4 |
| 40.683   | 5  | 2 | 3 | 298766   | 3990768  | 716975.8 | 3715070  | 997162.5 | 3843191  | 3661238  | 5254066  | 3495499  |
| 40.1365  | 5  | 1 | 4 | 456075.7 | 6408736  | 303827.9 | 6679709  | 1136959  | 6396727  | 6318762  | 5997559  | 6491717  |
| 9.9677   | 10 | 5 | 5 | 857947.3 | 2377698  | 950617.8 | 2011833  | 1323958  | 3444987  | 3216810  | 2332593  | 1310596  |
| 9.67     | 9  | 5 | 4 | 495083.5 | 1260002  | 351437.5 | 1435563  | 690483.7 | 996064.7 | 1693840  | 1496456  | 835823.5 |
| 10.008   | 10 | 5 | 5 | 1258572  | 3469037  | 1098111  | 3947873  | 1818106  | 3284034  | 4795580  | 4378113  | 2667905  |
| 9.872883 | 10 | 5 | 5 | 2342588  | 8452392  | 1457996  | 8972833  | 1810517  | 9026317  | 8308086  | 6732484  | 10574407 |
| 9.976317 | 9  | 5 | 4 | 925668.8 | 1696664  | 913133.3 | 2031358  | 1182551  | 2073490  | 2941666  | 1848051  | 654887.5 |
| 9.842    | 5  | 3 | 2 | 2260727  | 6554759  | 2936700  | 5622251  | 2965530  | 9361574  | 4663117  | 7396895  | 2452206  |
| 40.22283 | 3  | 3 | 0 | 261468.5 | 3282786  | 570282.5 | 3148442  | 114031.5 | 3276595  | 4114141  | 2846192  | 2674019  |
| 12.11938 | 10 | 5 | 5 | 784474.8 | 14006280 | 6729287  | 12003974 | 5912953  | 23884093 | 8825463  | 9584973  | 9559422  |
| 9.93625  | 8  | 4 | 4 | 1103197  | 2178490  | 352765.6 | 2035846  | 527992   | 2309287  | 2639637  | 2199872  | 2071162  |
| 9.8322   | 9  | 5 | 4 | 772090.9 | 3008453  | 298106.2 | 2860847  | 580047.2 | 3465780  | 3157210  | 2810997  | 2774844  |

|          |    |   |   |          |          |          |          |          |          |          |          |          |
|----------|----|---|---|----------|----------|----------|----------|----------|----------|----------|----------|----------|
| 9.4775   | 8  | 2 | 5 | 553122.5 | 2604756  | 1311849  | 3136290  | 1969073  | 3475213  | 1091239  | 3687037  | 3518191  |
| 10.008   | 10 | 5 | 5 | 1070723  | 2070421  | 552390.1 | 2390779  | 1294985  | 2270112  | 2726127  | 2328663  | 1692390  |
| 9.473733 | 6  | 4 | 2 | 470309.7 | 4439254  | 2027352  | 3896089  | 1315058  | 5474580  | 5149829  | 3916445  | 6458534  |
| 10.95602 | 10 | 5 | 5 | 321573   | 1169140  | 308682.8 | 1079722  | 254213.7 | 1270403  | 1419105  | 925856.9 | 766319.3 |
| 28.84783 | 9  | 5 | 4 | 2726635  | 23969793 | 18863394 | 18821502 | 13067758 | 7229622  | 26116379 | 2159261  | 41907140 |
| 9.856867 | 10 | 5 | 5 | 77242912 | 4.37E+08 | 13784769 | 4.55E+08 | 79452843 | 4.54E+08 | 4.44E+08 | 4.22E+08 | 4.23E+08 |
| 9.392767 | 9  | 5 | 4 | 1574732  | 5242304  | 1110681  | 4819628  | 1525113  | 6003489  | 6466993  | 3891386  | 4281159  |
| 44.969   | 6  | 2 | 3 | 286105   | 2864317  | 1224181  | 3282817  | 1418390  | 700600.1 | 3225643  | 3367798  | 3720139  |
| 10.57323 | 10 | 5 | 5 | 1670612  | 7332299  | 1228002  | 6756873  | 2235158  | 8218380  | 8897963  | 6797614  | 5794084  |
| 10.008   | 10 | 5 | 5 | 341702.2 | 1103898  | 285192   | 979466.2 | 473861.7 | 1169660  | 1523271  | 1108540  | 746811.3 |
| 8.9256   | 10 | 5 | 5 | 671008.6 | 2569179  | 818468   | 2327161  | 711374.3 | 2762445  | 3507726  | 3133751  | 1764186  |
| 9.93625  | 10 | 5 | 5 | 15903474 | 61214966 | 9552854  | 58519400 | 7355892  | 76481462 | 63916180 | 54362209 | 52834879 |
| 9.8207   | 6  | 3 | 3 | 616871.6 | 1726762  | 471604.4 | 1570833  | 515998.3 | 1528657  | 2372384  | 1519007  | 1181637  |
| 10.9645  | 6  | 3 | 2 | 207005.9 | 399306.4 | 167969.8 | 472985.3 | 281274   | 283335.1 | 626016.5 | 341937.7 | 225493.4 |
| 11.34412 | 10 | 5 | 5 | 337772.3 | 722974.2 | 274632   | 912116.7 | 781861.7 | 563867.6 | 1192814  | 741487   | 581619.5 |
| 10.7349  | 10 | 5 | 4 | 273991.5 | 2404571  | 561497.3 | 2177331  | 843955.5 | 2150537  | 1787248  | 2221259  | 2595954  |
| 9.92825  | 5  | 3 | 2 | 957545.5 | 1276682  | 1108378  | 978601   | 734308.5 | 2980515  | 0        | 1104736  | 1548398  |
| 9.4468   | 8  | 4 | 3 | 924790.1 | 3867520  | 1313953  | 4461083  | 2286983  | 3388879  | 5226107  | 5217647  | 3263158  |
| 8.93965  | 8  | 4 | 4 | 389980.3 | 1072379  | 404865.7 | 969449.9 | 209896.6 | 1549560  | 1237827  | 620525.9 | 1275505  |
| 10.9645  | 6  | 3 | 3 | 2716434  | 7580305  | 3982586  | 6073105  | 5439561  | 3918724  | 6187168  | 12350122 | 11279737 |
| 17.3365  | 7  | 3 | 4 | 84553.78 | 382552   | 107533.1 | 333699.5 | 188616.3 | 437593.3 | 487753.1 | 400103.6 | 383218.7 |
| 10.94208 | 12 | 5 | 4 | 376928.8 | 519590.3 | 161829.2 | 665951   | 617132   | 759189.5 | 573551.8 | 507835.9 | 330783.3 |
| 40.0645  | 10 | 4 | 3 | 437330   | 6033764  | 3219624  | 6786994  | 556718.3 | 7563463  | 6766534  | 9871264  | 4604853  |
| 43.675   | 10 | 3 | 4 | 483779.9 | 5648303  | 2026742  | 4698506  | 3698854  | 7519653  | 5011640  | 7818881  | 2942150  |
| 9.912633 | 10 | 5 | 5 | 3413228  | 14598091 | 3032204  | 13486645 | 3948970  | 11565770 | 12334911 | 17169656 | 18423516 |
| 9.992233 | 6  | 3 | 3 | 549776.8 | 847182.5 | 497732.9 | 675622.6 | 587133.3 | 1295514  | 1459789  | 618603   | 341547.7 |
| 10.95055 | 6  | 3 | 3 | 208650.7 | 476057.4 | 256704.2 | 563338.3 | 295862.3 | 875218.6 | 428536.1 | 193904.1 | 341375.4 |
| 39.2525  | 7  | 3 | 4 | 1795672  | 49769549 | 2979815  | 47920593 | 7570048  | 53602270 | 49318731 | 46198276 | 51845685 |
| 9.88865  | 11 | 5 | 5 | 762794.5 | 2347121  | 564048.2 | 2191798  | 406452   | 1793069  | 3002047  | 2889069  | 1890834  |
| 9.447733 | 6  | 3 | 3 | 793977.9 | 2138894  | 764255.9 | 1932155  | 519595.3 | 3398712  | 1323237  | 1977124  | 1903179  |
| 9.328967 | 5  | 3 | 2 | 359877   | 2701789  | 927651   | 2274025  | 1661014  | 3023583  | 2024805  | 2920514  | 3958115  |
| 10.95835 | 10 | 5 | 5 | 384917   | 1067238  | 376540.7 | 1173971  | 295932.8 | 1295086  | 1617324  | 866411.4 | 832373.5 |
| 9.92825  | 9  | 4 | 5 | 4201073  | 16191663 | 9226543  | 18610391 | 5590343  | 17742556 | 15046199 | 23208274 | 23882896 |
| 10.95055 | 10 | 5 | 5 | 402697.1 | 2136321  | 672135.8 | 1943487  | 546189.4 | 2781202  | 2404853  | 1361495  | 1471577  |
| 9.928667 | 8  | 4 | 4 | 2209795  | 2007439  | 738836.4 | 2584335  | 2416588  | 2973699  | 2220694  | 2214771  | 1630026  |

|          |    |   |   |          |          |          |          |          |          |          |          |          |
|----------|----|---|---|----------|----------|----------|----------|----------|----------|----------|----------|----------|
| 9.46925  | 11 | 5 | 4 | 12589933 | 23369589 | 11370043 | 30632003 | 29897936 | 29894432 | 3229860  | 25878706 | 29616929 |
| 43.79917 | 9  | 4 | 4 | 343268.1 | 6614144  | 2083882  | 5934245  | 2242554  | 4624864  | 4677508  | 9040658  | 6212673  |
| 9.56645  | 11 | 5 | 5 | 27107436 | 71308994 | 27882607 | 79121035 | 21300407 | 1.02E+08 | 45616253 | 53709630 | 53971251 |
| 9.989483 | 14 | 5 | 5 | 843428.4 | 3477140  | 1838794  | 4076455  | 1975334  | 3633499  | 838928.7 | 2901309  | 5881695  |
| 10.21522 | 6  | 4 | 2 | 202770.5 | 588125.7 | 126297   | 661164.7 | 297172.5 | 486281.5 | 622996.4 | 794299.8 | 515414.6 |
| 8.98945  | 10 | 5 | 5 | 768273.1 | 2534256  | 1178330  | 2902821  | 1170136  | 2200071  | 4491772  | 2691087  | 1619490  |
| 44.521   | 6  | 3 | 3 | 296750.5 | 4801126  | 551278.3 | 5286576  | 2051534  | 5165412  | 4539419  | 4789668  | 5466253  |
| 9.859983 | 10 | 5 | 5 | 2900128  | 18554285 | 2097786  | 17678114 | 3314147  | 17681781 | 15999629 | 21005176 | 20426594 |
| 24.0985  | 10 | 5 | 5 | 8982081  | 71755808 | 5127473  | 69056009 | 10834059 | 70845399 | 80600296 | 67954719 | 68440111 |
| 13.90238 | 6  | 3 | 3 | 164963   | 296805.2 | 286967.9 | 402296.4 | 377775   | 112620.7 | 92176.66 | 634845.7 | 584913.1 |
| 9.45945  | 8  | 5 | 3 | 935632.9 | 3067546  | 1569091  | 3584687  | 1724746  | 3455497  | 5621169  | 2528499  | 1870891  |
| 10.9645  | 10 | 5 | 5 | 414555.7 | 1206956  | 393731.2 | 1037280  | 649030.8 | 1766561  | 658755.6 | 1229214  | 1138389  |
| 9.9677   | 10 | 5 | 5 | 836778.9 | 3350191  | 667043.3 | 3079299  | 1015098  | 3786297  | 4267350  | 2860633  | 2657804  |
| 9.976317 | 10 | 5 | 5 | 2365643  | 7277325  | 1726552  | 8043341  | 2956658  | 8368066  | 9158541  | 7967685  | 5367575  |
| 9.845483 | 6  | 3 | 3 | 1060543  | 3070435  | 789235.6 | 3434230  | 1419229  | 4104838  | 2559551  | 3279482  | 3355519  |
| 9.445217 | 10 | 4 | 5 | 20891676 | 1.05E+08 | 75000229 | 1.23E+08 | 37868858 | 1.93E+08 | 87292227 | 1.62E+08 | 3048334  |
| 10.03947 | 9  | 4 | 3 | 765567.1 | 1275082  | 637378.2 | 1503536  | 808076   | 606531   | 693986.7 | 1429395  | 2151901  |
| 9.848417 | 10 | 5 | 5 | 2566649  | 13139867 | 3830209  | 12052668 | 3054261  | 15882898 | 11587792 | 12433397 | 7991894  |
| 9.864767 | 9  | 4 | 5 | 6478270  | 28516542 | 10519752 | 31823776 | 10609178 | 31855313 | 14072586 | 35314711 | 39818687 |
| 9.960467 | 9  | 5 | 4 | 947679.1 | 3165934  | 786923.7 | 2814013  | 1363810  | 3185074  | 3181498  | 2540411  | 2483956  |
| 9.445217 | 8  | 3 | 4 | 2305272  | 4994308  | 1693659  | 6970689  | 8471143  | 6440816  | 6772766  | 5079413  | 3944710  |
| 23.68867 | 8  | 4 | 4 | 716758.8 | 3814253  | 1614935  | 3382268  | 1076780  | 1580927  | 5898411  | 3918178  | 3099046  |
| 9.976317 | 10 | 5 | 5 | 1493032  | 2537951  | 288814.9 | 2843344  | 1305466  | 2889488  | 2383113  | 2651084  | 2633340  |
| 40.827   | 13 | 5 | 3 | 397936.7 | 4586152  | 2218210  | 4058348  | 693676.9 | 6877994  | 4071143  | 1045287  | 5655820  |
| 9.992233 | 9  | 5 | 4 | 484244.4 | 1038757  | 201598.4 | 1212127  | 734365.1 | 1277511  | 1195497  | 769079.6 | 962508.8 |
| 9.840617 | 10 | 5 | 5 | 4743581  | 13547451 | 1785019  | 14893307 | 5654036  | 15429136 | 13850133 | 14767975 | 12800649 |
| 9.94455  | 10 | 5 | 5 | 3259837  | 13575083 | 2411991  | 12906990 | 1805581  | 17174505 | 14767372 | 12240089 | 11092813 |
| 9.856867 | 8  | 3 | 5 | 836112.5 | 4553255  | 1226987  | 4859918  | 603276.8 | 4937757  | 2443917  | 5014631  | 4730120  |
| 12.98252 | 4  | 1 | 3 | 38911.05 | 154175.5 | 55908.03 | 136433.6 | 57593.94 | 195092.3 | 193100.9 | 108795.8 | 79236.7  |
| 8.8977   | 9  | 5 | 4 | 609322.4 | 1227902  | 780869.8 | 1515685  | 1037605  | 1201210  | 2510860  | 1097810  | 399034.5 |
| 35.76367 | 10 | 5 | 5 | 689073.3 | 4116528  | 2928254  | 3230757  | 2738627  | 8741148  | 3077088  | 924626.8 | 3035135  |
| 9.43325  | 5  | 3 | 1 | 1356979  | 4673444  | 3130695  | 5590082  | 2720698  | 8014955  | 1935003  | 2257455  | 8135280  |
| 42.10733 | 6  | 1 | 3 | 246584.8 | 2687837  | 757625.9 | 2365397  | 1235369  | 4023844  | 2134906  | 2414998  | 2451819  |
| 10.9645  | 10 | 5 | 5 | 370032   | 1904447  | 310267.6 | 2026622  | 455068.1 | 2394169  | 1656002  | 1863007  | 1628706  |
| 10.008   | 9  | 5 | 4 | 345431.2 | 865427   | 167649.9 | 759416.8 | 439232.8 | 783154.8 | 866769.2 | 744965.8 | 777887.2 |

|          |    |   |   |          |          |          |          |          |          |          |          |          |
|----------|----|---|---|----------|----------|----------|----------|----------|----------|----------|----------|----------|
| 7.946033 | 11 | 4 | 4 | 707169.1 | 28183319 | 26090892 | 21523793 | 14513416 | 72904404 | 13771719 | 29188675 | 15986282 |
| 9.8322   | 9  | 5 | 4 | 2125906  | 9994069  | 3145814  | 8506336  | 5874411  | 8986369  | 10459955 | 7223634  | 8101161  |
| 8.9519   | 10 | 3 | 5 | 2557100  | 77214925 | 39765335 | 61322444 | 59579343 | 25377969 | 90460633 | 67313707 | 68379328 |
| 9.994767 | 9  | 5 | 4 | 724875.9 | 1631018  | 912878   | 1370394  | 747423.6 | 2361872  | 2464670  | 1947756  | 348054.1 |
| 9.331383 | 7  | 3 | 3 | 1048962  | 2910759  | 1268563  | 2488178  | 1435502  | 5035151  | 2696210  | 2696602  | 1618843  |
| 9.568567 | 9  | 5 | 4 | 2435150  | 8648695  | 1396780  | 8004013  | 2532883  | 10371994 | 9932711  | 7943006  | 7637132  |
| 9.999217 | 3  | 0 | 3 | 424139.9 | 466394   | 213545   | 583071   | 474507.5 | 605215.1 | 90942.21 | 579304.4 | 498517.8 |
| 9.845483 | 10 | 5 | 5 | 959181.7 | 3497368  | 875805.5 | 3269422  | 534073.2 | 2569647  | 3038693  | 4297123  | 4560562  |
| 9.4468   | 11 | 5 | 4 | 1509370  | 2837472  | 687832.2 | 4037021  | 5204526  | 2159825  | 2677962  | 3190165  | 3843268  |
| 9.979667 | 6  | 4 | 2 | 970349.2 | 1390436  | 807929.2 | 1051610  | 1294997  | 1926709  | 2389092  | 1476934  | 534445.5 |
| 9.460217 | 10 | 4 | 4 | 689045   | 3650353  | 1523625  | 4250725  | 2244097  | 2541366  | 5013874  | 5380010  | 3444537  |
| 29.11983 | 6  | 3 | 3 | 1141862  | 4441727  | 1448302  | 5198070  | 3056756  | 6114180  | 3687090  | 2514342  | 5578691  |
| 9.992233 | 10 | 5 | 5 | 636984.8 | 1465994  | 437808.9 | 1680042  | 853826.7 | 1672433  | 1960817  | 1687991  | 961053.8 |
| 9.859983 | 5  | 2 | 3 | 5733745  | 19525603 | 16407151 | 15207041 | 10512129 | 40252914 | 17688682 | 4288204  | 3470049  |
| 9.845483 | 5  | 3 | 2 | 566871.3 | 2129131  | 1103163  | 1850889  | 585163.5 | 1536708  | 605581.4 | 3056613  | 3284283  |
| 38.91367 | 6  | 1 | 3 | 450281.8 | 5627353  | 374454.3 | 6346034  | 3125120  | 5621879  | 5420900  | 6246342  | 5585403  |
| 10.008   | 9  | 5 | 4 | 318063.3 | 913482.9 | 209907.1 | 849428.7 | 201634.4 | 837710.7 | 1196831  | 883050.1 | 633077.3 |
| 10.95835 | 10 | 5 | 5 | 311914.9 | 1251859  | 267656.4 | 1150603  | 372155   | 1286442  | 1594855  | 1032485  | 941371   |
| 9.473717 | 15 | 5 | 5 | 9617094  | 62881798 | 11462731 | 57393312 | 21809450 | 58268475 | 54400314 | 82957500 | 57816828 |
| 9.41815  | 4  | 3 | 1 | 457987.8 | 1808413  | 1412132  | 2170280  | 812513.1 | 1153743  | 666290   | 3296960  | 3373236  |
| 9.992233 | 8  | 5 | 3 | 821135.8 | 2733790  | 602775.7 | 2389285  | 1414430  | 2817872  | 3372779  | 2597053  | 1789705  |
| 9.992233 | 7  | 4 | 3 | 344550.2 | 1172463  | 341154   | 1073472  | 293178.8 | 1074100  | 1660138  | 1359272  | 791704.2 |
| 22.22217 | 9  | 4 | 5 | 110482.1 | 347501.9 | 125429.9 | 312188   | 99893.26 | 241105.9 | 496568.1 | 468737.4 | 240457.2 |
| 20.274   | 10 | 5 | 5 | 241477.7 | 554530   | 287089.4 | 470203   | 254155.9 | 818209.7 | 890955   | 236763.6 | 357955.1 |
| 9.023433 | 9  | 5 | 4 | 413933.2 | 1887549  | 1092365  | 2248427  | 1225274  | 1212801  | 3800720  | 1325855  | 1311429  |
| 44.02033 | 19 | 5 | 3 | 323060.7 | 5405530  | 2548834  | 4800663  | 844273   | 4260207  | 4536703  | 9939450  | 4452692  |
| 9.573333 | 5  | 2 | 3 | 308382.7 | 349290.2 | 272772.2 | 484865.1 | 544100.6 | 574473.7 | 671088.7 | 220343.4 | 280545.3 |
| 17.30717 | 5  | 2 | 3 | 219145.7 | 1611508  | 330004.7 | 1445601  | 667399.5 | 2068020  | 1759614  | 1504751  | 1175569  |
| 9.845483 | 9  | 5 | 4 | 1271273  | 6309313  | 1038044  | 5671506  | 2647676  | 6524585  | 5986257  | 5643500  | 5389035  |
| 29.61567 | 5  | 2 | 3 | 430274.1 | 1561699  | 1622248  | 1126667  | 1119958  | 429843.3 | 1385461  | 0        | 4149383  |
| 9.983433 | 10 | 5 | 5 | 730831.6 | 1976048  | 725054.6 | 1706301  | 986244   | 2617147  | 2823812  | 1870929  | 1235778  |
| 43.43067 | 8  | 4 | 2 | 293982.8 | 3672999  | 1459034  | 3328646  | 451696.7 | 2837567  | 5004902  | 3747106  | 1673806  |
| 10.00998 | 9  | 5 | 4 | 322074.2 | 904935.2 | 367714.5 | 768804.9 | 496626.6 | 929651.4 | 1481471  | 684816.5 | 506081.1 |
| 9.976317 | 7  | 4 | 3 | 317074.4 | 831101.9 | 222458.7 | 921883.4 | 345279.5 | 796267.5 | 1194187  | 859782.1 | 638757.5 |
| 13.37587 | 4  | 3 | 1 | 68291.45 | 87870.57 | 40742.08 | 108086.7 | 81172.65 | 66590.48 | 62178.23 | 61003.07 | 92551.56 |

|          |    |   |   |          |          |          |          |          |          |          |          |          |
|----------|----|---|---|----------|----------|----------|----------|----------|----------|----------|----------|----------|
| 11.17508 | 6  | 2 | 3 | 6.61E+08 | 2.39E+09 | 2.19E+09 | 1.69E+09 | 2.34E+09 | 1128382  | 1749996  | 4.22E+09 | 3.97E+09 |
| 9.989483 | 9  | 4 | 5 | 1582802  | 4841421  | 1789778  | 4245058  | 2042895  | 5461259  | 1875740  | 5520117  | 6619304  |
| 9.967367 | 10 | 5 | 5 | 2054867  | 3687740  | 1475362  | 3264630  | 1240245  | 5147065  | 4461619  | 1309540  | 4155148  |
| 9.928667 | 10 | 5 | 5 | 555267.4 | 1877468  | 495903.2 | 2009858  | 339480.1 | 2659055  | 2018492  | 1740634  | 1597421  |
| 9.4468   | 9  | 4 | 4 | 700120.4 | 2972444  | 1691524  | 3700813  | 2827128  | 5071933  | 1775078  | 2301737  | 1255665  |
| 10.9645  | 10 | 5 | 5 | 1438676  | 6740297  | 1602768  | 6277397  | 1372614  | 8008699  | 8625425  | 5328047  | 4974549  |
| 9.842    | 10 | 5 | 5 | 3153190  | 13795482 | 1935793  | 13136433 | 2296970  | 16321684 | 15428205 | 12427760 | 12103556 |
| 9.8322   | 7  | 4 | 3 | 817510.2 | 1911340  | 757292.8 | 1681747  | 723916   | 2843792  | 2438883  | 1451401  | 945156.2 |
| 25.28567 | 5  | 4 | 1 | 123458.2 | 418693.4 | 277475   | 486576.2 | 125990.5 | 273863.4 | 874714.6 | 489222.9 | 203248.5 |
| 10.9645  | 10 | 5 | 5 | 1430970  | 6764036  | 1556399  | 6310170  | 1365825  | 8055709  | 8489861  | 5302254  | 5065393  |
| 9.976317 | 9  | 5 | 4 | 1667668  | 2810492  | 727296.5 | 3376339  | 2407366  | 3505889  | 3016663  | 3128209  | 2811378  |
| 9.840617 | 6  | 3 | 3 | 2348802  | 3387062  | 1296873  | 4564898  | 5056201  | 3568738  | 3453311  | 3455402  | 5050390  |
| 9.388367 | 6  | 3 | 3 | 1888571  | 10359852 | 8268512  | 13014641 | 8863305  | 20908487 | 9632615  | 3258285  | 1667148  |
| 9.445217 | 12 | 5 | 5 | 2.42E+08 | 2.33E+09 | 7.96E+08 | 2.12E+09 | 5.52E+08 | 1.74E+09 | 2.48E+09 | 2.34E+09 | 1.54E+09 |
| 9.8445   | 6  | 3 | 3 | 1371368  | 4834956  | 1952212  | 4303882  | 1426208  | 6176820  | 2098045  | 6716782  | 3520702  |
| 9.983433 | 7  | 4 | 3 | 572323.1 | 1079506  | 358243.9 | 1187504  | 339329   | 1614579  | 1226527  | 964196.2 | 921643.9 |
| 9.964417 | 13 | 5 | 5 | 1968856  | 5214563  | 2766417  | 4345374  | 2849652  | 4557718  | 5145387  | 2973927  | 3476477  |
| 10.95835 | 5  | 1 | 4 | 317824.9 | 776814.8 | 331342.1 | 892564.2 | 411400.5 | 866784.8 | 1291969  | 422236.3 | 586121   |
| 10.9645  | 10 | 5 | 5 | 560227.3 | 2310290  | 437880.4 | 2508796  | 783932.3 | 2702845  | 2777046  | 1813311  | 1926187  |
| 22.251   | 10 | 5 | 5 | 441859.1 | 4291692  | 1591198  | 3885124  | 927687.4 | 2898409  | 6980244  | 3949865  | 4254697  |
| 14.44302 | 9  | 5 | 4 | 110751.3 | 896404.5 | 131317.3 | 847530.6 | 179883   | 817418.5 | 1128382  | 818130   | 860849.5 |
| 9.616167 | 6  | 3 | 3 | 458190.1 | 955842.9 | 274119.7 | 845753.3 | 418624.1 | 1269475  | 1176130  | 900549.6 | 850835.5 |
| 10.02372 | 8  | 5 | 3 | 273961.1 | 691381.7 | 203945.3 | 569204.8 | 508374.3 | 715967.6 | 885082.8 | 443513.1 | 523999.8 |
| 9.915583 | 5  | 2 | 3 | 1257924  | 1710873  | 471727.9 | 1866389  | 532164.5 | 1908887  | 1194286  | 2340427  | 1291427  |
| 10.008   | 8  | 5 | 3 | 266258.9 | 603992.6 | 140029.9 | 518877.4 | 354930   | 671544.7 | 789164.9 | 587949.7 | 410435.4 |
| 10.008   | 10 | 5 | 5 | 578141.9 | 2028386  | 187588   | 1860687  | 721381.1 | 2091185  | 2115965  | 1700125  | 2064570  |
| 9.964417 | 10 | 5 | 5 | 10829328 | 29026690 | 11570407 | 32823290 | 12972806 | 40114679 | 42988264 | 23031618 | 19225090 |
| 9.659033 | 8  | 4 | 4 | 264042.8 | 696318.3 | 157549.7 | 983663   | 1259418  | 676368.8 | 834098   | 826442.6 | 699292.7 |
| 9.960467 | 5  | 3 | 2 | 452743.4 | 771708.7 | 555980.4 | 603800.1 | 531649.6 | 1192018  | 1505419  | 551371.3 | 168785.8 |
| 20.8785  | 4  | 3 | 1 | 121987.4 | 386457.2 | 166879.1 | 324380.3 | 229049.8 | 165707.7 | 522149.2 | 329401.5 | 333218.9 |
| 9.573333 | 8  | 3 | 4 | 1178671  | 6442882  | 3268990  | 5216224  | 4545915  | 6290125  | 4523332  | 9101938  | 10136641 |
| 24.609   | 9  | 4 | 5 | 224030.7 | 1143121  | 433896.9 | 1024996  | 320646.3 | 1364600  | 1148410  | 697119.7 | 1743165  |
| 17.6875  | 6  | 3 | 3 | 58740.07 | 170676.8 | 60196.4  | 198243.3 | 109474.9 | 118131.1 | 120842.4 | 251268.7 | 217049.6 |
| 31.7685  | 9  | 5 | 4 | 4245199  | 27365577 | 13849664 | 23016941 | 14340338 | 22134129 | 26080016 | 7596438  | 39525713 |
| 24.42083 | 8  | 4 | 4 | 274490.7 | 986289.1 | 330911.4 | 789804.8 | 818738.1 | 872351.5 | 817952.9 | 735717.1 | 1562504  |

|          |    |   |   |          |          |          |          |          |          |          |          |          |
|----------|----|---|---|----------|----------|----------|----------|----------|----------|----------|----------|----------|
| 10.9645  | 10 | 5 | 5 | 392491.2 | 1656406  | 409999.7 | 1535097  | 376105.8 | 2124417  | 2058477  | 1227374  | 1363868  |
| 9.283817 | 6  | 3 | 3 | 466039.3 | 1082663  | 642710.1 | 1375478  | 1163367  | 2013732  | 1490205  | 659678   | 727860.9 |
| 9.3919   | 6  | 3 | 3 | 5838847  | 7677039  | 7357644  | 13387064 | 24424711 | 2422937  | 8822041  | 3099666  | 20049702 |
| 9.8322   | 9  | 5 | 4 | 3589649  | 14958351 | 1461440  | 16188393 | 5290140  | 16805146 | 15910147 | 14103639 | 13090087 |
| 10.95835 | 8  | 3 | 5 | 477099.8 | 1204366  | 434241.9 | 1065770  | 464977.7 | 1868117  | 1326815  | 871737.5 | 771183.7 |
| 9.406667 | 9  | 4 | 4 | 1786908  | 13172064 | 4371025  | 11683016 | 5247159  | 15738820 | 7380645  | 9740552  | 15412242 |
| 9.041133 | 10 | 5 | 5 | 5019747  | 35204949 | 13271298 | 40304832 | 19170387 | 29188126 | 58693680 | 32518814 | 27636171 |
| 9.514733 | 5  | 3 | 2 | 624212.2 | 1478986  | 661528.2 | 1887105  | 1713260  | 2536097  | 1476858  | 1260949  | 1403451  |
| 9.976317 | 5  | 3 | 2 | 484656.8 | 626340   | 485475.7 | 444448.4 | 676706.1 | 974707.8 | 1237514  | 455287.8 | 0        |
| 10.008   | 5  | 3 | 2 | 537786.5 | 573118.9 | 333525.2 | 696481.2 | 456166.3 | 792664.5 | 0        | 780807.5 | 560870.3 |
| 9.992233 | 7  | 3 | 4 | 552514.2 | 612887.7 | 256260.3 | 759199   | 608512.3 | 677151.1 | 1009099  | 570466.5 | 325184.2 |
| 43.15717 | 8  | 3 | 3 | 383044.7 | 5220189  | 1435699  | 5755578  | 1989949  | 5625495  | 4045953  | 3632530  | 5560506  |
| 9.992233 | 8  | 4 | 4 | 382926.7 | 1023290  | 276264.1 | 916473.8 | 403471.8 | 1118734  | 1370285  | 966531.7 | 608891.8 |
| 10.93618 | 7  | 4 | 3 | 242340.9 | 705676.2 | 229569.6 | 811055.1 | 420862.1 | 673271.4 | 561085.5 | 681077.9 | 516708.5 |
| 44.9835  | 9  | 3 | 5 | 500982.1 | 5539560  | 1466946  | 6340327  | 3310788  | 6274403  | 4773568  | 3329078  | 6457522  |
| 9.559117 | 4  | 3 | 1 | 199724.6 | 344141   | 197480.2 | 262320   | 317274.2 | 475777.6 | 394383.7 | 150234.6 | 128265.9 |
| 10.97242 | 10 | 5 | 5 | 1081248  | 6182098  | 876674.1 | 5862086  | 1177922  | 6765023  | 6721950  | 5109950  | 5352978  |
| 9.9677   | 10 | 5 | 5 | 1769154  | 4654577  | 1460148  | 4104179  | 2057434  | 5646274  | 6615576  | 4099384  | 2947445  |
| 9.992233 | 7  | 4 | 3 | 607600.4 | 593058.9 | 281770   | 736620.7 | 586780.7 | 848491   | 699530.1 | 818921.8 | 206313   |
| 9.864767 | 9  | 5 | 4 | 1148641  | 4940890  | 2210845  | 4323307  | 1779321  | 3289129  | 1910712  | 6485740  | 6917985  |
| 10.12955 | 6  | 2 | 4 | 1.19E+09 | 1.73E+09 | 2.09E+09 | 1.05E+09 | 2.34E+09 | 4.88E+09 | 1.01E+09 | 6518120  | 3078386  |
| 37.64733 | 9  | 5 | 4 | 791402.6 | 15733685 | 2539351  | 17893341 | 9327556  | 13231988 | 17501029 | 14925338 | 19203908 |
| 10.3061  | 9  | 5 | 4 | 282354.6 | 947158.8 | 421029.7 | 839573.2 | 253628.6 | 791776   | 1550133  | 1138687  | 427070.6 |
| 9.433    | 8  | 5 | 3 | 602149.2 | 2876061  | 1376599  | 3300350  | 1388092  | 3289799  | 647175.1 | 2644482  | 4282060  |
| 9.960467 | 10 | 5 | 5 | 2495534  | 4906562  | 985224.3 | 5707464  | 3451313  | 6083373  | 5312441  | 5332135  | 4162599  |
| 3.68215  | 9  | 3 | 5 | 1035754  | 18248612 | 12681731 | 14921766 | 8460830  | 0        | 24644423 | 24291741 | 10761348 |
| 9.976317 | 6  | 3 | 3 | 1052033  | 1336622  | 273762.6 | 1514336  | 752493.8 | 1198814  | 1507317  | 989742.1 | 1696145  |
| 9.8445   | 5  | 3 | 2 | 1232897  | 3211751  | 1721046  | 2631495  | 2043517  | 5628615  | 1591028  | 4369790  | 2489170  |
| 9.3919   | 10 | 4 | 4 | 9280802  | 57641581 | 10341767 | 66482948 | 38227231 | 50968769 | 55443995 | 73517506 | 47001974 |
| 30.29483 | 8  | 4 | 4 | 285962.2 | 1607836  | 306012   | 1462730  | 585459.9 | 1901788  | 1867053  | 1632294  | 1155395  |
| 9.365833 | 7  | 3 | 4 | 806826.6 | 3620370  | 2482738  | 2978836  | 1569239  | 1397373  | 2945262  | 6174646  | 1274844  |
| 9.311883 | 5  | 3 | 2 | 411763.9 | 2076377  | 1110831  | 1723649  | 1187947  | 2207521  | 495361.5 | 3629951  | 2022476  |
| 9.848417 | 9  | 5 | 4 | 1546814  | 5174251  | 2143384  | 4177885  | 4004199  | 4621995  | 5078672  | 2991806  | 4433706  |
| 11.8546  | 10 | 5 | 5 | 1095766  | 8850168  | 2206314  | 10344933 | 6361027  | 6764898  | 11679117 | 10496148 | 8537241  |
| 24.21533 | 10 | 5 | 5 | 1041877  | 10581196 | 4349925  | 9125729  | 5105603  | 7442906  | 13630523 | 5364306  | 10472953 |

|          |    |   |   |          |          |          |          |          |          |          |          |          |
|----------|----|---|---|----------|----------|----------|----------|----------|----------|----------|----------|----------|
| 22.611   | 8  | 3 | 5 | 98536.87 | 335695.5 | 110365.9 | 370144.4 | 114406.2 | 271494.7 | 457018   | 361390.9 | 180726.3 |
| 11.53673 | 10 | 5 | 5 | 153126.2 | 827976.1 | 94453.35 | 893877.2 | 281371.5 | 914037.8 | 934949.8 | 814331.5 | 721562   |
| 12.25235 | 10 | 5 | 5 | 301506.1 | 2119710  | 705118.3 | 1833713  | 1105656  | 2828122  | 2600747  | 2204886  | 1015528  |
| 9.960467 | 6  | 2 | 4 | 1150640  | 1829711  | 352177.6 | 1701145  | 475518   | 1665989  | 1397507  | 2343783  | 1956926  |
| 10.78613 | 8  | 4 | 4 | 260471.1 | 723674.5 | 248093.5 | 653408.6 | 208675   | 482324.7 | 1051371  | 922918   | 587492   |
| 9.45945  | 12 | 5 | 4 | 1897075  | 8998962  | 2116600  | 7728946  | 5343302  | 12168976 | 10174656 | 7840746  | 7221896  |
| 10.95602 | 7  | 4 | 3 | 273643.4 | 880437.6 | 144586.4 | 973942   | 396789   | 984191.1 | 877597.7 | 827304.5 | 1042132  |
| 10.92208 | 5  | 2 | 3 | 190912   | 1069426  | 335894.3 | 960977.3 | 371479.1 | 764779.7 | 1545650  | 846575.2 | 894157.5 |
| 9.992233 | 7  | 3 | 4 | 366708.2 | 557517.8 | 141338   | 654387.3 | 413468.1 | 674195.7 | 719886.8 | 558852.6 | 434928.7 |
| 42.8985  | 8  | 3 | 3 | 620644   | 5315019  | 2421593  | 6092960  | 2656404  | 8104793  | 3359501  | 3426056  | 7807721  |
| 29.84833 | 10 | 5 | 5 | 1913456  | 16064216 | 2078482  | 16716927 | 2186370  | 16126705 | 16502590 | 13101182 | 15671486 |
| 10.95835 | 4  | 1 | 3 | 282488.7 | 475868.8 | 139139.5 | 544251.6 | 278922.5 | 536916.4 | 619905.9 | 559822.9 | 285820.8 |
| 10.9645  | 10 | 5 | 5 | 1847647  | 5998892  | 811391.6 | 6824407  | 3608443  | 6602558  | 7092012  | 5622090  | 5164339  |
| 10.008   | 8  | 5 | 3 | 829378.8 | 1013992  | 110688.5 | 1330139  | 1403587  | 1052490  | 1015328  | 1124388  | 1048541  |
| 9.976317 | 10 | 5 | 5 | 2190973  | 6137850  | 2354200  | 7006930  | 3239203  | 7805338  | 8772149  | 6749984  | 3703052  |
| 9.848417 | 10 | 5 | 5 | 1306033  | 7483423  | 1101615  | 6729398  | 3220950  | 7115310  | 7632225  | 6267489  | 7155074  |
| 10.61757 | 9  | 5 | 4 | 315240.4 | 1237254  | 245298   | 1153294  | 300324.7 | 1128456  | 1619743  | 1141854  | 978470.1 |
| 9.94455  | 4  | 3 | 1 | 1179022  | 3375293  | 1815595  | 3915053  | 1713649  | 2503904  | 2607214  | 5737363  | 4745441  |
| 12.03522 | 8  | 4 | 4 | 67577.19 | 194688.9 | 57755.46 | 221939.6 | 110343.7 | 229438.1 | 112197.4 | 256452.9 | 161057.3 |
| 10.97857 | 10 | 5 | 5 | 404138.8 | 2092259  | 760470.8 | 1833201  | 925270   | 2770264  | 2497933  | 1347371  | 1189122  |
| 10.96997 | 8  | 4 | 4 | 336350.9 | 1212636  | 403776.5 | 1465374  | 1071601  | 778267.5 | 1696906  | 990827.9 | 1011385  |
| 10.09898 | 11 | 5 | 5 | 3251916  | 9651435  | 585768.3 | 8958522  | 3048773  | 9780377  | 9873035  | 8721586  | 9570720  |
| 9.433    | 7  | 3 | 4 | 582869.6 | 2814753  | 1503027  | 2428075  | 953259.6 | 4995242  | 1804185  | 2040594  | 1480443  |
| 10.94853 | 3  | 0 | 3 | 203295   | 712707.1 | 329733.3 | 624710.8 | 237467.4 | 458130.8 | 893695.6 | 317832.2 | 757629.8 |
| 8.93965  | 10 | 5 | 5 | 1756419  | 6762197  | 1773464  | 7265684  | 1514997  | 7944072  | 8938311  | 6851975  | 5536702  |
| 10.9645  | 10 | 5 | 5 | 552383.3 | 3438277  | 678002.4 | 3231604  | 678186.6 | 3613185  | 4464535  | 2753707  | 2903502  |
| 9.960467 | 10 | 5 | 5 | 1337432  | 2928928  | 691333.9 | 3327240  | 1675950  | 3826565  | 2209255  | 3472233  | 2696343  |
| 9.994767 | 10 | 4 | 4 | 2573248  | 4223559  | 3341794  | 5182243  | 2933037  | 10190272 | 2486270  | 2840749  | 2592007  |
| 9.536783 | 11 | 4 | 4 | 2115578  | 4910003  | 6805134  | 6972060  | 6728852  | 1217153  | 1955977  | 2902039  | 17028153 |
| 9.94455  | 9  | 5 | 4 | 1114755  | 4075956  | 607927.8 | 3807754  | 1071962  | 4806405  | 4343204  | 3410162  | 3477010  |
| 27.36967 | 9  | 5 | 4 | 143648.9 | 692489.2 | 299829.1 | 619480.4 | 147293.9 | 1015436  | 891876.6 | 371778.6 | 376783.8 |
| 9.976317 | 9  | 5 | 4 | 945317.7 | 2270161  | 898626.2 | 1967903  | 1075324  | 2658162  | 3506314  | 2280597  | 1124655  |
| 33.61517 | 10 | 5 | 5 | 415575   | 3014622  | 872394.2 | 2777472  | 666695.3 | 4138465  | 2858756  | 1727232  | 3330188  |
| 9.960467 | 8  | 4 | 4 | 723981.8 | 1144577  | 559022.1 | 1285835  | 332095.6 | 1394396  | 205207.8 | 1649713  | 1365300  |
| 10.03947 | 9  | 5 | 4 | 267606.7 | 827009.5 | 138814.3 | 742190.1 | 359830.8 | 603794.1 | 871456.8 | 891166.4 | 969734.7 |



|          |    |   |   |          |          |          |          |          |          |          |          |          |
|----------|----|---|---|----------|----------|----------|----------|----------|----------|----------|----------|----------|
| 35.59933 | 9  | 4 | 5 | 210162.8 | 1473603  | 559640.7 | 1291445  | 633817.4 | 2008532  | 1200212  | 681789.5 | 1988074  |
| 9.684583 | 9  | 5 | 4 | 969835.6 | 3142745  | 541275.1 | 3500387  | 1530490  | 3602037  | 3579645  | 3339077  | 2856031  |
| 20.28867 | 5  | 3 | 2 | 26271564 | 82960360 | 1.13E+08 | 1.17E+08 | 1.1E+08  | 2.05E+08 | 438049.9 | 2.08E+08 | 352923.2 |
| 9.732983 | 3  | 3 | 0 | 312519.9 | 559193.7 | 212362.5 | 660200.1 | 411879.9 | 529344.8 | 760718.8 | 777933.4 | 277879.4 |
| 9.9677   | 10 | 5 | 5 | 2392173  | 8734901  | 2133735  | 7827260  | 3595989  | 9875317  | 11551855 | 7351783  | 6078629  |
| 9.999517 | 6  | 4 | 2 | 268848.8 | 804381.8 | 332716.1 | 709050.1 | 292642.5 | 268686.6 | 1162147  | 830996   | 791500.7 |
| 10.01477 | 5  | 1 | 4 | 789194.6 | 697547.5 | 411170.9 | 848472.4 | 565986.4 | 1084013  | 1145121  | 286178.9 | 301795.2 |
| 9.960467 | 9  | 5 | 4 | 1862564  | 2047434  | 463050.7 | 2344685  | 1270535  | 2298295  | 1443582  | 2604980  | 2166871  |
| 9.43325  | 6  | 4 | 2 | 699817.6 | 3403715  | 1623147  | 3827726  | 1104052  | 4899730  | 3988068  | 4774365  | 1427753  |
| 9.3735   | 4  | 1 | 3 | 481837.5 | 627476.3 | 437957.6 | 487679.7 | 480905.9 | 1185994  | 845767.4 | 515676.9 | 589943.2 |
| 9.932033 | 10 | 5 | 5 | 22152424 | 86316074 | 17770568 | 82073211 | 7829359  | 1.11E+08 | 98604635 | 72734415 | 68712781 |
| 9.992233 | 7  | 3 | 4 | 9808899  | 6691466  | 8365036  | 4248704  | 7720573  | 640616.7 | 1200852  | 11716466 | 19078030 |
| 10.94443 | 6  | 3 | 3 | 302248.8 | 652877.6 | 257789.8 | 722153.7 | 193168.1 | 322532.9 | 627301.8 | 532731.3 | 771987.8 |
| 10.12327 | 10 | 5 | 5 | 1215586  | 3936864  | 1041656  | 3502746  | 1717366  | 4186558  | 3256152  | 3083725  | 3515435  |
| 10.95602 | 9  | 5 | 4 | 241731.8 | 567435.9 | 84283.73 | 500762.1 | 290630.2 | 555733.6 | 484051.8 | 558284.7 | 530648.4 |
| 10.95055 | 6  | 3 | 3 | 232157.1 | 736250.2 | 206291.5 | 664236.1 | 264234.9 | 983807.9 | 917334.4 | 494018.9 | 650046   |
| 9.431517 | 5  | 3 | 2 | 456622.8 | 1343158  | 855322.1 | 1067127  | 962481.9 | 1462724  | 1344912  | 741951   | 479605.7 |
| 9.915583 | 3  | 0 | 3 | 776944.6 | 1800804  | 702440.7 | 2073220  | 1051471  | 1675072  | 698153.3 | 2535265  | 2248555  |
| 29.83417 | 10 | 5 | 5 | 1661760  | 13273488 | 1969343  | 13884858 | 2066137  | 13093053 | 13615447 | 10744558 | 12701349 |
| 9.880683 | 5  | 3 | 2 | 2186101  | 3363299  | 2707137  | 2521953  | 2847218  | 4034893  | 374792.8 | 1698722  | 3205182  |
| 10.9645  | 9  | 4 | 5 | 211263.4 | 575371.3 | 291566.6 | 653034.1 | 213931.2 | 926759.9 | 834205.5 | 467370.3 | 247456.9 |
| 41.316   | 10 | 3 | 2 | 300225.6 | 2921502  | 1280356  | 2632779  | 260081   | 2722571  | 1314752  | 2607383  | 4873191  |
| 10.9645  | 8  | 4 | 4 | 195280.5 | 626018.3 | 176340.6 | 537250.7 | 368920.3 | 916559.3 | 593879.5 | 641803.1 | 465486.2 |
| 9.853633 | 6  | 3 | 2 | 1047968  | 1936266  | 633447.5 | 2407465  | 2051572  | 2127367  | 1392372  | 1413488  | 2929062  |
| 15.00018 | 10 | 5 | 5 | 3859557  | 9505956  | 8127552  | 13580304 | 16926362 | 20906087 | 6067443  | 15059483 | 2380377  |
| 26.32467 | 7  | 4 | 3 | 180215.7 | 1366987  | 351913.7 | 1240395  | 473985.9 | 1126218  | 1925898  | 1188181  | 1093183  |
| 9.976317 | 13 | 5 | 5 | 7693899  | 26376837 | 3171231  | 22964543 | 15132158 | 28545935 | 29722282 | 27589480 | 22672795 |
| 10.9645  | 10 | 5 | 5 | 606843.3 | 2206554  | 443673.4 | 2411618  | 837895.4 | 2644223  | 2721706  | 1919070  | 1758852  |
| 9.983467 | 10 | 5 | 5 | 9618344  | 18303942 | 8042446  | 20284600 | 4409066  | 29210066 | 20467965 | 6918895  | 16036943 |
| 9.41815  | 5  | 2 | 3 | 1365766  | 7548498  | 1474974  | 5917926  | 7242543  | 9091394  | 8068826  | 7698361  | 5104122  |
| 9.43325  | 10 | 5 | 4 | 1371600  | 11554278 | 2744943  | 12493356 | 3426654  | 9342680  | 14354757 | 14740876 | 9418054  |
| 9.27445  | 12 | 5 | 5 | 145033   | 1862180  | 283137.1 | 1640683  | 969526.4 | 1834098  | 2353441  | 1758910  | 1642800  |
| 9.388617 | 7  | 4 | 3 | 629307.9 | 944199.2 | 777737.1 | 729409   | 637241.2 | 1051560  | 0        | 691367.3 | 833730.6 |
| 10.96015 | 6  | 3 | 3 | 1686468  | 5308286  | 1219234  | 4798652  | 2031504  | 4435976  | 7065875  | 4170669  | 4813942  |
| 9.311883 | 6  | 3 | 3 | 3455762  | 11674264 | 10905890 | 8649802  | 9035897  | 23690924 | 4532225  | 4739517  | 23431213 |

|          |    |   |   |          |          |          |          |          |          |          |          |          |
|----------|----|---|---|----------|----------|----------|----------|----------|----------|----------|----------|----------|
| 9.445217 | 11 | 5 | 5 | 35457932 | 2.91E+08 | 34075794 | 2.61E+08 | 1.32E+08 | 3.37E+08 | 2.81E+08 | 2.45E+08 | 2.84E+08 |
| 10.03947 | 9  | 5 | 4 | 623702.6 | 781324.9 | 209795.7 | 1025030  | 1086260  | 527930.8 | 958549.8 | 757933.3 | 1024672  |
| 9.37135  | 8  | 3 | 3 | 1321265  | 4985042  | 4832829  | 3662227  | 3877201  | 1430658  | 771571.5 | 2225084  | 10209055 |
| 42.23667 | 14 | 4 | 5 | 339478.3 | 5024878  | 2557252  | 6134755  | 4478013  | 5118351  | 5669853  | 5610051  | 861996.1 |
| 10.008   | 10 | 5 | 5 | 661126.8 | 2252138  | 442936.2 | 2061225  | 769052   | 2502519  | 2798383  | 2325359  | 1675762  |
| 9.856867 | 10 | 5 | 5 | 796603.5 | 3172191  | 405963   | 3333198  | 631593.7 | 3291191  | 3450419  | 2508299  | 3091812  |
| 10.95055 | 10 | 5 | 5 | 1332765  | 6041131  | 1647192  | 5568609  | 1484316  | 7800017  | 6798285  | 4503815  | 4078046  |
| 18.65817 | 7  | 4 | 3 | 188785.4 | 463638.6 | 222295.1 | 516892.2 | 106014   | 795311.7 | 417129.7 | 558688.9 | 319215.5 |
| 9.976317 | 8  | 4 | 4 | 791156.3 | 1404179  | 830874.9 | 1605566  | 425522.6 | 2284900  | 87055.96 | 1877969  | 1498962  |
| 9.0035   | 8  | 4 | 4 | 170514.9 | 437044.4 | 336988.9 | 609469.2 | 722555.3 | 483691.4 | 910191.6 | 545879.5 | 219604.1 |
| 10.95055 | 6  | 3 | 3 | 717078.8 | 1903224  | 356277.3 | 1690918  | 909824.5 | 2186057  | 2334901  | 1801997  | 1449802  |
| 29.20333 | 9  | 4 | 5 | 1552565  | 13321615 | 4549137  | 12176933 | 2790567  | 10096977 | 13228452 | 12147787 | 10048987 |
| 10.02372 | 10 | 5 | 5 | 290327.7 | 749891.2 | 134990.7 | 817289.8 | 281317.7 | 900031.7 | 797060.9 | 836201.5 | 623130.6 |
| 9.516467 | 15 | 5 | 5 | 6319006  | 39745274 | 11445855 | 43586402 | 13927586 | 39257048 | 24391560 | 33732315 | 48115231 |
| 19.68067 | 10 | 5 | 5 | 907543.4 | 4487055  | 760840.3 | 5039598  | 2413979  | 4962001  | 4281068  | 5549112  | 3951433  |
| 9.976317 | 10 | 5 | 5 | 998636.9 | 2645716  | 917647.2 | 2955063  | 1125353  | 3119199  | 3624461  | 3051488  | 2101063  |
| 10.9645  | 10 | 5 | 5 | 586556.2 | 2201221  | 365293.4 | 2398347  | 834532.8 | 2606608  | 2567876  | 2044239  | 1790761  |
| 9.992233 | 9  | 4 | 5 | 502466   | 851838.6 | 432498.9 | 1051741  | 822069.7 | 743660.6 | 519023.8 | 1586163  | 852651.6 |
| 9.333667 | 8  | 4 | 4 | 740198.9 | 4030009  | 3215581  | 3266532  | 1463416  | 2976323  | 3479564  | 9570209  | 2929866  |
| 9.536783 | 7  | 2 | 3 | 664820.4 | 819766.3 | 366005.9 | 1054351  | 1014922  | 1164131  | 1010119  | 839589   | 879296.2 |
| 9.445217 | 14 | 5 | 5 | 15214258 | 1.27E+08 | 28575988 | 1.18E+08 | 35786572 | 1.09E+08 | 1.4E+08  | 1.72E+08 | 1.09E+08 |
| 9.4159   | 6  | 3 | 3 | 815752.6 | 4183452  | 2058681  | 3608290  | 1754222  | 2928628  | 4960763  | 1509472  | 6911969  |
| 9.960467 | 6  | 2 | 4 | 2117095  | 3027906  | 1961920  | 3771698  | 2878360  | 1578510  | 483647.2 | 5336088  | 4063512  |
| 9.530583 | 10 | 3 | 5 | 2512206  | 8676202  | 3729226  | 11900280 | 14262057 | 4306900  | 5817097  | 8437844  | 11945839 |
| 10.9645  | 7  | 3 | 4 | 218674.7 | 599418.4 | 226240.8 | 540591.9 | 157598.1 | 848784   | 843468.9 | 432137.1 | 466605.6 |
| 9.992233 | 5  | 2 | 3 | 293134.3 | 609547.6 | 230521.1 | 514932.7 | 377095.3 | 560979.6 | 248339.1 | 729883.4 | 646192.1 |
| 9.992233 | 11 | 5 | 5 | 665447.3 | 1702732  | 857511.8 | 1967342  | 903821.2 | 2315410  | 2854409  | 1456952  | 1057754  |
| 19.67967 | 10 | 5 | 5 | 4596263  | 35506498 | 2705901  | 32533496 | 13283752 | 39038320 | 33329117 | 32296405 | 36281965 |
| 29.31933 | 8  | 5 | 3 | 196843.7 | 937296.2 | 326818.2 | 849517.5 | 251629.7 | 869619.2 | 1275518  | 713687   | 555245.2 |
| 9.992233 | 9  | 5 | 4 | 1141570  | 1264717  | 569373.4 | 1486915  | 870856.6 | 728410   | 2195245  | 1344012  | 1139404  |
| 9.840617 | 8  | 4 | 4 | 665692.9 | 1920815  | 336093.5 | 1765341  | 641149.1 | 2054180  | 1364029  | 2247631  | 2048376  |
| 9.904767 | 10 | 5 | 5 | 8451708  | 82657917 | 5171194  | 79071025 | 15669478 | 87244033 | 84995753 | 78034072 | 76195526 |
| 9.842    | 6  | 3 | 3 | 2162914  | 4191194  | 3695017  | 3265610  | 2260125  | 1977481  | 9487405  | 1230659  | 1591511  |
| 9.983433 | 10 | 5 | 5 | 4868414  | 13279547 | 4613589  | 11700209 | 5830324  | 16796973 | 19167146 | 12328248 | 8196246  |
| 39.38833 | 5  | 1 | 4 | 358388.2 | 5585722  | 1237855  | 6278915  | 2961253  | 6124482  | 5846324  | 6209930  | 6351784  |

|          |    |   |   |          |          |          |          |          |          |          |          |          |
|----------|----|---|---|----------|----------|----------|----------|----------|----------|----------|----------|----------|
| 44.27917 | 5  | 2 | 3 | 394125.9 | 4317512  | 240651.2 | 6045479  | 7844837  | 4200001  | 4099550  | 4290859  | 4726673  |
| 10.10793 | 14 | 5 | 5 | 5069213  | 18135024 | 4371955  | 17032807 | 2749104  | 23355385 | 22287257 | 16198256 | 13885168 |
| 9.3919   | 10 | 5 | 4 | 2356316  | 15493805 | 4727700  | 17199409 | 6485606  | 13830663 | 8851158  | 18065188 | 21480308 |
| 9.872883 | 10 | 5 | 5 | 1687514  | 6040946  | 2160785  | 5215899  | 3217287  | 5933484  | 6304526  | 3599711  | 4944707  |
| 24.10183 | 5  | 2 | 3 | 89615.91 | 250063.4 | 116661.8 | 216322.7 | 108521.5 | 119121.3 | 364605.8 | 311354.8 | 129104   |
| 41.61817 | 7  | 3 | 4 | 370988.1 | 5001121  | 1334243  | 4484463  | 2026518  | 7242140  | 3865732  | 4716790  | 4148077  |
| 9.4925   | 5  | 2 | 3 | 2404382  | 5826960  | 1844868  | 8361319  | 11419209 | 3937324  | 3883952  | 7630445  | 7533217  |
| 11.52297 | 5  | 2 | 3 | 85931.63 | 168114.6 | 67647.81 | 207483.8 | 169320.7 | 200477.7 | 258547.9 | 92213.44 | 177974.7 |
| 10.9645  | 10 | 5 | 5 | 3546930  | 16653847 | 2714122  | 15706799 | 3543800  | 19168770 | 19747481 | 14842813 | 13514119 |
| 28.836   | 8  | 4 | 4 | 211359   | 1351909  | 1086157  | 1072584  | 738038.8 | 404050.8 | 1782424  | 117145.6 | 2764428  |
| 31.13783 | 6  | 2 | 4 | 38038.34 | 138529.7 | 96307.03 | 162608.5 | 58920.57 | 195160   | 103382.8 | 111504.5 | 14983.1  |
| 14.15748 | 10 | 5 | 5 | 472450.3 | 3420300  | 951823.1 | 3056052  | 1423618  | 4202583  | 3750774  | 2242762  | 2582635  |
| 9.887133 | 7  | 4 | 3 | 5915421  | 10610150 | 16863228 | 15833694 | 18044448 | 3535648  | 2086571  | 3861637  | 40751134 |
| 9.55155  | 4  | 1 | 3 | 204124.4 | 398972.4 | 249673.2 | 319565.7 | 280296.5 | 499558.7 | 568114.7 | 658131.8 | 176927.1 |
| 10.01477 | 10 | 5 | 5 | 1027155  | 3169619  | 859911.6 | 2831541  | 1335677  | 3605634  | 4346425  | 3055398  | 2068990  |
| 20.46733 | 7  | 4 | 3 | 59881.02 | 169607.5 | 50171.22 | 195818.6 | 111117.8 | 92334.78 | 187966.8 | 195118.1 | 150589   |
| 16.896   | 9  | 5 | 4 | 148207.5 | 524992.2 | 178686   | 601168.2 | 308950.8 | 785501.9 | 340047.4 | 410097.5 | 468268   |
| 9.983433 | 9  | 5 | 4 | 497136.8 | 1373316  | 386307.8 | 1236607  | 516145.3 | 1821495  | 1478597  | 1615221  | 904339.4 |
| 10.95602 | 7  | 5 | 2 | 1554321  | 3561141  | 1868042  | 3100961  | 1076703  | 4161070  | 6532631  | 2421225  | 1838865  |
| 9.857683 | 9  | 5 | 4 | 1072501  | 3422922  | 1276424  | 3907777  | 1892599  | 3917804  | 3710219  | 2613984  | 5099858  |
| 9.999217 | 10 | 5 | 5 | 2049103  | 5613422  | 2049004  | 4873706  | 2824033  | 7111418  | 7985660  | 5896821  | 3208336  |
| 9.514733 | 10 | 5 | 5 | 2070795  | 3448195  | 2348633  | 4221272  | 2801348  | 6197615  | 2064153  | 2859307  | 616472.6 |
| 44.87733 | 4  | 1 | 3 | 107729.1 | 476832.8 | 132306.6 | 511892.9 | 99444.85 | 600768.6 | 453036.6 | 576066.9 | 487534.9 |
| 9.864767 | 10 | 5 | 5 | 1720224  | 11446929 | 628643.9 | 11873841 | 1870053  | 11198712 | 10512360 | 12185190 | 11638276 |
| 9.43325  | 5  | 3 | 1 | 789576.9 | 2095606  | 911245.4 | 2398735  | 1106855  | 870388.1 | 1798933  | 2470787  | 3352359  |
| 9.91875  | 8  | 4 | 3 | 1921782  | 6734187  | 2775254  | 7496028  | 2298653  | 10111857 | 4511598  | 9267405  | 5677630  |
| 29.76183 | 10 | 5 | 5 | 461610.3 | 1725180  | 565238.6 | 2026863  | 1285514  | 1136235  | 1658460  | 1753997  | 1434711  |
| 26.37983 | 5  | 3 | 2 | 187060.6 | 971334.1 | 871640.4 | 1190558  | 551816.3 | 489111.4 | 359710.5 | 174204.8 | 1984261  |
| 15.61058 | 6  | 3 | 3 | 55620.22 | 251615.5 | 73863.59 | 222272.9 | 116727.6 | 339834   | 268694.3 | 245631.8 | 135695.1 |
| 9.992233 | 10 | 5 | 5 | 1017132  | 4463362  | 1071473  | 4093795  | 1381394  | 4542266  | 5999353  | 4034374  | 3052024  |
| 22.6675  | 7  | 4 | 3 | 118234   | 378606.5 | 158405.2 | 336639.4 | 119530   | 293252.2 | 646597.6 | 243622.5 | 385668.7 |
| 9.488133 | 10 | 4 | 4 | 3455762  | 11724620 | 7465022  | 9708856  | 5946133  | 10276896 | 11196371 | 294470.5 | 18529958 |
| 10.95602 | 10 | 5 | 5 | 921122.1 | 2360339  | 824241.4 | 2602045  | 797209.6 | 3676516  | 2375517  | 2339873  | 1454585  |
| 9.374083 | 9  | 4 | 4 | 1326035  | 3587686  | 3701305  | 2728585  | 1512656  | 3713379  | 2282513  | 9869063  | 484928.7 |
| 9.8445   | 9  | 5 | 4 | 793259.5 | 1924816  | 832064.4 | 1684814  | 777960.8 | 2957587  | 2661281  | 1610574  | 1158101  |

|          |    |   |   |          |          |          |          |          |          |          |          |          |
|----------|----|---|---|----------|----------|----------|----------|----------|----------|----------|----------|----------|
| 9.365833 | 8  | 4 | 3 | 827565.1 | 2941556  | 2858275  | 3643407  | 1649748  | 7818040  | 2569691  | 2584833  | 991713.5 |
| 10.95055 | 7  | 3 | 4 | 203852.2 | 474630.1 | 160491.9 | 538870.5 | 256807.7 | 585366.5 | 648535.8 | 495744.8 | 403407.7 |
| 10.03947 | 11 | 5 | 5 | 7874607  | 43482277 | 3766849  | 41661021 | 7651516  | 42537613 | 39144336 | 46832909 | 47909009 |
| 10.3828  | 9  | 3 | 3 | 314966.1 | 365366.5 | 229563.9 | 445597.4 | 303014.8 | 400270.4 | 746339   | 290461.3 | 213568.2 |
| 9.91765  | 8  | 4 | 4 | 1346510  | 2135505  | 553527.1 | 1998241  | 335440.9 | 3021098  | 1835497  | 1923461  | 1604815  |
| 11.39828 | 5  | 2 | 3 | 205939.7 | 1032896  | 573507.4 | 847793.5 | 666684.4 | 211872.8 | 714802.2 | 1616418  | 1461589  |
| 9.992233 | 6  | 3 | 3 | 1045349  | 1118227  | 261410   | 1436268  | 1439037  | 875602.1 | 858669   | 1297956  | 1102233  |
| 10.877   | 3  | 0 | 3 | 197741.7 | 197144.5 | 154835.1 | 243058.2 | 153939.1 | 134860.7 | 272903.5 | 64728.75 | 81016.42 |
| 3.5906   | 4  | 1 | 3 | 5207026  | 92283922 | 70644090 | 74869590 | 41837962 | 359589.2 | 1.85E+08 | 1.35E+08 | 60683876 |
| 10.008   | 10 | 5 | 5 | 553152.7 | 1738265  | 384741.7 | 1603003  | 513341.9 | 1844217  | 2228550  | 1924225  | 1346696  |
| 9.949233 | 5  | 3 | 2 | 982262.1 | 1812483  | 850177.7 | 2070854  | 887711.4 | 2245457  | 1251073  | 1607475  | 908937.5 |
| 38.1505  | 9  | 4 | 3 | 3066039  | 28472662 | 45414795 | 42956430 | 51798395 | 6486459  | 3896428  | 10175163 | 1.1E+08  |
| 43.47383 | 5  | 3 | 2 | 352002   | 3701292  | 1665931  | 4071988  | 393140.2 | 4119728  | 3705879  | 927783.9 | 4391021  |
| 9.295167 | 5  | 2 | 3 | 1625565  | 7080649  | 5293382  | 5575604  | 4827133  | 1040676  | 11064664 | 10747647 | 11017561 |
| 9.842    | 9  | 5 | 4 | 1161822  | 4525899  | 1042076  | 4087003  | 1789310  | 4476025  | 4110613  | 3661393  | 4064374  |
| 9.848417 | 10 | 5 | 5 | 12312930 | 30205696 | 4302542  | 34301239 | 18425049 | 35211707 | 30423950 | 28998186 | 32636600 |
| 9.920517 | 11 | 5 | 5 | 4037664  | 17147150 | 1822251  | 15518877 | 7310215  | 18013586 | 18774739 | 17008794 | 17851987 |
| 9.967367 | 7  | 3 | 4 | 761994.1 | 1160560  | 622846.6 | 1014477  | 286429.7 | 2054858  | 419295.3 | 838619.4 | 1039346  |
| 22.537   | 10 | 5 | 5 | 430110.8 | 1683252  | 665668.9 | 1511577  | 470772.9 | 870241.5 | 2712585  | 1644376  | 1462824  |
| 9.960467 | 9  | 5 | 4 | 1346619  | 2202812  | 463776.8 | 2654669  | 2037448  | 2549331  | 2117836  | 2768227  | 1978326  |
| 9.464933 | 10 | 5 | 3 | 736578.9 | 4586908  | 1612057  | 4101357  | 1662938  | 5573344  | 6718078  | 4554526  | 2799746  |
| 13.36215 | 10 | 5 | 5 | 163537.6 | 1116720  | 539337.3 | 923587.2 | 742765.2 | 1323349  | 1613143  | 744861.7 | 367477.2 |
| 24.00133 | 10 | 5 | 5 | 2800483  | 25517969 | 2943860  | 26356951 | 2710920  | 22516225 | 29757701 | 24001309 | 24023237 |
| 15.54018 | 7  | 3 | 3 | 372967.3 | 5089134  | 2513615  | 4369724  | 2336899  | 6747106  | 5663236  | 2011341  | 3025618  |
| 14.79588 | 3  | 3 | 0 | 49482.48 | 232013   | 196308.5 | 186889.6 | 77354.85 | 574399.6 | 76354.78 | 181920.2 | 143126.1 |
| 9.514733 | 11 | 4 | 5 | 4596614  | 25265588 | 15873752 | 20965475 | 12958846 | 44256909 | 28345481 | 31217354 | 1014940  |
| 10.03947 | 6  | 2 | 4 | 1285385  | 2427827  | 1593998  | 1960391  | 1560837  | 585735.7 | 915927.4 | 2979064  | 4184596  |
| 9.49445  | 4  | 1 | 3 | 257010.8 | 381727   | 276767.1 | 552221.3 | 746502.5 | 419259.3 | 625481.2 | 649680.7 | 214213.6 |
| 10.9645  | 6  | 3 | 3 | 258795.4 | 663002.2 | 185412.1 | 596652.5 | 255340.7 | 570421.6 | 779846.5 | 398911   | 874523.8 |
| 44.02017 | 6  | 4 | 2 | 435800.3 | 10021841 | 4214357  | 9102715  | 348582.9 | 17510227 | 8928732  | 7937728  | 8126856  |
| 9.960467 | 7  | 3 | 4 | 624517.8 | 1432264  | 635206   | 1256232  | 549430.9 | 1066750  | 531301.6 | 1928399  | 2068183  |
| 26.4115  | 7  | 4 | 3 | 633300.6 | 4361065  | 5212544  | 5840889  | 4770627  | 1778946  | 2454642  | 304532.8 | 13398898 |
| 9.848417 | 9  | 5 | 4 | 1687254  | 5913736  | 2102510  | 5388138  | 1341361  | 7204149  | 7897455  | 3057308  | 4320061  |
| 9.032483 | 8  | 4 | 4 | 625290.3 | 1881958  | 815884   | 1651779  | 736765.8 | 1718001  | 2776845  | 974317.6 | 1264785  |
| 9.45945  | 10 | 4 | 4 | 2295062  | 11547307 | 6699618  | 9907258  | 3933791  | 12705375 | 2358955  | 7474600  | 19003152 |

|          |    |   |   |          |          |          |          |          |          |          |          |          |
|----------|----|---|---|----------|----------|----------|----------|----------|----------|----------|----------|----------|
| 40.7265  | 9  | 4 | 3 | 808834.1 | 6424322  | 4606343  | 7926751  | 5501664  | 4616482  | 3714519  | 3941011  | 5256353  |
| 9.119933 | 5  | 3 | 2 | 1973973  | 5724968  | 4365808  | 4510228  | 3825534  | 1556130  | 2650275  | 6125181  | 5552707  |
| 9.392767 | 9  | 5 | 4 | 820422.7 | 1333291  | 559484.4 | 1182910  | 450455   | 1695861  | 1323789  | 777054.6 | 806182.7 |
| 9.983467 | 4  | 1 | 3 | 515537.7 | 991176.5 | 407003   | 1110999  | 404149.4 | 1179890  | 472449.4 | 663695.2 | 1451304  |
| 10.9645  | 10 | 5 | 5 | 429955.3 | 1929378  | 498994.7 | 1787633  | 459724.9 | 2454446  | 2382539  | 1478877  | 1371634  |
| 9.43325  | 10 | 5 | 4 | 780620.5 | 3901744  | 1392126  | 3354907  | 2196235  | 4455381  | 4336308  | 3503976  | 5467195  |
| 9.960467 | 8  | 4 | 4 | 797485.9 | 930793.5 | 405103.5 | 1366620  | 1980654  | 1022050  | 649223.8 | 864473.1 | 1574618  |
| 9.983433 | 10 | 5 | 5 | 4853638  | 13361109 | 4808463  | 11782015 | 5828000  | 17526882 | 19114853 | 12349115 | 8091901  |
| 9.55155  | 5  | 3 | 2 | 210721.3 | 363764.5 | 194989.9 | 291204.2 | 285724.5 | 542492.1 | 538134.3 | 374562.4 | 290005.1 |
| 10.48497 | 5  | 2 | 3 | 135615   | 277873.9 | 75111.2  | 252954.7 | 92599.07 | 286752.1 | 180379.3 | 311796.6 | 233330.9 |
| 10.02372 | 5  | 2 | 3 | 261383   | 418595.3 | 292179.6 | 490704   | 179491.2 | 522247.9 | 0        | 691876.6 | 639375.1 |
| 9.842    | 9  | 5 | 4 | 1069264  | 6111351  | 638347.1 | 5873227  | 938947.1 | 6102271  | 6326520  | 5324106  | 5771476  |
| 10.96452 | 7  | 4 | 2 | 256156.8 | 738638.4 | 219836.1 | 854674.6 | 500489.6 | 587467.4 | 472357.5 | 865557.3 | 740307.7 |
| 9.992233 | 5  | 2 | 3 | 622435.4 | 967545.2 | 691444.7 | 1166826  | 659212.3 | 751549   | 159888.9 | 581285.4 | 1485022  |
| 9.992233 | 7  | 4 | 3 | 531140.3 | 807689   | 439290.2 | 1025490  | 929971.3 | 939809.6 | 1503275  | 691100.8 | 406467.4 |
| 10.9645  | 10 | 5 | 5 | 397840   | 2062117  | 611338.5 | 1865453  | 717055.2 | 1990525  | 2361016  | 1303321  | 1743283  |
| 11.00657 | 7  | 4 | 3 | 56268080 | 65993338 | 1.46E+08 | 1.1E+08  | 1.55E+08 | 706856.5 | 1110555  | 466074.4 | 3.27E+08 |
| 9.445217 | 8  | 5 | 3 | 1488399  | 11213927 | 2878272  | 12911136 | 7440549  | 13894539 | 13431742 | 11292883 | 10803697 |
| 9.960467 | 10 | 5 | 5 | 3331350  | 8407621  | 1562283  | 9269901  | 3748644  | 10020519 | 8943936  | 9496840  | 7259424  |
| 9.94405  | 12 | 4 | 5 | 1623257  | 2486040  | 1050591  | 3100604  | 2692694  | 4314339  | 1942412  | 2284068  | 2218410  |
| 8.8316   | 7  | 3 | 4 | 345973.5 | 755127   | 496546.4 | 917523.7 | 599779.4 | 678559.8 | 1396523  | 994014.8 | 660624.3 |
| 41.84867 | 7  | 3 | 2 | 260362.3 | 3722166  | 1133198  | 3471676  | 280963.4 | 3673162  | 3724868  | 2351663  | 5491746  |
| 9.929783 | 7  | 5 | 2 | 1086249  | 1500653  | 130224.4 | 1317275  | 840704.6 | 1642560  | 1431740  | 1341144  | 1460958  |
| 9.929783 | 10 | 5 | 4 | 925122.6 | 2427224  | 1479452  | 2087622  | 609493.8 | 1771943  | 384641   | 3006896  | 4373502  |
| 9.994767 | 8  | 4 | 4 | 431200.8 | 1021891  | 425979.2 | 1150541  | 447501.3 | 1535553  | 1407033  | 893721.2 | 648506.9 |
| 10.57323 | 10 | 5 | 5 | 1645023  | 8173330  | 1364073  | 7794117  | 1205334  | 9237458  | 9544907  | 7005561  | 6475955  |
| 9.999217 | 7  | 4 | 3 | 826775.6 | 1219844  | 668882   | 977828.8 | 944789.7 | 1560815  | 2129020  | 1264428  | 515032.4 |
| 20.85217 | 7  | 3 | 4 | 83207.3  | 206587.4 | 34159.4  | 183218.2 | 104053.2 | 252954.1 | 181669.6 | 228790.7 | 199777.1 |
| 10.9645  | 10 | 5 | 5 | 1471591  | 6439935  | 1482783  | 6012201  | 1422446  | 7645836  | 8176652  | 5329196  | 4683587  |
| 9.972483 | 6  | 3 | 3 | 206919.4 | 428241   | 312708.6 | 336424.6 | 311292.5 | 124929   | 173531   | 428873.9 | 508277.9 |
| 9.640367 | 10 | 5 | 5 | 13489958 | 52852266 | 9314691  | 48987109 | 15881913 | 58014572 | 65779452 | 51650527 | 46558987 |
| 7.012683 | 4  | 3 | 1 | 571021.8 | 6579650  | 3571222  | 5343618  | 4728369  | 5820417  | 6366694  | 3269228  | 4831004  |
| 9.874317 | 6  | 3 | 2 | 839601.3 | 1595269  | 241688.5 | 1939863  | 1583046  | 1803734  | 1349849  | 1456277  | 1901379  |
| 9.4775   | 13 | 5 | 5 | 14173388 | 1.01E+08 | 26927984 | 1.1E+08  | 34364404 | 1.34E+08 | 68654422 | 79470916 | 1.02E+08 |
| 9.659033 | 10 | 5 | 5 | 1957165  | 4506738  | 1485610  | 5221678  | 3050232  | 4315968  | 5208185  | 3444206  | 2909368  |

|          |    |   |   |          |          |          |          |          |          |          |          |          |
|----------|----|---|---|----------|----------|----------|----------|----------|----------|----------|----------|----------|
| 9.8322   | 9  | 5 | 4 | 1326694  | 6386577  | 1540082  | 5847626  | 2078058  | 6577568  | 4393907  | 5658303  | 6716276  |
| 9.445217 | 14 | 5 | 5 | 4622630  | 40986468 | 8903634  | 38382629 | 8833122  | 32538237 | 48207412 | 51953049 | 32518812 |
| 9.859667 | 5  | 2 | 3 | 1125582  | 3156506  | 1282539  | 2802944  | 1118885  | 3451866  | 1844288  | 3009989  | 5165129  |
| 9.473733 | 7  | 4 | 3 | 1409320  | 3030699  | 4167466  | 4156565  | 3460912  | 10462034 | 1493776  | 1456614  | 1062721  |
| 9.445217 | 17 | 5 | 5 | 1.8E+08  | 1.5E+09  | 3.85E+08 | 1.38E+09 | 3.8E+08  | 1.32E+09 | 1.89E+09 | 1.93E+09 | 1.24E+09 |
| 10.00385 | 9  | 4 | 5 | 718240.2 | 1788466  | 850931.7 | 1559894  | 696828   | 1867536  | 301860.2 | 2315297  | 2143035  |
| 9.845483 | 11 | 5 | 5 | 4337291  | 16561963 | 2711842  | 18172832 | 7103852  | 19459601 | 19519090 | 14255757 | 14212910 |
| 10.94443 | 6  | 3 | 3 | 181121.2 | 421072.7 | 174034.9 | 501087.7 | 338740   | 600872.1 | 605835.8 | 369452.2 | 303693   |
| 9.960467 | 10 | 5 | 5 | 3813404  | 5799957  | 1847373  | 7012037  | 5402504  | 7871265  | 5580463  | 7203278  | 5183678  |
| 9.960467 | 7  | 3 | 4 | 554444   | 1239507  | 509825.6 | 1378710  | 436116.7 | 1664846  | 1803460  | 1247613  | 887887.2 |
| 9.942317 | 11 | 5 | 5 | 2320977  | 11715969 | 1828560  | 10734869 | 4274113  | 13532385 | 9685091  | 12490464 | 9824425  |
| 10.13345 | 7  | 3 | 4 | 598072.8 | 1346251  | 343508.8 | 1259752  | 233660.2 | 1944423  | 1229489  | 1233645  | 1261503  |
| 10.01477 | 8  | 3 | 4 | 375939.6 | 555174.6 | 202242.5 | 698365   | 642884.9 | 274998.1 | 617851.6 | 501604   | 834882.3 |
| 21.697   | 10 | 5 | 5 | 1706290  | 16720264 | 2997043  | 15247936 | 6331768  | 21017243 | 13907213 | 13868837 | 16910996 |
| 10.9645  | 10 | 5 | 5 | 315301.5 | 1277392  | 266815.7 | 1186594  | 346827.2 | 1549102  | 1569401  | 1045858  | 1019416  |
| 9.94455  | 10 | 5 | 5 | 2601233  | 9920151  | 2095040  | 9374247  | 1590378  | 12384759 | 11887279 | 9146343  | 7688761  |
| 14.15748 | 10 | 5 | 5 | 634439.4 | 4971104  | 1493376  | 4502179  | 1702344  | 6478529  | 5408544  | 3010671  | 3835736  |
| 10.95055 | 5  | 2 | 3 | 323034.5 | 573956.4 | 318990   | 680700.1 | 404076.2 | 980317.6 | 749762.1 | 600674.1 | 381087.7 |
| 9.324967 | 4  | 3 | 0 | 1100266  | 1065524  | 357792.9 | 828485.2 | 1059620  | 1427129  | 1386249  | 936851.9 | 1021734  |
| 10.9645  | 10 | 5 | 5 | 466311.5 | 1710917  | 235635.1 | 1608521  | 429099.5 | 2115751  | 1704477  | 1589555  | 1522097  |
| 9.976317 | 9  | 5 | 4 | 1230673  | 2156643  | 1055473  | 1806352  | 1319864  | 2771975  | 3626817  | 1852994  | 921955.1 |
| 41.71917 | 12 | 5 | 2 | 354163.4 | 4896885  | 3105133  | 5795901  | 3040527  | 589771.9 | 5631115  | 9272873  | 4443685  |
| 9.45945  | 15 | 5 | 5 | 62423256 | 5.02E+08 | 84771977 | 5.48E+08 | 2.03E+08 | 4.16E+08 | 4.93E+08 | 6.41E+08 | 4.59E+08 |
| 10.008   | 10 | 5 | 5 | 639676.8 | 2239596  | 508357.5 | 2014691  | 947407.3 | 2452522  | 2868042  | 2282211  | 1480668  |
| 9.845483 | 9  | 5 | 4 | 1216486  | 4133961  | 1131839  | 4560857  | 1712476  | 4450236  | 3579310  | 3389003  | 5981750  |
| 9.830833 | 3  | 0 | 3 | 701367   | 960619.5 | 640206.1 | 1104957  | 238588.1 | 1393404  | 0        | 1634104  | 1068315  |
| 8.949567 | 5  | 2 | 3 | 195527.3 | 245173.8 | 123059.6 | 203266.2 | 160518.9 | 345213   | 381938.9 | 222679.6 | 202794.5 |
| 37.02867 | 3  | 0 | 3 | 314564.2 | 3625060  | 140890.4 | 3798412  | 798953.2 | 3763085  | 3409519  | 3564375  | 3676006  |
| 10.96    | 8  | 3 | 5 | 459462.6 | 806108.6 | 317390.1 | 705063.1 | 371434.3 | 1080863  | 966896.7 | 952007.1 | 751269.5 |
| 9.999217 | 10 | 5 | 5 | 910313.4 | 3242891  | 741857.4 | 2954569  | 1170949  | 3554549  | 4077621  | 3543784  | 2152061  |
| 9.9677   | 10 | 5 | 5 | 6269265  | 21002379 | 5797476  | 18976086 | 7873809  | 25103414 | 27413710 | 14327905 | 15575874 |
| 18.02733 | 9  | 4 | 5 | 17210010 | 1E+08    | 16461431 | 94649917 | 20075147 | 1.2E+08  | 1.08E+08 | 89497776 | 78051916 |
| 9.874317 | 6  | 3 | 3 | 632758   | 1534373  | 276140.5 | 1751004  | 982602.4 | 1521315  | 1561682  | 1348698  | 1977107  |
| 9.94455  | 10 | 5 | 5 | 3455784  | 13836996 | 2184524  | 13220039 | 2038641  | 16970953 | 15196898 | 12480149 | 11695734 |
| 43.2725  | 6  | 3 | 2 | 319373.5 | 4791741  | 1168551  | 4469064  | 1037540  | 3968815  | 6755833  | 3979293  | 4300974  |

|          |    |   |   |          |          |          |          |          |          |          |          |          |
|----------|----|---|---|----------|----------|----------|----------|----------|----------|----------|----------|----------|
| 10.90802 | 5  | 2 | 3 | 161014.2 | 334470.8 | 152764.9 | 374418.9 | 118258.7 | 310258.9 | 578323   | 168635.2 | 260934.9 |
| 40.43967 | 6  | 3 | 2 | 387004.5 | 8678339  | 2406274  | 8111967  | 1249745  | 6544667  | 8232698  | 7729745  | 8066732  |
| 10.95222 | 5  | 2 | 3 | 185285.7 | 673125.9 | 208029.8 | 610084.4 | 223803.8 | 474186.8 | 594904.5 | 536270.8 | 772950.1 |
| 9.992233 | 9  | 5 | 4 | 823441.3 | 2172316  | 277957.5 | 1911184  | 1196124  | 2496382  | 2264157  | 2006422  | 1785763  |
| 22.712   | 8  | 4 | 4 | 554012.4 | 3698206  | 1578516  | 3241349  | 1553981  | 2328694  | 4465783  | 2164099  | 3568879  |
| 28.50817 | 5  | 3 | 2 | 120178.8 | 779701.4 | 463127.5 | 639759.2 | 495786.3 | 580267.7 | 1301830  | 100673.5 | 855420.3 |
| 40.35217 | 5  | 1 | 4 | 390273.7 | 4908718  | 243894.4 | 4719674  | 857968.3 | 5108800  | 4544798  | 4826809  | 5151096  |
| 31.62283 | 10 | 5 | 5 | 2875164  | 18618007 | 4923647  | 16852372 | 6961576  | 16029219 | 19046650 | 12032846 | 20931638 |
| 34.33983 | 8  | 4 | 4 | 859581   | 4398354  | 2171194  | 5811508  | 6333290  | 7866242  | 4427697  | 2399241  | 4574116  |
| 10.95055 | 9  | 5 | 4 | 383537.9 | 1422370  | 385299.6 | 1521469  | 285365.1 | 1980103  | 1375907  | 1090559  | 1054796  |
| 9.43325  | 4  | 3 | 1 | 2845466  | 9301905  | 11718599 | 12485248 | 10058002 | 24401515 | 840479.5 | 889367.3 | 19606178 |
| 10.95055 | 5  | 3 | 2 | 171865.7 | 434532.4 | 99370.68 | 378816.7 | 245991.7 | 567624.7 | 491008.5 | 396796.1 | 305491.5 |
| 9.43325  | 3  | 3 | 0 | 596174.6 | 2415145  | 1104660  | 2038746  | 1450573  | 1293984  | 2426187  | 4235727  | 2228843  |
| 9.9677   | 9  | 5 | 4 | 2191391  | 7708684  | 1615748  | 6884213  | 3591872  | 9181716  | 6808299  | 6455701  | 6366493  |
| 25.2045  | 10 | 5 | 5 | 2078006  | 23532397 | 5900937  | 25642652 | 8332311  | 33247159 | 22904341 | 23827255 | 19299543 |
| 8.771083 | 8  | 4 | 4 | 877234.8 | 1587425  | 2380745  | 2784662  | 5205938  | 275933   | 725779.7 | 5836168  | 591171   |
| 10.9645  | 10 | 5 | 5 | 635540.1 | 2958479  | 577169.1 | 2779053  | 653583.7 | 3422669  | 3587385  | 2199877  | 2579004  |
| 21.39367 | 8  | 4 | 4 | 83963.35 | 341184.5 | 158142.2 | 303936.1 | 84107.66 | 249623.6 | 555603.1 | 442009.6 | 156905.5 |
| 9.05635  | 8  | 4 | 4 | 359335.7 | 1155092  | 443250.3 | 997062.8 | 624627.8 | 1231489  | 1700780  | 1341307  | 996831.5 |
| 10.90765 | 3  | 0 | 3 | 288876.5 | 631168.2 | 156189.5 | 703127.9 | 308324.1 | 812170.3 | 773576.4 | 463773.3 | 506538.1 |
| 35.67217 | 6  | 4 | 2 | 275046.4 | 1183806  | 1021014  | 922314.7 | 752808.9 | 2963360  | 874937.4 | 500055.2 | 534881.2 |
| 9.9677   | 10 | 5 | 5 | 5832328  | 14882080 | 4536205  | 13170309 | 6932487  | 18733110 | 20203429 | 13521121 | 9132451  |
| 9.952017 | 10 | 5 | 5 | 1202220  | 4497535  | 808856.5 | 4287923  | 618311.8 | 5798547  | 4657042  | 4355873  | 3770436  |
| 9.43325  | 8  | 5 | 3 | 775446.1 | 4118993  | 1540337  | 3518620  | 2460648  | 5903437  | 5461441  | 3977969  | 2741276  |
| 10.9645  | 10 | 5 | 5 | 1544629  | 7158994  | 1963906  | 6651146  | 1493325  | 8566234  | 9393546  | 4780895  | 5527061  |
| 26.8695  | 9  | 5 | 4 | 616836.8 | 3447851  | 2094659  | 2893212  | 1699999  | 2031888  | 4443612  | 735419.2 | 3944142  |
| 9.88815  | 7  | 4 | 3 | 5290215  | 6045616  | 8861168  | 8857440  | 10429037 | 1848084  | 2173103  | 21861266 | 2989400  |
| 9.960467 | 10 | 5 | 5 | 3802510  | 8466265  | 1729236  | 9371149  | 3973081  | 10516831 | 9315239  | 9099448  | 7144004  |
| 9.595733 | 9  | 5 | 4 | 1037466  | 6232294  | 1169602  | 5810182  | 1681146  | 7069025  | 7872345  | 5259009  | 5527712  |
| 9.983433 | 9  | 4 | 5 | 788634.9 | 1889971  | 863126.7 | 1626624  | 949520.6 | 2592804  | 2957222  | 1740962  | 1005938  |
| 9.295167 | 4  | 1 | 3 | 366743.1 | 1074752  | 572174.9 | 1344297  | 1162348  | 1016079  | 1270309  | 629067.3 | 514471.5 |
| 9.912633 | 8  | 4 | 4 | 2042408  | 4672084  | 1694957  | 4045401  | 2521726  | 5448041  | 4803135  | 2527305  | 3631734  |
| 10.9645  | 10 | 5 | 5 | 1442590  | 5790499  | 1630900  | 5341171  | 1461145  | 7355129  | 7574755  | 4527737  | 3960935  |
| 28.936   | 3  | 0 | 3 | 3598048  | 53464801 | 3075341  | 60046331 | 30789976 | 50817709 | 53324229 | 57240371 | 50137024 |
| 9.856867 | 10 | 5 | 5 | 6306141  | 36220091 | 4325871  | 34361209 | 7857399  | 36038299 | 30037608 | 40137368 | 40464975 |

|          |    |   |   |          |          |          |          |          |          |          |          |          |
|----------|----|---|---|----------|----------|----------|----------|----------|----------|----------|----------|----------|
| 9.887133 | 10 | 5 | 5 | 2883340  | 15216266 | 1129635  | 16241456 | 4719705  | 15998141 | 14043157 | 15391638 | 16561679 |
| 9.858833 | 10 | 5 | 5 | 1364605  | 7427854  | 1361558  | 6799043  | 2703685  | 6647335  | 5707375  | 7438517  | 8062653  |
| 9.967367 | 4  | 3 | 1 | 804903.4 | 825463.1 | 644458.4 | 658462.5 | 495476.3 | 1863854  | 84732.33 | 669555.8 | 751850.2 |
| 41.40233 | 12 | 3 | 5 | 469172.2 | 7952740  | 4420824  | 6809664  | 3378093  | 8113050  | 9310472  | 848630.7 | 8483569  |
| 9.999517 | 9  | 5 | 4 | 1130780  | 2557172  | 884425.8 | 2225185  | 1345957  | 2880308  | 2353754  | 1238854  | 2643267  |
| 9.983433 | 10 | 5 | 5 | 2437071  | 4678326  | 2672156  | 5502562  | 3005177  | 6264399  | 8179713  | 4831132  | 1930114  |
| 10.5297  | 10 | 5 | 5 | 597740.6 | 1674793  | 348321.7 | 1511121  | 706973.7 | 1473444  | 1643059  | 1541596  | 1434294  |
| 44.9835  | 11 | 4 | 3 | 373180.6 | 2602523  | 1423830  | 2949179  | 894160.1 | 400203.1 | 3020582  | 2211219  | 3159021  |
| 9.952017 | 10 | 5 | 5 | 5670378  | 12554856 | 2703868  | 13842606 | 5579700  | 15919996 | 14026199 | 13166814 | 10348967 |
| 33.42683 | 10 | 5 | 5 | 613224.3 | 4696261  | 1543883  | 4297518  | 1179515  | 6549666  | 4462249  | 2332345  | 5367832  |
| 43.905   | 4  | 3 | 1 | 776746.2 | 7383675  | 4947719  | 8576014  | 2982695  | 1068683  | 3047684  | 11365678 | 11475062 |
| 10.97857 | 6  | 3 | 3 | 966321.6 | 1694243  | 434278.5 | 1863612  | 698593   | 2159587  | 2129044  | 1432764  | 1570454  |
| 9.976317 | 4  | 3 | 1 | 355123.4 | 509675.5 | 484510   | 389427.8 | 328459.8 | 973296.4 | 945811.4 | 629269.7 | 0        |
| 10.95602 | 7  | 4 | 3 | 348063.1 | 895599   | 477517.7 | 1023157  | 400926.6 | 239708.8 | 1568032  | 814404.4 | 825328.5 |
| 21.62883 | 8  | 4 | 4 | 202203.4 | 1001821  | 428196.8 | 858860.1 | 551218.7 | 674667.2 | 1067718  | 740139   | 806768.7 |
| 10.20545 | 8  | 4 | 4 | 362750.3 | 1035297  | 280653.8 | 913512.6 | 518419.6 | 1493812  | 942590.7 | 916349.6 | 751216.1 |
| 9.992233 | 10 | 5 | 5 | 1722186  | 3708871  | 1298028  | 4215527  | 2092368  | 4263107  | 5342131  | 4181660  | 2415536  |
| 44.03467 | 7  | 1 | 5 | 439249   | 6292469  | 379474.5 | 6010867  | 1288715  | 6295367  | 6050584  | 6851363  | 6409963  |
| 9.845483 | 8  | 4 | 4 | 6567601  | 12104853 | 17890035 | 16781231 | 14255488 | 5116333  | 4215067  | 3412060  | 3694336  |
| 9.300733 | 4  | 3 | 1 | 3413078  | 15270761 | 10911195 | 18246555 | 9664623  | 29725043 | 7966119  | 5289467  | 9260374  |
| 10.45433 | 7  | 4 | 3 | 212098.3 | 499719.6 | 112028   | 460482.2 | 155404.3 | 327566   | 573999.4 | 450018.2 | 602553.4 |
| 9.55155  | 10 | 5 | 5 | 2512906  | 11777675 | 2137124  | 10873037 | 3832012  | 13757505 | 13580055 | 11592247 | 11495545 |
| 10.10048 | 4  | 3 | 0 | 287668.4 | 666791.7 | 279781.5 | 761912.7 | 371528.8 | 1070398  | 704940   | 591111.3 | 678723.2 |
| 29.0345  | 10 | 5 | 5 | 185234.3 | 972500.4 | 334193.3 | 866375.4 | 398376.5 | 915271.4 | 1081479  | 724195.8 | 652079.2 |
| 9.379233 | 4  | 3 | 1 | 444603.8 | 689138.5 | 504864.1 | 508751.1 | 721985.9 | 1050532  | 122973.9 | 160074.1 | 1154130  |
| 9.507167 | 13 | 5 | 5 | 1472943  | 8880324  | 4080398  | 7378677  | 6086650  | 13325452 | 8848823  | 5151893  | 4494058  |
| 44.9835  | 5  | 3 | 2 | 173935.9 | 522688.1 | 91487.01 | 549430.1 | 94060.93 | 605150.9 | 369189   | 562094.1 | 561572   |
| 9.91875  | 5  | 3 | 2 | 834330.3 | 1717621  | 1059658  | 1480347  | 424471.4 | 885668.2 | 1864448  | 999966.6 | 3486456  |
| 9.976317 | 10 | 5 | 5 | 4942198  | 12603177 | 4608258  | 14183240 | 6204745  | 16398341 | 17430278 | 13598519 | 7800356  |
| 9.976317 | 10 | 5 | 5 | 3738258  | 6019218  | 1108924  | 6838395  | 3754310  | 7220705  | 5903273  | 6945278  | 5552387  |
| 9.903017 | 9  | 4 | 5 | 2138929  | 7737229  | 1754230  | 6575893  | 5279452  | 8520484  | 5853817  | 6574281  | 7413565  |
| 10.9645  | 9  | 5 | 4 | 258721.6 | 766623.9 | 335100.5 | 664958.8 | 369517.4 | 1086467  | 900958.4 | 250998.8 | 972085.3 |
| 23.1175  | 8  | 4 | 4 | 101257.6 | 330142.6 | 73240.57 | 300834.7 | 122439.4 | 351754.4 | 248712.1 | 270718.6 | 432880.7 |
| 9.45945  | 5  | 2 | 3 | 373849   | 798407.4 | 271618.9 | 947202.6 | 663499   | 1012027  | 1036767  | 397420.3 | 649283   |
| 9.1476   | 10 | 5 | 4 | 4326478  | 41164134 | 27844943 | 49483397 | 29900841 | 28213554 | 114349.8 | 58860058 | 71072399 |



|          |    |   |   |          |          |          |          |          |          |          |          |          |
|----------|----|---|---|----------|----------|----------|----------|----------|----------|----------|----------|----------|
| 10.008   | 15 | 4 | 5 | 2421451  | 2821711  | 1713465  | 4232494  | 6516178  | 1158634  | 1012056  | 3075147  | 3953333  |
| 9.94455  | 5  | 3 | 2 | 1776187  | 3954144  | 1201865  | 3647392  | 903069.6 | 4622832  | 4593196  | 4978874  | 3546894  |
| 10.45545 | 8  | 5 | 3 | 198280.9 | 573940.6 | 417065.9 | 684732.2 | 349444.8 | 1008991  | 504507.4 | 1003935  | 188211.6 |
| 9.960817 | 11 | 4 | 5 | 1471790  | 2481587  | 222918.8 | 2313609  | 772530.1 | 2236180  | 2787426  | 2378779  | 2373274  |
| 9.419733 | 5  | 3 | 2 | 1327749  | 5823032  | 1103250  | 6859772  | 4820207  | 6069938  | 5950884  | 5337296  | 7386705  |
| 42.98483 | 12 | 4 | 4 | 344502.9 | 3977726  | 1577352  | 4442913  | 1656867  | 3099304  | 1603594  | 5152782  | 4965149  |
| 9.356517 | 4  | 3 | 1 | 11535511 | 26676594 | 25276854 | 32774709 | 15741716 | 63427539 | 9007668  | 13890925 | 4692826  |
| 11.26338 | 6  | 3 | 3 | 3629642  | 23882975 | 5307588  | 21109848 | 12307600 | 28136197 | 30831049 | 18490341 | 20551108 |
| 9.478833 | 9  | 4 | 4 | 3310952  | 9788995  | 11124612 | 12828606 | 9987139  | 10512843 | 7926097  | 28253404 | 1213305  |
| 9.960467 | 10 | 4 | 4 | 4431886  | 4585435  | 3276265  | 3650713  | 3229125  | 1413249  | 1812559  | 7334754  | 3681418  |
| 10.9645  | 9  | 5 | 4 | 345749.7 | 1397148  | 265845.6 | 1246387  | 676766.9 | 1601646  | 1720670  | 1085861  | 1199833  |
| 9.999217 | 10 | 5 | 5 | 1119955  | 3515447  | 1104989  | 3142388  | 1461760  | 4109028  | 4999844  | 3468217  | 2136736  |
| 9.976317 | 4  | 3 | 1 | 457695.9 | 712074.5 | 361641.6 | 584871.5 | 508755.7 | 1025758  | 1088948  | 630952.1 | 194729.6 |
| 11.74397 | 10 | 5 | 5 | 275792.3 | 1223989  | 290479.8 | 1109189  | 480234.1 | 1543932  | 1303234  | 978552.2 | 867103.6 |
| 9.856867 | 10 | 5 | 5 | 6486531  | 46345202 | 1577126  | 44910354 | 6679277  | 46649561 | 44382336 | 48026114 | 47594577 |
| 18.13683 | 10 | 5 | 5 | 1035280  | 7619777  | 1264755  | 6758260  | 3944378  | 9239601  | 5806040  | 7140799  | 7835517  |
| 3.62865  | 7  | 3 | 4 | 240344.4 | 3956872  | 2394693  | 4619142  | 2219731  | 0        | 5455273  | 6163545  | 4342637  |
| 9.976317 | 9  | 5 | 4 | 657023.1 | 1433909  | 413097.3 | 1599783  | 697852.8 | 1864217  | 1198371  | 1802720  | 1423339  |
| 9.559117 | 9  | 5 | 4 | 370722.5 | 782085.1 | 223585.9 | 703050.8 | 317389.7 | 693674.2 | 1165251  | 739156.8 | 579429   |
| 10.91673 | 5  | 3 | 2 | 120689.3 | 251925.9 | 110221.8 | 286980.9 | 133034.6 | 373626.7 | 275934.3 | 135565   | 139177   |
| 10.9645  | 10 | 5 | 5 | 506980.5 | 1864759  | 248299.3 | 2046222  | 836268.4 | 2093068  | 2141538  | 1548611  | 1763970  |
| 26.81067 | 6  | 4 | 2 | 658962.9 | 4374771  | 3210650  | 3586072  | 2166098  | 1224132  | 5501321  | 878374.5 | 6000382  |
| 9.36565  | 6  | 3 | 3 | 389503.5 | 575215.2 | 487811.3 | 743997.7 | 671984.9 | 1108973  | 119783   | 0        | 772662.2 |
| 9.915583 | 8  | 4 | 4 | 868324.1 | 2505654  | 440341.2 | 2220258  | 1303682  | 3221467  | 2118333  | 2277164  | 2288339  |
| 10.95835 | 5  | 2 | 3 | 493824.4 | 1153065  | 794194.8 | 939144.7 | 695733.4 | 444242.2 | 2198150  | 271981.4 | 1382888  |
| 40.84117 | 9  | 3 | 2 | 309106.6 | 4356358  | 734966   | 4175164  | 504012.3 | 3936259  | 3714476  | 5295291  | 5002279  |
| 9.43325  | 5  | 3 | 2 | 1449718  | 4801132  | 2253501  | 5702954  | 3801711  | 7174813  | 3981994  | 7108449  | 3653471  |
| 9.43325  | 9  | 5 | 3 | 1595332  | 10934720 | 2184862  | 10245759 | 2608197  | 9457362  | 10066170 | 11767649 | 14366953 |
| 44.07783 | 12 | 2 | 5 | 376994   | 5059306  | 1682628  | 5940219  | 3934049  | 2479227  | 5956515  | 4229859  | 6217234  |
| 9.842    | 5  | 2 | 3 | 3105759  | 8373397  | 4206096  | 7191791  | 4064196  | 12511077 | 2863347  | 9006262  | 5380863  |
| 9.94455  | 10 | 5 | 5 | 4511060  | 16993345 | 2271284  | 16247679 | 2899579  | 20539906 | 17711729 | 16114186 | 14580710 |
| 10.33625 | 5  | 3 | 2 | 183835.6 | 247076.9 | 144342.1 | 282825.4 | 101032.4 | 210371.1 | 499896.1 | 215599.6 | 150421.3 |
| 9.999217 | 7  | 4 | 3 | 722576.4 | 870358.3 | 440355   | 1065127  | 844444.9 | 1351825  | 1143251  | 1045740  | 462066.4 |
| 44.73917 | 7  | 3 | 4 | 466091.6 | 5647444  | 238630   | 5580911  | 227006.7 | 5536309  | 5694108  | 5354428  | 5648012  |
| 39.07183 | 4  | 1 | 3 | 355541.3 | 3533221  | 273121.5 | 3908065  | 1772783  | 3590531  | 3367216  | 3297308  | 3981666  |

|          |    |   |   |          |          |          |          |          |          |          |          |          |
|----------|----|---|---|----------|----------|----------|----------|----------|----------|----------|----------|----------|
| 20.679   | 3  | 3 | 0 | 17176956 | 2.36E+08 | 46491396 | 2.2E+08  | 67330561 | 2.96E+08 | 2.58E+08 | 2.31E+08 | 1.7E+08  |
| 8.911617 | 7  | 3 | 3 | 149570.8 | 390977.2 | 206997.1 | 479591.5 | 381484.5 | 263240.4 | 734909.8 | 422898.9 | 316842.5 |
| 10.90802 | 4  | 3 | 1 | 162322.5 | 275329.2 | 215561.8 | 222280.5 | 148068.8 | 438995.5 | 322971.3 | 58684.71 | 43623.67 |
| 9.872917 | 5  | 2 | 3 | 1875023  | 6552714  | 2673149  | 5676598  | 3407844  | 9679741  | 4829401  | 2966918  | 7097803  |
| 9.3919   | 7  | 2 | 4 | 1347982  | 5391184  | 1453626  | 6868030  | 6941713  | 5106550  | 7049325  | 5890066  | 5800327  |
| 10.95055 | 10 | 5 | 5 | 428907.5 | 2250883  | 777324.4 | 2049031  | 627349.7 | 3202565  | 1581554  | 1800251  | 1684637  |
| 10.008   | 10 | 5 | 5 | 367975.1 | 1047894  | 196193.9 | 965953.9 | 351058.1 | 1209083  | 1115779  | 1154209  | 713118.2 |
| 20.26667 | 10 | 5 | 5 | 7328661  | 64538528 | 7481451  | 61926665 | 10518396 | 68884297 | 72824396 | 66484060 | 53622608 |
| 44.9835  | 8  | 4 | 4 | 144377.5 | 667997.5 | 144335.8 | 720080.4 | 212787.9 | 777180.7 | 858173.8 | 627871.9 | 542388   |
| 9.848417 | 5  | 3 | 2 | 687187.8 | 1350264  | 251397.7 | 1571965  | 1038068  | 1513611  | 1595657  | 1410984  | 954258   |
| 9.311883 | 6  | 4 | 2 | 807576.1 | 4627708  | 1485902  | 4069908  | 2314938  | 4283466  | 3629621  | 3239667  | 7008475  |
| 10.97857 | 5  | 2 | 3 | 274000.6 | 889647   | 156935.7 | 826842.1 | 266205.6 | 848911.7 | 1045873  | 648045.4 | 1008047  |
| 10.9645  | 5  | 4 | 1 | 292149.2 | 737587.2 | 248181.1 | 797605.6 | 161612.7 | 530417.2 | 1163385  | 609652.5 | 721158.9 |
| 9.830083 | 5  | 4 | 1 | 1066326  | 1956927  | 517313.9 | 2261481  | 1386687  | 1865033  | 1494696  | 2734874  | 2175245  |
| 10.95055 | 7  | 3 | 4 | 666285.8 | 1482473  | 513774.8 | 1729267  | 1092107  | 2339900  | 1457106  | 1440921  | 1033119  |
| 9.986767 | 5  | 2 | 3 | 271481.7 | 479490.3 | 276273.1 | 567425.9 | 337358.5 | 291923.4 | 131917   | 627343.3 | 511173.2 |
| 8.8316   | 7  | 3 | 4 | 191485.1 | 511917   | 232025.5 | 430028.7 | 331807.5 | 555324.1 | 782754.9 | 526115.8 | 555019.3 |
| 9.45945  | 10 | 5 | 4 | 478006.6 | 3113366  | 908925.2 | 2707605  | 1770010  | 4127655  | 3558051  | 3564148  | 2318590  |
| 9.568567 | 11 | 5 | 4 | 1461602  | 8548523  | 3727858  | 7113024  | 6018920  | 12309748 | 7547369  | 4107863  | 6281815  |
| 12.03538 | 7  | 3 | 4 | 155064.3 | 301403.8 | 84381.78 | 389545.7 | 415806.5 | 251480.1 | 443072   | 307825.3 | 275335.8 |
| 44.46617 | 7  | 4 | 3 | 377542   | 5154249  | 3650048  | 5933259  | 901277.9 | 471687.5 | 10252012 | 6887729  | 3900357  |
| 9.382183 | 5  | 3 | 2 | 528494.1 | 1712492  | 806155   | 1443004  | 1066286  | 1375343  | 1711571  | 1699973  | 786817.8 |
| 9.983433 | 10 | 5 | 5 | 6088308  | 13928584 | 5087299  | 12140858 | 7250508  | 17918436 | 20387226 | 11744661 | 7929701  |
| 9.845483 | 5  | 2 | 3 | 453782.1 | 1313705  | 408223.7 | 1174923  | 554224.3 | 1714299  | 713227.3 | 1564932  | 1489410  |
| 9.9677   | 8  | 4 | 4 | 1749873  | 3427865  | 1970436  | 2935712  | 1440551  | 6473845  | 1464366  | 3099533  | 4052033  |
| 11.287   | 5  | 2 | 3 | 177897.1 | 574355.1 | 238616.1 | 661257.8 | 357846.5 | 940290.7 | 608070.7 | 403098.1 | 323604.1 |
| 11.13867 | 8  | 3 | 5 | 118717.8 | 423818.2 | 89068.43 | 399516.7 | 81798.37 | 520258.4 | 436578.8 | 496800.3 | 345909.2 |
| 10.9645  | 10 | 5 | 5 | 1127101  | 5270212  | 1016624  | 5589523  | 1219532  | 6452422  | 6170705  | 4589809  | 4079461  |
| 9.960467 | 10 | 5 | 5 | 9158844  | 21083778 | 3757295  | 23092464 | 9069009  | 25137883 | 22470843 | 23464881 | 18133303 |
| 10.95055 | 10 | 5 | 5 | 294335.2 | 1509611  | 361779.3 | 1410758  | 333791.6 | 1696360  | 1922972  | 1218548  | 1050684  |
| 9.872917 | 9  | 5 | 4 | 1917410  | 6690991  | 3052602  | 5930081  | 2223659  | 1558058  | 7160282  | 8536029  | 9390615  |
| 10.13048 | 6  | 3 | 2 | 922608.3 | 2055680  | 1077247  | 2302795  | 564572   | 2394472  | 2719516  | 2679786  | 2331749  |
| 9.103733 | 7  | 3 | 4 | 539990.6 | 700866.6 | 186653.1 | 908851.5 | 985828.5 | 783650.7 | 782970.4 | 659628.4 | 880307.1 |
| 9.920517 | 10 | 5 | 5 | 810882.5 | 3103701  | 677523.6 | 2887592  | 835454.6 | 3041514  | 2342154  | 4070342  | 3424503  |
| 9.983433 | 10 | 5 | 5 | 6853071  | 16926374 | 5873814  | 14904974 | 8143918  | 21845595 | 24163974 | 13954301 | 10052315 |

|          |    |   |   |          |          |          |          |          |          |          |          |          |
|----------|----|---|---|----------|----------|----------|----------|----------|----------|----------|----------|----------|
| 9.979667 | 10 | 5 | 5 | 1046641  | 2502784  | 1080272  | 2865057  | 1441227  | 3321712  | 3653051  | 2778875  | 1183533  |
| 9.9677   | 5  | 2 | 3 | 652557.8 | 972977.9 | 241719.8 | 1048424  | 287896.8 | 1164453  | 1094470  | 1173240  | 788762.1 |
| 9.830283 | 5  | 2 | 3 | 7352970  | 23494567 | 19042457 | 17900480 | 20405643 | 34909448 | 2982973  | 42415902 | 34285077 |
| 9.853633 | 10 | 5 | 5 | 1070425  | 5941104  | 1014280  | 5676934  | 839765.3 | 6256520  | 5997836  | 4193614  | 6548624  |
| 10.97857 | 10 | 5 | 5 | 2098610  | 7362740  | 457274.2 | 8211020  | 4060118  | 6744005  | 7024090  | 7546920  | 7804292  |
| 9.946467 | 10 | 5 | 5 | 737798.8 | 2397947  | 536143.3 | 2211179  | 758158.6 | 3040589  | 2683467  | 2020460  | 1697657  |
| 10.9645  | 8  | 3 | 5 | 207737.4 | 642834.7 | 167334.2 | 704749.1 | 257637.8 | 676446.5 | 876772.5 | 626525.4 | 627485.7 |
| 28.63617 | 10 | 5 | 5 | 1302809  | 31970546 | 5870105  | 33892806 | 7565842  | 38032922 | 35131698 | 34831588 | 23705281 |
| 43.51683 | 6  | 1 | 3 | 307929   | 4077835  | 2252660  | 3579632  | 944015.3 | 8105400  | 3092940  | 3164486  | 3065103  |
| 9.82645  | 6  | 4 | 2 | 589214.6 | 1922358  | 412642.3 | 2049892  | 484507.5 | 1533168  | 1934439  | 2213222  | 1495822  |
| 34.22667 | 6  | 3 | 0 | 289366.3 | 2355252  | 1137445  | 2591891  | 58428.24 | 3676201  | 2549090  | 2348140  | 539329.1 |
| 24.4195  | 8  | 4 | 4 | 739262.5 | 3480098  | 1429337  | 3088222  | 1337940  | 3557216  | 2311234  | 3304482  | 2386660  |
| 26.82483 | 8  | 4 | 4 | 628004.4 | 4474306  | 2674166  | 3813663  | 1913659  | 2239361  | 4995707  | 1274240  | 6215001  |
| 26.02    | 6  | 3 | 3 | 92524.7  | 442287.8 | 140865.2 | 402031.7 | 143604   | 195632.8 | 512864.8 | 457057.3 | 535667.3 |
| 10.98385 | 13 | 4 | 5 | 464468.9 | 1147494  | 417289   | 985639.7 | 685414.5 | 1672845  | 1512480  | 784169.7 | 793335.6 |
| 10.008   | 9  | 5 | 4 | 1115466  | 2524643  | 967571.3 | 2855897  | 1335825  | 2592024  | 3829830  | 3035064  | 1542073  |
| 17.67533 | 4  | 3 | 1 | 69384.01 | 263374.2 | 82853.93 | 283964.8 | 60492.06 | 278195.8 | 210039.6 | 382109   | 282757.5 |
| 9.37735  | 4  | 3 | 1 | 1206530  | 3458027  | 2221396  | 4303969  | 3564470  | 5967630  | 1330313  | 2588935  | 1696746  |
| 29.12    | 7  | 5 | 2 | 4646682  | 22820124 | 7517453  | 26087677 | 14289360 | 30830490 | 19362703 | 11991200 | 28504596 |
| 9.975217 | 10 | 5 | 4 | 2142115  | 3684514  | 1987815  | 3147972  | 1800999  | 5453416  | 6071761  | 3151708  | 1618395  |
| 22.121   | 5  | 2 | 3 | 93910.07 | 256395.1 | 99506.28 | 222427.2 | 136954   | 165048.1 | 374426.9 | 290430.9 | 141393.5 |
| 21.3235  | 7  | 3 | 4 | 55338.97 | 159384.4 | 28105.97 | 147170   | 53419.49 | 194106   | 175577.6 | 157497.8 | 150467.4 |
| 24.6815  | 8  | 5 | 3 | 87274.79 | 317644.1 | 128313.6 | 351657.7 | 111643.3 | 296259.6 | 325417.5 | 163230.8 | 518661   |
| 9.206    | 9  | 5 | 4 | 3519995  | 24310470 | 1898984  | 28309862 | 19212596 | 24606874 | 24993576 | 20979656 | 25410491 |
| 9.859983 | 7  | 4 | 3 | 787283   | 2928901  | 449164.5 | 2748227  | 775510   | 3336345  | 2860005  | 3443906  | 2444115  |
| 11.86875 | 7  | 4 | 3 | 95191.7  | 300761.1 | 135203.8 | 265130.5 | 116147.1 | 305003.4 | 330103.5 | 142931.4 | 222148.4 |
| 10.95055 | 6  | 3 | 3 | 343261   | 1047811  | 248362.5 | 965349.8 | 328417   | 1231825  | 1057293  | 680017.5 | 958433.7 |
| 9.951283 | 9  | 5 | 4 | 2465395  | 5028190  | 840734.7 | 4772593  | 964288.2 | 6273365  | 4709499  | 4998027  | 5201604  |
| 10.95602 | 9  | 5 | 4 | 504309.8 | 1707542  | 699513   | 1545144  | 399642.4 | 533332.9 | 2378593  | 1931963  | 1986527  |
| 24.65217 | 9  | 4 | 5 | 302548.1 | 1176745  | 531074.1 | 1049910  | 341294.9 | 944247.6 | 1176864  | 750542.2 | 924834.8 |
| 9.992233 | 8  | 4 | 4 | 619760.4 | 1233904  | 570727.7 | 1451824  | 921351.7 | 1025786  | 1416425  | 625166.7 | 2123148  |
| 9.903567 | 4  | 3 | 1 | 1679758  | 3058624  | 394816.6 | 2805005  | 1176454  | 2887441  | 2757414  | 3516148  | 3449496  |
| 10.95055 | 9  | 5 | 4 | 250804.5 | 1476664  | 391808.8 | 1357532  | 449914.7 | 1535243  | 1834510  | 1428978  | 838250.4 |
| 8.142883 | 8  | 4 | 3 | 398751.3 | 11106833 | 4857705  | 12777164 | 6778286  | 14601244 | 16245121 | 6373745  | 12746641 |
| 9.295167 | 6  | 3 | 3 | 1717629  | 6923269  | 7465290  | 5078339  | 5400613  | 14802514 | 677087.1 | 15356826 | 2015648  |

|          |    |   |   |          |          |          |          |          |          |          |          |          |
|----------|----|---|---|----------|----------|----------|----------|----------|----------|----------|----------|----------|
| 9.946467 | 5  | 2 | 3 | 641376.6 | 801682   | 469585.9 | 678340   | 401430   | 1363383  | 632291.3 | 1191730  | 210924.3 |
| 9.554967 | 11 | 4 | 4 | 6397803  | 15874203 | 20966927 | 20727341 | 11863170 | 46322510 | 1298824  | 1202506  | 29467370 |
| 10.211   | 8  | 3 | 5 | 706620.4 | 668334.9 | 268886.4 | 919415.8 | 1191129  | 1015545  | 627351.2 | 678155.2 | 268520.6 |
| 10.8926  | 3  | 0 | 3 | 251174.1 | 420097.9 | 229260.9 | 499641.7 | 324388.6 | 301676.5 | 772844.7 | 228748   | 267747.6 |
| 15.19022 | 7  | 3 | 4 | 49124.34 | 258146.1 | 76496.16 | 236245.3 | 78807.98 | 320242.2 | 342576.8 | 201245.2 | 264166.8 |
| 9.842    | 9  | 5 | 4 | 1149994  | 4099646  | 1493124  | 3579976  | 2123352  | 2562111  | 4649832  | 2855392  | 4163596  |
| 13.39087 | 10 | 5 | 5 | 953874   | 4104973  | 1529703  | 5209806  | 5177849  | 4797964  | 6303705  | 2264306  | 3350433  |
| 9.644783 | 8  | 5 | 3 | 743808.8 | 2418504  | 750937   | 2659588  | 945576   | 2314102  | 1840841  | 1977619  | 2243047  |
| 9.986767 | 10 | 5 | 5 | 1018183  | 2494614  | 913691.1 | 2822614  | 1358586  | 2884971  | 3762994  | 2604653  | 1580486  |
| 23.57233 | 5  | 3 | 0 | 449189.8 | 8626531  | 4247273  | 9625786  | 2591844  | 10077983 | 14888176 | 5539250  | 4010145  |
| 9.559117 | 10 | 5 | 5 | 555000.7 | 1066793  | 356718.2 | 1275843  | 963121.9 | 1400790  | 1414193  | 911708.5 | 564683.8 |
| 9.392767 | 6  | 3 | 2 | 5736029  | 14400253 | 15999334 | 18378488 | 11863902 | 37786356 | 4043661  | 24445713 | 1720957  |
| 43.04233 | 4  | 1 | 3 | 316158.6 | 4022542  | 819004.1 | 3808457  | 696452.9 | 3656152  | 3708956  | 5446601  | 3380577  |
| 9.4775   | 14 | 5 | 4 | 2107603  | 10025093 | 5751890  | 8455928  | 5396401  | 17664725 | 3882858  | 5929734  | 8486885  |
| 44.9835  | 4  | 3 | 1 | 453263.1 | 4789256  | 3624276  | 4039153  | 294325.1 | 3780992  | 10771495 | 4404159  | 4085496  |
| 23.7695  | 10 | 5 | 5 | 4992347  | 40655821 | 12654576 | 36394933 | 17197901 | 23015658 | 39705134 | 41523963 | 40279397 |
| 9.659033 | 10 | 5 | 5 | 8291827  | 50150673 | 24018474 | 41609416 | 35340087 | 84976238 | 45862761 | 28713760 | 28638741 |
| 9.145433 | 4  | 3 | 1 | 638910.3 | 1156653  | 356234.9 | 1311522  | 681862.1 | 1028774  | 1133139  | 932733.3 | 1774506  |
| 10.9645  | 10 | 5 | 5 | 466596.7 | 2074805  | 506366.3 | 1954995  | 318817.4 | 2642767  | 2516651  | 1694044  | 1473063  |
| 26.82483 | 8  | 4 | 4 | 932013.2 | 7037598  | 4820708  | 5800495  | 3924031  | 2803828  | 8923089  | 1198346  | 9741703  |
| 10.03947 | 4  | 3 | 1 | 636153   | 596402.4 | 218426.7 | 706313.9 | 498122.6 | 405402.3 | 487053.9 | 442901.2 | 912350.7 |
| 10.9645  | 6  | 4 | 2 | 304747.6 | 572614.5 | 177347.8 | 649845.8 | 340829.1 | 808536   | 481540.7 | 451434.4 | 407661.6 |
| 9.976317 | 6  | 3 | 3 | 565099.6 | 962067.3 | 521538.2 | 821860.4 | 475944.4 | 1383040  | 1535124  | 1017686  | 556454.2 |
| 10.03947 | 8  | 5 | 3 | 436974.8 | 715042.8 | 243006   | 824906.5 | 488877.8 | 515050   | 1104060  | 504077.7 | 717986.5 |
| 9.992233 | 10 | 5 | 5 | 1350039  | 2935171  | 540977.7 | 3244816  | 1430278  | 3137617  | 2135114  | 3584834  | 3090990  |
| 9.994767 | 9  | 4 | 5 | 809405.9 | 1931368  | 712435.6 | 2175464  | 998056.4 | 2179553  | 2953109  | 1967627  | 1090746  |
| 8.872967 | 6  | 2 | 4 | 333111.7 | 349719.2 | 210702.5 | 435545   | 373274.8 | 615656.4 | 380249.4 | 337705   | 388222.2 |
| 9.960467 | 4  | 3 | 1 | 936998   | 889224.1 | 472337.3 | 1085436  | 858162.7 | 1370496  | 97081.83 | 981850.8 | 977095.2 |
| 10.45545 | 10 | 5 | 5 | 181105   | 516638.4 | 202058.9 | 571239.1 | 187222.8 | 843329   | 505596.3 | 520976.8 | 305420.3 |
| 10.9645  | 9  | 5 | 4 | 366969.3 | 1611645  | 302672.6 | 1532072  | 263482.2 | 1800336  | 1815849  | 1377081  | 1199626  |
| 10.58803 | 9  | 5 | 4 | 369644.6 | 1126358  | 342052.9 | 1039929  | 269210.6 | 1036992  | 1256130  | 1639860  | 735207.6 |
| 10.94962 | 9  | 4 | 4 | 345993.2 | 1049190  | 374323.5 | 1185710  | 573485.2 | 1125903  | 651086.9 | 860692.7 | 1643676  |
| 9.419733 | 5  | 3 | 2 | 509188.6 | 1905357  | 1194428  | 2202945  | 904229.4 | 3131390  | 3288070  | 1066272  | 1124605  |
| 7.318367 | 10 | 5 | 5 | 602358.8 | 4475111  | 226507.5 | 4729644  | 1223663  | 4602299  | 4506823  | 4595180  | 4076097  |
| 9.928667 | 9  | 4 | 5 | 1752157  | 3672991  | 410805.1 | 3490811  | 810420.3 | 4165555  | 3696036  | 3897225  | 3535371  |

|          |    |   |   |          |          |          |          |          |          |          |          |          |
|----------|----|---|---|----------|----------|----------|----------|----------|----------|----------|----------|----------|
| 9.842    | 9  | 5 | 4 | 644416   | 1553777  | 370227.2 | 1676767  | 496832.7 | 1907304  | 1964068  | 1098567  | 1391832  |
| 30.29317 | 10 | 5 | 5 | 10574327 | 78695779 | 12022554 | 73191771 | 24650288 | 76551857 | 95615632 | 76510409 | 62319515 |
| 10.54367 | 8  | 5 | 2 | 140699.3 | 322169.7 | 117254.3 | 357014.9 | 131287.6 | 197780.1 | 457796.3 | 240221.1 | 280352.9 |
| 9.4468   | 5  | 4 | 1 | 675195.6 | 2512327  | 980609.5 | 2870325  | 1507828  | 2104787  | 3756155  | 2640524  | 1121339  |
| 9.433    | 6  | 3 | 2 | 3539246  | 4681570  | 4341138  | 5966462  | 4828456  | 1269502  | 6742676  | 1143744  | 2941158  |
| 9.983433 | 10 | 4 | 5 | 638961.8 | 1233390  | 627995.1 | 1083525  | 416595.6 | 2121259  | 462735   | 1539741  | 1098208  |
| 41.2875  | 6  | 3 | 1 | 357422.3 | 6428764  | 4804326  | 5440179  | 421087.3 | 14725970 | 5598721  | 5421870  | 2523262  |
| 7.57885  | 5  | 2 | 3 | 715450.9 | 16124480 | 5800814  | 13885175 | 9624083  | 18248402 | 20544242 | 9360788  | 10543231 |
| 10.93208 | 4  | 1 | 3 | 274423.3 | 389202.7 | 156577.2 | 455549.4 | 292675.8 | 259777.4 | 515532.3 | 187315.7 | 449336.8 |
| 10.9645  | 11 | 5 | 5 | 740501.8 | 3049657  | 943193.3 | 3326495  | 1035694  | 4290808  | 3534023  | 2089142  | 2134153  |
| 10.92828 | 10 | 5 | 5 | 302212   | 816069.6 | 310323.6 | 741878.2 | 208172.7 | 1289099  | 668610.1 | 486566.1 | 693293.8 |
| 9.979667 | 10 | 5 | 5 | 856408.6 | 2612596  | 961438.7 | 2306499  | 1212126  | 3446617  | 3592043  | 2756949  | 1404356  |
| 7.174533 | 9  | 5 | 4 | 153550   | 1150918  | 135716   | 1029456  | 581491.4 | 1282978  | 945439.3 | 1089281  | 1241844  |
| 44.68267 | 8  | 1 | 4 | 397063   | 4329294  | 1737864  | 4986538  | 2811148  | 7429614  | 3689553  | 3350661  | 3545769  |
| 9.40325  | 6  | 3 | 3 | 5345196  | 18093629 | 9666692  | 15340569 | 10056683 | 21423233 | 21964910 | 25169802 | 20847455 |
| 9.36565  | 4  | 3 | 1 | 925264.9 | 1405143  | 500506.9 | 1894563  | 2351460  | 1605308  | 943778.1 | 2003759  | 827876.3 |
| 9.568567 | 5  | 2 | 3 | 386283.6 | 1190674  | 258806.9 | 1299206  | 478543.3 | 1515055  | 881243.4 | 1142643  | 1386241  |
| 9.976317 | 9  | 4 | 5 | 789063.2 | 2236047  | 1051141  | 2529815  | 1055067  | 3226357  | 3172266  | 2521855  | 1259228  |
| 11.34627 | 9  | 4 | 5 | 369000.4 | 1745196  | 656089.5 | 2014109  | 1179254  | 1756642  | 2833925  | 1283004  | 1670353  |
| 9.494433 | 7  | 3 | 3 | 12582149 | 59308303 | 59798400 | 43979602 | 49548062 | 1795237  | 52412090 | 1.31E+08 | 1.1E+08  |
| 10.99268 | 5  | 2 | 3 | 843648.5 | 2351025  | 1443640  | 1850932  | 2072250  | 1225724  | 3775903  | 437426.8 | 3352226  |
| 9.970617 | 6  | 4 | 2 | 369764   | 790578.9 | 421841.5 | 677779.5 | 386919.1 | 1323426  | 208084.7 | 836193.9 | 1000546  |
| 9.928667 | 5  | 3 | 2 | 864853.8 | 1295388  | 764498.1 | 1060087  | 915923   | 1655929  | 0        | 1270245  | 1590465  |
| 9.445217 | 14 | 5 | 5 | 806119.1 | 7759268  | 1865206  | 7281325  | 1547004  | 7001759  | 9358259  | 10015402 | 6880393  |
| 9.976317 | 8  | 4 | 4 | 838435.6 | 1689177  | 417974.3 | 1494485  | 879947.4 | 2069461  | 2154781  | 1626537  | 1413193  |
| 9.864767 | 10 | 5 | 5 | 14326399 | 85099003 | 10216829 | 82436372 | 8846329  | 82851668 | 94045812 | 68706692 | 92839821 |
| 30.25033 | 10 | 5 | 5 | 7343119  | 57056169 | 8571196  | 52408810 | 21508862 | 46694219 | 61928918 | 59649692 | 49791114 |
| 10.9645  | 10 | 5 | 5 | 3927035  | 16419132 | 4492349  | 15310396 | 3372946  | 20678474 | 21249437 | 12948700 | 11220040 |
| 31.76783 | 4  | 3 | 1 | 65364.1  | 231824   | 180107.2 | 189024.3 | 119802.1 | 86604.66 | 241486   | 32325.87 | 319847.8 |
| 9.983433 | 9  | 4 | 5 | 886858.3 | 1311555  | 937554.9 | 1593312  | 1081090  | 1848311  | 2581555  | 1246712  | 224157.2 |
| 10.008   | 5  | 1 | 4 | 552835.4 | 803193.6 | 546729.7 | 680163.9 | 288146.8 | 387464.1 | 96436.86 | 1406705  | 1173188  |
| 9.976317 | 9  | 5 | 4 | 1068409  | 2418032  | 1038455  | 2065821  | 1450163  | 3085789  | 3831434  | 2196087  | 1273547  |
| 10.94208 | 6  | 2 | 4 | 258858.7 | 436906.7 | 284405   | 517584.6 | 295509.2 | 276126.2 | 915188.1 | 359583.4 | 186204.2 |
| 9.999217 | 9  | 5 | 4 | 615016.3 | 1197900  | 649658.4 | 1380999  | 666789.7 | 1561087  | 2005501  | 1348921  | 474938.3 |
| 10.95055 | 10 | 5 | 5 | 3258031  | 16738294 | 4987500  | 15551011 | 3344178  | 23349224 | 18692521 | 12207879 | 11306761 |

|          |    |   |   |          |          |          |          |          |          |          |          |          |
|----------|----|---|---|----------|----------|----------|----------|----------|----------|----------|----------|----------|
| 24.87067 | 10 | 5 | 5 | 731097.1 | 3824408  | 662533.2 | 4140774  | 1438408  | 4508717  | 3111273  | 3180149  | 3898875  |
| 8.9177   | 5  | 3 | 2 | 125895   | 229881.9 | 156761.6 | 186591.9 | 154551.7 | 427533.8 | 357176.8 | 124671.7 | 182524.6 |
| 9.3471   | 4  | 3 | 1 | 3983998  | 14009041 | 12655085 | 17058381 | 8844960  | 2725453  | 5782016  | 27400757 | 5943227  |
| 9.960467 | 10 | 5 | 5 | 3639996  | 8270594  | 1649916  | 9089047  | 3748731  | 10094775 | 8923152  | 9154348  | 7185301  |
| 10.55813 | 4  | 1 | 3 | 95315.3  | 272626.4 | 84136.28 | 304769.3 | 138848.1 | 123405.5 | 293613   | 314877.3 | 307660.3 |
| 9.522017 | 10 | 5 | 5 | 1249521  | 3436991  | 1549355  | 2857393  | 2486501  | 4488115  | 1402587  | 2202565  | 4112590  |
| 16.25713 | 10 | 5 | 5 | 171793.8 | 1054712  | 349110.5 | 1167526  | 454412.8 | 1367936  | 1040792  | 490851.7 | 1052313  |
| 9.536783 | 11 | 4 | 5 | 1020544  | 5180772  | 2219960  | 4493444  | 2701163  | 8745955  | 5630489  | 3100864  | 3664643  |
| 12.4121  | 8  | 4 | 4 | 209074.4 | 1185651  | 528636.1 | 1402693  | 957791   | 1262847  | 777908.9 | 767869.2 | 2055331  |
| 10.9645  | 10 | 5 | 5 | 414508.7 | 1154301  | 298048.4 | 1274839  | 529960.3 | 1525582  | 1407942  | 1012249  | 822349   |
| 9.870017 | 9  | 5 | 4 | 1329060  | 3151960  | 991195.3 | 3691388  | 2505850  | 2813813  | 1879430  | 2842469  | 4470436  |
| 9.568567 | 6  | 3 | 3 | 307681.2 | 569558.6 | 231342.3 | 683774.3 | 523428.2 | 801855.9 | 821295.2 | 297008.9 | 456830.9 |
| 27.56867 | 4  | 3 | 1 | 85379.22 | 601127.8 | 252506.8 | 685893.9 | 348541.5 | 606995.3 | 395769.4 | 814428.6 | 883393.9 |
| 9.992233 | 8  | 5 | 3 | 467064.2 | 738107.5 | 192599.3 | 866776.9 | 610146   | 949714.2 | 755160.3 | 548261.3 | 536334.5 |
| 9.842    | 10 | 5 | 5 | 3891207  | 16650735 | 1540211  | 16035390 | 2698858  | 18833206 | 17394547 | 16604656 | 15317054 |
| 9.4468   | 9  | 5 | 4 | 1028760  | 6264013  | 1839607  | 5574059  | 2969317  | 6877060  | 7739528  | 6699031  | 6952886  |
| 9.9677   | 10 | 5 | 5 | 2441771  | 5993765  | 2120182  | 5277125  | 2961305  | 7937870  | 8354193  | 5237107  | 3280868  |
| 9.976317 | 10 | 5 | 5 | 3747537  | 5944811  | 981184.3 | 6728502  | 3765461  | 6827522  | 6074649  | 6799329  | 5550577  |
| 9.992233 | 6  | 2 | 4 | 364907.2 | 623438.7 | 298021.9 | 705115.6 | 292113   | 960552.4 | 196362.5 | 847529.9 | 553517.7 |
| 10.008   | 15 | 5 | 4 | 874319   | 1818610  | 470753.5 | 2198968  | 1829521  | 2107717  | 1853215  | 2108622  | 2026150  |
| 10.9645  | 10 | 5 | 5 | 2119388  | 7785207  | 571103.2 | 8600543  | 3985864  | 8576086  | 7020821  | 8003874  | 7754800  |
| 10.9645  | 6  | 3 | 3 | 443097.7 | 899830.3 | 188732.4 | 780331.7 | 565744.6 | 1156220  | 920333.4 | 969249.1 | 650717.6 |
| 9.932033 | 9  | 5 | 4 | 717152   | 2355587  | 682644.3 | 2148489  | 807512.4 | 3268899  | 2816231  | 1979737  | 1557944  |
| 10.4842  | 7  | 3 | 4 | 201518.4 | 541432.4 | 148929.6 | 580452.9 | 132524.1 | 455198.3 | 333941.3 | 606791.8 | 718400.4 |
| 10.9645  | 4  | 3 | 1 | 345995.4 | 785223.3 | 202121.3 | 690515.8 | 432205   | 827705.3 | 1026540  | 726346.5 | 479614.6 |
| 9.976317 | 10 | 5 | 5 | 1196932  | 3330099  | 1596257  | 3778877  | 1650205  | 4446959  | 5238197  | 3540383  | 1597785  |
| 34.34983 | 10 | 5 | 5 | 2357388  | 15218916 | 7137633  | 18912598 | 17125326 | 26860585 | 13559339 | 8294883  | 16227844 |
| 9.9677   | 10 | 5 | 5 | 3703780  | 9822753  | 3317343  | 8736384  | 4439839  | 12518282 | 13728462 | 9524160  | 5791710  |
| 29.02817 | 5  | 3 | 2 | 100018.2 | 460927.3 | 280126.7 | 535282.8 | 257315   | 865047.4 | 614742.7 | 162188.1 | 286189.5 |
| 21.45133 | 5  | 3 | 2 | 237286.3 | 1523154  | 305063   | 1450822  | 206460.8 | 1243135  | 1891608  | 1352372  | 1313799  |
| 9.887133 | 10 | 5 | 5 | 13349748 | 76909935 | 5758284  | 80485548 | 16929044 | 77310068 | 70544781 | 83225640 | 81833928 |
| 30.18067 | 11 | 5 | 5 | 311958.8 | 1829966  | 627433.1 | 1996969  | 580816.7 | 1115040  | 1556635  | 2186023  | 1570633  |
| 23.04483 | 5  | 2 | 3 | 157552.3 | 627203.2 | 427372.9 | 514859   | 384929.5 | 267887.7 | 989695.9 | 310336.1 | 383750.7 |
| 10.97242 | 5  | 3 | 2 | 515225.4 | 948658.5 | 731595.3 | 1134050  | 603508   | 1845797  | 366981.1 | 500222.5 | 1642755  |
| 9.43325  | 7  | 4 | 3 | 765642.7 | 3354926  | 1804949  | 2922933  | 1263848  | 5375164  | 4964025  | 3204890  | 1993106  |

|          |    |   |   |          |          |          |          |          |          |          |          |          |
|----------|----|---|---|----------|----------|----------|----------|----------|----------|----------|----------|----------|
| 10.96278 | 10 | 5 | 5 | 199380.9 | 721721.5 | 114822.8 | 663277.8 | 270811.4 | 853925   | 797636.2 | 749781.9 | 583400.3 |
| 15.5851  | 9  | 5 | 4 | 113146.3 | 616102.6 | 263414.9 | 556522.3 | 148301.8 | 806346.2 | 833986.3 | 449489.5 | 233659.6 |
| 40.97067 | 11 | 2 | 4 | 303411   | 5742336  | 2345777  | 5179250  | 1660228  | 4815396  | 9904197  | 4970423  | 4193567  |
| 10.72028 | 5  | 1 | 4 | 8332386  | 69394945 | 3035851  | 65852065 | 17306256 | 73425149 | 65164226 | 68233324 | 69603275 |
| 10.77503 | 10 | 5 | 5 | 278896.2 | 834401.9 | 281993.6 | 757849   | 272811   | 557494.3 | 1088379  | 1171510  | 760692.6 |
| 9.992233 | 8  | 4 | 4 | 447598.3 | 1176170  | 493949.7 | 1328280  | 602403   | 1425256  | 1724610  | 1424155  | 703784   |
| 14.18023 | 6  | 4 | 2 | 64664.61 | 237420.2 | 84520.34 | 266432.9 | 121648.6 | 273108.7 | 349403.6 | 191064.9 | 125608.6 |
| 9.94455  | 8  | 5 | 3 | 673806.1 | 1421238  | 301613   | 1315304  | 448479   | 1905214  | 1479792  | 1362448  | 1233040  |
| 9.9677   | 10 | 5 | 5 | 20357128 | 48673830 | 17200828 | 43071774 | 22914781 | 63802778 | 69654690 | 40875873 | 29379628 |
| 11.38553 | 5  | 3 | 2 | 154525.4 | 1332679  | 425560.4 | 1427484  | 223370.8 | 1742352  | 1685945  | 1095189  | 1414433  |
| 9.445217 | 9  | 5 | 3 | 929162.1 | 5785517  | 1245985  | 6902582  | 5424058  | 4342884  | 4633575  | 7126584  | 6082382  |
| 30.25033 | 10 | 5 | 5 | 3791335  | 28649893 | 4820694  | 26259602 | 11063828 | 23066817 | 32324650 | 30209880 | 24039316 |
| 44.20717 | 3  | 3 | 0 | 309986.7 | 3239451  | 506913.3 | 3134323  | 139770.6 | 3651515  | 3453960  | 3421806  | 3310170  |
| 10.95602 | 10 | 5 | 5 | 310165.7 | 1209341  | 281697.8 | 1107940  | 435043.6 | 1606396  | 1028793  | 972984.5 | 1030716  |
| 9.979667 | 9  | 5 | 4 | 1300185  | 3363478  | 891633.7 | 3005835  | 1587914  | 4286550  | 3512843  | 3413616  | 1887567  |
| 9.960817 | 5  | 2 | 3 | 771868.1 | 1359818  | 315259.2 | 1564154  | 976327.8 | 1152130  | 948649.5 | 1755889  | 1428370  |
| 19.41733 | 8  | 4 | 4 | 228082.1 | 1526386  | 331161.9 | 1382475  | 651630.9 | 1605621  | 1149342  | 2029842  | 1335191  |
| 6.867017 | 8  | 5 | 2 | 790639.8 | 21637783 | 10561984 | 24007457 | 5840300  | 36590555 | 22413703 | 20467206 | 6785914  |
| 28.849   | 8  | 4 | 4 | 971018.6 | 8083828  | 6841127  | 6471256  | 4623612  | 2050592  | 8361512  | 362426.5 | 14439624 |
| 9.979667 | 10 | 5 | 5 | 3337940  | 8449388  | 3763373  | 9320379  | 2383966  | 10713593 | 12751948 | 9282980  | 3178263  |
| 9.93625  | 8  | 4 | 4 | 1171131  | 2863754  | 633890.8 | 3084702  | 939416.5 | 3960634  | 2644115  | 2334052  | 2603650  |
| 10.95055 | 9  | 3 | 5 | 183655.9 | 598627.9 | 451719.1 | 725259   | 471723.6 | 1377191  | 564118.1 | 354584.6 | 238424.1 |
| 9.887133 | 10 | 5 | 5 | 13283354 | 75188138 | 4591259  | 79103623 | 19068676 | 76927152 | 70304482 | 75629816 | 81716312 |
| 9.964417 | 10 | 5 | 5 | 1378689  | 3774662  | 1245455  | 3353766  | 1767585  | 4930682  | 5078604  | 3605521  | 2121588  |
| 9.928667 | 5  | 3 | 1 | 2198278  | 2389322  | 2187344  | 2913322  | 1571444  | 1524972  | 1233777  | 6296589  | 1383661  |
| 10.008   | 9  | 5 | 4 | 458749.2 | 900532.4 | 293981.4 | 1011399  | 485796.2 | 967841.7 | 1222652  | 1117713  | 653142.5 |
| 24.72467 | 10 | 5 | 5 | 56111    | 334757   | 51679.14 | 312685.9 | 100004.4 | 289808.7 | 397354.3 | 274325.2 | 346741.4 |
| 9.992233 | 6  | 3 | 3 | 384266.9 | 575117.4 | 295642.3 | 479324.3 | 394819.3 | 794472   | 802943.2 | 668484.6 | 87147.54 |
| 9.994767 | 9  | 5 | 4 | 609550   | 1105579  | 262252.7 | 1014896  | 385374.1 | 1227986  | 1390472  | 1197508  | 704483.5 |
| 28.24533 | 9  | 5 | 4 | 248037.6 | 987983.7 | 381810.2 | 876930.1 | 428408.6 | 936711.6 | 1197970  | 511034.5 | 787743.7 |
| 9.9014   | 6  | 3 | 3 | 529567.6 | 2181790  | 778144.3 | 1985777  | 647462.5 | 2876650  | 2272088  | 1893534  | 2861914  |
| 28.259   | 10 | 5 | 5 | 696302.5 | 2721590  | 977724   | 2399627  | 1340575  | 2258937  | 2932099  | 1606164  | 2572874  |
| 9.4925   | 10 | 5 | 5 | 574983.7 | 3101382  | 1868070  | 3724174  | 2608681  | 2088110  | 358938.1 | 3666795  | 4730512  |
| 9.94455  | 12 | 5 | 5 | 3279465  | 5931936  | 1693950  | 5225934  | 3187215  | 4808870  | 6289689  | 3687806  | 6924739  |
| 36.81383 | 10 | 5 | 5 | 453751.8 | 3575712  | 1097194  | 3314342  | 780973.7 | 3857885  | 2991708  | 2060056  | 4956587  |

|          |    |   |   |          |          |          |          |          |          |          |          |          |
|----------|----|---|---|----------|----------|----------|----------|----------|----------|----------|----------|----------|
| 22.5115  | 8  | 4 | 4 | 214029   | 738726.3 | 307056.1 | 671460.7 | 153908.1 | 572907.6 | 1255736  | 699626.2 | 455972.4 |
| 10.95602 | 9  | 5 | 4 | 289117.3 | 952891.6 | 355156.5 | 842046   | 448999   | 1469040  | 923593.3 | 968199.8 | 466269   |
| 10.9645  | 10 | 5 | 5 | 190518.7 | 822683.3 | 259163.4 | 896027.9 | 277654.5 | 1142410  | 974262.5 | 742718.1 | 800928.8 |
| 18.98017 | 6  | 3 | 3 | 54274.48 | 188282.5 | 64661.69 | 171110.7 | 61067.32 | 225964   | 207000.8 | 135859.3 | 264390.7 |
| 9.888767 | 6  | 3 | 2 | 1032218  | 2771682  | 1167624  | 2524113  | 468043.7 | 2370751  | 1740864  | 2854741  | 4733209  |
| 10.1999  | 11 | 4 | 4 | 484056   | 781533.5 | 186956.3 | 889598.6 | 514947.2 | 911789.6 | 601614.8 | 770433.5 | 1022276  |
| 43.7615  | 4  | 3 | 1 | 295643.5 | 6015110  | 849738.5 | 5802024  | 702858.5 | 7263548  | 6062635  | 5903478  | 5976833  |
| 24.73917 | 10 | 5 | 5 | 5884486  | 44034214 | 3146437  | 45869755 | 8756284  | 39295941 | 47888935 | 43351467 | 45363880 |
| 9.999217 | 10 | 5 | 5 | 1488931  | 4245271  | 1311240  | 3723570  | 2333726  | 4798400  | 6073513  | 3712715  | 2534637  |
| 17.94383 | 6  | 4 | 2 | 111013.8 | 429223.9 | 207409.5 | 378450.5 | 161103.3 | 145090.2 | 546607   | 684174.1 | 319264.6 |
| 10.9645  | 10 | 5 | 5 | 1993502  | 8907851  | 1224637  | 8519146  | 1594211  | 10182755 | 8196902  | 7139598  | 9419926  |
| 9.960467 | 10 | 5 | 5 | 8961367  | 20957884 | 3798846  | 22867451 | 8953405  | 25148344 | 22337987 | 23285922 | 17915932 |
| 15.84798 | 10 | 5 | 5 | 777660.3 | 4098033  | 477371.9 | 3778418  | 1544013  | 4722772  | 4104065  | 3735135  | 3543605  |
| 21.37967 | 7  | 4 | 3 | 222810.8 | 696062.4 | 245364.9 | 641850.6 | 130479.4 | 502979.1 | 1120099  | 675057.6 | 616058.9 |
| 37.561   | 5  | 2 | 3 | 329576.8 | 2775170  | 1398139  | 2466533  | 741453.5 | 4611032  | 2902872  | 2816352  | 672507.5 |
| 9.431017 | 14 | 5 | 5 | 9164221  | 62365476 | 11151222 | 71245861 | 43370661 | 54737962 | 70590597 | 77897184 | 54658668 |
| 10.9049  | 4  | 1 | 3 | 176492.3 | 443302.3 | 188708.6 | 496455.1 | 201044.6 | 394370.5 | 656633.1 | 230697.8 | 312200.7 |
| 10.45545 | 7  | 3 | 4 | 213816   | 374338.5 | 105338.8 | 336616.2 | 163584.1 | 448040.9 | 280028.4 | 302673.7 | 522125.4 |
| 11       | 10 | 5 | 5 | 227402.5 | 873787.7 | 265635.6 | 800306.8 | 273848.4 | 844363.4 | 451519.7 | 895506.8 | 1017490  |
| 15.31398 | 10 | 5 | 5 | 199140.1 | 1320079  | 309599.4 | 1224054  | 389720.7 | 1613274  | 1599056  | 1112465  | 903213.7 |
| 10.45433 | 8  | 3 | 5 | 303431   | 679107.4 | 145650   | 604869.1 | 349421.1 | 927344.1 | 654390.7 | 667572.5 | 569840.8 |
| 10.7349  | 6  | 4 | 2 | 5068168  | 2941962  | 4522105  | 5396333  | 11647510 | 1825566  | 360570.4 | 1483383  | 113375   |
| 9.992233 | 8  | 5 | 3 | 1118545  | 2640035  | 510500.1 | 2347619  | 1396394  | 2231159  | 3377389  | 2549329  | 2137043  |
| 9.979667 | 5  | 3 | 2 | 356553.1 | 717245.6 | 379200.5 | 596202.8 | 499653.3 | 971484   | 288968.6 | 555850   | 535100.7 |
| 9.659033 | 9  | 5 | 4 | 1070168  | 2261545  | 599061.9 | 2573158  | 1471650  | 2435742  | 2525526  | 1691859  | 1619388  |
| 9.928667 | 10 | 5 | 5 | 1608164  | 3139032  | 462423.5 | 2987441  | 634600.4 | 3667723  | 3302468  | 3314492  | 2971673  |
| 13.74132 | 9  | 5 | 4 | 148556.3 | 1223487  | 383372.6 | 1132368  | 275209.1 | 1673759  | 1374607  | 1023335  | 675190.3 |
| 9.999217 | 5  | 3 | 2 | 383593.6 | 691790.9 | 431171.8 | 814479.6 | 470033.7 | 928960.9 | 1231064  | 741550.9 | 116224.8 |
| 10.01477 | 10 | 5 | 4 | 2319400  | 2265965  | 926447.2 | 3159996  | 4415621  | 2679731  | 1940745  | 3099071  | 2814462  |
| 10.9645  | 10 | 5 | 5 | 533747.6 | 2565102  | 468533.4 | 2422267  | 576005.3 | 2968078  | 3016415  | 1934571  | 2241778  |
| 9.872067 | 9  | 4 | 5 | 5277782  | 17613008 | 5212457  | 19687379 | 9340138  | 21581343 | 17769976 | 21115872 | 18875436 |
| 9.992233 | 6  | 3 | 3 | 1262001  | 1826130  | 1129253  | 2083693  | 707972.4 | 998456.7 | 352696.6 | 2515304  | 2146978  |
| 9.445217 | 14 | 5 | 5 | 4128400  | 27562798 | 10203987 | 31755372 | 19045101 | 26281534 | 41849050 | 33165168 | 20025955 |
| 9.9351   | 9  | 5 | 3 | 1154227  | 3435949  | 1286025  | 3994554  | 2569770  | 3021713  | 5207462  | 1733285  | 4025106  |
| 10.008   | 8  | 5 | 3 | 1659999  | 2570262  | 1378605  | 3013357  | 1845657  | 2947417  | 4726894  | 2281154  | 1126969  |



|          |    |   |   |          |          |          |          |          |          |          |          |          |
|----------|----|---|---|----------|----------|----------|----------|----------|----------|----------|----------|----------|
| 28.83683 | 8  | 4 | 4 | 1003655  | 6613568  | 5562116  | 5317347  | 3782937  | 1202381  | 6858731  | 785375.8 | 12070295 |
| 10.95055 | 8  | 3 | 5 | 184717.9 | 553415.6 | 221664.9 | 600651.1 | 97802.1  | 732628.4 | 840857.7 | 464177.7 | 328541.3 |
| 9.601917 | 8  | 5 | 3 | 1104665  | 5071342  | 1374988  | 5412530  | 1126264  | 4800208  | 6116594  | 5006343  | 2964547  |
| 9.976317 | 10 | 5 | 5 | 1185875  | 3711448  | 788969.4 | 3480550  | 909265   | 3962658  | 4823070  | 3667844  | 2652461  |
| 9.872883 | 10 | 5 | 5 | 1459209  | 4923609  | 1737247  | 4504757  | 1316330  | 6494036  | 6320779  | 2624809  | 3553437  |
| 10.9645  | 5  | 2 | 3 | 232318.2 | 550269.5 | 288283.8 | 485996.5 | 165107.7 | 930237.1 | 728936.2 | 538926.5 | 332483.7 |
| 43.01367 | 5  | 3 | 1 | 264983.1 | 3922678  | 1172212  | 3682698  | 336512.3 | 3905809  | 3572248  | 5673391  | 4052957  |
| 9.845483 | 8  | 4 | 4 | 872306.5 | 2291423  | 640924   | 2557584  | 1214682  | 2906000  | 1964239  | 2240510  | 2924125  |
| 10.96715 | 8  | 4 | 4 | 414926.8 | 1212610  | 638559.9 | 1066391  | 409584.8 | 2265769  | 1097079  | 1278858  | 722293.2 |
| 9.976317 | 7  | 3 | 4 | 3521379  | 1775055  | 1021651  | 2428714  | 3170661  | 1422593  | 1125638  | 934437.6 | 3478951  |
| 10.9645  | 10 | 5 | 5 | 298145.1 | 1467289  | 284715.4 | 1398248  | 219794   | 1753079  | 1738417  | 1298292  | 1092686  |
| 9.9677   | 10 | 5 | 5 | 5866177  | 14895685 | 4494796  | 13285248 | 7044755  | 18593317 | 20193925 | 13830712 | 9129516  |
| 22.30867 | 7  | 3 | 4 | 517388.1 | 2891784  | 259531.6 | 2672651  | 1081017  | 2512852  | 3111986  | 2819903  | 2856109  |
| 9.622983 | 4  | 3 | 1 | 201033.5 | 388534.9 | 145975.1 | 337039.5 | 224263   | 514524.3 | 228362.4 | 529293.3 | 430678.6 |
| 43.071   | 9  | 2 | 3 | 420839.8 | 6346468  | 3654826  | 5615229  | 556169.6 | 12380621 | 5656870  | 2402931  | 5721954  |
| 9.872883 | 10 | 5 | 5 | 3637853  | 22549637 | 3133732  | 21182477 | 6318687  | 21896386 | 21068617 | 20081734 | 21689997 |
| 27.49417 | 8  | 5 | 2 | 304027.3 | 3385999  | 866961   | 3178172  | 650197.3 | 2857307  | 3819322  | 3295498  | 2357834  |
| 25.59717 | 8  | 5 | 3 | 164292.5 | 671596   | 266289.9 | 596790.3 | 286712.8 | 414751.6 | 1091884  | 597195.5 | 501515.2 |
| 9.840617 | 9  | 5 | 4 | 1001877  | 1758967  | 650576.4 | 1614636  | 369000.5 | 2569621  | 2270318  | 1619385  | 1000699  |
| 9.928667 | 5  | 3 | 2 | 1251294  | 1609093  | 840446.3 | 1327679  | 1201500  | 2061316  | 181341   | 1629789  | 1835377  |
| 17.59967 | 10 | 5 | 5 | 101168.3 | 486891   | 84254.69 | 453263.1 | 152441.3 | 603455.6 | 455730.9 | 510006.3 | 493518.4 |
| 35.906   | 9  | 5 | 4 | 257080.5 | 1216817  | 860747   | 954690.6 | 1065691  | 2536152  | 945123.4 | 306126.5 | 754422.7 |
| 9.217867 | 6  | 2 | 3 | 278411.8 | 756156.8 | 409424.7 | 629677.8 | 518731.8 | 723072.5 | 140438.5 | 705905.6 | 1253073  |
| 41.30167 | 8  | 2 | 5 | 401312.8 | 4268588  | 1041645  | 3876538  | 1749438  | 4280079  | 3390990  | 3850116  | 3777386  |
| 9.842    | 9  | 5 | 4 | 678239.6 | 2669550  | 1154451  | 2284496  | 1643020  | 2386477  | 2229856  | 1419083  | 2776658  |
| 9.3735   | 6  | 2 | 4 | 577584.3 | 961083.6 | 653998.3 | 1125751  | 561108.4 | 1460750  | 1754882  | 507203.2 | 910488.7 |
| 10.98605 | 7  | 3 | 3 | 180586.7 | 445822.1 | 119856.9 | 486435.9 | 174519.8 | 279169   | 413989.5 | 579661.3 | 412290.6 |
| 10.008   | 9  | 5 | 4 | 451206.7 | 835236   | 390437.7 | 938287.7 | 372748.5 | 947586.9 | 1469803  | 661259.7 | 542896.6 |
| 36.28083 | 4  | 3 | 0 | 320371.1 | 6523567  | 1725979  | 6868188  | 261363.9 | 3756069  | 7176387  | 8441159  | 6363054  |
| 9.61395  | 5  | 2 | 3 | 333504.8 | 399749.9 | 160533.5 | 539516   | 692716.2 | 446139.8 | 251361   | 534425   | 556965.2 |
| 9.419733 | 6  | 4 | 2 | 620410.8 | 1237907  | 319483.3 | 1117708  | 537009.1 | 1706950  | 1426343  | 995050.3 | 1093183  |
| 9.516467 | 10 | 5 | 4 | 881197.9 | 2605780  | 1067046  | 3260951  | 3180820  | 3729786  | 2901617  | 1232779  | 1770815  |
| 11.07845 | 5  | 2 | 3 | 1216465  | 4891604  | 2408688  | 4139370  | 3113767  | 6696152  | 7475955  | 2457195  | 5562914  |
| 9.979667 | 9  | 5 | 4 | 487048.4 | 1133397  | 399711.8 | 1278778  | 642993.3 | 1291376  | 1544274  | 1402866  | 611050.6 |
| 9.94455  | 5  | 3 | 2 | 1378404  | 1001070  | 641251.4 | 1252009  | 1134984  | 1431775  | 165688.3 | 1691184  | 1207957  |

|          |    |   |   |          |          |          |          |          |          |          |          |          |
|----------|----|---|---|----------|----------|----------|----------|----------|----------|----------|----------|----------|
| 10.10793 | 10 | 5 | 5 | 1250147  | 2225265  | 494449.9 | 2526696  | 1463676  | 2741313  | 2505261  | 1799540  | 1602264  |
| 10.59763 | 11 | 5 | 5 | 1111993  | 4372795  | 1796201  | 3845022  | 2103944  | 5540383  | 6523848  | 4554596  | 3237167  |
| 24.6815  | 9  | 4 | 5 | 185329.9 | 464253.6 | 223664   | 526136   | 235433.8 | 253500.1 | 784928.6 | 252049.6 | 479399.6 |
| 9.3494   | 5  | 3 | 2 | 650522.8 | 4085093  | 2489645  | 4718001  | 2196882  | 2546753  | 1254522  | 7468178  | 3463664  |
| 10.008   | 10 | 5 | 5 | 724017.6 | 2110873  | 616710.7 | 1952802  | 554627.8 | 2039300  | 3123251  | 2152262  | 1559647  |
| 41.01417 | 3  | 3 | 0 | 262000.3 | 2346802  | 782831   | 2501846  | 64658.74 | 2441575  | 1132299  | 3307763  | 2551184  |
| 10.9645  | 10 | 5 | 5 | 2018894  | 9604100  | 898011.2 | 9249858  | 1607866  | 10047489 | 8322652  | 9201593  | 9747159  |
| 43.2725  | 8  | 4 | 3 | 434944.7 | 7177814  | 3615060  | 6382826  | 2008924  | 2236873  | 7030433  | 12406786 | 6613532  |
| 10.97242 | 10 | 5 | 5 | 281398.9 | 1586585  | 361163.7 | 1714329  | 561227.8 | 2076576  | 1411696  | 1171888  | 1443838  |
| 9.94455  | 10 | 5 | 5 | 1238550  | 4381665  | 961177.9 | 4136705  | 857086.7 | 5690331  | 5076410  | 3993801  | 3424320  |
| 10.01477 | 10 | 5 | 5 | 875646.1 | 2737197  | 724643.6 | 2425639  | 1446005  | 3013531  | 3774419  | 2558566  | 1800745  |
| 10.03947 | 10 | 5 | 5 | 305014.2 | 742308.9 | 225051.5 | 831837.4 | 408183   | 557522.3 | 616970.8 | 957443   | 1015573  |
| 9.433    | 12 | 5 | 5 | 1603517  | 11139842 | 2306849  | 9900916  | 5957524  | 9065584  | 11792916 | 13349303 | 8361931  |
| 10.8937  | 9  | 5 | 4 | 1048877  | 5870939  | 1989290  | 5407938  | 1387532  | 8066617  | 6513645  | 4877945  | 2959995  |
| 29.935   | 10 | 5 | 5 | 4716971  | 28223417 | 6908584  | 31114156 | 13345524 | 20905692 | 30384629 | 28930129 | 22628648 |
| 39.79117 | 5  | 2 | 3 | 480905.6 | 6150420  | 995976.3 | 5895111  | 901591.1 | 5728691  | 7922500  | 5540087  | 5738971  |
| 10.008   | 9  | 5 | 4 | 657419   | 2201624  | 521520.9 | 2004132  | 888881   | 2446304  | 2737037  | 2296556  | 1346048  |
| 32.9795  | 7  | 4 | 3 | 115603.1 | 301880.9 | 68505.53 | 321401   | 76540.57 | 257617.8 | 298797.8 | 318975.1 | 227414.6 |
| 9.93625  | 11 | 5 | 5 | 2673577  | 7615877  | 1349231  | 7222693  | 1569170  | 8869197  | 8866367  | 6615045  | 7868384  |
| 9.43325  | 7  | 4 | 3 | 1595667  | 5217120  | 4602947  | 4096510  | 3679217  | 13356018 | 3313064  | 2164151  | 3126868  |
| 9.858833 | 10 | 5 | 5 | 2929731  | 19118750 | 1833774  | 18407508 | 3226729  | 18446954 | 16593171 | 20772476 | 21051352 |
| 9.9677   | 5  | 2 | 3 | 3034286  | 11012640 | 6853231  | 9420364  | 4776143  | 18524326 | 4725584  | 14334067 | 14678862 |
| 10.00998 | 8  | 4 | 4 | 579927.3 | 788719.3 | 337646.9 | 911632.8 | 547718.5 | 979483.4 | 1181360  | 910383.2 | 468596.1 |
| 9.82645  | 3  | 3 | 0 | 654111.8 | 1812359  | 527574.3 | 1954812  | 535003.9 | 2495479  | 1235204  | 1650133  | 2218431  |
| 36.56933 | 8  | 4 | 4 | 227812.7 | 1620672  | 471169.4 | 1503170  | 401810.7 | 1291455  | 1394817  | 1573407  | 2443841  |
| 9.992233 | 10 | 5 | 5 | 985633.6 | 2705741  | 699249.2 | 3005002  | 1392562  | 3211039  | 3332670  | 3086717  | 2042405  |
| 9.500733 | 5  | 3 | 2 | 404347.8 | 588042.9 | 173516.3 | 682048.3 | 453973.9 | 657069.8 | 694822.1 | 302907.6 | 550548.4 |
| 10.008   | 9  | 5 | 4 | 726090   | 1903675  | 819093.9 | 2111124  | 725337.4 | 2295455  | 3156101  | 1156262  | 1434673  |
| 35.60183 | 3  | 3 | 0 | 295479.4 | 4405436  | 356972.2 | 4322200  | 252943.9 | 3920079  | 4517297  | 4766460  | 4667812  |
| 9.864767 | 10 | 5 | 5 | 26653044 | 1.81E+08 | 12385981 | 1.87E+08 | 25215176 | 1.87E+08 | 1.71E+08 | 1.66E+08 | 1.96E+08 |
| 9.419733 | 5  | 3 | 2 | 4981576  | 13053869 | 5848828  | 14504343 | 4926432  | 18763717 | 9712236  | 19802760 | 6769351  |
| 39.3595  | 5  | 1 | 3 | 321093   | 3945326  | 941518   | 3630000  | 1363010  | 3797630  | 3555704  | 3529241  | 5593478  |
| 9.960467 | 10 | 5 | 5 | 1572562  | 3133927  | 696331.7 | 3543516  | 1997405  | 3756235  | 3479838  | 3553042  | 2824044  |
| 10.24195 | 5  | 2 | 3 | 391266.3 | 5133854  | 2799245  | 5719337  | 1184062  | 176420.3 | 6877376  | 6472232  | 5774141  |
| 9.060817 | 7  | 4 | 3 | 402894.8 | 634806.7 | 299215.1 | 550138.9 | 332488.4 | 484041   | 933843.5 | 958527.3 | 520839.7 |

|          |    |   |   |          |          |          |          |          |          |          |          |          |
|----------|----|---|---|----------|----------|----------|----------|----------|----------|----------|----------|----------|
| 24.20617 | 7  | 5 | 2 | 233874.3 | 1275441  | 824240.5 | 1082286  | 596174.8 | 452831   | 1935190  | 413768.8 | 1376478  |
| 9.856867 | 5  | 2 | 3 | 1570933  | 4353463  | 1393172  | 5088726  | 3546591  | 5824363  | 2678156  | 3143993  | 5467325  |
| 29.76167 | 10 | 5 | 5 | 163267.3 | 475587.7 | 107236.1 | 565908.6 | 451069.2 | 356916.6 | 435197.2 | 526756.7 | 425022.4 |
| 13.11357 | 7  | 3 | 4 | 62360.95 | 210947.5 | 87478.15 | 192698.4 | 36491.84 | 327170.3 | 181363.2 | 259595.3 | 94781.51 |
| 10.58733 | 6  | 2 | 4 | 147290.3 | 247746.9 | 185581.8 | 287341.2 | 90739.5  | 182372   | 551650.9 | 153274.4 | 71244.52 |
| 9.311883 | 6  | 4 | 2 | 799466.6 | 3864799  | 819806.8 | 4373255  | 2495776  | 4967693  | 3207716  | 3315301  | 3311300  |
| 9.904767 | 7  | 4 | 3 | 946838.2 | 4795785  | 764059.2 | 5143141  | 1641112  | 5535719  | 3819702  | 4401380  | 4620884  |
| 8.801817 | 10 | 5 | 5 | 4454524  | 38780360 | 8552122  | 36145129 | 10978299 | 37226276 | 51608966 | 32080794 | 30567615 |
| 9.857683 | 5  | 2 | 3 | 4878835  | 9885027  | 7424464  | 11972166 | 8174984  | 19740609 | 9731163  | 3111242  | 2372758  |
| 9.848417 | 10 | 5 | 5 | 4035738  | 15136483 | 2914518  | 16591389 | 6979511  | 18279649 | 17898425 | 11381136 | 13893572 |
| 10.95835 | 10 | 5 | 5 | 310050.3 | 1120462  | 294794.4 | 1231588  | 503331.1 | 1400933  | 1461582  | 1031066  | 892963   |
| 9.94455  | 10 | 5 | 5 | 1931741  | 3891455  | 1746629  | 3455306  | 1508602  | 5818102  | 5705659  | 3228012  | 2242828  |
| 41.057   | 6  | 3 | 2 | 406103.7 | 4207944  | 2507658  | 4704617  | 443416.5 | 3093576  | 7812939  | 988879.9 | 4951573  |
| 9.447733 | 15 | 5 | 5 | 6189637  | 37447494 | 20322589 | 41771232 | 9845750  | 4479078  | 46496052 | 58337555 | 34366030 |
| 9.848417 | 6  | 3 | 3 | 869806.9 | 1832565  | 1160460  | 1502247  | 1308491  | 3287654  | 175526.8 | 1363871  | 1969067  |
| 9.622983 | 5  | 3 | 2 | 477982.5 | 1005047  | 430497.3 | 884962.4 | 468242.2 | 1227723  | 288816.6 | 937012.2 | 1376456  |
| 10.95055 | 10 | 5 | 5 | 563636.5 | 1580249  | 508955.2 | 1770421  | 859777.2 | 2130728  | 2103585  | 1336749  | 998911.9 |
| 10.9645  | 10 | 5 | 5 | 260005.7 | 1336506  | 354505.8 | 1425466  | 310243.3 | 1812936  | 974137.9 | 1191984  | 1103692  |
| 44.40867 | 6  | 2 | 3 | 337150.8 | 5382918  | 1028176  | 5090561  | 1158462  | 5146186  | 4820763  | 4450165  | 5386413  |
| 9.872917 | 10 | 5 | 5 | 1263696  | 7643195  | 894120.8 | 7320579  | 1443273  | 6963816  | 6489253  | 8586245  | 8332295  |
| 9.886083 | 6  | 2 | 3 | 1242758  | 2225450  | 760062.2 | 1943461  | 1273203  | 3365222  | 1410980  | 2182401  | 1692756  |
| 10.92828 | 5  | 2 | 3 | 244760.4 | 773550.6 | 297663.2 | 704401.3 | 211560.8 | 1081595  | 1105600  | 482816.1 | 555781.8 |
| 10.02372 | 6  | 4 | 2 | 688492.9 | 832483   | 476490.8 | 1030775  | 923119.2 | 467160.2 | 418851.1 | 806674.1 | 861278.3 |
| 9.177967 | 6  | 3 | 3 | 638507   | 770520.3 | 645866.8 | 994948.4 | 991457.8 | 353090.1 | 1874794  | 821188.5 | 415496.5 |
| 10.14893 | 9  | 4 | 4 | 2934335  | 7190785  | 4328351  | 5960859  | 4882310  | 13630786 | 5579831  | 9403178  | 2900630  |
| 9.864767 | 10 | 5 | 5 | 1371099  | 7871486  | 1688467  | 7226217  | 2945309  | 7760030  | 7159558  | 5552199  | 8910314  |
| 43.3875  | 15 | 3 | 5 | 384097.7 | 4465755  | 1101696  | 5162689  | 3440654  | 2907572  | 4926858  | 3732737  | 5415683  |
| 28.259   | 5  | 3 | 2 | 98523.28 | 343306.8 | 162926.2 | 301133.8 | 153791.2 | 243680.7 | 421199.2 | 137072.5 | 353199.4 |
| 9.848417 | 10 | 5 | 5 | 2548593  | 6263239  | 959197.9 | 6909688  | 3207484  | 7640795  | 5551698  | 6166170  | 6722076  |
| 17.46683 | 5  | 3 | 1 | 959761   | 7661750  | 3934372  | 6801385  | 2244049  | 6536555  | 13054899 | 7468100  | 2216700  |
| 10.36622 | 9  | 5 | 4 | 350775.9 | 810003.1 | 103819.4 | 868967.6 | 288601.1 | 741412.8 | 848394.6 | 664826.1 | 882188.5 |
| 9.976317 | 10 | 5 | 5 | 2197238  | 8943075  | 2192646  | 8332967  | 2389726  | 10219263 | 11830780 | 8757703  | 6143071  |
| 10.97857 | 9  | 5 | 4 | 1251669  | 3587468  | 675389   | 3844314  | 1172867  | 3685993  | 4427804  | 2590474  | 3378794  |
| 32.05567 | 5  | 3 | 2 | 112984.9 | 275846.3 | 180172.2 | 230284.4 | 162019.8 | 138005   | 363032.4 | 35918.9  | 462744   |
| 10.9645  | 10 | 5 | 5 | 2203837  | 9307616  | 2349476  | 9917242  | 2237160  | 11623744 | 11999892 | 7063303  | 7373158  |

|          |    |   |   |          |          |          |          |          |          |          |          |          |
|----------|----|---|---|----------|----------|----------|----------|----------|----------|----------|----------|----------|
| 10.02372 | 9  | 5 | 4 | 325369.8 | 855668.2 | 247855.7 | 913166.8 | 177580.3 | 623705.4 | 662195   | 783074.3 | 992423.9 |
| 9.8322   | 6  | 4 | 2 | 1245162  | 1854466  | 719286.3 | 2299769  | 2200375  | 2090670  | 1760800  | 2462610  | 2301722  |
| 9.46325  | 10 | 4 | 4 | 11937659 | 21588939 | 25406092 | 27873773 | 21733583 | 7023470  | 14206465 | 13754944 | 66566207 |
| 9.352183 | 5  | 3 | 2 | 481786.5 | 1092713  | 484803.2 | 1327371  | 1128184  | 1887497  | 833792.1 | 1193031  | 895014.2 |
| 9.842    | 4  | 3 | 1 | 1309888  | 3117687  | 1489539  | 3543221  | 1706200  | 2331206  | 5695365  | 2732532  | 1927274  |
| 26.8825  | 7  | 4 | 3 | 138230.8 | 641754.8 | 419571.8 | 539868.6 | 342954.2 | 296807.7 | 986388.9 | 159947.7 | 639871.6 |
| 42.0065  | 5  | 2 | 3 | 362032.7 | 5286931  | 420868.8 | 5501956  | 1042236  | 4901170  | 5978005  | 5236682  | 5005983  |
| 22.65633 | 5  | 3 | 2 | 1073646  | 8233584  | 3560275  | 9330975  | 4622879  | 13725183 | 5298170  | 6074600  | 9930745  |
| 9.93625  | 4  | 1 | 3 | 1354646  | 2848302  | 990764   | 2551139  | 1232743  | 3065623  | 1549430  | 4143345  | 3237657  |
| 9.8322   | 6  | 3 | 3 | 682505.8 | 1934262  | 641922.8 | 2124668  | 785429.9 | 1133461  | 1479723  | 2038100  | 2258407  |
| 10.83632 | 9  | 5 | 4 | 368632.9 | 1108476  | 360101.9 | 995414.7 | 481819.3 | 1266502  | 1370592  | 481806.4 | 1137659  |
| 16.08207 | 10 | 5 | 5 | 994555.4 | 4450477  | 3808517  | 3447842  | 3758590  | 8090729  | 2238559  | 9077386  | 1164082  |
| 10.9645  | 10 | 5 | 5 | 807051.4 | 3322595  | 884124   | 3112413  | 687067.2 | 4276773  | 4173442  | 2586083  | 2353026  |
| 10.97242 | 9  | 4 | 5 | 759973.9 | 3029947  | 490937.6 | 2900185  | 489197.1 | 2494349  | 3305941  | 2495477  | 3434350  |
| 9.07525  | 5  | 2 | 3 | 408285.5 | 833902.8 | 482716.5 | 733703.6 | 209133.6 | 1573127  | 889444   | 852222.3 | 588037.2 |
| 9.061    | 7  | 2 | 5 | 223269.4 | 539436.5 | 256137.1 | 485068.8 | 128700.1 | 324839.1 | 891543.5 | 255316.2 | 591272.7 |
| 10.9645  | 6  | 3 | 3 | 205337.6 | 432984.8 | 183175.1 | 479731.2 | 169918   | 727003   | 474743.9 | 375524.4 | 249160.2 |
| 10.44062 | 5  | 3 | 2 | 207367.8 | 506786.7 | 157698.6 | 462651   | 175500.9 | 438865.1 | 679037.8 | 629866   | 503050   |
| 36.25117 | 9  | 5 | 4 | 182381.7 | 447096.6 | 201281.4 | 546913.8 | 484028.2 | 764112.5 | 348578.8 | 219935.1 | 461726.9 |
| 9.880683 | 10 | 5 | 5 | 2901305  | 11910136 | 6383066  | 10614336 | 2293813  | 10575104 | 8233638  | 8053319  | 23180841 |
| 10.01477 | 14 | 5 | 5 | 897573.3 | 2361450  | 857786.8 | 2701703  | 1583318  | 3539531  | 1873641  | 1288381  | 2768043  |
| 8.94625  | 5  | 2 | 3 | 122203   | 197397.9 | 126196.9 | 230942.6 | 127827.5 | 198032.2 | 309525.4 | 305221.9 | 174210.3 |
| 10.92828 | 10 | 5 | 5 | 319097.1 | 1398892  | 465682.9 | 1273804  | 481579.5 | 1782830  | 1267297  | 993588.8 | 962172   |
| 9.0035   | 10 | 4 | 5 | 4238377  | 10511896 | 18250156 | 6703427  | 8385106  | 2816456  | 4435120  | 179169.4 | 43044069 |
| 9.450483 | 6  | 3 | 2 | 21316632 | 30830367 | 42597348 | 41914585 | 41352032 | 1839658  | 1005474  | 56269525 | 1021244  |
| 10.008   | 7  | 5 | 2 | 280641.8 | 570938.7 | 151360.3 | 526341.7 | 184384.8 | 660144.2 | 526851.2 | 787965.4 | 428076.4 |
| 10.9645  | 10 | 5 | 5 | 8046596  | 36287534 | 7638273  | 34232533 | 7927158  | 44124370 | 44652554 | 31020258 | 28131694 |
| 10.21522 | 8  | 4 | 4 | 221379.2 | 537900.8 | 128182.8 | 578179.6 | 172768.9 | 615288.2 | 698579   | 543078.7 | 369876.1 |
| 9.992233 | 10 | 5 | 5 | 2786619  | 6517739  | 3167437  | 7364247  | 3246875  | 8937518  | 10522933 | 5868748  | 2877573  |
| 10.95055 | 5  | 1 | 4 | 145979.6 | 345850.9 | 173723   | 390384.5 | 163563.3 | 484632   | 567283.7 | 184006.8 | 189406.8 |
| 10.98885 | 5  | 3 | 2 | 709218.8 | 2008500  | 1923258  | 2443646  | 1298235  | 3841428  | 4349234  | 728593.8 | 304760.5 |
| 32.47467 | 10 | 5 | 5 | 1646992  | 11257277 | 2882554  | 10592251 | 2076297  | 8655100  | 9919075  | 10421151 | 11138765 |
| 9.8374   | 9  | 5 | 4 | 1096054  | 3395607  | 1285345  | 3004960  | 1648106  | 4031904  | 3590203  | 1639636  | 2706108  |
| 10.97242 | 10 | 5 | 5 | 315675.1 | 1102612  | 365672.4 | 1002961  | 389632.7 | 1542379  | 1443932  | 759386.3 | 808496   |
| 9.960467 | 10 | 5 | 5 | 31939846 | 75430865 | 26756152 | 67533252 | 32756166 | 99586296 | 1.07E+08 | 63083459 | 45096380 |

|          |    |   |   |          |          |          |          |          |          |          |          |          |
|----------|----|---|---|----------|----------|----------|----------|----------|----------|----------|----------|----------|
| 10.9645  | 10 | 5 | 5 | 862072.9 | 3554110  | 754404.5 | 3821003  | 1204803  | 4280555  | 4421289  | 3035689  | 2742655  |
| 9.994767 | 7  | 4 | 3 | 802861.3 | 1113317  | 416049.8 | 1256331  | 639093.5 | 1446314  | 1035864  | 1591988  | 550196.8 |
| 9.975217 | 9  | 4 | 5 | 2872016  | 6534284  | 2381377  | 5849611  | 2791788  | 8703731  | 2638452  | 6311480  | 8160990  |
| 9.856867 | 11 | 5 | 5 | 19624936 | 1.31E+08 | 13284541 | 1.29E+08 | 6099509  | 1.47E+08 | 1.36E+08 | 1.15E+08 | 1.21E+08 |
| 10.82922 | 5  | 2 | 3 | 181427   | 494349.2 | 197207.3 | 438622.1 | 224918.9 | 192307   | 715258   | 590012.2 | 431067.7 |
| 29.615   | 8  | 4 | 4 | 654963.6 | 4455169  | 2382081  | 3909621  | 1686129  | 1842195  | 4982380  | 2098853  | 6970657  |
| 18.76067 | 8  | 5 | 3 | 492962   | 2011161  | 690654.2 | 2235754  | 982893   | 2789725  | 958283.4 | 1773747  | 2212251  |
| 10.008   | 9  | 4 | 5 | 963097.6 | 1110442  | 448727.2 | 1305187  | 928921.7 | 1210658  | 1772304  | 1186778  | 694868.6 |
| 11.30483 | 8  | 5 | 3 | 120222.2 | 506935.8 | 205540.7 | 454637.9 | 191513.3 | 591563.7 | 748473.4 | 580535.2 | 211757.1 |
| 9.992233 | 4  | 3 | 1 | 1199225  | 2167147  | 1930019  | 2642409  | 1668951  | 684733.1 | 1018193  | 589427.5 | 4139707  |
| 25.14117 | 6  | 3 | 2 | 6286598  | 21642650 | 11870593 | 27506376 | 28567731 | 35313663 | 31936186 | 20402588 | 7929718  |
| 9.45945  | 8  | 5 | 3 | 416059.8 | 1922151  | 845349.6 | 1632069  | 1298429  | 2019835  | 3263520  | 1849669  | 1003667  |
| 9.13445  | 4  | 1 | 3 | 273821.2 | 522693.6 | 121562.3 | 633746.3 | 566058.1 | 361197.1 | 626110.3 | 455399   | 514863.3 |
| 9.840617 | 9  | 4 | 5 | 1039088  | 4648182  | 608239.3 | 4248533  | 2004386  | 4798760  | 3604524  | 5033039  | 5115207  |
| 10.9645  | 10 | 5 | 5 | 993143.9 | 4211080  | 826549.9 | 4552794  | 1615317  | 5056351  | 5112395  | 3731846  | 3283186  |
| 10.4842  | 7  | 4 | 3 | 238633.7 | 669170.7 | 192786.2 | 592915.1 | 356862   | 500652.9 | 667244.6 | 614379.8 | 567432.5 |
| 9.93625  | 7  | 4 | 3 | 647767.9 | 1395545  | 239781.9 | 1454467  | 206785   | 1579381  | 1635579  | 1223247  | 1466276  |
| 9.964417 | 9  | 5 | 4 | 4704801  | 5648024  | 1437148  | 7179872  | 7848379  | 7449779  | 6240560  | 6165639  | 3912223  |
| 9.310917 | 4  | 1 | 3 | 1697345  | 4648058  | 1736990  | 6114269  | 7458133  | 6922395  | 2029746  | 4781696  | 4739188  |
| 10.8937  | 7  | 3 | 4 | 220222.2 | 514469   | 280929.9 | 448815.4 | 212504.1 | 606111.4 | 839332.5 | 152610   | 300978.1 |
| 16.27152 | 5  | 3 | 2 | 89376.04 | 228827.7 | 202973.3 | 181451.2 | 153017.6 | 301512.5 | 83094.16 | 55643.91 | 549381.9 |
| 10.03258 | 8  | 4 | 4 | 567179.7 | 3415094  | 774128   | 3156578  | 1147210  | 3632098  | 2565253  | 3737045  | 2711526  |
| 15.55123 | 8  | 4 | 4 | 153660.2 | 1423505  | 308849.8 | 1312155  | 508179.3 | 1777806  | 1452583  | 1056336  | 1170213  |
| 9.636567 | 7  | 4 | 3 | 507845.5 | 1242144  | 398225   | 1064626  | 852993.3 | 1170528  | 769485.9 | 1692390  | 1604322  |
| 9.433    | 14 | 5 | 5 | 84852064 | 6.63E+08 | 1.63E+08 | 7.09E+08 | 1.84E+08 | 5.09E+08 | 7.38E+08 | 9.11E+08 | 5.54E+08 |
| 43.57433 | 4  | 1 | 3 | 214820.1 | 2262670  | 187846.3 | 2359832  | 477463.9 | 1972343  | 2402477  | 2448748  | 2276925  |
| 9.964417 | 10 | 5 | 5 | 1088290  | 2208387  | 589177.6 | 2478352  | 1303989  | 3084670  | 1929520  | 2476802  | 1994567  |
| 9.842    | 5  | 2 | 3 | 4850524  | 13463688 | 10849046 | 11024835 | 7285778  | 2342803  | 14786209 | 26628594 | 2658947  |
| 9.994767 | 9  | 5 | 4 | 1144274  | 1374659  | 886572.9 | 1164232  | 703384.4 | 2310162  | 2299291  | 994976.5 | 339552.4 |
| 9.40615  | 13 | 5 | 5 | 922808   | 7752457  | 1158336  | 7304577  | 2089248  | 6242329  | 7402130  | 9451620  | 7654797  |
| 10.008   | 10 | 5 | 5 | 599203.1 | 2191216  | 67903.68 | 2068240  | 636336.2 | 2108474  | 2233777  | 2245120  | 2242604  |
| 9.43325  | 5  | 3 | 1 | 613485.3 | 2093736  | 1433165  | 1780293  | 870117.5 | 1088338  | 301373.5 | 3800924  | 3130599  |
| 9.960467 | 5  | 3 | 2 | 1180229  | 1715584  | 999175.8 | 1492816  | 653478.2 | 2742333  | 2707320  | 1654064  | 601055.7 |
| 10.9645  | 8  | 4 | 4 | 696575.8 | 2353959  | 534592.5 | 2467746  | 286829.9 | 2918109  | 2888200  | 2290209  | 1845863  |
| 9.346    | 6  | 4 | 2 | 614740.1 | 1956702  | 637179.9 | 2293048  | 1659158  | 2120694  | 1843498  | 2746164  | 2087951  |

|          |    |   |   |          |          |          |          |          |          |          |          |          |
|----------|----|---|---|----------|----------|----------|----------|----------|----------|----------|----------|----------|
| 36.33867 | 8  | 4 | 4 | 179240.6 | 1006042  | 373131.7 | 902927.4 | 411989   | 1228317  | 1008518  | 363214.2 | 1273715  |
| 10.9645  | 6  | 3 | 3 | 198726.4 | 488342   | 202508.7 | 565404.8 | 358490.1 | 797057.4 | 579138.8 | 382164.7 | 397323.7 |
| 44.9835  | 8  | 3 | 2 | 372572   | 3824874  | 2598259  | 4661221  | 3671366  | 1936096  | 3282834  | 2894576  | 2621988  |
| 9.856867 | 10 | 5 | 5 | 815999.1 | 2341386  | 98688.98 | 2610833  | 1400712  | 2436511  | 2256631  | 2259016  | 2295687  |
| 9.655117 | 9  | 5 | 4 | 1019519  | 2716909  | 609659.3 | 2424915  | 1424980  | 3187887  | 2716264  | 2725943  | 3235494  |
| 9.55155  | 6  | 3 | 3 | 631279.2 | 1016481  | 358393.9 | 1200760  | 907997.7 | 923716.1 | 1350916  | 1285803  | 1069403  |
| 10.00998 | 8  | 3 | 4 | 518335.1 | 1014432  | 419079.1 | 1141458  | 542134.7 | 1208329  | 1501217  | 1213186  | 545165.6 |
| 9.328967 | 4  | 3 | 1 | 355203.8 | 573973.1 | 399294.9 | 722479   | 688332   | 1239363  | 183575.4 | 554533.5 | 515333.1 |
| 10.9645  | 10 | 5 | 5 | 228685.6 | 1019520  | 257277.7 | 939616.9 | 345691.1 | 1385662  | 697760.5 | 873295.4 | 1052968  |
| 10.95835 | 5  | 2 | 3 | 327635.5 | 558197.5 | 446066.4 | 670454.5 | 412009.9 | 1181458  | 882153.9 | 198192.7 | 248998.6 |
| 15.17462 | 4  | 0 | 4 | 27823.13 | 92888.3  | 22710.24 | 100265.5 | 32632.75 | 113958.9 | 95321.88 | 115917.8 | 69820.16 |
| 10.008   | 10 | 5 | 5 | 584121.6 | 1965512  | 425551.5 | 1795337  | 805045.4 | 2119994  | 2459423  | 1870768  | 1305071  |
| 9.622983 | 4  | 3 | 1 | 367233.1 | 757797.3 | 311660.6 | 656038.5 | 451221.4 | 1008625  | 242033.9 | 703138.4 | 864940.1 |
| 10.9645  | 9  | 4 | 5 | 1336960  | 2422085  | 991137.1 | 2790250  | 1708732  | 3117037  | 3246818  | 3066917  | 1276984  |
| 9.983433 | 8  | 4 | 4 | 909266.7 | 1618488  | 448879.6 | 1731990  | 419766.8 | 2205019  | 1241332  | 1647297  | 1880519  |
| 10.01477 | 11 | 5 | 5 | 1370232  | 3942819  | 1083450  | 3498591  | 2114715  | 4400818  | 5348350  | 3305970  | 2507219  |
| 9.93625  | 11 | 4 | 5 | 1821628  | 5202717  | 1073831  | 5583797  | 1745803  | 3366070  | 5800358  | 5546556  | 5224207  |
| 11.05325 | 11 | 5 | 5 | 5081012  | 20580424 | 5884194  | 19125369 | 5242307  | 26697677 | 26642875 | 15944433 | 14127652 |
| 6.736483 | 7  | 3 | 3 | 778193.7 | 23473422 | 9167784  | 26653465 | 14473046 | 27717836 | 36186501 | 11741369 | 22482725 |
| 9.46855  | 9  | 4 | 3 | 1728695  | 4246393  | 4060774  | 5392307  | 4702237  | 3597195  | 1610942  | 4448742  | 10974125 |
| 9.538267 | 10 | 3 | 5 | 1622513  | 7113022  | 3851552  | 5920429  | 5178875  | 6595416  | 10177030 | 7057712  | 1041716  |
| 9.983433 | 10 | 5 | 5 | 2.54E+08 | 1.28E+09 | 1.77E+08 | 1.21E+09 | 2.98E+08 | 1.46E+09 | 1.48E+09 | 1.19E+09 | 1.09E+09 |
| 18.02717 | 10 | 5 | 5 | 1190662  | 4620131  | 862087.3 | 4358294  | 1126700  | 5728836  | 5007523  | 4021584  | 3526212  |
| 9.994767 | 10 | 5 | 5 | 832564.2 | 1908022  | 678272   | 2120242  | 928014.8 | 1932062  | 2971498  | 1986347  | 1218037  |
| 9.102783 | 7  | 4 | 3 | 1295417  | 2286441  | 1856774  | 1866687  | 1310982  | 1585725  | 756646.3 | 981191.7 | 2828623  |
| 11.35653 | 11 | 5 | 5 | 3494255  | 24789994 | 6986019  | 27372944 | 12040326 | 25643633 | 35872369 | 20151785 | 24570976 |
| 10.13878 | 9  | 5 | 4 | 714324   | 7669647  | 1040095  | 6989556  | 3452584  | 9175179  | 7803369  | 7830013  | 7215731  |
| 10.14893 | 7  | 2 | 5 | 193797.1 | 389804.2 | 209841.9 | 431114.9 | 62678.67 | 619866.1 | 97430.6  | 562602.7 | 304890.5 |
| 9.992233 | 10 | 5 | 5 | 673004.5 | 2083791  | 506739.3 | 1929385  | 666907.4 | 2227792  | 2439467  | 1720231  | 1408091  |
| 9.9847   | 6  | 3 | 2 | 3922695  | 4096141  | 6371784  | 5749694  | 6347908  | 15421400 | 2331407  | 1359354  | 1038558  |
| 9.859983 | 10 | 5 | 5 | 14329098 | 70179654 | 17990399 | 65061040 | 21213804 | 42230161 | 74553335 | 69844245 | 71929168 |
| 23.1325  | 9  | 5 | 2 | 572904.8 | 796089.6 | 318717.7 | 975338.4 | 899181.3 | 577676.5 | 634084.8 | 712447.1 | 698194   |
| 9.976317 | 7  | 3 | 4 | 426993.4 | 1026635  | 667792.1 | 1212045  | 755515.2 | 1445385  | 1729075  | 1332708  | 275642.7 |
| 9.9014   | 14 | 5 | 5 | 1381208  | 3329174  | 764292.3 | 3538209  | 842434.6 | 3658549  | 4280709  | 2516704  | 2569197  |
| 43.32983 | 6  | 2 | 3 | 366717.1 | 7083180  | 2136039  | 7519587  | 950058.7 | 8664796  | 5204022  | 8432587  | 4338711  |

|          |    |   |   |          |          |          |          |          |          |          |          |          |
|----------|----|---|---|----------|----------|----------|----------|----------|----------|----------|----------|----------|
| 9.928667 | 9  | 4 | 5 | 4837950  | 13128992 | 1668464  | 14569835 | 7430543  | 13632511 | 10802712 | 13491055 | 15320858 |
| 43.09967 | 5  | 3 | 2 | 344688.5 | 4432980  | 1930783  | 4804192  | 314754.1 | 6873726  | 4844227  | 4668443  | 4297030  |
| 9.392767 | 5  | 3 | 2 | 7652727  | 8117526  | 11654285 | 5725008  | 5386904  | 800952.6 | 1011136  | 9886774  | 27787320 |
| 9.853633 | 9  | 5 | 4 | 1511132  | 5621159  | 1279687  | 6070667  | 2068812  | 5674810  | 4930537  | 5233027  | 7776040  |
| 9.91765  | 8  | 4 | 4 | 684119.4 | 1766964  | 649236   | 1605582  | 593263.7 | 2074615  | 1643315  | 1043854  | 1362764  |
| 24.11883 | 5  | 1 | 3 | 89660.16 | 152641.6 | 59720.97 | 134179.1 | 80671.31 | 75630.9  | 241268.2 | 132408.5 | 152793.4 |
| 9.8322   | 9  | 5 | 4 | 607004.4 | 2322975  | 314603.4 | 2180100  | 699466.6 | 2464599  | 2567734  | 2519194  | 1799594  |
| 9.445217 | 14 | 5 | 5 | 2829917  | 26159877 | 6480333  | 24566815 | 5789694  | 24659877 | 32144238 | 33549480 | 21774433 |
| 9.9898   | 5  | 2 | 3 | 997022.3 | 2203295  | 1066802  | 1893583  | 1308668  | 3555657  | 1121268  | 2803532  | 2405728  |
| 9.311883 | 8  | 5 | 3 | 910355.5 | 3941183  | 1852984  | 4465399  | 2178779  | 3487096  | 1360600  | 5262952  | 6149392  |
| 8.94625  | 7  | 3 | 4 | 128432.8 | 408656.9 | 101946   | 373546.2 | 160997.3 | 425304.6 | 464642.3 | 500546.9 | 416347.2 |
| 26.8695  | 10 | 5 | 5 | 143803.7 | 542639.2 | 171416.2 | 586792.4 | 169758.3 | 743819.8 | 688904.2 | 399276   | 356072.6 |
| 9.40615  | 7  | 4 | 3 | 589976.3 | 1122549  | 534668.7 | 922660.3 | 940493.3 | 1679999  | 1690595  | 538665.5 | 745759.4 |
| 9.992233 | 10 | 5 | 5 | 2997356  | 7366608  | 3056558  | 6493794  | 3655433  | 10388222 | 9623641  | 2859489  | 5855210  |
| 9.071467 | 4  | 1 | 3 | 558877.6 | 751030.7 | 404864.8 | 636425   | 477264.2 | 727240.4 | 296818.6 | 574118   | 759872.2 |
| 10.9645  | 4  | 3 | 1 | 635540.1 | 1015081  | 644970.2 | 1166967  | 521364.5 | 820568.2 | 1898971  | 508917.3 | 388747.7 |
| 9.848417 | 10 | 5 | 5 | 3142889  | 9883401  | 1461487  | 10786613 | 4594511  | 10203204 | 9294538  | 11846407 | 10221045 |
| 36.99983 | 7  | 2 | 3 | 369033   | 6408216  | 1060471  | 5680654  | 3728665  | 6015609  | 6699649  | 8059941  | 6038538  |
| 30.296   | 10 | 5 | 5 | 257689   | 1285265  | 496654.7 | 1156124  | 502375.7 | 1515925  | 1813642  | 1278818  | 478249.8 |
| 28.259   | 9  | 4 | 5 | 183343.6 | 1360298  | 225557.7 | 1309063  | 164820.4 | 1569878  | 1316219  | 1066037  | 1247534  |
| 9.856867 | 5  | 2 | 3 | 1873156  | 4025618  | 2021284  | 4548142  | 2021742  | 3675868  | 1610047  | 2662451  | 6137858  |
| 10.9645  | 9  | 4 | 5 | 242353.6 | 730335.4 | 316806.9 | 807146   | 275911   | 1038000  | 1090278  | 371552.6 | 555443.6 |
| 9.275617 | 9  | 4 | 4 | 8750408  | 25926113 | 17735977 | 36337931 | 52784227 | 19870521 | 54618858 | 30683307 | 11749557 |
| 10.01477 | 10 | 5 | 5 | 491536.5 | 1677774  | 332562.2 | 1586013  | 376060.3 | 1693371  | 2220096  | 1650153  | 1354903  |
| 9.35985  | 12 | 5 | 5 | 2383677  | 11140762 | 2206569  | 10292046 | 4033560  | 14557989 | 11000532 | 11022691 | 10739295 |
| 9.999217 | 9  | 5 | 4 | 958967.9 | 2652318  | 785472.4 | 2433349  | 904874.7 | 3456692  | 3213794  | 2908658  | 1592091  |
| 9.857683 | 10 | 5 | 5 | 1567606  | 8442658  | 442924.3 | 8099337  | 1773100  | 9067346  | 8422674  | 8661324  | 7970516  |
| 9.319233 | 6  | 3 | 3 | 517277.7 | 2132402  | 1276739  | 2380817  | 359466   | 3906647  | 994630.7 | 782193.7 | 2491847  |
| 9.37735  | 8  | 4 | 3 | 751535.6 | 2414166  | 1508337  | 2761117  | 1151607  | 1074959  | 2885921  | 2025331  | 1289603  |
| 10.01837 | 9  | 4 | 5 | 453016.1 | 912707.3 | 556852.1 | 797046.1 | 287188.8 | 1462985  | 83032.59 | 1386943  | 866718.1 |
| 9.874317 | 7  | 3 | 4 | 914109.9 | 3932554  | 611310.5 | 3522970  | 2102619  | 4365038  | 3261559  | 4638652  | 4052054  |
| 9.983433 | 9  | 5 | 4 | 641113.1 | 1190135  | 533278.7 | 1314813  | 426591   | 1415051  | 1985211  | 1071011  | 607716.9 |
| 10.00998 | 9  | 5 | 4 | 411436.6 | 786602.2 | 231565.6 | 721309.9 | 272921.7 | 688053.9 | 1066777  | 930562.2 | 461708.7 |
| 9.538267 | 11 | 5 | 5 | 1435067  | 4213181  | 1942152  | 5569900  | 6983873  | 3590257  | 3931379  | 4983665  | 6927726  |
| 26.82483 | 8  | 4 | 4 | 290649   | 1237157  | 1294417  | 1554582  | 1164915  | 795645.6 | 81640.74 | 199253.5 | 1996396  |

|          |    |   |   |          |          |          |          |          |          |          |          |          |
|----------|----|---|---|----------|----------|----------|----------|----------|----------|----------|----------|----------|
| 10.45667 | 3  | 3 | 0 | 162572.3 | 455042.7 | 219322.9 | 507201.8 | 183510   | 316775.8 | 798049.2 | 544269.5 | 260786.5 |
| 9.4775   | 12 | 5 | 5 | 1089429  | 8471233  | 6265435  | 7050233  | 4603514  | 11701303 | 3588293  | 8970018  | 16853131 |
| 10.9645  | 8  | 5 | 3 | 377486.7 | 1270787  | 316458.2 | 1179364  | 388547.2 | 1799617  | 951444.4 | 1165366  | 1184015  |
| 10.97857 | 5  | 2 | 3 | 868320.4 | 2047816  | 1003373  | 1760134  | 1218642  | 2072091  | 3768769  | 1361640  | 1389588  |
| 9.933967 | 9  | 5 | 3 | 2644393  | 5528099  | 1397303  | 4984313  | 2604438  | 6505408  | 4812005  | 3888627  | 5054421  |
| 9.960467 | 10 | 5 | 5 | 1917300  | 3824394  | 703978.6 | 4246900  | 2156306  | 4283933  | 4222310  | 4466693  | 3269013  |
| 30.29417 | 10 | 5 | 5 | 9348717  | 68423293 | 12691216 | 63826184 | 21603569 | 69221214 | 86965698 | 65041587 | 51470810 |
| 9.55155  | 10 | 5 | 5 | 515176.9 | 1223570  | 300490.6 | 1127584  | 431042   | 1186268  | 1741910  | 1147361  | 980176.5 |
| 12.53042 | 6  | 3 | 3 | 93140.28 | 245683.1 | 51735.11 | 227167.9 | 86825.5  | 262983.8 | 228973.5 | 305698.2 | 166958.9 |
| 10.61648 | 7  | 3 | 4 | 122527.3 | 377354.2 | 54550.2  | 392845.4 | 65399.18 | 352711.2 | 441336.3 | 312068.4 | 354250.8 |
| 9.071517 | 7  | 4 | 3 | 186525.9 | 396697.6 | 221703.9 | 348967.5 | 137401.2 | 301066.3 | 441273.8 | 312756.5 | 173231.7 |
| 9.419733 | 7  | 3 | 3 | 354611.2 | 1616776  | 618169.3 | 1468158  | 534891.3 | 2158441  | 2246880  | 1728915  | 1000505  |
| 10.02372 | 7  | 4 | 3 | 272936.5 | 997679.2 | 141804.6 | 928896.7 | 343699.5 | 920165.7 | 1207602  | 1005893  | 1028371  |
| 9.94455  | 6  | 3 | 3 | 1360260  | 2078939  | 555781.1 | 1758767  | 1631058  | 2504867  | 1970461  | 2473094  | 2286094  |
| 9.992233 | 5  | 3 | 2 | 793395.6 | 940900.1 | 719109.4 | 1186500  | 1134934  | 1372017  | 1818362  | 1039715  | 0        |
| 40.65433 | 8  | 2 | 3 | 336547   | 2976677  | 747902.4 | 3296920  | 1569274  | 2911670  | 3045371  | 2928045  | 1944371  |
| 31.8825  | 10 | 5 | 5 | 309255.8 | 982853.2 | 325857.1 | 1165684  | 929692.8 | 493808.5 | 1126181  | 850749.9 | 1351024  |
| 9.960467 | 5  | 3 | 2 | 661374.5 | 1184559  | 185167.9 | 1094290  | 451886.6 | 1461303  | 1258333  | 1109624  | 970836.7 |
| 9.522017 | 7  | 3 | 3 | 564605.1 | 2544740  | 1528780  | 2964949  | 1737677  | 1631281  | 2318180  | 633563.8 | 3791554  |
| 8.902983 | 5  | 2 | 3 | 141155.4 | 262775.2 | 141952.6 | 306728.2 | 195287.2 | 322311.9 | 359049.7 | 300949.8 | 319919.1 |
| 10.9645  | 6  | 3 | 3 | 270182.8 | 508995.6 | 165860.8 | 575521.1 | 322029.8 | 692569.7 | 673107.8 | 316341.4 | 419777.3 |
| 9.4925   | 11 | 5 | 4 | 3787527  | 24586942 | 10110097 | 27921262 | 15229723 | 24605429 | 17476917 | 19151014 | 19663954 |
| 22.77133 | 4  | 3 | 1 | 47792.36 | 148145.1 | 78116.94 | 132780.6 | 27748.93 | 83186.32 | 274098.7 | 87857.8  | 166369.3 |
| 9.994767 | 8  | 5 | 3 | 305077.3 | 817787.7 | 206540.6 | 757630.2 | 258864.4 | 833225.4 | 893503.6 | 684010.3 | 569043.9 |
| 9.8445   | 4  | 3 | 1 | 4562956  | 12451590 | 6375721  | 10705472 | 7210487  | 15548551 | 2372510  | 19588320 | 12861825 |
| 10.08658 | 5  | 3 | 2 | 427869.6 | 1620461  | 588155.3 | 1749154  | 390425   | 1749434  | 1063060  | 1274246  | 2571908  |
| 9.445217 | 6  | 3 | 3 | 1437190  | 5291055  | 5211830  | 4129574  | 3682173  | 12291357 | 1585193  | 1771305  | 1310972  |
| 20.26667 | 9  | 4 | 5 | 42061.71 | 209065.6 | 63334.96 | 195634.4 | 37273.55 | 256052.2 | 269035.1 | 150683.1 | 131614   |
| 10.9645  | 10 | 5 | 5 | 844036.6 | 3596250  | 757839.6 | 3848124  | 1155984  | 4357607  | 4438790  | 3146301  | 2755182  |
| 28.8515  | 9  | 5 | 4 | 2657481  | 24953475 | 18941438 | 20831960 | 12360622 | 8431266  | 27934804 | 2486339  | 42657655 |
| 9.46925  | 8  | 3 | 5 | 483985.6 | 2410863  | 957317   | 2095032  | 1445923  | 3189877  | 1406931  | 1387764  | 3370711  |
| 13.56607 | 3  | 3 | 0 | 34476.52 | 87262.91 | 32024.77 | 95109.55 | 29174.02 | 80257.21 | 138604.5 | 55666.91 | 67895.94 |
| 9.920517 | 10 | 5 | 5 | 2680234  | 6084794  | 1156134  | 5752324  | 1422942  | 8076754  | 5990761  | 5303612  | 5787222  |
| 9.4468   | 8  | 4 | 3 | 1483392  | 7397198  | 3667090  | 6494565  | 3375237  | 9324910  | 10008503 | 7215406  | 9325252  |
| 9.960467 | 9  | 5 | 4 | 2063927  | 6281095  | 2149776  | 6799908  | 1892960  | 8294708  | 8934224  | 4965661  | 4453095  |



|          |    |   |   |          |          |          |          |          |          |          |          |          |
|----------|----|---|---|----------|----------|----------|----------|----------|----------|----------|----------|----------|
| 9.842    | 7  | 3 | 4 | 3516973  | 6140312  | 2912782  | 7078582  | 4257630  | 7032666  | 3397317  | 5326714  | 4200898  |
| 10.95835 | 8  | 4 | 4 | 214247.5 | 637833.7 | 311471.5 | 569963.2 | 204888.5 | 921294.7 | 957892.9 | 514458   | 591125.3 |
| 44.6385  | 11 | 4 | 4 | 328237.3 | 4019767  | 1762998  | 4564399  | 2425478  | 4361193  | 5055262  | 4706175  | 5067043  |
| 10.95055 | 10 | 5 | 5 | 762955.7 | 3276282  | 1362733  | 3665724  | 1661114  | 4955061  | 4522495  | 2589607  | 1956802  |
| 9.887133 | 10 | 5 | 5 | 9184754  | 49026416 | 12476849 | 45906449 | 11891168 | 51955073 | 53931591 | 27304986 | 52668992 |
| 6.794633 | 7  | 5 | 2 | 858631.8 | 15962232 | 11926940 | 19804426 | 17441172 | 9423282  | 37233839 | 10234055 | 11916114 |
| 9.976317 | 9  | 5 | 4 | 713330.4 | 3232904  | 687087.5 | 2917217  | 1573105  | 3737063  | 3841790  | 2914589  | 2185032  |
| 40.92767 | 4  | 0 | 3 | 199462.1 | 1707013  | 58733.42 | 1958242  | 1338979  | 1649600  | 1702293  | 1749385  | 1782045  |
| 9.4873   | 10 | 4 | 4 | 1093347  | 2162258  | 1588165  | 1844244  | 683237.1 | 1925783  | 1346829  | 4959772  | 1385822  |
| 9.992233 | 8  | 4 | 4 | 387533.7 | 1078439  | 477943.9 | 951840.7 | 511738.8 | 1161929  | 247205.3 | 1253769  | 1261615  |
| 10.02372 | 6  | 4 | 2 | 558940.6 | 807865.1 | 268475.1 | 726519   | 359675.6 | 582076.2 | 651142   | 714137.9 | 1258806  |
| 9.840617 | 5  | 2 | 3 | 1835579  | 8164078  | 2165454  | 7702278  | 1320840  | 9407001  | 4588203  | 9231191  | 9911698  |
| 10.9645  | 10 | 5 | 5 | 811400.9 | 3266100  | 733281.6 | 3492456  | 1010536  | 4384804  | 3508072  | 3004163  | 2426442  |
| 42.53883 | 5  | 0 | 4 | 274195.5 | 3442147  | 249291.5 | 3176107  | 1404413  | 3130618  | 3611765  | 3380278  | 3322480  |
| 9.992233 | 6  | 4 | 2 | 575290.1 | 847408.3 | 537818.9 | 975242.7 | 459082.2 | 636600.4 | 874137.2 | 463365.3 | 1765099  |
| 10.9645  | 10 | 5 | 5 | 23165974 | 92042078 | 26258239 | 85636942 | 23837495 | 1.19E+08 | 1.2E+08  | 72103273 | 62654571 |
| 9.701933 | 8  | 4 | 4 | 330778   | 901066.2 | 333699.1 | 816930.9 | 325591.7 | 1330826  | 1066896  | 527528.5 | 604239.6 |
| 9.960467 | 10 | 5 | 5 | 930304.9 | 3354832  | 397295.7 | 3227947  | 576338.8 | 3646332  | 3715373  | 3554427  | 2845545  |
| 10.9645  | 9  | 5 | 4 | 379324.3 | 990994   | 266470.6 | 1081399  | 420411.7 | 1239934  | 1308037  | 737149.6 | 770168.7 |
| 35.86267 | 9  | 4 | 5 | 789748.5 | 4595661  | 2843039  | 3808973  | 3301857  | 9098732  | 3184806  | 1759258  | 3471404  |
| 29.528   | 10 | 5 | 5 | 1008089  | 5274476  | 1641221  | 4783547  | 2162454  | 5025294  | 5797626  | 3056830  | 4898769  |
| 9.93625  | 6  | 3 | 3 | 866206   | 1570816  | 436522.5 | 1443949  | 549987.7 | 1880371  | 2032268  | 1724759  | 1076874  |
| 9.45945  | 8  | 4 | 3 | 480592.1 | 1510173  | 538650.2 | 1658215  | 618840.3 | 1998944  | 1101473  | 2190450  | 1167433  |
| 40.10767 | 7  | 2 | 4 | 413469.3 | 4631265  | 728993.2 | 4867828  | 1082711  | 4659734  | 5828896  | 3904579  | 4244053  |
| 10.9307  | 10 | 5 | 5 | 551528.2 | 1976890  | 509058.8 | 1867091  | 327855.3 | 2599255  | 1939906  | 1349285  | 1642278  |
| 9.017783 | 8  | 4 | 4 | 1759417  | 4001054  | 2386382  | 5337005  | 6847152  | 3987335  | 7460887  | 4639285  | 2973864  |
| 44.73917 | 6  | 3 | 3 | 415169.4 | 4865826  | 1024984  | 4649018  | 612145.5 | 4926781  | 3969372  | 4673575  | 6569224  |
| 10.17253 | 4  | 0 | 3 | 56454856 | 82124086 | 36986799 | 1.1E+08  | 1.47E+08 | 1.15E+08 | 22306229 | 96784994 | 1.05E+08 |
| 19.184   | 4  | 3 | 1 | 99749.1  | 406271.6 | 229266.3 | 455209.8 | 142247.6 | 190496.5 | 706182.1 | 520965.2 | 163983.3 |
| 9.912633 | 5  | 3 | 2 | 2866734  | 2008492  | 1288452  | 2523982  | 2516789  | 3266081  | 0        | 2855579  | 2349426  |
| 10.95055 | 4  | 3 | 1 | 206222.6 | 380251.1 | 118492.4 | 333545.9 | 227313.4 | 504009   | 241078.4 | 403241.4 | 274190.5 |
| 9.93625  | 10 | 5 | 5 | 4431541  | 16925211 | 3843242  | 16146765 | 1847298  | 21775893 | 20095720 | 14072547 | 12925625 |
| 9.527817 | 11 | 5 | 4 | 1557108  | 13851211 | 5211686  | 12616055 | 4457323  | 10581770 | 15200534 | 14044730 | 21592329 |
| 25.3125  | 8  | 4 | 4 | 389944.3 | 2553918  | 1783613  | 2134181  | 1500235  | 743111.6 | 3800184  | 573993.5 | 3219662  |
| 42.85533 | 11 | 3 | 4 | 443589.9 | 8783407  | 2494899  | 7731052  | 5200318  | 10945576 | 9573058  | 4837982  | 10610541 |

|          |    |   |   |          |          |          |          |          |          |          |          |          |
|----------|----|---|---|----------|----------|----------|----------|----------|----------|----------|----------|----------|
| 9.976317 | 10 | 5 | 5 | 2750314  | 8380992  | 3539220  | 9342981  | 4008719  | 10965711 | 12583250 | 8752629  | 4843834  |
| 28.906   | 7  | 5 | 2 | 308806.8 | 1534919  | 1267829  | 1248584  | 956671.1 | 394164.2 | 1428463  | 203842.7 | 2720696  |
| 9.976317 | 9  | 5 | 4 | 347850.6 | 1030133  | 275380.6 | 915925.1 | 562915.4 | 1279404  | 1225296  | 885246.4 | 618389.6 |
| 39.70467 | 4  | 3 | 1 | 350414   | 3858013  | 2512668  | 3381600  | 551915.7 | 3315806  | 7901974  | 974633.6 | 3773903  |
| 11.68858 | 3  | 3 | 0 | 97096.38 | 185479.8 | 96614.51 | 205795.8 | 56783.77 | 133222.6 | 106672.6 | 118577.6 | 237962.1 |
| 28.2735  | 6  | 4 | 2 | 63910.78 | 208371.5 | 95010.7  | 189323   | 43128.29 | 303748.7 | 318464.2 | 159963.1 | 140170.7 |
| 10.4842  | 6  | 2 | 4 | 113860.8 | 202813.6 | 75400.37 | 235039.6 | 159879.5 | 217872.3 | 231986.5 | 112816.1 | 146588.1 |
| 29.878   | 5  | 3 | 2 | 11892114 | 33284812 | 45761901 | 44426130 | 41831486 | 151760.2 | 104356.8 | 152196.2 | 74782035 |
| 16.68017 | 10 | 5 | 5 | 329170.6 | 1967125  | 555393.8 | 1831865  | 508175.7 | 1822064  | 1844585  | 1265057  | 2109348  |
| 9.976317 | 10 | 5 | 5 | 2268114  | 7289669  | 2737437  | 8078321  | 3425485  | 9304305  | 10384413 | 7840048  | 4363097  |
| 10.6618  | 5  | 4 | 1 | 234719.1 | 758558.8 | 335413.1 | 690233.6 | 169383.7 | 424894.1 | 1163370  | 1026178  | 740506.2 |
| 9.960467 | 10 | 5 | 5 | 1310593  | 2987241  | 554300.8 | 3296930  | 1593684  | 3485275  | 3256993  | 3412577  | 2478746  |
| 25.39117 | 6  | 4 | 2 | 85278.85 | 289313.9 | 174893.3 | 252263.6 | 106693.7 | 187210.2 | 594431.9 | 276666   | 210697.2 |
| 40.525   | 11 | 3 | 4 | 302435.1 | 5243805  | 3852932  | 4487132  | 1500844  | 11975492 | 4079607  | 3902934  | 2135689  |
| 9.43325  | 5  | 2 | 3 | 1654359  | 11530550 | 6661323  | 9922729  | 5989962  | 16726551 | 2480987  | 15131167 | 16929756 |
| 10.95602 | 6  | 3 | 3 | 587656.6 | 1930645  | 308388.5 | 2076344  | 735837.4 | 1989239  | 2400138  | 1940499  | 1584963  |
| 9.36565  | 4  | 3 | 1 | 315245.3 | 573945.5 | 415811.5 | 471778.2 | 389081.5 | 876018.4 | 111717   | 146148.3 | 743746.8 |
| 10.95835 | 5  | 2 | 3 | 211741.8 | 882201   | 280297.2 | 946702.2 | 224417.6 | 1060759  | 630623.8 | 911218.3 | 574594.6 |
| 9.859983 | 5  | 2 | 3 | 1397706  | 3957477  | 1480539  | 3590809  | 1410568  | 3936245  | 2700447  | 6191799  | 4411698  |
| 9.55155  | 10 | 5 | 5 | 646701.9 | 1518964  | 298604.2 | 1625348  | 506933.1 | 1493865  | 2003278  | 1440019  | 1182315  |
| 9.976317 | 10 | 5 | 5 | 2135469  | 6174467  | 2413888  | 6872532  | 3046749  | 8090958  | 8790339  | 6654148  | 3642929  |
| 9.989483 | 6  | 3 | 3 | 299927.9 | 691296   | 320651.4 | 601581.4 | 383573.2 | 409062.1 | 341242.7 | 931084.2 | 694478.1 |
| 9.999517 | 7  | 4 | 3 | 351500.9 | 608994.8 | 222997.4 | 671231.3 | 265690   | 222195.5 | 616865   | 734205.5 | 762041.5 |
| 9.840617 | 9  | 4 | 4 | 1726368  | 2030896  | 656167.1 | 1816696  | 991036.9 | 1257992  | 1430116  | 2401450  | 2284004  |
| 10.94208 | 5  | 2 | 3 | 237085.7 | 479195.2 | 156119.8 | 552018.2 | 367576.3 | 377733.8 | 722231.3 | 541923.5 | 336252.1 |
| 9.858833 | 10 | 5 | 5 | 79526016 | 4.02E+08 | 17214520 | 4.19E+08 | 91354094 | 4.25E+08 | 3.97E+08 | 4.13E+08 | 3.97E+08 |
| 44.466   | 7  | 3 | 4 | 319449.9 | 4279476  | 1203483  | 3696770  | 2956770  | 3748200  | 4226370  | 2828630  | 6113295  |
| 10.92253 | 6  | 3 | 3 | 269741   | 888393.4 | 164012.3 | 788420   | 519341.6 | 761952.1 | 1088354  | 701908.9 | 872517.6 |
| 9.571683 | 15 | 5 | 5 | 1117632  | 9672926  | 2087030  | 9138280  | 2133416  | 8382347  | 11305240 | 12263529 | 7186412  |
| 9.092333 | 9  | 5 | 4 | 1169923  | 1424410  | 390723.5 | 1532378  | 458239.1 | 1725731  | 1111070  | 1302594  | 1045298  |
| 9.8322   | 8  | 5 | 3 | 490302.1 | 1735027  | 543578.1 | 1543414  | 911905.6 | 1996474  | 1813118  | 869458.4 | 1666459  |
| 9.960467 | 10 | 5 | 5 | 889885.2 | 3699900  | 561539   | 3506671  | 912973.7 | 4231122  | 4069604  | 3985834  | 2938614  |
| 10.008   | 10 | 4 | 5 | 477221.1 | 1587496  | 500578.9 | 1458208  | 521211.5 | 920847.7 | 2083819  | 2091381  | 1452586  |
| 11.16387 | 11 | 5 | 5 | 1469174  | 4578009  | 1403678  | 4998285  | 1877837  | 6052986  | 6116922  | 3912344  | 3141929  |
| 10.8937  | 6  | 3 | 3 | 132242.7 | 289745.2 | 140621.4 | 254479.7 | 138425.7 | 411819.6 | 363490.5 | 85585.84 | 201608.1 |

|          |    |   |   |          |          |          |          |          |          |          |          |          |
|----------|----|---|---|----------|----------|----------|----------|----------|----------|----------|----------|----------|
| 10.008   | 8  | 5 | 3 | 510422.1 | 926710.7 | 380744.4 | 810526.8 | 524488.7 | 929051.9 | 422262.2 | 1369657  | 1208719  |
| 37.53183 | 8  | 3 | 3 | 348209.8 | 5240966  | 2239794  | 5734781  | 1603324  | 4961050  | 3358367  | 4589026  | 4192733  |
| 9.999217 | 10 | 5 | 5 | 2075220  | 8200071  | 2209709  | 8748692  | 2134273  | 10808596 | 9006319  | 8551499  | 4757935  |
| 33.81667 | 6  | 4 | 2 | 64691.92 | 274754.5 | 128422.6 | 303175.7 | 93072.07 | 386344.9 | 221398.8 | 147591.8 | 182482   |
| 38.92767 | 3  | 0 | 3 | 397366.5 | 5992187  | 214268.9 | 5538483  | 2444119  | 6025171  | 6281223  | 5720158  | 5858183  |
| 21.66983 | 5  | 3 | 2 | 68404.98 | 315580.1 | 116595.9 | 276447.8 | 183972.1 | 192769.4 | 258230.6 | 256266.3 | 391642.4 |
| 10.37347 | 5  | 2 | 3 | 297260.7 | 677168.8 | 188116.4 | 637550.6 | 114641.2 | 922163.6 | 815900.8 | 639126.9 | 481025.4 |
| 10.95835 | 10 | 5 | 5 | 425147.2 | 2380140  | 506855.8 | 2202281  | 848900.2 | 2609629  | 3118134  | 2051128  | 1817759  |
| 11       | 10 | 4 | 5 | 840083.6 | 1870684  | 715120.9 | 2077663  | 910392.4 | 2118050  | 2930450  | 1096182  | 1359833  |
| 10.94208 | 5  | 2 | 3 | 198419.4 | 477090.8 | 195198.8 | 528741.9 | 213940.6 | 432660.3 | 815186.4 | 317271.7 | 438698.5 |
| 10.03947 | 9  | 5 | 4 | 311955.7 | 1166949  | 149318.6 | 1090896  | 390667.1 | 916608.5 | 1229051  | 1311905  | 1207409  |
| 9.9677   | 10 | 5 | 5 | 8578885  | 21416408 | 7773710  | 19046744 | 10730178 | 27945419 | 31104467 | 18015123 | 12605925 |
| 9.36515  | 7  | 2 | 3 | 645311.8 | 2201508  | 839013.1 | 1909663  | 1393236  | 1434138  | 1379957  | 2102644  | 3288181  |
| 9.976317 | 10 | 5 | 5 | 4837927  | 12777370 | 4664977  | 14155867 | 6158462  | 16852158 | 17481185 | 13734376 | 7984971  |
| 9.392767 | 6  | 3 | 3 | 709283.2 | 1136776  | 825535.7 | 928593.4 | 828897.5 | 1025552  | 1614521  | 150669   | 633833.7 |
| 9.40325  | 5  | 2 | 3 | 1174091  | 3676092  | 1605401  | 3987544  | 602560.9 | 5318908  | 1953642  | 1957535  | 4383642  |
| 9.856867 | 10 | 5 | 5 | 71731008 | 4.6E+08  | 25553187 | 4.51E+08 | 42351943 | 4.95E+08 | 4.68E+08 | 4.34E+08 | 4.36E+08 |
| 9.9014   | 9  | 3 | 5 | 1948508  | 3923338  | 823014.6 | 4209770  | 1369331  | 4339417  | 3237765  | 3510035  | 3353046  |
| 9.864767 | 10 | 5 | 5 | 18100606 | 1.13E+08 | 8085527  | 1.1E+08  | 12956543 | 1.11E+08 | 1.19E+08 | 1.08E+08 | 1.03E+08 |
| 9.9677   | 10 | 5 | 5 | 1383022  | 3669076  | 1218992  | 3285790  | 1765639  | 4760550  | 5051258  | 3343145  | 2131837  |
| 9.445217 | 6  | 2 | 4 | 5375600  | 32456512 | 6663743  | 34865250 | 11651017 | 36422612 | 25274327 | 25846791 | 34340673 |
| 23.045   | 8  | 4 | 4 | 171028.8 | 1716935  | 502164.9 | 1616823  | 235978   | 848411.7 | 1917167  | 1862141  | 1810610  |
| 33.7885  | 10 | 5 | 4 | 160093.1 | 853578.7 | 337612.5 | 777166   | 264639.2 | 1443386  | 827606.5 | 676958.5 | 635284.2 |
| 9.979667 | 5  | 3 | 2 | 738193.3 | 1352737  | 566323   | 1191165  | 708951.4 | 1845223  | 394374.5 | 1598119  | 1326302  |
| 10.9645  | 10 | 5 | 5 | 749055.9 | 2897196  | 766572.6 | 2638540  | 1225301  | 3665601  | 2433995  | 2212891  | 2377731  |
| 22.756   | 6  | 4 | 2 | 56315.2  | 230814.9 | 74772.24 | 215415.8 | 42239.99 | 103512.2 | 261626.9 | 236709.9 | 299239.1 |
| 9.541433 | 12 | 5 | 4 | 13074391 | 28330003 | 28680273 | 34977393 | 24011784 | 29842653 | 69387554 | 1150216  | 1333910  |
| 10.16938 | 10 | 5 | 5 | 1100395  | 4463654  | 785599.9 | 4233956  | 1024300  | 4902592  | 5498319  | 4224867  | 3406891  |
| 9.872883 | 10 | 5 | 5 | 1685101  | 10156595 | 2315756  | 9368295  | 3751815  | 8254685  | 9730902  | 7791466  | 11779172 |
| 10.008   | 10 | 5 | 5 | 491408.3 | 1610773  | 238169.5 | 1531853  | 372138.7 | 1625449  | 1902454  | 1779127  | 1356288  |
| 9.516467 | 10 | 4 | 5 | 3085943  | 29596650 | 8130276  | 26410572 | 15763472 | 41353859 | 26385003 | 33912407 | 20470960 |
| 10.9645  | 10 | 5 | 5 | 4641826  | 19543510 | 5398922  | 18340650 | 4072197  | 24637934 | 25494850 | 15374786 | 13440714 |
| 10.91977 | 5  | 3 | 2 | 131485.7 | 277061.8 | 103209   | 315786.1 | 189824.6 | 277410.9 | 438905.9 | 261678.8 | 151687.9 |
| 9.61185  | 9  | 4 | 5 | 624557.8 | 3121237  | 763695.8 | 2923101  | 815710.3 | 2379000  | 3447314  | 3168542  | 2409726  |
| 11.07685 | 5  | 3 | 2 | 437963.9 | 429427   | 185266.6 | 504275.7 | 373246.6 | 670845.2 | 223325   | 487564.6 | 502673.7 |

|          |    |   |   |          |          |          |          |          |          |          |          |          |
|----------|----|---|---|----------|----------|----------|----------|----------|----------|----------|----------|----------|
| 10.95835 | 10 | 5 | 5 | 356378   | 1432664  | 319093.8 | 1356583  | 286854.9 | 1754548  | 1749104  | 1290171  | 1011094  |
| 39.063   | 7  | 4 | 2 | 303788.2 | 3860154  | 1091233  | 3644081  | 500435.4 | 3168049  | 5603553  | 2786615  | 3656831  |
| 10.02372 | 8  | 4 | 4 | 1928307  | 1502422  | 1977988  | 2098490  | 2706323  | 496213.9 | 489663.3 | 863174.3 | 632677.1 |
| 9.999217 | 10 | 5 | 5 | 5308742  | 12778535 | 3125480  | 11403213 | 6968734  | 13732281 | 16820540 | 11101755 | 13717863 |
| 9.346    | 7  | 4 | 3 | 519114.3 | 2090192  | 1300735  | 2462154  | 1644201  | 1113215  | 4350637  | 1939914  | 1384112  |
| 9.445217 | 13 | 5 | 5 | 5.26E+09 | 5.19E+10 | 1.77E+10 | 4.8E+10  | 1.25E+10 | 3.76E+10 | 5.5E+10  | 5.28E+10 | 3.48E+10 |
| 9.992233 | 9  | 5 | 4 | 387137.5 | 948308.4 | 318264.6 | 878210.3 | 234198.5 | 1156231  | 1035716  | 1312261  | 666151.2 |
| 9.856867 | 11 | 5 | 5 | 15262408 | 1.15E+08 | 2291142  | 1.12E+08 | 14958683 | 1.16E+08 | 1.12E+08 | 1.16E+08 | 1.17E+08 |
| 10.00098 | 10 | 5 | 5 | 488333.1 | 972966.1 | 426497.2 | 1112189  | 656601   | 1298719  | 1493519  | 962622.7 | 577182.1 |
| 9.880683 | 9  | 5 | 4 | 860326.1 | 4181890  | 208684.6 | 4464614  | 1533048  | 4474292  | 4045585  | 4120751  | 4310298  |
| 9.864767 | 10 | 5 | 5 | 2459095  | 17505155 | 753153.3 | 17071154 | 2278477  | 17831818 | 16198729 | 17846742 | 18084229 |
| 22.71217 | 5  | 2 | 3 | 95370.16 | 265789.5 | 102776.7 | 291244.5 | 100942.9 | 180927.4 | 351120.2 | 401483.5 | 204277.7 |
| 23.205   | 5  | 2 | 3 | 119267.8 | 481026.9 | 332713.1 | 409207.8 | 230502.6 | 342192.3 | 763538.6 | 226589.4 | 167061.9 |
| 19.98483 | 3  | 3 | 0 | 36352.12 | 79696.96 | 16036.79 | 73083.7  | 33265.46 | 94109.29 | 54352.7  | 73721.64 | 88285.03 |
| 22.8425  | 10 | 5 | 5 | 569540.1 | 4132570  | 636753.7 | 4304286  | 734237.3 | 3474444  | 5173368  | 3889065  | 3927981  |
| 33.54333 | 10 | 5 | 5 | 1303533  | 10718750 | 3337883  | 9963989  | 2658968  | 15017884 | 10068003 | 5826550  | 12030824 |
| 9.858833 | 9  | 5 | 4 | 13880326 | 42149023 | 10049474 | 39383638 | 11992904 | 46582008 | 27651090 | 43437958 | 54721028 |
| 9.960467 | 10 | 5 | 5 | 3963112  | 12580569 | 2168233  | 13410434 | 4110221  | 14108900 | 15269769 | 12573421 | 10043164 |
| 9.994767 | 5  | 3 | 2 | 230368.5 | 406652.6 | 132009.2 | 441735.6 | 148486.4 | 221370.8 | 538360   | 332991.8 | 517753   |
| 10.55298 | 6  | 4 | 2 | 164414.2 | 624675.5 | 408015.6 | 709173.2 | 243354.7 | 363681.2 | 1259164  | 782682.9 | 479342.5 |
| 9.388367 | 7  | 4 | 3 | 455748.1 | 919727.1 | 526569.4 | 773843.2 | 636727.9 | 1148213  | 1262547  | 965927.2 | 1221948  |
| 9.473733 | 10 | 5 | 4 | 997622.9 | 3836452  | 1653060  | 3325480  | 2366026  | 5211252  | 5438820  | 4368759  | 1956788  |
| 9.992233 | 7  | 5 | 2 | 414952.4 | 726555.6 | 264535.3 | 627478.9 | 489047.4 | 821173.6 | 1086780  | 781497.5 | 407464   |
| 10.95835 | 10 | 5 | 5 | 1497267  | 5768413  | 1787852  | 5349206  | 1567176  | 6954431  | 8277652  | 4733304  | 3951979  |
| 9.856867 | 10 | 5 | 5 | 3177327  | 15484447 | 2585552  | 14199873 | 6665256  | 18348590 | 12968609 | 12535749 | 16528019 |
| 10.9645  | 10 | 5 | 5 | 631280.7 | 2659296  | 663613.8 | 2503308  | 585617.8 | 3285244  | 3297758  | 2069580  | 1882224  |
| 42.13617 | 5  | 3 | 2 | 416265.7 | 6561701  | 1266414  | 6943685  | 1751682  | 7376011  | 6268274  | 8000863  | 6496538  |
| 9.93625  | 10 | 5 | 5 | 4629503  | 17036707 | 3816089  | 16270356 | 1982897  | 22139483 | 19934491 | 14499253 | 13197632 |
| 11.01157 | 6  | 2 | 3 | 1228390  | 3159214  | 1878302  | 2661994  | 2108930  | 2810074  | 5253189  | 981168.4 | 1831844  |
| 28.65867 | 4  | 3 | 1 | 95334.17 | 292465.5 | 178811.9 | 248214.3 | 176832.4 | 198842.7 | 472847.1 | 34207.63 | 327278.9 |
| 10.9645  | 10 | 5 | 5 | 3188929  | 17403949 | 2861498  | 16654182 | 3156078  | 20603844 | 20017142 | 15077280 | 14212703 |
| 10.42575 | 8  | 5 | 3 | 314787.7 | 1353272  | 622824.9 | 1217694  | 449150.9 | 1542590  | 2021563  | 1772523  | 517066.1 |
| 9.023433 | 5  | 3 | 2 | 159453.8 | 674263.3 | 303470.4 | 604637.7 | 253528.5 | 587076.1 | 1084990  | 329099.9 | 875741.6 |
| 28.86367 | 5  | 3 | 2 | 296546.5 | 1548839  | 1220038  | 1290763  | 802170.4 | 423388.2 | 1806246  | 164290.6 | 2386161  |
| 9.992233 | 4  | 3 | 1 | 369953.6 | 400046.6 | 288734.1 | 495468.6 | 455665.7 | 662746.5 | 0        | 662824.5 | 220065.6 |

|          |    |   |   |          |          |          |          |          |          |          |          |          |
|----------|----|---|---|----------|----------|----------|----------|----------|----------|----------|----------|----------|
| 23.51217 | 4  | 1 | 3 | 76224.88 | 170112.8 | 56057.1  | 152702.6 | 81173.45 | 98346.04 | 209623.7 | 239941.5 | 163076.2 |
| 9.392767 | 7  | 4 | 3 | 651897.4 | 1175731  | 397398.3 | 1085534  | 323998   | 1678293  | 1434592  | 776291.3 | 786105.6 |
| 24.15433 | 6  | 4 | 2 | 234541.7 | 1146409  | 602367.9 | 992036.5 | 640230.9 | 693834   | 1737410  | 756027.6 | 675250.9 |
| 8.8977   | 4  | 3 | 1 | 2493048  | 2063224  | 3848531  | 1344662  | 1046830  | 8943387  | 555045.4 | 368560   | 212814   |
| 10.9645  | 10 | 5 | 5 | 311898.5 | 1214903  | 340905.9 | 1124856  | 383629.3 | 1596130  | 1540318  | 902992.7 | 878894.1 |
| 10.008   | 8  | 4 | 4 | 551414.2 | 1064141  | 391379.4 | 1191863  | 608996.5 | 1172138  | 1679103  | 961618.1 | 654203.4 |
| 39.31617 | 5  | 1 | 4 | 417724.2 | 5862040  | 665125   | 5565483  | 1525539  | 6027307  | 5836033  | 6304435  | 6400881  |
| 9.848417 | 5  | 2 | 3 | 6762578  | 19220431 | 17812551 | 15219706 | 14218559 | 1826574  | 17149318 | 2208624  | 39412395 |
| 9.976317 | 5  | 3 | 2 | 650074.9 | 918844.7 | 393785.4 | 1042931  | 584425.7 | 1271450  | 1419740  | 638861.9 | 598999.5 |
| 24.88383 | 9  | 5 | 4 | 134686.5 | 567674.6 | 153233.6 | 599795   | 98680.44 | 391814.8 | 562288.4 | 540874.6 | 529208.2 |
| 9.856867 | 10 | 5 | 5 | 6424779  | 46248109 | 1678712  | 45000372 | 6721420  | 46332972 | 44141348 | 48216657 | 47489292 |
| 9.983433 | 10 | 5 | 5 | 1.19E+09 | 5.98E+09 | 8.28E+08 | 5.7E+09  | 1.37E+09 | 6.85E+09 | 6.88E+09 | 5.58E+09 | 5.1E+09  |
| 9.311883 | 7  | 3 | 4 | 503224   | 3022349  | 1146119  | 3505277  | 2464291  | 3897993  | 1170863  | 2907301  | 3092742  |
| 10.95602 | 7  | 4 | 3 | 201856.1 | 634357.2 | 222929.3 | 566498.6 | 315233.9 | 428753.8 | 421194.2 | 652616.7 | 711033.8 |
| 10.008   | 10 | 5 | 5 | 791765.9 | 2491807  | 581431.5 | 2324221  | 757770.9 | 2595854  | 3391823  | 2509105  | 1912181  |
| 21.1525  | 10 | 5 | 5 | 289390.8 | 1378528  | 319171.7 | 1465680  | 381497.8 | 1552440  | 1827231  | 1302283  | 1207398  |
| 11.48403 | 9  | 5 | 4 | 86152.87 | 269468.1 | 61045.43 | 306958.6 | 199936.5 | 189457   | 231524.4 | 331402.6 | 268671.6 |
| 10.94443 | 9  | 4 | 5 | 323456.2 | 1654129  | 577995.9 | 1537262  | 321672   | 1975423  | 2046097  | 1012789  | 1041304  |
| 9.975217 | 5  | 2 | 3 | 378254.1 | 657823.4 | 241433.6 | 580560   | 367070.4 | 413360.5 | 995392.1 | 773807.2 | 443427.7 |
| 9.9677   | 10 | 5 | 5 | 1077302  | 3630718  | 680172.7 | 3369273  | 1311492  | 4086338  | 4491120  | 3226102  | 2772763  |
| 41.2295  | 12 | 3 | 5 | 378900.5 | 6802017  | 3231876  | 7941349  | 5590544  | 4252027  | 7580336  | 11091460 | 2983546  |
| 8.785267 | 8  | 4 | 4 | 268964.6 | 1532233  | 370906.1 | 1417248  | 539412.3 | 1591419  | 2143655  | 1257210  | 1236812  |
| 19.4465  | 5  | 4 | 1 | 55372.95 | 257533   | 86095.43 | 274672.8 | 44427.8  | 377850.1 | 191007.1 | 305910.9 | 166522.9 |
| 9.530583 | 12 | 5 | 5 | 1851586  | 8802198  | 6745502  | 10568466 | 7519607  | 6972164  | 2856715  | 2519650  | 14246245 |
| 10.79303 | 9  | 5 | 4 | 208483   | 555167.8 | 270227.5 | 502998.2 | 114256.5 | 538178.7 | 1015967  | 357664.8 | 503169.4 |
| 9.331383 | 6  | 4 | 2 | 640278.4 | 1760037  | 356188   | 1653509  | 492208.9 | 2027146  | 1723322  | 1319272  | 1534782  |
| 11.80168 | 9  | 5 | 4 | 120258.6 | 472232.6 | 115462.4 | 430189.7 | 208464.3 | 528505.4 | 437511.7 | 335392.6 | 421287.6 |
| 10.02372 | 10 | 5 | 5 | 541708.3 | 1100852  | 306073.3 | 1214930  | 569041.4 | 968286.2 | 950432.4 | 1606257  | 1154496  |
| 10.03947 | 5  | 3 | 2 | 269856.1 | 358477.5 | 239892.6 | 294438.6 | 277056.6 | 348251.9 | 30436.91 | 252401.2 | 501572.4 |
| 10.9645  | 10 | 5 | 5 | 645655.4 | 2594246  | 635120.2 | 2444890  | 572890.5 | 3239534  | 3218417  | 1951712  | 1966016  |
| 12.2379  | 8  | 5 | 3 | 359261.5 | 3278432  | 466288.5 | 3610893  | 1793634  | 2868472  | 3285657  | 2771728  | 3608062  |
| 9.972483 | 10 | 5 | 5 | 980498.7 | 2352999  | 1203325  | 2688907  | 1498415  | 3632383  | 3477161  | 2352512  | 1106430  |
| 9.374083 | 6  | 3 | 3 | 1118999  | 1641547  | 758516.2 | 1917517  | 1369840  | 2250779  | 1821478  | 492455.7 | 1315220  |
| 10.94443 | 10 | 5 | 5 | 496972   | 2529022  | 760819.2 | 2323449  | 898498.5 | 3406125  | 3243239  | 1645006  | 2221976  |
| 10.94208 | 5  | 3 | 2 | 325182.2 | 1138791  | 390849.7 | 1007785  | 635075   | 817544.8 | 1357961  | 693647   | 1175818  |

|          |    |   |   |          |          |          |          |          |          |          |          |          |
|----------|----|---|---|----------|----------|----------|----------|----------|----------|----------|----------|----------|
| 27.99633 | 8  | 4 | 4 | 189162   | 826696.8 | 558478.8 | 682221.6 | 611553.5 | 657250.5 | 462839   | 1690007  | 283055.6 |
| 10.97242 | 5  | 2 | 3 | 1184473  | 3229108  | 1095492  | 2897699  | 1544482  | 4667691  | 3059080  | 3323976  | 1608375  |
| 9.102033 | 10 | 5 | 5 | 5031400  | 15058741 | 5191082  | 13567324 | 6774947  | 13118422 | 22072669 | 18111233 | 13495176 |
| 9.999217 | 10 | 5 | 5 | 1764247  | 4045970  | 977942.5 | 3673297  | 1873276  | 4901931  | 5006483  | 2849075  | 3213813  |
| 11.86923 | 8  | 3 | 5 | 872545.6 | 15872551 | 1705695  | 15133255 | 3810344  | 13134244 | 15759128 | 16729237 | 16032701 |
| 9.999217 | 10 | 5 | 5 | 2264531  | 3055942  | 1686107  | 3567830  | 2390928  | 3941617  | 5354776  | 3099461  | 1228856  |
| 10.9645  | 5  | 3 | 2 | 8598058  | 16198933 | 20147713 | 20736938 | 16441396 | 2681272  | 46636271 | 2229566  | 27275018 |
| 9.075083 | 6  | 3 | 3 | 731072.5 | 1146886  | 866710.9 | 964292.5 | 580115   | 647009   | 337319.5 | 1142781  | 1017291  |
| 12.17992 | 6  | 3 | 3 | 166613.8 | 636881.1 | 239449.1 | 559584.6 | 370747.2 | 893134.9 | 827113.3 | 682708   | 344882.3 |
| 9.494433 | 8  | 4 | 4 | 7983844  | 24211512 | 23716165 | 31195504 | 32243401 | 1660969  | 20639117 | 2382137  | 41035635 |
| 18.3115  | 7  | 4 | 3 | 729505.2 | 6304990  | 1152992  | 5747435  | 2926173  | 8163361  | 5497213  | 5406917  | 5785245  |
| 10.96997 | 6  | 4 | 2 | 488151.8 | 1390228  | 403889   | 1546461  | 790193.3 | 1163983  | 1654988  | 1182718  | 987959.7 |
| 10.95055 | 10 | 5 | 5 | 210241.8 | 638801.5 | 198397.8 | 693065.5 | 240429.3 | 876351   | 826642.3 | 512103.7 | 539814.1 |
| 37.10133 | 6  | 3 | 2 | 563693.9 | 3059493  | 1873455  | 3646883  | 2791917  | 2048626  | 1442400  | 1915123  | 3951257  |
| 20.7205  | 5  | 3 | 2 | 135397   | 527828.8 | 160316.3 | 465720.2 | 314478.8 | 349907.9 | 666365.5 | 423516.5 | 475678.1 |
| 20.05667 | 5  | 3 | 0 | 18473212 | 1.34E+08 | 47647842 | 1.23E+08 | 41530412 | 1.01E+08 | 2.16E+08 | 1.35E+08 | 1.07E+08 |
| 9.508883 | 5  | 2 | 3 | 247432.4 | 360481.1 | 274927.8 | 289325.1 | 303390.7 | 467269.9 | 735970.2 | 378896.5 | 220268.8 |
| 9.356517 | 6  | 3 | 2 | 1737824  | 5925266  | 4123373  | 6932693  | 4080939  | 10894404 | 1216229  | 4804402  | 9479322  |
| 10.008   | 9  | 5 | 4 | 322219.9 | 759220.8 | 192047.6 | 708851.4 | 217208.2 | 698728.8 | 1098183  | 711879.2 | 647033.7 |
| 9.992233 | 10 | 5 | 4 | 544476.2 | 1059024  | 259836.5 | 1149500  | 446758.5 | 826159.9 | 1012727  | 848509.7 | 1461157  |
| 9.976317 | 3  | 3 | 0 | 617422.3 | 756332.3 | 329903.1 | 624852.2 | 670904.2 | 697432.1 | 1330409  | 680628.5 | 538990.4 |
| 9.49445  | 15 | 5 | 5 | 5787006  | 47130545 | 10154269 | 43958700 | 15098463 | 39661434 | 55637574 | 60162065 | 37313330 |
| 10.03947 | 7  | 4 | 3 | 250835.3 | 661596.1 | 190417.6 | 594324.1 | 333864.8 | 740035.1 | 944759.5 | 577111.3 | 441900   |
| 9.872917 | 10 | 5 | 5 | 2724351  | 16420940 | 1293967  | 15883423 | 2767511  | 16299074 | 15202019 | 17726342 | 17760011 |
| 9.445217 | 13 | 5 | 5 | 6313923  | 54638558 | 13227618 | 58661766 | 18952972 | 43752760 | 66431291 | 71406029 | 44224965 |
| 29.86267 | 10 | 5 | 5 | 172066.2 | 987048.3 | 180247.8 | 1037458  | 227557.6 | 1029262  | 1069287  | 733330   | 1207701  |
| 44.46617 | 9  | 3 | 2 | 362933.2 | 4540854  | 413843.7 | 4447192  | 346784.8 | 4348429  | 4162815  | 5228324  | 4369070  |
| 9.061    | 5  | 2 | 3 | 439784.8 | 798441.8 | 392263.8 | 720637.5 | 207986.5 | 1207520  | 1137372  | 724804.6 | 685371.2 |
| 9.45945  | 11 | 5 | 4 | 559981.8 | 3757458  | 2079008  | 4284937  | 2225125  | 5636064  | 5590198  | 4128805  | 2698182  |
| 10.95602 | 10 | 5 | 4 | 265209.5 | 853089   | 235709.1 | 789166.8 | 283657.7 | 1100679  | 1000500  | 759401.4 | 496238.5 |
| 9.596017 | 5  | 2 | 3 | 1832088  | 1400562  | 1012821  | 1202527  | 499308.5 | 1746859  | 535832.3 | 859263.8 | 839318.2 |
| 27.52367 | 7  | 4 | 3 | 435655.9 | 3075012  | 571125.3 | 2945329  | 484099.3 | 2491480  | 3061594  | 2596114  | 3333668  |
| 10.9645  | 7  | 3 | 4 | 358837.3 | 857809.1 | 347082.9 | 761112.6 | 436753.5 | 1203340  | 1248792  | 568056.7 | 520735.7 |
| 10.9645  | 10 | 5 | 5 | 450458.1 | 1386249  | 340557.6 | 1296879  | 388091.3 | 1941730  | 1265372  | 1324882  | 1016153  |
| 9.976317 | 9  | 5 | 4 | 1231923  | 2406275  | 1032608  | 2094658  | 1468288  | 3006959  | 3782188  | 2244679  | 1087722  |

|          |    |   |   |          |          |          |          |          |          |          |          |          |
|----------|----|---|---|----------|----------|----------|----------|----------|----------|----------|----------|----------|
| 8.964883 | 7  | 4 | 3 | 530798.9 | 1355592  | 529877.4 | 1702085  | 1879443  | 1731988  | 1990525  | 1064409  | 1337700  |
| 9.872883 | 10 | 5 | 5 | 687288.2 | 2120106  | 405683.7 | 1990962  | 622155.1 | 2603921  | 2479442  | 1652811  | 1987488  |
| 9.840617 | 10 | 5 | 5 | 1129367  | 3714160  | 967775.4 | 3516185  | 596953.7 | 4664727  | 4743983  | 2735384  | 2811716  |
| 10.39612 | 7  | 3 | 4 | 175610.1 | 322821.7 | 93187.97 | 342745.1 | 67157.81 | 292993.6 | 467172.1 | 359184   | 259706.8 |
| 10.2608  | 8  | 3 | 5 | 260450.1 | 1040291  | 266404.7 | 1116754  | 351816.6 | 1057109  | 1280628  | 1296223  | 903560.4 |
| 9.1322   | 7  | 3 | 3 | 288100.3 | 862195.2 | 548901.1 | 1023794  | 753338.3 | 1668150  | 777406.8 | 1119200  | 328632   |
| 11.52297 | 10 | 5 | 5 | 251667.9 | 905481.9 | 182678.2 | 961842.5 | 268422.4 | 1189902  | 787049.9 | 736364.5 | 836482.7 |
| 9.874317 | 7  | 3 | 4 | 1416094  | 4817873  | 2294182  | 4242071  | 2418251  | 7916382  | 2774585  | 2459705  | 4810746  |
| 9.960467 | 10 | 5 | 5 | 898077.9 | 3077664  | 690681.8 | 2913148  | 655798.9 | 3629610  | 3809473  | 3169813  | 2152091  |
| 9.960467 | 5  | 3 | 2 | 724000.5 | 1338955  | 301267.9 | 1208298  | 680764.4 | 1407735  | 1178522  | 1193501  | 1833881  |
| 9.904767 | 10 | 5 | 5 | 1417052  | 3299164  | 818803.2 | 3054530  | 1149885  | 4075046  | 2392829  | 3970678  | 3603531  |
| 10.38125 | 6  | 2 | 4 | 168492.1 | 463537.8 | 150944.9 | 432718   | 92890.7  | 513191.3 | 686748.3 | 456697.9 | 289186.6 |
| 9.507167 | 10 | 5 | 5 | 1266636  | 3611278  | 1718100  | 3139855  | 2117466  | 4568548  | 1066167  | 2601408  | 4811092  |
| 9.43325  | 8  | 4 | 4 | 2472199  | 17907131 | 10069699 | 15608838 | 8698300  | 21647364 | 28061648 | 1109785  | 18326827 |
| 9.994767 | 6  | 4 | 2 | 792813.6 | 1129940  | 1282744  | 1424429  | 1124028  | 3408122  | 810308.5 | 502010.3 | 534914.1 |
| 9.880683 | 10 | 5 | 5 | 1438282  | 7847887  | 1164280  | 7507621  | 1584054  | 6999715  | 6639977  | 8760482  | 9356950  |
| 13.52208 | 5  | 2 | 3 | 154554.3 | 814448.8 | 670206.7 | 660756.2 | 586172.4 | 83868.29 | 1282303  | 1226077  | 82902.18 |
| 26.09517 | 8  | 5 | 3 | 299249.9 | 1972089  | 1063825  | 1720576  | 997615.5 | 1115388  | 2593568  | 713691   | 2124043  |
| 8.903533 | 6  | 4 | 2 | 2066293  | 22321498 | 12635886 | 19242903 | 12615939 | 31042673 | 309989.5 | 30291485 | 24521603 |
| 9.516467 | 8  | 3 | 4 | 949975   | 2904191  | 1519843  | 3524636  | 3208625  | 4180701  | 2995800  | 1389676  | 1349915  |
| 9.4775   | 5  | 3 | 2 | 681328.8 | 3115896  | 1422108  | 2798644  | 1166262  | 4578027  | 1233333  | 2013039  | 3752657  |
| 9.046783 | 10 | 5 | 5 | 3892108  | 29623509 | 13158890 | 26204356 | 14862853 | 26998870 | 49957376 | 34169626 | 19901763 |
| 9.092333 | 10 | 5 | 5 | 2000677  | 6602593  | 1623646  | 6150684  | 2056357  | 6502359  | 9352194  | 5856792  | 5100108  |
| 9.853633 | 10 | 5 | 5 | 2094619  | 8698536  | 4454264  | 7815086  | 2445443  | 8536530  | 5694268  | 4919692  | 16165655 |
| 10.9645  | 10 | 5 | 5 | 1210908  | 5675646  | 1427737  | 5998810  | 1218243  | 7159037  | 7211912  | 4428572  | 4306164  |
| 11.70442 | 10 | 5 | 5 | 136095.1 | 581898   | 64075.65 | 556427.3 | 131272.6 | 656979.5 | 541848.9 | 515488.3 | 643841.7 |
| 21.18133 | 5  | 3 | 2 | 44765.08 | 141426.9 | 39186.78 | 130640   | 48831.71 | 202943.1 | 146261.8 | 134876.7 | 95654.84 |
| 10.22043 | 5  | 2 | 3 | 213214.1 | 728602.4 | 372867.1 | 655189.8 | 197725   | 437233.2 | 1346717  | 808583.2 | 520331.4 |
| 9.929783 | 11 | 5 | 5 | 2319536  | 5586081  | 975421.3 | 6151440  | 3060017  | 4619508  | 5079403  | 5701739  | 7181364  |
| 23.82067 | 11 | 5 | 5 | 443437.2 | 1855566  | 715356.7 | 2183307  | 1731307  | 2844842  | 1908190  | 1029104  | 1324022  |
| 10.18683 | 9  | 4 | 4 | 793761.2 | 1794483  | 687045.6 | 1620323  | 746272.8 | 2427682  | 2561335  | 1421517  | 939935.3 |
| 9.888767 | 10 | 5 | 5 | 1576899  | 5381085  | 412689.6 | 5240687  | 699641.1 | 5421342  | 5420403  | 6015522  | 5125731  |
| 9.986767 | 10 | 5 | 5 | 783805.3 | 2701958  | 573636.2 | 2923131  | 1137867  | 2698204  | 3477125  | 3031876  | 2154662  |
| 30.27883 | 10 | 5 | 5 | 2433757  | 16140136 | 3008533  | 14947982 | 6169054  | 14091529 | 19829317 | 16118242 | 12407811 |
| 10.95602 | 12 | 5 | 5 | 548808.9 | 1216504  | 401407.9 | 1116344  | 425116.2 | 964258.3 | 937022   | 892196.6 | 1519618  |

|          |    |   |   |          |          |          |          |          |          |          |          |          |
|----------|----|---|---|----------|----------|----------|----------|----------|----------|----------|----------|----------|
| 9.431517 | 7  | 3 | 3 | 3489280  | 8330078  | 8701637  | 11205971 | 14221585 | 14128127 | 3634010  | 1881031  | 1223077  |
| 11.52297 | 10 | 5 | 5 | 27606872 | 1.63E+08 | 22540941 | 1.71E+08 | 36767199 | 1.97E+08 | 1.76E+08 | 1.48E+08 | 1.44E+08 |
| 22.62767 | 4  | 4 | 0 | 47832.54 | 175396.1 | 57490.52 | 188304.7 | 48683.26 | 129606.1 | 175623.1 | 273497.2 | 141383.9 |
| 9.887133 | 9  | 4 | 5 | 1383976  | 6539837  | 1874698  | 6086573  | 1870125  | 8767609  | 3926198  | 7269133  | 7282741  |
| 21.72717 | 10 | 5 | 5 | 157581.9 | 711458.5 | 314155.8 | 620931.8 | 423977.4 | 807680   | 208847.6 | 1060619  | 671703.6 |
| 9.976317 | 7  | 4 | 3 | 530350.3 | 887121.7 | 345268.3 | 767095.2 | 603806.8 | 1065565  | 1410789  | 653226.6 | 709808.7 |
| 9.268717 | 10 | 5 | 5 | 872265.4 | 1696867  | 618327   | 1956009  | 1358409  | 2756698  | 1428757  | 1364956  | 1223744  |
| 18.74517 | 5  | 2 | 3 | 302913.6 | 656023.8 | 787465.5 | 839338.6 | 727341.2 | 207958.1 | 253281.3 | 35216.04 | 1961575  |
| 9.874317 | 9  | 4 | 5 | 1904301  | 5742246  | 1956206  | 6306207  | 2643579  | 5918713  | 3432651  | 8125804  | 7071143  |
| 9.845483 | 10 | 5 | 5 | 2528891  | 13706536 | 1038631  | 13164413 | 2925257  | 13496526 | 12504748 | 14968355 | 14563570 |
| 9.928667 | 10 | 5 | 5 | 8300146  | 34739593 | 9373227  | 37298616 | 11653496 | 24476261 | 42152164 | 42587337 | 39892092 |
| 10.94443 | 6  | 4 | 2 | 463097   | 1073518  | 291923.8 | 1156160  | 384405.4 | 762449   | 1238200  | 979884.6 | 894009.2 |
| 25.69517 | 6  | 4 | 2 | 374303.5 | 3514496  | 1127936  | 3282074  | 748527.1 | 2784162  | 5337112  | 2942431  | 2633473  |
| 10.008   | 10 | 5 | 5 | 547461.6 | 1545415  | 287008.2 | 1643503  | 491849.6 | 1410460  | 1949697  | 1742702  | 1307058  |
| 10.36838 | 11 | 5 | 5 | 10694637 | 36902214 | 9281218  | 39502403 | 12037611 | 52270907 | 37620391 | 35109584 | 30867594 |
| 9.976317 | 10 | 5 | 5 | 2219030  | 7301774  | 2790802  | 8030400  | 3226791  | 9460024  | 10380605 | 7841793  | 4275387  |
| 9.874317 | 7  | 3 | 2 | 692689.1 | 1269927  | 711069.1 | 1072384  | 910455.1 | 642132.1 | 512020.7 | 1423088  | 2254226  |
| 21.62883 | 4  | 3 | 1 | 88638.05 | 371713.5 | 92017.64 | 417448.2 | 245984.3 | 272373.4 | 297353.8 | 378176.9 | 408186.2 |
| 10.95055 | 10 | 5 | 5 | 416582.6 | 2535813  | 921392.3 | 2334237  | 736142.5 | 3502643  | 3424287  | 1815902  | 1463697  |
| 9.872917 | 5  | 3 | 2 | 893389   | 3081059  | 1925953  | 2706851  | 994089.1 | 3417128  | 1606311  | 1552614  | 6238961  |
| 9.848417 | 7  | 5 | 2 | 655304.1 | 1289593  | 163058.9 | 1539400  | 1406595  | 1329546  | 1489555  | 1212930  | 1057022  |
| 9.976317 | 10 | 5 | 5 | 2352896  | 7395890  | 1689887  | 7953408  | 2770889  | 8327507  | 9124125  | 8372782  | 5598566  |
| 35.9635  | 5  | 3 | 2 | 181249.4 | 557230.5 | 272303.8 | 622168.6 | 266398.1 | 839779.6 | 716374.4 | 681264.4 | 184844.4 |
| 10.95835 | 10 | 5 | 5 | 232811.8 | 868768   | 220535.8 | 826407.5 | 107028.8 | 967676.3 | 1138830  | 658796.1 | 623288.1 |
| 30.28383 | 8  | 3 | 5 | 116670.2 | 669974.1 | 244186.5 | 586917.4 | 416960.8 | 622756.2 | 903670.9 | 778425.7 | 271102.1 |
| 9.994767 | 10 | 5 | 5 | 944890.1 | 2492927  | 1119805  | 2234329  | 1023486  | 3485053  | 3222203  | 2861627  | 679927.5 |
| 20.08633 | 10 | 5 | 5 | 693330.8 | 3291655  | 658729.3 | 3114312  | 804806   | 3719542  | 4239120  | 2825771  | 2726677  |
| 9.94455  | 10 | 5 | 5 | 2202166  | 8921793  | 1418815  | 8621144  | 1041507  | 11105326 | 9566902  | 8194543  | 7614832  |
| 10.49903 | 8  | 5 | 3 | 115354.1 | 270087.6 | 78246.99 | 241914   | 143969.3 | 312841.3 | 326992.1 | 340380.1 | 180545   |
| 10.9645  | 10 | 5 | 5 | 1037195  | 4294695  | 930402.3 | 4593079  | 1473884  | 5264912  | 5321090  | 3724665  | 3331120  |
| 9.999217 | 10 | 5 | 5 | 2122511  | 6407989  | 1692768  | 5861161  | 2711258  | 8448473  | 7700285  | 5960409  | 4169861  |
| 9.992233 | 10 | 5 | 5 | 2352174  | 4842996  | 2782421  | 5558947  | 3161753  | 5899185  | 8730467  | 5274735  | 1925451  |
| 9.419733 | 7  | 3 | 3 | 1375968  | 7041328  | 2580797  | 6416638  | 2620338  | 8965458  | 3051338  | 9646981  | 6977157  |
| 9.986767 | 12 | 5 | 4 | 925092.2 | 2318151  | 319751.9 | 2020691  | 1668149  | 2472750  | 1869556  | 2427663  | 2688615  |
| 9.856867 | 10 | 5 | 5 | 2731992  | 16177799 | 1916454  | 15686279 | 2167858  | 16791570 | 12771185 | 17377676 | 16996368 |



|          |    |   |   |          |          |          |          |          |          |          |          |          |
|----------|----|---|---|----------|----------|----------|----------|----------|----------|----------|----------|----------|
| 10.008   | 8  | 4 | 4 | 307330.2 | 697914.1 | 319154.7 | 771897.2 | 296646.8 | 814490   | 1043384  | 857586.4 | 220115.2 |
| 22.713   | 5  | 3 | 2 | 122752.5 | 540116.7 | 78117.99 | 487078.1 | 294110.2 | 475308   | 487365.8 | 487835.4 | 613405.6 |
| 10.9645  | 10 | 5 | 5 | 261771.8 | 982604.4 | 247632   | 924145.1 | 239617.2 | 1337645  | 1124294  | 793032   | 739453.7 |
| 9.845483 | 10 | 5 | 5 | 7638195  | 42996403 | 4030221  | 41464062 | 7963929  | 43043532 | 37139248 | 46010497 | 47366645 |
| 11.3027  | 3  | 3 | 0 | 95359.26 | 129013.1 | 60426.34 | 116688.7 | 39738.54 | 174703.7 | 210680.8 | 89202.68 | 70559.99 |
| 9.1932   | 5  | 2 | 3 | 228336.3 | 378878   | 298789.9 | 455005.8 | 335199.7 | 663047.3 | 704556.5 | 257881.2 | 268905   |
| 10.9645  | 7  | 4 | 3 | 522157.6 | 1451825  | 432974.6 | 1336744  | 522139.5 | 2041519  | 1306729  | 1521478  | 845415.8 |
| 10.189   | 8  | 4 | 4 | 333430.2 | 1143791  | 188102.2 | 1089849  | 255612.6 | 1313798  | 917731.4 | 1150774  | 994728.5 |
| 9.992233 | 4  | 3 | 1 | 352625.1 | 411758.2 | 191011.4 | 497392.7 | 458669.8 | 418296.1 | 740899.5 | 301543.9 | 298738.6 |
| 10.94443 | 9  | 4 | 5 | 586375.6 | 684914   | 454340   | 588929.6 | 336070.7 | 341394   | 1387564  | 404790.3 | 902691.3 |
| 10.9645  | 10 | 5 | 5 | 7560403  | 35522738 | 6877119  | 33813004 | 7392306  | 44639701 | 40263644 | 30734114 | 27863427 |
| 23.66667 | 6  | 3 | 3 | 208832.6 | 2881243  | 698816.4 | 2697740  | 827299   | 3729944  | 3236727  | 2689108  | 1847167  |
| 41.86267 | 13 | 3 | 3 | 321984.8 | 3444113  | 618632.5 | 3697970  | 1342124  | 3631573  | 2801443  | 2838562  | 3697577  |
| 11.119   | 8  | 5 | 3 | 442109.8 | 2035176  | 488531.5 | 1886004  | 729174   | 2235190  | 2547613  | 1761438  | 1325469  |
| 35.77567 | 8  | 5 | 3 | 93246.44 | 471879.6 | 235672.8 | 418333.7 | 211354.6 | 799787.1 | 389581.3 | 160590.1 | 571098.2 |
| 9.8374   | 6  | 4 | 2 | 921879.1 | 3119486  | 1429572  | 2800373  | 1230964  | 4900677  | 1681841  | 1615905  | 3670804  |
| 9.445217 | 14 | 5 | 5 | 10099843 | 89525835 | 20160545 | 82793119 | 33999785 | 1.18E+08 | 82820019 | 1.03E+08 | 71542908 |
| 9.541433 | 11 | 3 | 5 | 4401560  | 21159422 | 12910411 | 18031756 | 13271027 | 31301597 | 23482694 | 271921.1 | 31954533 |
| 32.95083 | 4  | 1 | 3 | 52336.25 | 196310.8 | 70932.71 | 214253.9 | 79025.68 | 257033.1 | 74487.26 | 214267.5 | 231006.7 |
| 10.94603 | 4  | 1 | 3 | 197711.8 | 428081.1 | 50731.19 | 480649.7 | 297314.5 | 436400.1 | 451954.7 | 494350.9 | 364421.5 |
| 41.5895  | 5  | 2 | 3 | 318226.7 | 4489076  | 764253.6 | 5073322  | 3274539  | 4142395  | 4331542  | 4283498  | 5817925  |
| 9.45945  | 6  | 4 | 2 | 880970.6 | 3197018  | 1112108  | 2861900  | 1633017  | 3977246  | 3182765  | 1861565  | 4575510  |
| 14.89697 | 6  | 3 | 3 | 37058.17 | 208963.7 | 103069.2 | 228061.1 | 41485.61 | 347587.6 | 256979.1 | 70703.86 | 203279.6 |
| 9.175017 | 4  | 3 | 1 | 868049.6 | 4427689  | 4759917  | 5471464  | 3941130  | 1818017  | 523304.3 | 640045.4 | 10341389 |
| 10.96997 | 6  | 3 | 3 | 245494.2 | 874129.1 | 354869.6 | 799271.1 | 264356.1 | 1099419  | 1392166  | 624729.1 | 612499.7 |
| 9.856867 | 4  | 1 | 3 | 1117678  | 2889220  | 1374564  | 2542782  | 1525385  | 3997431  | 1762560  | 4732044  | 1972393  |
| 9.40615  | 7  | 4 | 3 | 594146.8 | 1319861  | 299614.1 | 1199512  | 636416   | 1696896  | 1498077  | 1141582  | 1334258  |
| 9.976317 | 10 | 5 | 5 | 14908195 | 78186073 | 14139581 | 74949908 | 12973236 | 84623652 | 99557959 | 69639583 | 63921148 |
| 9.856867 | 10 | 5 | 5 | 1898249  | 8782006  | 2617496  | 8246978  | 1767689  | 10067247 | 10313898 | 4596418  | 7892841  |
| 9.673333 | 10 | 5 | 5 | 361422.3 | 1042532  | 277367.4 | 1147517  | 549014.7 | 1141702  | 1111705  | 837014.9 | 707437.5 |
| 9.4468   | 10 | 5 | 5 | 768847.9 | 3193854  | 1106157  | 2854430  | 1669888  | 3680643  | 4731781  | 2289913  | 1982708  |
| 9.45945  | 6  | 2 | 3 | 1311218  | 3303150  | 2191122  | 3973127  | 3292400  | 6116504  | 3278327  | 4712226  | 707836.7 |
| 9.559117 | 13 | 4 | 5 | 1580164  | 6929591  | 4998623  | 5845116  | 4042528  | 13131463 | 6572901  | 605327.5 | 10428228 |
| 8.967683 | 11 | 5 | 5 | 1789336  | 4086205  | 2915909  | 4632260  | 1295639  | 5551202  | 7966122  | 149737.3 | 3783537  |
| 9.928667 | 5  | 3 | 2 | 980634.4 | 1387238  | 804659.1 | 1214017  | 637669.9 | 1593719  | 107275.3 | 1679822  | 2286833  |

|          |    |   |   |          |          |          |          |          |          |          |          |          |
|----------|----|---|---|----------|----------|----------|----------|----------|----------|----------|----------|----------|
| 36.06417 | 10 | 5 | 5 | 806808.9 | 4026274  | 2252769  | 3393498  | 2995360  | 7257743  | 2926807  | 1524414  | 3133952  |
| 9.842    | 9  | 5 | 4 | 2089480  | 5191133  | 2998480  | 5984403  | 3627706  | 5173052  | 5555007  | 1979380  | 3352371  |
| 43.60333 | 5  | 1 | 4 | 220147.8 | 2166607  | 127527.2 | 2378484  | 1209966  | 2217827  | 2205587  | 2243699  | 1939829  |
| 9.447733 | 6  | 2 | 4 | 5838847  | 12563723 | 5747564  | 14934454 | 12623966 | 19507751 | 11012678 | 6435557  | 8257557  |
| 8.874167 | 9  | 5 | 4 | 285508.4 | 856788.1 | 287445.9 | 737361   | 636843.9 | 612373.5 | 1280899  | 1016146  | 623945.4 |
| 9.856867 | 5  | 2 | 3 | 783312.8 | 1304408  | 670146.3 | 1531959  | 1160992  | 1367567  | 2272458  | 1404800  | 1058710  |
| 9.960467 | 5  | 3 | 2 | 509731   | 832575.7 | 657616.8 | 658833.5 | 794705.9 | 1193293  | 1715856  | 771298.9 | 0        |
| 9.994767 | 8  | 5 | 3 | 327515.9 | 806685.2 | 232243.9 | 721893.2 | 441050.9 | 802626.5 | 843799.7 | 651130.5 | 565730.4 |
| 9.912633 | 10 | 5 | 5 | 19650800 | 2.08E+08 | 18886403 | 2.01E+08 | 36361497 | 2.14E+08 | 2.01E+08 | 1.89E+08 | 1.98E+08 |
| 9.842    | 10 | 5 | 5 | 1760825  | 5524802  | 1259183  | 5284314  | 640999.7 | 6351658  | 7057553  | 4504709  | 4026972  |
| 10.95055 | 10 | 5 | 5 | 811051.6 | 3393162  | 900805.6 | 3190788  | 797577.8 | 4308573  | 4302731  | 2671293  | 2366744  |
| 40.17967 | 6  | 3 | 3 | 418098.1 | 4494070  | 786872.6 | 4667291  | 663603.5 | 4170957  | 5737747  | 4414237  | 3591132  |
| 9.992233 | 6  | 3 | 3 | 2063497  | 2023982  | 2023827  | 1592195  | 1572506  | 723711.3 | 417329.4 | 720643.6 | 5009346  |
| 9.999217 | 5  | 3 | 2 | 32717274 | 24673362 | 33395364 | 17569342 | 25751830 | 1661191  | 2403247  | 74745135 | 867976   |
| 9.848417 | 10 | 5 | 5 | 8056316  | 33437968 | 3996530  | 35245772 | 9778092  | 36913825 | 34008025 | 36849918 | 32161705 |
| 9.494433 | 7  | 3 | 3 | 1807329  | 3560592  | 2433555  | 4082346  | 1919283  | 1313752  | 1771794  | 2336585  | 6425500  |
| 9.933967 | 4  | 3 | 1 | 1164841  | 1266676  | 790811.9 | 1047373  | 1034591  | 2186664  | 0        | 1378513  | 1311291  |
| 10.95602 | 10 | 5 | 5 | 511523.9 | 1927753  | 443443.2 | 2103610  | 932112.4 | 2185458  | 2550613  | 1472160  | 1584242  |
| 38.856   | 9  | 4 | 2 | 326558.3 | 4686340  | 1960985  | 4308403  | 1053140  | 4645311  | 3376705  | 3387436  | 3953485  |
| 9.445217 | 14 | 5 | 5 | 5971001  | 27683360 | 9185098  | 31120059 | 18004937 | 26996063 | 38699540 | 35147565 | 19687981 |
| 9.872883 | 6  | 3 | 2 | 405273.6 | 1822924  | 635198.3 | 2009014  | 902875.7 | 2356308  | 1285166  | 1326416  | 2651407  |
| 9.328967 | 6  | 4 | 2 | 1197336  | 5758269  | 1264696  | 6441198  | 3770826  | 6141847  | 4373660  | 6083328  | 4682143  |
| 9.858833 | 7  | 3 | 4 | 1823565  | 5345097  | 3008786  | 4758445  | 1714303  | 10163635 | 5688124  | 4412361  | 4468364  |
| 10.07098 | 8  | 4 | 4 | 318829.9 | 890456.5 | 189291.9 | 844223   | 200054.7 | 636284.3 | 969397.6 | 1152552  | 850468.4 |
| 19.9125  | 7  | 4 | 3 | 122024.9 | 564398.1 | 473746.3 | 678107   | 484235.9 | 324780   | 448864   | 206567   | 449316.8 |
| 9.3735   | 6  | 3 | 3 | 417758.7 | 934155.3 | 455021.6 | 793163.3 | 700658.9 | 1475258  | 1315959  | 889529.1 | 526104.5 |
| 16.68033 | 7  | 5 | 2 | 56676.52 | 244539.3 | 102511.4 | 219848.9 | 105600.8 | 417453.4 | 198836.1 | 254546.4 | 192236   |
| 10.9645  | 10 | 5 | 5 | 401635.7 | 1428257  | 458767.7 | 1334750  | 311835.1 | 2081299  | 1733905  | 1018704  | 1111993  |
| 39.44567 | 7  | 2 | 3 | 373398   | 4220294  | 638928.1 | 3720890  | 2820775  | 5051594  | 3951396  | 4746397  | 3689192  |
| 10.01545 | 7  | 4 | 3 | 264670.2 | 454251.3 | 210247.7 | 501346.9 | 185847.3 | 133300.8 | 722859.3 | 461848.3 | 493917.9 |
| 11.27975 | 6  | 3 | 3 | 383399.7 | 1185036  | 656588.3 | 1346735  | 706295.8 | 2309391  | 822284.4 | 1118505  | 1040822  |
| 10.9645  | 10 | 5 | 5 | 794050.5 | 4110320  | 1346095  | 3827355  | 1010801  | 5195514  | 5077845  | 2399842  | 2902418  |
| 31.7815  | 8  | 4 | 4 | 1447948  | 7778426  | 4496447  | 6724937  | 4391374  | 4419301  | 7435145  | 2470350  | 11691840 |
| 9.770733 | 5  | 3 | 2 | 2519673  | 3516724  | 1685315  | 4056882  | 2720557  | 5463521  | 2301626  | 2958197  | 1731946  |
| 43.91967 | 8  | 5 | 2 | 360746.2 | 4585319  | 1030484  | 4821114  | 957599.9 | 4057997  | 3246688  | 4570773  | 5977915  |

|          |    |   |   |          |          |          |          |          |          |          |          |          |
|----------|----|---|---|----------|----------|----------|----------|----------|----------|----------|----------|----------|
| 9.49445  | 13 | 5 | 5 | 1142676  | 10668283 | 2703243  | 9415384  | 6829634  | 9594247  | 12440964 | 14474501 | 8803102  |
| 8.8696   | 8  | 5 | 3 | 158293.4 | 492981.4 | 141163.6 | 569421.5 | 423700.4 | 642676.7 | 533483.2 | 568724.2 | 445336   |
| 9.840617 | 7  | 4 | 3 | 688515.4 | 2106970  | 997739.4 | 1881947  | 901733.3 | 1436405  | 1585077  | 3061102  | 3303431  |
| 9.365833 | 6  | 4 | 2 | 584228.9 | 4167757  | 2076396  | 3670828  | 2125419  | 6688476  | 2395621  | 6152986  | 2609537  |
| 9.856867 | 10 | 5 | 5 | 1778989  | 6016542  | 2173691  | 5389891  | 3035511  | 6296437  | 6390099  | 3136949  | 5140649  |
| 31.32017 | 5  | 3 | 2 | 74328.86 | 266627.6 | 79953.88 | 248203.2 | 75801.65 | 270686.5 | 196774.2 | 200154   | 271490.4 |
| 10.9645  | 10 | 5 | 5 | 11518954 | 59701207 | 11187539 | 64174806 | 23879379 | 69794040 | 72649817 | 50324711 | 47877329 |
| 22.525   | 9  | 5 | 4 | 178722   | 540119.1 | 264528   | 656201.9 | 629043.6 | 308277.9 | 457478.3 | 352080.7 | 961230.2 |
| 10.02372 | 8  | 5 | 3 | 430910.2 | 760069.9 | 209970.8 | 867570   | 593316.4 | 661794.6 | 945878.9 | 862601.5 | 892625.5 |
| 16.92833 | 3  | 0 | 3 | 124258.4 | 818524.6 | 39591.34 | 784129.5 | 195687.5 | 853731   | 849053.7 | 768366.8 | 783705.8 |
| 41.17217 | 9  | 4 | 2 | 343122.3 | 4236278  | 979438.4 | 4416943  | 411328.8 | 3543016  | 4492283  | 3223087  | 5740152  |
| 36.079   | 9  | 5 | 4 | 193089.3 | 720514.1 | 530174.3 | 612830.3 | 360723.3 | 1480775  | 447181.8 | 151911.1 | 492104.3 |
| 9.541433 | 10 | 5 | 4 | 540327.4 | 1595107  | 512818.9 | 1399977  | 1032426  | 2051331  | 2084863  | 1110581  | 1001960  |
| 10.55887 | 5  | 3 | 2 | 43270.66 | 121104.4 | 33936.34 | 113050.2 | 34235.52 | 133900.5 | 127104.4 | 77781.52 | 99981.37 |
| 9.983433 | 8  | 4 | 4 | 2030712  | 4110706  | 1085124  | 4659768  | 3030089  | 4762361  | 2641648  | 3814089  | 3825490  |
| 9.41815  | 9  | 3 | 4 | 2181730  | 17027538 | 10832560 | 14746995 | 8265721  | 1561310  | 11187097 | 19346897 | 28804178 |
| 9.976317 | 14 | 5 | 5 | 3535261  | 13635896 | 2454805  | 14320064 | 3267763  | 17302263 | 14863461 | 12865863 | 11402336 |
| 9.498117 | 7  | 2 | 4 | 1058496  | 4758771  | 2454337  | 3974714  | 3966574  | 6834669  | 5628130  | 7024006  | 1750999  |
| 30.3085  | 3  | 3 | 0 | 72996.23 | 216970.2 | 82739.7  | 236824.6 | 85602.46 | 337426.8 | 234001.6 | 190050.3 | 215287.7 |
| 18.51133 | 10 | 5 | 5 | 1136057  | 4281942  | 1266411  | 5114311  | 4693910  | 4048706  | 3599783  | 3577146  | 6521409  |
| 9.43325  | 6  | 3 | 2 | 897658.8 | 3931872  | 2701829  | 3350332  | 2197769  | 6774263  | 2490494  | 534198.6 | 6589306  |
| 44.95467 | 6  | 3 | 1 | 624020.5 | 3108871  | 1792403  | 2750248  | 1166590  | 4051392  | 5235517  | 2189768  | 3497347  |
| 10.9645  | 10 | 5 | 5 | 546811.9 | 2532667  | 460048.8 | 2380779  | 777947.4 | 2759492  | 3084327  | 2224787  | 1919689  |
| 9.8445   | 9  | 4 | 5 | 1378869  | 3792501  | 1509808  | 3505370  | 787627.1 | 4545261  | 4008411  | 5711423  | 1777101  |
| 20.548   | 9  | 4 | 5 | 118031.9 | 500916.3 | 126617.9 | 473091.5 | 108612.9 | 310369.2 | 564799.3 | 618799.7 | 435292.1 |
| 9.00395  | 6  | 2 | 4 | 198298.7 | 743882   | 357645.8 | 678880.3 | 135377.9 | 1047742  | 151169.7 | 797613.7 | 998328.2 |
| 9.929783 | 10 | 5 | 5 | 1719688  | 2349621  | 473005.8 | 2567083  | 1190481  | 3088278  | 2409790  | 2212819  | 2250828  |
| 9.392767 | 9  | 5 | 4 | 808500.3 | 2002999  | 370288.8 | 1854802  | 794659.3 | 2568476  | 2158730  | 1625488  | 1793332  |
| 9.431017 | 6  | 4 | 2 | 561062   | 3257305  | 1608553  | 3817197  | 2912962  | 4668282  | 3593312  | 1930201  | 1258978  |
| 31.1325  | 7  | 4 | 3 | 73293.73 | 296670.7 | 93620.31 | 321510.3 | 115864.1 | 329822.4 | 328720.4 | 144204.9 | 286083.6 |
| 9.388617 | 6  | 3 | 3 | 863722.8 | 1115751  | 822945.5 | 897825.7 | 1015625  | 1415742  | 1657489  | 0        | 530600.1 |
| 33.38367 | 10 | 5 | 5 | 365489.3 | 2272335  | 888723.2 | 2081495  | 721828.3 | 3564089  | 2119308  | 1065833  | 2374511  |
| 9.960467 | 9  | 5 | 4 | 1386985  | 2224944  | 546093.5 | 2544484  | 1793234  | 2551708  | 2359884  | 2885917  | 1643547  |
| 9.994767 | 9  | 5 | 4 | 622627.7 | 1157072  | 626099   | 1322566  | 771228.5 | 1549578  | 1987959  | 1122128  | 473019.2 |
| 10.9645  | 9  | 4 | 5 | 294346.7 | 864083.1 | 399107   | 979172.8 | 562133   | 1466601  | 915847.9 | 756464.5 | 355766   |

|          |    |   |   |          |          |          |          |          |          |          |          |          |
|----------|----|---|---|----------|----------|----------|----------|----------|----------|----------|----------|----------|
| 9.864767 | 10 | 5 | 5 | 17854302 | 1.12E+08 | 8159039  | 1.1E+08  | 12631940 | 1.11E+08 | 1.18E+08 | 1.07E+08 | 1.03E+08 |
| 9.848417 | 5  | 3 | 2 | 1542709  | 2141302  | 2258441  | 1677223  | 1624459  | 798027.4 | 6164805  | 1188349  | 1346226  |
| 9.992233 | 5  | 2 | 3 | 818234.3 | 947139.3 | 112724.1 | 1072326  | 720582.2 | 1056780  | 952907.7 | 1058088  | 854502   |
| 9.932033 | 9  | 5 | 4 | 714954.7 | 2219169  | 707732   | 2040563  | 808220.8 | 2808879  | 2761943  | 1351563  | 1551306  |
| 11.70247 | 6  | 4 | 2 | 190331.3 | 1078206  | 382870   | 998948.5 | 282345.9 | 1151507  | 1305537  | 782005.5 | 1545864  |
| 26.82483 | 8  | 4 | 4 | 1219202  | 9464752  | 6777438  | 8050686  | 5122924  | 3381497  | 12040471 | 1370392  | 13358650 |
| 24.99983 | 4  | 3 | 1 | 6683621  | 54793549 | 12481734 | 50908382 | 19631958 | 54731097 | 74738976 | 53022837 | 40343519 |
| 9.419733 | 9  | 5 | 3 | 467260.9 | 2262222  | 1629728  | 1920213  | 1253879  | 5023033  | 1649112  | 992344.8 | 1262864  |
| 9.8322   | 4  | 3 | 1 | 862538.4 | 2793517  | 1145190  | 2555910  | 852981   | 2913604  | 4412931  | 3246503  | 1686783  |
| 29.53933 | 10 | 5 | 5 | 5119673  | 36979936 | 8679146  | 34255546 | 13825953 | 38552547 | 40994996 | 24744119 | 32857454 |
| 17.336   | 6  | 3 | 3 | 60662.42 | 219583.1 | 104770.2 | 240365.5 | 67522.77 | 338306.9 | 239240.7 | 166070.6 | 284294.5 |
| 10.9645  | 10 | 5 | 5 | 2444932  | 9630992  | 2753319  | 9089356  | 1719638  | 12674182 | 7806050  | 5837405  | 10808784 |
| 18.80533 | 5  | 3 | 2 | 44831.16 | 120090.7 | 45087.26 | 109635.9 | 44179.5  | 83046.24 | 95419.2  | 165572.2 | 83766.16 |
| 9.840617 | 6  | 3 | 3 | 743900.8 | 2261997  | 1016155  | 2484000  | 872788   | 3704002  | 1334975  | 1638706  | 1684812  |
| 9.986767 | 13 | 5 | 5 | 831777.1 | 3899460  | 652632.7 | 4088760  | 933215.9 | 5023968  | 3872351  | 3517515  | 3406373  |
| 9.311883 | 9  | 5 | 4 | 2935306  | 18992879 | 4341612  | 20947237 | 10751399 | 20150762 | 12448529 | 17022523 | 23049077 |
| 31.78217 | 9  | 5 | 4 | 577251.3 | 3169338  | 1659312  | 2762508  | 1813320  | 1806772  | 3168136  | 1242777  | 4940819  |
| 10.04747 | 7  | 4 | 3 | 480089.5 | 902815   | 426473.9 | 826693.6 | 143414.9 | 1637759  | 790038   | 521265.7 | 774439.5 |
| 9.22495  | 4  | 3 | 1 | 483840   | 2387175  | 1367291  | 2717179  | 1453342  | 3674001  | 767331.7 | 2062203  | 3915346  |
| 9.983433 | 10 | 5 | 5 | 674329.3 | 2081456  | 560217   | 1956167  | 509965.5 | 2711625  | 2607810  | 1941182  | 1423077  |
| 10.9645  | 10 | 5 | 5 | 1510857  | 8818194  | 1158314  | 9476815  | 3713434  | 8881814  | 10107545 | 7739361  | 7563351  |
| 9.976317 | 11 | 5 | 5 | 1480642  | 6289642  | 1234538  | 5944120  | 1679004  | 7041756  | 7733712  | 6377524  | 4503745  |
| 9.508883 | 9  | 3 | 3 | 4537572  | 25237348 | 23223581 | 20611665 | 15387942 | 52317236 | 11096196 | 606352.6 | 47651609 |
| 9.9677   | 10 | 5 | 5 | 2198278  | 4492380  | 436988.2 | 4301386  | 1049140  | 5024310  | 4477995  | 4750299  | 4342853  |
| 10.95602 | 5  | 3 | 2 | 374822.2 | 876774.2 | 300075.2 | 949740.2 | 324624.8 | 1146275  | 1149657  | 495599.2 | 961694.7 |
| 9.946467 | 4  | 1 | 3 | 4066535  | 11109966 | 3356324  | 10040140 | 5491328  | 11932715 | 15874179 | 11930794 | 8396657  |
| 9.986767 | 7  | 3 | 3 | 2426740  | 3920259  | 3936121  | 3040322  | 3597236  | 9663314  | 688363.1 | 6348979  | 978890.3 |
| 9.859983 | 7  | 3 | 4 | 1335964  | 2352383  | 897582   | 2160370  | 738688.7 | 2657493  | 1336625  | 1853384  | 2209834  |
| 9.3735   | 4  | 3 | 1 | 674186.8 | 985584.2 | 949610.9 | 753350.3 | 1039126  | 1934814  | 2017138  | 191912.4 | 784057.3 |
| 9.856867 | 7  | 4 | 3 | 1023874  | 1578488  | 560133.2 | 1881779  | 1708189  | 2193366  | 2066927  | 1563038  | 1186846  |
| 9.445217 | 13 | 5 | 5 | 1197876  | 9280926  | 2045929  | 9957966  | 3519373  | 7323666  | 10837337 | 11966895 | 7561864  |
| 10.95602 | 10 | 5 | 5 | 564428.9 | 1995400  | 581997.6 | 2149034  | 725842   | 2404412  | 2793715  | 1774411  | 1415566  |
| 9.858833 | 10 | 5 | 5 | 6522375  | 20168613 | 4148705  | 19242971 | 3781746  | 15429477 | 22106146 | 16838292 | 20710464 |
| 10.31835 | 7  | 4 | 3 | 413393.9 | 1706557  | 575485.3 | 1517093  | 983680.8 | 1843465  | 2514855  | 1843121  | 1322007  |
| 9.5812   | 9  | 4 | 3 | 7425597  | 20492617 | 32511566 | 28462925 | 35793026 | 8617642  | 3810562  | 7375483  | 4125703  |

|          |    |   |   |          |          |          |          |          |          |          |          |          |
|----------|----|---|---|----------|----------|----------|----------|----------|----------|----------|----------|----------|
| 36.3665  | 8  | 4 | 4 | 140945.7 | 698987.9 | 457094.6 | 803510.7 | 440008   | 901842.5 | 247014.5 | 217167.4 | 1277794  |
| 43.0855  | 5  | 2 | 3 | 396023   | 5559510  | 376520.4 | 6072729  | 2991166  | 5739181  | 4941524  | 5926371  | 5506516  |
| 39.70483 | 7  | 4 | 2 | 408273.5 | 6872069  | 1932481  | 6359339  | 2433892  | 8612216  | 7718155  | 4100317  | 8286598  |
| 18.241   | 5  | 4 | 1 | 164578.5 | 520040.8 | 257913.6 | 613015.3 | 495140.5 | 577525.4 | 73890.03 | 605860.8 | 743920.1 |
| 9.872933 | 7  | 3 | 4 | 615450.7 | 2366370  | 632645.7 | 2601025  | 1257585  | 2204534  | 1751805  | 3402851  | 2025418  |
| 10.95835 | 8  | 3 | 5 | 183478.3 | 486322.8 | 206807.7 | 441255.2 | 179139.9 | 585026.3 | 790652.9 | 450248.4 | 309462.5 |
| 10.9645  | 11 | 5 | 5 | 1998517  | 9141549  | 2354220  | 8703479  | 1166917  | 11407382 | 5202964  | 9082374  | 10106663 |
| 9.460217 | 9  | 5 | 3 | 1255002  | 4324311  | 2269899  | 5116138  | 4186505  | 3576458  | 1316497  | 3539849  | 6796579  |
| 9.842    | 9  | 5 | 4 | 1602389  | 7452030  | 1373007  | 7057463  | 1955105  | 7098354  | 7027698  | 6145939  | 7198346  |
| 10.9645  | 10 | 5 | 5 | 417964.7 | 1931220  | 475409.4 | 1828637  | 402854   | 2393501  | 2390861  | 1478230  | 1410454  |
| 9.983433 | 10 | 5 | 5 | 5405821  | 11484856 | 6242284  | 13042149 | 7117579  | 15041647 | 19788345 | 11775965 | 4989108  |
| 9.45945  | 8  | 5 | 2 | 460520.1 | 2847088  | 1071663  | 3105547  | 1150167  | 3262737  | 4140325  | 3236711  | 1353453  |
| 9.872883 | 10 | 5 | 5 | 1695420  | 8682407  | 3687083  | 7883130  | 3165878  | 3738300  | 7662395  | 7361845  | 11769533 |
| 10.2456  | 4  | 0 | 4 | 167622.6 | 444060.4 | 128474.4 | 410897.3 | 155399.1 | 500028.1 | 628580.2 | 439002   | 302854   |
| 10.96997 | 5  | 3 | 2 | 516242.6 | 1342226  | 1308846  | 1585708  | 654873.7 | 427547.5 | 3199668  | 422515   | 403485   |
| 9.848417 | 8  | 5 | 3 | 1297724  | 2193541  | 762709.7 | 2365229  | 714518.1 | 1594283  | 2585299  | 2028576  | 1453019  |
| 11.53673 | 9  | 5 | 4 | 184991.2 | 768990.7 | 255082.8 | 823294.1 | 209930.5 | 1102653  | 796557.3 | 481863.5 | 554470.3 |
| 10.9645  | 7  | 3 | 4 | 454677.8 | 821367.6 | 546034.2 | 718835.4 | 288652.3 | 614488.5 | 1405046  | 416514.1 | 267577   |
| 23.755   | 10 | 5 | 5 | 823970.8 | 5160360  | 2167772  | 4614675  | 2516751  | 2270816  | 5091447  | 5001168  | 5052223  |
| 11.60778 | 5  | 3 | 2 | 46839.16 | 106452.9 | 48774.48 | 95478.38 | 45756.39 | 28039.67 | 148600   | 93554.46 | 120647.1 |
| 9.673333 | 11 | 5 | 5 | 792825.3 | 3885976  | 1011867  | 3620331  | 1260918  | 3923485  | 4289082  | 3206322  | 2693800  |
| 24.23    | 10 | 5 | 5 | 1147703  | 10079147 | 4434862  | 8997761  | 4875395  | 7041741  | 12962774 | 4327866  | 10727465 |
| 9.976317 | 5  | 3 | 2 | 1688589  | 1725978  | 1329950  | 2041838  | 1392650  | 1005439  | 1238872  | 858807.8 | 4069946  |
| 10.57323 | 9  | 4 | 5 | 64702.04 | 204275.1 | 96907.48 | 184717.9 | 68733.27 | 318850.9 | 225230.1 | 157043.4 | 65604.94 |
| 9.93625  | 4  | 1 | 3 | 4431541  | 9861001  | 7834391  | 8211514  | 6293790  | 20595685 | 2808794  | 1517985  | 12388053 |
| 9.864767 | 10 | 5 | 5 | 10802131 | 76669229 | 4982830  | 78491677 | 9793262  | 79569256 | 72966348 | 70096405 | 82199698 |
| 9.992233 | 9  | 5 | 4 | 1152117  | 4334735  | 1099520  | 4105813  | 858694.6 | 3507216  | 4648327  | 3648544  | 3738624  |
| 9.929783 | 10 | 5 | 4 | 6144630  | 19146949 | 5067072  | 18072138 | 4163886  | 25434225 | 23709722 | 16956418 | 14643862 |
| 18.761   | 6  | 3 | 3 | 263570.6 | 393632.4 | 541497.2 | 506289.1 | 423011.7 | 70242.34 | 276381.3 | 0        | 1335934  |
| 9.848417 | 7  | 4 | 3 | 1625826  | 4883950  | 1735696  | 4365912  | 2627759  | 3536226  | 2863815  | 6817089  | 4768538  |
| 10.008   | 9  | 5 | 4 | 775187.1 | 1794083  | 435112.6 | 1664630  | 656108.7 | 1736792  | 2175946  | 2204881  | 1135665  |
| 17.45233 | 6  | 3 | 3 | 83232.23 | 365348   | 177140   | 412633.6 | 227785.1 | 473852.4 | 605970.7 | 151623.6 | 319971   |
| 9.976317 | 14 | 5 | 5 | 4864277  | 12303469 | 4619831  | 13606930 | 6462490  | 15678788 | 17597589 | 13138821 | 7754164  |
| 9.487467 | 9  | 4 | 4 | 1689508  | 3259814  | 1315956  | 2798984  | 2461985  | 3937705  | 2780947  | 4191371  | 4232575  |
| 9.88815  | 4  | 3 | 1 | 1432037  | 2980679  | 1677906  | 3473753  | 2492922  | 4211047  | 358341.2 | 2406448  | 4515276  |

|          |    |   |   |          |          |          |          |          |          |          |          |          |
|----------|----|---|---|----------|----------|----------|----------|----------|----------|----------|----------|----------|
| 9.872917 | 7  | 4 | 3 | 1027327  | 3283316  | 1452410  | 3565748  | 919094.1 | 3578330  | 1800473  | 4444580  | 4846315  |
| 8.967683 | 6  | 3 | 3 | 125843.3 | 480668.8 | 250841.6 | 423100.3 | 247823   | 583442.1 | 874169.9 | 343114.3 | 340163.9 |
| 9.659033 | 5  | 1 | 4 | 188707   | 294425.6 | 71206.4  | 332028.8 | 213646.7 | 378327.5 | 362522.7 | 219840.3 | 250961.5 |
| 40.69767 | 13 | 4 | 5 | 327789.9 | 4316368  | 1574895  | 4688889  | 1651379  | 2141935  | 3608438  | 4486505  | 4970764  |
| 19.95717 | 5  | 2 | 3 | 35269.89 | 110576.9 | 78473.49 | 91985.29 | 82545.39 | 0        | 151619.7 | 144319.1 | 61609.09 |
| 9.586183 | 5  | 1 | 3 | 435752.7 | 928275.9 | 321784.8 | 1211074  | 1649899  | 1111239  | 537486.6 | 1371632  | 853458   |
| 9.2033   | 5  | 3 | 2 | 644963   | 1434548  | 697134.3 | 1223079  | 1082818  | 1624741  | 611826   | 790502.5 | 2047073  |
| 10.008   | 8  | 5 | 3 | 290142.4 | 714225.3 | 263930.1 | 774667.4 | 259994.4 | 665367.3 | 1163336  | 654654   | 463361.8 |
| 9.999217 | 10 | 5 | 5 | 492326.1 | 1138511  | 569981.4 | 1269972  | 569744.8 | 1516162  | 1818620  | 1247714  | 582608.8 |
| 9.952017 | 10 | 5 | 5 | 2854688  | 8557641  | 1944774  | 7998618  | 2804344  | 9064490  | 8577021  | 5243794  | 9904950  |
| 9.270733 | 4  | 1 | 3 | 2711599  | 7853559  | 624971   | 8578995  | 4261940  | 8691029  | 8017271  | 6942453  | 7804887  |
| 13.44873 | 10 | 5 | 5 | 270701.4 | 3307427  | 439712.6 | 3122154  | 1027704  | 3944141  | 3355030  | 3054168  | 2768887  |
| 3.559017 | 6  | 2 | 3 | 358224.9 | 4026457  | 2641575  | 4649731  | 2765550  | 0        | 6296055  | 6515915  | 3457059  |
| 10.9645  | 9  | 5 | 4 | 368121.4 | 922520.6 | 169550.4 | 849973.6 | 403507.7 | 1133679  | 697649.8 | 815225.7 | 960653.4 |
| 9.986767 | 9  | 4 | 5 | 1298707  | 3018067  | 1295535  | 2726188  | 1237641  | 4979772  | 1522660  | 3430678  | 2769163  |
| 27.51183 | 8  | 4 | 4 | 131524.5 | 474924.3 | 271907.9 | 402925.1 | 347484.4 | 138614.1 | 644979.6 | 444737.9 | 314778.3 |
| 17.045   | 10 | 5 | 5 | 308680.6 | 1769780  | 782075.5 | 1919522  | 469983.6 | 2786303  | 947583.1 | 1860378  | 2214023  |
| 9.853633 | 8  | 5 | 3 | 2452465  | 8020241  | 3140785  | 7416707  | 1915966  | 9903617  | 6671826  | 3586150  | 11817781 |
| 44.43733 | 8  | 5 | 2 | 332462   | 4730418  | 2873160  | 4232988  | 785450.5 | 4025558  | 9597620  | 2087480  | 4559905  |
| 11.00657 | 9  | 5 | 4 | 397751.1 | 1238794  | 183376.7 | 1356963  | 683423.9 | 1166142  | 1457831  | 1032713  | 1132625  |
| 9.23175  | 5  | 2 | 3 | 905138.5 | 3105101  | 1310828  | 3963942  | 4973948  | 3959047  | 1358850  | 3466331  | 4558697  |
| 9.445217 | 14 | 5 | 5 | 5958010  | 27797156 | 8822036  | 31102285 | 18020277 | 26943535 | 38303834 | 35056814 | 20836087 |
| 9.960467 | 6  | 3 | 3 | 586814.5 | 1092307  | 624903.8 | 929038.1 | 784144.3 | 1483293  | 1983971  | 832474.1 | 472515.4 |
| 9.329083 | 3  | 3 | 0 | 478087.8 | 1481181  | 767304   | 1622685  | 388510.7 | 930708.4 | 642436.6 | 2617512  | 1495183  |
| 9.445217 | 11 | 5 | 4 | 1172230  | 5610762  | 2385353  | 5003901  | 2869736  | 7686878  | 8040873  | 5610427  | 4451529  |
| 15.8469  | 10 | 5 | 5 | 315737.9 | 1793119  | 171764.2 | 1665307  | 745687.2 | 2037089  | 1852379  | 1709192  | 1574179  |
| 10.95055 | 10 | 5 | 5 | 301384   | 1218684  | 324998.8 | 1136608  | 386657.3 | 1363904  | 1675458  | 968750   | 857822.8 |
| 20.26667 | 10 | 5 | 5 | 62873.47 | 366064.3 | 159667.4 | 394103.4 | 55498.5  | 588428.4 | 259278.6 | 457450   | 187225.6 |
| 9.311883 | 9  | 5 | 4 | 503956.7 | 3037021  | 1824622  | 2642157  | 1607105  | 1742453  | 2075359  | 1918789  | 3350873  |
| 10.9645  | 10 | 5 | 5 | 703240.9 | 3239909  | 747782.9 | 3078383  | 656076.5 | 4059089  | 3870546  | 2539875  | 2419583  |
| 24.4     | 3  | 3 | 0 | 10197482 | 54707410 | 54259653 | 42798709 | 49380279 | 23799613 | 1.41E+08 | 75367981 | 16189253 |
| 10.25713 | 9  | 4 | 5 | 553779.9 | 1605068  | 581709.6 | 1761020  | 762494.7 | 1711004  | 2369605  | 1884563  | 933970.1 |
| 9.864767 | 10 | 5 | 5 | 7247771  | 46597115 | 4222791  | 45111797 | 8009975  | 45339007 | 40834703 | 50681916 | 50852878 |
| 9.556217 | 6  | 3 | 3 | 2979379  | 8555249  | 9282357  | 6969357  | 2013242  | 4165815  | 794999.6 | 1333550  | 14678510 |
| 25.36167 | 5  | 2 | 3 | 90081.08 | 413553.9 | 160379   | 379557.9 | 134664.8 | 413821.3 | 689163.4 | 351648.8 | 316588.2 |

|          |    |   |   |          |          |          |          |          |          |          |          |          |
|----------|----|---|---|----------|----------|----------|----------|----------|----------|----------|----------|----------|
| 24.543   | 10 | 5 | 5 | 212318.5 | 979628.9 | 553383.4 | 858482.5 | 501483.8 | 312901.7 | 967388.5 | 1014923  | 766744.7 |
| 9.872917 | 11 | 5 | 5 | 2931345  | 11221258 | 6819886  | 9946181  | 3753243  | 10772472 | 6955415  | 6568060  | 23050597 |
| 10.9645  | 10 | 5 | 5 | 574071.1 | 2776521  | 578827.5 | 2921967  | 684305.7 | 3402894  | 3338192  | 2401565  | 2086076  |
| 9.162767 | 7  | 3 | 3 | 652199.4 | 2403088  | 937813.3 | 2755399  | 1928226  | 1243554  | 3777797  | 2526615  | 2558555  |
| 9.16125  | 3  | 3 | 0 | 472820.9 | 1075841  | 276382   | 918733   | 905104.6 | 768255   | 1154597  | 1490817  | 895571.7 |
| 10.98605 | 7  | 4 | 3 | 435980.1 | 1224134  | 104470   | 1143842  | 470007   | 1246732  | 1316347  | 1293393  | 1051774  |
| 10.97857 | 10 | 5 | 5 | 707824.8 | 4074358  | 1051125  | 3792309  | 1382762  | 3073709  | 5676161  | 3514974  | 3534532  |
| 10.0926  | 6  | 4 | 2 | 429294.5 | 951539.4 | 334840.8 | 869632.8 | 378715.8 | 1061786  | 1480117  | 761717.2 | 827263.3 |
| 9.9677   | 5  | 3 | 2 | 596362.9 | 956738.7 | 588801.6 | 1111910  | 754015.9 | 1905089  | 327559   | 950883.1 | 945674.8 |
| 10.55813 | 6  | 3 | 3 | 197716.9 | 353922.5 | 42240.43 | 400522.2 | 275662.3 | 370959.4 | 418908.9 | 342321.7 | 316559.3 |
| 8.995417 | 6  | 3 | 3 | 190231   | 446134.4 | 350473.8 | 584195.3 | 763905.4 | 493249.6 | 982838.3 | 466173.8 | 239944.9 |
| 9.976317 | 9  | 4 | 5 | 2046202  | 2620706  | 914612.6 | 2435170  | 686241.1 | 2322932  | 3297879  | 2047559  | 3824731  |
| 9.1172   | 5  | 3 | 2 | 182064.3 | 364153.2 | 153696.3 | 316575.3 | 248328.4 | 317920   | 496183.5 | 513979.1 | 357503.5 |
| 10.89125 | 4  | 1 | 3 | 313012.9 | 789875.1 | 428654.7 | 695563   | 394948.2 | 1119847  | 1364936  | 477548.4 | 388154.7 |
| 9.960467 | 10 | 5 | 5 | 4312687  | 7673085  | 1481234  | 8417421  | 4254101  | 9811490  | 7813967  | 8002979  | 6947653  |
| 10.44525 | 6  | 2 | 4 | 208078.2 | 890381.3 | 209348.3 | 820209.9 | 375407.4 | 940051.5 | 992670.2 | 1113293  | 557303.8 |
| 10.95602 | 4  | 3 | 1 | 173426.4 | 301451.5 | 59171.75 | 323371.7 | 120042.4 | 388893.4 | 304276.2 | 289336.2 | 302065.5 |
| 10.88747 | 5  | 1 | 4 | 198894   | 508741.7 | 233720.5 | 454661.5 | 239341.5 | 565730.9 | 684850.7 | 213614.7 | 321564.3 |
| 9.975217 | 8  | 4 | 4 | 2182555  | 6011897  | 2239021  | 5534920  | 1917862  | 8490038  | 2551388  | 5363355  | 6522386  |
| 9.64815  | 10 | 5 | 5 | 423680.5 | 1008379  | 387638.7 | 932314.5 | 262769.8 | 989508.4 | 1444055  | 597130.9 | 657933.8 |
| 10.9645  | 9  | 5 | 4 | 214619.8 | 959769.5 | 150283.1 | 922213.9 | 176923.5 | 1029109  | 1129579  | 849326.7 | 760849.5 |
| 9.952017 | 5  | 2 | 3 | 638104.6 | 912674.1 | 378838.7 | 1074860  | 910494.1 | 632645.5 | 1327857  | 1324032  | 688037.1 |
| 8.88395  | 9  | 4 | 4 | 1144459  | 13609626 | 4678539  | 15057525 | 7568074  | 14584932 | 7433656  | 19672462 | 15558818 |
| 9.4925   | 7  | 4 | 3 | 653101.4 | 2173068  | 828262.5 | 1897505  | 1474012  | 2650114  | 2154654  | 1624254  | 1166756  |
| 9.845483 | 7  | 3 | 4 | 1643895  | 5977782  | 1795286  | 5640217  | 1037132  | 6519595  | 3016914  | 5855811  | 6705796  |
| 11.42482 | 7  | 4 | 3 | 56155.35 | 144200.9 | 64335.95 | 127895.6 | 77751.12 | 220379.3 | 194006.8 | 132895.4 | 58850.23 |
| 17.88033 | 10 | 5 | 5 | 349389.9 | 1433432  | 916846.8 | 1238293  | 787161.1 | 1324393  | 1199146  | 302179.9 | 2852165  |
| 9.106183 | 10 | 5 | 5 | 2532884  | 10206209 | 2047635  | 9744145  | 2002772  | 11098153 | 13365403 | 8501233  | 8623255  |
| 36.56933 | 10 | 5 | 5 | 2877037  | 23396792 | 7743541  | 21709602 | 7026758  | 27807791 | 19455962 | 12511541 | 32612883 |
| 9.872933 | 10 | 5 | 5 | 5365203  | 46140103 | 3190861  | 44919161 | 6747372  | 49029683 | 46565548 | 41428922 | 44713817 |
| 10.93412 | 3  | 0 | 3 | 397027.8 | 579509.1 | 285929.8 | 650278.6 | 332821.1 | 680491.3 | 993322.5 | 339244.1 | 283855.7 |
| 44.39417 | 11 | 4 | 3 | 451788.8 | 6550319  | 2342352  | 7238557  | 3546154  | 9464589  | 4305204  | 8460748  | 4413156  |
| 18.96583 | 10 | 5 | 5 | 104796.4 | 758394.4 | 167032.2 | 726633.8 | 102133.3 | 854386.3 | 879565.8 | 606066.8 | 549346.1 |
| 10.9645  | 10 | 5 | 5 | 2697820  | 11791480 | 2326507  | 12526686 | 3888154  | 13882946 | 14561405 | 10568825 | 9109342  |
| 11.03488 | 10 | 5 | 4 | 217477.9 | 627925.2 | 181458.3 | 719431.3 | 526398.3 | 855351.9 | 738118   | 484416.9 | 411687.1 |

|          |    |   |   |          |          |          |          |          |          |          |          |          |
|----------|----|---|---|----------|----------|----------|----------|----------|----------|----------|----------|----------|
| 9.992233 | 7  | 3 | 4 | 302336   | 544045.9 | 321590.4 | 613282.5 | 286014.2 | 777508   | 850967.3 | 680170.2 | 111943.7 |
| 9.976317 | 5  | 3 | 2 | 541685.9 | 810637.2 | 335972.1 | 705007.9 | 559179.2 | 748221.9 | 1368248  | 520118.8 | 833470.7 |
| 9.43325  | 5  | 4 | 1 | 526436.9 | 1267069  | 361728.7 | 1152428  | 608612.5 | 905993.5 | 1039182  | 1113178  | 1494477  |
| 9.447617 | 10 | 4 | 5 | 8450745  | 62098065 | 19870072 | 52573391 | 54583327 | 79124892 | 28705763 | 60529031 | 68716364 |
| 44.969   | 5  | 4 | 1 | 487325.9 | 6561227  | 3031034  | 7066809  | 259868.5 | 2161258  | 5557389  | 7674027  | 6983863  |
| 9.989483 | 6  | 2 | 4 | 1854925  | 7068791  | 2412342  | 6321703  | 3939991  | 10565022 | 5416838  | 5086813  | 5656546  |
| 9.976317 | 10 | 5 | 5 | 2327436  | 5520601  | 1939023  | 4913035  | 3218699  | 6810701  | 8135468  | 4861791  | 3251549  |
| 10.9645  | 8  | 4 | 4 | 611168.3 | 1822799  | 631949.3 | 1964509  | 617399.3 | 2484731  | 2269446  | 1285667  | 1033089  |
| 10.9645  | 10 | 5 | 5 | 514618   | 2277600  | 598482.4 | 2155217  | 470990.3 | 2820552  | 2833292  | 1686477  | 1604961  |
| 9.3919   | 10 | 5 | 3 | 724103.5 | 5749228  | 1269429  | 5467526  | 1214888  | 5320280  | 6774553  | 7391355  | 4564849  |
| 9.5021   | 11 | 5 | 5 | 2254175  | 16206720 | 8621435  | 14002201 | 10686972 | 21072653 | 11019426 | 8315961  | 11630968 |
| 11.63542 | 3  | 0 | 3 | 44122.33 | 87185.15 | 44290.64 | 95636.6  | 27975.85 | 103323.2 | 155563.8 | 41483.31 | 73634.45 |
| 10.008   | 10 | 5 | 5 | 673957.8 | 1793649  | 570079.5 | 1925776  | 595474.9 | 2365160  | 2441451  | 1243231  | 1575432  |
| 10.9645  | 5  | 2 | 3 | 11115044 | 24504963 | 23912484 | 19018115 | 24508099 | 2251608  | 59416431 | 27373565 | 31648598 |
| 10.31835 | 7  | 4 | 3 | 234380.2 | 651511.1 | 69886.8  | 685195.6 | 193774.1 | 631367.5 | 756733.9 | 620342.2 | 677633.5 |
| 9.888767 | 10 | 5 | 5 | 2246966  | 7451287  | 1038366  | 8003431  | 3206249  | 7945076  | 7327522  | 5938684  | 8768554  |
| 9.856867 | 6  | 3 | 3 | 1013977  | 2334965  | 836683.9 | 2100687  | 1194184  | 2240040  | 1446567  | 3201733  | 3181855  |
| 9.00395  | 3  | 0 | 3 | 368612.2 | 548798.4 | 297933.4 | 497504.2 | 97424.88 | 454008.5 | 422364.9 | 439561.6 | 351018.9 |
| 10.9645  | 11 | 5 | 5 | 592682.4 | 2645498  | 333871.5 | 2546965  | 513791.4 | 2863768  | 2101525  | 2576716  | 2743264  |
| 10.95602 | 10 | 5 | 5 | 284889   | 1472626  | 314027.2 | 1398645  | 339763   | 1452532  | 1890592  | 1161665  | 1185368  |
| 9.245983 | 7  | 4 | 3 | 524136.6 | 3228535  | 1694581  | 3723601  | 2572181  | 2412866  | 752621   | 3673285  | 5121484  |
| 9.93625  | 10 | 5 | 5 | 2854775  | 10006929 | 1430963  | 9443015  | 3167210  | 12255543 | 8516237  | 9066083  | 10170051 |
| 9.992233 | 8  | 4 | 4 | 1199313  | 2841006  | 1411807  | 3156177  | 1377929  | 4192535  | 624943.2 | 3418878  | 2328514  |
| 25.534   | 5  | 2 | 3 | 196951.6 | 2597571  | 1016441  | 2815817  | 912094.3 | 3637578  | 2329114  | 2902209  | 985457.9 |
| 11.15248 | 7  | 4 | 3 | 2446645  | 2924408  | 3738136  | 3804316  | 4044687  | 1731380  | 9567578  | 885897.4 | 791699.6 |
| 9.311417 | 8  | 5 | 3 | 468347.3 | 1043098  | 445349.8 | 922741.1 | 605834.2 | 1310853  | 1411753  | 1250495  | 315639.6 |
| 9.03715  | 8  | 3 | 5 | 537521.3 | 1092626  | 545073.6 | 992107.9 | 304335.2 | 1376614  | 1876815  | 668078.7 | 1000432  |
| 10.9645  | 10 | 5 | 5 | 23041684 | 78981392 | 23114882 | 84808398 | 28237683 | 1.04E+08 | 1.04E+08 | 66009603 | 54435524 |
| 11.24743 | 14 | 5 | 5 | 226584.7 | 1115424  | 850071.3 | 943778.5 | 658089   | 1224951  | 502864.6 | 238209.3 | 1180563  |
| 9.874317 | 10 | 5 | 5 | 6031466  | 46301803 | 10860129 | 48150028 | 3181544  | 56968197 | 42207799 | 45968068 | 30500501 |
| 9.9847   | 8  | 4 | 4 | 786398.4 | 1975830  | 993688.7 | 2150779  | 423041.1 | 3197280  | 2677223  | 1762699  | 1599928  |
| 9.928667 | 10 | 5 | 5 | 1977813  | 6474426  | 2826825  | 6967098  | 1105127  | 5293420  | 4789964  | 3908687  | 7401240  |
| 9.460217 | 10 | 4 | 5 | 729924.8 | 3609919  | 1206046  | 3345202  | 1143322  | 5609942  | 3542645  | 2653799  | 3581223  |
| 9.848417 | 10 | 5 | 5 | 7615343  | 31676937 | 3593189  | 33217935 | 8800398  | 35081818 | 32357797 | 34256485 | 30659476 |
| 26.12683 | 10 | 5 | 5 | 3392579  | 19575047 | 6393296  | 18207943 | 5725708  | 11771315 | 19622231 | 17125572 | 19960266 |



|          |    |   |   |          |          |          |          |          |          |          |          |          |
|----------|----|---|---|----------|----------|----------|----------|----------|----------|----------|----------|----------|
| 10.97857 | 9  | 4 | 5 | 1423461  | 4069526  | 1362594  | 3749241  | 1480097  | 3324714  | 2032702  | 4692360  | 5098325  |
| 9.279417 | 5  | 2 | 3 | 1506692  | 6768418  | 5638549  | 5330929  | 7041462  | 786017.7 | 9706197  | 13191305 | 9309740  |
| 9.976317 | 9  | 5 | 4 | 2702062  | 6576673  | 2021202  | 5979300  | 3139470  | 8009337  | 9285470  | 5602392  | 4290876  |
| 28.19967 | 5  | 3 | 2 | 20043580 | 47661621 | 66139652 | 61946289 | 60802576 | 1.36E+08 | 168918.6 | 127297.3 | 1.02E+08 |
| 16.67983 | 10 | 5 | 5 | 132583.1 | 666388.9 | 147637.4 | 716620.2 | 275588.5 | 911755.1 | 587256.7 | 531145.3 | 619670.9 |
| 10.43932 | 4  | 3 | 1 | 152985.4 | 383440.1 | 62953.87 | 398547.9 | 71178.7  | 370529.3 | 443734.6 | 443947.2 | 293652.5 |
| 10.008   | 8  | 5 | 3 | 1020787  | 997184.5 | 367609.4 | 1191376  | 1136860  | 1075915  | 1544856  | 1041485  | 600506.7 |
| 9.77355  | 4  | 1 | 3 | 1270710  | 2139649  | 248065.2 | 2269212  | 757900.3 | 2269598  | 2321000  | 2262832  | 2130744  |
| 10.99268 | 6  | 3 | 2 | 188626.1 | 804006.3 | 296571.7 | 733632.4 | 329044.3 | 465336.9 | 517049.1 | 932506.1 | 1138296  |
| 40.568   | 4  | 3 | 1 | 321756.7 | 3329022  | 1522700  | 3629039  | 1108717  | 3296093  | 3444048  | 3504926  | 1055736  |
| 29.9215  | 10 | 5 | 5 | 4054759  | 23929786 | 6272479  | 25979482 | 11146800 | 17403958 | 25549343 | 23585646 | 19545542 |
| 9.845483 | 9  | 5 | 4 | 1421238  | 7125051  | 1597570  | 6721560  | 1972476  | 6798950  | 6665284  | 5663174  | 6632147  |
| 29.86267 | 10 | 5 | 5 | 44439.49 | 213332.8 | 65720.07 | 228493.7 | 69307.49 | 217972.7 | 227126.4 | 122169.9 | 194428.8 |
| 10.97242 | 10 | 5 | 5 | 386811   | 1788451  | 645453.1 | 1639355  | 682875.8 | 2840804  | 1379469  | 1488677  | 1268204  |
| 9.960467 | 8  | 4 | 4 | 528630.9 | 1480480  | 615262.3 | 1352939  | 516264.6 | 1862978  | 2183270  | 1341623  | 556251.8 |
| 9.857683 | 10 | 5 | 5 | 1827539  | 5866284  | 1019707  | 6219215  | 1949392  | 6224259  | 4516192  | 5108303  | 6515099  |
| 9.68585  | 5  | 2 | 3 | 360729.2 | 805973.6 | 185067.2 | 884525.3 | 450231.2 | 539825.9 | 1038615  | 845376.9 | 875388.9 |
| 9.189117 | 10 | 5 | 4 | 1447888  | 7749375  | 3067471  | 8435596  | 3057443  | 11591755 | 8763442  | 8943435  | 3695724  |
| 10.0926  | 5  | 2 | 3 | 338692.3 | 532518.9 | 282229.9 | 472182.3 | 255722.1 | 676969.2 | 326999   | 560242.5 | 905692.8 |
| 9.94455  | 12 | 5 | 3 | 1239703  | 2451870  | 148690.8 | 2316541  | 815383.5 | 2245335  | 2509748  | 2348917  | 2587041  |
| 43.45933 | 7  | 1 | 4 | 256450.4 | 2445937  | 594294.2 | 2582640  | 627312.8 | 2269223  | 3504715  | 2178375  | 2146026  |
| 10.02372 | 6  | 3 | 3 | 957877.8 | 1383129  | 1194991  | 1715025  | 1714841  | 396893.2 | 467694.3 | 677028.5 | 2722514  |
| 9.946467 | 7  | 3 | 3 | 7070976  | 16160239 | 18549387 | 12401841 | 14811052 | 2044803  | 36930190 | 2982619  | 2827251  |
| 42.32317 | 6  | 2 | 3 | 370533.7 | 4393059  | 543494.5 | 4270877  | 549681.6 | 3475547  | 4425536  | 4473285  | 4860144  |
| 37.90633 | 4  | 0 | 3 | 284728   | 4313424  | 137318   | 4667827  | 2162542  | 4153609  | 4357966  | 4225030  | 4513610  |
| 9.419733 | 13 | 5 | 5 | 1346234  | 9489557  | 2102386  | 10116791 | 3336413  | 8622348  | 11466555 | 12013859 | 7821042  |
| 9.859983 | 15 | 5 | 5 | 772190.3 | 3694421  | 1668954  | 3363379  | 1258970  | 755534   | 4217748  | 4803138  | 4619439  |
| 9.857683 | 6  | 4 | 2 | 914629.8 | 3633475  | 1508698  | 3273664  | 1706717  | 3138158  | 3081612  | 6016578  | 1969706  |
| 10.77167 | 8  | 4 | 4 | 140970.9 | 340622.4 | 109469.6 | 309870.5 | 160051.8 | 479482.9 | 282409.3 | 235898.4 | 268975.8 |
| 9.999217 | 10 | 5 | 5 | 2255366  | 3009956  | 1683991  | 3473327  | 2391235  | 3759657  | 5397284  | 3052159  | 1305477  |
| 9.952017 | 9  | 5 | 4 | 3262734  | 7721896  | 1953327  | 6921354  | 4590619  | 5622099  | 6554393  | 7363825  | 8353508  |
| 42.82667 | 4  | 3 | 1 | 376415.3 | 6553276  | 4476660  | 5821592  | 134939.6 | 13216450 | 5957841  | 5778528  | 7131790  |
| 9.960467 | 8  | 4 | 4 | 385126.8 | 952191   | 176645.5 | 991632.5 | 176940.9 | 1112382  | 823447.2 | 1169339  | 780325.5 |
| 10.95835 | 10 | 5 | 5 | 412546.8 | 1351948  | 466291.5 | 1443254  | 339825   | 1776891  | 1784250  | 1175477  | 665597.8 |
| 9.541433 | 4  | 4 | 0 | 329755.5 | 1331023  | 695231.3 | 1196665  | 486762.1 | 2457809  | 985054.3 | 1481875  | 1074093  |

|          |    |   |   |          |          |          |          |          |          |          |          |          |
|----------|----|---|---|----------|----------|----------|----------|----------|----------|----------|----------|----------|
| 10.90802 | 7  | 3 | 4 | 197899   | 455540.7 | 223732.6 | 405598.9 | 224254   | 682502.6 | 261683.1 | 186424.2 | 499864.9 |
| 9.3141   | 5  | 2 | 3 | 466375.8 | 1691738  | 238751.7 | 1945611  | 1541746  | 1961587  | 1902647  | 1647123  | 1556149  |
| 10.008   | 6  | 4 | 2 | 771362.1 | 911106.3 | 938845.5 | 742884.1 | 480113.5 | 522718.2 | 766291.9 | 2562559  | 378146.2 |
| 8.801817 | 10 | 5 | 5 | 2039474  | 15961952 | 3673507  | 14942894 | 5286911  | 16114895 | 21607335 | 12692104 | 12673317 |
| 10.9645  | 10 | 5 | 5 | 443826.9 | 1919374  | 474715.2 | 1823454  | 379651.5 | 2379241  | 2424828  | 1505389  | 1408029  |
| 9.979667 | 10 | 5 | 5 | 1214799  | 4289240  | 1302413  | 4014278  | 1160852  | 4990859  | 5338245  | 4380847  | 2047681  |
| 9.41815  | 5  | 2 | 3 | 833309.3 | 3890457  | 2304293  | 4451632  | 2713687  | 6578136  | 1611984  | 1352541  | 4712631  |
| 11.52297 | 10 | 5 | 5 | 72011272 | 4.55E+08 | 58241904 | 4.72E+08 | 95823242 | 5.42E+08 | 4.86E+08 | 4.18E+08 | 4.02E+08 |
| 12.64643 | 10 | 5 | 5 | 430095.8 | 2492715  | 610539.4 | 2318689  | 914380.4 | 3239825  | 3068368  | 2001481  | 1991942  |
| 44.60983 | 7  | 3 | 2 | 325055.8 | 4000005  | 764680.7 | 4190362  | 934593   | 4307335  | 3592275  | 2864310  | 4728694  |
| 8.952283 | 10 | 4 | 5 | 5013090  | 37756699 | 11880204 | 40290286 | 10874342 | 36040366 | 58404726 | 29612848 | 30043395 |
| 10.02372 | 8  | 5 | 3 | 473236.7 | 828652   | 173418.5 | 940243.3 | 668863.9 | 705152.8 | 918817.6 | 863083.8 | 1046881  |
| 30.18067 | 10 | 5 | 5 | 6153622  | 45780201 | 8862105  | 42600558 | 17891594 | 34952537 | 46555462 | 49412727 | 39976107 |
| 11.74397 | 10 | 5 | 5 | 167530.8 | 675508.5 | 276277.2 | 732192.5 | 231043.8 | 1130073  | 724413.6 | 570505.7 | 530508.5 |
| 9.999217 | 12 | 5 | 5 | 1113217  | 2468348  | 986658.1 | 2710575  | 1182032  | 2919298  | 3779850  | 2666594  | 1420489  |
| 12.6321  | 10 | 5 | 5 | 6781554  | 59821233 | 7123601  | 57493202 | 12827505 | 66737491 | 67946795 | 54799013 | 52193753 |
| 40.942   | 8  | 3 | 3 | 300503   | 3711375  | 1866314  | 4073257  | 1338741  | 3220738  | 6662744  | 3560619  | 3626545  |
| 39.6185  | 5  | 2 | 3 | 403194.6 | 6940367  | 912358.3 | 7189250  | 1288990  | 6575393  | 6810990  | 8526562  | 6210640  |
| 9.392767 | 12 | 4 | 5 | 2550372  | 15709938 | 3528350  | 14302321 | 8087676  | 18654633 | 10068540 | 18662889 | 16105106 |
| 9.983433 | 7  | 3 | 4 | 384948.4 | 827790.4 | 253476.7 | 772602.5 | 243630.1 | 1209777  | 708618.1 | 798774.5 | 896246.9 |
| 9.859983 | 10 | 5 | 5 | 5847057  | 28669790 | 8227220  | 26761732 | 8947198  | 15543391 | 30970126 | 28585502 | 30024374 |
| 9.979667 | 4  | 3 | 1 | 1260439  | 965301.6 | 806097.2 | 1144467  | 808460.7 | 2396783  | 448444.6 | 626853.2 | 711515.2 |
| 38.9855  | 8  | 3 | 4 | 333268.6 | 5142381  | 764169.3 | 4726001  | 2475879  | 5043545  | 4481085  | 6455395  | 4788830  |
| 40.3955  | 4  | 0 | 3 | 193531.2 | 1953359  | 74410.42 | 1820912  | 812794.2 | 1960325  | 1845240  | 1927538  | 2045840  |
| 9.994767 | 10 | 5 | 5 | 363966.8 | 1058259  | 282496.4 | 977249.4 | 428906.8 | 1028518  | 1476283  | 1137407  | 706056.5 |
| 9.960467 | 11 | 5 | 4 | 2844881  | 5892267  | 2851833  | 6394462  | 1353625  | 3088385  | 8806661  | 7285273  | 2580662  |
| 9.8374   | 8  | 5 | 3 | 763657.5 | 2266532  | 1016251  | 1977877  | 1523735  | 1398849  | 2079613  | 1298058  | 2854463  |
| 9.887133 | 10 | 5 | 5 | 2663869  | 15223533 | 2879604  | 14508909 | 3525094  | 14473003 | 13459091 | 14312917 | 20312373 |
| 9.245983 | 5  | 2 | 3 | 1202622  | 6795144  | 2778604  | 7610427  | 4357577  | 4610604  | 8860398  | 10427137 | 6153273  |
| 10.008   | 9  | 5 | 4 | 1308132  | 2596376  | 627485.9 | 2786317  | 1026698  | 3184578  | 3044181  | 2916813  | 1971983  |
| 9.856867 | 10 | 5 | 5 | 2516771  | 8156700  | 823355.3 | 8740724  | 3529062  | 9235999  | 8347775  | 8416708  | 7760033  |
| 9.920517 | 6  | 2 | 4 | 1060990  | 1723421  | 88964.59 | 1568509  | 951776   | 1732185  | 1718506  | 1832017  | 1749185  |
| 9.856867 | 10 | 5 | 5 | 3865379  | 14569095 | 1192385  | 14013524 | 3263327  | 14596226 | 12589159 | 14646117 | 15484293 |
| 9.93625  | 7  | 4 | 3 | 1754089  | 4870780  | 1772659  | 4443163  | 2072358  | 5324094  | 3163910  | 5307694  | 7391687  |
| 30.25033 | 10 | 5 | 5 | 1688045  | 9985241  | 1716964  | 9189304  | 4673267  | 8177511  | 10622339 | 10399637 | 8406269  |

|          |    |   |   |          |          |          |          |          |          |          |          |          |
|----------|----|---|---|----------|----------|----------|----------|----------|----------|----------|----------|----------|
| 21.595   | 3  | 0 | 3 | 61317.91 | 285127.9 | 33620.24 | 307739.6 | 136377.2 | 310118.4 | 291014.5 | 314073.7 | 230368.4 |
| 9.979667 | 10 | 5 | 5 | 810390.8 | 1923873  | 789269.9 | 1737173  | 892420.7 | 2489007  | 2934746  | 1820946  | 1021549  |
| 9.559117 | 4  | 1 | 3 | 211748.1 | 330416.2 | 120301.6 | 365581.9 | 187982.6 | 382646.5 | 386512.1 | 324538.9 | 126331.1 |
| 16.95717 | 10 | 5 | 5 | 115524.2 | 646709   | 119432.8 | 606654.6 | 223136   | 857760.2 | 604307   | 593127.8 | 613923.7 |
| 28.0405  | 5  | 0 | 4 | 309337.9 | 2902612  | 107651.7 | 3176961  | 1690191  | 2849488  | 2935160  | 3021684  | 2961637  |
| 36.23767 | 9  | 4 | 5 | 326036.9 | 1899430  | 833476.7 | 1693401  | 1016485  | 3062460  | 1462946  | 834688.5 | 1919010  |
| 9.999517 | 5  | 3 | 2 | 246743.6 | 426561.2 | 46387.71 | 476658   | 306631.2 | 388514.7 | 445989.5 | 379355.4 | 494023.9 |
| 30.29317 | 10 | 5 | 5 | 2817680  | 18462601 | 3315824  | 17236640 | 6978797  | 18025269 | 22808401 | 18080502 | 13654924 |
| 10.9645  | 10 | 5 | 5 | 290546.8 | 1602669  | 502823.4 | 1494336  | 476011.7 | 2231929  | 1969932  | 1193605  | 1043809  |
| 9.338567 | 5  | 3 | 2 | 448741.7 | 671559.8 | 714421.4 | 539629.4 | 436559   | 774862.7 | 0        | 0        | 866990.7 |
| 34.12083 | 8  | 4 | 4 | 501951.2 | 4812990  | 3658293  | 4111478  | 2565754  | 11073723 | 4439523  | 1941862  | 4142856  |
| 10.02372 | 7  | 4 | 3 | 323688.4 | 663485.2 | 184722.2 | 616224.7 | 238772.1 | 661504.5 | 954401.7 | 689016.5 | 535884.6 |
| 10.9645  | 10 | 5 | 5 | 5185494  | 21042813 | 6358245  | 19828585 | 4423762  | 27332883 | 28023043 | 15076780 | 15029447 |
| 9.45945  | 7  | 3 | 3 | 4395536  | 14453164 | 17889728 | 10732065 | 15742288 | 1587817  | 1966367  | 37334309 | 30387857 |
| 9.03715  | 5  | 3 | 2 | 372739.5 | 802405.6 | 475391   | 719822.5 | 213753.7 | 575570.1 | 980908.5 | 372200.6 | 531236.5 |
| 9.842    | 7  | 5 | 2 | 1876835  | 1665908  | 527139.2 | 1955628  | 1734806  | 1157409  | 1949011  | 1088776  | 2309738  |
| 9.40325  | 9  | 5 | 4 | 1347895  | 7571586  | 4450416  | 8600079  | 4867219  | 10853948 | 1819648  | 11767782 | 3856309  |
| 10.9645  | 7  | 4 | 3 | 442825.6 | 1398020  | 445009.6 | 1512950  | 585585.3 | 1750065  | 1987058  | 1170691  | 955024.7 |
| 9.63045  | 12 | 5 | 5 | 5993897  | 26297775 | 13278840 | 21955292 | 24182241 | 38066671 | 28739763 | 11848172 | 13150248 |
| 9.960467 | 10 | 5 | 5 | 14944453 | 35276216 | 12582558 | 32017606 | 16651286 | 45799264 | 51020404 | 29378647 | 21064839 |
| 9.976317 | 10 | 5 | 5 | 984373.6 | 2786793  | 584638.6 | 2988731  | 1140551  | 3152765  | 3433842  | 2998453  | 2074756  |
| 12.25165 | 4  | 3 | 1 | 133310   | 482466.3 | 471690.5 | 568784.3 | 283370.8 | 204000.3 | 1150526  | 809366.8 | 88334.85 |
| 19.82867 | 8  | 5 | 3 | 115688.9 | 430887.9 | 246555.7 | 383701.2 | 174325.5 | 276290.6 | 405899.7 | 252894.3 | 361664.3 |
| 9.9014   | 7  | 4 | 3 | 1024802  | 4318772  | 1617831  | 3946130  | 1763707  | 6405874  | 4301276  | 3289009  | 2296825  |
| 9.673333 | 10 | 5 | 5 | 592371.4 | 2508597  | 1100530  | 2265039  | 1112490  | 4136129  | 2924808  | 1946821  | 1215857  |
| 10.03947 | 9  | 4 | 5 | 325940.5 | 787791.5 | 186610.3 | 829768.9 | 194711.7 | 628968.7 | 991018.4 | 815785.1 | 937822.8 |
| 9.840617 | 5  | 2 | 3 | 961990.4 | 1630473  | 852391.8 | 1895522  | 1457973  | 2520638  | 920884.4 | 2167849  | 2000839  |
| 9.311883 | 6  | 3 | 3 | 832269.7 | 3792312  | 1211115  | 3409716  | 2115522  | 4258350  | 2476474  | 5608083  | 3030936  |
| 9.983433 | 10 | 5 | 5 | 1323119  | 3096857  | 1158774  | 2771691  | 1727621  | 3745726  | 4666704  | 2722835  | 1606956  |
| 9.933967 | 5  | 2 | 3 | 13080708 | 40266392 | 33773436 | 33075395 | 31576325 | 68616432 | 40312438 | 79029061 | 5925647  |
| 21.91383 | 3  | 0 | 3 | 3034840  | 9260471  | 1473103  | 11126112 | 11520445 | 7308252  | 9055281  | 10176336 | 8612907  |
| 10.008   | 10 | 5 | 5 | 1871556  | 5471921  | 910162.8 | 5116677  | 2057870  | 5050453  | 6473789  | 6434082  | 4792034  |
| 9.46265  | 11 | 4 | 5 | 1587257  | 12234642 | 3286118  | 11358343 | 4560653  | 13728752 | 6362759  | 13943732 | 13591258 |
| 9.886433 | 10 | 5 | 5 | 2693879  | 19046042 | 1993223  | 19810958 | 4422803  | 16327540 | 19056919 | 19192413 | 18714227 |
| 10.008   | 10 | 5 | 5 | 851927.7 | 2024715  | 639526.8 | 2217543  | 1053973  | 2001868  | 2818710  | 1305521  | 1505564  |

|          |    |   |   |          |          |          |          |          |          |          |          |          |
|----------|----|---|---|----------|----------|----------|----------|----------|----------|----------|----------|----------|
| 9.94455  | 10 | 5 | 5 | 1444454  | 5243248  | 882479.6 | 5050156  | 880433   | 6547197  | 5646869  | 5074731  | 4613634  |
| 9.976317 | 9  | 5 | 4 | 1893593  | 5722545  | 860756   | 5326767  | 2351490  | 6029351  | 6456759  | 4320664  | 5515664  |
| 10.93618 | 6  | 4 | 2 | 285067.3 | 866957.3 | 164323.9 | 783978   | 497552.8 | 747472.7 | 641769.8 | 971630.2 | 946539.1 |
| 41.93467 | 3  | 0 | 3 | 356829.2 | 6384419  | 182118.8 | 6590021  | 1273115  | 6103632  | 6390366  | 6356998  | 6596211  |
| 10.31835 | 4  | 3 | 1 | 169152.6 | 634763.6 | 121819.3 | 590944.2 | 251321   | 656488.2 | 641470   | 548076.1 | 821421.5 |
| 27.04183 | 4  | 3 | 0 | 15668644 | 65379083 | 36946955 | 58348794 | 26131190 | 1.25E+08 | 74296503 | 45934872 | 31231205 |
| 34.56467 | 3  | 0 | 3 | 280861.4 | 1187478  | 128732.1 | 1465662  | 1732852  | 1409722  | 1119318  | 1150069  | 1174105  |
| 11.31645 | 9  | 4 | 5 | 189264.3 | 464587.7 | 268853.1 | 536404.2 | 376294.2 | 935435.7 | 262917.4 | 334265.3 | 386946.2 |
| 9.992233 | 9  | 5 | 4 | 1164126  | 3243367  | 867215.7 | 2933864  | 1774181  | 3694951  | 4453326  | 2844075  | 2173920  |
| 9.951283 | 8  | 4 | 4 | 1141680  | 2322253  | 918011   | 2545544  | 1112447  | 3439122  | 3127260  | 1302923  | 1991840  |
| 9.880683 | 5  | 3 | 2 | 893520.6 | 3844674  | 1775581  | 4164852  | 1031091  | 5715707  | 5141242  | 4431549  | 2102391  |
| 28.2445  | 8  | 4 | 4 | 227479.7 | 869852.5 | 1085859  | 1079877  | 810804.7 | 2776562  | 240289.8 | 161721.5 | 482572.9 |
| 9.328967 | 4  | 1 | 3 | 539779   | 1887174  | 983533.9 | 1624843  | 1376216  | 2243106  | 555164.3 | 2760980  | 2712794  |
| 10.9645  | 10 | 5 | 5 | 600849.7 | 1849736  | 313157.6 | 1982206  | 781479.3 | 2407322  | 1746112  | 1697825  | 1667589  |
| 10.9645  | 10 | 5 | 5 | 872708.6 | 3556544  | 719355.7 | 3773232  | 1192056  | 4338562  | 4281333  | 3152601  | 2720775  |
| 10.008   | 9  | 5 | 4 | 834437.1 | 2753053  | 605085.5 | 2592278  | 842795   | 2833101  | 3398981  | 2707790  | 1777422  |
| 9.960467 | 10 | 5 | 5 | 6996122  | 27242160 | 5382454  | 26036358 | 5657050  | 30882497 | 34071278 | 24826632 | 20238061 |
| 10.01477 | 9  | 5 | 4 | 838496.2 | 1068267  | 668279   | 954318   | 283549.7 | 1021791  | 2226795  | 824930.7 | 581502.6 |
| 11.52297 | 10 | 5 | 5 | 892128.7 | 4072102  | 970537.3 | 4301654  | 1125820  | 5584466  | 4190205  | 3343906  | 3106544  |
| 9.460217 | 8  | 5 | 3 | 302972.9 | 1040925  | 114339.7 | 1112460  | 436811.6 | 979628.8 | 1043702  | 1070717  | 1208960  |
| 20.888   | 10 | 5 | 5 | 103426.3 | 237221.6 | 63259.92 | 260320.6 | 133426.5 | 287180.2 | 295689.7 | 211033.6 | 141213.9 |
| 10.9645  | 10 | 5 | 5 | 375231.7 | 1705328  | 413468.7 | 1619480  | 372186.5 | 2142678  | 2119799  | 1366930  | 1255680  |
| 10.99268 | 5  | 3 | 2 | 1.61E+09 | 3.84E+09 | 5.39E+09 | 4.98E+09 | 5.04E+09 | 11978939 | 1.14E+10 | 18073260 | 7.77E+09 |
| 29.84833 | 10 | 5 | 5 | 11892114 | 1.13E+08 | 13758252 | 1.16E+08 | 15133883 | 1.12E+08 | 1.15E+08 | 95800572 | 1.08E+08 |
| 9.976317 | 10 | 5 | 5 | 484658.4 | 1946151  | 398256.7 | 1844936  | 519822   | 2020986  | 2510737  | 2061344  | 1646577  |
| 16.97183 | 5  | 2 | 3 | 224848.5 | 1578511  | 276306.2 | 1783255  | 1260335  | 1554342  | 2046122  | 1355275  | 1546051  |
| 9.40325  | 9  | 5 | 4 | 1580082  | 3291407  | 541683   | 3002025  | 1752673  | 2895933  | 3679134  | 2799958  | 3040591  |
| 37.37417 | 4  | 3 | 0 | 303462.2 | 4196471  | 1186366  | 4388507  | 240312.6 | 3036250  | 4706922  | 4581181  | 2943350  |
| 9.5415   | 14 | 5 | 5 | 1789847  | 12323933 | 5005423  | 13219252 | 2854958  | 18058326 | 5686002  | 16232723 | 9502742  |
| 10.90802 | 6  | 3 | 3 | 196547.5 | 490236.4 | 294940.9 | 433437.8 | 219918.1 | 766623.8 | 467712.9 | 136401.5 | 274828.7 |
| 9.94455  | 5  | 3 | 2 | 917328.2 | 1396789  | 548589.7 | 1214701  | 1033593  | 1045882  | 801273.7 | 1182581  | 1919599  |
| 9.713983 | 12 | 5 | 5 | 7831878  | 21590677 | 5006183  | 20462667 | 5353896  | 23953856 | 28393271 | 21592212 | 18791375 |
| 15.1892  | 10 | 5 | 5 | 87266.48 | 499968.4 | 117906.3 | 480011.7 | 48336.81 | 413859.1 | 637178   | 354765.8 | 590922   |
| 38.942   | 7  | 2 | 3 | 513358.6 | 7682171  | 919278.1 | 7954316  | 1496345  | 8265990  | 7450807  | 7956360  | 6203860  |
| 9.445217 | 14 | 5 | 5 | 1366862  | 10431152 | 2139180  | 10929988 | 2434254  | 8983159  | 11266353 | 13503534 | 7967298  |

|          |    |   |   |          |          |          |          |          |          |          |          |          |
|----------|----|---|---|----------|----------|----------|----------|----------|----------|----------|----------|----------|
| 9.960467 | 8  | 4 | 4 | 496618.4 | 1540775  | 463620.8 | 1435119  | 506545.8 | 2133863  | 1838021  | 1493451  | 1295476  |
| 8.93965  | 10 | 5 | 5 | 1665500  | 6602947  | 1448234  | 6908579  | 1360068  | 6842485  | 8497509  | 7285267  | 5589146  |
| 12.6321  | 10 | 5 | 5 | 2036031  | 15699162 | 2211197  | 14987791 | 4010697  | 17796185 | 18299316 | 13987147 | 13495009 |
| 9.975217 | 4  | 1 | 3 | 366966.1 | 383105.3 | 251641.1 | 431098.9 | 182868.8 | 508764.9 | 0        | 341560.3 | 681445.1 |
| 10.91977 | 5  | 3 | 2 | 290048.9 | 511014.8 | 281429.3 | 455383.4 | 226649.3 | 400920   | 653473.7 | 267576.5 | 298074   |
| 43.89083 | 6  | 3 | 3 | 354244.9 | 5884166  | 705061.1 | 5581292  | 1801043  | 5800855  | 6194932  | 4837741  | 6770394  |
| 10.95055 | 10 | 5 | 5 | 303947.5 | 1076055  | 243364.1 | 1014490  | 317575.8 | 1289946  | 1335606  | 853928.1 | 803993.7 |
| 9.762917 | 5  | 3 | 2 | 2158402  | 3018795  | 2197080  | 2586143  | 1759044  | 5454709  | 1450182  | 5348665  | 987101.7 |
| 10.9645  | 10 | 5 | 5 | 399702.1 | 1406973  | 580636   | 1531902  | 570651.3 | 2042573  | 2027742  | 1112484  | 996331.3 |
| 10.94443 | 5  | 2 | 3 | 696022   | 1092199  | 778436.6 | 1292240  | 1041202  | 533100.4 | 377999.1 | 949716.9 | 1262195  |
| 9.93625  | 6  | 2 | 4 | 1141680  | 1656064  | 220967.2 | 1774390  | 719826.1 | 1834552  | 1839769  | 1757834  | 1500611  |
| 10.9645  | 10 | 5 | 5 | 968105.7 | 1808149  | 526387.4 | 2013646  | 1209213  | 2075064  | 2537080  | 1793456  | 1427581  |
| 10.02372 | 9  | 5 | 4 | 388393.5 | 885864.6 | 390949.1 | 798705.4 | 413240.5 | 771826   | 1549539  | 589338.7 | 621584.3 |
| 10.38125 | 10 | 5 | 5 | 1495356  | 4873822  | 843638.4 | 4610960  | 1477723  | 5614106  | 5923800  | 4291276  | 4017198  |
| 10.008   | 10 | 5 | 5 | 762767.1 | 2451880  | 666926.5 | 2293608  | 788699.1 | 2480032  | 3414668  | 2678441  | 1671483  |
| 10.94538 | 3  | 3 | 0 | 162343.2 | 452641.2 | 85556.43 | 483286.5 | 178026.7 | 344929.2 | 529020.9 | 497847   | 376047.9 |
| 9.388617 | 8  | 5 | 3 | 831339.6 | 2711747  | 1249727  | 2444093  | 1224534  | 3065964  | 1160496  | 1918838  | 2962818  |
| 14.07785 | 4  | 1 | 3 | 139305.8 | 638283.1 | 220409.1 | 712969.3 | 429259.7 | 697767.5 | 586435.1 | 988787.8 | 435676.1 |
| 33.48483 | 10 | 5 | 5 | 1064764  | 7897533  | 2483131  | 7412705  | 1961554  | 11040247 | 7884522  | 4171194  | 8797243  |
| 33.29717 | 10 | 5 | 5 | 161601.6 | 886407.2 | 449923.5 | 789665.2 | 444770.1 | 1453185  | 734070.7 | 277936   | 1178640  |
| 10.93618 | 7  | 4 | 3 | 1027599  | 1238922  | 1313018  | 1550588  | 1556318  | 851527.8 | 788179.2 | 467116   | 3568882  |
| 11.26148 | 4  | 3 | 1 | 81004.95 | 253280.4 | 104236.6 | 276318.9 | 108844   | 393101.5 | 299295.9 | 265651.5 | 185780.5 |
| 9.23865  | 9  | 5 | 4 | 534260.7 | 807788.6 | 430704.4 | 695768.1 | 590130.4 | 1373258  | 477715   | 512349.6 | 502971.3 |
| 10.9645  | 10 | 5 | 5 | 3523831  | 14486685 | 2187503  | 15495506 | 6087081  | 16655704 | 17086440 | 13149768 | 12746775 |
| 9.311417 | 9  | 5 | 4 | 1381939  | 1674079  | 243199.2 | 1945543  | 1704764  | 2063655  | 1591719  | 1475097  | 1747594  |
| 9.531467 | 11 | 5 | 5 | 2874710  | 13208127 | 11483962 | 11348444 | 2967682  | 25925969 | 16708072 | 21098813 | 579280.7 |
| 10.01477 | 10 | 5 | 5 | 352779.4 | 1070838  | 263918.4 | 986536.9 | 479023.9 | 1067878  | 1440625  | 1147357  | 711819.7 |
| 9.830833 | 10 | 5 | 5 | 984717.8 | 4812291  | 602835.3 | 4679145  | 630640.6 | 4305624  | 4737813  | 4340820  | 4883025  |
| 10.51392 | 8  | 5 | 3 | 1141719  | 11296770 | 3728945  | 10393103 | 4589000  | 13144456 | 9129749  | 8429962  | 8753669  |
| 9.992233 | 9  | 5 | 4 | 1022288  | 1950854  | 648425.6 | 2166997  | 1241330  | 2017468  | 2934936  | 1161903  | 1981641  |
| 9.203483 | 7  | 4 | 3 | 2304505  | 7890282  | 11315155 | 9815721  | 5152720  | 28077934 | 3185313  | 3907771  | 2622624  |
| 9.245983 | 9  | 4 | 5 | 1842536  | 2348411  | 1736586  | 2888131  | 3047902  | 1898247  | 5045755  | 2923385  | 1305947  |
| 9.460217 | 5  | 4 | 1 | 354355   | 2147190  | 1031185  | 1924619  | 1033412  | 3634886  | 2475064  | 2277496  | 1068351  |
| 9.392767 | 12 | 5 | 5 | 1303052  | 10988182 | 3343741  | 10286400 | 3164418  | 15802848 | 8311317  | 7403049  | 11224389 |
| 9.929783 | 5  | 2 | 3 | 1738119  | 2703764  | 1446798  | 2410432  | 1267351  | 4541294  | 543938.3 | 2704417  | 2490549  |

|          |    |   |   |          |          |          |          |          |          |          |          |          |
|----------|----|---|---|----------|----------|----------|----------|----------|----------|----------|----------|----------|
| 9.872883 | 10 | 5 | 5 | 4724997  | 16092424 | 1388207  | 16603083 | 2996448  | 17376371 | 15532850 | 17777938 | 14855173 |
| 10.07923 | 6  | 3 | 3 | 576237.4 | 552256.3 | 354463.4 | 635347   | 413847.1 | 747011.9 | 1051540  | 227913.4 | 222793.4 |
| 10.008   | 9  | 5 | 4 | 788359.3 | 1143964  | 445577.2 | 1302448  | 924487.9 | 1202626  | 1850181  | 928763.2 | 651652.3 |
| 35.4155  | 4  | 0 | 3 | 297020.3 | 4748325  | 168872.2 | 5104301  | 2252402  | 4890239  | 4472872  | 4861818  | 4808225  |
| 24.86933 | 8  | 4 | 4 | 175693.1 | 1013693  | 466057.2 | 1111803  | 444584.7 | 923922.7 | 1727102  | 420951.1 | 1000035  |
| 24.05683 | 8  | 4 | 4 | 312487.8 | 823093.4 | 170407.1 | 972116.6 | 933814.1 | 851596.1 | 954111.8 | 738939.2 | 995474.3 |
| 17.88883 | 6  | 3 | 2 | 548270   | 6306744  | 893948.5 | 6921044  | 3820425  | 7807311  | 5590326  | 5673632  | 6132784  |
| 9.830083 | 5  | 3 | 2 | 1545331  | 5209645  | 2603576  | 4578749  | 3216892  | 3740017  | 2752803  | 5370773  | 9521687  |
| 9.874317 | 9  | 4 | 5 | 1579680  | 6278167  | 2039293  | 5823898  | 2180411  | 7099698  | 5164147  | 7467605  | 8369562  |
| 38.66883 | 7  | 1 | 5 | 346375.4 | 3880764  | 472326.6 | 4038961  | 913323.7 | 3923652  | 4119078  | 4240511  | 4059746  |
| 9.983433 | 10 | 5 | 5 | 850666.3 | 2627952  | 534794.9 | 2443281  | 1073440  | 3303714  | 2459453  | 1936647  | 2433495  |
| 10.02372 | 9  | 5 | 4 | 259064.7 | 891943.4 | 122971   | 830381.2 | 376320.7 | 860663.6 | 1083742  | 876658.3 | 742053.7 |
| 9.960467 | 10 | 5 | 5 | 14668516 | 34327608 | 12713926 | 31133197 | 16682813 | 45130649 | 50158844 | 28548366 | 20133393 |
| 9.8322   | 9  | 5 | 4 | 1576333  | 6651080  | 676766.8 | 6980010  | 2008176  | 7100447  | 7217014  | 5876769  | 5946956  |
| 31.45167 | 5  | 3 | 2 | 153916.5 | 667650   | 614434.7 | 792314.1 | 544428.7 | 202372.5 | 1346904  | 227884.9 | 226753.8 |
| 9.960467 | 5  | 3 | 2 | 759605.6 | 1088478  | 235994.7 | 1172930  | 495497.9 | 1271463  | 1042581  | 1350739  | 749765.4 |
| 9.999217 | 8  | 3 | 4 | 945261.4 | 3593802  | 693861.3 | 3308494  | 1711303  | 4280232  | 3157519  | 3702149  | 2643761  |
| 9.976317 | 9  | 5 | 4 | 5175182  | 14612066 | 6860733  | 16141699 | 7381172  | 19509412 | 22991866 | 15031767 | 7544978  |
| 35.97767 | 9  | 5 | 4 | 884381.3 | 3195635  | 2444541  | 2749544  | 1602982  | 2014771  | 1946648  | 811986.2 | 6959225  |
| 9.445217 | 14 | 5 | 5 | 5934347  | 28183583 | 8762661  | 31301191 | 18273543 | 27181762 | 38825804 | 35251336 | 21122205 |
| 10.74635 | 10 | 5 | 5 | 17071474 | 13986316 | 19581026 | 21628330 | 45513799 | 10392531 | 2903718  | 8033769  | 324566.7 |
| 9.976317 | 10 | 5 | 5 | 828170.5 | 2752714  | 472354.3 | 2904527  | 870422.2 | 2912448  | 3361753  | 2932656  | 2195821  |
| 9.328967 | 6  | 3 | 3 | 544850.2 | 3323245  | 1684105  | 2957037  | 1729115  | 2046610  | 3036730  | 3808763  | 5961653  |
| 6.828767 | 5  | 3 | 1 | 928151.1 | 13765562 | 7763879  | 15869317 | 11415086 | 11892367 | 27215347 | 7095823  | 11613518 |
| 36.928   | 6  | 4 | 1 | 347018.6 | 6721326  | 2170880  | 6369619  | 639240.4 | 6722721  | 7624902  | 6738015  | 3293222  |
| 11.31857 | 8  | 4 | 4 | 10085711 | 2.16E+08 | 31163968 | 2.08E+08 | 46364610 | 2.47E+08 | 2.43E+08 | 2.02E+08 | 1.71E+08 |
| 44.72483 | 5  | 2 | 3 | 105608.4 | 465062.1 | 139856.5 | 494950.3 | 138970.3 | 309084.7 | 674916.4 | 474988.9 | 495359.8 |
| 9.447733 | 7  | 3 | 4 | 1652046  | 9556822  | 6454350  | 8363563  | 4446526  | 15251909 | 5281643  | 10284170 | 16002800 |
| 8.918933 | 7  | 3 | 4 | 387175.7 | 591835.6 | 412927.5 | 681874.3 | 427080.5 | 914320.4 | 1053061  | 593616.1 | 367628.1 |
| 24.79767 | 10 | 5 | 5 | 821245.8 | 5266935  | 1048874  | 5011035  | 1320128  | 3411901  | 5950519  | 5641295  | 5534541  |
| 10.57357 | 10 | 5 | 5 | 386877.6 | 1295986  | 473943.5 | 1205810  | 357491.8 | 1152200  | 1970500  | 1542285  | 1081102  |
| 41.949   | 5  | 0 | 4 | 367637.8 | 5159159  | 244636   | 4748198  | 2612280  | 5421165  | 5054244  | 5420378  | 4994760  |
| 9.992233 | 9  | 5 | 4 | 1291338  | 3878419  | 1044675  | 3583007  | 1633767  | 3997437  | 5427635  | 3416964  | 2564380  |
| 9.379233 | 7  | 4 | 3 | 751708.9 | 1629806  | 841703.4 | 1480615  | 496903.2 | 1015142  | 995972.1 | 2835165  | 1103433  |
| 9.999217 | 5  | 3 | 2 | 274232.8 | 488823.4 | 357204.7 | 553494.6 | 229668.4 | 778995.7 | 715019.6 | 735519.9 | 214581.8 |

|          |    |   |   |          |          |          |          |          |          |          |          |          |
|----------|----|---|---|----------|----------|----------|----------|----------|----------|----------|----------|----------|
| 10.08538 | 9  | 4 | 4 | 1510414  | 2474475  | 3492283  | 1897294  | 1340942  | 1050149  | 664729.4 | 1323522  | 633294.8 |
| 9.848417 | 9  | 5 | 4 | 802909.6 | 3309396  | 1401283  | 2958531  | 1839412  | 4952895  | 4303231  | 2578612  | 1403738  |
| 14.10667 | 9  | 4 | 5 | 107049.2 | 684883.3 | 142223.8 | 623059.7 | 374511.4 | 855874   | 757556.6 | 673636   | 470552.7 |
| 9.887133 | 5  | 3 | 2 | 703444.4 | 2263486  | 769629   | 2085642  | 886965.1 | 2562834  | 1246075  | 3263087  | 1801978  |
| 9.684583 | 11 | 5 | 5 | 3330692  | 18397975 | 3036533  | 17580546 | 4437389  | 17432270 | 23774361 | 17520726 | 16757542 |
| 17.372   | 10 | 5 | 5 | 647278.4 | 4072632  | 379245.8 | 4248568  | 1073964  | 4383338  | 4443837  | 4192723  | 3621860  |
| 9.352183 | 10 | 5 | 5 | 1911196  | 7176489  | 2606775  | 6499611  | 3619119  | 7760933  | 11151493 | 5654165  | 7091339  |
| 9.445217 | 9  | 5 | 4 | 1467346  | 7018236  | 4222843  | 6228034  | 3048660  | 11418706 | 10295641 | 8242525  | 2791839  |
| 9.848417 | 9  | 5 | 4 | 1460336  | 4456654  | 1668901  | 3915755  | 3124774  | 4978703  | 3540226  | 2134259  | 5127806  |
| 9.912633 | 10 | 5 | 5 | 5044634  | 28030971 | 5165297  | 29332014 | 6875361  | 29868941 | 27679172 | 19289060 | 31171304 |
| 10.95055 | 4  | 1 | 3 | 351385.2 | 855500.6 | 206500.1 | 795569.2 | 336057.3 | 992186   | 1104103  | 601115.7 | 698387.9 |
| 11       | 6  | 3 | 3 | 1053345  | 2568959  | 2756097  | 2051490  | 2028883  | 5259538  | 5886825  | 643218.4 | 310660.6 |
| 10.14543 | 7  | 3 | 4 | 242281.8 | 513318.5 | 147162   | 572657.8 | 357751.3 | 696934.6 | 462978.8 | 411957.4 | 356658.5 |
| 9.45945  | 15 | 5 | 5 | 2E+09    | 1.69E+10 | 4.46E+09 | 1.79E+10 | 4.18E+09 | 1.25E+10 | 1.96E+10 | 2.34E+10 | 1.41E+10 |
| 9.304717 | 7  | 4 | 3 | 438900.9 | 2219282  | 724553.1 | 1988196  | 1334182  | 1952684  | 1655841  | 3448348  | 1773644  |
| 9.960467 | 10 | 5 | 5 | 3838352  | 12886832 | 2165769  | 13607393 | 4203800  | 14224063 | 15405866 | 13522389 | 10379820 |
| 10.9645  | 4  | 3 | 1 | 157588.3 | 347375.4 | 149323.7 | 400714.8 | 315836   | 564895.3 | 439567.3 | 220850.3 | 272938.9 |
| 8.97505  | 10 | 5 | 5 | 1421239  | 4890378  | 822336.3 | 4691188  | 1033701  | 4824550  | 5814842  | 4642588  | 3691083  |
| 9.43325  | 7  | 2 | 4 | 1876708  | 11294747 | 3595387  | 10291176 | 5568920  | 15121148 | 9445246  | 11468459 | 14175605 |
| 9.976317 | 10 | 5 | 5 | 2284308  | 7392089  | 2816005  | 8036034  | 3217634  | 9595265  | 10462957 | 7963312  | 4356616  |
| 9.640367 | 10 | 5 | 5 | 1509536  | 4909714  | 1609629  | 4631361  | 871848.4 | 4977330  | 7620070  | 3658753  | 3770549  |
| 14.9415  | 6  | 5 | 1 | 1311918  | 1326877  | 1530174  | 1790700  | 2646804  | 713273.9 | 308680.3 | 1358127  | 300866.6 |
| 9.992233 | 10 | 5 | 5 | 1934866  | 4483905  | 1669000  | 4024226  | 2541153  | 5415745  | 6307176  | 3601384  | 5033791  |
| 9.1476   | 3  | 0 | 3 | 20400284 | 2.01E+08 | 13066387 | 1.8E+08  | 1.37E+08 | 2.16E+08 | 1.95E+08 | 2.1E+08  | 2.04E+08 |
| 9.224517 | 7  | 4 | 2 | 392026.9 | 1712105  | 1031953  | 1483383  | 1118427  | 602345.2 | 863107.3 | 1537017  | 2774603  |
| 30.877   | 10 | 5 | 5 | 2439320  | 14792979 | 6402493  | 13471435 | 6030021  | 7276025  | 14414405 | 11650276 | 16038807 |
| 36.56933 | 10 | 5 | 5 | 708817.5 | 6068625  | 1964693  | 5681647  | 1663803  | 7333870  | 5158877  | 3243780  | 8299038  |
| 9.338567 | 7  | 4 | 3 | 712384   | 1236112  | 1006101  | 1067818  | 455591.7 | 854810.6 | 0        | 1218349  | 1333155  |
| 10.83632 | 10 | 5 | 5 | 296246.6 | 917582.4 | 147952.6 | 856786.9 | 369240.8 | 987776.5 | 1138127  | 790023.1 | 882937.5 |
| 9.4873   | 9  | 3 | 4 | 630036.5 | 2071801  | 967313.9 | 1871229  | 921911.6 | 2772189  | 1069524  | 1143328  | 2126302  |
| 44.55217 | 9  | 4 | 3 | 323618.9 | 4932246  | 784573.3 | 4692178  | 1378090  | 5288147  | 3929108  | 4257769  | 5572078  |
| 9.983433 | 10 | 5 | 5 | 12882967 | 54701033 | 10056810 | 52202486 | 13229881 | 63441059 | 66695205 | 52905803 | 44297645 |
| 9.365833 | 8  | 5 | 2 | 362249.2 | 1777714  | 868215.1 | 1549238  | 1244564  | 2029205  | 763702.5 | 3045475  | 1832400  |
| 9.673333 | 6  | 2 | 4 | 261618.1 | 602226.1 | 258527.3 | 560825   | 76132.95 | 921113   | 233783.6 | 480912.2 | 670463.2 |
| 9.447733 | 8  | 4 | 3 | 1839288  | 11235196 | 6285186  | 9924621  | 6085411  | 14366702 | 7679823  | 11923594 | 2885316  |

|          |    |   |   |          |          |          |          |          |          |          |          |          |
|----------|----|---|---|----------|----------|----------|----------|----------|----------|----------|----------|----------|
| 9.992233 | 7  | 4 | 3 | 3723195  | 6749913  | 3768640  | 7737369  | 5378298  | 10831485 | 1484905  | 9920717  | 5307761  |
| 9.445217 | 8  | 4 | 4 | 660185.5 | 3923831  | 1409493  | 3550464  | 2043347  | 3704799  | 5546019  | 4157438  | 1713842  |
| 9.4468   | 6  | 3 | 2 | 813919.8 | 3824604  | 2488306  | 3357250  | 1871675  | 7127275  | 5700208  | 3003884  | 1940302  |
| 9.9014   | 10 | 5 | 5 | 2619579  | 6235373  | 2635066  | 5760767  | 1732869  | 9784618  | 2964943  | 6499735  | 7423927  |
| 9.856867 | 10 | 5 | 5 | 79325896 | 5.07E+08 | 27171164 | 4.98E+08 | 53879673 | 5.45E+08 | 5.18E+08 | 4.85E+08 | 4.77E+08 |
| 36.33867 | 10 | 5 | 5 | 3045890  | 25510821 | 8808403  | 23723563 | 8058827  | 32214843 | 20851228 | 12917053 | 34622733 |
| 26.43333 | 5  | 3 | 2 | 154965.3 | 822476.7 | 208248.6 | 864265.4 | 185820.1 | 1111360  | 526613.4 | 789858.8 | 860070.8 |
| 10.95602 | 4  | 3 | 1 | 496330.5 | 1296644  | 416713.5 | 1217926  | 319212.6 | 1649694  | 824490.3 | 1199492  | 1008410  |
| 9.912633 | 8  | 5 | 3 | 4094687  | 8318860  | 4734171  | 7291795  | 4975372  | 11395341 | 1745792  | 5855825  | 8734061  |
| 9.82645  | 4  | 3 | 1 | 735237.1 | 1668703  | 647722.9 | 1906236  | 1424821  | 2034848  | 728942.4 | 2180299  | 2145422  |
| 13.69757 | 9  | 5 | 4 | 131222.7 | 687731.5 | 109739.2 | 746039.7 | 364573.3 | 823075.9 | 791019.7 | 602956.7 | 601822   |
| 44.9835  | 6  | 2 | 3 | 406390.2 | 7183018  | 1954412  | 7579143  | 1787778  | 5214194  | 8724862  | 8602782  | 8491733  |
| 9.37735  | 6  | 3 | 3 | 1795666  | 13149776 | 8693977  | 11299212 | 8813798  | 7652021  | 5509221  | 7595176  | 20474905 |
| 9.932    | 8  | 3 | 4 | 5222579  | 9074855  | 1775875  | 8741172  | 1343318  | 9352709  | 6597784  | 8577659  | 9300715  |
| 18.64583 | 10 | 5 | 5 | 679888.1 | 4259069  | 893803.8 | 4060240  | 985725.3 | 5483638  | 4496119  | 3371564  | 3385791  |
| 8.931783 | 4  | 1 | 3 | 159578   | 188922.8 | 156483.4 | 220948.7 | 146629.4 | 184544.2 | 456983.9 | 95975.26 | 141356.1 |
| 9.77345  | 8  | 4 | 4 | 1561899  | 2721880  | 1207665  | 3082315  | 2068037  | 1592514  | 4482621  | 2624852  | 3262780  |
| 9.992233 | 9  | 5 | 4 | 790190.4 | 1356880  | 607807.9 | 1521001  | 909966.5 | 1618721  | 2281769  | 1191561  | 797322.7 |
| 9.338567 | 5  | 2 | 3 | 1603007  | 1862305  | 1398619  | 2143816  | 1265662  | 2124708  | 251581.8 | 573055.2 | 3079328  |
| 20.25967 | 10 | 5 | 5 | 435583.4 | 2671436  | 542263.1 | 2564460  | 468758.2 | 3130499  | 3285913  | 2034105  | 2245309  |
| 9.01065  | 7  | 4 | 3 | 183522.9 | 421877.6 | 277299.8 | 368653   | 224377.7 | 585429.2 | 718675.2 | 486373.9 | 318909.8 |
| 10.90553 | 3  | 0 | 3 | 239711.2 | 494222.1 | 249141.6 | 541057.8 | 190603.9 | 380043.8 | 901976   | 305644.5 | 323586.4 |
| 19.57633 | 7  | 5 | 2 | 104086.8 | 278347.1 | 111069.9 | 260244.8 | 43655.61 | 304935.9 | 379756.5 | 260383.5 | 96880.69 |
| 9.858833 | 10 | 5 | 5 | 2254255  | 7591971  | 887428   | 8277633  | 4386626  | 7304050  | 7215167  | 7402336  | 9142607  |
| 12.74955 | 7  | 3 | 4 | 86373.33 | 251164.8 | 88756.85 | 282163.6 | 185422.4 | 294802   | 354314   | 135735.1 | 184734.6 |
| 9.43325  | 8  | 4 | 4 | 945699.1 | 4590023  | 1828048  | 5389363  | 4940292  | 4055626  | 4002953  | 4025990  | 7777791  |
| 10.98605 | 8  | 4 | 3 | 463097   | 1496836  | 752566.6 | 1689243  | 1046481  | 1443237  | 751659.2 | 2497999  | 810639.9 |
| 11.5253  | 6  | 3 | 3 | 73703.32 | 241488.9 | 70895.92 | 225299.6 | 82470.25 | 297127.3 | 276581.5 | 129750   | 212803.9 |
| 9.960467 | 9  | 5 | 4 | 1591832  | 5675318  | 963034.3 | 5523758  | 238537.7 | 6652396  | 6434413  | 4827714  | 4501094  |
| 9.976317 | 10 | 5 | 5 | 1041058  | 2631864  | 980863.2 | 2847803  | 1071557  | 3164142  | 3881643  | 2802547  | 1471956  |
| 10.16418 | 7  | 4 | 2 | 1457892  | 1800483  | 2549557  | 2272335  | 1878622  | 6347148  | 560534.2 | 557586.9 | 1010299  |
| 7.1216   | 10 | 5 | 5 | 3785743  | 1.13E+08 | 23709650 | 1.06E+08 | 35474400 | 1.17E+08 | 1.39E+08 | 90439174 | 86131087 |
| 9.886083 | 6  | 4 | 1 | 1486791  | 2115557  | 535299.3 | 1949709  | 967629.5 | 2623823  | 1204576  | 2292757  | 2204514  |
| 12.26695 | 10 | 5 | 5 | 254078.4 | 1338568  | 261740.6 | 1404809  | 359363.7 | 1515725  | 1652946  | 1266326  | 969717   |
| 26.03767 | 9  | 5 | 4 | 229413.6 | 2388973  | 1463831  | 2111065  | 1160414  | 1210652  | 3524594  | 618332.2 | 2549366  |



|          |    |   |   |          |          |          |          |          |          |          |          |          |
|----------|----|---|---|----------|----------|----------|----------|----------|----------|----------|----------|----------|
| 9.960817 | 10 | 5 | 5 | 14356172 | 38922988 | 15043843 | 35816108 | 14540247 | 51319802 | 57457731 | 35984104 | 22974830 |
| 9.9677   | 10 | 5 | 5 | 9737165  | 27815178 | 9153553  | 25776956 | 10222977 | 35741288 | 38162932 | 27397231 | 17205058 |
| 10.95835 | 10 | 5 | 5 | 997662.3 | 3908387  | 1325272  | 3686203  | 653112.7 | 5215301  | 5061016  | 2567430  | 2464498  |
| 10.95055 | 10 | 5 | 5 | 372855.8 | 1879555  | 650790.4 | 1758461  | 489317.8 | 2639827  | 1759279  | 1224594  | 1307148  |
| 9.37735  | 5  | 3 | 2 | 5572806  | 12819732 | 13679406 | 16255479 | 18605547 | 3179107  | 24709984 | 30533140 | 3599356  |
| 10.95602 | 10 | 5 | 5 | 284202.7 | 1082736  | 250513.5 | 1019040  | 347133   | 1186125  | 1427423  | 803436.5 | 877354.3 |
| 9.960467 | 5  | 2 | 3 | 957123.7 | 1365490  | 847530.7 | 1203442  | 688049.2 | 2279948  | 0        | 1778636  | 1407118  |
| 28.73467 | 8  | 5 | 3 | 401226.4 | 1954292  | 478277.1 | 1802418  | 894073.4 | 1680091  | 2193962  | 1290142  | 2083182  |
| 9.089733 | 10 | 5 | 5 | 2990197  | 20789862 | 10849299 | 18747149 | 8460111  | 14840676 | 38367334 | 22850527 | 17722207 |
| 17.32833 | 10 | 5 | 5 | 1129615  | 6480315  | 2858105  | 5845837  | 3186947  | 7685180  | 2141704  | 9436100  | 7919724  |
| 30.29317 | 10 | 5 | 5 | 2691021  | 16893478 | 3447516  | 15786172 | 6539810  | 17294721 | 22008044 | 15904529 | 12394266 |
| 9.1172   | 5  | 3 | 2 | 1303240  | 5246431  | 2905853  | 4546832  | 3711627  | 7052189  | 7457003  | 7579401  | 2192133  |
| 9.45945  | 11 | 5 | 4 | 3594299  | 19834878 | 11991486 | 22444869 | 12913363 | 19904743 | 5119248  | 11349557 | 34491054 |
| 10.01477 | 5  | 2 | 3 | 709381.4 | 1150305  | 693212.2 | 1290330  | 643680.9 | 1725382  | 2031756  | 877280.1 | 417802.4 |
| 41.48883 | 6  | 3 | 3 | 431992.3 | 4275184  | 945722   | 4469486  | 910622.4 | 5308478  | 4812746  | 3028267  | 3559310  |
| 20.67717 | 5  | 3 | 2 | 197458.5 | 894777.8 | 514403.3 | 804691.5 | 317656.2 | 299596   | 1278198  | 432639.5 | 990327   |
| 9.983433 | 10 | 5 | 5 | 37840108 | 1.55E+08 | 27600756 | 1.47E+08 | 46340352 | 1.82E+08 | 1.84E+08 | 1.49E+08 | 1.26E+08 |
| 10.9645  | 6  | 3 | 3 | 656357.7 | 1698369  | 736569.8 | 1569607  | 451838.6 | 2485024  | 1468340  | 2097941  | 556347.8 |
| 18.6585  | 9  | 5 | 4 | 56153.68 | 190030.4 | 76905    | 175634.3 | 59340.51 | 292935.9 | 230742.7 | 99647.91 | 133209.3 |
| 20.05633 | 8  | 5 | 3 | 614520.3 | 3345480  | 591401.3 | 3089123  | 1593722  | 4047700  | 2639831  | 2829293  | 3548192  |
| 10.95602 | 9  | 5 | 4 | 307358.4 | 1400800  | 502803.3 | 1309420  | 355759   | 1851148  | 1695890  | 909485.2 | 800623.8 |
| 9.964417 | 6  | 3 | 3 | 841675.3 | 991371   | 379841.3 | 1146321  | 957113.3 | 1048895  | 941807.9 | 1462657  | 1094094  |
| 9.859983 | 7  | 3 | 4 | 2321092  | 8434560  | 2199520  | 9214561  | 4718967  | 10869736 | 4983546  | 8460819  | 9644067  |
| 9.616167 | 10 | 5 | 5 | 977285.8 | 2833076  | 931337.1 | 2619525  | 1105285  | 2412910  | 3006382  | 2293788  | 4380085  |
| 9.45945  | 14 | 5 | 5 | 1838240  | 11391021 | 4144347  | 12841626 | 8762512  | 16940633 | 13405155 | 11992445 | 7583035  |
| 9.999217 | 6  | 3 | 3 | 5081681  | 5322079  | 5985943  | 4140850  | 5313161  | 1049809  | 1238584  | 867415.5 | 13530243 |
| 42.84083 | 7  | 2 | 4 | 404799.6 | 5595540  | 820810.3 | 5907356  | 1911013  | 6174708  | 4911622  | 5006108  | 6749899  |
| 9.345767 | 5  | 2 | 3 | 605662.1 | 3509987  | 2223532  | 3052252  | 2165492  | 5196466  | 5750044  | 1590666  | 4269339  |
| 10.49953 | 10 | 5 | 5 | 488052.2 | 1561938  | 532251.6 | 1459526  | 444965.4 | 1726120  | 2242605  | 1799646  | 1005937  |
| 31.811   | 4  | 1 | 3 | 260262.5 | 622077.8 | 425581.8 | 523582   | 513883.5 | 322360.9 | 664731.8 | 77899.07 | 934084.3 |
| 9.43325  | 6  | 3 | 3 | 11937659 | 30126496 | 30963617 | 24172622 | 25854746 | 12985799 | 2717897  | 64955821 | 62641739 |
| 39.77667 | 4  | 1 | 3 | 338108.4 | 5047981  | 1052975  | 5489957  | 2746300  | 5339436  | 5282426  | 5736942  | 3199079  |
| 10.95835 | 7  | 4 | 3 | 356622.2 | 894430.2 | 372876.7 | 990865.1 | 534165   | 832855.2 | 1430249  | 1014764  | 404770.4 |
| 34.10983 | 5  | 3 | 2 | 235777.4 | 2004632  | 910767.4 | 1799772  | 1049269  | 3259106  | 1935050  | 905397.8 | 2475347  |
| 9.445217 | 11 | 4 | 4 | 3102023  | 6269157  | 11015745 | 4386776  | 6245859  | 1249441  | 874420.8 | 2167579  | 25955071 |

|          |    |   |   |          |          |          |          |          |          |          |          |          |
|----------|----|---|---|----------|----------|----------|----------|----------|----------|----------|----------|----------|
| 9.933967 | 4  | 1 | 3 | 946784.1 | 2680418  | 1012822  | 3013767  | 1993745  | 3533085  | 2021718  | 3730087  | 1328126  |
| 30.296   | 10 | 5 | 5 | 1033695  | 6095504  | 1257811  | 5722110  | 2176196  | 6263125  | 7884670  | 6023765  | 4341410  |
| 10.03947 | 9  | 5 | 4 | 601347.8 | 898306   | 175930.2 | 939975.4 | 220967.5 | 691009.5 | 1016190  | 826986.8 | 822253.4 |
| 9.999217 | 10 | 5 | 5 | 1684659  | 2527335  | 1254924  | 2887094  | 2075054  | 2657080  | 4625332  | 1456295  | 1768979  |
| 10.99687 | 7  | 4 | 3 | 353820.4 | 2216220  | 905861.2 | 2376225  | 588868.7 | 2656989  | 3151961  | 1546424  | 992777.1 |
| 9.880683 | 6  | 3 | 2 | 1078299  | 4087868  | 1430251  | 4352071  | 1077284  | 3094029  | 4694717  | 3650556  | 6274211  |
| 9.999217 | 8  | 4 | 4 | 866568.1 | 1032059  | 645299   | 1201073  | 944321.8 | 1415047  | 1898404  | 1021116  | 385585   |
| 9.311417 | 9  | 5 | 3 | 2333451  | 6561013  | 3214145  | 5841278  | 3686065  | 9378945  | 8400064  | 8872254  | 2640926  |
| 10.00998 | 7  | 3 | 3 | 931984.8 | 2662473  | 1646932  | 2407848  | 341142.9 | 2835592  | 5291876  | 2175195  | 2207769  |
| 19.75767 | 9  | 5 | 4 | 153118.4 | 352017.9 | 113547.8 | 328581.6 | 111827.2 | 391019.6 | 393495.9 | 210914.5 | 267040.8 |
| 10.95835 | 10 | 5 | 5 | 323732.4 | 1119096  | 574286.8 | 1017338  | 379736.6 | 1922508  | 1296686  | 674188.2 | 463382.4 |
| 9.960467 | 5  | 3 | 2 | 771060.4 | 1367429  | 951352.3 | 1151383  | 1118642  | 1837117  | 2746989  | 1194716  | 354120.7 |
| 9.933967 | 6  | 3 | 1 | 3681082  | 11291295 | 8557166  | 12720660 | 4376402  | 22056565 | 2760120  | 18753627 | 5567978  |
| 9.887133 | 10 | 5 | 5 | 35969268 | 2E+08    | 14160309 | 2.06E+08 | 37125617 | 1.99E+08 | 1.82E+08 | 2.16E+08 | 2.11E+08 |
| 9.382183 | 8  | 3 | 4 | 473722.9 | 3640020  | 946975   | 4040423  | 2499376  | 4584412  | 2381304  | 4336077  | 2923108  |
| 36.151   | 6  | 3 | 3 | 148999.2 | 605840.1 | 232858.5 | 550908.3 | 291751.8 | 773849.8 | 227844.1 | 531886.8 | 746357.8 |
| 44.03467 | 5  | 1 | 3 | 321247.7 | 3590848  | 398847.8 | 3908864  | 2065005  | 3660541  | 3045261  | 4149982  | 3455151  |
| 9.205717 | 5  | 4 | 1 | 362524.6 | 1028380  | 773690.7 | 895413.4 | 457033.6 | 796306.4 | 185573.9 | 859495.2 | 2293773  |
| 9.447733 | 7  | 3 | 3 | 659894.8 | 7331787  | 1655624  | 7888625  | 3361007  | 9018942  | 7366696  | 6612938  | 8713885  |
| 10.94443 | 3  | 0 | 3 | 281319.2 | 476149.3 | 250707.1 | 542753.4 | 375750.1 | 653762.4 | 791510.8 | 393360.1 | 149737.2 |
| 10.2973  | 11 | 5 | 3 | 432919.9 | 814189.3 | 336367   | 737620.2 | 398647.7 | 1076829  | 1255894  | 658564.8 | 456995.6 |
| 9.392767 | 4  | 3 | 1 | 472321.3 | 514315.7 | 423815.9 | 399201.9 | 655672.4 | 777007.7 | 898160.9 | 0        | 109919.9 |
| 10.97857 | 5  | 3 | 2 | 1767675  | 4057874  | 1809242  | 3706632  | 1569869  | 6625426  | 5186285  | 3191613  | 2156314  |
| 40.7655  | 7  | 4 | 2 | 301995.6 | 3928606  | 1326552  | 3724576  | 261483.6 | 2980217  | 3756406  | 6176381  | 3824414  |
| 9.43325  | 5  | 3 | 2 | 1170371  | 6722648  | 2356415  | 6028506  | 4064812  | 4821870  | 7264852  | 9328809  | 8415482  |
| 10.008   | 9  | 5 | 4 | 576436.2 | 969849   | 410204.7 | 1072725  | 567335.7 | 877259.5 | 1684275  | 864796.1 | 642443.5 |
| 9.175017 | 7  | 4 | 3 | 3653568  | 13120110 | 11526971 | 15735656 | 13623111 | 6508138  | 3116707  | 14186015 | 32420225 |
| 43.35883 | 5  | 1 | 4 | 295643.5 | 4254764  | 364300.5 | 4091551  | 1029879  | 4069606  | 4304225  | 3786173  | 4771349  |
| 9.842    | 9  | 5 | 4 | 1143728  | 3066576  | 1119007  | 2795696  | 1469052  | 3267378  | 3521339  | 1713320  | 2256353  |
| 10.02372 | 10 | 5 | 4 | 295228.6 | 869599.5 | 328202.2 | 817417.9 | 120291.7 | 496284.9 | 1029735  | 662650.1 | 820070.4 |
| 42.3805  | 5  | 3 | 2 | 352721   | 5981677  | 1623143  | 5731957  | 338912.8 | 5587068  | 8763735  | 4819010  | 5889365  |
| 31.36383 | 4  | 3 | 1 | 399781   | 2030333  | 1107710  | 1796073  | 1158646  | 1170319  | 2084881  | 685352.1 | 2956733  |
| 9.18195  | 8  | 4 | 4 | 3512427  | 22027564 | 16120933 | 19290295 | 9210274  | 16991585 | 3264009  | 12668648 | 42126386 |
| 9.94455  | 4  | 3 | 1 | 1162379  | 1538353  | 251451.9 | 1653628  | 730113.5 | 1408693  | 1871519  | 1524592  | 1674685  |
| 10.49953 | 5  | 3 | 2 | 127065.3 | 411012.4 | 67927.86 | 429426   | 105297.7 | 391420.1 | 452302   | 440046.7 | 470021.5 |

|          |    |   |   |          |          |          |          |          |          |          |          |          |
|----------|----|---|---|----------|----------|----------|----------|----------|----------|----------|----------|----------|
| 9.960817 | 9  | 5 | 4 | 1036433  | 3768067  | 953960   | 3487111  | 1652425  | 2844241  | 5050638  | 3572358  | 2948265  |
| 24.609   | 6  | 4 | 2 | 396829.3 | 3857237  | 963403   | 3694739  | 536214.4 | 5006347  | 4799484  | 3057418  | 3087869  |
| 9.856867 | 10 | 5 | 5 | 1466230  | 6262878  | 1031948  | 5924414  | 2046046  | 6450127  | 5224513  | 5157273  | 7171736  |
| 13.7122  | 10 | 5 | 5 | 1421678  | 9950330  | 1966808  | 10647564 | 4282401  | 12194063 | 11455269 | 8785015  | 7339689  |
| 10.94443 | 4  | 1 | 3 | 269298.2 | 943424.6 | 130572.9 | 1052628  | 714951.6 | 1076182  | 1084638  | 809160.9 | 835851.5 |
| 9.93625  | 10 | 5 | 5 | 3647197  | 13609199 | 1993093  | 13167964 | 2275224  | 16964177 | 13816709 | 12755946 | 11944154 |
| 32.46033 | 10 | 5 | 5 | 9657763  | 79670918 | 17894188 | 76501662 | 12181955 | 63363449 | 73889159 | 72028385 | 79027955 |
| 18.02583 | 8  | 3 | 5 | 6688226  | 35634051 | 5852687  | 34150893 | 8285694  | 43428230 | 38206426 | 32495529 | 27916566 |
| 10.95835 | 9  | 4 | 5 | 367066.8 | 810100.9 | 664179.1 | 936104.1 | 553588.9 | 375073.5 | 759043.3 | 621258.4 | 338474.3 |
| 9.952017 | 10 | 5 | 5 | 1751553  | 4609201  | 1601091  | 4227542  | 2069106  | 5846941  | 6676191  | 3979838  | 2784370  |
| 10.95602 | 10 | 5 | 5 | 259315.8 | 1060042  | 225824.5 | 1001381  | 331664   | 1202670  | 1373949  | 845170.3 | 869437.4 |
| 31.78217 | 9  | 5 | 4 | 251777.1 | 1144820  | 783665.7 | 997687.4 | 636799.7 | 594708.6 | 1115094  | 174315.3 | 1851563  |
| 10.95835 | 4  | 1 | 3 | 1003335  | 2693068  | 779889.4 | 2447782  | 1474301  | 3572153  | 1603255  | 3085610  | 2213696  |
| 9.976317 | 10 | 5 | 5 | 1726128  | 3739632  | 1804867  | 4135534  | 2037608  | 5350102  | 5805005  | 3356560  | 1544205  |
| 9.842    | 7  | 3 | 4 | 1722782  | 5447878  | 2991927  | 4987196  | 755939.9 | 6385109  | 2280863  | 3693638  | 10074709 |
| 9.976317 | 10 | 5 | 5 | 4016404  | 11488739 | 3775863  | 10661445 | 4257153  | 14508216 | 15861252 | 11511951 | 6975128  |
| 44.9835  | 6  | 1 | 5 | 230269.7 | 1100881  | 162110.3 | 1140388  | 217319   | 1268148  | 1076615  | 1191830  | 840878.5 |
| 37.74817 | 4  | 3 | 1 | 376187.8 | 5361568  | 898572   | 5205312  | 579494.2 | 5561118  | 4347010  | 6769368  | 5103751  |
| 9.992233 | 9  | 5 | 4 | 514533.7 | 1429293  | 560388.7 | 1274358  | 899318.7 | 1517070  | 2268719  | 1069028  | 789943.9 |
| 44.71033 | 6  | 3 | 3 | 166739.2 | 937795.3 | 216371.1 | 876045.5 | 362221.8 | 853206   | 1157446  | 1158535  | 660293.1 |
| 9.365833 | 5  | 3 | 2 | 1478469  | 9009620  | 7133872  | 7718481  | 5262376  | 19556988 | 4935172  | 5917083  | 1822013  |
| 9.975217 | 4  | 1 | 3 | 611997.3 | 791442.9 | 348177.7 | 718422   | 363326.6 | 356611   | 929731.9 | 1130255  | 486564.4 |
| 44.77217 | 5  | 1 | 4 | 308984.2 | 2839218  | 279503.1 | 3091821  | 1665136  | 2439781  | 2884546  | 3041974  | 2693173  |
| 9.43325  | 12 | 5 | 4 | 1104453  | 9695254  | 2496555  | 9186350  | 2464600  | 12765102 | 10415016 | 10950924 | 6587383  |
| 25.291   | 7  | 4 | 3 | 323731.5 | 2144969  | 1419921  | 1886216  | 1072017  | 1077348  | 2945699  | 254815.9 | 2784954  |
| 9.856867 | 10 | 5 | 5 | 1001128  | 3450904  | 807082.6 | 3280974  | 849193.8 | 3946863  | 3669953  | 2643129  | 2587681  |
| 30.23817 | 10 | 5 | 5 | 416823.3 | 3270949  | 808087.5 | 3059694  | 1203526  | 3733784  | 4179686  | 3115765  | 2027098  |
| 10.9645  | 10 | 5 | 5 | 2645722  | 11765022 | 2180992  | 12419664 | 3906391  | 13859173 | 14262133 | 10615823 | 9281982  |
| 9.960467 | 7  | 3 | 3 | 7346317  | 14223871 | 14914212 | 11536114 | 10926167 | 3876112  | 3507496  | 22503914 | 36702283 |
| 9.0511   | 4  | 3 | 1 | 908883.4 | 1411447  | 685587.9 | 1237736  | 977492.6 | 1408490  | 1195004  | 2576194  | 816731   |
| 9.976317 | 9  | 5 | 4 | 746784.4 | 1054219  | 457660.2 | 1155001  | 523194.6 | 1320679  | 1689220  | 861018.8 | 505871.7 |
| 9.106183 | 6  | 3 | 3 | 771310.7 | 2014276  | 2208332  | 1644622  | 1229832  | 524483.4 | 714068.4 | 1323486  | 1626086  |
| 15.5851  | 9  | 5 | 4 | 140532.1 | 929530.5 | 296026.8 | 1011334  | 476492.6 | 1161436  | 1134252  | 738516.2 | 499977.4 |
| 9.992233 | 10 | 5 | 5 | 671086.9 | 1861644  | 823661.7 | 2044601  | 956658.8 | 2072272  | 3098653  | 1912741  | 1030414  |
| 9.93625  | 12 | 5 | 5 | 1454114  | 4050616  | 2094630  | 3668258  | 1597309  | 2603930  | 2286066  | 3154898  | 4857595  |

|          |    |   |   |          |          |          |          |          |          |          |          |          |
|----------|----|---|---|----------|----------|----------|----------|----------|----------|----------|----------|----------|
| 9.983433 | 10 | 5 | 5 | 5332345  | 13439203 | 4592669  | 12211730 | 7070221  | 15723875 | 19814192 | 12243204 | 7559504  |
| 10.97857 | 7  | 4 | 3 | 1170414  | 2626395  | 578614.8 | 2420257  | 1278422  | 3038842  | 2775631  | 2944511  | 1612660  |
| 10.9645  | 9  | 4 | 4 | 370259.5 | 1178789  | 495026.8 | 1088185  | 381482.7 | 1116440  | 1847885  | 881776.1 | 580952.1 |
| 9.3919   | 4  | 1 | 3 | 4576291  | 20494458 | 9056826  | 16809660 | 23306115 | 27024017 | 19677237 | 21799741 | 5617400  |
| 9.992233 | 9  | 5 | 4 | 621023.8 | 1979953  | 313221.1 | 1912147  | 348846.3 | 2310638  | 2130725  | 2114555  | 1509962  |
| 10.95602 | 7  | 4 | 3 | 200726.3 | 620319.8 | 220565.5 | 569581.9 | 272638.8 | 852913.2 | 870711.9 | 461678.2 | 454020.1 |
| 28.142   | 8  | 4 | 4 | 42627.7  | 213302.9 | 90081.56 | 234003.9 | 111191.4 | 283812.7 | 155338.7 | 237078.2 | 88132.05 |
| 9.992233 | 7  | 4 | 3 | 777937.1 | 1244714  | 593999.9 | 1371277  | 644197.1 | 1641942  | 1979101  | 1239637  | 881016.2 |
| 9.388367 | 8  | 4 | 4 | 771174.9 | 1671884  | 952998.7 | 1442655  | 1264649  | 2308034  | 2754367  | 1477683  | 1564156  |
| 9.842    | 6  | 2 | 4 | 1393065  | 2639970  | 1179436  | 2448576  | 567087.2 | 3334807  | 2896658  | 4093768  | 1505401  |
| 9.976317 | 10 | 5 | 5 | 4123943  | 11062282 | 4133266  | 10138478 | 4888094  | 14309128 | 16274155 | 10316281 | 6799470  |
| 44.006   | 14 | 3 | 4 | 439249   | 5130958  | 1185586  | 4727234  | 2498430  | 6323700  | 4783260  | 4272197  | 6430364  |
| 10.58813 | 10 | 5 | 5 | 1028925  | 4077291  | 854153.6 | 3903069  | 857216.8 | 5338057  | 4576485  | 3364613  | 3445766  |
| 3.710683 | 11 | 4 | 5 | 1460392  | 29651497 | 21552364 | 33723152 | 18284546 | 0        | 50459508 | 51016771 | 21049609 |
| 13.7122  | 10 | 5 | 5 | 498803.4 | 3770270  | 692223.2 | 4013668  | 1516173  | 4529499  | 4307105  | 3409327  | 2810488  |
| 10.72028 | 9  | 4 | 5 | 282831.6 | 940894.3 | 371741.9 | 873933.5 | 278007.5 | 792604.1 | 1537460  | 1008714  | 819063.1 |
| 9.992233 | 10 | 5 | 5 | 933847.6 | 5080616  | 1239535  | 5288480  | 719758.4 | 6711391  | 4466633  | 5089317  | 3431318  |
| 9.964417 | 9  | 5 | 4 | 894084.6 | 1849786  | 537063.8 | 1751187  | 424667.7 | 2641007  | 1980715  | 1854935  | 1185376  |
| 10.99152 | 5  | 3 | 2 | 1104932  | 1426625  | 420578.5 | 1644739  | 1420529  | 1291719  | 1830631  | 1044519  | 1915411  |
| 9.9677   | 10 | 5 | 5 | 9674362  | 27997505 | 9045537  | 26049715 | 10088869 | 35672992 | 38273703 | 27771439 | 17457841 |
| 9.9677   | 10 | 5 | 5 | 9670617  | 27770423 | 9080902  | 25805694 | 10218801 | 35690815 | 37938377 | 27503576 | 17301287 |
| 9.951283 | 10 | 5 | 5 | 1875306  | 5757021  | 2236449  | 5337419  | 1874686  | 4348064  | 5456682  | 3164722  | 6917978  |
| 9.976317 | 10 | 5 | 5 | 1902789  | 6148526  | 2329247  | 6644557  | 2551307  | 7873151  | 8695555  | 6749925  | 3662652  |
| 9.933967 | 9  | 5 | 4 | 1160426  | 3496696  | 562969.2 | 3266054  | 1472570  | 3712876  | 4390455  | 3212238  | 3100882  |
| 9.845483 | 7  | 4 | 3 | 676497.7 | 2326183  | 1061302  | 2049926  | 1593796  | 1908897  | 829577.4 | 2223142  | 3487721  |
| 9.960467 | 10 | 5 | 5 | 7115923  | 27122509 | 5364366  | 25996464 | 5724883  | 30770200 | 33936439 | 24883364 | 20134461 |
| 9.994767 | 9  | 5 | 4 | 598405.9 | 1345314  | 621223.7 | 1231272  | 494038   | 2089212  | 1939675  | 1057676  | 785420.9 |
| 9.8322   | 5  | 3 | 2 | 802151.7 | 1559717  | 395180.3 | 1828918  | 1782131  | 1685441  | 1387140  | 1098758  | 1468905  |
| 10.008   | 10 | 5 | 5 | 1088378  | 2259217  | 741246.1 | 2052644  | 1223163  | 2666041  | 3209313  | 2336344  | 1323786  |
| 9.445217 | 14 | 5 | 5 | 1.74E+08 | 1.45E+09 | 3.72E+08 | 1.38E+09 | 3.63E+08 | 1.28E+09 | 1.83E+09 | 1.87E+09 | 1.2E+09  |
| 9.4873   | 5  | 3 | 2 | 1414031  | 1979985  | 663015.7 | 2232580  | 1600841  | 1991898  | 1423586  | 1218633  | 2723385  |
| 10.97857 | 6  | 5 | 1 | 400330.3 | 888978.9 | 260502   | 962152.7 | 435248.3 | 1092633  | 1220725  | 584138.4 | 759424.5 |
| 9.392767 | 8  | 3 | 5 | 395718.9 | 1334751  | 885052.5 | 1165291  | 786014.5 | 2765373  | 994647.3 | 444599.7 | 953072.5 |
| 24.39    | 4  | 3 | 1 | 108073.9 | 483594.4 | 246746.6 | 435278.1 | 230418.2 | 283477   | 492116.7 | 354471.8 | 383844.2 |
| 10.98385 | 6  | 3 | 3 | 325806.1 | 1118820  | 517218.5 | 1001625  | 633615   | 530664.1 | 1473072  | 675606.3 | 1163309  |

|          |    |   |   |          |          |          |          |          |          |          |          |          |
|----------|----|---|---|----------|----------|----------|----------|----------|----------|----------|----------|----------|
| 9.9677   | 10 | 5 | 5 | 2116152  | 5470305  | 1968371  | 4982221  | 2771408  | 7001018  | 7972844  | 4689693  | 3139369  |
| 33.48467 | 5  | 4 | 1 | 201086   | 1310468  | 434880.4 | 1231188  | 341845.8 | 1920056  | 1146840  | 739693   | 1483642  |
| 9.445217 | 14 | 5 | 5 | 4521765  | 40294531 | 9965663  | 42270163 | 9564951  | 35779048 | 49584730 | 52433644 | 32123514 |
| 9.03715  | 10 | 5 | 5 | 11517615 | 96414040 | 38193137 | 88852794 | 36557973 | 77519725 | 1.57E+08 | 1.1E+08  | 71860005 |
| 24.54817 | 8  | 4 | 4 | 266057.9 | 1127513  | 489215.3 | 1257308  | 758379.2 | 1499076  | 457546   | 1201066  | 827795.4 |
| 9.6501   | 15 | 5 | 5 | 4584873  | 40874517 | 10099919 | 42835739 | 9275671  | 36284554 | 50223860 | 53236683 | 32595417 |
| 35.77867 | 9  | 5 | 4 | 284093.8 | 1188864  | 772295.2 | 1006264  | 1013485  | 2353534  | 905097.9 | 321136.3 | 869432.6 |
| 9.920517 | 10 | 5 | 5 | 2770924  | 5862233  | 1095940  | 5610418  | 1375821  | 7724287  | 5416400  | 5787160  | 5533240  |
| 42.20817 | 6  | 4 | 2 | 271568.3 | 4077481  | 531777.6 | 4198769  | 659745.8 | 3734177  | 3710687  | 3672329  | 4419794  |
| 10.008   | 9  | 5 | 4 | 631181.7 | 960831.8 | 427932.8 | 1076561  | 681800.7 | 1038981  | 1629925  | 958895.5 | 610178.6 |
| 11.05325 | 4  | 3 | 1 | 130685.7 | 399417.1 | 108310.4 | 378880.7 | 94431.79 | 579624.7 | 343339.7 | 309302   | 418505.8 |
| 10.18005 | 8  | 5 | 3 | 435732.3 | 1220027  | 163344.5 | 1144698  | 490045.5 | 1150749  | 1493654  | 1237499  | 1141884  |
| 10.97857 | 11 | 5 | 5 | 227845.2 | 1009654  | 344754.7 | 1090352  | 446865.8 | 460741.1 | 1355014  | 1020646  | 971426.7 |
| 10.28787 | 6  | 2 | 4 | 459195.8 | 2087052  | 849194.9 | 2317947  | 1365690  | 1067657  | 2850252  | 1329868  | 2890469  |
| 10.6411  | 6  | 3 | 3 | 182636.7 | 448409.2 | 161898.3 | 418395.2 | 134086.4 | 398359.7 | 718412   | 439854.4 | 401954.6 |
| 20.73633 | 5  | 2 | 3 | 64496.27 | 268537.8 | 172970.9 | 300654.8 | 143829.2 | 369689.8 | 430266.5 | 95228.31 | 380660.1 |
| 9.4468   | 7  | 3 | 3 | 15683261 | 41435931 | 55362248 | 31553413 | 41390122 | 1.12E+08 | 1873476  | 90624215 | 1723460  |
| 10.01545 | 4  | 3 | 1 | 308526.2 | 502982.9 | 300224.4 | 445234.1 | 271720.8 | 1024270  | 427646   | 248413.5 | 405972.1 |
| 10.82193 | 6  | 3 | 3 | 218506.3 | 412700.1 | 152160.2 | 386487.6 | 102072.7 | 318463.4 | 597883.7 | 342982.8 | 253170.1 |
| 9.9677   | 10 | 5 | 5 | 14759232 | 34850257 | 13591084 | 31772674 | 16773397 | 46207940 | 52289354 | 26842756 | 20882518 |
| 10.9645  | 10 | 5 | 5 | 3266773  | 15910836 | 2702887  | 15316701 | 3176845  | 18878306 | 18765816 | 13569001 | 13568833 |
| 9.857683 | 10 | 5 | 5 | 1926637  | 8322811  | 1306155  | 8629460  | 1707337  | 8025901  | 6426741  | 9779517  | 9302455  |
| 41.949   | 4  | 1 | 3 | 377239.6 | 6980075  | 1432232  | 6519278  | 2860395  | 6130921  | 6490284  | 6279814  | 9528509  |
| 9.886433 | 10 | 5 | 5 | 5882134  | 28298075 | 7640562  | 26600391 | 9157617  | 23921317 | 30926915 | 18210722 | 29993481 |
| 9.445217 | 14 | 5 | 5 | 2460882  | 16352412 | 5888350  | 17801924 | 8279801  | 15673903 | 25113188 | 18682734 | 12104671 |
| 17.61267 | 7  | 3 | 4 | 500632.5 | 1960633  | 1306477  | 1748788  | 682790.1 | 1460812  | 4269561  | 1199943  | 1679661  |
| 9.848417 | 5  | 2 | 3 | 912497.3 | 3151802  | 1449339  | 2826027  | 1772312  | 3096158  | 1170559  | 3681422  | 5141860  |
| 9.1932   | 7  | 4 | 3 | 725268.9 | 2087065  | 965476.9 | 1846477  | 1383020  | 2173259  | 3455217  | 2240918  | 1798952  |
| 10.05535 | 7  | 3 | 3 | 842219.3 | 1513787  | 845334.6 | 1333183  | 949365.3 | 593264.9 | 666836.9 | 1723229  | 2158478  |
| 10.98385 | 5  | 3 | 1 | 559483.6 | 1064764  | 870914.1 | 1215898  | 604945.2 | 2388806  | 591788.6 | 336300.3 | 1512872  |
| 9.8322   | 5  | 5 | 0 | 927409.6 | 1642182  | 181740.9 | 1895335  | 1718410  | 1678378  | 1376806  | 1612114  | 1658059  |
| 12.73317 | 10 | 5 | 5 | 469721.7 | 2415099  | 1040267  | 2183303  | 1258823  | 832385   | 2084793  | 2651410  | 2897771  |
| 9.3494   | 4  | 3 | 1 | 453063.7 | 2065892  | 569103.9 | 1896023  | 1040940  | 2398122  | 2584416  | 1490407  | 2451326  |
| 43.9995  | 10 | 3 | 4 | 296320.1 | 5097991  | 1491011  | 5446095  | 1944428  | 5682903  | 5598104  | 5805923  | 5961017  |
| 10.95055 | 10 | 5 | 5 | 782722.3 | 3445716  | 1391732  | 3753314  | 1662681  | 5189999  | 4590935  | 2621344  | 1873869  |

|          |    |   |   |          |          |          |          |          |          |          |          |          |
|----------|----|---|---|----------|----------|----------|----------|----------|----------|----------|----------|----------|
| 10.38337 | 6  | 3 | 3 | 186823.4 | 307305   | 112253.5 | 331753.7 | 130902.4 | 320959.5 | 137187   | 452847.6 | 316918.4 |
| 40.52533 | 5  | 2 | 3 | 364399.7 | 3574472  | 322654.2 | 3365195  | 1400368  | 3976108  | 3805679  | 3558278  | 3341199  |
| 10.02372 | 10 | 5 | 5 | 367058.5 | 852331.6 | 107750.7 | 814809.7 | 237706.6 | 715560.8 | 912385.2 | 993374.5 | 853078.9 |
| 9.992233 | 11 | 5 | 5 | 798249.4 | 2729169  | 1333387  | 2451554  | 1437105  | 2566100  | 2136341  | 2496524  | 4982832  |
| 10.58257 | 8  | 5 | 3 | 153589.4 | 553253.7 | 199133.2 | 523113.8 | 59783.22 | 415934.3 | 811154.2 | 726060.9 | 419712.9 |
| 9.992233 | 9  | 5 | 4 | 356198   | 779852.9 | 171307.1 | 824246.2 | 260808.9 | 912184.9 | 529122.6 | 930403.8 | 846916.8 |
| 10.95055 | 10 | 5 | 5 | 424455   | 2431169  | 890489.2 | 2272587  | 675932.1 | 3438714  | 3177057  | 1780179  | 1346604  |
| 9.36565  | 5  | 3 | 2 | 521341.8 | 896850   | 615133.1 | 774531.8 | 607607   | 1006213  | 142692.1 | 472600.3 | 1130187  |
| 20.24783 | 10 | 5 | 5 | 1799625  | 14049971 | 1968635  | 13676390 | 1758782  | 15951844 | 16173527 | 12053338 | 12219809 |
| 9.983467 | 11 | 5 | 5 | 2663234  | 4411708  | 2016658  | 4726049  | 840939.7 | 6262285  | 5054564  | 960554.5 | 4716397  |
| 9.979667 | 6  | 3 | 2 | 1547464  | 3472016  | 2951083  | 3961105  | 1750459  | 7272180  | 3543012  | 5373948  | 817431.5 |
| 9.659033 | 10 | 5 | 5 | 4373901  | 11483116 | 1498039  | 12366685 | 5898437  | 12702876 | 11520995 | 9376147  | 10748637 |
| 10.01477 | 5  | 1 | 4 | 2909825  | 3291585  | 1878848  | 3640848  | 1600220  | 3977482  | 0        | 3553706  | 4448588  |
| 9.4468   | 9  | 5 | 3 | 5828677  | 19853091 | 1595997  | 18767645 | 7294140  | 19739394 | 20331347 | 21686910 | 20197481 |
| 9.295167 | 3  | 0 | 3 | 351197.7 | 894245.1 | 349564.2 | 1022934  | 824657.2 | 583800.1 | 891195.6 | 1265172  | 509748.7 |
| 19.4465  | 10 | 5 | 5 | 5620057  | 96539474 | 39949394 | 85796138 | 64119390 | 75775847 | 1.37E+08 | 1.43E+08 | 61634773 |
| 11.34627 | 4  | 0 | 4 | 10865831 | 1.82E+08 | 24450338 | 1.94E+08 | 77695522 | 1.69E+08 | 2.24E+08 | 1.85E+08 | 1.67E+08 |
| 8.978067 | 5  | 2 | 3 | 45252436 | 1.3E+08  | 1.58E+08 | 97118046 | 1.7E+08  | 2.89E+08 | 1170577  | 3.14E+08 | 360313.2 |
| 9.26025  | 12 | 5 | 5 | 14632727 | 74081018 | 20621546 | 69606318 | 24092723 | 79288829 | 98408096 | 85337796 | 61539149 |
| 9.43325  | 8  | 5 | 3 | 542813.7 | 3077293  | 1525470  | 2803000  | 1203430  | 4550750  | 4727619  | 2891750  | 1784996  |
| 10.95055 | 10 | 5 | 5 | 2332126  | 12484583 | 2921206  | 11941454 | 2512218  | 14828635 | 15971076 | 10167624 | 9155749  |
| 10.98385 | 8  | 4 | 4 | 249123.9 | 744767.2 | 393763   | 677252.9 | 269710.5 | 839064.7 | 680728.2 | 388365.9 | 445779.3 |
| 9.856867 | 10 | 5 | 5 | 1405913  | 6117525  | 1029257  | 5872300  | 1399302  | 7377418  | 7101901  | 5334458  | 5401073  |
| 15.38067 | 10 | 5 | 5 | 146137.5 | 928669   | 302700.6 | 876262.2 | 214978.3 | 1172061  | 1273913  | 798342   | 517760.1 |
| 31.78217 | 6  | 3 | 3 | 116897.1 | 324662.8 | 231682.9 | 375202.3 | 274478.4 | 150221.1 | 380382.9 | 61172.02 | 654878   |
| 9.848417 | 10 | 5 | 5 | 812107.6 | 3915742  | 719594.9 | 3740555  | 1011998  | 4026756  | 4506537  | 3800364  | 2749417  |
| 9.999217 | 8  | 4 | 4 | 925055.9 | 1092325  | 814821   | 938238.4 | 732926.6 | 888822   | 1005057  | 2500239  | 549264.4 |
| 11.83155 | 6  | 3 | 1 | 419076.8 | 3856110  | 918896.8 | 4265995  | 2703162  | 3612810  | 5012143  | 2558950  | 3712642  |
| 9.8322   | 6  | 4 | 2 | 1922433  | 3687353  | 4469098  | 4494871  | 3602851  | 1822891  | 1720712  | 11680279 | 1616726  |
| 9.445217 | 14 | 5 | 5 | 1.74E+08 | 1.46E+09 | 3.75E+08 | 1.38E+09 | 3.65E+08 | 1.28E+09 | 1.84E+09 | 1.88E+09 | 1.2E+09  |
| 10.9645  | 10 | 5 | 5 | 2445508  | 10215497 | 2520122  | 9752498  | 2123302  | 12433869 | 13079166 | 8224641  | 7339292  |
| 9.202433 | 8  | 4 | 4 | 1719372  | 5625998  | 3270022  | 6612740  | 6140487  | 4026810  | 10973243 | 6352719  | 4124062  |
| 9.9677   | 11 | 5 | 5 | 1403328  | 3851421  | 1322373  | 3549100  | 1695476  | 4908300  | 5452372  | 3525159  | 2190616  |
| 10.9645  | 10 | 5 | 5 | 398727.6 | 1132935  | 361901.1 | 1058474  | 388018.4 | 1453679  | 1542807  | 1063195  | 924515.1 |
| 9.317167 | 7  | 3 | 4 | 1315701  | 1959002  | 1131111  | 1754393  | 918499.1 | 1786277  | 1257098  | 779788.6 | 2245831  |

|          |    |   |   |          |          |          |          |          |          |          |          |          |
|----------|----|---|---|----------|----------|----------|----------|----------|----------|----------|----------|----------|
| 9.716267 | 8  | 4 | 4 | 380048.5 | 514425.9 | 363851   | 580643.9 | 300353.2 | 679354.7 | 0        | 987138.6 | 510551.8 |
| 10.008   | 10 | 5 | 5 | 2103717  | 5681932  | 1261244  | 5337080  | 2091518  | 5299723  | 7747751  | 4423172  | 5099014  |
| 15.72875 | 5  | 3 | 2 | 9010669  | 1.63E+08 | 63547292 | 1.51E+08 | 57848447 | 2.67E+08 | 1E+08    | 1.46E+08 | 1.73E+08 |
| 10.38125 | 10 | 5 | 5 | 670378.7 | 2094196  | 656902   | 2218435  | 595200.5 | 1841593  | 3212809  | 2092035  | 1524698  |
| 9.9677   | 10 | 5 | 5 | 2414480  | 8868791  | 2377168  | 8194934  | 4135090  | 9677101  | 12298260 | 7729166  | 5889494  |
| 18.67267 | 6  | 3 | 3 | 54086.18 | 184410.3 | 25031.73 | 196170.3 | 78201.81 | 196129.8 | 217659.3 | 180788.3 | 177801.7 |
| 18.82033 | 10 | 5 | 5 | 257246.1 | 1304203  | 475021.3 | 1403137  | 522812.4 | 1096272  | 1153710  | 844845.4 | 1331449  |
| 9.912633 | 3  | 3 | 0 | 744368.1 | 1294763  | 428245.9 | 1187496  | 631007.9 | 1105807  | 642303.3 | 1651256  | 1654500  |
| 9.857683 | 7  | 5 | 2 | 1510369  | 3481177  | 432063.2 | 3955252  | 3252927  | 3363950  | 2826233  | 3796867  | 3933218  |
| 40.4255  | 4  | 1 | 3 | 315786.6 | 5887231  | 362351.1 | 5573189  | 2146756  | 6460019  | 5540911  | 5985240  | 5638617  |
| 9.4775   | 8  | 4 | 4 | 1701624  | 8642614  | 4371540  | 7447387  | 7267307  | 6106510  | 2159991  | 12044327 | 12015992 |
| 10.95055 | 6  | 2 | 4 | 231979.3 | 542457.7 | 307747.8 | 594082.9 | 200363.8 | 842441.7 | 902739.5 | 415054.9 | 255551.4 |
| 9.845483 | 10 | 5 | 5 | 3080733  | 15479498 | 1403582  | 15990876 | 3313729  | 16150745 | 15367500 | 17500261 | 14137834 |
| 9.398583 | 5  | 3 | 2 | 589571.5 | 2241403  | 571655.9 | 2539142  | 1998849  | 2399433  | 2653715  | 2299048  | 1252250  |
| 10.03947 | 9  | 5 | 4 | 329450   | 765215.4 | 140367.4 | 826244.1 | 404209   | 803364.9 | 767263.8 | 866406.4 | 863514.1 |
| 10.9645  | 10 | 5 | 5 | 491203.7 | 1879605  | 810009.3 | 2021397  | 608038.8 | 2805324  | 2562900  | 1495630  | 818300.4 |
| 24.14267 | 6  | 3 | 3 | 175762.6 | 1293465  | 609101.4 | 1165906  | 680733.7 | 730081.3 | 1448505  | 787544.1 | 1266507  |
| 9.976317 | 10 | 5 | 5 | 4007193  | 11219360 | 3766604  | 10414293 | 4363972  | 14340816 | 15659772 | 10904408 | 6913851  |
| 9.43325  | 7  | 3 | 2 | 1126213  | 4567325  | 3786102  | 5436077  | 4925888  | 1333156  | 2612695  | 8989321  | 8357323  |
| 9.979667 | 9  | 5 | 4 | 1469784  | 3732808  | 1012182  | 3450559  | 1733098  | 4647720  | 4858026  | 3239140  | 2432611  |
| 29.006   | 10 | 5 | 5 | 1669890  | 9969673  | 2498305  | 9333569  | 3788299  | 8925511  | 9657492  | 8235980  | 8686394  |
| 9.989483 | 10 | 5 | 5 | 1248522  | 3849593  | 1464908  | 3551391  | 1558039  | 5506885  | 4747375  | 4375458  | 2243667  |
| 10.95835 | 5  | 2 | 3 | 8453944  | 23094811 | 21937459 | 18512685 | 24494425 | 36320164 | 638623.4 | 28697976 | 333835.2 |
| 8.99545  | 10 | 5 | 5 | 438299   | 867754.7 | 398918.4 | 950796.7 | 442850.4 | 1456651  | 577867.7 | 474142.8 | 762896.2 |
| 9.903567 | 9  | 4 | 5 | 1097867  | 3681234  | 1640523  | 3368570  | 1532008  | 3127348  | 5642643  | 3054337  | 5010464  |
| 9.328967 | 11 | 4 | 5 | 927585.4 | 1941501  | 861629.5 | 1779390  | 782182.9 | 3294377  | 1590134  | 2279750  | 1316330  |
| 9.9014   | 9  | 4 | 5 | 1468972  | 5802346  | 742143.2 | 5446650  | 2383410  | 5301360  | 5134300  | 6675527  | 6541720  |
| 10.008   | 10 | 5 | 5 | 438194.7 | 1029219  | 173586.4 | 1105132  | 504844.4 | 1212767  | 904697.8 | 1057887  | 1167944  |
| 11.53673 | 9  | 4 | 5 | 301028.8 | 1067328  | 357814.8 | 1142345  | 402837.4 | 1398008  | 793514.8 | 581818.6 | 1271252  |
| 10.211   | 10 | 5 | 5 | 470315.3 | 2728929  | 990215   | 2553532  | 776439.1 | 2261051  | 3846469  | 3213923  | 3049111  |
| 11.88973 | 10 | 5 | 5 | 493159.6 | 2447275  | 541742.4 | 2579693  | 778160.2 | 2853127  | 3190837  | 2158863  | 2052113  |
| 9.94455  | 9  | 5 | 4 | 758337.3 | 2050598  | 554390.8 | 1958802  | 350552.3 | 2896389  | 2016969  | 1523377  | 1596402  |
| 9.9677   | 10 | 5 | 5 | 1835342  | 3662883  | 1510324  | 3423681  | 782378.7 | 5620676  | 4682981  | 2643463  | 3487931  |
| 10.49903 | 5  | 4 | 1 | 150054.5 | 348074.5 | 68867.09 | 369176   | 133305.3 | 431880.6 | 394641.8 | 356827.4 | 275046   |
| 25.76783 | 10 | 5 | 5 | 1767610  | 9502848  | 4332492  | 8689166  | 3934427  | 3460904  | 8734880  | 9657101  | 10018708 |

|          |    |   |   |          |          |          |          |          |          |          |          |          |
|----------|----|---|---|----------|----------|----------|----------|----------|----------|----------|----------|----------|
| 30.30733 | 10 | 5 | 5 | 532419.1 | 3380568  | 672237.1 | 3194719  | 1143683  | 2939409  | 4173606  | 3328495  | 2546404  |
| 9.915583 | 9  | 5 | 4 | 1172830  | 4765209  | 2653930  | 5210118  | 1761246  | 2534630  | 2279892  | 7114374  | 8034456  |
| 9.992233 | 10 | 5 | 5 | 1082994  | 2279718  | 843985.3 | 2061781  | 1311491  | 2608636  | 3426675  | 2398861  | 1218283  |
| 30.08117 | 10 | 5 | 5 | 7061468  | 40831110 | 7472328  | 43571188 | 17910395 | 30514503 | 42751563 | 47102003 | 35908770 |
| 23.0595  | 10 | 5 | 5 | 1639976  | 21240608 | 5265059  | 20373754 | 3279911  | 13580102 | 20109642 | 21279178 | 28128317 |
| 10.45545 | 10 | 5 | 5 | 2166552  | 10811480 | 6846351  | 9271901  | 8701936  | 19647600 | 7921840  | 16190031 | 3148202  |
| 42.36617 | 4  | 0 | 4 | 333550.3 | 3496299  | 128454.9 | 3845167  | 2427583  | 3552734  | 3332149  | 3663401  | 3522219  |
| 39.56083 | 6  | 3 | 2 | 396365.8 | 5375022  | 670103.5 | 5223379  | 860410.3 | 6435596  | 5162279  | 5072741  | 5541504  |
| 9.1322   | 5  | 3 | 2 | 281471.1 | 440791.4 | 187110.5 | 373246.3 | 441305.8 | 435003.4 | 278507.1 | 667352.8 | 585660.5 |
| 9.992233 | 5  | 4 | 1 | 369202.1 | 842399   | 272870.2 | 763333.1 | 494861.7 | 750601.4 | 1199218  | 926568.5 | 450969.2 |
| 9.577683 | 9  | 5 | 4 | 530100.1 | 1419511  | 378296.2 | 1509379  | 524385.5 | 1714581  | 1893579  | 1219863  | 1305949  |
| 9.960467 | 10 | 5 | 5 | 12901467 | 37345785 | 12118539 | 34875131 | 13085615 | 48047184 | 51018836 | 36539214 | 23613681 |
| 32.47467 | 10 | 5 | 5 | 1426908  | 10315071 | 2514284  | 9883969  | 1817463  | 8105720  | 9416937  | 9291696  | 10142274 |
| 9.311883 | 5  | 2 | 3 | 771614.6 | 4912134  | 3062260  | 4390276  | 2174284  | 7113411  | 483390.2 | 2944215  | 7443997  |
| 9.531467 | 4  | 3 | 1 | 304686.9 | 347676.1 | 75526.05 | 427723.9 | 555166   | 404008.5 | 445694.6 | 329036.6 | 264335.6 |
| 10.95835 | 6  | 3 | 3 | 256448.6 | 1084191  | 234296.9 | 1032380  | 291188.4 | 848353.2 | 1232530  | 1385546  | 1096161  |
| 9.8322   | 5  | 3 | 2 | 836509.1 | 2556155  | 1128584  | 2317786  | 1300062  | 3484541  | 768039.3 | 2161562  | 2967470  |
| 34.55167 | 9  | 5 | 4 | 175665.4 | 656198.4 | 399859.1 | 587329.5 | 294034.7 | 353213.4 | 623354.9 | 185576.4 | 1057954  |
| 42.841   | 9  | 4 | 4 | 324218.2 | 5409516  | 1648423  | 5056616  | 1945838  | 5111919  | 8078657  | 3616996  | 4748822  |
| 19.95717 | 10 | 5 | 5 | 15234069 | 95844577 | 38220026 | 87734127 | 44508323 | 39483268 | 1.14E+08 | 1.05E+08 | 80319300 |
| 11.13867 | 6  | 3 | 3 | 478284.5 | 1898626  | 372974.9 | 1966740  | 322294.8 | 2265499  | 1275520  | 2019648  | 1896247  |
| 36.94217 | 4  | 0 | 3 | 296997.2 | 5192831  | 165242.8 | 5664795  | 3301383  | 5050675  | 4986508  | 5371371  | 5269816  |
| 9.992233 | 4  | 3 | 1 | 668901   | 704953.2 | 134608.9 | 792885   | 604761.1 | 749066.1 | 601459.3 | 529847.5 | 793323.3 |
| 10.95602 | 8  | 5 | 3 | 916253.6 | 2659756  | 1077931  | 2881278  | 1188522  | 3949622  | 3685479  | 2172938  | 1851862  |
| 8.9343   | 5  | 3 | 2 | 226181.2 | 548714.8 | 186262.1 | 588030.4 | 215327.9 | 571278.7 | 801677.2 | 459683.6 | 611925.6 |
| 10.93618 | 5  | 3 | 2 | 148768.3 | 534454.5 | 166846.9 | 490196.9 | 271412   | 503668.6 | 426890.5 | 423787.6 | 492256.8 |
| 10.008   | 6  | 3 | 3 | 425055.4 | 695838.5 | 330775.8 | 769307.8 | 416487.3 | 670308.4 | 1223021  | 733906.6 | 348586.1 |
| 9.382183 | 7  | 4 | 3 | 443959.7 | 1841001  | 290298.8 | 1668500  | 1183012  | 2263239  | 1850777  | 1881388  | 1453968  |
| 10.87708 | 4  | 1 | 3 | 306968.3 | 603136.5 | 250561.2 | 662942.9 | 352338.4 | 669318.3 | 877475.9 | 333716.3 | 348079.2 |
| 9.979667 | 5  | 3 | 2 | 8522845  | 15242635 | 18994461 | 18676101 | 16088226 | 44380410 | 3477997  | 2010289  | 1508760  |
| 9.848417 | 8  | 5 | 3 | 1120610  | 2573884  | 638611.1 | 2765779  | 1220893  | 2558372  | 3347727  | 3047143  | 2115958  |
| 3.822717 | 12 | 3 | 5 | 568323.9 | 8806190  | 5481437  | 9888298  | 5629164  | 0        | 11732844 | 14214271 | 7507015  |
| 38.3235  | 7  | 2 | 3 | 339676.6 | 4100101  | 1102746  | 3859272  | 1354800  | 5077072  | 4464618  | 4615912  | 4116438  |
| 21.76517 | 10 | 5 | 5 | 230861.5 | 1335720  | 268170.3 | 1382935  | 213014.2 | 1352737  | 1753930  | 1069101  | 1134857  |
| 9.979667 | 9  | 5 | 4 | 773526   | 1421287  | 591755.8 | 1573829  | 929551.6 | 1777484  | 1632418  | 2091115  | 715246.7 |



|          |    |   |   |          |          |          |          |          |          |          |          |          |
|----------|----|---|---|----------|----------|----------|----------|----------|----------|----------|----------|----------|
| 9.94455  | 10 | 5 | 5 | 1247122  | 4229603  | 1001269  | 4031128  | 1038683  | 5616856  | 4852227  | 4037764  | 3255043  |
| 10.97857 | 10 | 5 | 5 | 276820.5 | 1111750  | 177525   | 1024235  | 595344.3 | 938015.5 | 1233004  | 1252078  | 1237568  |
| 36.83683 | 3  | 3 | 0 | 494867.4 | 10550053 | 2889000  | 10138804 | 151700.2 | 14834815 | 6690610  | 10317098 | 10283547 |
| 8.97505  | 10 | 5 | 5 | 802948.1 | 2228434  | 711626.2 | 2097876  | 628475.2 | 2778046  | 2801174  | 2649158  | 1575196  |
| 10.45545 | 10 | 5 | 5 | 4135141  | 14612730 | 3134104  | 13839418 | 4642747  | 19691793 | 13985850 | 12253669 | 11931415 |
| 31.7815  | 9  | 5 | 4 | 9388241  | 58644236 | 31840314 | 52477830 | 31636102 | 35433317 | 57957726 | 19554332 | 88674791 |
| 10.9645  | 10 | 5 | 5 | 1199537  | 4805316  | 1582005  | 4516670  | 1381651  | 6526611  | 6545841  | 3551364  | 3634530  |
| 9.46265  | 11 | 5 | 4 | 4617709  | 66655576 | 32695790 | 60289556 | 32885348 | 97209383 | 34374616 | 37748704 | 1.04E+08 |
| 9.331383 | 6  | 4 | 2 | 756229.3 | 1122267  | 799829.9 | 953493.6 | 932457.3 | 1001867  | 93594.72 | 773639.6 | 1522439  |
| 10.74635 | 7  | 4 | 3 | 168639.3 | 673268.5 | 189223.4 | 637045   | 184081.4 | 860403   | 580992.5 | 768162.2 | 387761.9 |
| 9.460217 | 12 | 4 | 5 | 2678676  | 4817807  | 4809310  | 5897296  | 6210194  | 1742911  | 13286578 | 2386049  | 2614859  |
| 9.9847   | 6  | 4 | 2 | 1331389  | 2448961  | 1322050  | 2217578  | 1043643  | 3334859  | 3231452  | 1509718  | 3575386  |
| 9.856867 | 10 | 5 | 5 | 1.91E+08 | 1.05E+09 | 45798548 | 1.08E+09 | 1.71E+08 | 1.13E+09 | 1.05E+09 | 1.03E+09 | 1.01E+09 |
| 9.920517 | 10 | 5 | 5 | 2673076  | 28859976 | 1366746  | 28303313 | 3738890  | 30595186 | 29344941 | 27731345 | 29399627 |
| 16.00877 | 8  | 4 | 4 | 271189   | 2277139  | 491304   | 2192845  | 367104.3 | 3131752  | 1931121  | 1982862  | 2115848  |
| 26.8245  | 9  | 5 | 4 | 1082265  | 6922645  | 5407939  | 6047324  | 3312009  | 2205812  | 8703277  | 475652.9 | 9885342  |
| 37.072   | 8  | 1 | 4 | 345995.9 | 3198401  | 1005519  | 2922327  | 1726306  | 2877269  | 4990009  | 2632242  | 2776701  |
| 9.45135  | 5  | 1 | 3 | 426227.4 | 1489888  | 399594.4 | 1390200  | 603339.1 | 2115990  | 1546468  | 1434329  | 1028393  |
| 20.25967 | 5  | 3 | 2 | 351096.7 | 1516225  | 1648602  | 1816217  | 1438244  | 277852.2 | 286501.6 | 3045600  | 3574009  |
| 9.983433 | 11 | 5 | 5 | 866653.9 | 3295055  | 805112.4 | 3053114  | 1550514  | 2937460  | 2592951  | 4151989  | 4176535  |
| 10.008   | 10 | 5 | 5 | 587785.4 | 2063460  | 554381.4 | 2184054  | 683468.5 | 2266840  | 2880592  | 2017229  | 1428777  |
| 9.986767 | 10 | 5 | 5 | 798965.3 | 1998263  | 722271.5 | 1827683  | 1011621  | 2535064  | 2872043  | 2023650  | 1238955  |
| 10.9645  | 10 | 5 | 5 | 822107.3 | 3097150  | 765593.6 | 2960290  | 643454.8 | 3973447  | 3768560  | 2511956  | 2215782  |
| 10.9645  | 10 | 5 | 5 | 387688.7 | 1461163  | 449907.6 | 1373314  | 459378.9 | 1837640  | 2028138  | 1028392  | 1085858  |
| 10.7188  | 7  | 3 | 4 | 39762424 | 3.54E+08 | 43942456 | 3.41E+08 | 85650842 | 3.87E+08 | 3.86E+08 | 2.83E+08 | 3.42E+08 |
| 10.008   | 12 | 5 | 5 | 666167.7 | 883335.1 | 175890   | 1035274  | 1064712  | 760594.2 | 650379.1 | 1072728  | 1015053  |
| 9.4468   | 9  | 4 | 5 | 5067397  | 19540581 | 7101095  | 20988156 | 7873480  | 12710113 | 17535849 | 25639460 | 28327902 |
| 9.37135  | 5  | 2 | 3 | 2944302  | 12179909 | 10220012 | 10073768 | 11555611 | 24140975 | 14804863 | 1990047  | 18766496 |
| 10.95055 | 10 | 5 | 5 | 2315295  | 12373700 | 2878807  | 11855865 | 2470186  | 14530700 | 15898196 | 10215458 | 8997958  |
| 9.559117 | 8  | 4 | 4 | 790940.7 | 1480601  | 1578100  | 1216830  | 1104236  | 1024962  | 935219.9 | 444073.7 | 4275094  |
| 10.9645  | 10 | 5 | 5 | 10513957 | 40687692 | 10552758 | 43083481 | 13990213 | 51708478 | 52105365 | 34769670 | 29100585 |
| 10.9645  | 10 | 5 | 5 | 1019615  | 4304398  | 905760.4 | 4540571  | 1463291  | 5282217  | 5252306  | 3760584  | 3316477  |
| 10.03947 | 10 | 5 | 5 | 238152.2 | 517424.4 | 135954.7 | 497247.5 | 51038.72 | 420484.2 | 570745.4 | 462464.2 | 730748.5 |
| 9.43325  | 12 | 5 | 4 | 1200566  | 9945869  | 2453179  | 9461782  | 2568626  | 8794212  | 12223413 | 12882990 | 8496652  |
| 9.960817 | 10 | 5 | 4 | 680099.9 | 1291109  | 878515.7 | 1579503  | 1892806  | 1297550  | 1556391  | 549026.3 | 441061.5 |

|          |    |   |   |          |          |          |          |          |          |          |          |          |
|----------|----|---|---|----------|----------|----------|----------|----------|----------|----------|----------|----------|
| 9.992233 | 9  | 4 | 5 | 307162   | 712406.9 | 194155   | 751221.3 | 208620.5 | 894646.4 | 637794.8 | 912917.9 | 668625.9 |
| 9.972483 | 7  | 3 | 4 | 3124217  | 2842618  | 1040501  | 3228229  | 2580478  | 4382774  | 2846510  | 3204605  | 1963609  |
| 14.22425 | 3  | 3 | 0 | 570590.6 | 4388721  | 3107249  | 4993494  | 3173584  | 3877866  | 2299002  | 9698022  | 4067515  |
| 9.311417 | 9  | 5 | 4 | 706468.3 | 1641931  | 290209.8 | 1528884  | 761374.6 | 1969962  | 1742945  | 1211294  | 1772398  |
| 12.71968 | 10 | 5 | 5 | 229788.3 | 1595744  | 999732   | 1806966  | 1184686  | 2478493  | 2778564  | 405717.8 | 1258221  |
| 41.96333 | 11 | 4 | 4 | 417645.3 | 3924084  | 1933783  | 4335287  | 2316823  | 3734683  | 4391017  | 5608857  | 5172325  |
| 9.1476   | 6  | 3 | 3 | 94917984 | 92583336 | 1.09E+08 | 73398193 | 88485509 | 10121313 | 22993139 | 18398244 | 2.57E+08 |
| 22.19183 | 7  | 5 | 2 | 315475.6 | 571441.6 | 541256.6 | 695735.8 | 732527.4 | 882739.8 | 181845.6 | 1377776  | 144379.5 |
| 9.999217 | 10 | 5 | 5 | 1181296  | 3817925  | 1118298  | 3563928  | 1488881  | 5249599  | 4713685  | 2567360  | 3222278  |
| 36.33867 | 10 | 5 | 5 | 882538.7 | 7417311  | 2330646  | 6990162  | 2102461  | 9329308  | 6259127  | 4081968  | 9774344  |
| 10.95835 | 8  | 4 | 4 | 1108210  | 1845672  | 2331280  | 1507161  | 688075.7 | 607865.9 | 6007089  | 1023123  | 739878.3 |
| 9.071517 | 8  | 5 | 3 | 225286   | 485957.9 | 182023.7 | 433266.1 | 337631.4 | 604003   | 647679.5 | 601653.4 | 267473.1 |
| 42.79783 | 3  | 0 | 3 | 345829   | 4908503  | 173559.3 | 4605215  | 2151891  | 4843048  | 4770716  | 4974870  | 5181207  |
| 10.9645  | 10 | 5 | 5 | 551162   | 3152378  | 404384   | 3048473  | 643561.9 | 3597459  | 3483959  | 2981648  | 2591209  |
| 9.999217 | 10 | 5 | 5 | 1129818  | 3258877  | 1271089  | 2954435  | 1835337  | 4480638  | 4545068  | 3273515  | 1738989  |
| 10.008   | 9  | 5 | 4 | 303502.2 | 599156.9 | 91962.43 | 633956.2 | 234365.1 | 585973.8 | 638425.2 | 736143.6 | 512571.8 |
| 12.00275 | 9  | 4 | 5 | 193092.3 | 406790.9 | 270980.4 | 485696.3 | 507474.3 | 856662.8 | 182630.5 | 211352.3 | 356765.5 |
| 9.928667 | 4  | 3 | 1 | 923217.5 | 1401642  | 727681.1 | 1210041  | 1197950  | 1657513  | 230857.6 | 1412304  | 1484361  |
| 10.92828 | 10 | 5 | 5 | 581227.8 | 1960088  | 675203.6 | 1855601  | 353407.5 | 3013924  | 1646440  | 1397802  | 1495195  |
| 9.46925  | 7  | 4 | 3 | 3674972  | 10395472 | 19298988 | 13914146 | 17339826 | 803689.2 | 2101975  | 3260552  | 44872672 |
| 10.008   | 6  | 4 | 2 | 468513.2 | 619167.9 | 289789.9 | 700790.6 | 521487.6 | 806395.5 | 947418.8 | 683986.7 | 227688   |
| 9.960467 | 10 | 5 | 5 | 5514353  | 16581237 | 5459471  | 15465378 | 6158106  | 21152411 | 22978108 | 16188327 | 10476172 |
| 9.23175  | 7  | 3 | 3 | 984924.9 | 2568973  | 2313607  | 3123990  | 3359298  | 2602721  | 6331982  | 2554951  | 459661.3 |
| 9.960467 | 10 | 5 | 5 | 637181.6 | 1938360  | 332340.1 | 1860099  | 470181.8 | 2294734  | 2192357  | 2023814  | 1611592  |
| 9.9677   | 10 | 5 | 5 | 1581609  | 6567810  | 1530906  | 6224430  | 2014276  | 7264975  | 8766418  | 6094978  | 4687055  |
| 10.9645  | 9  | 4 | 5 | 378082.6 | 1212974  | 397724.8 | 1324329  | 711209.6 | 1528070  | 1713922  | 745743.3 | 997541.8 |
| 9.8374   | 9  | 5 | 4 | 906018.7 | 4186130  | 1553082  | 4491489  | 1636677  | 3415742  | 3393026  | 2920325  | 4413127  |
| 10.01837 | 8  | 4 | 4 | 272003.9 | 627855.7 | 261343.5 | 667028.6 | 113522.2 | 251079.7 | 854382.9 | 560412.4 | 575948.1 |
| 10.95055 | 10 | 5 | 5 | 461845.6 | 2097055  | 823868.2 | 2244538  | 712789.4 | 3363196  | 1723962  | 1840905  | 1185187  |
| 8.888783 | 4  | 1 | 3 | 169832.6 | 312413.4 | 173140   | 281288   | 151367   | 376874.9 | 570200.2 | 285745.5 | 214148.3 |
| 10.45545 | 6  | 2 | 4 | 222379.3 | 558456.5 | 296844.8 | 607905.9 | 211231   | 1060804  | 290116.4 | 489350.3 | 406233.1 |
| 9.976317 | 10 | 5 | 5 | 1091541  | 2336602  | 783492.4 | 2591938  | 1688896  | 3012903  | 3078285  | 2573336  | 1616193  |
| 9.8161   | 5  | 3 | 2 | 967705.4 | 2851456  | 756355.9 | 2694725  | 877650.8 | 3165887  | 2708373  | 1871500  | 2591788  |
| 36.12233 | 10 | 5 | 5 | 2689332  | 21208702 | 7950731  | 19758971 | 7197959  | 27752267 | 17871531 | 10162149 | 29931964 |
| 9.976317 | 6  | 3 | 3 | 352521.2 | 610960.8 | 532440   | 522010.1 | 383988   | 1020140  | 1191521  | 725282.1 | 0        |

|          |    |   |   |          |          |          |          |          |          |          |          |          |
|----------|----|---|---|----------|----------|----------|----------|----------|----------|----------|----------|----------|
| 9.912633 | 10 | 5 | 5 | 12442783 | 1.11E+08 | 13798698 | 1.07E+08 | 25266858 | 1.24E+08 | 1.08E+08 | 89284413 | 1.12E+08 |
| 10.94443 | 9  | 5 | 4 | 250023.7 | 824026.4 | 146916   | 857992.5 | 203313.5 | 959673.5 | 967654.7 | 845704.9 | 701400.6 |
| 9.874317 | 8  | 3 | 5 | 6038608  | 19889913 | 7875092  | 21584938 | 9762935  | 29210759 | 11378047 | 24588059 | 22210869 |
| 11.21708 | 6  | 3 | 3 | 476710.8 | 2297212  | 959477.5 | 2647682  | 2366984  | 3013233  | 1914865  | 1538671  | 1423858  |
| 10.64557 | 7  | 3 | 4 | 164890.4 | 403080.2 | 102636.3 | 427182.5 | 145519.2 | 410042.1 | 375801.6 | 575204.2 | 317306.5 |
| 9.992233 | 10 | 5 | 5 | 621272.4 | 2202797  | 647793.5 | 2321090  | 591965.1 | 2048716  | 3249342  | 2309543  | 1546758  |
| 9.992233 | 3  | 3 | 0 | 932872.8 | 1373327  | 663287.4 | 1529219  | 943233.4 | 549638   | 775730.9 | 1997705  | 1863534  |
| 10.15407 | 9  | 5 | 4 | 627094.4 | 1094134  | 440457.3 | 1161465  | 224109.4 | 891847.6 | 1851162  | 1107133  | 828501.3 |
| 9.473733 | 6  | 3 | 3 | 439198   | 1872589  | 444411.6 | 1679153  | 1334041  | 2565277  | 1709817  | 1364498  | 1749204  |
| 9.845483 | 10 | 5 | 5 | 1545593  | 3784820  | 733117.1 | 4244534  | 3240975  | 4085360  | 4468439  | 4123521  | 3672246  |
| 9.999217 | 10 | 5 | 5 | 455478.2 | 745390.5 | 324965.5 | 808550.9 | 339371.7 | 816658.8 | 1225787  | 799405.3 | 432316.4 |
| 10.03947 | 8  | 3 | 4 | 2419540  | 3478996  | 2241316  | 3970851  | 2887402  | 3538143  | 1116291  | 2779476  | 2799991  |
| 9.979667 | 9  | 5 | 4 | 554403.9 | 1524045  | 818328.9 | 1355708  | 949165.9 | 2151843  | 2441161  | 1623612  | 500130.6 |
| 10.90802 | 10 | 5 | 5 | 274604.2 | 949116.1 | 385771.3 | 876921   | 374825.5 | 884945   | 1293764  | 523631   | 646902.8 |
| 30.28183 | 10 | 5 | 5 | 2070014  | 12814675 | 3013467  | 12018106 | 5061836  | 13337173 | 17095630 | 12310356 | 8636717  |
| 10.9645  | 4  | 1 | 3 | 151935.9 | 452196.1 | 136358.7 | 490407.8 | 247040.2 | 669971.3 | 475148.6 | 322754.8 | 438233.6 |
| 10.57323 | 9  | 4 | 5 | 157112.4 | 314408.7 | 157724.3 | 336862.5 | 42352.34 | 184812.9 | 567201.3 | 199988.7 | 256737.2 |
| 9.9847   | 5  | 2 | 3 | 4291993  | 8056354  | 7148899  | 6678637  | 7383627  | 15918520 | 472415.9 | 12004252 | 11446987 |
| 30.27883 | 10 | 5 | 5 | 3272969  | 20680509 | 3641264  | 19524428 | 7689445  | 18512890 | 25288512 | 20821980 | 15943572 |
| 9.8322   | 10 | 5 | 4 | 1328054  | 4536056  | 1447756  | 4281081  | 1231212  | 6331051  | 5738013  | 3541533  | 2933451  |
| 9.43325  | 8  | 5 | 3 | 644525.4 | 2192946  | 1175401  | 2437034  | 1388597  | 1960987  | 4253514  | 1311729  | 1743808  |
| 42.13617 | 7  | 2 | 4 | 459789.9 | 8342160  | 724389.8 | 7987731  | 2477712  | 8266628  | 9022459  | 8747638  | 8528319  |
| 10.9645  | 10 | 5 | 5 | 272143.1 | 973329.5 | 317199.6 | 924472.9 | 172256.9 | 1321500  | 1280642  | 741216.5 | 614502.9 |
| 44.68167 | 11 | 5 | 2 | 312267.3 | 4358310  | 2012382  | 4642926  | 478222.1 | 6237013  | 4106760  | 3955166  | 6164394  |
| 11.1329  | 10 | 5 | 5 | 235389.8 | 707390.5 | 252498.6 | 752198.6 | 219232.9 | 296394.2 | 651531.5 | 944047.2 | 806968.8 |
| 9.960467 | 10 | 5 | 5 | 4343217  | 7809876  | 1194378  | 8433189  | 4380209  | 9362539  | 8168673  | 8188854  | 7111864  |
| 10.03947 | 9  | 4 | 5 | 310992   | 687145.8 | 200691.7 | 725392.8 | 203403.6 | 536022.8 | 745923.7 | 959405.2 | 746362.7 |
| 10.47023 | 10 | 5 | 5 | 590615.8 | 2556543  | 155951   | 2477092  | 557803.9 | 2688822  | 2639073  | 2500646  | 2646237  |
| 9.848417 | 10 | 5 | 5 | 1425723  | 4832214  | 1076752  | 4613285  | 1230297  | 5857112  | 3636799  | 5782479  | 5131954  |
| 10.92828 | 5  | 2 | 3 | 418160.1 | 1127666  | 381370.6 | 1063034  | 294811.1 | 1227682  | 1682197  | 878325.1 | 680114.6 |
| 9.4468   | 12 | 5 | 5 | 2931399  | 19454959 | 6630868  | 18392366 | 4288702  | 19502782 | 24905402 | 25987211 | 17384761 |
| 10.01477 | 8  | 3 | 5 | 312646.8 | 684459.7 | 264724.5 | 731835.7 | 235054.4 | 628744.2 | 1117687  | 725003.9 | 459678.1 |
| 39.8775  | 5  | 2 | 3 | 334073.2 | 4600929  | 1353100  | 4940268  | 2127778  | 4003548  | 4234053  | 6974179  | 4218230  |
| 9.29345  | 4  | 3 | 1 | 5882456  | 8996054  | 9764591  | 10786757 | 9162485  | 2285221  | 20907279 | 1231017  | 18368243 |
| 9.650367 | 16 | 5 | 5 | 29571336 | 2.42E+08 | 63930199 | 2.31E+08 | 49428679 | 3.44E+08 | 2.5E+08  | 1.72E+08 | 2.14E+08 |

|          |    |   |   |          |          |          |          |          |          |          |          |          |
|----------|----|---|---|----------|----------|----------|----------|----------|----------|----------|----------|----------|
| 28.1865  | 5  | 3 | 2 | 84527.55 | 318011.9 | 181846.6 | 349819   | 153030.1 | 147431.2 | 335844.8 | 441023.5 | 123974.6 |
| 10.9645  | 10 | 5 | 5 | 1348244  | 6626744  | 1211292  | 6397016  | 1219630  | 7841062  | 8033319  | 5781186  | 5489057  |
| 9.992233 | 9  | 5 | 4 | 560622.8 | 1857489  | 318937.4 | 1806112  | 211216.3 | 2190530  | 1914455  | 1922370  | 1325864  |
| 12.28077 | 3  | 0 | 3 | 97820.29 | 208790.9 | 22248.55 | 241264.3 | 234218.2 | 227633.9 | 217123.9 | 184129   | 185806.8 |
| 9.93625  | 5  | 1 | 4 | 1491186  | 2271620  | 1283650  | 2472315  | 757657.1 | 3588067  | 209137.3 | 2852352  | 2710114  |
| 22.538   | 10 | 5 | 5 | 316934.7 | 1001120  | 395641.8 | 1160096  | 1097446  | 636964.6 | 857407.4 | 728787.3 | 1608413  |
| 10.9049  | 5  | 2 | 3 | 176043.2 | 479215.3 | 230362.6 | 516624.5 | 157120.5 | 524063.9 | 760597.3 | 168277.1 | 340647.5 |
| 9.960467 | 9  | 5 | 4 | 1911247  | 3527555  | 1583466  | 3256674  | 1263546  | 5632532  | 4827825  | 2558712  | 2285451  |
| 9.960467 | 8  | 4 | 4 | 545123.9 | 1745355  | 756420.8 | 1594286  | 841156.5 | 2136018  | 2660049  | 1690861  | 612918.7 |
| 10.95835 | 5  | 3 | 2 | 347402   | 933083.9 | 318576.7 | 991095.8 | 295715.9 | 1340858  | 829388.8 | 1043044  | 470010.8 |
| 10.02372 | 10 | 5 | 5 | 301502.4 | 873075   | 284844.5 | 821430.6 | 261894.7 | 973504.5 | 1280045  | 902702   | 561211.9 |
| 38.42433 | 10 | 2 | 3 | 335918.6 | 3456625  | 2347928  | 3126301  | 541893.1 | 2979537  | 3048173  | 3077579  | 7307097  |
| 21.0655  | 5  | 4 | 1 | 64207.01 | 251540.3 | 93268.46 | 236267.4 | 65718.02 | 269973.5 | 302465.9 | 363062.6 | 200257.3 |
| 40.237   | 6  | 2 | 3 | 375772   | 3889882  | 1362996  | 3652531  | 1143010  | 6262539  | 3032893  | 3251964  | 3821775  |
| 10.9645  | 10 | 5 | 5 | 1154466  | 5130537  | 1030227  | 4950171  | 876178.9 | 6277475  | 6003165  | 4121775  | 4059421  |
| 11.51172 | 6  | 3 | 3 | 189099.7 | 722155   | 144655.2 | 751867   | 169697.2 | 903510   | 657451.7 | 668166.9 | 546347.9 |
| 10.9645  | 10 | 5 | 5 | 659048.8 | 2512282  | 862636.1 | 2370368  | 620238.7 | 3252804  | 3459559  | 2018114  | 1379613  |
| 9.856867 | 7  | 3 | 4 | 425085.3 | 1086368  | 445094.2 | 1159648  | 320874.3 | 1707106  | 1330433  | 545383.9 | 889399.2 |
| 29.84867 | 10 | 5 | 5 | 250391.8 | 960918.1 | 304076.3 | 1017992  | 302478   | 1061361  | 1067136  | 460975.6 | 940932.3 |
| 10.95835 | 9  | 4 | 5 | 398851.4 | 792486.9 | 361573.1 | 861718   | 374528   | 1336669  | 817481   | 653082.4 | 338440.2 |
| 9.992233 | 10 | 5 | 5 | 497968.3 | 1468652  | 449218.3 | 1566420  | 580032.1 | 1901894  | 1806490  | 1664084  | 978773.4 |
| 9.4468   | 4  | 3 | 1 | 302601.2 | 795319.2 | 213713.5 | 755187   | 213141   | 933561.4 | 599056.2 | 527433.7 | 948434.6 |
| 9.9677   | 10 | 5 | 5 | 695894.4 | 1845021  | 855380.4 | 1695558  | 728018.7 | 2611055  | 2808229  | 1683124  | 780611.9 |
| 9.983433 | 6  | 3 | 3 | 2627530  | 3128720  | 3598537  | 3813684  | 3689991  | 9114999  | 910147.8 | 1099573  | 3904360  |
| 9.8374   | 9  | 5 | 4 | 2487799  | 9889483  | 622334.7 | 10150161 | 1817111  | 9563028  | 9704903  | 9487559  | 9701654  |
| 9.912633 | 8  | 4 | 4 | 2107130  | 8478235  | 2202180  | 7803554  | 4505831  | 7392344  | 5665647  | 7955335  | 11050072 |
| 9.960467 | 10 | 5 | 5 | 1647903  | 6335257  | 1649283  | 5995159  | 1956855  | 7251323  | 8678350  | 5702485  | 4429643  |
| 9.762917 | 3  | 3 | 0 | 545383   | 873452.8 | 512390.9 | 800211.2 | 170705.9 | 1153192  | 0        | 1053072  | 867188.7 |
| 10.9645  | 10 | 5 | 5 | 1079063  | 4656679  | 888459.3 | 4894050  | 1537285  | 5531909  | 5669939  | 4128293  | 3693270  |
| 10.54388 | 10 | 5 | 5 | 176760.5 | 600492.5 | 247782.8 | 558753.6 | 193637.5 | 377875.1 | 869126.9 | 624985   | 810978.2 |
| 13.04075 | 10 | 5 | 5 | 944685.7 | 12391265 | 2894747  | 11947354 | 1627047  | 15029514 | 15326888 | 8364235  | 12131009 |
| 9.9677   | 10 | 5 | 5 | 5359028  | 15609943 | 4924912  | 14671991 | 5094772  | 20202560 | 21012128 | 15106740 | 10014176 |
| 9.967367 | 9  | 5 | 4 | 826193.3 | 1950600  | 1022765  | 1803862  | 367370.4 | 3136649  | 2849093  | 669602.1 | 1605377  |
| 22.626   | 3  | 3 | 0 | 16027381 | 1.42E+08 | 34280242 | 1.34E+08 | 44476377 | 2E+08    | 1.09E+08 | 1.29E+08 | 1.35E+08 |
| 9.976317 | 6  | 3 | 3 | 483977.8 | 977347   | 135227.9 | 930642.2 | 319927.2 | 1101879  | 1141032  | 912663.6 | 894543.9 |

|          |    |   |   |          |          |          |          |          |          |          |          |          |
|----------|----|---|---|----------|----------|----------|----------|----------|----------|----------|----------|----------|
| 10.00098 | 6  | 2 | 4 | 681498.6 | 1532083  | 655691.3 | 1391115  | 837885.8 | 2063362  | 742325.9 | 2325477  | 1121083  |
| 9.960467 | 10 | 5 | 5 | 10798545 | 30880835 | 11211170 | 33151947 | 13009648 | 40217132 | 42917582 | 32641211 | 19181585 |
| 9.872917 | 8  | 4 | 4 | 3729143  | 13334353 | 3994973  | 12591846 | 3951496  | 13274253 | 6495509  | 14975711 | 16487884 |
| 44.98283 | 10 | 4 | 2 | 357154.8 | 3659217  | 2348031  | 3337319  | 218441.2 | 3614492  | 3548704  | 3663337  | 7053462  |
| 9.9677   | 6  | 2 | 4 | 932834.1 | 2127096  | 1170978  | 1905357  | 1202441  | 3557296  | 939419.4 | 909946   | 2804554  |
| 10.96997 | 5  | 2 | 3 | 299873.8 | 879104.7 | 333646.2 | 792062.5 | 562733.8 | 543404.9 | 696499.8 | 855993.7 | 874004.4 |
| 10.9645  | 10 | 5 | 5 | 659242.6 | 3055469  | 494807.5 | 2944426  | 677080.5 | 3512250  | 3492250  | 2353331  | 2774564  |
| 9.979667 | 9  | 5 | 4 | 726758.9 | 1527123  | 473953.8 | 1649984  | 793074.3 | 1893373  | 1806116  | 1233638  | 832326.4 |
| 10.95835 | 5  | 2 | 3 | 667880.9 | 1609903  | 658571.5 | 1500899  | 495459.1 | 2242203  | 2355396  | 1317558  | 838335.4 |
| 16.27878 | 7  | 4 | 3 | 68750.85 | 208179.8 | 92858.54 | 222686.9 | 57527.41 | 167627.1 | 118308.7 | 239126.7 | 355036.7 |
| 14.16525 | 8  | 4 | 4 | 188406.2 | 515893.1 | 136757.5 | 489854.4 | 142429.5 | 496268.2 | 421265.7 | 739961.9 | 528934.6 |
| 10.9645  | 6  | 3 | 3 | 280025.3 | 810012.6 | 234809.8 | 745521   | 423759.1 | 886567.6 | 1093824  | 562286.5 | 571455.2 |
| 10.008   | 8  | 5 | 3 | 1063179  | 2622351  | 1057390  | 2842474  | 1291590  | 3166685  | 3937797  | 2930744  | 1538652  |
| 26.3895  | 3  | 3 | 0 | 18163948 | 87718325 | 23350607 | 93697307 | 38581342 | 64243436 | 78572600 | 1.24E+08 | 74928251 |
| 31.13783 | 10 | 5 | 5 | 19390424 | 1.9E+08  | 19685498 | 1.85E+08 | 30550664 | 1.74E+08 | 2.01E+08 | 1.81E+08 | 1.74E+08 |
| 9.992233 | 9  | 5 | 4 | 654719.3 | 862119.8 | 127491.2 | 802527.8 | 424022.8 | 937350.2 | 902120.9 | 894919.5 | 939305.9 |
| 9.983467 | 6  | 4 | 2 | 2327436  | 2060492  | 3075063  | 2683945  | 3606248  | 7535285  | 1180834  | 441509.9 | 456122.1 |
| 9.858833 | 10 | 5 | 5 | 2980361  | 19034789 | 1923606  | 18557546 | 3052647  | 17969953 | 16419206 | 20615622 | 21114806 |
| 9.859983 | 10 | 5 | 5 | 2460719  | 11345860 | 1813725  | 10920038 | 2668623  | 11135743 | 8559649  | 13108554 | 12823854 |
| 10.9645  | 10 | 5 | 5 | 952831.7 | 4496667  | 1042761  | 4686208  | 997565   | 5560874  | 5603877  | 3854287  | 3279754  |
| 10.9645  | 10 | 5 | 5 | 799828.8 | 3378335  | 926918.6 | 3228669  | 656893.4 | 4402637  | 4291524  | 2626594  | 2407646  |
| 10.9645  | 10 | 5 | 5 | 2876642  | 14232983 | 2738296  | 14795283 | 3289651  | 17394132 | 16810812 | 12408219 | 11188517 |
| 10.96997 | 6  | 2 | 4 | 630152.4 | 1681274  | 766673.1 | 1831691  | 851896.6 | 2412546  | 2409630  | 597334.2 | 1351314  |
| 10.9645  | 7  | 4 | 3 | 445159.1 | 1263111  | 305721.2 | 1369400  | 735972.1 | 1347487  | 1498315  | 1517966  | 1177739  |
| 9.999217 | 6  | 3 | 3 | 588143.7 | 929667.8 | 562784.3 | 1027923  | 494610.1 | 1445101  | 1569051  | 847838.2 | 322190.9 |
| 9.864767 | 10 | 5 | 5 | 5570114  | 41983836 | 2511041  | 41166333 | 5609536  | 41747192 | 38686668 | 44886331 | 43983275 |
| 3.57485  | 4  | 1 | 3 | 94572.45 | 905941.7 | 442224.9 | 1006175  | 620745.9 | 144451.2 | 954247.9 | 1241181  | 1004793  |
| 9.4925   | 11 | 5 | 5 | 588522.5 | 4065554  | 2219478  | 4516752  | 2630158  | 2726475  | 865845.1 | 5593606  | 6205686  |
| 9.554967 | 9  | 5 | 4 | 257522.8 | 678305   | 287471.3 | 746612.3 | 432500.9 | 959051.6 | 962364.2 | 453101.6 | 331487.8 |
| 43.73267 | 10 | 4 | 3 | 442608   | 6357879  | 1540086  | 6016654  | 2094810  | 7593161  | 4206788  | 6140530  | 8074475  |
| 9.507167 | 6  | 3 | 2 | 1539225  | 4544437  | 3145771  | 5078204  | 2590414  | 8081362  | 2036492  | 2729724  | 2006263  |
| 20.62683 | 7  | 3 | 4 | 64099.87 | 176188.7 | 92506.22 | 162773.2 | 40643.48 | 119430.7 | 316246.4 | 79929.57 | 214623   |
| 10.01523 | 4  | 1 | 3 | 1050511  | 1769286  | 848397.3 | 1584592  | 1125273  | 2507597  | 337212.2 | 2024419  | 1741738  |
| 21.29517 | 7  | 4 | 3 | 104815.4 | 410232.9 | 352408.9 | 486065.7 | 459253.9 | 257334.8 | 483110.7 | 993314.2 | 130771.5 |
| 9.433    | 8  | 4 | 4 | 564358.9 | 3971701  | 2279599  | 3548648  | 2298420  | 3054007  | 1027629  | 5185955  | 7069928  |

|          |    |   |   |          |          |          |          |          |          |          |          |          |
|----------|----|---|---|----------|----------|----------|----------|----------|----------|----------|----------|----------|
| 10.95602 | 7  | 4 | 3 | 387656.4 | 556170.8 | 320393.6 | 643980   | 583473.2 | 1089460  | 372972.3 | 364298.6 | 329892.4 |
| 11.52297 | 9  | 4 | 5 | 216196.7 | 1106776  | 586278   | 1019897  | 297573.1 | 1598948  | 1107806  | 105155.2 | 1370045  |
| 20.26667 | 10 | 5 | 5 | 57993.87 | 425505.7 | 65371.95 | 440442.9 | 93403.75 | 507495.1 | 434163.5 | 447751.9 | 327650.1 |
| 44.96767 | 7  | 3 | 3 | 500982.1 | 7493253  | 2121804  | 7849926  | 1716720  | 8977280  | 9129248  | 4811914  | 8983236  |
| 18.776   | 10 | 5 | 5 | 216350.5 | 1146111  | 514964.5 | 1073363  | 183132.4 | 1192502  | 1784640  | 435932.3 | 888362.6 |
| 9.992233 | 8  | 4 | 4 | 393633.3 | 659355   | 150646.1 | 709760.3 | 349418.6 | 874090.3 | 754780.8 | 533028.5 | 530670.3 |
| 11.96588 | 10 | 5 | 5 | 421114.7 | 2266996  | 508798.5 | 2172312  | 518484.5 | 2873451  | 2627387  | 1894744  | 1636163  |
| 9.38595  | 9  | 4 | 3 | 1132543  | 2946007  | 1279180  | 2614253  | 2180195  | 3366035  | 3189039  | 1399709  | 2059351  |
| 9.94455  | 5  | 3 | 2 | 644735.1 | 1124392  | 477279.1 | 1033872  | 505585   | 1532665  | 1548105  | 1255154  | 437566   |
| 22.66967 | 10 | 5 | 5 | 160902.2 | 388525.5 | 172578.7 | 348728.9 | 250810.4 | 203314.8 | 668521.2 | 386340.2 | 309507.8 |
| 9.872917 | 9  | 4 | 5 | 1145294  | 4057215  | 982635.3 | 3806176  | 1643620  | 5057758  | 4662546  | 3656341  | 4351395  |
| 9.9677   | 10 | 5 | 5 | 3649957  | 9172545  | 3504369  | 8451611  | 4284042  | 12196265 | 13477231 | 7775749  | 5230477  |
| 11.52297 | 10 | 5 | 5 | 44337328 | 2.84E+08 | 49213401 | 2.73E+08 | 66565341 | 3.53E+08 | 2.72E+08 | 2.28E+08 | 2.56E+08 |
| 9.992233 | 9  | 5 | 4 | 2251911  | 2646947  | 847946.9 | 3132838  | 3537144  | 3289004  | 2958665  | 3476047  | 1967546  |
| 9.992233 | 10 | 5 | 5 | 815647.9 | 2215123  | 1099201  | 2413460  | 1057402  | 2905925  | 3396546  | 2676053  | 935094.3 |
| 10.95835 | 10 | 5 | 5 | 627530.1 | 2527973  | 676745.1 | 2411879  | 581417   | 3187946  | 3257867  | 2001345  | 1769476  |
| 9.960467 | 10 | 5 | 5 | 4433670  | 15897587 | 3829975  | 15158489 | 4199909  | 18413092 | 20700696 | 11694674 | 12501404 |
| 9.933967 | 9  | 5 | 4 | 2169057  | 4376687  | 438491.7 | 4514513  | 949497.6 | 4744285  | 4138089  | 4076476  | 3976360  |
| 10.9645  | 6  | 2 | 4 | 268232.7 | 440344.1 | 244916.4 | 487117.7 | 264068.4 | 479447.4 | 252407.2 | 183592   | 477433.4 |
| 9.992233 | 10 | 5 | 5 | 1604219  | 3542763  | 455182.7 | 3780998  | 1729901  | 3796896  | 3132527  | 4002951  | 3801745  |
| 9.398583 | 11 | 4 | 5 | 5565623  | 28740684 | 7229591  | 31120545 | 16544439 | 20099307 | 22034772 | 35991722 | 31361737 |
| 9.972483 | 13 | 5 | 5 | 953684.7 | 6351573  | 1130643  | 6548706  | 1013563  | 4560266  | 6688055  | 6163977  | 7624140  |
| 9.856867 | 10 | 5 | 5 | 2909110  | 12671462 | 1928598  | 12367735 | 1309682  | 13667258 | 15020134 | 11208290 | 10237565 |
| 10.96997 | 10 | 5 | 5 | 6.87E+08 | 4.64E+09 | 4.28E+08 | 4.81E+09 | 1.21E+09 | 5.12E+09 | 5E+09    | 4.21E+09 | 4.2E+09  |
| 10.9645  | 10 | 5 | 5 | 11517217 | 49684363 | 12581840 | 47563398 | 10433523 | 63757903 | 61207197 | 39494585 | 35662150 |
| 9.365833 | 5  | 3 | 1 | 1456222  | 5661221  | 2698414  | 6289891  | 4004364  | 2925680  | 4682566  | 3625427  | 8468545  |
| 9.568567 | 9  | 5 | 3 | 2370301  | 2273524  | 2540579  | 2770133  | 2867839  | 913729.8 | 955525.9 | 1145637  | 6795360  |
| 9.976317 | 9  | 5 | 4 | 2327265  | 5384385  | 2226565  | 4901708  | 2975007  | 7185475  | 8174545  | 4282227  | 2773865  |
| 11.52297 | 10 | 5 | 5 | 299617.9 | 1506134  | 584949.6 | 1411267  | 437667.2 | 2257147  | 1250413  | 1108216  | 920710.4 |
| 9.9014   | 13 | 4 | 5 | 4592555  | 8885370  | 3468891  | 10861435 | 14450337 | 7370178  | 14150165 | 8535899  | 9656779  |
| 24.06933 | 9  | 5 | 4 | 301466.6 | 1288588  | 666680   | 1406938  | 625252.4 | 298413.4 | 1488688  | 1448945  | 1087028  |
| 43.48817 | 6  | 2 | 3 | 344056.5 | 4002338  | 1062774  | 4199165  | 1087781  | 5841951  | 3669389  | 3689230  | 3731595  |
| 9.9677   | 10 | 5 | 5 | 5536958  | 15951366 | 5823197  | 14820383 | 6515339  | 20726222 | 23025344 | 15161480 | 9706348  |
| 10.9645  | 10 | 5 | 5 | 1106356  | 4545034  | 778824.5 | 4791595  | 1709510  | 5463420  | 5278721  | 4114321  | 3696480  |
| 9.864767 | 10 | 5 | 5 | 65439400 | 4.3E+08  | 19484099 | 4.39E+08 | 64263539 | 4.36E+08 | 4E+08    | 4.29E+08 | 4.54E+08 |

|          |    |   |   |          |          |          |          |          |          |          |          |          |
|----------|----|---|---|----------|----------|----------|----------|----------|----------|----------|----------|----------|
| 10.51392 | 4  | 4 | 0 | 131130.4 | 256150.1 | 156277.2 | 229956.8 | 128622.6 | 495214.8 | 68824.72 | 221556.9 | 292874.9 |
| 10.9645  | 4  | 1 | 3 | 203165.6 | 468483.1 | 250439.2 | 510257.7 | 203717.9 | 691657.7 | 734236.9 | 128169.1 | 436545.8 |
| 25.32033 | 7  | 4 | 3 | 179005.5 | 958642.6 | 240059.2 | 919655.7 | 181523.7 | 545395   | 1013672  | 999379.7 | 1165629  |
| 9.536783 | 11 | 5 | 5 | 910260.4 | 3707009  | 2374611  | 3170507  | 3387856  | 5318359  | 3540278  | 1236519  | 1641056  |
| 9.960467 | 6  | 3 | 3 | 1393798  | 2107748  | 1092787  | 1926656  | 875284.1 | 3207342  | 3203984  | 2076457  | 919891.9 |
| 9.55155  | 10 | 5 | 5 | 15497782 | 70962079 | 14222594 | 67190578 | 25209983 | 78568884 | 86587546 | 75570142 | 64053818 |
| 9.522017 | 5  | 3 | 2 | 709512.6 | 2183613  | 339871.7 | 2035392  | 1069760  | 2209220  | 2588847  | 1680143  | 2076642  |
| 30.29317 | 10 | 5 | 5 | 647486.3 | 2732276  | 343439.9 | 2907777  | 1280478  | 2915089  | 3079527  | 2588434  | 2205604  |
| 10.9645  | 3  | 3 | 0 | 436803.8 | 596745.1 | 158973.6 | 642274.6 | 310812.6 | 546775.8 | 787507.6 | 510670.3 | 732629.8 |
| 10.39823 | 10 | 5 | 5 | 559662.8 | 1575823  | 845536.1 | 1454863  | 372985.8 | 1528381  | 2895438  | 1771400  | 860589   |
| 9.00395  | 10 | 5 | 5 | 1692481  | 5065921  | 996361.1 | 4850482  | 1336406  | 6002865  | 6162584  | 4573293  | 3815632  |
| 9.952017 | 10 | 5 | 5 | 1093565  | 2236364  | 596788.2 | 2432302  | 1372722  | 2948808  | 2591463  | 2388343  | 1736684  |
| 8.94625  | 6  | 2 | 4 | 198082.9 | 429820.8 | 217716.3 | 475099.9 | 275749.2 | 451219.4 | 741976   | 486590.6 | 156225.3 |
| 9.976317 | 10 | 5 | 5 | 898743.3 | 2154504  | 807424.3 | 1988719  | 1002993  | 2940056  | 3022268  | 1983689  | 1179219  |
| 10.2456  | 9  | 4 | 5 | 353362.8 | 866101.9 | 163626.4 | 831917.1 | 209082.4 | 603324.4 | 828430.8 | 986519.2 | 1010511  |
| 44.5235  | 9  | 3 | 3 | 412652.7 | 4480191  | 1957088  | 4768104  | 1041838  | 7641371  | 4173431  | 3944409  | 4383536  |
| 9.119933 | 11 | 5 | 5 | 9556464  | 46136989 | 16061458 | 50486521 | 29427582 | 62109395 | 48560412 | 60947380 | 29863159 |
| 9.888767 | 8  | 3 | 5 | 2034555  | 6685999  | 651896   | 7160527  | 3527979  | 6991500  | 5759855  | 6283614  | 7019195  |
| 21.33733 | 6  | 3 | 3 | 85378.9  | 247736.2 | 129537.2 | 227650.7 | 86258.44 | 246410.2 | 346723.8 | 149824.2 | 93374.44 |
| 8.931817 | 7  | 4 | 3 | 183823.1 | 638763.3 | 367671.6 | 571808.8 | 369996.7 | 581826.2 | 1278072  | 524518.7 | 349250.1 |
| 9.960467 | 10 | 5 | 5 | 1939740  | 4584443  | 1550219  | 4253736  | 2050091  | 5763270  | 6686024  | 3850948  | 3422885  |
| 9.856867 | 10 | 5 | 5 | 1138652  | 5054803  | 678933.2 | 4840133  | 1502199  | 4486571  | 4662459  | 6081245  | 5416347  |
| 32.80633 | 5  | 3 | 2 | 224746.3 | 1238953  | 840139.6 | 1381482  | 726384.6 | 152270.1 | 2122264  | 2054575  | 1001954  |
| 10.008   | 9  | 5 | 4 | 1077283  | 1121888  | 524532.6 | 1278385  | 1084526  | 1260058  | 1954306  | 1010386  | 632840.7 |
| 9.976317 | 5  | 2 | 3 | 622627.7 | 715439.4 | 353637.8 | 812783.3 | 663296.3 | 791190.6 | 95607.57 | 809356.6 | 931434.9 |
| 9.864767 | 5  | 2 | 3 | 1544867  | 3432452  | 2622143  | 4006380  | 3613588  | 1410312  | 2199036  | 7768773  | 1773038  |
| 10.01477 | 10 | 5 | 5 | 466462   | 776354.2 | 178932.8 | 844058.5 | 486729.2 | 798222.9 | 1046904  | 805320.2 | 646561.2 |
| 9.999217 | 10 | 5 | 5 | 4621614  | 8887675  | 4288334  | 7994213  | 5487783  | 11466748 | 14693522 | 8417459  | 4020001  |
| 11.52297 | 10 | 5 | 5 | 1.18E+08 | 7.76E+08 | 1.3E+08  | 7.47E+08 | 1.78E+08 | 9.56E+08 | 7.46E+08 | 6.3E+08  | 6.94E+08 |
| 9.992233 | 10 | 5 | 5 | 869803   | 2093820  | 799941.7 | 1942350  | 872874.8 | 2347325  | 3237164  | 2167701  | 1133570  |
| 40.99967 | 5  | 3 | 2 | 355607.5 | 3347812  | 830105.5 | 3527339  | 1127072  | 4424480  | 3147719  | 2167516  | 3256953  |
| 9.976317 | 8  | 5 | 3 | 558179.8 | 1226295  | 476541.3 | 1126967  | 612632.2 | 1552789  | 1820274  | 1245415  | 816396.4 |
| 31.36467 | 8  | 4 | 4 | 4149359  | 25598752 | 13214506 | 23201598 | 13350835 | 15446274 | 25122273 | 9872139  | 38248189 |
| 10.99775 | 10 | 5 | 5 | 1048397  | 6913138  | 1702659  | 7287474  | 2376784  | 9065613  | 6411033  | 6285320  | 4699807  |
| 16.72333 | 7  | 5 | 2 | 60673.09 | 143003.1 | 53712.55 | 152821.7 | 55115.87 | 114001.1 | 212850.6 | 79737.24 | 182199.5 |

|          |    |   |   |          |          |          |          |          |          |          |          |          |
|----------|----|---|---|----------|----------|----------|----------|----------|----------|----------|----------|----------|
| 9.371417 | 6  | 4 | 1 | 795990.9 | 2896063  | 2242093  | 3385794  | 3101212  | 6725198  | 1162136  | 1812358  | 1776649  |
| 9.948333 | 5  | 4 | 1 | 1329997  | 2993481  | 2137917  | 3434844  | 2714305  | 1979010  | 257993.5 | 4551587  | 2517637  |
| 10.64708 | 10 | 5 | 5 | 228838   | 819117.1 | 300347.9 | 771349.1 | 222375.7 | 1165242  | 1050207  | 582623.2 | 456851.3 |
| 10.58747 | 5  | 2 | 3 | 242402.7 | 606355.8 | 125662.1 | 577529.8 | 186899.4 | 460944.7 | 685027.9 | 760354   | 627176.2 |
| 9.976317 | 9  | 5 | 4 | 915080.8 | 2315702  | 863927.9 | 2166423  | 791662.7 | 3154284  | 3281899  | 2132613  | 1493260  |
| 10.008   | 6  | 4 | 2 | 594455.1 | 869888.3 | 360276   | 942961.2 | 445598   | 1193276  | 1107786  | 1082698  | 401845.4 |
| 10.9645  | 10 | 5 | 5 | 332519.8 | 1484543  | 291377.3 | 1546695  | 389988.5 | 1806831  | 1714420  | 1318111  | 1090685  |
| 14.15092 | 7  | 4 | 3 | 75556.79 | 382605.4 | 118580   | 351280.9 | 213245.6 | 442595.9 | 526216   | 308380.6 | 413163.1 |
| 10.77857 | 10 | 5 | 5 | 200987.3 | 840687.1 | 292250.6 | 791788.8 | 249748.3 | 689871.3 | 1310096  | 933060.1 | 582419.2 |
| 31.14717 | 10 | 5 | 5 | 3796087  | 34360409 | 4189759  | 33424589 | 6019598  | 31367052 | 36743614 | 32405507 | 30720282 |
| 9.1172   | 9  | 5 | 4 | 1494243  | 3945614  | 1945480  | 3562999  | 2295551  | 3487292  | 6110176  | 5568881  | 3297321  |
| 8.859667 | 9  | 4 | 5 | 435704.3 | 3645497  | 917110.7 | 3474275  | 987771.1 | 3764301  | 5173250  | 3369306  | 2938019  |
| 10.37347 | 10 | 5 | 5 | 507045   | 1511554  | 649212.5 | 1416669  | 355274.1 | 461469.5 | 2219543  | 1781030  | 1605858  |
| 9.9677   | 8  | 4 | 4 | 1117117  | 2431497  | 405009.1 | 2221396  | 1561805  | 2793871  | 2262923  | 2675061  | 1799638  |
| 30.43733 | 10 | 5 | 5 | 1013257  | 3769897  | 1984240  | 4312600  | 3736894  | 6382469  | 2916978  | 1510655  | 5237654  |
| 9.445217 | 12 | 5 | 5 | 73904896 | 7.7E+08  | 2.51E+08 | 7.29E+08 | 2.01E+08 | 5.82E+08 | 8.09E+08 | 7.83E+08 | 5.16E+08 |
| 9.979667 | 9  | 5 | 4 | 391201.4 | 1033567  | 265985.6 | 977722.4 | 349489.4 | 1298587  | 1136492  | 914270.3 | 629046.2 |
| 41.46017 | 10 | 3 | 3 | 855158.1 | 5759777  | 3723237  | 5136675  | 3198593  | 425475.9 | 3928913  | 8946988  | 6079511  |
| 19.66517 | 7  | 4 | 3 | 190612.6 | 1540450  | 454349.2 | 1644455  | 677855   | 2042592  | 1743231  | 1533459  | 811442.8 |
| 9.999517 | 6  | 3 | 3 | 282041.1 | 405549.2 | 289627.3 | 463260.2 | 350247.2 | 168320.4 | 800182.9 | 571045.8 | 95773.1  |
| 40.9565  | 6  | 3 | 2 | 199658.3 | 2193715  | 769779.6 | 2324264  | 682605   | 1992284  | 1863401  | 1641711  | 1920546  |
| 9.3471   | 3  | 3 | 0 | 3122271  | 4883917  | 1057377  | 4510702  | 2690198  | 5003430  | 5862388  | 3449912  | 5884895  |
| 24.3485  | 5  | 2 | 3 | 356308.8 | 1134987  | 804346.2 | 1014309  | 498097.4 | 247897.2 | 312992.3 | 2021273  | 1521040  |
| 10.94443 | 5  | 2 | 3 | 370032   | 1234066  | 390593.6 | 1360471  | 901253.4 | 1524037  | 919879.3 | 1464332  | 1551282  |
| 9.516467 | 8  | 5 | 3 | 889153.1 | 832365.9 | 192336.4 | 965001.6 | 998944.3 | 959426.1 | 1027405  | 556631.1 | 900518.1 |
| 9.976317 | 7  | 4 | 3 | 771076.1 | 1251291  | 316523   | 1379363  | 938530.1 | 1679576  | 1153527  | 1453180  | 1097496  |
| 10.95835 | 5  | 2 | 3 | 229522.3 | 949681.7 | 486073.6 | 869751.3 | 401972.7 | 1144443  | 1686680  | 707358.1 | 421131.3 |
| 14.0339  | 6  | 3 | 3 | 68482.26 | 350163.3 | 116284.5 | 371253.2 | 119367.6 | 492252.2 | 321534.5 | 237954.3 | 450750.1 |
| 9.9014   | 10 | 4 | 5 | 1267476  | 3511198  | 1331182  | 3785913  | 1709411  | 3032486  | 2606884  | 4573243  | 5230819  |
| 21.267   | 6  | 4 | 2 | 106895.6 | 514878.5 | 152163   | 486694.7 | 162637.8 | 476139.5 | 535838.2 | 391689.5 | 404306.4 |
| 9.527817 | 11 | 5 | 5 | 1044323  | 6108645  | 2817767  | 7056461  | 6816394  | 9412625  | 5533037  | 3712444  | 3230117  |
| 10.9645  | 7  | 4 | 3 | 757492.4 | 2446406  | 654858.2 | 2341267  | 510823.8 | 3128818  | 3131864  | 1954449  | 1730794  |
| 9.856867 | 5  | 3 | 2 | 1067409  | 2124288  | 778052   | 2372555  | 1772846  | 2768501  | 887349.5 | 2809822  | 2044945  |
| 31.09517 | 5  | 3 | 2 | 55890.34 | 174922.1 | 60128.85 | 184850.9 | 50569.37 | 135652   | 91930.15 | 192388.1 | 216458.6 |
| 7.259233 | 5  | 2 | 3 | 4074201  | 35988851 | 20694823 | 39881191 | 22863788 | 33709721 | 26292361 | 71379153 | 30887920 |



|          |    |   |   |          |          |          |          |          |          |          |          |          |
|----------|----|---|---|----------|----------|----------|----------|----------|----------|----------|----------|----------|
| 9.8374   | 9  | 5 | 4 | 1298460  | 7355099  | 1605217  | 7090978  | 1340418  | 6538863  | 5749407  | 6319320  | 9160428  |
| 9.9677   | 10 | 5 | 5 | 5559032  | 16592649 | 5493854  | 15545721 | 6219264  | 21331049 | 22814707 | 16409513 | 10351225 |
| 13.59517 | 4  | 3 | 1 | 43366.26 | 227938.1 | 54556.09 | 242497.6 | 100477.1 | 146716.2 | 299775.6 | 222326.7 | 234036.5 |
| 9.473733 | 8  | 5 | 2 | 594350.3 | 2037312  | 1161214  | 1829501  | 1169754  | 905472.7 | 3652571  | 2656920  | 1991416  |
| 12.3163  | 4  | 3 | 1 | 17870590 | 2.63E+08 | 54143030 | 2.75E+08 | 81023498 | 3.07E+08 | 2.03E+08 | 3.29E+08 | 2.23E+08 |
| 20.9675  | 7  | 3 | 3 | 10180330 | 70706599 | 37778374 | 63908230 | 38512961 | 67413193 | 80494157 | 1.29E+08 | 32749683 |
| 44.9835  | 7  | 2 | 4 | 335500.2 | 4511773  | 563720.4 | 4288145  | 1644161  | 4169340  | 4891965  | 5270211  | 4355669  |
| 21.2385  | 3  | 3 | 0 | 154313.3 | 272735.3 | 88804.25 | 290040.1 | 104608.4 | 396670   | 246616.2 | 210871.6 | 180498.4 |
| 40.97067 | 6  | 2 | 4 | 422987.5 | 6001916  | 631777.5 | 5610018  | 2958513  | 7040905  | 5649541  | 5999118  | 5377966  |
| 9.08685  | 9  | 4 | 5 | 1996108  | 5215422  | 2044854  | 4751156  | 3047731  | 4989933  | 8262787  | 5859352  | 4178176  |
| 24.146   | 6  | 3 | 3 | 110020.9 | 524170.7 | 167552.6 | 482494.1 | 282694.4 | 363049.1 | 697705.4 | 410852.4 | 436259.6 |
| 10.95835 | 10 | 5 | 5 | 302654   | 948884.6 | 344004.3 | 1014932  | 396020.5 | 1206542  | 1357772  | 772242   | 493487.8 |
| 9.904767 | 10 | 5 | 5 | 4555748  | 9737857  | 1181272  | 9123980  | 4606844  | 10274681 | 9078022  | 10974336 | 8017236  |
| 41.44533 | 10 | 3 | 2 | 411418.1 | 4394280  | 1972410  | 4137273  | 162158.4 | 7750214  | 3895305  | 3329719  | 4307620  |
| 10.008   | 9  | 5 | 4 | 342036.3 | 925189.5 | 280554.8 | 853638.5 | 489763.7 | 846435   | 1392947  | 851354.8 | 635834.6 |
| 10.92208 | 6  | 2 | 4 | 155213.1 | 343963.2 | 273693.6 | 304028.9 | 156073.2 | 531951.9 | 225556.2 | 117162.3 | 117224.5 |
| 9.500733 | 8  | 5 | 3 | 1477735  | 6324264  | 2026336  | 6640569  | 1480863  | 6089917  | 7398747  | 8239705  | 6914875  |
| 43.09967 | 5  | 3 | 2 | 276685.5 | 3551166  | 441952.4 | 3470579  | 464910.4 | 4090369  | 3342593  | 2982640  | 3451568  |
| 9.9847   | 9  | 4 | 5 | 436756.6 | 1227151  | 519419.9 | 1144152  | 406483.8 | 925081.2 | 1954348  | 1559361  | 1024525  |
| 9.992233 | 9  | 5 | 4 | 846560.3 | 3054239  | 738538.7 | 2918705  | 786818.3 | 2185780  | 4009200  | 2909644  | 2586803  |
| 9.4925   | 9  | 4 | 5 | 806382.3 | 5863949  | 1597131  | 5448045  | 2868350  | 3302344  | 6670842  | 5376942  | 6637987  |
| 9.673333 | 9  | 5 | 4 | 439808.7 | 946091   | 263290.1 | 1024847  | 560495.5 | 1034859  | 985605.2 | 624412.7 | 772911.7 |
| 38.38133 | 10 | 5 | 5 | 5199823  | 91726120 | 14522539 | 94276817 | 14251575 | 83867940 | 82253407 | 1.15E+08 | 80734319 |
| 9.445217 | 14 | 5 | 5 | 7247313  | 60004912 | 13901709 | 57649229 | 12650043 | 54287143 | 76090619 | 73231386 | 51969325 |
| 10.31835 | 10 | 5 | 5 | 604510.1 | 3009419  | 1012228  | 3188196  | 1006046  | 3071104  | 4092772  | 3842608  | 1652836  |
| 10.57323 | 9  | 5 | 4 | 81462.38 | 236196.8 | 54766.94 | 223921.6 | 80758.38 | 292622.3 | 218508.3 | 200142.7 | 174866   |
| 9.972483 | 5  | 3 | 2 | 636566.9 | 1250183  | 1148609  | 1050661  | 1105507  | 2920454  | 446991.5 | 417544.9 | 1990724  |
| 11.16097 | 9  | 4 | 5 | 460553.4 | 2462326  | 1216257  | 2663844  | 1053801  | 4085213  | 2810701  | 765332.6 | 1975478  |
| 9.4775   | 13 | 5 | 4 | 1566604  | 11153477 | 2042078  | 11796222 | 4630157  | 8312074  | 14013322 | 10684543 | 11147783 |
| 9.976317 | 7  | 4 | 3 | 435333.3 | 899654.5 | 181797.9 | 835232.2 | 471967.4 | 777046.2 | 1103912  | 1069520  | 860395.6 |
| 11.63255 | 8  | 4 | 4 | 200718.2 | 1009035  | 542263   | 933724.1 | 240929.1 | 1803162  | 993189.6 | 737199.8 | 341583.5 |
| 24.68117 | 10 | 5 | 5 | 447501.5 | 1223049  | 440695.7 | 1325808  | 688292.2 | 1185092  | 1908211  | 686785.5 | 1089379  |
| 10.008   | 5  | 3 | 2 | 371878.5 | 678458.8 | 149018.6 | 720814.6 | 299940.2 | 723897.2 | 822337.2 | 791810.7 | 587983.8 |
| 44.62433 | 5  | 2 | 3 | 90611.68 | 341466.4 | 109160.6 | 320467.4 | 127673.8 | 260586.4 | 389613.3 | 412390.5 | 450910.7 |
| 10.03035 | 7  | 3 | 4 | 802005.4 | 1614678  | 588067.7 | 1480688  | 890597.6 | 2406704  | 1553924  | 1765984  | 1585659  |

|          |    |   |   |          |          |          |          |          |          |          |          |          |
|----------|----|---|---|----------|----------|----------|----------|----------|----------|----------|----------|----------|
| 10.94443 | 10 | 5 | 5 | 319184.1 | 1641446  | 464638.3 | 1571299  | 310709.1 | 2306956  | 1642618  | 1289442  | 1132517  |
| 9.872883 | 5  | 2 | 3 | 744162.2 | 2612869  | 611066.6 | 2483252  | 835155.2 | 2979971  | 1605670  | 3095119  | 2914698  |
| 10.008   | 7  | 3 | 3 | 371200.2 | 622509   | 169372.2 | 564312.9 | 425631.1 | 667791.5 | 749783.6 | 437878.1 | 805091.7 |
| 9.979667 | 10 | 4 | 5 | 2578077  | 7917966  | 3489219  | 7389796  | 2359951  | 11601816 | 2733784  | 10161444 | 8759400  |
| 9.40325  | 8  | 4 | 4 | 754034.8 | 974849   | 91691.58 | 1041824  | 512987.8 | 958943   | 865833   | 1059747  | 1076968  |
| 23.40733 | 6  | 3 | 3 | 180219.2 | 916315.7 | 742533.4 | 1051327  | 786897.8 | 610745.3 | 376405.4 | 1668517  | 172262.7 |
| 9.979667 | 10 | 5 | 5 | 623756.9 | 1508622  | 506249.1 | 1618203  | 713777   | 1961523  | 1764123  | 1897951  | 941501.5 |
| 9.900133 | 7  | 3 | 3 | 1111250  | 3504190  | 1811653  | 3795222  | 1464951  | 5928141  | 2208637  | 3305577  | 4636584  |
| 9.857683 | 9  | 5 | 4 | 1614837  | 5112389  | 2295292  | 4571138  | 3651281  | 4228667  | 4963523  | 2899559  | 4487063  |
| 42.17917 | 5  | 3 | 2 | 229592.4 | 2952085  | 1660364  | 3228179  | 1463656  | 2650910  | 3386809  | 843482.4 | 2464667  |
| 9.960967 | 6  | 4 | 2 | 267160.9 | 446042   | 201081.9 | 496047.7 | 343383.5 | 480617.1 | 199731   | 278880.2 | 626932.2 |
| 9.202433 | 13 | 5 | 5 | 11602821 | 47990113 | 18560577 | 41402369 | 48456352 | 47966938 | 72348979 | 58934295 | 34960784 |
| 9.979667 | 5  | 3 | 2 | 549924.1 | 918290   | 541545.4 | 820127.8 | 571899   | 1781491  | 351493.2 | 1022016  | 629063.7 |
| 10.97857 | 8  | 5 | 3 | 386436.6 | 1068642  | 534761.6 | 1156738  | 461598.8 | 926244.1 | 976426.3 | 306808.9 | 1428559  |
| 10.9645  | 10 | 5 | 5 | 1886428  | 7684605  | 2237731  | 8090108  | 2365129  | 10220101 | 10034663 | 5803763  | 6297420  |
| 10.008   | 7  | 3 | 4 | 406315.9 | 739041   | 323797.1 | 805914.6 | 426849.6 | 713534.5 | 1133913  | 931313.7 | 273674.3 |
| 18.04033 | 7  | 4 | 3 | 30438.17 | 86756.73 | 19917.07 | 80416.81 | 46014.27 | 107157   | 87528.32 | 101052.9 | 56049.29 |
| 9.392767 | 5  | 3 | 2 | 563439.4 | 856647.9 | 161649.3 | 906627.9 | 361110   | 837383.1 | 861137.5 | 912229.2 | 1060085  |
| 43.19967 | 7  | 3 | 3 | 446898.2 | 6059608  | 468648.6 | 6276588  | 1636226  | 6388959  | 5345476  | 5820920  | 6437445  |
| 9.77345  | 9  | 4 | 4 | 374140.6 | 776819.3 | 232399.3 | 731630   | 278610.3 | 906378.7 | 1080454  | 496271.8 | 791876.6 |
| 9.960467 | 10 | 5 | 5 | 10791507 | 30935956 | 11325031 | 33079340 | 12972387 | 40177728 | 43062586 | 33061633 | 19022429 |
| 9.964417 | 15 | 5 | 5 | 4510187  | 14488478 | 6637914  | 13060933 | 9323765  | 11262326 | 4477883  | 20462632 | 19454761 |
| 9.311417 | 5  | 2 | 3 | 628020.2 | 1072958  | 1217931  | 891564.5 | 790061   | 181245   | 456751.4 | 0        | 1991335  |
| 9.94455  | 11 | 5 | 4 | 1294594  | 3956586  | 2532903  | 3576432  | 1689109  | 2667365  | 4238392  | 1956972  | 2685094  |
| 11.23103 | 11 | 5 | 4 | 511748.4 | 774824   | 280022.8 | 899235.2 | 938019.1 | 1015829  | 691126.4 | 773132.4 | 353176.4 |
| 20.17317 | 12 | 5 | 5 | 4542610  | 26456726 | 11461834 | 24263594 | 13428644 | 9646355  | 30353718 | 29888838 | 21950933 |
| 9.992233 | 8  | 4 | 4 | 345189   | 1025049  | 221050.1 | 1065574  | 240206.7 | 1030235  | 1395891  | 865626   | 849563.9 |
| 27.18717 | 3  | 3 | 0 | 122235.5 | 461173.5 | 397334.1 | 400928.2 | 275422.7 | 91864.43 | 557888.2 | 26830.25 | 660986.7 |
| 10.97242 | 10 | 5 | 5 | 307700.9 | 1845039  | 393857.5 | 1765842  | 500732.9 | 1783939  | 2183323  | 1230014  | 1830926  |
| 9.976317 | 10 | 5 | 5 | 8512220  | 20553323 | 7116627  | 18939283 | 10811982 | 23718741 | 31153020 | 17805416 | 12598125 |
| 36.1655  | 10 | 5 | 5 | 593299.2 | 3109301  | 1652973  | 2776728  | 2107054  | 5341663  | 2267864  | 1273415  | 2391476  |
| 9.94455  | 10 | 5 | 5 | 2225120  | 8544229  | 1421198  | 8318060  | 1141848  | 10481846 | 9563331  | 7865810  | 7065443  |
| 10.00098 | 8  | 4 | 4 | 647115.1 | 946925.8 | 392628   | 1046483  | 693778.7 | 817498.6 | 1572348  | 1057092  | 563623   |
| 9.023433 | 10 | 5 | 5 | 841160.6 | 4593661  | 1319227  | 4292950  | 2026462  | 4652625  | 6646290  | 4767823  | 3224946  |
| 10.90275 | 6  | 3 | 3 | 194800.7 | 359917   | 127124.8 | 380789.7 | 110842.5 | 561318   | 328395.5 | 298898.9 | 223515.9 |

|          |    |   |   |          |          |          |          |          |          |          |          |          |
|----------|----|---|---|----------|----------|----------|----------|----------|----------|----------|----------|----------|
| 9.976317 | 7  | 4 | 3 | 559011.7 | 1181807  | 197918.8 | 1139589  | 276769.6 | 1435681  | 1157189  | 1226305  | 1206453  |
| 9.976317 | 5  | 2 | 3 | 605955.4 | 1084404  | 243676.7 | 1021050  | 445162.8 | 727108.3 | 1399773  | 1112967  | 1022201  |
| 17.11767 | 9  | 5 | 4 | 98800.07 | 351253   | 126777.6 | 327926.4 | 139674.6 | 309784.6 | 506439.1 | 463499.6 | 251663.7 |
| 9.999217 | 10 | 5 | 5 | 2208907  | 5944668  | 2092923  | 5451049  | 3370042  | 6954085  | 8852487  | 5384184  | 3241855  |
| 24.638   | 10 | 5 | 5 | 578882.3 | 3980730  | 775401.8 | 4105106  | 639282.9 | 3256431  | 4399897  | 3363011  | 3772352  |
| 25.5655  | 5  | 1 | 4 | 482555.7 | 2554481  | 719805.2 | 2418760  | 828990.4 | 1934411  | 3668421  | 2287730  | 2022483  |
| 9.338567 | 6  | 3 | 3 | 668816.4 | 1023555  | 1060959  | 859179   | 797361   | 0        | 1171309  | 0        | 1433971  |
| 9.229717 | 10 | 5 | 5 | 15504222 | 25158027 | 10498240 | 29061501 | 29146309 | 19471410 | 42670854 | 25972318 | 15577315 |
| 10.66002 | 10 | 5 | 5 | 423341.9 | 1328452  | 466340.4 | 1399280  | 330213.7 | 1320405  | 2094150  | 1314086  | 1016356  |
| 10.095   | 10 | 5 | 5 | 714858   | 2625658  | 1049995  | 2445174  | 1016703  | 1877499  | 3976294  | 3260532  | 2661740  |
| 9.856867 | 10 | 5 | 5 | 2122388  | 8472273  | 1524465  | 8770204  | 1866370  | 9650393  | 8696955  | 8346011  | 9708410  |
| 9.174967 | 5  | 3 | 2 | 584015.9 | 3396052  | 1360511  | 3066180  | 2278098  | 2193894  | 2035289  | 5249886  | 4208306  |
| 10.9645  | 5  | 3 | 2 | 326626.7 | 746415.3 | 120423.1 | 784569.7 | 279595.7 | 820125.2 | 875483   | 790213.7 | 580717.8 |
| 13.95983 | 7  | 3 | 4 | 63029.71 | 375272.6 | 260353.4 | 333279.4 | 218755.5 | 182332.9 | 160970.2 | 621562.5 | 694885.4 |
| 10.32122 | 10 | 5 | 5 | 3303802  | 13976644 | 5162651  | 12915412 | 6853919  | 17770457 | 19688913 | 14267086 | 11478227 |
| 40.194   | 12 | 4 | 4 | 270295.6 | 3480181  | 683708.5 | 3340283  | 902947.9 | 3860914  | 3992817  | 3507569  | 2299584  |
| 9.102033 | 5  | 2 | 3 | 337002.8 | 1150365  | 802284.5 | 1016383  | 734007.5 | 1149920  | 2510548  | 890826.5 | 761452.3 |
| 9.473717 | 5  | 3 | 2 | 3561036  | 8556227  | 4373420  | 9593946  | 7138338  | 14787258 | 6504941  | 10939753 | 3506226  |
| 8.93965  | 6  | 4 | 2 | 185966.7 | 357223.8 | 129108.2 | 321930.5 | 252462.2 | 332444.6 | 408178   | 553745.5 | 250757   |
| 9.992233 | 9  | 5 | 4 | 1106883  | 2190967  | 869091.5 | 1991764  | 1355454  | 2589837  | 3415512  | 2163096  | 1182225  |
| 9.8445   | 16 | 5 | 5 | 1285059  | 3585567  | 1070263  | 3345229  | 1624491  | 4870413  | 4542337  | 3054062  | 3098531  |
| 9.992233 | 10 | 5 | 5 | 2836346  | 8753169  | 3205390  | 9348086  | 3625591  | 10068951 | 13273445 | 9002164  | 5287556  |
| 9.983433 | 10 | 5 | 5 | 1429775  | 4245675  | 1588095  | 3957614  | 1724422  | 5472178  | 6207798  | 4114046  | 2568848  |
| 24.1025  | 8  | 4 | 4 | 152376.5 | 872626.8 | 412087.3 | 796259   | 465187.5 | 1562676  | 490028.1 | 722706.1 | 689387.3 |
| 10.9645  | 10 | 5 | 5 | 494528.9 | 1190232  | 448510.4 | 1117312  | 388533   | 1758946  | 1579536  | 769832.1 | 986235.7 |
| 8.980067 | 5  | 4 | 1 | 170427.9 | 512546.3 | 288756.7 | 569840.1 | 365536   | 654315.8 | 833865.9 | 634386.2 | 330220.3 |
| 10.03947 | 17 | 5 | 5 | 2477523  | 6684020  | 3872235  | 7363108  | 3949793  | 9437831  | 937068.3 | 6004393  | 6054699  |
| 9.91875  | 11 | 5 | 5 | 944213.7 | 3159969  | 1039030  | 2994082  | 862386.8 | 2350533  | 3324130  | 4676179  | 2032389  |
| 9.43325  | 9  | 4 | 3 | 1705619  | 8391466  | 6093591  | 7279013  | 6710664  | 18035206 | 5607822  | 9806857  | 6654954  |
| 43.17183 | 5  | 1 | 4 | 304601.3 | 3219988  | 977215.6 | 3470484  | 1770813  | 4952724  | 2705195  | 2791466  | 2656175  |
| 9.960467 | 10 | 5 | 5 | 1603161  | 6439603  | 1432207  | 6153375  | 1838310  | 7062291  | 8480695  | 5913978  | 4632642  |
| 10.00998 | 8  | 5 | 3 | 2677060  | 3992676  | 2326587  | 3648736  | 1546157  | 5944726  | 6230237  | 3886660  | 453256.3 |
| 10.008   | 11 | 5 | 4 | 1050382  | 1151451  | 683656.3 | 1037829  | 627557.2 | 2244984  | 513525.3 | 640207.9 | 1135318  |
| 9.433    | 9  | 5 | 4 | 705367.8 | 1169688  | 182448.8 | 1096278  | 558119.2 | 957267.1 | 1460571  | 1166525  | 1148922  |
| 9.514733 | 16 | 5 | 5 | 1854076  | 14460340 | 3187210  | 13710317 | 5190588  | 11955441 | 17265577 | 18351938 | 11233297 |

|          |    |   |   |          |          |          |          |          |          |          |          |          |
|----------|----|---|---|----------|----------|----------|----------|----------|----------|----------|----------|----------|
| 9.983433 | 11 | 3 | 4 | 708390.3 | 1571741  | 1007425  | 1408843  | 870877.1 | 1329082  | 835355.7 | 3168594  | 663800.1 |
| 9.9677   | 5  | 3 | 2 | 1077977  | 1528018  | 968726.6 | 1381046  | 706227   | 2563679  | 314512.9 | 2420700  | 1450026  |
| 9.388367 | 10 | 4 | 5 | 675810.6 | 6302645  | 1269381  | 6034621  | 1780396  | 5314133  | 6881955  | 7526124  | 4610179  |
| 9.960467 | 8  | 5 | 3 | 883602.6 | 1969296  | 302177.5 | 1906070  | 418997.3 | 2360366  | 2147686  | 1847386  | 1564588  |
| 9.864767 | 10 | 5 | 5 | 2307464  | 16907396 | 607569.4 | 16681632 | 1709719  | 17167322 | 16192837 | 16492997 | 17759687 |
| 30.407   | 11 | 5 | 5 | 1242603  | 6982570  | 1607632  | 6502001  | 3536797  | 5149019  | 6994581  | 7212563  | 6096608  |
| 10.45433 | 9  | 4 | 5 | 235332.6 | 594903.6 | 145825.3 | 554587.2 | 292456.7 | 640154.7 | 452691.1 | 518445   | 826363.1 |
| 27.18417 | 6  | 4 | 2 | 64687.84 | 177086.9 | 105287.9 | 193217.3 | 79752.66 | 334710.5 | 103027   | 69609.25 | 156068.9 |
| 9.94455  | 6  | 4 | 2 | 1115964  | 1161179  | 326576.5 | 1287516  | 961918.3 | 1372604  | 1065119  | 1503692  | 1206591  |
| 9.983433 | 10 | 5 | 5 | 11109266 | 50993516 | 12271908 | 48952410 | 11417784 | 55586782 | 70017741 | 47210743 | 39031370 |
| 25.2335  | 10 | 5 | 5 | 207692.5 | 1384186  | 368638   | 1297509  | 603323.8 | 1822013  | 1584681  | 1109172  | 910936.4 |
| 10.9645  | 10 | 5 | 5 | 1.51E+08 | 1.06E+09 | 82518181 | 1.09E+09 | 2.69E+08 | 1.16E+09 | 1.01E+09 | 1.07E+09 | 9.42E+08 |
| 9.989483 | 6  | 2 | 4 | 260653.6 | 691692.3 | 310281.5 | 750253.9 | 367679.1 | 168330.2 | 789028   | 855777.6 | 680385.1 |
| 9.920517 | 5  | 2 | 3 | 1289054  | 1928951  | 530465.2 | 2021266  | 543157.6 | 2549338  | 1131349  | 1750487  | 2038156  |
| 10.95602 | 10 | 5 | 5 | 170368.6 | 584937.5 | 164118.3 | 622476.6 | 259331.1 | 752234.8 | 747728.7 | 417872.7 | 581049.1 |
| 10.98385 | 7  | 3 | 4 | 739296.8 | 2643924  | 1129287  | 2804213  | 660529.9 | 3904200  | 1299449  | 1659433  | 2891064  |
| 31.379   | 7  | 3 | 4 | 1034724  | 4941007  | 2661975  | 4476906  | 2737542  | 2839564  | 5046637  | 1732430  | 7343930  |
| 10.97242 | 8  | 3 | 5 | 373302.5 | 934754.9 | 338633.4 | 878152.3 | 319664.2 | 1021628  | 1477932  | 841345   | 707573.7 |
| 9.43325  | 6  | 5 | 1 | 438580.5 | 2360330  | 794287.7 | 2239233  | 597892   | 3363693  | 2979257  | 1418002  | 1934891  |
| 9.531583 | 4  | 3 | 1 | 440689.5 | 689857   | 175463.3 | 622594.2 | 513144.2 | 472432.5 | 847456.2 | 603119.3 | 891151.6 |
| 9.9014   | 10 | 5 | 5 | 1127379  | 6842420  | 1296990  | 6515771  | 2327395  | 6528308  | 5972392  | 8268789  | 8101387  |
| 10.95055 | 10 | 5 | 5 | 531531.4 | 2879129  | 540920   | 3036253  | 1156325  | 3206679  | 3638565  | 2538629  | 2291660  |
| 9.942317 | 11 | 5 | 5 | 19738900 | 46910803 | 13745916 | 44282524 | 16695508 | 66844132 | 55486591 | 36797050 | 40305075 |
| 9.4468   | 7  | 4 | 3 | 693161.7 | 1667703  | 649721.7 | 1910277  | 1847686  | 2245722  | 1623360  | 2280556  | 1494206  |
| 17.9245  | 9  | 5 | 4 | 418430.6 | 1360102  | 1005351  | 1211421  | 691285.5 | 1119151  | 1223051  | 83370.67 | 2882800  |
| 9.896717 | 3  | 3 | 0 | 992158.9 | 1627067  | 485374.6 | 1757690  | 947720.5 | 2218306  | 962665.9 | 1547358  | 1445314  |
| 9.338567 | 7  | 3 | 4 | 657085.2 | 1174133  | 939641.1 | 1038541  | 592960.2 | 1230692  | 830432.9 | 0        | 1210461  |
| 10.07098 | 11 | 5 | 4 | 637543.4 | 1192000  | 519071.6 | 1099736  | 556173   | 1453602  | 1870444  | 1236095  | 522715.5 |
| 9.445217 | 10 | 5 | 4 | 651698.7 | 4504882  | 985768.9 | 4268865  | 1661625  | 5717389  | 5034343  | 3483501  | 3498982  |
| 10.84733 | 4  | 1 | 3 | 140604.7 | 270634   | 49812.36 | 286292.3 | 116970.4 | 341475.1 | 269891.1 | 224714.5 | 223152.7 |
| 9.896717 | 10 | 5 | 5 | 1726374  | 13061210 | 2191067  | 12531612 | 3741155  | 12907241 | 9387425  | 13610078 | 14754955 |
| 10.9645  | 7  | 3 | 4 | 436713.1 | 1470254  | 365860.2 | 1573632  | 758760.9 | 1520235  | 2057638  | 1243038  | 1103690  |
| 9.960467 | 7  | 3 | 4 | 785854.3 | 1845817  | 721800.2 | 1960870  | 616096   | 2375279  | 641279.1 | 2426552  | 1818700  |
| 9.8374   | 7  | 4 | 3 | 524518.8 | 1661753  | 495428.2 | 1554903  | 725852.2 | 1316223  | 2382754  | 1133167  | 1898683  |
| 10.9645  | 10 | 5 | 5 | 367605.5 | 1363172  | 412106.7 | 1298490  | 339213.7 | 1777366  | 1806568  | 1205200  | 869345.2 |

|          |    |   |   |          |          |          |          |          |          |          |          |          |
|----------|----|---|---|----------|----------|----------|----------|----------|----------|----------|----------|----------|
| 10.9645  | 10 | 5 | 5 | 321940.5 | 1329412  | 337446   | 1272970  | 322462.4 | 1742620  | 1601066  | 1055695  | 963369.2 |
| 9.283817 | 5  | 3 | 2 | 435144.2 | 892674.7 | 290465.8 | 809848.7 | 610561.3 | 667617.1 | 761283.5 | 957404.3 | 704747.6 |
| 10.97242 | 6  | 2 | 4 | 689107.4 | 1409400  | 380482.6 | 1507315  | 706272.5 | 1336130  | 1869189  | 1716632  | 1179263  |
| 30.25033 | 10 | 5 | 5 | 782775.3 | 4409310  | 769105.7 | 4148310  | 1977310  | 3506127  | 4962316  | 4573807  | 3727477  |
| 9.960467 | 7  | 4 | 3 | 632686.7 | 1013903  | 375879.4 | 1122420  | 802893.3 | 1090371  | 1555118  | 1110934  | 628641.1 |
| 9.406667 | 12 | 5 | 5 | 1031413  | 7069630  | 3183544  | 6497636  | 3506843  | 5625782  | 4396480  | 5475417  | 7429348  |
| 10.90275 | 5  | 2 | 3 | 254509.5 | 318710.3 | 242005.3 | 350829.6 | 99730.11 | 507063   | 275956.2 | 24521.53 | 170098.3 |
| 10.95055 | 10 | 5 | 5 | 332705.6 | 1425186  | 388178.1 | 1372772  | 181352.5 | 1824200  | 1864433  | 1137895  | 1059539  |
| 9.3735   | 4  | 3 | 1 | 461478.2 | 2364184  | 887001.9 | 2519209  | 929305.6 | 1604063  | 2828294  | 3674029  | 2106555  |
| 9.379233 | 9  | 5 | 4 | 1671114  | 12021890 | 5507067  | 11093346 | 5375456  | 12053678 | 16341342 | 17785959 | 9986509  |
| 9.918833 | 9  | 4 | 4 | 2604289  | 3073217  | 1994125  | 2759399  | 1666316  | 4330898  | 612055.7 | 4790313  | 4426803  |
| 12.006   | 8  | 4 | 4 | 179648.7 | 440054.1 | 162063.4 | 405789.2 | 232139.9 | 640557.1 | 393551.5 | 578405   | 314108.8 |
| 9.9014   | 10 | 5 | 4 | 1501801  | 2160957  | 1293388  | 2349016  | 858309.8 | 2106450  | 1465665  | 1586874  | 1241902  |
| 41.02833 | 6  | 3 | 3 | 298519.3 | 4233433  | 515716.1 | 4138650  | 593310.2 | 3988530  | 5105048  | 4167735  | 4155996  |
| 10.01837 | 7  | 4 | 3 | 209487.5 | 630132.3 | 290730.5 | 580486.6 | 292082.7 | 237335.3 | 872679.2 | 423569.1 | 711966.9 |
| 9.93625  | 10 | 5 | 5 | 2512436  | 8388252  | 1764642  | 8055212  | 2125289  | 10902408 | 7369332  | 6190954  | 8634132  |
| 35.949   | 8  | 3 | 5 | 162080.3 | 877589.3 | 521034.8 | 797453.6 | 412218.7 | 1161991  | 578363.7 | 209005.8 | 1562048  |
| 10.98193 | 9  | 4 | 4 | 806825.4 | 3252417  | 572053.1 | 3388089  | 961175.3 | 4007404  | 3718822  | 2917403  | 2718751  |
| 9.880683 | 7  | 4 | 3 | 4832212  | 15327166 | 3852033  | 14382710 | 6759235  | 15198800 | 10466229 | 19299947 | 18950535 |
| 9.960817 | 8  | 4 | 4 | 926521.9 | 2288201  | 838468.2 | 2116401  | 1150553  | 2922646  | 3314793  | 1927015  | 2074422  |
| 10.95055 | 4  | 1 | 3 | 131103.6 | 216845.1 | 128794.4 | 239083.8 | 132640   | 362465.6 | 309329.3 | 84154.84 | 82191.16 |
| 26.40517 | 5  | 3 | 2 | 63988.42 | 233196.9 | 82797.72 | 220571   | 64190.95 | 184594.8 | 332653.2 | 295957.7 | 127527.2 |
| 9.94455  | 6  | 4 | 2 | 571348.9 | 978772.1 | 555600.1 | 878222.1 | 625063   | 1427577  | 73850.91 | 912391.9 | 1048252  |
| 10.97857 | 9  | 5 | 4 | 265162.7 | 1420592  | 306862.4 | 1496368  | 544430.5 | 1042184  | 1176543  | 1598316  | 1495605  |
| 10.9645  | 10 | 5 | 5 | 5032875  | 21023598 | 5792389  | 20174322 | 3998436  | 26816911 | 27346658 | 16793107 | 14664786 |
| 9.960467 | 9  | 4 | 5 | 1164384  | 2133034  | 485417.8 | 2296336  | 1243533  | 2446778  | 2601178  | 2301090  | 1927774  |
| 10.95055 | 10 | 5 | 5 | 526408.6 | 2699350  | 672570.7 | 2591714  | 591857   | 3103484  | 3511929  | 2171523  | 1870184  |
| 9.406667 | 3  | 0 | 3 | 1047689  | 3195017  | 1219517  | 3658577  | 3581257  | 5111718  | 1836314  | 3189290  | 3290726  |
| 9.177967 | 8  | 4 | 4 | 2148426  | 10120660 | 4165576  | 9314194  | 5259643  | 13385405 | 14874114 | 9708779  | 4439134  |
| 9.8322   | 9  | 5 | 4 | 1194011  | 3956546  | 306614.8 | 4095020  | 1084138  | 4313343  | 3707625  | 4139326  | 4046948  |
| 9.888767 | 10 | 5 | 5 | 1162425  | 4610807  | 1319376  | 4430567  | 684297.7 | 4148271  | 2523418  | 5290167  | 5846794  |
| 9.999217 | 10 | 5 | 5 | 1108940  | 3150570  | 1222251  | 2916665  | 1515965  | 3806363  | 4595111  | 3259037  | 1336360  |
| 20.86667 | 3  | 0 | 3 | 1668248  | 7500692  | 1212941  | 6729586  | 6132420  | 7396256  | 5477015  | 7805730  | 8302961  |
| 9.009533 | 7  | 4 | 3 | 276972.5 | 1395495  | 247972.3 | 1480800  | 652998   | 1666070  | 1525586  | 1326449  | 1010512  |
| 10.53828 | 9  | 5 | 4 | 519539.7 | 2431962  | 508150.6 | 2337421  | 602591   | 2729919  | 2937706  | 2049617  | 1745177  |

|          |    |   |   |          |          |          |          |          |          |          |          |          |
|----------|----|---|---|----------|----------|----------|----------|----------|----------|----------|----------|----------|
| 11.16097 | 10 | 5 | 5 | 2867659  | 23142808 | 8534647  | 24734280 | 10176641 | 34428266 | 23070124 | 11373861 | 19862021 |
| 9.992233 | 9  | 5 | 4 | 535940.2 | 1475046  | 534749.5 | 1383821  | 542994.4 | 1866675  | 2051553  | 1622942  | 835004.8 |
| 9.348233 | 6  | 3 | 3 | 416586.8 | 701034.9 | 401538   | 621487.4 | 528162.7 | 1032336  | 319194.2 | 991728.8 | 952459.9 |
| 9.994767 | 10 | 5 | 5 | 546998.2 | 1431243  | 720505.8 | 1538154  | 524300.4 | 1990327  | 2204810  | 1441132  | 396497.5 |
| 9.949233 | 7  | 4 | 3 | 4010281  | 5018927  | 2790815  | 5469204  | 2525424  | 8268018  | 1555148  | 4359690  | 3483105  |
| 8.8977   | 10 | 5 | 5 | 245623.3 | 4930057  | 765409.4 | 5130394  | 1469694  | 5076869  | 5808963  | 5386937  | 4536315  |
| 11.5253  | 10 | 5 | 5 | 107298   | 401477.8 | 201702.8 | 433744.8 | 179170.7 | 667610.5 | 207500.6 | 311559.2 | 258637.3 |
| 9.45945  | 5  | 2 | 3 | 653251.8 | 1843624  | 245816.7 | 1624210  | 1763072  | 2070829  | 2028705  | 1774880  | 1457272  |
| 11.52297 | 10 | 5 | 5 | 258254.3 | 1590804  | 301880.3 | 1530525  | 402332   | 2004110  | 1493534  | 1251444  | 1416986  |
| 10.008   | 7  | 4 | 3 | 482477.3 | 806755.4 | 352309.1 | 743467.6 | 394994.9 | 822200.5 | 269044.9 | 1178213  | 712213   |
| 9.920517 | 7  | 3 | 4 | 5443510  | 5203079  | 6194767  | 4302210  | 4237704  | 1292670  | 14779753 | 859690.7 | 8199272  |
| 9.559117 | 9  | 5 | 4 | 1095644  | 4490413  | 1025122  | 4329439  | 872933.4 | 4369667  | 6231869  | 4335375  | 3928042  |
| 10.03947 | 4  | 3 | 1 | 312898.4 | 455073.9 | 218999.6 | 505722.8 | 359758.1 | 460868.3 | 109880.8 | 592153.3 | 685450.6 |
| 9.43325  | 11 | 5 | 4 | 1371912  | 7719297  | 3226914  | 7219192  | 2663244  | 8817019  | 5175011  | 6303106  | 12883650 |
| 8.903533 | 7  | 4 | 3 | 336878.1 | 897371.9 | 666390   | 1002073  | 569558.3 | 601920.5 | 1873955  | 1253825  | 565588.8 |
| 24.72467 | 10 | 5 | 5 | 567239.3 | 3538783  | 648310.3 | 3407571  | 884162.5 | 3149449  | 4500957  | 2797980  | 3765889  |
| 9.56645  | 4  | 1 | 3 | 432061   | 778615.6 | 478866.2 | 708627.3 | 334777   | 844046.3 | 546100.5 | 379754.9 | 542131.5 |
| 10.008   | 10 | 5 | 5 | 703108.8 | 2426999  | 516960.4 | 2322299  | 706700   | 2601165  | 3171830  | 2452804  | 1818782  |
| 9.992233 | 9  | 5 | 4 | 483336.2 | 1287571  | 287903.9 | 1215526  | 524882.2 | 1605787  | 1307891  | 1458309  | 1221412  |
| 9.983433 | 10 | 5 | 5 | 2260957  | 5887778  | 2085326  | 5419886  | 3297978  | 6785286  | 8890657  | 5293668  | 3298467  |
| 10.9645  | 8  | 4 | 4 | 172058.5 | 519000.3 | 262906.3 | 477864.8 | 223283.1 | 735185.8 | 834050.6 | 342321.7 | 476657   |
| 10.98605 | 9  | 4 | 5 | 251106.4 | 1309049  | 265237.5 | 1251053  | 405194.2 | 1162573  | 1520890  | 909869.9 | 1478401  |
| 22.757   | 7  | 4 | 3 | 111927.3 | 508954.4 | 225033.3 | 554766   | 310658.8 | 303202.6 | 410416.2 | 348271.9 | 650342.3 |
| 29.834   | 7  | 3 | 4 | 45615.06 | 207666.9 | 85767.4  | 219958.9 | 56569.61 | 157348.4 | 212051   | 118241.4 | 205651   |
| 9.93625  | 4  | 1 | 3 | 1527775  | 2019970  | 503640.9 | 1803445  | 1704399  | 2436201  | 1192123  | 2163811  | 2376900  |
| 11.49505 | 6  | 4 | 2 | 82581.08 | 243859.1 | 69437.8  | 233436   | 53052.82 | 347854.1 | 258120   | 158118.6 | 241530.5 |
| 9.119933 | 4  | 3 | 1 | 711729.6 | 1217707  | 1095404  | 1062252  | 697802.2 | 385647   | 385427.6 | 2444873  | 484155.5 |
| 9.999217 | 9  | 4 | 5 | 1055989  | 2548860  | 874460.4 | 2735258  | 1291192  | 3119137  | 3584727  | 2726712  | 1793856  |
| 36.12233 | 10 | 5 | 5 | 836076.6 | 6605634  | 2222490  | 6226793  | 2282484  | 8382882  | 5525544  | 3453366  | 8947205  |
| 9.9677   | 10 | 5 | 5 | 1536977  | 4304107  | 1372368  | 4063976  | 1481255  | 5512459  | 5756736  | 4407698  | 2665724  |
| 9.4925   | 8  | 3 | 5 | 1528816  | 4503515  | 3106422  | 5318745  | 6030019  | 1127889  | 1760435  | 8732903  | 5509898  |
| 9.976317 | 10 | 5 | 5 | 2385250  | 7551090  | 1847436  | 7963789  | 2916214  | 8928426  | 9439299  | 8217277  | 5676385  |
| 9.960467 | 10 | 5 | 5 | 3907434  | 13010072 | 2059221  | 13566735 | 4145604  | 14331427 | 15373739 | 13574345 | 10509916 |
| 9.433    | 12 | 5 | 5 | 1890962  | 16233477 | 6444017  | 15246170 | 5230081  | 10588908 | 15965704 | 17260686 | 10892048 |
| 10.45433 | 10 | 5 | 5 | 312594.7 | 991835.3 | 324429.8 | 940912.9 | 279909   | 1255280  | 1426563  | 764127.6 | 749232.9 |

|          |    |   |   |          |          |          |          |          |          |          |          |          |
|----------|----|---|---|----------|----------|----------|----------|----------|----------|----------|----------|----------|
| 21.73783 | 10 | 5 | 5 | 1410661  | 10604253 | 1094662  | 11154504 | 4382312  | 8667804  | 11297271 | 10961214 | 11193601 |
| 18.65867 | 10 | 5 | 5 | 43364.66 | 183321.2 | 111056.6 | 168105.1 | 61626.53 | 366952.4 | 110912.1 | 156077.5 | 86094.32 |
| 35.98267 | 10 | 5 | 5 | 25937090 | 1.44E+08 | 92208099 | 1.3E+08  | 83119205 | 99355470 | 93188799 | 52482528 | 2.79E+08 |
| 9.976317 | 4  | 3 | 1 | 459904.3 | 584239.5 | 558228.3 | 488670.3 | 580841.2 | 841495.4 | 1360361  | 620180.2 | 0        |
| 9.992233 | 8  | 4 | 4 | 928314.7 | 1219054  | 807336.4 | 1406710  | 1348594  | 1435201  | 2424139  | 1217140  | 284691.6 |
| 15.86305 | 4  | 3 | 1 | 93130.54 | 340250.2 | 100632.3 | 322999.6 | 105269.6 | 435161.2 | 278155.5 | 391095.5 | 194595.7 |
| 10.02372 | 9  | 5 | 4 | 501982.7 | 1157868  | 261008.9 | 1076494  | 623535.5 | 1154229  | 896696.8 | 1475685  | 1357048  |
| 9.95825  | 12 | 5 | 5 | 745353.4 | 3168061  | 682935.5 | 3405989  | 1848878  | 2899125  | 3534373  | 3719120  | 3600543  |
| 19.068   | 5  | 3 | 2 | 348921.7 | 1067061  | 1193660  | 1258183  | 1085507  | 2385085  | 2359032  | 161540.3 | 113990.4 |
| 9.992233 | 9  | 5 | 4 | 335371.6 | 820278.4 | 177926.8 | 763241.2 | 438845.9 | 939447.3 | 928384.7 | 979847.4 | 641974.2 |
| 10.93752 | 6  | 2 | 4 | 247904.3 | 782937.8 | 105324.5 | 744392.9 | 301247.9 | 750940.7 | 672952.6 | 720891.9 | 827554   |
| 9.994767 | 6  | 3 | 3 | 261830   | 525858   | 265514.5 | 482520.6 | 252174.7 | 169728.7 | 899498.4 | 594924.4 | 423245.4 |
| 9.507167 | 5  | 4 | 1 | 464078.8 | 1104564  | 408056.2 | 1028828  | 492175.6 | 1420207  | 815420.5 | 555566.4 | 1215973  |
| 9.311883 | 4  | 3 | 1 | 3263723  | 15982711 | 10495803 | 17638671 | 9250455  | 6420769  | 4179652  | 26973699 | 16968961 |
| 10.97242 | 10 | 5 | 5 | 401102.5 | 1828126  | 550345.1 | 1937950  | 744956.2 | 1915201  | 2673184  | 1737927  | 1154918  |
| 9.946467 | 10 | 5 | 5 | 2159350  | 4253102  | 1267180  | 4019565  | 1513009  | 4872655  | 4568683  | 2037689  | 4567713  |
| 10.9645  | 9  | 4 | 5 | 716459   | 2362292  | 362520.6 | 2301683  | 362856.7 | 2586500  | 2668040  | 1961349  | 1971552  |
| 11.04433 | 6  | 3 | 2 | 763779.9 | 2038024  | 1155090  | 2262527  | 1503777  | 1228612  | 1638089  | 3361535  | 805434.8 |
| 10.9645  | 10 | 5 | 5 | 418928.9 | 2262421  | 555768.3 | 2387888  | 897674.5 | 2080025  | 3188276  | 2092897  | 1700136  |
| 10.03947 | 8  | 4 | 4 | 310557.5 | 606890   | 363427.7 | 550397.6 | 311113.3 | 749625.5 | 0        | 563396   | 927365.1 |
| 10.008   | 9  | 5 | 4 | 950662.1 | 1773085  | 752129.8 | 1936403  | 1153144  | 1490024  | 1218407  | 1090251  | 2177936  |
| 9.4925   | 9  | 3 | 4 | 664315   | 2467422  | 1539382  | 2701671  | 1249499  | 1855418  | 3487267  | 1782089  | 662462.4 |
| 9.778967 | 6  | 2 | 4 | 923817.2 | 2008521  | 431165.7 | 1893604  | 860556.5 | 2562448  | 1529525  | 2141918  | 1614661  |
| 10.008   | 10 | 5 | 5 | 843535.7 | 2539072  | 632457.7 | 2668536  | 893147.2 | 2841503  | 3326011  | 2722784  | 1752277  |
| 10.17253 | 5  | 4 | 1 | 432711.8 | 707134.9 | 288421.6 | 598798.7 | 852765.4 | 792313   | 978888.2 | 843651.9 | 224550.1 |
| 10.9645  | 10 | 5 | 5 | 5084875  | 21189549 | 5851214  | 20347732 | 4048652  | 27041731 | 27606649 | 17001181 | 14769323 |
| 9.970617 | 12 | 5 | 5 | 24794520 | 42925873 | 12280830 | 45258625 | 15486600 | 56341005 | 24213872 | 50723869 | 43824010 |
| 9.447733 | 13 | 5 | 5 | 1539249  | 11269457 | 2593314  | 12235961 | 7605656  | 9705566  | 8630952  | 12446507 | 10380895 |
| 9.928667 | 9  | 4 | 5 | 4656456  | 18342516 | 4115184  | 19121772 | 5167564  | 16807255 | 15405296 | 25180240 | 15262130 |
| 9.856867 | 8  | 4 | 4 | 525373.1 | 1630896  | 379015   | 1706819  | 519412.6 | 1551890  | 1503727  | 2083160  | 1906206  |
| 44.96767 | 8  | 3 | 3 | 369814.3 | 4268108  | 1540877  | 4496653  | 1174491  | 3861523  | 3027071  | 3953353  | 3551181  |
| 9.979667 | 9  | 5 | 4 | 481627.9 | 1218314  | 304006.9 | 1270274  | 320156.1 | 1658081  | 1406053  | 1049032  | 928374.9 |
| 10.37908 | 7  | 1 | 5 | 455081.1 | 605936.6 | 131248.8 | 572086   | 252590.7 | 430705.7 | 766999.7 | 524394.8 | 631113.7 |
| 22.81283 | 9  | 4 | 5 | 1654835  | 4962519  | 1816424  | 4672075  | 1672396  | 1879341  | 5829048  | 6474481  | 4864081  |
| 9.21755  | 5  | 3 | 2 | 497655.1 | 1298464  | 476994.4 | 1214994  | 525607.2 | 1531525  | 1025638  | 1234323  | 729196.2 |

|          |    |   |   |          |          |          |          |          |          |          |          |          |
|----------|----|---|---|----------|----------|----------|----------|----------|----------|----------|----------|----------|
| 25.2045  | 6  | 3 | 3 | 520555.3 | 3581806  | 1071511  | 3764451  | 1125264  | 4799586  | 2765517  | 2368604  | 3421123  |
| 11.52297 | 10 | 5 | 5 | 166784.1 | 816086.3 | 279609   | 860212.6 | 250484.5 | 1216640  | 717838.4 | 679691.8 | 498330.7 |
| 9.976317 | 10 | 5 | 5 | 4173540  | 11021250 | 4274334  | 10263354 | 4829435  | 14325583 | 16373935 | 10397718 | 6351587  |
| 10.95055 | 10 | 5 | 5 | 812717   | 4959938  | 1370746  | 4756079  | 1058811  | 6484907  | 5948574  | 3647087  | 3419251  |
| 39.8775  | 4  | 1 | 3 | 309357.3 | 4489268  | 205743.8 | 4697569  | 1706996  | 4521348  | 4510393  | 4803786  | 4279762  |
| 13.0989  | 9  | 5 | 4 | 167574.6 | 877647.3 | 328029.1 | 925993.3 | 247075.1 | 1388555  | 763502   | 674354.1 | 561466.5 |
| 9.4925   | 10 | 4 | 5 | 1192718  | 7033801  | 3524054  | 6410748  | 3963953  | 7090348  | 3451907  | 10828685 | 3552004  |
| 29.602   | 4  | 3 | 1 | 176197.5 | 298613.4 | 302949.7 | 251450.7 | 263614.2 | 75269    | 308309.6 | 18101.31 | 786891.7 |
| 9.896717 | 10 | 5 | 5 | 2313621  | 16394578 | 2218247  | 15932614 | 3232619  | 13804838 | 18376870 | 14360933 | 18558582 |
| 9.18975  | 5  | 3 | 2 | 1054160  | 5615358  | 1692291  | 6269042  | 5183558  | 4345933  | 6905851  | 4611026  | 7935445  |
| 9.999217 | 10 | 5 | 5 | 1318361  | 2480567  | 1111082  | 2712781  | 1627659  | 2936212  | 4116971  | 2397897  | 1359804  |
| 9.887133 | 8  | 3 | 5 | 1089507  | 3692197  | 769727.8 | 3931073  | 1849466  | 4383096  | 3357401  | 4345402  | 3837336  |
| 9.94455  | 9  | 5 | 4 | 1840424  | 2108320  | 454257.9 | 2289354  | 1441192  | 2660057  | 2283868  | 2260244  | 1869444  |
| 9.856867 | 10 | 5 | 5 | 1532397  | 6373657  | 1995487  | 5984032  | 2650328  | 6531819  | 6770554  | 4201134  | 4978146  |
| 10.95055 | 6  | 3 | 3 | 190078.2 | 409654.9 | 108747.8 | 429400.3 | 128651.6 | 420023.5 | 588943.8 | 321257.8 | 391516.3 |
| 9.856867 | 10 | 5 | 5 | 2.14E+08 | 1.26E+09 | 71781994 | 1.28E+09 | 1.49E+08 | 1.37E+09 | 1.28E+09 | 1.19E+09 | 1.21E+09 |
| 9.856867 | 6  | 3 | 3 | 966370.7 | 2440827  | 827582.3 | 2258472  | 1308299  | 3099336  | 2939831  | 3061742  | 1763741  |
| 9.4468   | 7  | 4 | 3 | 531864.9 | 2881621  | 924401.6 | 3043876  | 1032578  | 3502615  | 4054912  | 2875699  | 1819106  |
| 10.95055 | 10 | 5 | 5 | 1461757  | 8857063  | 2402848  | 8498962  | 1887752  | 11717360 | 10805403 | 6642156  | 6366914  |
| 9.999217 | 9  | 5 | 4 | 701517.7 | 1154533  | 659934.2 | 1276292  | 803384.9 | 1253226  | 2095249  | 1377790  | 536642.5 |
| 10.31835 | 7  | 4 | 3 | 191736.5 | 552768   | 303066.2 | 512702.8 | 150732.3 | 646439.7 | 964290.1 | 644957.1 | 219874.8 |
| 9.932033 | 8  | 5 | 3 | 1637402  | 3026397  | 1390258  | 2797469  | 1378318  | 4329128  | 4709338  | 2411519  | 1758945  |
| 10.94443 | 4  | 1 | 3 | 420009   | 1272964  | 402271.3 | 1209218  | 367989   | 637020.9 | 1676308  | 1170505  | 1358187  |
| 9.960467 | 3  | 3 | 0 | 620142.3 | 927227   | 233393.8 | 857299.6 | 541080.4 | 1055014  | 944687.3 | 692608.3 | 1238574  |
| 9.976317 | 10 | 5 | 5 | 601223.2 | 1850488  | 600851.1 | 1742517  | 702253.9 | 2061629  | 2569966  | 2051052  | 967212.9 |
| 9.3735   | 4  | 3 | 1 | 1292415  | 2097520  | 1870200  | 1820829  | 1448332  | 1081641  | 1269408  | 2068892  | 5327150  |
| 9.979667 | 10 | 5 | 5 | 690422.2 | 1971213  | 749588.5 | 1827793  | 970949.7 | 2664554  | 2838144  | 1812176  | 1206486  |
| 9.999217 | 10 | 5 | 5 | 1103157  | 2106631  | 807872.9 | 2275361  | 1191815  | 2285860  | 3307564  | 2220142  | 1297105  |
| 9.976317 | 7  | 3 | 4 | 426572.8 | 830694.4 | 499902.6 | 749687.7 | 482383.4 | 1060313  | 1529252  | 720593.5 | 184847.2 |
| 9.473733 | 10 | 5 | 4 | 1655370  | 6417371  | 2569383  | 6787686  | 1853960  | 8173928  | 9680550  | 5970593  | 5135254  |
| 10.95835 | 10 | 5 | 5 | 371294.5 | 1220496  | 316644.6 | 1166438  | 339541.2 | 1509020  | 1593445  | 971379.2 | 1140096  |
| 40.899   | 8  | 4 | 1 | 309076.8 | 3391221  | 1570181  | 3580523  | 121625.3 | 3965391  | 746804.7 | 3833474  | 4918832  |
| 9.976317 | 7  | 4 | 3 | 568532.3 | 905053.5 | 376914.5 | 852244.6 | 248406.1 | 833001.9 | 1458576  | 606422.6 | 539057.8 |
| 10.9645  | 10 | 5 | 5 | 328396.1 | 1477690  | 356761   | 1534233  | 329834   | 1811611  | 1876957  | 1199819  | 1080727  |
| 9.951283 | 9  | 5 | 4 | 2368715  | 4360640  | 1824767  | 4114128  | 1041784  | 6319506  | 4950472  | 1362286  | 4439154  |



|          |    |   |   |          |          |          |          |          |          |          |          |          |
|----------|----|---|---|----------|----------|----------|----------|----------|----------|----------|----------|----------|
| 11.05325 | 9  | 4 | 5 | 174353.4 | 776408.1 | 256107.6 | 849203.1 | 561673.1 | 988753   | 954706   | 420694   | 588149.3 |
| 9.822117 | 5  | 2 | 3 | 3623601  | 8566125  | 5279502  | 7749573  | 4627366  | 12496653 | 2737316  | 13957950 | 10486386 |
| 11.5372  | 7  | 4 | 3 | 68864.39 | 231225.6 | 84384.65 | 216742.4 | 91717.36 | 258945.2 | 218358.1 | 351381.6 | 119011.1 |
| 9.445217 | 12 | 5 | 5 | 3176248  | 18771438 | 8579549  | 19980852 | 5816507  | 19258323 | 28801973 | 5179830  | 18871729 |
| 11.46753 | 11 | 5 | 5 | 7350213  | 41350381 | 5798889  | 39440396 | 15071939 | 44758051 | 38395071 | 49683514 | 38708181 |
| 9.37135  | 5  | 3 | 1 | 471965.2 | 2219403  | 1114156  | 2430903  | 1436070  | 1941207  | 862682.2 | 1678872  | 3748054  |
| 12.6321  | 9  | 5 | 4 | 134119.8 | 584014.9 | 138609   | 629858   | 362012.3 | 776525.5 | 676885.4 | 492852.8 | 531590.9 |
| 13.77065 | 5  | 4 | 1 | 167654   | 1591209  | 236536.7 | 1537417  | 394420.5 | 1769743  | 1554222  | 1197056  | 1676927  |
| 9.856867 | 5  | 3 | 2 | 3199711  | 15640513 | 2837438  | 16115227 | 2961792  | 14900594 | 15721114 | 11448363 | 19140434 |
| 30.29417 | 10 | 5 | 5 | 2046412  | 12249995 | 2663266  | 11603920 | 4848963  | 11934271 | 16481103 | 11629489 | 9093111  |
| 9.8445   | 10 | 5 | 5 | 726526.1 | 3838817  | 685271.7 | 3691764  | 1063051  | 4267259  | 4039668  | 3557635  | 2794465  |
| 23.10317 | 10 | 5 | 5 | 8885603  | 1.02E+08 | 11760923 | 98819892 | 26695333 | 81589590 | 1.1E+08  | 1.04E+08 | 1.08E+08 |
| 9.992233 | 10 | 5 | 5 | 643939.6 | 1572741  | 543483.6 | 1679714  | 746948.2 | 2023258  | 2159907  | 1652941  | 1049210  |
| 10.96997 | 5  | 2 | 3 | 271300.4 | 829858   | 169644.5 | 800481.4 | 189614.6 | 792615.6 | 1097368  | 673152.4 | 706745.9 |
| 9.507167 | 12 | 5 | 5 | 2253872  | 14101964 | 6545262  | 15526731 | 10378299 | 21767970 | 12679096 | 9026890  | 7032139  |
| 9.8445   | 7  | 3 | 4 | 675519.8 | 2127307  | 1018925  | 1985630  | 673677.1 | 2817739  | 763912.6 | 1631434  | 3378177  |
| 9.983433 | 5  | 2 | 3 | 2750314  | 3201362  | 4172525  | 3862098  | 3921897  | 10216702 | 361977.1 | 919878.1 | 616586.4 |
| 15.52152 | 10 | 5 | 5 | 86685.45 | 424910   | 164598.9 | 451976.8 | 167342.9 | 688771   | 397957.6 | 233509.2 | 415429.4 |
| 9.999217 | 11 | 5 | 5 | 570429.3 | 1279897  | 596629.3 | 1390825  | 752973.6 | 1560820  | 1764399  | 1799231  | 550355.4 |
| 9.994767 | 9  | 5 | 4 | 1681432  | 2797275  | 1021960  | 2519524  | 2147408  | 3023020  | 4259596  | 3064443  | 1767612  |
| 9.976317 | 7  | 2 | 5 | 1562565  | 4948416  | 742380.9 | 5198627  | 1996677  | 5428404  | 5562487  | 5455899  | 4316515  |
| 24.622   | 10 | 5 | 5 | 229747.2 | 1128207  | 216352.5 | 1054669  | 588037.3 | 1437621  | 1146969  | 1208790  | 947387.9 |
| 44.351   | 9  | 3 | 2 | 374877.5 | 7008993  | 4759371  | 7771004  | 4602362  | 6365839  | 935747.4 | 6560011  | 6887933  |
| 9.992233 | 7  | 4 | 3 | 1690446  | 3506369  | 1426285  | 3225450  | 1971068  | 4244024  | 5207041  | 4028307  | 1873375  |
| 9.859983 | 8  | 3 | 5 | 1131408  | 3049622  | 878706.6 | 3315030  | 2092131  | 3150522  | 1647356  | 3353197  | 4059408  |
| 9.460217 | 4  | 3 | 0 | 465489.9 | 1169423  | 487022.6 | 1237469  | 330833.9 | 872213   | 1975527  | 741578.1 | 1018690  |
| 10.52333 | 5  | 3 | 2 | 124043.9 | 356471.2 | 83830.01 | 377386.4 | 159195.4 | 318362.7 | 376992.8 | 245642.9 | 474103.3 |
| 10.93468 | 5  | 3 | 2 | 167211.6 | 666767.3 | 337184   | 612677.9 | 327814.5 | 994795.6 | 633270.5 | 217241.9 | 487395.6 |
| 38.827   | 5  | 1 | 3 | 330694.3 | 4541397  | 332653.5 | 4790147  | 2074103  | 4606323  | 4860417  | 4761737  | 4468944  |
| 9.421167 | 13 | 5 | 5 | 5296977  | 35890847 | 17181179 | 33435425 | 12591411 | 26481554 | 26083252 | 26496938 | 34408377 |
| 13.25948 | 6  | 3 | 3 | 140872.8 | 553268.3 | 323703   | 616807.8 | 446065.6 | 405468.6 | 360223.3 | 955808.2 | 209305.7 |
| 9.465    | 8  | 4 | 3 | 1889001  | 13357119 | 7443543  | 14380271 | 4812754  | 8035766  | 5189267  | 17524728 | 12282950 |
| 39.23    | 4  | 1 | 3 | 371706.1 | 6208261  | 527501.5 | 6673406  | 3895182  | 6221845  | 6504812  | 6572754  | 5294541  |
| 44.58117 | 12 | 3 | 5 | 600859.5 | 9402334  | 3724467  | 8582722  | 6051747  | 4959371  | 13124079 | 11285224 | 5848682  |
| 11.00657 | 8  | 5 | 3 | 230957.1 | 631291.4 | 214414.8 | 671054.2 | 272188.3 | 502213.2 | 595179.8 | 542942.9 | 507079.1 |

|          |    |   |   |          |          |          |          |          |          |          |          |          |
|----------|----|---|---|----------|----------|----------|----------|----------|----------|----------|----------|----------|
| 9.5415   | 5  | 1 | 4 | 869855.1 | 1774329  | 1055252  | 1977991  | 1424820  | 1755083  | 128848.3 | 3049863  | 2116446  |
| 43.74717 | 5  | 3 | 2 | 314475.8 | 4942182  | 857682.7 | 5076237  | 796102.2 | 5247878  | 3768617  | 5202009  | 6027038  |
| 20.79667 | 6  | 3 | 3 | 164552.9 | 1271561  | 296737.7 | 1329868  | 411778.3 | 1184478  | 1566203  | 831613.2 | 1524246  |
| 9.960467 | 10 | 5 | 5 | 14534207 | 39309396 | 15140524 | 36762889 | 16300890 | 52050211 | 57822803 | 36116930 | 23285489 |
| 10.94853 | 7  | 3 | 4 | 686332.3 | 1314110  | 508023.5 | 1205165  | 799227.6 | 2033159  | 1381254  | 1374549  | 1163528  |
| 10.71928 | 11 | 5 | 5 | 457578.5 | 1882830  | 228275.7 | 1832274  | 375433.3 | 1739902  | 2197151  | 2050844  | 1754268  |
| 9.4775   | 10 | 4 | 4 | 567176.8 | 4200446  | 2225365  | 3807167  | 2625554  | 1185010  | 4101065  | 3007178  | 6390380  |
| 9.928667 | 7  | 4 | 3 | 1175325  | 2077416  | 656554.6 | 1984741  | 472914.3 | 2644356  | 956767.4 | 2316127  | 2377019  |
| 30.54383 | 6  | 4 | 2 | 223894.1 | 799227   | 590437.6 | 876305.6 | 314919.7 | 1793807  | 409742.7 | 304745   | 782316.5 |
| 9.43325  | 6  | 4 | 2 | 840054.9 | 5237897  | 3170587  | 4746458  | 2919271  | 8982345  | 1579382  | 7290573  | 5944057  |
| 22.04267 | 9  | 5 | 4 | 149722.8 | 770326.5 | 139543.3 | 815544.8 | 363677.7 | 818530.9 | 993094.1 | 649223   | 690707.9 |
| 9.91765  | 6  | 2 | 4 | 873222.1 | 1462439  | 769158   | 1601557  | 945549.5 | 529795.6 | 2348333  | 1345317  | 959293.8 |
| 9.960467 | 9  | 5 | 4 | 877161.2 | 1845830  | 231410.7 | 1920049  | 596645.1 | 2154098  | 1541068  | 1763530  | 1975827  |
| 10.94443 | 5  | 3 | 2 | 1120698  | 2195024  | 2164078  | 2524039  | 1914807  | 4925851  | 699001.3 | 695874.9 | 4165001  |
| 9.40325  | 5  | 3 | 2 | 368213.7 | 1351063  | 761950.2 | 1185354  | 1229693  | 1475484  | 2168398  | 1932180  | 855603.9 |
| 44.8685  | 6  | 3 | 3 | 155683.8 | 1566350  | 133933.3 | 1594430  | 205903.2 | 1604456  | 1579852  | 1489029  | 1757825  |
| 9.976317 | 10 | 5 | 5 | 1967944  | 5432573  | 1931544  | 5108135  | 2101134  | 7087795  | 7638385  | 5370046  | 3309891  |
| 10.90802 | 6  | 4 | 2 | 162295.2 | 554402.6 | 337643.3 | 503457.2 | 294578.6 | 474768.6 | 403177.1 | 329159.9 | 413636.4 |
| 8.785267 | 3  | 3 | 0 | 369563.1 | 5355988  | 2134285  | 5026050  | 1968540  | 5693078  | 2403895  | 8379866  | 4864513  |
| 8.902983 | 9  | 5 | 4 | 473840.9 | 975224   | 607159.3 | 874953.2 | 640466.8 | 949256   | 1994836  | 847186.1 | 395356.3 |
| 10.008   | 10 | 5 | 5 | 2631444  | 6372851  | 2413466  | 5982398  | 2447153  | 5711073  | 10583081 | 4610777  | 5013392  |
| 10.008   | 7  | 4 | 3 | 420542.2 | 860464   | 162342.4 | 809139.3 | 413215.3 | 1076835  | 915888.6 | 801865.4 | 632680.4 |
| 30.28183 | 10 | 5 | 5 | 7143927  | 49478017 | 9928004  | 47231679 | 16927920 | 50982764 | 63421948 | 47809619 | 35522754 |
| 9.856867 | 10 | 5 | 5 | 3690036  | 13410931 | 2084462  | 13777990 | 2466928  | 16209963 | 14848714 | 12804707 | 12105553 |
| 10.94443 | 10 | 5 | 5 | 365805.3 | 1843715  | 518237.6 | 1776037  | 283133.5 | 2649752  | 2077434  | 1576716  | 1450389  |
| 9.8207   | 3  | 3 | 0 | 697968.4 | 1803587  | 401425.5 | 1701502  | 793650.3 | 1589407  | 1588866  | 1711869  | 2515924  |
| 38.971   | 5  | 3 | 2 | 361360.5 | 5137250  | 1218886  | 4875148  | 1945785  | 7240634  | 4656861  | 4936867  | 4082675  |
| 9.859983 | 10 | 5 | 5 | 3772637  | 21065444 | 962256   | 21369275 | 2449483  | 20106144 | 21769383 | 21331702 | 20007140 |
| 9.9677   | 10 | 5 | 5 | 1703824  | 5831609  | 1434882  | 5608399  | 1347106  | 7486110  | 6562714  | 5641599  | 3611930  |
| 33.326   | 4  | 3 | 1 | 69743.17 | 246209.4 | 146232.5 | 265441   | 82971.08 | 353153.8 | 253198.4 | 67654.36 | 420082.8 |
| 10.9645  | 10 | 5 | 5 | 22963500 | 92134855 | 26402931 | 88203637 | 22427586 | 1.19E+08 | 1.2E+08  | 73518281 | 62951530 |
| 10.9645  | 6  | 3 | 3 | 460119   | 872528.2 | 271662.7 | 808262.6 | 491532.2 | 1303231  | 776232   | 946725   | 592591.4 |
| 10.9645  | 10 | 5 | 5 | 1228289  | 5577253  | 1249780  | 5402658  | 892394.2 | 6847230  | 6896741  | 4303347  | 4469072  |
| 9.976317 | 10 | 5 | 5 | 507338.9 | 1798381  | 389307.2 | 1874449  | 544193.9 | 2115939  | 2154075  | 1937124  | 1514778  |
| 10.45545 | 10 | 5 | 5 | 12835238 | 46124676 | 8867999  | 44220880 | 14149713 | 59508218 | 46073588 | 39769167 | 36690095 |

|          |    |   |   |          |          |          |          |          |          |          |          |          |
|----------|----|---|---|----------|----------|----------|----------|----------|----------|----------|----------|----------|
| 9.4468   | 7  | 3 | 3 | 714020.1 | 3873318  | 1376212  | 3641923  | 1510033  | 3246261  | 3332478  | 5274560  | 5321803  |
| 10.92828 | 10 | 5 | 5 | 282890.6 | 958284.9 | 352776.9 | 906440.3 | 291659.5 | 1331802  | 862592.3 | 550818.8 | 727553.5 |
| 10.47857 | 5  | 3 | 2 | 132113.6 | 319392.7 | 92888.3  | 303887.1 | 100787.4 | 326062.7 | 298515.6 | 474427.3 | 242626.8 |
| 10.9645  | 10 | 5 | 5 | 23092196 | 92155818 | 26426146 | 88234812 | 22409837 | 1.19E+08 | 1.21E+08 | 73675454 | 62779642 |
| 10.008   | 10 | 5 | 5 | 522749.4 | 1515311  | 286358.7 | 1589556  | 582041.8 | 1616637  | 1438780  | 1961469  | 1248804  |
| 9.559117 | 20 | 5 | 5 | 2413908  | 7876880  | 8666071  | 9168733  | 7468419  | 1357983  | 2315166  | 1070370  | 16251752 |
| 9.544833 | 10 | 5 | 5 | 651787.4 | 1702233  | 375534.6 | 1616036  | 657906.2 | 1659929  | 2337128  | 1343822  | 1544243  |
| 10.48497 | 10 | 5 | 5 | 861782.4 | 2164262  | 409275.2 | 2019912  | 1185187  | 2156513  | 2371775  | 1998009  | 1600378  |
| 9.848417 | 10 | 5 | 5 | 872243.9 | 3458214  | 1837293  | 3727098  | 1515611  | 5866811  | 2347276  | 3058655  | 4727319  |
| 9.992233 | 9  | 5 | 4 | 1498564  | 3033209  | 811721.3 | 3221483  | 1442543  | 3485925  | 4105542  | 2798474  | 1944678  |
| 9.864767 | 10 | 5 | 5 | 4482624  | 26930792 | 1914809  | 26572621 | 2526971  | 26969228 | 28500141 | 25783551 | 24378943 |
| 9.964417 | 9  | 5 | 4 | 1056530  | 2597052  | 904086.2 | 2418557  | 1294055  | 3277265  | 3714828  | 2260449  | 1432625  |
| 44.9835  | 8  | 3 | 5 | 154767.4 | 681114.7 | 76986.23 | 692189.7 | 61054.15 | 705991.5 | 606570.4 | 720362.3 | 775591.5 |
| 10.97857 | 7  | 4 | 2 | 252833.3 | 942788.7 | 512337.9 | 864588.5 | 469357.6 | 1166445  | 588019.7 | 585801.5 | 626697.5 |
| 9.960467 | 10 | 5 | 5 | 1857125  | 6290772  | 1498304  | 6046775  | 1569529  | 7417295  | 8213995  | 5784408  | 4508681  |
| 9.864767 | 10 | 5 | 5 | 12393732 | 70140213 | 3346146  | 68926422 | 10034440 | 73542702 | 67169191 | 72605454 | 71347983 |
| 9.979667 | 10 | 5 | 5 | 426068.6 | 1334952  | 574438.2 | 1261806  | 290417.5 | 1662218  | 2080185  | 1293424  | 570199.7 |
| 9.928667 | 5  | 3 | 2 | 888964.4 | 3119703  | 1445624  | 3346669  | 1412789  | 2674818  | 5161387  | 3979143  | 1546823  |
| 9.8322   | 9  | 5 | 4 | 743926.3 | 2935014  | 138653.5 | 2877081  | 484645.4 | 2989956  | 2928385  | 2750970  | 2878878  |
| 9.874317 | 7  | 3 | 4 | 660043.1 | 2352097  | 500007   | 2510651  | 1294775  | 2634326  | 1535111  | 2318268  | 2424118  |
| 13.54892 | 10 | 5 | 5 | 656844.5 | 5083926  | 1068279  | 4889143  | 1364543  | 3953997  | 4744858  | 4298725  | 6300273  |
| 9.928667 | 10 | 5 | 5 | 1236261  | 5053347  | 2477764  | 5370975  | 1312001  | 2847644  | 2791353  | 7573175  | 7806171  |
| 9.41815  | 6  | 2 | 4 | 1054160  | 5325043  | 1552918  | 4652179  | 5649581  | 7499154  | 5759789  | 3490428  | 4208224  |
| 10.10223 | 7  | 2 | 5 | 233915.5 | 892587   | 253532.4 | 941980.1 | 359269.8 | 825293.3 | 517963.8 | 1213496  | 921949.5 |
| 10.02372 | 8  | 5 | 3 | 343059.5 | 944532.2 | 192513.5 | 992256.8 | 375281.2 | 835512.5 | 1248415  | 1006493  | 876111.4 |
| 9.664033 | 10 | 5 | 5 | 5669654  | 18909062 | 1220431  | 18075254 | 7134168  | 20038303 | 18722324 | 19242461 | 19635410 |
| 10.9645  | 10 | 5 | 5 | 1445673  | 7062666  | 967206.2 | 6861862  | 1500181  | 7558478  | 8410476  | 6572340  | 5874449  |
| 40.62567 | 10 | 2 | 4 | 426147.4 | 4733253  | 1403726  | 5096165  | 2880667  | 5901981  | 4534556  | 5491085  | 5354132  |
| 10.08658 | 11 | 5 | 5 | 2787714  | 13848780 | 2594821  | 14234117 | 2263699  | 13167739 | 12402498 | 10705855 | 17036677 |
| 10.95835 | 10 | 5 | 5 | 649893.6 | 2580076  | 772455.3 | 2473125  | 558655.6 | 3360731  | 3432146  | 1992706  | 1774630  |
| 10.9645  | 9  | 5 | 4 | 267729.3 | 1148244  | 283190.5 | 1107868  | 222931   | 1224801  | 1103524  | 742715.4 | 1136782  |
| 10.02372 | 5  | 3 | 2 | 331284.3 | 719727.5 | 323065.1 | 673568.7 | 256217.9 | 877543.1 | 1166059  | 699507.7 | 321762.1 |
| 9.174967 | 9  | 4 | 4 | 635556.6 | 1194764  | 562039.7 | 1105905  | 562914.7 | 2165315  | 1022496  | 930107   | 1127310  |
| 9.842    | 10 | 5 | 5 | 951774.7 | 4621001  | 421965.6 | 4517131  | 817340   | 5035173  | 4661169  | 4180251  | 5029365  |
| 9.93625  | 10 | 5 | 5 | 3566660  | 13274208 | 1990368  | 12941505 | 2221543  | 16507925 | 13664637 | 12110287 | 11389944 |

|          |    |   |   |          |          |          |          |          |          |          |          |          |
|----------|----|---|---|----------|----------|----------|----------|----------|----------|----------|----------|----------|
| 24.2155  | 11 | 5 | 5 | 1561152  | 8158005  | 6688077  | 7320603  | 3208028  | 14240135 | 858747.4 | 8559957  | 15204726 |
| 9.206    | 6  | 3 | 3 | 955431.4 | 5155528  | 2386435  | 4796314  | 2167696  | 4488694  | 1881927  | 8238289  | 4649499  |
| 23.26217 | 10 | 5 | 5 | 543756.5 | 1850721  | 532740.2 | 1767872  | 519068.6 | 1478624  | 2016613  | 1442241  | 1604214  |
| 10.97857 | 10 | 5 | 5 | 566261.6 | 2611924  | 343498.6 | 2540489  | 537386.2 | 2427083  | 2161455  | 2663312  | 2728170  |
| 8.949567 | 7  | 3 | 4 | 436897   | 1996621  | 638250.3 | 2136461  | 1072400  | 1916543  | 2950003  | 1727274  | 2173796  |
| 8.989067 | 9  | 4 | 4 | 247689   | 596335.7 | 482491.6 | 525876.5 | 409886.1 | 317740.1 | 1369171  | 183010.2 | 758598.2 |
| 10.03035 | 8  | 3 | 4 | 380609.6 | 1096635  | 226737.6 | 1148761  | 405505.3 | 982426.4 | 1479961  | 1002208  | 1112931  |
| 9.2946   | 7  | 4 | 3 | 9049373  | 32997782 | 63609259 | 42397339 | 55647690 | 3456188  | 6476406  | 7025932  | 1.47E+08 |
| 9.4468   | 9  | 4 | 4 | 4945123  | 14284185 | 1941305  | 16400949 | 18353081 | 11581276 | 17016125 | 13920259 | 14693420 |
| 9.979667 | 10 | 5 | 5 | 790250.1 | 1888037  | 916425.4 | 2038503  | 996046   | 2772667  | 2918635  | 1454967  | 808805.6 |
| 10.008   | 9  | 4 | 5 | 455864.3 | 714688.4 | 334870.6 | 776410.8 | 441447.8 | 743009.9 | 1278121  | 602314.1 | 437824.6 |
| 9.554967 | 6  | 3 | 3 | 208827.4 | 349940.6 | 139319.9 | 321483.2 | 213397.6 | 328579.4 | 460365   | 120775.9 | 383525   |
| 9.960467 | 7  | 4 | 3 | 760117   | 1106461  | 291834.6 | 1193645  | 714859.8 | 1580256  | 1042589  | 1118868  | 1002002  |
| 10.008   | 10 | 5 | 5 | 822095.3 | 2604169  | 654763   | 2728291  | 901984.9 | 2810600  | 3243327  | 3148878  | 1925626  |
| 10.45545 | 10 | 5 | 5 | 5376621  | 17917815 | 3168353  | 17179870 | 5773293  | 22652643 | 17330024 | 14574790 | 15799604 |
| 9.3919   | 5  | 3 | 2 | 774963.1 | 3596404  | 1043100  | 3909978  | 2574295  | 4345872  | 4619345  | 4066182  | 2405566  |
| 10.00098 | 8  | 4 | 4 | 384698.6 | 708119.2 | 235103.3 | 778533.6 | 577983.3 | 1023567  | 859805.7 | 599678   | 422733.6 |
| 9.9014   | 6  | 3 | 3 | 1214999  | 2927291  | 1184319  | 2747510  | 1105586  | 2078954  | 3750622  | 2646825  | 4509639  |
| 43.9915  | 7  | 3 | 3 | 223570.4 | 1571187  | 1874332  | 1815613  | 1127264  | 1138002  | 4871353  | 424991.2 | 1010304  |
| 9.976317 | 9  | 5 | 4 | 886949.3 | 2352548  | 823186.6 | 2218206  | 887905.9 | 3079858  | 3270645  | 2256644  | 1323842  |
| 9.221317 | 6  | 3 | 3 | 1023345  | 3648707  | 1295133  | 3301035  | 2806903  | 2982262  | 1951661  | 5139190  | 3459611  |
| 10.86517 | 10 | 5 | 5 | 2837923  | 11775420 | 2266312  | 12206344 | 3140030  | 14222479 | 14154761 | 10927980 | 10147257 |
| 10.02372 | 7  | 4 | 3 | 410487.9 | 893836.3 | 395978.7 | 958554.9 | 428534.5 | 706682   | 525605.9 | 604888.1 | 1407206  |
| 9.842    | 7  | 4 | 2 | 4616301  | 11954911 | 7747432  | 13001465 | 5319880  | 12165356 | 1806923  | 7767934  | 15872098 |
| 9.40325  | 8  | 5 | 3 | 1674112  | 3002498  | 557117.2 | 3235113  | 1972049  | 2598010  | 3148451  | 2828674  | 2535696  |
| 9.983433 | 14 | 5 | 5 | 2794494  | 8794280  | 3225896  | 9312850  | 3388577  | 10326881 | 13264975 | 8946345  | 5315186  |
| 3.559017 | 7  | 2 | 4 | 104846.2 | 1649788  | 1181783  | 1485861  | 884071.5 | 0        | 2185595  | 2028254  | 977395.8 |
| 27.25633 | 6  | 4 | 2 | 549836.5 | 1301245  | 1414769  | 1086915  | 1319470  | 230437.6 | 810339   | 777758.9 | 899787.3 |
| 10.95055 | 9  | 4 | 5 | 223007.3 | 597661.5 | 190580.9 | 629752.1 | 217968.6 | 869289.9 | 691407.1 | 544327.4 | 366858.5 |
| 10.97242 | 4  | 1 | 3 | 1083111  | 3076971  | 1166843  | 2897971  | 1118427  | 3176453  | 4995234  | 1960976  | 2397582  |
| 43.0565  | 6  | 1 | 4 | 336589   | 3762127  | 262919.1 | 3836176  | 604281.4 | 4172727  | 3782087  | 3594412  | 3780445  |
| 30.2075  | 10 | 5 | 5 | 344084.7 | 2296036  | 698124.1 | 2166259  | 938589.2 | 2970829  | 2956579  | 2213691  | 1304800  |
| 9.992233 | 10 | 5 | 5 | 1086348  | 2699288  | 961647   | 2876261  | 1273648  | 3363432  | 3780541  | 2961669  | 1648311  |
| 9.992233 | 10 | 5 | 5 | 1887462  | 4974890  | 1712938  | 4729257  | 1409402  | 7181623  | 6307288  | 3056777  | 3942276  |
| 9.56645  | 7  | 3 | 4 | 1046086  | 3046544  | 607048.1 | 2950747  | 617887.4 | 3683499  | 2679545  | 2981802  | 2270001  |

|          |    |   |   |          |          |          |          |          |          |          |          |          |
|----------|----|---|---|----------|----------|----------|----------|----------|----------|----------|----------|----------|
| 9.041133 | 7  | 4 | 3 | 196124.6 | 568901.5 | 358735.1 | 512357.8 | 364569.2 | 699048.3 | 1016728  | 622107.5 | 471545.3 |
| 35.9635  | 9  | 5 | 4 | 879574.8 | 4299052  | 2418088  | 3818708  | 3586276  | 7824511  | 3051466  | 1640576  | 3425554  |
| 9.473733 | 7  | 5 | 2 | 673742.1 | 3883250  | 1269477  | 3676399  | 1374613  | 4663264  | 3119810  | 4799172  | 4827912  |
| 10.008   | 13 | 5 | 4 | 602383.3 | 1149759  | 208937   | 1123244  | 113389.8 | 1135962  | 1307027  | 1160639  | 810223.7 |
| 9.999217 | 5  | 2 | 3 | 942057.6 | 1567028  | 854077.6 | 1698013  | 825420.7 | 2015995  | 658653.6 | 674161.9 | 1943540  |
| 10.2456  | 8  | 4 | 4 | 317530.9 | 1511488  | 620421   | 1430319  | 387455.9 | 1234151  | 2020803  | 2307421  | 1141684  |
| 10.95055 | 10 | 5 | 5 | 350783.4 | 1950537  | 561839.9 | 2065334  | 870084.8 | 2110173  | 2762658  | 1808633  | 1209139  |
| 9.976317 | 10 | 5 | 5 | 1214297  | 4942848  | 891927.2 | 5117829  | 1305237  | 5295238  | 6082889  | 5267664  | 4006261  |
| 9.976317 | 10 | 5 | 5 | 2094754  | 6496007  | 2103345  | 6101144  | 2889112  | 8250105  | 8873353  | 6525992  | 4022885  |
| 9.949233 | 5  | 1 | 4 | 496697.5 | 1185400  | 468102   | 1125735  | 262977.1 | 1210136  | 713009.1 | 1947224  | 1135524  |
| 9.848417 | 10 | 5 | 5 | 775005.9 | 3231489  | 1238861  | 3078789  | 580385.7 | 4228811  | 3309003  | 2708004  | 1420820  |
| 9.531467 | 5  | 3 | 2 | 376096.5 | 810574   | 584275.1 | 734730   | 355956.9 | 1786868  | 666197   | 414460.1 | 328432.2 |
| 11.45398 | 10 | 5 | 5 | 382281.8 | 1612656  | 453109.4 | 1515351  | 752530.3 | 1621317  | 1448978  | 1098161  | 1556554  |
| 10.96997 | 10 | 5 | 4 | 154798.7 | 420895.1 | 215332.2 | 450293.9 | 157129.2 | 222990.3 | 609780.9 | 213075.4 | 381110   |
| 9.8322   | 9  | 5 | 4 | 1717435  | 6266864  | 1318473  | 6032201  | 1674597  | 6628224  | 6870673  | 4893156  | 4973169  |
| 10.05535 | 9  | 4 | 5 | 589631.3 | 2350506  | 1006992  | 2229744  | 388100.1 | 1557779  | 3254799  | 3081304  | 2856986  |
| 9.05635  | 8  | 4 | 4 | 1748580  | 7013018  | 5152317  | 6235859  | 4842822  | 12138223 | 10251481 | 9528223  | 171990.6 |
| 9.874317 | 7  | 4 | 3 | 1558845  | 4327196  | 2809910  | 3836545  | 3464532  | 2210422  | 3023235  | 2560648  | 4820043  |
| 10.008   | 10 | 5 | 5 | 462456.5 | 828862.4 | 219347.9 | 877735.1 | 382881.4 | 891171.7 | 1164500  | 815152.3 | 605827.6 |
| 9.304717 | 4  | 3 | 1 | 589346   | 3190862  | 3220398  | 2722797  | 2788128  | 1113413  | 521878.2 | 7247438  | 6119471  |
| 10.95055 | 10 | 5 | 5 | 798497.2 | 4972142  | 1274945  | 4792409  | 1023788  | 6312617  | 6015932  | 3779465  | 3515200  |
| 9.460217 | 6  | 3 | 2 | 431848.5 | 1982102  | 535393.5 | 1887492  | 674129.6 | 1555451  | 2899758  | 1796920  | 1973075  |
| 29.61717 | 6  | 4 | 2 | 160047.1 | 704441.6 | 500342.1 | 634971.3 | 386128.9 | 197778.1 | 866189.9 | 150186.1 | 1213379  |
| 9.9014   | 4  | 1 | 3 | 1190259  | 2744619  | 638207.6 | 2639932  | 709319.6 | 2797085  | 1803873  | 2634729  | 3583728  |
| 25.37817 | 7  | 3 | 4 | 160859.1 | 779844.9 | 192052.4 | 807281.3 | 160016.3 | 1006644  | 941922.2 | 540883.6 | 677594.4 |
| 10.94443 | 5  | 3 | 2 | 442238   | 1117891  | 328277.1 | 1169305  | 335131.4 | 891961.4 | 1484586  | 748705.9 | 1028177  |
| 9.912633 | 4  | 3 | 1 | 859032.8 | 1772439  | 702650.4 | 1651447  | 851434.9 | 1937540  | 755231.4 | 2321219  | 1392249  |
| 6.95375  | 10 | 5 | 5 | 2192054  | 1.1E+08  | 73516121 | 1.2E+08  | 53039449 | 81025366 | 33292.31 | 1.43E+08 | 1.29E+08 |
| 9.089733 | 10 | 5 | 5 | 876537.1 | 4162398  | 1528973  | 3961744  | 993526.5 | 4181790  | 6589372  | 3821799  | 3860287  |
| 9.419733 | 9  | 5 | 2 | 716436.6 | 1778369  | 1035499  | 1944282  | 1107577  | 3417846  | 1568783  | 1260449  | 1983115  |
| 25.54783 | 4  | 1 | 3 | 46955.52 | 95925.02 | 30599.27 | 104086.6 | 66901.58 | 111628.1 | 47576.49 | 107403.8 | 126574.7 |
| 9.970617 | 7  | 5 | 2 | 1086651  | 861397   | 422402.8 | 943406   | 615545.2 | 1258716  | 423213.8 | 967855.4 | 1247136  |
| 10.9645  | 10 | 5 | 5 | 2573803  | 10796308 | 2542610  | 10420597 | 2308788  | 13510722 | 12938401 | 7751185  | 8668009  |
| 24.638   | 8  | 5 | 3 | 544866.2 | 2358561  | 716816.1 | 2443320  | 251660.9 | 2034805  | 1795067  | 3060869  | 3200237  |
| 9.999217 | 9  | 5 | 4 | 735797.8 | 2215372  | 849129   | 2063321  | 1097977  | 2701179  | 3286887  | 2327256  | 1163642  |

|          |    |   |   |          |          |          |          |          |          |          |          |          |
|----------|----|---|---|----------|----------|----------|----------|----------|----------|----------|----------|----------|
| 10.9645  | 10 | 5 | 5 | 486806.2 | 1774471  | 530715.8 | 1863412  | 615990.4 | 2027316  | 2372986  | 951849   | 1877077  |
| 9.976317 | 10 | 5 | 5 | 1037334  | 3640337  | 1104381  | 3471210  | 1084998  | 4269285  | 5187618  | 3440420  | 2432967  |
| 10.11782 | 6  | 3 | 3 | 20020852 | 56338882 | 74239686 | 46347609 | 52954784 | 20383171 | 1.89E+08 | 27437975 | 21774426 |
| 9.856867 | 10 | 5 | 5 | 2228640  | 11658821 | 3496589  | 11235984 | 1526437  | 14633365 | 11237866 | 9256967  | 7453848  |
| 9.43325  | 6  | 3 | 1 | 531448.1 | 2055611  | 1444639  | 2282945  | 1500855  | 929289.8 | 741282.6 | 3647971  | 3588011  |
| 9.976317 | 5  | 3 | 2 | 580657.6 | 892855.5 | 636665.8 | 788721.7 | 710967.8 | 1342211  | 1721174  | 807516   | 209431.6 |
| 9.56645  | 5  | 2 | 3 | 304686.9 | 421072.9 | 170572.2 | 471274.6 | 419306.8 | 553753.9 | 591190.7 | 470968.3 | 193986   |
| 9.929783 | 11 | 5 | 5 | 1333533  | 5621936  | 1804049  | 5910441  | 1934774  | 5902993  | 5613093  | 6089323  | 7746866  |
| 10.39408 | 5  | 2 | 3 | 99812    | 233027.7 | 76231.58 | 245716.6 | 87868.66 | 145078.8 | 265408.8 | 167509   | 255902.7 |
| 9.964417 | 19 | 5 | 5 | 1002295  | 3891910  | 825012   | 3719565  | 1337141  | 4184938  | 2451339  | 4549064  | 4205581  |
| 35.93483 | 4  | 1 | 3 | 69858.45 | 127368.3 | 173235.9 | 105198.8 | 104142.4 | 0        | 19994.8  | 17498.48 | 401754.9 |
| 37.705   | 5  | 0 | 4 | 286211.1 | 3557079  | 118015.1 | 3374853  | 1616974  | 3532574  | 3451290  | 3518530  | 3522803  |
| 41.56067 | 4  | 1 | 3 | 541661.4 | 6264700  | 2215533  | 6535694  | 1064115  | 7299377  | 2308184  | 7056154  | 7245945  |
| 9.845483 | 6  | 3 | 3 | 5060422  | 4233295  | 1307499  | 3863049  | 3082938  | 4765991  | 2858148  | 5204646  | 2806569  |
| 43.41617 | 10 | 3 | 4 | 412604.4 | 7337154  | 3608378  | 6864704  | 2379278  | 8909216  | 8608529  | 1121592  | 10378754 |
| 10.01477 | 9  | 5 | 4 | 325431.6 | 808972.8 | 294410.6 | 763172.7 | 301178.7 | 722393.6 | 1308956  | 804258.2 | 657990.2 |
| 9.678733 | 11 | 5 | 5 | 506187.7 | 1749842  | 631403.5 | 1622041  | 984546.3 | 801315.5 | 2022220  | 1976974  | 2458288  |
| 24.1275  | 10 | 5 | 5 | 319541.9 | 1226151  | 343896.3 | 1282450  | 387802.3 | 698908.3 | 1225561  | 1378643  | 1188680  |
| 9.999217 | 10 | 5 | 5 | 722760.3 | 2278020  | 567336.4 | 2177251  | 732774.4 | 2481176  | 3020816  | 2475795  | 1680742  |
| 9.904767 | 11 | 5 | 5 | 1683918  | 4976567  | 852530.6 | 4853422  | 748592.3 | 5665824  | 5167532  | 3609338  | 5671617  |
| 9.999217 | 9  | 4 | 5 | 564672.3 | 1221481  | 724558   | 1108842  | 743774.9 | 1860048  | 1996108  | 1232960  | 312744.4 |
| 9.920517 | 8  | 4 | 4 | 1745115  | 8099320  | 1173764  | 8285920  | 1257253  | 9124965  | 8604508  | 9092472  | 6710605  |
| 12.54318 | 6  | 4 | 2 | 68945.38 | 254994.4 | 89667.29 | 236883.8 | 139715.5 | 330955.2 | 294979.4 | 100661.8 | 263308.3 |
| 9.464933 | 13 | 5 | 5 | 1317365  | 7229847  | 4500244  | 6583850  | 3895098  | 9728292  | 12949177 | 1132191  | 5023719  |
| 41.80517 | 9  | 3 | 4 | 321156.7 | 2952701  | 1595574  | 3246701  | 2181604  | 1321681  | 5296445  | 2090958  | 3826073  |
| 10.9645  | 9  | 4 | 5 | 188482.6 | 591168.4 | 268938.8 | 556408.9 | 171075.6 | 918766.6 | 782498.3 | 361353.5 | 287274.8 |
| 9.989483 | 9  | 5 | 4 | 767077.4 | 1236446  | 266860.9 | 1342074  | 913935.3 | 1356591  | 1093053  | 1586243  | 1265768  |
| 36.155   | 7  | 4 | 3 | 109625.7 | 624049.8 | 181228.6 | 594142.9 | 207916.6 | 704702.6 | 434713.8 | 444431.5 | 855380.2 |
| 10.96997 | 10 | 5 | 5 | 520072.3 | 1564164  | 522263.6 | 1639017  | 452545.8 | 1630932  | 2352414  | 972951.5 | 1231123  |
| 9.972483 | 8  | 4 | 4 | 1092339  | 2311925  | 345242.1 | 2201154  | 942816.9 | 2837044  | 2418045  | 2061692  | 1956258  |
| 15.07327 | 3  | 3 | 0 | 4171675  | 92248739 | 57482686 | 85632780 | 16297239 | 99039255 | 1.18E+08 | 143625.9 | 1.56E+08 |
| 9.986767 | 10 | 5 | 5 | 5940857  | 8019555  | 4650689  | 7417162  | 3011406  | 12768840 | 12299895 | 3854065  | 2718917  |
| 9.616167 | 9  | 5 | 4 | 633707.9 | 1860202  | 313602.5 | 1777356  | 687739.6 | 1459246  | 2178238  | 1690465  | 2174606  |
| 9.3919   | 6  | 3 | 3 | 675164.3 | 3810171  | 1749076  | 4240983  | 3530241  | 4119779  | 1106919  | 3764227  | 5993224  |
| 10.95055 | 10 | 5 | 5 | 532427.7 | 2983959  | 558100.7 | 3114632  | 1058998  | 3367529  | 3753683  | 2623531  | 2411348  |

|          |    |   |   |          |          |          |          |          |          |          |          |          |
|----------|----|---|---|----------|----------|----------|----------|----------|----------|----------|----------|----------|
| 9.5812   | 19 | 5 | 5 | 7159395  | 40098941 | 23283838 | 36628736 | 22135956 | 47161402 | 1184343  | 57344722 | 37396259 |
| 9.830833 | 5  | 3 | 2 | 7308212  | 30924586 | 6824250  | 29637701 | 9713317  | 33240217 | 21608514 | 38651516 | 26428493 |
| 10.97857 | 10 | 5 | 5 | 235551.8 | 822181.9 | 122632.9 | 795625.2 | 211065.8 | 900941   | 698845.5 | 782837.5 | 993894.5 |
| 17.395   | 11 | 5 | 5 | 296181.2 | 2217792  | 361193.6 | 2145615  | 558535.5 | 2165707  | 1911786  | 1908159  | 2320687  |
| 9.976317 | 6  | 3 | 3 | 1346295  | 9821030  | 6446594  | 8834927  | 6477759  | 12237769 | 16630791 | 14276834 | 3510892  |
| 22.71217 | 10 | 5 | 5 | 241256.2 | 1339177  | 198106.8 | 1288901  | 415615   | 1642271  | 1112585  | 1233158  | 1386332  |
| 10.29105 | 10 | 5 | 5 | 1327708  | 4836861  | 710825.6 | 5056847  | 1873700  | 5606196  | 5502606  | 4083432  | 4191060  |
| 11.01378 | 7  | 4 | 3 | 370680.4 | 1162883  | 867736.5 | 1299452  | 923421   | 2653258  | 587707.4 | 515390.6 | 980325.6 |
| 10.9645  | 10 | 5 | 5 | 515637.3 | 1805358  | 389774.3 | 1711003  | 772856.8 | 2496896  | 1645161  | 1616972  | 1702834  |
| 10.98385 | 6  | 3 | 3 | 528188.8 | 1024851  | 809905   | 910693.5 | 681568.3 | 2292057  | 411433.7 | 357801.2 | 717912.7 |
| 8.94625  | 10 | 5 | 5 | 778499.5 | 2615954  | 662457.1 | 2525338  | 517060.3 | 2726535  | 3698523  | 2326086  | 1965277  |
| 25.2045  | 6  | 3 | 3 | 90456.41 | 280725.9 | 53595.75 | 295912   | 128155   | 250775.1 | 325382.1 | 212235.5 | 272536.6 |
| 10.95835 | 10 | 5 | 5 | 743293.8 | 2910310  | 789797.5 | 2801389  | 631872.7 | 3570262  | 3911882  | 2455331  | 2060506  |
| 9.536783 | 11 | 4 | 4 | 5360667  | 22454418 | 14025624 | 20399319 | 12993419 | 24308940 | 25150531 | 2512759  | 41552839 |
| 9.63045  | 9  | 4 | 5 | 1171136  | 5358552  | 763982.1 | 4981238  | 3335837  | 5895357  | 6308764  | 4699528  | 4516471  |
| 40.56817 | 8  | 4 | 2 | 352704.3 | 5808859  | 1617556  | 5992430  | 404190.8 | 6242876  | 3805179  | 4997993  | 5821863  |
| 10.95602 | 10 | 5 | 5 | 356719.4 | 1739199  | 592348.7 | 1816738  | 408549.3 | 2596950  | 1414729  | 1151054  | 1438707  |
| 40.62567 | 7  | 2 | 3 | 235610   | 2860077  | 1381299  | 3014480  | 208312.3 | 2909838  | 3142626  | 4228888  | 3463663  |
| 9.999217 | 10 | 5 | 5 | 734404.9 | 2534184  | 535628.8 | 2442339  | 667112.5 | 2805390  | 3154549  | 2752565  | 1866293  |
| 9.445217 | 7  | 4 | 3 | 584581.8 | 2822790  | 925359.7 | 2649807  | 1314827  | 4465225  | 2343259  | 2474805  | 2564462  |
| 42.0065  | 6  | 2 | 3 | 416415.5 | 7308080  | 1350540  | 6887560  | 3608558  | 8180382  | 8127141  | 7079889  | 5036762  |
| 9.445217 | 9  | 5 | 4 | 1075390  | 2816634  | 1207268  | 3056125  | 1867190  | 3729854  | 4333791  | 1811437  | 1526006  |
| 10.9742  | 10 | 5 | 5 | 373777.5 | 1281844  | 559352.7 | 1358719  | 448011.4 | 1925807  | 1759610  | 844349.6 | 637185.3 |
| 9.999217 | 10 | 5 | 5 | 1106516  | 3042909  | 844992.7 | 2883806  | 1214664  | 3408224  | 4204760  | 2846622  | 1903893  |
| 9.853633 | 6  | 3 | 3 | 1103907  | 3447668  | 1509799  | 3267158  | 698384.3 | 4531976  | 2377071  | 3005342  | 5465939  |
| 9.365833 | 5  | 3 | 1 | 488020.9 | 2697913  | 1709944  | 2450790  | 1551122  | 1916204  | 4532064  | 2259813  | 475040.2 |
| 9.4468   | 4  | 3 | 1 | 541617.1 | 1803519  | 663725.5 | 1662722  | 1124629  | 2839106  | 1169776  | 2030931  | 1350405  |
| 9.856867 | 10 | 5 | 5 | 1667713  | 6360497  | 2255842  | 5979543  | 2749534  | 6374552  | 6985685  | 3383774  | 5483333  |
| 9.918833 | 8  | 4 | 4 | 1252305  | 2106502  | 924739.5 | 1957157  | 1045001  | 3656987  | 2146612  | 1305265  | 1536556  |
| 9.870017 | 5  | 2 | 3 | 7732521  | 31662781 | 28589972 | 27733582 | 22980986 | 1424727  | 38940836 | 1691429  | 59371458 |
| 9.94455  | 10 | 5 | 5 | 2153222  | 8638275  | 1368725  | 8442336  | 1217606  | 10519392 | 9616069  | 7966933  | 7265638  |
| 9.8322   | 5  | 3 | 2 | 632055.6 | 1201629  | 685662.6 | 1085375  | 842271.8 | 1260220  | 871171.1 | 757775.8 | 748699.3 |
| 9.362817 | 6  | 3 | 2 | 289025.1 | 596312.4 | 222245.1 | 554767.7 | 317283.8 | 805334.5 | 376593.6 | 698416.4 | 763918.4 |
| 10.008   | 10 | 5 | 5 | 1096964  | 2456965  | 1183949  | 2639665  | 1234999  | 3226089  | 3833776  | 2719988  | 979475.8 |
| 10.01477 | 8  | 3 | 5 | 458557.6 | 781467.7 | 258120   | 829085.8 | 361937.1 | 603843.6 | 1174759  | 635851.8 | 914695.4 |

|          |    |   |   |          |          |          |          |          |          |          |          |          |
|----------|----|---|---|----------|----------|----------|----------|----------|----------|----------|----------|----------|
| 9.964417 | 6  | 3 | 3 | 37947380 | 44180022 | 67034292 | 35360571 | 47962033 | 1.54E+08 | 1270981  | 1147789  | 617526   |
| 10.00098 | 6  | 3 | 3 | 310860.5 | 716786   | 124761.4 | 669950.8 | 410890.8 | 554743.4 | 903473.2 | 685257.2 | 712044.8 |
| 9.568567 | 9  | 5 | 4 | 592820   | 994548.4 | 323614.1 | 926015.1 | 550025.8 | 1430314  | 1155489  | 993324.6 | 583207.8 |
| 9.9677   | 6  | 4 | 2 | 927357.4 | 3062566  | 1051449  | 2891147  | 1217543  | 3440091  | 2711003  | 4716431  | 2152392  |
| 18.8455  | 8  | 5 | 3 | 101994.4 | 636365   | 187145.4 | 600073   | 282949.5 | 880989.7 | 434068.5 | 473307.7 | 748945.7 |
| 9.092333 | 10 | 5 | 5 | 832585.8 | 2108570  | 570461   | 2023640  | 558446.7 | 2711105  | 1879075  | 2193219  | 1257600  |
| 6.726017 | 5  | 3 | 2 | 767149.1 | 15537894 | 5038023  | 17734710 | 19530339 | 22221086 | 18684980 | 9327764  | 12768906 |
| 9.445217 | 6  | 3 | 3 | 649168.3 | 4663387  | 1340339  | 4327052  | 2823633  | 4434346  | 4900188  | 5236266  | 2559130  |
| 10.95835 | 10 | 5 | 5 | 525988.1 | 1774923  | 773455.2 | 1673446  | 556162.3 | 2906303  | 2169463  | 1453915  | 919190.7 |
| 9.976317 | 10 | 5 | 5 | 1056516  | 3662194  | 1146735  | 3487980  | 1174199  | 4303899  | 5184763  | 3657569  | 2267779  |
| 9.992233 | 6  | 3 | 3 | 358102.1 | 470270.7 | 158859.3 | 511003.1 | 343664.6 | 657943.9 | 590742.3 | 476298.5 | 343365.6 |
| 22.71217 | 6  | 3 | 3 | 213624.8 | 1212794  | 656996.9 | 1300946  | 505470.3 | 510670.9 | 1475881  | 579381.7 | 1442342  |
| 9.93625  | 9  | 4 | 5 | 986373.6 | 3058064  | 656284.3 | 2972510  | 463876.6 | 3775466  | 3304195  | 3460207  | 2211921  |
| 44.1065  | 8  | 5 | 1 | 312862.3 | 5346518  | 3135703  | 5001643  | 315599.5 | 9468741  | 1461282  | 5013107  | 7282444  |
| 14.0342  | 6  | 3 | 3 | 380734.5 | 3460945  | 588727   | 3829113  | 3321842  | 3218345  | 3067662  | 4501060  | 3190525  |
| 9.203483 | 4  | 1 | 3 | 594510.5 | 1462461  | 540325.9 | 1603727  | 1197744  | 1159812  | 1110001  | 1040368  | 2312220  |
| 9.132467 | 6  | 4 | 2 | 198324.2 | 402308.9 | 300047.6 | 361075.3 | 246987.6 | 342933.7 | 810434.6 | 563307.4 | 278162.7 |
| 25.2895  | 9  | 5 | 4 | 557096.9 | 3731574  | 2512177  | 3390471  | 2004116  | 1598286  | 5553114  | 650590.6 | 4396574  |
| 10.008   | 8  | 5 | 3 | 545589.4 | 871743.2 | 336219.4 | 952453.4 | 673656.5 | 923847   | 1386714  | 713214.9 | 472948   |
| 9.956417 | 7  | 3 | 3 | 24471386 | 56823215 | 75980644 | 46723788 | 57261405 | 1.34E+08 | 883950.1 | 2488645  | 1.46E+08 |
| 9.964417 | 9  | 4 | 4 | 2102932  | 3776824  | 1182491  | 3914338  | 483086.1 | 4664576  | 1797153  | 4199623  | 3619794  |
| 9.976317 | 6  | 3 | 3 | 1859271  | 2375195  | 1853870  | 2641534  | 1701045  | 1013372  | 955075.1 | 3213126  | 5255644  |
| 9.9677   | 10 | 5 | 5 | 2196358  | 6517161  | 2273702  | 6166581  | 2409157  | 8435225  | 9199129  | 6319814  | 4120641  |
| 9.976317 | 9  | 5 | 4 | 726264.6 | 1688775  | 522737.3 | 1821892  | 1126186  | 2267428  | 2165231  | 1405966  | 1026072  |
| 21.2385  | 6  | 3 | 3 | 65657.27 | 216349   | 18066.72 | 208766.9 | 67630.37 | 197456   | 230786.9 | 238628.5 | 200917.8 |
| 41.58967 | 7  | 3 | 3 | 267345.2 | 3990594  | 710896.9 | 4373898  | 3456404  | 4473481  | 2733428  | 4227164  | 4319945  |
| 9.904767 | 9  | 5 | 4 | 1551023  | 7492680  | 2543292  | 6998346  | 3898748  | 7421828  | 6358740  | 4539227  | 7672575  |
| 42.29417 | 11 | 3 | 4 | 278334.4 | 3408655  | 898213.3 | 3101574  | 2702631  | 5005316  | 2940639  | 2962786  | 3183228  |
| 9.609367 | 4  | 3 | 1 | 330775.9 | 1330870  | 713415.5 | 1219242  | 780007   | 1289497  | 926897.4 | 1054577  | 815841.2 |
| 10.97242 | 9  | 4 | 5 | 382761.8 | 1753785  | 707680.4 | 1665700  | 431118.8 | 2637479  | 932279.5 | 1364515  | 2331112  |
| 21.697   | 5  | 2 | 3 | 615483.8 | 2351496  | 415525.8 | 2576267  | 2029302  | 3077483  | 2226302  | 2261814  | 2163969  |
| 10.95055 | 12 | 5 | 5 | 362055.3 | 1728748  | 684619.1 | 1843157  | 838893.5 | 2869673  | 1434987  | 1400656  | 1119609  |
| 9.9677   | 10 | 5 | 5 | 1087213  | 2442573  | 998920.6 | 2270699  | 1282586  | 3380464  | 3591285  | 2010785  | 1271256  |
| 9.224517 | 5  | 3 | 2 | 527552.1 | 1483620  | 533188.4 | 1654943  | 1500508  | 1126747  | 1049423  | 2079991  | 2053548  |
| 9.507167 | 6  | 3 | 3 | 524129.2 | 932548   | 718100   | 1029887  | 577421.6 | 1428866  | 99063.18 | 301009.6 | 1060807  |



|          |    |   |   |          |          |          |          |          |          |          |          |          |
|----------|----|---|---|----------|----------|----------|----------|----------|----------|----------|----------|----------|
| 39.3595  | 6  | 2 | 3 | 389770.5 | 7583820  | 1515481  | 7787550  | 1194120  | 4930414  | 8387683  | 8259310  | 8591845  |
| 9.960467 | 3  | 3 | 0 | 888770.3 | 2035252  | 1182956  | 2218679  | 1279271  | 817363.3 | 3974479  | 1646833  | 2140272  |
| 22.75567 | 5  | 3 | 2 | 84914.86 | 285751.2 | 143108.1 | 261198.7 | 183688.5 | 305220.3 | 480669.1 | 98125.25 | 209180.1 |
| 9.983433 | 10 | 5 | 5 | 2065533  | 6454517  | 2162359  | 6069112  | 2942625  | 8152352  | 9036569  | 6410256  | 4035605  |
| 44.68167 | 4  | 3 | 1 | 65280.55 | 234362.3 | 131805.8 | 217307.3 | 93312.64 | 161354.6 | 100737.3 | 290618.7 | 435713.2 |
| 10.05805 | 5  | 2 | 3 | 372248.8 | 795449.8 | 168068.1 | 758824.7 | 301254.5 | 983643.6 | 900321   | 600906   | 636936.8 |
| 10.03947 | 9  | 5 | 4 | 247349.8 | 632202.7 | 77324.9  | 654511.7 | 193545.8 | 643053.5 | 555623.4 | 749818.1 | 643373.4 |
| 16.30165 | 7  | 5 | 2 | 53347.5  | 239112.4 | 118474.3 | 258595.7 | 142189.7 | 290467.7 | 407363.2 | 91094.09 | 222385.5 |
| 9.79485  | 8  | 3 | 5 | 1224997  | 3347601  | 1329302  | 3545839  | 1337975  | 3178698  | 1103332  | 3949257  | 4260914  |
| 9.94455  | 8  | 5 | 3 | 658309.2 | 1304779  | 325354.9 | 1259676  | 279492.9 | 1795728  | 1465173  | 1156827  | 989538   |
| 9.9677   | 7  | 3 | 4 | 810629.4 | 1417082  | 699385.2 | 1311891  | 716589.2 | 1711917  | 2381749  | 1400197  | 1084491  |
| 9.976317 | 10 | 5 | 5 | 4111378  | 11009330 | 4208029  | 10329659 | 4908470  | 14243938 | 16303437 | 10389023 | 6470525  |
| 9.859983 | 9  | 4 | 5 | 1675053  | 6601224  | 1095317  | 6298316  | 2621767  | 7450995  | 4983922  | 6056087  | 7646386  |
| 10.95602 | 7  | 3 | 4 | 216714.3 | 1226927  | 304749   | 1180181  | 325231   | 1160110  | 1719575  | 1049783  | 926488.6 |
| 10.32122 | 9  | 5 | 4 | 425371.7 | 1356328  | 461239.4 | 1293932  | 374881.1 | 1451280  | 1919286  | 1559210  | 687828.6 |
| 20.23117 | 10 | 5 | 5 | 164242.5 | 516669.2 | 173400.8 | 472967.6 | 372977.6 | 730387.3 | 255739.3 | 564193.2 | 562626.7 |
| 9.032133 | 5  | 2 | 3 | 621861.1 | 1504511  | 772361.3 | 1377403  | 933209.9 | 2206925  | 1697758  | 1763195  | 1676425  |
| 9.3919   | 7  | 3 | 3 | 1471157  | 7050116  | 3405387  | 6144428  | 7801103  | 6072725  | 6073272  | 11821541 | 2663069  |
| 9.392767 | 5  | 2 | 3 | 356467.8 | 864766.1 | 637886.6 | 772160.3 | 612009.8 | 975323.5 | 857724.7 | 509641.2 | 136885.2 |
| 9.960467 | 6  | 4 | 2 | 1802528  | 3865098  | 1155063  | 3712823  | 878311   | 5151431  | 4853768  | 3500590  | 3520875  |
| 9.999217 | 10 | 5 | 5 | 2772321  | 6194572  | 2286922  | 5763810  | 3397639  | 7711968  | 9057669  | 6223999  | 3399837  |
| 9.999217 | 10 | 5 | 5 | 2654709  | 3037722  | 1673849  | 3396359  | 2955171  | 3691925  | 5479722  | 2977994  | 1201619  |
| 9.983433 | 10 | 5 | 5 | 898891.6 | 2059106  | 1008029  | 1904070  | 1086288  | 2701136  | 3475958  | 1755816  | 1104577  |
| 9.928667 | 10 | 4 | 4 | 1288035  | 2956025  | 1173096  | 2720496  | 1904768  | 1477182  | 4711008  | 2508587  | 2934880  |
| 9.872933 | 4  | 3 | 1 | 627421.3 | 1066320  | 466730.4 | 971215.7 | 773517.8 | 1473544  | 455230.3 | 1029444  | 1575117  |
| 10.008   | 7  | 3 | 4 | 1118563  | 1584228  | 699983.5 | 1423148  | 1355248  | 1210732  | 2359252  | 2165345  | 646109.6 |
| 9.032483 | 10 | 5 | 5 | 859858.7 | 2143196  | 984511.6 | 2020014  | 637721.9 | 2574782  | 1743681  | 1618420  | 1137670  |
| 11.38553 | 7  | 4 | 3 | 108375.4 | 406228.5 | 85575.22 | 419810   | 97844.88 | 409491.9 | 476012.5 | 263342.4 | 413247.5 |
| 9.346    | 7  | 3 | 4 | 758674.4 | 3930825  | 2072152  | 3512686  | 3395228  | 1769821  | 3763137  | 4580673  | 7077371  |
| 8.960333 | 8  | 5 | 3 | 556036.9 | 1265018  | 815498.4 | 1364286  | 474137.3 | 1913934  | 2012694  | 1542930  | 744642.1 |
| 10.9645  | 10 | 5 | 5 | 638248.6 | 2524711  | 750005.6 | 2430290  | 499034.8 | 3208656  | 3409008  | 1967818  | 1720099  |
| 9.223417 | 7  | 3 | 4 | 294005.1 | 1229967  | 366325.9 | 1285566  | 387660.6 | 1718171  | 1267446  | 1350364  | 714798.5 |
| 9.36515  | 6  | 3 | 2 | 4426741  | 22603360 | 23031629 | 20018382 | 7732560  | 7266736  | 44546160 | 50650095 | 8284712  |
| 8.874167 | 10 | 5 | 5 | 702196.6 | 3096817  | 1409320  | 3350115  | 1972043  | 2636052  | 5413703  | 3355676  | 2213806  |
| 41.69033 | 9  | 4 | 4 | 341076.8 | 5027960  | 2360757  | 5371885  | 2314937  | 6085033  | 5801494  | 6045096  | 6386855  |

|          |    |   |   |          |          |          |          |          |          |          |          |          |
|----------|----|---|---|----------|----------|----------|----------|----------|----------|----------|----------|----------|
| 21.702   | 7  | 4 | 3 | 158493   | 548459.4 | 236906.6 | 578630.3 | 165669.8 | 471407   | 776277.3 | 675088.7 | 172958.4 |
| 9.859983 | 10 | 5 | 5 | 1568092  | 9130903  | 499362.5 | 9378602  | 2266725  | 9243635  | 8387263  | 9603704  | 9522770  |
| 20.3605  | 9  | 4 | 5 | 245547.2 | 1701674  | 770112.4 | 1605937  | 496885.8 | 863066.1 | 1859025  | 1154761  | 1772183  |
| 42.23667 | 6  | 3 | 3 | 378713.9 | 4944874  | 824157.6 | 5291269  | 3146962  | 5087079  | 4809760  | 3888328  | 6180761  |
| 9.994767 | 8  | 5 | 3 | 393579   | 772053.2 | 326226.8 | 822699.6 | 362239   | 927678.6 | 1096056  | 991958.4 | 463922.6 |
| 10.0926  | 10 | 5 | 5 | 5452006  | 11018128 | 2453842  | 11852068 | 7469028  | 12822272 | 13735193 | 9194878  | 7868558  |
| 9.848417 | 9  | 4 | 5 | 711116.4 | 2331751  | 479954.9 | 2243781  | 694722.5 | 2968171  | 1793275  | 2514471  | 2468609  |
| 10.9645  | 10 | 5 | 5 | 252737.3 | 946027.7 | 248674.3 | 908542.4 | 262121.2 | 1296527  | 1114187  | 756634.6 | 725942.4 |
| 9.601917 | 7  | 4 | 3 | 318877.6 | 837816.1 | 187568.5 | 802999.3 | 276781.1 | 1041502  | 878528.4 | 975745.2 | 698953.8 |
| 9.445217 | 14 | 5 | 5 | 4439227  | 38693767 | 8986666  | 37427725 | 8292800  | 34406751 | 46151954 | 50432629 | 31441468 |
| 10.95055 | 7  | 4 | 3 | 463473.7 | 1252193  | 462143.1 | 1192822  | 337247.4 | 1191312  | 1654942  | 1097501  | 589858   |
| 9.40325  | 10 | 5 | 5 | 2299331  | 5648943  | 719949.6 | 5360438  | 2625639  | 4779744  | 5998393  | 5243900  | 5561791  |
| 9.992233 | 8  | 3 | 4 | 535522.9 | 1392655  | 249677.3 | 1446219  | 448428.1 | 1181786  | 1541468  | 1332354  | 1746768  |
| 9.960467 | 5  | 3 | 2 | 1154809  | 3221683  | 1779382  | 3013040  | 901488.3 | 797864   | 2118915  | 5366096  | 3812550  |
| 8.911617 | 9  | 5 | 4 | 5609880  | 46880653 | 6913019  | 48480251 | 13651580 | 48658244 | 57379019 | 46887555 | 39655385 |
| 9.976317 | 10 | 5 | 5 | 2847338  | 5537563  | 938491.3 | 5858724  | 2895582  | 6650526  | 5263231  | 6342914  | 5038984  |
| 10.9645  | 10 | 5 | 5 | 479038.8 | 1895665  | 569898.5 | 1820523  | 452287.3 | 2428108  | 2536064  | 1470935  | 1252073  |
| 9.0258   | 6  | 4 | 2 | 224043.5 | 561961.7 | 282717.2 | 520569.5 | 285058.2 | 690197.3 | 794538.5 | 640423.4 | 613011.2 |
| 9.840617 | 10 | 5 | 5 | 1304706  | 3782917  | 1631233  | 3562379  | 1381858  | 4262924  | 4920790  | 1503055  | 2753460  |
| 9.994767 | 9  | 5 | 4 | 533013.4 | 1274016  | 549935.9 | 1172799  | 808744.1 | 1504953  | 1927907  | 1304144  | 423261.3 |
| 28.906   | 10 | 5 | 5 | 1030848  | 7902861  | 1406369  | 7652806  | 1969358  | 7505359  | 7339421  | 7054589  | 7213759  |
| 42.62517 | 4  | 1 | 3 | 364583.5 | 6104362  | 350136.3 | 5857476  | 2301046  | 6160454  | 6274523  | 6155572  | 5508923  |
| 10.49953 | 6  | 3 | 3 | 101668.6 | 219166.8 | 76094.11 | 231668.4 | 94411.32 | 314151.3 | 201850.5 | 184155.3 | 274335.9 |
| 21.48683 | 6  | 3 | 3 | 846494.5 | 4240137  | 5458643  | 3504986  | 4593935  | 10259975 | 199186.7 | 10178423 | 193892.2 |
| 10.95055 | 10 | 5 | 5 | 311075.5 | 1725481  | 473219.2 | 1666588  | 317594.1 | 2290042  | 2031900  | 1337290  | 1155537  |
| 9.896717 | 10 | 5 | 5 | 3863553  | 10252790 | 3685762  | 10746475 | 3080533  | 9677092  | 6515734  | 10321476 | 16313833 |
| 10.008   | 10 | 5 | 5 | 1091699  | 2275282  | 808505.7 | 2117982  | 1290839  | 2802135  | 3284021  | 2328859  | 1316387  |
| 9.8445   | 6  | 4 | 2 | 631216.7 | 1426287  | 719914.9 | 1288241  | 1127663  | 1337925  | 1135686  | 789865.2 | 1205862  |
| 10.9645  | 10 | 5 | 5 | 1197379  | 5854136  | 1241177  | 6038059  | 1294773  | 7081203  | 7226571  | 5051661  | 4448579  |
| 9.45945  | 12 | 5 | 5 | 2008121  | 18203060 | 5403093  | 17434073 | 5213138  | 22645281 | 17550592 | 11498096 | 24529383 |
| 9.45945  | 13 | 5 | 5 | 11683342 | 55035195 | 27247556 | 51271611 | 24638412 | 52489542 | 84691701 | 11529653 | 68552480 |
| 21.27933 | 6  | 3 | 3 | 257419.3 | 492952.4 | 663023.3 | 405596.9 | 534786   | 465375.4 | 115240.1 | 214910.8 | 27092.38 |
| 15.90593 | 5  | 1 | 3 | 631989.6 | 7898816  | 1767185  | 8289663  | 3341099  | 7271433  | 6971628  | 8597724  | 10605236 |
| 18.02583 | 4  | 1 | 3 | 41214.25 | 82654.59 | 60903.38 | 90191.88 | 40873.37 | 184098.1 | 69709.48 | 74356.72 | 19170.51 |
| 10.93618 | 6  | 3 | 3 | 336308.3 | 738798.7 | 331704.1 | 788243.8 | 352126.6 | 996587   | 1172035  | 498707.5 | 397902.7 |

|          |    |   |   |          |          |          |          |          |          |          |          |          |
|----------|----|---|---|----------|----------|----------|----------|----------|----------|----------|----------|----------|
| 9.992233 | 13 | 5 | 5 | 738449.1 | 1222545  | 892350.8 | 1360062  | 1006526  | 817462.5 | 1161191  | 632068.6 | 2778160  |
| 10.21522 | 10 | 5 | 5 | 18811374 | 73881261 | 17148242 | 76666020 | 21151674 | 1.01E+08 | 77187201 | 71046411 | 62685331 |
| 10.9645  | 10 | 5 | 5 | 300997.8 | 1119953  | 293042.2 | 1181203  | 517693.8 | 1510079  | 1349055  | 989586.9 | 909584.8 |
| 9.976317 | 10 | 5 | 5 | 581251.8 | 1257394  | 294783.5 | 1323083  | 565194.9 | 1152055  | 1662843  | 1211274  | 1392813  |
| 10.008   | 10 | 5 | 5 | 464527.6 | 1064876  | 306011.8 | 1114880  | 382431.7 | 1185008  | 1543664  | 926651   | 887808.5 |
| 10.95835 | 10 | 5 | 5 | 325970   | 1507917  | 316071.4 | 1581499  | 639560.3 | 1697993  | 1915969  | 1496141  | 1103101  |
| 9.912633 | 10 | 5 | 5 | 2897270  | 6684883  | 1156047  | 6469972  | 1751255  | 8705379  | 6483726  | 6115706  | 6302183  |
| 9.4925   | 8  | 4 | 3 | 524626.4 | 1456290  | 316672.2 | 1529233  | 632760.2 | 1617887  | 1259353  | 1294607  | 1173569  |
| 16.03795 | 10 | 5 | 5 | 846004.3 | 6391629  | 1309869  | 5895779  | 4570456  | 8393319  | 4887403  | 6226710  | 5719848  |
| 10.9645  | 10 | 5 | 5 | 1146866  | 5446401  | 1227386  | 5622123  | 1214455  | 6726050  | 6736774  | 4717307  | 4027313  |
| 8.787367 | 9  | 4 | 5 | 510959.7 | 3656424  | 953065.2 | 3810534  | 1174830  | 3740568  | 5283960  | 3089630  | 3103264  |
| 10.44215 | 9  | 4 | 5 | 486350   | 1658299  | 635775.6 | 1578322  | 459815   | 1395875  | 2525878  | 2123466  | 1067873  |
| 9.999217 | 10 | 5 | 5 | 1133129  | 2335785  | 802228.7 | 2182966  | 1262525  | 3001820  | 3123992  | 2569727  | 1369834  |
| 10.12327 | 8  | 5 | 3 | 336079.9 | 784822.8 | 275318.1 | 820402.1 | 215744.5 | 485353   | 1183968  | 915634.6 | 742130   |
| 37.92067 | 5  | 3 | 2 | 342128.5 | 4145755  | 1167472  | 3991355  | 973708   | 2570307  | 3918040  | 3896682  | 4559419  |
| 9.284283 | 4  | 3 | 1 | 561151.4 | 1321853  | 315334.6 | 1243206  | 696247.2 | 1426977  | 1340459  | 777666.2 | 1501954  |
| 9.475667 | 4  | 3 | 1 | 455982.7 | 3073543  | 1016532  | 3268832  | 1621019  | 2447444  | 3810524  | 1901926  | 4398561  |
| 24.20483 | 6  | 3 | 3 | 438887.9 | 2039015  | 1815146  | 1775649  | 1860208  | 824129.2 | 4092699  | 576982.3 | 745373.6 |
| 10.95835 | 9  | 4 | 5 | 195506.8 | 619332.5 | 189695.4 | 648833.5 | 220592.7 | 943306.3 | 622238.3 | 530054.4 | 537762.6 |
| 15.99403 | 5  | 3 | 2 | 135052.4 | 802596.2 | 274516.7 | 836151.6 | 182503.6 | 1169070  | 739907.4 | 997981.6 | 567901.4 |
| 30.1075  | 10 | 5 | 5 | 1205020  | 5617077  | 1530591  | 6003423  | 3433387  | 3829594  | 5846969  | 5802466  | 4698958  |
| 10.26505 | 8  | 4 | 4 | 183948.5 | 672607.1 | 189525.2 | 636492.9 | 299590.2 | 666474.4 | 371319.5 | 892046.6 | 696062.1 |
| 8.91745  | 8  | 3 | 5 | 396823.8 | 1648063  | 701231   | 1798395  | 1293045  | 1426799  | 2867143  | 1142914  | 1567936  |
| 38.7265  | 5  | 2 | 3 | 254344.6 | 1022730  | 669628.8 | 943852.6 | 386341.2 | 696972.3 | 554956.7 | 386516.8 | 1882220  |
| 10.52898 | 8  | 5 | 3 | 227592.8 | 527890   | 323694.2 | 565518.2 | 175561.9 | 436349.1 | 1062918  | 448154.3 | 184829.1 |
| 30.226   | 5  | 2 | 3 | 101846.1 | 604616.2 | 163073.8 | 576220   | 227293.4 | 455465.7 | 792482.6 | 770440.1 | 516781.6 |
| 10.35832 | 5  | 3 | 2 | 162808.3 | 254681.4 | 102175.4 | 239989.5 | 103195.8 | 184517.4 | 431203.7 | 251124.8 | 189507.9 |
| 9.999217 | 10 | 5 | 5 | 993298.6 | 3172868  | 878324.7 | 3010803  | 1330759  | 3630290  | 4298908  | 3218049  | 1984155  |
| 9.8374   | 8  | 5 | 3 | 493444.5 | 2146935  | 354581.3 | 2058555  | 785282.8 | 1884605  | 1972758  | 2247876  | 1904067  |
| 10.36865 | 8  | 4 | 4 | 448984.7 | 2044896  | 923900.5 | 1930081  | 653165.2 | 1850377  | 3041858  | 2799028  | 717783.1 |
| 9.976317 | 9  | 4 | 5 | 5954530  | 7045285  | 2079085  | 7434569  | 3216842  | 7425203  | 9177028  | 8852820  | 4827399  |
| 9.842    | 5  | 3 | 2 | 789808.9 | 1864255  | 1032755  | 2003261  | 908015.9 | 1761437  | 1513182  | 1084805  | 1305256  |
| 11.52297 | 10 | 5 | 5 | 9686343  | 55796815 | 11243916 | 53979744 | 14004369 | 70774868 | 53641872 | 42080236 | 49603781 |
| 10.008   | 8  | 4 | 4 | 696059.2 | 1063728  | 439359.7 | 1153405  | 763003.1 | 987883.1 | 1823123  | 904961   | 917114.8 |
| 10.95835 | 7  | 4 | 3 | 146386.8 | 502223.3 | 109214.1 | 483979.1 | 143458.7 | 550154.7 | 647700.7 | 526194.7 | 388629.5 |

|          |    |   |   |          |          |          |          |          |          |          |          |          |
|----------|----|---|---|----------|----------|----------|----------|----------|----------|----------|----------|----------|
| 9.41815  | 12 | 5 | 4 | 1282266  | 6265257  | 4547256  | 6828006  | 3188829  | 756565.6 | 2120151  | 11102983 | 8974714  |
| 9.864767 | 10 | 5 | 5 | 4492989  | 26733098 | 1850155  | 26400890 | 2707168  | 25248811 | 28236326 | 26043863 | 25003081 |
| 10.84643 | 5  | 2 | 3 | 137927.3 | 390838   | 211204.9 | 415291.2 | 115149.1 | 208778   | 706023.5 | 492581.4 | 210123   |
| 9.787633 | 9  | 5 | 4 | 1032941  | 1325515  | 401332.1 | 1444296  | 1086016  | 1912074  | 1161752  | 826240.3 | 1260799  |
| 10.008   | 10 | 5 | 5 | 457975.6 | 1094437  | 119652   | 1150827  | 532150.8 | 1167553  | 1101190  | 1249774  | 970359.6 |
| 9.9677   | 10 | 5 | 5 | 2977040  | 7988283  | 3182711  | 7503926  | 3607193  | 10829619 | 11608123 | 7703176  | 4592876  |
| 9.864767 | 10 | 5 | 5 | 6094627  | 42837110 | 2084952  | 42249086 | 5349550  | 42651026 | 39426097 | 44242138 | 44752224 |
| 29.5305  | 5  | 2 | 3 | 55715.85 | 185046.1 | 79554.72 | 194408   | 47023.24 | 174807.9 | 179713.3 | 155507.8 | 99682.72 |
| 10.9645  | 7  | 4 | 3 | 574207.9 | 1711321  | 445245.7 | 1812633  | 891141.9 | 2199148  | 2172196  | 1336273  | 1287756  |
| 21.51867 | 6  | 4 | 2 | 580560.7 | 2562632  | 1180386  | 2388644  | 1265963  | 980024.8 | 2738930  | 2871326  | 2029810  |
| 9.582167 | 10 | 5 | 5 | 1807253  | 7207922  | 1319712  | 6897960  | 2746243  | 7156822  | 9076900  | 7840514  | 5797907  |
| 19.85467 | 5  | 2 | 3 | 46123.75 | 108082.1 | 37646.68 | 101844.8 | 49252.3  | 44030.81 | 134547.7 | 122669.7 | 133524.6 |
| 24.07483 | 5  | 1 | 4 | 105267   | 719801.7 | 68427    | 703299.9 | 147063.8 | 728699.7 | 834180.9 | 678097.3 | 663189.1 |
| 3.696283 | 9  | 4 | 4 | 654485.2 | 13156185 | 8613697  | 14286412 | 7252243  | 0        | 21332925 | 19063346 | 9412543  |
| 28.3895  | 6  | 3 | 3 | 106129.4 | 467460.7 | 267291   | 428684.5 | 279828.2 | 291048.4 | 529847.4 | 102087.3 | 672845.6 |
| 9.512983 | 9  | 3 | 5 | 9264799  | 35803786 | 23964767 | 30788158 | 43439385 | 1398774  | 22235256 | 59695276 | 41985869 |
| 10.008   | 8  | 4 | 4 | 547717.5 | 850272.7 | 361221.8 | 926604.2 | 662833.3 | 888791.2 | 1411431  | 809520.7 | 416401.8 |
| 10.03947 | 9  | 5 | 4 | 471032.6 | 1046682  | 263649.9 | 1099830  | 456017.3 | 585746   | 1135460  | 1145419  | 1256102  |
| 9.43325  | 7  | 3 | 3 | 1466508  | 4437594  | 981323.8 | 4568491  | 863754.2 | 2802522  | 4604722  | 4466036  | 5395780  |
| 44.9835  | 7  | 4 | 3 | 111849.9 | 345729.7 | 54116.12 | 363948.5 | 169896.7 | 324846.9 | 427150.3 | 371772.6 | 291892.5 |
| 8.926833 | 11 | 5 | 5 | 4116912  | 19373352 | 6788000  | 20694964 | 11235365 | 17049404 | 30615170 | 20513244 | 13774413 |
| 9.842    | 8  | 4 | 4 | 1980141  | 3625582  | 1779243  | 4079935  | 4108173  | 2977401  | 2698237  | 6675962  | 2184486  |
| 9.508883 | 8  | 4 | 4 | 7743146  | 20624342 | 16846102 | 22970259 | 16353481 | 13906960 | 13606582 | 11939661 | 12939222 |
| 31.0315  | 3  | 3 | 0 | 1583508  | 8523392  | 6909915  | 7809818  | 424492.7 | 4170205  | 8109514  | 20504712 | 3845885  |
| 9.983433 | 10 | 5 | 5 | 1509143  | 4469518  | 1646721  | 4199329  | 2140790  | 4993665  | 6847003  | 4387503  | 2374969  |
| 10.57323 | 10 | 5 | 5 | 3452599  | 8634475  | 1904518  | 9308842  | 6324367  | 9705348  | 11146074 | 8747800  | 6461344  |
| 36.32417 | 7  | 3 | 4 | 106388.8 | 729611.1 | 344080   | 680870.7 | 346668.5 | 859997.5 | 1122331  | 928271   | 334116.8 |
| 9.388617 | 7  | 4 | 3 | 565742.4 | 1820182  | 1047801  | 1662648  | 1181383  | 2363033  | 2357034  | 627603.8 | 785740.8 |
| 9.507167 | 7  | 3 | 4 | 351556.7 | 812082   | 484154.6 | 745033.3 | 466634.8 | 1543245  | 884345.5 | 786220.3 | 641049.5 |
| 9.433    | 10 | 5 | 5 | 3479245  | 8989786  | 775268.3 | 8690134  | 2831675  | 9059166  | 8812545  | 8090430  | 8768185  |
| 21.267   | 10 | 5 | 5 | 592757.6 | 2173563  | 744143.6 | 2042194  | 1082421  | 3297721  | 1255262  | 1945396  | 2351574  |
| 9.840617 | 10 | 5 | 5 | 4845045  | 9537733  | 10112905 | 8070639  | 10710760 | 1944881  | 2366002  | 24134562 | 16213906 |
| 10.45545 | 10 | 5 | 5 | 1207601  | 3889549  | 778822.6 | 3741487  | 1256907  | 5117105  | 3919307  | 3386399  | 3076039  |
| 9.45945  | 8  | 4 | 2 | 317964.1 | 1836665  | 918948.9 | 1956252  | 773169.7 | 604073.4 | 2057626  | 1372566  | 2071796  |
| 9.208217 | 5  | 3 | 2 | 499954.8 | 1285725  | 418408.6 | 1205024  | 688753.2 | 1741133  | 1554541  | 1449049  | 836513.7 |

|          |    |   |   |          |          |          |          |          |          |          |          |          |
|----------|----|---|---|----------|----------|----------|----------|----------|----------|----------|----------|----------|
| 9.999217 | 8  | 5 | 3 | 535608.4 | 959112.5 | 213912.3 | 890810.2 | 637900   | 1223807  | 934071.2 | 938068.1 | 640039.2 |
| 19.95717 | 6  | 4 | 2 | 39565.16 | 99868.31 | 78987.78 | 89180    | 72867.54 | 13225.19 | 91961.75 | 121726.2 | 51754.4  |
| 11.43992 | 7  | 4 | 3 | 75499.66 | 214371.4 | 116877.4 | 197807.5 | 118792.8 | 208173.2 | 136272.5 | 158254.9 | 151356.2 |
| 9.874317 | 8  | 5 | 3 | 1625768  | 5048129  | 3248550  | 5465985  | 2660699  | 5313612  | 1862291  | 4108589  | 10417563 |
| 10.9645  | 10 | 5 | 5 | 3951222  | 16345512 | 4420695  | 15807703 | 3084680  | 20412571 | 21439794 | 13033271 | 11471529 |
| 9.379233 | 14 | 5 | 4 | 1752838  | 2113214  | 884795.5 | 2318733  | 1840653  | 2578325  | 814114.6 | 1684362  | 2393803  |
| 11.28255 | 3  | 0 | 3 | 479854.8 | 4369334  | 537867.9 | 4111751  | 2465821  | 4543541  | 4996873  | 4486658  | 4295119  |
| 9.43325  | 8  | 3 | 4 | 889368.1 | 2952581  | 1380950  | 3176550  | 1778830  | 4449601  | 3226804  | 1368033  | 4038981  |
| 9.419733 | 12 | 5 | 5 | 8297610  | 44377352 | 18996144 | 47012675 | 18551477 | 19307129 | 31635541 | 65333483 | 58777064 |
| 9.177967 | 8  | 4 | 4 | 2056700  | 4480143  | 848004   | 4754889  | 2576298  | 5128566  | 4276638  | 3171989  | 5318407  |
| 9.840617 | 6  | 2 | 4 | 2614500  | 5600760  | 3476017  | 5055515  | 4249766  | 2437730  | 1896889  | 9935138  | 8010196  |
| 10.94443 | 3  | 0 | 3 | 242232.2 | 568407.8 | 333453.2 | 623609.3 | 444670.1 | 489662.4 | 1074660  | 334067   | 238694.1 |
| 9.3834   | 10 | 5 | 4 | 1445007  | 8058131  | 4036495  | 7409229  | 5148199  | 2567146  | 5613475  | 12758542 | 10602752 |
| 9.94455  | 5  | 2 | 3 | 1435447  | 2130974  | 1238666  | 1972316  | 1013520  | 2756509  | 3724559  | 2411102  | 832486.8 |
| 31.16217 | 9  | 5 | 4 | 181831.1 | 789243.6 | 219074.1 | 856062.1 | 625179   | 692949.7 | 1132800  | 605024.1 | 637834   |
| 9.311883 | 5  | 3 | 2 | 520360.7 | 3945446  | 2075515  | 3685531  | 1603880  | 3126106  | 1087836  | 4218549  | 6771230  |
| 25.76683 | 10 | 5 | 5 | 10317898 | 62117880 | 23676663 | 58870090 | 22798624 | 28795054 | 59428622 | 62710073 | 64062997 |
| 8.94625  | 10 | 5 | 5 | 2953141  | 12650991 | 5403136  | 11812200 | 6550509  | 11013918 | 22128870 | 10977075 | 8461189  |
| 7.571583 | 7  | 3 | 4 | 7008530  | 51001705 | 34232049 | 46595566 | 28606942 | 74833001 | 11681048 | 17456961 | 64431233 |
| 32.965   | 3  | 0 | 3 | 103457.4 | 395100.7 | 68791.87 | 360986.4 | 329534   | 467502.7 | 282144.2 | 407601   | 395375   |
| 30.18067 | 10 | 5 | 5 | 4955465  | 34943352 | 6698448  | 33336551 | 14619666 | 27282164 | 36168527 | 37424767 | 29664443 |
| 40.88467 | 5  | 2 | 3 | 352524.7 | 5607117  | 739199.5 | 5764495  | 1397746  | 5932159  | 4429022  | 6044373  | 6270244  |
| 10.9645  | 10 | 5 | 5 | 3885493  | 16464708 | 4585829  | 15919983 | 3042114  | 21017631 | 21451371 | 12988770 | 11425732 |
| 9.960467 | 11 | 5 | 5 | 14496265 | 39316134 | 15065264 | 37175228 | 15671886 | 52179733 | 57591546 | 36080640 | 23289002 |
| 24.50683 | 10 | 5 | 5 | 4306537  | 24676331 | 10931425 | 23189067 | 10434777 | 10063861 | 20209040 | 26476190 | 26535197 |
| 9.842    | 5  | 3 | 2 | 1292675  | 1510670  | 1382618  | 1733196  | 1785692  | 1016427  | 3980273  | 881057.7 | 811426.3 |
| 10.008   | 10 | 5 | 5 | 713935.8 | 2422390  | 549990.3 | 2330484  | 752494.9 | 2545679  | 3222724  | 2465073  | 1732445  |
| 18.98033 | 10 | 5 | 5 | 97683.66 | 669831.2 | 261901   | 699921.1 | 153828   | 1017436  | 564711.3 | 585005.2 | 343145.2 |
| 9.992233 | 7  | 3 | 4 | 300560.6 | 480890.6 | 241502.5 | 513983.8 | 234705.9 | 711233.5 | 753585.1 | 428499.3 | 227388.6 |
| 9.0258   | 5  | 2 | 3 | 301395.2 | 424211.4 | 246108.5 | 461299.4 | 285867.9 | 637594.5 | 578255.5 | 398305.7 | 492224.9 |
| 10.33355 | 6  | 3 | 3 | 253609.5 | 826263.7 | 363067.4 | 777009.3 | 345725.8 | 830367   | 1439502  | 670613.6 | 494456.3 |
| 9.445217 | 7  | 4 | 2 | 593052.5 | 3653030  | 1357243  | 3446798  | 1599306  | 3734957  | 5687109  | 2563111  | 2271108  |
| 18.7025  | 5  | 5 | 0 | 448273.6 | 2629628  | 372476.8 | 2505534  | 1178689  | 3152156  | 2705090  | 2158152  | 2414825  |
| 9.976317 | 10 | 5 | 5 | 598207.4 | 1563614  | 783400.5 | 1444934  | 920193.2 | 2006524  | 2591467  | 1591637  | 616423.3 |
| 9.986767 | 12 | 5 | 5 | 7078329  | 27128758 | 15152115 | 25446018 | 7600832  | 37046906 | 2581491  | 22230205 | 38064688 |

|          |    |   |   |          |          |          |          |          |          |          |          |          |
|----------|----|---|---|----------|----------|----------|----------|----------|----------|----------|----------|----------|
| 10.17587 | 9  | 3 | 3 | 11809328 | 26927563 | 29558148 | 22982288 | 27267124 | 6345839  | 4675007  | 67676401 | 6600789  |
| 10.9645  | 7  | 4 | 3 | 325513.1 | 828962.7 | 217452.5 | 860575.5 | 238154.4 | 887290.6 | 1171224  | 704704.1 | 604259   |
| 9.05635  | 6  | 3 | 3 | 645745.7 | 2736103  | 530192   | 2893728  | 1486649  | 2460465  | 3116980  | 3464288  | 2205770  |
| 10.9645  | 10 | 5 | 5 | 22799084 | 91140439 | 26501415 | 87758715 | 22098346 | 1.2E+08  | 1.18E+08 | 71531027 | 62417706 |
| 21.827   | 5  | 2 | 3 | 70285.91 | 115651.9 | 80924.87 | 105212.8 | 69312.07 | 235971.1 | 92582.24 | 24989.26 | 73985.2  |
| 9.845483 | 10 | 5 | 5 | 828724.9 | 3309755  | 702512.5 | 3166028  | 1274558  | 2720872  | 3056744  | 4190270  | 3917838  |
| 10.9645  | 8  | 4 | 4 | 219816.9 | 805118.9 | 229567.4 | 834135.8 | 187528.3 | 1097903  | 922686   | 859677.3 | 582997.1 |
| 9.886433 | 7  | 3 | 3 | 995494.3 | 1530405  | 277565.4 | 1464708  | 602342.2 | 1540578  | 1068667  | 1641556  | 1811449  |
| 9.999217 | 10 | 5 | 5 | 1512419  | 3139577  | 1259850  | 3338185  | 1591639  | 4010573  | 4693820  | 3227995  | 1821408  |
| 9.842    | 7  | 5 | 2 | 571513   | 1705499  | 334490.4 | 1753946  | 366196.5 | 1884148  | 1860578  | 1855815  | 1818319  |
| 25.583   | 4  | 1 | 3 | 361709.7 | 1632138  | 429690.4 | 1562246  | 570186.2 | 1208450  | 2292060  | 1503565  | 1353362  |
| 10.97242 | 6  | 2 | 4 | 1165859  | 1810321  | 1391335  | 1618153  | 1392401  | 329533.3 | 411783   | 2757322  | 2131946  |
| 9.94405  | 8  | 3 | 4 | 700577.7 | 1431248  | 534039   | 1493570  | 343595.9 | 1585187  | 533136.8 | 1752206  | 1400037  |
| 9.554967 | 6  | 3 | 3 | 374785.4 | 792952.8 | 381550.4 | 737250.5 | 424358.5 | 580381.5 | 1356037  | 358255.8 | 717640.8 |
| 10.95602 | 7  | 4 | 3 | 269333.3 | 849017.6 | 401913.4 | 790228.5 | 449458   | 190327.3 | 1006788  | 753616   | 1162542  |
| 9.388367 | 6  | 2 | 4 | 541977.6 | 1004276  | 437898.8 | 937697.1 | 523432.5 | 1176589  | 1611422  | 765071.6 | 1021852  |
| 10.2666  | 6  | 2 | 4 | 142733.3 | 438458   | 126778.9 | 457504.5 | 148639.7 | 534392.1 | 557406.3 | 336601   | 271996.8 |
| 10.77503 | 4  | 1 | 3 | 151178.9 | 280972.7 | 165321.3 | 304634.1 | 178007.7 | 121459.8 | 536483   | 350494.4 | 192598.6 |
| 11.01157 | 10 | 5 | 5 | 856929.9 | 4498846  | 1398612  | 4666497  | 994389.2 | 4370094  | 5570908  | 2822729  | 3527211  |
| 10.6411  | 4  | 1 | 3 | 140565.6 | 399825.9 | 100487.9 | 429291.6 | 279388.5 | 472828.3 | 527844.1 | 273957.5 | 360443.6 |
| 12.64667 | 10 | 5 | 5 | 2278273  | 14947455 | 2901979  | 14441719 | 4283072  | 18548820 | 17538422 | 12825856 | 12132224 |
| 9.041133 | 5  | 2 | 3 | 677131   | 2313922  | 1462546  | 2092469  | 1741149  | 2316648  | 4738965  | 1903443  | 1791128  |
| 9.999217 | 9  | 4 | 5 | 451634.2 | 858188.9 | 218271.8 | 893777   | 292320.3 | 1179707  | 972531.6 | 751705.6 | 758838.7 |
| 9.999217 | 10 | 5 | 5 | 1689583  | 3483615  | 1707571  | 3740639  | 2013070  | 4456857  | 5722054  | 3628709  | 1646532  |
| 41.12917 | 8  | 1 | 4 | 353581.4 | 3129268  | 129604.8 | 3193550  | 629857.2 | 3119804  | 3039001  | 3145972  | 3336953  |
| 10.008   | 8  | 4 | 4 | 300834.6 | 703116.9 | 187573.9 | 670997.4 | 270304.9 | 527944   | 820496   | 669546   | 535525.2 |
| 10.008   | 10 | 5 | 5 | 547776.5 | 1990911  | 614293.6 | 2082987  | 720040.2 | 1999174  | 2991613  | 1940435  | 1359918  |
| 9.94455  | 8  | 5 | 3 | 688884.4 | 1259979  | 193957.6 | 1300591  | 365285.5 | 1395291  | 1267491  | 1416719  | 1287221  |
| 10.95602 | 8  | 4 | 4 | 774376.4 | 1485634  | 1430597  | 1690754  | 1551100  | 4013126  | 546666.5 | 921991   | 1165123  |
| 9.999217 | 7  | 3 | 4 | 729259   | 1353810  | 568439.5 | 1444771  | 741081.8 | 1160076  | 1784706  | 1916333  | 488613   |
| 8.91745  | 10 | 5 | 5 | 2320641  | 7946438  | 3780469  | 8453399  | 3595702  | 9690795  | 12041822 | 9908901  | 5283158  |
| 33.25333 | 5  | 3 | 2 | 106107.3 | 289164   | 157678.5 | 269329.6 | 129428.8 | 513504.4 | 294365.1 | 74063.31 | 245053.1 |
| 10.9645  | 10 | 5 | 5 | 3931826  | 16367298 | 4549939  | 15836188 | 2990136  | 20861625 | 21355370 | 13034381 | 11328946 |
| 8.67205  | 9  | 5 | 4 | 2215240  | 35599412 | 10578098 | 34252556 | 8965373  | 42663725 | 33270372 | 28024117 | 24157896 |
| 9.106183 | 5  | 2 | 3 | 716144.1 | 1563133  | 2320046  | 1290105  | 1569657  | 550471.6 | 58235.98 | 0        | 1670756  |

|          |    |   |   |          |          |          |          |          |          |          |          |          |
|----------|----|---|---|----------|----------|----------|----------|----------|----------|----------|----------|----------|
| 9.976317 | 5  | 3 | 2 | 444595.7 | 697514.9 | 272180.6 | 660164.2 | 272260.7 | 1129075  | 740603   | 635363.8 | 393059.2 |
| 9.842    | 8  | 4 | 4 | 638409.1 | 2141984  | 282549.7 | 2243677  | 986600.9 | 2178072  | 2413524  | 2114310  | 2321656  |
| 42.66833 | 5  | 2 | 3 | 403685.7 | 6203273  | 928548.6 | 6389775  | 1668228  | 6002359  | 6890671  | 6495022  | 4685444  |
| 9.8445   | 8  | 4 | 4 | 1818284  | 6193369  | 2745030  | 5779084  | 3277652  | 9116674  | 1923577  | 5648965  | 7938751  |
| 9.516467 | 7  | 3 | 4 | 26517434 | 1.3E+08  | 30182401 | 1.41E+08 | 1.12E+08 | 1.35E+08 | 79405284 | 1.57E+08 | 1.3E+08  |
| 9.5812   | 10 | 5 | 5 | 1065162  | 6641024  | 1459168  | 6349149  | 2608781  | 4135830  | 7937184  | 7264971  | 6923799  |
| 9.976317 | 9  | 5 | 4 | 1391174  | 4940359  | 1333477  | 4754760  | 1378355  | 6037626  | 6309778  | 4839990  | 2975045  |
| 9.872883 | 10 | 5 | 5 | 5748962  | 42101471 | 1782395  | 41509310 | 5726220  | 42554822 | 39768734 | 42643346 | 44483767 |
| 18.379   | 4  | 3 | 1 | 51375.77 | 147612.1 | 53830.64 | 140822.6 | 45103.31 | 213334.9 | 182360.2 | 72643.79 | 142561   |
| 9.859983 | 10 | 5 | 5 | 3908397  | 21767910 | 882595.7 | 22012945 | 2332299  | 20957525 | 22668453 | 21751097 | 20824257 |
| 9.976317 | 4  | 3 | 1 | 540903.3 | 1125842  | 356032.7 | 1065220  | 514655.3 | 1030262  | 1157174  | 887335.8 | 1721180  |
| 9.992233 | 10 | 5 | 5 | 2939624  | 9445085  | 2244445  | 9090197  | 2905700  | 10647011 | 12137007 | 10205293 | 7277789  |
| 33.5575  | 10 | 5 | 5 | 249132.6 | 1576691  | 572667.6 | 1642448  | 362430.6 | 2256210  | 1630537  | 673793.8 | 1755140  |
| 9.903283 | 6  | 4 | 2 | 637984.4 | 1755257  | 360575.1 | 1685928  | 616202.7 | 2303065  | 1848883  | 1390606  | 1475580  |
| 10.31255 | 5  | 3 | 2 | 110039.5 | 255296   | 133946.4 | 271411.2 | 99507.7  | 114930.9 | 229392.9 | 200127.5 | 475176.1 |
| 9.840617 | 9  | 5 | 4 | 1029236  | 1967684  | 708095.7 | 1887965  | 416689.1 | 2739090  | 2719848  | 1673521  | 1317441  |
| 43.60317 | 10 | 5 | 5 | 1599735  | 41355061 | 8037850  | 42236186 | 4169861  | 45259653 | 43410117 | 27100248 | 44679710 |
| 10.2608  | 10 | 5 | 5 | 317646.7 | 623751.6 | 163100   | 662540.8 | 362310.1 | 560442.3 | 618781.7 | 457832.1 | 586870.5 |
| 10.00385 | 10 | 5 | 5 | 476301.6 | 1423415  | 226903.7 | 1354602  | 663568.6 | 1605031  | 1552084  | 1607816  | 1171610  |
| 9.4468   | 7  | 4 | 3 | 587515.4 | 2413538  | 1204912  | 2626654  | 1848922  | 3824013  | 3582770  | 1946972  | 1369996  |
| 9.856867 | 9  | 4 | 5 | 1303046  | 5238545  | 2652252  | 5575341  | 2291031  | 4468783  | 2438269  | 8842015  | 7054606  |
| 44.66717 | 4  | 3 | 1 | 235977.5 | 2660281  | 313126.3 | 2618054  | 308900.1 | 2434217  | 2586768  | 2401097  | 3176727  |
| 9.952017 | 5  | 3 | 2 | 2030712  | 2849681  | 2364210  | 3211040  | 2924703  | 1366078  | 1179693  | 1107659  | 6381429  |
| 22.23367 | 8  | 4 | 4 | 95108.4  | 381385.8 | 186525.1 | 354459.2 | 209699.6 | 253001.6 | 430373.2 | 665243.4 | 376126.8 |
| 9.994767 | 8  | 4 | 4 | 368982.3 | 774513.7 | 310879.4 | 840048.5 | 600481.2 | 439856.1 | 1237186  | 789604.8 | 544759.5 |
| 9.56645  | 8  | 5 | 3 | 343618.3 | 1042624  | 592518.9 | 950599.8 | 753189.9 | 1949801  | 1279314  | 599330.1 | 488118.2 |
| 10.008   | 5  | 2 | 3 | 378151.6 | 673263.8 | 253004.7 | 725833.9 | 480925.7 | 696419   | 974480.5 | 857976.6 | 395534.9 |
| 10.97857 | 10 | 5 | 5 | 419131.3 | 2556275  | 853739   | 2448889  | 726269.4 | 2078914  | 3406552  | 1579853  | 2214162  |
| 31.98417 | 7  | 4 | 3 | 259038.3 | 440526.4 | 384221.4 | 526785.8 | 802785.8 | 252419.7 | 1052828  | 576984.3 | 113186.9 |
| 10.01477 | 10 | 5 | 5 | 759148.3 | 2353654  | 574553.2 | 2262257  | 760584.5 | 2587483  | 3183688  | 2363424  | 1803163  |
| 9.979667 | 10 | 5 | 5 | 912678.8 | 2323415  | 841920.8 | 2187669  | 1139820  | 3141840  | 3113662  | 2303753  | 1155984  |
| 9.856867 | 10 | 5 | 5 | 1871868  | 10629984 | 3357999  | 10969785 | 880131.4 | 13568690 | 10704773 | 7263500  | 7266173  |
| 11.50918 | 4  | 3 | 1 | 219657.2 | 923056.4 | 300437.3 | 883509.9 | 285006.4 | 795974.3 | 1353430  | 959068.7 | 977925.5 |
| 9.928667 | 5  | 3 | 2 | 803230   | 1416557  | 824627.9 | 1534400  | 918639   | 1928740  | 127948.1 | 1262481  | 1469170  |
| 9.4468   | 4  | 4 | 0 | 418500.6 | 1860931  | 899372.7 | 2003247  | 1186822  | 1870099  | 1710844  | 1068812  | 3364307  |

|          |    |   |   |          |          |          |          |          |          |          |          |          |
|----------|----|---|---|----------|----------|----------|----------|----------|----------|----------|----------|----------|
| 10.9645  | 10 | 5 | 5 | 21934190 | 1.44E+08 | 12723231 | 1.48E+08 | 43026359 | 1.55E+08 | 1.59E+08 | 1.41E+08 | 1.3E+08  |
| 10.95835 | 8  | 3 | 5 | 405450.7 | 1040535  | 517892.9 | 976638.4 | 424508.3 | 1607597  | 1576835  | 693773.4 | 493104.4 |
| 9.431017 | 13 | 5 | 5 | 1264959  | 9750324  | 1813976  | 9486858  | 2086320  | 7640970  | 10785134 | 11557761 | 10816784 |
| 10.99268 | 10 | 5 | 5 | 198157.7 | 711395.4 | 229066.3 | 739171.5 | 180526   | 608049.5 | 483382.4 | 605459   | 787953.3 |
| 9.9898   | 10 | 4 | 4 | 3792510  | 10154020 | 10042628 | 8865830  | 9095661  | 28114777 | 5498441  | 6024988  | 5518302  |
| 9.91875  | 6  | 4 | 2 | 1329044  | 1814135  | 726729.1 | 1942665  | 1131490  | 2112281  | 644211.8 | 1617707  | 2196883  |
| 9.94455  | 10 | 5 | 5 | 4719283  | 17898595 | 4546029  | 17411451 | 2237656  | 23495472 | 20729239 | 17827331 | 15770997 |
| 31.78217 | 5  | 3 | 2 | 149640.1 | 470161.1 | 279261.1 | 431505.6 | 295937   | 247398   | 635998.7 | 108543.9 | 770166.8 |
| 9.640367 | 19 | 5 | 5 | 2969962  | 10805944 | 1703234  | 11250202 | 4273013  | 11826162 | 13284833 | 9775727  | 9964710  |
| 9.992233 | 8  | 4 | 4 | 2294101  | 3447171  | 1481018  | 3170811  | 2481472  | 3207413  | 5740291  | 3741815  | 1718914  |
| 9.419733 | 10 | 4 | 4 | 964745.8 | 3713995  | 2459591  | 3984158  | 1384062  | 7135434  | 2147117  | 3083843  | 993435.9 |
| 9.507167 | 12 | 5 | 5 | 2217694  | 14176032 | 6782704  | 15367650 | 10487270 | 21528388 | 12581621 | 8739202  | 7022253  |
| 10.9645  | 10 | 5 | 5 | 11526783 | 50791061 | 13516354 | 49223322 | 9391275  | 64431685 | 65389780 | 40753326 | 35981812 |
| 9.952017 | 7  | 3 | 3 | 898758.3 | 2153388  | 1249453  | 2291807  | 731616.6 | 3903853  | 551286.5 | 2474522  | 2366037  |
| 24.65217 | 14 | 5 | 5 | 1266638  | 5399196  | 2316355  | 5131739  | 1589415  | 4581321  | 5793272  | 3175678  | 4254090  |
| 10.00385 | 9  | 5 | 4 | 690215.9 | 964627.1 | 391827.4 | 1052419  | 826023.5 | 1405590  | 990791.6 | 1284686  | 628968.6 |
| 9.887133 | 4  | 1 | 3 | 749977.1 | 1344851  | 467624.5 | 1267849  | 661053.1 | 1054310  | 1074678  | 1943291  | 1749332  |
| 10.9645  | 5  | 2 | 3 | 241286.7 | 590263.3 | 227470.4 | 551927.3 | 332511.7 | 869494.3 | 444997.8 | 374920.9 | 460341.7 |
| 9.976317 | 10 | 5 | 5 | 839055.4 | 2095107  | 775755.7 | 1967309  | 1099371  | 2531217  | 2891235  | 2490250  | 1508189  |
| 44.07783 | 5  | 2 | 3 | 468832.7 | 7724441  | 3420873  | 7361945  | 1610420  | 13693283 | 6514517  | 6414936  | 7013261  |
| 9.856867 | 10 | 5 | 5 | 1.96E+08 | 1.15E+09 | 59120552 | 1.16E+09 | 1.49E+08 | 1.24E+09 | 1.16E+09 | 1.09E+09 | 1.1E+09  |
| 9.976317 | 10 | 5 | 5 | 3074694  | 9616139  | 2624795  | 9249915  | 2850627  | 12711177 | 11611918 | 9792905  | 7195457  |
| 9.762917 | 8  | 5 | 3 | 1275818  | 1684315  | 92638.75 | 1785111  | 1030392  | 1584243  | 1605983  | 1767802  | 1789665  |
| 9.992233 | 8  | 4 | 4 | 1000247  | 1511225  | 784505.1 | 1379608  | 1145451  | 1800152  | 2694945  | 1355601  | 645796.2 |
| 9.970617 | 11 | 5 | 5 | 13030835 | 26445421 | 14306701 | 24674955 | 12132524 | 42047069 | 40415136 | 19772028 | 21057365 |
| 11.10482 | 9  | 5 | 4 | 7590753  | 84904088 | 47658089 | 79929157 | 20903605 | 1.23E+08 | 1.09E+08 | 73976923 | 6253673  |
| 9.946467 | 9  | 5 | 4 | 528633.8 | 1477153  | 512831.5 | 1547778  | 547151.2 | 2190355  | 1662728  | 1544862  | 1130400  |
| 9.0511   | 6  | 3 | 3 | 307014.4 | 562479.6 | 229175   | 536915.3 | 143209.1 | 667665.9 | 861169.4 | 400322.1 | 276853.7 |
| 9.976317 | 4  | 3 | 1 | 510388.1 | 864397.8 | 404532.4 | 800040.8 | 551175.4 | 1320665  | 1072310  | 1004835  | 289241.6 |
| 9.46925  | 5  | 2 | 3 | 385783.3 | 919181.3 | 597248.4 | 983920.7 | 334186.8 | 763997.2 | 1049711  | 0        | 1172702  |
| 9.983467 | 5  | 3 | 2 | 849549.1 | 1064419  | 811658.1 | 1163038  | 667038.3 | 1610383  | 2225217  | 398481.8 | 496580.9 |
| 30.23817 | 9  | 4 | 5 | 524294.2 | 6036483  | 921839.8 | 6167150  | 1046530  | 6787396  | 5279204  | 4870331  | 6295249  |
| 9.659033 | 10 | 5 | 5 | 1602782  | 4069907  | 919871.4 | 3848351  | 2145534  | 3612589  | 3911329  | 3088621  | 4193239  |
| 10.9645  | 10 | 5 | 5 | 3570640  | 16962271 | 2990254  | 16547565 | 3276720  | 19537054 | 20703117 | 14900285 | 13875102 |
| 10.25103 | 5  | 2 | 3 | 609310.9 | 1156369  | 831460.3 | 1260977  | 750484.8 | 2460358  | 426734.8 | 493770.6 | 1412175  |



|          |    |   |   |          |          |          |          |          |          |          |          |          |
|----------|----|---|---|----------|----------|----------|----------|----------|----------|----------|----------|----------|
| 9.992233 | 8  | 5 | 3 | 519638   | 1093470  | 316760.6 | 1157856  | 604760.8 | 1295435  | 1361535  | 1311117  | 799024.2 |
| 30.27883 | 10 | 5 | 5 | 4698262  | 31733451 | 7297192  | 30460445 | 11432712 | 33760486 | 41329224 | 30753426 | 20970854 |
| 9.960467 | 8  | 4 | 4 | 572999.5 | 1843223  | 788411.5 | 1722604  | 1021034  | 2486918  | 2638431  | 1640915  | 661827.1 |
| 9.8445   | 9  | 5 | 4 | 1004494  | 3462270  | 792123.5 | 3332297  | 1139310  | 3398186  | 2456675  | 3245790  | 3548330  |
| 9.864767 | 5  | 3 | 2 | 545544.9 | 1437934  | 740336.4 | 1548232  | 919612.5 | 988861.8 | 1044789  | 1265311  | 1141797  |
| 10.93618 | 4  | 3 | 1 | 256320   | 468495.1 | 112244.2 | 448168.4 | 185030.4 | 662483.2 | 433472.3 | 403049   | 383781.9 |
| 9.4468   | 9  | 5 | 4 | 568795.9 | 2988448  | 1432353  | 2797077  | 1471542  | 4693746  | 3555711  | 3695243  | 1359368  |
| 11.52297 | 10 | 5 | 5 | 156158.8 | 760896.4 | 268044.5 | 795237.4 | 253103   | 1146699  | 746580.8 | 671594.1 | 407020.7 |
| 9.597067 | 8  | 4 | 4 | 575573   | 2224204  | 616425.6 | 2317007  | 780805.7 | 2833623  | 2557890  | 2281898  | 1207541  |
| 9.34115  | 7  | 4 | 3 | 3276224  | 8249904  | 14232165 | 9984360  | 12018526 | 2784616  | 864469.3 | 33670547 | 1420225  |
| 8.8836   | 10 | 5 | 5 | 1.09E+08 | 2.39E+09 | 3.01E+08 | 2.46E+09 | 7.6E+08  | 2.53E+09 | 2.74E+09 | 2.49E+09 | 2.21E+09 |
| 9.999217 | 10 | 5 | 5 | 1486997  | 4275939  | 1522367  | 4037825  | 2052000  | 4802939  | 6499577  | 4207942  | 2462814  |
| 37.44517 | 5  | 3 | 2 | 101389.4 | 383470   | 168690.7 | 401928.8 | 102274.9 | 432983.4 | 87615.03 | 429621.2 | 512516.7 |
| 10.2456  | 8  | 4 | 4 | 280652.9 | 913716.7 | 396933.2 | 963021.3 | 351873.5 | 951069.9 | 697621.6 | 1581881  | 758229.2 |
| 10.211   | 8  | 5 | 3 | 448457.3 | 744585.9 | 324592.2 | 778687.9 | 162549.8 | 514723.9 | 1129439  | 430721.8 | 1057861  |
| 9.55155  | 6  | 3 | 3 | 194952   | 379586.9 | 192613.4 | 352611.3 | 217333   | 531547.5 | 222876.1 | 558573.8 | 456074.5 |
| 9.976317 | 5  | 4 | 1 | 437119.5 | 815435.9 | 213297.5 | 853271.8 | 344304.9 | 990897.8 | 781575.9 | 596979.4 | 1076768  |
| 9.102783 | 5  | 2 | 3 | 1284650  | 2585561  | 2160035  | 2873215  | 2226428  | 2112229  | 894835.6 | 1332231  | 2273077  |
| 9.999217 | 10 | 5 | 5 | 949268   | 2180256  | 850937.4 | 2302034  | 999777.7 | 2601220  | 3201397  | 2506460  | 1353409  |
| 9.983433 | 4  | 1 | 3 | 511542   | 850369.5 | 362336.5 | 805892   | 314427.3 | 518188.5 | 1001766  | 968008   | 1315563  |
| 8.97505  | 6  | 3 | 3 | 271025.9 | 554449.1 | 187125.1 | 535139.3 | 85082.01 | 631844.3 | 675100.6 | 509468   | 707893   |
| 9.856867 | 10 | 5 | 5 | 2.15E+08 | 1.28E+09 | 64075492 | 1.29E+09 | 1.54E+08 | 1.38E+09 | 1.29E+09 | 1.24E+09 | 1.21E+09 |
| 9.976317 | 5  | 3 | 2 | 569895.9 | 728475.8 | 532955.7 | 801297.5 | 577888.5 | 918932.6 | 1463348  | 826256.5 | 100905   |
| 9.999217 | 10 | 5 | 5 | 2019611  | 8698822  | 1289841  | 8448622  | 2345627  | 9794473  | 10291634 | 8383271  | 7478223  |
| 9.999217 | 10 | 5 | 5 | 1364062  | 3327610  | 1122056  | 3108877  | 2056908  | 4026652  | 4780995  | 3035063  | 1840943  |
| 43.27233 | 6  | 4 | 2 | 324780.3 | 5837870  | 1080365  | 5575573  | 2575896  | 5968539  | 7568637  | 4851457  | 5012876  |
| 9.43325  | 12 | 5 | 5 | 1639101  | 15921511 | 5485516  | 15113190 | 6796391  | 16802964 | 19646769 | 21595856 | 13995075 |
| 9.3332   | 5  | 3 | 2 | 405345.1 | 3129327  | 719672   | 3036563  | 700656.4 | 2527146  | 4353021  | 3071877  | 2690326  |
| 9.023433 | 10 | 5 | 5 | 363864.7 | 1392253  | 333614.1 | 1458765  | 630220.7 | 1377462  | 1884160  | 1350354  | 943841.8 |
| 9.992233 | 10 | 5 | 5 | 1486040  | 2998398  | 724986.6 | 3164669  | 1620698  | 3423602  | 1917252  | 3810407  | 3121873  |
| 9.523633 | 9  | 4 | 4 | 1346481  | 5059341  | 2778386  | 4528979  | 4971615  | 1313648  | 4662950  | 4297707  | 8940720  |
| 10.9645  | 10 | 5 | 5 | 1316841  | 6622923  | 1202673  | 6464564  | 1224545  | 7836277  | 7998644  | 5765886  | 5451646  |
| 35.98267 | 10 | 5 | 5 | 7479771  | 38529970 | 27969653 | 35140590 | 23783248 | 24352282 | 23557846 | 10950092 | 79822616 |
| 9.976317 | 10 | 5 | 5 | 1817262  | 6876127  | 1538124  | 7111574  | 2030706  | 7621643  | 9000117  | 6937754  | 5190788  |
| 10.94208 | 10 | 5 | 5 | 244656.1 | 1304668  | 354257.7 | 1243826  | 552534.4 | 1719932  | 1606911  | 1048659  | 892029.4 |

|          |    |   |   |          |          |          |          |          |          |          |          |          |
|----------|----|---|---|----------|----------|----------|----------|----------|----------|----------|----------|----------|
| 28.14183 | 10 | 5 | 5 | 22130550 | 1.98E+08 | 29554698 | 1.92E+08 | 57005776 | 2.1E+08  | 2.14E+08 | 1.56E+08 | 1.81E+08 |
| 9.91875  | 6  | 4 | 2 | 2138718  | 7035395  | 3722529  | 6464428  | 4939908  | 7454909  | 5356859  | 4096302  | 4952046  |
| 34.422   | 9  | 4 | 5 | 1257491  | 8925051  | 7661030  | 7864325  | 8610507  | 8639673  | 4566685  | 22233426 | 5313149  |
| 10.44062 | 10 | 5 | 5 | 537849.4 | 2159922  | 563447.6 | 2082408  | 626306.1 | 1737455  | 2933260  | 2590392  | 1806744  |
| 9.9847   | 6  | 3 | 3 | 246856.3 | 488632.3 | 201379.1 | 516580.8 | 227449.5 | 428166.4 | 192170.3 | 577636.2 | 738471.6 |
| 9.983433 | 10 | 5 | 5 | 2180902  | 5767679  | 2259907  | 5390883  | 3396222  | 6796004  | 8929935  | 5116895  | 2839592  |
| 9.655117 | 7  | 4 | 3 | 288976.3 | 918949   | 386918.8 | 977164.9 | 500095.7 | 936264.2 | 1494556  | 974834.3 | 430834.6 |
| 10.95055 | 10 | 5 | 5 | 768044.4 | 3333721  | 905501.9 | 3232484  | 621002.6 | 4204960  | 4348775  | 2650429  | 2345018  |
| 18.10767 | 4  | 1 | 3 | 105305.9 | 564880.4 | 127180.8 | 541994   | 212335.9 | 703206.5 | 553256.7 | 372870.6 | 654236.6 |
| 9.976317 | 10 | 5 | 5 | 2103293  | 6437602  | 2141918  | 6113144  | 2803032  | 8186184  | 8921398  | 6381136  | 3901224  |
| 9.568567 | 4  | 3 | 1 | 277810.1 | 655673.4 | 108974.9 | 630357.6 | 249286.4 | 685132.2 | 525058.6 | 804408   | 688099   |
| 9.473733 | 9  | 5 | 4 | 1033382  | 7043318  | 4045435  | 7609685  | 4665625  | 10635526 | 5385570  | 9896253  | 8536218  |
| 10.95835 | 5  | 1 | 4 | 298634.9 | 534180.8 | 436522.4 | 589767.4 | 421039.9 | 350289.2 | 294889.2 | 236338.2 | 493146   |
| 24.5185  | 9  | 5 | 4 | 664960.4 | 2928572  | 1570812  | 2731129  | 1476748  | 989716   | 2203557  | 3062269  | 3105948  |
| 9.992233 | 9  | 5 | 4 | 915545.4 | 1675991  | 643899.7 | 1603086  | 465266.5 | 1733361  | 2453885  | 2107881  | 868279.4 |
| 44.98333 | 7  | 2 | 3 | 287295.7 | 3831616  | 2190892  | 3594003  | 1366886  | 3589680  | 3576473  | 7166681  | 3813811  |
| 9.992233 | 8  | 4 | 4 | 463991.6 | 773090.3 | 197812.8 | 724863.2 | 479745.5 | 953131.8 | 994858.4 | 689704.3 | 706812.4 |
| 9.952017 | 5  | 2 | 3 | 1219447  | 1228572  | 205306.6 | 1170308  | 590302.4 | 1308315  | 1361931  | 1273199  | 1333436  |
| 9.40325  | 8  | 5 | 3 | 421093.9 | 1415809  | 461453.7 | 1493755  | 712048.4 | 1541309  | 1745972  | 604473.6 | 1541279  |
| 10.9645  | 10 | 5 | 5 | 1102999  | 5427500  | 1195642  | 5582902  | 1210179  | 6609840  | 6729521  | 4758709  | 4005115  |
| 43.17183 | 6  | 2 | 4 | 500534.3 | 7623395  | 1356382  | 7869503  | 2306711  | 8566539  | 6016620  | 8857878  | 6288931  |
| 9.952017 | 7  | 4 | 3 | 1697566  | 4351755  | 1253499  | 4541642  | 1654461  | 3957633  | 2566648  | 5379445  | 5709808  |
| 10.9645  | 7  | 4 | 3 | 146868.5 | 438009.5 | 189250.1 | 415320.8 | 161360.7 | 459221.7 | 757613.9 | 288702.3 | 346435.8 |
| 10.95055 | 6  | 3 | 3 | 707138.1 | 1894374  | 720937.9 | 1992933  | 805574.5 | 2887755  | 2393200  | 1346653  | 1201510  |
| 9.177967 | 9  | 5 | 4 | 5896437  | 8663763  | 5002767  | 9689296  | 9945746  | 7613254  | 16380286 | 10491509 | 4574705  |
| 9.976317 | 10 | 5 | 5 | 4316257  | 6998125  | 3603242  | 7580885  | 5260505  | 9068537  | 11967393 | 6648664  | 3177856  |
| 9.701933 | 5  | 3 | 2 | 519024.3 | 700442.5 | 349723   | 752363.6 | 449430   | 1193068  | 497719.1 | 543693.4 | 340597.7 |
| 10.5972  | 9  | 5 | 4 | 74727.63 | 207159.5 | 78860.82 | 199202.1 | 34776.99 | 342912.8 | 187258   | 171999.7 | 138891.5 |
| 11.1891  | 9  | 4 | 5 | 221371.1 | 943417.7 | 403189.4 | 1005284  | 545648.1 | 1406111  | 1034055  | 296552.7 | 1040869  |
| 9.960467 | 8  | 4 | 4 | 1147582  | 2950738  | 1374575  | 3163809  | 1890394  | 2776782  | 3518739  | 1830563  | 4999999  |
| 9.9014   | 7  | 3 | 4 | 947623.1 | 1938316  | 789519.3 | 1845519  | 645529.1 | 2413879  | 2645872  | 1436178  | 797026.2 |
| 10.95055 | 10 | 5 | 5 | 384345   | 1169955  | 436943.7 | 1116740  | 390483.6 | 1531179  | 1721492  | 787415.7 | 759760.8 |
| 9.419733 | 5  | 2 | 3 | 778146.4 | 3434063  | 2164309  | 3185611  | 1672026  | 4870264  | 1211393  | 4684073  | 5445509  |
| 11.52312 | 10 | 5 | 5 | 539749.9 | 2199270  | 557849.7 | 2289782  | 823862.1 | 2921138  | 2625402  | 1556505  | 1920913  |
| 9.976317 | 10 | 5 | 5 | 893970.9 | 2839166  | 868326.5 | 2976609  | 1237876  | 4118937  | 2745654  | 3131873  | 2407951  |

|          |    |   |   |          |          |          |          |          |          |          |          |          |
|----------|----|---|---|----------|----------|----------|----------|----------|----------|----------|----------|----------|
| 10.008   | 10 | 5 | 5 | 1101074  | 2737073  | 1022670  | 2882858  | 1242103  | 3236312  | 4045180  | 2989338  | 1568709  |
| 9.103733 | 10 | 5 | 5 | 1431299  | 5757639  | 2247659  | 6006371  | 1563919  | 6523844  | 7329673  | 4420902  | 2530981  |
| 10.9645  | 9  | 5 | 4 | 229620.8 | 674439.8 | 236615.6 | 645151.3 | 220871.8 | 925244.8 | 936295.4 | 484782.2 | 559526.4 |
| 19.869   | 8  | 4 | 4 | 164356   | 427235.4 | 196225   | 455176   | 238182.2 | 202823.2 | 577071.6 | 634618.6 | 239632.3 |
| 9.976317 | 7  | 4 | 3 | 525513.3 | 922134.6 | 199527.4 | 956070.6 | 315346.5 | 1046144  | 1177071  | 762894   | 691077.7 |
| 22.9005  | 10 | 5 | 5 | 751582.9 | 6704125  | 1185086  | 6835329  | 828236.4 | 5718612  | 6155947  | 6780401  | 6152572  |
| 9.859983 | 5  | 3 | 2 | 603546.4 | 1737371  | 759942.8 | 1626405  | 961982.9 | 1642808  | 1055983  | 2076463  | 2857581  |
| 9.848417 | 9  | 5 | 4 | 1646215  | 4827413  | 2565755  | 5201076  | 3238020  | 4262645  | 4378150  | 2951157  | 3263039  |
| 28.73967 | 10 | 5 | 5 | 2707853  | 16042993 | 4058575  | 15226808 | 7969588  | 13540684 | 18510189 | 10119648 | 18429814 |
| 10.95055 | 10 | 5 | 5 | 337884.5 | 1131359  | 218306.7 | 1101319  | 251453   | 1440833  | 1221320  | 850185.7 | 1053346  |
| 40.9995  | 6  | 4 | 2 | 322126.8 | 4761897  | 1082022  | 4547771  | 2086664  | 3762352  | 3814915  | 4405146  | 5974395  |
| 10.95055 | 11 | 5 | 5 | 353219.7 | 2085341  | 634197.3 | 2156599  | 469349.4 | 2760861  | 2673962  | 1889900  | 1864650  |
| 19.09667 | 6  | 3 | 3 | 82249.01 | 227973.5 | 106993.4 | 214486.5 | 104857.1 | 364682.3 | 130122.3 | 321430.5 | 166196.4 |
| 9.3834   | 6  | 4 | 2 | 651568.6 | 3256861  | 1693582  | 2990460  | 2413531  | 2252740  | 1862606  | 2600652  | 3475567  |
| 10.95055 | 10 | 5 | 5 | 774376.4 | 3516974  | 1351205  | 3707876  | 1632350  | 5083971  | 4710949  | 2672072  | 1898471  |
| 10.01837 | 10 | 5 | 5 | 483726.3 | 1380917  | 247942.6 | 1440777  | 605881.2 | 1308154  | 1227400  | 1725552  | 1535354  |
| 13.54892 | 9  | 5 | 4 | 89243.92 | 473892   | 134941.4 | 493808.5 | 175158.5 | 527796.4 | 425360.1 | 433234.9 | 310841   |
| 16.53468 | 10 | 5 | 5 | 116060.7 | 778227.8 | 214991.9 | 753744.9 | 166660.5 | 773878   | 459577.7 | 834517.1 | 762262   |
| 10.9645  | 10 | 5 | 5 | 235233.5 | 933056.7 | 163412.8 | 902004.5 | 301480.2 | 1119919  | 1084106  | 800116.1 | 758454   |
| 9.992233 | 9  | 4 | 5 | 773742.9 | 2138421  | 592748.1 | 2222120  | 719951.8 | 2655823  | 2079858  | 2801806  | 1756886  |
| 10.23422 | 4  | 3 | 1 | 215779.2 | 581130.7 | 397065.2 | 536734.1 | 294481.4 | 1180893  | 676857.7 | 605711.5 | 190194.1 |
| 10.97857 | 8  | 4 | 4 | 986030.6 | 1614418  | 1087837  | 1736335  | 813947.6 | 1325417  | 3525956  | 856164.4 | 1027982  |
| 9.992233 | 10 | 5 | 5 | 1162379  | 2713570  | 1010708  | 2857072  | 1242056  | 3448832  | 3739136  | 3113277  | 1631614  |
| 9.960467 | 10 | 5 | 5 | 3977577  | 15999136 | 4305450  | 15457138 | 4260332  | 18754997 | 21531184 | 15614841 | 10536032 |
| 9.951283 | 6  | 3 | 3 | 5611464  | 7151398  | 10688118 | 8412049  | 9166445  | 25992010 | 5561144  | 1019781  | 1726177  |
| 9.960467 | 5  | 3 | 2 | 590171.4 | 854619.7 | 373634.5 | 811665.1 | 301265.9 | 1193031  | 818192.2 | 1278093  | 485237.7 |
| 12.1935  | 7  | 5 | 2 | 83514.05 | 330554.7 | 148764.7 | 350654.8 | 168568.8 | 249147.4 | 496325.2 | 240298.4 | 181427.1 |
| 9.983433 | 10 | 5 | 5 | 1532366  | 4485805  | 1581554  | 4240002  | 2238964  | 5212427  | 6770770  | 4166190  | 2624704  |
| 9.960817 | 7  | 3 | 4 | 534944.2 | 1071181  | 845949.5 | 1160744  | 525967.1 | 2110562  | 1483317  | 1359839  | 287477.1 |
| 9.976317 | 9  | 5 | 4 | 2627530  | 6297293  | 2091911  | 6014235  | 2377591  | 7775958  | 9066887  | 5318461  | 3842648  |
| 30.2235  | 9  | 4 | 5 | 181594.6 | 824095.3 | 273324.3 | 779685   | 412364.9 | 1049894  | 1133952  | 825019.8 | 618531.1 |
| 9.946467 | 11 | 5 | 5 | 38138952 | 89354201 | 19670809 | 86400856 | 26479619 | 1.14E+08 | 1.06E+08 | 73837178 | 83906928 |
| 9.999517 | 11 | 5 | 5 | 6715113  | 10417957 | 5976837  | 9805130  | 3245659  | 18139327 | 13842335 | 3090883  | 10807235 |
| 9.445217 | 6  | 3 | 3 | 294284.7 | 938567.1 | 539294.4 | 1002019  | 462733.5 | 869587.1 | 1774324  | 1073496  | 620683.7 |
| 10.97242 | 7  | 4 | 3 | 303912.2 | 652452.9 | 109148.4 | 679475.2 | 277001.2 | 552098.6 | 522995.3 | 699944.1 | 712408.7 |

|          |    |   |   |          |          |          |          |          |          |          |          |          |
|----------|----|---|---|----------|----------|----------|----------|----------|----------|----------|----------|----------|
| 10.77857 | 5  | 3 | 2 | 68920.63 | 171410   | 45265.83 | 177642   | 53131.73 | 162118.8 | 211650.7 | 97668.28 | 201079.7 |
| 6.707283 | 5  | 2 | 3 | 855405.3 | 31278794 | 13309043 | 29494589 | 14920518 | 14793436 | 42751471 | 46823921 | 24010571 |
| 20.25983 | 10 | 5 | 5 | 225956.7 | 1421615  | 282013.1 | 1454585  | 238517.3 | 1466683  | 1769511  | 1154400  | 1118166  |
| 10.008   | 10 | 5 | 5 | 1193829  | 1246807  | 890446.9 | 1344539  | 632264.1 | 805210   | 2835339  | 775515.6 | 871717.7 |
| 14.1514  | 10 | 5 | 5 | 80967.26 | 484062.7 | 189912.9 | 458842.6 | 209648.5 | 628450.9 | 468528.9 | 314385.9 | 288192.7 |
| 9.295167 | 5  | 3 | 2 | 5999965  | 16699666 | 21669130 | 19352086 | 20421956 | 42808858 | 681979.3 | 1213551  | 37911533 |
| 9.840617 | 7  | 3 | 4 | 4298345  | 12965105 | 13816056 | 11386123 | 11084509 | 25780929 | 2915398  | 2807736  | 30221782 |
| 9.103733 | 10 | 5 | 5 | 710109.6 | 5634810  | 2959547  | 5247130  | 3194624  | 6742519  | 9399162  | 6180452  | 4453186  |
| 10.95835 | 10 | 5 | 5 | 417908.2 | 1150528  | 302550.2 | 1196163  | 412287.5 | 1504053  | 1375359  | 909735.2 | 787244.7 |
| 9.915583 | 10 | 5 | 5 | 1282814  | 4203204  | 1382004  | 4040685  | 1192965  | 2974921  | 2746327  | 5404124  | 5801150  |
| 9.568567 | 12 | 4 | 4 | 898451.8 | 3592035  | 2281048  | 3981914  | 3709828  | 2100704  | 3600586  | 873904.4 | 6782563  |
| 9.473717 | 5  | 4 | 1 | 2723307  | 3081630  | 4471677  | 3529020  | 2166405  | 11067468 | 1026224  | 793665   | 1018828  |
| 10.98385 | 7  | 4 | 3 | 1461757  | 2526165  | 4211293  | 3010773  | 3449979  | 10056526 | 697870.7 | 447768.6 | 660788.3 |
| 10.96015 | 6  | 4 | 2 | 473010.7 | 1093712  | 449188   | 1033297  | 509956.4 | 760600.1 | 1634929  | 970442.2 | 612883.4 |
| 9.3471   | 5  | 3 | 2 | 1445055  | 4392379  | 4243735  | 4915245  | 4079404  | 959140.7 | 707368.8 | 9198155  | 8781377  |
| 9.864767 | 10 | 5 | 5 | 6396423  | 42151572 | 1998575  | 41402232 | 7983061  | 42576199 | 39533161 | 40841752 | 44640795 |
| 9.498117 | 13 | 5 | 4 | 3711597  | 12827656 | 7300724  | 11941093 | 6814895  | 11667184 | 14760180 | 1003648  | 20256386 |
| 9.365833 | 4  | 3 | 1 | 510112.9 | 3508149  | 1792998  | 3714357  | 1475515  | 5174864  | 3781416  | 5023325  | 2713825  |
| 9.999217 | 10 | 5 | 5 | 2815111  | 6175835  | 2149183  | 5818520  | 3380015  | 7666061  | 8814735  | 6219720  | 3549673  |
| 10.43932 | 7  | 3 | 4 | 203525.4 | 641082.4 | 103802.7 | 621148.1 | 196961.6 | 775016.3 | 578505.6 | 566926.7 | 553760.6 |
| 40.4675  | 7  | 3 | 2 | 321776.5 | 4804241  | 1884801  | 4478597  | 3125064  | 3301710  | 4512399  | 8016411  | 4616887  |
| 30.28133 | 10 | 5 | 5 | 1001249  | 5273304  | 839121.9 | 5470947  | 2029290  | 5948624  | 6195856  | 5218421  | 4104366  |
| 38.971   | 13 | 3 | 5 | 303909.3 | 3589025  | 501527.4 | 3671859  | 783466   | 3324372  | 4046644  | 4087505  | 3589084  |
| 28.78067 | 4  | 3 | 1 | 74632.77 | 323706.5 | 186989.6 | 300778.4 | 179347.9 | 250876.1 | 457532.2 | 59198.68 | 311502.9 |
| 9.976317 | 9  | 4 | 5 | 620347.3 | 1673722  | 503286.6 | 1600491  | 654977.3 | 2019174  | 2294622  | 1711912  | 1205538  |
| 10.9645  | 10 | 5 | 5 | 784070.2 | 3065181  | 774303.4 | 3192549  | 1204459  | 3910455  | 3861779  | 2543771  | 2231511  |
| 9.856867 | 10 | 5 | 5 | 3373490  | 14169319 | 1123421  | 13846467 | 3394140  | 15516552 | 14738171 | 13175529 | 14573256 |
| 9.8322   | 9  | 5 | 4 | 904205.8 | 2706301  | 846391.8 | 2584197  | 1087232  | 2577557  | 3157425  | 1598435  | 2354207  |
| 29.84833 | 10 | 5 | 5 | 3838851  | 31398329 | 4695462  | 32048548 | 5648780  | 30453245 | 31664005 | 25534878 | 30704841 |
| 10.50278 | 11 | 4 | 5 | 407860.8 | 1507186  | 394848.6 | 1576609  | 671928.2 | 1391024  | 1296192  | 1776419  | 1040442  |
| 9.071517 | 8  | 5 | 3 | 115905.9 | 209939   | 138586.1 | 227557.7 | 143380.1 | 139974.5 | 402658.3 | 309737.6 | 104316.4 |
| 11.31857 | 6  | 4 | 2 | 4091731  | 3938440  | 5487851  | 5006004  | 10622284 | 855998.8 | 1169052  | 3579020  | 568103.6 |
| 7.734267 | 12 | 5 | 5 | 2495178  | 1.68E+08 | 1.05E+08 | 1.52E+08 | 1.35E+08 | 2.99E+08 | 50282762 | 1.59E+08 | 2.45E+08 |
| 10.94443 | 7  | 3 | 4 | 386811   | 1075848  | 774045.1 | 1168654  | 711036   | 2108622  | 1281977  | 1374142  | 215045.8 |
| 12.26695 | 10 | 5 | 5 | 1994111  | 14665663 | 2492601  | 14993244 | 2753787  | 17284158 | 16688626 | 13160820 | 11264378 |

|          |    |   |   |          |          |          |          |          |          |          |          |          |
|----------|----|---|---|----------|----------|----------|----------|----------|----------|----------|----------|----------|
| 9.55155  | 3  | 0 | 3 | 436326.9 | 258911.1 | 209986.4 | 287079.3 | 240724.1 | 609772.5 | 87476.47 | 108742.5 | 265553.7 |
| 9.46265  | 4  | 1 | 3 | 1553622  | 2639090  | 1037210  | 2806257  | 1577541  | 3251114  | 2023995  | 2723337  | 3928899  |
| 9.4468   | 10 | 4 | 4 | 1225876  | 5423474  | 3339012  | 4988995  | 3631054  | 3898833  | 5905603  | 11023091 | 2757817  |
| 9.392767 | 7  | 4 | 3 | 397584.2 | 829126.1 | 503462.3 | 766440.2 | 503505.4 | 1160223  | 1219324  | 0        | 711645.1 |
| 10.5677  | 3  | 3 | 0 | 124313.2 | 361034.6 | 103183.4 | 350083.6 | 68455.41 | 372785.9 | 379045.2 | 505840.5 | 219349.3 |
| 9.616167 | 8  | 4 | 4 | 406199.5 | 993821.2 | 210177   | 955562.9 | 376347.6 | 758658.7 | 1132372  | 1056348  | 789832.9 |
| 9.56645  | 16 | 5 | 5 | 23110714 | 1.99E+08 | 50262755 | 1.93E+08 | 58057186 | 1.75E+08 | 2.47E+08 | 2.6E+08  | 1.62E+08 |
| 9.249433 | 5  | 3 | 2 | 2986534  | 12726102 | 13483790 | 11308360 | 8695900  | 1117550  | 20212835 | 32903954 | 4252575  |
| 9.701933 | 4  | 3 | 1 | 300674.7 | 591368.7 | 144031.5 | 631153.2 | 419933.2 | 731815.5 | 460808.1 | 663003.4 | 413213.6 |
| 10.008   | 9  | 5 | 4 | 314351.3 | 857324.4 | 254818.9 | 817746.5 | 369416.4 | 1006593  | 1067696  | 1052837  | 558879.7 |
| 10.03947 | 9  | 5 | 4 | 464457.5 | 945786.4 | 288813.4 | 889545.7 | 563643.9 | 580463   | 1118206  | 862351.2 | 833636.2 |
| 9.445217 | 5  | 3 | 2 | 656466.6 | 2720871  | 672335.4 | 2571506  | 1535144  | 3199115  | 1913710  | 2841942  | 2157091  |
| 29.84833 | 10 | 5 | 5 | 203539.3 | 1518219  | 190530.2 | 1494224  | 195862.9 | 1587029  | 1539291  | 1253399  | 1440466  |
| 10.9645  | 10 | 5 | 5 | 209455.9 | 814318.4 | 314449.3 | 847514.3 | 206372.9 | 1159695  | 1157676  | 576073.3 | 581898.6 |
| 30.296   | 6  | 3 | 3 | 584745.4 | 3659695  | 3801131  | 3208351  | 3458514  | 7876181  | 807953.2 | 753675.4 | 7765784  |
| 9.856867 | 10 | 5 | 5 | 909810.9 | 4206784  | 243570.9 | 4275728  | 729971.4 | 3923066  | 4399813  | 4433782  | 4309997  |
| 9.992233 | 10 | 5 | 5 | 1850030  | 6129857  | 1470001  | 5926563  | 1786721  | 7354262  | 7103941  | 7139594  | 4647547  |
| 16.02333 | 6  | 3 | 3 | 143420.8 | 742040.9 | 702319.2 | 831526.7 | 739558.6 | 382223   | 191396.9 | 1432444  | 1572994  |
| 9.498117 | 4  | 1 | 3 | 2534695  | 8899694  | 5477828  | 8266299  | 4697490  | 12155927 | 7546299  | 7732834  | 1252994  |
| 10.02372 | 4  | 3 | 1 | 857763.7 | 1338442  | 766969.1 | 1436522  | 813810.2 | 821561.9 | 717718.3 | 2014213  | 815304.4 |
| 10.90802 | 5  | 2 | 3 | 170694.4 | 634399.7 | 258659.5 | 600962.1 | 280415.5 | 423851.4 | 1014601  | 456412.2 | 485235.7 |
| 30.29833 | 10 | 5 | 5 | 282645.8 | 1326825  | 277675.8 | 1393073  | 689691.7 | 1629515  | 1378062  | 1519262  | 935575.3 |
| 12.1789  | 5  | 1 | 4 | 577982.8 | 5638287  | 728676.5 | 5853307  | 2289317  | 6515191  | 5620927  | 4706268  | 5182929  |
| 9.994767 | 10 | 5 | 5 | 1828699  | 2956634  | 1330174  | 3157911  | 1865272  | 3681022  | 4761873  | 2895295  | 1373315  |
| 9.972483 | 10 | 5 | 5 | 1420657  | 4180885  | 1530676  | 3986784  | 1603941  | 5544483  | 5880673  | 4118269  | 2438674  |
| 9.992233 | 10 | 5 | 5 | 1604857  | 3312033  | 504399.6 | 3467524  | 1663375  | 3178560  | 3166090  | 3979496  | 3596426  |
| 9.0258   | 10 | 5 | 5 | 1239342  | 13455415 | 4315271  | 12820199 | 5817904  | 13807739 | 19020393 | 12349477 | 7138504  |
| 9.9677   | 10 | 5 | 5 | 2943316  | 7885991  | 3209364  | 7476394  | 3410959  | 10495509 | 11873154 | 7220747  | 4440942  |
| 44.72467 | 4  | 4 | 0 | 321485   | 5311097  | 1520809  | 5172984  | 191101.7 | 5407384  | 5752599  | 2898879  | 7106129  |
| 9.460217 | 7  | 4 | 3 | 1251604  | 4907783  | 1613464  | 4639358  | 2590663  | 6396493  | 6325908  | 5290507  | 3823648  |
| 9.856867 | 10 | 5 | 5 | 1074033  | 4390998  | 319469.7 | 4495757  | 1127609  | 4658828  | 4699662  | 3944428  | 4455208  |
| 8.48665  | 6  | 3 | 3 | 809932.1 | 24726098 | 9380180  | 26060524 | 12035461 | 9818675  | 29339176 | 24401246 | 24939118 |
| 9.8322   | 5  | 3 | 2 | 6756275  | 8479867  | 7107242  | 9581163  | 10367406 | 3662650  | 3733885  | 16632145 | 15851161 |
| 10.9645  | 10 | 5 | 5 | 340818.8 | 1417150  | 471622   | 1373057  | 149393.9 | 1763360  | 1851500  | 1376696  | 656153.8 |
| 9.842    | 7  | 3 | 4 | 731027.9 | 1600899  | 446700.2 | 1517227  | 841062.3 | 1242465  | 1621832  | 2358296  | 1329938  |

|          |    |   |   |          |          |          |          |          |          |          |          |          |
|----------|----|---|---|----------|----------|----------|----------|----------|----------|----------|----------|----------|
| 9.392767 | 15 | 5 | 5 | 40201056 | 2.03E+08 | 1.15E+08 | 1.93E+08 | 37068716 | 4.02E+08 | 1.82E+08 | 1.05E+08 | 1.59E+08 |
| 9.379233 | 6  | 4 | 2 | 660395.5 | 1022044  | 789456.1 | 1133816  | 1014781  | 1279086  | 700601   | 0        | 978402.9 |
| 43.071   | 11 | 3 | 4 | 368515.1 | 5452689  | 925869.7 | 5576466  | 1084199  | 6758238  | 5325501  | 5898868  | 4332474  |
| 10.96997 | 9  | 4 | 5 | 440102.3 | 850595.9 | 412826.6 | 926473.7 | 761662.9 | 918232.1 | 1407166  | 566035   | 1018932  |
| 35.949   | 6  | 3 | 3 | 157592.7 | 1181615  | 312869.4 | 1219260  | 300922.6 | 1008917  | 1486021  | 1389562  | 1301733  |
| 18.96567 | 9  | 5 | 4 | 422260.3 | 2350328  | 451400.4 | 2295092  | 449973.7 | 2598957  | 2318094  | 2855196  | 1645319  |
| 10.008   | 10 | 5 | 5 | 1054609  | 2267917  | 835372.4 | 2136547  | 1256810  | 2745590  | 3239771  | 2519059  | 1183591  |
| 10.95055 | 9  | 4 | 5 | 482273.4 | 1103817  | 614269.8 | 1036535  | 473289   | 1758360  | 1750048  | 681347.4 | 442091.4 |
| 31.15217 | 10 | 5 | 5 | 43663.06 | 210461.1 | 55241.69 | 201175.5 | 91105.35 | 167731   | 194959.1 | 189324.5 | 192944.3 |
| 9.758367 | 4  | 1 | 3 | 328268.8 | 594178.5 | 240999.9 | 649141.4 | 577526.6 | 976140.3 | 355501.6 | 508733.9 | 464043.7 |
| 9.40325  | 6  | 3 | 3 | 15078021 | 85102626 | 1.03E+08 | 73376555 | 88721029 | 2.17E+08 | 3996232  | 11175807 | 18193991 |
| 21.55783 | 6  | 3 | 1 | 10661777 | 69690734 | 55968388 | 63795419 | 38604563 | 69959808 | 1.66E+08 | 47643306 | 25530056 |
| 10.44215 | 9  | 5 | 4 | 338930.2 | 1611253  | 651027.6 | 1542025  | 463400   | 1585103  | 2443084  | 2064468  | 1031349  |
| 10.95835 | 6  | 2 | 4 | 260853.7 | 445437.1 | 310642   | 481120   | 272370.4 | 811475   | 739580.3 | 164339.8 | 170391.5 |
| 9.445217 | 11 | 4 | 5 | 596985.7 | 6199335  | 1438903  | 6407295  | 1925087  | 4876781  | 6933962  | 7374401  | 4415834  |
| 44.43717 | 5  | 2 | 3 | 284924.5 | 4362480  | 1050602  | 4160192  | 2068421  | 4026399  | 4148163  | 4135087  | 3354594  |
| 9.896717 | 7  | 3 | 3 | 1214485  | 3412793  | 1356603  | 3252531  | 1272067  | 1998572  | 2579007  | 2762195  | 5007086  |
| 9.992233 | 8  | 4 | 4 | 379263.8 | 1029203  | 332320.7 | 965195.8 | 655416.5 | 969530   | 1592990  | 967581   | 711432.3 |
| 9.857683 | 5  | 2 | 3 | 1108492  | 2619382  | 793820.5 | 2519898  | 838982   | 2745902  | 1735147  | 3229703  | 3511421  |
| 28.14217 | 9  | 5 | 4 | 312720.4 | 1556321  | 319834.7 | 1604996  | 463219.8 | 1770105  | 1726702  | 1082201  | 1371507  |
| 9.983433 | 10 | 5 | 5 | 2806142  | 8817109  | 3202993  | 9233813  | 3629141  | 10355439 | 13273009 | 8895374  | 5349912  |
| 10.33625 | 9  | 4 | 5 | 261246.2 | 846716.4 | 172025.2 | 866592   | 154200.9 | 1104498  | 878810.2 | 628799   | 830890.2 |
| 21.42167 | 6  | 3 | 3 | 141185.4 | 538591.6 | 211571.4 | 570770.7 | 307153.7 | 889359.9 | 364113.7 | 540043.1 | 519615.9 |
| 44.71033 | 8  | 3 | 2 | 458292   | 6847395  | 3507861  | 7163386  | 715120.8 | 7491370  | 1309383  | 7141507  | 11079963 |
| 13.53678 | 8  | 3 | 5 | 89349.37 | 489231.5 | 98031.28 | 474389.4 | 141502.9 | 352809.4 | 538011.2 | 546692.7 | 421578.9 |
| 9.089733 | 9  | 5 | 4 | 942594.3 | 1682977  | 890747   | 1777311  | 638211.6 | 2494951  | 2249438  | 632408.2 | 799287.7 |
| 9.40615  | 8  | 5 | 2 | 681513.8 | 2166658  | 165900.1 | 2325526  | 1788523  | 2153523  | 2318822  | 2099569  | 2330284  |
| 9.992233 | 7  | 3 | 4 | 372550.9 | 723010.1 | 385666   | 772634.6 | 431119.3 | 703830.6 | 1304112  | 700498.9 | 217807.8 |
| 40.76933 | 4  | 0 | 3 | 314808.4 | 4585928  | 196895.8 | 4760964  | 1969597  | 4584999  | 4876719  | 4433369  | 4379778  |
| 9.979667 | 6  | 3 | 3 | 1736900  | 3436928  | 3538225  | 3824192  | 2798028  | 8001855  | 402853.9 | 1301657  | 974183.9 |
| 10.9645  | 8  | 5 | 3 | 460678   | 1303915  | 179838.5 | 1358718  | 599057.1 | 1489086  | 1453777  | 1119499  | 1111841  |
| 9.421167 | 7  | 3 | 3 | 383106.8 | 1677789  | 1141707  | 1559953  | 756859.7 | 749400.9 | 995788.9 | 3044852  | 2796570  |
| 9.41815  | 7  | 3 | 3 | 2774552  | 11430595 | 13315439 | 9926384  | 11483047 | 857818.1 | 2769886  | 1781678  | 28343030 |
| 9.311883 | 7  | 4 | 2 | 339943.3 | 1405258  | 320801.6 | 1511967  | 1176235  | 1683123  | 1287492  | 922283.4 | 1434055  |
| 10.008   | 5  | 3 | 2 | 863081.9 | 1332797  | 1040739  | 1451480  | 918473.7 | 577327.6 | 631062.7 | 518725.9 | 2585334  |

|          |    |   |   |          |          |          |          |          |          |          |          |          |
|----------|----|---|---|----------|----------|----------|----------|----------|----------|----------|----------|----------|
| 9.438833 | 9  | 4 | 4 | 508798.2 | 3372833  | 1550500  | 3620169  | 2425506  | 913886.1 | 2754699  | 4383655  | 4281005  |
| 9.3332   | 5  | 3 | 2 | 654818.9 | 2039280  | 1299828  | 1892546  | 1122156  | 2290333  | 1325964  | 1430278  | 956013.9 |
| 9.951283 | 10 | 5 | 4 | 856815.2 | 1041257  | 228371.6 | 977187.8 | 698649.4 | 1291266  | 1288553  | 881094.9 | 907836.6 |
| 9.45945  | 6  | 3 | 3 | 707062.7 | 2932008  | 1043555  | 3158852  | 2401301  | 3921139  | 3293648  | 1958345  | 1688054  |
| 10.86275 | 3  | 0 | 3 | 179997.7 | 337637.2 | 129266.9 | 324015.7 | 93096.04 | 308381.8 | 352971.7 | 150078.8 | 366705.4 |
| 8.936617 | 6  | 3 | 3 | 190985   | 647587.3 | 246785.9 | 680762.9 | 300524.2 | 227681   | 865953.3 | 675816.2 | 777791   |
| 9.94455  | 10 | 5 | 4 | 1498843  | 5761674  | 3406425  | 6092611  | 1796513  | 4069339  | 3762673  | 9081105  | 9720366  |
| 9.77355  | 7  | 3 | 4 | 692043.4 | 1344887  | 375762.9 | 1284621  | 596265.9 | 1489888  | 1362372  | 1161826  | 850330.2 |
| 30.31267 | 9  | 5 | 4 | 199351.8 | 822203.1 | 288952.3 | 773332.3 | 492092.1 | 1010672  | 1116157  | 865641.1 | 369677.3 |
| 42.12167 | 5  | 2 | 3 | 341894.8 | 5780347  | 830512.5 | 5901173  | 1150356  | 5816021  | 6060998  | 4350378  | 6253337  |
| 18.04767 | 4  | 3 | 1 | 5221118  | 51237021 | 31060993 | 54135485 | 12838538 | 72425248 | 75943371 | 43678403 | 63753745 |
| 41.10033 | 5  | 1 | 3 | 265858.1 | 4050865  | 1098440  | 4182482  | 1094977  | 2122889  | 4397551  | 4884562  | 4509823  |
| 9.664767 | 10 | 5 | 5 | 36534728 | 1.04E+08 | 31291854 | 1.09E+08 | 52061755 | 1.13E+08 | 1.2E+08  | 61793365 | 83079447 |
| 9.994767 | 9  | 5 | 4 | 1402187  | 3793874  | 1106084  | 3611370  | 1828245  | 4271140  | 5252177  | 3212285  | 2315517  |
| 9.508883 | 7  | 3 | 4 | 1561400  | 8506080  | 3658612  | 7781155  | 7616990  | 3377237  | 10946433 | 12902329 | 7154110  |
| 20.24533 | 7  | 2 | 5 | 38383.35 | 159532.7 | 107915.6 | 170371.3 | 67554.46 | 321743.5 | 90854.9  | 155508.9 | 38844.1  |
| 10.008   | 10 | 5 | 5 | 997046.6 | 2224782  | 945970   | 2345431  | 1066513  | 2776824  | 3263245  | 2635478  | 1111913  |
| 18.81983 | 10 | 5 | 5 | 96317.96 | 374394.8 | 164616.9 | 356604.5 | 130312.3 | 628603.3 | 359130.6 | 186097.5 | 290755.1 |
| 9.992233 | 10 | 5 | 5 | 382673.4 | 1014267  | 190332.5 | 976943   | 392090.6 | 1126840  | 1249942  | 1046505  | 783610   |
| 9.283817 | 5  | 2 | 3 | 331378.7 | 1313069  | 747892.5 | 1193089  | 1194998  | 2186233  | 1911228  | 1334468  | 602757.2 |
| 44.37983 | 9  | 3 | 2 | 446836.4 | 6197384  | 771245.4 | 6120582  | 467277.6 | 7459372  | 6205708  | 5417561  | 6122696  |
| 9.932567 | 5  | 3 | 2 | 1.48E+08 | 3.71E+08 | 5.09E+08 | 4.29E+08 | 4.47E+08 | 8.46E+08 | 596839.3 | 3160823  | 1334673  |
| 21.63717 | 6  | 4 | 2 | 196986.8 | 977623.6 | 505821.8 | 919262   | 469184.4 | 494249.3 | 1266657  | 793559.8 | 618757.8 |
| 11.52297 | 10 | 5 | 5 | 148475.2 | 873054   | 140148   | 895053.7 | 217451.3 | 1078848  | 955647.7 | 754398.9 | 766864   |
| 10.9645  | 10 | 5 | 5 | 2366797  | 12230029 | 2789779  | 11912275 | 2516220  | 13536636 | 16177422 | 10180140 | 9126787  |
| 9.842    | 9  | 4 | 5 | 2046351  | 5408202  | 2807935  | 5025892  | 3537447  | 6499592  | 6503812  | 2133084  | 2966622  |
| 10.90012 | 5  | 4 | 1 | 258245.6 | 621988.6 | 259020.6 | 651263.3 | 230363.5 | 533641.9 | 1032984  | 361933.9 | 485675.1 |
| 8.981583 | 10 | 5 | 5 | 785616.4 | 1682366  | 874173.1 | 1598525  | 448433.1 | 2242365  | 2540957  | 1603664  | 270097   |
| 11.287   | 7  | 4 | 3 | 229386.3 | 520885.5 | 436032.1 | 474496   | 332943.7 | 369318.1 | 234798.1 | 1294854  | 359693.9 |
| 20.93283 | 6  | 4 | 2 | 229884.3 | 2292977  | 612407.4 | 2415854  | 1302167  | 2560979  | 2158470  | 2156504  | 1460312  |
| 8.8977   | 8  | 4 | 4 | 542055.7 | 3331713  | 549165.1 | 3443684  | 1190357  | 3573730  | 4139800  | 3231798  | 2985735  |
| 9.3919   | 8  | 4 | 3 | 575646.9 | 3456569  | 1518087  | 3727649  | 2804596  | 3323721  | 5008584  | 3902544  | 4081832  |
| 9.842    | 4  | 3 | 1 | 1861580  | 4991191  | 1506660  | 5170700  | 1511479  | 5404916  | 2783990  | 6965534  | 4652965  |
| 9.328967 | 7  | 3 | 4 | 1059786  | 3584766  | 2238314  | 3327301  | 2091536  | 2897783  | 822665.2 | 6632720  | 4918595  |
| 9.975217 | 10 | 5 | 5 | 3308411  | 8264434  | 1517592  | 8653325  | 4278802  | 10052601 | 8498337  | 9246691  | 7253321  |

|          |    |   |   |          |          |          |          |          |          |          |          |          |
|----------|----|---|---|----------|----------|----------|----------|----------|----------|----------|----------|----------|
| 10.95602 | 7  | 4 | 3 | 292850.9 | 915619.9 | 196191.2 | 861076.7 | 604952.8 | 761751.3 | 722345.7 | 897263.3 | 984787.4 |
| 12.64525 | 5  | 4 | 1 | 20490.63 | 64433.36 | 25853.53 | 67050.74 | 17144    | 77062.51 | 99467.46 | 54384.44 | 30161.14 |
| 9.992233 | 10 | 5 | 5 | 798643   | 2249152  | 553142.8 | 2161451  | 878828.2 | 3002974  | 2205077  | 2579857  | 1767915  |
| 9.91765  | 4  | 1 | 3 | 787361.6 | 1194897  | 735245.4 | 1096545  | 909988.8 | 1938567  | 0        | 1126778  | 1309622  |
| 9.4925   | 8  | 5 | 3 | 547519.1 | 1046803  | 340417   | 995562.1 | 504079.8 | 1225318  | 1480740  | 1064521  | 880869.3 |
| 11.52312 | 10 | 5 | 5 | 327963.1 | 1324969  | 599492.6 | 1390445  | 499052.3 | 2194952  | 1252194  | 573231   | 1068508  |
| 9.928667 | 9  | 5 | 4 | 1706072  | 3099644  | 632543.2 | 3274090  | 1936869  | 2679585  | 3795973  | 2870702  | 2410552  |
| 9.992233 | 9  | 4 | 5 | 1142068  | 2050158  | 1069533  | 2241555  | 1991448  | 1970659  | 1767105  | 2030484  | 3727160  |
| 9.848417 | 9  | 5 | 4 | 1233467  | 6530402  | 2385816  | 6280299  | 1779764  | 6185737  | 4450664  | 4122732  | 9599512  |
| 11.6216  | 8  | 5 | 3 | 134264.2 | 544533.2 | 275656.9 | 518459.5 | 136257.8 | 853612.7 | 739164.6 | 566487.4 | 155424   |
| 9.41815  | 4  | 3 | 1 | 429451.4 | 1518183  | 672930   | 1604736  | 782723.3 | 1201821  | 726950.9 | 2206522  | 1216192  |
| 9.999217 | 7  | 3 | 4 | 767339.8 | 1022906  | 507624.7 | 965103   | 467265.7 | 1660082  | 1126152  | 780127.4 | 1238473  |
| 9.9677   | 10 | 5 | 5 | 830776.6 | 2969104  | 850806.4 | 2862608  | 944489   | 3328380  | 4185713  | 2983426  | 2069879  |
| 10.96278 | 4  | 1 | 3 | 840592.8 | 1643859  | 615744.5 | 1794093  | 1650662  | 1829819  | 2485202  | 1548312  | 1584747  |
| 10.03947 | 7  | 4 | 2 | 22880088 | 29861734 | 29518978 | 32761582 | 17723792 | 10557547 | 22212224 | 17481299 | 82143608 |
| 9.887133 | 6  | 3 | 3 | 1362657  | 4449215  | 1713077  | 4216808  | 2183790  | 5277576  | 2459408  | 5594512  | 6157464  |
| 9.1932   | 11 | 5 | 5 | 1992462  | 9744258  | 1892903  | 10038685 | 2951846  | 9098692  | 13059680 | 9176872  | 9135416  |
| 22.757   | 3  | 3 | 0 | 51101.64 | 190217.6 | 106217   | 203590.1 | 119832.8 | 112119.5 | 300706.5 | 114343.2 | 111662.8 |
| 9.976317 | 7  | 3 | 4 | 651149.1 | 1107925  | 229860.3 | 1053326  | 600862.7 | 1059251  | 1006753  | 1483527  | 1121889  |
| 31.36467 | 8  | 4 | 4 | 1947702  | 10183589 | 6562093  | 9456579  | 5741354  | 6069530  | 10127967 | 1607038  | 16044228 |
| 9.979667 | 10 | 5 | 5 | 549607.4 | 1505914  | 619176.3 | 1423551  | 768694.6 | 1997395  | 2214446  | 1533629  | 758781.9 |
| 9.992233 | 8  | 4 | 4 | 363175.8 | 801530.5 | 361293.9 | 849870.7 | 453830.1 | 1030996  | 1248775  | 804329.7 | 322894.1 |
| 9.999217 | 10 | 5 | 5 | 870815.5 | 2543300  | 566224.5 | 2630662  | 878069   | 2817711  | 2781838  | 3213122  | 1984350  |
| 9.994767 | 4  | 3 | 1 | 1266158  | 1545137  | 1054365  | 1428766  | 920739.3 | 2210274  | 2925182  | 1535363  | 408542.9 |
| 9.999217 | 11 | 5 | 5 | 420605.2 | 958848.6 | 229601.4 | 1003197  | 475295.8 | 1081091  | 1240324  | 938670.7 | 620898.3 |
| 9.859983 | 10 | 5 | 5 | 3009165  | 18088964 | 1889129  | 17754736 | 3513207  | 17192231 | 15534754 | 19424230 | 20356374 |
| 9.960467 | 10 | 5 | 5 | 4103994  | 15951794 | 4382810  | 15445439 | 4257276  | 18768161 | 21612133 | 15477845 | 10430866 |
| 10.70315 | 4  | 1 | 3 | 96932.65 | 196389.3 | 57603.78 | 204126.4 | 73274.23 | 192852.7 | 289391.4 | 189858.9 | 178681.9 |
| 22.8715  | 9  | 5 | 4 | 726408.3 | 4003050  | 909230.8 | 3916114  | 504427.4 | 5415402  | 4420101  | 3473298  | 3272771  |
| 24.33217 | 10 | 5 | 5 | 6601942  | 59367554 | 9918196  | 58294901 | 8316042  | 51973584 | 68629566 | 53095014 | 51470739 |
| 9.952017 | 10 | 5 | 5 | 1011643  | 3466122  | 950321   | 3357727  | 901856.2 | 4717530  | 4164047  | 3105334  | 2382529  |
| 11.66097 | 9  | 5 | 4 | 256620.5 | 1151741  | 292365.8 | 1195511  | 438237.1 | 1322116  | 1445905  | 1266971  | 711845.1 |
| 9.830833 | 6  | 3 | 3 | 1144234  | 2265827  | 539557.3 | 2122671  | 1608811  | 2494010  | 2274171  | 1785834  | 1734750  |
| 9.445217 | 9  | 4 | 4 | 777713.8 | 5676590  | 2522794  | 5992242  | 2864344  | 5940149  | 6160452  | 4907553  | 9191876  |
| 36.6265  | 7  | 4 | 3 | 120302.3 | 580991.9 | 185078.7 | 604770.5 | 220067.3 | 832292.9 | 348124.6 | 673064.7 | 475469.8 |



|          |    |   |   |          |          |          |          |          |          |          |          |          |
|----------|----|---|---|----------|----------|----------|----------|----------|----------|----------|----------|----------|
| 37.64717 | 4  | 1 | 3 | 438400.3 | 3727774  | 251928.3 | 3918239  | 2224479  | 3601008  | 4160327  | 3713332  | 3518658  |
| 9.4468   | 8  | 4 | 4 | 971231.8 | 3160313  | 942779.5 | 3367925  | 2288588  | 2957332  | 3581417  | 4282923  | 1722559  |
| 42.66833 | 5  | 1 | 3 | 276511.7 | 4798384  | 1021114  | 4626152  | 1800636  | 2979367  | 5203359  | 5184367  | 5211333  |
| 10.9645  | 10 | 5 | 5 | 2888411  | 14530316 | 3110918  | 14912773 | 3435487  | 17465852 | 18183753 | 12299206 | 11285333 |
| 8.981583 | 10 | 5 | 5 | 2406009  | 8690525  | 3134952  | 8362624  | 2434602  | 9966467  | 12806552 | 9559181  | 6001641  |
| 9.960467 | 10 | 5 | 5 | 765900.7 | 2565594  | 394201.1 | 2507063  | 587433.2 | 3067948  | 2608650  | 2806251  | 2188305  |
| 42.04983 | 10 | 3 | 4 | 325616.4 | 4600188  | 1450628  | 4875637  | 2972436  | 2722133  | 3927005  | 5525595  | 6475879  |
| 9.999217 | 10 | 5 | 5 | 795368.4 | 2461548  | 670046.1 | 2375511  | 802216   | 2747660  | 3415143  | 2447908  | 1685976  |
| 10.93618 | 6  | 3 | 3 | 212801.6 | 565110   | 331920.1 | 527985.3 | 306158.1 | 1076971  | 596369.3 | 407244.7 | 174274.9 |
| 15.43927 | 8  | 4 | 4 | 180005.9 | 665813.7 | 853388.2 | 573698.5 | 725430.6 | 299101.6 | 2190284  | 351542   | 237089.3 |
| 11.52297 | 9  | 5 | 4 | 56187.09 | 146641.1 | 36126.78 | 142561.2 | 34052.12 | 202397.6 | 160348.1 | 109166.4 | 128657.5 |
| 10.11782 | 9  | 5 | 4 | 225204   | 626032.6 | 156566.4 | 599154.9 | 283924.8 | 760887.3 | 496628.8 | 825782.2 | 556353.1 |
| 9.536783 | 5  | 3 | 2 | 338620.7 | 724854.6 | 267508.2 | 670231.2 | 598612.1 | 934119.7 | 721833.6 | 1038803  | 530246.2 |
| 9.43325  | 8  | 3 | 5 | 2032137  | 11936964 | 5311063  | 11326423 | 5202999  | 17578196 | 9397738  | 17660382 | 8719415  |
| 20.40217 | 4  | 3 | 1 | 117003.5 | 720748.1 | 351449.4 | 771147.7 | 501033.7 | 907917.2 | 870906.5 | 930244.8 | 98703.18 |
| 9.992233 | 10 | 5 | 5 | 1122148  | 2753517  | 1021670  | 2887472  | 1271184  | 3405578  | 3828137  | 3210864  | 1638222  |
| 9.8445   | 9  | 5 | 4 | 943399.8 | 4093152  | 567606   | 4150244  | 398751.6 | 4681633  | 4448886  | 3308164  | 3707788  |
| 9.960817 | 10 | 5 | 5 | 4500161  | 15010469 | 3442710  | 14504149 | 5093946  | 13813055 | 20987984 | 13438756 | 12260116 |
| 44.32217 | 4  | 1 | 3 | 414990.9 | 4486045  | 310778.1 | 4588023  | 1174458  | 4972663  | 4358768  | 4162907  | 4586817  |
| 30.16817 | 10 | 5 | 5 | 1261616  | 6461282  | 1295584  | 6779968  | 3590815  | 4456199  | 6429176  | 7562700  | 6207430  |
| 10.23422 | 10 | 5 | 4 | 633968.8 | 1160538  | 503432   | 1244684  | 885706.9 | 1426835  | 1799672  | 1157030  | 456967.3 |
| 9.93625  | 8  | 4 | 4 | 996287.1 | 2753158  | 922931.1 | 2650829  | 841840.1 | 2808722  | 1648065  | 2527616  | 4202826  |
| 43.40167 | 6  | 2 | 3 | 598196   | 5306765  | 2409746  | 5549112  | 1699633  | 6287336  | 2562131  | 2883295  | 7185996  |
| 15.21017 | 8  | 4 | 4 | 114349   | 480188.2 | 117734.3 | 505745.9 | 283806.3 | 500929.7 | 398254   | 549244.3 | 328773.7 |
| 9.82645  | 5  | 3 | 2 | 1204711  | 1196402  | 274311.6 | 1305258  | 1265710  | 1154641  | 1127599  | 1437471  | 1468699  |
| 9.976317 | 9  | 5 | 4 | 1212602  | 3557997  | 1082344  | 3738249  | 1896791  | 4514328  | 4632578  | 3786183  | 2508289  |
| 10.9645  | 10 | 5 | 5 | 921152.1 | 4566306  | 1030744  | 4685379  | 1026764  | 5637799  | 5621915  | 3914709  | 3341631  |
| 10.95055 | 10 | 5 | 5 | 783554   | 4919887  | 1308884  | 4783411  | 1028744  | 6379964  | 5903158  | 3717466  | 3422412  |
| 9.431017 | 5  | 3 | 2 | 1259715  | 3229618  | 1682555  | 3031429  | 1742056  | 1426161  | 2165190  | 3053535  | 5818050  |
| 24.79717 | 7  | 3 | 4 | 110088.4 | 529818.2 | 92436.09 | 517528.6 | 118058.5 | 382366.4 | 592527.9 | 523817.8 | 528552.3 |
| 41.6185  | 8  | 4 | 4 | 565994.2 | 7581215  | 215460.8 | 7501996  | 919031.6 | 7490652  | 7482801  | 7491297  | 7474869  |
| 9.896717 | 10 | 5 | 5 | 7228544  | 64051520 | 8166591  | 62903277 | 11361333 | 66887529 | 68220604 | 49759182 | 65401049 |
| 9.960467 | 6  | 4 | 2 | 2186987  | 4110640  | 1784981  | 3859973  | 2479846  | 5788464  | 6210241  | 3540629  | 2344837  |
| 10.95835 | 10 | 5 | 5 | 388219   | 1678865  | 331869.7 | 1716782  | 323912.7 | 2122912  | 1946059  | 1471848  | 1395112  |
| 9.270733 | 7  | 4 | 2 | 1706927  | 5659159  | 3050028  | 6137092  | 4945717  | 5288781  | 10141207 | 6942047  | 2334053  |

|          |    |   |   |          |          |          |          |          |          |          |          |          |
|----------|----|---|---|----------|----------|----------|----------|----------|----------|----------|----------|----------|
| 9.541433 | 8  | 4 | 4 | 2038813  | 5739232  | 2784058  | 5375242  | 3468896  | 5991493  | 7823765  | 7981401  | 5803919  |
| 20.51933 | 3  | 3 | 0 | 40897.85 | 112338.2 | 42593.94 | 116296.3 | 21974.93 | 86517.88 | 169970.3 | 75841.64 | 83649.44 |
| 10.9645  | 10 | 5 | 5 | 4325657  | 19686749 | 3589570  | 20255766 | 5917480  | 24211303 | 22631509 | 17747740 | 15628352 |
| 9.976317 | 10 | 5 | 5 | 1218949  | 4956720  | 958683.9 | 5093966  | 1372874  | 5504596  | 5922179  | 5451891  | 3650991  |
| 9.36515  | 8  | 4 | 4 | 965050.3 | 5249996  | 2368658  | 4934012  | 3053827  | 2308407  | 4537821  | 4057344  | 7913765  |
| 10.51392 | 10 | 5 | 5 | 661915.1 | 2039137  | 631422.6 | 1970333  | 558313.2 | 1787134  | 3096452  | 2127859  | 1538087  |
| 8.8836   | 10 | 5 | 5 | 244554.8 | 5066957  | 730761.1 | 5203295  | 1481424  | 5228711  | 6056986  | 5279228  | 4662728  |
| 44.30767 | 6  | 3 | 3 | 652855.2 | 5505966  | 2961596  | 5162072  | 3002317  | 2505562  | 8529479  | 4411586  | 3287633  |
| 35.93467 | 10 | 5 | 5 | 1745581  | 13994771 | 5380741  | 13400838 | 4908887  | 18530695 | 11556321 | 6531177  | 19775087 |
| 10.9645  | 10 | 5 | 5 | 190467.8 | 799690   | 273707.5 | 769513.2 | 249129.3 | 1116550  | 1073673  | 664351.6 | 604625.9 |
| 9.999217 | 10 | 5 | 5 | 878472.3 | 1986769  | 547584.7 | 2063591  | 765624.5 | 2637305  | 2331269  | 2121341  | 1448428  |
| 10.92828 | 9  | 5 | 4 | 221975.9 | 934916.2 | 352589.7 | 903001.4 | 160371.9 | 987426.4 | 817769.1 | 672611.6 | 674979.4 |
| 10.008   | 8  | 4 | 4 | 812867.2 | 1194270  | 1022483  | 1094239  | 674961.3 | 690856.4 | 1209779  | 766956.3 | 2941609  |
| 9.840617 | 7  | 4 | 3 | 2472096  | 3987553  | 5877751  | 4510262  | 2348345  | 1088410  | 921560.5 | 14471431 | 2092363  |
| 9.388367 | 7  | 3 | 4 | 760860   | 803671   | 344454.9 | 858412.8 | 573930.8 | 1002549  | 952554.7 | 225464.9 | 757642.9 |
| 23.52283 | 3  | 0 | 3 | 1781303  | 5254456  | 176695.1 | 5803975  | 6553742  | 5193736  | 5385612  | 5135133  | 5068468  |
| 10.95055 | 10 | 5 | 5 | 234111.5 | 912307.7 | 230650.8 | 883500   | 269365.4 | 990313.9 | 1011196  | 670389.6 | 1205872  |
| 10.9645  | 10 | 5 | 5 | 404095.6 | 1718536  | 613015.3 | 1657602  | 428572.6 | 2347006  | 2371958  | 1300871  | 1544619  |
| 9.8207   | 4  | 3 | 1 | 601402.8 | 586078.8 | 336969.4 | 651362.4 | 718900.2 | 816382.2 | 796419.1 | 874634.4 | 283852   |
| 9.601917 | 8  | 4 | 4 | 2047413  | 11829568 | 3485737  | 11222892 | 6529598  | 13346754 | 8222059  | 13868470 | 15671495 |
| 17.07417 | 10 | 5 | 5 | 223113.7 | 1324570  | 303021.3 | 1293212  | 238781.5 | 1802187  | 963734.1 | 1274862  | 1244951  |
| 10.96997 | 8  | 4 | 4 | 478616.2 | 1549789  | 598996.2 | 1619866  | 622112.9 | 2596502  | 1199720  | 1260325  | 1504856  |
| 19.4915  | 4  | 3 | 1 | 87357.53 | 358680.7 | 96596.11 | 380292.6 | 243918.5 | 446923.4 | 276371.5 | 233590.9 | 415513.7 |
| 9.928667 | 8  | 5 | 3 | 2304820  | 4832612  | 365648.2 | 4757129  | 842490.3 | 5293154  | 4597725  | 4543081  | 4563173  |
| 9.842    | 9  | 5 | 4 | 1095348  | 3847454  | 1238636  | 3701149  | 1316290  | 4362299  | 4169807  | 2394296  | 2838900  |
| 9.979667 | 5  | 3 | 2 | 1002397  | 1669930  | 1236864  | 1553182  | 722507.5 | 3531212  | 632458.6 | 854410.8 | 989950.5 |
| 18.05667 | 5  | 2 | 3 | 36117.83 | 105682.5 | 40538.54 | 110806.4 | 48622.09 | 151745   | 129976.7 | 68698.48 | 57876.65 |
| 9.960467 | 6  | 3 | 3 | 968081.8 | 2391317  | 223051.9 | 2293151  | 1159955  | 2402208  | 2097984  | 2620890  | 2589135  |
| 10.93618 | 5  | 2 | 3 | 113456.2 | 287119.8 | 184968.4 | 305881.5 | 139208.2 | 461988.2 | 495568.8 | 102140   | 121104.6 |
| 13.71188 | 7  | 4 | 3 | 70281.3  | 248932.8 | 66448.48 | 258569.4 | 98368.55 | 302995.8 | 323151.4 | 195002   | 169580.2 |
| 9.26025  | 8  | 4 | 4 | 997940.9 | 3004027  | 258974.5 | 3057090  | 593254.8 | 2603263  | 2963307  | 3189740  | 2992623  |
| 22.18533 | 6  | 3 | 3 | 403106.3 | 2321608  | 390416.1 | 2387148  | 703393.1 | 1916975  | 2603093  | 2037770  | 2206235  |
| 9.830833 | 8  | 4 | 4 | 4054480  | 2537403  | 2334441  | 2328170  | 1047193  | 1124847  | 6616813  | 1129739  | 1467775  |
| 9.992233 | 5  | 3 | 2 | 1563148  | 2443509  | 2311546  | 2670593  | 1593337  | 788766.5 | 1086608  | 433862.2 | 4681886  |
| 10.9645  | 10 | 5 | 5 | 4619786  | 19542286 | 5383042  | 19014403 | 3696202  | 24886145 | 25456068 | 15676652 | 13597404 |

|          |    |   |   |          |          |          |          |          |          |          |          |          |
|----------|----|---|---|----------|----------|----------|----------|----------|----------|----------|----------|----------|
| 30.28117 | 10 | 5 | 5 | 477684.9 | 2832470  | 679341.5 | 2727706  | 1100482  | 3142664  | 3650797  | 2910814  | 1813261  |
| 9.992233 | 10 | 5 | 5 | 661344.1 | 1921638  | 767933.6 | 2018410  | 926101.4 | 2166736  | 3044306  | 1966594  | 1076500  |
| 11.147   | 10 | 5 | 5 | 276934.8 | 991097.7 | 164809.7 | 961647.1 | 323003.4 | 933637.8 | 1225255  | 857000.4 | 1095552  |
| 24.21817 | 9  | 4 | 5 | 599080   | 1648294  | 1476208  | 1458038  | 1847529  | 2087974  | 80002.16 | 872685.9 | 1249605  |
| 10.9645  | 10 | 5 | 5 | 5805116  | 26055440 | 5714013  | 26758352 | 6623513  | 31727356 | 32584465 | 22454216 | 20044644 |
| 10.23515 | 8  | 4 | 4 | 575423.9 | 1457336  | 483468.2 | 1403649  | 462514.1 | 1389147  | 1820708  | 1278420  | 782960.2 |
| 24.39067 | 4  | 3 | 1 | 93463.14 | 510229.9 | 86828.96 | 496945.7 | 139928.4 | 568701.3 | 394458   | 439003.8 | 575568.3 |
| 10.008   | 10 | 5 | 5 | 1903999  | 3053516  | 1721535  | 3270067  | 2079579  | 2157125  | 5932022  | 3292239  | 1594985  |
| 9.952017 | 10 | 5 | 5 | 6997589  | 26484275 | 6258037  | 25805102 | 5714486  | 30960514 | 34308019 | 21203419 | 19592188 |
| 9.678733 | 6  | 3 | 3 | 443458.4 | 1128503  | 359776.2 | 1084854  | 409145.4 | 889680.8 | 1227041  | 1708361  | 1004006  |
| 9.23865  | 5  | 2 | 3 | 323238.5 | 750290.4 | 203672.6 | 717340.7 | 353762   | 1069261  | 737586.1 | 789079.5 | 539094.4 |
| 9.999217 | 9  | 5 | 4 | 980744.4 | 1305174  | 616537.2 | 1243289  | 462913.9 | 2015463  | 881397.4 | 1846370  | 1208284  |
| 30.26733 | 8  | 4 | 4 | 157185.7 | 932165.9 | 278858.2 | 974063.3 | 439636.2 | 1014785  | 1369401  | 640691.9 | 786261.4 |
| 10.9645  | 10 | 5 | 5 | 372570.1 | 1614771  | 383124.4 | 1656411  | 352932.6 | 2078808  | 1978924  | 1416572  | 1272629  |
| 9.4468   | 8  | 4 | 4 | 381978.4 | 2477634  | 772389.4 | 2399857  | 589367.9 | 2318696  | 2939735  | 2787068  | 3136776  |
| 24.3255  | 10 | 5 | 5 | 1013351  | 7675043  | 1637770  | 7509765  | 1257482  | 6419642  | 9256396  | 6744761  | 6303228  |
| 9.976317 | 15 | 5 | 5 | 661264.8 | 2344854  | 837089.1 | 2446165  | 952797.8 | 3114212  | 1043506  | 2219504  | 2295572  |
| 9.9847   | 4  | 3 | 1 | 1267381  | 1245188  | 1367561  | 1384232  | 1075964  | 3661130  | 591706.9 | 833420.3 | 829970   |
| 9.4468   | 6  | 3 | 3 | 10051467 | 45113266 | 56176928 | 39160084 | 49216600 | 1.1E+08  | 4632653  | 2270876  | 1.03E+08 |
| 17.60283 | 10 | 5 | 5 | 212341   | 1297921  | 181769.7 | 1256211  | 481606.2 | 1566275  | 1275850  | 1231477  | 1068227  |
| 10.95835 | 10 | 5 | 5 | 235448.7 | 816966.2 | 362497.2 | 853721.5 | 285220.5 | 1210409  | 1060570  | 737485.6 | 811788.9 |
| 10.008   | 7  | 3 | 3 | 1499368  | 1824274  | 1568073  | 2002417  | 1599648  | 567034.2 | 856154.1 | 3867808  | 3165175  |
| 10.9645  | 10 | 5 | 5 | 241770.3 | 1091764  | 112047.9 | 1125063  | 393586.4 | 1144350  | 1244171  | 1063321  | 940911.3 |
| 9.445217 | 8  | 3 | 5 | 437323.9 | 2666324  | 1049413  | 2844189  | 1950830  | 2543581  | 4421752  | 2344013  | 2427100  |
| 10.95835 | 10 | 5 | 5 | 323623.7 | 1165808  | 308540.9 | 1133546  | 263298.3 | 1334810  | 1625292  | 877041.6 | 998321   |
| 35.59933 | 9  | 4 | 5 | 482020.4 | 3678835  | 1535650  | 3505244  | 1553638  | 5251220  | 3041024  | 1598872  | 5137949  |
| 43.47383 | 5  | 4 | 1 | 323464.7 | 4204317  | 1054472  | 4349653  | 1486735  | 3567704  | 4001703  | 5098479  | 5441814  |
| 34.177   | 10 | 5 | 5 | 913780.8 | 9144129  | 5311967  | 8532365  | 5572488  | 17747108 | 8235464  | 4115936  | 9955156  |
| 9.915583 | 5  | 2 | 3 | 2015857  | 3641174  | 1907464  | 3447168  | 1518346  | 4887398  | 289905.4 | 4470617  | 3912882  |
| 14.32588 | 6  | 4 | 2 | 81346.77 | 576375.1 | 181066.8 | 596424.3 | 176038.5 | 750151.6 | 676558.7 | 334094.3 | 434631   |
| 33.48483 | 10 | 5 | 5 | 362187.5 | 2345398  | 684982.8 | 2265596  | 736298.7 | 3131037  | 2266420  | 1270500  | 2652264  |
| 9.9351   | 4  | 3 | 1 | 661403.4 | 599434.6 | 550008.5 | 535254.9 | 593566.5 | 297346   | 1475547  | 809194.2 | 212511.4 |
| 29.675   | 5  | 3 | 2 | 181440   | 911292.8 | 419055   | 865793.1 | 392177.3 | 231685.2 | 1106828  | 848186.5 | 1028928  |
| 9.992233 | 5  | 3 | 2 | 1490796  | 1917386  | 1388507  | 2117501  | 2094166  | 634867.7 | 819845.5 | 1761137  | 2285117  |
| 44.696   | 5  | 3 | 1 | 283330.8 | 2503618  | 1208659  | 2612570  | 623873.7 | 2438106  | 2316203  | 971341.6 | 2431166  |

|          |    |   |   |          |          |          |          |          |          |          |          |          |
|----------|----|---|---|----------|----------|----------|----------|----------|----------|----------|----------|----------|
| 10.07098 | 10 | 5 | 5 | 416749.2 | 989963.1 | 165642.5 | 967881.8 | 223258.9 | 769744.8 | 969403.5 | 1233234  | 1017415  |
| 18.746   | 6  | 3 | 3 | 368540.3 | 795859.2 | 1079171  | 898971.7 | 717860.7 | 265376.5 | 217044   | 111196.8 | 2683821  |
| 9.431017 | 12 | 4 | 4 | 1366862  | 8640874  | 1213179  | 8095684  | 6596123  | 8139408  | 9686256  | 10168877 | 7780554  |
| 10.95835 | 7  | 3 | 4 | 415847.3 | 979282.2 | 562705   | 917547.5 | 542406.5 | 1620500  | 1556551  | 575572.7 | 455198.4 |
| 10.95055 | 8  | 3 | 5 | 324929.9 | 930328   | 387269.2 | 884676.9 | 428820.1 | 1391112  | 1267011  | 555467.7 | 868044.3 |
| 26.56417 | 7  | 4 | 3 | 102860.8 | 338374.4 | 99860.68 | 328238.7 | 80327.47 | 314794.9 | 488059.2 | 247864.3 | 256931.2 |
| 10.95055 | 5  | 2 | 3 | 331985.3 | 578276.5 | 250415   | 608371   | 287057   | 772068.5 | 840843.7 | 274755.4 | 359503.9 |
| 9.3919   | 6  | 3 | 2 | 1225925  | 4569187  | 2120037  | 4302362  | 2625797  | 7617378  | 5715747  | 2668146  | 2671448  |
| 9.8374   | 7  | 4 | 3 | 683687.2 | 2185360  | 785383   | 2310039  | 1355816  | 2426554  | 2042179  | 1015718  | 2248746  |
| 10.9645  | 7  | 5 | 2 | 267665.3 | 669099.3 | 138891.9 | 645992.1 | 255028.2 | 713743.1 | 868282.9 | 591002.4 | 497734.7 |
| 41.17217 | 8  | 4 | 3 | 378488.3 | 5271281  | 3467472  | 4926331  | 2656848  | 4720548  | 1114870  | 9905783  | 3182378  |
| 9.976317 | 10 | 5 | 5 | 69278944 | 3.63E+08 | 52745687 | 3.57E+08 | 63969061 | 4.11E+08 | 4.28E+08 | 3.4E+08  | 3.11E+08 |
| 10.01477 | 9  | 4 | 5 | 624490.1 | 1035304  | 311791   | 1099179  | 735210.2 | 1110372  | 1526618  | 997014.8 | 749786.8 |
| 9.979667 | 9  | 5 | 4 | 659445   | 1433331  | 460032.8 | 1511605  | 870825.6 | 1356934  | 2012268  | 1194524  | 846651.6 |
| 3.569883 | 6  | 2 | 4 | 184250.4 | 1860547  | 1072235  | 1726823  | 1316608  | 27861.05 | 2534577  | 2718085  | 1961171  |
| 8.8622   | 11 | 5 | 5 | 3758826  | 38076745 | 4423564  | 39048949 | 11318281 | 42879084 | 42543629 | 35230471 | 33058650 |
| 22.51233 | 6  | 3 | 3 | 155719.4 | 579859   | 238217.9 | 557887.7 | 142136.2 | 306459.1 | 951007.5 | 460520.4 | 593627.7 |
| 9.870017 | 4  | 3 | 1 | 2871905  | 8897475  | 3057708  | 9192440  | 2149486  | 7214050  | 5569350  | 7397145  | 12021692 |
| 10.94443 | 8  | 4 | 4 | 254197.2 | 1309372  | 418261.6 | 1353607  | 376054.9 | 1918712  | 1571957  | 1058506  | 955629.2 |
| 10.9645  | 10 | 5 | 5 | 308415.8 | 1076317  | 461454.5 | 1030524  | 353529.8 | 1652650  | 1245470  | 950799   | 390132.7 |
| 10.97857 | 9  | 5 | 4 | 241987.9 | 950228.2 | 378203.7 | 912575.6 | 292602.2 | 969425.3 | 551037.7 | 639754.3 | 1098404  |
| 25.83867 | 5  | 3 | 2 | 85979.52 | 304321.8 | 159208.7 | 289427.5 | 101067.7 | 370728.9 | 549890   | 208645.8 | 241611   |
| 10.95835 | 10 | 5 | 5 | 436651   | 1442615  | 219500.5 | 1405059  | 419451.3 | 1691641  | 1566953  | 1180749  | 1244637  |
| 10.9645  | 10 | 5 | 5 | 378480.6 | 1510845  | 275999.5 | 1472993  | 393260.2 | 1875802  | 1572751  | 1234957  | 1235150  |
| 9.559117 | 6  | 2 | 4 | 342356.3 | 728741.2 | 271084.3 | 693838.1 | 351320   | 976257.2 | 1053258  | 518117.2 | 453960.5 |
| 9.582167 | 6  | 4 | 2 | 379912   | 579570.1 | 424790.8 | 620398.4 | 297007.4 | 465528.3 | 465176.1 | 269226.1 | 1325532  |
| 10.97857 | 10 | 5 | 5 | 2234681  | 8059547  | 528044.4 | 8413975  | 4352009  | 7270129  | 8725092  | 8271625  | 8028195  |
| 9.853633 | 5  | 2 | 3 | 554228.1 | 1737494  | 867574.7 | 1654548  | 599915   | 1788511  | 654008.9 | 1850644  | 3033462  |
| 44.03467 | 6  | 3 | 3 | 366842.3 | 5041015  | 978602.6 | 4935672  | 925740.5 | 6727570  | 4573137  | 4225831  | 4942575  |
| 9.43325  | 6  | 3 | 3 | 748054.8 | 2477266  | 1016985  | 2345845  | 1333995  | 2880661  | 763476.9 | 3283195  | 3090380  |
| 9.992233 | 5  | 3 | 2 | 776117.1 | 1158027  | 541015.6 | 1225546  | 672970.5 | 1292660  | 2006838  | 711039.7 | 1100149  |
| 9.999217 | 10 | 5 | 5 | 2574874  | 3083066  | 1574401  | 3348684  | 2978058  | 3816459  | 5311572  | 3060095  | 1399509  |
| 32.08483 | 9  | 5 | 4 | 274724.3 | 1449348  | 965609.8 | 1365162  | 448219.5 | 1187726  | 937884.6 | 250293.4 | 2342758  |
| 39.302   | 4  | 3 | 1 | 326322.9 | 4712773  | 2735938  | 4933729  | 242122.4 | 3795513  | 8454296  | 892032.6 | 5153873  |
| 27.39817 | 5  | 3 | 2 | 215087.2 | 2308410  | 579280.6 | 2401103  | 1026070  | 3114781  | 1755836  | 2215831  | 1800527  |

|          |    |   |   |          |          |          |          |          |          |          |          |          |
|----------|----|---|---|----------|----------|----------|----------|----------|----------|----------|----------|----------|
| 9.9677   | 6  | 3 | 3 | 419186.8 | 843234.9 | 357839.3 | 812084.1 | 165296   | 1471289  | 786271.9 | 669820.1 | 696130.8 |
| 9.992233 | 9  | 5 | 4 | 1627337  | 2560910  | 1404954  | 2744374  | 1881173  | 3491867  | 4525922  | 1530198  | 1200693  |
| 20.79233 | 3  | 0 | 3 | 60574.41 | 231353.1 | 51947.89 | 220292.9 | 129689.9 | 214445.6 | 265814.2 | 300373.2 | 167946.3 |
| 9.842    | 8  | 4 | 4 | 3502360  | 6281745  | 8163690  | 5509577  | 5561380  | 2846643  | 1290757  | 3617600  | 2846909  |
| 11.52297 | 9  | 4 | 5 | 222647.3 | 1189753  | 196013.8 | 1160832  | 313015.9 | 1375063  | 1197062  | 954309.2 | 1033765  |
| 8.93965  | 8  | 4 | 4 | 394982.8 | 948548.3 | 470809.3 | 899562   | 417380   | 721912.9 | 1658355  | 959422.3 | 1025020  |
| 10.20545 | 10 | 5 | 5 | 761258.6 | 3836606  | 1291854  | 3980541  | 1328035  | 3587365  | 4808754  | 5450824  | 3075211  |
| 10.9645  | 9  | 5 | 4 | 712102.5 | 2522806  | 793311.5 | 2615821  | 896304   | 3306584  | 1914087  | 1929464  | 1992693  |
| 9.880683 | 10 | 5 | 5 | 2743677  | 15800251 | 3785119  | 15367392 | 4089176  | 12015005 | 13157356 | 14332916 | 20904099 |
| 9.392767 | 10 | 5 | 3 | 2529743  | 20278162 | 5472607  | 19445582 | 9134656  | 28997716 | 15077235 | 21807524 | 18658992 |
| 10.94962 | 9  | 5 | 3 | 191360.3 | 663196   | 312949.1 | 630723.4 | 277364   | 931131.5 | 523818.5 | 409852.8 | 387531.9 |
| 10.9645  | 7  | 4 | 3 | 226589.3 | 601633.4 | 370409.1 | 563356.1 | 325529   | 1213038  | 462592.8 | 259084.2 | 414459.3 |
| 41.89167 | 7  | 2 | 3 | 233708.6 | 3338451  | 709538.9 | 3588062  | 3054819  | 3223304  | 2451616  | 3339773  | 3241545  |
| 9.999217 | 10 | 5 | 5 | 1037310  | 2308977  | 806060.2 | 2194517  | 1227211  | 2984302  | 3211684  | 2312888  | 1322172  |
| 10.9645  | 10 | 5 | 5 | 226755.3 | 825914.3 | 283189   | 797052.1 | 241252.7 | 1149207  | 1119523  | 626249.8 | 656985.5 |
| 9.9847   | 6  | 3 | 3 | 681014.6 | 1301199  | 1272750  | 1414785  | 698976.7 | 3515836  | 433801.7 | 946723.7 | 1124292  |
| 13.46338 | 5  | 2 | 3 | 79645.43 | 542052.1 | 132627.9 | 518744.4 | 266386.2 | 582676.3 | 593087.1 | 644988.8 | 309520.9 |
| 9.93625  | 5  | 3 | 2 | 1019391  | 1442319  | 332652.9 | 1399040  | 448480.7 | 1868351  | 1634763  | 1226804  | 1460452  |
| 10.44062 | 10 | 5 | 5 | 1822003  | 6417557  | 767959.9 | 6562800  | 1686818  | 7038919  | 7349830  | 6320051  | 5558795  |
| 9.568783 | 7  | 3 | 3 | 462214.9 | 949474.4 | 678331.7 | 1013494  | 470619.5 | 512932.8 | 324698.5 | 642103.4 | 1295816  |
| 9.975217 | 10 | 5 | 5 | 3888681  | 8005798  | 1472701  | 7627475  | 4565781  | 9970424  | 9150364  | 7277254  | 7081070  |
| 30.226   | 10 | 5 | 5 | 691048.8 | 4595432  | 1191164  | 4421400  | 1897575  | 5757060  | 5676690  | 4496559  | 2871961  |
| 9.964417 | 11 | 5 | 5 | 15622432 | 38063559 | 8433323  | 36934263 | 11891847 | 42742519 | 50477962 | 31682038 | 34985590 |
| 9.762917 | 8  | 5 | 3 | 956131.3 | 1900073  | 281267.2 | 1965919  | 788697.4 | 1778141  | 1733146  | 2384642  | 1901604  |
| 9.830833 | 9  | 5 | 4 | 839675.1 | 2851749  | 360571.2 | 2799627  | 566862.1 | 2421491  | 2803959  | 2688632  | 2948180  |
| 10.9645  | 4  | 3 | 1 | 511015.2 | 1012296  | 278498.6 | 1065297  | 618038.5 | 1436445  | 1098229  | 697430.7 | 963494.4 |
| 10.008   | 9  | 5 | 4 | 537523.9 | 1234111  | 429388.5 | 1168777  | 723544.3 | 1108205  | 1904895  | 1371887  | 793529.8 |
| 10.43932 | 8  | 4 | 4 | 402501.6 | 882075.9 | 192986.1 | 856048   | 275588.8 | 1193925  | 788231.2 | 678996.8 | 846638.8 |
| 9.994767 | 8  | 5 | 3 | 577130.3 | 949276.7 | 256700.8 | 989029   | 443195.4 | 1227865  | 1108817  | 953747.3 | 551130.4 |
| 9.842    | 8  | 4 | 4 | 1490339  | 5621156  | 2503062  | 5831769  | 986188.1 | 6045829  | 1461180  | 5573360  | 7055911  |
| 10.008   | 5  | 3 | 2 | 1341543  | 1787977  | 1520133  | 1994307  | 2197535  | 860278.6 | 444643.1 | 4091549  | 2568914  |
| 9.3919   | 9  | 4 | 4 | 1060863  | 5276689  | 2380236  | 4965069  | 3266623  | 2463766  | 3021043  | 6700632  | 7803402  |
| 9.388367 | 6  | 3 | 3 | 724940.4 | 2492568  | 678785.1 | 2587889  | 1032997  | 2334606  | 3051713  | 2623984  | 3046724  |
| 43.77583 | 5  | 1 | 3 | 324884.8 | 3817816  | 152532.6 | 3764408  | 661027.9 | 3591705  | 3790230  | 3793118  | 3926873  |
| 25.219   | 4  | 3 | 1 | 43421.09 | 107602.1 | 33945.44 | 104462.3 | 22588.65 | 100387.9 | 106666.3 | 77489.09 | 88540.45 |

|          |    |   |   |          |          |          |          |          |          |          |          |          |
|----------|----|---|---|----------|----------|----------|----------|----------|----------|----------|----------|----------|
| 9.46925  | 8  | 3 | 4 | 652237.9 | 671972.8 | 468352.2 | 720758.7 | 431364.5 | 529631.7 | 1182543  | 346823.3 | 155548.1 |
| 9.976317 | 11 | 5 | 5 | 688007.9 | 1609805  | 667446.8 | 1537918  | 660245.8 | 2061800  | 2467466  | 1591899  | 902977.2 |
| 10.9645  | 8  | 3 | 5 | 209570.4 | 753660.5 | 283554.4 | 781651.3 | 229957.2 | 1029682  | 1004750  | 368789   | 572684.9 |
| 9.93625  | 8  | 3 | 3 | 2146936  | 2981432  | 2825908  | 2723379  | 1806212  | 888500.6 | 1128316  | 829511.9 | 6703192  |
| 43.77567 | 5  | 1 | 3 | 254671   | 3132700  | 133695.9 | 3085835  | 582086.5 | 3195186  | 2906961  | 3257773  | 3163274  |
| 9.91875  | 7  | 3 | 3 | 825636.9 | 1489147  | 213904.8 | 1599516  | 1385725  | 1554902  | 1229332  | 1303006  | 1633054  |
| 9.992233 | 7  | 4 | 3 | 457623.8 | 990424.8 | 124325.6 | 1023598  | 405820.8 | 855529.3 | 1130591  | 865771   | 1075801  |
| 9.9677   | 10 | 5 | 5 | 1469239  | 4170129  | 1486545  | 4009626  | 1484585  | 5366633  | 5939144  | 4080922  | 2473441  |
| 9.992233 | 10 | 5 | 5 | 1946516  | 6176569  | 1403360  | 6002361  | 1794677  | 7425596  | 6884161  | 7257922  | 4785950  |
| 11.52297 | 6  | 3 | 3 | 131228.8 | 410450.6 | 190726   | 433397.9 | 232509.1 | 340433.3 | 207075.9 | 614932.6 | 610819.4 |
| 9.102033 | 6  | 3 | 3 | 195771.5 | 595279.1 | 366123.7 | 550354.5 | 460900.5 | 592795.6 | 1115560  | 764843.6 | 267438.8 |
| 10.008   | 8  | 4 | 4 | 241429.4 | 622711.2 | 257380.4 | 593892.4 | 277317.1 | 712715.8 | 955513.3 | 665238   | 255797.6 |
| 10.4121  | 11 | 5 | 5 | 7504379  | 48545013 | 10115065 | 50996874 | 29908622 | 59591565 | 48756881 | 34545824 | 43302766 |
| 10.93468 | 5  | 3 | 2 | 294974.3 | 1129779  | 409669.8 | 1087582  | 374971   | 1013397  | 834315.8 | 806353   | 1184719  |
| 9.544833 | 16 | 5 | 5 | 4599018  | 12042925 | 18163711 | 13745179 | 13052787 | 43418196 | 1176504  | 2045514  | 12355031 |
| 9.91875  | 10 | 5 | 4 | 918753.1 | 2155462  | 417329.8 | 2062463  | 1129298  | 1930290  | 1749134  | 1885183  | 2630828  |
| 18.54067 | 7  | 3 | 4 | 91060.27 | 351053.2 | 156014.1 | 324114.8 | 314517.2 | 206604.3 | 178514.8 | 375642.5 | 456181   |
| 9.445217 | 14 | 5 | 5 | 19244422 | 1.66E+08 | 40031423 | 1.62E+08 | 34714798 | 1.47E+08 | 2.01E+08 | 2.18E+08 | 1.32E+08 |
| 10.9645  | 10 | 5 | 5 | 361363.3 | 1234453  | 337519.2 | 1200467  | 295242.7 | 1611997  | 1505787  | 930534.3 | 852628.6 |
| 10.95055 | 10 | 5 | 5 | 2336859  | 10190181 | 2530043  | 9951115  | 1872722  | 12802476 | 12874029 | 8260144  | 7461429  |
| 10.008   | 6  | 3 | 3 | 412013.6 | 595111.1 | 370509.2 | 637788   | 424515.6 | 749585.1 | 988124.6 | 816607.4 | 96474.83 |
| 9.887133 | 5  | 2 | 3 | 754432.5 | 2084698  | 597364.7 | 2009459  | 791472.8 | 2537949  | 1511319  | 2894269  | 1732700  |
| 9.976317 | 8  | 5 | 3 | 467798.5 | 1169507  | 329803.5 | 1124898  | 486397.4 | 1494657  | 1514812  | 1139147  | 802864.2 |
| 9.419733 | 14 | 5 | 5 | 30192966 | 2.48E+08 | 65082953 | 2.42E+08 | 47761546 | 3.51E+08 | 2.59E+08 | 1.76E+08 | 2.21E+08 |
| 8.801817 | 10 | 5 | 5 | 2052237  | 13621099 | 4103396  | 14122261 | 5201979  | 13331127 | 20391632 | 11511199 | 9509087  |
| 9.872917 | 7  | 3 | 4 | 2053202  | 7191461  | 2014457  | 7437584  | 2558249  | 9499754  | 3993124  | 7982590  | 7388894  |
| 22.756   | 10 | 5 | 5 | 3918905  | 17268512 | 11090401 | 16032754 | 12055445 | 2791756  | 14349061 | 21293225 | 14781159 |
| 9.280767 | 7  | 3 | 3 | 3495167  | 6530840  | 7268532  | 7213088  | 5344198  | 14642315 | 2359250  | 14267582 | 469952.5 |
| 10.95835 | 10 | 5 | 5 | 389262.9 | 1405227  | 430667.5 | 1364720  | 319051.8 | 1869539  | 1868049  | 1037124  | 1024839  |
| 9.999217 | 10 | 5 | 5 | 2644839  | 2996779  | 1673753  | 3254499  | 2949322  | 3744581  | 5418498  | 2872096  | 1218630  |
| 43.7615  | 10 | 5 | 5 | 2270393  | 50518944 | 2307486  | 50929543 | 4879692  | 47676914 | 50795945 | 53572204 | 51635439 |
| 11.52297 | 10 | 5 | 5 | 277726   | 1609799  | 272467   | 1571723  | 424396.3 | 1959515  | 1564378  | 1306344  | 1408751  |
| 38.03567 | 5  | 2 | 3 | 396192.7 | 6566693  | 936724.6 | 6705164  | 1574891  | 7784410  | 6727067  | 6385631  | 5176966  |
| 27.59467 | 5  | 2 | 3 | 282125.1 | 1784056  | 965949.8 | 1683683  | 925635.7 | 1159546  | 2566213  | 2295058  | 390064.6 |
| 9.992233 | 7  | 5 | 2 | 382873.3 | 800841.4 | 393331.1 | 847941.4 | 489316.5 | 928188.6 | 1434671  | 617617.5 | 499745.3 |

|          |    |   |   |          |          |          |          |          |          |          |          |          |
|----------|----|---|---|----------|----------|----------|----------|----------|----------|----------|----------|----------|
| 9.573333 | 4  | 1 | 3 | 201894.6 | 324659.7 | 212870.6 | 351222.6 | 282555.9 | 669457.2 | 212602.4 | 108369.9 | 278376.2 |
| 9.928667 | 8  | 4 | 4 | 14391612 | 27971198 | 54755146 | 33040543 | 39469812 | 2349141  | 3738936  | 6877134  | 1.26E+08 |
| 33.42683 | 9  | 5 | 4 | 277932.5 | 1524121  | 605808.1 | 1460883  | 589178.6 | 2170094  | 1441830  | 564797   | 1872594  |
| 24.11067 | 3  | 3 | 0 | 185642.7 | 627254.8 | 403374   | 595863.5 | 63236.83 | 1217758  | 450717.7 | 533041.3 | 792175.7 |
| 9.9014   | 5  | 3 | 2 | 1037225  | 2335031  | 2079302  | 2522193  | 1377265  | 919497.9 | 1131574  | 1925097  | 5981008  |
| 9.91875  | 5  | 3 | 2 | 1190062  | 3028060  | 976023.9 | 3154012  | 1369707  | 3315647  | 1511823  | 4129621  | 3413550  |
| 9.853633 | 5  | 3 | 2 | 2847128  | 4636437  | 5024567  | 4130671  | 4544292  | 2036214  | 13513419 | 1848807  | 3776527  |
| 24.59417 | 9  | 5 | 4 | 150680.3 | 941681.3 | 233551.7 | 907947.6 | 383881.1 | 882825.7 | 1201858  | 634301   | 841539.7 |
| 9.856867 | 7  | 3 | 4 | 2157882  | 5613392  | 1927856  | 5356126  | 2844470  | 7376084  | 3211832  | 7696174  | 5444387  |
| 42.68283 | 5  | 1 | 4 | 285507.1 | 3888823  | 381950.9 | 3804897  | 1037411  | 3730536  | 3532746  | 4536582  | 3782051  |
| 9.848417 | 4  | 3 | 1 | 775092   | 942949.7 | 604139.8 | 1050702  | 1296919  | 1489675  | 246359   | 1111644  | 1502375  |
| 28.128   | 10 | 5 | 5 | 49720.39 | 293699.4 | 83061.64 | 306000.1 | 141756.1 | 328032.5 | 309886.6 | 167981.4 | 269963.8 |
| 9.960467 | 5  | 2 | 3 | 461305.7 | 921671.1 | 537184.1 | 977359   | 522775.2 | 1672892  | 260390.4 | 1086923  | 578700.3 |
| 10.02372 | 11 | 5 | 5 | 287307.5 | 969420.3 | 111484.4 | 946806.6 | 278312.4 | 892901.9 | 885181.3 | 1157389  | 932778.4 |
| 18.327   | 10 | 5 | 5 | 192204   | 1090266  | 195794.8 | 1069173  | 206489.5 | 1343602  | 1121323  | 853922   | 941369.4 |
| 12.42808 | 5  | 3 | 2 | 42738.81 | 160512.4 | 18051.7  | 155682.3 | 61122.99 | 165588.9 | 133457   | 153289.8 | 169318   |
| 10.95055 | 10 | 5 | 5 | 653188.5 | 4120453  | 663915.1 | 4035899  | 923478.9 | 4499750  | 5082892  | 3543180  | 3554466  |
| 9.979667 | 7  | 4 | 3 | 353010.4 | 709605.5 | 249182.4 | 679819   | 314591.9 | 961232.8 | 562871.7 | 1000835  | 500398.4 |
| 9.999217 | 9  | 5 | 4 | 298061.2 | 871218.5 | 198873.2 | 842143   | 335049.5 | 958266.8 | 1088122  | 990118.1 | 655398.1 |
| 9.445217 | 5  | 3 | 2 | 1659633  | 4003219  | 3864390  | 4421775  | 4121207  | 1383064  | 7321764  | 9040242  | 999443   |
| 9.976317 | 10 | 5 | 5 | 1271756  | 2982743  | 1410943  | 2821305  | 1659502  | 3918131  | 4812892  | 2942026  | 1509280  |
| 39.23    | 7  | 3 | 2 | 443157.4 | 3232536  | 1683894  | 3387478  | 1231789  | 4458291  | 3954379  | 573339.7 | 4586823  |
| 9.419733 | 7  | 4 | 3 | 1141261  | 4149076  | 2370251  | 3899980  | 2387519  | 5919248  | 5301532  | 6319046  | 1193724  |
| 22.785   | 7  | 3 | 4 | 167015.4 | 684955.6 | 438166.1 | 640285.1 | 414840.4 | 655049.2 | 984199.3 | 307634.8 | 224498.4 |
| 9.43325  | 6  | 3 | 2 | 2617351  | 14042360 | 13138670 | 12963095 | 5835888  | 33430610 | 3943733  | 8293630  | 21580383 |
| 9.45945  | 6  | 4 | 2 | 530327.8 | 1668206  | 906734.9 | 1784974  | 1286149  | 1301482  | 3275877  | 1174628  | 1447295  |
| 9.933967 | 4  | 3 | 1 | 923604.1 | 2391610  | 1248485  | 2247105  | 1501109  | 3850905  | 2042418  | 3498849  | 896220.5 |
| 9.856867 | 10 | 5 | 5 | 4663183  | 14875640 | 5995150  | 14294530 | 5076039  | 18126434 | 16229642 | 7680426  | 9996707  |
| 33.68667 | 10 | 5 | 5 | 346013.3 | 2453532  | 834879.6 | 2521654  | 356553.3 | 3390608  | 2325014  | 1127644  | 2741127  |
| 24.38117 | 6  | 4 | 2 | 73781.08 | 268057   | 90486.09 | 257770.3 | 105718.9 | 249941.6 | 427224.7 | 237761.2 | 216983.9 |
| 9.999217 | 10 | 5 | 5 | 661538.9 | 2066830  | 543898.6 | 2007598  | 589114.6 | 2525219  | 2394861  | 2460834  | 1394044  |
| 9.845483 | 9  | 5 | 4 | 1633744  | 5381085  | 538547.4 | 5554076  | 2224234  | 5165112  | 4598854  | 6019468  | 5682105  |
| 44.66717 | 4  | 1 | 3 | 90779.45 | 351198   | 76140.76 | 360724.3 | 103981.3 | 321513.4 | 337576.3 | 445748.6 | 402615.1 |
| 9.983433 | 10 | 5 | 5 | 3591259  | 10108623 | 3406377  | 9695080  | 4446440  | 11725460 | 14976046 | 9545047  | 6084614  |
| 10.51423 | 10 | 5 | 5 | 455026.4 | 1427339  | 449835   | 1370727  | 620124.7 | 1993032  | 1653707  | 1303750  | 1408897  |

|          |    |   |   |          |          |          |          |          |          |          |          |          |
|----------|----|---|---|----------|----------|----------|----------|----------|----------|----------|----------|----------|
| 28.90583 | 10 | 5 | 5 | 243651.7 | 1295093  | 268729.3 | 1257039  | 437451.9 | 1072244  | 1298199  | 1157227  | 1194396  |
| 10.98385 | 6  | 4 | 2 | 260993.2 | 777410.9 | 382181.2 | 814272.5 | 324495.9 | 198742.3 | 1002878  | 577026.7 | 1105070  |
| 9.392767 | 9  | 4 | 4 | 4443430  | 31264151 | 10665393 | 30317301 | 7160555  | 45927449 | 33996657 | 26495257 | 33014868 |
| 9.999217 | 10 | 5 | 5 | 2657572  | 3120610  | 1658959  | 3371653  | 2961529  | 3720825  | 5588230  | 3035112  | 1400654  |
| 9.994767 | 10 | 5 | 5 | 1938385  | 3298542  | 2059405  | 3118330  | 1317000  | 5170594  | 5230939  | 3373956  | 311351   |
| 10.9645  | 10 | 5 | 4 | 520544.6 | 2597451  | 822266.5 | 2495560  | 1118268  | 3535753  | 1293490  | 2657257  | 2941967  |
| 10.95055 | 9  | 4 | 5 | 895700.2 | 2919682  | 933995.3 | 2795708  | 1403285  | 4054460  | 3814320  | 2349102  | 2114024  |
| 31.19083 | 5  | 3 | 2 | 233593.8 | 1722481  | 283816.9 | 1692021  | 304304.9 | 1983135  | 1534281  | 1325100  | 1821118  |
| 9.970617 | 9  | 5 | 4 | 1478156  | 3132862  | 672387.2 | 2995506  | 1718889  | 4076194  | 3088999  | 2441297  | 3485388  |
| 9.986767 | 10 | 5 | 5 | 753583.1 | 2260000  | 923436.3 | 2364722  | 1093171  | 2951468  | 3196991  | 2598864  | 1325584  |
| 9.507167 | 5  | 2 | 3 | 381135.6 | 545209.1 | 431894.4 | 597085.1 | 562098.4 | 906546.3 | 915808.3 | 737796.7 | 165894.2 |
| 9.544833 | 6  | 2 | 4 | 999340.6 | 1553119  | 1142342  | 1430633  | 1228287  | 1089246  | 840463.8 | 1728782  | 645536.5 |
| 9.872067 | 9  | 5 | 4 | 1337347  | 7094837  | 1284804  | 7324978  | 2834282  | 7036916  | 5319110  | 7379640  | 8909871  |
| 10.03947 | 9  | 5 | 4 | 223678.3 | 541266   | 196611.7 | 522750.7 | 160499.9 | 361021.7 | 466868.3 | 576665.3 | 864563.3 |
| 9.975217 | 7  | 4 | 3 | 32757966 | 68355129 | 1.31E+08 | 79486954 | 76623273 | 9657831  | 12226318 | 3.02E+08 | 12723466 |
| 9.844033 | 5  | 2 | 3 | 364930.3 | 832854   | 467468.6 | 884135.5 | 526633.7 | 1027975  | 0        | 1108267  | 992806.3 |
| 6.765333 | 5  | 2 | 3 | 811629.4 | 26363729 | 5472265  | 25049901 | 16814946 | 29919889 | 32443836 | 28255120 | 20327887 |
| 9.3907   | 5  | 2 | 3 | 3125900  | 14008906 | 12244273 | 15236347 | 11598235 | 23466635 | 24965317 | 760397.7 | 704948.9 |
| 10.99268 | 9  | 5 | 4 | 342165.9 | 1277341  | 294052.5 | 1243028  | 368339.8 | 1022042  | 1041229  | 1132584  | 1566868  |
| 9.071517 | 4  | 1 | 3 | 595967.6 | 713002   | 302865.2 | 741006.7 | 237119.1 | 602915.3 | 922038.3 | 228112.8 | 878569.6 |
| 10.94443 | 8  | 4 | 4 | 552017.1 | 1035367  | 638981.4 | 979513.3 | 420843.4 | 741338.7 | 1122410  | 680255.2 | 524241.5 |
| 9.398583 | 4  | 1 | 3 | 803672.3 | 3551408  | 1206747  | 3754362  | 2482798  | 4030977  | 4603731  | 4591077  | 2041788  |
| 9.887133 | 5  | 2 | 3 | 1726331  | 4734720  | 2057671  | 4971650  | 2529883  | 3652686  | 2906292  | 7676098  | 6092199  |
| 10.94443 | 5  | 2 | 3 | 314145   | 1013556  | 185628.3 | 985759.2 | 331351.7 | 1082139  | 1298162  | 824550.2 | 893216.5 |
| 9.986767 | 8  | 4 | 4 | 1430495  | 2296780  | 1403728  | 2469356  | 1912402  | 3097663  | 4197142  | 2230524  | 702652.2 |
| 30.2655  | 10 | 5 | 5 | 2771490  | 18029479 | 4615629  | 17415402 | 7047453  | 20092679 | 23840578 | 17359129 | 11203172 |
| 9.8322   | 5  | 3 | 2 | 3276873  | 5262902  | 5864346  | 4739671  | 4159351  | 1512706  | 1278947  | 879412.2 | 8583769  |
| 9.358417 | 5  | 3 | 2 | 789488.6 | 5538656  | 2085747  | 5309328  | 2377656  | 3129661  | 8152224  | 4903258  | 4292759  |
| 9.872933 | 5  | 3 | 2 | 1308971  | 3848455  | 3497548  | 3553189  | 2027274  | 5484858  | 1491255  | 1434569  | 1545579  |
| 9.983433 | 9  | 4 | 5 | 809336.4 | 1681154  | 636356.5 | 1596534  | 972085.3 | 2223717  | 2280664  | 1895298  | 987345.9 |
| 44.35117 | 5  | 1 | 4 | 353923   | 5512772  | 199477.9 | 5702310  | 2529312  | 5569218  | 5639020  | 5211372  | 5717303  |
| 9.9014   | 7  | 4 | 3 | 1623257  | 3569606  | 527211.1 | 3442859  | 1631299  | 2869962  | 3428045  | 3603910  | 3601881  |
| 9.999217 | 10 | 5 | 5 | 1703295  | 3387696  | 1856819  | 3583555  | 1968044  | 4469017  | 5787847  | 3579091  | 1351844  |
| 44.624   | 7  | 2 | 3 | 309943.4 | 4268687  | 893721.5 | 4161194  | 1181988  | 4629743  | 2672618  | 4615491  | 4677978  |
| 9.43325  | 9  | 4 | 4 | 3608560  | 18398563 | 15205971 | 19725609 | 10093456 | 6491003  | 26151910 | 40477275 | 15554671 |



|          |    |   |   |          |          |          |          |          |          |          |          |          |
|----------|----|---|---|----------|----------|----------|----------|----------|----------|----------|----------|----------|
| 9.992233 | 10 | 5 | 5 | 709801   | 2294063  | 532100.5 | 2231753  | 675833.1 | 2819861  | 2495374  | 2698271  | 1806551  |
| 10.008   | 10 | 5 | 5 | 1115462  | 2687892  | 1025809  | 2808511  | 1311425  | 3219264  | 3967500  | 2976226  | 1674931  |
| 9.999217 | 10 | 5 | 5 | 2789191  | 6124133  | 2259213  | 5831229  | 3349727  | 7547078  | 8890626  | 6349405  | 3230364  |
| 9.9677   | 10 | 5 | 5 | 3213455  | 9342174  | 3538542  | 8943895  | 4230440  | 12038214 | 13794407 | 8841680  | 5449455  |
| 10.008   | 8  | 4 | 4 | 832539.1 | 2094182  | 572155.3 | 2028031  | 715017.5 | 2213514  | 2364174  | 2761745  | 1235461  |
| 9.432533 | 12 | 5 | 5 | 5983230  | 15580254 | 3588646  | 15277609 | 2113652  | 21035330 | 13465843 | 13614760 | 12395047 |
| 10.96997 | 5  | 3 | 2 | 345133.6 | 1033685  | 244747.2 | 1006005  | 295412.8 | 1090242  | 1395682  | 756591.9 | 1059333  |
| 9.960467 | 7  | 5 | 2 | 1837506  | 3390468  | 1369417  | 3268856  | 978904   | 4847401  | 4721680  | 3268811  | 2192413  |
| 9.4775   | 5  | 3 | 1 | 2189088  | 9096769  | 5986671  | 9619238  | 4047218  | 14412783 | 7316910  | 2958526  | 4445099  |
| 10.95835 | 9  | 4 | 5 | 253248.4 | 1021731  | 97643.77 | 982896.3 | 515954.3 | 1099404  | 1037265  | 1126328  | 948898.3 |
| 9.976317 | 5  | 3 | 2 | 376607.8 | 642050.6 | 147444.6 | 677839.5 | 464161.2 | 778027.2 | 762034.2 | 590616.5 | 416270.4 |
| 9.992233 | 10 | 5 | 5 | 1346988  | 3287376  | 578158   | 3177402  | 1390989  | 3802572  | 3015291  | 3927557  | 3160118  |
| 9.856867 | 10 | 5 | 5 | 2337037  | 11707747 | 1452494  | 11950917 | 3012480  | 12348546 | 10800710 | 10293291 | 13925149 |
| 9.94455  | 7  | 4 | 3 | 568241.6 | 1144224  | 234246.3 | 1114478  | 339619.3 | 1174861  | 945194.4 | 1334559  | 1400148  |
| 9.43325  | 6  | 3 | 3 | 677811.7 | 3876864  | 1650457  | 3668925  | 2366932  | 5950292  | 4384153  | 4306280  | 3273113  |
| 9.960817 | 10 | 5 | 5 | 657956.7 | 1699912  | 422420.7 | 1648164  | 581714.9 | 2180435  | 1017749  | 1715983  | 1796682  |
| 9.992233 | 10 | 5 | 5 | 2856832  | 7146445  | 2831305  | 7457583  | 3281529  | 9009455  | 10402774 | 7913862  | 4009697  |
| 9.840617 | 8  | 4 | 4 | 2055758  | 2845604  | 2448703  | 2641338  | 1408618  | 7038888  | 1011951  | 2486858  | 2519029  |
| 9.445217 | 14 | 5 | 5 | 2529942  | 16375963 | 5995751  | 17143321 | 8808063  | 15786598 | 25166322 | 18899333 | 12087325 |
| 9.880683 | 10 | 5 | 5 | 5665271  | 39755314 | 11420871 | 38761315 | 7749369  | 55363206 | 31309998 | 34700145 | 29240102 |
| 31.81117 | 5  | 2 | 3 | 121446.6 | 369880.1 | 192232.7 | 393379.2 | 264227.7 | 213042.2 | 464648.8 | 155593.7 | 385319   |
| 10.211   | 8  | 3 | 5 | 243459.9 | 922507.5 | 411267.8 | 963050.2 | 388251.1 | 736223.4 | 896064.8 | 1571278  | 954678.2 |
| 9.986767 | 10 | 5 | 5 | 1013447  | 2360930  | 674865.6 | 2284553  | 823047.1 | 2820594  | 2179102  | 3004701  | 2507705  |
| 10.008   | 10 | 5 | 5 | 749357.3 | 2353565  | 604680.8 | 2287924  | 687277.2 | 2546813  | 3275722  | 2304799  | 1777837  |
| 10.94603 | 4  | 1 | 3 | 712224.7 | 2139639  | 647158.1 | 2075659  | 615878.7 | 2413799  | 2863137  | 1863993  | 1170353  |
| 10.95055 | 10 | 5 | 5 | 566697.1 | 3591638  | 717327   | 3677530  | 958705.1 | 3943915  | 4633227  | 3112160  | 2817210  |
| 10.008   | 9  | 5 | 4 | 1758095  | 2249600  | 1273223  | 2407818  | 1801019  | 2960351  | 4123008  | 1491855  | 999134.8 |
| 12.28138 | 10 | 5 | 5 | 103866.7 | 371921.4 | 211715.3 | 391281.6 | 168351.4 | 473030.6 | 543060.5 | 252088.2 | 57169.65 |
| 10.99775 | 10 | 5 | 5 | 359788.4 | 1095024  | 392644   | 1143913  | 557814.7 | 1293110  | 1117129  | 488388.8 | 1547355  |
| 9.960817 | 10 | 5 | 5 | 683370.9 | 1631824  | 217486.6 | 1609323  | 228206   | 1798444  | 1774174  | 1766191  | 1298692  |
| 16.30088 | 4  | 0 | 4 | 78375.95 | 240701.4 | 65574.72 | 247786.1 | 74456.79 | 306178.6 | 175066.1 | 184735.6 | 224616.9 |
| 31.09117 | 6  | 3 | 3 | 87970.78 | 279330.7 | 104586   | 289425.8 | 95264.4  | 159241.2 | 301825.5 | 203997.5 | 301770.2 |
| 17.76267 | 6  | 2 | 4 | 315431.5 | 1975687  | 337674.4 | 1930151  | 537381.3 | 1622364  | 2117033  | 1609059  | 2196171  |
| 44.96917 | 6  | 3 | 3 | 388036.1 | 3909739  | 584338.2 | 3834963  | 865719.7 | 4703231  | 3999952  | 3064755  | 3808861  |
| 10.19043 | 10 | 5 | 5 | 960870.1 | 5422461  | 1106569  | 5317111  | 981566.2 | 4386967  | 6954708  | 5642719  | 5829587  |

|          |    |   |   |          |          |          |          |          |          |          |          |          |
|----------|----|---|---|----------|----------|----------|----------|----------|----------|----------|----------|----------|
| 9.45945  | 13 | 5 | 5 | 2010352  | 14544748 | 1316607  | 14809963 | 3418746  | 14535618 | 14302490 | 12492095 | 15757435 |
| 9.311883 | 6  | 3 | 3 | 469220.5 | 2019445  | 1074055  | 1910922  | 1083799  | 1382939  | 3482864  | 2831558  | 1019778  |
| 9.992233 | 10 | 5 | 5 | 1207881  | 3425730  | 846527.3 | 3542132  | 1388070  | 4131400  | 3924546  | 4065494  | 2573316  |
| 31.0625  | 10 | 5 | 5 | 367173.8 | 1725351  | 688298   | 1654680  | 716836.1 | 1119341  | 1741484  | 1240278  | 1665142  |
| 9.976317 | 10 | 5 | 5 | 2256214  | 6515811  | 2273183  | 6278198  | 2448966  | 8380281  | 9112875  | 6610511  | 4064695  |
| 9.01065  | 6  | 3 | 3 | 223417.2 | 545136.5 | 290943.5 | 512994.1 | 346066.5 | 832905.2 | 627119.4 | 649426.9 | 558940.3 |
| 8.91745  | 10 | 5 | 5 | 1164513  | 4056015  | 1717053  | 3873306  | 1916461  | 4499023  | 6447275  | 4470995  | 2893826  |
| 10.008   | 10 | 5 | 5 | 270903.2 | 740889.4 | 212768.9 | 766366.4 | 288177.1 | 598952.4 | 1091539  | 796249.9 | 603912   |
| 9.8445   | 9  | 5 | 4 | 904282.6 | 4188732  | 519712.9 | 4132316  | 601537.6 | 4836557  | 4601006  | 3656743  | 3739884  |
| 9.992233 | 3  | 3 | 0 | 1486276  | 1058650  | 674004.5 | 1152107  | 1122236  | 932586.9 | 0        | 1539732  | 1727884  |
| 9.9677   | 10 | 5 | 5 | 2903468  | 7808554  | 3026064  | 7487269  | 3371882  | 10372096 | 11492723 | 7118360  | 4498748  |
| 10.71765 | 5  | 2 | 3 | 123502.2 | 338742   | 181272.3 | 354583.9 | 129749   | 202070.5 | 643390.4 | 342762.3 | 303444.3 |
| 9.872883 | 10 | 5 | 5 | 2571271  | 9289590  | 1456742  | 9073430  | 2653503  | 9387202  | 8260161  | 11366811 | 9823303  |
| 3.584583 | 7  | 2 | 4 | 126351.7 | 1569852  | 995100.8 | 1480588  | 771831   | 0        | 1233596  | 2497437  | 2207826  |
| 10.94443 | 10 | 5 | 5 | 566573.5 | 3070469  | 844098.5 | 2994054  | 671273.8 | 4353006  | 3211372  | 2367931  | 2245343  |
| 9.348233 | 5  | 3 | 2 | 424088.5 | 803660.6 | 530437   | 735965   | 791533.3 | 1492469  | 822372.5 | 842927.8 | 860534   |
| 10.9645  | 10 | 5 | 5 | 2901519  | 14532642 | 3151072  | 14858070 | 3356895  | 17585611 | 18135031 | 12394862 | 11123891 |
| 9.91875  | 6  | 3 | 3 | 1650883  | 2654137  | 1473470  | 2513312  | 1340759  | 3789159  | 85595.39 | 3043520  | 3402080  |
| 9.507167 | 6  | 3 | 3 | 512285.2 | 1024836  | 722660.2 | 951563.6 | 743724.4 | 1262013  | 435734.8 | 134138.1 | 1400936  |
| 12.10843 | 4  | 4 | 0 | 57412.72 | 173893.6 | 38998.1  | 167255.6 | 84110.88 | 173413.3 | 140515   | 136122.8 | 187606.3 |
| 9.992233 | 11 | 4 | 4 | 723054.5 | 1056762  | 744317.4 | 978901.6 | 813848.7 | 1692458  | 583053.7 | 558401.4 | 424141.2 |
| 10.93618 | 4  | 1 | 3 | 344436   | 549995.9 | 241334.8 | 528388.3 | 187600.6 | 661417.4 | 587200.6 | 144931.6 | 572825.7 |
| 9.986767 | 7  | 4 | 3 | 5332345  | 8209571  | 11523496 | 9415202  | 12617341 | 28773931 | 2132903  | 3674432  | 4024123  |
| 10.96997 | 8  | 4 | 4 | 465750   | 1508193  | 489961.4 | 1456446  | 546077.8 | 1960902  | 2087913  | 1032454  | 1367594  |
| 9.9677   | 5  | 2 | 3 | 730835.8 | 1336523  | 887126.7 | 1267054  | 396049.2 | 2346632  | 108459.3 | 2020977  | 1248577  |
| 30.28183 | 10 | 5 | 5 | 666091.3 | 3502938  | 739298.7 | 3387616  | 1439843  | 3274767  | 4308741  | 3833845  | 2354893  |
| 29.91983 | 11 | 5 | 5 | 2112041  | 9808840  | 5592179  | 9288979  | 4803237  | 3332151  | 8421483  | 8599129  | 9953243  |
| 9.960467 | 8  | 4 | 4 | 763877.9 | 1598504  | 703946.3 | 1513823  | 969467.9 | 2106759  | 2546184  | 1179856  | 1317023  |
| 10.84643 | 8  | 4 | 4 | 140828   | 354739.4 | 143494.7 | 339525.5 | 161215.7 | 155747.1 | 349674.1 | 508175.3 | 285405   |
| 9.684583 | 9  | 4 | 5 | 227361.2 | 877218.9 | 426581.3 | 917263.8 | 375489.8 | 1078478  | 1491312  | 456023   | 514031.3 |
| 38.10833 | 8  | 3 | 2 | 402078.7 | 6094285  | 766662.2 | 6174088  | 834039.9 | 4828679  | 6554139  | 6810470  | 6036775  |
| 21.029   | 5  | 3 | 2 | 77290.73 | 166952.7 | 36880.7  | 171657.9 | 55413.59 | 205916.3 | 170313.2 | 156953.1 | 191341.9 |
| 9.507167 | 8  | 4 | 4 | 826329.3 | 1325968  | 744034.1 | 1403494  | 814206.7 | 1755080  | 1657664  | 1642408  | 1574691  |
| 9.886433 | 10 | 5 | 5 | 1858962  | 6185631  | 1161847  | 6327057  | 1635878  | 6722715  | 4877099  | 5052562  | 7526094  |
| 9.999217 | 11 | 5 | 5 | 1425773  | 3269353  | 1097132  | 3117292  | 1850040  | 3984667  | 4516742  | 3505976  | 1800478  |

|          |    |   |   |          |          |          |          |          |          |          |          |          |
|----------|----|---|---|----------|----------|----------|----------|----------|----------|----------|----------|----------|
| 9.4925   | 10 | 4 | 5 | 825940   | 4403290  | 2693362  | 4145094  | 2505427  | 3362368  | 604454.5 | 4291428  | 6094774  |
| 25.62567 | 7  | 3 | 4 | 310763.5 | 2200151  | 801514.5 | 2122075  | 771719.8 | 2478919  | 2022414  | 2416041  | 954589.7 |
| 41.5605  | 8  | 2 | 4 | 360120.7 | 4779390  | 421417.9 | 4869656  | 1191042  | 5059707  | 5254900  | 4901245  | 4393801  |
| 13.02562 | 5  | 2 | 3 | 139858   | 667997.2 | 544340.8 | 618512.9 | 448655.7 | 912483.8 | 76664.36 | 1085190  | 85441.39 |
| 9.992233 | 10 | 5 | 5 | 411592.8 | 1301622  | 376003.3 | 1337831  | 355404.7 | 1153789  | 1875325  | 1480070  | 1005750  |
| 9.983433 | 10 | 5 | 5 | 3801599  | 11459267 | 4156741  | 11002524 | 5035948  | 13643879 | 17186934 | 11262817 | 6671388  |
| 9.162767 | 6  | 3 | 3 | 229109.8 | 545224.7 | 247461.7 | 576341.2 | 367943.6 | 699790.3 | 775678.9 | 623183.5 | 479110.1 |
| 9.992233 | 9  | 5 | 4 | 536773.1 | 1275951  | 454441.4 | 1230068  | 474267.1 | 1000378  | 1864324  | 1667610  | 888965.7 |
| 9.498117 | 5  | 4 | 1 | 687271.1 | 751288   | 159850.9 | 809753.5 | 800016.1 | 886438.5 | 911970.4 | 597875.8 | 569516.2 |
| 11.29108 | 10 | 5 | 5 | 170666   | 842746.9 | 365115.2 | 810581.4 | 279988.2 | 348951.2 | 652111.5 | 970072.1 | 919229.3 |
| 11.06267 | 7  | 3 | 4 | 1591226  | 4599382  | 4029638  | 4241543  | 3160387  | 1804295  | 10536128 | 926482.4 | 6897634  |
| 20.782   | 6  | 4 | 2 | 226897.2 | 1340699  | 350043.6 | 1310492  | 253374.4 | 1366122  | 1775172  | 1301489  | 805792.1 |
| 10.97242 | 10 | 5 | 5 | 1337435  | 6305131  | 1346845  | 6189705  | 954497   | 8013635  | 4474302  | 5560134  | 6574631  |
| 11.52297 | 10 | 5 | 5 | 100355.7 | 499792.6 | 132693.9 | 486662.2 | 133986.2 | 683154.7 | 519053.7 | 316162.6 | 454674.8 |
| 9.976317 | 9  | 5 | 4 | 605995.6 | 1230629  | 584031.4 | 1169358  | 658996.7 | 1822544  | 1830394  | 1082690  | 499348.6 |
| 9.43325  | 7  | 4 | 3 | 544421.1 | 1721435  | 1123023  | 1620867  | 910714.3 | 3522292  | 967660.2 | 663666.7 | 1487481  |
| 10.32433 | 10 | 5 | 5 | 589484.1 | 1981235  | 575275.7 | 2043378  | 684825.9 | 2345178  | 2408657  | 2432635  | 1232121  |
| 40.8555  | 4  | 3 | 1 | 440202.3 | 7493586  | 6306754  | 7036249  | 1198439  | 6673657  | 6890390  | 1782275  | 18131706 |
| 9.94455  | 9  | 5 | 4 | 511618   | 1505082  | 414961.9 | 1536434  | 160777.8 | 1848306  | 1932325  | 1044206  | 1097201  |
| 10.98605 | 10 | 5 | 5 | 675228.3 | 1868505  | 588239.7 | 1935811  | 771516   | 2276313  | 2141124  | 1493700  | 2407175  |
| 19.95567 | 10 | 5 | 5 | 590741.3 | 2141340  | 1061236  | 2026698  | 1269376  | 507479.1 | 2678093  | 2423360  | 1795373  |
| 10.97857 | 8  | 4 | 4 | 351280   | 1238651  | 348237   | 1282107  | 519334.1 | 836583.3 | 1268326  | 1120578  | 1177031  |
| 9.983433 | 10 | 5 | 5 | 1078591  | 3309539  | 1027484  | 3201850  | 1168715  | 4262975  | 4249953  | 3579756  | 2313718  |
| 9.992233 | 10 | 5 | 5 | 1939176  | 6181972  | 1486810  | 6016258  | 1874527  | 7555209  | 6924112  | 7270357  | 4791320  |
| 10.00385 | 6  | 3 | 3 | 269723.3 | 522229.7 | 247906.4 | 549694.2 | 309608.5 | 114905.8 | 653289.8 | 514941.8 | 557970.2 |
| 9.960817 | 10 | 5 | 5 | 1140221  | 2318332  | 594519   | 2428505  | 1451109  | 2681174  | 2501561  | 2805870  | 2289749  |
| 10.9645  | 9  | 5 | 4 | 325052.8 | 1104483  | 280180.9 | 1136046  | 359537.7 | 1557739  | 1140139  | 937122.5 | 826263.6 |
| 10.008   | 9  | 4 | 5 | 377120.2 | 758315.3 | 396172.3 | 798405.2 | 423929.2 | 672171.5 | 1449916  | 594877.5 | 443297.4 |
| 27.042   | 4  | 1 | 3 | 207929.8 | 952023.1 | 359748.6 | 904544.6 | 581468.6 | 321271.8 | 1130818  | 1217075  | 1037039  |
| 20.99217 | 10 | 4 | 5 | 88181.95 | 463434.1 | 251202.3 | 443732.5 | 129430   | 457810   | 348678.8 | 455213.8 | 867493.8 |
| 10.95602 | 10 | 5 | 5 | 298593.2 | 1194537  | 295172.1 | 1165686  | 296624.7 | 1429039  | 1489636  | 1020566  | 779099   |
| 9.992233 | 13 | 5 | 5 | 962452.1 | 2757348  | 715707.2 | 2661019  | 1189716  | 3677318  | 2608242  | 3309569  | 2104273  |
| 10.94443 | 4  | 1 | 3 | 228225.5 | 544636.7 | 253874   | 574071.3 | 342467.9 | 601543.9 | 947935.3 | 502504.5 | 298505.2 |
| 9.960467 | 7  | 4 | 3 | 3798120  | 2681882  | 2998431  | 2947701  | 2429884  | 1720746  | 1423996  | 8024952  | 1238315  |
| 7.398833 | 5  | 3 | 2 | 77156.73 | 285644.6 | 226965.6 | 307270.5 | 217846.7 | 631033.8 | 66257.98 | 110360.9 | 368124.1 |

|          |    |   |   |          |          |          |          |          |          |          |          |          |
|----------|----|---|---|----------|----------|----------|----------|----------|----------|----------|----------|----------|
| 10.9645  | 8  | 5 | 3 | 235670.7 | 739725.2 | 258066.9 | 706346.9 | 408353.7 | 1087718  | 884587.4 | 481116.5 | 500135.8 |
| 10.2608  | 4  | 1 | 3 | 717620.3 | 3668703  | 1039931  | 3750949  | 571716.3 | 4245953  | 4110646  | 4804129  | 2285694  |
| 9.970617 | 6  | 3 | 3 | 705702.9 | 1029388  | 289344.6 | 974360.8 | 732819.9 | 950266.3 | 1075175  | 1503486  | 857064.1 |
| 9.43325  | 5  | 3 | 2 | 1456051  | 7634798  | 7720161  | 6944555  | 6427467  | 15479667 | 1166015  | 16616591 | 3047877  |
| 9.983433 | 11 | 5 | 5 | 828104.2 | 2363106  | 865238   | 2262269  | 1182070  | 2879759  | 3421792  | 2532104  | 1322295  |
| 9.94455  | 5  | 3 | 2 | 1258038  | 1509096  | 767860   | 1592903  | 947471.2 | 2267297  | 293264.1 | 1802447  | 1270479  |
| 9.842    | 8  | 4 | 4 | 661195.1 | 2071673  | 773794.1 | 2148894  | 816911.4 | 1968456  | 1539292  | 3421931  | 1608556  |
| 22.95817 | 7  | 2 | 4 | 76437.73 | 316095.4 | 94915.55 | 305369.7 | 123847.8 | 390758.9 | 163198.5 | 314807.9 | 400129.5 |
| 9.979667 | 10 | 5 | 5 | 1728030  | 3893176  | 1954421  | 4082755  | 1955199  | 5237245  | 6407993  | 3687407  | 1601188  |
| 9.992233 | 10 | 5 | 5 | 454547.9 | 1146423  | 364203.1 | 1185875  | 444513.7 | 1399264  | 1188781  | 1556714  | 639313.7 |
| 18.36417 | 4  | 3 | 1 | 280419   | 2659721  | 1545352  | 2796522  | 1258016  | 3155598  | 2886435  | 2392237  | 301433.3 |
| 9.388367 | 10 | 4 | 5 | 2067120  | 10499102 | 10523603 | 9626425  | 7071619  | 6478526  | 28454081 | 7209617  | 877762.7 |
| 10.008   | 10 | 5 | 5 | 842574   | 2729029  | 698162.1 | 2808949  | 931186.2 | 2845354  | 3520377  | 3252172  | 1934046  |
| 9.848417 | 10 | 5 | 5 | 1285184  | 5178232  | 1392225  | 5052960  | 1185488  | 5413230  | 2877028  | 5059806  | 6302629  |
| 9.992233 | 10 | 5 | 5 | 1379131  | 2368426  | 959228.1 | 2502199  | 1684311  | 2790792  | 3689671  | 2487830  | 1378945  |
| 9.406667 | 7  | 3 | 3 | 1911242  | 7831825  | 5777135  | 8373228  | 5402945  | 5756615  | 2915719  | 2790540  | 15748156 |
| 9.8322   | 7  | 5 | 2 | 897780.9 | 2123262  | 641936.9 | 2172558  | 306851.2 | 2944664  | 2494233  | 1862638  | 1248727  |
| 10.45433 | 10 | 5 | 5 | 187981.3 | 609045.4 | 243518.8 | 586658.4 | 218335.4 | 961376.9 | 544827.4 | 507198.4 | 314388.1 |
| 10.00998 | 8  | 4 | 4 | 285781.5 | 578870.1 | 289552.1 | 601699.7 | 159954.1 | 181427.9 | 758063   | 934594.7 | 578328.3 |
| 10.18477 | 6  | 2 | 3 | 351129.6 | 488268.9 | 186936.7 | 468129.5 | 227247.5 | 231866.3 | 738908.5 | 424110.3 | 571489.5 |
| 10.91407 | 5  | 2 | 3 | 145676.6 | 344277.1 | 98174.06 | 333620.7 | 120922.2 | 324440.5 | 426462.2 | 440577.6 | 195865.1 |
| 17.3215  | 7  | 3 | 3 | 292280.4 | 2411977  | 1035587  | 2325638  | 716856.8 | 3256402  | 3331457  | 2413444  | 763461.5 |
| 9.992233 | 6  | 3 | 3 | 5239475  | 3105090  | 4126352  | 2754406  | 3035499  | 550298.1 | 421152   | 662868.6 | 10020765 |
| 29.73183 | 7  | 4 | 3 | 290424   | 1143778  | 606066.2 | 1089018  | 525293.6 | 705090.6 | 754038.4 | 923011.4 | 1155648  |
| 9.960467 | 10 | 5 | 5 | 4005845  | 16016915 | 4341795  | 15594857 | 4409135  | 18635152 | 21838805 | 15508218 | 10838232 |
| 8.8977   | 6  | 4 | 2 | 263148.1 | 2412483  | 1266940  | 2515912  | 819557.6 | 2565428  | 3863398  | 2772485  | 373663.7 |
| 9.816317 | 5  | 3 | 2 | 1138949  | 2682455  | 1317859  | 2563076  | 1153649  | 1688676  | 1995740  | 4621351  | 3473888  |
| 10.9645  | 10 | 5 | 5 | 4599072  | 19408322 | 5384053  | 18962970 | 3660433  | 24779907 | 25293378 | 15448191 | 13505946 |
| 36.151   | 5  | 3 | 2 | 137922.9 | 597390.2 | 288542.9 | 625197   | 289014.3 | 1048062  | 242135.3 | 547824.3 | 584695.9 |
| 9.0035   | 5  | 4 | 1 | 1511376  | 1193253  | 1917110  | 1354293  | 1372028  | 339983.9 | 297035   | 372988.3 | 333914   |
| 10.046   | 10 | 4 | 5 | 497205.3 | 2044100  | 342700.4 | 1968637  | 1031045  | 2080389  | 2291075  | 1641454  | 1758674  |
| 9.419733 | 7  | 4 | 2 | 2456032  | 4410527  | 6797113  | 4980136  | 4847235  | 1078983  | 527251.3 | 16519422 | 2069889  |
| 10.57323 | 10 | 5 | 5 | 4946815  | 14610999 | 3595502  | 15304291 | 9358412  | 16456953 | 19438149 | 14826122 | 10382191 |
| 14.70718 | 7  | 3 | 4 | 41741.54 | 162982.2 | 45491.04 | 169432.1 | 82342.63 | 115396.4 | 216925   | 171667   | 117284.5 |
| 10.45545 | 10 | 5 | 5 | 998564.5 | 3027593  | 771352.5 | 3118116  | 1081641  | 4334650  | 2937940  | 2680404  | 2305845  |

|          |    |   |   |          |          |          |          |          |          |          |          |          |
|----------|----|---|---|----------|----------|----------|----------|----------|----------|----------|----------|----------|
| 10.91977 | 5  | 2 | 3 | 200073.7 | 518760.1 | 245502.9 | 547401   | 341860.3 | 238931.1 | 543634.7 | 302641.2 | 706854.6 |
| 24.01583 | 5  | 4 | 1 | 220911.8 | 589632.1 | 345910.8 | 553702.9 | 401171.8 | 380479.6 | 835007.7 | 80052.68 | 864773   |
| 10.008   | 10 | 5 | 5 | 850302   | 2827603  | 651819   | 2753948  | 868530.4 | 3253839  | 3520568  | 3048956  | 1945133  |
| 9.976317 | 5  | 3 | 2 | 647800.6 | 1024400  | 661916.7 | 1082326  | 541942.2 | 1292695  | 0        | 1332968  | 1714965  |
| 9.912633 | 10 | 5 | 5 | 2963055  | 6764168  | 1321825  | 6617448  | 1716028  | 9094084  | 6490049  | 5934958  | 6301521  |
| 9.979667 | 11 | 5 | 4 | 1868014  | 4081948  | 1427116  | 3939830  | 1548404  | 6008423  | 4143764  | 4631882  | 2139119  |
| 9.01065  | 8  | 4 | 4 | 328945.7 | 620461.6 | 357022.2 | 658412.4 | 434396.7 | 945626.7 | 810009.1 | 800397.2 | 490570.1 |
| 9.870017 | 10 | 5 | 5 | 15944591 | 78502952 | 23498122 | 76506035 | 17966959 | 98771343 | 94702686 | 46071342 | 61066332 |
| 9.976317 | 10 | 5 | 5 | 1006304  | 2886174  | 582569.4 | 2983311  | 1298945  | 2954989  | 3500585  | 3371373  | 2132717  |
| 9.951283 | 9  | 5 | 4 | 1640125  | 4359218  | 1200107  | 4458210  | 843056.3 | 3998242  | 6345894  | 3091607  | 4099886  |
| 8.94605  | 4  | 3 | 1 | 139388.7 | 230643.2 | 96494.89 | 220335.8 | 119021.5 | 236635   | 184877.8 | 371139.7 | 252055.1 |
| 36.972   | 3  | 3 | 0 | 292356.4 | 4382337  | 1100648  | 4458947  | 126537.3 | 2493330  | 4690504  | 4518658  | 4859147  |
| 10.03947 | 9  | 5 | 4 | 401180   | 1028951  | 212142.8 | 1072640  | 603170.6 | 685605.4 | 1114878  | 1252145  | 999441.6 |
| 9.9847   | 5  | 3 | 2 | 207352.6 | 398366   | 244199.2 | 423410.3 | 282746.2 | 0        | 558158.6 | 512680.2 | 331042.8 |
| 20.30317 | 6  | 3 | 3 | 60703576 | 1.02E+08 | 1.39E+08 | 1.16E+08 | 1.58E+08 | 859078.3 | 326065.6 | 517339.4 | 2.31E+08 |
| 9.8445   | 8  | 5 | 3 | 698001   | 1992312  | 756201.6 | 1901613  | 1117365  | 1353020  | 2511802  | 1026081  | 2328611  |
| 10.02372 | 10 | 5 | 5 | 284303.1 | 703802.6 | 174299.3 | 684650.9 | 226241.7 | 609189.6 | 949583.3 | 789939.2 | 676213.9 |
| 9.992233 | 7  | 4 | 3 | 886679.9 | 1458271  | 779247.5 | 1554564  | 1200750  | 1856453  | 2626985  | 1156337  | 907127.9 |
| 10.97242 | 9  | 4 | 5 | 849415.7 | 4420277  | 470692.5 | 4345415  | 1000079  | 5004636  | 4703769  | 3773473  | 4205886  |
| 23.17633 | 5  | 3 | 2 | 103823.3 | 518606.7 | 154390   | 503257.9 | 169831.2 | 646819.2 | 626235.6 | 259696.5 | 526822.3 |
| 20.25967 | 10 | 5 | 5 | 638724.1 | 4313783  | 718363   | 4233660  | 955964.5 | 5001351  | 4816762  | 4499606  | 3203273  |
| 9.842    | 10 | 5 | 5 | 582736.8 | 2234001  | 555173.3 | 2185195  | 474222.3 | 2529650  | 1742392  | 2531651  | 2819559  |
| 10.36865 | 5  | 3 | 2 | 155394.5 | 783911.9 | 162366.5 | 766817.6 | 197541.6 | 730948.7 | 670415.3 | 1050339  | 816947.6 |
| 10.16938 | 8  | 3 | 5 | 857082.6 | 1955695  | 683777.8 | 2037024  | 1001964  | 1610229  | 1120540  | 1774931  | 2419571  |
| 9.994767 | 9  | 5 | 4 | 543674.2 | 1308991  | 545860.9 | 1245278  | 779136.7 | 1550494  | 1966605  | 1452672  | 526136.1 |
| 10.008   | 7  | 4 | 3 | 325188.1 | 739635.8 | 191153.9 | 755673   | 145050.3 | 802339.9 | 611043.8 | 1049285  | 624788.1 |
| 9.999217 | 10 | 5 | 5 | 1780818  | 3210266  | 1271457  | 3042586  | 2149247  | 4126393  | 4813170  | 3099758  | 1736640  |
| 9.568567 | 8  | 5 | 3 | 302382.1 | 544598.5 | 232879.4 | 515375.9 | 368743.8 | 733116   | 830230.7 | 370647.6 | 283846.4 |
| 9.445217 | 14 | 5 | 5 | 91527264 | 6.09E+08 | 1.31E+08 | 6.27E+08 | 2.21E+08 | 5.15E+08 | 6.59E+08 | 8.19E+08 | 5.24E+08 |
| 9.992233 | 10 | 5 | 5 | 794449.4 | 1246801  | 691248.7 | 1323541  | 918928.6 | 1476936  | 2252467  | 1309364  | 588089.2 |
| 10.95055 | 8  | 3 | 5 | 496325.5 | 1229392  | 539221.4 | 1177571  | 561366.9 | 1541434  | 1963415  | 782242.6 | 658285   |
| 25.304   | 6  | 4 | 2 | 170586   | 487962.8 | 407560.5 | 452691   | 338665.8 | 165537.4 | 425904.8 | 99266.67 | 643658   |
| 10.9645  | 9  | 5 | 4 | 175238.6 | 696634.3 | 144299   | 679135.7 | 218618.1 | 759051.4 | 887344.4 | 495030.3 | 647947.4 |
| 9.40325  | 9  | 3 | 4 | 1420315  | 6342037  | 3700122  | 5948057  | 4621488  | 5840611  | 3013667  | 11851445 | 7917805  |
| 18.09933 | 5  | 1 | 4 | 313727.2 | 1724872  | 253413.2 | 1786124  | 865125.3 | 1896434  | 1593015  | 1742978  | 1373435  |

|          |    |   |   |          |          |          |          |          |          |          |          |          |
|----------|----|---|---|----------|----------|----------|----------|----------|----------|----------|----------|----------|
| 9.859983 | 10 | 5 | 5 | 2004696  | 8742299  | 1052460  | 8885747  | 1865382  | 8472004  | 7470660  | 10113215 | 9478396  |
| 9.992233 | 10 | 5 | 5 | 983929.8 | 2671881  | 1171239  | 2547273  | 1463428  | 3118558  | 4365309  | 2556697  | 1237186  |
| 9.419733 | 6  | 3 | 3 | 629929.8 | 732954   | 725988.4 | 666829.9 | 683996.7 | 1681326  | 0        | 0        | 976524.8 |
| 3.559017 | 7  | 3 | 4 | 327208.3 | 4100062  | 3293749  | 3842349  | 2019629  | 0        | 3584642  | 8933511  | 2780094  |
| 11.27298 | 9  | 5 | 4 | 525615.3 | 1559409  | 790541.8 | 1486782  | 759144.8 | 2947254  | 1337129  | 1161243  | 986875.8 |
| 40.69733 | 8  | 2 | 3 | 373118   | 4485597  | 836863.7 | 4576111  | 1077256  | 4298766  | 4030146  | 3961381  | 5964352  |
| 10.00998 | 10 | 5 | 5 | 557466   | 1080546  | 499718   | 1132147  | 596886   | 1300061  | 1632696  | 1353566  | 445078.8 |
| 9.976317 | 10 | 5 | 5 | 2000592  | 5476380  | 2028112  | 5280622  | 2151217  | 7025666  | 7786546  | 5708254  | 3048247  |
| 9.874317 | 10 | 5 | 5 | 8538151  | 33687612 | 8059276  | 34886946 | 16001198 | 43292566 | 27106282 | 41650017 | 27698450 |
| 9.983433 | 10 | 5 | 5 | 1261523  | 2920568  | 1500266  | 2767267  | 1762752  | 3886062  | 4857871  | 2896462  | 1186383  |
| 10.9645  | 10 | 5 | 5 | 413661.6 | 1516908  | 559554.3 | 1460150  | 649408.8 | 2041691  | 2203696  | 1115287  | 1022437  |
| 18.6605  | 7  | 3 | 4 | 43518.52 | 170725.5 | 112602   | 179083.7 | 53793.25 | 355184.8 | 132141.6 | 117946.4 | 60601.43 |
| 9.842    | 9  | 5 | 4 | 715221.9 | 2298135  | 290407.8 | 2363299  | 919773.7 | 2388907  | 2244825  | 1985276  | 2127240  |
| 9.994767 | 9  | 5 | 4 | 1010499  | 2395343  | 1249679  | 2277140  | 1277928  | 3896313  | 1306521  | 2937873  | 903533.8 |
| 10.9645  | 7  | 4 | 3 | 178858   | 473063.8 | 182648.4 | 456736.4 | 166089.1 | 689037.9 | 630039.4 | 402504   | 246181.3 |
| 10.21522 | 11 | 5 | 5 | 9555659  | 25961468 | 5538769  | 26856012 | 12145083 | 34286472 | 27721996 | 20638876 | 21274145 |
| 9.445217 | 14 | 5 | 5 | 2364733  | 21337538 | 4871509  | 20881391 | 4896277  | 18910423 | 26276335 | 26941695 | 17669372 |
| 28.14183 | 10 | 5 | 5 | 4562323  | 39109495 | 6434518  | 38192002 | 12163954 | 41545147 | 42282507 | 30024257 | 35323888 |
| 35.44283 | 10 | 5 | 5 | 212040.4 | 1346977  | 707725.7 | 1416615  | 783741.3 | 1888560  | 1211985  | 364626   | 2164575  |
| 9.102783 | 7  | 4 | 3 | 1267487  | 2539734  | 2321941  | 2753606  | 2265905  | 1591549  | 815743.4 | 1014965  | 2826806  |
| 10.95055 | 10 | 5 | 5 | 551509.8 | 3592998  | 651419   | 3668482  | 937059.7 | 3992374  | 4469517  | 3056974  | 2900127  |
| 9.975217 | 5  | 2 | 3 | 617750.9 | 862664.8 | 444132.9 | 810116.4 | 658402.4 | 590885.5 | 1415955  | 1156229  | 294514.8 |
| 9.960467 | 10 | 5 | 5 | 4441532  | 9007203  | 1362426  | 9270314  | 3678291  | 10771539 | 7799894  | 9764459  | 9191853  |
| 21.70333 | 7  | 4 | 3 | 95772.63 | 462442.5 | 109812.1 | 474547.7 | 146900.4 | 319477.7 | 522836.8 | 547454.6 | 553195.7 |
| 11.64913 | 10 | 5 | 5 | 1282678  | 5440007  | 873802.8 | 5287564  | 2105310  | 6250154  | 6418459  | 5001963  | 4354524  |
| 9.0258   | 7  | 4 | 3 | 192137.6 | 614734.2 | 110538.8 | 593321   | 299992.1 | 617069   | 758023.6 | 573385.2 | 665532.5 |
| 9.999217 | 7  | 3 | 4 | 346690.5 | 712927.8 | 347363.1 | 744807   | 338115.1 | 1071613  | 1026510  | 722469.9 | 479568.2 |
| 9.46925  | 5  | 3 | 2 | 629893.8 | 1250308  | 486600.8 | 1180654  | 928692.1 | 1186235  | 1509597  | 1278037  | 1790819  |
| 6.828767 | 5  | 3 | 2 | 3271806  | 87297533 | 32649824 | 90535558 | 36836314 | 38282625 | 1.17E+08 | 1.17E+08 | 78782368 |
| 9.43325  | 4  | 3 | 1 | 594199.7 | 2713253  | 1494238  | 2849042  | 1427677  | 2393535  | 4361481  | 817419.4 | 4082501  |
| 16.92833 | 10 | 5 | 5 | 695312   | 5385933  | 726309.4 | 5487632  | 1350898  | 5692521  | 5530903  | 4178017  | 6117658  |
| 9.295167 | 6  | 3 | 3 | 440498.1 | 2631146  | 1320091  | 2800494  | 2195037  | 3125786  | 1256951  | 3824832  | 3770856  |
| 7.280183 | 11 | 5 | 5 | 12237929 | 6.81E+08 | 2.81E+08 | 6.46E+08 | 4.45E+08 | 6.27E+08 | 1.03E+09 | 9.02E+08 | 3.46E+08 |
| 10.95835 | 10 | 5 | 5 | 906423.4 | 3776523  | 1128689  | 3883112  | 1170646  | 4777129  | 5078528  | 3089197  | 2411055  |
| 9.992233 | 8  | 4 | 4 | 1506494  | 3033849  | 764759.2 | 2934053  | 1304255  | 3477462  | 4124790  | 2759095  | 2199690  |

|          |    |   |   |          |          |          |          |          |          |          |          |          |
|----------|----|---|---|----------|----------|----------|----------|----------|----------|----------|----------|----------|
| 9.3332   | 3  | 3 | 0 | 510295.1 | 1055927  | 724862.9 | 999387   | 459375.9 | 1050373  | 1011334  | 2253579  | 541044.3 |
| 9.992233 | 10 | 5 | 5 | 568029   | 1459765  | 427594.2 | 1506412  | 567459.2 | 1856953  | 1803820  | 1633647  | 1058109  |
| 25.284   | 7  | 4 | 3 | 230675.2 | 1431952  | 905533.9 | 1353967  | 775442.5 | 691023.1 | 1786894  | 377132.1 | 1675703  |
| 42.99883 | 11 | 5 | 3 | 353860.4 | 6614027  | 4588193  | 6295331  | 1293016  | 14536114 | 5142279  | 3912246  | 6313774  |
| 22.14983 | 8  | 4 | 4 | 718551.6 | 3526327  | 1133002  | 3433517  | 853178.7 | 2634596  | 5431158  | 3195671  | 3614648  |
| 10.21522 | 16 | 5 | 5 | 905845.4 | 2047359  | 997189.8 | 2168859  | 1561097  | 3380364  | 1255369  | 2634082  | 938852.9 |
| 8.9256   | 6  | 3 | 3 | 181094.7 | 487551.7 | 230766.9 | 463695.9 | 283651.7 | 563138.1 | 736657.9 | 411420.6 | 596250.3 |
| 21.51867 | 10 | 5 | 5 | 2401584  | 11895297 | 5545906  | 11330618 | 6649618  | 4520527  | 12914036 | 13749554 | 8948495  |
| 9.983433 | 9  | 5 | 4 | 723688.7 | 1434953  | 581599.2 | 1387710  | 430305.6 | 1964718  | 1115993  | 1884347  | 1629620  |
| 10.67637 | 10 | 5 | 5 | 448902.4 | 2766509  | 333938.6 | 2722606  | 580283.3 | 3221182  | 2848079  | 2608163  | 2316598  |
| 25.19017 | 10 | 5 | 5 | 945283.4 | 5353228  | 1073170  | 5489135  | 1776384  | 4546278  | 5415773  | 4428286  | 5265184  |
| 10.95055 | 10 | 5 | 5 | 1055082  | 6400659  | 1275800  | 6539679  | 1709864  | 7242409  | 8196432  | 5574210  | 5138534  |
| 9.7038   | 11 | 2 | 5 | 883257.8 | 1893324  | 1179814  | 2096293  | 2839957  | 2772795  | 680480.7 | 699765.7 | 2051376  |
| 22.0905  | 9  | 5 | 4 | 139151   | 675184.5 | 341806.8 | 633897.1 | 532311.7 | 254286.7 | 1058308  | 799883.2 | 382662.6 |
| 9.1036   | 9  | 5 | 4 | 1690431  | 3749859  | 4981243  | 3334371  | 4012012  | 1181382  | 675020.2 | 739036.7 | 3793978  |
| 10.008   | 10 | 5 | 5 | 517103   | 1723646  | 341817.1 | 1685176  | 482528.2 | 1815033  | 2193864  | 1825939  | 1332310  |
| 9.43325  | 12 | 5 | 4 | 800672.1 | 6522038  | 2005330  | 6693071  | 1711211  | 5229369  | 8362174  | 8975000  | 5526793  |
| 9.992233 | 8  | 4 | 4 | 353952.3 | 969355.6 | 464958.8 | 931954.8 | 339541.5 | 968047.3 | 1493199  | 899149.1 | 251712   |
| 18.12983 | 3  | 3 | 0 | 47300.02 | 105172.1 | 35413.79 | 109738.3 | 60350.97 | 110812.1 | 89522.65 | 134788.6 | 52529    |
| 9.960467 | 10 | 5 | 5 | 4464113  | 8753636  | 1454744  | 9027746  | 3895260  | 10781998 | 7719104  | 9312512  | 8916116  |
| 10.95055 | 6  | 3 | 3 | 380675.2 | 918455   | 393763.4 | 885200.3 | 329139   | 1350653  | 1309077  | 499726.1 | 607232.3 |
| 10.02372 | 9  | 4 | 4 | 6.27E+08 | 6.75E+08 | 1.5E+09  | 5.5E+08  | 1.22E+09 | 2641619  | 3.36E+09 | 5167723  | 3733516  |
| 10.96997 | 6  | 3 | 3 | 195438.4 | 470221.6 | 260757.2 | 445702.2 | 274805.5 | 798207.2 | 649274.4 | 459436.2 | 154667.4 |
| 13.15802 | 10 | 5 | 5 | 81810.65 | 289027.7 | 124997.4 | 272464.6 | 221225.1 | 232917.6 | 157269.9 | 347696.7 | 230743.6 |
| 9.840617 | 10 | 5 | 5 | 646318   | 2365760  | 522047.6 | 2425180  | 754482.8 | 2740444  | 2224966  | 1598588  | 2316826  |
| 10.29792 | 12 | 5 | 5 | 766469.4 | 2185074  | 615661.3 | 2124066  | 717532.1 | 2734033  | 2455196  | 2599593  | 1244916  |
| 9.856867 | 6  | 3 | 3 | 1060221  | 2323935  | 769101   | 2381668  | 444682.5 | 1828676  | 1794868  | 3056369  | 3264176  |
| 9.203483 | 8  | 3 | 3 | 19052588 | 36599016 | 49372813 | 40940061 | 45858601 | 903411.8 | 1369741  | 459414   | 80182686 |
| 9.40615  | 7  | 4 | 3 | 745769.3 | 887907.6 | 640070   | 818455.6 | 864189.3 | 1353804  | 1586695  | 0        | 518530.4 |
| 9.874317 | 8  | 4 | 4 | 1072821  | 3630320  | 1292270  | 3498660  | 1585278  | 4946959  | 1667951  | 3220146  | 4588219  |
| 9.9014   | 12 | 5 | 5 | 1507851  | 4323535  | 1808659  | 4156577  | 1864583  | 5131551  | 2767379  | 4530065  | 6810322  |
| 27.28433 | 10 | 5 | 5 | 1979636  | 7598180  | 4257588  | 7054565  | 7236198  | 4372275  | 5691146  | 6092981  | 6784032  |
| 9.992233 | 9  | 4 | 5 | 1982810  | 3420838  | 1522045  | 3250956  | 2150025  | 4371193  | 5406763  | 3392754  | 1658666  |
| 9.554967 | 15 | 5 | 5 | 1150366  | 7015251  | 6038431  | 7494209  | 4331341  | 13194459 | 12722068 | 1097241  | 7368064  |
| 10.97242 | 10 | 5 | 5 | 216146   | 1162442  | 274917   | 1135401  | 319563.8 | 955889.4 | 1603240  | 1133858  | 912327.2 |

|          |    |   |   |          |          |          |          |          |          |          |          |          |
|----------|----|---|---|----------|----------|----------|----------|----------|----------|----------|----------|----------|
| 10.95835 | 6  | 3 | 3 | 1569900  | 3856613  | 3616508  | 4148408  | 2747612  | 6891816  | 8617531  | 1597239  | 1037456  |
| 10.02372 | 9  | 4 | 4 | 562475.4 | 1061970  | 791785.8 | 999534.7 | 562511.6 | 497106.2 | 644046   | 575320.6 | 2387246  |
| 10.0614  | 9  | 4 | 5 | 377650.6 | 1120231  | 215325   | 1091123  | 395359.5 | 1088622  | 1193564  | 1431997  | 1041989  |
| 10.94443 | 3  | 0 | 3 | 1097266  | 2256512  | 1292270  | 2363963  | 1069682  | 1484380  | 4323820  | 1400532  | 1336644  |
| 9.864767 | 10 | 5 | 5 | 10613310 | 78659258 | 3868414  | 77975802 | 9786017  | 78930625 | 72526209 | 81932205 | 81967032 |
| 9.976317 | 10 | 4 | 4 | 56136412 | 98161101 | 1.86E+08 | 1.15E+08 | 1.94E+08 | 16075384 | 16359265 | 25783006 | 4.31E+08 |
| 32.47467 | 10 | 5 | 5 | 154029.5 | 696597.4 | 263614.1 | 676849.4 | 157545.4 | 585694.9 | 537052.9 | 517542.9 | 689907.8 |
| 9.992233 | 10 | 5 | 5 | 1129852  | 2227748  | 713292.8 | 2133339  | 1281398  | 2667844  | 3109025  | 2264945  | 1283348  |
| 10.02372 | 7  | 4 | 2 | 400164.5 | 775868.8 | 488839.1 | 728602.2 | 556955.6 | 772913.1 | 95144.43 | 551700.2 | 1352500  |
| 10.008   | 10 | 5 | 5 | 1512587  | 2550389  | 1171286  | 2417879  | 1709983  | 2960638  | 4316966  | 2432059  | 1339700  |
| 9.994767 | 9  | 5 | 4 | 769824.8 | 1717222  | 865373.3 | 1626591  | 1127744  | 2087229  | 3030977  | 1424242  | 822265.6 |
| 9.848417 | 9  | 5 | 4 | 2562284  | 8567316  | 1818114  | 8359167  | 2703781  | 7970623  | 6309077  | 7874690  | 11046134 |
| 9.874317 | 7  | 4 | 3 | 572020.5 | 1986202  | 567851   | 2048806  | 800204.3 | 1816142  | 1302908  | 2596755  | 2550184  |
| 10.92208 | 7  | 4 | 3 | 148838.2 | 365484.9 | 196308.6 | 349175.2 | 164880.7 | 684301.4 | 358115.8 | 173241.3 | 241123.5 |
| 9.3907   | 9  | 3 | 5 | 1678687  | 6196504  | 2153964  | 6491230  | 4055233  | 3947614  | 9259428  | 4345136  | 6992336  |
| 9.960817 | 10 | 5 | 5 | 1973563  | 3816958  | 839363.4 | 3983680  | 2432701  | 4657183  | 4087149  | 4458716  | 3155618  |
| 9.992233 | 10 | 5 | 5 | 1122807  | 3122116  | 700967.7 | 3023232  | 1371082  | 3860023  | 3571749  | 3353739  | 2131388  |
| 42.79783 | 7  | 4 | 2 | 646183.1 | 5396014  | 4224149  | 5689938  | 1701097  | 514749   | 6901348  | 2971099  | 4936685  |
| 10.94443 | 5  | 2 | 3 | 180848.8 | 402656.4 | 120249.2 | 416086.8 | 173065.5 | 484918.8 | 532684.7 | 443375.5 | 260340.6 |
| 9.932033 | 10 | 5 | 5 | 1177131  | 3763400  | 1232253  | 3667691  | 859442   | 5293556  | 4856241  | 3129309  | 3050163  |
| 10.97242 | 5  | 2 | 3 | 599289.9 | 1411572  | 276196.7 | 1455811  | 629260.8 | 1646376  | 1526826  | 1559111  | 949286.7 |
| 21.44733 | 4  | 1 | 3 | 65541.17 | 238138.1 | 58352.8  | 233027.2 | 55623.96 | 219885.8 | 306998.8 | 270713.4 | 151689   |
| 9.976317 | 8  | 4 | 4 | 1041979  | 1596968  | 1125555  | 1710847  | 1397202  | 1994233  | 3210348  | 1525039  | 168154.8 |
| 9.445217 | 14 | 5 | 5 | 2.26E+08 | 1.98E+09 | 5.34E+08 | 1.93E+09 | 5.88E+08 | 1.73E+09 | 2.5E+09  | 2.61E+09 | 1.63E+09 |
| 41.388   | 3  | 0 | 3 | 332604.3 | 4603247  | 130251.6 | 4539694  | 966859.6 | 4509733  | 4764962  | 4675478  | 4627602  |
| 10.96015 | 4  | 3 | 1 | 686336.2 | 994284.7 | 411876.9 | 956806.8 | 428253.5 | 1558702  | 1122631  | 1092270  | 495742.7 |
| 11.52297 | 10 | 5 | 5 | 3605195  | 20822026 | 3262585  | 20453882 | 4809526  | 25896815 | 20303945 | 18783110 | 17414975 |
| 10.00385 | 9  | 4 | 5 | 747987.3 | 1362218  | 424703.4 | 1302822  | 829220.3 | 1595579  | 628416.7 | 1672148  | 1542227  |
| 9.986767 | 6  | 3 | 3 | 445884.3 | 646355.5 | 406026   | 685802.7 | 475207.3 | 1177219  | 858048.4 | 688135   | 145878.3 |
| 9.887133 | 7  | 3 | 4 | 2329247  | 4617500  | 1347597  | 4367133  | 3661342  | 5118126  | 3373878  | 4776228  | 3286218  |
| 26.8555  | 10 | 5 | 5 | 704350.9 | 4038676  | 805299.5 | 3965288  | 843202.6 | 3758395  | 4937273  | 3295701  | 3343307  |
| 44.73917 | 7  | 3 | 4 | 347205.7 | 5175173  | 1504878  | 5041528  | 1499481  | 7635755  | 3788656  | 4135951  | 5181716  |
| 10.008   | 9  | 5 | 4 | 396112.1 | 1148897  | 223783.4 | 1124025  | 324493.7 | 1096376  | 1327290  | 1005205  | 888616.1 |
| 35.93467 | 10 | 5 | 5 | 623795.1 | 4911607  | 1937853  | 4749479  | 1703452  | 6844408  | 4070013  | 2302792  | 6814878  |
| 10.79303 | 6  | 4 | 2 | 122687.9 | 250839.5 | 125887.3 | 240697.9 | 100820.9 | 220679.4 | 431715.5 | 301370.6 | 209211.9 |



|          |    |   |   |          |          |          |          |          |          |          |          |          |
|----------|----|---|---|----------|----------|----------|----------|----------|----------|----------|----------|----------|
| 10.9645  | 8  | 4 | 4 | 411006.1 | 1176376  | 255626   | 1211338  | 489439.4 | 1530849  | 1357062  | 1068770  | 969665.1 |
| 10.9645  | 8  | 5 | 3 | 1003335  | 2736107  | 936887.3 | 2646237  | 1084902  | 4055582  | 3206507  | 2573215  | 1607440  |
| 9.68775  | 8  | 4 | 4 | 495572.8 | 1063385  | 186294.9 | 1029997  | 489645.1 | 974994.4 | 1094319  | 1295422  | 801491.1 |
| 9.992233 | 10 | 5 | 5 | 1421234  | 3303431  | 1210618  | 3165332  | 1830840  | 4117199  | 4788060  | 3362504  | 1797798  |
| 9.419733 | 5  | 3 | 2 | 1416935  | 5109792  | 6084369  | 4652957  | 3957833  | 1547751  | 1938721  | 5756449  | 15446638 |
| 10.44215 | 10 | 5 | 5 | 643165.9 | 2242221  | 942256.5 | 2312472  | 597736.7 | 1993468  | 3755366  | 2487581  | 1483885  |
| 10.9645  | 10 | 5 | 5 | 2369960  | 10276013 | 2606793  | 10073006 | 1914158  | 12843285 | 13155573 | 8355706  | 7418913  |
| 10.9645  | 6  | 3 | 3 | 703537.4 | 1906668  | 560302.1 | 1834556  | 996076.9 | 2612276  | 1826269  | 2331471  | 1480866  |
| 9.896717 | 8  | 4 | 4 | 4656946  | 22424142 | 2913391  | 21875359 | 8114868  | 25452753 | 19760734 | 23710446 | 24306417 |
| 39.604   | 5  | 3 | 1 | 235880.5 | 2441389  | 1505965  | 2539075  | 214715.6 | 2508860  | 2387398  | 1958621  | 587842.5 |
| 28.83467 | 6  | 4 | 1 | 221360.9 | 1283322  | 785503.1 | 1342217  | 515694.9 | 859636.5 | 1818923  | 768791.1 | 574714   |
| 25.2625  | 8  | 5 | 3 | 131921.8 | 609510.4 | 165520.9 | 594604.4 | 172448.2 | 338727.7 | 722861.1 | 729291.1 | 563680.3 |
| 9.487467 | 8  | 4 | 3 | 1744014  | 5660543  | 9750237  | 6348668  | 4900452  | 1431642  | 468910.8 | 23079211 | 1525868  |
| 9.23175  | 8  | 5 | 3 | 705959.6 | 1350959  | 573213   | 1396579  | 452915.4 | 1125802  | 691409   | 1133780  | 1606650  |
| 9.94455  | 10 | 5 | 3 | 1948546  | 4497941  | 1087125  | 4337226  | 2306543  | 3377469  | 3703745  | 5719696  | 4099952  |
| 9.857683 | 7  | 4 | 3 | 669465.4 | 2179133  | 1241629  | 2326631  | 2003728  | 1332319  | 2013619  | 1917517  | 1309094  |
| 9.888767 | 10 | 5 | 5 | 2061920  | 6524533  | 1794210  | 6746230  | 3055975  | 4696181  | 8732061  | 5210007  | 8109188  |
| 9.4925   | 9  | 4 | 5 | 1493594  | 6839753  | 2144303  | 7125691  | 4025952  | 4843516  | 5769854  | 5701968  | 7690419  |
| 10.93208 | 8  | 4 | 4 | 176011.3 | 544931.4 | 83435.86 | 564620.3 | 298697.9 | 526458.8 | 458521.8 | 621300.9 | 476122.8 |
| 10.9645  | 6  | 2 | 4 | 296737.1 | 668401.8 | 327696.3 | 642050   | 270758.9 | 886667.5 | 1118116  | 438745   | 325040.6 |
| 10.32433 | 7  | 3 | 4 | 258703   | 481587.4 | 230348.2 | 515948.6 | 497090.1 | 768127.1 | 671064   | 434172.2 | 275565.2 |
| 9.872883 | 10 | 5 | 5 | 8113449  | 41406127 | 4476035  | 41964439 | 7750602  | 49003677 | 39703001 | 37146601 | 40454221 |
| 9.992233 | 10 | 5 | 5 | 987630.3 | 3033442  | 900252.6 | 2954259  | 911487.3 | 4015089  | 3673750  | 3304740  | 2121368  |
| 10.45545 | 10 | 5 | 5 | 30891640 | 1.19E+08 | 18901323 | 1.16E+08 | 34348797 | 1.49E+08 | 1.15E+08 | 1.03E+08 | 1.04E+08 |
| 9.3735   | 5  | 2 | 3 | 404141.1 | 648615.4 | 497319.2 | 681880.8 | 178235.9 | 1018084  | 1248366  | 656310.5 | 249198.8 |
| 9.872917 | 10 | 5 | 5 | 6572826  | 45374995 | 6990849  | 44846638 | 4866545  | 46306886 | 34142685 | 44328463 | 52269702 |
| 9.874317 | 6  | 2 | 4 | 663369.5 | 2429929  | 547807.5 | 2506730  | 1100239  | 3010406  | 1836494  | 2438143  | 2937856  |
| 9.859983 | 10 | 5 | 5 | 6073441  | 35967304 | 979867   | 36232726 | 4075170  | 35641479 | 36769510 | 36441826 | 34393312 |
| 9.999217 | 10 | 5 | 5 | 826637.2 | 2545418  | 734048.1 | 2473954  | 894595.4 | 2731191  | 3550400  | 2754038  | 1635777  |
| 9.992233 | 10 | 5 | 5 | 1111009  | 3032345  | 835015.3 | 2916552  | 1658860  | 3869852  | 3699448  | 3249953  | 1934393  |
| 32.34483 | 6  | 4 | 2 | 483087.2 | 11079522 | 4117084  | 10787161 | 2268453  | 7170315  | 6642290  | 11332239 | 15047074 |
| 24.23017 | 10 | 5 | 5 | 677733.6 | 2867243  | 2341335  | 2705806  | 1097186  | 5025088  | 300700.2 | 2981774  | 5319492  |
| 9.071467 | 4  | 1 | 3 | 542434   | 568838.3 | 506017   | 614110.2 | 533326.4 | 389424.3 | 205538.5 | 469709.6 | 322208   |
| 30.26467 | 10 | 5 | 5 | 825250.9 | 5567459  | 1288772  | 5414231  | 2111146  | 6215401  | 7162181  | 5546440  | 3678025  |
| 9.983433 | 10 | 5 | 5 | 621962.6 | 1994902  | 664395.9 | 2050254  | 606113.4 | 2650616  | 2567636  | 2163291  | 1339906  |

|          |    |   |   |          |          |          |          |          |          |          |          |          |
|----------|----|---|---|----------|----------|----------|----------|----------|----------|----------|----------|----------|
| 43.50283 | 8  | 2 | 4 | 392134.9 | 7631253  | 1376877  | 7869322  | 3547158  | 7272590  | 8252702  | 8607414  | 8647009  |
| 9.976317 | 10 | 5 | 5 | 1022701  | 3328977  | 278482.1 | 3262853  | 1013637  | 3696275  | 3103982  | 3561701  | 3151345  |
| 10.95835 | 6  | 3 | 3 | 482406.1 | 955563.6 | 486654.3 | 990486.5 | 286094.8 | 1808033  | 728758.7 | 799407.5 | 589316   |
| 9.986767 | 9  | 4 | 5 | 1303147  | 3489325  | 1275474  | 3639872  | 2079984  | 4477233  | 5051204  | 2988388  | 1855771  |
| 9.992233 | 10 | 5 | 5 | 2812753  | 6187039  | 2267673  | 5931554  | 3472544  | 7722506  | 8895839  | 6399285  | 3288403  |
| 41.37383 | 7  | 2 | 4 | 396025   | 6078195  | 935882.7 | 6259461  | 2745361  | 5877376  | 5029407  | 7600355  | 6009402  |
| 9.673333 | 10 | 5 | 5 | 2661980  | 7238539  | 797826.9 | 7437774  | 3079704  | 7200175  | 8152011  | 6074374  | 6987371  |
| 9.05635  | 7  | 2 | 4 | 1239273  | 5219065  | 2630548  | 4964280  | 3227070  | 6345531  | 8243097  | 6292081  | 3718961  |
| 9.986767 | 8  | 4 | 4 | 420029.2 | 1096122  | 136754.9 | 1071533  | 370657.2 | 1125552  | 958508.9 | 958721.6 | 1164282  |
| 10.95835 | 9  | 4 | 5 | 397751.1 | 1339817  | 554420.1 | 1389111  | 586378.8 | 1682528  | 2111929  | 732412.4 | 1181606  |
| 9.62055  | 15 | 5 | 5 | 1.45E+08 | 1.09E+09 | 2.18E+08 | 1.07E+09 | 3.15E+08 | 9.75E+08 | 1.15E+09 | 1.45E+09 | 9.36E+08 |
| 10.9645  | 9  | 5 | 4 | 474185   | 1296443  | 392055.7 | 1332885  | 449524   | 1900366  | 1304651  | 824540.1 | 1319915  |
| 22.58433 | 7  | 4 | 3 | 152673.6 | 467983.6 | 221696.9 | 485376.5 | 178381.5 | 302275.8 | 834019.8 | 373368.8 | 516657.3 |
| 9.8445   | 6  | 4 | 2 | 554922.6 | 1510484  | 638806.8 | 1580791  | 952862.6 | 1044044  | 1244830  | 1802420  | 2492816  |
| 9.992233 | 10 | 5 | 5 | 2757497  | 7152165  | 2794293  | 7418903  | 3358269  | 9247911  | 10098119 | 8005735  | 4037490  |
| 14.04152 | 8  | 5 | 3 | 62887.9  | 407356.9 | 167106.9 | 392875   | 168753.2 | 534394.6 | 590173.6 | 183453.5 | 299914.9 |
| 9.673333 | 10 | 5 | 5 | 18797448 | 54231830 | 11685542 | 56070044 | 27320988 | 40227406 | 60285097 | 47991711 | 52005279 |
| 9.445217 | 9  | 4 | 3 | 984033.8 | 5179905  | 1928980  | 5492126  | 4667598  | 7095102  | 5288551  | 6947254  | 3952878  |
| 9.8322   | 5  | 3 | 2 | 1083204  | 2089562  | 793718.6 | 2016808  | 894139.4 | 1630862  | 1978749  | 3383510  | 2151945  |
| 9.976317 | 7  | 4 | 3 | 1051228  | 939271   | 650111.4 | 998515.2 | 725706.8 | 1350404  | 1820809  | 804906.3 | 193462.3 |
| 9.328967 | 5  | 2 | 3 | 706612.7 | 3858196  | 2092039  | 3691972  | 1759303  | 6198059  | 4847221  | 1982709  | 1331533  |
| 9.989483 | 5  | 2 | 3 | 290947.8 | 396376.6 | 98553.97 | 412957.4 | 249636.5 | 341818.6 | 525219.7 | 441288.3 | 265527.2 |
| 40.17967 | 7  | 3 | 2 | 624050.3 | 5482048  | 2159930  | 5293539  | 2241557  | 7873806  | 7042679  | 5908744  | 2686352  |
| 9.40615  | 5  | 3 | 2 | 3103546  | 10243936 | 11657617 | 11154947 | 9487879  | 24412337 | 3073877  | 1299840  | 21452949 |
| 9.992233 | 10 | 5 | 5 | 975867.3 | 2858679  | 961702.3 | 2947102  | 1098613  | 3438766  | 4038513  | 3060899  | 1928041  |
| 9.40135  | 12 | 5 | 4 | 1788117  | 12415214 | 2090344  | 12617403 | 2604088  | 10354781 | 12399348 | 15896269 | 11965927 |
| 9.01065  | 8  | 5 | 3 | 130109.2 | 405317.2 | 184876.3 | 423409.7 | 234815.3 | 431018.4 | 670603.9 | 462662.6 | 260501   |
| 9.976317 | 8  | 5 | 3 | 549989.4 | 1306714  | 197541   | 1287020  | 258432.4 | 1526826  | 1214626  | 1099571  | 1183299  |
| 9.721317 | 4  | 1 | 3 | 469162.8 | 902812.8 | 450603.8 | 864587.8 | 444203.5 | 1357152  | 187657.9 | 1175521  | 797207.3 |
| 20.3905  | 5  | 2 | 3 | 1195790  | 7497226  | 1261565  | 7743959  | 3803142  | 6405079  | 6179021  | 7751227  | 7852114  |
| 9.976317 | 9  | 5 | 4 | 636353   | 1556891  | 582891.7 | 1495553  | 828866.3 | 2138926  | 2206067  | 1272006  | 896735.9 |
| 10.9645  | 10 | 5 | 5 | 739540.8 | 2779959  | 680703.8 | 2854068  | 1016980  | 3482191  | 3493364  | 2572168  | 1977630  |
| 10.40908 | 10 | 4 | 3 | 38419084 | 3.83E+08 | 22329293 | 3.96E+08 | 2.13E+08 | 3.87E+08 | 3.78E+08 | 3.48E+08 | 4.04E+08 |
| 10.008   | 8  | 4 | 4 | 285613.8 | 773683.4 | 256300.6 | 796672.4 | 282511.8 | 672711.9 | 1109615  | 680522.5 | 456834.4 |
| 19.23333 | 10 | 5 | 4 | 557292.8 | 2796744  | 1560697  | 2946186  | 1923663  | 2364774  | 3570546  | 4743038  | 523097.4 |

|          |    |   |   |          |          |          |          |          |          |          |          |          |
|----------|----|---|---|----------|----------|----------|----------|----------|----------|----------|----------|----------|
| 10.008   | 6  | 4 | 2 | 275987   | 446322   | 292915.8 | 422883.5 | 255706.7 | 687191.1 | 0        | 729348.8 | 369691.1 |
| 13.14267 | 4  | 3 | 1 | 2560605  | 58416167 | 47370817 | 55439032 | 8152558  | 56646890 | 1.32E+08 | 75436.44 | 43760144 |
| 40.16517 | 5  | 2 | 3 | 466929.8 | 6500781  | 662993   | 6590390  | 1315076  | 6198542  | 6091937  | 6606780  | 5995411  |
| 10.95602 | 8  | 4 | 4 | 152098.1 | 438443.3 | 171477.5 | 421061   | 231772.9 | 532424   | 516626   | 274521   | 239683.7 |
| 10.45545 | 6  | 3 | 3 | 667057.9 | 1971968  | 426432.9 | 2024977  | 763003.5 | 2506136  | 2125362  | 1764702  | 1371117  |
| 9.845483 | 10 | 5 | 5 | 2141669  | 6691346  | 1378629  | 6891672  | 2988062  | 6487278  | 6086993  | 5800045  | 9115475  |
| 9.392767 | 14 | 5 | 5 | 2147656  | 9211353  | 5676785  | 9715456  | 6178499  | 16664804 | 3611041  | 4310863  | 8153541  |
| 10.95602 | 7  | 2 | 5 | 215688   | 549780.3 | 146957.1 | 536279.6 | 170044.1 | 591716.5 | 713368.8 | 605754.7 | 317685.5 |
| 43.50283 | 5  | 2 | 3 | 325416.1 | 5017677  | 438412.3 | 4889966  | 2027636  | 4550165  | 4921735  | 5117329  | 4789380  |
| 18.02733 | 10 | 5 | 5 | 4958849  | 33079556 | 2823188  | 32651447 | 6447240  | 38050629 | 32691589 | 31474977 | 31523204 |
| 8.9459   | 7  | 4 | 3 | 3517431  | 3686037  | 6283103  | 4176693  | 5238391  | 776585.4 | 1160101  | 1049329  | 527201.9 |
| 8.911617 | 8  | 4 | 4 | 317088.3 | 1507517  | 518634.8 | 1561608  | 735079.7 | 1711723  | 1923521  | 1798960  | 1476351  |
| 28.90017 | 8  | 3 | 5 | 114864.6 | 481216.5 | 145828.7 | 461553   | 290019.8 | 655893.1 | 321971.6 | 529433.5 | 560843.3 |
| 9.089733 | 4  | 3 | 1 | 1056439  | 1811080  | 1546110  | 1696267  | 1123672  | 1318871  | 624362.2 | 832755.2 | 1831341  |
| 10.9645  | 10 | 5 | 5 | 423670.2 | 1789668  | 452361.4 | 1757831  | 277168   | 2165867  | 2375468  | 1447004  | 1369031  |
| 9.43325  | 8  | 4 | 3 | 1867448  | 6463008  | 4441922  | 6826882  | 4186667  | 14075916 | 6179920  | 2912382  | 3819058  |
| 10.94443 | 5  | 2 | 3 | 2601232  | 5947290  | 4152208  | 5529519  | 5626324  | 6986248  | 1882530  | 1446273  | 8532575  |
| 9.976317 | 8  | 4 | 4 | 806451.1 | 1492680  | 613680.9 | 1423518  | 977554.4 | 1672161  | 2338760  | 1656197  | 787096.8 |
| 16.54893 | 4  | 4 | 0 | 65121.85 | 281159.6 | 58905.86 | 287464.6 | 87488.75 | 297719.3 | 369096.8 | 273245   | 256803   |
| 10.95055 | 5  | 2 | 3 | 156640.2 | 370466.7 | 136163.9 | 383367.6 | 168360.1 | 502543.1 | 516662.3 | 247359.7 | 229042.1 |
| 44.58117 | 7  | 3 | 3 | 358762.5 | 5241498  | 1587251  | 5401413  | 2162803  | 2653349  | 5614725  | 6949952  | 5805036  |
| 9.960467 | 5  | 3 | 2 | 619446.9 | 849634.5 | 649300.8 | 790788   | 747108.5 | 1370934  | 1566790  | 881974.2 | 0        |
| 38.741   | 8  | 5 | 3 | 1062556  | 4450222  | 4030729  | 4148785  | 3066544  | 2190052  | 1567772  | 876946   | 9447899  |
| 9.559117 | 12 | 4 | 4 | 729924.8 | 1494770  | 1111144  | 1608488  | 1556194  | 2332288  | 560062.8 | 787241.2 | 770392.2 |
| 9.856867 | 10 | 5 | 5 | 3020482  | 15134119 | 1292151  | 15339314 | 3159049  | 14938593 | 13605121 | 16194231 | 16682465 |
| 9.992233 | 6  | 4 | 2 | 503216   | 665715.9 | 149545.8 | 639408.5 | 410739.5 | 786826.3 | 622566.1 | 808900.9 | 436881.8 |
| 9.872883 | 6  | 3 | 3 | 4320919  | 7265252  | 9138468  | 6609479  | 6241452  | 780188.8 | 14277419 | 19810282 | 699848.1 |
| 9.960467 | 7  | 4 | 3 | 999233.5 | 1404804  | 267163.6 | 1455814  | 804945.4 | 1684300  | 1275075  | 1537558  | 1521445  |
| 10.94208 | 5  | 1 | 4 | 209620.8 | 484860.8 | 250231.1 | 503416.1 | 190225.1 | 344835.9 | 869215.4 | 598839.6 | 251193.3 |
| 9.3332   | 9  | 4 | 4 | 1739934  | 10544183 | 2383713  | 10097456 | 7043670  | 12720164 | 6757827  | 12418855 | 10180053 |
| 22.84233 | 9  | 5 | 4 | 146370.4 | 969825.5 | 147292.8 | 988285.6 | 273353   | 808187.3 | 1148705  | 857114.3 | 1093041  |
| 9.84525  | 6  | 3 | 3 | 27939834 | 37693058 | 60863584 | 32845986 | 55383359 | 1391542  | 1.42E+08 | 41194026 | 1352186  |
| 9.999217 | 9  | 5 | 4 | 575502.9 | 1306569  | 746733.3 | 1239348  | 863549.2 | 1869787  | 2172659  | 1384169  | 448935.4 |
| 10.73262 | 5  | 2 | 3 | 132510.1 | 357644.7 | 144487.5 | 348524   | 47237.54 | 489248   | 503197   | 310018.7 | 152349.6 |
| 11.50905 | 6  | 3 | 3 | 61410.09 | 235281.2 | 79156.12 | 229317.7 | 63261.65 | 376242.5 | 193566.3 | 198605.4 | 195338.8 |

|          |    |   |   |          |          |          |          |          |          |          |          |          |
|----------|----|---|---|----------|----------|----------|----------|----------|----------|----------|----------|----------|
| 9.976317 | 7  | 3 | 4 | 463286.1 | 769462.1 | 374959.9 | 800014   | 360838.5 | 1268894  | 873391.8 | 897331.2 | 499885.8 |
| 9.960467 | 8  | 4 | 4 | 1278433  | 2584230  | 1046805  | 2476745  | 1498119  | 3559897  | 3852776  | 2119306  | 1801786  |
| 16.09423 | 5  | 3 | 2 | 95291.93 | 390721.2 | 210207.8 | 376544.9 | 115557.1 | 634777.5 | 118408.1 | 568770.1 | 308373   |
| 9.824233 | 6  | 3 | 3 | 4130742  | 6519173  | 7538087  | 5944372  | 6270056  | 1337654  | 1397104  | 933157.5 | 11568808 |
| 9.903283 | 9  | 5 | 4 | 762928.2 | 1741981  | 414549.1 | 1793098  | 759702.9 | 1723471  | 1292380  | 1382559  | 2074113  |
| 9.93625  | 5  | 1 | 3 | 2199690  | 3520833  | 1500123  | 3621174  | 796794.4 | 4276564  | 1336752  | 5365977  | 3021985  |
| 9.8322   | 9  | 5 | 4 | 1059790  | 4532697  | 1478930  | 4645264  | 1229073  | 4670383  | 4925995  | 2892991  | 3463477  |
| 9.43325  | 9  | 4 | 4 | 578132.9 | 2872201  | 981665.7 | 2785435  | 1113822  | 2441906  | 2679041  | 1876003  | 4496938  |
| 9.994767 | 8  | 4 | 4 | 862319.4 | 1179304  | 928560.7 | 1240740  | 472413.6 | 2679774  | 447392.3 | 1479828  | 646793.5 |
| 9.999    | 6  | 3 | 3 | 334841.7 | 567974.4 | 164394   | 592693.7 | 383967   | 516552.6 | 798684.2 | 657718.2 | 370263.1 |
| 9.999217 | 9  | 4 | 5 | 919468.1 | 1617942  | 783685.2 | 1530798  | 1262229  | 2116694  | 2706674  | 1364200  | 765679.7 |
| 9.960467 | 5  | 2 | 3 | 334320.9 | 657088.6 | 409298.7 | 620089.7 | 484959.9 | 1122195  | 0        | 723135.9 | 789771.4 |
| 9.960467 | 6  | 3 | 3 | 9043342  | 11473277 | 13126029 | 12650623 | 15370544 | 2228608  | 1893099  | 1593932  | 24739077 |
| 9.419733 | 9  | 4 | 3 | 826632.6 | 4747356  | 2439007  | 4548919  | 2384771  | 4417358  | 4011891  | 8476689  | 5102011  |
| 10.97857 | 10 | 5 | 5 | 282966.9 | 966178.6 | 218368   | 983834.9 | 210904.1 | 1052443  | 1083730  | 757339.1 | 1219541  |
| 10.9645  | 10 | 5 | 5 | 2379421  | 10489903 | 2325571  | 10682711 | 2364651  | 12739949 | 13259873 | 8935812  | 8269001  |
| 9.447733 | 14 | 5 | 5 | 8736480  | 67831560 | 12355759 | 70263251 | 39052922 | 67246080 | 52931108 | 86751255 | 69610579 |
| 29.848   | 9  | 4 | 5 | 89717.45 | 377830.1 | 159659.1 | 388294.4 | 78942.84 | 388901.3 | 395525.3 | 161548.8 | 607914.1 |
| 9.840617 | 6  | 3 | 3 | 478470.6 | 891478.9 | 643868.8 | 843091.6 | 528265.6 | 1479032  | 1496979  | 510245.3 | 0        |
| 9.445217 | 11 | 5 | 3 | 1632707  | 9133565  | 2408248  | 8850076  | 4216421  | 9210628  | 12351632 | 10174374 | 8050327  |
| 9.949233 | 11 | 5 | 5 | 2432178  | 12160418 | 1150522  | 12002556 | 2433426  | 12045484 | 11300985 | 13733112 | 12833521 |
| 10.94443 | 3  | 0 | 3 | 201975   | 426648.6 | 169748.5 | 444665.5 | 259011.1 | 663220.7 | 550719.4 | 325269.1 | 294589.7 |
| 9.928667 | 6  | 3 | 3 | 1272708  | 2698756  | 1994050  | 2543187  | 1803357  | 1185474  | 3014367  | 6041813  | 1488321  |
| 9.983433 | 10 | 5 | 5 | 3928038  | 11525115 | 4387978  | 11136397 | 5090663  | 13803541 | 17638609 | 11142660 | 6464599  |
| 12.74778 | 10 | 5 | 5 | 790074.1 | 9182906  | 4243925  | 9515749  | 3899438  | 13866173 | 10429896 | 3996848  | 5540982  |
| 9.512983 | 13 | 5 | 4 | 1480037  | 2259351  | 1131430  | 2359008  | 1302533  | 481217.9 | 2447661  | 2062514  | 2772880  |
| 9.41815  | 9  | 4 | 5 | 1773969  | 5251167  | 321305.3 | 5147202  | 1724662  | 4784557  | 5545906  | 5258760  | 5551022  |
| 9.912633 | 9  | 5 | 4 | 1263807  | 5669276  | 1593502  | 5817125  | 2006894  | 4924676  | 3252728  | 6754400  | 7171197  |
| 9.986767 | 6  | 2 | 4 | 396150.7 | 731649.9 | 414306.3 | 773960.6 | 603615.6 | 532038.9 | 1411129  | 750613.6 | 308615.3 |
| 10.94208 | 7  | 3 | 4 | 299680.6 | 678157.9 | 323357.1 | 651211   | 338535   | 1074353  | 973399.4 | 447543.7 | 361898.9 |
| 9.976317 | 9  | 5 | 4 | 631218   | 1421287  | 618299.4 | 1371772  | 598301.8 | 1827329  | 2206056  | 1409804  | 668982.6 |
| 9.8445   | 4  | 3 | 1 | 5988376  | 8665078  | 11144381 | 9482207  | 8783112  | 12875004 | 947008   | 26472285 | 1225229  |
| 10.9645  | 10 | 5 | 5 | 2345049  | 10262638 | 2618019  | 10076612 | 1888975  | 12890717 | 13122933 | 8387609  | 7387292  |
| 9.333667 | 5  | 3 | 2 | 730840.9 | 1916965  | 687128.5 | 1999825  | 1254908  | 2402431  | 1284558  | 1199741  | 2776345  |
| 10.008   | 8  | 4 | 4 | 611574.3 | 908216.5 | 163476.4 | 870211.8 | 625752.4 | 823727.6 | 951996.9 | 818731   | 771620.6 |

|          |    |   |   |          |          |          |          |          |          |          |          |          |
|----------|----|---|---|----------|----------|----------|----------|----------|----------|----------|----------|----------|
| 25.40583 | 5  | 3 | 2 | 334998.2 | 3242098  | 1242600  | 3163267  | 538292   | 4091696  | 3029737  | 3492342  | 1224689  |
| 9.9014   | 7  | 3 | 4 | 1048004  | 2138154  | 938525.1 | 2070289  | 716424.4 | 2819551  | 2616209  | 1421058  | 863787.2 |
| 18.96583 | 10 | 5 | 5 | 1069926  | 8144281  | 1684134  | 8257372  | 1004337  | 9298378  | 9685087  | 6542152  | 6102014  |
| 9.999217 | 10 | 5 | 5 | 829231.4 | 2371547  | 557316.7 | 2437110  | 989069.6 | 2966269  | 2894984  | 2361936  | 1827203  |
| 9.999217 | 10 | 5 | 5 | 1504899  | 3222087  | 1420351  | 3343572  | 1587245  | 4098695  | 5102247  | 3209727  | 1842703  |
| 10.45433 | 4  | 1 | 3 | 70336.76 | 125297.2 | 91907.44 | 118396.3 | 78839.96 | 276150.2 | 76650.18 | 60884.32 | 62802.71 |
| 9.859983 | 9  | 5 | 4 | 3268869  | 14649468 | 3225998  | 15135888 | 7772449  | 13146678 | 11634034 | 12662986 | 16293196 |
| 9.999217 | 10 | 5 | 5 | 540204.9 | 1158718  | 435254.9 | 1116977  | 588803.3 | 1335032  | 1722602  | 1257255  | 585588   |
| 9.976317 | 10 | 5 | 5 | 3057168  | 5458580  | 789706.3 | 5656843  | 3309997  | 6273889  | 5483859  | 6124243  | 5060188  |
| 10.95835 | 3  | 0 | 3 | 312385.7 | 652017.7 | 315354.8 | 678565.4 | 346829.3 | 856382.9 | 1094961  | 477036.2 | 321872.3 |
| 10.96997 | 9  | 4 | 4 | 254589.2 | 909957.3 | 431956.8 | 879505.2 | 319391.7 | 751440.8 | 1018753  | 255109.8 | 1135062  |
| 9.419733 | 4  | 3 | 0 | 258616.5 | 987216   | 385964.9 | 950877   | 512744.8 | 763709.7 | 1478416  | 1100215  | 1128087  |
| 10.008   | 10 | 5 | 5 | 942863.8 | 2294856  | 824491.4 | 2362624  | 872996.9 | 2805891  | 3274937  | 2500241  | 1356633  |
| 9.445217 | 14 | 5 | 5 | 10066358 | 89201697 | 20133534 | 86884772 | 35423841 | 76518223 | 1.01E+08 | 1.19E+08 | 74727374 |
| 29.87767 | 7  | 5 | 2 | 151455.8 | 689531.3 | 222294.7 | 673247.7 | 183985.4 | 347181.7 | 943893.2 | 643914.4 | 707596.7 |
| 9.946467 | 8  | 4 | 3 | 5131739  | 7269554  | 12287974 | 8147962  | 9544598  | 29218548 | 1180029  | 1294056  | 1787404  |
| 10.01477 | 10 | 5 | 5 | 438588.5 | 989055.7 | 167858   | 969762.4 | 295528   | 1091337  | 1224227  | 953856.9 | 841144.7 |
| 9.994767 | 4  | 3 | 1 | 315079.8 | 461038.9 | 190541.4 | 439142.8 | 335623.6 | 198292.9 | 731935   | 478165.6 | 481500.3 |
| 9.964417 | 9  | 5 | 4 | 1175774  | 2839780  | 1043514  | 2917871  | 915170.5 | 3649439  | 4012504  | 2550326  | 1357678  |
| 10.008   | 10 | 5 | 5 | 1062716  | 2258602  | 925136.2 | 2343941  | 1200103  | 2574388  | 3645836  | 2212506  | 1319360  |
| 9.999217 | 16 | 5 | 5 | 1037816  | 2443993  | 1621921  | 2569394  | 1532693  | 3271911  | 729582.5 | 1381005  | 2028109  |
| 9.992233 | 9  | 4 | 5 | 586765.1 | 1489245  | 470510   | 1448038  | 562402.7 | 1983391  | 1721737  | 1769199  | 1019837  |
| 43.09967 | 8  | 2 | 4 | 370629.5 | 6007127  | 3755466  | 5723379  | 3386584  | 12692582 | 4034289  | 4810085  | 3922098  |
| 9.43325  | 11 | 5 | 4 | 892733   | 5376528  | 3353572  | 5580040  | 1213527  | 7123333  | 7710809  | 8542842  | 2067165  |
| 9.8207   | 5  | 3 | 2 | 608871.4 | 1456866  | 599940.4 | 1513984  | 821408   | 1478326  | 643672.1 | 2310748  | 1578966  |
| 9.9677   | 10 | 5 | 5 | 3162584  | 9043656  | 3502013  | 8729322  | 4379254  | 11871613 | 13388045 | 8344918  | 5197228  |
| 8.93965  | 10 | 5 | 5 | 1416399  | 5152876  | 2755488  | 4917552  | 3172565  | 4617888  | 9930595  | 4109424  | 2828128  |
| 9.857683 | 5  | 3 | 2 | 2074744  | 4416507  | 2262939  | 4273158  | 1144020  | 1198398  | 3264876  | 6869158  | 4686583  |
| 9.896717 | 9  | 4 | 5 | 1940090  | 6918873  | 4106016  | 7241126  | 4046879  | 4525029  | 4061211  | 5331508  | 14055562 |
| 10.94853 | 4  | 3 | 1 | 285868.3 | 1236986  | 366484.8 | 1205719  | 422286.4 | 1843092  | 966518.6 | 1317721  | 986813.7 |
| 9.11795  | 10 | 5 | 4 | 829646.6 | 3190334  | 1057167  | 3073978  | 1776863  | 3279896  | 4989099  | 2415653  | 2690933  |
| 10.02372 | 7  | 4 | 3 | 313837.3 | 639648.4 | 165113.5 | 657183.3 | 264654   | 659200.6 | 707989.3 | 810385.9 | 654209.6 |
| 9.554967 | 9  | 5 | 4 | 423988.2 | 928431.9 | 261101.5 | 907671.3 | 264480.1 | 851662.4 | 1361552  | 726156.3 | 736451   |
| 9.388367 | 5  | 2 | 3 | 1220338  | 4324122  | 1659350  | 4528045  | 3210863  | 1623615  | 5426746  | 5059828  | 5647486  |
| 12.13705 | 3  | 3 | 0 | 49820.52 | 152741.1 | 35795.19 | 149260.4 | 50791.89 | 112114.2 | 154953.4 | 204736.2 | 164309   |

|          |    |   |   |          |          |          |          |          |          |          |          |          |
|----------|----|---|---|----------|----------|----------|----------|----------|----------|----------|----------|----------|
| 30.18267 | 10 | 5 | 5 | 189748.2 | 1045021  | 455090.2 | 1008082  | 480445.2 | 1672309  | 1039331  | 996564.7 | 392176.6 |
| 18.96567 | 10 | 5 | 5 | 5202881  | 39789664 | 6010322  | 39236812 | 7853380  | 41825221 | 41864605 | 46527227 | 30377398 |
| 9.972483 | 6  | 2 | 4 | 1278267  | 1677216  | 1011677  | 1569621  | 1630413  | 2321474  | 2985377  | 1595962  | 417306.3 |
| 10.14983 | 6  | 3 | 3 | 11003921 | 20638436 | 15296630 | 19393580 | 16277109 | 10634206 | 7057552  | 33960722 | 40283228 |
| 9.952017 | 7  | 4 | 3 | 2742848  | 4365050  | 1296633  | 4237482  | 1877613  | 6387181  | 4063172  | 3581809  | 4760379  |
| 9.970617 | 8  | 3 | 2 | 1321072  | 1848965  | 1061156  | 1914771  | 482815.3 | 2391344  | 0        | 2107764  | 2076665  |
| 10.6618  | 7  | 4 | 3 | 160230.2 | 287338.1 | 134364.2 | 277141.5 | 124587.2 | 178048.8 | 182356.4 | 324641.8 | 248937.4 |
| 18.65867 | 6  | 4 | 2 | 59206.55 | 185656.9 | 50949.12 | 180970.6 | 66937.33 | 219476.6 | 183500.1 | 104968.1 | 182580   |
| 10.58733 | 9  | 5 | 4 | 187484.9 | 482372.5 | 207053   | 466828.7 | 188328   | 309423.3 | 839362.8 | 415995.4 | 386110.8 |
| 9.960467 | 5  | 3 | 2 | 454857   | 928108.2 | 515828.7 | 885567.8 | 566754.8 | 1597422  | 1236317  | 907370.5 | 271960.5 |
| 9.992233 | 10 | 5 | 5 | 600430.1 | 1587542  | 409816.6 | 1547674  | 586816.4 | 1937110  | 1952944  | 1752389  | 1117056  |
| 9.874317 | 8  | 3 | 5 | 1191945  | 3229398  | 934037   | 3365967  | 2235956  | 3659786  | 1656000  | 3877715  | 3855038  |
| 9.262217 | 5  | 1 | 4 | 673565.4 | 3944458  | 1623987  | 3703526  | 3954533  | 4975856  | 1198820  | 5031860  | 4790848  |
| 43.02817 | 3  | 3 | 0 | 361973.8 | 4871873  | 670986.7 | 4911914  | 225423.4 | 3967210  | 5180094  | 5754440  | 4912684  |
| 10.97857 | 10 | 5 | 5 | 412833.9 | 1498666  | 271649   | 1528308  | 456221.4 | 1464965  | 1595246  | 1686707  | 1703259  |
| 10.93618 | 7  | 3 | 4 | 165543.2 | 778390.6 | 314200.9 | 753657.8 | 316841   | 1062746  | 548073.2 | 513659.9 | 593300.5 |
| 29.84833 | 10 | 5 | 5 | 20909956 | 1.82E+08 | 24749595 | 1.85E+08 | 29584745 | 1.81E+08 | 1.83E+08 | 1.5E+08  | 1.78E+08 |
| 39.17233 | 5  | 3 | 2 | 200213.5 | 806091   | 461764.9 | 775924.5 | 283603.7 | 233444.9 | 915513.5 | 869202.6 | 1469279  |
| 7.278817 | 10 | 5 | 5 | 1852899  | 94046647 | 37053695 | 91578002 | 24497026 | 65396669 | 1.45E+08 | 1.04E+08 | 1.06E+08 |
| 9.887133 | 6  | 2 | 4 | 1165018  | 2877976  | 1147967  | 2975054  | 1328359  | 2793913  | 2296818  | 3037829  | 4675531  |
| 10.008   | 6  | 4 | 2 | 388190.4 | 526915.8 | 326979.6 | 555804.2 | 406972.1 | 607349.3 | 981867.3 | 529410.9 | 71497.13 |
| 9.856867 | 10 | 5 | 5 | 7430406  | 39334336 | 5088976  | 38682122 | 10526890 | 39180508 | 32075001 | 43525008 | 44694925 |
| 9.999217 | 10 | 5 | 5 | 1186204  | 3304212  | 1338277  | 3211204  | 1024437  | 5407658  | 3759825  | 2931478  | 2249281  |
| 20.375   | 4  | 3 | 1 | 130164.8 | 773744.3 | 287766.7 | 799031   | 357990.4 | 882905.8 | 1050476  | 485424.6 | 1003215  |
| 9.864767 | 6  | 3 | 3 | 624879.1 | 2214266  | 502602.4 | 2252790  | 489249.3 | 1431291  | 2134036  | 2408067  | 2803271  |
| 10.008   | 8  | 5 | 3 | 642141.9 | 775501   | 169864.7 | 828065.2 | 916266.3 | 867296.3 | 820888.1 | 639262.7 | 567220.8 |
| 9.842    | 6  | 4 | 2 | 1228514  | 3003193  | 1346389  | 3103448  | 1234892  | 951411.2 | 2756754  | 4669430  | 3271966  |
| 9.994767 | 10 | 5 | 5 | 2687536  | 4003575  | 2426103  | 3841268  | 1673123  | 6025798  | 6418379  | 3970778  | 400828.5 |
| 9.976317 | 10 | 5 | 5 | 2003178  | 4391852  | 800505.8 | 4516493  | 2085495  | 4993300  | 3652484  | 5400666  | 4315499  |
| 40.13633 | 9  | 3 | 5 | 272036.4 | 3381580  | 1981813  | 3578105  | 2966231  | 5331009  | 2986035  | 496543.9 | 2919287  |
| 9.864767 | 10 | 5 | 5 | 1081658  | 5649697  | 1281614  | 5800038  | 2394330  | 4595234  | 5722679  | 4382871  | 5961250  |
| 18.18767 | 9  | 4 | 5 | 362497.8 | 3460875  | 500867.6 | 3506446  | 661391.4 | 2656295  | 3646659  | 3442305  | 3536508  |
| 10.21522 | 10 | 5 | 5 | 17685082 | 53199720 | 11919493 | 54670050 | 23716609 | 70838297 | 57367520 | 44516780 | 40380943 |
| 10.18477 | 15 | 5 | 5 | 3133730  | 8380725  | 5381762  | 8759866  | 4341582  | 9509908  | 3681258  | 12774621 | 14004147 |
| 9.992233 | 9  | 5 | 4 | 2259715  | 3816911  | 1562711  | 3627928  | 3037171  | 4611187  | 6102627  | 3185068  | 2084435  |

|          |    |   |   |          |          |          |          |          |          |          |          |          |
|----------|----|---|---|----------|----------|----------|----------|----------|----------|----------|----------|----------|
| 15.76082 | 10 | 5 | 5 | 145210.7 | 488271.3 | 245315.8 | 523423.3 | 584848.7 | 300522.3 | 361080.6 | 869362.1 | 599892   |
| 9.45945  | 7  | 4 | 3 | 810260.4 | 3482775  | 1149251  | 3372584  | 1651413  | 3798725  | 3128332  | 5329072  | 2492939  |
| 10.9645  | 8  | 4 | 4 | 193953   | 641065.7 | 212931.5 | 621938.8 | 277792.2 | 656920.6 | 959202.5 | 429190.7 | 462641.1 |
| 40.17967 | 6  | 3 | 2 | 395464.4 | 5267835  | 486499.9 | 5331939  | 1053333  | 4916602  | 4649237  | 5812830  | 5316793  |
| 10.95055 | 10 | 5 | 5 | 690423.4 | 2301494  | 1225277  | 2217642  | 927807.8 | 3340242  | 3650957  | 1905181  | 611185.4 |
| 9.94455  | 7  | 4 | 3 | 532072.4 | 1210726  | 219283.9 | 1179802  | 515216.6 | 1490222  | 1119494  | 1314878  | 1226226  |
| 19.80933 | 8  | 4 | 4 | 80418.54 | 247724.3 | 90476.48 | 242470.2 | 27570.62 | 405627.4 | 225459.9 | 206765.3 | 224417   |
| 9.328967 | 6  | 3 | 3 | 1438105  | 8507284  | 4139750  | 8162905  | 4791281  | 8959512  | 2178409  | 13231113 | 7453984  |
| 10.94443 | 7  | 3 | 4 | 1054314  | 1896096  | 515295.9 | 1972467  | 1282990  | 2482884  | 1986116  | 2177296  | 1710120  |
| 10.02372 | 7  | 3 | 4 | 366857.4 | 997173.2 | 419457.5 | 962548.4 | 479694.7 | 1114150  | 1602055  | 794507.5 | 465218.2 |
| 15.8626  | 7  | 2 | 3 | 638350.1 | 5647956  | 3133238  | 5417996  | 2852940  | 3530599  | 5812068  | 2363734  | 10531301 |
| 30.09567 | 10 | 5 | 5 | 3619179  | 24408353 | 5020951  | 23760981 | 10661121 | 18496921 | 24626449 | 25503741 | 21507483 |
| 9.992233 | 6  | 3 | 3 | 329407.5 | 620428.3 | 400504.5 | 651004.6 | 397202.6 | 926367.1 | 1070352  | 665239.7 | 112763.7 |
| 9.848417 | 10 | 5 | 5 | 1623530  | 6469889  | 841739.5 | 6599820  | 2200317  | 6751344  | 6163866  | 7410510  | 6835538  |
| 10.008   | 8  | 4 | 4 | 1118089  | 880403   | 690588   | 828024   | 676035.3 | 594086.2 | 721996.8 | 643583.6 | 2090727  |
| 9.419733 | 11 | 5 | 4 | 2017843  | 17967906 | 3817210  | 18270125 | 4065824  | 13531972 | 20473597 | 22272385 | 19124004 |
| 10.95095 | 3  | 0 | 3 | 343935.8 | 751695.3 | 508875.4 | 714090.8 | 472581   | 509115.4 | 1558811  | 348364.8 | 397352.8 |
| 10.9645  | 10 | 5 | 5 | 881063.1 | 3475833  | 932378   | 3408778  | 814995.5 | 4413239  | 4529866  | 3002422  | 2480940  |
| 9.960467 | 10 | 5 | 5 | 1813290  | 6300782  | 1308262  | 6188934  | 1599337  | 7244927  | 7960493  | 5854193  | 4641715  |
| 9.530583 | 10 | 5 | 4 | 2633613  | 12984961 | 9014730  | 12265265 | 9795237  | 17988634 | 3159318  | 3174175  | 20008807 |
| 10.9645  | 10 | 5 | 5 | 415339.7 | 1391948  | 428296.2 | 1363037  | 318086.3 | 1859654  | 1754538  | 1143184  | 824996.3 |
| 11.02755 | 6  | 3 | 3 | 64389212 | 1.62E+08 | 2.2E+08  | 1.8E+08  | 2.45E+08 | 1715119  | 1772974  | 3.97E+08 | 4.09E+08 |
| 8.985867 | 5  | 3 | 2 | 510598.8 | 2500178  | 1723600  | 2620466  | 1422921  | 4445483  | 3955675  | 223791.1 | 1649517  |
| 22.0015  | 5  | 3 | 2 | 79716.25 | 225288.9 | 137196.6 | 216997.1 | 66453.24 | 222829.5 | 455042.4 | 175754.7 | 182484.8 |
| 11.7578  | 7  | 3 | 4 | 83918.8  | 224171.7 | 39971.18 | 218583   | 94315.81 | 246669.8 | 154524.1 | 241581.7 | 227031   |
| 10.94962 | 6  | 3 | 3 | 262910.1 | 898753.5 | 353230.9 | 865261.5 | 511579.9 | 412597.5 | 847466   | 785251.8 | 1091255  |
| 31.16317 | 10 | 5 | 5 | 41609.22 | 194449.6 | 88592.07 | 201415.6 | 94927.65 | 126132.3 | 214349.1 | 129395.9 | 162695   |
| 9.494433 | 9  | 3 | 5 | 20764854 | 89795606 | 54199202 | 85443845 | 60344986 | 3009955  | 1.01E+08 | 1.12E+08 | 1.5E+08  |
| 9.992233 | 9  | 5 | 4 | 561308.2 | 938036.8 | 396492.8 | 972714.3 | 509632.7 | 1159737  | 1459879  | 782285.3 | 409249.5 |
| 9.371417 | 7  | 4 | 2 | 416319.3 | 3002652  | 1344920  | 2907277  | 1164760  | 3684023  | 723080.1 | 4226131  | 3129100  |
| 9.946467 | 10 | 5 | 5 | 877161.2 | 2920061  | 475996.6 | 2954291  | 427806   | 3470044  | 2820681  | 2623581  | 2345931  |
| 11.27298 | 9  | 4 | 5 | 603454.4 | 2448219  | 1315243  | 2343987  | 1439781  | 4633651  | 1967346  | 1639429  | 1345826  |
| 10.9645  | 10 | 5 | 5 | 543449.2 | 1892702  | 978538.4 | 1964339  | 917228.7 | 2850635  | 1734437  | 701020.7 | 1254886  |
| 8.93965  | 6  | 4 | 2 | 2003534  | 2763237  | 4332703  | 3068580  | 3730314  | 1099595  | 1198679  | 10491889 | 598452.7 |
| 9.43325  | 6  | 3 | 2 | 2043229  | 6913500  | 7915140  | 7434561  | 5682265  | 15977405 | 1621861  | 15167202 | 843955   |

|          |    |   |   |          |          |          |          |          |          |          |          |          |
|----------|----|---|---|----------|----------|----------|----------|----------|----------|----------|----------|----------|
| 9.4925   | 13 | 4 | 5 | 4148310  | 20765170 | 13408150 | 21848114 | 15249502 | 21509255 | 42519197 | 19769912 | 12577499 |
| 27.25633 | 9  | 5 | 4 | 240226.9 | 529493.8 | 350591.9 | 571060.7 | 687403.2 | 229706.8 | 372902.6 | 452325.7 | 457906.9 |
| 11.27298 | 5  | 2 | 3 | 208226.1 | 1060391  | 328587.6 | 1013759  | 796712   | 876688.7 | 568190.7 | 1283015  | 1329331  |
| 10.00385 | 12 | 5 | 5 | 1394700  | 3493116  | 1683218  | 3363549  | 1766512  | 4791447  | 682331.2 | 3535610  | 3651676  |
| 10.95602 | 10 | 5 | 5 | 248091.1 | 920034.5 | 217803.9 | 901803.3 | 265991.9 | 1019585  | 1250716  | 726800.8 | 751188.1 |
| 9.858833 | 7  | 3 | 4 | 1731624  | 4488605  | 3894193  | 4253830  | 2033291  | 11126663 | 1230841  | 4149703  | 3756018  |
| 10.008   | 8  | 5 | 3 | 499515.3 | 916210.6 | 104147.8 | 887050.5 | 526943.4 | 908044.5 | 821400.8 | 864953.3 | 893802.5 |
| 10.008   | 6  | 4 | 2 | 241988.9 | 496233.4 | 134145.5 | 480117.5 | 270073.6 | 545371.8 | 654618.7 | 543734.9 | 299063.6 |
| 9.960467 | 10 | 5 | 5 | 1831608  | 6183485  | 1456922  | 6070215  | 1572617  | 7247641  | 8111938  | 4927659  | 4788871  |
| 28.59133 | 5  | 3 | 2 | 77751.8  | 171661.6 | 88394.58 | 165168.3 | 85423.9  | 99963.86 | 246141.9 | 98190.48 | 127413   |
| 9.999217 | 8  | 3 | 5 | 400581.7 | 775258.9 | 287295.3 | 800915   | 390478   | 1056546  | 1092456  | 714762.7 | 474305.2 |
| 9.538267 | 11 | 5 | 4 | 1217472  | 6852685  | 2163108  | 7332252  | 8611940  | 9482696  | 5984440  | 8751766  | 5629683  |
| 9.95825  | 6  | 3 | 3 | 1309522  | 1750106  | 623235.9 | 1684071  | 1075942  | 2213078  | 2596549  | 1373338  | 1132100  |
| 9.93625  | 8  | 3 | 4 | 1668543  | 2343080  | 1328958  | 2261921  | 753087.8 | 2855656  | 0        | 2858782  | 3301696  |
| 25.3635  | 5  | 2 | 3 | 156317   | 646552.4 | 314251.1 | 671184   | 346124.3 | 437686.7 | 1118888  | 426299.1 | 426394   |
| 9.845483 | 10 | 5 | 5 | 839958.2 | 3950771  | 473439.6 | 3877989  | 1272993  | 4133836  | 3496834  | 4492307  | 4219863  |
| 5.653533 | 5  | 4 | 1 | 485263.1 | 6864237  | 1574643  | 6721662  | 2200465  | 6327649  | 8286398  | 8722555  | 5050859  |
| 9.94405  | 10 | 4 | 4 | 1712841  | 3849552  | 1469257  | 3981294  | 2026192  | 2939920  | 1714676  | 4827807  | 4601563  |
| 9.983433 | 7  | 4 | 3 | 791828.3 | 1953247  | 996064.3 | 2031599  | 1114361  | 1845342  | 3462248  | 911382.8 | 1258925  |
| 9.9014   | 10 | 5 | 5 | 822251   | 3033494  | 651171.1 | 3109960  | 1288398  | 3440295  | 2034612  | 3359462  | 3608807  |
| 9.358417 | 10 | 5 | 5 | 2711941  | 8308794  | 6985005  | 7790869  | 7054067  | 4246493  | 3820698  | 4375700  | 8844056  |
| 9.983433 | 4  | 1 | 3 | 773430.6 | 767969   | 799348.4 | 834480.9 | 990912.9 | 2009441  | 0        | 754714.2 | 937039.1 |
| 9.8445   | 9  | 5 | 4 | 734045.7 | 3632549  | 452296.7 | 3680095  | 785545   | 3770180  | 3978501  | 3238605  | 3077604  |
| 40.15283 | 9  | 3 | 3 | 393666.6 | 3526105  | 1473242  | 3645684  | 1764706  | 906339.4 | 4301590  | 4376390  | 4033478  |
| 10.9645  | 10 | 5 | 5 | 11727087 | 50453729 | 13530286 | 49595336 | 9427537  | 64789303 | 64510281 | 40144180 | 35962552 |
| 9.610767 | 9  | 5 | 4 | 604755.9 | 2123644  | 421492.1 | 2168017  | 737269   | 2280310  | 2769883  | 1828241  | 1708011  |
| 9.992233 | 10 | 5 | 5 | 513238.2 | 1513349  | 366748.5 | 1549567  | 590619.3 | 1925827  | 1645020  | 1734138  | 1062947  |
| 9.976317 | 10 | 5 | 5 | 3154527  | 9036243  | 3572612  | 8745771  | 4325720  | 11886626 | 13422337 | 8577863  | 5142062  |
| 42.7545  | 11 | 4 | 3 | 254316.9 | 3202325  | 1139570  | 3277436  | 898177.5 | 2089536  | 2904958  | 5126179  | 3077005  |
| 23.552   | 5  | 2 | 3 | 147492.4 | 601966.2 | 302929.1 | 628843   | 421122.2 | 771651.3 | 243923.2 | 918656.9 | 312468   |
| 9.95825  | 3  | 0 | 3 | 943418.4 | 2279703  | 991326.6 | 2367316  | 1370992  | 2487254  | 535275.4 | 2632339  | 2773732  |
| 11.10065 | 5  | 3 | 2 | 843648.5 | 2113184  | 1585406  | 2250478  | 2126866  | 4074599  | 3348543  | 1486619  | 126220.3 |
| 9.445217 | 13 | 5 | 5 | 1065745  | 9721747  | 2099698  | 9871506  | 2002965  | 8320385  | 11933079 | 12061184 | 7729447  |
| 22.79833 | 8  | 3 | 5 | 303821.7 | 1045676  | 298685.9 | 1019154  | 416979.2 | 536307.8 | 1221388  | 1249822  | 1019711  |
| 10.92828 | 5  | 3 | 2 | 286706.4 | 769833.5 | 348315.5 | 747405.7 | 259089.1 | 1019058  | 1174062  | 444536.7 | 382014.7 |



|          |    |   |   |          |          |          |          |          |          |          |          |          |
|----------|----|---|---|----------|----------|----------|----------|----------|----------|----------|----------|----------|
| 9.392767 | 3  | 3 | 0 | 466981.8 | 1400167  | 450869.4 | 1362311  | 579128.5 | 1050030  | 789752.7 | 1803170  | 1672238  |
| 9.976317 | 4  | 1 | 3 | 634652.7 | 876398.6 | 493374.8 | 921723.3 | 724944.4 | 1094346  | 94655.7  | 1368814  | 1099214  |
| 10.03258 | 7  | 3 | 4 | 829104   | 1462242  | 934289.6 | 1527586  | 860886.3 | 944090.8 | 681017.4 | 1425858  | 1202938  |
| 10.42575 | 12 | 5 | 5 | 487767.2 | 4758443  | 885969.7 | 4671133  | 1437896  | 5852523  | 5030616  | 4683751  | 3395363  |
| 10.95602 | 9  | 5 | 4 | 360348.5 | 838007.2 | 399978.7 | 808334.8 | 417203.1 | 1222325  | 1272670  | 770189.4 | 371383.5 |
| 30.16817 | 10 | 5 | 5 | 6607292  | 48642437 | 7532157  | 49697370 | 18761638 | 37112264 | 48933367 | 55042267 | 46521424 |
| 9.960467 | 9  | 5 | 4 | 719829.6 | 2055353  | 294204.9 | 2019698  | 620016.1 | 2266940  | 1950141  | 2456194  | 1778502  |
| 9.8445   | 9  | 5 | 4 | 1771211  | 6927964  | 1705538  | 6779230  | 2341065  | 7121672  | 7051236  | 4748092  | 6263212  |
| 9.983433 | 10 | 5 | 5 | 3843904  | 11552214 | 4301988  | 11204363 | 5254041  | 13772253 | 17494150 | 11296117 | 6486580  |
| 9.94455  | 7  | 4 | 3 | 922672.3 | 2028360  | 674333.4 | 1985481  | 495579.7 | 1254789  | 1854576  | 3013964  | 1678976  |
| 10.95055 | 10 | 5 | 5 | 366750.6 | 1973569  | 575753.9 | 1919359  | 884956.1 | 2740226  | 2232913  | 1550286  | 1278418  |
| 9.4468   | 8  | 4 | 4 | 2022429  | 6647029  | 6924174  | 7043495  | 3287487  | 18899855 | 2098490  | 4334303  | 3218909  |
| 9.374083 | 6  | 1 | 5 | 868389.9 | 2138046  | 1385482  | 2305666  | 2933806  | 1516645  | 4423986  | 2427757  | 1352117  |
| 10.008   | 13 | 5 | 4 | 865845.3 | 1455773  | 794687.1 | 1519914  | 972559.7 | 2357516  | 1192139  | 845099.3 | 645133.5 |
| 9.18195  | 6  | 3 | 3 | 6777099  | 30611521 | 34784377 | 28230692 | 31173481 | 5198478  | 1941803  | 9024931  | 73089990 |
| 9.992233 | 10 | 5 | 5 | 1912448  | 3198329  | 1533582  | 3342692  | 2365932  | 3949306  | 5376788  | 3096463  | 1572544  |
| 9.507167 | 11 | 5 | 5 | 963647.9 | 5816491  | 3636531  | 5543943  | 3926226  | 7921614  | 4348196  | 2958570  | 2703552  |
| 9.992233 | 5  | 3 | 2 | 835039.6 | 915018.5 | 78717.79 | 982065.4 | 1275104  | 859057.1 | 950831.5 | 857265.1 | 1037641  |
| 10.97857 | 9  | 5 | 4 | 303145   | 1421825  | 365374.7 | 1450234  | 422307.1 | 1558441  | 1726420  | 1125140  | 947014.8 |
| 9.912633 | 5  | 3 | 2 | 1786877  | 4813425  | 2959837  | 4599417  | 3001169  | 3121664  | 9862435  | 4757198  | 2376646  |
| 9.37735  | 8  | 3 | 3 | 803923.1 | 3616019  | 862162   | 3769666  | 2834970  | 3729637  | 4947630  | 3700916  | 2782585  |
| 9.976317 | 10 | 5 | 5 | 1743107  | 4058589  | 1952698  | 4201566  | 2031837  | 5467490  | 6578978  | 3781402  | 1941848  |
| 9.856867 | 8  | 4 | 4 | 1463179  | 6113408  | 490629.5 | 6201028  | 1617860  | 5514558  | 5817715  | 6785171  | 6367509  |
| 9.856867 | 10 | 5 | 5 | 681084.4 | 2293056  | 635471.5 | 2329837  | 334104.6 | 2408023  | 2476000  | 1405871  | 2036380  |
| 14.57592 | 8  | 4 | 4 | 50221.83 | 202803.7 | 54536    | 197361.4 | 91536.44 | 289330   | 175822.3 | 142577.7 | 208365   |
| 9.994767 | 11 | 5 | 4 | 2569837  | 4146868  | 1705962  | 4310566  | 2721075  | 4737074  | 6714760  | 3495447  | 2140952  |
| 9.932    | 11 | 4 | 5 | 822049.4 | 2342873  | 363937.2 | 2417921  | 1400575  | 1927807  | 2778529  | 2670103  | 2177820  |
| 30.19367 | 4  | 1 | 3 | 82781.62 | 201096.1 | 89725.51 | 193772.6 | 113257.4 | 314806.5 | 205346.2 | 234683.7 | 67689.55 |
| 9.994767 | 11 | 5 | 4 | 539111.3 | 990597.3 | 303447.7 | 1028843  | 681084.1 | 1224679  | 1336234  | 795227.6 | 595899.5 |
| 9.992233 | 8  | 4 | 4 | 9.24E+08 | 1.03E+09 | 2.28E+09 | 1.2E+09  | 2.68E+09 | 3357782  | 5314406  | 5.11E+09 | 3381152  |
| 9.994767 | 10 | 5 | 5 | 1105386  | 2616273  | 1144856  | 2519577  | 1527793  | 3017844  | 4254799  | 2692935  | 1283534  |
| 9.912633 | 10 | 5 | 5 | 1471703  | 7508595  | 619461.2 | 7589492  | 1451062  | 8140059  | 7606506  | 7070638  | 6694932  |
| 10.9645  | 17 | 5 | 5 | 5638215  | 5890624  | 5993874  | 6691206  | 14416242 | 2583091  | 569994.4 | 1907851  | 10065730 |
| 9.1892   | 10 | 5 | 5 | 6092362  | 14732313 | 4334248  | 14191898 | 9629352  | 14171311 | 14157935 | 11096484 | 12123084 |
| 10.008   | 6  | 3 | 3 | 477226.8 | 983625.8 | 142941.3 | 1011097  | 512410.3 | 1106623  | 1137909  | 964848.1 | 787169.9 |

|          |    |   |   |          |          |          |          |          |          |          |          |          |
|----------|----|---|---|----------|----------|----------|----------|----------|----------|----------|----------|----------|
| 14.03425 | 10 | 5 | 5 | 1525778  | 10405614 | 4048626  | 10781746 | 6218132  | 10988866 | 9097311  | 16635608 | 9838163  |
| 3.55515  | 5  | 2 | 3 | 98769.18 | 1648427  | 938057.6 | 1715528  | 944148.7 | 2623.912 | 1850408  | 2199514  | 2279401  |
| 10.9645  | 10 | 5 | 5 | 335437.6 | 1222985  | 430814.6 | 1186765  | 572959   | 1733890  | 1637689  | 859313   | 843894.3 |
| 9.933967 | 5  | 2 | 3 | 1112562  | 2208679  | 1408511  | 2294193  | 938170.2 | 3821322  | 86477.61 | 3014698  | 1798106  |
| 9.992233 | 10 | 5 | 5 | 1879443  | 5996352  | 1382262  | 5885810  | 1708495  | 7159739  | 6728631  | 7103570  | 4590579  |
| 10.01477 | 8  | 4 | 4 | 255101.8 | 659132.4 | 242155.9 | 678992.5 | 312005.5 | 560815.4 | 1053857  | 462922.2 | 495971.7 |
| 9.03715  | 11 | 5 | 5 | 2121717  | 7518180  | 2782223  | 7857677  | 6074483  | 7883776  | 11639564 | 8195618  | 5092580  |
| 9.992233 | 9  | 5 | 4 | 374437.3 | 1152037  | 203623.9 | 1177644  | 460559.4 | 1403125  | 1218869  | 1215987  | 857812.8 |
| 9.859983 | 10 | 5 | 5 | 7015586  | 34897030 | 5415471  | 35454944 | 9626697  | 38122773 | 34122461 | 26601692 | 41013965 |
| 10.72028 | 9  | 5 | 4 | 21456182 | 1.75E+08 | 25817564 | 1.7E+08  | 84161278 | 1.98E+08 | 2.06E+08 | 1.62E+08 | 1.48E+08 |
| 10.95835 | 10 | 5 | 5 | 445476   | 1628816  | 466584.7 | 1595260  | 482607.3 | 2030238  | 2225813  | 1287538  | 1198089  |
| 10.9645  | 10 | 5 | 5 | 464375.3 | 1986460  | 456853.4 | 1954623  | 444604.1 | 2546638  | 2347341  | 1653140  | 1461284  |
| 10.63232 | 10 | 5 | 5 | 323238.1 | 1045033  | 515981.7 | 1077100  | 381028.7 | 822140.9 | 1872357  | 1155261  | 865579.3 |
| 9.872883 | 10 | 5 | 5 | 2284130  | 7661511  | 1130414  | 7799018  | 2479267  | 8955481  | 7830976  | 8448012  | 6896117  |
| 10.008   | 10 | 5 | 5 | 1016550  | 2139058  | 845326.1 | 2065689  | 1201900  | 2679900  | 3237827  | 2026316  | 1075522  |
| 9.920517 | 3  | 0 | 3 | 1192729  | 1299264  | 457169.6 | 1344518  | 778627.4 | 2034398  | 911669.4 | 1023707  | 1446089  |
| 9.848417 | 5  | 2 | 3 | 9266424  | 5394103  | 8042512  | 6131908  | 12371857 | 1449345  | 19713180 | 1798840  | 949305.2 |
| 9.976317 | 9  | 4 | 5 | 713596.9 | 1839010  | 590485.9 | 1887215  | 766652.4 | 2329824  | 2573772  | 1573818  | 1561822  |
| 10.95055 | 8  | 4 | 4 | 1139273  | 2831259  | 859900   | 2756136  | 1236627  | 4086016  | 3233034  | 2044124  | 2061623  |
| 9.992233 | 10 | 5 | 5 | 726923.5 | 2112082  | 579026.5 | 2068125  | 668349.3 | 2634698  | 2294099  | 2619807  | 1360756  |
| 9.992233 | 10 | 5 | 5 | 2961273  | 9175209  | 2416939  | 8987039  | 2925143  | 10563475 | 11983452 | 10035903 | 6757141  |
| 9.976317 | 7  | 5 | 2 | 816323.8 | 1417789  | 91979.43 | 1479148  | 1199554  | 1449175  | 1283930  | 1385108  | 1534029  |
| 9.989483 | 7  | 3 | 4 | 314289.3 | 709101.3 | 500516   | 742061.9 | 440453.8 | 1313160  | 0        | 736197.2 | 492554.2 |
| 44.9835  | 9  | 5 | 4 | 523298.1 | 3324950  | 465543.2 | 3295905  | 357241.1 | 4084238  | 3402639  | 2864290  | 3162816  |
| 9.3735   | 7  | 3 | 3 | 2779519  | 9077657  | 9076528  | 8449265  | 8926414  | 1739900  | 3676279  | 2012844  | 18476577 |
| 10.28695 | 11 | 5 | 5 | 6202404  | 11502434 | 6107564  | 12015116 | 8365624  | 14765351 | 19990203 | 11055837 | 4748159  |
| 9.952017 | 7  | 4 | 3 | 520208   | 937332.9 | 481413.4 | 974875.3 | 587853   | 1173959  | 91706.42 | 1284836  | 1045602  |
| 10.95835 | 9  | 4 | 5 | 238733.8 | 726436.1 | 319563.5 | 744567.4 | 175444.4 | 1085052  | 1049225  | 517563.8 | 389139.3 |
| 9.406667 | 9  | 5 | 2 | 846627.6 | 5357081  | 2810435  | 5166983  | 2649251  | 5877155  | 583235.3 | 7651835  | 7157967  |
| 40.97067 | 11 | 4 | 1 | 334048.3 | 2565868  | 2119542  | 2450108  | 944167.6 | 5618659  | 3006200  | 3111598  | 511579.6 |
| 9.928667 | 9  | 5 | 4 | 515673.7 | 1888044  | 297858   | 1855352  | 586103.8 | 1606594  | 2393604  | 1815219  | 1771623  |
| 10.9645  | 10 | 5 | 5 | 11589093 | 50181627 | 12602553 | 49404172 | 9478564  | 64611666 | 61776989 | 40998101 | 35996254 |
| 10.9645  | 5  | 3 | 2 | 216987.9 | 693690.2 | 301549   | 668002.3 | 424303.5 | 1116869  | 819218.2 | 371942.4 | 439475.4 |
| 10.02372 | 10 | 5 | 4 | 332978.1 | 847244.9 | 188565.6 | 868650.5 | 386703   | 653072.2 | 658393.1 | 1087410  | 940769.3 |
| 43.53133 | 4  | 3 | 1 | 319632.5 | 3186321  | 1683630  | 3087537  | 1080340  | 2789891  | 6022826  | 2543580  | 3031700  |

|          |    |   |   |          |          |          |          |          |          |          |          |          |
|----------|----|---|---|----------|----------|----------|----------|----------|----------|----------|----------|----------|
| 9.9677   | 5  | 3 | 2 | 930294.3 | 2145421  | 1890615  | 2249331  | 897480.9 | 5499000  | 1062035  | 1710173  | 1275544  |
| 9.859983 | 10 | 5 | 5 | 6158615  | 36215251 | 1213920  | 36422962 | 3965865  | 35611446 | 36900223 | 36757998 | 34391434 |
| 10.00998 | 9  | 5 | 4 | 377588.3 | 922627.1 | 319863.4 | 957033.2 | 616806.4 | 756750.8 | 1299442  | 1143996  | 485909.7 |
| 9.40325  | 7  | 4 | 3 | 471224.3 | 1681616  | 1116068  | 1608085  | 1003650  | 1192141  | 1274190  | 606656.6 | 1808133  |
| 10.22632 | 8  | 4 | 4 | 257164.7 | 747989   | 148095.7 | 734429.8 | 232280.3 | 641824.4 | 840989.4 | 961143.4 | 613523.1 |
| 9.046783 | 8  | 3 | 5 | 296774.4 | 797037.3 | 253746.4 | 782891.4 | 132063   | 1090727  | 1038253  | 721743.8 | 597399.9 |
| 9.999217 | 9  | 5 | 4 | 866324.7 | 1128167  | 531211.5 | 1094087  | 449208.1 | 1857703  | 711714.6 | 1531233  | 724333   |
| 10.95055 | 9  | 4 | 5 | 146043.9 | 439601.7 | 224576.4 | 427726.6 | 79520.34 | 730294   | 603788.1 | 401262.2 | 263399.3 |
| 20.79717 | 10 | 5 | 5 | 454505.8 | 1595748  | 642073.8 | 1551529  | 637820.3 | 1298343  | 1616900  | 786903.5 | 1740056  |
| 10.43382 | 5  | 4 | 1 | 157566.7 | 463780.3 | 178364.5 | 477378.5 | 213701.2 | 346449.8 | 714405.5 | 580431.3 | 284806.6 |
| 41.316   | 7  | 3 | 3 | 718053.6 | 7445302  | 3257565  | 7202556  | 3759044  | 5695508  | 10726243 | 6251202  | 3593173  |
| 9.976317 | 9  | 5 | 4 | 747564.1 | 1525237  | 535317.7 | 1477884  | 804894.7 | 1962135  | 2184386  | 1424750  | 940183.7 |
| 10.9645  | 10 | 5 | 5 | 5312848  | 24600920 | 5050990  | 25036669 | 7333464  | 29565671 | 30344570 | 21535116 | 19075517 |
| 25.56267 | 4  | 3 | 1 | 81182.32 | 232790.7 | 198669.4 | 221172.4 | 129972.8 | 138015.9 | 82555.87 | 127335.5 | 572022.7 |
| 9.992233 | 9  | 5 | 4 | 1282038  | 3736152  | 901865.3 | 3806403  | 1123632  | 4004808  | 4698360  | 3127011  | 2505753  |
| 9.8374   | 8  | 4 | 4 | 967736.3 | 2232626  | 1080917  | 2154437  | 1188557  | 3081136  | 2026205  | 990235.9 | 1487015  |
| 9.920517 | 9  | 5 | 4 | 3006891  | 6302526  | 1446505  | 6208246  | 1289067  | 8706990  | 6341594  | 5870417  | 5730924  |
| 9.992233 | 7  | 3 | 4 | 679075.3 | 864221.7 | 484768.9 | 912629.4 | 860657   | 778513.6 | 1653495  | 898176.1 | 360213.8 |
| 10.99268 | 5  | 3 | 2 | 250216.1 | 826863.6 | 295326.4 | 808996.3 | 217905.5 | 713558.7 | 1210691  | 452000.1 | 1025225  |
| 39.6185  | 9  | 3 | 4 | 370684.8 | 5427906  | 2462952  | 5610701  | 2848352  | 4465914  | 9793676  | 4459640  | 4643602  |
| 10.95055 | 6  | 3 | 3 | 1.14E+08 | 3.27E+08 | 4.44E+08 | 2.98E+08 | 4.09E+08 | 4167433  | 2495037  | 8.17E+08 | 1769316  |
| 11.52297 | 10 | 5 | 5 | 95717.79 | 486500   | 106891.1 | 477497.9 | 150948.2 | 616133.7 | 464863.2 | 349372.7 | 433236.1 |
| 9.457083 | 12 | 5 | 5 | 937146.3 | 3504218  | 1961457  | 3367744  | 2021692  | 5474636  | 1217468  | 4045458  | 1665606  |
| 10.96997 | 10 | 5 | 5 | 823542.6 | 5611022  | 481822.9 | 5730848  | 2360576  | 5933174  | 6041954  | 5244220  | 4954212  |
| 9.992233 | 10 | 5 | 5 | 2839480  | 7880912  | 2148359  | 8057684  | 2936853  | 10003044 | 9133906  | 9138280  | 5761338  |
| 25.23217 | 5  | 3 | 2 | 101091.5 | 669985.8 | 250290.7 | 651947   | 276927.3 | 660960.3 | 952419.4 | 575189.5 | 310685.3 |
| 10.211   | 7  | 4 | 3 | 323000.6 | 761054.8 | 227758.7 | 747006.2 | 180820.6 | 561263.3 | 991584.2 | 792899.4 | 965839.2 |
| 9.842    | 6  | 3 | 3 | 1130792  | 2457917  | 1506633  | 2364817  | 1207069  | 1804598  | 1561505  | 4778385  | 1031441  |
| 9.93625  | 7  | 4 | 3 | 2880924  | 12409645 | 3012230  | 12652907 | 4044496  | 16112523 | 11722342 | 14908657 | 10226825 |
| 9.460217 | 8  | 4 | 4 | 1740309  | 6881413  | 9486049  | 7429526  | 6235448  | 4054244  | 3147622  | 1082334  | 23738318 |
| 9.992233 | 10 | 5 | 5 | 1122044  | 2677065  | 1074515  | 2759963  | 1349954  | 3486030  | 3844225  | 2948947  | 1531132  |
| 23.73233 | 10 | 5 | 5 | 2134351  | 10023186 | 1509348  | 9917016  | 1621566  | 7506239  | 11314384 | 9852031  | 10951145 |
| 43.48817 | 7  | 3 | 2 | 793507.1 | 7924538  | 5043963  | 8278428  | 5406270  | 3054431  | 6347707  | 12002330 | 3811606  |
| 10.9645  | 8  | 4 | 4 | 388094.4 | 1276954  | 266751.3 | 1252575  | 430571.4 | 1511271  | 1549581  | 976993.8 | 1025142  |
| 9.976317 | 10 | 5 | 5 | 697776.8 | 1356667  | 361730   | 1328338  | 470411.2 | 1435211  | 1746898  | 1627394  | 1082360  |

|          |    |   |   |          |          |          |          |          |          |          |          |          |
|----------|----|---|---|----------|----------|----------|----------|----------|----------|----------|----------|----------|
| 44.98333 | 7  | 3 | 3 | 281248.7 | 2413640  | 438199.2 | 2469491  | 1067819  | 2504323  | 2536412  | 1662086  | 2815296  |
| 9.541433 | 9  | 5 | 4 | 348062   | 953783.8 | 184081.9 | 923502.6 | 595876.1 | 1165121  | 709342.4 | 1079007  | 982575.8 |
| 10.97857 | 5  | 4 | 1 | 804093.8 | 1745356  | 584158.3 | 1698936  | 781342.2 | 2497394  | 2176482  | 1267380  | 1131585  |
| 3.724617 | 7  | 2 | 4 | 447598.7 | 5799203  | 3452266  | 5553404  | 3857958  | 100213.1 | 5145273  | 8838276  | 7597028  |
| 9.94455  | 10 | 5 | 5 | 865961.5 | 2516895  | 541310.2 | 2481773  | 504949   | 3051601  | 3021516  | 2205555  | 1785751  |
| 9.983433 | 11 | 5 | 5 | 1781587  | 3005989  | 1681787  | 3137937  | 2211095  | 3968969  | 5326193  | 2839202  | 1203692  |
| 10.02372 | 9  | 5 | 4 | 414608.6 | 737543.3 | 206868.7 | 760539.5 | 433048   | 777788.3 | 1030776  | 782919.3 | 478296.1 |
| 10.008   | 10 | 5 | 5 | 1118061  | 2331757  | 774578.1 | 2262773  | 1225571  | 2810005  | 3310512  | 2327083  | 1324036  |
| 9.9677   | 6  | 3 | 3 | 492906.6 | 795598.5 | 472637.8 | 830549.7 | 567396.2 | 1060026  | 0        | 1176837  | 1001072  |
| 10.95835 | 9  | 5 | 4 | 242171.7 | 961578.8 | 133938   | 942507.4 | 373008.7 | 750536.4 | 1045956  | 1085711  | 1011256  |
| 9.864767 | 8  | 5 | 3 | 1767661  | 4139094  | 1327377  | 4023827  | 2034536  | 4377994  | 3108640  | 3228348  | 6341252  |
| 38.03567 | 16 | 3 | 4 | 306434.3 | 4060351  | 1329633  | 3946642  | 1998353  | 4378647  | 5096972  | 1739889  | 4693322  |
| 25.32033 | 9  | 4 | 5 | 76721.94 | 274934.2 | 158755.3 | 264609.6 | 150850.5 | 557784.2 | 197229.4 | 206905.8 | 225643   |
| 9.4468   | 6  | 3 | 3 | 420345.6 | 1685855  | 728085.5 | 1743148  | 969967.4 | 634156.4 | 1782689  | 1926241  | 2631296  |
| 9.00395  | 7  | 4 | 3 | 437979   | 1127038  | 374866.3 | 1092066  | 635047.1 | 1432577  | 1626215  | 812969.8 | 898468.3 |
| 9.994767 | 10 | 5 | 5 | 453205.9 | 1220945  | 409683.9 | 1252210  | 521338.6 | 1437409  | 1668177  | 1418056  | 703524.6 |
| 10.85773 | 8  | 5 | 3 | 260151.4 | 482482.7 | 303534.6 | 463934.2 | 251105.2 | 316459.6 | 957487.7 | 611774.3 | 227418.4 |
| 10.008   | 10 | 5 | 5 | 2874411  | 8092255  | 2384216  | 7939223  | 2217196  | 6500145  | 11688375 | 9326649  | 5971210  |
| 8.981583 | 10 | 5 | 5 | 36167932 | 5.25E+08 | 1.04E+08 | 5.16E+08 | 1.61E+08 | 5.1E+08  | 6.93E+08 | 5.41E+08 | 4.56E+08 |
| 10.008   | 8  | 4 | 4 | 401280.4 | 709445.2 | 383736   | 735310.1 | 395744.8 | 798058.3 | 1309854  | 654654.5 | 301381.1 |
| 9.915583 | 6  | 4 | 2 | 3981712  | 6938265  | 7346433  | 6538618  | 4227654  | 4176188  | 3104653  | 20054442 | 3315985  |
| 40.98533 | 4  | 3 | 1 | 355789.7 | 7111627  | 1748395  | 7196597  | 240477.2 | 9951218  | 5305901  | 6874356  | 7228131  |
| 10.008   | 8  | 5 | 3 | 321130.4 | 701292.9 | 184991.2 | 715074.2 | 229482.8 | 865152.4 | 786514.8 | 843226.6 | 561384.5 |
| 9.40325  | 13 | 5 | 5 | 1360183  | 9170714  | 2490396  | 8974923  | 3360462  | 7609480  | 9775276  | 13161851 | 6795525  |
| 9.992233 | 8  | 4 | 4 | 2527205  | 3758024  | 1527145  | 3598917  | 3007091  | 5308064  | 4976567  | 3751271  | 1475079  |
| 9.206    | 7  | 4 | 3 | 2349638  | 10619809 | 10108647 | 11310006 | 10815529 | 6098274  | 3208534  | 8668826  | 6763982  |
| 9.986767 | 5  | 1 | 4 | 1040857  | 1167695  | 446135.8 | 1128312  | 713274.1 | 1399210  | 1687595  | 1303760  | 897055.2 |
| 9.952017 | 10 | 5 | 5 | 1845985  | 5893038  | 561660.1 | 5827663  | 1269556  | 5761329  | 6699812  | 6171172  | 5240421  |
| 10.64557 | 8  | 5 | 3 | 357650.4 | 1123139  | 408648.7 | 1101309  | 225255.4 | 992387.1 | 1800614  | 1186675  | 789179.5 |
| 9.845483 | 7  | 3 | 4 | 531563   | 1654006  | 630540.4 | 1589579  | 1222262  | 906478.1 | 1410550  | 1470145  | 1889063  |
| 19.95717 | 8  | 4 | 4 | 206160.1 | 778671.1 | 360994   | 752572.3 | 431384.2 | 426293.5 | 954126.8 | 883783.4 | 394644.2 |
| 9.992233 | 9  | 5 | 4 | 1863031  | 3037760  | 1350586  | 3156843  | 2173713  | 3723449  | 4945564  | 2923892  | 1575228  |
| 9.859983 | 10 | 5 | 5 | 3994227  | 15466897 | 4121347  | 15827083 | 6559029  | 17610989 | 19104412 | 8848867  | 17612134 |
| 9.949233 | 7  | 2 | 3 | 3503535  | 5850427  | 3827595  | 5619371  | 3216503  | 10477131 | 3468746  | 9562308  | 2908874  |
| 25.32033 | 8  | 4 | 4 | 406735.8 | 3028869  | 1944079  | 2907677  | 1763876  | 1651337  | 4481517  | 405665.5 | 3602048  |

|          |    |   |   |          |          |          |          |          |          |          |          |          |
|----------|----|---|---|----------|----------|----------|----------|----------|----------|----------|----------|----------|
| 9.967367 | 4  | 3 | 1 | 1063591  | 3190694  | 2479860  | 3333072  | 1820810  | 6451233  | 1224176  | 1192289  | 5254439  |
| 10.98385 | 9  | 4 | 2 | 233947.5 | 626039.4 | 249479   | 640967.4 | 205807.8 | 408120.7 | 648167.6 | 393773.2 | 673608.8 |
| 10.008   | 10 | 5 | 5 | 516047.6 | 1599913  | 459067.5 | 1571515  | 413417.5 | 1806633  | 2258264  | 1529461  | 1050714  |
| 9.999217 | 10 | 5 | 5 | 4604388  | 8701665  | 3957210  | 8381740  | 5720448  | 11068521 | 14133386 | 8110098  | 4319703  |
| 9.328967 | 4  | 3 | 1 | 306885.1 | 862568.9 | 597006.5 | 911035.6 | 870349.6 | 1072209  | 79228.27 | 824184.7 | 1706802  |
| 38.7695  | 7  | 3 | 3 | 347999.6 | 4970007  | 1799106  | 4859386  | 1615716  | 2114400  | 4700211  | 5024049  | 6517700  |
| 9.960467 | 10 | 5 | 5 | 24123076 | 60623337 | 24018836 | 59089802 | 23402486 | 80889332 | 89832030 | 55899587 | 35075905 |
| 10.9645  | 10 | 5 | 5 | 916445.4 | 4537464  | 1035200  | 4601815  | 953578.7 | 5608523  | 5642475  | 3762788  | 3426726  |
| 9.419733 | 7  | 3 | 2 | 1783081  | 8166143  | 3814780  | 7886487  | 4771964  | 12806129 | 7658997  | 10389436 | 7362976  |
| 28.142   | 10 | 5 | 5 | 44107.39 | 295468.7 | 45202.12 | 289260.8 | 125510.5 | 346544.1 | 325032.6 | 236964   | 261791.2 |
| 9.994767 | 10 | 5 | 4 | 1814906  | 2382022  | 937551.3 | 2324763  | 831243.1 | 3906500  | 1767950  | 2178047  | 2540550  |
| 24.6805  | 10 | 5 | 5 | 294994.8 | 919639.1 | 492200   | 947688.4 | 366190.9 | 622998.1 | 1114471  | 321620.4 | 922722.8 |
| 25.2895  | 7  | 3 | 4 | 333184.9 | 1987615  | 1393292  | 1903471  | 1210542  | 1156192  | 3090936  | 439459.4 | 1475688  |
| 9.976317 | 9  | 5 | 4 | 778167   | 1696245  | 1081212  | 1751811  | 534426.3 | 1190496  | 1565796  | 687848.2 | 3527023  |
| 17.65833 | 6  | 3 | 3 | 61113.54 | 272051.2 | 117805.7 | 265458.2 | 83423.79 | 334369.1 | 399481.1 | 85593.53 | 287998.8 |
| 9.992233 | 9  | 5 | 4 | 2348627  | 4041599  | 1727142  | 3882497  | 3008892  | 4880141  | 6557401  | 3487962  | 2061946  |
| 10.97857 | 13 | 5 | 4 | 502107.7 | 1065949  | 373085.3 | 1092728  | 454387   | 1639556  | 917985.5 | 1144865  | 623493   |
| 10.95602 | 7  | 3 | 4 | 183438   | 573665.5 | 172035.4 | 587917   | 260159.5 | 704958.1 | 731421.8 | 392882.6 | 382206.7 |
| 9.856867 | 10 | 5 | 5 | 5527888  | 28860310 | 1594712  | 28543769 | 6602617  | 31209745 | 29701879 | 27792599 | 27274191 |
| 18.67333 | 6  | 4 | 2 | 3688341  | 15074958 | 8177383  | 14410380 | 12046172 | 3229746  | 17890488 | 17977597 | 11354438 |
| 10.95835 | 6  | 2 | 4 | 211444.5 | 551417.5 | 213835   | 539567.3 | 147940.9 | 454840.9 | 894274.9 | 399761.6 | 384633.4 |
| 10.01477 | 7  | 5 | 2 | 323196.3 | 768049   | 205411.1 | 749197   | 357255.5 | 736301.8 | 1076172  | 808528.4 | 507176.5 |
| 22.56683 | 8  | 4 | 4 | 256774.5 | 1261478  | 228212.8 | 1241670  | 368973.8 | 1434357  | 948104.7 | 1448724  | 1386562  |
| 8.91745  | 9  | 4 | 5 | 307389.4 | 736993.8 | 229167.3 | 725955.3 | 64066.02 | 993393.9 | 874374.7 | 819543.5 | 549799.2 |
| 10.008   | 10 | 5 | 5 | 1113189  | 2265506  | 931950.9 | 2335021  | 1214495  | 2492097  | 3685171  | 2273709  | 1299251  |
| 29.31033 | 4  | 3 | 1 | 60021.95 | 193579.1 | 25598.78 | 196918   | 67736.64 | 153385.1 | 185658.4 | 199235.7 | 216993.1 |
| 44.40867 | 6  | 3 | 3 | 366206.5 | 5657226  | 1033609  | 5592002  | 1004894  | 5545170  | 6982265  | 4172480  | 6156222  |
| 10.9645  | 10 | 5 | 5 | 285621.2 | 1177161  | 191558.9 | 1158199  | 368559.7 | 1416516  | 1306495  | 970908.8 | 1003670  |
| 9.848417 | 6  | 3 | 1 | 8323232  | 18669543 | 11428261 | 18057100 | 7181671  | 18067447 | 35137073 | 21346588 | 3406634  |
| 9.284283 | 5  | 3 | 2 | 707432.3 | 2037251  | 1679425  | 2135448  | 1386037  | 937458.3 | 4853556  | 714173.3 | 2236020  |
| 21.65483 | 6  | 4 | 2 | 89902.3  | 300760.9 | 174307.2 | 311837.7 | 173718.5 | 181013.1 | 579724.9 | 351148.1 | 146634.2 |
| 43.89083 | 6  | 2 | 3 | 273066   | 3871717  | 2603868  | 4004479  | 1322457  | 3611608  | 3499022  | 595696.3 | 7892792  |
| 44.48033 | 6  | 2 | 3 | 498104.6 | 5291140  | 819855.4 | 5227945  | 1142545  | 5827530  | 5459798  | 4833677  | 6199957  |
| 10.95055 | 9  | 5 | 4 | 361609.9 | 1863840  | 366165.7 | 1885834  | 327133   | 2025393  | 2288317  | 1516317  | 1443909  |
| 10.97242 | 10 | 5 | 5 | 299840   | 1128402  | 501257.2 | 1101151  | 343811.1 | 1831689  | 1391387  | 1073421  | 565483.5 |

|          |    |   |   |          |          |          |          |          |          |          |          |          |
|----------|----|---|---|----------|----------|----------|----------|----------|----------|----------|----------|----------|
| 9.328967 | 5  | 3 | 2 | 429112.8 | 1037734  | 596262.5 | 1000007  | 600576.4 | 791110.3 | 260004.2 | 1097267  | 1899252  |
| 10.9645  | 6  | 3 | 3 | 465704.6 | 1532161  | 627543.9 | 1493997  | 583254.7 | 2017298  | 2299343  | 814702.8 | 1048474  |
| 20.25983 | 10 | 5 | 5 | 2071642  | 16646771 | 2700134  | 16482880 | 2512058  | 18816938 | 19550033 | 13753977 | 13931876 |
| 42.28    | 9  | 2 | 4 | 345459.7 | 3663157  | 1099241  | 3606756  | 614912.1 | 2516998  | 3472711  | 5496155  | 3402897  |
| 9.43325  | 6  | 3 | 3 | 2012455  | 14367381 | 14157637 | 13627976 | 8607146  | 33348963 | 2536357  | 8336298  | 25307221 |
| 9.972483 | 6  | 2 | 4 | 461929.7 | 641180.8 | 219693.4 | 656281.8 | 260105.8 | 826540.1 | 803717.2 | 356528.4 | 452623.4 |
| 9.43325  | 10 | 5 | 3 | 372670.3 | 1964980  | 726081.8 | 2012335  | 784405.8 | 2045768  | 2029688  | 1396510  | 3094469  |
| 10.94443 | 6  | 2 | 4 | 319325.2 | 671978.4 | 373096   | 693511.8 | 311248.1 | 585173.3 | 1279716  | 456952.1 | 310581.8 |
| 9.284683 | 5  | 4 | 1 | 325044.7 | 1331720  | 663723.5 | 1380971  | 889901.1 | 1375908  | 648080.8 | 697732.3 | 2168484  |
| 9.4775   | 7  | 4 | 2 | 399339.5 | 1396663  | 582974   | 1357362  | 669392.8 | 1682864  | 1532793  | 2088556  | 1121979  |
| 9.999217 | 10 | 5 | 5 | 1584397  | 3287237  | 1397819  | 3381978  | 1620925  | 4141742  | 5018971  | 3534885  | 1800541  |
| 9.999217 | 12 | 5 | 5 | 8786143  | 13569633 | 10479142 | 14111960 | 6270620  | 24799866 | 25165617 | 6779505  | 4140778  |
| 9.864767 | 10 | 5 | 5 | 25624952 | 1.89E+08 | 9430904  | 1.88E+08 | 24670647 | 1.9E+08  | 1.75E+08 | 1.99E+08 | 1.95E+08 |
| 6.8961   | 10 | 5 | 5 | 2221682  | 1.12E+08 | 46281199 | 1.09E+08 | 38681459 | 1.89E+08 | 84254943 | 75812788 | 1.19E+08 |
| 9.311883 | 4  | 3 | 1 | 450791.1 | 1398122  | 742839.6 | 1451761  | 962862.2 | 1491772  | 649053   | 1095128  | 2614311  |
| 9.960467 | 10 | 5 | 5 | 24202892 | 60782961 | 24129897 | 59300764 | 23508391 | 81195664 | 90112209 | 55836760 | 34897245 |
| 9.571683 | 6  | 4 | 2 | 594536.4 | 909105.1 | 777764.2 | 868283.8 | 498888.3 | 1286913  | 272511   | 129699.3 | 826003.8 |
| 10.94443 | 10 | 5 | 5 | 1087488  | 3945526  | 1061411  | 4021274  | 1357110  | 3949104  | 2655871  | 4045823  | 3506415  |
| 10.9645  | 10 | 5 | 5 | 497674.3 | 2138769  | 581927.9 | 2104353  | 525377.5 | 2636540  | 2785364  | 1999494  | 1922754  |
| 9.460217 | 9  | 4 | 4 | 1982848  | 6408095  | 4320849  | 6171036  | 3227976  | 10311920 | 3326677  | 1163446  | 11135116 |
| 10.008   | 10 | 5 | 5 | 1015339  | 2255446  | 845090.7 | 2311992  | 974039   | 2828289  | 3218221  | 2480946  | 1376412  |
| 10.37347 | 8  | 4 | 4 | 208379.3 | 468748.8 | 110046   | 478939.1 | 202470.6 | 370817   | 356648.8 | 618360.2 | 531165.7 |
| 10.19043 | 4  | 1 | 3 | 400679.8 | 5755550  | 1291597  | 5687505  | 851014.2 | 7237895  | 5731693  | 5923123  | 3692547  |
| 38.42433 | 7  | 3 | 3 | 330541.3 | 4497597  | 769086.2 | 4429829  | 1331520  | 4569786  | 3860308  | 3758103  | 4622262  |
| 9.445217 | 14 | 5 | 5 | 19005298 | 1.64E+08 | 41681024 | 1.62E+08 | 34933055 | 1.37E+08 | 2.01E+08 | 2.18E+08 | 1.32E+08 |
| 11.147   | 10 | 5 | 5 | 610596.6 | 2979191  | 347284.6 | 2955306  | 422807.3 | 2810085  | 3549629  | 3033322  | 2855807  |
| 18.93683 | 4  | 1 | 3 | 47797.44 | 103686.4 | 62760.74 | 107200.1 | 50408.85 | 61600.47 | 142888.5 | 165717.7 | 15586.91 |
| 10.008   | 10 | 5 | 5 | 1101139  | 2247414  | 872266.3 | 2179650  | 1284360  | 2699896  | 3401463  | 2316862  | 1188574  |
| 9.59825  | 5  | 3 | 2 | 273862.5 | 845550.4 | 404018.9 | 863925.2 | 82432.11 | 895463.1 | 1330677  | 626090.4 | 289559.8 |
| 9.979667 | 10 | 5 | 5 | 605586.1 | 1450997  | 619985.5 | 1495083  | 802408.7 | 1797511  | 2177497  | 1666835  | 727525   |
| 9.91875  | 4  | 1 | 3 | 1077467  | 1783365  | 937069   | 1729486  | 814200.6 | 2680617  | 305339.3 | 1611313  | 1835899  |
| 9.986767 | 4  | 1 | 3 | 635553.6 | 652702.7 | 602575.4 | 696684.2 | 812696.6 | 1583217  | 0        | 779066.2 | 273324.3 |
| 10.95835 | 10 | 5 | 5 | 432470.9 | 1504579  | 426693.1 | 1478004  | 440477.2 | 1780177  | 2091292  | 1167219  | 1074051  |
| 11.55282 | 5  | 2 | 3 | 23969494 | 49660798 | 47051235 | 46247077 | 63035577 | 86578502 | 98908474 | 62509776 | 212010.5 |
| 9.268717 | 5  | 3 | 2 | 255787.8 | 538709.2 | 207831.8 | 552452.7 | 239973.6 | 588609   | 252384.2 | 826315.4 | 559362.7 |

|          |    |   |   |          |          |          |          |          |          |          |          |          |
|----------|----|---|---|----------|----------|----------|----------|----------|----------|----------|----------|----------|
| 10.58733 | 9  | 5 | 4 | 300570.2 | 1236363  | 565450   | 1207413  | 351783   | 986005.6 | 2154405  | 1379732  | 721295.9 |
| 9.848417 | 7  | 4 | 3 | 739293.4 | 2875541  | 840296.8 | 2815460  | 1105808  | 2799491  | 1473945  | 3198276  | 3249197  |
| 9.999217 | 10 | 5 | 5 | 4622187  | 8738511  | 3931465  | 8438256  | 5710860  | 10867020 | 14255084 | 8265531  | 4474485  |
| 9.268717 | 4  | 1 | 3 | 258240.5 | 405089.7 | 187035.4 | 392313.3 | 229625   | 161559.7 | 401990.3 | 432540.8 | 681770.8 |
| 9.857683 | 9  | 4 | 5 | 1501866  | 4362004  | 1558368  | 4238899  | 2380060  | 3884769  | 3713131  | 6414822  | 2411740  |
| 9.94455  | 6  | 3 | 3 | 23676616 | 71121873 | 91392463 | 66250461 | 66217782 | 7711001  | 1.82E+08 | 431096.7 | 5770916  |
| 10.01477 | 9  | 5 | 4 | 284272.6 | 591393.6 | 161180.8 | 578054.8 | 262530   | 519726.4 | 874495   | 567304.7 | 481831.2 |
| 9.9677   | 5  | 3 | 2 | 610764.1 | 1000900  | 75097.38 | 960256.5 | 913576   | 986186.7 | 1119139  | 975560.7 | 1010089  |
| 30.226   | 10 | 5 | 5 | 250044.5 | 1608934  | 577707.9 | 1648962  | 728223.2 | 1976068  | 2310466  | 1554518  | 792989.7 |
| 9.928667 | 7  | 4 | 3 | 1807913  | 2112956  | 1261155  | 2028586  | 1503442  | 2616912  | 86555.55 | 1889414  | 2523578  |
| 9.856867 | 10 | 5 | 5 | 754330.3 | 2654728  | 663401   | 2692645  | 583447.4 | 3167997  | 3435519  | 1987885  | 1990446  |
| 10.9645  | 5  | 3 | 2 | 985994.9 | 2735550  | 800350.2 | 2819915  | 1771844  | 3160354  | 3826459  | 2686053  | 1763322  |
| 9.960467 | 8  | 3 | 5 | 972438.6 | 1482837  | 550755.4 | 1447809  | 605745.1 | 1202772  | 2424087  | 1480323  | 1280005  |
| 9.174967 | 6  | 3 | 3 | 728035.3 | 1656525  | 641033.3 | 1699405  | 770052.4 | 2228217  | 1067085  | 863143.9 | 1987905  |
| 10.008   | 7  | 4 | 3 | 662587.3 | 895879.8 | 521713.5 | 936578.4 | 793620.8 | 612841.6 | 417872.8 | 595563.2 | 1678259  |
| 38.309   | 7  | 4 | 2 | 377833.1 | 4540126  | 683311.8 | 4487856  | 1013612  | 4986023  | 4508227  | 3828667  | 3941393  |
| 9.365833 | 6  | 3 | 2 | 765063.1 | 6155044  | 1860386  | 6001067  | 3074299  | 9079503  | 4813325  | 5816438  | 4392170  |
| 12.10843 | 10 | 5 | 5 | 165796.6 | 973069.7 | 113848.5 | 958294.7 | 321217.7 | 914190.4 | 841738.9 | 1023021  | 946245.6 |
| 9.759167 | 5  | 2 | 3 | 944356.4 | 1203585  | 680843.5 | 1238164  | 436110.6 | 1369196  | 0        | 1649855  | 1543796  |
| 9.976317 | 10 | 5 | 5 | 1202304  | 4909099  | 965053   | 4974165  | 1186625  | 5441434  | 5925076  | 5405183  | 3694745  |
| 7.659217 | 8  | 4 | 3 | 3467358  | 37903137 | 14400135 | 39404134 | 31764645 | 41105846 | 38148370 | 14448574 | 42037499 |
| 10.008   | 9  | 4 | 5 | 300776.8 | 826785.4 | 310357.8 | 808085.6 | 312650.5 | 949934.1 | 1037929  | 1101792  | 701425.7 |
| 9.298683 | 12 | 5 | 5 | 791310.9 | 2338183  | 1262291  | 2409056  | 1094005  | 3032626  | 3908818  | 2520424  | 1559751  |
| 22.498   | 4  | 3 | 1 | 38859.53 | 131943.6 | 37097.13 | 134096   | 34797.47 | 162716.2 | 145346.9 | 96917.31 | 166798.9 |
| 35.97817 | 7  | 4 | 3 | 254270   | 1020914  | 705108.1 | 969765.9 | 977826.9 | 2228761  | 660845.1 | 422198.6 | 823277.5 |
| 11.99367 | 10 | 5 | 5 | 566433   | 3175946  | 587665.6 | 3134126  | 794910.6 | 3259536  | 4169497  | 2835124  | 2811502  |
| 30.27983 | 10 | 5 | 5 | 414533.8 | 3093150  | 554506.5 | 3150193  | 1213565  | 3550134  | 3726479  | 3097424  | 2443656  |
| 17.0735  | 10 | 5 | 5 | 2643092  | 12281041 | 5697472  | 11931514 | 6032511  | 4194383  | 14575398 | 18973218 | 9185681  |
| 22.756   | 10 | 5 | 5 | 1098412  | 3813118  | 2686383  | 3649719  | 2802875  | 689819.4 | 2865017  | 4616451  | 2974577  |
| 10.97857 | 11 | 5 | 5 | 374011.1 | 1623055  | 229994.5 | 1606179  | 327151.4 | 1353877  | 1416154  | 1673057  | 1797016  |
| 10.008   | 9  | 5 | 4 | 657144.6 | 945539.9 | 217149.8 | 962211.6 | 329827.4 | 1051036  | 1099202  | 884838.4 | 590873.2 |
| 9.983467 | 4  | 3 | 1 | 453977.5 | 970010.4 | 308968.6 | 947060.2 | 447927.6 | 995594.3 | 651685.2 | 1460114  | 770872.5 |
| 9.856867 | 10 | 5 | 5 | 7533971  | 40124699 | 4320623  | 39734462 | 8133295  | 39089721 | 35096732 | 44205523 | 44969457 |
| 22.987   | 7  | 3 | 3 | 48318.07 | 190827.6 | 81778.65 | 194703.3 | 40657.47 | 181786.5 | 254719.6 | 107941.9 | 117312.1 |
| 10.9645  | 10 | 5 | 5 | 467982.6 | 1848947  | 698823.1 | 1814852  | 404761.4 | 2712123  | 2246928  | 1531935  | 875001.9 |

|          |    |   |   |          |          |          |          |          |          |          |          |          |
|----------|----|---|---|----------|----------|----------|----------|----------|----------|----------|----------|----------|
| 9.992233 | 5  | 3 | 2 | 925592.4 | 878727.4 | 556469.8 | 932909.6 | 1150769  | 1456175  | 92533.41 | 1348548  | 621152.8 |
| 9.45945  | 7  | 4 | 3 | 655804.1 | 4583480  | 679370.7 | 4674335  | 2016989  | 4592515  | 4888806  | 3788277  | 5532746  |
| 9.392767 | 4  | 3 | 1 | 421621.2 | 660019.7 | 323368.2 | 619079.6 | 904997.8 | 961035.8 | 923621.2 | 153594.6 | 628464.6 |
| 9.507167 | 7  | 3 | 2 | 7247313  | 19497483 | 22832803 | 20674095 | 16336815 | 48132380 | 2845308  | 1226813  | 40453094 |
| 10.008   | 9  | 5 | 4 | 480882.8 | 1190366  | 227956.3 | 1217095  | 586427.9 | 1232972  | 983184.4 | 1526646  | 1237352  |
| 9.992233 | 6  | 4 | 2 | 456944.4 | 863160   | 344628.1 | 843102.9 | 334537.1 | 875754.6 | 696521.8 | 785610.8 | 1434102  |
| 13.14282 | 5  | 2 | 3 | 80246.67 | 327579.2 | 77462.29 | 332998.7 | 103898.3 | 223286.6 | 405402.7 | 367844.1 | 268952.5 |
| 9.94455  | 10 | 5 | 5 | 1010545  | 2377113  | 586451.7 | 2336425  | 777321.1 | 3281344  | 2609253  | 2183405  | 1800067  |
| 22.19533 | 10 | 5 | 5 | 2305268  | 7195905  | 5795113  | 7615276  | 8194733  | 11618511 | 3579880  | 15138896 | 3227101  |
| 10.8926  | 3  | 0 | 3 | 368085.9 | 861872.7 | 345097   | 887749.4 | 514404.5 | 676587.7 | 1222049  | 496127   | 674167.6 |
| 9.999217 | 10 | 5 | 5 | 571887.7 | 1108950  | 515643.1 | 1141129  | 578528.8 | 1463744  | 1760591  | 1095428  | 512706.3 |
| 9.999217 | 8  | 4 | 4 | 350650.8 | 801173   | 270531.5 | 818399.2 | 314892.8 | 1043021  | 1025823  | 907868   | 450812.1 |
| 14.61935 | 7  | 4 | 3 | 109388.1 | 843911.6 | 612693.8 | 875192.5 | 435871.1 | 1640494  | 1336783  | 547559.3 | 200460.8 |
| 10.95055 | 7  | 3 | 4 | 291212.5 | 902702.4 | 254212.4 | 888068.9 | 244910.1 | 1098448  | 1090819  | 563127.5 | 695491.5 |
| 23.01617 | 6  | 3 | 3 | 80312456 | 2.72E+08 | 3.71E+08 | 2.51E+08 | 3.52E+08 | 1039336  | 1679447  | 6.96E+08 | 1429297  |
| 9.43325  | 7  | 4 | 3 | 1124194  | 3989105  | 2456968  | 4149416  | 2993179  | 2044647  | 4788886  | 1843793  | 7837713  |
| 10.95055 | 9  | 4 | 5 | 267693.5 | 722246.9 | 291738.6 | 739656.2 | 303644.8 | 899022.8 | 1108949  | 709156   | 510389   |
| 9.43325  | 7  | 3 | 3 | 869744.6 | 3712056  | 2926788  | 3854769  | 1797179  | 6951037  | 1514281  | 6878540  | 1429076  |
| 11.43992 | 8  | 5 | 3 | 135723.2 | 545768.8 | 148190.2 | 537477.2 | 135606.1 | 519320.4 | 715702.5 | 499415.5 | 336893   |
| 9.999217 | 10 | 5 | 5 | 1092359  | 2236462  | 812016.9 | 2169108  | 1405443  | 2692801  | 3299325  | 2217339  | 1191397  |
| 11.52297 | 10 | 5 | 5 | 284029.1 | 1428897  | 563449.9 | 1400392  | 398293.6 | 2136554  | 1157565  | 1074386  | 855787.6 |
| 44.25033 | 5  | 4 | 0 | 289663.6 | 3027822  | 538472.5 | 3004452  | 130149.8 | 2572538  | 3217978  | 2400761  | 3724076  |
| 44.121   | 9  | 3 | 3 | 317081.6 | 3879116  | 1074650  | 3714492  | 3770069  | 3203282  | 3144457  | 2947040  | 5122642  |
| 9.559117 | 14 | 5 | 5 | 5224962  | 38627355 | 21094208 | 37600572 | 13193024 | 26312898 | 27917177 | 41264820 | 23338259 |
| 9.999217 | 10 | 5 | 5 | 888770.3 | 2426063  | 811072.5 | 2475813  | 901837.7 | 2824876  | 3197898  | 3008667  | 1559508  |
| 22.0635  | 10 | 5 | 5 | 96878.35 | 623256.4 | 152455.8 | 614622.7 | 145374.7 | 672728.8 | 723990.9 | 476553.5 | 449969.7 |
| 9.999517 | 5  | 2 | 3 | 2288657  | 2592962  | 3368479  | 2431373  | 1998062  | 8125214  | 239245.2 | 491781.6 | 597316.9 |
| 9.379233 | 11 | 5 | 4 | 1086963  | 7147534  | 2609217  | 7034859  | 628440.4 | 6573114  | 7148413  | 6263454  | 4336701  |
| 9.976317 | 5  | 3 | 2 | 1452040  | 1319289  | 1083581  | 1255864  | 1106572  | 826412.8 | 3132416  | 1381700  | 306661.8 |
| 9.976317 | 9  | 5 | 4 | 872560.2 | 1555781  | 457905.4 | 1519937  | 740144.6 | 2247767  | 1042419  | 1301935  | 1713928  |
| 9.79485  | 5  | 2 | 3 | 606177.3 | 1584010  | 388519.8 | 1620647  | 794885.9 | 1283251  | 1576695  | 1711837  | 2164387  |
| 17.77333 | 10 | 5 | 5 | 260810.2 | 1281210  | 365895.3 | 1262533  | 270917.4 | 1338374  | 1803243  | 1349243  | 806514.7 |
| 9.912633 | 8  | 4 | 4 | 1368997  | 2257448  | 410939.7 | 2299125  | 917010.8 | 2495185  | 2152507  | 1580499  | 2500862  |
| 9.856867 | 7  | 3 | 3 | 79556760 | 1.74E+08 | 2.19E+08 | 1.87E+08 | 2.39E+08 | 15462843 | 15332793 | 4.22E+08 | 4.05E+08 |
| 10.01477 | 5  | 2 | 3 | 10798545 | 8254687  | 15948330 | 9237489  | 18021213 | 1144506  | 36783324 | 1102258  | 976527.3 |



|          |    |   |   |          |          |          |          |          |          |          |          |          |
|----------|----|---|---|----------|----------|----------|----------|----------|----------|----------|----------|----------|
| 9.960467 | 6  | 3 | 2 | 663418.1 | 1722273  | 468752.9 | 1678248  | 957673.8 | 1608406  | 992230.6 | 1792291  | 2228873  |
| 44.98333 | 8  | 3 | 2 | 288147.1 | 3862667  | 2833001  | 3735828  | 1162864  | 1054971  | 3230108  | 3086966  | 3293758  |
| 10.9645  | 10 | 5 | 5 | 5370271  | 24785547 | 5150204  | 25153168 | 7361610  | 29867372 | 30624441 | 21718037 | 19136343 |
| 9.960467 | 5  | 2 | 3 | 732782.3 | 1095503  | 654384   | 1131525  | 594313.6 | 1525503  | 47576.3  | 1381609  | 1644111  |
| 9.999217 | 10 | 5 | 5 | 4591414  | 8919626  | 4247977  | 8621600  | 5940225  | 11516543 | 14709450 | 8327933  | 4252789  |
| 10.9645  | 4  | 1 | 3 | 262564.1 | 512649.7 | 277681.5 | 531970.9 | 383860.9 | 959047   | 582260.5 | 241926.4 | 368344.9 |
| 11.16097 | 10 | 5 | 5 | 1458992  | 9925316  | 3779493  | 9697046  | 4164890  | 14905467 | 9699045  | 4549780  | 8972111  |
| 9.43325  | 8  | 4 | 3 | 1368793  | 4351606  | 4068646  | 4582846  | 3992838  | 2208282  | 2353109  | 4091073  | 11445097 |
| 23.7695  | 9  | 5 | 4 | 298477.8 | 1462473  | 559995.8 | 1496043  | 609425.4 | 715030.6 | 1752220  | 1531220  | 1141489  |
| 9.976317 | 10 | 5 | 5 | 863734.1 | 1998559  | 1037051  | 1939034  | 1040971  | 2608192  | 3390839  | 1974630  | 877248.8 |
| 26.94033 | 5  | 3 | 2 | 107765.6 | 239186.1 | 182874.3 | 249120.2 | 163637.5 | 167947.7 | 157113.4 | 96974.17 | 216551.1 |
| 11.07605 | 6  | 3 | 3 | 6.61E+08 | 1.96E+09 | 2.68E+09 | 1.81E+09 | 2.57E+09 | 5.17E+09 | 16892219 | 4.6E+09  | 6930411  |
| 44.02033 | 7  | 2 | 3 | 405325.9 | 4149227  | 1213073  | 4210491  | 899801.7 | 4885970  | 2958854  | 5224259  | 2703265  |
| 9.903567 | 7  | 3 | 4 | 4171688  | 11222054 | 13172168 | 11938406 | 11854076 | 2265100  | 15860290 | 3275008  | 2290013  |
| 10.41105 | 10 | 5 | 5 | 746121.3 | 3017445  | 604522.1 | 3071931  | 1189781  | 3384862  | 3866903  | 2566342  | 2401625  |
| 8.902983 | 10 | 5 | 5 | 2593611  | 10811591 | 4457502  | 11069128 | 4573937  | 12570598 | 16129655 | 12769622 | 7607614  |
| 9.445217 | 13 | 5 | 5 | 48202252 | 3.24E+08 | 70345020 | 3.18E+08 | 1.33E+08 | 3.1E+08  | 4.05E+08 | 3.9E+08  | 2.64E+08 |
| 10.44888 | 3  | 3 | 0 | 172437.5 | 646551.1 | 182009.8 | 654318.3 | 49984.17 | 776190.5 | 848122.1 | 696353.1 | 454104.2 |
| 9.08685  | 9  | 5 | 4 | 3862378  | 39793368 | 14078420 | 40975365 | 25508204 | 21801936 | 58306169 | 47300278 | 40127323 |
| 10.9645  | 10 | 5 | 5 | 658024.1 | 3197242  | 526303.6 | 3230671  | 643048.6 | 3748364  | 3784805  | 2889826  | 2684122  |
| 13.7701  | 6  | 3 | 3 | 55261.59 | 163409.7 | 45130.03 | 160092.8 | 68662.65 | 205966.1 | 104048.7 | 158489.9 | 209992.5 |
| 9.960467 | 10 | 5 | 5 | 24110684 | 60319186 | 24091541 | 58965176 | 23610979 | 80765632 | 89453597 | 55896127 | 34950903 |
| 9.460217 | 10 | 4 | 4 | 924500.8 | 4280810  | 1731415  | 4374949  | 1587987  | 2531336  | 4620471  | 6686035  | 4908855  |
| 10.008   | 9  | 5 | 4 | 410815.9 | 875829.9 | 355376.4 | 897456.1 | 406152.3 | 808757.2 | 1475524  | 868459.4 | 652183.6 |
| 43.66083 | 9  | 3 | 3 | 282682.5 | 4332844  | 1272224  | 4419351  | 1739248  | 3613980  | 3236480  | 4028232  | 4293721  |
| 9.43325  | 7  | 4 | 1 | 570733   | 3803480  | 1998129  | 3976515  | 3789756  | 6612335  | 3961238  | 4252219  | 3101250  |
| 10.94208 | 5  | 3 | 2 | 573099.4 | 1053318  | 956096   | 1004128  | 776418   | 330515.2 | 542116.5 | 444270.8 | 1341067  |
| 10.03947 | 5  | 2 | 3 | 301177.4 | 644131.5 | 185665.5 | 626096.6 | 405960.8 | 457990   | 544651.3 | 696460.1 | 582746.1 |
| 9.8322   | 5  | 2 | 3 | 532622.3 | 1143042  | 707889.9 | 1182964  | 709250   | 1682395  | 1871318  | 1371712  | 470376.6 |
| 9.460217 | 6  | 3 | 3 | 1059086  | 4077540  | 2029697  | 3962057  | 2071224  | 6691216  | 4260586  | 3292910  | 4938842  |
| 43.7615  | 6  | 2 | 3 | 373222.2 | 4905986  | 659117.7 | 4853722  | 1125958  | 4940360  | 3761130  | 5371568  | 5204418  |
| 10.45545 | 11 | 5 | 5 | 1915641  | 5816117  | 1360712  | 5931731  | 2539392  | 7731252  | 6419292  | 4613518  | 4429293  |
| 30.18067 | 10 | 5 | 5 | 902939.1 | 5014789  | 1237200  | 4903570  | 2475646  | 3531896  | 5523213  | 5236450  | 4100322  |
| 10.008   | 10 | 5 | 5 | 1549402  | 3069903  | 1088186  | 3156453  | 1868217  | 3227539  | 4767020  | 2853031  | 1780227  |
| 9.933967 | 9  | 5 | 3 | 1108367  | 4131911  | 1737403  | 4053755  | 882571.2 | 3919144  | 6458171  | 2405078  | 2604262  |

|          |    |   |   |          |          |          |          |          |          |          |          |          |
|----------|----|---|---|----------|----------|----------|----------|----------|----------|----------|----------|----------|
| 9.445217 | 14 | 5 | 5 | 19375210 | 1.65E+08 | 41631964 | 1.63E+08 | 34582762 | 1.37E+08 | 2.01E+08 | 2.19E+08 | 1.32E+08 |
| 9.071517 | 6  | 3 | 3 | 174566.4 | 475199.6 | 204114.5 | 464619.1 | 171629.4 | 567239   | 601153.8 | 268204.8 | 692643.9 |
| 9.999217 | 10 | 5 | 5 | 729226.8 | 1146848  | 620851.1 | 1181114  | 602656.5 | 1427984  | 2023110  | 1164315  | 512021.1 |
| 9.999517 | 9  | 5 | 3 | 585175.8 | 1059845  | 613053.1 | 1028659  | 492987.4 | 665558   | 1107849  | 439737.8 | 1046006  |
| 9.388617 | 9  | 5 | 4 | 1458845  | 2364535  | 581596.8 | 2418196  | 1207274  | 2640110  | 2880157  | 1575041  | 1923281  |
| 9.992233 | 9  | 5 | 4 | 1055038  | 3549733  | 718169.8 | 3509284  | 728004.5 | 4022918  | 4346703  | 3215426  | 2509822  |
| 9.999    | 7  | 3 | 4 | 663444.3 | 1416812  | 832837.6 | 1459666  | 693764.5 | 2425548  | 979847.3 | 2190419  | 920893.1 |
| 9.976317 | 10 | 5 | 5 | 3246719  | 9222842  | 3569645  | 9030469  | 3313752  | 12431770 | 12327367 | 10525585 | 5823272  |
| 9.845483 | 10 | 5 | 5 | 3071976  | 15496397 | 1781928  | 15329477 | 3776901  | 15188846 | 13052285 | 17100364 | 17374370 |
| 23.9815  | 7  | 4 | 3 | 225784.5 | 1299449  | 663784.3 | 1338353  | 728349.8 | 947963.1 | 1466394  | 410236.7 | 1487148  |
| 9.94455  | 10 | 5 | 5 | 960512.8 | 3516776  | 820487.9 | 3480369  | 401828   | 4738155  | 3885755  | 3061241  | 2622665  |
| 24.44917 | 8  | 4 | 4 | 67693.25 | 242940   | 115674.2 | 248799   | 93215.73 | 149617.8 | 317099.9 | 174499.4 | 162660.5 |
| 18.96583 | 8  | 3 | 5 | 108411.5 | 661412.3 | 250136.3 | 673572.9 | 179710.3 | 1000540  | 549459.8 | 605550.9 | 346695.3 |
| 22.56617 | 10 | 5 | 5 | 629713.1 | 2558255  | 1048805  | 2498876  | 1088015  | 2217446  | 2879912  | 1297240  | 2257387  |
| 9.979667 | 10 | 5 | 5 | 1432979  | 3289009  | 680456.3 | 3350904  | 1400296  | 4188209  | 2404241  | 3679674  | 3200560  |
| 10.11545 | 4  | 1 | 3 | 233212.9 | 534870.3 | 207368.3 | 519703.5 | 323291.8 | 655186.6 | 379151.9 | 837318.7 | 456801.2 |
| 9.857683 | 7  | 4 | 3 | 982750.8 | 2799062  | 1725837  | 2881011  | 1156052  | 900888.3 | 4821776  | 1401519  | 2582268  |
| 9.992233 | 6  | 3 | 3 | 483991.2 | 543732.4 | 536625.9 | 569524.7 | 374622.3 | 867533.7 | 1212044  | 639084.7 | 0        |
| 9.976317 | 9  | 5 | 4 | 741893.8 | 1667163  | 632025.2 | 1633141  | 592897   | 2033332  | 2506460  | 1617438  | 878363.3 |
| 9.856867 | 10 | 5 | 5 | 1848930  | 6235381  | 2599515  | 6103760  | 2111257  | 5524171  | 4642334  | 4336536  | 10739809 |
| 10.9645  | 10 | 5 | 5 | 742353.8 | 2559150  | 700142.7 | 2518461  | 765648.9 | 3295416  | 3296037  | 1783062  | 2087232  |
| 10.95835 | 7  | 3 | 4 | 189347.9 | 511724.7 | 103708.7 | 523459.9 | 276158.8 | 600811.7 | 616471.3 | 534140.5 | 414306.6 |
| 9.388367 | 9  | 4 | 5 | 645025.2 | 4100557  | 2453802  | 3964942  | 2453865  | 2650587  | 3964942  | 3599010  | 2018890  |
| 9.983467 | 10 | 5 | 5 | 1751068  | 3922309  | 1470764  | 3858909  | 625657.4 | 5997551  | 4030158  | 1849013  | 3989350  |
| 10.97857 | 8  | 5 | 3 | 295577.1 | 1122285  | 182170.9 | 1139048  | 382879.1 | 1061356  | 907439   | 1174221  | 1400223  |
| 40.17967 | 11 | 4 | 5 | 299107.7 | 4015987  | 1189048  | 4103190  | 1875804  | 5712271  | 4513548  | 2514500  | 3804436  |
| 9.983433 | 10 | 5 | 5 | 2224366  | 3773887  | 1776957  | 3903533  | 2789556  | 4804609  | 6252812  | 3518352  | 1969441  |
| 20.679   | 6  | 2 | 4 | 94470.16 | 294663.4 | 151748.6 | 285608.5 | 176158.8 | 246051.4 | 409116.9 | 164586   | 156980.6 |
| 9.994767 | 5  | 3 | 2 | 549226.4 | 1100213  | 869837.1 | 1051763  | 891020.3 | 2051805  | 394423.1 | 455104.5 | 549228.6 |
| 23.99617 | 8  | 4 | 4 | 314443.7 | 1335688  | 1457151  | 1267158  | 978610.1 | 445918.6 | 763102.1 | 202801.4 | 3800045  |
| 9.40615  | 5  | 3 | 2 | 30842502 | 1.19E+08 | 1.54E+08 | 1.26E+08 | 1.22E+08 | 5101958  | 2.76E+08 | 2414620  | 2.98E+08 |
| 9.830833 | 5  | 3 | 2 | 2477523  | 2770830  | 2390213  | 2618611  | 3108043  | 5461750  | 1071126  | 925675.7 | 5313599  |
| 10.008   | 9  | 5 | 4 | 438906.2 | 808733.6 | 99697.94 | 829402   | 510606.3 | 878435.2 | 814599.5 | 802088.1 | 646901.6 |
| 10.9645  | 9  | 5 | 4 | 445986.3 | 1802371  | 421329.9 | 1824857  | 400614.9 | 1953978  | 1833132  | 1393567  | 1418907  |
| 10.16938 | 10 | 5 | 5 | 3352053  | 13107538 | 2304207  | 12968281 | 2776201  | 14952269 | 15910733 | 12047092 | 10214483 |

|          |    |   |   |          |          |          |          |          |          |          |          |          |
|----------|----|---|---|----------|----------|----------|----------|----------|----------|----------|----------|----------|
| 28.53383 | 5  | 3 | 2 | 86662.81 | 384572.3 | 147831.8 | 377442.6 | 110704.6 | 402006.2 | 546478.2 | 275606.9 | 196824   |
| 10.9645  | 10 | 5 | 5 | 737329.4 | 2995192  | 858797.7 | 2953625  | 649818.2 | 3845409  | 3957901  | 2476720  | 2036647  |
| 11.52297 | 10 | 5 | 5 | 364153.9 | 1672590  | 367490.1 | 1650373  | 446035.1 | 2307999  | 1401865  | 1569445  | 1446114  |
| 10.95055 | 5  | 3 | 2 | 468377.9 | 1245475  | 490737.5 | 1220642  | 422486.8 | 1106814  | 1047490  | 659420.2 | 1446324  |
| 17.8785  | 10 | 5 | 5 | 600736.7 | 2052488  | 1702178  | 1972871  | 1177871  | 1945360  | 2056176  | 475302.3 | 4852187  |
| 9.872933 | 5  | 2 | 3 | 1105800  | 2340389  | 413811   | 2397419  | 1398261  | 1854206  | 2529099  | 2069082  | 2326775  |
| 9.902617 | 5  | 3 | 2 | 783498.3 | 1342119  | 419320.9 | 1372144  | 658419   | 2054341  | 1075792  | 1109479  | 1390845  |
| 10.27612 | 9  | 5 | 4 | 444658.4 | 2187528  | 910695.4 | 2150398  | 269983.3 | 1396354  | 3045850  | 3229245  | 1990046  |
| 9.078567 | 5  | 3 | 2 | 813337.1 | 1510452  | 1458993  | 1429211  | 1543805  | 1568236  | 772068.7 | 429439.5 | 771710.6 |
| 9.986767 | 8  | 4 | 4 | 1119499  | 1698197  | 1725930  | 1610134  | 1523762  | 4709969  | 376345.1 | 1405270  | 1133260  |
| 9.4925   | 12 | 5 | 5 | 913366.4 | 6702193  | 1525012  | 6547167  | 3697811  | 6283033  | 5217298  | 9175563  | 6984287  |
| 16.18388 | 5  | 3 | 2 | 39497.45 | 148750.5 | 60701.68 | 145784.9 | 48625.28 | 231157.5 | 139084.1 | 177094.6 | 67047.52 |
| 9.398583 | 7  | 4 | 2 | 926321.4 | 2195199  | 1030778  | 2127240  | 1450631  | 3283334  | 2981572  | 706813.1 | 2282991  |
| 26.8245  | 6  | 3 | 3 | 114919.4 | 432335.6 | 459861.1 | 411286.6 | 303986.3 | 156550.5 | 748560.4 | 12808.29 | 162544.8 |
| 22.13233 | 4  | 3 | 1 | 169141.3 | 637241.3 | 194475.4 | 627874.1 | 150796.8 | 549372.2 | 909714.7 | 681124.4 | 666683.2 |
| 9.880683 | 9  | 5 | 4 | 2387147  | 8856561  | 3289274  | 8993064  | 1312213  | 5328902  | 9761231  | 6212169  | 13629062 |
| 12.11005 | 10 | 5 | 5 | 93830.56 | 388318   | 62843.46 | 382734.7 | 131336.7 | 477251.2 | 322738   | 423745.8 | 376314.5 |
| 9.554967 | 9  | 3 | 5 | 15087306 | 63563672 | 54822133 | 61377398 | 13223293 | 1.23E+08 | 26082020 | 2219459  | 1.19E+08 |
| 11.18767 | 6  | 2 | 3 | 1464655  | 4231149  | 3361799  | 4025265  | 4269278  | 7792650  | 161979.4 | 6714716  | 1262778  |
| 11.30483 | 9  | 4 | 5 | 342541.7 | 1304439  | 595503.3 | 1335257  | 557260.9 | 2359866  | 1167799  | 945572.3 | 1037869  |
| 10.05535 | 8  | 3 | 3 | 1182931  | 2017036  | 1295828  | 2068680  | 322496.4 | 1796239  | 286453.9 | 3362746  | 1403720  |
| 10.00098 | 10 | 5 | 5 | 458936.7 | 908134.4 | 288886.6 | 925392.5 | 355382.2 | 1189616  | 1188739  | 925681.6 | 679782.7 |
| 9.93625  | 8  | 4 | 4 | 7187527  | 14608350 | 15194264 | 13781288 | 15957337 | 8552985  | 7674680  | 41773504 | 7902802  |
| 8.9177   | 6  | 3 | 3 | 63406824 | 2.52E+08 | 3.46E+08 | 2.71E+08 | 3.94E+08 | 296311.9 | 189311.5 | 6.74E+08 | 95627.56 |
| 40.61117 | 6  | 4 | 2 | 76238.23 | 314947.8 | 77616.14 | 319353   | 88128.44 | 415436.4 | 334828   | 327462.3 | 296560   |
| 10.45545 | 10 | 5 | 5 | 85313960 | 3.44E+08 | 54736318 | 3.39E+08 | 94854055 | 4.28E+08 | 3.38E+08 | 2.93E+08 | 3E+08    |
| 9.420133 | 4  | 3 | 1 | 312823.6 | 1295190  | 714024.2 | 1239327  | 1293933  | 1013290  | 910565.6 | 595792.4 | 1536624  |
| 9.999517 | 9  | 4 | 5 | 948371   | 1788647  | 1108149  | 1736662  | 829927.1 | 2692909  | 257563.6 | 967016.3 | 2398871  |
| 9.992233 | 8  | 4 | 4 | 580658.7 | 955262.4 | 438072   | 980280.4 | 505746.8 | 1251174  | 1427865  | 950905.5 | 286195.7 |
| 9.1036   | 8  | 4 | 4 | 1734859  | 3601381  | 4858335  | 3367194  | 3959218  | 1077617  | 716938.7 | 805716.1 | 3329713  |
| 10.9645  | 10 | 5 | 5 | 752551.3 | 3031249  | 800707.2 | 2994461  | 569938   | 3871903  | 3880778  | 2474246  | 2161486  |
| 9.972483 | 4  | 1 | 3 | 348657.5 | 640636.5 | 375538.5 | 624670.5 | 196505.9 | 852870.8 | 0        | 951224.3 | 648293   |
| 9.983433 | 10 | 5 | 5 | 19903800 | 38639685 | 12223817 | 37563386 | 25787169 | 49385212 | 53591388 | 35035276 | 28495749 |
| 9.992233 | 10 | 5 | 5 | 886473.7 | 4568179  | 1214985  | 4617286  | 450542.1 | 6111663  | 3224569  | 4897052  | 3446723  |
| 9.382183 | 4  | 3 | 1 | 591076.8 | 2260096  | 1413704  | 2329804  | 1228545  | 3551697  | 710173.4 | 2521730  | 870044.2 |

|          |    |   |   |          |          |          |          |          |          |          |          |          |
|----------|----|---|---|----------|----------|----------|----------|----------|----------|----------|----------|----------|
| 10.9645  | 8  | 4 | 4 | 201235.7 | 629494.5 | 300783.6 | 644470.8 | 267866.4 | 993996.9 | 896510.5 | 313231.7 | 535145.1 |
| 9.8887   | 10 | 5 | 5 | 1530970  | 8125040  | 1026431  | 8034850  | 2166314  | 6430803  | 8641106  | 8626295  | 7917091  |
| 11.51172 | 9  | 5 | 4 | 58169.55 | 240101.4 | 46050.27 | 244813   | 115983.8 | 316765.2 | 209260.8 | 215820.6 | 208928.8 |
| 9.445217 | 14 | 5 | 5 | 4533877  | 38411803 | 10102861 | 37902908 | 9261038  | 32528880 | 46365762 | 51887162 | 32634408 |
| 10.95835 | 5  | 2 | 3 | 368488.9 | 777497.5 | 96950.09 | 768338.7 | 223024.6 | 868204.4 | 819717   | 760549.6 | 618082.6 |
| 9.896717 | 9  | 5 | 4 | 1839522  | 14046086 | 2763436  | 13890956 | 3140977  | 16284864 | 13242863 | 11170759 | 11974464 |
| 9.6607   | 15 | 5 | 5 | 7253240  | 39719335 | 11612214 | 40521538 | 18136453 | 27794205 | 50470733 | 43850549 | 26835936 |
| 9.976317 | 10 | 5 | 5 | 2235277  | 8638616  | 2534643  | 8508806  | 2421322  | 10317331 | 12027414 | 5962293  | 6614161  |
| 22.77    | 8  | 4 | 4 | 593452.9 | 2308580  | 1487626  | 2227892  | 1592955  | 567859.7 | 1743854  | 2853771  | 1836559  |
| 10.03035 | 11 | 5 | 5 | 1093865  | 3067567  | 1603206  | 2991798  | 1269027  | 4570717  | 339600.5 | 3325573  | 3399503  |
| 9.967367 | 10 | 5 | 5 | 1179016  | 3155463  | 1292878  | 3099698  | 758334.9 | 4760955  | 4354585  | 2071385  | 2207757  |
| 9.979667 | 9  | 5 | 4 | 568143.4 | 1283345  | 525871.4 | 1254250  | 587478.9 | 1568605  | 1856882  | 1294437  | 450048.9 |
| 10.01837 | 10 | 5 | 5 | 499581.3 | 1271924  | 184495.9 | 1247285  | 628092.3 | 1260654  | 1133705  | 1494762  | 1414937  |
| 9.94455  | 10 | 5 | 5 | 1853687  | 6226021  | 768264.3 | 6164381  | 1468391  | 7277422  | 6601377  | 6284414  | 5418861  |
| 10.94443 | 4  | 3 | 1 | 185723.8 | 407046.5 | 205784.9 | 421498.6 | 331652.6 | 650091.2 | 578943.2 | 385543.9 | 248478.9 |
| 11.90427 | 6  | 3 | 3 | 79565.58 | 232655.9 | 76369.45 | 235968.1 | 46822.25 | 137678.3 | 313395.2 | 283800   | 261599.6 |
| 9.976317 | 9  | 5 | 4 | 592284.4 | 1489610  | 393973.4 | 1512449  | 480345.1 | 1763663  | 1986505  | 1262836  | 994631.6 |
| 30.00817 | 3  | 0 | 3 | 113611.6 | 640207.9 | 115763.8 | 651439.4 | 278555.7 | 539501.1 | 787690   | 517722.4 | 634224.9 |
| 9.338567 | 4  | 1 | 3 | 389843.3 | 445999.2 | 633952.9 | 418653.1 | 383620.4 | 0        | 0        | 0        | 874456.8 |
| 11.04953 | 4  | 3 | 1 | 1185298  | 3454522  | 2197660  | 3564090  | 2025433  | 1435464  | 6289573  | 1568603  | 5229579  |
| 7.74495  | 5  | 2 | 3 | 787888.2 | 35788530 | 4615642  | 36652426 | 22501581 | 34971302 | 37110027 | 42514997 | 29784097 |
| 9.872883 | 10 | 5 | 5 | 807622.2 | 3089936  | 800205.4 | 3047170  | 849708.4 | 2303433  | 2797453  | 4142258  | 3715413  |
| 44.00583 | 5  | 3 | 1 | 289523.3 | 3566531  | 603189.9 | 3589970  | 165292.2 | 3983137  | 4071396  | 2591648  | 3399483  |
| 10.9645  | 10 | 5 | 5 | 1509457  | 7249711  | 1641794  | 7170603  | 1409635  | 8864231  | 9067020  | 6022651  | 5463046  |
| 10.9645  | 10 | 5 | 5 | 1406112  | 7146515  | 973893.5 | 7077032  | 1619349  | 7864317  | 8364797  | 6627101  | 5927713  |
| 9.976317 | 8  | 3 | 5 | 863706.6 | 1779635  | 889534.5 | 1723935  | 1236711  | 2420336  | 2896113  | 1758165  | 886646.1 |
| 43.51683 | 5  | 1 | 3 | 334809.2 | 3188092  | 380768.8 | 3170714  | 285299.4 | 2638234  | 3049826  | 3338778  | 3243091  |
| 9.311883 | 5  | 2 | 3 | 7067781  | 52277604 | 5465043  | 53442567 | 30629755 | 57875742 | 51099724 | 58000045 | 46075610 |
| 9.992233 | 10 | 5 | 5 | 713177.4 | 2262962  | 537812.6 | 2231581  | 671465.6 | 2873457  | 2536218  | 2512399  | 1747961  |
| 10.95602 | 10 | 5 | 5 | 191516.4 | 718362.4 | 228003.9 | 732691.4 | 319448.3 | 856526.4 | 1032316  | 573873.8 | 669648.3 |
| 10.94853 | 5  | 2 | 3 | 172663.2 | 663435.5 | 179007.8 | 677206.4 | 329516.2 | 610676.1 | 396781.2 | 672024.1 | 873195   |
| 9.960467 | 8  | 5 | 3 | 1435261  | 3865673  | 3295024  | 3705788  | 2933746  | 559107.5 | 878010.9 | 4253394  | 5090417  |
| 9.55155  | 5  | 3 | 2 | 1228984  | 3957873  | 3584577  | 3793420  | 2771276  | 1548373  | 1155047  | 1612880  | 6380113  |
| 9.67075  | 11 | 5 | 5 | 14872406 | 42337967 | 5482892  | 41755964 | 14799197 | 38836281 | 40049351 | 39336405 | 41485515 |
| 41.61833 | 10 | 5 | 5 | 3316420  | 56007399 | 3107437  | 56182633 | 3703436  | 51841753 | 60011964 | 56451870 | 54284911 |

|          |    |   |   |          |          |          |          |          |          |          |          |          |
|----------|----|---|---|----------|----------|----------|----------|----------|----------|----------|----------|----------|
| 10.008   | 9  | 3 | 4 | 606600   | 1075592  | 757320.2 | 1041142  | 575212.7 | 721526.3 | 686957   | 2326718  | 419403.2 |
| 11.3298  | 9  | 4 | 4 | 8584579  | 33420769 | 8492379  | 34355581 | 23937306 | 33227471 | 37447658 | 26474163 | 45444561 |
| 29.83417 | 10 | 5 | 5 | 1470155  | 14323996 | 1958800  | 14228973 | 1764146  | 14091337 | 14904725 | 11328698 | 14533944 |
| 19.41867 | 10 | 5 | 5 | 201999.3 | 935706.1 | 388984.5 | 953941.7 | 323102.6 | 1236723  | 1020061  | 869045.3 | 300810.3 |
| 8.94795  | 11 | 5 | 5 | 3580336  | 15937434 | 5763690  | 15624420 | 6507981  | 17746887 | 23712307 | 17588351 | 11607614 |
| 6.8014   | 5  | 2 | 3 | 1237751  | 32786462 | 8566011  | 31740853 | 27178448 | 27603921 | 38094263 | 22374576 | 31718492 |
| 10.94208 | 4  | 1 | 3 | 235461.5 | 662947.8 | 232083.3 | 650009.2 | 277693   | 519780.3 | 1052867  | 621871.7 | 459915.1 |
| 9.365833 | 9  | 4 | 4 | 2914628  | 30445995 | 20741207 | 29619214 | 9873587  | 24797541 | 50546025 | 50243996 | 943872.6 |
| 44.98283 | 11 | 2 | 4 | 420733.3 | 6844719  | 3374463  | 6699939  | 2248719  | 1163316  | 7342674  | 10216054 | 7667328  |
| 41.46017 | 7  | 2 | 3 | 405297.8 | 5665561  | 575659.8 | 5590486  | 1988399  | 5959184  | 5158604  | 6145576  | 6130694  |
| 42.5245  | 6  | 3 | 3 | 407326.2 | 5164439  | 1173446  | 5242742  | 1855870  | 5033911  | 5420421  | 4897988  | 3600250  |
| 21.22417 | 5  | 4 | 1 | 53731.23 | 118455.2 | 28405.71 | 120160.3 | 38726.56 | 158006.4 | 128839.1 | 103443.7 | 82016.52 |
| 10.95835 | 8  | 3 | 5 | 231996.6 | 960468.4 | 400100.4 | 944454.9 | 200642.5 | 937030   | 742136.7 | 1004855  | 525000.7 |
| 9.992233 | 10 | 5 | 5 | 1024786  | 3223780  | 774224.6 | 3174096  | 1163898  | 3899922  | 3760407  | 3697531  | 2435006  |
| 10.95055 | 10 | 5 | 5 | 635444.9 | 4180301  | 635756.3 | 4141088  | 903726.2 | 4564063  | 5107819  | 3634670  | 3701663  |
| 9.202433 | 3  | 3 | 0 | 6162224  | 4579276  | 5978743  | 4254338  | 6975927  | 4679532  | 14848856 | 213700.4 | 1117070  |
| 9.983433 | 10 | 5 | 5 | 845600.9 | 2134301  | 974938.5 | 2084419  | 1021643  | 2959104  | 3134294  | 2275463  | 860363.8 |
| 9.559117 | 12 | 5 | 4 | 2052552  | 5872383  | 2558992  | 6019438  | 3277752  | 4604363  | 8966194  | 2276212  | 6250298  |
| 9.983433 | 10 | 5 | 5 | 12260079 | 46766589 | 8589252  | 46246873 | 12009149 | 56103805 | 55871494 | 43003814 | 38178326 |
| 9.960467 | 10 | 5 | 5 | 584854.8 | 1585061  | 280665.1 | 1568240  | 388311.3 | 1912149  | 1353955  | 1807914  | 1261018  |
| 10.37347 | 9  | 4 | 5 | 519507   | 2204079  | 265430   | 2168493  | 959364.5 | 1949040  | 2563438  | 2370933  | 1961205  |
| 30.09567 | 10 | 5 | 5 | 6315337  | 42955279 | 9131003  | 43721757 | 19641574 | 31875716 | 44527125 | 46460216 | 36523427 |
| 9.992233 | 5  | 2 | 3 | 1617188  | 4629282  | 1542698  | 4734859  | 2575909  | 6407217  | 2303720  | 5473891  | 4170213  |
| 9.4925   | 9  | 3 | 5 | 5981067  | 49240660 | 10524119 | 50433480 | 31803759 | 41634011 | 46578092 | 52000914 | 39913347 |
| 9.507167 | 13 | 5 | 5 | 9405494  | 21975252 | 12781388 | 21088278 | 21764339 | 39050592 | 11847622 | 27853499 | 7120916  |
| 10.008   | 10 | 5 | 5 | 1057826  | 2203286  | 753698.9 | 2152427  | 1237419  | 2653283  | 3114684  | 2356081  | 1259950  |
| 9.960817 | 4  | 1 | 3 | 494227.8 | 598270.8 | 376751.5 | 579941   | 367606.2 | 0        | 977304.5 | 579848.5 | 580001.9 |
| 9.032133 | 9  | 5 | 3 | 626438.1 | 3099060  | 1003438  | 3156439  | 1306571  | 4608624  | 2569474  | 2419672  | 2255382  |
| 9.995817 | 5  | 3 | 1 | 1940365  | 3141404  | 1364197  | 3230505  | 2155883  | 2216766  | 2151732  | 2964064  | 5489301  |
| 32.51783 | 10 | 5 | 5 | 190284.6 | 616064.8 | 178541.2 | 636679.9 | 554489.9 | 433566.8 | 506786.4 | 662427.3 | 580662.4 |
| 9.999217 | 8  | 4 | 4 | 809776.9 | 1139945  | 918985.9 | 1101420  | 617283.2 | 749240.4 | 480896.2 | 2758540  | 786583.2 |
| 10.9645  | 10 | 5 | 5 | 1409490  | 5757988  | 1622306  | 5690525  | 1065057  | 7360605  | 7573100  | 4631161  | 3991798  |
| 6.85285  | 10 | 3 | 4 | 429379.7 | 9518554  | 4860247  | 9880466  | 9153836  | 6336241  | 9195986  | 15428200 | 3497381  |
| 10.02372 | 7  | 3 | 4 | 331086.2 | 654035.1 | 114318.7 | 665175.9 | 295507.4 | 666419.7 | 719154.3 | 453355.9 | 719011.7 |
| 9.976317 | 10 | 5 | 5 | 19611216 | 89603833 | 13946738 | 90447495 | 19920862 | 99305972 | 1.08E+08 | 87576128 | 74619126 |

|          |    |   |   |          |          |          |          |          |          |          |          |          |
|----------|----|---|---|----------|----------|----------|----------|----------|----------|----------|----------|----------|
| 11.88527 | 10 | 5 | 5 | 674976.8 | 3089543  | 367365.7 | 3138770  | 1343326  | 3380726  | 3498880  | 2729495  | 2695822  |
| 9.103733 | 8  | 4 | 4 | 543482.3 | 1566120  | 842896   | 1598161  | 353227.9 | 975977.8 | 2406263  | 2029238  | 2021668  |
| 8.859667 | 10 | 5 | 5 | 2587160  | 11850016 | 4180164  | 12135218 | 7070222  | 9897695  | 19095676 | 11672114 | 8808340  |
| 9.445217 | 8  | 4 | 2 | 4208307  | 25215795 | 9856623  | 24793620 | 7321369  | 20522346 | 20210648 | 31309011 | 14813867 |
| 9.1428   | 6  | 4 | 2 | 3202169  | 9096251  | 4671405  | 8813619  | 6758419  | 10523896 | 5341860  | 13322047 | 13220873 |
| 10.008   | 10 | 5 | 5 | 1730993  | 2847321  | 1173207  | 2925287  | 1932039  | 2856577  | 4728406  | 2881172  | 1645769  |
| 10.97242 | 4  | 0 | 3 | 193644   | 527107.6 | 319503.6 | 541464.2 | 270547.4 | 538128   | 1016618  | 228715.7 | 254107.6 |
| 10.92828 | 4  | 3 | 1 | 323508.4 | 709378   | 167372.6 | 698808.3 | 257495.9 | 766186.3 | 849699.8 | 430526.2 | 813639.8 |
| 9.329083 | 9  | 5 | 4 | 3137334  | 19377674 | 7684256  | 19783777 | 9047410  | 10796466 | 12399581 | 25558492 | 20086980 |
| 7.58515  | 10 | 5 | 4 | 3347903  | 1.22E+08 | 1.18E+08 | 1.28E+08 | 1.22E+08 | 63423.03 | 3.07E+08 | 53668551 | 93441220 |
| 10.95835 | 5  | 2 | 3 | 429051.3 | 1566484  | 321096.4 | 1585744  | 461153.6 | 1545835  | 1829477  | 1131859  | 1402400  |
| 41.76217 | 8  | 4 | 1 | 418806.1 | 6963064  | 1565624  | 6907436  | 250067   | 8404488  | 6380946  | 4581563  | 8252396  |
| 9.36515  | 6  | 3 | 2 | 471887.8 | 1904505  | 519338.7 | 1869828  | 867168   | 1334155  | 1536561  | 1974077  | 1995365  |
| 10.9645  | 6  | 2 | 4 | 264275.2 | 654059   | 222198.5 | 669080.7 | 378679.3 | 875458   | 619304.2 | 441346   | 441619.7 |
| 10.95055 | 5  | 2 | 3 | 257257.7 | 645448.5 | 218761.2 | 633569.9 | 272530.3 | 835718.5 | 879946.8 | 503261.3 | 362576.9 |
| 10.00998 | 10 | 5 | 5 | 452481.6 | 1258957  | 422826.3 | 1279447  | 431896.6 | 948379.5 | 1954321  | 1228031  | 892851.7 |
| 34.237   | 9  | 4 | 5 | 530113.9 | 4650305  | 2746562  | 4802767  | 3550510  | 9135943  | 3370150  | 2031056  | 5188562  |
| 22.3495  | 10 | 5 | 5 | 118876   | 488883   | 75340.73 | 482213.5 | 178848.9 | 360082.3 | 506294.1 | 546922.5 | 492970.4 |
| 9.9677   | 10 | 5 | 5 | 786984.6 | 1923540  | 845432.6 | 1969465  | 1062382  | 2581409  | 3003499  | 1694634  | 983199   |
| 9.8445   | 9  | 5 | 4 | 2217976  | 8143491  | 2330191  | 7998147  | 3591824  | 10450779 | 4416169  | 7586530  | 9477085  |
| 28.28817 | 5  | 2 | 3 | 77479.91 | 427548.5 | 301148.8 | 441492   | 283383.7 | 448895.2 | 130706.7 | 713204.7 | 732742.6 |
| 9.872067 | 7  | 3 | 4 | 7247796  | 14812539 | 15579575 | 13962332 | 19875407 | 41841806 | 13495287 | 5645627  | 9512670  |
| 8.98945  | 10 | 5 | 5 | 4336047  | 13734015 | 8084475  | 14101657 | 7365743  | 10685509 | 27247595 | 14655840 | 9426964  |
| 15.72875 | 4  | 3 | 1 | 50448.35 | 314059   | 48847.64 | 308604   | 151357.6 | 374828.3 | 239947.7 | 305402.9 | 320471   |
| 10.03035 | 11 | 5 | 5 | 315301.8 | 779694.7 | 309344.7 | 765330.6 | 295463   | 687963.6 | 1280559  | 855737.8 | 534291.7 |
| 9.523633 | 13 | 5 | 5 | 2419763  | 7218195  | 9688377  | 7623754  | 7173019  | 1357601  | 8635394  | 23577542 | 770139.8 |
| 9.388367 | 6  | 3 | 3 | 1740309  | 13144213 | 5525088  | 12853634 | 6662285  | 19195473 | 8051259  | 9278591  | 19091265 |
| 22.90067 | 6  | 3 | 3 | 80312456 | 2.21E+08 | 3E+08    | 2.07E+08 | 2.82E+08 | 2723198  | 546928.9 | 2745814  | 5.72E+08 |
| 11       | 3  | 0 | 3 | 426234.3 | 877189.9 | 340844.9 | 892310.3 | 299474.9 | 967989.5 | 1412427  | 559074.5 | 619854.8 |
| 10.00385 | 11 | 5 | 5 | 1442216  | 5129893  | 1350892  | 5050680  | 1949684  | 3854805  | 3510870  | 5841355  | 6507915  |
| 9.4775   | 12 | 5 | 5 | 3599124  | 26023003 | 13952117 | 25414244 | 11818644 | 16048819 | 17230724 | 22487264 | 24123005 |
| 10.95055 | 8  | 3 | 5 | 821938.4 | 2149563  | 524561.3 | 2186303  | 963597.6 | 2692367  | 2342627  | 1364653  | 1898891  |
| 23.48367 | 5  | 2 | 3 | 91415.12 | 498255.5 | 170264.8 | 489258   | 211103.8 | 620569.9 | 494826.9 | 491323.7 | 224709.1 |
| 10.95835 | 6  | 3 | 3 | 2435040  | 5203500  | 6415930  | 4934870  | 4943170  | 499561.6 | 14087156 | 589167.4 | 826040.1 |
| 10.9645  | 6  | 2 | 4 | 193796.2 | 614151.6 | 303415.1 | 600720.4 | 269933.9 | 908049.9 | 935204.1 | 363837   | 274266.4 |

|          |    |   |   |          |          |          |          |          |          |          |          |          |
|----------|----|---|---|----------|----------|----------|----------|----------|----------|----------|----------|----------|
| 10.45433 | 9  | 5 | 4 | 181190.1 | 605749.6 | 136256.8 | 597288.9 | 215335   | 821809   | 578875.5 | 489397.4 | 496293.3 |
| 9.928667 | 7  | 3 | 2 | 3255129  | 4629163  | 2360278  | 4502120  | 3038385  | 2889625  | 3947557  | 2573219  | 8375025  |
| 10.95055 | 5  | 2 | 3 | 245765.4 | 611560.9 | 367267.5 | 595553.3 | 318050.3 | 874330.8 | 1021258  | 232498.7 | 224119.6 |
| 9.9754   | 8  | 3 | 3 | 7.23E+08 | 2.11E+09 | 2.9E+09  | 1.98E+09 | 2.72E+09 | 4603260  | 4.86E+09 | 5.69E+09 | 2846871  |
| 11.02755 | 6  | 3 | 3 | 6.61E+08 | 1.61E+09 | 2.26E+09 | 1.51E+09 | 2.15E+09 | 11208926 | 4.75E+09 | 8300433  | 3.29E+09 |
| 10.94443 | 10 | 5 | 5 | 306490.3 | 1624479  | 589526.1 | 1601063  | 397550.4 | 2213103  | 2183134  | 923465.5 | 1136210  |
| 38.32367 | 9  | 1 | 3 | 312804.3 | 4631633  | 149850.7 | 4583335  | 1424245  | 4689243  | 4376283  | 4762178  | 4633613  |
| 10.9645  | 10 | 5 | 5 | 360376.1 | 2134083  | 449672   | 2155484  | 476315.8 | 2144999  | 2660415  | 1559348  | 1836084  |
| 9.999517 | 5  | 2 | 3 | 2272921  | 3107307  | 4116511  | 2944276  | 2784430  | 9636704  | 228469.6 | 445302.5 | 458149.8 |
| 9.857983 | 4  | 3 | 1 | 773560.1 | 1351026  | 801907.4 | 1404534  | 1413391  | 1312938  | 333062.1 | 1912856  | 2338656  |
| 9.650367 | 4  | 3 | 1 | 211037.1 | 773481.9 | 245097.3 | 760665.8 | 306204.2 | 958694.4 | 584125.8 | 443710.1 | 887372.2 |
| 9.983433 | 16 | 5 | 5 | 39949420 | 1.82E+08 | 29624913 | 1.8E+08  | 39685383 | 2.06E+08 | 2.18E+08 | 1.75E+08 | 1.51E+08 |
| 9.976317 | 10 | 5 | 5 | 2913747  | 8993493  | 2451905  | 9115411  | 2823755  | 11074818 | 11590326 | 9324215  | 6887863  |
| 10.02372 | 10 | 5 | 5 | 337827.5 | 1030396  | 194374.2 | 1019492  | 271524.8 | 880627.1 | 846136.2 | 1260757  | 1216958  |
| 22.353   | 6  | 3 | 3 | 1473311  | 8472339  | 11300320 | 7978733  | 10105783 | 180904.3 | 209883.6 | 19706918 | 328995.5 |
| 9.975217 | 4  | 1 | 3 | 488963.8 | 1040039  | 427522.6 | 1066753  | 697302   | 1385512  | 397315.3 | 1125722  | 855191.7 |
| 9.9014   | 8  | 5 | 3 | 608095.8 | 1899579  | 503794.5 | 1923789  | 550278   | 1756895  | 1244327  | 1719716  | 2554500  |
| 9.43325  | 8  | 4 | 3 | 748186.4 | 4087112  | 2358480  | 3980171  | 2304549  | 3429666  | 3164945  | 5360647  | 7346463  |
| 9.976317 | 8  | 4 | 3 | 932152.9 | 1545822  | 735706.5 | 1504981  | 1020179  | 973371.6 | 1264133  | 888555.7 | 1998344  |
| 40.99967 | 7  | 1 | 4 | 448925.4 | 4594705  | 309284.1 | 4568357  | 740820.9 | 4323712  | 4222369  | 4917095  | 4668229  |
| 18.3255  | 3  | 3 | 0 | 3144207  | 18398567 | 7837577  | 18032116 | 8203684  | 14546575 | 32223163 | 16700515 | 15409255 |
| 33.877   | 8  | 5 | 3 | 107283.5 | 382531.7 | 255739.6 | 371481.1 | 230739.6 | 233042.8 | 251019   | 143157.8 | 763701.6 |
| 9.856867 | 10 | 5 | 5 | 2070467  | 11448584 | 3032705  | 11334207 | 1836861  | 12814322 | 11151272 | 10727565 | 7136321  |
| 15.18045 | 10 | 5 | 5 | 631158.8 | 5068833  | 771957.1 | 5037718  | 588789   | 4758635  | 5938944  | 4318543  | 4475073  |
| 10.9645  | 10 | 5 | 5 | 610023.1 | 3196111  | 503579.4 | 3221682  | 621073.6 | 3755603  | 3727979  | 2837262  | 2726426  |
| 10.51392 | 7  | 3 | 4 | 232308.7 | 633743.9 | 185834.7 | 642099.4 | 184312.9 | 585026.8 | 931612.8 | 682871.7 | 476238.7 |
| 10.9645  | 6  | 4 | 2 | 236840.2 | 680436.3 | 367872.6 | 694419.5 | 234636.2 | 718871.2 | 1289346  | 401420.2 | 388130   |
| 9.392767 | 4  | 1 | 3 | 459919.6 | 878133.9 | 634517.1 | 910563.3 | 793589.2 | 965566.3 | 0        | 555945.7 | 1201537  |
| 22.091   | 6  | 3 | 3 | 305902.5 | 1935047  | 2091980  | 2024883  | 1894376  | 398924   | 4030599  | 636275   | 207770.2 |
| 9.55155  | 5  | 4 | 1 | 745240.1 | 2101873  | 1346201  | 2037193  | 1534614  | 920067.8 | 1142215  | 2273677  | 1869715  |
| 9.460217 | 9  | 4 | 4 | 15683261 | 42276022 | 70750556 | 39428694 | 55281791 | 1.68E+08 | 7423402  | 19645998 | 8507058  |
| 9.983433 | 5  | 3 | 2 | 392646.3 | 1012515  | 234126.7 | 996017.5 | 459765.6 | 608417.1 | 1207074  | 1070707  | 1128647  |
| 10.93618 | 5  | 3 | 2 | 220886.5 | 644744   | 335034.1 | 658764.6 | 291843.3 | 1026960  | 278242.6 | 507677.6 | 438559.7 |
| 8.902983 | 10 | 5 | 5 | 3199545  | 12364565 | 4870820  | 12600380 | 5687297  | 14160105 | 18373462 | 14053694 | 9573765  |
| 15.3823  | 5  | 3 | 2 | 7318258  | 21286004 | 29094852 | 20188035 | 19008725 | 188155.2 | 58933156 | 370429.6 | 267619.4 |

|          |    |   |   |          |          |          |          |          |          |          |          |          |
|----------|----|---|---|----------|----------|----------|----------|----------|----------|----------|----------|----------|
| 9.392767 | 6  | 3 | 3 | 854501   | 1035148  | 771801.1 | 997977.3 | 898285.5 | 1058419  | 1567738  | 0        | 599468.5 |
| 9.992233 | 10 | 5 | 5 | 3025659  | 9347287  | 2239220  | 9229944  | 2995202  | 10722736 | 12177599 | 9629896  | 7128643  |
| 9.983433 | 10 | 5 | 5 | 940553.4 | 1575040  | 886190.4 | 1623526  | 1265313  | 2022976  | 2785349  | 1599883  | 561987.2 |
| 9.976317 | 7  | 4 | 3 | 6932455  | 6688401  | 12414663 | 7156649  | 8250454  | 1125690  | 1789131  | 629232.3 | 28883844 |
| 16.85517 | 6  | 4 | 2 | 101416   | 269963   | 151754.5 | 263646.1 | 134365.5 | 317021.9 | 475518.1 | 295248.2 | 66217.73 |
| 10.94443 | 5  | 1 | 4 | 900323.9 | 1999023  | 1080992  | 2042025  | 860602.1 | 1884394  | 3610383  | 1449155  | 715058.3 |
| 9.479567 | 7  | 3 | 3 | 1197325  | 6907292  | 3562178  | 6677818  | 6404202  | 9813287  | 2356899  | 11138676 | 6034938  |
| 10.97857 | 10 | 5 | 5 | 520802.4 | 2405638  | 662609.7 | 2432362  | 550811.5 | 1863440  | 3381556  | 2200996  | 1821154  |
| 10.1265  | 5  | 3 | 2 | 212072.3 | 939400.6 | 388659.1 | 923161.3 | 352288.9 | 1609858  | 842910.3 | 595947.6 | 803258.8 |
| 10.008   | 8  | 5 | 3 | 274655.3 | 659651.4 | 139270.1 | 647888.9 | 347811.4 | 725899.2 | 814491.1 | 697119.6 | 445546.8 |
| 9.9847   | 6  | 3 | 3 | 409699.9 | 758629.1 | 262652.1 | 740670.3 | 512683.5 | 588556.1 | 681447   | 748140.1 | 1209787  |
| 9.848417 | 10 | 5 | 5 | 984649.4 | 3969303  | 1552410  | 3897196  | 1747213  | 6326702  | 3113024  | 2766793  | 4784040  |
| 9.45945  | 6  | 3 | 3 | 607261.4 | 1457554  | 712329.3 | 1426086  | 731995   | 1759204  | 2208126  | 533756.3 | 886561.6 |
| 9.445217 | 6  | 4 | 2 | 672192.9 | 2138730  | 671987.9 | 2103984  | 903149   | 1631313  | 3028891  | 1635283  | 2696911  |
| 9.43325  | 5  | 3 | 2 | 8402023  | 37080446 | 27375298 | 38231459 | 25494503 | 10513500 | 22457839 | 72287252 | 60327544 |
| 9.983433 | 10 | 5 | 5 | 6149555  | 12211740 | 6320835  | 12539597 | 8590972  | 15993237 | 20819309 | 11591051 | 5381702  |
| 9.994767 | 9  | 5 | 4 | 1462528  | 2428556  | 1040715  | 2489339  | 1675152  | 3009351  | 3818729  | 2368551  | 1131783  |
| 30.25033 | 10 | 5 | 5 | 5514698  | 43944484 | 5344085  | 43374855 | 17432667 | 35403436 | 46573586 | 47252764 | 42080796 |
| 42.36617 | 9  | 2 | 4 | 425244.8 | 8298920  | 1647043  | 8457906  | 4829818  | 9432208  | 8129791  | 5500648  | 9102524  |
| 9.697633 | 6  | 4 | 2 | 228178.4 | 527581.3 | 163025.9 | 533110.4 | 72821.24 | 668445.8 | 723273.3 | 409907.9 | 346133.7 |
| 41.89183 | 6  | 2 | 4 | 418806.1 | 4582776  | 179445.8 | 4464554  | 3750023  | 4307103  | 4703168  | 4641228  | 4754090  |
| 10.97857 | 5  | 2 | 3 | 799498.6 | 1532392  | 489991   | 1499286  | 954840.1 | 1967023  | 2003834  | 1532742  | 816119.8 |
| 30.28183 | 10 | 5 | 5 | 382804   | 2251889  | 460973   | 2222969  | 819329.8 | 1741476  | 2908800  | 2236865  | 1913149  |
| 10.8937  | 6  | 4 | 2 | 134556.7 | 418942.7 | 194425.2 | 411200.2 | 163177.6 | 351046   | 277569.6 | 252257.4 | 488274.9 |
| 40.2085  | 9  | 4 | 3 | 619880.3 | 5111278  | 2329165  | 5221422  | 2780154  | 3761542  | 8427926  | 3812214  | 2910872  |
| 9.392767 | 9  | 4 | 5 | 7625972  | 24771417 | 9593542  | 24340209 | 10510664 | 32930467 | 19774568 | 14112713 | 20306909 |
| 9.9677   | 6  | 3 | 3 | 584565.7 | 939189.3 | 556882.1 | 959650.4 | 378098   | 1242224  | 0        | 1367393  | 1218642  |
| 9.415167 | 6  | 3 | 2 | 856854.8 | 3610799  | 2953243  | 3722755  | 2219606  | 1131669  | 2559989  | 7888350  | 1108686  |
| 10.97857 | 11 | 5 | 5 | 852925.7 | 3650973  | 430328   | 3625385  | 723540.9 | 3338190  | 3110881  | 3756995  | 3849668  |
| 10.02372 | 9  | 5 | 4 | 431616.7 | 1076501  | 334104.5 | 1093860  | 466340.5 | 652984.2 | 1041576  | 1354242  | 1460492  |
| 9.992233 | 10 | 5 | 5 | 1880828  | 6105073  | 1410244  | 6035704  | 1820959  | 7393855  | 6770281  | 7189459  | 4758985  |
| 9.992233 | 10 | 5 | 5 | 1910092  | 6131566  | 1404560  | 6065043  | 1707222  | 7342782  | 6798622  | 7288557  | 4744540  |
| 9.888767 | 5  | 3 | 2 | 780617.6 | 2506475  | 1663248  | 2565723  | 1041083  | 1138836  | 2341511  | 1686467  | 5375133  |
| 12.74778 | 9  | 5 | 4 | 474607.9 | 5209562  | 2212716  | 5312767  | 2638419  | 7765953  | 5999480  | 2322772  | 3568031  |
| 9.297883 | 11 | 5 | 5 | 1060917  | 2387230  | 1665774  | 2472612  | 2305870  | 361247.1 | 4779510  | 3026295  | 2307526  |



|          |    |   |   |          |          |          |          |          |          |          |          |          |
|----------|----|---|---|----------|----------|----------|----------|----------|----------|----------|----------|----------|
| 12.17977 | 8  | 4 | 4 | 102638.1 | 423447.1 | 179812.3 | 430954.9 | 176183.3 | 567703.9 | 136149.5 | 372736.4 | 568481.6 |
| 9.445217 | 5  | 2 | 3 | 319431.9 | 1677663  | 613085.8 | 1702368  | 557638.9 | 1038488  | 1518314  | 2607958  | 1924371  |
| 9.559117 | 23 | 5 | 5 | 2837290  | 11240881 | 10184655 | 11617183 | 7422560  | 22758137 | 846076.9 | 581516.9 | 13260586 |
| 11.03478 | 5  | 3 | 2 | 775433.1 | 2243985  | 1515890  | 2300865  | 1161230  | 961846.3 | 1662867  | 870764.4 | 4070772  |
| 9.848417 | 7  | 3 | 4 | 514053.7 | 1334392  | 517296.4 | 1314279  | 438600.8 | 1219645  | 2113911  | 1422890  | 676664.8 |
| 42.927   | 9  | 3 | 3 | 814404.2 | 7412834  | 5431067  | 7631987  | 5081542  | 3244461  | 2495371  | 12731970 | 4766176  |
| 9.880683 | 10 | 5 | 5 | 1120985  | 4767182  | 1433178  | 4708795  | 1369903  | 3435525  | 2979626  | 5846766  | 5816879  |
| 9.976317 | 9  | 4 | 5 | 860803.6 | 1741821  | 1068911  | 1695947  | 1133862  | 2370035  | 3043780  | 1990392  | 802927.3 |
| 9.920517 | 10 | 5 | 5 | 2563955  | 5795479  | 1114505  | 5739697  | 1529009  | 7553830  | 6043196  | 5278460  | 5519667  |
| 18.746   | 6  | 3 | 3 | 266743.8 | 698253.1 | 788762.3 | 670251.7 | 529813.7 | 188907.3 | 445042.6 | 31712.94 | 2004241  |
| 9.848417 | 9  | 5 | 4 | 1515244  | 6581214  | 1502281  | 6676178  | 2846830  | 4891350  | 5841132  | 5830052  | 8166296  |
| 9.716267 | 10 | 5 | 5 | 874172.9 | 2288723  | 787349.6 | 2316355  | 517404   | 3073581  | 3216307  | 1841658  | 1693496  |
| 9.857683 | 3  | 3 | 0 | 713033.3 | 1769008  | 673727.8 | 1818939  | 1546934  | 1601619  | 817844.9 | 2697766  | 1897842  |
| 9.992233 | 9  | 5 | 4 | 1202036  | 3113130  | 903035.9 | 3172544  | 1803984  | 4373553  | 2032141  | 3362735  | 2480070  |
| 9.856867 | 10 | 5 | 5 | 893498.4 | 4220230  | 242031.9 | 4196466  | 761934.2 | 4170641  | 4303317  | 4560947  | 4172493  |
| 10.96997 | 10 | 5 | 5 | 729465.9 | 3219418  | 1042973  | 3169344  | 1369397  | 4278507  | 4180526  | 1983550  | 3312442  |
| 35.76367 | 10 | 5 | 5 | 377955.7 | 3011302  | 1174291  | 2965136  | 1075317  | 4203425  | 2554594  | 1304014  | 3996738  |
| 9.916767 | 12 | 5 | 5 | 8682869  | 38928722 | 21509236 | 38264614 | 6606116  | 49662505 | 566558.8 | 50384616 | 47938841 |
| 9.992233 | 9  | 5 | 4 | 1167433  | 3598272  | 1039674  | 3559366  | 857873.3 | 3963774  | 4972665  | 3128685  | 2165062  |
| 26.375   | 7  | 5 | 2 | 142366.9 | 777356.9 | 392523.3 | 789600.3 | 142118.8 | 413388.4 | 1284503  | 1015558  | 807079   |
| 19.99933 | 6  | 5 | 1 | 74145.1  | 286505.3 | 67444.1  | 283269.1 | 90691.71 | 331349.6 | 378184.7 | 261288.9 | 209078   |
| 9.94455  | 10 | 5 | 5 | 905340.8 | 3258153  | 599163.1 | 3231287  | 725010.9 | 3924862  | 3798744  | 3177052  | 2524018  |
| 9.952017 | 7  | 3 | 4 | 1674522  | 5732768  | 2119947  | 5659243  | 1448266  | 7619857  | 2237173  | 5549987  | 7156920  |
| 10.6557  | 6  | 3 | 3 | 197837.9 | 288072.8 | 119662.9 | 282705.6 | 145558.9 | 258246.6 | 490385   | 286982.2 | 182783.8 |
| 32.47417 | 10 | 5 | 5 | 182490   | 816258.9 | 176250.6 | 808690.7 | 199587.1 | 646695.1 | 744528.3 | 730081   | 858928.6 |
| 8.902983 | 8  | 3 | 5 | 655059.4 | 806453.5 | 556256.1 | 786325.8 | 440784.2 | 660778.4 | 1185067  | 1562804  | 388300.6 |
| 30.2805  | 10 | 5 | 5 | 649736.4 | 3891042  | 392343.1 | 3937242  | 1547383  | 3533073  | 4330580  | 4260873  | 3498398  |
| 10.92828 | 6  | 3 | 3 | 378082.6 | 1501337  | 368667.7 | 1523012  | 665831.2 | 2075552  | 1303317  | 1086003  | 1547932  |
| 9.842    | 7  | 4 | 3 | 2461865  | 12493325 | 2685955  | 12398593 | 2009121  | 13515927 | 10004773 | 9963803  | 12588639 |
| 9.864767 | 10 | 5 | 5 | 65108112 | 4.37E+08 | 23546923 | 4.39E+08 | 63904109 | 4.37E+08 | 4.01E+08 | 4.6E+08  | 4.55E+08 |
| 41.8055  | 4  | 3 | 1 | 326189.8 | 3519906  | 2185006  | 3584033  | 412859.1 | 3023885  | 3440913  | 662688.8 | 3688292  |
| 9.568567 | 7  | 3 | 4 | 263838.8 | 557060.5 | 270873.2 | 568676.8 | 312912.5 | 944480.7 | 559845.1 | 216236.6 | 418337.8 |
| 10.95835 | 10 | 5 | 5 | 511768.2 | 1922401  | 497616.8 | 1899766  | 634890.8 | 2611643  | 2285595  | 1661849  | 1494079  |
| 9.68775  | 10 | 4 | 5 | 718714.6 | 1725037  | 326254.2 | 1747797  | 732528.3 | 1331873  | 1780040  | 2106122  | 1456576  |
| 8.98945  | 10 | 5 | 5 | 8953090  | 34496819 | 17542351 | 33814834 | 16997975 | 27557325 | 63162163 | 38514542 | 24229840 |

|          |    |   |   |          |          |          |          |          |          |          |          |          |
|----------|----|---|---|----------|----------|----------|----------|----------|----------|----------|----------|----------|
| 9.4468   | 12 | 5 | 5 | 3292815  | 23317670 | 11451541 | 22806663 | 14269929 | 33095591 | 26441494 | 34432855 | 13210689 |
| 9.951283 | 8  | 4 | 4 | 1764557  | 3151447  | 1198154  | 3189202  | 598023.5 | 3673133  | 3425457  | 1438214  | 4619906  |
| 10.97857 | 10 | 5 | 4 | 413235.2 | 1925852  | 400935.3 | 1904799  | 634893.1 | 1468714  | 1655760  | 1825857  | 2272663  |
| 10.99268 | 11 | 5 | 5 | 486656.8 | 1719105  | 992020.3 | 1753700  | 742459.9 | 1189704  | 937634.5 | 1015744  | 2215259  |
| 9.94455  | 5  | 3 | 2 | 599198.1 | 804564   | 450101.5 | 820150.1 | 330076.8 | 1253914  | 53628.23 | 968218.6 | 937757.1 |
| 10.95835 | 5  | 3 | 2 | 979470.7 | 2293980  | 816116.3 | 2254552  | 1152853  | 3586649  | 2367040  | 1952000  | 1365650  |
| 9.976317 | 9  | 4 | 5 | 1862919  | 4228291  | 2100565  | 4141630  | 2304457  | 5385790  | 6900880  | 4614031  | 2376840  |
| 12.3249  | 6  | 3 | 3 | 44267.45 | 144442   | 35979.93 | 142600.7 | 55311.85 | 158900.6 | 157461.9 | 109047.4 | 106474.2 |
| 15.99403 | 8  | 4 | 4 | 129821   | 639724.6 | 120439   | 647658.4 | 255725.2 | 746347.5 | 731454.2 | 683424.9 | 459390.1 |
| 9.992233 | 7  | 4 | 3 | 631595.8 | 769360   | 525055.1 | 744269.6 | 734516.4 | 1190850  | 1327148  | 663341.7 | 0        |
| 38.80117 | 5  | 1 | 3 | 334171.2 | 2990433  | 856734.9 | 3039229  | 1523337  | 1459181  | 3351070  | 3434836  | 3353097  |
| 7.280183 | 7  | 4 | 2 | 109686.8 | 549362.2 | 185152.7 | 560500.9 | 352848.9 | 446818.3 | 826065.1 | 559762.9 | 328811.1 |
| 9.071517 | 7  | 4 | 3 | 594526.1 | 817401.4 | 434855   | 798741.5 | 516340.2 | 1250796  | 1248232  | 594239.1 | 749524.8 |
| 9.536783 | 9  | 3 | 4 | 873795.8 | 2110704  | 578204.5 | 2144179  | 1053105  | 2263519  | 2431991  | 1701526  | 2799757  |
| 9.507167 | 8  | 4 | 4 | 550973.4 | 943671.6 | 401916.3 | 930534.2 | 250926.1 | 743950.1 | 732526   | 1087684  | 574440.9 |
| 9.95825  | 7  | 4 | 3 | 1234880  | 1381074  | 663140.5 | 1350191  | 899439.1 | 1665655  | 375019.7 | 1559299  | 1159462  |
| 9.983433 | 11 | 5 | 5 | 2937217  | 5639624  | 2666181  | 5768267  | 3826123  | 7385035  | 9120330  | 5557279  | 2932993  |
| 9.41815  | 9  | 5 | 4 | 1841652  | 5321929  | 452368.9 | 5276296  | 1563334  | 4880805  | 5381283  | 4843937  | 5646065  |
| 10.95055 | 10 | 5 | 5 | 439294.4 | 2458607  | 584121.3 | 2484845  | 756950   | 2739573  | 3261468  | 2164189  | 1715336  |
| 9.343517 | 5  | 2 | 3 | 549515.8 | 3025760  | 843145.8 | 2968988  | 1863854  | 3734893  | 2243920  | 2008115  | 3793873  |
| 10.9645  | 9  | 4 | 5 | 421358.6 | 1310208  | 425899   | 1325577  | 365055.6 | 1887159  | 1615282  | 1052246  | 1136644  |
| 9.93625  | 10 | 5 | 5 | 1094205  | 2540169  | 697385   | 2509710  | 864914.1 | 3716708  | 2341568  | 2176917  | 2549709  |
| 9.983433 | 7  | 3 | 4 | 2702062  | 3263194  | 3309498  | 3118424  | 4117542  | 8593945  | 1081534  | 1418470  | 4397188  |
| 9.900133 | 9  | 5 | 4 | 1159647  | 3202853  | 2351440  | 3272564  | 866361.7 | 2772309  | 1861247  | 2287837  | 7346805  |
| 7.10655  | 7  | 3 | 4 | 7385224  | 1.05E+08 | 23111032 | 1.07E+08 | 49541928 | 98957267 | 1.27E+08 | 69977296 | 1.06E+08 |
| 10.95835 | 9  | 5 | 4 | 1805434  | 5855097  | 1988885  | 5774935  | 2180358  | 6202373  | 8986044  | 5559831  | 3652705  |
| 9.992233 | 3  | 3 | 0 | 475533.2 | 513800   | 316802.9 | 496972.6 | 528608.4 | 770382   | 0        | 591846.7 | 446081.7 |
| 18.355   | 4  | 3 | 1 | 69840.28 | 116633.9 | 72166.86 | 119424.6 | 73517.72 | 234948   | 81672.86 | 96615.39 | 44933.12 |
| 10.95835 | 10 | 5 | 5 | 966973.3 | 3836119  | 1145538  | 3797265  | 861430.8 | 4441753  | 5556654  | 3257578  | 3135787  |
| 10.95602 | 10 | 5 | 5 | 454127.6 | 1824218  | 461178.1 | 1809020  | 317764.3 | 2246038  | 2381431  | 1536998  | 1335965  |
| 30.25033 | 10 | 5 | 5 | 960724.2 | 6177897  | 870280.6 | 6262109  | 2925363  | 4883037  | 6601609  | 6756451  | 5693390  |
| 9.9677   | 5  | 2 | 3 | 876503.5 | 1139772  | 981576.1 | 1171116  | 608507.8 | 2695856  | 74759.37 | 772540.3 | 798753.5 |
| 9.673333 | 10 | 5 | 5 | 374315.5 | 1179342  | 303887.9 | 1168132  | 283393.1 | 1364690  | 1169280  | 1449027  | 671193.8 |
| 9.992233 | 9  | 5 | 4 | 2491772  | 4217112  | 1994468  | 4321290  | 3282135  | 5256052  | 7031424  | 3746524  | 1829651  |
| 42.2655  | 8  | 5 | 3 | 333248.3 | 5901106  | 2343311  | 5969445  | 871084   | 4770711  | 9547724  | 3498733  | 4946703  |

|          |    |   |   |          |          |          |          |          |          |          |          |          |
|----------|----|---|---|----------|----------|----------|----------|----------|----------|----------|----------|----------|
| 9.992233 | 9  | 4 | 5 | 1433483  | 3080624  | 1090078  | 3024158  | 1787745  | 3807496  | 4627441  | 2553254  | 2086715  |
| 10.9645  | 10 | 5 | 5 | 477008   | 1948815  | 560305.7 | 1968040  | 446792.5 | 2474552  | 2526341  | 1353415  | 1409953  |
| 9.858833 | 10 | 5 | 5 | 2573248  | 7942541  | 2129057  | 7868878  | 1738314  | 8565996  | 4582348  | 9982894  | 9302276  |
| 9.421167 | 5  | 3 | 2 | 369299.6 | 1036737  | 610242.6 | 1061200  | 685076.1 | 961473.4 | 790217.9 | 2105885  | 643141.4 |
| 9.983433 | 4  | 1 | 3 | 393027.8 | 935207.6 | 445499.6 | 916797.5 | 529540.1 | 1369117  | 255162.6 | 1292876  | 946501.6 |
| 11.147   | 9  | 4 | 5 | 237809.3 | 894684.9 | 136332.4 | 904726.8 | 346509.7 | 867867.6 | 1060063  | 830710.6 | 717030.3 |
| 9.419733 | 5  | 3 | 2 | 2674511  | 13533133 | 11268028 | 13159158 | 8419324  | 26513992 | 5652834  | 25034855 | 7124676  |
| 10.02372 | 10 | 5 | 5 | 365373.5 | 1157410  | 169038.9 | 1148886  | 271617   | 1085053  | 1241731  | 1414064  | 1022063  |
| 9.928667 | 10 | 5 | 5 | 4657079  | 47717992 | 5709963  | 47337722 | 13044858 | 44192399 | 49389858 | 52773632 | 52617195 |
| 24.23    | 8  | 4 | 4 | 114736.9 | 438389.8 | 138963.1 | 446869.7 | 286724.8 | 531783.9 | 263274   | 398413.8 | 379130.9 |
| 9.445217 | 14 | 5 | 5 | 10645372 | 93415948 | 21031741 | 94514170 | 35724022 | 79392637 | 1.05E+08 | 1.25E+08 | 79018469 |
| 9.6501   | 7  | 4 | 3 | 692342.1 | 2060297  | 1141494  | 2121918  | 2025798  | 3055433  | 1284306  | 1051279  | 1385300  |
| 9.933967 | 6  | 2 | 3 | 1056332  | 1476864  | 789226   | 1503709  | 647501.6 | 1921892  | 222260.5 | 2278613  | 1285075  |
| 9.979667 | 5  | 3 | 2 | 1179370  | 2220462  | 643158   | 2178677  | 1431536  | 2634487  | 3019323  | 2284889  | 1693824  |
| 20.65817 | 9  | 4 | 5 | 733771.3 | 5130454  | 1567754  | 5076397  | 1331814  | 3457526  | 5959979  | 4346018  | 4460400  |
| 10.21522 | 10 | 5 | 5 | 42814472 | 1.48E+08 | 31146830 | 1.5E+08  | 58985301 | 2E+08    | 1.47E+08 | 1.28E+08 | 1.21E+08 |
| 9.842    | 10 | 5 | 5 | 2533950  | 13286350 | 1088343  | 13355837 | 2383586  | 13143229 | 12333732 | 14716894 | 14042933 |
| 16.52005 | 10 | 5 | 5 | 1276105  | 11731353 | 2918793  | 11827568 | 2254157  | 12471810 | 7215599  | 11796405 | 11818722 |
| 9.992233 | 9  | 5 | 4 | 1411305  | 2741638  | 929826.1 | 2686212  | 1889012  | 3407169  | 3783195  | 2512670  | 1375805  |
| 9.43325  | 11 | 4 | 5 | 1299391  | 3231097  | 1015626  | 3274020  | 1301659  | 2648947  | 2100125  | 4797578  | 3157154  |
| 8.9343   | 5  | 2 | 3 | 395940   | 2188448  | 685674.7 | 2156826  | 1003120  | 2113322  | 3063865  | 2416916  | 2187505  |
| 30.29417 | 10 | 5 | 5 | 402507.5 | 2525214  | 607224.5 | 2502640  | 629799.6 | 3025351  | 3069418  | 2309474  | 1591896  |
| 33.398   | 5  | 3 | 2 | 443288.1 | 2439881  | 1345491  | 2400535  | 692355.6 | 1859836  | 1082404  | 1741463  | 4499577  |
| 9.701933 | 10 | 5 | 5 | 2034195  | 4894612  | 577344.5 | 4929643  | 1216170  | 4184872  | 5665463  | 4479405  | 5083427  |
| 9.445217 | 9  | 5 | 4 | 950413.5 | 4496196  | 2581115  | 4422983  | 1135055  | 7038184  | 6679745  | 1905702  | 1635749  |
| 10.008   | 9  | 5 | 4 | 643462.4 | 1114787  | 310080.2 | 1136754  | 785420.1 | 1220471  | 1573299  | 1098759  | 761027.7 |
| 9.445217 | 14 | 5 | 5 | 1177398  | 9312464  | 2444298  | 9219476  | 2694543  | 8366416  | 11454607 | 12184512 | 8250767  |
| 10.52333 | 9  | 5 | 4 | 306755   | 688561.9 | 269504   | 698674.6 | 290357   | 1051920  | 885151.7 | 401287.5 | 543531   |
| 9.845483 | 9  | 4 | 5 | 1975824  | 4121528  | 1279901  | 4250288  | 4762614  | 3727000  | 2995115  | 4162864  | 3441507  |
| 10.95055 | 5  | 3 | 2 | 206941.9 | 430415.5 | 215552.4 | 438390.4 | 228634.5 | 701298.9 | 558503.8 | 128412.9 | 390871.7 |
| 9.508883 | 9  | 4 | 5 | 4416968  | 9202357  | 12942863 | 8839697  | 5595022  | 4161575  | 3731038  | 2704421  | 3081507  |
| 10.96997 | 5  | 3 | 2 | 263042.8 | 612260.4 | 201004.4 | 620369.7 | 248647.4 | 460382.7 | 914553.9 | 405760.4 | 601910.1 |
| 11.26338 | 10 | 5 | 5 | 1520586  | 6665644  | 1474652  | 6761166  | 3423131  | 7437361  | 6029897  | 8805258  | 6043402  |
| 11.27725 | 10 | 5 | 5 | 319737.5 | 1339473  | 694832.8 | 1361347  | 517938.8 | 2522560  | 1326821  | 944769.1 | 758418.3 |
| 9.40325  | 6  | 2 | 3 | 15295273 | 62870406 | 45046328 | 61649386 | 15327173 | 91522350 | 29295346 | 1.05E+08 | 87161031 |

|          |    |   |   |          |          |          |          |          |          |          |          |          |
|----------|----|---|---|----------|----------|----------|----------|----------|----------|----------|----------|----------|
| 9.508883 | 6  | 3 | 2 | 3229098  | 13734620 | 16651339 | 14228578 | 10353456 | 33023674 | 1053537  | 30864152 | 2585407  |
| 9.992233 | 8  | 5 | 3 | 438285.8 | 640369   | 206749.8 | 625186.7 | 558696.8 | 694999.9 | 926413.7 | 661294   | 358671.3 |
| 9.787633 | 4  | 3 | 1 | 1095738  | 2785436  | 919018.9 | 2738590  | 1614333  | 1854438  | 3031384  | 1778081  | 3585539  |
| 9.032483 | 10 | 5 | 5 | 292229.6 | 1688530  | 470678.3 | 1708299  | 632345.5 | 1816497  | 2110025  | 2108487  | 1355263  |
| 10.44737 | 5  | 2 | 3 | 210397.5 | 562472.5 | 73467.78 | 558345   | 145925.1 | 449789.3 | 589907.3 | 652133.9 | 553520.6 |
| 9.530583 | 10 | 5 | 4 | 545022.6 | 1065192  | 295778.5 | 1078167  | 426190.8 | 1339105  | 1286854  | 1147464  | 937596.8 |
| 12.17977 | 6  | 4 | 2 | 107340.2 | 287249.5 | 116693.7 | 292510   | 174939.9 | 216915.7 | 361726.7 | 401373.1 | 337565.4 |
| 9.8322   | 4  | 4 | 0 | 93819920 | 59856498 | 1.32E+08 | 55980212 | 82296646 | 2306960  | 2.95E+08 | 1082436  | 575436.8 |
| 36.856   | 8  | 4 | 3 | 100273.4 | 491287.8 | 171430.6 | 499201.9 | 266922.7 | 469587.4 | 727854.1 | 246999.1 | 528465.4 |
| 9.976317 | 6  | 3 | 3 | 474972.7 | 780889.5 | 510572.9 | 800197   | 587199.3 | 1120227  | 1446263  | 631080.1 | 133216.3 |
| 10.03947 | 9  | 5 | 4 | 376172.5 | 1303449  | 232553.8 | 1292406  | 377017.8 | 900238.5 | 1342395  | 1354074  | 1475799  |
| 9.445217 | 14 | 5 | 5 | 2591916  | 17814505 | 5030907  | 18066452 | 8759147  | 16201435 | 25555126 | 19517666 | 12292898 |
| 9.175017 | 7  | 4 | 2 | 1286091  | 4935155  | 2827025  | 5038112  | 3051943  | 6973868  | 326275.7 | 6570325  | 6717811  |
| 9.992233 | 9  | 5 | 4 | 1457230  | 3439945  | 1227349  | 3391671  | 1522193  | 4220681  | 4913571  | 3600490  | 1843418  |
| 9.94455  | 9  | 5 | 4 | 1162094  | 3941988  | 630204   | 3964826  | 682358.2 | 4880289  | 3860422  | 3715671  | 3151578  |
| 9.976317 | 10 | 5 | 5 | 3217183  | 9522459  | 3058558  | 9637070  | 3515975  | 12026740 | 12588707 | 10415426 | 6463937  |
| 41.25867 | 4  | 1 | 3 | 213140   | 1068963  | 343980.5 | 1092518  | 877699.8 | 837225.2 | 1673946  | 876016.8 | 985938.2 |
| 40.568   | 5  | 3 | 2 | 371157.1 | 6518610  | 1760869  | 6574845  | 1464390  | 6181326  | 4757890  | 5910087  | 9477457  |
| 9.999217 | 10 | 5 | 5 | 1151162  | 2631782  | 1075334  | 2677685  | 1524941  | 2868318  | 4194330  | 2807839  | 1373768  |
| 9.999217 | 10 | 5 | 5 | 4324532  | 7241947  | 3971315  | 7398831  | 5005770  | 10357750 | 12536650 | 3778071  | 4023564  |
| 9.983433 | 9  | 4 | 5 | 610982   | 1357431  | 630551.8 | 1330063  | 924609.8 | 1889126  | 2051091  | 1410899  | 663394   |
| 9.994767 | 8  | 4 | 4 | 882595.9 | 1527754  | 1053281  | 1561315  | 892615.2 | 1328698  | 1325215  | 1195000  | 484856.8 |
| 9.976317 | 12 | 5 | 4 | 2406420  | 3432839  | 1655671  | 3516949  | 3008064  | 4375088  | 5857875  | 2724123  | 1820639  |
| 30.27883 | 6  | 3 | 3 | 416605   | 1656584  | 1744350  | 1594884  | 1848371  | 291772.9 | 3395794  | 399739.4 | 3727907  |
| 10.9645  | 10 | 5 | 5 | 600410.4 | 2038016  | 532483.2 | 2064569  | 947085.1 | 2553345  | 2646874  | 1874399  | 1487859  |
| 9.992233 | 9  | 4 | 5 | 373803.4 | 932187.3 | 321856.4 | 921056.9 | 330414.9 | 1184032  | 479171.7 | 1001242  | 1255365  |
| 42.395   | 5  | 2 | 3 | 202478.7 | 2489464  | 621717.2 | 2509074  | 525401.5 | 2526219  | 2702030  | 3055368  | 1431063  |
| 9.162767 | 9  | 4 | 4 | 731892.5 | 1482613  | 953027.7 | 1454434  | 672984.9 | 2028249  | 2899179  | 952243   | 872290.5 |
| 29.0115  | 5  | 2 | 3 | 107992   | 239056.6 | 205775.3 | 233000.6 | 143254.1 | 201683.5 | 126410.4 | 47432.47 | 236373.4 |
| 9.994767 | 10 | 5 | 5 | 888572.4 | 2936938  | 701561.6 | 2964976  | 927270   | 3427738  | 3558826  | 3344075  | 2075947  |
| 10.9645  | 6  | 3 | 3 | 690916   | 1418402  | 438540.5 | 1442011  | 866713.7 | 2049316  | 1672750  | 1164654  | 956472.4 |
| 11.00892 | 6  | 3 | 3 | 1.77E+08 | 4.64E+08 | 6.37E+08 | 4.43E+08 | 6.04E+08 | 2558149  | 1.26E+09 | 1.05E+09 | 2061969  |
| 34.16817 | 6  | 3 | 3 | 397253.8 | 3520516  | 2056989  | 3449414  | 2130522  | 7030388  | 3230353  | 1757660  | 3211940  |
| 28.2735  | 9  | 4 | 5 | 269782.3 | 670099.3 | 528338.2 | 685425.2 | 354720.1 | 1550979  | 349959.8 | 401549.5 | 772319.8 |
| 10.00998 | 7  | 3 | 4 | 315178.3 | 614694.1 | 203605.7 | 607218.7 | 236168.1 | 390960.9 | 941686.6 | 639561.4 | 547986.6 |

|          |    |   |   |          |          |          |          |          |          |          |          |          |
|----------|----|---|---|----------|----------|----------|----------|----------|----------|----------|----------|----------|
| 9.994767 | 9  | 5 | 4 | 773440.8 | 1295934  | 426116   | 1268102  | 1065125  | 1482305  | 1758463  | 1368172  | 609486.3 |
| 40.29483 | 4  | 0 | 3 | 390313.1 | 3946063  | 224697.1 | 3962104  | 621209.7 | 3956032  | 3598458  | 3993694  | 3955592  |
| 9.979667 | 5  | 2 | 3 | 7169163  | 10781364 | 14274774 | 10344601 | 11477644 | 33696907 | 1913721  | 1188295  | 1159027  |
| 15.62507 | 4  | 3 | 1 | 363963.1 | 2451887  | 678922.5 | 2471142  | 434049.1 | 2425107  | 2689390  | 1488658  | 2291637  |
| 9.4468   | 5  | 3 | 2 | 2365813  | 7544064  | 4976555  | 7368239  | 5484000  | 13618202 | 11949936 | 3049119  | 6075096  |
| 9.445217 | 14 | 5 | 5 | 19291630 | 1.57E+08 | 41778407 | 1.58E+08 | 51912888 | 1.38E+08 | 1.96E+08 | 2.06E+08 | 1.3E+08  |
| 9.979667 | 10 | 5 | 5 | 1873445  | 3636010  | 2702670  | 3555716  | 2022037  | 6009132  | 7042908  | 1605584  | 1118291  |
| 30.4715  | 5  | 2 | 3 | 246011.1 | 1001479  | 565386.7 | 977395.9 | 837583.7 | 1668815  | 912594   | 791486.7 | 1414508  |
| 38.6835  | 5  | 4 | 1 | 524392.6 | 3682179  | 2937065  | 3609352  | 561656.3 | 7421233  | 3825525  | 5600405  | 758329.7 |
| 9.514333 | 8  | 4 | 4 | 646248.3 | 1336992  | 551693.8 | 1320778  | 400509.2 | 1497964  | 1536880  | 2036516  | 1030468  |
| 9.992233 | 10 | 5 | 5 | 1915018  | 6028196  | 1384486  | 5974741  | 1779596  | 7221672  | 6752792  | 7115537  | 4623516  |
| 10.58813 | 5  | 4 | 1 | 242926.5 | 531048   | 123408.9 | 539292   | 319583.3 | 582647   | 437885   | 366692.5 | 607901.1 |
| 9.886433 | 9  | 5 | 4 | 4146987  | 18673843 | 8245082  | 18395437 | 8473364  | 14284498 | 14493257 | 10712241 | 22747421 |
| 10.95602 | 7  | 4 | 3 | 329640.6 | 1262065  | 399558.3 | 1247959  | 445998.2 | 1971863  | 1111657  | 1011973  | 1077643  |
| 9.507167 | 6  | 3 | 3 | 2593058  | 7417038  | 4839842  | 7242910  | 5591164  | 7625520  | 4043169  | 13758489 | 1527138  |
| 9.856867 | 5  | 2 | 3 | 1845841  | 7911385  | 3032591  | 7996854  | 1968679  | 11871256 | 4239351  | 7461269  | 6068174  |
| 9.56645  | 7  | 3 | 3 | 714771.4 | 731888.4 | 485974.8 | 711930.1 | 694524.1 | 1589920  | 398323.3 | 519623.2 | 534491   |
| 10.9645  | 10 | 5 | 5 | 726906.4 | 3072043  | 745652.5 | 3093508  | 528479.6 | 3908900  | 3758811  | 2588521  | 2179627  |
| 44.65283 | 6  | 2 | 3 | 319709.7 | 4410213  | 1954334  | 4460794  | 856363.8 | 937989.9 | 5021232  | 5106929  | 5592657  |
| 9.912633 | 6  | 4 | 2 | 1191829  | 2558942  | 764849.8 | 2582246  | 644864.5 | 2498432  | 2196041  | 2156828  | 2049160  |
| 9.912633 | 6  | 3 | 3 | 1979906  | 3290944  | 1921234  | 3228582  | 1868256  | 4281320  | 0        | 3636434  | 3589188  |
| 11.12052 | 7  | 3 | 2 | 461071.1 | 1262309  | 602916.8 | 1280370  | 490458.2 | 481188.6 | 1930802  | 790280.2 | 1595133  |
| 10.008   | 7  | 4 | 3 | 374547.7 | 627852   | 234098.5 | 616987.8 | 401376.1 | 738531.5 | 873545.1 | 740936   | 284471.5 |
| 36.15133 | 7  | 4 | 3 | 171764   | 1104290  | 376882.1 | 1115260  | 283977.8 | 1505634  | 593848.9 | 944009   | 1444601  |
| 9.257033 | 6  | 3 | 3 | 1103930  | 2170937  | 1372674  | 2127273  | 1292718  | 693044.4 | 2517868  | 1431068  | 1894947  |
| 23.0015  | 6  | 3 | 3 | 96365.82 | 273302.6 | 172775.1 | 279885.6 | 225616.1 | 155812.3 | 473347.5 | 451157   | 147805.4 |
| 10.94443 | 9  | 5 | 4 | 300949   | 713871.2 | 212766.4 | 723010.9 | 331063   | 893309.5 | 981597.1 | 482098   | 594186.1 |
| 10.95602 | 9  | 5 | 4 | 723665.8 | 2687969  | 987503.7 | 2659206  | 765952.5 | 1153872  | 2356053  | 3454441  | 3587780  |
| 21.9805  | 5  | 3 | 2 | 77250.32 | 280127.5 | 111135.6 | 276195.8 | 130869.8 | 170812.8 | 239345.5 | 247296.3 | 276769.3 |
| 9.933967 | 7  | 3 | 4 | 4063883  | 6461460  | 3779871  | 6567500  | 2671474  | 9556508  | 651402.8 | 8844054  | 4617492  |
| 9.960467 | 9  | 5 | 4 | 689106.4 | 1989579  | 330691.3 | 1977436  | 418521   | 2479382  | 1789661  | 2011088  | 1600852  |
| 10.008   | 9  | 5 | 4 | 542398   | 815767.8 | 352507.7 | 799938   | 595979.5 | 765675.3 | 1401593  | 732130.9 | 444536.5 |
| 10.19555 | 10 | 5 | 5 | 382390.1 | 1009746  | 228203.1 | 1016992  | 224591.9 | 924881.9 | 1137739  | 1345705  | 820727.1 |
| 9.999217 | 4  | 1 | 3 | 827389.3 | 952653.9 | 543099.8 | 928272   | 923156.8 | 1607144  | 989752.8 | 1291425  | 666066.8 |
| 10.95835 | 5  | 2 | 3 | 468426.7 | 1250636  | 349391.4 | 1261544  | 335758.7 | 1774096  | 1222046  | 1176107  | 795954.3 |

|          |    |   |   |          |          |          |          |          |          |          |          |          |
|----------|----|---|---|----------|----------|----------|----------|----------|----------|----------|----------|----------|
| 30.252   | 10 | 5 | 5 | 1383423  | 9397260  | 2455929  | 9287520  | 4171164  | 10913506 | 12127873 | 9304500  | 5626955  |
| 10.95602 | 8  | 3 | 5 | 404519   | 1049987  | 323309.6 | 1039938  | 307946.4 | 1486149  | 1240568  | 646953.9 | 892858   |
| 9.976317 | 9  | 5 | 4 | 694880.3 | 1713274  | 587701.9 | 1692877  | 692164.4 | 1981745  | 2447656  | 1786212  | 870258.6 |
| 10.008   | 10 | 5 | 5 | 982180.1 | 2389206  | 919787.2 | 2419621  | 999890.5 | 2380328  | 3924735  | 1526157  | 1882663  |
| 9.976317 | 8  | 5 | 3 | 1564900  | 4684089  | 674914.4 | 4654069  | 1148335  | 4964606  | 5476303  | 4529682  | 3646030  |
| 22.294   | 9  | 5 | 4 | 112821.8 | 384648.7 | 119073.6 | 389328.4 | 171606.9 | 224893.1 | 537597.6 | 447349.3 | 322750.1 |
| 9.853633 | 10 | 5 | 5 | 1291225  | 6976251  | 875927.7 | 7011533  | 1309078  | 7162962  | 6972169  | 5496614  | 7581881  |
| 30.30733 | 5  | 3 | 2 | 78190.5  | 270077   | 132439.5 | 273562.5 | 82549.99 | 404651.3 | 417366.7 | 213658.5 | 127684.7 |
| 9.840617 | 10 | 5 | 5 | 1779472  | 8095041  | 1529619  | 8130954  | 404940.2 | 9148762  | 8873980  | 6384311  | 6499828  |
| 35.76133 | 10 | 5 | 5 | 989015.8 | 7631491  | 2922757  | 7538666  | 3026262  | 10262805 | 6791689  | 3271076  | 10369921 |
| 9.994767 | 5  | 4 | 1 | 342498.9 | 463380.5 | 83063.12 | 456175.5 | 309235.9 | 361006.3 | 556703.6 | 539056.2 | 445267   |
| 9.840617 | 5  | 2 | 3 | 771162.2 | 1202628  | 726803.6 | 1179192  | 779999.4 | 914442.4 | 1318603  | 2223331  | 1332756  |
| 9.445217 | 13 | 5 | 5 | 2055167  | 19225455 | 5005874  | 19385258 | 5290925  | 25312376 | 20685768 | 21972487 | 13568496 |
| 10.04697 | 6  | 2 | 4 | 1353715  | 4054929  | 1697616  | 4157074  | 4264793  | 5668540  | 3942201  | 5239593  | 1315437  |
| 9.983433 | 10 | 5 | 5 | 6121244  | 12147439 | 6297509  | 12379817 | 8567143  | 15742410 | 20813113 | 11584754 | 5329192  |
| 9.976317 | 10 | 5 | 5 | 3236129  | 9604859  | 3052673  | 9706461  | 3522422  | 12034271 | 12695256 | 10548898 | 6515721  |
| 10.96997 | 10 | 5 | 5 | 217387.3 | 889148   | 317263.9 | 880882.5 | 207005   | 665727.3 | 823088.6 | 562908.3 | 1035210  |
| 11.9773  | 10 | 5 | 5 | 186977.2 | 871886.4 | 269119.3 | 879445.7 | 220836.2 | 1185315  | 1079625  | 566494.3 | 637974.9 |
| 10.0926  | 9  | 4 | 5 | 1003193  | 3346897  | 596397.8 | 3320000  | 1076634  | 2974203  | 2808318  | 3047529  | 3659518  |
| 9.960467 | 10 | 5 | 5 | 5107298  | 12689723 | 5252647  | 12529856 | 5194324  | 16886441 | 19232374 | 11721060 | 7007237  |
| 9.311883 | 8  | 5 | 3 | 499840.1 | 2431110  | 862674.6 | 2460677  | 1057370  | 2803393  | 1026771  | 2333659  | 3326530  |
| 30.28183 | 10 | 5 | 5 | 1377851  | 8542427  | 2024606  | 8457662  | 3326932  | 9056335  | 11203895 | 8557252  | 5540257  |
| 10.61757 | 10 | 5 | 5 | 130820.7 | 506832.1 | 57052.51 | 510157.3 | 140769.5 | 418866.5 | 568112.6 | 545043.1 | 501398.6 |
| 9.4775   | 14 | 5 | 5 | 1416935  | 6543234  | 3299715  | 6456264  | 2321177  | 4388476  | 2853093  | 7366182  | 11504221 |
| 21.4435  | 5  | 3 | 2 | 129179.2 | 526308.5 | 182239.9 | 518553.2 | 308697.2 | 493087.5 | 451768.4 | 450890.1 | 390170   |
| 10.9645  | 10 | 5 | 5 | 799202.6 | 3126410  | 412306   | 3142656  | 630667.8 | 3776708  | 2939771  | 3073159  | 2661196  |
| 11.287   | 6  | 3 | 3 | 65928132 | 1.39E+08 | 1.9E+08  | 1.33E+08 | 1.92E+08 | 822643.7 | 3.26E+08 | 1168325  | 3.66E+08 |
| 10.9645  | 8  | 4 | 4 | 475605.4 | 1208888  | 551367.6 | 1192239  | 547026.4 | 1755598  | 1843098  | 995978.2 | 747881.5 |
| 10.9645  | 10 | 5 | 5 | 392788.6 | 2154051  | 467207.1 | 2138435  | 559314.6 | 2636418  | 2567246  | 1700211  | 1644926  |
| 9.872883 | 8  | 3 | 4 | 4306025  | 8449434  | 8582307  | 8188765  | 8655948  | 1222831  | 13145896 | 3006970  | 3521092  |
| 10.45433 | 10 | 5 | 5 | 185403.2 | 623592.5 | 113353.6 | 618956.5 | 183507.7 | 791866.8 | 607055   | 488512.4 | 568247.7 |
| 13.09803 | 10 | 5 | 5 | 665496.8 | 3841022  | 1126234  | 3880497  | 1460563  | 5728708  | 3250532  | 3078303  | 3106342  |
| 9.270733 | 5  | 3 | 2 | 1750177  | 5541360  | 3148156  | 5445667  | 3195738  | 7116900  | 7705195  | 1545594  | 8540099  |
| 9.975217 | 10 | 5 | 5 | 1308925  | 2572377  | 650152.6 | 2614626  | 1835697  | 3623735  | 2614674  | 2550589  | 2102501  |
| 33.62883 | 9  | 5 | 4 | 339932   | 2452530  | 1004741  | 2475714  | 365693.9 | 3793658  | 2655406  | 1382383  | 2901439  |

|          |    |   |   |          |          |          |          |          |          |          |          |          |
|----------|----|---|---|----------|----------|----------|----------|----------|----------|----------|----------|----------|
| 10.00385 | 5  | 2 | 3 | 1927140  | 3383368  | 3409778  | 3288941  | 2830380  | 8127733  | 758605.4 | 1119345  | 1008973  |
| 9.840617 | 4  | 1 | 3 | 674692.8 | 2144554  | 1135758  | 2172199  | 604417.3 | 1858130  | 324340.6 | 3270339  | 2545146  |
| 9.999217 | 10 | 5 | 5 | 2080520  | 8483122  | 1253027  | 8538532  | 2257651  | 9400261  | 10138996 | 8189442  | 7425032  |
| 9.43325  | 6  | 4 | 2 | 738124.8 | 3934234  | 1817146  | 3882465  | 1617723  | 6562115  | 4202625  | 2201983  | 4481851  |
| 9.840617 | 8  | 4 | 4 | 5327313  | 6405970  | 10098953 | 6659393  | 6222245  | 2415299  | 1829381  | 1921895  | 24460063 |
| 21.55233 | 8  | 4 | 4 | 245062.5 | 1034418  | 330165.9 | 1043011  | 237922.9 | 585922.6 | 1437287  | 1135394  | 832303.6 |
| 10.32122 | 10 | 5 | 5 | 577700.9 | 2031645  | 403871.7 | 2021310  | 275804.7 | 1742517  | 2552241  | 2365317  | 1864843  |
| 10.9645  | 10 | 5 | 5 | 4583829  | 19080860 | 5546123  | 18938986 | 3825195  | 24284160 | 25360965 | 13856356 | 13755789 |
| 44.98333 | 6  | 1 | 4 | 298437.7 | 3244105  | 97018.61 | 3269732  | 1185903  | 3227475  | 3385813  | 3192638  | 3284548  |
| 37.47467 | 10 | 5 | 5 | 1886017  | 43473550 | 19031801 | 42924809 | 18085771 | 32776570 | 33884361 | 36744020 | 77380533 |
| 9.531467 | 5  | 3 | 2 | 243102   | 355093.6 | 217734.2 | 346296.8 | 357344.4 | 539909.8 | 525601.5 | 367452.3 | 342504.2 |
| 8.855567 | 10 | 5 | 5 | 2777293  | 10655939 | 2917011  | 10784236 | 5357846  | 9037215  | 15569051 | 11102193 | 8583709  |
| 11.52297 | 10 | 5 | 5 | 1108500  | 6131021  | 1136535  | 6089720  | 1623389  | 7718506  | 6475201  | 4958747  | 5093408  |
| 9.842    | 9  | 5 | 4 | 4975521  | 27390780 | 5329872  | 27260290 | 3254950  | 28427542 | 28157363 | 18479607 | 29034461 |
| 9.842    | 7  | 4 | 3 | 723054.5 | 1372009  | 362969.1 | 1358681  | 528764.3 | 1765762  | 1671772  | 958004.7 | 1043013  |
| 9.856867 | 10 | 5 | 5 | 1300346  | 7210504  | 654662   | 7262354  | 2361110  | 7233188  | 6874607  | 7681165  | 7958542  |
| 10.70315 | 6  | 3 | 3 | 142213.7 | 427130.7 | 249932.6 | 434374   | 246316   | 165815.2 | 828043.5 | 324275.7 | 339498.6 |
| 10.93618 | 4  | 3 | 1 | 184260.9 | 596844   | 297595.6 | 587632.5 | 333446.6 | 649140.5 | 334988.7 | 428537.3 | 483096.2 |
| 10.05535 | 7  | 4 | 2 | 983768.6 | 1440800  | 831244.5 | 1467354  | 991850.1 | 1853265  | 613146.7 | 553553.9 | 1722318  |
| 9.8887   | 7  | 2 | 4 | 943290.4 | 2859907  | 779059.8 | 2820913  | 1717122  | 3084329  | 1534299  | 3542628  | 3251446  |
| 9.460217 | 6  | 4 | 1 | 454778.5 | 1512082  | 708366.9 | 1534253  | 830083   | 1129443  | 1520449  | 1612262  | 2601244  |
| 9.896717 | 7  | 4 | 3 | 1222711  | 2835483  | 1082515  | 2797731  | 1519787  | 2053942  | 1995297  | 3189867  | 4574137  |
| 10.9645  | 5  | 2 | 3 | 326589.5 | 847573.4 | 359427.6 | 837549.3 | 343929.1 | 1159582  | 1303052  | 686074.1 | 511038.6 |
| 10.9645  | 10 | 5 | 5 | 6207328  | 29318825 | 6610881  | 29123440 | 7120222  | 36151636 | 36501957 | 24701831 | 22269505 |
| 9.986767 | 8  | 3 | 5 | 416365.8 | 1060358  | 396553.5 | 1076709  | 703117.3 | 1246320  | 1603301  | 1010471  | 538327.2 |
| 9.280767 | 6  | 3 | 3 | 924654.3 | 6449958  | 3303460  | 6561987  | 4489811  | 3948321  | 2216937  | 9212245  | 9842318  |
| 9.388367 | 5  | 3 | 1 | 522273.9 | 1150364  | 514008.1 | 1138467  | 288421.1 | 2008852  | 1128475  | 905404.8 | 649225.1 |
| 9.859983 | 10 | 5 | 5 | 14552606 | 85961540 | 2918064  | 86154708 | 9015520  | 84076696 | 87630645 | 87231700 | 81859931 |
| 10.98385 | 9  | 5 | 3 | 476943.1 | 1199632  | 840717.4 | 1220949  | 655916.2 | 270628   | 1223032  | 449266.6 | 1906240  |
| 10.94443 | 7  | 2 | 4 | 337827.3 | 1149950  | 346374.8 | 1162771  | 537248.3 | 1169201  | 1607028  | 964692   | 693022.3 |
| 9.999217 | 10 | 5 | 5 | 834949.1 | 2557625  | 853517.7 | 2583376  | 967580.9 | 2824991  | 3791196  | 2600915  | 1533919  |
| 10.9645  | 7  | 4 | 3 | 451962.2 | 1650489  | 516684.3 | 1635634  | 538984.5 | 2102879  | 2313704  | 1286090  | 1210088  |
| 9.903283 | 10 | 5 | 5 | 4742619  | 21922702 | 4486924  | 22137511 | 9692992  | 26292857 | 15560894 | 24694408 | 24079486 |
| 34.24917 | 10 | 5 | 5 | 1461749  | 13049264 | 6774602  | 13284001 | 9664995  | 24134263 | 11508673 | 6158816  | 13636738 |
| 14.54663 | 5  | 4 | 1 | 890753.3 | 4116883  | 4183794  | 4215043  | 2596269  | 1220644  | 5729484  | 2964264  | 103777.6 |

|          |    |   |   |          |          |          |          |          |          |          |          |          |
|----------|----|---|---|----------|----------|----------|----------|----------|----------|----------|----------|----------|
| 11.06855 | 11 | 5 | 5 | 6925522  | 28301968 | 5369729  | 28490253 | 7815259  | 34444890 | 33630810 | 26079046 | 22813836 |
| 9.874317 | 7  | 4 | 3 | 768080.9 | 3442380  | 1210882  | 3490225  | 2081925  | 4949818  | 1609925  | 3880555  | 3520488  |
| 10.9645  | 8  | 5 | 3 | 216131   | 560252   | 66886.43 | 555888.4 | 206450.8 | 590353.6 | 609741.3 | 478643.7 | 498499.6 |
| 8.91745  | 10 | 5 | 5 | 2830663  | 21064111 | 4599652  | 20818559 | 11379793 | 23209193 | 27686144 | 20368988 | 18275674 |
| 9.840617 | 7  | 3 | 4 | 822394.9 | 2632380  | 1043706  | 2603015  | 1065968  | 2357629  | 1480607  | 2976185  | 2112875  |
| 41.17217 | 8  | 2 | 4 | 411103.3 | 6857840  | 1060335  | 6930857  | 3479647  | 5022087  | 7472087  | 7638356  | 6930834  |
| 9.94455  | 5  | 2 | 3 | 1172981  | 1298440  | 718237.7 | 1322974  | 1018113  | 1932492  | 1912526  | 1582261  | 655620.3 |
| 31.28067 | 6  | 2 | 4 | 203885.4 | 1606440  | 499715.1 | 1583255  | 1057147  | 1872401  | 1208908  | 2016993  | 1997337  |
| 9.4468   | 8  | 5 | 3 | 458614   | 2047952  | 900287.9 | 2069645  | 644628.7 | 3461131  | 2428069  | 1561209  | 1323783  |
| 10.008   | 9  | 5 | 4 | 490496.6 | 1242960  | 136865.3 | 1228884  | 689890.5 | 1375749  | 1137042  | 1406128  | 1121527  |
| 10.008   | 10 | 5 | 5 | 1550578  | 2888278  | 1180149  | 2931877  | 1891141  | 3204161  | 4635952  | 2938450  | 1531073  |
| 18.297   | 7  | 4 | 3 | 72338.99 | 216423   | 152199.7 | 211723.6 | 189827.7 | 188026   | 42904.73 | 154346.6 | 455761.2 |
| 10.9645  | 5  | 3 | 2 | 820469.1 | 1803736  | 229690.6 | 1815361  | 550069.2 | 1858589  | 1525095  | 1670229  | 1826297  |
| 16.37372 | 4  | 1 | 3 | 51608.87 | 149585.8 | 29083.3  | 150714.5 | 50876.31 | 182126.7 | 117819.2 | 162535.2 | 165674.8 |
| 44.30783 | 4  | 3 | 1 | 505336.1 | 6828999  | 2083747  | 6785807  | 787585.4 | 4969775  | 5460703  | 6494082  | 6939675  |
| 36.15133 | 3  | 0 | 3 | 301991   | 5043802  | 155094.5 | 5022575  | 1071863  | 5114973  | 5228603  | 4839837  | 5101605  |
| 10.008   | 7  | 4 | 3 | 263903.1 | 545338.8 | 197200.6 | 550537.8 | 189926.5 | 510166   | 877457.6 | 543153.3 | 381141.3 |
| 39.31633 | 4  | 0 | 3 | 284094.8 | 5067971  | 159448.4 | 5095852  | 1420406  | 4935210  | 5100421  | 5321261  | 4931650  |
| 10.008   | 10 | 5 | 5 | 1077454  | 2156020  | 916845.1 | 2183779  | 1148677  | 2376019  | 3533428  | 2222180  | 1204526  |
| 10.96015 | 5  | 2 | 3 | 2059898  | 4670123  | 1752414  | 4630220  | 1168753  | 6686950  | 6430520  | 3521312  | 2941675  |
| 10.008   | 9  | 4 | 4 | 463643.4 | 1688412  | 436697.5 | 1676689  | 446979.2 | 2014176  | 1013588  | 2008487  | 1481048  |
| 9.460217 | 9  | 4 | 4 | 649685.9 | 2308148  | 934862.7 | 2354106  | 2225916  | 3563620  | 2555980  | 2415085  | 2027610  |
| 9.859983 | 10 | 5 | 5 | 1917495  | 8543185  | 1062370  | 8500116  | 2015815  | 8139460  | 7226057  | 9838009  | 9407884  |
| 9.896717 | 10 | 5 | 5 | 7196193  | 39821112 | 8125339  | 40026305 | 7361965  | 31843988 | 35349386 | 35176002 | 50895430 |
| 9.960817 | 6  | 2 | 4 | 763892.6 | 1650867  | 728543.1 | 1633343  | 591224.1 | 1404513  | 739932.1 | 2301076  | 1320768  |
| 10.93618 | 4  | 1 | 3 | 214426.4 | 496718.3 | 179967.1 | 491504.9 | 213923.8 | 569338.4 | 777945.4 | 415187.5 | 333496.3 |
| 40.92767 | 9  | 2 | 3 | 397636.8 | 4993983  | 797112.3 | 5023420  | 1353351  | 5309766  | 3589193  | 5572901  | 5209300  |
| 9.999217 | 10 | 5 | 5 | 2156265  | 3485025  | 1775214  | 3548355  | 2881471  | 4417253  | 6015069  | 2985102  | 1413218  |
| 9.992233 | 10 | 5 | 5 | 593579.4 | 1681556  | 500243.3 | 1699502  | 818233.2 | 1981148  | 2259574  | 1802515  | 1361034  |
| 9.994767 | 9  | 5 | 4 | 274029.7 | 675684.8 | 141554.7 | 680670.2 | 227157.7 | 882254.6 | 672208.8 | 702147.3 | 488728.4 |
| 11.01617 | 6  | 3 | 3 | 1079120  | 3195936  | 2395690  | 3133180  | 2409915  | 6205873  | 1635013  | 5286145  | 782473.4 |
| 29.64517 | 8  | 3 | 5 | 92340.33 | 385940.2 | 227264.7 | 381127.5 | 123956.3 | 519040.1 | 135406.4 | 187524.9 | 408098   |
| 9.992233 | 6  | 3 | 3 | 249668.4 | 652405.5 | 158957.3 | 656839.1 | 181979.3 | 564311.4 | 935247.1 | 578773.2 | 575209.9 |
| 9.30295  | 7  | 2 | 5 | 483313   | 1235981  | 607647.5 | 1267105  | 1561817  | 1161001  | 1049210  | 613803.1 | 1104072  |
| 10.95835 | 8  | 3 | 5 | 1030978  | 2788367  | 1108316  | 2758542  | 1202348  | 3052920  | 4575069  | 2179978  | 1720451  |



|          |    |   |   |          |          |          |          |          |          |          |          |          |
|----------|----|---|---|----------|----------|----------|----------|----------|----------|----------|----------|----------|
| 44.74217 | 6  | 3 | 2 | 202057.8 | 2602726  | 698814.3 | 2616790  | 301766.2 | 2463553  | 2364922  | 3608315  | 1710208  |
| 10.95055 | 10 | 5 | 5 | 644791.4 | 4001134  | 995718   | 3973128  | 1171041  | 5092699  | 4830961  | 3049449  | 2920536  |
| 9.960467 | 10 | 5 | 5 | 1021384  | 2759499  | 645061.4 | 2781325  | 1005704  | 3199648  | 2656384  | 3619741  | 2120226  |
| 9.999217 | 10 | 4 | 5 | 1120753  | 3489919  | 1906835  | 3543827  | 2290156  | 1950647  | 2735990  | 1873786  | 6267077  |
| 10.5677  | 6  | 4 | 2 | 102713.7 | 259232.5 | 24471.11 | 256950.1 | 120676.8 | 225427.5 | 293905.9 | 263470.3 | 253570.9 |
| 10.9645  | 10 | 5 | 5 | 271917.3 | 1202964  | 206078.9 | 1193380  | 481540.2 | 1425790  | 1380728  | 944068.6 | 1056100  |
| 9.928667 | 6  | 2 | 4 | 1361700  | 6553759  | 3463560  | 6635590  | 2966095  | 1915802  | 4703934  | 6468081  | 8991967  |
| 10.37572 | 3  | 0 | 3 | 116800.5 | 262021.2 | 132157.3 | 259322.4 | 69200.03 | 167082.3 | 478409   | 246787.9 | 145069   |
| 10.02372 | 8  | 5 | 3 | 1062239  | 2790196  | 878512   | 2762811  | 1247698  | 2312929  | 3124298  | 1741655  | 2701137  |
| 9.952017 | 5  | 2 | 3 | 771532.5 | 1079948  | 727159.8 | 1098175  | 721426.1 | 1750579  | 1952571  | 814737.9 | 532550.8 |
| 8.8836   | 10 | 5 | 5 | 14484146 | 3.21E+08 | 47192218 | 3.23E+08 | 90430734 | 3.28E+08 | 3.7E+08  | 3.59E+08 | 2.9E+08  |
| 10.21522 | 10 | 5 | 5 | 851781.8 | 4295238  | 947750.7 | 4355489  | 3176978  | 5442163  | 4177970  | 3008218  | 3888103  |
| 9.328967 | 8  | 4 | 4 | 567652.6 | 2148625  | 972935   | 2112797  | 1748937  | 1351653  | 3831836  | 1836217  | 1694665  |
| 10.95055 | 7  | 3 | 4 | 292907.8 | 698810.3 | 326961.9 | 707417.1 | 360855.1 | 1044126  | 1030844  | 607451.4 | 500915   |
| 10.11545 | 7  | 4 | 2 | 2036019  | 2951693  | 1469730  | 2907896  | 1997703  | 2758673  | 1851731  | 5414039  | 1798503  |
| 10.99268 | 10 | 5 | 4 | 445626.9 | 2087945  | 747821.1 | 2070723  | 630834.3 | 781593.8 | 2548369  | 2173999  | 2362310  |
| 9.979667 | 9  | 4 | 5 | 993194.1 | 3237078  | 1061193  | 3209361  | 1181304  | 4484720  | 4049318  | 3313636  | 2160729  |
| 9.999217 | 11 | 5 | 5 | 721827.1 | 2138100  | 600216.1 | 2122000  | 701116   | 2890741  | 2360089  | 2301654  | 1843607  |
| 9.999217 | 10 | 5 | 5 | 425286.8 | 1306080  | 341910.8 | 1295721  | 489204.4 | 1412152  | 1525050  | 1691527  | 1011842  |
| 10.008   | 10 | 5 | 5 | 1583231  | 2951261  | 1214826  | 2913281  | 1822753  | 3258359  | 4753038  | 2986883  | 1517215  |
| 9.983433 | 10 | 5 | 5 | 867892.6 | 2112751  | 871210.6 | 2087103  | 1198546  | 2845058  | 3129536  | 2007803  | 1063424  |
| 30.5395  | 10 | 5 | 5 | 758590.2 | 2570880  | 2074354  | 2520771  | 2041209  | 5884121  | 2008211  | 844060   | 3157108  |
| 40.59667 | 7  | 3 | 4 | 329589.7 | 4847246  | 811791.3 | 4802815  | 2398451  | 5177269  | 4726150  | 4615337  | 5967430  |
| 42.72567 | 6  | 1 | 4 | 312248.1 | 4476912  | 861755.2 | 4511469  | 1791001  | 2945578  | 4978577  | 4923928  | 4722016  |
| 9.431017 | 12 | 4 | 4 | 838481.2 | 1529694  | 1086595  | 1504423  | 992016.7 | 1005950  | 3242957  | 741217.7 | 692357.4 |
| 9.445217 | 4  | 3 | 1 | 498749.8 | 1637131  | 669696   | 1618833  | 828365.9 | 1109935  | 1196630  | 1923428  | 2687717  |
| 10.96997 | 6  | 3 | 3 | 1500069  | 2480738  | 2225306  | 2544323  | 2960248  | 3869747  | 5739408  | 786879.4 | 885559.2 |
| 10.9645  | 10 | 5 | 5 | 1410923  | 5711670  | 1574224  | 5678692  | 1101142  | 7189945  | 7530679  | 4580845  | 3998721  |
| 9.848417 | 6  | 2 | 4 | 1099080  | 4034686  | 1462480  | 4066052  | 1111020  | 3563992  | 1675515  | 4727671  | 5054127  |
| 10.008   | 6  | 5 | 1 | 1026507  | 1329933  | 399405.1 | 1312332  | 944064.9 | 1396282  | 1906806  | 1073434  | 853424.8 |
| 9.848417 | 8  | 4 | 4 | 675667.2 | 2082181  | 453929.1 | 2099438  | 901872.7 | 1872831  | 1897096  | 2047713  | 1725251  |
| 9.848417 | 9  | 5 | 4 | 761400.3 | 2959694  | 1428236  | 2995827  | 1600558  | 4632938  | 4138776  | 1597607  | 1506136  |
| 10.97242 | 9  | 5 | 4 | 437935.5 | 1920519  | 681394.4 | 1905485  | 576213.9 | 2438506  | 2332275  | 944947.2 | 1460448  |
| 10.9645  | 10 | 5 | 5 | 1399813  | 5766506  | 1540706  | 5735354  | 1011443  | 7289821  | 7448646  | 4637903  | 4051836  |
| 10.93468 | 6  | 3 | 3 | 1693364  | 4888868  | 2913662  | 4982016  | 4699967  | 7780113  | 3450587  | 1567708  | 8141864  |

|          |    |   |   |          |          |          |          |          |          |          |          |          |
|----------|----|---|---|----------|----------|----------|----------|----------|----------|----------|----------|----------|
| 9.45945  | 7  | 4 | 3 | 1199115  | 4652391  | 5542586  | 4782965  | 5500637  | 3155448  | 2500746  | 1347639  | 14489672 |
| 10.96015 | 5  | 2 | 3 | 277124.5 | 720025.5 | 207275.7 | 714699.7 | 241561.2 | 718360.6 | 848429.2 | 519078.1 | 520244.5 |
| 9.94405  | 11 | 5 | 5 | 917977.9 | 4079753  | 895865.9 | 4097200  | 524112.5 | 3980778  | 3868230  | 2845263  | 4384107  |
| 9.976317 | 10 | 5 | 5 | 1275305  | 3007849  | 1533365  | 3046537  | 1746761  | 4103913  | 4994577  | 2817446  | 1425299  |
| 9.9847   | 4  | 3 | 1 | 419004.3 | 1062964  | 380504.1 | 1053284  | 442110.4 | 1538646  | 1388058  | 840435.2 | 897273.7 |
| 9.976317 | 10 | 5 | 5 | 576719.7 | 1440428  | 625811.4 | 1425991  | 605120.2 | 1963275  | 2198005  | 1320549  | 734723.9 |
| 9.848417 | 9  | 5 | 4 | 1024403  | 3566673  | 827408.4 | 3535332  | 1679531  | 3411418  | 4153172  | 3328386  | 2398995  |
| 9.992233 | 10 | 5 | 5 | 496313   | 1297444  | 318915.2 | 1307540  | 517577.5 | 1703593  | 1366529  | 1463902  | 934736.1 |
| 9.94455  | 7  | 3 | 4 | 778040.4 | 1297963  | 352733.7 | 1287513  | 522903.6 | 1732536  | 1370069  | 1482791  | 828963.2 |
| 9.9847   | 8  | 4 | 4 | 472990.1 | 649347   | 186609.4 | 645241.8 | 166627.9 | 492095.4 | 455197.1 | 897074   | 630025.6 |
| 9.992233 | 3  | 3 | 0 | 348749.8 | 466245.2 | 182660.5 | 458323.8 | 442062.3 | 592002.9 | 158194.7 | 472214.9 | 494537.4 |
| 10.90012 | 6  | 3 | 3 | 227672.8 | 583230.1 | 334441.9 | 590516.8 | 296936.9 | 497274.4 | 707283.3 | 285498.1 | 324281.1 |
| 9.999217 | 6  | 3 | 3 | 738477.2 | 1102722  | 517607.6 | 1116911  | 699431.5 | 1353222  | 1794603  | 1177233  | 532486   |
| 11       | 5  | 2 | 3 | 382557   | 1096943  | 406983   | 1106587  | 431988.4 | 1376099  | 1651883  | 778687.8 | 693555.2 |
| 9.880683 | 4  | 3 | 1 | 1332524  | 4681725  | 938117   | 4713583  | 1703641  | 3134005  | 4474468  | 5332468  | 5077756  |
| 9.93625  | 6  | 3 | 3 | 11043806 | 13885036 | 17103418 | 14277819 | 17110687 | 1278694  | 1186966  | 1783471  | 33983622 |
| 9.508883 | 12 | 5 | 5 | 6603672  | 32308907 | 29928399 | 31591103 | 32630888 | 26366944 | 9249259  | 25063368 | 16474005 |
| 9.4468   | 8  | 4 | 4 | 620225.1 | 3738756  | 1529842  | 3785960  | 2460934  | 4509961  | 2528121  | 5241603  | 4703261  |
| 10.9645  | 6  | 3 | 3 | 180648.3 | 625388.8 | 181038.7 | 621011.9 | 201554.2 | 848778.1 | 780126.6 | 548155.6 | 420078.6 |
| 8.967683 | 10 | 5 | 5 | 6570340  | 86179153 | 17155578 | 86712410 | 28259033 | 87251825 | 1.1E+08  | 94390968 | 71503223 |
| 9.92825  | 9  | 4 | 4 | 2269075  | 6081621  | 2344755  | 6019134  | 3130948  | 5300050  | 4303712  | 5986292  | 10118878 |
| 40.87017 | 5  | 2 | 3 | 411900.5 | 3999793  | 502548.5 | 4038488  | 2313586  | 4778340  | 3611565  | 4209496  | 3820968  |
| 10.92208 | 10 | 5 | 5 | 310953.4 | 1360053  | 468486.8 | 1348294  | 570978.4 | 1760123  | 1576073  | 880425   | 827146.7 |
| 9.03715  | 8  | 5 | 3 | 408021.9 | 1001407  | 229833.2 | 992064   | 534096.5 | 1207303  | 1274720  | 950036.4 | 783081.8 |
| 9.975217 | 10 | 5 | 5 | 9175140  | 20466925 | 3612247  | 20652292 | 10914532 | 25822989 | 22521188 | 18437684 | 18363764 |
| 9.960817 | 7  | 4 | 3 | 32904100 | 2.3E+08  | 15089439 | 2.3E+08  | 28057853 | 2.47E+08 | 2.44E+08 | 2.19E+08 | 2.12E+08 |
| 9.976317 | 10 | 5 | 5 | 837163.3 | 2882237  | 1042096  | 2858180  | 1115511  | 3623896  | 4258005  | 2637496  | 1736507  |
| 9.888767 | 6  | 3 | 3 | 2117149  | 4252839  | 3180433  | 4194310  | 1866069  | 7811173  | 1764645  | 2827154  | 1307153  |
| 10.008   | 10 | 5 | 5 | 634587.3 | 1972227  | 353203.8 | 1960550  | 644114.9 | 2211843  | 2146786  | 2309433  | 1683516  |
| 9.190317 | 8  | 5 | 3 | 588713.4 | 3079310  | 1441057  | 3116098  | 1834616  | 4485727  | 758505.3 | 2720088  | 3681744  |
| 9.536783 | 6  | 3 | 3 | 752655.3 | 2073581  | 1555448  | 2105008  | 1253429  | 807032.8 | 944913.1 | 1071022  | 3877533  |
| 9.872883 | 10 | 5 | 5 | 2197939  | 15538237 | 2588665  | 15593671 | 2414067  | 12740579 | 12782232 | 16764456 | 18209549 |
| 9.992233 | 7  | 4 | 3 | 1093075  | 875780.9 | 489988.6 | 885472   | 376092.2 | 723562.9 | 692615.4 | 569948.8 | 1746172  |
| 9.388617 | 5  | 2 | 3 | 639421.3 | 1566214  | 492538.1 | 1578546  | 616284.3 | 2098341  | 1760728  | 794770.5 | 1751790  |
| 22.78483 | 5  | 3 | 2 | 90035.98 | 349001.5 | 215009.5 | 344056.6 | 232816.8 | 228592   | 295339.3 | 232855.7 | 257535.5 |

|          |    |   |   |          |          |          |          |          |          |          |          |          |
|----------|----|---|---|----------|----------|----------|----------|----------|----------|----------|----------|----------|
| 10.94443 | 10 | 5 | 5 | 319442.1 | 1007174  | 334820.4 | 1014839  | 362679.2 | 655713.4 | 1520831  | 921958.8 | 809270   |
| 9.508883 | 8  | 4 | 4 | 526705.4 | 1886128  | 555112.4 | 1915953  | 1801865  | 2520749  | 2383562  | 1435594  | 1274076  |
| 9.949233 | 9  | 5 | 4 | 1138454  | 3765494  | 1146420  | 3735497  | 1570753  | 4236521  | 5314656  | 2259913  | 3164561  |
| 10.02372 | 9  | 5 | 4 | 362342.5 | 976424.7 | 218429.7 | 982986.2 | 363049.5 | 927533.6 | 1324100  | 891866.5 | 732414.7 |
| 10.9645  | 10 | 5 | 5 | 313416.7 | 1150522  | 525255.8 | 1141726  | 206575.8 | 1874937  | 1320878  | 1036807  | 419537.2 |
| 10.02372 | 10 | 5 | 5 | 342744.6 | 801395.8 | 110557   | 797642.8 | 215619.2 | 672429.2 | 936349   | 889550.4 | 784690.8 |
| 10.008   | 8  | 5 | 3 | 336647.8 | 927473.3 | 234134.7 | 933957.5 | 351157.6 | 969442.8 | 1244623  | 695531.2 | 697982.9 |
| 13.02465 | 3  | 3 | 0 | 43692.59 | 191180   | 108192.2 | 193112.8 | 64565.4  | 97292.84 | 220257.2 | 223565.6 | 73999.2  |
| 9.431017 | 13 | 5 | 5 | 2043416  | 16504251 | 3904999  | 16404120 | 5325143  | 21493470 | 17094507 | 18757163 | 12530648 |
| 9.896717 | 7  | 3 | 4 | 4371520  | 12596192 | 4188906  | 12667694 | 2107576  | 9418314  | 9067158  | 13725752 | 19309496 |
| 9.8445   | 10 | 5 | 5 | 2763276  | 10415541 | 1877946  | 10478652 | 3703373  | 10671184 | 11167595 | 11393236 | 7126217  |
| 9.4775   | 13 | 5 | 5 | 1595689  | 11710369 | 2070920  | 11811380 | 6307072  | 10383973 | 8959049  | 14286658 | 12636206 |
| 10.97857 | 10 | 5 | 5 | 265816.8 | 1032334  | 199314.9 | 1039831  | 457673.8 | 1102968  | 935720.2 | 1302745  | 1054316  |
| 10.008   | 7  | 3 | 4 | 2391336  | 2376427  | 3163290  | 2446880  | 3576221  | 865684.2 | 1322315  | 1165605  | 8008472  |
| 44.37967 | 15 | 4 | 4 | 334567.4 | 4788939  | 1185877  | 4837645  | 3024631  | 4469448  | 4058188  | 3910501  | 6839002  |
| 9.999217 | 11 | 5 | 5 | 1205856  | 2667658  | 1102150  | 2695540  | 1530700  | 3210855  | 4188168  | 2641627  | 1352859  |
| 10.95055 | 8  | 4 | 4 | 165802.9 | 385196.6 | 73867.08 | 382322.7 | 178044.5 | 484862.9 | 390415.5 | 309440   | 317239.9 |
| 9.94455  | 5  | 3 | 2 | 6834142  | 8817562  | 10176355 | 9011745  | 8437687  | 1764163  | 1937546  | 23733788 | 15188044 |
| 9.270733 | 6  | 4 | 2 | 2012837  | 5543754  | 3298878  | 5471503  | 3709842  | 11296699 | 3475698  | 3880837  | 5353647  |
| 9.830833 | 4  | 1 | 3 | 2543237  | 5085589  | 2849274  | 5144587  | 2889021  | 6128710  | 1014239  | 4845346  | 4550691  |
| 9.992233 | 10 | 5 | 5 | 419624.5 | 1395043  | 419612.9 | 1402476  | 288516.6 | 1446809  | 2020561  | 1452966  | 891926.4 |
| 9.999217 | 10 | 5 | 5 | 1781380  | 3064724  | 1720201  | 3105670  | 2225654  | 4040692  | 5385965  | 3022451  | 1123722  |
| 44.32233 | 7  | 2 | 3 | 393496.6 | 5002082  | 404813.4 | 4964528  | 2483985  | 5158953  | 5594674  | 4918537  | 4509406  |
| 9.856867 | 10 | 5 | 5 | 2685030  | 12079519 | 1173762  | 12140920 | 3981958  | 14104130 | 11868851 | 11899343 | 11248929 |
| 10.38125 | 10 | 5 | 5 | 684546.1 | 2028593  | 630849.3 | 2039063  | 343426.6 | 2104638  | 2656370  | 2550711  | 1705388  |
| 18.96567 | 10 | 5 | 5 | 20656424 | 1.72E+08 | 26060896 | 1.71E+08 | 31500928 | 1.78E+08 | 1.83E+08 | 2.01E+08 | 1.31E+08 |
| 10.95055 | 10 | 5 | 5 | 582457   | 3682614  | 729915.6 | 3699688  | 929468   | 4319476  | 4555519  | 3147752  | 2877157  |
| 9.55155  | 10 | 5 | 5 | 660172.3 | 1634404  | 329796.3 | 1625232  | 539653.8 | 1671607  | 2179030  | 1524497  | 1480987  |
| 9.9014   | 11 | 5 | 5 | 622740.7 | 3386683  | 661613.4 | 3362255  | 1541667  | 3568959  | 3382440  | 2359651  | 4200086  |
| 11.29373 | 8  | 4 | 4 | 176387.2 | 492093.2 | 220694.4 | 497407.2 | 297231.1 | 862481.3 | 473534.7 | 442759.5 | 273367   |
| 9.946467 | 5  | 0 | 4 | 1402786  | 1892626  | 1062676  | 1875971  | 438212.5 | 2205974  | 0        | 2449208  | 2449591  |
| 10.94208 | 10 | 5 | 5 | 338717.6 | 892332.8 | 316550.4 | 886322.8 | 280141.7 | 963890.2 | 1335546  | 669338.6 | 515181.5 |
| 10.00998 | 8  | 5 | 3 | 421985   | 819653.8 | 221568.6 | 811997.4 | 484314.3 | 850052.6 | 1191811  | 645406.5 | 721633.9 |
| 9.190317 | 6  | 3 | 2 | 1440958  | 2652493  | 3218224  | 2723986  | 3885140  | 1364292  | 702994.5 | 714269.7 | 2173204  |
| 11.60568 | 5  | 3 | 2 | 123260.3 | 468095.2 | 116770.9 | 472082.5 | 253136.5 | 495139.9 | 624206.5 | 430116.8 | 488938.1 |

|          |    |   |   |          |          |          |          |          |          |          |          |          |
|----------|----|---|---|----------|----------|----------|----------|----------|----------|----------|----------|----------|
| 9.992233 | 4  | 3 | 1 | 806142.3 | 890045.3 | 466303.5 | 898817   | 410466.6 | 444200.7 | 673590.3 | 1544051  | 1207535  |
| 9.65225  | 11 | 4 | 4 | 16916370 | 31176100 | 45633706 | 30290149 | 43257177 | 1.13E+08 | 14996297 | 12994293 | 8914488  |
| 43.91983 | 4  | 3 | 1 | 392783.2 | 6659218  | 1638607  | 6683278  | 310860.6 | 7126724  | 5862467  | 7050147  | 8834281  |
| 10.01545 | 13 | 5 | 5 | 1518233  | 4329785  | 1417784  | 4308868  | 316621.5 | 2319863  | 4864324  | 3500301  | 5051712  |
| 8.960667 | 9  | 4 | 5 | 487515.3 | 1833350  | 904630.4 | 1819068  | 460632.7 | 2119011  | 3216304  | 1626337  | 1392601  |
| 9.992233 | 6  | 3 | 3 | 938437.3 | 1657249  | 955094.7 | 1677775  | 1127025  | 1591689  | 3250761  | 1170903  | 732563.2 |
| 10.95602 | 10 | 5 | 5 | 636668.1 | 2439528  | 756955   | 2451984  | 486700.6 | 3140359  | 3301178  | 1729799  | 1704113  |
| 10.008   | 8  | 4 | 4 | 383061.8 | 834752.5 | 196728.3 | 827956.7 | 446307.8 | 709089.7 | 850089.7 | 728557.8 | 714907.7 |
| 10.9645  | 10 | 5 | 5 | 1053345  | 5101045  | 937396.1 | 5119758  | 989043   | 6128541  | 6101509  | 4478366  | 4194650  |
| 10.9645  | 8  | 5 | 3 | 302195.7 | 895197.7 | 149691.4 | 890362   | 315963.3 | 970586.5 | 1081274  | 730900.8 | 940442.8 |
| 9.972483 | 9  | 5 | 4 | 1319285  | 1736140  | 1239865  | 1756031  | 770092   | 3835688  | 1883831  | 950143.5 | 1135400  |
| 16.5492  | 7  | 5 | 2 | 92852.02 | 447439.9 | 210681.6 | 444257.4 | 98496.8  | 647789.5 | 503943.5 | 144522.6 | 326606.8 |
| 27.1865  | 8  | 4 | 4 | 310830.5 | 664111.3 | 548785.2 | 654510.8 | 466257   | 204756.3 | 1012713  | 202346.4 | 1447872  |
| 9.568567 | 13 | 5 | 5 | 3339651  | 20100931 | 11604921 | 19864170 | 13553464 | 20242171 | 29371439 | 28910422 | 21215785 |
| 9.983433 | 10 | 5 | 5 | 6859697  | 12650600 | 3493744  | 12784697 | 9309506  | 15294245 | 17061503 | 12237915 | 9605875  |
| 9.872883 | 10 | 5 | 5 | 5685353  | 22547404 | 8041748  | 22732102 | 11378592 | 15389561 | 23842610 | 15312268 | 23280643 |
| 11.52297 | 10 | 5 | 5 | 1316674  | 7131745  | 1037789  | 7101817  | 1991441  | 8808511  | 7210958  | 6183731  | 6363710  |
| 11       | 7  | 3 | 3 | 64413164 | 1.51E+08 | 2.08E+08 | 1.47E+08 | 2.01E+08 | 4.21E+08 | 878345.5 | 3.32E+08 | 1445745  |
| 20.24783 | 10 | 5 | 5 | 149303.5 | 1046325  | 365871.8 | 1051977  | 219212.9 | 1620077  | 843089.5 | 968862.6 | 658953.6 |
| 8.97505  | 9  | 4 | 5 | 281358.1 | 808265.3 | 439586.1 | 798109.3 | 632238.5 | 693431.1 | 1584563  | 575830.1 | 668118.4 |
| 9.975217 | 8  | 4 | 4 | 695998.1 | 2273722  | 879161.9 | 2289082  | 771738.8 | 1903240  | 920151   | 2597742  | 2837259  |
| 42.86983 | 5  | 1 | 4 | 320679.8 | 4859647  | 174805.4 | 4870219  | 768367   | 4773742  | 4712865  | 4961263  | 5118040  |
| 9.63045  | 14 | 5 | 5 | 32696256 | 2.36E+08 | 88532761 | 2.38E+08 | 1.42E+08 | 3.59E+08 | 2.57E+08 | 1.62E+08 | 1.38E+08 |
| 9.382183 | 3  | 3 | 0 | 796435.1 | 1797003  | 836975.1 | 1777071  | 1270092  | 1366862  | 1353906  | 1999534  | 1094375  |
| 10.19043 | 7  | 4 | 2 | 338974.3 | 602374   | 339214   | 609930.5 | 468284.7 | 672287.8 | 1114083  | 616878.3 | 392732.6 |
| 9.992233 | 6  | 3 | 3 | 7214862  | 3977821  | 4428511  | 3887953  | 5308488  | 818578.8 | 1030989  | 633792.8 | 10107765 |
| 9.999217 | 10 | 5 | 5 | 820578   | 2711564  | 682913.7 | 2726599  | 932786.9 | 3127002  | 3457135  | 2964865  | 1813721  |
| 9.94455  | 5  | 2 | 3 | 1175656  | 1699272  | 735326.7 | 1684223  | 895970.5 | 1984988  | 1737889  | 2757419  | 961143.8 |
| 43.25817 | 8  | 5 | 2 | 385864.4 | 5073092  | 2322783  | 5104237  | 197575.4 | 1022786  | 5558557  | 6454044  | 6734649  |
| 15.34367 | 5  | 3 | 2 | 74874.76 | 356162.1 | 41959.38 | 357686.3 | 107995.9 | 310906.4 | 346735.3 | 324173   | 391556.7 |
| 8.855567 | 10 | 5 | 5 | 8581777  | 38175849 | 7781827  | 37947629 | 15671625 | 34187891 | 51237266 | 39383962 | 32196004 |
| 9.601917 | 10 | 5 | 5 | 4911495  | 24419380 | 3619994  | 24323856 | 6398358  | 27698171 | 28726202 | 23464271 | 20769298 |
| 10.95055 | 10 | 5 | 5 | 459501   | 1963939  | 539771.6 | 1952884  | 668494.6 | 2848340  | 2057443  | 1532844  | 1550601  |
| 11.6471  | 7  | 3 | 4 | 92584.66 | 303206.4 | 136428.4 | 301151   | 81409.12 | 185887   | 402930.1 | 193744.3 | 242863.6 |
| 9.983433 | 10 | 5 | 5 | 13929173 | 26526269 | 13469642 | 26809574 | 17409561 | 34748813 | 44804575 | 25097557 | 12031749 |

|          |    |   |   |          |          |          |          |          |          |          |          |          |
|----------|----|---|---|----------|----------|----------|----------|----------|----------|----------|----------|----------|
| 10.07558 | 17 | 5 | 5 | 3372710  | 8143268  | 2258517  | 8090534  | 3411854  | 7367286  | 11891004 | 7993457  | 7668187  |
| 9.845483 | 10 | 5 | 5 | 3040866  | 16315979 | 1332192  | 16354672 | 2697776  | 16698003 | 14499088 | 18023191 | 16771520 |
| 9.9847   | 5  | 3 | 2 | 3978753  | 5945623  | 7066361  | 6065146  | 6243597  | 15472623 | 586160.9 | 11554025 | 1767433  |
| 10.02372 | 9  | 4 | 5 | 319807.4 | 797510.7 | 199687.7 | 792738.4 | 317818.9 | 693533.9 | 1113806  | 716402.1 | 861250.7 |
| 19.286   | 6  | 4 | 2 | 66011.6  | 267485.1 | 112715.8 | 265870.9 | 57334.48 | 124238.1 | 257030.1 | 220705.5 | 304854.4 |
| 8.96815  | 11 | 4 | 4 | 171643.8 | 447098.6 | 181209.5 | 444170.7 | 147669.1 | 488443   | 741191.7 | 355384.4 | 375413.9 |
| 10.03947 | 7  | 4 | 3 | 255877.4 | 603970.3 | 120087.5 | 607355   | 239618.1 | 476108.7 | 685515.2 | 628973.7 | 744691.5 |
| 9.8445   | 6  | 3 | 3 | 2685411  | 2626201  | 1095867  | 2604491  | 1365793  | 3022245  | 1238505  | 3767121  | 1712428  |
| 9.994767 | 11 | 5 | 4 | 903651.6 | 2949726  | 634148.8 | 2960669  | 616622.2 | 2511291  | 3453300  | 2958347  | 2151277  |
| 10.95835 | 8  | 4 | 4 | 430800.9 | 1380358  | 653769.3 | 1370756  | 412349.6 | 1366136  | 1417660  | 1014176  | 681530.5 |
| 9.8374   | 9  | 5 | 4 | 803129.8 | 2010191  | 817381.1 | 1999207  | 309948   | 2011739  | 1397851  | 1157598  | 3241794  |
| 9.983433 | 5  | 3 | 2 | 910877.4 | 1165141  | 417807.8 | 1153753  | 830958.7 | 1674160  | 902551.9 | 681624.8 | 1516393  |
| 9.999217 | 10 | 5 | 5 | 873837.9 | 2470355  | 638759.7 | 2483585  | 886683.4 | 2945230  | 2883756  | 2956717  | 1947789  |
| 10.94208 | 9  | 5 | 4 | 154916   | 610576.7 | 241042.8 | 605792   | 314183.5 | 653194.5 | 1010225  | 463816   | 409573.1 |
| 17.32117 | 6  | 3 | 2 | 385557.7 | 1270425  | 1406322  | 1291509  | 1037996  | 248234.9 | 2409907  | 334690.4 | 3155646  |
| 9.9677   | 10 | 5 | 5 | 1262127  | 3028964  | 563842   | 3015944  | 916822.2 | 3701499  | 2997603  | 3436954  | 2279043  |
| 24.05483 | 9  | 4 | 5 | 263691.9 | 1203223  | 470708.4 | 1211016  | 450464.5 | 382512.5 | 1271348  | 1343848  | 1531978  |
| 8.98945  | 8  | 3 | 5 | 926657.4 | 2088770  | 1602658  | 2113206  | 1297272  | 1408046  | 4709469  | 2461749  | 1185877  |
| 9.872917 | 6  | 2 | 4 | 612624.5 | 2234056  | 387576.1 | 2242740  | 618721.6 | 2502955  | 2101767  | 2155318  | 2706705  |
| 9.842    | 10 | 5 | 5 | 1269363  | 3740494  | 898869.9 | 3721456  | 1330461  | 4878071  | 4248694  | 3908291  | 2892185  |
| 10.95835 | 10 | 5 | 5 | 240958.9 | 996935.7 | 247557.2 | 1000193  | 118800.8 | 1126177  | 1275352  | 664306.6 | 822558.9 |
| 9.845483 | 9  | 5 | 4 | 791577.4 | 4417872  | 955149.3 | 4436756  | 1298969  | 4514355  | 4523788  | 2815861  | 4914184  |
| 10.39823 | 3  | 3 | 0 | 150839.4 | 448262.5 | 139181.2 | 445731.7 | 167144.9 | 355024.1 | 687040.7 | 444702   | 348243.2 |
| 17.88033 | 8  | 4 | 4 | 190733.8 | 568075   | 426900.3 | 561675.1 | 347727.5 | 578475.9 | 409402   | 74469.19 | 1245413  |
| 9.983433 | 10 | 5 | 5 | 8664011  | 14423456 | 6898453  | 14270284 | 11240502 | 18438640 | 24124835 | 12646369 | 6768103  |
| 38.35217 | 13 | 5 | 4 | 365349.6 | 5545435  | 3871869  | 5598741  | 2481502  | 7495976  | 5822350  | 10647279 | 3144914  |
| 10.93618 | 5  | 2 | 3 | 229310.8 | 445295.9 | 358445.2 | 439881.1 | 303290.5 | 883887   | 692562.6 | 83724.53 | 86792.97 |
| 10.97242 | 8  | 4 | 4 | 419750.9 | 1221684  | 466382.2 | 1228603  | 379031.2 | 1671859  | 1775069  | 1017403  | 821265.1 |
| 9.859667 | 5  | 3 | 2 | 2061903  | 2786099  | 2523460  | 2823695  | 2102279  | 4708580  | 6257428  | 1123369  | 910665.3 |
| 9.43325  | 11 | 5 | 5 | 1274708  | 4739542  | 2204063  | 4777910  | 2547870  | 2430383  | 8310634  | 3828214  | 4087438  |
| 9.960467 | 5  | 2 | 3 | 558952.4 | 873069.4 | 482893.9 | 866888.2 | 235549.5 | 1262901  | 97802.65 | 1094483  | 1197220  |
| 9.67075  | 6  | 2 | 3 | 14160086 | 10290039 | 19684062 | 10617125 | 21055057 | 1255761  | 1593449  | 2372061  | 742892.3 |
| 9.859983 | 8  | 4 | 4 | 805279.9 | 2816636  | 1423215  | 2838245  | 1278856  | 1610588  | 5025815  | 2870142  | 3064862  |
| 28.24317 | 7  | 4 | 3 | 86820.55 | 421231.3 | 178977.4 | 418208.6 | 200576.9 | 215044.9 | 580632.4 | 277961.5 | 620238.1 |
| 10.00998 | 16 | 5 | 5 | 980077.4 | 2189934  | 1271154  | 2166642  | 1656797  | 2520951  | 592284.2 | 1553112  | 2251673  |

|          |    |   |   |          |          |          |          |          |          |          |          |          |
|----------|----|---|---|----------|----------|----------|----------|----------|----------|----------|----------|----------|
| 9.507167 | 9  | 3 | 4 | 3632543  | 16719388 | 13493619 | 16518614 | 12028235 | 1333563  | 15817268 | 5938824  | 28228673 |
| 30.09567 | 10 | 5 | 5 | 527326.8 | 2873655  | 751907.8 | 2854666  | 1515962  | 2025382  | 2985649  | 2948273  | 2396747  |
| 10.02372 | 14 | 5 | 4 | 977561.9 | 4195714  | 2108791  | 4163804  | 1971584  | 5049330  | 839892.2 | 3786060  | 4817821  |
| 9.374083 | 5  | 3 | 2 | 439088.5 | 1190974  | 476313.5 | 1198252  | 456467.3 | 1225100  | 468102.3 | 1808409  | 1223326  |
| 9.960467 | 10 | 5 | 5 | 6332133  | 16183198 | 6831101  | 16067888 | 7943431  | 21111116 | 25038837 | 15145927 | 8904734  |
| 9.94455  | 7  | 3 | 3 | 1084650  | 1275871  | 1222690  | 1292772  | 926564.7 | 2670967  | 2503598  | 203577.1 | 205310.2 |
| 9.979667 | 6  | 3 | 3 | 1028880  | 1916153  | 1749296  | 1894208  | 925089.7 | 4966003  | 1730241  | 995936.5 | 1234264  |
| 9.311883 | 6  | 4 | 2 | 1206530  | 5853097  | 3621073  | 5911254  | 3894389  | 4719495  | 1196673  | 6293931  | 11264488 |
| 9.874317 | 6  | 3 | 3 | 668246.4 | 1765516  | 1020211  | 1781615  | 1071540  | 1264752  | 490828.1 | 1599702  | 3169725  |
| 10.97857 | 10 | 5 | 5 | 331682.1 | 1751060  | 503505.7 | 1744024  | 405750.7 | 1144316  | 2345671  | 1365954  | 1769172  |
| 10.008   | 8  | 4 | 4 | 398064.3 | 867846.2 | 350006.4 | 860346.7 | 591609.3 | 821538.8 | 1399440  | 781536.4 | 425211.3 |
| 9.36565  | 8  | 4 | 4 | 423874.2 | 941950   | 341544.9 | 935843.2 | 447545.9 | 1281064  | 430343.4 | 812849.6 | 1210488  |
| 9.3735   | 8  | 4 | 4 | 690756   | 2776031  | 1023995  | 2755897  | 1545517  | 1233038  | 3915785  | 2583566  | 2686635  |
| 8.995417 | 4  | 1 | 3 | 182718.9 | 237883.6 | 182313.2 | 235299.5 | 154534.7 | 460148.7 | 249283.2 | 76103.87 | 367265.5 |
| 10.92208 | 8  | 4 | 4 | 192418.6 | 502298.1 | 235451.7 | 505681   | 210495.1 | 580035.8 | 364382.6 | 224272.4 | 495052.3 |
| 9.994767 | 5  | 2 | 3 | 1480878  | 2286921  | 1317529  | 2310143  | 1719477  | 3976351  | 3172832  | 2041555  | 607189.5 |
| 9.856867 | 10 | 5 | 5 | 1927136  | 11109501 | 3472336  | 11070369 | 933596.4 | 14438163 | 10810776 | 8995092  | 6641162  |
| 30.29417 | 10 | 5 | 5 | 3525631  | 17788587 | 2331488  | 17871430 | 7294708  | 17013463 | 21476808 | 17831051 | 15051823 |
| 9.886433 | 6  | 3 | 3 | 15839111 | 41657753 | 50210634 | 41005175 | 35263059 | 6393248  | 5674293  | 2958622  | 95176762 |
| 28.68683 | 4  | 1 | 3 | 442939.4 | 9019898  | 438499.1 | 8983073  | 3385017  | 8840217  | 8455797  | 9629383  | 8948952  |
| 10.95055 | 10 | 5 | 5 | 667429.9 | 3975834  | 1017425  | 3959929  | 1126973  | 5179376  | 4706031  | 3014673  | 2872241  |
| 9.960467 | 10 | 5 | 5 | 5091849  | 12779689 | 5408977  | 12857928 | 5164608  | 17100799 | 19447651 | 11999990 | 6909875  |
| 10.008   | 10 | 5 | 5 | 1548167  | 2878893  | 1128403  | 2902077  | 1890959  | 3235436  | 4544612  | 2869199  | 1584408  |
| 32.489   | 7  | 3 | 4 | 60393.82 | 215625.5 | 92775.38 | 216998.3 | 93030.41 | 159141.4 | 194454.4 | 162144.5 | 182878.3 |
| 11.52297 | 10 | 5 | 5 | 109325.7 | 436243.1 | 186063.7 | 433648.3 | 164541   | 667933.9 | 395639.3 | 310066.9 | 223340.4 |
| 10.9645  | 10 | 5 | 5 | 9239861  | 42124033 | 10303663 | 42278973 | 10718535 | 53224868 | 53162146 | 35442140 | 31612930 |
| 10.9645  | 10 | 5 | 5 | 6133529  | 29304792 | 6556565  | 29203501 | 7175058  | 36176543 | 36335334 | 24793612 | 22279276 |
| 13.0691  | 10 | 5 | 5 | 164415.4 | 1404742  | 415438.7 | 1399835  | 217798.9 | 1844686  | 1853526  | 962590.8 | 1191110  |
| 9.554967 | 8  | 3 | 3 | 2857903  | 18391032 | 11359605 | 18540783 | 8971098  | 32792614 | 17576806 | 18375201 | 21997590 |
| 9.992233 | 8  | 4 | 4 | 606780.5 | 1089704  | 444892.2 | 1081694  | 634899.4 | 1358621  | 1485679  | 1383859  | 520208.6 |
| 9.992233 | 8  | 4 | 4 | 5804961  | 6847258  | 11373899 | 6684801  | 11105139 | 949462.3 | 2497635  | 2120049  | 1503109  |
| 27.6245  | 10 | 5 | 5 | 577941   | 1405056  | 1323244  | 1381699  | 1882327  | 1160220  | 606573.7 | 429719.8 | 1126435  |
| 9.94455  | 5  | 2 | 3 | 3750064  | 4618147  | 5257378  | 4694935  | 5479653  | 995675.4 | 1062339  | 779257.6 | 12290979 |
| 9.842    | 7  | 4 | 3 | 2364525  | 3147934  | 3571993  | 3106501  | 1989506  | 1743472  | 1715874  | 9517220  | 1701865  |
| 9.3919   | 6  | 3 | 3 | 438043.2 | 2384431  | 1076305  | 2406497  | 1894954  | 3754723  | 777599   | 2782891  | 2336957  |

|          |    |   |   |          |          |          |          |          |          |          |          |          |
|----------|----|---|---|----------|----------|----------|----------|----------|----------|----------|----------|----------|
| 34.004   | 3  | 0 | 3 | 200167.4 | 646090.1 | 485908.5 | 654389.2 | 670453.7 | 1476579  | 482880.1 | 280337.4 | 651603.6 |
| 9.9351   | 11 | 5 | 5 | 1134333  | 3988697  | 1688489  | 3965266  | 1653669  | 6459383  | 2771328  | 2743511  | 5049335  |
| 17.0735  | 10 | 5 | 5 | 650837.1 | 2476942  | 1111632  | 2493403  | 1250067  | 933115.4 | 2709280  | 3954730  | 2001467  |
| 9.382183 | 10 | 5 | 4 | 978463.8 | 3306752  | 1612999  | 3283710  | 1712792  | 1206167  | 4617578  | 3999525  | 1978345  |
| 25.60867 | 4  | 3 | 1 | 61471.32 | 193818.1 | 70823.59 | 195069.9 | 106764.6 | 140774.9 | 230220.3 | 137219.8 | 159586.1 |
| 9.994767 | 10 | 5 | 5 | 675936   | 1158072  | 518184.3 | 1151780  | 391895.4 | 1561981  | 1614932  | 1415926  | 527886.1 |
| 18.02733 | 10 | 5 | 5 | 1861116  | 9969439  | 1071560  | 9995429  | 2431769  | 11881219 | 9491822  | 9467777  | 9394794  |
| 9.856867 | 10 | 5 | 5 | 6988536  | 40910293 | 6867218  | 40826120 | 5414117  | 45310027 | 42601039 | 29928523 | 39241523 |
| 10.02372 | 5  | 3 | 2 | 327747.9 | 495527.2 | 327444.7 | 500491.6 | 399307.5 | 407930   | 185064.7 | 225408.3 | 709983   |
| 44.98283 | 5  | 3 | 2 | 316619.9 | 4398603  | 950093.9 | 4387778  | 601045.3 | 4720536  | 4720728  | 4814671  | 2713495  |
| 21.77867 | 8  | 4 | 4 | 190954.5 | 2205681  | 442371.3 | 2195419  | 977523.2 | 1974704  | 2560415  | 2396625  | 1539604  |
| 11.07685 | 9  | 5 | 4 | 350891.2 | 1057772  | 478154.4 | 1051702  | 432891.1 | 1726398  | 1291111  | 1046910  | 701296.7 |
| 9.999217 | 10 | 5 | 5 | 1754723  | 3181655  | 1320027  | 3157754  | 2152054  | 4080674  | 4892564  | 3021502  | 1634204  |
| 10.008   | 8  | 4 | 4 | 645594.4 | 1072816  | 273411.2 | 1080887  | 797278.8 | 1131890  | 1515247  | 824343.1 | 891397   |
| 13.24407 | 6  | 3 | 3 | 32937.22 | 119546.6 | 40719.95 | 119033.3 | 37106.63 | 154933.6 | 85791.98 | 69125.9  | 159885.1 |
| 9.684583 | 12 | 5 | 5 | 1008714  | 4592858  | 2262837  | 4566501  | 1723695  | 5729912  | 5219263  | 5907148  | 5537212  |
| 18.76233 | 10 | 5 | 5 | 133147.3 | 593338   | 211559.4 | 596744.3 | 301505.4 | 903625.6 | 491978.2 | 495461.9 | 369390.9 |
| 9.358417 | 9  | 5 | 4 | 1009769  | 5337958  | 2428148  | 5388013  | 4804953  | 4758330  | 1915137  | 5856192  | 8691508  |
| 9.379233 | 5  | 3 | 2 | 2742532  | 4352451  | 4406541  | 4303418  | 3018002  | 884931.8 | 6948903  | 10859342 | 949615.7 |
| 10.008   | 8  | 4 | 4 | 588402.8 | 966064.6 | 482351.3 | 958398.3 | 690984.6 | 1003146  | 1745960  | 910716.1 | 467060.9 |
| 10.95835 | 9  | 4 | 5 | 194870.3 | 586043.1 | 220372.2 | 588991.4 | 243748.8 | 883616.4 | 629383.2 | 388137   | 679516.8 |
| 10.008   | 10 | 5 | 5 | 548788.5 | 1518139  | 215994.9 | 1511627  | 679102.3 | 1552690  | 1419540  | 1868721  | 1451491  |
| 39.08617 | 4  | 1 | 3 | 371300.4 | 5745051  | 261813.6 | 5761467  | 1778341  | 5326592  | 5855603  | 6030908  | 5805565  |
| 18.87783 | 6  | 4 | 2 | 727626.7 | 6819976  | 1707895  | 6787358  | 3222596  | 9084539  | 5053999  | 5609204  | 6253808  |
| 9.032483 | 4  | 3 | 1 | 245633   | 534416.4 | 297106.5 | 537455.8 | 167952.1 | 456922.2 | 1013071  | 549625.9 | 450852.8 |
| 9.986767 | 9  | 5 | 4 | 1068192  | 1733643  | 980893.5 | 1722456  | 801608.5 | 1787939  | 3187469  | 2008086  | 658021.7 |
| 41.647   | 5  | 2 | 3 | 347978.6 | 4547094  | 342359.2 | 4525929  | 2307856  | 5107348  | 4575635  | 4509227  | 4293374  |
| 10.95055 | 10 | 5 | 5 | 255951.3 | 829166.9 | 268081.4 | 826131.6 | 216409   | 1244586  | 937244.1 | 573572.9 | 663567.9 |
| 9.856867 | 8  | 5 | 3 | 1095609  | 2424684  | 780678   | 2440507  | 1609246  | 3017813  | 1864900  | 3284563  | 2541259  |
| 20.30267 | 8  | 4 | 4 | 431067.3 | 1072124  | 1823083  | 1095456  | 1966766  | 249512.2 | 123114.4 | 4329848  | 319146.1 |
| 19.69417 | 5  | 3 | 2 | 149831.9 | 1231236  | 293469.1 | 1227693  | 285645.4 | 750479   | 1345895  | 1325353  | 1202335  |
| 9.4159   | 6  | 3 | 3 | 1163868  | 2853380  | 1128309  | 2870758  | 1676759  | 2786403  | 1751839  | 1770841  | 4269534  |
| 9.979667 | 10 | 5 | 5 | 14101519 | 60981476 | 10003845 | 60832562 | 14158118 | 70793976 | 72297891 | 57938096 | 50682568 |
| 9.365833 | 13 | 5 | 4 | 479084.8 | 1324202  | 440540.1 | 1310624  | 1491267  | 884471.3 | 1048534  | 2023822  | 1238943  |
| 10.9645  | 10 | 5 | 5 | 11416599 | 51596649 | 12622772 | 51438877 | 13491132 | 64913526 | 65227080 | 43581464 | 38209246 |

|          |    |   |   |          |          |          |          |          |          |          |          |          |
|----------|----|---|---|----------|----------|----------|----------|----------|----------|----------|----------|----------|
| 10.9645  | 10 | 5 | 5 | 240022.4 | 809333.6 | 250230.6 | 806897.2 | 131954.4 | 961376.6 | 1129310  | 835564.5 | 551715.8 |
| 9.859983 | 8  | 3 | 4 | 551319.8 | 2022481  | 866698.1 | 2007847  | 1475950  | 1819472  | 1806861  | 1454899  | 1488821  |
| 19.67967 | 8  | 4 | 4 | 136761.1 | 539808.3 | 220717.5 | 543598   | 388488.7 | 719224.1 | 607978.7 | 392954.2 | 233133.9 |
| 25.76133 | 7  | 3 | 4 | 93163.13 | 288082.4 | 132198.6 | 286348.7 | 158472.8 | 109186.9 | 278336.1 | 284894.6 | 285514.1 |
| 9.3919   | 8  | 3 | 4 | 897535.7 | 5982917  | 924380.3 | 5952940  | 3389435  | 6422190  | 7090357  | 5477978  | 6236924  |
| 9.976317 | 4  | 3 | 1 | 821415   | 1008905  | 363931   | 1018414  | 1062643  | 938169.9 | 1052930  | 615142   | 845381.9 |
| 10.008   | 10 | 5 | 5 | 864196.1 | 2758587  | 718029.3 | 2748581  | 969220.5 | 3145515  | 3601775  | 3000930  | 1850914  |
| 9.976317 | 10 | 5 | 5 | 655733.9 | 1714369  | 964514.8 | 1724392  | 728833.4 | 2299607  | 2661921  | 2041823  | 217096.9 |
| 9.45135  | 5  | 3 | 2 | 276209.1 | 489843.3 | 231745.9 | 492396.9 | 204493   | 813226.9 | 605796.2 | 488361.6 | 292618.9 |
| 8.827383 | 6  | 3 | 3 | 228739.4 | 1307627  | 558477.1 | 1300967  | 596470.6 | 1731702  | 1694977  | 1672687  | 504466.2 |
| 9.278717 | 5  | 3 | 2 | 3740774  | 3971081  | 4435197  | 3923887  | 3748239  | 1067552  | 1024595  | 557888.1 | 10475945 |
| 25.73817 | 3  | 3 | 0 | 101792   | 465576.9 | 243340.1 | 463326.5 | 126741.7 | 449177.3 | 818753.6 | 276237.6 | 211391.1 |
| 9.338567 | 6  | 2 | 3 | 479260.8 | 2884742  | 1269849  | 2863058  | 2344182  | 3309286  | 787413.3 | 2659726  | 3932609  |
| 9.9677   | 10 | 5 | 5 | 6306781  | 16017482 | 6844749  | 15932275 | 8054460  | 21050360 | 24841589 | 14891095 | 8676270  |
| 11.27517 | 10 | 5 | 5 | 1070131  | 5183983  | 2242071  | 5211967  | 2692345  | 9127624  | 4409321  | 3683681  | 3954694  |
| 9.904767 | 6  | 3 | 3 | 1440784  | 4386538  | 2672900  | 4358041  | 2368924  | 8912480  | 4164090  | 3766406  | 3206598  |
| 9.999217 | 10 | 5 | 5 | 801134.3 | 2129674  | 788472.1 | 2118694  | 1165569  | 2268504  | 3351334  | 1945683  | 1188509  |
| 10.9645  | 10 | 5 | 5 | 648809.1 | 2094393  | 708116.1 | 2086006  | 816306.2 | 3282586  | 1605267  | 1762248  | 1613416  |
| 9.994767 | 9  | 5 | 4 | 541088.4 | 1376489  | 360534.7 | 1371101  | 591837.9 | 1383816  | 1881254  | 1082331  | 989292.8 |
| 42.48133 | 7  | 4 | 1 | 325097.9 | 3145703  | 1829967  | 3166024  | 1898155  | 1898669  | 4742646  | 3543926  | 4875367  |
| 37.86317 | 4  | 1 | 3 | 517444.3 | 9668733  | 2455629  | 9642130  | 2458805  | 11127581 | 5305806  | 10361788 | 10646843 |
| 32.80633 | 5  | 2 | 3 | 94010.8  | 351826.5 | 353315   | 348402.6 | 272802.3 | 96028.68 | 192105.8 | 13322.47 | 797841.2 |
| 44.98333 | 4  | 3 | 1 | 297603.1 | 2801386  | 1835812  | 2786585  | 439124.8 | 5807138  | 874304.1 | 2821914  | 2504851  |
| 42.35183 | 5  | 3 | 2 | 251063.5 | 3417201  | 514596.9 | 3424091  | 736621.1 | 3274670  | 3153336  | 3954129  | 2772070  |
| 9.40325  | 9  | 5 | 4 | 1594471  | 3042969  | 764257   | 3058472  | 1848348  | 2670792  | 3546225  | 2068645  | 2899025  |
| 9.864767 | 10 | 5 | 5 | 26707064 | 1.87E+08 | 10091232 | 1.87E+08 | 25238128 | 1.87E+08 | 1.71E+08 | 1.95E+08 | 1.96E+08 |
| 9.999217 | 10 | 5 | 5 | 4306199  | 7920835  | 3441935  | 7970318  | 5474924  | 9206956  | 13026802 | 7643095  | 4195492  |
| 9.983433 | 10 | 5 | 5 | 6629742  | 23846184 | 5023003  | 23783271 | 6586553  | 28432214 | 29882071 | 22239961 | 19682771 |
| 9.746783 | 6  | 2 | 3 | 625717.8 | 2033641  | 440283.4 | 2016694  | 2162240  | 2634450  | 1558465  | 2321891  | 1926442  |
| 9.848417 | 9  | 5 | 4 | 736956.6 | 3240075  | 1139513  | 3252084  | 1159960  | 4736057  | 4156066  | 2401386  | 2156826  |
| 9.989483 | 10 | 5 | 5 | 3020193  | 4922503  | 982220.7 | 4893320  | 3812011  | 6195338  | 4588926  | 5466178  | 4786229  |
| 43.5745  | 9  | 2 | 4 | 413474.9 | 6188976  | 1511613  | 6163749  | 3117447  | 6336535  | 6452681  | 6245509  | 3841318  |
| 11.2653  | 8  | 4 | 4 | 130801.4 | 444709.7 | 308326.1 | 442129.3 | 180075.7 | 942976.6 | 486494.7 | 380356.5 | 287352.7 |
| 9.903567 | 5  | 3 | 2 | 1297594  | 3160297  | 810493.5 | 3172089  | 1416738  | 3651182  | 2002143  | 3977774  | 2657548  |
| 10.33625 | 7  | 4 | 3 | 134536.5 | 441142.3 | 74966.59 | 439761.3 | 175579.9 | 472045.2 | 523819.9 | 430848.3 | 457504   |



|          |    |   |   |          |          |          |          |          |          |          |          |          |
|----------|----|---|---|----------|----------|----------|----------|----------|----------|----------|----------|----------|
| 20.26667 | 8  | 4 | 4 | 35553.57 | 154020.6 | 96116.22 | 154827.6 | 61591.02 | 301713.2 | 89115.36 | 154110.7 | 51372.49 |
| 10.97857 | 10 | 5 | 5 | 280657.6 | 1309298  | 401643   | 1305230  | 421279.2 | 1017843  | 1817395  | 924550.5 | 1128775  |
| 10.01477 | 9  | 5 | 4 | 450819.9 | 974680.9 | 264021.5 | 978252   | 434897.2 | 995371.8 | 1295611  | 1159643  | 675686.2 |
| 10.9645  | 10 | 5 | 5 | 526412.1 | 2338652  | 511511.6 | 2334509  | 300685   | 2722517  | 2875322  | 1745212  | 1854524  |
| 37.7625  | 8  | 5 | 3 | 207500.8 | 1104668  | 527822   | 1099329  | 563666.8 | 418502.8 | 921273   | 1002889  | 1337534  |
| 10.97242 | 10 | 5 | 5 | 214257.5 | 902397.1 | 324673.4 | 898838.8 | 413565.4 | 1345942  | 1026132  | 902212.1 | 775070.9 |
| 10.008   | 8  | 5 | 3 | 313987.3 | 754068.6 | 225383   | 751704.5 | 270503.4 | 773314.9 | 469669   | 1095348  | 751833.6 |
| 9.55155  | 5  | 2 | 3 | 300327.1 | 411330.6 | 302104.1 | 414365.4 | 344296.3 | 552247.7 | 805314.5 | 483147.4 | 88279.37 |
| 9.45945  | 14 | 5 | 5 | 4813767  | 27108982 | 14684198 | 26992005 | 9899213  | 22726336 | 12766555 | 19663506 | 29246516 |
| 8.960667 | 5  | 3 | 2 | 464832.8 | 1458011  | 243090   | 1460515  | 298733.7 | 1711733  | 1416530  | 1141373  | 1689885  |
| 9.328967 | 5  | 3 | 2 | 422157.9 | 1242229  | 579795.1 | 1236459  | 683455.1 | 1379608  | 230042.8 | 1358753  | 1630896  |
| 10.96452 | 6  | 1 | 3 | 179886.8 | 483213.9 | 160334   | 484436.3 | 103212.7 | 228811.9 | 497317.3 | 452745.2 | 605890.4 |
| 12.1081  | 10 | 5 | 5 | 477460   | 2558079  | 587461.4 | 2552223  | 724016.7 | 2943611  | 2342771  | 2033843  | 2083946  |
| 8.400833 | 7  | 3 | 4 | 15125262 | 5.79E+08 | 2.67E+08 | 5.76E+08 | 4.28E+08 | 4.37E+08 | 5.77E+08 | 4.95E+08 | 1.03E+09 |
| 10.01477 | 18 | 5 | 5 | 2130739  | 4686624  | 3023702  | 4714411  | 3431544  | 4859355  | 3209642  | 2228515  | 3308982  |
| 9.960467 | 10 | 5 | 5 | 5142905  | 12766541 | 5331683  | 12811721 | 5224045  | 17102258 | 19346815 | 11843687 | 7127366  |
| 10.9645  | 10 | 5 | 5 | 355552.3 | 1499650  | 394645.4 | 1503191  | 435926.9 | 1866916  | 1945747  | 1287347  | 1021097  |
| 9.445217 | 14 | 5 | 5 | 693896.2 | 5973735  | 1718321  | 5960496  | 1413784  | 5658779  | 7819845  | 7643653  | 4815427  |
| 10.91407 | 7  | 4 | 3 | 154441   | 506532.5 | 149031.8 | 504649.7 | 279223   | 519611.1 | 640682.7 | 280947.7 | 637133.3 |
| 38.036   | 9  | 2 | 4 | 442209.5 | 6891085  | 1438426  | 6914575  | 3653408  | 7393816  | 7554611  | 7575785  | 4322221  |
| 22.97267 | 6  | 3 | 3 | 80312456 | 3.14E+08 | 4.29E+08 | 3.11E+08 | 4.26E+08 | 1578898  | 1379861  | 7.98E+08 | 600589   |
| 9.872883 | 11 | 5 | 5 | 1833682  | 8575004  | 1049924  | 8592228  | 2709593  | 8123658  | 7585669  | 9527127  | 9868327  |
| 10.9645  | 10 | 5 | 5 | 991537.5 | 5126303  | 892068.4 | 5118695  | 956278.1 | 6067840  | 6107280  | 4452722  | 4277438  |
| 9.896717 | 8  | 4 | 4 | 1.36E+08 | 2.05E+08 | 4.48E+08 | 2.02E+08 | 4.28E+08 | 7625892  | 2484221  | 1.01E+09 | 8477699  |
| 9.976317 | 11 | 4 | 4 | 1574654  | 3716797  | 893445.2 | 3728245  | 1750454  | 2817875  | 3570138  | 4448486  | 4816816  |
| 21.767   | 5  | 3 | 2 | 144537.7 | 1401025  | 261997.6 | 1403581  | 358840.5 | 1768508  | 1495053  | 1299737  | 1054261  |
| 10.49953 | 6  | 3 | 3 | 233659.2 | 869070.7 | 514143   | 865524.4 | 338050.4 | 1545942  | 706348.6 | 1265440  | 437335.7 |
| 15.14642 | 4  | 3 | 1 | 133034.2 | 351865.4 | 319196.6 | 349848.2 | 134924.7 | 205944.1 | 171588   | 849469.4 | 52325.03 |
| 10.96015 | 4  | 3 | 1 | 1439653  | 2101849  | 1329434  | 2111166  | 928705   | 4050104  | 2467973  | 2279532  | 894957   |
| 9.976317 | 10 | 5 | 5 | 738460.4 | 2698912  | 460497.4 | 2704753  | 901737.7 | 2687142  | 3313702  | 2933338  | 2100587  |
| 9.999217 | 10 | 5 | 5 | 646431.6 | 1171511  | 530838.1 | 1166597  | 680545.6 | 1449827  | 1819264  | 1337147  | 567497   |
| 9.82645  | 5  | 3 | 2 | 1004352  | 2431935  | 954608.8 | 2421524  | 1564679  | 1783288  | 2016318  | 3992523  | 2680274  |
| 9.09495  | 7  | 4 | 3 | 1632909  | 3230939  | 3944167  | 3199428  | 3995856  | 1294491  | 648688.2 | 778743.7 | 3437816  |
| 9.445217 | 13 | 5 | 4 | 761238.7 | 4797275  | 2449311  | 4780565  | 1672294  | 708961   | 6873140  | 6161439  | 4449894  |
| 10.95055 | 10 | 5 | 5 | 643123.4 | 4105759  | 1063449  | 4114152  | 1063552  | 5327367  | 4918581  | 3160216  | 2896559  |

|          |    |   |   |          |          |          |          |          |          |          |          |          |
|----------|----|---|---|----------|----------|----------|----------|----------|----------|----------|----------|----------|
| 9.994767 | 9  | 5 | 4 | 1902261  | 3373925  | 1918938  | 3356899  | 2384965  | 4323058  | 5973190  | 3361408  | 965328.8 |
| 9.972483 | 5  | 3 | 2 | 412930.3 | 602898.9 | 336822.2 | 600075.6 | 385535.7 | 177324.9 | 999747.2 | 427075.8 | 527183.1 |
| 9.08685  | 7  | 3 | 4 | 256120.3 | 663538.8 | 428140   | 667146.9 | 495885.8 | 813108.1 | 1034521  | 1041310  | 330593.9 |
| 9.95825  | 5  | 3 | 2 | 880669.3 | 1789476  | 1071419  | 1782117  | 800376.4 | 3618007  | 1756291  | 1262815  | 867930.8 |
| 42.0065  | 4  | 1 | 3 | 305802   | 3492697  | 195505.4 | 3495848  | 534365.8 | 3788102  | 3543808  | 3390745  | 3263848  |
| 10.38852 | 8  | 4 | 4 | 275441.5 | 1697994  | 268727.7 | 1693038  | 855980   | 2068325  | 1655359  | 1754928  | 1696313  |
| 36.30967 | 9  | 4 | 5 | 213123.3 | 1143190  | 473886.3 | 1147704  | 693722.9 | 1695024  | 722784.8 | 840680.5 | 834481.6 |
| 9.40325  | 6  | 4 | 2 | 21272786 | 84207129 | 40427398 | 83892226 | 46332473 | 53882935 | 75204522 | 1.36E+08 | 1.15E+08 |
| 9.601917 | 10 | 5 | 5 | 15123884 | 77503247 | 11183554 | 77382757 | 20522932 | 83994451 | 93313828 | 74796446 | 65599950 |
| 9.8445   | 5  | 2 | 3 | 1175586  | 2375858  | 775914   | 2366344  | 1680036  | 3386624  | 1887909  | 2753776  | 2473189  |
| 9.9014   | 10 | 5 | 5 | 3749998  | 8105608  | 2715784  | 8128469  | 3592154  | 10565840 | 3767571  | 8169800  | 10233460 |
| 9.43325  | 5  | 3 | 2 | 2787099  | 19106721 | 20006124 | 18973691 | 17044176 | 42415403 | 5020281  | 6691764  | 39411762 |
| 9.61185  | 4  | 1 | 3 | 474389.1 | 817223.9 | 267691.4 | 814386.5 | 491531.4 | 919645.8 | 340147.8 | 939415.9 | 972979.6 |
| 10.9645  | 10 | 5 | 5 | 386611.2 | 2030079  | 301486.2 | 2032797  | 447328.2 | 2325019  | 2349698  | 1830316  | 1666961  |
| 12.7768  | 11 | 5 | 5 | 116315.1 | 642093.4 | 194543.5 | 643610.9 | 234804.5 | 805746.8 | 886412.4 | 505762.8 | 574952.3 |
| 41.93483 | 5  | 2 | 3 | 357791   | 6128929  | 1498785  | 6137742  | 1038316  | 6735133  | 6367502  | 3611588  | 6322834  |
| 9.3332   | 6  | 4 | 2 | 567630.4 | 3959870  | 1313458  | 3975668  | 2978265  | 5738433  | 4858238  | 3505685  | 2492304  |
| 13.3325  | 7  | 3 | 4 | 451752.2 | 4059675  | 1292963  | 4045992  | 2517455  | 4083457  | 3856068  | 6090286  | 3770248  |
| 9.43325  | 6  | 3 | 3 | 426071.4 | 2306661  | 728409   | 2312726  | 1043041  | 3414660  | 1770648  | 2139478  | 2602991  |
| 10.95835 | 6  | 3 | 3 | 1944764  | 4315335  | 4928684  | 4284665  | 4283615  | 10047681 | 503274.8 | 770090.8 | 891829.2 |
| 11.4097  | 11 | 5 | 5 | 299777.1 | 946771   | 281747.6 | 949205.5 | 437538.9 | 1418224  | 864054.2 | 702002.7 | 779545.6 |
| 9.840617 | 10 | 5 | 5 | 569689.6 | 2197415  | 158783.8 | 2194942  | 501591.4 | 2026137  | 2269685  | 2298603  | 2363730  |
| 9.94455  | 5  | 3 | 2 | 878012.1 | 1261292  | 455041.4 | 1263993  | 370310   | 1835443  | 625541.7 | 1502733  | 1271265  |
| 9.929783 | 5  | 0 | 4 | 924675.8 | 2336420  | 492853   | 2333129  | 558513.8 | 2583620  | 1585716  | 2870913  | 2146586  |
| 9.960467 | 9  | 4 | 5 | 526551.9 | 1457669  | 446591.7 | 1455179  | 342246.2 | 1878377  | 1800206  | 1519811  | 763057.7 |
| 9.859983 | 10 | 5 | 5 | 14474005 | 86567541 | 2907035  | 86608661 | 8703034  | 84976661 | 88168699 | 87608782 | 82362666 |
| 9.840617 | 3  | 0 | 3 | 3944175  | 6988786  | 2504972  | 6955270  | 7115704  | 8310848  | 2873035  | 9332538  | 7853243  |
| 30.29417 | 10 | 5 | 5 | 1698544  | 9796235  | 1548878  | 9814290  | 3796279  | 10185032 | 11931603 | 9899401  | 7639049  |
| 9.3735   | 5  | 2 | 3 | 859928.6 | 4934448  | 1568739  | 4919777  | 3000993  | 5973666  | 2812216  | 3836496  | 5443506  |
| 10.95055 | 5  | 2 | 3 | 406795   | 1036285  | 381096.2 | 1033175  | 612883.7 | 1507561  | 1367142  | 814773.8 | 619993.7 |
| 9.999    | 8  | 4 | 4 | 988368.3 | 1265392  | 1492803  | 1257853  | 913732.8 | 3925660  | 530942.3 | 714109.6 | 734356.2 |
| 22.987   | 6  | 3 | 3 | 250389.3 | 978502   | 405955.2 | 982531.2 | 843404.7 | 1517935  | 685124.5 | 581687.5 | 1291909  |
| 9.992233 | 10 | 5 | 5 | 936299.6 | 2349357  | 845933.7 | 2343031  | 1225367  | 2390224  | 3679577  | 2411059  | 1458299  |
| 37.331   | 4  | 3 | 0 | 218488.4 | 2731772  | 1254367  | 2737241  | 89280.71 | 634722.8 | 4023111  | 2956268  | 3090461  |
| 9.992233 | 10 | 5 | 5 | 809383.1 | 2194713  | 487297.8 | 2191102  | 703765.6 | 2748720  | 2368922  | 2490985  | 1681373  |

|          |    |   |   |          |          |          |          |          |          |          |          |          |
|----------|----|---|---|----------|----------|----------|----------|----------|----------|----------|----------|----------|
| 9.3919   | 10 | 4 | 5 | 2695873  | 20911067 | 4585765  | 20854324 | 12733173 | 18676956 | 14366216 | 21462809 | 23989626 |
| 10.98385 | 6  | 4 | 2 | 176878.4 | 546529.1 | 302162.9 | 548291.6 | 303597.5 | 344410   | 337278.9 | 368250   | 647774.3 |
| 9.371417 | 4  | 3 | 1 | 373299   | 1474207  | 607010   | 1478377  | 811930.9 | 1507664  | 567355.4 | 1599002  | 1427456  |
| 39.20117 | 8  | 4 | 2 | 413227.3 | 5165554  | 877886.3 | 5157648  | 1715813  | 4323913  | 4679573  | 6583961  | 5367349  |
| 9.8445   | 4  | 1 | 3 | 1140453  | 2113596  | 1491727  | 2106947  | 630419.7 | 4222819  | 370869   | 2078161  | 1123740  |
| 9.8445   | 4  | 3 | 1 | 989169.3 | 1808767  | 414210.9 | 1817028  | 1951379  | 1605200  | 1766436  | 1289859  | 1989522  |
| 18.96583 | 10 | 5 | 5 | 1286760  | 8420260  | 1758537  | 8428768  | 1170918  | 9779454  | 9681955  | 6804492  | 6212606  |
| 8.97505  | 9  | 4 | 5 | 494456.5 | 1401010  | 635137.7 | 1398241  | 244479.9 | 2020787  | 1921371  | 1460349  | 457900.5 |
| 10.25713 | 8  | 3 | 5 | 439460.7 | 2848589  | 610215.6 | 2845486  | 478335.9 | 2485044  | 3423084  | 3582404  | 2521929  |
| 10.9645  | 5  | 3 | 2 | 1200759  | 1959522  | 1417805  | 1966136  | 878587.5 | 985598.2 | 3574296  | 1039834  | 3440574  |
| 9.388367 | 5  | 3 | 2 | 829697.3 | 4704512  | 2990198  | 4718464  | 1895412  | 3216187  | 8889968  | 2712218  | 1921625  |
| 9.999517 | 6  | 3 | 3 | 13434006 | 10426278 | 21552564 | 10329502 | 11691519 | 48975591 | 1321197  | 781356.7 | 712535.9 |
| 10.95835 | 10 | 5 | 5 | 1179962  | 2925872  | 1017872  | 2920121  | 1072457  | 4553113  | 3309291  | 2221595  | 2274814  |
| 9.970617 | 6  | 3 | 2 | 3952818  | 6155247  | 7327531  | 6187731  | 3991061  | 3251781  | 4158972  | 19128081 | 1260281  |
| 44.9835  | 6  | 2 | 4 | 353244.3 | 5626635  | 1530078  | 5634444  | 1362791  | 6172476  | 6847309  | 6131002  | 2951109  |
| 9.960467 | 5  | 2 | 3 | 491400.4 | 896046.6 | 449765.4 | 894006   | 285865.3 | 1390088  | 180772.9 | 1051407  | 812457.5 |
| 9.999217 | 10 | 5 | 5 | 959756.5 | 2543610  | 1015397  | 2537440  | 1289845  | 2866961  | 3999772  | 2502554  | 1234861  |
| 10.95602 | 9  | 4 | 5 | 341787.3 | 1119579  | 471881.5 | 1121793  | 351949.2 | 1857073  | 1332641  | 814472.8 | 798339.7 |
| 10.95602 | 9  | 5 | 4 | 268185.3 | 814588.9 | 190960.7 | 812837.4 | 426005.1 | 927719   | 1052065  | 786398.6 | 544065.2 |
| 9.388617 | 6  | 3 | 3 | 8545259  | 5715125  | 8695835  | 5674689  | 6939209  | 1017876  | 20885440 | 682188.2 | 743439.8 |
| 9.8322   | 8  | 4 | 4 | 948113.9 | 3906641  | 293034.9 | 3901718  | 1317729  | 3691012  | 3726550  | 4058815  | 4353787  |
| 10.008   | 8  | 4 | 4 | 4126929  | 4317141  | 6570773  | 4347537  | 6039626  | 1446894  | 2244534  | 1322739  | 16022039 |
| 9.848417 | 8  | 5 | 3 | 1575711  | 5573028  | 1032804  | 5564544  | 2255374  | 5853651  | 6454278  | 3805907  | 5645978  |
| 9.9677   | 10 | 5 | 5 | 6279443  | 15805859 | 6746755  | 15840428 | 7926132  | 20875701 | 24449438 | 14589480 | 8534473  |
| 9.872067 | 5  | 2 | 3 | 1712022  | 5031295  | 2346158  | 5041647  | 2106320  | 5731490  | 2663398  | 8071095  | 6039192  |
| 9.713983 | 4  | 1 | 3 | 203138.5 | 436329.4 | 214328.8 | 435477   | 164383.3 | 550949.9 | 399455   | 743723.5 | 260965.5 |
| 9.976317 | 8  | 4 | 4 | 955409.3 | 1590221  | 960382.4 | 1595418  | 1339281  | 2443813  | 2762422  | 1181880  | 545016.9 |
| 23.161   | 7  | 5 | 2 | 77282.9  | 232647.7 | 127699.5 | 232173.1 | 79876.33 | 150369.4 | 450550   | 234057.8 | 192293.7 |
| 10.57323 | 10 | 5 | 5 | 535626.6 | 1693694  | 710146.2 | 1696353  | 517708.5 | 1634590  | 2833355  | 1798540  | 1126770  |
| 9.842    | 5  | 3 | 2 | 593846.6 | 1447060  | 937338.7 | 1450819  | 830607.4 | 2526289  | 0        | 1942668  | 1352293  |
| 10.45433 | 8  | 4 | 4 | 468653.8 | 1329982  | 433844   | 1328187  | 416033.9 | 1956373  | 1513369  | 1074991  | 820240   |
| 10.39612 | 10 | 5 | 5 | 6685862  | 40578356 | 3329126  | 40555961 | 6716913  | 35673590 | 44124080 | 42993112 | 39239595 |
| 35.77633 | 5  | 2 | 3 | 114771.3 | 570425.3 | 152952.7 | 569577.4 | 244095.7 | 583336.4 | 677068.3 | 617996.9 | 305464.9 |
| 9.864767 | 10 | 5 | 5 | 1758198  | 5688472  | 2181744  | 5678835  | 2521566  | 1998612  | 6309430  | 6361999  | 7812664  |
| 9.8887   | 10 | 5 | 4 | 2319550  | 7517410  | 3607424  | 7529153  | 1965272  | 4681575  | 4139452  | 9824341  | 12605146 |

|          |    |   |   |          |          |          |          |          |          |          |          |          |
|----------|----|---|---|----------|----------|----------|----------|----------|----------|----------|----------|----------|
| 10.95835 | 10 | 5 | 4 | 378401.3 | 1652062  | 470369.6 | 1650000  | 560345.8 | 2180800  | 2036315  | 1042260  | 1359124  |
| 10.9645  | 10 | 5 | 5 | 1226861  | 6078180  | 1125096  | 6082704  | 1198723  | 7269257  | 7320232  | 5268811  | 5012697  |
| 10.02372 | 9  | 4 | 5 | 294467.5 | 782056.1 | 185996.6 | 781072   | 310741.4 | 677345.4 | 1088027  | 823913.7 | 625206.8 |
| 10.95055 | 9  | 4 | 5 | 212163.3 | 723136.2 | 263444   | 724079.5 | 238126   | 969843.7 | 975826.4 | 704492.5 | 618744.7 |
| 9.920517 | 5  | 3 | 2 | 55936456 | 66702324 | 88894461 | 66383810 | 87211162 | 4250855  | 2261489  | 1761261  | 1.84E+08 |
| 9.464933 | 6  | 2 | 3 | 2422941  | 8114528  | 4334050  | 8091090  | 8001992  | 12742813 | 10266888 | 3353541  | 3613582  |
| 29.92033 | 8  | 4 | 4 | 9297842  | 17260211 | 38006799 | 17395342 | 38385078 | 252408.5 | 114411.7 | 267614.2 | 85248567 |
| 9.840617 | 10 | 5 | 5 | 1471259  | 4386539  | 1491296  | 4391461  | 1288214  | 4670584  | 3557890  | 2776728  | 4195623  |
| 10.44888 | 6  | 3 | 3 | 213214.1 | 544472.8 | 80592.13 | 543927   | 202140   | 531982.2 | 683785.1 | 516166.3 | 514741.7 |
| 9.994767 | 10 | 5 | 5 | 872595.5 | 2787695  | 787659.8 | 2784579  | 996122.5 | 3301335  | 3551903  | 3208640  | 2020917  |
| 8.780767 | 4  | 1 | 3 | 516045.8 | 1963548  | 744732.1 | 1960717  | 925835.3 | 1774434  | 2993435  | 2322305  | 1733872  |
| 9.842    | 10 | 5 | 5 | 3467705  | 15612163 | 2672654  | 15621014 | 2655466  | 18375386 | 16923328 | 11283294 | 16211776 |
| 9.419733 | 5  | 3 | 2 | 2766269  | 12604553 | 11517663 | 12565994 | 11699468 | 23074689 | 7452382  | 2838967  | 26853345 |
| 38.5105  | 5  | 3 | 2 | 382266.6 | 4719290  | 1273308  | 4722509  | 496136.9 | 4632170  | 4916037  | 6369373  | 4880563  |
| 9.119933 | 9  | 5 | 4 | 1447304  | 5217096  | 3265237  | 5207503  | 2645599  | 6364036  | 10234949 | 3970597  | 3876921  |
| 10.94208 | 4  | 3 | 1 | 177893   | 444489.9 | 167456.3 | 443799.6 | 251823.3 | 280130.8 | 726627.1 | 386523.9 | 428766.1 |
| 9.473717 | 6  | 3 | 3 | 1620601  | 7446739  | 8251594  | 7420133  | 8387532  | 2550997  | 2893892  | 20160046 | 305245.5 |
| 42.52467 | 7  | 3 | 2 | 394976.3 | 6697873  | 2370899  | 6691729  | 1298167  | 5412863  | 4992885  | 6269114  | 5968133  |
| 10.95055 | 10 | 5 | 5 | 715936.5 | 2999068  | 810762.1 | 3001332  | 604345   | 3843473  | 3851569  | 2472952  | 2076487  |
| 10.00998 | 7  | 3 | 4 | 270774.6 | 625737.2 | 290826.6 | 626606.9 | 259904.5 | 311509   | 1050982  | 702826.4 | 399182.9 |
| 9.856867 | 10 | 5 | 5 | 1149563  | 3471673  | 747327.8 | 3468422  | 1280756  | 4306510  | 4235368  | 2812484  | 2804392  |
| 20.25933 | 10 | 5 | 5 | 152221.7 | 1059097  | 366002.6 | 1060069  | 254386.1 | 1636094  | 875715.9 | 982631.7 | 662678.8 |
| 43.48833 | 8  | 2 | 3 | 470090.8 | 7952764  | 1861235  | 7945907  | 2617534  | 11268555 | 6867934  | 7084319  | 7310470  |
| 44.19283 | 10 | 5 | 4 | 371197.6 | 5874159  | 3370116  | 5866110  | 1922651  | 3423128  | 11719937 | 5695062  | 4420904  |
| 11.27725 | 10 | 5 | 5 | 1218242  | 5652845  | 2279075  | 5660495  | 2959832  | 9670256  | 4806582  | 4058212  | 4604368  |
| 18.09517 | 7  | 4 | 3 | 206352.3 | 1230615  | 73599.59 | 1229838  | 369780.1 | 1308581  | 1182116  | 1307799  | 1205503  |
| 10.07923 | 8  | 4 | 4 | 687135.8 | 1755328  | 877549.6 | 1757304  | 461146.7 | 993413.6 | 3174101  | 1968988  | 1143446  |
| 9.983433 | 9  | 4 | 5 | 803217.6 | 1277132  | 851277.4 | 1279537  | 1005504  | 1813751  | 2418893  | 1158230  | 301191.4 |
| 9.992233 | 7  | 4 | 3 | 407404.2 | 697783.1 | 137214.5 | 698120.9 | 125948   | 758347.4 | 788242.4 | 596895.8 | 833999.4 |
| 9.9677   | 7  | 4 | 3 | 1040857  | 1610323  | 389098.5 | 1611717  | 679091.1 | 2012378  | 1822189  | 1769370  | 1417511  |
| 14.85343 | 3  | 0 | 3 | 964704.2 | 3874423  | 373410.3 | 3866988  | 4268885  | 4108793  | 3759559  | 3309112  | 3909349  |
| 10.9645  | 7  | 2 | 5 | 160935.9 | 471054.5 | 105644.4 | 470780.2 | 127573.5 | 508873.8 | 637180.1 | 415560.9 | 369292.3 |
| 10.31365 | 7  | 3 | 4 | 455511.1 | 1128166  | 432662.3 | 1129211  | 465757.2 | 1408939  | 425714.6 | 1478068  | 1003575  |
| 10.9645  | 10 | 5 | 5 | 1214287  | 6117718  | 1095132  | 6120307  | 1143494  | 7259012  | 7349890  | 5296297  | 5121125  |
| 30.2805  | 10 | 5 | 5 | 4030735  | 26153610 | 2375644  | 26136416 | 9991837  | 24623912 | 29364652 | 26554663 | 23163702 |

|          |    |   |   |          |          |          |          |          |          |          |          |          |
|----------|----|---|---|----------|----------|----------|----------|----------|----------|----------|----------|----------|
| 10.95055 | 10 | 5 | 5 | 686139.3 | 3365682  | 1314881  | 3368629  | 1247968  | 4862068  | 4467514  | 2578456  | 1684664  |
| 9.232283 | 4  | 1 | 3 | 345206.8 | 1664069  | 453917.1 | 1662112  | 1101309  | 2194881  | 1056809  | 1522556  | 2027861  |
| 10.95055 | 8  | 3 | 5 | 327482.7 | 772646.5 | 343232.3 | 773366.2 | 285839.3 | 1231200  | 1019849  | 570836.5 | 393895.7 |
| 10.9645  | 10 | 5 | 5 | 468279.2 | 2523447  | 342594.8 | 2524485  | 598051.3 | 2823636  | 2884933  | 2269913  | 2094509  |
| 9.9847   | 4  | 3 | 1 | 1023690  | 636771.9 | 387519.7 | 638087.6 | 845614.2 | 1183989  | 157766.2 | 515115.1 | 830175.6 |
| 10.008   | 8  | 4 | 4 | 365307.7 | 830446.4 | 234664.6 | 829845.3 | 360358.3 | 953657.7 | 1021178  | 1012579  | 503376.5 |
| 9.856867 | 10 | 5 | 5 | 1261138  | 7070336  | 862017.8 | 7066649  | 2458427  | 7260666  | 6450354  | 7693753  | 8008894  |
| 9.989483 | 10 | 5 | 5 | 1962576  | 4495642  | 744140   | 4498878  | 2248598  | 4910894  | 4008837  | 5428800  | 4595689  |
| 9.392767 | 4  | 3 | 1 | 582977.5 | 679889.2 | 394329.7 | 678693.8 | 797921.4 | 964042.6 | 902858.8 | 0        | 681562.2 |
| 8.949567 | 6  | 3 | 3 | 78612.83 | 838943.8 | 238500.4 | 838365.9 | 364304.6 | 801441.7 | 1226340  | 856909.4 | 718513.5 |
| 10.95835 | 6  | 3 | 3 | 366705.5 | 827680.5 | 296450.4 | 828295.6 | 366736.2 | 1070597  | 1214522  | 668055.9 | 533946   |
| 10.95055 | 6  | 3 | 3 | 477178   | 1277675  | 496487.8 | 1278604  | 562107.5 | 1813258  | 1814942  | 1039579  | 912256.8 |
| 9.952017 | 4  | 1 | 3 | 613447   | 951598.2 | 523618.5 | 952434.9 | 461232.7 | 1387993  | 1426008  | 457934.4 | 324403.3 |
| 11.52297 | 10 | 5 | 5 | 988074.6 | 4446628  | 968756.6 | 4444743  | 1260289  | 5635901  | 4518886  | 3406605  | 3552234  |
| 9.999217 | 7  | 3 | 3 | 481023.5 | 963199.5 | 337272.6 | 962532.6 | 478124.1 | 1500740  | 1057586  | 853021.3 | 769039.9 |
| 9.8887   | 8  | 4 | 4 | 1381313  | 4647210  | 2129167  | 4650492  | 2020307  | 5264288  | 2174016  | 6793916  | 6370788  |
| 9.979667 | 10 | 5 | 5 | 799830.2 | 1790475  | 1049869  | 1792126  | 1103347  | 2503682  | 3141605  | 1707960  | 571449.8 |
| 41.71867 | 8  | 4 | 2 | 334248.4 | 3834737  | 2504257  | 3831765  | 1135594  | 6130772  | 3319589  | 634003.1 | 6581247  |
| 10.96452 | 4  | 3 | 1 | 171903.1 | 511719.4 | 159772.2 | 511984   | 193569.8 | 249210.2 | 612456.3 | 539569.1 | 660248   |
| 9.514333 | 8  | 5 | 3 | 451597.8 | 832406   | 203509.5 | 832945.1 | 502132.2 | 1074170  | 928635   | 906625.5 | 687481.4 |
| 10.94208 | 3  | 3 | 0 | 147646.5 | 346583.4 | 103522.5 | 346835.5 | 243612.4 | 329670.8 | 420300.6 | 376631.3 | 175735   |
| 18.6005  | 3  | 3 | 0 | 91029.77 | 249165.6 | 82380.75 | 249303.8 | 128994.2 | 199823.3 | 143755.3 | 360578.1 | 259690   |
| 9.856867 | 10 | 5 | 5 | 3347001  | 15346637 | 2160834  | 15349440 | 2284089  | 18182250 | 16882614 | 13837613 | 12940010 |
| 9.859983 | 10 | 5 | 5 | 5979759  | 27922637 | 2506834  | 27929443 | 8124469  | 28408826 | 25146240 | 30146902 | 30429732 |
| 10.008   | 9  | 5 | 4 | 323384.1 | 689044.6 | 93982.59 | 689278.9 | 298228.9 | 820900.4 | 693996.3 | 555211   | 686042.4 |
| 23.7695  | 10 | 5 | 5 | 4868563  | 26878223 | 7484809  | 26891683 | 17631165 | 15991577 | 29276092 | 28258372 | 24405533 |
| 9.999517 | 7  | 4 | 3 | 1087162  | 1733540  | 1635488  | 1734805  | 1017053  | 4655304  | 993433.2 | 895595   | 991373.4 |
| 9.93625  | 10 | 5 | 5 | 1840624  | 5998004  | 853909.6 | 5997034  | 1234139  | 6793762  | 6930209  | 4910953  | 5794477  |
| 37.73383 | 10 | 5 | 5 | 456475.3 | 5459876  | 187139   | 5459539  | 524634.5 | 5421148  | 5628887  | 5368801  | 5664945  |
| 9.976317 | 7  | 4 | 2 | 701217.3 | 1524054  | 588942   | 1523363  | 1014711  | 1333845  | 585320.5 | 1744835  | 2044797  |
| 11.02755 | 6  | 3 | 3 | 3.44E+08 | 6.2E+08  | 8.99E+08 | 6.19E+08 | 8.52E+08 | 1.11E+09 | 1.98E+09 | 1499991  | 4808394  |
| 9.379233 | 10 | 5 | 5 | 1875743  | 3023283  | 1915367  | 3022128  | 683051.3 | 3100042  | 851350.5 | 2340737  | 2734705  |
| 9.582167 | 7  | 3 | 4 | 499731.3 | 901009.6 | 466033.4 | 900677.6 | 416782.3 | 1602900  | 543359.8 | 499301.9 | 723387.8 |
| 10.00385 | 10 | 5 | 5 | 1931242  | 4394063  | 928299.1 | 4395499  | 2507863  | 4999401  | 3192249  | 5426284  | 4663916  |
| 10.9645  | 10 | 5 | 5 | 31925292 | 1.17E+08 | 36457367 | 1.17E+08 | 30684345 | 1.55E+08 | 1.56E+08 | 93055111 | 77120373 |

|          |    |   |   |          |          |          |          |          |          |          |          |          |
|----------|----|---|---|----------|----------|----------|----------|----------|----------|----------|----------|----------|
| 10.9645  | 10 | 5 | 5 | 494563.8 | 2647754  | 340967.9 | 2647436  | 614304.2 | 3037595  | 2968730  | 2349480  | 2307371  |
| 9.536783 | 5  | 3 | 2 | 5913819  | 4050685  | 5322461  | 4053179  | 3339210  | 907757.9 | 1341918  | 1028925  | 3608947  |
| 10.9645  | 10 | 5 | 5 | 1301033  | 6457689  | 1416393  | 6456904  | 1499499  | 7788939  | 8092155  | 5534151  | 4869678  |
| 9.960467 | 9  | 5 | 4 | 1545848  | 4167594  | 631097.3 | 4167939  | 774986.2 | 5202575  | 4130066  | 4129124  | 3860209  |
| 9.106183 | 10 | 5 | 5 | 1573287  | 4710832  | 1269408  | 4710172  | 1558646  | 5385781  | 6344262  | 4519522  | 2929681  |
| 9.946467 | 10 | 5 | 5 | 769336.5 | 2081163  | 791086.4 | 2081469  | 494100.4 | 3299428  | 1683844  | 2411538  | 1716828  |
| 9.699333 | 7  | 3 | 4 | 398068.5 | 821709.7 | 270728.2 | 821584.3 | 376681.7 | 801127.5 | 1141039  | 1038804  | 490972.1 |
| 9.94455  | 7  | 4 | 3 | 1834737  | 3478755  | 1240356  | 3479045  | 1086190  | 4642550  | 4784024  | 2987699  | 3159968  |
| 10.03947 | 8  | 4 | 4 | 215690.5 | 609127.4 | 144576.9 | 609168.7 | 191099.7 | 589117.3 | 658927   | 569000.7 | 415467   |
| 10.42575 | 10 | 5 | 5 | 3550096  | 18350230 | 3151044  | 18351545 | 8299552  | 21640587 | 20258680 | 15369237 | 14604846 |
| 11.00657 | 9  | 4 | 4 | 1024701  | 2259940  | 2143213  | 2260307  | 2956663  | 1318313  | 1507596  | 1071264  | 1318726  |
| 10.97857 | 10 | 5 | 5 | 321914.2 | 1931809  | 439483.2 | 1931853  | 212040.1 | 1851324  | 2284652  | 1304492  | 1805083  |
| 17.074   | 7  | 3 | 4 | 57862.17 | 240720   | 50579.45 | 240714.3 | 44750.47 | 216296.1 | 263394.6 | 265404.7 | 293478.9 |
| 9.975217 | 6  | 2 | 4 | 289635.3 | 674038.1 | 275151.7 | 674073.7 | 389280.5 | 499432.1 | 1068692  | 716799.6 | 342343.9 |

| Untreat5 | 11oME1   | 11oME2   | 11oME3   | 11oME4   | 11oME5   | isotopes     | adduct     | pcgroup |
|----------|----------|----------|----------|----------|----------|--------------|------------|---------|
| 27007525 | 4688391  | 5302764  | 638770.8 | 8694485  | 2228634  |              |            | 1       |
| 14357702 | 550446.4 | 3787671  | 3807266  | 5555956  | 5339909  |              |            | 1       |
| 19990046 | 5321225  | 7734132  | 4401684  | 1020826  | 7135391  |              |            | 264     |
| 1366263  | 818372.4 | 467876.2 | 646938.8 | 865501.3 | 595290.1 |              | [M+H+HCC   | 15      |
| 1.47E+08 | 787672.6 | 1.03E+08 | 301031.7 | 570635.1 | 1070958  |              | [M+Na]+ 30 | 33      |
| 336607.5 | 10727583 | 15377056 | 14319482 | 10738353 | 16650657 | [1195][M]+   |            | 231     |
| 2900927  | 1853183  | 1556841  | 1807544  | 1831307  | 1412304  |              |            | 1       |
| 492997.3 | 4233242  | 6475798  | 6278810  | 5572193  | 4097288  |              |            | 423     |
| 580776   | 121791.5 | 143415   | 150847   | 130326.6 | 373418.6 |              |            | 25      |
| 2937280  | 783384.6 | 1460889  | 1703429  | 1452768  | 2742476  | [800][M+1]+  |            | 1       |
| 3642122  | 16106353 | 18733108 | 18974416 | 25243715 | 20623951 |              | [M+H]+ 49: | 97      |
| 283393.6 | 7223719  | 14058732 | 13176973 | 9968367  | 9512075  | [1197][M]+   |            | 147     |
| 1534504  | 1160721  | 1120393  | 1100556  | 984313.6 | 1045963  |              | [M+H]+ 11! | 29      |
| 1549249  | 156283.1 | 0        | 114224.6 | 0        | 346310.4 |              |            | 1       |
| 3997956  | 2915412  | 2430111  | 1462818  | 2327336  | 1847972  |              |            | 1       |
| 26524526 | 12486511 | 16307240 | 15550583 | 12363319 | 8588317  |              |            | 1       |
| 214738.5 | 1180967  | 2621638  | 2552268  | 1963222  | 2158643  |              |            | 135     |
| 714301   | 1820718  | 3556352  | 3199674  | 2737756  | 2746231  | [1197][M+1]+ |            | 147     |
| 56022.27 | 193257.9 | 312473.2 | 262783.5 | 195677.4 | 160614.2 |              |            | 302     |
| 14298497 | 8347594  | 9014262  | 8814972  | 8433323  | 4416046  |              |            | 2       |
| 54230117 | 14692375 | 13892770 | 23142874 | 1015709  | 29264012 |              |            | 1       |
| 270395.8 | 10601090 | 23305007 | 18122416 | 15965328 | 26001790 | [1196][M]+   |            | 86      |
| 2264630  | 1172509  | 1173915  | 1482879  | 1328536  | 1720404  |              | [M+H-CH4]  | 159     |
| 693807.7 | 11101076 | 23932678 | 26598002 | 24362123 | 15914368 |              |            | 144     |
| 2219279  | 1756348  | 420246.1 | 545486.9 | 1105604  | 679866.1 |              | [M+Na]+ 4! | 18      |
| 2469290  | 1174311  | 1135823  | 880547.2 | 2120201  | 441514.2 |              | [M+K]+ 51! | 15      |
| 1.79E+09 | 3373093  | 2382584  | 1.62E+09 | 2525703  | 8352176  |              |            | 11      |
| 574103.5 | 371066   | 274886.1 | 434514.7 | 122550.5 | 188313.9 |              | [M+H+NH3   | 51      |
| 208982.5 | 6844967  | 10429845 | 15172677 | 16361116 | 9169044  | [1160][M]+   |            | 156     |
| 4540054  | 4188175  | 3677511  | 2925502  | 3626017  | 3142372  |              | [2M+3H]3+  | 6       |
| 3609341  | 2847530  | 2713747  | 1851288  | 2528557  | 1700552  |              |            | 1       |
| 470075.4 | 267491.8 | 329158   | 339727.1 | 372617.6 | 328266.6 |              |            | 100     |
| 1016229  | 782278.9 | 515116.3 | 592337.8 | 859013.6 | 770150.4 |              |            | 62      |
| 3793922  | 618645.4 | 2279298  | 770185.4 | 2846685  | 3016107  |              |            | 9       |

|          |          |          |          |          |          |               |     |
|----------|----------|----------|----------|----------|----------|---------------|-----|
| 1790815  | 2111737  | 1910720  | 1868476  | 2017382  | 1898126  |               | 2   |
| 244419.5 | 4440320  | 11594937 | 10096666 | 7051528  | 6391433  |               | 100 |
| 768263.3 | 2410309  | 6255578  | 4574551  | 4350576  | 4313005  | [1196][M+1]+  | 86  |
| 868901.6 | 385394.1 | 514163   | 298276.2 | 173600.5 | 375330.9 | [M+Na]+ 4:    | 5   |
| 52802578 | 27873639 | 1525645  | 44581131 | 8613257  | 18567535 |               | 11  |
| 2818816  | 2364831  | 2420476  | 1984585  | 1718760  | 1511664  |               | 6   |
| 139789.2 | 441488.6 | 610452.3 | 800126.2 | 781592.2 | 400500.9 |               | 88  |
| 1145078  | 442545.8 | 186601.4 | 864645.3 | 348112.5 | 412390.9 |               | 110 |
| 757378.5 | 668828.8 | 545829.7 | 130181.3 | 785312.3 | 701573.3 | [3M+Na+K]     | 12  |
| 1293716  | 749368.6 | 926557.1 | 461297.1 | 691669.2 | 1051992  |               | 1   |
| 1689372  | 3255795  | 5761441  | 6518166  | 5730227  | 4158419  |               | 64  |
| 576460.6 | 250964.2 | 385589.8 | 246185.2 | 291799.3 | 467185.9 | [1019][M]+    | 503 |
| 871924.1 | 1775784  | 4142550  | 3773552  | 2907542  | 2876332  | [1195][M+1]+  | 231 |
| 2434315  | 1776807  | 2035359  | 1772835  | 1145116  | 487652   |               | 2   |
| 856869.8 | 4699687  | 12572115 | 11038600 | 8736377  | 6328720  |               | 135 |
| 2291668  | 1092487  | 270359.8 | 752121.2 | 2318915  | 1488266  | [M+2Na-H]     | 21  |
| 4633594  | 3029750  | 2782726  | 1878367  | 2942605  | 1938565  |               | 1   |
| 436081.7 | 724019.1 | 489852.7 | 861554.3 | 688864.8 | 626747.5 |               | 80  |
| 9204898  | 1329558  | 7186995  | 7216694  | 1675839  | 2005903  |               | 93  |
| 491454.3 | 192608.5 | 175860.7 | 0        | 173941.1 | 247822.1 | [3M+2H]2+     | 39  |
| 941557.1 | 350574.7 | 716774.1 | 458669.5 | 761918   | 491048.9 |               | 33  |
| 233296.4 | 104957.3 | 128004.6 | 108046.3 | 92486.01 | 54857.67 | [1038][M+1]2+ | 42  |
| 854462.9 | 1039737  | 1066631  | 1935817  | 1143273  | 1384849  |               | 35  |
| 25649808 | 21113147 | 13698887 | 18482945 | 18021386 | 16864575 |               | 1   |
| 6769075  | 5895514  | 4127823  | 3245747  | 5246910  | 4995057  |               | 1   |
| 462209.5 | 173912.4 | 339679.7 | 284092.4 | 326577.7 | 179174.2 |               | 508 |
| 1413610  | 468683.2 | 1169720  | 586184.8 | 637200.4 | 1096054  | [470][M+4]+   | 2   |
| 5964168  | 2740095  | 2511061  | 1215179  | 2422403  | 1012269  | [1186][M+1]+  | 6   |
| 7095747  | 1080238  | 3358462  | 6807716  | 1331143  | 2663068  |               | 1   |
| 2370158  | 654430   | 1103427  | 2063568  | 2156244  | 871024.4 |               | 23  |
| 3605008  | 6932179  | 11999909 | 18940724 | 14661655 | 15088649 | [M+K]+ 17:    | 155 |
| 14992583 | 3794465  | 954381   | 6813524  | 6903990  | 3506569  | [M+Na+CF:     | 3   |
| 812646.4 | 658949   | 483308.6 | 165155   | 535307.5 | 236873.8 |               | 46  |
| 5913610  | 1508031  | 3651947  | 3138585  | 1035532  | 249410.5 |               | 1   |
| 423855.3 | 1112641  | 2795232  | 1486452  | 1449852  | 1738674  | [M+H-H2O]     | 371 |



|          |          |          |          |          |          |              |            |     |
|----------|----------|----------|----------|----------|----------|--------------|------------|-----|
| 7238765  | 4945868  | 1157222  | 209861.8 | 5044896  | 2496005  | [36][M]+     | [M+H+NH3   | 18  |
| 1269198  | 1361603  | 1590778  | 2076958  | 1687502  | 1816292  |              | [M+Na]+ 4: | 46  |
| 22611448 | 435805   | 14870680 | 12668767 | 24888441 | 729677.2 |              |            | 20  |
| 1566926  | 1239284  | 782585   | 1176221  | 1603051  | 494651.8 | [1076][M]2+  |            | 134 |
| 6503876  | 4723842  | 4434481  | 2501000  | 5714105  | 4014238  |              | [M+Na+K]2  | 38  |
| 7.6E+08  | 7.71E+08 | 2313533  | 1562499  | 3417351  | 613681.7 |              |            | 1   |
| 1270578  | 796934.1 | 657942.9 | 475623   | 641689.4 | 198203.5 |              |            | 46  |
| 34579836 | 23585118 | 21677497 | 11551511 | 13377162 | 15776296 |              | [M+Na+K]2  | 15  |
| 1453313  | 929383.3 | 1036304  | 1262509  | 1013983  | 1203970  |              | [2M+K]+ 3: | 8   |
| 852260.1 | 625259.3 | 588556.7 | 557000.8 | 440704.4 | 812449.8 | [944][M]3+   |            | 57  |
| 732057.6 | 348650.6 | 287673.3 | 498518.5 | 121312.1 | 144014   |              | [M+H]+ 65: | 499 |
| 2852921  | 2304260  | 1725115  | 1478761  | 1813748  | 1337192  | [1426][M+1]+ |            | 38  |
| 1824317  | 1273454  | 859818.3 | 1134900  | 1047042  | 787080.8 |              |            | 4   |
| 728184.8 | 847379.3 | 811130.8 | 1064392  | 565688.9 | 1266841  | [298][M+1]+  |            | 4   |
| 474472.3 | 583041   | 1239016  | 1095511  | 1046817  | 748462.7 | [370][M+1]+  |            | 268 |
| 126132.4 | 560039.2 | 526444   | 549109.5 | 457492.3 | 787559.7 | [1030][M]3   | [2M+Na+2]  | 16  |
| 2467877  | 2498086  | 1211020  | 3608390  | 1121621  | 777612.2 |              |            | 6   |
| 3121405  | 1574710  | 2914554  | 2241608  | 2415193  | 1534483  |              |            | 2   |
| 30849279 | 21132962 | 6853152  | 12169857 | 1457646  | 9965362  |              | [M+2Na+K]  | 15  |
| 2607664  | 1516093  | 2067875  | 1533222  | 1871351  | 779381.8 |              |            | 9   |
| 2461244  | 2560892  | 2305374  | 1622632  | 2034145  | 1253005  |              |            | 6   |
| 3828282  | 4268751  | 3779092  | 4686784  | 5935530  | 6557557  |              |            | 2   |
| 5.58E+08 | 3.76E+08 | 3.28E+08 | 2.43E+08 | 2.56E+08 | 2.68E+08 | [754][M+2]3+ |            | 1   |
| 18104267 | 14039644 | 12631910 | 12433408 | 13078167 | 7018095  | [1186][M]+   | [M+H+NH3   | 6   |
| 7472433  | 4586818  | 5062773  | 5199730  | 2869759  | 2201827  |              |            | 10  |
| 369647.6 | 829193   | 2803720  | 2144587  | 1719624  | 1385763  |              |            | 107 |
| 389208   | 50745.03 | 288216.2 | 344783.1 | 259163.3 | 245856.7 |              |            | 33  |
| 569021.1 | 359641.5 | 397684.2 | 248469.9 | 161613.6 | 193494.5 |              |            | 16  |
| 2214515  | 1594725  | 1499947  | 1203055  | 1255164  | 99898.55 |              | [M+Na]+ 1: | 13  |
| 2381873  | 1925671  | 569189.2 | 1616612  | 1282818  | 1654398  |              |            | 1   |
| 135622   | 104640.2 | 102310.9 | 63429.46 | 100767.6 | 73255.74 |              |            | 98  |
| 1.44E+08 | 1.3E+08  | 67381947 | 1145618  | 900076.2 | 9493917  |              |            | 1   |
| 2382937  | 1450725  | 767513.4 | 539076.8 | 2628004  | 563900.4 |              |            | 1   |
| 3709739  | 2729554  | 1745730  | 2641336  | 4062014  | 3587189  |              |            | 1   |
| 855102.9 | 689744.7 | 513065.6 | 519217.4 | 540142.3 | 276992.7 | [764][M+1]2+ |            | 141 |

|          |          |          |          |          |          |                                     |     |
|----------|----------|----------|----------|----------|----------|-------------------------------------|-----|
| 1295579  | 999357.8 | 577248   | 280042   | 365176.6 | 384266.4 | [188][M+2] <sup>2+</sup>            | 4   |
| 966126.7 | 920805.2 | 813273   | 731637.3 | 853585.3 | 417246.8 |                                     | 9   |
| 2064091  | 1354752  | 1198229  | 1668770  | 1515136  | 776604.8 | [3M+2K] <sup>2+</sup>               | 12  |
| 5189657  | 2319246  | 3781979  | 3178953  | 1759898  | 3849808  |                                     | 354 |
| 1546740  | 1506454  | 237492.4 | 151425.4 | 308712.3 | 141958   |                                     | 101 |
| 1.46E+08 | 11399239 | 833691.4 | 1.32E+08 | 12478668 | 47428026 |                                     | 38  |
| 3624094  | 2247845  | 2275471  | 2435547  | 575814.8 | 1465570  | [3M+2Na] <sup>+</sup>               | 72  |
| 464892.2 | 0        | 251446   | 166108.8 | 166105.3 | 106294.9 |                                     | 38  |
| 1845044  | 137251.9 | 813072.1 | 1504271  | 846516   | 733794.9 |                                     | 319 |
| 29315912 | 4647370  | 4679127  | 6294262  | 27861870 | 10386422 |                                     | 257 |
| 703957.9 | 633614   | 757317.1 | 427377.6 | 651737.7 | 390198.5 | [1595][M+2] <sup>+</sup>            | 38  |
| 4192831  | 3558849  | 3223272  | 3594573  | 4028021  | 2746095  | [M+Na] <sup>+</sup>                 | 339 |
| 5951520  | 3252656  | 3483415  | 3623905  | 3629700  | 2150291  |                                     | 389 |
| 1021797  | 578527.4 | 125442.1 | 661181.3 | 813949.8 | 956232.6 |                                     | 53  |
| 33987726 | 1927896  | 2709585  | 2230751  | 4195370  | 5775274  |                                     | 1   |
| 31351953 | 6542814  | 1817155  | 28407692 | 11381962 | 6005852  |                                     | 252 |
| 25267460 | 24271188 | 4296045  | 7558345  | 3397607  | 4424814  |                                     | 270 |
| 786537.8 | 0        | 0        | 0        | 805663   | 0        |                                     | 1   |
| 10403580 | 5183774  | 7981189  | 6730610  | 4620655  | 3746960  |                                     | 121 |
| 2048128  | 2558433  | 2304989  | 959449.5 | 1811507  | 567925.6 |                                     | 1   |
| 555684.8 | 399583.9 | 67269.03 | 0        | 143979.2 | 476374.2 |                                     | 18  |
| 7252855  | 7760000  | 5448959  | 697565.1 | 6607507  | 1440042  | [2M+2Na] <sup>+</sup>               | 3   |
| 277864.9 | 172755.7 | 121944.8 | 164706.6 | 101183   | 91175.41 | [M+K+NH <sub>3</sub> ] <sup>+</sup> | 351 |
| 213274.4 | 47794.3  | 225108.7 | 34620.77 | 182778.2 | 194720.3 | [M+H] <sup>+</sup>                  | 38  |
| 36787329 | 3835114  | 2213589  | 623607.8 | 1504634  | 5029078  |                                     | 1   |
| 14401556 | 11655936 | 9319962  | 8760132  | 11753918 | 6927960  | [1386][M] <sup>+</sup>              | 12  |
| 524330.9 | 550104.3 | 736626.2 | 752570.1 | 713497.2 | 607376.1 | [M+Na] <sup>+</sup>                 | 83  |
| 629190.4 | 748490.1 | 0        | 0        | 570947.1 | 76522.32 | [M+Na] <sup>+</sup>                 | 46  |
| 25150832 | 1169948  | 9658018  | 4225372  | 23129566 | 4947877  |                                     | 201 |
| 2468381  | 1481248  | 2476607  | 1554639  | 960321.1 | 1628593  |                                     | 110 |
| 4384714  | 3274744  | 2532427  | 2767278  | 4220849  | 3511452  | [M+Na] <sup>+</sup>                 | 414 |
| 577415   | 77819.24 | 87330.1  | 55739.97 | 363979.2 | 91725.55 | [220][M+3] <sup>2+</sup>            | 4   |
| 31619203 | 29569990 | 27116743 | 29744950 | 27186051 | 23656644 | [1200][M+1] <sup>+</sup>            | 2   |
| 574969.2 | 384137.3 | 638284.5 | 176920.5 | 514611.3 | 479167.2 | [1588][M] <sup>+</sup>              | 28  |
| 42394177 | 29020425 | 1480149  | 34903541 | 3655641  | 24184194 |                                     | 2   |

|          |          |          |          |          |          |                       |     |
|----------|----------|----------|----------|----------|----------|-----------------------|-----|
| 570881.6 | 505722   | 363936.6 | 325079.4 | 448834.6 | 207019.5 |                       | 4   |
| 2474477  | 2028439  | 1891017  | 981321.8 | 2335787  | 2149949  |                       | 392 |
| 652125.5 | 632156.8 | 331751.7 | 358424.3 | 92652.24 | 412102.3 |                       | 72  |
| 1744799  | 4017743  | 3121562  | 2275211  | 3010930  | 5332023  | [M+K]+ 384            | 5   |
| 1119944  | 1805963  | 2657448  | 3977576  | 4296139  | 2246849  | [1160][M+1]+          | 156 |
| 1391683  | 1199707  | 831112.1 | 411728.4 | 883073   | 345579.8 |                       | 18  |
| 474638   | 321655.5 | 328009.1 | 310978.8 | 209221.1 | 306728   | [1107][M+1]+          | 16  |
| 4048091  | 3406430  | 2784905  | 2724882  | 3206346  | 2067311  | [1386][M+1]+          | 12  |
| 256624.9 | 88656.45 | 109116.8 | 132848.6 | 36332.26 | 137091.3 | [1532][M+1]2+         | 16  |
| 5558554  | 3172578  | 3470021  | 2982895  | 3216904  | 1410223  |                       | 2   |
| 5672777  | 3958844  | 5004458  | 1841397  | 3259754  | 3143859  |                       | 2   |
| 1555193  | 1290085  | 1281049  | 1188515  | 602323.9 | 1368763  | [1143][M]+ [M+Na]+ 64 | 110 |
| 1724298  | 487828.9 | 826469.9 | 570810.8 | 1055890  | 443666.1 | [1286][M+1]2+         | 4   |
| 3864554  | 3578993  | 2352953  | 3061733  | 1707072  | 3961856  |                       | 369 |
| 9364238  | 1318141  | 10894506 | 4661696  | 11351415 | 5430604  |                       | 1   |
| 1364071  | 1262503  | 904541.9 | 1153476  | 921318.7 | 782456.9 | [497][M]2+ [M+2H]2+   | 16  |
| 16215682 | 11177342 | 10726680 | 5900860  | 14230175 | 3629478  | [M+2H]2+              | 38  |
| 4061740  | 3828014  | 3718596  | 2187194  | 2529387  | 3631481  |                       | 425 |
| 2182776  | 2340768  | 2391947  | 1769608  | 1808878  | 1250508  |                       | 6   |
| 246115.2 | 334114.7 | 61856.79 | 11828.09 | 42202.33 | 253119.4 | [1439][M]2+           | 18  |
| 466370   | 267530.4 | 279378.7 | 335439.2 | 374190.2 | 339035.3 | [M+Na]+ 44            | 134 |
| 159599.6 | 45786.18 | 107370.7 | 72435.65 | 123111.4 | 152744.1 |                       | 288 |
| 35760077 | 40582636 | 21347434 | 1147200  | 1687883  | 1095462  |                       | 15  |
| 1314626  | 504834.5 | 767207   | 1117230  | 1075927  | 1403226  |                       | 9   |
| 3820036  | 84248923 | 62606018 | 60512742 | 97484644 | 1.39E+08 |                       | 15  |
| 16742377 | 12027252 | 7666036  | 11756199 | 9230589  | 6495603  |                       | 284 |
| 87146253 | 791513.3 | 925838.8 | 1955345  | 657005.1 | 29245114 |                       | 15  |
| 23152280 | 20466030 | 17259156 | 16740707 | 16911340 | 12674513 | [506][M+1]2+          | 12  |
| 18068019 | 17592032 | 13932984 | 12775789 | 14230373 | 6803051  | [M+H+NH3]             | 81  |
| 1350493  | 1197397  | 49951.82 | 153756.6 | 847125.2 | 587723.6 |                       | 41  |
| 2045948  | 1541550  | 961053.9 | 1246855  | 766739.2 | 1250293  |                       | 222 |
| 37912485 | 3458579  | 1909371  | 32864749 | 3965208  | 3788012  | [M+H-CO2]             | 3   |
| 14975472 | 9186926  | 1087275  | 765384.1 | 12707961 | 3540917  |                       | 266 |
| 544618.5 | 2324805  | 9665476  | 9387912  | 8034041  | 2789141  |                       | 309 |
| 2140518  | 1183611  | 2066778  | 1833857  | 1685485  | 862082.2 | [3M+2H]2+             | 35  |

|          |          |          |          |          |          |                                                   |     |
|----------|----------|----------|----------|----------|----------|---------------------------------------------------|-----|
| 1075661  | 1279896  | 1203378  | 1011632  | 832679.3 | 948876   | [616][M+1] <sup>2+</sup>                          | 9   |
| 645841   | 248348.8 | 635408   | 687092   | 796135.3 | 163658   |                                                   | 9   |
| 2264011  | 982647.9 | 498007.8 | 1813416  | 719425.6 | 569073.8 | [19][M+1] <sup>3+</sup>                           | 1   |
| 34253245 | 34491946 | 4896646  | 5216126  | 18769658 | 8368391  | [M+K] <sup>+</sup> 33:                            | 253 |
| 2895161  | 638429.5 | 2451767  | 1570879  | 2295775  | 2305330  |                                                   | 2   |
| 798559.9 | 2015886  | 1036792  | 55965723 | 1211910  | 5397356  |                                                   | 1   |
| 6343081  | 811447.5 | 8059021  | 3094967  | 4572742  | 405918.8 |                                                   | 1   |
| 46831754 | 3544802  | 6664637  | 1962860  | 12603440 | 3638773  | [M+2H-C3H <sub>6</sub> ] <sup>+</sup>             | 18  |
| 7794988  | 5481701  | 7712143  | 4843045  | 3587846  | 4734932  | [M+H-H <sub>2</sub> O]                            | 314 |
| 1053288  | 1038359  | 757861.2 | 648604.9 | 930676.4 | 734845.6 |                                                   | 9   |
| 9879036  | 3541056  | 5547714  | 6187432  | 3702049  | 6102456  |                                                   | 398 |
| 256923.4 | 94478.69 | 153695.6 | 143886.9 | 498320.3 | 0        | [M+H-CH <sub>2</sub> ]                            | 46  |
| 2343726  | 2113713  | 2276344  | 1360546  | 2172913  | 1777605  |                                                   | 2   |
| 221413.1 | 169412.8 | 247437.2 | 288321.1 | 85129.93 | 257016.6 | [M+Na] <sup>+</sup> 4:                            | 5   |
| 10986678 | 12086780 | 493532.4 | 2693507  | 1962257  | 3058098  | [M+K+HCO <sub>2</sub> ] <sup>+</sup>              | 21  |
| 5335947  | 591910.1 | 6537632  | 1717008  | 6255902  | 1716126  |                                                   | 1   |
| 4127623  | 2928370  | 3936387  | 2062505  | 3893515  | 1614718  | [M+H+K] <sup>2+</sup>                             | 38  |
| 4394725  | 4570609  | 2525312  | 2446848  | 4285507  | 2928901  |                                                   | 2   |
| 1253429  | 977977.5 | 764095.3 | 993859.6 | 591087.5 | 433509.6 | [M+Na+K] <sup>2</sup>                             | 93  |
| 41083778 | 1383871  | 34776075 | 32332636 | 3570881  | 23566823 | [487][M+1] <sup>3+</sup>                          | 29  |
| 8180614  | 6209714  | 5928059  | 3529650  | 6054041  | 4072049  | [M+Na+Na] <sup>+</sup>                            | 189 |
| 15012111 | 14753956 | 11314421 | 11515683 | 12481094 | 10282745 | [M+H-C <sub>4</sub> H <sub>8</sub> ] <sup>+</sup> | 169 |
| 299598.8 | 232792   | 441914.4 | 117195.3 | 201359.6 | 320897.3 | [1588][M+1] <sup>+</sup>                          | 28  |
| 1307951  | 1220066  | 1046490  | 965785.3 | 534478.9 | 325310.8 |                                                   | 1   |
| 3843875  | 1212749  | 2511801  | 2644151  | 952615.8 | 363960.1 |                                                   | 1   |
| 3485292  | 2537164  | 1621783  | 935319.5 | 3007365  | 622555.1 | [M+H-C <sub>6</sub> H <sub>6</sub> ] <sup>+</sup> | 15  |
| 696015.6 | 986574.5 | 3219706  | 2420790  | 1692511  | 1566283  | [1168][M] <sup>+</sup> [M+H] <sup>+</sup> 64:     | 371 |
| 487406.4 | 323661.1 | 475493.1 | 420253   | 466953.4 | 507347.8 |                                                   | 100 |
| 20846286 | 20687528 | 14502215 | 8148322  | 21906541 | 16207960 | [M+H+Na] <sup>2+</sup>                            | 38  |
| 0        | 298416.9 | 538540.2 | 325523.3 | 314127.8 | 206677   |                                                   | 4   |
| 4523548  | 5785350  | 1255121  | 2314179  | 3466221  | 3783392  |                                                   | 11  |
| 4129179  | 5688608  | 11474697 | 7788535  | 13132278 | 11641804 |                                                   | 1   |
| 18661501 | 7286476  | 7191511  | 7067715  | 8814336  | 6150079  |                                                   | 359 |
| 1633912  | 492868.9 | 1556733  | 1203438  | 1618725  | 1365206  |                                                   | 13  |
| 643933.7 | 517526.9 | 491334.9 | 240334.9 | 406973.5 | 444532   |                                                   | 4   |

|          |          |          |          |          |          |                      |     |
|----------|----------|----------|----------|----------|----------|----------------------|-----|
| 17421394 | 21199198 | 5581186  | 4859198  | 3882030  | 2712228  |                      | 1   |
| 0        | 420834.6 | 582269.4 | 184321.9 | 248770.3 | 350012.3 |                      | 4   |
| 197020.2 | 1098914  | 1018789  | 947711.2 | 945002.3 | 114851.7 | [644][M+1]+          | 26  |
| 891051.7 | 0        | 266934.3 | 208344   | 532907   | 1116348  | [1543][M+1]+         | 9   |
| 2104065  | 1998936  | 2487508  | 1752963  | 1991835  | 947710   | [3M+2H]2+            | 8   |
| 7145465  | 4807635  | 4661670  | 2481675  | 6219344  | 3768789  | [102][M+1]3+         | 1   |
| 12098928 | 8253721  | 3633124  | 3111250  | 6145882  | 5303980  | [741][M+1]3+         | 15  |
| 530486.2 | 254614.5 | 316312.8 | 559332.5 | 367275.3 | 341887.5 | [M+Na]+ 4            | 62  |
| 8567485  | 553711.2 | 6605133  | 7449926  | 7010599  | 2845525  |                      | 1   |
| 1276924  | 141476.6 | 1135961  | 585330   | 1087802  | 491673.5 |                      | 38  |
| 1767895  | 825074.8 | 1189636  | 1109591  | 1124105  | 465829.3 |                      | 4   |
| 4275703  | 1659876  | 3269942  | 3174074  | 3406175  | 1626981  | [M+Na]+ 3            | 29  |
| 1298273  | 1919412  | 1081170  | 1055894  | 961818.3 | 1304769  |                      | 2   |
| 935170.9 | 156686   | 857313.7 | 276929.9 | 321979.3 | 837056   |                      | 501 |
| 66297671 | 46866992 | 34252452 | 29518044 | 33259094 | 29234427 |                      | 1   |
| 266579.7 | 235350.5 | 118270.5 | 176803.3 | 194323.1 | 104142.6 |                      | 47  |
| 4633647  | 1936223  | 1397859  | 2675103  | 1649609  | 2752086  |                      | 2   |
| 2532068  | 1747314  | 1886446  | 2131422  | 907777.2 | 860264.7 | [1094][M]+ [M+Na]+ 5 | 16  |
| 3573932  | 2659028  | 1210785  | 2481739  | 3354797  | 1094422  | [M+K]+ 37            | 3   |
| 175435.9 | 90021.55 | 138433.7 | 68652.77 | 54122.78 | 18522.58 |                      | 111 |
| 166150.2 | 125953.4 | 181662.3 | 82120.94 | 160848.8 | 114688   |                      | 73  |
| 6123955  | 5827314  | 602424.5 | 3684366  | 4352560  | 3646954  | [2M+2Na+]            | 15  |
| 937145.3 | 677707.9 | 492522.6 | 246749.1 | 406879   | 571102.2 |                      | 238 |
| 1668041  | 647718.5 | 154250.3 | 964873.3 | 958894.3 | 1206417  |                      | 84  |
| 2121039  | 1682440  | 1342747  | 1994321  | 1423726  | 743159.4 |                      | 2   |
| 937462.4 | 1461102  | 2984908  | 3573517  | 1467612  | 2430854  |                      | 9   |
| 342103.9 | 807404   | 1427860  | 1251704  | 679901.8 | 1386367  | [M+H+Na]2            | 38  |
| 306700   | 130825.3 | 0        | 197498.2 | 209109.9 | 370151.2 |                      | 9   |
| 9360248  | 6159152  | 22833327 | 22020738 | 20944385 | 22669857 |                      | 1   |
| 3494651  | 2635558  | 2095519  | 2328115  | 3266804  | 2002995  | [M+3H-HC]            | 13  |
| 578967.1 | 413788.1 | 479092.4 | 327474   | 667245.9 | 336761.3 | [1229][M]+           | 23  |
| 1055804  | 650979.9 | 798922.4 | 700842.9 | 682403.8 | 284350.3 | [1008][M]2+          | 38  |
| 10718254 | 7074153  | 6000648  | 8196549  | 7396328  | 1566685  | [M+K]+ 44            | 14  |
| 26732980 | 17459046 | 14706679 | 14721833 | 14937071 | 14602344 | [M+H]+ 29            | 169 |
| 5982643  | 2198737  | 4968164  | 3344492  | 789882.3 | 5578373  | [M+K+NaC]            | 195 |

|          |          |          |          |          |          |                       |     |
|----------|----------|----------|----------|----------|----------|-----------------------|-----|
| 22800525 | 25459832 | 3451887  | 18071357 | 2551407  | 4973253  | [3M+3Na+]             | 93  |
| 11881150 | 1658655  | 3583996  | 7402602  | 648368.3 | 2230218  | [M+K]+ 30%            | 15  |
| 7710627  | 1488017  | 8079110  | 4338243  | 1072918  | 9157712  | [M+Na+Na]             | 15  |
| 1572533  | 2760353  | 3025680  | 2138916  | 2658482  | 3608863  | [3M+Na+K]             | 12  |
| 76411.61 | 28325.13 | 44607.98 | 20981.69 | 23987.42 | 22682.54 |                       | 232 |
| 1390906  | 779246.8 | 399984.8 | 541710.3 | 603532.9 | 1017080  | [M+K]+ 24%            | 24  |
| 4618599  | 2.43E+09 | 2.34E+09 | 2.02E+09 | 2.03E+09 | 1.33E+09 | [663][M+1]+           | 4   |
| 1138875  | 573537.3 | 696388.4 | 525585.4 | 846659.4 | 887950   | [M+Na+Na]             | 15  |
| 1237812  | 1523666  | 1581623  | 1492949  | 1581151  | 1582210  |                       | 252 |
| 24847582 | 19733898 | 4083604  | 16121307 | 511064.2 | 9101620  |                       | 1   |
| 5737046  | 4478906  | 10857410 | 4136210  | 236156.4 | 741336.2 | [3M+Na]+ :            | 155 |
| 27933430 | 30651900 | 8657850  | 4612336  | 4958971  | 2748725  |                       | 95  |
| 670529   | 539857.5 | 560431.3 | 601765   | 511481.4 | 323705.4 | [970][M+1]3+          | 16  |
| 389729.6 | 413993   | 313891.2 | 38791.75 | 285163.9 | 234080   | [M+2H]2+ :            | 18  |
| 1157533  | 173964.9 | 336498.9 | 1111169  | 215967.8 | 784702.5 |                       | 217 |
| 3827073  | 3074963  | 4402147  | 2581214  | 3043671  | 2305460  | [1595][M]+ [M+H]+ 12% | 38  |
| 422640.3 | 350166.9 | 632919.7 | 217273.9 | 339610.2 | 273976.6 | [1567][M]2+           | 110 |
| 6983763  | 840759.4 | 4518437  | 4698268  | 4905497  | 1850843  | [1293][M+2]+          | 2   |
| 5687247  | 4377301  | 3079088  | 3166273  | 3598350  | 2170521  |                       | 9   |
| 11377717 | 81028547 | 87432997 | 87098979 | 1.03E+08 | 92974194 | [803][M]+             | 1   |
| 5100661  | 9937158  | 6475917  | 10237757 | 10760102 | 9512970  |                       | 356 |
| 759434.3 | 588043.2 | 641678.6 | 513442.3 | 337424.1 | 105168.6 | [912][M]3+ [2M+3H]3+  | 23  |
| 4550361  | 3913846  | 2594917  | 3052665  | 2306682  | 2109949  | [3M+3Na+]             | 20  |
| 3056950  | 2426803  | 2119319  | 1924602  | 3625898  | 2240656  |                       | 1   |
| 12433726 | 9533092  | 2813207  | 7449383  | 5429505  | 3753761  | [M+Na+CF:]            | 11  |
| 4164541  | 762015.8 | 1798196  | 1845978  | 2160349  | 1776834  |                       | 20  |
| 5058367  | 3262585  | 3863063  | 3939769  | 4253295  | 2736546  |                       | 2   |
| 21462413 | 5647632  | 14076500 | 14484962 | 6636295  | 6711898  | [M+H]+ 24%            | 100 |
| 51608635 | 69739269 | 55789155 | 59944633 | 96527607 | 1.38E+08 | [459][M]+             | 2   |
| 1605636  | 620104.9 | 903793.5 | 767065.7 | 1711962  | 322671.4 |                       | 58  |
| 1113732  | 0        | 0        | 0        | 1065647  | 126915.7 |                       | 1   |
| 1.05E+08 | 43949651 | 2256530  | 1.03E+08 | 5686642  | 13862227 | [425][M+2]2+          | 2   |
| 1852498  | 1095645  | 1564624  | 1014759  | 1622409  | 586525.6 | [M+Na]+ 4%            | 28  |
| 4012041  | 2147483  | 2207788  | 2174040  | 1035375  | 1381059  |                       | 62  |
| 1016732  | 69795.63 | 0        | 510059.4 | 817338.7 | 0        |                       | 9   |

|          |          |          |          |          |          |                     |     |
|----------|----------|----------|----------|----------|----------|---------------------|-----|
| 236950.5 | 314065.3 | 2699686  | 2303922  | 1542282  | 1098701  | [1231][M]+ [M+K+HCO | 77  |
| 556666.1 | 345211.3 | 0        | 0        | 376214.8 | 833949.9 | [M+Na+Na            | 15  |
| 24375930 | 13811286 | 10535706 | 16653940 | 9811870  | 6902517  |                     | 9   |
| 1683985  | 2508426  | 1171561  | 1205776  | 2524090  | 110546.7 | [M+3H]3+!           | 15  |
| 24411658 | 14049879 | 24814152 | 31725463 | 22517810 | 23024344 | [1243][M+2]2+       | 2   |
| 12104904 | 9323273  | 2326338  | 8048073  | 10122335 | 6806662  | [M+K]+ 34:          | 11  |
| 19608472 | 526922.8 | 280655.4 | 13885719 | 19230241 | 359359.3 |                     | 4   |
| 423854.8 | 1380976  | 556931.8 | 2609880  | 2697352  | 2696827  | [1223][M+1]+        | 101 |
| 1317125  | 740689.9 | 334963.6 | 1057079  | 83700.58 | 842494.5 | [2M+H]+ 1!          | 53  |
| 2812048  | 819085.8 | 2167643  | 1302482  | 591927   | 0        | [246][M+1]2+        | 1   |
| 643591.3 | 971490.3 | 548077.8 | 526650.3 | 1086266  | 0        | [M+K+NH3            | 3   |
| 249303.3 | 193685.4 | 163382.7 | 202458.2 | 151559.6 | 210867.7 | [1559][M+1]+        | 497 |
| 7033644  | 8471814  | 3271294  | 5714013  | 4286105  | 2013961  | [M+Na+HC            | 3   |
| 694653.6 | 425595.8 | 422549.8 | 343364.1 | 266164.1 | 312470.4 | [3M+2Na+!           | 38  |
| 3374245  | 2549913  | 2714088  | 2642543  | 2748837  | 1290165  |                     | 9   |
| 1644787  | 598310.7 | 444895.7 | 495957.6 | 453990.5 | 463494.6 | [193][M+1]+         | 56  |
| 1944993  | 1026202  | 1148621  | 1585920  | 510991.5 | 1390856  | [M+K]+ 43(          | 15  |
| 1758378  | 1309680  | 1394036  | 2347515  | 1580533  | 1225332  | [M+Na]+ 1:          | 13  |
| 1349869  | 162994.8 | 1322864  | 798046   | 1765017  | 792994.2 |                     | 13  |
| 137810.1 | 88706.31 | 90549.32 | 151476.5 | 136521.4 | 46201.31 |                     | 304 |
| 11797577 | 9256029  | 9823853  | 575103.1 | 1904254  | 2422915  | [M+K]+ 17:          | 15  |
| 10660862 | 4136800  | 8962178  | 6618294  | 7253022  | 4414083  |                     | 1   |
| 167156.1 | 236056   | 243867.5 | 16718.8  | 137813.9 | 281295.3 | [1439][M+1]2+       | 18  |
| 3189820  | 1605454  | 0        | 1667760  | 1419260  | 152598.8 |                     | 1   |
| 2.31E+08 | 300825.5 | 2.44E+08 | 1.91E+08 | 462661.6 | 404821.3 | [M+Na]+ 3!          | 25  |
| 3563167  | 2212363  | 2497898  | 2436024  | 2197101  | 1225070  | [1267][M+1]+        | 12  |
| 6296781  | 6403797  | 4406529  | 4962569  | 4178803  | 6679108  |                     | 2   |
| 234510.5 | 91580912 | 74003741 | 82447249 | 72757882 | 51450678 |                     | 64  |
| 4204580  | 548782.4 | 671480.8 | 254322.8 | 2926077  | 1002374  |                     | 4   |
| 1055957  | 1316292  | 751344.7 | 357434.8 | 926660.1 | 1169566  | [M+Na]+ 8(          | 38  |
| 3412601  | 1159858  | 1316548  | 2202376  | 3067949  | 3181453  |                     | 382 |
| 13719206 | 10187216 | 7837670  | 8562915  | 9237918  | 9512009  |                     | 46  |
| 3906217  | 2286972  | 2112131  | 3123430  | 1645733  | 1917868  |                     | 437 |
| 1503977  | 1603827  | 1593369  | 1357878  | 1508404  | 2960817  | [3M+H+K]2           | 136 |
| 1728843  | 1566852  | 1408079  | 1054125  | 1556280  | 544420.5 | [348][M+1]2+        | 2   |

|          |          |          |          |          |          |                     |     |
|----------|----------|----------|----------|----------|----------|---------------------|-----|
| 14232838 | 10804018 | 8948411  | 4983486  | 11426716 | 3713672  | [3M+2K]2+           | 38  |
| 2683067  | 1912492  | 2432783  | 1192192  | 2998499  | 891353.1 |                     | 1   |
| 2411308  | 3430696  | 6607226  | 5569717  | 1346407  | 4109713  |                     | 4   |
| 7762900  | 4375116  | 2796189  | 2876186  | 6073442  | 5857695  |                     | 323 |
| 4124296  | 1315774  | 1579783  | 2931865  | 1446462  | 2540801  | [3M+2Na]2           | 3   |
| 563331   | 275757.7 | 430438.2 | 546645.9 | 416916.6 | 268027.5 | [M+K]+ 280          | 185 |
| 4123673  | 2700671  | 3699478  | 3515558  | 1718668  | 3085754  | [1455][M+1]+        | 44  |
| 65088.83 | 135041.1 | 185761.9 | 124590.7 | 138185.8 | 152907.9 | [1165][M+3]+        | 43  |
| 5721322  | 3156348  | 3990501  | 2483762  | 5178967  | 1069809  | [M+H]+ 860          | 38  |
| 3904081  | 2905962  | 3293793  | 3414398  | 3087066  | 2899059  | [M+H-CO]+           | 322 |
| 998451.4 | 187442.9 | 244579.6 | 299253.4 | 114193.7 | 807883.7 |                     | 18  |
| 158824.6 | 227017.4 | 555707.9 | 482350.8 | 307386.7 | 311431.4 |                     | 302 |
| 2.17E+08 | 1993515  | 2.27E+08 | 1.51E+08 | 1.79E+08 | 1.61E+08 |                     | 1   |
| 1441496  | 1566661  | 877999.5 | 878940.9 | 879258.4 | 707694.9 | [731][M+1]2+        | 4   |
| 2118093  | 1525988  | 1388987  | 1593232  | 1802612  | 444171.5 |                     | 47  |
| 349755.5 | 238738.7 | 304189.3 | 271161.1 | 115566   | 213005   |                     | 28  |
| 6809260  | 4893037  | 5941013  | 7495611  | 4610827  | 4848018  |                     | 2   |
| 751125.3 | 3.5E+08  | 3.06E+08 | 3.12E+08 | 2.76E+08 | 2.48E+08 | [M+H]+ 390          | 31  |
| 475329.3 | 968830.1 | 831517.3 | 814914.7 | 1031247  | 1005138  |                     | 77  |
| 1310156  | 765493.6 | 844249.5 | 669595.1 | 778508.4 | 193455.6 | [1026][M+1]3+       | 16  |
| 748740.4 | 831953.4 | 654546.7 | 589572.7 | 321292.1 | 862016   | [M+H+CF3O]          | 58  |
| 935363.2 | 929683.6 | 611105.1 | 734315.2 | 796236.5 | 435711.9 | [642][M+1]3+        | 4   |
| 438225.8 | 637688.9 | 169357   | 0        | 570691.1 | 0        | [M+H]+ 290          | 21  |
| 9566637  | 7673566  | 4267275  | 7070586  | 3416606  | 2356117  | [M+K]+ 290          | 15  |
| 325821.8 | 948722.7 | 2567184  | 1251224  | 817883.6 | 2094217  |                     | 8   |
| 5741030  | 3501117  | 6681915  | 4837636  | 1890282  | 4191013  |                     | 2   |
| 4045517  | 1910640  | 1665105  | 2698397  | 794794.7 | 749635.2 | [M+2H-CH3]          | 15  |
| 852116.8 | 908575.3 | 781062.6 | 455547.7 | 646599.2 | 103223.7 |                     | 1   |
| 418642.9 | 695574.1 | 3001127  | 3534705  | 2224753  | 977745.4 | [M+K]+ 580          | 77  |
| 36340.16 | 56746.1  | 98867.42 | 59541.29 | 48996.28 | 55448.77 |                     | 342 |
| 8205879  | 4952332  | 9930559  | 4400074  | 4684154  | 1628236  |                     | 1   |
| 1903677  | 6578816  | 7175179  | 7172408  | 11861481 | 12519329 | [2M+Na+3I]          | 97  |
| 4319281  | 4749415  | 3434949  | 3576274  | 4309723  | 2827784  |                     | 9   |
| 3280857  | 2475021  | 2706278  | 3434447  | 3218037  | 2603455  | [783][M]+ [M+K+NH3] | 24  |
| 1E+08    | 89806596 | 65589982 | 4922019  | 69736523 | 19840625 | [M+Na+K+I]          | 3   |



|          |          |          |          |          |          |                       |     |
|----------|----------|----------|----------|----------|----------|-----------------------|-----|
| 216055.6 | 111680.2 | 168118.5 | 96654.22 | 148164.6 | 179298.7 |                       | 136 |
| 866868.5 | 800483.5 | 589836.7 | 255596.7 | 523028.5 | 500865.6 | [1620][M]+ [M+H]+ 17! | 58  |
| 1.36E+08 | 1.66E+08 | 1.38E+08 | 1.15E+08 | 1.2E+08  | 1.69E+08 | [M+Na]+ 3!            | 31  |
| 3331430  | 1043902  | 1087620  | 672692.6 | 3601431  | 1977672  | [23][M+1]2+           | 1   |
| 1064056  | 2112942  | 1541645  | 1878029  | 1354212  | 1172361  | [220][M+1]2+          | 4   |
| 311813.4 | 56001.29 | 101806.7 | 262922.8 | 158222.1 | 193913.4 |                       | 505 |
| 293039   | 409695.5 | 161325.5 | 53611.45 | 312177.8 | 328026.1 | [M+H-CH2]             | 39  |
| 5387232  | 5137077  | 3873760  | 4541650  | 4904132  | 1188624  |                       | 2   |
| 6647055  | 3916698  | 6022495  | 6291477  | 2938588  | 2026136  | [M+Na]+ 2!            | 226 |
| 1573218  | 1709869  | 1013872  | 1001099  | 1384859  | 1480469  | [M+K]+ 27!            | 81  |
| 411233.4 | 124139.9 | 324896.1 | 321931.7 | 109791.9 | 65750.47 |                       | 25  |
| 345660.7 | 407900   | 0        | 81164.2  | 394474.9 | 220887.6 | [M+H-C2H4             | 81  |
| 472563.4 | 490123.5 | 292504.7 | 127127.6 | 714017.6 | 404624.6 | [M+2H-CH4             | 12  |
| 615889.8 | 878015.9 | 1017638  | 547201.1 | 964927.2 | 929660.2 | [M+Na]+ 7!            | 12  |
| 25524876 | 10885458 | 8140695  | 11630383 | 24314342 | 7627697  |                       | 13  |
| 1430114  | 1157059  | 1290968  | 520796.7 | 1307386  | 147770.2 |                       | 1   |
| 2009777  | 1818062  | 1446749  | 1263244  | 1049422  | 1063206  | [629][M]2+            | 38  |
| 15889894 | 13586150 | 11783559 | 11342993 | 11586880 | 10952839 | [306][M+1]+           | 140 |
| 4620303  | 1780229  | 850494.6 | 1611564  | 1760251  | 2304425  | [M+H]+ 64!            | 11  |
| 3131327  | 2212914  | 2301702  | 2234075  | 2116663  | 2455954  | [1219][M+1]+          | 150 |
| 447456.9 | 321678.4 | 181053   | 288881.1 | 197131.2 | 61643.8  | [996][M+2]3+          | 16  |
| 3287168  | 3669354  | 1922942  | 3186996  | 2671848  | 2333886  | [396][M+3]+           | 2   |
| 309334.4 | 726292   | 627692.7 | 769221.4 | 1146505  | 738080.7 | [M+H]+ 49!            | 209 |
| 4842189  | 834010.8 | 823043.6 | 1116281  | 1703217  | 2999222  |                       | 1   |
| 3938065  | 5205696  | 840403   | 4979122  | 3550580  | 666537.2 |                       | 3   |
| 7655401  | 11083149 | 8022029  | 6124032  | 6372809  | 7850552  | [M+3H-C3H             | 15  |
| 521898.5 | 1406720  | 1176123  | 988806.5 | 1038829  | 1123614  | [M+K]+ 68!            | 101 |
| 9203391  | 5168144  | 4702499  | 6162649  | 3401674  | 3227396  | [M+H]+ 58!            | 13  |
| 14382539 | 7301042  | 4704237  | 3846527  | 6922365  | 7870104  |                       | 1   |
| 3205228  | 1773448  | 1471766  | 666350.4 | 2169463  | 571454.9 |                       | 1   |
| 4151090  | 2365490  | 1103250  | 1483912  | 4058573  | 2042429  | [M+2K-H]+             | 11  |
| 5476234  | 3549116  | 4595354  | 3041403  | 5163691  | 4861522  |                       | 435 |
| 1168413  | 1697644  | 2416635  | 2447176  | 1486953  | 2792468  |                       | 9   |
| 547470.1 | 1066421  | 714372.8 | 505468.7 | 528583.1 | 489000.6 | [M+H]+ 30!            | 304 |
| 6893399  | 2850336  | 3149922  | 3343425  | 2345787  | 2444117  |                       | 346 |

|          |          |          |          |          |          |                       |     |
|----------|----------|----------|----------|----------|----------|-----------------------|-----|
| 3489645  | 1730822  | 2561667  | 2298015  | 1461639  | 66986.67 |                       | 2   |
| 3864019  | 4419011  | 3043632  | 1988623  | 3948577  | 3090955  | [M+Na+Na              | 3   |
| 14164338 | 4097887  | 6519023  | 7329463  | 14020744 | 4518536  |                       | 1   |
| 14646508 | 9533467  | 16063208 | 13661630 | 7301396  | 11514696 | [1473][M]+ [M+Na]+ 80 | 220 |
| 12058473 | 4099805  | 3147704  | 7665744  | 1978331  | 2654257  | [M+H]+ 330            | 15  |
| 88979.08 | 273224.9 | 1113490  | 582867.8 | 459454.2 | 238838.1 |                       | 297 |
| 538507.8 | 782993.6 | 484748.6 | 643366.5 | 277392.1 | 445301.2 |                       | 62  |
| 23574998 | 7176627  | 2911593  | 904441.1 | 5476018  | 4415114  |                       | 1   |
| 1011059  | 1464868  | 381032.7 | 608435.7 | 1401159  | 471028.6 | [2M+K]+ 30            | 21  |
| 5969657  | 4449860  | 2083859  | 3433956  | 4214855  | 2689103  |                       | 9   |
| 4665330  | 3555426  | 4203197  | 1913808  | 7086647  | 3631741  |                       | 1   |
| 1955367  | 1550606  | 1040571  | 1203265  | 1263021  | 502814.7 | [M+2H-CO]             | 58  |
| 14624482 | 10880396 | 31969.4  | 15909167 | 7479525  | 4026786  |                       | 177 |
| 1993774  | 1773738  | 320597.1 | 879119.3 | 1969192  | 516785.4 |                       | 21  |
| 464698.8 | 0        | 245408.5 | 152855.1 | 287191   | 283839.1 | [3M+2H]2+             | 8   |
| 750026.8 | 1031144  | 1229351  | 619107.1 | 387035   | 183124.7 |                       | 155 |
| 1369887  | 981059.9 | 444108.8 | 963949.3 | 566990.1 | 702273.3 | [M+H]+ 240            | 111 |
| 1879828  | 1766174  | 1415884  | 1606634  | 1718150  | 1772808  |                       | 2   |
| 2363127  | 1392366  | 352347.9 | 313330.1 | 2109029  | 488318   |                       | 1   |
| 5820673  | 4843480  | 1395978  | 4164116  | 3711103  | 2165934  | [M+H-CH3]             | 3   |
| 2401907  | 3510102  | 2872325  | 2462317  | 2537805  | 1346453  |                       | 1   |
| 5169180  | 3602288  | 3651402  | 3833286  | 2979713  | 704246.7 |                       | 199 |
| 2775135  | 1634119  | 2200130  | 2269779  | 845476.2 | 678016.5 | [1130][M]+ [M+H+NH3   | 110 |
| 23581533 | 4794676  | 21832201 | 6441993  | 5126415  | 20324544 |                       | 263 |
| 2259286  | 2260013  | 597586.3 | 1188314  | 1030243  | 1152680  | [743][M+2]+           | 83  |
| 5442263  | 5168519  | 5388488  | 2209086  | 3684939  | 2810733  |                       | 1   |
| 9658898  | 6254867  | 5504832  | 8545946  | 4694558  | 6150927  |                       | 1   |
| 10655764 | 3644834  | 4596431  | 6126980  | 4320941  | 1553278  | [M+Na+Na              | 15  |
| 1548468  | 1457768  | 1368300  | 2430108  | 1594804  | 1709250  | [801][M]+ [M+Na]+ 40  | 309 |
| 1089522  | 1153524  | 588649.1 | 737608   | 576595.6 | 1053990  |                       | 38  |
| 4037442  | 2606457  | 3213255  | 1516168  | 2796607  | 1121566  |                       | 38  |
| 837468.7 | 1112866  | 850709.4 | 462918.1 | 881896.6 | 356376.5 |                       | 42  |
| 7825158  | 976189.4 | 4805647  | 5070003  | 5480521  | 189608.1 |                       | 2   |
| 2285305  | 570828.1 | 1101791  | 1455825  | 1295075  | 803890.8 | [702][M+1]3+          | 81  |
| 10886127 | 6613028  | 6850939  | 3889686  | 6205012  | 1054181  |                       | 1   |

|          |          |          |          |          |          |                                                |     |
|----------|----------|----------|----------|----------|----------|------------------------------------------------|-----|
| 1496808  | 1879525  | 2227000  | 1042384  | 1003458  | 1361214  |                                                | 9   |
| 3946642  | 1816913  | 2498145  | 813090.5 | 1345797  | 610640.7 | [3M+H] <sup>+</sup> 1!                         | 3   |
| 54796547 | 187908.3 | 50531743 | 43892509 | 134974.1 | 273815.8 | [M+H] <sup>+</sup> 52!                         | 116 |
| 472969   | 2517480  | 1825739  | 3762775  | 3316596  | 5763128  |                                                | 2   |
| 15206421 | 13735230 | 3348441  | 18605646 | 15806041 | 2282991  | [3M+Na+K]                                      | 3   |
| 8711559  | 10864051 | 7880670  | 6639599  | 10179906 | 2600088  |                                                | 1   |
| 453043.5 | 479286   | 8512768  | 4758348  | 5041208  | 2877468  |                                                | 9   |
| 2196146  | 1804958  | 2381618  | 1091119  | 1886594  | 3372957  |                                                | 93  |
| 204070   | 178469.1 | 190515.7 | 184014.9 | 127773.8 | 303172.8 |                                                | 16  |
| 1111532  | 144198.8 | 121689.7 | 0        | 1079794  | 139023.6 |                                                | 1   |
| 4038131  | 3665574  | 108672.1 | 128313.3 | 3224822  | 117663.8 | [M+H-C4H8]                                     | 276 |
| 565349.7 | 810339.3 | 132556.6 | 0        | 174177.2 | 304367.9 | [M+K] <sup>+</sup> 95!                         | 18  |
| 1046858  | 83513.41 | 604246.8 | 745988.6 | 771277.9 | 271966.8 | [8][M+1] <sup>3+</sup>                         | 9   |
| 373436.3 | 448680.2 | 316857.4 | 224598.8 | 292664   | 262795.6 | [M+2H] <sup>2+</sup> 1!                        | 357 |
| 215877.1 | 513134.5 | 467510.3 | 43643.44 | 363161.4 | 389620.1 | [3M+2K] <sup>2+</sup>                          | 39  |
| 27626690 | 7776028  | 4632765  | 7168897  | 25611194 | 25128376 |                                                | 267 |
| 6725212  | 9404637  | 7187043  | 9287605  | 6238419  | 8923548  | [M+Na] <sup>+</sup> 1!                         | 6   |
| 4529347  | 6119359  | 3638379  | 4544751  | 5034248  | 562080.7 |                                                | 1   |
| 13036333 | 10441985 | 11820472 | 12283204 | 5355137  | 11171314 | [1455][M] <sup>+</sup> [M+Na] <sup>+</sup> 7!  | 44  |
| 4831230  | 522927.3 | 5735939  | 3603323  | 2950154  | 2484549  |                                                | 1   |
| 7814769  | 8337443  | 7063228  | 3644743  | 7784048  | 5583809  |                                                | 2   |
| 448963.1 | 274388.4 | 257473.4 | 306122.3 | 253649.2 | 314156.9 | [3M+H+K] <sup>2</sup>                          | 450 |
| 5378326  | 3553957  | 3264506  | 4171202  | 4434069  | 3226098  |                                                | 13  |
| 2256560  | 1556722  | 1859901  | 1673903  | 1653224  | 618698.5 |                                                | 1   |
| 197915.7 | 610455   | 781322.6 | 329530.7 | 462589.8 | 674974.3 | [M+3H-CO] <sup>+</sup>                         | 112 |
| 2649983  | 540374   | 1900728  | 1731317  | 1596441  | 755472.9 |                                                | 13  |
| 3175058  | 2398104  | 2197637  | 2183954  | 2064044  | 1143011  | [M+2H-CH <sub>2</sub> ] <sup>+</sup>           | 12  |
| 1504764  | 0        | 1437923  | 665702.7 | 1558400  | 155674   |                                                | 2   |
| 62054413 | 57426130 | 48301986 | 50019592 | 46948786 | 33533755 | [506][M] <sup>2+</sup> [M+2H] <sup>2+</sup> 1! | 12  |
| 3287287  | 1237918  | 2335403  | 2338496  | 2496900  | 2463711  |                                                | 404 |
| 1214429  | 542589.8 | 141515.4 | 945149   | 1353579  | 115974   |                                                | 3   |
| 353079.9 | 883112.8 | 3612845  | 4050513  | 896361.4 | 2823776  | [2M+Na] <sup>+</sup> 1!                        | 8   |
| 2257548  | 1131135  | 1009008  | 1749090  | 585308.5 | 1201063  | [3M+3Na] <sup>+</sup> 1!                       | 3   |
| 7280426  | 8716949  | 7090654  | 1976072  | 3455406  | 4700835  | [M+H] <sup>+</sup> 31!                         | 15  |
| 4454042  | 3319988  | 3625240  | 3760788  | 3385624  | 2773145  |                                                | 400 |

|          |          |          |          |          |          |              |           |     |
|----------|----------|----------|----------|----------|----------|--------------|-----------|-----|
| 27053066 | 27755974 | 36045293 | 34296018 | 28966193 | 29335971 | [602][M]+    | [M+H]+ 38 | 83  |
| 1475085  | 10545856 | 7366513  | 1213672  | 7474996  | 10750972 | [714][M+2]+  |           | 4   |
| 1881259  | 2186484  | 1029060  | 546724.2 | 3457497  | 861221.3 |              |           | 15  |
| 1257370  | 1277146  | 1726195  | 1179849  | 1383547  | 2456115  |              |           | 4   |
| 3884058  | 4350012  | 4414111  | 893423.1 | 596561   | 3680836  |              |           | 295 |
| 1.59E+08 | 174066   | 1.78E+08 | 86874.86 | 1.54E+08 | 169015.1 |              |           | 37  |
| 5719540  | 6292571  | 4235865  | 3953054  | 5605727  | 6865290  |              |           | 97  |
| 5241388  | 5488570  | 1620351  | 4314117  | 3819722  | 1272837  |              |           | 15  |
| 2543113  | 3792185  | 1182955  | 758022.7 | 1221925  | 1114172  |              |           | 1   |
| 160976.3 | 93618.73 | 97948.18 | 99931.92 | 87413.28 | 49176.95 |              |           | 117 |
| 2477441  | 360893.5 | 779478.7 | 1687440  | 623041.6 | 577468.3 | [185][M+1]2+ |           | 4   |
| 114865.9 | 499229   | 175281.5 | 28534.87 | 166295.8 | 164549.4 |              |           | 18  |
| 2466969  | 2301774  | 2451948  | 1997316  | 4767520  | 0        | [87][M+1]2+  |           | 1   |
| 2721693  | 2341406  | 1549865  | 646071.1 | 2436856  | 1333664  |              | [2M+2Na+] | 39  |
| 4162072  | 1789624  | 1253358  | 1662643  | 1621431  | 1204624  | [917][M+1]2+ |           | 1   |
| 3423786  | 795465.8 | 844379.6 | 1593446  | 1575753  | 302322.1 |              |           | 1   |
| 1265107  | 1278785  | 1669185  | 1068843  | 999998   | 1231191  | [401][M+2]+  |           | 4   |
| 18745358 | 2201641  | 1783811  | 1367485  | 14925462 | 8978695  | [1300][M]+   |           | 2   |
| 1E+08    | 311283.7 | 24424386 | 82495237 | 109477.9 | 202357.6 |              |           | 50  |
| 1143875  | 3.24E+08 | 688915.9 | 3.21E+08 | 3.31E+08 | 1.59E+08 | [133][M]+    |           | 4   |
| 8223269  | 1709655  | 3426065  | 7326501  | 2504347  | 1668976  |              |           | 3   |
| 10413835 | 11853004 | 9827586  | 13688958 | 19327554 | 12237347 |              | [M+H]+ 55 | 15  |
| 11018541 | 11899862 | 9899934  | 14227765 | 19143431 | 22788034 |              | [M+Na+Na  | 3   |
| 1398620  | 595801.5 | 1398975  | 505213.2 | 911229.4 | 133982.2 |              |           | 1   |
| 394070.7 | 1379145  | 5009534  | 4593067  | 943102.6 | 3253480  |              | [M+H+HCC  | 8   |
| 1695320  | 826452.8 | 755003.6 | 1038889  | 942276.3 | 457544.9 |              |           | 2   |
| 228283.8 | 67470.12 | 241874.2 | 105100.1 | 93137.89 | 0        | [1579][M+1]+ |           | 47  |
| 1953526  | 1848144  | 1701180  | 1657311  | 1140682  | 914527.4 | [248][M+2]2+ |           | 9   |
| 638574.8 | 189596   | 481969.6 | 0        | 567886.8 | 0        | [1534][M+1]+ |           | 6   |
| 1635031  | 1488679  | 1221129  | 1098631  | 1747690  | 384849.3 |              |           | 179 |
| 6276781  | 3842768  | 4226564  | 4033117  | 3014760  | 289528.2 |              |           | 2   |
| 428107.9 | 191561.4 | 385220.7 | 424273.8 | 195842.2 | 49118.46 | [1451][M+2]+ |           | 44  |
| 2019036  | 1920858  | 1706930  | 1681767  | 1596063  | 1373529  | [811][M+2]+  |           | 98  |
| 950108.6 | 898219.2 | 566640.5 | 627456.3 | 910505.3 | 119791   |              |           | 9   |
| 16131985 | 2640397  | 19890718 | 11766252 | 18095951 | 5159507  |              |           | 6   |

|          |          |          |          |          |          |                          |     |
|----------|----------|----------|----------|----------|----------|--------------------------|-----|
| 1939841  | 5255496  | 4828426  | 4862037  | 4803575  | 3483571  | [M+H] <sup>+</sup> 53    | 189 |
| 3069977  | 0        | 2599895  | 2667442  | 1644916  | 0        |                          | 9   |
| 287567.1 | 182229.5 | 32049.51 | 155624.4 | 201426.4 | 48799.93 | [M+Na] <sup>+</sup> 4    | 16  |
| 1957809  | 901283.2 | 1288022  | 333247   | 1336707  | 699727.2 |                          | 1   |
| 6999070  | 7794287  | 5278091  | 3089311  | 8174054  | 6428554  | [1514][M] <sup>2+</sup>  | 38  |
| 407663.6 | 292787.2 | 258769.9 | 216429.9 | 294436.7 | 187674.5 | [M+2H] <sup>2+</sup>     | 116 |
| 90608.6  | 33508.97 | 184854.8 | 86415.71 | 52092.22 | 0        |                          | 28  |
| 7204100  | 2742995  | 2735837  | 7060650  | 4438292  | 1846593  |                          | 2   |
| 523581.1 | 102084.6 | 158245.3 | 533343   | 78509.57 | 160044.2 |                          | 118 |
| 4624697  | 2877398  | 4032768  | 3308267  | 713191.6 | 1969344  | [M+H] <sup>+</sup> 11    | 72  |
| 774829.7 | 252750.6 | 429302.3 | 201175.2 | 655035.1 | 258504.7 |                          | 4   |
| 1155830  | 1315377  | 1113439  | 1212730  | 1104679  | 1284365  | [1597][M] <sup>+</sup>   | 366 |
| 4100245  | 2165882  | 3800559  | 813728.4 | 5500124  | 703634.9 |                          | 1   |
| 1473561  | 2032204  | 663158   | 857065.4 | 841047.5 | 870057.8 | [M+H] <sup>+</sup> 36    | 21  |
| 98228551 | 579176.6 | 1.97E+08 | 1.02E+08 | 1.1E+08  | 1.22E+08 |                          | 18  |
| 2295927  | 1662675  | 419594.8 | 100951.2 | 1375665  | 2055533  | [1479][M] <sup>3+</sup>  | 18  |
| 337189.5 | 313079.6 | 336409.2 | 91297.39 | 144949.1 | 214993.4 | [2M+Na] <sup>+</sup>     | 134 |
| 1862900  | 1631738  | 2701419  | 2272221  | 2207644  | 3482476  |                          | 2   |
| 164426   | 243538.1 | 317457.2 | 237745.2 | 320032.4 | 269743.1 | [602][M+2] <sup>+</sup>  | 83  |
| 6990251  | 5617283  | 2345349  | 7792873  | 9000137  | 3552101  |                          | 1   |
| 1471817  | 202810.5 | 1608099  | 162321.9 | 1440633  | 128709.8 |                          | 25  |
| 17482255 | 17157141 | 11873445 | 5758938  | 19538470 | 14417891 | [3M+Na+2]                | 38  |
| 306241.5 | 268918.7 | 173062.5 | 305660   | 224890.5 | 101940.2 | [789][M+1] <sup>+</sup>  | 302 |
| 661227.7 | 1346101  | 2923788  | 2104171  | 1045024  | 2332921  | [108][M+1] <sup>2+</sup> | 9   |
| 903512.3 | 706474.8 | 577581.8 | 635896.8 | 648443.7 | 461366.8 | [626][M+2] <sup>+</sup>  | 119 |
| 5855463  | 4800887  | 5356437  | 5584023  | 5488187  | 5694241  |                          | 405 |
| 2507529  | 2465254  | 487218.5 | 1696128  | 1249684  | 1818353  | [3M+2Na] <sup>2</sup>    | 6   |
| 5190763  | 1336175  | 1969073  | 1502316  | 1181528  | 1319782  | [M+H-COCl]               | 3   |
| 5003311  | 4335949  | 4517692  | 4073947  | 4824593  | 4022097  |                          | 198 |
| 3683757  | 1132176  | 297215.4 | 457186   | 520920.9 | 854699   |                          | 101 |
| 1015464  | 0        | 1194693  | 230957.7 | 811893.7 | 0        |                          | 2   |
| 3820907  | 586586.8 | 1886777  | 3054973  | 3107497  | 2175964  | [M+Na] <sup>+</sup> 7    | 14  |
| 58218661 | 3832064  | 57421774 | 37747939 | 43476181 | 46982051 |                          | 6   |
| 14536532 | 12263107 | 14141206 | 11925387 | 7192256  | 27340271 |                          | 2   |
| 5400550  | 3611699  | 4850908  | 3922469  | 821514.6 | 2795108  |                          | 72  |

|          |          |          |          |          |          |                                               |     |
|----------|----------|----------|----------|----------|----------|-----------------------------------------------|-----|
| 359975.5 | 842523.5 | 543817.8 | 316577.8 | 596302.3 | 776026.4 |                                               | 4   |
| 712545.3 | 424584.7 | 397600.7 | 602964.2 | 497336.4 | 222560.2 | [1076][M+1] <sup>2+</sup>                     | 134 |
| 919605.4 | 477034.9 | 432351.2 | 630201.6 | 552970.9 | 724021.8 | [1081][M] <sup>2</sup> [M+Na+K] <sup>2</sup>  | 134 |
| 1292112  | 2016398  | 1520532  | 799736.3 | 2155201  | 1203009  |                                               | 3   |
| 2303339  | 627341.1 | 1159064  | 451278.2 | 1303553  | 3049429  | [201][M] <sup>+</sup>                         | 239 |
| 2300547  | 1707588  | 1406264  | 1296063  | 1476625  | 894403.2 | [764][M] <sup>2+</sup>                        | 141 |
| 4564484  | 5075922  | 1535174  | 4142237  | 968675.8 | 3278342  |                                               | 9   |
| 1033199  | 623858.3 | 749107.1 | 920838.2 | 146456.3 | 232196.6 |                                               | 97  |
| 4448228  | 3103940  | 5215958  | 4475071  | 2388774  | 3508987  | [1473][M+1] <sup>+</sup>                      | 220 |
| 16986256 | 18520725 | 2775141  | 5529623  | 3666257  | 1980510  |                                               | 1   |
| 60676144 | 57355083 | 55032831 | 57266927 | 59356434 | 54063517 | [202][M] <sup>+</sup>                         | 150 |
| 581586.5 | 292958.6 | 336486.1 | 340040.8 | 168667.8 | 134590.3 |                                               | 42  |
| 2438096  | 1080317  | 1629318  | 1126727  | 1832273  | 1369935  | [1335][M+1] <sup>+</sup>                      | 12  |
| 7584152  | 7579867  | 5363300  | 4430095  | 6530823  | 3988560  | [1426][M] <sup>+</sup> [M+H+NH <sub>3</sub> ] | 38  |
| 9268856  | 8950207  | 13392719 | 5444691  | 40595.23 | 1581100  |                                               | 90  |
| 337019.3 | 286872.8 | 409398.9 | 464606.3 | 346673.3 | 200435.7 |                                               | 55  |
| 208328   | 131494.2 | 124377.8 | 84207.91 | 155880.2 | 107477.3 | [503][M+1] <sup>+</sup>                       | 135 |
| 567543.4 | 254430.8 | 654859.6 | 219697.9 | 212113.5 | 146957   | [1454][M+1] <sup>+</sup>                      | 28  |
| 290879.8 | 756844.7 | 730791.8 | 1051749  | 460449.1 | 654506.5 | [2M+2Na+I]                                    | 8   |
| 3635131  | 3163857  | 3389080  | 1470441  | 3620700  | 2938222  |                                               | 38  |
| 1040962  | 433024.3 | 480979.9 | 680949   | 342643.1 | 113586.7 | [1423][M+1] <sup>+</sup>                      | 38  |
| 341270.5 | 176168.6 | 156624.5 | 245471.5 | 230515.7 | 111020.7 |                                               | 47  |
| 6524075  | 5506208  | 5259339  | 5512198  | 5120530  | 5312022  |                                               | 419 |
| 18151163 | 16713979 | 17716602 | 23993594 | 1773226  | 17348475 | [M+H] <sup>+</sup> 21!                        | 6   |
| 11430247 | 9144612  | 10138302 | 9291811  | 10700426 | 6036846  | [526][M] <sup>+</sup>                         | 281 |
| 6301963  | 4274356  | 6003802  | 4396877  | 6417642  | 4019840  |                                               | 363 |
| 499337.1 | 277014.3 | 168519.7 | 271755.5 | 371477.7 | 288028.8 | [1380][M] <sup>2</sup> [3M+3Na+I]             | 16  |
| 3423181  | 1673126  | 2619123  | 3193541  | 841247.8 | 710899.6 | [1451][M+1] <sup>+</sup>                      | 44  |
| 8354001  | 8488926  | 8504864  | 7935389  | 7607064  | 7824725  |                                               | 236 |
| 9991382  | 5581828  | 4559332  | 5988748  | 6785673  | 2266006  | [1063][M] <sup>3+</sup>                       | 9   |
| 1202023  | 1257479  | 807883.7 | 1275113  | 987417.5 | 1683874  | [1157][M] <sup>2+</sup>                       | 62  |
| 6266731  | 3034923  | 1291591  | 4543746  | 3587458  | 2851107  |                                               | 233 |
| 29414486 | 6459649  | 13275037 | 9893499  | 30252673 | 5271172  |                                               | 15  |
| 10856456 | 5287574  | 2214030  | 9678165  | 6216402  | 6137527  | [630][M+1] <sup>+</sup>                       | 22  |
| 17897655 | 11582644 | 9881317  | 3963760  | 5431256  | 5463040  | [334][M] <sup>3+</sup>                        | 1   |

|          |          |          |          |          |          |                      |     |
|----------|----------|----------|----------|----------|----------|----------------------|-----|
| 4072982  | 3427793  | 3111346  | 2767468  | 3761740  | 1904582  | [269][M+2]3+         | 9   |
| 3471213  | 3420749  | 3286984  | 3325519  | 3536524  | 1738995  | [M+Na]+ 3            | 339 |
| 30749700 | 27224542 | 20422194 | 23581771 | 18057096 | 9534791  | [904][M]3+           | 1   |
| 2083505  | 5556650  | 2663548  | 3721007  | 2261892  | 5655045  | [995][M+1]+          | 182 |
| 12103187 | 11490356 | 14945567 | 10770586 | 15481844 | 10864026 |                      | 145 |
| 2742120  | 803830.7 | 1988624  | 2277741  | 1736604  | 1509948  |                      | 9   |
| 1296328  | 1212097  | 2206803  | 1455705  | 1597270  | 1693776  |                      | 9   |
| 1782150  | 1495244  | 5373799  | 6210001  | 5021556  | 5838599  |                      | 2   |
| 1640281  | 2130014  | 1123299  | 583747.4 | 556047.3 | 1271950  | [480][M+1]2+         | 1   |
| 507939.6 | 707730.7 | 5038055  | 3612692  | 913028   | 5090991  | [86][M+1]3+          | 4   |
| 487780.4 | 304717.7 | 327603.4 | 282269.6 | 123683.3 | 356989.4 |                      | 25  |
| 269654.6 | 418568.9 | 581210.4 | 616204.3 | 491771.3 | 494794   | [314][M+1]+          | 268 |
| 5897302  | 4944064  | 1849937  | 1793060  | 4735935  | 2215107  |                      | 4   |
| 4460986  | 1190623  | 2813675  | 3488462  | 2349059  | 2776888  | [1618][M]2+          | 2   |
| 1542690  | 1060482  | 1086169  | 861488   | 630405.6 | 617816.4 |                      | 4   |
| 4518528  | 4005674  | 2950221  | 2795985  | 3368985  | 1983449  | [333][M]2+ [M+2H]2+  | 18  |
| 12567297 | 11789401 | 11652960 | 7778735  | 8715987  | 8721933  | [M+K]+ 26            | 18  |
| 4838046  | 4726555  | 2914171  | 3729413  | 2072904  | 3498217  | [1477][M]+ [M+H-COCl | 38  |
| 11005924 | 6325630  | 7792980  | 8672702  | 8087607  | 3693438  | [435][M+1]+          | 2   |
| 21565976 | 11197100 | 10219685 | 14349991 | 12833136 | 7739890  | [1086][M]+           | 1   |
| 1.22E+08 | 70665020 | 85139622 | 55788433 | 74620682 | 52495391 |                      | 175 |
| 680749.2 | 1626336  | 3026634  | 1142319  | 1860739  | 3320160  |                      | 9   |
| 1578495  | 1579784  | 995563   | 1098673  | 1742566  | 2528033  |                      | 2   |
| 269319   | 245160.2 | 190641.3 | 385289.3 | 310304.6 | 240176.8 | [912][M+1]3+         | 23  |
| 410993.2 | 1.3E+08  | 1.59E+08 | 1.54E+08 | 1.32E+08 | 64709843 |                      | 55  |
| 5618304  | 4419443  | 4700365  | 5267780  | 2929022  | 5188129  |                      | 65  |
| 5116337  | 5779062  | 4255047  | 4149107  | 3893703  | 3590240  |                      | 1   |
| 6969587  | 4323347  | 4523430  | 6347498  | 2473732  | 9916804  |                      | 2   |
| 4337213  | 2428909  | 3711334  | 1647688  | 3819999  | 1486347  | [755][M+1]2+         | 15  |
| 552109.9 | 87840.82 | 572376.4 | 180541   | 250594.4 | 183212   | [M+2H-C3+            | 12  |
| 3743578  | 3774433  | 2921417  | 2883945  | 4299034  | 1304176  |                      | 97  |
| 992305.4 | 2283010  | 1643770  | 2579715  | 1184451  | 3854267  | [1065][M+1]+         | 238 |
| 3363502  | 932542.4 | 1162968  | 828067.5 | 4074754  | 2168900  | [M+H+NH3             | 3   |
| 616543.3 | 739494.7 | 190013   | 326555.8 | 315800.9 | 273054.7 |                      | 4   |
| 38620304 | 47191933 | 23887499 | 29705378 | 31012088 | 38310609 |                      | 1   |

|          |          |          |          |          |          |                       |     |
|----------|----------|----------|----------|----------|----------|-----------------------|-----|
| 10788275 | 13393538 | 10480658 | 4484201  | 6084883  | 7301025  | [1536][M]+ [M+H]+ 92: | 3   |
| 2183480  | 2053259  | 1880099  | 1793542  | 912988.8 | 1725269  | [1107][M]+ [M+Na]+ 5: | 16  |
| 1813069  | 1183383  | 2036225  | 617722.7 | 2017411  | 1753903  | [1102][M+1]2+         | 38  |
| 2029206  | 406564.6 | 456023.6 | 293359.8 | 759181.1 | 370318.9 | [99][M+3]+            | 4   |
| 198431.2 | 4083542  | 4036618  | 3396571  | 3754602  | 2250738  |                       | 5   |
| 458113.2 | 0        | 484702.8 | 0        | 355894.8 | 0        |                       | 12  |
| 18029855 | 20850305 | 1673672  | 20115764 | 13856047 | 11029431 | [2M+K]+ 18:           | 15  |
| 3579580  | 4520449  | 3879472  | 2637055  | 2615697  | 820407.5 | [204][M]2+            | 46  |
| 380140.9 | 417618.4 | 324556.4 | 39541.13 | 195379.7 | 174063.6 |                       | 39  |
| 3689699  | 560781.4 | 2978958  | 1887295  | 3259472  | 529577.7 |                       | 190 |
| 4638944  | 1316683  | 8393137  | 6587789  | 4095460  | 5580077  | [3M+2K]2+             | 8   |
| 2016741  | 1997169  | 1111435  | 1416030  | 1243617  | 960904.5 | [310][M+1]+           | 255 |
| 821354.2 | 5582959  | 6734454  | 4925587  | 7048041  | 4176564  |                       | 326 |
| 12407239 | 10957573 | 7286178  | 1866595  | 5443720  | 2592901  | [854][M+1]2+          | 1   |
| 1140032  | 2959651  | 1428858  | 2369651  | 5561449  | 4715984  |                       | 1   |
| 397097.3 | 143731.5 | 333293.3 | 278588   | 284891   | 286601.7 |                       | 134 |
| 267266.2 | 2090268  | 1956152  | 1762007  | 2115699  | 4560598  |                       | 62  |
| 17006732 | 13019976 | 9782221  | 13096082 | 11048039 | 11685260 | [914][M]2+ [3M+H+K]2  | 46  |
| 5107941  | 2617583  | 4693830  | 2665805  | 4067330  | 2526731  |                       | 1   |
| 43902898 | 4036580  | 50336176 | 30681774 | 31550020 | 27930765 |                       | 1   |
| 3532173  | 3611864  | 3046488  | 1792481  | 2880587  | 1211217  |                       | 4   |
| 6359695  | 13764414 | 6897707  | 12834604 | 12855283 | 12453085 |                       | 337 |
| 722455.6 | 649445.5 | 395149.4 | 513647.2 | 345977.5 | 483906.8 |                       | 16  |
| 8091618  | 5931692  | 5495841  | 5883205  | 4263167  | 5908241  | [914][M+1]2+          | 46  |
| 1667907  | 1839207  | 287114.3 | 1012328  | 1441858  | 1200342  |                       | 11  |
| 1076416  | 1366900  | 1980669  | 1110006  | 1526224  | 1219919  | [120][M+1]2+          | 1   |
| 481855.1 | 45548.97 | 157265   | 160271.6 | 362353.7 | 400859.4 | [M+H]+ 11:            | 134 |
| 47103120 | 38225148 | 67468760 | 899129.4 | 1753329  | 35128367 | [38][M]3+             | 1   |
| 5463463  | 3685473  | 4813705  | 3233326  | 5111383  | 4829196  |                       | 372 |
| 5118400  | 5552899  | 8230667  | 5870283  | 7110045  | 5189818  |                       | 226 |
| 237132.2 | 250958.8 | 242248.1 | 138508.1 | 134865.6 | 88586.96 | [M+2H]2+ :            | 169 |
| 433214.6 | 53540.24 | 363922   | 565872.9 | 246626.7 | 286762.6 | [1008][M+1]2+         | 38  |
| 422678.1 | 322734.3 | 333310.4 | 170520.5 | 262705.6 | 114618.7 |                       | 162 |
| 499389.1 | 254532.4 | 435863.5 | 325595.4 | 206987.5 | 209124.8 |                       | 102 |
| 466032.1 | 244543.1 | 163829.8 | 188566.9 | 268874.9 | 98615.76 |                       | 44  |



|          |          |          |          |          |          |                       |     |
|----------|----------|----------|----------|----------|----------|-----------------------|-----|
| 173359.2 | 496103.7 | 1036121  | 535910.2 | 296977   | 454937.3 |                       | 4   |
| 1584209  | 1069706  | 1106509  | 598832.7 | 865027.7 | 600426.3 |                       | 39  |
| 1.32E+08 | 1.48E+08 | 1.16E+08 | 87490062 | 95520233 | 71691581 |                       | 1   |
| 96147879 | 8911354  | 9100052  | 13248882 | 5902982  | 6497999  |                       | 1   |
| 4378810  | 2391718  | 2841101  | 4885648  | 2904985  | 4031170  | [M+Na]+ 20            | 314 |
| 14285260 | 929721.3 | 24500791 | 8207461  | 14508370 | 3909278  |                       | 1   |
| 1198238  | 1069494  | 542742   | 424822.5 | 783369.9 | 0        |                       | 97  |
| 3364348  | 2474092  | 1876160  | 2922886  | 3286334  | 1383996  |                       | 1   |
| 15588081 | 14288263 | 14521825 | 15591752 | 14870964 | 13899745 |                       | 253 |
| 8373269  | 6856002  | 7861682  | 4931593  | 6477694  | 3472164  | [M+H+HCC              | 140 |
| 25408626 | 10938898 | 13694257 | 10322343 | 12159479 | 10901356 | [M+H]+ 40             | 195 |
| 4601379  | 272289.2 | 254934.3 | 638523.6 | 275541.5 | 1137547  |                       | 204 |
| 493155   | 114597.2 | 104243.2 | 276277.5 | 186448.3 | 153942.3 | [M+K]+ 11             | 134 |
| 6241333  | 4735531  | 10659551 | 10516591 | 11465486 | 9776513  |                       | 190 |
| 2231973  | 995572.9 | 2183636  | 1651215  | 2035187  | 507625.1 |                       | 2   |
| 10318460 | 8170438  | 8095264  | 6772239  | 6889814  | 6981910  |                       | 9   |
| 2004029  | 1556698  | 1495802  | 1290367  | 1333886  | 702285.1 | [581][M+1]+           | 249 |
| 1667906  | 509451.5 | 0        | 647550.6 | 776033.6 | 127754.7 | [3M+2Na+I             | 46  |
| 3532582  | 2581856  | 2781927  | 2371655  | 2867702  | 0        |                       | 2   |
| 4383739  | 4474574  | 2991365  | 2899500  | 3021924  | 2236219  | [275][M+1]+           | 56  |
| 1957042  | 1677434  | 692246   | 1203226  | 648859.4 | 228499.3 |                       | 62  |
| 3321061  | 3569843  | 3784335  | 3780318  | 3404521  | 3212449  |                       | 121 |
| 731789.6 | 867374   | 767381.4 | 630664.9 | 344830.3 | 590605.7 |                       | 24  |
| 1095288  | 2090361  | 1906568  | 2686103  | 2033473  | 2020508  | [M+2H-CH <sub>2</sub> | 8   |
| 561906   | 3043032  | 502337.1 | 3849392  | 763382   | 3139371  |                       | 459 |
| 13703455 | 6367383  | 5314149  | 6328850  | 4105878  | 870036.2 |                       | 9   |
| 4864355  | 3505490  | 3026098  | 3635416  | 3417739  | 3220332  | [M+Na]+ 3             | 346 |
| 7670406  | 8652410  | 7451813  | 8305164  | 5631482  | 4532756  |                       | 1   |
| 1453514  | 11230272 | 7123673  | 6696558  | 14925764 | 19340594 | [M+K]+ 21             | 29  |
| 1981340  | 1329477  | 1189183  | 1120084  | 1267329  | 650854.1 |                       | 249 |
| 877330.6 | 588809.2 | 597094.1 | 707639.8 | 539556.1 | 302783.2 | [1083][M]+ [M+K]+ 56  | 72  |
| 68399352 | 1625893  | 885301.5 | 50524049 | 658261.5 | 60805233 | [39][M]2+             | 1   |
| 10675943 | 363949.3 | 1628432  | 8758042  | 2381987  | 13430287 | [M+K]+ 14             | 11  |
| 832149   | 2530507  | 5599271  | 5335936  | 2787708  | 5468472  |                       | 93  |
| 23609696 | 16561084 | 22451451 | 20705398 | 20681655 | 16849667 |                       | 235 |

|          |          |          |          |          |          |                       |     |
|----------|----------|----------|----------|----------|----------|-----------------------|-----|
| 4556678  | 3225775  | 2787253  | 1466667  | 1762035  | 581080.9 |                       | 6   |
| 65270046 | 37890542 | 42955752 | 1568798  | 1728732  | 3876506  | [860][M]2+            | 1   |
| 732500.9 | 205311.1 | 700213.2 | 664821.3 | 122951.8 | 115731.4 |                       | 110 |
| 0        | 104816.1 | 78233.94 | 0        | 155342.5 | 285019.8 |                       | 46  |
| 9428158  | 4768123  | 1477704  | 6025238  | 6584254  | 0        |                       | 2   |
| 16284059 | 4153912  | 3877088  | 6760692  | 7819534  | 4521735  |                       | 368 |
| 2674087  | 1754229  | 1792135  | 1770608  | 1948460  | 54685.1  | [1142][M+1]2+         | 2   |
| 1.72E+08 | 1.2E+08  | 70752480 | 1.54E+08 | 48021832 | 50503445 |                       | 13  |
| 104002   | 99349.62 | 47599.68 | 50889.43 | 66021.61 | 177829.1 | [M+Na]+ 9:            | 450 |
| 2235164  | 2370467  | 1784972  | 2680413  | 2505312  | 302699.6 |                       | 2   |
| 1780163  | 1432748  | 2727989  | 1012630  | 1462311  | 1870513  | [M+K]+ 34:            | 11  |
| 2569208  | 5407822  | 1088613  | 1562484  | 2349170  | 2111504  | [M+H]+ 61:            | 3   |
| 1861168  | 1503756  | 1070746  | 1662066  | 1239674  | 958949   | [1012][M]2+           | 62  |
| 5197654  | 3885917  | 4517613  | 3224568  | 3538878  | 1225315  | [1619][M]+ [M+H]+ 17: | 38  |
| 1384102  | 19396799 | 20240050 | 21916350 | 20338898 | 19656236 |                       | 250 |
| 6203209  | 6180072  | 6010201  | 5123876  | 4031290  | 3508200  | [1349][M]2+           | 2   |
| 10781755 | 11573852 | 10395725 | 7941258  | 8396494  | 5781294  | [852][M+2]+           | 1   |
| 1298415  | 782189.1 | 339248.7 | 21919.38 | 729289.6 | 1016659  | [2M+2Na+]             | 18  |
| 1474545  | 835333.5 | 1804287  | 750128.9 | 1073946  | 386952.7 | [1454][M]+ [M+Na]+ 7: | 28  |
| 7507168  | 5207334  | 2925666  | 5147896  | 7750190  | 3234993  | [3M+H+Na              | 15  |
| 350697.7 | 480411.7 | 95159.08 | 0        | 321635.7 | 0        |                       | 12  |
| 269263.4 | 143669.5 | 167163.6 | 151529.5 | 102031.2 | 130316.9 | [1532][M]2+           | 16  |
| 1135209  | 916057.4 | 651216.9 | 568790.6 | 339022.6 | 505066.7 |                       | 81  |
| 4100063  | 4311282  | 251745.4 | 3227563  | 6524035  | 5886782  | [M+K+NaCl             | 11  |
| 1642534  | 1226533  | 1799393  | 1429686  | 2141376  | 1654275  |                       | 9   |
| 4108595  | 3398022  | 3446403  | 4047491  | 2993010  | 2494454  |                       | 2   |
| 7644290  | 3456132  | 3292215  | 5779194  | 5488659  | 3271081  | [917][M]2+            | 1   |
| 1354415  | 3175848  | 4700596  | 4988000  | 3674784  | 12165331 |                       | 9   |
| 10207408 | 8010905  | 3189218  | 5518697  | 10840327 | 1878097  |                       | 3   |
| 353875.3 | 216820.2 | 269429.4 | 187253.5 | 126437   | 228790   | [M+H-C2H4             | 100 |
| 2271726  | 3521643  | 4109420  | 3232830  | 3205804  | 5808894  | [M+H]+ 19:            | 264 |
| 350038.2 | 815486.8 | 672623.1 | 773314.8 | 422186.1 | 1263306  | [1163][M+1]2+         | 62  |
| 337817   | 160755.3 | 278885.8 | 329231.9 | 209883.1 | 139954   | [1550][M+1]+          | 71  |
| 2959793  | 747721.4 | 5531793  | 1066506  | 3130755  | 1246224  |                       | 1   |
| 11319940 | 7518367  | 7858361  | 3799822  | 8185655  | 2714227  | [1294][M+1]+          | 1   |

|          |          |          |          |          |          |                                      |     |
|----------|----------|----------|----------|----------|----------|--------------------------------------|-----|
| 410060.8 | 414676.8 | 177458.2 | 138157.5 | 250460.9 | 260308.2 | [M+Na] <sup>+</sup> 4!               | 98  |
| 159213.6 | 135100.3 | 60209.74 | 68970.19 | 133476.6 | 36739.22 |                                      | 102 |
| 885925.4 | 738096.3 | 1532575  | 1148116  | 1323732  | 886189.4 | [148][M] <sup>+</sup>                | 239 |
| 2167967  | 67597.7  | 24705.78 | 31822.86 | 134557.8 | 312283.3 | [M+H-CO <sub>2</sub> ]               | 18  |
| 4917515  | 4906805  | 4600231  | 4971376  | 4972236  | 3724830  |                                      | 443 |
| 3876563  | 4579879  | 4814995  | 3635612  | 3687794  | 1524321  |                                      | 1   |
| 562510.1 | 0        | 1152334  | 243226.8 | 747227.6 | 481179.1 |                                      | 1   |
| 294467.4 | 259329.6 | 216126.4 | 126353.7 | 15999.68 | 103464.6 |                                      | 72  |
| 2477577  | 2486940  | 1362059  | 2467111  | 2213334  | 2248728  | [M+H-C <sub>4</sub> H <sub>8</sub> ] | 201 |
| 2435514  | 127970.4 | 153679   | 230354.1 | 2099679  | 1017859  |                                      | 480 |
| 830569.2 | 391147   | 567867.6 | 606632.9 | 144338.2 | 149355.7 |                                      | 110 |
| 3796092  | 1589935  | 1743472  | 1757810  | 1689979  | 3966602  | [83][M] <sup>+</sup>                 | 342 |
| 2676321  | 1858877  | 963588.1 | 783513.9 | 1586592  | 438407.4 |                                      | 15  |
| 723610.6 | 4510766  | 3404504  | 2531161  | 3444256  | 5632274  | [710][M+3] <sup>+</sup>              | 4   |
| 497047.4 | 914938.4 | 1439279  | 549694.3 | 527126.3 | 845064.7 |                                      | 9   |
| 802748.5 | 833981.1 | 5442294  | 4024397  | 742170.8 | 5601876  |                                      | 9   |
| 7482030  | 3699696  | 2922996  | 4484163  | 3496801  | 2340509  | [3M+2Na] <sup>+</sup>                | 14  |
| 420287.5 | 1031233  | 2947959  | 2101102  | 579971.5 | 1430616  |                                      | 4   |
| 788684.4 | 747348.7 | 644318.2 | 425864.3 | 805654.2 | 881921.4 | [2M+2Na] <sup>+</sup>                | 18  |
| 3803192  | 1538339  | 2532869  | 2948445  | 1126032  | 2160140  |                                      | 1   |
| 4434365  | 6644691  | 4169085  | 3905418  | 4922644  | 2932538  |                                      | 3   |
| 3794853  | 2554325  | 5367210  | 2717376  | 8029882  | 6494618  | [M+2K-H] <sup>+</sup>                | 29  |
| 16857332 | 23151041 | 26741298 | 12893781 | 15882276 | 13326643 | [3M+K] <sup>+</sup> 5!               | 15  |
| 1080070  | 895157.7 | 328885.5 | 136412.8 | 1248104  | 316508.3 |                                      | 1   |
| 4247453  | 4933928  | 4072411  | 4527566  | 5738670  | 6334063  |                                      | 431 |
| 4283504  | 3967012  | 2662217  | 2526149  | 3879634  | 3029002  | [423][M+1] <sup>2+</sup>             | 2   |
| 2710562  | 2246778  | 1419438  | 1450699  | 1911516  | 2227168  |                                      | 9   |
| 1883977  | 3060090  | 2901705  | 1953845  | 3991208  | 991886.7 |                                      | 1   |
| 1660230  | 1155381  | 1458762  | 1551377  | 593525.4 | 636924.5 | [3M+H+K] <sup>2</sup>                | 42  |
| 1588442  | 1531520  | 1565840  | 1157310  | 1027146  | 782001.4 |                                      | 9   |
| 3811804  | 3430900  | 3256054  | 3575473  | 3549209  | 3426848  |                                      | 452 |
| 5182876  | 7386060  | 4756266  | 6187897  | 5015588  | 4937431  |                                      | 202 |
| 2211543  | 6276894  | 23305395 | 20295587 | 6747501  | 9399327  | [1136][M+4] <sup>3+</sup>            | 2   |
| 305881.1 | 258038.2 | 220207.1 | 177594.4 | 204982.1 | 194425.4 | [1123][M+1] <sup>2+</sup>            | 35  |
| 4096263  | 7443558  | 7634089  | 7238413  | 9856570  | 7308812  |                                      | 396 |

|          |          |          |          |          |          |                       |     |
|----------|----------|----------|----------|----------|----------|-----------------------|-----|
| 2683743  | 2623989  | 2372559  | 1077404  | 4981987  | 1120911  |                       | 1   |
| 4263715  | 1912081  | 2514242  | 2672291  | 3611549  | 765246.8 |                       | 2   |
| 12916892 | 17148524 | 38262878 | 27439659 | 16912869 | 43815695 | [1087][M]+ [M+Na]+ 5: | 110 |
| 241964.4 | 173124.4 | 138381.8 | 96889.09 | 145658.8 | 210405   | [1377][M+2]+          | 42  |
| 535193   | 214835.2 | 504618.3 | 279547.8 | 227445.7 | 205809.7 | [556][M+1]+           | 193 |
| 1266381  | 438450.7 | 659431.6 | 419977.2 | 296593.9 | 524592.1 | [3M+3K-H]             | 16  |
| 2707350  | 608167.4 | 348114   | 239279.9 | 389264.2 | 289315.2 |                       | 91  |
| 1878061  | 781397.9 | 631311.3 | 983553.5 | 1008356  | 989635.6 |                       | 1   |
| 445975   | 257202.8 | 217554.5 | 228636.9 | 203457.1 | 243154.6 |                       | 27  |
| 6869458  | 4681567  | 4256161  | 3232489  | 6732521  | 2288590  | [M+H-CH4]             | 15  |
| 5381745  | 5885292  | 556507.6 | 466260.1 | 274004.7 | 2180653  | [220][M+2]2+          | 4   |
| 1359540  | 1402519  | 736342.9 | 145026   | 634047.1 | 1218904  |                       | 153 |
| 263648   | 725390.3 | 5280974  | 3464981  | 1028549  | 1168068  |                       | 294 |
| 592884.5 | 348827.5 | 552464.7 | 362025.9 | 525965.3 | 124361.3 | [993][M+1]+           | 242 |
| 4613260  | 2619624  | 3975839  | 2448841  | 2978249  | 324226.5 |                       | 9   |
| 11728516 | 12150349 | 10396624 | 7910807  | 7894810  | 3546132  | [733][M+1]3+          | 1   |
| 16978581 | 12658799 | 16296181 | 23637085 | 17459391 | 28600432 |                       | 6   |
| 2630736  | 2906570  | 1469202  | 1942685  | 2868583  | 2559512  | [29][M+2]2+           | 2   |
| 1398181  | 1431785  | 481845   | 0        | 1294802  | 140492.9 |                       | 1   |
| 24428193 | 23325628 | 20667868 | 11835973 | 11070508 | 16823063 | [184][M+1]3+          | 2   |
| 1048921  | 982636   | 686135.9 | 761622.3 | 518363.7 | 570668.8 |                       | 512 |
| 8831474  | 6243129  | 6505793  | 2133790  | 8561171  | 1650422  | [M+H]+ 19:            | 6   |
| 22661590 | 22447581 | 21176546 | 23056489 | 21613253 | 20899826 |                       | 180 |
| 12159632 | 12721290 | 10781738 | 6434706  | 12603505 | 7575964  |                       | 1   |
| 713283.6 | 467793.5 | 118079.7 | 0        | 805172.5 | 0        | [515][M+1]3+          | 1   |
| 1361471  | 2207714  | 1710963  | 1713015  | 2756600  | 3554722  |                       | 2   |
| 466927.4 | 969630.4 | 1386132  | 3406397  | 3443598  | 1312630  | [296][M+1]+           | 9   |
| 11126792 | 9195119  | 5629110  | 6916067  | 8761468  | 10427116 | [1091][M+1]+          | 1   |
| 6188269  | 3327700  | 4472065  | 4183480  | 6348182  | 4266527  |                       | 2   |
| 502074.2 | 467427.8 | 402247.8 | 777685   | 413673.4 | 937349.9 | [313][M+1]+           | 304 |
| 745865.2 | 0        | 373103.6 | 664018.7 | 454974   | 0        | [3M+H+K]2             | 8   |
| 824444.3 | 218352.9 | 821850   | 768640.3 | 803222.1 | 747603.4 | [M+2K]2+ t            | 39  |
| 5092635  | 18748827 | 14352483 | 2926524  | 3296731  | 25477411 |                       | 1   |
| 2356848  | 2010478  | 316287.4 | 736085   | 2144211  | 566260.1 |                       | 1   |
| 4272495  | 2117421  | 3671612  | 4056374  | 5015634  | 2950366  | [M+K+NaCl             | 13  |

|          |          |          |          |          |          |                          |     |
|----------|----------|----------|----------|----------|----------|--------------------------|-----|
| 350578   | 106563.6 | 220912.3 | 342802.2 | 342412.3 | 109542.8 | [M+H] <sup>+</sup> 37    | 62  |
| 508404.6 | 264852   | 502031.3 | 470587.2 | 134529.8 | 176890.6 | [893][M+2] <sup>+</sup>  | 116 |
| 2368447  | 11262865 | 5098337  | 5564853  | 12055848 | 12859281 | [3M+K] <sup>+</sup> 2    | 29  |
| 3013594  | 2191694  | 2405069  | 1817787  | 1958930  | 1800992  | [43][M+3] <sup>3+</sup>  | 2   |
| 95119508 | 89653756 | 81060642 | 72445196 | 76517435 | 50221863 |                          | 2   |
| 2036567  | 1786619  | 175636.3 | 796721.1 | 1831349  | 870476.8 |                          | 1   |
| 10687120 | 11116624 | 10237132 | 7646226  | 8117944  | 4471137  |                          | 1   |
| 8840057  | 347925.6 | 9918141  | 7415446  | 5935623  | 3765996  |                          | 1   |
| 110994.4 | 129714.1 | 171736.6 | 31962.44 | 151351.2 | 113434.7 | [1229][M+1] <sup>+</sup> | 23  |
| 4227875  | 744456.5 | 7182000  | 1739222  | 1829530  | 719662.7 |                          | 1   |
| 4499012  | 4525673  | 6819372  | 6272686  | 4902782  | 5100054  | [602][M+1] <sup>+</sup>  | 83  |
| 302946.3 | 231554.9 | 11054180 | 1088727  | 7040803  | 10221193 |                          | 240 |
| 3016070  | 3437126  | 2178216  | 1574771  | 4607498  | 3162177  |                          | 15  |
| 749792.8 | 514118.1 | 655022.5 | 623236.2 | 326103.1 | 554541.4 | [802][M+2] <sup>+</sup>  | 57  |
| 9027138  | 9585591  | 10243606 | 4207308  | 4420560  | 6601026  | [M+H] <sup>+</sup> 52    | 15  |
| 785309.4 | 0        | 1655016  | 843536.7 | 911734.9 | 0        |                          | 9   |
| 5796185  | 5639077  | 6026923  | 3310310  | 4616502  | 1756151  | [707][M] <sup>2+</sup>   | 15  |
| 138730.9 | 465461.2 | 411743.9 | 215093.9 | 331401.8 | 661428.7 |                          | 292 |
| 9767221  | 7705669  | 7920083  | 9167217  | 7258467  | 9134971  | [1046][M] <sup>+</sup>   | 150 |
| 2990825  | 2960365  | 2924064  | 1525877  | 1587284  | 867906.1 | [M+K] <sup>+</sup> 74    | 13  |
| 982571.7 | 107677   | 1109755  | 786965.4 | 791335.5 | 123589.8 |                          | 12  |
| 5755008  | 5543111  | 4835031  | 5433750  | 3451594  | 4892955  |                          | 337 |
| 5629877  | 5329264  | 3286397  | 3963350  | 4330548  | 1125499  |                          | 1   |
| 5814985  | 5734378  | 5493001  | 5509527  | 3025192  | 4344513  |                          | 325 |
| 593995   | 222821.6 | 433424.8 | 256711.8 | 268117.4 | 197074.5 |                          | 91  |
| 192618.7 | 766910.9 | 6571238  | 3977534  | 1183843  | 1422494  | [957][M] <sup>+</sup>    | 87  |
| 6987775  | 2.3E+09  | 4.06E+09 | 3.85E+09 | 1.61E+08 | 2.69E+09 |                          | 7   |
| 37472765 | 37462292 | 34196003 | 37143857 | 35793580 | 33148062 | [440][M] <sup>+</sup>    | 221 |
| 112406.6 | 172143.2 | 136384.2 | 184210   | 254216.3 | 149937.6 | [M+Na+HC]                | 136 |
| 80152411 | 51155769 | 24343062 | 25606780 | 30156210 | 39178500 | [756][M] <sup>+</sup>    | 1   |
| 91203.07 | 141715.9 | 91616.17 | 67392.14 | 88157.39 | 107057.2 | [M+H] <sup>+</sup> 18    | 319 |
| 632180.2 | 1204321  | 3477793  | 1895304  | 758879.7 | 3065024  |                          | 9   |
| 1969793  | 2120533  | 1954978  | 598881.1 | 1722491  | 1232828  | [M+K] <sup>+</sup> 27    | 20  |
| 1805115  | 1268290  | 1908672  | 1132638  | 1824528  | 0        | [M+2H-CH <sub>3</sub> ]  | 15  |
| 12254349 | 13239235 | 10743721 | 10114619 | 12718965 | 8203022  | [1016][M] <sup>3+</sup>  | 9   |

|          |          |          |          |          |          |              |     |
|----------|----------|----------|----------|----------|----------|--------------|-----|
| 0        | 223654.3 | 88139.06 | 98697.84 | 186007.2 | 78115.6  |              | 81  |
| 461133.9 | 377586.8 | 489039.6 | 375400.6 | 622365.9 | 441600.9 |              | 134 |
| 1216073  | 101446.1 | 2390584  | 988692   | 1196035  | 662769.5 | [1068][M]2+  | 9   |
| 4520109  | 8586492  | 10267820 | 4040163  | 10294795 | 12321134 | [M+3H-C5H]   | 15  |
| 1729542  | 1214158  | 1168136  | 1312260  | 2494174  | 934543.5 |              | 1   |
| 18197628 | 3980772  | 1528364  | 1202290  | 6035888  | 2856962  |              | 1   |
| 245439.8 | 433079.6 | 810842.9 | 764479.7 | 465444.3 | 235044.6 | [1231][M+1]+ | 77  |
| 371095.9 | 45717.73 | 341786.9 | 146857.7 | 269992   | 175284   | [1472][M+1]+ | 38  |
| 236986.9 | 228615.9 | 170754.3 | 169875.5 | 234878.8 | 56244.75 | [148][M+1]+  | 239 |
| 26737814 | 8676483  | 14187250 | 14457922 | 11859727 | 16543283 |              | 1   |
| 446240   | 1361771  | 3645796  | 2170549  | 3032961  | 4000018  | [M+3H-C3H]   | 18  |
| 3529769  | 1339450  | 1860267  | 2521215  | 3052361  | 1203137  |              | 4   |
| 184396.7 | 338731   | 378435.7 | 254200.8 | 271126.7 | 417217   |              | 23  |
| 24074834 | 37711421 | 24097008 | 29398053 | 36014420 | 30547209 |              | 2   |
| 2442099  | 7207002  | 6154751  | 4406498  | 4052301  | 4013170  |              | 396 |
| 488890.6 | 528906.2 | 966938.2 | 543070.6 | 502057.4 | 762372.4 |              | 245 |
| 22779636 | 24552779 | 23210507 | 19776529 | 13640448 | 16639273 |              | 9   |
| 12968084 | 5121049  | 4534070  | 2425719  | 3436364  | 4818193  | [787][M]+    | 4   |
| 17478585 | 6467592  | 15749184 | 18339010 | 14228152 | 16375512 |              | 2   |
| 829655.1 | 230707.5 | 752328.1 | 603584.1 | 891975.9 | 538173.4 |              | 6   |
| 7265514  | 7125591  | 7813075  | 5038233  | 5040824  | 6728620  |              | 221 |
| 6721511  | 5328698  | 5431862  | 4988153  | 4675555  | 6075629  | [460][M+3]2+ | 2   |
| 512189.9 | 131709.7 | 399623.7 | 392210.8 | 131242.4 | 100900.1 |              | 72  |
| 1347565  | 1070175  | 727826.1 | 709976.1 | 1224810  | 479624.6 | [3M+Na]+     | 8   |
| 728605.9 | 1002230  | 1928281  | 4303324  | 1025640  | 3016920  | [M+H-CH4]    | 6   |
| 408248.3 | 831595.7 | 1273284  | 1369475  | 783031.2 | 2664733  |              | 9   |
| 1068483  | 1057922  | 763545.8 | 65878.6  | 1005870  | 424723.7 |              | 18  |
| 1055539  | 0        | 1050902  | 941469.1 | 893883   | 142329.1 |              | 9   |
| 59858543 | 51040166 | 30547947 | 46076437 | 47227894 | 19532995 | [M+Na+NH]    | 14  |
| 6948163  | 5561277  | 6022559  | 4386382  | 6730752  | 0        |              | 2   |
| 35917577 | 1485145  | 43538285 | 25726827 | 37178556 | 71362405 |              | 4   |
| 5874435  | 8958913  | 6443588  | 5301029  | 9212203  | 1175590  | [M+H]+ 24:   | 3   |
| 1017564  | 1234144  | 1504360  | 1276873  | 911227.9 | 1273964  | [1319][M+1]+ | 9   |
| 1412700  | 1534089  | 217853   | 63078.94 | 1146684  | 776286.9 |              | 18  |
| 3577772  | 9532728  | 9331128  | 3473078  | 9748724  | 9582045  |              | 335 |

|          |          |          |          |          |          |               |     |
|----------|----------|----------|----------|----------|----------|---------------|-----|
| 32689912 | 6195929  | 2282212  | 1496907  | 2466603  | 3133584  |               | 3   |
| 2411350  | 2807865  | 1660886  | 1498230  | 1079074  | 1940581  |               | 5   |
| 755999.3 | 587017.2 | 420277.7 | 552830.8 | 569568.3 | 0        |               | 8   |
| 17045963 | 10719436 | 16574057 | 8175497  | 14369611 | 11325921 |               | 2   |
| 6136061  | 21961283 | 16959410 | 16082425 | 29274506 | 39119994 |               | 2   |
| 9522078  | 6329661  | 6608751  | 7855468  | 3649452  | 2267375  | [M+H+NH3      | 58  |
| 4710821  | 4604804  | 4619193  | 4164617  | 4237564  | 4082522  |               | 380 |
| 3542097  | 4228990  | 9427413  | 7176237  | 4451548  | 12111630 | [1087][M+1]+  | 110 |
| 334830.4 | 397812   | 373783.9 | 412884.1 | 304856.5 | 253119.2 | [257][M+1]3+  | 24  |
| 7736091  | 4986054  | 4158590  | 2755495  | 4113432  | 3670692  |               | 201 |
| 3682165  | 742351.8 | 2750929  | 2225757  | 4691841  | 2308632  | [M+2K-H]+     | 6   |
| 248415   | 225594.4 | 136305.6 | 163921.4 | 10492.85 | 109927.3 | [1069][M+1]+  | 17  |
| 1002601  | 1478452  | 840827.2 | 813809.4 | 1211657  | 283580.9 |               | 9   |
| 3768940  | 2044509  | 1545270  | 3003150  | 2319066  | 465524.3 |               | 2   |
| 870911.1 | 379949.4 | 896067.7 | 1033004  | 597646.1 | 544329.7 |               | 7   |
| 12730283 | 5946909  | 9995979  | 2181302  | 5645256  | 1060770  | [M+2Na+K]     | 15  |
| 914645.4 | 920773.9 | 956969.4 | 846901   | 969051.2 | 559175   | [818][M+1]+   | 86  |
| 878805.4 | 649662.2 | 573320.5 | 584937   | 678087.6 | 294444.5 | [1012][M+1]2+ | 62  |
| 189588.8 | 138929.5 | 195471.4 | 120797.5 | 130970.3 | 144352.5 | [3M+Na+K]     | 357 |
| 924241   | 300868.1 | 772891.3 | 382191.4 | 619264.5 | 318197.2 |               | 4   |
| 2026542  | 573742   | 1676673  | 1971130  | 2190174  | 2513335  |               | 13  |
| 5243891  | 7463306  | 4425410  | 3203288  | 3746205  | 11259582 | [M+2H]2+      | 15  |
| 3350713  | 2496639  | 2071379  | 3143070  | 1223982  | 1678548  | [1616][M]3+   | 9   |
| 3586579  | 8635265  | 4484661  | 4109389  | 4772746  | 861537.9 | [M+H+CF3O     | 15  |
| 2551412  | 3981530  | 18189385 | 4300037  | 6080901  | 8910355  | [3M+H+K]2     | 15  |
| 3490960  | 4358779  | 4107481  | 2376626  | 3416306  | 1360942  | [1510][M]+    | 4   |
| 4742633  | 2012030  | 1379357  | 3034249  | 1688390  | 1762962  | [M+Na]+ 10    | 3   |
| 7300954  | 7434297  | 11946323 | 9546427  | 309589.6 | 3052821  | [65][M+1]3+   | 1   |
| 257951.8 | 224248.4 | 138676.5 | 206355.9 | 163729.1 | 181035.5 | [1146][M+1]+  | 66  |
| 4143699  | 2753205  | 2869230  | 1850566  | 6419559  | 2154282  |               | 1   |
| 552681.8 | 421742.3 | 750013.8 | 703307.9 | 298823.1 | 894520.1 |               | 91  |
| 9732291  | 5143928  | 4142566  | 2736795  | 2048069  | 6447642  |               | 1   |
| 358309.8 | 483847.5 | 464888.8 | 195555.8 | 255174.2 | 512806.5 | [M+Na]+ 6     | 51  |
| 3432480  | 6931460  | 8783891  | 29883867 | 9226469  | 26105362 |               | 6   |
| 1380407  | 1737823  | 1419786  | 1382408  | 900932.8 | 1884692  |               | 134 |

|          |          |          |          |          |          |                                               |     |
|----------|----------|----------|----------|----------|----------|-----------------------------------------------|-----|
| 569205.5 | 1078603  | 131828.5 | 0        | 112197.2 | 617015.1 | [3M+3K-H]                                     | 18  |
| 1678934  | 1031823  | 1615611  | 2656623  | 860893.8 | 1026175  |                                               | 2   |
| 4703136  | 2997042  | 1007019  | 492268.1 | 3161073  | 3321507  | [M+H] <sup>+</sup> 70                         | 18  |
| 2686667  | 1235971  | 2194143  | 2713743  | 1384632  | 0        |                                               | 2   |
| 2492385  | 893523.6 | 1300135  | 630280.3 | 1529527  | 1118934  |                                               | 7   |
| 27281444 | 23426669 | 19075390 | 16986680 | 24376242 | 16506595 | [70][M] <sup>+</sup>                          | 9   |
| 2245628  | 1957515  | 4502322  | 1467314  | 1004401  | 1865858  |                                               | 1   |
| 360496.3 | 683205.8 | 1377851  | 1420859  | 334817.2 | 983512.5 |                                               | 255 |
| 4215384  | 2248028  | 1259081  | 4134079  | 4726473  | 3627865  | [3M+H+Na]                                     | 13  |
| 1226721  | 63218.09 | 510909.1 | 791781.8 | 1469385  | 721681.4 |                                               | 9   |
| 5854382  | 5018495  | 3946390  | 3987552  | 4730244  | 2249983  |                                               | 9   |
| 19535282 | 13718943 | 7448372  | 5291638  | 16897255 | 2064146  |                                               | 1   |
| 832309.3 | 680416.4 | 418900.6 | 603296.7 | 1266173  | 359788.6 |                                               | 38  |
| 709050.7 | 265725   | 299372   | 478300.6 | 331085   | 263015.9 |                                               | 39  |
| 4658852  | 3806373  | 3166209  | 2056721  | 3824200  | 863497.8 |                                               | 1   |
| 430959.6 | 168185   | 208946   | 245929.3 | 332434.2 | 275553.7 |                                               | 243 |
| 105872.1 | 66992.22 | 239608.1 | 13950.06 | 65752.36 | 0        |                                               | 28  |
| 11730273 | 14390853 | 10146753 | 2676106  | 5752168  | 3730948  |                                               | 3   |
| 904855.6 | 582035.7 | 325664.2 | 522129.5 | 896824.9 | 373319.4 |                                               | 4   |
| 413282.3 | 1257594  | 1355922  | 844724.6 | 1176299  | 2378014  | [865][M+2] <sup>2+</sup>                      | 9   |
| 19737602 | 550993.4 | 6551463  | 655706   | 14747163 | 4579428  | [3M+2H] <sup>2+</sup>                         | 81  |
| 1436861  | 1630392  | 1414725  | 1541209  | 1570723  | 1404884  |                                               | 93  |
| 5698376  | 79870438 | 78935406 | 79049089 | 77066316 | 76892803 |                                               | 180 |
| 667426.5 | 2774329  | 942523.7 | 3246202  | 198396.4 | 4540412  | [M+K] <sup>+</sup> 19                         | 38  |
| 3018892  | 3035022  | 3124475  | 1190865  | 3383828  | 2152287  | [1102][M] <sup>2</sup> [M+2H] <sup>2+</sup>   | 38  |
| 2560671  | 3146321  | 2353362  | 1091026  | 2541842  | 1739758  | [209][M] <sup>2+</sup> [M+2H-C2H]             | 18  |
| 593494.6 | 363856.9 | 418327.2 | 63718.92 | 580565   | 276094.9 |                                               | 18  |
| 13448105 | 6026727  | 8515371  | 10837941 | 3801988  | 2395542  | [1451][M] <sup>+</sup> [M+H+NH <sub>3</sub> ] | 44  |
| 6413394  | 4909255  | 4933959  | 4660560  | 2979430  | 4946672  |                                               | 321 |
| 1513665  | 1102608  | 9973544  | 11460361 | 16107991 | 11225997 |                                               | 29  |
| 2488836  | 35593446 | 33052947 | 35717214 | 35040694 | 33503289 |                                               | 226 |
| 6331488  | 4073129  | 2612742  | 2405957  | 7091282  | 5680821  | [3M+Na] <sup>+</sup>                          | 11  |
| 1322866  | 483619.5 | 1114735  | 1149216  | 986643.6 | 684271   | [327][M+2] <sup>+</sup>                       | 75  |
| 5439870  | 3861511  | 3289021  | 4416753  | 3412120  | 2439773  |                                               | 1   |
| 2901937  | 24773243 | 3139925  | 3115036  | 44899672 | 1469606  |                                               | 2   |



|          |          |          |          |          |          |               |     |
|----------|----------|----------|----------|----------|----------|---------------|-----|
| 1003543  | 867006.2 | 1958266  | 1848478  | 1732164  | 490866.2 |               | 1   |
| 1535881  | 1178091  | 1220199  | 1003672  | 1983498  | 1673503  |               | 2   |
| 3707839  | 5117656  | 1550610  | 2950187  | 1090592  | 919507.6 | [89][M+1]3+   | 1   |
| 1558552  | 1573808  | 1634237  | 1194006  | 869691.6 | 577648   | [3M+Na+K]     | 23  |
| 2434864  | 3142556  | 629309.6 | 387983   | 1903606  | 2583252  | [1478][M+1]3+ | 18  |
| 592236.9 | 346006.8 | 594500.1 | 743739.6 | 313004.7 | 274149   |               | 35  |
| 970814.6 | 550293   | 561297.1 | 870830.3 | 808514.5 | 485815.8 |               | 4   |
| 5964534  | 5146470  | 4876793  | 5663287  | 2646924  | 4984108  | [M+Na]+ 71    | 42  |
| 3487370  | 4124544  | 3826732  | 4679536  | 9875114  | 2671745  |               | 3   |
| 1.2E+08  | 76681225 | 58211152 | 57685801 | 49570876 | 51109712 |               | 1   |
| 1867879  | 1664570  | 2242384  | 1917417  | 936088   | 1569125  | [1552][M+1]+  | 362 |
| 5535957  | 790714.2 | 1132136  | 5066775  | 5241870  | 314007.4 |               | 4   |
| 532306.1 | 99007.19 | 626724.9 | 313705.4 | 169304.4 | 131849.1 | [M+H+NH3      | 62  |
| 1465154  | 1481013  | 885827.1 | 1105544  | 1339884  | 1066172  |               | 9   |
| 969962.9 | 499480.5 | 331376.2 | 206584.1 | 534874   | 231139.2 | [3M+K]+ 21    | 42  |
| 1.08E+08 | 73747348 | 64492378 | 54692095 | 85685947 | 35213639 |               | 1   |
| 1609789  | 1128514  | 912262   | 352239.2 | 1424049  | 469493.1 | [2M+3H]3+     | 39  |
| 590464   | 608579.8 | 521855.1 | 576093.1 | 530684.2 | 843541.4 | [M+K+HCO      | 16  |
| 2087475  | 3748292  | 2605783  | 3523350  | 2710795  | 2747471  |               | 403 |
| 651655.1 | 474317.3 | 906632.6 | 454449.8 | 559108.6 | 242035.2 | [1015][M]3+   | 16  |
| 670299.9 | 753930.2 | 776712.4 | 735112.2 | 367403.2 | 268886.2 | [M+K+HCO      | 5   |
| 1984425  | 1596847  | 2491884  | 1502000  | 2790126  | 3143926  |               | 9   |
| 1493644  | 663843.5 | 590027.1 | 419612.5 | 569079.7 | 483250.4 |               | 4   |
| 58220.44 | 85523.56 | 94264.5  | 86726.01 | 59952.38 | 109878.2 | [3M+2K]2+     | 42  |
| 2272429  | 2677084  | 5844871  | 4814214  | 2699712  | 4870895  | [1489][M+1]+  | 302 |
| 1143241  | 953724.9 | 203201.7 | 569152.1 | 902958.1 | 1316571  | [2M+K]+ 25    | 11  |
| 451368.5 | 1519188  | 1340721  | 1779851  | 787081   | 2826160  |               | 9   |
| 547468.2 | 1376977  | 948867.8 | 1020805  | 1048943  | 2032799  |               | 247 |
| 1305524  | 4074737  | 11334643 | 10371756 | 3243042  | 2932588  | [M+Na]+ 31    | 97  |
| 3955970  | 3003328  | 2539684  | 1619025  | 2193217  | 1857703  | [M+Na+Na      | 39  |
| 4824786  | 1855536  | 3499249  | 3333062  | 6346892  | 901884.1 |               | 1   |
| 2434139  | 3292227  | 4148951  | 2327552  | 2420136  | 3741446  |               | 404 |
| 1547714  | 928081.3 | 158151.1 | 423081.4 | 1556606  | 0        | [3M+2H]2+     | 21  |
| 2075467  | 1858034  | 1573779  | 1782921  | 1379156  | 0        |               | 2   |
| 1115820  | 1430491  | 416535.3 | 0        | 1118292  | 0        | [M+K]+ 580    | 15  |

|          |          |          |          |          |          |                                     |     |
|----------|----------|----------|----------|----------|----------|-------------------------------------|-----|
| 2032906  | 0        | 1829353  | 1538674  | 1198840  | 0        | [1624][M+1] <sup>+</sup>            | 2   |
| 940010.9 | 158044.1 | 131598.3 | 624421.4 | 747120   | 0        |                                     | 9   |
| 4739836  | 1879227  | 3220914  | 2442106  | 4265582  | 1340006  |                                     | 1   |
| 706658.1 | 1165920  | 678589.8 | 58581.48 | 680731.9 | 936089.6 | [M+K] <sup>+</sup> 66               | 18  |
| 2846869  | 11809480 | 9036413  | 8767396  | 10155391 | 6674973  |                                     | 1   |
| 1953491  | 1237715  | 3040804  | 1150894  | 2072347  | 1300455  | [1393][M+2] <sup>+</sup>            | 47  |
| 2276028  | 2850791  | 1713221  | 2004396  | 2436612  | 561639.6 | [M+Na+K] <sup>+</sup>               | 15  |
| 4796521  | 26852183 | 6186639  | 19978728 | 35985761 | 4966686  |                                     | 1   |
| 1395689  | 1000986  | 930415.1 | 997055.8 | 849417.8 | 404561.5 |                                     | 225 |
| 1787291  | 1752234  | 939317.2 | 595011.8 | 1283098  | 1307607  | [M+H] <sup>+</sup> 42               | 39  |
| 10843012 | 5938216  | 5432357  | 8843848  | 7394545  | 9946988  | [860][M+1] <sup>2+</sup>            | 1   |
| 27095290 | 63107051 | 43965300 | 18458157 | 32827055 | 27304919 | [1289][M+1] <sup>2+</sup>           | 3   |
| 3540042  | 4602673  | 3055918  | 3608187  | 3938675  | 2007975  | [1509][M] <sup>2+</sup>             | 9   |
| 9195354  | 11424959 | 5756173  | 3738680  | 7195752  | 10341029 |                                     | 1   |
| 3421565  | 2301611  | 2493015  | 2435419  | 2000268  | 1413005  |                                     | 4   |
| 3269883  | 4049782  | 3012246  | 2744742  | 1619346  | 4372273  | [1260][M+1] <sup>+</sup>            | 2   |
| 382752.5 | 2724167  | 315324   | 4201211  | 438432.5 | 3288077  |                                     | 17  |
| 6380391  | 4022122  | 3500211  | 3648521  | 4502148  | 1565414  |                                     | 1   |
| 3618307  | 2284690  | 1470180  | 1687265  | 1231999  | 2307882  |                                     | 15  |
| 336330.6 | 32583.96 | 243161.8 | 181610.1 | 650528.9 | 288607.2 | [M+K] <sup>+</sup> 55               | 38  |
| 1875082  | 2.41E+09 | 3.09E+09 | 3.35E+09 | 3.12E+09 | 2.41E+09 | [427][M+1] <sup>2+</sup>            | 2   |
| 3246306  | 3205514  | 2904251  | 2343776  | 1961529  | 2211082  | [3M+Na+K] <sup>+</sup>              | 86  |
| 7460386  | 623211.9 | 4045840  | 5123916  | 6058698  | 1759255  |                                     | 2   |
| 17454333 | 11204084 | 1488015  | 7526394  | 8144676  | 6795342  |                                     | 1   |
| 688680.3 | 716974.2 | 494197.8 | 384801.2 | 769463.4 | 577456.4 | [M+H-CH <sub>3</sub> ] <sup>+</sup> | 8   |
| 2241201  | 2442418  | 2517470  | 2562805  | 965640.2 | 1717933  | [M+Na] <sup>+</sup> 2               | 24  |
| 5481655  | 2343493  | 2646070  | 3121640  | 8360092  | 1431212  |                                     | 1   |
| 1100346  | 717166.5 | 646890   | 445346.8 | 335401.6 | 393232.8 |                                     | 4   |
| 512532.4 | 352937.7 | 729663.9 | 366090.3 | 113743.5 | 0        |                                     | 9   |
| 223913.3 | 10439555 | 7349448  | 6281244  | 7019264  | 11356701 | [M+H+HCC] <sup>+</sup>              | 10  |
| 4984087  | 575223.2 | 1310433  | 1742855  | 4645359  | 2992117  | [665][M+1] <sup>3+</sup>            | 4   |
| 12668766 | 12552527 | 11184629 | 9502919  | 11528371 | 2450456  |                                     | 1   |
| 704892.5 | 463102.6 | 489200.8 | 495025.8 | 530558   | 285440.3 | [3M+2Na] <sup>2+</sup>              | 42  |
| 262616.8 | 189148   | 224555.4 | 533419   | 316818.7 | 73487.54 | [M+H] <sup>+</sup> 33               | 46  |
| 167076.3 | 55612.28 | 91355.77 | 113361.4 | 144245   | 202572.1 | [M+Na] <sup>+</sup> 5               | 44  |

|          |          |          |          |          |          |                      |     |
|----------|----------|----------|----------|----------|----------|----------------------|-----|
| 322354.1 | 171319.7 | 138529.7 | 129296   | 333919.2 | 104581.9 | [1494][M]2 [3M+2Na]2 | 44  |
| 239788.8 | 575601.8 | 446225.2 | 951751.1 | 616758.4 | 1173000  | [1185][M+1]+         | 96  |
| 5748086  | 4372828  | 83466303 | 67225093 | 39586717 | 22029654 | [M+Na+NH             | 12  |
| 993957.2 | 1419063  | 652520.1 | 310854.5 | 474759   | 263537.8 |                      | 1   |
| 950452.9 | 815595.1 | 0        | 533110.6 | 973988.1 | 0        |                      | 1   |
| 14942333 | 11877733 | 9982866  | 9999247  | 10783265 | 5325920  | [581][M]+            | 249 |
| 1302142  | 1278185  | 889284.3 | 1011412  | 782960.4 | 214703.3 |                      | 9   |
| 514641.7 | 668253.9 | 167279.1 | 94373.7  | 508416.2 | 113083.8 |                      | 7   |
| 887051.6 | 810517.6 | 446496   | 219211.4 | 91877.64 | 121520.4 |                      | 50  |
| 7350617  | 1370181  | 6624444  | 2564663  | 1732609  | 3193329  | [2M+H+Na             | 38  |
| 1783176  | 2119918  | 1379906  | 871548.9 | 3295270  | 2505223  | [M+2Na]2+            | 15  |
| 412688.5 | 225036.3 | 392562.2 | 271701.3 | 233941.8 | 174722.2 |                      | 297 |
| 4161623  | 7744850  | 6430800  | 5544274  | 6781755  | 5264605  |                      | 199 |
| 1767232  | 2917876  | 2066253  | 1654263  | 2031970  | 2093361  | [M+K]+ 49            | 46  |
| 9403097  | 1906198  | 6860553  | 2318265  | 2089255  | 3661409  |                      | 93  |
| 887720.7 | 2021229  | 1730533  | 687168   | 1475842  | 2306369  |                      | 4   |
| 3962331  | 2253405  | 3418704  | 3424625  | 2357376  | 4344086  |                      | 1   |
| 4056952  | 2804195  | 2916490  | 3564962  | 2658059  | 2572925  | [1438][M]+           | 235 |
| 26748954 | 19491333 | 39765458 | 15245229 | 25257607 | 17226267 | [1393][M]+ [M+Na]+ 7 | 47  |
| 643295.9 | 472337   | 563228.4 | 363885.9 | 61349.34 | 431329.1 |                      | 72  |
| 895482.2 | 5776047  | 7838333  | 752429.9 | 8473008  | 11494873 | [750][M+2]+          | 1   |
| 5811381  | 3959909  | 6649938  | 6267801  | 2942488  | 4552204  |                      | 351 |
| 8543806  | 6931105  | 8364192  | 6693417  | 5513258  | 1507576  |                      | 2   |
| 1529887  | 1542320  | 1098650  | 663636.8 | 1237109  | 1089943  | [M+K]+ 39            | 31  |
| 2.74E+09 | 4876732  | 4.23E+09 | 3.13E+09 | 1.94E+09 | 2.56E+09 |                      | 7   |
| 6831080  | 5998619  | 5383345  | 5642077  | 7359724  | 4819070  |                      | 3   |
| 584338.9 | 959498.4 | 546503.2 | 189786.4 | 636797.4 | 856307   |                      | 46  |
| 28798940 | 27112820 | 23611316 | 20374461 | 26603579 | 13883192 | [883][M]+            | 4   |
| 1736342  | 973300.6 | 99795.99 | 190020.2 | 1388380  | 273814.6 |                      | 1   |
| 792254.4 | 4564769  | 1330103  | 4788855  | 9476846  | 6543205  |                      | 1   |
| 580562.5 | 1197506  | 188892.8 | 189197.2 | 515656.4 | 756764.7 |                      | 46  |
| 2967007  | 3114433  | 2583227  | 2913843  | 2458230  | 1420686  |                      | 369 |
| 1140603  | 1069210  | 1085496  | 1392647  | 609645.2 | 320837.9 |                      | 65  |
| 1421402  | 639381.1 | 131034.7 | 264222.5 | 1225085  | 885016.6 |                      | 52  |
| 1643768  | 1544425  | 1729571  | 1405442  | 1401642  | 1334971  | [1584][M+2]+         | 42  |

|          |          |          |          |          |          |              |     |
|----------|----------|----------|----------|----------|----------|--------------|-----|
| 567718.4 | 161651.6 | 275741.4 | 635803.3 | 535450   | 150663.6 | [M+K]+ 56    | 8   |
| 464091.5 | 358931   | 232811   | 238491.8 | 418909   | 299948.3 | [M+K]+ 35    | 20  |
| 5427343  | 4489120  | 5884152  | 5893177  | 1773520  | 4382468  |              | 426 |
| 775050.3 | 986705.4 | 680829.3 | 362817.6 | 534705.9 | 292913.7 | [1510][M+2]+ | 4   |
| 1033675  | 0        | 538890.6 | 857422.9 | 789457.6 | 211291.2 | [M+H]+ 16    | 8   |
| 4876317  | 5996338  | 7291560  | 2433631  | 6273968  | 6481709  |              | 18  |
| 1958578  | 603729.1 | 1320214  | 238421.7 | 1243991  | 557924.1 |              | 4   |
| 5590950  | 4102895  | 2213411  | 1359613  | 1167023  | 2475662  |              | 1   |
| 224694.7 | 42759.75 | 88279.24 | 250669.8 | 230363.3 | 87465.13 | [M+K]+ 11    | 35  |
| 578706.2 | 1274898  | 939841.9 | 112135.1 | 611400   | 167822.5 |              | 1   |
| 1.2E+08  | 76678131 | 56073899 | 57424935 | 49632447 | 51762007 |              | 1   |
| 7615311  | 7478698  | 5898045  | 4239369  | 6319110  | 1008236  |              | 2   |
| 509672.7 | 1078409  | 1058946  | 658617.9 | 692890.1 | 928465.9 |              | 4   |
| 1294032  | 984016.8 | 1650346  | 288359.9 | 944370.9 | 708074.5 |              | 1   |
| 775676   | 707967.8 | 529058   | 736479.7 | 452300.9 | 280291.6 |              | 4   |
| 4883612  | 3137419  | 5126391  | 2408660  | 4285981  | 2856123  |              | 1   |
| 1786532  | 1187681  | 1445816  | 1082123  | 1425615  | 771439.6 |              | 249 |
| 2913745  | 1.09E+09 | 1.51E+09 | 1.25E+09 | 1.55E+09 | 1.11E+09 |              | 1   |
| 2672987  | 3071057  | 2671678  | 2862180  | 2835131  | 912790.1 | [M+3H]3+     | 6   |
| 3900355  | 2077109  | 878761   | 2908119  | 2887660  | 0        |              | 2   |
| 230321.7 | 5054349  | 5863231  | 5712585  | 4581494  | 4031709  |              | 2   |
| 27502655 | 13985638 | 10849552 | 22231040 | 7216755  | 10165104 |              | 22  |
| 8130376  | 2653168  | 5946555  | 6217294  | 4865226  | 2621231  | [M+Na]+ 3    | 29  |
| 1844720  | 1904399  | 4629132  | 3073327  | 4478336  | 2144145  |              | 2   |
| 949436.5 | 2260550  | 1390779  | 940369.9 | 1550259  | 2337344  | [M+K]+ 21    | 21  |
| 2416645  | 2236536  | 1116670  | 2006386  | 2364832  | 2892422  | [1543][M]+   | 9   |
| 2115598  | 2259166  | 256727.5 | 2314632  | 5788304  | 1407318  |              | 4   |
| 945961.9 | 760858.7 | 450215.1 | 783585.5 | 468735.5 | 673291.1 | [1520][M]+   | 485 |
| 404004.8 | 883121.3 | 478469.4 | 1444092  | 1138522  | 542825.2 |              | 9   |
| 436695   | 515821.3 | 7905235  | 3804142  | 7374776  | 7647049  | [M+H-CO2]    | 6   |
| 1897178  | 1869717  | 2695586  | 1510766  | 3434604  | 3663611  |              | 2   |
| 1277764  | 817856.8 | 1007747  | 1368977  | 880859.5 | 454880.5 |              | 147 |
| 3055642  | 3793389  | 3289191  | 3474088  | 4361340  | 3015369  |              | 11  |
| 1075923  | 100944.2 | 1228062  | 1562749  | 866226.5 | 0        | [M+2Na]2+    | 13  |
| 1112432  | 788902   | 499907.3 | 487424.8 | 850239.2 | 172912.9 |              | 9   |

|          |          |          |          |          |          |                                                          |     |
|----------|----------|----------|----------|----------|----------|----------------------------------------------------------|-----|
| 1974187  | 2805097  | 1573781  | 1561161  | 1344366  | 976051.5 | [M+H] <sup>+</sup> 77                                    | 8   |
| 2987016  | 2370966  | 2289522  | 3113676  | 1282123  | 2164779  | [1111][M+1] <sup>+</sup>                                 | 150 |
| 2717136  | 2512941  | 1084933  | 191188.9 | 1569078  | 1158046  | [M+K] <sup>+</sup> 27                                    | 39  |
| 5045082  | 3996200  | 4007923  | 2915692  | 3632437  | 2048678  | [1057][M] <sub>2</sub> [M+H+K] <sub>2</sub> <sup>+</sup> | 42  |
| 5721914  | 3697017  | 4563595  | 5123380  | 4691228  | 2549184  |                                                          | 2   |
| 547578.7 | 357032.3 | 636940.6 | 165671.2 | 535778.4 | 392612.8 | [M+K] <sup>+</sup> 33                                    | 18  |
| 12707930 | 11034894 | 11339288 | 9824951  | 10115021 | 5932400  | [1251][M+1] <sup>+</sup>                                 | 10  |
| 1486905  | 1737295  | 894393.4 | 530379.9 | 901775.4 | 2094592  |                                                          | 15  |
| 3375709  | 3083975  | 2676355  | 4197700  | 581268   | 2662381  | [M+H-CH <sub>2</sub> ]                                   | 346 |
| 564316.4 | 780951.5 | 515423.1 | 328890.2 | 342158.8 | 438732.5 |                                                          | 4   |
| 1720101  | 2565767  | 1759986  | 1155016  | 3226647  | 122091.9 |                                                          | 1   |
| 10281051 | 6183787  | 8077703  | 9417155  | 5558815  | 2146521  |                                                          | 2   |
| 3593952  | 2481638  | 3328018  | 3450090  | 2091273  | 57570.54 | [1350][M+1] <sub>2</sub> <sup>+</sup>                    | 2   |
| 1485102  | 3095243  | 1103943  | 1026736  | 4004769  | 122689   |                                                          | 1   |
| 7659474  | 9289387  | 1900270  | 9324779  | 8495560  | 4963037  |                                                          | 15  |
| 2387692  | 4032670  | 5171059  | 2733725  | 4363420  | 6665050  |                                                          | 2   |
| 29161.2  | 74738.77 | 543972.9 | 273699.2 | 193616.1 | 105431.2 |                                                          | 288 |
| 18304573 | 12407025 | 16317798 | 10955637 | 13256651 | 4937994  | [1284][M+2] <sup>+</sup>                                 | 1   |
| 4905924  | 3121431  | 4503225  | 2124091  | 3615824  | 4267733  | [1150][M+2] <sub>2</sub> <sup>+</sup>                    | 2   |
| 4246738  | 4967320  | 4499082  | 3579023  | 3121300  | 3943796  |                                                          | 4   |
| 2493682  | 19430414 | 2408888  | 3573189  | 37847574 | 26350718 |                                                          | 2   |
| 2694716  | 1414703  | 2845847  | 1421171  | 2135066  | 1003600  | [798][M+1] <sup>+</sup>                                  | 44  |
| 31943871 | 12077032 | 6420002  | 10698554 | 34046305 | 13933656 |                                                          | 3   |
| 6021021  | 9474113  | 5456297  | 1151195  | 4115792  | 4257342  |                                                          | 3   |
| 1779844  | 1322554  | 95231.59 | 692193.3 | 1138153  | 330924.2 |                                                          | 52  |
| 4255925  | 5078239  | 2320641  | 3669848  | 4321577  | 2518612  |                                                          | 9   |
| 851881.2 | 1648271  | 1823362  | 2120160  | 1416556  | 2922019  |                                                          | 9   |
| 6244706  | 6059491  | 4962204  | 4202885  | 4759140  | 2043482  | [863][M+3] <sup>+</sup>                                  | 1   |
| 5543413  | 5931090  | 6034506  | 6905902  | 4382198  | 743149.7 | [M+H+CF <sub>3</sub> O]                                  | 195 |
| 1684258  | 1620973  | 1405805  | 662363.3 | 1528751  | 565132.4 | [1510][M+1] <sup>+</sup>                                 | 4   |
| 1565156  | 1520827  | 3037425  | 1501463  | 1790416  | 1818911  | [M+H-CH <sub>4</sub> ]                                   | 314 |
| 7055375  | 3950423  | 2953115  | 4771608  | 5672243  | 2111132  |                                                          | 9   |
| 388670.2 | 291502.6 | 207913.3 | 174231.6 | 188771.7 | 455047.7 | [929][M+1] <sup>+</sup>                                  | 72  |
| 1012590  | 1246076  | 1000614  | 754348.4 | 1120999  | 928063.2 |                                                          | 4   |
| 346038.8 | 281880.8 | 335981.1 | 150890.5 | 133974.5 | 381536   | [1143][M+1] <sup>+</sup>                                 | 110 |

|          |          |          |          |          |          |                          |     |
|----------|----------|----------|----------|----------|----------|--------------------------|-----|
| 5347256  | 4967204  | 4963880  | 5860961  | 4687834  | 1866328  |                          | 202 |
| 1014153  | 769463.7 | 90496.33 | 189026.5 | 104052.3 | 614046.7 |                          | 30  |
| 1373930  | 1909711  | 1304316  | 345752.5 | 1282085  | 441699.2 |                          | 15  |
| 1225694  | 1052608  | 720720.1 | 724287.7 | 907511.2 | 658063.8 | [M+2H] <sup>2+</sup>     | 62  |
| 22968776 | 13039925 | 24668975 | 20742585 | 8429303  | 10269471 | [494][M] <sup>+</sup>    | 240 |
| 359751.3 | 897434   | 2688224  | 1373841  | 772205.8 | 660766   | [753][M+1] <sup>3+</sup> | 4   |
| 1854623  | 1118919  | 2286838  | 904474   | 3131566  | 832303.1 |                          | 1   |
| 2463761  | 586651.4 | 698576.5 | 1955001  | 108962.9 | 18847.33 |                          | 491 |
| 1007124  | 4611120  | 2665853  | 3443553  | 6034015  | 2470125  |                          | 208 |
| 10264292 | 11706289 | 11238843 | 8149742  | 8112703  | 4276573  |                          | 1   |
| 570462.5 | 779312.8 | 549198.8 | 688236.4 | 659154   | 577953.4 | [M+H] <sup>+</sup> 51!   | 134 |
| 3446159  | 4289730  | 2864250  | 1631239  | 3159007  | 2054090  |                          | 2   |
| 11350203 | 15054866 | 11280777 | 10785934 | 15557914 | 16643873 |                          | 2   |
| 1877685  | 2227075  | 1457925  | 713273.8 | 988709.3 | 612103.7 | [M+K] <sup>+</sup> 32!   | 6   |
| 266943.5 | 263708.6 | 256256.4 | 243563.1 | 131900.7 | 159759.7 |                          | 61  |
| 11284815 | 1085836  | 3817565  | 7958930  | 4566904  | 4886011  |                          | 15  |
| 664269.1 | 1373242  | 32989533 | 12843766 | 17612576 | 12213270 |                          | 9   |
| 4701472  | 4093650  | 4490855  | 2841991  | 3960474  | 1560045  |                          | 2   |
| 9665453  | 2339630  | 8976510  | 2534314  | 2200625  | 5008025  |                          | 4   |
| 538840.2 | 715121.2 | 303773.4 | 922734.2 | 893725.4 | 1004864  | [M+Na] <sup>+</sup> 2!   | 72  |
| 12995573 | 11960572 | 12295875 | 10451071 | 10685759 | 12588050 |                          | 2   |
| 17451562 | 8922138  | 7377830  | 8701791  | 8770715  | 6279102  |                          | 307 |
| 8360078  | 7414873  | 6364278  | 7701953  | 3984007  | 8675201  |                          | 62  |
| 1739992  | 1591709  | 1518911  | 1626449  | 1606030  | 3192308  | [502][M+3] <sup>3+</sup> | 2   |
| 3948121  | 2518450  | 3094965  | 3255087  | 2366511  | 1871821  |                          | 2   |
| 16351355 | 26066580 | 997931.4 | 3253471  | 11523439 | 2302030  | [3M+2Na] <sup>2</sup>    | 5   |
| 49773845 | 371835.4 | 56610664 | 604693.1 | 668899.5 | 341717.1 |                          | 83  |
| 2090588  | 3781993  | 1814672  | 136855.6 | 688006.9 | 2419569  |                          | 18  |
| 837292.1 | 243497.7 | 490764.6 | 608211   | 586708.4 | 274515.5 | [M+2H] <sup>2+</sup>     | 38  |
| 191945.9 | 161147.1 | 256676.7 | 212399.3 | 147272.5 | 222693.7 | [M+Na+HC                 | 28  |
| 1799264  | 3114146  | 2000823  | 1056116  | 1577704  | 329990   |                          | 1   |
| 1873469  | 1158272  | 677034.6 | 1518353  | 2967202  | 929345.6 |                          | 3   |
| 3342362  | 3310401  | 3488626  | 2831945  | 3223715  | 2822568  | [M+H] <sup>+</sup> 31!   | 356 |
| 150034.4 | 207359   | 188504.2 | 224344.1 | 204691.5 | 123657.8 |                          | 112 |
| 866154.2 | 570143.8 | 264739   | 610354.8 | 486669.6 | 18889.11 | [670][M] <sup>3+</sup>   | 77  |

|          |          |          |          |          |          |                    |     |
|----------|----------|----------|----------|----------|----------|--------------------|-----|
| 8756517  | 10581810 | 9251351  | 2819380  | 7119086  | 1887446  |                    | 1   |
| 344648.8 | 176963.6 | 144883.6 | 0        | 150831   | 257032.4 |                    | 243 |
| 2788339  | 3533028  | 535505.1 | 89601.47 | 1357431  | 2117177  |                    | 18  |
| 193531.6 | 196715.6 | 3455359  | 3312615  | 4063219  | 2790647  |                    | 146 |
| 3555388  | 3261233  | 3565949  | 3336478  | 3590825  | 3571221  | [965][M]+ [M+H+NH3 | 83  |
| 401589.5 | 400662   | 159781.9 | 229146.4 | 97944.06 | 344843.2 |                    | 69  |
| 4983868  | 4550110  | 7366977  | 4504830  | 6541325  | 5337498  |                    | 2   |
| 8293022  | 7405489  | 6141956  | 6285762  | 8214454  | 6625113  | [439][M]2+         | 2   |
| 5335631  | 253095.7 | 6357089  | 4372316  | 3299623  | 3501178  | [M+Na+3K           | 46  |
| 1253883  | 1392328  | 1215739  | 574878.7 | 2111454  | 0        |                    | 1   |
| 301953.9 | 1146073  | 800801.5 | 1342722  | 906679.7 | 1966832  | [M+K]+ 30          | 33  |
| 1.99E+10 | 1.39E+10 | 1.19E+10 | 9.71E+09 | 7.8E+09  | 8.81E+09 | [794][M+1]+        | 1   |
| 7879944  | 5842405  | 5075269  | 4395959  | 3226276  | 4430413  | [76][M]+           | 287 |
| 7705615  | 9534523  | 7715887  | 4186903  | 8097760  | 1648435  |                    | 1   |
| 15871643 | 16833775 | 15044441 | 1943809  | 3625010  | 1466707  |                    | 4   |
| 25027767 | 9345695  | 5747739  | 10117021 | 5349737  | 5796612  |                    | 90  |
| 5634197  | 5375160  | 2893459  | 5446242  | 3287151  | 1204462  | [1044][M+2]+       | 13  |
| 469961.5 | 490408.9 | 459328.3 | 208945.6 | 264213.9 | 306767.9 | [M+2H]2+           | 100 |
| 424633.9 | 315834.9 | 391908.7 | 540750.9 | 466179.5 | 460431.9 |                    | 514 |
| 5191729  | 7264128  | 4987286  | 2509079  | 4722475  | 2878784  | [M+K+NH3           | 41  |
| 313053.2 | 0        | 131406.6 | 196380.9 | 348601.9 | 412107   | [1450][M+1]+       | 38  |
| 1479031  | 2251577  | 2408347  | 1116943  | 1404592  | 2000238  |                    | 4   |
| 3030892  | 4633198  | 2191559  | 1765922  | 2886683  | 1194719  |                    | 2   |
| 2790342  | 1375958  | 2181644  | 625849.8 | 1304329  | 821152   | [3M+H+K]2          | 6   |
| 6079319  | 2061622  | 6795205  | 7218686  | 6080328  | 3941252  | [M+K]+ 35          | 314 |
| 6122209  | 4191776  | 4100552  | 3381563  | 4484723  | 1062756  |                    | 1   |
| 247117.8 | 865976.6 | 781758.9 | 602310.4 | 575075.3 | 972697.5 |                    | 9   |
| 5981328  | 2984989  | 3179043  | 2117521  | 3140645  | 3016422  |                    | 421 |
| 9156736  | 6511623  | 4389514  | 7553610  | 5809991  | 2159812  |                    | 9   |
| 430421.9 | 431507.6 | 0        | 257450.3 | 168801.1 | 433617.8 | [M+H]+ 51          | 5   |
| 1241136  | 111686.1 | 1271627  | 1284973  | 790001.9 | 555265.7 |                    | 9   |
| 0        | 186851.6 | 95187.31 | 18170.13 | 211482.1 | 392489.8 | [M+Na+CF           | 18  |
| 21268102 | 29670999 | 12830461 | 24251792 | 33971402 | 12051296 | [M+Na]+ 3          | 93  |
| 1123037  | 883021.7 | 357855.1 | 1108677  | 724396.6 | 0        |                    | 9   |
| 3589515  | 159600.7 | 5898201  | 3558412  | 1548903  | 5480742  | [M+Na]+ 2          | 8   |

|          |          |          |          |          |          |              |     |
|----------|----------|----------|----------|----------|----------|--------------|-----|
| 5586113  | 2763221  | 4757720  | 5467228  | 5165335  | 2424067  |              | 2   |
| 277352   | 108438.6 | 1061644  | 854566.1 | 351355.3 | 1079547  |              | 6   |
| 5750939  | 5215259  | 5241486  | 4869222  | 5116240  | 5354382  |              | 407 |
| 2470471  | 671453.8 | 1179444  | 1439974  | 1524875  | 1163920  |              | 4   |
| 16679749 | 14631397 | 17688415 | 8328720  | 10554444 | 2255307  |              | 1   |
| 2494039  | 4466564  | 4437398  | 5746111  | 3468925  | 2337645  | [M+H-H2O]    | 288 |
| 11028900 | 1936226  | 2509924  | 2674946  | 1182125  | 2346711  |              | 3   |
| 3155109  | 4466653  | 3125146  | 1543917  | 3803974  | 2866010  | [3M+H+Na     | 3   |
| 3279018  | 3277978  | 4189036  | 787519.8 | 2052731  | 2905029  |              | 15  |
| 7401409  | 9375357  | 6783151  | 4819408  | 7548619  | 589657.6 |              | 1   |
| 404218.4 | 775036   | 712845.1 | 1032028  | 539321.5 | 1001263  | [61][M+1]+   | 4   |
| 1399026  | 3702154  | 1722303  | 1847165  | 2618672  | 4123031  |              | 2   |
| 204157.1 | 129567   | 257792.7 | 149610.8 | 226750.6 | 6195364  |              | 74  |
| 2769568  | 2508282  | 1841072  | 1705217  | 1909527  | 2650518  | [851][M+1]+  | 4   |
| 5063933  | 5215893  | 3200131  | 3189395  | 3640293  | 1900252  |              | 9   |
| 1569473  | 21262689 | 1631306  | 2130237  | 1269774  | 2168801  |              | 2   |
| 720447.8 | 172489.9 | 436487.1 | 175657.2 | 433179.2 | 50738.33 |              | 67  |
| 36558451 | 3734381  | 2578064  | 1441705  | 3347433  | 4399395  | [651][M]+    | 127 |
| 3406898  | 12761014 | 11718238 | 3090232  | 11930698 | 11215471 |              | 341 |
| 12394720 | 10347060 | 1206119  | 8908685  | 12761962 | 8094970  | [M+H]+ 60!   | 11  |
| 727571.5 | 944860.1 | 102463.6 | 319332   | 660111.6 | 256585.6 | [M+Na+HC     | 46  |
| 815573.8 | 306129.7 | 496811.2 | 296330.3 | 564590.6 | 104397.7 |              | 4   |
| 3501501  | 2608225  | 1913071  | 3241946  | 2333665  | 1131824  | [1086][M+1]+ | 1   |
| 2021214  | 177093.6 | 307918   | 2245243  | 1541685  | 472580.8 |              | 52  |
| 760990.7 | 443168.6 | 251579.6 | 657736   | 304502.6 | 400335.6 | [M+H-CH3]    | 23  |
| 505457   | 536201   | 564913.1 | 614742.8 | 348552.3 | 150532.3 | [M+H+NH3     | 23  |
| 717922.9 | 36197.79 | 1243897  | 740286   | 640733   | 438479.7 |              | 9   |
| 7064023  | 5247357  | 9117278  | 5069627  | 2551726  | 8318533  | [566][M]+    | 240 |
| 5301106  | 5710516  | 50671458 | 46092405 | 53422197 | 89296328 |              | 4   |
| 458406.8 | 165372.7 | 142980.9 | 190502.5 | 220723.3 | 44784.09 | [3M+2Na+I    | 110 |
| 7453688  | 5953507  | 7192807  | 5833153  | 4873291  | 1030513  | [1623][M+1]+ | 2   |
| 9992804  | 7504039  | 16498599 | 5825991  | 10164127 | 6570383  | [1393][M+1]+ | 47  |
| 5685678  | 5308725  | 5300248  | 974149.2 | 5111287  | 5092155  |              | 439 |
| 24258455 | 21075777 | 24507859 | 21954369 | 15318224 | 12876219 | [M+H]+ 30!   | 112 |
| 7372574  | 8042907  | 2376743  | 3489920  | 8158359  | 3498149  | [M+H-CO]+    | 3   |



|          |          |          |          |          |          |               |     |
|----------|----------|----------|----------|----------|----------|---------------|-----|
| 792533.8 | 363247.7 | 363334.4 | 280592.1 | 278855.4 | 9456.076 |               | 86  |
| 641899.2 | 1203129  | 15151583 | 11342812 | 1114608  | 4357815  |               | 9   |
| 6001793  | 4568453  | 3579329  | 3267248  | 3876581  | 2183176  | [225][M]+     | 9   |
| 462639.3 | 228999.9 | 125483.5 | 166027.8 | 348940.7 | 246257.1 | [3M+3K-H]     | 16  |
| 5720855  | 4443323  | 4011306  | 3191134  | 3071648  | 0        |               | 2   |
| 3209943  | 1595768  | 146937.6 | 1731449  | 1779088  | 228150   |               | 1   |
| 4731205  | 3521111  | 6099632  | 3731407  | 1746922  | 5254537  | [886][M]+     | 218 |
| 3905953  | 2571588  | 2967048  | 4303113  | 5642977  | 3245782  |               | 2   |
| 20024455 | 20410927 | 1.51E+08 | 1.97E+08 | 3985382  | 66680167 |               | 1   |
| 332110.6 | 138220.2 | 117905.8 | 484651.3 | 225849.9 | 87568.59 | [1593][M+1]+  | 154 |
| 4961197  | 4824960  | 4876336  | 3929321  | 5758902  | 3402713  |               | 356 |
| 853217.6 | 357241.6 | 483254.5 | 458248.5 | 525816.4 | 219537.9 | [1115][M+1]2+ | 35  |
| 31674837 | 35938652 | 237604.8 | 1642754  | 25553280 | 25058261 |               | 173 |
| 6226677  | 4093036  | 5198649  | 5776807  | 4088612  | 4635660  | [1399][M]+    | 235 |
| 1937727  | 1.57E+09 | 1636468  | 1.14E+09 | 1.55E+09 | 1.32E+09 | [2M+Na+K-     | 3   |
| 181272.5 | 98302.94 | 77285.79 | 0        | 156215.9 | 155281.5 |               | 18  |
| 7201171  | 8576908  | 6609787  | 7055957  | 5663032  | 6957285  |               | 190 |
| 3685604  | 3835863  | 549212.2 | 975996.8 | 4651998  | 1715173  | [3M+2H]2+     | 3   |
| 5237607  | 3421707  | 967072.1 | 3685986  | 3205975  | 5183875  | [M+H-CO]+     | 323 |
| 2183855  | 1811423  | 1422630  | 1242835  | 1700755  | 870789.9 |               | 1   |
| 905512.6 | 66331.76 | 993313.5 | 190092.1 | 58442.72 | 1687135  |               | 111 |
| 7457257  | 4488647  | 1535368  | 4663970  | 5248358  | 616892.8 |               | 1   |
| 2733295  | 940360.9 | 1693528  | 1640635  | 946337.8 | 0        | [1576][M+1]3+ | 2   |
| 655310.8 | 100222.2 | 892157.4 | 699252.3 | 575537.9 | 172589.4 |               | 9   |
| 574122.9 | 1324590  | 766208.5 | 1928319  | 1307466  | 3110002  |               | 8   |
| 30359766 | 22844886 | 17150196 | 27463857 | 23907023 | 8218359  | [M+Na+CF:     | 13  |
| 199101.4 | 695397.4 | 229931   | 198666.8 | 451845.5 | 1230551  |               | 9   |
| 993508.1 | 1171160  | 1188658  | 753373.1 | 813979.9 | 511845.6 |               | 9   |
| 2547882  | 1857684  | 2318687  | 2066175  | 1437488  | 2259134  |               | 2   |
| 222997.6 | 218649.3 | 218034   | 112491.1 | 171560.1 | 294901   | [2M+Na+2I     | 28  |
| 4271265  | 1584686  | 2331402  | 3745486  | 2461878  | 2838230  | [1320][M+2]+  | 2   |
| 450078.9 | 178880.2 | 285120.1 | 456788.1 | 251798.6 | 216235   | [889][M+1]+   | 28  |
| 14289134 | 4563725  | 3963124  | 4389435  | 15966847 | 7247993  | [M+3H-NH:     | 3   |
| 17944908 | 21398513 | 29348873 | 8146909  | 20918926 | 18100275 |               | 1   |
| 340133.3 | 188150.6 | 299481.8 | 135188   | 165261.3 | 187481.3 | [1520][M+1]+  | 485 |

|          |          |          |          |          |          |                     |     |
|----------|----------|----------|----------|----------|----------|---------------------|-----|
| 1555237  | 1917833  | 1183426  | 1289022  | 1351802  | 1190013  | [1034][M]3+         | 9   |
| 14485104 | 4778081  | 1777941  | 11166841 | 2837819  | 10358702 |                     | 1   |
| 6501697  | 4405347  | 5968119  | 3944095  | 5938915  | 2626305  |                     | 2   |
| 1725097  | 2146630  | 714761.2 | 62918.75 | 1035417  | 1161881  | [3M+H]+ 2:          | 18  |
| 9610180  | 15955779 | 10660311 | 7913129  | 8842704  | 4972555  |                     | 15  |
| 640277.2 | 735258.2 | 361271.1 | 286217.7 | 379052.5 | 333176.5 | [M+H]+ 10:          | 62  |
| 943496.8 | 1186129  | 874484.1 | 613739.7 | 798987.1 | 786583.3 |                     | 81  |
| 6541761  | 1229721  | 1881702  | 3820354  | 4733343  | 1336382  | [M+K+NH3            | 15  |
| 1507413  | 426269.3 | 542269.8 | 573468.5 | 965786.7 | 645185.9 | [M+H+K]2+           | 5   |
| 31353453 | 31173202 | 27029125 | 27812235 | 27021577 | 25787268 |                     | 221 |
| 382319.8 | 1090186  | 11469288 | 9370806  | 878158.3 | 2949784  |                     | 8   |
| 701234.6 | 80389.36 | 1005367  | 385705.7 | 596039.9 | 53545.93 | [1095][M+1]2+       | 7   |
| 468441.9 | 533474.2 | 448923.5 | 0        | 450853.8 | 336742.2 | [M+H-C2H4           | 46  |
| 37574145 | 8191717  | 104127.1 | 51532.96 | 910908   | 3207563  |                     | 215 |
| 504624.2 | 435185.3 | 418809.3 | 173333.2 | 378340.4 | 136627.5 |                     | 94  |
| 4270815  | 4906480  | 3941404  | 3776172  | 4446583  | 2940105  | [103][M]+           | 9   |
| 26214957 | 18158453 | 18247512 | 23749598 | 7620344  | 6595399  | [1099][M]+ [M+H+NH3 | 134 |
| 584172.5 | 547516   | 569490.1 | 368797.7 | 551674.2 | 436181.6 |                     | 4   |
| 9154277  | 3028228  | 3147729  | 614312.4 | 2865062  | 3208310  |                     | 190 |
| 2038702  | 2820245  | 2372709  | 2239855  | 1715777  | 2387825  |                     | 7   |
| 9526918  | 557367.1 | 12183936 | 4689712  | 873209.9 | 9035935  | [M+2Na+2I           | 6   |
| 323710.7 | 201925.8 | 451530.5 | 91810.97 | 279578.5 | 23681.68 |                     | 47  |
| 1781678  | 1115453  | 1913475  | 140257.8 | 1196966  | 157968   |                     | 1   |
| 6383263  | 10782387 | 6513703  | 18033303 | 7418772  | 5971324  |                     | 194 |
| 1965041  | 3408984  | 2421448  | 1978151  | 1698639  | 1387063  | [M+Na+HC            | 46  |
| 2.36E+09 | 1.58E+09 | 1.42E+09 | 1.03E+09 | 2.11E+09 | 1.17E+09 | [754][M]3+          | 1   |
| 9783064  | 2646327  | 1050615  | 14238144 | 3072778  | 6964194  | [117][M]+           | 16  |
| 3503943  | 1653800  | 3752222  | 3198098  | 807526.3 | 1409433  | [494][M+1]+         | 240 |
| 6666934  | 6079067  | 5504538  | 3548975  | 6250532  | 2857073  | [M+K+NaCl           | 15  |
| 3391711  | 6710059  | 6096849  | 6290156  | 6651042  | 8740856  |                     | 337 |
| 827878.6 | 1333985  | 582001.2 | 278010   | 880081.8 | 384988.8 |                     | 89  |
| 2803727  | 1510121  | 2800229  | 2294410  | 925147.5 | 2199375  | [M+H]+ 21:          | 6   |
| 364443.4 | 245348.6 | 60736.28 | 250005.7 | 352371.4 | 94117.78 | [1330][M+1]2+       | 16  |
| 4228924  | 4112706  | 3249989  | 2763531  | 3265754  | 2028790  |                     | 232 |
| 22541690 | 2011060  | 6497930  | 24729899 | 16589831 | 2879004  | [1245][M+1]3+       | 2   |

|          |          |          |          |          |          |                    |     |
|----------|----------|----------|----------|----------|----------|--------------------|-----|
| 410324.8 | 92380.39 | 152457.5 | 281449.9 | 194180.4 | 144540.9 |                    | 247 |
| 3609780  | 866563.6 | 1531069  | 1496716  | 2007604  | 4616215  |                    | 1   |
| 36640738 | 25875201 | 39121081 | 41867034 | 49852485 | 96990359 | [950][M]+ [M+H+HCC | 15  |
| 4114088  | 213072.8 | 184429.6 | 177494.1 | 58447.2  | 1830531  |                    | 319 |
| 6242994  | 23503662 | 26528128 | 25048566 | 31076180 | 67225097 |                    | 2   |
| 3145138  | 2390479  | 2587714  | 2476085  | 2488505  | 2604106  |                    | 202 |
| 757065.1 | 2175012  | 1386042  | 936681.2 | 1773910  | 1420140  |                    | 4   |
| 7142203  | 5516981  | 5930387  | 3099844  | 5529893  | 1066890  |                    | 1   |
| 251530.7 | 261746   | 1611254  | 1426073  | 1675654  | 900236.3 |                    | 256 |
| 121173.8 | 776027.4 | 927841.6 | 817960.2 | 302452.3 | 600268.1 |                    | 507 |
| 7450724  | 25433456 | 44008642 | 12963590 | 32351970 | 14710142 | [21][M]3+          | 15  |
| 14375104 | 4802762  | 9799666  | 3215191  | 10219023 | 2111838  |                    | 1   |
| 8344437  | 1934434  | 1481089  | 2077017  | 1124877  | 4041876  |                    | 165 |
| 2364669  | 3005598  | 2958097  | 1722416  | 2106064  | 685608.4 |                    | 9   |
| 1098681  | 3734423  | 709970.8 | 1114666  | 1443080  | 2543371  |                    | 49  |
| 1572737  | 102960.3 | 2842374  | 1280596  | 1681478  | 1566225  |                    | 13  |
| 1829830  | 2822700  | 2422529  | 2508036  | 2893261  | 3489650  |                    | 2   |
| 1150092  | 0        | 373109.8 | 445889.5 | 1290655  | 1540442  | [M+2K-H]+          | 13  |
| 3172989  | 4235336  | 4244420  | 3475957  | 5016835  | 2674479  | [1610][M+1]2+      | 2   |
| 5194508  | 5308250  | 4779122  | 4751197  | 4944594  | 3310662  |                    | 226 |
| 5082079  | 506895.3 | 4989608  | 3683489  | 4846292  | 620417.6 |                    | 2   |
| 780413.7 | 1048960  | 591881   | 505652.9 | 782699.8 | 304091   |                    | 9   |
| 582083.8 | 510470.8 | 326200.2 | 142177.4 | 94740.57 | 365593.9 |                    | 282 |
| 24298275 | 17531864 | 15642092 | 23102116 | 20737496 | 8928142  | [1207][M]+         | 2   |
| 1592818  | 3486038  | 3495536  | 1062711  | 2072451  | 2056412  | [345][M+1]3+       | 20  |
| 5767765  | 4967515  | 3769138  | 2316685  | 3055563  | 2800500  |                    | 4   |
| 4763574  | 2667205  | 4302370  | 4243575  | 2823518  | 1264525  |                    | 110 |
| 6644739  | 6687839  | 6396213  | 5660690  | 5844756  | 3180961  | [M+2H]2+ !         | 23  |
| 2184539  | 1823657  | 1737356  | 2210996  | 2162597  | 1591561  | [973][M+1]+        | 9   |
| 3160941  | 757571.2 | 1964987  | 2763711  | 455618.6 | 2212844  | [M+K]+ 146         | 14  |
| 387002.7 | 1219073  | 842323.7 | 453614.2 | 691467.2 | 311247   |                    | 9   |
| 238203   | 721950   | 304391.5 | 206206.6 | 281410.1 | 658731.9 |                    | 4   |
| 1264558  | 1163553  | 1587341  | 642078.7 | 718932.3 | 194810.8 | [2M+2Na+;          | 13  |
| 7002431  | 5173754  | 10518730 | 6057756  | 6603958  | 1486550  |                    | 1   |
| 318892.5 | 154666.6 | 392813.3 | 307776.7 | 105419.9 | 205324.3 |                    | 168 |

|          |          |          |          |          |          |                    |     |
|----------|----------|----------|----------|----------|----------|--------------------|-----|
| 4417719  | 3756542  | 3337954  | 3088188  | 4038869  | 0        |                    | 2   |
| 507202.6 | 1271250  | 1143206  | 154839   | 196293.5 | 365396.6 | [3M+2K-H]          | 155 |
| 4016773  | 3743390  | 891082.8 | 184449   | 2850849  | 3873659  | [M+K]+ 67:         | 18  |
| 354227.1 | 268057.2 | 133851.4 | 203134.4 | 283295.4 | 167823.5 |                    | 232 |
| 2015944  | 4712636  | 3474508  | 1479770  | 5180817  | 7229665  | [3M+H+K]2          | 97  |
| 7158736  | 5461599  | 1151111  | 1194059  | 6558157  | 5893932  |                    | 1   |
| 576091.6 | 1094360  | 1702982  | 489605.5 | 1162598  | 824051.5 | [M+H]+ 31:         | 39  |
| 885860.7 | 542687.2 | 83894.85 | 0        | 435972   | 399981.6 | [1435][M]2+        | 18  |
| 13520661 | 18716173 | 10940296 | 9089447  | 13514948 | 14738031 | [M+K+HCO           | 15  |
| 7266232  | 6106920  | 1191816  | 3615783  | 5722099  | 6820267  | [751][M+1]+        | 3   |
| 2508492  | 746972.8 | 1033324  | 847447.9 | 1069049  | 792761.2 |                    | 7   |
| 7776035  | 4147995  | 1134635  | 1335211  | 4534533  | 970901.6 |                    | 46  |
| 852640   | 894204.3 | 917394.9 | 446251.6 | 468258.7 | 496090.5 |                    | 9   |
| 6562595  | 7227622  | 6811469  | 6878163  | 7491098  | 6436110  | [M+H+HCC           | 226 |
| 2462856  | 3493618  | 2041253  | 2021419  | 2920974  | 1833230  |                    | 2   |
| 383343.2 | 517385.4 | 712683.2 | 489037.9 | 405085.7 | 289272.4 | [699][M+1]+        | 292 |
| 970622.5 | 1977963  | 1142033  | 1657591  | 880440.8 | 1398816  | [1116][M+1]+       | 101 |
| 133991.7 | 122282.5 | 143245.9 | 161795.2 | 135148.6 | 99967.14 | [1344][M+1]+       | 24  |
| 45075196 | 37609075 | 44712226 | 32436702 | 34262264 | 7560469  | [437][M]+ [M+H-HCO | 16  |
| 5095720  | 3713184  | 3760555  | 2961328  | 3687628  | 3661185  | [M+Na]+ 3:         | 121 |
| 20320197 | 14739157 | 25011346 | 25770151 | 11923676 | 17007991 | [1208][M+2]+       | 2   |
| 820168.4 | 964626.7 | 960620.4 | 800416.9 | 563335.3 | 1018069  | [1481][M+1]2+      | 35  |
| 486170.7 | 4057194  | 3826142  | 382347.8 | 3806444  | 3057609  |                    | 169 |
| 4132245  | 893101.9 | 540995.2 | 1011348  | 395863   | 522849.4 |                    | 473 |
| 4204576  | 1938053  | 2629512  | 2973313  | 3087820  | 694332.9 |                    | 4   |
| 2979535  | 2306846  | 1897419  | 2499506  | 1965426  | 1638867  | [M+Na]+ 3:         | 39  |
| 5425246  | 3638622  | 5157032  | 4138295  | 2796925  | 8022567  | [1348][M+1]2+      | 2   |
| 1135212  | 3015591  | 1480372  | 2070091  | 3813014  | 5168477  |                    | 29  |
| 701374   | 250876.5 | 788247.2 | 404572.6 | 1605568  | 892970.2 | [1583][M+2]2+      | 12  |
| 784562.9 | 986934   | 674248.2 | 420272.7 | 766070.3 | 631467   | [1480][M+1]+       | 89  |
| 348827.7 | 180378   | 324041.8 | 277887.7 | 258356.3 | 187416.5 |                    | 214 |
| 4328963  | 6742501  | 3748449  | 2199925  | 2178476  | 2630394  | [M+H+NH3           | 15  |
| 626633.1 | 655083.4 | 480018.7 | 591423.4 | 425323.8 | 279597.7 |                    | 51  |
| 5225487  | 2829256  | 759527.9 | 4603311  | 2359918  | 2762159  | [M+K]+ 51:         | 6   |
| 5318461  | 14614435 | 14294412 | 14093786 | 13845478 | 13670908 | [M+H-C4H8          | 195 |

|          |          |          |          |          |          |                         |     |
|----------|----------|----------|----------|----------|----------|-------------------------|-----|
| 525625.4 | 90646.68 | 683927.7 | 406747.5 | 497959.1 | 388396.5 | [1598][M+1]+            | 62  |
| 5545463  | 5277508  | 7133123  | 5677258  | 5966384  | 8814221  |                         | 365 |
| 34351300 | 24685620 | 21612205 | 29457698 | 27000460 | 10005626 | [1213][M]+              | 2   |
| 4458449  | 3682437  | 3009064  | 2180339  | 2597160  | 1334294  | [20][M+1]+              | 2   |
| 11726681 | 7188726  | 4633309  | 8509718  | 6952028  | 3255632  | [M+K]+ 37:              | 3   |
| 2755270  | 6884142  | 4804305  | 3282724  | 6155367  | 4771866  |                         | 2   |
| 4128304  | 3939667  | 3875172  | 3868847  | 4034838  | 3081033  |                         | 174 |
| 1.51E+08 | 1.64E+08 | 1.63E+08 | 96014215 | 1.04E+08 | 31882720 | [735][M]3+              | 1   |
| 1823181  | 1437369  | 1051426  | 947496.4 | 1486627  | 376936.8 |                         | 9   |
| 23286756 | 22326319 | 8158169  | 24698455 | 501212.5 | 15430186 | [M+Na]+ 3:              | 86  |
| 7473134  | 787446.3 | 2433909  | 2763508  | 2226942  | 3012547  | [95][M+1]2+             | 2   |
| 2655208  | 1512045  | 1605717  | 2732092  | 2954272  | 2300747  |                         | 4   |
| 205281.6 | 159208   | 264103   | 177063.4 | 253283.6 | 157716.3 | [936][M+1]+             | 486 |
| 627582.7 | 263873.3 | 876485.1 | 796446.6 | 326904.1 | 742001.1 |                         | 345 |
| 2817828  | 2627998  | 2019619  | 2229027  | 2831546  | 1090156  |                         | 9   |
| 5314409  | 2084507  | 2626613  | 1351508  | 1193339  | 920757   |                         | 1   |
| 4196619  | 2928824  | 4189957  | 2871715  | 3482121  | 1180431  | [M+H]+ 38:              | 12  |
| 1221100  | 1144551  | 290508.5 | 799770.7 | 1007865  | 624446.3 |                         | 41  |
| 796320.3 | 594280.6 | 650828.3 | 613982.5 | 564633.6 | 545304   |                         | 27  |
| 570088.8 | 1157245  | 1468140  | 858136   | 973621.6 | 1853008  | [M+K]+ 71:              | 8   |
| 1240506  | 1222603  | 423971.3 | 53796.37 | 648694.8 | 1766744  | [1478][M+2]3+           | 18  |
| 85566.18 | 1664094  | 941556.2 | 939583.6 | 270696.1 | 99985.02 | [M+2H-CH <sub>2</sub> ] | 38  |
| 1093110  | 1040622  | 1292572  | 870248.2 | 668354   | 409913.2 |                         | 68  |
| 230075.2 | 113556.3 | 91023.8  | 107075.3 | 207474.9 | 145218.7 | [1383][M+1]2+           | 16  |
| 2333801  | 3455657  | 2254402  | 2281556  | 3770427  | 0        |                         | 2   |
| 959005.3 | 82749.72 | 957306.7 | 762156.8 | 902996.8 | 134067.4 |                         | 9   |
| 1957309  | 1040150  | 1312295  | 1041430  | 521046.3 | 125459.2 | [509][M]2+              | 476 |
| 127052.8 | 41121.09 | 161335.6 | 120978   | 1481021  | 1054992  | [2M+3Na+I]              | 26  |
| 1320107  | 0        | 1389329  | 1019541  | 1883304  | 948254.5 |                         | 9   |
| 487893.2 | 180904.6 | 322696.6 | 246776.9 | 377872.5 | 182567.3 |                         | 66  |
| 3437376  | 1450486  | 4071610  | 1555646  | 4855551  | 3085015  |                         | 9   |
| 528346.3 | 449328.5 | 457672.6 | 480822   | 498564.6 | 544457.8 |                         | 4   |
| 1775219  | 1626398  | 2063970  | 2200622  | 1799674  | 2165771  | [230][M+1]3+            | 2   |
| 1035403  | 1024463  | 1030093  | 1060191  | 1153147  | 427213.1 |                         | 4   |
| 398734.9 | 542942.7 | 662251.5 | 608567.2 | 274743.2 | 867080.1 |                         | 28  |

|          |          |          |          |          |          |                       |     |
|----------|----------|----------|----------|----------|----------|-----------------------|-----|
| 5330914  | 4508601  | 2798522  | 2711454  | 2344643  | 2672034  | [633][M]+             | 296 |
| 2362682  | 2219274  | 1958218  | 2336792  | 1669061  | 628478.5 | [M+K]+ 220            | 29  |
| 2476518  | 3282754  | 2623344  | 1708149  | 3570431  | 631091.7 |                       | 1   |
| 2768262  | 2579908  | 8.25E+08 | 8.03E+08 | 1.03E+09 | 23536510 |                       | 2   |
| 2077705  | 1377536  | 1361761  | 1792938  | 1491395  | 1472418  | [1493][M]+            | 289 |
| 6166434  | 1828841  | 3254275  | 1683595  | 5551454  | 2402053  |                       | 1   |
| 6006297  | 5956506  | 3155120  | 5508320  | 4969408  | 1977292  |                       | 2   |
| 38410111 | 28222163 | 30586578 | 30808218 | 29251950 | 9722294  |                       | 2   |
| 1944231  | 621858.7 | 324965.1 | 1204956  | 1283502  | 865565   |                       | 4   |
| 3108327  | 2726275  | 2764516  | 2804339  | 1752533  | 1917672  | [1529][M]+ [M+Na]+ 8' | 81  |
| 912609.6 | 699079.7 | 826580.3 | 1130978  | 506565.8 | 581727.2 | [1529][M+1]+          | 81  |
| 6165472  | 4763977  | 4226930  | 6652759  | 5883854  | 5643498  |                       | 420 |
| 1499707  | 687185.6 | 547142.2 | 425260.2 | 807789.7 | 534647.5 |                       | 4   |
| 1.07E+08 | 86284386 | 82393253 | 80009352 | 68260374 | 18361027 | [388][M]+             | 2   |
| 1282013  | 1636752  | 1067105  | 1013115  | 1071811  | 1509014  |                       | 16  |
| 7741512  | 5321949  | 6204202  | 7246685  | 5137485  | 2485433  |                       | 2   |
| 59624082 | 49513709 | 38711834 | 53345301 | 49267984 | 34347590 |                       | 2   |
| 5914471  | 48153696 | 6850850  | 48670626 | 79806628 | 16891071 | [3M+2Na+K]            | 13  |
| 1693908  | 2087659  | 2581448  | 1259440  | 2195423  | 0        |                       | 2   |
| 756998.4 | 0        | 781112.7 | 877487.8 | 883778.8 | 0        | [M+2H-H2O]            | 13  |
| 1002768  | 902984.1 | 155341.9 | 0        | 808613.3 | 319624.2 |                       | 1   |
| 2487311  | 1720894  | 1469473  | 1996148  | 1523970  | 761603.3 | [1139][M]2+           | 2   |
| 337098.5 | 381305.9 | 400719.1 | 383913.3 | 362863.5 | 498360.9 |                       | 137 |
| 11357025 | 10324018 | 9317311  | 9215862  | 12022853 | 0        |                       | 2   |
| 22500260 | 57688469 | 33834980 | 11235319 | 24321376 | 20218247 |                       | 9   |
| 16685616 | 18915472 | 4437453  | 10098748 | 8615265  | 9981658  | [3M+Na+K]             | 3   |
| 1.54E+08 | 1.65E+08 | 1.57E+08 | 1.46E+08 | 1.32E+08 | 1.06E+08 | [256][M]+             | 64  |
| 1924378  | 2405324  | 4060793  | 4416970  | 2487309  | 6094097  | [1185][M]+            | 96  |
| 1554619  | 17895273 | 1440761  | 6693928  | 1639037  | 9894437  |                       | 263 |
| 86705.54 | 361531.5 | 27289.37 | 0        | 169832.6 | 404732.2 |                       | 18  |
| 741652   | 379638.7 | 565058.5 | 342249.2 | 549900.3 | 364141.9 |                       | 57  |
| 5948221  | 5904360  | 6765335  | 3982367  | 4910674  | 885068.5 |                       | 1   |
| 2635585  | 1479922  | 2359971  | 1521146  | 787159.6 | 823760.5 | [2M+Na+K]             | 11  |
| 4224380  | 3513725  | 3615400  | 2443021  | 4281694  | 4237374  |                       | 241 |
| 76468.14 | 10229.3  | 3047891  | 3410445  | 37744.14 | 814932.9 |                       | 440 |

|          |          |          |          |          |          |                      |     |
|----------|----------|----------|----------|----------|----------|----------------------|-----|
| 4954455  | 5431892  | 1090487  | 3596694  | 4646546  | 4697126  |                      | 3   |
| 604781.8 | 649842.3 | 201307.7 | 147574.6 | 355346.9 | 886444.7 | [1469][M+1]3+        | 18  |
| 2718657  | 2758597  | 2610692  | 2630759  | 2466488  | 2614786  |                      | 189 |
| 41675424 | 44776356 | 43089677 | 53468889 | 39181372 | 41000310 | [78][M]+ [M+H]+ 22:  | 159 |
| 578838.1 | 1852365  | 3070124  | 2112931  | 1821831  | 2662261  |                      | 190 |
| 5391568  | 8700392  | 2531405  | 2945140  | 4776929  | 2683990  |                      | 3   |
| 2121745  | 59450.49 | 558896   | 754491   | 668172   | 808487.7 |                      | 9   |
| 1372484  | 81319.42 | 524213.6 | 787128.3 | 1108400  | 597433.5 |                      | 9   |
| 2201491  | 880644.1 | 1245623  | 674930   | 755621.6 | 3458676  |                      | 1   |
| 7548426  | 527012   | 7077922  | 6775830  | 3268081  | 4973740  | [1549][M]+ [M+K+CF3C | 16  |
| 7438422  | 7251944  | 4755388  | 6816783  | 6742398  | 1528147  |                      | 2   |
| 5840548  | 4095086  | 1088204  | 4610530  | 3809686  | 2924178  |                      | 9   |
| 356770.9 | 115295.6 | 311663   | 107006.6 | 291344.5 | 185426.7 | [M+Na]+ 4:           | 134 |
| 288312.8 | 199766.8 | 98872.86 | 181950.9 | 172121.4 | 26171.74 | [1463][M+1]2+        | 65  |
| 1490076  | 3002086  | 15505213 | 15831879 | 2409645  | 6679037  | [M+K]+ 35(           | 14  |
| 957462.9 | 966166.3 | 1582837  | 1389313  | 1134490  | 733284   |                      | 2   |
| 818268.5 | 512419.6 | 962372.3 | 897083.5 | 320246.8 | 637861.4 | [1473][M+2]+         | 220 |
| 145954.6 | 202698   | 174955.6 | 123758   | 132622.7 | 87232.08 |                      | 118 |
| 8452452  | 6158072  | 7982212  | 7393594  | 4951343  | 5224535  |                      | 1   |
| 117630.1 | 887869.4 | 839012.3 | 106982.8 | 408155.4 | 1678967  |                      | 9   |
| 358737.1 | 2.35E+08 | 2.3E+08  | 2.25E+08 | 1.97E+08 | 1.61E+08 | [253][M]+            | 37  |
| 3195628  | 1886239  | 658183.9 | 1539263  | 3437762  | 1526356  |                      | 3   |
| 2822337  | 2691138  | 2639914  | 2742137  | 3618774  | 362515.7 |                      | 1   |
| 13388652 | 11883411 | 6459962  | 10363094 | 10701717 | 3746135  | [M+K]+ 53(           | 14  |
| 4982439  | 5243913  | 3700056  | 3917026  | 7252118  | 3458077  |                      | 1   |
| 569761.6 | 237240.9 | 558551.9 | 376433.1 | 256522.1 | 298164.9 | [M+H+NH3             | 450 |
| 23706199 | 1.18E+10 | 1.12E+10 | 9.78E+09 | 29959424 | 6.42E+09 | [3M+2Na]2            | 5   |
| 7835422  | 7656967  | 7524062  | 4615160  | 4793033  | 9462660  |                      | 390 |
| 190399.8 | 392000.5 | 513581.2 | 334250.2 | 297338.6 | 599719.2 | [M+Na]+ 1(           | 136 |
| 5818351  | 6265721  | 2856867  | 3109200  | 6379068  | 1850519  |                      | 2   |
| 2522467  | 2049480  | 3488168  | 2867161  | 3062275  | 1864761  |                      | 2   |
| 955449.2 | 335717.3 | 1397869  | 649960.8 | 469473.3 | 734250.9 |                      | 476 |
| 1755967  | 2099646  | 1851363  | 404357.1 | 1003528  | 682569.8 | [235][M]3+           | 4   |
| 467484.8 | 545968.2 | 614685.6 | 304262.8 | 396296.8 | 84951.1  |                      | 81  |
| 13607295 | 8465395  | 9583596  | 14843220 | 8600908  | 8963284  | [1210][M+1]+         | 2   |

|          |          |          |          |          |          |                                             |     |
|----------|----------|----------|----------|----------|----------|---------------------------------------------|-----|
| 290510.4 | 752626.7 | 282499.7 | 667242.6 | 593727.3 | 497306.6 |                                             | 48  |
| 4601298  | 6396768  | 6029511  | 6071571  | 8521436  | 5690188  | [M+H] <sup>+</sup> 47:                      | 257 |
| 1809051  | 5829247  | 3068063  | 2849898  | 2907234  | 2715870  |                                             | 341 |
| 2313047  | 673695.4 | 1893756  | 808530.7 | 776859.6 | 169055.3 | [975][M+2] <sup>+</sup>                     | 9   |
| 3587857  | 565318.9 | 2504772  | 2961556  | 515558.9 | 2624732  |                                             | 2   |
| 26780255 | 29403795 | 26627712 | 24937658 | 23388582 | 17855657 | [256][M+1] <sup>+</sup>                     | 64  |
| 3580219  | 2774223  | 2383162  | 2921781  | 2642225  | 873740.9 | [693][M]3 <sup>+</sup>                      | 9   |
| 1327182  | 796463.1 | 1462489  | 1087266  | 116897.7 | 654021.4 |                                             | 72  |
| 1045836  | 1016688  | 898199.5 | 897364.3 | 920429.3 | 709563.6 |                                             | 387 |
| 1896788  | 1305771  | 802011.7 | 1055614  | 1257616  | 1221785  |                                             | 58  |
| 3218140  | 3094972  | 3387368  | 2872989  | 2975636  | 1525764  | [706][M]3 <sup>+</sup>                      | 20  |
| 1339903  | 1506542  | 1099067  | 925659.7 | 837993   | 943876.4 |                                             | 89  |
| 836107.8 | 481809.7 | 286356.7 | 248689.9 | 568670.3 | 255840.8 | [1204][M+1] <sup>+</sup>                    | 436 |
| 5254463  | 2845469  | 5848391  | 1756686  | 1407707  | 2367915  |                                             | 4   |
| 6335804  | 8767112  | 6476204  | 1849191  | 7963905  | 6000450  | [M+H] <sup>+</sup> 17:                      | 15  |
| 2911825  | 2201004  | 1075315  | 1906292  | 2683291  | 944864.5 | [572][M+1] <sup>+</sup>                     | 9   |
| 1097648  | 759491.6 | 577973.8 | 379248.4 | 1041743  | 1501347  | [1472][M+2]3 <sup>+</sup>                   | 38  |
| 25018537 | 25105895 | 856067   | 20298756 | 19791359 | 8583737  | [M+Na] <sup>+</sup> 3:                      | 41  |
| 8122121  | 3535371  | 839848.8 | 7245730  | 8500458  | 2644209  |                                             | 3   |
| 1986066  | 1217489  | 2151976  | 1008096  | 1387898  | 998241.3 |                                             | 1   |
| 127562.8 | 727700   | 263290.9 | 14897.66 | 219853.4 | 849803.4 | [M+H] <sup>+</sup> 68:                      | 18  |
| 824671.7 | 2297798  | 1972457  | 2053053  | 2395645  | 349543.5 | [368][M+1] <sup>+</sup>                     | 77  |
| 488980.9 | 2861851  | 4230645  | 597538   | 6232526  | 7761408  |                                             | 15  |
| 20942626 | 22382175 | 21901239 | 17642258 | 16186805 | 10192018 |                                             | 1   |
| 3681631  | 3166642  | 2732711  | 1667578  | 2090306  | 3529799  |                                             | 164 |
| 5409075  | 3500851  | 3665086  | 5126753  | 1899546  | 970520.9 | [1452][M] <sup>+</sup> [M+H+NH <sub>3</sub> | 42  |
| 19802710 | 13861625 | 13858391 | 11956724 | 14702616 | 4483632  |                                             | 1   |
| 2745074  | 1464160  | 2528012  | 881980   | 766456.6 | 98284.3  | [M+H] <sup>+</sup> 76:                      | 46  |
| 673297.1 | 513880.2 | 798378.1 | 291907.1 | 609641.4 | 952981.6 | [M+Na+K]2                                   | 38  |
| 3032957  | 3970116  | 996459.6 | 351409.4 | 1739275  | 3244590  | [M+Na+CF <sub>3</sub>                       | 18  |
| 27405499 | 18109561 | 12453360 | 18551649 | 24487694 | 7560871  |                                             | 13  |
| 1707664  | 626464.7 | 2.2E+08  | 1.65E+08 | 1.67E+08 | 38956593 |                                             | 27  |
| 2397709  | 647068.4 | 538404.6 | 311618.1 | 386103.7 | 529614.8 |                                             | 4   |
| 871835.4 | 1218454  | 5879276  | 4370275  | 1154989  | 1798973  |                                             | 9   |
| 19994438 | 13744981 | 13907950 | 12071340 | 14381428 | 4520624  |                                             | 1   |



|          |          |          |          |          |          |              |     |
|----------|----------|----------|----------|----------|----------|--------------|-----|
| 22008075 | 17228608 | 3509980  | 26822974 | 23117613 | 8591363  | [M+Na]+ 5:   | 3   |
| 12071282 | 2592407  | 4714791  | 2489402  | 14227611 | 5868998  |              | 1   |
| 3338911  | 2164860  | 2440269  | 3011393  | 2244232  | 0        |              | 2   |
| 1224029  | 871350.8 | 972342.4 | 761930.2 | 741796.9 | 1325209  |              | 4   |
| 9148680  | 5412233  | 9260426  | 8408216  | 578989.2 | 5298817  | [295][M]+    | 126 |
| 972336.4 | 908499.5 | 675163.3 | 742974.4 | 648484.8 | 569982.9 |              | 134 |
| 3498918  | 2681154  | 1045197  | 1338042  | 3574033  | 1320166  | [515][M]3+   | 1   |
| 36932969 | 26748486 | 16463797 | 22742872 | 20127191 | 20198776 | [272][M]+    | 152 |
| 9769890  | 5585510  | 5763805  | 5904271  | 5573705  | 3327253  | [M+Na]+ 10   | 13  |
| 60586302 | 59120668 | 52617487 | 43239559 | 35381831 | 26929432 |              | 1   |
| 3936891  | 9067115  | 5291992  | 1093265  | 6130881  | 5042579  |              | 1   |
| 1068706  | 1685740  | 123889.9 | 137128   | 1605632  | 0        |              | 1   |
| 2289848  | 2263584  | 2445706  | 1423857  | 737745.6 | 2724099  | [698][M+1]+  | 203 |
| 12749209 | 11750049 | 12931877 | 9260127  | 10980944 | 3176211  | [420][M+1]2+ | 12  |
| 52264.74 | 198799.3 | 156208.8 | 365894   | 155047.8 | 480370.8 |              | 62  |
| 322682.8 | 247323.8 | 120556.7 | 166067.6 | 318791.4 | 329057.4 | [1383][M]2+  | 16  |
| 188961.7 | 2943019  | 3884783  | 1279084  | 1792281  | 4226765  | [M+Na]+ 2:   | 116 |
| 3498981  | 2207134  | 2351796  | 3068397  | 2209414  | 1350606  |              | 2   |
| 4781639  | 5203819  | 3276047  | 3328179  | 3268696  | 4407446  | [1484][M]+   | 89  |
| 568707.7 | 247804   | 230491.7 | 343381.2 | 409849.1 | 136031.3 | [1401][M]2+  | 16  |
| 1068755  | 1284668  | 1055446  | 818181.6 | 651919.2 | 949174.5 | [M+Na+HC     | 35  |
| 29439403 | 28109600 | 28416872 | 21824547 | 24290369 | 10538041 | [711][M]+    | 4   |
| 1424961  | 695562.7 | 1588010  | 318863.4 | 1156221  | 523092.2 |              | 4   |
| 5771427  | 3648975  | 2444515  | 3746025  | 2645003  | 3716182  |              | 135 |
| 584507.1 | 686677.2 | 565215.6 | 557051.9 | 450819.7 | 534963.7 |              | 16  |
| 1189292  | 1122108  | 890622.8 | 858515.9 | 893371.7 | 1329563  |              | 7   |
| 8745100  | 6328735  | 6962696  | 7652429  | 6197456  | 6417631  | [1327][M]+   | 150 |
| 3947821  | 3781421  | 685439.7 | 3719703  | 3825916  | 3516425  | [2M+2Na+H    | 15  |
| 4820798  | 3104185  | 1791666  | 2896483  | 1985744  | 2156982  | [272][M+1]+  | 152 |
| 32194165 | 29682779 | 24306993 | 26650762 | 28835668 | 16223917 | [M+Na]+ 3:   | 13  |
| 4530792  | 3825274  | 5591781  | 6409195  | 4143062  | 4630345  |              | 404 |
| 6792415  | 1710011  | 5033790  | 4921391  | 4479923  | 4681142  |              | 202 |
| 4155253  | 3427484  | 2013721  | 3834516  | 7843468  | 3484709  |              | 2   |
| 3819734  | 5186714  | 1509068  | 1011405  | 4436542  | 508355   | [M+2H-C6H    | 15  |
| 358351.7 | 182537.5 | 150148.7 | 189958.2 | 180348.4 | 84654.2  | [1463][M]2+  | 65  |

|          |          |          |          |          |          |                      |     |
|----------|----------|----------|----------|----------|----------|----------------------|-----|
| 3674752  | 5551283  | 3304554  | 1998134  | 4022332  | 476291.4 | [3M+Na+K-            | 15  |
| 2563977  | 1890042  | 3341972  | 2644230  | 2353838  | 860033.4 | [2M+2Na+             | 6   |
| 167305.1 | 106405.3 | 320674.7 | 163066.1 | 318678.2 | 266396.6 |                      | 159 |
| 3767799  | 3606471  | 3103258  | 2301857  | 3016633  | 681687.1 | [M+2H-CH             | 12  |
| 3223651  | 7101849  | 4034252  | 1602555  | 5044548  | 2162971  | [M+Na]+ 3            | 15  |
| 16613878 | 15073163 | 8966321  | 12728840 | 15848627 | 3788076  | [1044][M]+ [M+H-H2O] | 13  |
| 1002337  | 1564039  | 3868514  | 640756.4 | 1526449  | 3224942  |                      | 9   |
| 375987.8 | 272644.2 | 321356.3 | 242858.8 | 347449.5 | 258835.1 | [3M+H+K]2            | 35  |
| 258923.4 | 199377.2 | 142928.7 | 156466   | 88703.95 | 140851.6 |                      | 16  |
| 513890.1 | 500307.3 | 124024   | 256096.8 | 264734.6 | 183216   |                      | 303 |
| 6582429  | 2002911  | 6506850  | 954002.3 | 563830.5 | 3234303  |                      | 4   |
| 198260   | 348274.9 | 419198.6 | 297670.9 | 133350.5 | 305811.4 | [55][M+1]+           | 117 |
| 200234.9 | 285652.9 | 230969.1 | 164355.9 | 407459.5 | 196547   |                      | 255 |
| 4000732  | 3898162  | 3853368  | 2551514  | 4034512  | 5664706  |                      | 191 |
| 5663272  | 4187467  | 3310001  | 4104108  | 7359219  | 922139.5 |                      | 1   |
| 684647.4 | 720294.8 | 769723.7 | 538350.5 | 769863.4 | 596041.9 |                      | 247 |
| 25410738 | 24844610 | 23269129 | 19661082 | 22935707 | 15580011 | [1117][M]+           | 89  |
| 932756.3 | 941809.8 | 1187936  | 1288088  | 1051419  | 589789.4 | [M+K]+ 77            | 16  |
| 5154993  | 1999245  | 4086668  | 1429371  | 2150442  | 3069545  |                      | 1   |
| 2604985  | 1283088  | 2603283  | 2667564  | 808993.2 | 515132   |                      | 450 |
| 5099001  | 3896540  | 3786824  | 3863969  | 4167110  | 3882995  |                      | 323 |
| 2132702  | 11799849 | 2844494  | 68868684 | 9746935  | 49155231 | [M+K+NH3             | 29  |
| 11131426 | 8076175  | 9220240  | 9738985  | 8380509  | 2798701  |                      | 2   |
| 2012602  | 3413581  | 2242196  | 2544082  | 3727127  | 3293086  |                      | 13  |
| 16341707 | 8404241  | 12228643 | 11757122 | 22530275 | 6390816  |                      | 1   |
| 255453.6 | 245262   | 157752.8 | 253729.4 | 108865.7 | 207670.2 |                      | 63  |
| 4506189  | 6429099  | 8306128  | 2541308  | 6701134  | 7127556  | [M+Na+K-t            | 18  |
| 12846080 | 13354781 | 10681434 | 11115711 | 13357894 | 8210365  |                      | 9   |
| 3674571  | 3420293  | 2481128  | 3702897  | 2872371  | 1011195  |                      | 2   |
| 2648779  | 3922862  | 3344144  | 3515746  | 4392463  | 7529349  |                      | 2   |
| 6235523  | 3938621  | 4632370  | 4951189  | 3649056  | 4288783  | [M+H-H2O]            | 398 |
| 5299604  | 5626736  | 5254035  | 4407698  | 4758416  | 2522775  | [1153][M+2]+         | 2   |
| 1544377  | 1225183  | 1731583  | 1361722  | 1407403  | 216505.9 |                      | 1   |
| 1367868  | 1564537  | 1249316  | 1167413  | 1451633  | 764526.6 |                      | 9   |
| 2206124  | 3014346  | 1795711  | 2733843  | 1840191  | 855083.1 |                      | 2   |

|          |          |          |          |          |          |                      |     |
|----------|----------|----------|----------|----------|----------|----------------------|-----|
| 1062897  | 1864169  | 1387127  | 615154.6 | 1499831  | 936253.1 |                      | 332 |
| 496954.6 | 370489.5 | 502684.8 | 365061.5 | 178989.9 | 154868.3 |                      | 57  |
| 1435456  | 1361617  | 1321624  | 1349862  | 3736489  | 0        |                      | 1   |
| 32177601 | 25960007 | 27758850 | 25893685 | 2268093  | 7702339  | [98][M]2+            | 1   |
| 64837511 | 11994094 | 8590279  | 6404782  | 14802091 | 5928161  |                      | 1   |
| 128086.3 | 420517.7 | 2632827  | 1212253  | 194726.1 | 359718.8 |                      | 239 |
| 469666.8 | 518957.8 | 353771.7 | 378304.3 | 408171.4 | 187507.5 |                      | 12  |
| 2933519  | 4026824  | 4428946  | 3965244  | 3724055  | 2345281  |                      | 368 |
| 5356723  | 7930255  | 4399905  | 2488139  | 5314082  | 6367756  | [M+K]+ 38            | 3   |
| 12969775 | 9369795  | 10730996 | 10794340 | 9652699  | 3487229  |                      | 2   |
| 2493093  | 2529759  | 1635393  | 1755148  | 2816182  | 1520210  |                      | 9   |
| 7863517  | 6575712  | 6498534  | 6988302  | 5471223  | 3221154  | [416][M+2]2+         | 2   |
| 1400589  | 1889485  | 2529843  | 1446558  | 1034730  | 941113   |                      | 4   |
| 2078482  | 2614506  | 789855.5 | 196353.1 | 1017420  | 1928693  | [1478][M]3+          | 18  |
| 11441381 | 11531016 | 7219419  | 9388956  | 5205164  | 12938297 | [1182][M]+           | 38  |
| 3730771  | 12456703 | 33096438 | 5573014  | 16481632 | 7573962  | [M+Na]+ 3            | 21  |
| 2112036  | 1218091  | 1462088  | 751211   | 449837.8 | 730776.8 |                      | 4   |
| 2349073  | 1092801  | 1134139  | 1798587  | 2091362  | 921512.7 | [1][M+1]3+           | 9   |
| 307597.7 | 156557   | 383285.3 | 0        | 848746.2 | 666197.5 | [1586][M]2 [2M+3Na+] | 12  |
| 428474.6 | 258186.7 | 562786.3 | 216143.9 | 794616.8 | 798793.1 | [1586][M+1]2+        | 12  |
| 2329710  | 2645141  | 2929124  | 2215516  | 2971959  | 5575592  |                      | 1   |
| 6835116  | 5748894  | 5473089  | 3274637  | 5336847  | 1206312  |                      | 1   |
| 807872.8 | 486810.1 | 815208.8 | 320166.5 | 796767   | 284833   |                      | 510 |
| 3718379  | 2130056  | 2322733  | 3022838  | 3163487  | 1513382  |                      | 4   |
| 149694.8 | 83916    | 139959.9 | 245707.5 | 146404.5 | 130110   | [M+H]+ 70            | 16  |
| 2124070  | 28722343 | 30159275 | 1306447  | 1883985  | 7779767  |                      | 4   |
| 3722599  | 704345.6 | 3791267  | 4557022  | 3792697  | 978879.9 |                      | 295 |
| 203755   | 347467.1 | 138186.9 | 203842.5 | 246755.2 | 246412.8 | [1334][M]2+          | 16  |
| 1360326  | 572147.1 | 776894.9 | 1498530  | 505272.1 | 212752.9 | [1459][M+1]+         | 74  |
| 5057879  | 2391099  | 4050029  | 3982831  | 2826528  | 3791441  |                      | 2   |
| 1093641  | 1120140  | 843805.3 | 1065185  | 696258.7 | 199734.9 |                      | 9   |
| 261570.6 | 415604.6 | 107858.9 | 146591.7 | 337910.4 | 549970.6 |                      | 4   |
| 1909905  | 1453374  | 1980662  | 1593397  | 1168599  | 1268243  |                      | 55  |
| 78363.19 | 22104.95 | 2719932  | 3267942  | 31849.04 | 569220.4 |                      | 345 |
| 4704171  | 3531820  | 2895805  | 3688654  | 3632407  | 3741989  |                      | 307 |

|          |          |          |          |          |          |               |     |
|----------|----------|----------|----------|----------|----------|---------------|-----|
| 2772865  | 4351272  | 2542752  | 3182535  | 904640.1 | 7423745  | [457][M+1]2+  | 2   |
| 4009285  | 3593333  | 2422548  | 2910280  | 5291777  | 5041474  |               | 174 |
| 2778076  | 3531515  | 3427651  | 2665745  | 3373386  | 974041.9 | [1619][M+1]+  | 38  |
| 719202.1 | 648376.9 | 352877.3 | 569623   | 677993.5 | 200905   | [M+H+K]2+     | 134 |
| 1923494  | 1498011  | 1228583  | 958670.2 | 1604365  | 516813.1 | [962][M]2+    | 62  |
| 1276524  | 1248645  | 1009953  | 756331.9 | 902878.6 | 372745.1 |               | 4   |
| 2109233  | 456959   | 2011464  | 1654960  | 2099804  | 473738.3 |               | 2   |
| 2508325  | 3812537  | 432222.9 | 772083.2 | 2039980  | 185422   | [3M+Na+K]     | 3   |
| 8807848  | 6710401  | 3731560  | 2925098  | 6918183  | 5161833  |               | 2   |
| 91601.6  | 602630.1 | 796112.4 | 155405.2 | 585872.8 | 117041.1 |               | 9   |
| 1018167  | 1880502  | 50960184 | 44868324 | 1461598  | 8530789  |               | 9   |
| 19895513 | 18805625 | 20057567 | 18129095 | 18271381 | 17219331 |               | 279 |
| 426351.6 | 745253.6 | 452534.2 | 398302.2 | 478076.7 | 607560.6 | [M+2Na]2+     | 20  |
| 1843713  | 779377.3 | 3793556  | 7842025  | 1341190  | 6358604  | [M+H+HCC      | 46  |
| 18689274 | 28168006 | 21156337 | 16239051 | 18195565 | 13517293 | [852][M+2]+   | 1   |
| 4475024  | 792617.7 | 5055195  | 992129.3 | 2809984  | 447360.3 |               | 2   |
| 14331498 | 10224388 | 9715497  | 10425057 | 6738966  | 6716616  |               | 1   |
| 4449006  | 3746672  | 3494679  | 4615904  | 1516576  | 1640639  | [1099][M+1]+  | 134 |
| 425682.9 | 865826.9 | 7939774  | 5976004  | 1101512  | 1275056  |               | 4   |
| 11379349 | 19059462 | 14218935 | 6730723  | 10682311 | 6520787  | [M+H]+ 39     | 15  |
| 940810.8 | 1219861  | 1030901  | 578220.3 | 715241.7 | 1351450  | [2M+H]+ 1     | 6   |
| 1901581  | 840559.3 | 2510869  | 937218.2 | 1213413  | 130404.8 | [M+Na]+ 3     | 6   |
| 1066955  | 1078125  | 785531.8 | 761782.8 | 729754.9 | 1259343  | [1477][M+1]+  | 38  |
| 8165498  | 5501206  | 7921307  | 8180738  | 5207169  | 7162442  |               | 352 |
| 4333447  | 3971360  | 7563222  | 5958480  | 5563399  | 5150223  | [128][M]+     | 69  |
| 6930059  | 6101629  | 6871362  | 1261690  | 6389562  | 5253928  |               | 311 |
| 294554   | 460425.5 | 0        | 179026.1 | 332378   | 96008.43 | [M+Na]+ 30    | 46  |
| 6064437  | 3570448  | 2899436  | 4338100  | 4859784  | 2096377  |               | 2   |
| 107624.9 | 495902.9 | 320645.7 | 0        | 488429.1 | 1192091  | [1034][M+1]3+ | 9   |
| 1109581  | 1568532  | 1486202  | 812770.4 | 1239058  | 1426143  |               | 4   |
| 7229781  | 6238881  | 5404078  | 7026735  | 6944992  | 1791939  |               | 9   |
| 1256082  | 862261.2 | 1740389  | 1559787  | 668054.5 | 777127.6 | [826][M+1]+   | 318 |
| 1864622  | 1843719  | 2034323  | 2149386  | 3221207  | 1836928  |               | 1   |
| 1002995  | 1856290  | 1949543  | 851853.3 | 1115610  | 1079170  |               | 9   |
| 2479247  | 5342389  | 2639154  | 2213064  | 3006697  | 4342540  |               | 2   |

|          |          |          |          |          |          |               |     |
|----------|----------|----------|----------|----------|----------|---------------|-----|
| 705071.8 | 367753.9 | 381319.1 | 398184.3 | 389253.6 | 186655.5 | [1015][M+1]3+ | 16  |
| 19500887 | 13600555 | 14331493 | 11959379 | 14526601 | 4789640  |               | 1   |
| 1882214  | 1696948  | 966644.8 | 1617458  | 167076.8 | 997931.6 |               | 12  |
| 2540746  | 3695819  | 2448067  | 1072203  | 2176762  | 1254674  | [208][M]2+    | 18  |
| 3091316  | 2466795  | 2658319  | 3080151  | 5096494  | 900012.9 |               | 1   |
| 114555.4 | 70107.43 | 53638.75 | 23635.69 | 75964.41 | 51515.61 | [1041][M+1]+  | 161 |
| 3449446  | 3300331  | 553349   | 114663.4 | 2016714  | 2695330  |               | 18  |
| 4386964  | 3901108  | 2052181  | 4261618  | 4197536  | 4399972  | [M+H-C4H8]    | 189 |
| 2586960  | 1920041  | 1862038  | 1283839  | 1870720  | 132117.1 |               | 1   |
| 353910   | 1877470  | 7510174  | 8998391  | 1681639  | 3108912  |               | 2   |
| 5707005  | 5557638  | 4758148  | 5619471  | 4604942  | 1168732  | [505][M+2]2+  | 2   |
| 2325997  | 2251887  | 1983382  | 1353405  | 1670926  | 688262.7 |               | 46  |
| 0        | 470583   | 118914.4 | 27241.66 | 112345.3 | 386884.1 |               | 20  |
| 680512.2 | 501419.9 | 400249.1 | 549284.5 | 462732.7 | 1355707  |               | 38  |
| 602465.4 | 167485.2 | 355136.9 | 392387.2 | 744887.3 | 569524.7 |               | 9   |
| 777116.1 | 1098138  | 1159065  | 2548907  | 1275241  | 1466821  | [44][M+2]+    | 2   |
| 2116888  | 5793169  | 6188957  | 4297478  | 2261162  | 12230307 | [3M+H+K]2     | 6   |
| 1353267  | 152585.6 | 1530764  | 231340   | 675595.4 | 0        |               | 1   |
| 361808.3 | 241714.8 | 284149.9 | 168373.5 | 276176.5 | 13856.01 |               | 67  |
| 8408109  | 14444804 | 10969119 | 7331659  | 7658819  | 5949101  |               | 1   |
| 2044334  | 1423353  | 708196   | 2249601  | 1662639  | 1739265  |               | 9   |
| 1900022  | 1673168  | 1839863  | 1625588  | 1555344  | 1316738  | [1399][M+1]+  | 235 |
| 1681785  | 762644.8 | 1508032  | 1419690  | 1755178  | 556063.2 |               | 1   |
| 1745299  | 1444398  | 1635725  | 298122.2 | 1171929  | 704379   |               | 167 |
| 5124812  | 4217552  | 3000981  | 5075631  | 4077133  | 2774546  | [557][M]+     | 94  |
| 940982.6 | 1642367  | 2299010  | 125256.5 | 1004074  | 1183969  | [M+Na]+ 2:    | 15  |
| 514299.3 | 532161.5 | 100525.7 | 237874.1 | 212594.5 | 77706.84 |               | 4   |
| 53407542 | 42468872 | 27467833 | 32420525 | 40970989 | 55348853 | [1091][M]+    | 1   |
| 4586791  | 3863418  | 7098786  | 2981230  | 3293130  | 3552011  | [553][M]+     | 4   |
| 948131.4 | 1142902  | 57303.53 | 151216.7 | 1304626  | 777352.8 | [1292][M+1]+  | 1   |
| 5991854  | 5624300  | 5709514  | 10159632 | 14233669 | 4170581  |               | 1   |
| 4090375  | 3721633  | 10171422 | 3985597  | 6036996  | 3239268  |               | 408 |
| 6276076  | 3658450  | 3684081  | 8549380  | 3480354  | 3677402  |               | 428 |
| 531598.4 | 851694.9 | 1172178  | 265164.8 | 1285866  | 0        |               | 1   |
| 664890.3 | 434258.5 | 867175.4 | 764721.9 | 311280.7 | 559960.7 | [1468][M+1]+  | 74  |

|          |          |          |          |          |          |                       |     |
|----------|----------|----------|----------|----------|----------|-----------------------|-----|
| 204313.5 | 291671.9 | 243880.9 | 164071.6 | 12364.18 | 192370   | [341][M+1]+           | 111 |
| 1192562  | 1099843  | 1127966  | 1412676  | 1226127  | 574945.2 |                       | 5   |
| 2973869  | 2073721  | 2782719  | 3114161  | 3125051  | 1851588  |                       | 2   |
| 295016.7 | 512467.5 | 482705.3 | 194147.9 | 312561.3 | 789331.5 |                       | 4   |
| 8216816  | 6567908  | 6903755  | 3904263  | 6348614  | 1209470  |                       | 1   |
| 595175.3 | 364728.9 | 278683.9 | 477390.3 | 489178.6 | 244005.4 | [1170][M+1]2+         | 23  |
| 12660441 | 14309092 | 9600138  | 12476588 | 11734874 | 3771317  | [443][M]2+            | 2   |
| 731341.5 | 747436.1 | 195830.3 | 281378.1 | 632189.6 | 0        | [M+H-COCl             | 81  |
| 398870.6 | 96955.45 | 310020.2 | 268905.2 | 345930.2 | 106835.7 | [M+K]+ 42'            | 28  |
| 5.79E+10 | 65320505 | 4.4E+10  | 5.01E+10 | 5.28E+10 | 3.44E+10 |                       | 1   |
| 5796945  | 4204373  | 5060276  | 2938974  | 4906685  | 685906.3 |                       | 2   |
| 3032646  | 2711349  | 2697860  | 2873771  | 2661580  | 2586212  |                       | 310 |
| 896367.1 | 1067611  | 1355116  | 963951.4 | 1098525  | 1612493  | [1021][M]+            | 214 |
| 448157.9 | 374085   | 314911.4 | 132119   | 27655.85 | 317329.9 |                       | 72  |
| 554967.5 | 391149.8 | 953709.6 | 408798.1 | 475644.6 | 515098.3 |                       | 228 |
| 1251727  | 0        | 1110661  | 1361476  | 1027851  | 501928.1 |                       | 2   |
| 710368.3 | 807380.8 | 707641.4 | 645299.2 | 702090.7 | 480622.2 |                       | 9   |
| 5482048  | 6549507  | 2648525  | 767798.9 | 4585568  | 4880107  | [M+H]+ 39'            | 15  |
| 83201.79 | 63588.73 | 21604.61 | 66426.4  | 62967.71 | 51252.56 |                       | 110 |
| 4075926  | 3599309  | 4074072  | 3393222  | 4363869  | 1031084  |                       | 2   |
| 1339870  | 1694690  | 820451.4 | 1083702  | 1860926  | 764167.1 | [225][M+3]+           | 9   |
| 1726519  | 1007460  | 1927509  | 1293631  | 799550.8 | 573573.1 |                       | 4   |
| 410949   | 399855.7 | 261735.6 | 465458.5 | 80194.34 | 154715.6 | [1130][M+1]+          | 110 |
| 6092042  | 6316480  | 5452279  | 5492100  | 6228827  | 2438260  |                       | 2   |
| 448937.3 | 334096.7 | 345738.5 | 236634.9 | 242428.7 | 273254.4 | [76][M+1]+            | 287 |
| 3442815  | 2719582  | 2782791  | 2751547  | 2853506  | 595961.2 |                       | 2   |
| 214746.1 | 351694.4 | 417812.6 | 705188.1 | 192861.3 | 253169.4 |                       | 48  |
| 1583309  | 1064339  | 1528397  | 1443014  | 1312398  | 556893.6 |                       | 2   |
| 1437875  | 2799548  | 6422227  | 5114158  | 8201879  | 10386925 |                       | 2   |
| 6127692  | 5705567  | 4961034  | 5876861  | 4715250  | 3439081  | [1335][M]+ [M+H]+ 71' | 12  |
| 3803933  | 0        | 3295344  | 3548092  | 3837552  | 629401.9 | [2M+H]+ 7'            | 13  |
| 4682605  | 5818493  | 2227541  | 4750051  | 2795561  | 804883.5 |                       | 9   |
| 5067264  | 3346214  | 3615930  | 4632543  | 3900914  | 1513268  |                       | 2   |
| 12143821 | 13614555 | 10736886 | 10908916 | 12728720 | 8277646  |                       | 9   |
| 750117.7 | 1722286  | 1673212  | 194005.8 | 970429.1 | 0        |                       | 1   |

|          |          |          |          |          |          |                           |     |
|----------|----------|----------|----------|----------|----------|---------------------------|-----|
| 4552282  | 4688517  | 1297938  | 4415003  | 5269214  | 4230830  |                           | 293 |
| 873889.1 | 1562626  | 1184515  | 3276208  | 1090246  | 1808884  |                           | 9   |
| 2290693  | 1491302  | 1082148  | 531232.7 | 380360.1 | 284483.4 |                           | 4   |
| 999273.9 | 382218.2 | 412206.1 | 308326.2 | 851861   | 793244.3 |                           | 129 |
| 7058204  | 5111376  | 6532699  | 5680848  | 5528888  | 7458103  |                           | 2   |
| 2099764  | 1733917  | 4024026  | 2444653  | 3010858  | 2426397  | [M+2H-CO]                 | 252 |
| 507971.3 | 141896.5 | 739033.6 | 623684.4 | 308256.1 | 155677   | [M+H] <sup>+</sup> 46!    | 112 |
| 1397364  | 4000141  | 3652384  | 3504763  | 3287915  | 1857107  |                           | 296 |
| 151187.4 | 650230.1 | 450383.5 | 722987.3 | 640764.1 | 1519395  |                           | 96  |
| 1303560  | 1040291  | 835540.4 | 1019085  | 1060771  | 156596.8 |                           | 9   |
| 280842.6 | 406102   | 147419.3 | 139890.8 | 225812.1 | 106526.8 | [1053][M+1] <sup>2+</sup> | 117 |
| 1238476  | 2720799  | 1445909  | 596153.7 | 1378479  | 2679541  |                           | 9   |
| 699488.2 | 1269540  | 371127   | 0        | 1164502  | 274069.2 |                           | 2   |
| 4122346  | 4695154  | 3511248  | 3404965  | 4400917  | 1823591  |                           | 9   |
| 584512.2 | 705636.7 | 624163.6 | 398762   | 490111.4 | 0        | [M+3K-H] <sup>2</sup>     | 12  |
| 19671635 | 21474395 | 21125932 | 17365776 | 15783420 | 16375675 |                           | 290 |
| 5288934  | 3555658  | 3613620  | 2551419  | 3460432  | 2627173  |                           | 443 |
| 3562432  | 2204998  | 4929910  | 4511770  | 3655169  | 917740.5 |                           | 1   |
| 904159.5 | 536839.9 | 618421.1 | 808483.2 | 485994.4 | 499034.3 | [M+2Na] <sup>2+</sup>     | 8   |
| 1869504  | 536258.2 | 1944228  | 1901965  | 2394236  | 4381416  | [M+K] <sup>+</sup> 32!    | 26  |
| 36942721 | 28533030 | 31376940 | 32595006 | 29991343 | 17178761 | [1305][M] <sup>+</sup>    | 2   |
| 14860860 | 15940118 | 10544160 | 12645948 | 10686970 | 10856867 | [310][M] <sup>+</sup>     | 255 |
| 265444.6 | 162839.2 | 60254.27 | 83003.72 | 156276.9 | 317628.3 | [1524][M] <sup>2+</sup>   | 51  |
| 3697411  | 1705084  | 3775243  | 1513973  | 10408399 | 8213890  |                           | 11  |
| 258097   | 154019.1 | 465880.7 | 284341.4 | 197474.8 | 443248.6 | [676][M+1] <sup>+</sup>   | 72  |
| 136292.4 | 563565.9 | 503301.9 | 88120.46 | 415122.3 | 156050.7 | [M+K+CF3C                 | 39  |
| 589592.3 | 64227058 | 70036537 | 66619295 | 41223589 | 35289234 |                           | 45  |
| 3145987  | 3096107  | 2242123  | 2250079  | 3099319  | 1459411  | [978][M+3] <sup>+</sup>   | 9   |
| 9839842  | 9683076  | 7887242  | 8047106  | 5882303  | 6595168  |                           | 1   |
| 1364313  | 411318.3 | 192762.2 | 877713.5 | 1045675  | 154029.1 |                           | 46  |
| 223618   | 358273   | 233806.9 | 1000064  | 228855.4 | 853769.6 |                           | 72  |
| 10827379 | 10656380 | 10638945 | 5261905  | 7667437  | 1065917  |                           | 1   |
| 3855957  | 7435397  | 4560637  | 3701640  | 8220283  | 8598020  |                           | 2   |
| 1114390  | 2623252  | 2994967  | 888506.2 | 4855643  | 957300.5 |                           | 3   |
| 28709627 | 16989973 | 2125533  | 21934527 | 32559450 | 13833193 |                           | 11  |

|          |          |          |          |          |          |               |     |
|----------|----------|----------|----------|----------|----------|---------------|-----|
| 5509333  | 4200028  | 3899714  | 4622711  | 5060892  | 1699487  | [3M+3Na+]     | 14  |
| 16361549 | 3875127  | 8348403  | 8320642  | 3177497  | 2196028  |               | 328 |
| 305146.9 | 790835.8 | 343278.4 | 2499181  | 164557   | 1230620  |               | 162 |
| 2258087  | 1614922  | 2004430  | 2209787  | 1590060  | 478919.5 | [288][M+1]3+  | 2   |
| 35208434 | 15835168 | 13340642 | 18755047 | 28278073 | 8941196  |               | 1   |
| 10280673 | 9111175  | 10137194 | 7588046  | 6826159  | 2859193  |               | 1   |
| 2940400  | 4127991  | 5851761  | 1310688  | 1688626  | 3707908  |               | 1   |
| 7982527  | 15581306 | 9253889  | 1321383  | 10127399 | 4410598  | [M+Na]+ 4!    | 15  |
| 5412009  | 3644449  | 3258889  | 3275405  | 2721736  | 3600620  |               | 407 |
| 3469325  | 1783823  | 4441077  | 2415169  | 1159664  | 4320898  |               | 410 |
| 818574.5 | 515070   | 45968.83 | 0        | 152018.4 | 784452.8 | [M+K]+ 75!    | 18  |
| 2297125  | 1963873  | 3578925  | 655362   | 2873071  | 867254.2 | [M+K]+ 54!    | 15  |
| 14172131 | 10549919 | 12060250 | 11893237 | 10790588 | 4497419  | [1296][M+3]+  | 2   |
| 1203922  | 708882.2 | 662021.1 | 892801.9 | 641894.7 | 416569.8 | [584][M+1]+   | 80  |
| 1236205  | 2799361  | 2462990  | 2059290  | 3243528  | 5829936  |               | 15  |
| 4380182  | 0        | 1129919  | 1110007  | 1067199  | 1218645  | [1187][M+1]2+ | 2   |
| 2369035  | 2342875  | 2331994  | 2466434  | 3283264  | 2867692  |               | 185 |
| 4923822  | 4103601  | 1681981  | 4619382  | 3599373  | 803312.4 | [2M+H]+ 2!    | 3   |
| 948938.4 | 2019249  | 69000621 | 55200358 | 1773285  | 8618906  | [577][M]2+    | 9   |
| 9.54E+08 | 2124166  | 671006   | 7.16E+08 | 8.97E+08 | 2782269  | [M+Na]+ 4!    | 5   |
| 185723.9 | 245501.8 | 75870.49 | 109625.3 | 242370.5 | 69839.69 | [1494][M+1]2+ | 44  |
| 667830.2 | 512803.1 | 2071655  | 2307381  | 1247729  | 3013607  |               | 36  |
| 120322.6 | 62888.51 | 44107.92 | 25049.87 | 98205.76 | 0        |               | 66  |
| 5328486  | 9151334  | 4351671  | 4248821  | 6405294  | 2360117  | [M+H]+ 36!    | 15  |
| 1974339  | 461998.9 | 1940672  | 1877213  | 1596233  | 1831159  |               | 194 |
| 219007.4 | 283479.4 | 160770.4 | 28849.7  | 200985.1 | 276690.9 |               | 91  |
| 2144826  | 1307436  | 1945277  | 1286570  | 1629394  | 101724.5 |               | 1   |
| 3053935  | 8444720  | 7003934  | 554866   | 3402317  | 5109739  |               | 1   |
| 3993134  | 7203181  | 7853718  | 3416648  | 3716991  | 2488306  |               | 1   |
| 13193277 | 6658433  | 14799171 | 13054090 | 4180958  | 4530395  | [827][M]+     | 218 |
| 188646.9 | 1954218  | 647571.5 | 734930.7 | 1963076  | 3491608  |               | 233 |
| 44337861 | 61725815 | 54185002 | 27000059 | 37301968 | 14852155 |               | 1   |
| 21556272 | 9251143  | 6532962  | 7020793  | 11323783 | 11887819 | [146][M+1]2+  | 1   |
| 185188.9 | 328960.6 | 191283.9 | 206214.7 | 269957.3 | 160462.3 | [682][M+2]+   | 44  |
| 854366.8 | 588061.9 | 1119537  | 643076.1 | 708411.6 | 408367.8 |               | 4   |



|          |          |          |          |          |          |                           |     |
|----------|----------|----------|----------|----------|----------|---------------------------|-----|
| 1052199  | 3148277  | 3017491  | 2037121  | 3173160  | 1693071  |                           | 402 |
| 1136075  | 1183274  | 1311708  | 848809.2 | 1144140  | 1092836  |                           | 9   |
| 1955687  | 3147223  | 2545652  | 2083233  | 1721932  | 3942950  |                           | 1   |
| 7809582  | 6767046  | 6659677  | 6754587  | 6291587  | 2566457  |                           | 2   |
| 2047730  | 1487963  | 1669017  | 1467920  | 1254168  | 1315170  |                           | 475 |
| 9557387  | 7775946  | 7642892  | 6946528  | 8262788  | 4565344  |                           | 2   |
| 1056956  | 1644774  | 1282376  | 6690751  | 2645336  | 5137119  | [M+2H-NH <sub>3</sub> ]   | 3   |
| 608779.4 | 955465   | 652901.3 | 371101.1 | 536093.3 | 0        |                           | 12  |
| 2742559  | 18882050 | 5139926  | 27276070 | 64352381 | 1.03E+08 |                           | 1   |
| 3175205  | 1215603  | 4095523  | 5011471  | 1870786  | 2122331  |                           | 2   |
| 24502340 | 27665336 | 26479186 | 18998977 | 20125707 | 6573838  |                           | 1   |
| 4693375  | 5115981  | 4606535  | 3357972  | 5247594  | 5539120  |                           | 2   |
| 536022.9 | 2697705  | 2473146  | 2042343  | 2207289  | 3701436  |                           | 339 |
| 2708049  | 2690789  | 1365257  | 2588001  | 3175171  | 2439347  |                           | 341 |
| 481954.1 | 298076.6 | 403117.4 | 265191.8 | 342954.2 | 0        |                           | 64  |
| 273313.3 | 825342.3 | 781046.8 | 737097.5 | 496072.8 | 610216.1 |                           | 112 |
| 4582095  | 5691287  | 6671854  | 3668102  | 4118703  | 814851.7 |                           | 1   |
| 2379464  | 2231002  | 2413264  | 1777126  | 1978251  | 1416419  |                           | 4   |
| 4471327  | 8598215  | 9826243  | 3087597  | 3173721  | 4492818  |                           | 279 |
| 32558243 | 28296468 | 31385498 | 32204645 | 29218082 | 19503422 |                           | 2   |
| 445972.5 | 224727   | 262334.2 | 137674.3 | 340172.7 | 51959.27 | [1380][M+1] <sup>2+</sup> | 16  |
| 3330196  | 2731482  | 2797591  | 2681766  | 4709347  | 9939720  | [M+Na] <sup>+</sup> 3!    | 3   |
| 2777486  | 2009719  | 2135133  | 1838175  | 1399086  | 1405217  | [1074][M] <sup>+</sup>    | 284 |
| 3239734  | 2841674  | 2329356  | 3384645  | 2962498  | 1036312  |                           | 2   |
| 3409684  | 4355842  | 4759807  | 3338520  | 3387095  | 1135236  |                           | 15  |
| 4939741  | 9350051  | 4952990  | 5221475  | 8529401  | 5043482  |                           | 341 |
| 5155471  | 2491539  | 1446046  | 5837614  | 1329157  | 7216949  |                           | 2   |
| 2757282  | 1521541  | 809902.8 | 1726459  | 1910627  | 1603572  | [556][M] <sup>+</sup>     | 193 |
| 5355692  | 7829758  | 7160322  | 3464060  | 1092308  | 9714093  |                           | 383 |
| 8077070  | 7523166  | 6959549  | 6472330  | 266885.5 | 4596293  |                           | 86  |
| 7672705  | 16490060 | 7043903  | 7916793  | 9174533  | 12674151 | [3M+2K] <sup>2+</sup>     | 3   |
| 2529228  | 1252483  | 1455624  | 1289672  | 1390398  | 1287830  |                           | 184 |
| 2599350  | 3043495  | 2967976  | 2865705  | 3013073  | 826129.5 |                           | 201 |
| 15218251 | 7834115  | 12680934 | 15025228 | 8421052  | 2562634  |                           | 2   |
| 8079735  | 1209942  | 1148078  | 7531031  | 1592712  | 1379074  |                           | 2   |

|          |          |          |          |          |          |                         |     |
|----------|----------|----------|----------|----------|----------|-------------------------|-----|
| 293374.7 | 544531.2 | 935483.7 | 238695.4 | 419943.5 | 574728.5 | [M+H] <sup>+</sup> 25   | 8   |
| 758555.9 | 490735.5 | 781999.1 | 533441.2 | 691992.1 | 161453.8 |                         | 4   |
| 18387187 | 7553183  | 3202404  | 13817130 | 16773794 | 8929053  |                         | 3   |
| 265953.9 | 985592.2 | 1595954  | 3139872  | 977429.6 | 718627.7 |                         | 217 |
| 2480442  | 1368076  | 4717809  | 1809613  | 2247674  | 577594   |                         | 28  |
| 7133892  | 5348665  | 6035762  | 6755518  | 5307590  | 5584189  | [960][M] <sup>+</sup>   | 150 |
| 22588738 | 23136072 | 19664587 | 19774636 | 22166891 | 11735592 |                         | 2   |
| 9830298  | 12264949 | 14393709 | 8143530  | 9081122  | 10302401 | [M+H-CO] <sup>+</sup>   | 41  |
| 3819094  | 2589068  | 3632187  | 2006907  | 1930658  | 4685064  |                         | 345 |
| 3592099  | 7576985  | 5568497  | 353631.2 | 3679689  | 1934325  |                         | 3   |
| 8845647  | 6492158  | 5062802  | 6023345  | 5693120  | 5922226  |                         | 241 |
| 454858.2 | 778767.4 | 203002.9 | 0        | 467924.8 | 724859.6 |                         | 18  |
| 273165.5 | 482026.6 | 561252.9 | 1735862  | 680949.6 | 3133171  |                         | 8   |
| 5612455  | 4567798  | 4356153  | 2741533  | 5030353  | 6792266  | [M+H-CH <sub>3</sub> ]  | 264 |
| 85800.95 | 283708.3 | 44316.63 | 131496   | 41225.52 | 100880.4 |                         | 96  |
| 3464659  | 573746.1 | 3157826  | 2968649  | 1972756  | 547466.7 |                         | 2   |
| 5035829  | 8378412  | 5161043  | 5268861  | 5013036  | 5647481  |                         | 272 |
| 1092509  | 314171.2 | 2996341  | 1088801  | 846524.8 | 678249.5 | [639][M+1] <sup>+</sup> | 9   |
| 1.02E+08 | 56529826 | 48407476 | 66017216 | 31415387 | 19704387 |                         | 1   |
| 970611.7 | 45548.9  | 47841.46 | 38471.77 | 45209.89 | 26609.68 |                         | 127 |
| 465908.5 | 72664.52 | 775033.2 | 112953.7 | 449424.9 | 164929.2 |                         | 9   |
| 2579409  | 24846007 | 33415499 | 12912929 | 1431819  | 1075305  |                         | 3   |
| 1764189  | 2188872  | 2036675  | 1582467  | 1936101  | 0        |                         | 2   |
| 4079783  | 2571368  | 737844.3 | 4142869  | 3950332  | 2422127  | [M+H+CF <sub>3</sub> O] | 11  |
| 441880.6 | 0        | 937699.5 | 866438.4 | 635392.1 | 0        |                         | 9   |
| 11997602 | 7157228  | 10676242 | 7210115  | 12449848 | 3922539  |                         | 2   |
| 8803284  | 9888842  | 7857306  | 6360592  | 8636024  | 7345725  |                         | 2   |
| 20325966 | 28884186 | 3260585  | 17594292 | 21471950 | 4735493  | [M+K] <sup>+</sup> 54   | 3   |
| 6010160  | 4288771  | 3808359  | 4155723  | 824570.1 | 3069718  | [M+H-H <sub>2</sub> O]  | 252 |
| 2211830  | 3276507  | 3185606  | 1981026  | 3186607  | 125923.4 |                         | 9   |
| 6639254  | 4981174  | 4220854  | 3398815  | 3902553  | 2190270  |                         | 9   |
| 2927528  | 1424960  | 531315.2 | 2687435  | 883904.2 | 114134.8 |                         | 1   |
| 2948045  | 3283874  | 2203321  | 3065753  | 3605538  | 2381851  |                         | 2   |
| 3448290  | 7813458  | 1643438  | 2213905  | 10252830 | 2144875  |                         | 1   |
| 3363366  | 3173384  | 8419080  | 6662097  | 2618408  | 2576481  |                         | 310 |

|          |          |          |          |          |          |                       |     |
|----------|----------|----------|----------|----------|----------|-----------------------|-----|
| 4115589  | 3044496  | 5457425  | 1527540  | 2699059  | 9235311  | [M+H+HCC              | 21  |
| 4568648  | 4635057  | 2911434  | 5594544  | 4160317  | 4389089  |                       | 317 |
| 34867443 | 16094693 | 13286577 | 19097080 | 28493891 | 8949093  | [1179][M]3+           | 1   |
| 42673705 | 31926805 | 34214278 | 37588107 | 35080516 | 12702214 | [42][M]+              | 2   |
| 5978307  | 5436828  | 5000025  | 5630363  | 4599235  | 1303132  |                       | 2   |
| 5082149  | 6001259  | 7937366  | 10629023 | 6185646  | 10865139 | [1489][M]+ [M+Na]+ 8: | 302 |
| 2798014  | 1693679  | 1292819  | 1443193  | 1400557  | 1077205  |                       | 282 |
| 6112755  | 9589149  | 10364448 | 4746538  | 8237824  | 4792604  | [2M+2K-H]             | 6   |
| 3068366  | 3261645  | 409128.8 | 2752781  | 2169409  | 1484078  |                       | 11  |
| 1181858  | 2277797  | 1459425  | 688095.8 | 1559095  | 846369.5 |                       | 93  |
| 739392.1 | 826865   | 437898.9 | 609733.1 | 753512.8 | 507657.7 |                       | 4   |
| 34798145 | 16231026 | 13245261 | 19342330 | 28430635 | 8964130  |                       | 1   |
| 353414.6 | 1552725  | 807954.5 | 8781866  | 1298202  | 5861923  |                       | 2   |
| 8200873  | 2785779  | 2570217  | 4123902  | 6384836  | 1994800  |                       | 1   |
| 266353.8 | 48359.88 | 122244.5 | 0        | 101846.5 | 119285.4 | [3M+2Na]2             | 18  |
| 1163954  | 1310985  | 1812978  | 0        | 1592549  | 136587.7 |                       | 1   |
| 400580   | 295709.8 | 37437.99 | 419220.3 | 256638.7 | 26563.3  |                       | 19  |
| 6316134  | 5909939  | 5064836  | 5346663  | 6266174  | 2992397  |                       | 9   |
| 15638213 | 11389220 | 13653535 | 11476035 | 11977426 | 6183228  |                       | 176 |
| 233450.3 | 338577.8 | 142049.3 | 551731.7 | 281146.2 | 444636.5 |                       | 283 |
| 3704020  | 5326330  | 9981921  | 14124825 | 3847776  | 9272541  | [M+2H-NH:             | 35  |
| 2765533  | 1404819  | 2286690  | 2901879  | 7313590  | 4151741  | [31][M+3]2+           | 2   |
| 3485529  | 3597066  | 2084200  | 1426962  | 3113425  | 938721   |                       | 1   |
| 1398475  | 112407.3 | 145513.6 | 119752.4 | 78919.58 | 38186.83 | [M+K+NH3              | 232 |
| 12768819 | 7924191  | 4014118  | 8314916  | 7427424  | 1571535  | [M+K]+ 29:            | 3   |
| 0        | 856827.5 | 396328.4 | 641683.7 | 435320.3 | 496003.6 |                       | 9   |
| 213879.7 | 965877.2 | 147057.7 | 191215.7 | 346136.6 | 0        | [M+Na]+ 3:            | 15  |
| 416596.6 | 456516.4 | 282959   | 80517.76 | 398521.3 | 306466.5 |                       | 18  |
| 1001119  | 17708162 | 17956059 | 10761913 | 11974544 | 11255164 | [219][M]+             | 4   |
| 251799.1 | 105066.7 | 155623.3 | 151509.2 | 148506.5 | 178327.7 | [1565][M+1]+          | 123 |
| 580709.2 | 329482.5 | 285927.5 | 332761.1 | 355427.4 | 356693.8 |                       | 35  |
| 9755089  | 3821467  | 3619372  | 4589292  | 3547900  | 2109178  |                       | 14  |
| 22100977 | 17439072 | 2267544  | 6465855  | 11551995 | 11497231 | [450][M]+             | 99  |
| 1020265  | 969651.7 | 863092.3 | 664829.3 | 708393.2 | 1188181  | [M+Na]+ 4:            | 73  |
| 10377876 | 10006536 | 9570107  | 9716195  | 8093384  | 8583160  | [M+H+NH3              | 121 |

|          |          |          |          |          |          |                     |     |
|----------|----------|----------|----------|----------|----------|---------------------|-----|
| 499307.2 | 417081.9 | 863493.4 | 309939.2 | 414954.3 | 258866.9 | [920][M]3+          | 23  |
| 38087230 | 28433632 | 31684190 | 32185085 | 28420824 | 10317784 | [1296][M+2]+        | 2   |
| 1968836  | 425787.9 | 1134256  | 1288215  | 2228681  | 781241.3 | [3M+H+Na            | 14  |
| 1730680  | 579596.4 | 1224563  | 1051864  | 1992816  | 2386786  | [M+H-C4H8           | 29  |
| 201114.3 | 193226.3 | 250615.1 | 126633.9 | 149525.1 | 294414.3 |                     | 91  |
| 3987424  | 1235006  | 2634712  | 3017767  | 2707069  | 534470.4 |                     | 2   |
| 1454249  | 2449452  | 2742496  | 2826718  | 1634584  | 5309612  |                     | 9   |
| 1526304  | 426491.7 | 418635.2 | 97032.49 | 989155.4 | 319704.9 |                     | 345 |
| 7090769  | 5374926  | 5726720  | 4741325  | 5133442  | 2787051  |                     | 198 |
| 3372286  | 2449597  | 3125450  | 3462190  | 3587673  | 1062968  |                     | 2   |
| 33556567 | 3467010  | 1338829  | 601597.5 | 30712733 | 9028679  | [762][M]+           | 4   |
| 12533950 | 6440969  | 12793279 | 10612955 | 17757556 | 944096.6 | [M+K+NH3            | 15  |
| 6643796  | 10296475 | 7503898  | 5107678  | 15859600 | 13154947 |                     | 9   |
| 2134525  | 180478.9 | 3308169  | 2141750  | 1711237  | 1400807  | [744][M]+ [M+H-H2O] | 135 |
| 5760004  | 3096007  | 2088828  | 2132041  | 4015214  | 3185183  |                     | 21  |
| 6344352  | 6271428  | 2818649  | 3898086  | 6406528  | 5929879  |                     | 316 |
| 1031734  | 722011.1 | 80871.58 | 420036   | 685584.8 | 718658.1 |                     | 9   |
| 39595863 | 19026907 | 34145158 | 24085681 | 21971108 | 16942754 |                     | 1   |
| 426363.5 | 761504.7 | 13363599 | 474983.4 | 7746981  | 19592033 |                     | 68  |
| 685153.5 | 695328.5 | 1151762  | 467366.7 | 696926   | 535082   |                     | 26  |
| 1926734  | 597233.2 | 874910.9 | 1537206  | 1310332  | 215306.8 |                     | 4   |
| 5184587  | 1882969  | 1244092  | 4182464  | 663370.5 | 1701440  | [M+K+NaCl           | 3   |
| 2261291  | 1098208  | 953597.1 | 527418.5 | 955611.7 | 526762.7 | [810][M+1]2+        | 9   |
| 432322.6 | 720760.3 | 749164.1 | 437297.5 | 687554.7 | 328551.2 | [M+H+NH3            | 16  |
| 8229232  | 2548274  | 2795552  | 4076238  | 6103016  | 1830143  |                     | 1   |
| 772886.6 | 326903.1 | 312249   | 544432.5 | 435239.6 | 114366.8 |                     | 91  |
| 1436113  | 756859.6 | 2341227  | 751281.1 | 776757.6 | 0        |                     | 1   |
| 4859702  | 1845593  | 3019734  | 4581622  | 2240711  | 475732.9 |                     | 2   |
| 6680703  | 1529383  | 3541736  | 4039249  | 6170266  | 4526426  |                     | 1   |
| 1558768  | 1074150  | 1580422  | 378490.2 | 1050521  | 0        | [1301][M+1]+        | 1   |
| 9305907  | 3713421  | 2775038  | 4051020  | 2986240  | 984472.6 |                     | 442 |
| 1951516  | 3916365  | 2062217  | 2361572  | 5149997  | 5628126  |                     | 2   |
| 98288409 | 1.02E+08 | 81368917 | 88313940 | 89410333 | 92371631 |                     | 2   |
| 36077.08 | 368678.4 | 26898.19 | 26508.17 | 26384.11 | 214609.5 | [M+2H-CO]           | 18  |
| 506384.4 | 636153.8 | 226512.9 | 435122.5 | 669107.7 | 0        |                     | 8   |

|          |          |          |          |          |          |               |     |
|----------|----------|----------|----------|----------|----------|---------------|-----|
| 449951.2 | 859438.7 | 790443.7 | 247876.6 | 487795.3 | 673366.5 | [204][M+1]2+  | 46  |
| 13889120 | 14685616 | 11064567 | 13333247 | 14598931 | 8799793  |               | 2   |
| 3827060  | 0        | 2170492  | 2831138  | 2200031  | 1782970  |               | 2   |
| 1785576  | 1437645  | 1011089  | 1708964  | 2499502  | 2731177  | [M+K]+ 36!    | 46  |
| 7.74E+08 | 9.17E+08 | 7.74E+08 | 785753.3 | 7.19E+08 | 8.43E+08 |               | 4   |
| 6115905  | 6086004  | 5631582  | 5395033  | 5104599  | 781472.1 | [1356][M+1]2+ | 2   |
| 226844.7 | 563091.7 | 527798.9 | 432969.1 | 193982.1 | 325988.9 |               | 4   |
| 1788653  | 1726996  | 1404813  | 1695099  | 595297.2 | 1211267  | [3M+H+K]2     | 6   |
| 4135542  | 5003981  | 3398906  | 3222886  | 3810777  | 5468503  |               | 420 |
| 2711126  | 6839299  | 6134507  | 2264484  | 2891133  | 2713638  | [M+Na+Na      | 15  |
| 4383629  | 5914581  | 3787826  | 1094533  | 4123081  | 2545057  | [M+K]+ 25!    | 41  |
| 18115509 | 14397063 | 15271487 | 15281876 | 14469133 | 2703932  |               | 2   |
| 5911548  | 6060388  | 5861767  | 6377852  | 3572099  | 5615854  |               | 354 |
| 74039480 | 61380337 | 59277210 | 60687301 | 61465266 | 15782334 |               | 2   |
| 9155561  | 5417366  | 5762142  | 4243540  | 9321908  | 1713602  | [M+Na+HC      | 15  |
| 1634541  | 173970.7 | 2849388  | 1356170  | 975671.7 | 1462198  |               | 9   |
| 3579948  | 4153966  | 2629385  | 821403.6 | 4483571  | 5465385  | [M+2Na]2+     | 38  |
| 5688811  | 5359546  | 3713723  | 2621831  | 6630554  | 2977175  | [3M+2H]2+     | 3   |
| 6623926  | 3030682  | 2682253  | 4169209  | 2936010  | 3546128  | [1097][M+2]+  | 86  |
| 481883.2 | 787390.3 | 14007830 | 10511818 | 1259284  | 7016773  |               | 9   |
| 150904.5 | 100195.7 | 76298.13 | 91771.33 | 101676.7 | 55147.78 |               | 480 |
| 30512848 | 21743901 | 14240365 | 19891680 | 17817733 | 17617854 | [223][M]+     | 152 |
| 1622262  | 3262023  | 2527844  | 2753218  | 1889492  | 2051038  |               | 191 |
| 951621.3 | 675351.6 | 2344364  | 1538744  | 833231.5 | 1041219  |               | 9   |
| 528321.3 | 322025.3 | 250728.6 | 313597.7 | 624271   | 226291   | [1330][M]2+   | 16  |
| 2116726  | 1238683  | 1801549  | 751652.5 | 1623815  | 928731.3 | [M+H-CH2]     | 15  |
| 1006361  | 1123247  | 525848.3 | 516926   | 427322.7 | 77585.29 |               | 97  |
| 674366.4 | 585368.4 | 503749.2 | 348634.4 | 376045.6 | 345809.5 | [M+H-CH2]     | 5   |
| 32822626 | 24662178 | 26632166 | 28586258 | 26625967 | 9342670  | [44][M]+      | 2   |
| 912002.1 | 566537.2 | 377924.1 | 788320.7 | 822289.1 | 67795.2  | [978][M+2]+   | 9   |
| 2049777  | 1459070  | 1086784  | 1849236  | 1777429  | 214681.2 |               | 2   |
| 19807838 | 37696359 | 10815880 | 3058881  | 2277100  | 1710853  | [M+Na+2K]     | 15  |
| 6921502  | 5657437  | 3696352  | 3564259  | 3278371  | 3688737  | [569][M]+     | 296 |
| 608470.7 | 894900.8 | 658371.1 | 1877688  | 856488.9 | 869848.9 |               | 8   |
| 1039165  | 734866.5 | 1471706  | 4966081  | 1695345  | 4738173  |               | 172 |

|          |          |          |          |          |          |               |     |
|----------|----------|----------|----------|----------|----------|---------------|-----|
| 4877574  | 8070095  | 463489   | 3371421  | 2566980  | 5703749  | [3M+2Na+]     | 3   |
| 9947.477 | 554910.5 | 119967.9 | 11985.47 | 71095.66 | 281553.5 | [M+K]+ 64     | 18  |
| 114671.6 | 151022.9 | 122517   | 72426.87 | 105453.9 | 87371.6  | [M+K]+ 52     | 116 |
| 14445239 | 3999627  | 10899573 | 14579412 | 10977594 | 11048733 |               | 9   |
| 345570.2 | 293464.7 | 434501.3 | 189703.2 | 257068.9 | 375554.7 |               | 306 |
| 21435815 | 22455766 | 18639161 | 18652563 | 20960530 | 10565080 |               | 2   |
| 2091923  | 6836032  | 2119998  | 11162339 | 6833245  | 9344080  |               | 2   |
| 1.15E+08 | 71241327 | 1.25E+08 | 98384606 | 90059167 | 44055982 |               | 47  |
| 1043135  | 1553779  | 1089797  | 869281.9 | 1709267  | 1520633  |               | 93  |
| 63711503 | 1.07E+08 | 75301711 | 4426483  | 58604213 | 24340982 |               | 1   |
| 12061965 | 8361114  | 1754061  | 1241935  | 14103209 | 2435206  |               | 1   |
| 12987287 | 8439903  | 13237293 | 10210368 | 10680921 | 0        |               | 2   |
| 1763311  | 1490613  | 957510   | 1224779  | 960328.1 | 1085109  | [1362][M]2+   | 20  |
| 4446684  | 4398380  | 38780907 | 7785145  | 43214113 | 2423756  |               | 190 |
| 2716598  | 2252717  | 3060839  | 679035.3 | 3108377  | 458885.7 |               | 1   |
| 12327166 | 9943355  | 8376959  | 10667526 | 7890013  | 7857678  | [1194][M+1]+  | 2   |
| 2771567  | 1438519  | 2260545  | 1631669  | 1904263  | 3487542  | [98][M+2]2+   | 1   |
| 49736473 | 43911125 | 44249243 | 26899974 | 40904619 | 17712639 |               | 1   |
| 4112556  | 3752075  | 3767390  | 2587772  | 2819314  | 1627496  |               | 20  |
| 13492755 | 2057452  | 1965938  | 1446293  | 2148304  | 4380784  |               | 1   |
| 495383.4 | 609920.2 | 681058.6 | 220296.3 | 524720.5 | 383581.5 | [M+Na]+ 6     | 86  |
| 10550657 | 6369515  | 7474181  | 5082785  | 10071091 | 3917335  | [1299][M+1]3+ | 2   |
| 1604891  | 3828394  | 1565485  | 565340.6 | 2483326  | 5381722  | [3M+H+Na]     | 15  |
| 22033969 | 20701490 | 19595604 | 19171460 | 20502368 | 19730623 |               | 293 |
| 5472942  | 6176738  | 1051209  | 4781548  | 2719968  | 3426304  | [857][M]2+    | 3   |
| 917298.7 | 905385.7 | 581500.8 | 637870   | 557212   | 459445.3 |               | 4   |
| 1081285  | 985692.2 | 762318.1 | 852423.2 | 159171.2 | 999555.3 | [1069][M]+    | 17  |
| 2166884  | 398740.5 | 883223.1 | 1347147  | 2301696  | 1734747  |               | 9   |
| 264131.7 | 35224.74 | 7161838  | 10991288 | 58238.78 | 1185363  |               | 303 |
| 6099523  | 7618712  | 4546577  | 5628777  | 13402638 | 6022077  |               | 385 |
| 1235119  | 3298306  | 1204887  | 408031.5 | 2101217  | 261335.5 |               | 1   |
| 188469.8 | 338644.9 | 109881.7 | 62421.31 | 68382.09 | 116328.7 |               | 128 |
| 1182724  | 8265642  | 6000062  | 1003001  | 5350892  | 9041445  | [M+K]+ 38     | 5   |
| 467372.7 | 1097468  | 1034202  | 874706.8 | 722819.6 | 2172147  | [M+2Na+K]     | 8   |
| 5548195  | 2921491  | 2719348  | 3445669  | 5657170  | 1964658  |               | 1   |

|          |          |          |          |          |          |                                              |     |
|----------|----------|----------|----------|----------|----------|----------------------------------------------|-----|
| 2181963  | 600598.4 | 2342234  | 514756.3 | 866745.9 | 1614383  | [M+H] <sup>+</sup> 28                        | 112 |
| 2218904  | 738337.3 | 884119.2 | 477303.1 | 987858.4 | 107349.6 | [486][M+1] <sup>2+</sup>                     | 280 |
| 6006362  | 5745207  | 1359660  | 6277414  | 5682546  | 5499075  |                                              | 310 |
| 1347355  | 2378401  | 13223985 | 12368189 | 2026174  | 2205793  |                                              | 2   |
| 7815105  | 5261196  | 3687633  | 8359706  | 6599939  | 2497067  |                                              | 2   |
| 3249725  | 3110685  | 3893433  | 1938964  | 3667220  | 243963   |                                              | 1   |
| 159647.8 | 148188.6 | 103885   | 153405.3 | 68149.51 | 95895.77 |                                              | 127 |
| 2857308  | 3456817  | 2336426  | 2122416  | 1672799  | 3369676  |                                              | 6   |
| 1418335  | 2447629  | 2078277  | 28104693 | 41113917 | 4767730  |                                              | 2   |
| 3996138  | 798533.8 | 3053908  | 1927543  | 3966632  | 2040638  |                                              | 2   |
| 4515392  | 1384219  | 1197823  | 4076670  | 4802983  | 2151111  |                                              | 1   |
| 8304924  | 4380977  | 6530084  | 5248184  | 10225580 | 7010807  |                                              | 2   |
| 88771373 | 74170523 | 72542204 | 81535811 | 78314948 | 48992831 |                                              | 90  |
| 3764424  | 4248120  | 3479894  | 1368659  | 3312842  | 380963.8 | [1297][M+1] <sup>2+</sup>                    | 1   |
| 101825.6 | 187559   | 297473.1 | 215974.2 | 207236.1 | 208605.1 |                                              | 160 |
| 589485.2 | 576683.4 | 288814.2 | 402651.4 | 508436.1 | 632014   | [1123][M] <sup>2</sup> [M+Na+K] <sup>2</sup> | 35  |
| 5153910  | 7195334  | 4854397  | 4468192  | 6403386  | 5075022  |                                              | 2   |
| 12580715 | 6449058  | 8442214  | 6401598  | 10110371 | 17116292 |                                              | 3   |
| 685072.4 | 0        | 1279067  | 1091460  | 1164578  | 3745633  | [407][M+2] <sup>3+</sup>                     | 2   |
| 1522754  | 1450277  | 4705893  | 3480052  | 847840.3 | 2157657  |                                              | 338 |
| 40818458 | 2593809  | 34635010 | 35306693 | 2914390  | 5978898  | [394][M] <sup>2+</sup>                       | 2   |
| 1059776  | 2606700  | 791561.9 | 191195.7 | 548506.5 | 1521640  | [M+2Na-H]                                    | 18  |
| 1515079  | 631992.5 | 121667.2 | 1142215  | 1183142  | 2688154  |                                              | 84  |
| 535637.4 | 884035   | 2500497  | 946213.2 | 1017465  | 1205326  | [969][M+1] <sup>+</sup>                      | 66  |
| 533899.1 | 198527   | 114971.3 | 564508.5 | 598282.5 | 579205.7 | [M+Na+NH]                                    | 18  |
| 2255249  | 2050747  | 2162261  | 862499   | 1512585  | 0        |                                              | 1   |
| 5.02E+08 | 3.15E+08 | 5.49E+08 | 4.31E+08 | 3.96E+08 | 1.99E+08 | [M+H] <sup>+</sup> 36                        | 28  |
| 1013066  | 3212817  | 990982   | 456763.2 | 2699319  | 1012593  | [M+H-H <sub>2</sub> O]                       | 3   |
| 946799.6 | 808187.1 | 732944.3 | 1002905  | 558166.5 | 533499   | [M+Na] <sup>+</sup> 6                        | 134 |
| 1639022  | 1775809  | 1685499  | 1407747  | 1309245  | 805026.9 | [M+H-C <sub>3</sub> H <sub>7</sub> ]         | 33  |
| 948171.6 | 647695.1 | 422513.5 | 404954.5 | 649689   | 231214.2 | [1170][M] <sup>2+</sup>                      | 23  |
| 5184297  | 3671063  | 1447264  | 4525170  | 2186437  | 1141425  |                                              | 3   |
| 23649618 | 25228749 | 19372067 | 20632378 | 24355725 | 9065097  |                                              | 2   |
| 41218865 | 45399816 | 5026802  | 6984712  | 46569887 | 2981946  | [M+Na] <sup>+</sup> 1                        | 3   |
| 6399183  | 5957113  | 5474840  | 5556210  | 5326427  | 4959149  |                                              | 2   |

|          |          |          |          |          |          |                       |     |
|----------|----------|----------|----------|----------|----------|-----------------------|-----|
| 4543630  | 7576625  | 8975924  | 2342127  | 6899264  | 3205565  | [1376][M]+            | 332 |
| 117956.5 | 181887.7 | 144720.5 | 176017.4 | 115419.9 | 111498.2 | [M+K]+ 80%            | 220 |
| 3552876  | 2712107  | 2933842  | 3262643  | 3307138  | 535616.6 |                       | 2   |
| 1609094  | 1043058  | 1661915  | 1952947  | 956013.9 | 1505169  | [1491][M]+            | 256 |
| 1932952  | 0        | 1908678  | 774979.4 | 904505.5 | 0        |                       | 1   |
| 1487117  | 2810908  | 1.03E+08 | 88442844 | 2375960  | 7443352  |                       | 14  |
| 3018435  | 3117682  | 1779816  | 2278205  | 2793141  | 3237223  |                       | 95  |
| 1950900  | 1609972  | 1432920  | 911712.9 | 601274.9 | 212976   |                       | 4   |
| 10195648 | 4608802  | 6792314  | 9050556  | 6528842  | 2035080  |                       | 2   |
| 3991964  | 4365740  | 4772546  | 4681052  | 4294009  | 5273675  |                       | 333 |
| 9137362  | 6491627  | 7163028  | 7979642  | 5065853  | 346178.6 |                       | 1   |
| 769151.9 | 60955792 | 1.07E+08 | 79029888 | 74017183 | 28562076 | [530][M+1]+           | 27  |
| 1493386  | 44112534 | 1786999  | 1853098  | 1060816  | 4475810  |                       | 53  |
| 6086704  | 6662395  | 3582233  | 5271301  | 6511540  | 933743.9 | [1][M]3+              | 9   |
| 2312338  | 1284056  | 1711269  | 1817813  | 1498462  | 112885.7 |                       | 4   |
| 3084192  | 7527877  | 14285747 | 4497783  | 19959353 | 10772574 | [534][M]+             | 1   |
| 1704113  | 3286193  | 1341283  | 552565.3 | 2250167  | 4110713  |                       | 1   |
| 1489003  | 1709769  | 1786682  | 3076186  | 712784.3 | 0        |                       | 2   |
| 4872195  | 6468391  | 4988277  | 8115036  | 5415423  | 6448203  |                       | 412 |
| 2060439  | 724886.1 | 1972159  | 2139486  | 1832115  | 0        |                       | 2   |
| 1.14E+08 | 1.19E+08 | 1.34E+08 | 78318891 | 76022807 | 1.44E+08 |                       | 94  |
| 881119.3 | 730971.7 | 347042.7 | 636391   | 325554.1 | 477624   | [1589][M]+ [M+K]+ 11% | 134 |
| 3264437  | 1908009  | 2808095  | 3196751  | 2165607  | 1954309  | [1166][M+2]3+         | 2   |
| 675199   | 769736.1 | 958294.3 | 641533.1 | 596314.7 | 1256258  |                       | 9   |
| 927731.2 | 627996.8 | 1033341  | 735752.3 | 47593.08 | 610876.2 | [295][M+1]+           | 126 |
| 3126140  | 2598123  | 2011975  | 2225732  | 3063680  | 1095501  |                       | 9   |
| 1887409  | 1841783  | 1222925  | 1636370  | 2866966  | 789335.5 |                       | 2   |
| 8032129  | 4581648  | 5668010  | 5686333  | 8400028  | 6554030  | [1609][M]2+           | 2   |
| 1776437  | 914860.6 | 1700620  | 2010034  | 1060578  | 625884.2 |                       | 20  |
| 6736245  | 6845719  | 6102691  | 4850613  | 5168277  | 1175628  | [M+K]+ 30%            | 12  |
| 4000939  | 4467130  | 5407421  | 2156480  | 4954357  | 1563830  |                       | 1   |
| 5669956  | 5326621  | 4221181  | 4154565  | 4621957  | 1694241  |                       | 4   |
| 1551908  | 0        | 0        | 161149.7 | 928324.5 | 187088.3 |                       | 1   |
| 756753.8 | 609176.6 | 834125.7 | 741781.6 | 615102   | 192932   | [942][M+1]3+          | 57  |
| 7052093  | 1756700  | 1963410  | 1201475  | 732099.3 | 5790864  | [493][M]+             | 4   |



|          |          |          |          |          |          |                       |     |
|----------|----------|----------|----------|----------|----------|-----------------------|-----|
| 6054417  | 7895496  | 4375558  | 5145362  | 5483465  | 5382711  | [1228][M]+ [M+K]+ 63' | 6   |
| 5744234  | 1912542  | 4141965  | 2885871  | 5758133  | 4832441  |                       | 190 |
| 4499374  | 15661383 | 1883499  | 38714759 | 6092955  | 26126790 |                       | 1   |
| 52919878 | 2841045  | 40416134 | 45721326 | 3349468  | 5890424  | [457][M+2]2+          | 2   |
| 326307   | 712265.3 | 473399   | 801734.7 | 80998.91 | 513841.3 |                       | 256 |
| 19436228 | 31707828 | 24229996 | 16185633 | 18212228 | 15365182 | [735][M+1]3+          | 1   |
| 2509775  | 2019200  | 2113189  | 2303585  | 2854468  | 704452.6 | [M+H+NH3              | 14  |
| 4267462  | 3559471  | 3750921  | 3547688  | 4342203  | 4052915  | [340][M]3+            | 2   |
| 2955693  | 3143835  | 2557506  | 3017853  | 3067523  | 4921066  |                       | 386 |
| 4222788  | 3057076  | 1682427  | 3088670  | 1517694  | 2902245  |                       | 3   |
| 37790228 | 14986441 | 16955195 | 22315980 | 26970262 | 5574446  |                       | 1   |
| 280067.5 | 46815.67 | 109813.5 | 152804.4 | 175339.2 | 23143.98 | [1504][M+1]3+         | 166 |
| 625477.3 | 481945.2 | 479570   | 205471.1 | 404149.3 | 106810.1 | [1225][M]+            | 74  |
| 2557678  | 2728293  | 2322779  | 2646225  | 3218746  | 2201365  |                       | 4   |
| 1155968  | 613843.3 | 493866.6 | 950192.9 | 237963.1 | 446457.3 |                       | 4   |
| 7301553  | 7533340  | 7136144  | 4116065  | 4927035  | 5298917  | [79][M]3+             | 20  |
| 3737922  | 4447700  | 469008.1 | 4582561  | 3385088  | 526104.8 | [M+H]+ 63!            | 322 |
| 3865607  | 3641546  | 2203501  | 3126349  | 3910698  | 1243636  |                       | 2   |
| 3969837  | 0        | 1780595  | 3268463  | 3332783  | 657423.6 |                       | 2   |
| 6397363  | 4491954  | 1448983  | 4147822  | 5678024  | 928068.8 | [3M+Na+K·             | 11  |
| 396417.9 | 157234.6 | 174382.1 | 293825.3 | 371136.6 | 45382.6  |                       | 42  |
| 4814912  | 4507951  | 4508871  | 1335997  | 4594641  | 4471307  |                       | 375 |
| 335355.5 | 461697.4 | 409053.7 | 359916   | 318668.6 | 295028.6 | [1080][M+1]2+         | 366 |
| 428281.4 | 471593   | 588226.8 | 666768.2 | 395659.4 | 451343.2 | [887][M+1]+           | 318 |
| 3738250  | 3096498  | 3376895  | 3952200  | 8938211  | 5506264  |                       | 386 |
| 2794159  | 1874731  | 2236486  | 1598470  | 1923760  | 1054847  |                       | 249 |
| 18946443 | 30488286 | 13310063 | 14407841 | 18807197 | 19837096 |                       | 11  |
| 1132262  | 241323.5 | 910568.2 | 1015810  | 957718.7 | 2530412  | [627][M+1]2+          | 15  |
| 8724932  | 10948184 | 10335917 | 6402576  | 7658679  | 6707427  |                       | 1   |
| 3370025  | 547676.3 | 2958571  | 3250566  | 3311232  | 3054380  |                       | 295 |
| 51073404 | 45497694 | 4412855  | 4027619  | 4135231  | 8942387  |                       | 1   |
| 490038.9 | 415161.3 | 193316   | 276755.5 | 300819.6 | 235976.3 |                       | 475 |
| 11992783 | 5876659  | 3210862  | 5975793  | 5520535  | 1271718  | [M+2K-H]+             | 3   |
| 674033.1 | 235082.5 | 576830.3 | 890202.5 | 113957.4 | 170084.6 | [M+H+NH3              | 16  |
| 5605909  | 6571002  | 2320142  | 5026493  | 9155754  | 4375472  | [M+H-C4H8             | 3   |

|          |          |          |          |          |          |                      |     |
|----------|----------|----------|----------|----------|----------|----------------------|-----|
| 582426   | 328875.3 | 358113.9 | 348448.1 | 386065.1 | 128287.9 |                      | 4   |
| 5669866  | 5925342  | 18608276 | 28013611 | 7585325  | 7922191  |                      | 105 |
| 252560   | 238617.3 | 461098.9 | 790148.6 | 503651.8 | 651011.4 |                      | 355 |
| 3672213  | 1221394  | 1723908  | 3625343  | 1504426  | 526514.4 | [M+3H-C5H            | 15  |
| 3628600  | 3654826  | 3374976  | 3537546  | 3530499  | 2804995  |                      | 390 |
| 375687.8 | 1185664  | 0        | 110338.7 | 488117.2 | 1240554  | [3M+Na+K-            | 6   |
| 4510031  | 4919612  | 4379550  | 6150505  | 7116595  | 2526831  | [1300][M+2]+         | 2   |
| 488082.5 | 29057.98 | 51724.08 | 111237.7 | 68648.48 | 41216.57 |                      | 127 |
| 4825109  | 8399288  | 3894938  | 2788821  | 7347675  | 6923967  | [2M+K]+ 16           | 11  |
| 2144447  | 2883433  | 5948737  | 5849029  | 2295658  | 1356572  |                      | 76  |
| 1781700  | 634196   | 8350578  | 1217554  | 5318445  | 2587691  |                      | 9   |
| 1435902  | 7684435  | 7807792  | 1135989  | 1608635  | 320174.1 |                      | 58  |
| 1709906  | 3354610  | 2407984  | 1719808  | 2244245  | 3119397  |                      | 5   |
| 9842773  | 4770717  | 9105338  | 6537209  | 7430854  | 3080322  |                      | 2   |
| 19978965 | 67062598 | 28977875 | 6144789  | 16803216 | 87540296 | [M+Na]+ 20           | 58  |
| 757147   | 892307   | 579684.4 | 667986.6 | 778906.9 | 511470.6 | [M+K]+ 27            | 8   |
| 9946185  | 7514857  | 6799825  | 6499392  | 4714489  | 6762971  | [6][M]+              | 287 |
| 632536.2 | 231665.7 | 489031.3 | 185471.1 | 288191.1 | 238907   | [226][M+1]2+         | 16  |
| 1994622  | 2523150  | 1222246  | 2048183  | 1786140  | 1411622  |                      | 161 |
| 575739.3 | 1832520  | 1467709  | 1137107  | 759702.3 | 995314.3 |                      | 9   |
| 884153.9 | 1430662  | 1135039  | 2035687  | 1048151  | 1038534  |                      | 9   |
| 617507.7 | 2144633  | 39940.62 | 1759891  | 2427397  | 1807982  |                      | 3   |
| 6339115  | 6174773  | 4729264  | 5245809  | 5813550  | 6362688  |                      | 2   |
| 8646689  | 10043777 | 7947705  | 5800859  | 9057352  | 6746397  | [446][M]3+           | 2   |
| 353859.6 | 640388.2 | 919305   | 767624   | 778947.7 | 1451372  | [M+K]+ 41            | 83  |
| 15440908 | 16245376 | 43356778 | 36200523 | 15062382 | 20118634 | [1058][M]+ [M+H]+ 58 | 110 |
| 896498.9 | 742901.5 | 1639422  | 705865.4 | 514025.1 | 1127094  | [M+H+CF3O            | 8   |
| 400263.4 | 1507311  | 150102   | 1600728  | 1693749  | 1561255  |                      | 101 |
| 1114809  | 0        | 1071468  | 839319.1 | 866681.6 | 81877.49 |                      | 9   |
| 49476166 | 43825178 | 44677567 | 27113991 | 40873154 | 17263420 |                      | 1   |
| 9037951  | 4780265  | 4187186  | 7213239  | 3297729  | 2261935  |                      | 9   |
| 321626.9 | 1564847  | 1574245  | 1026811  | 630884   | 1162929  |                      | 9   |
| 935033.3 | 1052117  | 380674.1 | 753460.6 | 580292.6 | 1050239  | [M+H]+ 42            | 16  |
| 17335776 | 28361671 | 21564278 | 16853984 | 17971962 | 14087553 |                      | 1   |
| 1.21E+08 | 1.06E+08 | 1.33E+08 | 1.2E+08  | 89341601 | 69697519 | [293][M]+            | 56  |

|          |          |          |          |          |          |                                    |     |
|----------|----------|----------|----------|----------|----------|------------------------------------|-----|
| 1558471  | 3531240  | 43065.6  | 6279416  | 3128703  | 9534587  | [M+H+K] <sup>2+</sup>              | 11  |
| 944777.4 | 1142081  | 575899.7 | 783078.1 | 905245.1 | 261308.3 | [1115][M] <sup>2+</sup>            | 35  |
| 364291.6 | 1180735  | 925754.6 | 469818   | 684439.8 | 2720488  | [3M+H+Na                           | 8   |
| 4231801  | 8722791  | 3569893  | 3950102  | 7312766  | 20648299 |                                    | 2   |
| 41341639 | 41720696 | 31416445 | 39757812 | 42305789 | 22603629 | [400][M] <sup>2+</sup>             | 2   |
| 767315.4 | 930315.7 | 476402.4 | 563666.2 | 585697.5 | 506882.6 |                                    | 147 |
| 2332506  | 1250283  | 2334351  | 2631731  | 2334664  | 1708217  |                                    | 386 |
| 1148602  | 1284915  | 1076969  | 1184993  | 1149892  | 711463.7 |                                    | 4   |
| 163335.3 | 900863.3 | 881108.2 | 222707.4 | 508154.3 | 1791873  |                                    | 9   |
| 433980.2 | 1049068  | 876762   | 1550070  | 646419.3 | 947197   |                                    | 9   |
| 2437834  | 442567.5 | 1876742  | 2219816  | 3557618  | 3050031  |                                    | 9   |
| 5795430  | 5655757  | 4920306  | 5718656  | 5489574  | 3042420  |                                    | 335 |
| 19774411 | 5611862  | 3762104  | 2091476  | 18069901 | 8555749  |                                    | 3   |
| 11066815 | 3230660  | 8400418  | 8502453  | 4739067  | 18518582 | [M+H-C <sub>3</sub> H <sub>2</sub> | 97  |
| 1830308  | 1216363  | 3048370  | 1480141  | 1313326  | 1647165  |                                    | 18  |
| 17041421 | 7184397  | 4649492  | 2341835  | 8539711  | 7275317  |                                    | 404 |
| 19524001 | 1.4E+08  | 52502443 | 2544507  | 1.98E+08 | 2.08E+08 |                                    | 1   |
| 189376.6 | 638585.4 | 644444.3 | 0        | 205150.5 | 1088215  |                                    | 9   |
| 1225004  | 1472268  | 1395959  | 8534472  | 1195982  | 11178997 | [1310][M+1] <sup>+</sup>           | 9   |
| 397118.9 | 0        | 532474.4 | 370416.7 | 396833.3 | 394994.6 |                                    | 38  |
| 627237.7 | 673483.2 | 805432.4 | 868854.4 | 734561.1 | 344050.7 | [1036][M+1] <sup>+</sup>           | 22  |
| 4716054  | 5243021  | 3749772  | 3551514  | 3931506  | 909256.1 |                                    | 29  |
| 1030945  | 3804005  | 856352.3 | 1238577  | 682615.4 | 632660.2 | [M+H] <sup>+</sup> 50              | 15  |
| 271699.1 | 197893.2 | 137510.6 | 288168.5 | 290906.3 | 185271   | [174][M+1] <sup>+</sup>            | 254 |
| 57260833 | 4028618  | 4537469  | 15714569 | 4866194  | 1341787  | [637][M] <sup>+</sup>              | 127 |
| 1580273  | 93231.01 | 820134.3 | 540972.3 | 591231.6 | 0        | [3M+2Na] <sup>+</sup>              | 46  |
| 4053457  | 3046528  | 2895817  | 2809725  | 2852114  | 1659353  | [175][M] <sup>+</sup>              | 249 |
| 449260.7 | 1373311  | 1260267  | 1097435  | 622061.4 | 904865.5 |                                    | 9   |
| 1582159  | 162174.9 | 1442807  | 1185313  | 1356043  | 336056.7 | [M+2H-NH <sub>2</sub>              | 13  |
| 1542233  | 3245484  | 3914552  | 2586499  | 2506105  | 1766414  |                                    | 417 |
| 38515097 | 23807127 | 32150589 | 33437317 | 28048631 | 13150280 |                                    | 2   |
| 67757.89 | 804230.2 | 0        | 270629.4 | 218786.3 | 362594   |                                    | 29  |
| 2799718  | 2411515  | 2012796  | 1969225  | 3272434  | 1970582  |                                    | 9   |
| 1051037  | 1036955  | 817225.1 | 687619.7 | 871678.4 | 534338.4 | [870][M+2] <sup>+</sup>            | 123 |
| 1470820  | 95716.06 | 136966.1 | 101894.7 | 154312.3 | 143625.7 |                                    | 83  |

|          |          |          |          |          |          |                      |     |
|----------|----------|----------|----------|----------|----------|----------------------|-----|
| 4387689  | 3879456  | 1587598  | 4027034  | 3893185  | 2776418  |                      | 325 |
| 469052.5 | 510508.5 | 807407.8 | 405239.9 | 613093.1 | 777476.5 |                      | 33  |
| 4106767  | 4239076  | 4168152  | 2523540  | 4424205  | 2425341  |                      | 191 |
| 141621.9 | 318819.2 | 0        | 0        | 10312.07 | 36498.66 |                      | 18  |
| 6224311  | 4928188  | 4230233  | 9669448  | 5359610  | 1469595  |                      | 2   |
| 22451948 | 23551983 | 19867119 | 19754016 | 22059866 | 11247498 |                      | 2   |
| 30368241 | 41653770 | 26359990 | 29651383 | 42436530 | 22051618 | [457][M]2+           | 2   |
| 7233528  | 7056414  | 5971737  | 5261630  | 6668269  | 4396830  |                      | 4   |
| 654169.9 | 817414   | 736042.6 | 312009.2 | 568068.5 | 494163.5 | [944][M+1]3+         | 57  |
| 15328454 | 4766608  | 2917149  | 4250555  | 15576915 | 10151117 | [797][M+1]+          | 15  |
| 9381076  | 10442010 | 8687089  | 7086546  | 8348647  | 4795257  | [1049][M+1]+         | 58  |
| 13011085 | 2200478  | 18322433 | 8162347  | 5685478  | 8030372  | [17][M]+             | 1   |
| 52420.01 | 439140.8 | 205615.6 | 12332.59 | 164092.5 | 439670   |                      | 18  |
| 210285.7 | 90092.03 | 78624.97 | 123099   | 97084.74 | 92208.02 | [83][M+1]+           | 342 |
| 4282316  | 4167270  | 11758949 | 10748160 | 4102567  | 5074908  | [1058][M+1]+         | 110 |
| 10894396 | 6424941  | 6288088  | 6258083  | 4085486  | 5820704  |                      | 236 |
| 11041291 | 20984389 | 11923760 | 6768344  | 19302955 | 8797004  | [3M+Na+K]            | 15  |
| 1183326  | 771184.4 | 923896.7 | 999444.4 | 682066.4 | 42152.45 |                      | 4   |
| 428706.6 | 413273.5 | 281007.8 | 438336.4 | 369350.3 | 637824.6 | [M+H+CF3O]           | 16  |
| 168615.9 | 481909.8 | 527460.8 | 467892.9 | 497583   | 235754.2 | [788][M+2]+          | 135 |
| 22119206 | 31376470 | 15572912 | 17372573 | 21259250 | 18597988 | [975][M]+            | 9   |
| 3463773  | 4403293  | 3211067  | 3162655  | 7732040  | 7100145  |                      | 337 |
| 3813749  | 42785807 | 3472082  | 3666624  | 1951395  | 45968564 |                      | 2   |
| 4514358  | 3331581  | 62337836 | 7818724  | 5130728  | 60750676 | [M+K]+ 33%           | 195 |
| 49191416 | 43884238 | 44381770 | 26907990 | 40955968 | 17433942 |                      | 1   |
| 5989730  | 7245377  | 5869618  | 4881631  | 6256017  | 4384369  |                      | 9   |
| 1545438  | 1585286  | 1917696  | 1317430  | 1378906  | 1683011  |                      | 4   |
| 346639.1 | 183440.7 | 366649.9 | 350618.2 | 149217.2 | 96263.82 |                      | 170 |
| 143243.2 | 123564.6 | 98078.87 | 77782.41 | 109612.1 | 90657.88 | [898][M+1]+          | 110 |
| 359202.6 | 490047   | 333463.9 | 501807.8 | 440864.9 | 472423.4 | [M+Na]+ 4%           | 147 |
| 1079181  | 715719.9 | 6678229  | 1012548  | 1183442  | 7846660  |                      | 9   |
| 49543095 | 52878122 | 50742580 | 38817439 | 43227544 | 22515112 | [1049][M]+ [M+H+NH3] | 58  |
| 2125328  | 1050934  | 1162262  | 1384031  | 1445878  | 0        |                      | 1   |
| 8183230  | 6074978  | 3881572  | 8089085  | 8095117  | 9397125  |                      | 354 |
| 2537110  | 1539222  | 2318690  | 1970954  | 2104985  | 2286319  | [M+H+HCC]            | 201 |

|          |          |          |          |          |          |              |     |
|----------|----------|----------|----------|----------|----------|--------------|-----|
| 1475957  | 2232492  | 1444865  | 1114295  | 393496.4 | 1212907  |              | 9   |
| 12142527 | 19193349 | 14369184 | 10394300 | 10473687 | 13543877 |              | 1   |
| 1104475  | 1434325  | 1384845  | 1093852  | 1095575  | 972695.7 | [1264][M+1]+ | 86  |
| 486008.5 | 988095.7 | 765808.3 | 85970.67 | 570587.5 | 706275.4 |              | 46  |
| 6906206  | 2300787  | 6395827  | 2691400  | 6518393  | 3097879  |              | 279 |
| 8186798  | 2812956  | 3764553  | 5376945  | 7043095  | 1812342  | [M+Na]+ 3!   | 15  |
| 7657739  | 4846476  | 3773400  | 3748072  | 744536   | 3566444  |              | 323 |
| 3075650  | 2294413  | 2336517  | 2421277  | 2143029  | 1342698  | [590][M]2+   | 166 |
| 681959.5 | 1036626  | 836180.9 | 544746.8 | 735294.2 | 548740.8 | [M+Na]+ 5!   | 35  |
| 20577243 | 18226717 | 22674583 | 20576882 | 14791300 | 11345950 | [293][M+1]+  | 56  |
| 2848895  | 11577581 | 1659492  | 3004206  | 3329105  | 16924258 |              | 2   |
| 680914.3 | 2555246  | 696073.3 | 2467467  | 3963328  | 2813178  |              | 4   |
| 1056252  | 7324973  | 5512698  | 1009992  | 5787772  | 15542281 |              | 2   |
| 2773977  | 421470.4 | 408090.2 | 2787916  | 328239.9 | 572638.3 | [M+H]+ 22!   | 5   |
| 22280913 | 15681093 | 14417782 | 22362669 | 14760691 | 9398154  | [380][M]2+   | 2   |
| 1187117  | 2511539  | 1392061  | 1230774  | 3078581  | 3417813  |              | 93  |
| 1043818  | 1937477  | 2450049  | 2008597  | 2522719  | 6874962  | [725][M+1]+  | 9   |
| 25714671 | 23951303 | 25918575 | 19446973 | 19781109 | 5537667  |              | 12  |
| 1150295  | 372912.7 | 651096.7 | 793246.9 | 1041876  | 124634.3 |              | 9   |
| 37111466 | 27597898 | 30737556 | 31616280 | 29931854 | 10570927 |              | 2   |
| 398099   | 302390.9 | 266024.7 | 232563.5 | 358047.7 | 675607.9 | [M+H]+ 64!   | 23  |
| 696620.6 | 1566343  | 1757126  | 518165.2 | 1432036  | 120473.7 | [M+2H]2+     | 15  |
| 1516519  | 4726907  | 10995610 | 11208262 | 9458688  | 4456415  |              | 2   |
| 6577619  | 5540579  | 5026718  | 4203032  | 5470447  | 1201287  | [585][M+1]+  | 4   |
| 2401994  | 2339045  | 1048039  | 1197308  | 2009724  | 2860149  |              | 93  |
| 1212640  | 1336762  | 1405341  | 640531.6 | 1586283  | 0        | [M+H]+ 58!   | 15  |
| 612591.7 | 755194.2 | 277531.2 | 635312.8 | 382197.3 | 585974.6 |              | 179 |
| 3647731  | 485569.9 | 1319201  | 792711.4 | 2390387  | 139347.3 |              | 1   |
| 368960.4 | 1202193  | 947490.9 | 438537.3 | 671601.1 | 1725958  |              | 4   |
| 4949371  | 7402053  | 4899770  | 782153.1 | 6856859  | 2454683  | [M+K+CF3C    | 15  |
| 33716123 | 26523115 | 33088451 | 26461701 | 22257347 | 12711086 | [136][M]2+   | 215 |
| 413358.3 | 386528.9 | 477435.7 | 496807.6 | 390497.5 | 426868.4 |              | 109 |
| 3276261  | 2291365  | 1673038  | 410877   | 2333738  | 1950684  | [M+2H-CH:    | 398 |
| 4162092  | 2841234  | 2344426  | 4418253  | 6673628  | 5377940  |              | 2   |
| 5240841  | 2080985  | 4096313  | 6172489  | 3739134  | 1376217  |              | 2   |

|          |          |          |          |          |          |                      |     |
|----------|----------|----------|----------|----------|----------|----------------------|-----|
| 10392510 | 737743.4 | 591126.1 | 618163.6 | 532048.2 | 636250.9 |                      | 127 |
| 484415   | 137406.4 | 744031.5 | 761784.1 | 549778.8 | 71488.12 |                      | 9   |
| 932250.1 | 1418116  | 764709.5 | 928677.8 | 1213729  | 1422180  | [1481][M]2+          | 35  |
| 5279995  | 5152337  | 3566181  | 3731559  | 2099039  | 3976468  | [1444][M]+ [M+Na]+ 7 | 12  |
| 2.95E+08 | 98715385 | 70280915 | 26846760 | 61545874 | 30682860 |                      | 1   |
| 531427   | 212293.6 | 464972.2 | 470133.9 | 486700.6 | 183116.3 |                      | 118 |
| 10151932 | 7721658  | 8337286  | 9511413  | 7439776  | 7589697  | [1219][M]+ [M+H+NH3  | 150 |
| 339098.4 | 705693.1 | 766678.2 | 844339.1 | 381731.9 | 1675022  |                      | 9   |
| 3867928  | 2917317  | 2964342  | 2874493  | 2968258  | 1535825  | [1412][M]+           | 166 |
| 624619.8 | 671742   | 407215.1 | 431946.4 | 682961.7 | 437938.3 |                      | 8   |
| 2582401  | 1123923  | 2834846  | 2545418  | 892631.3 | 693557   | [827][M+1]+          | 218 |
| 3840742  | 2586544  | 3729368  | 1629928  | 2621883  | 766811.9 |                      | 1   |
| 949686.1 | 570625.9 | 1086678  | 799775.2 | 756158.7 | 312755.7 | [M+H]+ 36            | 28  |
| 480894.6 | 604153.4 | 299186   | 1038742  | 489285.2 | 655403.3 | [M+K+NH3             | 185 |
| 8190506  | 3967570  | 3943637  | 4197198  | 12150456 | 2492591  |                      | 1   |
| 11720893 | 6345884  | 1279144  | 7257418  | 5380887  | 7564321  |                      | 372 |
| 3625964  | 3661969  | 4317274  | 8674668  | 4721338  | 2962163  |                      | 385 |
| 1706537  | 1360644  | 1296074  | 696768.3 | 9106365  | 3051074  | [69][M+1]+           | 1   |
| 776254.5 | 1694005  | 761663.1 | 844602.2 | 1407199  | 0        |                      | 2   |
| 2868999  | 3400339  | 3490627  | 172715   | 891861.4 | 1103786  |                      | 4   |
| 1291429  | 1008730  | 923137.8 | 873150.6 | 823229   | 630444.7 |                      | 497 |
| 71909552 | 69406452 | 49501699 | 71607618 | 68648790 | 27961095 |                      | 2   |
| 283363.5 | 679101.6 | 359430.8 | 100227.3 | 179480.9 | 654723.5 | [M+K]+ 58            | 18  |
| 6221234  | 9024134  | 4279471  | 4951463  | 5620226  | 2234733  |                      | 3   |
| 1059742  | 1052793  | 1180564  | 324972.2 | 1305487  | 809686.5 |                      | 1   |
| 5375626  | 5852130  | 4627858  | 4516000  | 2473374  | 5906655  | [1114][M+1]+         | 134 |
| 3278062  | 2169895  | 2987733  | 1504717  | 2232656  | 121948.8 |                      | 1   |
| 7776408  | 7470523  | 7825957  | 6888465  | 6014707  | 4218284  | [682][M]+ [M+H]+ 40  | 44  |
| 21629585 | 3569610  | 4256810  | 3693576  | 24116274 | 11173230 | [M+Na]+ 1            | 15  |
| 2883051  | 6848780  | 4624114  | 1700701  | 4998252  | 5302677  | [M+Na+NH             | 6   |
| 4177246  | 3298144  | 3652524  | 2620716  | 2465314  | 487842.7 | [690][M]3+           | 58  |
| 3269809  | 3491465  | 3742556  | 2789959  | 2566118  | 2289796  |                      | 246 |
| 768721.5 | 2369046  | 1332018  | 183394.5 | 519402.6 | 1540791  | [3M+H+Na             | 18  |
| 19085353 | 3598705  | 4386658  | 2540640  | 25921354 | 930043.9 | [M+3H-NH             | 11  |
| 2451910  | 2435338  | 656862.3 | 2390742  | 996266.3 | 890565.8 |                      | 80  |

|          |          |          |          |          |          |                      |     |
|----------|----------|----------|----------|----------|----------|----------------------|-----|
| 7073501  | 5142214  | 5635607  | 4778482  | 4824824  | 4331684  |                      | 2   |
| 0        | 390583.2 | 68956.9  | 15658.93 | 36452.65 | 147268   | [1469][M]3+          | 18  |
| 27087432 | 32248769 | 26671750 | 20472216 | 19658725 | 14388618 |                      | 1   |
| 206131.4 | 434118.1 | 293596   | 360774.9 | 171130.6 | 381825.1 | [1590][M]+           | 366 |
| 3017024  | 4215809  | 3865089  | 1276497  | 2627158  | 3500320  | [1280][M+1]2+        | 1   |
| 324297.2 | 176738.6 | 153879.8 | 306018.2 | 231949.4 | 85832.99 |                      | 168 |
| 1785844  | 1734256  | 3021920  | 972523.5 | 7457179  | 1905566  |                      | 9   |
| 2890792  | 4443510  | 14370614 | 3685974  | 5532049  | 5992864  | [M+H-C2H4            | 93  |
| 5976649  | 19566204 | 8166643  | 5400052  | 5677829  | 1881522  | [M+K+NaCl            | 15  |
| 2530096  | 2260719  | 2008446  | 2338282  | 1678876  | 0        |                      | 2   |
| 16943574 | 7038748  | 15942910 | 16163214 | 5882146  | 3940901  | [1464][M]+ [M+H+NH3  | 220 |
| 12628171 | 5528055  | 4205251  | 6290703  | 10642558 | 2456224  |                      | 1   |
| 39655246 | 39392040 | 40988791 | 26014789 | 28640076 | 11406354 | [420][M]2+ [M+H+Na]2 | 12  |
| 11961559 | 1715243  | 2580340  | 7913821  | 8459596  | 4131922  | [M+H]+ 34            | 3   |
| 6341111  | 3333859  | 2743062  | 4080319  | 2608588  | 3128870  |                      | 3   |
| 1607495  | 3491926  | 866713.3 | 3060269  | 3379307  | 1029070  |                      | 1   |
| 28189263 | 30310405 | 26240520 | 20115814 | 18552657 | 13850101 |                      | 1   |
| 2561663  | 2698921  | 2272925  | 1960210  | 2627648  | 1780937  | [8][M+2]3+           | 9   |
| 1449848  | 2092112  | 1611509  | 1400342  | 1174127  | 1282154  | [1379][M+1]+         | 299 |
| 702140.7 | 0        | 579484.9 | 376436.7 | 504664.6 | 723218.7 |                      | 9   |
| 2958530  | 7002066  | 1002378  | 21354541 | 3903098  | 3526891  | [3M+K]+ 2            | 93  |
| 413851.2 | 244568.5 | 375978.2 | 419191.5 | 276632.9 | 137567.3 | [954][M+1]3+         | 134 |
| 6155993  | 2289854  | 1233745  | 3348207  | 1987167  | 377142.9 | [M+K+NH3             | 3   |
| 263824.1 | 289303.5 | 87605.86 | 228067.1 | 161914.4 | 14697.26 |                      | 65  |
| 2063806  | 1852768  | 1834832  | 4429894  | 984356.2 | 4928842  |                      | 2   |
| 3794541  | 1651042  | 3670606  | 2471448  | 2731833  | 0        |                      | 2   |
| 2.16E+08 | 2.4E+08  | 2.36E+08 | 1.74E+08 | 1.49E+08 | 97314482 | [794][M+3]+          | 1   |
| 1829104  | 1204921  | 1766776  | 806352.8 | 1037022  | 621075.6 |                      | 1   |
| 2260891  | 4315111  | 2807896  | 1832839  | 2948625  | 1584334  | [M+H]+ 73            | 16  |
| 5567705  | 5142904  | 3658910  | 4283489  | 4666589  | 2020687  |                      | 9   |
| 1.14E+08 | 65044259 | 66772810 | 51795017 | 44577877 | 40984705 |                      | 1   |
| 1081659  | 198195.6 | 324910.4 | 261667.7 | 249718.6 | 0        | [525][M+1]2+         | 200 |
| 720165.8 | 767931.7 | 12063195 | 32635430 | 1230872  | 4815182  | [153][M]+            | 118 |
| 1417751  | 1420163  | 1344327  | 1481021  | 909627.6 | 1843760  | [M+Na]+ 6            | 150 |
| 546812   | 1452911  | 2100161  | 1935724  | 883244.9 | 1007313  | [161][M+1]3+         | 9   |

|          |          |          |          |          |          |              |     |
|----------|----------|----------|----------|----------|----------|--------------|-----|
| 321280   | 594882.9 | 2231687  | 2202967  | 1995553  | 1512499  | [251][M]3+   | 24  |
| 380015.8 | 517840.8 | 1136252  | 1119340  | 835380.6 | 1695902  | [1278][M+1]+ | 130 |
| 6183972  | 563087.7 | 363617.7 | 1150849  | 590174.2 | 649398.7 | [651][M+1]+  | 127 |
| 11963384 | 6782419  | 0        | 10461721 | 6607802  | 5596037  | [760][M+1]+  | 90  |
| 240160.9 | 230973.9 | 243026.9 | 74988.49 | 97544.99 | 71708.05 |              | 77  |
| 139460.2 | 302815.1 | 201859.8 | 215113.6 | 191416.8 | 121992.4 | [1379][M+2]+ | 299 |
| 1209253  | 1021172  | 723070.2 | 1073090  | 366885.8 | 324075.5 |              | 134 |
| 461207.6 | 726462.7 | 720546.6 | 445530.8 | 429323.1 | 778193.9 | [1125][M+2]+ | 89  |
| 7380421  | 9037197  | 8249219  | 5602160  | 4917710  | 7677877  | [M+H]+ 36    | 20  |
| 3126852  | 4630152  | 6708218  | 3014436  | 3264470  | 2541122  | [3M+H+Na     | 356 |
| 74355394 | 66973468 | 67595754 | 65413508 | 61266537 | 20151808 | [M+H]+ 57    | 13  |
| 3129956  | 2709411  | 2289978  | 2417369  | 2998103  | 302807.3 | [M+H]+ 79    | 14  |
| 133507.3 | 651708.8 | 548245.2 | 326949.4 | 237396.6 | 856290.6 |              | 4   |
| 14831892 | 16158744 | 4733540  | 8292324  | 17411847 | 11611100 |              | 11  |
| 8691509  | 11862334 | 11843916 | 5824528  | 8383969  | 633268.3 |              | 1   |
| 1332713  | 1763887  | 1109945  | 1172153  | 1394051  | 653413.3 |              | 9   |
| 2820552  | 2279398  | 4301398  | 2920319  | 1191113  | 549634   |              | 1   |
| 483945.2 | 378977.4 | 334425.7 | 452887.4 | 171946.1 | 136138   | [1073][M]3+  | 51  |
| 7935038  | 13716554 | 14028781 | 6361468  | 7367811  | 2743420  |              | 1   |
| 1386383  | 4277228  | 3270772  | 2086989  | 1693778  | 1015604  | [3M+Na+K]    | 38  |
| 2776688  | 1713343  | 2621715  | 3342881  | 3299531  | 1380766  | [87][M+2]2+  | 1   |
| 2131166  | 1987379  | 1730367  | 1605981  | 1928354  | 1309987  | [63][M]3+    | 4   |
| 1712517  | 23013894 | 71402194 | 1683559  | 2115460  | 14742681 | [414][M+2]3+ | 2   |
| 2450083  | 2947375  | 1275785  | 1898149  | 1622639  | 1045098  | [M+K+NH3     | 56  |
| 4196298  | 3166866  | 2337283  | 2976471  | 2860835  | 477648.3 | [242][M]2+   | 9   |
| 1294648  | 906397   | 3510169  | 1420498  | 3720093  | 3046588  |              | 69  |
| 8310892  | 10347767 | 9618413  | 7365280  | 9376793  | 6249168  | [1577][M]+   | 9   |
| 22309774 | 32439987 | 16016140 | 18703618 | 40118485 | 65495497 |              | 2   |
| 3885941  | 2496911  | 1434874  | 2279328  | 1618541  | 1802344  | [223][M+1]+  | 152 |
| 539142.4 | 174207.4 | 601902.4 | 548284.3 | 245805.8 | 380029.1 | [M+H]+ 71    | 35  |
| 16823776 | 14372504 | 15116359 | 8903168  | 14071074 | 4965897  |              | 1   |
| 1817165  | 523785.7 | 1849916  | 1559647  | 1354782  | 1635633  | [1608][M]+   | 7   |
| 762512.7 | 1364879  | 647321.3 | 617325.5 | 1562902  | 3498792  |              | 1   |
| 1467021  | 1088647  | 1510399  | 955684.2 | 1301838  | 521272.5 |              | 1   |
| 598816.5 | 76413.73 | 116459.8 | 430573.6 | 150849.1 | 273847.4 |              | 9   |



|          |          |          |          |          |          |                       |     |
|----------|----------|----------|----------|----------|----------|-----------------------|-----|
| 7754417  | 7436916  | 8912009  | 4131523  | 2032719  | 7230009  | [M+K]+ 358            | 11  |
| 1532516  | 2643086  | 624383.6 | 332845.1 | 1703137  | 148944.4 |                       | 1   |
| 2531175  | 4218843  | 2580644  | 2555255  | 3016523  | 1913762  | [335][M+2]3+          | 2   |
| 489724.1 | 889907.9 | 511268.2 | 401264.7 | 575699.8 | 724440.4 | [M+2Na]2+             | 8   |
| 4677660  | 5252564  | 4427258  | 4359794  | 3446997  | 3071113  | [386][M]+ [M+H]+ 338  | 112 |
| 1982038  | 1053959  | 1773879  | 1604367  | 1073721  | 1125518  |                       | 312 |
| 4787796  | 3441248  | 4148203  | 5021255  | 3861511  | 4552006  | [M+Na+HC              | 257 |
| 2030106  | 2006614  | 842021.8 | 1693258  | 2090202  | 957565   |                       | 9   |
| 1403589  | 1969446  | 5604275  | 3852593  | 4408382  | 1647859  |                       | 4   |
| 533842.8 | 572658.7 | 653725   | 324031.3 | 233417.5 | 0        |                       | 46  |
| 2.52E+08 | 734035.3 | 2.31E+08 | 470745   | 703500.9 | 2.14E+08 |                       | 32  |
| 1369100  | 1089610  | 1510298  | 1071453  | 804593.1 | 1257352  |                       | 9   |
| 1120268  | 923708.2 | 1147811  | 317487.9 | 422179.7 | 816254.2 | [M+Na+Na              | 25  |
| 1295953  | 6198953  | 4830771  | 5032982  | 1056068  | 3090222  |                       | 1   |
| 8186435  | 14089029 | 10767868 | 7387131  | 9953676  | 6258846  |                       | 1   |
| 447607.1 | 257560.6 | 607552.4 | 319578.1 | 372920.7 | 104346.1 | [M+K]+ 786            | 28  |
| 1429514  | 1570354  | 1468281  | 1227733  | 1121745  | 948005.6 |                       | 394 |
| 1935252  | 1967170  | 1839880  | 1774377  | 1448962  | 957534.8 | [3M+2Na]2             | 42  |
| 3263367  | 2205283  | 428771.8 | 1071714  | 1447154  | 1739099  | [127][M]+             | 99  |
| 431519.3 | 254395   | 38316.19 | 185048.8 | 153552.2 | 78583.55 |                       | 124 |
| 8911944  | 4959231  | 11255892 | 6977447  | 7408726  | 1965990  | [M+H+CF3O             | 28  |
| 2178973  | 1589121  | 652853   | 668217.4 | 597325.9 | 329154.9 |                       | 39  |
| 1176267  | 2384956  | 807160.8 | 1625406  | 1507095  | 907326.8 |                       | 4   |
| 6393956  | 9930921  | 8791397  | 5005151  | 7160346  | 6711768  |                       | 1   |
| 382611.1 | 380281.7 | 106909.5 | 313513.6 | 228466   | 172226.8 | [1232][M+1]+          | 210 |
| 7276213  | 9086966  | 6289663  | 6805230  | 7048750  | 5305802  | [351][M]3+            | 2   |
| 2614078  | 6921198  | 7087957  | 7265923  | 7152579  | 11582938 |                       | 241 |
| 448212.8 | 417583.1 | 416496.3 | 351871.2 | 474737.4 | 231491.7 | [1563][M]+ [M+H]+ 108 | 169 |
| 644910.3 | 0        | 259213.7 | 577772   | 444909.8 | 436416.1 |                       | 9   |
| 1494298  | 1837604  | 1425738  | 1030297  | 1474820  | 1207353  |                       | 9   |
| 178756   | 255962.3 | 145806   | 118186.5 | 217209.2 | 327195.7 | [1511][M+1]+          | 328 |
| 6397353  | 3169067  | 5406712  | 5121344  | 4473228  | 686693.1 |                       | 2   |
| 16703592 | 14599322 | 15083110 | 9006967  | 13932680 | 4919793  |                       | 1   |
| 1285263  | 1610692  | 1387100  | 8551193  | 1004109  | 6370601  |                       | 29  |
| 3394651  | 483021.4 | 3294194  | 508843.9 | 2689280  | 2232171  |                       | 93  |

|          |          |          |          |          |          |              |     |
|----------|----------|----------|----------|----------|----------|--------------|-----|
| 434806.6 | 945699.1 | 1369419  | 646919   | 1050912  | 645304.2 | [1537][M+3]+ | 33  |
| 12891357 | 5612471  | 4429782  | 6492392  | 10493733 | 2318236  |              | 1   |
| 7529515  | 6254479  | 6947150  | 6952335  | 5098334  | 2743591  |              | 2   |
| 1464201  | 1008086  | 823927   | 921546.8 | 1869603  | 235394.8 | [M+2H]2+     | 15  |
| 8027102  | 7729362  | 7681001  | 7088512  | 6496291  | 4127605  | [1269][M+1]+ | 62  |
| 552424.8 | 360216.2 | 567233.6 | 650475.8 | 326298.6 | 308263.8 | [M+Na]+ 4!   | 42  |
| 1156648  | 1793953  | 1007530  | 166461.7 | 1478657  | 913269.5 | [M+Na]+ 2!   | 20  |
| 83069.23 | 674283.9 | 299908.2 | 96392.13 | 601655.6 | 0        |              | 1   |
| 934671.8 | 555068.9 | 1259513  | 765759.6 | 152139.9 | 1083770  | [886][M+1]+  | 218 |
| 366185.8 | 0        | 493001.6 | 376810.9 | 580978   | 285148   |              | 89  |
| 910076.9 | 883817.6 | 833245.2 | 574745.2 | 741176.4 | 623565.6 |              | 4   |
| 9493390  | 9038075  | 9406534  | 8585807  | 8396949  | 9161651  |              | 4   |
| 864817.7 | 500649   | 360880.4 | 261984.6 | 707984.4 | 159318.6 |              | 91  |
| 2530751  | 1954132  | 2028613  | 2354394  | 1568129  | 2200226  | [1046][M+1]+ | 150 |
| 2438153  | 1274801  | 2084503  | 1867267  | 1.22E+08 | 1.64E+08 | [390][M+1]2+ | 2   |
| 3114141  | 2898403  | 4704887  | 2982568  | 3979029  | 4439149  |              | 428 |
| 9880894  | 9975958  | 7563184  | 6290559  | 7689197  | 11432438 | [1198][M+1]+ | 6   |
| 48410438 | 35986575 | 38880006 | 40274186 | 38695689 | 3335273  | [20][M]+     | 2   |
| 11015504 | 7962981  | 8778967  | 8311133  | 11217789 | 7237371  |              | 9   |
| 253786.8 | 304317.5 | 125880.3 | 282970.7 | 0        | 118782.5 | [1443][M+2]+ | 44  |
| 708391   | 799350.9 | 752441.1 | 735667.3 | 871317.4 | 1312669  |              | 7   |
| 1459954  | 2337921  | 1312499  | 187614.2 | 1514849  | 995568.8 |              | 20  |
| 6051840  | 3592610  | 5260133  | 3140419  | 4739640  | 0        |              | 2   |
| 866386.4 | 1885414  | 1020229  | 948708.9 | 1619549  | 1320102  |              | 9   |
| 1432771  | 1460323  | 1393567  | 906465   | 1060165  | 747389.3 | [592][M+1]2+ | 4   |
| 16670635 | 14736391 | 15193404 | 12423520 | 12378533 | 18290563 |              | 308 |
| 1681153  | 2265384  | 1658184  | 881980.4 | 1770304  | 1333457  |              | 9   |
| 33457.99 | 90444.55 | 14780.55 | 108780.1 | 210334.6 | 53027.97 |              | 83  |
| 2317070  | 2863433  | 3037531  | 2514580  | 2659412  | 3662934  | [M+H]+ 4!    | 14  |
| 3617054  | 893825.7 | 1409342  | 1427056  | 2024350  | 826482.1 |              | 1   |
| 214551.3 | 531769   | 421835.1 | 51062.42 | 321778.6 | 1194941  |              | 9   |
| 6917586  | 14496850 | 6297174  | 9463838  | 6513614  | 4770472  |              | 435 |
| 1130327  | 992304.5 | 581473.9 | 200134.3 | 893505   | 559075.7 |              | 18  |
| 3533746  | 589089.7 | 4489211  | 3056683  | 316614.5 | 661852   | [185][M]2+   | 4   |
| 301192.1 | 333602.4 | 124009.1 | 176607.2 | 114209   | 327147.5 | [646][M+2]+  | 125 |

|          |          |          |          |          |          |                       |     |
|----------|----------|----------|----------|----------|----------|-----------------------|-----|
| 508622.9 | 536182.5 | 502275.4 | 548058.4 | 470295.6 | 312250   | [3M+2K]2+             | 24  |
| 1512555  | 1601452  | 1881690  | 645606.9 | 1229958  | 0        |                       | 1   |
| 5091823  | 5017207  | 4871497  | 4727159  | 1618592  | 1083983  |                       | 51  |
| 465437.6 | 867675   | 650684.1 | 760785.8 | 601839   | 693974.4 |                       | 33  |
| 1160534  | 1622701  | 21481483 | 22940353 | 1442832  | 1004347  |                       | 9   |
| 1487431  | 1294258  | 1540964  | 519027.5 | 886319.2 | 432471.4 |                       | 58  |
| 6736074  | 1329887  | 4439396  | 5555728  | 3153002  | 0        |                       | 2   |
| 1525555  | 1211686  | 1897015  | 1323937  | 1516914  | 725840.6 | [M+H+HCC              | 62  |
| 4532112  | 199132.1 | 2347657  | 4673030  | 3818254  | 0        |                       | 2   |
| 233547.7 | 374590.3 | 165809   | 166380.7 | 189507.7 | 273047.1 | [M+Na]+ 40            | 342 |
| 1092469  | 751496.2 | 1498120  | 801263.7 | 505977   | 2216730  | [561][M]+             | 256 |
| 6978829  | 12068914 | 10783718 | 11572636 | 11036129 | 3041693  |                       | 226 |
| 498621   | 918349.1 | 2153389  | 1313704  | 1059270  | 936189.7 | [37][M+1]+            | 1   |
| 1688234  | 3377404  | 7738410  | 1853187  | 2144317  | 14499437 |                       | 14  |
| 2980870  | 1831475  | 1771927  | 2526938  | 2664996  | 1282270  |                       | 2   |
| 492021.8 | 877268.7 | 428201.2 | 1046065  | 780627.3 | 539009.2 |                       | 9   |
| 10126096 | 24191379 | 46165224 | 45632512 | 44400269 | 32403094 |                       | 2   |
| 149297.6 | 94725.45 | 26406.81 | 23972.38 | 105559.5 | 0        |                       | 124 |
| 5572777  | 5088639  | 3813619  | 5074835  | 5202080  | 1804207  | [M+H+HCC              | 14  |
| 0        | 918784.1 | 1884744  | 0        | 659432.1 | 3367642  |                       | 2   |
| 1233628  | 1077795  | 983339.2 | 882707.3 | 1045904  | 530468.5 | [484][M+1]+           | 4   |
| 3490714  | 5024515  | 1322102  | 2258045  | 5709813  | 2344787  |                       | 1   |
| 668974.3 | 1275134  | 907918.1 | 627518.3 | 942006.1 | 1318399  | [3M+2K]2+             | 29  |
| 388181.1 | 306410.2 | 627439.3 | 0        | 1221722  | 726031   |                       | 46  |
| 2041025  | 2395953  | 1929317  | 3146854  | 1466269  | 1329687  |                       | 97  |
| 983070.9 | 922455.9 | 5666761  | 2281469  | 1101482  | 1614155  |                       | 9   |
| 1748836  | 8813847  | 5270570  | 7229895  | 7356898  | 2634061  | [M+H]+ 20             | 11  |
| 6309903  | 5501112  | 3980829  | 6257564  | 8315264  | 732138.6 | [M+Na+CF <sub>3</sub> | 314 |
| 385069.6 | 144149.9 | 275067.8 | 340288.8 | 107206.6 | 289898.9 |                       | 440 |
| 208967.5 | 221266.5 | 0        | 120474.7 | 186115.9 | 62293.65 | [1541][M+1]2+         | 110 |
| 2965295  | 3477594  | 1602739  | 1405536  | 3688419  | 2046636  |                       | 2   |
| 16181030 | 7885812  | 3929129  | 14125551 | 8030069  | 1771492  |                       | 2   |
| 2795418  | 2473111  | 2506742  | 2434930  | 2565249  | 1598751  |                       | 231 |
| 352915.5 | 679343.6 | 283943.3 | 251484.1 | 588823.2 | 1174080  | [M+H+NH <sub>3</sub>  | 8   |
| 1726945  | 1362484  | 1690705  | 754865.1 | 1513289  | 0        |                       | 1   |

|          |          |          |          |          |          |                                              |     |
|----------|----------|----------|----------|----------|----------|----------------------------------------------|-----|
| 48318760 | 35933306 | 38904156 | 41407327 | 38396228 | 13374130 |                                              | 2   |
| 36804044 | 31882957 | 37707910 | 30083829 | 22492847 | 5268582  | [839][M]+                                    | 1   |
| 1584614  | 1211215  | 1288569  | 1158910  | 1304046  | 687308.5 | [1412][M+1]+                                 | 166 |
| 2125716  | 3570090  | 1090665  | 1508979  | 3970850  | 6455686  |                                              | 9   |
| 8227563  | 9705111  | 11188579 | 4857954  | 1.89E+09 | 1.32E+09 |                                              | 1   |
| 5200297  | 2708071  | 3378792  | 4066623  | 4995766  | 1490572  |                                              | 1   |
| 294293.9 | 4224897  | 3012187  | 2919985  | 3612940  | 2671459  |                                              | 398 |
| 477579.8 | 33514.51 | 390029.6 | 634418.5 | 625659.5 | 410647.6 |                                              | 9   |
| 1369634  | 1153474  | 865853.8 | 1011334  | 856922.4 | 905283.2 | [1438][M+1]+                                 | 235 |
| 11644992 | 10063048 | 11442548 | 5557590  | 9132374  | 4239812  |                                              | 1   |
| 1101889  | 1387724  | 907558.6 | 869122.7 | 279963.5 | 229827.1 | [1476][M] <sub>2</sub> [3M+2Na] <sub>2</sub> | 35  |
| 35462678 | 37110662 | 30702611 | 22925077 | 30365295 | 45965427 | [1198][M]+ [M+Na]+ 6:                        | 6   |
| 9674103  | 5846318  | 6021371  | 6341751  | 6170281  | 6345985  |                                              | 333 |
| 1143308  | 749622.7 | 59095987 | 38180238 | 1328169  | 1338333  | [M+H-CH <sub>4</sub> ]                       | 33  |
| 14037535 | 5237052  | 3764103  | 8345137  | 10149648 | 1766530  |                                              | 1   |
| 969259.7 | 979522.9 | 1087149  | 671883.1 | 789928.1 | 1074760  |                                              | 4   |
| 828731.5 | 887916.3 | 969030.2 | 1202519  | 817110.5 | 338195.8 | [1026][M] <sub>3</sub> +                     | 16  |
| 1733130  | 2460898  | 58675030 | 54001839 | 1.76E+08 | 1.51E+08 | [487][M] <sub>3</sub> +                      | 29  |
| 34123733 | 30161754 | 25527041 | 32181996 | 29349204 | 14384081 |                                              | 2   |
| 432392.1 | 94208333 | 97622507 | 61316022 | 330839.5 | 1.97E+08 |                                              | 50  |
| 602836.6 | 251968.1 | 465238.2 | 516210.5 | 324231.7 | 63236.57 |                                              | 309 |
| 1825638  | 1896421  | 7159230  | 10603106 | 2398622  | 2488476  |                                              | 105 |
| 1249028  | 877099.8 | 618204.6 | 155610.4 | 821206.1 | 533170.7 |                                              | 18  |
| 3019344  | 1380765  | 2858693  | 3179390  | 1198873  | 812470.1 | [M+H+NH <sub>3</sub> ]                       | 351 |
| 33927736 | 452329.7 | 29739465 | 35087001 | 27120117 | 5944073  |                                              | 2   |
| 559992.5 | 674807.7 | 551993   | 471106.5 | 589810.2 | 298468.5 | [M+2H] <sub>2</sub> +                        | 98  |
| 2905652  | 2869788  | 2408982  | 3046569  | 2759717  | 851158.5 | [1339][M] <sub>2</sub> +                     | 62  |
| 2697972  | 467395.1 | 4843051  | 1129073  | 2122498  | 1796385  |                                              | 6   |
| 2843604  | 282839.2 | 2391783  | 1915015  | 1182709  | 2678660  | [3M+2Na] <sub>2</sub>                        | 12  |
| 7688107  | 5614375  | 8743205  | 8540564  | 13251172 | 2289952  | [102][M] <sub>3</sub> +                      | 1   |
| 2609988  | 2652988  | 1084042  | 1511410  | 1785507  | 1466256  |                                              | 4   |
| 51776829 | 49673503 | 44665985 | 44223910 | 50680127 | 60240804 |                                              | 2   |
| 220672.2 | 184646.5 | 265092.4 | 157386   | 40875.66 | 155367.6 |                                              | 147 |
| 3085011  | 2431486  | 292267.7 | 785586.7 | 1331760  | 1494089  | [450][M+1]+                                  | 99  |
| 534134.4 | 778494.5 | 74606.34 | 433225.7 | 390733.6 | 115824.3 |                                              | 81  |

|          |          |          |          |          |          |                                |     |
|----------|----------|----------|----------|----------|----------|--------------------------------|-----|
| 15855962 | 10180629 | 12090931 | 12030290 | 8892183  | 1007755  |                                | 2   |
| 5323921  | 5011472  | 4242114  | 4104479  | 4894168  | 1374878  |                                | 2   |
| 2937295  | 1865106  | 3517811  | 2768624  | 4325299  | 711060.8 |                                | 1   |
| 430302.2 | 199348   | 110308.9 | 156226.5 | 192515.9 | 285796.2 |                                | 23  |
| 439619   | 489049.1 | 341644.2 | 270882.1 | 330279.5 | 208793   | [M+H] <sup>+</sup> 38          | 5   |
| 651506.1 | 994855.4 | 692208.9 | 232940.5 | 462497.5 | 0        |                                | 81  |
| 2365305  | 2679891  | 2087688  | 942371.1 | 2740883  | 1787179  | [1514][M+1] <sup>2+</sup>      | 38  |
| 6594057  | 5564324  | 12362919 | 8891328  | 4954637  | 7199578  | [370][M] <sup>+</sup> [M+K+HCO | 268 |
| 67699.33 | 46919.21 | 183752.1 | 318472.3 | 68589.95 | 66391.17 |                                | 118 |
| 4174458  | 2878201  | 3740001  | 3117610  | 3513477  | 1849949  |                                | 154 |
| 4017876  | 3703967  | 2804965  | 1677353  | 2548574  | 2152869  |                                | 4   |
| 5407542  | 1475997  | 3948819  | 4065925  | 1847892  | 6752793  | [M+Na] <sup>+</sup> 4          | 29  |
| 3697810  | 2148363  | 1878957  | 2576266  | 4302868  | 3198414  | [M+Na] <sup>+</sup> 3          | 3   |
| 8567202  | 9348648  | 1900227  | 7508924  | 6783948  | 8268302  | [M+H] <sup>+</sup> 14          | 15  |
| 308286.3 | 289537.4 | 345266.4 | 832776.5 | 355881.5 | 994768.6 | [378][M+2] <sup>+</sup>        | 33  |
| 274974.6 | 132030.7 | 188906   | 241993.6 | 213352.6 | 92443.14 | [1401][M+1] <sup>2+</sup>      | 16  |
| 690708.8 | 2257722  | 18865860 | 9900725  | 2575715  | 5456434  |                                | 15  |
| 923009   | 248976.5 | 1097997  | 823807   | 747730.5 | 585606.5 |                                | 9   |
| 2849078  | 0        | 1921429  | 3025926  | 2681353  | 704219.9 | [M+H+CF <sub>3</sub> O         | 14  |
| 1116550  | 344236.3 | 1178882  | 972956.4 | 1907521  | 1870990  | [M+Na+2K                       | 28  |
| 8294022  | 13865054 | 2224093  | 5791422  | 14308646 | 8634755  | [M+Na+3K                       | 3   |
| 432223.6 | 578191.6 | 7437326  | 2443561  | 4159392  | 8108271  |                                | 1   |
| 1808017  | 607305.4 | 2059705  | 1692738  | 1961335  | 0        |                                | 2   |
| 7139564  | 57973224 | 6766505  | 31318995 | 7017907  | 16470756 |                                | 3   |
| 998332.1 | 1479003  | 4672985  | 624839.4 | 742639.3 | 3976474  |                                | 9   |
| 166054.6 | 101642.7 | 345977.3 | 323068.4 | 271410.9 | 248873.2 |                                | 87  |
| 8564340  | 9898718  | 7765911  | 8505167  | 7195543  | 3206144  | [355][M+3] <sup>3+</sup>       | 2   |
| 435699.9 | 428500.5 | 1119828  | 1485146  | 494671.1 | 9770800  | [M+K] <sup>+</sup> 31          | 46  |
| 6409286  | 3536016  | 4672201  | 5385578  | 4074617  | 2780570  |                                | 2   |
| 11445659 | 533899.9 | 669682.4 | 1401581  | 670927.7 | 147616.3 | [637][M+1] <sup>+</sup>        | 127 |
| 187919.8 | 218483.6 | 5840929  | 424220.5 | 781847.7 | 10509204 |                                | 161 |
| 661687.9 | 346452.8 | 541488.6 | 542065.1 | 480900.9 | 103722.8 |                                | 91  |
| 6103118  | 2542196  | 3826572  | 3966306  | 4646085  | 3726506  |                                | 420 |
| 216209.5 | 479333.2 | 217124.7 | 16566.32 | 208475.7 | 520959.9 | [M+H-CH <sub>2</sub> ]         | 18  |
| 531333.7 | 757164.4 | 1633542  | 2172987  | 1020112  | 182738   |                                | 56  |

|          |          |          |          |          |          |                      |     |
|----------|----------|----------|----------|----------|----------|----------------------|-----|
| 6402389  | 3065064  | 4457132  | 3998360  | 3101539  | 0        |                      | 2   |
| 24213321 | 25503822 | 21251863 | 21237669 | 24540363 | 8547041  |                      | 2   |
| 7751872  | 4779920  | 6777081  | 6210066  | 7926627  | 2460676  |                      | 2   |
| 338555   | 432336.9 | 651789.6 | 459859.7 | 327855.4 | 190333.9 | [M+H+K]2+            | 43  |
| 2034887  | 1158959  | 1423674  | 3124083  | 1989964  | 816326.9 |                      | 2   |
| 3676157  | 6592743  | 2667724  | 4056437  | 1707743  | 1613737  |                      | 2   |
| 4938835  | 4880230  | 4006049  | 4932697  | 2369564  | 5391645  |                      | 57  |
| 14223938 | 12806055 | 11129663 | 14133428 | 11446857 | 6793757  |                      | 2   |
| 62125369 | 38617650 | 39981275 | 38039546 | 40967175 | 32712719 |                      | 167 |
| 36564368 | 9136145  | 6088892  | 14392622 | 15669352 | 8485907  |                      | 1   |
| 366558   | 619022.5 | 535212.4 | 636267.8 | 455914.6 | 395750.5 | [M+K]+ 786           | 134 |
| 515348   | 1.14E+08 | 649474.9 | 1.39E+08 | 1E+08    | 194360.7 |                      | 61  |
| 3555493  | 2864545  | 2974002  | 2230132  | 3492347  | 3319740  |                      | 9   |
| 1820907  | 2123704  | 1671251  | 1925577  | 1427165  | 3021410  |                      | 9   |
| 4875805  | 5903716  | 4299141  | 4409518  | 4679940  | 5354847  |                      | 201 |
| 1880516  | 2466512  | 1892852  | 1348721  | 1750825  | 1035383  |                      | 9   |
| 1751413  | 2396326  | 4565070  | 2018742  | 1670256  | 6382442  |                      | 46  |
| 86388058 | 65507108 | 79814853 | 71820722 | 42157267 | 29760380 |                      | 2   |
| 1805863  | 6844815  | 6761995  | 1965687  | 3464082  | 6046134  | [618][M]+            | 9   |
| 585915   | 999867   | 558829.7 | 727511.1 | 926698.1 | 406061.3 |                      | 32  |
| 6539773  | 14576051 | 9347266  | 581315.2 | 12658246 | 1717615  |                      | 1   |
| 5238360  | 3639790  | 1811316  | 3932664  | 2776312  | 601938.3 |                      | 1   |
| 1104565  | 300811.1 | 0        | 334024.1 | 703110.4 | 0        |                      | 1   |
| 188248.4 | 210788.9 | 226846   | 205337.9 | 85426.51 | 73243.38 |                      | 61  |
| 6429291  | 6050438  | 5672251  | 5264059  | 5175245  | 6775552  |                      | 2   |
| 10322646 | 11833991 | 10887660 | 7926001  | 15456568 | 10261334 | [1029][M]+ [M+Na]+ 5 | 3   |
| 5677199  | 4852183  | 4728163  | 5115803  | 5184720  | 4985474  |                      | 241 |
| 3099587  | 4355470  | 2289501  | 4969728  | 4654653  | 4326892  |                      | 337 |
| 8709938  | 1181501  | 591872.3 | 411302.6 | 598017.7 | 7921871  | [923][M+1]+          | 101 |
| 2626945  | 6619250  | 7015705  | 7123255  | 6991614  | 5188903  |                      | 375 |
| 1098088  | 912034.5 | 3474475  | 751331.3 | 1416637  | 2408209  |                      | 9   |
| 298073   | 213348.8 | 129551.5 | 248927.4 | 147170.7 | 91660.36 | [1334][M+1]2+        | 16  |
| 4095917  | 4189986  | 2740994  | 3095377  | 3184238  | 3979673  |                      | 14  |
| 3583850  | 939242.5 | 6149613  | 1220445  | 2366378  | 5049524  | [M+H-C2H4            | 15  |
| 9.59E+08 | 3708212  | 3704384  | 5.56E+08 | 1.12E+09 | 2400923  | [M+H]+ 43            | 15  |

|          |          |          |          |          |          |                     |     |
|----------|----------|----------|----------|----------|----------|---------------------|-----|
| 2724108  | 1807182  | 2699553  | 3235057  | 2948711  | 588919.6 |                     | 418 |
| 580974   | 1103255  | 685725.4 | 221479.9 | 626522.8 | 239012.2 |                     | 3   |
| 617405.8 | 659481.1 | 593724.9 | 246382.2 | 640457.5 | 546010.4 |                     | 89  |
| 23689853 | 20967220 | 21222083 | 17689574 | 18204001 | 11277947 |                     | 4   |
| 16455376 | 1886879  | 23592766 | 9768410  | 31213017 | 12783318 | [1136][M]+          | 2   |
| 2485728  | 2384150  | 2483030  | 2596648  | 1890624  | 1982822  | [1327][M+1]+        | 150 |
| 1331085  | 465194.1 | 672164.4 | 705843.9 | 1027608  | 215255.4 |                     | 4   |
| 8923962  | 4226162  | 11207157 | 9695193  | 9935296  | 4584852  | [M+H-C3H:]          | 6   |
| 118680.4 | 19964.37 | 144497.1 | 180816.6 | 104050.8 | 121529.7 | [M+Na+Na            | 42  |
| 3465237  | 2197575  | 2395148  | 1038023  | 2086780  | 1060289  |                     | 129 |
| 2551934  | 1558242  | 2055250  | 2712022  | 2158786  | 468267.9 |                     | 2   |
| 6388787  | 7290679  | 6083264  | 5597399  | 6828753  | 3368657  |                     | 2   |
| 1202769  | 781918.4 | 905749.7 | 423065.5 | 848863.8 | 414583.6 | [1582][M+1]2+       | 12  |
| 86119010 | 67320883 | 75678436 | 81488503 | 58781428 | 47958103 | [328][M]+           | 113 |
| 3027178  | 2670811  | 2783267  | 4003618  | 5227977  | 3879848  |                     | 333 |
| 6.16E+08 | 8593334  | 5E+08    | 5.35E+08 | 4.81E+08 | 2.37E+08 | [91][M]+ [M+H-C6H:] | 6   |
| 1617994  | 1266873  | 819671.7 | 943500.7 | 1522302  | 895519.9 |                     | 7   |
| 6322121  | 3238883  | 5261597  | 5051531  | 3152585  | 5023414  |                     | 263 |
| 3461643  | 2762035  | 4893593  | 4080858  | 3784144  | 4255611  | [639][M]+           | 9   |
| 4787596  | 3344752  | 3239081  | 1016116  | 1825591  | 185982.6 | [343][M+1]2+        | 169 |
| 5615360  | 5588497  | 6166952  | 3595285  | 3080075  | 987462.9 |                     | 9   |
| 12510915 | 10612037 | 7148115  | 9703634  | 7027947  | 7280908  |                     | 1   |
| 11167655 | 652987.9 | 1659597  | 10384592 | 2388357  | 9154627  |                     | 310 |
| 0        | 374659.7 | 71388.85 | 24249.61 | 42261.42 | 173601.7 | [1435][M+1]2+       | 18  |
| 3944166  | 4177940  | 2826127  | 3995487  | 3730614  | 2724463  |                     | 372 |
| 3.09E+08 | 1.22E+08 | 1.42E+08 | 1.03E+08 | 1.1E+08  | 79959450 | [1252][M+1]+        | 16  |
| 83257763 | 85448179 | 56661122 | 67022030 | 68504746 | 49614750 | [626][M]+           | 119 |
| 452131.5 | 85213.78 | 113087.8 | 99479.97 | 203706.4 | 192631   |                     | 384 |
| 720203.2 | 1037800  | 1104061  | 960763   | 913125.9 | 685893   | [680][M]3+          | 112 |
| 6430377  | 6666480  | 5924815  | 5987702  | 4927584  | 6096729  |                     | 226 |
| 805098.9 | 2944382  | 1123602  | 200833.9 | 544790.7 | 1446459  | [1483][M+1]3+       | 18  |
| 1648058  | 2178599  | 468083.4 | 435870.2 | 913797.2 | 1575830  |                     | 4   |
| 5053516  | 4953876  | 1952217  | 2182661  | 4961530  | 4150758  |                     | 1   |
| 1136598  | 1832065  | 1066116  | 1121695  | 1257275  | 1224927  | [2M+Na+3I           | 134 |
| 3291819  | 20454962 | 346180.9 | 3475120  | 7508815  | 6475878  | [946][M]+ [M+H+NH3  | 20  |

|          |          |          |          |          |          |              |     |
|----------|----------|----------|----------|----------|----------|--------------|-----|
| 2839010  | 559614   | 869352.4 | 565446.3 | 2421108  | 339937.5 |              | 4   |
| 7036746  | 11496439 | 11519839 | 6184136  | 6222224  | 4245154  |              | 15  |
| 341471   | 207756.3 | 461328.2 | 995311.5 | 471129.7 | 172464.9 |              | 129 |
| 869994.4 | 1008980  | 4235287  | 2037480  | 991827.5 | 1470738  |              | 118 |
| 1493691  | 4263058  | 1062314  | 411613.3 | 2329847  | 815830.9 | [M+K]+ 50:   | 15  |
| 595825.4 | 585081.9 | 1440564  | 4059996  | 914833.2 | 2393853  | [180][M+2]3+ | 9   |
| 8913119  | 6307808  | 5907611  | 1950504  | 8896946  | 871157.6 | [1280][M]2+  | 1   |
| 54445.12 | 436713.2 | 171406.1 | 19302.42 | 200015   | 523661.5 |              | 18  |
| 388515.3 | 339377.9 | 492535.2 | 188219   | 370276.4 | 200393.1 | [496][M+1]2+ | 42  |
| 1581048  | 1827888  | 5909056  | 4394992  | 1717373  | 2357867  | [M+H-H20]    | 110 |
| 3552135  | 616982.7 | 1726369  | 3089668  | 2288154  | 0        |              | 13  |
| 2777595  | 4363458  | 2799451  | 2677813  | 3477136  | 1904481  |              | 9   |
| 1739904  | 2124284  | 1856964  | 1632282  | 1407267  | 2312601  |              | 346 |
| 1162966  | 112956.3 | 1789557  | 944386.9 | 1342929  | 278089.2 | [M+H]+ 43:   | 14  |
| 5114148  | 3724830  | 9162737  | 11852605 | 7038974  | 5684133  | [833][M+1]+  | 130 |
| 2030192  | 1817912  | 1983578  | 1435519  | 873273.6 | 511276.6 | [511][M]3+   | 4   |
| 534717.6 | 369041   | 481231.3 | 401039.9 | 325484.1 | 78959.35 |              | 57  |
| 2640943  | 3188418  | 50522510 | 68503802 | 963316.5 | 1687392  |              | 1   |
| 8696470  | 8478066  | 6851136  | 8275776  | 7796192  | 4789457  |              | 9   |
| 1143840  | 5207057  | 3545820  | 4087496  | 8820249  | 4175880  |              | 383 |
| 44290337 | 20950735 | 1433510  | 6347956  | 37729836 | 8873037  | [M+Na]+ 6!   | 97  |
| 958797.3 | 1630276  | 632486.9 | 3039517  | 1666474  | 3268867  |              | 1   |
| 37446478 | 26887918 | 30208254 | 31065465 | 29870112 | 1186459  |              | 2   |
| 63614628 | 76490978 | 44562336 | 47606142 | 78334688 | 80246852 | [1293][M+1]+ | 2   |
| 2637233  | 2437688  | 1146619  | 1604402  | 2264167  | 1517751  |              | 4   |
| 10422957 | 9839424  | 12140270 | 2787142  | 18357640 | 12022644 |              | 22  |
| 816443.6 | 1454208  | 2083243  | 579556.1 | 2107991  | 326046.9 |              | 1   |
| 450308.1 | 219688   | 1345739  | 950204.9 | 536820.6 | 939146.8 | [1489][M+2]+ | 302 |
| 2874938  | 3459623  | 2370785  | 2575815  | 3418422  | 2084304  |              | 2   |
| 6790811  | 7891458  | 4060758  | 3384161  | 7455418  | 8682124  |              | 2   |
| 229880.4 | 310621.6 | 331198   | 333827.1 | 308654.9 | 184273.1 | [1184][M+1]+ | 23  |
| 1697654  | 2154344  | 3210328  | 3955160  | 9229264  | 14505517 |              | 6   |
| 12139151 | 11941977 | 11290675 | 4128820  | 12882937 | 6145078  |              | 1   |
| 1955876  | 1600929  | 1572328  | 1782794  | 38597.12 | 1262112  | [1443][M+1]+ | 44  |
| 6537748  | 4660390  | 3515312  | 4441452  | 8158738  | 3393673  | [56][M+3]+   | 2   |



|          |          |          |          |          |          |               |     |
|----------|----------|----------|----------|----------|----------|---------------|-----|
| 878482.3 | 1344494  | 1045423  | 5685107  | 1228290  | 4405078  |               | 1   |
| 1386865  | 3850667  | 5677907  | 700107.1 | 1810039  | 3791265  | [M+Na]+ 4     | 3   |
| 955399.4 | 587850.5 | 463314.5 | 391724.7 | 308794.6 | 453235   | [569][M+1]+   | 296 |
| 266021.4 | 195225.6 | 492884.7 | 566862.9 | 332555.6 | 435802   | [M+2H-HC      | 38  |
| 331132.7 | 232990.7 | 297059.1 | 223665.4 | 177846.2 | 146521.4 |               | 294 |
| 6080578  | 1565710  | 1209855  | 823397.1 | 433204.2 | 3054698  |               | 437 |
| 4309393  | 623014.2 | 9197001  | 4124037  | 648438.5 | 835054.9 |               | 9   |
| 2156582  | 2976798  | 2347183  | 2293345  | 2389622  | 1329067  | [1480][M]+    | 89  |
| 512372.4 | 1150734  | 1352508  | 919564.3 | 996620.5 | 0        |               | 1   |
| 1124048  | 3116612  | 4127479  | 4639606  | 2439811  | 1667037  | [406][M+1]3+  | 2   |
| 1731743  | 0        | 1509584  | 1815108  | 1177600  | 0        | [1607][M+2]+  | 2   |
| 16575091 | 14517205 | 15162769 | 8924764  | 14300269 | 5098025  |               | 1   |
| 9667862  | 3787740  | 2907143  | 2328410  | 2249564  | 8113942  |               | 165 |
| 756931.5 | 1656365  | 1003602  | 13408001 | 1748840  | 10518838 | [675][M+2]3+  | 9   |
| 4.15E+08 | 3.7E+08  | 3.73E+08 | 3.32E+08 | 3.41E+08 | 2.15E+08 | [661][M+2]+   | 4   |
| 1642563  | 835517.9 | 221088.7 | 1348482  | 494298.6 | 881115.6 | [M+H]+ 43     | 314 |
| 18365783 | 24787962 | 22019801 | 25075441 | 610924   | 8179057  |               | 13  |
| 4927991  | 3334596  | 3636981  | 3603577  | 2772248  | 4555519  |               | 442 |
| 6454006  | 3908644  | 4480895  | 7316905  | 5846370  | 2304066  |               | 2   |
| 5489125  | 6705642  | 6628127  | 7079083  | 4743663  | 6595627  |               | 272 |
| 375945.1 | 134350.7 | 190170.5 | 252858.4 | 274731.9 | 368446.2 | [1589][M+1]+  | 134 |
| 3594077  | 2427813  | 3069274  | 2851351  | 2641148  | 1050376  |               | 4   |
| 1019067  | 845132.7 | 898960.8 | 926309   | 801202   | 499098.7 |               | 351 |
| 10406881 | 5706462  | 10000078 | 9780616  | 5585109  | 691144.2 |               | 1   |
| 1578205  | 197476.5 | 1563778  | 1359006  | 889593.5 | 595616.2 | [1617][M+1]+  | 38  |
| 1430769  | 1287211  | 1443938  | 723637.8 | 1301679  | 476201.8 | [1085][M]+    | 245 |
| 446610.4 | 84053.14 | 0        | 890729.2 | 257568.5 | 132290.8 | [M+Na]+ 7     | 12  |
| 2481599  | 211740.1 | 211369.5 | 834847.4 | 1995788  | 468425.9 | [1179][M+1]3+ | 1   |
| 189155.9 | 195922.1 | 101465.5 | 193751.5 | 231462.5 | 157996   |               | 210 |
| 1853504  | 1260786  | 388690.1 | 769480.2 | 652873.1 | 44424.99 |               | 338 |
| 1125310  | 747896.5 | 1438481  | 966302.6 | 1140686  | 453026   |               | 28  |
| 3723363  | 4417689  | 3077401  | 3025726  | 3551411  | 4814840  | [1125][M+1]+  | 89  |
| 1056521  | 933769.9 | 391454.3 | 774183.4 | 566541.3 | 74324.52 | [693][M+2]3+  | 9   |
| 291927.1 | 257938.2 | 262201.1 | 271454.9 | 169530.4 | 258509.5 | [6][M+1]+     | 287 |
| 1347470  | 1258598  | 969371.9 | 914218.6 | 1187106  | 558554.2 |               | 4   |

|          |          |          |          |          |          |                       |     |
|----------|----------|----------|----------|----------|----------|-----------------------|-----|
| 16622451 | 8492360  | 10113002 | 8274093  | 7328499  | 11253370 |                       | 215 |
| 1194256  | 936251.9 | 0        | 779691.8 | 1525092  | 510873.9 |                       | 1   |
| 1125139  | 1407839  | 361737.6 | 1139760  | 1115345  | 2884103  |                       | 182 |
| 2990868  | 3256103  | 1995608  | 2248521  | 3059534  | 1479994  |                       | 9   |
| 8282373  | 11897606 | 6276261  | 7200706  | 7928705  | 7126560  | [975][M+1]+           | 9   |
| 48275787 | 46690389 | 23202224 | 39961138 | 55044673 | 40879775 | [M+K]+ 55:            | 13  |
| 14004812 | 10343663 | 12215875 | 12363403 | 10307095 | 3568590  |                       | 2   |
| 4147429  | 5183406  | 850946.7 | 2473097  | 1286488  | 3534844  | [M+K+NaCl             | 5   |
| 5139989  | 2390974  | 5230061  | 5180935  | 1882844  | 1282145  | [1464][M+1]+          | 220 |
| 15041383 | 6313547  | 6669990  | 9286109  | 17694470 | 1786479  | [94][M+1]+            | 3   |
| 1097176  | 2054565  | 865218.5 | 1249001  | 1723189  | 4330523  | [203][M+1]3+          | 29  |
| 33201398 | 29960821 | 38121296 | 28034878 | 12553189 | 10649269 | [M+Na]+ 1:            | 13  |
| 11058624 | 2016817  | 16951470 | 12480389 | 1521278  | 10633280 | [684][M+1]+           | 9   |
| 846008.4 | 1079850  | 611076.7 | 122420.1 | 540156.4 | 859525.6 | [M+H]+ 62:            | 18  |
| 1287568  | 1314387  | 1182326  | 628464.3 | 932701.1 | 0        | [M+H-C6H:             | 12  |
| 1489499  | 1929714  | 2489541  | 1246485  | 1454711  | 2589562  |                       | 4   |
| 3639532  | 3481022  | 4104788  | 2528367  | 4010621  | 3104279  | [2M+2Na+I             | 8   |
| 3458964  | 4685101  | 3690538  | 3452247  | 3586519  | 3255134  | [1264][M]+ [M+H]+ 68: | 86  |
| 3544478  | 510449.9 | 2058995  | 4293134  | 2660235  | 509415.7 | [3M+2H]2+             | 14  |
| 6722245  | 4484463  | 1451371  | 4957215  | 6680726  | 3047167  | [M+H+NH3              | 3   |
| 5986831  | 5761649  | 5567877  | 2505784  | 7215564  | 3037859  |                       | 316 |
| 2496691  | 1355446  | 1885252  | 2571332  | 710130   | 0        |                       | 29  |
| 607552.7 | 6227806  | 1486607  | 8263928  | 6361241  | 2921953  | [M+K+NH3              | 15  |
| 461400.7 | 798453.1 | 1921687  | 465037.3 | 534463.4 | 1133987  |                       | 4   |
| 853997   | 1774263  | 3368079  | 564211.5 | 1222079  | 4737669  | [200][M]3+            | 9   |
| 3380907  | 3195478  | 2300584  | 2317531  | 3009443  | 1533907  |                       | 9   |
| 4309331  | 4190441  | 4622940  | 6042568  | 3792529  | 1119502  |                       | 295 |
| 2449632  | 0        | 825021.5 | 840191.3 | 1321789  | 1929488  | [1161][M+1]2+         | 1   |
| 4085972  | 4466779  | 2480196  | 2287608  | 3024094  | 3727835  | [M+K]+ 67:            | 81  |
| 749278.7 | 770475.1 | 837293.5 | 592452.4 | 799383.8 | 947943.4 |                       | 4   |
| 198906.5 | 190061   | 192430.1 | 150484.8 | 173057.2 | 35561.36 | [1054][M+1]+          | 44  |
| 12796826 | 8341602  | 9576706  | 11619972 | 8115843  | 3790395  | [1295][M+1]3+         | 2   |
| 444516   | 1799404  | 1907292  | 408955.9 | 772131.8 | 3180347  |                       | 9   |
| 4332458  | 5132118  | 31391575 | 34473886 | 3813145  | 2118689  | [1252][M+2]+          | 16  |
| 3764353  | 6874464  | 5487020  | 3457174  | 4720400  | 888089.1 |                       | 1   |

|          |          |          |          |          |          |                        |     |
|----------|----------|----------|----------|----------|----------|------------------------|-----|
| 65577679 | 59135394 | 63396390 | 46679847 | 49398155 | 16483385 | [M+2H] <sup>2+</sup>   | 12  |
| 5025529  | 4897583  | 4949883  | 5073802  | 4444656  | 1498281  |                        | 2   |
| 875590   | 1117056  | 956316.7 | 853211.2 | 663218.9 | 388623.5 |                        | 4   |
| 1470583  | 1215515  | 1388227  | 1433588  | 1547987  | 2193149  |                        | 221 |
| 5898724  | 5323858  | 4584699  | 4810696  | 3865799  | 2750987  | [584][M] <sup>+</sup>  | 80  |
| 222361.9 | 59436.29 | 0        | 61459.33 | 196760.2 | 11305.43 |                        | 124 |
| 13457326 | 17657327 | 9474121  | 14315438 | 12211756 | 4925200  | [3M+H+Na]              | 3   |
| 3456387  | 4279437  | 2989727  | 2648191  | 4227690  | 3648895  | [M+2K] <sup>2+</sup>   | 13  |
| 851429.9 | 802567.5 | 375650.6 | 625416.4 | 451729   | 301988.9 |                        | 91  |
| 1595906  | 2731929  | 2655910  | 1309482  | 2555697  | 3814039  |                        | 15  |
| 423273.6 | 1223250  | 848899.1 | 4636741  | 677772.6 | 2442184  |                        | 8   |
| 832856.8 | 610509.7 | 238053.6 | 8909215  | 9897532  | 602068.8 |                        | 311 |
| 22192920 | 23767926 | 20506917 | 16757697 | 19500761 | 15406364 | [871][M] <sup>+</sup>  | 118 |
| 881138.3 | 1383663  | 1255832  | 596887.7 | 748919.4 | 1031247  |                        | 9   |
| 5152266  | 2118714  | 843094   | 1867209  | 2598277  | 1723322  | [3M+Na+K]              | 15  |
| 593568.5 | 814130.2 | 2028074  | 1422979  | 501567.4 | 560231.4 |                        | 9   |
| 3359971  | 2915380  | 2796152  | 13578696 | 1919957  | 7456288  | [366][M] <sup>3+</sup> | 2   |
| 10734219 | 15398491 | 1492137  | 9469730  | 10733922 | 9093059  | [M+H+HCC]              | 11  |
| 3758238  | 4669276  | 3866423  | 9679743  | 2274556  | 15022064 | [195][M] <sup>+</sup>  | 173 |
| 3143135  | 2671910  | 3086654  | 2038684  | 3257551  | 876591.1 |                        | 2   |
| 1.07E+08 | 83255554 | 83179216 | 91246290 | 63631398 | 11915590 | [466][M] <sup>3+</sup> | 2   |
| 7608522  | 6171177  | 6252176  | 7738380  | 5584266  | 2730012  |                        | 2   |
| 1601079  | 893272.9 | 1887788  | 996398.4 | 1192080  | 314501   |                        | 1   |
| 6318952  | 6174661  | 3300843  | 3355837  | 5542431  | 8060298  |                        | 1   |
| 17319843 | 16331820 | 15685331 | 16028690 | 15996700 | 15429800 |                        | 307 |
| 680587.9 | 409374   | 1654424  | 431220.8 | 832537.8 | 170560.8 | [1579][M] <sup>+</sup> | 47  |
| 1641908  | 3623661  | 1833449  | 500739   | 1199696  | 2600335  |                        | 1   |
| 9450414  | 18051929 | 16303568 | 8854293  | 9757877  | 7479298  |                        | 15  |
| 59426299 | 45900818 | 49398272 | 53105591 | 24538304 | 6527967  |                        | 22  |
| 24080767 | 19727533 | 25292994 | 18162936 | 13391234 | 6869711  |                        | 2   |
| 440946.3 | 632755.8 | 705781.4 | 817607.5 | 664051.5 | 351217.2 |                        | 327 |
| 1285316  | 2088649  | 2118263  | 2384970  | 1649438  | 1169887  | [2M+H] <sup>+</sup>    | 13  |
| 3872734  | 4479467  | 3240528  | 1993348  | 3421602  | 5894379  | [3M+3K-H]              | 6   |
| 19474941 | 12967417 | 16541336 | 18172808 | 11886713 | 3046758  |                        | 2   |
| 7782493  | 11980619 | 10808041 | 8202267  | 8529441  | 5630977  |                        | 1   |

|          |          |          |          |          |          |                     |     |
|----------|----------|----------|----------|----------|----------|---------------------|-----|
| 36759825 | 19784117 | 4905910  | 24623602 | 9918789  | 2904292  |                     | 1   |
| 150699.7 | 228630.3 | 230010.6 | 214483.9 | 111497.7 | 106374.9 |                     | 345 |
| 4513593  | 2738321  | 3806071  | 3944591  | 3273665  | 0        | [3M+Na+2I           | 15  |
| 903814.7 | 2894109  | 1762317  | 1253904  | 4126664  | 10771609 | [3M+Na+2I           | 29  |
| 5751514  | 5153250  | 5860577  | 6773926  | 1003956  | 4429165  |                     | 409 |
| 7325920  | 5011725  | 4512293  | 4811963  | 4663479  | 5660911  |                     | 369 |
| 195651.8 | 152462.7 | 166323.2 | 208086.9 | 133211.6 | 103185.1 |                     | 145 |
| 591582.5 | 1058987  | 341253.1 | 506171   | 643850   | 253161   |                     | 146 |
| 3160563  | 2015988  | 2212762  | 1865194  | 2073060  | 1037450  |                     | 2   |
| 11520499 | 9902924  | 11135635 | 6326789  | 9323332  | 4247729  |                     | 1   |
| 13032984 | 15757102 | 11529140 | 11209275 | 12719415 | 10758558 | [M+Na]+ 50          | 15  |
| 2890937  | 3297525  | 4496118  | 1988590  | 3557712  | 489175.6 | [576][M+1]2+        | 1   |
| 3534524  | 999720.5 | 343725.6 | 348516.2 | 3614399  | 4666759  |                     | 91  |
| 7357103  | 6186676  | 1042254  | 6459082  | 6082102  | 5717735  |                     | 11  |
| 87224.18 | 403344.6 | 397235.1 | 269423.4 | 331593.9 | 472075.4 |                     | 25  |
| 32012853 | 26901428 | 26516178 | 23144357 | 39399427 | 17637961 |                     | 1   |
| 3288176  | 1278662  | 2864711  | 2540528  | 1779807  | 2928865  |                     | 2   |
| 974751.9 | 1251852  | 531309.4 | 724410.2 | 1348499  | 1836714  | [3M+Na+K]           | 13  |
| 0        | 790317.3 | 896191   | 218498.8 | 575995.4 | 573731.4 |                     | 2   |
| 976132.4 | 412765.3 | 511473.2 | 1225849  | 494414.2 | 1039218  |                     | 9   |
| 2478284  | 419848.2 | 743173.2 | 2300392  | 1890857  | 0        |                     | 2   |
| 13123580 | 14616565 | 11001381 | 12699107 | 13659279 | 4757632  | [417][M]2+          | 2   |
| 0        | 942830.8 | 415772.5 | 286502.4 | 629039.2 | 1294089  | [M+Na+K]2           | 14  |
| 3136423  | 2980093  | 3020130  | 2885648  | 2824433  | 2853803  |                     | 364 |
| 1093508  | 1259605  | 1199345  | 859938.9 | 882742.7 | 706749   | [838][M]+           | 294 |
| 297660.7 | 531210.1 | 196096   | 99483.68 | 157105.9 | 210582.4 | [M+2H]2+            | 38  |
| 115288.2 | 352504.6 | 67886.33 | 17892.48 | 78440.24 | 353133.1 | [1469][M+2]3+       | 18  |
| 2081803  | 1036701  | 962861.5 | 1405692  | 875943.7 | 181107.4 |                     | 9   |
| 99293065 | 1.04E+08 | 1.03E+08 | 82778223 | 90632141 | 79705976 | [811][M]+ [M+H]+ 45 | 98  |
| 354014.9 | 272368.9 | 266074.4 | 350106.5 | 253663.4 | 169537.8 | [M+K]+ 40           | 42  |
| 2656419  | 2684582  | 2273193  | 2754010  | 2865239  | 550098.1 | [M+H+HCC            | 14  |
| 18806966 | 19322069 | 12234989 | 14222738 | 15057723 | 10310989 | [626][M+1]+         | 119 |
| 4508070  | 4963641  | 4839943  | 2311316  | 4348388  | 2172713  |                     | 1   |
| 3546734  | 2724746  | 2353012  | 3887659  | 3125892  | 1233825  |                     | 2   |
| 12548647 | 12570998 | 10182379 | 12780963 | 11470005 | 9125839  |                     | 2   |

|          |          |          |          |          |          |                      |     |
|----------|----------|----------|----------|----------|----------|----------------------|-----|
| 8333710  | 7018012  | 5955608  | 7338795  | 9126239  | 6838194  |                      | 1   |
| 820087   | 1178690  | 1023409  | 607301.1 | 1067529  | 523411.2 |                      | 9   |
| 3297493  | 8177872  | 227597.4 | 2516258  | 1988660  | 5393267  | [819][M]+ [2M+2K-H]  | 20  |
| 3711486  | 4387662  | 2808729  | 2374441  | 3192917  | 3164148  |                      | 9   |
| 11765379 | 8974823  | 10286383 | 11045274 | 9121919  | 3075065  | [43][M+1]3+          | 2   |
| 19453018 | 18056329 | 295075.9 | 15986747 | 26456439 | 77111628 | [M+H+CF3O]           | 11  |
| 1562539  | 790189.2 | 1455883  | 716717.3 | 816181.3 | 751268.8 |                      | 4   |
| 249276.3 | 69833.25 | 247036.1 | 207874.3 | 99193.29 | 104624.4 |                      | 214 |
| 22237857 | 37153055 | 36934247 | 23202625 | 22966475 | 16495935 |                      | 1   |
| 1037217  | 1264860  | 1027874  | 584602.4 | 769221.9 | 363671.4 |                      | 4   |
| 1594121  | 237564.7 | 1109561  | 1018752  | 1147533  | 1915058  | [1484][M+1]+         | 89  |
| 1287083  | 1036640  | 1467847  | 0        | 891879.3 | 0        |                      | 1   |
| 1419683  | 7922927  | 3363598  | 2804658  | 3812318  | 4375966  |                      | 1   |
| 11613693 | 11510886 | 11071693 | 8775267  | 7996841  | 6210481  | [1267][M]+ [M+H]+ 69 | 12  |
| 8504024  | 5711998  | 7304653  | 8383626  | 10536050 | 6174699  | [43][M]3+            | 2   |
| 1121915  | 9252297  | 2090350  | 6538006  | 7958614  | 13864199 | [857][M+1]2+         | 3   |
| 4796934  | 4174495  | 5015452  | 4612612  | 3282564  | 4011586  |                      | 434 |
| 3.67E+08 | 2.7E+08  | 3.18E+08 | 2.3E+08  | 2.68E+08 | 1.02E+08 | [1284][M]+           | 1   |
| 4307352  | 2066454  | 2898885  | 4263158  | 4152171  | 3345876  |                      | 322 |
| 7691225  | 5913052  | 6685394  | 3677773  | 7687524  | 1785113  | [899][M]+            | 1   |
| 12809153 | 5675809  | 4235746  | 6679637  | 10639348 | 2532460  |                      | 1   |
| 131101.6 | 87945.35 | 146847.6 | 131754.8 | 110268.4 | 45203.81 |                      | 169 |
| 343377   | 436305.5 | 242957.7 | 159032.7 | 297798.7 | 89124.42 | [2M+H]+ 3            | 25  |
| 2949258  | 2554064  | 4120165  | 4280584  | 2340722  | 4398885  | [M+Na]+ 1            | 15  |
| 2881937  | 3923456  | 118884.9 | 12236002 | 3832002  | 2259920  |                      | 148 |
| 1878857  | 1867803  | 1195897  | 906813.1 | 2718286  | 686456.4 | [1582][M]2+          | 12  |
| 6928158  | 15161623 | 8495084  | 10271684 | 16751027 | 17739146 |                      | 2   |
| 1758170  | 2160106  | 1934609  | 1902248  | 1718213  | 549267.7 |                      | 9   |
| 815195.1 | 0        | 731339.3 | 474550.3 | 488226.6 | 0        |                      | 9   |
| 7529528  | 5965822  | 6558679  | 5963649  | 5411219  | 1170819  |                      | 4   |
| 153617.8 | 99448.09 | 364771.4 | 1118108  | 87003.57 | 343167.7 |                      | 207 |
| 9073736  | 12857526 | 11730990 | 5625751  | 8907762  | 657427.2 | [480][M+2]2+         | 1   |
| 4294821  | 4589158  | 3165221  | 543333.5 | 4639032  | 2794520  |                      | 333 |
| 299115.4 | 293471.5 | 229571.5 | 76636.23 | 194966.9 | 171242.7 | [1158][M+2]+         | 227 |
| 391015.6 | 100860.3 | 0        | 0        | 409690.6 | 96430.05 |                      | 48  |

|          |          |          |          |          |          |                      |     |
|----------|----------|----------|----------|----------|----------|----------------------|-----|
| 39814281 | 1405545  | 2502041  | 31181237 | 1953994  | 12286252 |                      | 2   |
| 6005642  | 2438879  | 5651657  | 3349192  | 3845089  | 5354569  | [537][M]+            | 160 |
| 161382.7 | 212261.9 | 198684.7 | 264158.2 | 158447.4 | 76175.46 | [1073][M+1]3+        | 51  |
| 14624277 | 9139020  | 18924112 | 10917402 | 13364589 | 6834647  |                      | 215 |
| 861155.8 | 0        | 1305048  | 90708.03 | 406486.7 | 0        |                      | 1   |
| 1838749  | 883492.5 | 3162109  | 1888758  | 2672345  | 250847.4 |                      | 1   |
| 651248.6 | 671575.9 | 966797.7 | 930790.7 | 662167.7 | 511887.5 | [M+K]+ 81            | 16  |
| 310497.7 | 301438.1 | 468413.4 | 652986.2 | 202687.2 | 407159.7 | [1496][M+2]+         | 83  |
| 1146406  | 806974.7 | 1723153  | 89788.59 | 461937.3 | 0        |                      | 1   |
| 11413065 | 1200959  | 8502174  | 10146156 | 11104796 | 12069275 | [1357][M+2]2+        | 2   |
| 9719723  | 8073989  | 7201378  | 7594481  | 9563245  | 3593309  | [M+H]+ 21            | 13  |
| 2.64E+08 | 1.1E+08  | 1.09E+08 | 1.65E+08 | 1.91E+08 | 55720948 |                      | 1   |
| 0        | 669677   | 159660   | 0        | 158409.7 | 432580   | [1479][M+1]3+        | 18  |
| 5678903  | 10493134 | 4274543  | 6641948  | 5407678  | 10742869 | [1233][M]2+          | 9   |
| 3822536  | 2070430  | 3753204  | 2864270  | 3494177  | 3541494  |                      | 121 |
| 327688.7 | 818848.6 | 1011025  | 2576259  | 705743.2 | 2949961  |                      | 9   |
| 11181389 | 10466297 | 7441324  | 4670162  | 10779993 | 1355041  |                      | 1   |
| 3127493  | 1634818  | 1204995  | 911276.1 | 2878098  | 2084020  |                      | 1   |
| 5297055  | 8509408  | 4976644  | 2579359  | 3537993  | 3390789  |                      | 18  |
| 676813.9 | 714285.5 | 794996.4 | 686770.5 | 604103.8 | 2104052  | [M+H-COCl            | 8   |
| 1162261  | 1924716  | 1685607  | 1095203  | 1200153  | 2029048  | [1218][M]2 [3M+2K]2+ | 33  |
| 231173.9 | 221845.9 | 100841.6 | 156151.7 | 281879.3 | 193796.5 | [1524][M+1]2+        | 51  |
| 669003.4 | 66693.97 | 608387.1 | 982921.8 | 660883.9 | 649693.6 |                      | 8   |
| 418051.1 | 375892.5 | 384689.7 | 531551.7 | 385897   | 1272184  |                      | 17  |
| 530618.4 | 712303.9 | 394026.2 | 508156.7 | 659546.1 | 431618.6 |                      | 9   |
| 11669963 | 1050453  | 20988.73 | 4600255  | 2589213  | 12958.06 |                      | 90  |
| 4318613  | 4376877  | 4728218  | 3736638  | 5524205  | 8251446  |                      | 1   |
| 3653054  | 3798290  | 3211534  | 4932321  | 4141255  | 4507075  |                      | 2   |
| 403952.8 | 790910.8 | 1547900  | 670381.1 | 352395.5 | 2195309  |                      | 9   |
| 2539006  | 1479470  | 2774756  | 2424269  | 2802290  | 5314380  | [M+K]+ 21            | 97  |
| 1249479  | 909597.9 | 1145578  | 521272.3 | 1533558  | 374573.9 |                      | 1   |
| 2078802  | 2088931  | 47450661 | 1.19E+08 | 4904629  | 4007524  | [M+Na]+ 2            | 42  |
| 25277500 | 18149241 | 13183595 | 21255947 | 23159238 | 7582825  | [M+H]+ 22            | 13  |
| 227254.6 | 151977.5 | 105917.5 | 836182.4 | 157668.3 | 352787.8 | [117][M+1]+          | 16  |
| 4843483  | 4617138  | 3944432  | 3477874  | 4369926  | 4577666  |                      | 2   |

|          |          |          |          |          |          |                                     |     |
|----------|----------|----------|----------|----------|----------|-------------------------------------|-----|
| 11840809 | 7807365  | 7228174  | 9921164  | 6786883  | 8131641  |                                     | 15  |
| 1134381  | 723728.8 | 599528.4 | 610057.3 | 594588.3 | 0        |                                     | 8   |
| 1692980  | 2006003  | 1385064  | 1065430  | 1795768  | 926642.3 |                                     | 4   |
| 413320.6 | 2935024  | 1364909  | 1174798  | 2198023  | 2141697  |                                     | 2   |
| 2860287  | 2963568  | 2800419  | 2787387  | 2582367  | 1466620  |                                     | 9   |
| 4233177  | 3126385  | 3893598  | 2959075  | 4931463  | 720397.6 |                                     | 2   |
| 21471086 | 19450196 | 24477840 | 19137469 | 15512681 | 10733149 |                                     | 167 |
| 1242763  | 0        | 131526.1 | 105037.2 | 1068195  | 146278   |                                     | 1   |
| 6239097  | 3442479  | 3528954  | 5123880  | 1700202  | 1122493  | [1177][M]+                          | 38  |
| 3931189  | 2845697  | 4122924  | 4428368  | 4173020  | 4620480  |                                     | 253 |
| 365236.9 | 320838.2 | 164614.6 | 20836.69 | 66911.88 | 414219.3 |                                     | 215 |
| 1033867  | 1040263  | 1128092  | 1349143  | 3083967  | 0        | [M+H] <sup>+</sup> 22'              | 15  |
| 4082495  | 3943681  | 3450419  | 3424902  | 2557715  | 180487.4 |                                     | 9   |
| 224677.1 | 892487.4 | 17812.37 | 0        | 127035.7 | 695557.5 |                                     | 15  |
| 298752   | 125408.4 | 0        | 62852.58 | 205354.4 | 30420.66 |                                     | 158 |
| 937798.9 | 799451.1 | 555164.9 | 1170087  | 679985   | 220513.8 | [1499][M] <sub>2</sub> [3M+2Na+]    | 23  |
| 4164329  | 3496689  | 13433422 | 4433844  | 2749473  | 4548219  |                                     | 2   |
| 2475383  | 1560000  | 1691067  | 347218.3 | 2321062  | 746432.8 |                                     | 39  |
| 908675.7 | 69734.38 | 769487.3 | 549483.8 | 746508.5 | 0        |                                     | 9   |
| 1590240  | 1558070  | 1205575  | 805684.8 | 848109.4 | 1993594  |                                     | 4   |
| 2893170  | 2481566  | 2389231  | 2501534  | 2317407  | 1228457  | [475][M] <sub>2</sub> <sup>+</sup>  | 4   |
| 675385.5 | 766898.4 | 735842.4 | 520426.9 | 543594.6 | 185473.3 | [M+H+NH <sub>3</sub> ]              | 16  |
| 51048799 | 56367314 | 42948997 | 40684030 | 41255331 | 41322730 |                                     | 2   |
| 3639215  | 3089685  | 3721533  | 3184948  | 3808838  | 1133206  |                                     | 2   |
| 4784021  | 1804908  | 2957481  | 3585649  | 3024118  | 3806183  | [1576][M] <sub>3</sub> <sup>+</sup> | 2   |
| 29766881 | 24363820 | 49953365 | 61817480 | 40201638 | 33480715 | [833][M] <sup>+</sup>               | 130 |
| 1944590  | 4713482  | 3886574  | 1426625  | 2781041  | 2844466  |                                     | 1   |
| 820691.2 | 916205.7 | 627126   | 756090.2 | 559605.6 | 579177.2 |                                     | 35  |
| 1212549  | 485620.1 | 120446.2 | 513505.4 | 1125214  | 497610.8 | [534][M+1] <sup>+</sup>             | 1   |
| 4456143  | 4514842  | 1682013  | 5062704  | 3325653  | 4501368  |                                     | 256 |
| 2316615  | 1603841  | 675586.2 | 640666.3 | 1524345  | 1710141  | [M+H] <sup>+</sup> 63'              | 6   |
| 1720282  | 1769779  | 1729089  | 1629737  | 968897.9 | 732774.6 |                                     | 4   |
| 2657096  | 935045.5 | 2310101  | 2017720  | 419115.6 | 1916206  |                                     | 4   |
| 206721   | 213069   | 207641.9 | 187623.8 | 174371.7 | 0        | [M+2H] <sub>2</sub> <sup>+</sup>    | 35  |
| 12121164 | 14562061 | 11555499 | 13355682 | 11942816 | 4853222  | [433][M] <sub>2</sub> <sup>+</sup>  | 2   |

|          |          |          |          |          |          |                         |     |
|----------|----------|----------|----------|----------|----------|-------------------------|-----|
| 872444.9 | 578998.7 | 491053   | 810149.3 | 365280.8 | 592776   |                         | 4   |
| 14369597 | 13750143 | 15737187 | 12956962 | 229228   | 14133691 |                         | 23  |
| 5296201  | 4495181  | 3835654  | 4583851  | 5106086  | 1459119  | [2M+Na+K]               | 14  |
| 414787.1 | 330044.9 | 815584.7 | 468597.7 | 505275.6 | 595570.7 |                         | 9   |
| 3184041  | 3153758  | 2749009  | 2916497  | 3839342  | 15809605 | [1220][M+1]+            | 2   |
| 1660002  | 2116854  | 3703603  | 1622339  | 2183057  | 2229037  |                         | 1   |
| 550457.7 | 1460243  | 992900.1 | 853675.6 | 173294   | 323174.3 |                         | 391 |
| 27704413 | 30017557 | 23969017 | 22582191 | 26803220 | 13191298 | [1150][M]+              | 2   |
| 1049537  | 1427387  | 1486813  | 1069658  | 860430.3 | 319417.4 |                         | 4   |
| 123260.2 | 147638.2 | 48478.4  | 138447.1 | 181190.3 | 149834   |                         | 51  |
| 15542882 | 19867744 | 13262143 | 12438991 | 13195257 | 16277030 |                         | 119 |
| 1383387  | 1814989  | 3981941  | 3220633  | 5317120  | 2059103  |                         | 2   |
| 470577   | 235920.1 | 0        | 31784.47 | 387578.2 | 91363.76 | [1137][M+1]2+           | 68  |
| 122634.6 | 524320.8 | 234036.2 | 251272   | 471978.2 | 1432217  |                         | 9   |
| 25853485 | 33236507 | 26621049 | 13800563 | 19216262 | 14697744 | [M+2H]2+                | 20  |
| 378127.2 | 100493.8 | 722000.6 | 77286.43 | 256559.3 | 686307.5 | [M+H-CO]+               | 18  |
| 8367584  | 8871125  | 2271178  | 4552872  | 9393783  | 5740737  |                         | 3   |
| 21426460 | 29115126 | 3188009  | 19560493 | 21714270 | 20886343 | [M+Na+CF <sub>3</sub> ] | 11  |
| 917377.5 | 823393   | 735973.3 | 400978.5 | 173089.5 | 35988.79 |                         | 67  |
| 68150191 | 580623.6 | 28818179 | 54715274 | 1529703  | 26715750 |                         | 1   |
| 924635   | 867522.7 | 524096.7 | 840056.2 | 1211689  | 286179.7 |                         | 21  |
| 3084426  | 3629556  | 2449033  | 3239545  | 2471806  | 2651823  |                         | 9   |
| 1321072  | 1381093  | 1456438  | 1393332  | 886084.9 | 433659.1 | [996][M]3+              | 16  |
| 417180.8 | 199417.2 | 8666475  | 16722206 | 484479.6 | 296359.9 |                         | 38  |
| 9276218  | 13839774 | 15120867 | 7915810  | 9773720  | 5195765  |                         | 1   |
| 1384691  | 1060297  | 311884.1 | 1002216  | 1251931  | 772515   |                         | 1   |
| 25022253 | 8702327  | 10855116 | 15891563 | 16333014 | 2254902  |                         | 1   |
| 1.41E+08 | 1.21E+08 | 1.03E+08 | 1.28E+08 | 1.14E+08 | 46970673 | [3M+2K]2+               | 13  |
| 2228775  | 107850.1 | 4009433  | 1451871  | 2206889  | 1027519  |                         | 9   |
| 23323342 | 23165757 | 22048656 | 18155377 | 19337210 | 12440695 | [834][M]+ [M+H]+ 46     | 116 |
| 3633457  | 4335368  | 4050492  | 4316277  | 4108972  | 3789444  |                         | 451 |
| 2992214  | 2892931  | 2680510  | 2961590  | 4346318  | 667218.1 |                         | 208 |
| 1939162  | 1250574  | 2962905  | 1026347  | 2139717  | 0        |                         | 1   |
| 13581709 | 22738921 | 17952695 | 20984740 | 20531050 | 15508038 | [864][M]+               | 2   |
| 19013568 | 14226755 | 15646165 | 17025600 | 14285568 | 5126197  |                         | 2   |



|          |          |          |          |          |          |                     |     |
|----------|----------|----------|----------|----------|----------|---------------------|-----|
| 406628.8 | 830726.2 | 2013067  | 228748.1 | 661066.4 | 893389.2 |                     | 277 |
| 1456598  | 1728173  | 487746   | 1316251  | 1192405  | 528009.4 | [367][M+1]3+        | 9   |
| 6885091  | 8574524  | 7003593  | 7431544  | 8187900  | 14141349 |                     | 2   |
| 8765159  | 875197.4 | 5203875  | 5627325  | 7893265  | 6872282  |                     | 201 |
| 5922178  | 6518898  | 5797995  | 5384785  | 6473985  | 3546337  |                     | 9   |
| 4887969  | 4778214  | 1083118  | 5015212  | 4483381  | 4047204  | [3M+Na+K]           | 3   |
| 28207873 | 25401439 | 14764431 | 29633068 | 25987091 | 29283440 | [M+H-H2O]           | 226 |
| 8440818  | 9581482  | 8517457  | 6962728  | 7606779  | 7438977  | [977][M]+ [M+H]+ 53 | 98  |
| 5.84E+08 | 1.71E+08 | 4.93E+08 | 2.16E+08 | 1.48E+08 | 60811564 |                     | 90  |
| 22789864 | 29253110 | 3922455  | 18940342 | 22223828 | 16321735 | [3M+3K-H]           | 3   |
| 27724108 | 25461951 | 24725893 | 39515618 | 41629000 | 1.31E+08 | [M+H]+ 43           | 3   |
| 1001208  | 1353593  | 1617724  | 1139421  | 918941.3 | 0        |                     | 13  |
| 431038.1 | 453787.8 | 439156.7 | 322730.8 | 240903.2 | 202186.6 | [M+H+NH3]           | 16  |
| 4534738  | 4759924  | 4903280  | 7774748  | 5012983  | 6149417  |                     | 97  |
| 16391702 | 12275596 | 13482188 | 15045959 | 12774753 | 1773364  | [41][M+1]3+         | 2   |
| 336258.7 | 232262.6 | 240434   | 389107.7 | 119780   | 286677.8 |                     | 518 |
| 9848714  | 10196976 | 1532924  | 9143046  | 10214004 | 9744526  |                     | 325 |
| 1367198  | 1874542  | 1505843  | 1061312  | 1764316  | 0        |                     | 2   |
| 6777942  | 8939106  | 8198367  | 5856753  | 6886812  | 5260276  |                     | 18  |
| 8829492  | 6717807  | 7709297  | 8070240  | 5453931  | 1540026  | [394][M+1]2+        | 2   |
| 258295.3 | 207961.3 | 249232.3 | 328042.1 | 208985   | 50999.39 |                     | 66  |
| 14149441 | 5543489  | 5542773  | 5714968  | 3026316  | 5654959  |                     | 363 |
| 814302.9 | 1199446  | 1502886  | 633321.7 | 840713.6 | 1112083  |                     | 8   |
| 3882636  | 2279946  | 1685461  | 1288064  | 3166181  | 3144745  |                     | 288 |
| 860298.4 | 1571521  | 2090313  | 827022.9 | 12177462 | 4781338  |                     | 8   |
| 2748443  | 1719426  | 2856956  | 1572849  | 2609558  | 1124512  | [889][M]+ [M+H]+ 48 | 28  |
| 10962996 | 5856319  | 4926783  | 1765280  | 12807589 | 2760729  |                     | 1   |
| 1023107  | 10586419 | 1460134  | 2790465  | 1339569  | 7078761  |                     | 2   |
| 5304174  | 5393640  | 4468985  | 5380889  | 3658977  | 1050751  |                     | 1   |
| 93063.2  | 47861.09 | 0        | 10681.37 | 113774.8 | 10873.57 |                     | 59  |
| 194764.3 | 95064.47 | 242072.1 | 185523.3 | 216317.9 | 134199.1 | [M+2H]2+ !          | 98  |
| 9326453  | 5584344  | 998066.8 | 7133303  | 2338305  | 9438407  |                     | 11  |
| 274353.1 | 167026.5 | 196498.6 | 248642.4 | 168229.1 | 89194.87 | [1088][M+1]3+       | 66  |
| 1181513  | 81811.84 | 481397.1 | 1096209  | 1046887  | 363333.8 |                     | 9   |
| 10131214 | 5008665  | 4643475  | 7966415  | 5162949  | 536892.2 |                     | 9   |

|          |          |          |          |          |          |                       |     |
|----------|----------|----------|----------|----------|----------|-----------------------|-----|
| 2028151  | 2349990  | 2123129  | 1621626  | 2039268  | 1775293  | [977][M+1]+           | 98  |
| 1065726  | 1302139  | 1101723  | 828015.4 | 1021406  | 2023766  |                       | 4   |
| 5141038  | 9092543  | 10078819 | 4609783  | 5587822  | 2388654  | [M+H]+ 33'            | 15  |
| 15163484 | 5686212  | 2717477  | 4205696  | 1160191  | 2137892  |                       | 114 |
| 883829.1 | 316819.9 | 256745.9 | 521824.6 | 701078.6 | 280075.2 |                       | 183 |
| 3764504  | 3010172  | 3679184  | 3139295  | 3062952  | 2231077  |                       | 2   |
| 6572048  | 3974940  | 5249676  | 5833678  | 3825697  | 972220.9 | [42][M+1]+            | 2   |
| 2885665  | 4832430  | 4537719  | 3562931  | 4595222  | 3947796  |                       | 9   |
| 736489.6 | 969896.6 | 877642.1 | 422106.2 | 725399.4 | 731484   | [1326][M]+ [M+Na]+ 6' | 86  |
| 438184   | 988138.8 | 514104.3 | 2845934  | 977564.4 | 3250396  |                       | 9   |
| 8343271  | 8402938  | 7957062  | 8223133  | 8138115  | 7536323  | [594][M+1]+           | 226 |
| 1519841  | 4459452  | 10923021 | 1933379  | 3095426  | 7789169  |                       | 2   |
| 1002384  | 509396.7 | 452638.5 | 675140.9 | 726375.7 | 0        | [M+K]+ 72'            | 8   |
| 14496767 | 12512318 | 11687498 | 14024790 | 10811419 | 3213950  |                       | 2   |
| 2745335  | 2559087  | 2284251  | 1322437  | 2335279  | 1258707  |                       | 9   |
| 2599464  | 937699   | 2109932  | 2167488  | 2587519  | 388636.5 |                       | 2   |
| 0        | 678692.5 | 0        | 0        | 44309.49 | 439798.5 | [M+K]+ 95'            | 18  |
| 4159518  | 3627132  | 2816160  | 2541815  | 3060388  | 3521320  |                       | 9   |
| 35584966 | 10049980 | 12977740 | 9000257  | 29076296 | 7581905  | [M+K]+ 17'            | 15  |
| 2083396  | 7360781  | 3483786  | 2205539  | 6579455  | 10723280 | [742][M+1]+           | 1   |
| 3578488  | 3325300  | 3615982  | 4029308  | 3631701  | 4999140  |                       | 265 |
| 6100221  | 3.47E+08 | 11612671 | 1.34E+09 | 1.16E+09 | 3.02E+09 | [M+H+K]2+             | 8   |
| 919863.2 | 117242.6 | 1199845  | 700910.1 | 581694.6 | 0        |                       | 9   |
| 224245.6 | 1360660  | 1405925  | 367794.9 | 613993   | 1247456  |                       | 9   |
| 3193206  | 2294035  | 1646638  | 1696648  | 1682893  | 1218967  |                       | 2   |
| 3452203  | 3145550  | 3050189  | 3133318  | 3892390  | 973202.6 | [M+H]+ 29'            | 13  |
| 6459428  | 8576157  | 6923775  | 5606814  | 4961034  | 3478521  |                       | 1   |
| 6172124  | 4402322  | 4347093  | 3516040  | 4612416  | 1590819  |                       | 1   |
| 999153.5 | 1084111  | 677213.8 | 696675.9 | 932888.7 | 784840.3 |                       | 179 |
| 3243628  | 455689   | 331610.9 | 147684.5 | 262519.8 | 597806.8 | [705][M]2+            | 25  |
| 284385.9 | 557699.2 | 0        | 73782.44 | 227484.4 | 330955.1 | [3M+2K]2+             | 46  |
| 1892782  | 1375968  | 3180293  | 1366857  | 1481185  | 721809.7 |                       | 9   |
| 4289953  | 4116592  | 6171418  | 6528393  | 4682033  | 5146658  | [M+Na]+ 4'            | 121 |
| 9377514  | 932806   | 10224963 | 7345324  | 589433   | 2323007  | [26][M+1]3+           | 4   |
| 5781810  | 3371809  | 6383945  | 7541693  | 4921793  | 3050721  |                       | 2   |

|          |          |          |          |          |          |                       |     |
|----------|----------|----------|----------|----------|----------|-----------------------|-----|
| 2141003  | 846722   | 1221814  | 867641.1 | 264157.9 | 14650.84 |                       | 391 |
| 1422471  | 10233137 | 1602046  | 10183725 | 17642027 | 16589430 |                       | 2   |
| 4370554  | 3932768  | 4670089  | 2266036  | 6371762  | 6411216  | [3M+2Na]2             | 263 |
| 1860182  | 2357636  | 2001226  | 1547843  | 1849159  | 833728.4 |                       | 9   |
| 155090.4 | 2325418  | 4039112  | 543025.3 | 306818.9 | 1125681  |                       | 39  |
| 3641016  | 4817898  | 4609286  | 3651840  | 3161575  | 2916279  | [1421][M]+            | 296 |
| 3238018  | 6240289  | 3219534  | 5185338  | 3378070  | 3241694  |                       | 264 |
| 404526.6 | 310408.8 | 136336.8 | 160993.1 | 257076.7 | 170551.7 |                       | 328 |
| 2626888  | 4907628  | 3639498  | 2084198  | 5066808  | 12753683 | [M+K+HCO              | 29  |
| 1204878  | 1364957  | 753933.8 | 715653.7 | 1574946  | 683767.9 |                       | 5   |
| 7692572  | 2723419  | 2585710  | 5770802  | 5368269  | 2275258  |                       | 335 |
| 3245315  | 4136650  | 4341159  | 1503971  | 5025550  | 3405573  | [1583][M]+ [M+Na]+ 1: | 12  |
| 1690471  | 2493677  | 1613242  | 763051   | 1935680  | 4041321  |                       | 155 |
| 2369006  | 3299925  | 1412180  | 2817990  | 1286088  | 323217.1 |                       | 2   |
| 2183407  | 4307304  | 2711067  | 2129461  | 4862504  | 7343380  |                       | 2   |
| 1511091  | 1598651  | 825373.7 | 829373.1 | 610824.8 | 978037.2 | [676][M]+ [M+K]+ 369  | 72  |
| 725809.5 | 590984.3 | 811568.2 | 703574.8 | 558829.9 | 1181036  | [112][M+1]2+          | 4   |
| 3357693  | 2944893  | 3548587  | 3398672  | 6139825  | 8133457  |                       | 1   |
| 1189108  | 1139955  | 996978.7 | 372762.5 | 521190.1 | 0        | [M+Na]+ 3:            | 15  |
| 14249484 | 13980564 | 13875848 | 11682764 | 10582314 | 8705352  | [529][M]2+            | 20  |
| 14062698 | 11897292 | 10478200 | 11417181 | 10519071 | 6740912  | [586][M]2+            | 227 |
| 11816707 | 8302114  | 9218926  | 11411464 | 8443509  | 2607779  |                       | 2   |
| 45094667 | 2330243  | 29890570 | 31552741 | 55200762 | 14455437 |                       | 1   |
| 7353969  | 60470277 | 39513864 | 30300570 | 1384734  | 67131474 |                       | 4   |
| 248472.3 | 1075566  | 1201110  | 1152378  | 1134646  | 139608   |                       | 61  |
| 6822285  | 2024823  | 2689359  | 2630445  | 2291999  | 2327431  |                       | 267 |
| 4044644  | 6651098  | 3929599  | 4583236  | 3883719  | 3606876  |                       | 454 |
| 1451246  | 1580393  | 1015906  | 1042702  | 677268   | 1138861  |                       | 46  |
| 5322399  | 3375979  | 2451154  | 3187854  | 5407876  | 2398923  | [M+H]+ 20             | 15  |
| 3091216  | 3610151  | 2796457  | 2192278  | 2700751  | 4351720  | [1430][M+1]+          | 38  |
| 1315089  | 1113266  | 1693598  | 1267703  | 6630818  | 3851326  | [84][M+1]2+           | 9   |
| 34030858 | 24535625 | 21556432 | 28802236 | 27086986 | 8828566  |                       | 2   |
| 3340391  | 868173.8 | 752156   | 4389993  | 816217.7 | 746879.5 | [M+2Na]2+             | 14  |
| 290526.7 | 204290.5 | 397567.7 | 520559.1 | 217635.4 | 123231.7 |                       | 437 |
| 208951.3 | 205296.5 | 187056.9 | 176782   | 146179.6 | 123742.1 | [955][M+1]2+          | 159 |

|          |          |          |          |          |          |                       |     |
|----------|----------|----------|----------|----------|----------|-----------------------|-----|
| 4410706  | 5342081  | 4813039  | 4380990  | 3407926  | 2959266  |                       | 41  |
| 287812.9 | 294979.1 | 460606.4 | 425698.4 | 252750.7 | 266025.9 |                       | 309 |
| 2365048  | 9820925  | 11264200 | 3798806  | 5463573  | 10052712 | [1255][M]+            | 9   |
| 5839298  | 1210620  | 3572024  | 7608478  | 1391800  | 1627299  |                       | 176 |
| 3572001  | 4982868  | 1872509  | 3007774  | 9269375  | 12388759 |                       | 2   |
| 2648318  | 6355132  | 4288960  | 1015410  | 3952900  | 1943834  | [1536][M+1]+          | 3   |
| 8021056  | 7877722  | 4951060  | 5561022  | 3548408  | 8824474  | [1425][M]+ [M+Na]+ 70 | 38  |
| 11384515 | 6833393  | 11115857 | 11078892 | 9070734  | 1552868  |                       | 2   |
| 1094907  | 498221.6 | 529527   | 1156522  | 786071   | 644280.4 | [951][M+1]+           | 312 |
| 203400   | 1705306  | 550854.8 | 280167.9 | 1886590  | 2173966  |                       | 97  |
| 3825753  | 1624916  | 4682923  | 1461605  | 4984469  | 3064137  |                       | 9   |
| 995393.1 | 760674   | 460969   | 543372.3 | 568345.3 | 97394.53 |                       | 69  |
| 529117.3 | 1196639  | 961018.8 | 414956.9 | 638686.1 | 1877290  |                       | 9   |
| 1017505  | 1418499  | 14630098 | 854755.2 | 955904   | 6347821  |                       | 9   |
| 1460146  | 1025254  | 855677.6 | 1176885  | 966391.7 | 79398.48 | [621][M+2]+           | 9   |
| 80716321 | 81109332 | 74072012 | 67034947 | 65098598 | 47317528 | [947][M]+ [M+H]+ 520  | 116 |
| 818829.3 | 807132.4 | 1016804  | 551850.1 | 458087.2 | 372513.9 | [M+H]+ 500            | 57  |
| 451502.6 | 911081.5 | 958495   | 290904.3 | 224290.3 | 356719.5 | [819][M+1]+           | 20  |
| 6344915  | 9582069  | 9962034  | 2729968  | 5491000  | 4337210  |                       | 15  |
| 15330957 | 14188850 | 11655562 | 13477891 | 15904976 | 5071391  | [M+K]+ 510            | 14  |
| 9716919  | 12057261 | 8577321  | 9732496  | 12729037 | 16380042 | [1309][M+3]+          | 2   |
| 3193679  | 4247858  | 2842154  | 4686430  | 3219302  | 1142663  |                       | 2   |
| 45430012 | 4035613  | 3474219  | 3217569  | 42594801 | 5681980  |                       | 194 |
| 1971346  | 1308786  | 1572135  | 620374.3 | 1414195  | 506799.2 | [M+H-CO2]             | 39  |
| 1246147  | 641594.8 | 398420.8 | 578368.4 | 1070682  | 379094.1 |                       | 91  |
| 2432857  | 1716838  | 1388956  | 1668375  | 371008.6 | 569779.3 | [1545][M]+ [M+H+NH3   | 62  |
| 3473591  | 6230043  | 3748985  | 3826194  | 4397660  | 3869159  |                       | 382 |
| 1804111  | 1587167  | 769148   | 1927235  | 2205710  | 0        |                       | 1   |
| 9394520  | 5300654  | 1436483  | 533864.5 | 349875.9 | 21926930 | [M+2K-H]+             | 21  |
| 1900738  | 1243415  | 1584083  | 1616078  | 1082754  | 0        |                       | 2   |
| 5188741  | 4475173  | 2092309  | 5258468  | 5268176  | 2436760  |                       | 9   |
| 7409186  | 4970477  | 1049708  | 1141132  | 2079264  | 6619709  | [M+H-COCl             | 15  |
| 1342661  | 688455.8 | 356186.9 | 582358.3 | 419363   | 350489.3 | [M+H-CH3]             | 39  |
| 39843890 | 43474945 | 34146406 | 32226353 | 38015752 | 22187777 | [1156][M]2+           | 2   |
| 2052643  | 2306469  | 393849.2 | 940976.8 | 1035200  | 2929268  | [M+H]+ 190            | 29  |

|          |          |          |          |          |          |                                                |     |
|----------|----------|----------|----------|----------|----------|------------------------------------------------|-----|
| 10216261 | 10406911 | 9076714  | 8321618  | 8435822  | 4676911  | [M+2H] <sup>2+</sup>                           | 62  |
| 2917019  | 1733712  | 2796584  | 1393455  | 2102506  | 0        | [331][M] <sup>2+</sup>                         | 1   |
| 1133985  | 1144198  | 1710046  | 624199.7 | 842869.5 | 529725.4 |                                                | 4   |
| 3932994  | 4273799  | 15825509 | 6371346  | 3928678  | 6051552  | [969][M] <sup>+</sup>                          | 66  |
| 200162.2 | 81414.41 | 0        | 15872.96 | 156327   | 0        | [M+K] <sup>+</sup> 113                         | 217 |
| 1744434  | 180451.3 | 1038185  | 860922.1 | 931339.5 | 2147089  | [649][M] <sup>3+</sup>                         | 9   |
| 906543.4 | 620051.5 | 961275   | 1008068  | 844605.5 | 797296.9 |                                                | 340 |
| 1073532  | 1834960  | 337979.7 | 1378245  | 1706605  | 764201.6 | [3M+3K-H]                                      | 3   |
| 8751722  | 6560159  | 5681704  | 8749703  | 7185605  | 4878509  | [1212][M] <sup>2+</sup>                        | 2   |
| 11591751 | 8520466  | 10788602 | 10629456 | 8087711  | 8482544  | [1111][M] <sup>+</sup> [M+H+NH <sub>3</sub> ]  | 150 |
| 4214075  | 1515678  | 3535008  | 4242796  | 2638807  | 6230106  |                                                | 2   |
| 26307684 | 17627874 | 21936935 | 24140336 | 17394437 | 3692641  | [46][M] <sup>2+</sup>                          | 2   |
| 1.08E+08 | 29326699 | 19644703 | 23194526 | 3139078  | 89388452 |                                                | 84  |
| 960082.7 | 1023825  | 1159034  | 1736301  | 1559803  | 745244.6 |                                                | 9   |
| 246415.1 | 97751.9  | 10596.37 | 24234.7  | 311404   | 44048.85 |                                                | 158 |
| 41920.05 | 148057.7 | 4006096  | 1333559  | 15622.27 | 124144.3 |                                                | 30  |
| 4447586  | 5068569  | 5529519  | 5042560  | 5051454  | 2726749  | [M+K] <sup>+</sup> 413                         | 3   |
| 2739383  | 2128377  | 3232132  | 2184863  | 1930021  | 1423464  | [1533][M] <sup>+</sup>                         | 167 |
| 3854493  | 3430553  | 3899991  | 2991470  | 4066759  | 4198820  |                                                | 2   |
| 589930.9 | 860416.1 | 919517.4 | 679511.9 | 754601.6 | 1549562  |                                                | 9   |
| 1150999  | 706459.7 | 877854.9 | 627699.2 | 790606.5 | 390621.5 | [1031][M] <sup>+</sup>                         | 136 |
| 4998382  | 3903147  | 48087370 | 2793787  | 49876564 | 2767122  |                                                | 202 |
| 375815.7 | 189749.5 | 44079.15 | 47121.83 | 357728.5 | 53380.58 |                                                | 384 |
| 1223366  | 1307051  | 1124992  | 571667.6 | 1456179  | 198095.1 |                                                | 233 |
| 532819.2 | 771121.9 | 836355.7 | 525779.9 | 495254.9 | 730228.6 |                                                | 4   |
| 4643138  | 909178.2 | 913546.5 | 2643071  | 3426694  | 1703227  |                                                | 15  |
| 2235832  | 6210855  | 2026729  | 1670068  | 7063088  | 13992056 | [M+H-CH <sub>4</sub> ]                         | 97  |
| 9.19E+08 | 7.9E+08  | 7.14E+08 | 8.35E+08 | 7.96E+08 | 4.89E+08 | [436][M] <sup>2+</sup>                         | 2   |
| 6090037  | 6559628  | 7169352  | 4170091  | 4958233  | 1639585  | [M+K] <sup>+</sup> 343                         | 46  |
| 1039541  | 84462.75 | 1249393  | 1496454  | 1005706  | 248818.7 |                                                | 9   |
| 464480.3 | 159846.4 | 21057.11 | 13323.81 | 326518.5 | 46114.62 |                                                | 206 |
| 19573159 | 20019020 | 23667115 | 20439251 | 18925014 | 8871342  | [M+H] <sup>+</sup> 213                         | 39  |
| 3047183  | 4081218  | 3041549  | 2848109  | 3623396  | 1133567  | [417][M+1] <sup>2+</sup>                       | 2   |
| 1240235  | 4139509  | 7619727  | 2562910  | 2182003  | 2928765  | [452][M] <sup>3+</sup> [M+3H-H <sub>2</sub> O] | 18  |
| 385364.8 | 808724.5 | 1985855  | 1156573  | 547157.7 | 5276637  | [103][M+1] <sup>+</sup>                        | 9   |

|          |          |          |          |          |          |              |            |     |
|----------|----------|----------|----------|----------|----------|--------------|------------|-----|
| 3589872  | 17129162 | 3062755  | 2719162  | 37183341 | 86586363 | [862][M]+    | [M+Na]+ 4! | 100 |
| 5381391  | 4436166  | 3411226  | 2834144  | 8122853  | 7954364  | [1210][M+2]+ |            | 2   |
| 15865806 | 10358908 | 11550945 | 16907827 | 16397982 | 4700500  |              | [M+H]+ 17! | 13  |
| 7087880  | 6947141  | 6832578  | 5548577  | 91386.71 | 5516802  |              |            | 341 |
| 3898911  | 477137.8 | 344684   | 2917904  | 1485658  | 630014.6 |              | [2M+2Na+H] | 3   |
| 646688.9 | 634007.4 | 753305.7 | 394215.6 | 188794.4 | 0        |              |            | 4   |
| 1382142  | 1784056  | 3620521  | 4354792  | 1043436  | 13917317 |              |            | 1   |
| 155492.4 | 478500.6 | 1199786  | 541986.2 | 463372.6 | 1416461  |              | [M+Na]+ 3! | 51  |
| 4675797  | 623340.5 | 5730446  | 2908261  | 2924657  | 3106812  |              |            | 369 |
| 929062.2 | 1213071  | 1178421  | 1842768  | 3590407  | 1131980  |              |            | 521 |
| 2689924  | 5167367  | 1604663  | 2141884  | 3946916  | 8174052  |              |            | 2   |
| 453663.6 | 695009.9 | 428677.8 | 686610.8 | 361144.2 | 1100930  |              | [M+K]+ 22! | 116 |
| 1180910  | 6527568  | 5108608  | 3911141  | 3726797  | 7764952  |              |            | 233 |
| 7852244  | 8202533  | 6571501  | 5699923  | 2258518  | 8815240  |              |            | 20  |
| 15105277 | 3699550  | 3298282  | 3243200  | 4173297  | 7120866  | [74][M+1]+   |            | 96  |
| 7393605  | 821210.9 | 1725688  | 5228965  | 1012109  | 3931893  |              |            | 1   |
| 1.09E+08 | 1.12E+08 | 76013909 | 93097287 | 1.09E+08 | 67901288 | [1298][M+2]+ |            | 2   |
| 1346901  | 2356050  | 812154.6 | 2116216  | 3455230  | 1778631  |              | [3M+H]+ 1! | 11  |
| 3248877  | 394717.1 | 1085686  | 2211642  | 2170736  | 662069.6 |              |            | 9   |
| 1081884  | 1662684  | 804654.2 | 1779280  | 1531777  | 2795857  |              |            | 1   |
| 1839516  | 569623.7 | 440400.5 | 1047268  | 638616   | 10777.57 |              |            | 124 |
| 66093    | 122391.3 | 244086.1 | 0        | 165117.3 | 137324.4 |              | [M+2H-C2H] | 18  |
| 693589.6 | 1144730  | 7009737  | 17752896 | 460770.4 | 1010681  |              | [M+2H-C5H] | 8   |
| 2873114  | 2974810  | 2652027  | 1066337  | 2836320  | 2327590  |              |            | 380 |
| 3046092  | 3739503  | 1565894  | 2655762  | 3442077  | 592633.9 | [145][M+1]3+ |            | 9   |
| 11766120 | 52279990 | 3464618  | 3605253  | 71971632 | 1.33E+08 |              |            | 251 |
| 3897065  | 3591879  | 4872215  | 3577398  | 3120024  | 2131458  |              |            | 203 |
| 3237707  | 2880880  | 2691603  | 2206580  | 2668194  | 214886.5 |              |            | 2   |
| 203860   | 627587.4 | 616907.9 | 338869.9 | 473862.7 | 599807.9 |              | [M+K+NaCl] | 18  |
| 12224848 | 10873019 | 10563774 | 8821295  | 9497199  | 6100456  |              | [M+2H]2+   | 232 |
| 12208901 | 8594171  | 9776437  | 11628830 | 8874993  | 2873705  |              |            | 2   |
| 1849727  | 1462339  | 1552906  | 1634969  | 1816218  | 446287.3 |              |            | 13  |
| 144482.1 | 311940.9 | 171065.1 | 104137.9 | 497465.6 | 300219.5 |              | [M+H-COCl] | 222 |
| 700376.4 | 327048   | 1504316  | 882636.4 | 313304.8 | 553852.9 | [1058][M+2]+ |            | 110 |
| 10741290 | 9485737  | 6447425  | 9861848  | 10509738 | 4219439  |              | [M+Na]+ 3! | 13  |

|          |          |          |          |          |          |               |     |
|----------|----------|----------|----------|----------|----------|---------------|-----|
| 8494386  | 6155558  | 6014851  | 5861151  | 3195390  | 1293050  |               | 89  |
| 192587.8 | 1307056  | 395598.7 | 306869.3 | 556340.8 | 2197949  |               | 4   |
| 2501235  | 1290190  | 1561161  | 456130.5 | 1166376  | 178188.8 |               | 493 |
| 830951.6 | 904490   | 722804   | 575207.6 | 723052.7 | 369657.1 | [M+H+NH3      | 16  |
| 681804.5 | 637599.5 | 477479.1 | 573422.4 | 255220   | 129173.8 |               | 35  |
| 647069.1 | 685307.3 | 345648.8 | 227801.8 | 459119.3 | 287760.8 |               | 12  |
| 14301977 | 4999469  | 13645526 | 16662545 | 10618822 | 10807550 | [1609][M+1]2+ | 2   |
| 9198998  | 7785963  | 6409841  | 8819055  | 9647989  | 2955045  | [M+Na]+ 1!    | 13  |
| 1396362  | 3182147  | 4953954  | 4383920  | 3884430  | 4007074  |               | 2   |
| 3601774  | 3634444  | 2451267  | 2531967  | 3598345  | 2869090  | [177][M+2]+   | 4   |
| 5525961  | 3320678  | 4833601  | 5121153  | 3331701  | 2762444  | [M+K]+ 43!    | 21  |
| 2859213  | 1359143  | 1743892  | 8684071  | 2821954  | 12722892 |               | 1   |
| 1117470  | 1098881  | 10740230 | 1894165  | 1450948  | 3221585  |               | 9   |
| 864426.8 | 616178.4 | 1920344  | 795240   | 625757.8 | 651492.1 | [829][M+1]+   | 288 |
| 5614785  | 5734078  | 5695964  | 5150136  | 3828385  | 2059358  | [M+2H-C4H     | 15  |
| 3963969  | 6168922  | 5040277  | 575200   | 3852696  | 2546489  | [M+H]+ 29!    | 41  |
| 27077058 | 768717.4 | 4629652  | 4342507  | 31276146 | 5703315  |               | 1   |
| 2287591  | 4540191  | 5255676  | 1843468  | 1864543  | 4288207  |               | 9   |
| 47803016 | 19725477 | 69916323 | 38698854 | 32214362 | 4786985  | [1364][M+1]+  | 47  |
| 39555471 | 1152679  | 1750853  | 2479977  | 2085397  | 7436491  |               | 2   |
| 872685.5 | 781497.1 | 918694   | 4515832  | 3078951  | 223288.9 |               | 436 |
| 9606455  | 4477242  | 9131722  | 8844783  | 1666422  | 7293376  |               | 241 |
| 241527.8 | 206590.9 | 83161.5  | 109367.8 | 246206.3 | 197694.4 |               | 48  |
| 2524319  | 3235478  | 1994648  | 1996162  | 68923.2  | 2643570  | [341][M]+     | 111 |
| 1543510  | 1771405  | 1502565  | 1124121  | 1209723  | 710659.5 |               | 4   |
| 72696274 | 69205421 | 59858677 | 71597549 | 68618080 | 27245475 |               | 2   |
| 11715306 | 9856765  | 11472664 | 6466536  | 9544143  | 4304438  |               | 1   |
| 13033466 | 11445128 | 10135279 | 11813788 | 10535042 | 5575831  |               | 2   |
| 1017342  | 721364.1 | 2108271  | 8557518  | 1127546  | 7381971  |               | 11  |
| 116416.3 | 94025.22 | 109606.4 | 77182.44 | 122326   | 0        |               | 328 |
| 860760   | 2449707  | 3591361  | 6484262  | 3366947  | 3685123  |               | 191 |
| 900997.1 | 94727.2  | 1301425  | 1245888  | 866565.6 | 353639.7 |               | 9   |
| 2648503  | 3455350  | 2818605  | 2041637  | 2451358  | 2212376  | [444][M+2]2+  | 2   |
| 9691122  | 6115793  | 5014802  | 6766787  | 4221231  | 1565243  | [3M+3K-H]     | 29  |
| 2534812  | 2797807  | 2038498  | 2054859  | 2042466  | 1261609  | [765][M]+     | 218 |

|          |          |          |          |          |          |                          |     |
|----------|----------|----------|----------|----------|----------|--------------------------|-----|
| 7400798  | 7515676  | 7083162  | 3097733  | 7518998  | 7056129  | [M+H] <sup>+</sup> 60    | 257 |
| 2386249  | 3229212  | 2452736  | 2066817  | 3338173  | 2586739  |                          | 13  |
| 12647212 | 773609.6 | 561987.6 | 399906.8 | 341731.1 | 736565.4 | [M+K+NH <sub>3</sub> ]   | 5   |
| 1349656  | 933984.7 | 1012977  | 631711.5 | 540621.7 | 324522.8 | [428][M+1] <sup>+</sup>  | 4   |
| 2094346  | 1328529  | 1303840  | 1734509  | 1116113  | 737711.6 |                          | 46  |
| 758272.1 | 0        | 1171204  | 601044.1 | 493527.4 | 0        |                          | 1   |
| 640462.3 | 421550   | 677456.5 | 875108   | 566542.9 | 865193.9 | [M+Na] <sup>+</sup> 8:   | 62  |
| 358430.7 | 305902.2 | 281472.8 | 252227.2 | 90738.69 | 150328.7 |                          | 26  |
| 29020477 | 27995797 | 22299356 | 13267699 | 28801870 | 23029727 |                          | 2   |
| 24397617 | 23832393 | 19768670 | 22761999 | 23860872 | 17226697 | [M+K] <sup>+</sup> 34(   | 13  |
| 13459203 | 14610068 | 12381063 | 9091684  | 11939793 | 6562183  | [580][M] <sup>+</sup>    | 4   |
| 1836752  | 1110499  | 2138358  | 2039923  | 961791.8 | 0        |                          | 2   |
| 1452624  | 1007840  | 1699673  | 1914338  | 2041498  | 5427822  | [444][M+3] <sup>2+</sup> | 2   |
| 706958   | 99303.28 | 373546.8 | 561843.7 | 534805.6 | 488469   | [M+2H-CH <sub>3</sub> ]  | 8   |
| 2426492  | 2308341  | 1843042  | 1844654  | 1749069  | 1209011  | [M+H] <sup>+</sup> 49:   | 73  |
| 1248564  | 1148809  | 1060914  | 805692   | 972224.4 | 867216.2 |                          | 210 |
| 360742.8 | 161343.6 | 406664.5 | 316388.7 | 292409.5 | 407314.4 | [M+K] <sup>+</sup> 11(   | 33  |
| 2902014  | 2196346  | 1885689  | 2037384  | 1490621  | 0        |                          | 2   |
| 10923968 | 12369805 | 10082335 | 8595022  | 10757811 | 4993832  | [159][M] <sup>+</sup>    | 9   |
| 2758439  | 4121752  | 3102587  | 2090793  | 3201133  | 1960124  |                          | 1   |
| 5627398  | 4953258  | 4131687  | 4943439  | 5619661  | 1690105  | [3M+2Na] <sup>2</sup>    | 13  |
| 3656599  | 3347737  | 3146889  | 3678474  | 3818489  | 1464830  | [M+Na+NH <sub>3</sub> ]  | 13  |
| 1101250  | 1063842  | 606815.5 | 817794.2 | 1070099  | 1125225  | [M+2H-CO]                | 33  |
| 13865372 | 5366163  | 5677501  | 7757476  | 9576285  | 3304706  |                          | 1   |
| 21425416 | 22460640 | 18999592 | 19180734 | 21032524 | 4945269  |                          | 2   |
| 4323752  | 2863858  | 3423045  | 3433720  | 3030242  | 464841.9 |                          | 9   |
| 252069.7 | 156043.3 | 0        | 14035.52 | 145489.9 | 54820.41 |                          | 124 |
| 292899.9 | 219288.3 | 214292.6 | 156067.6 | 182944   | 242502.8 |                          | 520 |
| 4324634  | 7280157  | 5847339  | 1780246  | 3658213  | 2480186  |                          | 1   |
| 15461253 | 13702324 | 11458679 | 13823914 | 15753018 | 3927847  | [M+K] <sup>+</sup> 75(   | 14  |
| 3039881  | 0        | 1623119  | 2515336  | 3303707  | 499294   | [1467][M] <sup>+</sup>   | 2   |
| 2535340  | 837115.1 | 711143.5 | 1838020  | 1857266  | 249917.9 |                          | 1   |
| 525972.4 | 46481.52 | 651647.6 | 572086.9 | 248832.3 | 127428.2 |                          | 9   |
| 10716992 | 2593755  | 4938376  | 10800320 | 5296968  | 155133.4 |                          | 2   |
| 1.26E+08 | 92266794 | 1.12E+08 | 78227031 | 93659292 | 30890828 | [1284][M+1] <sup>+</sup> | 1   |



|          |          |          |          |          |          |               |     |
|----------|----------|----------|----------|----------|----------|---------------|-----|
| 5849275  | 3228446  | 4077236  | 4226125  | 3957480  | 1306821  | [640][M]+     | 9   |
| 455305.1 | 462824.6 | 323011.3 | 270568.9 | 369175.8 | 409687.8 | [M+Na]+ 6:    | 351 |
| 3407672  | 373605.5 | 3465641  | 2927117  | 1764639  | 1466760  | [1136][M+3]+  | 2   |
| 6517601  | 0        | 2875851  | 6198559  | 5001935  | 1291862  |               | 14  |
| 6423812  | 7091966  | 5254781  | 5599575  | 5685360  | 4439735  | [1206][M+1]+  | 2   |
| 1075860  | 1468681  | 1032616  | 648738.8 | 930824.6 | 1539884  |               | 12  |
| 349760.1 | 226176.6 | 275346.1 | 242261.6 | 471144   | 286604.6 |               | 121 |
| 15778480 | 4867485  | 4361899  | 4861422  | 9415210  | 15709943 |               | 21  |
| 1549042  | 708858.7 | 289010.4 | 331131.5 | 1050198  | 214409.8 | [M+2H-CO]     | 217 |
| 18559258 | 23629432 | 21206953 | 13000497 | 20343798 | 1713674  |               | 1   |
| 465199.1 | 767909.3 | 523201.1 | 409243.4 | 603914   | 379899.7 |               | 39  |
| 4817387  | 4872933  | 3793259  | 3850410  | 4964824  | 1609121  |               | 9   |
| 5505471  | 6332335  | 2705110  | 3896270  | 7132549  | 2494523  | [M+Na]+ 5!    | 3   |
| 973790.3 | 668910.9 | 612832.4 | 769809.7 | 518101.8 | 416937.4 |               | 158 |
| 22106780 | 15683492 | 17321697 | 22362653 | 15033096 | 8965897  | [472][M]2+    | 2   |
| 1427296  | 2002321  | 1252394  | 415451.7 | 1458914  | 1101347  |               | 1   |
| 286917.1 | 328839.1 | 207303.5 | 234924   | 212455.4 | 111014.9 | [M+H+K]2+     | 35  |
| 3188203  | 318237.7 | 8210756  | 2341627  | 3346811  | 1322893  |               | 9   |
| 468968.7 | 1857012  | 2046217  | 2140256  | 1817172  | 4961557  |               | 410 |
| 315885.8 | 143114.9 | 10640.64 | 30976.04 | 370758.8 | 32839.6  | [812][M+1]2+  | 83  |
| 710323.5 | 966029.9 | 895597.7 | 501685   | 829930.6 | 1336698  |               | 9   |
| 7673039  | 7952445  | 6782938  | 5947462  | 8781372  | 8222926  |               | 2   |
| 1455163  | 1374753  | 1830455  | 1392070  | 1130016  | 631835.4 | [1506][M+1]+  | 228 |
| 759097.3 | 665050.3 | 363665.1 | 468189.7 | 342408   | 332769   |               | 16  |
| 248307.9 | 91095.17 | 111129.2 | 207611.6 | 97134.52 | 162207.1 | [1446][M+1]2+ | 42  |
| 341354.1 | 188655.9 | 249472.6 | 166341.8 | 234590   | 92688.68 | [1389][M+1]+  | 40  |
| 24347105 | 8479915  | 10805974 | 15474833 | 16161190 | 2150646  | [477][M]2+    | 1   |
| 1329487  | 793481.6 | 256990.4 | 350567.5 | 972610.2 | 371539.7 | [1033][M]2+   | 128 |
| 457704.8 | 605530.9 | 315883.6 | 331235   | 584065.1 | 0        | [M+K]+ 33'    | 81  |
| 925302.3 | 643878.3 | 1133197  | 920720.4 | 574530.2 | 795529.7 | [629][M+1]2+  | 38  |
| 3481528  | 2004751  | 1925580  | 2344542  | 2938834  | 642822.8 |               | 9   |
| 2037686  | 3044313  | 11162940 | 9929056  | 14864943 | 21740712 |               | 1   |
| 2127203  | 6720845  | 2290479  | 2782980  | 5543754  | 11108409 |               | 2   |
| 302803.7 | 184148.5 | 1299486  | 855045.5 | 1472204  | 3269689  |               | 345 |
| 5209442  | 5364701  | 5318688  | 5259276  | 9731192  | 4667812  |               | 326 |

|          |          |          |          |          |          |                       |     |
|----------|----------|----------|----------|----------|----------|-----------------------|-----|
| 2119077  | 7247888  | 2932539  | 2649809  | 3004493  | 5804463  |                       | 4   |
| 1.14E+08 | 35973350 | 32525280 | 35791073 | 39411508 | 56082145 | [74][M]+              | 96  |
| 17026381 | 12721044 | 14604760 | 13613259 | 14181071 | 14643919 |                       | 2   |
| 237152.5 | 601248.3 | 42419078 | 1.21E+08 | 2437877  | 102613.8 | [382][M]+             | 104 |
| 6812894  | 12043272 | 10260274 | 5567235  | 9481227  | 964305.3 |                       | 1   |
| 3187064  | 3017692  | 2726804  | 3646264  | 2087189  | 1264681  | [M+3H-C5H8]+          | 13  |
| 0        | 602843.9 | 0        | 0        | 122971   | 265357.9 | [M+H-C5H8]+           | 46  |
| 493903   | 344521   | 244169.2 | 408918   | 367432.4 | 141850.9 |                       | 67  |
| 550362.1 | 717851.6 | 703288.6 | 937210.5 | 675620.8 | 460119.5 | [3M+Na+K]+            | 39  |
| 31696592 | 26962502 | 26323535 | 29213697 | 29970341 | 12042986 | [45][M]2+             | 2   |
| 15253727 | 3370872  | 12252483 | 13114162 | 5901056  | 19125211 | [M+3H-C4H8]+          | 97  |
| 829897.4 | 387667.1 | 929406.8 | 1216864  | 724226.7 | 300784.4 | [1201][M+1]2+         | 33  |
| 510900.6 | 1028825  | 225871   | 139381.7 | 181015.9 | 184980.7 |                       | 206 |
| 1735597  | 2026211  | 1860863  | 2001808  | 3895229  | 3116024  |                       | 1   |
| 3598433  | 3457935  | 3006726  | 1789326  | 2030047  | 443558.1 | [M+Na]+ 3'            | 10  |
| 1467174  | 752953.2 | 1375458  | 1491669  | 1612725  | 517121.5 | [573][M+1]+           | 13  |
| 2148834  | 1587920  | 2219252  | 2797238  | 3984589  | 10742465 | [M+K]+ 41'            | 97  |
| 751864.2 | 989799.9 | 973178.3 | 547970.4 | 763875.5 | 1592604  |                       | 8   |
| 1891265  | 1698271  | 1626010  | 1696917  | 588871.2 | 2113867  |                       | 210 |
| 34561737 | 38938953 | 26077175 | 27170824 | 25647212 | 22563519 |                       | 1   |
| 1757604  | 1495377  | 1429386  | 1442425  | 1509973  | 658106.8 |                       | 4   |
| 3598623  | 2928136  | 2919202  | 3174847  | 2637987  | 569764.3 | [1366][M]2+           | 2   |
| 908807.9 | 956365.2 | 580858.5 | 114465.8 | 988401   | 767429.4 | [M+K]+ 30'            | 39  |
| 432641.6 | 805379.9 | 4.24E+08 | 3.62E+08 | 537353.9 | 1.99E+08 |                       | 4   |
| 6773282  | 6364669  | 10212683 | 32572972 | 25821412 | 734505.7 |                       | 6   |
| 950960.7 | 862265.8 | 919654.8 | 744225.4 | 799176.7 | 0        |                       | 9   |
| 45631840 | 17401122 | 15782816 | 17543680 | 18679391 | 24466411 | [4][M]+               | 96  |
| 4010584  | 4070713  | 4129904  | 5914808  | 4217608  | 3572861  |                       | 466 |
| 160699.1 | 33984.64 | 159803.8 | 177331.3 | 131128.5 | 9427.146 |                       | 160 |
| 23821602 | 24254161 | 19832299 | 23121613 | 24062202 | 10049819 | [474][M]2+            | 2   |
| 2025392  | 1678325  | 1845630  | 1513261  | 2058761  | 1260038  |                       | 2   |
| 1211990  | 2361205  | 1785705  | 1156804  | 1011147  | 853483.8 |                       | 9   |
| 2307573  | 2627364  | 2833342  | 1640497  | 2374037  | 579841.8 |                       | 9   |
| 443448.9 | 1875454  | 2078593  | 489948.7 | 749138.7 | 4431627  | [518][M+1]2+          | 9   |
| 1.07E+08 | 46913024 | 1.55E+08 | 86512513 | 72156637 | 12684535 | [1364][M]+ [M+H]+ 72' | 47  |

|          |          |          |          |          |          |                     |     |
|----------|----------|----------|----------|----------|----------|---------------------|-----|
| 625696.3 | 160234   | 3810180  | 234059.5 | 3114728  | 51900.93 |                     | 71  |
| 622475.7 | 1019712  | 2058823  | 525218.2 | 682387.4 | 2653334  |                     | 9   |
| 1496870  | 2400496  | 1431731  | 897599.4 | 1472701  | 340434.2 |                     | 46  |
| 865752.8 | 126675.1 | 662097.4 | 337568.1 | 156135.8 | 18815.21 | [1274][M]2+         | 71  |
| 1294851  | 4254798  | 1523205  | 1575482  | 937015.3 | 755014.2 |                     | 228 |
| 1367025  | 597120.8 | 253362.3 | 640835.5 | 407836.3 | 1391884  | [M+Na+NH            | 15  |
| 2507587  | 603154.1 | 3526837  | 5470336  | 1648301  | 2356483  | [106][M]+           | 32  |
| 5319738  | 61375193 | 2160941  | 1545798  | 7052925  | 15873107 |                     | 52  |
| 1796987  | 1232691  | 1795577  | 1953110  | 1236327  | 1613775  |                     | 2   |
| 596354.5 | 217357.3 | 17008.79 | 0        | 400807.5 | 87232.48 |                     | 59  |
| 2288755  | 1870298  | 1593194  | 2205582  | 1512134  | 2232255  | [M+H+Na]2           | 14  |
| 3914862  | 5918602  | 5069258  | 4168178  | 3496449  | 3866333  | [1379][M]+          | 299 |
| 217016.6 | 1243301  | 1184786  | 479267.8 | 534481.2 | 2330124  | [921][M+1]3+        | 9   |
| 2991544  | 6685157  | 6116953  | 2672679  | 8630915  | 12128311 | [359][M+3]3+        | 2   |
| 2438102  | 1335537  | 3620440  | 3636488  | 1268884  | 915913.4 |                     | 423 |
| 5220845  | 2722617  | 3920428  | 4591755  | 1516699  | 1466822  | [M+Na+HC            | 81  |
| 235052.7 | 201683.6 | 17388.67 | 41842.37 | 186709.1 | 96306.32 |                     | 83  |
| 5786765  | 2659184  | 411887.5 | 4273879  | 5302031  | 994744.9 |                     | 1   |
| 103299.9 | 79235.85 | 448498.1 | 372935.9 | 408188   | 833836.1 | [M+Na+Na            | 136 |
| 2785097  | 2341971  | 2177716  | 1539836  | 2023759  | 1913679  |                     | 2   |
| 4799908  | 5298606  | 4585132  | 5142069  | 4057212  | 2137960  | [M+K]+ 16           | 16  |
| 131557.4 | 161474.3 | 250660.3 | 639106.3 | 244629.4 | 531911.3 | [712][M+1]+         | 319 |
| 3365550  | 3116693  | 2088907  | 2156027  | 2389248  | 653187.9 | [M+H]+ 63           | 81  |
| 288225.3 | 3118016  | 3654720  | 139422.8 | 3833864  | 3292328  |                     | 122 |
| 7282694  | 6987417  | 5909697  | 5273359  | 6636897  | 4312707  |                     | 4   |
| 15724451 | 15949828 | 7021290  | 19538740 | 8701819  | 2796666  |                     | 19  |
| 17641098 | 17574938 | 6435797  | 17511252 | 18917689 | 2503354  |                     | 259 |
| 8589925  | 11773205 | 15541337 | 7313916  | 9978260  | 13832604 | [925][M]+ [M+Na]+ 4 | 23  |
| 2004379  | 745425.2 | 787708.1 | 1311445  | 1644520  | 1803618  | [774][M+3]+         | 9   |
| 10727191 | 5162987  | 9280859  | 8866011  | 6072858  | 465797.3 |                     | 2   |
| 8175357  | 370137.1 | 7084414  | 3579172  | 366179.3 | 3322746  |                     | 13  |
| 728376.9 | 130271.8 | 0        | 27050.78 | 443751.7 | 140637   | [1033][M+1]2+       | 128 |
| 2934375  | 2499194  | 1359018  | 1942195  | 1543805  | 1191684  | [536][M]2+          | 39  |
| 8585183  | 3969186  | 8152428  | 853450.5 | 12241048 | 9535759  | [M+H+NH3            | 3   |
| 501996.8 | 944601.9 | 455593.2 | 226841.7 | 1847689  | 452942.1 |                     | 17  |

|          |          |          |          |          |          |                       |     |
|----------|----------|----------|----------|----------|----------|-----------------------|-----|
| 1549077  | 1918338  | 1669858  | 971710.7 | 1630240  | 1620658  |                       | 2   |
| 2979503  | 2635199  | 10339077 | 2571818  | 4448127  | 3436897  |                       | 341 |
| 929963.4 | 740179.5 | 727468   | 607849.3 | 600243.7 | 907719.2 |                       | 4   |
| 535238.8 | 1358077  | 1391226  | 93227.59 | 879531.7 | 1050718  |                       | 9   |
| 43214918 | 33343228 | 34847370 | 37150201 | 30846249 | 9536441  | [395][M]3+            | 2   |
| 8595927  | 7712595  | 3673903  | 5942045  | 4362594  | 5790383  |                       | 330 |
| 3835404  | 4849315  | 3932498  | 3274130  | 4655315  | 3016898  |                       | 9   |
| 166988.3 | 129743   | 122097.8 | 161851.9 | 202239.5 | 331188.5 |                       | 66  |
| 2375565  | 2404944  | 1441633  | 2537831  | 2495583  | 2683107  |                       | 415 |
| 218287.8 | 131065.8 | 9663.644 | 11188.74 | 251652.9 | 50979.51 |                       | 217 |
| 395340.5 | 0        | 1117060  | 1142509  | 736487.6 | 0        |                       | 2   |
| 1309519  | 866278.9 | 1256682  | 1109357  | 1120480  | 719522   | [1269][M+2]+          | 62  |
| 3630809  | 3062425  | 3395018  | 3685871  | 3534889  | 3216041  |                       | 410 |
| 2.78E+08 | 1.81E+08 | 1.59E+08 | 1.33E+08 | 1.12E+08 | 1.25E+08 |                       | 1   |
| 74418847 | 68761071 | 82657921 | 57026968 | 74270335 | 94070694 |                       | 120 |
| 4177434  | 3236034  | 7816717  | 3925652  | 3536030  | 6053291  |                       | 382 |
| 617733.4 | 519722.3 | 564554.3 | 549628.6 | 332704.6 | 346459   | [994][M]+             | 357 |
| 5256085  | 4712008  | 3069704  | 4486671  | 4554183  | 4590909  |                       | 400 |
| 6093858  | 8493335  | 22697009 | 21469669 | 6172973  | 17892769 |                       | 2   |
| 4126323  | 0        | 1938915  | 3695553  | 2657604  | 748057.8 |                       | 2   |
| 1719944  | 2741266  | 2398715  | 1938236  | 1947150  | 3374380  |                       | 9   |
| 756104.5 | 134754.5 | 1736317  | 5072095  | 1755754  | 1185069  |                       | 64  |
| 671929.4 | 276299.3 | 0        | 13185.78 | 508621   | 55065.98 | [874][M+1]2+          | 48  |
| 1513286  | 476469.5 | 1622300  | 1662067  | 1145958  | 260501.4 |                       | 124 |
| 27261606 | 26279041 | 24538701 | 36207537 | 15994121 | 21060206 | [140][M]+             | 168 |
| 16234412 | 21652398 | 18926343 | 8814932  | 13742993 | 8923397  | [267][M]2+ [M+2H]2+ ! | 20  |
| 10030050 | 4026084  | 6730820  | 9179376  | 7538521  | 2302952  |                       | 2   |
| 2374769  | 1499773  | 3176367  | 198178.2 | 1642076  | 0        | [1120][M]+            | 1   |
| 3058434  | 862624.5 | 3079218  | 2872094  | 4071647  | 3297190  |                       | 174 |
| 2357041  | 3821380  | 1134679  | 1070231  | 2013080  | 2613129  |                       | 9   |
| 4044351  | 3999815  | 3636230  | 4017547  | 4137041  | 4445927  |                       | 2   |
| 4487745  | 4583824  | 2822058  | 4432371  | 5544070  | 2072951  |                       | 2   |
| 1289826  | 1492411  | 2326565  | 1617490  | 1134527  | 680344.9 |                       | 4   |
| 53313085 | 31509215 | 21322320 | 10844982 | 39588237 | 41374055 |                       | 1   |
| 4079134  | 5720151  | 4042641  | 3620255  | 3630133  | 5149925  |                       | 15  |

|          |          |          |          |          |          |                                     |     |
|----------|----------|----------|----------|----------|----------|-------------------------------------|-----|
| 6476366  | 6505879  | 3743102  | 5861023  | 4338536  | 4954818  |                                     | 322 |
| 888560   | 613571.8 | 846348.4 | 0        | 962987   | 312949.3 | [M+H] <sup>+</sup> 280              | 39  |
| 4145934  | 4067876  | 2137797  | 2651401  | 3468952  | 2443488  |                                     | 2   |
| 3.91E+08 | 14923711 | 9105142  | 1718495  | 3.85E+08 | 6573778  |                                     | 21  |
| 515442.9 | 961899.9 | 595973   | 356335.4 | 547753.2 | 1517336  | [3M+2Na] <sup>2+</sup>              | 8   |
| 1405307  | 495010   | 94021.9  | 474281.1 | 122176.1 | 655282.7 |                                     | 6   |
| 1395361  | 736917.4 | 6098432  | 732932.9 | 2772371  | 3557316  |                                     | 9   |
| 12752187 | 24416439 | 44259160 | 61185111 | 93176049 | 60594766 |                                     | 3   |
| 872455.9 | 264933.2 | 41130.51 | 64448.97 | 735178.8 | 189113.2 |                                     | 217 |
| 501209   | 1793463  | 630941.6 | 0        | 1498788  | 5062409  |                                     | 2   |
| 2159494  | 821539.7 | 119360.7 | 257643.1 | 1645016  | 351900.1 |                                     | 206 |
| 1205605  | 1107818  | 1387139  | 825229.9 | 835967.1 | 667707.7 |                                     | 186 |
| 577886.1 | 2190062  | 1444837  | 2362886  | 2086783  | 3936180  | [M+H+NH <sub>3</sub> ] <sup>+</sup> | 238 |
| 3812522  | 4296014  | 3269141  | 2067676  | 3495310  | 5696948  | [M+K] <sup>+</sup> 650              | 6   |
| 5857307  | 7207245  | 5880452  | 3594742  | 3379264  | 7926790  |                                     | 430 |
| 28558601 | 28247603 | 21886006 | 12896917 | 28718846 | 23172054 |                                     | 2   |
| 1288988  | 1120560  | 586693.4 | 1046926  | 1363131  | 486799.6 |                                     | 9   |
| 5755188  | 5507869  | 5058167  | 4472018  | 5824777  | 4856295  |                                     | 2   |
| 7412935  | 7184217  | 6893814  | 7123919  | 12479470 | 6532694  | [3M+2K] <sup>2+</sup>               | 346 |
| 343394.9 | 482229.8 | 507677.9 | 300393.2 | 60651.27 | 425214.7 |                                     | 4   |
| 22232136 | 45293461 | 16594981 | 19416180 | 22214704 | 25032073 | [3M+2Na] <sup>2+</sup>              | 3   |
| 363532.2 | 70802.95 | 0        | 0        | 295048   | 14648.47 |                                     | 158 |
| 5972347  | 7781508  | 4083833  | 5944935  | 7664805  | 2805955  |                                     | 2   |
| 2158942  | 1693441  | 2192136  | 1194692  | 1649433  | 0        | [M+3H] <sup>3+</sup> !              | 14  |
| 18946378 | 46382125 | 24302347 | 14252396 | 29199113 | 24291082 |                                     | 1   |
| 7558440  | 4246590  | 3650909  | 3870425  | 6361623  | 1953246  |                                     | 1   |
| 9823911  | 18966997 | 14219060 | 6499050  | 12290951 | 8733226  | [M+2K-H] <sup>+</sup>               | 15  |
| 0        | 666290.9 | 270176   | 0        | 9862.392 | 350037.2 | [M+K] <sup>+</sup> 650              | 18  |
| 750566.5 | 1253947  | 557157.8 | 717659.5 | 1217847  | 1567594  |                                     | 4   |
| 440632.1 | 614282.4 | 657432.2 | 721025.3 | 505998   | 831432.3 | [725][M+3] <sup>+</sup>             | 9   |
| 2147460  | 2553912  | 7297764  | 2001914  | 1763095  | 5801441  | [392][M+3] <sup>2+</sup>            | 2   |
| 13346912 | 18454218 | 12249313 | 11101274 | 19025045 | 34261547 |                                     | 2   |
| 206679.6 | 1478162  | 159898.3 | 323012.5 | 205808.9 | 175581.5 |                                     | 63  |
| 3493869  | 2430855  | 3803480  | 2021474  | 2349804  | 0        |                                     | 1   |
| 329261.4 | 796033   | 541886.3 | 341062.9 | 530942.7 | 574465.2 |                                     | 8   |

|          |          |          |          |          |          |                      |     |
|----------|----------|----------|----------|----------|----------|----------------------|-----|
| 388492.3 | 945272.4 | 601230.9 | 50455.9  | 575722.5 | 1401687  |                      | 9   |
| 23983273 | 7127866  | 9864147  | 17991843 | 20337105 | 2355995  | [168][M]3+           | 19  |
| 4072521  | 3652912  | 58522694 | 1.64E+08 | 5645174  | 1772395  | [M+H]+ 21!           | 42  |
| 2642979  | 0        | 2547377  | 1892822  | 782901.1 | 270277.2 | [1207][M+2]+         | 2   |
| 18329083 | 23302937 | 11881841 | 11701411 | 16216648 | 17553013 | [M+2Na+K]            | 13  |
| 1384159  | 383938.5 | 1619710  | 1513782  | 1197631  | 1252422  | [812][M]2+ [3M+2H]2+ | 83  |
| 2.72E+09 | 2.48E+09 | 2.42E+09 | 2.15E+09 | 2.24E+09 | 1.46E+09 | [661][M+1]+          | 4   |
| 316909.2 | 889672.7 | 656287   | 488804.5 | 635570.6 | 2662249  |                      | 9   |
| 2617641  | 2558485  | 2352588  | 1663649  | 2767066  | 2544571  |                      | 9   |
| 9.59E+09 | 8.27E+09 | 8.01E+09 | 8.8E+09  | 8.27E+09 | 5.13E+09 |                      | 2   |
| 10987570 | 13708798 | 10661275 | 10033689 | 12322133 | 9397659  |                      | 9   |
| 3467800  | 869719.2 | 523059.6 | 2167389  | 528362.4 | 1248298  |                      | 91  |
| 8429515  | 9074643  | 54415931 | 1.48E+08 | 10248311 | 4990494  | [M+H-H2O]            | 42  |
| 8707145  | 7299346  | 7353111  | 6031899  | 7041646  | 3327697  | [1394][M+1]+         | 232 |
| 1497299  | 280001.6 | 1063818  | 1115230  | 370858   | 101771.6 | [M+H]+ 99'           | 29  |
| 7269815  | 8572079  | 5639651  | 6089289  | 7423597  | 8386684  | [M+H]+ 43!           | 97  |
| 20815992 | 38107491 | 10346380 | 16151490 | 19495235 | 25826221 | [2M+K]+ 2'           | 3   |
| 2906872  | 916824.6 | 3061405  | 2902241  | 657469.9 | 2252474  |                      | 8   |
| 466157.5 | 1237295  | 1078235  | 271074   | 353032.6 | 1473315  |                      | 6   |
| 1739500  | 2326226  | 2096930  | 855164.6 | 1472569  | 1305408  | [M+Na]+ 3!           | 39  |
| 451722.8 | 686274.3 | 561156.6 | 1309169  | 544824.9 | 712549   | [M+H-COCl            | 8   |
| 1323664  | 1104145  | 1796764  | 886107.3 | 1412389  | 0        |                      | 13  |
| 400046.2 | 227621.8 | 169224.5 | 237712.8 | 197226.7 | 127646   | [1088][M]3+          | 66  |
| 326314.2 | 239890.6 | 13311.13 | 14759.24 | 382282.1 | 63479.73 | [1089][M+1]2+        | 59  |
| 5368934  | 5534679  | 4053514  | 3646261  | 3677229  | 8083991  | [1390][M+1]+         | 12  |
| 1365221  | 500613.1 | 3812523  | 6192926  | 529174.9 | 546865.1 | [M+H+HCC             | 16  |
| 9984944  | 9440156  | 11020940 | 1830821  | 3077866  | 3890702  |                      | 1   |
| 1387711  | 135338.8 | 1519624  | 695385.1 | 1485968  | 1132290  |                      | 14  |
| 9295827  | 8392231  | 9386355  | 18128499 | 26204053 | 5349544  |                      | 1   |
| 2756910  | 1911950  | 3202669  | 2102443  | 7433705  | 813489.4 | [38][M+2]2+          | 1   |
| 1705619  | 1191066  | 986937.6 | 730809.1 | 1629837  | 450045   | [1522][M]+           | 38  |
| 446612.6 | 376036.9 | 22650.75 | 26530.51 | 662550.3 | 91224.36 |                      | 124 |
| 20260622 | 13626004 | 16884169 | 18925062 | 13136488 | 3394125  |                      | 2   |
| 838649.6 | 244638.4 | 337301.9 | 486068.1 | 289412.1 | 0        |                      | 124 |
| 2743767  | 2923599  | 2389958  | 2778427  | 2754352  | 1872107  | [254][M+2]+          | 32  |

|          |          |          |          |          |          |               |     |
|----------|----------|----------|----------|----------|----------|---------------|-----|
| 1762196  | 891823.8 | 1861913  | 2218667  | 932874.4 | 924911.5 |               | 136 |
| 5075286  | 5476477  | 5701692  | 4726982  | 4642188  | 12584054 | [610][M+3]+   | 9   |
| 340920.4 | 372333.2 | 136178.6 | 172682.3 | 72069.63 | 208189.8 | [252][M+1]3+  | 24  |
| 2502466  | 3319018  | 986823.1 | 1765580  | 3694259  | 7058557  | [3M+3Na+]     | 21  |
| 3106479  | 3354551  | 3210405  | 3123136  | 3122412  | 2738058  |               | 189 |
| 889388.6 | 724250.4 | 507818.8 | 757420.1 | 691352   | 535481   | [1574][M+1]+  | 7   |
| 8672233  | 6193724  | 6256184  | 6320613  | 5657179  | 3143628  |               | 421 |
| 2919198  | 3471642  | 1526251  | 3849373  | 5313837  | 12070979 | [1341][M+2]+  | 2   |
| 5264921  | 4907807  | 5026233  | 8101632  | 4313476  | 8819297  |               | 241 |
| 10794884 | 9171922  | 6004533  | 9903813  | 10145915 | 3992214  | [M+K]+ 356    | 13  |
| 238500.9 | 166183.8 | 24696.81 | 28224.74 | 133999.1 | 50600.83 |               | 48  |
| 5453133  | 771429.1 | 1085374  | 981431.5 | 1108490  | 3651683  | [M+K]+ 346    | 13  |
| 579229.9 | 874826.6 | 1010464  | 2126575  | 1662822  | 5614707  |               | 9   |
| 6891141  | 7511103  | 22817185 | 4682750  | 25587647 | 2651959  |               | 2   |
| 4787372  | 4042165  | 2990199  | 4242570  | 4322424  | 3619047  |               | 230 |
| 2997239  | 2376289  | 1632368  | 2847577  | 7424862  | 7697544  |               | 2   |
| 69847813 | 10476390 | 62424573 | 7834577  | 58008630 | 11889229 |               | 2   |
| 1296624  | 1409759  | 1536156  | 1271099  | 1092244  | 814903.3 | [1512][M+1]+  | 168 |
| 817427.1 | 327397.4 | 55102.55 | 69426.47 | 738350.3 | 115562.4 |               | 206 |
| 8133306  | 6207851  | 6403787  | 1924556  | 2693689  | 8022353  |               | 15  |
| 3.82E+08 | 2.84E+08 | 3.36E+08 | 3.21E+08 | 1.89E+08 | 1.24E+08 |               | 2   |
| 701667.1 | 98420.91 | 717697.1 | 519847.9 | 699453.4 | 356420.4 |               | 20  |
| 17422246 | 14134817 | 14029128 | 14263826 | 13080596 | 8520203  |               | 166 |
| 36207168 | 31666827 | 28860138 | 34541478 | 24965410 | 12955744 | [1287][M+1]+  | 2   |
| 3835080  | 3029272  | 3730069  | 1823698  | 2987932  | 1033423  |               | 1   |
| 2704994  | 1810936  | 2134700  | 2301164  | 1496376  | 0        |               | 2   |
| 634403.2 | 1215017  | 5204402  | 476041.1 | 1103275  | 1978547  | [1020][M+1]2+ | 9   |
| 1011399  | 66931.97 | 12546508 | 39555268 | 1244414  | 3618792  | [2M+Na+3I]    | 73  |
| 3920929  | 3903235  | 3725638  | 5277043  | 3477687  | 3839993  |               | 121 |
| 1503996  | 1933599  | 958535.2 | 948634.9 | 1666835  | 1340570  | [675][M+1]3+  | 9   |
| 826774   | 776081.4 | 987823.1 | 563111.8 | 556921.9 | 468042.7 |               | 9   |
| 1436544  | 1089456  | 1178742  | 1578780  | 352052.3 | 798227.8 | [294][M+1]+   | 207 |
| 396998.2 | 865999.1 | 1683434  | 269477.3 | 575405.1 | 3247744  |               | 8   |
| 835862.8 | 957738   | 921209.2 | 1287136  | 674364.9 | 790191.5 |               | 9   |
| 90222475 | 75274281 | 68073006 | 87944284 | 51809014 | 54042749 |               | 2   |

|          |          |          |          |          |          |               |     |
|----------|----------|----------|----------|----------|----------|---------------|-----|
| 422901.7 | 1414255  | 1797240  | 395510.4 | 691669.3 | 1497603  |               | 9   |
| 3158367  | 5576126  | 5829690  | 4133771  | 4785843  | 2871138  | [1577][M+1]+  | 9   |
| 36847954 | 31514196 | 31347269 | 34133428 | 25540950 | 5811300  | [1315][M+1]+  | 2   |
| 951718.8 | 1036435  | 1083461  | 830973.3 | 646753.9 | 367461.3 | [942][M]3+    | 57  |
| 13305947 | 2053334  | 7457498  | 12658439 | 13236869 | 3029772  |               | 14  |
| 1379593  | 231934.3 | 0        | 505566.5 | 783525.6 | 860781.1 | [656][M+1]3+  | 9   |
| 547631.9 | 521105.5 | 604623.7 | 652103   | 289281.6 | 365850.1 | [M+K]+ 476    | 62  |
| 219461.6 | 123092.2 | 159923.5 | 110855.5 | 238131.5 | 220764   |               | 16  |
| 1685687  | 1761609  | 1836930  | 1167325  | 1145154  | 1336943  |               | 78  |
| 24141325 | 8827753  | 10559262 | 15431464 | 16023234 | 2055961  | [468][M]2+    | 1   |
| 68067141 | 919268.2 | 65077747 | 41420103 | 57150003 | 91377059 | [846][M+3]+   | 1   |
| 2927970  | 4792635  | 5789647  | 1667661  | 4440396  | 1983321  | [1376][M+3]+  | 332 |
| 222414.9 | 334116.4 | 330728.5 | 528281.2 | 309709.5 | 11415.12 | [M+H]+ 360    | 86  |
| 1991865  | 1189106  | 1502466  | 1960253  | 1562031  | 2212859  |               | 2   |
| 1451617  | 1610436  | 1319427  | 6050063  | 1263626  | 9793264  |               | 2   |
| 571805.7 | 490112.8 | 253932.8 | 230717.2 | 591581.9 | 535168   | [739][M+1]+   | 220 |
| 789990.7 | 884496.8 | 684322.6 | 375788.3 | 688505.6 | 457867.1 |               | 4   |
| 604759.2 | 490665.9 | 560529.7 | 192862.9 | 416702.4 | 171679.6 | [M+K+HCO      | 25  |
| 713164.4 | 631946.7 | 367286.7 | 521815.1 | 924667.3 | 619826   |               | 4   |
| 309041.1 | 744940.2 | 438350.8 | 311957.9 | 10116632 | 829768.1 | [M+H-NH3]     | 38  |
| 1409170  | 1875696  | 1124856  | 1467109  | 2913586  | 5505419  |               | 2   |
| 13704310 | 7134657  | 2769021  | 9802006  | 4915587  | 11074424 |               | 250 |
| 102964.2 | 196602.5 | 34253148 | 1.19E+08 | 3683022  | 476597.7 |               | 96  |
| 611767.5 | 1463265  | 2036555  | 2460806  | 1111596  | 736066.6 | [707][M+1]2+  | 15  |
| 33993127 | 23764723 | 26519770 | 32030895 | 16339662 | 11813122 |               | 2   |
| 1546630  | 1479098  | 2328249  | 4340937  | 721311.6 | 8522340  | [M+Na+Na      | 46  |
| 575243.1 | 192673.1 | 466916   | 1340387  | 225287.8 | 416460.8 |               | 38  |
| 11097852 | 7977993  | 8026702  | 13248916 | 7131149  | 19723089 | [3M+2Na]2     | 14  |
| 3867128  | 3881979  | 4985316  | 5843096  | 5066540  | 5108672  | [1609][M+3]2+ | 2   |
| 1204208  | 1310995  | 1091269  | 640196.4 | 1012069  | 159438.5 | [M+H-C2H4     | 12  |
| 6518967  | 11089386 | 17564910 | 16280005 | 19354360 | 9714140  |               | 2   |
| 25988387 | 18526004 | 20933952 | 23819763 | 19965068 | 8258699  |               | 2   |
| 193096.5 | 77555.13 | 13121.83 | 15334.58 | 220812.6 | 40837.35 |               | 206 |
| 3857117  | 4358781  | 2237080  | 1398882  | 3779266  | 5185133  |               | 84  |
| 478591.8 | 815641.6 | 519009.2 | 2019939  | 689579.3 | 845519.8 | [281][M+1]3+  | 9   |



|          |          |          |          |          |          |                     |     |
|----------|----------|----------|----------|----------|----------|---------------------|-----|
| 69974598 | 48982067 | 56736328 | 63318026 | 54192864 | 21520985 | [32][M]2+           | 2   |
| 102975.5 | 235034.8 | 215487   | 160128.9 | 65579.22 | 52150.27 |                     | 391 |
| 10295793 | 3359714  | 9252334  | 10085578 | 15005259 | 8906811  | [M+H-C6H]           | 46  |
| 4227729  | 3034694  | 1460612  | 2579846  | 2191854  | 2259326  | [72][M+1]+          | 152 |
| 180078.4 | 205264   | 261572.1 | 220374.3 | 173410.5 | 142723.6 |                     | 118 |
| 1536970  | 1920506  | 1455120  | 763398.3 | 1460967  | 1688919  | [M+H]+ 81           | 38  |
| 1087431  | 1121083  | 6531529  | 3335268  | 8666478  | 28429480 | [M+Na]+ 10          | 6   |
| 1753687  | 1618338  | 3283282  | 1447052  | 2533137  | 2241047  |                     | 52  |
| 1247644  | 976385   | 1258786  | 1966560  | 1668572  | 586967.6 | [1148][M]2+         | 62  |
| 3.06E+08 | 2.09E+08 | 2E+08    | 3.01E+08 | 96911638 | 92272092 |                     | 19  |
| 2974700  | 5095933  | 7220205  | 5059203  | 5058452  | 4755365  |                     | 373 |
| 356034.3 | 519229   | 205400.1 | 341496.9 | 759265.2 | 446750.2 |                     | 4   |
| 8045203  | 7063535  | 7767254  | 7236522  | 9111935  | 12188221 |                     | 2   |
| 3127715  | 2089085  | 1354623  | 9170920  | 8647723  | 1110233  | [1300][M+3]+        | 2   |
| 3508080  | 1370286  | 1545237  | 1499840  | 1386323  | 2987532  |                     | 385 |
| 1307427  | 1402730  | 1747846  | 3797850  | 935274.6 | 2534746  | [712][M]+ [M+2Na-H] | 319 |
| 1747979  | 745761.8 | 1105057  | 1147600  | 1595668  | 1769331  | [874][M]2+          | 48  |
| 2734056  | 4256984  | 2071052  | 2496329  | 2924164  | 2589119  | [398][M+1]2+        | 2   |
| 21063401 | 3228618  | 6138854  | 2778267  | 22975581 | 1094002  | [M+Na]+ 10          | 3   |
| 10430526 | 2114794  | 2566772  | 7122695  | 11933559 | 2308065  |                     | 1   |
| 12095753 | 5445661  | 1100975  | 8939138  | 7586419  | 292357.1 |                     | 2   |
| 373147.3 | 391553.8 | 592537.9 | 209864.1 | 216046.7 | 349160.4 |                     | 39  |
| 936167.6 | 364303.7 | 3920485  | 1910465  | 915790.8 | 2596780  | [655][M+1]2+        | 9   |
| 1812551  | 1065770  | 934431.4 | 1255067  | 943001.7 | 0        |                     | 9   |
| 3909179  | 5851844  | 5243835  | 3484267  | 3840952  | 1548077  | [M+Na+K+]           | 15  |
| 6768683  | 4676736  | 3920774  | 3811565  | 3680118  | 3569894  |                     | 316 |
| 536766.3 | 1989392  | 771939.6 | 1013010  | 521192.2 | 581832.1 | [M+H-H2O]           | 83  |
| 4827108  | 6781789  | 6456587  | 7627036  | 6195828  | 6066970  |                     | 407 |
| 2386866  | 640823.6 | 703333.2 | 2476545  | 1495695  | 1236735  |                     | 9   |
| 2756089  | 3424564  | 2137749  | 1644613  | 3758883  | 371658.2 | [1625][M]+          | 2   |
| 4176324  | 2260131  | 3170852  | 3890602  | 2764089  | 872274.9 | [1442][M]+          | 349 |
| 7293408  | 3441199  | 3480598  | 3077825  | 3198008  | 3078239  | [M+H-CH2]           | 95  |
| 653254.7 | 398356.9 | 1101627  | 539148.9 | 1401256  | 165418   |                     | 4   |
| 1458486  | 1689799  | 1400787  | 981995.7 | 1396085  | 542336.9 |                     | 9   |
| 663255   | 1342312  | 1968541  | 736479.1 | 750229.7 | 3522124  |                     | 9   |

|          |          |          |          |          |          |                                              |     |
|----------|----------|----------|----------|----------|----------|----------------------------------------------|-----|
| 944769.2 | 726810.8 | 991290.3 | 556378.7 | 904238.6 | 441512.9 |                                              | 4   |
| 597400.8 | 278807.1 | 1502421  | 1430079  | 310108.8 | 818746.7 |                                              | 245 |
| 12089517 | 8486271  | 9410371  | 11919022 | 8889763  | 1220577  |                                              | 2   |
| 1035913  | 1003897  | 1673589  | 720032.9 | 723546.4 | 2153136  |                                              | 2   |
| 1703544  | 2282118  | 2265585  | 1965572  | 1735096  | 1277244  |                                              | 49  |
| 7712315  | 4136141  | 4227328  | 4032184  | 676199.5 | 2738703  | [M+H] <sup>+</sup> 35                        | 140 |
| 2561186  | 8918542  | 8321311  | 4580729  | 3929698  | 13424169 | [M+Na] <sup>+</sup> 5                        | 93  |
| 316587.9 | 602135.6 | 590741.8 | 384329   | 513317.7 | 1255571  |                                              | 4   |
| 163770.9 | 281671.3 | 137667.6 | 6489878  | 1419960  | 963871   |                                              | 305 |
| 1558089  | 1361989  | 3587031  | 1702905  | 1673802  | 0        |                                              | 1   |
| 4769683  | 3830020  | 3030938  | 4080707  | 3299332  | 3011420  |                                              | 9   |
| 6558325  | 3275877  | 4191403  | 6269078  | 6503439  | 2337482  |                                              | 2   |
| 1395623  | 4636460  | 1222087  | 2327193  | 740598.2 | 3825074  | [815][M+1] <sup>+</sup>                      | 213 |
| 23393585 | 3035042  | 992748.5 | 9221239  | 5943836  | 458515.8 |                                              | 90  |
| 12798879 | 8570873  | 1711445  | 13576513 | 13586143 | 4042484  |                                              | 14  |
| 29104414 | 29940091 | 24112765 | 25629256 | 11020189 | 31146715 | [1114][M] <sup>+</sup> [M+Na] <sup>+</sup> 5 | 134 |
| 631790.5 | 1539513  | 220419.1 | 349495.1 | 2727306  | 10111782 |                                              | 89  |
| 13765490 | 11696766 | 11650835 | 11951421 | 12266125 | 3525197  | [3M+H+K] <sup>2+</sup>                       | 13  |
| 5410328  | 3783803  | 720900.4 | 3968112  | 6375723  | 1058566  | [M+K] <sup>+</sup> 64                        | 11  |
| 844964.7 | 496527.4 | 774956.2 | 420610.1 | 603076.5 | 570099.8 |                                              | 35  |
| 1443446  | 1635783  | 1164010  | 1606707  | 1266031  | 710954.7 | [1417][M+1] <sup>2+</sup>                    | 57  |
| 2470287  | 1172443  | 586945   | 1687702  | 452251.9 | 2766597  |                                              | 4   |
| 19265107 | 9171994  | 5330056  | 606529.4 | 3803448  | 19696544 |                                              | 9   |
| 552365.6 | 869231.7 | 5251145  | 18001678 | 1347878  | 1258136  | [M+H-CO] <sup>+</sup>                        | 28  |
| 3032437  | 3435482  | 2150993  | 2258146  | 3094519  | 1276660  |                                              | 9   |
| 266643.3 | 389296.7 | 403748   | 274536.8 | 326221.5 | 34723.74 |                                              | 4   |
| 1709131  | 606503.4 | 747898.5 | 1507250  | 1332454  | 355816.3 |                                              | 9   |
| 5190791  | 5138177  | 6049142  | 4791406  | 4390083  | 2500867  | [37][M+2] <sup>+</sup>                       | 1   |
| 5480797  | 952751.7 | 5616189  | 4605520  | 5311495  | 3492769  |                                              | 433 |
| 8002237  | 8808732  | 7030004  | 7049033  | 8521356  | 3206000  | [508][M] <sup>+</sup>                        | 2   |
| 12929055 | 21657817 | 20833686 | 12812628 | 14887435 | 4856617  | [758][M] <sup>3+</sup>                       | 1   |
| 894197.2 | 250109.9 | 2506064  | 11711649 | 741258.4 | 1438748  |                                              | 166 |
| 8000356  | 100201.3 | 308954.7 | 222356   | 78153.99 | 115494   | [1407][M+1] <sup>+</sup>                     | 181 |
| 4959016  | 3503313  | 3352781  | 4005685  | 5372405  | 797517.3 | [M+H+K] <sup>2+</sup>                        | 14  |
| 1513998  | 1212330  | 0        | 1125886  | 2146797  | 954846.7 |                                              | 1   |

|          |          |          |          |          |          |              |     |
|----------|----------|----------|----------|----------|----------|--------------|-----|
| 5935738  | 6644167  | 4889211  | 3929982  | 5053245  | 17197134 |              | 2   |
| 1193287  | 825302.9 | 495254.8 | 163075   | 532884.6 | 521460.7 | [M+Na]+ 2:   | 39  |
| 361690.5 | 479409.1 | 433686.3 | 419743.8 | 376833.3 | 299360.4 | [1495][M+1]+ | 62  |
| 1223613  | 952255   | 1383846  | 1113225  | 964191.1 | 362588.7 | [1547][M]+   | 169 |
| 8238594  | 1980458  | 3627382  | 2365883  | 7506061  | 4042697  | [M+2H]2+ :   | 15  |
| 13651133 | 18824291 | 10725355 | 8834714  | 24463938 | 14046954 | [M+H-C5H8    | 15  |
| 18209765 | 13019454 | 17219323 | 18205291 | 16228976 | 3978764  |              | 2   |
| 2241114  | 0        | 487904.4 | 1060047  | 1173662  | 1116371  |              | 84  |
| 3971156  | 0        | 2952748  | 2791894  | 4354186  | 5873267  |              | 14  |
| 3840629  | 5297631  | 2846541  | 1937018  | 2438232  | 1447478  |              | 4   |
| 4060538  | 4177034  | 2700746  | 2688671  | 3965668  | 3020385  | [231][M]3+   | 4   |
| 522446.6 | 2527014  | 1042559  | 485856.8 | 965923.7 | 1738089  | [M+Na]+ 3'   | 3   |
| 1665809  | 6624065  | 722359.6 | 805045.6 | 1822518  | 1123410  | [2M+2Na+:    | 15  |
| 8318310  | 8782502  | 7364845  | 4444322  | 5894597  | 5215825  |              | 350 |
| 4696917  | 4139088  | 2421658  | 3526354  | 390832.9 | 3111052  | [M+K]+ 13:   | 226 |
| 17463946 | 12038803 | 16245543 | 15273400 | 3763673  | 10725967 |              | 1   |
| 1751567  | 1883379  | 1509860  | 1303848  | 1609990  | 330488.4 |              | 9   |
| 1389899  | 80066.62 | 0        | 819872.9 | 985174.1 | 868382.7 |              | 9   |
| 7133062  | 2097082  | 1795864  | 10398344 | 10811725 | 6188696  |              | 2   |
| 19774294 | 185955.6 | 160427.5 | 546735.4 | 353645.9 | 390410.8 | [1407][M]+   | 181 |
| 1978010  | 904818.1 | 2326981  | 1460414  | 603628.8 | 1818200  |              | 8   |
| 97895551 | 71738911 | 58098625 | 95504001 | 67454046 | 71847004 | [630][M]+    | 22  |
| 208511.3 | 93246.51 | 46963854 | 1.66E+08 | 3712337  | 125038.6 | [311][M]+    | 79  |
| 1763324  | 4996846  | 2092188  | 1749797  | 871122.4 | 5327309  |              | 2   |
| 32579601 | 28971319 | 31287152 | 2897005  | 2144993  | 34712603 |              | 2   |
| 308751.6 | 331263.7 | 17328740 | 55879766 | 832813.3 | 298144.5 | [M+Na]+ 2:   | 135 |
| 1042686  | 798205.5 | 1136865  | 894274   | 659802.9 | 286692.3 | [996][M+1]3+ | 16  |
| 4245926  | 4110055  | 6300493  | 3596936  | 6062482  | 1246263  |              | 1   |
| 12616059 | 9326029  | 10200707 | 10855487 | 7894427  | 8405123  | [1207][M+1]+ | 2   |
| 221869.2 | 162209.2 | 160112.3 | 122101.4 | 109630.9 | 109775.2 | [1488][M+2]+ | 100 |
| 77472635 | 1834070  | 29190758 | 3496883  | 3799839  | 2104877  |              | 11  |
| 9834414  | 5789337  | 2431995  | 4811223  | 8647635  | 6549953  |              | 15  |
| 272858   | 173572.1 | 97242.21 | 124255.6 | 224486.4 | 159416.7 |              | 105 |
| 3969107  | 3507105  | 3279354  | 3208794  | 2407084  | 185244.6 |              | 2   |
| 2485566  | 2700701  | 2243370  | 2786949  | 4230799  | 15881068 |              | 2   |

|          |          |          |          |          |          |                      |     |
|----------|----------|----------|----------|----------|----------|----------------------|-----|
| 3725063  | 4473840  | 1848868  | 2241410  | 5299720  | 3709271  | [1238][M]2+          | 2   |
| 2569344  | 2672875  | 2613116  | 2690201  | 2778538  | 3919142  |                      | 4   |
| 16653772 | 11479113 | 12611445 | 16308353 | 11738033 | 3360591  |                      | 2   |
| 4656639  | 4830039  | 2585242  | 2787829  | 4947944  | 3595168  | [1270][M+2]+         | 1   |
| 2541974  | 1498237  | 3270166  | 3332847  | 1270855  | 1346787  |                      | 329 |
| 6318425  | 3788753  | 4547730  | 4525807  | 4519329  | 4307159  |                      | 190 |
| 2301510  | 8495644  | 3268789  | 4435410  | 5639439  | 16557412 |                      | 2   |
| 1240004  | 867364.2 | 500081.4 | 613982.5 | 556850.4 | 682975.5 |                      | 285 |
| 1966057  | 2145870  | 2259221  | 1936559  | 1486661  | 0        |                      | 2   |
| 18403857 | 2602130  | 5404723  | 5131349  | 4393877  | 3134988  |                      | 412 |
| 3384855  | 322498.2 | 2171776  | 2559599  | 1732204  | 156021.3 | [702][M]3+           | 81  |
| 2169306  | 1448933  | 2473220  | 2852174  | 1055093  | 7442343  |                      | 3   |
| 1738388  | 2308569  | 1574348  | 1175885  | 5574134  | 3980784  | [M+K+HCO             | 351 |
| 233649.7 | 92857.81 | 29299.95 | 42907.39 | 223278.3 | 35134.7  |                      | 206 |
| 160424.4 | 107268   | 94686473 | 90743626 | 54309277 | 60368152 |                      | 61  |
| 13332392 | 4910258  | 3318020  | 8483830  | 10329127 | 1735539  |                      | 1   |
| 6059455  | 7170710  | 25049053 | 68463363 | 6598669  | 3712281  |                      | 118 |
| 64468828 | 53769270 | 48152377 | 65165273 | 55023212 | 23359693 | [432][M+1]2+         | 2   |
| 500826.7 | 489528.4 | 47705512 | 1.67E+08 | 3737614  | 339152.8 |                      | 79  |
| 716468.1 | 9908791  | 3788423  | 3782417  | 3951012  | 6411351  | [M+K+HCO             | 264 |
| 3214484  | 2760886  | 3020634  | 4083115  | 3687787  | 3293591  |                      | 393 |
| 1474356  | 801877.2 | 919387.5 | 798879.4 | 1105450  | 420175.8 |                      | 91  |
| 14744695 | 615322   | 817903.1 | 13016823 | 401330.1 | 913960.2 |                      | 4   |
| 20775965 | 23600421 | 19086737 | 16601851 | 22665488 | 16668739 |                      | 9   |
| 4101482  | 6940964  | 16719876 | 6261268  | 4896676  | 7657720  | [301][M]+ [M+Na]+ 2: | 16  |
| 20085771 | 988232.1 | 3886407  | 1142118  | 2543370  | 6864156  | [M+3Na-H]            | 21  |
| 2.03E+08 | 2.02E+08 | 1.91E+08 | 1.66E+08 | 1.67E+08 | 1.14E+08 |                      | 44  |
| 664599.7 | 478556.1 | 5311164  | 18422953 | 381828.6 | 24906.16 |                      | 118 |
| 15508376 | 4648222  | 4258202  | 5222262  | 6704465  | 7362707  |                      | 96  |
| 1366315  | 6678015  | 4.05E+08 | 2698243  | 92822722 | 25623655 | [M+H+CF3O            | 21  |
| 1364594  | 2653207  | 1969031  | 1663627  | 4817756  | 12245593 |                      | 2   |
| 1985973  | 1607443  | 1742478  | 2630510  | 1530022  | 748320.6 | [1410][M+1]2+        | 33  |
| 4873589  | 3773405  | 1122126  | 3508510  | 4411109  | 10898870 | [M+K]+ 54:           | 11  |
| 4216170  | 4213422  | 4317399  | 4038173  | 3976067  | 3687098  |                      | 414 |
| 2379442  | 20402462 | 15293287 | 1020325  | 19570650 | 5798330  |                      | 1   |

|          |          |          |          |          |          |                      |     |
|----------|----------|----------|----------|----------|----------|----------------------|-----|
| 11637920 | 11988051 | 12167847 | 11933584 | 11381146 | 8139200  | [1072][M]+           | 13  |
| 625937.1 | 0        | 1265271  | 396988.8 | 487482.3 | 81429.14 | [M+K]+ 130           | 8   |
| 3473362  | 3904388  | 4269794  | 2319664  | 4155303  | 1341822  |                      | 12  |
| 199185.2 | 276013   | 461252.3 | 32302.78 | 335315.2 | 329946.1 | [816][M+1]3+         | 39  |
| 190170.6 | 997726.1 | 1265241  | 175684.1 | 0        | 4694004  |                      | 2   |
| 869642.2 | 827541.2 | 1237022  | 346937.8 | 354704.1 | 551069.6 |                      | 1   |
| 5140044  | 5359729  | 4436199  | 5047495  | 6076748  | 2544795  |                      | 14  |
| 18793849 | 9769932  | 15220559 | 18115723 | 14311018 | 3302754  |                      | 2   |
| 841958.9 | 1308224  | 1131775  | 359620.7 | 1116795  | 776545.3 | [997][M]3+           | 16  |
| 3952938  | 1729089  | 3714840  | 478165.2 | 2711651  | 1099518  | [3M+3K-H]            | 15  |
| 1009164  | 1297979  | 446060.4 | 536802.5 | 1227545  | 606107.5 | [M+K]+ 29!           | 39  |
| 171680   | 6946.309 | 13812019 | 47175613 | 617793.8 | 0        |                      | 104 |
| 1918052  | 2703550  | 4833482  | 7364330  | 6502410  | 4526106  | [M+H+CF30            | 11  |
| 5386556  | 5553927  | 5201635  | 5430725  | 7581996  | 5188488  |                      | 209 |
| 892037.9 | 876307.2 | 666520.5 | 698817   | 676458.2 | 584298.3 |                      | 31  |
| 579870.9 | 90658.4  | 1349302  | 544909.5 | 634161.1 | 583266.4 | [M+H-COCl            | 39  |
| 555512.5 | 709753.1 | 845854.6 | 501105.8 | 532250.5 | 0        |                      | 9   |
| 13716508 | 7519565  | 5550926  | 9544410  | 8338022  | 4437537  |                      | 1   |
| 39392997 | 18347791 | 29159056 | 35361565 | 25179709 | 11245309 |                      | 2   |
| 1896845  | 1329607  | 1555371  | 1653143  | 1284475  | 705012.2 | [M+Na]+ 6!           | 5   |
| 2264783  | 706106.4 | 1578592  | 1001937  | 1081526  | 72361.9  | [825][M]3+           | 71  |
| 181041.4 | 125282.6 | 24800.75 | 12628.13 | 148592.4 | 12881.69 |                      | 217 |
| 3088029  | 8067948  | 6262026  | 2977674  | 9267981  | 14490906 |                      | 2   |
| 2194511  | 1837481  | 1316655  | 2351575  | 1301063  | 0        |                      | 2   |
| 991171.8 | 198996.9 | 1785386  | 464672.4 | 640163.1 | 0        |                      | 1   |
| 2216795  | 2920073  | 953812.2 | 663403.7 | 3115964  | 1500596  |                      | 1   |
| 1.37E+09 | 1.23E+09 | 1.24E+09 | 1.18E+09 | 1.22E+09 | 8.3E+08  | [548][M]+            | 4   |
| 43306697 | 31604201 | 20150821 | 28772874 | 30566447 | 26397428 | [72][M]+             | 152 |
| 909351.6 | 662575.2 | 36259517 | 1.34E+08 | 3482983  | 503471.8 | [323][M]+ [M+H]+ 31! | 88  |
| 275603.7 | 471799.3 | 1208184  | 357919.1 | 440947.1 | 342923.5 | [301][M+1]+          | 16  |
| 1154344  | 847842.8 | 15056381 | 54399916 | 1652144  | 1277391  |                      | 118 |
| 6686665  | 2041295  | 3493794  | 7563605  | 1442559  | 1320708  |                      | 16  |
| 42391003 | 10783311 | 9103885  | 9861387  | 11587130 | 18589956 | [123][M]+            | 96  |
| 1202120  | 1700216  | 2103806  | 671283   | 2632318  | 1692377  |                      | 1   |
| 2.71E+08 | 2.23E+08 | 2.27E+08 | 1.67E+08 | 2.36E+08 | 1.21E+08 | [426][M]2+           | 65  |

|          |          |          |          |          |          |              |     |
|----------|----------|----------|----------|----------|----------|--------------|-----|
| 113270.2 | 892135.3 | 0        | 0        | 637202.2 | 1850594  |              | 9   |
| 1996073  | 2428213  | 2607469  | 2329118  | 2341766  | 2432801  | [1621][M+1]+ | 2   |
| 2140032  | 2422387  | 1376613  | 1382832  | 2428236  | 2150665  |              | 9   |
| 1149103  | 2361666  | 748749   | 1386565  | 6870164  | 19241628 |              | 2   |
| 2947649  | 2016491  | 2403244  | 2161763  | 3455819  | 0        |              | 2   |
| 5.38E+08 | 4.92E+08 | 4.96E+08 | 4.63E+08 | 4.77E+08 | 3.21E+08 | [176][M]+    | 4   |
| 11200339 | 12480650 | 10368816 | 8511839  | 12012786 | 8254455  |              | 9   |
| 326258.4 | 279732.4 | 393062.3 | 125947.3 | 325730   | 110977.5 |              | 507 |
| 2943145  | 4764143  | 4891271  | 11321564 | 3610721  | 3231779  |              | 9   |
| 99363316 | 41451342 | 38893364 | 60043675 | 73161888 | 17815926 |              | 1   |
| 1329513  | 1267574  | 1757334  | 989815.3 | 722164.8 | 1026529  |              | 4   |
| 7580295  | 2804554  | 6808206  | 3299302  | 6950905  | 2289592  |              | 310 |
| 9863321  | 4253866  | 7270054  | 9315445  | 6868438  | 10664156 | [430][M+1]2+ | 2   |
| 58508489 | 14411849 | 16790139 | 11171354 | 13538048 | 19623261 | [612][M]3+   | 117 |
| 1581190  | 3181941  | 2487608  | 1788282  | 3923285  | 9259597  | [1216][M+2]+ | 2   |
| 8280041  | 9150042  | 12821520 | 8901200  | 6309706  | 18173503 |              | 9   |
| 5516445  | 5539786  | 6900992  | 1021884  | 4285516  | 159249.1 |              | 1   |
| 8068248  | 10015399 | 10601045 | 5245605  | 7217754  | 7644846  |              | 1   |
| 4405781  | 4852067  | 1916688  | 2092167  | 4861428  | 3635303  | [1292][M]+   | 1   |
| 8118101  | 8658478  | 7392229  | 7030354  | 8705262  | 3458020  |              | 2   |
| 5723506  | 5888756  | 4032105  | 6581407  | 6054700  | 1312459  | [M+Na+3K]    | 13  |
| 674501.9 | 586597.8 | 944962.3 | 3350186  | 612761.8 | 1142543  |              | 9   |
| 18966619 | 31623095 | 23433752 | 17791022 | 18893276 | 24565555 |              | 1   |
| 89147.63 | 368435.6 | 420589.1 | 27667.27 | 221613.9 | 217063.6 |              | 20  |
| 2.33E+08 | 1.69E+08 | 1.87E+08 | 2.18E+08 | 1.86E+08 | 76356872 |              | 2   |
| 133769   | 136929   | 2466541  | 3089898  | 2747349  | 240494.3 |              | 246 |
| 1803389  | 2453690  | 1302539  | 1499051  | 1251632  | 2205802  |              | 4   |
| 18227257 | 12104349 | 9164201  | 14120632 | 7493522  | 11143254 |              | 172 |
| 416248   | 585099.1 | 325605.4 | 415670.2 | 2981275  | 1663913  |              | 4   |
| 4784059  | 4748645  | 4046495  | 3983042  | 5409149  | 2227381  | [227][M]2+   | 9   |
| 985004.8 | 0        | 1091464  | 798984.4 | 542945.1 | 288883.8 |              | 9   |
| 1507599  | 1361926  | 30415953 | 96214760 | 1479618  | 992039.4 | [M+H-H2O]    | 86  |
| 564800.2 | 409777.9 | 428742.5 | 106611.8 | 273454.3 | 151884.5 |              | 107 |
| 631450.2 | 849380.7 | 332183.1 | 593306.8 | 1257485  | 364609.4 | [M+K+HCO]    | 21  |
| 50248927 | 56633140 | 45656701 | 41287842 | 55153617 | 40266385 | [71][M]+     | 9   |

|          |          |          |          |          |          |             |     |
|----------|----------|----------|----------|----------|----------|-------------|-----|
| 7828728  | 1163382  | 1915551  | 537805   | 10249579 | 7008209  | [M+Na]+ 70  | 14  |
| 4879008  | 3793599  | 4047165  | 4801893  | 181833.2 | 2906588  | [1443][M]+  | 44  |
| 23407040 | 29658161 | 21510896 | 23066351 | 28804528 | 16228436 | [572][M]+   | 9   |
| 3555573  | 4567635  | 1413335  | 733508.5 | 4996836  | 757300.9 | [574][M]3+  | 11  |
| 937737.2 | 629402.6 | 2421797  | 778885.2 | 875385.4 | 1343976  | [M+Na]+ 4!  | 98  |
| 2781829  | 10643830 | 9648022  | 1788904  | 1108386  | 1039002  |             | 1   |
| 662386.1 | 598637.2 | 285052   | 121138.3 | 408081   | 287345.2 |             | 4   |
| 570295.6 | 897910.6 | 267413.6 | 0        | 411732.6 | 220424.8 | [M+2K-H]+   | 18  |
| 1791712  | 1347882  | 1597443  | 1494516  | 1543469  | 2350943  |             | 4   |
| 22962874 | 22899023 | 20733125 | 18361662 | 18189295 | 12478518 | [947][M+1]+ | 116 |
| 3892121  | 3887295  | 2834865  | 3827916  | 4371886  | 5539838  |             | 317 |
| 23549039 | 11927670 | 7810688  | 9984753  | 9181718  | 2913940  |             | 2   |
| 79499556 | 1.14E+08 | 1E+08    | 55808375 | 60591558 | 56504727 |             | 20  |
| 2859130  | 7946310  | 3761103  | 3084825  | 13218582 | 30216115 |             | 2   |
| 326960   | 948457.1 | 0        | 694252.7 | 1627460  | 1014557  |             | 1   |
| 591813.1 | 667282   | 504330.5 | 661275.2 | 463213.3 | 430788   |             | 500 |
| 285951.9 | 308857.7 | 327389.4 | 390002.3 | 269636.7 | 198651.6 | [M+K]+ 880  | 42  |
| 116762   | 959944.1 | 1418416  | 0        | 567341.9 | 4935678  |             | 9   |
| 1185626  | 1432627  | 1118958  | 1209456  | 1175827  | 144667.1 | [257][M]3+  | 24  |
| 0        | 1106221  | 101935   | 0        | 0        | 0        | [3M+2H]2+   | 15  |
| 8753996  | 5968363  | 6817137  | 8642080  | 6069835  | 1023949  |             | 9   |
| 81669.37 | 837047.1 | 25268455 | 7127046  | 10999551 | 293290.9 |             | 18  |
| 2049253  | 1699675  | 2381924  | 741410.2 | 1596517  | 224966.6 |             | 1   |
| 1.84E+08 | 1.32E+08 | 1.5E+08  | 1.7E+08  | 1.46E+08 | 59347621 |             | 2   |
| 3686461  | 4659685  | 3361023  | 2290733  | 4257666  | 2878776  | [1067][M]+  | 9   |
| 42527139 | 33852525 | 35040358 | 35671092 | 33561627 | 5464822  |             | 2   |
| 36927824 | 23214836 | 4867506  | 18716910 | 75753998 | 1.07E+08 |             | 3   |
| 5339868  | 4298697  | 5775684  | 3754612  | 14332509 | 5337973  | [M+H-CH2]   | 15  |
| 3.59E+08 | 2.74E+08 | 3.31E+08 | 3.61E+08 | 1.81E+08 | 1.49E+08 |             | 2   |
| 7194494  | 718550.2 | 5157449  | 5418242  | 5077382  | 4875248  |             | 377 |
| 531810.1 | 565610.6 | 159435.6 | 425602.6 | 696640   | 163557.3 |             | 4   |
| 1248134  | 0        | 1843050  | 1017866  | 607268.1 | 0        |             | 9   |
| 375315.2 | 527442.8 | 468678.1 | 367368.6 | 333928.9 | 264771.3 |             | 35  |
| 406683.6 | 228161.9 | 382616.8 | 611952.6 | 513890   | 241170   |             | 83  |
| 1217076  | 603189.4 | 798525.5 | 2841808  | 634680.4 | 2048340  |             | 6   |

|          |          |          |          |          |          |              |     |
|----------|----------|----------|----------|----------|----------|--------------|-----|
| 192991.3 | 303638.1 | 290329.4 | 369918.9 | 257476.1 | 124347   |              | 100 |
| 260006   | 481472.9 | 1355357  | 442243.3 | 408709.5 | 155483.6 | [957][M+1]+  | 87  |
| 432419.6 | 218761.3 | 219824.6 | 320254.4 | 199386.8 | 205014.2 | [217][M+1]+  | 76  |
| 896056.9 | 1059092  | 5357432  | 3220473  | 880697.6 | 2452066  |              | 4   |
| 3229776  | 3185168  | 2200194  | 2136268  | 2135720  | 475820   |              | 81  |
| 8535070  | 13712206 | 14808023 | 8389999  | 8169563  | 4912796  |              | 1   |
| 2922447  | 2036234  | 2865187  | 3378975  | 3090307  | 2928397  |              | 257 |
| 978087.1 | 4607833  | 3524608  | 975467.3 | 2121534  | 6774329  |              | 9   |
| 26816536 | 2794676  | 2485721  | 1610543  | 30085524 | 4658554  | [M+H]+ 180   | 15  |
| 125064.2 | 766991.9 | 694893.8 | 445683.9 | 398961.7 | 394498.2 |              | 4   |
| 157359.8 | 158754.8 | 11161480 | 39661384 | 310288.5 | 24467.16 |              | 134 |
| 1286692  | 1519896  | 2159369  | 914855.7 | 1326518  | 2750519  |              | 1   |
| 1.32E+08 | 4.55E+08 | 1.35E+08 | 1.58E+08 | 4.06E+08 | 95728150 |              | 124 |
| 5176750  | 4099069  | 2605612  | 6755985  | 5095630  | 4809776  |              | 424 |
| 7081288  | 3716522  | 7360000  | 4435712  | 5078048  | 4627701  |              | 2   |
| 5090445  | 856977.7 | 830441.8 | 805630.6 | 843248.9 | 1546140  | [123][M+1]+  | 96  |
| 4366184  | 3516367  | 7966284  | 3016330  | 7638241  | 24768964 | [1310][M+2]+ | 9   |
| 682719.8 | 868445.1 | 1832505  | 538355   | 786469.4 | 3291790  |              | 9   |
| 276874.4 | 191032.8 | 282628.9 | 450050.3 | 173588.9 | 86130.57 | [1545][M+1]+ | 62  |
| 5593339  | 7301385  | 6835995  | 3309953  | 5343717  | 2713392  | [M+H-C2H4    | 46  |
| 3901223  | 2977383  | 3697051  | 5051183  | 7941533  | 3684843  |              | 333 |
| 3676600  | 3090679  | 3113050  | 2246281  | 3676377  | 991629.4 |              | 1   |
| 321727.4 | 63370.22 | 0        | 266294.3 | 120030.7 | 568349.5 | [M+Na]+ 20   | 12  |
| 1894957  | 2038961  | 2225224  | 1718800  | 1764807  | 0        |              | 13  |
| 2801454  | 3176433  | 3037842  | 2800946  | 2237711  | 2269556  |              | 375 |
| 1582969  | 6230404  | 737885   | 12537596 | 2212195  | 2072269  | [M+H-CH4]    | 252 |
| 864817.9 | 920726.3 | 1001452  | 674109.4 | 875957.4 | 648039.4 | [M+2H-HC(    | 23  |
| 1004735  | 653150.2 | 912551.3 | 7831955  | 1118069  | 14013274 |              | 89  |
| 482752.8 | 711698.7 | 379438.4 | 435371.3 | 473853.5 | 468791.8 |              | 23  |
| 10303055 | 7404074  | 9079028  | 9592199  | 7716122  | 1605310  |              | 2   |
| 697214.4 | 492758.7 | 3412621  | 1558591  | 954591   | 2779853  |              | 9   |
| 311152.4 | 268135.5 | 3460242  | 1244637  | 325328.7 | 180570.8 | [312][M+1]+  | 212 |
| 2269675  | 3463452  | 2350698  | 2062781  | 2602542  | 6647704  |              | 2   |
| 573843.7 | 307439.9 | 4487017  | 15248701 | 612323.6 | 392895.4 |              | 243 |
| 609564.4 | 2240936  | 441142.1 | 324792   | 796053.8 | 1015576  |              | 1   |



|          |          |          |          |          |          |                      |     |
|----------|----------|----------|----------|----------|----------|----------------------|-----|
| 1339575  | 4029049  | 1947139  | 2785977  | 1991678  | 511882.7 |                      | 1   |
| 272267.9 | 458472.4 | 1548584  | 7704748  | 490536.3 | 610452.9 |                      | 247 |
| 10170060 | 6702934  | 5406737  | 1336198  | 8803453  | 1199256  | [1297][M]2+          | 1   |
| 1072952  | 966089.4 | 875272.9 | 598130.4 | 663035.1 | 179634.6 | [1118][M+1]+         | 302 |
| 945663.6 | 947757.9 | 1710461  | 1705140  | 582641.6 | 663592.2 |                      | 9   |
| 97232418 | 82177911 | 78345162 | 93459305 | 77574681 | 36140091 | [399][M]+            | 2   |
| 13530715 | 9309412  | 8607947  | 10805024 | 9915759  | 6353185  | [22][M]2+            | 2   |
| 2900656  | 2532168  | 1965142  | 2282198  | 2230421  | 1478087  |                      | 227 |
| 95353577 | 1.24E+08 | 1.2E+08  | 58498565 | 67187461 | 1.12E+08 |                      | 70  |
| 818083.9 | 894149.6 | 733005.6 | 256453   | 631263.5 | 0        | [M+K]+ 314           | 81  |
| 1783422  | 2371665  | 1625924  | 1691442  | 2288149  | 1508085  |                      | 14  |
| 7162306  | 8369083  | 6347682  | 6962301  | 7232798  | 2156617  | [348][M]2+           | 2   |
| 70473.14 | 199796.3 | 190310.8 | 112513.5 | 113981.1 | 94684.33 | [1004][M+1]+         | 305 |
| 7757508  | 6711043  | 6160926  | 7142949  | 4531479  | 2753280  |                      | 210 |
| 20804429 | 23335667 | 19526891 | 16853638 | 22574380 | 17236966 |                      | 9   |
| 1503629  | 2077275  | 1855038  | 1301388  | 1540429  | 773502.4 |                      | 9   |
| 811730.6 | 1495235  | 750545.5 | 421122.3 | 1022890  | 2871030  |                      | 9   |
| 2.15E+09 | 2.03E+09 | 512332.6 | 1863908  | 1.81E+09 | 3155196  | [664][M+2]2+         | 4   |
| 2966563  | 2766185  | 2889146  | 2076420  | 2065404  | 1764856  | [737][M]+ [M+K]+ 392 | 25  |
| 17126816 | 11690355 | 7971059  | 7333953  | 8647933  | 8502043  | [M+H-C4H8]           | 15  |
| 4648668  | 2684446  | 68412.07 | 4573394  | 3258513  | 3893136  | [792][M]+            | 90  |
| 2314150  | 2136391  | 1925901  | 2483303  | 3402619  | 1415659  | [M+H]+ 382           | 13  |
| 2441125  | 5176470  | 2258359  | 4465330  | 6023269  | 5798582  | [M+2K]2+ 3           | 14  |
| 9726296  | 590292.6 | 638223   | 698854.9 | 491820   | 455552.2 |                      | 16  |
| 2540621  | 1696346  | 2765330  | 2870182  | 1775507  | 1644057  | [46][M+2]2+          | 2   |
| 283354.3 | 448265.5 | 286262.4 | 371281.1 | 360521.2 | 336795.2 |                      | 94  |
| 5305016  | 542058.1 | 3464058  | 6825143  | 977727.7 | 3498320  |                      | 1   |
| 1368173  | 1236401  | 1822900  | 1611553  | 1307822  | 3557624  |                      | 9   |
| 483202.4 | 644831.8 | 564944.4 | 0        | 416689.2 | 338206.9 | [M+K]+ 369           | 81  |
| 6093003  | 12071456 | 11921784 | 6122553  | 7962951  | 4021089  | [365][M+1]+          | 1   |
| 4315436  | 2676589  | 2390311  | 2708972  | 2534592  | 491465.9 | [1007][M]2+          | 9   |
| 15120526 | 13979204 | 11731100 | 13946580 | 16199686 | 4938010  |                      | 14  |
| 6464839  | 4694596  | 4513112  | 5471025  | 7355858  | 1708276  |                      | 14  |
| 11589333 | 8925922  | 9383861  | 12621675 | 10926797 | 2849780  |                      | 2   |
| 3668942  | 16038075 | 3490152  | 5718378  | 3655648  | 3668233  |                      | 226 |

|          |          |          |          |          |          |                       |     |
|----------|----------|----------|----------|----------|----------|-----------------------|-----|
| 413509.9 | 1142190  | 528535.2 | 9532277  | 945415.4 | 2944386  |                       | 4   |
| 812311.1 | 2001468  | 771417.3 | 542028.2 | 2452461  | 5257071  |                       | 29  |
| 2106877  | 1388741  | 293771.2 | 473583.3 | 2942308  | 1190758  |                       | 1   |
| 17682359 | 10840665 | 10524427 | 14201024 | 1269105  | 12452519 | [97][M+1]3+           | 1   |
| 275341.8 | 216647.2 | 245057.5 | 127671.3 | 161651.2 | 154706.8 |                       | 277 |
| 1538269  | 3040459  | 921502.1 | 1754371  | 2189133  | 3250703  | [766][M+2]+           | 4   |
| 2944373  | 1692020  | 2870321  | 1469772  | 2026776  | 240446.3 |                       | 1   |
| 1050166  | 294178.9 | 886471.2 | 793590.9 | 923564.7 | 427152.2 |                       | 62  |
| 550453.6 | 238606.6 | 461002.1 | 662604.1 | 199490.7 | 100375.7 |                       | 518 |
| 1786224  | 4550179  | 2357635  | 3011394  | 4055152  | 2201070  |                       | 1   |
| 241404.3 | 366118.1 | 780737.3 | 421161.8 | 462539.7 | 268613.9 |                       | 4   |
| 468305.7 | 63032.62 | 992623.9 | 192283.6 | 182801   | 0        |                       | 9   |
| 4913099  | 4822521  | 1081689  | 9173083  | 4708722  | 5076909  |                       | 3   |
| 2992206  | 2946560  | 1981955  | 3180848  | 1572790  | 3839079  | [1546][M]+ [M+Na]+ 9! | 62  |
| 195670.9 | 25138.09 | 298659.6 | 312792.5 | 134498.1 | 131118.1 | [106][M+1]+           | 32  |
| 685291.3 | 803666.9 | 833139   | 551973   | 733825.6 | 3118807  |                       | 9   |
| 9013732  | 3044353  | 2696445  | 4941472  | 5401989  | 2752860  | [477][M+1]2+          | 1   |
| 2898625  | 2612829  | 1908870  | 2555605  | 2855668  | 2311252  | [M+Na+HC              | 404 |
| 1275892  | 1755356  | 297677.4 | 709451.8 | 2339201  | 1180996  | [M+2H-CO              | 3   |
| 1152270  | 1409589  | 1497814  | 923595.9 | 980445.5 | 1634082  |                       | 247 |
| 211992.4 | 243428.9 | 693768.7 | 712734.9 | 271793   | 833000.3 | [M+H-C6H:             | 42  |
| 4213277  | 3181114  | 4376641  | 5042683  | 5044522  | 3791611  |                       | 396 |
| 1259240  | 2668710  | 5207826  | 973210.7 | 2063524  | 12019977 |                       | 9   |
| 7908101  | 6888941  | 2759715  | 6517472  | 6184117  | 7142011  | [3M+2H]2+             | 11  |
| 247583.7 | 272161.5 | 221559.7 | 326882.1 | 251325.8 | 177918.7 |                       | 104 |
| 2.77E+08 | 2.49E+08 | 2.52E+08 | 2.41E+08 | 2.5E+08  | 1.71E+08 | [548][M+1]+           | 4   |
| 1470868  | 1167686  | 1315342  | 1158795  | 1077389  | 2538690  |                       | 9   |
| 316041.6 | 273813.2 | 197122.7 | 341673   | 13808.12 | 263529.6 |                       | 519 |
| 85951.64 | 173190.7 | 4780760  | 17083504 | 147457.7 | 0        |                       | 243 |
| 1245806  | 1434093  | 38172084 | 1.38E+08 | 1845047  | 1758572  |                       | 102 |
| 11924530 | 28673250 | 26736878 | 19084999 | 34128655 | 26109200 |                       | 1   |
| 3825377  | 3533405  | 3022116  | 3593935  | 4113982  | 940711.3 | [M+Na+Na              | 13  |
| 1919973  | 2001488  | 2456325  | 1378917  | 770861.7 | 352832.8 |                       | 1   |
| 3094302  | 1923825  | 2023644  | 5531935  | 3751855  | 3265978  | [M+Na]+ 4.            | 6   |
| 567115.9 | 541461.7 | 637225   | 581370.7 | 413586.9 | 1189563  | [M+3H]3+ :            | 33  |

|          |          |          |          |          |          |                       |     |
|----------|----------|----------|----------|----------|----------|-----------------------|-----|
| 3972553  | 4603117  | 1070619  | 3471965  | 868376.8 | 1026892  |                       | 1   |
| 1226310  | 1579539  | 1227394  | 430803.6 | 1282206  | 2503456  | [1127][M+1]2+         | 38  |
| 307191.4 | 616297.3 | 435538.5 | 268860   | 430690.7 | 634026.5 | [130][M+2]+           | 4   |
| 126987.2 | 441662.8 | 461084.9 | 439914.3 | 443671.6 | 375408.1 | [276][M+1]+           | 292 |
| 4001451  | 4422652  | 4353347  | 4891563  | 3384623  | 4218357  |                       | 409 |
| 4040529  | 2126386  | 3556587  | 4921167  | 2231186  | 1501907  | [1556][M+1]+          | 304 |
| 488784.3 | 514542.5 | 43632085 | 1.84E+08 | 4364169  | 430422.2 | [324][M]+             | 32  |
| 1098691  | 1570184  | 971253.8 | 696528.9 | 709833.3 | 1051667  |                       | 4   |
| 0        | 1040891  | 0        | 0        | 681418   | 780252.2 |                       | 1   |
| 1.12E+08 | 67012867 | 69487921 | 51914232 | 52764490 | 47837172 |                       | 1   |
| 1547699  | 1733116  | 1632120  | 1291896  | 780306.8 | 2065343  |                       | 42  |
| 1940436  | 1308243  | 1805506  | 1364437  | 1110474  | 0        |                       | 2   |
| 3183495  | 2678326  | 2744870  | 2499605  | 2374331  | 0        | [775][M]+             | 9   |
| 877487.6 | 1062719  | 724638.5 | 751021.6 | 1142757  | 610162   |                       | 4   |
| 2329262  | 2331279  | 1244734  | 3757139  | 1910647  | 1924273  | [M+K]+ 31:            | 252 |
| 9238782  | 6354431  | 6325742  | 7400562  | 6951216  | 8781153  |                       | 2   |
| 85718.52 | 189731.6 | 186340.3 | 175211.9 | 95175.96 | 148799.4 |                       | 70  |
| 3375247  | 6237207  | 3043842  | 7512109  | 5927842  | 1734962  |                       | 1   |
| 11341818 | 12780106 | 10756031 | 12606776 | 10556471 | 5940133  | [1606][M+2]+          | 2   |
| 395261.5 | 770500.8 | 612985   | 445855.3 | 463253.7 | 992418.4 |                       | 4   |
| 20504247 | 27874620 | 20799983 | 7988012  | 17507525 | 19338025 | [849][M+3]+           | 1   |
| 14463697 | 1458443  | 32937590 | 12007787 | 894874.9 | 12008763 | [514][M]3+            | 9   |
| 3331441  | 5095410  | 4445671  | 1979370  | 5819767  | 3098596  |                       | 58  |
| 3233608  | 3091390  | 2923438  | 2446593  | 2447953  | 7719107  |                       | 2   |
| 66457.56 | 851088.1 | 875478.4 | 232402.2 | 518207.2 | 2133442  |                       | 9   |
| 98680.53 | 87015.94 | 148430.8 | 360691.7 | 36956.9  | 170859.6 |                       | 292 |
| 10384677 | 9326818  | 9226380  | 12153817 | 6906679  | 5214806  |                       | 1   |
| 2001285  | 2056654  | 1597067  | 817620.3 | 1798628  | 243716.5 |                       | 1   |
| 2150018  | 2528396  | 1644329  | 908018.6 | 2107459  | 2188433  | [1555][M]+ [3M+K]+ 3: | 8   |
| 15822573 | 20011483 | 23737304 | 16238564 | 42698805 | 18795017 |                       | 269 |
| 224199.9 | 199042   | 107865.9 | 155108.4 | 93208.7  | 339439.3 |                       | 523 |
| 1130799  | 909876.1 | 1404139  | 1703393  | 433152.3 | 353663.1 |                       | 12  |
| 135448.3 | 28179.25 | 0        | 0        | 97184.12 | 12326.65 | [813][M]3+            | 203 |
| 2086348  | 9730894  | 1591972  | 7999777  | 3450536  | 14072700 | [M+H]+ 45:            | 11  |
| 819411.6 | 873477.5 | 579411.8 | 460402   | 475530   | 0        | [M+H]+ 71:            | 81  |

|          |          |          |          |          |          |              |     |
|----------|----------|----------|----------|----------|----------|--------------|-----|
| 12309612 | 32268950 | 21025161 | 20223665 | 32811444 | 57649739 |              | 2   |
| 23908792 | 4088614  | 1480698  | 2819383  | 3144848  | 3092107  | [414][M+1]3+ | 2   |
| 3.51E+08 | 2.21E+08 | 1.72E+08 | 1.63E+08 | 1.33E+08 | 1.41E+08 | [752][M]+    | 1   |
| 479465.3 | 447517   | 565386.5 | 225403.7 | 319633.7 | 296894.4 | [M+2K]2+ :   | 38  |
| 2425609  | 4304281  | 4043041  | 1217533  | 3326250  | 2035605  |              | 18  |
| 2495416  | 2335298  | 2033355  | 3885588  | 2431109  | 1632809  |              | 2   |
| 14164519 | 6482804  | 14007186 | 5139371  | 11336015 | 12419017 |              | 2   |
| 2686743  | 4166388  | 4091285  | 2303717  | 5883973  | 8849462  |              | 93  |
| 9374942  | 10371176 | 9538654  | 9429472  | 8915362  | 13479693 |              | 156 |
| 17642004 | 17746711 | 15184474 | 16690831 | 17051752 | 11946859 | [66][M]2+    | 4   |
| 16708977 | 11754244 | 13337740 | 16547784 | 11934403 | 2181033  |              | 2   |
| 3939087  | 2345299  | 2882984  | 2405697  | 3482700  | 2073460  | [M+K+HCO     | 15  |
| 8119532  | 8896473  | 6577233  | 6024617  | 5819863  | 4596778  |              | 1   |
| 387262.1 | 1332033  | 641071.2 | 409881.9 | 356816.7 | 225720.6 |              | 4   |
| 4555343  | 4199467  | 4151266  | 3723455  | 2900960  | 481328.8 |              | 2   |
| 8581869  | 10717314 | 9948426  | 8565635  | 9541674  | 12890293 |              | 365 |
| 741056   | 586611.9 | 14223067 | 49375242 | 444485.1 | 627026.4 |              | 148 |
| 641608.9 | 725173.7 | 450661.9 | 473530.9 | 421945.8 | 379003.5 |              | 179 |
| 75159.98 | 639728.1 | 141157.3 | 58487.25 | 243690.9 | 928811.1 |              | 4   |
| 1.69E+08 | 1.85E+08 | 1.8E+08  | 1.76E+08 | 1.55E+08 | 1.3E+08  | [255][M+1]+  | 24  |
| 40650076 | 28853695 | 32364013 | 38049441 | 31450222 | 9023239  |              | 2   |
| 3860025  | 2928923  | 2367649  | 3640387  | 3198695  | 1457837  | [M+K]+ 37:   | 13  |
| 8570282  | 9073241  | 5076377  | 1566417  | 8271710  | 15775838 |              | 1   |
| 2564496  | 2453848  | 34271163 | 1.43E+08 | 5363969  | 2156945  |              | 59  |
| 899998.5 | 738247.2 | 839699.4 | 499085.9 | 576560.9 | 0        |              | 4   |
| 839650.6 | 1202903  | 648675.1 | 1144458  | 1004506  | 219432.9 |              | 9   |
| 15910984 | 27571832 | 27893425 | 15914486 | 18427529 | 10468576 |              | 1   |
| 846967.3 | 2032835  | 1816579  | 1488379  | 1564417  | 4043351  | [M+Na+NH     | 13  |
| 6812629  | 1266114  | 13262169 | 11992283 | 1002115  | 2850946  |              | 9   |
| 235392.2 | 275265   | 236872.1 | 167271.2 | 161630.7 | 157459.5 |              | 118 |
| 50071833 | 56964079 | 45740338 | 41287276 | 54973686 | 40575474 |              | 9   |
| 640421.8 | 211806.6 | 420359.7 | 1185648  | 657189.8 | 469850.6 | [1089][M]2+  | 59  |
| 141901.7 | 142485.8 | 28725.48 | 11851.71 | 218229.5 | 44731.54 | [696][M+1]2+ | 105 |
| 192401.2 | 541614   | 817904   | 318283.8 | 178994.7 | 903040.8 |              | 4   |
| 1097092  | 1039613  | 673661.5 | 974412.5 | 1053078  | 305225.8 | [M+H]+ 37:   | 8   |

|          |          |          |          |          |          |                                               |     |
|----------|----------|----------|----------|----------|----------|-----------------------------------------------|-----|
| 1243323  | 1522371  | 2205842  | 1210504  | 740112.5 | 629153.3 | [M+H] <sup>+</sup> 15!                        | 6   |
| 327468.9 | 570578.8 | 499912.7 | 301455.8 | 735119.7 | 286573.4 | [1028][M+1] <sup>3+</sup>                     | 16  |
| 2608061  | 1785065  | 2272707  | 1759161  | 1837798  | 0        | [1354][M+2] <sup>+</sup>                      | 2   |
| 409672.1 | 232877.9 | 560558.1 | 270369.8 | 68104.76 | 333640.1 | [1416][M+1] <sup>3+</sup>                     | 72  |
| 2195348  | 6704315  | 6448691  | 6552856  | 7233588  | 5183442  | [805][M+1] <sup>3+</sup>                      | 1   |
| 109313.3 | 104242.9 | 17383203 | 71775338 | 1006188  | 40766.71 |                                               | 131 |
| 31515403 | 49014243 | 21162248 | 31795372 | 28633921 | 32327363 | [M+Na] <sup>+</sup> 5!                        | 3   |
| 7150635  | 8404550  | 5940358  | 6946591  | 7279728  | 6084582  | [502][M+2] <sup>2+</sup>                      | 2   |
| 10048731 | 9432523  | 8116847  | 6852954  | 5551126  | 2118117  |                                               | 2   |
| 1852936  | 2730657  | 2788782  | 2744856  | 2669589  | 2542383  |                                               | 192 |
| 120852.6 | 81684.27 | 43099664 | 1.81E+08 | 3000079  | 138654.8 | [M+H] <sup>+</sup> 31!                        | 86  |
| 1779266  | 2966540  | 1623212  | 1327351  | 1253775  | 2089985  | [3M+Na+K]                                     | 8   |
| 18945052 | 19150626 | 14055251 | 12688263 | 13496557 | 28054069 | [1390][M] <sup>+</sup> [M+Na] <sup>+</sup> 7! | 12  |
| 5745144  | 9073762  | 7799229  | 4175091  | 6506119  | 8449623  |                                               | 9   |
| 5339418  | 5014588  | 9128093  | 5219441  | 4947610  | 6366182  |                                               | 368 |
| 1881928  | 2313295  | 2045058  | 1724712  | 1607987  | 1489707  | [1203][M] <sup>+</sup>                        | 299 |
| 240415.2 | 443056.9 | 181493.8 | 71819.75 | 283052   | 295983.7 | [M+Na] <sup>+</sup> 6!                        | 18  |
| 2394063  | 1905085  | 964085.4 | 1433231  | 1112048  | 1557710  |                                               | 330 |
| 397798.5 | 443486.6 | 291326.8 | 213947.2 | 324864   | 459184.8 |                                               | 91  |
| 1387776  | 1215214  | 1220079  | 828505.8 | 1004455  | 306639.4 | [492][M] <sup>2+</sup>                        | 490 |
| 1161298  | 1536238  | 1097742  | 3535394  | 1063685  | 1632698  |                                               | 4   |
| 3379635  | 728404.5 | 2933470  | 3327204  | 2528200  | 788587.2 | [461][M+2] <sup>+</sup>                       | 2   |
| 78765.45 | 8464.422 | 17142218 | 69819208 | 772386.8 | 0        |                                               | 161 |
| 9856382  | 4968141  | 4404449  | 6770799  | 5745029  | 3576633  | [M+K] <sup>+</sup> 81!                        | 14  |
| 561716.1 | 125419.1 | 36400613 | 1.64E+08 | 4723999  | 723985.2 |                                               | 82  |
| 2841935  | 2574503  | 2285012  | 2003841  | 2444571  | 1233673  |                                               | 4   |
| 7002895  | 6273151  | 6385802  | 4879968  | 4383761  | 3115162  | [133][M+3] <sup>+</sup>                       | 4   |
| 1671379  | 1579069  | 1906009  | 828095.5 | 1175959  | 565752.5 |                                               | 4   |
| 505114.3 | 743220.4 | 618213.5 | 457482.5 | 679431   | 397451.8 | [M+Na] <sup>+</sup> 5!                        | 134 |
| 14132023 | 12296323 | 12211731 | 11892535 | 12740216 | 8283036  |                                               | 4   |
| 5670384  | 6103967  | 6347241  | 4682928  | 7210460  | 1547826  | [M+H-CO] <sup>+</sup>                         | 15  |
| 24187687 | 24855340 | 20314149 | 24265154 | 24721769 | 10592595 | [390][M] <sup>2+</sup>                        | 2   |
| 7387564  | 8724076  | 1579515  | 5342307  | 9348502  | 55849632 |                                               | 3   |
| 5731667  | 4265389  | 4913509  | 5223548  | 4878050  | 625487.3 |                                               | 2   |
| 351166.7 | 223121.7 | 457802   | 217370.9 | 274943.2 | 231371.2 | [M+2K] <sup>2+</sup> 6!                       | 38  |

|          |          |          |          |          |          |              |     |
|----------|----------|----------|----------|----------|----------|--------------|-----|
| 3193962  | 5233329  | 4063879  | 3859828  | 5812000  | 7877872  |              | 2   |
| 7752700  | 6911259  | 7075478  | 6966848  | 5968411  | 2743929  | [415][M]2+   | 2   |
| 296214.9 | 387622.1 | 654634.4 | 410692.8 | 370143   | 212949.3 | [M+H-H2O]    | 23  |
| 10014305 | 18482547 | 12577867 | 12155011 | 15247287 | 24089301 |              | 2   |
| 10614444 | 18247069 | 19511729 | 10340849 | 12376428 | 8961280  |              | 1   |
| 9448129  | 19173626 | 29312257 | 10835446 | 1903875  | 14115252 |              | 90  |
| 692593.9 | 1387121  | 148570.1 | 197474.4 | 290770.1 | 172066.4 |              | 124 |
| 3561566  | 3698297  | 8425135  | 3928911  | 4139784  | 4599534  |              | 191 |
| 1922342  | 3029678  | 2350033  | 1423721  | 2043626  | 790818.9 |              | 9   |
| 2265525  | 899489.8 | 1542770  | 3013992  | 1724662  | 8536433  | [1253][M+5]+ | 2   |
| 667446.7 | 496222.2 | 531756.4 | 566018.5 | 370004.8 | 316075.3 |              | 9   |
| 1576791  | 1502753  | 1986188  | 1234350  | 1066351  | 3369161  |              | 9   |
| 3815340  | 4085339  | 4383521  | 2957599  | 4282688  | 2678496  | [529][M+1]2+ | 20  |
| 1119452  | 2060968  | 1980455  | 10194735 | 1266924  | 1958136  |              | 4   |
| 4186014  | 1487304  | 1865962  | 2921699  | 2570660  | 89634.44 | [98][M+1]2+  | 1   |
| 322219   | 631549.9 | 366276.3 | 234740.7 | 418606.1 | 464164   |              | 91  |
| 10337189 | 17883704 | 13371761 | 10197482 | 11739565 | 12857284 |              | 1   |
| 7047912  | 4899460  | 4528387  | 7168527  | 5020098  | 2367013  |              | 2   |
| 8298706  | 3688751  | 26438994 | 4.74E+09 | 20847208 | 3.46E+09 |              | 9   |
| 1202005  | 1091523  | 365696.6 | 681551.9 | 1058096  | 354405.5 |              | 9   |
| 26626113 | 28602455 | 28368239 | 22135898 | 25018540 | 21643361 | [811][M+1]+  | 98  |
| 843225.8 | 414700.4 | 855386.4 | 971759   | 276305.9 | 192289.1 | [1464][M+2]+ | 220 |
| 9938.19  | 13002.01 | 7664660  | 31803822 | 283900.9 | 8665.056 | [311][M+1]+  | 79  |
| 2998702  | 11551974 | 6356458  | 4966459  | 12354972 | 65407951 |              | 2   |
| 3056980  | 3289379  | 5492761  | 861421   | 2502786  | 1541283  | [3M+H+K]2    | 6   |
| 31616466 | 29062771 | 31647652 | 22773623 | 29412136 | 9677071  | [M+K]+ 53    | 13  |
| 4301194  | 4667565  | 2860006  | 2934492  | 4267587  | 3777942  |              | 4   |
| 487707.3 | 437160.3 | 359955.3 | 432686   | 85406.05 | 391958.8 | [M+K+HCO     | 16  |
| 192880.9 | 312256.3 | 345871.7 | 352346.9 | 201286   | 259083.2 |              | 480 |
| 7190051  | 4409868  | 5665202  | 6319798  | 4872994  | 535042.3 |              | 2   |
| 9102289  | 7700421  | 5610207  | 6889295  | 8592587  | 10178541 |              | 2   |
| 12674990 | 6171887  | 11514775 | 14673357 | 6435139  | 7970017  | [448][M]+    | 181 |
| 12926823 | 8073146  | 10440523 | 5705526  | 12334186 | 10131196 |              | 2   |
| 1144110  | 1410068  | 568999.2 | 3610260  | 670043.6 | 1623747  | [M+H-C6H:    | 46  |
| 960626.6 | 1686965  | 482799.9 | 233912.1 | 1070693  | 1515168  | [M+Na]+ 5!   | 18  |

|          |          |          |          |          |          |             |     |
|----------|----------|----------|----------|----------|----------|-------------|-----|
| 72471250 | 50254713 | 23384508 | 66868038 | 80731774 | 1.41E+08 | [M+K]+ 51:  | 3   |
| 4131847  | 1418620  | 1412074  | 1468380  | 1478165  | 4781225  |             | 407 |
| 8963365  | 6184499  | 1262976  | 5968914  | 6597241  | 7921726  |             | 3   |
| 649600.1 | 792739.7 | 613688.7 | 810626.7 | 533546.3 | 894933.4 |             | 190 |
| 7144485  | 782788.3 | 8585258  | 1193303  | 585266.9 | 2192752  |             | 9   |
| 1670917  | 3627587  | 2631796  | 967680.6 | 1969715  | 4715004  |             | 4   |
| 1970905  | 2424705  | 1490106  | 1128389  | 2115526  | 1955365  | [M+K]+ 72:  | 12  |
| 24824869 | 24294445 | 25149656 | 25112375 | 23436309 | 24073163 | [495][M+1]+ | 121 |
| 79487.66 | 320409.6 | 71599.71 | 131267.6 | 207721.3 | 132987.2 | [M+H]+ 35:  | 20  |
| 144262.2 | 100139.8 | 8155850  | 34197510 | 495647.9 | 16404.98 |             | 179 |
| 1710050  | 2593887  | 1450692  | 1666967  | 2969414  | 1772584  |             | 4   |
| 645186.6 | 313168.2 | 454877.4 | 269901.6 | 628610.4 | 16021.61 |             | 338 |
| 1772043  | 1815390  | 3059529  | 1526757  | 1750691  | 2622357  |             | 2   |
| 671817   | 1487765  | 1932585  | 637156.6 | 846833.4 | 1581307  | [M+K]+ 19:  | 8   |
| 4757689  | 221378.9 | 4170575  | 4447416  | 1977789  | 0        |             | 2   |
| 5636910  | 3726160  | 5605422  | 5980552  | 4100460  | 4968986  |             | 192 |
| 2471324  | 4938888  | 2370374  | 1935772  | 5638909  | 13131344 | [M+K]+ 42:  | 97  |
| 4367169  | 6439622  | 4465311  | 3444387  | 5376125  | 10423308 | [M+3H-CO]   | 319 |
| 724090.4 | 717056   | 17045387 | 67979271 | 1056806  | 577585.9 |             | 133 |
| 4271406  | 5631604  | 3995647  | 3759923  | 5482998  | 3798180  | [2M+Na+2]   | 13  |
| 458453.9 | 695062.4 | 335110.2 | 282571.8 | 599519.4 | 134530.2 |             | 4   |
| 1529155  | 2505770  | 3206255  | 4811853  | 1743028  | 2367658  |             | 337 |
| 1361484  | 1449644  | 2977312  | 1229119  | 1511790  | 1501394  |             | 1   |
| 906482.6 | 2192394  | 1720462  | 1868548  | 2464448  | 3088804  |             | 9   |
| 4000768  | 4423262  | 4247107  | 3923842  | 6001022  | 3727044  |             | 398 |
| 44574650 | 28382942 | 56091752 | 5194282  | 87237097 | 54266674 |             | 1   |
| 44668958 | 35114049 | 36006764 | 37998920 | 38976874 | 38067381 | [469][M]2+  | 2   |
| 6448330  | 4443392  | 4587256  | 6172872  | 4690577  | 1838767  |             | 2   |
| 15271842 | 13915597 | 16657346 | 12559232 | 17099337 | 17484173 |             | 2   |
| 389581.8 | 495305.1 | 317247.6 | 165570.3 | 452289   | 2979021  |             | 91  |
| 1947837  | 100961.2 | 2105436  | 2493156  | 1814696  | 0        |             | 13  |
| 5025308  | 3654070  | 3097804  | 4710600  | 4164091  | 573704.4 |             | 2   |
| 335858.6 | 1537943  | 1232515  | 738995.1 | 725955.5 | 2697522  |             | 9   |
| 5857636  | 6529365  | 5574890  | 5785301  | 6378622  | 1699715  | [1363][M]2+ | 2   |
| 3135341  | 3231166  | 2147784  | 2199798  | 3117293  | 1392082  |             | 9   |

|          |          |          |          |          |          |             |     |
|----------|----------|----------|----------|----------|----------|-------------|-----|
| 5282736  | 2963372  | 3085271  | 1165757  | 5456641  | 5622483  | [M+K]+ 412  | 15  |
| 871881.1 | 520985.4 | 460604.9 | 723311.5 | 3847023  | 3379558  | [862][M+1]+ | 100 |
| 4.04E+09 | 3.46E+09 | 3.4E+09  | 3.68E+09 | 3.47E+09 | 2.16E+09 |             | 2   |
| 300501.6 | 559237.5 | 2992139  | 12672960 | 240615   | 128052   |             | 118 |
| 353574.6 | 0        | 846914.8 | 951664.6 | 568946   | 850551.3 |             | 152 |
| 1456922  | 1035543  | 1285444  | 669888.4 | 713722.6 | 0        |             | 1   |
| 2345312  | 455108.5 | 1371320  | 804477.5 | 1075574  | 0        |             | 182 |
| 394083.6 | 781472.4 | 896440.9 | 347131.3 | 407693.9 | 1685758  |             | 4   |
| 3445163  | 2654482  | 2958465  | 2771555  | 2725595  | 363694.4 | [753][M]3+  | 4   |
| 1827074  | 5126480  | 5716465  | 1726232  | 5036365  | 3275475  |             | 332 |
| 15087429 | 3924962  | 4773320  | 8248188  | 11057579 | 2869770  |             | 1   |
| 447289.1 | 604232.2 | 234147.5 | 317802.1 | 632667   | 147875.5 |             | 4   |
| 2302895  | 3012415  | 1702518  | 1424315  | 6054650  | 5331036  |             | 157 |
| 946445.2 | 869033.7 | 5360702  | 15559285 | 734918.3 | 698621.2 | [M+H-C5H8]  | 12  |
| 4598743  | 1481201  | 4306672  | 4910121  | 4777744  | 3280574  | [M+K]+ 418  | 93  |
| 2123509  | 1976258  | 1813270  | 1801690  | 1772550  | 0        | [M+H-CH2]   | 13  |
| 27235482 | 18834812 | 23054681 | 23763631 | 22499071 | 7659201  |             | 2   |
| 61554.5  | 255377.6 | 0        | 0        | 179957   | 233219.7 | [M+H]+ 861  | 20  |
| 187365.2 | 938195.6 | 476220.4 | 248612.1 | 498454.6 | 288030.1 |             | 20  |
| 1133613  | 1119198  | 2923410  | 1254125  | 1850023  | 1140204  |             | 250 |
| 2.99E+08 | 2.18E+08 | 1.97E+08 | 2.54E+08 | 1.47E+08 | 97621936 |             | 2   |
| 748880.6 | 1266587  | 840530.3 | 631280.9 | 1080100  | 201836.3 |             | 9   |
| 1267302  | 1263171  | 1524075  | 951249.4 | 989745   | 949248.5 | [1232][M]+  | 210 |
| 5789788  | 7473301  | 11553026 | 1832689  | 1423232  | 6159258  | [M+H]+ 518  | 15  |
| 559493.4 | 1433905  | 312980.4 | 507707.1 | 650825.1 | 2909647  |             | 4   |
| 3831835  | 1973339  | 4305730  | 4333388  | 1784419  | 1136168  | [1459][M]+  | 74  |
| 2719007  | 5835706  | 4888017  | 4429249  | 5385098  | 5068932  |             | 2   |
| 5230702  | 5926810  | 3246410  | 6981456  | 11926956 | 9003211  | [3M+3Na+]   | 3   |
| 1018435  | 736811.3 | 1254056  | 877748   | 781630.3 | 1101870  | [M+Na]+ 81  | 23  |
| 3491700  | 4018041  | 2160248  | 2756451  | 8103502  | 22758046 |             | 2   |
| 269079.9 | 442207.6 | 550895   | 207025.9 | 378985.4 | 91065.1  | [M+H+NH3]   | 25  |
| 2875007  | 3147632  | 3803654  | 2225671  | 1421160  | 2717864  | [M+H]+ 191  | 6   |
| 36869549 | 9.8E+09  | 13917169 | 9.97E+09 | 1.1E+10  | 8.27E+09 |             | 2   |
| 4846132  | 5664325  | 2831918  | 4172252  | 3829188  | 3392192  | [972][M]+   | 9   |
| 47354201 | 25465166 | 41915408 | 52713558 | 25215859 | 27004019 | [501][M]+   | 141 |



|          |          |          |          |          |          |                      |     |
|----------|----------|----------|----------|----------|----------|----------------------|-----|
| 34338069 | 52638259 | 28685927 | 21162221 | 54098489 | 11600854 |                      | 1   |
| 37781477 | 47389081 | 27714022 | 27778776 | 34417126 | 45009539 | [695][M]+            | 119 |
| 3368768  | 2406036  | 2623971  | 2876729  | 1562212  | 493001.4 | [1236][M+1]2+        | 2   |
| 13832256 | 6291328  | 6660866  | 11322774 | 8524782  | 975529.8 |                      | 13  |
| 12706152 | 19346549 | 11084886 | 8836577  | 24719070 | 14738913 | [M+K]+ 41:           | 15  |
| 1.28E+08 | 1.3E+08  | 1.25E+08 | 1.26E+08 | 1.2E+08  | 1.22E+08 | [495][M]+ [M+H]+ 35: | 121 |
| 363603.1 | 108146.2 | 313995.1 | 386790.8 | 378107.5 | 294379.4 | [16][M+1]+           | 116 |
| 19350766 | 17493835 | 12228070 | 17397403 | 21519795 | 13015624 | [1311][M+1]+         | 2   |
| 6432020  | 7731758  | 6338153  | 5298976  | 7055940  | 5251240  |                      | 9   |
| 192699.1 | 309605.8 | 168870.3 | 93243.85 | 158713.9 | 81393.69 | [36][M+1]+           | 18  |
| 2530948  | 3842597  | 2035545  | 1000016  | 3218912  | 4478808  | [M+Na]+ 8:           | 38  |
| 23907825 | 25752722 | 30045336 | 24380441 | 27956824 | 18979126 | [M+H]+ 38:           | 41  |
| 15766556 | 15402352 | 13780155 | 13123825 | 12679794 | 8283749  | [1138][M]+           | 23  |
| 4881423  | 3890796  | 4423957  | 3692341  | 2930811  | 1168732  |                      | 2   |
| 1120755  | 1630714  | 1233314  | 671257.3 | 1330516  | 2345544  |                      | 4   |
| 4855859  | 666498.2 | 599838.2 | 4520550  | 905359   | 800112.5 | [M+H+NH3             | 38  |
| 8260788  | 6687764  | 6550386  | 5030085  | 6848123  | 6684391  |                      | 419 |
| 1757543  | 2110260  | 1912880  | 1355508  | 1839028  | 482167.5 |                      | 9   |
| 1503852  | 1374471  | 3275164  | 3075670  | 3664054  | 2677028  |                      | 2   |
| 21164404 | 30381662 | 123014.3 | 19844369 | 22082169 | 21065904 | [M+K]+ 43:           | 15  |
| 1075431  | 391418.4 | 526909.9 | 512577.1 | 644153.2 | 372630.6 |                      | 4   |
| 2537920  | 2644684  | 2181440  | 2472428  | 1892079  | 1136261  | [M+K]+ 70:           | 23  |
| 3041255  | 2380842  | 3040255  | 2920676  | 2920916  | 160137.9 |                      | 9   |
| 15886408 | 20862740 | 22674941 | 13354822 | 22361174 | 38989323 |                      | 106 |
| 111474.5 | 468937.2 | 299574.7 | 119397.6 | 297737.6 | 1464655  | [785][M+2]+          | 9   |
| 11939360 | 14177834 | 14396740 | 7191693  | 10405028 | 5203854  |                      | 9   |
| 5966743  | 5520913  | 5105070  | 5507195  | 2746048  | 5459633  |                      | 421 |
| 0        | 982813.2 | 25025.38 | 0        | 788940   | 339312.5 |                      | 1   |
| 777813.2 | 1101502  | 955796   | 866319.4 | 939574.7 | 0        | [845][M]2+           | 9   |
| 5477482  | 9242190  | 6213363  | 6558237  | 5274387  | 10404211 |                      | 241 |
| 932281.3 | 905956.2 | 410479.4 | 676576.8 | 867723.3 | 90403.91 |                      | 9   |
| 635913.7 | 1383339  | 843311.1 | 1783678  | 1047155  | 649006.9 | [M+2H-CH:            | 20  |
| 3912692  | 4902430  | 14690007 | 5063742  | 5548707  | 4682402  |                      | 341 |
| 11742924 | 18062631 | 13275178 | 7998953  | 22353148 | 15187904 | [755][M]2+           | 15  |
| 4854536  | 5490991  | 2020353  | 3713918  | 3071312  | 4752037  |                      | 2   |

|          |          |          |          |          |          |               |     |
|----------|----------|----------|----------|----------|----------|---------------|-----|
| 8486736  | 2440472  | 1826085  | 1287315  | 2963391  | 1643547  |               | 53  |
| 1724573  | 1388797  | 1574745  | 1235232  | 1090019  | 1154093  | [987][M]+     | 55  |
| 24593204 | 7453893  | 739880.8 | 1540585  | 9136194  | 10471598 | [M+Na]+ 3!    | 15  |
| 5131943  | 5258771  | 5182157  | 5131637  | 5475014  | 4767207  |               | 183 |
| 1098736  | 670363.4 | 1437909  | 987213.4 | 594120   | 2002974  | [225][M+2]+   | 9   |
| 315376.6 | 310338.3 | 496425.1 | 659755.7 | 239410.3 | 128087.5 | [M+Na+CF:     | 57  |
| 5292206  | 3970800  | 3495669  | 215348   | 3862936  | 2553828  | [217][M]+     | 76  |
| 914376.3 | 541107.3 | 946239.7 | 27470.33 | 1102083  | 324471.3 |               | 20  |
| 1551405  | 3011493  | 3750732  | 2093160  | 2272616  | 5318322  |               | 9   |
| 184601   | 437602.7 | 48196.55 | 55513.56 | 99536.76 | 299524.1 | [M+K]+ 28!    | 12  |
| 6508257  | 3769521  | 2361490  | 4373122  | 2382535  | 3210000  | [M+K]+ 63!    | 112 |
| 10821501 | 9684371  | 5659139  | 8545371  | 8487713  | 10890418 | [616][M]2+    | 9   |
| 822721.5 | 84453.59 | 1761845  | 951472.6 | 1131612  | 150657.8 | [142][M]3+    | 9   |
| 32917623 | 42579022 | 33071236 | 30045835 | 39896184 | 28572456 | [1356][M]2+   | 2   |
| 1232936  | 1070663  | 1416017  | 1467829  | 1165054  | 1050013  | [27][M+1]+    | 61  |
| 5256401  | 5575416  | 7032794  | 2022231  | 4232910  | 281008.2 |               | 1   |
| 2164593  | 4560073  | 3355297  | 631254.6 | 2968987  | 926570.1 |               | 1   |
| 453199.3 | 809784.7 | 644108.2 | 3792179  | 502139.6 | 1763941  | [M+H]+ 20!    | 8   |
| 938853.5 | 734744.3 | 1079380  | 339783.4 | 353839.1 | 502657.3 | [M+K]+ 20!    | 20  |
| 208824.1 | 1414872  | 5032100  | 832975.8 | 753876   | 247382   |               | 277 |
| 1060548  | 1563135  | 2044528  | 518823.2 | 1160295  | 2891161  | [1090][M+1]2+ | 9   |
| 38170459 | 35990109 | 38654225 | 41231244 | 44741776 | 1.08E+08 |               | 2   |
| 328910.6 | 434268   | 417804.8 | 337743.9 | 493984.9 | 141566.7 |               | 91  |
| 6258153  | 9826409  | 9345698  | 9972665  | 901921.8 | 9562851  |               | 380 |
| 1162920  | 701529.1 | 626030.2 | 612784.3 | 1039478  | 553520.8 |               | 128 |
| 1893419  | 2057189  | 1500464  | 1263036  | 1352651  | 0        |               | 81  |
| 2876662  | 2802779  | 2516443  | 2107936  | 2701965  | 1681872  |               | 4   |
| 1183650  | 1310309  | 1084935  | 1319516  | 1085587  | 0        |               | 2   |
| 3124038  | 2760464  | 3775732  | 3703756  | 2785128  | 2939238  | [524][M]+     | 410 |
| 3962555  | 2197834  | 1777958  | 3898308  | 6195216  | 1522468  |               | 2   |
| 15307659 | 15946095 | 16273579 | 13354729 | 610199.8 | 8789061  | [666][M]+     | 4   |
| 836283.7 | 1172326  | 731979.8 | 573213.4 | 511874.3 | 326870.5 |               | 12  |
| 5707541  | 4795888  | 4559790  | 6306511  | 5153844  | 4764255  |               | 2   |
| 2091050  | 1434832  | 1746580  | 2506991  | 1552761  | 1636274  | [1251][M+2]+  | 10  |
| 1697016  | 3032111  | 2738918  | 1001585  | 2698373  | 0        |               | 1   |

|          |          |          |          |          |          |                      |     |
|----------|----------|----------|----------|----------|----------|----------------------|-----|
| 651291   | 521975.4 | 159227.7 | 908909.7 | 375675.5 | 809500.1 |                      | 81  |
| 1155497  | 1318266  | 898869.4 | 821780.5 | 150414.6 | 458976.5 | [M+Na]+ 3            | 423 |
| 10101885 | 11283535 | 8660082  | 7824434  | 7612023  | 14038042 | [1430][M]+ [M+Na]+ 7 | 38  |
| 1727313  | 1485822  | 886864.7 | 1480655  | 772704.6 | 1065111  |                      | 387 |
| 332786.3 | 222234.7 | 326408.2 | 288196.4 | 457160.2 | 481677.4 | [1081][M+1]2+        | 134 |
| 1027462  | 992799.7 | 323749.3 | 770935.9 | 769080.6 | 0        | [M+K]+ 34            | 21  |
| 279416.3 | 336312.7 | 292361.8 | 404718.2 | 255637   | 95148.47 |                      | 16  |
| 2463572  | 2112273  | 1921164  | 1920904  | 1438023  | 1368754  | [M+Na]+ 7            | 97  |
| 7775750  | 9756760  | 4995260  | 3368694  | 6448850  | 3375780  |                      | 114 |
| 7106987  | 8885793  | 6612057  | 4669313  | 6086427  | 11661990 | [1302][M+1]+         | 81  |
| 89728.3  | 39384.99 | 267549.7 | 67232.89 | 192442.9 | 775623.5 | [808][M+1]2+         | 33  |
| 2351698  | 2499789  | 1724241  | 2225661  | 2201456  | 1858132  | [66][M+1]2+          | 4   |
| 36547517 | 61734075 | 62429852 | 32976589 | 41909107 | 24054604 |                      | 1   |
| 4246607  | 4367772  | 2375403  | 3043831  | 2907375  | 2702734  | [821][M]+            | 137 |
| 1.17E+08 | 68602935 | 50077011 | 88553825 | 50080774 | 64536333 | [146][M]2+           | 1   |
| 1318869  | 1815397  | 1367381  | 1181852  | 1811583  | 1193812  |                      | 2   |
| 8.93E+08 | 9.77E+08 | 9.48E+08 | 9.36E+08 | 8.21E+08 | 6.92E+08 | [255][M]+ [M+K]+ 24  | 24  |
| 1357942  | 248089.8 | 973762   | 678005.3 | 1120590  | 0        |                      | 1   |
| 284038.5 | 433246.9 | 302420.4 | 224428.8 | 340225.6 | 428901   | [M+H]+ 83            | 16  |
| 2688438  | 1916177  | 2589451  | 1000002  | 1991954  | 0        |                      | 1   |
| 17222825 | 1666605  | 981022.3 | 5329580  | 1405178  | 7239995  | [446][M+1]3+         | 2   |
| 590143.7 | 191392.7 | 157737.1 | 666729.8 | 406342.3 | 342229.6 |                      | 33  |
| 1770711  | 2168722  | 1916139  | 1364632  | 1675410  | 912387   | [1133][M+1]3+        | 9   |
| 980651.6 | 507410.2 | 443704.3 | 660211.6 | 931533   | 561803.5 |                      | 89  |
| 4447742  | 4797430  | 3366298  | 3537610  | 6128700  | 3799135  | [M+H+NH3             | 13  |
| 8499378  | 9626195  | 7725007  | 8111122  | 8635961  | 3713709  |                      | 2   |
| 1916637  | 1912196  | 2064606  | 2037986  | 1976369  | 753617.2 |                      | 366 |
| 8201517  | 540204.1 | 6205854  | 8092002  | 6997413  | 1866324  |                      | 9   |
| 15284944 | 15763644 | 11338511 | 7584498  | 11166815 | 8318347  |                      | 37  |
| 845753.1 | 1686286  | 764642.3 | 613298.6 | 396674   | 746271.2 |                      | 5   |
| 400447.6 | 252851.9 | 250643.3 | 355077.4 | 275064.5 | 488378.7 | [M+3H]3+             | 23  |
| 17293165 | 25659654 | 22437246 | 12031015 | 21957778 | 8970978  |                      | 1   |
| 36313295 | 31906323 | 25508935 | 35583195 | 32534812 | 26049199 |                      | 2   |
| 4449442  | 2899818  | 5627012  | 3333071  | 644558.9 | 2989950  | [606][M+1]+          | 9   |
| 69869.31 | 58126.23 | 102708.9 | 56569.67 | 96570.09 | 21407.76 |                      | 17  |

|          |          |          |          |          |          |              |     |
|----------|----------|----------|----------|----------|----------|--------------|-----|
| 5195791  | 5379521  | 6682570  | 1323972  | 4223232  | 171502.2 |              | 1   |
| 411985   | 420974.6 | 450464.8 | 174784.7 | 777260.5 | 433333.4 | [1620][M+1]+ | 58  |
| 9389864  | 3220986  | 9945523  | 7381192  | 10051548 | 1549797  |              | 1   |
| 3158357  | 2321350  | 2528126  | 2505305  | 1852876  | 3551087  | [1187][M]2+  | 2   |
| 2337205  | 4911816  | 4821633  | 3077427  | 4596725  | 2480088  |              | 2   |
| 6655792  | 6436315  | 5870811  | 5118702  | 5791685  | 2672227  |              | 4   |
| 6131305  | 5725605  | 5727012  | 4388903  | 4803673  | 2224708  | [710][M]+    | 4   |
| 60600456 | 66463392 | 1.06E+08 | 1.06E+08 | 1.21E+08 | 1.79E+08 |              | 114 |
| 7214413  | 6363247  | 6852408  | 7011104  | 4647116  | 1312964  |              | 9   |
| 596128.9 | 258428.7 | 476588.9 | 380554   | 296116.2 | 247238.4 |              | 255 |
| 6760757  | 4801405  | 67351158 | 7030738  | 14290886 | 26249325 |              | 1   |
| 6837214  | 417029   | 1199790  | 3479947  | 3561690  | 2635563  |              | 1   |
| 3189659  | 3514616  | 2753121  | 2115593  | 2611767  | 2774333  |              | 4   |
| 2019134  | 904337.5 | 2336421  | 2034286  | 1649545  | 914105   | [M+2H-CH:    | 29  |
| 2500597  | 59693.93 | 1941319  | 2981941  | 2537098  | 557687.1 |              | 9   |
| 5481025  | 4660409  | 4039008  | 4374433  | 3982655  | 2744715  | [586][M+1]2+ | 227 |
| 1589654  | 862160.4 | 551415.7 | 1440923  | 1157834  | 0        |              | 9   |
| 31969177 | 21831634 | 23065461 | 30910026 | 21843479 | 4352274  |              | 2   |
| 293492.5 | 628988.5 | 595823.9 | 237027.6 | 104768.5 | 787104.4 | [723][M+1]+  | 336 |
| 4002313  | 6251749  | 3019313  | 3303636  | 6848782  | 21966206 |              | 2   |
| 65843352 | 71096812 | 48069416 | 51587470 | 30033040 | 23972353 |              | 44  |
| 579302.8 | 96609.91 | 617751.3 | 466267.1 | 489499.4 | 863108.4 | [3M+Na+2I    | 8   |
| 3.87E+08 | 4.09E+08 | 4.03E+08 | 3.04E+08 | 3.08E+08 | 2.62E+08 |              | 73  |
| 289642.1 | 238826.6 | 200011.8 | 242474.6 | 252232.8 | 351156.4 |              | 469 |
| 2083233  | 2005706  | 1708940  | 1529243  | 1913522  | 1244120  |              | 4   |
| 4884244  | 5469502  | 4144688  | 4271221  | 5146704  | 3413945  |              | 2   |
| 5210850  | 5226058  | 4990663  | 5232685  | 4634418  | 5228284  |              | 400 |
| 10121917 | 6663382  | 8957991  | 10766486 | 5591770  | 1637114  | [460][M+1]2+ | 2   |
| 580343.4 | 13632397 | 58893239 | 634548.5 | 1018581  | 1124121  | [M+Na]+ 3!   | 58  |
| 6811333  | 7413278  | 6988098  | 5814905  | 6965478  | 1930010  | [1625][M+1]+ | 2   |
| 715653.9 | 58515.02 | 515769.2 | 686716.3 | 1388331  | 176806.3 |              | 9   |
| 996005   | 1814879  | 2927201  | 850158   | 1286760  | 5404783  |              | 9   |
| 1810971  | 469529.2 | 611108.6 | 336485.1 | 1466030  | 2750191  | [M+K]+ 38!   | 5   |
| 2160191  | 2100340  | 2276955  | 3531128  | 4200319  | 8588945  |              | 2   |
| 51079    | 72002.05 | 5167875  | 25066024 | 378025.6 | 7015.753 | [323][M+1]+  | 88  |

|          |          |          |          |          |          |              |     |
|----------|----------|----------|----------|----------|----------|--------------|-----|
| 289429.6 | 326346.5 | 470415.7 | 272558.5 | 273563.6 | 990216.2 |              | 64  |
| 12886568 | 12235586 | 11422272 | 1870704  | 10348624 | 17883496 | [M+H-C4H8]   | 15  |
| 3449189  | 3423509  | 3044846  | 3247787  | 3070788  | 0        |              | 2   |
| 1457051  | 2074724  | 1515156  | 2582224  | 2064541  | 7148267  |              | 2   |
| 576415.8 | 1158442  | 1231904  | 1645433  | 789231.7 | 7517747  | [75][M+2]+   | 9   |
| 1.54E+08 | 1.57E+08 | 1.33E+08 | 1.25E+08 | 1.79E+08 | 1.07E+08 |              | 110 |
| 1069370  | 5007068  | 9831427  | 10963102 | 8334691  | 2500751  |              | 2   |
| 5433519  | 4879329  | 3863762  | 4838428  | 5796708  | 1766389  |              | 14  |
| 118809.6 | 113781.2 | 6502482  | 29232091 | 264721.3 | 44020.39 |              | 86  |
| 44614369 | 35196844 | 28485402 | 46474310 | 45377643 | 34435944 |              | 2   |
| 18778383 | 18426266 | 16241684 | 13513733 | 14606689 | 10214980 | [635][M+2]+  | 25  |
| 16410735 | 11080140 | 8034911  | 16834915 | 13046466 | 7450107  | [3M+3Na+]    | 14  |
| 663873.5 | 0        | 604680.8 | 664776.9 | 467378.1 | 0        |              | 9   |
| 2085364  | 1675933  | 1780367  | 1986011  | 1961116  | 748660.7 | [M+Na]+ 6!   | 185 |
| 104498.7 | 0        | 0        | 0        | 47839.47 | 9415.753 | [813][M+1]3+ | 203 |
| 737665.6 | 759514.2 | 615685.7 | 215697.4 | 583509.5 | 74325.71 | [M+Na+K+]    | 81  |
| 2134952  | 10779216 | 3781812  | 3763727  | 6487563  | 5168418  | [M+Na+HC]    | 15  |
| 37456.31 | 0        | 6233807  | 30175044 | 318769.4 | 13080.7  | [M+H-H2O]    | 88  |
| 813756.4 | 1097104  | 1350986  | 576802.7 | 727224.9 | 3910838  | [M+3H-C2H4]  | 8   |
| 3783176  | 3232557  | 37584231 | 39179661 | 1290623  | 2668403  |              | 201 |
| 2824996  | 2373949  | 3317641  | 2167658  | 2353251  | 4809578  |              | 1   |
| 5282943  | 1175595  | 19224538 | 5914877  | 5959537  | 428716.4 | [M+H]+ 33!   | 39  |
| 1.01E+08 | 1.02E+08 | 87482726 | 94543532 | 93263666 | 51957002 | [1315][M]+   | 2   |
| 1863051  | 1242788  | 2172162  | 1556220  | 939753.8 | 0        |              | 1   |
| 4451707  | 6355432  | 7874078  | 4056861  | 3695775  | 1073228  | [694][M+1]2+ | 15  |
| 3.75E+08 | 3.78E+08 | 3.8E+08  | 3.21E+08 | 699356.9 | 1.89E+08 |              | 4   |
| 1281593  | 1233497  | 1601986  | 970244   | 1057246  | 645895.6 |              | 70  |
| 1346272  | 1645270  | 1562498  | 1143987  | 1076678  | 1092017  | [1433][M+1]+ | 338 |
| 851467.7 | 1208204  | 494164   | 536295.4 | 904735.1 | 122398.4 | [997][M+1]3+ | 16  |
| 2058583  | 1670965  | 346236.9 | 706062.4 | 2135945  | 443606.6 |              | 1   |
| 2173077  | 2872270  | 3693776  | 2031850  | 3437236  | 1072909  |              | 2   |
| 3210811  | 3499267  | 2513010  | 2212943  | 3111858  | 1322626  |              | 9   |
| 6214464  | 2454287  | 2997777  | 3623329  | 4270982  | 2226222  |              | 2   |
| 4495924  | 5339661  | 3974223  | 3460123  | 4200561  | 2750152  |              | 9   |
| 5459250  | 3775913  | 3644380  | 5374217  | 3210433  | 1630467  |              | 2   |

|          |          |          |          |          |          |                       |     |
|----------|----------|----------|----------|----------|----------|-----------------------|-----|
| 457779.2 | 802551.2 | 383812.6 | 149910.5 | 181594.8 | 844443.2 |                       | 5   |
| 3242200  | 5458933  | 2133558  | 1778555  | 9298202  | 14523403 | [502][M+4]2+          | 2   |
| 554909.1 | 731797.4 | 88216069 | 28630612 | 764706.1 | 13889154 | [M+H-COCl             | 3   |
| 299154.4 | 173242.9 | 357247.3 | 391596.8 | 136294.3 | 255773.4 |                       | 17  |
| 7066367  | 3013390  | 6540978  | 6767616  | 6210712  | 5729211  |                       | 307 |
| 503606.4 | 708361.5 | 354247.1 | 399082.9 | 388091.2 | 505534.3 | [1613][M]+ [M+Na]+ 1  | 23  |
| 9575102  | 1916765  | 7949379  | 789129.7 | 2081793  | 4518846  | [665][M]3+            | 4   |
| 14898901 | 6569102  | 10098647 | 13763156 | 8414052  | 2570194  |                       | 2   |
| 1094691  | 350938.2 | 1051000  | 534083.4 | 352242.5 | 1007387  |                       | 4   |
| 4886720  | 4320826  | 4375866  | 4351251  | 4424739  | 3929458  |                       | 174 |
| 4347423  | 1027159  | 2996087  | 2551529  | 1426448  | 3471362  | [M+3Na-H]             | 15  |
| 2891821  | 3531089  | 3080342  | 1722721  | 3186985  | 9561613  | [1626][M]2+           | 2   |
| 4157068  | 1569056  | 1.35E+08 | 38589203 | 4380990  | 292866.1 | [M+H+NH3              | 35  |
| 1785644  | 2195390  | 1856117  | 1261682  | 1891676  | 911317.8 |                       | 9   |
| 11849023 | 277132.7 | 21016060 | 9927626  | 14554061 | 2757950  | [M+2H-CH <sub>3</sub> | 6   |
| 2892662  | 584345.1 | 1246101  | 2075292  | 1380343  | 759754.5 |                       | 14  |
| 9074456  | 9086807  | 4868604  | 9995947  | 10141577 | 8797227  | [1572][M+1]2+         | 2   |
| 334760.1 | 395081   | 827605.5 | 917684.8 | 606673.2 | 699801.1 | [M+H+HCC              | 23  |
| 1260982  | 1947727  | 1564015  | 1446575  | 925273.6 | 1199406  | [1413][M+1]2+         | 33  |
| 7029384  | 3787845  | 4625941  | 5462234  | 6877101  | 6589168  |                       | 174 |
| 1658384  | 1872481  | 6055886  | 5026895  | 1718720  | 6276750  | [412][M+3]+           | 9   |
| 1301358  | 1273551  | 463870   | 295487.7 | 415178.5 | 273226.6 | [422][M+1]2+          | 4   |
| 2082073  | 2234649  | 2304408  | 2248978  | 2761565  | 2134078  |                       | 390 |
| 3043438  | 2422167  | 852921.5 | 1535504  | 3945031  | 1719762  | [3M+3Na+H             | 3   |
| 4809348  | 1856752  | 1982001  | 3573762  | 1472606  | 298191.5 | [M+H-C6H <sub>5</sub> | 6   |
| 3420931  | 2305201  | 3120909  | 2006891  | 2652264  | 1140294  |                       | 4   |
| 625732.8 | 904179.3 | 0        | 0        | 896848.4 | 0        |                       | 1   |
| 327413.7 | 118431.2 | 291541.3 | 481243.3 | 350399.7 | 308695.2 |                       | 489 |
| 212107.3 | 999057.5 | 1256056  | 222233.4 | 559868.1 | 2450006  | [2M+2Na+H             | 13  |
| 9892162  | 7704048  | 6813191  | 11358579 | 7471532  | 2705012  |                       | 2   |
| 5689874  | 12037913 | 7596104  | 3634424  | 10824589 | 9755323  | [3M+H+K]2             | 15  |
| 66730.28 | 79484.04 | 6613854  | 34960936 | 532330.2 | 74974.88 | [324][M+1]+           | 32  |
| 1275467  | 1966170  | 1590108  | 923022.5 | 839619.1 | 1626768  |                       | 134 |
| 12904915 | 8821176  | 4435358  | 5700557  | 8889456  | 3242783  |                       | 2   |
| 905802.5 | 802248.6 | 5082021  | 811830.8 | 758803.6 | 1605426  |                       | 9   |

|          |          |          |          |          |          |                         |     |
|----------|----------|----------|----------|----------|----------|-------------------------|-----|
| 5464142  | 9912927  | 10221133 | 4416545  | 5814655  | 7611387  |                         | 1   |
| 4.27E+08 | 3.87E+08 | 3.88E+08 | 3.75E+08 | 3.76E+08 | 2.57E+08 | [51][M]+                | 4   |
| 834888   | 594433.2 | 255728.5 | 807698.6 | 364099.5 | 478156.8 | [121][M+1]+             | 298 |
| 3230874  | 2222079  | 2623084  | 1771993  | 2240347  | 886569.2 | [337][M+1]2+            | 4   |
| 3210376  | 3297923  | 2269503  | 3032461  | 3076345  | 2790498  | [1175][M+1]2+           | 190 |
| 908227.8 | 1269077  | 2043622  | 715701.4 | 1104539  | 2306320  | [673][M+1]+             | 3   |
| 10897478 | 17958059 | 10510145 | 8806242  | 13372872 | 34738078 |                         | 2   |
| 2942676  | 991087.8 | 2277313  | 2223041  | 656322.6 | 1441687  |                         | 2   |
| 413981.7 | 329018.5 | 465691.9 | 148706.6 | 390461.2 | 193558   |                         | 283 |
| 1152824  | 1525688  | 1606183  | 598173.2 | 1028658  | 547803.1 | [274][M+2]3+            | 9   |
| 2212300  | 2463883  | 2981318  | 2230028  | 2002191  | 1552665  | [1531][M]+              | 37  |
| 6895576  | 5283195  | 9798928  | 5719533  | 12983676 | 6824145  | [M+H]+ 50               | 356 |
| 16077530 | 27781041 | 29124746 | 17678651 | 17896461 | 11102878 |                         | 1   |
| 3435711  | 2022485  | 911545   | 866533.9 | 1610353  | 5943164  | [M+2H-CH <sub>2</sub> ] | 3   |
| 21721723 | 29922264 | 25597914 | 19189538 | 18517232 | 14413693 |                         | 1   |
| 26332847 | 17193717 | 18357148 | 7535462  | 18346009 | 12921607 | [471][M]3+              | 319 |
| 7834558  | 9921972  | 9559100  | 8918872  | 8316172  | 6177176  | [255][M+2]+             | 24  |
| 33217756 | 29088616 | 28501934 | 32125471 | 28705994 | 10604548 |                         | 2   |
| 1037593  | 1145476  | 958780.2 | 405521.8 | 779249.6 | 824423.3 | [M+H]+ 37               | 12  |
| 4860597  | 1.42E+08 | 3518414  | 5159284  | 2293099  | 1456483  | [1205][M+2]+            | 2   |
| 2124896  | 1199870  | 1359359  | 2158055  | 1363186  | 33991.58 |                         | 4   |
| 159548.6 | 2093068  | 18406647 | 1.05E+08 | 2652435  | 270607.1 |                         | 89  |
| 2314774  | 5.69E+08 | 5.27E+08 | 1766213  | 4.8E+08  | 3.87E+08 |                         | 25  |
| 18906448 | 15379038 | 18420605 | 22038473 | 23600844 | 21311666 |                         | 2   |
| 11709982 | 9523480  | 9003847  | 10013294 | 10490290 | 6284141  |                         | 9   |
| 2057172  | 2195343  | 5862372  | 2558130  | 2153520  | 1855050  | [896][M]+               | 22  |
| 2065548  | 2668748  | 1400863  | 1156620  | 3564356  | 124823.9 |                         | 15  |
| 7298854  | 8204542  | 10341188 | 7768609  | 14558699 | 24749707 |                         | 2   |
| 925466.9 | 1795983  | 1212478  | 800600.6 | 1953211  | 2927553  | [M+Na+2K]               | 97  |
| 5131007  | 5837267  | 6187716  | 5580782  | 8108183  | 5776932  |                         | 310 |
| 8558131  | 5210541  | 1715252  | 8096839  | 6114931  | 16090871 | [M+Na]+ 3               | 97  |
| 659772.8 | 668627.7 | 559251.6 | 269176.2 | 519833.3 | 289120.9 |                         | 89  |
| 439130.1 | 885836.2 | 942528.3 | 293057.1 | 736624.6 | 536313.6 |                         | 4   |
| 1312272  | 1346857  | 6755889  | 3296440  | 1229553  | 674057.5 |                         | 118 |
| 1888805  | 1801387  | 5077376  | 5789755  | 1688268  | 1001985  | [M+K]+ 21               | 16  |

|          |          |          |          |          |          |                       |     |
|----------|----------|----------|----------|----------|----------|-----------------------|-----|
| 3350623  | 5384691  | 2642088  | 796854.1 | 3758101  | 1677868  | [M+K]+ 32:            | 3   |
| 4412850  | 4256155  | 4313872  | 5683901  | 4287666  | 4188543  |                       | 321 |
| 6438184  | 10985184 | 10407132 | 6113387  | 6861659  | 5915620  |                       | 15  |
| 936229.1 | 619110   | 1096668  | 860862.9 | 790674.7 | 342515.5 |                       | 28  |
| 204458.5 | 1471704  | 850147.2 | 1138843  | 858932.5 | 943972.6 | [M+H]+ 54:            | 18  |
| 6630765  | 9597447  | 5741439  | 6067682  | 7263034  | 3871704  | [1167][M]2+           | 2   |
| 784139   | 1158812  | 3588045  | 505445.8 | 870115.8 | 1764862  |                       | 9   |
| 1830355  | 3210094  | 2831522  | 2265443  | 2453292  | 2984749  | [1447][M]+            | 7   |
| 5802097  | 4440509  | 3299295  | 7467862  | 5345462  | 565850.7 |                       | 2   |
| 3350902  | 1985001  | 4594249  | 4532805  | 6322065  | 2823580  |                       | 1   |
| 2594799  | 2334248  | 2175278  | 2486947  | 2467377  | 467150.1 | [8][M]3+              | 9   |
| 0        | 1234955  | 768358.9 | 381034.1 | 3216524  | 11685470 |                       | 2   |
| 1296911  | 3377907  | 1904468  | 1391493  | 2598080  | 5958603  | [1101][M+1]3+         | 9   |
| 4116909  | 3110542  | 2906484  | 3254836  | 2556689  | 569731.4 |                       | 9   |
| 1.08E+08 | 1287395  | 53079145 | 694675.4 | 1.31E+08 | 1.56E+08 |                       | 11  |
| 522607.9 | 610831.6 | 186201.2 | 431822.3 | 505236.5 | 673018.8 | [M+H+NH3              | 25  |
| 915477.2 | 2792859  | 870963.3 | 2560793  | 2984455  | 15014283 |                       | 2   |
| 4888831  | 39724436 | 3568605  | 3341358  | 11162251 | 18827663 |                       | 2   |
| 1535928  | 867078.5 | 1286489  | 1619599  | 534692.2 | 416024.3 | [1452][M+1]+          | 42  |
| 2670835  | 3218037  | 2505581  | 25210799 | 2932132  | 7425360  |                       | 2   |
| 480053.2 | 669444.8 | 51727.32 | 544985   | 169339.5 | 161230.6 |                       | 41  |
| 2877061  | 4237861  | 3006204  | 2226649  | 5118917  | 6782034  |                       | 29  |
| 4953704  | 4032945  | 4146623  | 4873800  | 4056738  | 13567280 |                       | 2   |
| 601756.3 | 2036830  | 1011805  | 125168.7 | 373832.5 | 760974.9 | [1483][M]3+           | 18  |
| 0        | 0        | 628470.6 | 0        | 114711.8 | 393234.7 |                       | 9   |
| 2620323  | 2619583  | 2286688  | 4266623  | 5499352  | 5513710  |                       | 2   |
| 1158416  | 1663941  | 826075.5 | 1162861  | 1050269  | 1462250  | [M+K]+ 10:            | 62  |
| 1003466  | 2324881  | 1436062  | 850004   | 2976673  | 7739729  |                       | 2   |
| 2259501  | 2536634  | 750367.2 | 1503951  | 2413469  | 1995414  |                       | 9   |
| 3178726  | 2903596  | 3008136  | 1847046  | 2525695  | 1000966  | [1118][M]+ [M+H]+ 62: | 302 |
| 3329562  | 3473746  | 3366192  | 3052915  | 3194184  | 3964442  |                       | 208 |
| 11598824 | 6848854  | 14010094 | 9357967  | 9108319  | 9921165  |                       | 256 |
| 2.67E+08 | 2.97E+08 | 2.4E+08  | 668181.3 | 369776.7 | 2.02E+08 |                       | 31  |
| 2467099  | 2592699  | 1797904  | 3879816  | 2157986  | 54608510 |                       | 2   |
| 1851077  | 6136718  | 3253367  | 2603115  | 6952290  | 1513556  |                       | 1   |



|          |          |          |          |          |          |                       |     |
|----------|----------|----------|----------|----------|----------|-----------------------|-----|
| 7710983  | 6971255  | 7267247  | 6809326  | 6291398  | 1551473  | [444][M]2+            | 2   |
| 23154894 | 19539285 | 20228339 | 17367690 | 18797642 | 9589597  | [1394][M]+ [M+H]+ 74  | 232 |
| 5055714  | 9345805  | 10221290 | 5546125  | 6654566  | 2767565  | [358][M+1]+           | 1   |
| 2950972  | 3636392  | 2663775  | 2404673  | 2981033  | 2135384  | [330][M]3+            | 2   |
| 398734.3 | 382361   | 194713.9 | 244757.6 | 311794   | 164530.3 |                       | 273 |
| 54440899 | 1.04E+08 | 97643350 | 55440289 | 54422091 | 50880882 |                       | 1   |
| 20248554 | 24123757 | 13941480 | 16551457 | 22986267 | 16385848 | [1064][M]3+           | 9   |
| 45058246 | 41989270 | 41749432 | 38857569 | 39327944 | 26284963 | [9][M]+               | 4   |
| 13930258 | 11653116 | 11440516 | 11844296 | 12266451 | 4133197  | [M+K]+ 77!            | 13  |
| 4623573  | 1741992  | 2996680  | 2559558  | 4053803  | 6302684  | [M+2H-CH:             | 97  |
| 3833701  | 4696171  | 5310185  | 3144783  | 5278942  | 2349787  |                       | 1   |
| 41750757 | 37722718 | 36424351 | 36672846 | 38459740 | 23849542 | [593][M]+             | 4   |
| 1781804  | 847002.1 | 816118.3 | 1494589  | 1305524  | 249294.7 |                       | 4   |
| 15665533 | 13210546 | 5261432  | 3940475  | 10707891 | 3553762  | [471][M+1]3+          | 319 |
| 1699690  | 1804605  | 1728649  | 215685.1 | 1856746  | 1473676  |                       | 75  |
| 2097013  | 2208345  | 1880227  | 2175319  | 1898556  | 850246.8 |                       | 9   |
| 13903811 | 7843058  | 8311868  | 14676326 | 7689260  | 209425.8 |                       | 2   |
| 9.23E+08 | 1138117  | 1.16E+09 | 2427748  | 9.45E+08 | 1694235  | [M+H]+ 33!            | 13  |
| 905494.9 | 1417602  | 896248.5 | 1046588  | 1215014  | 1294789  | [1450][M]+ [M+K]+ 76! | 38  |
| 307056.5 | 2794502  | 4105166  | 3421511  | 1830012  | 246086.2 |                       | 46  |
| 8217910  | 1153968  | 558410.7 | 1148751  | 1564390  | 2665041  |                       | 89  |
| 14496140 | 24503537 | 23417722 | 11377858 | 15872432 | 11450657 |                       | 1   |
| 1230249  | 1082654  | 994092.4 | 693187.5 | 715262.6 | 176841.5 | [307][M]2+ [M+2H]2+ ( | 302 |
| 6995355  | 7335866  | 7014492  | 6416101  | 931762.3 | 6959543  |                       | 419 |
| 1517273  | 1008579  | 1601501  | 1268020  | 1051664  | 577350.3 | [1525][M]+            | 203 |
| 6837310  | 4889397  | 7027395  | 5114205  | 4417283  | 2638051  | [136][M+1]2+          | 215 |
| 480825.1 | 1243072  | 934660.2 | 163219.4 | 598139.1 | 147696.4 |                       | 9   |
| 22297510 | 15821105 | 15283600 | 19081715 | 15230515 | 3169731  |                       | 2   |
| 3415585  | 798963   | 2207989  | 3019747  | 2321378  | 2836041  |                       | 2   |
| 7619165  | 6351424  | 6713103  | 6125906  | 7390541  | 1096513  | [289][M]+             | 9   |
| 9141911  | 17928265 | 19284738 | 9488967  | 10458740 | 6501799  | [50][M]3+             | 15  |
| 4585830  | 3588039  | 3033982  | 4852431  | 3221915  | 3506303  |                       | 2   |
| 4473892  | 4374390  | 4333974  | 3297816  | 3370104  | 2454078  | [1121][M]+            | 23  |
| 66719760 | 55676548 | 57699245 | 67034337 | 68050454 | 37961743 | [436][M+1]2+          | 2   |
| 4442557  | 3253050  | 3298524  | 3625144  | 3113848  | 5583630  |                       | 2   |

|          |          |          |          |          |          |                      |     |
|----------|----------|----------|----------|----------|----------|----------------------|-----|
| 1731036  | 1475612  | 837747.3 | 1649067  | 1835542  | 1036579  |                      | 9   |
| 758081.4 | 799769.2 | 20709898 | 21117845 | 719753.2 | 7121573  |                      | 9   |
| 1177196  | 1290367  | 1225310  | 752206.4 | 992806.9 | 221508.1 |                      | 4   |
| 3940907  | 787598   | 4420947  | 2079875  | 2429381  | 199427.3 | [924][M+1]2+         | 1   |
| 668730.4 | 367059.4 | 179272.3 | 310259.1 | 460863.7 | 11344.3  |                      | 338 |
| 5270529  | 7364385  | 7071594  | 3227436  | 5605268  | 2648698  |                      | 46  |
| 1626017  | 1866994  | 2319223  | 1090152  | 2081314  | 1008826  | [3M+2H]2+            | 39  |
| 711446.4 | 175080.6 | 895261.9 | 1070861  | 521462.4 | 951519   | [696][M]2+           | 105 |
| 1293297  | 1022408  | 1175950  | 1426564  | 1453144  | 2192769  | [M+3H-H2O]           | 14  |
| 1572359  | 1687534  | 139276.3 | 968915.6 | 2010218  | 345373.7 | [M+Na]+ 2:           | 3   |
| 1.37E+08 | 1.22E+08 | 1.26E+08 | 1.08E+08 | 1.08E+08 | 68153756 | [M+H]+ 56:           | 42  |
| 1528244  | 2574914  | 2253576  | 1152293  | 1469184  | 2686213  | [428][M+2]+          | 4   |
| 6123408  | 3147152  | 7937042  | 6091678  | 2387035  | 3212715  | [131][M]+ [M+Na]+ 2: | 297 |
| 20901593 | 10521578 | 5498979  | 11827001 | 13979238 | 6649100  |                      | 2   |
| 18720578 | 18265198 | 14088586 | 16610325 | 21150810 | 15979005 | [41][M+2]3+          | 2   |
| 3623506  | 0        | 3391883  | 2110604  | 1891939  | 2037838  |                      | 2   |
| 5263819  | 3426323  | 6376577  | 3974169  | 4037188  | 3771631  |                      | 199 |
| 4304302  | 5945694  | 4009144  | 3522754  | 5074190  | 4179265  |                      | 13  |
| 3004322  | 525730.6 | 483290   | 704276.3 | 740867.5 | 1099922  | [4][M+1]+            | 96  |
| 1640878  | 3078818  | 1255304  | 1777355  | 2253816  | 5346588  |                      | 4   |
| 70004917 | 1.2E+08  | 1.17E+08 | 73779782 | 85793237 | 51796503 | [849][M]+            | 1   |
| 1147563  | 929579.2 | 950743.9 | 1232809  | 1321240  | 259596.2 | [M+H-CH3]            | 5   |
| 18769113 | 28299227 | 19201378 | 16920933 | 25209304 | 49396735 | [1154][M]2+          | 2   |
| 4050906  | 3796981  | 3933518  | 3032419  | 3472714  | 1762040  |                      | 4   |
| 3987896  | 4759738  | 4716505  | 3918238  | 3978331  | 3779000  | [M+Na]+ 3:           | 382 |
| 1.5E+08  | 1.47E+08 | 1.31E+08 | 1.38E+08 | 1.33E+08 | 60439869 |                      | 2   |
| 15411370 | 28653984 | 24868464 | 7383024  | 13627581 | 10555494 |                      | 1   |
| 335314.7 | 1434237  | 1172792  | 5265397  | 621615.3 | 1108494  | [1388][M+1]+         | 46  |
| 1079642  | 394117.7 | 439327.5 | 495531.6 | 423194   | 341030   |                      | 152 |
| 5645682  | 2375728  | 7086413  | 5095602  | 2096165  | 1947654  |                      | 256 |
| 4376426  | 3562365  | 3949019  | 4009973  | 2695653  | 1108916  |                      | 210 |
| 10192566 | 16998297 | 904655.2 | 7764927  | 6183965  | 5135841  | [M+Na]+ 4:           | 41  |
| 179619.8 | 414563.7 | 483884   | 224015.1 | 199857.8 | 410597   | [1519][M+1]2+        | 16  |
| 5446948  | 3096476  | 577161.1 | 579829.1 | 485744   | 8097726  |                      | 341 |
| 831938.2 | 2227986  | 935480.6 | 38775.23 | 291379.2 | 1150307  |                      | 18  |

|          |          |          |          |          |          |                         |     |
|----------|----------|----------|----------|----------|----------|-------------------------|-----|
| 3278421  | 3636362  | 3338029  | 523985.2 | 1130708  | 3032035  | [M+Na]+ 30              | 136 |
| 2936044  | 2805852  | 4065471  | 1812775  | 3009622  | 1871521  | [999][M]+ [M+H]+ 54     | 57  |
| 2869118  | 6598431  | 52626343 | 1693808  | 5329886  | 11152413 |                         | 9   |
| 2651809  | 2075890  | 4527460  | 2378884  | 1460816  | 882451.5 |                         | 1   |
| 1307628  | 1448104  | 1838593  | 0        | 932121.4 | 0        |                         | 1   |
| 1148263  | 675498.4 | 1369105  | 919099.1 | 788008.9 | 0        |                         | 9   |
| 3304958  | 10563759 | 5046286  | 4335765  | 689885.8 | 7869051  |                         | 3   |
| 648480.7 | 400912.8 | 591026.2 | 731430.6 | 211228.8 | 216181.9 | [1554][M+1]+            | 497 |
| 684485.2 | 1100850  | 3368508  | 469992.6 | 962565.8 | 1853550  | [M+Na+CF <sub>3</sub> ] | 8   |
| 67801680 | 1.17E+08 | 1.24E+08 | 66061652 | 71653546 | 51331012 | [M+Na]+ 4               | 15  |
| 861232.1 | 4899944  | 1524750  | 2328532  | 4145074  | 19948159 |                         | 2   |
| 1948791  | 1905780  | 2598252  | 1298479  | 1362655  | 220731.6 |                         | 13  |
| 1134324  | 1129534  | 830721.1 | 917469.5 | 806484.7 | 619353.4 | [317][M+1]+             | 161 |
| 2406872  | 1542240  | 1415282  | 2376490  | 2985152  | 3344242  | [M+2Na-H]               | 13  |
| 6057147  | 10098962 | 5149231  | 13495871 | 4971206  | 15201293 | [M+K]+ 48               | 15  |
| 17868574 | 11536669 | 21677063 | 1705589  | 32507061 | 4455719  |                         | 1   |
| 370632.2 | 929342.2 | 1461974  | 276788.4 | 1369893  | 4808685  |                         | 9   |
| 792529.1 | 931392.2 | 617349.9 | 256161.4 | 574731.7 | 516487.2 |                         | 9   |
| 37615353 | 32199528 | 31794016 | 31399498 | 28989250 | 19811526 |                         | 166 |
| 1313515  | 1018833  | 987056.9 | 459746.1 | 1296167  | 1969230  |                         | 4   |
| 217314.5 | 230993.4 | 548394.4 | 404161.6 | 255391.1 | 336996.7 | [128][M+1]+             | 69  |
| 1146651  | 735722.4 | 1098215  | 1454592  | 633833.1 | 305414   |                         | 9   |
| 359378.5 | 1083210  | 574530.2 | 227152.5 | 595695.2 | 2319720  |                         | 4   |
| 4198341  | 3812995  | 3831518  | 3530916  | 3966860  | 710713.6 |                         | 9   |
| 5094119  | 9365141  | 10199115 | 6000207  | 6810963  | 3291819  | [2M+H]+ 3               | 15  |
| 2869540  | 7078386  | 374136.6 | 1610524  | 5852731  | 9869629  | [M+Na]+ 4               | 11  |
| 1792328  | 2002234  | 1607351  | 1510532  | 1125384  | 1112134  |                         | 9   |
| 3464528  | 1935651  | 3159598  | 2409517  | 2183026  | 151690.3 |                         | 1   |
| 6218784  | 5321406  | 5624008  | 3165145  | 4577747  | 2250239  |                         | 2   |
| 1281212  | 3267959  | 975548   | 1143792  | 2424429  | 4462773  | [M+H+HCC]               | 21  |
| 3180273  | 5637762  | 2879710  | 6825557  | 7625561  | 1079651  | [M+Na]+ 4               | 398 |
| 155648.2 | 164102.1 | 309446   | 265227.7 | 139006.7 | 33032.82 | [2M+2Na+H]              | 16  |
| 1366243  | 1322705  | 1182684  | 913078.1 | 570961.1 | 765144.5 | [1121][M+1]+            | 23  |
| 344953.4 | 296812.3 | 2733652  | 12381605 | 89413.52 | 258591.3 |                         | 154 |
| 293858.2 | 3143489  | 1827887  | 14918984 | 3393327  | 4259597  | [431][M+1]+             | 2   |

|          |          |          |          |          |          |              |     |
|----------|----------|----------|----------|----------|----------|--------------|-----|
| 2.24E+09 | 2.33E+09 | 1.95E+09 | 2.56E+09 | 2.25E+09 | 2.09E+09 | [1247][M+2]+ | 2   |
| 3624781  | 4628298  | 3121134  | 2728736  | 4592300  | 3568959  | [1044][M+1]+ | 13  |
| 15213672 | 323931.4 | 293382.6 | 806381.1 | 504119   | 1605143  | [318][M]+    | 59  |
| 1853476  | 705110.7 | 1421397  | 1485285  | 366638.4 | 208883.9 | [M+K]+ 78:   | 58  |
| 1441471  | 2003202  | 2944108  | 689298.1 | 1872729  | 1052848  | [1376][M+1]+ | 332 |
| 64157768 | 53682068 | 51895499 | 65163848 | 55429781 | 23110459 |              | 2   |
| 33300214 | 44484805 | 46377505 | 26611648 | 29998561 | 12953723 | [M+H+NH3     | 81  |
| 424756.9 | 7569811  | 3302983  | 7611488  | 7272568  | 7266111  |              | 333 |
| 11110418 | 9885728  | 9216542  | 12409658 | 4110279  | 5826693  | [294][M]+    | 207 |
| 2928626  | 1024266  | 960249.9 | 2028067  | 748224.5 | 1363014  |              | 1   |
| 162142.5 | 170425.5 | 67037.07 | 147822.3 | 160166.4 | 134364.4 | [1541][M]2+  | 110 |
| 6576174  | 4991915  | 3268495  | 5821479  | 7130853  | 10439239 |              | 363 |
| 33496159 | 60737781 | 63929520 | 32342835 | 41824404 | 23994737 | [365][M]+    | 1   |
| 575064.1 | 315544.5 | 231390.9 | 591815.7 | 315814.3 | 159465.3 | [M+Na]+ 5:   | 42  |
| 147632.7 | 39714.82 | 0        | 0        | 62355.98 | 37148.41 |              | 59  |
| 10445525 | 14090302 | 13447510 | 10439171 | 10209940 | 7048901  |              | 9   |
| 1466675  | 929902.6 | 917900.8 | 1005667  | 921977.6 | 196749.5 |              | 4   |
| 1836317  | 0        | 1412186  | 1688442  | 715848.4 | 0        |              | 2   |
| 35609334 | 789384.4 | 9486051  | 2202600  | 34875600 | 4394188  |              | 21  |
| 4010515  | 2025820  | 7434632  | 2719944  | 3517218  | 832391.7 | [3M+2Na]2    | 47  |
| 1511788  | 537267.8 | 8541114  | 7400407  | 3341982  | 4045955  |              | 2   |
| 36523728 | 28863828 | 29954943 | 35454904 | 27711856 | 6899665  |              | 2   |
| 3604035  | 7754195  | 3986482  | 1134031  | 9868028  | 12558147 | [23][M]2+    | 1   |
| 1206078  | 1491171  | 2653771  | 874160.9 | 1552120  | 1515848  | [M+H]+ 53:   | 38  |
| 1268731  | 3051352  | 1409746  | 1867981  | 3262297  | 4423504  |              | 2   |
| 5882236  | 2059138  | 1649330  | 3924644  | 4968288  | 3356483  |              | 1   |
| 1.18E+08 | 2E+08    | 1.85E+08 | 1.09E+08 | 1.37E+08 | 1.08E+08 | [846][M]+    | 1   |
| 484099.5 | 448461.4 | 8073260  | 3177860  | 2649848  | 4010755  |              | 9   |
| 6522929  | 6343201  | 6338477  | 6239136  | 5879480  | 5766982  |              | 301 |
| 4030942  | 3884748  | 3846792  | 3172040  | 3487365  | 1679607  |              | 4   |
| 17494360 | 13700990 | 17518300 | 16498369 | 10322355 | 307451   |              | 1   |
| 49461058 | 21304375 | 48590553 | 43541732 | 13187682 | 73837023 |              | 4   |
| 2078671  | 2863944  | 2809270  | 7263538  | 2874077  | 2604038  |              | 396 |
| 1566686  | 519405.3 | 165158.3 | 460233.9 | 2672727  | 273793.1 | [1466][M]+   | 406 |
| 310959.1 | 463825.2 | 379536.5 | 230845.9 | 117041.5 | 2198590  |              | 38  |

|          |          |          |          |          |          |               |     |
|----------|----------|----------|----------|----------|----------|---------------|-----|
| 15678510 | 10702802 | 11635768 | 13964545 | 10502397 | 4335531  |               | 2   |
| 2618536  | 2318198  | 1976184  | 1569603  | 2474447  | 2080575  | [1151][M+1]3+ | 2   |
| 6009510  | 5958290  | 6042028  | 5550548  | 3223982  | 3124809  | [M+H]+ 45     | 14  |
| 3265959  | 3955955  | 3944444  | 3867048  | 3782945  | 3489745  |               | 196 |
| 108274.4 | 725099   | 2137046  | 0        | 363510.2 | 1156234  | [M+2H-NH      | 13  |
| 9476178  | 15760347 | 8493809  | 5671837  | 7936314  | 10311760 |               | 9   |
| 2424782  | 2328264  | 3254934  | 2133341  | 1071319  | 0        |               | 9   |
| 1777167  | 2203270  | 2342675  | 1861315  | 1672170  | 672337.7 | [M+H+NH3      | 134 |
| 1876650  | 2425678  | 1092930  | 1932248  | 2806493  | 1314353  |               | 9   |
| 1439938  | 1361834  | 2216545  | 1455866  | 579409   | 3007861  |               | 9   |
| 1163788  | 469921.2 | 553952.8 | 932613.3 | 812714.9 | 162647.3 |               | 9   |
| 687971.7 | 780348.2 | 1134008  | 789476.3 | 405086.1 | 241231.5 |               | 9   |
| 508467.1 | 627566.7 | 677246.5 | 392115.9 | 302642.5 | 414398.1 |               | 4   |
| 5434274  | 4645570  | 1610910  | 4882961  | 2182226  | 2150751  |               | 111 |
| 935326.4 | 1410186  | 1036661  | 774562.2 | 631090.1 | 933737.4 | [M+2H-CH      | 20  |
| 2506793  | 339728   | 4877425  | 3023221  | 2927683  | 1549595  |               | 279 |
| 1624633  | 663526.3 | 1293548  | 2159318  | 1592246  | 1141371  | [M+3H-C5+     | 13  |
| 2820489  | 3404965  | 2421802  | 2029313  | 3661429  | 10014538 |               | 2   |
| 1080850  | 970356.9 | 965377.4 | 1037087  | 787245.7 | 2593069  |               | 9   |
| 3151799  | 1370871  | 2494724  | 1939744  | 960925.7 | 2228998  |               | 2   |
| 161740.4 | 323110.5 | 146272.6 | 218894.8 | 146099.9 | 325498.7 |               | 254 |
| 2465109  | 1789434  | 2854645  | 174967.4 | 1499880  | 251587.1 |               | 1   |
| 2129612  | 1785377  | 695766   | 3133837  | 2501601  | 2268716  |               | 9   |
| 1034030  | 1329742  | 1146432  | 1199521  | 2939747  | 2469376  |               | 1   |
| 649845.3 | 0        | 239837   | 346110.3 | 665574   | 0        |               | 9   |
| 3412708  | 2880642  | 2148788  | 2392878  | 2164705  | 200595.5 | [M+H-CO]+     | 81  |
| 334278.4 | 168459.8 | 64279.49 | 143229.9 | 658519.7 | 77528.45 |               | 453 |
| 1661973  | 2061734  | 2745147  | 229626.5 | 1854690  | 127339.9 |               | 1   |
| 3709313  | 4974259  | 3943570  | 2543419  | 3448692  | 1749703  |               | 9   |
| 9182518  | 11948817 | 8282103  | 8891787  | 14700624 | 20575999 | [359][M]3+    | 2   |
| 2841129  | 5236990  | 4602919  | 6747931  | 5890090  | 5427770  | [M+H]+ 35     | 314 |
| 3355058  | 3424258  | 3450649  | 3518950  | 305023.9 | 3694942  | [155][M]+     | 173 |
| 798195.9 | 911682.7 | 509017.9 | 537866.5 | 1060667  | 521734.3 |               | 4   |
| 3293857  | 4113799  | 3573865  | 3125988  | 4193848  | 2903652  |               | 346 |
| 1293305  | 668492.3 | 1393050  | 1800061  | 1651525  | 3643217  | [M+H]+ 30     | 136 |

|          |          |          |          |          |          |                      |     |
|----------|----------|----------|----------|----------|----------|----------------------|-----|
| 2799048  | 5205834  | 4957673  | 3617984  | 3744223  | 4167992  |                      | 1   |
| 2033124  | 1553908  | 3352870  | 3946646  | 4636654  | 14849860 |                      | 2   |
| 1436181  | 1970601  | 1202139  | 1113050  | 2365834  | 1944215  |                      | 8   |
| 3204373  | 4736528  | 3249959  | 3631497  | 4552950  | 7763816  |                      | 2   |
| 9.67E+08 | 7.33E+08 | 7.71E+08 | 9.23E+08 | 7.27E+08 | 3.55E+08 |                      | 2   |
| 28224182 | 23350146 | 24582213 | 25298009 | 26178364 | 6600510  |                      | 9   |
| 1278978  | 1455700  | 932376.4 | 928891.3 | 1223654  | 0        |                      | 9   |
| 1983588  | 2158436  | 1686276  | 801719.3 | 3663317  | 2318247  |                      | 1   |
| 5753944  | 5281293  | 6041656  | 5058142  | 4748013  | 782713.7 |                      | 9   |
| 814623.1 | 687043.1 | 725071.8 | 1250153  | 237852.1 | 174613.3 | [1557][M+1]+         | 12  |
| 712368.3 | 694159.8 | 468192.3 | 89125.64 | 467465   | 315842.7 |                      | 81  |
| 1.91E+08 | 1.33E+08 | 1.55E+08 | 1.73E+08 | 1.52E+08 | 56237924 | [1253][M]+           | 2   |
| 21836801 | 18459009 | 19358288 | 19270144 | 20201967 | 5115034  |                      | 9   |
| 812160.9 | 1150018  | 685861.7 | 933569.2 | 1130036  | 1100641  |                      | 9   |
| 1204332  | 324620.6 | 533845.9 | 668834.9 | 470188.2 | 48238.36 |                      | 91  |
| 39910.22 | 10781.49 | 3542433  | 21207939 | 212101.6 | 0        |                      | 96  |
| 339461.9 | 586168.1 | 542716.2 | 688154.5 | 524813.2 | 487817.4 |                      | 99  |
| 3415831  | 7469827  | 3698840  | 3422735  | 8473867  | 13816561 | [1162][M+2]3+        | 2   |
| 810158.3 | 1029615  | 647511.6 | 441143.7 | 492359.9 | 1195740  |                      | 16  |
| 5379657  | 4829377  | 4099439  | 4737196  | 5534819  | 1145691  | [M+H-C2H4            | 13  |
| 364635.5 | 518254.5 | 592631.6 | 681224.4 | 665615.8 | 464737.1 |                      | 366 |
| 2596542  | 2396659  | 2319234  | 1863528  | 2451690  | 1544619  | [113][M]2+           | 4   |
| 429897.1 | 232403.4 | 268823.3 | 225954.9 | 196506.5 | 10798.29 |                      | 86  |
| 336083.4 | 1492062  | 221572.6 | 128544.3 | 1570284  | 2612975  |                      | 14  |
| 70113122 | 63405573 | 64835584 | 60190430 | 61506810 | 41280047 | [176][M+1]+          | 4   |
| 12015700 | 21169514 | 10077110 | 12736621 | 21223615 | 59618812 |                      | 2   |
| 1474873  | 1388838  | 1898366  | 938634   | 1405775  | 208925.7 | [1534][M]+ [2M+H]+ 4 | 6   |
| 1319981  | 1554948  | 1334644  | 398221.6 | 1271491  | 913208.1 |                      | 24  |
| 14473683 | 10331134 | 5879867  | 13810409 | 13568963 | 3841115  | [M+Na]+ 3            | 14  |
| 934171.5 | 347323.9 | 775700.6 | 3925068  | 430588.3 | 981046.8 |                      | 89  |
| 7569301  | 9143730  | 3760219  | 6234822  | 8491052  | 5946251  |                      | 9   |
| 1051529  | 1383154  | 873469.3 | 986581.2 | 588021.5 | 643063.4 |                      | 355 |
| 3301340  | 3431223  | 2959625  | 1688761  | 4313536  | 2095491  |                      | 2   |
| 1029026  | 1576116  | 1699409  | 1844680  | 1278779  | 0        | [M+K]+ 41            | 13  |
| 808498.3 | 865407.3 | 635373.8 | 559058.4 | 554031.6 | 0        | [M+H-CH4]            | 81  |

|          |          |          |          |          |          |                                              |     |
|----------|----------|----------|----------|----------|----------|----------------------------------------------|-----|
| 401316.3 | 37345.48 | 3457062  | 1809644  | 539264.9 | 451767.7 | [M+H] <sup>+</sup> 28!                       | 8   |
| 3243437  | 4370994  | 7988525  | 6366250  | 55753245 | 7234993  |                                              | 208 |
| 20481335 | 23682766 | 19136255 | 17187625 | 22887945 | 16402447 |                                              | 9   |
| 13631757 | 358127.1 | 287955.2 | 774295.9 | 416454.6 | 1260363  | [381][M] <sup>+</sup>                        | 59  |
| 15496845 | 35155907 | 30647658 | 8244959  | 98403900 | 51595083 |                                              | 1   |
| 479829.9 | 415120.7 | 330368.1 | 414167.9 | 114729.1 | 325229.5 |                                              | 217 |
| 3469123  | 1511210  | 3471774  | 2867472  | 1276108  | 1913740  |                                              | 127 |
| 3038031  | 8209347  | 10280704 | 9205838  | 7497079  | 7934100  | [M+K] <sup>+</sup> 13!                       | 13  |
| 1.13E+08 | 92263289 | 94783979 | 1.03E+08 | 79601074 | 33946671 |                                              | 2   |
| 16891166 | 3785883  | 3387896  | 16376624 | 15738891 | 473010.3 |                                              | 316 |
| 13488246 | 6904721  | 10417712 | 12854377 | 9650335  | 3206014  |                                              | 2   |
| 4590107  | 1537140  | 2937395  | 2635979  | 2482050  | 73474.22 | [1178][M] <sup>2</sup> [3M+2H] <sup>2+</sup> | 169 |
| 505672   | 717362.1 | 1508993  | 560303.3 | 575198.1 | 768343   |                                              | 9   |
| 78544.28 | 96927.05 | 139537.7 | 455617.2 | 100791.6 | 182001.9 | [M+Na] <sup>+</sup> 2!                       | 342 |
| 2059462  | 2293341  | 2267654  | 1399007  | 2518551  | 6957410  |                                              | 345 |
| 6049323  | 6133060  | 17412912 | 3630541  | 4063459  | 16487403 | [M+Na] <sup>+</sup> 4!                       | 12  |
| 350127.2 | 461841.7 | 337835.4 | 191613.8 | 151547.8 | 201643.3 | [1613][M+1] <sup>+</sup>                     | 23  |
| 6120976  | 4635920  | 5602754  | 6244680  | 4550417  | 2070930  |                                              | 2   |
| 12267666 | 12455891 | 7667971  | 7973456  | 14033798 | 4093563  |                                              | 15  |
| 2127929  | 2265946  | 2152779  | 1000729  | 2137141  | 1415850  | [M+Na+K] <sup>2</sup>                        | 16  |
| 248442   | 469433.5 | 275045.7 | 249357.4 | 327349.4 | 367546.5 |                                              | 157 |
| 739247.6 | 558487   | 511468.6 | 631646.2 | 598833.8 | 438850.2 |                                              | 4   |
| 6941618  | 2765059  | 1823735  | 3802785  | 3770649  | 0        |                                              | 2   |
| 76805291 | 60514473 | 14711855 | 10958494 | 11439348 | 69001429 |                                              | 1   |
| 1668745  | 881995.6 | 831402.5 | 864807.6 | 701005.8 | 336225.2 | [738][M+1] <sup>2+</sup>                     | 294 |
| 8027098  | 524100.4 | 431466.8 | 7563376  | 4318301  | 3201253  |                                              | 2   |
| 3758283  | 3256578  | 2913473  | 3126463  | 3201246  | 1433009  | [M+K] <sup>+</sup> 34!                       | 14  |
| 1467117  | 1775533  | 2631678  | 1175561  | 1430455  | 2562179  |                                              | 9   |
| 20502923 | 19755829 | 17457671 | 19546752 | 16252652 | 3827718  |                                              | 2   |
| 834808.1 | 1859446  | 3703218  | 550467.4 | 1892858  | 928522.1 |                                              | 4   |
| 7470412  | 5015302  | 6921556  | 7240210  | 5739255  | 3391008  | [M+H] <sup>+</sup> 48!                       | 323 |
| 9452586  | 9552326  | 7361976  | 7235875  | 11164792 | 11062470 | [M+2Na+K] <sup>+</sup>                       | 97  |
| 925847.1 | 1121308  | 1085514  | 377797.2 | 1052170  | 2209077  | [354][M] <sup>2+</sup>                       | 17  |
| 42926.7  | 39568.31 | 4550865  | 27387629 | 106174.3 | 7606.344 | [382][M+1] <sup>+</sup>                      | 104 |
| 2323694  | 366568   | 1629619  | 1542842  | 2185955  | 0        |                                              | 9   |

|          |          |          |          |          |          |               |     |
|----------|----------|----------|----------|----------|----------|---------------|-----|
| 1474638  | 996081.8 | 54260465 | 703475.8 | 513036.7 | 3.11E+08 |               | 40  |
| 3979022  | 3979127  | 5936922  | 878432.1 | 8654115  | 6927172  | [M+H-CO2]     | 356 |
| 3237804  | 1933697  | 1213612  | 3104075  | 2703355  | 223527.1 |               | 9   |
| 6746804  | 3970354  | 4399495  | 6868449  | 5483538  | 2028746  |               | 2   |
| 4292015  | 6803594  | 3735607  | 4001913  | 3826707  | 2431055  |               | 2   |
| 30435089 | 25271156 | 2661350  | 24610192 | 25945663 | 26254919 | [M+Na]+ 3'    | 11  |
| 511106.9 | 643734.2 | 1343811  | 473221.3 | 480248.3 | 1235546  |               | 9   |
| 8452706  | 6504576  | 5917017  | 9746061  | 6824088  | 4366442  | [1215][M+1]2+ | 2   |
| 19896507 | 40508891 | 37889432 | 19720953 | 47268671 | 5949425  | [583][M]2+    | 1   |
| 1317819  | 3965813  | 43557774 | 1515105  | 1508110  | 4903294  |               | 20  |
| 1499821  | 1796942  | 1492494  | 682192   | 1478672  | 308763.4 |               | 12  |
| 2239998  | 3640063  | 3808238  | 1371367  | 4374641  | 476876   |               | 1   |
| 2182282  | 3619601  | 2142797  | 1503183  | 4132839  | 6885886  |               | 9   |
| 845087.3 | 651137.6 | 804903.5 | 916359.4 | 345139.2 | 574019.7 |               | 17  |
| 1354203  | 67800.58 | 1553838  | 906155.6 | 737617.4 | 0        |               | 9   |
| 693708.7 | 606240.2 | 562828.3 | 614894.4 | 456781.7 | 119377.3 | [1548][M]+    | 210 |
| 4140603  | 654469   | 5228498  | 849355.4 | 3849376  | 2084263  |               | 1   |
| 3656402  | 3093887  | 3620796  | 2226982  | 2888625  | 755644.4 |               | 1   |
| 27307029 | 13455451 | 7787622  | 23073122 | 6264098  | 6759809  |               | 22  |
| 1.42E+08 | 89330486 | 78033213 | 56770258 | 54318484 | 55053688 |               | 1   |
| 912047.7 | 775224.8 | 237150.8 | 459016.7 | 747834.8 | 116141.9 |               | 9   |
| 877067.3 | 791810.5 | 1458330  | 830765.8 | 704185.5 | 1999600  |               | 9   |
| 148001.8 | 666087.4 | 610994.9 | 292954.4 | 182063.4 | 669330.4 |               | 4   |
| 19513598 | 19312195 | 18847603 | 13892893 | 15453337 | 11659847 | [714][M]+     | 4   |
| 687477.8 | 82822.93 | 542306.4 | 472250.2 | 300931.9 | 255145.8 |               | 33  |
| 454821.2 | 103394.9 | 499635.8 | 532755.5 | 342332.3 | 280921.8 |               | 100 |
| 1066985  | 2726522  | 3031851  | 4514116  | 825298.8 | 10815390 |               | 1   |
| 429768.4 | 547505.6 | 336442.5 | 482875   | 468458.7 | 205921.4 |               | 8   |
| 3593299  | 3122628  | 3657242  | 1710711  | 3064137  | 1008125  |               | 1   |
| 418676.5 | 1250648  | 531484.8 | 0        | 125257.1 | 379115.4 | [1483][M+2]3+ | 18  |
| 6582383  | 5797027  | 4839123  | 9972119  | 3930229  | 5749315  |               | 364 |
| 3035334  | 2762292  | 2518038  | 2764527  | 1743576  | 2830541  |               | 2   |
| 3418064  | 8060490  | 3526481  | 5778320  | 5394069  | 5533225  |               | 449 |
| 7166499  | 6127075  | 5453319  | 7709310  | 7759695  | 2311799  | [973][M]+     | 9   |
| 259517.4 | 1682493  | 1546812  | 1621926  | 230185.8 | 156288.2 |               | 481 |



|          |          |          |          |          |          |             |     |
|----------|----------|----------|----------|----------|----------|-------------|-----|
| 1281550  | 1115097  | 1917628  | 1418196  | 1282383  | 1027457  | [1539][M]+  | 338 |
| 3118734  | 2280605  | 2456277  | 1763562  | 955544.6 | 182168.6 |             | 145 |
| 49930.66 | 991489.3 | 17355924 | 1.09E+08 | 315838.2 | 70056.92 | [M+K]+ 14!  | 93  |
| 551946.7 | 299366.8 | 384486.1 | 389014.6 | 320294.3 | 176595.6 | [M+H+CF3O   | 342 |
| 405551.4 | 546556.8 | 1472443  | 403070.9 | 651077.8 | 2125707  | [M+Na]+ 5!  | 8   |
| 942982.4 | 1093596  | 1022084  | 383323.3 | 873406.7 | 4045140  |             | 203 |
| 1084562  | 3281582  | 1227391  | 262997.1 | 2234666  | 702082.2 |             | 1   |
| 2300136  | 1983319  | 3876219  | 4759914  | 2742591  | 5975572  | [1278][M]+  | 130 |
| 13500685 | 332371.8 | 638472.2 | 518204   | 607428.1 | 6621550  | [410][M]+   | 59  |
| 17098391 | 20500179 | 13243159 | 12187650 | 14055471 | 15102010 |             | 1   |
| 67544557 | 1.17E+08 | 1.22E+08 | 75593577 | 70963535 | 51353581 | [750][M]+   | 1   |
| 1.08E+08 | 79194253 | 84875420 | 1.03E+08 | 81009883 | 33324013 |             | 2   |
| 2856406  | 3111524  | 5481655  | 1768663  | 2808545  | 2722476  |             | 337 |
| 9649007  | 4113191  | 4580623  | 9839246  | 5033603  | 783529.4 |             | 14  |
| 806097   | 734030.1 | 1081973  | 804818.2 | 974664.2 | 960269.4 |             | 79  |
| 11584500 | 8847102  | 13701875 | 8400950  | 7152621  | 3601805  | [M+H]+ 22!  | 116 |
| 4504774  | 5836341  | 5461704  | 5379436  | 3782181  | 5098490  |             | 320 |
| 17210780 | 21473151 | 18394910 | 18906829 | 29204143 | 2818755  | [M+H-COCl   | 15  |
| 3861384  | 4176348  | 3443120  | 3486491  | 3843566  | 3994534  | [M+Na]+ 2!  | 253 |
| 25559759 | 16249671 | 41618707 | 42076451 | 11480399 | 34906482 | [215][M+1]+ | 12  |
| 1115506  | 794388.8 | 944320.7 | 874549.3 | 663242.8 | 193431.2 |             | 9   |
| 584971   | 691934.8 | 503220.7 | 491928.1 | 780555.1 | 1259201  | [539][M+1]+ | 281 |
| 2060621  | 18156202 | 7992613  | 12528952 | 13217255 | 10820604 |             | 1   |
| 1176058  | 1131114  | 1205927  | 945161.5 | 1593188  | 1580363  |             | 9   |
| 4881094  | 3345018  | 4115487  | 3680163  | 4455414  | 4580284  |             | 333 |
| 7795450  | 6850642  | 6660935  | 5108524  | 6093015  | 1509716  |             | 4   |
| 371558.6 | 186233.2 | 330718.3 | 395128.1 | 137214.9 | 58897.01 |             | 114 |
| 3181857  | 2639611  | 2336108  | 2977183  | 2732619  | 714141.8 |             | 9   |
| 4918589  | 6579296  | 6836041  | 6695263  | 6750397  | 2538887  |             | 236 |
| 323274.6 | 491243   | 373531.9 | 489603.3 | 292020.7 | 355322   | [816][M]3+  | 39  |
| 5.02E+08 | 4.57E+08 | 4.66E+08 | 4.4E+08  | 4.49E+08 | 3.04E+08 |             | 4   |
| 5780188  | 5884013  | 5342020  | 5245248  | 5142931  | 1542651  |             | 2   |
| 961981.7 | 1469540  | 641296.2 | 290234.2 | 804565   | 1307936  |             | 4   |
| 2178650  | 3419279  | 657459.7 | 1109249  | 1960792  | 1609072  | [M+K]+ 24!  | 11  |
| 905484.4 | 678903.9 | 796880.4 | 595829.6 | 606215.9 | 368475.9 | [M+H+NH3    | 23  |

|          |          |          |          |          |          |              |     |
|----------|----------|----------|----------|----------|----------|--------------|-----|
| 6150635  | 3436709  | 3809933  | 6528515  | 3534736  | 5914167  | [M+Na]+ 3!   | 199 |
| 236081   | 121728.8 | 626091   | 236458.5 | 575775   | 131003.1 |              | 297 |
| 4034091  | 6358107  | 6953215  | 4012212  | 4005928  | 3996751  | [M+K]+ 40!   | 15  |
| 2441406  | 2970020  | 2576889  | 1484922  | 2481357  | 1643518  | [7][M+1]2+   | 9   |
| 1.08E+08 | 79723638 | 89796903 | 1.03E+08 | 80854376 | 33401745 | [430][M]2+   | 2   |
| 185089.4 | 418694.2 | 109217.8 | 96207.76 | 127913   | 94618.41 |              | 24  |
| 8067277  | 5576604  | 2477577  | 2627295  | 813352.9 | 3690276  | [M+K]+ 31!   | 3   |
| 61031213 | 50970517 | 52791460 | 54556769 | 54862253 | 19115499 | [M+Na+Na     | 13  |
| 1373642  | 3474338  | 1539105  | 1057787  | 3143981  | 6653981  | [3M+H]+ 1!   | 93  |
| 982715.2 | 1358906  | 1971333  | 842248.5 | 776929.8 | 3934586  | [M+Na+Na     | 8   |
| 1335843  | 0        | 709888.8 | 874489.6 | 283660.1 | 90082.62 |              | 46  |
| 8402887  | 8734843  | 10017728 | 8104569  | 6401155  | 18721688 | [282][M]+    | 61  |
| 585484.6 | 385159.1 | 460898.5 | 90476.47 | 606306   | 151777.2 | [1522][M+1]+ | 38  |
| 21688832 | 22262237 | 12194782 | 16041154 | 10555943 | 6485015  | [875][M]2+   | 1   |
| 1646179  | 1668377  | 6600234  | 21194139 | 1249706  | 196656.1 |              | 27  |
| 754059.6 | 777636.1 | 351447.5 | 784220.5 | 202056.2 | 163995.2 | [900][M+2]+  | 115 |
| 26302586 | 47457019 | 38149116 | 26535585 | 32539280 | 71520035 | [M+H-C4H8    | 13  |
| 667738.4 | 806919.6 | 584302.5 | 423696.1 | 584980.7 | 134767.1 |              | 4   |
| 1313055  | 2106761  | 1166605  | 1729965  | 2842178  | 5297572  |              | 2   |
| 8945512  | 7229260  | 7738868  | 7861328  | 7788474  | 2408484  | [M+3H-H2O    | 13  |
| 4782977  | 5848159  | 5151484  | 5670048  | 5713926  | 5740815  | [3M+H+K]2    | 339 |
| 939370.8 | 663185.7 | 597152   | 906497.8 | 828876.7 | 135268   | [304][M+1]2+ | 9   |
| 5542929  | 5400652  | 5501082  | 4175944  | 3714017  | 1222022  | [728][M]+    | 4   |
| 893113   | 1686582  | 3338988  | 5606122  | 1129344  | 1197495  |              | 46  |
| 6112769  | 4770118  | 4593032  | 4376887  | 3366475  | 6203409  |              | 5   |
| 3485258  | 3595734  | 3899643  | 3826185  | 3572761  | 3220206  |              | 335 |
| 621761.9 | 468186.3 | 336576.9 | 179538.3 | 504156.8 | 370177.7 |              | 91  |
| 1463373  | 1987043  | 14608989 | 1.03E+08 | 1241879  | 3544731  |              | 89  |
| 4736146  | 5505354  | 4917616  | 4223885  | 3495632  | 1868570  |              | 2   |
| 1553734  | 893613.7 | 904687.1 | 894350   | 1415998  | 219343.5 |              | 4   |
| 823219.3 | 722284.3 | 1209637  | 611468   | 560100.8 | 1121546  |              | 2   |
| 2997144  | 2039190  | 25354474 | 10115861 | 2958970  | 2878859  | [312][M]+    | 212 |
| 1956603  | 1013813  | 3872333  | 1900225  | 1750262  | 1000241  | [145][M+2]3+ | 9   |
| 504112.5 | 1059721  | 1023154  | 551009.5 | 634589.9 | 1342668  | [3M+H+K]2    | 8   |
| 1520380  | 848683.4 | 1273368  | 418115.5 | 560691.1 | 10766.58 |              | 475 |

|          |          |          |          |          |          |              |     |
|----------|----------|----------|----------|----------|----------|--------------|-----|
| 489119.8 | 1119874  | 1267443  | 410877.3 | 239679.9 | 528503.8 | [M+Na+Na     | 8   |
| 3651981  | 4431333  | 3343448  | 3054964  | 4020032  | 2587521  |              | 2   |
| 3525417  | 6008801  | 4566677  | 4567736  | 4111782  | 1572254  |              | 398 |
| 4791210  | 4625906  | 4536487  | 6135146  | 8410327  | 4378115  |              | 363 |
| 2235082  | 4199118  | 5148604  | 4477811  | 2536468  | 815885.8 |              | 1   |
| 2162179  | 1660441  | 2048965  | 516306.8 | 1836343  | 2050556  |              | 4   |
| 4388254  | 6097197  | 4215711  | 4061905  | 4850853  | 3553792  |              | 372 |
| 32274351 | 20705940 | 24792397 | 31796922 | 19845973 | 5203553  |              | 2   |
| 2515922  | 3055068  | 2809929  | 1835285  | 2748567  | 1407965  | [749][M+1]2+ | 9   |
| 1915099  | 2676475  | 1874747  | 6165599  | 17562797 | 17618228 |              | 2   |
| 6379087  | 6280328  | 3335118  | 3126192  | 5324285  | 8677262  |              | 1   |
| 3882368  | 5780790  | 4112700  | 2401350  | 8973581  | 3880686  |              | 404 |
| 5518307  | 2918130  | 4266858  | 5568785  | 2698882  | 0        |              | 2   |
| 2862327  | 2702899  | 1421337  | 1673195  | 3083300  | 3409204  |              | 258 |
| 8237263  | 7985462  | 6897507  | 7349988  | 7655535  | 4583774  |              | 9   |
| 3130198  | 3437498  | 2026806  | 2686592  | 3307400  | 1882480  |              | 2   |
| 6098741  | 4390650  | 3827474  | 4872962  | 3083412  | 4457730  | [M+H]+ 57!   | 15  |
| 369906.7 | 95845.94 | 538572.8 | 551450.3 | 351199.8 | 353624.2 |              | 238 |
| 108068.8 | 196028.5 | 1268109  | 7580304  | 201746   | 137773   | [M+H]+ 23!   | 26  |
| 2168210  | 1514333  | 1954667  | 2261084  | 1729277  | 0        |              | 13  |
| 916229.4 | 1385803  | 4859862  | 7712261  | 2739953  | 858124.2 |              | 61  |
| 458647.5 | 1168538  | 1042554  | 373783.4 | 771501.9 | 1667708  | [M+K]+ 18!   | 8   |
| 1285147  | 966707   | 1119489  | 861070.4 | 773279.3 | 1097855  | [1211][M+2]+ | 101 |
| 59693191 | 55896129 | 91872137 | 74978955 | 1812889  | 19848576 |              | 1   |
| 326415.2 | 1093597  | 964932.7 | 988033.7 | 884717.2 | 596068.6 | [M+K]+ 24!   | 24  |
| 22353852 | 19236350 | 20085604 | 19951665 | 20408248 | 5126159  | [606][M]+    | 9   |
| 3535078  | 2243954  | 3314953  | 2305241  | 3495758  | 470215.1 |              | 2   |
| 3452693  | 1454472  | 2744771  | 1658066  | 3178685  | 517068.8 |              | 1   |
| 6043186  | 7502050  | 1197014  | 4481008  | 6205668  | 10547167 |              | 3   |
| 1152266  | 1389183  | 956975   | 615099.5 | 1029979  | 1080295  |              | 159 |
| 1437559  | 3772425  | 3286155  | 1388178  | 7047083  | 15701291 |              | 97  |
| 196954.7 | 346216.6 | 472657.2 | 413046.4 | 344999   | 84731.77 | [1308][M+2]+ | 275 |
| 4397437  | 1632372  | 8177895  | 4548322  | 1920823  | 2278138  |              | 2   |
| 1564950  | 689465.3 | 540996.3 | 553617.5 | 567029.9 | 262278   | [1389][M]+   | 40  |
| 1.59E+08 | 1.32E+08 | 1.28E+08 | 1.64E+08 | 1.35E+08 | 56221012 |              | 2   |

|          |          |          |          |          |          |                      |     |
|----------|----------|----------|----------|----------|----------|----------------------|-----|
| 1466894  | 1456145  | 1431267  | 1244324  | 917297.6 | 1498761  |                      | 1   |
| 756501   | 4005668  | 1654479  | 15407729 | 2462325  | 4273268  |                      | 2   |
| 1561094  | 1362063  | 873609.9 | 1386610  | 1361619  | 385735.4 | [1191][M]3+          | 2   |
| 1839283  | 2649657  | 3034727  | 1858120  | 1232982  | 1689570  |                      | 1   |
| 1128230  | 902722.8 | 1478191  | 1014708  | 832594.2 | 678046.6 | [778][M+1]+          | 9   |
| 655034.9 | 349729.3 | 742248.8 | 342124.8 | 428197.6 | 635203   |                      | 312 |
| 5747562  | 6752588  | 3909335  | 3934337  | 4263803  | 4141359  | [923][M]+ [M+K]+ 466 | 101 |
| 2318167  | 3132134  | 16765356 | 15144949 | 25436691 | 27774718 | [852][M+2]+          | 1   |
| 6117643  | 4983211  | 6460153  | 11216301 | 8484057  | 5348789  |                      | 205 |
| 36803372 | 38096877 | 41564009 | 31124830 | 31080889 | 22277240 |                      | 234 |
| 202039   | 994258.3 | 2410810  | 14017955 | 109856   | 466778.3 |                      | 245 |
| 10561618 | 9586592  | 7993123  | 9292370  | 9498871  | 10817503 |                      | 13  |
| 3395971  | 5568473  | 2959929  | 4286020  | 1688848  | 38225984 |                      | 2   |
| 1793252  | 5.52E+08 | 5.19E+08 | 4.51E+08 | 1146456  | 3.41E+08 | [M+H]+ 396           | 25  |
| 7141979  | 5394334  | 5493514  | 5891573  | 8349716  | 18400247 |                      | 2   |
| 1449349  | 2901185  | 792442.4 | 666514.5 | 2594779  | 1979152  |                      | 2   |
| 2815060  | 3011579  | 2783552  | 663003.2 | 3186131  | 963040.6 |                      | 20  |
| 896010.9 | 268128.5 | 592975.5 | 404117.9 | 302022.5 | 118674.3 |                      | 291 |
| 1990560  | 823922.9 | 1664029  | 1943122  | 2217027  | 0        |                      | 2   |
| 1368995  | 4303750  | 9943762  | 15851498 | 15233328 | 2697901  | [3M+H]+ 10           | 15  |
| 14684002 | 13962264 | 12407865 | 12243774 | 19457892 | 18040013 | [1296][M+1]+         | 2   |
| 3793632  | 4222174  | 4137714  | 3166927  | 4503498  | 1437154  |                      | 1   |
| 2981999  | 3597310  | 3251197  | 2494932  | 2690977  | 4479099  | [1388][M]+ [M+K+CF3C | 46  |
| 6158696  | 4525973  | 6378151  | 3524296  | 4410659  | 852832   | [1270][M]+           | 1   |
| 3260413  | 3099899  | 2272378  | 2161342  | 2170204  | 450347.2 | [3M+2K]2+            | 81  |
| 3544267  | 3737636  | 3590483  | 2810205  | 4459144  | 3676426  |                      | 396 |
| 1012291  | 2328156  | 1560573  | 1213940  | 825109.2 | 626985.8 |                      | 4   |
| 3987341  | 3834799  | 2305873  | 2696100  | 2155363  | 3200207  | [638][M]+ [M+K]+ 356 | 16  |
| 818818.9 | 771835.3 | 959799.8 | 526785.9 | 502115.4 | 299338.8 |                      | 54  |
| 3641620  | 4077753  | 3836084  | 3797500  | 3733866  | 3447204  |                      | 393 |
| 3754928  | 3516871  | 2515402  | 2978314  | 2719735  | 1738445  | [391][M]2+           | 118 |
| 597299.5 | 550844.2 | 717334.9 | 561145.7 | 428485   | 230518   | [1168][M+1]+         | 371 |
| 1374341  | 348893.6 | 1653503  | 839547.1 | 2555943  | 9202647  |                      | 2   |
| 1645333  | 2599086  | 735491.1 | 1623652  | 4774916  | 7602944  |                      | 3   |
| 2454063  | 2404543  | 2449855  | 5750810  | 2174114  | 2181517  |                      | 404 |

|          |          |          |          |          |          |              |     |
|----------|----------|----------|----------|----------|----------|--------------|-----|
| 310136.7 | 843926.6 | 1039535  | 4945472  | 363604.4 | 714580.3 |              | 35  |
| 1983447  | 2000010  | 2668038  | 1453465  | 1717860  | 679200   |              | 9   |
| 1169500  | 1632855  | 1210301  | 1238533  | 1043969  | 2191539  | [2M+3Na+I    | 42  |
| 1017082  | 402467.3 | 1131673  | 1056027  | 328472.8 | 419901   |              | 336 |
| 4736434  | 2467407  | 933654.7 | 1031176  | 1234734  | 4727666  |              | 148 |
| 35737528 | 58492994 | 51332190 | 24781828 | 28580435 | 29713264 |              | 20  |
| 3379189  | 790394.8 | 3644928  | 2536400  | 628833   | 406960.6 |              | 91  |
| 1922601  | 2551935  | 1829079  | 1459256  | 1493869  | 1191135  | [508][M+2]+  | 2   |
| 3440139  | 3345002  | 2088502  | 2596653  | 2837630  | 1411837  |              | 2   |
| 13335602 | 15005368 | 11383600 | 12750698 | 14295379 | 4843003  | [423][M]2+   | 2   |
| 2406506  | 2647750  | 3067990  | 3263163  | 5473393  | 6381085  |              | 2   |
| 3600120  | 3048167  | 9484495  | 7910322  | 3478094  | 3834258  | [M+2H-H2O    | 302 |
| 268593.5 | 269571.9 | 371058.8 | 190610.3 | 276367.2 | 412488.9 |              | 23  |
| 0        | 797637.6 | 839380.2 | 2070529  | 565715.2 | 0        |              | 1   |
| 10147870 | 9114660  | 6935162  | 7653822  | 9815774  | 8482710  |              | 4   |
| 5052263  | 4752049  | 5123350  | 5891189  | 5630079  | 4065918  | [M+H]+ 56:   | 195 |
| 7902944  | 3923495  | 4679081  | 5038770  | 4883235  | 4179302  |              | 441 |
| 635102.8 | 542199.4 | 920927.4 | 978334.5 | 664414.4 | 0        | [1535][M+2]+ | 38  |
| 38425838 | 17576596 | 22852739 | 24539902 | 27964505 | 8811932  |              | 2   |
| 2797847  | 2826222  | 3530347  | 2877450  | 2739333  | 5297296  |              | 279 |
| 1464606  | 2979706  | 3142095  | 2101457  | 6572974  | 15265002 |              | 97  |
| 4076462  | 6061652  | 2999218  | 2981615  | 4530927  | 571570.2 |              | 13  |
| 1047120  | 1569389  | 1813207  | 1970979  | 1191390  | 168364.8 | [M+2Na+K-    | 13  |
| 2163380  | 5369328  | 2282057  | 3797876  | 6704446  | 14431753 | [3M+H+K]2    | 97  |
| 1574969  | 1077614  | 1815444  | 1028947  | 1238022  | 0        |              | 13  |
| 16683786 | 28663993 | 29854052 | 17502986 | 19028097 | 10188601 | [750][M+1]+  | 1   |
| 1193543  | 3254291  | 2199991  | 1616911  | 2112931  | 1741149  |              | 46  |
| 13484554 | 10071953 | 7125233  | 11787770 | 12942937 | 836169.7 |              | 13  |
| 2739758  | 2819801  | 2050893  | 3300474  | 2075780  | 426801.5 |              | 2   |
| 6440495  | 12103291 | 7546368  | 7047235  | 5596586  | 12317857 |              | 15  |
| 11018216 | 9425414  | 9569290  | 10189762 | 8845102  | 1882142  |              | 2   |
| 133668.8 | 175691.6 | 174821.7 | 130626.4 | 146979.6 | 135971.4 | [M+H]+ 96:   | 16  |
| 8779571  | 10834955 | 9872994  | 8263166  | 8621357  | 6396079  | [689][M+1]+  | 35  |
| 597302.5 | 1357404  | 859683.5 | 560901.1 | 865120.2 | 811594.6 | [M+K]+ 14:   | 62  |
| 225171.1 | 591528.8 | 631757   | 617416.5 | 723448.8 | 528241.6 | [1137][M]2+  | 68  |

|          |          |          |          |          |          |                      |     |
|----------|----------|----------|----------|----------|----------|----------------------|-----|
| 1004007  | 1264278  | 2024576  | 3880564  | 5563500  | 15597710 | [691][M+1]+          | 15  |
| 1824707  | 1724448  | 1794899  | 1615275  | 1221209  | 1234373  | [1392][M+1]+         | 99  |
| 607486.5 | 4680886  | 2730576  | 2888091  | 5146537  | 10667723 |                      | 9   |
| 1192308  | 1011709  | 811671.8 | 787975.5 | 948120.5 | 97301.94 |                      | 9   |
| 3008333  | 3139925  | 2433951  | 2197752  | 3015453  | 1155883  | [291][M+1]3+         | 9   |
| 7722821  | 31509188 | 45689243 | 43439758 | 47601524 | 28529356 | [1234][M+2]+         | 2   |
| 615740.9 | 1227823  | 2000316  | 389414.7 | 1218095  | 487340.3 | [M+Na]+ 50           | 18  |
| 4031625  | 2269423  | 2278756  | 4403313  | 3652726  | 619961.8 |                      | 2   |
| 7379283  | 8652780  | 6447818  | 6422111  | 11067999 | 17917722 |                      | 2   |
| 457398.1 | 656376.1 | 667473.5 | 715065.5 | 409632.8 | 378413.4 | [1002][M]3+          | 16  |
| 3600650  | 4048803  | 4024216  | 3692329  | 2289512  | 4567877  |                      | 63  |
| 51932461 | 43233587 | 44553564 | 48707734 | 37784753 | 7453871  |                      | 2   |
| 5077179  | 5272948  | 4802828  | 3732581  | 4223735  | 2193438  | [876][M]+            | 4   |
| 4100966  | 4066390  | 3135408  | 4128454  | 2989146  | 4426098  |                      | 63  |
| 196657.2 | 104647.3 | 236022.5 | 199633.9 | 127336.3 | 175104.6 | [M+2H-H2O]           | 18  |
| 16076320 | 26643018 | 29856261 | 19132815 | 22133591 | 6214961  |                      | 19  |
| 990612.4 | 1375853  | 1358715  | 12447307 | 1032910  | 2218901  | [1285][M+1]+         | 9   |
| 116351.1 | 108499.8 | 85067.13 | 206970   | 172259.7 | 170001.3 |                      | 387 |
| 1049670  | 1799321  | 2792014  | 1883204  | 3107533  | 2589187  |                      | 1   |
| 1455713  | 3291248  | 1290637  | 865250.6 | 3006691  | 8166421  |                      | 2   |
| 35482988 | 51558466 | 33597077 | 18688743 | 69148382 | 1.72E+08 |                      | 2   |
| 21523545 | 20376772 | 21968783 | 15664417 | 16739627 | 7155808  | [1424][M]+ [M+H]+ 77 | 12  |
| 35889.69 | 574888.9 | 277253.8 | 495372.8 | 179595.8 | 318826.9 | [598][M+1]2+         | 20  |
| 2522505  | 5457747  | 2846911  | 2245284  | 6123038  | 11385163 |                      | 93  |
| 965646.4 | 1743328  | 1200319  | 362557.7 | 857195.2 | 1357881  | [3M+3K-H]            | 20  |
| 598254.1 | 1.01E+08 | 586035.9 | 632663.3 | 670139.1 | 1024903  |                      | 10  |
| 24708230 | 16237877 | 18558634 | 23697856 | 17933082 | 3620886  |                      | 9   |
| 728927.1 | 693065.6 | 333111.1 | 457465   | 584798.6 | 227275.8 |                      | 4   |
| 281462.2 | 256428.2 | 1905687  | 9279287  | 64768.38 | 279521.6 | [M+2H-C4H8]          | 43  |
| 734166.3 | 257935.1 | 852822.8 | 936321.5 | 627398.6 | 450498.1 | [M+K+NH3]            | 371 |
| 2329803  | 1710339  | 2285647  | 1670164  | 2094390  | 711323.4 | [1257][M+1]+         | 283 |
| 33593062 | 60498323 | 63204645 | 32308718 | 41522981 | 23471617 | [358][M]+            | 1   |
| 3622049  | 4616648  | 3006946  | 3481486  | 4006011  | 3483486  |                      | 429 |
| 54270852 | 42697905 | 58221837 | 32109357 | 39235172 | 10958884 |                      | 1   |
| 2698061  | 2701751  | 2411260  | 2094035  | 2650772  | 1698866  |                      | 4   |

|          |          |          |          |          |          |                                              |     |
|----------|----------|----------|----------|----------|----------|----------------------------------------------|-----|
| 1171676  | 1669764  | 1062492  | 1471162  | 763239.3 | 1378542  |                                              | 1   |
| 3691240  | 3571815  | 3793557  | 3509978  | 3376545  | 4867031  | [M+Na] <sup>+</sup> 5:                       | 95  |
| 3.16E+08 | 3.42E+08 | 3.33E+08 | 3.32E+08 | 2.79E+08 | 2.36E+08 |                                              | 37  |
| 11853976 | 8580942  | 9320583  | 11847459 | 8334213  | 2320753  |                                              | 2   |
| 527729.4 | 916417.8 | 1588950  | 847042.6 | 709200.2 | 824072.2 | [1313][M+2] <sup>+</sup>                     | 9   |
| 1478226  | 1874049  | 1695936  | 1568189  | 1382035  | 744903.8 | [3M+2H] <sup>2+</sup>                        | 16  |
| 8816057  | 6464781  | 7181677  | 8589500  | 5748211  | 1261516  |                                              | 9   |
| 551434   | 87009.32 | 25562350 | 2.07E+08 | 3245372  | 645265.9 |                                              | 101 |
| 2027384  | 2157454  | 1671984  | 1424493  | 1313036  | 296570.5 |                                              | 81  |
| 4862257  | 5432706  | 5524562  | 4076875  | 4958665  | 3428813  |                                              | 119 |
| 6472191  | 9196565  | 8335927  | 2144823  | 6303264  | 3702125  | [241][M] <sup>3+</sup> [2M+3H] <sup>3+</sup> | 39  |
| 1468266  | 2380220  | 1433670  | 753482.3 | 2116551  | 2509414  | [M+2Na-H]                                    | 21  |
| 5008383  | 3862812  | 4833622  | 3660665  | 2740149  | 1977292  | [347][M] <sup>2+</sup>                       | 2   |
| 562846.8 | 462436.2 | 533373.5 | 502823.8 | 549737.6 | 185491   |                                              | 76  |
| 493192.4 | 864048.7 | 70634.51 | 655283.9 | 938765.3 | 418615.9 |                                              | 52  |
| 644631.8 | 573324.4 | 558410   | 481580.1 | 398332.6 | 378595.9 |                                              | 4   |
| 430314.2 | 355173.2 | 686881.7 | 458140.3 | 369057.8 | 227462.1 |                                              | 16  |
| 2731781  | 2942608  | 3302127  | 2554954  | 2242321  | 1918573  | [1461][M] <sup>+</sup> [M+H] <sup>+</sup> 81 | 357 |
| 230309   | 268272.3 | 264108   | 375901.5 | 40137.7  | 255252.1 |                                              | 147 |
| 615003.9 | 664248.2 | 700309.5 | 274165.2 | 509874   | 213012.8 |                                              | 224 |
| 330334.7 | 544153.3 | 356313.7 | 127095.6 | 321098   | 598139.6 |                                              | 58  |
| 1154352  | 2158772  | 1764126  | 935150.4 | 1580995  | 780834.9 |                                              | 13  |
| 1620036  | 1645810  | 1578968  | 763986.9 | 1323223  | 312368.3 | [M+K] <sup>+</sup> 49                        | 12  |
| 1062417  | 1038273  | 602243   | 835756.5 | 719002.2 | 522404.7 | [1146][M] <sup>+</sup>                       | 66  |
| 408412.4 | 848483.5 | 449170.4 | 371782   | 582865.5 | 1664280  | [M+K+CF3C                                    | 8   |
| 11121527 | 14354399 | 2147891  | 13710375 | 14400448 | 55862441 | [M+K] <sup>+</sup> 37                        | 21  |
| 140230.7 | 201493   | 584393.2 | 469307.8 | 159194.2 | 82085.23 |                                              | 387 |
| 394635.6 | 1064451  | 324035.2 | 427416   | 406308   | 105487.5 | [965][M+1] <sup>+</sup>                      | 83  |
| 16470838 | 17450369 | 3661369  | 5889900  | 21823482 | 62485294 |                                              | 84  |
| 4819147  | 1912426  | 2870900  | 4734558  | 2510440  | 728416.3 | [1612][M+1] <sup>+</sup>                     | 13  |
| 3525794  | 1493463  | 5805984  | 6588077  | 4260548  | 11524063 | [1144][M] <sup>+</sup>                       | 96  |
| 0        | 632833.6 | 74267.07 | 350345.3 | 721620.7 | 103055.3 |                                              | 1   |
| 2875920  | 2664246  | 2343364  | 2386646  | 2293921  | 1755619  |                                              | 440 |
| 591748.6 | 780749.2 | 579367.2 | 309226.1 | 383962   | 41898.75 | [1329][M+1] <sup>2+</sup>                    | 4   |
| 1169995  | 541978.4 | 1021317  | 371610.1 | 974160.3 | 209703.3 |                                              | 1   |

|          |          |          |          |          |          |                       |     |
|----------|----------|----------|----------|----------|----------|-----------------------|-----|
| 972524.5 | 1324262  | 1337566  | 690211.6 | 1044229  | 995393.1 | [666][M+1]+           | 4   |
| 1552198  | 2215671  | 2562833  | 1541996  | 1866444  | 5718576  |                       | 9   |
| 672482.5 | 310167.6 | 281161.7 | 571771.7 | 377972.1 | 779043.2 | [M+Na]+ 3'            | 62  |
| 1450457  | 1003963  | 2561274  | 8435059  | 1100651  | 165740.6 |                       | 129 |
| 5574830  | 4345373  | 3397422  | 3825026  | 1289207  | 1759117  |                       | 2   |
| 646772.7 | 1247200  | 804089.7 | 339360.2 | 1354287  | 4031321  |                       | 9   |
| 151997.4 | 295336.7 | 515422.6 | 2388779  | 97811.7  | 219473.8 | [3M+2H]2+             | 220 |
| 48418933 | 52649145 | 27860212 | 59697310 | 43410067 | 29502725 |                       | 186 |
| 6219249  | 6578925  | 1292885  | 5035147  | 2857981  | 2049616  | [M+K]+ 18'            | 6   |
| 2043479  | 1685389  | 1656372  | 1268480  | 1539587  | 613008.9 |                       | 4   |
| 443694.7 | 113818.5 | 462570   | 82010.76 | 369754.2 | 56403.68 |                       | 102 |
| 1228622  | 1153932  | 1249155  | 787682.4 | 1062459  | 485565.8 |                       | 4   |
| 3076458  | 2195399  | 2457751  | 2527869  | 2481060  | 702431.6 |                       | 4   |
| 1249237  | 2134218  | 2166153  | 1145686  | 3231346  | 5977178  |                       | 21  |
| 226339.6 | 373830.6 | 377436.4 | 65770.05 | 298020.9 | 288967.5 | [208][M+1]2+          | 18  |
| 20445831 | 5963914  | 7403601  | 10944612 | 13310532 | 3269346  | [935][M+1]2+          | 15  |
| 4202352  | 5396007  | 4312387  | 3276476  | 4357606  | 2608189  |                       | 9   |
| 16164123 | 11931664 | 13963819 | 14326925 | 10158195 | 5236371  |                       | 2   |
| 5172326  | 5347710  | 5203928  | 4476542  | 4095249  | 1136152  |                       | 9   |
| 14924740 | 3699492  | 5289797  | 2160479  | 14498726 | 5090466  |                       | 1   |
| 14669403 | 19089901 | 15327197 | 6126685  | 6870451  | 23765471 |                       | 69  |
| 9169663  | 4340664  | 7927016  | 10518607 | 4434757  | 4562932  | [501][M+1]+           | 141 |
| 4527270  | 1714767  | 2592310  | 3677360  | 5795339  | 218144.1 | [90][M+2]2+           | 2   |
| 1268123  | 1908302  | 1438778  | 868407.5 | 1336030  | 832399.8 |                       | 9   |
| 4019204  | 472085.7 | 3611172  | 3930820  | 6729875  | 4084128  | [M+K]+ 53'            | 14  |
| 1362219  | 2050139  | 1464839  | 357704.7 | 1057384  | 879161.2 | [1171][M]+ [M+H]+ 64' | 101 |
| 2390410  | 1913639  | 2497353  | 1949117  | 2063945  | 0        |                       | 9   |
| 626940.4 | 274019.8 | 633620.2 | 346861.1 | 172385   | 532568.3 |                       | 33  |
| 33282035 | 32869306 | 35958215 | 29283075 | 26972013 | 16814936 |                       | 274 |
| 2813026  | 2307440  | 2333629  | 1735762  | 2093924  | 1429274  | [1057][M+1]2+         | 42  |
| 675687.5 | 473867.3 | 609458.9 | 468324.5 | 351682   | 353592.1 |                       | 378 |
| 4162000  | 4066977  | 4263761  | 3423294  | 2504582  | 484438.6 | [288][M]3+            | 2   |
| 2287224  | 2585234  | 2486427  | 2562300  | 2367580  | 1765650  | [1441][M]+            | 7   |
| 3005987  | 1308550  | 3257303  | 3473870  | 1475769  | 1116542  | [558][M]+ [M+H+NH3    | 136 |
| 3484080  | 1341045  | 1511356  | 3105732  | 2530702  | 0        |                       | 14  |



|          |          |          |          |          |          |               |     |
|----------|----------|----------|----------|----------|----------|---------------|-----|
| 7372681  | 4151279  | 6994600  | 5999489  | 9071042  | 7067158  |               | 2   |
| 1149678  | 1034522  | 6754350  | 30557488 | 318814.1 | 635417.8 |               | 224 |
| 502786.7 | 1939876  | 796378.2 | 434149.7 | 523050.8 | 388777.7 | [297][M+2]3+  | 38  |
| 4160671  | 3051319  | 1173899  | 3054784  | 2085063  | 5828660  |               | 191 |
| 4922571  | 2755707  | 2767047  | 3737812  | 12037383 | 814932.4 |               | 2   |
| 4768036  | 4480375  | 3953165  | 4546017  | 5908321  | 6899205  | [1368][M+1]2+ | 2   |
| 3387413  | 9480683  | 8785915  | 8669128  | 9214757  | 8809872  |               | 407 |
| 93278076 | 81990440 | 80092493 | 93061172 | 79640745 | 21182760 |               | 2   |
| 833760.5 | 1122640  | 687107.2 | 544865.3 | 410837   | 629286.9 |               | 4   |
| 12440599 | 2567157  | 8390203  | 1981380  | 2197264  | 7432941  |               | 11  |
| 3770033  | 3066300  | 1389883  | 1979204  | 2155010  | 3542223  |               | 155 |
| 827203.6 | 1256722  | 2373375  | 940358.8 | 1622231  | 4831590  | [1357][M+1]2+ | 2   |
| 1648806  | 1626154  | 1396970  | 673079   | 1414262  | 931208.8 |               | 4   |
| 6772514  | 7922638  | 7106349  | 5535402  | 8046828  | 4641175  | [248][M]2+    | 9   |
| 9404905  | 5544388  | 6791049  | 9622616  | 7338241  | 1511763  |               | 2   |
| 4200888  | 4317081  | 4299010  | 4632786  | 4166345  | 6820476  |               | 426 |
| 41724821 | 37843509 | 35997426 | 32289243 | 33532585 | 18836601 | [1251][M]+    | 10  |
| 2557650  | 1029200  | 2445895  | 2671593  | 1054817  | 652971.1 |               | 127 |
| 945818.2 | 8810800  | 0        | 7889607  | 7354741  | 5693098  | [M+K]+ 15'    | 53  |
| 1402541  | 2038533  | 1113297  | 1320313  | 1580476  | 1040375  | [104][M+1]3+  | 9   |
| 1277221  | 1668627  | 1134337  | 652674.6 | 665533   | 438159.3 |               | 4   |
| 313913.7 | 118129.8 | 411026.2 | 816224.6 | 384833.1 | 0        |               | 182 |
| 1327127  | 5903786  | 393215.8 | 8164565  | 2855184  | 2683116  |               | 266 |
| 1422679  | 1454246  | 934446.2 | 408822.5 | 979519.8 | 1290006  |               | 4   |
| 356934.1 | 139399.2 | 325213.8 | 335533.2 | 322407.5 | 202659.8 |               | 31  |
| 4381310  | 4243831  | 4882990  | 2777643  | 2906186  | 6465491  |               | 2   |
| 2680239  | 3486150  | 2767606  | 3033697  | 4327997  | 6836135  |               | 9   |
| 22748076 | 23268456 | 21158816 | 20104783 | 18728556 | 6220729  | [234][M]2+    | 9   |
| 2312770  | 3140811  | 1871123  | 750129.7 | 3493145  | 604623.9 | [M+K]+ 13'    | 15  |
| 2323845  | 6548049  | 5457506  | 3412135  | 3018028  | 4919162  | [M+Na+K]2     | 62  |
| 4622354  | 5111404  | 4468384  | 3197547  | 4062824  | 3056414  | [871][M+1]+   | 118 |
| 1784914  | 26578033 | 2289150  | 1336486  | 1045361  | 4127492  | [M+Na+2K]     | 11  |
| 50630558 | 38985343 | 41004958 | 48068503 | 35367017 | 14627993 | [791][M+1]+   | 2   |
| 1044089  | 252819.4 | 436490.4 | 624077.5 | 558359   | 173771.1 |               | 4   |
| 1814974  | 2220354  | 998973.1 | 1729237  | 1378388  | 2162530  | [1574][M]+    | 7   |

|          |          |          |          |          |          |                       |     |
|----------|----------|----------|----------|----------|----------|-----------------------|-----|
| 2114783  | 1803289  | 1856445  | 1332325  | 1194045  | 454489.5 | [1619][M+2]+          | 38  |
| 3474953  | 4049821  | 3671125  | 3258270  | 3628492  | 3071205  |                       | 52  |
| 6639308  | 7114462  | 5965382  | 5904256  | 7129207  | 3394104  |                       | 2   |
| 1686589  | 0        | 1072579  | 1991860  | 780181   | 0        |                       | 13  |
| 940266.8 | 1567713  | 811008   | 1280378  | 1184689  | 706515.7 | [1495][M]+ [3M+Na]+ : | 62  |
| 12078084 | 9693309  | 11529858 | 11044187 | 10501624 | 2998745  | [617][M+1]+           | 13  |
| 4452919  | 4186556  | 2660693  | 3313472  | 4179406  | 3912348  |                       | 2   |
| 1.2E+10  | 1.07E+10 | 1.11E+10 | 9.1E+09  | 1.02E+10 | 6.73E+09 | [661][M]+             | 4   |
| 618028.4 | 1058903  | 727993   | 372760.3 | 411320.5 | 498481.9 |                       | 39  |
| 9237597  | 9103059  | 7978129  | 6524743  | 7093110  | 4529663  |                       | 127 |
| 4249096  | 2047328  | 7932621  | 6880987  | 8201885  | 22439249 |                       | 2   |
| 892734.7 | 319400.6 | 128915.1 | 63740014 | 4049558  | 4041156  |                       | 1   |
| 2867567  | 3942921  | 2726597  | 2366324  | 3290101  | 5070580  | [1360][M+1]+          | 2   |
| 8431711  | 22580775 | 20728558 | 1344652  | 29262240 | 3830658  | [88][M]3+             | 1   |
| 7251092  | 9203430  | 3768827  | 3793796  | 7146090  | 8443733  |                       | 1   |
| 4320332  | 1893721  | 22725257 | 16001863 | 15223554 | 9927861  | [800][M]+             | 1   |
| 3186872  | 4886048  | 5329890  | 1968685  | 4115107  | 2693691  |                       | 1   |
| 282813.8 | 834817.8 | 799847.7 | 350979.7 | 209949.8 | 962139.1 |                       | 4   |
| 5329412  | 5817023  | 1228953  | 4780128  | 4291483  | 4225425  | [3M+H+K]2             | 11  |
| 3079796  | 2750986  | 1880643  | 2056207  | 1627525  | 1762824  |                       | 170 |
| 94287271 | 2.15E+08 | 1.59E+08 | 72788081 | 95396878 | 1.34E+08 | [M+H+NH3              | 15  |
| 608617.3 | 1514078  | 898751.8 | 436746.1 | 908632.3 | 2342092  |                       | 4   |
| 2297566  | 2889289  | 22482889 | 3452355  | 4554521  | 2582646  | [M+Na+NH              | 38  |
| 3597853  | 4976049  | 6422853  | 6519168  | 6561228  | 11073643 |                       | 379 |
| 60621898 | 50958671 | 52891809 | 54312450 | 54965376 | 19194085 | [M+2H-C3+             | 13  |
| 5160989  | 90830762 | 54392465 | 49560240 | 5225452  | 3945994  | [M+H-CH2]             | 5   |
| 996410.1 | 1617623  | 631996.4 | 337644.7 | 1368035  | 2988199  |                       | 9   |
| 1280236  | 2380319  | 1171511  | 1769375  | 1153683  | 12895543 | [1217][M+2]2+         | 2   |
| 32971572 | 38889263 | 29647099 | 27403492 | 25983848 | 23969252 |                       | 1   |
| 4540695  | 3045123  | 834349.5 | 4047840  | 2615012  | 4432062  |                       | 90  |
| 3801301  | 2880129  | 3092724  | 3230071  | 3199191  | 984307.5 |                       | 4   |
| 126878.1 | 474207.5 | 364084.3 | 183051.1 | 376030   | 534718.8 | [M+Na+K]2             | 38  |
| 5675426  | 5836105  | 3747368  | 4827153  | 7746302  | 3722500  | [M+Na]+ 1'            | 13  |
| 612797.9 | 313383.8 | 757786.2 | 180621.6 | 517502   | 71531.55 |                       | 283 |
| 358163.1 | 1073448  | 490749.7 | 231643.7 | 327945.2 | 2895592  |                       | 4   |

|          |          |          |          |          |          |               |     |
|----------|----------|----------|----------|----------|----------|---------------|-----|
| 2401685  | 2970576  | 2698231  | 3317042  | 3022378  | 2460423  |               | 413 |
| 1430394  | 1800463  | 1397587  | 1262401  | 1042965  | 1253726  | [932][M]+     | 285 |
| 4047609  | 2006261  | 1705670  | 2526496  | 2844732  | 242131.9 | [M+Na]+ 3f    | 15  |
| 2172659  | 695297.2 | 983930.4 | 727221.8 | 1781968  | 719151.5 |               | 4   |
| 558821.8 | 613223.2 | 272652.5 | 449235.6 | 264678.5 | 163180.7 |               | 20  |
| 17426123 | 17504196 | 13734269 | 16175150 | 21230244 | 12918276 |               | 2   |
| 861185.9 | 753718.6 | 667393.4 | 582193.9 | 632790.5 | 464559.2 |               | 94  |
| 1800032  | 1981449  | 2189798  | 1297127  | 1274470  | 963971.3 |               | 4   |
| 3618584  | 2721452  | 4023007  | 5305880  | 28397891 | 4961473  | [1282][M+2]+  | 2   |
| 3387839  | 1557361  | 1266644  | 2035761  | 2869365  | 0        |               | 9   |
| 2839877  | 5118338  | 4414562  | 1988952  | 8309618  | 16248129 |               | 93  |
| 6368442  | 9718451  | 11318257 | 11144911 | 6346109  | 12581638 |               | 1   |
| 74788463 | 81660897 | 65607123 | 64257479 | 89647245 | 1.8E+08  | [1303][M+3]+  | 2   |
| 951671.2 | 963300.1 | 2681209  | 2449408  | 706299.4 | 503682.9 |               | 32  |
| 2553238  | 2475645  | 2733395  | 3259421  | 4384596  | 3411844  |               | 52  |
| 24981489 | 63276645 | 14661386 | 27646328 | 52964224 | 11876667 |               | 90  |
| 1.43E+08 | 1.21E+08 | 1.23E+08 | 1.29E+08 | 1.31E+08 | 46976046 | [M+H+NH3]     | 13  |
| 3902452  | 1.11E+08 | 3093572  | 2785704  | 45582197 | 3653732  |               | 2   |
| 975457.9 | 645608.7 | 739769.8 | 801745.7 | 955603.6 | 968751.2 |               | 9   |
| 5117263  | 10993835 | 11697406 | 3152832  | 2701208  | 5980584  | [654][M+2]+   | 4   |
| 6273694  | 3993992  | 3342458  | 4163585  | 3217335  | 1161931  |               | 9   |
| 2504546  | 3327131  | 2978440  | 768795.5 | 3133105  | 787667.5 | [1161][M+2]2+ | 1   |
| 5776681  | 1035271  | 956234.4 | 4693081  | 5645991  | 1005851  |               | 9   |
| 810227.7 | 2600832  | 1764464  | 942382.9 | 2194484  | 4377492  |               | 9   |
| 2919533  | 5126234  | 2892211  | 3443256  | 3293369  | 3441187  |               | 1   |
| 4718250  | 4445192  | 3592647  | 4049149  | 3451791  | 2652029  | [M+2H-CH3]    | 309 |
| 7475026  | 5716387  | 8879723  | 3568199  | 5134753  | 429547.6 |               | 1   |
| 9418491  | 15143408 | 6292856  | 8721986  | 20096496 | 34152465 |               | 2   |
| 157671.1 | 882218.8 | 554891.2 | 3094381  | 370034.8 | 281095.3 | [3M+2K]2+     | 6   |
| 17498614 | 951269   | 33796109 | 1030371  | 13056386 | 11935746 | [233][M+1]2+  | 9   |
| 1410396  | 1704972  | 1388523  | 1223362  | 3083559  | 7449718  | [2M+K]+ 5f    | 29  |
| 26537712 | 27481691 | 21620947 | 25607044 | 30072915 | 16127088 | [392][M+1]2+  | 2   |
| 874674.9 | 3088248  | 1427433  | 723719.7 | 2865322  | 4223237  | [M+Na+K-1]    | 6   |
| 490605.5 | 563963.4 | 478563.1 | 407196.1 | 156847.8 | 277442.1 |               | 232 |
| 22476666 | 20757959 | 8918133  | 20804104 | 23372054 | 13544438 | [M+Na+HC]     | 15  |

|          |          |          |          |          |          |                      |     |
|----------|----------|----------|----------|----------|----------|----------------------|-----|
| 5631247  | 5806940  | 6487529  | 4726796  | 6310519  | 6242027  |                      | 381 |
| 601605.9 | 528963.6 | 842383.2 | 363689.1 | 526749.3 | 188958.6 |                      | 9   |
| 934872.3 | 643033.5 | 1093806  | 679817.4 | 632848.5 | 3461.174 |                      | 493 |
| 91168242 | 9884124  | 1.12E+08 | 60276934 | 76199191 | 1931023  | [M+Na]+ 3!           | 6   |
| 5722830  | 5367112  | 5937561  | 4754403  | 4330690  | 4123005  | [1584][M+1]+         | 42  |
| 1864262  | 1344553  | 2255646  | 1486589  | 1926936  | 869047.6 | [1324][M+1]+         | 42  |
| 47024265 | 41934099 | 42663449 | 36936799 | 37059450 | 23061312 | [M+H+NH3             | 42  |
| 13863865 | 19585857 | 15993628 | 7516716  | 13641486 | 3508829  |                      | 1   |
| 609040.5 | 1057338  | 746705.7 | 2155354  | 1095774  | 747884   |                      | 9   |
| 3208217  | 3610078  | 3161038  | 2928614  | 2821755  | 1914827  | [M+2H]2+ (           | 35  |
| 700020.9 | 4393605  | 546760.7 | 1582499  | 3042055  | 23424096 |                      | 3   |
| 2490820  | 170045.1 | 1891930  | 3135084  | 1180480  | 1167917  |                      | 2   |
| 446836.4 | 430266.2 | 252521.6 | 186288.2 | 314001.9 | 173064.4 |                      | 7   |
| 4135825  | 5791774  | 8426987  | 4360514  | 15485058 | 3942425  | [M+H-C4H8            | 140 |
| 6.7E+08  | 6.68E+08 | 6.27E+08 | 5.48E+08 | 5.67E+08 | 4.53E+08 | [635][M]+ [M+H]+ 39! | 25  |
| 17449639 | 25448863 | 15562018 | 12828951 | 32408324 | 77337282 |                      | 2   |
| 12667369 | 6081070  | 9737345  | 14233684 | 7538859  | 94134.85 |                      | 2   |
| 601100   | 751214   | 876767   | 2089664  | 1507642  | 634507.6 | [M+H]+ 27!           | 62  |
| 3315355  | 11588597 | 1.19E+08 | 3315037  | 12481086 | 68796062 |                      | 2   |
| 11506897 | 7215974  | 12211539 | 7175295  | 7430620  | 1228537  | [1276][M+1]+         | 1   |
| 389234.2 | 1210030  | 1014892  | 181950.3 | 776015.5 | 1265897  | [1578][M+1]+         | 9   |
| 4245432  | 636455.5 | 4697722  | 3817917  | 1554164  | 1018951  |                      | 2   |
| 125399.1 | 254700   | 212579.8 | 229048.3 | 228506.2 | 77668.02 | [1590][M+1]+         | 366 |
| 1442030  | 2333235  | 1531864  | 1552164  | 1662994  | 3623149  | [510][M+1]3+         | 2   |
| 78116342 | 22333467 | 73251735 | 9728192  | 5338661  | 5522484  |                      | 4   |
| 1082652  | 871668.8 | 872482   | 981212.7 | 858277.5 | 115333.9 | [953][M+1]3+         | 9   |
| 361665.6 | 885084.4 | 660651.1 | 196330.4 | 465419.5 | 737185.4 |                      | 4   |
| 26648921 | 25947249 | 36197957 | 26889058 | 1344221  | 37252638 | [38][M+1]3+          | 1   |
| 2287858  | 2209179  | 1123449  | 1495824  | 2526989  | 2218926  |                      | 9   |
| 7665945  | 2438527  | 6366528  | 7917648  | 4683033  | 262278.7 |                      | 2   |
| 1208243  | 456351.9 | 1588776  | 908711.2 | 539721.6 | 273433   | [2M+H+Na             | 39  |
| 1767126  | 2384850  | 1301279  | 1185153  | 2216442  | 1606495  |                      | 9   |
| 679792.9 | 1003357  | 458343.6 | 594501.2 | 475560.2 | 514794.8 | [259][M+2]+          | 4   |
| 1867843  | 881495.6 | 923234.2 | 894572.4 | 1127975  | 291917.6 |                      | 4   |
| 828972.1 | 1255919  | 1295694  | 1144807  | 1308831  | 5093680  |                      | 97  |

|          |          |          |          |          |          |              |     |
|----------|----------|----------|----------|----------|----------|--------------|-----|
| 5899554  | 4392329  | 6233212  | 3380372  | 4386281  | 1443075  | [1301][M]+   | 1   |
| 4.81E+08 | 3.5E+08  | 4.01E+08 | 4.6E+08  | 3.6E+08  | 1.49E+08 |              | 2   |
| 1617834  | 2477861  | 1744113  | 2220036  | 1990258  | 1068617  | [262][M]+    | 24  |
| 9604914  | 8228131  | 7561655  | 6739762  | 7010189  | 2521404  | [337][M]2+   | 4   |
| 5709226  | 7303758  | 7512671  | 4599881  | 4659817  | 1763817  |              | 4   |
| 1787775  | 1810012  | 69674.12 | 321480.4 | 1637552  | 639042.1 |              | 52  |
| 7872320  | 12937507 | 12700035 | 12080363 | 12382676 | 738085.8 |              | 76  |
| 2796480  | 2385647  | 5020763  | 3115558  | 1410588  | 2764955  | [887][M]+    | 318 |
| 1463417  | 2330129  | 1932247  | 653830.7 | 1242028  | 1022129  |              | 9   |
| 249839.4 | 280368.8 | 178835.2 | 328953.6 | 221587.1 | 223574.9 |              | 146 |
| 2178949  | 2214196  | 3736929  | 935374.3 | 1678133  | 733906.2 |              | 9   |
| 5950196  | 6610146  | 5373063  | 5123750  | 5116958  | 3551815  |              | 444 |
| 96919.32 | 72128.38 | 79722.45 | 129177.7 | 115943.4 | 101952.2 | [M+Na]+ 40   | 342 |
| 6056193  | 7581899  | 6992239  | 5075275  | 6591176  | 8556284  |              | 4   |
| 373242   | 231922   | 930982   | 1005900  | 264560.2 | 352257.3 |              | 54  |
| 934767.5 | 1088558  | 1161367  | 401023.3 | 724459.5 | 715288.6 |              | 4   |
| 1179593  | 1011822  | 1340026  | 1582072  | 814173.8 | 1387769  | [1566][M+1]+ | 329 |
| 2367761  | 6049758  | 1210050  | 858468.9 | 3935053  | 3580587  | [M+H]+ 37    | 11  |
| 818009.4 | 684395.5 | 571209.7 | 658274.1 | 781385.4 | 331734   |              | 23  |
| 4596308  | 266768.1 | 2363560  | 4474553  | 4030148  | 1783846  | [M+K]+ 25    | 14  |
| 45628042 | 57994162 | 26702582 | 38815288 | 42354529 | 53108152 | [809][M]+    | 15  |
| 3678042  | 4714208  | 3102295  | 1964771  | 3626279  | 5978124  | [3M+2H]2+    | 6   |
| 4490593  | 5455245  | 4123111  | 3592742  | 4332291  | 2858297  |              | 9   |
| 18247901 | 30605079 | 34739575 | 20785899 | 20762737 | 4877479  |              | 1   |
| 155136.6 | 416560.4 | 359957.3 | 318592.2 | 336771.9 | 191234.7 |              | 245 |
| 3.05E+08 | 2.8E+08  | 3.03E+08 | 2.39E+08 | 1592041  | 1.33E+08 | [668][M]+    | 4   |
| 1.43E+08 | 1.21E+08 | 1.23E+08 | 1.29E+08 | 1.31E+08 | 46883924 | [M+K]+ 77    | 13  |
| 3122372  | 3212397  | 2454154  | 3330347  | 3223176  | 2846730  |              | 335 |
| 3313539  | 1993059  | 2682840  | 6567954  | 5294900  | 4516036  | [89][M]3+    | 1   |
| 5548884  | 4366723  | 4455273  | 8568507  | 3082013  | 2311415  | [M+Na]+ 20   | 288 |
| 8415531  | 6783521  | 7708148  | 6219846  | 6387375  | 3404463  |              | 42  |
| 1641079  | 1786543  | 1541389  | 900495.5 | 1448250  | 69627.47 | [3M+H+K]2    | 12  |
| 693461.4 | 820039.6 | 843277.7 | 460380.6 | 479172.3 | 233355.5 |              | 4   |
| 1398248  | 1079553  | 1844392  | 1527691  | 905974.4 | 1418036  |              | 329 |
| 1441916  | 1602669  | 1215496  | 854428.1 | 958447.6 | 1515370  | [541][M+1]+  | 4   |

|          |          |          |          |          |          |               |     |
|----------|----------|----------|----------|----------|----------|---------------|-----|
| 1264964  | 1174941  | 1248909  | 864650.4 | 1002658  | 995189.6 |               | 218 |
| 1286821  | 1442252  | 1123167  | 1021251  | 1219608  | 822057.4 |               | 4   |
| 225967.1 | 280159.3 | 264140.9 | 202040.8 | 269971.6 | 326153.2 | [1402][M+1]+  | 101 |
| 5630925  | 5748195  | 5055865  | 4618467  | 6884869  | 14271934 |               | 2   |
| 4346358  | 3371161  | 2320764  | 3628373  | 6669382  | 3917787  |               | 2   |
| 2094336  | 2508013  | 4209174  | 1753872  | 2655225  | 2928339  |               | 9   |
| 522173.9 | 784214.6 | 465731.5 | 799145.7 | 1003789  | 2141604  |               | 4   |
| 11210287 | 11776030 | 8604367  | 4371276  | 13613736 | 5489341  |               | 3   |
| 4615057  | 2.69E+08 | 4.83E+08 | 206900.9 | 326079.5 | 1.27E+08 | [530][M]+     | 27  |
| 6429817  | 6071837  | 2271866  | 2938144  | 3253993  | 2216589  | [305][M+1]+   | 34  |
| 116482.6 | 782367.1 | 2376290  | 15095126 | 85184.05 | 814741.1 |               | 51  |
| 1283512  | 3245385  | 4652597  | 4072151  | 2305829  | 1023970  |               | 52  |
| 275957.2 | 463846.2 | 582985.1 | 353730.1 | 174674.2 | 542801.7 | [M+H]+ 53:    | 73  |
| 9770144  | 34316363 | 25135770 | 11984198 | 45531510 | 2.84E+08 | [1295][M+2]3+ | 2   |
| 4782978  | 8547374  | 4750965  | 4855796  | 4606639  | 4290275  |               | 385 |
| 373156.8 | 965196.2 | 37487.69 | 123430.5 | 654773.3 | 137297.2 |               | 52  |
| 895372.7 | 0        | 919626   | 810469.6 | 838640   | 121585.4 |               | 9   |
| 6972604  | 6472959  | 6205864  | 6648635  | 5174643  | 1779496  |               | 9   |
| 92295656 | 70530740 | 73349689 | 84259778 | 66910341 | 28986852 |               | 2   |
| 9166011  | 16099326 | 533207.2 | 493166.7 | 2192847  | 11969659 | [M+2H-HC      | 29  |
| 132445.1 | 289182.6 | 784936.5 | 6445295  | 216968.6 | 280643.8 |               | 173 |
| 572651.5 | 1060947  | 5082840  | 2617997  | 4514558  | 793437.8 | [M+3H-NH      | 39  |
| 5103138  | 2386107  | 4771479  | 3160881  | 2465538  | 601304.8 | [358][M+2]+   | 1   |
| 25751445 | 30699103 | 27800999 | 23864736 | 27687995 | 17741782 |               | 9   |
| 5485528  | 7520404  | 6840307  | 3290265  | 5354639  | 2697411  | [M+Na+HC      | 46  |
| 848377.4 | 211188.1 | 231297.9 | 342260.9 | 259171.7 | 0        |               | 453 |
| 7451760  | 4867162  | 4252182  | 6805616  | 6369213  | 1757872  |               | 14  |
| 595952.7 | 1047494  | 278508.3 | 463094.2 | 301950.5 | 1154097  |               | 161 |
| 1543260  | 3842702  | 1582982  | 3182681  | 5367899  | 26030934 |               | 2   |
| 4696415  | 4470914  | 4930516  | 4102980  | 4260976  | 451066.6 |               | 365 |
| 5028600  | 3829214  | 3954770  | 4188622  | 4114473  | 1155314  |               | 4   |
| 9160145  | 2942305  | 8698545  | 11841495 | 8759568  | 10638858 |               | 2   |
| 5450222  | 6650033  | 4955953  | 4798686  | 5024268  | 3511278  |               | 407 |
| 12317096 | 3507352  | 9419970  | 1309659  | 8129254  | 2170611  | [941][M+1]2+  | 150 |
| 3515904  | 1880463  | 3047824  | 3032506  | 1937802  | 0        |               | 2   |

|          |          |          |          |          |          |                       |     |
|----------|----------|----------|----------|----------|----------|-----------------------|-----|
| 3018288  | 2304613  | 5045596  | 1940477  | 6582317  | 4294309  |                       | 2   |
| 3983496  | 2614501  | 2798163  | 2542423  | 2711764  | 1425061  | [669][M+1]+           | 4   |
| 1844395  | 2496608  | 7155408  | 6853416  | 2783950  | 2159271  | [1457][M+1]+          | 302 |
| 2480988  | 2665318  | 2601593  | 1267508  | 2049537  | 4766960  | [M+K]+ 32:            | 11  |
| 3982966  | 6503474  | 4900646  | 1898078  | 4406508  | 3200670  |                       | 9   |
| 2149264  | 2833048  | 2256414  | 2207299  | 2964325  | 1565597  | [3M+Na+K]             | 14  |
| 4349358  | 4714584  | 3362427  | 2963166  | 4736525  | 3503560  |                       | 9   |
| 3785492  | 2633709  | 2671124  | 2590696  | 2811905  | 525182.4 |                       | 4   |
| 2899326  | 2599459  | 2048239  | 3626295  | 2907429  | 1964976  |                       | 2   |
| 834403.6 | 464460   | 476980.1 | 420360.2 | 146863   | 0        |                       | 70  |
| 7818927  | 14371023 | 15043402 | 7678158  | 9664356  | 5083337  |                       | 1   |
| 153542.1 | 194337.5 | 135464.9 | 189608.6 | 14168.78 | 172083.9 | [3M+2H]2+             | 16  |
| 363086.5 | 391099.6 | 333714.7 | 387199.8 | 312984.2 | 104845.5 | [866][M+1]3+          | 35  |
| 2659492  | 2328235  | 2768549  | 2788807  | 2562212  | 1416795  |                       | 9   |
| 1279432  | 1075722  | 1114793  | 1032377  | 1060091  | 415482.7 |                       | 4   |
| 125407.3 | 731656.2 | 104348.9 | 0        | 489267.3 | 1120289  | [M+K]+ 49:            | 3   |
| 16412282 | 19506912 | 17090164 | 11770386 | 17007701 | 40871391 |                       | 15  |
| 650976.9 | 731928   | 2693344  | 922343.7 | 532623.1 | 440041.1 |                       | 469 |
| 7631491  | 6689157  | 6735183  | 5109226  | 5957150  | 2530177  |                       | 4   |
| 0        | 0        | 143637.2 | 63155217 | 2674024  | 3801226  |                       | 1   |
| 1436150  | 2590442  | 1814585  | 1177267  | 1562447  | 1037270  |                       | 9   |
| 65483872 | 1.2E+08  | 57030556 | 72717455 | 1.49E+08 | 3.77E+08 | [1250][M+1]+          | 2   |
| 1590025  | 1619417  | 1628414  | 1375087  | 2071630  | 6331896  |                       | 9   |
| 812706   | 1753941  | 13874203 | 646208.9 | 1795288  | 2992770  |                       | 9   |
| 26681806 | 22248630 | 23887703 | 25631688 | 18627956 | 4958258  |                       | 13  |
| 4219670  | 6381026  | 3302053  | 2272279  | 5996237  | 5757096  | [M+H]+ 36:            | 15  |
| 465289.5 | 909521.6 | 810203.3 | 406496   | 492806.1 | 1096782  |                       | 4   |
| 2642504  | 4942352  | 2598911  | 2944497  | 4092511  | 11076105 | [M+H]+ 10:            | 13  |
| 67205424 | 6302633  | 90665627 | 16031292 | 67596239 | 5750213  |                       | 9   |
| 130634.5 | 332234.6 | 580168.6 | 48132.64 | 293855.5 | 588207.3 |                       | 4   |
| 13777219 | 11914440 | 11463187 | 12075046 | 12438635 | 3943138  | [M+H-CH2]             | 13  |
| 3948905  | 2580778  | 2511108  | 2609573  | 2870333  | 724352.9 |                       | 4   |
| 1880536  | 1490684  | 1408917  | 1172378  | 411038.3 | 1539363  |                       | 311 |
| 127310.3 | 2225673  | 2218264  | 536543.1 | 2303317  | 1017546  | [195][M+1]+           | 173 |
| 1351106  | 1375151  | 1335928  | 826088.1 | 1098312  | 699181.8 | [1272][M]+ [M+H]+ 69: | 110 |

|          |          |          |          |          |          |                         |     |
|----------|----------|----------|----------|----------|----------|-------------------------|-----|
| 470286.6 | 543155.2 | 331384.8 | 620207.9 | 331634.5 | 167706.9 |                         | 89  |
| 4362618  | 4802121  | 2970327  | 2469888  | 3449748  | 3166893  |                         | 9   |
| 1688932  | 1850817  | 1741003  | 1013345  | 1037223  | 676709.3 |                         | 4   |
| 15867152 | 39601872 | 29140147 | 18243190 | 27676149 | 12650404 |                         | 15  |
| 2828059  | 5101882  | 1990921  | 3391475  | 3143178  | 8983549  |                         | 9   |
| 860143.8 | 1519496  | 1498329  | 756001.5 | 772083.2 | 591226.6 |                         | 4   |
| 28071157 | 24827917 | 21665785 | 17918757 | 38398457 | 19797661 | [M+3H-CH <sub>3</sub> ] | 15  |
| 5314566  | 6426912  | 4887182  | 4021923  | 6509687  | 4987661  | [565][M]+               | 9   |
| 2289479  | 2292446  | 2021617  | 1527169  | 1865063  | 1611842  |                         | 4   |
| 3224238  | 3738430  | 3998761  | 3274234  | 2859304  | 1637001  |                         | 213 |
| 136152.1 | 199043.7 | 229377.1 | 195498.7 | 184538.4 | 158328.3 | [127][M+1]+             | 99  |
| 2203711  | 2746614  | 4078535  | 2189834  | 6314421  | 1980314  |                         | 2   |
| 5497144  | 3637421  | 1.75E+08 | 1.21E+08 | 897089.2 | 1.41E+08 | [854][M]2+              | 1   |
| 878599.3 | 845943.5 | 699065.7 | 1120663  | 755342.2 | 295295.7 | [1047][M]3+             | 16  |
| 525120.3 | 2479914  | 3535643  | 47810595 | 3723597  | 5992406  | [M+2H-CH <sub>3</sub> ] | 15  |
| 629972.4 | 197502.5 | 1562678  | 1243752  | 152322   | 717302.5 |                         | 76  |
| 3663088  | 1569583  | 716418.6 | 703045   | 3416325  | 6282358  |                         | 1   |
| 2566425  | 3250112  | 2891400  | 1933855  | 2754117  | 1133259  |                         | 9   |
| 1319618  | 2373015  | 5641177  | 1217815  | 3075988  | 2485638  |                         | 2   |
| 1879743  | 1920764  | 1031762  | 457241.3 | 1947004  | 1610743  |                         | 4   |
| 1504698  | 3578457  | 2503582  | 767331.2 | 2404625  | 743119.7 |                         | 1   |
| 2761238  | 582045.5 | 626538.3 | 714434.2 | 575099.3 | 55165.52 | [M+K]+ 206              | 220 |
| 34497660 | 25967929 | 29959386 | 25377153 | 36079006 | 9271170  |                         | 1   |
| 6588225  | 23779289 | 6601078  | 6575474  | 6463531  | 6327101  | [M+H]+ 566              | 425 |
| 2025986  | 1659327  | 1466027  | 939097.5 | 1484508  | 354064   | [927][M+1]2+            | 4   |
| 3154174  | 3517214  | 3685811  | 1891781  | 2613550  | 6852110  |                         | 2   |
| 553059.5 | 3122383  | 991152.4 | 324781.3 | 1370780  | 1271450  |                         | 1   |
| 18296892 | 14243319 | 20208340 | 10846826 | 13414453 | 3322079  |                         | 1   |
| 6441635  | 10618636 | 8473149  | 3101955  | 14778356 | 36254713 |                         | 2   |
| 23277281 | 20803290 | 21662337 | 19993465 | 21657603 | 12962652 | [411][M+1]+             | 4   |
| 117416   | 266823.4 | 89851.5  | 65588.49 | 130330.7 | 757090.4 | [M+K]+ 496              | 42  |
| 13461520 | 5420908  | 4683864  | 5707069  | 5157263  | 3321034  |                         | 307 |
| 210223.8 | 468095.5 | 407061.4 | 250650.9 | 375009   | 915820.3 |                         | 91  |
| 5517112  | 5654100  | 5941654  | 2739473  | 4429775  | 1052598  |                         | 9   |
| 4760804  | 6021233  | 5130060  | 4292760  | 4049788  | 4186080  |                         | 421 |



|          |          |          |          |          |          |              |     |
|----------|----------|----------|----------|----------|----------|--------------|-----|
| 16704969 | 7100809  | 3382787  | 15312527 | 13580668 | 1309899  |              | 2   |
| 9205946  | 1901988  | 8905021  | 1.38E+09 | 55636643 | 88946572 |              | 20  |
| 8918139  | 5816085  | 5913819  | 11602526 | 8277312  | 7285981  |              | 2   |
| 31979910 | 27887604 | 31074369 | 30717304 | 28888089 | 8124337  |              | 9   |
| 1243021  | 1227595  | 693385.8 | 368819.6 | 1504829  | 129971.2 |              | 1   |
| 135951.1 | 182756.3 | 334320.6 | 128698.2 | 273842.7 | 170220.9 |              | 134 |
| 9535498  | 10814208 | 2308966  | 2377406  | 4557786  | 3818899  | [309][M]+    | 37  |
| 2288988  | 1409213  | 2784334  | 2412376  | 1187959  | 1887693  | [1468][M]+   | 74  |
| 738374.7 | 298621.3 | 872742.5 | 979661   | 473860   | 171656   | [2M+3Na+]    | 38  |
| 1.17E+09 | 8.54E+08 | 9.69E+08 | 1.13E+09 | 8.73E+08 | 3.56E+08 |              | 2   |
| 6131650  | 7387935  | 6784288  | 4916647  | 6727549  | 4417316  |              | 9   |
| 9130782  | 17657831 | 19271731 | 9707915  | 12182865 | 6994048  |              | 1   |
| 1833877  | 173152.7 | 235578.6 | 188611.8 | 213058.7 | 153245.5 | [318][M+1]+  | 59  |
| 1168099  | 1014754  | 1480403  | 6918955  | 1086836  | 462069.7 | [M+2H]2+     | 16  |
| 1908733  | 894090   | 457750.4 | 294102   | 362009.5 | 480156.8 |              | 101 |
| 3579244  | 4915649  | 4746585  | 3088889  | 4484707  | 3975781  | [M+K]+ 37    | 15  |
| 67953229 | 1.17E+08 | 80196908 | 54941002 | 68039368 | 88662872 | [M+K+HCO     | 15  |
| 4942003  | 5334712  | 4748971  | 6470480  | 5380008  | 4862243  |              | 325 |
| 1.96E+08 | 1.77E+08 | 1.86E+08 | 1.59E+08 | 1.57E+08 | 99827747 | [M+2H]2+     | 42  |
| 1660926  | 1638901  | 479297.2 | 2135167  | 917410.1 | 687324.6 | [M+3H-CO]    | 81  |
| 10720586 | 7774819  | 7882214  | 11323314 | 7441987  | 2257743  |              | 2   |
| 5271468  | 5374043  | 5497399  | 4662928  | 4175125  | 1181245  | [959][M+1]2+ | 9   |
| 1136421  | 1689658  | 1462164  | 773143.1 | 3045255  | 9318441  | [M+Na]+ 4    | 97  |
| 320694.6 | 375100.8 | 548566.8 | 591736.9 | 328423.5 | 412374.6 |              | 299 |
| 1612795  | 1755499  | 1686890  | 466108.5 | 1375288  | 311299.6 |              | 81  |
| 262613.5 | 847834.9 | 1674806  | 275936   | 351912.4 | 1236988  | [734][M+1]2+ | 9   |
| 3457800  | 1403625  | 2453489  | 4320874  | 1625679  | 0        |              | 2   |
| 600922.8 | 910818.9 | 961871.4 | 578479.7 | 511964.6 | 6362589  | [M+H-HCO     | 8   |
| 217740.6 | 196107.1 | 860726.8 | 4509236  | 191379   | 70507.05 |              | 296 |
| 14399007 | 26376196 | 25110040 | 9109988  | 17452266 | 2490160  |              | 1   |
| 667304.4 | 795370.3 | 919805.5 | 461268.7 | 827423.5 | 236580   | [970][M]3+   | 16  |
| 373082.8 | 494047.9 | 415867.7 | 274456.5 | 126020.2 | 393774.9 |              | 4   |
| 1379731  | 1531685  | 2070584  | 1173326  | 1472137  | 562522.1 |              | 9   |
| 814326.6 | 731116.1 | 1277153  | 731107.5 | 631573.4 | 1635804  | [350][M+1]3+ | 9   |
| 638026.6 | 162884   | 786265.2 | 671041   | 656640.7 | 11031004 |              | 73  |

|          |          |          |          |          |          |                      |     |
|----------|----------|----------|----------|----------|----------|----------------------|-----|
| 485243.2 | 1534579  | 0        | 185585.5 | 1204347  | 314036.6 |                      | 1   |
| 1832842  | 1519777  | 1715010  | 2455518  | 6942238  | 6669055  |                      | 1   |
| 3054193  | 1986894  | 3097333  | 3524555  | 1318949  | 157207.3 |                      | 97  |
| 6488822  | 7163148  | 9363225  | 5947191  | 7992386  | 8924960  | [1145][M+2]+         | 23  |
| 6626496  | 6787981  | 6783342  | 4309467  | 6966447  | 25347468 |                      | 9   |
| 1241465  | 1119149  | 1470403  | 336535.4 | 1504353  | 604384   | [496][M]2+ [M+2H]2+  | 42  |
| 10825688 | 4575587  | 2876032  | 4219762  | 3232270  | 1582905  | [M+K]+ 34            | 14  |
| 1740347  | 1170665  | 1739555  | 739505.4 | 1203146  | 0        | [1270][M+1]+         | 1   |
| 57452035 | 49901066 | 52629216 | 55905848 | 50400269 | 16981574 | [617][M]+            | 13  |
| 3371082  | 5239180  | 4157462  | 3618158  | 5238102  | 2923494  |                      | 1   |
| 3434865  | 6127741  | 2292754  | 3349397  | 4141945  | 7967480  |                      | 4   |
| 4874445  | 3593556  | 2780049  | 4097066  | 3609132  | 306577.4 |                      | 9   |
| 143353.7 | 518579   | 457037.5 | 19994.42 | 346510   | 567868.2 | [M+K+HCO             | 39  |
| 1355371  | 729896.9 | 1605052  | 1413094  | 394810.7 | 847930.4 |                      | 26  |
| 807636.7 | 920211.5 | 972659.9 | 976143.6 | 1353657  | 871001.3 |                      | 4   |
| 858167.6 | 4343156  | 3086681  | 684775.6 | 3471840  | 9841424  | [2M+Na]+             | 8   |
| 1245253  | 1049712  | 682783.7 | 21588.03 | 1178654  | 413000.4 |                      | 18  |
| 4313339  | 4625242  | 4154654  | 4468069  | 2203156  | 2728790  |                      | 194 |
| 20656056 | 14016569 | 17451408 | 19052739 | 13407868 | 2027873  | [1190][M+2]2+        | 2   |
| 461068.3 | 1639378  | 1483126  | 378692.2 | 911887.8 | 538655.6 | [683][M+1]2+         | 20  |
| 4514683  | 7576043  | 4683759  | 4103259  | 8257071  | 5303789  |                      | 184 |
| 2594758  | 3441983  | 1867690  | 2346788  | 2453765  | 1962587  |                      | 2   |
| 93944087 | 95332169 | 92917385 | 78793593 | 63136661 | 27625893 | [1241][M]+ [M+Na]+ 6 | 12  |
| 88484924 | 2336308  | 49816725 | 893701.5 | 87051465 | 2853744  |                      | 3   |
| 1487145  | 42976.36 | 49287.22 | 43369.66 | 103899.5 | 453903.6 | [410][M+1]+          | 59  |
| 38726.8  | 122333.8 | 101098.3 | 191356.2 | 100716.7 | 167773.9 |                      | 44  |
| 13761407 | 5852067  | 10034927 | 13283388 | 6309813  | 1328446  |                      | 2   |
| 11672882 | 7447683  | 11337920 | 13315165 | 9201549  | 3471864  |                      | 2   |
| 1092375  | 1891372  | 2.74E+08 | 1.87E+08 | 2901407  | 7081527  | [M+H]+ 47            | 6   |
| 1595985  | 3775526  | 4028988  | 1207137  | 2348350  | 2994602  |                      | 9   |
| 2353803  | 2652102  | 2297280  | 1986831  | 2629389  | 1843806  |                      | 29  |
| 3133597  | 1846205  | 1720551  | 2568371  | 1617870  | 3048807  | [1306][M]2 [2M+Na+2I | 134 |
| 1730493  | 2446271  | 2527208  | 955287.6 | 1708234  | 518791.8 | [M+H-C3H             | 13  |
| 317506.3 | 715085.7 | 1155316  | 514085.2 | 296770.8 | 140631   |                      | 4   |
| 4420768  | 4576761  | 3314903  | 2338066  | 2122946  | 1961672  |                      | 4   |

|          |          |          |          |          |          |               |     |
|----------|----------|----------|----------|----------|----------|---------------|-----|
| 1608367  | 899966.4 | 902578.6 | 1715584  | 744759.6 | 1003935  | [2M+3H]3+     | 20  |
| 14706287 | 6023675  | 12057501 | 14092534 | 10328773 | 2820866  |               | 2   |
| 4483244  | 7811361  | 7695604  | 6594115  | 7857883  | 6159564  | [M+H+CF3O]    | 199 |
| 1646854  | 2306438  | 1024057  | 959879.4 | 4011434  | 7336882  | [M+K]+ 30%    | 97  |
| 11067872 | 8460110  | 9378410  | 10048769 | 8280474  | 1787024  | [460][M+2]2+  | 2   |
| 3140084  | 912935.1 | 1316900  | 1533971  | 930654.2 | 4460005  |               | 2   |
| 4554382  | 4099091  | 4718474  | 4441708  | 4104432  | 315564.9 |               | 4   |
| 1030310  | 1475206  | 1431178  | 749766.9 | 1965414  | 2125179  |               | 15  |
| 7043828  | 3147438  | 5874814  | 6077376  | 2323469  | 789385.1 | [1288][M+1]3+ | 2   |
| 67757671 | 69557111 | 55098561 | 68888620 | 76534772 | 48476914 |               | 2   |
| 443835.7 | 396614   | 500219.5 | 491292.5 | 372456.1 | 474446.8 |               | 483 |
| 2500016  | 1881340  | 1985512  | 2544284  | 1727080  | 1411222  |               | 312 |
| 69676265 | 70626318 | 55489265 | 68913483 | 75501801 | 38913954 | [393][M]+     | 2   |
| 1065915  | 601776.3 | 6286810  | 4561529  | 1207775  | 6707051  |               | 4   |
| 9499150  | 13029502 | 10687879 | 9972582  | 7248970  | 16110869 |               | 1   |
| 2767335  | 3448378  | 2195859  | 1989955  | 3340428  | 2880937  |               | 9   |
| 1287720  | 0        | 1158798  | 1433209  | 768950.3 | 0        | [441][M+4]+   | 2   |
| 11062566 | 12449802 | 10284040 | 9075053  | 11936949 | 8245275  | [75][M]+      | 9   |
| 8290327  | 8235429  | 8114605  | 5167704  | 12760483 | 42530817 |               | 2   |
| 9614996  | 7527063  | 7456332  | 7514796  | 2014260  | 7534067  |               | 184 |
| 351998.4 | 436873.3 | 628206.3 | 612447.4 | 1246224  | 224127.2 |               | 296 |
| 963369.5 | 1664006  | 791872.6 | 6435699  | 1611478  | 3710721  | [356][M+1]3+  | 2   |
| 32409792 | 17141872 | 26159049 | 32632038 | 28531268 | 10679654 |               | 2   |
| 2625833  | 0        | 2396865  | 2281682  | 1205026  | 0        |               | 2   |
| 14053912 | 35606436 | 14319156 | 7047463  | 24323056 | 43686090 | [M+K]+ 22%    | 18  |
| 3063213  | 2533062  | 2402379  | 4190259  | 3857744  | 18644623 | [455][M+2]3+  | 2   |
| 5492189  | 3887606  | 5549500  | 5653729  | 10214715 | 5957093  |               | 321 |
| 1943504  | 1632855  | 1880366  | 1512174  | 1093985  | 656799.5 | [1581][M+2]+  | 42  |
| 5585930  | 5424231  | 6532617  | 8576380  | 3313503  | 7619676  | [M+K]+ 37%    | 226 |
| 1025476  | 756077.9 | 1068366  | 3988332  | 444884.8 | 870122.9 | [138][M+1]+   | 173 |
| 1403079  | 2148608  | 7744783  | 701635.5 | 1621040  | 1599171  | [M+Na]+ 5%    | 81  |
| 9470362  | 18766738 | 9221524  | 8180202  | 26272239 | 90399388 |               | 2   |
| 342427   | 765548.3 | 770109.7 | 27174.47 | 195554   | 417139.5 | [1542][M+1]2+ | 39  |
| 2007308  | 7194855  | 3531821  | 884614.5 | 8698210  | 11620568 | [18][M+1]2+   | 3   |
| 2277951  | 1887716  | 2586529  | 2390856  | 4662042  | 18137914 | [399][M+2]+   | 2   |

|          |          |          |          |          |          |                     |     |
|----------|----------|----------|----------|----------|----------|---------------------|-----|
| 1617517  | 1748074  | 1834170  | 1638583  | 1213599  | 2322267  | [3M+3Na+]           | 57  |
| 5336321  | 543181.7 | 1748478  | 1851659  | 5431562  | 3363526  | [1059][M]+          | 1   |
| 795092   | 1062112  | 722911.7 | 738794.5 | 770528.4 | 316166.8 | [1226][M]+          | 303 |
| 1255019  | 4844769  | 3385790  | 953010.3 | 2738352  | 9739658  |                     | 9   |
| 1219060  | 950709.5 | 2059000  | 733154.5 | 861648.5 | 2702126  |                     | 9   |
| 2756252  | 3951491  | 2563239  | 1785417  | 7698559  | 4460962  | [787][M+2]+         | 4   |
| 3378599  | 2217388  | 1789783  | 3458036  | 1482300  | 0        |                     | 2   |
| 1424004  | 990975.3 | 1934094  | 1047874  | 811368.7 | 0        |                     | 9   |
| 938303.2 | 1692657  | 1227722  | 0        | 139692.6 | 0        |                     | 1   |
| 32317402 | 28288273 | 30780781 | 30632034 | 29389091 | 7946287  | [82][M]+            | 9   |
| 5758170  | 7282973  | 3232554  | 3016553  | 7181503  | 5785846  |                     | 4   |
| 3761508  | 3533530  | 3934216  | 4101149  | 3632583  | 3496764  |                     | 252 |
| 485059.5 | 122506.5 | 562890.2 | 139073.4 | 635014.4 | 1312837  |                     | 9   |
| 1386025  | 932184.8 | 3036560  | 2275808  | 1100309  | 973309.1 | [878][M]+ [M+H+NH3] | 288 |
| 887314.6 | 1560310  | 8658235  | 475435.1 | 1181673  | 1868007  |                     | 8   |
| 394131.7 | 962053.9 | 960599.6 | 869070.2 | 54436.61 | 718215.8 |                     | 387 |
| 593838.5 | 3511772  | 1360124  | 1157492  | 3394975  | 14076595 | [1341][M+3]+        | 2   |
| 435385.6 | 582897   | 308089.6 | 329844.7 | 423113.9 | 268229.8 |                     | 4   |
| 18570297 | 12696596 | 14896559 | 26323457 | 888163.2 | 4271079  |                     | 1   |
| 9100694  | 10403058 | 8436547  | 8414275  | 11419031 | 20663531 |                     | 2   |
| 5321486  | 15920093 | 4391478  | 9924132  | 12119318 | 1.29E+08 |                     | 84  |
| 1016140  | 1045421  | 1234695  | 1277424  | 1132916  | 1394898  | [1594][M]+          | 366 |
| 423169.6 | 813965.9 | 842292.7 | 625641.5 | 741944.2 | 398841   | [M+H]+ 350          | 81  |
| 539754.9 | 443685.3 | 469982.5 | 280721.7 | 431993.6 | 287892.7 | [1039][M+1]+        | 61  |
| 237003.6 | 0        | 338706.2 | 477571.6 | 253243.8 | 667169.1 |                     | 446 |
| 4115124  | 3538581  | 5314893  | 4285507  | 3004639  | 3570355  | [916][M]+ [2M+Na]+  | 86  |
| 551211.7 | 490206.5 | 385068.7 | 452916.1 | 737446.8 | 861179.9 | [286][M+1]2+        | 9   |
| 1078172  | 1184095  | 1479545  | 543648.1 | 938985.8 | 1336702  |                     | 1   |
| 2191877  | 4231399  | 36820706 | 2489597  | 2802204  | 5904092  |                     | 9   |
| 220430.7 | 241194.7 | 292715.9 | 225918.5 | 191116.1 | 164496.4 | [1272][M+1]+        | 110 |
| 8681316  | 7560656  | 3400096  | 6179555  | 9948143  | 1140451  |                     | 15  |
| 6418425  | 6698449  | 5848555  | 8098032  | 6694029  | 4553776  | [34][M]3+           | 2   |
| 103516.6 | 803272.8 | 650595.7 | 0        | 624785   | 357783.5 | [M+H]+ 350          | 39  |
| 6307014  | 5505877  | 6199631  | 5931470  | 5562932  | 1239230  |                     | 9   |
| 9220135  | 15398066 | 7095751  | 7920037  | 21667278 | 50705576 | [389][M+1]+         | 2   |

|          |          |          |          |          |          |                      |     |
|----------|----------|----------|----------|----------|----------|----------------------|-----|
| 8918390  | 11991720 | 4385621  | 11865545 | 9516650  | 9715552  | [M+H+HCC             | 3   |
| 217303.8 | 313399.2 | 965401.7 | 418248.9 | 188599.2 | 172708.6 |                      | 212 |
| 388784.5 | 114593.6 | 46969.48 | 232445.7 | 423281.6 | 80914.84 | [1466][M+1]+         | 406 |
| 556434.5 | 830992.1 | 731078.9 | 334839.4 | 621859.9 | 743437.6 | [1266][M+1]2+        | 91  |
| 4928867  | 11189022 | 2901119  | 4504777  | 8081007  | 3025478  |                      | 1   |
| 11368622 | 4784033  | 3388403  | 2928944  | 4595495  | 5813632  |                      | 9   |
| 1196236  | 1991307  | 5020789  | 24001584 | 1390306  | 1015863  |                      | 111 |
| 2251452  | 1989751  | 3010267  | 1952724  | 2377867  | 516003.9 | [1183][M]+ [M+K]+ 61 | 23  |
| 713268.9 | 221035.2 | 177761.4 | 487791.7 | 677686.8 | 249334   |                      | 1   |
| 387149.7 | 1282041  | 813400.6 | 353666.3 | 864279.7 | 2410781  |                      | 9   |
| 2615732  | 2263977  | 3343118  | 3597133  | 2065034  | 3018175  | [1566][M]+           | 329 |
| 3355979  | 6272802  | 7216000  | 3543829  | 4836005  | 727218   |                      | 1   |
| 26821966 | 43193436 | 39746195 | 15480379 | 18805199 | 50239805 | [905][M]+            | 1   |
| 370441.2 | 1511577  | 1510005  | 954742.6 | 824740.3 | 829606.8 |                      | 9   |
| 1087847  | 696305.6 | 599110.1 | 593421.1 | 1023622  | 978444.3 |                      | 4   |
| 7335073  | 6734547  | 7498049  | 6917921  | 4804466  | 1564309  | [1607][M]+           | 2   |
| 1028015  | 909192.9 | 742802.5 | 216017.5 | 674104.4 | 499872.3 |                      | 9   |
| 145008.9 | 183140   | 163378.7 | 90533.68 | 113501.7 | 88794.12 |                      | 503 |
| 1791156  | 5168025  | 997102.2 | 4863702  | 5010994  | 4623258  |                      | 365 |
| 1955132  | 2082252  | 822072   | 1489024  | 2644019  | 830079   | [M+H-C6H:            | 11  |
| 232007.3 | 277131.8 | 235894.6 | 270225.8 | 303102.4 | 208161.3 |                      | 436 |
| 739746.9 | 735129.2 | 751687.5 | 1046145  | 724026.6 | 1040393  | [1427][M+1]+         | 12  |
| 54954.88 | 1300729  | 621907.2 | 12177.08 | 110283.4 | 876162.1 |                      | 215 |
| 57322249 | 51021417 | 52407735 | 55779955 | 51029871 | 17273229 | [605][M]+            | 13  |
| 479698.1 | 1183561  | 1742734  | 11037743 | 725072.6 | 559267.4 |                      | 9   |
| 810908.4 | 901755.3 | 905698.1 | 604951.5 | 303556.9 | 24883.85 |                      | 4   |
| 2682519  | 5265914  | 4629196  | 1233940  | 21842337 | 20739568 |                      | 3   |
| 12896256 | 18790340 | 18628199 | 14974718 | 77212251 | 13131851 |                      | 1   |
| 16766440 | 37979395 | 19779960 | 15916421 | 39857546 | 66199850 |                      | 2   |
| 6366052  | 4457617  | 5499499  | 6335648  | 5374167  | 3995218  | [951][M]+            | 312 |
| 46666613 | 59355077 | 37034186 | 40099972 | 45401891 | 42475372 |                      | 2   |
| 1023938  | 1475749  | 1156994  | 663203   | 654529.6 | 898085.6 | [1028][M]≡ [2M+Na+2I | 16  |
| 663260   | 1219126  | 538286.7 | 397806.4 | 680191.2 | 1552150  |                      | 9   |
| 25925939 | 30996157 | 27888296 | 23982753 | 27810180 | 18180323 |                      | 9   |
| 2442391  | 4817677  | 2390258  | 1027368  | 4635735  | 10822268 |                      | 9   |

|          |          |          |          |          |          |              |     |
|----------|----------|----------|----------|----------|----------|--------------|-----|
| 908538.4 | 1562294  | 656239.9 | 992696.3 | 1447759  | 1382238  |              | 13  |
| 1241226  | 2044538  | 709167   | 740830.7 | 1431745  | 194654.2 | [391][M+1]2+ | 118 |
| 381385.7 | 104187.2 | 865602.7 | 1278331  | 684428.8 | 1286637  | [1385][M+1]+ | 36  |
| 3742902  | 3402899  | 1568582  | 2363886  | 719422.6 | 4443261  | [M+Na]+ 5:   | 38  |
| 5428460  | 7046351  | 5061220  | 4725270  | 4807696  | 2940325  | [1247][M+5]+ | 2   |
| 3328615  | 8232440  | 4572572  | 1971691  | 6603225  | 16525638 | [203][M]3+   | 29  |
| 1061303  | 1475936  | 258038.8 | 3995985  | 1285234  | 8407706  |              | 21  |
| 568687.2 | 772067.7 | 3721567  | 379937.7 | 969340.3 | 3199425  | [M+2Na]2+    | 38  |
| 439108.3 | 279346.5 | 433412.5 | 235941.4 | 253460.5 | 319593   | [M+K]+ 14:   | 57  |
| 799042.3 | 1520468  | 744643.5 | 1652416  | 1061060  | 271862.5 | [963][M]3+   | 247 |
| 10067563 | 10994404 | 9976541  | 7762014  | 7790264  | 4636257  |              | 4   |
| 2314593  | 5407867  | 4232419  | 3818242  | 3310898  | 5703179  | [1352][M]2+  | 7   |
| 3226885  | 298205.1 | 2780307  | 3103592  | 1471919  | 580899.1 |              | 2   |
| 2292588  | 4045282  | 1563411  | 1860978  | 1235173  | 2531660  | [3M+Na+2I    | 38  |
| 3009468  | 3188016  | 2991464  | 1747921  | 2501275  | 2228979  |              | 4   |
| 1094041  | 454902.1 | 410009.7 | 408625.9 | 677905.9 | 11863.81 |              | 105 |
| 1710885  | 2032666  | 700618.8 | 1713043  | 1975716  | 0        |              | 2   |
| 1.71E+08 | 1.71E+08 | 1.59E+08 | 1.39E+08 | 1.45E+08 | 1.14E+08 | [635][M+1]+  | 25  |
| 1868968  | 1324157  | 834199   | 1563485  | 1896802  | 658873.1 |              | 6   |
| 826823.8 | 973022.6 | 511652.7 | 741746   | 628721.2 | 0        |              | 9   |
| 3766797  | 3799517  | 2626226  | 2590771  | 3702352  | 2929118  |              | 4   |
| 3605129  | 3290442  | 3540016  | 3128378  | 2855852  | 1319208  | [308][M+1]+  | 72  |
| 472401.5 | 1229345  | 1220633  | 168405.9 | 1201781  | 1140242  |              | 63  |
| 16125680 | 10956857 | 15516654 | 8376277  | 19497992 | 31792949 | [M+H]+ 49:   | 46  |
| 3204472  | 5038317  | 3781634  | 30277942 | 301580.6 | 1253435  |              | 91  |
| 9814845  | 3987441  | 16874719 | 7619816  | 6295922  | 972408.8 | [1364][M+2]+ | 47  |
| 5903462  | 4148938  | 3831255  | 3113637  | 2565158  | 300951.8 |              | 286 |
| 114867.8 | 102017.4 | 586561.1 | 5385295  | 118612.7 | 0        |              | 306 |
| 9275024  | 15448216 | 8316511  | 7676915  | 21328814 | 50603990 |              | 2   |
| 1259945  | 915527.5 | 1263631  | 659518.2 | 786751.8 | 882313.5 |              | 1   |
| 770591.9 | 761248.6 | 268745.2 | 535575.6 | 613901.3 | 567401.5 | [3M+Na+K]    | 276 |
| 1753487  | 2677199  | 1817448  | 2395428  | 2121295  | 1141145  |              | 24  |
| 284899.3 | 1864093  | 33539587 | 2846671  | 217309.9 | 524931.5 |              | 18  |
| 6517701  | 6312376  | 6300178  | 6551710  | 5801710  | 1462263  |              | 9   |
| 1210968  | 788237.4 | 1165065  | 1048049  | 820075.7 | 151341.2 | [623][M]2+   | 51  |

|          |          |          |          |          |          |                       |     |
|----------|----------|----------|----------|----------|----------|-----------------------|-----|
| 191604.8 | 55553.35 | 33962978 | 4.53E+08 | 1765343  | 49050.57 |                       | 26  |
| 1029213  | 1602566  | 2103831  | 4850700  | 5121884  | 3393247  |                       | 277 |
| 701824.8 | 3161328  | 1166191  | 551668.8 | 1626143  | 4174338  | [1154][M+2]2+         | 2   |
| 24965815 | 15081209 | 15564379 | 24221825 | 11205479 | 10987498 | [803][M+1]+           | 1   |
| 3463459  | 2247140  | 3604810  | 1898266  | 2376159  | 0        |                       | 1   |
| 6114042  | 3395735  | 2542902  | 6291706  | 4990081  | 0        | [3M+Na+K]             | 14  |
| 4918919  | 4562215  | 4620271  | 5026905  | 2845783  | 6275912  |                       | 293 |
| 6728002  | 6073259  | 3032369  | 3488484  | 5432536  | 8986615  |                       | 1   |
| 170427.9 | 1268095  | 21146744 | 704632.6 | 295758.9 | 795869.8 | [M+Na]+ 3:            | 12  |
| 663918.2 | 1694996  | 2886328  | 517159.2 | 1200470  | 0        |                       | 1   |
| 850087.8 | 1199148  | 0        | 833920.4 | 1772973  | 604370   | [M+Na]+ 1:            | 21  |
| 1596696  | 3656853  | 1954948  | 189995.5 | 718811.6 | 2003231  | [M+K+NH3              | 18  |
| 32018511 | 25734174 | 34200175 | 38222646 | 32187940 | 10892108 |                       | 2   |
| 4687194  | 2955311  | 2141155  | 4272330  | 3640887  | 1194039  | [3M+2Na]2             | 14  |
| 1083363  | 2298893  | 332754   | 710456.7 | 1711774  | 8387997  | [1604][M+1]+          | 9   |
| 1680292  | 3972384  | 4980397  | 965269.8 | 2173306  | 6821995  |                       | 1   |
| 178091.1 | 162884.3 | 417259.6 | 3216705  | 314162   | 563757.3 |                       | 416 |
| 872123.2 | 560698.2 | 930232.3 | 869602.9 | 376109.3 | 194477.7 | [1550][M]+            | 71  |
| 9489245  | 4453260  | 3281387  | 3897112  | 4797437  | 4894713  |                       | 341 |
| 41664731 | 15671525 | 6843038  | 18086155 | 39422597 | 16438890 | [M+2H-CO(             | 3   |
| 245374.6 | 211410.3 | 341866.5 | 307528.8 | 357483.6 | 139101.6 | [1071][M+1]+          | 17  |
| 485680.8 | 510405.2 | 174989   | 460738.7 | 897248   | 1063668  | [269][M+1]3+          | 9   |
| 9928507  | 18646476 | 10080888 | 7843597  | 18988855 | 34249814 |                       | 2   |
| 78983.57 | 548517.2 | 563147.7 | 91271.44 | 355988.2 | 9457753  |                       | 14  |
| 6014792  | 1210441  | 8854244  | 11660958 | 6499666  | 18095071 | [1065][M]+ [M+H]+ 59( | 238 |
| 3127851  | 957196.1 | 702836.5 | 4034672  | 1593461  | 9311266  |                       | 1   |
| 2142941  | 543454.4 | 1460496  | 1106721  | 982432.5 | 0        | [1553][M+2]+          | 129 |
| 778032.5 | 573585.8 | 806792.5 | 744219.5 | 576713   | 330659.3 | [M+Na]+ 6(            | 8   |
| 1903395  | 2240211  | 2452996  | 1686294  | 1499653  | 1720824  | [1262][M]+            | 40  |
| 886295.2 | 1247402  | 1527288  | 733751.4 | 2233346  | 6108192  |                       | 9   |
| 81041956 | 70452824 | 75850347 | 79224624 | 73534020 | 20085372 |                       | 9   |
| 3734632  | 3547951  | 3640963  | 3204741  | 3520526  | 1449366  |                       | 385 |
| 7984230  | 2711258  | 7736440  | 14130714 | 12563521 | 7597972  | [M+H+HCC              | 121 |
| 20058622 | 3031482  | 19065097 | 19692449 | 2879112  | 8954421  | [M+K+CF3(             | 14  |
| 72516999 | 51331971 | 54858743 | 75963584 | 58002646 | 17438088 | [30][M]2+             | 2   |

|          |          |          |          |          |          |                                              |     |
|----------|----------|----------|----------|----------|----------|----------------------------------------------|-----|
| 5095707  | 5008516  | 4865247  | 5152267  | 4724383  | 7001895  |                                              | 241 |
| 1314914  | 1450674  | 1392421  | 543758.2 | 847581.9 | 548062.1 |                                              | 4   |
| 6686218  | 3745529  | 5002159  | 6085197  | 3660173  | 476769.9 |                                              | 2   |
| 492385.2 | 821872.5 | 978577.1 | 971376.3 | 690588.1 | 1090217  |                                              | 62  |
| 7692946  | 9334427  | 7646170  | 6271687  | 8814428  | 6382370  |                                              | 9   |
| 1714347  | 2670925  | 1055100  | 1159587  | 1991050  | 993878.6 |                                              | 3   |
| 3.21E+08 | 3.13E+08 | 3E+08    | 3.34E+08 | 3.03E+08 | 2.24E+08 | [M+H] <sup>+</sup> 220                       | 13  |
| 4315119  | 4349582  | 4194253  | 3844123  | 3751707  | 2221339  | [681][M] <sup>+</sup> [M+H] <sup>+</sup> 400 | 220 |
| 1852651  | 116388.7 | 1955599  | 1526451  | 907087.8 | 482140   |                                              | 46  |
| 2941665  | 3884281  | 2511255  | 3431906  | 4319177  | 1818083  |                                              | 2   |
| 1400339  | 2935049  | 1177422  | 723339.1 | 4419547  | 17299949 |                                              | 97  |
| 32929938 | 20543646 | 23846575 | 30914836 | 24883746 | 5501965  | [84][M] <sup>2+</sup>                        | 9   |
| 4343530  | 7109660  | 4280752  | 4648445  | 5641166  | 4065131  |                                              | 259 |
| 311678.2 | 324784.1 | 283181.9 | 243013.8 | 233279.7 | 112329.2 | [M+H] <sup>+</sup> 580                       | 16  |
| 3441180  | 5284959  | 4319911  | 2721307  | 3294815  | 1993677  |                                              | 9   |
| 243286.6 | 476533.3 | 539515.1 | 616131.1 | 226837.4 | 337541.5 |                                              | 176 |
| 348072.3 | 276062.1 | 508806.6 | 124684.1 | 404742.2 | 100807.4 |                                              | 102 |
| 3256610  | 533514   | 3971690  | 3892818  | 4744871  | 3759905  |                                              | 421 |
| 11536879 | 4717251  | 8386624  | 10190691 | 9344337  | 3893798  |                                              | 2   |
| 1.93E+08 | 1.38E+08 | 1.42E+08 | 1.76E+08 | 1.52E+08 | 63263160 | [1242][M] <sup>+</sup>                       | 2   |
| 125113.9 | 95578.62 | 498010.4 | 2588049  | 35274.04 | 66760.89 |                                              | 304 |
| 3220175  | 2151795  | 3841677  | 5104509  | 2199100  | 2418660  |                                              | 54  |
| 2126572  | 5860827  | 481889.1 | 4235461  | 8202155  | 29591991 | [M+K] <sup>+</sup> 360                       | 14  |
| 5815869  | 4621533  | 4398240  | 4644124  | 4669482  | 4634861  |                                              | 368 |
| 6255122  | 2056513  | 5792527  | 6246970  | 1004985  | 2658164  | [1616][M+1] <sup>3+</sup>                    | 9   |
| 4726635  | 6022951  | 9494232  | 5955502  | 2769394  | 5763789  |                                              | 194 |
| 1235983  | 0        | 595295.9 | 930111   | 530577.1 | 0        | [1024][M+1] <sup>+</sup>                     | 9   |
| 628042   | 408515   | 702740.5 | 450830.6 | 512743.6 | 266123.2 | [1525][M+1] <sup>+</sup>                     | 203 |
| 2607393  | 3441495  | 2320948  | 2156480  | 3488655  | 2636901  | [M+3K-H] <sup>2</sup>                        | 13  |
| 1402736  | 1183535  | 1671873  | 1239514  | 1302728  | 745242   | [1445][M+1] <sup>+</sup>                     | 203 |
| 824601.6 | 318350.8 | 264738.5 | 552664.8 | 416638.3 | 356268.9 |                                              | 41  |
| 3295090  | 3057846  | 3609176  | 16286579 | 2460643  | 11649963 | [3M+2Na+I]                                   | 12  |
| 4929691  | 4800436  | 5240175  | 3873736  | 4513938  | 3221072  |                                              | 4   |
| 2988798  | 3661273  | 3113853  | 3009115  | 3470284  | 3044517  |                                              | 9   |
| 531708.9 | 17593.12 | 18357.35 | 28055.06 | 12175.14 | 30471.59 |                                              | 59  |



|          |          |          |          |          |          |              |     |
|----------|----------|----------|----------|----------|----------|--------------|-----|
| 817656.4 | 1218264  | 2006069  | 529519   | 858721.5 | 12602045 |              | 9   |
| 2.95E+08 | 2.14E+08 | 2.09E+08 | 2.69E+08 | 2.42E+08 | 87890842 | [614][M]+    | 14  |
| 26885.28 | 920900.2 | 254416.3 | 32046.26 | 497237   | 380464.1 | [536][M+1]2+ | 39  |
| 1572090  | 1746762  | 1667022  | 1284204  | 1001753  | 938957.8 | [1017][M]+   | 78  |
| 9192228  | 10456579 | 13106142 | 9862834  | 6894926  | 1739791  |              | 1   |
| 2901795  | 1619248  | 1949171  | 1152273  | 2023024  | 1801762  |              | 68  |
| 8792447  | 16167730 | 4064024  | 2.06E+08 | 9904606  | 23828097 | [M+2K-H]+    | 11  |
| 1013531  | 1454882  | 438098.5 | 3572267  | 268369.3 | 870711.8 |              | 61  |
| 7484473  | 9391831  | 8984111  | 6422521  | 6886919  | 2453198  | [517][M]2+   | 9   |
| 30070236 | 36317300 | 30371743 | 26745341 | 32577482 | 24838151 |              | 9   |
| 341463.7 | 301621.9 | 370420.9 | 341316   | 248204   | 164020.8 |              | 48  |
| 10250902 | 9344443  | 8209803  | 9485777  | 12371137 | 12692617 |              | 2   |
| 953323.7 | 939681.5 | 737999.1 | 592133   | 790367.7 | 447105.7 |              | 91  |
| 44141759 | 37302747 | 41724831 | 39075196 | 33035319 | 25565796 |              | 2   |
| 1035043  | 663453   | 1353959  | 97587.41 | 0        | 138705.8 |              | 1   |
| 111602.6 | 345343.7 | 534464.8 | 67260.43 | 48557.71 | 409876   | [1052][M+1]+ | 20  |
| 564290.5 | 1618800  | 749424   | 417537.5 | 1459960  | 2984851  |              | 9   |
| 200396.2 | 13922840 | 192003.5 | 145471   | 166160.3 | 7316703  |              | 78  |
| 6094245  | 3724108  | 3586788  | 6146533  | 3158529  | 389784.3 |              | 2   |
| 4876919  | 4354115  | 4740959  | 4856987  | 4980244  | 1043616  | [11][M]2+    | 9   |
| 0        | 1379997  | 150654.1 | 0        | 995307.6 | 122956   | [M+H-CH3]    | 15  |
| 1015938  | 4821991  | 10327363 | 9532003  | 5051199  | 12535403 |              | 2   |
| 762454.5 | 359656   | 444263.9 | 509842.3 | 313859.7 | 23015.06 | [M+H]+ 320   | 276 |
| 727157.1 | 1196148  | 1568889  | 1840227  | 1399761  | 746002.4 |              | 2   |
| 8761019  | 14746786 | 10625823 | 7243080  | 8161301  | 10271771 | [M+H]+ 43    | 15  |
| 1214006  | 2183749  | 1203013  | 1681662  | 1698358  | 6192177  | [1018][M+1]+ | 9   |
| 1078917  | 784963.1 | 530992.6 | 979397.6 | 766698.3 | 181732.2 |              | 9   |
| 8824226  | 9446690  | 6940827  | 6496462  | 6777670  | 4200946  |              | 2   |
| 4434929  | 5081709  | 2863336  | 7469926  | 10495948 | 5376691  | [3M+2K]2+    | 339 |
| 1153668  | 3051387  | 425790.6 | 881432.4 | 1242541  | 5723809  |              | 41  |
| 1800600  | 3970042  | 3961696  | 4010573  | 3718268  | 3523150  | [3M+H+Na     | 382 |
| 888131.5 | 1418730  | 841488.4 | 951516.1 | 916819.2 | 1248260  | [M+K]+ 79    | 16  |
| 784633.5 | 1083031  | 576292.9 | 706045.4 | 933060.7 | 659406.5 | [3M+2K]2+    | 8   |
| 5319511  | 4190926  | 4761527  | 3972695  | 4018887  | 595469.7 |              | 4   |
| 1333376  | 1330332  | 132899.9 | 838920.3 | 1725727  | 2002643  | [M+H]+ 18    | 11  |

|          |          |          |          |          |          |              |     |
|----------|----------|----------|----------|----------|----------|--------------|-----|
| 431839.3 | 1288035  | 766241.4 | 622692.6 | 650208.1 | 1087085  | [2M+Na+K]    | 8   |
| 434457.4 | 494918.4 | 492382.2 | 293763.8 | 462101.9 | 702361.6 | [M+Na]+ 4    | 5   |
| 893508.3 | 1969739  | 1660229  | 799338.9 | 1159568  | 2118443  |              | 4   |
| 394339.1 | 656593.1 | 344233.2 | 314536.8 | 395474.2 | 300584.2 |              | 125 |
| 1562975  | 2707529  | 2612095  | 1292595  | 1310022  | 2918953  | [M+Na]+ 4    | 5   |
| 692000.1 | 2718634  | 33294012 | 3360159  | 1213615  | 763449.7 |              | 38  |
| 379916.6 | 2122298  | 2442033  | 24781725 | 754269.5 | 1071853  |              | 9   |
| 1319420  | 1284098  | 1346243  | 856022.4 | 795557.5 | 433365.2 |              | 4   |
| 485185.5 | 799409.7 | 918548.7 | 521416   | 524277.2 | 0        |              | 9   |
| 130244.1 | 152382.8 | 160852.6 | 118358.4 | 107362   | 29155.93 |              | 318 |
| 1771344  | 5246554  | 2221166  | 2470840  | 5173021  | 11262561 |              | 2   |
| 4621016  | 4211495  | 15012658 | 3834118  | 5682366  | 4445377  |              | 310 |
| 405433.1 | 135012.4 | 349505.5 | 262717.3 | 285160.1 | 506569   |              | 23  |
| 25285854 | 24430842 | 21608153 | 26271801 | 22829653 | 11262674 | [1258][M+3]+ | 2   |
| 6705734  | 7980829  | 6233269  | 5180269  | 5379372  | 6611580  |              | 183 |
| 12198880 | 20176388 | 14117209 | 14309569 | 30510081 | 74961091 |              | 2   |
| 834566.9 | 1836472  | 1516387  | 527315.6 | 1113753  | 0        |              | 1   |
| 3270838  | 3317026  | 4327365  | 3337288  | 2064246  | 11294552 | [442][M]2+   | 9   |
| 3020853  | 1963627  | 1005973  | 479617.6 | 3157055  | 3465472  |              | 1   |
| 523306   | 949602.2 | 832189.5 | 949922.2 | 366107.9 | 686951.6 |              | 9   |
| 3516068  | 3905962  | 4163801  | 4256165  | 4403179  | 4186297  | [M+H-CO]+    | 322 |
| 5044537  | 5165402  | 7749373  | 4022333  | 3106954  | 1444043  |              | 1   |
| 8995096  | 5535277  | 7717584  | 8374160  | 5557488  | 1796491  |              | 2   |
| 891086.1 | 926728.3 | 630043.5 | 560893.3 | 671278   | 838453.5 | [1482][M+1]+ | 38  |
| 20926967 | 23361800 | 13877370 | 16293774 | 22657013 | 16525449 |              | 9   |
| 23057579 | 34347064 | 16655774 | 23719797 | 37778315 | 40398694 |              | 2   |
| 6435775  | 4655006  | 5455410  | 3871724  | 9375265  | 3598717  | [950][M+1]+  | 15  |
| 4.82E+08 | 3.51E+08 | 4.02E+08 | 4.61E+08 | 3.6E+08  | 1.48E+08 | [435][M]+    | 2   |
| 3780308  | 8670635  | 3498316  | 3974952  | 11214527 | 40292675 | [1221][M]2+  | 2   |
| 6326589  | 7289266  | 5100628  | 5176034  | 2545767  | 4835113  | [M+Na+Na     | 81  |
| 93556163 | 65867727 | 69428791 | 98847779 | 74644742 | 22107629 | [29][M]2+    | 2   |
| 2310966  | 2842816  | 2288789  | 1834757  | 2114146  | 795932.9 |              | 9   |
| 13261014 | 14598083 | 14364885 | 10508534 | 11908048 | 8133901  | [802][M+1]+  | 57  |
| 548483.5 | 879669.6 | 55492.56 | 430484.4 | 498136.4 | 314815.2 |              | 224 |
| 10851070 | 9954488  | 9760640  | 15530062 | 14910169 | 6701510  |              | 19  |

|          |          |          |          |          |          |                                            |     |
|----------|----------|----------|----------|----------|----------|--------------------------------------------|-----|
| 630931.3 | 598656.9 | 18872331 | 2.96E+08 | 1489717  | 453630.5 |                                            | 32  |
| 3572576  | 2565587  | 305346.6 | 2792600  | 3163164  | 18617101 | [M+H] <sup>+</sup> 17                      | 11  |
| 6545053  | 13322912 | 8765603  | 3558644  | 2959177  | 11019929 |                                            | 1   |
| 489040.5 | 1792078  | 565450.3 | 235704.5 | 1365107  | 3152344  | [M+Na] <sup>+</sup> 8                      | 13  |
| 35624091 | 32992666 | 31970426 | 32722430 | 28616279 | 12077746 | [1320][M] <sup>+</sup>                     | 2   |
| 1949232  | 2071887  | 2305412  | 2349298  | 2143300  | 1946663  |                                            | 2   |
| 5189367  | 3293616  | 892428   | 2700952  | 2083897  | 1939283  |                                            | 208 |
| 9215210  | 6570411  | 9367763  | 8572379  | 8263446  | 4995981  |                                            | 199 |
| 47909597 | 19712651 | 37153212 | 46857830 | 43812332 | 28338153 | [1242][M+1] <sup>+</sup>                   | 2   |
| 895294.5 | 1272235  | 541055   | 561753.1 | 906036.2 | 61595.84 | [M+H+HCC                                   | 81  |
| 4886767  | 4722734  | 2672578  | 3255439  | 2373194  | 3046463  | [28][M] <sup>+</sup> [M+K] <sup>+</sup> 16 | 86  |
| 12675851 | 12504417 | 12254017 | 12317651 | 595284.9 | 11306749 | [M+H-CH <sub>2</sub> ]                     | 264 |
| 310793.9 | 140923   | 314263.3 | 163451   | 133982.1 | 62015.17 |                                            | 83  |
| 1012985  | 568901.9 | 1116614  | 3401709  | 505011   | 496695.9 |                                            | 41  |
| 3430532  | 2048757  | 3305622  | 1070448  | 4345861  | 9260455  |                                            | 2   |
| 1117183  | 1249491  | 609651.4 | 1179851  | 962836.6 | 780308.1 |                                            | 119 |
| 2072388  | 5391177  | 153868.7 | 542167.6 | 2775593  | 8297711  | [M+3H] <sup>3+</sup> 1                     | 3   |
| 2939671  | 2691987  | 2055550  | 2255061  | 3617867  | 1258491  |                                            | 9   |
| 110694.7 | 9997987  | 10508988 | 4024628  | 1097182  | 8646583  |                                            | 5   |
| 9875103  | 9949200  | 7859034  | 9507753  | 7695148  | 5932310  | [171][M] <sup>+</sup>                      | 128 |
| 6394970  | 866948.1 | 3808434  | 9.75E+08 | 36073530 | 29887118 | [M+K] <sup>+</sup> 62                      | 6   |
| 1443953  | 2240896  | 1896135  | 1019055  | 2810962  | 5865608  |                                            | 422 |
| 4638216  | 866277.8 | 4356717  | 768582.9 | 6217510  | 2489346  | [3M+Na] <sup>+</sup> 1                     | 6   |
| 7275677  | 7320273  | 7036951  | 6424994  | 8016190  | 6771469  |                                            | 323 |
| 1562942  | 1982726  | 1133804  | 752691.6 | 1450538  | 2674349  | [M+Na] <sup>+</sup> 3                      | 81  |
| 8211838  | 11435035 | 5908475  | 6839442  | 9542996  | 8773049  | [968][M] <sup>+</sup>                      | 9   |
| 2187123  | 2842923  | 3495210  | 2696484  | 2478580  | 1519042  |                                            | 2   |
| 6571910  | 6643788  | 6471985  | 4317082  | 6170897  | 7493089  |                                            | 393 |
| 1559791  | 589354.5 | 452692.9 | 1151954  | 1084640  | 332247.2 | [82][M+2] <sup>+</sup>                     | 9   |
| 5094875  | 2980689  | 4290288  | 4323735  | 3915895  | 451249.8 |                                            | 2   |
| 3270969  | 3396523  | 3326044  | 6581643  | 7085315  | 6090321  | [3M+Na] <sup>+</sup> 1                     | 13  |
| 1285655  | 3658194  | 2812934  | 1617171  | 6112267  | 15401086 |                                            | 93  |
| 3418235  | 2071683  | 2642982  | 1578833  | 5642285  | 1054235  |                                            | 1   |
| 2554688  | 2969379  | 1800907  | 5867254  | 3514807  | 10964429 | [335][M+1] <sup>3+</sup>                   | 2   |
| 3209545  | 4154558  | 2329557  | 2095531  | 3114227  | 3849520  |                                            | 9   |

|          |          |          |          |          |          |              |     |
|----------|----------|----------|----------|----------|----------|--------------|-----|
| 1846522  | 1608047  | 1810273  | 1204260  | 1601791  | 518724.7 | [1498][M+1]+ | 16  |
| 1308693  | 2320559  | 1535066  | 1264162  | 1555118  | 2267689  | [1192][M+1]+ | 23  |
| 2979139  | 2858188  | 3455541  | 3302826  | 2737868  | 233179.1 |              | 9   |
| 132802.3 | 401264   | 423092   | 152030.6 | 251715.7 | 877304.2 | [134][M+2]3+ | 4   |
| 877561.3 | 948722.5 | 343902.1 | 518011.2 | 211716.9 | 1067889  |              | 338 |
| 6344630  | 6163776  | 6019908  | 6484046  | 6409322  | 8263599  |              | 339 |
| 5452684  | 7641224  | 6133691  | 3964605  | 354265.5 | 4522711  |              | 5   |
| 4733714  | 4468259  | 3879806  | 3685030  | 7104063  | 43520387 |              | 2   |
| 2204911  | 3709598  | 1795511  | 2043095  | 1004128  | 1609495  |              | 97  |
| 466144.3 | 1260395  | 363461   | 323736   | 174451.4 | 938947.2 |              | 330 |
| 1111216  | 2451412  | 1793909  | 890539.9 | 1913054  | 5904253  | [1101][M]3+  | 9   |
| 1019868  | 1020787  | 1041338  | 812586.9 | 858695.6 | 204103.5 |              | 4   |
| 2079049  | 2906941  | 2122180  | 1586592  | 2580589  | 5519688  |              | 2   |
| 722274.1 | 1602825  | 37792332 | 717042.9 | 4897250  | 815659.1 |              | 1   |
| 1.1E+08  | 76277817 | 67244163 | 56652357 | 87449762 | 37225983 |              | 1   |
| 1268687  | 1130703  | 2794315  | 1096854  | 1018228  | 3582698  | [640][M+1]+  | 9   |
| 2264812  | 2749273  | 1127890  | 692961   | 1574518  | 510785.6 |              | 9   |
| 1973868  | 986597   | 1412724  | 1761907  | 1107494  | 0        |              | 2   |
| 4897329  | 3224458  | 4374078  | 3704994  | 2370694  | 0        |              | 2   |
| 81496596 | 71051994 | 76417886 | 79869195 | 74227212 | 20105987 |              | 9   |
| 5513810  | 6330070  | 3560050  | 3963571  | 3871944  | 4081929  | [M+H+CF3O]   | 15  |
| 29824465 | 36385758 | 30558414 | 27146533 | 33617375 | 24831158 |              | 9   |
| 605662.2 | 5470743  | 271298.5 | 3550790  | 2186858  | 8583584  | [M+H]+ 46:   | 42  |
| 867756.1 | 1138964  | 2130783  | 581790   | 811048.1 | 17330910 |              | 9   |
| 2615350  | 7793921  | 1625549  | 1732027  | 10813212 | 59117888 |              | 2   |
| 1054922  | 1399728  | 575894.7 | 1488265  | 1347242  | 1600214  |              | 4   |
| 149587.1 | 719835.8 | 591191.4 | 647223.5 | 311822.6 | 22931.56 |              | 32  |
| 9291178  | 6436650  | 8018043  | 6372769  | 9000314  | 6182794  |              | 2   |
| 986294.3 | 1268070  | 1018653  | 768878.2 | 643117.8 | 0        |              | 81  |
| 3460369  | 2490528  | 3333829  | 2998941  | 1902144  | 429131.5 |              | 2   |
| 3723455  | 26341464 | 4135055  | 4595598  | 7683282  | 5112414  |              | 2   |
| 3379253  | 3654310  | 3349508  | 3099190  | 1836739  | 2026577  |              | 4   |
| 4520441  | 4.53E+08 | 9.27E+08 | 1.08E+09 | 10128971 | 11117730 |              | 2   |
| 513518.2 | 639673.7 | 535492.4 | 228164   | 377272.4 | 0        | [M+Na]+ 31:  | 81  |
| 2322714  | 2627967  | 2275970  | 4132521  | 5953142  | 1536336  | [M+K]+ 31:   | 398 |

|          |          |          |          |          |          |                                              |     |
|----------|----------|----------|----------|----------|----------|----------------------------------------------|-----|
| 0        | 1146309  | 182848.4 | 0        | 674049.2 | 0        |                                              | 1   |
| 6294623  | 5207957  | 62557954 | 64655973 | 74469824 | 62434559 | [M+3H-CO]                                    | 29  |
| 8550032  | 6717508  | 8331774  | 24287558 | 4386176  | 7963215  |                                              | 173 |
| 160203.4 | 474172.9 | 225490.2 | 70144.53 | 558852.6 | 381548.1 |                                              | 218 |
| 1356967  | 3310167  | 797339   | 555739.5 | 5412502  | 17483169 |                                              | 2   |
| 12239124 | 10969881 | 12850886 | 8535863  | 7344603  | 858105.3 |                                              | 9   |
| 2926872  | 5834580  | 4022009  | 2226893  | 4326408  | 11546761 |                                              | 9   |
| 1225526  | 0        | 1240440  | 2382626  | 1973693  | 2666087  | [3M+Na+K]                                    | 13  |
| 4044488  | 5514962  | 2259742  | 2364031  | 5300808  | 2173130  |                                              | 1   |
| 3681166  | 3890306  | 781926.5 | 1049318  | 4480578  | 1288397  |                                              | 11  |
| 8228236  | 10153695 | 7837803  | 7293960  | 9523640  | 7696715  |                                              | 9   |
| 820065.4 | 1436529  | 911969.8 | 498819.3 | 1352478  | 1815224  |                                              | 89  |
| 1038173  | 832548.6 | 582734.9 | 685115.2 | 740196.7 | 693556.1 |                                              | 4   |
| 3824511  | 2776777  | 3272144  | 3239223  | 3194877  | 942335.4 |                                              | 4   |
| 217073.4 | 299735.6 | 370202.9 | 1510767  | 235300.6 | 171351.5 | [M+Na]+ 40                                   | 35  |
| 2642140  | 3390403  | 2964975  | 1997831  | 2819209  | 3784528  | [479][M+2] <sup>2+</sup>                     | 4   |
| 481279.5 | 339670.7 | 267675.4 | 103351.1 | 153460   | 120744.2 |                                              | 40  |
| 4054516  | 3430486  | 2084965  | 6025120  | 3986967  | 25484351 |                                              | 1   |
| 1461095  | 4047798  | 1876827  | 1084111  | 13189279 | 4192847  | [2M+2K-H]                                    | 3   |
| 1366853  | 13700627 | 780553.2 | 1212973  | 918653.9 | 3451601  | [M+2H] <sup>2+</sup>                         | 12  |
| 287055.7 | 782115.9 | 996640.8 | 0        | 101632.5 | 158094.4 | [267][M+1] <sup>2+</sup>                     | 20  |
| 2748992  | 3427402  | 2055936  | 2266377  | 3537632  | 2868523  |                                              | 9   |
| 14014258 | 25426819 | 25780324 | 9334284  | 14044472 | 6868288  |                                              | 20  |
| 154397.7 | 251940.1 | 269182.5 | 400379.1 | 240081.2 | 195363.5 |                                              | 136 |
| 441312.5 | 1026729  | 476153.5 | 336635.1 | 368760.7 | 471758.1 | [1396][M+2] <sup>+</sup>                     | 101 |
| 901528.1 | 800396.4 | 938646.2 | 539577.7 | 573273.9 | 578415.1 | [1346][M] <sup>+</sup>                       | 210 |
| 479650.3 | 1122586  | 903311.5 | 672982.5 | 802120.3 | 1035283  |                                              | 1   |
| 1284747  | 1686733  | 1109084  | 681085.7 | 1354909  | 823089.8 |                                              | 4   |
| 3085968  | 1900543  | 4761255  | 2072721  | 2268637  | 1908535  | [319][M] <sup>+</sup>                        | 256 |
| 3023177  | 755821.9 | 2501876  | 2815608  | 2888224  | 15017459 |                                              | 2   |
| 1027488  | 687868.8 | 714040.2 | 604743.2 | 142242.8 | 51278.11 |                                              | 309 |
| 13232979 | 3676808  | 10582755 | 11537838 | 3579235  | 7877986  |                                              | 2   |
| 777755.4 | 202252.3 | 444757.6 | 215034   | 109699   | 551027.4 |                                              | 294 |
| 916667.1 | 815783.7 | 917745.4 | 883253   | 840151.2 | 182350.8 |                                              | 4   |
| 1693604  | 1350244  | 1952239  | 1470034  | 1482918  | 562760.9 | [361][M] <sup>2+</sup> [M+H+K] <sup>2+</sup> | 23  |

|          |          |          |          |          |          |                      |     |
|----------|----------|----------|----------|----------|----------|----------------------|-----|
| 1480691  | 1426732  | 1356765  | 941966.6 | 1899338  | 2561910  |                      | 2   |
| 17308912 | 29785043 | 13344081 | 14195558 | 34378651 | 94455538 |                      | 2   |
| 36457127 | 38873600 | 22841428 | 26640549 | 31992160 | 37545273 | [275][M]+ [M+K]+ 256 | 56  |
| 338710.2 | 7993216  | 5229562  | 5150088  | 5880676  | 13245128 |                      | 9   |
| 3528916  | 4430818  | 2964723  | 2846586  | 4394375  | 3778178  | [M+K]+ 776           | 13  |
| 988877   | 970767.2 | 1110650  | 3.81E+08 | 11822702 | 10118306 |                      | 1   |
| 2756413  | 2225388  | 1002301  | 1059059  | 852020.7 | 2390139  | [903][M+1]+          | 281 |
| 572155.6 | 154272.5 | 2296606  | 537163.1 | 631818.6 | 5371050  |                      | 9   |
| 10177301 | 20683972 | 8472133  | 13437580 | 20929768 | 21911394 | [352][M+3]3+         | 2   |
| 2674401  | 4581569  | 2600934  | 2569593  | 4345069  | 16811139 |                      | 2   |
| 1562586  | 1741839  | 703051.2 | 493678.4 | 1376015  | 1402838  |                      | 4   |
| 8451958  | 10483320 | 9101920  | 7702076  | 10015070 | 5929502  |                      | 9   |
| 94274834 | 1.28E+08 | 680506.9 | 69695334 | 1.75E+08 | 1.59E+08 | [M+Na+NH             | 15  |
| 4264671  | 4281526  | 3923857  | 3677948  | 3581149  | 3682152  |                      | 295 |
| 33932489 | 29470947 | 24190961 | 26723493 | 26464294 | 11474000 | [327][M+1]+          | 75  |
| 5178577  | 5261667  | 5007173  | 3895784  | 4277864  | 2121560  |                      | 4   |
| 750596.8 | 1653006  | 1509506  | 604809.3 | 1852896  | 275725.7 | [M+2H-CH             | 15  |
| 2436093  | 1252400  | 2085263  | 2440400  | 1904496  | 170948.4 |                      | 4   |
| 883600.9 | 666039   | 265431   | 461484.1 | 401030.2 | 624510.3 | [1493][M+1]+         | 289 |
| 5359679  | 6936189  | 5667666  | 4852353  | 5892049  | 4705961  |                      | 9   |
| 979519.7 | 1450838  | 1246117  | 405060.2 | 993576.2 | 1202068  | [3M+Na+K]            | 6   |
| 20952823 | 20805629 | 21133853 | 16742126 | 18304777 | 9290322  | [479][M]2+           | 4   |
| 7350061  | 31644354 | 17557449 | 4189244  | 1.25E+08 | 32588169 |                      | 1   |
| 201618.6 | 747438.1 | 805430.7 | 651603.1 | 533387.8 | 886685.5 | [2M+Na+2H            | 16  |
| 484938.2 | 618035.9 | 2418881  | 438694   | 1179800  | 5157692  | [538][M+1]2+         | 9   |
| 3076614  | 3995427  | 3112291  | 2950751  | 4189646  | 3182555  |                      | 13  |
| 536899.2 | 769260.9 | 391211.8 | 539806.8 | 847143.5 | 670383.1 |                      | 9   |
| 2368692  | 3770626  | 4131866  | 1676995  | 3155965  | 8157374  | [2M+Na]+             | 8   |
| 1.95E+08 | 2.42E+08 | 2.46E+08 | 1.48E+08 | 1.58E+08 | 86320272 | [M+2H]2+             | 20  |
| 2.76E+08 | 2.88E+08 | 433658.5 | 485231.7 | 623509   | 87567353 |                      | 4   |
| 2548113  | 3977448  | 4175549  | 3930051  | 3831195  | 6039635  |                      | 396 |
| 2.94E+08 | 2.13E+08 | 2.09E+08 | 2.69E+08 | 2.41E+08 | 88806852 | [608][M]+ [M+K]+ 347 | 14  |
| 9255086  | 8702220  | 7563760  | 13182852 | 4212196  | 1998699  |                      | 13  |
| 553197.5 | 626530.4 | 763773.5 | 567783   | 517823.6 | 464372   |                      | 9   |
| 9946181  | 6963559  | 8880075  | 8531832  | 8762095  | 1433497  |                      | 9   |

|          |          |          |          |          |          |                      |     |
|----------|----------|----------|----------|----------|----------|----------------------|-----|
| 935326.5 | 1126651  | 1008245  | 878290.7 | 554118.4 | 835600.8 |                      | 9   |
| 3332029  | 1230244  | 2398013  | 3841947  | 782959   | 621788.6 |                      | 2   |
| 216658.9 | 1476670  | 1193276  | 166246.2 | 497586.9 | 2711868  |                      | 9   |
| 7869314  | 13726774 | 7527202  | 6508247  | 16989357 | 42987469 | [1398][M+1]+         | 2   |
| 385714.6 | 428118.2 | 270165.2 | 335556.1 | 294649.6 | 120616.1 | [1047][M+2]3+        | 16  |
| 41674041 | 32011585 | 29137303 | 43873898 | 26806727 | 13551186 |                      | 188 |
| 4265552  | 3083174  | 4230384  | 5386535  | 4002377  | 0        |                      | 14  |
| 15221947 | 4559864  | 6108729  | 2019907  | 19162463 | 22899452 |                      | 3   |
| 23121452 | 19059271 | 20536687 | 20219305 | 21337192 | 4875923  | [615][M]+            | 9   |
| 395514.5 | 263991.8 | 853465   | 936920.5 | 405231.9 | 1717034  | [M+Na]+ 4            | 135 |
| 6315755  | 4802053  | 5676472  | 5943572  | 4799571  | 15773834 |                      | 2   |
| 41349494 | 22417181 | 31330110 | 38546445 | 25907126 | 7033368  |                      | 2   |
| 211698.6 | 519217.1 | 256309.7 | 316637.5 | 212374.7 | 271356.4 |                      | 4   |
| 745432.9 | 916465.9 | 1336111  | 575693.3 | 671210.6 | 2702282  | [M+Na]+ 2!           | 8   |
| 538683.1 | 786965.9 | 1034881  | 1192543  | 562390.2 | 1111347  |                      | 2   |
| 3275300  | 3357790  | 5012416  | 2169992  | 2456815  | 4425861  | [199][M]+ [M+H]+ 26! | 276 |
| 4339091  | 2096296  | 1557175  | 1041824  | 2357590  | 4717110  |                      | 294 |
| 1176102  | 2882972  | 1608801  | 873174.2 | 1452248  | 2486457  | [1048][M+1]+         | 101 |
| 3439068  | 4047366  | 2577132  | 3261211  | 3967164  | 3143131  |                      | 9   |
| 725716.8 | 197880.2 | 419303.4 | 620439   | 549829.7 | 0        |                      | 4   |
| 2254197  | 3056875  | 12238933 | 1852239  | 2657480  | 3246213  | [M+Na]+ 4            | 23  |
| 900315.5 | 2612634  | 1747360  | 511373.9 | 837699.7 | 1875333  | [M+H-CO]+            | 46  |
| 5676352  | 12403603 | 4393924  | 3693241  | 19578348 | 91013602 | [1353][M+1]2+        | 2   |
| 828342.6 | 942383   | 458634   | 909043   | 343679.1 | 257970.8 |                      | 4   |
| 520258.3 | 907693.7 | 677543.6 | 0        | 375064.7 | 157940.4 | [M+Na]+ 2'           | 81  |
| 4386112  | 3375912  | 3535857  | 3225458  | 4378163  | 1636683  |                      | 9   |
| 972917   | 690495.7 | 653166.4 | 1006716  | 1251159  | 585626   |                      | 8   |
| 146095.1 | 1149690  | 1380052  | 0        | 592441.8 | 10028136 |                      | 2   |
| 3449038  | 1663385  | 1836671  | 2164188  | 1956861  | 647827.4 |                      | 4   |
| 8601409  | 12050815 | 10760776 | 7018281  | 8834229  | 6181400  | [562][M]+            | 12  |
| 0        | 2255544  | 0        | 196520.5 | 1732728  | 5375006  |                      | 2   |
| 987681.6 | 1896964  | 840111.4 | 1785064  | 1475236  | 8895381  | [1281][M+1]2+        | 8   |
| 32062224 | 28448208 | 29822018 | 22804986 | 41486419 | 17368459 |                      | 1   |
| 11713509 | 14783006 | 9044183  | 7283810  | 19986165 | 38016204 |                      | 2   |
| 65376208 | 50143517 | 53456559 | 57854611 | 53015145 | 18243366 | [614][M+1]+          | 14  |

|          |          |          |          |          |          |              |     |
|----------|----------|----------|----------|----------|----------|--------------|-----|
| 2410163  | 2210387  | 904129.3 | 959030   | 2746827  | 2338252  |              | 1   |
| 669877.6 | 1948280  | 1168550  | 919530   | 2025488  | 1768700  |              | 2   |
| 645371.7 | 549339.4 | 356016.7 | 255119.4 | 373586.2 | 270433.7 |              | 4   |
| 46794047 | 46594992 | 20190858 | 27730192 | 29525653 | 21642690 | [305][M]+    | 34  |
| 5237752  | 5280642  | 5545533  | 4594859  | 4327716  | 1223981  |              | 9   |
| 785307.1 | 841258.7 | 1181099  | 857495.1 | 869253.7 | 656157.2 |              | 68  |
| 1676609  | 2275274  | 2076472  | 2755674  | 10683049 | 792860.2 |              | 1   |
| 2372139  | 2312318  | 2227091  | 1921297  | 2183979  | 1825947  |              | 4   |
| 1316567  | 1555728  | 1603663  | 1028149  | 1161983  | 677962.3 | [948][M]+    | 299 |
| 2671653  | 2084433  | 1489908  | 2425611  | 1763840  | 0        |              | 2   |
| 163508.4 | 818793.3 | 1424631  | 1639028  | 834512.7 | 588645.7 | [M+H]+ 66:   | 8   |
| 980381.9 | 2455902  | 1179373  | 1428632  | 4729544  | 11747789 |              | 2   |
| 78233203 | 1.29E+08 | 68640004 | 73068306 | 1.63E+08 | 4.42E+08 | [1357][M]2+  | 2   |
| 1086251  | 1096492  | 418056.4 | 587001.7 | 2176126  | 1070811  | [M+K]+ 37:   | 21  |
| 2185550  | 1587133  | 2282042  | 1801348  | 2131457  | 1297860  | [706][M+1]3+ | 20  |
| 286253.6 | 662054.4 | 233902.8 | 267050.8 | 161245   | 211806.9 |              | 91  |
| 391334   | 213313.5 | 628548.6 | 135641.7 | 324267.4 | 194109   | [1263][M+1]+ | 203 |
| 959254.3 | 843595.1 | 382226.3 | 793926.3 | 649809.5 | 240704.9 |              | 4   |
| 546730.2 | 1710894  | 1863964  | 426313.9 | 791647.6 | 2480188  |              | 9   |
| 1062493  | 223979.9 | 708274.9 | 695836.3 | 897191.9 | 220480   | [3M+2H]2+    | 42  |
| 16526051 | 8558371  | 10322013 | 18490672 | 9004258  | 1790433  |              | 2   |
| 1351002  | 661003.3 | 677678.3 | 617989.7 | 637075   | 596036.4 | [381][M+1]+  | 59  |
| 1929794  | 1728960  | 1474266  | 1023198  | 1238402  | 201080.9 |              | 4   |
| 2312651  | 3153623  | 2718034  | 2754482  | 2506086  | 3131277  |              | 95  |
| 1156931  | 1110899  | 1364713  | 983890.6 | 843003.5 | 853382.5 | [1461][M+1]+ | 357 |
| 3620548  | 148711.4 | 978734.7 | 988128.9 | 2900493  | 930591   |              | 1   |
| 1391883  | 189915.9 | 751487.8 | 1393075  | 1064645  | 2072376  |              | 295 |
| 10186854 | 4423227  | 1475018  | 3724337  | 5793193  | 5424204  | [M+H-COCl    | 195 |
| 619587.8 | 748482.8 | 2664196  | 427737.2 | 1146098  | 1074297  | [933][M+1]+  | 20  |
| 17933567 | 2416800  | 2239423  | 1965892  | 2470388  | 1592847  |              | 4   |
| 6033977  | 4493778  | 5311698  | 6204858  | 4022230  | 50927822 |              | 2   |
| 3750158  | 8774248  | 1910775  | 1210359  | 6860624  | 13386055 |              | 15  |
| 10659232 | 14194252 | 2727060  | 8626456  | 12462046 | 6994946  | [M+Na]+ 3:   | 15  |
| 12500138 | 24507791 | 13086644 | 11605720 | 32565033 | 66537239 |              | 2   |
| 3519959  | 3306619  | 2996996  | 2103331  | 2706576  | 1399762  | [422][M]2+   | 4   |



|          |          |          |          |          |          |              |     |
|----------|----------|----------|----------|----------|----------|--------------|-----|
| 7013611  | 8430644  | 7556297  | 5960557  | 8175007  | 4239555  | [677][M]+    | 9   |
| 682658.3 | 1416066  | 321392.3 | 414479.1 | 2121746  | 8801508  |              | 9   |
| 5484313  | 4080744  | 791216.5 | 1909754  | 857965.5 | 5078825  |              | 11  |
| 2938021  | 139377   | 2368437  | 3119744  | 2586128  | 257153.2 |              | 2   |
| 8856530  | 8414028  | 3264194  | 985257.4 | 14070014 | 9305822  |              | 6   |
| 1028749  | 472750.2 | 2575536  | 1012313  | 906018.4 | 429303.5 | [M+H+NH3     | 6   |
| 965596.3 | 773048.3 | 1332592  | 755710.3 | 499123.5 | 752436.3 |              | 9   |
| 15526967 | 12408984 | 11789553 | 11486944 | 13956989 | 6427488  | [661][M+3]+  | 4   |
| 12432388 | 7535743  | 9102261  | 13501090 | 7011602  | 20764818 | [33][M]2+    | 2   |
| 1534168  | 1035352  | 1805752  | 927513.7 | 1822116  | 2101707  |              | 9   |
| 5385452  | 6379445  | 4947680  | 4187076  | 6611500  | 4659480  | [658][M+1]3+ | 9   |
| 931849   | 1442663  | 1782071  | 796133.5 | 1017884  | 0        | [M+H-C2H4    | 13  |
| 1111771  | 2114677  | 1807916  | 855945.1 | 1184529  | 5447489  |              | 9   |
| 5956178  | 4718100  | 6056438  | 5078483  | 3936103  | 2054525  | [1581][M+1]+ | 42  |
| 636168.2 | 1764979  | 1240408  | 552597.6 | 1010653  | 3024504  | [M+3H-CH3    | 8   |
| 211089.1 | 123230.5 | 201362   | 185027.5 | 76264.63 | 108506.4 |              | 100 |
| 1283660  | 1361230  | 1501740  | 3671975  | 790158.2 | 1077399  | [M+2H-C2H    | 13  |
| 571930.6 | 1192809  | 263639   | 0        | 1747522  | 8546997  |              | 29  |
| 707156.5 | 385101   | 615081.6 | 1364800  | 653691.8 | 1293383  |              | 152 |
| 71114214 | 1.16E+08 | 61930345 | 66570870 | 1.44E+08 | 3.65E+08 | [1360][M]+   | 2   |
| 3900203  | 7575294  | 3962769  | 5918684  | 7218373  | 27165725 | [M+K]+ 39    | 15  |
| 1478226  | 1206201  | 1633853  | 1066753  | 1365119  | 7056014  | [1103][M+1]+ | 2   |
| 2371830  | 4570850  | 2501852  | 1268620  | 79523752 | 7264197  |              | 2   |
| 5172654  | 4782466  | 4827659  | 4736795  | 5030943  | 4527810  | [M+Na]+ 3    | 121 |
| 3.69E+08 | 4.64E+08 | 3.62E+08 | 2.71E+08 | 2.69E+08 | 2.55E+08 | [863][M+1]+  | 1   |
| 1353818  | 1574589  | 1366774  | 1186102  | 740879.5 | 1450687  | [333][M+1]2+ | 18  |
| 161407   | 247129   | 1272143  | 204607.6 | 236494.8 | 286696.8 | [M+Na]+ 5    | 38  |
| 2601387  | 2295285  | 2769491  | 4.91E+08 | 20696481 | 1126724  | [971][M]+    | 36  |
| 14821727 | 15411166 | 12605254 | 13180851 | 12470634 | 5926954  |              | 2   |
| 498055.6 | 416485.5 | 339207.6 | 312703.3 | 347145   | 69356.85 | [492][M+1]2+ | 490 |
| 11814400 | 11288184 | 10196018 | 7441434  | 9363404  | 5631681  |              | 4   |
| 4104126  | 8457157  | 8963479  | 4397607  | 4867304  | 2485080  | [803][M+2]+  | 1   |
| 4911595  | 4271776  | 9200176  | 2601450  | 5226609  | 2565885  | [M+Na]+ 3    | 6   |
| 902442.4 | 385277.5 | 4067773  | 5373332  | 1547174  | 1487488  |              | 235 |
| 32611653 | 28729866 | 31820239 | 28325568 | 29703895 | 9880591  | [M+H]+ 81    | 13  |

|          |          |          |          |          |          |              |     |
|----------|----------|----------|----------|----------|----------|--------------|-----|
| 1110279  | 2885302  | 3697229  | 771469.1 | 1405884  | 903145.4 |              | 1   |
| 14122460 | 12051684 | 13286472 | 12272357 | 12075228 | 3772367  |              | 13  |
| 3669873  | 5660112  | 4855816  | 4761199  | 1403325  | 3406792  |              | 2   |
| 23133080 | 20671188 | 23166880 | 16589856 | 20177147 | 10776864 | [622][M]+    | 4   |
| 160045.8 | 141483.3 | 104582.3 | 3098743  | 1063709  | 2168823  | [273][M+1]+  | 166 |
| 7297695  | 8113989  | 5689370  | 5912069  | 4165498  | 15613232 |              | 392 |
| 3659779  | 857937.5 | 2185693  | 1986666  | 1468815  | 7578942  |              | 93  |
| 438387   | 0        | 1013875  | 655343.5 | 909266.9 | 1792594  |              | 2   |
| 2924474  | 2299275  | 2238852  | 2374407  | 2202506  | 1589860  |              | 245 |
| 705220.3 | 555890.5 | 678031.7 | 806836.6 | 221748   | 481493.1 |              | 43  |
| 559775.1 | 833612.5 | 667525.3 | 507476.4 | 834140.3 | 893207   | [1174][M+1]+ | 23  |
| 1205712  | 1244670  | 860557.4 | 669771.8 | 6193372  | 30606944 | [3M+Na+K]    | 93  |
| 31903335 | 21379278 | 4509940  | 21837195 | 38039479 | 15822085 | [M+2H]2+     | 15  |
| 2701203  | 3595321  | 2788489  | 2285150  | 6748088  | 40517492 |              | 2   |
| 27916923 | 16934298 | 12678052 | 12777927 | 23855554 | 10451344 | [906][M+1]3+ | 1   |
| 512025.6 | 903126   | 1041339  | 1004803  | 452820.9 | 1366741  |              | 9   |
| 7766858  | 4462217  | 6100374  | 8250811  | 4647289  | 847922.8 | [45][M+1]2+  | 2   |
| 3369628  | 3275668  | 1297417  | 4994839  | 2906753  | 3233921  |              | 435 |
| 1808469  | 0        | 1458748  | 917345.2 | 556295.7 | 143113.7 |              | 1   |
| 811813.8 | 158663.1 | 1123418  | 250575.1 | 787702.7 | 881237.1 |              | 9   |
| 3901880  | 3769826  | 5900756  | 6868465  | 6316185  | 3046339  |              | 364 |
| 7693327  | 4395621  | 6139202  | 7211777  | 4665440  | 1482181  |              | 2   |
| 32544255 | 29154241 | 31746607 | 28548502 | 29574810 | 9779048  | [M+3Na-H]    | 13  |
| 1267154  | 2332443  | 3937111  | 796087.9 | 1372711  | 17347046 |              | 9   |
| 463472.8 | 631125.3 | 446190.4 | 330655.2 | 587050.2 | 904292.4 | [1511][M]+   | 328 |
| 11174908 | 7499215  | 9459004  | 8551752  | 10325081 | 12521147 |              | 2   |
| 1859795  | 1821418  | 1892389  | 1396575  | 985471.4 | 1054671  |              | 4   |
| 3988617  | 3436113  | 9408363  | 42935218 | 753419.2 | 2654914  |              | 71  |
| 255359.4 | 635547.3 | 333564.8 | 654118.2 | 482558.1 | 1371977  |              | 9   |
| 1914616  | 3617638  | 2196843  | 737042   | 3357092  | 0        | [628][M]3+   | 1   |
| 2771553  | 1956073  | 3081484  | 2950423  | 1327444  | 3986336  |              | 224 |
| 1020523  | 1338958  | 1090935  | 846738.3 | 866496.5 | 249947.2 |              | 9   |
| 2729889  | 414513.9 | 879971.9 | 316994.1 | 2367110  | 1519251  | [1060][M]+   | 1   |
| 10490642 | 11848440 | 12942259 | 13647492 | 9441335  | 5002825  | [328][M+1]+  | 113 |
| 1238009  | 181703.3 | 954069.7 | 559920.4 | 820808.2 | 1496592  | [962][M+1]2+ | 62  |

|          |          |          |          |          |          |              |     |
|----------|----------|----------|----------|----------|----------|--------------|-----|
| 1416011  | 1126122  | 1655560  | 1453254  | 1357627  | 0        | [M+Na]+ 2:   | 14  |
| 57162944 | 76891231 | 51367164 | 48793120 | 79338677 | 1.35E+08 |              | 2   |
| 494791.5 | 268272.5 | 97290.34 | 345007.4 | 196769.5 | 246390.7 |              | 228 |
| 3638002  | 3343460  | 3070055  | 2165684  | 2752828  | 1429455  |              | 4   |
| 1780167  | 3076287  | 3824759  | 1421725  | 1802726  | 7478618  |              | 9   |
| 2417804  | 1445937  | 2238983  | 445636.7 | 1370186  | 973498.5 |              | 91  |
| 579503.9 | 981116.1 | 808070.1 | 0        | 417684.2 | 0        | [M+Na]+ 5:   | 81  |
| 623941.7 | 614058.2 | 2528690  | 592328.7 | 843181.4 | 757581.2 | [M+Na]+ 2:   | 8   |
| 1501469  | 1322905  | 374879.4 | 4609133  | 1496645  | 2719141  | [M+H-C5H8]   | 3   |
| 619214.1 | 1088809  | 1291923  | 989892.3 | 993181.6 | 747073.6 | [1082][M]+   | 145 |
| 1672507  | 3347443  | 1576020  | 1956569  | 3217194  | 15499508 |              | 2   |
| 54574161 | 52314655 | 10515913 | 1368981  | 34611693 | 6739707  | [M+H]+ 40:   | 10  |
| 363897.8 | 235448.5 | 219939.6 | 140609.2 | 198303.5 | 43275.01 |              | 42  |
| 8104147  | 8644460  | 11515604 | 33149672 | 7263292  | 5449354  | [303][M]2+   | 76  |
| 1130520  | 1459429  | 1085859  | 496761.6 | 707674.4 | 559688.9 | [3M+H+K]2    | 11  |
| 3967278  | 2188450  | 1346448  | 884184.7 | 2171745  | 4011067  |              | 148 |
| 806239.4 | 380189.8 | 582896.6 | 1270310  | 333251.2 | 645505.5 | [M+H+NH3]    | 95  |
| 1648021  | 2130948  | 1274419  | 902988.7 | 1374578  | 1128101  | [M+2H-NH3]   | 81  |
| 13145140 | 7167834  | 8708142  | 12227531 | 8391724  | 2476287  |              | 2   |
| 13423487 | 26100967 | 15848985 | 15434465 | 16680583 | 44922050 | [M+K]+ 13:   | 13  |
| 9.15E+08 | 1.78E+09 | 1.62E+09 | 8.97E+08 | 1.08E+09 | 8.53E+08 |              | 1   |
| 29624333 | 18520722 | 23710958 | 29130142 | 24866489 | 2388715  |              | 9   |
| 16961203 | 10366336 | 9641292  | 13901876 | 9037991  | 0        |              | 2   |
| 334737.7 | 1643033  | 1011837  | 148174.7 | 1231572  | 119099.5 |              | 1   |
| 2873128  | 2505337  | 3705590  | 3937394  | 3934035  | 3466895  |              | 383 |
| 68598763 | 83444872 | 37164726 | 60846171 | 68367884 | 54451615 | [M+Na+Na]    | 15  |
| 2534601  | 2523835  | 2559844  | 1871781  | 2101190  | 1473752  | [303][M+1]2+ | 76  |
| 659166.2 | 1283956  | 3562686  | 503994.5 | 796610.7 | 32570755 |              | 9   |
| 2678783  | 2656669  | 1125384  | 2544881  | 2693727  | 2734725  |              | 375 |
| 2059357  | 3736926  | 2107772  | 816153.6 | 2685777  | 2186816  | [161][M+2]3+ | 9   |
| 23466233 | 32279642 | 21099901 | 20257204 | 32889528 | 58473110 |              | 2   |
| 1790372  | 1391596  | 1138478  | 1517507  | 1041879  | 420078.8 |              | 2   |
| 5465280  | 5057457  | 5300389  | 5821569  | 4131778  | 1301396  | [1607][M+1]+ | 2   |
| 1.13E+08 | 1.18E+08 | 99757225 | 93698230 | 1.24E+08 | 1.12E+08 | [485][M]+    | 2   |
| 2119619  | 2592751  | 2414975  | 1950618  | 1836788  | 1489072  |              | 2   |

|          |          |          |          |          |          |                       |     |
|----------|----------|----------|----------|----------|----------|-----------------------|-----|
| 3289441  | 2839416  | 3460735  | 3608372  | 2535499  | 910451.6 |                       | 2   |
| 9609478  | 3899133  | 2639499  | 5219619  | 5010014  | 2723907  |                       | 14  |
| 57151347 | 77428281 | 51381504 | 48670626 | 79682952 | 1.35E+08 |                       | 2   |
| 66638392 | 1.1E+08  | 81346929 | 58309391 | 64245361 | 85138779 | [M+Na]+ 3:            | 15  |
| 1241803  | 1895292  | 1969303  | 989361.2 | 261220.2 | 880140.2 |                       | 4   |
| 5825025  | 3093172  | 4866822  | 5230278  | 2287155  | 1230599  |                       | 2   |
| 1.18E+09 | 8.58E+08 | 9.67E+08 | 1.13E+09 | 8.74E+08 | 3.56E+08 |                       | 2   |
| 8851576  | 8868426  | 1487415  | 8264715  | 7889876  | 6569162  | [3M+2Na+I             | 11  |
| 664971.7 | 681019.3 | 1084981  | 605547.8 | 779966.3 | 506548.1 |                       | 4   |
| 6137051  | 2133689  | 5213416  | 5830054  | 2788519  | 590217.4 |                       | 2   |
| 4373265  | 8405548  | 3344232  | 3501506  | 11193686 | 37857796 | [1273][M]2+           | 2   |
| 2849995  | 2724652  | 2283168  | 1706535  | 2354002  | 1328054  |                       | 4   |
| 36878406 | 26583938 | 31096851 | 34854459 | 25665374 | 6139547  |                       | 2   |
| 1041778  | 932745   | 794482   | 1153021  | 962377.6 | 925590.3 |                       | 49  |
| 11634950 | 11204379 | 10193309 | 7349046  | 9449169  | 5754591  |                       | 4   |
| 1116936  | 158673.1 | 1430562  | 1124943  | 2847025  | 5904788  |                       | 9   |
| 138719.4 | 327934   | 335452.5 | 333783.5 | 441251.6 | 548763.7 | [M+H]+ 63:            | 18  |
| 402848.3 | 976006.7 | 978164   | 91583.7  | 365329.2 | 133428.4 |                       | 9   |
| 17558594 | 14986864 | 16918991 | 16557829 | 15458500 | 3649405  |                       | 9   |
| 842258.3 | 362528.6 | 1206712  | 533629.1 | 2390536  | 932952.2 |                       | 9   |
| 2609580  | 2377578  | 2368945  | 2133013  | 1714274  | 4097047  | [M+Na]+ 5:            | 42  |
| 7750524  | 7417724  | 7413033  | 5435083  | 6599944  | 3037030  |                       | 4   |
| 1239589  | 1126840  | 965334.1 | 1904064  | 828500   | 1257011  |                       | 9   |
| 3815647  | 35918762 | 46245414 | 2963308  | 5288130  | 22656689 | [M+Na]+ 3:            | 14  |
| 2354580  | 3269242  | 2668884  | 1638468  | 2425668  | 952405.8 |                       | 9   |
| 20788934 | 8650529  | 23275523 | 9950149  | 19084106 | 34140290 | [793][M]3+            | 1   |
| 1022068  | 1344970  | 1203977  | 696298.8 | 1030527  | 421273.1 | [2M+3H]3+             | 8   |
| 1033926  | 1149254  | 907887.5 | 655954   | 846961.5 | 445620.5 |                       | 4   |
| 490970.5 | 419812.2 | 531969.7 | 2035773  | 409630   | 639454.2 |                       | 469 |
| 35133166 | 23944790 | 36765929 | 22469593 | 22701854 | 4638763  | [1276][M]+            | 1   |
| 122828.9 | 364498.3 | 349820.8 | 152534.1 | 366195.8 | 145523.3 |                       | 28  |
| 13157726 | 2451432  | 1510640  | 1471349  | 2146601  | 14713235 |                       | 93  |
| 9122010  | 3130002  | 2870476  | 8507556  | 5646963  | 0        |                       | 2   |
| 389861.3 | 297625.1 | 116133.5 | 353005   | 400643.6 | 47477.89 | [M+H-C3H]:            | 64  |
| 307987.4 | 1695830  | 590963.4 | 388907.8 | 1593583  | 824311.4 | [1055][M]+ [M+K]+ 54: | 24  |

|          |          |          |          |          |          |             |     |
|----------|----------|----------|----------|----------|----------|-------------|-----|
| 3066309  | 3056774  | 4832362  | 3399275  | 3106322  | 2372416  |             | 385 |
| 1902866  | 2004017  | 2254817  | 1316269  | 1614238  | 1254010  |             | 4   |
| 2758395  | 2736566  | 1179716  | 2602256  | 2036323  | 164983.5 | [2M+2Na+]   | 97  |
| 2153757  | 263777.7 | 1035938  | 1108996  | 1595494  | 746596.2 | [1161][M]2+ | 1   |
| 2457864  | 1973362  | 1866553  | 1898683  | 1952750  | 414469.4 |             | 4   |
| 2197060  | 470221.5 | 2826782  | 2198965  | 1695737  | 2417601  |             | 2   |
| 776205.5 | 1067845  | 760579   | 232466.1 | 450470.6 | 0        |             | 9   |
| 829774.8 | 541478.5 | 506142.9 | 558363.8 | 276796.9 | 604482.4 |             | 9   |
| 8965589  | 9176369  | 26896361 | 15118365 | 40028660 | 6158808  | [96][M]3+   | 1   |
| 1126690  | 1735047  | 1393489  | 1167642  | 1153406  | 1253592  | [2M+Na+2I   | 62  |
| 66601654 | 1.1E+08  | 81633625 | 58338725 | 64211103 | 84979592 |             | 15  |
| 2854643  | 2872836  | 2031275  | 2730330  | 2903653  | 1826260  | [M+H+CF3O   | 226 |
| 2318036  | 4211927  | 3783177  | 2129536  | 2898851  | 5449607  | [687][M+1]+ | 9   |
| 227173.8 | 700370.4 | 294855.2 | 335024.3 | 570337.5 | 1211391  |             | 8   |
| 3941246  | 3601213  | 6628573  | 5615918  | 10100066 | 22549709 | [M+Na]+ 3'  | 3   |
| 2188906  | 3116801  | 8840033  | 1879466  | 3214820  | 3323432  | [2M+2Na+]   | 14  |
| 4932217  | 3625803  | 4317369  | 4655951  | 4462279  | 507943.7 |             | 2   |
| 12799324 | 13598052 | 50631365 | 18817618 | 22980002 | 13791432 |             | 188 |
| 35677125 | 24457616 | 37843204 | 23023433 | 23435874 | 4940796  |             | 1   |
| 5772907  | 9459381  | 4104522  | 4523297  | 12561449 | 39928699 |             | 2   |
| 1374633  | 4598959  | 3239774  | 893032.5 | 2105021  | 6632207  |             | 9   |
| 292392.6 | 820892.8 | 992736.4 | 779880.4 | 718458.1 | 555613   | [M+H]+ 24!  | 5   |
| 16425182 | 793235.2 | 10135202 | 10237743 | 721424   | 841786.8 |             | 9   |
| 8151395  | 8602243  | 5820726  | 7052662  | 4912943  | 4366047  |             | 2   |
| 328898.4 | 388767.1 | 1477071  | 309886.6 | 369084.6 | 258475.6 |             | 148 |
| 5479117  | 2847014  | 1766210  | 4932423  | 534771.3 | 6354123  | [M+K]+ 53!  | 46  |
| 902597.7 | 844823.7 | 930906.2 | 1094553  | 813117.7 | 8657330  |             | 210 |
| 824646   | 2322188  | 2261901  | 1271522  | 1124960  | 2084552  |             | 9   |
| 961254.1 | 1166251  | 1170770  | 1240365  | 1127568  | 1431840  |             | 30  |
| 473543.1 | 492014.5 | 1291131  | 385462.2 | 410372.5 | 870918.6 |             | 91  |
| 979534.5 | 1178281  | 271236.1 | 877026.2 | 876147   | 1989090  | [M+Na]+ 1!  | 351 |
| 468920.4 | 1598109  | 1220343  | 214099.2 | 495451.6 | 4279166  |             | 9   |
| 718746.1 | 208470.1 | 632231.4 | 169871.7 | 659875.7 | 134735.5 |             | 17  |
| 8982435  | 9047090  | 8706254  | 6887901  | 6902137  | 3587493  |             | 4   |
| 2799973  | 3558955  | 1639562  | 2202455  | 2963764  | 2905476  |             | 9   |

|          |          |          |          |          |          |               |     |
|----------|----------|----------|----------|----------|----------|---------------|-----|
| 1481636  | 1108546  | 160424.2 | 2755820  | 888191.5 | 7120465  |               | 46  |
| 827910.8 | 1721129  | 1110134  | 549257.1 | 1049743  | 1846204  |               | 9   |
| 6976525  | 8364628  | 7869188  | 5418777  | 8760296  | 14730115 | [539][M]+     | 281 |
| 1436687  | 1646576  | 1137592  | 644489.3 | 1099198  | 1701798  |               | 4   |
| 108676.6 | 0        | 714333.3 | 0        | 506615.3 | 221163.9 |               | 9   |
| 1498261  | 1936503  | 2077342  | 1064154  | 1461923  | 1015348  |               | 4   |
| 11835093 | 4130694  | 3019255  | 5001701  | 10862982 | 7574049  |               | 1   |
| 24473662 | 32361058 | 20733584 | 23545635 | 38333986 | 74671175 |               | 2   |
| 561321.9 | 78062.91 | 1269933  | 1227706  | 541387.3 | 5924924  |               | 9   |
| 203125.3 | 944544.7 | 1462761  | 0        | 658987.1 | 2605058  | [3M+Na]+      | 46  |
| 997566   | 2141020  | 1411179  | 634488.6 | 1310355  | 1830131  |               | 9   |
| 486529.5 | 0        | 882809.6 | 1134169  | 549177.7 | 1171807  |               | 502 |
| 1147136  | 6947412  | 4461343  | 3522502  | 2799594  | 7614555  | [M+H-CH2]     | 15  |
| 4306244  | 1762105  | 2600559  | 4382179  | 948204.8 | 514291.6 |               | 1   |
| 2240780  | 3632836  | 2622150  | 2957709  | 3751692  | 0        |               | 2   |
| 1688162  | 1550143  | 1842756  | 1406180  | 1070670  | 1011575  |               | 80  |
| 4178911  | 7075853  | 11165180 | 3813753  | 10647737 | 7906542  |               | 33  |
| 536182.6 | 683605.1 | 403578.8 | 688219.7 | 445098.7 | 414486.9 |               | 57  |
| 6937604  | 8149910  | 5743261  | 6205463  | 10787904 | 20297145 |               | 2   |
| 318535.8 | 0        | 395244.2 | 103064.4 | 429620.7 | 761161   |               | 9   |
| 333424.9 | 158858   | 278572.3 | 2.27E+08 | 6060184  | 1223070  |               | 66  |
| 910973.7 | 421380.8 | 583973.4 | 239383.1 | 830855.8 | 833716.7 |               | 4   |
| 2320507  | 2533848  | 2350342  | 3063918  | 1920448  | 0        |               | 14  |
| 1360489  | 534167.8 | 1469922  | 1382855  | 1047345  | 938054.4 |               | 1   |
| 1734775  | 1589778  | 1477188  | 1565498  | 1505622  | 727762.8 | [523][M]+     | 248 |
| 1450636  | 1558038  | 2824170  | 1027719  | 1917331  | 2118996  |               | 9   |
| 768934.5 | 1441518  | 2126727  | 668605.1 | 777322.2 | 1293876  | [M+K]+ 232    | 8   |
| 1753505  | 1205848  | 1161500  | 3394371  | 1544376  | 1743590  | [M+Na]+ 30    | 15  |
| 606424.1 | 6227025  | 3348940  | 8079539  | 5683044  | 8288602  | [M+Na]+ 18    | 3   |
| 429601.2 | 275835.2 | 498782.3 | 674560.3 | 249806.6 | 333457.7 |               | 103 |
| 7695514  | 11900134 | 8682955  | 9725163  | 14888936 | 11850319 |               | 3   |
| 5153026  | 4573582  | 4509438  | 4812826  | 3951183  | 260189.9 | [1159][M+2]3+ | 2   |
| 4674112  | 4539036  | 4347212  | 4087621  | 3407957  | 6754891  |               | 2   |
| 2414036  | 1607628  | 2350132  | 1866481  | 1627969  | 1654555  | [M+Na]+ 40    | 95  |
| 3884143  | 9707093  | 2850593  | 2898186  | 12874363 | 42525850 |               | 2   |

|          |          |          |          |          |          |              |     |
|----------|----------|----------|----------|----------|----------|--------------|-----|
| 1353289  | 394345   | 327940.3 | 568241.7 | 551014   | 4395933  |              | 17  |
| 91325038 | 8684258  | 8453950  | 6487038  | 6015460  | 3070487  |              | 91  |
| 1154505  | 1428961  | 1419409  | 825482.6 | 1029416  | 1170414  |              | 4   |
| 29086621 | 2720516  | 21898735 | 27329377 | 2496621  | 2541373  |              | 2   |
| 1178608  | 170581.2 | 1364341  | 1189995  | 536033.9 | 1449601  | [M+2Na-H]    | 13  |
| 53214725 | 47075629 | 47782283 | 45733727 | 45654440 | 30183340 | [51][M+1]+   | 4   |
| 26122768 | 27591788 | 21465941 | 25939665 | 30939805 | 20794286 | [467][M]+    | 2   |
| 5928260  | 3645994  | 3671765  | 6247332  | 3232697  | 273531.6 |              | 2   |
| 2730861  | 2650081  | 2028207  | 1689260  | 2006765  | 1398884  | [943][M+1]+  | 110 |
| 3869807  | 6322240  | 2622973  | 4456759  | 1872720  | 5064250  | [1234][M+1]+ | 2   |
| 3512217  | 4434998  | 3026742  | 2835805  | 4664121  | 3794554  | [M+H]+ 570   | 13  |
| 6420662  | 4846631  | 5770196  | 6193421  | 2867779  | 1037315  |              | 2   |
| 7823307  | 8060740  | 3572284  | 6708918  | 3516414  | 4088028  |              | 191 |
| 2215198  | 1731543  | 2140993  | 1585857  | 557852.4 | 137850.2 | [227][M+1]2+ | 9   |
| 2134755  | 2278608  | 2661583  | 1622866  | 1960267  | 5027622  |              | 9   |
| 3572810  | 3391331  | 3148454  | 2920770  | 3360619  | 1644734  |              | 4   |
| 882465.5 | 1091607  | 770872.5 | 1237491  | 801413.1 | 4101146  | [716][M]3+   | 4   |
| 6486772  | 3788781  | 5391304  | 4466022  | 10041133 | 9818119  |              | 2   |
| 1796911  | 815573.5 | 4259385  | 1605387  | 1926071  | 656754.9 |              | 1   |
| 36364424 | 20124368 | 42302066 | 42080622 | 20275593 | 22429674 |              | 67  |
| 3134148  | 431530.1 | 7605144  | 2814683  | 1754013  | 3173276  |              | 2   |
| 3325381  | 2321614  | 2393070  | 2010776  | 3879820  | 3154508  | [M+H-C2H4]   | 14  |
| 3135204  | 5041895  | 4156626  | 19349559 | 3965678  | 6749987  | [746][M+2]+  | 1   |
| 8081081  | 7808590  | 5612606  | 7751605  | 6610252  | 9002291  |              | 325 |
| 1912220  | 2315269  | 3925319  | 27269894 | 2767583  | 2379586  | [1062][M+1]+ | 142 |
| 7742744  | 2989974  | 6604342  | 6435441  | 5614432  | 2424664  | [M+Na]+ 20   | 121 |
| 5.18E+08 | 4.19E+08 | 4.3E+08  | 5.14E+08 | 3.89E+08 | 1.57E+08 |              | 2   |
| 227779.2 | 157440.1 | 133673.6 | 67480.03 | 192988.3 | 165861.5 |              | 145 |
| 3895803  | 4037078  | 6469208  | 4016797  | 4238525  | 2958286  |              | 346 |
| 477452.2 | 705439.8 | 712219.1 | 11415064 | 658262.5 | 82642.27 |              | 9   |
| 3731041  | 4071708  | 1166584  | 2365792  | 3975979  | 5969539  |              | 84  |
| 3188983  | 1894943  | 3217301  | 2624106  | 18470877 | 3796568  | [53][M+3]+   | 1   |
| 926625.4 | 3528770  | 3733430  | 6964850  | 3330217  | 3334908  | [M+H]+ 560   | 369 |
| 4183460  | 403754.1 | 14109256 | 16640016 | 5871220  | 4088190  |              | 2   |
| 835019.1 | 822380.9 | 1720501  | 501040.8 | 1447488  | 262906.5 |              | 1   |

|          |          |          |          |          |          |                       |     |
|----------|----------|----------|----------|----------|----------|-----------------------|-----|
| 4591670  | 26989631 | 3090122  | 3784272  | 7488769  | 20605667 |                       | 18  |
| 4060736  | 5058581  | 3513737  | 3028987  | 5018992  | 4560804  | [M+K]+ 840            | 13  |
| 548556.4 | 596580.3 | 491626.3 | 392382   | 454505.2 | 399198.3 |                       | 4   |
| 1134027  | 1749014  | 924923.6 | 1162468  | 976575.7 | 703359   | [M+Na]+ 10            | 29  |
| 16303716 | 16329721 | 15552097 | 11416867 | 11326779 | 5562182  | [463][M]2+ [M+H+Na]2+ | 38  |
| 1208100  | 0        | 556922.3 | 897105.1 | 799367.6 | 0        | [M+K]+ 870            | 8   |
| 5171323  | 7526170  | 4665262  | 3850747  | 6983876  | 24831588 |                       | 2   |
| 8307986  | 10096081 | 8010972  | 6562612  | 9603770  | 7745712  |                       | 9   |
| 2577500  | 2521846  | 1479405  | 2640580  | 3602364  | 1305783  |                       | 4   |
| 771824.9 | 812307.3 | 1086887  | 453596   | 786208.3 | 1061584  | [M+Na]+ 10            | 8   |
| 238988.5 | 846706.2 | 769705.5 | 398581.4 | 227949   | 1014363  |                       | 4   |
| 3712738  | 3138874  | 2242899  | 2811100  | 778779   | 2586870  |                       | 15  |
| 2871580  | 1621980  | 1991326  | 3694534  | 1921984  | 0        |                       | 2   |
| 2555611  | 3062796  | 1455719  | 1691055  | 1503190  | 1525118  |                       | 387 |
| 901485.5 | 2431987  | 680842.7 | 257995   | 1664607  | 5073323  |                       | 2   |
| 411277.7 | 858111.8 | 1026540  | 20984266 | 542352   | 477754.5 |                       | 4   |
| 1767920  | 476914.9 | 464222.7 | 420161   | 362082.3 | 160622.2 |                       | 72  |
| 6331890  | 6202039  | 6571529  | 5209243  | 5514935  | 2834247  |                       | 4   |
| 7102032  | 12681757 | 6828648  | 7157245  | 1352155  | 3728172  |                       | 270 |
| 305436.4 | 298165.6 | 276344.9 | 2.15E+08 | 5331127  | 222944.8 | [971][M+1]+           | 36  |
| 739384.6 | 1186723  | 8408898  | 433943.3 | 1059609  | 691677   | [M+H]+ 540            | 8   |
| 2054745  | 4057778  | 1999691  | 1332923  | 3826693  | 10925071 |                       | 97  |
| 2598532  | 2072430  | 1910364  | 2007395  | 2044164  | 214973.6 |                       | 4   |
| 538184.8 | 974656.4 | 677388.1 | 608881   | 880154.6 | 1177127  | [M+Na]+ 60            | 110 |
| 2342760  | 2447470  | 2174931  | 2123860  | 2447199  | 2122006  |                       | 190 |
| 1544773  | 2168120  | 1546222  | 926698.4 | 1179960  | 1460924  |                       | 4   |
| 2954978  | 3110077  | 3321184  | 3559772  | 4713433  | 14995183 |                       | 2   |
| 480887.1 | 600680.1 | 543393.8 | 298942.8 | 310171.4 | 214608.9 |                       | 4   |
| 2643399  | 2985306  | 2374581  | 2577951  | 1748543  | 2200792  | [355][M+3]3+          | 2   |
| 5196397  | 3523651  | 3724042  | 4628394  | 4668745  | 1883686  | [48][M+2]2+           | 2   |
| 6039507  | 3255468  | 1049402  | 4937750  | 7109858  | 3598691  | [3M+2Na]2             | 3   |
| 138570.5 | 114860.1 | 162871.6 | 122881.2 | 58469.48 | 76727.57 | [994][M+1]+           | 357 |
| 9122421  | 4332800  | 3740643  | 8273870  | 6291594  | 1602221  |                       | 2   |
| 30382487 | 1332236  | 80567905 | 27396843 | 671720.3 | 4698502  |                       | 9   |
| 0        | 0        | 0        | 1.91E+08 | 2592993  | 1426571  |                       | 1   |



|          |          |          |          |          |          |                      |     |
|----------|----------|----------|----------|----------|----------|----------------------|-----|
| 4023458  | 3427705  | 2975546  | 2835804  | 4325461  | 2504881  |                      | 1   |
| 3515586  | 4132146  | 2784895  | 2045045  | 2260247  | 3169001  |                      | 29  |
| 957921.4 | 2202362  | 862299   | 639917.7 | 4218791  | 11233505 |                      | 2   |
| 257269.6 | 1329244  | 64673479 | 1088637  | 217845.7 | 1032347  |                      | 12  |
| 19540421 | 32567735 | 17728589 | 15101498 | 38317865 | 96318628 |                      | 2   |
| 63853726 | 1.08E+08 | 1.04E+08 | 75109339 | 79555656 | 1E+08    |                      | 54  |
| 426134.5 | 303452.8 | 448903.2 | 527714.2 | 391487.6 | 362818.6 | [1002][M+1]3+        | 16  |
| 5792144  | 5694444  | 7698775  | 7673120  | 4672098  | 5180653  |                      | 241 |
| 0        | 530236.9 | 624132.5 | 26510.54 | 304349.7 | 153667.5 |                      | 18  |
| 5010245  | 4599901  | 6263089  | 5985443  | 3356695  | 6012861  |                      | 403 |
| 10373417 | 7842439  | 7309154  | 9570080  | 7142604  | 1526407  |                      | 2   |
| 735366.4 | 2007491  | 3298412  | 649037.9 | 833023.7 | 999023.2 |                      | 9   |
| 2381583  | 730664.3 | 2657821  | 1906858  | 2192624  | 1058947  | [M+H]+ 34!           | 46  |
| 2961832  | 3693738  | 4056997  | 1346000  | 2254194  | 3473708  |                      | 1   |
| 2342846  | 1421888  | 2541000  | 1412161  | 1980106  | 695736.1 | [1286][M]2+          | 4   |
| 4.13E+10 | 3.68E+10 | 3.68E+10 | 4.05E+10 | 3.6E+10  | 2.75E+10 | [1247][M]+           | 2   |
| 350834.6 | 922820.4 | 535296   | 287139.3 | 628620.5 | 2046008  | [M+K]+ 47!           | 8   |
| 32646254 | 45342242 | 20465318 | 28267897 | 46646458 | 1.05E+08 | [1341][M+1]+         | 2   |
| 5455467  | 2459437  | 2174928  | 4898208  | 1772160  | 394035.7 |                      | 11  |
| 8980843  | 2900126  | 9396156  | 8436445  | 1549671  | 1856915  |                      | 2   |
| 16030865 | 8341581  | 20974888 | 17802385 | 9034074  | 11533491 | [111][M]+ [M+K]+ 19! | 86  |
| 617215.7 | 5222727  | 4166495  | 7409331  | 1168932  | 50717895 |                      | 1   |
| 2502167  | 809097.7 | 699606.5 | 1000805  | 2076452  | 1692842  | [844][M+1]2+         | 68  |
| 5362476  | 6968722  | 4157299  | 3864110  | 4219769  | 7880219  | [M+Na]+ 6!           | 93  |
| 4514695  | 950479.2 | 795034.5 | 2835901  | 2926432  | 1526199  |                      | 1   |
| 21581854 | 21081644 | 21598339 | 16773869 | 18720905 | 9900979  |                      | 4   |
| 205274.8 | 856411.7 | 884779.8 | 660747.1 | 636243.6 | 315613.8 | [M+Na+NH             | 39  |
| 20977802 | 24198470 | 19642631 | 22689380 | 23983680 | 16963789 |                      | 13  |
| 9675339  | 7182429  | 18148117 | 1.04E+08 | 13570746 | 8958605  | [1062][M]+           | 142 |
| 15137310 | 16016085 | 15384866 | 15362620 | 13976889 | 15060712 | [777][M]+            | 190 |
| 2921825  | 1657932  | 414005.8 | 2421549  | 5165444  | 5228980  |                      | 5   |
| 3501708  | 6102125  | 3751327  | 2407219  | 4998418  | 22819016 |                      | 2   |
| 2576993  | 2264933  | 1784939  | 1785956  | 3970758  | 4940414  |                      | 2   |
| 68633854 | 51207958 | 53315111 | 76642628 | 56426889 | 16459642 | [1253][M+1]+         | 2   |
| 1242706  | 1307313  | 1014006  | 1175271  | 1214524  | 0        |                      | 9   |

|          |          |          |          |          |          |                    |     |
|----------|----------|----------|----------|----------|----------|--------------------|-----|
| 3311170  | 290886.8 | 2815051  | 807832.4 | 1877418  | 0        | [579][M]3+         | 397 |
| 2135368  | 843469.1 | 203165.9 | 944801.8 | 1639394  | 98894.45 | [M+2K]2+           | 11  |
| 19498235 | 19453476 | 22496907 | 29392974 | 21933584 | 22221248 | [697][M+1]+        | 83  |
| 1072443  | 1517144  | 762235.9 | 472658.6 | 897858.9 | 1193158  |                    | 13  |
| 16375545 | 11920388 | 13760079 | 15870377 | 10220575 | 5629565  |                    | 2   |
| 713426.9 | 572689   | 484490.6 | 500217.1 | 364647.6 | 310877.7 | [3M+2H]2+          | 16  |
| 3565070  | 2576314  | 2884315  | 3087736  | 2853108  | 789099.4 | [80][M+2]+         | 4   |
| 13586055 | 10917814 | 9950357  | 12522608 | 8803542  | 8103378  | [1305][M+1]+       | 2   |
| 2298418  | 2156051  | 3180537  | 92002.44 | 1482789  | 458755.7 |                    | 1   |
| 3804726  | 4687338  | 3293014  | 3083185  | 4879776  | 4118015  |                    | 13  |
| 564224.2 | 622397.2 | 550942.7 | 438631.8 | 550714.5 | 376131.4 |                    | 8   |
| 4953272  | 3459809  | 1543214  | 4216484  | 4248235  | 987486.8 | [3M+3Na]+          | 14  |
| 23367784 | 38404600 | 19814029 | 21988669 | 47554551 | 1.1E+08  | [1361][M+1]+       | 2   |
| 117720.4 | 405580.8 | 251872.9 | 0        | 417531.9 | 121920.1 | [1426][M+2]+       | 38  |
| 6276633  | 7833998  | 986398   | 2977747  | 8287803  | 3278349  | [3M+Na]+           | 11  |
| 5.45E+08 | 4.95E+08 | 4.76E+08 | 5.44E+08 | 4.69E+08 | 3.1E+08  | [1247][M+3]+       | 2   |
| 829531   | 999472.6 | 509049.6 | 727596.6 | 986403.2 | 602009.8 |                    | 9   |
| 3910267  | 0        | 1187366  | 2388201  | 2333981  | 1310270  |                    | 2   |
| 548110.8 | 426154.1 | 700631.5 | 494532.2 | 449378.1 | 529078.3 |                    | 134 |
| 113238.3 | 0        | 136881.6 | 1.46E+08 | 1629787  | 901879.1 |                    | 6   |
| 7849439  | 6903481  | 1680048  | 7679522  | 8615317  | 10694548 |                    | 3   |
| 2905931  | 1453824  | 2880017  | 2628935  | 1155411  | 2821702  | [1277][M+1]+       | 2   |
| 42168865 | 61755096 | 31497613 | 29793053 | 73144807 | 1.78E+08 |                    | 2   |
| 1236599  | 84474.97 | 1091887  | 1231314  | 743664   | 421835.7 |                    | 46  |
| 3678159  | 4688929  | 3886987  | 2975131  | 4402270  | 2983011  |                    | 9   |
| 9820138  | 8232472  | 10185737 | 7135594  | 8387775  | 2239081  | [M+Na+HC           | 16  |
| 61225356 | 55038497 | 48263905 | 53021856 | 65851680 | 54036523 |                    | 2   |
| 1865217  | 2052305  | 1904095  | 1959131  | 1743628  | 1372328  | [260][M]+ [M+Na+NH | 24  |
| 1756692  | 2550484  | 1640629  | 2453595  | 1213713  | 2166245  |                    | 9   |
| 3451944  | 3408569  | 21705283 | 7508187  | 3110476  | 1358282  |                    | 98  |
| 1198175  | 1423582  | 2852374  | 907432.1 | 1028382  | 1652943  |                    | 9   |
| 14483825 | 9765974  | 27339534 | 8951226  | 8617808  | 15353560 | [673][M]+ [M+K+HCO | 3   |
| 2032965  | 1627995  | 1519729  | 3893073  | 1721790  | 22616472 |                    | 1   |
| 10262002 | 14230805 | 8742168  | 8172443  | 18353411 | 56351824 |                    | 2   |
| 6145729  | 10914194 | 2284060  | 7719417  | 7319798  | 9077694  | [3M+Na]+           | 3   |

|          |          |          |          |          |          |                                        |     |
|----------|----------|----------|----------|----------|----------|----------------------------------------|-----|
| 1918294  | 1761086  | 1544826  | 1132754  | 1520464  | 312218   |                                        | 4   |
| 205971.1 | 191853.6 | 509227.7 | 191921.2 | 130419.4 | 174377.1 | [1567][M+1]2+                          | 110 |
| 553938.7 | 2149683  | 0        | 969990.7 | 1667429  | 12630402 | [M+2H-NH <sub>3</sub> ]                | 21  |
| 2569925  | 915242.3 | 4622466  | 17504227 | 3060506  | 409494.9 |                                        | 262 |
| 1030753  | 485415   | 757941.1 | 685870.5 | 915935.6 | 0        |                                        | 4   |
| 53424876 | 28916525 | 39491118 | 51196720 | 32370821 | 8889950  |                                        | 2   |
| 3749332  | 3585049  | 1.02E+08 | 4072837  | 3321446  | 3699143  | [M+K+CF <sub>3</sub> CO <sub>2</sub> ] | 3   |
| 209866.1 | 210961.2 | 194567.4 | 472513.6 | 90014.28 | 808397.4 | [M+H-C <sub>2</sub> H <sub>4</sub> ]   | 16  |
| 365111.1 | 295347.8 | 1258370  | 6801523  | 321020.6 | 318562.8 |                                        | 12  |
| 502289.3 | 0        | 1239866  | 355727.7 | 710659.5 | 0        |                                        | 9   |
| 1232744  | 1555652  | 1229327  | 778506   | 1187138  | 1603735  |                                        | 9   |
| 698456.8 | 0        | 985817.4 | 1608104  | 1933940  | 2768017  |                                        | 2   |
| 3425959  | 2401785  | 1517718  | 2661950  | 3648797  | 1221334  |                                        | 4   |
| 1983672  | 2395777  | 1770721  | 2006802  | 2109578  | 1325584  |                                        | 118 |
| 5526621  | 7271258  | 7215337  | 7403618  | 7134938  | 22469481 | [757][M]+ [M+Na]+ 4:                   | 83  |
| 984192.8 | 893942.6 | 954409.6 | 1.95E+08 | 4361489  | 304645.5 |                                        | 74  |
| 138911.6 | 112653.3 | 226962.3 | 91189.18 | 126648.4 | 36213.94 | [1571][M+1]+                           | 394 |
| 6250181  | 5693269  | 5299688  | 3924581  | 4281042  | 2482091  | [M+H-C <sub>3</sub> H <sub>7</sub> ]   | 20  |
| 1078474  | 1574048  | 1593650  | 1100370  | 1258740  | 1020967  | [1486][M+1]+                           | 394 |
| 12909240 | 15904826 | 44377784 | 20787892 | 21347704 | 8945898  | [M+K]+ 56:                             | 29  |
| 2092041  | 2428061  | 1228797  | 2237317  | 3737972  | 475654.8 |                                        | 2   |
| 170690   | 901618.3 | 776900.2 | 309559.7 | 517996.5 | 712734   |                                        | 9   |
| 416595.3 | 354131.7 | 445820   | 402793   | 434898.4 | 282835.2 | [765][M+1]+                            | 218 |
| 403488.7 | 518143.3 | 425473.2 | 385022.1 | 213062.5 | 311502   | [M+H]+ 14:                             | 23  |
| 227279.1 | 110887.4 | 243490.8 | 179108.9 | 169265.9 | 118165.6 |                                        | 148 |
| 16635323 | 19713300 | 17554797 | 23799790 | 24850977 | 12953103 | [53][M+1]+                             | 1   |
| 745499   | 994494.7 | 791472.4 | 492620.5 | 517780.3 | 621243.1 | [3M+3Na+]                              | 8   |
| 881665.2 | 76016125 | 11201177 | 74795276 | 1.02E+08 | 10224706 |                                        | 1   |
| 1146170  | 1410185  | 1966971  | 1261511  | 1332446  | 4107793  |                                        | 9   |
| 6565653  | 2547354  | 1195054  | 5716349  | 5414189  | 9377139  | [M+K]+ 69:                             | 97  |
| 12273971 | 82463872 | 33531918 | 8298154  | 34510800 | 2.18E+08 |                                        | 9   |
| 17398741 | 20361368 | 15984778 | 15834739 | 12387255 | 12956842 |                                        | 1   |
| 4761034  | 2736932  | 2599993  | 2575732  | 2571127  | 2410412  |                                        | 140 |
| 644771.7 | 950994.8 | 0        | 675307.5 | 989654.9 | 14223360 |                                        | 53  |
| 4623629  | 4640720  | 4072350  | 4057533  | 4298135  | 1779733  | [335][M]3+                             | 2   |

|          |          |          |          |          |          |                      |     |
|----------|----------|----------|----------|----------|----------|----------------------|-----|
| 324259.8 | 365446.7 | 632535.2 | 280961.6 | 924766.9 | 496917   | [3M+2Na]2            | 47  |
| 518055.3 | 1278846  | 1483648  | 339871.1 | 571060.4 | 568316.6 |                      | 9   |
| 29488028 | 29011943 | 29733598 | 23732213 | 22953799 | 9280401  | [1241][M+1]+         | 12  |
| 4305867  | 4292914  | 4085205  | 3349721  | 3493717  | 1993858  | [834][M+1]+          | 116 |
| 6469780  | 10046414 | 5872816  | 5346341  | 11670339 | 24425537 |                      | 2   |
| 3581314  | 6339594  | 3470237  | 3038399  | 6521518  | 14045526 |                      | 2   |
| 1565954  | 628270.9 | 2162447  | 1748847  | 441498.6 | 479297.2 |                      | 4   |
| 1116116  | 786549.9 | 1038327  | 638026.2 | 564199.4 | 492818.4 | [M+H]+ 28!           | 81  |
| 561273.4 | 1293016  | 1208189  | 0        | 817007.3 | 466876.2 | [M+H]+ 51!           | 46  |
| 2875134  | 1646187  | 2219542  | 2012471  | 1939630  | 453339.7 | [533][M]3+           | 58  |
| 1004933  | 2166097  | 3347564  | 749341.1 | 1238676  | 778548.7 |                      | 9   |
| 3.1E+09  | 2.4E+09  | 2.67E+09 | 2.91E+09 | 2.29E+09 | 1.16E+09 |                      | 2   |
| 3576283  | 2531006  | 2935969  | 3097905  | 1891512  | 0        |                      | 2   |
| 812120.6 | 713467.1 | 939831.2 | 690034.8 | 696749.8 | 285480.3 | [158][M+1]2+         | 4   |
| 2.98E+08 | 1.1E+09  | 3.32E+08 | 2.52E+08 | 3.14E+08 | 5.49E+08 | [M+Na]+ 4!           | 16  |
| 1434186  | 1850235  | 1087085  | 1124602  | 1850292  | 1553173  |                      | 29  |
| 10235642 | 1048164  | 12150910 | 13861021 | 9173999  | 8657902  | [M+H-NH3]            | 14  |
| 1863436  | 1820902  | 1515772  | 1582299  | 1447432  | 1270146  |                      | 117 |
| 1895437  | 5303276  | 1264430  | 1886309  | 1458741  | 7320062  |                      | 2   |
| 1946608  | 18167402 | 5925484  | 14988768 | 19987175 | 12918234 |                      | 15  |
| 136008.8 | 721213   | 597626.4 | 279438.9 | 308599.1 | 661706.7 | [M+H]+ 50!           | 18  |
| 2382664  | 285711.8 | 122867.3 | 1902278  | 1121145  | 0        | [M+2K]2+ (           | 46  |
| 2695017  | 1369515  | 3276760  | 3172792  | 1295281  | 1209921  | [559][M]+            | 50  |
| 1804039  | 1520763  | 364759.3 | 1677309  | 2143057  | 3094875  | [M+Na+NH             | 21  |
| 475257.3 | 1300734  | 1233082  | 374406.7 | 871375.7 | 2420457  |                      | 9   |
| 1436757  | 5213392  | 1676611  | 1576567  | 3259746  | 7708439  |                      | 2   |
| 1050010  | 782989.4 | 606489.9 | 498511.4 | 556959.4 | 0        | [2M+Na]+ :           | 81  |
| 29418049 | 24895712 | 28984218 | 22594805 | 23356033 | 6820012  | [798][M]+ [M+H]+ 45! | 44  |
| 2357262  | 2524982  | 2342317  | 3380158  | 3651812  | 6352767  |                      | 2   |
| 20373693 | 19348955 | 7810409  | 9176232  | 17676231 | 59197509 |                      | 218 |
| 1070897  | 2450918  | 2427863  | 2100357  | 1251066  | 5183072  | [M+H]+ 51!           | 14  |
| 329695.6 | 427501   | 288858.7 | 191672.2 | 202329.6 | 606354.2 | [1516][M]2+          | 91  |
| 8526407  | 1003854  | 1727577  | 3657395  | 916875.9 | 10494685 | [M+H-C3H:            | 159 |
| 1.07E+08 | 1.02E+08 | 88408032 | 96856667 | 1.12E+08 | 1.01E+08 | [1309][M+2]+         | 2   |
| 2157443  | 1690197  | 2606826  | 1789989  | 1577816  | 752684.3 | [1538][M]+           | 169 |

|          |          |          |          |          |          |              |     |
|----------|----------|----------|----------|----------|----------|--------------|-----|
| 390896.2 | 560914.1 | 349708.7 | 373414.6 | 290597   | 642018.9 | [1331][M+1]+ | 101 |
| 19905984 | 5196821  | 3482696  | 18075252 | 18743270 | 4293715  |              | 321 |
| 1016096  | 1500202  | 1525421  | 809593.8 | 475602.4 | 632383.5 |              | 5   |
| 5903864  | 11615537 | 12224214 | 1366064  | 2842680  | 8122585  | [2M+2Na+]    | 15  |
| 6265738  | 3130670  | 2864134  | 6605161  | 4375290  | 0        | [M+H-H2O]    | 14  |
| 3696046  | 5169510  | 2619106  | 3182632  | 5163211  | 9810812  |              | 2   |
| 2528867  | 4252725  | 2322400  | 900981.4 | 4171361  | 34685996 |              | 2   |
| 442338.6 | 500887.7 | 667641.9 | 459820.8 | 405884.6 | 179000.7 |              | 4   |
| 11261430 | 9189966  | 9246655  | 12142932 | 9981696  | 7559493  | [1215][M]2+  | 2   |
| 26150709 | 31415335 | 11200032 | 52801924 | 31277339 | 69007025 | [378][M+1]+  | 33  |
| 64801299 | 50603556 | 53665961 | 57317195 | 53174481 | 18966624 | [608][M+1]+  | 14  |
| 7894242  | 4305186  | 5267843  | 9568606  | 13605439 | 5028521  |              | 1   |
| 1789632  | 1155123  | 1127901  | 1072260  | 341678.2 | 0        |              | 70  |
| 484456.7 | 792007.8 | 0        | 266199.3 | 470371.2 | 308451.7 | [M+H+CF3O]   | 6   |
| 786775.6 | 792478.5 | 689981.9 | 730488.6 | 693368   | 3866260  |              | 9   |
| 535247   | 0        | 1164683  | 434112.9 | 597958.4 | 676800.1 |              | 9   |
| 19112189 | 9013671  | 15273637 | 18159195 | 10296048 | 3617360  |              | 2   |
| 895262   | 1148576  | 1201085  | 659812.9 | 817021.8 | 349247   |              | 4   |
| 5226321  | 3848264  | 1229389  | 2711887  | 5249666  | 1975076  |              | 11  |
| 1513254  | 1592349  | 1099925  | 1172088  | 1254900  | 419965.6 | [1424][M+2]+ | 12  |
| 904257.3 | 1549597  | 1464121  | 81616381 | 1021859  | 1120491  | [M+Na+Na]    | 8   |
| 1458833  | 2485967  | 1351789  | 1569743  | 1364468  | 10519543 |              | 9   |
| 2010575  | 3232875  | 3176632  | 3066379  | 3243488  | 3166591  |              | 439 |
| 360161.8 | 2998110  | 174931.1 | 0        | 3946768  | 15605414 |              | 2   |
| 336053.9 | 0        | 355843.1 | 170264.1 | 274693   | 381665.6 | [M+H]+ 180   | 8   |
| 513934.8 | 571193.4 | 371645.1 | 401929.4 | 317448.9 | 685735.2 |              | 128 |
| 2702942  | 2938963  | 2938677  | 2203067  | 1797048  | 1593909  | [806][M+2]+  | 4   |
| 3449994  | 3915521  | 2740871  | 2988933  | 4066147  | 3531581  | [M+K]+ 194   | 13  |
| 1076194  | 2400108  | 302124.1 | 947964.3 | 1384520  | 12380925 | [M+K+CF3O]   | 15  |
| 59167798 | 57184248 | 49604626 | 53085058 | 55915406 | 42126317 | [184][M]3+   | 2   |
| 1383388  | 399722.4 | 1899452  | 1310484  | 237973.6 | 283375.3 |              | 4   |
| 2658180  | 1793335  | 2872724  | 1962904  | 1802033  | 12446930 |              | 1   |
| 479063.2 | 698363   | 648875.5 | 263681.4 | 595493.4 | 3823657  |              | 9   |
| 2189031  | 2054972  | 3331979  | 1821921  | 1083605  | 1019869  |              | 4   |
| 77995333 | 94636377 | 77162805 | 70160321 | 86079966 | 72349091 |              | 13  |

|          |          |          |          |          |          |              |     |
|----------|----------|----------|----------|----------|----------|--------------|-----|
| 480259.3 | 1.58E+08 | 236930.3 | 751489.5 | 242112   | 84029958 | [326][M]+    | 55  |
| 752089.1 | 1148166  | 302181.8 | 844322.3 | 917585.3 | 4176277  |              | 9   |
| 4366668  | 1969679  | 1740581  | 2530301  | 3248318  | 460401.3 | [M+K+NH3     | 15  |
| 681767.1 | 266991.8 | 208910.9 | 219543.3 | 363338   | 9892666  |              | 17  |
| 149053.6 | 120930.1 | 188693.9 | 147102.2 | 151050.6 | 96143.84 | [M+H+NH3     | 450 |
| 721239.9 | 2486506  | 2909895  | 2353268  | 2148957  | 7485836  |              | 1   |
| 2757238  | 5768875  | 3771161  | 362767.5 | 1735638  | 1957173  | [M+H]+ 200   | 58  |
| 2885600  | 5743079  | 2892816  | 2441557  | 3868451  | 2973881  |              | 344 |
| 961405   | 930445.2 | 538366.6 | 585458.7 | 804125.9 | 65361.69 | [M+K+NH3     | 12  |
| 3946818  | 2021973  | 2177810  | 2128680  | 2451956  | 1125813  | [1204][M]+   | 436 |
| 881163.4 | 738831.9 | 469839.5 | 757117.3 | 567436   | 395651.7 |              | 55  |
| 1803109  | 1786588  | 1895081  | 1491342  | 1437093  | 923181.7 | [947][M+2]+  | 116 |
| 7631600  | 7598663  | 4529408  | 7697463  | 3443139  | 7608127  |              | 183 |
| 4128112  | 4256604  | 4580460  | 4405701  | 4834361  | 2783083  |              | 316 |
| 1642893  | 1494793  | 2648457  | 1844305  | 2638964  | 1097319  | [224][M+1]2+ | 2   |
| 812792   | 525931.8 | 498218.1 | 688943.9 | 779700.3 | 0        |              | 1   |
| 1097926  | 2268754  | 1451883  | 694322.2 | 2914412  | 2647324  |              | 2   |
| 1170235  | 799176.5 | 744876.2 | 641712.1 | 938607.1 | 2447642  | [M+K+CF3C    | 46  |
| 497306.6 | 870335.9 | 570976.4 | 360248.5 | 412452.4 | 97436.48 | [3M+2Na]2    | 12  |
| 1450796  | 2059773  | 1301502  | 852107.9 | 1309196  | 3890387  |              | 117 |
| 62212846 | 63295926 | 45288718 | 65164877 | 68014098 | 75316348 |              | 2   |
| 4108877  | 1952158  | 6233688  | 5413266  | 5830319  | 5265399  |              | 2   |
| 2981383  | 1867903  | 2260573  | 2463232  | 2163774  | 323239.9 |              | 4   |
| 4750398  | 297019.8 | 2553719  | 5332634  | 3545649  | 4800585  |              | 9   |
| 68807631 | 1.02E+08 | 61115365 | 57657533 | 1.21E+08 | 3.04E+08 | [1367][M]2+  | 2   |
| 13817735 | 8921474  | 6909161  | 13971520 | 8037033  | 2028570  |              | 2   |
| 4912292  | 1809615  | 4510102  | 5413771  | 4110919  | 1157112  |              | 2   |
| 3176377  | 3957128  | 4497861  | 2201101  | 1683828  | 0        |              | 9   |
| 2480599  | 3446309  | 5075775  | 10141458 | 8459219  | 997069   |              | 15  |
| 819730.6 | 1129530  | 891042.3 | 639229.4 | 865104.2 | 517120.9 | [2M+3H]3+    | 42  |
| 660964.4 | 878272.6 | 1072986  | 212974.6 | 665045.3 | 1044702  |              | 9   |
| 2314965  | 2482507  | 469432.7 | 575115.1 | 3937894  | 3878415  | [3M+K]+ 15   | 11  |
| 4354228  | 4151541  | 3713115  | 2759642  | 3146140  | 1929135  |              | 4   |
| 3290432  | 3045510  | 4535682  | 3032327  | 3094112  | 1718833  | [1445][M]+   | 203 |
| 7295272  | 9090799  | 6210717  | 6718572  | 9506674  | 5697160  |              | 2   |

|          |          |          |          |          |          |                       |     |
|----------|----------|----------|----------|----------|----------|-----------------------|-----|
| 1.26E+08 | 1.27E+08 | 1.17E+08 | 1.11E+08 | 1.05E+08 | 75375468 |                       | 4   |
| 533554.3 | 1429991  | 28582560 | 1658096  | 980749.5 | 414245.9 |                       | 89  |
| 3207219  | 2508579  | 2773249  | 3084956  | 3575595  | 979747.9 |                       | 9   |
| 544819.2 | 141341.1 | 1189995  | 256019   | 271829.7 | 78544.55 | [M+H+NH3              | 136 |
| 3539194  | 3394696  | 3134252  | 2319069  | 2743349  | 1075628  | [872][M+1]+           | 86  |
| 1.51E+08 | 1.4E+08  | 1.4E+08  | 1.39E+08 | 1.37E+08 | 90158537 | [411][M]+             | 4   |
| 8241841  | 17641714 | 4145932  | 27898125 | 30804023 | 15175487 | [M+Na]+ 4:            | 46  |
| 176391.2 | 422148.7 | 604606.6 | 349040.8 | 231599.3 | 339322.1 |                       | 4   |
| 2784888  | 2807234  | 2773635  | 1851480  | 2225615  | 1862403  |                       | 18  |
| 29893833 | 26189453 | 24567348 | 24088502 | 25172108 | 9944286  | [1070][M]+ [M+H]+ 59: | 46  |
| 415147.8 | 484980.9 | 465851.2 | 47811213 | 455565.5 | 579104.9 | [537][M+1]+           | 160 |
| 169211.4 | 1670611  | 1.14E+08 | 1552753  | 1542535  | 455149.1 | [M+H]+ 48:            | 58  |
| 0        | 2065962  | 462728.3 | 158489.8 | 1642197  | 1180562  |                       | 93  |
| 4997438  | 6497483  | 8334312  | 4445453  | 4480124  | 5125768  | [M+H-C4H8             | 15  |
| 5014863  | 5021670  | 6769477  | 5951496  | 4878010  | 7068263  |                       | 2   |
| 105770.1 | 200471.4 | 205370.4 | 235587.2 | 190945.9 | 752919.8 |                       | 517 |
| 18287101 | 16300401 | 14998948 | 12798361 | 20554013 | 7023144  | [849][M+2]+           | 1   |
| 851492   | 1621111  | 1352450  | 392274.7 | 501460.5 | 0        |                       | 2   |
| 1096130  | 970506   | 1182936  | 852024.2 | 539577.3 | 16909401 |                       | 9   |
| 48464727 | 68093674 | 51388100 | 32292929 | 39978709 | 67392713 | [852][M+2]+           | 1   |
| 1.92E+08 | 2.75E+08 | 1.74E+08 | 1.61E+08 | 3.24E+08 | 7.81E+08 | [1365][M]2+           | 2   |
| 769111.5 | 597508.7 | 718891.2 | 399677.7 | 967361.7 | 814956.4 | [1222][M+1]+          | 17  |
| 742456.7 | 898802.4 | 528526.2 | 4544754  | 154764   | 27372870 | [M+H]+ 22:            | 135 |
| 11263363 | 7195833  | 6460509  | 5550418  | 5478804  | 3177854  |                       | 40  |
| 30654747 | 16954306 | 17894145 | 12118203 | 8932801  | 15220174 |                       | 178 |
| 1534990  | 2008434  | 944257.7 | 1130213  | 2582942  | 3025906  |                       | 2   |
| 737294.6 | 4175717  | 3997897  | 760658.3 | 537503.5 | 1488446  |                       | 4   |
| 4918742  | 993439.3 | 880184.8 | 4689400  | 510807.3 | 1635780  |                       | 106 |
| 2899739  | 1928329  | 2739657  | 3436507  | 6386441  | 2827057  |                       | 386 |
| 1377959  | 7558450  | 6083283  | 1821766  | 838105.2 | 815195   |                       | 4   |
| 6567965  | 8978721  | 4401573  | 4173283  | 6276344  | 8521712  | [695][M+1]+           | 119 |
| 914222.2 | 1149355  | 730358.3 | 836636.9 | 1275397  | 0        |                       | 2   |
| 2.06E+08 | 2.91E+08 | 1.85E+08 | 1.73E+08 | 3.48E+08 | 8.2E+08  | [1361][M]+            | 2   |
| 780658.8 | 962979.9 | 370163.2 | 646853.5 | 654220.7 | 1371544  |                       | 9   |
| 235768.8 | 99373.55 | 302072.7 | 315494.7 | 316242.5 | 299041.2 | [316][M+2]+           | 48  |

|          |          |          |          |          |          |                           |     |
|----------|----------|----------|----------|----------|----------|---------------------------|-----|
| 5424822  | 5782135  | 5197881  | 13800809 | 5260193  | 4913975  |                           | 226 |
| 2127034  | 4005946  | 3787537  | 2906336  | 1.36E+08 | 3825328  | [M+H] <sup>+</sup> 20!    | 11  |
| 8556826  | 9014738  | 15370255 | 9303396  | 6352825  | 8022781  |                           | 380 |
| 599569.3 | 1104881  | 688266.2 | 454151.2 | 681721.8 | 820258.4 |                           | 4   |
| 431887.7 | 889909.4 | 21770731 | 1444075  | 628407.4 | 1282287  | [M+K] <sup>+</sup> 36!    | 46  |
| 5919832  | 5514431  | 5396879  | 4381346  | 6667606  | 3005143  |                           | 418 |
| 1428158  | 634149.6 | 1445927  | 1199245  | 2945272  | 4506049  |                           | 93  |
| 1354775  | 715319.2 | 1240698  | 16541715 | 153926.8 | 7822575  | [M+H-C4H8] <sup>+</sup>   | 41  |
| 904815.8 | 1224286  | 1107658  | 2237599  | 2112452  | 6660463  | [M+H+NH3] <sup>+</sup>    | 3   |
| 2278264  | 2854346  | 3035261  | 2608964  | 1067964  | 2016649  |                           | 35  |
| 4528154  | 2592242  | 3813771  | 2401330  | 880437.5 | 2677138  | [M+H] <sup>+</sup> 42!    | 15  |
| 650085.4 | 944989.4 | 2764325  | 508805.8 | 452492.6 | 832507.5 | [1275][M+2] <sup>+</sup>  | 38  |
| 1706551  | 1245386  | 2019241  | 354884.4 | 1374091  | 119106.4 |                           | 1   |
| 13086570 | 10885831 | 10137805 | 13800488 | 11569414 | 7604171  | [432][M+2] <sup>2+</sup>  | 2   |
| 15002630 | 38205543 | 8511827  | 5235552  | 24337180 | 32403902 | [18][M] <sup>2+</sup>     | 3   |
| 9229296  | 8023540  | 7620730  | 7260980  | 7280055  | 4693085  |                           | 2   |
| 1563660  | 1065250  | 2125323  | 128761.1 | 1010435  | 580688   |                           | 1   |
| 1312239  | 2459766  | 1534042  | 1577660  | 1676614  | 3734364  |                           | 4   |
| 260172.6 | 898612   | 962226.8 | 162722.3 | 385715.2 | 2031008  | [843][M+2] <sup>+</sup>   | 9   |
| 1185727  | 896642.6 | 1248574  | 1141755  | 1197854  | 973840.9 |                           | 28  |
| 3466407  | 5115830  | 2052098  | 3379531  | 5539954  | 7822310  |                           | 2   |
| 33031043 | 19013231 | 24325399 | 32626396 | 25832831 | 8373448  |                           | 2   |
| 37417083 | 1617300  | 1988525  | 468656.8 | 751577.1 | 881455.6 | [M+2K-H] <sup>+</sup>     | 13  |
| 493117   | 480882.5 | 605726.3 | 216134.7 | 533840.6 | 202268.6 | [1074][M+1] <sup>+</sup>  | 284 |
| 2115402  | 2092557  | 1713553  | 2251887  | 1721549  | 863905   |                           | 9   |
| 3061030  | 1735561  | 1931140  | 2001482  | 2619673  | 2291718  | [M+H-CO] <sup>+</sup>     | 15  |
| 2230157  | 2518881  | 3613955  | 1105086  | 3481131  | 732242.9 |                           | 52  |
| 2697098  | 1618643  | 1742278  | 2094931  | 1922550  | 456936.2 |                           | 4   |
| 905883.2 | 771721.5 | 474764.1 | 657744   | 669632.2 | 2283500  | [M+K] <sup>+</sup> 35!    | 8   |
| 8093972  | 7768699  | 6267676  | 8303573  | 8832370  | 2153234  | [M+K] <sup>+</sup> 54!    | 14  |
| 1693668  | 930148   | 1199802  | 1296205  | 1223405  | 1072457  | [M+3Na-H] <sup>+</sup>    | 13  |
| 5191167  | 4770647  | 4891766  | 3322694  | 3922912  | 2002208  | [1256][M+2] <sup>2+</sup> | 4   |
| 1264746  | 1090468  | 2972815  | 349296.6 | 2433165  | 0        |                           | 1   |
| 1008114  | 2573990  | 1434220  | 760615.4 | 1565579  | 5325958  |                           | 4   |
| 2304117  | 2723026  | 1529157  | 1465236  | 2454280  | 2232344  |                           | 9   |



|          |          |          |          |          |          |              |     |
|----------|----------|----------|----------|----------|----------|--------------|-----|
| 2255987  | 1947008  | 2088816  | 2109487  | 1861256  | 12466048 |              | 9   |
| 1254807  | 507444.4 | 5338757  | 966299.9 | 805467.7 | 843047.9 |              | 9   |
| 3323628  | 2151359  | 2148469  | 1610429  | 6079910  | 2197289  | [M+Na+NH     | 20  |
| 18598505 | 32790193 | 24979986 | 17466125 | 21823358 | 25785105 |              | 1   |
| 2900072  | 8273661  | 3370486  | 2676530  | 8802716  | 14383075 |              | 2   |
| 3397188  | 209623   | 2790143  | 4034158  | 2628605  | 297968.9 | [3M+2Na]2    | 13  |
| 25952084 | 17731256 | 19162229 | 25988061 | 20232557 | 5650894  | [31][M]2+    | 2   |
| 17870392 | 13193446 | 14348207 | 19510482 | 15489595 | 7751987  | [519][M]2+   | 2   |
| 7669973  | 48349002 | 14278959 | 6564603  | 10408619 | 53582050 |              | 144 |
| 10295453 | 9939550  | 8952399  | 9886409  | 12630701 | 12460118 |              | 2   |
| 4666569  | 5163934  | 4896707  | 748278.6 | 10340119 | 50632857 | [M+K]+ 43!   | 29  |
| 471820.3 | 489387.4 | 122342.1 | 145956.2 | 440297.2 | 61955.65 |              | 67  |
| 36125753 | 44178582 | 42193576 | 30358892 | 47623957 | 60652917 | [795][M+1]+  | 26  |
| 90820.27 | 152244.9 | 97712.52 | 200269.5 | 104408   | 658724.6 |              | 44  |
| 3227445  | 3153717  | 4842367  | 4682415  | 3662493  | 4270458  |              | 385 |
| 2083119  | 1614345  | 1766616  | 1413507  | 1511986  | 642498.7 |              | 4   |
| 10710272 | 4720023  | 1.28E+09 | 6211778  | 6577292  | 1607800  | [M+K]+ 34!   | 14  |
| 29986724 | 3844783  | 2836831  | 892582   | 4062923  | 4900039  |              | 2   |
| 4476781  | 5160998  | 4911557  | 3497409  | 3645958  | 1926168  |              | 9   |
| 1360205  | 608213   | 1282214  | 684931.9 | 1032421  | 259798   |              | 9   |
| 1054393  | 318210.2 | 945133.1 | 1070782  | 683618.1 | 782772   |              | 4   |
| 9803560  | 25872912 | 24355928 | 4555658  | 4.02E+08 | 38609432 | [741][M]3+   | 15  |
| 2490597  | 1778012  | 1005544  | 959630.5 | 3273347  | 5.68E+08 |              | 4   |
| 6727909  | 4924003  | 2597631  | 4208714  | 2939458  | 4055316  | [M+H+NH3     | 26  |
| 9783251  | 11159023 | 8577218  | 14072985 | 14498117 | 12430809 | [M+H]+ 47!   | 15  |
| 3899223  | 4380918  | 5197024  | 3099415  | 3233867  | 606986.9 | [M+H]+ 53!   | 46  |
| 2830414  | 2506355  | 51545727 | 2481740  | 4456677  | 12054108 | [609][M+1]+  | 9   |
| 5764583  | 5120062  | 4479424  | 5391308  | 2796821  | 3708997  | [1440][M+1]+ | 35  |
| 5140439  | 7300148  | 7196344  | 3651832  | 5233016  | 2722305  | [M+Na]+ 5!   | 12  |
| 2793679  | 2585126  | 1998805  | 2327653  | 1639488  | 175718.1 |              | 9   |
| 4577054  | 12379291 | 11813313 | 3027818  | 14862737 | 21346620 | [M+Na]+ 4!   | 33  |
| 535910.9 | 7586243  | 4317990  | 3009206  | 9558382  | 7034420  |              | 2   |
| 922571.5 | 1028801  | 1124091  | 781146.2 | 820591.4 | 479703.6 |              | 4   |
| 4257673  | 5742881  | 5992742  | 5417401  | 5235876  | 10352505 |              | 293 |
| 858355.4 | 572715.4 | 451515.2 | 406670.5 | 425460.4 | 130776.8 |              | 81  |

|          |          |          |          |          |          |               |     |
|----------|----------|----------|----------|----------|----------|---------------|-----|
| 17745431 | 15242821 | 17236632 | 16957634 | 15901675 | 3764555  |               | 9   |
| 4667242  | 4544826  | 10421141 | 40723483 | 819216   | 2991932  | [M+K+NH3      | 86  |
| 11770444 | 842674.2 | 1694821  | 2014592  | 3825850  | 11528804 |               | 2   |
| 10493828 | 23463770 | 16026322 | 7478393  | 10434139 | 27904401 |               | 14  |
| 17957037 | 28258884 | 15322985 | 15002413 | 37234974 | 88883029 | [436][M+2]2+  | 2   |
| 7324363  | 9693564  | 9291080  | 9566741  | 6026211  | 9255959  |               | 267 |
| 19711557 | 11301256 | 15466944 | 22243092 | 12397137 | 7179109  |               | 2   |
| 13402498 | 6313833  | 13998496 | 37967033 | 6516564  | 6411076  | [499][M+1]+   | 136 |
| 1.17E+08 | 66890663 | 94103431 | 1.09E+08 | 64341050 | 26886300 |               | 2   |
| 663401.7 | 1331582  | 1295564  | 0        | 454566.7 | 1547883  | [M+H-CH2]     | 6   |
| 14136243 | 4980444  | 931360.1 | 7268965  | 517394.9 | 24495145 |               | 15  |
| 5703924  | 5318146  | 4792557  | 3709152  | 4812413  | 3014488  |               | 4   |
| 2595423  | 1719502  | 2637715  | 2244494  | 1899835  | 246447.8 |               | 155 |
| 5583810  | 6620665  | 9417110  | 4567013  | 8624314  | 8972563  |               | 2   |
| 14197001 | 12460255 | 10079360 | 9922671  | 11193047 | 3507274  |               | 97  |
| 1086178  | 218887.1 | 2085034  | 2961610  | 1458669  | 2876064  |               | 446 |
| 654000.2 | 879741.7 | 784956   | 626292.3 | 444882.6 | 259172.1 | [329][M+1]2+  | 9   |
| 239989.9 | 377115.2 | 420233.2 | 8066952  | 417905.1 | 141911.6 | [M+2H-CH3     | 18  |
| 468791.3 | 421801.3 | 479246.7 | 292978.6 | 563028.8 | 228831.1 |               | 4   |
| 1592704  | 1863764  | 2332023  | 1491630  | 771700.3 | 416273.2 |               | 4   |
| 2307302  | 3647181  | 2294843  | 1411079  | 3823528  | 6235594  |               | 274 |
| 338696.7 | 683407.6 | 400906.9 | 0        | 371461.8 | 0        | [M+Na]+ 3:    | 12  |
| 10390219 | 8497313  | 8970115  | 10111326 | 10338703 | 3352229  | [3M+H]+ 1:    | 13  |
| 448326.5 | 431463   | 481041.5 | 44775225 | 515572.5 | 144202.9 |               | 66  |
| 8048719  | 2463354  | 7801805  | 10479200 | 2856080  | 11640343 |               | 2   |
| 2680859  | 1445171  | 3844473  | 2372850  | 3261974  | 3491677  |               | 14  |
| 837711.7 | 842578.2 | 535532.8 | 662187.1 | 560914.6 | 162610.1 | [M+2Na]2+     | 81  |
| 643075.9 | 0        | 608205.9 | 510099.9 | 505451.3 | 370175.1 | [M+H]+ 19:    | 8   |
| 2149303  | 2303809  | 1598442  | 2226167  | 1357704  | 0        |               | 1   |
| 1788915  | 1209149  | 1966079  | 2618972  | 1558906  | 2193511  | [M+Na]+ 4:    | 33  |
| 4628930  | 1204716  | 1151055  | 4571470  | 1130684  | 2686194  |               | 2   |
| 678805.3 | 1020956  | 642839.1 | 369237.4 | 664530.5 | 158547.7 |               | 81  |
| 1032869  | 122010.3 | 1479513  | 923649.8 | 1675167  | 0        | [1006][M+1]2+ | 9   |
| 9160620  | 4874528  | 6904107  | 7061772  | 6081459  | 2886290  |               | 4   |
| 2661027  | 1583704  | 1658145  | 2660222  | 692050.8 | 888422.4 | [1209][M+1]+  | 57  |

|          |          |          |          |          |          |               |     |
|----------|----------|----------|----------|----------|----------|---------------|-----|
| 2029378  | 2376107  | 2017069  | 1280169  | 2755896  | 5481429  |               | 9   |
| 2161981  | 3445107  | 3575410  | 2466398  | 4362197  | 1240454  | [2M+H+Na      | 12  |
| 2629365  | 1045000  | 1341208  | 1105619  | 1233484  | 0        |               | 182 |
| 982660.9 | 2447143  | 3370561  | 851117.1 | 1047515  | 6990087  |               | 9   |
| 993752.4 | 920029.8 | 774471.8 | 639782.8 | 1067553  | 5714652  | [M+Na+NH      | 8   |
| 1240413  | 626681.9 | 536327.1 | 456548.5 | 526333.1 | 213790.7 |               | 5   |
| 12427118 | 13198936 | 11079829 | 13903250 | 8293149  | 5042341  |               | 2   |
| 808320.8 | 1154105  | 778762   | 605356.3 | 658972.3 | 2070566  | [M+Na+HC      | 81  |
| 960964   | 808595.7 | 1235156  | 956056.9 | 1008282  | 294820   |               | 4   |
| 6970010  | 6975703  | 6523190  | 6170668  | 5938749  | 4063263  | [M+Na+NH      | 33  |
| 2318993  | 4215720  | 3206710  | 2769972  | 1734251  | 2138597  | [M+3Na+K·     | 18  |
| 1604496  | 2587417  | 1510639  | 1114599  | 2094152  | 4405141  |               | 214 |
| 66422061 | 60943002 | 62667405 | 57645689 | 58702805 | 39255983 | [133][M+1]+   | 4   |
| 5422416  | 4940534  | 4840185  | 3426456  | 4207447  | 2233577  | [1239][M+2]2+ | 4   |
| 12381233 | 12010660 | 8610472  | 12697519 | 12159675 | 7919379  | [1609][M+2]2+ | 2   |
| 5486255  | 9985037  | 6707227  | 8127979  | 6658821  | 6406589  | [M+Na]+ 5'    | 15  |
| 1241391  | 1005741  | 996305.5 | 1262976  | 1039351  | 385104.8 |               | 4   |
| 4832294  | 5749893  | 1423065  | 1825461  | 3833588  | 2173120  | [10][M+1]2+   | 3   |
| 470826.2 | 761339   | 10922416 | 530155.2 | 471887.4 | 421207.5 | [M+H]+ 37'    | 41  |
| 9732477  | 4120621  | 9127088  | 4611492  | 10783267 | 719219.7 |               | 1   |
| 2952623  | 3154537  | 2861195  | 3704037  | 5016873  | 3303206  |               | 95  |
| 5688625  | 2987249  | 6519795  | 6848122  | 3559662  | 8211229  |               | 300 |
| 82449795 | 1.17E+08 | 1.17E+08 | 60744841 | 75338866 | 38452543 | [3M+2Na+I     | 20  |
| 4063672  | 4613254  | 4316410  | 4110017  | 4317199  | 3862739  |               | 325 |
| 1178413  | 1057097  | 1092264  | 865666.6 | 2465121  | 1540575  |               | 1   |
| 1222520  | 1136234  | 1048954  | 772308.4 | 580384.1 | 7712515  | [M+H+CF3O     | 38  |
| 27853812 | 28695911 | 6023169  | 4750433  | 31448762 | 17930259 | [M+K]+ 14'    | 11  |
| 803223.6 | 482672.5 | 222307.2 | 555359.6 | 302725   | 347265.3 |               | 355 |
| 4467344  | 4541062  | 3413090  | 3866841  | 5683135  | 3802194  | [M+H]+ 87'    | 13  |
| 752647.5 | 1687990  | 1930246  | 370317.2 | 746268.3 | 2429797  |               | 9   |
| 568435.7 | 1835905  | 1324204  | 446584   | 1148827  | 1897354  |               | 2   |
| 879808.4 | 965544.6 | 1030723  | 682536   | 978894.3 | 662654.9 | [259][M+1]+   | 4   |
| 7770684  | 13008121 | 8559482  | 4639950  | 7751863  | 6802467  |               | 3   |
| 169942.5 | 334625.5 | 130167.2 | 45661.23 | 354498.8 | 224178   |               | 91  |
| 82606374 | 78116133 | 78129803 | 75736263 | 75140139 | 50656611 | [99][M]+      | 4   |

|          |          |          |          |          |          |              |     |
|----------|----------|----------|----------|----------|----------|--------------|-----|
| 7359853  | 5263016  | 6253963  | 7218207  | 6952372  | 1298289  |              | 2   |
| 8323011  | 5994994  | 13670696 | 1.04E+08 | 10237269 | 7153531  |              | 151 |
| 38536333 | 28942818 | 72462302 | 84845605 | 53690844 | 23750223 | [900][M]+    | 115 |
| 4688078  | 6372238  | 5194628  | 3730925  | 4554482  | 5423300  |              | 257 |
| 2756508  | 9242781  | 8743128  | 3154663  | 7248084  | 4674841  | [345][M]3+   | 20  |
| 913916.1 | 624773.9 | 258383.8 | 733116.8 | 740774.9 | 930531.3 |              | 9   |
| 903952.1 | 1994622  | 3410246  | 728606.5 | 1213040  | 1327855  | [3M+2Na]2    | 46  |
| 1884643  | 1187352  | 1257152  | 4084467  | 2205402  | 1399668  | [1527][M]+   | 463 |
| 176836.8 | 346542.9 | 182457.7 | 248472   | 220467.9 | 70866.39 | [262][M+1]+  | 24  |
| 4449346  | 1661031  | 4453793  | 2545737  | 2264701  | 0        |              | 1   |
| 885234.3 | 403553.4 | 568963.6 | 496306.1 | 822119.8 | 143850.6 |              | 51  |
| 1380193  | 8875615  | 90299490 | 1854628  | 1584307  | 1296510  | [M+H+NH3     | 20  |
| 6243493  | 3515853  | 5538200  | 5600443  | 9917533  | 12679139 | [427][M+2]2+ | 2   |
| 20436161 | 18537283 | 25532182 | 20347113 | 15839158 | 14547458 |              | 145 |
| 1321636  | 429054.7 | 2150100  | 1795193  | 1485992  | 1673507  |              | 5   |
| 2036428  | 3491687  | 2894492  | 3674401  | 2649722  | 2201035  |              | 2   |
| 41403.97 | 287083.6 | 107522.5 | 36288.98 | 252145.6 | 100749.8 |              | 24  |
| 1746561  | 2245052  | 1822054  | 1128903  | 1792509  | 16097543 |              | 9   |
| 2987616  | 8917697  | 8846532  | 33817733 | 2190659  | 2849639  | [M+2H-H2O    | 41  |
| 546144.2 | 1171492  | 1276018  | 480982.1 | 455786   | 2348415  |              | 9   |
| 2569986  | 4388720  | 5152738  | 1691743  | 4710824  | 2343974  |              | 1   |
| 1308894  | 1717736  | 1496408  | 1004861  | 939003   | 393066.3 |              | 4   |
| 3116169  | 2871873  | 2894119  | 2991850  | 4558666  | 11787154 |              | 1   |
| 1533170  | 655954.9 | 1267824  | 344307.2 | 1605306  | 1754767  | [3M+2Na+I    | 6   |
| 1344069  | 1339691  | 1270012  | 1068646  | 1143963  | 887228.3 |              | 25  |
| 6885263  | 757698.4 | 2331128  | 6703547  | 4690491  | 3789153  | [729][M]3+   | 1   |
| 459578.9 | 1294304  | 2298541  | 839190.2 | 403203.3 | 803103.7 |              | 9   |
| 368416   | 437360.5 | 382368.7 | 642512.9 | 353157.3 | 420401.9 | [497][M+1]2+ | 16  |
| 7717616  | 4731237  | 12899889 | 8913111  | 11239380 | 2248445  |              | 1   |
| 362562.7 | 291603.2 | 416688   | 322890.1 | 265602.2 | 204354.7 | [948][M+1]+  | 299 |
| 4089453  | 3991072  | 3741862  | 4415162  | 3599133  | 3109715  |              | 202 |
| 2053424  | 2284424  | 2521756  | 1924176  | 1548536  | 672532.6 | [1417][M]2+  | 57  |
| 6823395  | 4793684  | 5115787  | 3603727  | 3532741  | 461148.1 |              | 286 |
| 733726.1 | 982158.9 | 932241.2 | 492156.4 | 689671.1 | 486975.4 |              | 4   |
| 3200649  | 3043046  | 2706784  | 2573979  | 1691208  | 42609354 |              | 2   |

|          |          |          |          |          |          |                       |     |
|----------|----------|----------|----------|----------|----------|-----------------------|-----|
| 25822633 | 20939348 | 29597648 | 37803914 | 19515487 | 21395287 |                       | 2   |
| 1.77E+08 | 1.55E+08 | 1.3E+08  | 1.44E+08 | 1.4E+08  | 68435345 | [327][M]+             | 75  |
| 1228165  | 758337.3 | 850638.5 | 745610.1 | 1298079  | 2829967  |                       | 4   |
| 58979031 | 1.01E+08 | 69333137 | 50733813 | 58453128 | 72688017 | [M+H]+ 430            | 15  |
| 3947504  | 3681835  | 4088127  | 3202738  | 3399820  | 1731385  |                       | 4   |
| 41293307 | 46572098 | 34968147 | 41256475 | 42745759 | 24809313 | [1217][M]+            | 2   |
| 8997788  | 8596657  | 8687526  | 8585679  | 5699270  | 8328184  |                       | 335 |
| 63393221 | 1.1E+08  | 81065922 | 58822154 | 64675126 | 85683277 |                       | 15  |
| 386959.2 | 405915.8 | 200512.8 | 408457.4 | 305255.8 | 204701.9 |                       | 394 |
| 13987692 | 13132292 | 12941806 | 9080636  | 10688817 | 5609668  | [1256][M]2+           | 4   |
| 1145198  | 1707926  | 1485782  | 1144580  | 633642.6 | 2646600  |                       | 9   |
| 1275778  | 2775688  | 1393680  | 1930768  | 1128402  | 3068224  |                       | 2   |
| 18307431 | 6908680  | 1750041  | 18679644 | 26839214 | 5876145  |                       | 1   |
| 1166477  | 0        | 278682.4 | 986206.1 | 550069.6 | 0        |                       | 9   |
| 2123236  | 1871637  | 1821638  | 1560082  | 1547067  | 765610.7 |                       | 4   |
| 232165.8 | 168592.8 | 260995.1 | 194218.3 | 273645   | 218272.8 |                       | 124 |
| 5545952  | 4764334  | 5456136  | 5840787  | 5471609  | 6084297  |                       | 180 |
| 531354   | 956745.3 | 1424255  | 1869910  | 552990.4 | 1575060  |                       | 9   |
| 3002925  | 3349976  | 2871137  | 2227147  | 2825864  | 29937835 | [1351][M+1]+          | 2   |
| 18312510 | 28212966 | 14816568 | 14787929 | 37193974 | 88188568 |                       | 2   |
| 5172168  | 596681.5 | 4840434  | 5358353  | 4845179  | 1472347  |                       | 2   |
| 339342.5 | 582128.6 | 1103982  | 3404827  | 455229   | 260600.1 | [M+2H]2+!             | 12  |
| 1270928  | 504001.4 | 1121795  | 175885.8 | 900286.3 | 1263986  | [3M+2K]2+             | 12  |
| 3209003  | 3891772  | 4388390  | 2266688  | 2100096  | 11811652 | [2M+Na+2H]            | 46  |
| 1879176  | 22972511 | 29863965 | 2626911  | 3799884  | 44976192 |                       | 2   |
| 554663.5 | 404210.8 | 581348.6 | 628636.2 | 448930   | 259370.5 | [1042][M]≡ [2M+3H]3+  | 16  |
| 154911.8 | 594513.1 | 4061238  | 104319.7 | 664415.8 | 1665129  |                       | 15  |
| 2338759  | 3681538  | 2708851  | 2111119  | 2791477  | 5972801  |                       | 227 |
| 106077   | 869283.5 | 540137.8 | 132673.1 | 586347.1 | 439291.4 | [3M+2K]2+             | 46  |
| 2210959  | 2161491  | 2465116  | 2433083  | 1198443  | 2709145  |                       | 483 |
| 4515351  | 4411725  | 5361895  | 3153561  | 3917213  | 1339066  | [1010][M]+ [M+H]+ 550 | 16  |
| 392428.4 | 677103.7 | 2597312  | 1619724  | 529975.5 | 1109573  | [M+Na]+ 300           | 8   |
| 1334867  | 1726120  | 1329672  | 1282807  | 1047363  | 488914   |                       | 2   |
| 1428942  | 215719.3 | 651436.2 | 1515961  | 826283.2 | 0        |                       | 9   |
| 3573044  | 1896543  | 3592291  | 3342860  | 3451533  | 520935.9 |                       | 2   |

|          |          |          |          |          |          |                                               |     |
|----------|----------|----------|----------|----------|----------|-----------------------------------------------|-----|
| 603396.7 | 754943   | 615580.6 | 5421033  | 478226.5 | 240337.7 | [3M+H] <sup>+</sup> 1:                        | 38  |
| 3685072  | 16340927 | 1.54E+08 | 3325069  | 2556226  | 6869952  | [M+Na+NH                                      | 20  |
| 984234.6 | 0        | 1657662  | 850451.2 | 618587.6 | 0        |                                               | 9   |
| 11018084 | 5704510  | 5238533  | 11045440 | 7913568  | 2665004  | [M+H-CH3]                                     | 14  |
| 8759895  | 7759297  | 7044463  | 7494953  | 6248485  | 4525381  |                                               | 2   |
| 3710023  | 3456374  | 2944109  | 3500117  | 2707804  | 2043355  |                                               | 169 |
| 2086588  | 0        | 1633106  | 1571878  | 779005.9 | 608534.3 | [1001][M] <sup>2+</sup>                       | 38  |
| 1803071  | 2864478  | 1975437  | 977807.6 | 2135292  | 4431689  |                                               | 2   |
| 7887207  | 8652768  | 7829980  | 6304405  | 5387338  | 4749511  |                                               | 4   |
| 3571768  | 2679553  | 2123430  | 2329970  | 1496388  | 5226408  |                                               | 172 |
| 2617492  | 3360343  | 5517248  | 2109211  | 2295958  | 4381484  |                                               | 9   |
| 754426.2 | 994553.4 | 792012.1 | 598805.5 | 786094.9 | 1334529  |                                               | 4   |
| 3411588  | 5315564  | 5434674  | 3079714  | 3664463  | 1454011  | [M+H+CF3(                                     | 13  |
| 1446618  | 812278.2 | 759503.7 | 835079.6 | 1104566  | 1752990  |                                               | 155 |
| 0        | 1311990  | 887688.3 | 0        | 205971.8 | 1474436  |                                               | 1   |
| 77883833 | 94633596 | 76744331 | 69738662 | 85569965 | 72954862 | [M+H-COCl                                     | 13  |
| 828905.5 | 595993.3 | 1918801  | 2277705  | 1927241  | 9339813  | [535][M+1] <sup>3+</sup>                      | 2   |
| 4334762  | 4046981  | 3205305  | 5783878  | 6218194  | 249332.4 |                                               | 1   |
| 2076807  | 777185.8 | 1169549  | 1812375  | 401808.2 | 82803.18 | [M+H] <sup>+</sup> 87(                        | 81  |
| 1272899  | 5936631  | 3745137  | 1047421  | 2271672  | 2467021  | [683][M] <sup>2+</sup> [M+H+Na] <sup>2+</sup> | 20  |
| 1589055  | 330940.6 | 628461.7 | 646928.2 | 1089712  | 152722.7 | [1230][M+1] <sup>2+</sup>                     | 150 |
| 28298547 | 31119063 | 30116512 | 19903285 | 23298670 | 15277724 |                                               | 4   |
| 257814.4 | 59976.97 | 189486.9 | 137364.8 | 233601.1 | 105408.8 | [991][M+1] <sup>2+</sup>                      | 220 |
| 5237051  | 9260779  | 4962635  | 4307538  | 7694284  | 25194654 | [1212][M+2] <sup>2+</sup>                     | 2   |
| 8612817  | 9152321  | 9104714  | 6074347  | 6954869  | 4561039  |                                               | 4   |
| 6887242  | 3253987  | 2770290  | 2615412  | 3331773  | 2821866  |                                               | 410 |
| 619548.3 | 767720   | 304085.1 | 491789.1 | 483700.4 | 960672   | [M+K] <sup>+</sup> 72(                        | 38  |
| 1099490  | 2377854  | 1933023  | 2034655  | 1902718  | 327968.2 |                                               | 2   |
| 329512.7 | 873938.7 | 208417   | 69797.69 | 548544.6 | 2474046  |                                               | 9   |
| 1200169  | 543534.6 | 1182526  | 905313.5 | 944194.2 | 5963990  |                                               | 271 |
| 3569236  | 4332055  | 2863731  | 2418250  | 3779594  | 2649199  | [356][M+4] <sup>3+</sup>                      | 2   |
| 1309177  | 1059555  | 1482398  | 1052896  | 935099.1 | 311936.9 |                                               | 9   |
| 345379.3 | 1708196  | 706446.9 | 7801308  | 1070056  | 1192973  |                                               | 65  |
| 2386534  | 3112790  | 3370837  | 1787446  | 2535356  | 698228   | [344][M+2] <sup>3+</sup>                      | 9   |
| 4021788  | 3155179  | 3072567  | 3442014  | 2736752  | 1691425  | [3M+2Na+]                                     | 93  |

|          |          |          |          |          |          |               |     |
|----------|----------|----------|----------|----------|----------|---------------|-----|
| 408759.2 | 330968   | 396583.1 | 372145.2 | 221055.4 | 183129.7 | [1042][M+1]3+ | 16  |
| 266684.6 | 272812.9 | 316531.3 | 14939525 | 74408.97 | 47386.88 |               | 224 |
| 4233384  | 1605118  | 3841884  | 3671356  | 4209164  | 11956297 |               | 2   |
| 5944368  | 2294536  | 1481567  | 2118553  | 5640659  | 2573771  | [3M+2H]2+     | 15  |
| 2953478  | 752697.3 | 314539.4 | 1054406  | 2500167  | 5096002  | [M+Na+Na      | 11  |
| 1770281  | 1743338  | 0        | 1245359  | 2425524  | 1033504  |               | 1   |
| 1255653  | 3152975  | 1988788  | 989923   | 1748799  | 3942416  |               | 9   |
| 5639133  | 7636350  | 6219601  | 5040551  | 6314359  | 4591063  |               | 9   |
| 15080601 | 24031779 | 13854042 | 11718302 | 29612848 | 77468853 |               | 2   |
| 6482403  | 6060653  | 8275635  | 8749393  | 3873352  | 14534869 |               | 168 |
| 1231404  | 685496.4 | 486686.5 | 703692.3 | 579789.4 | 101975.5 |               | 4   |
| 5216468  | 3904844  | 4228336  | 4992453  | 3800936  | 1782938  |               | 2   |
| 6874320  | 2726743  | 7418839  | 6094862  | 2490399  | 22670916 |               | 2   |
| 793992.3 | 486814.7 | 898400.8 | 979563.4 | 466073.2 | 293630.8 |               | 477 |
| 3963151  | 3844861  | 4122696  | 3266777  | 3370774  | 1843641  |               | 4   |
| 2312977  | 4779477  | 2464473  | 1639738  | 3865763  | 5964680  |               | 2   |
| 123596.2 | 1875676  | 1199559  | 512866.6 | 1435019  | 4166721  |               | 4   |
| 1980876  | 1287292  | 1296631  | 1531786  | 1046338  | 1619196  | [M+H+NH3      | 38  |
| 12503460 | 12970194 | 11036307 | 12421284 | 10101295 | 1632101  | [1321][M]+    | 2   |
| 2189242  | 2651530  | 3104780  | 896973.9 | 2446059  | 3757082  |               | 2   |
| 3543796  | 4807504  | 5154047  | 2093828  | 3761439  | 3.59E+08 | [M+Na]+ 30    | 6   |
| 17601677 | 15741254 | 16099584 | 11731568 | 13735795 | 4344356  | [1149][M]+    | 4   |
| 330688.8 | 1139261  | 651111.9 | 275362.1 | 707099.7 | 2987213  |               | 4   |
| 394500.8 | 478791.3 | 425807.5 | 81881.3  | 370543   | 265914.7 | [251][M+1]3+  | 24  |
| 3232697  | 3651618  | 4623608  | 3886894  | 3388576  | 1822624  |               | 213 |
| 1883929  | 4258493  | 3619663  | 1530422  | 2090738  | 1814774  |               | 13  |
| 5247990  | 5466312  | 4551972  | 3705574  | 4343413  | 2259659  |               | 4   |
| 271023.7 | 320723.6 | 167753.3 | 243547.6 | 262039.2 | 100306.9 | [838][M+1]+   | 294 |
| 2324285  | 1748748  | 2153816  | 1965300  | 1344088  | 350496.6 |               | 2   |
| 4022467  | 3397182  | 2661413  | 3095346  | 2960285  | 365432.8 |               | 9   |
| 918182.9 | 1462049  | 1499277  | 512462.6 | 1006438  | 484733.8 |               | 4   |
| 3443447  | 7774658  | 3520211  | 5523237  | 2789630  | 3430126  |               | 341 |
| 6349276  | 6517868  | 6121890  | 1152887  | 347702.7 | 843604.4 | [M+H]+ 40     | 5   |
| 7854507  | 6857297  | 6282267  | 5050855  | 6208152  | 2329972  |               | 4   |
| 4014410  | 3742740  | 3584932  | 3001701  | 4571492  | 5318045  | [338][M+1]3+  | 2   |

|          |          |          |          |          |          |                                             |     |
|----------|----------|----------|----------|----------|----------|---------------------------------------------|-----|
| 2242757  | 2850737  | 2826959  | 1785878  | 2120717  | 904582.8 |                                             | 9   |
| 10338367 | 6585986  | 8401029  | 9292537  | 8385876  | 961391.7 |                                             | 2   |
| 7598928  | 21650816 | 10477407 | 7657644  | 23927909 | 65955928 |                                             | 2   |
| 2662860  | 2928021  | 1892926  | 1088610  | 2160624  | 976845.2 | [M+2H] <sup>2+</sup>                        | 18  |
| 1192866  | 1002772  | 1229582  | 938901   | 901944.1 | 0        |                                             | 9   |
| 4234760  | 4014952  | 3957298  | 2190684  | 3290754  | 1636594  |                                             | 4   |
| 11704604 | 8011491  | 12763622 | 7731460  | 7642019  | 1352877  |                                             | 1   |
| 3334355  | 553502.6 | 1155929  | 3028849  | 2501305  | 810852.5 |                                             | 9   |
| 3325029  | 2464686  | 4229119  | 1248113  | 806036.9 | 2944211  | [654][M+1] <sup>+</sup>                     | 4   |
| 6774612  | 8571692  | 5731993  | 7623320  | 6897642  | 2595971  | [352][M+5] <sup>3+</sup>                    | 2   |
| 925544.7 | 3692660  | 17871927 | 3415341  | 3784993  | 876294.8 | [M+H] <sup>+</sup> 59                       | 81  |
| 12194654 | 26391511 | 10036362 | 12275630 | 14530329 | 51643901 |                                             | 13  |
| 3715467  | 3415018  | 327190.5 | 4038392  | 3983461  | 74792026 |                                             | 52  |
| 790614.8 | 738004.7 | 595848.1 | 479524.5 | 659482.9 | 3743419  |                                             | 46  |
| 794741   | 1090307  | 827436.5 | 346448.6 | 830352.9 | 832675.2 | [1517][M+1] <sup>+</sup>                    | 4   |
| 8822117  | 11286607 | 10799726 | 6368392  | 11597229 | 6354509  |                                             | 1   |
| 1564512  | 1497614  | 1309665  | 524644.3 | 1482280  | 112637.4 | [3M+H+Na]                                   | 46  |
| 2597519  | 804508.2 | 2195190  | 951966.9 | 297987.2 | 38534.46 | [1603][M] <sup>+</sup>                      | 115 |
| 1467073  | 2204939  | 2828618  | 655646.5 | 1446775  | 40241185 |                                             | 9   |
| 86021.21 | 82018.17 | 468558.1 | 486629.7 | 423833.8 | 344247.6 |                                             | 24  |
| 1628715  | 2798319  | 17161.09 | 30480823 | 43715763 | 84449649 | [M+H] <sup>+</sup> 19                       | 11  |
| 71072432 | 70574891 | 67847812 | 60904983 | 60078404 | 42803911 | [802][M] <sup>+</sup> [M+H] <sup>+</sup> 45 | 57  |
| 1071585  | 0        | 1574530  | 1061536  | 1329348  | 0        | [M+Na+CF <sub>3</sub> ]                     | 13  |
| 2987840  | 1843778  | 2503852  | 2244733  | 3024235  | 8385071  | [3M+2Na] <sup>2</sup>                       | 97  |
| 678350.1 | 792778.9 | 940766.2 | 976299.4 | 233807.6 | 1017959  |                                             | 57  |
| 2.01E+08 | 4.77E+08 | 661795.4 | 545479.7 | 2.11E+08 | 529905.4 |                                             | 18  |
| 940620.4 | 2396883  | 1374417  | 650308   | 1931151  | 9728731  |                                             | 9   |
| 1199119  | 1559272  | 1196836  | 705298.2 | 972889.5 | 439482.8 |                                             | 9   |
| 7813570  | 9112335  | 8274310  | 7019599  | 7572492  | 5970226  | [1113][M+1] <sup>+</sup>                    | 35  |
| 5384497  | 5308177  | 4498561  | 3994620  | 3986454  | 2988005  | [897][M] <sup>+</sup>                       | 227 |
| 3551395  | 0        | 3893385  | 3964747  | 2291732  | 0        |                                             | 9   |
| 2106282  | 2664237  | 1677563  | 1290448  | 2021827  | 3523216  |                                             | 4   |
| 3308562  | 2106731  | 1978010  | 14634182 | 4626925  | 4456857  |                                             | 2   |
| 453556.3 | 892908   | 1079304  | 452140.8 | 494314.8 | 4267336  | [734][M] <sup>2+</sup>                      | 9   |
| 725835.7 | 582739.4 | 696140.1 | 351890.2 | 528746.4 | 503775.3 | [M+Na] <sup>+</sup> 5                       | 23  |



|          |          |          |          |          |          |                      |     |
|----------|----------|----------|----------|----------|----------|----------------------|-----|
| 15247590 | 10225914 | 11016196 | 13752183 | 14996632 | 8680915  | [352][M+4]3+         | 2   |
| 4040258  | 3421301  | 3658680  | 3635186  | 3265953  | 1750605  | [1325][M]+ [M+H]+ 70 | 16  |
| 419502.8 | 914075.2 | 887263   | 13289484 | 259207.2 | 4956047  | [218][M+1]+          | 100 |
| 327114.7 | 1682003  | 1673283  | 157285.3 | 485387.9 | 305360.6 |                      | 46  |
| 2309064  | 2156576  | 1674886  | 1732137  | 3031017  | 8314801  |                      | 52  |
| 786249.7 | 1043079  | 3934929  | 1499266  | 1137874  | 2372069  |                      | 9   |
| 415065.1 | 729971.4 | 556657.9 | 279318.6 | 193340.7 | 265731.8 |                      | 4   |
| 546495.7 | 738357.1 | 5386044  | 3747976  | 712969.3 | 5318555  |                      | 9   |
| 3056402  | 1526480  | 2688957  | 807861.3 | 1457162  | 1251756  |                      | 1   |
| 1493004  | 705268.5 | 914067.9 | 1007513  | 828296   | 474673.1 |                      | 170 |
| 213221.8 | 1064524  | 261307.6 | 353539.9 | 110282.3 | 233491.5 | [M+H]+ 35            | 56  |
| 32797631 | 19951537 | 24598524 | 33310599 | 17898758 | 1979862  |                      | 2   |
| 1918167  | 2207820  | 1906642  | 1377401  | 1613876  | 1168162  |                      | 4   |
| 860276.4 | 732039   | 786205.6 | 605933.5 | 1335156  | 6171483  |                      | 4   |
| 3407670  | 1943502  | 4460776  | 4155990  | 4483129  | 4108421  |                      | 377 |
| 4898448  | 5107240  | 5246067  | 5281274  | 5582476  | 5299406  |                      | 365 |
| 186646.4 | 461765.2 | 534291.8 | 328438.5 | 144372.1 | 352996.2 |                      | 4   |
| 580284.1 | 491608.9 | 431305.5 | 234023   | 341992.4 | 291107.6 | [638][M+1]+          | 16  |
| 12573784 | 15590968 | 6963214  | 12458825 | 12017418 | 24588518 |                      | 3   |
| 8014160  | 2640618  | 3068733  | 5075069  | 5273465  | 2112793  | [468][M+1]2+         | 1   |
| 17068234 | 13928475 | 14951825 | 16611632 | 11797610 | 1327900  |                      | 2   |
| 7524824  | 2127411  | 3677394  | 3392786  | 1684914  | 7776783  |                      | 1   |
| 1020489  | 868493   | 767733.5 | 502483.1 | 273072.5 | 86520.94 | [670][M+1]3+         | 77  |
| 1597902  | 2051754  | 73157.91 | 1481007  | 1459929  | 35191398 | [M+H-C4H8]           | 21  |
| 1333197  | 3431218  | 1631731  | 2256770  | 2180660  | 1858442  | [M+Na]+ 7            | 16  |
| 3515138  | 2465382  | 2897516  | 2988495  | 2931253  | 737029.8 |                      | 4   |
| 1601122  | 0        | 577843.3 | 1298358  | 1120838  | 0        |                      | 9   |
| 1228633  | 1383937  | 1222235  | 1374127  | 981169.6 | 770846   | [M+K]+ 79            | 16  |
| 3615397  | 3131372  | 3755578  | 3139058  | 2643518  | 1307071  |                      | 2   |
| 1264409  | 3712449  | 3803382  | 1377628  | 2395757  | 3120644  | [434][M]2+           | 9   |
| 11652784 | 12958313 | 12129460 | 9152847  | 11266138 | 6102003  | [243][M]3+           | 9   |
| 693580.8 | 1381298  | 1294495  | 419790.7 | 1027317  | 4863570  |                      | 9   |
| 745842.3 | 1680654  | 994031.4 | 632640.4 | 1018233  | 595550.2 | [M+H-C6H12]          | 81  |
| 4272816  | 3603298  | 3072732  | 4826081  | 4635809  | 152882.8 |                      | 1   |
| 11301046 | 10715091 | 11649510 | 9652657  | 10165745 | 2958713  |                      | 9   |

|          |          |          |          |          |          |               |     |
|----------|----------|----------|----------|----------|----------|---------------|-----|
| 1614006  | 2539893  | 1751904  | 5634570  | 5374802  | 1305353  |               | 4   |
| 9908179  | 15421780 | 11765634 | 23536911 | 12029755 | 4254740  |               | 1   |
| 3154247  | 1666129  | 2430786  | 3097054  | 2768445  | 2611503  |               | 2   |
| 1531363  | 1356412  | 1382069  | 1646597  | 934022   | 961181.1 | [1306][M+1]2+ | 134 |
| 9093353  | 346227.9 | 7885586  | 6812421  | 8203864  | 6198417  |               | 34  |
| 768391.4 | 935339.3 | 1069596  | 844026.3 | 516268.1 | 532676.3 | [1551][M]+    | 225 |
| 4323520  | 5884182  | 4073042  | 3051986  | 5466339  | 7757390  |               | 170 |
| 8556581  | 2917742  | 2799583  | 8448492  | 4739969  | 1472376  |               | 2   |
| 261584.9 | 1122856  | 1033935  | 150915.6 | 531906.9 | 2279713  | [847][M+1]+   | 9   |
| 162686.5 | 115217.6 | 117816.7 | 189773.3 | 44619.23 | 132434.2 | [85][M+1]2+   | 302 |
| 52704601 | 49039966 | 60395670 | 48535039 | 49211274 | 32587407 | [1110][M+1]+  | 43  |
| 1169656  | 1449523  | 1274504  | 1255824  | 978672.2 | 1633818  |               | 89  |
| 666831.9 | 1093005  | 319858.5 | 586180.2 | 689147.9 | 6099060  |               | 9   |
| 951038.6 | 1573203  | 684711.8 | 503722.2 | 2022322  | 6407366  | [3M+Na+2I     | 29  |
| 1306696  | 172748.2 | 1087513  | 1774500  | 216910.3 | 0        |               | 9   |
| 400050.3 | 1210106  | 0        | 0        | 632556.4 | 2714278  |               | 9   |
| 53621057 | 1326051  | 52133110 | 35690084 | 87118178 | 45305543 |               | 1   |
| 1804783  | 1874810  | 1486718  | 1720754  | 1426209  | 6182366  |               | 255 |
| 1241881  | 1488231  | 1126426  | 1738564  | 1056869  | 0        |               | 2   |
| 12119151 | 12462857 | 10153179 | 11740454 | 9836381  | 1791837  | [1277][M]+    | 2   |
| 6865233  | 11187453 | 5853627  | 5681552  | 14697435 | 30697018 | [1365][M+2]2+ | 2   |
| 4256649  | 3160606  | 534520.2 | 2241081  | 6193612  | 2225526  |               | 11  |
| 1442769  | 997621   | 3246158  | 1546930  | 2573103  | 1239245  | [M+Na]+ 3'    | 18  |
| 848752.8 | 730300.5 | 607861.1 | 674635.4 | 786993.2 | 468327.8 | [M+Na]+ 5'    | 12  |
| 2311251  | 4863301  | 3554621  | 1781049  | 6357154  | 12328375 |               | 9   |
| 10519219 | 5684110  | 40768640 | 5049808  | 4168197  | 11181390 | [M+Na]+ 3I    | 14  |
| 1255084  | 830025.2 | 1227808  | 1134168  | 482443.4 | 970055   | [M+K]+ 43'    | 6   |
| 6147145  | 4702836  | 4756094  | 4036784  | 5490641  | 3956752  |               | 389 |
| 1.47E+08 | 1.78E+08 | 1.67E+08 | 1.25E+08 | 2.09E+08 | 2.5E+08  | [795][M]+     | 26  |
| 95406.52 | 738267   | 389576.6 | 88919.3  | 162662.5 | 401323.2 | [M+H]+ 60I    | 39  |
| 4854698  | 8607927  | 30087260 | 3494106  | 6651146  | 6000827  | [M+Na]+ 5I    | 46  |
| 818537.1 | 433388.7 | 1100922  | 388878.2 | 485949.4 | 625166.8 |               | 9   |
| 285738.7 | 689242.4 | 288406.4 | 65474.87 | 211306.9 | 329329   | [3M+2Na]2     | 39  |
| 5794336  | 3447394  | 6227088  | 2577758  | 4119425  | 3685807  |               | 192 |
| 324640.8 | 506989.9 | 474841.3 | 372870.9 | 349902.9 | 31671.89 |               | 64  |

|          |          |          |          |          |          |                      |     |
|----------|----------|----------|----------|----------|----------|----------------------|-----|
| 2538280  | 3337841  | 3106738  | 1941610  | 2807043  | 1180400  |                      | 9   |
| 1898976  | 2461088  | 1445323  | 1838154  | 4573159  | 458347.4 |                      | 1   |
| 13314561 | 8734014  | 10423944 | 13392562 | 11084942 | 3469254  |                      | 2   |
| 897371.9 | 1496774  | 1358771  | 400326.7 | 457101.5 | 3536733  |                      | 81  |
| 567500   | 0        | 427881.3 | 636635.4 | 708318.9 | 1300583  |                      | 9   |
| 734387.5 | 712335.2 | 1091651  | 1890627  | 713793.8 | 309814.4 | [M+H-HCO             | 72  |
| 6288269  | 2399756  | 6426555  | 5976156  | 2294779  | 4265751  |                      | 2   |
| 783254.4 | 733186   | 469649   | 432439.8 | 597140.9 | 206507.7 |                      | 4   |
| 3857843  | 3970920  | 23865858 | 3637020  | 3313386  | 2092891  |                      | 38  |
| 333440.1 | 160926.7 | 443078   | 399793.4 | 267702.8 | 120136.8 | [164][M+1]+          | 48  |
| 442282.3 | 126749.5 | 0        | 564818.4 | 113934.9 | 681164.6 | [M+Na]+ 8            | 81  |
| 4697640  | 5068207  | 3292111  | 4181035  | 4540314  | 5083378  |                      | 402 |
| 5403706  | 4471464  | 4450547  | 1128404  | 1879617  | 4112952  |                      | 1   |
| 1024568  | 934312.1 | 5329085  | 423551.9 | 603497.1 | 853323.8 | [M+Na]+ 3            | 136 |
| 1275137  | 860083   | 1763990  | 1303919  | 583177.1 | 39790681 |                      | 2   |
| 3123169  | 2175406  | 2512724  | 2651304  | 2491562  | 599026.3 |                      | 4   |
| 1832160  | 2304737  | 2561289  | 15070945 | 2452904  | 6117086  |                      | 1   |
| 262949.4 | 223164.5 | 724226.1 | 3453894  | 178300.5 | 131934.8 | [1141][M+2]+         | 138 |
| 1840205  | 1912069  | 1112932  | 1072166  | 3393815  | 8556372  |                      | 2   |
| 1750012  | 0        | 1949649  | 1834323  | 3059611  | 3811643  |                      | 13  |
| 1.42E+08 | 1.32E+08 | 1.61E+08 | 1.31E+08 | 1.33E+08 | 91821180 | [1110][M]+ [M+H]+ 61 | 43  |
| 631560.3 | 2218339  | 1820477  | 620423   | 1429374  | 819012.5 | [3M+Na+K]            | 46  |
| 1604903  | 66198467 | 1075427  | 1256908  | 910310.6 | 849011.4 |                      | 156 |
| 3954533  | 5941056  | 2792029  | 3914643  | 5962336  | 8813917  | [1347][M+1]+         | 2   |
| 1.65E+08 | 1.8E+08  | 2.27E+08 | 1.58E+08 | 1.88E+08 | 2.11E+08 | [1145][M]+ [M+Na]+ 6 | 23  |
| 260863.8 | 185355   | 445124.3 | 122681.6 | 138867.9 | 317583.9 |                      | 243 |
| 1233686  | 2247698  | 1083637  | 1295760  | 714492.6 | 3394907  |                      | 9   |
| 2904653  | 5842409  | 1656159  | 4669529  | 7911658  | 4571648  |                      | 1   |
| 703902.5 | 208658   | 423480.1 | 536951.8 | 485174.4 | 262136.5 |                      | 465 |
| 7244579  | 21972694 | 7092661  | 14583080 | 16024255 | 33186262 |                      | 2   |
| 2901233  | 1267513  | 2309952  | 2997378  | 2233261  | 827911.4 |                      | 93  |
| 664698.4 | 805863   | 523235.3 | 407660.1 | 576606.9 | 573646.9 | [1419][M+2]+         | 232 |
| 1325882  | 3726365  | 1271817  | 495761.7 | 3398117  | 7356262  |                      | 5   |
| 3205670  | 2726757  | 2641259  | 2355729  | 2577216  | 1310382  | [1329][M]2+          | 4   |
| 1.27E+08 | 3.14E+08 | 1.36E+08 | 1.81E+08 | 3.44E+08 | 8.2E+08  | [1250][M]+           | 2   |

|          |          |          |          |          |          |                     |     |
|----------|----------|----------|----------|----------|----------|---------------------|-----|
| 3815206  | 661626.7 | 2106184  | 3546736  | 621674.1 | 1811700  |                     | 1   |
| 257382   | 622141.2 | 216981.8 | 260651.9 | 228364.6 | 220043.6 |                     | 217 |
| 1373985  | 4685403  | 3931357  | 233115.9 | 3086367  | 27069930 | [M+Na]+ 51          | 3   |
| 12527791 | 11026983 | 11641563 | 8007141  | 10264530 | 6315079  | [943][M]+ [M+H]+ 51 | 110 |
| 7553484  | 9242175  | 7395266  | 6350464  | 8599931  | 6381460  |                     | 9   |
| 24633920 | 17727947 | 23823254 | 27306516 | 25119030 | 2106658  |                     | 9   |
| 7590894  | 10292612 | 4628573  | 7058307  | 12207026 | 14319376 | [356][M]3+          | 2   |
| 1329802  | 1030375  | 493136.2 | 1080802  | 999381.2 | 759090.1 |                     | 9   |
| 10949336 | 9380824  | 9269573  | 10264158 | 8994500  | 2364970  |                     | 2   |
| 1292529  | 1039839  | 1193993  | 1136300  | 987295   | 1298277  | [M+Na]+ 6           | 29  |
| 306811   | 1596609  | 1091940  | 809778.3 | 1257073  | 793361.4 |                     | 9   |
| 213272.7 | 587000.4 | 346515.6 | 65918.38 | 573617.6 | 2447006  |                     | 4   |
| 3369925  | 3171455  | 2960626  | 2655373  | 3266868  | 1573518  |                     | 4   |
| 603781.5 | 499263.6 | 427840.6 | 210631.6 | 249294.3 | 310849.9 | [M+H-CH2]           | 5   |
| 7070062  | 14029546 | 13208772 | 6995072  | 8843692  | 5658173  | [803][M+3]+         | 1   |
| 852540.5 | 829698.1 | 983060.8 | 768376.6 | 1027730  | 1048103  |                     | 4   |
| 9922693  | 12217378 | 11013596 | 8989611  | 10776659 | 7307123  |                     | 9   |
| 366284.3 | 252119.7 | 413478.1 | 1669281  | 295313.5 | 58156.58 | [307][M+1]2+        | 302 |
| 9783161  | 9464201  | 10377276 | 12089065 | 8811665  | 8323480  |                     | 214 |
| 724623.5 | 1390844  | 1195395  | 1040645  | 2607065  | 2021770  |                     | 2   |
| 672971.1 | 3319476  | 1112115  | 947382.4 | 1965200  | 2255410  | [M+K]+ 47           | 3   |
| 1031865  | 364730.8 | 851609.4 | 846702.8 | 877827.4 | 6147133  |                     | 9   |
| 406134.4 | 1396987  | 2313834  | 900520.3 | 594287.4 | 1101508  | [1501][M+1]+        | 39  |
| 514380.5 | 1673793  | 1175715  | 395415.1 | 908259.8 | 2912614  | [M+K]+ 13           | 8   |
| 169671.2 | 1001015  | 516749   | 437759.9 | 318040.2 | 768293.8 |                     | 4   |
| 1279169  | 4703462  | 3524490  | 957730   | 2119830  | 9701688  |                     | 9   |
| 4103503  | 1437691  | 3520136  | 3551212  | 1644715  | 0        |                     | 2   |
| 27089005 | 22303628 | 26748576 | 19719167 | 22951522 | 5372062  |                     | 33  |
| 613583.6 | 190168.4 | 5416216  | 6678415  | 1517327  | 3154428  |                     | 13  |
| 818796.1 | 833701   | 796345.5 | 1072143  | 682633   | 945964.9 | [M+H+NH3            | 159 |
| 12064079 | 25002380 | 217834.5 | 10372086 | 29046260 | 38239293 |                     | 2   |
| 23279.49 | 195610.3 | 58288.48 | 32400.87 | 27581.23 | 10834.61 |                     | 67  |
| 2554481  | 3210360  | 1683403  | 2521881  | 3059119  | 2147307  |                     | 14  |
| 2471021  | 5648805  | 3957337  | 1445093  | 2348338  | 7039551  |                     | 9   |
| 15728115 | 10384908 | 6754518  | 13827607 | 8862838  | 3149583  |                     | 2   |

|          |          |          |          |          |          |              |     |
|----------|----------|----------|----------|----------|----------|--------------|-----|
| 5645481  | 11186321 | 1033615  | 2476639  | 9374199  | 55054172 | [3M+H+Na     | 11  |
| 754956.1 | 2668202  | 2058988  | 683104.6 | 2255137  | 7438375  | [736][M+1]+  | 8   |
| 441388.6 | 651981.7 | 838522.6 | 523757.7 | 554905.4 | 788419.1 |              | 4   |
| 14177981 | 13856987 | 15307311 | 70940952 | 13357994 | 9564247  | [M+2H]2+     | 43  |
| 3617382  | 2163217  | 4412458  | 4018839  | 2042085  | 2699451  | [M+K]+ 316   | 371 |
| 923064.6 | 1398719  | 33608941 | 496582.2 | 1656651  | 605298.9 | [M+K]+ 149   | 84  |
| 717375.7 | 204418.2 | 460237   | 456423.9 | 550734.9 | 31381.19 |              | 133 |
| 8519845  | 5491992  | 6895349  | 5744065  | 5867726  | 5892847  | [45][M+2]2+  | 2   |
| 3844682  | 10547419 | 10753183 | 4174615  | 6269793  | 11461373 |              | 9   |
| 2248500  | 3071605  | 2468531  | 1718705  | 2513043  | 1390012  |              | 9   |
| 6115172  | 6480047  | 5474320  | 5729434  | 5956843  | 2994726  |              | 2   |
| 6422548  | 5844444  | 2091371  | 4679951  | 4448178  | 1009962  |              | 1   |
| 2017571  | 1910886  | 2070117  | 1991429  | 1833866  | 1358227  | [273][M]+    | 166 |
| 4259059  | 2165647  | 2018353  | 2432826  | 3039608  | 290585   | [M+K]+ 498   | 15  |
| 6397745  | 8780789  | 7998996  | 4766619  | 6912779  | 3380548  | [810][M]2+   | 9   |
| 1368493  | 70399.4  | 844116.8 | 1086925  | 972715.8 | 0        | [953][M]3+   | 9   |
| 569837.8 | 670927.1 | 532805.3 | 239494.6 | 239338   | 220211.3 | [M+Na]+ 4:   | 25  |
| 4520094  | 4369520  | 4654121  | 4449242  | 4369794  | 4261020  |              | 436 |
| 1343265  | 7813158  | 3763041  | 736142.3 | 6479182  | 13480074 |              | 1   |
| 48059045 | 42793211 | 38487455 | 41507311 | 51398512 | 42477522 |              | 2   |
| 16344109 | 16200351 | 2308135  | 14641783 | 16041521 | 15389393 | [M+K]+ 510   | 3   |
| 1029867  | 1816254  | 1832399  | 2101490  | 3414698  | 2667204  |              | 1   |
| 7345635  | 22027336 | 3154955  | 10761599 | 6513512  | 4463226  |              | 3   |
| 2516932  | 2671927  | 2540924  | 2000227  | 1860485  | 1188940  |              | 4   |
| 1318373  | 1733772  | 1381951  | 1175244  | 1128295  | 14399447 | [407][M+1]3+ | 2   |
| 3325290  | 4379734  | 7534423  | 2134356  | 5091334  | 3058902  |              | 293 |
| 2933817  | 3919996  | 3039498  | 2171559  | 3499630  | 2715336  | [109][M+1]3+ | 9   |
| 3485130  | 5166524  | 2491687  | 2764994  | 4957141  | 2634474  | [3M+H+K]2    | 15  |
| 22989705 | 24224219 | 33603881 | 17018505 | 18810216 | 16570518 |              | 147 |
| 11673501 | 10026876 | 8353932  | 10246944 | 7000856  | 8288473  |              | 113 |
| 789522.5 | 1427276  | 1132116  | 477374.1 | 803804   | 538299   |              | 13  |
| 727501.5 | 1509808  | 1269144  | 1129399  | 640318.3 | 985786.9 |              | 9   |
| 1582460  | 1060714  | 713885.9 | 1312055  | 1140411  | 0        |              | 9   |
| 3155510  | 2860590  | 2894320  | 1.34E+08 | 1408253  | 132102.5 | [M+Na]+ 3:   | 86  |
| 34902487 | 34052648 | 27777677 | 34575914 | 29304272 | 19426273 |              | 2   |

|          |          |          |          |          |          |                      |     |
|----------|----------|----------|----------|----------|----------|----------------------|-----|
| 2138489  | 134292.1 | 1845455  | 2098804  | 1754023  | 11959163 |                      | 2   |
| 491868.7 | 985851.5 | 570649.3 | 317945.4 | 770093.9 | 904685.1 |                      | 8   |
| 6493948  | 6847946  | 4166050  | 3176309  | 4633596  | 3764753  | [M+K]+ 278           | 18  |
| 18105068 | 27316005 | 19307346 | 22244309 | 17116498 | 18472892 | [909][M]+ [M+Na]+ 4  | 147 |
| 3864605  | 3721021  | 2929314  | 3352584  | 2927131  | 3148196  |                      | 266 |
| 19541584 | 11103661 | 22093026 | 21787254 | 8696278  | 11416846 |                      | 239 |
| 3804180  | 4195698  | 3577547  | 3762931  | 5226692  | 3355197  |                      | 252 |
| 18043704 | 17256796 | 18323235 | 23194947 | 13372894 | 4886516  |                      | 1   |
| 7577036  | 7000746  | 5367741  | 6504179  | 5458414  | 5297692  | [193][M]+            | 56  |
| 13694262 | 4968219  | 5728106  | 13198615 | 9028870  | 555026.8 |                      | 2   |
| 2644538  | 1036037  | 603288.9 | 1327853  | 3969221  | 517507.4 | [1422][M]+           | 367 |
| 3125905  | 729746.2 | 882769.4 | 2309769  | 2642569  | 1690122  |                      | 46  |
| 1616118  | 2026426  | 1860542  | 1696136  | 1856238  | 0        | [M+H]+ 150           | 13  |
| 5331361  | 5083419  | 6238569  | 4778859  | 4541126  | 4728974  |                      | 209 |
| 2200437  | 2190252  | 2119033  | 1426838  | 1900390  | 778048.9 |                      | 4   |
| 847513.7 | 2086451  | 903699.4 | 674866.7 | 1469644  | 4407487  |                      | 4   |
| 13869009 | 40948135 | 30948630 | 26164950 | 24970144 | 4745676  |                      | 3   |
| 424361.7 | 277624.6 | 354424   | 270723.6 | 267682.1 | 43066.78 | [1498][M+2]+         | 16  |
| 549184.5 | 823653.5 | 616871   | 371927.3 | 705675.2 | 595908.8 |                      | 4   |
| 8913357  | 7931400  | 31184811 | 12288601 | 6398799  | 3910801  | [938][M]+            | 66  |
| 3043022  | 1246397  | 3785401  | 3367598  | 1497620  | 2515651  |                      | 9   |
| 3284307  | 3916462  | 3325674  | 1621063  | 3159780  | 1691110  | [M+H]+ 560           | 58  |
| 1982100  | 2340378  | 1368028  | 2549296  | 1623662  | 21319173 | [1410][M]2 [3M+2Na]2 | 33  |
| 1034233  | 1358074  | 1324047  | 573597.4 | 1043595  | 0        | [M+H]+ 530           | 12  |
| 674148.3 | 951582.2 | 5537099  | 669525.2 | 766439.6 | 376553.6 | [242][M+2]2+         | 9   |
| 2727417  | 3430764  | 4308010  | 1599813  | 3197849  | 5274280  |                      | 9   |
| 613905.2 | 476646   | 371818.9 | 289077.2 | 278410.3 | 12382.3  |                      | 476 |
| 472676.8 | 611419.1 | 457080.3 | 343697.7 | 526652.6 | 811321.8 |                      | 89  |
| 13015198 | 15205005 | 7212717  | 11485201 | 11341379 | 23739037 |                      | 11  |
| 2087331  | 2916784  | 3104164  | 993645.8 | 7110151  | 15087457 |                      | 2   |
| 512556.7 | 658628.4 | 628826.9 | 418566.8 | 445082.4 | 488036.1 | [1601][M+1]+         | 33  |
| 2582855  | 2956715  | 2610424  | 2342323  | 2729002  | 5911426  |                      | 484 |
| 2786011  | 3738600  | 2454190  | 2100389  | 3282794  | 2925291  | [467][M+1]+          | 2   |
| 10265673 | 12892364 | 11564110 | 11201122 | 8814286  | 6197361  | [531][M]2+           | 20  |
| 1459529  | 1878973  | 1167867  | 1159972  | 1638097  | 774875.3 |                      | 9   |

|          |          |          |          |          |          |                      |     |
|----------|----------|----------|----------|----------|----------|----------------------|-----|
| 542925.5 | 1167333  | 535929.8 | 446006.4 | 350345.3 | 670778.6 |                      | 5   |
| 1535488  | 1369255  | 4631573  | 550516.9 | 752565.3 | 1901338  |                      | 9   |
| 221736.9 | 123685.4 | 148733.5 | 238212.9 | 119705.9 | 188966.9 | [1596][M+1]+         | 154 |
| 2350545  | 7086270  | 4703323  | 686587.3 | 11256083 | 13272489 | [39][M+2]2+          | 1   |
| 2110848  | 2125165  | 103685.5 | 775100.9 | 4067737  | 13557129 | [M+K+CF3C            | 21  |
| 4165116  | 4844270  | 4440862  | 3307948  | 3403725  | 1707527  | [1528][M]2+          | 9   |
| 5546077  | 5117127  | 6086737  | 4511708  | 9076808  | 5002317  |                      | 241 |
| 1449473  | 1703613  | 1774741  | 775493.9 | 1557084  | 1020082  | [591][M]+ [M+Na]+ 3! | 23  |
| 196132.5 | 174198.4 | 210974.6 | 189245.9 | 432187.8 | 288860.4 |                      | 17  |
| 1.91E+08 | 1.57E+08 | 1.61E+08 | 39260512 | 1.35E+08 | 96436778 |                      | 120 |
| 752663.3 | 484597.3 | 446737.1 | 423676.5 | 211340   | 414287.3 |                      | 4   |
| 536714.1 | 1077585  | 393758.8 | 341250.1 | 459598   | 1461359  |                      | 91  |
| 6823574  | 4963692  | 8086349  | 762676.3 | 5717805  | 936278.4 | [M+Na+NH             | 14  |
| 630992.7 | 513655   | 1000595  | 594702   | 341469.7 | 365830.1 |                      | 4   |
| 4004462  | 4961246  | 4297640  | 3109808  | 4045558  | 2992787  |                      | 4   |
| 3056638  | 1522925  | 1261843  | 2238383  | 3335136  | 482618.9 |                      | 2   |
| 2970072  | 3678992  | 2410351  | 1551879  | 3051349  | 3236818  |                      | 9   |
| 6328537  | 7365124  | 5886455  | 3310240  | 8256147  | 7987072  |                      | 2   |
| 160587.3 | 675120.3 | 2026389  | 86057.3  | 172397.5 | 308903.9 |                      | 20  |
| 2098162  | 2255355  | 1667091  | 2221111  | 3019996  | 243851.3 | [3M+Na+K·            | 14  |
| 1309958  | 1737840  | 1358384  | 1040300  | 1352819  | 272189.7 |                      | 9   |
| 1192690  | 1571451  | 1134144  | 981503.2 | 585231.1 | 1392622  | [989][M+2]+          | 116 |
| 11368537 | 10664434 | 7957342  | 7851447  | 8339474  | 6507785  | [634][M+2]+          | 31  |
| 8089196  | 8071252  | 8640127  | 6597823  | 7088779  | 3533561  |                      | 4   |
| 2767414  | 1356409  | 2653642  | 3074979  | 1372449  | 1432096  |                      | 141 |
| 1050009  | 833493.2 | 1049913  | 679467.2 | 918106.2 | 0        |                      | 9   |
| 3489793  | 3071963  | 2945625  | 2509780  | 2887004  | 59855893 | [1159][M+1]+         | 2   |
| 17976645 | 4783099  | 1356964  | 14185895 | 17256543 | 34725291 | [M+H]+ 39·           | 11  |
| 1680576  | 3122000  | 1677966  | 1739258  | 2338061  | 22755895 |                      | 2   |
| 553948.5 | 801184.1 | 419729.3 | 193019.2 | 764354.6 | 734294.3 |                      | 134 |
| 1793920  | 2294861  | 1887727  | 1431313  | 1839368  | 5309207  | [180][M+1]3+         | 9   |
| 4413661  | 2051410  | 1453335  | 2722927  | 4061922  | 6766747  | [M+K]+ 48{           | 81  |
| 168173   | 2254324  | 370440   | 0        | 1933108  | 2198511  |                      | 2   |
| 5517324  | 7131335  | 6053080  | 5598839  | 6163495  | 14337564 |                      | 9   |
| 12093527 | 13303779 | 9802418  | 12910702 | 17756324 | 18529037 |                      | 2   |

|          |          |          |          |          |          |              |     |
|----------|----------|----------|----------|----------|----------|--------------|-----|
| 4053197  | 3592549  | 4636100  | 3744716  | 3528418  | 3791502  |              | 455 |
| 2096684  | 2284818  | 2141257  | 1675983  | 1792159  | 259197.2 |              | 9   |
| 5217961  | 6496448  | 4997014  | 4112296  | 6607641  | 4801502  | [304][M]2+   | 9   |
| 424993.8 | 722151.2 | 326240.9 | 193256.2 | 825280.8 | 1075560  |              | 9   |
| 2137558  | 3369288  | 1521191  | 1737824  | 5949264  | 12144737 |              | 2   |
| 15218342 | 11552402 | 13818945 | 38468862 | 7392129  | 12706939 | [138][M]+    | 173 |
| 1729652  | 1075999  | 1039458  | 2500988  | 979502.9 | 1626441  |              | 9   |
| 820823.6 | 1513956  | 17386688 | 675048.2 | 1421896  | 388598.6 | [488][M+1]3+ | 9   |
| 1345147  | 26890222 | 486958.1 | 46552055 | 61337295 | 46474234 | [M+K]+ 30(   | 6   |
| 1045018  | 1570711  | 1513001  | 698411.7 | 1640138  | 1102181  |              | 2   |
| 11422941 | 8753152  | 10019289 | 10376873 | 8051731  | 1972600  | [355][M+4]+  | 2   |
| 13815020 | 10512324 | 11755559 | 12589873 | 10523357 | 33635225 |              | 2   |
| 4164343  | 3156357  | 3320462  | 3347207  | 3253827  | 4555580  |              | 326 |
| 11901547 | 8572448  | 3337564  | 6080609  | 12915674 | 3167758  | [M+2H-H2(    | 3   |
| 14950347 | 6550618  | 6420813  | 6667631  | 7283891  | 3938969  |              | 196 |
| 2876331  | 2701677  | 2499666  | 1624892  | 2204735  | 1452772  |              | 4   |
| 0        | 1526036  | 120201.7 | 120502.7 | 1047001  | 0        |              | 1   |
| 2313028  | 0        | 388439.5 | 2206951  | 1270921  | 248732.3 |              | 2   |
| 9011176  | 12238865 | 8135705  | 8492236  | 14606354 | 21047976 |              | 2   |
| 313942.5 | 325355   | 129024.1 | 843923.8 | 264829.9 | 520023   |              | 159 |
| 640210.2 | 829354.3 | 645848.4 | 430582.9 | 669030.2 | 348527.4 |              | 9   |
| 2034354  | 3308279  | 2920368  | 1554892  | 1992552  | 11738680 |              | 2   |
| 2432325  | 2129478  | 1804807  | 1782639  | 2459253  | 1064601  | [1375][M]2+  | 4   |
| 3176085  | 2358770  | 6207120  | 27561905 | 2892237  | 1412374  | [M+H]+ 18'   | 18  |
| 4854944  | 4183151  | 4299094  | 4377533  | 3842555  | 205694.1 |              | 9   |
| 457731.6 | 1040385  | 1370713  | 527236.2 | 483821.6 | 582199.5 | [3M+H+K]2    | 8   |
| 1453215  | 4286509  | 4112325  | 1087372  | 2007663  | 6256908  |              | 9   |
| 3454215  | 3805138  | 2910863  | 3916726  | 4151627  | 1125121  |              | 2   |
| 459424.5 | 580754.5 | 441889.8 | 485344.1 | 461176.3 | 506487.5 | [M+Na]+ 4'   | 73  |
| 1288927  | 1604986  | 405227.2 | 7758960  | 333554   | 2431440  | [M+H]+ 38'   | 5   |
| 7351539  | 1906131  | 1973575  | 5374347  | 3300897  | 11536908 |              | 1   |
| 1796005  | 1830602  | 1814281  | 1408553  | 1490555  | 481314.2 | [1235][M+1]+ | 134 |
| 21217791 | 15685710 | 11708141 | 7363809  | 17832446 | 9134016  | [M+K+HCO     | 15  |
| 210114.4 | 225417.2 | 219668.2 | 371283.6 | 266243.9 | 667379.8 | [2M+Na]+ '   | 83  |
| 1620448  | 2670047  | 2837124  | 2131679  | 1410028  | 3192491  |              | 2   |



|          |          |          |          |          |          |               |     |
|----------|----------|----------|----------|----------|----------|---------------|-----|
| 3264363  | 2788495  | 2455603  | 2459157  | 2051027  | 2230436  |               | 97  |
| 2787571  | 2440112  | 2107583  | 3066964  | 2674797  | 145933.8 |               | 9   |
| 2551767  | 2004535  | 1795035  | 1858644  | 1634012  | 1621035  |               | 2   |
| 195464.7 | 597761.7 | 566454   | 131865.4 | 774841.8 | 2730809  | [M+Na]+ 9'    | 5   |
| 4322946  | 2501594  | 5642894  | 6342956  | 2961840  | 1369249  |               | 2   |
| 524186.6 | 1164148  | 1074534  | 2104171  | 1744712  | 2754597  |               | 9   |
| 95875971 | 71360161 | 79418091 | 89585781 | 73172013 | 33070664 |               | 2   |
| 2841373  | 2270730  | 1234853  | 2207536  | 2441268  | 208794   |               | 9   |
| 2016915  | 833804.6 | 1995427  | 1628119  | 254466.5 | 241861.1 |               | 91  |
| 421583.3 | 1225103  | 395148.6 | 331989.9 | 685363.1 | 3290013  |               | 9   |
| 1590587  | 2065256  | 1329065  | 1480917  | 1599837  | 1294413  | [1387][M+1]2+ | 62  |
| 2442432  | 1003960  | 3554507  | 4515861  | 2291894  | 6385615  | [1246][M]+    | 130 |
| 1.24E+08 | 11079058 | 4154193  | 2367698  | 6208421  | 17773351 |               | 2   |
| 3842872  | 4580055  | 4309441  | 2907232  | 2831662  | 3129466  | [M+Na]+ 4:    | 5   |
| 1119283  | 692304.4 | 634002.9 | 856547.9 | 1110332  | 234700.4 |               | 91  |
| 998834.4 | 805135.3 | 1270185  | 915968   | 778984.6 | 617295.2 | [1497][M+1]+  | 203 |
| 2909284  | 2609895  | 3868273  | 2510346  | 2659028  | 1213062  |               | 169 |
| 813192.7 | 1297658  | 1285282  | 1035728  | 3155120  | 9733403  | [M+3H-CO:     | 29  |
| 5697928  | 6057563  | 5670485  | 4499385  | 5966992  | 2615869  |               | 9   |
| 1281415  | 1292237  | 627434.7 | 251371.8 | 998518.1 | 765096.9 |               | 4   |
| 3160206  | 2972758  | 2338045  | 1564510  | 2243812  | 42275774 | [351][M+4]3+  | 2   |
| 427927.1 | 220075   | 632842.1 | 266888.2 | 240404.7 | 141768   |               | 71  |
| 1221497  | 3695649  | 1686339  | 621298.2 | 2689827  | 14127309 |               | 9   |
| 45369079 | 64327313 | 40748825 | 34518604 | 81114012 | 1.89E+08 | [451][M]2+    | 2   |
| 1164885  | 908412.6 | 1128307  | 918571.9 | 827277.6 | 1531341  |               | 9   |
| 457828.2 | 501431.1 | 674250.7 | 764309.4 | 1864738  | 870209.2 |               | 299 |
| 34661395 | 24231850 | 37001417 | 22152709 | 23383831 | 4951406  | [1294][M]+    | 1   |
| 0        | 385643.2 | 52114.02 | 29826.71 | 546641   | 317369.1 |               | 39  |
| 1953192  | 1915574  | 2042149  | 1777806  | 1961792  | 615389.7 |               | 4   |
| 0        | 539859.3 | 75856.43 | 122695.6 | 383146   | 63246.8  | [M+K]+ 35(    | 81  |
| 33370240 | 19839464 | 27408403 | 32991102 | 19441803 | 3796542  |               | 2   |
| 971606   | 861016.4 | 842400.9 | 1008957  | 817435.8 | 154511.2 |               | 9   |
| 8703589  | 7534247  | 2435427  | 12968782 | 11456050 | 24865735 |               | 92  |
| 4176901  | 1388468  | 5061337  | 2969548  | 2887200  | 1449169  |               | 1   |
| 8318671  | 7686952  | 5556531  | 5017362  | 21599846 | 7772542  | [M+H]+ 47:    | 226 |

|          |          |          |          |          |          |               |     |
|----------|----------|----------|----------|----------|----------|---------------|-----|
| 9273356  | 6469215  | 7560721  | 5139371  | 7536088  | 12965465 | [419][M]2+    | 2   |
| 3735795  | 3736292  | 4176706  | 3040577  | 3351505  | 611961.7 |               | 9   |
| 6470087  | 5415823  | 2402725  | 2827905  | 4422682  | 5965931  |               | 293 |
| 1508225  | 5253011  | 6085015  | 5823235  | 1112061  | 1801992  | [M+H-C3H]     | 93  |
| 16809368 | 20601425 | 17283276 | 14872341 | 18380427 | 15221972 |               | 9   |
| 172186   | 95652.41 | 73711.36 | 634725.3 | 136637.6 | 95124.32 |               | 173 |
| 1.2E+08  | 95979199 | 1.16E+08 | 1.04E+08 | 61250713 | 41118319 |               | 2   |
| 6678503  | 10127501 | 6354701  | 5057887  | 12762905 | 31501236 |               | 2   |
| 901827.6 | 673007.4 | 716979.9 | 736003.9 | 589968.3 | 370643.9 | [M+H]+ 63     | 351 |
| 256719.5 | 547668.6 | 418983.8 | 66710.32 | 757985.6 | 2696136  |               | 4   |
| 3580762  | 4018143  | 3849222  | 2504809  | 3340358  | 2812038  | [647][M+1]+   | 110 |
| 2680666  | 3307805  | 5321112  | 3191913  | 3367565  | 2953808  | [1506][M]+    | 228 |
| 369389.9 | 766505.3 | 208160.2 | 195688.4 | 433741.1 | 1297136  |               | 9   |
| 3.79E+08 | 4.71E+08 | 3.48E+08 | 2.67E+08 | 2.76E+08 | 2.8E+08  |               | 1   |
| 13659455 | 12364235 | 12995983 | 9158041  | 10181272 | 4829418  | [1239][M]2+   | 4   |
| 10466728 | 7611417  | 10297086 | 10321747 | 9432819  | 6974791  | [1040][M]+    | 278 |
| 4640704  | 5315937  | 5060585  | 3445133  | 4367733  | 2185809  |               | 9   |
| 5542990  | 9244167  | 4822084  | 3411582  | 6205850  | 12424872 | [M+H+HCC      | 21  |
| 3703041  | 4114869  | 4435608  | 2162969  | 3320709  | 192885   |               | 9   |
| 5687676  | 2161647  | 44076390 | 1913663  | 4569460  | 1530601  | [M+Na+Na      | 12  |
| 1.6E+08  | 1.32E+08 | 1.28E+08 | 1.64E+08 | 1.35E+08 | 56268618 | [432][M]2+    | 2   |
| 2312293  | 1953949  | 1899324  | 1556990  | 1773790  | 789931.7 |               | 4   |
| 612523.4 | 709213.9 | 814668.2 | 648274.6 | 468265.1 | 119086.6 |               | 8   |
| 1634522  | 1919684  | 3349440  | 850719.4 | 1710679  | 11830543 | [334][M+1]3+  | 1   |
| 343583.6 | 502397.1 | 348172.8 | 604503.7 | 518004.8 | 470869.4 |               | 396 |
| 28619970 | 38635306 | 44700602 | 1620137  | 22579303 | 18092869 |               | 15  |
| 711866.8 | 595292.6 | 1298667  | 182913.3 | 614068.9 | 882224   | [M+H]+ 32     | 136 |
| 4983823  | 4133761  | 2844534  | 4520727  | 1901824  | 1229530  |               | 2   |
| 2394477  | 1971141  | 3140720  | 2229880  | 2210066  | 1293538  | [1497][M]+    | 203 |
| 2264253  | 2036093  | 1949747  | 1487718  | 1722261  | 1145535  |               | 4   |
| 18348804 | 26878660 | 16077470 | 13629374 | 33077400 | 76886131 |               | 2   |
| 1914277  | 850021.7 | 3032566  | 2819946  | 2644902  | 206647   |               | 2   |
| 1823474  | 2360594  | 2667138  | 1573121  | 1483683  | 896889.3 | [1371][M+1]3+ | 9   |
| 7091299  | 10487628 | 7041374  | 5552582  | 7241747  | 9914607  | [3M+H+Na      | 3   |
| 4163188  | 3950695  | 4943901  | 3973962  | 4302017  | 5648756  | [3M+Na+K]     | 264 |

|          |          |          |          |          |          |               |     |
|----------|----------|----------|----------|----------|----------|---------------|-----|
| 1789898  | 1884389  | 1964211  | 1458805  | 1677949  | 882080.1 | [881][M]+     | 160 |
| 2162564  | 2849658  | 2830787  | 1722798  | 2271634  | 764843.6 |               | 9   |
| 1616077  | 429888.1 | 956151.9 | 1216689  | 338573.6 | 456438   |               | 2   |
| 4102331  | 7458943  | 7689502  | 2659149  | 5418410  | 3050379  | [258][M]2+    | 18  |
| 1702673  | 333426.8 | 793971.3 | 1192591  | 946822.6 | 642195.1 | [130][M+3]+   | 4   |
| 1270953  | 1333276  | 653596   | 1547959  | 2318126  | 4238834  |               | 9   |
| 4335203  | 333803.2 | 389083.5 | 4379596  | 3687046  | 738515.7 | [M+K]+ 18     | 13  |
| 194349.6 | 615590.2 | 626651.5 | 107295.3 | 0        | 234236.1 | [M+H+CF3O]    | 46  |
| 607750.4 | 1266474  | 1519010  | 367218.7 | 579478.5 | 1592037  |               | 9   |
| 284760.2 | 426666.1 | 371197.9 | 387859.6 | 422762.9 | 279815   | [1343][M+1]2+ | 39  |
| 15653312 | 4276576  | 7590117  | 8160505  | 10407294 | 5078000  | [984][M]+     | 258 |
| 3625523  | 4886260  | 3633102  | 2137343  | 3643114  | 2129184  |               | 233 |
| 5646604  | 5268787  | 4983491  | 4226294  | 6772961  | 14059932 |               | 2   |
| 2405129  | 3450535  | 1829915  | 1352380  | 3185107  | 3874348  | [M+Na]+ 1     | 29  |
| 5630824  | 8540894  | 5633615  | 6149812  | 7656056  | 8390472  |               | 2   |
| 13571008 | 14855480 | 21127066 | 4973414  | 6281684  | 10517813 |               | 18  |
| 560132   | 51664670 | 47798534 | 629017.8 | 50519394 | 1.2E+08  |               | 77  |
| 1414160  | 1082551  | 1642009  | 1912222  | 1543831  | 751886.7 | [M+Na]+ 6     | 209 |
| 1340360  | 1785795  | 786330.5 | 937121   | 870172.3 | 1284830  |               | 1   |
| 11904147 | 6456357  | 8933754  | 11067804 | 8831608  | 572141.4 |               | 9   |
| 11584556 | 17752747 | 13216548 | 10104256 | 10977488 | 13129642 |               | 15  |
| 671014.5 | 1403542  | 730905.5 | 1886320  | 860358   | 5720309  |               | 9   |
| 1667594  | 2136508  | 843053   | 1067639  | 2020425  | 11801700 |               | 2   |
| 8682423  | 4796919  | 9327379  | 11493215 | 4729215  | 3114547  | [1556][M]+    | 304 |
| 4651934  | 4576957  | 4527213  | 4813325  | 3238464  | 1252222  |               | 2   |
| 2019023  | 10918687 | 10386492 | 10733945 | 6878859  | 6158136  |               | 195 |
| 10861869 | 3372955  | 1.19E+09 | 9.49E+08 | 1.43E+09 | 1.08E+09 |               | 1   |
| 23072295 | 15430423 | 19851179 | 18151652 | 21888582 | 3521842  |               | 1   |
| 2530150  | 558520   | 1842161  | 410257.7 | 1407282  | 0        | [1230][M]2+   | 150 |
| 5068383  | 6462299  | 6624931  | 4747202  | 4917498  | 3155236  | [832][M+1]+   | 38  |
| 166920.7 | 140785.7 | 114348.9 | 137592.5 | 139102.1 | 14803.2  |               | 75  |
| 348314.7 | 0        | 475319   | 415584.1 | 657938.3 | 435210.6 | [M+Na]+ 8     | 33  |
| 262668.4 | 218619.5 | 183287.3 | 242938.4 | 321448.7 | 134306.1 |               | 16  |
| 10358280 | 14988094 | 17890910 | 22393899 | 16444714 | 7278993  |               | 2   |
| 769808.1 | 691348.4 | 1063345  | 700895.2 | 362152.7 | 285973.6 | [1538][M+1]+  | 169 |

|          |          |          |          |          |          |                       |     |
|----------|----------|----------|----------|----------|----------|-----------------------|-----|
| 877261.1 | 1057876  | 1914648  | 447025.4 | 1044466  | 218818.8 | [1465][M]2+           | 4   |
| 5495138  | 3832452  | 6235299  | 3161973  | 3486435  | 631093.1 |                       | 1   |
| 1412079  | 3078433  | 2091084  | 589700.7 | 2034832  | 7341178  |                       | 9   |
| 6763180  | 12714495 | 56438322 | 8206750  | 6967938  | 5770353  | [M+2H-CH <sub>4</sub> | 18  |
| 430149   | 575092.2 | 589673.9 | 300656   | 303275.6 | 595264.1 |                       | 4   |
| 1729896  | 5741419  | 872989.5 | 879553   | 1243857  | 26186844 | [500][M+1]+           | 57  |
| 6271978  | 6105283  | 6624511  | 5181611  | 5309104  | 2738607  |                       | 4   |
| 5593461  | 8207501  | 1509286  | 4307044  | 13240112 | 36035072 | [380][M+2]2+          | 2   |
| 1198529  | 2435899  | 3484565  | 781727.1 | 992623.7 | 4881111  |                       | 9   |
| 2875059  | 2459903  | 2696716  | 3100376  | 2539684  | 300946.4 |                       | 2   |
| 6645881  | 9608636  | 8282443  | 10870209 | 7161099  | 6928725  | [M+K+NaCl             | 15  |
| 4284826  | 1256825  | 3722449  | 4018172  | 1964132  | 334724.3 | [169][M+1]3+          | 2   |
| 1919740  | 1777763  | 0        | 1620458  | 735430.9 | 526460.4 |                       | 1   |
| 969893.7 | 4337616  | 1409637  | 1025169  | 722766.7 | 404016.1 | [563][M]2+            | 282 |
| 627923   | 1256876  | 1237591  | 651934.3 | 519330.1 | 1323732  |                       | 147 |
| 9640483  | 7275190  | 7518778  | 9024992  | 6410613  | 1189221  |                       | 2   |
| 4563802  | 4328421  | 3160875  | 3936485  | 5257170  | 8210310  | [1190][M+2]3+         | 2   |
| 2348286  | 1545272  | 2490014  | 2486834  | 1055136  | 929870.7 |                       | 154 |
| 1898836  | 1754472  | 2387895  | 2565626  | 2540873  | 2447397  |                       | 411 |
| 2087411  | 2559534  | 1237435  | 1470913  | 2428918  | 2219893  |                       | 9   |
| 5755562  | 5147026  | 4903342  | 5535022  | 7486279  | 7111179  |                       | 2   |
| 1199965  | 1497016  | 2413420  | 733449   | 1098333  | 3523908  |                       | 9   |
| 8109496  | 8163492  | 8816086  | 6613409  | 7147156  | 3885837  |                       | 4   |
| 3310715  | 2119911  | 3667702  | 1922822  | 2446667  | 0        |                       | 1   |
| 472137.4 | 954268.7 | 12901813 | 574606.9 | 978790.2 | 720268.3 | [773][M+1]+           | 9   |
| 5765646  | 5393041  | 4639660  | 3811176  | 4875954  | 3026918  |                       | 4   |
| 22059334 | 31704971 | 17833869 | 17944098 | 36372627 | 85830094 | [1368][M+2]2+         | 2   |
| 1763901  | 646877   | 1474744  | 782856.1 | 1350421  | 509557.2 | [762][M+1]+           | 4   |
| 1231299  | 2012469  | 1330462  | 964061.9 | 3476151  | 4597086  |                       | 2   |
| 1387643  | 944730.6 | 1197671  | 1027468  | 1146872  | 4795655  |                       | 9   |
| 370485.9 | 1386419  | 256125.7 | 591081.7 | 1316751  | 7937490  |                       | 9   |
| 661882.2 | 7418409  | 19992972 | 29956314 | 639544.1 | 2326222  |                       | 9   |
| 2593494  | 3887806  | 2623913  | 2034879  | 4408357  | 13117368 |                       | 29  |
| 2982166  | 516095.7 | 2947917  | 3070989  | 1271375  | 5046164  | [44][M+1]+            | 2   |
| 4905240  | 2712879  | 2091100  | 4473485  | 3262526  | 2417846  |                       | 2   |

|          |          |          |          |          |          |                       |     |
|----------|----------|----------|----------|----------|----------|-----------------------|-----|
| 1917420  | 1415101  | 1594002  | 1957533  | 1374267  | 508883   | [1442][M+1]+          | 349 |
| 1734395  | 2273304  | 2089366  | 1251278  | 1575739  | 765356.9 |                       | 9   |
| 2663506  | 3305146  | 1766114  | 2230846  | 2621356  | 3267499  | [M+K]+ 38:            | 14  |
| 5291027  | 5469325  | 5915356  | 4596111  | 4901206  | 534889   | [1372][M+2]2+         | 2   |
| 32715221 | 46912747 | 9871919  | 30122236 | 26658035 | 1.05E+08 | [781][M]+             | 157 |
| 7191525  | 8299764  | 6382841  | 8493569  | 8584081  | 7389035  | [M+K+HCO              | 226 |
| 1820056  | 1758380  | 1836167  | 1489245  | 1435780  | 771940.4 | [1507][M]+            | 99  |
| 1788733  | 2191717  | 2190083  | 1714551  | 1450416  | 1584529  | [1460][M+1]+          | 79  |
| 5447082  | 4030017  | 3890347  | 6468831  | 4287704  | 1919333  |                       | 2   |
| 376974.6 | 19672464 | 19305337 | 10287961 | 18590460 | 266465   | [M+K]+ 66:            | 57  |
| 3076518  | 5811341  | 1460902  | 1953485  | 5311306  | 29615306 |                       | 2   |
| 5479629  | 3726759  | 6338194  | 2353521  | 3583573  | 903089.7 |                       | 1   |
| 6537554  | 6516523  | 4104657  | 6529457  | 6950533  | 6708450  |                       | 236 |
| 18011712 | 8991799  | 9315932  | 17002247 | 12133636 | 1911376  | [2M+Na]+ :            | 14  |
| 2712501  | 2357880  | 2125645  | 92633.18 | 1388205  | 987678   | [598][M]2+            | 20  |
| 803390.7 | 609042.1 | 795377   | 465459.6 | 803040.9 | 416825.3 |                       | 9   |
| 45591047 | 64486428 | 39240179 | 34644454 | 81047668 | 1.88E+08 |                       | 2   |
| 2359764  | 1906291  | 1895874  | 1848593  | 2391136  | 1049433  |                       | 4   |
| 1724084  | 3170154  | 735854.4 | 342554.2 | 1068778  | 840957.7 |                       | 4   |
| 1350684  | 1318548  | 1366358  | 813407.5 | 1192363  | 685391.2 |                       | 4   |
| 1449255  | 621045.7 | 5730166  | 1407518  | 513219.6 | 410337.3 |                       | 58  |
| 25200496 | 23819084 | 26209749 | 22347805 | 20571150 | 12974789 | [1269][M]+ [M+H]+ 69: | 62  |
| 7844211  | 8775225  | 7462387  | 5504004  | 6571749  | 4584356  |                       | 4   |
| 1113119  | 2082571  | 2247150  | 1087464  | 1378342  | 989446   | [1201][M]2+           | 33  |
| 4407192  | 6612379  | 5721410  | 12031788 | 5917590  | 5649778  |                       | 190 |
| 764141.2 | 853188.4 | 651387.3 | 747459.1 | 385755.2 | 192092.1 |                       | 4   |
| 786989.1 | 1677809  | 726409.5 | 793338.5 | 1459693  | 1941213  |                       | 8   |
| 3693647  | 2091657  | 3102905  | 4649961  | 3408498  | 2991606  |                       | 2   |
| 3088605  | 1514967  | 3088458  | 4208726  | 1252218  | 1043155  |                       | 98  |
| 4163707  | 1795428  | 20937036 | 1882589  | 1572818  | 679035.9 |                       | 9   |
| 1108575  | 1854233  | 977946.4 | 377389.1 | 2275062  | 5054869  | [528][M+2]3+          | 2   |
| 563970.2 | 1132543  | 1264414  | 555692.2 | 862141.4 | 2719886  |                       | 9   |
| 4064872  | 4390186  | 5729936  | 4317392  | 4333817  | 4515241  |                       | 352 |
| 9301831  | 2103762  | 1564565  | 8112963  | 4533450  | 3998425  |                       | 216 |
| 182148.2 | 321015.8 | 339080   | 301139   | 214786.5 | 292111.6 | [M+Na]+ 5:            | 42  |

|          |          |          |          |          |          |                          |     |
|----------|----------|----------|----------|----------|----------|--------------------------|-----|
| 4046934  | 684210.1 | 970343.2 | 802585.5 | 4649958  | 4592456  | [M+H] <sup>+</sup> 38    | 15  |
| 1604619  | 4129248  | 2909240  | 1420382  | 2512835  | 8880996  |                          | 9   |
| 1550362  | 2113199  | 1505276  | 912764   | 728695.8 | 1102552  | [M+K+Na] <sup>+</sup>    | 57  |
| 906163.1 | 1865440  | 367363.8 | 1166460  | 2394191  | 1588316  | [M+H-C6H8] <sup>+</sup>  | 3   |
| 3894899  | 2380864  | 1671993  | 1114253  | 2630451  | 5328125  |                          | 294 |
| 661436.4 | 861960   | 440044.3 | 475421   | 297721.1 | 793434.4 |                          | 33  |
| 4963286  | 7200070  | 6664754  | 5709756  | 5357214  | 8866950  | [462][M] <sup>+</sup>    | 166 |
| 669859.2 | 2595213  | 17134.13 | 754615.9 | 1683825  | 5228426  | [M+2H-C6H8] <sup>+</sup> | 21  |
| 504988.5 | 1124174  | 1538391  | 498680.2 | 995255   | 4544554  |                          | 9   |
| 1362707  | 744156.3 | 1863407  | 4698781  | 699467.2 | 0        | [560][M+1] <sup>+</sup>  | 1   |
| 6719381  | 2741870  | 2782828  | 5614284  | 5597761  | 1857679  | [M+K] <sup>+</sup> 30    | 11  |
| 522285.5 | 889996.9 | 706128.8 | 397857.1 | 1237051  | 112276.2 | [51][M+2] <sup>+</sup>   | 4   |
| 4707223  | 6108337  | 3989918  | 3898752  | 4598156  | 20599545 | [1258][M+1] <sup>+</sup> | 2   |
| 714148.3 | 1142116  | 1288537  | 402969.8 | 672342.2 | 2073026  |                          | 9   |
| 486700.7 | 994304   | 518024.9 | 575216.6 | 1176949  | 1169304  |                          | 4   |
| 1183264  | 660356.4 | 1086339  | 921955.8 | 764524.8 | 524357.4 |                          | 9   |
| 368823.8 | 117674.7 | 163670.8 | 58948.32 | 314566.8 | 447119.4 |                          | 462 |
| 3757083  | 3865149  | 3805445  | 2871988  | 3346389  | 2316359  |                          | 4   |
| 71207666 | 2167480  | 21448596 | 68927999 | 2142564  | 7903905  |                          | 2   |
| 5229312  | 4458121  | 4759960  | 4956671  | 6792570  | 0        |                          | 1   |
| 2964952  | 921445.7 | 3002602  | 2673968  | 520172.7 | 0        |                          | 2   |
| 11050663 | 25069838 | 34258087 | 12329142 | 8690665  | 20773839 | [481][M+1] <sup>3+</sup> | 18  |
| 2252164  | 3484380  | 5097976  | 1436842  | 4232850  | 1216980  |                          | 1   |
| 1121024  | 1441791  | 1168937  | 1197840  | 651394   | 3789353  |                          | 81  |
| 2880172  | 3387723  | 3473108  | 2571156  | 7781857  | 24148873 |                          | 2   |
| 1820189  | 1656286  | 2452436  | 1873691  | 1146294  | 1605482  |                          | 2   |
| 4354169  | 4748583  | 5484630  | 3633145  | 3975919  | 656259.3 |                          | 13  |
| 1994345  | 2918079  | 1784385  | 1155859  | 1921086  | 851652.6 |                          | 4   |
| 1697962  | 1999169  | 1542921  | 1043031  | 1516112  | 1667607  | [787][M+1] <sup>+</sup>  | 4   |
| 7638603  | 13505079 | 30544081 | 12301090 | 11574213 | 32113941 |                          | 13  |
| 2082847  | 1483138  | 1453771  | 1145273  | 1479517  | 222336   |                          | 476 |
| 2175619  | 2613335  | 2606007  | 1587272  | 1982063  | 743111.2 |                          | 9   |
| 2629082  | 0        | 946044.4 | 1772737  | 1700413  | 0        |                          | 2   |
| 13136740 | 10570003 | 10676087 | 19523041 | 10354132 | 2299104  |                          | 2   |
| 5387224  | 5358176  | 5222727  | 5456533  | 4854680  | 3835570  |                          | 410 |

|          |          |          |          |          |          |                     |     |
|----------|----------|----------|----------|----------|----------|---------------------|-----|
| 603583.9 | 633888.9 | 259663.6 | 289294.4 | 301724.3 | 396546   |                     | 456 |
| 161672.6 | 1853633  | 1292374  | 33377.41 | 608909.9 | 479252.8 | [261][M]3+ [M+3H]3+ | 20  |
| 3284809  | 4617677  | 4090695  | 2156684  | 3292052  | 2401398  |                     | 9   |
| 4512754  | 76395.8  | 1950092  | 4667671  | 2146874  | 307154.9 |                     | 2   |
| 85888253 | 66549764 | 1.63E+08 | 1.63E+08 | 58471109 | 69798664 |                     | 165 |
| 834198.2 | 1217675  | 787541.9 | 746786   | 764882.9 | 2158623  |                     | 37  |
| 623544   | 1114374  | 1096748  | 272201.5 | 1189419  | 1063736  |                     | 39  |
| 4954459  | 1866642  | 3188645  | 4157123  | 31243673 | 3860187  |                     | 2   |
| 405258   | 522916.3 | 514336.9 | 316198.1 | 524543.3 | 223955.4 |                     | 9   |
| 685864.7 | 117245.2 | 510085.8 | 462746.5 | 269391.5 | 12526.29 | [1274][M+1]2+       | 71  |
| 1.16E+09 | 61375598 | 34576910 | 32665252 | 80123892 | 1.63E+08 | [429][M]3+          | 2   |
| 3040246  | 2177786  | 3714421  | 3175698  | 2474121  | 0        |                     | 2   |
| 1214833  | 5912557  | 2705762  | 2346709  | 2441461  | 4769853  |                     | 180 |
| 3004660  | 1541972  | 1743405  | 3762373  | 4419456  | 17077578 | [M+K]+ 32%          | 93  |
| 863165.3 | 1426897  | 539810.8 | 816586.3 | 2312602  | 3398004  |                     | 2   |
| 278649.4 | 1519151  | 672716.6 | 825845.9 | 248040.5 | 3524247  |                     | 193 |
| 5943852  | 4704734  | 5211220  | 4617302  | 5439782  | 924639.8 |                     | 9   |
| 6783832  | 5496988  | 6147416  | 5372807  | 5456709  | 792740.1 |                     | 4   |
| 1594370  | 2693828  | 2040133  | 87718847 | 1.3E+08  | 4.49E+08 |                     | 3   |
| 56316540 | 44288480 | 47395037 | 55926372 | 38840568 | 14123811 | [1247][M+5]+        | 2   |
| 2201017  | 2972795  | 2554305  | 1821607  | 2372754  | 1238184  |                     | 9   |
| 605164.1 | 862111.9 | 691779.6 | 425405.7 | 627451.8 | 632866.1 |                     | 4   |
| 338095.3 | 366860.4 | 345885.9 | 311153.9 | 338327.4 | 245794.8 | [M+H+NH3            | 72  |
| 2863222  | 2600078  | 1526464  | 2525324  | 2670887  | 908172.5 |                     | 9   |
| 4043077  | 2429956  | 2569631  | 4768096  | 3036733  | 0        |                     | 9   |
| 8977994  | 6681113  | 4784981  | 7509846  | 8096331  | 2094238  | [M+K+NH3            | 13  |
| 53094882 | 51478403 | 48156819 | 50803185 | 49120311 | 30118843 | [870][M]+           | 123 |
| 13100254 | 7035118  | 8768289  | 13351233 | 9164320  | 2834622  |                     | 2   |
| 1423276  | 514276.3 | 2544046  | 1115181  | 1962536  | 980119.6 | [M+H-COCl           | 6   |
| 4340892  | 6063025  | 2756165  | 3629346  | 3025396  | 17353736 | [781][M+1]+         | 157 |
| 804727.8 | 1740842  | 2547184  | 695624.9 | 565384.5 | 1017589  | [M+H-HCO            | 18  |
| 21088833 | 20747097 | 21169307 | 16867641 | 18551447 | 9334317  |                     | 4   |
| 2239357  | 0        | 2556453  | 1462279  | 1926298  | 0        |                     | 2   |
| 7436665  | 4991508  | 4669866  | 5369336  | 3358799  | 4894040  |                     | 158 |
| 8.84E+08 | 1819778  | 1.56E+09 | 8.25E+08 | 6.02E+08 | 4.31E+08 | [92][M]+ [M+H]+ 22% | 18  |

|          |          |          |          |          |          |                      |     |
|----------|----------|----------|----------|----------|----------|----------------------|-----|
| 4394146  | 5435334  | 2683251  | 2867328  | 5303323  | 16419842 |                      | 2   |
| 2.19E+08 | 2.38E+08 | 1.13E+08 | 3.73E+08 | 2.46E+08 | 4.52E+08 | [378][M]+ [M+Na]+ 30 | 33  |
| 2155925  | 3349558  | 1935733  | 3812902  | 1817479  | 7034376  | [1210][M+3]+         | 2   |
| 1347086  | 1486056  | 2371661  | 898789.3 | 1043502  | 0        |                      | 9   |
| 9360998  | 5982971  | 6317526  | 7399769  | 7177217  | 3950620  |                      | 2   |
| 1189122  | 1011064  | 1058251  | 1353691  | 1301896  | 1219782  | [960][M+1]+          | 150 |
| 646096.6 | 1004615  | 953857.3 | 523494   | 696462.6 | 608480.9 |                      | 4   |
| 1676171  | 1569053  | 2598433  | 2272844  | 2196077  | 1045589  |                      | 1   |
| 1313453  | 1338729  | 775463.7 | 2099438  | 2255130  | 1051606  | [983][M+1]+          | 311 |
| 2895898  | 2730147  | 298491.5 | 1434329  | 3797038  | 2896712  | [M+H+CF30            | 21  |
| 231417.9 | 257066.3 | 351508.9 | 236212.8 | 154781.2 | 172255   |                      | 69  |
| 4440309  | 5348733  | 3910740  | 3965305  | 3519945  | 9250043  |                      | 295 |
| 2085541  | 3298348  | 1598005  | 6026068  | 4496621  | 15168202 |                      | 29  |
| 1193184  | 3972697  | 2897610  | 784371   | 2401882  | 9851789  |                      | 9   |
| 6445953  | 2998348  | 4758755  | 3444922  | 3463641  | 7576039  |                      | 2   |
| 346859.2 | 255861.2 | 222449.2 | 132717.7 | 229340.2 | 1533962  | [928][M+1]+          | 83  |
| 3542279  | 63336.71 | 825306.4 | 2660928  | 481079.3 | 20904349 |                      | 12  |
| 414909.8 | 670945.4 | 1114255  | 433789   | 281708.3 | 324257.6 |                      | 91  |
| 1418180  | 2059570  | 1472116  | 942550.8 | 2542939  | 4258641  |                      | 218 |
| 2046403  | 4922317  | 2670519  | 1725341  | 3267003  | 13265663 |                      | 2   |
| 5300084  | 5598777  | 4531993  | 4810039  | 4699961  | 4034894  |                      | 401 |
| 2119299  | 1586349  | 2969236  | 472125.5 | 747166   | 1110572  |                      | 9   |
| 7162542  | 6255936  | 6359960  | 4980458  | 5742012  | 2928185  |                      | 4   |
| 615713.2 | 524608.3 | 284994.9 | 459221.9 | 947774.7 | 690670.5 |                      | 159 |
| 3974769  | 3263514  | 3089451  | 3404956  | 2757172  | 25605507 | [1348][M]2+          | 2   |
| 465874.7 | 1431116  | 705786.6 | 398949.2 | 489083.9 | 1476151  |                      | 9   |
| 97219141 | 1.27E+08 | 68313723 | 86878130 | 1.46E+08 | 3.15E+08 | [1341][M]+           | 2   |
| 1074930  | 1518466  | 743329.1 | 883966   | 958595.4 | 1208991  |                      | 35  |
| 1052398  | 1304551  | 1230192  | 1218914  | 929287.5 | 1585751  | [M+K]+ 710           | 23  |
| 617269   | 973157.5 | 918418   | 548992.3 | 524472.6 | 261720.3 | [580][M+2]+          | 4   |
| 0        | 0        | 797194.8 | 98143.44 | 348527.4 | 506844.5 |                      | 9   |
| 8443076  | 6466756  | 3295104  | 6368180  | 10445908 | 6287447  |                      | 3   |
| 5170445  | 6777325  | 4442280  | 3579671  | 6422066  | 16994452 |                      | 2   |
| 7289750  | 10545210 | 10465174 | 6289645  | 5248950  | 8525464  | [1518][M]+           | 20  |
| 15222660 | 12602959 | 10866148 | 14904145 | 6240181  | 3498026  |                      | 2   |



|          |          |          |          |          |          |              |     |
|----------|----------|----------|----------|----------|----------|--------------|-----|
| 1561738  | 1365452  | 1314214  | 1327864  | 1308619  | 0        |              | 9   |
| 606908.5 | 278509.9 | 531429.4 | 533662.6 | 506615.2 | 374053.3 |              | 54  |
| 3662921  | 5160724  | 3691461  | 3056487  | 4959809  | 4411668  |              | 13  |
| 2971270  | 2837754  | 2611312  | 2293176  | 2897394  | 1170596  |              | 4   |
| 748505.4 | 998335.9 | 933347.1 | 395377.1 | 862138.8 | 2800406  |              | 9   |
| 953911.6 | 483371.9 | 1477696  | 721155.5 | 1707742  | 482260.4 |              | 46  |
| 1977876  | 1688122  | 1155586  | 1611486  | 2371065  | 5892725  |              | 2   |
| 3808488  | 5214982  | 4435940  | 3028318  | 3588309  | 1776009  | [1285][M]+   | 9   |
| 1378144  | 1360122  | 1519379  | 1055795  | 727572.3 | 709980   |              | 4   |
| 475609.9 | 380443.9 | 538530   | 326029.4 | 446373.8 | 231643.6 |              | 4   |
| 1498793  | 735843.2 | 1956294  | 1278271  | 764902.6 | 826466.6 | [M+2Na+K     | 12  |
| 2937176  | 2236053  | 2402952  | 2832939  | 2618948  | 1301449  |              | 9   |
| 2323350  | 2732233  | 2108681  | 1543241  | 2082651  | 634350.6 |              | 9   |
| 730875.1 | 656785.5 | 549666.8 | 931794.3 | 734200.5 | 291959.1 | [954][M]3+   | 134 |
| 10238153 | 4011524  | 8369395  | 11816472 | 7850571  | 1053808  |              | 1   |
| 3.4E+08  | 1.86E+08 | 2.91E+08 | 2.79E+08 | 7429737  | 3.47E+08 | [1206][M]+   | 2   |
| 860601.4 | 529369.8 | 808691.3 | 732982.3 | 737927.3 | 47968.37 |              | 4   |
| 5533979  | 5139992  | 7791754  | 357444.9 | 6041208  | 2850050  | [M+2H-H2O    | 23  |
| 5162952  | 4198004  | 3937814  | 5355901  | 3759106  | 1144525  | [230][M]3+   | 2   |
| 3307183  | 3885191  | 1081046  | 2056013  | 3973544  | 3811231  |              | 1   |
| 1832889  | 1105518  | 1761850  | 2262640  | 1176803  | 187960.4 | [366][M+1]3+ | 2   |
| 1447661  | 968895   | 709140   | 1238579  | 1009118  | 256910.6 |              | 9   |
| 260211.6 | 529996.2 | 428586.6 | 241976.3 | 167120.9 | 591957.1 |              | 4   |
| 6190272  | 3871345  | 4295226  | 4613769  | 2693613  | 1832665  |              | 93  |
| 1001479  | 493395   | 155275   | 843609.1 | 1010806  | 1324657  |              | 41  |
| 400843.8 | 848481   | 514206.3 | 588888.8 | 1433453  | 133515.5 | [M+H-C6H6    | 46  |
| 1431485  | 3218139  | 2859234  | 2553897  | 1617082  | 2568031  | [3M+Na+2H    | 134 |
| 608143.6 | 407036.1 | 1230221  | 4410049  | 401241.5 | 322480   | [557][M+1]+  | 94  |
| 1109040  | 2039192  | 2191601  | 2700558  | 1027162  | 835009.4 | [M+H-H2O]    | 33  |
| 17777346 | 20874310 | 2266820  | 18091410 | 19895524 | 18298975 |              | 15  |
| 1938261  | 2639519  | 1900003  | 1507879  | 2881971  | 5220924  |              | 465 |
| 1438528  | 97077.97 | 0        | 221557   | 1103581  | 0        |              | 1   |
| 2160376  | 656105.7 | 467263.3 | 1341021  | 1135258  | 939550.7 |              | 1   |
| 3764089  | 5110538  | 3748331  | 3125932  | 3756013  | 6375813  |              | 418 |
| 943556.8 | 610010.7 | 719242   | 922749.8 | 789521.4 | 90826.46 |              | 4   |

|          |          |          |          |          |          |                       |     |
|----------|----------|----------|----------|----------|----------|-----------------------|-----|
| 773911   | 89552.27 | 1627540  | 2973975  | 541166.7 | 1616773  |                       | 9   |
| 496878.6 | 1333688  | 749739.6 | 283816.5 | 1415403  | 1455798  | [231][M+1]3+          | 4   |
| 1240250  | 1132782  | 5628071  | 3977441  | 3194758  | 2825441  | [607][M+1]3+          | 9   |
| 9126896  | 15929416 | 14458275 | 4171182  | 1.73E+08 | 11849689 |                       | 1   |
| 6594949  | 12540698 | 3509302  | 10861987 | 214795.3 | 49980506 | [M+Na]+ 2:            | 42  |
| 2081215  | 2047477  | 2321483  | 1333261  | 1779330  | 1089909  |                       | 4   |
| 1086150  | 1478880  | 648072.9 | 876020.9 | 1038005  | 10390165 |                       | 9   |
| 1389387  | 1966503  | 1102989  | 1027987  | 1115888  | 1036414  | [972][M+1]+           | 9   |
| 18020385 | 25936723 | 15414264 | 13321141 | 32942808 | 77206744 |                       | 2   |
| 1024883  | 1035448  | 1867542  | 1070004  | 817172.3 | 645781   |                       | 9   |
| 1855338  | 1503056  | 1099843  | 2405759  | 701772.1 | 970262.9 | [1557][M]+ [M+Na]+ 9: | 12  |
| 218675.3 | 242707.5 | 285258.9 | 287860.3 | 211858.1 | 194251.1 |                       | 66  |
| 95869192 | 1.05E+08 | 80623936 | 84560638 | 1.08E+08 | 1.36E+08 |                       | 2   |
| 643939.3 | 66250.56 | 1809206  | 319498.3 | 592221.2 | 105191.1 |                       | 9   |
| 595037.1 | 2309842  | 834093.4 | 759676   | 591195.7 | 328626.3 | [1405][M]+            | 220 |
| 3555939  | 2193535  | 8355941  | 8873902  | 2083255  | 1871368  |                       | 107 |
| 1777355  | 2648809  | 1204688  | 903647   | 922795.2 | 684631   |                       | 9   |
| 4503124  | 682995.7 | 815316.1 | 3482280  | 475814.7 | 1479784  |                       | 9   |
| 255874.6 | 662935.2 | 3479418  | 3255128  | 3450735  | 938508.6 |                       | 260 |
| 14133807 | 12729299 | 12144796 | 13107109 | 12704304 | 12735351 |                       | 311 |
| 634428.7 | 625575   | 976607.6 | 537038.7 | 263306.3 | 2206096  |                       | 38  |
| 3943580  | 4377018  | 4467973  | 4562518  | 4194995  | 4282266  |                       | 180 |
| 946840.9 | 1343017  | 809722.1 | 311515.1 | 927824.8 | 1290718  |                       | 4   |
| 349838.5 | 1666090  | 1065849  | 917188.4 | 702308.6 | 2210783  | [1255][M+3]+          | 9   |
| 2787664  | 13934773 | 581037   | 2170340  | 8018642  | 13636306 | [949][M+1]+           | 20  |
| 1392862  | 2064318  | 1633125  | 999021.4 | 1496461  | 2645922  |                       | 4   |
| 3252580  | 2353291  | 2178065  | 1608753  | 1841323  | 107629.8 |                       | 159 |
| 1124772  | 1000704  | 1006510  | 1337256  | 287364.5 | 761451.6 | [85][M]2+ [M+2H]2+    | 302 |
| 2391677  | 3280176  | 2770119  | 1769216  | 2621459  | 1249878  |                       | 9   |
| 88053.51 | 109017.4 | 120172.3 | 138555.3 | 264256.9 | 12704.93 |                       | 83  |
| 7502289  | 7445580  | 8087056  | 6130795  | 6598359  | 3370349  | [156][M+1]2+          | 4   |
| 422813.6 | 1145562  | 365834.1 | 232503.9 | 324161.7 | 197690.2 |                       | 32  |
| 1.16E+08 | 1.14E+08 | 94575132 | 95837671 | 91672866 | 79501148 | [634][M+1]+           | 31  |
| 834324.3 | 1378923  | 897325.2 | 208822.2 | 1290361  | 1200144  | [3M+Na]+ :            | 5   |
| 6428121  | 5979038  | 1057204  | 4735834  | 5589327  | 5944267  | [M+Na]+ 6:            | 3   |

|          |          |          |          |          |          |               |     |
|----------|----------|----------|----------|----------|----------|---------------|-----|
| 267783.6 | 138370.7 | 244131.4 | 148643.6 | 49256.67 | 210735.7 | [1416][M+2]3+ | 72  |
| 40198820 | 51625366 | 40971096 | 32010236 | 33096940 | 32447774 |               | 1   |
| 1223630  | 0        | 842509.1 | 1260576  | 800126.8 | 0        |               | 1   |
| 4280965  | 2068387  | 16578.15 | 2570352  | 1107632  | 585092.8 |               | 52  |
| 727149.1 | 987273.8 | 695089.5 | 696507.5 | 3166489  | 1687081  |               | 29  |
| 4324565  | 6329791  | 4461687  | 4588269  | 4435350  | 4182186  |               | 316 |
| 12938407 | 17661593 | 11926882 | 12054324 | 15111107 | 8806377  | [1247][M+5]+  | 2   |
| 6540031  | 6480259  | 6963458  | 5446769  | 5481377  | 1044253  |               | 9   |
| 9942287  | 5912048  | 3547941  | 2327820  | 5753256  | 11250850 |               | 294 |
| 2094458  | 2210642  | 3271427  | 1232627  | 1616914  | 925891.3 |               | 46  |
| 888064.7 | 452719.8 | 101439.5 | 1005110  | 318635.3 | 408777.2 |               | 22  |
| 1183418  | 2097376  | 1396612  | 828598.5 | 2576547  | 8089270  |               | 2   |
| 4281545  | 4767698  | 4761931  | 3333502  | 3701128  | 1819455  | [269][M]3+    | 9   |
| 23162775 | 11383437 | 6943837  | 8270423  | 9665037  | 8561407  |               | 2   |
| 294822.8 | 520046.3 | 220718.9 | 202959.2 | 279738.2 | 243952.2 | [1515][M+1]+  | 125 |
| 1437082  | 315812.2 | 986800.1 | 4374228  | 10564850 | 5783682  | [M+Na]+ 4!    | 38  |
| 4863242  | 5249599  | 1747946  | 6137907  | 2360110  | 3449316  | [839][M+1]+   | 1   |
| 5471855  | 17710996 | 6279052  | 3807798  | 15795778 | 24830001 |               | 11  |
| 374130.8 | 869896.5 | 391993.5 | 233018.9 | 553314.9 | 846252.2 |               | 4   |
| 14516666 | 26975416 | 16466922 | 11424632 | 17227444 | 15926307 | [M+H]+ 15!    | 13  |
| 6099367  | 6144730  | 6403793  | 6222080  | 10720143 | 6084085  |               | 356 |
| 4523512  | 598571.6 | 4163900  | 6197551  | 3874736  | 4039592  |               | 411 |
| 1245846  | 1875990  | 1624567  | 1219647  | 1750239  | 4322122  |               | 9   |
| 1640613  | 1506144  | 1816887  | 1476194  | 1417105  | 338776.2 |               | 13  |
| 2226009  | 1736939  | 2190971  | 2509491  | 2294848  | 1986840  |               | 312 |
| 1353156  | 3790085  | 5316979  | 3714021  | 2471503  | 8491650  |               | 15  |
| 335629.5 | 345133.6 | 378935.1 | 414507.4 | 304384.7 | 338248.5 | [1327][M+2]+  | 150 |
| 1.85E+08 | 2.32E+08 | 1.71E+08 | 3.81E+08 | 3.33E+08 | 2.09E+08 | [856][M+1]+   | 19  |
| 7130476  | 4036756  | 1539704  | 1710122  | 8054927  | 5869431  | [M+H-C2H4     | 11  |
| 1318945  | 1282230  | 890174.3 | 539775.6 | 732824.2 | 679693.7 | [511][M+1]3+  | 4   |
| 991189.7 | 1464705  | 1523881  | 1115896  | 919350.9 | 3248452  | [513][M+1]2+  | 9   |
| 1085502  | 1250910  | 997266.8 | 576523.2 | 895503.5 | 186460.3 |               | 12  |
| 7401174  | 7772203  | 7712367  | 8334838  | 6151742  | 8291272  | [M+H]+ 19!    | 20  |
| 4142915  | 5564168  | 5115928  | 4380931  | 2363046  | 915935.4 | [234][M+1]2+  | 9   |
| 640650.1 | 1529622  | 330732.8 | 134824.7 | 1096212  | 1080666  |               | 13  |

|          |          |          |          |          |          |               |     |
|----------|----------|----------|----------|----------|----------|---------------|-----|
| 3120055  | 6664905  | 6352953  | 6197295  | 6037201  | 2817530  | [M+K]+ 204    | 404 |
| 887266   | 1012574  | 1152029  | 1073721  | 976267.5 | 754371.6 | [1531][M+1]+  | 37  |
| 6903372  | 5378913  | 2796107  | 5331002  | 5588586  | 14152361 |               | 9   |
| 51765730 | 50945290 | 40420665 | 30594586 | 78341745 | 37726144 |               | 1   |
| 684435.1 | 3114818  | 1124431  | 380417.3 | 2582984  | 5729255  |               | 2   |
| 1321534  | 1060788  | 1026070  | 1025986  | 981002.3 | 0        |               | 9   |
| 480056.5 | 1342794  | 1228945  | 341336.7 | 606404.2 | 1690931  | [M+K]+ 285    | 8   |
| 1619467  | 3221461  | 3510749  | 6949993  | 2075795  | 6875895  | [924][M]2+    | 1   |
| 3158176  | 1629533  | 2724332  | 1035695  | 5531726  | 4086697  |               | 1   |
| 6220898  | 9519596  | 1247435  | 5924125  | 15406616 | 28710150 |               | 2   |
| 3685490  | 2658983  | 2833285  | 3560896  | 2579071  | 0        |               | 9   |
| 2560147  | 2372714  | 1847379  | 1824190  | 1579819  | 9358224  | [M+K]+ 636    | 81  |
| 9763437  | 5441407  | 2994304  | 4571730  | 4793999  | 3790789  | [M+H+HCC      | 14  |
| 7167242  | 7161594  | 760259.8 | 3944756  | 9747982  | 4152685  |               | 3   |
| 534339.8 | 937656.1 | 977205.5 | 447684.1 | 755316.6 | 535104.1 | [86][M+2]3+   | 4   |
| 316076.5 | 136679.7 | 279364.6 | 486954.7 | 1133620  | 4876721  | [1523][M+1]3+ | 9   |
| 1634481  | 1857568  | 2986897  | 559336.7 | 1597934  | 588400.5 | [454][M]2+    | 1   |
| 5516240  | 1937344  | 4122509  | 5132629  | 3885421  | 831512.3 |               | 2   |
| 6299013  | 6813895  | 7242276  | 5185205  | 6790943  | 4860398  |               | 9   |
| 1188333  | 3821248  | 1389816  | 556132.8 | 2779093  | 14286264 |               | 9   |
| 1041234  | 4502652  | 3351428  | 597536.7 | 2243444  | 9556265  |               | 9   |
| 32897458 | 22686638 | 26715533 | 32569252 | 28564710 | 10834367 |               | 2   |
| 2751769  | 2842626  | 2798581  | 2770636  | 2642030  | 1173060  |               | 250 |
| 66325322 | 45440239 | 47326104 | 41293111 | 36287956 | 3234320  | [M+2H]2+      | 169 |
| 3369871  | 4605911  | 4231793  | 2646540  | 3218600  | 1915737  | [160][M]3+    | 9   |
| 7852158  | 930816.2 | 8075432  | 6359675  | 6750846  | 2787182  | [M+H]+ 300    | 46  |
| 4757311  | 1177244  | 3528588  | 4002288  | 2207089  | 145736.4 | [34][M+1]3+   | 2   |
| 467359.5 | 1163800  | 335020.7 | 342998.2 | 1049260  | 573272.8 |               | 8   |
| 637740   | 470683.5 | 910797.3 | 502310.1 | 565208.9 | 429637.6 |               | 4   |
| 19499686 | 25917505 | 58212003 | 14770833 | 1.83E+08 | 10799993 | [M+Na]+ 4:    | 21  |
| 4703854  | 8576945  | 6249165  | 3980999  | 7585492  | 5612906  |               | 295 |
| 598973.4 | 189745.9 | 848519.9 | 357625.2 | 966485.4 | 1677712  |               | 9   |
| 621033   | 1583933  | 1464041  | 975528.8 | 634530.9 | 327096.3 | [M+H-CH3]     | 5   |
| 26771614 | 27762396 | 7294767  | 2558590  | 4494573  | 8070878  | [M+H-COCl     | 15  |
| 613207.5 | 1845710  | 7286879  | 615691.9 | 572543.8 | 1345397  |               | 20  |

|          |          |          |          |          |          |              |     |
|----------|----------|----------|----------|----------|----------|--------------|-----|
| 974506.4 | 2875456  | 3865733  | 1072926  | 98963.77 | 504577.8 | [M+K]+ 376   | 20  |
| 2383648  | 3232945  | 2921561  | 1824075  | 2603542  | 1178494  |              | 9   |
| 2098235  | 2248515  | 76344.03 | 131861.2 | 221598.4 | 1579815  |              | 472 |
| 0        | 959624.9 | 14773.67 | 67889.03 | 827589.4 | 0        | [M+2H-C4H]   | 15  |
| 7379231  | 2430390  | 5475293  | 7553814  | 3030022  | 1790007  | [31][M+1]2+  | 2   |
| 3530781  | 2588948  | 5732456  | 28231682 | 4137487  | 2491644  | [1141][M+1]+ | 138 |
| 10175223 | 11201796 | 6220906  | 7716109  | 9323394  | 2727764  | [379][M]2+   | 2   |
| 1667053  | 1443372  | 1056290  | 369687.5 | 1698190  | 582792   | [3M+H+Na]    | 6   |
| 5593009  | 4606202  | 2952923  | 3319035  | 3351429  | 2212015  |              | 415 |
| 350064.6 | 1126112  | 311791.8 | 71437.31 | 872523.5 | 3017677  | [1024][M+2]+ | 9   |
| 1171665  | 1146432  | 1088918  | 978468   | 780841   | 898029.4 |              | 9   |
| 16469981 | 16081995 | 17075626 | 13760404 | 13909013 | 4433120  | [952][M]+    | 9   |
| 3511903  | 2941622  | 1916951  | 2696055  | 3985449  | 3047286  |              | 1   |
| 1E+09    | 6.75E+08 | 8.47E+08 | 7.9E+08  | 7.19E+08 | 2.95E+08 |              | 2   |
| 37282105 | 6460400  | 33787010 | 7197987  | 37851218 | 1106339  |              | 2   |
| 1455100  | 2337150  | 1810781  | 433845.6 | 1570895  | 4672178  |              | 4   |
| 1807842  | 3354089  | 2987407  | 7537075  | 3094272  | 1090648  |              | 2   |
| 4534489  | 3909406  | 3533451  | 3210902  | 2191131  | 5258838  |              | 226 |
| 1214071  | 1149356  | 242337.2 | 533959.9 | 799538.2 | 12308314 | [M+K+HCO]    | 41  |
| 1134284  | 11948626 | 9238650  | 38564575 | 8914772  | 17427456 |              | 1   |
| 816766.3 | 3.87E+08 | 4.58E+08 | 2861235  | 2294895  | 2540992  |              | 2   |
| 2063158  | 1964451  | 2570116  | 1766565  | 1476523  | 1126298  | [1521][M]+   | 4   |
| 560741.5 | 1394453  | 457543.4 | 370680.9 | 1152401  | 1943827  |              | 1   |
| 5584460  | 4894871  | 5007122  | 4831897  | 3766840  | 704604.6 |              | 2   |
| 3077377  | 4226429  | 1677434  | 715675.9 | 4098392  | 5597839  | [M+K]+ 376   | 3   |
| 180838.8 | 1870370  | 570360.9 | 215578.5 | 884443   | 4217296  | [549][M+2]2+ | 9   |
| 4142941  | 4316825  | 4270398  | 3033901  | 3319914  | 4506581  |              | 208 |
| 4126571  | 1729402  | 1351681  | 3710152  | 5184309  | 860694.8 |              | 2   |
| 6977665  | 7759209  | 6413315  | 8130109  | 6256023  | 4629673  | [385][M]+    | 158 |
| 2380388  | 2357771  | 2347156  | 2104191  | 1882298  | 1219829  |              | 4   |
| 2328173  | 2505373  | 2482055  | 1919220  | 1975109  | 1017629  |              | 4   |
| 983724.3 | 1083191  | 1146155  | 653634.8 | 729242.1 | 129782.9 |              | 9   |
| 1.02E+08 | 1.37E+08 | 1.14E+08 | 66903082 | 70468846 | 1.13E+08 |              | 48  |
| 3249765  | 395136.2 | 2397277  | 3277223  | 1665061  | 0        |              | 2   |
| 4113580  | 6343809  | 6046161  | 5551720  | 1898977  | 23291661 | [M+H]+ 57    | 356 |

|          |          |          |          |          |          |               |     |
|----------|----------|----------|----------|----------|----------|---------------|-----|
| 1344537  | 3682880  | 3644227  | 960797   | 1207934  | 137165.8 | [3M+2K-H]     | 6   |
| 2660472  | 2330584  | 1276470  | 2733144  | 3326496  | 4687122  |               | 2   |
| 4794892  | 10142901 | 8678820  | 88535111 | 3193276  | 37355034 | [218][M]+     | 100 |
| 5054784  | 5955709  | 6940652  | 9536531  | 7800613  | 8940330  |               | 385 |
| 45644656 | 57411397 | 42095547 | 38395982 | 45217649 | 27574353 |               | 2   |
| 4111758  | 860701.6 | 2963322  | 3186844  | 4547622  | 6856235  |               | 11  |
| 2617726  | 2393142  | 3098063  | 2061121  | 2166411  | 5697065  |               | 9   |
| 828569.8 | 1368386  | 1115926  | 551065.6 | 944334.7 | 1817449  |               | 4   |
| 28836620 | 45941115 | 25690527 | 27875937 | 47857087 | 65175128 | [1369][M]+    | 2   |
| 217877.8 | 185621.1 | 187228   | 176784   | 183996.4 | 118814.4 | [M+H+HCC      | 43  |
| 3289780  | 4335284  | 5164045  | 2630516  | 3235238  | 602279.4 |               | 46  |
| 13696315 | 13289460 | 12332008 | 13103869 | 13093179 | 6837692  | [870][M+1]+   | 123 |
| 50021631 | 45000278 | 3851896  | 38561658 | 45219992 | 1.53E+08 |               | 3   |
| 2702867  | 1138855  | 2276170  | 1472787  | 1670936  | 1976663  |               | 63  |
| 1798455  | 1937978  | 364937.1 | 470636.3 | 2006025  | 1435264  |               | 84  |
| 840772.6 | 954580.7 | 1702594  | 876315.8 | 855260.8 | 1483422  |               | 9   |
| 2912077  | 3063273  | 2004423  | 3206541  | 2891552  | 428598.6 | [851][M+3]+   | 4   |
| 4261238  | 6096987  | 7185155  | 2875476  | 4394858  | 379020.1 |               | 1   |
| 63343390 | 19061304 | 27831264 | 29984245 | 57862000 | 29372281 | [M+2Na+K]     | 3   |
| 1060086  | 1282419  | 38531.02 | 831222.3 | 1093738  | 12928873 | [3M+2H]2+     | 11  |
| 2398770  | 2411246  | 2957383  | 1725934  | 2237124  | 0        | [895][M]2+    | 9   |
| 4265084  | 4458542  | 3547916  | 4253133  | 3222736  | 2845374  | [55][M]+      | 117 |
| 7709074  | 6424141  | 7758544  | 6791395  | 5632497  | 802126.8 | [238][M]2+    | 9   |
| 2321619  | 345587.2 | 1963680  | 2458403  | 747248.6 | 11342625 |               | 2   |
| 2575720  | 2527399  | 3437409  | 5777097  | 3189757  | 3078791  | [1496][M]+    | 83  |
| 845979.9 | 632192.2 | 1928984  | 1036381  | 939964.3 | 6044813  |               | 2   |
| 7710488  | 2371264  | 4842658  | 6920052  | 6478521  | 1263944  |               | 2   |
| 3699724  | 3265625  | 5554280  | 2490171  | 2635361  | 1693853  | [268][M+1]2+  | 18  |
| 2502718  | 2259086  | 2881986  | 1839277  | 1264413  | 1112281  | [1064][M+1]3+ | 9   |
| 5462080  | 5735073  | 6013146  | 5981587  | 3656145  | 1798877  |               | 2   |
| 1163959  | 2427662  | 1418932  | 1214561  | 966561.2 | 1153351  |               | 9   |
| 2320749  | 3093514  | 1814461  | 1647586  | 1567078  | 0        |               | 2   |
| 3327373  | 3578596  | 5016067  | 8321186  | 4176028  | 7626086  | [M+H-CH2]     | 189 |
| 3293060  | 4730754  | 4475675  | 2377411  | 3124980  | 1397535  | [1319][M]+    | 9   |
| 3205466  | 3257967  | 4039957  | 19558249 | 4241746  | 4301589  |               | 2   |

|          |          |          |          |          |          |              |     |
|----------|----------|----------|----------|----------|----------|--------------|-----|
| 7059186  | 6896145  | 4528688  | 5238831  | 5729591  | 4970659  |              | 121 |
| 375862.9 | 328590.2 | 213905.3 | 568275.7 | 287951.5 | 106300.3 | [1570][M+1]+ | 136 |
| 6553845  | 6246762  | 6775970  | 5643697  | 5754394  | 1273951  |              | 9   |
| 1602585  | 1471545  | 3947657  | 454745.9 | 2478205  | 729480.7 |              | 1   |
| 4865516  | 4138416  | 4255036  | 3891626  | 3790469  | 3080791  |              | 18  |
| 917935.3 | 975228.9 | 1023753  | 667863   | 1021911  | 1059318  |              | 9   |
| 5556528  | 1373609  | 862521.7 | 4633454  | 1206939  | 2899413  |              | 9   |
| 143492.8 | 790548.3 | 102691   | 279874.7 | 614963.6 | 400785.7 | [M+K]+ 53    | 5   |
| 6078676  | 7388444  | 5515086  | 4691804  | 5477561  | 2815026  |              | 2   |
| 6245855  | 3293230  | 2581445  | 2856859  | 3636244  | 5700410  |              | 9   |
| 1332822  | 954411.8 | 1094648  | 2126182  | 209644.8 | 665560.1 |              | 387 |
| 323489.4 | 292511.6 | 335242.7 | 345656   | 316035.1 | 52772.59 |              | 55  |
| 633426.6 | 1619615  | 1538416  | 812750.2 | 1199803  | 2159021  |              | 4   |
| 551913.7 | 934747   | 768281.1 | 5298672  | 472737.2 | 617059.5 |              | 9   |
| 2332515  | 2446233  | 2785698  | 2580205  | 1837868  | 232352.6 |              | 9   |
| 1494592  | 1414651  | 1518458  | 1474821  | 1496221  | 736379.8 |              | 127 |
| 4554589  | 21398874 | 9700420  | 10385237 | 15360975 | 60688119 |              | 11  |
| 314597.6 | 1188784  | 514901.9 | 0        | 367673.2 | 3117803  |              | 9   |
| 2814408  | 2923251  | 2951439  | 2896173  | 2723396  | 2792513  | [777][M+1]+  | 190 |
| 4718213  | 4392917  | 4543124  | 3097058  | 4954100  | 5675917  |              | 335 |
| 157544   | 1090289  | 0        | 63456.41 | 337767.8 | 2303317  | [1025][M+2]+ | 9   |
| 370728.4 | 190381.3 | 415242.6 | 406484.5 | 201258.9 | 124074.9 |              | 168 |
| 3276369  | 3291614  | 3342786  | 2705494  | 2766576  | 0        |              | 9   |
| 9489001  | 5199424  | 8195777  | 9679097  | 4846787  | 133996.2 |              | 2   |
| 1156877  | 2938309  | 1546206  | 808869.8 | 1828883  | 7420858  |              | 9   |
| 768492.2 | 1098711  | 570414   | 1185261  | 1.41E+08 | 1.2E+08  |              | 34  |
| 1221184  | 2945398  | 2698260  | 915593.5 | 1834165  | 4640466  |              | 9   |
| 166398   | 250470.7 | 146450.8 | 134836   | 201675.2 | 146850.8 | [1326][M+1]+ | 86  |
| 8582182  | 1276877  | 5146783  | 3272458  | 7114859  | 785152.1 | [570][M]2+   | 187 |
| 9315844  | 2802090  | 7180612  | 2688785  | 4753359  | 1740204  | [453][M+2]3+ | 150 |
| 621205.1 | 2008045  | 152730.4 | 0        | 290729.5 | 240219.8 | [2M+H]+ 3    | 46  |
| 2450363  | 1727602  | 1832836  | 2268943  | 995749.6 | 1750202  |              | 2   |
| 2899110  | 631230   | 3273507  | 966711.5 | 4470204  | 8828513  |              | 1   |
| 25372133 | 17153678 | 19422868 | 25116357 | 19323228 | 8191589  |              | 13  |
| 511566.7 | 721435.4 | 839970.2 | 347425.6 | 470767.6 | 582275.5 | [M+K+HCO     | 8   |

|          |          |          |          |          |          |             |     |
|----------|----------|----------|----------|----------|----------|-------------|-----|
| 3068778  | 4059167  | 1402839  | 1843031  | 2899687  | 806572.7 |             | 4   |
| 1995076  | 1253755  | 2359059  | 784035.8 | 1101801  | 310551.7 |             | 1   |
| 4429983  | 5289726  | 7523629  | 7051787  | 12661420 | 6093829  | [68][M+1]+  | 6   |
| 6227939  | 7524610  | 7642893  | 5164497  | 6742003  | 20648868 |             | 9   |
| 1055627  | 1949877  | 1426298  | 713151.6 | 1268514  | 3365498  |             | 9   |
| 1195849  | 207565.3 | 590895.5 | 665606.2 | 490535.4 | 8525238  | [M+Na]+ 5:  | 41  |
| 7785315  | 8646740  | 7388258  | 5478932  | 6522975  | 4618948  |             | 4   |
| 797249.9 | 4050753  | 5425795  | 3938036  | 3702296  | 3885907  |             | 419 |
| 6574819  | 7020601  | 6776676  | 5684111  | 7003472  | 2148521  | [1580][M]+  | 9   |
| 21805697 | 20243648 | 21532973 | 26405095 | 23398723 | 18548867 |             | 152 |
| 2462700  | 2600657  | 2533536  | 1998328  | 1929266  | 1227402  | [86][M]3+   | 4   |
| 5910962  | 2392269  | 466600.5 | 2730464  | 5693227  | 4383359  |             | 1   |
| 681338.4 | 1778901  | 1950951  | 1403108  | 721404.3 | 1682254  |             | 9   |
| 4879475  | 4828078  | 4775830  | 5421060  | 3365143  | 662745.9 |             | 2   |
| 13004427 | 9230724  | 6147941  | 12330606 | 12231742 | 2696360  |             | 2   |
| 16774796 | 16364020 | 16550523 | 12068904 | 13324627 | 5093856  | [872][M]+   | 86  |
| 4607258  | 4840775  | 4721722  | 5030125  | 1892103  | 4393522  | [1175][M]2+ | 190 |
| 56401861 | 51558450 | 50833832 | 68405846 | 51594758 | 55241617 | [421][M]+   | 183 |
| 0        | 1083951  | 226222.1 | 3406153  | 116651.9 | 290167   |             | 15  |
| 1090446  | 2032745  | 3861284  | 967964.7 | 1450425  | 4191027  |             | 9   |
| 2084843  | 3323973  | 3644789  | 2694740  | 2310794  | 5929779  |             | 1   |
| 3675929  | 3508135  | 3959082  | 2515533  | 462773.1 | 2525109  |             | 325 |
| 1722775  | 2885509  | 2810945  | 1252504  | 1698145  | 7531485  |             | 9   |
| 19185444 | 3571227  | 17230084 | 17487883 | 16920556 | 17003475 |             | 241 |
| 12349672 | 2850369  | 1910401  | 814169.5 | 8979239  | 14247938 |             | 15  |
| 2796772  | 1889818  | 2017675  | 2056899  | 18834229 | 2235424  |             | 2   |
| 3591613  | 2872798  | 3877554  | 4685301  | 688088.2 | 2247522  |             | 353 |
| 1.62E+08 | 2E+08    | 1.39E+08 | 1.56E+08 | 2.14E+08 | 3.07E+08 | [1293][M]+  | 2   |
| 5074883  | 7812477  | 8474072  | 8050761  | 8310918  | 6515599  |             | 310 |
| 958690.6 | 1344551  | 2267420  | 902238   | 752142   | 3548042  |             | 13  |
| 3825752  | 3244751  | 2812023  | 6111669  | 6437861  | 3188280  | [M+Na+Na    | 13  |
| 167747.3 | 169239.9 | 1130245  | 374244.6 | 286766.8 | 5061346  | [801][M+1]+ | 309 |
| 617248.9 | 355547   | 694298.1 | 1072914  | 744930   | 1243833  | [M+Na]+ 4:  | 288 |
| 768213.5 | 8750408  | 5518989  | 3783186  | 14756623 | 5672548  |             | 346 |
| 331904.7 | 365934.1 | 262638.6 | 321454.6 | 170647.5 | 198014.8 | [772][M+1]+ | 51  |



|          |          |          |          |          |          |              |     |
|----------|----------|----------|----------|----------|----------|--------------|-----|
| 487804.9 | 272381.2 | 217536.5 | 563564.9 | 461899.2 | 1021203  |              | 8   |
| 4297451  | 1107551  | 1489753  | 935923.7 | 4900227  | 4231623  |              | 9   |
| 2164109  | 2783890  | 2457435  | 1289602  | 2511131  | 1811973  |              | 9   |
| 483321.3 | 182167.3 | 450883.1 | 320998.6 | 312421.7 | 330872.4 |              | 12  |
| 3455021  | 2981379  | 4256861  | 3994357  | 3782296  | 7536863  |              | 2   |
| 2394985  | 6286937  | 2555251  | 2328230  | 3852934  | 21795775 |              | 4   |
| 4726148  | 3934009  | 3914358  | 3811707  | 3964644  | 3794215  |              | 208 |
| 6500700  | 14179441 | 7386478  | 4572001  | 10681720 | 50142146 | [684][M]+    | 9   |
| 21757954 | 11083765 | 16800560 | 23567122 | 11462640 | 2246352  | [30][M+1]2+  | 2   |
| 2080322  | 1684709  | 1735284  | 1950300  | 2246310  | 472137.6 | [M+K]+ 54'   | 14  |
| 20329050 | 18170224 | 21552552 | 16419725 | 17667694 | 4993739  | [M+H+K]2+    | 16  |
| 1643459  | 1770304  | 1784190  | 1252052  | 1779568  | 2189966  |              | 2   |
| 1391126  | 1328194  | 1723108  | 1252787  | 1123226  | 740558.9 | [1263][M]+   | 203 |
| 1624711  | 1654425  | 1473947  | 1703455  | 895023.7 | 780791.8 |              | 141 |
| 5361420  | 3845276  | 3008368  | 5031133  | 5467207  | 3876689  |              | 325 |
| 7694685  | 3451728  | 7210716  | 6663881  | 3937263  | 3815937  |              | 2   |
| 1230397  | 2176976  | 1756379  | 1005370  | 1660713  | 768499   | [M+H]+ 45'   | 13  |
| 2568573  | 2128074  | 2340160  | 1962004  | 2120492  | 989115.7 |              | 4   |
| 1637001  | 2003899  | 1423736  | 1322609  | 1194638  | 6786004  | [359][M+1]3+ | 2   |
| 3349566  | 2535217  | 4717652  | 2532235  | 2396615  | 1121086  |              | 1   |
| 284528   | 371192   | 641495   | 489537.4 | 355837.4 | 352055.1 | [M+K]+ 38'   | 147 |
| 24893603 | 21842357 | 15927578 | 31327697 | 23273958 | 5382768  |              | 1   |
| 1582422  | 3082633  | 2433777  | 777495.3 | 1583094  | 5321389  |              | 313 |
| 968462.4 | 1366774  | 725440.9 | 734028.6 | 928155   | 889308   |              | 81  |
| 1486094  | 1691203  | 838177.1 | 159492   | 1453155  | 1010107  |              | 4   |
| 37618852 | 21955937 | 29596044 | 40704074 | 19424296 | 3016610  |              | 2   |
| 1120848  | 2472259  | 1395263  | 684297.9 | 1752563  | 4850557  |              | 4   |
| 12473196 | 10820364 | 14111166 | 10245763 | 8616407  | 901175.6 |              | 9   |
| 5615498  | 7692665  | 9931962  | 11384310 | 1863737  | 16364644 | [M+Na]+ 4'   | 15  |
| 9532327  | 12217839 | 11121737 | 9164211  | 10825402 | 7496394  |              | 9   |
| 270512.7 | 1114540  | 1616508  | 287158.1 | 609721.3 | 1028880  | [404][M+1]2+ | 18  |
| 1029558  | 3744716  | 1886825  | 1108540  | 1917005  | 4390614  |              | 15  |
| 420388.6 | 593883   | 381360.1 | 418626.9 | 391538   | 201664.6 | [M+Na]+ 1'   | 8   |
| 4051045  | 3460760  | 4445491  | 3703991  | 2776279  | 235858   |              | 9   |
| 396895.2 | 1578255  | 1458385  | 203700   | 770779.9 | 2843511  |              | 9   |

|          |          |          |          |          |          |                          |     |
|----------|----------|----------|----------|----------|----------|--------------------------|-----|
| 9513460  | 6105408  | 8341708  | 9622726  | 8046630  | 2848321  |                          | 2   |
| 25641819 | 18181798 | 21311269 | 26593524 | 21231591 | 7575044  | [443][M+2] <sup>2+</sup> | 2   |
| 7866405  | 5796587  | 6538121  | 8496714  | 4911892  | 1084633  |                          | 2   |
| 2917074  | 5632934  | 4326931  | 2168429  | 4355272  | 11833072 | [713][M] <sup>+</sup>    | 9   |
| 1772179  | 4479083  | 429624.5 | 3061482  | 5002337  | 6294513  | [M+H] <sup>+</sup> 49!   | 21  |
| 26786517 | 31293044 | 15098860 | 29226262 | 26292306 | 30991301 | [M+Na] <sup>+</sup> 4!   | 3   |
| 1995108  | 1152340  | 2005081  | 1864094  | 1367000  | 1703564  |                          | 2   |
| 797387.8 | 1924735  | 3298526  | 824755.8 | 926064.6 | 2377247  |                          | 9   |
| 2100621  | 795811.7 | 2498477  | 587386.4 | 914810.4 | 0        | [1120][M+1] <sup>+</sup> | 1   |
| 2715742  | 641807.7 | 1292478  | 2325919  | 1694533  | 3877562  |                          | 2   |
| 7334286  | 6535325  | 4244706  | 7618528  | 7944346  | 6517707  |                          | 9   |
| 8689789  | 8629565  | 8770004  | 6575489  | 6730147  | 2815862  | [1424][M+1] <sup>+</sup> | 12  |
| 2341122  | 15706483 | 4048987  | 6050563  | 10400234 | 2685119  | [M+H] <sup>+</sup> 53!   | 253 |
| 13474346 | 9092149  | 7814522  | 9755473  | 13628828 | 2660289  | [M+K] <sup>+</sup> 51!   | 14  |
| 781682.2 | 1896296  | 420786.3 | 335150.5 | 257986.2 | 539111.2 |                          | 48  |
| 1363004  | 1504836  | 1229596  | 1314591  | 775820.7 | 1569517  | [M+H-CO] <sup>+</sup>    | 29  |
| 5065593  | 2300842  | 6476813  | 5977969  | 2741539  | 2635530  |                          | 79  |
| 16503275 | 20722998 | 18962557 | 15669191 | 17913475 | 13914471 | [687][M] <sup>+</sup>    | 9   |
| 3934948  | 6580986  | 4102806  | 4877599  | 4070110  | 3844628  | [909][M+1] <sup>+</sup>  | 147 |
| 164598.9 | 130715   | 232330.8 | 218278.5 | 82078.7  | 157084.5 | [M+H] <sup>+</sup> 46!   | 357 |
| 1491435  | 1213676  | 1315910  | 6211659  | 7712922  | 1979664  |                          | 1   |
| 8551515  | 9325374  | 1819976  | 3286130  | 9861221  | 4655445  | [M+K] <sup>+</sup> 53!   | 11  |
| 467438.6 | 533143.7 | 288909.9 | 174699.6 | 368740.5 | 13335.36 |                          | 100 |
| 9719954  | 11987615 | 9191458  | 7935743  | 14251256 | 18554616 | [1298][M+3] <sup>+</sup> | 2   |
| 3876352  | 3844331  | 3821870  | 3891372  | 3666932  | 2661723  |                          | 270 |
| 1736456  | 1780065  | 1887536  | 1070781  | 1669040  | 1329711  |                          | 4   |
| 6750169  | 3105628  | 4851633  | 4550878  | 984303.7 | 4929442  |                          | 190 |
| 3263797  | 3725904  | 3229622  | 3383360  | 3653043  | 3352327  |                          | 468 |
| 2852380  | 5131933  | 4504115  | 3269198  | 3769546  | 142232.6 |                          | 1   |
| 1053824  | 1052573  | 1148008  | 840555.6 | 683729.3 | 848345.4 |                          | 4   |
| 24505567 | 10319349 | 19405243 | 12780046 | 22130060 | 13383781 | [814][M] <sup>3+</sup>   | 2   |
| 477257.5 | 233332.1 | 578298.3 | 508458.7 | 518848.6 | 263854.4 | [1526][M+1] <sup>+</sup> | 183 |
| 401861.2 | 584714.9 | 92687.86 | 16232.71 | 62532.39 | 218973.7 | [2M+Na+3I]               | 18  |
| 2076594  | 0        | 1271959  | 1479963  | 1585212  | 1679490  |                          | 2   |
| 24346412 | 21833108 | 18113836 | 28291899 | 27388323 | 22426492 | [1572][M] <sup>2+</sup>  | 2   |

|          |          |          |          |          |          |                      |     |
|----------|----------|----------|----------|----------|----------|----------------------|-----|
| 2411049  | 2221126  | 2484422  | 2248318  | 1811365  | 0        |                      | 46  |
| 4371251  | 3371631  | 3739738  | 2555894  | 1875867  | 1797376  | [M+K]+ 17            | 29  |
| 1.28E+08 | 2687722  | 12847149 | 93603406 | 3028086  | 7354350  |                      | 1   |
| 234314.6 | 245195.8 | 221691.7 | 359019.7 | 161739.2 | 104005.2 |                      | 127 |
| 433645   | 880422.5 | 428805.4 | 268997.5 | 882913   | 3064364  |                      | 8   |
| 3800177  | 3186337  | 3146094  | 3344245  | 2784945  | 2156791  |                      | 9   |
| 7994270  | 9562600  | 8958063  | 6719030  | 7362181  | 2816320  |                      | 9   |
| 583907.9 | 322650.5 | 383248.6 | 262416.3 | 272752.5 | 164109.8 |                      | 40  |
| 1.95E+08 | 2.61E+08 | 1.51E+08 | 1.56E+08 | 3.32E+08 | 8.37E+08 | [1245][M]3+          | 2   |
| 5609564  | 1808152  | 2616746  | 4795850  | 3021933  | 2951345  |                      | 155 |
| 365993.9 | 980821   | 1200474  | 267316.9 | 633561.1 | 950034.8 |                      | 9   |
| 1814183  | 2566448  | 3101035  | 1446300  | 1265144  | 1310244  |                      | 9   |
| 557496   | 989854.4 | 334296.5 | 431910.9 | 803818.4 | 3081267  |                      | 8   |
| 1238360  | 2671598  | 1686634  | 614010.7 | 2262713  | 631991.4 | [M+Na+Na             | 3   |
| 5118602  | 8393901  | 3587665  | 5024157  | 7727518  | 6198411  | [1374][M]+           | 2   |
| 16558161 | 16040277 | 17178509 | 13944407 | 14153391 | 3908629  |                      | 9   |
| 7980219  | 8416480  | 7175416  | 5652941  | 7590777  | 11353479 | [715][M]2+           | 5   |
| 289272.3 | 1438230  | 1245179  | 328897.9 | 829376.6 | 0        | [M+H]+ 53            | 46  |
| 2202563  | 1536576  | 2242938  | 2574859  | 653945.8 | 1476037  |                      | 456 |
| 190829.7 | 151660.1 | 175255.8 | 216208.9 | 274268.1 | 75089.18 |                      | 16  |
| 1312129  | 1302281  | 1185927  | 1060748  | 1014330  | 288571.4 |                      | 9   |
| 3735760  | 3586766  | 3587106  | 3023428  | 3526536  | 1174989  | [1498][M]+ [M+K]+ 80 | 16  |
| 784142.5 | 1205243  | 491349.4 | 550577.1 | 840792.7 | 4394786  |                      | 9   |
| 353015.9 | 118683.7 | 126917.8 | 593229.3 | 719314.4 | 688618.6 |                      | 274 |
| 946168.7 | 1137575  | 2295646  | 1720896  | 1889474  | 571110.4 |                      | 155 |
| 1518519  | 1218275  | 1264630  | 1131105  | 1014046  | 548948.7 | [1325][M+1]+         | 16  |
| 1554325  | 1330988  | 575922.8 | 1026529  | 1270011  | 11639231 |                      | 9   |
| 62633566 | 12886821 | 65080068 | 27549943 | 33067707 | 27227711 | [733][M]3+           | 1   |
| 1277795  | 3767050  | 1189293  | 2709384  | 3666308  | 1731487  |                      | 21  |
| 130629.3 | 211644.3 | 133923.4 | 189985.6 | 258856.8 | 19638.92 | [M+K]+ 82            | 28  |
| 8415278  | 9532502  | 8236703  | 6714974  | 10314972 | 25292335 | [1237][M+1]2+        | 2   |
| 1821404  | 1580356  | 1882904  | 1613625  | 674532.9 | 757604.6 | [936][M]+            | 486 |
| 1591039  | 2117148  | 1784452  | 1042798  | 1686471  | 1351105  |                      | 9   |
| 1198878  | 3634846  | 2165069  | 1090671  | 2172517  | 8423199  |                      | 2   |
| 25322006 | 42051388 | 13540923 | 17635218 | 45010641 | 18894762 | [M+K+NH3             | 3   |

|          |          |          |          |          |          |                                               |     |
|----------|----------|----------|----------|----------|----------|-----------------------------------------------|-----|
| 4600451  | 4874513  | 4644285  | 3166562  | 3091264  | 2050203  |                                               | 9   |
| 27263902 | 1727008  | 2613331  | 986975.6 | 31728129 | 17580276 | [M+H-C4H8]                                    | 3   |
| 6440292  | 6651485  | 6022758  | 6573520  | 5314383  | 4593909  |                                               | 2   |
| 4903436  | 4107894  | 4637437  | 3851031  | 2989020  | 0        |                                               | 9   |
| 10502801 | 8557148  | 9092344  | 9938157  | 10273036 | 3746505  | [3M+H+Na]                                     | 13  |
| 1171494  | 864006.7 | 1128407  | 582018.5 | 1157321  | 222190.7 |                                               | 243 |
| 657973.1 | 3004815  | 474109   | 334519.4 | 158585.7 | 301413.3 |                                               | 206 |
| 5763708  | 2493337  | 2625841  | 4986776  | 3880310  | 1262687  |                                               | 9   |
| 1176722  | 3134859  | 2774298  | 769007.5 | 1455920  | 4912490  |                                               | 9   |
| 6992912  | 6304327  | 6323992  | 5014290  | 5831703  | 3196207  |                                               | 4   |
| 3067696  | 3686513  | 2661712  | 1750786  | 3896563  | 31342796 |                                               | 9   |
| 1178526  | 198974.6 | 140833.8 | 1301271  | 124360.4 | 360808.4 |                                               | 113 |
| 1515287  | 1268521  | 1286079  | 910008   | 667954.4 | 887806.4 | [M+H+Na] <sup>2+</sup>                        | 12  |
| 190188.1 | 113285.4 | 324827   | 160615.5 | 102089.5 | 36831.88 | [1563][M+1] <sup>+</sup>                      | 169 |
| 3940510  | 9530064  | 5616012  | 2933739  | 6391976  | 7685286  | [M+K] <sup>+</sup> 291                        | 3   |
| 1195350  | 1693453  | 2558414  | 689503.9 | 1176696  | 431244.2 | [M+H-C2H4]                                    | 15  |
| 3167787  | 1805232  | 840825.7 | 2905332  | 3802909  | 2070774  |                                               | 2   |
| 1.97E+08 | 1.52E+08 | 1.64E+08 | 1.91E+08 | 1.35E+08 | 61353918 | [799][M] <sup>+</sup>                         | 2   |
| 5481481  | 3874431  | 5297409  | 5549324  | 2938146  | 12180856 |                                               | 2   |
| 437279.4 | 4.07E+08 | 175199.3 | 1.73E+08 | 1.88E+08 | 2.36E+08 |                                               | 18  |
| 35334300 | 63758225 | 35818818 | 30287424 | 57995890 | 1.77E+08 |                                               | 2   |
| 5311905  | 3327570  | 1197222  | 3602135  | 4842455  | 2140837  |                                               | 454 |
| 2720056  | 3848024  | 2510193  | 2954171  | 5606647  | 6433198  |                                               | 14  |
| 782667.1 | 743509.6 | 850527   | 1110535  | 551345.9 | 217778.9 | [1148][M+1] <sup>2+</sup>                     | 62  |
| 711760.5 | 563399.1 | 887021.2 | 1036880  | 270793.5 | 863072.2 | [1559][M] <sup>+</sup> [M+Na] <sup>+</sup> 91 | 497 |
| 228276.1 | 203563.4 | 353853.1 | 152608.6 | 294646.8 | 437838.2 |                                               | 23  |
| 1170658  | 1573395  | 1105664  | 927308.5 | 1713209  | 869216   |                                               | 9   |
| 2987546  | 3226649  | 3173443  | 2426875  | 3162549  | 2283537  |                                               | 4   |
| 5412617  | 12588973 | 17354019 | 4602103  | 4927868  | 14293346 | [M+2H] <sup>2+</sup> 11                       | 18  |
| 3681605  | 2017508  | 3279065  | 3262587  | 4088739  | 2936507  |                                               | 1   |
| 1059170  | 1401038  | 1250149  | 1177180  | 1105157  | 177679.8 |                                               | 2   |
| 267567.8 | 216987   | 243001.1 | 217029.8 | 151261.8 | 129073   |                                               | 302 |
| 3989409  | 4311273  | 4901490  | 2949889  | 3406137  | 3798914  |                                               | 190 |
| 8.71E+08 | 1.06E+09 | 7.79E+08 | 7.69E+08 | 9.45E+08 | 1.61E+09 | [1303][M+2] <sup>+</sup>                      | 2   |
| 5834019  | 9360538  | 5298605  | 3906976  | 6724146  | 3707852  |                                               | 2   |

|          |          |          |          |          |          |                      |     |
|----------|----------|----------|----------|----------|----------|----------------------|-----|
| 16992532 | 13087917 | 14127490 | 16864007 | 12518952 | 4593302  |                      | 2   |
| 668887   | 534830   | 79566.73 | 274099.8 | 1440610  | 1926911  |                      | 52  |
| 5143548  | 5349151  | 5712375  | 2369698  | 6423760  | 3327072  | [M+Na]+ 4f           | 15  |
| 1140258  | 1240734  | 1586977  | 1065535  | 1014286  | 482016.4 |                      | 213 |
| 378448.8 | 177292.3 | 464736   | 227808.3 | 346870.2 | 132269.4 |                      | 351 |
| 4644410  | 513781.5 | 2929788  | 3436674  | 3278295  | 2887673  | [1403][M]+           | 9   |
| 1164294  | 986796.9 | 1003369  | 883828.7 | 798789.2 | 2417921  |                      | 9   |
| 34110182 | 24727693 | 61121689 | 53348969 | 55896490 | 13564716 |                      | 1   |
| 60284.36 | 502420.7 | 362395.1 | 18797.63 | 552896.4 | 580367.1 | [M+H]+ 34f           | 20  |
| 771662   | 2714264  | 1908133  | 489289   | 1358783  | 1832051  |                      | 46  |
| 2092538  | 2474249  | 2040483  | 1402559  | 1566684  | 1157084  | [790][M+1]+          | 4   |
| 16314268 | 1092343  | 21092323 | 821990.5 | 966626.3 | 13700174 | [M+3Na+K-            | 13  |
| 3143715  | 3219620  | 1367745  | 1263029  | 6205934  | 9381307  | [M+K+NH3             | 97  |
| 5544832  | 5832594  | 5446643  | 5051724  | 4552863  | 6157603  | [3M+2K]2+            | 314 |
| 1581068  | 1998287  | 2150731  | 844009.6 | 1713311  | 14309140 |                      | 9   |
| 14045516 | 14987770 | 11362319 | 9447881  | 9437304  | 26394922 |                      | 165 |
| 8915122  | 6168093  | 11731132 | 9753744  | 4684450  | 9032207  |                      | 64  |
| 12218056 | 9203443  | 12721209 | 8569350  | 10028559 | 2653356  | [M+2H]2+ f           | 33  |
| 20025764 | 26371130 | 18988327 | 13333642 | 16659867 | 19189373 |                      | 1   |
| 528016.4 | 631578.3 | 1889350  | 482898.1 | 1177045  | 455339.7 | [953][M+2]3+         | 9   |
| 1382526  | 387200.7 | 953272.3 | 1309088  | 928472   | 480230   |                      | 1   |
| 4.02E+09 | 7.34E+09 | 6.91E+09 | 7.52E+09 | 4.41E+09 | 2.42E+09 | [150][M]+            | 22  |
| 333745.7 | 164656.7 | 575690.4 | 461290.4 | 293472   | 22231.35 | [2M+Na+2f            | 134 |
| 5472047  | 3025723  | 4110979  | 8396602  | 3933036  | 5070705  | [814][M+1]3+         | 2   |
| 1288197  | 1640456  | 2895575  | 2574604  | 816137   | 1443694  |                      | 9   |
| 582759.9 | 1176971  | 1458820  | 643696.9 | 548279.1 | 3252287  |                      | 9   |
| 1293081  | 2410141  | 838264   | 907687.7 | 2121887  | 12005531 |                      | 9   |
| 1294484  | 1684441  | 802821.5 | 565234.5 | 2470278  | 3077262  |                      | 2   |
| 728923   | 1080810  | 167359.5 | 588587.6 | 1178625  | 14489700 |                      | 52  |
| 1866097  | 1226803  | 346488.6 | 570770.7 | 365709.1 | 454330.9 |                      | 116 |
| 1297637  | 4479771  | 3606300  | 1062211  | 2173037  | 6693753  |                      | 9   |
| 1833139  | 3460691  | 2020428  | 1840772  | 2214922  | 2538057  | [340][M+1]3+         | 2   |
| 2818054  | 6850824  | 3058854  | 7067887  | 907571.2 | 2764761  |                      | 427 |
| 33676803 | 40492479 | 41868287 | 29969257 | 28888380 | 18047774 | [832][M]+ [M+Na]+ 4f | 38  |
| 612271.4 | 0        | 1009846  | 547088   | 351130   | 119269.3 |                      | 9   |

|          |          |          |          |          |          |              |     |
|----------|----------|----------|----------|----------|----------|--------------|-----|
| 1384977  | 8137133  | 4039152  | 802407.8 | 10539577 | 4326229  |              | 379 |
| 9095725  | 8224251  | 5309801  | 7753151  | 5183135  | 16103552 | [285][M]+    | 108 |
| 9668216  | 14309845 | 9287677  | 12382939 | 12972584 | 10359413 |              | 2   |
| 11775246 | 16364651 | 9558234  | 12233414 | 15972984 | 14176958 | [1312][M+2]+ | 2   |
| 784802.9 | 769505.4 | 796822.3 | 553318.6 | 722314.4 | 829315.9 |              | 4   |
| 1158249  | 2163550  | 2454488  | 339972.7 | 785240.8 | 0        |              | 1   |
| 6542376  | 6248857  | 6167915  | 4974796  | 5623660  | 2569155  |              | 4   |
| 6639340  | 3781017  | 4849886  | 6697763  | 3135504  | 3245501  | [1220][M]+   | 2   |
| 919876.8 | 625035.4 | 757279.1 | 452087.4 | 649381.3 | 1131801  | [M+2Na]2+    | 8   |
| 1950132  | 1703252  | 141338.6 | 895529.2 | 2148188  | 0        |              | 21  |
| 84970043 | 77510784 | 89110040 | 70304811 | 75409570 | 43415561 | [1249][M]+   | 91  |
| 1446757  | 757075.1 | 1836527  | 1703674  | 783581.3 | 922822.8 | [111][M+1]+  | 86  |
| 1773791  | 1605436  | 1485398  | 520575   | 1280231  | 1101504  |              | 4   |
| 618519.4 | 2465071  | 869776.2 | 437982.6 | 1748572  | 2522389  |              | 3   |
| 526330.5 | 618501.6 | 166099.3 | 671836   | 122077.1 | 192482   |              | 387 |
| 1.4E+08  | 1.55E+08 | 1.23E+08 | 1.18E+08 | 1.49E+08 | 1.31E+08 | [2M+Na]+     | 13  |
| 25485822 | 17922004 | 20963481 | 26609296 | 21232995 | 7668223  | [431][M+2]+  | 2   |
| 4203450  | 2185384  | 3164453  | 2254679  | 1493358  | 16638.01 |              | 115 |
| 2266077  | 2382539  | 3101341  | 1729682  | 3627599  | 3612187  | [M+H-COCl    | 13  |
| 724461.3 | 405374.1 | 376613.3 | 605643.4 | 748465.7 | 2595138  |              | 9   |
| 395347.3 | 228086.3 | 287456.6 | 315428.7 | 331323.2 | 126392.7 |              | 394 |
| 4426844  | 8550132  | 5534310  | 2741055  | 5928833  | 16859003 | [287][M]2+   | 9   |
| 11571377 | 11913835 | 9335016  | 7215659  | 11839025 | 41114231 | [2M+Na+K-    | 11  |
| 12831819 | 16996925 | 9853193  | 10450404 | 13099346 | 31337492 | [1106][M]+   | 2   |
| 20881892 | 30353766 | 35520621 | 19439212 | 19211794 | 15445746 | [25][M+1]+   | 39  |
| 513411.6 | 388264.5 | 547960.4 | 344833.3 | 216772.5 | 556449.1 | [542][M+1]2+ | 160 |
| 3074138  | 2302485  | 1619869  | 773797.6 | 2205075  | 2007502  |              | 4   |
| 500746.5 | 2651625  | 1598599  | 357949.9 | 1288903  | 1906267  | [M+K]+ 36!   | 46  |
| 879842.2 | 2394610  | 2264266  | 700406.3 | 1249494  | 3238820  |              | 9   |
| 10423055 | 8341316  | 8958531  | 10197001 | 10180897 | 3299252  |              | 13  |
| 686093.6 | 960119.6 | 820394.8 | 422582.9 | 801623.9 | 2030123  |              | 4   |
| 2360094  | 1317385  | 2011806  | 2170071  | 1369879  | 3392541  |              | 2   |
| 25116483 | 32467091 | 19778046 | 25817764 | 20698632 | 6167382  | [M+H-COCl    | 13  |
| 79230561 | 1.28E+08 | 1.11E+08 | 79415119 | 82579523 | 84539096 | [364][M+1]+  | 1   |
| 3152140  | 4136137  | 3799223  | 2552262  | 4247816  | 3472328  | [M+K]+ 57(   | 13  |

|          |          |          |          |          |          |                                    |     |
|----------|----------|----------|----------|----------|----------|------------------------------------|-----|
| 2062412  | 2489607  | 1131931  | 2201522  | 2608553  | 185975.7 |                                    | 2   |
| 3.51E+08 | 4.6E+08  | 3.6E+08  | 2.45E+08 | 2.82E+08 | 2.31E+08 | [852][M+1]+                        | 1   |
| 5854332  | 5226535  | 5258726  | 6080219  | 4736420  | 5237611  |                                    | 293 |
| 4570234  | 6152526  | 5140236  | 4044521  | 5360876  | 3508519  |                                    | 9   |
| 3770167  | 3441254  | 3730202  | 861159.5 | 3590964  | 5163098  |                                    | 375 |
| 87824459 | 50923635 | 70769407 | 89147233 | 50176588 | 5553914  | [441][M]+                          | 2   |
| 160115.8 | 356442.8 | 362550.8 | 147882.4 | 480345.4 | 496424.8 |                                    | 4   |
| 3478876  | 5905458  | 7524505  | 7502111  | 9000905  | 13151006 |                                    | 7   |
| 2829544  | 2894847  | 2759304  | 2298413  | 2739453  | 2126817  |                                    | 4   |
| 3947344  | 4145020  | 5578872  | 5254664  | 3958212  | 5310585  |                                    | 393 |
| 2846307  | 1426164  | 2340283  | 2693022  | 1465927  | 789335.5 |                                    | 2   |
| 9350054  | 10273035 | 9952034  | 7413332  | 7461712  | 5644760  |                                    | 4   |
| 171645.8 | 339327.9 | 201603.5 | 116379.4 | 221588.9 | 389883.6 |                                    | 218 |
| 3955705  | 349512.6 | 2481573  | 2973474  | 5228987  | 3490604  | [M+2H-C3H <sub>7</sub> ]           | 13  |
| 53138349 | 56574197 | 74630218 | 49758298 | 61766779 | 69906152 | [1145][M+1]+                       | 23  |
| 1.4E+08  | 1.54E+08 | 1.23E+08 | 1.18E+08 | 1.49E+08 | 1.3E+08  |                                    | 13  |
| 7941803  | 15788507 | 14725963 | 6120374  | 13664434 | 33274140 |                                    | 2   |
| 8651855  | 14651496 | 17847930 | 4925501  | 13116821 | 6404883  | [1376][M+2]+                       | 332 |
| 1695663  | 1151931  | 1515299  | 1300351  | 1795708  | 3550915  |                                    | 97  |
| 1319494  | 1592136  | 1366474  | 765110.7 | 2877054  | 7889011  |                                    | 93  |
| 30320476 | 28701505 | 30699830 | 28364367 | 25898093 | 19474346 | [1077][M]+ [3M+K]+ 1H <sub>2</sub> | 13  |
| 4740869  | 9882954  | 4709851  | 1774661  | 12585152 | 15352873 |                                    | 2   |
| 9121346  | 8151668  | 36869474 | 12536746 | 6349743  | 1501254  | [837][M]+                          | 19  |
| 4120643  | 9896443  | 4803055  | 5670310  | 9764444  | 7034423  |                                    | 2   |
| 460036.6 | 60080.66 | 707254.7 | 2542867  | 326544.7 | 141755.7 | [153][M+1]+                        | 118 |
| 344636.6 | 376127.7 | 314315.4 | 234500   | 134146.9 | 69017.02 | [1548][M+1]+                       | 210 |
| 3146588  | 4376606  | 19066907 | 3105757  | 3439372  | 2113534  | [770][M]+ [M+H]+ 44H <sub>2</sub>  | 23  |
| 2212838  | 1313379  | 1345255  | 307146.2 | 808487.6 | 931826.5 |                                    | 24  |
| 787397   | 722111.3 | 1704754  | 610796.7 | 1096085  | 1729736  | [162][M+2]2+                       | 9   |
| 17262892 | 14324327 | 11097170 | 16205639 | 12486611 | 4259406  |                                    | 2   |
| 1992806  | 1109897  | 777538.3 | 1511587  | 2711146  | 3796438  |                                    | 9   |
| 1215482  | 954368.7 | 1019482  | 1240323  | 677044.7 | 1936786  |                                    | 63  |
| 875608.3 | 770335.9 | 947124.4 | 7670122  | 1001786  | 5178656  |                                    | 9   |
| 10665569 | 5622049  | 5936637  | 11192241 | 7778731  | 0        | [3M+H+K]2                          | 14  |
| 852097.9 | 2288928  | 922503   | 0        | 1836943  | 9201458  |                                    | 2   |

|          |          |          |          |          |          |                     |     |
|----------|----------|----------|----------|----------|----------|---------------------|-----|
| 1020742  | 1812210  | 1570270  | 1916076  | 1525572  | 456088.7 | [1448][M]+ [M+H+NH3 | 134 |
| 13130703 | 13038100 | 14329579 | 16293960 | 10791572 | 8113222  | [362][M]+           | 166 |
| 1037629  | 385289   | 748726   | 518971.4 | 1132932  | 779403.9 |                     | 179 |
| 14168194 | 14837159 | 18048732 | 13787769 | 10555697 | 5054336  | [168][M+1]3+        | 19  |
| 1409696  | 1505083  | 1642061  | 1435498  | 3203306  | 488690.6 |                     | 2   |
| 2542715  | 3297883  | 2816598  | 2076302  | 1730222  | 3217830  |                     | 2   |
| 3341992  | 3073580  | 3198483  | 3289092  | 3179553  | 974326.2 | [1365][M+1]2+       | 2   |
| 1801036  | 706167.5 | 160067.5 | 339128.5 | 1964403  | 550540.1 |                     | 1   |
| 1759322  | 1650424  | 2027927  | 1027336  | 1405445  | 875514   |                     | 4   |
| 2.61E+08 | 9816841  | 1645903  | 1.6E+08  | 6103625  | 1439551  | [469][M+4]2+        | 2   |
| 3202481  | 3751223  | 629368.7 | 4005593  | 4055500  | 1665474  |                     | 3   |
| 859178.4 | 839573.9 | 488372.7 | 284692.6 | 1010943  | 2615834  |                     | 9   |
| 1898438  | 2938888  | 2282836  | 1808248  | 2401439  | 2758859  |                     | 4   |
| 4687490  | 4872188  | 4654634  | 3664481  | 4073481  | 2576381  |                     | 4   |
| 365226.8 | 309903.9 | 442076.5 | 458799   | 257963.8 | 753641.3 |                     | 12  |
| 836193.4 | 2518855  | 878759.2 | 195306.4 | 1932984  | 1664932  |                     | 2   |
| 2359632  | 3163594  | 2991360  | 1744741  | 2616902  | 839973.8 |                     | 9   |
| 16936234 | 12376838 | 14708017 | 14499462 | 13988990 | 14462864 | [457][M+3]3+        | 2   |
| 3320753  | 5003225  | 2840989  | 1825356  | 3334790  | 5735405  |                     | 46  |
| 621552.9 | 890123.8 | 817124.7 | 451884.2 | 385956.4 | 439639   |                     | 4   |
| 3046954  | 1409083  | 3244553  | 3813986  | 33853772 | 3933479  | [1321][M+3]+        | 2   |
| 165741.4 | 509581.5 | 801349.8 | 149075.7 | 360222.5 | 518332.7 |                     | 9   |
| 2860181  | 6722705  | 3195927  | 2187289  | 8086612  | 9002056  |                     | 2   |
| 29560882 | 14660210 | 22014430 | 31557131 | 15237037 | 2683166  | [29][M+1]2+         | 2   |
| 2005162  | 1867861  | 1677991  | 1393521  | 1587922  | 1124728  |                     | 4   |
| 3273599  | 2395636  | 2130862  | 2325222  | 1629419  | 775867.9 | [M+H]+ 32!          | 268 |
| 5811925  | 4258849  | 3992145  | 5138250  | 4972748  | 446134   |                     | 2   |
| 9507599  | 10356453 | 9518058  | 6896772  | 7653580  | 4778002  | [790][M]+           | 4   |
| 8426160  | 16809420 | 5530927  | 5116055  | 15599799 | 26255031 |                     | 1   |
| 233982.5 | 955247.7 | 128009.5 | 648085.5 | 562205.8 | 742668.7 | [M+Na]+ 4!          | 23  |
| 6903711  | 6866978  | 9779872  | 4311648  | 12178951 | 74039452 |                     | 8   |
| 2476043  | 2551953  | 2513971  | 2603569  | 2793204  | 2513298  |                     | 421 |
| 323568.2 | 756616.6 | 793847.5 | 640828.5 | 627247.9 | 311489.6 |                     | 4   |
| 36783797 | 15647569 | 51836754 | 390776.7 | 196703.6 | 18033154 |                     | 63  |
| 14242949 | 13202652 | 13061424 | 9226405  | 10914625 | 4847193  | [192][M]+           | 4   |



|          |          |          |          |          |          |              |     |
|----------|----------|----------|----------|----------|----------|--------------|-----|
| 6306907  | 5060348  | 2758985  | 1446961  | 1653899  | 3135078  |              | 2   |
| 521640.1 | 0        | 601698.9 | 375448.3 | 567432.9 | 7846532  |              | 81  |
| 6470706  | 8618436  | 8086894  | 8921436  | 5801955  | 5019797  | [316][M+1]+  | 48  |
| 4541888  | 8160734  | 14576968 | 9343664  | 8202833  | 2474136  |              | 180 |
| 942907.3 | 182755.7 | 742422.5 | 532435.3 | 792710.1 | 764513.8 | [2M+Na]+     | 39  |
| 6.91E+08 | 7.77E+08 | 5.79E+08 | 6.67E+08 | 1.41E+09 | 7.54E+08 | [856][M]+    | 19  |
| 1.98E+08 | 1.52E+08 | 1.63E+08 | 1.92E+08 | 1.37E+08 | 60950290 | [791][M]+    | 2   |
| 2534285  | 186084.4 | 4731256  | 2704368  | 6309785  | 8856951  | [545][M+1]2+ | 2   |
| 870004   | 521251.8 | 405151.6 | 258675.2 | 381270.7 | 223762.5 |              | 94  |
| 678779.3 | 1275332  | 737838.9 | 264546.9 | 944114.3 | 6299235  |              | 9   |
| 673359.5 | 739089   | 610480   | 318549.6 | 1257997  | 452562.3 | [M+2H]2+     | 18  |
| 19066263 | 13059499 | 15395754 | 18935391 | 15939294 | 5661199  |              | 2   |
| 11451246 | 10913190 | 10783213 | 7484576  | 9284813  | 5733150  |              | 4   |
| 16623586 | 15570615 | 15361284 | 18520144 | 14768155 | 15639385 |              | 2   |
| 978585.8 | 1059331  | 1142693  | 452646.4 | 799512.8 | 2282883  |              | 4   |
| 4322527  | 4072044  | 3807116  | 3484707  | 3655315  | 18647045 |              | 2   |
| 1535370  | 5186231  | 1970101  | 1884834  | 4291421  | 6037750  |              | 2   |
| 7188371  | 6457863  | 7742439  | 7084945  | 4989892  | 735412.2 |              | 9   |
| 1897142  | 6065983  | 3059617  | 2868359  | 2893315  | 15507121 |              | 2   |
| 3413585  | 4113730  | 2601806  | 3016530  | 3642243  | 2270296  |              | 2   |
| 7105279  | 3498962  | 5775600  | 6449283  | 2960536  | 2669015  |              | 2   |
| 362768   | 268163   | 313466.7 | 418119.4 | 227993.1 | 308901.4 |              | 366 |
| 4681224  | 5734970  | 8084485  | 2442380  | 5937225  | 3152106  |              | 139 |
| 4750463  | 6498827  | 4422174  | 4745266  | 3243386  | 3003281  |              | 321 |
| 64402964 | 55984185 | 11360030 | 50264864 | 57541752 | 1.29E+08 |              | 84  |
| 724816.4 | 686265.3 | 1069725  | 759480.4 | 757046.7 | 658247.1 |              | 4   |
| 734272.1 | 688454.7 | 515151.6 | 682945.8 | 589985.9 | 0        |              | 8   |
| 3201506  | 3050998  | 4467696  | 2352011  | 2276495  | 367531.4 | [M+K]+ 248   | 121 |
| 2323026  | 2061087  | 2311806  | 1707178  | 1733657  | 865039.2 |              | 4   |
| 1524072  | 2418240  | 1096924  | 1063744  | 1068537  | 5448618  |              | 94  |
| 649581.7 | 589446.7 | 7360485  | 8441636  | 537252   | 402091.9 |              | 6   |
| 7666424  | 11475507 | 10274071 | 7935791  | 12327242 | 5980202  |              | 2   |
| 6759176  | 4915390  | 5017052  | 4390943  | 4775390  | 597484.7 | [188][M]2+   | 4   |
| 855037.5 | 1606561  | 1183429  | 758436.9 | 652777.1 | 1352414  |              | 4   |
| 16286594 | 15867392 | 17250983 | 13796084 | 14180546 | 4031898  | [278][M]2+   | 9   |

|          |          |          |          |          |          |                      |     |
|----------|----------|----------|----------|----------|----------|----------------------|-----|
| 1.98E+08 | 1.88E+08 | 1.7E+08  | 2.16E+08 | 2.49E+08 | 2E+08    | [3M+H+K]2            | 13  |
| 970858.8 | 1338627  | 916183.1 | 369374.5 | 887703.6 | 1575097  |                      | 227 |
| 4534119  | 1344895  | 0        | 2808260  | 3218541  | 1386820  |                      | 1   |
| 36621800 | 43917459 | 40133173 | 36014170 | 35552036 | 21663465 | [M+H-C2H4            | 62  |
| 1960291  | 3263891  | 2970936  | 2182577  | 2538280  | 5093202  | [405][M]2+           | 2   |
| 2456805  | 3453944  | 3194286  | 1633939  | 2594762  | 1155922  |                      | 9   |
| 9969633  | 7125362  | 8308486  | 10586209 | 8358083  | 5630737  |                      | 2   |
| 1565326  | 2866607  | 1686372  | 1380626  | 1741559  | 3891153  | [1578][M]+           | 9   |
| 530151.1 | 620221.6 | 196569.6 | 791569.7 | 928291.7 | 386706.1 |                      | 35  |
| 607714.8 | 270804.4 | 447278.8 | 460281.6 | 1122492  | 5959208  | [M+Na]+ 4!           | 93  |
| 7243413  | 3792556  | 6544488  | 3649723  | 6920463  | 2178987  | [M+K]+ 21!           | 93  |
| 5964453  | 3226996  | 2044489  | 5137735  | 7069763  | 3906160  | [M+H+K]2+            | 3   |
| 3247670  | 2082342  | 1720698  | 2532261  | 2583514  | 192099.2 |                      | 2   |
| 17715100 | 29799665 | 9240689  | 11597067 | 9741379  | 32352373 | [315][M]+            | 61  |
| 58422769 | 77922161 | 77338003 | 43610864 | 55871355 | 33630700 | [981][M]+ [M+Na+HC   | 46  |
| 530475.9 | 704190.4 | 883713.4 | 370728.7 | 465012.6 | 0        | [1332][M+1]+         | 9   |
| 1494735  | 2011175  | 2797571  | 1130358  | 3448298  | 1361786  |                      | 1   |
| 5214949  | 6469861  | 4696191  | 9787111  | 4951423  | 5542021  |                      | 372 |
| 0        | 1317989  | 0        | 0        | 1295302  | 223920.5 |                      | 15  |
| 284670.4 | 471345.7 | 57956.08 | 112332.8 | 46263.22 | 440490.6 |                      | 274 |
| 1072043  | 1433502  | 1032966  | 1394085  | 1025378  | 553216   |                      | 4   |
| 2561056  | 8182040  | 4076353  | 2476873  | 5140424  | 17081429 |                      | 9   |
| 1915735  | 5105143  | 4992301  | 755680.9 | 3591405  | 3387604  | [664][M+1]2+         | 4   |
| 2814737  | 2556957  | 2883349  | 2799589  | 2827290  | 1811133  |                      | 474 |
| 1839058  | 1485739  | 1052426  | 1332866  | 901483.5 | 491477.7 |                      | 4   |
| 2435686  | 1510865  | 2059165  | 1996675  | 1900996  | 749890.6 |                      | 4   |
| 564871   | 1133487  | 543760.1 | 230721.6 | 1101732  | 3240683  |                      | 9   |
| 30754381 | 22399043 | 2584102  | 23048315 | 28417517 | 1.53E+08 | [M+K+NaCl            | 21  |
| 94348.76 | 82525.06 | 27393.43 | 49949.12 | 49324.61 | 23691.12 |                      | 119 |
| 1534699  | 1697570  | 291289.9 | 2085219  | 1180662  | 11669837 | [M+Na]+ 1!           | 3   |
| 6050872  | 7204739  | 3858565  | 3878612  | 9228707  | 57750291 |                      | 2   |
| 737714.4 | 473945.7 | 883763   | 255478.9 | 587788.9 | 36813.03 |                      | 525 |
| 5055234  | 1336770  | 346938.8 | 5075149  | 1408796  | 1554179  |                      | 4   |
| 4.56E+08 | 4.53E+08 | 3.8E+08  | 4.04E+08 | 3.81E+08 | 3.23E+08 | [634][M]+ [M+H]+ 39! | 31  |
| 905226.8 | 922206.5 | 1023377  | 669297.3 | 691666.5 | 203556.1 | [716][M+1]3+         | 4   |

|          |          |          |          |          |          |                         |     |
|----------|----------|----------|----------|----------|----------|-------------------------|-----|
| 637235.4 | 790760.6 | 758501.5 | 248392.2 | 308332.7 | 1721916  | [M+K]+ 346              | 11  |
| 1298946  | 1824141  | 1727341  | 1441762  | 1049972  | 1151335  | [1421][M+1]+            | 296 |
| 3179405  | 2672419  | 1035691  | 2504013  | 4025633  | 2310696  |                         | 2   |
| 2038440  | 2250161  | 2083286  | 1900027  | 2116342  | 191306   |                         | 9   |
| 458395.2 | 486629.8 | 476828   | 305061.2 | 691998.1 | 751511   | [113][M+1]2+            | 4   |
| 3983049  | 6750289  | 6192019  | 2155419  | 3641743  | 3218938  |                         | 1   |
| 969335   | 377096.7 | 1159351  | 1266365  | 509075.4 | 187800.8 | [1485][M+1]+            | 256 |
| 6656555  | 10014621 | 4987021  | 4490358  | 5082437  | 5154393  |                         | 337 |
| 1389865  | 1045876  | 1365077  | 1484725  | 882802.3 | 526537.6 |                         | 487 |
| 1716483  | 906310.5 | 923658.4 | 1376012  | 1230391  | 57372.74 |                         | 4   |
| 3786738  | 7483939  | 4207299  | 3793704  | 7216760  | 10366133 |                         | 2   |
| 579404.7 | 1099407  | 2128774  | 731969.9 | 671540.8 | 55494935 | [517][M+1]2+            | 9   |
| 910388   | 813522.8 | 431748.5 | 4981570  | 958659.8 | 408085.3 | [M+H]+ 376              | 53  |
| 105942.8 | 854791.3 | 945148.1 | 25204.49 | 385261.8 | 277234.3 | [M+Na]+ 76              | 20  |
| 1359674  | 2484195  | 1508227  | 869092.5 | 1675538  | 5160923  |                         | 4   |
| 749067.6 | 1312896  | 646197.9 | 514479.6 | 872994.4 | 895421.3 |                         | 8   |
| 19287120 | 25959947 | 19239642 | 13765282 | 16746952 | 19487861 |                         | 1   |
| 4232209  | 8839541  | 7952138  | 1892061  | 4245350  | 4443622  |                         | 18  |
| 1320669  | 1271336  | 973632.9 | 1039435  | 908271.5 | 40764.1  | [680][M+1]3+            | 112 |
| 1097069  | 1502220  | 121809.1 | 214307.9 | 1356563  | 4745269  |                         | 4   |
| 48600.5  | 62251001 | 1.78E+08 | 1.61E+08 | 1.25E+08 | 38159359 |                         | 261 |
| 3631464  | 3655988  | 6180317  | 6019756  | 8074264  | 798479.4 | [M+2H-CH <sub>2</sub> ] | 15  |
| 1760371  | 1789859  | 1770685  | 1893468  | 1415784  | 1422792  |                         | 366 |
| 9325919  | 8992816  | 8194489  | 5981399  | 7593455  | 4331100  |                         | 4   |
| 1228812  | 1364757  | 1998264  | 3215357  | 1528429  | 1402445  |                         | 302 |
| 1188803  | 2229724  | 1825010  | 1010188  | 901344.5 | 6320751  |                         | 1   |
| 1351390  | 2180406  | 1675392  | 1055096  | 1611757  | 1160408  | [M+Na]+ 46              | 8   |
| 722428.4 | 624584.7 | 707397.7 | 786600.4 | 871706.3 | 2853165  | [357][M+1]3+            | 9   |
| 1102386  | 2915723  | 3096429  | 2569156  | 2445763  | 2572143  | [982][M]3+ [2M+3H]3+    | 18  |
| 834304.9 | 1752616  | 2695372  | 644032.1 | 1162942  | 4496905  |                         | 9   |
| 270533.6 | 282442.6 | 165947.7 | 173677.4 | 250341.9 | 38828.9  |                         | 91  |
| 1.39E+10 | 1.32E+10 | 1.14E+10 | 1.37E+10 | 1.29E+10 | 1.02E+10 | [1247][M+1]+            | 2   |
| 812714.2 | 1038458  | 1219849  | 839989.9 | 925473.6 | 483635.6 | [M+H+NH <sub>3</sub> ]  | 16  |
| 423394.2 | 705350.3 | 603585.4 | 0        | 243228.1 | 127637.9 |                         | 81  |
| 2523989  | 7218874  | 4429469  | 1689364  | 39465008 | 4931364  |                         | 15  |

|          |          |          |          |          |          |                          |     |
|----------|----------|----------|----------|----------|----------|--------------------------|-----|
| 6955658  | 5892271  | 3323654  | 6541778  | 8296908  | 10713672 | [M+H] <sup>+</sup> 16:   | 14  |
| 2468796  | 6429626  | 3549601  | 5938138  | 2551575  | 34934202 | [3M+2Na+]                | 3   |
| 4246857  | 3461823  | 473416.1 | 3634799  | 10421409 | 3615014  |                          | 52  |
| 284268.7 | 249208.9 | 396052.8 | 381542.1 | 372400.5 | 220641.8 |                          | 358 |
| 211816.4 | 289460.5 | 543368.6 | 246870   | 324411.1 | 200935.5 |                          | 44  |
| 381679   | 1618292  | 490291.2 | 330564.5 | 1102767  | 3922731  |                          | 4   |
| 219875.7 | 1246449  | 0        | 0        | 893125.4 | 3120689  |                          | 13  |
| 2056862  | 2088677  | 1541904  | 2134990  | 2503346  | 1388524  |                          | 9   |
| 18837645 | 14262023 | 19315089 | 17703790 | 42517159 | 3024584  | [120][M] <sup>2+</sup>   | 1   |
| 7391906  | 7453566  | 7301330  | 7557350  | 2063173  | 7899372  |                          | 325 |
| 6790361  | 5904640  | 7323493  | 9781581  | 6119763  | 4597066  | [M+H] <sup>+</sup> 51:   | 253 |
| 2.1E+08  | 2.05E+08 | 2.18E+08 | 2.26E+08 | 1.65E+08 | 1.3E+08  | [292][M] <sup>+</sup>    | 48  |
| 2281022  | 2788755  | 2408333  | 1848295  | 2459680  | 717078.3 |                          | 9   |
| 3334282  | 8252499  | 11963849 | 16028369 | 7069247  | 7254275  |                          | 1   |
| 3105194  | 3194050  | 2128368  | 1507388  | 2465299  | 4988750  |                          | 423 |
| 4428237  | 10304655 | 10920447 | 2987372  | 5639825  | 17428106 |                          | 9   |
| 11740886 | 15216091 | 9464666  | 8614998  | 20266730 | 38401602 | [32][M+2] <sup>2+</sup>  | 2   |
| 635648.7 | 205336.7 | 1626075  | 949688.1 | 479338.6 | 515789.1 | [100][M+1] <sup>3+</sup> | 9   |
| 1161316  | 1242992  | 1341419  | 1085872  | 840702.1 | 1209648  |                          | 9   |
| 17863826 | 14727957 | 9286627  | 19159390 | 24839533 | 6977471  |                          | 13  |
| 4247060  | 4772977  | 4480260  | 4873497  | 8110979  | 4841944  |                          | 195 |
| 5157778  | 8097668  | 646330.8 | 5357106  | 10962275 | 15007356 | [M+K] <sup>+</sup> 34:   | 3   |
| 5029951  | 5876153  | 3698662  | 3711269  | 5297457  | 3496820  |                          | 29  |
| 286381.5 | 501201.1 | 186959.3 | 66743.81 | 143142.2 | 103820.2 | [M+H] <sup>+</sup> 15:   | 33  |
| 1757716  | 1710585  | 677221.1 | 2305732  | 1003380  | 587056.7 | [M+H] <sup>+</sup> 95:   | 12  |
| 28218988 | 27419318 | 27417205 | 19826240 | 24758937 | 27672923 |                          | 272 |
| 1522246  | 2278600  | 2357273  | 1378746  | 1747093  | 811695.6 | [M+3H-C2H <sub>4</sub> ] | 18  |
| 1039337  | 955433.8 | 1808303  | 1985594  | 1346484  | 685802.9 | [22][M+1] <sup>2+</sup>  | 2   |
| 14859460 | 12358493 | 8909963  | 11865309 | 17585802 | 21604994 | [3M+3Na+]                | 81  |
| 322048.2 | 357717.6 | 289852.4 | 474285.3 | 70923.01 | 6592646  |                          | 62  |
| 18607133 | 26644530 | 19691536 | 15058663 | 32881481 | 57995427 | [247][M] <sup>2+</sup>   | 2   |
| 6069597  | 6021628  | 4974585  | 18231871 | 6067434  | 5852926  |                          | 241 |
| 1193037  | 1511416  | 1465481  | 762132   | 1062320  | 716987.3 |                          | 4   |
| 5678025  | 5131738  | 5991883  | 6614460  | 4792012  | 6757023  |                          | 194 |
| 7938251  | 7003287  | 6270188  | 4968760  | 6072240  | 2552361  |                          | 4   |

|          |          |          |          |          |          |                      |     |
|----------|----------|----------|----------|----------|----------|----------------------|-----|
| 2464017  | 1737890  | 132193.7 | 1109388  | 768679.3 | 13669308 |                      | 53  |
| 51385770 | 61597210 | 55629380 | 43554714 | 49310691 | 67862618 | [861][M]+ [M+Na]+ 4! | 57  |
| 818663.3 | 446700.3 | 710655.8 | 633862.9 | 643903.2 | 63086.19 | [M+H+HCC             | 12  |
| 3.91E+08 | 1.78E+08 | 25997133 | 2.65E+08 | 2.26E+08 | 2.2E+08  |                      | 21  |
| 830272   | 1058765  | 2301504  | 529863.6 | 695692.4 | 2883559  |                      | 9   |
| 1242084  | 2905179  | 994005.2 | 1253944  | 4386083  | 3393235  | [M+H]+ 4!            | 15  |
| 3086276  | 3138994  | 3677731  | 2442752  | 2478974  | 3163322  |                      | 9   |
| 2537971  | 2987192  | 2763000  | 2066661  | 2218508  | 1262617  | [693][M+1]3+         | 9   |
| 3363276  | 558195.5 | 1958688  | 1162813  | 2702994  | 0        | [570][M+1]2+         | 187 |
| 7385592  | 7392138  | 8079606  | 6266074  | 6654013  | 3330664  |                      | 4   |
| 657095   | 586874.7 | 539256.2 | 498279.6 | 235518.2 | 612116.9 | [1455][M+2]+         | 44  |
| 11178565 | 11518859 | 10021284 | 8108428  | 9598885  | 33560259 |                      | 2   |
| 3379948  | 2439417  | 2686448  | 2038924  | 2606302  | 3087652  |                      | 41  |
| 844487.3 | 878137.9 | 595614.2 | 796043.3 | 699329.8 | 4606802  |                      | 38  |
| 803139.1 | 920727   | 583315.9 | 521238.3 | 419508.1 | 472186.6 |                      | 4   |
| 11145898 | 12982841 | 12080598 | 9081100  | 11041567 | 6175349  |                      | 9   |
| 936063.9 | 1250820  | 2899247  | 1410579  | 1169874  | 1383033  |                      | 1   |
| 1.2E+08  | 75195029 | 57757808 | 57857147 | 1.08E+08 | 49708014 |                      | 1   |
| 330406   | 747075.1 | 494180.8 | 276480.7 | 690686.2 | 1183635  |                      | 17  |
| 286234.1 | 274973.1 | 386620.6 | 39963.86 | 151441.4 | 596423.5 |                      | 18  |
| 3476867  | 2593110  | 3810883  | 2674128  | 2582662  | 970239   |                      | 384 |
| 3157327  | 178259.2 | 828302.7 | 1094935  | 3073201  | 1059428  |                      | 1   |
| 82669230 | 74917874 | 69587689 | 86216118 | 91794382 | 72770905 |                      | 2   |
| 4499105  | 7455541  | 6438336  | 23340464 | 37630330 | 2676635  | [M+H+Na]2            | 15  |
| 1782224  | 2228728  | 1837184  | 2001541  | 3501242  | 14841040 |                      | 2   |
| 1041119  | 2789091  | 1583729  | 731700.2 | 1597237  | 2673550  |                      | 4   |
| 79726720 | 92150144 | 70626746 | 71941507 | 97178365 | 1.35E+08 | [1395][M]+           | 2   |
| 692657.7 | 723997.9 | 639365.6 | 716110.2 | 495260.1 | 539112.9 |                      | 336 |
| 1.24E+08 | 99613580 | 1.05E+08 | 1.26E+08 | 91740350 | 39432634 | [1247][M+4]+         | 2   |
| 4358707  | 2585641  | 3878599  | 4164488  | 2326964  | 0        |                      | 2   |
| 2890122  | 3555009  | 4662773  | 1496875  | 3153164  | 1688930  |                      | 332 |
| 277273.2 | 419449.4 | 512242.4 | 370956.5 | 443989.3 | 354620.5 |                      | 289 |
| 5451842  | 7135250  | 4677767  | 3699162  | 5258350  | 8021335  | [1158][M]+           | 227 |
| 7576706  | 8601763  | 9882585  | 5049612  | 7265702  | 3065672  |                      | 9   |
| 9208380  | 9689635  | 7239400  | 7498432  | 8939488  | 4364739  | [1298][M+4]+         | 2   |

|          |          |          |          |          |          |                      |     |
|----------|----------|----------|----------|----------|----------|----------------------|-----|
| 1447286  | 8724933  | 18807390 | 1026705  | 19106008 | 822978.7 | [M+Na]+ 4:           | 13  |
| 533620.6 | 922055.2 | 835374.6 | 346859.6 | 623890.1 | 600140.1 | [189][M+1]3+         | 4   |
| 648382.9 | 607132.7 | 456840.4 | 592110.1 | 631625.3 | 494509.9 | [866][M]3+ [2M+3H]3+ | 35  |
| 3446540  | 3604366  | 3634715  | 5867088  | 4273420  | 2522258  |                      | 2   |
| 1316868  | 474447.4 | 2117951  | 933076.6 | 1731645  | 9933262  |                      | 9   |
| 748684.6 | 2968066  | 3026060  | 3180333  | 4346252  | 2206688  | [M+Na+NH             | 3   |
| 1.62E+08 | 1.97E+08 | 1.36E+08 | 1.55E+08 | 2.14E+08 | 3.02E+08 | [1312][M]+           | 2   |
| 3164338  | 3500806  | 2925747  | 2948726  | 2321012  | 4542771  | [1427][M]+ [M+2K-H]+ | 12  |
| 3470872  | 2855800  | 2988691  | 2839093  | 3165598  | 1526647  |                      | 4   |
| 694446.3 | 1552662  | 821865.2 | 303580.1 | 620817.9 | 423471.7 | [281][M]3+           | 9   |
| 12065996 | 7967120  | 8349359  | 13861695 | 10738435 | 1402009  |                      | 2   |
| 7490264  | 7769341  | 19320366 | 11488837 | 6150908  | 3376980  | [M+H]+ 28            | 16  |
| 4355637  | 4574216  | 4331875  | 4582052  | 4290286  | 4235333  |                      | 142 |
| 1548281  | 788582.7 | 965675.7 | 1240326  | 1646738  | 2711227  |                      | 20  |
| 1335355  | 1665252  | 1130674  | 667200.2 | 1119323  | 1161153  |                      | 9   |
| 447262.3 | 6.29E+08 | 481434.3 | 5.76E+08 | 260702.2 | 700034   | [M+2H-C6H            | 18  |
| 7288229  | 6326586  | 4724918  | 6053408  | 6880008  | 1644727  | [17][M+2]+           | 1   |
| 729191.1 | 851256.8 | 521094.4 | 586350.1 | 759117.2 | 635160.6 | [922][M]3+ [2M+Na+2I | 23  |
| 9470645  | 16496043 | 14255657 | 7263070  | 10847788 | 18000826 | [1475][M]2+          | 9   |
| 11744.88 | 720474.1 | 129762.4 | 0        | 648529.1 | 678247.6 |                      | 18  |
| 6195302  | 13963227 | 5907880  | 4109566  | 10166378 | 50168782 |                      | 9   |
| 1669303  | 2308292  | 2430397  | 1568523  | 1482595  | 654060.7 | [1140][M+1]3+        | 9   |
| 8650889  | 5849835  | 7594221  | 6772989  | 4792610  | 1470223  |                      | 2   |
| 979274.7 | 251025.7 | 385628.7 | 469205.6 | 2925151  | 7064212  | [3M+2Na+I            | 97  |
| 2884946  | 1943313  | 1055481  | 2373547  | 2601475  | 0        |                      | 15  |
| 4530587  | 4028893  | 3827220  | 3331636  | 2706122  | 430955.9 |                      | 4   |
| 1484000  | 2090554  | 1456269  | 1553713  | 1032084  | 2552518  | [1425][M+1]+         | 38  |
| 1314534  | 2027238  | 1036415  | 905124   | 1094842  | 3618316  | [M+H-C4H8            | 304 |
| 1042714  | 1005457  | 1292581  | 674007.3 | 978343.7 | 315881.6 | [M+H]+ 190           | 8   |
| 78039404 | 77048564 | 7183890  | 6332707  | 1.28E+08 | 2.21E+08 |                      | 177 |
| 4357267  | 4217144  | 2589525  | 4348539  | 3165778  | 1587174  | [M+H]+ 35            | 20  |
| 1158394  | 1503953  | 1297257  | 1184426  | 781736.8 | 624297.1 |                      | 476 |
| 5593659  | 7761619  | 7421818  | 6529313  | 4724266  | 3721344  |                      | 2   |
| 661751.5 | 285459.6 | 1659542  | 354287.2 | 703767.4 | 2842125  |                      | 9   |
| 2646474  | 2404092  | 2067928  | 1350095  | 2520121  | 1953187  | [190][M+1]2+         | 4   |

|          |          |          |          |          |          |                       |     |
|----------|----------|----------|----------|----------|----------|-----------------------|-----|
| 1814237  | 1350517  | 1407484  | 931681.4 | 1344613  | 890984   |                       | 4   |
| 6582381  | 6225397  | 5902842  | 1714237  | 20188618 | 5905527  |                       | 380 |
| 406282.8 | 1767584  | 609329.3 | 375872.9 | 233996.2 | 217044.9 | [563][M+1]2+          | 282 |
| 359396.9 | 1945472  | 66837.36 | 0        | 2253493  | 11976009 |                       | 233 |
| 1180717  | 2533426  | 1204680  | 134565.2 | 1726610  | 3356098  |                       | 1   |
| 27272781 | 30579943 | 14886214 | 26258248 | 25882684 | 32834041 |                       | 3   |
| 6181121  | 8857812  | 6915127  | 6260593  | 10180794 | 6643771  |                       | 2   |
| 3976406  | 4838681  | 3945238  | 3190203  | 4499228  | 3055573  |                       | 9   |
| 2003636  | 3457770  | 3620491  | 1457658  | 2322956  | 786248.4 | [M+H]+ 56!            | 46  |
| 2822320  | 2748530  | 1786126  | 4566408  | 6561521  | 3394470  |                       | 2   |
| 2055274  | 1609960  | 2933637  | 977990.5 | 1426539  | 0        |                       | 1   |
| 4686846  | 4819854  | 4758241  | 5351402  | 4456027  | 3306070  | [M+K]+ 31!            | 257 |
| 5400204  | 5027673  | 5105271  | 5098469  | 5316552  | 5006918  |                       | 400 |
| 2351113  | 338263.5 | 2180164  | 436879.7 | 1288401  | 3531795  |                       | 9   |
| 52987014 | 37404030 | 38618442 | 31825600 | 29070697 | 2535448  | [343][M]2+ [M+2H]2+ ( | 169 |
| 6426024  | 24745862 | 5801496  | 7975520  | 30855653 | 1.06E+08 |                       | 2   |
| 2217816  | 1418605  | 2368912  | 1807790  | 1924192  | 8314873  |                       | 9   |
| 1.08E+08 | 2.26E+08 | 1.54E+08 | 85788032 | 1.35E+08 | 75086243 |                       | 1   |
| 19862393 | 6340342  | 2383046  | 16939128 | 6560644  | 7367084  |                       | 6   |
| 2268169  | 1796083  | 1836321  | 2031880  | 3543120  | 741686.8 |                       | 14  |
| 317002.4 | 622450.5 | 372363.3 | 482979.4 | 328223.4 | 2660790  |                       | 59  |
| 1474106  | 1264127  | 697384   | 1235162  | 1469957  | 691494.9 | [M+K]+ 52!            | 8   |
| 6327163  | 8948897  | 8324245  | 4654495  | 6779745  | 3344232  |                       | 9   |
| 462038.5 | 1585639  | 1492267  | 176207   | 683423.1 | 2453889  |                       | 9   |
| 2528671  | 2728349  | 2032729  | 1549503  | 2114606  | 2434409  | [189][M]3+            | 4   |
| 1119755  | 81284.68 | 232988.7 | 136340.5 | 1338274  | 1041821  | [377][M+1]+           | 148 |
| 954081.7 | 1424436  | 1188897  | 1210135  | 1221135  | 2152213  | [59][M+1]3+           | 9   |
| 21064443 | 10855714 | 26362428 | 24219402 | 13385767 | 15377787 | [110][M]+             | 211 |
| 968127.2 | 791838.9 | 771714.5 | 1562228  | 653792.3 | 1846032  | [282][M+1]+           | 61  |
| 22996727 | 20798351 | 21040321 | 17462198 | 20392063 | 11420211 | [654][M]+             | 4   |
| 1413098  | 1890491  | 9372917  | 1316207  | 1075799  | 1015287  | [283][M]2+            | 12  |
| 12394164 | 18617186 | 16430555 | 9741212  | 12650887 | 7863791  | [981][M+1]+           | 46  |
| 2000075  | 2355440  | 2433097  | 1806903  | 1995938  | 2562382  | [291][M]3+            | 9   |
| 1889285  | 3544097  | 103475.2 | 888290.6 | 2058865  | 7992126  |                       | 11  |
| 581726.7 | 2018322  | 1542336  | 103452.3 | 1169197  | 1130111  |                       | 1   |

|          |          |          |          |          |          |                           |     |
|----------|----------|----------|----------|----------|----------|---------------------------|-----|
| 259201.5 | 218862.2 | 60149.93 | 56233.25 | 135509.8 | 418200.5 |                           | 99  |
| 733588.7 | 986519.1 | 829804.3 | 594916   | 591822.4 | 4762925  |                           | 9   |
| 414033.3 | 780278.2 | 195068.7 | 109455   | 382871.5 | 2975018  | [M+2H-CH <sub>3</sub> ]   | 5   |
| 795740.9 | 0        | 922600   | 800055.4 | 1149313  | 0        | [210][M+1] <sup>+</sup>   | 2   |
| 1933605  | 893514.9 | 9788954  | 3040202  | 692450.4 | 2843210  |                           | 2   |
| 1555392  | 1211631  | 1257807  | 3272346  | 1432109  | 1160547  |                           | 366 |
| 479245.8 | 1766842  | 512237.5 | 172453.6 | 393279   | 589005.8 |                           | 328 |
| 3750895  | 4194722  | 3453827  | 2901705  | 3094756  | 2629456  |                           | 4   |
| 372540.5 | 930408.9 | 153833.6 | 112746.7 | 336373.9 | 757270.1 |                           | 9   |
| 0        | 723049.4 | 5223016  | 116245.9 | 788396.5 | 147410.3 |                           | 46  |
| 3499435  | 4847885  | 3287424  | 2882992  | 2884536  | 15517952 | [1147][M+1] <sup>+</sup>  | 2   |
| 82973085 | 60886324 | 7495963  | 11924542 | 79759072 | 8693266  | [2M+K] <sup>+</sup> 2C    | 15  |
| 3629760  | 2588623  | 3932966  | 2121520  | 1420696  | 1400523  |                           | 2   |
| 4047496  | 0        | 3543196  | 2852893  | 1221163  | 806473.9 |                           | 2   |
| 2378503  | 861154.8 | 4349555  | 3215773  | 1385105  | 735662.4 | [M+Na+NH <sub>3</sub> ]   | 13  |
| 3950657  | 3567810  | 2998222  | 3990207  | 2256055  | 16798656 |                           | 2   |
| 24899319 | 6880455  | 19752911 | 25640961 | 20681156 | 6531801  |                           | 9   |
| 2.14E+08 | 1.7E+08  | 1.72E+08 | 2.14E+08 | 2.09E+08 | 1.13E+08 | [441][M+2] <sup>+</sup>   | 2   |
| 3672106  | 3342183  | 3364705  | 3226517  | 3381298  | 2922296  | [M+Na] <sup>+</sup> 3'    | 201 |
| 1042500  | 808985.1 | 457291.1 | 747683.7 | 757702   | 1029485  |                           | 4   |
| 3108602  | 3260622  | 2359999  | 2708353  | 1079434  | 2815561  |                           | 9   |
| 182589.1 | 535288.6 | 421075   | 347047.8 | 271274.4 | 161507.8 | [1026][M+2] <sup>3+</sup> | 16  |
| 720830.6 | 701508.7 | 620688.8 | 168716.5 | 281389.6 | 321425.5 | [M+Na] <sup>+</sup> 2:    | 18  |
| 508900.9 | 392593.2 | 461297.8 | 303535.8 | 275368.1 | 351590.4 |                           | 509 |
| 2957376  | 3812736  | 641798.7 | 1093393  | 2961463  | 923740.5 | [3M+2K-H]                 | 84  |
| 24661769 | 27390612 | 21322386 | 20296326 | 24765955 | 22694248 | [1147][M] <sup>+</sup>    | 2   |
| 11900759 | 5435446  | 8881817  | 6220418  | 6620661  | 178899.9 | [550][M] <sup>3+</sup>    | 115 |
| 629676   | 233183.6 | 695036   | 183012.2 | 224603.9 | 7691.28  |                           | 200 |
| 7831220  | 3865798  | 4829287  | 4061446  | 4211717  | 135239.2 | [550][M+1] <sup>3+</sup>  | 115 |
| 7717506  | 7250192  | 7178985  | 8878475  | 7138149  | 6500481  |                           | 365 |
| 1234528  | 939315   | 1933788  | 799842.1 | 1430122  | 1060989  | [274][M+1] <sup>3+</sup>  | 9   |
| 1162603  | 1543799  | 1242103  | 565812.2 | 1186480  | 993294.1 |                           | 4   |
| 4165431  | 3701032  | 3646972  | 3209995  | 3957295  | 2154210  |                           | 4   |
| 7320699  | 6372579  | 2032765  | 4392098  | 8382866  | 7387475  | [M+Na+HC]                 | 3   |
| 12930190 | 32606538 | 6798682  | 5453779  | 9744886  | 1.15E+08 | [500][M] <sup>+</sup>     | 57  |



|          |          |          |          |          |          |                       |     |
|----------|----------|----------|----------|----------|----------|-----------------------|-----|
| 19736336 | 43369028 | 57711579 | 20372141 | 15621908 | 35076107 | [481][M]3+ [M+3H]3+   | 18  |
| 309799.7 | 422161.8 | 378287.5 | 781853.2 | 352002.9 | 249944.8 |                       | 35  |
| 682023   | 1109785  | 1057379  | 866509.4 | 487004.4 | 344995.1 |                       | 4   |
| 306745.1 | 697818.6 | 700743.7 | 362162.9 | 470181.7 | 0        |                       | 81  |
| 1057511  | 5817916  | 1375670  | 3908263  | 4005749  | 1229241  |                       | 3   |
| 1869743  | 2330262  | 708086.4 | 1004058  | 3429677  | 4861801  | [M+K]+ 154            | 21  |
| 913265.2 | 1431512  | 1378428  | 754871.8 | 1293268  | 199403.9 | [M+2H]2+              | 13  |
| 1329022  | 1964109  | 1122351  | 1230341  | 1917142  | 691195.2 | [2M+2Na+]             | 14  |
| 4414345  | 6714617  | 4161905  | 3683831  | 3896827  | 4138342  | [998][M]+ [M+K]+ 510  | 101 |
| 7833668  | 6104186  | 7061500  | 7852848  | 4921418  | 1560131  | [1216][M+1]+          | 2   |
| 8088288  | 7799220  | 7751239  | 6117406  | 6964680  | 3382764  |                       | 4   |
| 2.11E+08 | 2.74E+08 | 2.89E+08 | 1.77E+08 | 1.85E+08 | 444697.4 | [25][M]+              | 39  |
| 1.21E+08 | 96748977 | 1E+08    | 1.31E+08 | 88842078 | 60200239 |                       | 2   |
| 4459547  | 4268865  | 4157879  | 4355364  | 4142927  | 3863268  |                       | 368 |
| 442325.6 | 930293.5 | 444502.2 | 546414.3 | 902169.2 | 2971296  | [3M+Na+2H]            | 8   |
| 2322202  | 230427.1 | 2441519  | 1112378  | 2259075  | 1319838  |                       | 9   |
| 58657092 | 19145970 | 7925738  | 68807356 | 8563622  | 18156337 | [60][M]+ [M+H]+ 210   | 38  |
| 3281813  | 846146.6 | 646970.8 | 2220640  | 1231743  | 610657.9 | [286][M]2+            | 9   |
| 9854913  | 6179055  | 4058000  | 4679267  | 8259122  | 3340548  | [M+K+NH3]             | 14  |
| 105191.2 | 110832   | 61403.1  | 152610.5 | 77838.76 | 91466.35 | [372][M+1]+           | 129 |
| 1400253  | 1782312  | 1662070  | 1174720  | 1272407  | 866729.4 | [1181][M]+ [M+Na]+ 60 | 35  |
| 2984272  | 800236.8 | 4073905  | 2911979  | 4073494  | 4296609  |                       | 14  |
| 3202410  | 4381934  | 3663191  | 2174904  | 3326685  | 2309093  |                       | 9   |
| 3279302  | 2453955  | 1818410  | 2199327  | 1657785  | 127297.8 |                       | 286 |
| 9037398  | 5308925  | 5879005  | 5378305  | 5119492  | 294674   |                       | 129 |
| 616722.1 | 295578.5 | 770965.2 | 487998.5 | 46261.05 | 796585.5 |                       | 17  |
| 8247121  | 1284803  | 6527015  | 5986989  | 1125221  | 47925471 |                       | 2   |
| 21742719 | 11363883 | 1566264  | 16926539 | 4555883  | 6499445  | [M+K]+ 410            | 15  |
| 3208586  | 3074623  | 3185692  | 3195676  | 3130264  | 2812801  | [M+H]+ 370            | 392 |
| 932504.9 | 999517.6 | 720496.1 | 871158.5 | 1199235  | 0        |                       | 9   |
| 3882662  | 8310356  | 5300247  | 2651282  | 5493255  | 16438254 |                       | 9   |
| 1544438  | 1540949  | 1441221  | 1277613  | 1574202  | 774861.3 |                       | 4   |
| 5743496  | 5251393  | 4406623  | 3718484  | 5701589  | 10737271 |                       | 93  |
| 1778627  | 632357.9 | 840524   | 5046385  | 814055.2 | 3982017  |                       | 9   |
| 113224.3 | 537630   | 169435.1 | 314974.8 | 577911.3 | 2321997  |                       | 4   |

|          |          |          |          |          |          |                       |     |
|----------|----------|----------|----------|----------|----------|-----------------------|-----|
| 11237511 | 15331341 | 3564858  | 11819175 | 12511851 | 3384565  |                       | 84  |
| 2948761  | 1599595  | 3685727  | 2349863  | 2043240  | 2729622  |                       | 4   |
| 1.17E+08 | 95985696 | 98951484 | 1.14E+08 | 92111582 | 52512529 |                       | 2   |
| 892742.2 | 990023.2 | 819096.4 | 720387.4 | 937554.8 | 1804296  |                       | 4   |
| 366348   | 820446.9 | 1537690  | 632222.7 | 443140.9 | 1499668  |                       | 9   |
| 1328098  | 4638288  | 3673520  | 869642.6 | 2209157  | 6756524  | [776][M+1]3+          | 9   |
| 177030.3 | 213030.3 | 113484.2 | 135672.8 | 128827.4 | 704784.6 | [126][M+1]+           | 285 |
| 937321.6 | 971334.1 | 1614318  | 139251.7 | 634798.4 | 0        |                       | 1   |
| 405343.2 | 1042303  | 1506944  | 567132.5 | 702598.1 | 1298055  | [940][M]2+ [M+2H-H2O] | 18  |
| 737060.3 | 1075550  | 434075.6 | 445821.8 | 917418.8 | 2976204  |                       | 9   |
| 2777619  | 1925640  | 2187726  | 2132427  | 2228059  | 876657.6 |                       | 4   |
| 2312370  | 3228185  | 3813712  | 1904048  | 2786228  | 548100.7 |                       | 9   |
| 1384343  | 1587301  | 1474796  | 1115126  | 920311.6 | 937126.8 |                       | 4   |
| 335006.3 | 619168   | 724439.3 | 543769   | 673088.2 | 112753.9 |                       | 4   |
| 371092.3 | 323315.4 | 266691.6 | 302689.1 | 384282.7 | 108967.9 |                       | 48  |
| 3325483  | 3581689  | 3915968  | 2952225  | 2944862  | 2462984  |                       | 307 |
| 3364289  | 4810135  | 2829975  | 1839099  | 3287524  | 6160051  | [3M+3Na+H]            | 46  |
| 8609149  | 5955671  | 2115978  | 6154314  | 11207210 | 11864680 |                       | 11  |
| 574423   | 1061865  | 876663.4 | 412094.9 | 623653.3 | 621566   |                       | 4   |
| 1058091  | 1581508  | 2688626  | 420018.6 | 1020694  | 936424   | [M+K]+ 40%            | 15  |
| 6488325  | 2815384  | 5770085  | 6427214  | 3188292  | 17477472 |                       | 2   |
| 4652537  | 11876610 | 9774556  | 2720692  | 5759351  | 4692580  | [M+H-C6H6]            | 18  |
| 2334086  | 1790664  | 5213852  | 2345005  | 3221522  | 721966.4 | [1612][M]+ [M+Na]+ 1+ | 13  |
| 3946494  | 844394.7 | 2498739  | 3890900  | 4013480  | 4213641  | [461][M+1]+           | 2   |
| 5523937  | 5670098  | 5430472  | 5325346  | 5564720  | 5212761  |                       | 221 |
| 3.92E+09 | 4.85E+09 | 3.54E+09 | 3.67E+09 | 4.3E+09  | 7.13E+09 | [1303][M+1]+          | 2   |
| 3721616  | 4063981  | 7386457  | 4866587  | 4848443  | 4492808  |                       | 316 |
| 733744.7 | 1148602  | 911727.4 | 706565.6 | 1231654  | 754834.3 | [M+2H-C6H6]           | 8   |
| 74894083 | 55670890 | 74604111 | 1.05E+08 | 61142072 | 52578311 |                       | 2   |
| 5256307  | 4638445  | 4776425  | 7066624  | 13813588 | 4546195  |                       | 414 |
| 609904.5 | 0        | 980562.1 | 518379.4 | 501025.8 | 0        |                       | 9   |
| 1230920  | 1062926  | 1044649  | 1838757  | 1369012  | 1251067  | [415][M+1]2+          | 2   |
| 2063986  | 964774.6 | 1530892  | 1802428  | 2932601  | 1261929  |                       | 1   |
| 6388526  | 6689941  | 5284330  | 6343937  | 6264964  | 17176075 |                       | 2   |
| 1125272  | 1290566  | 424069   | 593683.3 | 999970.8 | 1791756  |                       | 9   |

|          |          |          |          |          |          |              |     |
|----------|----------|----------|----------|----------|----------|--------------|-----|
| 11184442 | 14785643 | 14356767 | 3301079  | 14379765 | 14261362 |              | 321 |
| 54258269 | 6427020  | 12082606 | 7853827  | 11237449 | 21436430 |              | 85  |
| 526368.8 | 1094094  | 673753.3 | 472889.3 | 711997.5 | 1062239  | [3M+Na+K]    | 8   |
| 1993764  | 1291919  | 1533261  | 539868.3 | 1296106  | 338379.5 |              | 1   |
| 1940251  | 922438.1 | 2039074  | 1010658  | 4328158  | 1947663  |              | 1   |
| 506641.2 | 958714.6 | 594228.8 | 575953.6 | 472632.9 | 404320   | [M+K]+ 139   | 35  |
| 10283483 | 7878304  | 664943.3 | 7262334  | 8929091  | 12895132 | [M+K]+ 549   | 11  |
| 3210612  | 3188183  | 2757858  | 2760782  | 2838788  | 2794835  |              | 9   |
| 5.86E+08 | 6.07E+09 | 4.16E+09 | 4.02E+09 | 3.87E+09 | 5.67E+09 | [855][M+1]+  | 3   |
| 1232313  | 1844023  | 1346170  | 1148181  | 1335357  | 797059.3 | [M+H-C2H4]   | 38  |
| 1727626  | 3337630  | 950527.4 | 2733061  | 2543208  | 1414584  | [M+K+NH3]    | 3   |
| 325613.7 | 238925.5 | 240416   | 170247.6 | 146165.7 | 125067.3 | [1224][M+1]+ | 23  |
| 320784.1 | 593199.8 | 249984.8 | 275778.9 | 352836.1 | 309305.5 | [909][M+2]+  | 147 |
| 9688648  | 9212502  | 9417276  | 5527384  | 8768659  | 9124315  |              | 401 |
| 20588139 | 5685794  | 16483436 | 6509730  | 13791341 | 17059.88 | [941][M]2+   | 150 |
| 2421812  | 2913963  | 2278835  | 1823112  | 2609451  | 5603178  |              | 4   |
| 981217.6 | 1205861  | 995780.8 | 1069140  | 1537015  | 5587633  |              | 2   |
| 1373251  | 2928157  | 2107066  | 1015153  | 2433894  | 4519259  |              | 9   |
| 88281249 | 47727066 | 68591420 | 89270324 | 46142126 | 8743280  | [418][M]+    | 2   |
| 1227226  | 2724530  | 1600931  | 1145081  | 1607795  | 2944210  | [M+Na]+ 59   | 21  |
| 550885.9 | 2001988  | 736038.2 | 163074.8 | 1201735  | 389612.1 |              | 3   |
| 11243852 | 6132579  | 16663239 | 11374397 | 6017643  | 4056723  |              | 9   |
| 3712956  | 2500634  | 3474099  | 5557926  | 3553051  | 3453875  | [M+K+NH3]    | 253 |
| 6896166  | 5847224  | 6263498  | 5678485  | 7091261  | 5996290  |              | 410 |
| 3423350  | 4268599  | 4705021  | 1655767  | 2901050  | 1176430  | [731][M]2+   | 4   |
| 1828804  | 2577636  | 1680989  | 2529299  | 1810554  | 5114217  |              | 2   |
| 4522090  | 0        | 1998959  | 4759842  | 1863652  | 0        |              | 2   |
| 226347.6 | 109060.9 | 437054.4 | 325902.7 | 1532290  | 294328.9 |              | 306 |
| 7442051  | 11500526 | 12579947 | 6913047  | 7360888  | 2896670  |              | 4   |
| 2608507  | 3862501  | 3766256  | 1818037  | 3101298  | 1802203  |              | 9   |
| 415684.8 | 295589.2 | 374985.5 | 230837.6 | 252843.3 | 84511.65 |              | 206 |
| 9477703  | 9519324  | 10864536 | 7732822  | 8017382  | 6195769  |              | 4   |
| 32278370 | 37342319 | 31937385 | 25837982 | 34019696 | 28089882 | [2M+Na]+ 139 | 13  |
| 622799.3 | 1700711  | 1110890  | 416639.3 | 1645810  | 236056   |              | 52  |
| 1068124  | 160167.7 | 760656.6 | 308904.5 | 833698.7 | 0        | [708][M+1]2+ | 262 |

|          |          |          |          |          |          |                      |     |
|----------|----------|----------|----------|----------|----------|----------------------|-----|
| 5553746  | 2933345  | 4518324  | 3987817  | 5398380  | 6131615  |                      | 413 |
| 3767629  | 741513.5 | 6645805  | 1366871  | 1465594  | 860664.1 |                      | 9   |
| 344203.3 | 972045.2 | 243533.9 | 131231.9 | 448354.5 | 1728452  |                      | 4   |
| 3036180  | 2595500  | 2205396  | 1754158  | 2640904  | 1453219  |                      | 39  |
| 22345229 | 17106680 | 8269672  | 19376131 | 24635071 | 8156846  |                      | 14  |
| 5344021  | 4785985  | 4823616  | 3297942  | 4065182  | 1993349  |                      | 4   |
| 9447946  | 10175228 | 9608020  | 6896012  | 7827225  | 4548558  | [516][M]2+           | 4   |
| 18744218 | 12161016 | 14615326 | 18294101 | 13183807 | 4135745  |                      | 2   |
| 1156752  | 932706   | 1318238  | 883158.1 | 821020.1 | 280816.9 |                      | 69  |
| 3824434  | 3896287  | 1091707  | 2049253  | 3998132  | 6412472  | [3M+K]+ 1:           | 11  |
| 3322459  | 5551817  | 1915823  | 1288898  | 3114776  | 15921692 | [851][M+4]2+         | 4   |
| 1374231  | 1305985  | 1267617  | 1150357  | 1167507  | 898217.6 |                      | 4   |
| 3974036  | 3429264  | 1867004  | 2282236  | 2594205  | 2186147  |                      | 4   |
| 5434585  | 1197709  | 4423275  | 5911468  | 4310910  | 1498823  |                      | 2   |
| 365570.8 | 313155.4 | 660058.9 | 282896   | 357230.3 | 616188.7 |                      | 89  |
| 1463634  | 2549375  | 2473321  | 1372042  | 1539959  | 467578.7 |                      | 9   |
| 2279434  | 16805384 | 2204949  | 5164747  | 2252954  | 2233184  |                      | 341 |
| 7261136  | 5865674  | 5793111  | 7288204  | 5553478  | 2763492  |                      | 2   |
| 3367712  | 3928989  | 2772299  | 2638355  | 2636122  | 3080629  | [M+Na]+ 2:           | 257 |
| 2179428  | 4053162  | 2316070  | 3047672  | 4653827  | 2425539  |                      | 2   |
| 1186259  | 1301326  | 975672.8 | 1462832  | 452184.7 | 849232   | [1362][M+1]2+        | 20  |
| 7564874  | 7821660  | 1366971  | 5404373  | 1831133  | 9136031  | [M+H-C4H8]           | 11  |
| 16740225 | 3346054  | 2330559  | 11880705 | 11843822 | 2574805  |                      | 1   |
| 663342.5 | 770205.3 | 870123.3 | 477967.4 | 497881.9 | 448815.9 |                      | 4   |
| 6673706  | 5521814  | 5788194  | 6069031  | 4200817  | 6389197  |                      | 393 |
| 3657379  | 559300.6 | 4067907  | 6991075  | 440919.1 | 449524.8 |                      | 9   |
| 7264450  | 19287050 | 13533050 | 4995820  | 6644075  | 1875758  | [M+H]+ 19:           | 15  |
| 2227820  | 2965475  | 2822423  | 1668457  | 2068798  | 1165276  |                      | 9   |
| 468227   | 702313.9 | 3813767  | 4275629  | 632796   | 5975942  |                      | 15  |
| 2537694  | 2148237  | 3357669  | 2690089  | 1457669  | 789226.6 | [M+Na]+ 1:           | 93  |
| 41502325 | 58925709 | 64470448 | 41701191 | 45753575 | 63338360 | [631][M]+ [M+Na]+ 3: | 39  |
| 2172650  | 2698046  | 1344935  | 1367736  | 2495991  | 2103300  |                      | 9   |
| 225521.7 | 142760.8 | 383311.8 | 570249.9 | 179328.6 | 259442   |                      | 340 |
| 8002481  | 5966070  | 6798704  | 7503492  | 5477209  | 642974.3 | [244][M]2+           | 19  |
| 12381676 | 2747459  | 11023936 | 11795336 | 10311900 | 10898461 |                      | 320 |

|          |          |          |          |          |          |               |     |
|----------|----------|----------|----------|----------|----------|---------------|-----|
| 4124887  | 3696126  | 2645739  | 2249892  | 2558531  | 1400374  | [3M+K]+ 3!    | 46  |
| 10287499 | 1433849  | 2356968  | 15844013 | 500037.8 | 8973286  | [M+Na]+ 2!    | 46  |
| 1351657  | 490286.7 | 266804.5 | 716727.7 | 1787247  | 2556334  | [M+H]+ 35!    | 11  |
| 1545499  | 1082185  | 6591704  | 1843543  | 1095243  | 772295   | [938][M+1]+   | 66  |
| 400435.2 | 954948.4 | 328154.8 | 116591.4 | 386912.4 | 1026269  |               | 91  |
| 3678963  | 4089028  | 3472543  | 2799534  | 3452425  | 2330553  |               | 4   |
| 1792573  | 2050345  | 1519084  | 2128880  | 2347015  | 9782355  | [686][M+1]3+  | 9   |
| 6996702  | 6837053  | 4003912  | 5957795  | 9087888  | 6205494  | [1361][M+2]2+ | 2   |
| 1267551  | 1343006  | 2002676  | 957410.6 | 1007241  | 0        |               | 9   |
| 4225965  | 4681114  | 5180976  | 4567701  | 6035486  | 8348731  |               | 9   |
| 3256814  | 1863175  | 3988888  | 3067457  | 3892792  | 252951.5 |               | 1   |
| 2307050  | 4086905  | 2834451  | 970757.1 | 2056945  | 2361234  |               | 1   |
| 4325341  | 498548.4 | 984415.2 | 3543257  | 5175758  | 14176897 |               | 9   |
| 1816868  | 1851047  | 1805914  | 1507154  | 1536263  | 758932   |               | 4   |
| 2353516  | 5320668  | 3862374  | 3518000  | 1274341  | 1067764  |               | 9   |
| 991861.5 | 4770963  | 5625310  | 1228979  | 4588311  | 16015404 |               | 2   |
| 7216451  | 7341823  | 9138969  | 4142003  | 5122020  | 6925335  |               | 317 |
| 12782167 | 10793117 | 378043.5 | 9655093  | 7212743  | 679790.1 |               | 52  |
| 9291513  | 9692246  | 10160729 | 7301878  | 8372097  | 5628106  |               | 4   |
| 2492852  | 4221393  | 2717129  | 2346549  | 3690519  | 7219876  |               | 477 |
| 4165793  | 4129249  | 4099557  | 5323130  | 6604000  | 5868014  |               | 2   |
| 942976.8 | 809797.8 | 1106814  | 6590443  | 388044.3 | 990061.2 |               | 1   |
| 475649.8 | 2388171  | 201056.1 | 1223449  | 2357095  | 505195.2 | [M+H-C6H8]    | 11  |
| 586180.6 | 455038.1 | 2820846  | 502079.6 | 2751137  | 319231   | [817][M+2]+   | 145 |
| 5332587  | 6472049  | 3137064  | 1004951  | 1804408  | 6378666  | [2M+2Na+]     | 3   |
| 1979876  | 63807.22 | 3245018  | 4497603  | 2225318  | 4878101  | [1385][M]+    | 36  |
| 2796557  | 2434843  | 2367903  | 1848000  | 2258584  | 277843.7 |               | 4   |
| 2160740  | 2224759  | 3342453  | 1319832  | 1443519  | 489454.2 |               | 1   |
| 5211341  | 6637288  | 7104554  | 30812833 | 488256.8 | 27844386 | [M+K]+ 34!    | 86  |
| 11104836 | 10985710 | 15040416 | 6433831  | 18437399 | 972400.7 | [3M+2Na]2     | 15  |
| 1777681  | 1152185  | 948800.4 | 1314252  | 672313.4 | 1581474  |               | 9   |
| 7890659  | 9502973  | 9436528  | 6134827  | 6360806  | 2963372  | [346][M+1]3+  | 9   |
| 3795728  | 1699120  | 1835681  | 4065264  | 1361737  | 1638341  |               | 2   |
| 2345660  | 2667958  | 2275921  | 1936160  | 2128147  | 943066.3 | [M+K+HCO]     | 13  |
| 1329619  | 2103650  | 2132411  | 1468780  | 1480434  | 1070424  | [M+K]+ 41!    | 13  |

|          |          |          |          |          |          |                     |     |
|----------|----------|----------|----------|----------|----------|---------------------|-----|
| 965559.3 | 1205162  | 3756193  | 636818.3 | 845392.3 | 232887.5 |                     | 62  |
| 1064335  | 1099775  | 2132456  | 1885209  | 1449857  | 456271.3 | [1474][M]+ [2M+2Na+ | 62  |
| 22841632 | 24141411 | 24230063 | 17181579 | 20743775 | 15988443 | [647][M]+           | 110 |
| 3609777  | 3335249  | 3072214  | 2158713  | 2847398  | 1359272  | [156][M+2]2+        | 4   |
| 1602535  | 2923377  | 1107885  | 2205364  | 1203398  | 1917351  |                     | 4   |
| 709161.5 | 933337.9 | 535019.8 | 687195.6 | 1015127  | 1581034  | [M+K+NaCl           | 8   |
| 5515392  | 4930284  | 5017553  | 4661765  | 3638479  | 3303511  | [1392][M]+          | 99  |
| 389190.9 | 633864   | 659422.7 | 496285.6 | 270471   | 152049.6 | [M+H+NH3            | 35  |
| 1771325  | 4334821  | 2518102  | 1237799  | 2814663  | 9943047  |                     | 9   |
| 2778648  | 3036477  | 2761107  | 1811083  | 2164186  | 1371790  | [M+H]+ 29.          | 110 |
| 1049224  | 1606578  | 569064   | 186361.9 | 652284   | 832742.7 |                     | 4   |
| 815369.7 | 1623684  | 3484945  | 543335.4 | 1332799  | 2304944  |                     | 9   |
| 6031556  | 8144191  | 6101875  | 4349871  | 6052032  | 5231654  |                     | 9   |
| 5181607  | 4814134  | 5076649  | 5427197  | 5392908  | 1317582  |                     | 9   |
| 2843636  | 3447146  | 2664579  | 1350595  | 3979947  | 13115660 |                     | 2   |
| 211687.9 | 159094.1 | 203405.5 | 184409.1 | 173401.3 | 222708.4 | [1180][M+4]+        | 17  |
| 642707.3 | 410720.4 | 472954.3 | 825577.6 | 622307.7 | 0        |                     | 91  |
| 302024.8 | 184143.3 | 376806   | 289864.7 | 273340.7 | 131700.9 | [M+2H-HCl           | 28  |
| 3798113  | 2639321  | 2750581  | 2609298  | 2029826  | 706447.1 | [650][M+1]+         | 4   |
| 2050430  | 7137857  | 3581234  | 1175006  | 7381217  | 9558343  |                     | 2   |
| 3924947  | 6591587  | 2008558  | 2865587  | 2109372  | 3847426  | [266][M+1]+         | 149 |
| 2073105  | 1.62E+08 | 33171327 | 1132508  | 1.27E+08 | 16172990 |                     | 11  |
| 1159531  | 2424859  | 1709718  | 2970247  | 1281130  | 1053869  |                     | 38  |
| 1683729  | 2615114  | 1460975  | 1235519  | 2008205  | 4142708  |                     | 2   |
| 535180.9 | 584294.1 | 5430235  | 382820.9 | 759723.2 | 0        | [M+K]+ 31(          | 46  |
| 1945675  | 1020049  | 2368502  | 1895484  | 2616663  | 970398.4 |                     | 2   |
| 292246.3 | 248025.4 | 231080.5 | 247138.1 | 186685   | 142482.8 | [823][M+1]+         | 210 |
| 2140068  | 0        | 1937302  | 2191319  | 2513715  | 222679.4 |                     | 13  |
| 885923.4 | 2104813  | 656050.6 | 1060107  | 1499098  | 1706673  | [M+Na+K]2           | 14  |
| 9779049  | 9605863  | 4800394  | 9756806  | 9180606  | 760589.4 |                     | 2   |
| 548097.8 | 1032877  | 819424.9 | 399662   | 421853.9 | 168807.7 | [3M+H+K]2           | 12  |
| 4533785  | 10423549 | 3240012  | 3566713  | 10337943 | 16477013 |                     | 2   |
| 43289.34 | 408566.1 | 605548.4 | 218049.5 | 347497.7 | 254137.6 | [1037][M+1]+        | 18  |
| 2831176  | 500886.7 | 2483845  | 2023691  | 3140300  | 3377180  |                     | 93  |
| 12865854 | 6940025  | 14734070 | 15600903 | 5962605  | 7564068  |                     | 86  |

|          |          |          |          |          |          |                      |     |
|----------|----------|----------|----------|----------|----------|----------------------|-----|
| 58559972 | 41642262 | 50124647 | 50309585 | 39578560 | 9213087  | [1624][M]+           | 2   |
| 2094087  | 3063002  | 3108111  | 3107412  | 3143216  | 2839833  |                      | 346 |
| 1677541  | 2162524  | 1956732  | 1368868  | 1886298  | 841019.6 |                      | 9   |
| 292872.5 | 753467.1 | 174208   | 199624.1 | 202196.7 | 199192.3 |                      | 32  |
| 4394445  | 1634582  | 1610965  | 439589.7 | 3269249  | 8407966  |                      | 1   |
| 2446047  | 2517960  | 1624280  | 2171929  | 2407487  | 826647.4 | [644][M]+ [M+Na+HC   | 26  |
| 10719173 | 8728161  | 8234166  | 11796182 | 10062241 | 3603823  |                      | 2   |
| 3487080  | 8845993  | 5936053  | 2822068  | 4378123  | 1922566  | [M+2H]2+             | 134 |
| 5807970  | 3718020  | 6452856  | 3252226  | 3650809  | 566953.5 |                      | 1   |
| 9903689  | 23602120 | 13780136 | 5902250  | 17869648 | 71794813 | [736][M]+ [M+Na]+ 40 | 8   |
| 395137.2 | 712902.1 | 998976.7 | 540094.5 | 278271   | 259926.6 |                      | 4   |
| 12039616 | 1.25E+08 | 1.57E+08 | 17850003 | 24860127 | 77980348 | [894][M]+ [M+Na]+ 40 | 20  |
| 3021088  | 2750297  | 3501432  | 1918242  | 2650551  | 2266706  |                      | 482 |
| 1536605  | 2498165  | 2066849  | 772158.4 | 698767.3 | 2077163  | [M+2Na-H]            | 18  |
| 10516509 | 11117261 | 7628421  | 9617780  | 8828770  | 5546901  | [317][M]+            | 161 |
| 2300637  | 2142218  | 2389129  | 1976559  | 1799216  | 533287.7 |                      | 9   |
| 1687231  | 1928129  | 804748   | 856029.4 | 1279046  | 3349810  |                      | 1   |
| 1251716  | 939883   | 1686632  | 1139243  | 818006.8 | 339327   |                      | 4   |
| 8318062  | 8215716  | 8001428  | 6417673  | 7155335  | 3121923  |                      | 4   |
| 10373654 | 15217203 | 13840473 | 6494933  | 13132224 | 22233035 | [3M+H+K]2            | 339 |
| 1761000  | 3073871  | 1007475  | 916014   | 2432790  | 1574569  |                      | 2   |
| 26682932 | 34257251 | 23556649 | 23656632 | 40727311 | 52902926 | [505][M]2+           | 2   |
| 4398177  | 1090778  | 1215399  | 2138656  | 3387157  | 22803256 |                      | 1   |
| 19446061 | 19309160 | 18380200 | 2996386  | 2213335  | 1657126  | [M+2Na-H]            | 226 |
| 415575.6 | 0        | 240228.2 | 304315.4 | 507170.2 | 322671.5 |                      | 9   |
| 2514000  | 2751408  | 2868085  | 3717464  | 2344034  | 1296313  | [1271][M]2+          | 7   |
| 11556296 | 5632882  | 14209938 | 14621129 | 14006389 | 2247580  | [118][M]2+           | 1   |
| 1040022  | 810988.8 | 968226.2 | 790694.2 | 902412.7 | 211664.2 |                      | 4   |
| 284945.4 | 467295.7 | 1149207  | 165234.6 | 546293.6 | 386235.9 | [1542][M]2+          | 39  |
| 159253.7 | 186784.7 | 274316.6 | 200620.7 | 335489.7 | 612404.4 | [M+H]+ 80            | 18  |
| 38752836 | 40536337 | 38964375 | 42366846 | 32327727 | 19429846 | [1606][M]+           | 2   |
| 257560.6 | 790091.4 | 726508.7 | 198983.4 | 278398.3 | 166058.1 |                      | 9   |
| 1054463  | 1138550  | 444240   | 490573.8 | 1246320  | 1788556  | [3M+H+K]2            | 8   |
| 12384484 | 13657553 | 13407471 | 9629838  | 10928199 | 7758443  |                      | 4   |
| 2626779  | 1463132  | 1003398  | 2320564  | 2418992  | 5417133  |                      | 3   |

|          |          |          |          |          |          |                       |     |
|----------|----------|----------|----------|----------|----------|-----------------------|-----|
| 6129580  | 6571386  | 6448060  | 4734902  | 5546330  | 4019798  |                       | 4   |
| 24560761 | 28177580 | 25128656 | 22208523 | 24144310 | 28966473 |                       | 2   |
| 3225703  | 7009893  | 4041389  | 876126.4 | 5124800  | 22969615 |                       | 2   |
| 16327425 | 7755245  | 9912014  | 15273567 | 7422331  | 151111.9 |                       | 2   |
| 5935731  | 6330949  | 5984888  | 4879599  | 5682290  | 4194874  |                       | 4   |
| 477394   | 392704.2 | 560820.8 | 1675029  | 137153.9 | 156147   | [M+K]+ 31:            | 16  |
| 998617.5 | 1259332  | 1022427  | 891501.5 | 2377615  | 8102548  |                       | 2   |
| 26475128 | 32751581 | 23659032 | 18402337 | 22839153 | 48272766 | [1302][M]+ [M+Na]+ 6: | 81  |
| 5488848  | 10829626 | 11221207 | 3729320  | 8904786  | 10346148 |                       | 91  |
| 2570644  | 3459376  | 1532945  | 906842.8 | 2468796  | 1783704  |                       | 9   |
| 539696.4 | 270348.6 | 331954.7 | 405843.4 | 364989.4 | 80891.23 |                       | 91  |
| 1265065  | 97083.23 | 625928.9 | 1177421  | 439019.4 | 86301.33 | [M+K]+ 72:            | 81  |
| 2255153  | 3722415  | 1935861  | 1983297  | 1247047  | 5903015  |                       | 97  |
| 1642104  | 3340661  | 1898931  | 1129977  | 2296283  | 5529900  |                       | 4   |
| 4272612  | 4544227  | 3389206  | 2128282  | 4539851  | 4715736  |                       | 87  |
| 1591326  | 144640.3 | 120620.9 | 1239767  | 1325108  | 1014641  | [M+K]+ 190:           | 136 |
| 6724141  | 5924946  | 6647162  | 7375771  | 5875391  | 1237782  |                       | 9   |
| 1500383  | 3949046  | 2028458  | 1007026  | 2441582  | 9047297  |                       | 9   |
| 15111303 | 10805125 | 10118895 | 8869053  | 8149995  | 219599.7 | [M+H]+ 430:           | 169 |
| 871548.9 | 1282486  | 186955.4 | 788570.6 | 0        | 3108632  |                       | 29  |
| 6560219  | 8642685  | 9127117  | 5744084  | 6462855  | 2633575  | [840][M]+             | 9   |
| 3476740  | 6022703  | 5972869  | 3254066  | 4463888  | 1470056  | [M+3H-CH:             | 13  |
| 2917807  | 645717   | 3642908  | 3408034  | 2596118  | 5052065  |                       | 470 |
| 1535459  | 1914857  | 116528.1 | 1081307  | 1404247  | 7411349  |                       | 11  |
| 2236000  | 4093617  | 2227467  | 2236610  | 3712606  | 5191408  |                       | 2   |
| 13048853 | 10006582 | 13252168 | 9068465  | 10376178 | 2182054  |                       | 283 |
| 1356242  | 76119.73 | 250932.3 | 1249345  | 1327295  | 0        |                       | 9   |
| 380681.9 | 242176.3 | 240537.1 | 465984   | 272968.7 | 0        |                       | 212 |
| 1177698  | 1023849  | 1190060  | 765105.9 | 881069.2 | 454960.2 |                       | 490 |
| 1677873  | 1431315  | 6169087  | 2331996  | 818021.7 | 328149.8 | [837][M+1]+           | 19  |
| 2746251  | 2831773  | 4125641  | 2521232  | 2289292  | 2270347  | [M+2Na]2+             | 18  |
| 232036.4 | 156155.7 | 157808.8 | 111733.9 | 380823.5 | 326604.5 | [199][M+1]+           | 276 |
| 806259.7 | 1076351  | 1085856  | 679116.4 | 724407.9 | 3783444  | [732][M+1]2+          | 9   |
| 5596842  | 3630915  | 4265060  | 4432257  | 7688234  | 3108126  |                       | 190 |
| 716054.2 | 864311.4 | 449624.7 | 268402.6 | 1105712  | 2083155  | [M+Na]+ 8:            | 38  |



|          |          |          |          |          |          |                       |     |
|----------|----------|----------|----------|----------|----------|-----------------------|-----|
| 7492504  | 8088798  | 7208442  | 6135491  | 7190730  | 5476740  |                       | 4   |
| 3848832  | 4796352  | 4436592  | 5851427  | 9802977  | 4503095  |                       | 1   |
| 3901472  | 1663253  | 2495482  | 3554396  | 1326967  | 777972.2 | [1423][M]+ [M+K]+ 739 | 38  |
| 2261135  | 1620829  | 1693931  | 5584360  | 3806267  | 2945200  | [M+H-COCl             | 14  |
| 12517009 | 22971603 | 8321182  | 9139167  | 63695542 | 31873000 |                       | 3   |
| 6693549  | 10185477 | 5611541  | 3427389  | 12866913 | 31394087 |                       | 2   |
| 14629961 | 17866275 | 13226424 | 13604863 | 15644534 | 11820684 | [1258][M]+            | 2   |
| 5345890  | 7346087  | 3518885  | 3056147  | 3869289  | 9669207  |                       | 2   |
| 50550601 | 38503592 | 41309985 | 48089012 | 34048520 | 14076045 | [799][M+1]+           | 2   |
| 459595.5 | 1053813  | 706998.2 | 691233.9 | 508841.9 | 969591.4 |                       | 9   |
| 1306869  | 1825838  | 1154690  | 1601052  | 1708845  | 1219175  |                       | 39  |
| 1.2E+08  | 98430525 | 21237968 | 1.08E+08 | 1.05E+08 | 1.21E+08 | [643][M]+ [M+H]+ 394  | 41  |
| 19986076 | 25538066 | 18739800 | 13807341 | 16840252 | 19633956 |                       | 1   |
| 1062857  | 112860   | 522802.2 | 782851.9 | 139313.3 | 692188.5 |                       | 104 |
| 1717624  | 1539227  | 1253542  | 1401295  | 1193327  | 6864067  |                       | 2   |
| 6907121  | 17092369 | 5692114  | 5263298  | 11178342 | 26095788 |                       | 15  |
| 1015576  | 218320.3 | 1418574  | 1371874  | 1448413  | 0        |                       | 2   |
| 2004073  | 2242781  | 2004606  | 482727.8 | 1598453  | 2946792  |                       | 2   |
| 9869819  | 12495548 | 8078342  | 7483272  | 15883916 | 28769395 | [429][M+1]3+          | 2   |
| 359913.2 | 786745.5 | 358969.3 | 253709.5 | 616861   | 2081306  |                       | 8   |
| 508279   | 1236396  | 355433   | 242923   | 765846.1 | 1223497  |                       | 18  |
| 10740624 | 8852846  | 10014028 | 10220340 | 7736610  | 4671126  | [1320][M+1]+          | 2   |
| 1739100  | 2733825  | 1816529  | 1589299  | 1125585  | 548551.6 |                       | 52  |
| 7128331  | 3382272  | 3010494  | 6735507  | 5597547  | 2444769  | [M+H-C6H:             | 14  |
| 6593716  | 9804941  | 8208527  | 4450270  | 7423669  | 9995112  |                       | 9   |
| 649069.7 | 1089645  | 904950.6 | 647563.8 | 840640.9 | 1180215  |                       | 4   |
| 2292332  | 517269.3 | 124940.3 | 1320674  | 993874.8 | 915706.2 |                       | 41  |
| 1165443  | 1109632  | 1363098  | 725989.3 | 1433159  | 438267.8 |                       | 33  |
| 1199582  | 1748339  | 1233052  | 476612.3 | 1153055  | 4665246  |                       | 12  |
| 5279117  | 1679273  | 3585140  | 3096003  | 1488606  | 1420254  |                       | 174 |
| 709688.4 | 1031980  | 510753   | 576778.4 | 918403.6 | 900455.3 |                       | 9   |
| 1067541  | 1280536  | 694744   | 1033061  | 485742.9 | 1201745  |                       | 496 |
| 2563062  | 2574943  | 2374066  | 2783617  | 2051102  | 2435026  | [77][M+1]+            | 200 |
| 1434334  | 269948.8 | 1800071  | 2158754  | 1339155  | 0        |                       | 9   |
| 2.48E+08 | 2.63E+08 | 2.98E+08 | 2.23E+08 | 2.45E+08 | 1.91E+08 | [M+H]+ 45:            | 16  |

|          |          |          |          |          |          |              |     |
|----------|----------|----------|----------|----------|----------|--------------|-----|
| 11772001 | 15793555 | 5.72E+09 | 4.93E+09 | 5.37E+09 | 4.6E+09  |              | 1   |
| 19239435 | 13846314 | 9299157  | 17525262 | 16260680 | 8811910  |              | 2   |
| 987710.3 | 2807806  | 1280252  | 328558.6 | 1575975  | 7026463  |              | 9   |
| 622160.3 | 535629.3 | 786853.6 | 781715   | 512972.3 | 142902.7 |              | 4   |
| 6901520  | 6954252  | 6102823  | 5267489  | 7001555  | 5362682  |              | 9   |
| 1004147  | 840135.8 | 1255811  | 908346   | 800649.2 | 526143.7 | [1462][M+1]+ | 69  |
| 6872638  | 13209934 | 11604842 | 12251799 | 11780655 | 4831052  |              | 310 |
| 4302940  | 4857084  | 4622970  | 3622336  | 3437969  | 1653320  |              | 9   |
| 4705744  | 7339664  | 3554803  | 3920996  | 5158728  | 3916428  | [399][M+1]+  | 2   |
| 543150.2 | 1470301  | 632092.1 | 84169.84 | 900482.1 | 5919339  |              | 9   |
| 7115957  | 9391027  | 7526549  | 5032869  | 7736145  | 7579341  | [3M+2H]2+    | 13  |
| 843950.1 | 1608639  | 1803749  | 884182.3 | 764954.1 | 1672841  |              | 4   |
| 1598876  | 4175983  | 2050782  | 1059670  | 2589140  | 9128444  | [1140][M]3+  | 9   |
| 197183.9 | 1045778  | 300913   | 150714   | 209975.1 | 178676.1 |              | 45  |
| 2711562  | 7340020  | 9709457  | 793657.3 | 2554050  | 6677714  |              | 18  |
| 3624876  | 1768986  | 4735010  | 3030758  | 3533755  | 116889.1 |              | 1   |
| 7733589  | 9297496  | 5683386  | 3289978  | 8750659  | 9477877  | [M+K]+ 40%   | 3   |
| 1191413  | 942103.6 | 1134392  | 1660052  | 696231.4 | 54181.35 |              | 87  |
| 124464.9 | 131569.4 | 80479.38 | 184402.4 | 110731.3 | 88656.18 |              | 384 |
| 9808537  | 7831406  | 352236.5 | 8171973  | 7496697  | 14383822 |              | 2   |
| 4986634  | 2682798  | 4139207  | 5830295  | 2956550  | 7453616  |              | 2   |
| 4358830  | 2799842  | 7839948  | 5708188  | 3005157  | 7648263  | [571][M+1]+  | 136 |
| 339552.4 | 889945.4 | 699278.6 | 741543.3 | 371335.4 | 823496.2 | [M+Na]+ 7'   | 16  |
| 10153207 | 6316034  | 4102800  | 5903009  | 7911974  | 1503810  |              | 1   |
| 19329730 | 13580731 | 15421531 | 19249781 | 16006228 | 5695960  | [45][M+4]2+  | 2   |
| 2176894  | 2288095  | 2422692  | 1839365  | 1875172  | 1139011  |              | 4   |
| 1553470  | 1362521  | 1476115  | 925694.2 | 1119418  | 954430.8 | [176][M+2]+  | 4   |
| 526571.5 | 650760.3 | 763122.1 | 949106.3 | 529972   | 412841.6 | [385][M+1]+  | 158 |
| 49391707 | 54243659 | 41844917 | 43409833 | 57404970 | 85147871 |              | 2   |
| 3612792  | 3581929  | 4965497  | 2955575  | 3031150  | 0        |              | 9   |
| 9290549  | 10304499 | 9413892  | 6865988  | 7693085  | 4888863  | [806][M]+    | 4   |
| 431367.6 | 621803.7 | 822902.8 | 628434.5 | 566517.5 | 373046.4 | [1539][M+1]+ | 338 |
| 721886.1 | 1184750  | 939822.1 | 496919.8 | 623090.2 | 596439.6 |              | 9   |
| 2955643  | 4458325  | 3969137  | 6744239  | 5334513  | 1622350  |              | 2   |
| 1439224  | 2504991  | 997964.1 | 464140.9 | 651243.1 | 2847781  | [315][M+1]+  | 61  |

|          |          |          |          |          |          |                       |     |
|----------|----------|----------|----------|----------|----------|-----------------------|-----|
| 664352.4 | 748386.1 | 2091310  | 562901.1 | 609729.9 | 1673455  |                       | 9   |
| 927560.5 | 1113577  | 1272724  | 820165.6 | 825193.5 | 538062.8 |                       | 9   |
| 3995662  | 4363056  | 2831078  | 1806289  | 4514872  | 31567023 | [1154][M+2]3+         | 2   |
| 57624389 | 3875897  | 61232877 | 2584150  | 47492146 | 1358022  | [M+K+HCO              | 46  |
| 200136.8 | 51580.9  | 533159.1 | 506543.9 | 588103.6 | 801771.7 |                       | 9   |
| 5900139  | 7872125  | 10551470 | 2284766  | 3035894  | 21274868 |                       | 1   |
| 4646589  | 5586156  | 4327786  | 5092722  | 5608860  | 8317509  |                       | 2   |
| 1.21E+08 | 36597915 | 43952817 | 71207523 | 6035616  | 1.03E+08 | [19][M]3+             | 1   |
| 5295361  | 2430572  | 4706529  | 5429658  | 3016374  | 898676.8 | [47][M+1]3+           | 2   |
| 453861.5 | 180503.2 | 177650.8 | 412762.8 | 131052.4 | 953156.6 | [M+2H-C3H             | 33  |
| 2626403  | 2152101  | 1201410  | 2616033  | 1030944  | 1813178  | [1011][M+1]+          | 46  |
| 826162.6 | 1401247  | 1846714  | 581710.9 | 1030987  | 1587089  |                       | 9   |
| 8935753  | 8626348  | 7048187  | 8688895  | 6237888  | 20061679 |                       | 63  |
| 1725478  | 922492.1 | 1850107  | 1327848  | 1052594  | 356278.9 |                       | 1   |
| 87782061 | 62039240 | 73691971 | 89838607 | 72195434 | 27236260 | [221][M]2+            | 2   |
| 2121095  | 1555132  | 2279920  | 2919873  | 5614583  | 2554895  |                       | 6   |
| 736481.7 | 265779.7 | 820939.4 | 849480.2 | 590436.7 | 727528.2 | [M+H-C3H              | 189 |
| 2302411  | 1797429  | 1060806  | 8072233  | 1364673  | 430715.2 | [302][M]3+ [M+3H]3+ ! | 159 |
| 4424639  | 1947909  | 2122236  | 4173550  | 1616492  | 2074676  |                       | 2   |
| 2289209  | 2791060  | 2945529  | 1793921  | 2439994  | 676819.2 |                       | 9   |
| 4283236  | 4468313  | 5475103  | 8145489  | 4286771  | 5409612  | [50][M+1]3+           | 15  |
| 5779508  | 5124734  | 5270309  | 5748768  | 4566263  | 2681139  |                       | 2   |
| 24749439 | 23635416 | 20991295 | 12608055 | 11824441 | 16852742 |                       | 2   |
| 737952   | 599340.5 | 683646.8 | 265696.4 | 1240886  | 324102.8 |                       | 39  |
| 2384921  | 653310.2 | 2552781  | 2372549  | 1677107  | 2696515  |                       | 2   |
| 1229563  | 325287.7 | 2675017  | 503230.3 | 1059128  | 1131638  |                       | 9   |
| 1131521  | 279948.9 | 484481.1 | 216085.9 | 1437690  | 435478.7 |                       | 1   |
| 853182.9 | 1325966  | 1145021  | 905340.9 | 821449.4 | 90360.47 |                       | 4   |
| 22143525 | 23053036 | 26363745 | 19984420 | 18909895 | 6178715  | [1025][M]+            | 9   |
| 1333082  | 2701787  | 2709667  | 297211.9 | 3512423  | 1160946  |                       | 15  |
| 9147793  | 10276928 | 10467284 | 7308046  | 7623658  | 2824745  |                       | 9   |
| 7127808  | 8353867  | 11670428 | 6755580  | 7877657  | 9800645  | [621][M]+             | 9   |
| 5602331  | 4922344  | 7498294  | 4657637  | 5659251  | 2315084  | [1324][M]+ [M+H]+ 700 | 42  |
| 2284687  | 1978510  | 8588470  | 1850934  | 1961008  | 949905   | [771][M]+ [M+H]+ 440  | 44  |
| 11735016 | 12955564 | 74308558 | 11102176 | 11680912 | 3454435  | [M+H]+ 590            | 46  |

|          |          |          |          |          |          |                      |     |
|----------|----------|----------|----------|----------|----------|----------------------|-----|
| 9414499  | 3238045  | 8706932  | 13358234 | 8682062  | 23164594 | [698][M]+            | 203 |
| 443693.6 | 509293.3 | 301464.3 | 357961.1 | 443614.6 | 668675.3 |                      | 33  |
| 896513   | 1142514  | 885508.9 | 855214.9 | 763741.8 | 996452.8 | [M+K]+ 13C           | 134 |
| 2706005  | 2803478  | 2896901  | 3599827  | 3213516  | 461662.8 | [1384][M]2 [3M+2Na]2 | 62  |
| 1790409  | 1064917  | 1094811  | 1295785  | 1473365  | 493184   | [1239][M+1]2+        | 4   |
| 2967925  | 3586595  | 4375038  | 4296872  | 2866052  | 2781353  | [M+Na+HC             | 398 |
| 373964   | 1179512  | 294037.9 | 844281.6 | 615290.6 | 292544.8 |                      | 41  |
| 2256553  | 376890.2 | 2364738  | 1816068  | 2774287  | 3715961  |                      | 2   |
| 305272.3 | 425742.9 | 271681.5 | 1341341  | 242082.2 | 98740.46 | [154][M+1]+          | 288 |
| 7766296  | 6370911  | 8048167  | 6699391  | 5888009  | 2091934  |                      | 9   |
| 2342348  | 451291.2 | 2280213  | 2244508  | 1747591  | 0        | [3M+K]+ 13C          | 13  |
| 1050826  | 1010944  | 1394652  | 838930.8 | 1506666  | 1101553  |                      | 4   |
| 262224.2 | 452577.4 | 283101.8 | 354740.5 | 298790.7 | 181551.2 |                      | 91  |
| 1105377  | 1181645  | 1551974  | 988685.9 | 1621505  | 966934.1 |                      | 9   |
| 610340.2 | 403218.4 | 495286.5 | 545121.8 | 543692   | 435960   | [1344][M]+           | 24  |
| 5092087  | 4009681  | 2529514  | 4369059  | 6941847  | 3699498  |                      | 2   |
| 435585   | 810324.7 | 432697.5 | 444854.5 | 418149.8 | 656827.8 | [3M+2Na]2            | 16  |
| 1666743  | 2856516  | 1296792  | 922703.8 | 2111129  | 2494554  |                      | 9   |
| 802266.5 | 1708383  | 932872.2 | 163360.9 | 1464722  | 2623074  |                      | 2   |
| 2922336  | 5045973  | 3417692  | 1877931  | 3206019  | 7317384  |                      | 4   |
| 1033277  | 4860023  | 1018349  | 6682365  | 7258528  | 305291.4 | [M+H+CF3O            | 28  |
| 275333.2 | 364574.4 | 642170.1 | 68210.12 | 322383.7 | 653584.9 |                      | 18  |
| 3690538  | 4160243  | 8334763  | 3227290  | 3833706  | 6846711  | [1382][M]+ [M+Na+K+H | 38  |
| 538462.4 | 361340.7 | 585146.6 | 1876781  | 152496.8 | 419035.1 |                      | 292 |
| 2882559  | 1082973  | 7720723  | 2913122  | 5082268  | 2766517  | [M+H-CH4]            | 257 |
| 84917210 | 83739469 | 96890177 | 1.21E+08 | 93721446 | 1.1E+08  | [697][M]+ [M+H]+ 41C | 83  |
| 1150428  | 1043657  | 783788.5 | 1950789  | 927070.6 | 1585961  |                      | 20  |
| 1167322  | 956045.4 | 918487.5 | 622272.6 | 1058867  | 0        |                      | 9   |
| 527079.9 | 294195.4 | 417760.7 | 615199.9 | 511049.3 | 45263.78 |                      | 91  |
| 1425364  | 1613667  | 3337593  | 1038550  | 992829.4 | 0        |                      | 1   |
| 10787704 | 16404367 | 18583149 | 9253012  | 8477809  | 2458548  | [194][M]3+ [M+3H]3+  | 20  |
| 536494.4 | 368928.4 | 636801.2 | 343474   | 389798.1 | 370630.4 | [1614][M+1]+         | 33  |
| 227017.4 | 187597.1 | 317707.1 | 292492   | 290134.5 | 321390.5 | [896][M+1]+          | 22  |
| 272867.2 | 878377.3 | 1354877  | 0        | 640085.9 | 4196042  | [1294][M+2]+         | 1   |
| 1430667  | 5634978  | 1017825  | 1261797  | 1369481  | 4894950  |                      | 2   |

|          |          |          |          |          |          |                      |     |
|----------|----------|----------|----------|----------|----------|----------------------|-----|
| 849571.2 | 1651991  | 1132511  | 529040.8 | 770261.1 | 775671.6 | [1598][M]+ [M+K]+ 12 | 62  |
| 2269896  | 7496635  | 6138270  | 1670453  | 4080309  | 9594174  | [1458][M+1]+         | 9   |
| 7059716  | 4916320  | 5227144  | 4707633  | 3547919  | 185643.5 | [636][M+1]2+         | 286 |
| 509321.1 | 922733.4 | 441675.2 | 441263   | 812463.9 | 3157795  |                      | 8   |
| 2863645  | 3636955  | 3060996  | 2333886  | 2791128  | 2670152  |                      | 9   |
| 7232624  | 15045963 | 12838878 | 4367886  | 6966786  | 6685339  | [M+H]+ 29            | 20  |
| 3186727  | 1608366  | 1933692  | 4081314  | 2375249  | 0        |                      | 2   |
| 10241064 | 11187622 | 8836398  | 9538733  | 12299595 | 10150695 |                      | 2   |
| 458101   | 815980.6 | 342309.6 | 240006.4 | 491829   | 1096494  |                      | 4   |
| 8181467  | 3589529  | 6960623  | 8240881  | 4003898  | 845636.5 |                      | 2   |
| 1541099  | 2801222  | 1048627  | 1932409  | 2004166  | 1360738  | [M+H-CH4]            | 11  |
| 8388094  | 6607865  | 7869736  | 7410113  | 9323199  | 12346728 |                      | 2   |
| 6346486  | 4114795  | 2238506  | 3999421  | 2350141  | 5875214  |                      | 7   |
| 1579234  | 1682921  | 1157431  | 878481   | 1243696  | 7663219  |                      | 2   |
| 448133.9 | 769380.6 | 488610.9 | 306454.9 | 896519.3 | 1293462  |                      | 9   |
| 839060.2 | 786906.7 | 646494.8 | 386106.8 | 667372.1 | 170852.1 |                      | 4   |
| 13211279 | 31662655 | 24898722 | 12512380 | 19066323 | 8936109  | [M+H]+ 73            | 134 |
| 639437.4 | 597968.9 | 687298.8 | 175799.3 | 682078.1 | 1072236  | [1472][M+3]2+        | 38  |
| 517380   | 2224617  | 225788.8 | 2195109  | 216728.3 | 2023836  | [229][M+2]+          | 108 |
| 10787688 | 8608572  | 8408596  | 11889219 | 9835214  | 4283299  | [224][M]2+           | 2   |
| 1282038  | 2456784  | 1048857  | 1293668  | 2631649  | 9125856  | [M+2H]2+             | 21  |
| 3732559  | 3324587  | 4231489  | 2771445  | 2939106  | 648657.1 |                      | 9   |
| 708250   | 2252135  | 530015.8 | 228440.8 | 690054.8 | 219052   |                      | 11  |
| 2315280  | 3125931  | 3538380  | 2081239  | 2514085  | 443384.7 |                      | 9   |
| 1150734  | 889797.9 | 1136026  | 1119985  | 965603.5 | 82272.28 |                      | 4   |
| 2012592  | 6177723  | 1469234  | 29402718 | 3524346  | 2320463  |                      | 1   |
| 3869799  | 5111737  | 4062220  | 2976982  | 4565526  | 3212148  |                      | 9   |
| 5700899  | 4602310  | 6117184  | 4777409  | 4831555  | 4846429  |                      | 321 |
| 1141139  | 1056652  | 1037933  | 792795.8 | 1057879  | 4491518  | [3M+H+K]2            | 41  |
| 5592600  | 4132514  | 9495283  | 4319917  | 5840803  | 571526   |                      | 1   |
| 615505   | 1842160  | 522699.1 | 100644.4 | 1163881  | 4008636  |                      | 9   |
| 1311075  | 1494302  | 2833863  | 699498.7 | 1454123  | 2850544  | [124][M+1]3+         | 9   |
| 631053.8 | 922963.2 | 775690.6 | 570362.5 | 620411.5 | 0        |                      | 9   |
| 1217301  | 3292602  | 2137876  | 2572317  | 9356040  | 12287160 |                      | 2   |
| 939125.7 | 1167648  | 1523367  | 880970.5 | 623762.9 | 2156895  |                      | 1   |

|          |          |          |          |          |          |                       |     |
|----------|----------|----------|----------|----------|----------|-----------------------|-----|
| 2952750  | 4258255  | 2917640  | 1936200  | 3062903  | 18632275 | [433][M+1]2+          | 2   |
| 1176308  | 814326.2 | 0        | 1257723  | 1705857  | 0        | [3M+2K]2+             | 6   |
| 58736.04 | 193445.7 | 32044.08 | 136297.7 | 155732.7 | 634257.6 |                       | 44  |
| 2795116  | 4949855  | 4102712  | 1836728  | 3062461  | 3893796  |                       | 6   |
| 3866311  | 6834242  | 5051358  | 2820911  | 4477323  | 9756086  |                       | 4   |
| 305131.6 | 1697229  | 1745090  | 56239.94 | 464859.4 | 490005.2 |                       | 41  |
| 1140280  | 409840.8 | 2056675  | 1606378  | 1201189  | 0        | [3M+H+Na              | 6   |
| 9039227  | 11527237 | 9636599  | 7482528  | 9584730  | 14911378 | [861][M+1]+           | 57  |
| 844301.6 | 784824.2 | 739455.5 | 1069661  | 769938.3 | 368588.2 | [1290][M+2]+          | 235 |
| 4311842  | 1260664  | 200538.8 | 1675711  | 4729553  | 23019569 | [M+Na]+ 1!            | 21  |
| 224069.2 | 3006455  | 3017708  | 2543975  | 68648.35 | 2002551  | [M+K+HCO              | 86  |
| 2840905  | 2937282  | 3122257  | 3175186  | 2754830  | 1848424  |                       | 386 |
| 1373383  | 1393430  | 795570.9 | 1001630  | 1097007  | 4049328  |                       | 9   |
| 3576355  | 3344966  | 4559454  | 3551976  | 2504590  | 2447783  | [1512][M]+            | 168 |
| 54908963 | 35119692 | 36031273 | 27318369 | 28345907 | 22928178 |                       | 15  |
| 6966934  | 534682.3 | 14511952 | 5124486  | 17908819 | 13714234 | [2M+3Na+I             | 6   |
| 3674530  | 11828420 | 4297748  | 2105715  | 5856036  | 26168470 |                       | 9   |
| 2190027  | 2180162  | 3291031  | 521524.5 | 1848827  | 333775.5 |                       | 1   |
| 3765810  | 8946900  | 860750.7 | 4719222  | 9832488  | 9664571  | [M+2H-CO:             | 3   |
| 247029.3 | 144564.2 | 176367.6 | 216240.5 | 1574309  | 180667.8 |                       | 32  |
| 5765403  | 3428699  | 4388258  | 6319120  | 3443935  | 1543656  |                       | 2   |
| 16525573 | 28813648 | 19355355 | 11357117 | 19291698 | 54749694 | [711][M+2]+           | 4   |
| 7323564  | 7485305  | 5313328  | 5067606  | 5807411  | 7257648  |                       | 2   |
| 1578304  | 4234021  | 2033146  | 903471.1 | 2560877  | 9249177  | [1134][M+1]3+         | 9   |
| 723184.7 | 173019.6 | 573535.4 | 418968.9 | 512519.3 | 298038.9 | [M+H]+ 36!            | 51  |
| 13586647 | 12118048 | 14727237 | 17994144 | 4528135  | 11776627 | [1440][M]+ [M+H]+ 79! | 35  |
| 387918.8 | 690242.1 | 1348806  | 338658.6 | 417580.6 | 384869.9 | [M+H-C5H8             | 8   |
| 547911.1 | 690867.5 | 839054.3 | 577484.5 | 383504.1 | 0        |                       | 4   |
| 1764968  | 1053537  | 1056811  | 1304347  | 1489043  | 240231.7 | [1256][M+1]2+         | 4   |
| 579189   | 1368879  | 693748.8 | 318581.9 | 932636.1 | 1623693  | [475][M+1]2+          | 4   |
| 7614368  | 12082746 | 9837508  | 5723832  | 6341304  | 22426181 |                       | 3   |
| 2072951  | 6229338  | 1491451  | 1242760  | 1531086  | 4877767  |                       | 212 |
| 11734436 | 12037470 | 11302478 | 13072915 | 12256690 | 3824603  | [605][M+1]+           | 13  |
| 1.66E+08 | 635445.3 | 1.61E+08 | 1.22E+08 | 1.16E+08 | 1.18E+08 | [754][M+1]3+          | 1   |
| 2399460  | 715865.8 | 2969578  | 547831.9 | 1425911  | 0        |                       | 343 |

|          |          |          |          |          |          |                      |     |
|----------|----------|----------|----------|----------|----------|----------------------|-----|
| 865480.6 | 236536.2 | 135795.5 | 379756.8 | 1511065  | 167144.3 | [1422][M+1]+         | 367 |
| 5982258  | 11074283 | 10366658 | 4013809  | 69687819 | 6062035  |                      | 1   |
| 3953007  | 3064979  | 773628.5 | 3570718  | 1677321  | 16092019 | [2M+2K-H]            | 6   |
| 76472872 | 1.22E+08 | 63473963 | 63000078 | 98676373 | 2.13E+08 | [M+Na+NH             | 3   |
| 945640.7 | 820841.3 | 523546.3 | 669862   | 565399.1 | 0        |                      | 9   |
| 914317.5 | 1764759  | 1361961  | 748590.2 | 1681410  | 771758   | [M+Na]+ 3:           | 3   |
| 10873502 | 16783543 | 11568001 | 10190075 | 10354427 | 32044870 | [M+H]+ 52:           | 15  |
| 657705.3 | 1216733  | 1220043  | 514097.1 | 759032.9 | 328632.3 | [M+K]+ 34:           | 46  |
| 1.07E+08 | 1.17E+08 | 56104528 | 47213738 | 84768697 | 4.39E+08 |                      | 87  |
| 564304.8 | 156153.2 | 1380420  | 286728.3 | 723100.4 | 749536.1 |                      | 9   |
| 24278994 | 19858573 | 16553312 | 21326229 | 22329535 | 37925635 | [352][M]3+           | 2   |
| 2482895  | 1796806  | 1974721  | 1864750  | 2217117  | 1655980  |                      | 4   |
| 5508984  | 6685038  | 6388664  | 5246926  | 5116158  | 5093883  |                      | 314 |
| 691745.1 | 292395.5 | 351262.2 | 398280.6 | 282345   | 163590.7 |                      | 91  |
| 3053318  | 1407851  | 2058084  | 2539410  | 1077354  | 14968572 |                      | 9   |
| 6370145  | 7218607  | 5997798  | 4450491  | 5461862  | 3879828  | [428][M]+            | 4   |
| 685214   | 3376364  | 1224443  | 1380302  | 3201254  | 2048893  | [1144][M+1]+         | 96  |
| 3946180  | 2220768  | 1573642  | 2626186  | 2809732  | 650975   | [M+K]+ 38:           | 15  |
| 3110974  | 1192578  | 58940.97 | 1624819  | 1237432  | 865605.2 | [M+K]+ 21:           | 41  |
| 20646791 | 19160188 | 11133459 | 11408851 | 5963304  | 21250699 | [M+Na]+ 5:           | 58  |
| 3165373  | 2548746  | 2423749  | 2898728  | 1875196  | 2020988  | [1351][M+2]2+        | 2   |
| 52165373 | 64600252 | 39581498 | 31659743 | 78719916 | 1.64E+08 | [425][M]2+           | 2   |
| 843678   | 0        | 1211771  | 1496984  | 1223595  | 0        | [M+K]+ 15:           | 13  |
| 6263638  | 8868428  | 8210192  | 4928492  | 7233043  | 3366069  |                      | 9   |
| 526997.1 | 1393202  | 928560.9 | 358580.7 | 741630.1 | 2602801  | [M+3H]3+ :           | 8   |
| 38766597 | 36085789 | 35760769 | 33709419 | 30099751 | 12563573 |                      | 2   |
| 7888098  | 3814184  | 2954345  | 4791475  | 5663339  | 6410226  | [704][M]+ [M+Na]+ 3: | 41  |
| 998702.8 | 1214609  | 1469030  | 842050.5 | 941654.4 | 316821.7 |                      | 9   |
| 2614768  | 4375855  | 5068335  | 1736295  | 2551029  | 1539702  |                      | 1   |
| 666265.2 | 1363796  | 623265.1 | 752047.4 | 1233166  | 3558531  |                      | 2   |
| 7598525  | 4286835  | 6867089  | 8501028  | 3395627  | 1973501  |                      | 2   |
| 4542661  | 8039797  | 4589008  | 3501661  | 5992688  | 23005947 |                      | 2   |
| 2781524  | 2467261  | 2641800  | 2030289  | 2352986  | 1140343  |                      | 4   |
| 445134.8 | 351806.7 | 538884.2 | 251260.6 | 279783.4 | 229951.9 | [1318][M+1]+         | 134 |
| 9574693  | 9465580  | 19219307 | 72970702 | 15371494 | 10879559 | [1244][M]+           | 163 |

|          |          |          |          |          |          |                                               |     |
|----------|----------|----------|----------|----------|----------|-----------------------------------------------|-----|
| 3764873  | 4420918  | 1619579  | 795271.6 | 3472870  | 2654203  |                                               | 4   |
| 814505.7 | 7818372  | 1109532  | 441791.7 | 210229.8 | 1131813  | [566][M+1] <sup>+</sup>                       | 240 |
| 15920449 | 20162009 | 17241083 | 12217884 | 16008919 | 12289617 |                                               | 9   |
| 8643916  | 3136071  | 3020699  | 2669702  | 2837584  | 2582074  |                                               | 417 |
| 1889450  | 1582490  | 1405752  | 3807057  | 1395935  | 2352539  |                                               | 1   |
| 1207234  | 2055662  | 1625737  | 3673921  | 1033534  | 3921023  |                                               | 2   |
| 937525.6 | 889617.6 | 1364097  | 816875.8 | 815800.3 | 938422.5 |                                               | 9   |
| 715405   | 596010.8 | 675233.3 | 267794.6 | 486976.5 | 135466.6 |                                               | 91  |
| 1437410  | 1840133  | 1578215  | 1646389  | 4452034  | 17894613 |                                               | 2   |
| 944418.9 | 6736259  | 158896.9 | 5810658  | 5943365  | 10510790 |                                               | 52  |
| 734728.7 | 53363.51 | 547177.9 | 514154.7 | 484164.2 | 648796.1 |                                               | 9   |
| 31804757 | 36838471 | 32281891 | 26185444 | 33729192 | 27914566 | [2M+H] <sup>+</sup> 1!                        | 13  |
| 12371335 | 8695819  | 20574586 | 20055420 | 23762844 | 5220704  | [65][M]3 <sup>+</sup>                         | 1   |
| 6231893  | 3565241  | 4156260  | 5276853  | 3736711  | 929470.3 |                                               | 9   |
| 4428012  | 4586746  | 4277668  | 4254337  | 3354215  | 3116318  | [1432][M] <sup>+</sup> [M+H] <sup>+</sup> 78! | 64  |
| 3630113  | 4655489  | 3942906  | 2389237  | 3708498  | 2615600  |                                               | 9   |
| 406584.9 | 561711.6 | 125244.2 | 260799.1 | 1148621  | 5702076  |                                               | 9   |
| 2760445  | 1744992  | 2254923  | 2152382  | 1839194  | 1494303  | [1153][M+3] <sup>+</sup>                      | 2   |
| 6371913  | 3296979  | 2872354  | 6305587  | 5158817  | 2394518  | [M+Na] <sup>+</sup> 1!                        | 14  |
| 49155369 | 42870709 | 38486027 | 43354027 | 53934686 | 42221197 | [1311][M] <sup>+</sup>                        | 2   |
| 754124.9 | 2362277  | 1912151  | 1676821  | 1423697  | 1860725  |                                               | 20  |
| 5391219  | 3664998  | 5029659  | 7944829  | 2677824  | 1549565  | [M+H] <sup>+</sup> 10!                        | 97  |
| 1640567  | 4275087  | 2390665  | 872644.8 | 2667700  | 9116401  |                                               | 9   |
| 3909692  | 3356771  | 3691156  | 4143463  | 2733422  | 2268766  |                                               | 361 |
| 1218450  | 935484.7 | 1934268  | 1098910  | 503485.5 | 768460.1 |                                               | 9   |
| 382682   | 1244675  | 245418.8 | 75496.55 | 1392150  | 6423629  |                                               | 9   |
| 9785973  | 10764570 | 10245634 | 7601295  | 8641477  | 6128725  |                                               | 4   |
| 200663.5 | 179590.2 | 295471.8 | 305133.2 | 235719.7 | 57880.99 | [1178][M+1]2 <sup>+</sup>                     | 169 |
| 1162235  | 1054424  | 1073340  | 511737.2 | 1141716  | 5688068  |                                               | 9   |
| 774912.5 | 553148.2 | 2297399  | 683264.1 | 410833.7 | 779013.2 | [M+Na] <sup>+</sup> 4!                        | 44  |
| 3742710  | 3488157  | 3468839  | 3512660  | 1122616  | 2826420  |                                               | 9   |
| 5513747  | 961941.4 | 7837802  | 3560546  | 511888.3 | 1448244  |                                               | 9   |
| 2453082  | 2619740  | 2657482  | 1689285  | 2133120  | 890376.9 |                                               | 9   |
| 613040.3 | 975326.1 | 493106.9 | 503506.2 | 623212   | 529178.6 | [546][M+4]2 <sup>+</sup>                      | 4   |
| 2955325  | 3981646  | 2045838  | 1265392  | 2210802  | 16170348 |                                               | 1   |



|          |          |          |          |          |          |                       |     |
|----------|----------|----------|----------|----------|----------|-----------------------|-----|
| 480874   | 114037.3 | 924114.2 | 1045588  | 2357533  | 30321031 |                       | 9   |
| 5813341  | 1596056  | 4284920  | 8125458  | 9222380  | 4093457  |                       | 1   |
| 2016148  | 1235181  | 211875.4 | 1112870  | 1105327  | 8888607  |                       | 4   |
| 28798017 | 11729130 | 6716247  | 5474538  | 25098166 | 5996051  |                       | 15  |
| 846153.4 | 976025.9 | 1308044  | 632779.7 | 1553113  | 88081.97 |                       | 4   |
| 4704508  | 4975839  | 6261031  | 3870733  | 4413813  | 4032915  | [1460][M]+            | 79  |
| 9864076  | 17158566 | 2852908  | 2113223  | 13400432 | 59595817 | [M+Na]+ 60            | 3   |
| 616993.6 | 443835.1 | 847978.9 | 1043957  | 687983.8 | 506357.5 | [1431][M+1]+          | 262 |
| 16079527 | 2071610  | 18257634 | 16152374 | 14993050 | 13604112 |                       | 1   |
| 9576530  | 7513287  | 9232823  | 8213369  | 6495562  | 3286725  | [1581][M]+ [M+H]+ 110 | 42  |
| 959997.1 | 1137322  | 482809.3 | 600982   | 1091399  | 2198383  | [M+K]+ 340            | 5   |
| 10707035 | 8348114  | 14026121 | 508339.8 | 25920858 | 8955070  |                       | 1   |
| 756060.6 | 1593411  | 872086.6 | 236304.1 | 852142.8 | 944284.7 | [M+2Na]2+             | 38  |
| 1202116  | 694423.2 | 894461.5 | 1159536  | 462826.3 | 417577.5 | [1177][M+1]+          | 38  |
| 808625.3 | 1126754  | 720037.1 | 557955.5 | 812947.6 | 1421199  | [M+H]+ 630            | 46  |
| 24278915 | 24344965 | 19022921 | 10603833 | 20439847 | 15840843 |                       | 359 |
| 356661.8 | 670843.7 | 1278725  | 230410.1 | 488978.8 | 731696.9 |                       | 9   |
| 65614.84 | 170864.3 | 38690.57 | 90930.25 | 142281.9 | 55816.24 |                       | 224 |
| 55338350 | 59995351 | 58701202 | 59782708 | 48557675 | 40250457 | [253][M+1]+           | 37  |
| 1113956  | 1158058  | 1183078  | 728055.5 | 927905.5 | 698553   |                       | 4   |
| 3381012  | 3725242  | 3454543  | 2780324  | 2998616  | 1984449  | [484][M+2]+           | 4   |
| 24397016 | 18498613 | 20067960 | 15827361 | 19017644 | 11349182 | [650][M]+             | 4   |
| 2591149  | 3172607  | 2813668  | 691794.4 | 1362371  | 4139189  |                       | 4   |
| 3203491  | 5970865  | 3910249  | 2077966  | 4454859  | 13724813 |                       | 9   |
| 1286000  | 1226062  | 1260172  | 1010266  | 1122286  | 728994.6 |                       | 4   |
| 1640904  | 1428342  | 1614224  | 1376235  | 3254184  | 6050883  |                       | 2   |
| 16565479 | 8807629  | 20547606 | 19209104 | 8208836  | 10209170 | [447][M]+             | 160 |
| 4861022  | 4751353  | 3976849  | 3854307  | 4401044  | 1965826  |                       | 4   |
| 59704099 | 85155380 | 76183927 | 30996308 | 72915252 | 1.64E+08 |                       | 107 |
| 13823872 | 22344260 | 14058917 | 9030108  | 15138381 | 70628280 |                       | 2   |
| 4706110  | 6503511  | 4646892  | 3744168  | 4604826  | 1730418  |                       | 2   |
| 1517111  | 1055375  | 676645.8 | 442183.5 | 974381.6 | 488775.5 |                       | 4   |
| 20476112 | 6551425  | 5856995  | 18296203 | 12142521 | 1451805  |                       | 2   |
| 6994715  | 14608829 | 16526818 | 4444921  | 12689445 | 1428252  |                       | 1   |
| 2282311  | 4382472  | 1955337  | 1458197  | 15437247 | 768674.7 |                       | 1   |

|          |          |          |          |          |          |               |     |
|----------|----------|----------|----------|----------|----------|---------------|-----|
| 10616264 | 33624297 | 20194257 | 11360276 | 23758112 | 63138085 | [725][M]+     | 9   |
| 537871.1 | 1309495  | 786945.2 | 363498.4 | 602453.7 | 512020.7 | [1169][M+1]+  | 86  |
| 99070.32 | 75245.15 | 91190.64 | 124015.2 | 291554.3 | 26559.11 |               | 83  |
| 3434762  | 10934833 | 8312489  | 2416877  | 5732704  | 18122166 |               | 9   |
| 28130381 | 22063178 | 26267112 | 27968734 | 21696664 | 3746609  |               | 22  |
| 455132.3 | 547088.5 | 469211.9 | 113880   | 230298.6 | 295875.8 |               | 210 |
| 1651720  | 2034015  | 1416200  | 1078983  | 1776142  | 2348877  | [1158][M+1]+  | 227 |
| 427221.5 | 581747.8 | 599665.8 | 173348.5 | 341887.2 | 401235.1 |               | 307 |
| 831856.7 | 1655809  | 1814918  | 565585.3 | 699595.1 | 1023493  |               | 9   |
| 866364.5 | 1612335  | 1472898  | 669210.9 | 1261939  | 0        | [485][M+2]+   | 2   |
| 87492101 | 62144221 | 73798327 | 89869254 | 72370640 | 27516029 |               | 2   |
| 1548681  | 1471284  | 1368038  | 1261994  | 1151543  | 4133339  | [757][M+1]+   | 83  |
| 1074882  | 508970.4 | 706796.8 | 1019364  | 896509.7 | 797266.1 |               | 4   |
| 1.49E+08 | 1.7E+08  | 1.26E+08 | 1.35E+08 | 1.42E+08 | 1.52E+08 | [1205][M+1]+  | 2   |
| 668728.8 | 744274.6 | 806096.5 | 656057.3 | 363064.2 | 130786.8 | [M+H]+ 32.    | 12  |
| 2840000  | 4693058  | 3884865  | 2832235  | 4549689  | 3022235  |               | 9   |
| 1291130  | 728484.1 | 2084976  | 1760681  | 1480730  | 546823   | [1271][M+1]2+ | 7   |
| 1330573  | 1819855  | 2580808  | 740240.8 | 2120017  | 1714150  | [1595][M+1]+  | 38  |
| 957907.3 | 0        | 312544.4 | 227358.5 | 2303385  | 9285867  |               | 93  |
| 438820   | 943842.7 | 1198058  | 419499.5 | 524929.3 | 104711.8 |               | 9   |
| 15137064 | 10221606 | 10281042 | 8842527  | 8612716  | 521970.6 | [M+H]+ 64.    | 169 |
| 4606394  | 5989862  | 5258961  | 3709139  | 5164314  | 3556682  |               | 9   |
| 235983.8 | 437021.8 | 427927.3 | 142810.7 | 91299.13 | 342296   | [28][M+1]+    | 86  |
| 5.18E+08 | 5.92E+08 | 5.47E+08 | 3.56E+08 | 5.21E+08 | 6.05E+08 | [1304][M]+    | 51  |
| 368930.4 | 263402   | 498648.4 | 555236.1 | 283076.6 | 395252.4 | [1596][M]+    | 154 |
| 8252296  | 7066545  | 3291587  | 1569002  | 8511999  | 6470118  |               | 1   |
| 3959377  | 1396328  | 1815667  | 2398374  | 2671886  | 1438595  | [984][M+1]+   | 258 |
| 1329528  | 393257   | 3052606  | 1150786  | 595859   | 972303.6 |               | 9   |
| 4954598  | 33759597 | 634870.5 | 2030032  | 2802314  | 31621260 |               | 198 |
| 1655979  | 3339574  | 1805710  | 1147217  | 2139404  | 5495248  |               | 4   |
| 1659720  | 537573   | 1741922  | 463106.3 | 172078.6 | 952155.8 |               | 4   |
| 1470203  | 711992.5 | 672917.8 | 1468665  | 1174580  | 256331.8 |               | 4   |
| 2512655  | 822900.4 | 3693992  | 2419363  | 1763506  | 795315   | [788][M+1]+   | 135 |
| 2153365  | 4030030  | 2438782  | 1364467  | 2611772  | 8121472  | [711][M+1]+   | 4   |
| 443958.7 | 635006.1 | 296070.4 | 215586.8 | 806875.9 | 672131.1 |               | 9   |

|          |          |          |          |          |          |                       |     |
|----------|----------|----------|----------|----------|----------|-----------------------|-----|
| 4511455  | 8473757  | 5406019  | 3106958  | 6700607  | 16410565 |                       | 9   |
| 1489615  | 1435383  | 2613397  | 604450.8 | 758299.4 | 949332.3 |                       | 9   |
| 59969.93 | 522683.3 | 318739.7 | 0        | 823246.2 | 264218.8 | [261][M+1]3+          | 20  |
| 1759123  | 1286325  | 1652926  | 1359079  | 997454.1 | 0        |                       | 9   |
| 7753028  | 13229711 | 7781824  | 8481428  | 15409102 | 8234159  | [118][M+2]2+          | 1   |
| 5114134  | 5548762  | 5508518  | 5240669  | 5282743  | 3494543  |                       | 9   |
| 1761075  | 4129956  | 1970352  | 935997.1 | 2646840  | 9818981  |                       | 9   |
| 2112727  | 3588151  | 2826416  | 2829542  | 2879874  | 7273473  |                       | 234 |
| 3199826  | 2949242  | 2632593  | 2588770  | 1635425  | 2889509  |                       | 466 |
| 383980.2 | 500914.1 | 570938.1 | 463921.8 | 376322.3 | 111579.6 | [767][M]2+            | 246 |
| 1688662  | 1183774  | 929181.2 | 1641451  | 470463.9 | 646872.7 | [M+H]+ 300            | 13  |
| 2699974  | 1588800  | 2498402  | 2906804  | 1386820  | 1636810  |                       | 2   |
| 487803.8 | 500074.7 | 879832   | 743409.6 | 752738.5 | 781059.6 | [1214][M+1]2+         | 33  |
| 4998768  | 4331886  | 4772542  | 5897140  | 4107605  | 1750641  | [1290][M+1]+          | 235 |
| 852796.4 | 0        | 432831.3 | 878344   | 737525.2 | 579069.8 |                       | 9   |
| 1112101  | 5988758  | 20053048 | 916525.6 | 2540536  | 3897736  | [894][M+2]+           | 20  |
| 98398815 | 1.38E+08 | 1.29E+08 | 73009284 | 68824197 | 84309754 | [1248][M]+            | 69  |
| 296765.1 | 628048.8 | 404423.2 | 402903.5 | 204693.4 | 570368.4 | [M+Na]+ 70            | 16  |
| 3137607  | 5844053  | 5391059  | 14538369 | 1506229  | 7675976  |                       | 1   |
| 1778982  | 0        | 276993.4 | 1034559  | 2240145  | 136616.6 |                       | 1   |
| 19611767 | 22699069 | 17165588 | 17590624 | 23249696 | 31065412 |                       | 2   |
| 1048524  | 1409724  | 1588501  | 605533   | 680253.7 | 222486.9 |                       | 2   |
| 2051302  | 6457921  | 1752642  | 1661373  | 8752041  | 25088843 |                       | 97  |
| 2849767  | 2772622  | 1685917  | 427222.5 | 1939305  | 2963211  | [859][M]2+            | 39  |
| 2292348  | 1412724  | 1658772  | 1740159  | 1795967  | 3365732  | [3M+2Na]2             | 13  |
| 651801   | 1216253  | 1273671  | 1251471  | 697517.6 | 593098.6 |                       | 9   |
| 3155131  | 1904164  | 616606.4 | 2929155  | 353281.2 | 643028.6 | [M+K]+ 130            | 38  |
| 18377348 | 16494475 | 23966080 | 11120256 | 13298596 | 7987353  | [268][M]2+ [M+2H]2+ 1 | 18  |
| 3226103  | 2537292  | 2931098  | 3081532  | 3115587  | 691234.1 | [M+3H-C4H             | 13  |
| 80816425 | 46824605 | 55899487 | 50205890 | 45292255 | 2257531  |                       | 129 |
| 3044191  | 929400.1 | 2504900  | 3140174  | 938034.1 | 536017.3 | [M+H]+ 77             | 12  |
| 12910801 | 9227798  | 17789401 | 20540027 | 24635662 | 5066030  |                       | 1   |
| 6103014  | 6830054  | 7265430  | 3962976  | 6143961  | 2766331  |                       | 1   |
| 164747.2 | 279606.2 | 105092.1 | 243437   | 158899   | 144125.5 |                       | 338 |
| 290472.4 | 1137774  | 910951.6 | 550088.3 | 503609.9 | 686080.8 |                       | 46  |

|          |          |          |          |          |          |                                             |     |
|----------|----------|----------|----------|----------|----------|---------------------------------------------|-----|
| 18761510 | 17093756 | 19462896 | 22033954 | 19063650 | 3692906  |                                             | 9   |
| 43612878 | 49321202 | 39708865 | 27187051 | 39669157 | 45223318 | [M+H+Na] <sup>2+</sup>                      | 42  |
| 1128464  | 1400041  | 3790125  | 4245802  | 5941304  | 5096995  |                                             | 233 |
| 1918369  | 1437370  | 2084763  | 4955852  | 1397900  | 1339777  | [448][M+1] <sup>+</sup>                     | 181 |
| 15102303 | 16274587 | 17274708 | 12129292 | 12901546 | 7992719  | [172][M] <sup>2+</sup>                      | 4   |
| 692815   | 687702.4 | 743849.5 | 870386   | 108451.9 | 522877.2 | [M+H] <sup>+</sup> 46                       | 309 |
| 1251992  | 625026.9 | 885917.5 | 1561967  | 1562512  | 774357   |                                             | 4   |
| 9051965  | 9187218  | 7853241  | 9174344  | 11586949 | 11099189 |                                             | 2   |
| 1068057  | 2462651  | 2209460  | 1317787  | 1334055  | 712925.9 |                                             | 9   |
| 11945118 | 12355085 | 13742687 | 11244591 | 12594800 | 3610718  |                                             | 9   |
| 1108875  | 7027869  | 1149367  | 2732113  | 3986331  | 9999433  | [M+Na] <sup>+</sup> 1                       | 11  |
| 1543564  | 2184256  | 2460325  | 937850.4 | 1128699  | 96304.1  | [1022][M+1] <sup>+</sup>                    | 9   |
| 272953.5 | 386716.5 | 365198.7 | 279066.2 | 832091.4 | 255630   |                                             | 455 |
| 21407687 | 23188077 | 7015282  | 8780368  | 12308830 | 15677022 | [M+H-H <sub>2</sub> O]                      | 11  |
| 541999.5 | 729232.6 | 1393867  | 564090.2 | 840568.3 | 282719   |                                             | 9   |
| 67667423 | 59391499 | 51401633 | 72954000 | 67372202 | 59026800 |                                             | 2   |
| 2271194  | 4286826  | 3667036  | 1733401  | 1335299  | 3200579  | [M+Na] <sup>+</sup> 30                      | 5   |
| 2063043  | 2444782  | 2022031  | 1704364  | 2129240  | 1610689  |                                             | 9   |
| 736192.6 | 1385637  | 525385.5 | 681487.7 | 1069573  | 1019316  |                                             | 9   |
| 6242677  | 2055517  | 5521422  | 5734578  | 3522171  | 18290141 | [M+K] <sup>+</sup> 650                      | 97  |
| 2431586  | 3307443  | 3145085  | 1729042  | 2324101  | 642822.1 |                                             | 9   |
| 288005.3 | 1122801  | 0        | 111927.7 | 241478.5 | 364670.7 |                                             | 21  |
| 3479305  | 3681583  | 3042970  | 3206518  | 3859884  | 6280332  |                                             | 241 |
| 5941908  | 5883994  | 6065233  | 5556134  | 5593674  | 5301327  |                                             | 180 |
| 281734.9 | 1736325  | 1548526  | 256358.6 | 1478827  | 1127075  | [M+Na] <sup>+</sup> 30                      | 83  |
| 17911163 | 12816758 | 19591344 | 15195655 | 15034749 | 3436911  |                                             | 4   |
| 7.45E+08 | 6.22E+08 | 5.94E+08 | 7.23E+08 | 7.02E+08 | 4.66E+08 |                                             | 2   |
| 6259605  | 5820092  | 6694900  | 5541168  | 3229492  | 6748215  |                                             | 385 |
| 713270.2 | 817498.6 | 889763.1 | 651887.7 | 959155.9 | 1204966  | [1378][M+1] <sup>+</sup>                    | 16  |
| 5395365  | 5486392  | 1505578  | 6356903  | 6171695  | 5190908  |                                             | 417 |
| 13413331 | 4920430  | 19026215 | 13190680 | 9452005  | 7549149  | [788][M] <sup>+</sup> [M+H] <sup>+</sup> 44 | 135 |
| 3072852  | 2381833  | 1521639  | 1591469  | 1465855  | 1663829  |                                             | 198 |
| 27272747 | 31498192 | 21008449 | 23245638 | 27928955 | 35512632 |                                             | 2   |
| 233419.1 | 630275   | 1551422  | 160762.7 | 339291   | 254607.6 |                                             | 277 |
| 157824.8 | 118076   | 247058.7 | 149851.6 | 200484.1 | 308629.3 | [M+Na] <sup>+</sup> 70                      | 111 |

|          |          |          |          |          |          |                       |     |
|----------|----------|----------|----------|----------|----------|-----------------------|-----|
| 444596.1 | 400160.2 | 448379.3 | 275673.5 | 294232   | 65765.72 |                       | 91  |
| 779007.1 | 1388070  | 1645062  | 607414.4 | 990499.1 | 2297975  | [621][M+1]+           | 9   |
| 207254.4 | 71625.44 | 357192   | 149720.2 | 304362.7 | 358884   |                       | 23  |
| 2476051  | 2804492  | 2756211  | 2428605  | 2463555  | 1905659  | [710][M+2]+           | 4   |
| 741298.1 | 909714.3 | 4565023  | 1013192  | 1142590  | 431043.8 |                       | 214 |
| 3560307  | 7778562  | 4795397  | 3040824  | 6560443  | 27452356 |                       | 9   |
| 1527720  | 1243145  | 1761830  | 1524058  | 1338558  | 606010.6 | [516][M+1]2+          | 4   |
| 5308172  | 4929367  | 4860815  | 5194562  | 5149057  | 9407879  |                       | 300 |
| 1155665  | 841914.7 | 794234.9 | 1140665  | 1052612  | 117771.4 |                       | 9   |
| 18476008 | 31517529 | 17515138 | 21443803 | 27554374 | 48881797 | [1155][M]+            | 2   |
| 6423894  | 9115590  | 5609645  | 3429933  | 4950613  | 11928731 |                       | 1   |
| 6359318  | 3403688  | 5844333  | 4113703  | 6209376  | 1627481  |                       | 9   |
| 5473341  | 5745002  | 10763325 | 4789603  | 2986333  | 6040164  | [M+H-C4H8]            | 425 |
| 1427865  | 2196344  | 3016743  | 0        | 1099297  | 317221.4 |                       | 1   |
| 828636.5 | 817481.4 | 1214331  | 794127.6 | 746706.6 | 735927.1 |                       | 4   |
| 6566636  | 9059568  | 6533391  | 5831351  | 7122257  | 4652511  |                       | 1   |
| 6190845  | 12741470 | 7731664  | 2988167  | 5596404  | 9833991  |                       | 1   |
| 3101501  | 1471360  | 1844254  | 1555288  | 1621399  | 79811.17 |                       | 71  |
| 234619.9 | 209697.6 | 1.33E+08 | 270681   | 182859   | 78086505 |                       | 60  |
| 2272775  | 3046274  | 2746544  | 1779141  | 2405603  | 766077.5 |                       | 9   |
| 2321805  | 2282426  | 2302065  | 1778209  | 1884997  | 844361.1 |                       | 4   |
| 1815387  | 2932876  | 2110453  | 1506618  | 1392738  | 2534577  | [1331][M]+ [M+Na]+ 68 | 101 |
| 1058507  | 980943.1 | 1033718  | 630707.3 | 571516.4 | 13422357 |                       | 9   |
| 1614461  | 855313.8 | 316385.5 | 1202809  | 1319145  | 509655   |                       | 1   |
| 3568834  | 6768079  | 9484157  | 2649464  | 3001410  | 283307   |                       | 1   |
| 1609580  | 4455004  | 5292424  | 1508999  | 1973331  | 2792510  |                       | 9   |
| 1436685  | 2619623  | 4388003  | 1733139  | 1576032  | 9307413  |                       | 1   |
| 13627669 | 15754961 | 9875880  | 11872701 | 18262379 | 29101805 |                       | 2   |
| 472186.5 | 280467.6 | 210177.7 | 353035.8 | 279161.5 | 200975.7 |                       | 128 |
| 1375932  | 3220199  | 1984969  | 1009080  | 1925501  | 4694825  |                       | 8   |
| 3083623  | 213811.3 | 2597088  | 2972438  | 3696894  | 1792872  |                       | 14  |
| 15136495 | 5547906  | 8446295  | 16342744 | 3892457  | 267492.9 |                       | 2   |
| 1903508  | 2177805  | 1890183  | 1434057  | 1645279  | 1200598  |                       | 4   |
| 2658894  | 4794671  | 3368754  | 1123192  | 3262555  | 5833982  | [M+Na+HC]             | 46  |
| 993524.2 | 699160.1 | 805827.2 | 1054539  | 642899.6 | 369153.7 |                       | 273 |

|          |          |          |          |          |          |              |     |
|----------|----------|----------|----------|----------|----------|--------------|-----|
| 1556607  | 2521028  | 1075800  | 1242500  | 1619309  | 3683125  |              | 4   |
| 3415201  | 3582795  | 2499599  | 1927351  | 3602391  | 3204841  |              | 9   |
| 2216744  | 4396813  | 3136480  | 1381183  | 4145161  | 2031077  |              | 2   |
| 4072826  | 1717740  | 4139317  | 13238268 | 2040177  | 848471.3 | [M+K+HCO     | 6   |
| 481268.9 | 612840.2 | 671566.5 | 259856   | 212690.6 | 0        |              | 4   |
| 2503734  | 1664357  | 1744578  | 2769316  | 1061611  | 0        |              | 2   |
| 3230090  | 2453730  | 1520195  | 2192447  | 1557389  | 1630241  | [14][M+1]+   | 24  |
| 258267.4 | 1079064  | 642206.3 | 240270.7 | 421446.8 | 1039332  |              | 4   |
| 4076887  | 5286750  | 4554757  | 4967261  | 5826531  | 5970926  |              | 15  |
| 4316649  | 4919228  | 3803273  | 2799962  | 4155300  | 14811620 |              | 2   |
| 10597568 | 1033897  | 13646089 | 20063631 | 11322542 | 31230904 | [995][M]+    | 182 |
| 16703805 | 26797028 | 20932948 | 14601631 | 15644640 | 24242364 | [M+Na]+ 6!   | 15  |
| 2275456  | 1649240  | 3056719  | 1055971  | 1642434  | 124849.8 |              | 1   |
| 5081905  | 5015205  | 4738822  | 4671577  | 4743320  | 6500435  |              | 151 |
| 687792.8 | 2648690  | 2820326  | 2370201  | 2513063  | 2521707  |              | 295 |
| 5691087  | 5821028  | 7011406  | 5410871  | 4654890  | 991541.1 |              | 9   |
| 770349.9 | 1246319  | 821361.7 | 589430.3 | 699828.9 | 569186.4 |              | 4   |
| 4349136  | 2189776  | 4479827  | 3019868  | 2178707  | 772446.1 |              | 1   |
| 1969632  | 1393628  | 1411006  | 739318.8 | 872816.6 | 0        |              | 124 |
| 179836.3 | 1193454  | 1087862  | 152342.1 | 286833.7 | 868387.3 | [1518][M+2]+ | 20  |
| 19023925 | 1422410  | 24589753 | 10500768 | 20645538 | 9247498  |              | 90  |
| 871025   | 1491225  | 275833.1 | 1091764  | 1472205  | 8516171  |              | 13  |
| 52500494 | 37419325 | 38790473 | 33882542 | 31124068 | 2264966  | [2M+3H]3+    | 169 |
| 1334004  | 1359637  | 1583193  | 708588.1 | 2188186  | 7745174  |              | 2   |
| 11685390 | 8224736  | 9906955  | 12161326 | 6956336  | 4304114  | [465][M+2]2+ | 2   |
| 5434092  | 5386726  | 5318361  | 5098497  | 5291985  | 5317136  |              | 250 |
| 11624895 | 12976757 | 610370.7 | 19695507 | 16299544 | 44005859 | [M+H-C2H4    | 53  |
| 636553.6 | 0        | 1011478  | 558260   | 614588.2 | 393558   | [1000][M]2+  | 8   |
| 764927.2 | 0        | 1156258  | 970786.2 | 795286.6 | 407265.2 |              | 8   |
| 450062.5 | 1269466  | 439906.4 | 393062.5 | 2380964  | 10299862 |              | 93  |
| 62794762 | 94999252 | 64889315 | 56474606 | 60260640 | 87395324 | [M+Na+Na     | 15  |
| 1492942  | 1938679  | 2496409  | 1339221  | 1453831  | 700429.3 |              | 9   |
| 39120251 | 33557336 | 23270587 | 31397347 | 25762531 | 25304536 | [14][M]+     | 24  |
| 6637283  | 4535462  | 2294951  | 4921382  | 3325842  | 8097181  |              | 2   |
| 1314195  | 473437.2 | 1118048  | 738671.6 | 476998.5 | 245172.3 |              | 4   |

|          |          |          |          |          |          |              |     |
|----------|----------|----------|----------|----------|----------|--------------|-----|
| 510743.3 | 859029.4 | 899880.2 | 316635.5 | 402533.3 | 1039529  |              | 4   |
| 6990571  | 8869218  | 3661846  | 5437982  | 9547010  | 39676468 |              | 2   |
| 5771662  | 4770333  | 6805844  | 5799702  | 4950809  | 5684179  |              | 2   |
| 1818268  | 2113571  | 2086202  | 2052360  | 1824057  | 1470790  |              | 24  |
| 11665274 | 13417379 | 11941686 | 8983676  | 11228947 | 6058791  |              | 9   |
| 378385.8 | 508057.2 | 620595.8 | 249264.5 | 663190.8 | 358114.6 | [1492][M]+   | 504 |
| 1573875  | 4011883  | 2072871  | 682384.6 | 2388870  | 9716197  |              | 9   |
| 1288580  | 3187747  | 2152371  | 939764.4 | 1900330  | 4475737  |              | 9   |
| 12535361 | 11890993 | 10438135 | 14113107 | 7181776  | 10101254 |              | 228 |
| 4478685  | 4218443  | 1063430  | 6870686  | 4389468  | 4001865  |              | 326 |
| 5846444  | 5866009  | 5508883  | 6010661  | 4185150  | 2394098  |              | 2   |
| 645132.2 | 643766.4 | 791892.5 | 635815   | 584568.3 | 375746.8 |              | 4   |
| 2034821  | 2139113  | 421676.6 | 548245   | 2058479  | 1474659  | [M+H]+ 271   | 15  |
| 14824629 | 11379978 | 12293680 | 13579476 | 14635970 | 4573734  |              | 14  |
| 1582732  | 984548.1 | 1601628  | 1673155  | 3397390  | 11723510 |              | 1   |
| 2028740  | 5732245  | 2439617  | 1924331  | 5874045  | 15266123 |              | 3   |
| 4292476  | 3603659  | 5619376  | 5923410  | 5475401  | 4063374  |              | 295 |
| 4698602  | 3543745  | 3309282  | 3776911  | 4509110  | 20993371 |              | 1   |
| 3335015  | 2812614  | 4351631  | 2591965  | 2293446  | 368946.8 |              | 2   |
| 1104775  | 1075595  | 1275528  | 1532684  | 1181904  | 730386.3 |              | 4   |
| 3960120  | 3202324  | 4274733  | 3423352  | 6574902  | 5393034  |              | 2   |
| 1021911  | 1380716  | 1372885  | 724969.2 | 952030.3 | 339252.4 |              | 9   |
| 2864394  | 2257448  | 3444127  | 2652546  | 1858414  | 1292697  |              | 370 |
| 2114952  | 1676951  | 1427991  | 2333527  | 1789914  | 1289434  |              | 13  |
| 12758976 | 14463412 | 13899157 | 10005360 | 11521056 | 8660313  |              | 4   |
| 2033969  | 2123861  | 2226562  | 1869530  | 1799447  | 774229   |              | 4   |
| 190124.7 | 513565.3 | 98401.63 | 63961.3  | 556172.6 | 1185518  | [M+Na]+ 11   | 8   |
| 209385   | 501923.6 | 764673   | 369799.3 | 245199.6 | 259179.9 |              | 110 |
| 108463.3 | 67096.32 | 192242   | 96866.5  | 155777.2 | 8879.317 |              | 17  |
| 633894.3 | 768228.4 | 558025.3 | 443349.6 | 572221.8 | 337629.7 | [M+H]+ 90    | 23  |
| 6469078  | 9560241  | 8706609  | 4448784  | 6224295  | 2878924  |              | 9   |
| 5.29E+08 | 5.51E+08 | 4.58E+08 | 4.7E+08  | 5.39E+08 | 5.09E+08 | [1298][M+1]+ | 2   |
| 320912.5 | 721719.7 | 365011.7 | 226270.9 | 557296.4 | 1990513  | [M+2K]2+ 1   | 8   |
| 1940515  | 461521.2 | 6221194  | 2058962  | 4797831  | 1645828  | [M+K]+ 18    | 13  |
| 223751   | 140760.9 | 174914.3 | 273624.1 | 142524.3 | 143835.9 |              | 118 |

|          |          |          |          |          |          |               |     |
|----------|----------|----------|----------|----------|----------|---------------|-----|
| 1648071  | 503737.7 | 1855806  | 262834.2 | 389336.5 | 0        |               | 343 |
| 5098433  | 4076447  | 5445124  | 5336636  | 1113448  | 9351504  |               | 1   |
| 5700915  | 7007470  | 5146888  | 4085238  | 5471483  | 4413949  |               | 325 |
| 10948391 | 14023760 | 11983210 | 8952265  | 11819876 | 9137463  |               | 9   |
| 533305.5 | 903196.5 | 413456.6 | 199070.8 | 728471.1 | 903117.9 | [M+Na]+ 10    | 8   |
| 400422.1 | 846737.9 | 705938.2 | 317052.5 | 750577.7 | 504991   |               | 296 |
| 1056716  | 1752057  | 1618651  | 112394.3 | 1151570  | 1105083  |               | 46  |
| 8288461  | 1182674  | 5469552  | 8208873  | 2589038  | 0        |               | 2   |
| 9737741  | 10780650 | 10267141 | 7593089  | 8507557  | 6216319  | [61][M]+      | 4   |
| 1162248  | 0        | 538477.8 | 961730.2 | 896749.5 | 0        |               | 1   |
| 1234602  | 1911823  | 4076050  | 1946929  | 873703.1 | 911302.8 |               | 9   |
| 3762165  | 5485375  | 2786890  | 3418868  | 4225697  | 8061151  |               | 2   |
| 7008213  | 9019659  | 4557984  | 9427718  | 3584098  | 1500959  | [M+K+NH3      | 97  |
| 884004.3 | 1377555  | 1175642  | 576305.8 | 952184.6 | 2360072  |               | 9   |
| 7093427  | 10460198 | 10701083 | 6363532  | 8103744  | 2951483  |               | 9   |
| 746705.6 | 614762.8 | 1628979  | 843566.3 | 965687.6 | 945587.9 | [M+K+CF3C     | 14  |
| 4203881  | 6353829  | 5880448  | 3981244  | 5693031  | 3016064  | [M+Na]+ 5:    | 46  |
| 24903291 | 20233893 | 20668920 | 23001900 | 20980698 | 8081657  | [1194][M]+    | 2   |
| 211189.5 | 95160.36 | 95847.49 | 744118.3 | 85975.97 | 241756.2 |               | 173 |
| 1467752  | 3276599  | 2132161  | 920754.1 | 2126050  | 4464148  | [895][M+1]2+  | 9   |
| 903218.8 | 925699.4 | 106262.7 | 791828.1 | 869914.6 | 90879.76 |               | 9   |
| 2339045  | 2637291  | 865912.6 | 2050268  | 3414243  | 4779551  |               | 1   |
| 1611495  | 1704989  | 1623674  | 1186309  | 900444.3 | 756088.6 |               | 4   |
| 2797116  | 2613487  | 1689886  | 3093308  | 1331690  | 0        |               | 2   |
| 1951903  | 16776932 | 6059063  | 18305534 | 17325978 | 5302555  | [M+Na+HC      | 15  |
| 1424559  | 1375945  | 358420.2 | 1386446  | 1447201  | 4079817  |               | 2   |
| 3595684  | 4399717  | 5379202  | 4406679  | 1161162  | 1886685  | [2M+Na+3I     | 15  |
| 628224.5 | 918435.7 | 1586454  | 1128186  | 749113.1 | 563398.4 |               | 1   |
| 1468719  | 108354.8 | 1401550  | 1429220  | 563694.4 | 492784.1 | [1001][M+1]2+ | 38  |
| 2933052  | 6088552  | 3297881  | 2365479  | 4752833  | 13748590 |               | 9   |
| 486945.2 | 535837.5 | 1178295  | 1077886  | 589403.1 | 1297570  | [1218][M+1]2+ | 33  |
| 361216.1 | 338389.8 | 292268.9 | 298825.8 | 409984.4 | 143299.3 |               | 48  |
| 21754991 | 14537171 | 14789043 | 13188285 | 11764944 | 604659.9 |               | 169 |
| 6582507  | 183334.2 | 104178.2 | 5711116  | 4945535  | 519617.2 |               | 92  |
| 19142284 | 8848570  | 13622933 | 23057011 | 11513234 | 846560   | [1237][M]2+   | 2   |



|          |          |          |          |          |          |               |     |
|----------|----------|----------|----------|----------|----------|---------------|-----|
| 3052028  | 4438450  | 2293650  | 2677795  | 6212316  | 11293805 |               | 2   |
| 1033702  | 431513.6 | 823377.7 | 1151338  | 575701.7 | 381054.5 | [1476][M+1]2+ | 35  |
| 14727335 | 14381057 | 1045788  | 14991366 | 28966622 | 24023947 |               | 3   |
| 1076353  | 2177505  | 490932.8 | 526901.7 | 274944.1 | 272727.3 |               | 384 |
| 5819879  | 5720155  | 6827270  | 5453063  | 4510912  | 1023964  | [233][M]2+    | 9   |
| 2991180  | 585710.4 | 346610.6 | 1434940  | 1240110  | 2245369  |               | 242 |
| 1125580  | 782554.6 | 1053285  | 1216340  | 657451.6 | 1097011  | [2M+2Na-t     | 8   |
| 287945   | 360524.9 | 112044.7 | 116980.5 | 170642.5 | 328505.6 |               | 277 |
| 6698934  | 5771017  | 5421685  | 5822392  | 5665612  | 5256751  |               | 208 |
| 3677456  | 1993596  | 1734183  | 3410684  | 2965556  | 429528.6 |               | 2   |
| 5606165  | 2309226  | 5185087  | 6695560  | 4125858  | 924662.2 |               | 2   |
| 1497175  | 5657798  | 384266.3 | 1386595  | 548743.6 | 13972168 | [M+2H-H2O     | 3   |
| 8573509  | 2931339  | 3145636  | 5408254  | 5559684  | 3262633  |               | 1   |
| 732558.7 | 1406725  | 886868.3 | 615833.9 | 680274.4 | 1053116  |               | 8   |
| 611549.6 | 994940.4 | 590674.5 | 259957.7 | 371512.3 | 504796.6 | [M+H]+ 680    | 101 |
| 10874482 | 24280297 | 9293604  | 11272480 | 13088560 | 35275236 | [3M+2Na-t     | 13  |
| 1847694  | 49392198 | 50759529 | 81764696 | 50146759 | 9529597  |               | 1   |
| 4108186  | 1427261  | 899927.5 | 3285109  | 4101509  | 4001449  | [M+K]+ 320    | 15  |
| 8271943  | 8893791  | 7427133  | 8474603  | 6968689  | 2908221  |               | 2   |
| 639309.1 | 466547   | 380773.4 | 812452.3 | 627555.8 | 2082872  |               | 9   |
| 629627.7 | 2512918  | 2933177  | 1262851  | 728213.8 | 1062116  |               | 9   |
| 2777018  | 10373713 | 5662384  | 2776475  | 2107990  | 19087881 | [3M+H+K]2     | 11  |
| 1218703  | 666945.8 | 1170801  | 664098   | 487518.9 | 585502.6 |               | 244 |
| 1028551  | 975055.6 | 1427441  | 837361.3 | 900785.3 | 468301.6 |               | 4   |
| 6481576  | 9038388  | 5271801  | 6468476  | 5761590  | 10850562 |               | 175 |
| 8156741  | 651917.2 | 7271566  | 6022318  | 10281382 | 64681075 | [528][M]3+    | 2   |
| 9.4E+09  | 1.14E+10 | 8.47E+09 | 8.8E+09  | 1.04E+10 | 1.77E+10 | [1303][M]+    | 2   |
| 11134657 | 18038132 | 11807882 | 7273600  | 12635639 | 31500835 |               | 4   |
| 1249692  | 2062905  | 1283387  | 857201.1 | 1684734  | 1256937  |               | 2   |
| 2853729  | 5045193  | 3369452  | 1809070  | 3230562  | 7194614  |               | 4   |
| 2021643  | 1932090  | 2305509  | 1581577  | 1694926  | 1235176  | [890][M+1]+   | 4   |
| 1525228  | 2285595  | 2027166  | 1119052  | 1637775  | 1359891  |               | 9   |
| 9874818  | 4774507  | 8396488  | 10066504 | 4944471  | 361284.3 | [416][M+1]2+  | 2   |
| 293885.4 | 395998.1 | 271469.8 | 323843.3 | 356325.7 | 384417.2 | [1448][M+1]+  | 134 |
| 25702446 | 414801.5 | 24244977 | 25467013 | 6537153  | 13466691 | [1215][M+2]2+ | 2   |

|          |          |          |          |          |          |                           |     |
|----------|----------|----------|----------|----------|----------|---------------------------|-----|
| 2621246  | 2457993  | 2920936  | 4114026  | 5420174  | 1965532  |                           | 2   |
| 11773526 | 9726096  | 10154652 | 12094910 | 8408806  | 1960271  |                           | 2   |
| 1125604  | 809304.4 | 787435.2 | 109519.1 | 625615.6 | 1011716  | [M+H] <sup>+</sup> 31!    | 46  |
| 2824396  | 2785473  | 2497782  | 2562889  | 2625880  | 2658800  |                           | 191 |
| 570226.6 | 793770.6 | 672430.3 | 638626.1 | 589354   | 564937.1 |                           | 4   |
| 6534195  | 8655798  | 9041098  | 5759171  | 6448288  | 2512280  |                           | 9   |
| 18177799 | 29486554 | 9893254  | 18856090 | 17783198 | 20416178 | [M+H-CH <sub>2</sub> ]    | 3   |
| 4928850  | 4628205  | 2132687  | 2188094  | 5185031  | 6048448  | [M+H-NH <sub>3</sub> ]    | 11  |
| 1183638  | 1587306  | 1351668  | 1148127  | 1073967  | 2090832  | [1370][M+1] <sup>2+</sup> | 35  |
| 3661467  | 3564801  | 3389414  | 2410312  | 2417232  | 3264516  | [1106][M+1] <sup>+</sup>  | 2   |
| 1143468  | 1074283  | 2123070  | 837407.7 | 1149407  | 1897510  |                           | 1   |
| 208190.9 | 313762   | 367683.4 | 153191.5 | 317162.9 | 141389.5 | [1126][M+4] <sup>+</sup>  | 17  |
| 7790926  | 3100247  | 4195960  | 15302522 | 6917321  | 839822.9 | [2M+2K-H]                 | 15  |
| 7643548  | 8720787  | 7934447  | 5615139  | 6447328  | 4062121  |                           | 4   |
| 5394920  | 5262334  | 4941962  | 3207167  | 4528209  | 5816893  |                           | 190 |
| 3803381  | 2308999  | 2481206  | 4821374  | 4055814  | 0        |                           | 9   |
| 226222   | 119778.9 | 538437.1 | 502439.2 | 558880.2 | 405601.3 |                           | 453 |
| 10209517 | 9571489  | 4412609  | 6455686  | 14963709 | 10142759 | [M+2H] <sup>2+</sup> :    | 3   |
| 1107383  | 3918067  | 3145826  | 3752488  | 3804739  | 5443573  |                           | 405 |
| 1.59E+09 | 2.21E+09 | 1.23E+09 | 1.41E+09 | 2E+09    | 1.03E+09 | [1252][M] <sup>+</sup>    | 16  |
| 882425.7 | 842229.9 | 734744.3 | 590316.2 | 1000767  | 0        | [M+2H-CO]                 | 8   |
| 1831310  | 2018487  | 1857842  | 1338042  | 1550581  | 1153302  |                           | 4   |
| 2357697  | 1644698  | 1855396  | 1748554  | 1548487  | 916473.9 |                           | 117 |
| 2342844  | 2964491  | 4245508  | 1661161  | 2012527  | 1667723  |                           | 9   |
| 2315930  | 3390118  | 3766689  | 1467552  | 2478360  | 988465.2 |                           | 9   |
| 1931142  | 1191763  | 1183203  | 1658850  | 1029742  | 19493641 |                           | 2   |
| 1761872  | 1704747  | 725974   | 780135.4 | 2182624  | 2072602  |                           | 9   |
| 780476.4 | 585910   | 393643.4 | 1820817  | 1040880  | 316959.2 |                           | 7   |
| 866492   | 1233715  | 1043788  | 413704.6 | 869551.8 | 2668160  | [M+3H-C6H <sub>6</sub> ]  | 8   |
| 1596341  | 762062.5 | 1805313  | 1695899  | 1857803  | 2079333  | [1622][M+1] <sup>+</sup>  | 2   |
| 0        | 567622.4 | 320774.1 | 0        | 348502   | 240480.2 |                           | 20  |
| 1716213  | 1950783  | 776298.3 | 859611.4 | 728326.9 | 8765610  | [M+2Na+K]                 | 15  |
| 486728.6 | 422079.1 | 770901.3 | 1400858  | 453745.3 | 842178   |                           | 113 |
| 6494007  | 3389005  | 3968321  | 5219560  | 3329669  | 13669050 |                           | 9   |
| 3420402  | 1818440  | 2512661  | 2719029  | 2130450  | 881727.1 |                           | 4   |

|          |          |          |          |          |          |                       |     |
|----------|----------|----------|----------|----------|----------|-----------------------|-----|
| 223040.4 | 130475.8 | 445716.3 | 194988.9 | 233084.9 | 119048.3 |                       | 72  |
| 17621099 | 30024490 | 20992400 | 14158266 | 23404550 | 54470205 |                       | 9   |
| 37849219 | 39121375 | 43245611 | 31848176 | 32344582 | 13532935 |                       | 9   |
| 850561.9 | 1340194  | 573682.1 | 328759.2 | 845934.3 | 598203   |                       | 4   |
| 1132200  | 1327820  | 1652661  | 837392   | 1663379  | 1134854  |                       | 14  |
| 1347037  | 1582995  | 1235414  | 663876.9 | 1203607  | 960582.1 |                       | 4   |
| 0        | 714165.1 | 981612.2 | 0        | 208262.6 | 528374   |                       | 20  |
| 1833449  | 760871.3 | 4984091  | 1515551  | 1432822  | 748893.1 | [2M+H]+ 2!            | 13  |
| 1811989  | 1210068  | 669881   | 1385870  | 1248633  | 162761.1 |                       | 4   |
| 163582.4 | 2086418  | 0        | 0        | 1085862  | 1986892  |                       | 2   |
| 4337692  | 6766649  | 4557458  | 3817792  | 6392783  | 17037105 |                       | 2   |
| 7333639  | 7078171  | 724734.3 | 6711274  | 4327870  | 6678036  | [M+H+HCC              | 13  |
| 1087857  | 1975617  | 2384717  | 854862.1 | 1090045  | 0        | [M+2H-C2H             | 13  |
| 5624310  | 4709192  | 1986573  | 2589620  | 3008634  | 4688868  |                       | 2   |
| 553077.7 | 2927715  | 368039.5 | 681952   | 1047310  | 5792750  | [M+H]+ 72!            | 15  |
| 929106.2 | 524861.6 | 86941.76 | 914683.8 | 753068.5 | 1054647  |                       | 9   |
| 641433.5 | 833712.4 | 691483.5 | 365645.8 | 373611.9 | 333969.6 | [M+H]+ 35!            | 81  |
| 5919786  | 4949481  | 4762770  | 4775048  | 9768021  | 9886871  | [M+2H]2+!             | 14  |
| 14097487 | 17262373 | 11404903 | 14262892 | 19463180 | 21826744 |                       | 2   |
| 259476.1 | 296431.6 | 274004.8 | 238515.3 | 251391.5 | 415893.1 |                       | 91  |
| 26330290 | 29150925 | 23113910 | 23349913 | 29665071 | 37219697 |                       | 2   |
| 526381.9 | 3562552  | 3241199  | 1291257  | 1013743  | 3178290  |                       | 4   |
| 1438021  | 2258671  | 2544907  | 1050365  | 1346011  | 888052.3 |                       | 9   |
| 575952.6 | 495040.8 | 791478   | 710734.1 | 538217   | 108480.7 |                       | 150 |
| 80975.39 | 75007.94 | 27145.53 | 346135.8 | 122620   | 744321.4 |                       | 33  |
| 2372466  | 2747928  | 1975739  | 1770873  | 3236142  | 3305561  | [1222][M]+            | 17  |
| 2096948  | 2542297  | 2568029  | 2022557  | 2505300  | 465128.4 | [690][M+1]3+          | 58  |
| 1179047  | 3141477  | 1813516  | 654265.8 | 2045619  | 6278545  |                       | 9   |
| 20496155 | 21475184 | 8932652  | 7273060  | 16525387 | 5468374  | [M+H]+ 40!            | 5   |
| 5590754  | 4609393  | 5281866  | 5139448  | 5453056  | 4723920  |                       | 408 |
| 3048773  | 3095453  | 2670199  | 3215028  | 3306152  | 3017227  |                       | 356 |
| 1679717  | 1158162  | 2143795  | 1695881  | 1362590  | 478187   | [1617][M]+ [M+K]+ 15! | 38  |
| 1020935  | 1048560  | 541215   | 1974456  | 485030.1 | 1265539  |                       | 12  |
| 4503386  | 3092218  | 6298195  | 4218614  | 4772294  | 763972.1 |                       | 2   |
| 4804122  | 5091875  | 6442939  | 4239944  | 4087826  | 843928.9 | [1490][M]2+           | 9   |

|          |          |          |          |          |          |              |     |
|----------|----------|----------|----------|----------|----------|--------------|-----|
| 405960.4 | 591206.4 | 398413.8 | 416427.2 | 517544.6 | 185190.3 | [3M+H+Na     | 23  |
| 1740526  | 4938023  | 1609559  | 2147942  | 2435887  | 1171468  |              | 1   |
| 284302.3 | 172239.8 | 265958.3 | 277586.1 | 350627.1 | 146428.3 |              | 124 |
| 1870531  | 1062062  | 1318519  | 2347417  | 2673498  | 7011907  |              | 2   |
| 332750.9 | 443829.8 | 361896.4 | 313509.8 | 259924.8 | 93520.1  |              | 118 |
| 987038.2 | 904934.6 | 948264.2 | 722565.5 | 1169994  | 1134937  | [1602][M]+   | 121 |
| 374091.9 | 244018.9 | 705557.8 | 245167.5 | 324578.5 | 144697.3 |              | 91  |
| 38297831 | 58152755 | 52897626 | 28956004 | 26460995 | 17958245 | [1248][M+1]+ | 69  |
| 187259   | 336743.6 | 380089.7 | 298202.5 | 359867   | 114410   |              | 4   |
| 4637395  | 3519884  | 16082.62 | 3433555  | 1491427  | 1351539  |              | 52  |
| 2115063  | 2765582  | 2993773  | 1377263  | 2634361  | 1915385  | [M+H-CH3]    | 134 |
| 4249410  | 1651109  | 3156417  | 2388810  | 2634514  | 16077.25 | [1470][M]+   | 205 |
| 21105427 | 18366901 | 22845885 | 27588810 | 12179594 | 30105884 |              | 23  |
| 36314235 | 21334272 | 25703351 | 22705090 | 20479477 | 1568682  |              | 129 |
| 1981424  | 540084   | 703222.4 | 2133294  | 1791303  | 10235994 | [543][M+1]2+ | 2   |
| 51814773 | 48021925 | 45483265 | 55690100 | 46751613 | 35811067 |              | 2   |
| 1703288  | 1829000  | 2038689  | 1377202  | 1479263  | 800621.4 | [135][M+1]+  | 4   |
| 2358770  | 2291441  | 1856629  | 1755855  | 1785045  | 1036587  |              | 4   |
| 2911214  | 1671672  | 12491343 | 2718533  | 2155910  | 4642858  |              | 181 |
| 9780700  | 3900784  | 7457030  | 10467948 | 4723998  | 11335419 |              | 2   |
| 9071454  | 9754360  | 10217385 | 7512245  | 7778688  | 3176418  |              | 9   |
| 28180648 | 4949656  | 1806513  | 31656348 | 26148150 | 64185976 |              | 20  |
| 2181980  | 1260897  | 9861394  | 2283649  | 1730462  | 3513726  |              | 293 |
| 3556343  | 1113879  | 2712381  | 2158286  | 2345369  | 1114296  | [717][M]2+   | 235 |
| 1.22E+08 | 1379459  | 1.31E+08 | 98313217 | 1067371  | 2801323  | [752][M+1]+  | 1   |
| 8250747  | 7445525  | 8186587  | 7918875  | 8574135  | 2688805  | [59][M]3+    | 9   |
| 2364103  | 123526.9 | 2392578  | 2569311  | 2553985  | 3318783  |              | 191 |
| 5517485  | 9237938  | 5945146  | 8051882  | 5258396  | 6342070  |              | 1   |
| 3.88E+08 | 6.24E+08 | 5.96E+08 | 3.67E+08 | 4.63E+08 | 7.95E+08 | [679][M+1]+  | 9   |
| 13481602 | 638015.2 | 11087595 | 13203405 | 9112416  | 503231.8 | [169][M]3+   | 2   |
| 3967677  | 22145191 | 28162664 | 3462986  | 4565276  | 12233361 | [894][M+1]+  | 20  |
| 2200289  | 2652385  | 1475600  | 1964604  | 2352281  | 3671458  |              | 9   |
| 16386427 | 2013721  | 15462661 | 12273435 | 2883469  | 5815457  | [451][M+1]2+ | 2   |
| 258464.2 | 343810.3 | 404230.1 | 190770.7 | 140911.6 | 472636.8 |              | 4   |
| 3610209  | 13656721 | 40193240 | 876800.1 | 3631134  | 3886931  | [913][M]+    | 20  |

|          |          |          |          |          |          |               |     |
|----------|----------|----------|----------|----------|----------|---------------|-----|
| 3769492  | 6167921  | 4267323  | 2446607  | 4156025  | 12111317 | [784][M+1]+   | 4   |
| 537071.9 | 428064.9 | 275300.1 | 217013.3 | 480230.2 | 226071.6 |               | 4   |
| 3381488  | 1840269  | 3089243  | 3202967  | 1548512  | 3688085  |               | 2   |
| 4197063  | 5914121  | 3027598  | 3731174  | 3216930  | 2514851  |               | 2   |
| 93084957 | 89398628 | 1.04E+08 | 79816407 | 82022433 | 49007707 |               | 17  |
| 5364014  | 21244728 | 3837953  | 6120282  | 3964079  | 1190316  |               | 1   |
| 14446842 | 11487013 | 11813196 | 13568765 | 13963046 | 5558857  |               | 13  |
| 327096.3 | 1213583  | 965113   | 500182.8 | 767895.7 | 987145.8 |               | 9   |
| 2058069  | 2816295  | 2712986  | 1687382  | 3256606  | 7622284  |               | 2   |
| 5497228  | 5392716  | 2611115  | 4359003  | 5353865  | 1567179  |               | 1   |
| 5315257  | 4171303  | 4542462  | 4195381  | 4363439  | 7232909  | [M+K]+ 41     | 12  |
| 6677092  | 11953514 | 7066426  | 6032171  | 13421486 | 16307607 |               | 2   |
| 3476782  | 4479489  | 3002573  | 2875888  | 3134303  | 214220   | [1221][M+1]2+ | 2   |
| 2855355  | 4257777  | 4659564  | 3225088  | 3105364  | 2484799  | [101][M+1]+   | 35  |
| 1981672  | 1965186  | 894793.9 | 1861440  | 1408633  | 3661973  |               | 2   |
| 314692.2 | 445723   | 292017.7 | 180082.9 | 307436.8 | 156385   |               | 89  |
| 400620.8 | 719113.7 | 476920.4 | 339541.7 | 523810.3 | 1411093  |               | 8   |
| 678488.7 | 1184997  | 1175804  | 975425.5 | 380088.4 | 444006.5 |               | 9   |
| 7310676  | 7689220  | 8303057  | 5849759  | 6318575  | 3977253  | [552][M+1]+   | 4   |
| 536538.5 | 751593.2 | 732232.1 | 615463.4 | 508590.4 | 472812.4 | [1262][M+1]+  | 40  |
| 6616764  | 4745446  | 7132211  | 6297502  | 7060143  | 993237.1 | [M+2H-C5+     | 13  |
| 1264044  | 1671781  | 1445759  | 916421.9 | 1077761  | 1267271  |               | 4   |
| 244987.2 | 289716.2 | 247638   | 177841.8 | 407887.8 | 250232.6 |               | 91  |
| 50259909 | 38501716 | 33803841 | 45599750 | 1.09E+08 | 37871013 |               | 152 |
| 1440506  | 1896076  | 1742509  | 1184083  | 1613377  | 525440.6 |               | 4   |
| 11476793 | 12747419 | 12552800 | 9044019  | 10313246 | 7349301  | [115][M]2+    | 4   |
| 2310262  | 3942205  | 1663974  | 1620965  | 1695582  | 2234376  | [864][M+1]+   | 2   |
| 1604230  | 640002.8 | 657432.8 | 1355615  | 1437351  | 313495.4 |               | 4   |
| 3058551  | 3959039  | 2620191  | 3014947  | 3505432  | 2618501  |               | 2   |
| 675851.7 | 2809008  | 804859.6 | 408971.7 | 2573857  | 1279545  |               | 2   |
| 16565625 | 3823740  | 1751239  | 15395186 | 1385899  | 2021854  |               | 15  |
| 2551769  | 3935240  | 2393423  | 2107670  | 3145156  | 2465645  | [375][M+2]3+  | 2   |
| 752159.9 | 870993.3 | 1309947  | 673088   | 645149.4 | 0        | [239][M+1]2+  | 9   |
| 16124001 | 10360022 | 14488449 | 14605291 | 2494040  | 6535613  | [1193][M]+    | 2   |
| 37051436 | 39872396 | 42227064 | 29918654 | 31970086 | 20774033 | [546][M]2+    | 4   |

|          |          |          |          |          |          |              |     |
|----------|----------|----------|----------|----------|----------|--------------|-----|
| 16339841 | 494081.7 | 1597066  | 9995863  | 3398236  | 3109138  |              | 386 |
| 2258800  | 2197437  | 2482015  | 1744765  | 2006344  | 1069199  |              | 4   |
| 635291.4 | 22139466 | 3298013  | 25924832 | 34478522 | 33221380 | [M+Na+K-]    | 15  |
| 400738.8 | 1093888  | 1094038  | 0        | 380309.2 | 0        |              | 9   |
| 783076   | 0        | 375131.3 | 747152.5 | 872254.6 | 1318576  |              | 9   |
| 1429997  | 421660.9 | 1079121  | 969257.7 | 1262925  | 588297.7 |              | 5   |
| 870191.3 | 3012730  | 1864466  | 1051145  | 1786030  | 4682634  | [M+H+CF3O]   | 8   |
| 1301362  | 1584931  | 1576740  | 1014156  | 1569847  | 2292515  |              | 243 |
| 1427535  | 2957576  | 1922425  | 923454.5 | 2134205  | 4668067  |              | 9   |
| 3212755  | 867056.2 | 2282468  | 2557234  | 2060688  | 261805.2 | [3M+2H]2+    | 159 |
| 29888859 | 37949582 | 33047143 | 23580001 | 20816616 | 44959190 |              | 2   |
| 6683102  | 3009563  | 5012275  | 6612736  | 3177739  | 393334.6 |              | 2   |
| 215132.5 | 1620788  | 1766152  | 155142.2 | 968424.3 | 0        |              | 1   |
| 76646362 | 11967639 | 70452141 | 2434191  | 18288202 | 63664920 |              | 2   |
| 12993520 | 13004032 | 11416817 | 12494456 | 16467847 | 16578564 |              | 2   |
| 4259903  | 3679293  | 3718723  | 3470604  | 4455546  | 4307913  |              | 2   |
| 6155732  | 5584898  | 5536516  | 5578265  | 6655558  | 5456962  |              | 241 |
| 4289542  | 11303750 | 3743362  | 3136876  | 6573055  | 16135880 | [M+H+NH3]    | 3   |
| 5294941  | 5664848  | 6050020  | 4602768  | 4806132  | 1150909  | [1022][M]+   | 9   |
| 3124160  | 1762774  | 2679833  | 2873393  | 1829987  | 3106242  |              | 2   |
| 19228933 | 20179185 | 17094628 | 17182164 | 20600256 | 19247553 |              | 289 |
| 324139   | 383456.5 | 574262   | 473290.1 | 303881.9 | 0        |              | 4   |
| 2845142  | 2444419  | 2180554  | 1925943  | 2278725  | 902970   |              | 4   |
| 1245603  | 3265685  | 10841689 | 480136.7 | 2672607  | 4391426  |              | 2   |
| 1327422  | 1877413  | 2113548  | 1100467  | 911363.2 | 986160.5 | [830][M+1]+  | 20  |
| 944611.6 | 17142150 | 569754   | 11300696 | 11743829 | 8751425  | [191][M]+    | 4   |
| 544260.8 | 700316.2 | 581801.8 | 0        | 457670.7 | 0        | [3M+3K-H]    | 12  |
| 3070802  | 2379257  | 5873793  | 5135680  | 5429310  | 1249659  |              | 2   |
| 857969.8 | 1124612  | 1301514  | 1591457  | 1376380  | 543693.6 |              | 4   |
| 2475917  | 5754015  | 9611076  | 2336570  | 1667471  | 5020570  | [481][M+2]3+ | 18  |
| 2529018  | 2267362  | 1821894  | 1123728  | 1171501  | 807242   |              | 4   |
| 554867.9 | 2398000  | 2259154  | 346024.5 | 1698255  | 2738451  |              | 9   |
| 25342681 | 81403408 | 26601588 | 48681901 | 2655969  | 8527794  |              | 4   |
| 1050326  | 5148057  | 4749370  | 2512680  | 5297038  | 2509284  |              | 2   |
| 9054062  | 4807618  | 8937811  | 18527472 | 8733076  | 7781490  |              | 426 |

|          |          |          |          |          |          |                      |     |
|----------|----------|----------|----------|----------|----------|----------------------|-----|
| 228288.7 | 46305134 | 9316824  | 38104002 | 360319.8 | 797442.4 |                      | 23  |
| 1218560  | 3448097  | 1269078  | 1060313  | 710584.9 | 2119244  |                      | 5   |
| 24771001 | 30260778 | 8428955  | 30995978 | 26818185 | 70320534 | [620][M+1]+          | 44  |
| 4334960  | 4922371  | 5390116  | 2620963  | 3680284  | 2182764  |                      | 9   |
| 5076344  | 5199409  | 5399672  | 4935599  | 5177308  | 3512090  |                      | 9   |
| 718602.7 | 2773044  | 2247569  | 2241779  | 2018663  | 32976703 |                      | 1   |
| 4559677  | 3272764  | 9608833  | 9769072  | 9707386  | 6770829  |                      | 413 |
| 667767.5 | 1113986  | 1578131  | 428995.3 | 537275.7 | 601996.6 |                      | 9   |
| 697663.1 | 766778.3 | 1017354  | 630672.8 | 811897.5 | 997991.8 |                      | 9   |
| 229576.1 | 308915.4 | 215744   | 303616.8 | 124001   | 167433.3 | [834][M+2]+          | 116 |
| 7212584  | 7225762  | 8120935  | 4665315  | 10196905 | 6929617  |                      | 196 |
| 3646886  | 5904555  | 5547605  | 2740518  | 3697706  | 2085954  |                      | 9   |
| 6377760  | 6197498  | 6921783  | 5342904  | 5316216  | 979190.7 |                      | 9   |
| 592265.9 | 1273190  | 1137410  | 462072.5 | 718348.5 | 1559023  |                      | 8   |
| 1360117  | 1177035  | 217500.5 | 677169.3 | 6932550  | 962530.8 | [915][M+1]+          | 21  |
| 519931.8 | 1209381  | 2714998  | 425676.6 | 1960874  | 5807387  |                      | 9   |
| 868201.5 | 568445.9 | 1135854  | 1237013  | 760910.8 | 2444281  |                      | 9   |
| 9507964  | 3073650  | 5490200  | 4819084  | 8560893  | 0        | [246][M]2+           | 1   |
| 3716585  | 8436373  | 3204631  | 2968357  | 5016841  | 16011985 | [1018][M]+           | 9   |
| 18146661 | 30151429 | 21317125 | 14212048 | 23422601 | 54331541 |                      | 9   |
| 7285221  | 8426903  | 1773219  | 5420339  | 7298788  | 10942661 |                      | 84  |
| 41032868 | 35685700 | 33092947 | 32491114 | 24666846 | 16898742 | [1275][M]+ [M+Na]+ 6 | 38  |
| 3416208  | 4360308  | 2651816  | 2535480  | 3492884  | 3447920  |                      | 9   |
| 327789.6 | 112646.3 | 1575497  | 1333856  | 1539161  | 1943746  |                      | 68  |
| 293683   | 704991   | 676119.1 | 343040.4 | 650583.6 | 432900.4 | [M+H]+ 42            | 25  |
| 1160920  | 3053435  | 1394881  | 715409.5 | 564750.1 | 4359177  |                      | 4   |
| 1232916  | 588225.9 | 672468   | 994103.5 | 612211.5 | 181148.1 |                      | 138 |
| 339346.7 | 375116.5 | 520563.1 | 527952.3 | 457386.1 | 262923.3 | [M+K]+ 19            | 232 |
| 1415923  | 1756165  | 780968.8 | 1875943  | 1478402  | 2692522  | [M+K]+ 62            | 46  |
| 3000495  | 3629550  | 2803364  | 2314333  | 2958721  | 3051147  | [248][M+1]2+         | 9   |
| 1073961  | 1401928  | 2062050  | 943140.7 | 1137174  | 1010510  |                      | 9   |
| 12558584 | 11636479 | 5853445  | 11552851 | 11561108 | 4300620  |                      | 337 |
| 14096789 | 9861761  | 13984256 | 10146635 | 7145852  | 4682581  | [1275][M+1]+         | 38  |
| 256830.6 | 2127923  | 1108478  | 565109.1 | 1497982  | 2737126  | [1009][M+1]3+        | 9   |
| 308737.7 | 262555.8 | 149446.6 | 111149.4 | 299266.9 | 0        |                      | 43  |

|          |          |          |          |          |          |                         |     |
|----------|----------|----------|----------|----------|----------|-------------------------|-----|
| 12016594 | 12655255 | 13320484 | 9607817  | 10156745 | 6392997  | [49][M]+                | 4   |
| 6113526  | 6390430  | 6714460  | 7306201  | 4467345  | 1659772  |                         | 2   |
| 4945192  | 4015342  | 4060240  | 5273354  | 3784101  | 1429924  |                         | 2   |
| 930783.3 | 806059.6 | 1381101  | 1763948  | 936799.6 | 833997.8 | [3M+3Na+]               | 39  |
| 2489062  | 2887703  | 2713200  | 2195697  | 2882882  | 1399925  | [M+2H-C5H]              | 33  |
| 1631314  | 3757485  | 2001138  | 1210919  | 2333574  | 6535936  |                         | 2   |
| 6109470  | 8037454  | 6965183  | 4403932  | 6321964  | 5381576  |                         | 9   |
| 17509234 | 15415758 | 13698043 | 15060245 | 18557441 | 15181873 |                         | 2   |
| 5864100  | 2814549  | 23717020 | 20073821 | 57555745 | 14532506 | [1299][M]3+             | 2   |
| 2080316  | 3411141  | 2036891  | 2193857  | 2320287  | 4250393  | [508][M+3]+             | 2   |
| 1008213  | 721436.2 | 1450417  | 352694.5 | 1046580  | 1232631  |                         | 4   |
| 8488593  | 8728529  | 4086322  | 7681081  | 5152548  | 874654.1 |                         | 347 |
| 2975851  | 1277386  | 6844062  | 1611339  | 831443.4 | 6081794  |                         | 9   |
| 297972.4 | 0        | 252367.6 | 334206.3 | 266191.4 | 0        | [M+2H-C3H]              | 8   |
| 1242624  | 2569607  | 1709424  | 808208.4 | 1651785  | 3703818  |                         | 4   |
| 14645316 | 11157968 | 13210622 | 15133349 | 12986272 | 3262130  |                         | 2   |
| 2754711  | 6510782  | 3153153  | 3002368  | 6783059  | 42316831 | [1354][M+1]+            | 2   |
| 2217297  | 7672916  | 748292.2 | 41204333 | 2085185  | 744704.4 | [M+2H-CH <sub>2</sub> ] | 6   |
| 757054.5 | 1254982  | 1087326  | 683634.1 | 430353.4 | 296198.9 |                         | 107 |
| 2831296  | 1393967  | 2601330  | 2907997  | 2383701  | 1369692  |                         | 2   |
| 167605.2 | 146170.2 | 44792.01 | 283747   | 74459.32 | 105180.5 |                         | 520 |
| 584896.2 | 718961.6 | 691883.1 | 637520.3 | 678407.6 | 35065.19 |                         | 4   |
| 7483190  | 23097170 | 10522331 | 3211887  | 10568850 | 43931387 |                         | 1   |
| 220389.6 | 340616.6 | 385299.9 | 367791   | 241716.3 | 136428.3 |                         | 242 |
| 807261.1 | 1783064  | 858087.1 | 939753.3 | 1369101  | 2553333  | [1471][M+1]2+           | 9   |
| 6309358  | 10670468 | 600470.3 | 8304080  | 5274127  | 12543702 |                         | 375 |
| 12719134 | 9011153  | 15564265 | 78916938 | 11388244 | 10517558 | [1141][M]+              | 138 |
| 37931990 | 39286216 | 43489857 | 32051833 | 32147321 | 13295522 | [1024][M]+              | 9   |
| 868025.4 | 1492267  | 1059292  | 967041   | 1416761  | 893756.9 | [M+H+NH <sub>3</sub> ]  | 46  |
| 3358173  | 13406886 | 4933885  | 5809504  | 3115130  | 1596162  | [M+H-CO <sub>2</sub> ]  | 15  |
| 1025666  | 334941.1 | 943047   | 1044050  | 677645.8 | 1037919  | [M+H-CF <sub>3</sub> O] | 53  |
| 1717530  | 4102196  | 2175995  | 875746.4 | 2606290  | 9131118  | [1373][M+2]2+           | 9   |
| 429240   | 1213951  | 513270   | 353357.3 | 519199.3 | 375471.1 | [1414][M+1]+            | 35  |
| 908340.3 | 1081028  | 1049113  | 1523253  | 1242696  | 368443.9 | [M+Na]+ 70              | 35  |
| 1645021  | 1443937  | 92869.33 | 935656.1 | 1963833  | 3611028  | [M+H-CO]+               | 11  |



|          |          |          |          |          |          |                          |     |
|----------|----------|----------|----------|----------|----------|--------------------------|-----|
| 982839.9 | 720865.8 | 1198931  | 708508.7 | 571966.3 | 486185   |                          | 4   |
| 536858.7 | 960350.4 | 934389.5 | 346304.5 | 531127.3 | 1694066  |                          | 91  |
| 18671670 | 23318707 | 21021293 | 15735657 | 20736875 | 17376634 |                          | 9   |
| 1787112  | 30610.01 | 553913.5 | 1212491  | 188300.4 | 2464831  |                          | 58  |
| 1.06E+08 | 9781798  | 1.27E+08 | 54202744 | 96416451 | 1.27E+08 | [M+H] <sup>+</sup> 49!   | 6   |
| 8596073  | 11537235 | 3937747  | 5840542  | 6541132  | 16322867 | [M+H] <sup>+</sup> 43!   | 3   |
| 1.87E+09 | 2.98E+09 | 2.84E+09 | 1.79E+09 | 2.23E+09 | 3.74E+09 | [679][M] <sup>+</sup>    | 9   |
| 1842019  | 895134.2 | 2767257  | 1240667  | 2135821  | 0        |                          | 6   |
| 607375.2 | 112813.7 | 1052312  | 859878.5 | 683171.1 | 1477738  |                          | 9   |
| 5304504  | 4941431  | 5096749  | 3826591  | 4643077  | 3086841  |                          | 4   |
| 5467424  | 4145010  | 3903925  | 4707321  | 3265724  | 1487084  |                          | 9   |
| 186876.1 | 250463   | 573928.6 | 536413.8 | 542348   | 428499.8 |                          | 186 |
| 7327453  | 9192549  | 5852627  | 5550975  | 9866434  | 20725599 |                          | 2   |
| 7645617  | 12817507 | 279737.8 | 9702070  | 18572461 | 11616904 | [M+H] <sup>+</sup> 41!   | 15  |
| 2054697  | 831960.2 | 1211747  | 1164078  | 1563974  | 3479882  |                          | 1   |
| 4457969  | 2309487  | 3240002  | 2275169  | 2517568  | 29771.01 |                          | 129 |
| 5454555  | 5532970  | 5767271  | 5788534  | 3851059  | 1060846  | [1605][M+1] <sup>+</sup> | 2   |
| 1316033  | 2318345  | 2039387  | 1301897  | 2004169  | 1269585  | [79][M+1] <sup>3+</sup>  | 20  |
| 2407078  | 1535705  | 914022   | 1240987  | 2353076  | 1487096  | [3M+K] <sup>+</sup> 2!   | 6   |
| 288251.8 | 343535.9 | 243114.6 | 280314.7 | 228856.2 | 99499.91 |                          | 360 |
| 1046539  | 712862   | 855364.4 | 933856.7 | 827305.6 | 19431.32 |                          | 4   |
| 796191.3 | 2294035  | 1372999  | 544796.2 | 2100023  | 10475930 |                          | 9   |
| 882526.4 | 1666003  | 1196911  | 1268951  | 980076.6 | 2920134  |                          | 2   |
| 2296268  | 5959674  | 2569768  | 2264260  | 2717134  | 6353932  |                          | 9   |
| 589910.1 | 249212.2 | 594729.5 | 761812.8 | 452530.7 | 670228.9 |                          | 275 |
| 1916122  | 4487298  | 2336492  | 2848899  | 2043419  | 6013698  | [918][M+1] <sup>+</sup>  | 193 |
| 40695319 | 17998102 | 29964011 | 42789478 | 20385713 | 8993999  |                          | 2   |
| 583760   | 1221684  | 788483.4 | 229063   | 972452.5 | 942706.5 | [1585][M] <sup>+</sup>   | 89  |
| 581221.6 | 1335333  | 2759060  | 557836.5 | 475752.7 | 1604464  |                          | 9   |
| 4752528  | 3799103  | 4388064  | 4220977  | 4368872  | 1595365  | [615][M+1] <sup>+</sup>  | 9   |
| 4841055  | 2781896  | 5471736  | 4953808  | 5400595  | 4553309  |                          | 434 |
| 407435.7 | 675153.3 | 467909.8 | 206118.5 | 246087   | 350059.8 |                          | 18  |
| 519532.8 | 643692.5 | 5297546  | 118724   | 695275.8 | 160960.9 |                          | 46  |
| 545907.8 | 665834.1 | 725561.9 | 348344.1 | 243092.6 | 266019.9 |                          | 161 |
| 4122059  | 6080068  | 3487582  | 3583175  | 3135203  | 3716666  |                          | 250 |

|          |          |          |          |          |          |                                             |     |
|----------|----------|----------|----------|----------|----------|---------------------------------------------|-----|
| 845222.3 | 868340.3 | 1062388  | 1824918  | 1380831  | 4420427  |                                             | 2   |
| 1430032  | 2136852  | 1318967  | 1035012  | 1802394  | 430620.5 |                                             | 97  |
| 1.62E+08 | 1.06E+08 | 2.49E+08 | 2.11E+08 | 2.31E+08 | 2.12E+08 |                                             | 56  |
| 814651.8 | 568357.9 | 2726417  | 3657161  | 2520901  | 1390176  |                                             | 1   |
| 553982.6 | 794167.4 | 0        | 855291   | 1457912  | 4906692  | [M+H] <sup>+</sup> 17:                      | 21  |
| 8629648  | 7371235  | 7170973  | 6882816  | 6144093  | 6184680  |                                             | 270 |
| 1292552  | 1775104  | 1842737  | 806064.6 | 1149279  | 1073085  | [1453][M] <sup>+</sup> [2M+Na] <sup>+</sup> | 25  |
| 226875.8 | 1409859  | 971058.5 | 156222.6 | 1324563  | 453523   |                                             | 1   |
| 1.28E+08 | 1.15E+08 | 69095030 | 1.73E+08 | 1.5E+08  | 86467366 | [M+H-C6H]                                   | 14  |
| 965472.9 | 182070.1 | 869169.6 | 300414.2 | 803156.4 | 121919.3 |                                             | 184 |
| 15415240 | 16859346 | 17635892 | 12400808 | 13309583 | 8866958  | [177][M] <sup>+</sup>                       | 4   |
| 3445379  | 3443412  | 8629235  | 2682710  | 2464306  | 1749896  | [M+K] <sup>+</sup> 67:                      | 38  |
| 13486030 | 6763559  | 16407487 | 15797758 | 7173634  | 8266574  |                                             | 211 |
| 633166   | 1179667  | 501649.4 | 1292481  | 904305.2 | 1006199  |                                             | 9   |
| 8355777  | 6345379  | 8395454  | 10137789 | 8757485  | 899227.2 |                                             | 9   |
| 2405102  | 3256862  | 2858203  | 1799358  | 2672438  | 1449444  |                                             | 9   |
| 2363173  | 376912.9 | 3007008  | 640606.2 | 2797519  | 30485.03 | [1568][M] <sup>+</sup>                      | 109 |
| 283350   | 1038706  | 228435.1 | 362017.7 | 580419.2 | 2573829  |                                             | 9   |
| 1105518  | 1742296  | 1156658  | 287161.1 | 1278090  | 771041.3 |                                             | 4   |
| 3050102  | 1523023  | 2661076  | 1275697  | 4050319  | 3831817  |                                             | 2   |
| 11111798 | 6650414  | 8413694  | 11865402 | 5118088  | 920498.6 |                                             | 2   |
| 615385.4 | 1386125  | 1791642  | 432621.2 | 955738.1 | 1910052  |                                             | 9   |
| 728492.1 | 1046152  | 12524344 | 8730118  | 853776.4 | 2735092  |                                             | 4   |
| 134374.2 | 774566.2 | 440327.5 | 817787.3 | 81557.45 | 98491.23 |                                             | 256 |
| 9369402  | 6907952  | 4501989  | 3231114  | 10231191 | 10324872 | [907][M+1] <sup>2+</sup>                    | 15  |
| 1105893  | 1113935  | 993957.6 | 1004490  | 580306.2 | 642293.5 | [897][M+1] <sup>+</sup>                     | 227 |
| 445339.7 | 374049.7 | 459157.2 | 356739.9 | 224269.6 | 539875.2 | [2M+3Na] <sup>+</sup>                       | 16  |
| 377254.7 | 8023082  | 370283.9 | 7078103  | 7306514  | 4345535  |                                             | 135 |
| 20923113 | 39057524 | 628660.8 | 24099001 | 63708466 | 5852401  | [M+2H-CO]                                   | 3   |
| 705220.5 | 251860.3 | 1506918  | 999787.6 | 817021.8 | 1458716  |                                             | 9   |
| 604582.4 | 275583   | 909301.4 | 240030.7 | 492091.9 | 191670.2 |                                             | 17  |
| 2644562  | 2607235  | 3286109  | 2214178  | 2269840  | 83986.79 |                                             | 9   |
| 163061   | 488402.7 | 102442.9 | 530956.3 | 157434.3 | 188869.3 |                                             | 510 |
| 12107857 | 1373841  | 15866180 | 21926321 | 12952926 | 35068973 | [918][M] <sup>+</sup>                       | 193 |
| 126123.2 | 296546.1 | 172972.2 | 4637365  | 58597.15 | 1599342  | [147][M+1] <sup>+</sup>                     | 164 |

|          |          |          |          |          |          |                      |     |
|----------|----------|----------|----------|----------|----------|----------------------|-----|
| 1E+09    | 2.95E+08 | 4.72E+08 | 2.27E+08 | 9.09E+08 | 2.23E+08 | [796][M]+ [M+K]+ 414 | 3   |
| 3865226  | 5568227  | 1064610  | 1540964  | 1243911  | 9415943  |                      | 116 |
| 723844.9 | 1054718  | 635751.1 | 303657.9 | 557604.4 | 930824   | [1283][M+1]+         | 134 |
| 9591922  | 13495500 | 1391672  | 7935726  | 8870306  | 50859508 |                      | 11  |
| 2923814  | 0        | 3704675  | 2822091  | 2401898  | 2756826  | [1238][M+1]2+        | 2   |
| 3862264  | 3531877  | 4454509  | 3792552  | 3516031  | 2201881  |                      | 4   |
| 2048445  | 2383577  | 2417267  | 1799152  | 1760658  | 1150774  |                      | 4   |
| 4688193  | 5446578  | 3926775  | 4140829  | 6957326  | 7728701  | [1212][M+1]2+        | 2   |
| 6899698  | 4127202  | 5015132  | 4210244  | 4309362  | 107748.7 | [1553][M+1]+         | 129 |
| 1.25E+08 | 78065369 | 92250121 | 77211574 | 74849603 | 4519962  |                      | 129 |
| 5385017  | 2782311  | 10046208 | 5892047  | 2185164  | 2205047  |                      | 224 |
| 3682679  | 2223583  | 1717427  | 2643130  | 1098953  | 1679327  | [245][M+1]+          | 133 |
| 208399.6 | 185003.8 | 196720   | 160108.2 | 156361.6 | 129025.7 |                      | 387 |
| 1520606  | 2415716  | 2877945  | 1131093  | 1387266  | 1250500  | [840][M+1]+          | 9   |
| 678278.4 | 592679.2 | 294317.4 | 470984.8 | 317795.6 | 418315.5 |                      | 507 |
| 1052943  | 2259145  | 134995.2 | 904741.5 | 2120080  | 10816621 |                      | 21  |
| 822018.2 | 708330.6 | 2623353  | 386044.5 | 328766.9 | 2248591  |                      | 4   |
| 56234266 | 68921009 | 87482247 | 82236150 | 2679489  | 31505506 |                      | 46  |
| 6511136  | 6189213  | 4167860  | 5749428  | 3104633  | 6315796  |                      | 401 |
| 11428065 | 12795429 | 12407203 | 9008375  | 10278143 | 7412528  |                      | 4   |
| 973769.1 | 960328.9 | 1197499  | 785429.3 | 738473.5 | 643528.3 | [1558][M]+           | 78  |
| 11772082 | 12613927 | 13289080 | 9572243  | 10009217 | 6325295  | [54][M]+             | 4   |
| 17991878 | 19783333 | 13864935 | 14547149 | 24955830 | 45675374 |                      | 2   |
| 5236164  | 3903783  | 5996772  | 3911681  | 4984405  | 2277519  | [1126][M+3]+         | 17  |
| 2798884  | 2974584  | 263839.8 | 2301580  | 3288430  | 8252782  |                      | 11  |
| 1577670  | 1090923  | 1710127  | 1408206  | 1157749  | 4494212  | [238][M+1]2+         | 9   |
| 148318.9 | 1095131  | 227704.8 | 0        | 211802.3 | 503910.2 | [3M+Na+K]            | 20  |
| 6625092  | 5227459  | 4625883  | 5187382  | 3150715  | 7132700  | [M+K]+ 407           | 199 |
| 4368046  | 854332.6 | 2312342  | 3461905  | 3041601  | 0        |                      | 14  |
| 6392006  | 8079478  | 8238135  | 7314362  | 5093184  | 5784244  | [M+K]+ 350           | 20  |
| 975912.7 | 360425.5 | 604460.6 | 1243931  | 1729918  | 1043727  |                      | 9   |
| 4468786  | 2804007  | 6116899  | 3604416  | 1289726  | 2918995  | [243][M+1]3+         | 9   |
| 858469.3 | 2069828  | 1339741  | 572255.6 | 1523321  | 2499379  |                      | 9   |
| 4222280  | 4056681  | 3836458  | 2585084  | 3454616  | 1879180  |                      | 4   |
| 42815699 | 19492946 | 12736423 | 15760560 | 41716251 | 37220977 | [522][M]2+           | 1   |

|          |          |          |          |          |          |                       |     |
|----------|----------|----------|----------|----------|----------|-----------------------|-----|
| 2720309  | 2858895  | 1872531  | 2555347  | 2441783  | 7487552  |                       | 2   |
| 1347644  | 1481439  | 386901   | 643542   | 1083094  | 3285761  | [M+Na+2K]             | 3   |
| 10047290 | 10702869 | 7390116  | 6109894  | 8529399  | 8541769  | [421][M+1]+           | 183 |
| 804102.4 | 1445228  | 1103107  | 443371.8 | 1025519  | 1905567  | [401][M+3]+           | 4   |
| 257413.8 | 227568.4 | 403714.5 | 348043.4 | 162625.7 | 293627.4 | [1219][M+2]+          | 150 |
| 638566.9 | 1546874  | 2366791  | 532961.2 | 724906.8 | 929527.3 |                       | 9   |
| 1559767  | 2729900  | 2111987  | 1413256  | 1604333  | 3878948  | [786][M+1]+           | 4   |
| 1284859  | 1306611  | 3177649  | 788883.6 | 7679322  | 3042453  |                       | 1   |
| 3376337  | 3540451  | 3198990  | 3901487  | 4291972  | 6307439  | [3M+3Na+H]            | 14  |
| 1161627  | 1291427  | 1278265  | 706674.5 | 678325.3 | 847981   |                       | 4   |
| 1941820  | 2622563  | 2206051  | 3086593  | 2234059  | 1611285  | [M+H]+ 240            | 288 |
| 944745.7 | 1572398  | 1246846  | 816010.5 | 1514653  | 1216466  | [470][M+1]+           | 2   |
| 3602789  | 4269886  | 4301113  | 2379483  | 3668878  | 3218006  | [1523][M]3+           | 9   |
| 8348900  | 8456390  | 3859858  | 3915976  | 9210299  | 8969184  |                       | 1   |
| 4468458  | 8178632  | 4957268  | 3430044  | 7443453  | 15845387 | [1090][M+3]2+         | 9   |
| 5998592  | 6679881  | 6481907  | 4660618  | 5491278  | 3931351  |                       | 4   |
| 209988.7 | 211657.6 | 87182.83 | 169459.5 | 95468.74 | 130312.8 |                       | 112 |
| 2335291  | 1730001  | 2296473  | 1733300  | 1935774  | 917622.8 |                       | 4   |
| 5375740  | 8634653  | 4931068  | 3818463  | 7219331  | 15878842 |                       | 9   |
| 164325.9 | 840414.9 | 1078472  | 194721.3 | 302890.7 | 1803860  | [1573][M]+ [M+H]+ 10! | 18  |
| 80300978 | 92955833 | 80012363 | 73399638 | 85781758 | 1.26E+08 |                       | 2   |
| 5914900  | 6729290  | 5216040  | 3642108  | 5534637  | 5164129  |                       | 4   |
| 2708294  | 4934239  | 3405860  | 1710653  | 3201799  | 7193810  |                       | 4   |
| 786930.5 | 313484.3 | 940002.3 | 1137758  | 916798.2 | 535436   |                       | 9   |
| 1337944  | 469963.1 | 1787378  | 443792.2 | 1716770  | 477027.2 | [M+K]+ 44!            | 33  |
| 290997   | 357358.1 | 108560.3 | 320072.7 | 250846.5 | 293831   |                       | 72  |
| 2215063  | 2544010  | 2539936  | 1802444  | 1335162  | 1440685  |                       | 9   |
| 24283303 | 46779443 | 34510873 | 23085486 | 45376644 | 44308399 |                       | 2   |
| 11696649 | 11617051 | 10096916 | 10765604 | 14252989 | 13466193 |                       | 2   |
| 878897.7 | 3132982  | 662006.5 | 266563.4 | 3294625  | 5036152  |                       | 2   |
| 977084.1 | 6432285  | 21974749 | 839924.6 | 2261570  | 2335744  | [841][M+2]+           | 20  |
| 1362696  | 1200367  | 749220.7 | 493900   | 1211123  | 849619.8 |                       | 91  |
| 2329286  | 2560505  | 2343782  | 1941233  | 1938272  | 2577490  | [1482][M]+            | 38  |
| 5471247  | 6427697  | 3520317  | 2496785  | 3916708  | 6107672  | [M+Na+NH]             | 3   |
| 5104154  | 5145968  | 4801373  | 4811480  | 4765464  | 10014835 |                       | 2   |

|          |          |          |          |          |          |              |     |
|----------|----------|----------|----------|----------|----------|--------------|-----|
| 803551.5 | 3859661  | 457729.7 | 793806.5 | 1750247  | 7222219  | [M+K+HCO     | 3   |
| 1733490  | 6563217  | 657844.3 | 1815359  | 4571190  | 18082119 | [M+Na+HC     | 11  |
| 5742379  | 8267503  | 5673447  | 5125571  | 8865604  | 7177403  |              | 2   |
| 1960944  | 3644535  | 3327437  | 1299242  | 2348579  | 4287820  |              | 9   |
| 1628999  | 9940917  | 1076332  | 6043575  | 13704984 | 17098724 |              | 11  |
| 1695886  | 2394459  | 1991971  | 2489364  | 3560461  | 2445334  | [3M+H+Na     | 6   |
| 4477580  | 1084411  | 4884154  | 4750966  | 1451253  | 0        |              | 2   |
| 969529.4 | 2032029  | 1457479  | 591581.4 | 1752709  | 3667885  |              | 9   |
| 1436246  | 2747562  | 879293.8 | 1745260  | 4547837  | 3669124  |              | 11  |
| 511842.9 | 974258.6 | 1593085  | 362607.1 | 518537.1 | 1119991  | [289][M+2]+  | 9   |
| 102745   | 816629.7 | 368167.1 | 206721.7 | 600747.2 | 1687107  | [M+H]+ 10    | 8   |
| 535739.1 | 486484.3 | 563791.2 | 738466.6 | 411885.7 | 244025.1 |              | 292 |
| 4944712  | 7317302  | 4441292  | 3843809  | 3703603  | 2173096  | [276][M]+    | 292 |
| 3736532  | 2375583  | 3288605  | 3009461  | 2277687  | 1125818  |              | 2   |
| 13670266 | 3023751  | 6017761  | 13389666 | 6136841  | 6317802  |              | 314 |
| 1791614  | 1855635  | 1708657  | 973406.4 | 2010993  | 1585564  |              | 4   |
| 1643803  | 2727657  | 2234333  | 1721892  | 1580927  | 2431347  |              | 4   |
| 4060585  | 3885839  | 776687.9 | 5222231  | 16315253 | 3406869  |              | 326 |
| 984794.8 | 2057147  | 713959.5 | 0        | 1620747  | 1058762  |              | 14  |
| 800099.8 | 771089.1 | 794645.6 | 637475.3 | 756798.1 | 183539.5 |              | 4   |
| 1038732  | 798339.9 | 137331.1 | 1568888  | 584777.4 | 506943.3 |              | 297 |
| 988453.7 | 1146030  | 1112901  | 765731.2 | 893899.4 | 557473.7 |              | 4   |
| 4435979  | 7377479  | 4104335  | 4015313  | 6268453  | 4161859  | [455][M]3+   | 2   |
| 1072204  | 990271.3 | 1224941  | 854555.6 | 789087.4 | 65511.63 |              | 9   |
| 30069197 | 12788808 | 22712682 | 16337822 | 18299627 | 1427245  |              | 205 |
| 18142261 | 9509426  | 15650786 | 19879660 | 15625992 | 9920879  | [502][M+3]3+ | 2   |
| 11940948 | 4622152  | 8914835  | 6204055  | 7080026  | 132826.4 |              | 205 |
| 1072913  | 1954220  | 1142030  | 710479.2 | 1486400  | 3062931  |              | 4   |
| 28920299 | 8638083  | 1793477  | 24934417 | 10628814 | 14492107 |              | 1   |
| 991665.8 | 3385983  | 2189157  | 628655   | 1511219  | 1095289  | [M+H-C2H4    | 18  |
| 726968.8 | 1037044  | 782049.6 | 678230.5 | 779924.3 | 460572.2 | [1441][M+1]+ | 7   |
| 395033.4 | 1007142  | 944698.4 | 299142.2 | 638375   | 1631867  |              | 8   |
| 1293350  | 2870576  | 1054134  | 702858   | 2123028  | 6672027  | [3M+2Na+I    | 14  |
| 4024365  | 4407821  | 4126581  | 4234568  | 4428795  | 3597013  |              | 262 |
| 2104376  | 1793740  | 2120316  | 3305002  | 871260.4 | 815982.6 | [212][M+1]+  | 210 |

|          |          |          |          |          |          |                       |     |
|----------|----------|----------|----------|----------|----------|-----------------------|-----|
| 1222138  | 1470592  | 1783105  | 915003.1 | 1427466  | 3523989  |                       | 41  |
| 793747   | 1793559  | 378981.1 | 554306.7 | 1024237  | 3817455  |                       | 9   |
| 3446890  | 1146322  | 4700571  | 3710875  | 3510963  | 3574743  |                       | 368 |
| 571396.1 | 0        | 1289472  | 478424   | 736207.9 | 688014.5 |                       | 8   |
| 11244394 | 15135125 | 11614650 | 9805027  | 12946879 | 9597666  |                       | 2   |
| 4888698  | 743314.7 | 5856565  | 607859.8 | 1046708  | 1464798  | [322][M+1]3+          | 9   |
| 2810172  | 1747970  | 2819742  | 2423853  | 2045389  | 0        |                       | 2   |
| 1232849  | 595569.5 | 600508.5 | 586804.2 | 776845.2 | 3467821  |                       | 4   |
| 910593.9 | 968311.4 | 1925931  | 858892.8 | 731401.1 | 416727.1 | [M+Na]+ 3!            | 16  |
| 1320939  | 1722411  | 1829359  | 1595290  | 2110400  | 4215679  |                       | 2   |
| 1803506  | 1793221  | 1571744  | 1387305  | 1611514  | 2849109  |                       | 4   |
| 36022471 | 17553214 | 16174755 | 23083201 | 25104257 | 4908245  | [935][M]2+            | 15  |
| 1692768  | 1401399  | 1120113  | 1710383  | 940367.2 | 1149263  |                       | 230 |
| 2230476  | 2668709  | 2855938  | 1548732  | 2044282  | 715399.7 |                       | 9   |
| 4943435  | 3835011  | 3434373  | 4605080  | 3410073  | 3576352  |                       | 2   |
| 1222332  | 3389832  | 3380681  | 856099.8 | 539171.8 | 2546180  | [1052][M]+ [M+2K-H]+  | 20  |
| 549604.9 | 1229800  | 3767312  | 507009.5 | 684138.9 | 3377805  |                       | 9   |
| 41442293 | 29267043 | 30546020 | 25015483 | 24766406 | 1568948  | [2M+3H]3+             | 169 |
| 934035.7 | 3098290  | 706748   | 443524.1 | 2073774  | 4487871  |                       | 2   |
| 11672398 | 9472176  | 9674688  | 8637940  | 6381887  | 8909852  |                       | 372 |
| 5089340  | 3773569  | 3461902  | 3595801  | 4491954  | 4814463  |                       | 337 |
| 4604477  | 3070435  | 3538494  | 3711067  | 3731086  | 754019.7 | [692][M+1]+           | 197 |
| 3290713  | 3704652  | 3552312  | 2641925  | 2733046  | 2019621  |                       | 4   |
| 552659.6 | 260169   | 685148.7 | 539964.4 | 609331.4 | 0        |                       | 461 |
| 36019542 | 40834412 | 47598740 | 31403276 | 43853033 | 46740959 | [1165][M]+ [M+Na]+ 6! | 43  |
| 235179.7 | 141716.4 | 209221.2 | 155971.7 | 155476.6 | 106777.5 | [1083][M+1]+          | 72  |
| 890475.4 | 3508138  | 3140557  | 3604188  | 5363880  | 13912945 | [M+Na]+ 1'            | 11  |
| 919912.2 | 715124.7 | 919196.6 | 524550   | 668043.1 | 4792482  |                       | 9   |
| 6590559  | 9770179  | 10719190 | 5365333  | 6903463  | 3071242  |                       | 9   |
| 5084458  | 2493036  | 3335756  | 4924015  | 2017992  | 627183.8 |                       | 9   |
| 192390.9 | 0        | 601130.2 | 778313.9 | 529330.7 | 727500.3 |                       | 55  |
| 8199611  | 3909188  | 7437358  | 7724511  | 4838783  | 18587523 | [457][M+3]2+          | 2   |
| 1573480  | 1052295  | 2028062  | 1912345  | 851168.9 | 634190.7 | [3M+2Na]2             | 134 |
| 4203324  | 4443195  | 4758526  | 3493795  | 3555935  | 2126612  |                       | 4   |
| 3803162  | 2177623  | 1772397  | 3734782  | 3417690  | 1976591  |                       | 2   |

|          |          |          |          |          |          |                      |     |
|----------|----------|----------|----------|----------|----------|----------------------|-----|
| 52833377 | 15838187 | 44829111 | 20285078 | 37570538 | 79796.52 | [453][M]3+           | 150 |
| 41127776 | 8619045  | 15809663 | 1381777  | 38705152 | 6500412  | [M+2H-CO]            | 3   |
| 27560024 | 34851181 | 18760448 | 23651092 | 41392462 | 52960281 | [355][M]2+           | 2   |
| 36984242 | 39161921 | 43100939 | 31776854 | 32256137 | 13473780 | [236][M]2+           | 9   |
| 320806.1 | 661871.4 | 279704.4 | 395874.4 | 608774   | 1042675  |                      | 63  |
| 1496646  | 4740918  | 1790225  | 1102801  | 2462038  | 6535364  |                      | 2   |
| 4759131  | 4345453  | 2126815  | 5817784  | 5893870  | 16689164 | [M+K]+ 516           | 11  |
| 33048232 | 48986430 | 59571852 | 78712641 | 44233064 | 48364729 | [571][M]+ [M+Na]+ 3! | 136 |
| 26118110 | 22237037 | 36228393 | 34691179 | 1178251  | 22849333 | [97][M]3+            | 1   |
| 2462408  | 3630254  | 4007772  | 1862550  | 2522676  | 891779   |                      | 9   |
| 20014367 | 20909304 | 19181507 | 12253472 | 12126335 | 32839953 | [M+2H-CO]            | 15  |
| 1466786  | 1347908  | 883000.6 | 1047145  | 804278.2 | 92026.63 |                      | 77  |
| 17140447 | 13006848 | 13881168 | 16913433 | 16039614 | 5634674  | [M+H]+ 36!           | 14  |
| 106800.7 | 986204   | 2789894  | 78121.29 | 93419.46 | 112732.9 | [122][M+1]2+         | 20  |
| 1497482  | 2521663  | 895566.7 | 1129471  | 863599.6 | 1367820  | [1444][M+1]+         | 12  |
| 6054771  | 5154557  | 5696483  | 6167224  | 3571894  | 3163112  | [1315][M+2]+         | 2   |
| 309037.3 | 163111.6 | 237873.3 | 599734.9 | 292327.2 | 243868.7 |                      | 483 |
| 10253571 | 3601378  | 7032958  | 8927156  | 5894847  | 3257884  | [758][M+1]3+         | 1   |
| 6544977  | 6340714  | 9244753  | 670703.4 | 20969186 | 16353932 |                      | 1   |
| 322580.7 | 0        | 845885.8 | 128436.6 | 922083.2 | 1278292  |                      | 9   |
| 1993529  | 1231016  | 2457516  | 1042956  | 1190076  | 2718714  |                      | 9   |
| 1148169  | 1209966  | 227519.9 | 494410.8 | 1497223  | 1430735  |                      | 9   |
| 4055985  | 4096526  | 3893584  | 3129307  | 4583245  | 2923755  | [M+H]+ 41!           | 398 |
| 730193.8 | 772038.2 | 650046.6 | 530834.3 | 377998.9 | 25216.8  |                      | 4   |
| 1520223  | 1187067  | 1565916  | 504613.5 | 1380773  | 1567885  |                      | 1   |
| 3002771  | 3136524  | 1590019  | 2576783  | 2091668  | 946448.5 |                      | 2   |
| 567344.3 | 1325426  | 1802840  | 531130.1 | 790173.1 | 0        |                      | 9   |
| 1350007  | 1351679  | 2041780  | 1028259  | 1052892  | 1805159  |                      | 9   |
| 4207752  | 847859.6 | 4794980  | 3297868  | 4339584  | 7710295  |                      | 14  |
| 1655596  | 1862971  | 508133.3 | 847635.4 | 280081   | 2386199  |                      | 61  |
| 650708   | 3612869  | 2325743  | 598027.2 | 5056418  | 735921.9 | [3M+2K]2+            | 11  |
| 12486779 | 81421992 | 17755021 | 7859741  | 13264516 | 37302977 | [M+H]+ 49!           | 21  |
| 8649698  | 9175487  | 7018898  | 8385584  | 7799005  | 2373012  |                      | 2   |
| 4044895  | 5115475  | 6085940  | 4333032  | 4499508  | 1470498  |                      | 9   |
| 588126.9 | 367510   | 663364.9 | 462492.5 | 435397.7 | 196105.1 |                      | 91  |

|          |          |          |          |          |          |              |     |
|----------|----------|----------|----------|----------|----------|--------------|-----|
| 1150138  | 850289.9 | 1028173  | 1151577  | 1096216  | 190580.8 |              | 4   |
| 1013849  | 40771514 | 29744303 | 26935731 | 22826823 | 2502814  | [M+Na]+ 3'   | 15  |
| 17881139 | 11121725 | 16072899 | 20035536 | 14685922 | 9688740  | [1056][M]+   | 230 |
| 1733992  | 75877.17 | 1044354  | 1451943  | 2125707  | 1160883  |              | 2   |
| 149467.1 | 277350.6 | 310445.5 | 184287   | 115573.5 | 123353.5 |              | 16  |
| 683526.5 | 670821.6 | 706458.3 | 322464.3 | 495240.5 | 677221.8 |              | 4   |
| 5185896  | 3144411  | 2641564  | 1741154  | 7889924  | 20294062 | [40][M+1]2+  | 1   |
| 1001871  | 1005262  | 531567.8 | 3458652  | 1473022  | 133130   | [M+K]+ 33:   | 12  |
| 2338357  | 873195.3 | 1330583  | 1804505  | 1038199  | 355097.4 | [M+H-C4H8    | 12  |
| 2926815  | 2615111  | 2572686  | 2325490  | 2284166  | 3161735  |              | 381 |
| 939172.5 | 1155760  | 1081256  | 742592.4 | 778055.3 | 77849.4  | [3M+H]+ 2:   | 12  |
| 738636.2 | 1097149  | 1022612  | 755494.3 | 807287   | 554467.6 |              | 9   |
| 378389.7 | 307988.1 | 342635.5 | 225990.7 | 579888.1 | 188826.4 | [M+H-CH3]    | 16  |
| 5491303  | 5797277  | 5569256  | 4637623  | 5397532  | 4026233  |              | 4   |
| 1517645  | 1370145  | 1053980  | 1830585  | 1268907  | 691949.1 |              | 182 |
| 903093.3 | 1364716  | 1261404  | 729946.7 | 1036857  | 424075.6 | [787][M+2]2+ | 4   |
| 30351588 | 21502383 | 25083448 | 31075411 | 24113394 | 8865452  | [95][M]2+    | 2   |
| 8872386  | 15584767 | 8319630  | 7151259  | 14998240 | 18593454 |              | 2   |
| 570553.6 | 1909649  | 473085.5 | 777786.2 | 193080.6 | 271394.7 |              | 69  |
| 3681759  | 3557225  | 3313174  | 2989523  | 3402998  | 1584908  |              | 4   |
| 1979177  | 2232361  | 1835603  | 1535611  | 2961427  | 1623010  |              | 2   |
| 6433197  | 6054421  | 5683124  | 6130468  | 3945026  | 5385930  |              | 458 |
| 1322234  | 2516745  | 1402704  | 727063.1 | 1768781  | 4174694  |              | 4   |
| 617977.5 | 1810574  | 1284792  | 2533799  | 2777686  | 2669307  | [M+2H-CO]    | 15  |
| 1799619  | 1123901  | 1186152  | 1217578  | 1625973  | 394066.3 |              | 91  |
| 940449.1 | 1231792  | 1149509  | 420884.8 | 276717.5 | 439502.6 |              | 2   |
| 229301.6 | 238956.1 | 231254.9 | 212271.9 | 86724.83 | 266309.2 | [M+Na]+ 6!   | 499 |
| 155559.9 | 125740.7 | 99355.75 | 42936.49 | 138942.7 | 167134.6 | [2M+3H]3+    | 16  |
| 9393628  | 5691948  | 6764918  | 9475441  | 5998830  | 5056040  | [983][M]+    | 311 |
| 2369383  | 2398250  | 2422903  | 1910640  | 2773884  | 3093875  |              | 228 |
| 1163260  | 1125782  | 140554.1 | 127018.3 | 123652.9 | 136344.2 |              | 83  |
| 806003.7 | 1757845  | 523044.4 | 253768.8 | 754466.3 | 1459623  | [574][M+1]3+ | 11  |
| 2288472  | 2610662  | 2266325  | 1810939  | 2749465  | 737554.9 |              | 9   |
| 92272.22 | 106615.3 | 237058.1 | 204053   | 129810.6 | 86215.84 |              | 45  |
| 6409631  | 6162316  | 3264974  | 4781695  | 4855945  | 883777.4 |              | 2   |



|          |          |          |          |          |          |                     |     |
|----------|----------|----------|----------|----------|----------|---------------------|-----|
| 1682130  | 1760400  | 299387.2 | 1195349  | 1784003  | 4764671  | [M+K]+ 32           | 3   |
| 1653803  | 328684   | 2369763  | 2552316  | 1677090  | 2627051  | [1072][M+1]+        | 13  |
| 1506231  | 1170500  | 2224438  | 6055390  | 2349835  | 640443.2 |                     | 1   |
| 3930540  | 6897967  | 4611919  | 2668870  | 5070582  | 7754272  |                     | 9   |
| 1628772  | 3911795  | 1961076  | 787768.2 | 2476266  | 8589148  |                     | 9   |
| 2528996  | 4482657  | 2167566  | 2408878  | 1087289  | 641771.9 | [1592][M+1]2+       | 9   |
| 4883423  | 4071727  | 4242834  | 5656978  | 3796297  | 3827925  |                     | 241 |
| 24776727 | 14317829 | 15151548 | 1.39E+08 | 7477299  | 4207592  |                     | 1   |
| 1420929  | 1542337  | 2369613  | 898304.6 | 951035.6 | 466677.7 | [M+H]+ 51           | 12  |
| 2646031  | 2488399  | 2023841  | 1620777  | 3179037  | 2080941  |                     | 52  |
| 4435830  | 7305434  | 5122249  | 3996401  | 5374989  | 22991685 |                     | 214 |
| 3393219  | 3584568  | 3621193  | 3510020  | 3342304  | 3157029  | [M+Na]+ 3           | 263 |
| 4242056  | 1972729  | 5599468  | 5144176  | 1930184  | 2852054  |                     | 296 |
| 539696.9 | 447528.7 | 461181   | 534836.7 | 295497.9 | 318815.9 |                     | 203 |
| 1311653  | 1370702  | 1067877  | 912511.7 | 997500.5 | 635432.7 |                     | 4   |
| 29525001 | 27266467 | 29653322 | 29405745 | 23627308 | 15055898 | [308][M]+ [M+H]+ 31 | 72  |
| 775949.2 | 1787742  | 1807576  | 2048553  | 1147355  | 910231   |                     | 1   |
| 1530185  | 1081427  | 1120291  | 896983.3 | 1059081  | 2523391  |                     | 9   |
| 1725103  | 378531.1 | 690569.1 | 773279.8 | 1787182  | 39888784 |                     | 3   |
| 1050680  | 637987.2 | 609475.9 | 1167408  | 691601.6 | 194835.9 |                     | 4   |
| 4770311  | 5071638  | 5890769  | 3880326  | 3859015  | 897121.7 |                     | 9   |
| 2377330  | 2468243  | 1048332  | 1549143  | 1016030  | 1449862  |                     | 122 |
| 5683547  | 3142792  | 4932528  | 5237667  | 2658524  | 4625302  | [375][M]3+          | 2   |
| 3183744  | 3235070  | 3701524  | 2837181  | 3104794  | 1748442  |                     | 4   |
| 745375.8 | 600066.6 | 854887.7 | 526163.8 | 900017.9 | 55655.38 | [1375][M+1]2+       | 4   |
| 1.02E+08 | 1.02E+08 | 85911679 | 93033783 | 94106372 | 47806629 | [1287][M]+          | 2   |
| 573897.9 | 1023366  | 804675.6 | 462216.1 | 699584.4 | 1406388  | [616][M+2]2+        | 9   |
| 679556.4 | 325287.9 | 438476.4 | 568428.3 | 304464.3 | 533018.4 |                     | 33  |
| 374629.9 | 278748.7 | 473481.5 | 313292.2 | 285738.3 | 555038.5 | [M+H]+ 50           | 33  |
| 880658.8 | 920657   | 2972396  | 507880.8 | 605618.2 | 470476.8 |                     | 9   |
| 5106321  | 2608633  | 1761015  | 928690.1 | 1842805  | 4352127  |                     | 9   |
| 522714.5 | 1065881  | 1562768  | 514650.9 | 745542.4 | 991621   | [649][M+2]2+        | 9   |
| 21829905 | 10653288 | 17357505 | 22997903 | 9606701  | 445415.7 |                     | 2   |
| 1108954  | 1172660  | 1194171  | 1559766  | 1402570  | 6802496  |                     | 9   |
| 12559208 | 21678611 | 16889614 | 20316702 | 19481511 | 15348234 |                     | 2   |

|          |          |          |          |          |          |               |     |
|----------|----------|----------|----------|----------|----------|---------------|-----|
| 33227569 | 7251885  | 28336522 | 12240979 | 23833094 | 18756.13 | [453][M+1]3+  | 150 |
| 30285044 | 33417100 | 34285341 | 24274794 | 27433291 | 20728041 |               | 4   |
| 2968871  | 5146331  | 1558619  | 8823835  | 2747896  | 5717539  |               | 1   |
| 515798.4 | 905254.8 | 770018.6 | 228314.4 | 935651.9 | 1681807  |               | 89  |
| 788358   | 1018229  | 483775.7 | 560718.4 | 808796.7 | 1115574  |               | 4   |
| 733072.9 | 3427781  | 3892035  | 911836.5 | 1263868  | 1990785  |               | 9   |
| 2483200  | 3114457  | 2719807  | 2035908  | 1950185  | 500213.2 | [1007][M+2]2+ | 9   |
| 1018783  | 1320583  | 673922.6 | 536766.5 | 765320.4 | 923165.2 |               | 8   |
| 6664732  | 2930417  | 999521.3 | 4912901  | 6938558  | 3003693  | [M+K]+ 478    | 15  |
| 391536.9 | 1468080  | 2109129  | 415061.8 | 815596.2 | 859025.9 |               | 9   |
| 4825824  | 4603031  | 6619395  | 6712292  | 2908627  | 4715456  |               | 457 |
| 31127013 | 33554752 | 34713884 | 24104855 | 28122744 | 22671053 |               | 4   |
| 19613772 | 16496805 | 18630400 | 27701267 | 10404170 | 8369010  | [212][M]+     | 210 |
| 568092.6 | 685395.8 | 730688.4 | 539669.8 | 454947.2 | 0        |               | 9   |
| 1800562  | 979733.5 | 1749869  | 1581300  | 521067   | 6708589  | [124][M+2]3+  | 9   |
| 22970209 | 18655256 | 19852305 | 15828025 | 18791863 | 11035439 | [669][M]+     | 4   |
| 1312909  | 2064048  | 2103736  | 937614.4 | 1512220  | 983743   |               | 9   |
| 4790349  | 7217596  | 8140083  | 7522153  | 4726013  | 1927874  |               | 1   |
| 989661   | 456914.8 | 1025335  | 1204002  | 1050776  | 552759.8 |               | 4   |
| 1359823  | 1833555  | 2683248  | 4793573  | 3437911  | 559763.3 |               | 3   |
| 305123   | 440389.3 | 332803.2 | 181570.4 | 218929.6 | 53141.27 |               | 246 |
| 5142587  | 8190198  | 4768200  | 3728804  | 7959992  | 12638883 |               | 11  |
| 3041549  | 1266534  | 2453194  | 2082686  | 4821891  | 6817140  |               | 9   |
| 1289114  | 3663003  | 697410.2 | 1303922  | 882853.3 | 5746011  |               | 339 |
| 3453366  | 3690897  | 4081676  | 2912310  | 2965250  | 524139.4 | [956][M+1]3+  | 9   |
| 921024.7 | 524959.9 | 141447.1 | 1129235  | 700626.7 | 2684853  | [620][M+2]+   | 44  |
| 5959768  | 7064931  | 6191073  | 7095416  | 6207697  | 2605122  |               | 421 |
| 5645499  | 3550186  | 4092688  | 7529798  | 3041217  | 2542894  | [1187][M+3]2+ | 2   |
| 1668419  | 3730960  | 3872628  | 735794.6 | 4944588  | 3348634  | [M+K]+ 221    | 15  |
| 85189750 | 50470435 | 32121327 | 74196363 | 55694296 | 89520292 |               | 2   |
| 2771286  | 4327721  | 4202339  | 2600396  | 3700670  | 730205.9 |               | 9   |
| 43175575 | 67093863 | 37952707 | 36151760 | 40313328 | 1.3E+08  |               | 3   |
| 335110.4 | 492925.2 | 366770.5 | 367660.5 | 366805.4 | 427230.6 |               | 25  |
| 18333422 | 9050615  | 9962016  | 18335794 | 4492576  | 1538057  |               | 97  |
| 854872.6 | 1429238  | 1085939  | 841255   | 1734375  | 6485596  |               | 2   |

|          |          |          |          |          |          |              |     |
|----------|----------|----------|----------|----------|----------|--------------|-----|
| 3512645  | 1621378  | 845815.3 | 2115174  | 6745924  | 1509450  | [1381][M]+   | 334 |
| 2214313  | 3406461  | 3303969  | 1810552  | 2514464  | 716761.1 |              | 9   |
| 1299661  | 1888260  | 1801492  | 2005906  | 1895472  | 2456410  | [M+Na]+ 60   | 150 |
| 223551.8 | 295016.4 | 262005.6 | 199548.6 | 194725.1 | 97016.65 |              | 484 |
| 4290568  | 788290.1 | 2306780  | 5055261  | 4361387  | 1930735  |              | 2   |
| 1166178  | 501722.4 | 2123574  | 1047837  | 866653.5 | 193196.7 | [1364][M+3]+ | 47  |
| 1659135  | 3267218  | 4821654  | 2537015  | 3230790  | 2152971  | [3M+H+Na     | 39  |
| 630272.6 | 919934   | 109427.5 | 417078.1 | 1161335  | 4490700  |              | 9   |
| 826497.4 | 486233.7 | 659958.1 | 1631335  | 1025482  | 1018751  |              | 4   |
| 992718.2 | 996480.9 | 1058632  | 864177.1 | 756718.1 | 629197.1 |              | 4   |
| 556166.6 | 0        | 802536.6 | 530244.7 | 451586.4 | 0        |              | 9   |
| 15247830 | 5719760  | 4254145  | 4482319  | 6761605  | 2503789  | [3M+H+K]2    | 392 |
| 1304830  | 960949.6 | 3300764  | 874535.7 | 787555.7 | 231899.2 |              | 139 |
| 3367424  | 4449212  | 2863038  | 2942213  | 4538557  | 1692774  |              | 2   |
| 1752036  | 1756704  | 1515213  | 614377.8 | 1587456  | 461796.7 |              | 4   |
| 3166502  | 5038431  | 4943070  | 2613371  | 3371079  | 564876.5 |              | 9   |
| 16027426 | 1.17E+08 | 60181902 | 9999879  | 1E+08    | 35024902 |              | 90  |
| 147679.3 | 91780.42 | 163137.2 | 193848.2 | 156637.2 | 246373.8 |              | 203 |
| 457814.6 | 857028.2 | 704875.5 | 585305.5 | 755899.9 | 270183.4 |              | 4   |
| 19840581 | 11977786 | 1862584  | 14270260 | 21308271 | 52117282 | [M+H]+ 54    | 21  |
| 4584726  | 4928067  | 4536107  | 3743394  | 4230330  | 2427379  |              | 4   |
| 1283667  | 1111816  | 623847.1 | 820289.3 | 1028827  | 1644969  | [715][M+1]2+ | 5   |
| 1465429  | 2746891  | 4251652  | 1319236  | 1324535  | 2490953  |              | 2   |
| 1476728  | 1140864  | 995636.3 | 1595750  | 617443   | 875233.3 |              | 29  |
| 2097233  | 1255773  | 2080774  | 2265583  | 2487340  | 2407504  |              | 2   |
| 8978802  | 5372908  | 7828224  | 8885654  | 4456867  | 960261.7 |              | 2   |
| 11064539 | 18325412 | 11832286 | 7417016  | 12812577 | 31956939 | [851][M]+    | 4   |
| 4918728  | 1877425  | 2202344  | 2155890  | 2089036  | 2008265  |              | 421 |
| 3146412  | 9466146  | 5135626  | 3678639  | 2700405  | 6144765  |              | 52  |
| 5504019  | 6099926  | 7142253  | 4396049  | 7149710  | 1623731  | [M+K]+ 56    | 14  |
| 552194.6 | 803145.7 | 848852.8 | 310769.1 | 322698.7 | 622908.1 |              | 179 |
| 38887216 | 37240093 | 40481415 | 39287730 | 39174385 | 24691536 |              | 9   |
| 41382164 | 61016594 | 44045373 | 27064189 | 61361228 | 79317410 | [1035][M]+   | 84  |
| 20916008 | 15133007 | 18082304 | 17924986 | 14589928 | 7594745  |              | 2   |
| 1239376  | 2844704  | 6523567  | 4528206  | 5018582  | 3717359  | [846][M+1]+  | 1   |

|          |          |          |          |          |          |                      |     |
|----------|----------|----------|----------|----------|----------|----------------------|-----|
| 1013722  | 1269201  | 1202568  | 698402   | 523727.6 | 638477.7 |                      | 4   |
| 683234.4 | 1718255  | 3205440  | 631567.3 | 719739.2 | 832372.9 |                      | 9   |
| 9080457  | 1894273  | 8581772  | 6227542  | 6473906  | 3076109  |                      | 2   |
| 27067709 | 31206943 | 30510577 | 34049114 | 26311674 | 16213334 | [1606][M+1]+         | 2   |
| 2566160  | 2930392  | 3764164  | 1898949  | 2827173  | 972519.1 | [1471][M]2+          | 9   |
| 859512   | 2560547  | 1186472  | 436327.4 | 1796829  | 6026764  | [M+Na+Na             | 13  |
| 3391058  | 3539469  | 3176659  | 2822328  | 3403692  | 3080811  | [M+K+NaCl            | 252 |
| 30230663 | 21426160 | 25470692 | 30981940 | 24138258 | 9020017  | [90][M]2+            | 2   |
| 357481.6 | 360378.7 | 905290.7 | 313234.3 | 340685.9 | 703765.2 | [M+H]+ 37!           | 18  |
| 7509532  | 8064787  | 8385551  | 6126102  | 6881737  | 4107008  | [546][M+2]2+         | 4   |
| 3280896  | 43565659 | 43867010 | 67250977 | 50934301 | 1.01E+08 | [M+3H]3+ !           | 6   |
| 5970592  | 6455405  | 6144794  | 4890256  | 5669351  | 4277033  | [114][M]2+           | 4   |
| 873407.7 | 853422.5 | 1109262  | 733280.6 | 817211   | 1554888  |                      | 9   |
| 2895984  | 4542944  | 5321767  | 3341941  | 3394571  | 658178.2 |                      | 46  |
| 3640333  | 5613429  | 3198256  | 3265310  | 3250337  | 4279552  |                      | 295 |
| 2082697  | 3094936  | 4149082  | 1918528  | 2590556  | 524354.7 | [1090][M+2]2+        | 9   |
| 2744994  | 1598659  | 2060321  | 3343635  | 1824517  | 1248552  |                      | 2   |
| 11247569 | 6795001  | 8177801  | 6943303  | 6841953  | 316190.8 | [1553][M]+           | 129 |
| 9567574  | 7192700  | 2162987  | 7844846  | 645426.5 | 34135249 | [M+H-C6H:            | 11  |
| 1077318  | 926450.4 | 699290.2 | 0        | 809431.1 | 169119.7 |                      | 1   |
| 10825447 | 3646029  | 654020.9 | 10463951 | 2507570  | 22542021 |                      | 1   |
| 614294.1 | 1138141  | 800680.7 | 638271.2 | 756648.7 | 787298.2 | [1400][M]+           | 299 |
| 25972653 | 29066613 | 14001635 | 24826433 | 24745118 | 30130135 | [751][M]+ [M+Na]+ 4: | 3   |
| 1315857  | 1225222  | 1630313  | 1576586  | 1168702  | 2509679  |                      | 2   |
| 4182457  | 7846284  | 5051957  | 3408373  | 6300247  | 13539644 |                      | 9   |
| 780131   | 555163.8 | 819295   | 883646.3 | 688722   | 522525.9 | [7][M+2]2+           | 9   |
| 799740.8 | 0        | 2433172  | 2221477  | 1286864  | 8728111  |                      | 9   |
| 14247238 | 8174416  | 10649162 | 14249386 | 8173099  | 1688517  | [1253][M+3]+         | 2   |
| 2894452  | 1461516  | 692325.7 | 2628979  | 550235.9 | 2623825  |                      | 9   |
| 2135193  | 2696479  | 2695349  | 1454059  | 2242990  | 730199.2 | [M+K+CF3C            | 8   |
| 2150885  | 3772198  | 2620163  | 2308531  | 3584352  | 1197036  | [1621][M]+           | 2   |
| 5391442  | 7044486  | 14540101 | 4405894  | 3458846  | 5671413  | [668][M+1]+          | 4   |
| 414886.2 | 1424882  | 323692.3 | 948477.8 | 593167.4 | 1606968  | [555][M+1]+          | 83  |
| 749869.1 | 1821061  | 1205224  | 527224.7 | 897680.4 | 1828584  |                      | 9   |
| 1168398  | 1315027  | 1215759  | 1050664  | 1223613  | 895633.4 | [641][M]+            | 25  |

|          |          |          |          |          |          |                       |     |
|----------|----------|----------|----------|----------|----------|-----------------------|-----|
| 2697727  | 4490824  | 3414817  | 3698542  | 1112163  | 826832.4 |                       | 2   |
| 33205205 | 32514046 | 28662686 | 31341672 | 41439472 | 40807022 |                       | 2   |
| 4857255  | 1591038  | 1899086  | 3124639  | 1496662  | 1269334  | [M+K]+ 22!            | 97  |
| 729925.8 | 720181.4 | 726023.5 | 343080.6 | 806560.1 | 2549669  |                       | 5   |
| 26093655 | 44483139 | 45039495 | 22793601 | 28885065 | 50146966 |                       | 172 |
| 9300722  | 9350547  | 9430877  | 9516010  | 5354777  | 4393823  |                       | 292 |
| 2604233  | 4760481  | 2628437  | 2136746  | 1873469  | 1767501  | [1169][M]+ [M+H]+ 64! | 86  |
| 1078754  | 1313158  | 1064848  | 947150.7 | 926604.6 | 5117733  |                       | 2   |
| 2260657  | 22872655 | 10641133 | 2102741  | 12703486 | 72608641 |                       | 1   |
| 1771564  | 1877437  | 851613.2 | 832006.9 | 3771690  | 1843351  | [M+Na]+ 4!            | 264 |
| 2718680  | 1585997  | 1007371  | 1605305  | 1848944  | 954872.3 |                       | 1   |
| 368829.6 | 268840   | 227288.3 | 348831.9 | 141901.8 | 219824.6 | [932][M+1]+           | 285 |
| 8833664  | 8470319  | 4318684  | 8444009  | 803547.4 | 4261449  |                       | 354 |
| 0        | 202103.2 | 366213.4 | 665706.1 | 639170.1 | 494509.7 | [2M+2Na+H]            | 81  |
| 2208441  | 2202172  | 1404085  | 1489590  | 1907919  | 1692217  | [M+Na+2K]             | 24  |
| 544909   | 560727.8 | 595270.9 | 360468.9 | 531627.7 | 45481.9  |                       | 4   |
| 7614058  | 10315679 | 6197018  | 6819631  | 11683643 | 14643042 |                       | 2   |
| 2398834  | 2442465  | 1698101  | 1847226  | 1394769  | 137869.6 | [M+H]+ 30!            | 159 |
| 1289499  | 1186531  | 637654.4 | 696161.5 | 587385.6 | 377954.2 |                       | 4   |
| 11473665 | 20592471 | 17786718 | 9260285  | 15307064 | 24474726 | [892][M]+ [M+2Na-H]   | 38  |
| 11383829 | 13303560 | 15100104 | 9468756  | 14054217 | 15341063 | [1165][M+1]+          | 43  |
| 1027459  | 1775656  | 1064939  | 399403.2 | 1081429  | 737287.2 |                       | 4   |
| 5.84E+08 | 2.44E+08 | 2.21E+08 | 5.7E+08  | 5.62E+08 | 2.09E+08 | [53][M]+              | 1   |
| 4650651  | 5929418  | 4606884  | 3375740  | 6307081  | 4066743  |                       | 2   |
| 186296.2 | 199094.9 | 253677.9 | 78988.56 | 278370.2 | 187873.9 |                       | 17  |
| 5072330  | 8657434  | 5021132  | 3475036  | 7701028  | 15958026 | [84][M+2]2+           | 9   |
| 1224431  | 657540   | 911151.3 | 1130163  | 1266025  | 591708.5 | [135][M+2]+           | 4   |
| 47146803 | 29780121 | 2374459  | 29822215 | 41636740 | 1.39E+08 | [M+K+CF3C]            | 11  |
| 1123173  | 1044405  | 1408631  | 907723.7 | 994686.7 | 289566.4 |                       | 9   |
| 3583524  | 8091594  | 1425065  | 2667410  | 4243871  | 18505674 | [M+H-CH3]             | 3   |
| 633831   | 1701798  | 19339.93 | 1167006  | 1073228  | 721236.4 | [M+K]+ 24!            | 84  |
| 1308048  | 0        | 1328757  | 1412253  | 1346273  | 264152.1 | [M+2Na+2H]            | 13  |
| 1232440  | 146637.2 | 7681811  | 1015308  | 2605561  | 2908251  |                       | 2   |
| 4491707  | 1019420  | 1641562  | 4236717  | 3647631  | 781635.2 | [M+H+HCC]             | 14  |
| 3742064  | 2004351  | 2717609  | 3052169  | 1794710  | 7308725  |                       | 2   |

|          |          |          |          |          |          |               |     |
|----------|----------|----------|----------|----------|----------|---------------|-----|
| 119336.5 | 467351.9 | 260758.1 | 81461.38 | 156858.5 | 232427.9 | [1434][M+2]+  | 137 |
| 2850828  | 0        | 2561410  | 2982093  | 2736575  | 541030.9 |               | 9   |
| 3613385  | 5822413  | 5538792  | 2797002  | 3855396  | 2009898  | [161][M]3+    | 9   |
| 2699534  | 8734829  | 454141.5 | 319318.1 | 314160.1 | 261840.1 | [437][M+1]+   | 16  |
| 5424599  | 9174896  | 7651895  | 4448915  | 6399392  | 8763750  | [296][M]+     | 9   |
| 4124447  | 3630460  | 3604438  | 2647550  | 2865331  | 4671907  |               | 4   |
| 40877972 | 35293709 | 36009352 | 35098568 | 38946467 | 39379837 |               | 2   |
| 4089999  | 4543502  | 3985346  | 3929651  | 3662537  | 3521531  |               | 326 |
| 6293875  | 6299234  | 4275622  | 3520037  | 10452126 | 5745552  |               | 400 |
| 4472801  | 4634047  | 5102776  | 3549964  | 3741651  | 3386398  |               | 4   |
| 2719640  | 2380221  | 1895614  | 1679999  | 2305366  | 1163664  |               | 4   |
| 953486.7 | 600996.4 | 2001806  | 622507.3 | 2229634  | 4260092  | [M+Na]+ 1'    | 6   |
| 2257306  | 2160097  | 2422241  | 2074039  | 2116820  | 2590080  |               | 337 |
| 477617.2 | 1756563  | 2718800  | 1079711  | 680524.2 | 908012   | [1067][M+1]+  | 9   |
| 6591760  | 6683609  | 5613630  | 6029845  | 7292826  | 19128603 | [1151][M]3+   | 2   |
| 599752.7 | 1317207  | 1381639  | 0        | 606953.2 | 0        | [M+K+NH3      | 46  |
| 4942377  | 4.3E+08  | 86398762 | 2.43E+08 | 3.68E+08 | 4049138  | [M+H]+ 45'    | 15  |
| 578145.5 | 534798.7 | 795452.2 | 54198.44 | 418089   | 606581.5 | [M+K+NH3      | 18  |
| 1692367  | 2601103  | 3448061  | 2466235  | 1933487  | 1642144  |               | 68  |
| 741090.4 | 405187.4 | 1336254  | 934189.9 | 959406.9 | 550901.2 | [M+Na+3K-     | 5   |
| 42597654 | 24806757 | 36099728 | 38603701 | 26576690 | 7795627  |               | 2   |
| 64401382 | 92240184 | 52527778 | 47615424 | 90156352 | 1.79E+08 | [483][M+1]+   | 2   |
| 1510318  | 1780549  | 1149998  | 890374.3 | 1359811  | 1286087  |               | 4   |
| 530786.3 | 1277850  | 1142753  | 303652.7 | 381894.9 | 331101.8 |               | 46  |
| 548321   | 576432.6 | 473326.5 | 186772.3 | 353404.3 | 0        | [M+H]+ 29'    | 12  |
| 1892927  | 1484120  | 2186604  | 1611892  | 1689204  | 134377.1 |               | 13  |
| 4807215  | 3388740  | 3628826  | 590171.3 | 12582999 | 3802546  |               | 375 |
| 555251.7 | 981274   | 543427.8 | 336004.5 | 765228   | 1407055  |               | 8   |
| 4125815  | 2279150  | 3040843  | 2398985  | 2480027  | 218352.8 | [835][M]3+    | 280 |
| 1702862  | 2915138  | 1071672  | 1444823  | 2322253  | 2307008  |               | 9   |
| 3500457  | 7100401  | 3303632  | 3099906  | 7115307  | 6937079  | [1349][M+1]2+ | 2   |
| 5915094  | 2993004  | 2996654  | 2992582  | 2854027  | 2700074  |               | 385 |
| 1507773  | 1881350  | 1479815  | 793504   | 1395257  | 1027929  |               | 9   |
| 1031432  | 1649518  | 1274646  | 930215   | 862236.8 | 653449.1 |               | 4   |
| 12402692 | 4109843  | 4109426  | 11117943 | 13182979 | 6196465  | [M+2H-H2O     | 15  |

|          |          |          |          |          |          |               |     |
|----------|----------|----------|----------|----------|----------|---------------|-----|
| 2787117  | 3373786  | 984667.9 | 1276414  | 1136189  | 10841981 | [126][M]+     | 285 |
| 1964247  | 3008709  | 2687112  | 1768965  | 2179817  | 773225.2 | [M+2Na]2+     | 13  |
| 6839072  | 4489028  | 7018386  | 1028930  | 5277741  | 4443310  |               | 307 |
| 2890598  | 5081050  | 2909632  | 3480774  | 4027806  | 16096378 |               | 2   |
| 1225499  | 1342885  | 1176469  | 1477902  | 1528695  | 1583047  |               | 252 |
| 671977   | 652379.8 | 1011810  | 563966.2 | 678834.8 | 52927.08 |               | 4   |
| 474058.8 | 1738288  | 995122.9 | 91208.13 | 740392.1 | 2679456  |               | 9   |
| 2481060  | 1510203  | 3459996  | 5865869  | 1.01E+08 | 47750167 |               | 2   |
| 127475.2 | 395863.1 | 199254.4 | 85043.71 | 442737.8 | 225978.9 | [1055][M+1]+  | 24  |
| 3681163  | 1479284  | 2991546  | 3220476  | 1441281  | 0        |               | 2   |
| 2760863  | 345491.2 | 1225320  | 1904734  | 2462959  | 1110729  |               | 300 |
| 37332930 | 40066319 | 42270595 | 30064219 | 32015951 | 20301824 |               | 4   |
| 2973473  | 3468790  | 2155491  | 2440497  | 1533691  | 2287716  |               | 317 |
| 131816.8 | 1012231  | 545748.4 | 0        | 56673.93 | 2648431  | [M+K+CF3C     | 46  |
| 1210115  | 1265674  | 1583642  | 917049.6 | 971233.8 | 169941.8 |               | 9   |
| 3413437  | 3515620  | 3258056  | 3440437  | 3162376  | 3379851  |               | 408 |
| 861592.3 | 2620801  | 2660677  | 1081042  | 1044789  | 286099.8 |               | 4   |
| 72864.22 | 88754.41 | 116467.1 | 280896.4 | 123689.9 | 477826.4 | [M+Na]+ 2!    | 220 |
| 3222922  | 1703822  | 252729   | 2113568  | 2568920  | 3093103  |               | 4   |
| 1079591  | 1167434  | 1226440  | 733496.9 | 1044024  | 0        | [1129][M+1]3+ | 68  |
| 5561434  | 4048106  | 4946447  | 5438778  | 4982519  | 1288736  |               | 2   |
| 13929221 | 15015083 | 16150593 | 11409854 | 12004617 | 7549003  | [135][M]+     | 4   |
| 692850.8 | 721507.3 | 880452.6 | 708641.7 | 1072583  | 576396.5 | [3][M+1]2+    | 9   |
| 15189828 | 16062814 | 17572773 | 12195086 | 12903709 | 7912995  | [1317][M]+    | 4   |
| 122238.8 | 618312.9 | 122516.8 | 796348.5 | 54834.94 | 154817.7 |               | 176 |
| 0        | 472292.6 | 514075.1 | 0        | 120386.3 | 965414.3 | [1573][M+1]+  | 18  |
| 5130453  | 5543682  | 8580772  | 5314992  | 6068541  | 2596475  | [M+Na]+ 2!    | 264 |
| 742764   | 1633750  | 1952326  | 497690.9 | 1234310  | 351998   |               | 455 |
| 2884029  | 3274175  | 3979979  | 2129833  | 2401361  | 496593.2 |               | 9   |
| 477752   | 1821186  | 1344790  | 781393.8 | 604509.1 | 3187292  |               | 9   |
| 3632792  | 3571813  | 4053177  | 3149662  | 3304509  | 2174457  |               | 4   |
| 522712   | 0        | 145803.2 | 347648   | 730770.1 | 233642.1 |               | 9   |
| 998690.3 | 1079257  | 468987.5 | 222389.5 | 705282.7 | 597081.1 |               | 4   |
| 12754373 | 9321016  | 8969236  | 7621902  | 6958279  | 637704.4 |               | 286 |
| 501176.6 | 404240   | 633710.6 | 526489   | 227019   | 283276.1 |               | 284 |

|          |          |          |          |          |          |                       |     |
|----------|----------|----------|----------|----------|----------|-----------------------|-----|
| 34772261 | 44405378 | 66817432 | 37494089 | 53595587 | 36783920 | [1537][M]+ [2M+2Na+   | 33  |
| 4776604  | 4562870  | 2626900  | 4181318  | 2595173  | 7728462  |                       | 2   |
| 2102275  | 1811182  | 2749956  | 2343299  | 1751817  | 1144987  |                       | 71  |
| 922573.4 | 3562538  | 3112560  | 624803.7 | 1932348  | 4519908  |                       | 9   |
| 1629907  | 1689088  | 1571440  | 857472.5 | 1229276  | 1188891  |                       | 4   |
| 587458   | 2337093  | 1781424  | 1100974  | 1381401  | 560657.1 |                       | 46  |
| 0        | 917280.2 | 0        | 0        | 386433   | 2556032  |                       | 9   |
| 539227.6 | 521052.3 | 633431.7 | 602614.8 | 222003.1 | 656593.1 |                       | 108 |
| 3696990  | 4381586  | 2187173  | 4531122  | 3943515  | 1728367  |                       | 190 |
| 3334862  | 3306082  | 3417036  | 2940685  | 1971602  | 2203298  | [1488][M]+ [M+H]+ 83: | 100 |
| 1677879  | 1212105  | 5086011  | 783425.8 | 6963664  | 494106.7 |                       | 15  |
| 2251427  | 3222938  | 2132481  | 1789195  | 2199886  | 2940053  |                       | 2   |
| 876595.7 | 758555.9 | 524449.4 | 753865.5 | 943336.8 | 592583   |                       | 5   |
| 3532114  | 3316103  | 3492320  | 2430729  | 4444074  | 3128932  |                       | 2   |
| 3104270  | 1086534  | 349155.9 | 1393136  | 3221682  | 1917304  |                       | 1   |
| 1907714  | 1335436  | 205389.5 | 1627344  | 1753846  | 1194303  |                       | 254 |
| 409959.9 | 387830.5 | 526149   | 311652.5 | 408220.1 | 141815.7 | [1333][M+1]+          | 17  |
| 622405.8 | 1117894  | 421790.1 | 314861.1 | 440264.4 | 1274009  |                       | 91  |
| 1069576  | 626722.3 | 472177.2 | 807403.5 | 776244.1 | 1764473  |                       | 42  |
| 6339447  | 6514833  | 4144865  | 9555631  | 6304442  | 10244842 |                       | 208 |
| 111780.9 | 482758   | 189496.4 | 110747.6 | 114338.7 | 8209.382 |                       | 462 |
| 1708634  | 818785.1 | 1109014  | 1493705  | 892453.2 | 0        |                       | 4   |
| 7374826  | 7669403  | 8273266  | 6519781  | 6703583  | 4318986  | [134][M]3+            | 4   |
| 1305044  | 2860304  | 2639023  | 944494.3 | 956175.6 | 313930.3 |                       | 1   |
| 469334.9 | 818454.4 | 1024018  | 185493.5 | 611417.4 | 2636825  | [1003][M+1]3+         | 9   |
| 128892.9 | 214803   | 185684.6 | 115440.5 | 184377.9 | 87589.35 | [647][M+2]+           | 110 |
| 73932346 | 78527341 | 69625979 | 81416011 | 73087179 | 61682696 |                       | 2   |
| 2345750  | 1843667  | 1724284  | 1125313  | 2212631  | 925129.1 | [M+H]+ 35:            | 6   |
| 18212782 | 9470831  | 22523873 | 21496762 | 8334413  | 10607629 |                       | 160 |
| 1307884  | 1364624  | 1470667  | 1199766  | 590123.1 | 999091.9 | [1587][M]+ [2M+H]+ 5: | 20  |
| 15762402 | 20455757 | 17600379 | 11748312 | 15922632 | 12333918 |                       | 9   |
| 3934577  | 6566005  | 4051715  | 2495245  | 5502255  | 11706849 | [613][M+1]+           | 9   |
| 828332.4 | 1058623  | 1909141  | 842877.7 | 670706.5 | 0        |                       | 9   |
| 1442237  | 0        | 1270098  | 1333781  | 1213625  | 873705.2 | [3M+2K]2+             | 8   |
| 406847.5 | 953406.6 | 807024   | 471463   | 734109.6 | 1381277  |                       | 9   |



|          |          |          |          |          |          |              |     |
|----------|----------|----------|----------|----------|----------|--------------|-----|
| 0        | 593529.3 | 108015.7 | 0        | 493844.9 | 0        | [3M+2Na]2    | 46  |
| 11875531 | 9415312  | 8786036  | 13943231 | 11179263 | 5248116  |              | 2   |
| 590595.7 | 445937.2 | 723846.3 | 339521.7 | 624306.5 | 70051.22 | [493][M+1]+  | 4   |
| 422456   | 43339.3  | 348855.5 | 48335.37 | 243300.1 | 2472107  | [512][M+1]2+ | 58  |
| 392707.6 | 366571.9 | 285558.1 | 861227.9 | 444129.9 | 161766.7 |              | 360 |
| 1146121  | 2088412  | 964765.4 | 3023601  | 1553090  | 1862027  | [1214][M]2+  | 33  |
| 1515133  | 1234684  | 958396.4 | 2000102  | 922255.7 | 1176430  |              | 9   |
| 987097.7 | 1129088  | 1617880  | 1045728  | 515745.5 | 555571.8 | [1533][M+1]+ | 167 |
| 1228330  | 1482249  | 2594966  | 884631.1 | 858819.3 | 1650824  | [75][M+1]+   | 9   |
| 1639694  | 1573993  | 1852225  | 1457702  | 1451992  | 816912.9 |              | 4   |
| 2028164  | 3754614  | 2963748  | 1909690  | 1831158  | 3079601  |              | 62  |
| 5893303  | 7889879  | 7311636  | 4783758  | 6130909  | 4038287  |              | 9   |
| 17152093 | 13131295 | 14142510 | 16817147 | 16135027 | 5499861  | [M+H]+ 36    | 14  |
| 618701   | 876397   | 0        | 1442099  | 685032.2 | 2625247  |              | 9   |
| 6020000  | 6030771  | 4677683  | 4699854  | 5158253  | 2940309  | [1104][M+1]+ | 227 |
| 185399.7 | 309276.3 | 285928.2 | 125964.2 | 154837   | 76935.42 | [M+H-C6H8    | 16  |
| 11697543 | 6917468  | 5731677  | 11025180 | 9415135  | 2207981  |              | 2   |
| 709496   | 1465380  | 1306708  | 829700.4 | 771332   | 1359978  | [3M+Na+K]    | 38  |
| 17760702 | 28316463 | 10438591 | 17030430 | 13875995 | 21688069 | [M+K]+ 14    | 3   |
| 1689163  | 2171421  | 1831400  | 1803862  | 489825.4 | 244337.4 | [M+H+NH3     | 135 |
| 5755130  | 2884499  | 5562593  | 4297621  | 4535870  | 879849.6 |              | 66  |
| 3616063  | 2262365  | 2854120  | 3400877  | 3254306  | 510849.8 |              | 2   |
| 11334062 | 6928007  | 10162645 | 3335522  | 12697607 | 1774230  | [M+H]+ 18    | 3   |
| 2719314  | 2455731  | 1918408  | 1702088  | 2036192  | 922917.3 |              | 4   |
| 3133436  | 2755903  | 5917314  | 2620214  | 3250624  | 862316   | [M+Na+NH     | 14  |
| 1240145  | 745388.1 | 1954946  | 1477754  | 1391413  | 618087   |              | 4   |
| 15727856 | 1413627  | 336453.5 | 11573967 | 15530099 | 2873412  |              | 4   |
| 3380368  | 2702596  | 3156761  | 2803193  | 3198240  | 2665746  |              | 2   |
| 268176.4 | 191300.2 | 1671244  | 158724.4 | 1723821  | 1474937  |              | 152 |
| 1054475  | 1131027  | 1621876  | 972534.9 | 1650230  | 886241.8 | [M+2H-CH3    | 6   |
| 3242833  | 6763697  | 3561987  | 5120765  | 7004836  | 5658852  |              | 1   |
| 2129893  | 2315749  | 2299777  | 1740040  | 2036670  | 1548120  |              | 4   |
| 896041.9 | 760019.1 | 1105486  | 1112797  | 347943.5 | 841144.7 | [1436][M+1]+ | 340 |
| 527855.8 | 454318.4 | 140309   | 648773   | 194187.4 | 425567.8 | [575][M+1]+  | 145 |
| 1.29E+08 | 72144039 | 1.05E+08 | 1.28E+08 | 70194481 | 2469113  |              | 2   |

|          |          |          |          |          |          |                     |     |
|----------|----------|----------|----------|----------|----------|---------------------|-----|
| 2316710  | 3776531  | 3780196  | 1821744  | 3160937  | 2103467  | [640][M+2]+         | 9   |
| 3798732  | 134558.8 | 822776   | 811971.6 | 176552.6 | 5556273  | [456][M+1]+         | 94  |
| 3847596  | 11257546 | 3791859  | 3618609  | 10740480 | 16226454 | [M+H+NH3            | 3   |
| 228015.1 | 240990   | 252128.4 | 450363.3 | 189824.8 | 349047   |                     | 243 |
| 21611990 | 21435599 | 16734008 | 17097999 | 18488561 | 10809345 | [1104][M]+          | 227 |
| 976732.8 | 1800952  | 1580556  | 1186228  | 824276.5 | 1079131  | [M+K]+ 65:          | 12  |
| 1481879  | 1079927  | 1556040  | 1003397  | 957417.6 | 208772.8 |                     | 4   |
| 4296576  | 2716431  | 1639520  | 4718762  | 2327750  | 1654937  | [911][M]+           | 395 |
| 763766.3 | 1078778  | 1092304  | 1014676  | 561704.9 | 1375739  | [3M+2Na]2           | 16  |
| 585056.3 | 495637.6 | 692556.6 | 652306.9 | 601609.5 | 0        | [336][M+1]+         | 4   |
| 179390.3 | 76373.95 | 344462.1 | 161258.9 | 382644.6 | 116705.1 | [131][M+1]+         | 297 |
| 3485899  | 2728603  | 2985852  | 2952327  | 2763834  | 4367233  |                     | 2   |
| 4432759  | 5713598  | 6149639  | 3961782  | 4671658  | 3864220  |                     | 9   |
| 5516188  | 5130536  | 6271597  | 4784295  | 5072410  | 2781698  | [270][M]+ [M+H-H2O] | 72  |
| 459946.9 | 484670   | 1739598  | 1413450  | 1147097  | 6694614  |                     | 2   |
| 3090022  | 874493.9 | 832089.5 | 386847.4 | 3838946  | 1049223  |                     | 4   |
| 2264279  | 3559001  | 3261149  | 2342991  | 3461547  | 3366443  |                     | 9   |
| 2317953  | 18753159 | 2834937  | 13348014 | 19379920 | 15019896 |                     | 1   |
| 1648969  | 2554847  | 2037994  | 1285950  | 2214121  | 3620046  | [547][M+1]+         | 4   |
| 8829369  | 2628967  | 2478816  | 2755908  | 2606991  | 2457068  |                     | 316 |
| 47023322 | 3832764  | 47194838 | 4231831  | 3074410  | 45426697 |                     | 140 |
| 37816574 | 37381554 | 39811531 | 40841106 | 29502688 | 22559605 | [292][M+1]+         | 48  |
| 18699682 | 31490385 | 18845384 | 15265204 | 26693708 | 55892910 | [609][M]+           | 9   |
| 0        | 1364535  | 1027848  | 417477.2 | 199448   | 0        | [M+K]+ 47(          | 46  |
| 1671838  | 904564   | 1095649  | 554015.3 | 1024858  | 0        | [717][M+1]2+        | 235 |
| 4557123  | 3410227  | 1739525  | 3934905  | 1552906  | 897280.8 |                     | 1   |
| 2989492  | 4492609  | 3296974  | 2085162  | 5085507  | 5194830  |                     | 2   |
| 12794186 | 9890723  | 9139082  | 8487582  | 7069047  | 251327.3 |                     | 286 |
| 1490093  | 2160687  | 2764684  | 601379.1 | 1391635  | 364706.4 |                     | 1   |
| 2212684  | 1483114  | 2332865  | 1242926  | 1168658  | 56845.66 |                     | 200 |
| 7387141  | 1983325  | 1917980  | 7489221  | 4463149  | 7932199  | [M+H-COCl           | 97  |
| 3207906  | 3176379  | 3963360  | 2726705  | 2931201  | 1276129  |                     | 9   |
| 2089485  | 1436410  | 1614932  | 1703906  | 2973763  | 5290472  |                     | 2   |
| 5208913  | 5667986  | 6499228  | 4972208  | 4534396  | 4200865  |                     | 135 |
| 9865155  | 4998297  | 4941880  | 6379375  | 5223288  | 5045396  |                     | 365 |

|          |          |          |          |          |          |                       |     |
|----------|----------|----------|----------|----------|----------|-----------------------|-----|
| 44354101 | 1.29E+08 | 49115440 | 39136896 | 37733718 | 27660863 |                       | 74  |
| 36160199 | 47844404 | 30016270 | 35263256 | 61696011 | 1.14E+08 |                       | 2   |
| 2379501  | 2275285  | 1974907  | 1496729  | 2135241  | 1002625  | [M+K]+ 556            | 38  |
| 626807.7 | 1577407  | 771450.8 | 404734.1 | 1000731  | 3751966  | [287][M+1]2+          | 9   |
| 8006551  | 11418580 | 7051197  | 7332565  | 10778783 | 8578272  | [1372][M+1]+          | 2   |
| 6315003  | 9089340  | 7620918  | 3864946  | 7089241  | 4241725  |                       | 4   |
| 1474521  | 1496878  | 1860334  | 1282734  | 1823771  | 1779857  | [1165][M+2]+          | 43  |
| 43793910 | 56357093 | 50514047 | 37864266 | 38967530 | 41830873 |                       | 9   |
| 6381950  | 2798665  | 5668978  | 6559505  | 3847057  | 662502   |                       | 2   |
| 16693023 | 21141894 | 31855607 | 17633755 | 26220126 | 17334514 | [1537][M+1]+          | 33  |
| 2450399  | 8401866  | 8.32E+09 | 7813617  | 6.9E+09  | 4.24E+09 | [M+H]+ 456            | 6   |
| 1.05E+08 | 4220525  | 89808319 | 1822295  | 4594390  | 14900165 |                       | 2   |
| 8818135  | 9633878  | 10146065 | 12063824 | 11526423 | 0        | [1622][M]+            | 2   |
| 9170497  | 6328434  | 6235438  | 9438654  | 8206780  | 3285499  |                       | 2   |
| 203467.9 | 270657.2 | 315663   | 149064.6 | 270453.9 | 44605.27 | [M+H+Na]2+            | 23  |
| 5301782  | 4420690  | 6362453  | 4258937  | 4766495  | 1732411  | [397][M]2+            | 17  |
| 5742427  | 12250640 | 3436661  | 28289084 | 32401506 | 33602746 | [M+K]+ 356            | 15  |
| 3225757  | 4048318  | 3892211  | 2081855  | 3353139  | 3089356  | [107][M+2]+           | 9   |
| 8479461  | 4974037  | 6885891  | 9714271  | 4732836  | 6875103  |                       | 2   |
| 1430262  | 2097754  | 1415560  | 889607.7 | 1787533  | 2478718  | [289][M+1]+           | 9   |
| 8057940  | 14362423 | 10071322 | 6411107  | 11085604 | 24717417 |                       | 9   |
| 2890165  | 2838280  | 3125643  | 3508402  | 1694924  | 5657473  | [1277][M+2]+          | 2   |
| 807453.3 | 346813.8 | 347863.6 | 699016.4 | 278258.8 | 86253.45 |                       | 4   |
| 444366.2 | 209886.3 | 338083.1 | 340814   | 71516.12 | 232067.4 | [1416][M]3 [2M+3H]3+  | 72  |
| 2747631  | 865878.7 | 3705482  | 2635375  | 2787042  | 3006143  |                       | 208 |
| 4116651  | 2639492  | 3350452  | 4269583  | 3000046  | 5769005  |                       | 2   |
| 9419081  | 2526470  | 86699723 | 7471460  | 17594752 | 42555685 |                       | 9   |
| 1.41E+08 | 2.63E+08 | 1.92E+08 | 1.25E+08 | 15039091 | 2.15E+08 | [846][M+2]+           | 1   |
| 2730556  | 2601603  | 2273028  | 2240669  | 2474191  | 899849.5 |                       | 4   |
| 3065827  | 8710955  | 2980121  | 1765911  | 4266036  | 14816496 | [M+H-C3H]2+           | 15  |
| 261024.8 | 175879.6 | 192880.4 | 180310.3 | 102597.2 | 85353.95 |                       | 306 |
| 26170529 | 724157.6 | 52050326 | 82817232 | 719996.4 | 1310782  |                       | 9   |
| 481305.5 | 158461.2 | 157510   | 205355.5 | 216510.1 | 130880.5 |                       | 161 |
| 1615933  | 2027351  | 1024631  | 1639017  | 705735.1 | 187383.1 | [M+2H-C6H]2+          | 97  |
| 1.58E+08 | 1.83E+08 | 65867981 | 1.9E+08  | 1.63E+08 | 3.77E+08 | [620][M]+ [M+Na]+ 306 | 44  |

|          |          |          |          |          |          |              |     |
|----------|----------|----------|----------|----------|----------|--------------|-----|
| 4636754  | 5363601  | 3706945  | 4140278  | 6883822  | 4300621  |              | 13  |
| 5497153  | 2787911  | 6313736  | 7708315  | 3227160  | 2318469  | [249][M+1]+  | 154 |
| 2982943  | 3137115  | 4210236  | 3285691  | 3054419  | 2924040  |              | 279 |
| 2892920  | 1742855  | 2474831  | 3765806  | 1734060  | 370515.3 |              | 2   |
| 7920547  | 14085019 | 9959027  | 6265868  | 11083980 | 24524724 |              | 9   |
| 4341080  | 3308939  | 8092918  | 4041622  | 450628.5 | 516161.7 |              | 192 |
| 4564775  | 2806367  | 4755691  | 3355520  | 2656142  | 0        |              | 2   |
| 1325029  | 2922462  | 2704046  | 996421.4 | 1694847  | 3682942  |              | 9   |
| 38594500 | 46753734 | 36284236 | 34838323 | 42941176 | 33975648 | [1159][M]+   | 2   |
| 328863.1 | 332212.1 | 163594.4 | 358701.9 | 308932.4 | 312504   | [M+K]+ 506   | 16  |
| 1730218  | 2728186  | 3228982  | 1409389  | 1388673  | 496641.7 | [179][M+1]+  | 9   |
| 28100191 | 32915935 | 26259118 | 15845806 | 26655801 | 29702452 |              | 42  |
| 3872216  | 2294260  | 2386740  | 1230933  | 1901287  | 0        | [835][M+1]3+ | 280 |
| 1179884  | 2653258  | 2769057  | 1369034  | 1812093  | 256698.4 | [3M+H]+ 2:   | 13  |
| 846408.6 | 791506.2 | 1230286  | 647399   | 892697.4 | 763649.1 | [M+3H]3+     | 13  |
| 1940843  | 2233351  | 2317482  | 1692612  | 1389434  | 623823.5 |              | 9   |
| 824239.7 | 3071953  | 286157.3 | 545619.9 | 243515.9 | 879684.2 | [M+Na]+ 3:   | 56  |
| 15843716 | 7670682  | 13587096 | 14926428 | 1882657  | 4366736  | [M+H]+ 34:   | 97  |
| 6043717  | 3444404  | 3239262  | 1859970  | 2680676  | 2431267  | [449][M]3+   | 25  |
| 6607498  | 5823874  | 5390034  | 4777571  | 9094351  | 6531180  | [M+H-CH2]    | 253 |
| 1207634  | 1291652  | 1205107  | 789881.9 | 1229551  | 533261.2 |              | 4   |
| 583339.1 | 0        | 489218.2 | 451535.3 | 1528175  | 7584105  |              | 9   |
| 1932692  | 828973.3 | 2205855  | 1821710  | 1668343  | 2890186  |              | 2   |
| 423233.7 | 979656.8 | 1365691  | 362715.9 | 954735.8 | 2651231  |              | 9   |
| 7247501  | 6330113  | 6061484  | 5724167  | 7835545  | 7358451  |              | 2   |
| 1623034  | 2329374  | 2322640  | 1127732  | 2304603  | 2258527  |              | 4   |
| 534071.3 | 1765475  | 2727665  | 1710822  | 877928.1 | 918974.4 |              | 9   |
| 22143209 | 55375184 | 31880176 | 9672767  | 23480399 | 5652862  |              | 90  |
| 2499195  | 2780779  | 2672485  | 1960422  | 2501028  | 976631.9 | [240][M+2]2+ | 9   |
| 1187948  | 796722.8 | 700749.1 | 339520.4 | 220846.3 | 361838.7 |              | 107 |
| 9788266  | 15199937 | 5415331  | 10420694 | 8057746  | 26853759 | [M+K+NH3     | 3   |
| 1554375  | 4007194  | 3151337  | 1305737  | 1782978  | 1828269  | [2M+Na+K     | 13  |
| 5316075  | 4257642  | 6099162  | 8987872  | 5396407  | 5374427  |              | 379 |
| 2669229  | 1852082  | 2207966  | 1902114  | 2128487  | 2489679  |              | 2   |
| 1347189  | 2174492  | 4211506  | 533754.1 | 1543031  | 2136826  |              | 9   |

|          |          |          |          |          |          |                       |     |
|----------|----------|----------|----------|----------|----------|-----------------------|-----|
| 38492972 | 23248461 | 32152157 | 37779027 | 26274760 | 7670801  | [1237][M+2]2+         | 2   |
| 1357424  | 823486.5 | 1362290  | 2116608  | 1589991  | 294868.6 |                       | 2   |
| 433661   | 1221831  | 392256   | 58964.9  | 531452   | 2320361  |                       | 4   |
| 42878327 | 71047689 | 50865279 | 34702442 | 56121671 | 1.13E+08 |                       | 13  |
| 883625.6 | 1608680  | 971642.4 | 791803.4 | 499287.2 | 791654.4 | [M+Na+NH              | 81  |
| 662300.3 | 587979.9 | 1728703  | 273754.4 | 713625.5 | 2382572  |                       | 1   |
| 1856870  | 1362850  | 4187475  | 1724927  | 4648296  | 1191155  |                       | 1   |
| 1782215  | 1503719  | 109982.7 | 2228261  | 1600086  | 267276.8 | [561][M+1]+           | 256 |
| 2520497  | 3742980  | 2606594  | 2381185  | 2488020  | 1170755  |                       | 2   |
| 1132475  | 68633.53 | 242307.8 | 1012345  | 802032.5 | 407627.5 | [703][M+1]3+          | 9   |
| 3887308  | 5147936  | 6616035  | 4091235  | 6122294  | 3774535  | [1537][M+2]+          | 33  |
| 62868653 | 14345041 | 44713597 | 57874120 | 1459567  | 947326.7 | [2M+K]+ 2:            | 6   |
| 2924957  | 3139619  | 5715999  | 3542472  | 2527136  | 1487163  | [16][M]+ [M+H]+ 19'   | 116 |
| 462466   | 420311.2 | 1068284  | 65916.02 | 169048   | 751070.6 | [M+Na]+ 50            | 18  |
| 36630300 | 29923625 | 40016577 | 44402491 | 40894077 | 46654956 |                       | 14  |
| 1324433  | 1029794  | 1200785  | 707300.3 | 994605.5 | 397535.9 |                       | 4   |
| 1301472  | 1020504  | 1510153  | 1018911  | 1044956  | 506355.5 |                       | 4   |
| 1678495  | 2635605  | 2388395  | 1070362  | 4619219  | 4156226  |                       | 1   |
| 1770839  | 3640515  | 4396440  | 1490388  | 2718022  | 1046137  |                       | 9   |
| 14445503 | 12381767 | 12444211 | 14330164 | 12908352 | 5818964  |                       | 2   |
| 6519045  | 9625348  | 9097663  | 5754498  | 6379870  | 2421767  |                       | 9   |
| 1404171  | 1110809  | 718015.2 | 1384092  | 545742.5 | 302994.2 | [M+K+HCO              | 12  |
| 988064.7 | 1484006  | 1582400  | 375104.8 | 740181.1 | 1542548  |                       | 1   |
| 926925.1 | 34428.18 | 330140.3 | 832769.3 | 785010.8 | 760222.7 |                       | 9   |
| 452693.8 | 1041118  | 878444.9 | 376159.9 | 628032.7 | 1745059  | [1199][M+1]+          | 23  |
| 27072250 | 32909281 | 28966524 | 25324251 | 26714239 | 22086101 | [1113][M]+ [M+H]+ 61' | 35  |
| 1174904  | 1795016  | 1092620  | 910491.5 | 1271128  | 2673097  | [M+Na]+ 7:            | 81  |
| 18644020 | 18967129 | 18346495 | 12085937 | 14899845 | 10371439 | [190][M]2+            | 4   |
| 3495785  | 15511020 | 3869958  | 17781120 | 21506861 | 5792567  |                       | 1   |
| 2824636  | 1597838  | 2196992  | 3074785  | 1178994  | 1457022  | [M+2H]2+ :            | 12  |
| 16388329 | 12052070 | 15767062 | 15835987 | 12953845 | 10745866 |                       | 2   |
| 690700.2 | 44965.42 | 1854162  | 1516018  | 930941.2 | 1591751  |                       | 9   |
| 1081936  | 908098.3 | 1248672  | 1441144  | 1388230  | 715656.8 |                       | 4   |
| 3576662  | 4621732  | 4179713  | 3071381  | 3276910  | 2278471  |                       | 9   |
| 7457877  | 7761957  | 8609768  | 6026272  | 6506678  | 4183953  |                       | 4   |

|          |          |          |          |          |          |                                                          |     |
|----------|----------|----------|----------|----------|----------|----------------------------------------------------------|-----|
| 4221179  | 2711711  | 2392165  | 3458331  | 2643715  | 7630234  | [677][M+3]+                                              | 9   |
| 6328237  | 7885802  | 6582246  | 6514616  | 9068110  | 9633320  |                                                          | 2   |
| 991040.1 | 1176184  | 236280.6 | 265493.4 | 515307.9 | 285588.5 |                                                          | 4   |
| 502532.7 | 582960.7 | 519728.7 | 424533.2 | 431409.4 | 321945.4 |                                                          | 4   |
| 1208689  | 1291073  | 1519557  | 942117.2 | 1023081  | 957576.8 | [772][M]+                                                | 51  |
| 6368559  | 6377905  | 7852209  | 5447607  | 5956502  | 3097019  | [888][M]+ [M+H]+ 48!                                     | 33  |
| 1127450  | 1182430  | 1460032  | 839427   | 933006   | 3069641  |                                                          | 9   |
| 1.86E+08 | 1.93E+08 | 1.6E+08  | 1.64E+08 | 2.1E+08  | 2.12E+08 | [389][M]+                                                | 2   |
| 492204.8 | 177177.5 | 482521.4 | 704470   | 190292.2 | 532250.6 |                                                          | 102 |
| 2110712  | 1006330  | 2907147  | 2515708  | 1196462  | 1376575  | [110][M+1]+                                              | 211 |
| 1770067  | 3594492  | 2831031  | 1357211  | 2720175  | 4861488  |                                                          | 9   |
| 2659260  | 2316664  | 2799334  | 2654731  | 3006292  | 281095.2 |                                                          | 9   |
| 300556.8 | 1706503  | 1112673  | 349042   | 1308184  | 716475   | [1228][M+1]+                                             | 6   |
| 530474.7 | 595202.2 | 2039954  | 6744539  | 10319313 | 23248463 |                                                          | 3   |
| 1917489  | 2396555  | 2318984  | 1892544  | 2135817  | 587880.8 |                                                          | 4   |
| 1307891  | 1481729  | 1024186  | 1220933  | 755987.2 | 569824.9 |                                                          | 38  |
| 214320.4 | 610090.4 | 450565.1 | 114499.5 | 127542.4 | 714577.5 | [M+K]+ 25!                                               | 5   |
| 70196160 | 74330505 | 49842901 | 54019709 | 45951913 | 28033786 |                                                          | 215 |
| 1207289  | 1873786  | 332996.7 | 1401120  | 911214.7 | 3497219  |                                                          | 11  |
| 582321.8 | 69387.25 | 1709785  | 673972   | 414050.7 | 180605.2 | [M+H-H2O]                                                | 38  |
| 1217856  | 3459076  | 2723939  | 1689235  | 2354031  | 2896622  | [1387][M] <sub>2</sub> [3M+2H] <sub>2</sub> <sup>+</sup> | 62  |
| 660587.6 | 1209399  | 1151487  | 501976.7 | 943375   | 2683002  |                                                          | 9   |
| 3626691  | 1573553  | 3172859  | 6540190  | 3710830  | 3316509  |                                                          | 424 |
| 6237789  | 5094267  | 5751000  | 5589416  | 7338621  | 5546758  |                                                          | 263 |
| 36677657 | 363361.7 | 51671504 | 2704872  | 2420282  | 345501.4 |                                                          | 63  |
| 63366436 | 36768389 | 45687005 | 39375210 | 38230561 | 1889872  |                                                          | 129 |
| 2157383  | 1524906  | 3114831  | 2745047  | 1165302  | 1882204  | [M+Na]+ 9!                                               | 351 |
| 5033066  | 8448731  | 9163748  | 3636802  | 5619535  | 3798897  | [1291][M+1]+                                             | 9   |
| 2390412  | 497812.1 | 2072126  | 2952029  | 1524701  | 125445.6 | [M+K]+ 16!                                               | 46  |
| 2319800  | 2406523  | 2310315  | 2393413  | 2372542  | 6626676  |                                                          | 2   |
| 1352772  | 182054.4 | 955917   | 1066977  | 847528.9 | 1261988  |                                                          | 8   |
| 13213485 | 2891045  | 10096633 | 13451784 | 6314880  | 10680389 |                                                          | 2   |
| 2889841  | 1535335  | 2293882  | 5483753  | 908865   | 1125082  |                                                          | 93  |
| 67743332 | 55572377 | 1.65E+08 | 1.06E+08 | 59560289 | 29689288 | [24][M+1]+                                               | 85  |
| 1187424  | 857311.4 | 328422.7 | 965272   | 574059.3 | 2229704  | [M+H-CO <sub>2</sub> ]                                   | 41  |

|          |          |          |          |          |          |               |     |
|----------|----------|----------|----------|----------|----------|---------------|-----|
| 17354589 | 22674548 | 34388843 | 13010263 | 13442405 | 5711375  |               | 9   |
| 18473153 | 31368270 | 20110579 | 15037475 | 27159012 | 55866660 | [613][M]+     | 9   |
| 664626.9 | 321945.7 | 866080.2 | 588261.6 | 514559.4 | 40299.79 |               | 4   |
| 318113.5 | 834329.8 | 776462.4 | 400935   | 304887.4 | 1961534  |               | 6   |
| 1990208  | 2389887  | 1993762  | 1269664  | 2212393  | 4704460  | [1061][M]2+   | 42  |
| 1691328  | 1838280  | 1999465  | 2366771  | 1972370  | 739002.3 | [1384][M+1]2+ | 62  |
| 1695092  | 2401061  | 2238963  | 1557219  | 1833242  | 1424976  |               | 9   |
| 17087262 | 18033712 | 15840959 | 18620206 | 16807619 | 17574291 |               | 2   |
| 2206389  | 2090014  | 3222394  | 13125846 | 3553837  | 775772   |               | 6   |
| 1514753  | 901658   | 1658905  | 683922.2 | 2017758  | 582991.3 |               | 1   |
| 1943411  | 2200740  | 1697446  | 2100936  | 1264831  | 2096743  | [32][M+1]2+   | 2   |
| 736884.3 | 0        | 0        | 213703.6 | 1009996  | 152105   |               | 1   |
| 605692.4 | 508794.4 | 686928.5 | 844852.9 | 507086.2 | 52687.78 |               | 4   |
| 507777   | 684213.1 | 302090.1 | 354682   | 856513.3 | 896326.8 |               | 9   |
| 14203783 | 5897722  | 6715865  | 14035525 | 9613720  | 3610272  | [M+H]+ 22     | 14  |
| 79225.64 | 69549.29 | 179285.4 | 56734.03 | 64210.7  | 53421.26 | [M+Na+NH      | 72  |
| 44526235 | 55847559 | 50560582 | 38567162 | 49807864 | 41811109 |               | 9   |
| 43194705 | 71365626 | 50891043 | 34444388 | 56132703 | 1.13E+08 | [M+H]+ 39     | 13  |
| 1354965  | 1640929  | 1580915  | 907712.6 | 1436655  | 930440.9 |               | 4   |
| 3852965  | 3329433  | 3985994  | 3993637  | 3491686  | 3706603  | [M+2Na]2+     | 185 |
| 18320392 | 23254162 | 21238266 | 15558988 | 20774415 | 17270413 |               | 9   |
| 330000.7 | 1019104  | 1041081  | 0        | 299970.7 | 3964684  | [M+H-CH2]     | 46  |
| 2981239  | 2104158  | 2756009  | 1963330  | 2778156  | 4852242  | [380][M+1]2+  | 2   |
| 342844.5 | 540707.9 | 123528.8 | 177387.6 | 633177.3 | 1103003  |               | 9   |
| 958822.1 | 356603.2 | 930749.6 | 1036401  | 1099111  | 1503584  |               | 190 |
| 29210919 | 14240758 | 23424927 | 29895543 | 14254376 | 2684212  |               | 2   |
| 385688.4 | 836599.5 | 1033505  | 563405.3 | 801318.8 | 804354.9 |               | 4   |
| 5299661  | 5135319  | 6183851  | 5203362  | 4359938  | 12946526 |               | 2   |
| 1300084  | 2726858  | 1872169  | 834639.5 | 2451359  | 2228190  |               | 9   |
| 20270991 | 52555190 | 27938713 | 7708993  | 13814277 | 36924933 |               | 20  |
| 5037626  | 5343693  | 5041568  | 5043681  | 5156585  | 8148973  |               | 453 |
| 4766965  | 10545189 | 11483689 | 6257565  | 8000564  | 6903680  |               | 1   |
| 385690.7 | 523286.8 | 694268.7 | 420849.7 | 642039.5 | 455254.1 |               | 305 |
| 6386214  | 6377012  | 7545954  | 8427199  | 7358782  | 10447185 | [M+Na]+ 3     | 24  |
| 12476488 | 13421143 | 8458306  | 12641972 | 17995232 | 18990903 |               | 2   |

|          |          |          |          |          |          |               |     |
|----------|----------|----------|----------|----------|----------|---------------|-----|
| 7895975  | 10425185 | 10523903 | 6188402  | 31481020 | 7668885  |               | 1   |
| 3343390  | 2341753  | 4357815  | 2256175  | 1896422  | 263141.8 | [458][M+2]2+  | 139 |
| 3020959  | 1048549  | 3500384  | 2932342  | 3533468  | 8586289  |               | 2   |
| 4397177  | 2879287  | 3463155  | 3343076  | 4586116  | 7590193  |               | 2   |
| 226386.2 | 430843.5 | 306001.6 | 224487.3 | 160252.6 | 68723.17 | [963][M+1]3+  | 247 |
| 1923458  | 2131323  | 1209241  | 1251244  | 1264149  | 1119842  |               | 329 |
| 2043175  | 2793146  | 3157359  | 2543354  | 2653011  | 0        |               | 13  |
| 3494364  | 4749448  | 4574941  | 1613619  | 2955114  | 2022083  |               | 15  |
| 676454   | 3126043  | 153841.9 | 1095959  | 2057750  | 1569057  |               | 11  |
| 3752522  | 1725218  | 2597093  | 1828388  | 3566937  | 900524.1 |               | 4   |
| 705214.9 | 1098048  | 964682.9 | 831708.8 | 676373.8 | 320893.3 |               | 4   |
| 1967462  | 1786019  | 1675028  | 1339559  | 1621928  | 870428.3 |               | 4   |
| 6141608  | 6531428  | 6318328  | 5062385  | 6678645  | 8180877  |               | 4   |
| 1753369  | 95295.64 | 1055352  | 913084.9 | 582460.7 | 0        |               | 1   |
| 2134130  | 133036.6 | 115779   | 1025450  | 1355016  | 456034.5 |               | 1   |
| 6112918  | 5673078  | 4664359  | 5547925  | 6346261  | 4901272  |               | 386 |
| 12774490 | 5680541  | 1985689  | 10271628 | 6653679  | 16140466 | [489][M]+     | 2   |
| 1772241  | 162718.6 | 1281324  | 1439862  | 1272761  | 892695.1 |               | 9   |
| 296116.4 | 967888.4 | 421140   | 155017.6 | 619766.3 | 1133776  |               | 9   |
| 1481865  | 1334884  | 1862569  | 2652307  | 1475819  | 924124   | [1339][M+1]2+ | 62  |
| 815448.5 | 791929   | 652376.3 | 901052   | 564135.9 | 754243.6 |               | 366 |
| 5998124  | 5739374  | 639240.5 | 3964148  | 2249093  | 3498417  | [3M+Na+2I     | 11  |
| 3066544  | 3458968  | 2904112  | 2685719  | 4000796  | 3069616  |               | 9   |
| 13017723 | 15159966 | 7243766  | 12178190 | 12117291 | 13214481 |               | 3   |
| 1.24E+08 | 1.18E+08 | 236892.1 | 415618.1 | 1.23E+08 | 134501   |               | 43  |
| 3812065  | 4891272  | 3248795  | 4418127  | 1558681  | 3283279  |               | 389 |
| 2755663  | 4095756  | 3730203  | 2217188  | 2687286  | 1084551  | [M+H]+ 47!    | 8   |
| 2298770  | 4186903  | 1559281  | 2231601  | 1481790  | 1947301  |               | 2   |
| 3222371  | 4171296  | 4091833  | 2508026  | 3397137  | 2328261  |               | 9   |
| 352824.5 | 780828.4 | 1487206  | 0        | 447163.4 | 1984728  | [M+K]+ 33!    | 15  |
| 1859937  | 7306816  | 1784435  | 853301.2 | 6070127  | 15283228 |               | 84  |
| 4025287  | 4639078  | 5239708  | 4080372  | 1931613  | 2046155  | [510][M]3+    | 2   |
| 730823.1 | 273660.5 | 613929.7 | 231413   | 615025.6 | 173488.8 |               | 44  |
| 532288.1 | 401268.7 | 565725.8 | 468616.3 | 427491.9 | 245445.1 | [1540][M+1]+  | 71  |
| 404280   | 682849.4 | 1128044  | 2845234  | 364827.1 | 1499966  |               | 52  |



|          |          |          |          |          |          |              |     |
|----------|----------|----------|----------|----------|----------|--------------|-----|
| 616098.3 | 1199400  | 588483.6 | 387199.4 | 474470.6 | 634204.4 |              | 9   |
| 4121332  | 2309743  | 6664186  | 3273263  | 2926967  | 2897607  |              | 341 |
| 4609969  | 4500961  | 3790990  | 3420302  | 3960809  | 2212238  | [883][M+1]+  | 4   |
| 11773543 | 2624038  | 16217100 | 2904180  | 3425044  | 0        |              | 2   |
| 9533813  | 16808035 | 14370273 | 7133280  | 11499035 | 18180788 |              | 9   |
| 3657397  | 2614678  | 3313352  | 6779272  | 6972655  | 1090350  |              | 1   |
| 4023401  | 6532614  | 1533441  | 1470936  | 6089919  | 2902865  |              | 1   |
| 1143152  | 1577349  | 1320540  | 932685.8 | 1068865  | 485593.2 | [M+H-CH3]    | 8   |
| 3136707  | 4273833  | 3516868  | 5011551  | 3402338  | 4217644  |              | 2   |
| 2875950  | 2449973  | 2248458  | 2386384  | 2756333  | 1043808  |              | 4   |
| 2092824  | 2617407  | 2853388  | 1680836  | 2046572  | 801445.6 |              | 9   |
| 6875732  | 6220514  | 2521450  | 2695374  | 7488273  | 5739400  | [M+H]+ 17!   | 3   |
| 30764586 | 24770274 | 25159287 | 25512127 | 21796281 | 5719199  |              | 2   |
| 2209728  | 2370433  | 3084716  | 1683251  | 2209513  | 483714.4 | [993][M]+    | 242 |
| 456847.4 | 567467.5 | 628431   | 577712.7 | 246033.1 | 165182.1 | [920][M+1]3+ | 23  |
| 11647556 | 1223522  | 5965112  | 10781628 | 2665072  | 2743267  |              | 15  |
| 13017632 | 4406208  | 7321521  | 8320447  | 86517900 | 4386775  |              | 1   |
| 4323024  | 3718840  | 3272196  | 3154581  | 3091356  | 768469.7 |              | 12  |
| 3436675  | 3810207  | 3752618  | 4965961  | 4660731  | 4983541  |              | 226 |
| 3270888  | 2076372  | 3248042  | 3883877  | 1673905  | 1308191  | [1485][M]+   | 256 |
| 333345.8 | 384965.1 | 487038.4 | 1061385  | 138626.3 | 469250.5 | [M+2Na]2+    | 18  |
| 15801300 | 19307767 | 18698767 | 13443361 | 15220315 | 9188127  |              | 9   |
| 546709.7 | 295234.7 | 298260.7 | 226914.2 | 257532.2 | 13903.01 | [3M+Na+K]    | 86  |
| 47393329 | 57070606 | 58035208 | 36024219 | 40863899 | 30218758 |              | 4   |
| 6012484  | 4112852  | 3267304  | 6051352  | 4252600  | 1286161  |              | 2   |
| 222976.8 | 258584.5 | 173356   | 169807.5 | 149038.5 | 861738.4 | [M+K]+ 20!   | 136 |
| 363143.4 | 325854.3 | 301212.2 | 267251.6 | 383377.4 | 860473.3 |              | 5   |
| 32587419 | 31056938 | 37100176 | 28215846 | 28830639 | 16573135 |              | 17  |
| 3179078  | 1153905  | 2811491  | 2474421  | 1639140  | 1984738  |              | 2   |
| 2437422  | 2275081  | 2013542  | 1500051  | 2303519  | 1473975  | [3M+2H]2+    | 29  |
| 8235862  | 6843552  | 6253960  | 7444309  | 8049284  | 4413155  |              | 2   |
| 6793654  | 18906895 | 15486630 | 4701159  | 12706895 | 25251677 | [1458][M]+   | 9   |
| 1902026  | 3899242  | 2705629  | 1063782  | 2424923  | 4754936  |              | 9   |
| 905683.9 | 901960.6 | 819843.8 | 1001252  | 731032.9 | 501080.8 | [171][M+1]+  | 128 |
| 2521184  | 5023087  | 4286355  | 1649128  | 2839941  | 2984354  | [M+Na+NH     | 13  |

|          |          |          |          |          |          |                                  |     |
|----------|----------|----------|----------|----------|----------|----------------------------------|-----|
| 1003016  | 4940143  | 4599770  | 4353273  | 4829816  | 4505713  | [M+H-C2H <sub>4</sub>            | 257 |
| 470814.1 | 324375.2 | 650306.5 | 800220.4 | 453681.8 | 370576   | [524][M+1]+                      | 410 |
| 1861234  | 3394876  | 2763914  | 4489136  | 5864672  | 1428237  | [M+H+NH <sub>3</sub>             | 3   |
| 1844941  | 1216358  | 1728425  | 1296959  | 1240619  | 3427455  |                                  | 2   |
| 1548125  | 2167406  | 1510194  | 1189133  | 1552513  | 1200516  |                                  | 14  |
| 259318.7 | 1181640  | 176837.1 | 212637.2 | 255241.6 | 192910.3 | [M+H+NH <sub>3</sub>             | 56  |
| 6754645  | 31370834 | 15598887 | 6866024  | 7070521  | 8660673  | [836][M]+ [M+H]+ 46              | 20  |
| 5883053  | 911790   | 3930511  | 1677404  | 7665669  | 3826617  | [M+Na+HC                         | 252 |
| 4997078  | 3480173  | 2370782  | 3561790  | 5455719  | 6774726  | [363][M+1]2+                     | 2   |
| 2063141  | 1471460  | 1872092  | 445412.4 | 503585   | 912738.4 |                                  | 4   |
| 1136167  | 1474419  | 2124758  | 1037506  | 1142802  | 1939397  | [M+2H-C4H <sub>8</sub>           | 14  |
| 2318352  | 1806785  | 1623457  | 1228160  | 2862106  | 8436567  |                                  | 2   |
| 2844661  | 1628159  | 3064514  | 886562.7 | 2367267  | 827017.7 |                                  | 53  |
| 7370188  | 6537381  | 8844615  | 6534108  | 6762723  | 4046280  | [1110][M+2]+                     | 43  |
| 4946854  | 1815845  | 6795431  | 4395512  | 2329411  | 10401821 |                                  | 9   |
| 15654397 | 20588273 | 17510642 | 11841550 | 16174530 | 12160981 |                                  | 9   |
| 142576.7 | 1017461  | 1471361  | 105875.6 | 596177.3 | 0        | [979][M+1]+                      | 9   |
| 7805758  | 8412403  | 6842075  | 5717401  | 8680121  | 6977690  |                                  | 2   |
| 3631704  | 3728626  | 3116436  | 2702156  | 5242307  | 4583201  |                                  | 2   |
| 5716335  | 2194933  | 4703304  | 9129996  | 5188442  | 14625598 | [555][M]+ [M+H-CO <sub>2</sub> ] | 83  |
| 677148.9 | 1041693  | 991715.4 | 531446.9 | 665070.1 | 642053.6 |                                  | 8   |
| 31979345 | 61155363 | 54158275 | 18150045 | 69849996 | 24986507 |                                  | 1   |
| 151868   | 54889.09 | 324399.5 | 286981.2 | 194049.8 | 98933.04 |                                  | 62  |
| 547090.8 | 1063055  | 1086087  | 651525.8 | 604283.9 | 527816.5 |                                  | 4   |
| 5358830  | 3561395  | 3103830  | 6791305  | 6150496  | 2364816  |                                  | 2   |
| 4603878  | 4099355  | 14867244 | 3617173  | 4794678  | 2732085  | [578][M]+                        | 9   |
| 1793630  | 2455746  | 2265674  | 1350571  | 702766.3 | 3388195  |                                  | 4   |
| 3616670  | 2580084  | 3203209  | 3482348  | 4097931  | 3106619  |                                  | 323 |
| 9314123  | 10939050 | 924810.7 | 6451218  | 10063702 | 10168452 |                                  | 11  |
| 1100224  | 494346.9 | 356937.8 | 385978.6 | 1197148  | 726412.6 |                                  | 1   |
| 370496.7 | 160316.8 | 464732   | 3115049  | 573668.6 | 1662783  | [M+K]+ 42                        | 8   |
| 3812201  | 4465142  | 5566059  | 3343299  | 3331034  | 245645.9 |                                  | 9   |
| 3318883  | 655273.6 | 414631.5 | 3089948  | 1104507  | 0        |                                  | 9   |
| 313824.5 | 308108.5 | 470433   | 482745.9 | 284858.5 | 773253.2 |                                  | 9   |
| 615196   | 33438.22 | 1666323  | 529103.5 | 528008.2 | 768989.7 |                                  | 9   |

|          |          |          |          |          |          |                          |     |
|----------|----------|----------|----------|----------|----------|--------------------------|-----|
| 362988.3 | 319525.6 | 817919.9 | 273797.8 | 161190.4 | 524816.1 | [M+2H-CO]                | 18  |
| 4062299  | 3989582  | 3798486  | 3936339  | 2815378  | 5947155  |                          | 266 |
| 7921590  | 4576062  | 7777624  | 10589718 | 4594056  | 7553582  | [M+H] <sup>+</sup> 10    | 319 |
| 6888473  | 10207018 | 4491707  | 4549592  | 4752268  | 4275583  |                          | 253 |
| 6182872  | 7317350  | 6830785  | 3799607  | 6833958  | 3321047  |                          | 9   |
| 2895478  | 2899482  | 2625306  | 2806399  | 4515098  | 1871601  | [512][M] <sup>2+</sup>   | 58  |
| 1443267  | 2392862  | 2687128  | 1426760  | 1316835  | 405990   |                          | 9   |
| 5383569  | 5259368  | 5448512  | 3973385  | 5078284  | 569979.4 | [1351][M+2] <sup>+</sup> | 2   |
| 3100079  | 4263874  | 2831880  | 2421680  | 4305627  | 3777665  | [M+2H-CH <sub>2</sub> ]  | 13  |
| 408590.5 | 496745.8 | 729886.3 | 284477.1 | 415696.9 | 634583.7 | [188][M+1] <sup>2+</sup> | 4   |
| 2863755  | 5889688  | 1599638  | 4929927  | 7009058  | 936340.3 |                          | 2   |
| 1777882  | 1116476  | 3229956  | 3154487  | 1194033  | 2978160  |                          | 288 |
| 5082824  | 10207017 | 4724030  | 4810184  | 3130907  | 4195628  |                          | 250 |
| 949450.9 | 240284.6 | 477977.6 | 369662   | 619460.5 | 34365.34 |                          | 142 |
| 857525.4 | 630372.7 | 235938.7 | 412602.5 | 755893.1 | 0        |                          | 9   |
| 749573.7 | 750469   | 840675.3 | 579648.7 | 757401.9 | 237030.4 | [3M+2Na+]                | 14  |
| 3083887  | 9161829  | 9654682  | 2026799  | 4576502  | 10327466 |                          | 9   |
| 7304049  | 5122846  | 5232121  | 4665017  | 4443524  | 328489.5 |                          | 286 |
| 376619   | 1342513  | 1064634  | 73738.32 | 614326.4 | 2578743  | [776][M+2] <sup>2+</sup> | 9   |
| 4248122  | 4182066  | 4416779  | 3527187  | 3724262  | 742244.1 |                          | 9   |
| 7815092  | 6761607  | 7055630  | 6989005  | 9403523  | 8124675  |                          | 2   |
| 269344.8 | 811251.1 | 257325.5 | 223486.2 | 145814.8 | 65009.22 | [1405][M+1] <sup>+</sup> | 220 |
| 0        | 1235835  | 1974571  | 0        | 1073056  | 0        |                          | 1   |
| 3940593  | 942020.1 | 3490384  | 4503634  | 953201.9 | 1645448  |                          | 2   |
| 1039353  | 1021241  | 1265942  | 700978.3 | 412601.4 | 1181756  |                          | 9   |
| 4020810  | 4657860  | 4007626  | 3622985  | 3559151  | 2253959  | [1138][M+1] <sup>+</sup> | 23  |
| 1270236  | 853760.3 | 536319.3 | 892554.2 | 666503.9 | 624274.7 |                          | 133 |
| 236781.6 | 304684.1 | 195904.8 | 211237   | 204713.9 | 258496   |                          | 277 |
| 7084337  | 6742929  | 6827376  | 7728498  | 4698875  | 1154382  | [1605][M] <sup>+</sup>   | 2   |
| 395564.6 | 347437.6 | 916338.5 | 233411.2 | 111808.6 | 235001.7 |                          | 302 |
| 674319.6 | 1486300  | 1383733  | 332292   | 623372.9 | 2589477  |                          | 9   |
| 1419535  | 2909331  | 2118472  | 1212325  | 2326265  | 4253637  |                          | 9   |
| 1253900  | 733045.7 | 861854.9 | 1530605  | 746136.5 | 1005079  |                          | 41  |
| 849444.8 | 2398237  | 2419224  | 675742.1 | 1236971  | 423000.9 |                          | 9   |
| 46197445 | 65338534 | 34869658 | 40962721 | 48228925 | 1.1E+08  | [1153][M] <sup>+</sup>   | 2   |

|          |          |          |          |          |          |                        |     |
|----------|----------|----------|----------|----------|----------|------------------------|-----|
| 581036.5 | 946803.7 | 2485802  | 698041.6 | 465893.2 | 1769691  |                        | 1   |
| 2282381  | 3468723  | 2402333  | 2150120  | 2879373  | 2670653  | [2M+3H]3+              | 13  |
| 691357.4 | 810665.7 | 615807.1 | 884175.9 | 807292.6 | 94256.33 |                        | 4   |
| 1580894  | 2933965  | 1080240  | 1027317  | 2912960  | 6979829  | [820][M+1]3+           | 4   |
| 2613167  | 594050.2 | 0        | 1864860  | 2394506  | 1055151  |                        | 1   |
| 11646583 | 26454582 | 4686442  | 9642271  | 29785149 | 52588573 | [1351][M]+             | 2   |
| 1344907  | 629579   | 635906.7 | 1009777  | 716909   | 61351.35 |                        | 4   |
| 1878462  | 3528415  | 3576047  | 1451520  | 2429038  | 596209.5 | [M+K]+ 36 <sup>+</sup> | 46  |
| 76736.72 | 160679.2 | 701070.3 | 195989.2 | 349346   | 6059479  |                        | 41  |
| 2429597  | 2734760  | 2266767  | 2843674  | 2475536  | 2498406  |                        | 317 |
| 203329.5 | 312254.4 | 285920.7 | 233570.5 | 254857.5 | 24761.77 | [1408][M+1]2+          | 23  |
| 389947.5 | 674930.9 | 71274.52 | 0        | 441550.1 | 686775.9 |                        | 46  |
| 7502363  | 9698066  | 13435021 | 1690722  | 16051352 | 1.01E+08 |                        | 1   |
| 1643595  | 1581644  | 1981846  | 1531895  | 1118672  | 1107584  | [1513][M]+             | 246 |
| 1361538  | 858374.6 | 605315.4 | 774298.5 | 692709   | 260608.5 |                        | 338 |
| 1.11E+08 | 1.35E+08 | 1.99E+08 | 1.04E+08 | 80758744 | 53522491 | [92][M+1]+             | 18  |
| 11029309 | 6990354  | 12957943 | 17267348 | 25297309 | 661379.6 |                        | 6   |
| 30534108 | 29723238 | 35003031 | 41866726 | 32835172 | 31848456 | [743][M+1]+            | 83  |
| 19288102 | 3238651  | 24967113 | 14499586 | 13500735 | 5861284  | [756][M+1]+            | 1   |
| 22756088 | 11629170 | 4324820  | 16341900 | 19791345 | 14583773 |                        | 3   |
| 1070026  | 423176.8 | 1211843  | 342027.6 | 1765022  | 474353.2 |                        | 2   |
| 5757673  | 3218930  | 4181807  | 4091985  | 2692137  | 105257.1 |                        | 129 |
| 2335479  | 3825912  | 2317070  | 2121343  | 2533633  | 2330560  | [M+H]+ 41 <sup>+</sup> | 435 |
| 686058.3 | 1086941  | 1120007  | 408928.4 | 1197472  | 1039554  |                        | 9   |
| 6191234  | 4262748  | 6291475  | 5433319  | 8173216  | 8802190  |                        | 385 |
| 3940933  | 7139653  | 5056115  | 2918678  | 4394678  | 10377379 |                        | 4   |
| 454996.9 | 900874.3 | 453844.7 | 425653.8 | 338668.8 | 662508.9 |                        | 8   |
| 1.19E+08 | 1.16E+08 | 1.33E+08 | 1.58E+08 | 1.27E+08 | 1.26E+08 | [743][M]+ [M+H+NH3     | 83  |
| 1010039  | 2049894  | 1274488  | 868802.2 | 966552.5 | 3005244  |                        | 9   |
| 3131492  | 3748257  | 3908824  | 2424454  | 2892725  | 1612941  |                        | 9   |
| 85888.43 | 1884561  | 2266516  | 569918.6 | 692731.1 | 1154321  | [M+H]+ 23 <sup>+</sup> | 20  |
| 459575.8 | 712720.7 | 345247.2 | 469881.5 | 379320.9 | 360217.8 |                        | 511 |
| 25674.35 | 698053   | 54592.05 | 0        | 66088.91 | 45920.97 |                        | 18  |
| 284015.2 | 507293.1 | 301808.9 | 307111.7 | 175804.2 | 690878.7 |                        | 243 |
| 585911.5 | 1619630  | 2755283  | 449853.3 | 592811.8 | 1006840  |                        | 9   |

|          |          |          |          |          |          |                                              |     |
|----------|----------|----------|----------|----------|----------|----------------------------------------------|-----|
| 11900174 | 10008638 | 1683351  | 10763669 | 10694912 | 16778724 | [M+H] <sup>+</sup> 50                        | 3   |
| 6069465  | 6366664  | 2889830  | 1287929  | 5915089  | 49732231 | [M+2Na-H]                                    | 81  |
| 5.4E+08  | 8.4E+08  | 4.69E+08 | 4.51E+08 | 5.12E+08 | 1.44E+09 |                                              | 3   |
| 5907455  | 10707764 | 7132994  | 4902299  | 8610918  | 14846544 |                                              | 9   |
| 6914694  | 7374107  | 6818160  | 4360499  | 5789123  | 4435810  |                                              | 4   |
| 829020.6 | 733020.3 | 803558.9 | 535494.2 | 684363.3 | 67323.64 | [966][M+1] <sup>+</sup>                      | 280 |
| 3833058  | 1880030  | 3759075  | 4083921  | 1370785  | 0        |                                              | 2   |
| 24420356 | 14459089 | 16756343 | 15086339 | 12684534 | 607989.2 |                                              | 129 |
| 14588743 | 18271558 | 15784170 | 20016787 | 19529608 | 8409492  | [41][M] <sup>3+</sup>                        | 2   |
| 1710862  | 1955990  | 2110400  | 1392856  | 1679790  | 1092419  | [401][M+1] <sup>+</sup>                      | 4   |
| 48561012 | 54592589 | 54205016 | 47864248 | 46899905 | 35810382 | [689][M] <sup>+</sup> [M+H] <sup>+</sup> 40  | 35  |
| 1929302  | 4389463  | 3925372  | 1124566  | 3263096  | 1888953  |                                              | 13  |
| 2.26E+08 | 41846231 | 55878632 | 2.15E+08 | 77402361 | 1.95E+08 |                                              | 1   |
| 14779698 | 11000009 | 6838973  | 14069999 | 7926242  | 2002225  |                                              | 2   |
| 2091614  | 2337762  | 1668966  | 2221533  | 2302498  | 1498078  |                                              | 2   |
| 1412985  | 2110408  | 2339608  | 963195.9 | 1549677  | 1030814  |                                              | 4   |
| 1706074  | 921955.1 | 2196753  | 2019620  | 1645914  | 1600870  |                                              | 141 |
| 635628.6 | 210446.8 | 521375.8 | 1046316  | 709568.6 | 525184.8 | [M+K+NH <sub>3</sub> ]                       | 185 |
| 1938176  | 961284.4 | 917746.8 | 1579725  | 3407096  | 7094842  | [1309][M+5] <sup>2+</sup>                    | 2   |
| 15873919 | 19106716 | 18691967 | 13446741 | 15057403 | 9149960  |                                              | 9   |
| 1220705  | 2265894  | 1479633  | 759638.2 | 1539281  | 3493591  |                                              | 4   |
| 2129553  | 2062121  | 2204817  | 1889867  | 1848413  | 945867.5 |                                              | 4   |
| 6139670  | 6304563  | 5645375  | 5749490  | 4768886  | 1753608  | [1273][M+1] <sup>2+</sup>                    | 2   |
| 1235187  | 1080063  | 1914488  | 2728714  | 1428677  | 1579280  | [1496][M+1] <sup>+</sup>                     | 83  |
| 626980.7 | 489469.1 | 760820.7 | 405518.7 | 182269.6 | 272409.5 | [1108][M] <sup>3</sup> [2M+3H] <sup>3+</sup> | 159 |
| 1296418  | 956718.8 | 745672.9 | 1575367  | 598134.6 | 872654.4 | [372][M] <sup>+</sup>                        | 129 |
| 15558044 | 10971190 | 13482579 | 16073243 | 13796722 | 4755157  |                                              | 2   |
| 1412084  | 2068710  | 1249248  | 1220746  | 1584366  | 1727300  |                                              | 2   |
| 1.14E+08 | 1.93E+08 | 1E+08    | 94056445 | 1.02E+08 | 1.48E+08 | [M+K+HCO]                                    | 3   |
| 2049828  | 2673151  | 1929511  | 1704871  | 2431737  | 6251814  | [M+3H-C <sub>3</sub> H <sub>7</sub> ]        | 13  |
| 5171582  | 7694038  | 5802246  | 7149307  | 10154425 | 14464962 |                                              | 2   |
| 1844198  | 4702658  | 3705693  | 1642254  | 3255612  | 1863401  | [322][M] <sup>3+</sup>                       | 9   |
| 9600040  | 16783410 | 14609880 | 7303091  | 11038563 | 18695714 |                                              | 9   |
| 394611.9 | 803441.7 | 764058.7 | 368672.2 | 364422.3 | 516284.5 |                                              | 9   |
| 472495.8 | 625238.2 | 293459.9 | 365635.6 | 566106.3 | 1789442  |                                              | 4   |

|          |          |          |          |          |          |                       |     |
|----------|----------|----------|----------|----------|----------|-----------------------|-----|
| 5552696  | 4762179  | 7838396  | 7167271  | 37558675 | 3891257  |                       | 1   |
| 4938230  | 4327286  | 5315728  | 3686652  | 4498250  | 2248860  | [320][M]2+            | 17  |
| 1289160  | 1433950  | 1202094  | 763427.8 | 1108213  | 543767.6 |                       | 9   |
| 1.69E+08 | 1.61E+08 | 1.56E+08 | 1.51E+08 | 50377400 | 28630936 |                       | 188 |
| 44374654 | 55818153 | 50496362 | 38391879 | 49521632 | 41515999 |                       | 9   |
| 18232289 | 19861813 | 18082266 | 11555255 | 15225854 | 13114572 |                       | 4   |
| 5595304  | 16118282 | 4709164  | 9673945  | 6578054  | 67297387 |                       | 1   |
| 3225582  | 2392916  | 3266995  | 2637331  | 2294596  | 1549904  | [1162][M+1]2+         | 2   |
| 466854   | 495528.2 | 717832.5 | 601303.9 | 561205.8 | 298029.3 |                       | 4   |
| 16932281 | 16437074 | 17460995 | 12429733 | 11359302 | 11661213 | [726][M]+             | 4   |
| 1325826  | 1314084  | 1387961  | 815067.6 | 1082554  | 1760132  | [1164][M+2]+          | 76  |
| 9435834  | 5858402  | 8273907  | 4555307  | 1443763  | 5057392  |                       | 2   |
| 1026000  | 1771628  | 2300319  | 1173274  | 1655575  | 918748.8 |                       | 9   |
| 1245020  | 1762660  | 2363229  | 1852343  | 1382317  | 0        |                       | 9   |
| 3847498  | 4801029  | 2148884  | 1371314  | 2069320  | 3311615  |                       | 4   |
| 3251644  | 4509093  | 4406536  | 2619854  | 3145195  | 1934906  |                       | 9   |
| 328436.7 | 585551.9 | 905494.2 | 1007101  | 460051.8 | 571191   | [M+H]+ 65.            | 185 |
| 3960895  | 4653960  | 3873738  | 1331834  | 6293281  | 2197005  | [M+H]+ 39.            | 3   |
| 1327521  | 1671070  | 944311.2 | 2235603  | 3551896  | 3805041  |                       | 2   |
| 1607432  | 530558.3 | 2311054  | 1025178  | 1162785  | 475672.5 |                       | 9   |
| 1179902  | 963077.5 | 1750284  | 1117098  | 984106.4 | 555631.1 |                       | 465 |
| 20274386 | 23230559 | 19047550 | 12776122 | 13262617 | 18628330 |                       | 1   |
| 422258.2 | 469415.3 | 492467.3 | 331733.5 | 383435.3 | 91479.24 |                       | 4   |
| 1603632  | 4413285  | 5300130  | 1182912  | 2444629  | 3489688  |                       | 9   |
| 8612959  | 1940613  | 2079395  | 5930744  | 2581279  | 538144.8 | [1437][M]+ [M+H]+ 79. | 41  |
| 2389954  | 3415373  | 2885442  | 2027315  | 2649743  | 3795961  |                       | 4   |
| 1733809  | 3179864  | 1728984  | 2737831  | 2890283  | 3138967  |                       | 62  |
| 24901355 | 31224740 | 29584361 | 17751380 | 32949060 | 41672870 | [1180][M+2]+          | 17  |
| 1134221  | 1222462  | 1092865  | 1287011  | 886051.6 | 0        |                       | 9   |
| 0        | 476620.5 | 5383820  | 133325.5 | 614967.3 | 0        |                       | 46  |
| 855383.3 | 2783930  | 2296164  | 1910361  | 3321204  | 1967374  | [M+H-COCl             | 29  |
| 10494483 | 11644910 | 8435800  | 8890828  | 9215808  | 8951519  | [338][M]3+            | 2   |
| 1.22E+08 | 1.76E+08 | 1.66E+08 | 1.6E+08  | 1.51E+08 | 1.65E+08 |                       | 120 |
| 407663.4 | 515769.5 | 610652.8 | 591209.6 | 371119.3 | 440583.4 | [1203][M+1]+          | 299 |
| 569963.1 | 50748.74 | 1571381  | 403776.8 | 526915.9 | 106081.7 | [1404][M+1]2+         | 9   |

|          |          |          |          |          |          |              |     |
|----------|----------|----------|----------|----------|----------|--------------|-----|
| 9395613  | 11079292 | 14535749 | 8196586  | 8385440  | 1302253  | [2][M]+      | 9   |
| 2283428  | 1692249  | 2341618  | 2342911  | 2076748  | 1384093  | [1040][M+1]+ | 278 |
| 638675   | 524833.8 | 775627.9 | 622615.7 | 556737.9 | 235306.8 | [M+H+NH3     | 23  |
| 658015.6 | 1218443  | 710988.4 | 580262.1 | 774129.2 | 1024775  |              | 8   |
| 520882.6 | 809112.1 | 655304.6 | 260347.4 | 466072.5 | 103476.4 |              | 9   |
| 6052556  | 8014653  | 6923281  | 4657175  | 6290318  | 4882021  |              | 9   |
| 1048718  | 1826546  | 396640.8 | 1142277  | 1207359  | 11011146 |              | 1   |
| 1154206  | 2049777  | 880944.5 | 879934.5 | 1405061  | 2362329  |              | 9   |
| 3686948  | 2436585  | 3105403  | 2592741  | 2024558  | 820817   |              | 4   |
| 5424670  | 5332689  | 4902305  | 6519613  | 5881586  | 4078349  |              | 460 |
| 482785.9 | 2003356  | 2033765  | 982878.4 | 363554.7 | 1599803  |              | 52  |
| 1381971  | 1663719  | 1925597  | 1164701  | 1361929  | 628466   |              | 4   |
| 12704.56 | 406143.7 | 25233.2  | 16648.04 | 22667.4  | 132874.3 |              | 18  |
| 546453.5 | 1194576  | 720162.8 | 313633.4 | 681881.6 | 1138476  |              | 8   |
| 359843.1 | 894349.7 | 749761.4 | 1108474  | 706984.5 | 0        |              | 1   |
| 1668376  | 2228252  | 1551914  | 996901.8 | 1458674  | 894941.8 | [493][M+3]+  | 4   |
| 4693470  | 4036375  | 5071330  | 4819512  | 3217007  | 3532241  |              | 61  |
| 10597667 | 9926442  | 7658844  | 2816888  | 18200513 | 12423425 |              | 22  |
| 416683.2 | 205566.5 | 482232   | 171330.6 | 344395.9 | 121465.6 |              | 23  |
| 741729.7 | 809679.3 | 261040.5 | 531490   | 889824.7 | 1343668  |              | 9   |
| 3077828  | 4251045  | 4247845  | 2216260  | 2933424  | 1394935  |              | 9   |
| 1667949  | 2265089  | 1255417  | 998741.5 | 2460008  | 4356900  |              | 9   |
| 1070808  | 1969930  | 2213439  | 818753.8 | 1200199  | 2220123  |              | 9   |
| 782950   | 960157.9 | 687016.7 | 445262.5 | 374861.4 | 701722   |              | 5   |
| 3764584  | 5920199  | 3852250  | 3339011  | 5159374  | 3707057  | [M+Na]+ 8:   | 13  |
| 4636061  | 5509467  | 9524861  | 30181472 | 3384643  | 898788.9 | [M+Na]+ 4:   | 6   |
| 290698.8 | 293748.8 | 796285.5 | 4922106  | 255418.7 | 682495   |              | 332 |
| 755871.7 | 2027005  | 420772.5 | 366915.6 | 290771.8 | 435440   |              | 254 |
| 7357837  | 4743535  | 6554278  | 5150408  | 5450758  | 2562367  | [3M+2K]2+    | 14  |
| 958269.9 | 440216.8 | 4317675  | 3682446  | 2218511  | 2599263  |              | 9   |
| 3364571  | 2458011  | 2611624  | 3472730  | 1774118  | 2697743  | [905][M+2]+  | 1   |
| 854070.3 | 2439590  | 2443253  | 709916.7 | 1205490  | 698977   |              | 9   |
| 11198624 | 7229603  | 1662955  | 9973495  | 11293551 | 17175831 | [M+K]+ 34:   | 21  |
| 4680526  | 1718134  | 3897142  | 11480391 | 1705289  | 977612.5 | [46][M+1]2+  | 2   |
| 13448488 | 51521989 | 1004959  | 44696835 | 897595.4 | 28906345 | [M+Na]+ 1:   | 11  |

|          |          |          |          |          |          |                           |     |
|----------|----------|----------|----------|----------|----------|---------------------------|-----|
| 5656246  | 6207708  | 6478969  | 4096651  | 4880648  | 3406522  |                           | 1   |
| 2487974  | 1366103  | 8039130  | 3019038  | 1429643  | 1571021  |                           | 282 |
| 6735022  | 4149911  | 2762055  | 5893464  | 1366867  | 3027765  |                           | 97  |
| 1152349  | 1713790  | 1161009  | 675664.4 | 1261956  | 1876526  |                           | 9   |
| 4.15E+08 | 8437627  | 3.66E+08 | 3.71E+08 | 14138219 | 36294592 |                           | 2   |
| 5639073  | 2527057  | 6183068  | 4460422  | 8110223  | 14501372 |                           | 2   |
| 1277956  | 1695842  | 1189601  | 1102230  | 1509137  | 507826.1 | [M+Na] <sup>+</sup> 2!    | 14  |
| 4007237  | 3747991  | 3565896  | 4154954  | 3274718  | 2882538  | [1036][M] <sup>+</sup>    | 22  |
| 846550.3 | 542950.1 | 782752.8 | 707210.3 | 646401.1 | 4729015  |                           | 9   |
| 812139.7 | 727879.8 | 880721.7 | 650792.5 | 514979.5 | 626259   |                           | 5   |
| 4959922  | 4793627  | 4514989  | 4509758  | 4804368  | 4783568  |                           | 226 |
| 1273360  | 703590.2 | 822782   | 1264518  | 1377139  | 0        |                           | 4   |
| 2051050  | 1308327  | 9949676  | 987541.1 | 873922.8 | 551159.4 |                           | 89  |
| 2832732  | 3187474  | 1498449  | 1892520  | 3260078  | 4571804  |                           | 9   |
| 209088.5 | 228448.8 | 326223.9 | 271281.4 | 231862.2 | 272358.9 | [175][M+1] <sup>+</sup>   | 249 |
| 1795694  | 1827222  | 2781578  | 1272599  | 2141721  | 1004296  |                           | 4   |
| 8928397  | 13020597 | 14234404 | 6950626  | 4291886  | 15642073 | [M+H+CF <sub>3</sub> O]   | 18  |
| 4301679  | 1898996  | 2032185  | 949479.4 | 1717964  | 3340194  |                           | 2   |
| 321129   | 1024703  | 470887.6 | 340970.2 | 444687.9 | 1680654  |                           | 4   |
| 8237953  | 2066416  | 208980.5 | 6360030  | 8741039  | 8150393  | [M+K+NaCl]                | 84  |
| 839086.6 | 4098572  | 3393749  | 3026340  | 3234138  | 4125694  |                           | 310 |
| 174679.6 | 276053   | 376900.1 | 252797.3 | 231324.3 | 141764.4 |                           | 319 |
| 3583463  | 4517273  | 2993652  | 3505304  | 3050277  | 778324   |                           | 2   |
| 10284611 | 8882478  | 8881183  | 10949657 | 12594270 | 5208174  |                           | 2   |
| 7444028  | 8044891  | 7232914  | 5869609  | 7235234  | 11947573 | [M+H] <sup>+</sup> 42!    | 5   |
| 1757760  | 2526648  | 1723417  | 1535669  | 1412871  | 622975.9 |                           | 9   |
| 7368583  | 9693876  | 3126647  | 5040748  | 5669558  | 3440552  | [903][M] <sup>+</sup>     | 281 |
| 338449.3 | 865181.8 | 740186.4 | 307823.6 | 482030.7 | 907462.4 |                           | 4   |
| 1224015  | 482169   | 1154252  | 204102.9 | 1249565  | 1064225  | [1152][M+1] <sup>+</sup>  | 101 |
| 1819650  | 2267987  | 3021324  | 2258295  | 1466911  | 1254682  | [387][M+1] <sup>+</sup>   | 237 |
| 11086582 | 15920304 | 15991603 | 16385104 | 9253000  | 10829220 |                           | 19  |
| 1279518  | 1169783  | 980496.2 | 1389960  | 509269   | 709547.5 |                           | 38  |
| 1430416  | 1298337  | 1458469  | 1385278  | 1028269  | 1908753  | [1167][M+1] <sup>2+</sup> | 2   |
| 2675971  | 3216807  | 1993312  | 2456477  | 3728005  | 2989515  |                           | 4   |
| 282136.4 | 1037296  | 30483.77 | 709542.5 | 226924.4 | 0        | [M+2H-NH <sub>3</sub> ]   | 21  |



|          |          |          |          |          |          |                         |     |
|----------|----------|----------|----------|----------|----------|-------------------------|-----|
| 4612944  | 4873912  | 4614824  | 3921135  | 4465056  | 3402341  | [12][M]3+               | 4   |
| 2788665  | 4182825  | 3701611  | 3459213  | 6346861  | 902675.2 |                         | 337 |
| 1207420  | 1749648  | 823080.8 | 519034.3 | 1296478  | 939415.7 |                         | 9   |
| 26588177 | 28691762 | 23723689 | 26776112 | 25479853 | 16959109 |                         | 2   |
| 47072757 | 27177156 | 38717716 | 46647959 | 26314943 | 1657186  |                         | 2   |
| 323711.3 | 483589.1 | 366322.5 | 271305.6 | 323702.2 | 519422.3 | [740][M+1]+             | 44  |
| 535618.3 | 1092751  | 797101.3 | 538793.6 | 332205.5 | 705236.7 | [704][M+1]+             | 41  |
| 0        | 905095.4 | 465658.1 | 1363996  | 370165.7 | 744949.6 | [3M+2H]2+               | 20  |
| 5931365  | 5954782  | 6394504  | 5130776  | 5320118  | 3487590  |                         | 4   |
| 1855791  | 2066294  | 1883630  | 2092265  | 1701225  | 1533989  |                         | 471 |
| 8531725  | 10655631 | 4290014  | 9619631  | 4941046  | 6591456  | [902][M]+               | 43  |
| 8861004  | 9888204  | 10624125 | 7557121  | 7951547  | 3159187  | [236][M+1]2+            | 9   |
| 632314   | 411588.6 | 435274.1 | 2887297  | 133288.4 | 330044.1 |                         | 240 |
| 2857504  | 9140341  | 2974136  | 1236066  | 2729927  | 6444035  |                         | 4   |
| 1395002  | 2023053  | 1561776  | 1671207  | 1935065  | 203906.6 | [M+3H-CH <sub>4</sub> ] | 14  |
| 4146124  | 4653557  | 3821822  | 4062457  | 4219471  | 1707582  | [3M+Na+K]               | 6   |
| 5081670  | 6518543  | 3486357  | 4614210  | 7365551  | 9517468  |                         | 2   |
| 7773084  | 8297547  | 4711988  | 6422599  | 7536637  | 8706825  | [1136][M+2]+            | 2   |
| 947969.5 | 1389774  | 377354.7 | 549398   | 1241622  | 1753674  |                         | 9   |
| 4892206  | 4971012  | 4207565  | 4061305  | 4493198  | 5765286  |                         | 259 |
| 7474582  | 5772649  | 8498405  | 750038.6 | 8041684  | 6155571  |                         | 325 |
| 207442.6 | 332202.5 | 307474.7 | 249427.3 | 390313.4 | 352656.3 | [M+Na+K]2               | 134 |
| 161343.6 | 195140.8 | 211680.6 | 274159.8 | 1167188  | 1450401  | [M+Na]+ 2               | 100 |
| 9290603  | 10923498 | 11363760 | 10404352 | 10069636 | 8654915  | [587][M+1]+             | 174 |
| 715115.7 | 2390228  | 1745957  | 580005   | 1248807  | 1138868  |                         | 9   |
| 65599.06 | 330757.7 | 666066.2 | 58935.63 | 89149.89 | 249475.5 | [3M+2H]2+               | 18  |
| 193870.3 | 332242.1 | 272879.1 | 164480.3 | 260052.1 | 55402.33 | [M+Na]+ 3               | 12  |
| 765442.4 | 5532286  | 5226953  | 7845448  | 5852864  | 5193477  |                         | 317 |
| 1185312  | 394297.2 | 125295.9 | 654788.1 | 1709987  | 1158214  |                         | 1   |
| 2475899  | 1022614  | 1159690  | 1979072  | 3363124  | 5929379  | [82][M+3]+              | 9   |
| 399714.6 | 1712720  | 2737358  | 401430.3 | 709487.4 | 945050.7 | [216][M+1]3+            | 9   |
| 34004126 | 40193881 | 25360099 | 27728647 | 41303615 | 41695099 |                         | 2   |
| 1672492  | 607821.2 | 1919712  | 3117496  | 2541410  | 2283666  | [M+Na]+ 3               | 13  |
| 15104004 | 15000220 | 11891354 | 16801577 | 7690349  | 12691096 | [139][M+1]+             | 112 |
| 422368   | 1098549  | 412756.1 | 25179.37 | 491941.2 | 741375.4 | [M+H]+ 63               | 18  |

|          |          |          |          |          |          |              |     |
|----------|----------|----------|----------|----------|----------|--------------|-----|
| 214750.8 | 477969.6 | 442558.9 | 118234   | 341473.8 | 243402.1 | [M+Na]+ 2:   | 18  |
| 2410006  | 4293864  | 2935461  | 1671066  | 3622436  | 6863796  |              | 9   |
| 5869309  | 9255837  | 2930643  | 4492968  | 3228713  | 8400295  | [507][M+1]+  | 122 |
| 2306346  | 4327382  | 2387369  | 1368579  | 2731029  | 2649460  |              | 2   |
| 1853070  | 0        | 3261753  | 1841137  | 1547264  | 495618   | [M+Na]+ 7:   | 8   |
| 531356.4 | 286403   | 734473.3 | 859273.7 | 530618.5 | 905173.6 | [462][M+1]+  | 166 |
| 1307226  | 4157800  | 3836582  | 747204.5 | 2213560  | 4170495  |              | 9   |
| 234647.8 | 843981.6 | 375634.3 | 208218.4 | 203290.7 | 114573.4 | [559][M+1]+  | 50  |
| 8775320  | 4681934  | 4654804  | 4499657  | 4560949  | 4329705  |              | 344 |
| 1310475  | 2902198  | 1778093  | 873906.7 | 2088596  | 2126339  |              | 9   |
| 9948599  | 13513419 | 12236217 | 7930363  | 10952483 | 18503605 | [547][M]+    | 4   |
| 1083743  | 3226013  | 1398854  | 2322456  | 1747730  | 54647.89 |              | 2   |
| 3922684  | 3869702  | 4936167  | 4766692  | 2869816  | 6534193  |              | 325 |
| 1683529  | 2625142  | 3007043  | 922232.5 | 1113160  | 907725.3 |              | 1   |
| 659548.4 | 90448.89 | 102524.7 | 519427.7 | 1253406  | 2058211  |              | 9   |
| 15003568 | 18955334 | 9237234  | 13260308 | 19880895 | 28053129 | [1347][M]+   | 2   |
| 723308.5 | 2237942  | 2289203  | 2452065  | 2313610  | 2101567  | [3M+H+K]2    | 257 |
| 4496665  | 7698043  | 6276355  | 4344829  | 4595600  | 6939448  | [M+H+Na]2    | 15  |
| 6864630  | 6963694  | 5717824  | 5937996  | 16032700 | 6043184  | [M+H-CH2]    | 392 |
| 595637.4 | 998101.4 | 736415.3 | 382655.9 | 729474   | 521801.6 | [851][M+2]+  | 4   |
| 1045547  | 854546.5 | 1232102  | 746554.5 | 658130.9 | 1001005  | [592][M+3]2+ | 4   |
| 754157.4 | 1868135  | 924273.7 | 509207   | 1080404  | 2501196  |              | 9   |
| 20050789 | 43390743 | 23894877 | 27322080 | 29436157 | 34489737 | [3M+2K]2+    | 3   |
| 4092309  | 1530664  | 1847396  | 4721784  | 2292726  | 909801   |              | 2   |
| 287817.3 | 290517.4 | 1505589  | 117666.8 | 265871.5 | 75125.26 |              | 57  |
| 1684943  | 3149000  | 1228865  | 1020885  | 2363620  | 5991283  |              | 9   |
| 149294.4 | 105277   | 276446.3 | 141565.7 | 104119.5 | 46323.86 |              | 145 |
| 1921150  | 2055625  | 1941455  | 2654793  | 3351155  | 1195562  |              | 2   |
| 441869.8 | 820607.3 | 168978.9 | 333084.7 | 904901.3 | 3376339  |              | 9   |
| 5462834  | 4908403  | 5415751  | 4957570  | 4246809  | 1721394  |              | 2   |
| 2472787  | 2061591  | 1717570  | 1303970  | 1378032  | 78395.44 |              | 476 |
| 13007323 | 10970160 | 12503601 | 15599742 | 10430753 | 4582523  | [1290][M]+   | 235 |
| 428909   | 120257.2 | 192132   | 218039.5 | 607927.2 | 2202602  |              | 8   |
| 571290.4 | 575620   | 539479   | 355373.9 | 535934.3 | 1161464  |              | 4   |
| 708850.7 | 489290   | 899685.7 | 811300.3 | 833506.8 | 247765.1 |              | 4   |

|          |          |          |          |          |          |              |     |
|----------|----------|----------|----------|----------|----------|--------------|-----|
| 508531.5 | 1406888  | 1942639  | 2681768  | 666535.6 | 2342474  |              | 4   |
| 1256157  | 761942.7 | 837554.1 | 818198.2 | 791856.1 | 39987.55 |              | 4   |
| 9528647  | 13512372 | 5982473  | 13387331 | 10339873 | 10939704 | [M+H-CO]+    | 15  |
| 5774472  | 6009080  | 6471730  | 5238551  | 5276227  | 3542410  |              | 4   |
| 5843302  | 6787216  | 5016071  | 3356380  | 5564643  | 5389485  |              | 4   |
| 1903010  | 6124184  | 4977219  | 1354071  | 7226059  | 1312020  |              | 1   |
| 1754851  | 527131.6 | 1201773  | 2214824  | 1770020  | 3059362  | [56][M+1]+   | 2   |
| 5873842  | 3206924  | 1991190  | 4291782  | 5551243  | 1456889  |              | 3   |
| 59080108 | 66243081 | 52308609 | 49730137 | 63300678 | 61695189 | [573][M]+    | 13  |
| 2521066  | 2026327  | 3578244  | 1572658  | 2232613  | 1877328  |              | 4   |
| 954610.1 | 454838.7 | 1947272  | 764015.7 | 470153.2 | 3575405  |              | 9   |
| 127737.8 | 110114.9 | 254699.4 | 140162.1 | 216058.4 | 239459.7 |              | 266 |
| 1202105  | 1537900  | 1368864  | 1164492  | 995146.2 | 917018   | [489][M+1]+  | 2   |
| 4608298  | 4825061  | 4669581  | 3956442  | 4483653  | 3460818  |              | 4   |
| 381767.5 | 1101118  | 541467.2 | 263873.5 | 491523   | 1720450  | [M+Na]+ 4:   | 8   |
| 1.38E+08 | 3796987  | 78237555 | 1.3E+08  | 75838468 | 41310797 |              | 2   |
| 1342952  | 3685456  | 2895856  | 734447.1 | 2206458  | 4940540  |              | 9   |
| 6921802  | 7395065  | 6928459  | 4387869  | 5770115  | 4690944  |              | 4   |
| 1068782  | 1419146  | 5820100  | 2001900  | 2259920  | 185008.9 | [873][M+1]3+ | 39  |
| 1818722  | 1019707  | 1109732  | 1744993  | 654161.9 | 1557249  |              | 9   |
| 26235229 | 47190830 | 35507857 | 19572771 | 40646984 | 36489098 |              | 215 |
| 4648027  | 7887417  | 4090196  | 2894068  | 6218698  | 24901127 |              | 2   |
| 3179128  | 1895130  | 2865787  | 3094033  | 1354347  | 1464484  | [399][M+3]+  | 2   |
| 3531255  | 3144496  | 3738912  | 2275561  | 4333584  | 1899422  | [654][M+3]+  | 4   |
| 8082016  | 10615124 | 5576048  | 4187590  | 8893483  | 13847168 | [766][M+1]+  | 4   |
| 1418095  | 1213069  | 1152043  | 917764.1 | 1007114  | 2408871  |              | 9   |
| 4343965  | 4106056  | 425493   | 6350526  | 3243218  | 4256033  | [M+3Na-H]    | 226 |
| 10708813 | 1961698  | 11708030 | 18542882 | 10275159 | 29012564 | [815][M]+    | 213 |
| 1134308  | 1253769  | 1597590  | 898804.2 | 1091714  | 605014.8 |              | 4   |
| 4545659  | 3376928  | 5068976  | 4164715  | 1575484  | 5946665  |              | 385 |
| 15526347 | 19583348 | 14752196 | 10245621 | 14821357 | 15957099 |              | 4   |
| 290478.5 | 321717.6 | 401358   | 351814.7 | 394251.3 | 423186.4 |              | 42  |
| 5241699  | 4109931  | 4920997  | 5593162  | 4419417  | 1073092  | [3M+H+K]2    | 13  |
| 5746514  | 5835205  | 5388420  | 5543238  | 5775094  | 6419469  |              | 352 |
| 5762090  | 9842875  | 5242320  | 3555116  | 13396269 | 3687912  |              | 1   |

|          |          |          |          |          |          |              |     |
|----------|----------|----------|----------|----------|----------|--------------|-----|
| 1518842  | 3428903  | 3421061  | 1254398  | 2009132  | 725552   |              | 46  |
| 609880.2 | 987805.4 | 1514582  | 289590.3 | 865634.1 | 1236177  |              | 4   |
| 2140288  | 3074254  | 3376229  | 1871718  | 2184508  | 954480   | [843][M]+    | 9   |
| 2221879  | 2309316  | 2708000  | 1794922  | 1885202  | 478652.2 |              | 9   |
| 3240717  | 2550154  | 5330459  | 4699657  | 3621340  | 2603923  |              | 250 |
| 2479498  | 4132563  | 1827539  | 2401343  | 4490885  | 2749396  |              | 2   |
| 4156830  | 7027587  | 5050041  | 2722838  | 26499216 | 3254514  |              | 1   |
| 2870190  | 3454921  | 2033361  | 2484236  | 3487354  | 4790106  |              | 2   |
| 24799501 | 52759071 | 48639499 | 22772112 | 31611560 | 81756555 | [679][M+2]+  | 9   |
| 3132932  | 2116113  | 1048861  | 2884454  | 1265112  | 1151270  | [237][M]+    | 211 |
| 368395.5 | 10441860 | 3235188  | 8865925  | 2450675  | 786532.1 |              | 4   |
| 4398854  | 4607011  | 2881064  | 6129056  | 10356538 | 4380035  |              | 1   |
| 978952.2 | 2486104  | 2030123  | 1867392  | 2067782  | 2014411  | [M+K]+ 68:   | 29  |
| 564202.7 | 747932.9 | 666993.6 | 577554.3 | 752481.7 | 20839.03 | [1599][M+2]+ | 169 |
| 18309979 | 19968280 | 18336743 | 11831181 | 15437994 | 13270413 |              | 4   |
| 3035710  | 4795203  | 3515273  | 1976079  | 3104801  | 5815320  |              | 4   |
| 9268587  | 8230357  | 4880361  | 10284476 | 10579663 | 5384503  | [M+2Na-H]    | 14  |
| 1357641  | 902733.7 | 909360.5 | 517171.1 | 689183.1 | 1461556  |              | 4   |
| 2553471  | 2273409  | 811271   | 2291065  | 913593.3 | 1734929  | [57][M]+     | 450 |
| 2779902  | 1111840  | 248153.1 | 3081706  | 308171.5 | 729679.2 | [60][M+1]+   | 38  |
| 82381514 | 1.38E+08 | 73633056 | 62237962 | 80932891 | 1.48E+08 |              | 15  |
| 13424180 | 8533264  | 1947538  | 9419980  | 8588991  | 9430978  | [M+K]+ 45'   | 11  |
| 1549689  | 1444731  | 1162682  | 950627.5 | 1060332  | 913710.9 |              | 4   |
| 1057621  | 777023.3 | 620467.6 | 977002.1 | 853421.5 | 242167.3 |              | 8   |
| 29825793 | 42763146 | 3178535  | 2742125  | 23427613 | 1.06E+08 |              | 177 |
| 2573275  | 1682327  | 881433.6 | 2596513  | 4188761  | 2335537  | [3M+2K-H]    | 15  |
| 2353792  | 4180680  | 6315230  | 1966078  | 2151089  | 4644580  |              | 9   |
| 1351897  | 2254133  | 3787420  | 977944   | 1620648  | 2984291  |              | 9   |
| 7807355  | 9174415  | 5187772  | 6048739  | 8123967  | 18087665 |              | 2   |
| 125686.8 | 156057.8 | 167888.3 | 206868.8 | 174037.1 | 122693.2 |              | 224 |
| 23993250 | 26459508 | 28763904 | 20214376 | 22075735 | 15905097 |              | 4   |
| 335057.2 | 321774.6 | 294255.2 | 292126   | 1.95E+08 | 1.69E+08 |              | 32  |
| 1690090  | 2854522  | 1511749  | 929857.7 | 2602388  | 6137716  |              | 9   |
| 703690.9 | 1767768  | 417643.6 | 131772.7 | 517415.7 | 982665.8 |              | 18  |
| 62719632 | 2.67E+08 | 1.27E+08 | 62281564 | 2.43E+08 | 24065531 |              | 90  |

|          |          |          |          |          |          |                      |     |
|----------|----------|----------|----------|----------|----------|----------------------|-----|
| 2163844  | 1036487  | 2820097  | 3141935  | 3531204  | 582783.9 | [118][M+1]2+         | 1   |
| 370484.8 | 641797.6 | 240785.4 | 243769.8 | 648346   | 404271.1 |                      | 91  |
| 11964759 | 13313625 | 14088961 | 9565246  | 10764084 | 7855158  |                      | 4   |
| 943025.8 | 1044737  | 1159418  | 748644.1 | 961010.2 | 837721.6 | [114][M+1]2+         | 4   |
| 1478958  | 3411482  | 2687256  | 1293710  | 2083042  | 906341.8 |                      | 9   |
| 1156948  | 967170.2 | 1346116  | 1726557  | 1363721  | 3967653  |                      | 2   |
| 770958.6 | 1350018  | 2972831  | 651940.1 | 795247.3 | 1256543  |                      | 9   |
| 7376583  | 7668590  | 8114913  | 6494086  | 6752433  | 4397171  |                      | 4   |
| 788156.7 | 1024918  | 850552.2 | 875765   | 460373.6 | 733614.4 | [M+2H-C6H6]          | 57  |
| 250066.5 | 262924.5 | 90478    | 226117.9 | 205692.2 | 349758.6 |                      | 32  |
| 5277928  | 6528881  | 6309564  | 8285146  | 4642891  | 5044300  |                      | 1   |
| 6823420  | 5251211  | 6968006  | 8252099  | 1502962  | 5044819  | [657][M]+ [M+H]+ 39H | 110 |
| 286525.7 | 252369.3 | 362170.4 | 362587.7 | 285885.1 | 160066.3 |                      | 112 |
| 2306308  | 2533572  | 4154475  | 1059413  | 2603444  | 598347.5 |                      | 1   |
| 1496754  | 25637586 | 29501823 | 34855773 | 3238669  | 1096769  | [M+2Na-H]            | 29  |
| 923455.5 | 1488954  | 471123.5 | 546084.7 | 1274251  | 3867798  |                      | 9   |
| 277314   | 430982.1 | 451192.4 | 3127107  | 2504745  | 174703.9 |                      | 43  |
| 9201903  | 4363611  | 6355797  | 4535890  | 8353736  | 4886993  | [M+K]+ 35H           | 226 |
| 4057570  | 4430915  | 4659328  | 3491969  | 3504087  | 2024626  |                      | 4   |
| 5723413  | 1803135  | 4985338  | 5339599  | 2362111  | 1859524  |                      | 97  |
| 8183247  | 5496263  | 6230038  | 7953401  | 12263770 | 973514.9 | [950][M+2]+          | 15  |
| 2688916  | 1110456  | 3404041  | 2658486  | 1852553  | 0        |                      | 1   |
| 1.8E+08  | 1.51E+08 | 1079296  | 1.57E+08 | 1.83E+08 | 5.97E+08 |                      | 3   |
| 4745032  | 5247294  | 4346291  | 2761900  | 4024476  | 3552514  |                      | 4   |
| 3122153  | 2962082  | 3873265  | 2440891  | 2458717  | 312450.5 |                      | 9   |
| 1289105  | 2488348  | 2909910  | 3150041  | 3886996  | 2028791  | [M+K]+ 18H           | 15  |
| 14384243 | 25419731 | 1.05E+10 | 9630463  | 13442839 | 22334066 | [664][M]2+           | 4   |
| 4831669  | 5139923  | 4577539  | 2860356  | 3954825  | 3456146  |                      | 4   |
| 1080486  | 347563.4 | 1288104  | 1636153  | 1377375  | 7994535  |                      | 2   |
| 12868059 | 7288249  | 6374388  | 11875626 | 771724.3 | 2262942  |                      | 2   |
| 1869713  | 1999166  | 6227297  | 4229769  | 843046.3 | 1847841  |                      | 349 |
| 2143825  | 2803615  | 2807039  | 1796296  | 2153914  | 916733.8 |                      | 9   |
| 489051.6 | 827892.3 | 1453853  | 404254.3 | 530233.8 | 0        | [M+H+HCC]            | 14  |
| 755726.6 | 543690   | 391723.3 | 296594.7 | 718996.2 | 1114749  |                      | 20  |
| 1431148  | 88719.16 | 4705703  | 1217175  | 429723.4 | 1634914  |                      | 448 |

|          |          |          |          |          |          |                          |     |
|----------|----------|----------|----------|----------|----------|--------------------------|-----|
| 5267034  | 5313061  | 4874503  | 5019161  | 5479684  | 4940642  |                          | 183 |
| 857405.4 | 1552015  | 654989.6 | 584039   | 1010615  | 1613836  | [M+H] <sup>+</sup> 86    | 8   |
| 1282688  | 1436661  | 1606048  | 666242.7 | 1450264  | 1349039  | [1377][M+1] <sup>+</sup> | 42  |
| 32868636 | 13736082 | 9739586  | 23656594 | 14453707 | 4178021  |                          | 90  |
| 24474570 | 41368997 | 28630751 | 21061572 | 32616334 | 63675957 | [656][M]3 <sup>+</sup>   | 9   |
| 5.27E+08 | 8.17E+08 | 4.52E+08 | 4.39E+08 | 5E+08    | 1.4E+09  | [3M+2Na]2                | 3   |
| 8275542  | 15179610 | 3970544  | 5374797  | 4704927  | 8561454  | [149][M] <sup>+</sup>    | 260 |
| 2666885  | 1672850  | 2713895  | 2925725  | 1615107  | 861525.9 |                          | 2   |
| 1368136  | 2591811  | 1533796  | 521742.8 | 1622859  | 3082565  |                          | 4   |
| 910899.2 | 1617190  | 2281368  | 1454030  | 1708666  | 731360.3 |                          | 23  |
| 2072576  | 1043902  | 1585249  | 1213492  | 1274949  | 0        | [1023][M]2 <sup>+</sup>  | 343 |
| 4087448  | 4456265  | 4694642  | 3516166  | 3533683  | 2128066  |                          | 4   |
| 1076098  | 1615795  | 1499737  | 814110.6 | 1730889  | 1419118  | [M+2H-C4]                | 8   |
| 34147151 | 54306491 | 42537130 | 23758297 | 35462256 | 73935387 |                          | 4   |
| 903802.1 | 1177505  | 788614.4 | 586102   | 392480.9 | 699970.2 |                          | 4   |
| 7490961  | 2498676  | 11458341 | 7507202  | 6795014  | 1923727  | [475][M+2]2 <sup>+</sup> | 4   |
| 3716479  | 3869688  | 3981541  | 3045284  | 3245087  | 811467.5 |                          | 9   |
| 8848625  | 14417462 | 14598823 | 6872576  | 9423573  | 6035831  |                          | 9   |
| 1900570  | 1933812  | 1811271  | 1504695  | 1618661  | 927455.1 |                          | 4   |
| 35633928 | 32934383 | 32100945 | 32485190 | 28751954 | 13319182 | [1282][M] <sup>+</sup>   | 2   |
| 14832379 | 3074392  | 5975639  | 10495451 | 9412188  | 748145.6 | [438][M]3 <sup>+</sup>   | 15  |
| 213705.2 | 209236   | 310038.1 | 130203   | 292899.6 | 487488.2 | [354][M+1]2 <sup>+</sup> | 17  |
| 316781.3 | 394333.4 | 882602.1 | 949403.8 | 312244.2 | 638386.8 | [1112][M] <sup>+</sup>   | 211 |
| 800540.8 | 560651.4 | 1091834  | 554230.5 | 1108863  | 300406.4 |                          | 17  |
| 35147511 | 24212885 | 29747273 | 34835591 | 20544446 | 5564767  |                          | 2   |
| 4404722  | 4873535  | 4677840  | 4240868  | 4131190  | 4083664  |                          | 241 |
| 288589.1 | 650224.8 | 585308.5 | 274768.8 | 160379.7 | 547372   |                          | 4   |
| 4165908  | 3385238  | 3764034  | 3851495  | 2308053  | 842827.2 |                          | 2   |
| 3385548  | 8333882  | 2985891  | 2745929  | 3187455  | 1128668  |                          | 194 |
| 699813.1 | 754869.6 | 527481.7 | 707451.2 | 669103.5 | 227177.6 | [681][M+1] <sup>+</sup>  | 220 |
| 793964.1 | 983634.6 | 831986.6 | 459510.5 | 772037.5 | 639265.3 |                          | 4   |
| 1916994  | 930480.2 | 243535.1 | 465377.8 | 129265.2 | 899848.8 |                          | 46  |
| 3067381  | 3504069  | 1343875  | 757064   | 3326122  | 5793929  | [M+H] <sup>+</sup> 88    | 5   |
| 1248330  | 991247.7 | 932446.5 | 527329.6 | 686644.8 | 1084295  |                          | 4   |
| 1.1E+08  | 74227750 | 93594641 | 1E+08    | 67099994 | 21863779 |                          | 2   |

|          |          |          |          |          |          |                    |     |
|----------|----------|----------|----------|----------|----------|--------------------|-----|
| 790909.5 | 1484323  | 2071269  | 557951.9 | 715964.4 | 686357.7 |                    | 9   |
| 1780994  | 2682778  | 2161851  | 1079610  | 1803166  | 2325120  |                    | 4   |
| 4.63E+08 | 5.52E+08 | 3.83E+08 | 3.59E+08 | 5.91E+08 | 9.31E+08 | [482][M+1]2+       | 14  |
| 84889161 | 1.13E+08 | 61899239 | 56544783 | 53684061 | 67369259 | [882][M]+ [M+H+NH3 | 101 |
| 1069170  | 2242138  | 2167161  | 630079.5 | 1117410  | 2217603  |                    | 9   |
| 15458815 | 17251466 | 5723628  | 8306295  | 15135438 | 57583576 |                    | 132 |
| 30472123 | 33533603 | 33809522 | 24293959 | 27431877 | 19666392 |                    | 4   |
| 591133.5 | 546352   | 572971.4 | 763397   | 517334.5 | 583827.4 | [1080][M]2+        | 366 |
| 2421708  | 3938791  | 3688112  | 5323486  | 4322965  | 4425237  |                    | 9   |
| 1258692  | 2045339  | 746494.7 | 422516.5 | 1607023  | 3854534  |                    | 9   |
| 669760.3 | 492157   | 479162.1 | 421467.7 | 405242.9 | 19211.07 |                    | 181 |
| 362098.2 | 506159.2 | 1099835  | 202383.2 | 823752.4 | 330388.5 |                    | 106 |
| 1781168  | 2455676  | 2694173  | 1458721  | 1676641  | 2048147  |                    | 9   |
| 1.15E+09 | 1.35E+09 | 9.63E+08 | 9.12E+08 | 1.45E+09 | 2.26E+09 | [482][M]2+         | 14  |
| 544233.7 | 1482668  | 1940035  | 419664.4 | 877566.9 | 104976.6 | [1616][M+2]+       | 9   |
| 115303.5 | 178825.5 | 554729.3 | 545031.3 | 580960.1 | 139140.6 |                    | 25  |
| 5671476  | 4247866  | 3204300  | 4097520  | 7391938  | 3928904  |                    | 412 |
| 2511462  | 1591133  | 669298.5 | 2285129  | 1500662  | 2198216  |                    | 4   |
| 511519   | 1596775  | 1190676  | 2904638  | 900896.6 | 2543994  | [577][M+1]2+       | 9   |
| 45233519 | 94541114 | 88344461 | 42325463 | 41682796 | 58464426 |                    | 20  |
| 13965354 | 13797359 | 16246440 | 11540137 | 12123516 | 7073414  |                    | 4   |
| 469910.5 | 1210992  | 879547   | 393448   | 842595.1 | 1080401  |                    | 9   |
| 11661806 | 9898037  | 4171499  | 4470701  | 12232187 | 11417835 | [M+Na+HC           | 3   |
| 1223216  | 1606563  | 1185630  | 514318.8 | 424028.7 | 605331.2 | [882][M+2]+        | 101 |
| 723102.8 | 4061092  | 3980371  | 4440720  | 4006822  | 3523512  |                    | 95  |
| 6906188  | 7421814  | 6836568  | 4374545  | 5833129  | 4651330  |                    | 4   |
| 8195257  | 25355083 | 21937637 | 10269160 | 16302751 | 20227181 |                    | 1   |
| 979109.8 | 460210   | 343339.9 | 761258.9 | 846429.7 | 1021535  | [1562][M+1]+       | 38  |
| 11640036 | 5014283  | 5091219  | 5182395  | 3282521  | 5078386  |                    | 399 |
| 219075.5 | 276121.2 | 156354.9 | 176558.6 | 189899.8 | 527368.9 |                    | 110 |
| 10083256 | 1335025  | 12259237 | 3516424  | 532080.2 | 10106542 | [258][M+1]2+       | 18  |
| 405016.5 | 324510.9 | 220066.5 | 110273.7 | 200987.6 | 189468.6 |                    | 524 |
| 2363552  | 2537015  | 2460511  | 2646327  | 2211884  | 1712962  |                    | 402 |
| 929074.5 | 2361169  | 2097667  | 571226   | 1445445  | 2644018  |                    | 9   |
| 429798.3 | 374525.3 | 499468.7 | 0        | 248949.4 | 205178.2 | [1328][M]2+        | 20  |

|          |          |          |          |          |          |                          |     |
|----------|----------|----------|----------|----------|----------|--------------------------|-----|
| 2465693  | 2393722  | 2844299  | 2397479  | 2479671  | 1359677  |                          | 4   |
| 452764.1 | 1248201  | 1342952  | 174212.3 | 1018973  | 376284.6 | [M+H] <sup>+</sup> 56:   | 46  |
| 3179193  | 6295965  | 3774437  | 3341613  | 3038389  | 3812333  |                          | 4   |
| 740214.9 | 1353661  | 545760.1 | 782792   | 597021.5 | 873856.3 | [1075][M+1] <sup>+</sup> | 58  |
| 989576.9 | 2006283  | 2270375  | 1011648  | 1840304  | 3071916  | [1336][M+1] <sup>+</sup> | 12  |
| 969198.5 | 1364171  | 404589   | 326705.5 | 1271180  | 1279711  |                          | 2   |
| 1355038  | 1316398  | 788246.3 | 1303151  | 1866528  | 1304020  | [3M+3Na] <sup>+</sup>    | 6   |
| 37730559 | 39211975 | 45394571 | 30483057 | 33499013 | 22934705 | [552][M] <sup>+</sup>    | 4   |
| 1.9E+08  | 2.06E+08 | 1.54E+08 | 1.86E+08 | 2.37E+08 | 2.45E+08 | [396][M] <sup>+</sup>    | 2   |
| 5896975  | 6418981  | 6900311  | 4840065  | 5373752  | 4090540  |                          | 4   |
| 5615643  | 1721708  | 1558283  | 4989263  | 5328430  | 7783175  |                          | 1   |
| 5751336  | 5889194  | 6529661  | 5157741  | 5156862  | 3557820  |                          | 4   |
| 1561046  | 2172993  | 1610495  | 706559.9 | 1661406  | 1304824  | [M+K] <sup>+</sup> 64:   | 101 |
| 1540457  | 1616270  | 1593438  | 1316336  | 1390884  | 1068792  |                          | 4   |
| 8220235  | 10479077 | 9981999  | 10320177 | 9258881  | 801929.7 |                          | 9   |
| 2771040  | 3855924  | 2057391  | 971848.7 | 2519650  | 2428727  |                          | 4   |
| 376433.2 | 1011094  | 3252410  | 268302.3 | 423228.3 | 90063.23 | [3M+2K] <sup>2+</sup>    | 18  |
| 1929983  | 2841960  | 3747632  | 1251259  | 1835531  | 973851.2 |                          | 9   |
| 87697.06 | 155402.4 | 89949.39 | 109076.8 | 91431.2  | 57365.57 |                          | 273 |
| 2064022  | 1729682  | 1944360  | 3094779  | 2246984  | 1158269  |                          | 2   |
| 698941.1 | 1086108  | 1109103  | 828667   | 1221632  | 609406.9 | [619][M+1] <sup>+</sup>  | 4   |
| 49642.03 | 22140.68 | 242130.3 | 19163.94 | 71908.48 | 13997.59 |                          | 28  |
| 2876616  | 2855528  | 4985796  | 2987656  | 3059676  | 1078971  |                          | 208 |
| 2348034  | 788344.3 | 2543318  | 2591081  | 1299164  | 374523.9 |                          | 2   |
| 4513796  | 2876487  | 4833629  | 10508383 | 2607880  | 3796128  | [1552][M] <sup>+</sup>   | 362 |
| 12572277 | 18668702 | 14449741 | 9617382  | 9592620  | 18317880 |                          | 102 |
| 74599967 | 1.22E+08 | 62816175 | 62381669 | 73025380 | 2.07E+08 | [M+Na] <sup>+</sup> 4:   | 3   |
| 1848697  | 2115489  | 2937654  | 1683446  | 1559060  | 165001.2 |                          | 9   |
| 1909993  | 1611438  | 3324870  | 957661.7 | 1064767  | 0        | [M+K+HCO]                | 6   |
| 3556543  | 5748749  | 5559623  | 2641260  | 3888612  | 2600076  |                          | 9   |
| 3938578  | 3199448  | 2892901  | 3672935  | 4019815  | 748845.7 |                          | 1   |
| 324830.4 | 808548.4 | 787778.4 | 128321   | 616330.4 | 1341364  |                          | 9   |
| 1507964  | 492657.9 | 0        | 1150605  | 1832191  | 1968257  |                          | 9   |
| 5.27E+08 | 7.87E+08 | 5.43E+08 | 4.06E+08 | 4.61E+08 | 4.96E+08 | [742][M] <sup>+</sup>    | 1   |
| 4284720  | 3850912  | 5106539  | 5087255  | 5386741  | 5465878  |                          | 448 |



|          |          |          |          |          |          |                      |     |
|----------|----------|----------|----------|----------|----------|----------------------|-----|
| 41450451 | 58906888 | 32016447 | 37755181 | 43563026 | 86691880 |                      | 2   |
| 3721109  | 2088456  | 2744297  | 3991429  | 1929840  | 2031640  |                      | 2   |
| 904731.5 | 2520776  | 1718286  | 844230.8 | 1239027  | 2713745  |                      | 4   |
| 364221.8 | 737053.4 | 553099.1 | 489076.3 | 457993.4 | 10981.83 | [3M+H+Na             | 24  |
| 1767359  | 1252857  | 2133021  | 1434058  | 1179649  | 280807.6 | [668][M+2]+          | 4   |
| 1776145  | 1573314  | 2872174  | 1131737  | 1549936  | 0        |                      | 1   |
| 2521873  | 2408895  | 2461501  | 1845700  | 2089199  | 986810.1 |                      | 4   |
| 3433455  | 1402632  | 1461402  | 1382063  | 5217273  | 11939473 |                      | 15  |
| 1212318  | 808373.5 | 1456965  | 208908   | 941711.2 | 0        |                      | 1   |
| 873876.9 | 977797.4 | 1194136  | 958863   | 3251391  | 8272264  | [3M+H+K]2            | 14  |
| 16084945 | 18850072 | 12123655 | 11802917 | 17921005 | 18446599 | [M+H+HCC             | 13  |
| 635912.4 | 656749.2 | 809060.9 | 305758   | 595032.4 | 643726.9 | [672][M+1]2+         | 18  |
| 2341095  | 1169682  | 1582940  | 985472.3 | 1722716  | 0        |                      | 182 |
| 9070324  | 7599101  | 6531177  | 6568466  | 6127428  | 6075513  | [202][M+1]+          | 150 |
| 697845.7 | 639665.6 | 1281658  | 1487255  | 618045   | 1028006  |                      | 9   |
| 14271064 | 9177316  | 10653004 | 15202510 | 12754988 | 4695186  |                      | 2   |
| 3581352  | 4969856  | 3977443  | 2566926  | 3574062  | 2829873  |                      | 9   |
| 13130510 | 7247511  | 11563057 | 5480666  | 18867648 | 2742907  |                      | 3   |
| 331496.8 | 359963.2 | 458522.7 | 191881.9 | 340337.1 | 84144.82 | [1085][M+1]+         | 245 |
| 2872361  | 2206771  | 2724044  | 1626390  | 2194229  | 3893649  | [1342][M+2]+         | 12  |
| 2524903  | 1513504  | 2760828  | 3247864  | 2094373  | 433291.6 |                      | 87  |
| 1681723  | 3189212  | 2673465  | 979104.3 | 1902454  | 3813440  |                      | 9   |
| 11341861 | 3465847  | 6893877  | 9262731  | 10693326 | 3760403  | [67][M+1]+           | 1   |
| 691659   | 639540.8 | 785426.8 | 740463.6 | 585974.9 | 2958228  |                      | 2   |
| 5474492  | 10834947 | 18244174 | 4947313  | 5389993  | 8249319  | [M+2H]2+             | 18  |
| 11559753 | 22556261 | 14466363 | 10235856 | 12207269 | 21807045 |                      | 3   |
| 804665.7 | 2784131  | 2218967  | 1193221  | 1780312  | 1200710  |                      | 9   |
| 1882571  | 4437340  | 446532.9 | 643232.3 | 3743012  | 1903684  |                      | 11  |
| 1923729  | 2992322  | 2356061  | 1473230  | 2249555  | 2885188  | [1283][M]+ [M+2Na-H] | 134 |
| 27950242 | 17498748 | 33570140 | 35549591 | 19496173 | 15898527 | [250][M]+            | 171 |
| 369309.6 | 859424.9 | 276596.6 | 714045.1 | 786574.1 | 1054824  |                      | 235 |
| 658806.8 | 333012   | 0        | 261500.9 | 242147.2 | 1925117  | [M+Na]+ 6:           | 15  |
| 2728555  | 3145693  | 2853463  | 1882732  | 2321064  | 1265930  | [642][M]3+           | 4   |
| 2533995  | 2870639  | 2568297  | 5527134  | 2485810  | 1119316  |                      | 9   |
| 4100138  | 5471895  | 4350137  | 6014858  | 4266933  | 897570.7 |                      | 95  |

|          |          |          |          |          |          |               |     |
|----------|----------|----------|----------|----------|----------|---------------|-----|
| 3500524  | 2597718  | 2489062  | 1256359  | 853517.4 | 3228615  |               | 4   |
| 587522.6 | 707082.7 | 414070.1 | 187989.4 | 518637.3 | 927470   | [M+Na]+ 3!    | 51  |
| 1792132  | 1383682  | 2108428  | 1289368  | 1656468  | 1048190  |               | 4   |
| 3339364  | 1944096  | 3228991  | 5113967  | 2421503  | 194767.2 |               | 2   |
| 335099.3 | 1483259  | 3873078  | 244496   | 584888.1 | 441633.3 |               | 53  |
| 7562075  | 6544353  | 5642749  | 7029367  | 9374342  | 7092745  |               | 2   |
| 2725459  | 5129453  | 3188020  | 2099661  | 3799480  | 7852784  |               | 9   |
| 615357.5 | 1139673  | 1754774  | 1049035  | 1019819  | 206715.9 |               | 4   |
| 354337.8 | 364599.7 | 457761.2 | 502523.1 | 135406.9 | 298526.8 |               | 71  |
| 4533263  | 5101052  | 1954762  | 4091390  | 6597447  | 10110495 |               | 2   |
| 1963530  | 822061.3 | 663176.9 | 1535090  | 1401755  | 450623.6 | [191][M+2]+   | 4   |
| 51497135 | 12537402 | 60544963 | 30770112 | 85415426 | 52726442 |               | 1   |
| 1735890  | 0        | 1077969  | 1001687  | 1029650  | 0        | [885][M+2]+   | 1   |
| 6343814  | 14558871 | 8817972  | 44706133 | 13345028 | 4346830  | [15][M]2+     | 1   |
| 6211280  | 6204871  | 6076310  | 5526292  | 6051812  | 2875439  |               | 321 |
| 2926968  | 3460067  | 1086456  | 1184881  | 4212658  | 10046063 | [1303][M+5]3+ | 2   |
| 1407003  | 4676615  | 4023203  | 1589845  | 7873547  | 10655967 | [1615][M]3+   | 9   |
| 3344761  | 5222925  | 1563575  | 2206645  | 1570284  | 2933543  |               | 149 |
| 466194.8 | 303983.3 | 663045.4 | 493292.3 | 217911.9 | 177930.4 |               | 88  |
| 1045024  | 2633472  | 3399982  | 706267.6 | 1731956  | 1733912  |               | 9   |
| 884745.9 | 870184.4 | 946462.3 | 427632.7 | 535192.6 | 1692254  | [M+Na]+ 2!    | 169 |
| 357105.8 | 0        | 586221.7 | 871574.6 | 317879.9 | 513549.4 |               | 210 |
| 2820537  | 1765584  | 1184396  | 2742613  | 1130124  | 803089   | [280][M+1]+   | 219 |
| 874616.5 | 962419   | 671993.1 | 1109961  | 502462.2 | 558986.5 |               | 303 |
| 2271219  | 94044.7  | 4405142  | 682360   | 1079723  | 2725590  |               | 9   |
| 3065187  | 2982625  | 3494306  | 2973942  | 2961046  | 1707112  |               | 4   |
| 765058.4 | 1665308  | 486900   | 300008.2 | 1527163  | 3303315  |               | 2   |
| 1887325  | 1557932  | 2420746  | 2681074  | 1443273  | 1835217  | [1155][M+2]2+ | 2   |
| 2846715  | 2529683  | 2590656  | 2302077  | 2407828  | 1343538  |               | 2   |
| 696455.1 | 523142.6 | 1424462  | 2393327  | 456204.3 | 336937.6 |               | 65  |
| 7759857  | 7862735  | 10637985 | 10361651 | 5999775  | 3680043  |               | 266 |
| 1129032  | 1130741  | 1349965  | 872901.5 | 742254.3 | 458052.4 |               | 4   |
| 982918.9 | 1005422  | 1094835  | 844381.8 | 940544.7 | 493721.7 |               | 4   |
| 2990357  | 3340221  | 3699900  | 1972907  | 1899130  | 1128538  | [167][M+2]3+  | 18  |
| 722688.6 | 1424400  | 1035183  | 2265603  | 924795.2 | 760088.5 | [1261][M+1]3+ | 9   |

|          |          |          |          |          |          |                     |     |
|----------|----------|----------|----------|----------|----------|---------------------|-----|
| 1084520  | 1001115  | 761471.8 | 868708.7 | 1017905  | 235168.2 |                     | 291 |
| 2910040  | 1062009  | 2338905  | 611386.8 | 562786   | 13496769 | [1047][M+1]3+       | 16  |
| 16840604 | 11321282 | 13010770 | 14206154 | 12203863 | 6503340  |                     | 2   |
| 9253243  | 11229608 | 11387669 | 7005675  | 8162751  | 1365534  |                     | 9   |
| 1180711  | 1677679  | 1303754  | 802205.7 | 1178123  | 439457.7 |                     | 9   |
| 1749879  | 649067.8 | 279174.8 | 1725051  | 480845.5 | 916629   |                     | 4   |
| 855614.7 | 953052   | 1993544  | 771332.8 | 755295.6 | 2602964  |                     | 9   |
| 1493997  | 1481870  | 2345681  | 1257139  | 1020584  | 1432229  |                     | 9   |
| 5179847  | 7157768  | 5250206  | 7067108  | 10192889 | 14567880 |                     | 2   |
| 574861.6 | 1645878  | 1590351  | 466056.2 | 551762.3 | 1625929  |                     | 9   |
| 1643794  | 1833833  | 2199434  | 1326504  | 1670440  | 1179931  |                     | 4   |
| 1045070  | 1511484  | 1682045  | 1540969  | 993480.3 | 154351.8 |                     | 13  |
| 4098453  | 8380315  | 4126653  | 4531809  | 636331.4 | 858453.6 |                     | 279 |
| 3788057  | 2700883  | 5709188  | 3252516  | 528157.3 | 1551232  | [M+Na+Na            | 11  |
| 1546597  | 1498089  | 4302154  | 1473520  | 1070328  | 798847.1 | [M+H-C4H8           | 6   |
| 28590802 | 46721725 | 31552432 | 28927974 | 53425672 | 55218823 | [M+Na]+ 50          | 15  |
| 33272787 | 32673356 | 28498949 | 31174915 | 41414316 | 40806229 | [210][M]+           | 2   |
| 3590050  | 4357553  | 2237527  | 2405113  | 3203927  | 2436908  | [M+Na]+ 20          | 13  |
| 23681705 | 20982231 | 14623519 | 19934292 | 11099473 | 16771330 | [290][M]+ [M+H-CH2] | 88  |
| 1754653  | 1860510  | 2413880  | 3402004  | 1643063  | 0        |                     | 2   |
| 3192597  | 4338192  | 1862710  | 4233306  | 1702759  | 3598975  | [M+Na]+ 70          | 46  |
| 29026951 | 14615544 | 23605619 | 29975796 | 13446596 | 2864787  | [416][M]2+          | 2   |
| 749546.9 | 3900692  | 343349.5 | 2748071  | 862872.9 | 1884582  |                     | 4   |
| 4393132  | 5023147  | 3473977  | 2355907  | 3540932  | 6869031  |                     | 249 |
| 1290689  | 383914.3 | 1399555  | 1605117  | 995684.6 | 1096291  |                     | 7   |
| 12324508 | 9230148  | 12648499 | 13752605 | 11621782 | 7228557  | [1096][M]+          | 244 |
| 1689145  | 1068826  | 1725605  | 813975.5 | 1250091  | 5627923  |                     | 2   |
| 1562111  | 903210   | 1470769  | 1060425  | 820717.8 | 4632336  | [355][M+4]+         | 2   |
| 1606495  | 274184.3 | 2727246  | 96488.71 | 628565.4 | 265803.5 |                     | 6   |
| 968653.6 | 1507027  | 1013028  | 870549.7 | 1122497  | 1891685  |                     | 4   |
| 1739701  | 887071   | 2933109  | 1913739  | 1477032  | 1613450  |                     | 9   |
| 10563287 | 14819766 | 9028598  | 13340184 | 15064394 | 8308700  |                     | 2   |
| 17332027 | 4970909  | 7066384  | 8112886  | 4528437  | 1E+08    |                     | 87  |
| 748950   | 0        | 4843407  | 514298.8 | 503854.7 | 3013000  |                     | 9   |
| 1402092  | 2642411  | 525928.4 | 876077.7 | 1691142  | 3167931  | [M+K]+ 336          | 21  |

|          |          |          |          |          |          |              |     |
|----------|----------|----------|----------|----------|----------|--------------|-----|
| 890400.9 | 1325676  | 856477.7 | 829765   | 838348.6 | 642422   |              | 4   |
| 29685538 | 13374379 | 23342740 | 31959962 | 17336638 | 6888410  |              | 2   |
| 12829778 | 9855349  | 11387790 | 10373165 | 8568191  | 12420428 |              | 2   |
| 7241161  | 7634772  | 4422250  | 7829609  | 14978283 | 3679028  |              | 226 |
| 3783742  | 2095543  | 3710822  | 1964554  | 3321525  | 12849869 |              | 2   |
| 2113317  | 1888196  | 123810.4 | 1004213  | 2056062  | 1235063  |              | 1   |
| 658478.1 | 1028335  | 605955.6 | 698460.3 | 345073.3 | 179831.6 | [1078][M+1]+ | 101 |
| 4413920  | 6926610  | 13078168 | 17091712 | 7141645  | 7422145  | [M+H]+ 61:   | 15  |
| 24352059 | 41022805 | 28616121 | 20539023 | 32325913 | 63665742 |              | 9   |
| 10789906 | 16548503 | 7726930  | 10454146 | 8870773  | 7602085  |              | 13  |
| 333056.5 | 502772.2 | 400038.8 | 90507.44 | 284403.7 | 858829.5 |              | 4   |
| 2540505  | 0        | 1940576  | 2345336  | 3046196  | 1005875  | [379][M+1]2+ | 2   |
| 834792.8 | 1397078  | 790696.7 | 620521.8 | 1066538  | 1826283  | [197][M+1]3+ | 9   |
| 114986.6 | 128938.2 | 145456.2 | 123919.8 | 64456.2  | 76377    |              | 218 |
| 1728292  | 3570775  | 1089214  | 810630.2 | 1887959  | 5007158  |              | 4   |
| 881702.6 | 841690.7 | 2384055  | 482393.2 | 739267.5 | 807745.9 |              | 9   |
| 278558.8 | 263091.1 | 1364904  | 211321.4 | 242838.9 | 198489.5 | [771][M+1]+  | 44  |
| 4203446  | 10336391 | 7908287  | 4689911  | 7142774  | 2043869  | [M+H]+ 74:   | 35  |
| 3590369  | 3379646  | 3792147  | 4293963  | 7198453  | 11549126 |              | 1   |
| 3459271  | 5668253  | 2547204  | 1771896  | 4233059  | 1968333  |              | 2   |
| 4188267  | 8027172  | 1584412  | 2122907  | 5125985  | 18173799 | [M+H+HCC     | 15  |
| 3419660  | 4463453  | 2947309  | 2424612  | 5420803  | 6999280  |              | 2   |
| 1770307  | 1513984  | 1622500  | 1500458  | 1242732  | 480995.2 |              | 16  |
| 3839219  | 1866817  | 1424133  | 3320431  | 3948229  | 3382410  |              | 15  |
| 2306080  | 5194444  | 4061919  | 1365136  | 3185503  | 6674494  |              | 9   |
| 47107204 | 1.14E+08 | 1.93E+08 | 73069778 | 1.12E+08 | 87664214 |              | 175 |
| 504354.6 | 626057.1 | 581196.5 | 552835.6 | 500915.6 | 356144.4 |              | 4   |
| 2790098  | 1753219  | 1539299  | 2184180  | 3897618  | 62930842 |              | 1   |
| 38797455 | 54973624 | 36613221 | 37454081 | 47399951 | 41165643 | [1354][M]+   | 2   |
| 8159628  | 7018645  | 5089214  | 4159054  | 3630432  | 3704270  |              | 407 |
| 11820230 | 10983327 | 14246585 | 12537538 | 13331966 | 7764291  | [548][M+2]+  | 4   |
| 3769103  | 5175293  | 4836461  | 6071889  | 3897690  | 2838847  |              | 427 |
| 20584677 | 45091662 | 43350700 | 16505936 | 18490605 | 27199966 |              | 20  |
| 335886.8 | 172675.9 | 379072.3 | 234105.3 | 237871.9 | 193395.5 | [320][M+1]2+ | 17  |
| 3197891  | 2173176  | 2270205  | 1813951  | 2078773  | 101117.5 | [1599][M+1]+ | 169 |

|          |          |          |          |          |          |                                              |     |
|----------|----------|----------|----------|----------|----------|----------------------------------------------|-----|
| 705345.8 | 1815448  | 319184.5 | 341217   | 1456779  | 3085678  |                                              | 9   |
| 8170623  | 7308905  | 7800455  | 7000377  | 6602382  | 438061.5 | [M+H] <sup>+</sup> 64                        | 169 |
| 1975605  | 1062958  | 897070.7 | 1264034  | 1036658  | 818803.7 |                                              | 4   |
| 19301507 | 12256987 | 13461096 | 25055963 | 17711122 | 4020796  |                                              | 2   |
| 2516573  | 2190421  | 4540049  | 3434280  | 1920512  | 6708092  |                                              | 171 |
| 496757.8 | 404477.8 | 357798.1 | 175991.7 | 360019.1 | 65943.52 |                                              | 9   |
| 1231786  | 1738061  | 626398.7 | 335335.2 | 285372.4 | 2163835  | [931][M+1] <sup>+</sup>                      | 357 |
| 1449599  | 4020580  | 4347827  | 1072129  | 2068906  | 4045790  | [549][M+2] <sup>+</sup>                      | 9   |
| 2999076  | 2024326  | 3401831  | 3388973  | 2977965  | 1905610  | [1202][M+1] <sup>+</sup>                     | 275 |
| 1996316  | 2421449  | 3821857  | 4926104  | 4593926  | 6395835  |                                              | 445 |
| 1637798  | 151356.3 | 635585.3 | 1524235  | 325589.1 | 368085.9 |                                              | 125 |
| 1230151  | 1071540  | 1169704  | 1471342  | 1472356  | 949113.8 | [M+H-H20]                                    | 39  |
| 647577   | 726076.6 | 1043518  | 874907.3 | 595210.4 | 682279.5 | [916][M+1] <sup>+</sup>                      | 86  |
| 3889296  | 3920226  | 10030292 | 10379538 | 3882190  | 4314022  |                                              | 136 |
| 6601397  | 5509045  | 8712612  | 15921986 | 6343693  | 5059161  | [1457][M] <sup>+</sup> [M+H] <sup>+</sup> 81 | 302 |
| 2286555  | 2192209  | 2513397  | 2102140  | 2047134  | 1230721  |                                              | 4   |
| 3846686  | 4927114  | 4614687  | 6198795  | 4844068  | 3628973  |                                              | 412 |
| 2781677  | 2873892  | 2552875  | 3651771  | 4084102  | 1669136  |                                              | 1   |
| 4515684  | 1492756  | 2143730  | 4759534  | 2811328  | 1315085  |                                              | 2   |
| 9720205  | 2178666  | 3132738  | 4664470  | 4678377  | 906545.4 | [438][M+1] <sup>3+</sup>                     | 15  |
| 4443314  | 6211097  | 3019122  | 3672837  | 5993201  | 8973568  | [1338][M+1] <sup>+</sup>                     | 2   |
| 3.91E+08 | 865763.6 | 2722777  | 3.53E+08 | 2548363  | 1.13E+09 | [483][M] <sup>+</sup>                        | 2   |
| 3028280  | 11065843 | 6.67E+09 | 7.48E+09 | 7009820  | 3047382  |                                              | 2   |
| 3822743  | 4044904  | 3486106  | 3453504  | 3376460  | 6644116  |                                              | 198 |
| 5079294  | 1773364  | 902666.7 | 5688801  | 6515829  | 3016634  | [M+H] <sup>+</sup> 19                        | 11  |
| 2527323  | 2901087  | 3867220  | 2707903  | 3193135  | 2606283  |                                              | 174 |
| 647809.3 | 1534107  | 950640.9 | 453852.1 | 873417.2 | 473130.8 |                                              | 81  |
| 58503662 | 680267.7 | 1303879  | 51795889 | 53181021 | 20572803 |                                              | 4   |
| 471660.9 | 1392665  | 1356291  | 432138.1 | 787495.4 | 952841.8 |                                              | 9   |
| 8281597  | 8770448  | 6939868  | 6412549  | 7508219  | 8359307  |                                              | 4   |
| 1500619  | 839864.1 | 2137274  | 908685.4 | 926351.5 | 0        |                                              | 1   |
| 43601441 | 1734091  | 1710257  | 216736.7 | 43452861 | 62298907 | [M+Na+CF <sub>3</sub> ]                      | 46  |
| 2172579  | 137518.6 | 1268423  | 1032880  | 1246592  | 136888.1 |                                              | 1   |
| 2412253  | 1900451  | 3606580  | 2530888  | 1526755  | 1326577  |                                              | 71  |
| 1317752  | 1087669  | 1276165  | 1276426  | 937438.1 | 385516.7 | [405][M+1] <sup>2+</sup>                     | 2   |

|          |          |          |          |          |          |                       |     |
|----------|----------|----------|----------|----------|----------|-----------------------|-----|
| 17162074 | 19161187 | 21558728 | 15488422 | 19388084 | 9707539  | [52][M+1]+            | 9   |
| 839970.3 | 2272355  | 2142056  | 579725.1 | 1737235  | 1238758  |                       | 9   |
| 1275963  | 1894595  | 1564895  | 1724741  | 1172913  | 1034876  | [353][M+1]3+          | 4   |
| 2586474  | 2139718  | 6119256  | 5061699  | 2084564  | 1417707  | [674][M]2+ [M+2H]2+ : | 302 |
| 7210466  | 2382767  | 8390154  | 11121470 | 2868271  | 5303368  |                       | 267 |
| 3488915  | 1204667  | 2253909  | 3072336  | 1469886  | 0        |                       | 2   |
| 292989.8 | 462299.3 | 255341.9 | 852959.5 | 2023608  | 2082412  | [M+K+HCO              | 51  |
| 1359389  | 109356.6 | 2053357  | 1342383  | 1615070  | 250865.6 |                       | 9   |
| 5282047  | 1464580  | 3425231  | 5301633  | 1832066  | 361767.8 |                       | 2   |
| 1366242  | 1679521  | 1410302  | 1096522  | 1352092  | 823025.7 |                       | 249 |
| 843582.7 | 4685226  | 6263861  | 3464174  | 4083201  | 3924643  |                       | 344 |
| 2735868  | 2679234  | 3412565  | 2102450  | 2191403  | 823968.2 | [973][M+2]3+          | 9   |
| 8435908  | 12680009 | 10506965 | 8729575  | 12222013 | 8410218  |                       | 9   |
| 81760.05 | 70983.32 | 109311.2 | 15522.69 | 79810.8  | 279238.1 |                       | 18  |
| 1572727  | 2521243  | 1663026  | 992007.7 | 1976353  | 2156265  |                       | 9   |
| 12357542 | 4402706  | 2615948  | 1371985  | 4518851  | 28324501 |                       | 2   |
| 570237.4 | 1114152  | 738795.1 | 486005.2 | 998851.7 | 712323.9 |                       | 38  |
| 5427716  | 5288494  | 3596453  | 1870605  | 1094039  | 13002083 | [M+Na+HC              | 15  |
| 1914928  | 3518735  | 2583645  | 3150850  | 2370000  | 1657650  |                       | 2   |
| 5959424  | 4835376  | 5195595  | 5778722  | 3102913  | 4173664  |                       | 252 |
| 255230.5 | 840626.3 | 909673.6 | 431998.7 | 683773.8 | 539564.8 | [209][M+1]2+          | 18  |
| 307655.1 | 519549.5 | 470822.5 | 326500.5 | 321201.4 | 0        |                       | 4   |
| 3985348  | 2849325  | 3511723  | 4063996  | 2429048  | 1114011  |                       | 2   |
| 9776498  | 9076157  | 7436766  | 9308156  | 8879700  | 8004657  |                       | 363 |
| 34427618 | 37689421 | 28094757 | 25764464 | 40533878 | 40002876 |                       | 2   |
| 2662638  | 3405705  | 4214137  | 2154313  | 2215822  | 537242.6 |                       | 9   |
| 15068436 | 17815681 | 12208240 | 13281816 | 19036106 | 20124169 |                       | 2   |
| 8247028  | 7145936  | 8193997  | 8067698  | 8495102  | 2256412  |                       | 9   |
| 4906096  | 5032494  | 4709513  | 6616854  | 2898871  | 4515794  |                       | 180 |
| 2893557  | 3635565  | 4047294  | 4434983  | 1503590  | 180619.8 |                       | 2   |
| 944716.4 | 1556287  | 1074291  | 982396.3 | 1301824  | 826686.4 |                       | 2   |
| 570314.8 | 2029627  | 2327197  | 382005.4 | 652342.4 | 425884.8 |                       | 9   |
| 2206781  | 1300204  | 947590.5 | 807983.6 | 2135594  | 1965185  |                       | 1   |
| 11331191 | 9322967  | 6385376  | 3694338  | 12301422 | 9280843  | [M+Na+NH              | 15  |
| 295594.4 | 297023   | 419347.7 | 208974   | 115125   | 133764.7 | [M+2H-CO]             | 43  |

|          |          |          |          |          |          |                      |     |
|----------|----------|----------|----------|----------|----------|----------------------|-----|
| 1065661  | 694123   | 756539.5 | 660462   | 863680.1 | 239992   | [58][M+1]+           | 9   |
| 2374473  | 3045347  | 2764436  | 2114324  | 1461809  | 1584743  | [M+K]+ 46!           | 5   |
| 6334065  | 8473356  | 6775395  | 2724756  | 6730774  | 22582382 |                      | 9   |
| 4502174  | 2499084  | 3663150  | 4778842  | 2059136  | 1198389  | [30][M+2]2+          | 2   |
| 2411316  | 962993.5 | 4266869  | 3531205  | 5494136  | 3742421  |                      | 418 |
| 14482677 | 249321.1 | 3712145  | 9082204  | 382154.4 | 32245051 | [456][M]+            | 94  |
| 2771316  | 3892295  | 3509270  | 2059718  | 3545413  | 4724927  | [M+Na]+ 4!           | 33  |
| 7392714  | 3249565  | 6189946  | 2887848  | 4405906  | 0        |                      | 115 |
| 2616082  | 3976767  | 3575262  | 1448004  | 3069484  | 5760692  | [1199][M]+ [M+2Na-H] | 23  |
| 6317980  | 5833505  | 6278299  | 6115143  | 7519642  | 5995276  |                      | 310 |
| 2802140  | 1863399  | 1643571  | 2071201  | 2191146  | 954758.3 |                      | 4   |
| 1453825  | 1637073  | 1484910  | 1112610  | 1262111  | 1588153  |                      | 2   |
| 6939847  | 3694129  | 5101503  | 3487903  | 4161857  | 81448.25 | [486][M]2+           | 280 |
| 1456186  | 1714285  | 956136.8 | 1702041  | 2020699  | 1667811  | [579][M+1]3+         | 397 |
| 6090211  | 11110621 | 8483754  | 6335370  | 7541043  | 14777507 | [M+K]+ 39!           | 62  |
| 1533901  | 1120903  | 2804918  | 2413770  | 3156140  | 2691372  |                      | 386 |
| 399503.2 | 160572.2 | 412964.6 | 264940.3 | 308382.6 | 0        | [490][M+1]2+         | 280 |
| 4888724  | 4126977  | 3303343  | 6193743  | 4210281  | 1622030  |                      | 1   |
| 33158445 | 13630183 | 27608337 | 12402989 | 18976442 | 956748.8 |                      | 115 |
| 4086221  | 1833353  | 5870402  | 3171840  | 3999602  | 2351543  |                      | 2   |
| 13344671 | 14214486 | 19807412 | 14875973 | 10655208 | 9550152  | [387][M]+            | 237 |
| 681002.4 | 767768.4 | 313458.2 | 400785.3 | 716029.5 | 256824.4 |                      | 228 |
| 1588765  | 1835966  | 1652397  | 1282689  | 964573.8 | 2012315  |                      | 38  |
| 1829561  | 2395365  | 8310812  | 8240563  | 8117747  | 86829.23 |                      | 101 |
| 65176442 | 31898825 | 4185086  | 52685095 | 55344463 | 1.32E+08 | [M+K+NH3             | 21  |
| 527843.4 | 1792845  | 3072780  | 765520.8 | 794824.4 | 1056799  |                      | 9   |
| 1071006  | 1397657  | 1767623  | 603989.6 | 958304.8 | 1362175  |                      | 13  |
| 1684167  | 1362844  | 1497370  | 2092675  | 426089.9 | 1364016  | [789][M]+ [M+H]+ 45! | 302 |
| 2905232  | 3277833  | 3489828  | 3769398  | 3068816  | 1083910  |                      | 9   |
| 301138.4 | 838322.8 | 5921660  | 122445.5 | 473903.9 | 630762.3 | [913][M+1]+          | 20  |
| 1100723  | 3540703  | 2134224  | 625907.7 | 1990759  | 4769687  | [1406][M]2+          | 9   |
| 4298557  | 1738571  | 3183636  | 2397074  | 3052358  | 11297.86 | [564][M+1]3+         | 343 |
| 1299967  | 4228367  | 869769.9 | 664224.2 | 3077540  | 4986055  |                      | 1   |
| 3084013  | 4018340  | 3963191  | 4009491  | 4196089  | 3691680  | [3M+H+K]2            | 414 |
| 7232876  | 13602733 | 12304002 | 2703130  | 5675097  | 6365744  |                      | 1   |

|          |          |          |          |          |          |              |     |
|----------|----------|----------|----------|----------|----------|--------------|-----|
| 13553232 | 16174872 | 11720529 | 10754813 | 12403892 | 25496044 | [1150][M+1]+ | 2   |
| 1124561  | 5933515  | 7237725  | 1245967  | 1007687  | 3683414  | [2M+2Na+I    | 3   |
| 14033083 | 4355592  | 19060894 | 6793157  | 13614723 | 16393471 |              | 1   |
| 4199150  | 3089515  | 3695150  | 2973542  | 4147581  | 4251610  | [412][M+1]+  | 9   |
| 2020475  | 731774.9 | 1363576  | 927765.1 | 1041260  | 0        | [1470][M+1]+ | 205 |
| 14482644 | 18554912 | 8048557  | 9998384  | 18452747 | 17969523 | [M+Na]+ 5'   | 13  |
| 1262922  | 1704563  | 1972682  | 866595.7 | 1301724  | 371417.2 |              | 9   |
| 13333106 | 6453351  | 2677203  | 4775817  | 13561634 | 12109468 | [522][M+1]2+ | 1   |
| 92295169 | 68909475 | 55337173 | 84011388 | 65834747 | 26693519 |              | 2   |
| 835000.2 | 961268.3 | 768243.5 | 1181159  | 1040340  | 1813067  |              | 9   |
| 1045989  | 81231.3  | 146371.8 | 420396   | 526788.9 | 1835834  |              | 9   |
| 754351.8 | 535670.1 | 5960708  | 637158   | 777496.4 | 2167834  |              | 9   |
| 230613   | 173832.2 | 167558.2 | 439176.3 | 89392.82 | 110168   |              | 117 |
| 392989.3 | 706297.5 | 238341.4 | 102135.7 | 587824.2 | 1938422  | [1322][M]+   | 17  |
| 15165455 | 16644652 | 15641636 | 12418227 | 10907610 | 8179728  |              | 4   |
| 7945748  | 11015888 | 10638372 | 6614921  | 8121222  | 5531004  |              | 9   |
| 771616.1 | 791069.1 | 1158621  | 740774.4 | 789523.3 | 1247806  |              | 9   |
| 1139914  | 968033.8 | 497403.1 | 877862   | 1262589  | 3262357  | [M+2Na]2+    | 81  |
| 2992103  | 2191904  | 1458042  | 1670505  | 1255042  | 780955.6 |              | 133 |
| 45885507 | 45829532 | 37696775 | 36389723 | 52415719 | 52989349 |              | 2   |
| 3010845  | 4184588  | 3290844  | 3042100  | 4560975  | 2880703  |              | 9   |
| 961088.5 | 1809874  | 1715075  | 2377916  | 3565972  | 3372528  |              | 1   |
| 1559520  | 2142716  | 1853356  | 1256119  | 1580959  | 1215316  | [M+Na+CF:    | 8   |
| 4139972  | 7079333  | 5349805  | 6045745  | 8924387  | 6662344  |              | 2   |
| 6787818  | 7891125  | 6711844  | 5622848  | 8442028  | 7502477  |              | 2   |
| 422194.7 | 545396.8 | 86503.88 | 459548.6 | 364791.7 | 1544789  |              | 9   |
| 2770534  | 4017462  | 4276562  | 2332691  | 2496759  | 1235269  |              | 9   |
| 2830183  | 3115622  | 2977520  | 2849660  | 3229462  | 2946419  |              | 293 |
| 17103120 | 7538119  | 7283340  | 17092538 | 11322410 | 1755316  | [M+K]+ 34(   | 14  |
| 1106073  | 1036565  | 852332.6 | 1096543  | 793662.7 | 751010.1 | [170][M+1]+  | 146 |
| 4353295  | 3872192  | 3031517  | 3773124  | 4199466  | 3767525  |              | 9   |
| 30455738 | 27720060 | 23912538 | 905054.7 | 8204662  | 40003179 |              | 261 |
| 2280395  | 838846.7 | 737399.2 | 1706618  | 1315943  | 965728.8 |              | 1   |
| 34285870 | 56001001 | 41495081 | 23854461 | 35386141 | 72911851 |              | 4   |
| 442343   | 959712.8 | 650789.2 | 126737.4 | 357513.2 | 1140817  | [3M+Na+K]    | 20  |



|          |          |          |          |          |          |               |     |
|----------|----------|----------|----------|----------|----------|---------------|-----|
| 1033371  | 2003321  | 2150761  | 522539   | 1309496  | 2420321  |               | 9   |
| 1974244  | 2015831  | 3775613  | 1592997  | 2065113  | 1212409  |               | 9   |
| 891855.8 | 2125317  | 1140277  | 840827.4 | 1581637  | 1790602  |               | 4   |
| 1040347  | 291780.7 | 826430   | 300844.2 | 418943.5 | 0        |               | 115 |
| 613635.1 | 428925.1 | 212816.5 | 555872.4 | 552387.8 | 640511.7 |               | 171 |
| 721903.8 | 936336.9 | 609792.2 | 53894.3  | 571138.5 | 777773.9 |               | 39  |
| 2609698  | 3704980  | 1845272  | 2724830  | 2744664  | 2996637  |               | 415 |
| 24276745 | 31038953 | 21071897 | 21827530 | 35562172 | 37530710 |               | 2   |
| 503662.4 | 157245.9 | 702816   | 2448695  | 877021.7 | 360284.3 |               | 81  |
| 13228824 | 13558693 | 11461644 | 12727497 | 17093655 | 16042407 |               | 2   |
| 1659423  | 626343.5 | 1520029  | 4400501  | 1966623  | 263718   |               | 97  |
| 1676978  | 1229099  | 729001.7 | 878410.5 | 998856.4 | 183548   |               | 4   |
| 4920351  | 1464669  | 1747082  | 2253038  | 3282911  | 12651478 |               | 1   |
| 3308255  | 7168529  | 3612443  | 5095397  | 5925917  | 1030782  |               | 97  |
| 2329428  | 2197876  | 1085170  | 2497985  | 984063   | 214716.5 |               | 2   |
| 858496.9 | 1465271  | 0        | 330360   | 1532653  | 1804920  |               | 3   |
| 6207473  | 4140892  | 4530539  | 4845640  | 4811944  | 4622118  |               | 202 |
| 369346.6 | 1129660  | 1102271  | 248334.9 | 429584.7 | 1101030  |               | 270 |
| 2021918  | 5394226  | 4494108  | 1676904  | 3239214  | 3048094  | [3M+Na]+ :    | 13  |
| 7751545  | 5830839  | 7000890  | 7696575  | 6954620  | 1709600  | [M+K]+ 31!    | 14  |
| 5488593  | 2581884  | 4748495  | 5822188  | 2773209  | 677292.7 | [1191][M+1]3+ | 2   |
| 6214777  | 26796681 | 19414116 | 2731871  | 14880045 | 14507585 |               | 1   |
| 521500   | 676345.7 | 417573.3 | 486628.2 | 567025.6 | 234286.9 |               | 196 |
| 498342.4 | 3206877  | 575824.9 | 378867.3 | 493925.1 | 335295.6 |               | 89  |
| 5197074  | 7661338  | 5121908  | 5945130  | 7512908  | 7252242  |               | 381 |
| 3836934  | 3234099  | 4790870  | 4060545  | 3398355  | 1685906  |               | 2   |
| 1764519  | 0        | 1751137  | 710181   | 1937151  | 1211836  |               | 1   |
| 401362.8 | 763887.8 | 490106.3 | 404518.7 | 1227075  | 356576.3 |               | 4   |
| 1.54E+09 | 751957.9 | 2.52E+09 | 6146336  | 4403863  | 3.35E+09 |               | 9   |
| 1173913  | 1383865  | 1197394  | 936188.2 | 1134844  | 940563.5 |               | 4   |
| 448713.2 | 287292.1 | 303386.2 | 223258   | 246129.6 | 58430.62 | [1581][M+3]+  | 42  |
| 707365.7 | 1484604  | 1115171  | 408516.1 | 1609712  | 3333516  |               | 9   |
| 2041182  | 1118642  | 3118299  | 2970284  | 4938696  | 2962340  | [1321][M+1]+  | 2   |
| 1859036  | 2048889  | 1926127  | 1399908  | 1813082  | 1392678  | [353][M]3+    | 4   |
| 18536345 | 28755473 | 20227007 | 11793627 | 19307236 | 44709709 |               | 4   |

|          |          |          |          |          |          |                                           |     |
|----------|----------|----------|----------|----------|----------|-------------------------------------------|-----|
| 6528845  | 6548778  | 4332182  | 9374060  | 5146165  | 6260876  |                                           | 2   |
| 1712543  | 2475357  | 2200150  | 1847308  | 3205983  | 0        |                                           | 2   |
| 1767653  | 10261445 | 2138741  | 5392609  | 1681150  | 2490686  | [M+2H] <sup>2+</sup>                      | 15  |
| 564677.2 | 821027.9 | 1131849  | 345669.7 | 654933.9 | 193122   |                                           | 9   |
| 2014586  | 754606.8 | 1536967  | 680228.4 | 1290529  | 44340.84 | [1603][M+1] <sup>+</sup>                  | 115 |
| 45752245 | 6030707  | 3262995  | 46907636 | 4379861  | 42800876 | [M+Na] <sup>+</sup>                       | 189 |
| 14621890 | 9128170  | 9667951  | 11787571 | 9405163  | 3628390  | [213][M] <sup>+</sup>                     | 248 |
| 1859440  | 6326843  | 6993983  | 2559360  | 27077373 | 13391810 | [M+H-C6H6] <sup>+</sup>                   | 11  |
| 4961546  | 5056512  | 5159928  | 8022933  | 4549981  | 4343243  |                                           | 429 |
| 417943.2 | 1714437  | 573617.4 | 184604.6 | 1049057  | 641430.3 |                                           | 2   |
| 1248453  | 1214319  | 853991.7 | 775289.2 | 280440.8 | 531849.2 | [567][M+1] <sup>+</sup>                   | 4   |
| 1787540  | 2680674  | 1628666  | 1157643  | 2386837  | 4381574  |                                           | 9   |
| 2840949  | 3797030  | 3400137  | 2989306  | 2831259  | 2835684  |                                           | 272 |
| 4018850  | 778863.7 | 4285202  | 2843324  | 724529.4 | 4145515  | [721][M+3] <sup>+</sup>                   | 4   |
| 7564821  | 8666902  | 5869426  | 6076535  | 8374590  | 8555540  |                                           | 2   |
| 4308063  | 4557813  | 4225625  | 8548920  | 3117403  | 4415981  |                                           | 385 |
| 204695.6 | 226415   | 140654.9 | 103324   | 215599.4 | 72053.73 | [977][M+2] <sup>+</sup>                   | 98  |
| 1185887  | 3114144  | 2730364  | 692620.6 | 1506003  | 2330595  | [785][M]3 <sup>+</sup>                    | 9   |
| 4595723  | 4607699  | 4433424  | 4155539  | 8345998  | 5498345  |                                           | 380 |
| 598420.3 | 174413.4 | 316993.9 | 286926.9 | 327307.7 | 108799.4 |                                           | 76  |
| 591582.4 | 524777.9 | 797427   | 404924.2 | 419818.8 | 277243.8 | [325][M+1]2 <sup>+</sup>                  | 9   |
| 1.06E+08 | 589082.6 | 11682775 | 11802492 | 1.08E+08 | 29564285 | [M+2H] <sup>2+</sup>                      | 15  |
| 1068633  | 2169046  | 1428041  | 848705.2 | 2690900  | 7552979  |                                           | 93  |
| 479358.1 | 628651   | 656791.1 | 417740.5 | 448143.9 | 227258.3 |                                           | 9   |
| 2656954  | 3300395  | 2769641  | 1928139  | 2244401  | 2241560  |                                           | 4   |
| 638448.1 | 775091.1 | 860103.8 | 799868.1 | 544739.3 | 440736.2 |                                           | 4   |
| 526940   | 495202.8 | 590346.9 | 618761.3 | 426815.2 | 402407.7 | [1565][M] <sup>+</sup>                    | 123 |
| 5646603  | 5660196  | 5883219  | 3783735  | 4620399  | 4444358  |                                           | 356 |
| 3.87E+08 | 4.22E+08 | 3.54E+08 | 4.27E+08 | 3.76E+08 | 2.85E+08 | [254][M] <sup>+</sup>                     | 32  |
| 339079.9 | 934762.9 | 415656.2 | 220837.4 | 450605.5 | 421948.6 | [1575][M+1] <sup>+</sup>                  | 38  |
| 27990475 | 18966036 | 24155728 | 28625302 | 22744288 | 8060323  | [221][M+1]2 <sup>+</sup>                  | 2   |
| 1701639  | 2362740  | 2175518  | 1328779  | 1828812  | 889984.6 |                                           | 4   |
| 6940752  | 1229515  | 3680717  | 6115463  | 13412541 | 1267387  |                                           | 2   |
| 2.53E+08 | 2.86E+08 | 2.62E+08 | 2.03E+08 | 2.24E+08 | 3.03E+08 | [701][M] <sup>+</sup> [M+Na] <sup>+</sup> | 25  |
| 29381340 | 38793647 | 48491465 | 24195352 | 28888489 | 8897176  | [778][M] <sup>+</sup>                     | 9   |

|          |          |          |          |          |          |                     |     |
|----------|----------|----------|----------|----------|----------|---------------------|-----|
| 81257477 | 93523701 | 82854730 | 73196479 | 83561295 | 76003134 | [685][M]+ [M+Na]+ 3 | 13  |
| 5428144  | 3742962  | 3646937  | 3383052  | 2794595  | 267794.7 |                     | 159 |
| 8745598  | 11304026 | 9968808  | 7119673  | 9904795  | 8830538  |                     | 9   |
| 5508670  | 1042110  | 3388391  | 5145196  | 2467215  | 121464.9 |                     | 2   |
| 5434498  | 6877310  | 8968384  | 4041675  | 5034356  | 923695.8 |                     | 9   |
| 4921480  | 9012342  | 7142495  | 8267771  | 7308440  | 4927302  |                     | 116 |
| 954635.4 | 520255.4 | 1042995  | 878300.6 | 708732.7 | 274797.5 |                     | 28  |
| 264945.3 | 144335.9 | 185215.4 | 228773.7 | 558987.9 | 246401.6 | [155][M+1]+         | 173 |
| 2969635  | 4006983  | 4033207  | 2158700  | 2992796  | 1553128  |                     | 9   |
| 1125676  | 1912501  | 1344178  | 874593.4 | 1300385  | 2449117  | [546][M+3]2+        | 4   |
| 1608169  | 3789556  | 1278256  | 881476.3 | 1140730  | 0        |                     | 2   |
| 1727296  | 2288389  | 2047484  | 1466478  | 1920789  | 491848.9 | [1373][M+1]+        | 9   |
| 110329.2 | 727771.7 | 369350.3 | 176471.1 | 335340.9 | 678114.8 |                     | 4   |
| 4344341  | 5452963  | 3312357  | 3866083  | 6172546  | 9562581  | [M+K]+ 17           | 13  |
| 1220485  | 1482195  | 1519075  | 1093097  | 1225191  | 747515.3 |                     | 4   |
| 1819476  | 1013778  | 1855444  | 3061767  | 2007889  | 817843.8 | [2M+Na+K            | 8   |
| 1501059  | 1315433  | 1457011  | 1092649  | 1529372  | 597652.7 |                     | 4   |
| 838604.6 | 735119.3 | 5455803  | 881365   | 936139.8 | 2053420  |                     | 9   |
| 4947203  | 6419116  | 4673265  | 2858550  | 6477354  | 6667815  | [467][M+4]+         | 2   |
| 579499.7 | 216184.7 | 427125   | 152784.4 | 377352.4 | 0        |                     | 68  |
| 3783064  | 741473.7 | 2739717  | 4124980  | 2735252  | 0        |                     | 2   |
| 3003613  | 171897.9 | 26861.91 | 1765878  | 1269054  | 840073   |                     | 41  |
| 165232.1 | 967502.7 | 516885.7 | 0        | 421464.8 | 156418.5 | [M+K]+ 26           | 81  |
| 754646.2 | 278427.3 | 335195.8 | 555620   | 780762.7 | 173749.5 |                     | 91  |
| 514124.7 | 358795.7 | 240752.1 | 235883.9 | 250756.4 | 690315.7 |                     | 65  |
| 711173.1 | 833616.4 | 697496.7 | 635772.9 | 605208   | 300406.9 | [M+2H-C3            | 8   |
| 1449209  | 85739.29 | 2341511  | 776339.1 | 1201097  | 1133911  | [M+K+NH3            | 8   |
| 4764477  | 4856005  | 6053749  | 4276893  | 4142987  | 764146.9 | [239][M]2+          | 9   |
| 551574.1 | 845853.7 | 622292   | 714800.9 | 521801.1 | 473457.8 | [769][M]+           | 456 |
| 12517381 | 14837375 | 13425554 | 9117637  | 10564123 | 8905049  |                     | 4   |
| 5228148  | 2750101  | 4599667  | 5612053  | 3032468  | 151342.1 |                     | 2   |
| 3601156  | 910965.2 | 5023601  | 1871696  | 599125   | 236968.9 |                     | 15  |
| 1.26E+08 | 4E+08    | 9.19E+08 | 1.24E+08 | 1.7E+08  | 1.86E+08 | [841][M]+ [M+H]+ 47 | 20  |
| 1764936  | 1937119  | 1457794  | 970184.6 | 1121210  | 862061.5 |                     | 4   |
| 5428531  | 5907782  | 5678160  | 4573182  | 5319368  | 3983241  | [207][M]+           | 4   |

|          |          |          |          |          |          |               |     |
|----------|----------|----------|----------|----------|----------|---------------|-----|
| 1311403  | 1572606  | 2440333  | 1253032  | 752754.5 | 1982270  | [M+H-CH2]     | 18  |
| 1875816  | 1845557  | 2279223  | 1565765  | 1455051  | 409978.8 |               | 4   |
| 905076.9 | 527128.3 | 1627255  | 1625990  | 2403080  | 1084062  | [649][M+1]3+  | 9   |
| 13814541 | 25897865 | 10935279 | 15146184 | 26709805 | 33418968 | [1250][M+3]+  | 2   |
| 275969.4 | 572980.7 | 255005.2 | 465992.6 | 293432.5 | 240019.2 |               | 366 |
| 9006710  | 15638303 | 11190842 | 7574296  | 12092013 | 22671802 | [709][M]2+    | 9   |
| 2368540  | 3279882  | 2209059  | 2667632  | 1669849  | 2119603  |               | 2   |
| 284685.1 | 479311.8 | 1591022  | 1655280  | 355863.4 | 1182433  | [252][M]3+    | 24  |
| 2007450  | 1965455  | 2894353  | 1643124  | 1207088  | 0        | [3M+2K]2+     | 6   |
| 1809186  | 91778.97 | 2461472  | 2335793  | 1770114  | 471859.4 |               | 14  |
| 845858.7 | 1230905  | 925638.1 | 576694.2 | 1027766  | 904954   |               | 4   |
| 2156108  | 534733.1 | 883921.3 | 2055833  | 322858.9 | 2113199  |               | 9   |
| 238946.8 | 585116.6 | 272251.6 | 271291.5 | 237435   | 296594.6 |               | 134 |
| 2176530  | 979822.5 | 4039819  | 1662077  | 660605.7 | 2717137  |               | 9   |
| 1938524  | 1022749  | 793955.4 | 1239703  | 1055125  | 4707085  | [533][M+1]3+  | 58  |
| 1700155  | 2729195  | 2620149  | 4114026  | 2221800  | 1685951  | [1309][M+4]+  | 2   |
| 9937505  | 16308695 | 19027581 | 8245257  | 9987291  | 4730677  |               | 9   |
| 5350862  | 2680167  | 4642257  | 2162557  | 3217257  | 13064.42 |               | 280 |
| 1003616  | 1396188  | 1355989  | 875447.9 | 727535.3 | 1066407  |               | 9   |
| 33372393 | 24151.69 | 343481   | 33526615 | 26696197 | 801901.5 | [842][M+1]+   | 92  |
| 10839963 | 1506340  | 10399390 | 13355156 | 6572420  | 6467307  |               | 9   |
| 3616941  | 3855496  | 3924526  | 3343027  | 2694045  | 1139661  |               | 9   |
| 705835.9 | 553295.1 | 1162662  | 1036804  | 442572.4 | 1377089  |               | 62  |
| 1665105  | 2088360  | 863366.1 | 2084289  | 1065235  | 1447684  | [902][M+1]+   | 43  |
| 11858391 | 12562830 | 13521018 | 9602855  | 10113396 | 6231595  |               | 4   |
| 4380031  | 6055929  | 5273827  | 3436850  | 4836552  | 7059158  | [890][M]+     | 4   |
| 13033085 | 17303864 | 22097200 | 10732579 | 12695999 | 3264125  |               | 9   |
| 445355.9 | 724696   | 762462.4 | 411111.9 | 355004.3 | 599321.5 |               | 4   |
| 289685.3 | 395035.9 | 685497.9 | 577040.7 | 292252.9 | 0        |               | 4   |
| 3025212  | 3271465  | 2023551  | 2219364  | 3038168  | 1125830  |               | 9   |
| 639460.8 | 1524289  | 2237979  | 620006.4 | 777848.6 | 963375.7 | [1406][M+1]2+ | 9   |
| 1.42E+08 | 596543.7 | 3619021  | 1.42E+08 | 1.16E+08 | 5055837  | [842][M]+     | 92  |
| 445756.5 | 509826.8 | 531634.7 | 995452.1 | 1118979  | 289536.9 |               | 4   |
| 761612.9 | 1559527  | 1021907  | 509192.4 | 778240.6 | 554365.9 |               | 4   |
| 6259739  | 4627926  | 3839862  | 5230458  | 5830744  | 1319348  | [1190][M+1]2+ | 2   |

|          |          |          |          |          |          |              |     |
|----------|----------|----------|----------|----------|----------|--------------|-----|
| 2540844  | 1245022  | 2456500  | 2779899  | 2667322  | 919229.3 | [M+H-COCl    | 3   |
| 22323892 | 12300012 | 57571232 | 20391058 | 23012954 | 8722511  |              | 175 |
| 196399.2 | 191354.4 | 196811.5 | 167447.7 | 174920.6 | 178591.2 | [M+Na]+ 20   | 136 |
| 1001949  | 1196127  | 1403132  | 986412.1 | 1035039  | 828544.9 |              | 9   |
| 625761   | 451893   | 354577.1 | 2308130  | 639132.3 | 335541.7 |              | 91  |
| 3918042  | 2317354  | 5158753  | 2446656  | 1826417  | 387129.8 |              | 1   |
| 3420565  | 5039184  | 3335153  | 2459789  | 3430959  | 9477658  |              | 304 |
| 2730117  | 1355779  | 1911647  | 2425304  | 985639.2 | 677575.2 |              | 2   |
| 4742783  | 4914728  | 4379854  | 2847196  | 3932629  | 3538688  |              | 4   |
| 1141908  | 2730524  | 2684952  | 2076078  | 1328463  | 2282038  |              | 9   |
| 34372091 | 54503818 | 42139618 | 23441540 | 35098811 | 73960340 | [782][M]+    | 4   |
| 2054461  | 3020167  | 3303214  | 1669117  | 2050036  | 831716.8 |              | 9   |
| 3525095  | 5330557  | 3915601  | 2150752  | 4374085  | 3356721  |              | 9   |
| 4296091  | 1578596  | 1751472  | 3122923  | 7391766  | 6395841  | [M+H]+ 49    | 21  |
| 964961   | 1001725  | 1044943  | 667702.6 | 1021903  | 76235.52 | [3M+2Na]2    | 8   |
| 875403.7 | 637150.1 | 1166649  | 627637.1 | 552447.6 | 74857.23 | [843][M+1]+  | 9   |
| 5831557  | 4383468  | 5014752  | 5313600  | 5051717  | 822035.9 |              | 2   |
| 2266123  | 5063097  | 2166300  | 2122667  | 10197667 | 7591043  | [400][M+1]2+ | 2   |
| 429337.3 | 65289.13 | 832132.6 | 520375.7 | 427916.5 | 0        | [M+H]+ 10    | 8   |
| 682614.2 | 1292889  | 1276594  | 335595.8 | 981990.4 | 2181864  |              | 9   |
| 3358059  | 8221544  | 13399057 | 2908034  | 5381857  | 4749125  |              | 222 |
| 2668940  | 604650.1 | 1856936  | 901781.4 | 479032.6 | 5306333  |              | 1   |
| 2561200  | 6328206  | 1778044  | 2689864  | 1935226  | 866310.2 |              | 4   |
| 1090339  | 981904.2 | 444442.3 | 655984.5 | 920780.9 | 2375967  |              | 9   |
| 63728937 | 42522366 | 88244972 | 89212956 | 58273685 | 324416.7 | [68][M]+     | 6   |
| 623146.9 | 1038601  | 2130754  | 949551.1 | 1903646  | 921916.3 | [M+3H-C4H    | 14  |
| 7725024  | 5681827  | 9033387  | 19354961 | 9302696  | 4562542  | [900][M+1]+  | 115 |
| 36974229 | 16313259 | 29761569 | 13424059 | 21918236 | 55488.96 | [373][M]2+   | 115 |
| 1481993  | 2576122  | 1935186  | 662230   | 1485059  | 1294296  |              | 4   |
| 12911129 | 4267324  | 4699064  | 3990381  | 6021739  | 4266902  |              | 377 |
| 914281.7 | 925132.1 | 725838   | 847443.9 | 1063179  | 840581.8 |              | 4   |
| 667872.1 | 1073310  | 741705   | 664757.6 | 769719.5 | 1086050  |              | 4   |
| 1413034  | 1361432  | 1374715  | 810463.3 | 550274.9 | 890983.1 |              | 4   |
| 903939.8 | 2637178  | 2461577  | 563078.2 | 1725453  | 2835084  |              | 9   |
| 420584   | 689438.9 | 812949.8 | 501529.3 | 559009.1 | 11231.93 |              | 338 |

|          |          |          |          |          |          |              |     |
|----------|----------|----------|----------|----------|----------|--------------|-----|
| 521827.4 | 1003437  | 1180079  | 240747.8 | 602612.8 | 897384   |              | 52  |
| 115496.5 | 1228338  | 404057.4 | 46516.19 | 115331.9 | 692305.8 | [M+2Na-H]    | 18  |
| 559826.9 | 1257923  | 1942910  | 455829.6 | 785862.3 | 1040009  | [M+K+NaCl]   | 8   |
| 6052152  | 3308279  | 623661.8 | 3245712  | 6498493  | 5571983  |              | 9   |
| 9597365  | 5737720  | 8689528  | 14273723 | 10776548 | 1085376  |              | 2   |
| 2268029  | 3453641  | 2106280  | 2044850  | 2871802  | 1641487  |              | 2   |
| 2898770  | 4785262  | 1932840  | 1206997  | 2586331  | 2638902  |              | 4   |
| 3154625  | 1882451  | 4088520  | 2663959  | 2936819  | 481857.6 |              | 1   |
| 1939753  | 5071357  | 2178118  | 1587545  | 3466996  | 8180672  |              | 9   |
| 10675185 | 2717336  | 8979360  | 4921335  | 6273112  | 1530952  | [532][M]2+   | 109 |
| 1.23E+08 | 1.37E+08 | 1.16E+08 | 1.12E+08 | 1.1E+08  | 84861347 | [M+H-C4H8]   | 58  |
| 1761495  | 3125255  | 1915524  | 1052198  | 2061112  | 4365361  | [544][M]2+   | 4   |
| 742500.3 | 134491.3 | 615048.7 | 758911.6 | 823647.4 | 965779.1 | [M+Na]+ 1:   | 8   |
| 621181.6 | 1499766  | 1051071  | 566780.4 | 1732761  | 4707193  |              | 14  |
| 1309081  | 818787.3 | 350450.6 | 2261189  | 468766.1 | 166058.8 |              | 81  |
| 1582274  | 949326.3 | 1588330  | 963460.7 | 779736.8 | 566938.3 | [3M+K]+ 2:   | 297 |
| 985940.8 | 982921.3 | 1208916  | 895737.7 | 1040611  | 106327.7 |              | 4   |
| 4189982  | 1226033  | 1054780  | 2059876  | 2462494  | 3171872  | [480][M]2+   | 1   |
| 2299176  | 1448217  | 1478783  | 3319464  | 2125307  | 1854963  | [33][M+1]2+  | 2   |
| 1719370  | 3042201  | 1564065  | 2007105  | 1379902  | 2197741  |              | 1   |
| 3314523  | 4258653  | 4332050  | 2801384  | 2994663  | 1479921  |              | 9   |
| 1.49E+08 | 3616296  | 1.89E+08 | 2646048  | 4466366  | 358470.2 |              | 9   |
| 8954775  | 9688528  | 12023042 | 7134029  | 7521686  | 2816892  | [1025][M+1]+ | 9   |
| 728373.4 | 1609373  | 1812693  | 534276.3 | 942887.5 | 983978.5 | [M+K+CF3Cl]  | 8   |
| 43521752 | 43649958 | 46766853 | 40588297 | 30153779 | 28924487 | [2M+3H]3+    | 20  |
| 7825011  | 7543164  | 7180821  | 1751898  | 6833396  | 6019840  |              | 174 |
| 1145739  | 4171713  | 5937642  | 888478.8 | 1836540  | 3152874  |              | 9   |
| 2824158  | 4096370  | 4594488  | 2404467  | 2646517  | 1373352  |              | 9   |
| 4733424  | 9189965  | 6151899  | 6783739  | 6238891  | 4843872  | [1011][M]+   | 46  |
| 1398611  | 2974400  | 1879992  | 825248.5 | 1765910  | 4593268  | [3M+K]+ 1:   | 8   |
| 22408985 | 15172082 | 21667002 | 24699821 | 15757951 | 2752716  | [560][M]+    | 1   |
| 4422464  | 4117942  | 4231654  | 4338190  | 7910591  | 4083452  |              | 454 |
| 1073892  | 307569.7 | 2278099  | 1787425  | 346138.9 | 961829.3 | [2M+Na]+ 1:  | 136 |
| 638273.3 | 250645.3 | 672792.4 | 456533.6 | 503482.3 | 501035.5 |              | 39  |
| 1795502  | 2428192  | 1816829  | 2026610  | 2103218  | 1703389  |              | 9   |

|          |          |          |          |          |          |               |     |
|----------|----------|----------|----------|----------|----------|---------------|-----|
| 710315.2 | 811573.8 | 695222.2 | 431530   | 487734   | 276793.3 |               | 81  |
| 452859.9 | 660164.7 | 463631.3 | 123179.6 | 284881.9 | 952391.7 | [876][M+1]+   | 4   |
| 140827.1 | 246673.5 | 178200.1 | 154106.7 | 227282.6 | 158829.3 |               | 25  |
| 921801.8 | 1035447  | 460753.2 | 669058.1 | 681014.2 | 230093.5 |               | 9   |
| 2646540  | 3436997  | 2923767  | 2066986  | 2773628  | 3777979  | [622][M+1]+   | 4   |
| 2887499  | 3786522  | 4368712  | 2033456  | 2434208  | 834094.9 |               | 9   |
| 1827945  | 3591822  | 2217733  | 2181657  | 4558494  | 2695957  | [1623][M]+    | 2   |
| 968667.2 | 1526947  | 263995.9 | 578545.8 | 1039097  | 1454142  | [1490][M+1]2+ | 9   |
| 2719734  | 281677.4 | 820322.6 | 2125425  | 1484243  | 1307695  | [2M+Na+K-     | 14  |
| 16162169 | 8885842  | 13024105 | 7274132  | 8777661  | 6760477  |               | 280 |
| 2519357  | 3187005  | 3061003  | 2259541  | 2394409  | 2015304  |               | 9   |
| 12093156 | 1930217  | 3079324  | 1106782  | 8497578  | 2362182  | [M+H]+ 37:    | 12  |
| 8597924  | 4489950  | 11376573 | 5428352  | 6569106  | 15846520 | [M+Na+K-      | 136 |
| 5869183  | 4361422  | 5445764  | 6168183  | 5418138  | 5951353  |               | 293 |
| 7357387  | 5755213  | 3749836  | 6473626  | 9246226  | 2608436  |               | 1   |
| 908900.4 | 1138677  | 1880598  | 703766.7 | 800159.6 | 0        | [774][M+1]+   | 9   |
| 9119874  | 6462219  | 7510054  | 9275694  | 4670181  | 1028308  |               | 2   |
| 365059.3 | 62122.81 | 1167141  | 2082671  | 1475027  | 2837077  |               | 9   |
| 625913   | 381612   | 758942.1 | 314586   | 303241   | 155886.1 |               | 4   |
| 8390935  | 8005379  | 13072606 | 12779949 | 15245727 | 6802642  |               | 331 |
| 22072030 | 18471515 | 13962934 | 10974968 | 10103184 | 13915230 |               | 1   |
| 62717538 | 67628291 | 54783078 | 56232270 | 68043965 | 83717652 | [1397][M]+    | 2   |
| 758145.5 | 473022.9 | 2758743  | 590367.9 | 466328.2 | 380770.3 | [770][M+1]+   | 23  |
| 3583834  | 9144616  | 7902371  | 2713815  | 5304997  | 10128310 |               | 9   |
| 460408.6 | 865215.5 | 1367454  | 1262459  | 887040   | 1080918  |               | 9   |
| 2710817  | 2581358  | 2046092  | 2659380  | 2913857  | 2651413  |               | 195 |
| 1157506  | 2933214  | 3284835  | 834192.5 | 1669666  | 2187590  | [785][M+1]3+  | 9   |
| 10782732 | 7868722  | 11844481 | 5420853  | 16124831 | 26383588 |               | 46  |
| 1291994  | 604052.2 | 1860032  | 1069802  | 1267429  | 231353.3 |               | 9   |
| 640524.5 | 910689.8 | 1171082  | 622559.8 | 949047.6 | 853453.4 |               | 81  |
| 3120997  | 2581031  | 1008965  | 3263445  | 1276321  | 1848320  | [M+Na]+ 8:    | 58  |
| 2968204  | 3402173  | 4824347  | 1473969  | 587662.6 | 8617031  |               | 1   |
| 1053416  | 1259213  | 2651553  | 1838086  | 829759.9 | 261583.1 |               | 93  |
| 1481044  | 3247770  | 3076014  | 3172644  | 1057439  | 3426707  | [M+Na]+ 7:    | 33  |
| 1144594  | 1873051  | 1287917  | 1322879  | 1224779  | 1233910  | [M+Na]+ 2:    | 29  |

|          |          |          |          |          |          |              |     |
|----------|----------|----------|----------|----------|----------|--------------|-----|
| 64987572 | 43149392 | 10013483 | 48015317 | 81356786 | 1.45E+08 | [M+K+NH3     | 11  |
| 2292413  | 2559658  | 1762589  | 1680930  | 1717260  | 7786779  |              | 2   |
| 495756   | 1196370  | 524089.7 | 604426.9 | 980086.6 | 1837479  | [M+Na]+ 2'   | 8   |
| 90908.18 | 121234.3 | 65808.68 | 75088.12 | 103082.8 | 112461.6 |              | 274 |
| 2138043  | 3914453  | 2851126  | 1371727  | 2443482  | 3228807  |              | 9   |
| 4595765  | 1050784  | 1820645  | 4567699  | 3782466  | 710045.6 | [M+H]+ 37'   | 13  |
| 1689530  | 2271961  | 1979240  | 890019.2 | 944236.6 | 1935531  |              | 9   |
| 10207458 | 2266949  | 1339560  | 11016619 | 7457849  | 2764543  |              | 9   |
| 2282196  | 0        | 1606045  | 1967779  | 2304825  | 6746303  |              | 2   |
| 16312417 | 17018875 | 14021196 | 14418453 | 19314969 | 18854798 |              | 2   |
| 521069.5 | 1264996  | 108838.3 | 311149.7 | 901184.1 | 0        |              | 15  |
| 3791346  | 0        | 1056732  | 1274394  | 575571.4 | 373410.8 |              | 46  |
| 272240.9 | 843692.6 | 386532.2 | 305622.9 | 312262.1 | 346086.2 | [M+Na]+ 5'   | 51  |
| 708086   | 520271   | 1009484  | 654529.2 | 741464.5 | 55876.77 |              | 4   |
| 922823.6 | 647573.7 | 4364507  | 882913   | 409453.1 | 579709.2 |              | 1   |
| 2043843  | 761934   | 1909281  | 3367205  | 2459431  | 3882535  |              | 9   |
| 480240.3 | 902343   | 1112807  | 202203.8 | 282765   | 733099.4 |              | 9   |
| 146816.3 | 1359068  | 878759.4 | 510230.3 | 79819.86 | 1288051  |              | 9   |
| 71640836 | 28855.71 | 37257.34 | 62131968 | 40975097 | 2810221  |              | 132 |
| 240965   | 432591   | 468686.8 | 241892.9 | 247352.5 | 976705.8 | [M+K]+ 25'   | 5   |
| 22761070 | 15704194 | 21544124 | 25398064 | 23301259 | 3260156  |              | 1   |
| 9490128  | 4082009  | 7882563  | 3685388  | 5659776  | 11029.78 |              | 115 |
| 5324509  | 5746095  | 4553464  | 3818614  | 4507527  | 2030737  | [567][M]+    | 4   |
| 484928.6 | 542824.1 | 887790.4 | 356776.6 | 310275.8 | 276320.4 |              | 76  |
| 2363914  | 5080922  | 363317.8 | 2052054  | 2090173  | 2334520  |              | 344 |
| 12116706 | 15816547 | 20258173 | 10138448 | 11728500 | 3538797  | [776][M]3+   | 9   |
| 4727843  | 4772882  | 4035729  | 3481190  | 4062141  | 1181990  |              | 4   |
| 3224739  | 4444670  | 3025833  | 2304152  | 3288776  | 4027251  |              | 9   |
| 3623524  | 2691262  | 2431477  | 6805417  | 1464797  | 2756386  |              | 200 |
| 1070659  | 1720584  | 797797.4 | 675609.7 | 1399132  | 1797091  | [1254][M+1]+ | 4   |
| 229208.2 | 975198   | 1127650  | 28607.26 | 834893.1 | 0        | [M+3K-H]2    | 29  |
| 239217.9 | 281591.8 | 266255.4 | 259109.7 | 190181.2 | 125906.7 | [260][M+1]+  | 24  |
| 309564.2 | 470613.5 | 197299   | 183074.5 | 200288   | 255532.9 |              | 170 |
| 5603795  | 1314650  | 8961355  | 4583593  | 6386370  | 555123.5 | [M+H-CO2]    | 12  |
| 775133   | 0        | 762534   | 702032.4 | 1048181  | 179232   |              | 9   |



|          |          |          |          |          |          |              |     |
|----------|----------|----------|----------|----------|----------|--------------|-----|
| 1067578  | 3100181  | 2782569  | 806367.8 | 1998768  | 4335611  | [162][M+1]2+ | 9   |
| 787752.7 | 1281230  | 1543733  | 180214.2 | 827044.2 | 296405.4 |              | 9   |
| 6621611  | 10487331 | 8856055  | 7133761  | 6397416  | 5850824  |              | 18  |
| 50879045 | 26374718 | 11908094 | 16246289 | 39500629 | 7909941  |              | 1   |
| 1071683  | 750963.3 | 1364096  | 839062.7 | 604514.6 | 544601.4 |              | 69  |
| 600205.3 | 611464.8 | 1069769  | 368787.1 | 510742.2 | 2045413  |              | 9   |
| 26340110 | 26398287 | 20144757 | 27780157 | 34741521 | 53358797 | [1295][M]3+  | 2   |
| 1149547  | 1836548  | 105018.5 | 942077.7 | 1856044  | 3241400  |              | 3   |
| 527150.3 | 534696.7 | 7.33E+08 | 7.24E+08 | 6.35E+08 | 373741.5 | [M+K]+ 24    | 24  |
| 2450637  | 3221523  | 1026085  | 429332.1 | 2430347  | 7424746  |              | 4   |
| 229681.4 | 361784.8 | 109892.6 | 188822.9 | 410479.8 | 190205.7 |              | 210 |
| 1209032  | 1068388  | 1340090  | 1224735  | 1447594  | 556765.6 |              | 4   |
| 7907963  | 3611141  | 6128293  | 3229497  | 3862100  | 14962.1  | [660][M+1]2+ | 280 |
| 1640536  | 2710950  | 919542.8 | 563577.8 | 1365041  | 1414865  | [1043][M+2]+ | 101 |
| 387011.4 | 315558.6 | 302564   | 286318   | 180352.8 | 27575.04 |              | 276 |
| 21089626 | 1.02E+08 | 2.43E+08 | 21023442 | 38114137 | 40692100 | [841][M+1]+  | 20  |
| 1383842  | 4081825  | 1311440  | 986821   | 2153244  | 8567763  |              | 9   |
| 1085425  | 1069878  | 1154770  | 1373048  | 767110.2 | 682132.2 |              | 64  |
| 59323.21 | 145424.3 | 120993   | 110050.6 | 108682.3 | 138959.3 |              | 136 |
| 1069068  | 1726730  | 2712164  | 842983.1 | 1345931  | 774897.5 | [3M+2K-H]    | 13  |
| 1729757  | 3392248  | 7495760  | 760151   | 9550057  | 940143.3 | [M+2H]2+     | 15  |
| 1986024  | 2456666  | 2058940  | 1586287  | 2005878  | 2301072  |              | 340 |
| 826553.3 | 1144669  | 1413609  | 653444.2 | 795519.2 | 604883.3 |              | 81  |
| 3699846  | 5388627  | 2963109  | 3863634  | 3089421  | 3270562  |              | 425 |
| 6838915  | 7858402  | 6075296  | 5026446  | 6994817  | 7443583  |              | 352 |
| 1583506  | 3225773  | 3639472  | 1401039  | 1013351  | 779531.1 |              | 9   |
| 1277824  | 1113667  | 2369598  | 689924.4 | 1074443  | 1930182  | [1382][M+1]+ | 38  |
| 2219551  | 5755646  | 5933820  | 1793659  | 3240763  | 3015478  |              | 9   |
| 7620666  | 10470685 | 7267637  | 6754252  | 10404845 | 9966748  | [393][M+1]+  | 2   |
| 965223.4 | 2652522  | 3580398  | 852543.8 | 854741.5 | 2216587  |              | 9   |
| 8900002  | 1454135  | 9012783  | 7229548  | 6507580  | 3907208  |              | 2   |
| 3502984  | 3119399  | 2968227  | 3192795  | 3191345  | 3270443  |              | 270 |
| 18177447 | 11970068 | 20444861 | 9005447  | 4557094  | 14042397 |              | 328 |
| 1672493  | 2799272  | 1777724  | 1589028  | 2370128  | 1643080  | [M+H]+ 55    | 13  |
| 2833437  | 3366835  | 2616334  | 2114656  | 2681465  | 3524948  |              | 2   |

|          |          |          |          |          |          |              |     |
|----------|----------|----------|----------|----------|----------|--------------|-----|
| 1252102  | 4033052  | 758506.8 | 1698629  | 3428426  | 5762837  | [3M+H+Na     | 11  |
| 1334815  | 2866086  | 2065114  | 744596.1 | 2010726  | 4267374  |              | 9   |
| 1196882  | 4297987  | 3601561  | 4237249  | 5467966  | 1875679  | [M+Na]+ 3·   | 15  |
| 1464016  | 1338477  | 1269741  | 1049919  | 1052969  | 687506.3 |              | 4   |
| 42436562 | 17982349 | 35403097 | 15394471 | 25309594 | 17997.14 |              | 115 |
| 4.41E+08 | 4.75E+08 | 3.73E+08 | 3.93E+08 | 4.62E+08 | 5.74E+08 | [1200][M]+   | 2   |
| 5568493  | 5306230  | 6963667  | 2830993  | 4105279  | 4891971  |              | 1   |
| 3307406  | 3325849  | 3096496  | 5558527  | 2744947  | 1688265  |              | 190 |
| 6953452  | 8442376  | 6363849  | 3276843  | 6735961  | 8965333  | [1050][M]2+  | 42  |
| 971207   | 1508446  | 1365634  | 691030.9 | 974050.9 | 358169.1 |              | 8   |
| 1677786  | 3348776  | 1609227  | 2200576  | 2704112  | 1773111  | [982][M+1]3+ | 18  |
| 58480102 | 65944011 | 52180705 | 49249718 | 63538292 | 61684274 | [M+Na+2K]    | 13  |
| 2032125  | 1580785  | 1130039  | 1278603  | 1420608  | 2444133  |              | 2   |
| 519749.3 | 927088.3 | 537209.4 | 301085.3 | 390795.1 | 208748.6 |              | 4   |
| 535083.1 | 2241106  | 855992.1 | 720417.9 | 536848.7 | 206218.2 | [M+H]+ 52!   | 51  |
| 3267858  | 2289535  | 1796385  | 2838670  | 937745.4 | 3024321  | [1549][M+1]+ | 16  |
| 749759.9 | 0        | 1504596  | 1862455  | 607540.2 | 918414.7 | [M+Na]+ 1!   | 13  |
| 2241809  | 6027403  | 3432446  | 1502116  | 3980142  | 7363309  |              | 1   |
| 678477.1 | 878493   | 778246.5 | 1160931  | 1227649  | 801930.3 | [982][M+2]3+ | 18  |
| 4165775  | 2444540  | 14206946 | 2917278  | 1646070  | 9150694  |              | 4   |
| 204091.5 | 96246.02 | 565386.4 | 395799.1 | 421287.9 | 189778   | [878][M+1]+  | 288 |
| 426591.1 | 601880.3 | 1730498  | 448574   | 401222.8 | 147580.1 |              | 91  |
| 1362705  | 5801164  | 6941156  | 7158564  | 7006950  | 7027136  |              | 396 |
| 4949192  | 7311262  | 4665219  | 9356979  | 1119667  | 1039403  | [M+H]+ 50!   | 253 |
| 13496603 | 13083891 | 8706726  | 13540260 | 19671334 | 12431013 |              | 2   |
| 520458.3 | 953580.6 | 1517515  | 316172.1 | 590845   | 0        |              | 9   |
| 541253   | 631774.5 | 924660.4 | 697515.8 | 419002.7 | 143738   |              | 91  |
| 47882785 | 49574127 | 49035939 | 57644148 | 46805960 | 36542789 |              | 241 |
| 2160586  | 2510635  | 2614554  | 2286666  | 1877489  | 1669646  | [M+H]+ 26!   | 97  |
| 2092216  | 2149230  | 1595256  | 1816856  | 2712422  | 1387009  |              | 155 |
| 1581927  | 1886361  | 518052.9 | 994496.5 | 3594493  | 4376719  | [3M+2H]2+    | 11  |
| 724995.5 | 1369604  | 1363771  | 658533.9 | 1269656  | 1208288  |              | 4   |
| 1078388  | 20140408 | 19672666 | 22080526 | 22328993 | 8829362  | [47][M]3+    | 2   |
| 2662481  | 2342658  | 2318868  | 1744385  | 2242206  | 1069320  |              | 4   |
| 998006.8 | 2808045  | 696540   | 844748.3 | 1948747  | 6623597  |              | 2   |

|          |          |          |          |          |          |                      |     |
|----------|----------|----------|----------|----------|----------|----------------------|-----|
| 28228019 | 25993696 | 82467327 | 19782811 | 19123082 | 5793097  | [M+K+HCO             | 3   |
| 8515016  | 6214410  | 4611938  | 7958609  | 8061224  | 2825045  | [M+H]+ 51            | 253 |
| 1.01E+08 | 51042732 | 1.11E+08 | 73742655 | 81870610 | 78373538 | [M+Na]+ 3            | 6   |
| 4130268  | 682923.1 | 4077554  | 4805020  | 5328312  | 5488464  |                      | 2   |
| 521636   | 485367.7 | 559823.3 | 995565.6 | 317408.3 | 947658.6 | [M+Na]+ 6            | 33  |
| 1668861  | 3526466  | 4441942  | 2323820  | 1359390  | 2862489  | [1501][M]+ [2M+H]+ 4 | 39  |
| 4044878  | 4845233  | 6227617  | 2558401  | 8107980  | 4693649  |                      | 372 |
| 17658247 | 18156310 | 14692671 | 13848737 | 20684885 | 21007969 |                      | 2   |
| 70938514 | 78192850 | 65710279 | 79369753 | 69333498 | 52673664 | [254][M+1]+          | 32  |
| 59469.96 | 167524.5 | 199749.4 | 75361.6  | 589764.1 | 979082.5 |                      | 494 |
| 1861672  | 3105397  | 3368651  | 1243811  | 4227104  | 5978472  |                      | 1   |
| 1241861  | 331966.4 | 995528.4 | 614429.9 | 1220616  | 2023859  |                      | 4   |
| 3178871  | 4036421  | 4047053  | 2627107  | 3043025  | 1642889  |                      | 9   |
| 5524756  | 10196871 | 7357982  | 4013890  | 7049851  | 11598110 |                      | 9   |
| 2052787  | 2696247  | 2361084  | 3132595  | 3069750  | 5911477  | [1217][M+1]+         | 2   |
| 77324924 | 1.67E+08 | 1.1E+08  | 81910490 | 1.6E+08  | 98834201 | [40][M]2+            | 1   |
| 1493595  | 683127.5 | 954034.1 | 1358467  | 1777135  | 2744916  |                      | 9   |
| 17803355 | 11509810 | 13875888 | 14604980 | 13285636 | 6987027  |                      | 2   |
| 21521411 | 37136315 | 28095578 | 21806601 | 24374089 | 47706297 |                      | 2   |
| 4438732  | 2762405  | 2719633  | 4389478  | 3500087  | 698463.7 |                      | 9   |
| 2733837  | 2120493  | 4652010  | 3292851  | 2755884  | 22032207 |                      | 155 |
| 4574704  | 3623532  | 2738900  | 5166007  | 2812918  | 2569983  |                      | 340 |
| 2132729  | 2814500  | 1808432  | 1878588  | 2683525  | 5031676  |                      | 9   |
| 5280514  | 4629332  | 2953190  | 4662353  | 4094475  | 3952388  | [M+K]+ 43            | 425 |
| 989188.6 | 1597183  | 579541.2 | 484571.1 | 1150125  | 2249216  |                      | 9   |
| 10889365 | 16969965 | 9620349  | 8696468  | 17016983 | 22162770 |                      | 2   |
| 12600637 | 15175967 | 13025876 | 10204623 | 13577005 | 12551480 | [M+K]+ 33            | 13  |
| 5639850  | 5206361  | 4433793  | 5489844  | 5135241  | 4034354  |                      | 2   |
| 194651.6 | 191522.1 | 199782.4 | 116271.3 | 109487.9 | 65104.48 | [1225][M+1]+         | 74  |
| 930595.9 | 1726576  | 2994043  | 476573.2 | 563965   | 1817267  | [409][M]3+ [2M+3H]3+ | 18  |
| 4804642  | 1816702  | 1047042  | 2826085  | 7975937  | 2488019  | [1265][M]+           | 301 |
| 3024527  | 3923133  | 8986323  | 3149029  | 8077111  | 3814816  | [M+K]+ 17            | 6   |
| 2413620  | 2384120  | 3734907  | 3143325  | 483149.2 | 2081484  | [M+H]+ 22            | 199 |
| 1980352  | 2380084  | 1665299  | 1477774  | 2063458  | 2546494  |                      | 4   |
| 1154358  | 1004836  | 1107092  | 837696.3 | 847459.4 | 0        |                      | 9   |

|          |          |          |          |          |          |                       |     |
|----------|----------|----------|----------|----------|----------|-----------------------|-----|
| 9065513  | 19131078 | 30731410 | 7153381  | 41379484 | 9223610  |                       | 216 |
| 15199226 | 8625702  | 11750443 | 15744463 | 6280347  | 130727.5 |                       | 2   |
| 1.35E+08 | 42451114 | 40911458 | 1.67E+08 | 29443583 | 26625589 |                       | 215 |
| 1032735  | 2157194  | 2214510  | 750988.4 | 802429.9 | 926845.8 | [144][M+1]+           | 9   |
| 2506988  | 2271536  | 72908.05 | 3181457  | 3492255  | 3422733  | [M+2K]2+              | 41  |
| 7358632  | 10253939 | 7051918  | 4297079  | 7973638  | 10443489 | [659][M]2+ [M+H+Na]2+ | 12  |
| 557990.4 | 0        | 1305468  | 568054.3 | 396722.5 | 645110   |                       | 9   |
| 3020814  | 3629973  | 2818772  | 3716742  | 3612327  | 2569297  |                       | 2   |
| 2316142  | 13249294 | 2649911  | 2116605  | 1552240  | 617053   |                       | 1   |
| 624998.9 | 0        | 3285964  | 674094.8 | 916516.6 | 381475.9 |                       | 9   |
| 1871979  | 1844636  | 4782237  | 2504659  | 4566247  | 7555844  | [M+H-H2O]             | 15  |
| 4314329  | 3217978  | 4663714  | 10466169 | 4722513  | 2919977  | [901][M+1]+           | 153 |
| 1047674  | 2305030  | 1511075  | 531105.5 | 1342104  | 2710897  |                       | 9   |
| 31928165 | 18394329 | 1736387  | 26514247 | 6884068  | 22506171 | [502][M]2+            | 2   |
| 2162471  | 2664146  | 1780474  | 1079070  | 2096889  | 1633864  |                       | 2   |
| 5262244  | 5383784  | 5222048  | 11877613 | 4209438  | 5037287  |                       | 381 |
| 1016746  | 936121.5 | 1152487  | 805910.2 | 703088.7 | 649536.6 |                       | 9   |
| 1404140  | 1394787  | 1533401  | 1096222  | 1165088  | 563517   | [54][M+1]+            | 4   |
| 60965871 | 81091098 | 27009086 | 48834558 | 54330358 | 75701458 |                       | 11  |
| 551836   | 2917990  | 1214745  | 1580146  | 3070242  | 2068276  |                       | 15  |
| 3091540  | 2968670  | 3900465  | 2477662  | 2524844  | 74785.31 |                       | 9   |
| 977099   | 1300600  | 1292825  | 961572.9 | 1202507  | 609854.6 | [1018][M+2]+          | 9   |
| 290641.1 | 371598   | 460157.7 | 253155.8 | 237065.5 | 238963.2 | [1551][M+1]+          | 225 |
| 468766.5 | 641908.6 | 795224.3 | 151774   | 326431.9 | 435676   | [1453][M+1]+          | 25  |
| 1786940  | 3111369  | 3952892  | 1075551  | 1611616  | 1490705  |                       | 20  |
| 3838601  | 4141875  | 5358750  | 4418348  | 4082247  | 6002095  | [M+H-CO]+             | 226 |
| 0        | 521530.7 | 0        | 475280.7 | 64577.46 | 1362937  |                       | 81  |
| 1549588  | 1187334  | 1812043  | 2414722  | 731984.9 | 1081922  | [M+H+NH3]             | 288 |
| 8003188  | 5365124  | 6278076  | 8442083  | 6891850  | 1380397  |                       | 2   |
| 1843806  | 296191.3 | 2657452  | 761995.2 | 1906190  | 11504.86 |                       | 343 |
| 1332576  | 2437650  | 3038636  | 1010315  | 1306201  | 738704   |                       | 9   |
| 5101613  | 2586042  | 3736522  | 3442092  | 3613849  | 3264724  |                       | 337 |
| 922655.3 | 1171825  | 1242927  | 749319.2 | 679953.5 | 0        | [2M+Na+K]             | 8   |
| 666515.8 | 1394258  | 1065155  | 450217.3 | 836237.2 | 863549.5 |                       | 9   |
| 157029.5 | 99035.72 | 233218   | 87747.8  | 113222.3 | 7209.656 |                       | 304 |

|          |          |          |          |          |          |              |     |
|----------|----------|----------|----------|----------|----------|--------------|-----|
| 3.76E+09 | 4.81E+09 | 3989000  | 634655.7 | 3.61E+09 | 3559586  | [M+Na]+ 4I   | 10  |
| 4730686  | 4029288  | 1420191  | 4325750  | 4262140  | 7187920  |              | 9   |
| 3365330  | 1499141  | 3673799  | 2539798  | 4007315  | 4603096  |              | 9   |
| 1371737  | 1955042  | 1749623  | 1630663  | 2304619  | 2409341  | [2M+Na+2I    | 14  |
| 4457806  | 4259154  | 1033579  | 5499536  | 7116360  | 595436.8 | [2M+2Na-t    | 3   |
| 6764763  | 7175742  | 7724778  | 6107588  | 6247313  | 4131563  |              | 4   |
| 12696203 | 16478023 | 11786686 | 11494698 | 14598395 | 11324360 | [1350][M]2+  | 2   |
| 1877470  | 2708572  | 1737155  | 1328117  | 1886781  | 748106.8 |              | 2   |
| 252417.8 | 480097.8 | 696709.7 | 473683.1 | 412817.2 | 369572.9 |              | 68  |
| 6906965  | 7053727  | 7794480  | 6194424  | 6363601  | 4144619  | [173][M]3+   | 4   |
| 1590323  | 4530621  | 1639846  | 1558647  | 2061323  | 7091256  | [1020][M]2+  | 9   |
| 1407468  | 3316378  | 2465722  | 1253618  | 2274786  | 13513984 |              | 2   |
| 16332728 | 18189767 | 4894681  | 2045787  | 18487242 | 21455727 |              | 15  |
| 3.57E+09 | 2.46E+09 | 2.18E+09 | 1.69E+09 | 2.81E+09 | 1.46E+09 | [794][M+2]+  | 1   |
| 5662429  | 2642350  | 4871989  | 2909803  | 5635784  | 5459484  |              | 2   |
| 670581.6 | 1155810  | 1343025  | 1664584  | 1003751  | 770353   |              | 9   |
| 9919307  | 4337633  | 2835043  | 8415986  | 5346525  | 791683.8 | [M+K]+ 26I   | 14  |
| 716963.1 | 1082658  | 718323.5 | 484845.1 | 659841.1 | 1517153  |              | 4   |
| 2332059  | 2769649  | 2271648  | 1618377  | 2178782  | 3705525  |              | 4   |
| 3375244  | 4802060  | 3635730  | 4745550  | 3683175  | 2559104  | [1486][M]+   | 394 |
| 857242.7 | 1013480  | 949360.1 | 920149.8 | 796314.2 | 558348.4 | [M+H]+ 43I   | 73  |
| 582224.2 | 1230389  | 493740.8 | 623484.9 | 515286.8 | 1365864  | [1390][M+2]+ | 12  |
| 888345   | 0        | 1217314  | 772123.4 | 751441.1 | 105145   |              | 9   |
| 1819339  | 2798217  | 1677219  | 1468306  | 1767831  | 1620372  | [M+Na+K-t    | 29  |
| 560868.2 | 863314.3 | 778309.8 | 326192   | 626570.9 | 0        |              | 9   |
| 2170085  | 2570212  | 834560.3 | 1445936  | 2433418  | 2019311  |              | 9   |
| 19773799 | 44060922 | 37679749 | 13358390 | 26179776 | 42837611 |              | 9   |
| 445389.5 | 39460.26 | 841767   | 363822.2 | 496192.6 | 3177073  | [M+H+Na]2    | 38  |
| 440949.3 | 957605.7 | 1321605  | 459854.3 | 279935.6 | 0        |              | 9   |
| 581808.8 | 645618   | 397162.4 | 279269.5 | 288599.5 | 11252.33 |              | 86  |
| 2162375  | 3104599  | 2106797  | 1728845  | 12608009 | 6532870  | [M+K+NaCl    | 6   |
| 762312.8 | 709918.4 | 1196085  | 1484413  | 762642.7 | 971920.9 | [697][M+2]+  | 83  |
| 146092.2 | 238414   | 203518.4 | 357014.8 | 107015.7 | 85253.6  | [M+K+NH3     | 423 |
| 41491591 | 17415787 | 35799987 | 27797341 | 33366771 | 704818.7 |              | 109 |
| 942920.1 | 2252458  | 364807   | 434973.1 | 482447.4 | 414338.2 |              | 105 |

|          |          |          |          |          |          |                      |     |
|----------|----------|----------|----------|----------|----------|----------------------|-----|
| 1507894  | 1801586  | 2004809  | 1340274  | 1476157  | 1052658  |                      | 4   |
| 521838.2 | 1662745  | 925481.6 | 602036.8 | 413135.4 | 3273993  | [3M+Na+2I            | 21  |
| 3990851  | 3173361  | 1546383  | 2562503  | 2586302  | 57066772 | [2M+2Na+I            | 21  |
| 14882734 | 16503684 | 13062576 | 12646946 | 13475554 | 25253206 |                      | 2   |
| 1183976  | 951914.1 | 1844173  | 988165.4 | 588357   | 956242.4 |                      | 4   |
| 17588058 | 8858114  | 3802880  | 16327984 | 14472078 | 14954024 | [M+Na]+ 3I           | 11  |
| 27987954 | 50724806 | 69240522 | 25941540 | 26142610 | 29474683 | [211][M]+            | 20  |
| 717576.5 | 2062509  | 341681.4 | 693222.4 | 1650868  | 4687244  |                      | 81  |
| 464190.6 | 0        | 1614189  | 183764.8 | 424287.8 | 0        | [713][M+2]+          | 9   |
| 731252   | 811411.1 | 520985.1 | 715348.2 | 1344674  | 89988.2  |                      | 9   |
| 482537.3 | 994293.9 | 1676091  | 433908   | 608206   | 83495.69 |                      | 9   |
| 7236459  | 5796675  | 5703414  | 6063334  | 8408703  | 2805765  |                      | 407 |
| 1052009  | 1008254  | 1456870  | 726283.1 | 1024766  | 366195.3 |                      | 9   |
| 1096238  | 660818.8 | 1180285  | 306505.7 | 597282.3 | 1310384  |                      | 4   |
| 6863230  | 4982640  | 4220617  | 9958410  | 2776535  | 9763432  |                      | 190 |
| 572043.3 | 23202.59 | 0        | 558764.6 | 75185.52 | 654447.5 |                      | 12  |
| 6960589  | 5922006  | 6696907  | 6831288  | 5972465  | 3887765  | [99][M+1]+           | 4   |
| 3964206  | 4902201  | 6788562  | 3432343  | 4229967  | 1167821  |                      | 9   |
| 392038.4 | 1042900  | 276956.2 | 124968.7 | 668923.8 | 1569355  |                      | 9   |
| 6100884  | 5716711  | 5126433  | 5224967  | 4268365  | 1280061  | [1156][M+1]2+        | 2   |
| 2.76E+09 | 2315377  | 5.23E+09 | 651422.4 | 6636853  | 7077376  |                      | 8   |
| 13806159 | 34264397 | 14358305 | 12286393 | 12049721 | 16507891 |                      | 326 |
| 828128.5 | 1166020  | 1051922  | 724622.6 | 591495.5 | 663805.7 | [1611][M]+ [3M+2K-H] | 134 |
| 3516787  | 1915019  | 2182589  | 3239891  | 5372416  | 3791834  | [2M+3Na+I            | 11  |
| 3642263  | 5730715  | 3697956  | 2270561  | 5495867  | 11342223 |                      | 9   |
| 31545547 | 18971589 | 23832220 | 15952226 | 14694454 | 1158343  | [1268][M]+           | 139 |
| 1291091  | 1514255  | 1270619  | 1505666  | 598061.8 | 2683077  |                      | 9   |
| 1980151  | 0        | 1731391  | 2064729  | 4327571  | 5033785  |                      | 2   |
| 61275662 | 74171687 | 33359503 | 48506140 | 46815042 | 1.3E+08  | [M+H]+ 50I           | 3   |
| 1482651  | 2294357  | 1339913  | 652294.9 | 1478930  | 1548154  | [958][M+2]+          | 101 |
| 6309726  | 2429201  | 2520260  | 5693264  | 2632649  | 1618804  |                      | 1   |
| 2026577  | 2190698  | 96773.67 | 866554.9 | 2656550  | 2807671  | [M+Na+CF:            | 3   |
| 8745075  | 1287187  | 6642306  | 9868185  | 2863155  | 228591.6 |                      | 2   |
| 6773435  | 11432601 | 6796649  | 5032432  | 7536568  | 20926414 |                      | 292 |
| 15995294 | 12342162 | 12807744 | 10943724 | 9187504  | 347509.2 | [636][M]2+           | 286 |

|          |          |          |          |          |          |                       |     |
|----------|----------|----------|----------|----------|----------|-----------------------|-----|
| 407847.4 | 322640.4 | 570968   | 353163.7 | 292335.7 | 311614.4 | [1558][M+1]+          | 78  |
| 754999.2 | 964280.8 | 829736.6 | 449768.6 | 1027588  | 1198012  | [1188][M]+            | 17  |
| 1949268  | 1596890  | 2157740  | 1853844  | 243383.4 | 3316705  | [929][M]+ [M+Na]+ 4:  | 72  |
| 1784353  | 1475951  | 1474654  | 2549001  | 1553681  | 1452440  | [81][M]3+             | 9   |
| 574266.3 | 870978.9 | 872972.9 | 535272.4 | 410844.6 | 576974.4 | [1051][M+1]3+         | 16  |
| 7588536  | 8701286  | 8679019  | 3081478  | 15688573 | 2494371  | [588][M]2+            | 1   |
| 670962.5 | 500623.5 | 1438277  | 1158581  | 1151265  | 620963.4 |                       | 4   |
| 1295966  | 1327038  | 1069271  | 657768.4 | 1262496  | 488314.4 |                       | 4   |
| 399725.4 | 777114.6 | 1304077  | 478428.4 | 493674.1 | 218642.1 | [200][M+1]3+          | 9   |
| 3877026  | 7766451  | 6398587  | 7728404  | 7125112  | 1446247  |                       | 293 |
| 18919119 | 15316116 | 18421196 | 19677679 | 14801573 | 15368073 | [27][M]+              | 61  |
| 376877.8 | 654060.9 | 957052.9 | 506885.5 | 232344.8 | 370913.8 |                       | 4   |
| 5513460  | 7430379  | 4417590  | 3604282  | 5947473  | 12722310 |                       | 4   |
| 829213.7 | 1291069  | 290285.5 | 319693.1 | 1034364  | 3715285  |                       | 9   |
| 3658729  | 9087450  | 7775345  | 2360401  | 5274681  | 10536773 |                       | 9   |
| 9247016  | 6222680  | 8189442  | 10140780 | 7542601  | 1551487  |                       | 2   |
| 1317749  | 1521415  | 1022166  | 766198.4 | 1075108  | 1381584  | [1050][M+1]2+         | 42  |
| 1282544  | 2025090  | 4051903  | 2947121  | 3949538  | 6601611  | [461][M+3]+           | 2   |
| 214298.8 | 284116.9 | 191082   | 335581.9 | 250609.7 | 48307.32 | [991][M]2+            | 220 |
| 2656606  | 2876927  | 2746103  | 1474054  | 1254440  | 814480.2 |                       | 4   |
| 1585796  | 1971330  | 715956.1 | 1122112  | 438555.8 | 3078914  |                       | 4   |
| 10311459 | 10809825 | 11626890 | 8238779  | 10132220 | 3984897  |                       | 9   |
| 3753302  | 2741473  | 1456716  | 1371125  | 3233292  | 3337767  | [M+Na+NH              | 15  |
| 1136247  | 758635.3 | 459567.7 | 963347.9 | 566988.5 | 375014.7 |                       | 4   |
| 4539924  | 8464883  | 7966950  | 8614877  | 5915217  | 5366492  | [671][M]2+ [M+2H]2+ : | 18  |
| 3456456  | 3909310  | 3813375  | 2465122  | 3393143  | 2577069  |                       | 4   |
| 2440244  | 3905109  | 2612309  | 1232768  | 3117582  | 5768430  |                       | 9   |
| 3008498  | 3363932  | 2041976  | 9025826  | 4029691  | 7449791  | [360][M+1]+           | 2   |
| 1446692  | 3850240  | 1921807  | 1154214  | 16627167 | 11306870 |                       | 1   |
| 4342998  | 3753371  | 4267108  | 4569730  | 4473473  | 1975089  | [58][M]+              | 9   |
| 806570.7 | 862167.2 | 605071.4 | 529586.1 | 621075.2 | 479501.9 |                       | 484 |
| 1781075  | 2584442  | 3208934  | 1724120  | 1980588  | 341430.8 |                       | 9   |
| 3018471  | 2413322  | 3137789  | 3557820  | 2939248  | 1839184  | [1096][M+1]+          | 244 |
| 1108270  | 1667509  | 1116021  | 1559041  | 850490.3 | 1236116  |                       | 9   |
| 798895.5 | 906118.6 | 791301.3 | 917549.4 | 985283.6 | 110697.5 | [M+H-C2H4             | 8   |

|          |          |          |          |          |          |              |     |
|----------|----------|----------|----------|----------|----------|--------------|-----|
| 1489408  | 702709.7 | 1678185  | 2007176  | 1517531  | 551623.7 | [1500][M+1]+ | 367 |
| 2336933  | 3396068  | 2736208  | 5729187  | 1619821  | 4020653  | [892][M+1]+  | 38  |
| 249867.6 | 2E+08    | 512317.5 | 1.51E+08 | 415991.7 | 2.32E+08 |              | 25  |
| 450091.9 | 1374325  | 591895.4 | 573641.1 | 375039.3 | 386099.7 | [M+H-HCO     | 93  |
| 8816919  | 9831206  | 12061735 | 7393439  | 7449149  | 2400769  | [240][M]2+   | 9   |
| 968579.1 | 1065227  | 367576.7 | 463142.5 | 901770.4 | 747534.3 |              | 9   |
| 670629.6 | 739413.7 | 854665.2 | 1801326  | 412081.7 | 434875   | [1467][M+1]+ | 2   |
| 1723440  | 3608145  | 1737118  | 1459488  | 1102557  | 3816117  |              | 9   |
| 1928658  | 3663440  | 3434703  | 2435198  | 5456172  | 4149119  |              | 1   |
| 0        | 706547.1 | 1106109  | 0        | 625742.6 | 0        |              | 1   |
| 80943854 | 93635459 | 83209965 | 73436422 | 83741613 | 76342596 | [678][M]+    | 13  |
| 821365.9 | 1008393  | 1033482  | 602595.4 | 545212.1 | 18053838 |              | 9   |
| 1009835  | 795457.5 | 404840.2 | 788728.7 | 703584.7 | 918157.2 |              | 4   |
| 5642450  | 3574028  | 4729555  | 4317184  | 4369049  | 523912.8 | [910][M]2+   | 62  |
| 708461   | 954449.4 | 589763.4 | 389992.5 | 381144.4 | 188461   |              | 4   |
| 636044   | 890178.1 | 994148.7 | 504367   | 554072.4 | 378414.4 |              | 4   |
| 2686598  | 287366.6 | 1822999  | 2241999  | 983269.5 | 0        | [M+H]+ 66!   | 6   |
| 1846973  | 1132684  | 1564419  | 1324114  | 2784411  | 3560473  |              | 2   |
| 16213033 | 13116530 | 16186149 | 15954372 | 11626665 | 12540575 | [73][M+1]+   | 61  |
| 7502904  | 0        | 1338878  | 6379764  | 4656025  | 235096   |              | 2   |
| 401063.9 | 723351   | 800047.1 | 402040.8 | 454291.3 | 885440.2 |              | 4   |
| 3089615  | 2321647  | 2966824  | 2775871  | 2431614  | 2667939  | [M+H]+ 35!   | 339 |
| 512363.6 | 825025.7 | 924733.6 | 386730.2 | 549764.1 | 0        |              | 4   |
| 1819044  | 383346.3 | 2089503  | 1463521  | 2268957  | 5831996  |              | 2   |
| 3116392  | 4165664  | 2865917  | 41682738 | 1814171  | 17373030 | [147][M]+    | 164 |
| 1501456  | 1190401  | 1867931  | 1456931  | 1108104  | 578609.1 | [1540][M]+   | 71  |
| 23353694 | 2132906  | 18516743 | 21655597 | 28944219 | 43573253 | [1162][M]2+  | 2   |
| 1988919  | 2793667  | 2054552  | 1484695  | 2066068  | 3659106  | [551][M+1]+  | 4   |
| 18885840 | 25091820 | 13346322 | 22053308 | 19178061 | 21753489 | [M+K]+ 15!   | 13  |
| 7779788  | 3140959  | 4942802  | 18539479 | 361140.6 | 2605249  |              | 3   |
| 9915025  | 13915855 | 12057247 | 11099671 | 8074838  | 17319169 | [809][M+1]+  | 15  |
| 1721653  | 2590955  | 2707633  | 815184.8 | 1449157  | 640484.9 |              | 18  |
| 2144338  | 0        | 1093752  | 1468851  | 956147.2 | 128295.4 |              | 1   |
| 6054968  | 3951618  | 7035348  | 3604268  | 6862277  | 2539747  |              | 4   |
| 1977441  | 3177511  | 12835220 | 1082162  | 22633619 | 3520500  | [M+K]+ 19!   | 3   |



|          |          |          |          |          |          |              |     |
|----------|----------|----------|----------|----------|----------|--------------|-----|
| 3.08E+08 | 3.4E+08  | 1.39E+08 | 99931493 | 3.98E+08 | 3.28E+08 | [M+H-C2H4    | 15  |
| 637538.2 | 883421.4 | 404149.3 | 290312.2 | 621750.5 | 2925518  | [3M+2Na]2    | 8   |
| 10288840 | 1638621  | 1868239  | 1019289  | 10425410 | 3359574  | [M+Na]+ 1!   | 3   |
| 7864140  | 13215186 | 4534569  | 6736938  | 5174010  | 1013071  | [M+H+HCC     | 257 |
| 1958669  | 2670590  | 2858583  | 1691490  | 2127659  | 957802.5 |              | 9   |
| 3519234  | 3601566  | 2833707  | 2908425  | 4323943  | 2998352  |              | 2   |
| 7025490  | 7115085  | 6889708  | 4531045  | 5634641  | 3672565  |              | 4   |
| 227847   | 530685.1 | 641562.1 | 593583.3 | 399418.4 | 419211.9 | [1110][M+3]+ | 43  |
| 1272009  | 2235201  | 1371505  | 1231190  | 1852523  | 1337409  |              | 9   |
| 25855.34 | 827671   | 1782648  | 34857.93 | 183078.7 | 219089.8 |              | 20  |
| 1743361  | 3255035  | 1406320  | 876271.3 | 1535819  | 1381145  |              | 4   |
| 21085870 | 15688435 | 11066897 | 14192460 | 8595672  | 11341203 |              | 207 |
| 593031.2 | 1064910  | 877459.9 | 427480   | 638860.5 | 1077739  | [703][M]3+   | 9   |
| 53230214 | 36612202 | 24292507 | 47814252 | 47741553 | 61471499 |              | 3   |
| 3691660  | 2963736  | 6372114  | 4762405  | 2666570  | 8433161  |              | 154 |
| 1332369  | 3583161  | 2515024  | 1460994  | 2773667  | 4442472  |              | 9   |
| 1996621  | 2768545  | 2130192  | 1319156  | 2203268  | 3570575  |              | 4   |
| 557694.4 | 657469.1 | 899993.6 | 702810.8 | 498590.7 | 2499839  |              | 9   |
| 1194084  | 4123011  | 1053821  | 4951123  | 2952441  | 3252262  | [M+Na]+ 3:   | 15  |
| 205695.7 | 996752.7 | 610400.5 | 104345.6 | 789208.4 | 2771047  | [M+2Na]2+    | 46  |
| 1.07E+08 | 1.68E+08 | 92356389 | 84376674 | 1.01E+08 | 1.42E+08 | [M+H+CF3O    | 3   |
| 4606428  | 3851530  | 3318393  | 4017475  | 5869650  | 984402.8 |              | 11  |
| 3677775  | 2879681  | 1567069  | 3214017  | 2397639  | 8800086  |              | 9   |
| 12873329 | 3404917  | 859724.1 | 6216157  | 12908028 | 36112575 |              | 1   |
| 406096.5 | 670988.2 | 568865.8 | 367551.2 | 387309.6 | 708244.7 |              | 4   |
| 862343.8 | 621328.5 | 765484.1 | 923373.4 | 264477.4 | 0        |              | 9   |
| 829137.7 | 2703577  | 2555939  | 668542.8 | 1366166  | 2542486  |              | 9   |
| 36586683 | 23465899 | 43993551 | 49517746 | 25681062 | 20009221 | [249][M]+    | 154 |
| 1272412  | 901316.2 | 943217.7 | 1125951  | 833970.8 | 443131.3 | [213][M+1]+  | 248 |
| 916513.8 | 1562526  | 2372854  | 1925353  | 1518614  | 55228.34 |              | 9   |
| 1889859  | 2755314  | 1517758  | 1127798  | 2021939  | 1403896  |              | 2   |
| 86820202 | 71783416 | 83547242 | 92330893 | 92266545 | 55427028 | [56][M]+     | 2   |
| 6668914  | 1613248  | 5993653  | 5430984  | 1245654  | 2044514  |              | 2   |
| 9909121  | 16314220 | 19018846 | 8511221  | 9850657  | 4806103  |              | 9   |
| 3396093  | 8856728  | 7046481  | 5915769  | 1377294  | 8198301  |              | 241 |

|          |          |          |          |          |          |              |     |
|----------|----------|----------|----------|----------|----------|--------------|-----|
| 4270476  | 19788201 | 4321945  | 1122444  | 4065678  | 929130.1 |              | 344 |
| 14949052 | 20899184 | 18452981 | 15179422 | 16719111 | 13913337 |              | 9   |
| 15241706 | 17025653 | 16969503 | 10894946 | 13275986 | 27830956 |              | 11  |
| 9422304  | 2761989  | 7596426  | 9599857  | 3836996  | 2284226  |              | 2   |
| 326131.2 | 253717.2 | 93499.87 | 199873.6 | 379430.5 | 155092.6 |              | 32  |
| 5032868  | 3693696  | 3137801  | 3537957  | 8068132  | 3984730  |              | 443 |
| 6149864  | 6769251  | 2294505  | 28477379 | 2187134  | 2078326  |              | 1   |
| 111359.5 | 143168.7 | 136848.7 | 96377.5  | 153120.1 | 507903.8 | [1322][M+1]+ | 17  |
| 15996050 | 20341665 | 15379753 | 10530719 | 15281745 | 17000115 |              | 4   |
| 1691497  | 950756.9 | 1998077  | 864151.1 | 1512136  | 37801.08 |              | 115 |
| 267617.9 | 134270.4 | 163041.1 | 239243.4 | 83366.19 | 193121.6 |              | 63  |
| 4322746  | 3574877  | 4664209  | 2970896  | 3292046  | 778233.8 |              | 283 |
| 2815759  | 4476247  | 29300444 | 2228097  | 2335168  | 40828513 | [351][M+3]3+ | 2   |
| 92129.74 | 642340.7 | 533855   | 0        | 72277.94 | 349355.1 |              | 46  |
| 2771650  | 3998750  | 4383481  | 2204084  | 2411777  | 1159615  |              | 9   |
| 222028.6 | 244797   | 123357.8 | 370077.7 | 122186.7 | 118673.7 | [237][M+1]+  | 211 |
| 621046.3 | 552760.9 | 1137734  | 410396.3 | 526445.2 | 378505   | [M+H]+ 28    | 342 |
| 1046927  | 1802902  | 1225055  | 476763.6 | 1068599  | 1609717  |              | 9   |
| 2851912  | 4733374  | 3365199  | 2971344  | 2620284  | 1814605  |              | 4   |
| 1772742  | 4565016  | 2125988  | 2154318  | 4022980  | 6670583  |              | 2   |
| 3864876  | 7112187  | 7830402  | 3365868  | 5160293  | 899779.8 |              | 9   |
| 5503428  | 2209195  | 5357088  | 8453530  | 3663164  | 1423385  | [88][M+1]3+  | 1   |
| 266757   | 633973   | 487454.8 | 483779.2 | 375028.6 | 579228.9 |              | 190 |
| 11700107 | 11173800 | 9798241  | 10735381 | 14172966 | 13488816 |              | 2   |
| 1985564  | 1550091  | 4126478  | 2250666  | 2706308  | 1360134  |              | 1   |
| 4102445  | 7083261  | 5006765  | 9192920  | 5736098  | 10461096 | [M+K]+ 426   | 93  |
| 2642496  | 4216956  | 1175261  | 1493320  | 1134589  | 2114190  |              | 61  |
| 1849383  | 458613.3 | 734890   | 1612641  | 1614905  | 1531739  | [825][M+1]3+ | 71  |
| 268222.1 | 391916.9 | 209629.9 | 147996.7 | 272080   | 89741.16 | [300][M+1]2+ | 227 |
| 4688794  | 5733481  | 5208687  | 3302516  | 3869788  | 2354503  |              | 9   |
| 323891.4 | 365003.3 | 433897.4 | 374239   | 381819   | 128238.1 |              | 78  |
| 18325403 | 4338883  | 10838517 | 12707062 | 17455658 | 3204161  |              | 1   |
| 1955206  | 3391502  | 3255106  | 1439243  | 2237230  | 2687144  |              | 4   |
| 1588544  | 2517213  | 5168821  | 1148196  | 1932547  | 2876148  |              | 1   |
| 1236536  | 2702279  | 1711733  | 1768504  | 1729733  | 511822   |              | 2   |

|          |          |          |          |          |          |              |     |
|----------|----------|----------|----------|----------|----------|--------------|-----|
| 743505.2 | 2797081  | 1284888  | 4277869  | 5600095  | 4257104  | [M+K]+ 31:   | 3   |
| 240095.6 | 927954.8 | 617332.4 | 412944.3 | 241473.7 | 494647.4 |              | 4   |
| 40987521 | 44905088 | 34125672 | 32746053 | 47949332 | 48578958 | [424][M]2+   | 2   |
| 176193.5 | 489545.9 | 944301.9 | 235557.7 | 372031.9 | 186549.5 |              | 62  |
| 2292654  | 1587649  | 1800060  | 2472382  | 2130165  | 2000951  | [M+H-CH3]    | 14  |
| 1159800  | 512465   | 320045.2 | 1073620  | 1919037  | 413800.9 | [2M+Na]+ :   | 51  |
| 1456673  | 1356628  | 590514.1 | 283617.1 | 1048068  | 3902513  |              | 9   |
| 432213.1 | 206372.3 | 318270.5 | 407743.2 | 282904.8 | 0        |              | 91  |
| 80653489 | 77731980 | 1.41E+08 | 53987503 | 73796560 | 27962488 |              | 139 |
| 1347634  | 2309628  | 1861911  | 976014.6 | 1570308  | 1297155  |              | 8   |
| 3049471  | 956215.5 | 1976432  | 2531639  | 1605792  | 3284191  |              | 13  |
| 12300029 | 5368878  | 1.03E+08 | 3618174  | 6566552  | 95904351 |              | 184 |
| 5362050  | 4522866  | 3682264  | 4416913  | 3693396  | 4044498  |              | 333 |
| 1532695  | 2529286  | 3199453  | 1510579  | 13213136 | 7425565  | [M+K]+ 41(   | 21  |
| 6317088  | 3523222  | 5082374  | 6582882  | 3324504  | 1922034  |              | 2   |
| 23758037 | 33976596 | 17858300 | 23432697 | 30980875 | 65257726 |              | 2   |
| 14086644 | 17971912 | 18821195 | 21044363 | 17043463 | 2713452  |              | 2   |
| 1450684  | 1362265  | 1236532  | 826021.3 | 981359.2 | 666208.7 |              | 9   |
| 1726234  | 1655732  | 2213895  | 1518794  | 1021363  | 1148101  | [1544][M]+   | 40  |
| 1600341  | 2928956  | 1005388  | 711103.5 | 2809696  | 5818201  |              | 9   |
| 3288844  | 5300398  | 5658086  | 2005609  | 4909408  | 2633283  | [583][M+1]2+ | 1   |
| 1534768  | 999660.8 | 286441.1 | 2126468  | 336057.6 | 869309   | [M+H]+ 29(   | 304 |
| 27291375 | 27769923 | 24703346 | 29478201 | 22595622 | 27237664 | [77][M]+     | 200 |
| 7998371  | 7851440  | 3058687  | 5551342  | 1990704  | 3396447  |              | 256 |
| 184264.5 | 111305.2 | 215312.4 | 305103   | 129967   | 172760.2 |              | 518 |
| 21493254 | 318202   | 22821463 | 29004741 | 34072571 | 18610399 |              | 6   |
| 3473811  | 1205599  | 702095   | 3990449  | 634608.2 | 3269204  |              | 9   |
| 0        | 478967.6 | 0        | 0        | 462719.6 | 1819419  | [3M+Na+2I    | 6   |
| 691307.9 | 507702.5 | 486317.2 | 458187.2 | 1052320  | 478735.8 | [M+Na+NH     | 5   |
| 7605664  | 9411294  | 9257028  | 8505035  | 9188831  | 9151389  | [M+H-C2H4    | 398 |
| 1566689  | 1011496  | 717540.6 | 1243412  | 1134622  | 2174088  |              | 14  |
| 3868304  | 12238864 | 2940812  | 2045966  | 2298502  | 9680300  |              | 71  |
| 7089707  | 6757206  | 5842342  | 6219863  | 4731490  | 3389790  | [1190][M]2+  | 2   |
| 2675841  | 2055212  | 1034376  | 2713438  | 1493397  | 962470.6 | [M+H]+ 35:   | 39  |
| 16194456 | 10622807 | 4979794  | 15859251 | 9326003  | 8748437  | [M+Na]+ 3:   | 11  |

|          |          |          |          |          |          |                      |     |
|----------|----------|----------|----------|----------|----------|----------------------|-----|
| 14593245 | 3671103  | 4997707  | 14396387 | 13396595 | 3171961  |                      | 323 |
| 12740546 | 4164674  | 187381.7 | 9846569  | 6524963  | 1827555  |                      | 52  |
| 2063566  | 1187257  | 1938561  | 934550.1 | 1082080  | 772103.2 |                      | 1   |
| 1188544  | 1016194  | 1077738  | 1016699  | 670079.5 | 1774287  |                      | 9   |
| 1959393  | 2019944  | 2183323  | 1940794  | 1788388  | 1005719  |                      | 4   |
| 1745859  | 3679984  | 2278818  | 623297.3 | 3595532  | 6596905  | [3M+Na+K]            | 3   |
| 543602   | 588043.5 | 205531.6 | 458216.2 | 686288   | 4895019  |                      | 9   |
| 9722793  | 16298028 | 19174882 | 8488690  | 10009354 | 4939122  |                      | 9   |
| 73628.68 | 655941.4 | 389300.8 | 0        | 410778.8 | 0        | [M+Na]+ 3            | 46  |
| 377110.6 | 204189.2 | 280556.6 | 403572.6 | 195063.8 | 181391.5 | [591][M+1]+          | 23  |
| 239477.1 | 676954.5 | 620949.9 | 274039.4 | 328341.5 | 553234.6 |                      | 8   |
| 7032382  | 5179901  | 6065923  | 5405928  | 5279732  | 7434652  |                      | 2   |
| 1027502  | 1037872  | 652532.2 | 1319209  | 1185264  | 78495.19 |                      | 4   |
| 1859981  | 844357.4 | 2068599  | 1619724  | 446730   | 854722.3 |                      | 9   |
| 497792.2 | 1604370  | 2323014  | 716349.8 | 483716.2 | 0        | [7][M+3]2+           | 9   |
| 2912439  | 2501622  | 2277766  | 1576758  | 2230537  | 740584.7 | [156][M+3]2+         | 4   |
| 1173691  | 896446.4 | 698016.1 | 319183.5 | 3.29E+08 | 2.21E+08 |                      | 4   |
| 6646772  | 5872968  | 11596510 | 5913953  | 21892185 | 19280063 | [849][M+1]+          | 1   |
| 6317386  | 10607533 | 7168621  | 4819111  | 8996149  | 14758089 | [104][M]3+           | 9   |
| 1670972  | 2161319  | 1405880  | 1209466  | 2972241  | 7754116  | [M+H-CO2]            | 29  |
| 45913.31 | 1453479  | 1036234  | 21746.51 | 646852.7 | 1429306  | [M+H]+ 66            | 18  |
| 3369389  | 3178820  | 3673733  | 3749764  | 3595172  | 3160893  | [M+H-H2O]            | 356 |
| 1626861  | 359936.6 | 2449595  | 1501493  | 1652478  | 622871.8 | [M+2Na+K]            | 13  |
| 2599138  | 2292900  | 1958630  | 1529406  | 3035489  | 1621685  |                      | 2   |
| 624642.4 | 1249307  | 1827067  | 932228.8 | 616302.7 | 1127801  |                      | 9   |
| 8602770  | 8513177  | 9553692  | 7223987  | 7000981  | 6678745  | [1584][M]+ [M+Na]+ 1 | 42  |
| 629926.4 | 0        | 2478815  | 389628   | 928786.2 | 1091915  |                      | 9   |
| 169745.5 | 351646.7 | 182465.6 | 181364.3 | 124675   | 75939.26 | [872][M+2]+          | 86  |
| 6364402  | 6774043  | 7483899  | 6071087  | 6031328  | 3700647  | [1307][M+1]+         | 4   |
| 905593.2 | 511431.8 | 0        | 643216.6 | 527474.7 | 0        |                      | 9   |
| 42257794 | 56598828 | 47501729 | 33637399 | 35286951 | 71910636 | [M+Na]+ 50           | 58  |
| 12610908 | 3554956  | 3652706  | 13070922 | 5925169  | 514335.1 |                      | 19  |
| 1465105  | 981539.1 | 987456.2 | 890969   | 2253740  | 4585609  |                      | 2   |
| 1.19E+08 | 81904383 | 71573559 | 1.55E+08 | 1.09E+08 | 1.3E+08  | [694][M]2+           | 15  |
| 6655962  | 4858501  | 8870050  | 7082533  | 4528739  | 768565.5 | [1535][M]+ [M+H]+ 92 | 38  |

|          |          |          |          |          |          |               |     |
|----------|----------|----------|----------|----------|----------|---------------|-----|
| 8586831  | 4220917  | 6534448  | 7382574  | 3139464  | 7960725  |               | 2   |
| 39714832 | 51214954 | 37960181 | 29507865 | 31036578 | 42193568 |               | 1   |
| 2311260  | 2138183  | 2832938  | 2329823  | 1991740  | 4722035  |               | 2   |
| 678349.1 | 2073756  | 7386093  | 8401525  | 918088.8 | 2003363  |               | 1   |
| 1.11E+09 | 1.96E+09 | 1.45E+09 | 9.9E+08  | 1.1E+09  | 1.42E+09 | [M+K]+ 394    | 15  |
| 2314604  | 2174357  | 494609.2 | 1689840  | 2145487  | 1295175  |               | 9   |
| 15362456 | 18660135 | 9376197  | 13944550 | 20715629 | 28167651 | [1338][M]+    | 2   |
| 225510.3 | 740854.9 | 494384.1 | 113179.1 | 232833.8 | 924186.7 |               | 4   |
| 3161104  | 5488179  | 4219871  | 2211228  | 6986584  | 16154326 |               | 9   |
| 593727.9 | 1649393  | 1765954  | 1650331  | 1039947  | 787926.7 |               | 9   |
| 13047478 | 11584059 | 13130981 | 15003410 | 10152878 | 3803019  |               | 2   |
| 1062196  | 1168362  | 1638630  | 1131753  | 1316729  | 1043286  |               | 7   |
| 546537.2 | 650770.1 | 1821721  | 385641.6 | 323937.9 | 309754.4 |               | 9   |
| 17897029 | 10826778 | 20960886 | 23282223 | 10317413 | 10852383 |               | 246 |
| 1203182  | 1542798  | 1538207  | 852090.6 | 1156575  | 843301.3 |               | 4   |
| 8493613  | 11368255 | 10070491 | 7129859  | 9661079  | 8641553  |               | 9   |
| 6122037  | 5088114  | 6282864  | 3847195  | 5404752  | 1887968  | [1257][M]+    | 283 |
| 157940.3 | 1139383  | 936043.6 | 309885.3 | 208163.1 | 810025.3 | [M+2H-CO]     | 5   |
| 555655   | 2659729  | 20493.12 | 314805.4 | 787210.6 | 360187.4 | [M+2H-C6H6]   | 11  |
| 1622705  | 1972898  | 1671139  | 946990.2 | 1985296  | 1466282  |               | 4   |
| 1609476  | 2410466  | 3761427  | 1261899  | 1275889  | 322076.8 |               | 9   |
| 4546979  | 3867126  | 3896332  | 3896647  | 10855245 | 6464155  |               | 194 |
| 5.01E+08 | 6.3E+08  | 3.34E+08 | 4.38E+08 | 4.83E+08 | 8.57E+08 | [M+H+NH3]     | 3   |
| 2114537  | 2809869  | 3026559  | 1568279  | 1970453  | 698295.7 |               | 9   |
| 3269505  | 3251463  | 3453664  | 4002917  | 4624270  | 7471971  |               | 2   |
| 707274.7 | 1322344  | 1285031  | 746597   | 1182430  | 988382.7 | [1626][M+1]2+ | 2   |
| 73243.27 | 251491.9 | 300788.5 | 39051.5  | 391513.4 | 33485.75 |               | 18  |
| 3712315  | 3591471  | 3519190  | 3282947  | 3386762  | 5211690  |               | 180 |
| 279506.8 | 1239073  | 860882   | 292056.8 | 437195.1 | 696108.5 | [188][M+3]2+  | 4   |
| 2886440  | 4148381  | 4071555  | 2020861  | 2970170  | 1561877  | [367][M]3+    | 9   |
| 22590992 | 23533952 | 26395485 | 20239640 | 18794221 | 5917134  |               | 9   |
| 1.04E+08 | 1.05E+08 | 1.19E+08 | 89162793 | 94455133 | 65278043 | [1109][M]+    | 76  |
| 1263062  | 847085.2 | 1223619  | 1364081  | 1965804  | 3354431  |               | 2   |
| 12841246 | 15372308 | 13071924 | 10104099 | 14682276 | 12869590 | [M+H-C4H8]    | 13  |
| 4953789  | 3850529  | 4137785  | 6294657  | 4251792  | 3810557  | [M+K]+ 314    | 264 |

|          |          |          |          |          |          |                       |     |
|----------|----------|----------|----------|----------|----------|-----------------------|-----|
| 354201.9 | 440701.2 | 476345.4 | 453113.4 | 298321   | 203613.6 | [376][M+1]2+          | 4   |
| 12817852 | 7156334  | 7580067  | 7705466  | 7815527  | 10302442 |                       | 432 |
| 987317.1 | 450844.4 | 578144   | 955192.2 | 679798.5 | 386442.8 |                       | 4   |
| 2308857  | 2146869  | 3317322  | 2070157  | 2021574  | 0        |                       | 9   |
| 5963576  | 4458589  | 4252769  | 3519733  | 3390440  | 585214   |                       | 159 |
| 1060315  | 1029570  | 1217690  | 620863.1 | 318223.1 | 12449.77 |                       | 129 |
| 4912088  | 4629712  | 4949761  | 3352614  | 4971295  | 5694989  |                       | 432 |
| 25049681 | 16475217 | 21351483 | 20667855 | 20865212 | 4902095  | [692][M]+             | 197 |
| 2724475  | 2213836  | 2802969  | 17087834 | 3916429  | 3036472  | [1355][M+1]+          | 223 |
| 1610487  | 1427655  | 1518805  | 1190463  | 1494392  | 1976031  | [544][M+1]2+          | 4   |
| 771987.2 | 26830513 | 7825057  | 569371   | 17642509 | 9558789  |                       | 11  |
| 411741   | 625379.5 | 608446.3 | 296719.3 | 330310.5 | 33227.6  |                       | 4   |
| 1890983  | 4510688  | 1425145  | 1724321  | 1832006  | 701572.3 |                       | 1   |
| 9731210  | 6727584  | 5264309  | 11781919 | 8493734  | 2153518  |                       | 9   |
| 18383688 | 33462089 | 24220958 | 35082448 | 17826967 | 17620798 |                       | 59  |
| 508071.5 | 813606.6 | 12089999 | 370255.3 | 303863.5 | 345586.3 |                       | 18  |
| 3003457  | 2910790  | 3424973  | 2969111  | 2915582  | 1674808  |                       | 4   |
| 301780.8 | 282336.6 | 408441.3 | 177591   | 326642.4 | 324669.1 |                       | 99  |
| 505054.4 | 1520945  | 1749805  | 265647.7 | 590347.1 | 858568.9 |                       | 20  |
| 599783.2 | 680303.9 | 1176185  | 616045.1 | 724566.3 | 318539.6 |                       | 4   |
| 1045795  | 663025   | 499133.7 | 517137.9 | 2261410  | 670866.4 | [1381][M+1]+          | 334 |
| 12820287 | 16992845 | 22133906 | 10612589 | 12439451 | 3672753  |                       | 9   |
| 3905776  | 4992328  | 4010690  | 3905343  | 4901565  | 3629691  |                       | 9   |
| 2510841  | 5029383  | 1807011  | 597686   | 3405810  | 6753208  |                       | 1   |
| 7527232  | 7578568  | 8208087  | 6484321  | 6701217  | 4283539  |                       | 4   |
| 6084192  | 3529972  | 4626679  | 3120904  | 3131001  | 57506.19 | [490][M]2+            | 280 |
| 1356230  | 7026650  | 2514357  | 27221719 | 2688959  | 4835514  | [419][M+1]2+          | 2   |
| 6255800  | 10751326 | 7398852  | 4638880  | 8810166  | 15256518 | [109][M]3+            | 9   |
| 5433379  | 7950731  | 6524989  | 4013958  | 4179524  | 6381708  | [1336][M]+ [M+Na]+ 6' | 12  |
| 1152927  | 2243531  | 2974367  | 882286.2 | 1251786  | 781147.8 |                       | 9   |
| 1943833  | 710501.8 | 282707.4 | 548716.5 | 2325077  | 2854484  | [2M+3Na+I             | 15  |
| 6950203  | 3822718  | 4208161  | 7458185  | 4380489  | 357453.2 |                       | 2   |
| 5533938  | 6771820  | 6951450  | 3818353  | 5045109  | 4119124  |                       | 4   |
| 55804671 | 52762044 | 39450759 | 49283917 | 44350259 | 1.14E+08 |                       | 115 |
| 34422207 | 38557804 | 23776214 | 28319548 | 41907870 | 39244612 | [352][M+2]3+          | 2   |

|          |          |          |          |          |          |                                      |     |
|----------|----------|----------|----------|----------|----------|--------------------------------------|-----|
| 14086712 | 16006010 | 9995912  | 13842475 | 19122887 | 22239994 |                                      | 2   |
| 9283391  | 5840021  | 8198164  | 9497500  | 7890165  | 2569365  |                                      | 2   |
| 757323.2 | 0        | 536828.6 | 1315612  | 936978.8 | 502892.8 |                                      | 9   |
| 13007979 | 7175537  | 8687339  | 10319102 | 1371731  | 6494611  |                                      | 317 |
| 3669676  | 2480462  | 1929593  | 3540721  | 3095906  | 79243.38 |                                      | 9   |
| 2186274  | 7143296  | 9233484  | 1652612  | 3412677  | 6070740  | [749][M]2+                           | 9   |
| 2281573  | 1802441  | 2183505  | 1494608  | 1749360  | 325688.8 |                                      | 57  |
| 4221588  | 4111738  | 1746643  | 2698243  | 3478801  | 2710468  | [M+H] <sup>+</sup> 53!               | 252 |
| 9312302  | 15726838 | 11253335 | 7742777  | 12052905 | 22437174 | [655][M]2+                           | 9   |
| 4769213  | 3318777  | 5402973  | 5285674  | 4685372  | 2794794  | [1391][M] <sup>+</sup>               | 262 |
| 9961265  | 10141530 | 3246521  | 9901430  | 9822925  | 9767664  | [M+H] <sup>+</sup> 25!               | 314 |
| 1179365  | 2136850  | 2560641  | 983718   | 1264654  | 2372195  | [M+H-C2H <sub>4</sub> ] <sup>+</sup> | 5   |
| 0        | 885364.4 | 254514.8 | 0        | 316076.6 | 491183.2 |                                      | 14  |
| 1030522  | 1228249  | 1562300  | 813930.2 | 1003987  | 507320.9 |                                      | 4   |
| 1719815  | 1414068  | 1177917  | 557449   | 1097022  | 47844.92 |                                      | 476 |
| 1072517  | 448472   | 1660639  | 979189.8 | 1082991  | 396271.1 | [1530][M+3] <sup>+</sup>             | 33  |
| 2341923  | 5513458  | 4243519  | 1175170  | 3473808  | 6671682  |                                      | 9   |
| 5855068  | 5823336  | 7376899  | 4983805  | 4579491  | 7290806  | [M+K] <sup>+</sup> 43!               | 314 |
| 44086471 | 7455508  | 2776203  | 34727500 | 9644920  | 29302027 | [1363][M+1]2+                        | 2   |
| 24112801 | 25098369 | 17072419 | 20474268 | 26316411 | 2271307  | [805][M]3+                           | 1   |
| 544460.8 | 547875.3 | 525932.8 | 185738   | 551151.7 | 491713.3 | [922][M+1]3+                         | 23  |
| 8463023  | 11351518 | 11373331 | 6234221  | 8827398  | 16578715 | [980][M+1] <sup>+</sup>              | 81  |
| 288786.5 | 385661.1 | 979566.2 | 504550.9 | 645508.5 | 1294277  | [M+Na+HC] <sup>+</sup>               | 62  |
| 1489477  | 746016   | 565122.7 | 1545653  | 605326.6 | 869758.7 |                                      | 492 |
| 957982.3 | 0        | 0        | 0        | 1540063  | 1003692  |                                      | 1   |
| 12581394 | 6120481  | 2250242  | 17407639 | 2999002  | 8116021  | [M+H-C2H <sub>4</sub> ] <sup>+</sup> | 6   |
| 515434.5 | 638667   | 552676   | 421933.1 | 494316.2 | 639558.1 | [1098][M+1]2+                        | 366 |
| 1351568  | 1355616  | 1513636  | 2182498  | 1285756  | 1064227  | [3M+2Na]2                            | 14  |
| 7788390  | 18452575 | 15551137 | 5235364  | 10921631 | 20755492 |                                      | 9   |
| 4474448  | 7330675  | 4406397  | 3460976  | 5984167  | 13009762 |                                      | 9   |
| 10323996 | 3738634  | 8872595  | 14737341 | 3887354  | 1643540  |                                      | 2   |
| 622609.5 | 1140715  | 729506.3 | 504020.1 | 805277.9 | 145274.7 |                                      | 4   |
| 346647.2 | 146083.4 | 407022.1 | 428505.5 | 209739.3 | 312823   |                                      | 94  |
| 896539.8 | 553971.6 | 1835006  | 1357867  | 148371.6 | 840796.5 | [M+H] <sup>+</sup> 41!               | 6   |
| 47560310 | 63542508 | 49762081 | 22989755 | 19487027 | 91635616 |                                      | 20  |

|          |          |          |          |          |          |                      |     |
|----------|----------|----------|----------|----------|----------|----------------------|-----|
| 4909385  | 1790360  | 1541083  | 409205.8 | 1572820  | 15848999 |                      | 2   |
| 2028926  | 4484420  | 3573464  | 2209591  | 4346113  | 3623371  | [M+K+HCO             | 13  |
| 164057.8 | 403949.6 | 512775   | 952621.3 | 395589   | 1158726  | [62][M+1]+           | 23  |
| 2632278  | 3108441  | 1117330  | 2024484  | 2693038  | 2624750  |                      | 29  |
| 4370338  | 3068539  | 4738808  | 15008632 | 7347737  | 4135143  | [364][M+2]+          | 1   |
| 5067803  | 6801725  | 4756442  | 2681250  | 4936369  | 3038781  |                      | 293 |
| 42364013 | 46928896 | 6259290  | 34034037 | 41831799 | 34819525 | [797][M]+ [2M+K]+ 2C | 15  |
| 21406183 | 29679021 | 22486506 | 23023134 | 30289926 | 70655.46 | [M+H+HCC             | 28  |
| 1039325  | 9984448  | 5585085  | 3244390  | 27815524 | 17513582 |                      | 1   |
| 8685197  | 1050336  | 4643255  | 8884162  | 1851594  | 1824218  |                      | 2   |
| 1377730  | 1476281  | 1691986  | 1538538  | 1479197  | 45932.34 | [876][M+2]+          | 4   |
| 2863411  | 4338501  | 4971097  | 2157927  | 2722790  | 1521624  |                      | 9   |
| 619984.4 | 942387.6 | 1295880  | 199820.8 | 343498.3 | 142770.6 | [M+H]+ 18:           | 14  |
| 1427125  | 1085593  | 1690824  | 1055211  | 1333443  | 380876.3 | [974][M]+            | 245 |
| 45073422 | 47104138 | 38903189 | 36945697 | 49257393 | 52341351 |                      | 2   |
| 8076930  | 3902538  | 11904348 | 10134747 | 3662329  | 4187338  |                      | 297 |
| 3822904  | 6260638  | 7172932  | 2671786  | 4939766  | 2050588  | [1337][M+3]+         | 139 |
| 880897.9 | 1995445  | 1185421  | 746316.4 | 1530392  | 2541340  |                      | 9   |
| 732914.5 | 1167204  | 799078   | 451532.2 | 732278.6 | 365161   | [3M+Na+K]            | 12  |
| 335326.7 | 318111.1 | 255429   | 92142.24 | 307790.3 | 461431.7 |                      | 91  |
| 1776607  | 2195974  | 1379535  | 1411157  | 1827359  | 3417088  |                      | 4   |
| 8269646  | 4094541  | 5656978  | 3435935  | 4742908  | 0        |                      | 280 |
| 874658.4 | 117309   | 138230.1 | 565170.6 | 1352886  | 1546392  | [1060][M+1]+         | 1   |
| 2622966  | 1652664  | 2136063  | 3567528  | 3357796  | 387237.8 |                      | 2   |
| 1468061  | 1832541  | 363603   | 1413843  | 177241.3 | 908495.1 |                      | 4   |
| 3833485  | 3946169  | 4025975  | 3848587  | 3986056  | 5069034  |                      | 323 |
| 2086932  | 4647263  | 2899455  | 1590199  | 9960224  | 9417630  | [M+2H-C6H            | 6   |
| 9015469  | 11192539 | 10676327 | 13795284 | 8616832  | 6947813  |                      | 1   |
| 6413697  | 2281793  | 7189151  | 2709216  | 5549855  | 11971081 | [M+Na+HC             | 314 |
| 12105438 | 1841172  | 12374399 | 9902664  | 5908115  | 5932605  |                      | 2   |
| 16020194 | 18743529 | 14248782 | 12139915 | 18132659 | 17973511 | [M+2H]2+             | 13  |
| 159096.2 | 446213.4 | 301889.6 | 204129.5 | 197816   | 264078.6 | [M+H]+ 67:           | 35  |
| 348909.7 | 1448232  | 992507.7 | 81758.32 | 533552.9 | 2269586  | [713][M+1]+          | 9   |
| 6004362  | 5951933  | 5599318  | 5446463  | 5359750  | 5547092  |                      | 121 |
| 3429386  | 3297948  | 3050246  | 1793126  | 5164953  | 6234050  |                      | 447 |



|          |          |          |          |          |          |              |     |
|----------|----------|----------|----------|----------|----------|--------------|-----|
| 2.26E+08 | 2.45E+08 | 1.96E+08 | 1.51E+08 | 1.83E+08 | 3.24E+08 |              | 77  |
| 216994.7 | 812094.7 | 955208   | 84766.96 | 227890.4 | 317997.6 | [187][M+1]2+ | 18  |
| 512370.9 | 151837.4 | 314112.8 | 274173.5 | 371278.9 | 0        |              | 91  |
| 8189708  | 1816755  | 7727512  | 2519332  | 9748577  | 6570815  |              | 2   |
| 3109653  | 8144591  | 1337683  | 2216906  | 4275858  | 18365112 |              | 3   |
| 2985409  | 2744488  | 2379774  | 1485206  | 2345303  | 1290385  |              | 4   |
| 1047283  | 1365826  | 1168150  | 725805.3 | 1075702  | 494286.5 | [M+K]+ 289   | 8   |
| 60877279 | 70020880 | 63322776 | 48571383 | 54131638 | 73586648 | [701][M+1]+  | 25  |
| 534372.9 | 988193.4 | 641219.3 | 871927.1 | 445177.3 | 653884.7 | [1594][M+1]+ | 366 |
| 1276811  | 2500011  | 766900.3 | 225123.9 | 1838900  | 2528890  |              | 2   |
| 4977314  | 5547171  | 1065355  | 3800783  | 7034528  | 2901703  | [3M+Na+K]    | 11  |
| 897357.8 | 1038021  | 1107663  | 434713.9 | 801934.4 | 751877.8 |              | 5   |
| 663322.8 | 1048768  | 804481.1 | 801924.6 | 607645.2 | 725209.3 | [666][M+2]+  | 4   |
| 1514787  | 3639513  | 2863232  | 1493503  | 3088494  | 222660   |              | 2   |
| 1141316  | 2218635  | 1688268  | 771900.9 | 664002.7 | 3303527  |              | 4   |
| 835094.5 | 524592.4 | 730925.8 | 741273   | 840338.4 | 0        |              | 9   |
| 140370.7 | 979624.5 | 452312.7 | 107386   | 268839.2 | 341981   |              | 18  |
| 1998386  | 4033776  | 2737558  | 929923.1 | 4857856  | 978912.3 | [M+H]+ 49    | 15  |
| 12495821 | 4282508  | 1961997  | 17322507 | 4648262  | 7349847  | [M+Na]+ 8    | 6   |
| 229305.9 | 1126832  | 183214.7 | 299827.7 | 172238.1 | 165615.9 |              | 328 |
| 4259462  | 4739052  | 6534503  | 6714102  | 5193480  | 6485159  |              | 208 |
| 2988754  | 1453920  | 1077941  | 1742689  | 2940469  | 0        |              | 1   |
| 11662894 | 15448201 | 22190653 | 10507435 | 9949947  | 2608051  |              | 9   |
| 1086658  | 1343534  | 1347368  | 1434220  | 1554101  | 195392.5 | [1360][M+2]+ | 2   |
| 2049546  | 1077155  | 3129926  | 2572885  | 5094384  | 2804207  |              | 9   |
| 596712   | 459439.1 | 1084464  | 690999   | 896224.3 | 175162.7 |              | 47  |
| 319544.5 | 445272.4 | 380897   | 370407.4 | 292165.3 | 508841.6 | [M+Na]+ 5    | 44  |
| 5058663  | 6496578  | 5676180  | 3804877  | 5084705  | 6885274  |              | 4   |
| 16211982 | 26179404 | 17396644 | 13049833 | 22133603 | 36702839 |              | 9   |
| 1659489  | 1696340  | 1693522  | 1377430  | 1407753  | 878747.4 | [192][M+1]+  | 4   |
| 6809973  | 6974646  | 5682455  | 7492415  | 7339095  | 2161793  |              | 2   |
| 152875   | 1611217  | 2764961  | 1829031  | 2418363  | 2890401  |              | 14  |
| 397776.3 | 715901.9 | 734115.3 | 2615852  | 306037.4 | 172351   | [1437][M+1]+ | 41  |
| 2639995  | 3579781  | 3208068  | 1561306  | 3492674  | 2596131  |              | 2   |
| 14615686 | 18270411 | 26462511 | 12646645 | 12761570 | 4383731  | [152][M]2+   | 9   |

|          |          |          |          |          |          |                      |     |
|----------|----------|----------|----------|----------|----------|----------------------|-----|
| 1576746  | 3904256  | 3450768  | 879312.5 | 1846042  | 4244905  | 9                    |     |
| 643964   | 1407883  | 1048616  | 609849.5 | 1146477  | 1029297  | 13                   |     |
| 2879436  | 3053494  | 2209775  | 3941603  | 37492881 | 42804646 | 2                    |     |
| 6708925  | 6221479  | 5777572  | 5699279  | 6413418  | 4272919  | 2                    |     |
| 7694390  | 9746800  | 5105983  | 4630713  | 7053458  | 14518143 | 4                    |     |
| 2547561  | 2233275  | 2504661  | 2809402  | 2601987  | 906572.9 | 9                    |     |
| 406943.3 | 788688.6 | 735656.8 | 341272.2 | 611711.7 | 1046416  | 4                    |     |
| 28151242 | 38537915 | 40398771 | 35008019 | 34415061 | 21104264 | 276                  |     |
| 2961245  | 3150306  | 2594459  | 3885046  | 5056525  | 3211824  | 325                  |     |
| 2435140  | 1824183  | 2036770  | 1770474  | 1727848  | 2890182  | 2                    |     |
| 2663500  | 2620875  | 2680304  | 2543495  | 2569132  | 2545649  | 308                  |     |
| 5840898  | 3239707  | 3384866  | 4952429  | 1260985  | 2603122  | 105                  |     |
| 7647220  | 3890100  | 6146818  | 3655987  | 4509583  | 865826.5 | [966][M]+            | 280 |
| 510216.6 | 325547.6 | 565734   | 515438.7 | 393517.3 | 209921   | [1547][M+1]+         | 169 |
| 974639.2 | 918823.2 | 438440.3 | 379637.7 | 1114078  | 2077219  | [1517][M]+           | 4   |
| 1624226  | 4252063  | 4176049  | 1156198  | 2206355  | 2488820  |                      | 9   |
| 163769.2 | 354416   | 319091.2 | 259768.8 | 290934.2 | 195613.7 |                      | 371 |
| 5706513  | 6216578  | 948927.1 | 3702171  | 1236109  | 9416061  |                      | 1   |
| 23411628 | 16455267 | 25482186 | 49796483 | 25300048 | 13404403 | [901][M]+            | 153 |
| 2127292  | 3932332  | 5924225  | 2173493  | 2277951  | 1431858  |                      | 9   |
| 310675.9 | 375286.8 | 125907.6 | 365588.4 | 153886.1 | 91467.27 |                      | 513 |
| 119273.3 | 191732.7 | 160006.8 | 73420.27 | 198305.9 | 112384.2 | [1492][M+1]+         | 504 |
| 284651.8 | 391757.8 | 362737.7 | 503420.4 | 297627.1 | 202745.4 |                      | 48  |
| 25561753 | 33913873 | 2593075  | 24099160 | 25138769 | 55804433 | [915][M]+ [3M+K]+ 1! | 21  |
| 2560133  | 2176559  | 1979240  | 2496663  | 3264461  | 3824209  |                      | 2   |
| 503618.7 | 194605.6 | 371497.7 | 367790.9 | 289533.2 | 102225   |                      | 292 |
| 1311486  | 1020120  | 1126782  | 1267048  | 1004090  | 408709.6 |                      | 4   |
| 3958456  | 4444602  | 3650379  | 4908834  | 6287087  | 4572064  |                      | 2   |
| 1707296  | 1185728  | 1044287  | 1900571  | 1847848  | 1747284  |                      | 4   |
| 2087237  | 1427739  | 1293369  | 930240.1 | 1047870  | 550333.2 | [822][M+1]+          | 83  |
| 978996.4 | 1306286  | 1263001  | 877555.8 | 766812.1 | 3045466  |                      | 9   |
| 2682618  | 2220083  | 2576444  | 1522332  | 4659192  | 3046974  |                      | 2   |
| 1746340  | 1841730  | 1453939  | 1251703  | 1590274  | 650013.3 | [851][M+4]2+         | 4   |
| 5567412  | 13134188 | 21759642 | 16342400 | 8194453  | 4455138  |                      | 261 |
| 1764270  | 3248097  | 2376291  | 1738348  | 14665749 | 3363208  |                      | 84  |

|          |          |          |          |          |          |                      |     |
|----------|----------|----------|----------|----------|----------|----------------------|-----|
| 610081.5 | 966153.7 | 814372.2 | 646348.1 | 0        | 964825.8 |                      | 9   |
| 1079808  | 21272710 | 32368786 | 26664720 | 997000.5 | 22333487 |                      | 1   |
| 752102.4 | 460569.5 | 303210.2 | 559104.2 | 236215.3 | 3037980  | [M+H+NH3             | 33  |
| 529472.9 | 721965.8 | 891692.6 | 500568.8 | 311323.7 | 72657.72 |                      | 4   |
| 162499.8 | 183490.3 | 210073   | 274478.2 | 354278   | 158906.9 |                      | 240 |
| 6267295  | 4288226  | 5509723  | 4574919  | 3527012  | 0        |                      | 2   |
| 3808457  | 4372507  | 899145.1 | 5183972  | 1690441  | 13902964 | [313][M]+ [M+Na]+ 2! | 304 |
| 3716913  | 3128344  | 3442042  | 3040466  | 2639651  | 1047439  | [3M+H+Na             | 38  |
| 1639967  | 3847632  | 2914183  | 764673.4 | 2386157  | 4200426  |                      | 9   |
| 8617098  | 9577200  | 8276176  | 7361687  | 8886480  | 14027387 |                      | 387 |
| 1042592  | 1214815  | 425368.9 | 1275816  | 598482.9 | 2864732  | [M+K]+ 25!           | 81  |
| 4004578  | 15581673 | 3893253  | 26591830 | 33793669 | 12032015 | [3M+Na+K]            | 15  |
| 3920424  | 3673326  | 4968080  | 3334016  | 3850314  | 3216550  |                      | 191 |
| 14161262 | 3329324  | 8511473  | 10654048 | 16265811 | 3518986  |                      | 1   |
| 904135.4 | 3928922  | 3865662  | 4405593  | 4286376  | 3709211  |                      | 386 |
| 58754954 | 51435765 | 20437978 | 49006463 | 15139793 | 45954668 | [498][M]+            | 146 |
| 62561865 | 32030137 | 9408610  | 59695112 | 13088134 | 93825089 | [125][M]+ [M+Na]+ 2! | 38  |
| 914114   | 1331254  | 806857.9 | 476568.6 | 1836421  | 2106507  | [2M+2K-H]            | 21  |
| 2047501  | 2236939  | 2226696  | 1790530  | 2034706  | 1486101  |                      | 4   |
| 12521024 | 6462258  | 10974631 | 5082133  | 6464445  | 19009.25 |                      | 280 |
| 734304   | 155471   | 589603.3 | 778578.8 | 1500470  | 507445.9 |                      | 9   |
| 713899.9 | 826641.6 | 504331.2 | 534966   | 246934.6 | 1136356  |                      | 4   |
| 318032.4 | 1535762  | 893909.1 | 269519.7 | 533475.7 | 876635.9 |                      | 9   |
| 734039.4 | 795614.4 | 1529587  | 941801.8 | 684744.5 | 172784.6 |                      | 8   |
| 2727299  | 3348540  | 2166301  | 1938808  | 3222861  | 5547573  |                      | 9   |
| 1465807  | 3001127  | 3308434  | 881393.1 | 1594502  | 2091862  | [413][M+1]2+         | 9   |
| 26762.96 | 405077.3 | 1054457  | 73232.83 | 231599.5 | 413358.5 | [452][M+2]3+         | 18  |
| 1019597  | 0        | 1258226  | 1109359  | 710574.2 | 2349023  |                      | 9   |
| 407869.8 | 464793.8 | 868974.3 | 492457.1 | 632664.7 | 397305.4 | [M+H+CF3O            | 23  |
| 1865335  | 1823478  | 1751162  | 1268750  | 1558300  | 1258672  | [589][M+1]+          | 4   |
| 963598.6 | 1166741  | 1164667  | 564627   | 1212270  | 1091338  | [M+Na]+ 5!           | 42  |
| 964593.4 | 1408620  | 663548.1 | 1501901  | 1845478  | 509005.4 |                      | 4   |
| 916447.5 | 1598430  | 3577224  | 1361683  | 1847436  | 2629949  |                      | 15  |
| 4595158  | 5329528  | 2837565  | 4373583  | 5022537  | 6085009  |                      | 22  |
| 3070768  | 4169059  | 2734108  | 2527703  | 4261094  | 3762090  |                      | 13  |

|          |          |          |          |          |          |                    |     |
|----------|----------|----------|----------|----------|----------|--------------------|-----|
| 1407114  | 2024771  | 1591108  | 1077606  | 1374425  | 2315925  | [1139][M+1]2+      | 2   |
| 82481480 | 1.16E+08 | 69941555 | 55335542 | 57417938 | 67421924 | [958][M]+ [M+H+NH3 | 101 |
| 434698.3 | 434428.7 | 532634   | 303996   | 325187.7 | 188828.2 |                    | 57  |
| 2938827  | 3406323  | 4041133  | 3286585  | 3391374  | 226212.4 |                    | 1   |
| 11310771 | 2706144  | 779103.8 | 7904774  | 13143812 | 5298478  |                    | 1   |
| 945005.3 | 1508351  | 1426065  | 771311.1 | 1168470  | 543429.2 |                    | 9   |
| 3873997  | 5168065  | 5357201  | 5102585  | 5416082  | 6156961  | [M+H-CH4]          | 339 |
| 21925736 | 23768232 | 4300932  | 24639223 | 9812520  | 6904967  |                    | 90  |
| 534051.3 | 514368   | 799560.9 | 559103.6 | 404714.6 | 0        |                    | 4   |
| 3200158  | 4026329  | 3151588  | 2227794  | 2518272  | 4708493  |                    | 4   |
| 942779   | 786642.4 | 476116.1 | 709668   | 684613.4 | 1052351  |                    | 91  |
| 1863017  | 3278896  | 3798847  | 1375026  | 2114857  | 964869.3 |                    | 9   |
| 1195046  | 1169456  | 11733.42 | 1163784  | 1438616  | 1363692  |                    | 19  |
| 3630871  | 3796291  | 7407359  | 8058566  | 4514465  | 1156010  |                    | 427 |
| 1062748  | 8194011  | 13013945 | 23052774 | 28200882 | 4241233  | [21][M+1]3+        | 15  |
| 1644992  | 1752932  | 166782.1 | 388684.9 | 1221252  | 5943162  |                    | 1   |
| 1028191  | 1941555  | 1615439  | 1231085  | 887863   | 820086.1 | [1032][M+1]+       | 12  |
| 1000527  | 3170676  | 3181019  | 923306.7 | 1984331  | 3389745  |                    | 9   |
| 1182055  | 2062583  | 1537632  | 989749.2 | 1469623  | 4010957  | [116][M+1]+        | 51  |
| 1867493  | 1.28E+08 | 38179879 | 37377525 | 4899176  | 11025197 |                    | 11  |
| 2963846  | 307670.4 | 531952.9 | 2472180  | 717706   | 5225153  |                    | 5   |
| 584644.4 | 75470.14 | 847767.3 | 820608   | 1091645  | 553407.2 |                    | 9   |
| 1960299  | 0        | 1488404  | 2074451  | 1556650  | 180932.9 | [M+K]+ 14f         | 13  |
| 5540526  | 9754850  | 7465179  | 5567967  | 6668650  | 6949977  |                    | 1   |
| 1181914  | 2146223  | 2714513  | 849867.5 | 969017.4 | 792806.9 |                    | 9   |
| 87051022 | 93837399 | 81445958 | 78621312 | 70601602 | 87675588 |                    | 2   |
| 67216903 | 89669079 | 39894807 | 45349410 | 36517362 | 50613391 | [M+K+NH3           | 101 |
| 15999011 | 18676965 | 19117473 | 12837915 | 14081374 | 11838255 |                    | 4   |
| 478855.8 | 148026.8 | 289175.5 | 226248.4 | 281670.5 | 0        | [1409][M+2]+       | 109 |
| 657039.1 | 2037788  | 3268394  | 668457   | 1222393  | 769527   |                    | 9   |
| 952173.9 | 565059.6 | 603863.8 | 990089.5 | 296892.5 | 944914.3 |                    | 9   |
| 1703301  | 2808705  | 3916261  | 1681376  | 1922765  | 0        |                    | 9   |
| 447431.6 | 721931.7 | 876870.4 | 476307.1 | 398405.3 | 114408.2 |                    | 4   |
| 599052.5 | 1889317  | 2209429  | 638022.6 | 854489.6 | 1313736  |                    | 9   |
| 18135086 | 19615426 | 18111810 | 11540973 | 15281928 | 13204921 |                    | 4   |

|          |          |          |          |          |          |                          |     |
|----------|----------|----------|----------|----------|----------|--------------------------|-----|
| 4423027  | 2830084  | 4923839  | 6273358  | 3104727  | 3571862  |                          | 206 |
| 57502.4  | 353613.7 | 104619.7 | 0        | 339728.1 | 134998   | [M+H] <sup>+</sup> 280   | 39  |
| 28193751 | 2397961  | 18729474 | 22471963 | 25159604 | 16532904 | [87][M] <sup>2+</sup>    | 1   |
| 5995394  | 10367438 | 7081111  | 4736905  | 8572693  | 14687090 |                          | 9   |
| 323575.7 | 258037.6 | 288179.9 | 291701   | 153797.8 | 532130.2 | [M+H-CO <sub>2</sub> ]   | 42  |
| 4979099  | 1654922  | 564214   | 974129.5 | 5465883  | 5627814  |                          | 1   |
| 1321668  | 1068246  | 1519985  | 1745866  | 828227.4 | 675307.4 | [362][M+1] <sup>+</sup>  | 166 |
| 4761907  | 3780848  | 1351947  | 6295544  | 2925658  | 8113224  | [M+Na+Na]                | 6   |
| 1064297  | 274886.2 | 2720803  | 1996526  | 1013856  | 1007393  | [674][M+1] <sup>2+</sup> | 302 |
| 1003381  | 1476414  | 1011415  | 726754.8 | 1066482  | 2093129  | [890][M+2] <sup>+</sup>  | 4   |
| 3753651  | 3755418  | 2440708  | 1472763  | 2861380  | 7926672  |                          | 2   |
| 470802.1 | 565076   | 90932.46 | 608756.8 | 621315.6 | 1532791  |                          | 81  |
| 305052   | 655969   | 859021.5 | 1018087  | 107826.4 | 788564.8 |                          | 130 |
| 901067   | 1159199  | 1745692  | 618843.1 | 672752.1 | 137398.5 | [225][M+1] <sup>+</sup>  | 9   |
| 15104210 | 19425801 | 13626639 | 13330965 | 18129756 | 15663787 |                          | 2   |
| 3051559  | 5479842  | 8773924  | 2438123  | 8344634  | 2833771  |                          | 1   |
| 5158789  | 6907128  | 9134006  | 4056241  | 5008924  | 1279327  |                          | 9   |
| 4471980  | 7287133  | 4353908  | 3396700  | 5668283  | 12936484 |                          | 9   |
| 559230.9 | 1085233  | 908828.5 | 362734.4 | 517466.5 | 651315   |                          | 9   |
| 997345.9 | 898090.7 | 1924693  | 743654.6 | 2147152  | 5281248  |                          | 2   |
| 7570451  | 10126832 | 5471292  | 4594256  | 8271120  | 14539215 |                          | 4   |
| 802631.7 | 1778836  | 586143.6 | 571891.1 | 371562.2 | 593225.9 |                          | 4   |
| 2155126  | 2082698  | 2467508  | 2939375  | 2442400  | 810461.2 | [M+3K-H] <sup>2</sup>    | 13  |
| 592830.2 | 515521.8 | 423836.2 | 676092.4 | 532880   | 753934   | [1145][M+3] <sup>+</sup> | 23  |
| 865909.5 | 1454139  | 523548.2 | 547238.7 | 383507.9 | 544145.3 |                          | 4   |
| 1827170  | 4804211  | 5174324  | 1524290  | 2513165  | 4878396  |                          | 9   |
| 11151928 | 7717635  | 16004786 | 49006238 | 12626486 | 9207844  | [1355][M] <sup>+</sup>   | 223 |
| 7551153  | 10801394 | 14705719 | 6611504  | 8695023  | 2868282  |                          | 9   |
| 376468.9 | 521313.9 | 740815   | 639331.2 | 97747.5  | 677206.4 |                          | 492 |
| 1814853  | 1614382  | 1600338  | 1580051  | 1288317  | 1171019  | [1432][M+1] <sup>+</sup> | 64  |
| 71635259 | 79974353 | 58912981 | 69906379 | 92611013 | 1.01E+08 |                          | 2   |
| 2721498  | 2942181  | 1549920  | 2096204  | 1514119  | 1882422  |                          | 125 |
| 1184346  | 701979.7 | 417796.3 | 416663.5 | 1037856  | 0        |                          | 112 |
| 387537.5 | 2051636  | 1420214  | 892424.6 | 576141.6 | 729835   |                          | 4   |
| 1237444  | 3749795  | 3031905  | 4451512  | 2091007  | 1290445  |                          | 1   |

|          |          |          |          |          |          |                      |     |
|----------|----------|----------|----------|----------|----------|----------------------|-----|
| 623864   | 1083997  | 387886.8 | 482256.9 | 740725.7 | 621522.3 |                      | 4   |
| 757031.6 | 759099.9 | 410744.9 | 551385.2 | 640972.2 | 420409.5 | [1104][M+2]+         | 227 |
| 4828097  | 7776440  | 5761691  | 3724411  | 4727210  | 3906499  |                      | 272 |
| 70548752 | 64591430 | 93076617 | 67844690 | 57374056 | 46373530 | [611][M+1]+          | 16  |
| 593934.3 | 1132391  | 691445.1 | 370696.8 | 798715.1 | 795997.1 | [1051][M]3 [2M+Na+2I | 16  |
| 603046.5 | 1707643  | 1444635  | 468589.1 | 1015901  | 2004633  | [166][M+1]2+         | 9   |
| 247915.1 | 299395.9 | 458453.1 | 207755.3 | 227796.4 | 138763.8 | [1257][M+2]+         | 283 |
| 1125695  | 1726654  | 1250148  | 597570.7 | 1654236  | 1347909  | [M+H]+ 23:           | 13  |
| 39656182 | 55820775 | 73867747 | 34615356 | 37821916 | 13233078 |                      | 9   |
| 725477.8 | 1254940  | 1777409  | 1232136  | 1369245  | 1503687  |                      | 51  |
| 6742160  | 4409974  | 3011671  | 1624459  | 13220130 | 12246674 |                      | 11  |
| 33608803 | 45166945 | 18402708 | 22453801 | 18784473 | 26490085 | [722][M]+ [M+K]+ 38: | 101 |
| 2359804  | 3029627  | 2942108  | 3252931  | 3235127  | 3211821  |                      | 344 |
| 1407818  | 1543435  | 1522811  | 1017944  | 949222.2 | 506285.6 |                      | 4   |
| 3716812  | 4127549  | 4516163  | 2426513  | 3411972  | 546975.8 |                      | 9   |
| 1514050  | 1050526  | 470921.6 | 2639848  | 2556272  | 1103202  |                      | 9   |
| 1511935  | 660827   | 1528920  | 1960629  | 2022094  | 739906.1 |                      | 136 |
| 21931536 | 25578279 | 22185328 | 20952840 | 18049457 | 33271384 |                      | 188 |
| 15204985 | 6061655  | 12566589 | 5062057  | 8637643  | 28335.1  | [371][M+1]2+         | 115 |
| 6320157  | 11503276 | 11678627 | 6224865  | 7654250  | 9540876  |                      | 9   |
| 2776321  | 1563858  | 3388989  | 3010503  | 3351975  | 4108184  |                      | 13  |
| 458821.9 | 1143158  | 409147.5 | 220035.4 | 553550.1 | 1300404  |                      | 91  |
| 71362927 | 79898364 | 52526721 | 69669042 | 92331723 | 1.01E+08 |                      | 2   |
| 3136914  | 4095468  | 5799966  | 2795474  | 3086409  | 991513.2 |                      | 9   |
| 1507610  | 1162015  | 3746925  | 3217245  | 1512138  | 4928289  |                      | 2   |
| 541312.1 | 1360092  | 961627.3 | 353382.2 | 789408.5 | 1592486  | [M+H]+ 27:           | 8   |
| 365555.2 | 368789.5 | 358325.4 | 411684.5 | 261424.9 | 163205   |                      | 48  |
| 522539.7 | 550742.1 | 1062701  | 263227.7 | 519950.3 | 0        |                      | 9   |
| 1007448  | 1293167  | 1308084  | 1087594  | 1022900  | 362738.1 |                      | 9   |
| 1506459  | 934152.9 | 1259670  | 1056806  | 991225.4 | 142796.3 | [464][M+1]2+         | 210 |
| 1004764  | 1814735  | 1221487  | 1618514  | 2837299  | 2436848  | [347][M+1]2+         | 2   |
| 4237876  | 2658582  | 3794966  | 2913239  | 2447229  | 184120   | [464][M]2+           | 210 |
| 4662558  | 2878948  | 529379   | 2385550  | 6267021  | 6559974  | [M+H]+ 38:           | 21  |
| 7948573  | 2854464  | 5763749  | 3530139  | 3411831  | 10569487 | [352][M+1]3+         | 2   |
| 4012326  | 2841458  | 3507731  | 4401081  | 3490305  | 2331135  | [1056][M+1]+         | 230 |

|          |          |          |          |          |          |              |     |
|----------|----------|----------|----------|----------|----------|--------------|-----|
| 709389.8 | 750223.1 | 905818.1 | 580551.5 | 578668.3 | 542042.7 | [1544][M+1]+ | 40  |
| 937356   | 1371164  | 1245030  | 661924.7 | 622351.1 | 309759.8 |              | 4   |
| 453097.3 | 1111936  | 818678.9 | 467444.9 | 918507.2 | 1163573  |              | 4   |
| 108197.5 | 122174.7 | 266548.3 | 178232.4 | 175325.9 | 113272   |              | 277 |
| 2158846  | 1904065  | 2808430  | 2971459  | 2148448  | 2788162  | [1150][M+2]+ | 2   |
| 601553.2 | 743328.2 | 867854.6 | 401198.3 | 677047.3 | 1758565  | [3M+Na+2I    | 62  |
| 4869056  | 6265528  | 6200487  | 4603383  | 6203831  | 5736892  |              | 253 |
| 44270847 | 51638638 | 50502201 | 54005461 | 39242252 | 33960221 | [316][M]+    | 48  |
| 4107087  | 4701503  | 6941259  | 3241898  | 3160139  | 573051.9 |              | 9   |
| 450983.5 | 583432.2 | 291380.8 | 411179.9 | 158560   | 447699.5 |              | 87  |
| 9600076  | 9821006  | 6241199  | 7986705  | 10237990 | 8308832  |              | 4   |
| 16101233 | 25694556 | 17555787 | 12799226 | 21922616 | 36365070 | [107][M]+    | 9   |
| 4384590  | 2824794  | 4879329  | 5942672  | 2794269  | 2451029  | [1564][M]+   | 329 |
| 566117.4 | 701205.6 | 777829.5 | 680431   | 617736.5 | 432050.1 | [1507][M+1]+ | 99  |
| 2873085  | 2716678  | 3135821  | 1204027  | 2771715  | 2504425  |              | 236 |
| 53942970 | 86470818 | 38459280 | 41372249 | 49138734 | 1.41E+08 | [M+H]+ 39    | 3   |
| 622609.4 | 750830.3 | 594064.3 | 426111   | 501978   | 209292.1 |              | 4   |
| 318824.2 | 178592.3 | 563102.1 | 387635.1 | 379420.7 | 174331   | [361][M+1]2+ | 23  |
| 1160058  | 1004161  | 585388.1 | 912890.7 | 1061314  | 437780.3 |              | 4   |
| 1372384  | 1786006  | 1065570  | 1256643  | 1297992  | 714060.7 |              | 119 |
| 576388.9 | 359624.3 | 1074277  | 282950.9 | 876774.5 | 430719   | [265][M+1]2+ | 23  |
| 10926914 | 26231000 | 383750.3 | 160434.6 | 91352.07 | 115125.3 | [M+H]+ 48    | 16  |
| 2905257  | 2875465  | 3709174  | 2736290  | 2417166  | 0        |              | 9   |
| 1234825  | 799739   | 121657.1 | 1013890  | 1045728  | 0        |              | 9   |
| 3035212  | 2433505  | 4363157  | 3346304  | 2337374  | 385449.3 | [1535][M+1]+ | 38  |
| 2438802  | 3716368  | 2372599  | 2451004  | 3601450  | 2795784  |              | 13  |
| 1370543  | 1427654  | 1072762  | 1195932  | 1268576  | 696913.6 | [1394][M+2]+ | 232 |
| 441153.7 | 1015619  | 1355141  | 121419.8 | 603782.3 | 976436.1 | [240][M+3]3+ | 9   |
| 795817.9 | 470744.5 | 1482512  | 10909157 | 2511596  | 425971.9 | [392][M+2]2+ | 2   |
| 2664668  | 2533399  | 2935204  | 2624170  | 2587984  | 1430578  | [51][M+3]+   | 4   |
| 8722411  | 23637919 | 9826113  | 12431861 | 19314071 | 33226930 |              | 2   |
| 3117215  | 1699967  | 2617799  | 1169085  | 1994716  | 2936899  |              | 9   |
| 16492285 | 47448555 | 20642386 | 10933094 | 23819962 | 55932861 |              | 1   |
| 3192180  | 2947318  | 4686541  | 8079221  | 2904615  | 1355075  |              | 2   |
| 1768874  | 3995549  | 5775081  | 2145906  | 1843898  | 1306350  |              | 9   |

|          |          |          |          |          |          |                      |     |
|----------|----------|----------|----------|----------|----------|----------------------|-----|
| 12151057 | 4735583  | 10237275 | 4338141  | 7250219  | 25515.89 |                      | 115 |
| 400873.1 | 659948.1 | 667537.3 | 451136.9 | 674140.9 | 550492.5 |                      | 4   |
| 6469016  | 6022121  | 6248188  | 6009788  | 5274828  | 3507725  | [1032][M]+ [M+H-C6H: | 12  |
| 3451207  | 4741484  | 4079596  | 2625681  | 3225292  | 2730695  |                      | 9   |
| 5624984  | 5860582  | 4974945  | 5330388  | 3759574  | 2598294  |                      | 2   |
| 220764.1 | 702878.4 | 620350.8 | 410208.6 | 336575   | 359969.6 |                      | 4   |
| 2408983  | 4047100  | 3758240  | 3161995  | 3864630  | 3581527  |                      | 191 |
| 1422242  | 3718307  | 1179579  | 2444805  | 1584976  | 3860253  |                      | 2   |
| 699049.9 | 695284.7 | 1180981  | 736251.7 | 1705489  | 1013947  | [133][M+2]+          | 4   |
| 1913653  | 993881.1 | 1130780  | 856581.6 | 1064682  | 8097647  |                      | 9   |
| 1453970  | 1575170  | 1562662  | 1423435  | 1398151  | 1031820  | [592][M+2]2+         | 4   |
| 12730954 | 17067224 | 22454432 | 10676885 | 12577409 | 3650289  |                      | 9   |
| 3158070  | 2683859  | 2715319  | 4375095  | 1454048  | 2134933  | [140][M+1]+          | 168 |
| 239815.9 | 401670.3 | 65843.5  | 217157.3 | 333237.2 | 667289.4 | [M+2Na]2+            | 12  |
| 5569964  | 5515004  | 5662742  | 5124894  | 6533714  | 5239793  |                      | 293 |
| 28011451 | 18846706 | 24112275 | 28714822 | 22406470 | 11832113 |                      | 2   |
| 4600037  | 4020547  | 2740490  | 3405081  | 2343277  | 3381465  |                      | 96  |
| 752633.7 | 502170.1 | 1054349  | 667624.1 | 455426.3 | 304381.9 | [1508][M+1]+         | 69  |
| 1334814  | 2158181  | 1599211  | 1128420  | 1670111  | 1517259  |                      | 2   |
| 2337643  | 138630.1 | 1860779  | 2735579  | 1903407  | 0        | [M+2H-C6t            | 13  |
| 371743.7 | 403264.6 | 438295.5 | 716609   | 329566.1 | 378580.5 | [1561][M+1]+         | 123 |
| 1542261  | 545220.4 | 400929.7 | 297612.7 | 2842811  | 686879.6 | [1172][M+1]+         | 327 |
| 958294.2 | 754980.7 | 496876.9 | 165954.5 | 1464008  | 266568.9 | [3M+2H]2+            | 41  |
| 6044367  | 1138417  | 5413550  | 3613624  | 5396465  | 3820634  |                      | 339 |
| 4535677  | 1440131  | 2996525  | 4670127  | 1978889  | 336806.2 |                      | 2   |
| 172093.9 | 1307071  | 1998815  | 525013.8 | 883582   | 914275.1 |                      | 1   |
| 543999.8 | 558562.4 | 397967.8 | 265617.7 | 478689.6 | 731342.2 |                      | 4   |
| 554633.5 | 1011004  | 1514151  | 575621.7 | 642917.9 | 947743.3 |                      | 9   |
| 6881167  | 6978107  | 7275408  | 6701484  | 6748384  | 6637557  |                      | 455 |
| 209858.6 | 324195.1 | 116455.9 | 0        | 532947.4 | 1723982  |                      | 38  |
| 968010.4 | 1490939  | 1818146  | 587531   | 1063703  | 628221.7 | [M+K]+ 31f           | 15  |
| 3393904  | 1972952  | 33672.11 | 5848025  | 1075114  | 7374994  |                      | 6   |
| 2265802  | 8448109  | 271585.8 | 2357672  | 5579142  | 4040342  | [M+Na]+ 4f           | 5   |
| 817419   | 1798908  | 1655719  | 316396.3 | 915938.7 | 1706926  |                      | 9   |
| 508744.6 | 1789159  | 386642.7 | 273136.3 | 832490.8 | 2978617  |                      | 9   |



|          |          |          |          |          |          |                      |     |
|----------|----------|----------|----------|----------|----------|----------------------|-----|
| 2477947  | 2962833  | 4890428  | 1672225  | 1845146  | 1262847  | [985][M+1]+          | 7   |
| 2007979  | 7100907  | 2929741  | 1538279  | 4515903  | 3140284  | [1414][M]+ [M+Na]+ 7 | 35  |
| 551390.4 | 522699.8 | 628832   | 861203.1 | 356765.2 | 261180.1 | [1345][M+1]+         | 48  |
| 5692345  | 7572869  | 3189750  | 2806411  | 6590689  | 3430285  |                      | 1   |
| 1679906  | 2903136  | 1840857  | 1442457  | 1772594  | 1804967  |                      | 9   |
| 2301191  | 2481172  | 2569846  | 2421836  | 2566849  | 2469528  |                      | 375 |
| 10701605 | 10833931 | 7529735  | 7601299  | 10672569 | 9611757  |                      | 4   |
| 7601445  | 3895386  | 5950359  | 9344546  | 7067632  | 5656208  | [M+H]+ 45            | 264 |
| 1828926  | 2460030  | 1650764  | 979608.6 | 1459020  | 2022223  |                      | 4   |
| 3723465  | 5280270  | 4390129  | 3099517  | 4418291  | 3495319  |                      | 9   |
| 2538724  | 3273760  | 4261334  | 1980236  | 2192721  | 420146.9 |                      | 9   |
| 564035.8 | 860220.5 | 533701.9 | 366047.8 | 988312.5 | 1410904  |                      | 8   |
| 13129477 | 11974872 | 6802241  | 19054600 | 8206596  | 3466274  |                      | 1   |
| 6936491  | 6530203  | 6417097  | 4929912  | 5964664  | 3197815  | [1249][M+1]+         | 91  |
| 38267984 | 52418548 | 19211256 | 26805952 | 22035878 | 35099146 | [266][M]+            | 149 |
| 5821854  | 6039174  | 7322927  | 4960699  | 5816943  | 5335810  |                      | 316 |
| 2182172  | 2630564  | 2967406  | 1678196  | 2056106  | 688386   |                      | 9   |
| 406598.9 | 327029.9 | 358039.1 | 363854.9 | 370333.1 | 187748.1 |                      | 452 |
| 5860389  | 6821128  | 8740960  | 7721236  | 8122369  | 4707773  | [1077][M+1]+         | 13  |
| 4125500  | 2110392  | 7055977  | 9007891  | 1096078  | 1212212  |                      | 1   |
| 18729795 | 18738399 | 15265851 | 14948321 | 21693315 | 21391651 | [47][M+2]3+          | 2   |
| 2800361  | 6006099  | 6089609  | 16236696 | 12703601 | 6065813  |                      | 2   |
| 403773.7 | 1029647  | 1818301  | 474851.5 | 632099.7 | 603264.8 |                      | 9   |
| 1462550  | 1424133  | 1951433  | 1428185  | 2376933  | 2593375  |                      | 2   |
| 1399839  | 1642695  | 1125894  | 1843717  | 1877651  | 1025892  |                      | 196 |
| 1855875  | 3847635  | 2685332  | 1172177  | 2492117  | 4827747  |                      | 9   |
| 734866.5 | 770182.9 | 645649.5 | 1272377  | 722032.3 | 0        |                      | 46  |
| 1475882  | 2857972  | 2870458  | 1240528  | 1722037  | 1864626  |                      | 9   |
| 4155531  | 4695362  | 4144240  | 4425004  | 4295732  | 4050660  |                      | 367 |
| 1.86E+08 | 1.86E+08 | 1.6E+08  | 1.63E+08 | 2.08E+08 | 2.15E+08 | [398][M]2+           | 2   |
| 10221280 | 13193460 | 18064499 | 7710390  | 20396140 | 13157225 | [793][M+1]3+         | 1   |
| 3250578  | 3680971  | 1779404  | 5611967  | 3710686  | 3366970  |                      | 241 |
| 2056474  | 4103636  | 2187511  | 1518470  | 3261885  | 6646078  |                      | 9   |
| 6369103  | 6647831  | 6801190  | 5680559  | 5636453  | 3830653  | [808][M]2+           | 33  |
| 276781.8 | 509629.2 | 595011.3 | 127929.6 | 1053155  | 464969.6 | [M+Na]+ 3            | 20  |

|          |          |          |          |          |          |                      |     |
|----------|----------|----------|----------|----------|----------|----------------------|-----|
| 2198938  | 1538088  | 1587733  | 831227.5 | 1294309  | 160070.7 | [1428][M]2+          | 286 |
| 4653475  | 3177465  | 1240350  | 3864576  | 6853606  | 10307632 | [1369][M+2]+         | 2   |
| 634045.7 | 1365515  | 289144.3 | 388045.1 | 335352.7 | 451485.6 | [149][M+1]+          | 260 |
| 191827   | 174609.8 | 252505.2 | 155128.3 | 189517.4 | 191731.3 | [1021][M+1]+         | 214 |
| 280192.6 | 237970.3 | 348416.9 | 408457.4 | 180451.9 | 261409.7 | [1446][M]2+          | 42  |
| 4521983  | 5370889  | 1056507  | 3017158  | 7681730  | 4739990  | [M+H-C6H8]           | 11  |
| 5601241  | 4427397  | 5633943  | 6004518  | 6955101  | 2694745  |                      | 2   |
| 42418148 | 44612890 | 50680672 | 28595372 | 31787500 | 25049210 | [167][M]3+ [2M+3H]3+ | 18  |
| 14469365 | 4704973  | 15130751 | 13396612 | 3341753  | 23286741 | [1166][M]+           | 2   |
| 14229633 | 17938587 | 7163575  | 12894032 | 19230386 | 25730367 |                      | 2   |
| 815765   | 1451919  | 1132360  | 633830.3 | 977947.8 | 1961882  |                      | 4   |
| 2462674  | 5406413  | 4475353  | 1529615  | 2959297  | 2905852  |                      | 9   |
| 4192750  | 4467220  | 4749124  | 5232518  | 4980585  | 4093636  |                      | 420 |
| 43558757 | 54544711 | 26895728 | 41580419 | 43486774 | 42348529 |                      | 1   |
| 2366704  | 0        | 2960202  | 2064282  | 2247442  | 239307   |                      | 2   |
| 1195225  | 535049.1 | 1185467  | 1155129  | 1306985  | 242181.3 | [992][M+1]2+         | 58  |
| 1331273  | 2650868  | 1662698  | 631432.6 | 1318845  | 2588260  |                      | 4   |
| 1599779  | 1750226  | 1627326  | 1305407  | 1488385  | 955983.3 |                      | 4   |
| 7111062  | 3637262  | 4728850  | 4786504  | 5522574  | 6777612  |                      | 208 |
| 7844365  | 6323503  | 6304897  | 7078718  | 9809179  | 7086599  |                      | 2   |
| 2475889  | 1999839  | 2923841  | 3351280  | 1245543  | 196803.4 |                      | 97  |
| 641960.7 | 578484.7 | 982489.4 | 769448.5 | 766116.3 | 425467.5 |                      | 4   |
| 1608451  | 591903.9 | 885031.3 | 2481707  | 1195233  | 0        |                      | 9   |
| 388031.8 | 1444955  | 2541925  | 304618.8 | 396775.1 | 286467.9 | [M+Na+NH]            | 41  |
| 4439498  | 6350923  | 14263512 | 3224937  | 3701705  | 2263218  |                      | 9   |
| 9975331  | 6441444  | 7942059  | 10456881 | 8656632  | 2634070  |                      | 2   |
| 5345927  | 9421019  | 887759.9 | 3135093  | 4644740  | 7724834  |                      | 407 |
| 561382   | 333846.4 | 457039.2 | 366202.1 | 302388.5 | 46192.83 |                      | 210 |
| 5235456  | 5906740  | 4039805  | 5487948  | 6739875  | 12374073 |                      | 2   |
| 9032498  | 6563053  | 4502695  | 5543147  | 6964501  | 10433531 |                      | 294 |
| 913193.6 | 1100295  | 1213417  | 841972.3 | 664205.1 | 524949.3 | [1113][M+2]+         | 35  |
| 7764559  | 10976783 | 10630341 | 6348733  | 7919030  | 5789949  |                      | 9   |
| 3854278  | 3029155  | 4478407  | 2362250  | 5330249  | 4021508  |                      | 4   |
| 379531.4 | 233377.1 | 441800.6 | 297700.9 | 178543.4 | 0        |                      | 205 |
| 8477983  | 11772225 | 10031087 | 6623081  | 9024939  | 12134880 |                      | 4   |

|          |          |          |          |          |          |                       |     |
|----------|----------|----------|----------|----------|----------|-----------------------|-----|
| 1216942  | 821538.5 | 649276.2 | 1036732  | 974666.8 | 1083620  |                       | 9   |
| 656530.7 | 2440659  | 1189775  | 232426.3 | 1669649  | 5966336  |                       | 2   |
| 6393610  | 21315983 | 65524153 | 11069262 | 16019495 | 25439973 | [69][M]+              | 1   |
| 654231.7 | 1643979  | 760542.8 | 312252.2 | 768686.7 | 3151395  | [M+H+HCC              | 11  |
| 2902057  | 5691540  | 2870244  | 1253599  | 4658320  | 3242404  |                       | 2   |
| 1125758  | 878397   | 674022.8 | 424874   | 722049.2 | 0        |                       | 280 |
| 5312814  | 4816607  | 5361311  | 5011133  | 4988266  | 7332462  |                       | 321 |
| 6139221  | 5976904  | 10722959 | 4832964  | 8611462  | 16510587 |                       | 78  |
| 2245457  | 1788735  | 1214400  | 2297009  | 3065596  | 4389955  |                       | 2   |
| 2761619  | 2745257  | 2433176  | 2724888  | 881667.7 | 1838350  |                       | 2   |
| 1285818  | 1210736  | 1567276  | 1044730  | 895687.7 | 258642.7 | [226][M]2+ [M+2H]2+ ! | 16  |
| 1681628  | 885771   | 482464.5 | 7049633  | 782767.7 | 8038572  | [182][M]+             | 102 |
| 3223649  | 3834041  | 3815057  | 2720666  | 2902150  | 2290152  |                       | 4   |
| 3419616  | 2975218  | 2872906  | 2667210  | 3655913  | 2329677  |                       | 4   |
| 266683.3 | 580070   | 463121   | 962402   | 889396.3 | 773528.8 | [2M+2Na+I             | 20  |
| 634210.9 | 543808.3 | 413448.9 | 595955.5 | 293628.7 | 578502.7 | [M+H]+ 36I            | 20  |
| 338492.5 | 507091.3 | 757310.1 | 399237.9 | 312632   | 422384.9 |                       | 4   |
| 283114.8 | 549972.6 | 348317.1 | 414614.8 | 279515.4 | 720834.9 | [3M+3Na+I             | 23  |
| 441129.4 | 199487.3 | 467053.2 | 467332   | 1381407  | 219289.4 |                       | 455 |
| 9507777  | 10502571 | 10006058 | 13966190 | 11025522 | 7571340  |                       | 2   |
| 2337653  | 1584128  | 2475934  | 890153.9 | 3794766  | 4763531  | [427][M+3]2+          | 2   |
| 0        | 132212.5 | 410014.7 | 314876.7 | 110031.3 | 187577.8 |                       | 18  |
| 1988571  | 1902264  | 1493758  | 1207667  | 1177606  | 587724.5 |                       | 4   |
| 2084666  | 4750630  | 21585184 | 2023628  | 2446441  | 2711252  | [632][M]+ [M+H-CH4]   | 18  |
| 94015936 | 1394843  | 73065018 | 93130761 | 1898136  | 40084169 | [94][M]+              | 3   |
| 451656.4 | 721921.6 | 533368.4 | 222599.3 | 589489.3 | 564329.8 | [M+Na]+ 5I            | 8   |
| 33508791 | 45112186 | 36013385 | 23198781 | 31581472 | 35256841 |                       | 4   |
| 462681.9 | 592069   | 712224.6 | 282184.4 | 615733.2 | 688687.2 | [M+2H-CO(             | 62  |
| 4381921  | 10613967 | 10417391 | 2898724  | 5872160  | 7018994  |                       | 9   |
| 303925.3 | 520186.7 | 516874.2 | 378701.6 | 416589.8 | 119570.3 |                       | 4   |
| 818482.5 | 855256.2 | 3566593  | 2770715  | 3704705  | 1320963  | [M+H-CH3]             | 5   |
| 16152296 | 11252418 | 9572205  | 13745185 | 8214358  | 10177089 | [229][M+1]+           | 108 |
| 5010186  | 2241629  | 4624567  | 4798206  | 2363386  | 997010.9 | [1258][M+4]+          | 2   |
| 958865.3 | 974356.1 | 1491285  | 1113790  | 1028277  | 407098.8 |                       | 4   |
| 61936376 | 87776993 | 1.11E+08 | 51056106 | 61220201 | 26572233 |                       | 9   |

|          |          |          |          |          |          |                     |     |
|----------|----------|----------|----------|----------|----------|---------------------|-----|
| 3290361  | 4349035  | 3360307  | 2421700  | 3375676  | 5598299  |                     | 4   |
| 942222.6 | 1543706  | 872294.7 | 527691.1 | 1153123  | 2184838  |                     | 9   |
| 6856766  | 7391254  | 1594614  | 4560397  | 7135941  | 8565847  |                     | 9   |
| 1.38E+08 | 1.38E+08 | 1.22E+08 | 1.27E+08 | 1.32E+08 | 1.25E+08 | [1216][M]+          | 2   |
| 543101.1 | 625282.9 | 655051.8 | 446552.7 | 367532.6 | 98690.76 | [1066][M]3+         | 16  |
| 6381762  | 2931956  | 5953624  | 3838113  | 5106075  | 1718335  | [564][M]3+          | 343 |
| 2321801  | 1676637  | 3366432  | 3211295  | 1712028  | 1212376  | [447][M+1]+         | 160 |
| 687604.1 | 1477038  | 2850375  | 563679.8 | 751171.5 | 883670.8 |                     | 9   |
| 402349.5 | 471799.2 | 701360.9 | 456114.5 | 163319   | 480595.9 |                     | 28  |
| 4403674  | 487312.8 | 1219482  | 3702236  | 3602728  | 4200286  |                     | 9   |
| 12631094 | 27799444 | 16468557 | 7185103  | 9520446  | 76558328 |                     | 128 |
| 1474062  | 2371310  | 3346488  | 862935   | 1579613  | 0        |                     | 1   |
| 655898.5 | 842851.3 | 35678.86 | 733960.9 | 134479.4 | 1421761  |                     | 52  |
| 4689378  | 3295078  | 2840270  | 2461013  | 5494105  | 7152201  | [M+Na]+ 40          | 97  |
| 3871620  | 5326245  | 4048102  | 2401786  | 4231821  | 6756018  | [130][M]+           | 4   |
| 996143.8 | 432554.1 | 1125945  | 709639.6 | 530136   | 166300.8 | [595][M+1]2+        | 23  |
| 1073241  | 1480919  | 1694314  | 1172536  | 1591137  | 1333430  | [M+K]+ 200          | 14  |
| 4471920  | 4552972  | 2942792  | 2789172  | 4472867  | 21141556 |                     | 9   |
| 4767265  | 6021104  | 1374251  | 2013507  | 2116767  | 19045714 | [2M+H+Na            | 3   |
| 673313   | 539345.1 | 639189.1 | 336669.7 | 598293.5 | 130579.7 |                     | 91  |
| 154506.2 | 30067.93 | 287883.5 | 273923.1 | 315381.4 | 0        | [1504][M]3+         | 166 |
| 4429547  | 2350839  | 3380412  | 4572949  | 3790720  | 1687972  | [M+3H-CH:           | 8   |
| 1660587  | 1074719  | 1638626  | 2038507  | 975202.9 | 833719.1 | [1554][M]+ [M+H+NH3 | 497 |
| 973995.5 | 1147880  | 387014.1 | 298480.8 | 1062296  | 2427460  | [M+2Na]2+           | 58  |
| 6.06E+08 | 8.73E+08 | 5.72E+08 | 5.98E+08 | 5.59E+08 | 9.43E+08 | [855][M+2]+         | 3   |
| 2212857  | 2237581  | 2103368  | 2231205  | 2027872  | 3199133  |                     | 253 |
| 1556377  | 2959530  | 1865467  | 1131538  | 1935529  | 4499695  | [653][M+1]2+        | 9   |
| 20901887 | 3224496  | 19614473 | 16162715 | 3953963  | 12168528 | [543][M]2+          | 2   |
| 929314.3 | 2358396  | 673233.1 | 866897.5 | 695673   | 1226959  |                     | 9   |
| 8011410  | 6467944  | 4599444  | 7763468  | 7349437  | 10342592 | [M+Na]+ 50          | 11  |
| 2126104  | 2700801  | 1325880  | 1456520  | 2559319  | 2298681  |                     | 9   |
| 2147443  | 1198373  | 2999840  | 1323149  | 2389060  | 991044.6 |                     | 1   |
| 873148.4 | 2445588  | 1758162  | 700807.5 | 1356872  | 1202653  | [M+H]+ 73:          | 13  |
| 1827412  | 2775304  | 2752940  | 2305867  | 2382940  | 2121681  |                     | 4   |
| 985204.5 | 1657778  | 289949.2 | 2083452  | 4834140  | 2599918  | [M+H+NH3            | 11  |

|          |          |          |          |          |          |                      |     |
|----------|----------|----------|----------|----------|----------|----------------------|-----|
| 1156443  | 857290.8 | 1218758  | 1363001  | 760049   | 315538.3 | [1227][M+2]+         | 185 |
| 286025.5 | 911552   | 190543.2 | 164384.3 | 763423.5 | 797121.2 | [479][M+1]2+         | 4   |
| 8388877  | 3127538  | 3152187  | 3175001  | 11216486 | 2634894  |                      | 386 |
| 2459083  | 1542410  | 2212019  | 1991815  | 2241872  | 5066048  | [472][M+1]2+         | 2   |
| 1718958  | 2414910  | 2103048  | 446658.5 | 2732420  | 4427541  | [1127][M]2 [M+H+Na]2 | 38  |
| 452568.4 | 1384617  | 733307.1 | 401548.2 | 788082.5 | 2696247  | [3M+Na]+             | 46  |
| 604262.1 | 1693313  | 1645244  | 431474.5 | 805106.3 | 1132152  |                      | 9   |
| 377060.4 | 730552.1 | 210836.5 | 303432.9 | 465402.6 | 1902171  |                      | 52  |
| 1087916  | 1145721  | 1220032  | 983874.9 | 1001396  | 347061   |                      | 4   |
| 280184.1 | 699078.1 | 1283542  | 615407.2 | 124937.1 | 629307.7 |                      | 4   |
| 69422.76 | 118513.1 | 96695.77 | 45047.24 | 115896.5 | 125175   |                      | 240 |
| 2072305  | 2298896  | 2634352  | 1551639  | 1942935  | 548861.6 |                      | 9   |
| 970248.9 | 183382.3 | 1089977  | 1143487  | 611131.6 | 252214.5 | [M+K]+ 37%           | 38  |
| 1402671  | 3310743  | 1829218  | 1127114  | 2182895  | 5501277  |                      | 4   |
| 1118272  | 1956660  | 1359869  | 1419145  | 2357143  | 1567130  |                      | 9   |
| 4151737  | 4294964  | 6264890  | 3406825  | 3099074  | 427203.5 |                      | 9   |
| 6076397  | 6830811  | 5026721  | 7480937  | 5590317  | 2990198  | [183][M+1]3+         | 13  |
| 19489480 | 24592299 | 24863045 | 16018633 | 16606030 | 13546839 | [1307][M]+           | 4   |
| 19238680 | 28271544 | 49736888 | 10615192 | 24279097 | 20364603 |                      | 315 |
| 600962.2 | 4346035  | 1735975  | 622224.1 | 11912058 | 8345241  |                      | 3   |
| 10693235 | 346837.8 | 11659026 | 7356590  | 650945.4 | 9588744  | [M+H-CO2]            | 6   |
| 1.18E+09 | 1.39E+09 | 1.6E+09  | 1.12E+09 | 1.14E+09 | 8.15E+08 | [610][M+1]+          | 9   |
| 4816500  | 5266521  | 5572038  | 3939127  | 4266595  | 2747192  | [1109][M+2]+         | 76  |
| 1432166  | 2907631  | 2958936  | 845532.6 | 1478273  | 2410840  |                      | 9   |
| 5280021  | 1017138  | 75482.1  | 2751329  | 2187968  | 3301515  |                      | 41  |
| 17711210 | 29472124 | 22810104 | 14271736 | 23712532 | 46598226 | [116][M]+ [M+Na]+ 2% | 51  |
| 6323942  | 6520670  | 5124285  | 6630506  | 3851369  | 12820948 |                      | 62  |
| 364230.8 | 526489.5 | 418445.6 | 390352.7 | 365891.4 | 454395.2 | [M+H+CF3O]           | 33  |
| 2623375  | 2149235  | 2922136  | 1933878  | 1368244  | 1273432  |                      | 9   |
| 329985.8 | 1406230  | 16527638 | 6246474  | 1312981  | 3255146  |                      | 9   |
| 92341361 | 70929811 | 73741068 | 84621850 | 67058252 | 28954219 |                      | 2   |
| 1358045  | 636300.5 | 563273.5 | 598547.6 | 497334.8 | 2581235  | [M+Na]+ 2%           | 159 |
| 350365   | 1702402  | 1462634  | 100079   | 816750.3 | 1978362  |                      | 9   |
| 3620709  | 3047354  | 3397635  | 3606053  | 2721214  | 4918789  |                      | 2   |
| 8775783  | 8271783  | 6116248  | 6957996  | 8236722  | 8015187  | [M+H]+ 32%           | 264 |

|          |          |          |          |          |          |              |     |
|----------|----------|----------|----------|----------|----------|--------------|-----|
| 12397822 | 17677498 | 7627769  | 9931417  | 11540134 | 26072357 |              | 13  |
| 1481473  | 5311986  | 4661873  | 4557729  | 4903345  | 4586028  |              | 191 |
| 1101448  | 3759387  | 1460788  | 12862702 | 652157.3 | 9890006  |              | 1   |
| 4491380  | 5453295  | 4521847  | 4543041  | 6307583  | 9527569  |              | 2   |
| 2710270  | 977510.8 | 1174413  | 2403250  | 2016531  | 1456206  |              | 2   |
| 161106.8 | 145357   | 201390.3 | 131834.7 | 192313.6 | 0        |              | 286 |
| 2263754  | 2863014  | 2186570  | 1090050  | 2047174  | 2713693  |              | 2   |
| 18671359 | 33093551 | 25182422 | 17404929 | 21608808 | 25544362 |              | 1   |
| 1130293  | 1227288  | 2377730  | 1782302  | 291489.3 | 3789107  |              | 9   |
| 3445877  | 4885579  | 1828613  | 4054933  | 7808700  | 3749170  |              | 84  |
| 236443.3 | 223714.8 | 345844.5 | 221520.9 | 577362   | 499288.6 | [1343][M]2+  | 39  |
| 525123.5 | 704004.9 | 588426.2 | 690177.6 | 657539.4 | 293813.9 | [597][M+1]+  | 280 |
| 957728.8 | 1592608  | 2151579  | 80122.43 | 788992.3 | 0        |              | 1   |
| 8106478  | 8979852  | 10241013 | 5181117  | 7147764  | 919224.6 |              | 9   |
| 1397104  | 523937.7 | 0        | 619914.1 | 702731   | 1335542  |              | 41  |
| 1458199  | 482191.1 | 1913959  | 1343454  | 1028491  | 1066740  |              | 4   |
| 7851813  | 12181875 | 6956801  | 5242943  | 13153125 | 16398318 | [379][M+2]2+ | 2   |
| 5227341  | 6229807  | 6005165  | 11020179 | 651494.5 | 4496624  |              | 373 |
| 1339689  | 2000266  | 1017298  | 866313   | 716677.3 | 1180068  | [1013][M+1]+ | 101 |
| 1601821  | 1315465  | 1423220  | 1485121  | 1262254  | 1059257  | [823][M]+    | 210 |
| 6041868  | 2188800  | 5039932  | 6906602  | 2744070  | 5861306  | [1250][M+4]+ | 2   |
| 596402.8 | 1086484  | 1021868  | 821893.3 | 711977.9 | 393506.6 |              | 4   |
| 12708322 | 28392882 | 2218405  | 11662053 | 10204422 | 1.29E+08 | [M+K]+ 39%   | 11  |
| 1470348  | 2026323  | 1896879  | 1229949  | 1575987  | 1200925  |              | 9   |
| 8383306  | 12215937 | 6858124  | 5569429  | 11426047 | 15390692 | [1035][M+1]+ | 84  |
| 2090355  | 3475979  | 3135598  | 1190625  | 2292992  | 2071550  |              | 9   |
| 8091431  | 9486884  | 6891240  | 7405573  | 6285604  | 10427386 | [1397][M+1]+ | 2   |
| 2486690  | 2143938  | 2892011  | 1986399  | 2576246  | 2305490  |              | 11  |
| 4795019  | 3782766  | 3230921  | 3609846  | 1051699  | 2130356  |              | 15  |
| 763857.5 | 1108078  | 466411.3 | 546596.8 | 821030.6 | 1043114  | [M+K]+ 30%   | 8   |
| 3345468  | 3799484  | 2019825  | 3080512  | 1734593  | 6980434  |              | 2   |
| 871685.8 | 1794586  | 962442.1 | 988290.5 | 1062854  | 1765892  |              | 9   |
| 785909.2 | 1127953  | 762093.3 | 602176.8 | 734422.4 | 379903.6 | [2M+Na+2I    | 8   |
| 1632877  | 6039796  | 3042277  | 1058158  | 294450.6 | 17414817 | [M+H+NH3     | 3   |
| 3112851  | 2150938  | 2658882  | 623503.1 | 2329525  | 10060.48 |              | 182 |

|          |          |          |          |          |          |                     |     |
|----------|----------|----------|----------|----------|----------|---------------------|-----|
| 355332.7 | 594178.3 | 682352.5 | 630756.1 | 255964.6 | 372757.7 |                     | 23  |
| 1243421  | 5483516  | 1241061  | 13907038 | 6467820  | 8151728  | [M+K]+ 34:          | 11  |
| 1253491  | 1572328  | 1486267  | 700334.5 | 1294123  | 843765.4 |                     | 4   |
| 1646994  | 2830428  | 3295751  | 559867.3 | 1121140  | 993486   |                     | 4   |
| 7380035  | 5123744  | 5600210  | 8890928  | 3203402  | 2103283  | [M+H]+ 45:          | 93  |
| 2880024  | 4656910  | 3124987  | 1927844  | 3864956  | 7659805  |                     | 9   |
| 69417154 | 1.01E+08 | 62627303 | 45951736 | 50604918 | 59362179 | [1043][M]+ [M+H+NH3 | 101 |
| 1062132  | 1808751  | 1166949  | 795698   | 1147714  | 718808.5 | [M+H]+ 31:          | 81  |
| 263801   | 245628.8 | 268748.3 | 241311.6 | 77974.62 | 302176.3 | [M+K]+ 35:          | 351 |
| 426404.3 | 456434.3 | 452590.6 | 374860.2 | 382729.9 | 297612.1 | [M+H-H2O]           | 42  |
| 755159.6 | 400534.8 | 340237   | 379565.4 | 498191.4 | 126308.8 | [M+K]+ 36:          | 20  |
| 949141.1 | 1622247  | 2238003  | 1123353  | 1526045  | 831141.5 | [M+Na]+ 1:          | 6   |
| 826364.4 | 1461634  | 739056.7 | 545068.6 | 996837.8 | 901886.7 | [1000][M+1]2+       | 8   |
| 1160181  | 0        | 1407529  | 893803.1 | 2185264  | 4307238  |                     | 9   |
| 474407.1 | 1713381  | 2947467  | 412192.1 | 549609.2 | 309849.6 |                     | 9   |
| 4053926  | 1085233  | 3054783  | 4359787  | 5176295  | 2808502  |                     | 385 |
| 1092504  | 797364.2 | 680362   | 2786544  | 1068970  | 495178.1 |                     | 467 |
| 1122701  | 1388007  | 1714730  | 843361   | 939722.5 | 585630.7 | [M+Na]+ 2:          | 13  |
| 4349123  | 1147571  | 3925240  | 1197858  | 3474764  | 5079314  |                     | 6   |
| 11645.75 | 364498.2 | 253272.4 | 147916   | 150313.7 | 617640.9 | [M+H]+ 66:          | 18  |
| 443181.6 | 1049795  | 745095.4 | 482148.1 | 321401.1 | 279166.1 |                     | 4   |
| 42037396 | 23454383 | 5492170  | 31261834 | 32077519 | 47320405 |                     | 3   |
| 129213.5 | 149157.3 | 164945.9 | 139700.3 | 114830.3 | 95269.04 |                     | 145 |
| 1109155  | 866838.2 | 1002550  | 816887.1 | 782428.2 | 319447   |                     | 9   |
| 11886746 | 359426.7 | 11926371 | 7317720  | 14763055 | 19160788 | [545][M]2+          | 2   |
| 1443657  | 1442991  | 2265716  | 1345461  | 1662083  | 2029519  |                     | 7   |
| 9496450  | 1781233  | 1650422  | 1963744  | 10217432 | 5035039  |                     | 1   |
| 237943.5 | 247041.2 | 188917.3 | 204000   | 195489.2 | 142724.2 | [641][M+1]+         | 25  |
| 3283370  | 4420098  | 3450035  | 2412214  | 3478795  | 5479480  |                     | 4   |
| 43257313 | 19313174 | 37418652 | 18304867 | 25712624 | 3410484  | [371][M]2+          | 115 |
| 2699030  | 2551271  | 4255387  | 1387900  | 1903333  | 377270.3 | [M+Na]+ 5:          | 6   |
| 93889.97 | 123111.3 | 79621.22 | 128328.5 | 61489.62 | 82997.15 | [M+K]+ 37:          | 319 |
| 5265620  | 6709732  | 4201864  | 4206478  | 6596580  | 7046964  |                     | 14  |
| 1111917  | 10817489 | 6028156  | 3835244  | 8968026  | 2823911  | [875][M+1]2+        | 1   |
| 4757786  | 7049330  | 9637390  | 4406458  | 6099176  | 6807187  |                     | 9   |

|          |          |          |          |          |          |                       |     |
|----------|----------|----------|----------|----------|----------|-----------------------|-----|
| 10743963 | 3763379  | 12345930 | 11038971 | 3569864  | 4674766  |                       | 2   |
| 204397.7 | 743396.1 | 796399   | 378821.2 | 346759.1 | 584440.6 |                       | 4   |
| 909159.2 | 4353157  | 6054073  | 1419470  | 7692590  | 3302706  |                       | 310 |
| 2357443  | 4738225  | 3218611  | 1374546  | 3263689  | 5733548  |                       | 4   |
| 59271436 | 57307751 | 49859418 | 53199634 | 27155080 | 42010363 |                       | 2   |
| 11003871 | 21010862 | 49345278 | 9629552  | 13227684 | 5808754  |                       | 315 |
| 3486044  | 3645997  | 4503419  | 3094507  | 3033863  | 308300.8 |                       | 9   |
| 1651743  | 1987325  | 1799499  | 4048946  | 1630228  | 325213.7 |                       | 272 |
| 1193087  | 934088.2 | 1830178  | 2703299  | 2263203  | 1490452  | [3M+Na+2I             | 6   |
| 1467678  | 1555004  | 551336.4 | 859315.5 | 1401091  | 392457   | [M+2K]2+ :            | 8   |
| 833163.2 | 1196816  | 324375.9 | 744591.3 | 427941.7 | 938870.3 |                       | 9   |
| 7682295  | 8311908  | 7123206  | 5677137  | 9000509  | 8398630  |                       | 2   |
| 3007019  | 4466932  | 3534241  | 2001502  | 3098229  | 4361378  | [724][M+2]+           | 4   |
| 3765592  | 4073472  | 3122120  | 2839126  | 4772173  | 1073645  |                       | 335 |
| 497840.3 | 405013.8 | 1304383  | 1565283  | 816579.8 | 784954   |                       | 9   |
| 87106312 | 1.11E+08 | 1.12E+08 | 64957451 | 73898671 | 66364440 |                       | 4   |
| 975841.5 | 916665   | 1154683  | 986290.3 | 722317.9 | 304698.3 |                       | 38  |
| 3012484  | 3475886  | 3006892  | 2489108  | 4041638  | 3126211  |                       | 9   |
| 899680.7 | 1778542  | 1128077  | 894138.1 | 923221.9 | 683014.8 |                       | 4   |
| 5464106  | 1929401  | 1450453  | 3101171  | 9582049  | 2981791  | [1172][M]+            | 327 |
| 7593860  | 4270023  | 6340070  | 6657707  | 5356098  | 1293838  | [384][M+1]+           | 143 |
| 1139807  | 2333513  | 1606196  | 1158946  | 968146.1 | 1152944  | [M+3H]3+ :            | 13  |
| 1092566  | 1868475  | 1206218  | 887485.2 | 1867148  | 2461748  |                       | 1   |
| 4519062  | 6187694  | 4339605  | 3961715  | 3965793  | 5884331  |                       | 400 |
| 2353724  | 1937203  | 1816547  | 1725944  | 2372388  | 1483374  |                       | 4   |
| 943901.8 | 5316124  | 17168783 | 1051142  | 2230553  | 918421.8 | [122][M]2+ [M+2H]2+ : | 20  |
| 4190179  | 5048449  | 4435512  | 5509402  | 4070551  | 4181179  | [M+H-H2O]             | 121 |
| 71946338 | 6574724  | 99302379 | 3110118  | 80643047 | 3.61E+08 | [M+Na]+ 6!            | 14  |
| 449731.1 | 229502.2 | 557959.3 | 516576.3 | 568992.3 | 403018.9 |                       | 306 |
| 1571372  | 0        | 1631671  | 1382314  | 3003064  | 6602863  |                       | 13  |
| 478736.2 | 353551.5 | 563547   | 540242.2 | 161642.2 | 48746.65 |                       | 4   |
| 15756269 | 18577862 | 16775403 | 13651094 | 16556531 | 15172937 | [678][M+1]+           | 13  |
| 7836694  | 13837639 | 12795021 | 9507492  | 19250408 | 7689717  |                       | 6   |
| 4432639  | 2764669  | 3922923  | 1331912  | 2640005  | 11397.41 |                       | 68  |
| 7949879  | 6352761  | 10739619 | 15189501 | 3568235  | 2805145  |                       | 389 |



|          |          |          |          |          |          |                          |     |
|----------|----------|----------|----------|----------|----------|--------------------------|-----|
| 4759534  | 12333010 | 12500975 | 3678392  | 6535948  | 11666580 |                          | 9   |
| 2927427  | 1447211  | 2593398  | 1425556  | 776757.1 | 0        | [373][M+1] <sup>2+</sup> | 115 |
| 1142331  | 1062532  | 1539844  | 1048777  | 928472   | 0        | [775][M+1] <sup>+</sup>  | 9   |
| 3323748  | 3200026  | 3151110  | 3184038  | 3012806  | 4360022  |                          | 354 |
| 330964.4 | 192369.8 | 226792.2 | 291857.7 | 143385.8 | 174573.7 | [554][M+1] <sup>+</sup>  | 110 |
| 119510.9 | 256885.8 | 184202   | 197034.3 | 141419.8 | 167073   | [1346][M+1] <sup>+</sup> | 210 |
| 304804.7 | 349598.8 | 409812.1 | 177404.8 | 238382.6 | 0        | [M+H] <sup>+</sup> 76!   | 23  |
| 91233710 | 69100431 | 134254.6 | 91129892 | 61549215 | 216855.6 |                          | 61  |
| 2794569  | 1966156  | 2149877  | 2143959  | 1961650  | 937685.1 |                          | 305 |
| 4556482  | 10751220 | 9988529  | 2914283  | 6211649  | 10525922 |                          | 9   |
| 437845.3 | 869821.7 | 652695   | 761355.8 | 746931.1 | 420364.5 | [M+H] <sup>+</sup> 54!   | 16  |
| 2302613  | 3824955  | 2417588  | 1523524  | 2998212  | 5720370  |                          | 9   |
| 177564.4 | 256238.4 | 430395.8 | 204357.7 | 220429.3 | 149897   |                          | 203 |
| 4125303  | 6002394  | 2984069  | 3830990  | 6190601  | 3427608  | [M+Na] <sup>+</sup> 4!   | 189 |
| 6384289  | 7192138  | 6054096  | 14578535 | 17877674 | 3911204  |                          | 1   |
| 1738386  | 2894140  | 1612272  | 1150218  | 2001890  | 2723198  |                          | 4   |
| 992097   | 0        | 257159.4 | 921249.5 | 821336.6 | 359145.5 |                          | 1   |
| 1233809  | 735514.4 | 1241969  | 1069958  | 971456.7 | 714612.9 |                          | 4   |
| 2547194  | 4385333  | 2119653  | 2054953  | 4274657  | 5119447  |                          | 2   |
| 1475346  | 2423862  | 1403367  | 1081927  | 1458510  | 1759072  | [M+H] <sup>+</sup> 76!   | 81  |
| 3693960  | 8990274  | 7721119  | 2517860  | 5117329  | 10016079 | [163][M+1] <sup>2+</sup> | 9   |
| 1080613  | 865697.3 | 637041.3 | 518068.5 | 987099.9 | 0        |                          | 9   |
| 709666.5 | 870328.2 | 422398   | 470713.7 | 562599.7 | 1030117  |                          | 9   |
| 2780916  | 1810635  | 1810162  | 980427.4 | 1043441  | 3438815  |                          | 2   |
| 417835.2 | 865554.8 | 931912.9 | 469845.3 | 474701.7 | 18076.32 |                          | 4   |
| 3.8E+08  | 4.44E+08 | 3.09E+08 | 3.62E+08 | 4.31E+08 | 5.51E+08 | [1210][M] <sup>+</sup>   | 2   |
| 4480887  | 753759   | 8329492  | 3870177  | 4006349  | 1524072  |                          | 208 |
| 1017234  | 610100.6 | 1339842  | 1128646  | 863511.2 | 0        |                          | 4   |
| 9227102  | 12079549 | 9262883  | 6354259  | 8062270  | 9932440  |                          | 1   |
| 1937360  | 918400.8 | 2072952  | 1601949  | 1822301  | 1246286  |                          | 41  |
| 2329624  | 1493821  | 2521988  | 2118168  | 1464329  | 118765.9 |                          | 2   |
| 3274328  | 4329953  | 4310683  | 2904797  | 3742911  | 2245008  |                          | 9   |
| 1388849  | 2229969  | 1294830  | 879616.5 | 1189220  | 1697406  |                          | 9   |
| 3665867  | 5948117  | 4772025  | 2595460  | 4110455  | 7565366  |                          | 4   |
| 386222   | 320962.2 | 365617.6 | 229644.5 | 332337.9 | 23836.07 |                          | 91  |

|          |          |          |          |          |          |                                              |     |
|----------|----------|----------|----------|----------|----------|----------------------------------------------|-----|
| 703863   | 641646.6 | 257592.3 | 431537.3 | 1269883  | 1451975  |                                              | 9   |
| 9103655  | 6793869  | 4647593  | 4646557  | 4536297  | 8049592  |                                              | 395 |
| 7876005  | 9095659  | 12183640 | 6477456  | 8022015  | 7964689  |                                              | 9   |
| 435955.1 | 344737.4 | 272232.2 | 392619.7 | 350505.6 | 155783.6 |                                              | 312 |
| 6076201  | 6026309  | 6510256  | 7814446  | 1373384  | 5968018  | [M+H] <sup>+</sup> 48                        | 195 |
| 478991.7 | 423006.5 | 409689.1 | 398182.8 | 94595.51 | 56765.07 | [767][M+1] <sup>2+</sup>                     | 246 |
| 527627.3 | 633577.8 | 723275.2 | 697322.7 | 441053.5 | 692523.8 | [M+Na] <sup>+</sup> 70                       | 35  |
| 2304051  | 3232123  | 2406422  | 974862   | 1829067  | 2568932  |                                              | 4   |
| 1848905  | 1798883  | 3206063  | 1508315  | 1042872  | 2832184  |                                              | 4   |
| 381637.1 | 614184.8 | 817048.1 | 369184.9 | 570413.8 | 272877.7 |                                              | 4   |
| 1169772  | 1539280  | 747111.9 | 656238.9 | 1410605  | 1101243  |                                              | 9   |
| 17411106 | 24640843 | 33865520 | 14826404 | 16461668 | 5439287  | [144][M+3] <sup>+</sup>                      | 9   |
| 2802621  | 2051805  | 351833.9 | 2308100  | 3941647  | 894929.4 | [M+Na+CF <sub>3</sub> ] <sup>+</sup>         | 11  |
| 7834159  | 18374725 | 15540182 | 5317552  | 10841773 | 20705103 | [162][M] <sup>2+</sup>                       | 9   |
| 2259303  | 0        | 1957923  | 1611263  | 700569.3 | 373212.5 |                                              | 1   |
| 4766734  | 4043310  | 2948984  | 4135914  | 4389642  | 4419869  |                                              | 15  |
| 4.66E+08 | 4.92E+08 | 3.9E+08  | 4.25E+08 | 4.68E+08 | 4.8E+08  |                                              | 2   |
| 5176426  | 5453248  | 2614661  | 2831873  | 4986701  | 5162365  |                                              | 93  |
| 1.23E+08 | 1.23E+08 | 1.07E+08 | 1.19E+08 | 1.12E+08 | 89592415 | [858][M] <sup>+</sup>                        | 2   |
| 3058590  | 3941820  | 5686702  | 2798888  | 3170287  | 831251.9 |                                              | 9   |
| 40398156 | 47219727 | 43589548 | 33159553 | 33042258 | 17315162 |                                              | 6   |
| 2146345  | 1815581  | 1444825  | 1651115  | 1311876  | 1860720  | [93][M+1] <sup>+</sup>                       | 94  |
| 684658   | 415156.7 | 876713.5 | 943490.3 | 1056417  | 594052.9 |                                              | 278 |
| 1599667  | 493718.4 | 479600   | 1197290  | 1762977  | 2022240  |                                              | 9   |
| 3795759  | 1941716  | 3965444  | 3434157  | 2952798  | 898583.8 |                                              | 4   |
| 252986.5 | 170388.4 | 185118.3 | 276590.2 | 209280.5 | 235701.6 | [1082][M+1] <sup>+</sup>                     | 145 |
| 39935681 | 24437144 | 53497752 | 61415516 | 1021922  | 34514630 | [M+Na+K] <sup>+</sup>                        | 6   |
| 4285601  | 4529308  | 4074546  | 2695337  | 4329899  | 5540692  |                                              | 33  |
| 13226748 | 8391413  | 10516682 | 13305220 | 11193023 | 3435136  |                                              | 2   |
| 1390547  | 2057809  | 1723747  | 1141703  | 1499503  | 1236502  |                                              | 9   |
| 25861024 | 39039752 | 18091967 | 2488113  | 35643908 | 36789122 | [691][M] <sup>+</sup> [M+Na] <sup>+</sup> 30 | 15  |
| 18769266 | 21976098 | 23316705 | 15384891 | 16858751 | 14166804 |                                              | 4   |
| 255625.5 | 571269   | 407264.8 | 225400.9 | 308759.1 | 66236.84 |                                              | 91  |
| 4201606  | 3274967  | 3789363  | 3370396  | 1773828  | 2406950  | [M+K+Na] <sup>+</sup>                        | 58  |
| 262726.6 | 598405.9 | 411379.7 | 247780.9 | 162122.2 | 1101690  |                                              | 65  |

|          |          |          |          |          |          |                           |     |
|----------|----------|----------|----------|----------|----------|---------------------------|-----|
| 1358403  | 1749744  | 1538532  | 1119026  | 1306250  | 1069362  |                           | 4   |
| 4085720  | 3796354  | 3687466  | 2796397  | 3819201  | 4120985  |                           | 445 |
| 5030383  | 624862.8 | 6769019  | 281900.2 | 680771.4 | 2135898  | [M+H-C3H <sub>2</sub> ]   | 8   |
| 8520234  | 14298621 | 22034515 | 6812256  | 9368886  | 4501786  | [1456][M] <sup>+</sup>    | 9   |
| 1663080  | 1653952  | 1379357  | 1161442  | 5107435  | 3008584  | [M+Na] <sup>+</sup> 10    | 11  |
| 7.92E+10 | 5.61E+10 | 4.81E+10 | 3.71E+10 | 6.42E+10 | 3.47E+10 | [794][M] <sup>+</sup>     | 1   |
| 571183   | 1121364  | 805539.6 | 524205.6 | 889872.6 | 1050069  |                           | 9   |
| 1.13E+08 | 1.17E+08 | 98835377 | 93827435 | 1.23E+08 | 1.28E+08 | [470][M+2] <sup>+</sup>   | 2   |
| 532787.8 | 1695740  | 1908999  | 447951.6 | 593762.4 | 914492.5 | [514][M+1] <sup>3+</sup>  | 9   |
| 3958524  | 2836701  | 3390295  | 4021714  | 5560420  | 6513940  |                           | 2   |
| 17564259 | 17570832 | 14454623 | 14938026 | 19406522 | 18985765 |                           | 2   |
| 191138.8 | 136859.2 | 348756.8 | 407149.1 | 282188.6 | 281269   | [955][M] <sup>2+</sup>    | 159 |
| 905752.3 | 376178.7 | 654470.3 | 602583.6 | 332156   | 80650.26 |                           | 112 |
| 88016.14 | 69789.68 | 109740.4 | 23693.35 | 65223.84 | 96971.21 | [1019][M+1] <sup>+</sup>  | 503 |
| 4197990  | 4147900  | 4092963  | 5416358  | 3396586  | 4467624  | [78][M+1] <sup>+</sup>    | 159 |
| 10650489 | 7829774  | 12298278 | 12458209 | 10669390 | 6564292  | [1202][M] <sup>+</sup>    | 275 |
| 38353029 | 28106022 | 46434739 | 55889373 | 38273311 | 28214745 |                           | 2   |
| 10907588 | 16728076 | 12230643 | 7572842  | 12590520 | 17930088 |                           | 9   |
| 422787.3 | 643767.3 | 316602.3 | 474920.2 | 275884.9 | 497503.2 | [M+H-CH <sub>3</sub> ]    | 8   |
| 238507.4 | 866558.5 | 736092.2 | 992674   | 371353.2 | 579188.1 |                           | 23  |
| 0        | 979268   | 1547652  | 119222.7 | 1111285  | 111789   |                           | 1   |
| 2206641  | 3921321  | 6879150  | 2957271  | 2465370  | 404288.5 |                           | 6   |
| 535863.1 | 0        | 1237021  | 429420.1 | 481662   | 989291.3 |                           | 9   |
| 4924698  | 7543104  | 5706634  | 3439017  | 4311397  | 5745877  |                           | 4   |
| 17041271 | 14923666 | 15107670 | 24006275 | 11198894 | 5762861  |                           | 2   |
| 2761673  | 2813022  | 3132891  | 2477790  | 2526702  | 1566133  |                           | 4   |
| 4666818  | 9940786  | 5499079  | 6216698  | 6121774  | 6940089  |                           | 321 |
| 15412674 | 18887456 | 16806437 | 13345173 | 16220549 | 16092167 | [685][M+1] <sup>+</sup>   | 13  |
| 4919794  | 1846930  | 5412520  | 4303465  | 1357769  | 389287.5 |                           | 4   |
| 429151.1 | 161105.2 | 459858.7 | 351519.7 | 268587.8 | 0        |                           | 276 |
| 17108779 | 19190153 | 17008270 | 11748366 | 15766259 | 19557862 |                           | 4   |
| 912616.6 | 766138.8 | 1545064  | 1720049  | 735345.5 | 1321872  | [1502][M+1] <sup>2+</sup> | 23  |
| 494408.7 | 235664.4 | 809070.6 | 450090.2 | 717387.3 | 810975.8 | [M+H-C4H <sub>8</sub> ]   | 20  |
| 2964109  | 1464234  | 2167797  | 1156917  | 1649926  | 14943.06 |                           | 115 |
| 454596.3 | 0        | 1204660  | 216941.6 | 493188.4 | 562552.5 |                           | 9   |

|          |          |          |          |          |          |              |     |
|----------|----------|----------|----------|----------|----------|--------------|-----|
| 139576.7 | 95860.35 | 91767.04 | 221406.4 | 95117.68 | 259361.4 |              | 242 |
| 1203375  | 968896.5 | 1642345  | 824552.1 | 1073691  | 918188   |              | 1   |
| 1869524  | 1384545  | 1639845  | 1283166  | 543949.3 | 108676.7 |              | 32  |
| 236314.2 | 1343500  | 610884   | 2924055  | 217472.1 | 1627401  |              | 18  |
| 1156179  | 1418686  | 1544262  | 968559.5 | 1117430  | 575342.8 |              | 4   |
| 853642.4 | 1653441  | 1940845  | 437143   | 829813.8 | 1098071  |              | 9   |
| 4741543  | 4482823  | 5757524  | 3692542  | 6325371  | 7569156  |              | 241 |
| 35505244 | 3170025  | 32925377 | 27601707 | 2078478  | 10322943 |              | 2   |
| 665172.2 | 1010843  | 2018840  | 453221.7 | 900024.3 | 831727   |              | 9   |
| 814187.3 | 606261.3 | 686433.4 | 571630.8 | 447948.3 | 686701   |              | 206 |
| 45060278 | 47175318 | 38990928 | 36905119 | 49705579 | 52224917 |              | 2   |
| 5.49E+09 | 6.49E+09 | 7.48E+09 | 5.29E+09 | 5.38E+09 | 3.85E+09 | [610][M]+    | 9   |
| 4042846  | 2810998  | 624573.2 | 1965288  | 6232169  | 5893358  |              | 21  |
| 958187.3 | 833232.7 | 682538.5 | 815438   | 410915.8 | 90367.9  | [1521][M+1]+ | 4   |
| 2050070  | 3343596  | 2834934  | 1451049  | 2092493  | 1899030  |              | 9   |
| 1003290  | 1746857  | 1544697  | 1889580  | 1143506  | 1003759  | [M+H]+ 46    | 147 |
| 326285.1 | 534118.9 | 489172.5 | 136100.3 | 281127.7 | 94273.63 |              | 51  |
| 2195032  | 1830682  | 1810970  | 1349601  | 1617404  | 1077653  |              | 4   |
| 663129.7 | 887985.7 | 836149.9 | 444552.9 | 734111.7 | 0        |              | 9   |
| 3577266  | 4629502  | 4370479  | 2875627  | 3599656  | 1371101  |              | 9   |
| 8102719  | 1142968  | 14494595 | 12258074 | 3792422  | 8018685  | [M+H-CH4]    | 95  |
| 1432067  | 1472955  | 1480439  | 903878.1 | 975964.1 | 2253003  | [1418][M+1]+ | 215 |
| 246373.9 | 262735.2 | 351444.3 | 235914.1 | 264530   | 258740.5 |              | 136 |
| 17416217 | 2617991  | 2458471  | 13925600 | 15301775 | 18538493 |              | 3   |
| 360859   | 554063.5 | 569243.9 | 456723.5 | 325076.5 | 609883.8 | [M+Na+HC     | 16  |
| 2195663  | 1598021  | 1332090  | 1729762  | 2440891  | 1166780  | [1029][M+1]+ | 3   |
| 638465.8 | 368255.6 | 445727.1 | 702075.4 | 505072.1 | 129818.3 |              | 118 |
| 824787.9 | 917638.7 | 782783.6 | 794767.2 | 1487425  | 2092033  | [2M+K]+ 2    | 8   |
| 659725.4 | 0        | 459035.2 | 670171.1 | 276014.2 | 66972.26 |              | 8   |
| 2595551  | 2636167  | 3162404  | 2314755  | 2525303  | 1585821  | [546][M+1]2+ | 4   |
| 3858239  | 3236991  | 3949910  | 6429831  | 2848099  | 1589633  | [M+H]+ 21    | 72  |
| 1196510  | 3478531  | 3089537  | 609539.6 | 1814763  | 4452166  |              | 9   |
| 2327804  | 1447443  | 3590923  | 2800292  | 1748925  | 0        |              | 1   |
| 2128765  | 2818646  | 2983922  | 2377243  | 2670942  | 766494.2 |              | 4   |
| 1648983  | 796481.1 | 1025973  | 1754292  | 1386034  | 76143.47 |              | 4   |

|          |          |          |          |          |          |                     |     |
|----------|----------|----------|----------|----------|----------|---------------------|-----|
| 1040332  | 1382860  | 284575.4 | 230106.4 | 194890.3 | 1318676  |                     | 152 |
| 3486416  | 5267242  | 2961915  | 3019995  | 2185877  | 1053467  |                     | 4   |
| 8496205  | 20409511 | 21536352 | 8485460  | 8454464  | 8950832  | [339][M]2+ [M+2H]2+ | 20  |
| 4258548  | 3361100  | 6123248  | 4089905  | 3896279  | 895953.4 |                     | 13  |
| 17707445 | 17006704 | 17607947 | 17702664 | 14667211 | 8681750  |                     | 292 |
| 1655000  | 4537090  | 7275883  | 1286986  | 2142391  | 2596802  |                     | 9   |
| 2172539  | 4148122  | 42697868 | 24686321 | 27581927 | 4570453  | [M+H-C6H8]          | 5   |
| 2590030  | 1514128  | 0        | 1258708  | 1124485  | 924140.8 | [M+H+HCC]           | 41  |
| 436566.9 | 1129015  | 598027.9 | 444148.6 | 524922.8 | 101808.9 |                     | 234 |
| 55339702 | 35307614 | 13473969 | 20154934 | 2278048  | 84762955 | [M+Na]+ 1           | 3   |
| 6672212  | 3480739  | 9081371  | 8817128  | 3587352  | 3770585  | [3M+Na+K]           | 26  |
| 1961490  | 1456308  | 1792669  | 2322680  | 1914530  | 246120.3 |                     | 4   |
| 439096.5 | 860431.4 | 611268.3 | 354810.4 | 661008.9 | 977808.5 |                     | 4   |
| 5940059  | 1606028  | 3727941  | 8231326  | 3462839  | 1206280  |                     | 230 |
| 723676.1 | 776083.1 | 248395.8 | 605076.1 | 670154.5 | 28891.63 |                     | 77  |
| 1.11E+08 | 1.59E+08 | 1.09E+08 | 81396243 | 90807786 | 1.75E+08 |                     | 67  |
| 0        | 724104.7 | 0        | 0        | 334965.6 | 387555.4 | [3M+2H]2+           | 46  |
| 3231974  | 8728704  | 1676944  | 3657763  | 11387371 | 9212684  | [M+H]+ 20           | 11  |
| 640278.9 | 988098.5 | 650799.3 | 411621.9 | 657056.2 | 836681.1 |                     | 8   |
| 1146565  | 1040787  | 999627.7 | 657992.7 | 1871817  | 1177273  |                     | 9   |
| 534201.2 | 226647.2 | 1778536  | 526475.1 | 502851.2 | 89751.34 | [160][M+1]3+        | 9   |
| 42878323 | 59473278 | 43408979 | 25518261 | 32953643 | 58439341 | [746][M+1]+         | 1   |
| 604174.5 | 1050636  | 208683.5 | 354149.2 | 587223.9 | 770927.7 | [M+Na]+ 1           | 8   |
| 15117255 | 17698365 | 12507571 | 13427499 | 18852841 | 16930838 | [467][M+2]+         | 2   |
| 47377748 | 72577363 | 54538036 | 38737334 | 83449792 | 44006308 | [863][M+2]+         | 1   |
| 895662.2 | 829000.8 | 1199571  | 1348307  | 851415.2 | 958998   | [271][M+2]+         | 61  |
| 4595633  | 5033963  | 4479893  | 4253527  | 4173021  | 4295556  |                     | 415 |
| 237141.8 | 1014370  | 758736.4 | 698460.3 | 701583.6 | 430037.4 | [M+H-CH2]           | 20  |
| 734042.3 | 4660242  | 4344933  | 844837.4 | 4500560  | 7074111  |                     | 1   |
| 908625.4 | 1082569  | 966886.1 | 692202.9 | 851867.2 | 352309.2 |                     | 4   |
| 3021534  | 1028030  | 1050483  | 1908981  | 1444094  | 581046.6 | [M+K]+ 45           | 12  |
| 3892202  | 3465589  | 2531212  | 3417279  | 2426704  | 2885864  |                     | 130 |
| 748120.4 | 1154007  | 1249338  | 565462.7 | 638686.7 | 198069.2 |                     | 4   |
| 1383109  | 1483441  | 1805201  | 765284.7 | 1133567  | 1296902  |                     | 4   |
| 1909826  | 3036281  | 4035353  | 1472151  | 1682263  | 247243.4 |                     | 9   |

|          |          |          |          |          |          |                                      |     |
|----------|----------|----------|----------|----------|----------|--------------------------------------|-----|
| 653339.3 | 1434335  | 4950710  | 449876   | 367750.2 | 1307756  | [M+2H] <sup>2+</sup>                 | 39  |
| 1876867  | 2930655  | 1739215  | 1457230  | 2304463  | 1523248  |                                      | 2   |
| 3614989  | 4432719  | 3726861  | 2887249  | 3163856  | 3370241  | [1166][M+1] <sup>+</sup>             | 2   |
| 235051.9 | 442277.1 | 314463.4 | 357126.1 | 341529.2 | 258329.9 | [M+2K] <sup>2+</sup>                 | 35  |
| 663933.4 | 1201182  | 1345961  | 803757.7 | 705661.1 | 1527207  |                                      | 179 |
| 417587.1 | 2073446  | 1489107  | 171641.8 | 637773.3 | 747002.3 | [M+2H-CH <sub>2</sub> ] <sup>+</sup> | 18  |
| 977610   | 912928.7 | 1304270  | 906660.2 | 1104504  | 580849.5 | [119][M] <sup>2+</sup>               | 17  |
| 6127945  | 3607397  | 3304979  | 8518072  | 2598252  | 3181654  |                                      | 2   |
| 2627330  | 3595347  | 2487551  | 2007189  | 3383031  | 3092619  |                                      | 9   |
| 1081135  | 164395.5 | 2033419  | 1224431  | 1132974  | 1486270  |                                      | 9   |
| 2453737  | 4357308  | 2235225  | 1535105  | 3378592  | 3766420  |                                      | 2   |
| 371864.9 | 335242.6 | 563313.9 | 464019.7 | 450019.8 | 350993.9 | [M+Na] <sup>+</sup>                  | 35  |
| 5009175  | 1779572  | 1691530  | 1324428  | 5452045  | 5451702  |                                      | 1   |
| 20390029 | 22384253 | 22788223 | 12518731 | 18441549 | 1911434  |                                      | 6   |
| 394344   | 0        | 2658051  | 2393687  | 674313.8 | 1396094  | [374][M+2] <sup>+</sup>              | 9   |
| 7482309  | 8951189  | 5940400  | 8703671  | 5650196  | 8292650  |                                      | 2   |
| 1397093  | 259007.1 | 65244.35 | 1218718  | 1355033  | 405778.4 | [M+Na+K] <sup>+</sup>                | 319 |
| 3313753  | 2718412  | 2308531  | 1968030  | 1474009  | 133896.9 |                                      | 169 |
| 25441740 | 32801407 | 119253.3 | 24820612 | 24527638 | 13945606 |                                      | 18  |
| 4604865  | 2187487  | 1488976  | 3460579  | 1412985  | 9073154  | [M+2H] <sup>2+</sup>                 | 46  |
| 4002424  | 1377969  | 1828714  | 2993681  | 4025431  | 3767426  |                                      | 1   |
| 17089910 | 39251905 | 44827903 | 12695218 | 14031661 | 20215095 | [284][M+1] <sup>2+</sup>             | 20  |
| 6201509  | 8308423  | 7133762  | 7365774  | 3567317  | 4378143  | [879][M] <sup>3+</sup>               | 20  |
| 8176536  | 8182304  | 6868339  | 11106035 | 8506733  | 4412020  |                                      | 2   |
| 5272544  | 6909371  | 6073029  | 4179720  | 5566049  | 7265881  |                                      | 4   |
| 551331.5 | 693152.7 | 659094.1 | 466061.9 | 582971.3 | 380856.4 | [898][M] <sup>+</sup>                | 110 |
| 127398.1 | 162212.4 | 164937.9 | 146594.3 | 133102.7 | 46352.52 | [M+H+CF <sub>3</sub> ] <sup>+</sup>  | 147 |
| 530147.3 | 670021.8 | 991792.7 | 555175.1 | 504477.3 | 554482.3 | [3M+2K] <sup>2+</sup>                | 33  |
| 5348393  | 6005822  | 4443544  | 3361855  | 5648478  | 11297502 |                                      | 29  |
| 2171674  | 148448.1 | 1750998  | 2392490  | 1720264  | 4904333  |                                      | 242 |
| 1621946  | 1995619  | 2545503  | 1635287  | 535126.9 | 1390080  | [346][M+2] <sup>3+</sup>             | 9   |
| 4922425  | 5490765  | 4465756  | 4603414  | 6148512  | 5494990  | [535][M] <sup>3+</sup>               | 2   |
| 2147921  | 3672490  | 3002252  | 1052043  | 2912141  | 3976732  |                                      | 9   |
| 18253783 | 25785342 | 12727048 | 11513235 | 10836352 | 13877935 | [882][M+1] <sup>+</sup>              | 101 |
| 1769425  | 999929.3 | 1789424  | 997719.5 | 1167781  | 626866.6 | [1465][M+1] <sup>2+</sup>            | 4   |

|          |          |          |          |          |          |              |     |
|----------|----------|----------|----------|----------|----------|--------------|-----|
| 20784146 | 2277122  | 2159781  | 992037.5 | 16761644 | 33839268 |              | 1   |
| 1.53E+08 | 1.75E+08 | 1.7E+08  | 1.14E+08 | 1.78E+08 | 2.17E+08 | [1180][M+1]+ | 17  |
| 156870.3 | 250389.2 | 137620.2 | 222560.8 | 185983.8 | 144969.3 | [1017][M+1]+ | 78  |
| 5453503  | 7161257  | 4758235  | 3457188  | 7542673  | 7513510  |              | 2   |
| 808442.1 | 204999   | 1240399  | 807635.1 | 265677.7 | 585947.9 |              | 135 |
| 596219.2 | 886898.1 | 1495593  | 1127451  | 325533.1 | 0        |              | 9   |
| 1710182  | 1654108  | 1613226  | 748119.5 | 1468533  | 4296058  |              | 41  |
| 822088.5 | 178972.8 | 982609.6 | 1385180  | 1649930  | 0        |              | 160 |
| 4162917  | 7981342  | 2732410  | 5388876  | 5768757  | 9659651  |              | 2   |
| 12999482 | 14358247 | 9317026  | 10822192 | 15796498 | 15528102 | [356][M+2]3+ | 2   |
| 24590111 | 46405151 | 25506287 | 23619822 | 45811474 | 45150348 |              | 2   |
| 1493046  | 1630136  | 1374664  | 1094105  | 1081886  | 600008   |              | 4   |
| 3875300  | 3458285  | 3776427  | 4114264  | 2799076  | 2262315  | [719][M]3+   | 69  |
| 1317157  | 2205041  | 2066967  | 1008665  | 1534339  | 1402503  | [1261][M]3+  | 9   |
| 28642591 | 37179537 | 51217646 | 22799458 | 51259018 | 35056355 | [M+2H-C6†    | 33  |
| 4551060  | 10859326 | 9902901  | 3213942  | 6225825  | 9950005  | [166][M]2+   | 9   |
| 1518170  | 286627   | 1818439  | 2060472  | 1196383  | 0        |              | 2   |
| 502477.1 | 519959   | 359441.5 | 585501.2 | 608934.5 | 13404.93 | [509][M+1]2+ | 476 |
| 2472534  | 3275089  | 2287825  | 1214658  | 2419737  | 2473877  |              | 4   |
| 2590281  | 1090745  | 2907586  | 2533549  | 3567473  | 3434900  |              | 2   |
| 1358913  | 91277.53 | 1459961  | 1177134  | 1089017  | 3879611  |              | 2   |
| 5556469  | 9912086  | 7521922  | 4139681  | 6913780  | 11279571 |              | 9   |
| 363889.5 | 700450.1 | 687271.3 | 729017.8 | 836743.3 | 157360.6 |              | 49  |
| 955249.2 | 902099.6 | 940701.4 | 784850.7 | 836708.1 | 667677.5 |              | 4   |
| 773915.6 | 1282299  | 419041.9 | 497171.8 | 168266.5 | 567808.3 |              | 101 |
| 2215822  | 3307685  | 3059756  | 2009089  | 2070449  | 724664.9 |              | 9   |
| 2947167  | 3588503  | 4076328  | 2870743  | 3096784  | 1939201  |              | 171 |
| 8127363  | 9394735  | 8183903  | 7214776  | 9862900  | 8449405  | [M+K]+ 32:   | 13  |
| 189679.6 | 367202.2 | 397864.9 | 71500.07 | 124417.5 | 248585.2 |              | 243 |
| 3831687  | 5282275  | 4123969  | 2802220  | 4045530  | 6711402  |              | 4   |
| 5760918  | 8183903  | 8594055  | 4830378  | 5769361  | 1928109  |              | 9   |
| 2385143  | 7630389  | 9352033  | 1711697  | 3054929  | 6045690  |              | 9   |
| 6565704  | 6139018  | 4295223  | 5148973  | 10947941 | 5552037  | [M+2H-C3†    | 3   |
| 2132169  | 922714.5 | 1191236  | 538206.2 | 4508531  | 2942769  | [469][M+3]2+ | 2   |
| 16952199 | 17762648 | 13574122 | 14874483 | 18232299 | 13987843 |              | 2   |

|          |          |          |          |          |          |              |     |
|----------|----------|----------|----------|----------|----------|--------------|-----|
| 553995   | 1094791  | 808079.3 | 319325.6 | 682197.2 | 955092.9 |              | 8   |
| 636668.6 | 868838.7 | 552073.8 | 394079.9 | 560015.4 | 60382.51 |              | 159 |
| 918597.6 | 982239.7 | 1261379  | 960723.3 | 802940.2 | 613443.6 |              | 4   |
| 41422093 | 45197054 | 32872772 | 32817778 | 48161214 | 48271491 | [431][M]+    | 2   |
| 99918.55 | 119293.6 | 47356.59 | 138469.7 | 136129   | 142194.4 |              | 51  |
| 0        | 398615.7 | 596611.3 | 105102.5 | 220783.8 | 953915.7 | [M+Na]+ 5:   | 21  |
| 1543982  | 1568660  | 928242.1 | 646070.7 | 1678831  | 1861917  | [3M+3K-H]    | 5   |
| 1341923  | 1332209  | 1233453  | 1217873  | 962294.1 | 703415.9 | [888][M+1]+  | 33  |
| 299312.7 | 0        | 1205494  | 654647.3 | 301615.9 | 325206.6 |              | 9   |
| 388130.8 | 1176118  | 562581.4 | 371000.8 | 416328.5 | 418619.4 |              | 4   |
| 34112807 | 43583923 | 35676074 | 23456252 | 30769713 | 35579057 | [784][M]+    | 4   |
| 2903267  | 2305411  | 3357227  | 3442128  | 1456059  | 2927878  | [1436][M]+   | 340 |
| 4251407  | 2380412  | 5906384  | 2970908  | 3774343  | 3457802  |              | 443 |
| 2306171  | 2384671  | 2561520  | 1990416  | 1791447  | 701966.4 | [2M+H]+ 4:   | 44  |
| 438341.2 | 153652.7 | 616161.5 | 459992.6 | 614558.5 | 247303   | [1449][M+2]+ | 301 |
| 3728203  | 3057916  | 4369764  | 3458584  | 1630469  | 1485133  |              | 2   |
| 72774592 | 1.08E+08 | 51805123 | 58070358 | 66649397 | 1.29E+08 | [3M+Na+2I    | 3   |
| 18786365 | 36140011 | 19533231 | 23067953 | 952573.1 | 10465013 | [M+Na+HC     | 6   |
| 204759.5 | 274776.7 | 193955   | 118597.9 | 313449.8 | 170490   |              | 527 |
| 393278.2 | 680515.5 | 800791.1 | 265285.2 | 85057.47 | 571599.1 |              | 4   |
| 3870021  | 3645835  | 10914757 | 3231737  | 3910413  | 3663869  |              | 174 |
| 2388003  | 2845835  | 2195639  | 3918584  | 4800299  | 549142.3 |              | 1   |
| 166268.4 | 279220   | 250163.5 | 181504.7 | 189664.7 | 239752.5 |              | 224 |
| 8815690  | 1087657  | 1724719  | 6099560  | 8812673  | 9632711  |              | 84  |
| 641831.9 | 667434.7 | 1023442  | 1093417  | 765245   | 446817.1 |              | 4   |
| 1981672  | 2321243  | 2606115  | 1860232  | 909528   | 5016791  |              | 2   |
| 928494.4 | 1679108  | 1995971  | 466576.4 | 1116444  | 739460.1 |              | 1   |
| 73188025 | 77996749 | 93065646 | 73336233 | 73603754 | 56747158 | [100][M]3+   | 9   |
| 11039627 | 8465099  | 9432207  | 10257548 | 7307070  | 5772966  | [1282][M+1]+ | 2   |
| 1414803  | 916187.4 | 1170629  | 2055671  | 999938.2 | 595160.7 | [M+2H]2+     | 38  |
| 3284227  | 2052476  | 5759758  | 1543821  | 2320017  | 2596079  |              | 1   |
| 1700857  | 1000723  | 8280548  | 689930.8 | 6230466  | 3663967  |              | 1   |
| 3910034  | 11707476 | 7158799  | 4415780  | 656617.3 | 5286908  |              | 1   |
| 2980427  | 5246194  | 6436089  | 3335622  | 4693902  | 3449494  | [599][M]3+   | 39  |
| 1268542  | 1248747  | 239056.1 | 1103201  | 1504909  | 1974174  |              | 13  |



|          |          |          |          |          |          |              |     |
|----------|----------|----------|----------|----------|----------|--------------|-----|
| 5288456  | 2076342  | 955400.1 | 2994346  | 8586840  | 2354562  | [1014][M]+   | 324 |
| 9895854  | 2804024  | 7994416  | 11133022 | 2569704  | 5420848  | [423][M+2]2+ | 2   |
| 2226092  | 2420463  | 501517.7 | 3218114  | 2124178  | 3628146  | [M+H-CH2]    | 253 |
| 17605074 | 9798139  | 2468322  | 7691784  | 20480400 | 34233627 |              | 11  |
| 750575.9 | 839302.5 | 502444.4 | 325065.5 | 1796779  | 223213.1 | [M+2H-CO]    | 18  |
| 418502.6 | 2586745  | 335229.7 | 215670.8 | 2420830  | 2101320  | [1316][M+1]+ | 2   |
| 482430.9 | 794170.6 | 1970832  | 120284.2 | 408880.3 | 0        |              | 9   |
| 1170139  | 784567   | 1188364  | 910122.3 | 726412.7 | 0        |              | 9   |
| 2.38E+08 | 1.95E+08 | 1.94E+08 | 2.34E+08 | 2.36E+08 | 1.47E+08 |              | 2   |
| 5683118  | 5650420  | 5451982  | 5293422  | 4196193  | 5829553  | [400][M+2]2+ | 2   |
| 3316470  | 4070856  | 3828068  | 2055934  | 2961917  | 3037166  |              | 4   |
| 4556278  | 4258527  | 4724754  | 4970709  | 3825821  | 5556647  |              | 352 |
| 3248883  | 763275.8 | 1705325  | 4282022  | 666854   | 543496.2 |              | 9   |
| 43689260 | 1224800  | 2916969  | 61145812 | 21096882 | 1462245  | [604][M+1]2+ | 9   |
| 27256367 | 41605044 | 23369890 | 25850853 | 41828026 | 43575047 |              | 2   |
| 5955331  | 3529941  | 2342098  | 5212101  | 6837323  | 2490265  |              | 3   |
| 1456911  | 0        | 2333182  | 1683182  | 1220503  | 0        |              | 9   |
| 1846292  | 2805120  | 1893323  | 900240.3 | 1673134  | 3246234  |              | 4   |
| 8068765  | 4083167  | 6155815  | 3877263  | 3909855  | 3515918  |              | 380 |
| 17885652 | 49445299 | 16638355 | 11856631 | 27401740 | 50258273 |              | 3   |
| 1495325  | 1230495  | 1375883  | 1456371  | 3089018  | 2893304  |              | 2   |
| 7510366  | 4501046  | 10090225 | 4701881  | 10744263 | 2168572  | [M+K]+ 338   | 11  |
| 1993001  | 4705813  | 7382041  | 3067524  | 3417628  | 5219221  | [355][M+1]2+ | 2   |
| 843580.5 | 762129.5 | 980445.8 | 871391.7 | 547889.8 | 1059258  | [1447][M+1]+ | 7   |
| 1392462  | 282218.7 | 550479.1 | 1327105  | 205579.6 | 1025152  |              | 67  |
| 463925.9 | 1412632  | 1616564  | 292534.8 | 644085.5 | 0        | [1059][M+1]+ | 1   |
| 159624.4 | 62491.92 | 318543.8 | 241604.8 | 171407.1 | 305197   |              | 526 |
| 1195382  | 1610359  | 1677747  | 998272.2 | 1339191  | 1048183  |              | 4   |
| 3662892  | 3680343  | 3437757  | 75764.79 | 3405009  | 8005578  |              | 439 |
| 459330.1 | 818027.5 | 344427.1 | 442808.6 | 402275.3 | 499195.9 |              | 8   |
| 634176.4 | 1205505  | 2381359  | 866786.7 | 1682783  | 597239.1 | [M+H]+ 528   | 28  |
| 4975982  | 5096475  | 4473770  | 2953136  | 3919855  | 2693539  |              | 4   |
| 12875494 | 4689437  | 10358239 | 7997866  | 10488206 | 90935.21 | [1358][M]+   | 109 |
| 5128331  | 2616862  | 3654914  | 3327450  | 8772774  | 1912409  | [M+K]+ 664   | 29  |
| 5073220  | 4488946  | 6437706  | 3908022  | 4779681  | 4491216  |              | 226 |

|          |          |          |          |          |          |               |     |
|----------|----------|----------|----------|----------|----------|---------------|-----|
| 8028599  | 14558528 | 8481599  | 4717869  | 1380999  | 17937926 | [3M+H+Na      | 3   |
| 274686.9 | 662014.9 | 1247077  | 204264.3 | 234760.5 | 498991.5 | [M+H]+ 29!    | 18  |
| 1148837  | 2859537  | 843291.8 | 1019160  | 2190813  | 2496931  | [3M+Na+K-     | 97  |
| 2992163  | 6104515  | 1709296  | 1347724  | 5367458  | 3825146  | [M+K]+ 54     | 3   |
| 9118574  | 2553971  | 7580946  | 9588377  | 3803819  | 3422343  |               | 2   |
| 394033   | 128864.3 | 297260.1 | 302531.7 | 296530.6 | 215829.2 | [1399][M+2]+  | 235 |
| 57860138 | 71901498 | 43653860 | 40164846 | 66049137 | 99104688 | [766][M]+     | 4   |
| 621528.4 | 279906.7 | 1572557  | 1046717  | 280329.7 | 101498.4 | [1600][M+1]+  | 40  |
| 437449   | 985354   | 467776.8 | 415057   | 618446.2 | 1851216  | [M+H-C3H:     | 8   |
| 837765.8 | 824142.2 | 1038960  | 878634.3 | 620342.1 | 558569.4 | [625][M+1]+   | 342 |
| 4182852  | 4366498  | 5026238  | 3867851  | 4385310  | 4438816  |               | 375 |
| 1030598  | 407450.8 | 534928.6 | 425444.3 | 1252118  | 444209.5 | [1014][M+1]+  | 324 |
| 1726800  | 1717664  | 515416.4 | 3060124  | 968525.2 | 738156.5 |               | 81  |
| 166754.2 | 113849.2 | 114982.6 | 116793.1 | 158025.9 | 61600.39 | [1027][M+1]2+ | 42  |
| 5509942  | 3970978  | 8755763  | 4478393  | 5715021  | 378683.4 | [3M+2K]2+     | 13  |
| 24238208 | 14189382 | 1870833  | 14888280 | 24460567 | 18325912 | [M+K+NH3      | 15  |
| 11745559 | 15689384 | 12158820 | 10296706 | 14679998 | 18775412 |               | 2   |
| 2556054  | 555982.9 | 1723892  | 1670983  | 5829790  | 10092920 |               | 1   |
| 108084.6 | 377546.3 | 187104.2 | 185024.5 | 174887.4 | 259560.9 | [964][M+2]+   | 101 |
| 3662669  | 4089931  | 2872860  | 1850095  | 3375245  | 13383425 | [143][M]+     | 287 |
| 3271100  | 5167813  | 6145535  | 2672301  | 1427123  | 1338889  |               | 1   |
| 570329.7 | 3800726  | 2434611  | 3130486  | 3510721  | 874694   |               | 190 |
| 2675037  | 3299531  | 2934872  | 1936575  | 1345250  | 2387664  |               | 4   |
| 2920310  | 4875153  | 3101656  | 3399071  | 3250461  | 2900509  |               | 2   |
| 575321.3 | 635301.3 | 514671   | 456563.7 | 405340.7 | 353580.8 | [1041][M]+    | 161 |
| 724556.9 | 698701.8 | 864272.3 | 483266.3 | 684913.6 | 663247.3 |               | 20  |
| 1786390  | 2659304  | 1546164  | 1541668  | 2633794  | 4454482  |               | 13  |
| 1868969  | 2089020  | 2942743  | 768130   | 1538468  | 1935652  |               | 1   |
| 4835752  | 3848800  | 2002606  | 7931023  | 4997805  | 305750.3 |               | 1   |
| 394522.3 | 354515.9 | 330915.4 | 150094.2 | 299944.7 | 472081.2 |               | 63  |
| 1974926  | 0        | 2358237  | 1468434  | 662457.7 | 0        |               | 1   |
| 2237935  | 1734254  | 2630647  | 3022856  | 1757152  | 1262568  | [1431][M]+    | 262 |
| 1683666  | 3120097  | 1079867  | 814540.4 | 2446092  | 5261825  |               | 9   |
| 652673.8 | 1911468  | 2357290  | 550546   | 936008.8 | 857515.5 | [565][M+1]+   | 9   |
| 825736.2 | 1345228  | 845250.5 | 331986.9 | 635764.5 | 1737634  |               | 4   |

|          |          |          |          |          |          |                     |     |
|----------|----------|----------|----------|----------|----------|---------------------|-----|
| 1.23E+08 | 1.22E+08 | 1.06E+08 | 1.18E+08 | 1.12E+08 | 89721971 | [853][M]+           | 2   |
| 1209104  | 4379381  | 1129391  | 1322916  | 1554428  | 0        |                     | 2   |
| 813418.6 | 663164.6 | 1224777  | 706284.8 | 500976.3 | 2266426  | [730][M+3]2+        | 9   |
| 2622153  | 1831274  | 2805151  | 2462304  | 2367310  | 736777.2 | [M+K]+ 189          | 13  |
| 606118.3 | 1139026  | 888048.1 | 900771   | 662681.4 | 1404216  | [554][M]+ [M+2K-H]+ | 110 |
| 17172752 | 8762518  | 13989685 | 7215595  | 10221701 | 63928.24 | [660][M]2+          | 280 |
| 51131316 | 66599648 | 57318972 | 29962096 | 30144847 | 70516347 |                     | 124 |
| 2383756  | 1684698  | 2074883  | 2007853  | 3677746  | 155884.4 | [M+K]+ 470          | 15  |
| 1707764  | 3673435  | 1800800  | 2579841  | 3075497  | 1649979  | [56][M+2]+          | 2   |
| 47750562 | 31798153 | 42294508 | 46778336 | 38864625 | 11542106 | [384][M]+           | 143 |
| 70002.73 | 136303.3 | 299777.6 | 287457.5 | 267936   | 210352.9 |                     | 288 |
| 11028540 | 11067587 | 9222368  | 7932377  | 10359168 | 6865282  |                     | 4   |
| 172649.5 | 184196.1 | 66093.88 | 103539.1 | 95678.66 | 98671.76 |                     | 160 |
| 2947488  | 2062454  | 2397744  | 2216951  | 1755544  | 3987307  | [330][M+1]3+        | 2   |
| 3677090  | 5047358  | 3327711  | 3209903  | 3729062  | 5129765  |                     | 2   |
| 22293504 | 27342912 | 2503740  | 22234585 | 23029602 | 29625347 |                     | 21  |
| 4688184  | 1883287  | 4475313  | 3327787  | 4081473  | 44681.69 | [1358][M+1]+        | 109 |
| 790572.7 | 807612.9 | 655203.8 | 806716   | 1054308  | 809627.8 | [1555][M+1]+        | 8   |
| 1516994  | 3306507  | 278400.1 | 3293909  | 4064642  | 2642434  | [M+H]+ 250          | 11  |
| 1723584  | 2533937  | 2492311  | 1525605  | 1622343  | 1606640  |                     | 9   |
| 9798900  | 8479430  | 9884947  | 15250103 | 8785991  | 4983605  | [411][M+2]+         | 4   |
| 5791473  | 7655666  | 7361407  | 4541032  | 6281322  | 3881170  |                     | 9   |
| 14515345 | 38013080 | 7025858  | 35490056 | 16907021 | 5622313  |                     | 6   |
| 3866442  | 5224955  | 3393575  | 2952975  | 4869005  | 5066418  | [M+2H-C2H]          | 13  |
| 630645.5 | 1367234  | 1217997  | 831894   | 658113.5 | 673463.4 | [728][M+1]+         | 4   |
| 7415486  | 14487187 | 15605705 | 5720678  | 11377062 | 3010070  |                     | 2   |
| 1921751  | 719035.4 | 9234524  | 620965.1 | 1573874  | 3053209  |                     | 2   |
| 3704580  | 1604484  | 1179080  | 2403640  | 2892263  | 2722381  |                     | 2   |
| 0        | 386195.1 | 2494514  | 0        | 886042.3 | 0        |                     | 1   |
| 882264.8 | 1701198  | 641169.7 | 401980.5 | 1971711  | 4692833  |                     | 2   |
| 8714866  | 11930140 | 8437880  | 5994664  | 14990138 | 8437010  |                     | 1   |
| 1588899  | 2611515  | 2232766  | 1105257  | 1817630  | 2978001  |                     | 4   |
| 25758687 | 23953210 | 15134641 | 20427387 | 21101477 | 15598139 |                     | 2   |
| 1009337  | 1983431  | 2898760  | 1402647  | 988190.2 | 312435.2 | [M+2H]2+            | 35  |
| 78533695 | 7033513  | 896559.8 | 2292069  | 80108843 | 51983640 | [M+2K-H]+           | 3   |

|          |          |          |          |          |          |              |     |
|----------|----------|----------|----------|----------|----------|--------------|-----|
| 851121.3 | 237651.5 | 1123219  | 1216767  | 1009159  | 430756.5 | [M+K]+ 32'   | 185 |
| 5683956  | 5375118  | 3241264  | 5304543  | 5266608  | 11176110 |              | 407 |
| 5643060  | 3089301  | 8080316  | 7988583  | 8240544  | 4397952  |              | 202 |
| 599007.7 | 381759.7 | 830454   | 1345866  | 48166    | 458831   | [201][M+1]+  | 239 |
| 2447239  | 1200016  | 1924245  | 2150607  | 4368335  | 3361923  |              | 2   |
| 296223.9 | 674666.5 | 537821.2 | 306310.7 | 460635.2 | 226842.2 |              | 4   |
| 9908365  | 7521280  | 9152822  | 7467602  | 10124839 | 9250852  |              | 4   |
| 6392172  | 2588079  | 1151601  | 3152717  | 7295789  | 11392504 |              | 11  |
| 9789812  | 5526070  | 7696824  | 9988266  | 5071669  | 7004485  |              | 2   |
| 1983054  | 2076578  | 2259784  | 1814268  | 1796835  | 1195719  |              | 4   |
| 5829216  | 17641483 | 21679078 | 4093913  | 7929566  | 13866706 | [747][M]2+   | 9   |
| 2242215  | 3731424  | 3270331  | 1098462  | 3942255  | 3485266  |              | 1   |
| 12879963 | 8353213  | 7525620  | 11958916 | 8468422  | 3109480  |              | 2   |
| 349837.5 | 460413.5 | 640114.6 | 386765.7 | 349207.5 | 217985.1 | [M+Na+K]2    | 33  |
| 2257912  | 927702.6 | 937501.3 | 2352204  | 2109665  | 1601466  |              | 4   |
| 3306526  | 2492424  | 2283117  | 3286333  | 2475446  | 1288826  |              | 2   |
| 909409.1 | 937263.4 | 1050895  | 831432.1 | 806993   | 489887.2 | [884][M+1]+  | 17  |
| 1403213  | 702156.1 | 663188.1 | 1196537  | 417297.6 | 614998.7 |              | 4   |
| 8386145  | 7119976  | 2309308  | 6377462  | 1546289  | 5720338  | [498][M+1]+  | 146 |
| 141423.5 | 136594.8 | 75358.99 | 97435.54 | 29174.44 | 138828.1 | [57][M+1]+   | 450 |
| 5317192  | 4964966  | 4736624  | 3187098  | 3335197  | 1877772  | [463][M+1]2+ | 38  |
| 15335888 | 11736564 | 11889840 | 11651593 | 9205791  | 505020.4 |              | 286 |
| 1456825  | 1054722  | 1064582  | 2005136  | 1659447  | 4425302  |              | 9   |
| 254646.3 | 239123.6 | 260718.1 | 152042.4 | 182316.2 | 89389.14 |              | 42  |
| 11994489 | 2280763  | 15660690 | 12040848 | 1131952  | 9943317  | [686][M]3+   | 9   |
| 78514437 | 79553124 | 67867299 | 69066897 | 87468421 | 88502642 |              | 2   |
| 6130966  | 3852458  | 4121583  | 5339566  | 4266009  | 2949448  |              | 9   |
| 14990517 | 19905672 | 14451744 | 13123348 | 19750631 | 23129296 |              | 2   |
| 285605   | 128240.3 | 666491.7 | 748659.2 | 988054.4 | 0        |              | 160 |
| 6434082  | 2514412  | 8083266  | 4621292  | 5312617  | 1297975  | [1242][M+3]+ | 2   |
| 1717133  | 2290324  | 2125833  | 1581511  | 1713657  | 611824   |              | 9   |
| 275322.6 | 153513.1 | 574411.9 | 549219   | 610730.7 | 175293.1 |              | 54  |
| 7347981  | 17832899 | 15659352 | 5206815  | 8660667  | 20674916 | [1189][M]+   | 9   |
| 1156472  | 3048673  | 939221.7 | 1366165  | 1670729  | 6970134  |              | 6   |
| 3412282  | 449956.4 | 3348823  | 3254401  | 2924007  | 7391579  |              | 2   |

|          |          |          |          |          |          |               |     |
|----------|----------|----------|----------|----------|----------|---------------|-----|
| 1746883  | 4779603  | 3394854  | 3075368  | 2428313  | 4150604  |               | 2   |
| 262454   | 438332.2 | 830785   | 170880.4 | 360584.5 | 314919.6 |               | 39  |
| 260476.2 | 212770.1 | 591978.8 | 463156.9 | 348837   | 43401.01 | [M+Na]+ 9     | 38  |
| 6374200  | 2534236  | 3963041  | 5321488  | 4627071  | 6998611  | [M+K]+ 260    | 323 |
| 195336.6 | 197538.1 | 0        | 144767.6 | 22305.89 | 95314.88 |               | 50  |
| 767564.5 | 590321.6 | 327888.1 | 590292.3 | 391847.8 | 4155020  | [M+K]+ 430    | 3   |
| 2098595  | 229984.5 | 166757.9 | 1167620  | 1845629  | 2705402  | [M+K]+ 400    | 21  |
| 624407   | 1207844  | 811630.4 | 554170.6 | 621557.7 | 678134.3 |               | 9   |
| 527450.5 | 1715179  | 1840415  | 458751   | 948843.8 | 1386674  |               | 9   |
| 9997948  | 5515966  | 4795399  | 8228483  | 10946155 | 10507085 | [M+Na]+ 30    | 13  |
| 7812156  | 6271280  | 16074951 | 5935622  | 6629791  | 7983330  | [M+Na+3K]     | 15  |
| 3414908  | 2157192  | 3761948  | 4417265  | 2030342  | 3244022  | [1560][M]+    | 304 |
| 3863258  | 4487803  | 8242830  | 5287825  | 4732865  | 497333.5 | [1268][M+1]+  | 139 |
| 1005394  | 775375.6 | 1562252  | 631342.1 | 677645.8 | 603252.1 |               | 4   |
| 2388059  | 4544025  | 2243075  | 1129430  | 2907809  | 2806600  |               | 9   |
| 831511.4 | 1016390  | 168451.9 | 284741   | 229583.1 | 315460   |               | 130 |
| 1040615  | 1543486  | 2736356  | 1799242  | 1826657  | 1691869  | [377][M]+     | 148 |
| 8121832  | 5524597  | 5533444  | 7615776  | 9953968  | 8455752  | [1618][M+1]2+ | 2   |
| 3381529  | 3865422  | 4680484  | 3617307  | 3603703  | 5398024  |               | 208 |
| 1404660  | 2423581  | 1261371  | 1239936  | 1344156  | 515771.6 | [M+H]+ 360    | 5   |
| 2182583  | 1896697  | 759700.5 | 907597.5 | 3633284  | 12622430 | [3M+K]+ 10    | 21  |
| 17845511 | 49373122 | 16634795 | 11787496 | 27403176 | 50312836 | [3M+Na+K]     | 3   |
| 689282.1 | 1438496  | 2048173  | 397326.7 | 558400.8 | 202794.4 |               | 9   |
| 1720063  | 1988694  | 1572391  | 2050177  | 1186495  | 1315668  | [899][M+1]+   | 1   |
| 2264103  | 4789187  | 8141152  | 5861673  | 5868012  | 359480.8 |               | 1   |
| 1792756  | 1294147  | 2070362  | 2783334  | 1156128  | 1022563  | [1564][M+1]+  | 329 |
| 1227485  | 1391798  | 1558673  | 1012040  | 1165638  | 554890.7 | [49][M+1]+    | 4   |
| 337938.6 | 478475.9 | 360558.5 | 355922   | 352153.1 | 423407.3 | [705][M+1]2+  | 25  |
| 6097632  | 968303   | 1741802  | 3373699  | 5061131  | 2065849  |               | 3   |
| 3310453  | 3675695  | 3702891  | 2833963  | 3057424  | 2121945  |               | 4   |
| 16954730 | 24400420 | 29394898 | 13289220 | 16511008 | 1.3E+08  |               | 105 |
| 1126200  | 1712546  | 1818041  | 1872715  | 628451   | 2773346  | [M+Na+K]2     | 134 |
| 45277071 | 46023170 | 37953568 | 35894108 | 52958347 | 52729790 |               | 2   |
| 21803371 | 8811025  | 5683794  | 4498418  | 6656080  | 9197469  | [M+H]+ 450    | 6   |
| 296548   | 460117.5 | 578576.1 | 286810.2 | 300023.9 | 272261.6 |               | 203 |

|          |          |          |          |          |          |               |     |
|----------|----------|----------|----------|----------|----------|---------------|-----|
| 1836187  | 1110572  | 326086.2 | 1365134  | 311353.3 | 1179267  |               | 158 |
| 8759745  | 10853927 | 8828044  | 15878781 | 5921996  | 8248155  |               | 2   |
| 2653880  | 3273791  | 2988829  | 1906934  | 2702098  | 3738185  |               | 4   |
| 1908918  | 4370664  | 5010273  | 2069092  | 2068824  | 258143   | [836][M+1]+   | 20  |
| 1069966  | 2060510  | 15907.66 | 100382.9 | 1608783  | 808081.8 | [M+H]+ 16!    | 11  |
| 1212422  | 1911484  | 1081297  | 780087.3 | 1196628  | 749714.7 |               | 4   |
| 4572416  | 4878939  | 4724338  | 3800153  | 4110457  | 1447656  |               | 4   |
| 626812.8 | 238414.6 | 921674.8 | 980337.6 | 944856.4 | 1262881  |               | 62  |
| 654487.1 | 611842.1 | 2408944  | 575284.9 | 881892.6 | 1081586  |               | 9   |
| 320862.9 | 671605.7 | 212671.7 | 102097.4 | 304435.1 | 711801.2 | [1061][M+1]2+ | 42  |
| 48465.21 | 729660.2 | 1859201  | 17791.12 | 126530.4 | 187793.4 | [M+K+NaCl     | 20  |
| 1610430  | 2496198  | 3103630  | 1288711  | 2517473  | 2769839  |               | 9   |
| 135180   | 614482.5 | 551179.9 | 68808.78 | 152388.1 | 196017.2 | [M+H]+ 63!    | 20  |
| 598889.6 | 788542   | 1348789  | 491261.5 | 421662.6 | 427559.6 |               | 4   |
| 5789336  | 9098440  | 5608676  | 5117354  | 6748638  | 15513997 |               | 9   |
| 848588.5 | 1360196  | 994997.2 | 665795.8 | 365756.1 | 714304.8 | [M+H]+ 87!    | 23  |
| 222686.3 | 370444.6 | 504364.5 | 302039.2 | 240524.7 | 199485.6 |               | 4   |
| 757947.8 | 419974.2 | 695940.9 | 445122.3 | 630190.4 | 82079.95 |               | 4   |
| 7132319  | 7008151  | 2388311  | 7016267  | 6093753  | 5168119  |               | 9   |
| 1353268  | 1334985  | 797508.6 | 883631.4 | 1009117  | 636330   | [1472][M]+    | 38  |
| 1029983  | 964949.1 | 982898.2 | 961962   | 1082870  | 618390.6 |               | 4   |
| 590797.8 | 1440417  | 589956.3 | 254323.4 | 587653.2 | 2501949  |               | 9   |
| 10798262 | 8170882  | 20797915 | 8211595  | 13140886 | 24966348 | [M+2K]2+ !    | 18  |
| 3269563  | 1490134  | 1016204  | 3497968  | 3344437  | 138780.3 |               | 15  |
| 7790796  | 4727250  | 6441801  | 6953856  | 4604250  | 5473931  |               | 2   |
| 114872.9 | 186215.4 | 197940.7 | 151367.9 | 8415.494 | 95538.5  |               | 66  |
| 1489274  | 883560.8 | 1990048  | 1948099  | 1264171  | 105585.8 |               | 87  |
| 9443004  | 11516988 | 10258865 | 11273291 | 6608079  | 9063500  | [M+H]+ 58!    | 20  |
| 24595785 | 16043937 | 25661752 | 30429967 | 23165477 | 13246875 | [1128][M]+    | 196 |
| 48962545 | 48660421 | 44713962 | 52516688 | 44270099 | 34434636 | [1234][M]+    | 2   |
| 600632   | 811013   | 1148608  | 303778   | 494627.4 | 493366.4 |               | 4   |
| 6107901  | 5276876  | 5821291  | 13569226 | 5690942  | 5834452  |               | 344 |
| 902606.8 | 886346.7 | 712694.6 | 736529.7 | 692433.3 | 605164.7 |               | 277 |
| 10834883 | 14435527 | 10965601 | 7795280  | 11372179 | 18064845 |               | 4   |
| 650052.2 | 579108.1 | 687070   | 1580750  | 608208.3 | 142020.5 |               | 4   |

|          |          |          |          |          |          |             |     |
|----------|----------|----------|----------|----------|----------|-------------|-----|
| 299640.1 | 835900.7 | 829725.4 | 151661.3 | 531124   | 718001.1 |             | 9   |
| 583126.5 | 824983.4 | 1495936  | 817155.7 | 386964.9 | 0        |             | 9   |
| 1782516  | 940203.7 | 2069992  | 1389448  | 898588.4 | 463907   |             | 1   |
| 73414275 | 1239492  | 10376052 | 55099570 | 57123317 | 1.39E+08 | [2M+Na]+    | 3   |
| 10429599 | 7418828  | 7057314  | 7001388  | 7155686  | 6700831  |             | 190 |
| 8618736  | 4804290  | 5512178  | 2988603  | 5151178  | 13152264 |             | 9   |
| 4543497  | 6505186  | 9383606  | 3986787  | 3905171  | 784427.1 |             | 9   |
| 2041062  | 2608745  | 2072721  | 978112.9 | 1860535  | 2302430  |             | 4   |
| 2442717  | 2451278  | 2636917  | 2097917  | 2185387  | 1404586  |             | 4   |
| 4695101  | 7416689  | 5488095  | 4119448  | 4940355  | 5373044  | [M+Na+K]+   | 15  |
| 28994592 | 9826097  | 2840565  | 26078925 | 6586739  | 24678679 |             | 1   |
| 61920.93 | 91909.95 | 110357.6 | 66850.64 | 73604.29 | 135460.5 | [986][M+2]+ | 110 |
| 1342970  | 2671040  | 1815848  | 1039033  | 1923137  | 2179821  |             | 9   |
| 1834611  | 3090906  | 55534735 | 33354581 | 1606961  | 1503391  |             | 4   |
| 571478.7 | 722857.3 | 876545.2 | 803696.1 | 648800.6 | 374079   | [2M+H+Na    | 134 |
| 7276599  | 8711008  | 5869662  | 5521561  | 6620523  | 13294402 | [435][M+2]+ | 2   |
| 1604630  | 1326306  | 2245886  | 1008020  | 1864515  | 4058709  |             | 2   |
| 1077038  | 393484   | 471478.6 | 424765.2 | 616462.2 | 581330.9 |             | 20  |
| 2942218  | 3070896  | 2044340  | 2082546  | 3096342  | 2440703  |             | 4   |
| 1672974  | 1943371  | 1420088  | 1182547  | 1391831  | 1055390  |             | 4   |
| 4182420  | 2222618  | 366459.5 | 3671898  | 6843813  | 5513215  | [M+K]+ 570  | 11  |
| 10026729 | 10335758 | 5202228  | 7362966  | 11088207 | 13225918 | [3M+H+Na    | 13  |
| 3640158  | 4356844  | 4730950  | 2335611  | 2916696  | 1440786  |             | 9   |
| 3133495  | 2589415  | 3469642  | 3719962  | 1393427  | 2906639  |             | 69  |
| 1645486  | 8329281  | 8077241  | 1348031  | 1164301  | 102724.6 | [M+K]+ 330  | 5   |
| 926749.8 | 1202524  | 1860469  | 438330.7 | 496374   | 616007.9 | [2M+K]+ 290 | 41  |
| 541192.1 | 1461548  | 1093240  | 946022.4 | 719596.8 | 740132.6 |             | 39  |
| 67030809 | 1.04E+08 | 87524282 | 48171537 | 65974981 | 1.18E+08 | [780][M]+   | 4   |
| 2430533  | 584641.6 | 104194.3 | 1810975  | 1323386  | 895695.6 |             | 44  |
| 55864451 | 43064006 | 51245095 | 48267222 | 47807729 | 50366088 | [1260][M]+  | 2   |
| 642020.1 | 2522843  | 2465697  | 1569067  | 1838990  | 2357295  |             | 9   |
| 10978820 | 6306072  | 7675241  | 6025137  | 8567589  | 6261449  |             | 2   |
| 2661984  | 2978721  | 4713826  | 4388324  | 2178286  | 2466851  | [65][M+2]3+ | 1   |
| 26029111 | 39433531 | 22370092 | 24897563 | 39267067 | 40121419 |             | 2   |
| 29395850 | 20443461 | 16389481 | 26792812 | 11631734 | 15782228 | [245][M]+   | 133 |

|          |          |          |          |          |          |                                                |     |
|----------|----------|----------|----------|----------|----------|------------------------------------------------|-----|
| 5199530  | 1797590  | 5892102  | 3804269  | 4031470  | 3220776  |                                                | 4   |
| 848831.7 | 1137729  | 1063749  | 6241302  | 944835.7 | 17267026 | [M+H] <sup>+</sup> 380                         | 21  |
| 5695291  | 7219585  | 10522545 | 5427833  | 4638877  | 2087659  |                                                | 9   |
| 158905.3 | 1.19E+08 | 154198.3 | 166312.8 | 1.24E+08 | 66170305 |                                                | 55  |
| 682116.3 | 762703.6 | 937257.9 | 684361.9 | 934399.6 | 264378.1 | [1004][M] <sup>+</sup>                         | 305 |
| 365336.9 | 437490.3 | 473207   | 437112.8 | 315028   | 329901.5 | [1408][M] <sup>2+</sup> [M+Na+K] <sup>2+</sup> | 23  |
| 723160.9 | 1380088  | 3057526  | 686069.5 | 729470.6 | 103725.3 |                                                | 9   |
| 1714071  | 3156411  | 1867260  | 1645139  | 3027777  | 1649472  | [3M+Na+K] <sup>+</sup>                         | 93  |
| 966843.2 | 1232663  | 652838.8 | 361434.1 | 572899.9 | 848325.6 | [M+K+NaCl] <sup>+</sup>                        | 5   |
| 5344306  | 3078877  | 5592600  | 3213278  | 3340293  | 2920148  |                                                | 347 |
| 33564440 | 44313648 | 16807051 | 23130559 | 17889148 | 27757004 |                                                | 61  |
| 9865700  | 5248992  | 8459772  | 9231959  | 5003769  | 5663309  |                                                | 2   |
| 304966.2 | 164460.6 | 340299.5 | 247299.3 | 190548.7 | 199860.6 |                                                | 61  |
| 1965101  | 2599452  | 1896830  | 885353.9 | 1090371  | 1724770  |                                                | 4   |
| 1458275  | 1594421  | 2128135  | 1194347  | 1006255  | 841536   |                                                | 9   |
| 6967564  | 7586780  | 3799961  | 5774190  | 8722474  | 5212667  |                                                | 2   |
| 730661.7 | 764992.2 | 723433.4 | 1673309  | 728684.6 | 532207.3 | [M+H-H <sub>2</sub> O] <sup>+</sup>            | 38  |
| 5752518  | 9175459  | 6798129  | 4917716  | 8189828  | 13096848 |                                                | 21  |
| 192690.8 | 72303.49 | 518723.9 | 464317   | 521996.5 | 783570.6 |                                                | 7   |
| 2568312  | 3527828  | 2052108  | 2613237  | 2056028  | 1333503  |                                                | 29  |
| 2131346  | 2982996  | 2097019  | 2191061  | 2146174  | 3495951  |                                                | 325 |
| 2651516  | 499589.5 | 3626873  | 3556192  | 344440.9 | 548031.2 |                                                | 9   |
| 36016331 | 2109957  | 1719245  | 34662633 | 2784885  | 20732486 | [439][M+1] <sup>2+</sup>                       | 2   |
| 4730782  | 3628823  | 3766514  | 4717942  | 4399681  | 4841426  | [3M+2Na+I] <sup>+</sup>                        | 382 |
| 4316905  | 8389657  | 2915849  | 4463451  | 3481208  | 4088970  |                                                | 468 |
| 7523980  | 11418697 | 8930654  | 8143333  | 15276752 | 6814520  |                                                | 1   |
| 4076247  | 4625029  | 2781467  | 4300585  | 3609428  | 1500385  | [3M+H+K] <sup>2+</sup>                         | 29  |
| 3961323  | 1608329  | 4589367  | 2975292  | 5448089  | 1747243  | [1187][M+2] <sup>2+</sup>                      | 2   |
| 436345.8 | 318257.8 | 344694.8 | 553585.6 | 148763.1 | 184050.9 | [1094][M+1] <sup>+</sup>                       | 16  |
| 1535204  | 4382073  | 7202135  | 1170759  | 2066783  | 2544887  |                                                | 9   |
| 10715654 | 5723706  | 6773266  | 13947959 | 7024514  | 1137323  | [M+H-CH <sub>2</sub> ] <sup>+</sup>            | 13  |
| 681768.7 | 5949852  | 5718560  | 5665039  | 5807768  | 5966742  |                                                | 293 |
| 875461.2 | 997625.3 | 772763   | 894696.9 | 1246299  | 1046779  |                                                | 9   |
| 1357524  | 1498854  | 1934667  | 1358118  | 1439727  | 984902.6 |                                                | 4   |
| 656282.2 | 1880127  | 863369.1 | 724386.9 | 994055.6 | 1521389  | [M+H] <sup>+</sup> 600                         | 81  |



|          |          |          |          |          |          |                      |     |
|----------|----------|----------|----------|----------|----------|----------------------|-----|
| 647228.8 | 341023.5 | 481872   | 420411.8 | 701051.4 | 83635.79 |                      | 91  |
| 1391183  | 1570944  | 1012439  | 1648810  | 860974.2 | 4634888  | [3M+2Na+I            | 15  |
| 325816   | 147046.2 | 639222   | 486138.5 | 1092271  | 1349743  | [M+Na+2K·            | 8   |
| 16722108 | 19309744 | 21837190 | 12028151 | 11738739 | 9800649  | [167][M+1]3+         | 18  |
| 1879383  | 2060523  | 2172854  | 1866600  | 1823440  | 1193853  |                      | 4   |
| 4688568  | 5071601  | 4994638  | 3522031  | 4209752  | 2273370  |                      | 9   |
| 5196991  | 8540883  | 2142790  | 1816094  | 5093641  | 4664752  | [M+H+Na]z            | 15  |
| 4.26E+08 | 4.81E+08 | 4.73E+08 | 3.24E+08 | 4.93E+08 | 5.91E+08 | [1180][M]+           | 17  |
| 2161959  | 2956368  | 2197192  | 1380351  | 1541491  | 3518045  | [893][M+1]+          | 116 |
| 4507410  | 4032641  | 5555429  | 4250079  | 2924658  | 4189006  |                      | 372 |
| 34682161 | 51693992 | 52300048 | 31720745 | 30118939 | 35617704 | [M+H]+ 38:           | 18  |
| 609324.5 | 48084.09 | 783220.7 | 890507.4 | 1063892  | 1915512  |                      | 8   |
| 58004175 | 72028441 | 28364460 | 40100621 | 28349620 | 44159651 | [646][M]+            | 125 |
| 422042   | 940011.9 | 850952.3 | 348951.6 | 822786.1 | 698260.9 |                      | 118 |
| 1555510  | 3668872  | 4004083  | 1086915  | 2110371  | 2682633  | [513][M]2+           | 9   |
| 57429111 | 69875545 | 53450244 | 43145390 | 48995216 | 71999618 | [989][M]+ [M+Na]+ 5: | 116 |
| 1486228  | 3533683  | 4284942  | 6290933  | 2874165  | 3382564  |                      | 272 |
| 6578248  | 6806283  | 6120834  | 6251673  | 7482288  | 9285171  |                      | 418 |
| 15058522 | 10416074 | 4474448  | 13431894 | 16966424 | 26222762 | [M+H]+ 50:           | 11  |
| 525535.6 | 853749.7 | 704577.1 | 992537.2 | 381591.9 | 930556.7 | [1068][M+1]2+        | 9   |
| 38225558 | 29238696 | 30698777 | 34971977 | 27330949 | 11568259 |                      | 2   |
| 642911.7 | 269195.6 | 1467719  | 936112   | 684609.2 | 2364697  |                      | 9   |
| 4943047  | 8894632  | 5026307  | 3433432  | 2727430  | 3548200  |                      | 295 |
| 1987854  | 1980764  | 467560.9 | 2024533  | 1959457  | 2672246  |                      | 385 |
| 943030.1 | 1491082  | 1263270  | 759432.6 | 980497.3 | 391964.9 |                      | 9   |
| 7700354  | 7858454  | 4611101  | 7470947  | 5486694  | 6545116  |                      | 13  |
| 3701678  | 1147168  | 3055146  | 3938990  | 1633515  | 114565.2 |                      | 2   |
| 13560281 | 18270577 | 11185641 | 10500145 | 15277491 | 17310693 |                      | 2   |
| 3924307  | 11974167 | 12654158 | 5394982  | 3422104  | 4606725  | [M+K]+ 25:           | 41  |
| 1864327  | 3642926  | 4094153  | 1690127  | 2251558  | 2252820  | [3M+2K-H]            | 8   |
| 7022985  | 9697150  | 6459926  | 6079597  | 6946878  | 14520071 |                      | 2   |
| 1585215  | 0        | 1436032  | 1908892  | 2020491  | 2477129  | [M+K]+ 72:           | 13  |
| 15529680 | 12329700 | 10817335 | 12803566 | 14874655 | 19242365 |                      | 2   |
| 3166515  | 5848485  | 4126543  | 4705149  | 6425139  | 1110501  |                      | 2   |
| 12320450 | 17180711 | 6139907  | 7604854  | 5771387  | 9249662  |                      | 137 |

|          |          |          |          |          |          |              |     |
|----------|----------|----------|----------|----------|----------|--------------|-----|
| 280064.3 | 325908.6 | 232538.2 | 529362.3 | 279054.5 | 171834.4 |              | 100 |
| 1353116  | 2298965  | 3006421  | 931759.7 | 1429800  | 1018918  | [178][M+1]2+ | 9   |
| 432052.4 | 289015.9 | 284387.2 | 396437.7 | 184197.3 | 673871.5 |              | 81  |
| 564426.4 | 924510.5 | 556107.8 | 719776.7 | 344290.4 | 488587.5 | [M+H]+ 40    | 342 |
| 2745094  | 3167871  | 2798107  | 1567503  | 2345605  | 6005717  |              | 355 |
| 2218048  | 1312697  | 691513.4 | 2228635  | 3198460  | 1035699  |              | 455 |
| 424922.3 | 820725.3 | 641949.1 | 423909.3 | 496706.4 | 0        |              | 9   |
| 19743910 | 29383187 | 15636887 | 12174798 | 13070787 | 15917544 | [958][M+1]+  | 101 |
| 1574071  | 2055635  | 1346674  | 784953.9 | 1536067  | 1748351  |              | 4   |
| 1715946  | 164027.4 | 664981.5 | 969141.9 | 899996.2 | 0        |              | 1   |
| 2466988  | 1877974  | 3482219  | 8439255  | 4135635  | 2622305  | [1505][M]+   | 308 |
| 476618.7 | 829169   | 894779.6 | 436400.1 | 570393.7 | 350380.9 |              | 8   |
| 19751910 | 25225914 | 23647443 | 15839186 | 15635808 | 18794576 |              | 4   |
| 989471.4 | 37834192 | 798821.2 | 2304048  | 1419414  | 11303851 | [M+K]+ 19    | 3   |
| 1552112  | 563802.2 | 636910.1 | 1053364  | 806347.2 | 538689   |              | 20  |
| 1824607  | 4748673  | 1883893  | 1333682  | 1811891  | 0        |              | 2   |
| 9560245  | 12302243 | 2209632  | 6722747  | 14507019 | 7258754  | [M+H-C2H4    | 21  |
| 1127263  | 1641801  | 1469487  | 937797   | 1086113  | 2429551  |              | 4   |
| 39684022 | 14635250 | 7772258  | 64919233 | 13249348 | 9200370  | [M+H]+ 25    | 12  |
| 29117927 | 40978114 | 55262615 | 23508268 | 28393779 | 11945256 |              | 9   |
| 2274147  | 4073697  | 2851937  | 1314088  | 2666675  | 4037260  |              | 9   |
| 160103.9 | 129273.2 | 906097.8 | 675122.2 | 604985.2 | 528443.1 |              | 72  |
| 857690.5 | 601094.6 | 217610.2 | 512573.4 | 210331.4 | 376896.7 |              | 309 |
| 5300877  | 6031371  | 4265836  | 5148593  | 2001728  | 2283123  | [M+H]+ 48    | 97  |
| 2319370  | 2751980  | 1567226  | 2349764  | 877019.8 | 3779206  | [1182][M+1]+ | 38  |
| 565362.3 | 928336.6 | 737294.8 | 584495.1 | 799992.3 | 1098726  |              | 8   |
| 542155.8 | 2114548  | 647668.6 | 403677.3 | 2291238  | 4020478  |              | 2   |
| 3587718  | 3504210  | 331860.4 | 3508411  | 6309652  | 3394446  |              | 3   |
| 2742065  | 3657754  | 5205947  | 2035245  | 2300554  | 658952.3 |              | 9   |
| 7448384  | 11074342 | 52138395 | 6345926  | 79423179 | 16395132 |              | 13  |
| 11149578 | 11068620 | 7321080  | 30555694 | 365523.6 | 6319643  |              | 79  |
| 4609246  | 8147073  | 4844625  | 2638780  | 5843263  | 4109648  |              | 9   |
| 13546710 | 11436759 | 3458727  | 14458716 | 13846632 | 13590883 | [3M+3Na+]    | 3   |
| 21939112 | 18912504 | 20174918 | 22599867 | 24471057 | 12896443 |              | 2   |
| 2491909  | 3412190  | 2603178  | 1817101  | 2630414  | 624834.2 |              | 9   |

|          |          |          |          |          |          |               |     |
|----------|----------|----------|----------|----------|----------|---------------|-----|
| 4333810  | 5691551  | 4641586  | 4172533  | 6251255  | 4493855  |               | 9   |
| 6290288  | 6128937  | 7237436  | 5402382  | 6571709  | 1293371  |               | 9   |
| 1027375  | 474428.2 | 1458293  | 1101865  | 672491.8 | 212811.2 |               | 4   |
| 6474888  | 6460421  | 6514010  | 5245091  | 8678645  | 6051939  | [3M+2Na]2     | 199 |
| 506362.3 | 241025   | 566747.5 | 947731.5 | 632569   | 566648   | [M+H+CF3O]    | 35  |
| 50042012 | 66834007 | 99901128 | 45204863 | 46203919 | 33600052 |               | 80  |
| 1084175  | 977894.8 | 551057.6 | 4491333  | 1135913  | 172112.5 |               | 142 |
| 403373.8 | 368589.2 | 1009609  | 862724.3 | 284936.5 | 156162.3 | [M+H-H2O]     | 51  |
| 3050561  | 3618579  | 4984533  | 3306834  | 2593513  | 165858.6 |               | 9   |
| 1750119  | 2625403  | 2005341  | 1751709  | 1900764  | 4444502  |               | 9   |
| 1832480  | 3156734  | 4822517  | 5622125  | 3795297  | 3427589  |               | 2   |
| 688115.9 | 2448084  | 576909.3 | 452667.5 | 1164489  | 757234.1 |               | 475 |
| 1163825  | 1333590  | 224023.6 | 1554939  | 1096648  | 3915013  | [M+Na+3K]     | 21  |
| 1729834  | 2162451  | 1767632  | 908333.1 | 1989931  | 3082682  |               | 4   |
| 3289452  | 4281835  | 3267165  | 2355113  | 3442705  | 5519341  |               | 4   |
| 3047973  | 2807638  | 3806130  | 2363109  | 2516100  | 1468411  |               | 9   |
| 26192330 | 32782727 | 30762052 | 21451680 | 25369883 | 19815449 | [961][M]+     | 9   |
| 686313.1 | 1170269  | 1326037  | 878311.9 | 706094.8 | 690878.2 |               | 9   |
| 4135391  | 4188823  | 5558318  | 4126282  | 5037717  | 2597130  | [64][M]2+     | 17  |
| 901619.4 | 1559367  | 1122519  | 827603.9 | 1509850  | 542961.2 |               | 1   |
| 250990.9 | 295476.6 | 257448.5 | 460007.3 | 184250.2 | 104420.4 | [3M+2K-H]     | 86  |
| 1641552  | 1978441  | 1972662  | 1429590  | 1611404  | 1105303  |               | 4   |
| 18340990 | 1.02E+10 | 9.99E+09 | 13359203 | 11799396 | 4.69E+09 | [663][M]+     | 4   |
| 1.34E+08 | 1.1E+08  | 1.34E+08 | 1.3E+08  | 99050941 | 1.07E+08 | [73][M]+      | 61  |
| 1491111  | 2325688  | 1981595  | 984948   | 1790072  | 2142378  | [1063][M+1]3+ | 9   |
| 1390766  | 1552368  | 516519.2 | 2561198  | 758955.3 | 3527235  |               | 342 |
| 4041420  | 3106713  | 5797648  | 2800178  | 2277046  | 1028539  |               | 1   |
| 5714650  | 4740205  | 4179915  | 4471412  | 4400773  | 4150232  |               | 419 |
| 12139872 | 16499032 | 9401784  | 15019019 | 13860518 | 11315906 |               | 15  |
| 805615.1 | 496190.5 | 587945.5 | 305569.3 | 658278.2 | 119205.8 |               | 91  |
| 2034608  | 1264254  | 746789.8 | 2819559  | 1242904  | 0        |               | 2   |
| 15222672 | 20973141 | 23272178 | 17396073 | 13369381 | 27302562 | [1125][M]+    | 89  |
| 503117.2 | 556804.1 | 443206.7 | 450221.7 | 498940.7 | 450885.3 | [369][M+1]+   | 240 |
| 8533835  | 8345490  | 8475105  | 8216310  | 9338913  | 5395761  |               | 295 |
| 10435414 | 13228289 | 8582061  | 8709958  | 10421159 | 13708475 | [M+Na]+ 4I    | 15  |

|          |          |          |          |          |          |              |     |
|----------|----------|----------|----------|----------|----------|--------------|-----|
| 943064.9 | 2042339  | 1506298  | 1050250  | 1768648  | 808057.7 |              | 9   |
| 4800328  | 8485835  | 7862463  | 7148053  | 5753503  | 5293042  | [672][M]2+   | 18  |
| 14918152 | 18569943 | 13889646 | 10505042 | 12231332 | 19742991 | [989][M+1]+  | 116 |
| 383756   | 575057.9 | 657181   | 320434.1 | 390970.6 | 211850.7 |              | 9   |
| 935029.6 | 628599.4 | 279533   | 518068.2 | 688816   | 161900.2 |              | 4   |
| 5816906  | 5016810  | 5766115  | 3148631  | 5814889  | 8160016  |              | 314 |
| 1096801  | 1208230  | 1386584  | 942460.7 | 991546.7 | 543625.4 |              | 4   |
| 1853314  | 900241.3 | 4294415  | 1413602  | 4674534  | 1647923  |              | 29  |
| 855737   | 1964316  | 1138490  | 850281.4 | 1472599  | 2233823  |              | 4   |
| 2337985  | 2801769  | 857511   | 465033.4 | 1927989  | 408899   |              | 4   |
| 1347555  | 2288630  | 1281605  | 1205783  | 1308940  | 2786991  |              | 13  |
| 1207563  | 3094603  | 913914.9 | 807284   | 1830875  | 3421551  |              | 4   |
| 897035.2 | 1292416  | 1115209  | 564196.1 | 754197.6 | 267508.2 |              | 8   |
| 4522731  | 5556714  | 6485414  | 4039765  | 4344167  | 2628741  |              | 35  |
| 2014775  | 3209937  | 2978907  | 1311408  | 2089553  | 1878234  |              | 9   |
| 515361   | 509980.6 | 614311   | 529546.4 | 588602   | 173992.6 |              | 4   |
| 4450620  | 1262941  | 1262172  | 2339915  | 3402627  | 3952813  |              | 1   |
| 482748.8 | 718270.9 | 186209.4 | 438643   | 1294791  | 926932.4 | [181][M+1]+  | 218 |
| 7594460  | 5849186  | 9331171  | 9110953  | 7847930  | 4924289  | [1308][M]+   | 275 |
| 788204   | 545299.8 | 1215699  | 1302199  | 594901.5 | 290226.9 | [1487][M]+   | 495 |
| 518905   | 333607.8 | 586741.3 | 3471528  | 347362.1 | 3013700  |              | 4   |
| 122572.9 | 290565.1 | 160091.9 | 432697.7 | 311339   | 186900.7 | [M+K]+ 230   | 28  |
| 1172649  | 629141.7 | 189304.6 | 230811.9 | 780557.9 | 1649024  | [M+2Na-H]    | 41  |
| 12794740 | 18477966 | 13567233 | 8595284  | 12464710 | 24372338 |              | 4   |
| 1492332  | 1209768  | 4868334  | 594712.7 | 1099395  | 1955505  | [M+2H]2+     | 15  |
| 1728503  | 15298687 | 13415587 | 10786152 | 8900032  | 8341761  | [37][M]+     | 1   |
| 986509.5 | 1492713  | 1404522  | 691150.6 | 989953.5 | 354345.9 | [M+Na]+ 3:   | 8   |
| 5794175  | 3786221  | 4787563  | 5390112  | 4346060  | 5085768  |              | 2   |
| 17026014 | 11494801 | 12259416 | 16546804 | 6016586  | 5647909  | [1209][M]+   | 57  |
| 1658319  | 3646633  | 3346385  | 1435771  | 1511655  | 894538.3 |              | 9   |
| 1657767  | 6133382  | 6771918  | 10046749 | 7485147  | 18641410 | [M+K]+ 45:   | 11  |
| 568722   | 3822382  | 7806136  | 717899.8 | 494555.7 | 1599678  | [520][M+1]2+ | 52  |
| 1280154  | 2447817  | 1240699  | 894750   | 1581594  | 3458236  |              | 1   |
| 12199306 | 8979110  | 7141537  | 15550231 | 10337539 | 9423582  | [1060][M+2]+ | 1   |
| 3238620  | 345961.2 | 3094411  | 2051939  | 3115163  | 3444688  |              | 14  |

|          |          |          |          |          |          |                     |     |
|----------|----------|----------|----------|----------|----------|---------------------|-----|
| 14919786 | 18326422 | 14046542 | 13171652 | 17070954 | 20399841 | [1369][M+1]+        | 2   |
| 512022.5 | 799348.3 | 1260857  | 459507.9 | 482949.3 | 174072.4 |                     | 9   |
| 1086597  | 1433897  | 2839086  | 906849   | 858637.2 | 473768.3 |                     | 9   |
| 4708470  | 8974513  | 4062500  | 4753130  | 4585987  | 3145375  |                     | 458 |
| 996456.6 | 1857317  | 886363.9 | 959577.1 | 712032   | 1143723  |                     | 206 |
| 575345.6 | 2615535  | 732340.4 | 437523.4 | 355513   | 719671.2 |                     | 32  |
| 6329667  | 6573352  | 8077800  | 12797789 | 3441274  | 3715004  |                     | 87  |
| 4662943  | 2756813  | 3720384  | 3879425  | 2322845  | 10214277 |                     | 2   |
| 3289821  | 7191223  | 2311036  | 7605407  | 6891055  | 5120769  |                     | 2   |
| 3060834  | 3376916  | 3364543  | 5550397  | 4219572  | 3683380  |                     | 434 |
| 3006449  | 1985449  | 1772779  | 3901461  | 3218894  | 1337819  | [M+Na+NH            | 14  |
| 896599.3 | 1341513  | 540769.8 | 392699.7 | 995079.5 | 881844.6 | [M+K]+ 32:          | 8   |
| 27666789 | 40424296 | 54323330 | 22244169 | 27456434 | 11217755 |                     | 9   |
| 7114213  | 6616665  | 6482204  | 6224328  | 5154691  | 10422161 |                     | 2   |
| 1334335  | 1190653  | 1243431  | 213732.2 | 1132264  | 181489.7 | [1111][M+2]+        | 150 |
| 1027841  | 1625703  | 1748730  | 850788.5 | 1034454  | 604974.7 | [M+K]+ 43:          | 13  |
| 4185350  | 5717986  | 2728225  | 1146829  | 4124262  | 2825170  |                     | 9   |
| 7982306  | 21537952 | 22861254 | 5802107  | 11060130 | 19447051 |                     | 9   |
| 4245545  | 1212859  | 3171399  | 3118211  | 5036332  | 1208919  | [768][M+2]+         | 49  |
| 18536809 | 50185417 | 16400835 | 11998708 | 27403269 | 50517725 | [M+H-CH4]           | 3   |
| 48276997 | 1.03E+08 | 2908203  | 1094154  | 295301.2 | 817114   | [129][M]2+ [M+2H]2+ | 16  |
| 2360895  | 3567139  | 2633512  | 1628739  | 2846869  | 3846374  |                     | 9   |
| 1762467  | 3400528  | 482088.8 | 2441709  | 5262100  | 3198758  |                     | 21  |
| 11010755 | 17829522 | 33696765 | 8866796  | 15341534 | 3611968  |                     | 175 |
| 9227768  | 6794233  | 6582248  | 5248799  | 6745281  | 6477533  |                     | 230 |
| 2.18E+08 | 2.35E+08 | 2.1E+08  | 1.33E+08 | 2.06E+08 | 2.55E+08 | [1304][M+1]+        | 51  |
| 370960.6 | 583673.1 | 608059.8 | 494011.8 | 259585.9 | 529420.7 | [1602][M+1]+        | 121 |
| 963586   | 11079778 | 2899722  | 9458582  | 4757578  | 13622156 | [M+H-C6H:           | 11  |
| 30552.38 | 897124.8 | 1127079  | 17768.78 | 832036.6 | 535361.7 | [M+H]+ 54!          | 18  |
| 5796420  | 6839672  | 4442372  | 5935409  | 3740668  | 4097056  | [214][M]+           | 124 |
| 733841.2 | 1559941  | 1344137  | 671560.1 | 1026255  | 1427160  |                     | 42  |
| 4905248  | 5069249  | 1149917  | 3889453  | 5242215  | 8390154  | [M+H]+ 41!          | 356 |
| 3985677  | 4270486  | 5990591  | 3046066  | 2954866  | 1653026  |                     | 9   |
| 2199317  | 1890391  | 783520.4 | 1544410  | 1202028  | 1982724  |                     | 1   |
| 0        | 696163.8 | 826479.1 | 260869.3 | 384934.2 | 599026.5 |                     | 9   |

|          |          |          |          |          |          |                                               |     |
|----------|----------|----------|----------|----------|----------|-----------------------------------------------|-----|
| 8700681  | 2656074  | 1207763  | 1071131  | 667601.3 | 3883901  |                                               | 9   |
| 3308505  | 3570352  | 4728386  | 4323400  | 1842184  | 328334.9 |                                               | 2   |
| 666797.2 | 697551.9 | 910929.9 | 969510.5 | 43507.93 | 493798.2 |                                               | 218 |
| 2443458  | 1273037  | 2473192  | 1836868  | 3434337  | 1410779  |                                               | 2   |
| 16504976 | 23226985 | 20510959 | 15069159 | 17154542 | 11941085 | [M+H] <sup>+</sup> 430                        | 38  |
| 3721404  | 5184278  | 4757159  | 4433870  | 4462658  | 2404876  | [154][M] <sup>+</sup> [M+H+HCC                | 288 |
| 4224514  | 10029473 | 3655332  | 1694533  | 8193065  | 8925653  | [M+Na+NH                                      | 3   |
| 2342470  | 10860911 | 4245312  | 4021466  | 7852215  | 4160263  | [919][M] <sup>+</sup>                         | 1   |
| 6502277  | 2765253  | 6206824  | 7882131  | 2724569  | 0        |                                               | 2   |
| 32146380 | 29153217 | 31543625 | 32321639 | 35837691 | 17803897 |                                               | 2   |
| 881710   | 846679.6 | 1164568  | 791932.5 | 923657.3 | 251008.8 | [710][M+1] <sup>+</sup>                       | 4   |
| 744554.7 | 715928.6 | 4917812  | 3467642  | 821230.2 | 334835.7 |                                               | 4   |
| 638063.2 | 350852.3 | 993036.6 | 756531.3 | 680671.4 | 82197.36 | [1474][M+1] <sup>+</sup>                      | 62  |
| 1.51E+10 | 2.25E+10 | 1.51E+10 | 1.49E+10 | 1.45E+10 | 2.24E+10 | [855][M] <sup>+</sup> [M+Na] <sup>+</sup> 4!  | 3   |
| 2265894  | 3312214  | 414525.8 | 1644776  | 3424229  | 1145236  | [M+Na] <sup>+</sup> 2!                        | 3   |
| 10902025 | 16940042 | 12450807 | 7615389  | 12771399 | 18259328 |                                               | 9   |
| 238624.9 | 428016   | 299453.8 | 0        | 398490   | 877614.1 | [M+K+NH3                                      | 5   |
| 5478827  | 5777295  | 4438354  | 5776571  | 3654678  | 3809041  | [M+Na] <sup>+</sup> 3!                        | 18  |
| 6263275  | 13455410 | 7873843  | 2191225  | 16756315 | 11179085 | [M+H] <sup>+</sup> 20!                        | 6   |
| 4582296  | 10769396 | 9906965  | 3270577  | 6152124  | 10081108 |                                               | 9   |
| 4521870  | 6013655  | 3928465  | 4324564  | 3959191  | 4930932  | [1075][M] <sup>+</sup> [M+K] <sup>+</sup> 56! | 58  |
| 3953438  | 424079.9 | 1570952  | 6420858  | 135287.5 | 402320.3 |                                               | 273 |
| 2061431  | 4624436  | 8210372  | 2337931  | 2859543  | 2088851  | [1456][M+1] <sup>+</sup>                      | 9   |
| 1.82E+08 | 1922442  | 2.1E+08  | 3.78E+08 | 1.84E+08 | 1.26E+08 |                                               | 20  |
| 2783451  | 1037358  | 94441.16 | 1030046  | 2466707  | 2788364  | [3M+2H] <sup>2+</sup>                         | 21  |
| 24585379 | 16013391 | 10848737 | 22604661 | 10909243 | 6981143  | [280][M] <sup>+</sup>                         | 219 |
| 6307558  | 4259988  | 6808392  | 7504987  | 6199946  | 3634921  | [1128][M+1] <sup>+</sup>                      | 196 |
| 2774247  | 1013411  | 1316979  | 1187030  | 1503166  | 318501.7 | [M+K] <sup>+</sup> 38!                        | 15  |
| 789048.1 | 1003650  | 1247070  | 804904.4 | 968438.3 | 259871.8 | [1010][M+1] <sup>+</sup>                      | 16  |
| 3247662  | 2043127  | 1733315  | 1645461  | 3248088  | 686154.3 |                                               | 1   |
| 5614130  | 6303613  | 3539240  | 5501652  | 5109718  | 3006667  |                                               | 208 |
| 46165453 | 56144977 | 71872133 | 48447873 | 48847271 | 35700177 |                                               | 9   |
| 1217789  | 3373461  | 138350.1 | 983721.9 | 1102843  | 2147813  | [M+K] <sup>+</sup> 27!                        | 11  |
| 704858.6 | 497240.3 | 613475.4 | 621848.7 | 460310.2 | 611250.3 | [1430][M+2] <sup>+</sup>                      | 38  |
| 19320546 | 14335597 | 6084166  | 17734133 | 8719749  | 2749461  |                                               | 1   |

|          |          |          |          |          |          |                      |     |
|----------|----------|----------|----------|----------|----------|----------------------|-----|
| 6204697  | 952959.9 | 14995020 | 4667894  | 7584493  | 10486479 |                      | 9   |
| 4497055  | 6090349  | 2540379  | 1065965  | 5168278  | 2887349  |                      | 1   |
| 1351353  | 2868074  | 3431696  | 3215145  | 6242640  | 1028695  |                      | 1   |
| 4503641  | 5192314  | 4170998  | 6988281  | 8126245  | 4325999  |                      | 2   |
| 5.11E+08 | 5.38E+08 | 4.18E+08 | 4.66E+08 | 5.35E+08 | 5.33E+08 | [1309][M+1]+         | 2   |
| 26948248 | 16610374 | 29650681 | 32649197 | 25529752 | 14177812 | [1227][M]+ [M+H+NH3  | 185 |
| 824480.3 | 732906.1 | 1095171  | 903538.3 | 962733.8 | 626977.8 |                      | 186 |
| 1801134  | 1679560  | 1255125  | 960554   | 1318223  | 876170   |                      | 4   |
| 13863280 | 5502987  | 6971171  | 13758548 | 9824963  | 401307.1 | [3M+2K]2+            | 14  |
| 1254002  | 1045205  | 1938216  | 927975.4 | 1262655  | 4357129  |                      | 2   |
| 619783.1 | 857915.9 | 749012.6 | 253783.1 | 614123   | 1255364  | [601][M]2+ [M+H+Na]2 | 232 |
| 4881520  | 8312397  | 8207705  | 4605589  | 7460087  | 9309937  | [3M+2K]2+            | 121 |
| 24517557 | 6918890  | 11654588 | 26411480 | 6642572  | 4868531  | [3M+2H]2+            | 3   |
| 11545408 | 11072625 | 8077742  | 7669023  | 8356164  | 8530309  | [M+H-CH2]            | 29  |
| 4558234  | 4630550  | 5258061  | 3694760  | 4069299  | 2648528  |                      | 43  |
| 65754.57 | 149240   | 441596.8 | 56037.19 | 179692.6 | 278177   |                      | 39  |
| 1646634  | 5743277  | 4443157  | 3066857  | 1351947  | 806336.8 | [M+H-CO2]            | 93  |
| 895027.5 | 1911649  | 2937726  | 715664.4 | 989680.3 | 1050287  |                      | 9   |
| 3282850  | 2250375  | 1940565  | 2607235  | 3702997  | 217905.1 |                      | 1   |
| 2661355  | 3053481  | 2972206  | 2179836  | 2620201  | 1996573  | [568][M+1]+          | 25  |
| 0        | 570017.2 | 643030.7 | 133762.1 | 274422   | 222033   | [3M+Na]+             | 39  |
| 559859.7 | 544591.7 | 572522.4 | 314319.1 | 829961.9 | 443894   | [648][M+1]3+         | 4   |
| 349779.1 | 301561.7 | 223433.2 | 285799.4 | 286785.6 | 203644.3 | [1031][M+1]+         | 136 |
| 6895694  | 8698141  | 6869074  | 2882573  | 7910375  | 15028004 |                      | 2   |
| 286238.4 | 267401.3 | 573611.5 | 285008.9 | 60883.62 | 223912.5 | [105][M+1]+          | 157 |
| 3087754  | 3044930  | 5131439  | 13720349 | 4292688  | 757407.5 |                      | 1   |
| 1980647  | 3140816  | 2304486  | 667582.2 | 1557137  | 776192.7 |                      | 4   |
| 291181.9 | 263390.5 | 162017.1 | 177515.5 | 170125.9 | 353449.2 | [1188][M+1]+         | 17  |
| 5960972  | 5276774  | 5576729  | 5657851  | 5285373  | 5822062  | [228][M]2+           | 9   |
| 1839031  | 3904530  | 3293036  | 1223752  | 2346250  | 3471450  |                      | 9   |
| 526844.8 | 560678.4 | 4774649  | 3750534  | 849277.2 | 1426538  | [3M+Na+2I            | 8   |
| 1.3E+08  | 92303205 | 65124374 | 1.54E+08 | 89986197 | 1.3E+08  |                      | 19  |
| 2252115  | 3167099  | 1975300  | 2211494  | 1925967  | 468682.9 |                      | 93  |
| 1288128  | 1658827  | 1324355  | 1184888  | 982942.7 | 1873034  | [402][M+1]+          | 72  |
| 4041920  | 2998506  | 2917251  | 2044937  | 2441871  | 152761.8 | [1599][M]+ [2M+H]+ 6 | 169 |

|          |          |          |          |          |          |                      |     |
|----------|----------|----------|----------|----------|----------|----------------------|-----|
| 26878470 | 50330006 | 52386936 | 21893505 | 30343210 | 24126881 | [179][M]+            | 9   |
| 20569381 | 35208314 | 37665071 | 16075690 | 23584026 | 16351681 |                      | 9   |
| 4233690  | 4375226  | 4317000  | 3298151  | 3573084  | 2867553  |                      | 4   |
| 2466929  | 1987054  | 2165532  | 1745222  | 1969688  | 924810.4 |                      | 4   |
| 2077072  | 4455146  | 4068271  | 23685325 | 3266880  | 45801771 |                      | 3   |
| 1119342  | 1310106  | 1398372  | 947971.7 | 904774.8 | 533977   |                      | 4   |
| 1361746  | 1661345  | 1606762  | 1289478  | 1459625  | 0        |                      | 9   |
| 2524082  | 1962802  | 2365854  | 2765110  | 1461825  | 456496.4 | [383][M+1]+          | 204 |
| 10168566 | 22960989 | 27959911 | 11460577 | 8203232  | 23151035 | [3M+Na]+ :           | 20  |
| 5218865  | 3384597  | 11387248 | 5452108  | 4281169  | 4724061  | [829][M]+ [M+H]+ 46! | 288 |
| 16865828 | 27085220 | 15031863 | 10754096 | 11952233 | 14107449 | [1043][M+1]+         | 101 |
| 1951428  | 6794107  | 9893160  | 1314800  | 1496118  | 3235974  | [M+H-CH3]            | 20  |
| 28309789 | 21902102 | 6167316  | 14569979 | 38965353 | 30619595 | [M+K+HCO             | 3   |
| 699305.2 | 1337912  | 2185587  | 1072991  | 406456.1 | 1448702  |                      | 9   |
| 4667121  | 3181077  | 5529143  | 4638181  | 5001411  | 3997618  |                      | 402 |
| 1473128  | 1154217  | 1041273  | 648756.8 | 822676.3 | 356535   |                      | 77  |
| 1.31E+08 | 1.74E+08 | 2.09E+08 | 1.25E+08 | 1.35E+08 | 88672126 | [610][M+2]+          | 9   |
| 1884192  | 2126890  | 1937094  | 1069796  | 1232800  | 1481455  |                      | 4   |
| 193616   | 177022   | 266816.4 | 160628.1 | 172460.4 | 101244.5 | [M+K]+ 57!           | 43  |
| 3662384  | 1837693  | 4575149  | 5065263  | 2119102  | 1848408  | [250][M+1]+          | 171 |
| 1746852  | 1711584  | 1437407  | 1174567  | 1452232  | 771311.7 |                      | 4   |
| 409400.8 | 1019744  | 370110   | 648854.2 | 893055.8 | 2799839  |                      | 9   |
| 8214632  | 5517981  | 6142018  | 5906132  | 12796432 | 15710243 |                      | 2   |
| 2072214  | 3223084  | 3148336  | 1011254  | 3735804  | 1979147  | [1583][M+1]+         | 12  |
| 7033837  | 16896502 | 4863602  | 5368561  | 11250970 | 25828493 | [M+K+NH3             | 15  |
| 9924342  | 1095793  | 1392044  | 13304524 | 4250339  | 661551   |                      | 9   |
| 5135361  | 3856249  | 4893898  | 6421534  | 8893855  | 5471246  |                      | 293 |
| 743419.4 | 1088296  | 1390073  | 6229475  | 4262090  | 2291327  |                      | 11  |
| 1035382  | 1689115  | 1778768  | 1678871  | 691907.4 | 1458972  |                      | 57  |
| 1111313  | 358806.5 | 1270802  | 181943.9 | 806357.8 | 0        | [1568][M+1]+         | 109 |
| 7331223  | 5796546  | 51429656 | 3604175  | 6544195  | 53488539 |                      | 1   |
| 5682024  | 5395829  | 9539072  | 5364684  | 5366105  | 1784093  |                      | 451 |
| 789512   | 930598.7 | 509740.9 | 697275.3 | 922852.7 | 1893858  |                      | 4   |
| 1448257  | 904830.5 | 2058812  | 3505376  | 1430180  | 1099662  | [1505][M+1]+         | 308 |
| 1099275  | 2239998  | 15539903 | 1402805  | 1333552  | 1417624  |                      | 1   |



|          |          |          |          |          |          |                      |     |
|----------|----------|----------|----------|----------|----------|----------------------|-----|
| 2789074  | 1045535  | 2605492  | 2926121  | 2146351  | 6345336  |                      | 2   |
| 5964552  | 9530878  | 5336412  | 4291078  | 4368397  | 5083786  | [1013][M]+ [M+H]+ 55 | 101 |
| 1135090  | 987293.7 | 953070.1 | 750160.2 | 732193.7 | 1277159  |                      | 9   |
| 2128989  | 4035027  | 5975577  | 1736934  | 1719183  | 968751.5 |                      | 9   |
| 2732950  | 2063920  | 3026692  | 2309627  | 2882750  | 1598137  | [M+H-C5H8]           | 5   |
| 2725828  | 4446583  | 2586864  | 5512724  | 4465509  | 4748676  |                      | 2   |
| 440145.7 | 1536941  | 2656806  | 261652.3 | 563567.4 | 986399.1 |                      | 9   |
| 3512875  | 8334971  | 10756292 | 2613000  | 2199828  | 5302301  |                      | 41  |
| 801933.1 | 2167155  | 2683347  | 2825630  | 2016143  | 2346963  | [359][M+5]3+         | 2   |
| 497618.7 | 302015.7 | 386601.2 | 420450.4 | 389201.2 | 144639.6 |                      | 176 |
| 1238713  | 1346678  | 1506801  | 707486.4 | 803098.8 | 722626.7 |                      | 4   |
| 704201.8 | 0        | 2993449  | 651510.6 | 1152076  | 959881.1 |                      | 9   |
| 7318183  | 9971950  | 17382722 | 6843976  | 16272666 | 13131986 | [1243][M+1]2+        | 2   |
| 1.9E+08  | 2.05E+08 | 1.55E+08 | 1.86E+08 | 2.37E+08 | 2.45E+08 | [460][M]2+           | 2   |
| 3975200  | 3608098  | 734602.7 | 2871141  | 6012716  | 6975555  | [M+2H-CH3]           | 3   |
| 749261.9 | 507321.5 | 429181.6 | 495119.6 | 1046299  | 276619.2 | [M+Na]+ 4!           | 209 |
| 3643303  | 6060673  | 3860197  | 5434156  | 768931.3 | 3420360  |                      | 279 |
| 1006751  | 962131.8 | 177344.4 | 1027864  | 1440584  | 869142.5 | [M+K+HCO]            | 21  |
| 4946476  | 7489426  | 12760173 | 9353430  | 4047244  | 5792852  |                      | 1   |
| 392375.7 | 791997.5 | 436846.5 | 344283.2 | 95713.03 | 1044927  |                      | 4   |
| 622663   | 1054527  | 1232627  | 383246.2 | 682007.2 | 335693.8 | [967][M+1]+          | 9   |
| 786490   | 172532.4 | 1566020  | 105187.4 | 152269.9 | 0        |                      | 1   |
| 3129733  | 6133973  | 4298793  | 2961745  | 2082746  | 3055901  |                      | 5   |
| 2905611  | 4023317  | 3847386  | 3649318  | 3778965  | 3323896  | [M+K+HCO]            | 425 |
| 3782229  | 2722388  | 4191014  | 2391949  | 10335511 | 10501666 |                      | 1   |
| 780471.1 | 1324875  | 1950565  | 700249   | 811530.9 | 576403.5 | [952][M+1]+          | 9   |
| 9369463  | 39726360 | 7586261  | 9074331  | 8511200  | 13780125 |                      | 21  |
| 4342467  | 2935981  | 3948403  | 3728308  | 4093746  | 5751315  |                      | 325 |
| 4574491  | 1750042  | 4325095  | 4470485  | 1897315  | 1535541  | [407][M]3+           | 2   |
| 1339257  | 855832.8 | 922584.4 | 860607.8 | 609932.3 | 838132.2 |                      | 9   |
| 4849207  | 5438506  | 6264480  | 5766839  | 5754685  | 5435276  |                      | 405 |
| 3254381  | 1388189  | 2941705  | 2020133  | 2614836  | 15503.49 | [1359][M+1]+         | 150 |
| 35087193 | 22874854 | 2928313  | 25235895 | 22524521 | 22887893 | [M+H+NH3]            | 21  |
| 1212278  | 1593508  | 2774199  | 878288.2 | 1171093  | 1851051  |                      | 13  |
| 301271.7 | 375723.9 | 512449.8 | 280798.1 | 437279.9 | 540878.2 |                      | 42  |

|          |          |          |          |          |          |                      |     |
|----------|----------|----------|----------|----------|----------|----------------------|-----|
| 4424830  | 4050186  | 5011120  | 3696052  | 4012845  | 665351   | [M+Na+NH             | 13  |
| 3335067  | 3382771  | 3547078  | 4533294  | 3863053  | 3147499  | [M+2K]2+             | 83  |
| 7310743  | 8095864  | 4877504  | 6104573  | 7513760  | 3030365  |                      | 2   |
| 9977612  | 12842263 | 8841535  | 5772331  | 8925692  | 16855998 | [1419][M]+ [M+Na]+ 7 | 232 |
| 911290.2 | 707882.9 | 1079827  | 484006.1 | 718198.2 | 2273226  |                      | 4   |
| 12565008 | 14715345 | 11020632 | 10442509 | 14220796 | 15440540 |                      | 13  |
| 1.1E+08  | 81302249 | 70225334 | 94386132 | 62105176 | 74489419 | [229][M]+            | 108 |
| 36123503 | 38953534 | 44190521 | 31528135 | 33923924 | 22158353 | [1109][M+1]+         | 76  |
| 1956655  | 1366555  | 690806.3 | 466984.5 | 478090.5 | 1678084  |                      | 4   |
| 3758663  | 5125230  | 6978931  | 3347521  | 4281856  | 1404171  |                      | 9   |
| 1008986  | 1311269  | 1190154  | 1047108  | 1010314  | 448057.3 |                      | 4   |
| 1988417  | 703973.7 | 1492669  | 1284537  | 1491656  | 15601.35 | [1409][M]+           | 109 |
| 2990627  | 4799703  | 1725308  | 962444.6 | 2836240  | 1915214  |                      | 4   |
| 2642288  | 5323226  | 7046002  | 1943851  | 3411570  | 2953020  |                      | 9   |
| 4805070  | 5510791  | 5641849  | 4100973  | 4226762  | 5455605  | [1618][M+3]2+        | 2   |
| 8587149  | 14505754 | 15782272 | 6715090  | 9441246  | 6862864  | [344][M+1]2+         | 9   |
| 1126935  | 1385253  | 861712.6 | 1333597  | 1035616  | 1085761  | [1098][M]2+          | 366 |
| 5026594  | 5032578  | 5368748  | 6119477  | 4897129  | 4608628  |                      | 221 |
| 1501703  | 1616167  | 2471079  | 1258974  | 1025567  | 0        |                      | 9   |
| 859496.5 | 1103661  | 1216823  | 361009.8 | 1061729  | 637005.1 |                      | 121 |
| 12816843 | 7451499  | 1956750  | 7406731  | 16241453 | 5535970  |                      | 15  |
| 1054052  | 1121940  | 1073265  | 451582.3 | 626422.1 | 318900.8 |                      | 9   |
| 3136613  | 3215388  | 451946.5 | 3713357  | 5020309  | 3058104  |                      | 442 |
| 7757847  | 11330873 | 8085064  | 6362870  | 12189351 | 7963591  | [M+H+K]2+            | 15  |
| 3662026  | 2100314  | 2930505  | 2042562  | 2282328  | 75372.87 |                      | 68  |
| 4406894  | 2822577  | 4020281  | 2967691  | 2289899  | 4304420  |                      | 2   |
| 3298412  | 5101465  | 2970775  | 2074261  | 2277544  | 2874426  | [1396][M+1]+         | 101 |
| 10806000 | 14396263 | 10894137 | 7627778  | 11241798 | 17938346 | [551][M]+            | 4   |
| 4529548  | 3407282  | 4181319  | 25315870 | 3277058  | 21499041 |                      | 93  |
| 1060813  | 2788092  | 87242.69 | 1060996  | 987249.9 | 1265098  |                      | 41  |
| 894303.8 | 1065837  | 2050487  | 801245.3 | 759111.1 | 1098324  |                      | 9   |
| 5883258  | 1412904  | 499367.8 | 3636488  | 1851019  | 823332.3 |                      | 52  |
| 1113471  | 884075   | 677188.5 | 721095.9 | 932395.7 | 1841914  | [300][M]2+           | 227 |
| 1194138  | 2825691  | 2917364  | 781567.3 | 1293609  | 2404773  |                      | 9   |
| 7350591  | 2268700  | 3444213  | 6141428  | 4170614  | 2316333  | [1193][M+1]+         | 2   |

|          |          |          |          |          |          |                       |     |
|----------|----------|----------|----------|----------|----------|-----------------------|-----|
| 11855238 | 16158991 | 22000749 | 9125953  | 10226219 | 3546740  |                       | 9   |
| 2760333  | 4458803  | 1876514  | 1161210  | 1815994  | 2788762  |                       | 4   |
| 1466893  | 1747902  | 1037023  | 867728.9 | 995034.8 | 793235.9 |                       | 4   |
| 28353895 | 17212381 | 4401359  | 57003400 | 4411008  | 1020151  |                       | 155 |
| 1833886  | 2164390  | 2262388  | 1366076  | 1902585  | 1865294  |                       | 9   |
| 462275.5 | 829802   | 624669.9 | 569199.1 | 709599.8 | 114638.8 |                       | 4   |
| 302152.6 | 223122.2 | 333278.6 | 295058.5 | 270152.2 | 48407.82 | [332][M+1]3+          | 55  |
| 481872.4 | 1670528  | 2336679  | 960106.2 | 715264.7 | 1173806  |                       | 9   |
| 255179.9 | 1949031  | 3251653  | 0        | 1457061  | 555527.7 |                       | 1   |
| 1369216  | 2598692  | 2064261  | 2539477  | 1779418  | 3261031  | [1367][M+1]2+         | 2   |
| 7612378  | 14171417 | 16510298 | 6323134  | 7948778  | 5738760  |                       | 9   |
| 3845268  | 8025203  | 5523863  | 1090424  | 4749570  | 4247109  |                       | 226 |
| 3661533  | 4130371  | 4480477  | 2452441  | 4573368  | 3878686  | [1377][M]+ [M+Na]+ 70 | 42  |
| 25731598 | 41483284 | 57957380 | 18074369 | 38026493 | 13074233 | [1337][M]+            | 139 |
| 3794933  | 4843395  | 3415444  | 2289920  | 3334294  | 6185290  | [1419][M+1]+          | 232 |
| 546629.6 | 795636.3 | 978923.6 | 942622.2 | 450255.9 | 1202230  | [M+Na]+ 8:            | 16  |
| 5704419  | 4850617  | 5396188  | 4314707  | 5752643  | 6128243  | [413][M]2+            | 9   |
| 1586899  | 2312593  | 1856900  | 1307416  | 1933744  | 1345282  |                       | 9   |
| 1050848  | 3683070  | 364080.9 | 2571005  | 781115.1 | 824422.9 |                       | 291 |
| 20811549 | 35306442 | 37828996 | 16529611 | 23880790 | 16702733 |                       | 9   |
| 20418062 | 35549575 | 37371029 | 15790221 | 23688085 | 16629561 | [346][M]3+            | 9   |
| 8897660  | 5941863  | 3859791  | 6112236  | 7721540  | 3051662  |                       | 14  |
| 3761348  | 8691308  | 8232108  | 2725977  | 5384645  | 8188747  |                       | 9   |
| 3067029  | 3615440  | 4079091  | 4287561  | 3667825  | 680352.8 |                       | 9   |
| 3181578  | 1617660  | 3084812  | 4125127  | 1422033  | 0        | [459][M+1]+           | 2   |
| 25888083 | 32820892 | 30722082 | 21193330 | 25483281 | 19762735 |                       | 9   |
| 854588.6 | 1490939  | 1971408  | 810910.7 | 1032342  | 850760.9 |                       | 9   |
| 2158341  | 0        | 1840188  | 2055581  | 619177.8 | 4629641  |                       | 2   |
| 1760603  | 2665264  | 3811018  | 1298298  | 1810673  | 677966.9 |                       | 9   |
| 1.08E+09 | 1.92E+09 | 1.47E+09 | 9.59E+08 | 1.15E+09 | 1.39E+09 | [863][M]+             | 1   |
| 2542424  | 706925.4 | 4388226  | 2478013  | 2985017  | 604718.2 | [M+Na+NH              | 46  |
| 787972.8 | 1484004  | 1302880  | 888832.2 | 729542.8 | 405504.5 | [3M+2H]2+             | 5   |
| 1516063  | 606233.2 | 2506096  | 1228177  | 755478.3 | 730469.3 |                       | 1   |
| 904062.3 | 451384.8 | 635803.8 | 442176   | 594501.7 | 52524.32 |                       | 105 |
| 1751450  | 681279.5 | 1475925  | 1488107  | 1328146  | 34665.98 |                       | 4   |

|          |          |          |          |          |          |                     |     |
|----------|----------|----------|----------|----------|----------|---------------------|-----|
| 4548602  | 6213370  | 8731874  | 4225044  | 4551833  | 1188985  |                     | 9   |
| 1262110  | 650917.6 | 1419898  | 1523346  | 1231837  | 1329940  |                     | 275 |
| 31551717 | 50906686 | 40672561 | 31598150 | 34912839 | 53260577 |                     | 15  |
| 65147398 | 1.29E+08 | 1.28E+08 | 56404872 | 60323869 | 70549359 | [284][M]2+ [3M+H+Na | 20  |
| 1652080  | 1372841  | 246304.6 | 944084.2 | 1394483  | 2328828  |                     | 158 |
| 32032071 | 51432248 | 41224598 | 32852998 | 35292596 | 53376254 |                     | 1   |
| 1495118  | 561083   | 497273.2 | 772235.4 | 2802585  | 398142   | [1265][M+1]+        | 301 |
| 4850079  | 5549872  | 3880319  | 4867501  | 6239531  | 7514864  | [M+Na]+ 1           | 14  |
| 4850416  | 5280499  | 4350731  | 3784254  | 3931443  | 3646918  | [M+K]+ 44           | 404 |
| 566178.5 | 1496944  | 2042526  | 596237.3 | 856405.2 | 390690.2 |                     | 8   |
| 346313.3 | 356450   | 426829.1 | 420887.5 | 225070.8 | 465166.3 |                     | 65  |
| 1076350  | 709758.3 | 1134795  | 707791.7 | 1275992  | 1895153  |                     | 33  |
| 1240440  | 1618342  | 1085954  | 461218.1 | 899623   | 1386622  |                     | 4   |
| 2297012  | 1202491  | 1600306  | 2725957  | 1527281  | 4533701  | [2M+2Na+I           | 134 |
| 283465.1 | 330344.9 | 430822.8 | 513004.8 | 243254.3 | 574549.2 | [M+H-C6H:           | 16  |
| 66844.46 | 403493.3 | 142729.9 | 387448.8 | 424792.8 | 144809.1 | [2M+H+Na            | 77  |
| 597431.4 | 74637445 | 1269288  | 796273.5 | 79080531 | 1983528  |                     | 1   |
| 408612.5 | 38733.65 | 608488.2 | 713161.5 | 307704.3 | 558082.8 | [M+Na]+ 4           | 8   |
| 551000.4 | 400988.8 | 237738.1 | 410059.8 | 521382   | 362269.2 |                     | 313 |
| 28028719 | 41863378 | 54602424 | 22721319 | 28071403 | 11604848 |                     | 9   |
| 14772226 | 19082622 | 15855631 | 10467192 | 14532926 | 16645135 | [786][M]+           | 4   |
| 8079440  | 8408065  | 6978674  | 7063103  | 10858945 | 9838515  |                     | 2   |
| 6470848  | 4888167  | 6070544  | 11325208 | 6391720  | 3920753  |                     | 321 |
| 38437939 | 29177141 | 29785824 | 35172665 | 27872329 | 10993998 |                     | 2   |
| 10187563 | 26828830 | 13137171 | 7413219  | 16077553 | 25552846 |                     | 1   |
| 1193189  | 1397007  | 1414533  | 1073437  | 2780583  | 2078382  |                     | 371 |
| 2669010  | 1867512  | 2195929  | 2602359  | 1546260  | 5918074  |                     | 2   |
| 766976.7 | 2260195  | 4070528  | 687122.6 | 1326877  | 887663.6 | [946][M+1]+         | 20  |
| 2427124  | 750023.2 | 1612623  | 2338604  | 1964663  | 0        |                     | 13  |
| 494053.4 | 1957344  | 521525.1 | 1437706  | 1497745  | 665169   | [M+Na]+ 4           | 5   |
| 1885551  | 467123.8 | 1751956  | 989082.6 | 1422499  | 4846016  |                     | 2   |
| 3609133  | 3443698  | 819905.6 | 3175615  | 869459.1 | 2607836  | [105][M]+           | 157 |
| 1405187  | 3202922  | 497188.4 | 1268119  | 2166063  | 2345823  |                     | 1   |
| 2442010  | 5528953  | 4043875  | 6227635  | 3225559  | 8204451  |                     | 314 |
| 2952434  | 4811243  | 3434569  | 1475426  | 3206490  | 5838842  |                     | 4   |

|          |          |          |          |          |          |                       |     |
|----------|----------|----------|----------|----------|----------|-----------------------|-----|
| 308612.8 | 397737.5 | 255092   | 394360.9 | 142935.1 | 468643.1 | [M+Na+CF:             | 23  |
| 3191097  | 4395783  | 3805106  | 926279.6 | 3556771  | 4142036  |                       | 347 |
| 787258.6 | 1086241  | 741924.3 | 493779.5 | 741016.7 | 1011087  | [M+H]+ 43'            | 8   |
| 1464049  | 2943162  | 1832976  | 948688.4 | 1843450  | 4689493  |                       | 9   |
| 393406   | 582208.3 | 448782.7 | 507832   | 490521.1 | 586225.1 | [3M+2Na]2             | 42  |
| 680636.3 | 1076447  | 700545.8 | 430776.2 | 916389   | 997073   |                       | 9   |
| 2413291  | 3148486  | 2303317  | 1261663  | 2198271  | 2451201  |                       | 4   |
| 1732557  | 373714.6 | 110908.5 | 658551.6 | 1652446  | 1077038  |                       | 1   |
| 13851337 | 15563697 | 14711518 | 13408231 | 13788926 | 10909576 | [196][M]+             | 25  |
| 5064737  | 5355476  | 3666896  | 4437824  | 5781420  | 4388628  |                       | 13  |
| 353506.6 | 3208738  | 3099784  | 2730647  | 3741550  | 7024807  |                       | 2   |
| 13066927 | 12808050 | 18296172 | 12868299 | 15252857 | 2608047  | [M+Na+Na              | 38  |
| 4478149  | 5114048  | 4172096  | 4162428  | 3848856  | 906810   |                       | 29  |
| 17310323 | 21695943 | 29191225 | 19184256 | 11320945 | 12445854 |                       | 1   |
| 1221310  | 1348335  | 47421.39 | 746873.3 | 725225.2 | 2246816  | [M+2Na]2+             | 3   |
| 65542703 | 36063816 | 70414683 | 1.93E+08 | 91850869 | 38012510 | [499][M]+ [M+H]+ 35'  | 136 |
| 1.68E+08 | 2.29E+08 | 1.87E+08 | 1.32E+08 | 1.16E+08 | 3.08E+08 |                       | 51  |
| 44412980 | 3.94E+08 | 5034400  | 833775.8 | 84819971 | 812610.8 | [M+K]+ 43'            | 20  |
| 45831220 | 93254737 | 88523344 | 34833817 | 56620186 | 74799506 | [949][M]+ [M+Na]+ 50' | 20  |
| 1431349  | 4916059  | 2175802  | 2039695  | 2654919  | 2228525  |                       | 1   |
| 12299831 | 15470613 | 13288914 | 8890684  | 11016365 | 11040696 |                       | 4   |
| 1369898  | 339311.4 | 779706.3 | 514558.3 | 702376.5 | 1050312  |                       | 4   |
| 5372772  | 8217806  | 5451071  | 4539832  | 5894799  | 5257994  |                       | 2   |
| 881269.4 | 1056054  | 786669.3 | 636676.4 | 1145829  | 756082.6 |                       | 498 |
| 376660.1 | 205397.6 | 458060.6 | 511179.6 | 701373.9 | 0        | [1409][M+1]+          | 109 |
| 4495637  | 3856214  | 4074597  | 4589231  | 4188741  | 1993993  |                       | 2   |
| 518244.3 | 733306.9 | 790467.3 | 2222652  | 448608.1 | 496157.3 |                       | 8   |
| 4384003  | 4230030  | 2651839  | 2131154  | 3428911  | 8888039  | [2M+2Na+:             | 110 |
| 1596157  | 3865345  | 1347445  | 6103185  | 1296588  | 9861794  |                       | 2   |
| 1.08E+09 | 1.92E+09 | 1.48E+09 | 9.62E+08 | 1.15E+09 | 1.4E+09  | [852][M]+             | 1   |
| 10000516 | 11708005 | 12312933 | 8045435  | 8978478  | 7717640  |                       | 4   |
| 2653156  | 6427659  | 16722189 | 1401690  | 1984032  | 6528132  | [877][M+1]+           | 41  |
| 3180659  | 4331755  | 5737449  | 2929744  | 3587443  | 1159108  | [357][M]3+            | 9   |
| 680479.8 | 1621364  | 1292853  | 696876.4 | 889614.1 | 791662.2 |                       | 4   |
| 3726013  | 194465.3 | 1787265  | 2423593  | 1934000  | 2432641  | [627][M]2+            | 15  |

|          |          |          |          |          |          |                      |     |
|----------|----------|----------|----------|----------|----------|----------------------|-----|
| 395084.3 | 200967.9 | 862860.1 | 527289.7 | 903870.8 | 408231.3 |                      | 89  |
| 5839999  | 7025558  | 7347070  | 3752829  | 5991983  | 2567961  |                      | 9   |
| 1.31E+08 | 1.87E+08 | 1.33E+08 | 81366226 | 1.25E+08 | 2.3E+08  |                      | 111 |
| 1799843  | 2483329  | 1850404  | 2185424  | 1511564  | 3061455  | [M+Na+K]2            | 35  |
| 8749935  | 9779080  | 13867724 | 7532160  | 7298384  | 2497324  |                      | 9   |
| 149672.5 | 126571.9 | 297226.1 | 109540.5 | 237525.2 | 209987.8 | [M+K]+ 618           | 43  |
| 2094738  | 1392053  | 1452381  | 2102433  | 1440516  | 628300.5 | [723][M]+            | 336 |
| 1419951  | 1048221  | 1287505  | 1383197  | 1978978  | 239581.3 | [M+Na]+ 90           | 29  |
| 3485614  | 779160.5 | 3491488  | 2527661  | 3561007  | 9416942  |                      | 2   |
| 5811366  | 4714779  | 9231528  | 5207147  | 3575844  | 5136649  |                      | 385 |
| 10886252 | 4926883  | 1636944  | 1068512  | 11466035 | 18138562 | [M+K]+ 609           | 11  |
| 296500.9 | 828994   | 731534.6 | 311737.8 | 512087.1 | 586060.9 |                      | 4   |
| 14241149 | 16868063 | 11120431 | 14294257 | 18407654 | 19263976 | [424][M+1]2+         | 2   |
| 2602569  | 2532513  | 1392046  | 1894726  | 924870.2 | 5951557  |                      | 1   |
| 525527.6 | 902003.6 | 454484.1 | 464706   | 869788.8 | 1440238  | [M+K+HCO             | 8   |
| 1715870  | 2637173  | 2250099  | 1032637  | 1921337  | 2265737  |                      | 4   |
| 2234686  | 1693264  | 1662054  | 1339272  | 1107384  | 27555.12 | [1428][M+1]2+        | 286 |
| 8277955  | 14252580 | 15693506 | 6303135  | 9350062  | 6472180  |                      | 9   |
| 1544130  | 1841804  | 2930945  | 1576139  | 7830244  | 13001251 |                      | 1   |
| 3486543  | 3966612  | 5624531  | 3794923  | 3005675  | 861054.1 |                      | 9   |
| 14342987 | 8949138  | 6720994  | 15912310 | 6935558  | 8149847  |                      | 75  |
| 2374579  | 5892414  | 3910798  | 1749358  | 3576269  | 2628116  |                      | 9   |
| 49483456 | 438829   | 502465.9 | 44735504 | 45944612 | 942015.8 |                      | 4   |
| 1067216  | 1725847  | 769488   | 682190.2 | 901992.2 | 674466.1 | [3M+Na+K]            | 39  |
| 1571378  | 2851651  | 1864724  | 2252666  | 4347482  | 5526330  | [467][M+3]+          | 2   |
| 1226912  | 1581425  | 1536662  | 1058716  | 1600018  | 3120131  |                      | 52  |
| 5358822  | 6242135  | 3105600  | 2738558  | 7235326  | 7911630  |                      | 2   |
| 802797   | 1213387  | 694048.2 | 586111.6 | 1175719  | 1856396  | [M+K+NH3             | 8   |
| 1292047  | 1196778  | 1484903  | 1229745  | 1349507  | 450790.3 | [397][M+1]2+         | 17  |
| 1274088  | 3078770  | 1633663  | 2501016  | 2006825  | 3547388  | [1413][M]2 [3M+2H]2+ | 33  |
| 1981436  | 2913686  | 2958213  | 1637963  | 1902412  | 3486191  | [761][M]+            | 292 |
| 2219853  | 1646949  | 1759395  | 2128847  | 2495062  | 1763759  | [M+H-C6H:            | 13  |
| 1879366  | 3271626  | 2719764  | 2955998  | 4731685  | 3439331  | [3][M]2+             | 9   |
| 281976.5 | 409416.8 | 557730   | 375814.9 | 306915.1 | 196003.4 | [3M+2Na]2            | 57  |
| 15642650 | 11187447 | 4770945  | 13937639 | 5124187  | 8425614  | [206][M+1]+          | 103 |

|          |          |          |          |          |          |                                       |     |
|----------|----------|----------|----------|----------|----------|---------------------------------------|-----|
| 3914928  | 5163903  | 3201728  | 2353776  | 2664025  | 2590162  | [M+K]+ 55 <sup>+</sup>                | 101 |
| 3862693  | 4541652  | 2921372  | 5148450  | 7759299  | 5679815  |                                       | 2   |
| 1746137  | 2659479  | 3998308  | 1289823  | 1739191  | 622105.1 |                                       | 9   |
| 47878710 | 64634790 | 26246425 | 37193715 | 29155941 | 60625068 | [507][M]+                             | 122 |
| 23105799 | 22141239 | 21491504 | 20121345 | 14866380 | 23248301 | [93][M]+                              | 94  |
| 7149728  | 4837596  | 2739326  | 18565627 | 1368223  | 18848732 | [62][M]+                              | 23  |
| 3410990  | 3313428  | 3419765  | 7880367  | 1284165  | 3328109  |                                       | 379 |
| 4662992  | 4780133  | 5042522  | 6742760  | 4882439  | 4669042  |                                       | 202 |
| 237433.4 | 96447.11 | 261277.1 | 1154047  | 136283.9 | 218175.9 | [M+H]+ 24 <sup>+</sup>                | 41  |
| 884638   | 947002   | 1312011  | 954344   | 603308.5 | 0        |                                       | 9   |
| 963584.1 | 2023453  | 1481877  | 1977644  | 1314590  | 749328.1 | [562][M+1]+                           | 12  |
| 27510010 | 48414970 | 48649111 | 20740498 | 31838717 | 24732356 | [144][M]+                             | 9   |
| 14618728 | 10653852 | 8901264  | 12581608 | 7838489  | 9444635  | [35][M]+                              | 108 |
| 6575659  | 4446050  | 1279963  | 4198134  | 7414599  | 4612632  | [M+3H-CH <sub>3</sub> ] <sup>+</sup>  | 11  |
| 295305.4 | 755732.7 | 0        | 0        | 134552.3 | 1248335  | [M+H-C2H <sub>4</sub> ] <sup>+</sup>  | 46  |
| 858363.8 | 1282432  | 1078710  | 671862.6 | 797558.3 | 1331339  |                                       | 4   |
| 3399163  | 2727593  | 2969197  | 2887937  | 3004201  | 0        |                                       | 2   |
| 1060893  | 377635.3 | 674091.1 | 818271.8 | 876223.2 | 190425.9 |                                       | 142 |
| 5491188  | 5781739  | 3813909  | 2919330  | 7962477  | 4805623  |                                       | 346 |
| 1.41E+08 | 1.43E+08 | 33725192 | 1.1E+08  | 51843034 | 99572215 | [868][M]+                             | 50  |
| 2036217  | 2210705  | 2057431  | 1508060  | 2283382  | 1774120  | [2M+H+Na] <sup>+</sup>                | 44  |
| 5285784  | 11367588 | 4258211  | 5024041  | 4838182  | 2835954  |                                       | 429 |
| 851069.8 | 670868.4 | 1694390  | 742187.5 | 856979.1 | 0        | [M+Na+2K] <sup>+</sup>                | 13  |
| 1638878  | 3582725  | 2951425  | 1562347  | 1877446  | 4432448  |                                       | 4   |
| 299009.1 | 567849.9 | 559567.2 | 282747.7 | 884194.1 | 645792.9 | [M+H]+ 57 <sup>+</sup>                | 18  |
| 825669.2 | 731096.6 | 675610.2 | 362678.3 | 606644.8 | 74954.82 | [235][M+1] <sup>3+</sup>              | 4   |
| 503370.3 | 1120234  | 1260137  | 287818.2 | 460611.5 | 717739.3 |                                       | 9   |
| 1755634  | 3735626  | 1143533  | 1129631  | 1524486  | 809225.4 | [M+K+CF <sub>3</sub> CO] <sup>+</sup> | 15  |
| 787093   | 1025379  | 1028277  | 600038.3 | 388651.2 | 272369.5 |                                       | 91  |
| 24835718 | 40665107 | 2560291  | 3440749  | 26198611 | 20515746 | [344][M] <sup>2+</sup>                | 9   |
| 1800222  | 4474752  | 2019728  | 1257586  | 3214235  | 2862594  |                                       | 2   |
| 10576819 | 13526862 | 15045846 | 6247139  | 12804714 | 1816929  | [1337][M+1] <sup>+</sup>              | 139 |
| 2226463  | 4142520  | 1656387  | 4271221  | 3870573  | 5355659  |                                       | 433 |
| 1367973  | 1708744  | 1314475  | 1432251  | 1332576  | 1126627  | [503][M]+                             | 135 |
| 890170.4 | 2098701  | 2928472  | 776017.3 | 1282152  | 783804.6 |                                       | 9   |

|          |          |          |          |          |          |                      |     |
|----------|----------|----------|----------|----------|----------|----------------------|-----|
| 3386126  | 5341715  | 4483961  | 2955060  | 4394066  | 2980837  |                      | 9   |
| 898086.6 | 1256953  | 416085.5 | 357321.1 | 1598883  | 1491933  |                      | 4   |
| 10624194 | 10051084 | 10177542 | 10272186 | 9921242  | 10271966 |                      | 373 |
| 1338594  | 2396709  | 2332362  | 1817900  | 2785196  | 1157214  | [873][M]3+           | 39  |
| 15200923 | 14547299 | 20052205 | 12800797 | 14689347 | 7107444  | [M+2H-C5H8O]         | 23  |
| 91601017 | 41943906 | 80868173 | 62709622 | 74400605 | 2466842  |                      | 109 |
| 3768234  | 5724594  | 5790101  | 4113354  | 4534379  | 2420924  | [541][M]+            | 4   |
| 59660774 | 48082167 | 79562213 | 47576181 | 1.06E+08 | 20524008 |                      | 1   |
| 2219796  | 0        | 1044953  | 1821442  | 1901073  | 0        |                      | 1   |
| 769022.8 | 869485.1 | 734985.9 | 662691   | 396231.5 | 521831.7 | [M+Na]+ 60           | 16  |
| 4058638  | 4121975  | 3906301  | 653669.3 | 4114777  | 16689757 | [M+K]+ 37%           | 3   |
| 593388.2 | 631332.3 | 2558343  | 3220264  | 1751771  | 2926177  |                      | 9   |
| 1.05E+09 | 1.12E+09 | 8.82E+08 | 9.34E+08 | 1.15E+09 | 1.3E+09  | [1205][M]+           | 2   |
| 27228780 | 28330601 | 27279265 | 29601290 | 33307201 | 22998208 | [1005][M]+           | 2   |
| 2224110  | 1905922  | 2642329  | 2471664  | 2171595  | 1772714  |                      | 281 |
| 13343142 | 6402452  | 10236408 | 5287587  | 7193569  | 1116604  |                      | 280 |
| 2715784  | 2776788  | 4698232  | 966113.6 | 4645002  | 1525500  |                      | 180 |
| 1324259  | 1085664  | 1922643  | 1134422  | 2116184  | 692088.2 | [M+H-COCl]           | 6   |
| 397161.4 | 266999.9 | 384496.2 | 2920170  | 3404339  | 2105082  | [737][M+1]+          | 25  |
| 2616338  | 2985449  | 2711968  | 3949105  | 4880023  | 739023   | [465][M+1]2+         | 2   |
| 1723861  | 2961705  | 2350860  | 1161777  | 1916475  | 2529454  |                      | 9   |
| 1321605  | 2579011  | 3199606  | 927571.5 | 1426598  | 1005628  |                      | 9   |
| 3016003  | 3482382  | 3747691  | 2415726  | 2873165  | 2282487  |                      | 4   |
| 1325786  | 1718566  | 1930680  | 1184283  | 1265440  | 767599.1 | [134][M+1]3+         | 4   |
| 3.73E+08 | 3.5E+08  | 4.85E+08 | 2.95E+08 | 3.06E+08 | 2.68E+08 | [611][M]+ [M+H]+ 38% | 16  |
| 917921.4 | 944113.5 | 351855.8 | 397002.9 | 589827.9 | 2893569  |                      | 9   |
| 13489583 | 30585594 | 19514616 | 22379509 | 23527063 | 8933998  |                      | 1   |
| 1197164  | 1965721  | 2399208  | 1804137  | 17008354 | 27191420 |                      | 11  |
| 12226190 | 15255732 | 13262715 | 8809327  | 10837115 | 11114436 |                      | 4   |
| 723654.8 | 625249.1 | 3115757  | 942666.6 | 304919.6 | 1095556  |                      | 12  |
| 35754363 | 53267522 | 43016034 | 24684668 | 34847775 | 59601407 |                      | 4   |
| 3910408  | 5290367  | 4123052  | 2587705  | 4188639  | 6513089  |                      | 4   |
| 402679.7 | 558689.9 | 430011.8 | 531842.6 | 498852.9 | 466840.2 | [M+K+NaCl]           | 8   |
| 7332076  | 12913769 | 8804651  | 11013453 | 8334819  | 6242217  | [M+H-NH3]            | 15  |
| 2611516  | 981475.6 | 843017.1 | 4942529  | 743335.1 | 387159.4 |                      | 38  |



|          |          |          |          |          |          |                     |     |
|----------|----------|----------|----------|----------|----------|---------------------|-----|
| 448049.2 | 842436.4 | 558842.5 | 496939   | 950507.7 | 907380.7 |                     | 9   |
| 1815591  | 3586797  | 2063724  | 602666.5 | 2457048  | 7430910  |                     | 14  |
| 2001200  | 4848888  | 3041520  | 2646469  | 3969214  | 10461377 |                     | 360 |
| 1513054  | 1244021  | 2523557  | 860984   | 874969.7 | 2140889  |                     | 1   |
| 1057725  | 770991.1 | 3216763  | 830301.7 | 1266495  | 2950280  |                     | 157 |
| 713537.6 | 4297985  | 6967252  | 614448.2 | 5076250  | 4720497  |                     | 411 |
| 1.55E+08 | 22454751 | 29669825 | 2.24E+08 | 82709780 | 8650544  | [M+3K-H]2           | 20  |
| 270466.7 | 215513.8 | 174685.9 | 1486204  | 95014.19 | 1507261  | [264][M+1]+         | 225 |
| 3336703  | 3683871  | 6052416  | 3181590  | 2585366  | 2316396  |                     | 9   |
| 7641809  | 5299765  | 8807241  | 9278105  | 7081363  | 4484339  | [1227][M+1]+        | 185 |
| 850405.5 | 1499564  | 770054.9 | 2344577  | 892981.5 | 2028627  |                     | 4   |
| 308980.6 | 790944.4 | 807477.8 | 148855.8 | 268701.8 | 150350.6 | [M+Na]+ 7!          | 20  |
| 4772674  | 3723623  | 4664290  | 1983848  | 7898798  | 4755516  | [M+H]+ 48'          | 322 |
| 3107614  | 3630443  | 2616253  | 2186176  | 3146126  | 3663365  |                     | 4   |
| 2256176  | 4080741  | 5291719  | 2060639  | 2818796  | 520279.7 |                     | 9   |
| 522670.2 | 944457   | 702122.5 | 299263.8 | 665188   | 558749.4 | [242][M+1]2+        | 9   |
| 426543.3 | 217404.9 | 408084   | 1366413  | 88978.99 | 347600.7 | [M+H]+ 21!          | 220 |
| 2223175  | 0        | 2482111  | 2301159  | 1266935  | 0        | [M+H-CH3]           | 13  |
| 2247079  | 1815020  | 1719812  | 1864225  | 2421843  | 1457106  |                     | 4   |
| 938469.2 | 1822065  | 23920564 | 39792164 | 3363642  | 672297.2 |                     | 1   |
| 430350.6 | 997999.8 | 1434085  | 556904.4 | 412390.8 | 102572.6 |                     | 9   |
| 12111166 | 21427869 | 22405582 | 8925614  | 13858612 | 10709211 |                     | 9   |
| 895550.7 | 3389314  | 8854985  | 953423.1 | 898628   | 1523602  | [M+H]+ 43:          | 222 |
| 1569303  | 2478863  | 2159254  | 1466075  | 1842523  | 1353781  |                     | 9   |
| 6025625  | 8080663  | 8429591  | 4510906  | 6106068  | 3994920  |                     | 9   |
| 1079594  | 1694452  | 742169.5 | 477525.9 | 1486510  | 2220988  |                     | 4   |
| 6788428  | 2876948  | 4524350  | 6961317  | 3149481  | 4945350  |                     | 2   |
| 897455.3 | 793353.3 | 512045.6 | 663236.9 | 757518.8 | 608988.3 |                     | 8   |
| 2372026  | 3045077  | 2321289  | 1099668  | 2238699  | 2517960  |                     | 4   |
| 115098.3 | 195464.3 | 527796   | 128897   | 288511.2 | 265771.7 | [632][M+1]+         | 18  |
| 545779.1 | 752507.3 | 765184.1 | 767911.1 | 360266   | 393660.9 | [2M+Na+K]           | 23  |
| 1402293  | 3518736  | 1696191  | 756488.9 | 1952813  | 5035462  |                     | 9   |
| 3919733  | 2630019  | 2637697  | 3716474  | 3146011  | 1343424  |                     | 97  |
| 20325597 | 13286807 | 25158976 | 27562320 | 21524008 | 11262743 | [1340][M]+ [M+H+NH3 | 209 |
| 117859.9 | 909381.5 | 896793.3 | 129325.2 | 533250.4 | 141300   |                     | 9   |

|          |          |          |          |          |          |                                              |     |
|----------|----------|----------|----------|----------|----------|----------------------------------------------|-----|
| 1.22E+08 | 1.09E+08 | 89207817 | 1.29E+08 | 1.34E+08 | 74816607 |                                              | 2   |
| 645698.1 | 1074904  | 1052975  | 838106.5 | 701017.5 | 622959.9 |                                              | 4   |
| 12061831 | 24207626 | 11581742 | 13905332 | 21975762 | 36254227 | [355][M+2] <sup>2+</sup>                     | 2   |
| 3595435  | 1724240  | 1472418  | 2008765  | 1186215  | 6846772  |                                              | 378 |
| 337046.7 | 612114   | 350472.6 | 550748.1 | 346560.5 | 276017.2 | [M+K+NaCl]                                   | 16  |
| 1859627  | 2845233  | 2860856  | 1476454  | 1989905  | 2433004  |                                              | 9   |
| 1680027  | 1071758  | 1569381  | 2033330  | 2728789  | 242838.1 |                                              | 2   |
| 792024.4 | 1371037  | 1142586  | 1203759  | 792292.6 | 1297650  | [1163][M] <sup>2</sup> [M+Na+K] <sup>2</sup> | 62  |
| 1974151  | 1422972  | 1083076  | 3525439  | 2364279  | 0        |                                              | 6   |
| 2574534  | 2254702  | 2161530  | 2119163  | 5108550  | 9578726  |                                              | 2   |
| 452785.4 | 1055637  | 1279334  | 546799.2 | 528198.9 | 632785.5 |                                              | 9   |
| 7161080  | 3158811  | 9015135  | 1644953  | 3110616  | 2924741  | [M+2H-C4H <sub>8</sub> ]                     | 13  |
| 903479.4 | 1705927  | 2610669  | 1367022  | 1094921  | 0        |                                              | 9   |
| 1396338  | 1462548  | 803949.2 | 514877.6 | 990394.1 | 612836   |                                              | 91  |
| 12693501 | 20705836 | 11531033 | 7831466  | 9239501  | 10782695 | [1100][M+1] <sup>+</sup>                     | 101 |
| 354872.1 | 672761.3 | 331507   | 181935.9 | 475056.6 | 790778.5 |                                              | 4   |
| 363303.3 | 390536.5 | 369796.5 | 294898.8 | 329570.8 | 299509.9 | [M+Na] <sup>+</sup> 4!                       | 57  |
| 439597.6 | 1073356  | 17566966 | 11059523 | 795725.4 | 2897616  |                                              | 9   |
| 22835590 | 32950921 | 16359079 | 14928359 | 14564716 | 18819064 | [831][M] <sup>+</sup> [M+H] <sup>+</sup> 46! | 101 |
| 4136230  | 5790767  | 4104163  | 3095497  | 3126600  | 5288378  |                                              | 2   |
| 1694691  | 1477937  | 2380320  | 4114439  | 735620.1 | 3476855  |                                              | 1   |
| 7145756  | 4975490  | 8396808  | 5979345  | 10862926 | 9724083  |                                              | 356 |
| 908786.3 | 1123613  | 925686.8 | 648557.7 | 957373.7 | 967134   |                                              | 4   |
| 1328217  | 4721825  | 5428626  | 4258431  | 4284235  | 4521515  |                                              | 208 |
| 838010.8 | 856799.1 | 996604.1 | 758745   | 745193.2 | 403651.5 |                                              | 65  |
| 6217451  | 9311563  | 5850657  | 4733279  | 6606833  | 15663612 | [658][M] <sup>3+</sup>                       | 9   |
| 448014.7 | 939968.9 | 584419.8 | 476456.7 | 707618   | 918500.8 | [M+Na+K] <sup>2</sup>                        | 8   |
| 2307938  | 2854505  | 2326444  | 1647018  | 2455922  | 3101571  | [1174][M] <sup>+</sup>                       | 23  |
| 3752725  | 6218356  | 3062511  | 4597313  | 5326371  | 3861872  |                                              | 2   |
| 1170011  | 1399161  | 1315662  | 994316.7 | 927331.5 | 678697   |                                              | 4   |
| 9494638  | 24958992 | 20324737 | 15943535 | 16466868 | 14267697 |                                              | 1   |
| 491184.8 | 1057146  | 800746.2 | 448436.8 | 785903.8 | 566946   | [M+K] <sup>+</sup> 10!                       | 8   |
| 3574635  | 3413920  | 4025023  | 4378328  | 8691029  | 4193038  |                                              | 316 |
| 2188510  | 14045225 | 226661   | 1792688  | 18894970 | 18974239 |                                              | 84  |
| 2.3E+08  | 3.07E+08 | 1.73E+08 | 2.07E+08 | 2.29E+08 | 2.39E+08 | [M+K] <sup>+</sup> 41!                       | 3   |

|          |          |          |          |          |          |               |     |
|----------|----------|----------|----------|----------|----------|---------------|-----|
| 541785.5 | 359475.8 | 515469.6 | 197630.3 | 484394.8 | 192124.7 | [987][M+1]+   | 55  |
| 5989099  | 7655771  | 6261903  | 4563049  | 6147387  | 7356972  |               | 4   |
| 1934226  | 1902846  | 1971170  | 1437423  | 1849479  | 1869641  |               | 9   |
| 229260.9 | 102226.2 | 139412.6 | 658486.1 | 160404.2 | 145792.6 | [M+2Na-H]     | 72  |
| 1998429  | 3228587  | 2255015  | 2167583  | 3237441  | 1472949  | [M+H]+ 52:    | 14  |
| 1174028  | 641014.2 | 2562648  | 2102694  | 359299.6 | 134822   | [1600][M]+    | 40  |
| 602490.8 | 518365.4 | 613795.5 | 654618.2 | 543426.1 | 252917.2 |               | 4   |
| 2333256  | 3669223  | 5173348  | 3030950  | 1831391  | 2578457  |               | 9   |
| 1626928  | 2030084  | 2717055  | 1176861  | 1550163  | 497264.8 | [240][M+1]2+  | 9   |
| 982118.2 | 1081406  | 1250751  | 928626.5 | 508980   | 1185715  | [3M+H+K]2     | 5   |
| 647911.7 | 1134899  | 1030485  | 482442.9 | 747465.9 | 711860.1 | [M+H]+ 31!    | 8   |
| 870737.7 | 2519277  | 2839744  | 3851060  | 3514417  | 2907009  |               | 433 |
| 121942.2 | 347108.4 | 209159.3 | 178212.7 | 240084.1 | 206772.7 | [1400][M+1]+  | 299 |
| 3080238  | 3102413  | 2901219  | 3467671  | 3126802  | 5664550  |               | 300 |
| 5190847  | 5306270  | 6232252  | 4734946  | 4586181  | 3891205  |               | 4   |
| 835298.6 | 764047.5 | 833215.6 | 715050.2 | 953139.9 | 493881.9 | [64][M+1]2+   | 17  |
| 2451320  | 2864183  | 3157317  | 1998121  | 2165480  | 1666738  |               | 4   |
| 959516.6 | 1300212  | 1158478  | 904520   | 817331.6 | 1617699  |               | 2   |
| 1274186  | 909490.5 | 1347919  | 1334690  | 760353   | 737506.5 | [1039][M]+    | 61  |
| 816761.6 | 1214004  | 1318706  | 511017.6 | 634003.7 | 630858.2 |               | 4   |
| 992017.5 | 2204776  | 1470172  | 721616.9 | 1426664  | 2008871  | [1090][M+4]3+ | 9   |
| 968110.2 | 422059.7 | 850402.8 | 972505.1 | 849856   | 681111.5 |               | 6   |
| 1342082  | 2269433  | 2574603  | 956767.8 | 1668030  | 1008955  |               | 9   |
| 614517.7 | 1653791  | 9700570  | 5188084  | 914798   | 1611176  |               | 9   |
| 10990272 | 10506832 | 9065232  | 9356474  | 8662224  | 13160044 |               | 2   |
| 10327777 | 7241982  | 6202259  | 13604309 | 10347216 | 1622004  |               | 2   |
| 5614485  | 7857773  | 8107805  | 4287390  | 5835400  | 3887430  |               | 9   |
| 1293812  | 666433.1 | 753330.3 | 800681   | 1090597  | 690014.3 |               | 29  |
| 4259984  | 5606637  | 4376783  | 2973945  | 4432930  | 7079959  |               | 4   |
| 319497.3 | 833153.8 | 690229   | 462703.3 | 413307.7 | 394374.4 |               | 23  |
| 11104679 | 10930755 | 12718654 | 14356628 | 10227108 | 11503623 |               | 214 |
| 11714112 | 19895382 | 20111828 | 8905463  | 13148171 | 11299113 |               | 9   |
| 1492280  | 1359885  | 2255909  | 1965276  | 1497801  | 1940442  | [M+3H-HC(     | 14  |
| 1.36E+08 | 1.69E+08 | 1.32E+08 | 90113756 | 92128634 | 1.89E+08 |               | 78  |
| 836616.6 | 837970.9 | 1405396  | 1085729  | 602443.3 | 721672.2 |               | 9   |

|          |          |          |          |          |          |              |     |
|----------|----------|----------|----------|----------|----------|--------------|-----|
| 1408167  | 932712   | 1901962  | 436712.3 | 1128140  | 2556049  |              | 9   |
| 19446664 | 44259637 | 37918444 | 13857874 | 26121341 | 43602440 | [163][M]2+   | 9   |
| 15438407 | 13489069 | 14462884 | 14241512 | 15161533 | 5604230  |              | 2   |
| 416090.1 | 3450418  | 3414782  | 3146892  | 3597840  | 3076664  | [3M+2Na]2    | 121 |
| 2424266  | 1174837  | 3183792  | 1129713  | 796959   | 3241483  |              | 9   |
| 1425621  | 455332.9 | 960032.7 | 1460767  | 1067893  | 16286.63 |              | 4   |
| 3144947  | 3111195  | 3567098  | 3097412  | 3162680  | 1783745  | [190][M+2]2+ | 4   |
| 1870163  | 1450157  | 1410837  | 935112.8 | 1438866  | 3014950  | [342][M+1]3+ | 9   |
| 1296022  | 2062591  | 2014401  | 1245242  | 1063227  | 1119036  |              | 4   |
| 160800   | 238488.4 | 279547.3 | 266823.2 | 142085.4 | 186490.2 | [590][M+1]2+ | 166 |
| 393035.1 | 471804.3 | 698922.8 | 361025.6 | 362378.6 | 555140.8 |              | 283 |
| 935930   | 866519   | 1215369  | 844129.3 | 743936.2 | 57652.05 |              | 4   |
| 1537876  | 4199373  | 3928364  | 1096154  | 2069788  | 2918689  |              | 9   |
| 97164005 | 1.18E+08 | 1.49E+08 | 74373611 | 67509041 | 59083069 |              | 71  |
| 2.19E+08 | 1.78E+08 | 1.69E+08 | 2.16E+08 | 1.46E+08 | 2.16E+08 | [652][M]+    | 63  |
| 636902.5 | 903763   | 713345.4 | 1178836  | 1100262  | 116433.2 |              | 9   |
| 688708.5 | 134968.1 | 9027724  | 1925867  | 1382077  | 949089.6 |              | 9   |
| 19054356 | 19279514 | 15765964 | 15007818 | 20832712 | 21901721 |              | 2   |
| 11101498 | 11484333 | 7296226  | 9312408  | 14136828 | 12370395 |              | 2   |
| 4184544  | 5446089  | 4683040  | 3196693  | 4375866  | 5729351  |              | 4   |
| 3163271  | 4010428  | 3843218  | 2527349  | 2837220  | 2925129  |              | 4   |
| 13363234 | 17404505 | 14857129 | 10048765 | 13404820 | 18261194 |              | 4   |
| 1635545  | 2416177  | 2144946  | 1357889  | 583186.5 | 2656256  |              | 4   |
| 774048.3 | 1801217  | 848083.5 | 767383   | 971230.6 | 2459088  |              | 4   |
| 464158.5 | 1441209  | 1629905  | 440651.1 | 747248.8 | 880603.7 |              | 9   |
| 40615712 | 43092639 | 34901680 | 35522495 | 46943601 | 45371250 | [466][M+1]3+ | 2   |
| 1185035  | 931390.8 | 1971963  | 1011652  | 875026.6 | 240843.2 |              | 139 |
| 4936159  | 4691306  | 545944.9 | 4605795  | 4790248  | 7950468  |              | 21  |
| 685519.9 | 707826   | 214993.7 | 1112386  | 455622.8 | 1242233  |              | 81  |
| 5774440  | 2522926  | 7241732  | 5651213  | 7682412  | 6984987  | [M+H]+ 53:   | 392 |
| 7868345  | 6252184  | 1739400  | 7733205  | 6723349  | 2942880  |              | 1   |
| 150713.9 | 179798.5 | 208040.4 | 146646   | 178049.8 | 101331.1 |              | 161 |
| 2235464  | 2740944  | 1840359  | 530196   | 2520777  | 290685.5 | [749][M+2]2+ | 9   |
| 186633.5 | 236622.8 | 133468   | 1172518  | 141923.9 | 745796   |              | 357 |
| 3520985  | 5380657  | 1449105  | 5760318  | 4391144  | 762016.3 | [M+K]+ 16(   | 11  |

|          |          |          |          |          |          |                      |     |
|----------|----------|----------|----------|----------|----------|----------------------|-----|
| 624230.6 | 300582.7 | 616719.5 | 212984.7 | 1651444  | 438169   |                      | 291 |
| 1351925  | 1045345  | 1274061  | 827718   | 1328455  | 623903.3 | [1333][M]+           | 17  |
| 410467.8 | 489474   | 433738.7 | 308361.8 | 411243.4 | 559396.8 | [M+H-CH4]            | 25  |
| 5564585  | 9035017  | 8597019  | 5320772  | 9423384  | 6873439  |                      | 190 |
| 1429121  | 1294956  | 1157249  | 974323.2 | 1123262  | 817022.3 | [542][M]2+           | 160 |
| 604205.2 | 847972.8 | 1244976  | 455216.9 | 623383.8 | 377252.2 |                      | 9   |
| 2303235  | 2384096  | 2819055  | 1919996  | 2296270  | 1442143  | [988][M]+ [M+H]+ 54: | 220 |
| 4715900  | 546306.2 | 2021995  | 4837161  | 4994949  | 670854.1 |                      | 15  |
| 848469.2 | 1131148  | 1673597  | 713859   | 1280576  | 370182.8 |                      | 13  |
| 374943.4 | 226655.7 | 783823.4 | 200395.1 | 189409.5 | 343360.7 |                      | 78  |
| 2558037  | 4892449  | 2770050  | 1817270  | 3609954  | 5941158  | [M+Na]+ 1:           | 97  |
| 7183004  | 10263787 | 14549840 | 6361718  | 7953080  | 3129629  |                      | 9   |
| 3.13E+08 | 2.83E+08 | 3.48E+08 | 2.76E+08 | 2.94E+08 | 1.66E+08 | [1126][M+1]+         | 17  |
| 1543472  | 625751.7 | 2153783  | 885532.7 | 2734984  | 9264138  |                      | 9   |
| 1161996  | 3589240  | 2814497  | 961576.2 | 1713287  | 2988701  |                      | 9   |
| 2423231  | 2756084  | 3063418  | 2338357  | 2385824  | 1515710  |                      | 4   |
| 16178071 | 19402112 | 18675853 | 13431050 | 15223181 | 9060249  |                      | 9   |
| 4948223  | 3828414  | 3640963  | 4019488  | 5451107  | 5632593  | [M+H]+ 37:           | 14  |
| 808840.5 | 324097.8 | 273024.1 | 899361.3 | 335472.4 | 603632.7 | [172][M+3]2+         | 4   |
| 2979697  | 4487416  | 1999161  | 2314557  | 3844597  | 6259257  |                      | 9   |
| 34215883 | 29761727 | 12331033 | 44794768 | 50667723 | 18047474 | [3M+H+Na             | 11  |
| 6721425  | 6502704  | 6229564  | 6139085  | 8266004  | 5606171  | [1255][M+2]+         | 9   |
| 13224064 | 14095840 | 12617817 | 11567123 | 12892020 | 10665874 | [1236][M]2+          | 2   |
| 4.68E+09 | 5.08E+09 | 4.45E+09 | 3.28E+09 | 4.64E+09 | 6.61E+09 | [721][M]+            | 4   |
| 48299977 | 57634936 | 59888408 | 39305166 | 43135021 | 37853460 | [763][M]+            | 4   |
| 8603887  | 9847733  | 323832.6 | 7391513  | 9571921  | 4314456  | [3M+H]+ 1:           | 11  |
| 1557368  | 1433110  | 3666558  | 563286.7 | 782351.5 | 7405362  | [3M+H+K]2            | 81  |
| 4505814  | 6623822  | 8982704  | 3893650  | 3782860  | 1225506  | [1259][M+1]+         | 9   |
| 1994183  | 1235920  | 2065509  | 1329793  | 1545591  | 879523.7 | [1135][M]+           | 17  |
| 4713831  | 10984186 | 3706142  | 3317802  | 529975.2 | 35769069 |                      | 2   |
| 2119866  | 1931394  | 972376.6 | 2014333  | 564416.2 | 1552173  |                      | 32  |
| 3079525  | 5585584  | 3517271  | 5159152  | 3227159  | 3506660  |                      | 325 |
| 11137435 | 21495524 | 22075120 | 7988141  | 11880689 | 10662438 | [1313][M]+           | 9   |
| 4172228  | 5658644  | 4214928  | 2503992  | 4490628  | 7089784  |                      | 4   |
| 4.32E+08 | 4.41E+08 | 3.69E+08 | 3.81E+08 | 4.91E+08 | 5.14E+08 | [392][M]2+           | 2   |

|          |          |          |          |          |          |                     |     |
|----------|----------|----------|----------|----------|----------|---------------------|-----|
| 202279.1 | 101164.5 | 262846.7 | 179098.4 | 170766.7 | 435907.9 | [M+Na]+ 5           | 42  |
| 351806.2 | 753210.6 | 640691.6 | 547726.3 | 350435.8 | 259224   |                     | 4   |
| 1069138  | 1147927  | 930147.1 | 1040330  | 754516.8 | 725356.6 |                     | 203 |
| 6798834  | 2061687  | 571095.4 | 3354511  | 952676.2 | 8912564  |                     | 46  |
| 1131065  | 2797723  | 2788961  | 764992.3 | 1483841  | 1797762  | [1133][M]3+         | 9   |
| 50030006 | 80254477 | 70082160 | 38032328 | 47091904 | 1E+08    | [980][M]+ [M+Na]+ 5 | 81  |
| 2363213  | 2248483  | 468400.2 | 1528128  | 3175010  | 2756940  | [M+K]+ 46           | 6   |
| 2872725  | 4640665  | 2548864  | 1450428  | 2143413  | 3755514  | [964][M+1]+         | 101 |
| 406141.8 | 1034458  | 770818.7 | 359128.5 | 291436.1 | 755531.7 |                     | 5   |
| 823306.1 | 1536999  | 1478662  | 1449134  | 883171.7 | 1926347  | [M+Na]+ 7           | 35  |
| 4775228  | 5001267  | 5971192  | 5008495  | 5687903  | 2583555  | [M+H]+ 35           | 39  |
| 1516520  | 2953771  | 1876427  | 976756.6 | 1812005  | 4542551  |                     | 9   |
| 313092.8 | 341207.5 | 935230.4 | 443507.6 | 450449.6 | 205104.5 |                     | 18  |
| 1647285  | 3034496  | 2980888  | 979912.2 | 1920623  | 1027676  | [518][M]2+          | 9   |
| 901723.7 | 1113950  | 617529.1 | 670648.4 | 976112.1 | 781346.4 | [M+H+Na]2           | 33  |
| 2258207  | 6323714  | 5364317  | 4172664  | 3972519  | 4007307  |                     | 415 |
| 29204601 | 69939479 | 82714908 | 13765706 | 25881465 | 60131046 | [759][M]+ [M+Na+K+] | 20  |
| 7375830  | 4161379  | 6373258  | 6239439  | 5756407  | 13272149 | [1303][M+4]+        | 2   |
| 402348.5 | 296364.2 | 220013.9 | 299727.1 | 87174.43 | 234973.7 |                     | 99  |
| 460149.8 | 431944.6 | 1023061  | 316882.8 | 184538.8 | 902616.5 | [M+H]+ 86           | 18  |
| 3199087  | 5050134  | 7315679  | 3234001  | 3765303  | 1903561  |                     | 13  |
| 4627391  | 6262628  | 4011649  | 3321230  | 6640815  | 3964343  |                     | 2   |
| 863701.6 | 1993856  | 1882479  | 400163.9 | 809078.3 | 1821832  |                     | 486 |
| 751851.1 | 1567201  | 3048218  | 701811.5 | 708152.2 | 366541.9 |                     | 9   |
| 949607.1 | 232677   | 1953411  | 573488.1 | 734140.3 | 570200.3 |                     | 9   |
| 4011099  | 2326246  | 1235880  | 3906543  | 2321174  | 10242057 |                     | 2   |
| 584762.9 | 1194599  | 1525655  | 444416.4 | 542467   | 513154.8 | [2M+Na+2]           | 8   |
| 5840644  | 9850905  | 16719024 | 4144309  | 5935021  | 3321806  |                     | 9   |
| 8.53E+08 | 7.74E+08 | 9.45E+08 | 7.58E+08 | 8.03E+08 | 4.58E+08 | [1126][M]+          | 17  |
| 1583340  | 2729596  | 3032867  | 1113724  | 1388710  | 1446851  |                     | 9   |
| 3742394  | 3287960  | 3270203  | 5481529  | 2994054  | 2602951  |                     | 375 |
| 696601.7 | 1619625  | 1938892  | 578173.2 | 828304.3 | 669840.4 |                     | 9   |
| 39304888 | 18895439 | 35122784 | 27236222 | 32676871 | 2076670  | [527][M]2+ [M+2H]2+ | 150 |
| 8103915  | 6787293  | 6573134  | 4689643  | 7216252  | 11171048 | [M+K+CF3C           | 5   |
| 126227.1 | 191942.1 | 206096.6 | 121572.3 | 171930   | 72567.32 |                     | 305 |

|          |          |          |          |          |          |                                                   |     |
|----------|----------|----------|----------|----------|----------|---------------------------------------------------|-----|
| 3003975  | 8055485  | 111426.8 | 1056482  | 4053675  | 3651902  | [M+H+Na] <sup>2+</sup>                            | 11  |
| 5661175  | 2165015  | 6069864  | 6447758  | 2307030  | 184553.3 | [M+3H] <sup>3+</sup>                              | 97  |
| 840661.1 | 850245.5 | 949664   | 746573.5 | 912187.9 | 398074.9 | [M+Na] <sup>+</sup>                               | 16  |
| 498276   | 549889.6 | 542115.2 | 848440.5 | 619739.8 | 327463.7 |                                                   | 247 |
| 1516454  | 2755070  | 3259941  | 1510290  | 1715653  | 1591159  |                                                   | 9   |
| 563836.1 | 1449998  | 899192.6 | 244475.4 | 961366.5 | 1159774  |                                                   | 9   |
| 1492670  | 1798450  | 1530796  | 970745.1 | 1438193  | 1995292  | [493][M+2] <sup>+</sup>                           | 4   |
| 222671.4 | 153422.2 | 635552   | 368592.8 | 467135.4 | 131702.4 |                                                   | 283 |
| 687989   | 925181.4 | 992342.1 | 619363.5 | 438350.3 | 983706.5 | [M+K+HCO <sub>2</sub> ] <sup>+</sup>              | 16  |
| 40565592 | 32543822 | 30318268 | 38858529 | 25492041 | 39910285 | [652][M+1] <sup>+</sup>                           | 63  |
| 1264401  | 6018069  | 6083122  | 1359229  | 2139688  | 2214887  | [339][M+1] <sup>2+</sup>                          | 20  |
| 2982611  | 3925389  | 5014718  | 2803382  | 2859359  | 2768527  | [M+H] <sup>+</sup>                                | 18  |
| 1489870  | 1704908  | 1686294  | 1565849  | 1259219  | 867074.1 | [M+H+NH <sub>3</sub> ] <sup>+</sup>               | 35  |
| 2625993  | 367964.5 | 2330338  | 1485508  | 2301367  | 4621800  | [71][M+2] <sup>+</sup>                            | 9   |
| 2801730  | 2702164  | 2862070  | 10641290 | 4377062  | 980411.2 | [945][M] <sup>+</sup>                             | 165 |
| 1.16E+09 | 7.99E+08 | 6.97E+08 | 5.69E+08 | 1.04E+09 | 5.43E+08 | [364][M] <sup>+</sup>                             | 1   |
| 1189437  | 938972.6 | 1511487  | 1088101  | 733036.9 | 617014.3 | [442][M+1] <sup>2+</sup>                          | 9   |
| 9417999  | 4244791  | 1604328  | 8133427  | 8821247  | 2879584  |                                                   | 317 |
| 1571528  | 991835.4 | 1814718  | 2292634  | 872644.1 | 2250442  |                                                   | 154 |
| 392423.6 | 588807.9 | 956417.7 | 335366.9 | 435708.4 | 0        |                                                   | 9   |
| 3550634  | 1900801  | 2483390  | 1926692  | 3455853  | 1854585  |                                                   | 95  |
| 4218960  | 7411739  | 174203.2 | 4662406  | 5816053  | 4489107  | [M+K] <sup>+</sup>                                | 3   |
| 1571734  | 1594602  | 534208.5 | 772099.9 | 1507464  | 663167.8 |                                                   | 105 |
| 710798.5 | 2528643  | 1124487  | 525296.7 | 2062464  | 561466.7 |                                                   | 4   |
| 717849   | 810518.2 | 2657333  | 613753.1 | 743403.7 | 0        | [M+H-C <sub>3</sub> H <sub>7</sub> ] <sup>+</sup> | 46  |
| 872676.6 | 1624446  | 458950.3 | 547626.4 | 1504917  | 2760877  |                                                   | 9   |
| 788795.2 | 1548599  | 731781.2 | 531965.4 | 894172.6 | 642238.2 |                                                   | 4   |
| 248325.5 | 529295.7 | 441919.2 | 354854.3 | 311015.3 | 219181.4 |                                                   | 218 |
| 2112558  | 2905254  | 3004990  | 2237922  | 4216820  | 6564579  |                                                   | 2   |
| 766418.9 | 752045.9 | 368950.4 | 340832.8 | 474595.7 | 497048.9 | [633][M+1] <sup>+</sup>                           | 296 |
| 8654999  | 4239217  | 1777362  | 18343793 | 2498526  | 8423406  |                                                   | 6   |
| 2286104  | 3120415  | 2567874  | 2007539  | 1850080  | 2160428  |                                                   | 4   |
| 2110825  | 388146.6 | 2534820  | 1410171  | 2385554  | 5144083  |                                                   | 2   |
| 238181.6 | 193805.6 | 153307.2 | 230353.6 | 231792.9 | 114995.3 |                                                   | 515 |
| 17675100 | 33547524 | 19518577 | 22610086 | 48237648 | 75492122 | [856][M+2] <sup>+</sup>                           | 19  |

|          |          |          |          |          |          |              |     |
|----------|----------|----------|----------|----------|----------|--------------|-----|
| 9007476  | 5706710  | 6763365  | 7052768  | 6618712  | 9313332  | [1321][M+2]+ | 2   |
| 12056752 | 21550337 | 22521123 | 9086342  | 14159221 | 10411581 | [1291][M]+   | 9   |
| 236835.5 | 231887.5 | 358066.4 | 291335.5 | 245292.8 | 85905.98 |              | 274 |
| 980180.4 | 1515443  | 2806375  | 1969712  | 2855973  | 0        | [2M+H]+ 1:   | 6   |
| 2.53E+08 | 3.32E+08 | 2.94E+08 | 1.59E+08 | 2.3E+08  | 3.6E+08  | [M+H+CF3O]   | 72  |
| 43621519 | 63754482 | 47249067 | 20710560 | 62379671 | 1.25E+08 |              | 86  |
| 3871679  | 6685924  | 3657058  | 4359127  | 2150316  | 4588302  | [M+Na]+ 3:   | 252 |
| 329020.2 | 251333.4 | 386365   | 412026.1 | 168729.4 | 231746.6 |              | 147 |
| 5942051  | 9821295  | 5920476  | 1495296  | 5118253  | 5694768  |              | 272 |
| 2786863  | 7515285  | 8230929  | 3489614  | 3564194  | 955756.9 | [194][M+1]3+ | 20  |
| 712987   | 745480   | 708530.7 | 451240.2 | 470009.6 | 37210.13 |              | 286 |
| 914378.9 | 817094.3 | 1277955  | 633736   | 770589.7 | 1575284  |              | 4   |
| 10345011 | 5839439  | 7468050  | 8804969  | 6395133  | 17112306 |              | 2   |
| 2688543  | 3861307  | 4202927  | 4137906  | 4279061  | 4205166  | [M+H+HCC     | 339 |
| 899376   | 1085403  | 1522447  | 576402.2 | 848010.7 | 235930.5 |              | 8   |
| 727921.1 | 180921.9 | 488468.4 | 374106.8 | 370075   | 106572.4 |              | 4   |
| 2978075  | 7469150  | 5443395  | 5409111  | 6052164  | 8829024  | [905][M+1]+  | 1   |
| 3888662  | 3570826  | 3754719  | 4023647  | 3121194  | 2882508  |              | 191 |
| 672438.4 | 1186083  | 965845.8 | 635899.6 | 1182502  | 1750431  |              | 9   |
| 3579770  | 3100447  | 3306109  | 3348983  | 3315837  | 1522149  | [956][M]3+   | 9   |
| 7331633  | 5018517  | 983702.9 | 6012634  | 8858635  | 6366734  | [M+K]+ 32:   | 3   |
| 1312666  | 994531.9 | 1554687  | 1061538  | 1400889  | 112587.4 | [M+3H-H2O]   | 38  |
| 96661796 | 1.14E+08 | 75629143 | 1E+08    | 92750417 | 88524075 | [306][M]+    | 140 |
| 44446089 | 72222199 | 70529554 | 46155752 | 50756102 | 48582536 |              | 1   |
| 2387776  | 4213362  | 3775332  | 2772645  | 1650662  | 3528976  | [M+Na]+ 7:   | 134 |
| 294844.8 | 244819.9 | 325344   | 225030.3 | 224439.4 | 99974.32 | [1038][M]2+  | 42  |
| 475198.8 | 0        | 2586055  | 380956.5 | 449732.6 | 1836561  |              | 9   |
| 2674906  | 2740686  | 919317.7 | 3754704  | 2817401  | 3087112  | [540][M+1]+  | 44  |
| 11609660 | 14199049 | 9630488  | 17711724 | 11988646 | 5451204  |              | 1   |
| 687398.8 | 624124.4 | 1476361  | 304863.9 | 612390.1 | 1158422  | [48][M+1]2+  | 2   |
| 1170040  | 701631.6 | 949366.4 | 1211874  | 1125141  | 680607.5 | [657][M+1]+  | 110 |
| 1245778  | 1241366  | 1491279  | 2405113  | 639845   | 851435.7 | [1345][M]+   | 48  |
| 466265.1 | 908797.1 | 1083354  | 311949.6 | 560879   | 739093.1 |              | 9   |
| 193831.2 | 226984.4 | 275590.7 | 455786.9 | 187575.1 | 456399.9 |              | 442 |
| 761118.8 | 2481558  | 2302132  | 939120   | 402882.7 | 1277746  | [M+Na]+ 7:   | 8   |



|          |          |          |          |          |          |                      |     |
|----------|----------|----------|----------|----------|----------|----------------------|-----|
| 1835699  | 1589616  | 1716312  | 1034385  | 1700059  | 1816126  |                      | 4   |
| 2468886  | 3578220  | 1417236  | 2716072  | 2780224  | 1924509  |                      | 2   |
| 451999.9 | 735537.2 | 1147420  | 566289.8 | 372317.3 | 0        | [3M+2H]2+            | 8   |
| 6333385  | 9257233  | 4792321  | 5101237  | 9959710  | 7838482  |                      | 2   |
| 912753.5 | 1293319  | 1784592  | 702887.5 | 946610.7 | 481709.5 | [M+Na]+ 4!           | 15  |
| 1753648  | 329872.5 | 530609.6 | 667889.9 | 1534846  | 2193419  |                      | 387 |
| 978009.7 | 2319405  | 1481806  | 598742.1 | 1406804  | 2284260  |                      | 9   |
| 1442009  | 2254146  | 5280873  | 5074458  | 2284165  | 4082466  | [1154][M+1]2+        | 2   |
| 8983136  | 1273964  | 6996544  | 9700396  | 3217332  | 1667455  |                      | 2   |
| 5414556  | 5843390  | 2589641  | 2668925  | 2568429  | 2470513  |                      | 257 |
| 644049.3 | 170328.9 | 1015308  | 566498.1 | 531557.2 | 196546.4 |                      | 89  |
| 25739571 | 2348499  | 1.22E+08 | 16530669 | 14618361 | 51995333 | [877][M]+ [M+Na]+ 4! | 41  |
| 807385.5 | 65739.01 | 1534428  | 916702.2 | 1122055  | 461714.8 |                      | 9   |
| 1705171  | 989395   | 1194191  | 1816949  | 1242569  | 540586.9 |                      | 4   |
| 6067079  | 9834206  | 8347914  | 5569818  | 5821381  | 10877224 |                      | 4   |
| 642769   | 1247016  | 1201865  | 218844.2 | 653006.9 | 708841.2 |                      | 9   |
| 81996.07 | 112258.5 | 138762.8 | 56500.5  | 72610.78 | 21951.56 |                      | 76  |
| 612404.7 | 330609.8 | 1229216  | 796533   | 1026967  | 1149814  |                      | 6   |
| 6305242  | 8145850  | 6309966  | 6322302  | 3672450  | 6932374  |                      | 264 |
| 609115.5 | 701446.9 | 509248.4 | 1188139  | 754021.6 | 505293.8 |                      | 81  |
| 19355403 | 43833120 | 37839063 | 13567732 | 26530373 | 43626413 |                      | 9   |
| 16784787 | 20265047 | 4707275  | 15268816 | 2029079  | 23034447 |                      | 2   |
| 2735459  | 0        | 1365893  | 1808418  | 1147464  | 136047.8 | [M+H]+ 38'           | 15  |
| 8235106  | 2803744  | 4320367  | 6003292  | 3242470  | 1512287  |                      | 2   |
| 1040855  | 424015.6 | 440472.9 | 268408   | 826956.6 | 2536323  |                      | 4   |
| 40443788 | 41271263 | 8323058  | 30950219 | 13204058 | 27569371 | [868][M+1]+          | 50  |
| 983929.1 | 1063870  | 1436711  | 782781.7 | 953964.6 | 1090546  |                      | 9   |
| 968298   | 300455.3 | 742037.5 | 439903   | 522245.1 | 0        |                      | 238 |
| 2196992  | 2176199  | 2187385  | 1795200  | 1712772  | 957656.3 |                      | 4   |
| 17491312 | 24556526 | 33934157 | 14308221 | 16518868 | 5378641  | [1259][M]+           | 9   |
| 4272088  | 1775375  | 1191836  | 2618814  | 6435069  | 1862548  | [937][M]+ [M+H+NH3   | 209 |
| 7744713  | 9354716  | 8026834  | 6892349  | 9604708  | 7711691  | [3M+2K]2+            | 13  |
| 724068   | 1408524  | 2095248  | 572128.7 | 702462.1 | 454054   |                      | 9   |
| 3676623  | 5419173  | 5747604  | 1270519  | 3133648  | 5893805  | [631][M+1]+          | 39  |
| 387456.5 | 355298.9 | 257026   | 340250.5 | 557914.2 | 393458.8 |                      | 91  |

|          |          |          |          |          |          |                                                    |     |
|----------|----------|----------|----------|----------|----------|----------------------------------------------------|-----|
| 883408.3 | 1393345  | 1076272  | 1287041  | 688528.6 | 1252758  |                                                    | 9   |
| 1159974  | 863044.8 | 703277.2 | 1322875  | 578636   | 1637415  |                                                    | 9   |
| 224878.2 | 473658.2 | 229621.1 | 245714   | 204304.5 | 486334.3 |                                                    | 148 |
| 5290730  | 7143767  | 10258469 | 4109662  | 4345866  | 1397482  |                                                    | 9   |
| 5111961  | 4445358  | 4822036  | 4401849  | 3414844  | 3441441  | [M+H+CF <sub>3</sub> O]                            | 83  |
| 2859360  | 2345470  | 3812389  | 2332749  | 1928377  | 1674815  | [1462][M] <sup>+</sup>                             | 69  |
| 2512494  | 0        | 1270354  | 1659965  | 1365575  | 0        |                                                    | 1   |
| 22098238 | 34547926 | 77433072 | 14733070 | 13853160 | 4740278  |                                                    | 52  |
| 897261   | 1648070  | 1653310  | 1583015  | 914052.9 | 1197953  | [2M+2Na] <sup>+</sup>                              | 16  |
| 1352226  | 2582077  | 2209230  | 2667023  | 968924.8 | 3798615  | [1352][M+1] <sup>2+</sup>                          | 7   |
| 5959595  | 11091997 | 6662811  | 7245090  | 8748601  | 10102522 | [1155][M+1] <sup>+</sup>                           | 2   |
| 3292885  | 4040624  | 749441.7 | 669829.2 | 4010606  | 5860401  | [2M+Na+K] <sup>+</sup>                             | 11  |
| 665536.8 | 1217500  | 832139.9 | 466301.1 | 768833.4 | 638074   |                                                    | 4   |
| 216611.8 | 60638.87 | 446401.8 | 290483.5 | 636907.9 | 231965.1 |                                                    | 494 |
| 6678537  | 24420093 | 11053829 | 6380177  | 12868624 | 9854340  | [M+Na] <sup>+</sup> 7:                             | 134 |
| 3740020  | 4309686  | 3251501  | 3081628  | 2016060  | 4042540  |                                                    | 377 |
| 439077.1 | 1922206  | 1636801  | 252605.4 | 440725.9 | 829576.7 | [M+2H-C <sub>2</sub> H <sub>4</sub> ] <sup>+</sup> | 20  |
| 7042956  | 6433673  | 22222517 | 6463597  | 4929733  | 7920208  | [M+Na] <sup>+</sup> 4:                             | 6   |
| 240993.7 | 546900   | 594895.6 | 18392.44 | 127786   | 321678.3 |                                                    | 18  |
| 1604166  | 2650630  | 3987812  | 1124231  | 1636932  | 559216.3 | [1093][M+1] <sup>2+</sup>                          | 9   |
| 2362491  | 5948221  | 2111426  | 2123101  | 2657841  | 3885556  | [M+2H-CO]                                          | 97  |
| 6133732  | 12610922 | 12700523 | 4279799  | 7194270  | 9954915  |                                                    | 9   |
| 2865504  | 5430905  | 5827386  | 2231370  | 4134324  | 2164086  |                                                    | 9   |
| 898336.4 | 678162.4 | 166974.1 | 911731.9 | 1460540  | 763886.6 |                                                    | 32  |
| 856611.3 | 1475067  | 1491325  | 668614.5 | 1193219  | 758333.5 |                                                    | 4   |
| 109943.3 | 771815.1 | 1078744  | 146592.5 | 341808.2 | 510240.5 | [M+H] <sup>+</sup> 68:                             | 39  |
| 10986108 | 7531922  | 9270811  | 12314038 | 6032437  | 1666333  |                                                    | 2   |
| 3416616  | 4237614  | 2739748  | 2262286  | 2234852  | 3495910  | [M+K] <sup>+</sup> 22:                             | 97  |
| 1852489  | 17986063 | 4413942  | 1133766  | 3424073  | 9437223  |                                                    | 1   |
| 2994379  | 3907772  | 2844881  | 724438.7 | 5176959  | 4698369  |                                                    | 337 |
| 6108411  | 7811519  | 8310920  | 4818531  | 5704784  | 4121121  |                                                    | 9   |
| 3448503  | 5296628  | 5167210  | 2999266  | 3080179  | 1700398  |                                                    | 9   |
| 1223219  | 691285.3 | 1146661  | 1180796  | 1927356  | 243048.2 |                                                    | 9   |
| 1115156  | 1125575  | 1995449  | 977057   | 909560.4 | 473747.8 |                                                    | 1   |
| 13495449 | 18166042 | 11578053 | 7803428  | 10916348 | 20087711 |                                                    | 1   |

|          |          |          |          |          |          |                       |     |
|----------|----------|----------|----------|----------|----------|-----------------------|-----|
| 1861873  | 881093.5 | 1019780  | 1090617  | 1093653  | 2959071  |                       | 9   |
| 891173.2 | 221628.9 | 1883604  | 1294448  | 1513658  | 1991889  | [1189][M+1]+          | 9   |
| 7180834  | 6165515  | 5705000  | 4114448  | 5274522  | 8913621  | [3M+H+K]2             | 15  |
| 1926452  | 2294926  | 1864769  | 1754229  | 2311757  | 1304669  | [3M+2Na]2             | 13  |
| 16924135 | 17017683 | 14869783 | 15088500 | 18940527 | 17491665 | [388][M+1]+           | 2   |
| 9460077  | 12419725 | 3789327  | 5722180  | 3856088  | 6722683  | [646][M+1]+           | 125 |
| 536863.9 | 387759.2 | 989421.2 | 613611.5 | 575805.6 | 206338.3 | [1183][M+1]+          | 23  |
| 222019   | 153469.8 | 187428.7 | 331550.2 | 160728.1 | 132909.5 |                       | 522 |
| 657886.5 | 1560333  | 453044.1 | 508950.5 | 1113200  | 2802054  |                       | 9   |
| 43120946 | 52283107 | 65514509 | 45124111 | 47716361 | 34123963 | [412][M]+             | 9   |
| 1494127  | 881031   | 477189.4 | 1948208  | 1675576  | 1505540  |                       | 68  |
| 1.1E+09  | 1.23E+09 | 1E+09    | 7.33E+08 | 1.04E+09 | 1.46E+09 | [721][M+1]+           | 4   |
| 964940.5 | 1219763  | 837590.7 | 826943   | 663833.8 | 203138.5 |                       | 9   |
| 2175424  | 1840859  | 1610935  | 2348380  | 1506003  | 2800152  | [M+K]+ 186            | 13  |
| 425802   | 583529.5 | 658768.6 | 393252   | 432844.5 | 1043988  |                       | 4   |
| 3465476  | 3891909  | 2338887  | 2223055  | 2724471  | 2842743  |                       | 4   |
| 7742474  | 3567447  | 6737180  | 5324867  | 6610492  | 144544.5 | [1359][M]+ [M+H]+ 72: | 150 |
| 625295.7 | 1387414  | 996407.1 | 712874.5 | 672137.2 | 621929   |                       | 4   |
| 2105805  | 2495673  | 2227095  | 1736889  | 3102539  | 1633969  |                       | 1   |
| 635125.5 | 505004.1 | 282058.7 | 174470.1 | 680740.1 | 1470698  | [3M+3Na]+             | 81  |
| 5341223  | 7231624  | 5343919  | 3046095  | 8342072  | 8615145  | [48][M]2+             | 2   |
| 2720112  | 3785893  | 2628978  | 1513177  | 2731141  | 4522074  |                       | 4   |
| 35121169 | 60087470 | 61736378 | 31899929 | 24115856 | 43572986 |                       | 13  |
| 694671.1 | 1715883  | 734684.5 | 5147606  | 1054652  | 898558   |                       | 1   |
| 1492136  | 944285.9 | 1883445  | 1859449  | 1140084  | 229842.5 | [1569][M]3+           | 87  |
| 1961693  | 962032.3 | 1453397  | 2747921  | 2782203  | 842896.1 |                       | 2   |
| 2599077  | 1205004  | 1164351  | 1465735  | 1357613  | 0        | [930][M]2+            | 1   |
| 877145.4 | 951600.4 | 2025732  | 866706.6 | 1105866  | 548773.3 |                       | 9   |
| 4790195  | 4937650  | 4840781  | 1682403  | 6098099  | 3785391  | [M+Na]+ 4:            | 15  |
| 293936.4 | 471418.9 | 312403.5 | 226994.8 | 258878.8 | 161765.5 |                       | 91  |
| 14646348 | 11765165 | 9789022  | 16359139 | 16445146 | 8299590  | [363][M]2+            | 2   |
| 1426667  | 1946843  | 1202420  | 499250.4 | 1724798  | 2494849  |                       | 4   |
| 1967274  | 2601374  | 2176410  | 1064694  | 2339862  | 1622009  |                       | 9   |
| 1577938  | 2434520  | 1775400  | 1734218  | 1381277  | 449100   |                       | 2   |
| 1157379  | 1719126  | 1517082  | 830073.8 | 1185292  | 1240876  |                       | 4   |

|          |          |          |          |          |          |                    |     |
|----------|----------|----------|----------|----------|----------|--------------------|-----|
| 1284311  | 1342223  | 1624558  | 1230018  | 1411342  | 756708.2 |                    | 4   |
| 1372321  | 922436.6 | 483313.9 | 465338.3 | 348397   | 1829758  | [2M+K]+ 1          | 3   |
| 945784.5 | 2461229  | 1155033  | 600033.5 | 1446411  | 1873867  |                    | 4   |
| 5276826  | 7509201  | 2805909  | 3424036  | 2733307  | 4269099  | [722][M+1]+        | 101 |
| 684451.2 | 1293930  | 605522   | 232077   | 1137907  | 2342666  | [1003][M]3+        | 9   |
| 12421121 | 5449083  | 975005   | 10147870 | 7994699  | 7921523  | [3M+2K]2+          | 3   |
| 615912.4 | 404530.2 | 332615.9 | 183897.5 | 422192.7 | 410911.7 |                    | 91  |
| 1239863  | 1497321  | 1623285  | 1278617  | 1282150  | 1182487  |                    | 4   |
| 1607982  | 3296550  | 2826204  | 903349.3 | 2742146  | 2827798  |                    | 1   |
| 3941964  | 19177174 | 10285219 | 4122437  | 10255114 | 11626788 |                    | 1   |
| 1206013  | 4085938  | 776777.3 | 4481446  | 3196560  | 1256275  |                    | 89  |
| 273647.9 | 281617.7 | 455481.4 | 252702.1 | 247231.6 | 791913   | [988][M+1]+        | 220 |
| 4403896  | 3344763  | 2280581  | 2887606  | 2157392  | 1074736  | [M+H-CH3]          | 97  |
| 3749854  | 4922184  | 3351183  | 4087311  | 4457728  | 3874846  |                    | 375 |
| 905110.9 | 721476.9 | 537295.9 | 636793.9 | 893600.2 | 113266.2 | [1509][M+1]2+      | 9   |
| 8844433  | 9039679  | 4788537  | 7069634  | 9447769  | 9930442  |                    | 13  |
| 876538.2 | 399372.1 | 1151022  | 1157946  | 968357.5 | 310570.8 |                    | 49  |
| 2899704  | 3687796  | 4169521  | 2019162  | 2797273  | 4266694  | [1266][M]2+        | 91  |
| 12720321 | 10456405 | 6514836  | 12518545 | 23295083 | 19128678 |                    | 2   |
| 1202131  | 2549951  | 3757433  | 1157716  | 2218925  | 897979.5 |                    | 9   |
| 246084.4 | 221163.7 | 432133.6 | 284145.6 | 186046.7 | 71929.2  |                    | 4   |
| 225251.4 | 227738.1 | 261545.1 | 280819.6 | 115153.1 | 217599   |                    | 193 |
| 1431789  | 63178.12 | 1558371  | 1431000  | 815978.1 | 522583.7 |                    | 9   |
| 1790312  | 2046515  | 991320.7 | 1057183  | 1270713  | 2116110  |                    | 4   |
| 19496528 | 24768495 | 23871575 | 15425933 | 17984412 | 18821195 |                    | 4   |
| 1388350  | 2500047  | 1815813  | 949733.8 | 1928634  | 4287455  |                    | 9   |
| 2839630  | 3451390  | 2880685  | 1906175  | 2333397  | 2386923  |                    | 4   |
| 2547037  | 2170063  | 1654620  | 2772665  | 1682428  | 10013109 |                    | 1   |
| 8195868  | 15553213 | 13979650 | 7347750  | 3091262  | 6599097  | [830][M]+ [M+Na+Na | 20  |
| 3575490  | 4502522  | 3022666  | 3137364  | 4147313  | 5665236  | [443][M+1]2+       | 2   |
| 5245385  | 4426940  | 4192599  | 3673371  | 5539993  | 4319931  |                    | 2   |
| 2755977  | 4439459  | 4503464  | 1647921  | 2721392  | 1271088  |                    | 9   |
| 8521500  | 7623289  | 3405132  | 16431378 | 92665.5  | 6095466  |                    | 86  |
| 1448857  | 1451003  | 2045525  | 1238563  | 533108.3 | 2135800  | [M+H+NH3           | 39  |
| 2697389  | 2710411  | 2922622  | 2358369  | 2343374  | 1352328  | [M+H+HCC           | 42  |

|          |          |          |          |          |          |                      |     |
|----------|----------|----------|----------|----------|----------|----------------------|-----|
| 26979767 | 26105515 | 8427658  | 36331979 | 24615226 | 28191023 | [540][M]+ [M+H]+ 36  | 44  |
| 999054.4 | 1858487  | 1967165  | 682113.1 | 1375823  | 1035517  | [159][M+1]+          | 9   |
| 209455.1 | 1053123  | 0        | 99443.03 | 1070546  | 884325.4 |                      | 1   |
| 1123449  | 1847378  | 2035563  | 1727474  | 1375384  | 704972   | [277][M+2]3+         | 9   |
| 7428676  | 4429593  | 8294375  | 7454425  | 1940922  | 5226702  | [3M+Na+K]            | 13  |
| 3841202  | 6851190  | 5899128  | 2897802  | 4814266  | 5189582  |                      | 18  |
| 562081.4 | 446799.8 | 699931.6 | 334881.7 | 468736.4 | 218374.4 | [1135][M+1]+         | 17  |
| 1886434  | 655933.1 | 4660448  | 1449999  | 1153731  | 200940.7 | [M+Na]+ 4!           | 6   |
| 1787948  | 1579665  | 1958483  | 1568592  | 1677774  | 868112.4 | [1122][M]+           | 17  |
| 1052106  | 731014.1 | 843221.2 | 622797   | 1307355  | 212950.9 |                      | 9   |
| 884006.7 | 2038528  | 11329366 | 753083   | 2281927  | 5108146  |                      | 93  |
| 3587114  | 5255848  | 5039472  | 3630596  | 3245114  | 4476166  | [939][M]+ [M+Na]+ 4! | 12  |
| 427016.5 | 0        | 893375.1 | 337009.1 | 504051.6 | 794178.2 | [M+Na+CF:            | 8   |
| 5417699  | 6267101  | 3457712  | 10217879 | 9271147  | 6882122  | [M+K+HCO             | 3   |
| 191569.7 | 1599425  | 1521761  | 234499.5 | 928456.6 | 726223.1 | [1045][M+1]2+        | 18  |
| 3479637  | 3298458  | 4086246  | 4439908  | 2997584  | 2215657  | [164][M]+            | 48  |
| 1581045  | 741415.9 | 755829.8 | 1192950  | 586480.5 | 266460.6 | [939][M+1]+          | 12  |
| 2090412  | 3321420  | 2465747  | 1354375  | 2350633  | 2119322  |                      | 9   |
| 844455.1 | 1726423  | 910821   | 600147.3 | 1042139  | 1798099  |                      | 9   |
| 5170812  | 6999525  | 10195561 | 3726940  | 4583594  | 1593811  |                      | 9   |
| 206786   | 422229.7 | 573516.7 | 147010.6 | 490206.2 | 756360.8 |                      | 4   |
| 1473512  | 1891297  | 1214598  | 1192455  | 1194602  | 762312.4 |                      | 4   |
| 832538.9 | 760361   | 666661.7 | 807624.7 | 498347.6 | 40835.08 | [1108][M+1]3+        | 159 |
| 345042.5 | 249923.2 | 252278   | 252335.9 | 224250.1 | 121007.3 |                      | 61  |
| 1930814  | 2286424  | 252596.7 | 994799.5 | 929668.7 | 4553739  |                      | 233 |
| 213672.4 | 313520.5 | 240703.7 | 172055.9 | 238987.4 | 201912.5 |                      | 17  |
| 2388431  | 1327898  | 184375.6 | 2073743  | 819859.2 | 905382.1 | [M+K]+ 41!           | 41  |
| 1519867  | 4098242  | 3912612  | 1082230  | 1905171  | 2678035  |                      | 9   |
| 6719171  | 4093580  | 8021017  | 8739047  | 6622750  | 3657572  | [1340][M+1]+         | 209 |
| 3177917  | 5581644  | 5270079  | 1941762  | 4171693  | 3354701  | [732][M]2+           | 9   |
| 5386448  | 5684986  | 2564265  | 1324633  | 1389420  | 15630423 |                      | 1   |
| 5494062  | 9914404  | 7410465  | 3939226  | 7012719  | 11542129 |                      | 9   |
| 11260935 | 17172481 | 12603728 | 7601090  | 12610406 | 17845971 |                      | 9   |
| 26460039 | 16485588 | 13242155 | 12638319 | 23691654 | 10173135 |                      | 1   |
| 763973.3 | 1103953  | 1147935  | 1135224  | 811927.5 | 505525.7 | [1184][M]+           | 23  |

|          |          |          |          |          |          |              |     |
|----------|----------|----------|----------|----------|----------|--------------|-----|
| 10901373 | 10626213 | 9018912  | 11557389 | 6400260  | 18169748 |              | 135 |
| 196569.8 | 184925   | 197993.3 | 206955.9 | 191829.6 | 58821.67 | [M+H+HCC     | 43  |
| 1.98E+08 | 82812540 | 1.73E+08 | 1.68E+08 | 2.16E+08 | 8582866  | [768][M]+    | 49  |
| 99160.33 | 850529   | 1321558  | 0        | 271264.7 | 0        |              | 13  |
| 734097.2 | 2047694  | 3473319  | 461528.2 | 796306.9 | 254699.8 |              | 9   |
| 402243.2 | 283604.3 | 366147.1 | 484947.5 | 262032.2 | 218266.8 | [1564][M+2]+ | 329 |
| 905680.1 | 946504.8 | 818912   | 591537.4 | 858499.1 | 2167015  |              | 8   |
| 2087142  | 4139051  | 2263094  | 870325.3 | 4149956  | 5607517  |              | 2   |
| 315656.1 | 2579648  | 1868453  | 175849.8 | 104642.2 | 1562322  |              | 141 |
| 611738.6 | 1195622  | 300307   | 332297.3 | 797929.8 | 1190051  | [2][M+1]+    | 9   |
| 942349.7 | 664739.5 | 600528.4 | 1099587  | 995672.6 | 361437.1 |              | 4   |
| 541893.1 | 599937.3 | 770377.1 | 465763.2 | 490706.5 | 85818.68 |              | 9   |
| 1515654  | 697692   | 873965.1 | 696663.5 | 1879659  | 996158.7 | [3M+2Na]2    | 6   |
| 25370475 | 25057775 | 7890848  | 19930621 | 27325737 | 7988375  | [M+2Na]2+    | 3   |
| 1659400  | 2841249  | 1964435  | 794820.2 | 1852680  | 2236565  |              | 4   |
| 5218769  | 4576720  | 1409432  | 4669680  | 4161130  | 5280863  |              | 14  |
| 2624019  | 2265884  | 2635190  | 2333360  | 2560605  | 1713374  | [9][M+1]+    | 4   |
| 3156450  | 3549270  | 3666061  | 2754685  | 432993.5 | 909623.5 | [M+H+CF3O    | 5   |
| 2250772  | 3343998  | 2484860  | 1426733  | 1513768  | 3170081  |              | 4   |
| 794063.3 | 38718.57 | 744663.4 | 792951.6 | 701794   | 473860.6 | [3M+H+K]2    | 8   |
| 2888808  | 1957343  | 2923502  | 2114599  | 2686572  | 0        |              | 9   |
| 4549872  | 1607441  | 1196274  | 3003984  | 4010348  | 3690306  |              | 1   |
| 2194055  | 2688090  | 2495768  | 2122856  | 1625667  | 535637.3 |              | 93  |
| 2052783  | 3771973  | 2894278  | 1351106  | 2357191  | 2968131  |              | 9   |
| 696271.4 | 326984.2 | 229913.7 | 2105153  | 331942.3 | 0        |              | 9   |
| 19528860 | 24966693 | 24184034 | 15618682 | 18162094 | 18807154 |              | 4   |
| 39526608 | 69644775 | 32337347 | 49952151 | 32429725 | 41929128 | [M+H+NH3     | 13  |
| 15183364 | 10610477 | 3855520  | 10407720 | 11628328 | 24677758 | [3M+H+Na     | 11  |
| 19057658 | 26075755 | 13863607 | 20847399 | 20725997 | 14096104 | [183][M]3+   | 13  |
| 1109496  | 1928949  | 1199250  | 1158840  | 1873910  | 2373145  |              | 2   |
| 6947412  | 4247899  | 4554921  | 6462606  | 3684203  | 3533638  | [M+H]+ 57!   | 121 |
| 1050031  | 1388148  | 1443698  | 786916.6 | 1127608  | 1605000  |              | 9   |
| 676469.2 | 471027.8 | 490275.1 | 551457.9 | 344311.2 | 1003358  | [M+H]+ 48!   | 35  |
| 5765645  | 6535468  | 2643525  | 6190853  | 3560782  | 4429746  | [869][M]+    | 159 |
| 1971638  | 558521.5 | 1951068  | 1356280  | 1314234  | 894868.8 | [M+H]+ 42!   | 11  |

|          |          |          |          |          |          |                      |     |
|----------|----------|----------|----------|----------|----------|----------------------|-----|
| 4554199  | 3660564  | 4083396  | 5505350  | 2720369  | 2852575  | [314][M]+ [M+K]+ 274 | 268 |
| 967930.8 | 774476.9 | 965232   | 485629.4 | 917117.4 | 1158607  |                      | 17  |
| 7657425  | 14103280 | 16590634 | 6496113  | 8449436  | 5677304  | [178][M]2+           | 9   |
| 5299873  | 5865678  | 4766157  | 3066642  | 4697085  | 5384831  |                      | 4   |
| 4331053  | 4490331  | 7647003  | 3957016  | 4121903  | 3271590  |                      | 316 |
| 1000359  | 750977.4 | 1338615  | 971890   | 806639   | 761844.4 | [976][M+1]+          | 214 |
| 10246059 | 6742506  | 1407031  | 10922933 | 9434431  | 3546841  |                      | 15  |
| 304495.4 | 70871.55 | 607372.5 | 109306.8 | 456125.7 | 13576.98 |                      | 343 |
| 16871664 | 15977430 | 15866318 | 17221289 | 19733502 | 10864532 | [441][M+3]+          | 2   |
| 4278536  | 4565337  | 1946965  | 3154961  | 6689994  | 14987955 |                      | 11  |
| 1591951  | 3258433  | 5243243  | 994776.8 | 1928011  | 2139440  | [538][M]2+           | 9   |
| 2537748  | 4533146  | 2723445  | 2307516  | 3209761  | 6881498  | [1316][M]+           | 2   |
| 1467986  | 2372645  | 1217699  | 1184572  | 1968156  | 4703697  |                      | 9   |
| 9386633  | 4603929  | 7659371  | 9784951  | 4460015  | 3411896  |                      | 2   |
| 326532.9 | 276713.3 | 633270.1 | 394990   | 422429.6 | 419598.6 |                      | 4   |
| 1.27E+09 | 1.35E+09 | 1.1E+09  | 1.15E+09 | 1.38E+09 | 1.44E+09 | [1309][M]+           | 2   |
| 1339487  | 3904937  | 1785509  | 984262.5 | 3377320  | 1240329  |                      | 2   |
| 2155773  | 2993226  | 4786979  | 2097085  | 2828333  | 2513758  |                      | 1   |
| 8753483  | 10462151 | 8417790  | 5515684  | 8383481  | 9715702  | [259][M]+            | 4   |
| 509758.3 | 1719421  | 2441855  | 429700.1 | 796010.2 | 994475.1 |                      | 9   |
| 288278.1 | 777554.3 | 476511.3 | 400111.8 | 457120.7 | 452216   | [1611][M+1]+         | 134 |
| 1923054  | 3925767  | 4261386  | 2180152  | 2772241  | 847797.3 | [3M+Na]+!            | 13  |
| 1522799  | 1289881  | 1793851  | 1095115  | 1052857  | 814385   |                      | 4   |
| 705251.3 | 143804.7 | 1526203  | 692591.8 | 674257.2 | 1249641  |                      | 9   |
| 1602581  | 2580575  | 2325791  | 1239486  | 1640725  | 926006.3 | [278][M+1]2+         | 9   |
| 740509.1 | 965894.6 | 1240702  | 1632819  | 4360177  | 904550.6 |                      | 1   |
| 1334706  | 2476064  | 3172581  | 1215232  | 1464764  | 810324.1 |                      | 9   |
| 1422487  | 3072386  | 3931761  | 1013340  | 1693141  | 1666177  |                      | 9   |
| 658466.6 | 1140071  | 1336512  | 310998.2 | 700158.8 | 260698   |                      | 9   |
| 3126529  | 9917754  | 5611704  | 5887206  | 7036286  | 5485480  |                      | 1   |
| 888540   | 1622201  | 1295496  | 700467   | 1027685  | 1186340  |                      | 4   |
| 3491601  | 3713779  | 3536445  | 3707260  | 3465527  | 3479605  |                      | 272 |
| 1088209  | 889633.3 | 1220550  | 738305.6 | 541695.7 | 871038.8 |                      | 9   |
| 1419338  | 1612528  | 1510170  | 1119284  | 1405389  | 2023793  |                      | 4   |
| 4731783  | 3591597  | 3539578  | 3805828  | 5969101  | 3664535  |                      | 13  |

|          |          |          |          |          |          |                      |     |
|----------|----------|----------|----------|----------|----------|----------------------|-----|
| 929737.9 | 594589.2 | 707149.9 | 282525.1 | 888292.8 | 1773458  |                      | 10  |
| 3152318  | 13825347 | 10592659 | 1804570  | 5596714  | 6928575  | [M+K]+ 436           | 93  |
| 208432   | 146495.3 | 367703.7 | 145512.7 | 232071.1 | 191929.1 |                      | 17  |
| 21745336 | 27457210 | 22633568 | 17830384 | 20230686 | 11752412 | [2M+H]+ 19           | 3   |
| 35207088 | 33337351 | 37933104 | 21673828 | 41370372 | 62887327 | [600][M]+ [M+Na]+ 30 | 28  |
| 2866198  | 2335611  | 250726.4 | 2711147  | 4270521  | 2586509  |                      | 3   |
| 442219.9 | 660733.7 | 1239794  | 368048.1 | 514082.2 | 366632   | [M+H-CO]+            | 116 |
| 1758097  | 1579725  | 1788805  | 1861992  | 1589397  | 867168.1 |                      | 255 |
| 16992060 | 15371252 | 18101668 | 16473970 | 19134227 | 11495017 | [1303][M+5]+         | 2   |
| 12112000 | 20015289 | 10184117 | 8096376  | 8655525  | 11068295 | [934][M]+ [M+H]+ 510 | 101 |
| 4535057  | 3891794  | 3152092  | 5036885  | 4157066  | 2220984  |                      | 2   |
| 1.08E+08 | 1.04E+08 | 88617950 | 1.32E+08 | 60152467 | 1.09E+08 | [139][M]+ [M+H-CO2]  | 112 |
| 978391.6 | 2305403  | 1816307  | 592064.1 | 1301258  | 2383540  |                      | 9   |
| 879407.8 | 913999.6 | 1017083  | 512155.1 | 777747.5 | 781421.7 |                      | 4   |
| 20003726 | 9822597  | 3145213  | 26236736 | 12034968 | 26394143 |                      | 6   |
| 2045272  | 1692203  | 1959649  | 1095001  | 2271839  | 2909455  | [1395][M+1]+         | 2   |
| 3891668  | 980463.5 | 10338436 | 3326385  | 555999.6 | 4109206  |                      | 9   |
| 388882.8 | 270639.1 | 678502.4 | 502922.8 | 302418.3 | 505401.4 | [1491][M+1]+         | 256 |
| 724678.4 | 2401584  | 1892790  | 496105.3 | 1044489  | 1119159  |                      | 9   |
| 1871705  | 3810715  | 5526576  | 1245802  | 1884667  | 129858.6 |                      | 9   |
| 3978773  | 6537667  | 4414280  | 2572391  | 4735087  | 7733712  |                      | 9   |
| 900269.7 | 714478.7 | 783528.9 | 645320.8 | 1062291  | 2067724  | [M+Na]+ 50           | 83  |
| 14295436 | 15816110 | 6431909  | 4071663  | 6317000  | 6218340  |                      | 250 |
| 2179099  | 5484666  | 5207488  | 1732875  | 2352365  | 1349858  |                      | 9   |
| 3037626  | 3908927  | 1872618  | 1510588  | 2604392  | 6678623  |                      | 2   |
| 1239106  | 852065.9 | 1692238  | 1444007  | 1128961  | 1070073  |                      | 1   |
| 367254.2 | 632667   | 432968.7 | 255069.1 | 296878.6 | 269348.8 | [M+H]+ 370           | 42  |
| 1001133  | 958397.4 | 728779.8 | 503175   | 770279.7 | 102757.7 |                      | 4   |
| 4009565  | 7089764  | 1724591  | 4805757  | 6223612  | 4107011  |                      | 381 |
| 65984113 | 27667819 | 15035432 | 48201916 | 37901604 | 38370355 | [M+Na]+ 40           | 3   |
| 835535.7 | 329282.8 | 313550.8 | 834579.2 | 301182.7 | 1305444  |                      | 98  |
| 23752883 | 20082469 | 10981138 | 19019249 | 9691641  | 12126858 | [M+H-H2O]            | 11  |
| 6447352  | 2789224  | 13182334 | 6291311  | 6088747  | 5015414  |                      | 417 |
| 11794317 | 5939665  | 3841602  | 18849408 | 5208681  | 9074251  |                      | 310 |
| 1009042  | 823020.8 | 554473.3 | 581081.4 | 1051955  | 344740.6 | [M+H-C6H:            | 5   |



|          |          |          |          |          |          |                                             |     |
|----------|----------|----------|----------|----------|----------|---------------------------------------------|-----|
| 1821401  | 4352906  | 1320251  | 1362752  | 2155705  | 698339.4 | [2M+3Na+]                                   | 81  |
| 4465369  | 4217114  | 4938566  | 6373045  | 4765986  | 5086471  |                                             | 226 |
| 1251266  | 1210196  | 1639236  | 1505247  | 1632519  | 662140.2 | [M+H] <sup>+</sup> 25:                      | 86  |
| 27271545 | 50784107 | 57166417 | 20323490 | 30769163 | 24771267 |                                             | 9   |
| 618061.1 | 2164923  | 695316.3 | 581337.8 | 595814.7 | 1988434  |                                             | 4   |
| 1671983  | 2282130  | 2156394  | 1767086  | 1456250  | 1499509  | [M+H-COCl                                   | 16  |
| 6318598  | 5353586  | 489803.2 | 4496174  | 6909171  | 1787100  |                                             | 15  |
| 2092810  | 2160441  | 2332312  | 1997232  | 2264236  | 1169485  |                                             | 14  |
| 705523.9 | 845780.2 | 754905.7 | 1421793  | 624631.7 | 734418   | [990][M+1] <sup>+</sup>                     | 165 |
| 2393126  | 8375056  | 3830521  | 2952741  | 7154327  | 1419648  |                                             | 1   |
| 700076.8 | 886733.7 | 1204664  | 874794.7 | 897879   | 213652.5 |                                             | 228 |
| 2129456  | 1655627  | 2288604  | 2319991  | 1743565  | 0        | [M+2H-CH:                                   | 14  |
| 1794627  | 2161127  | 2734923  | 1281641  | 2033041  | 1389511  |                                             | 9   |
| 489393.7 | 541729.2 | 4800215  | 3304904  | 3464534  | 508811.9 |                                             | 4   |
| 323649.4 | 3106065  | 1735138  | 261223.4 | 473588.9 | 350756   |                                             | 15  |
| 1400588  | 1672291  | 1404933  | 1620590  | 1388898  | 1885437  |                                             | 190 |
| 3756748  | 6980180  | 7584219  | 2849366  | 4671227  | 3455684  | [847][M] <sup>+</sup>                       | 9   |
| 1151271  | 486865.4 | 718272.6 | 638292.3 | 673855.5 | 0        |                                             | 4   |
| 5438589  | 6135974  | 6694972  | 1830895  | 6004823  | 4463589  | [M+Na+Na                                    | 18  |
| 689485.9 | 1417736  | 1623854  | 369522.9 | 149586.1 | 814066.5 | [M+2H] <sup>2+</sup> !                      | 18  |
| 5945933  | 7601602  | 8744867  | 4553104  | 6416710  | 2595707  |                                             | 9   |
| 875050.4 | 1196842  | 980856.1 | 908338.3 | 851622.2 | 108038.3 |                                             | 9   |
| 49653000 | 75843341 | 46608733 | 32564807 | 37153903 | 43987614 | [1100][M] <sup>+</sup> [M+H+NH <sub>3</sub> | 101 |
| 11085718 | 15331729 | 10910816 | 11286615 | 15317834 | 16042955 |                                             | 2   |
| 1464285  | 1745069  | 1923923  | 1340786  | 2105082  | 1765323  |                                             | 4   |
| 1611869  | 603846.5 | 1396452  | 1785875  | 2776301  | 1945037  |                                             | 2   |
| 4769213  | 4724665  | 4537496  | 4638147  | 2527682  | 7947752  |                                             | 445 |
| 22112849 | 23842143 | 18892578 | 18581249 | 22965752 | 22564653 | [828][M+1] <sup>2+</sup>                    | 2   |
| 5855691  | 6533051  | 5736080  | 6028208  | 6473524  | 3271133  | [978][M] <sup>+</sup>                       | 9   |
| 136957.7 | 189728.7 | 283567.4 | 398744.8 | 248068.2 | 207095.9 | [1487][M+1] <sup>+</sup>                    | 495 |
| 84573532 | 1.15E+08 | 1.08E+08 | 61997019 | 74470954 | 81769993 | [589][M] <sup>+</sup>                       | 4   |
| 743861.9 | 1626729  | 440540.4 | 408740   | 768885.9 | 796417.7 |                                             | 4   |
| 5369876  | 5724043  | 6651635  | 4911877  | 5453895  | 4271841  |                                             | 4   |
| 1269989  | 2297359  | 1828246  | 952510.9 | 2097099  | 2197029  |                                             | 9   |
| 48582311 | 44862227 | 63839903 | 42502323 | 45920100 | 23979848 | [M+2H] <sup>2+</sup> (                      | 23  |

|          |          |          |          |          |          |                     |     |
|----------|----------|----------|----------|----------|----------|---------------------|-----|
| 2191490  | 1843440  | 3736955  | 4917694  | 5297668  | 2413858  |                     | 1   |
| 1318658  | 845024.5 | 859628.2 | 1028114  | 1299344  | 500090.7 |                     | 91  |
| 255331.3 | 379221   | 433746.7 | 271742.4 | 185056.1 | 249669.5 | [M+2K]2+            | 57  |
| 84664442 | 1.15E+08 | 1.08E+08 | 62053032 | 74431473 | 81912616 | [718][M]+           | 4   |
| 1310864  | 1869871  | 1173557  | 967657.5 | 1504807  | 2431886  |                     | 9   |
| 18389130 | 1251905  | 18261439 | 13344771 | 1697212  | 11288340 |                     | 46  |
| 1626043  | 2277355  | 1401459  | 721901.7 | 1422347  | 2257117  | [M+H-COCl           | 81  |
| 2694637  | 2228245  | 3740090  | 1774496  | 1933227  | 423505   | [595][M]2+ [M+2H]2+ | 23  |
| 1291008  | 5285754  | 4311478  | 2410451  | 4787400  | 1840408  |                     | 2   |
| 2831429  | 3673419  | 5564797  | 2347267  | 2358216  | 2163715  |                     | 9   |
| 29022096 | 29088003 | 25785192 | 28632502 | 26573196 | 22784214 | [853][M+1]+         | 2   |
| 2300095  | 2986411  | 4172455  | 2107294  | 2182006  | 644618.2 |                     | 9   |
| 597057.8 | 793072.6 | 663820.1 | 669308.3 | 700336.1 | 634411.4 | [1597][M+1]+        | 366 |
| 1746980  | 636056.8 | 895282.5 | 1344824  | 1251366  | 195413.7 |                     | 4   |
| 5529479  | 8287959  | 6854401  | 4754711  | 5863384  | 4473418  | [959][M]2+          | 9   |
| 66035735 | 78948876 | 55451842 | 63074216 | 78226838 | 68930340 | [1312][M+1]+        | 2   |
| 1068735  | 1527597  | 1607345  | 935205.8 | 1111535  | 1127349  |                     | 9   |
| 2236341  | 4117124  | 2054625  | 4592377  | 4382276  | 1586941  |                     | 2   |
| 3126882  | 3280890  | 2641203  | 2271537  | 2736452  | 3455323  |                     | 2   |
| 2848662  | 2183225  | 1145943  | 3268556  | 1612971  | 4342558  |                     | 2   |
| 6121776  | 5131071  | 6407930  | 5634343  | 4469112  | 2803258  | [349][M]+           | 319 |
| 4248394  | 5963215  | 4066631  | 3903304  | 6850450  | 6071274  | [43][M+2]3+         | 2   |
| 5667618  | 3149410  | 1705993  | 1326504  | 2397418  | 14681570 |                     | 1   |
| 984231.9 | 1405169  | 1116050  | 441334.6 | 797917.8 | 949429.8 |                     | 62  |
| 756129.9 | 1458553  | 959711.7 | 485647   | 821871.1 | 1235502  | [M+2H-NH            | 8   |
| 16906810 | 20928579 | 25203290 | 11071252 | 23337377 | 9835773  | [848][M]2+ [M+H+Na] | 38  |
| 6897588  | 8303948  | 5950964  | 4800934  | 7045637  | 8207828  | [401][M]+           | 4   |
| 2384513  | 9395813  | 5713136  | 3235071  | 5328170  | 1808635  | [M+H-H2O]           | 189 |
| 15931129 | 11448618 | 13459309 | 14750623 | 17658497 | 13853538 | [355][M+3]3+        | 2   |
| 2340167  | 3130797  | 3006557  | 1880000  | 2155222  | 2193050  | [158][M]2+          | 4   |
| 1533396  | 923080.6 | 1040945  | 1184248  | 931939.5 | 1459127  | [763][M+1]+         | 4   |
| 533766.1 | 805583.9 | 994496   | 450235   | 740327.1 | 377201.6 | [865][M+1]2+        | 9   |
| 728592.7 | 1524490  | 1569372  | 598067.3 | 1442993  | 394604.2 |                     | 41  |
| 4199045  | 5289304  | 3951194  | 4015507  | 5519340  | 3810311  |                     | 2   |
| 12698247 | 14322805 | 11019358 | 10179018 | 13868249 | 15318096 | [M+H-COCl           | 13  |

|          |          |          |          |          |          |                         |     |
|----------|----------|----------|----------|----------|----------|-------------------------|-----|
| 1926459  | 8728448  | 8808082  | 4338219  | 3617618  | 11110647 |                         | 254 |
| 6519232  | 4919933  | 2011634  | 3457233  | 7581301  | 6011470  |                         | 11  |
| 2711912  | 2393124  | 1423620  | 2161975  | 1126116  | 1734525  | [290][M+1]+             | 88  |
| 3079602  | 3078029  | 1956144  | 2072863  | 3092437  | 2502970  | [13][M+1]3+             | 4   |
| 1215490  | 3462914  | 2999753  | 880870.7 | 1872591  | 1466176  | [3M+Na+K]               | 18  |
| 353158.5 | 1013092  | 888428.9 | 80022.57 | 217045.7 | 430792.9 | [241][M+1]3+            | 39  |
| 905648.9 | 1359176  | 1737980  | 1039068  | 893909.6 | 713671.4 |                         | 8   |
| 1320388  | 6026567  | 50853285 | 4293596  | 1.36E+08 | 14738657 | [M+K]+ 160              | 3   |
| 14209845 | 8319514  | 2285252  | 10757324 | 48533623 | 12109033 |                         | 11  |
| 1485109  | 2608852  | 3493095  | 1077484  | 1643970  | 1369114  |                         | 9   |
| 512171.9 | 1018315  | 1424363  | 361690.9 | 629051.9 | 448633.6 | [M+3H-CH <sub>3</sub> ] | 8   |
| 456457.8 | 553603.1 | 447622.2 | 238536   | 367654.9 | 0        |                         | 12  |
| 788588.3 | 1421739  | 2236874  | 848631.1 | 1152204  | 308776   |                         | 9   |
| 1892416  | 3882039  | 2888032  | 1418122  | 2425709  | 3027551  |                         | 9   |
| 19232016 | 16420878 | 24577875 | 16994854 | 19298702 | 8607040  | [1092][M+2]+            | 23  |
| 2545057  | 5640761  | 1267686  | 2348690  | 2797367  | 7495384  | [M+Na]+ 3'              | 3   |
| 634811.9 | 743706.6 | 1752425  | 564361.8 | 613541.4 | 218632.8 |                         | 9   |
| 1650416  | 2709357  | 4135665  | 1777197  | 1570937  | 3544395  | [M+Na]+ 2'              | 29  |
| 411281.9 | 1059936  | 2610696  | 1131029  | 3403688  | 872716.9 | [M+Na+Na                | 226 |
| 1831751  | 3080151  | 3282005  | 1476157  | 1508703  | 1744013  |                         | 9   |
| 4710812  | 2577931  | 6922991  | 828671.9 | 5503348  | 672232.7 |                         | 3   |
| 9424620  | 14616958 | 14170872 | 7496306  | 10433664 | 14313919 |                         | 91  |
| 1224800  | 374482.9 | 1567321  | 926885.4 | 857630.7 | 1066455  |                         | 9   |
| 22162247 | 7754946  | 11427920 | 21992538 | 11859140 | 11972782 | [1242][M+2]+            | 2   |
| 3901657  | 2845009  | 6587198  | 2887296  | 2488989  | 1367073  |                         | 1   |
| 6118011  | 12187374 | 12727348 | 4782694  | 7030029  | 9836806  | [M+H]+ 33'              | 13  |
| 3057696  | 1530092  | 2583656  | 1649684  | 1553962  | 111909.2 |                         | 493 |
| 3787902  | 603863.9 | 494287.1 | 456453.6 | 435573.4 | 3444399  |                         | 96  |
| 516424.5 | 890418.2 | 779415.9 | 339434.2 | 505678.4 | 633814   |                         | 4   |
| 2854610  | 4242616  | 3876749  | 1771454  | 2654555  | 1944478  |                         | 4   |
| 3480966  | 3782246  | 3141937  | 4810463  | 3744901  | 3701335  |                         | 341 |
| 2034280  | 3705703  | 2061883  | 1192179  | 1726086  | 2145445  |                         | 125 |
| 1742487  | 4164824  | 4013023  | 1116767  | 2212731  | 2873961  |                         | 9   |
| 4386486  | 5363200  | 4118805  | 2537961  | 5714035  | 5912284  |                         | 9   |
| 3617875  | 3681047  | 2396597  | 2433903  | 2695914  | 3546273  | [659][M+1]2+            | 12  |

|          |          |          |          |          |          |              |     |
|----------|----------|----------|----------|----------|----------|--------------|-----|
| 35078.23 | 910395.3 | 714935.9 | 19972.99 | 253460.6 | 663024.3 | [1587][M+1]+ | 20  |
| 5553154  | 1043500  | 1553824  | 3477352  | 9974797  | 3044069  | [1079][M]+   | 49  |
| 2006091  | 4488897  | 1676353  | 2961276  | 5164591  | 4090879  | [M+Na]+ 3:   | 11  |
| 1334941  | 1219812  | 1157638  | 971088.9 | 1040179  | 1227502  |              | 9   |
| 2542788  | 1209586  | 2199748  | 2270865  | 473528.6 | 2336337  |              | 9   |
| 853378.7 | 1466233  | 1752294  | 1029179  | 1043484  | 1860407  | [2M+2Na+I    | 134 |
| 1862082  | 2765401  | 1775646  | 958529.5 | 1711173  | 3115920  |              | 4   |
| 4062187  | 6474695  | 5196061  | 3079531  | 4857833  | 5981027  | [615][M+2]+  | 9   |
| 4807701  | 8151960  | 9976165  | 3467540  | 5406597  | 3503459  |              | 9   |
| 921108.7 | 958985   | 946401.2 | 931068.3 | 1268514  | 1523705  | [677][M+1]+  | 9   |
| 4490809  | 2969506  | 3625896  | 3341183  | 3329560  | 2127798  |              | 2   |
| 856912.2 | 1197465  | 648089.3 | 569434.8 | 286073.7 | 972586.8 |              | 81  |
| 2338269  | 1598569  | 2334682  | 1707723  | 1657293  | 278490.2 |              | 66  |
| 677519   | 453219.6 | 684808.6 | 352981.3 | 490830.8 | 269629.4 |              | 4   |
| 7969098  | 5629268  | 6728064  | 8532401  | 4178070  | 5093202  | [406][M]3+   | 2   |
| 1001662  | 2310714  | 1743924  | 2507270  | 1922741  | 2664069  | [1281][M]2+  | 8   |
| 2975174  | 11214749 | 9655554  | 370400   | 1829546  | 8109048  | [3M+Na+K]    | 20  |
| 9021632  | 2051426  | 3494415  | 9672732  | 3354849  | 609300.7 |              | 2   |
| 667660.1 | 1132418  | 1417134  | 563855.4 | 729175.7 | 546091.9 |              | 8   |
| 952108.1 | 6957760  | 1730134  | 3983860  | 942228.3 | 0        | [M+Na]+ 2(   | 11  |
| 5237496  | 5927125  | 4680187  | 3178214  | 4851920  | 5324598  |              | 4   |
| 1685306  | 983377.8 | 1556870  | 2781352  | 2188287  | 1927575  |              | 1   |
| 1094675  | 587976.7 | 1001318  | 651257.7 | 916246.4 | 18057.57 | [564][M+2]3+ | 343 |
| 2903682  | 2883027  | 3420715  | 1812247  | 3107305  | 1976366  |              | 2   |
| 732180.1 | 600751.1 | 741948.7 | 999809.8 | 934365.9 | 759530.8 |              | 203 |
| 1436022  | 1576251  | 1488810  | 981603.8 | 924496.2 | 875364.7 |              | 4   |
| 2455957  | 372330.4 | 1500144  | 2658094  | 2125635  | 1601035  | [M+Na+K]2    | 14  |
| 1.95E+08 | 1.47E+08 | 1.02E+08 | 1.95E+08 | 98462957 | 55450781 |              | 114 |
| 2358741  | 5085142  | 4846577  | 3060082  | 2919488  | 3897431  | [1518][M+1]+ | 20  |
| 661651.1 | 963810.2 | 3261559  | 1119535  | 3028228  | 1348277  |              | 1   |
| 86442.02 | 17072.83 | 177212.9 | 165453   | 87110.25 | 73584.11 | [1591][M+1]+ | 69  |
| 410064   | 165392.6 | 498754   | 1227236  | 1103552  | 1722095  |              | 9   |
| 11113225 | 11991127 | 13384556 | 9224829  | 9989583  | 7512890  |              | 4   |
| 1701824  | 2756478  | 2357549  | 2317755  | 2644361  | 2140460  |              | 83  |
| 1597897  | 2856216  | 3486811  | 1072995  | 1916583  | 984001.9 |              | 9   |

|          |          |          |          |          |          |                          |     |
|----------|----------|----------|----------|----------|----------|--------------------------|-----|
| 1643127  | 2461695  | 1851163  | 1244348  | 1257071  | 2502782  |                          | 4   |
| 2871397  | 4984005  | 4065718  | 2217501  | 3300145  | 2788680  |                          | 9   |
| 23040168 | 23967484 | 21285705 | 22951180 | 22473365 | 1.41E+08 | [M+H] <sup>+</sup> 43    | 62  |
| 15712057 | 10631618 | 12517520 | 12567322 | 11558933 | 8904529  |                          | 2   |
| 1371499  | 3797587  | 605850.8 | 1194719  | 3892445  | 1924123  |                          | 1   |
| 383944.6 | 1098054  | 1885711  | 221211.2 | 525775.9 | 212856.5 |                          | 9   |
| 295465.8 | 656560   | 393686.1 | 0        | 220207.7 | 1085919  | [M+H-CO] <sup>+</sup>    | 46  |
| 2757407  | 7796154  | 6432614  | 2808257  | 7057670  | 5457508  |                          | 2   |
| 331239.2 | 283100.7 | 224522.8 | 377114.7 | 150943.7 | 192900.9 | [M+K] <sup>+</sup> 80    | 23  |
| 4068626  | 1799402  | 3418237  | 3413936  | 5192146  | 4774105  | [528][M+1] <sup>3+</sup> | 2   |
| 197593.4 | 0        | 155127.5 | 131206.6 | 239659.6 | 0        |                          | 49  |
| 3760199  | 4549189  | 4925548  | 3557142  | 822281.7 | 3020105  |                          | 326 |
| 7413841  | 4798867  | 7289331  | 6241310  | 7319506  | 7029455  |                          | 194 |
| 5531121  | 2376291  | 3657169  | 3793508  | 8879819  | 608456.8 |                          | 2   |
| 7667677  | 10139224 | 6107361  | 4462142  | 8476068  | 5138726  |                          | 337 |
| 551265.5 | 1033392  | 1113855  | 407286.5 | 580334.4 | 680995.4 | [M+2H] <sup>2+</sup> !   | 8   |
| 1490410  | 2584558  | 1309882  | 427662.1 | 1094390  | 2693715  | [M+2Na] <sup>2+</sup>    | 38  |
| 1638965  | 1531839  | 942754.9 | 1768883  | 851041.3 | 1317734  |                          | 32  |
| 1731569  | 3121234  | 2755629  | 1357272  | 1786236  | 1865882  |                          | 9   |
| 4768525  | 5878582  | 3768082  | 4795127  | 4879286  | 4946034  |                          | 2   |
| 705546.4 | 1605772  | 2160983  | 522988.1 | 788084.7 | 466383.1 | [961][M+1] <sup>+</sup>  | 9   |
| 6964048  | 9738736  | 6681936  | 7640400  | 9357037  | 8011490  |                          | 2   |
| 285067.2 | 238486.2 | 472171.4 | 110620.4 | 199698.7 | 163442.3 |                          | 490 |
| 7315857  | 10912608 | 10658006 | 2732352  | 4589660  | 4026622  |                          | 1   |
| 2228349  | 4665001  | 2931170  | 1927137  | 601763.5 | 6108433  |                          | 174 |
| 605948.9 | 781011.5 | 667205.2 | 439337.5 | 538913.6 | 355576.9 |                          | 4   |
| 880573.7 | 1505054  | 503402.7 | 633976.7 | 1274911  | 2793028  |                          | 9   |
| 681021.1 | 497097   | 801371.6 | 776917.4 | 596387.3 | 298941.3 | [M+H] <sup>+</sup> 69    | 209 |
| 1633397  | 1974731  | 2253003  | 1458271  | 1278996  | 1230086  |                          | 4   |
| 2286585  | 2512132  | 1794548  | 817416.8 | 2563616  | 3318057  | [M+Na] <sup>+</sup> 20   | 13  |
| 88557927 | 1.06E+08 | 1.01E+08 | 74492576 | 77589439 | 69848139 |                          | 162 |
| 8456057  | 8282588  | 11424276 | 4453888  | 8567844  | 4357216  |                          | 9   |
| 1798457  | 2549297  | 1832377  | 1891020  | 1954237  | 659851.2 | [992][M] <sup>2+</sup>   | 58  |
| 4066706  | 3670363  | 846466.3 | 3298092  | 3154612  | 10235382 | [M+Na+Na]                | 11  |
| 2763704  | 3914260  | 2619941  | 1732379  | 2908017  | 4398560  |                          | 4   |

|          |          |          |          |          |          |                       |     |
|----------|----------|----------|----------|----------|----------|-----------------------|-----|
| 57407978 | 55581196 | 52057356 | 42391599 | 32739867 | 373664.1 | [M+H-CH4]             | 6   |
| 34694191 | 22223080 | 30893885 | 43229382 | 33285831 | 18556326 |                       | 2   |
| 734391.1 | 641544.5 | 835977.7 | 810699   | 1116736  | 573169.2 |                       | 4   |
| 2782620  | 2031588  | 2834907  | 2490682  | 2014953  | 1355945  | [738][M]2+            | 294 |
| 2448864  | 19258967 | 1827297  | 7782336  | 9410315  | 5895717  |                       | 2   |
| 1321540  | 932021.4 | 1591677  | 1848767  | 912410.6 | 1159629  |                       | 159 |
| 4801012  | 7563515  | 6059108  | 4599723  | 4502894  | 2558995  | [1235][M]+ [M+Na]+ 6' | 134 |
| 1077735  | 644776.3 | 2579316  | 1909906  | 1004211  | 359051.1 | [191][M+1]+           | 4   |
| 1564925  | 2606947  | 1304335  | 653334.6 | 1729739  | 2260659  |                       | 4   |
| 1345049  | 435969.7 | 290125.3 | 986782.5 | 819255.6 | 2021335  | [M+2Na-H]             | 5   |
| 2363348  | 3167646  | 2880546  | 1901317  | 2149485  | 2527697  | [671][M+1]2+          | 18  |
| 342700   | 269489.9 | 379040.9 | 471685   | 188803.3 | 170541   | [M+Na]+ 2'            | 268 |
| 2553568  | 3448490  | 3510076  | 2349874  | 2527232  | 2171272  |                       | 4   |
| 18747023 | 16005321 | 16557169 | 22674622 | 40962455 | 5797030  |                       | 1   |
| 5372639  | 3585143  | 10782968 | 3504155  | 4619704  | 2414218  |                       | 58  |
| 8176384  | 5812622  | 5771442  | 5766338  | 6708802  | 5902945  |                       | 385 |
| 2094557  | 2309933  | 1851949  | 1182653  | 1957670  | 1781487  |                       | 4   |
| 555369.4 | 2704627  | 3219810  | 3189838  | 3011833  | 2946291  |                       | 189 |
| 2092123  | 3280614  | 2814173  | 1498883  | 2391262  | 2226763  |                       | 9   |
| 2266201  | 3411218  | 3754198  | 1766432  | 3546529  | 770659.3 |                       | 1   |
| 8116228  | 8879140  | 8142452  | 7876514  | 492104.2 | 9047589  |                       | 199 |
| 2682081  | 5335535  | 4675719  | 1514270  | 1180625  | 2574477  | [588][M+1]2+          | 1   |
| 1242266  | 1767454  | 1736332  | 752629   | 1502695  | 1034486  |                       | 4   |
| 2851045  | 3834864  | 4457076  | 2190745  | 2395282  | 1541063  | [730][M+1]2+          | 9   |
| 1858012  | 2657193  | 3841398  | 2478604  | 3300072  | 4058520  |                       | 2   |
| 4306443  | 893043.5 | 1001109  | 3168624  | 4585375  | 2605800  | [M+H-H2O]             | 3   |
| 1627375  | 1659515  | 3252215  | 2193267  | 531166.1 | 677449   |                       | 1   |
| 9575142  | 3868458  | 7776143  | 9838307  | 5039351  | 3375454  |                       | 2   |
| 1887089  | 2969687  | 574128.9 | 2243484  | 2819180  | 1179304  |                       | 2   |
| 56885454 | 2170851  | 50401570 | 48220322 | 5322037  | 32553131 | [1398][M]+            | 2   |
| 7823341  | 9692914  | 7687626  | 7148865  | 9791289  | 7890987  |                       | 13  |
| 2370280  | 344979.8 | 1637636  | 2283602  | 719283.8 | 441373   |                       | 2   |
| 337298.9 | 864134.7 | 91559.17 | 407609.7 | 592462.4 | 818072.8 |                       | 3   |
| 1525498  | 3680109  | 3918832  | 878363   | 2111458  | 2609565  |                       | 9   |
| 578189.1 | 1142393  | 1281895  | 563146.3 | 690764.3 | 467230.1 |                       | 8   |

|          |          |          |          |          |          |              |     |
|----------|----------|----------|----------|----------|----------|--------------|-----|
| 64221044 | 1146188  | 968203.1 | 72998535 | 1086454  | 1.01E+08 |              | 9   |
| 728411.3 | 0        | 847561.5 | 624503.8 | 783486.3 | 1094202  |              | 8   |
| 810406.7 | 1130772  | 582246.3 | 1794738  | 440552.1 | 681766.8 |              | 12  |
| 2292910  | 1975678  | 3992414  | 1943693  | 4431942  | 2112009  | [52][M+3]+   | 9   |
| 644513.3 | 901869.2 | 775971.9 | 538572.9 | 159780.6 | 624170.5 |              | 336 |
| 2501853  | 2210475  | 2529102  | 1611410  | 2495122  | 1272093  | [M+H]+ 33!   | 20  |
| 14686733 | 10302309 | 14497252 | 52073556 | 6511776  | 5288656  |              | 175 |
| 6187005  | 3342474  | 2552100  | 1635067  | 5369735  | 8735884  |              | 1   |
| 1425744  | 2195416  | 2100898  | 1008049  | 1144774  | 1918091  |              | 4   |
| 2896958  | 4844352  | 4548660  | 2264424  | 3304072  | 2478391  |              | 9   |
| 283003.1 | 515408.8 | 1044253  | 470379.7 | 439795   | 85179.12 |              | 9   |
| 2055697  | 1809580  | 1643775  | 1533799  | 715951   | 801626   |              | 159 |
| 2538532  | 3417203  | 3161800  | 2210963  | 2896557  | 3176029  |              | 9   |
| 3507017  | 5555500  | 4833906  | 4784929  | 4883733  | 4950147  | [M+H-CO]+    | 314 |
| 3327131  | 2768040  | 2015186  | 2985506  | 9694451  | 1682380  |              | 218 |
| 1689903  | 1621239  | 81325.39 | 1492495  | 1386593  | 3436983  | [M+K]+ 61!   | 21  |
| 16706.21 | 617815.2 | 600450.3 | 51570.74 | 206162.8 | 329377.7 | [M+H]+ 76!   | 20  |
| 6459307  | 4331161  | 5180229  | 3356695  | 4084270  | 0        |              | 68  |
| 861991.9 | 1172312  | 1953892  | 796815.3 | 712879.6 | 126368.4 |              | 9   |
| 905321.3 | 1234688  | 1.08E+08 | 1.11E+08 | 702617.1 | 13291206 | [395][M+1]3+ | 2   |
| 4602973  | 3690352  | 3349234  | 4215301  | 4579272  | 3737529  | [M+Na+NH     | 14  |
| 1438760  | 1303249  | 1549677  | 5552214  | 2443371  | 2359157  | [457][M+3]3+ | 2   |
| 4510994  | 8482653  | 8879856  | 3472652  | 5501746  | 4496000  | [1313][M+1]+ | 9   |
| 1579178  | 2002837  | 1593083  | 783264.4 | 1076900  | 3653373  |              | 9   |
| 213956   | 273357.7 | 268852.4 | 175713.1 | 111851.2 | 214060.2 |              | 147 |
| 4198952  | 4210378  | 9995325  | 587626.3 | 3999984  | 3076177  |              | 478 |
| 11471028 | 3964469  | 8328324  | 11368658 | 9351140  | 1979141  |              | 2   |
| 2951306  | 508685.9 | 3817637  | 7244266  | 3029794  | 907490.6 |              | 382 |
| 2567538  | 1459030  | 296115.3 | 1935650  | 492004.1 | 1913408  |              | 12  |
| 1503540  | 2215502  | 1956652  | 1125334  | 1417000  | 1614013  | [648][M]3+   | 4   |
| 2027912  | 1788731  | 2598204  | 2644927  | 131529.5 | 5717942  |              | 246 |
| 1818817  | 2732055  | 1761951  | 537389.8 | 1784650  | 2399739  |              | 4   |
| 1959078  | 2727877  | 3975834  | 2073700  | 2152207  | 423875.2 |              | 9   |
| 1108390  | 893605.1 | 104122.1 | 974455.1 | 2416285  | 3886247  | [2M+K]+ 3!   | 11  |
| 1772995  | 513197.2 | 1201632  | 426876.8 | 1838728  | 1169003  |              | 1   |

|          |          |          |          |          |          |               |     |
|----------|----------|----------|----------|----------|----------|---------------|-----|
| 7749850  | 7341304  | 7727306  | 9487572  | 8165102  | 6216466  |               | 241 |
| 1597314  | 4158929  | 2269857  | 2109299  | 1983323  | 571988.5 |               | 2   |
| 335561.5 | 213079.4 | 513699.9 | 225835.9 | 340028.2 | 13350.22 | [1108][M+2]3+ | 159 |
| 4637802  | 8393797  | 9844390  | 3801686  | 5269512  | 3036175  |               | 9   |
| 183387.9 | 202298.8 | 248141.3 | 114526   | 359040.8 | 162529.4 |               | 474 |
| 855441.8 | 703054.8 | 1244755  | 575628.7 | 808146.2 | 462538.9 | [M+Na]+ 5!    | 8   |
| 569144.9 | 857967.7 | 514075.3 | 394570.1 | 782674.9 | 723270.2 | [M+H+K]2+     | 8   |
| 184251.5 | 175014.3 | 149669.3 | 228810.8 | 234785.5 | 504698.8 |               | 166 |
| 4245804  | 4353066  | 4355519  | 4740601  | 1653527  | 2626484  |               | 97  |
| 1116632  | 1362554  | 1669200  | 1082522  | 939420.9 | 1244681  |               | 9   |
| 507056.6 | 2315489  | 1707101  | 482967.3 | 1170306  | 883592.7 | [1332][M]+    | 9   |
| 7639727  | 14485322 | 16588815 | 6498501  | 8374927  | 5700731  |               | 9   |
| 6868730  | 8614057  | 4820369  | 8045980  | 7608569  | 2402604  |               | 2   |
| 1278679  | 1514022  | 1318746  | 1110789  | 1299941  | 657406.6 |               | 4   |
| 1164033  | 1438678  | 1163310  | 1502021  | 705258.3 | 1660391  | [1323][M+1]2+ | 134 |
| 470399.3 | 223971.9 | 1111287  | 427697.2 | 414437.5 | 187444.5 |               | 25  |
| 178250.8 | 2725283  | 1396571  | 108746.3 | 1489523  | 1166892  |               | 20  |
| 8619969  | 5907897  | 1407230  | 804835.8 | 2957278  | 19644898 | [M+H+CF3O]    | 3   |
| 1844256  | 0        | 276908.1 | 1476399  | 1020708  | 1086786  |               | 1   |
| 2298826  | 4616159  | 3695709  | 2370807  | 4367646  | 3513793  |               | 13  |
| 4579388  | 7697057  | 10618107 | 3527796  | 4813978  | 2162113  |               | 9   |
| 1837349  | 4292934  | 8179816  | 1501312  | 2000146  | 1007589  |               | 9   |
| 1258042  | 2768279  | 3288348  | 657291.6 | 1423630  | 1382802  |               | 9   |
| 3148469  | 1850088  | 2607405  | 5846082  | 2565591  | 733316.1 |               | 2   |
| 798265.2 | 620409.2 | 488970.2 | 225154.3 | 1418511  | 2103034  | [3M+H+K]2     | 93  |
| 1539700  | 1271367  | 3803617  | 711143.8 | 665679.7 | 663931   | [1134][M]3+   | 9   |
| 3641429  | 1827572  | 2079061  | 2220337  | 2865148  | 1107952  |               | 20  |
| 469048.2 | 268900.4 | 513232.4 | 377590   | 474120.2 | 465207   | [623][M+1]2+  | 51  |
| 2463122  | 3414098  | 691907.7 | 1794160  | 2336249  | 9327016  | [M+H-C2H4]    | 11  |
| 110889.5 | 2045981  | 1184717  | 738169.6 | 1390483  | 1462079  |               | 39  |
| 2317973  | 2941646  | 2995534  | 1959388  | 2056821  | 2198062  |               | 4   |
| 1099058  | 1314755  | 1116334  | 1050299  | 1001070  | 1945371  | [M+Na]+ 5!    | 41  |
| 2269096  | 12674539 | 11748566 | 20983945 | 29419975 | 25264887 | [M+H-CH3]     | 3   |
| 1864849  | 5419555  | 5526954  | 1582976  | 1698994  | 2522095  | [186][M+1]2+  | 18  |
| 821325.3 | 2087704  | 4718644  | 5953702  | 8508216  | 5591162  | [M+H-CO]+     | 369 |



|          |          |          |          |          |          |              |     |
|----------|----------|----------|----------|----------|----------|--------------|-----|
| 646565.7 | 658448.2 | 816773.3 | 564170.8 | 441667.2 | 412092   | [1513][M+1]+ | 246 |
| 8897145  | 8946388  | 6057235  | 8891811  | 11729591 | 11267984 |              | 2   |
| 2859337  | 2258615  | 1794071  | 1252143  | 1738218  | 986638   | [449][M+1]3+ | 25  |
| 4758440  | 4980824  | 6132981  | 997684.2 | 9750822  | 4594031  |              | 382 |
| 380650.7 | 1239025  | 1121638  | 340103   | 739616.6 | 673115.8 |              | 9   |
| 11469742 | 13346573 | 23905256 | 7403839  | 9989878  | 4614793  | [985][M]+    | 7   |
| 1914230  | 3210643  | 1854555  | 2322863  | 2473251  | 1357594  |              | 2   |
| 836846.6 | 1083221  | 1196996  | 914607.3 | 833633.9 | 514253.4 |              | 4   |
| 594351.2 | 622045.1 | 822266.6 | 701489.6 | 1272514  | 596681.2 | [M+H]+ 25!   | 81  |
| 31036033 | 49633848 | 36447502 | 28687135 | 31407753 | 40962388 | [M+K]+ 37!   | 15  |
| 1727350  | 1551426  | 1494769  | 1216559  | 866291.7 | 835066.8 |              | 4   |
| 6660888  | 5956678  | 9279156  | 4667502  | 4877706  | 2021146  |              | 1   |
| 1160898  | 1695311  | 1783024  | 1430950  | 678294.4 | 1643513  |              | 9   |
| 4012992  | 1958038  | 4242370  | 3142555  | 2330314  | 3391924  |              | 13  |
| 41823060 | 50949813 | 52325081 | 34018863 | 37025347 | 68082151 | [473][M]+    | 18  |
| 4392159  | 6588492  | 3770150  | 3152862  | 5335631  | 10446487 |              | 9   |
| 1791143  | 2250994  | 2267265  | 1189207  | 1649722  | 1745429  |              | 4   |
| 71637.93 | 786009.5 | 614913.1 | 34177.07 | 607123.6 | 560624.4 | [531][M+1]2+ | 20  |
| 5474356  | 2719624  | 4654390  | 5419996  | 2328391  | 2689492  |              | 2   |
| 1209815  | 1405505  | 2483877  | 697164.7 | 791189   | 486259.2 | [807][M+1]+  | 9   |
| 10401179 | 7733580  | 5964290  | 10775808 | 5958500  | 7831850  | [121][M]+    | 298 |
| 6422341  | 6346005  | 8966162  | 5903275  | 2513012  | 5558928  | [M+Na]+ 3!   | 201 |
| 121340.9 | 88513.21 | 339383.9 | 206575.9 | 238522.3 | 285346.6 | [M+Na]+ 6!   | 57  |
| 369209.2 | 8987137  | 183220.6 | 139965   | 8062042  | 152565.8 |              | 99  |
| 1812633  | 2027298  | 1653768  | 1211121  | 1547240  | 1893510  |              | 4   |
| 8435816  | 10374045 | 10295915 | 14629905 | 12203969 | 6228543  |              | 2   |
| 1645007  | 2855752  | 3887339  | 1301589  | 1941321  | 603907.9 |              | 9   |
| 2662100  | 1027231  | 2311154  | 2593989  | 508831.2 | 0        |              | 2   |
| 5462665  | 7110376  | 6155320  | 4100630  | 5543406  | 7280565  |              | 4   |
| 14791945 | 20315811 | 13032727 | 14414128 | 25253945 | 14153752 | [3M+2Na]2    | 15  |
| 57912601 | 83404614 | 65477360 | 18039275 | 46059128 | 43377679 | [796][M+1]+  | 3   |
| 1642143  | 1335282  | 40352.49 | 380882.8 | 137037.6 | 134429.7 |              | 357 |
| 6048060  | 8049777  | 5767568  | 6397196  | 7165807  | 14067966 |              | 348 |
| 65938.13 | 108401.3 | 124464.7 | 122257.5 | 64858.32 | 30977.6  |              | 76  |
| 628761.6 | 995862.1 | 1274586  | 738479.6 | 522567.6 | 409723.4 |              | 4   |

|          |          |          |          |          |          |                         |     |
|----------|----------|----------|----------|----------|----------|-------------------------|-----|
| 723844.3 | 862055   | 1233082  | 1124453  | 493745.7 | 3086974  |                         | 14  |
| 57170810 | 73455717 | 1.01E+08 | 47235539 | 93418549 | 68700270 | [M+Na]+ 4               | 33  |
| 841458.9 | 1406853  | 1184063  | 501525.6 | 928578.2 | 1884993  |                         | 4   |
| 867986.1 | 1531753  | 974821   | 1069769  | 822542.4 | 2216527  |                         | 9   |
| 781249.9 | 1564616  | 1415281  | 649478.7 | 839514.4 | 1105510  | [M+Na+K+]               | 8   |
| 1326382  | 2239874  | 1380799  | 915376.5 | 1095396  | 2276047  |                         | 4   |
| 5817420  | 7312826  | 4110750  | 5247521  | 7228525  | 8450239  | [M+2H-CH <sub>3</sub> ] | 14  |
| 1936034  | 1544175  | 804523.5 | 1044107  | 2378556  | 1874803  | [M+H]+ 49               | 6   |
| 6730864  | 3037540  | 11544425 | 10176134 | 2077340  | 2643455  | [826][M]+               | 318 |
| 5024562  | 6549792  | 5762989  | 3818784  | 5124311  | 6854739  | [99][M+2]+              | 4   |
| 3064699  | 4020254  | 4758157  | 2611375  | 2578431  | 5084454  | [1418][M]+              | 215 |
| 1178404  | 1731063  | 1865441  | 1416269  | 858426.6 | 2020409  |                         | 23  |
| 1613551  | 3051965  | 3833507  | 1499522  | 1874716  | 655118.4 |                         | 9   |
| 597028.3 | 1101051  | 854703.4 | 548550.8 | 924173.6 | 673532.1 | [1157][M+1]2+           | 62  |
| 5784327  | 3894506  | 3252555  | 3645446  | 5682028  | 3482241  |                         | 184 |
| 1562208  | 1112635  | 2008747  | 1063557  | 1790144  | 240946.8 |                         | 3   |
| 2809259  | 1518249  | 5869384  | 3033389  | 3430152  | 2492984  | [M+H]+ 26               | 6   |
| 3955890  | 4085008  | 524695   | 189533.7 | 3503825  | 575185.8 |                         | 156 |
| 463301.2 | 847401.3 | 724759.4 | 362007   | 471826.3 | 838173.4 |                         | 4   |
| 538120.3 | 835861.7 | 836000.9 | 690948.9 | 683650.8 | 1134296  | [526][M+1]+             | 281 |
| 7907400  | 11590781 | 2945654  | 5207641  | 3645252  | 6627788  | [408][M+1]+             | 122 |
| 737132.9 | 1020046  | 456039.1 | 885675.7 | 496866.2 | 323837.9 |                         | 134 |
| 1235522  | 657374.9 | 3903660  | 978173.3 | 1358511  | 2094256  |                         | 18  |
| 1592986  | 599412.7 | 1056691  | 1332936  | 1253623  | 476601.2 | [720][M+1]+             | 295 |
| 507199.3 | 834836   | 616731.4 | 477462.4 | 367558.8 | 531002.4 |                         | 57  |
| 487911.2 | 824981.1 | 451606.7 | 542711.2 | 281894.3 | 779906.6 |                         | 137 |
| 217053.2 | 233757.6 | 161100   | 411482   | 236775.4 | 156832.4 | [3M+Na+2I]              | 134 |
| 2732939  | 4110306  | 4633166  | 2243544  | 2643329  | 1423671  | [488][M]3+              | 9   |
| 2725367  | 2864779  | 2586009  | 2265240  | 1681687  | 895058.9 | [1374][M+2]2+           | 2   |
| 1815432  | 2536492  | 2261319  | 2008255  | 827616.6 | 2016722  | [3M+3Na+I]              | 35  |
| 4943974  | 8852172  | 5937606  | 4982159  | 4963975  | 12436933 | [M+Na]+ 1               | 13  |
| 3656596  | 1752481  | 2849731  | 3068521  | 1219753  | 1125818  |                         | 2   |
| 62883317 | 56174231 | 69433026 | 54382066 | 58698877 | 31210519 | [1126][M+2]+            | 17  |
| 685557.6 | 1307123  | 2422243  | 569004.5 | 700117.4 | 768537.6 | [325][M+2]2+            | 9   |
| 398437   | 679908.6 | 553186.3 | 423273.6 | 296433.7 | 467093.4 |                         | 4   |

|          |          |          |          |          |          |                      |     |
|----------|----------|----------|----------|----------|----------|----------------------|-----|
| 8371870  | 6219692  | 2295397  | 9511284  | 10240854 | 5872802  | [M+K]+ 342           | 3   |
| 29133407 | 29178016 | 25384738 | 28480179 | 26587032 | 22374483 | [858][M+1]+          | 2   |
| 336683.9 | 579967.1 | 392495.3 | 478013   | 296642.2 | 329338.8 | [1519][M]2+          | 16  |
| 1466712  | 1166895  | 2941462  | 1936081  | 1177043  | 0        |                      | 93  |
| 983306.6 | 1452826  | 730444.2 | 642973.6 | 1010729  | 1917162  |                      | 9   |
| 5207622  | 10604666 | 12081204 | 3945897  | 5852943  | 5034922  |                      | 9   |
| 43114065 | 42582562 | 36141061 | 37547212 | 47669290 | 47305304 | [466][M+2]3+         | 2   |
| 315518.8 | 209596.5 | 151271.8 | 242550.8 | 230308.7 | 138312.2 |                      | 143 |
| 1561233  | 2738828  | 1196157  | 786099.6 | 1610693  | 2731385  |                      | 4   |
| 4193068  | 4036302  | 1015047  | 3153757  | 1284350  | 2453765  | [867][M+1]+          | 144 |
| 6167464  | 9689071  | 7081662  | 2606181  | 6320163  | 8792724  | [478][M]2+ [M+2Na]2+ | 12  |
| 105637.7 | 165417.7 | 29348.03 | 120402.5 | 99772.01 | 94283.66 |                      | 67  |
| 694841.7 | 844782.7 | 620845.7 | 824388.5 | 733265   | 493217.6 |                      | 32  |
| 15972109 | 17160867 | 23201324 | 7917006  | 17380940 | 5771921  | [1337][M+2]+         | 139 |
| 741474.9 | 636119.2 | 454888.9 | 708837.6 | 343577   | 0        |                      | 129 |
| 53703756 | 40733233 | 1214094  | 5430113  | 3686093  | 1.03E+08 |                      | 3   |
| 725219.4 | 1137980  | 1991133  | 520902.9 | 626167.6 | 356837.2 |                      | 9   |
| 1110682  | 1364267  | 627567.1 | 724526.1 | 1053774  | 1729015  |                      | 9   |
| 4918909  | 3460545  | 5849233  | 4604322  | 4680274  | 4248082  |                      | 1   |
| 312986.2 | 478981.6 | 289209   | 602868.4 | 241343.8 | 207339.6 |                      | 366 |
| 14914530 | 29406530 | 35424120 | 9913281  | 11561519 | 17169370 | [186][M]2+           | 18  |
| 3591826  | 1613497  | 3015545  | 3021044  | 1443361  | 11306228 |                      | 2   |
| 50729285 | 16000866 | 6944466  | 46840584 | 12679477 | 32385900 | [2M+Na]+             | 46  |
| 5986644  | 8424258  | 7875409  | 7837692  | 7665147  | 7246586  |                      | 172 |
| 3744449  | 5838221  | 7082029  | 2440733  | 3279494  | 2356170  | [865][M]2+           | 9   |
| 7111806  | 11758874 | 5971382  | 2596559  | 7238578  | 18978818 | [M+Na]+ 50           | 42  |
| 403339.5 | 388556.5 | 1077086  | 786799.7 | 896148.2 | 255763.1 |                      | 489 |
| 2967499  | 726369.5 | 2989323  | 2617001  | 1742274  | 238271.5 |                      | 1   |
| 205550.1 | 1093658  | 631700.6 | 114814   | 580939   | 1304055  | [M+K+NH3             | 46  |
| 10218602 | 8758363  | 12798800 | 8563936  | 8531299  | 4798273  | [885][M+1]+          | 1   |
| 2017864  | 786369.4 | 3522545  | 2739605  | 1523602  | 1638848  | [931][M]+            | 357 |
| 3029312  | 3267937  | 8176768  | 1393445  | 26535200 | 979845.4 | [M+K]+ 512           | 46  |
| 3948894  | 3276870  | 5277206  | 3659553  | 4521467  | 1972341  | [232][M]2+           | 23  |
| 3077265  | 2446366  | 1441272  | 1116747  | 3023816  | 1753061  | [M+H-CH3]            | 3   |
| 847388.5 | 1459570  | 2267637  | 613191.7 | 629912.1 | 1054808  | [3M+H+K]2            | 20  |

|          |          |          |          |          |          |                     |     |
|----------|----------|----------|----------|----------|----------|---------------------|-----|
| 1059578  | 0        | 1528737  | 1392368  | 1035446  | 497500.4 |                     | 9   |
| 220674   | 202751.6 | 0        | 71389.87 | 80937.05 | 90821.45 |                     | 50  |
| 417800.6 | 237656.7 | 291941.3 | 278878.5 | 180561.3 | 0        |                     | 66  |
| 3538590  | 4401717  | 2877756  | 4279917  | 5965235  | 9805303  | [1338][M+2]+        | 2   |
| 15370392 | 19536491 | 18638580 | 12531379 | 14263037 | 14069028 |                     | 4   |
| 3095467  | 918322   | 4992832  | 620798.7 | 3387328  | 1674384  | [3M+2K]2+           | 15  |
| 3524478  | 4769841  | 3426094  | 297484   | 5169701  | 6895633  |                     | 47  |
| 1679486  | 4159554  | 2334052  | 591205.8 | 3590195  | 5207743  |                     | 1   |
| 46833544 | 42883474 | 19437341 | 67542003 | 60192506 | 45008050 |                     | 15  |
| 4505113  | 3361625  | 8810158  | 4134964  | 5421081  | 2046617  | [1279][M+1]+        | 52  |
| 5723847  | 2714740  | 1204260  | 7595530  | 2476392  | 11286656 |                     | 2   |
| 704955.7 | 420072.7 | 635752.6 | 223959.7 | 463627.8 | 1374633  |                     | 91  |
| 8748739  | 10742539 | 782260.4 | 8346888  | 13452081 | 3722376  | [3M+3Na+]           | 11  |
| 930214.4 | 3042127  | 3063221  | 883803.4 | 1521784  | 1350642  | [M+K]+ 33           | 13  |
| 877610.2 | 617706.5 | 322217.7 | 799126.8 | 1931923  | 609336.3 |                     | 63  |
| 4523509  | 2570549  | 2648462  | 3447800  | 6470859  | 3289983  |                     | 3   |
| 95592652 | 73347582 | 37000576 | 89372672 | 37471559 | 57158061 | [206][M]+           | 103 |
| 10673904 | 16579577 | 20643792 | 4911511  | 7807775  | 9118343  | [263][M]3+ [M+3H]3+ | 18  |
| 86606284 | 56189568 | 148830.5 | 77735380 | 53815373 | 45088681 | [760][M]+           | 90  |
| 422880.6 | 926868.7 | 274464.5 | 163780   | 338159.3 | 101659.7 |                     | 452 |
| 44176859 | 56811820 | 19725530 | 31728380 | 22808402 | 35608622 | [582][M]+           | 125 |
| 5359786  | 4002039  | 6036636  | 7872450  | 5444594  | 5466758  |                     | 272 |
| 15440036 | 19498294 | 18662133 | 12398405 | 14087095 | 14953990 | [26][M]3+           | 4   |
| 27439749 | 50684218 | 56997835 | 22537974 | 30829312 | 24826802 |                     | 9   |
| 40097367 | 26646705 | 13408003 | 36925855 | 12007914 | 26956860 | [205][M]+           | 158 |
| 864166.6 | 1422988  | 410060.9 | 981620.6 | 989280.4 | 4862028  | [521][M+1]+         | 2   |
| 2146027  | 3269949  | 2726631  | 1243994  | 2289520  | 2122328  |                     | 9   |
| 838858.7 | 883881.4 | 672990.1 | 809756.1 | 645271.9 | 487706   |                     | 31  |
| 283746.8 | 547925.7 | 900431.9 | 304370   | 451619   | 365572.2 | [82][M+1]+          | 9   |
| 14676.55 | 567253.7 | 796029.1 | 30990.48 | 552007.5 | 360216.1 | [M+Na]+ 3           | 39  |
| 696379.1 | 936675.8 | 1153727  | 938678.5 | 571020.7 | 284944.7 |                     | 134 |
| 4008862  | 4327038  | 2739903  | 2604526  | 5784190  | 1778335  |                     | 1   |
| 2717919  | 1630773  | 3765546  | 3810917  | 1848961  | 1471473  |                     | 388 |
| 1012017  | 2242370  | 2630796  | 643371.7 | 899301.4 | 808828.2 |                     | 9   |
| 35720500 | 29478988 | 24158428 | 33601011 | 26600936 | 13390725 |                     | 2   |

|          |          |          |          |          |          |                      |     |
|----------|----------|----------|----------|----------|----------|----------------------|-----|
| 49339775 | 1627413  | 5490000  | 48859831 | 2465055  | 56469140 | [418][M+1]+          | 2   |
| 777335.7 | 1077136  | 646359.1 | 562952.8 | 1039110  | 977319.1 |                      | 4   |
| 2433013  | 3694411  | 4741034  | 2966097  | 798208.3 | 2268888  | [211][M+1]+          | 20  |
| 83874596 | 1.12E+08 | 1.09E+08 | 62055198 | 73914837 | 81341607 | [724][M]+            | 4   |
| 150731.6 | 42192.45 | 46384.47 | 118990.4 | 105606.7 | 212889.8 |                      | 231 |
| 2663051  | 4088343  | 2506988  | 1685899  | 4842593  | 2706315  |                      | 2   |
| 562331.6 | 1070714  | 710285.6 | 590133.1 | 924325.6 | 875220.8 |                      | 4   |
| 1589774  | 1128012  | 1195984  | 1053740  | 2511544  | 1434262  |                      | 93  |
| 1944089  | 4571200  | 5373993  | 1587267  | 2225193  | 2933274  |                      | 9   |
| 1108635  | 2070474  | 1738669  | 1506515  | 1295002  | 2159069  |                      | 2   |
| 1803252  | 1505044  | 2501414  | 1496584  | 1351141  | 957048.8 | [1508][M]+           | 69  |
| 3421021  | 3726930  | 2206278  | 372218.1 | 470007.8 | 1315332  |                      | 91  |
| 1885672  | 1518172  | 1299925  | 1870054  | 1757867  | 1021833  |                      | 9   |
| 952448.8 | 1162802  | 1062891  | 690766.7 | 687151.4 | 82640.83 |                      | 12  |
| 1131815  | 476926.4 | 1040960  | 1182660  | 1093603  | 156993   | [54][M+2]+           | 4   |
| 446444.9 | 1065843  | 1641626  | 229173.8 | 683110.8 | 1068732  |                      | 1   |
| 491893.6 | 529133.5 | 665318.7 | 318920.8 | 461004.9 | 313144.3 | [2M+Na+K]            | 134 |
| 203827.7 | 429711   | 272469   | 141784.4 | 138229.7 | 540976.2 | [M+Na]+ 5!           | 16  |
| 6203288  | 5504703  | 4885889  | 4444764  | 5433050  | 3064078  | [593][M+1]+          | 4   |
| 364056   | 331276.8 | 922040.3 | 243989.8 | 366740.5 | 282410.4 |                      | 16  |
| 13691952 | 17161933 | 13491408 | 9375588  | 11968066 | 20211599 | [893][M]+ [M+Na]+ 4! | 116 |
| 819426.2 | 3235903  | 4375741  | 731334.8 | 159778.8 | 1959590  | [M+2H]2+ (           | 39  |
| 628161.3 | 1247979  | 1027342  | 525308.6 | 667363.1 | 1000893  | [2M+Na+K-            | 8   |
| 1963923  | 5188931  | 6378290  | 1482861  | 2387013  | 3266100  |                      | 9   |
| 3004608  | 2801255  | 4279968  | 3063199  | 3107588  | 2715743  |                      | 375 |
| 962073.4 | 752782.7 | 846766.9 | 807239   | 755680.1 | 192518.2 |                      | 9   |
| 1663415  | 2812911  | 2369723  | 977933.9 | 1785295  | 2469073  |                      | 9   |
| 933171.7 | 1502719  | 1185113  | 745390.5 | 1710259  | 1359475  |                      | 13  |
| 781264.1 | 726233.3 | 480744.2 | 1383657  | 1507546  | 4355590  |                      | 4   |
| 1419322  | 1901522  | 2355208  | 1508531  | 472957.8 | 985635   | [618][M+1]+          | 9   |
| 2807515  | 11369075 | 12367792 | 4544360  | 4950108  | 9035661  | [2M+3H]3+            | 18  |
| 318834.3 | 208644.9 | 264252.6 | 487317.1 | 239009.4 | 147423.9 |                      | 508 |
| 15256170 | 19279997 | 18583929 | 12327232 | 14024342 | 14965441 |                      | 4   |
| 49880951 | 30042212 | 35808881 | 21457954 | 45004302 | 38949433 |                      | 215 |
| 5536203  | 55754.03 | 29030.86 | 3761392  | 1865114  | 739231.5 |                      | 52  |

|          |          |          |          |          |          |              |     |
|----------|----------|----------|----------|----------|----------|--------------|-----|
| 589473.7 | 865855.8 | 831306.7 | 875789.1 | 325810.5 | 402058.8 |              | 9   |
| 1682361  | 2563364  | 987203.7 | 3509582  | 2606339  | 1551896  |              | 2   |
| 6942871  | 6620206  | 3952669  | 8651342  | 6254701  | 6469958  |              | 201 |
| 6338877  | 8000777  | 6557100  | 6876789  | 7460753  | 0        |              | 2   |
| 1.48E+08 | 89129250 | 86292631 | 52530761 | 1.47E+08 | 3.33E+08 | [M+Na+K]2    | 46  |
| 6943337  | 7596196  | 7455319  | 7637363  | 7370500  | 1686365  | [1070][M+1]+ | 46  |
| 4539355  | 6136329  | 5174008  | 2862305  | 3818397  | 5782760  | [1310][M]+   | 9   |
| 41056686 | 43287475 | 35137354 | 35768995 | 47399768 | 45952956 |              | 2   |
| 127160.5 | 206617.1 | 136203.6 | 93890.86 | 106470.8 | 160931   |              | 26  |
| 22638217 | 24378884 | 19392021 | 19613111 | 23404877 | 23275832 |              | 2   |
| 833255.7 | 268192.7 | 993841.3 | 1196085  | 1179015  | 1688965  |              | 9   |
| 6958326  | 12571973 | 9407970  | 4779696  | 8154525  | 10536820 |              | 9   |
| 1567776  | 1411653  | 2030594  | 2004419  | 1549563  | 1216010  |              | 275 |
| 1758150  | 1216542  | 1222880  | 2418482  | 2299421  | 1272313  |              | 14  |
| 256852.7 | 244514   | 284506.2 | 431459.5 | 232949.3 | 163627.1 |              | 134 |
| 1388518  | 2349714  | 1759716  | 1304925  | 2229286  | 1796183  |              | 2   |
| 46325575 | 46011104 | 44695301 | 38681706 | 36832582 | 44960233 |              | 253 |
| 894831.2 | 611069.5 | 1087747  | 899507   | 579669.6 | 134711   |              | 9   |
| 1180533  | 1906949  | 525825.6 | 812964.1 | 1497792  | 2029481  |              | 9   |
| 1343940  | 2535745  | 3073955  | 962708.9 | 1062082  | 5498780  | [M+Na+HC     | 6   |
| 3389054  | 5919259  | 3938315  | 3720453  | 4935563  | 9363115  |              | 2   |
| 2702595  | 2420881  | 2406226  | 2612452  | 2499819  | 3150893  |              | 442 |
| 4213547  | 731213.5 | 7207876  | 5448617  | 1468115  | 1199380  |              | 9   |
| 182183.9 | 379616   | 701325.6 | 284385.3 | 250652.1 | 156317.1 |              | 225 |
| 861161.9 | 1313500  | 1518050  | 637970.8 | 730722.2 | 0        |              | 9   |
| 896555   | 857371.3 | 247351.8 | 2070147  | 309294.9 | 1268834  | [M+H]+ 29    | 81  |
| 441907.7 | 1050565  | 350799.5 | 244184.3 | 600924.4 | 1382697  |              | 9   |
| 3501894  | 3051545  | 2566726  | 2338387  | 3019833  | 1267956  |              | 4   |
| 207213.1 | 1937191  | 367329.7 | 276253.8 | 28725.57 | 24429.17 |              | 479 |
| 1830512  | 3147739  | 2979039  | 1408491  | 1947415  | 1828601  |              | 9   |
| 1901834  | 3381354  | 3353414  | 1040006  | 2006990  | 1156583  |              | 9   |
| 14346785 | 10186886 | 11981119 | 11342519 | 11425231 | 9913170  |              | 2   |
| 528884.1 | 1079137  | 469896.6 | 710928.7 | 1009827  | 1147761  |              | 17  |
| 2294448  | 1672838  | 2205135  | 2277263  | 1516763  | 0        | [M+K]+ 86    | 13  |
| 1290595  | 3175733  | 2190040  | 1050134  | 3071709  | 528617.2 |              | 1   |

|          |          |          |          |          |          |                       |     |
|----------|----------|----------|----------|----------|----------|-----------------------|-----|
| 1.35E+08 | 1.66E+08 | 1.24E+08 | 1.02E+08 | 1.37E+08 | 2.13E+08 | [721][M+2]+           | 4   |
| 831365.7 | 1336566  | 1522055  | 659299.1 | 582079.1 | 783193.2 |                       | 4   |
| 7950974  | 11750735 | 8572926  | 7393045  | 11701316 | 8016267  | [846][M+4]3+          | 1   |
| 1072133  | 546380.4 | 647433.9 | 708566.7 | 1027473  | 766003.4 |                       | 4   |
| 5613591  | 5864862  | 25050839 | 4589054  | 3411351  | 5413047  |                       | 2   |
| 2499590  | 1385335  | 2705372  | 2929592  | 2474325  | 218701.8 | [M+H-COCl             | 14  |
| 11669937 | 20618872 | 17531295 | 15775567 | 18242066 | 14889454 |                       | 9   |
| 588698.1 | 350094.2 | 664084.9 | 392646.2 | 750702.6 | 0        | [1358][M+2]+          | 109 |
| 9178288  | 16824364 | 9165848  | 5973177  | 10122096 | 14165527 | [M+2Na-H]             | 46  |
| 2827423  | 4671782  | 6527522  | 2194914  | 2375320  | 84518.36 |                       | 9   |
| 5210144  | 5801396  | 3568617  | 5039045  | 2925107  | 2586623  | [M+H]+ 37             | 11  |
| 21008699 | 9658927  | 2880458  | 26109892 | 11737941 | 26451030 |                       | 155 |
| 47398700 | 59647333 | 57691179 | 37334359 | 43911925 | 47531813 | [484][M]+             | 4   |
| 1471242  | 2677792  | 1693635  | 1558010  | 3334166  | 2195433  | [538][M+2]2+          | 9   |
| 9191620  | 6683144  | 6199594  | 5199572  | 5001239  | 2575147  | [822][M]+             | 83  |
| 513099   | 1313767  | 314891.4 | 379489.5 | 918470.3 | 2335475  |                       | 9   |
| 902643.6 | 1649875  | 1331184  | 1964710  | 1176351  | 217124.3 |                       | 2   |
| 801562   | 615719.3 | 842166.9 | 528927   | 772823.1 | 0        |                       | 4   |
| 1054643  | 2307976  | 3705016  | 893972   | 1609161  | 1320420  |                       | 9   |
| 4986208  | 6562738  | 6329525  | 7607806  | 6237614  | 10072042 |                       | 279 |
| 1.15E+09 | 1.23E+09 | 9.65E+08 | 1.04E+09 | 1.25E+09 | 1.32E+09 | [1208][M]+            | 2   |
| 6769237  | 12789711 | 9360812  | 4952926  | 8770293  | 10375831 |                       | 9   |
| 1673885  | 2229001  | 3334020  | 1583916  | 940657.8 | 837959.6 |                       | 29  |
| 1059632  | 1893668  | 3104755  | 654708.1 | 1032214  | 212695.1 |                       | 9   |
| 8935506  | 30257179 | 38745449 | 30463036 | 13080052 | 10829059 |                       | 9   |
| 1.12E+08 | 92112622 | 95292220 | 70091069 | 94631254 | 47518622 | [426][M+1]2+          | 65  |
| 857421.2 | 1867515  | 2063706  | 838539.8 | 1883358  | 1085770  |                       | 9   |
| 606386.8 | 717431.1 | 444245.6 | 357337.2 | 535845   | 629717.8 | [M+K+NaCl             | 20  |
| 634938   | 1366710  | 479459.3 | 175562   | 583202.3 | 1395270  |                       | 13  |
| 1609497  | 689506.5 | 1245287  | 1425185  | 862567.4 | 697057.7 |                       | 46  |
| 591434.7 | 1786717  | 1923768  | 908111.6 | 364607.8 | 831984.9 |                       | 9   |
| 6950235  | 5398398  | 6940947  | 7300412  | 6391408  | 4804585  |                       | 137 |
| 5543757  | 3910355  | 6723566  | 3584550  | 4314335  | 708951   | [297][M]3+ [M+3H]3+ ! | 38  |
| 15795799 | 20108877 | 15636681 | 11786521 | 16096215 | 19109529 |                       | 4   |
| 988807.2 | 589003.1 | 2326441  | 1050218  | 1719627  | 619597.3 |                       | 179 |

|          |          |          |          |          |          |                      |     |
|----------|----------|----------|----------|----------|----------|----------------------|-----|
| 700237.2 | 1598755  | 1826110  | 375919.5 | 714044.4 | 1274450  |                      | 9   |
| 31853265 | 49532483 | 30239263 | 19650945 | 24219519 | 28660012 | [1211][M]+ [M+H+NH3  | 101 |
| 1788024  | 2307998  | 2816774  | 1523858  | 1846554  | 117834.3 |                      | 9   |
| 4662370  | 2952183  | 3603094  | 5172697  | 2677585  | 2255927  |                      | 2   |
| 2748913  | 586393.6 | 1754044  | 3012672  | 1293393  | 1094659  | [1213][M+1]+         | 2   |
| 459689.1 | 721355.7 | 538835.6 | 334095.5 | 252974.5 | 393580.8 | [173][M+1]3+         | 4   |
| 1638171  | 3116149  | 3966086  | 1200578  | 1328351  | 4374224  |                      | 1   |
| 832587   | 619624.9 | 932272.9 | 474831.5 | 834137.6 | 1115320  | [1173][M]+           | 17  |
| 2240068  | 2177305  | 3011789  | 1471852  | 1693918  | 3230169  |                      | 12  |
| 2509660  | 28740375 | 15443432 | 2156449  | 2358365  | 1223178  | [M+H]+ 21:           | 3   |
| 1.97E+09 | 3.26E+09 | 3.07E+09 | 1.37E+09 | 2.12E+09 | 2.49E+09 | [151][M]+ [M+Na]+ 2: | 18  |
| 3406424  | 5637380  | 6744222  | 2336894  | 3315582  | 2155049  |                      | 9   |
| 454613.6 | 513395.9 | 367390.3 | 416962.8 | 246933.2 | 464961.7 | [911][M+1]+          | 395 |
| 579782.3 | 1431550  | 1210577  | 864534.3 | 570424.7 | 738020.7 | [1429][M+1]+         | 134 |
| 590183.6 | 1007029  | 819771.6 | 779346.2 | 731364.6 | 555927.8 |                      | 33  |
| 128862.7 | 509979.2 | 533029.5 | 85958.38 | 487316.9 | 146772.3 |                      | 81  |
| 630958.3 | 693388.4 | 1228224  | 799231.2 | 1154953  | 390562.6 |                      | 9   |
| 6315431  | 1118728  | 291213.6 | 3688782  | 3364940  | 5902412  |                      | 41  |
| 1238793  | 2971359  | 3491977  | 874486.7 | 2046310  | 2126037  |                      | 9   |
| 448322.1 | 1076862  | 1096063  | 389632   | 569033.8 | 897868.7 |                      | 2   |
| 247939.6 | 609829.2 | 631581.9 | 426035.4 | 515273.4 | 492976.4 |                      | 39  |
| 1.27E+09 | 1.35E+09 | 1.11E+09 | 1.15E+09 | 1.38E+09 | 1.47E+09 | [1298][M]+           | 2   |
| 332937.5 | 891562.9 | 1310215  | 243080.7 | 165903.6 | 1395725  |                      | 9   |
| 7546510  | 9935780  | 11679588 | 7450691  | 7437432  | 5739616  | [603][M]3+           | 9   |
| 2954397  | 3838208  | 6076393  | 2602389  | 2571924  | 455471.7 | [71][M+1]+           | 9   |
| 5787841  | 1937512  | 5508249  | 5683396  | 9220714  | 5527994  |                      | 337 |
| 7566889  | 22088336 | 12670099 | 6796856  | 11817815 | 22192843 | [M+H-CO]+            | 3   |
| 3004265  | 2792338  | 2228709  | 3066469  | 4151011  | 2944286  | [M+H]+ 41:           | 15  |
| 1405446  | 1875577  | 2364870  | 934499   | 1068804  | 1050073  | [M+H]+ 37:           | 39  |
| 2718858  | 3397778  | 1706151  | 1685771  | 3402989  | 5630656  |                      | 9   |
| 6081678  | 13082065 | 3217041  | 4119751  | 619901.2 | 1606135  | [M+2H-CH4            | 3   |
| 6062160  | 7783200  | 6242543  | 4623999  | 6314270  | 7358810  |                      | 4   |
| 53967017 | 20199571 | 47179485 | 45357963 | 61175148 | 1790782  | [768][M+1]+          | 49  |
| 5630332  | 8944825  | 7705258  | 4152181  | 5984598  | 8771008  |                      | 9   |
| 1255807  | 1696855  | 1007546  | 417283.4 | 1335397  | 1762050  |                      | 4   |



|          |          |          |          |          |          |              |     |
|----------|----------|----------|----------|----------|----------|--------------|-----|
| 2.31E+08 | 1.97E+08 | 2.27E+08 | 2.49E+08 | 1.89E+08 | 1E+08    |              | 55  |
| 13316860 | 4118073  | 7751003  | 14023155 | 5684529  | 745379.7 |              | 2   |
| 3872323  | 2541516  | 6257140  | 23069888 | 4039857  | 3413226  | [1244][M+1]+ | 163 |
| 1731760  | 2617157  | 2053337  | 1574175  | 1368166  | 2799202  | [3M+2Na]2    | 23  |
| 506716.9 | 604182   | 168191.6 | 521657.5 | 794709.8 | 494163.1 |              | 9   |
| 5155969  | 7090137  | 10251627 | 3921301  | 4346871  | 1344482  | [807][M]+    | 9   |
| 758255.7 | 1130438  | 1384076  | 436314.2 | 458279.6 | 1476717  | [M+Na+Na     | 38  |
| 3119424  | 4041898  | 3699361  | 2516676  | 2953002  | 2951485  |              | 4   |
| 540831.6 | 496165.6 | 813593.2 | 226563.9 | 564866.2 | 608781.2 |              | 462 |
| 4798067  | 8350958  | 9711414  | 3721451  | 5345014  | 3436883  | [350][M]3+   | 9   |
| 575669.3 | 462760.4 | 719168.9 | 1028781  | 507780.6 | 433297.7 | [M+H]+ 89!   | 12  |
| 763022.8 | 11001533 | 1142225  | 4962036  | 12746362 | 8196267  | [M+H-C5H8    | 3   |
| 1296242  | 1285144  | 425944   | 282318.7 | 278874.6 | 676555.2 | [130][M+1]+  | 4   |
| 5281370  | 3333196  | 1293600  | 4624690  | 1165547  | 3238614  | [205][M+1]+  | 158 |
| 1216546  | 2156999  | 1616695  | 1950120  | 1246432  | 1045187  |              | 9   |
| 1011434  | 1375677  | 3707894  | 4010099  | 3752175  | 5124169  |              | 121 |
| 520944.5 | 930344.2 | 1434904  | 490574.4 | 593185.5 | 175307.2 |              | 9   |
| 865981.6 | 1422758  | 1194513  | 1975506  | 410332.8 | 848430.8 | [374][M+2]3+ | 9   |
| 1646009  | 978925.1 | 1125425  | 1876441  | 920692.7 | 2567294  |              | 1   |
| 5034314  | 6409820  | 5696383  | 3797190  | 5106834  | 6904284  | [157][M]2+   | 4   |
| 8387009  | 11624635 | 8517948  | 6839650  | 6110018  | 6255262  |              | 191 |
| 4145243  | 2628712  | 3816246  | 4205136  | 4974209  | 7083908  |              | 9   |
| 338074.1 | 506077.2 | 615000.1 | 393233.6 | 380008.6 | 182284.8 |              | 4   |
| 1642753  | 2655927  | 1955621  | 1046982  | 1375657  | 2930480  |              | 4   |
| 4259063  | 14293166 | 25115114 | 2120214  | 2565799  | 4352187  | [520][M]2+   | 52  |
| 4128177  | 9755323  | 15836949 | 3366689  | 5072819  | 3872646  |              | 9   |
| 927134.2 | 620775.4 | 1421998  | 251590.2 | 946747.7 | 520707   |              | 38  |
| 194735.6 | 178906.2 | 230363.2 | 184213.7 | 241398.9 | 161128.5 | [1027][M]2+  | 42  |
| 939500.5 | 1070021  | 203371.2 | 1740847  | 1042274  | 969905.3 | [596][M+1]+  | 44  |
| 1627605  | 2466745  | 3711034  | 1593086  | 1837578  | 6210603  |              | 9   |
| 2398622  | 1704342  | 2366541  | 2468380  | 1836492  | 851839.1 |              | 2   |
| 1049925  | 1260531  | 1653081  | 1053620  | 1039791  | 576678.2 | [177][M+1]+  | 4   |
| 959077.4 | 3008032  | 1387233  | 2717145  | 5942411  | 2873237  |              | 1   |
| 1972391  | 1760900  | 2126982  | 1338353  | 2834165  | 3388511  | [1180][M+3]+ | 17  |
| 1791415  | 4169386  | 3443998  | 1138217  | 2326599  | 3804845  | [1093][M]2+  | 9   |

|          |          |          |          |          |          |                                            |     |
|----------|----------|----------|----------|----------|----------|--------------------------------------------|-----|
| 1845825  | 4166505  | 4054737  | 1234963  | 2246089  | 2711996  |                                            | 9   |
| 7982796  | 6923069  | 6454420  | 7839031  | 4038926  | 4776410  | [M+H] <sup>+</sup> 58:                     | 20  |
| 466350.4 | 948940.7 | 790854.4 | 408836.2 | 499493.2 | 577631.9 |                                            | 4   |
| 482031.4 | 364609.8 | 163857.4 | 786754.9 | 373923.2 | 586734.9 |                                            | 309 |
| 933486.2 | 1128332  | 1182459  | 1213950  | 759774.9 | 495837.7 |                                            | 9   |
| 8713093  | 7713797  | 6454948  | 7721060  | 6350194  | 5936646  | [5][M] <sup>+</sup> [M+H] <sup>+</sup> 16: | 24  |
| 1054021  | 740989.9 | 1420636  | 704930.4 | 2612344  | 2653124  |                                            | 2   |
| 9282074  | 2046416  | 6994220  | 9939936  | 2959310  | 4065499  | [1253][M+4] <sup>+</sup>                   | 2   |
| 19614627 | 15407658 | 21126247 | 23667445 | 12578730 | 3353959  | [383][M] <sup>+</sup>                      | 204 |
| 1091112  | 1164787  | 1374818  | 1064228  | 1204112  | 698649.9 |                                            | 4   |
| 5852677  | 3479623  | 8272626  | 3774996  | 3484551  | 3727059  |                                            | 375 |
| 1237330  | 2649106  | 1949041  | 1447126  | 2336835  | 2400884  |                                            | 4   |
| 157435.9 | 171182.7 | 386618.7 | 223256.9 | 183973.4 | 107400.7 |                                            | 141 |
| 6092743  | 2483814  | 1606443  | 5800341  | 5061703  | 0        |                                            | 1   |
| 3219405  | 4803332  | 3237551  | 1570368  | 3136578  | 5791553  |                                            | 4   |
| 1108125  | 1846752  | 780676   | 873806.7 | 1527859  | 2174794  |                                            | 9   |
| 672227.8 | 445123.7 | 663218.2 | 692342   | 359414.5 | 308944.2 | [349][M+1] <sup>+</sup>                    | 319 |
| 1060904  | 939733.3 | 912631   | 726551.3 | 589148.5 | 600660.2 | [137][M+1] <sup>+</sup>                    | 117 |
| 902688.3 | 978649   | 1229672  | 988955.8 | 903445.9 | 409299.6 |                                            | 4   |
| 1397733  | 3089827  | 2130132  | 1114443  | 2265831  | 2510368  |                                            | 9   |
| 251997   | 209201.7 | 369124.3 | 605381.3 | 509310.5 | 990652.7 | [M+Na] <sup>+</sup> 5:                     | 33  |
| 1336569  | 2100962  | 2649742  | 1297542  | 2071061  | 562369.2 |                                            | 4   |
| 1634991  | 4135872  | 3952820  | 1149349  | 2210470  | 2836850  |                                            | 9   |
| 13558626 | 19453754 | 20402555 | 10832118 | 14153765 | 12443499 |                                            | 9   |
| 1457880  | 1833968  | 18663509 | 1983076  | 1345827  | 18233866 |                                            | 9   |
| 498545   | 1167968  | 729348   | 362506.8 | 821049.6 | 977453.1 | [3M+Na+K]                                  | 13  |
| 485575.5 | 492833.6 | 496490.2 | 206277   | 135626.4 | 422046.9 |                                            | 328 |
| 3654933  | 5994988  | 7150109  | 2412556  | 3575324  | 2067033  | [850][M] <sup>+</sup>                      | 9   |
| 114709.8 | 1523104  | 1464916  | 241817.4 | 1230100  | 1343785  |                                            | 9   |
| 5482513  | 6870897  | 9724473  | 5170621  | 4636796  | 3668389  |                                            | 9   |
| 493079.8 | 1462578  | 677220.1 | 348758.8 | 648078   | 761790.2 |                                            | 137 |
| 69244880 | 1.05E+08 | 77465788 | 92523194 | 45210582 | 1.12E+08 | [M+K+NaCl]                                 | 13  |
| 6210005  | 12701823 | 9598727  | 4747318  | 12619802 | 9357980  | [1615][M+1] <sup>3+</sup>                  | 9   |
| 354744.1 | 1102475  | 1756474  | 602804.4 | 690524   | 857819.4 |                                            | 1   |
| 774817.6 | 417595.6 | 862909.5 | 373327.1 | 1007799  | 735744.7 | [3M+H+K] <sup>2</sup>                      | 5   |

|          |          |          |          |          |          |                      |     |
|----------|----------|----------|----------|----------|----------|----------------------|-----|
| 184532.6 | 183507.6 | 230765.1 | 182958   | 201790.9 | 89188.49 |                      | 16  |
| 28014573 | 38503299 | 48800980 | 9576507  | 26814130 | 23778029 |                      | 315 |
| 1599317  | 1628009  | 1529715  | 1495673  | 1581982  | 1037544  | [196][M+1]+          | 25  |
| 946251.4 | 2291131  | 1631159  | 824952.5 | 1207094  | 768358.8 |                      | 9   |
| 720754.9 | 656800.3 | 596840.9 | 490762.4 | 431260.3 | 118549.2 |                      | 283 |
| 882409.1 | 2548722  | 5979083  | 42877504 | 40446523 | 4908598  | [M+2H]2+             | 3   |
| 3099679  | 3864374  | 2238486  | 27381298 | 4826255  | 18620201 |                      | 2   |
| 1398734  | 7704965  | 8645494  | 710689.7 | 5531308  | 3643192  |                      | 20  |
| 1176246  | 1565756  | 1560202  | 1006464  | 1261010  | 587385.7 | [376][M]2+           | 4   |
| 4089498  | 3597082  | 2526236  | 3572815  | 5396605  | 5110686  |                      | 14  |
| 4602418  | 3008337  | 2905174  | 3606940  | 201441.9 | 10187676 |                      | 1   |
| 1501965  | 2065789  | 6016342  | 798608.1 | 5258115  | 3506245  |                      | 6   |
| 767873   | 473483.8 | 558848.7 | 4998755  | 857358.2 | 8165420  | [M+Na+NH             | 5   |
| 1489703  | 1125790  | 1162111  | 1307984  | 1424290  | 146310.5 |                      | 4   |
| 2315855  | 9649892  | 1794880  | 1637025  | 9084991  | 2409436  |                      | 21  |
| 43165953 | 42704051 | 29689765 | 37639692 | 47639100 | 49338553 |                      | 2   |
| 16450879 | 7669332  | 16824736 | 14377566 | 18574447 | 2259386  |                      | 1   |
| 847313.1 | 4924542  | 2094383  | 2554573  | 3488493  | 5509796  | [M+K]+ 53            | 3   |
| 4628990  | 7831565  | 10559623 | 3661881  | 4924751  | 2114781  |                      | 9   |
| 731202.9 | 596871.3 | 915757.5 | 486514.8 | 695527.4 | 411069.5 | [1224][M]+           | 23  |
| 3573798  | 2129498  | 3469817  | 3439582  | 9977218  | 3376871  |                      | 385 |
| 4899251  | 7783272  | 5201337  | 3092702  | 4004669  | 7272757  | [1116][M]+ [M+Na]+ 5 | 101 |
| 2897520  | 3273215  | 2824860  | 3342065  | 4798093  | 4121064  |                      | 295 |
| 539422.9 | 285115   | 361975   | 399856.4 | 456945.6 | 0        |                      | 204 |
| 1137362  | 2379902  | 1654264  | 612128.7 | 1436513  | 1919645  |                      | 9   |
| 2778388  | 4087111  | 2953261  | 1559073  | 2733307  | 4629990  |                      | 4   |
| 12843087 | 18668530 | 9758085  | 11801247 | 13770596 | 15233878 |                      | 2   |
| 3843882  | 1710488  | 3298216  | 4042951  | 1443057  | 2426276  |                      | 2   |
| 38634675 | 30689460 | 38855811 | 36854933 | 25548394 | 28294143 | [271][M+1]+          | 61  |
| 2031851  | 964289.4 | 2274675  | 913960.5 | 1453838  | 2276283  | [925][M+1]+          | 23  |
| 93008.38 | 304494.4 | 404404   | 41879.56 | 257700.3 | 129310.1 | [M+Na]+ 3            | 20  |
| 13520024 | 24007043 | 373614.1 | 268489.3 | 260442.3 | 120434.1 |                      | 51  |
| 85170276 | 3E+08    | 37217833 | 76994907 | 48127029 | 3E+08    |                      | 216 |
| 399451.6 | 1440614  | 449394   | 936715.2 | 751136.1 | 2265410  | [207][M+1]+          | 4   |
| 14930336 | 15920276 | 14065015 | 12272123 | 13396162 | 19312643 | [402][M]+ [M+Na]+ 3  | 72  |

|          |          |          |          |          |          |               |     |
|----------|----------|----------|----------|----------|----------|---------------|-----|
| 223010.6 | 512837.7 | 470989.7 | 0        | 56855.63 | 394713.3 |               | 81  |
| 1268104  | 1829364  | 2358244  | 1275875  | 3261508  | 5306294  | [839][M+2]+   | 1   |
| 3532025  | 3383520  | 4716221  | 4691452  | 10956988 | 1196795  |               | 1   |
| 1054438  | 1100804  | 1146512  | 119325.1 | 1143142  | 322418.5 |               | 1   |
| 328151.9 | 366697.8 | 302426.2 | 270083.5 | 362990.7 | 448219.7 | [M+Na]+ 5:    | 42  |
| 1231894  | 1404292  | 502719.8 | 698095.9 | 913691.8 | 1259015  |               | 12  |
| 1.53E+08 | 2.72E+08 | 1.93E+08 | 1.17E+08 | 1.65E+08 | 2.16E+08 |               | 1   |
| 5143598  | 1893239  | 3638157  | 14554769 | 23162452 | 13293181 |               | 21  |
| 688003.1 | 287979.1 | 1101141  | 1049523  | 505316.2 | 211807.5 | [1084][M+1]2+ | 38  |
| 600616.5 | 1299589  | 696960.5 | 388245   | 615010.7 | 1088927  |               | 9   |
| 1334276  | 864380.5 | 1491077  | 1230489  | 861781.9 | 0        |               | 9   |
| 3492497  | 1936256  | 1525043  | 4978360  | 3176455  | 1241418  | [M+K]+ 18:    | 46  |
| 1770911  | 1519181  | 1480521  | 1785550  | 1238076  | 1447792  | [222][M+1]+   | 61  |
| 596249.1 | 1008760  | 1024476  | 757209.8 | 916124.7 | 531000.4 |               | 4   |
| 1094880  | 1235119  | 6934965  | 281744   | 569227.4 | 7020697  | [998][M+1]+   | 101 |
| 3967264  | 4340829  | 3646652  | 3428796  | 5078219  | 4884145  |               | 2   |
| 4403939  | 8026974  | 5980669  | 3138080  | 5808665  | 6678428  |               | 9   |
| 131146.5 | 240482.2 | 531276.9 | 1639942  | 1611659  | 134273.2 |               | 281 |
| 15810417 | 1096605  | 12074223 | 7425731  | 12899707 | 7835229  |               | 6   |
| 2323411  | 464575.8 | 2109293  | 1429670  | 813335.4 | 2365736  | [M+2Na]2+     | 8   |
| 791897.8 | 860685.2 | 380390.3 | 450166.6 | 947861.4 | 365707   |               | 4   |
| 1171711  | 2540345  | 1088383  | 1104425  | 757713.9 | 1474500  | [1100][M+2]+  | 101 |
| 6166119  | 5812618  | 7599719  | 8432593  | 4730342  | 2691264  |               | 234 |
| 2071667  | 3995020  | 6055407  | 1833696  | 2237487  | 1667946  |               | 9   |
| 2922325  | 5285924  | 5857056  | 2036720  | 3905630  | 2848588  |               | 9   |
| 2639593  | 4042311  | 2067745  | 1837736  | 3448253  | 5941573  |               | 9   |
| 14960963 | 19748119 | 17849154 | 8066559  | 6614245  | 11822915 | [M+Na]+ 1!    | 20  |
| 5399605  | 10327694 | 11857754 | 4139435  | 6022914  | 5034173  |               | 9   |
| 5390495  | 5036334  | 5345557  | 5302788  | 5273210  | 4907032  |               | 307 |
| 2702357  | 2700039  | 3771973  | 4037413  | 3501057  | 9186308  |               | 1   |
| 4196862  | 5389029  | 3961976  | 3136221  | 4086176  | 5905385  |               | 2   |
| 35132273 | 23770345 | 45426186 | 20418893 | 27482959 | 13204236 |               | 85  |
| 2519496  | 239917.6 | 18161417 | 23158596 | 2038149  | 4307735  |               | 2   |
| 1438042  | 1514811  | 1521884  | 1270376  | 1376146  | 1182066  |               | 4   |
| 1451966  | 887262.2 | 1278790  | 1390725  | 1049041  | 2980318  |               | 2   |

|          |          |          |          |          |          |                                      |     |
|----------|----------|----------|----------|----------|----------|--------------------------------------|-----|
| 1.69E+08 | 1.72E+08 | 2.27E+08 | 2.12E+08 | 2.16E+08 | 1.38E+08 | [M+H] <sup>+</sup> 37                | 3   |
| 2152128  | 357007.1 | 160526.8 | 1171302  | 1248344  | 2731901  |                                      | 1   |
| 4948362  | 5461844  | 5065828  | 4747934  | 7461991  | 5144736  |                                      | 191 |
| 342613.7 | 1111195  | 566548.9 | 394965.1 | 378544.1 | 2181115  |                                      | 4   |
| 721842.6 | 1663792  | 950283.7 | 1062131  | 1026469  | 1393623  | [1411][M+2] <sup>+</sup>             | 49  |
| 2334075  | 2714613  | 2255832  | 1743640  | 1984698  | 2776675  | [700][M+2] <sup>+</sup>              | 31  |
| 1651572  | 2967380  | 3812691  | 1315567  | 1894894  | 692201.5 |                                      | 9   |
| 887239.2 | 1477563  | 1605923  | 855350.2 | 640086.3 | 603751.6 |                                      | 4   |
| 307346.6 | 104801   | 155280.1 | 326984.9 | 155355.5 | 263455.8 |                                      | 63  |
| 666473   | 662127.8 | 701253.2 | 262765.1 | 1561567  | 57993.62 | [M+2H-H2O]                           | 12  |
| 1.75E+08 | 15486057 | 2760333  | 1.26E+08 | 2.05E+08 | 17663633 | [M+2H-C4H8]                          | 3   |
| 39733560 | 69917575 | 44168917 | 20863561 | 59587441 | 1.24E+08 |                                      | 99  |
| 932262.3 | 1344743  | 1936937  | 1666660  | 834715.3 | 1927073  | [1502][M]2 <sup>+</sup>              | 23  |
| 341398.9 | 471155.7 | 944656.2 | 394993.3 | 238867.2 | 355927.4 |                                      | 4   |
| 7395698  | 7125801  | 5117622  | 3997124  | 8991403  | 6804522  | [694][M+2]2 <sup>+</sup>             | 15  |
| 6148156  | 2996674  | 3935671  | 2203931  | 4058907  | 7605778  |                                      | 208 |
| 4717103  | 2327948  | 2570956  | 5097589  | 2205602  | 4060563  |                                      | 2   |
| 904480.9 | 1401774  | 1693974  | 1014999  | 715232.3 | 0        |                                      | 9   |
| 1874735  | 2082601  | 1903860  | 1790302  | 3163268  | 3659458  | [1136][M+3]2 <sup>+</sup>            | 2   |
| 1831090  | 1798934  | 1766949  | 2074567  | 1533772  | 850755   | [326][M+2] <sup>+</sup>              | 55  |
| 6211814  | 12483007 | 12551215 | 4144215  | 7059089  | 9931537  |                                      | 9   |
| 790584.4 | 1109368  | 891264.4 | 703181.1 | 773055   | 856091.1 | [2M+H+K]2                            | 134 |
| 379825.5 | 469650.2 | 803467.1 | 964849.3 | 209084.4 | 406802.4 |                                      | 64  |
| 7214752  | 6918195  | 8372023  | 7171445  | 6839956  | 6515314  |                                      | 310 |
| 587065.1 | 688275.7 | 392252.7 | 530158.6 | 439394.7 | 321865.3 |                                      | 319 |
| 2238800  | 1532574  | 1889890  | 2774413  | 1037910  | 1651770  | [M+K] <sup>+</sup> 36                | 20  |
| 1931094  | 5020527  | 462814.5 | 3153116  | 1492038  | 1499133  |                                      | 1   |
| 688801.5 | 989918.8 | 1376350  | 478016.3 | 740130.7 | 278757.4 |                                      | 9   |
| 4654774  | 3855641  | 4325927  | 3129136  | 8174305  | 4319810  |                                      | 425 |
| 6504093  | 664549.7 | 5363973  | 7030453  | 1104448  | 4957535  |                                      | 9   |
| 1345374  | 1882642  | 885466.8 | 629700.4 | 1401690  | 1994093  |                                      | 4   |
| 802333.5 | 1590341  | 562961.5 | 1811428  | 2616619  | 1218415  | [M+Na+NH <sub>4</sub> ] <sup>+</sup> | 3   |
| 23400563 | 2820171  | 1188934  | 18112576 | 26089379 | 1420857  |                                      | 3   |
| 1699338  | 895575.3 | 137915.8 | 1072407  | 2972419  | 2481519  | [M+H] <sup>+</sup> 30                | 3   |
| 2351534  | 605349.3 | 1371074  | 2957289  | 1491035  | 832651.3 | [144][M+2] <sup>+</sup>              | 9   |

|          |          |          |          |          |          |              |     |
|----------|----------|----------|----------|----------|----------|--------------|-----|
| 4530917  | 4647493  | 1397112  | 4120765  | 1048599  | 6886875  | [919][M+1]+  | 1   |
| 4193813  | 1488571  | 157601.3 | 3020060  | 2197062  | 2599434  |              | 21  |
| 837536.5 | 245715.9 | 1040341  | 682625.8 | 801715.9 | 2115541  |              | 9   |
| 3798856  | 1025630  | 2037031  | 1393416  | 4792594  | 6545591  |              | 1   |
| 510048.2 | 403333.1 | 267262.9 | 416495.8 | 337151.3 | 195835.2 |              | 91  |
| 690694.8 | 560728   | 1215707  | 497695.4 | 552656.4 | 577028   | [M+H-C4H8]   | 39  |
| 2174886  | 7721552  | 4510946  | 4381858  | 8236689  | 5612008  |              | 2   |
| 1860020  | 1490627  | 1056120  | 2232741  | 812846.4 | 830772.9 | [M+H-CH2]    | 93  |
| 748868.1 | 1533011  | 889907.1 | 610094.9 | 196513.2 | 637135.1 | [1314][M+2]+ | 101 |
| 6420999  | 6060276  | 5811058  | 4006385  | 6851833  | 6776311  |              | 321 |
| 384337.8 | 52483477 | 46363394 | 37851641 | 67520914 | 66458001 |              | 76  |
| 4339499  | 4451076  | 5514824  | 2489064  | 4424530  | 4032915  |              | 375 |
| 1.41E+08 | 1.13E+08 | 1.7E+08  | 1.13E+08 | 1.23E+08 | 25979603 | [M+2H]2+     | 38  |
| 3918251  | 4433083  | 6247214  | 3175270  | 2805008  | 1396278  |              | 9   |
| 8150291  | 11249390 | 4500559  | 3160913  | 560491.4 | 19434420 |              | 3   |
| 190712.4 | 240379.6 | 143747.1 | 205464.5 | 195683   | 66582.13 | [645][M+1]+  | 25  |
| 1336451  | 3247886  | 3596785  | 992806.6 | 1847506  | 2042173  |              | 9   |
| 407387.5 | 470135.2 | 495655.5 | 359656.4 | 267628.6 | 189946.9 | [881][M+1]+  | 160 |
| 864438.8 | 1434755  | 673277.7 | 485256.9 | 1060818  | 1230607  |              | 9   |
| 530660.8 | 1090608  | 1054869  | 128100.4 | 486547.3 | 3205319  | [3M+2K]2+    | 11  |
| 5781581  | 6032487  | 6242471  | 6623655  | 6328372  | 5375923  |              | 266 |
| 1.01E+09 | 3.55E+08 | 8.65E+08 | 9.18E+08 | 1947758  | 3668887  | [424][M+2]2+ | 2   |
| 1714894  | 969805.2 | 1285364  | 1078165  | 1157355  | 105620.8 |              | 476 |
| 809511.4 | 860182   | 910638.3 | 566992.9 | 969399.6 | 1168056  | [1176][M]+   | 17  |
| 12129159 | 15437152 | 13236238 | 8813069  | 10959561 | 11115354 |              | 4   |
| 8937902  | 2351306  | 7984541  | 9700536  | 2561260  | 2531815  |              | 2   |
| 695707.9 | 991406.3 | 624108.7 | 681491.9 | 613859.8 | 345449.6 |              | 4   |
| 1754747  | 1645519  | 2198281  | 938307.8 | 1662160  | 1548358  |              | 18  |
| 345763.9 | 197313.6 | 394250.4 | 1025112  | 239522.1 | 516282.1 |              | 28  |
| 3128620  | 2681942  | 884829.9 | 2276129  | 1821716  | 4414653  |              | 86  |
| 2727504  | 3361641  | 3279083  | 2338202  | 2797296  | 5442199  | [473][M+1]+  | 18  |
| 966166   | 6417287  | 580663   | 1414300  | 3510595  | 6715400  | [M+2Na-H]    | 3   |
| 5148553  | 2833415  | 5666092  | 6875518  | 5746270  | 4732205  |              | 2   |
| 2652067  | 5593592  | 3763754  | 862367   | 1466652  | 4950139  | [M+Na+2K]    | 3   |
| 6271219  | 10356589 | 4278213  | 5121708  | 8634475  | 14875640 | [1006][M]2+  | 9   |

|          |          |          |          |          |          |              |     |
|----------|----------|----------|----------|----------|----------|--------------|-----|
| 1211952  | 583134.7 | 736094.4 | 1625859  | 1280413  | 79882.37 |              | 4   |
| 61091.23 | 78150.99 | 80655.76 | 55546.36 | 78448.54 | 42452.06 |              | 116 |
| 1689935  | 2927606  | 2065341  | 902896.8 | 1849078  | 3062334  |              | 9   |
| 1599517  | 0        | 1421213  | 2147645  | 1612946  | 300920.5 | [M+Na]+ 80   | 14  |
| 582564.2 | 1541421  | 1426192  | 291378.4 | 863445.1 | 855374.4 | [M+K]+ 363   | 46  |
| 1535959  | 1422618  | 1957875  | 1447838  | 1538436  | 585457.3 | [1071][M]+   | 17  |
| 3741406  | 2122859  | 2756203  | 6151413  | 4153807  | 1186169  |              | 2   |
| 755381.3 | 2474978  | 1204930  | 581720.9 | 1358118  | 5588026  |              | 9   |
| 8293367  | 8610151  | 6984142  | 4313553  | 4672266  | 6821383  |              | 2   |
| 407977.3 | 493799.1 | 399873.2 | 538990.8 | 419126.6 | 740507.7 | [M+Na]+ 39   | 110 |
| 2239430  | 1449240  | 647765.3 | 1402665  | 2812374  | 1711638  | [17][M+1]+   | 1   |
| 309696.5 | 1066541  | 1286052  | 423339.4 | 545511.6 | 1504071  |              | 9   |
| 2278120  | 3731737  | 4032753  | 2021766  | 2167276  | 2359506  |              | 9   |
| 771217.7 | 2773951  | 482347.1 | 847857.7 | 629577.7 | 4236731  |              | 4   |
| 16913992 | 13427875 | 30515011 | 52156431 | 49652139 | 18056454 |              | 9   |
| 2757117  | 2771888  | 3280379  | 2734294  | 4353118  | 7944359  | [356][M+3]3+ | 2   |
| 8250628  | 12082292 | 13685842 | 6470372  | 7884243  | 10070678 | [M+H-CH4]    | 20  |
| 312255.8 | 317222.5 | 247917.7 | 220390.4 | 232420.1 | 0        | [M+H]+ 92    | 159 |
| 868203.7 | 1208320  | 2042110  | 637083.7 | 737074   | 642042.2 |              | 9   |
| 17069181 | 7185118  | 14327981 | 11836299 | 13482151 | 451347.6 | [527][M+1]2+ | 150 |
| 1025319  | 1963180  | 2385169  | 629477.6 | 1435377  | 704549.3 |              | 9   |
| 600657.1 | 1171889  | 1485338  | 470122.4 | 612153.9 | 509850   |              | 9   |
| 1919479  | 3631961  | 2863074  | 1249993  | 2469234  | 2939047  |              | 9   |
| 646321.2 | 2469415  | 2327407  | 421265.9 | 1123134  | 802610.4 | [M+H]+ 183   | 14  |
| 913259.6 | 1477109  | 1426184  | 737666.2 | 1026845  | 348179.3 | [M+H]+ 323   | 8   |
| 17937230 | 18152608 | 14536895 | 13791224 | 20881463 | 21411488 |              | 2   |
| 13469966 | 19888283 | 19946879 | 10635709 | 14016517 | 12739807 |              | 9   |
| 131161.4 | 206645.1 | 190292.9 | 304834.3 | 99675.8  | 219184.1 | [3M+Na+K]    | 16  |
| 3433676  | 3511730  | 4066547  | 4082591  | 3327358  | 4592342  | [M+H+NH3]    | 159 |
| 71668869 | 62039241 | 62398479 | 67932009 | 49674673 | 49430105 | [141][M]+    | 126 |
| 2961169  | 4245229  | 4434656  | 2658588  | 2816366  | 2633796  | [968][M+1]+  | 9   |
| 1011868  | 1445445  | 952745.8 | 676507.3 | 1100394  | 1802465  | [986][M+1]+  | 110 |
| 3040369  | 1560421  | 2946440  | 4302386  | 1804109  | 0        |              | 2   |
| 2182922  | 5031903  | 4564135  | 5100533  | 4191298  | 11073342 |              | 1   |
| 576007.6 | 293158.2 | 891989.3 | 687873.6 | 523013   | 627818.7 | [1128][M+2]+ | 196 |

|          |          |          |          |          |          |                     |     |
|----------|----------|----------|----------|----------|----------|---------------------|-----|
| 3645544  | 7597525  | 3542972  | 1539998  | 3579236  | 3331467  |                     | 326 |
| 3257337  | 1442398  | 3109948  | 3771100  | 1480591  | 7035589  | [M+Na+2K-           | 6   |
| 5413491  | 5227504  | 7040339  | 2338655  | 5062619  | 3461642  |                     | 335 |
| 13417436 | 17196307 | 14954556 | 10058476 | 13417557 | 18936968 |                     | 4   |
| 5118783  | 10385427 | 11508816 | 5921745  | 7139437  | 6857694  |                     | 18  |
| 2156813  | 2743861  | 2317737  | 1860740  | 3394429  | 2218549  |                     | 9   |
| 4350326  | 10090763 | 2738325  | 3860930  | 4301261  | 3386906  |                     | 411 |
| 2011054  | 3280970  | 3162452  | 1492805  | 2089192  | 1852136  |                     | 9   |
| 570689.3 | 808523.3 | 874327.6 | 394567.7 | 416759.8 | 145748.3 |                     | 4   |
| 251051.7 | 90932.42 | 414925.3 | 265097.1 | 1855028  | 242509.7 | [319][M+1]+         | 256 |
| 132636   | 178601.8 | 142300.8 | 157242.4 | 147748.2 | 86912.74 | [119][M+1]2+        | 17  |
| 490511.8 | 422316.8 | 929216.9 | 389980.2 | 888780   | 365480.3 |                     | 62  |
| 399270   | 1507638  | 962218.6 | 103667.2 | 99458.82 | 678173.1 | [M+K]+ 332          | 46  |
| 6329090  | 15702919 | 8907853  | 3471815  | 12825403 | 15724124 | [3M+2Na+]           | 3   |
| 795968.9 | 832105.4 | 776898.7 | 122511.3 | 609153.8 | 1515069  |                     | 282 |
| 1684781  | 4156818  | 4086690  | 1190994  | 2156342  | 2846517  | [639][M+2]+         | 9   |
| 4319291  | 4613439  | 4422573  | 3805333  | 3679215  | 4230657  | [355][M+3]3+        | 2   |
| 14552436 | 17093419 | 18077725 | 16143215 | 15662683 | 5543701  |                     | 13  |
| 4349069  | 4935438  | 4227613  | 6374327  | 3199563  | 4203173  |                     | 344 |
| 7650902  | 10893249 | 3509647  | 5321768  | 3797746  | 10377429 | [662][M+1]+         | 125 |
| 962184.1 | 1607924  | 2478535  | 895927.7 | 1160320  | 80713.74 |                     | 9   |
| 2578563  | 2247078  | 4146338  | 2144689  | 2419527  | 2296512  |                     | 2   |
| 7615067  | 7189904  | 5911587  | 2661643  | 5952256  | 6030172  |                     | 325 |
| 623739.4 | 530790.9 | 819171.7 | 691521   | 403922.3 | 83323.61 |                     | 240 |
| 793599.5 | 870457.4 | 655849.1 | 204555.9 | 1349183  | 3446245  | [M+H]+ 310          | 97  |
| 2348606  | 4887563  | 3415563  | 1308396  | 2840323  | 6239400  | [1090][M]2+         | 9   |
| 4315475  | 5499404  | 4699991  | 3207793  | 4248180  | 5771530  |                     | 4   |
| 5176434  | 5830093  | 4798950  | 3120440  | 4774310  | 5393260  | [220][M]2+          | 4   |
| 3685155  | 1748147  | 859374.9 | 3127361  | 4958524  | 4463736  |                     | 1   |
| 621826.8 | 635006.4 | 426899.4 | 655338.2 | 410818.2 | 459580.7 | [214][M+1]+         | 124 |
| 7966457  | 7489808  | 7489839  | 8999645  | 6923330  | 6607360  |                     | 174 |
| 69989234 | 60902473 | 64796063 | 71538640 | 72742909 | 44536301 |                     | 2   |
| 2669030  | 5121053  | 7413711  | 2735054  | 3088811  | 941235   |                     | 9   |
| 1458394  | 2048013  | 1597610  | 1240516  | 1718444  | 1979326  |                     | 4   |
| 3589708  | 8783981  | 13305484 | 1641111  | 1882563  | 5072322  | [933][M]+ [M+H+CF3O | 20  |



|          |          |          |          |          |          |               |     |
|----------|----------|----------|----------|----------|----------|---------------|-----|
| 1095582  | 1035876  | 5814956  | 8189269  | 9127531  | 2708580  | [M+2H-NH      | 6   |
| 145711.5 | 135884.2 | 118467.5 | 91610.49 | 139318   | 96201.45 | [1112][M+1]+  | 211 |
| 18214840 | 25478411 | 19170515 | 12096890 | 17967725 | 26565291 |               | 4   |
| 4253941  | 6501663  | 5407696  | 2813884  | 5144966  | 5601622  |               | 9   |
| 7432643  | 5684137  | 1955467  | 5816216  | 9225446  | 1988792  | [M+Na]+ 5:    | 3   |
| 1646155  | 1449954  | 2556114  | 2127705  | 1318882  | 2399012  | [M+Na+K]2     | 57  |
| 4107131  | 6697935  | 6224290  | 2902539  | 4791287  | 5400427  |               | 18  |
| 8795570  | 2006059  | 4025047  | 8807923  | 7862716  | 3108617  |               | 344 |
| 13580576 | 9149695  | 17058890 | 18527795 | 14900302 | 7367510  | [1411][M]+    | 49  |
| 539249.1 | 959714.6 | 791975.1 | 400713.9 | 669566.5 | 1025596  |               | 4   |
| 1395502  | 2645211  | 2864050  | 927050.2 | 2088871  | 1792773  | [3M+H+K]2     | 8   |
| 1521795  | 849914.8 | 1039031  | 832530.4 | 1092355  | 701176   |               | 4   |
| 362148.6 | 983318.9 | 1328271  | 2131148  | 454178.2 | 574278   |               | 9   |
| 1363998  | 2138425  | 7018474  | 6471513  | 2030430  | 4892468  | [1142][M+2]2+ | 2   |
| 1080144  | 590168.2 | 1133722  | 1471925  | 1096248  | 0        |               | 1   |
| 5489331  | 5196790  | 2615750  | 17044563 | 183159.5 | 3979614  |               | 242 |
| 683767.1 | 1280947  | 995442.2 | 614605.4 | 859461.2 | 667043.8 |               | 4   |
| 1028228  | 2095160  | 2103790  | 1554936  | 1386586  | 1147537  |               | 4   |
| 159106.4 | 0        | 351990   | 207446.1 | 910632.6 | 1786744  |               | 2   |
| 8039060  | 10781099 | 7760362  | 5926050  | 9191314  | 22455632 |               | 12  |
| 1337117  | 1502415  | 1524510  | 1207705  | 1289608  | 941818.7 | [926][M]+     | 148 |
| 1187544  | 1679557  | 596849.5 | 2263661  | 1652254  | 1907008  |               | 4   |
| 421004.1 | 296929.5 | 585262.4 | 688746.5 | 138776   | 191748.7 | [558][M+1]+   | 136 |
| 5165926  | 4646296  | 5825429  | 4683312  | 5118344  | 3512266  | [M+2H-H2O     | 14  |
| 5471969  | 3251616  | 4527848  | 5504780  | 2155810  | 3065692  | [469][M+2]2+  | 2   |
| 2341618  | 854274.7 | 2258411  | 2398358  | 1014729  | 1240139  |               | 9   |
| 120115.6 | 135289.1 | 171008.8 | 88118.37 | 117198.4 | 42417.14 |               | 76  |
| 2246370  | 3509804  | 1181637  | 1589113  | 1594787  | 3590414  |               | 9   |
| 254797.4 | 300991.2 | 435471.4 | 374941.6 | 345305.8 | 72697.75 |               | 4   |
| 253934.7 | 266719.7 | 204500.3 | 145291   | 266712.9 | 409623.3 | [601][M+1]2+  | 232 |
| 3271200  | 3109011  | 3896713  | 2277313  | 3208384  | 2794030  | [M+Na+NH      | 11  |
| 2843970  | 2769889  | 2044084  | 3276539  | 1426497  | 2418732  |               | 225 |
| 2347840  | 1543104  | 2442038  | 2477598  | 1247654  | 3930454  |               | 2   |
| 5226425  | 893363.8 | 1153727  | 4560946  | 3633983  | 3110943  |               | 9   |
| 18095162 | 23065159 | 22639273 | 14601971 | 16991934 | 17773680 | [112][M]2+    | 4   |

|          |          |          |          |          |          |                      |     |
|----------|----------|----------|----------|----------|----------|----------------------|-----|
| 2644816  | 4611915  | 2142923  | 1980363  | 2104454  | 2798876  | [1078][M]+ [M+H]+ 59 | 101 |
| 1354053  | 2853428  | 2776742  | 789229.6 | 1297280  | 2375370  |                      | 9   |
| 844043.4 | 1480439  | 996780.7 | 720685.8 | 946427.5 | 663902.7 | [682][M+1]+          | 44  |
| 3951201  | 1127408  | 832036.6 | 294167.1 | 333182   | 4703398  |                      | 156 |
| 23466520 | 31759126 | 25789919 | 17633103 | 24142486 | 34467124 |                      | 4   |
| 2015443  | 1781348  | 1720265  | 1589390  | 1272676  | 654568.6 | [M+H]+ 41            | 33  |
| 573418.3 | 714603.8 | 419144   | 560651.4 | 402726.7 | 387602.3 |                      | 105 |
| 2291210  | 4854289  | 6066004  | 1764936  | 2367931  | 1297176  |                      | 9   |
| 26357236 | 32774483 | 30420388 | 21005357 | 25123097 | 19702187 |                      | 9   |
| 813423.8 | 1204005  | 1107488  | 699391.8 | 718522.8 | 1694863  |                      | 89  |
| 616431.3 | 1249673  | 845506.8 | 338108.9 | 670016.1 | 483397.9 | [M+H+NH3             | 41  |
| 574356.1 | 1819073  | 1459576  | 849354.7 | 1393797  | 694642.8 |                      | 9   |
| 849690.6 | 1440492  | 1107998  | 348431   | 716614.2 | 1256782  | [1402][M]+ [M+Na]+ 7 | 101 |
| 1326925  | 2024051  | 1578965  | 1267044  | 1389325  | 2022672  | [548][M+3]+          | 4   |
| 1205893  | 3019280  | 2723188  | 1464269  | 2509940  | 2282606  |                      | 1   |
| 9651187  | 7972062  | 8293932  | 8898792  | 6408929  | 5975108  | [141][M+1]+          | 126 |
| 3051475  | 1029863  | 2718458  | 2948653  | 2027678  | 3506171  |                      | 2   |
| 309710.5 | 232524.5 | 1728292  | 2978698  | 1399551  | 582092.8 |                      | 9   |
| 5515237  | 1811617  | 5109796  | 4894286  | 1.06E+08 | 78242436 | [M+2H]2+             | 6   |
| 1347777  | 967908.2 | 1468157  | 1980268  | 1113634  | 751086.2 | [1561][M]+           | 123 |
| 264577.7 | 1059766  | 1136734  | 729009.3 | 917441.6 | 425656.9 |                      | 4   |
| 665200.3 | 534346.4 | 3963733  | 1528617  | 576922.6 | 3408469  |                      | 9   |
| 1066065  | 1314324  | 1156762  | 604678.6 | 909269.1 | 1640281  |                      | 4   |
| 1595174  | 4289004  | 1040588  | 560804.8 | 3397776  | 4932773  |                      | 1   |
| 993573.6 | 1365548  | 1429579  | 897319.1 | 1124508  | 850776.5 |                      | 4   |
| 3365112  | 2092223  | 5017018  | 4904837  | 3826515  | 1685628  | [1500][M]+           | 367 |
| 2911882  | 3721475  | 3734644  | 7008078  | 3639989  | 3644080  |                      | 364 |
| 5666979  | 3431384  | 8873922  | 17739653 | 7613798  | 5003068  |                      | 308 |
| 4645070  | 3740258  | 3390488  | 4256084  | 4915947  | 933062.1 | [M+Na]+ 1            | 13  |
| 686439.9 | 628710.9 | 661506.6 | 829986.9 | 499409   | 362508.4 |                      | 173 |
| 2406769  | 1764670  | 2851196  | 2745123  | 2753424  | 1213566  | [1308][M+1]+         | 275 |
| 202574.3 | 650320.9 | 1441119  | 0        | 584834   | 0        |                      | 2   |
| 1340836  | 946514.7 | 1244646  | 283038   | 1170259  | 684508.4 | [1023][M+1]2+        | 343 |
| 4085960  | 700601.4 | 856987.5 | 4455834  | 4338912  | 235172   |                      | 2   |
| 4361275  | 2437672  | 2214536  | 2295114  | 2397963  | 3717567  |                      | 474 |

|          |          |          |          |          |          |              |     |
|----------|----------|----------|----------|----------|----------|--------------|-----|
| 960018.4 | 1216333  | 1200039  | 742225.4 | 853286.6 | 827524.5 |              | 7   |
| 701858.2 | 254463.9 | 1312612  | 1064928  | 1781474  | 81380.44 |              | 160 |
| 7429273  | 11954102 | 2119875  | 6677789  | 2274582  | 17452074 |              | 3   |
| 688588.9 | 1475453  | 1522102  | 528785.4 | 373164.8 | 688231.9 |              | 4   |
| 570005   | 1384665  | 1161003  | 590952.2 | 322070.8 | 964693.6 |              | 4   |
| 384222.3 | 362298.8 | 426483.7 | 342309.2 | 300255.4 | 209846.2 |              | 186 |
| 644210.7 | 812709.8 | 639188.8 | 317410.1 | 319502.4 | 953044   |              | 4   |
| 4173215  | 4655675  | 8530275  | 1501460  | 3138939  | 3685461  |              | 155 |
| 3193601  | 770081.3 | 2843434  | 4343142  | 1661541  | 1931999  |              | 2   |
| 674733.4 | 974777.8 | 643733.5 | 550307.1 | 771665.3 | 289476.9 |              | 4   |
| 7432824  | 4791787  | 4914436  | 4116590  | 9085747  | 1723098  |              | 438 |
| 3.26E+08 | 3.77E+08 | 4.42E+08 | 3.43E+08 | 3.57E+08 | 2.65E+08 | [549][M]+    | 9   |
| 792726.6 | 1374944  | 2229315  | 754608   | 820451   | 316577.6 | [277][M+1]3+ | 9   |
| 1756278  | 1815884  | 2702400  | 1328108  | 1416611  | 295021.5 | [70][M+1]+   | 9   |
| 2061040  | 1209607  | 3797280  | 1797781  | 1641176  | 188268.6 | [458][M+1]2+ | 139 |
| 36671893 | 37039212 | 38457393 | 27432590 | 34495561 | 57819986 | [M+3Na+K-    | 18  |
| 587680.2 | 632227.7 | 748340.4 | 502185.8 | 537157.5 | 369527.2 |              | 40  |
| 12285137 | 7822877  | 8730818  | 8982338  | 12883738 | 7542431  | [1300][M+1]+ | 2   |
| 1042057  | 1644156  | 1154819  | 827000.1 | 1384117  | 1757944  | [1240][M+1]+ | 4   |
| 1142533  | 1349462  | 1397697  | 863023.8 | 995785.7 | 546651.2 |              | 4   |
| 1492520  | 535975.6 | 672851.5 | 1044268  | 1090114  | 1219669  | [157][M+1]2+ | 4   |
| 150733.4 | 432980.1 | 294879.1 | 258151.1 | 309028.9 | 152098.5 |              | 516 |
| 1529095  | 1793786  | 1899143  | 1266439  | 1111723  | 954205.5 |              | 4   |
| 1635566  | 1628747  | 2036156  | 1226621  | 1465692  | 1007751  |              | 4   |
| 642113.2 | 841095.9 | 217021.5 | 1016019  | 432162.7 | 962891   | [M+Na]+ 9!   | 81  |
| 372387.8 | 166333.1 | 953562.2 | 544823.3 | 791667.9 | 645605.7 | [M+H]+ 25!   | 12  |
| 8002693  | 8388416  | 4701059  | 4963485  | 8528011  | 15488906 |              | 4   |
| 1360844  | 1696069  | 1454604  | 800722.9 | 1880895  | 2440449  |              | 2   |
| 4735960  | 5324990  | 4931741  | 4514833  | 3708676  | 6198119  |              | 314 |
| 2368620  | 1312071  | 2556707  | 790751   | 2918713  | 4150983  |              | 1   |
| 679447.5 | 1813479  | 2082202  | 620753.7 | 723099.6 | 888195.7 |              | 9   |
| 1827694  | 4047682  | 8248419  | 1443201  | 2016065  | 988053.9 | [1131][M]3+  | 9   |
| 2528076  | 955220.2 | 1841950  | 1277358  | 928263.3 | 1823020  |              | 205 |
| 5268151  | 5178891  | 4754354  | 5159084  | 4944760  | 4631559  |              | 241 |
| 2655074  | 2132155  | 3182926  | 3551873  | 929134.9 | 2209426  |              | 96  |

|          |          |          |          |          |          |                      |     |
|----------|----------|----------|----------|----------|----------|----------------------|-----|
| 592662.5 | 901226.5 | 915963.1 | 598488.5 | 971902.6 | 672840   |                      | 9   |
| 2055868  | 3756606  | 5539820  | 1327016  | 2023764  | 1074663  |                      | 9   |
| 208186.3 | 399128.4 | 241821.5 | 272167.7 | 81347.4  | 106999.4 | [1097][M+1]+         | 86  |
| 20806815 | 3277041  | 15284172 | 1348354  | 3538024  | 4100292  | [504][M+1]3+         | 2   |
| 1388565  | 1231379  | 1472128  | 1108492  | 1337406  | 654752.8 |                      | 17  |
| 378031.1 | 937484.4 | 1577699  | 533828.5 | 582289.2 | 866508.2 | [452][M+1]3+         | 18  |
| 2260873  | 5076905  | 4857927  | 2757161  | 2319918  | 4890794  | [M+2Na]2+            | 33  |
| 3471200  | 2332352  | 3662152  | 2871375  | 2959369  | 1253857  | [1317][M+1]+         | 4   |
| 18591876 | 14964092 | 11200636 | 12860358 | 15903179 | 21908696 |                      | 2   |
| 16849346 | 26425384 | 5541484  | 19178482 | 28776990 | 17305570 | [M+K]+ 339           | 11  |
| 1063645  | 651187.1 | 866928.6 | 809279.2 | 663030.1 | 163192.1 |                      | 4   |
| 658993.4 | 705574.1 | 583521.5 | 711477.8 | 816207.3 | 0        |                      | 4   |
| 4436018  | 588559.7 | 8743391  | 2947799  | 3142403  | 2518157  |                      | 356 |
| 1713838  | 2904557  | 3839805  | 1364570  | 2124955  | 738699.9 |                      | 9   |
| 577606.1 | 993812.6 | 1040078  | 787140.4 | 727957.4 | 436271.5 |                      | 4   |
| 485340.4 | 629698.1 | 2100186  | 1432218  | 798472.8 | 2113350  |                      | 9   |
| 579987.4 | 455127.1 | 700089.1 | 837122.5 | 141860.3 | 459522.8 | [1560][M+1]+         | 304 |
| 1021227  | 1383353  | 866837.9 | 1193667  | 1463279  | 2088061  | [3M+Na+2I            | 13  |
| 5820190  | 7382358  | 5686872  | 4512249  | 6289950  | 8942568  | [1192][M]+ [M+H-C4H8 | 23  |
| 1971821  | 495425.6 | 1530268  | 1124397  | 551152.1 | 1366228  | [M+K]+ 514           | 12  |
| 6549877  | 8149399  | 4385450  | 4336326  | 5958538  | 15307663 |                      | 9   |
| 4174892  | 7570453  | 4129449  | 2535882  | 3503043  | 4368172  | [1434][M]+           | 137 |
| 30429689 | 45838226 | 21854917 | 31773836 | 51770497 | 33433837 | [M+Na]+ 1!           | 13  |
| 1702832  | 2740794  | 1281197  | 1151307  | 2824578  | 1831720  |                      | 93  |
| 3396482  | 2233176  | 2875003  | 2857509  | 2359869  | 3672579  |                      | 2   |
| 865882.6 | 1139397  | 1896183  | 1096327  | 1040573  | 154006.7 |                      | 4   |
| 992037.2 | 1049394  | 2438442  | 833762.7 | 868844.2 | 653443.3 |                      | 9   |
| 902587.4 | 644226.7 | 1233108  | 829599   | 1017329  | 555976.8 | [232][M+1]2+         | 23  |
| 904823.6 | 1328912  | 1544827  | 766789.8 | 858591.7 | 446025   | [142][M+1]3+         | 9   |
| 7969503  | 6452822  | 6677657  | 6143071  | 5687984  | 4197311  |                      | 2   |
| 974499.6 | 135326.5 | 5569639  | 832361.3 | 829966.6 | 2604240  | [107][M+3]2+         | 9   |
| 6394602  | 6593505  | 765246.1 | 3051819  | 5124545  | 9290232  | [M+Na+HC             | 11  |
| 1405811  | 761719.5 | 3037541  | 2824171  | 3045424  | 3270589  |                      | 15  |
| 3987151  | 3652956  | 3748036  | 4714464  | 2856048  | 3850537  |                      | 226 |
| 164926.7 | 87390.51 | 101345.6 | 92640.66 | 143788.6 | 97146.43 |                      | 59  |

|          |          |          |          |          |          |                      |     |
|----------|----------|----------|----------|----------|----------|----------------------|-----|
| 1145318  | 292438.8 | 1435033  | 735076.3 | 622435.6 | 518810.1 | [2M+3H]3+            | 6   |
| 1024884  | 1968610  | 2384305  | 840657   | 1554249  | 941769.9 |                      | 9   |
| 792396.9 | 754953.4 | 900967.7 | 456778.2 | 718811.5 | 1076746  |                      | 4   |
| 5357639  | 1894997  | 4957496  | 4362591  | 1043986  | 1357824  | [3M+2Na+H]           | 29  |
| 3140307  | 2643174  | 2987617  | 3265656  | 2541043  | 3991688  | [M+K]+ 24%           | 226 |
| 1725443  | 475251.1 | 2134320  | 3461040  | 1926967  | 0        |                      | 14  |
| 1024433  | 1168715  | 1245682  | 627278.6 | 573998.6 | 1502319  |                      | 9   |
| 2990504  | 5066574  | 5782706  | 1994055  | 3885969  | 3318826  |                      | 9   |
| 4529214  | 8046878  | 5539495  | 3288326  | 6077617  | 7059490  | [807][M+2]+          | 9   |
| 278992   | 801269.3 | 250914.4 | 516196.7 | 250342.4 | 348266.5 | [1173][M+1]+         | 17  |
| 235757   | 671058   | 1299732  | 193011.9 | 209025.4 | 378945   | [3M+H+K]2            | 20  |
| 524291.5 | 782268.1 | 948015.2 | 406748.4 | 572050.9 | 260379.5 | [M+Na+NH3]           | 8   |
| 56528029 | 42893286 | 20761056 | 1.01E+08 | 47789094 | 42403347 | [299][M]+ [M+H]+ 30% | 33  |
| 1810111  | 1172139  | 1360881  | 1414113  | 1009730  | 481045.2 |                      | 4   |
| 1219378  | 2102908  | 33639954 | 15844322 | 1780699  | 15358013 |                      | 6   |
| 2581875  | 1649366  | 1997689  | 3894871  | 1955855  | 814533   | [M+H+NH3]            | 14  |
| 538323.4 | 162491.1 | 124053.5 | 315590.5 | 148014.8 | 870423.9 | [143][M+1]+          | 287 |
| 1.35E+08 | 2.11E+08 | 1.57E+08 | 1.28E+08 | 1.34E+08 | 1.82E+08 |                      | 1   |
| 1271319  | 1307942  | 1580564  | 1148448  | 1200735  | 764643.5 | [219][M+1]+          | 4   |
| 9552827  | 11847082 | 11825312 | 7580943  | 8849036  | 9653202  |                      | 4   |
| 324763.7 | 774117   | 1298894  | 200225   | 524901.7 | 390801.9 |                      | 9   |
| 1747252  | 1373847  | 2030380  | 1808333  | 1487841  | 3346897  |                      | 2   |
| 896057   | 1564748  | 1652998  | 709056.8 | 1121458  | 576230   |                      | 9   |
| 2.35E+08 | 3.16E+08 | 1.82E+08 | 2.39E+08 | 2.33E+08 | 2.41E+08 |                      | 3   |
| 13362448 | 16601585 | 21534908 | 11395827 | 7889769  | 13189216 |                      | 18  |
| 7092945  | 7519250  | 6740778  | 3627787  | 8818868  | 10481240 |                      | 2   |
| 33127360 | 24091833 | 2837538  | 31049712 | 5263611  | 16921073 | [817][M]+            | 145 |
| 915100.2 | 10496358 | 0        | 3913079  | 13512031 | 8143972  | [M+Na+3K+H]          | 21  |
| 1226584  | 1813730  | 1492354  | 1222892  | 1340478  | 954143.6 |                      | 4   |
| 1730089  | 4005316  | 8073862  | 1392970  | 1975364  | 824984.1 |                      | 9   |
| 48914216 | 48434751 | 47738670 | 59438620 | 48411104 | 50624572 | [594][M]+ [M+H+NH3]  | 226 |
| 1810008  | 1630919  | 2041853  | 1588549  | 1714877  | 882414.7 | [1132][M]+           | 17  |
| 6759391  | 5899223  | 9462071  | 6460921  | 6130137  | 5573466  |                      | 184 |
| 2509396  | 2515383  | 512196.7 | 1132292  | 2704585  | 1553961  | [1246][M+1]+         | 130 |
| 523984.1 | 1042420  | 1609377  | 675714.7 | 497156.5 | 415038.6 |                      | 9   |

|          |          |          |          |          |          |                           |     |
|----------|----------|----------|----------|----------|----------|---------------------------|-----|
| 354492.9 | 243590.7 | 125970.8 | 395762.3 | 168688.9 | 822100.6 | [M+H] <sup>+</sup> 27     | 12  |
| 1047410  | 4220973  | 1540714  | 90904182 | 11274495 | 57262349 |                           | 2   |
| 1571291  | 1238417  | 1954502  | 1991507  | 1556175  | 563814   | [1391][M+1] <sup>+</sup>  | 262 |
| 142581.6 | 552025.4 | 603644.8 | 682249.9 | 622099.5 | 519297.8 |                           | 32  |
| 1717980  | 1937713  | 1871492  | 1543103  | 2323134  | 4935524  |                           | 2   |
| 2769657  | 901299.6 | 4325140  | 3738236  | 3947269  | 2858114  | [M+K] <sup>+</sup> 18     | 14  |
| 2007216  | 12190903 | 2331712  | 1200864  | 2100494  | 2829381  |                           | 2   |
| 1147882  | 985546.7 | 1385445  | 913318.1 | 942629.9 | 312798.7 | [3M+Na+K]                 | 83  |
| 4338483  | 10151762 | 5172866  | 3139611  | 3278050  | 5038340  |                           | 2   |
| 3862199  | 2684630  | 3189572  | 5060820  | 3345132  | 4744331  |                           | 201 |
| 364695.3 | 336602.3 | 632884.6 | 0        | 1011170  | 3272851  |                           | 2   |
| 392632.5 | 314796.4 | 418516.2 | 419269.6 | 305537.4 | 71881.12 |                           | 55  |
| 1009450  | 856217.5 | 1649511  | 1229149  | 923138.7 | 228778   | [1371][M]3 <sup>+</sup>   | 9   |
| 978851.1 | 1042358  | 545319.6 | 789640.9 | 1116808  | 1239907  |                           | 8   |
| 1191113  | 1228801  | 1155575  | 1206733  | 1027562  | 727192   |                           | 26  |
| 180908.1 | 232099.4 | 121743.3 | 155142.5 | 194181.4 | 75244.89 |                           | 302 |
| 3921976  | 5252598  | 3810256  | 2755998  | 3864002  | 4496644  |                           | 4   |
| 522688.9 | 1047562  | 434293.8 | 286180.6 | 750073.9 | 880984.6 |                           | 9   |
| 664187.3 | 1279180  | 1055148  | 620070.6 | 817585.9 | 438730.8 | [M+Na+NH                  | 8   |
| 1271583  | 1926567  | 1990825  | 896323.5 | 10604383 | 6690777  |                           | 11  |
| 1731387  | 3916996  | 5154791  | 1177801  | 1735245  | 2121692  |                           | 9   |
| 2589846  | 1281026  | 4101892  | 4414509  | 3558063  | 3581900  |                           | 390 |
| 2011831  | 1404928  | 2869201  | 2934094  | 7644589  | 4647089  |                           | 15  |
| 1253397  | 1031643  | 362711.2 | 1019557  | 704210.6 | 83303.69 | [302][M+1]3 <sup>+</sup>  | 159 |
| 2963444  | 7562054  | 15369546 | 5910967  | 17255938 | 18716970 | [M+K] <sup>+</sup> 15     | 11  |
| 1141746  | 1738312  | 3435916  | 883954.1 | 2622838  | 243847.4 |                           | 1   |
| 1669660  | 958543.1 | 3664914  | 2762519  | 3485109  | 364438.6 | [2M+K] <sup>+</sup> 1     | 13  |
| 22344993 | 10397300 | 20758095 | 18823902 | 10294541 | 11198811 |                           | 2   |
| 2683270  | 2057522  | 2423902  | 2901705  | 2860136  | 2365006  |                           | 278 |
| 208373.5 | 290391.1 | 395935.4 | 285143.8 | 204349.4 | 113032.1 |                           | 105 |
| 1559191  | 2797965  | 2070856  | 1136208  | 2010804  | 2022160  | [325][M]2 <sup>+</sup>    | 9   |
| 5439886  | 5049463  | 4903797  | 4541168  | 3833005  | 9442946  | [1357][M+3]2 <sup>+</sup> | 2   |
| 248536.4 | 406834.9 | 409986.1 | 353116.9 | 184958.7 | 448725.2 |                           | 442 |
| 8211947  | 13069510 | 15591072 | 6004342  | 8273781  | 5536693  |                           | 9   |
| 777308.2 | 1235434  | 1698505  | 372893.3 | 1558334  | 1988471  | [M+Na] <sup>+</sup> 5     | 57  |

|          |          |          |          |          |          |                     |     |
|----------|----------|----------|----------|----------|----------|---------------------|-----|
| 1753398  | 1493650  | 1283426  | 1798412  | 1069545  | 640162.4 |                     | 115 |
| 1003338  | 675025.3 | 843581.4 | 1096142  | 1119913  | 336700.5 |                     | 4   |
| 16886522 | 28530634 | 29210841 | 22306721 | 41976527 | 29561783 |                     | 1   |
| 1858226  | 4112731  | 8227955  | 1477354  | 2022595  | 1017628  |                     | 9   |
| 2405870  | 4714536  | 4002363  | 1687349  | 3304471  | 1882933  |                     | 9   |
| 2558789  | 3569306  | 2468019  | 766699.9 | 3396548  | 2277229  |                     | 4   |
| 2266503  | 4344846  | 3014743  | 1114085  | 1612823  | 3892045  |                     | 4   |
| 1948771  | 1497637  | 1831393  | 2064062  | 1783032  | 1283979  |                     | 485 |
| 2572431  | 3623933  | 3165623  | 4030413  | 4157562  | 0        |                     | 9   |
| 1227093  | 3318517  | 3120322  | 722253.8 | 1783764  | 2878751  |                     | 9   |
| 0        | 1111993  | 770932.2 | 0        | 0        | 1102500  | [M+K+NaCl           | 6   |
| 3461564  | 240216.8 | 2232476  | 860910.2 | 646657   | 3172904  |                     | 12  |
| 6828648  | 6582473  | 8549673  | 10303938 | 8352794  | 2836011  |                     | 2   |
| 437211.4 | 649710.1 | 351201.8 | 732048.2 | 432545.7 | 448247.6 | [3M+H+K]2           | 8   |
| 4731280  | 1.59E+08 | 1366790  | 1.6E+08  | 13669379 | 63469730 |                     | 2   |
| 1035222  | 837838   | 1313724  | 1222774  | 1046341  | 0        |                     | 2   |
| 20871914 | 33080225 | 48969079 | 5359712  | 22889344 | 14951146 |                     | 175 |
| 20147230 | 18422545 | 30428393 | 935154   | 19689772 | 6705872  | [91][M+1]+          | 6   |
| 1623983  | 1132034  | 1225966  | 1691586  | 1455283  | 710271.3 |                     | 4   |
| 933374.1 | 754442.9 | 501543.1 | 507784.3 | 1031993  | 909269.8 |                     | 41  |
| 2108589  | 895005.1 | 704453.5 | 1561710  | 506327.1 | 1230071  |                     | 4   |
| 2489466  | 5675725  | 1770041  | 920538.8 | 3653275  | 6752230  |                     | 1   |
| 3346325  | 3796427  | 2958919  | 3272453  | 5781269  | 9049180  |                     | 2   |
| 969713.1 | 1342930  | 1317657  | 587932.1 | 820488.9 | 859788.9 |                     | 4   |
| 1255921  | 3553433  | 5312825  | 771406.9 | 1356297  | 1352817  | [688][M+1]+         | 9   |
| 17651838 | 29265159 | 17384980 | 10854970 | 13954869 | 15617030 | [1314][M]+ [M+H+NH3 | 101 |
| 14059674 | 1602394  | 8623660  | 9886334  | 1335348  | 2250617  | [M+K]+ 61!          | 97  |
| 7215376  | 2646339  | 2875435  | 6298049  | 7062078  | 7664737  |                     | 1   |
| 9286016  | 3788598  | 6975548  | 2340656  | 2005322  | 2655820  |                     | 2   |
| 1018747  | 2481543  | 2787221  | 724029.7 | 1211411  | 778463.4 |                     | 9   |
| 5426944  | 5701276  | 2044127  | 9039447  | 6577152  | 5149550  |                     | 208 |
| 4344233  | 3933009  | 3577247  | 2842171  | 5669809  | 1192059  | [2M+3Na+I           | 97  |
| 1750683  | 5157078  | 5966836  | 1182402  | 2380740  | 3230721  | [1592][M]2+         | 9   |
| 4747604  | 4458239  | 4483552  | 4364982  | 5333248  | 2165951  |                     | 310 |
| 3317957  | 25539745 | 27047913 | 2528985  | 24595128 | 18916274 | [2M+Na+3I           | 3   |

|          |          |          |          |          |          |              |     |
|----------|----------|----------|----------|----------|----------|--------------|-----|
| 1650260  | 2923718  | 2054920  | 1175248  | 2337864  | 2667017  |              | 9   |
| 1601541  | 4168348  | 4051298  | 1133337  | 1991677  | 2697893  |              | 9   |
| 4603190  | 7892249  | 10492088 | 3574280  | 4986147  | 2211383  |              | 9   |
| 6587111  | 12003155 | 14764360 | 5271627  | 7148020  | 5532312  |              | 9   |
| 1896016  | 2476403  | 2805252  | 1445184  | 2295564  | 1117754  | [1592][M+2]+ | 9   |
| 17390290 | 14129507 | 17931271 | 14436218 | 12874107 | 17016944 | [643][M+1]+  | 41  |
| 866575.9 | 993075.1 | 1307348  | 934644.6 | 1236191  | 558767.1 |              | 4   |
| 1922034  | 4559416  | 3821759  | 2010471  | 3207700  | 2744936  | [476][M]2+   | 9   |
| 16350525 | 8150349  | 4221971  | 14550783 | 12591574 | 8581515  |              | 6   |
| 896760.4 | 1485923  | 1052673  | 248374.7 | 707151.6 | 1420359  |              | 4   |
| 663304.8 | 949521.6 | 1206437  | 760831.6 | 472407.7 | 0        |              | 9   |
| 2531344  | 3551503  | 1816531  | 1793557  | 3647671  | 5077746  |              | 9   |
| 11171038 | 13498542 | 8092109  | 9332486  | 14353068 | 14478383 | [351][M+2]3+ | 2   |
| 866358   | 1572249  | 703549.1 | 864971.5 | 1224709  | 1206913  |              | 13  |
| 1470482  | 5391065  | 1446271  | 757430.9 | 5695721  | 5054136  |              | 1   |
| 1788713  | 2010841  | 1029711  | 1148004  | 2415792  | 1636470  |              | 9   |
| 4396436  | 10479031 | 10941520 | 3137563  | 5749964  | 6979839  | [7][M]2+     | 9   |
| 1171295  | 2285033  | 3986113  | 894130.2 | 1867263  | 4174151  | [M+Na+K]2    | 97  |
| 9940238  | 26880354 | 12767353 | 6421984  | 14033137 | 25613778 |              | 1   |
| 48163117 | 28079564 | 40964379 | 45730416 | 45497319 | 33534895 |              | 2   |
| 630796.6 | 236331.6 | 665973.2 | 550257.7 | 500657.2 | 13676.24 | [532][M+1]2+ | 109 |
| 454292.6 | 825044.1 | 1527750  | 747020.9 | 544536.2 | 1170900  |              | 33  |
| 1292549  | 3273172  | 2191492  | 1015194  | 2325745  | 2617163  |              | 9   |
| 1862651  | 2953957  | 3042075  | 1463268  | 2089335  | 1890985  |              | 9   |
| 2386915  | 2794873  | 2646588  | 1562963  | 1453559  | 1920310  |              | 4   |
| 3451678  | 4672167  | 3397871  | 2376845  | 3359794  | 4580976  |              | 4   |
| 1673652  | 3077360  | 5288584  | 1222259  | 1339497  | 1111391  | [686][M+2]3+ | 9   |
| 534257.7 | 484436.2 | 608996.4 | 239617.2 | 415640.7 | 207717.3 | [270][M+1]+  | 72  |
| 1029136  | 640667.9 | 1539140  | 1714440  | 1361386  | 463931.9 |              | 4   |
| 1521621  | 1754273  | 1370684  | 1544623  | 1450166  | 1926870  |              | 9   |
| 312909.7 | 259699.4 | 342228.1 | 254179.6 | 249364   | 133459.1 |              | 166 |
| 429819.2 | 249437.4 | 356720   | 407247.9 | 270530.2 | 163193.6 |              | 515 |
| 2333808  | 2005260  | 2819237  | 1787895  | 1497155  | 1541207  |              | 423 |
| 3971897  | 3325767  | 3622923  | 3114008  | 3803095  | 5309022  |              | 252 |
| 4298324  | 5856174  | 4758087  | 4188319  | 5080066  | 6702907  |              | 33  |



|          |          |          |          |          |          |                       |     |
|----------|----------|----------|----------|----------|----------|-----------------------|-----|
| 15636102 | 18344319 | 9247598  | 16022620 | 16088494 | 14346782 |                       | 3   |
| 1380086  | 2407575  | 2707196  | 857988.2 | 633278   | 2948575  | [M+H-CO]+             | 20  |
| 2433894  | 4717639  | 3336751  | 1526876  | 3149394  | 4979998  |                       | 9   |
| 2860511  | 1619458  | 1908670  | 2599144  | 1531922  | 614207.6 |                       | 172 |
| 4410694  | 8629786  | 9044734  | 3455852  | 5450559  | 4810058  |                       | 9   |
| 57290.7  | 774795.4 | 762817.6 | 16517.7  | 730689.7 | 280150.1 | [M+H-CO2]             | 20  |
| 1968957  | 5822136  | 5809139  | 1715124  | 2303743  | 3716391  | [403][M+1]2+          | 18  |
| 613793.4 | 1170054  | 580643.2 | 420894.7 | 769922.5 | 890317.5 |                       | 8   |
| 4109473  | 4115438  | 4137788  | 3874739  | 3446881  | 5086731  |                       | 2   |
| 1093045  | 70132.51 | 720347   | 1780284  | 392001.4 | 2797768  |                       | 9   |
| 5560841  | 10453530 | 11681376 | 4160976  | 6151105  | 4989358  |                       | 9   |
| 202042.6 | 282099.7 | 460883.4 | 453675.4 | 161373.9 | 414886.9 | [M+Na]+ 8:            | 16  |
| 7610473  | 11405210 | 7141820  | 5903545  | 12057063 | 8859510  |                       | 2   |
| 1910400  | 1524279  | 2208520  | 1220428  | 2133871  | 315840.6 |                       | 139 |
| 3174691  | 3750936  | 3042537  | 1963493  | 2842266  | 3371038  |                       | 4   |
| 0        | 1846496  | 127811.4 | 0        | 1261443  | 444075.3 |                       | 1   |
| 13423813 | 17353638 | 14771895 | 10094884 | 13448309 | 18621623 |                       | 4   |
| 2950333  | 2718066  | 1892984  | 3406779  | 3984823  | 563907.4 | [M+K]+ 75:            | 14  |
| 1891360  | 184388.1 | 1439215  | 262161.5 | 1905844  | 966208.8 | [454][M+1]2+          | 1   |
| 231810.6 | 151731.9 | 257351.7 | 223107.3 | 166524.8 | 37562.44 | [1503][M+1]+          | 328 |
| 2025758  | 600981.6 | 735096.6 | 2418554  | 428459   | 711416.7 | [3M+2Na]2             | 14  |
| 783604.1 | 533808.5 | 723933   | 650829.4 | 499390.3 | 233980.1 |                       | 4   |
| 2442463  | 3213517  | 31395220 | 906490.1 | 2918119  | 8642662  |                       | 13  |
| 1092101  | 1894002  | 1769418  | 1422131  | 1666555  | 530123.6 |                       | 4   |
| 957969.6 | 902332.4 | 1309944  | 943191.8 | 1290559  | 1889243  | [1093][M+2]2+         | 9   |
| 3742446  | 5922370  | 2861161  | 2759505  | 2348608  | 3046437  | [831][M+1]+           | 101 |
| 18738193 | 11214602 | 6150021  | 16874291 | 5437681  | 6768303  | [279][M]+             | 229 |
| 842697.9 | 1630872  | 3015084  | 1077168  | 1472162  | 373829.7 |                       | 9   |
| 474695.7 | 314223   | 423244.1 | 209084.6 | 179700.6 | 571374.9 | [1516][M+1]2+         | 91  |
| 846249.6 | 1053037  | 1037818  | 1411759  | 493839.9 | 589865.6 | [1562][M]+ [M+H]+ 10: | 38  |
| 6241362  | 5885815  | 5894285  | 5920208  | 7638355  | 5531775  |                       | 184 |
| 110238.8 | 210402.6 | 188357   | 77203.02 | 170914.8 | 211411.9 |                       | 299 |
| 0        | 2078379  | 1604083  | 115791.5 | 1155251  | 2063965  | [M+H]+ 42:            | 46  |
| 6749686  | 4619409  | 5694580  | 6826820  | 5597226  | 8897250  |                       | 2   |
| 2538901  | 4433196  | 5655293  | 1782136  | 2388411  | 1327424  |                       | 9   |

|          |          |          |          |          |          |                                                             |     |
|----------|----------|----------|----------|----------|----------|-------------------------------------------------------------|-----|
| 7663427  | 3242361  | 809387.8 | 4127822  | 4839258  | 7706644  | [M+H] <sup>+</sup> 28!                                      | 11  |
| 3128789  | 2562352  | 2778403  | 2707581  | 1284838  | 1277201  | [719][M+1] <sup>3+</sup>                                    | 69  |
| 4287296  | 4920665  | 4042309  | 3596770  | 6690296  | 5098239  |                                                             | 259 |
| 1180206  | 295179.6 | 1109465  | 1028879  | 80366.01 | 578675.3 |                                                             | 74  |
| 993174.9 | 1607275  | 1315514  | 806333.8 | 1246316  | 1713713  |                                                             | 9   |
| 8531316  | 15004058 | 17627235 | 6414508  | 9047369  | 6919449  |                                                             | 9   |
| 148361   | 733638.8 | 894981.5 | 91624.89 | 280507.7 | 880952.9 | [3M+3Na] <sup>+</sup>                                       | 20  |
| 958475.7 | 1809425  | 961961   | 593132.5 | 1263569  | 1522254  |                                                             | 9   |
| 790639.1 | 372951.1 | 660569.6 | 298338   | 497245.9 | 2219663  | [M+Na] <sup>+</sup> 3!                                      | 46  |
| 1323371  | 1172136  | 916915.6 | 903492.2 | 583402.9 | 476960.9 | [M+H] <sup>+</sup> 39!                                      | 51  |
| 2832371  | 8427465  | 1429674  | 804114.6 | 5811268  | 4735196  |                                                             | 10  |
| 1454919  | 1671044  | 1434310  | 1294388  | 1048344  | 1104374  | [1097][M] <sup>+</sup> [M+H-C2H <sub>4</sub> ] <sup>+</sup> | 86  |
| 6902953  | 6605361  | 7490040  | 5136541  | 5383005  | 6333578  |                                                             | 4   |
| 525917.2 | 500502   | 668741   | 526536.5 | 436129.7 | 301401.8 | [1132][M+1] <sup>+</sup>                                    | 17  |
| 918167.5 | 1287101  | 2233432  | 1028742  | 769522.8 | 527993.9 |                                                             | 9   |
| 1966074  | 508485.7 | 2985062  | 1243640  | 1497809  | 1869337  |                                                             | 1   |
| 1487586  | 2434173  | 2417927  | 1827158  | 936523.6 | 2601106  | [1323][M] <sup>2</sup> [3M+Na+2I] <sup>+</sup>              | 134 |
| 3989902  | 9165459  | 6447389  | 6444079  | 6741805  | 6382513  |                                                             | 272 |
| 1603370  | 1535442  | 1580865  | 1528456  | 1743126  | 1294282  | [11][M+1] <sup>2+</sup>                                     | 9   |
| 1024211  | 2559802  | 2360886  | 1346962  | 2529792  | 881611   | [820][M] <sup>3+</sup>                                      | 4   |
| 3302397  | 3861364  | 684944.5 | 2483646  | 995423.6 | 2108114  | [868][M+2] <sup>+</sup>                                     | 50  |
| 1790737  | 1452821  | 1383811  | 1815437  | 1343071  | 415396.2 |                                                             | 4   |
| 2141291  | 4382006  | 3811440  | 1372547  | 2802061  | 3641195  | [198][M] <sup>3+</sup>                                      | 9   |
| 4368862  | 8415888  | 5781215  | 3223439  | 5980546  | 6680199  |                                                             | 9   |
| 770040.6 | 746208.1 | 693335.9 | 648894.5 | 660032.6 | 0        | [M+K] <sup>+</sup> 90!                                      | 8   |
| 1313308  | 3048420  | 1038058  | 1063613  | 2505690  | 4486743  | [277][M] <sup>3+</sup>                                      | 9   |
| 1061151  | 1266796  | 1698479  | 891581.4 | 1019406  | 803967.9 |                                                             | 4   |
| 631314.3 | 1114489  | 1366314  | 432372.7 | 658404.2 | 420445.4 |                                                             | 9   |
| 1053913  | 1168908  | 320212   | 287616.7 | 1126414  | 1619572  | [M+Na] <sup>+</sup> 5!                                      | 238 |
| 187974.3 | 393774.7 | 654123.3 | 443035.8 | 425060.9 | 302667.6 | [3M+2Na+I] <sup>+</sup>                                     | 86  |
| 1254345  | 1266931  | 1500128  | 1167725  | 1205702  | 687944.1 |                                                             | 4   |
| 2087337  | 4246969  | 3210985  | 1011670  | 2366402  | 2469067  |                                                             | 9   |
| 372694.8 | 871085.5 | 751119.3 | 190296.8 | 214114.3 | 843740.8 |                                                             | 4   |
| 1001400  | 1630623  | 6667862  | 886394.5 | 1410128  | 4143498  |                                                             | 9   |
| 252446.1 | 168721.6 | 8602.48  | 358004.5 | 454839.8 | 546184.2 | [792][M+1] <sup>+</sup>                                     | 90  |

|          |          |          |          |          |          |                       |     |
|----------|----------|----------|----------|----------|----------|-----------------------|-----|
| 745068.6 | 818932.8 | 1030896  | 924139.1 | 757767   | 0        |                       | 4   |
| 2897091  | 3985463  | 4498686  | 3572067  | 2937785  | 3760744  | [1429][M]+ [M+Na]+ 70 | 134 |
| 760948.4 | 561776.9 | 2204472  | 765466.3 | 1013444  | 326644.6 |                       | 9   |
| 1863837  | 16697061 | 3187432  | 2140726  | 10363459 | 2334097  |                       | 84  |
| 1659577  | 3214216  | 3758187  | 1420742  | 1931781  | 986419.9 |                       | 9   |
| 1911995  | 222776.2 | 2871283  | 1803415  | 1651706  | 1415335  |                       | 9   |
| 1820130  | 1245944  | 2504494  | 1695352  | 1934841  | 3363838  |                       | 2   |
| 311582.2 | 283575.2 | 148521.2 | 363428.3 | 252446.1 | 478877.5 | [783][M+1]+           | 24  |
| 2532046  | 5016632  | 7022666  | 2075881  | 3203093  | 3095501  |                       | 9   |
| 948044   | 1635256  | 1116685  | 505917.3 | 1140353  | 1531164  |                       | 9   |
| 4562901  | 2676585  | 1705231  | 2565111  | 2098166  | 4937518  | [M+Na]+ 50            | 26  |
| 9475522  | 6936948  | 7094146  | 7243387  | 4717045  | 22140601 |                       | 11  |
| 2093197  | 3889796  | 3028994  | 1374629  | 2571029  | 3180299  |                       | 9   |
| 6238469  | 4191852  | 4062336  | 5367850  | 4677136  | 6965624  |                       | 2   |
| 1494892  | 3232045  | 5066627  | 1361736  | 1981411  | 869174.1 |                       | 9   |
| 11948097 | 6526227  | 4515831  | 8847901  | 4485167  | 17491012 | [M+Na]+ 40            | 11  |
| 2066047  | 2450655  | 2154822  | 1692592  | 2133202  | 2431520  | [1258][M+2]+          | 2   |
| 717436   | 504701   | 919285.2 | 480029.3 | 675231.1 | 354045.3 | [1105][M]+ [M+H-C2H4  | 23  |
| 441936.3 | 746012.2 | 545278.5 | 355510.5 | 629889.9 | 731807.3 | [3M+H+K]2             | 8   |
| 474969.9 | 344718.5 | 336405.4 | 413083.3 | 375381.7 | 871058.7 | [M+Na]+ 40            | 62  |
| 334039.9 | 484519.1 | 261755.8 | 305509.2 | 427464   | 188855.3 |                       | 4   |
| 2295122  | 2181450  | 2372842  | 2757086  | 1212247  | 3104566  | [M+Na]+ 60            | 288 |
| 3870368  | 611344.3 | 718222.4 | 7189534  | 575226.3 | 4677705  |                       | 9   |
| 2181103  | 1254252  | 904007.1 | 1924578  | 756255   | 605995.9 | [279][M+1]+           | 229 |
| 13264167 | 20184728 | 20394321 | 11002829 | 13926375 | 12466031 |                       | 9   |
| 2487438  | 3214874  | 3369169  | 2604024  | 1937610  | 1453882  | [92][M+2]+            | 18  |
| 1632622  | 1896000  | 1511106  | 3335662  | 4204041  | 1868570  | [1136][M+1]+          | 2   |
| 18014191 | 22942210 | 22559563 | 14558739 | 16930816 | 17823523 | [156][M]2+            | 4   |
| 564233.9 | 631899.4 | 451549.9 | 671357.7 | 1069317  | 301861.5 | [937][M+1]+           | 209 |
| 4622345  | 280662.6 | 2182608  | 3366170  | 267253.3 | 674772.5 |                       | 20  |
| 2448908  | 3092472  | 1545134  | 1228326  | 3051876  | 925377.4 | [457][M+4]3+          | 2   |
| 1857093  | 929344.6 | 2419133  | 1296645  | 8636043  | 11619514 |                       | 3   |
| 11951580 | 18719079 | 10395694 | 4373220  | 13839254 | 29194207 | [M+2Na]2+             | 42  |
| 193638.3 | 235283.7 | 143701.2 | 67249.92 | 130621.1 | 270304.4 |                       | 170 |
| 2879127  | 2722020  | 4319125  | 3403624  | 3669364  | 1476444  | [265][M]2+            | 23  |

|          |          |          |          |          |          |                                    |     |
|----------|----------|----------|----------|----------|----------|------------------------------------|-----|
| 801738.7 | 436390.2 | 713805.3 | 902774.6 | 671262.9 | 12772.15 |                                    | 4   |
| 787847.7 | 809228.8 | 902881.6 | 255577.2 | 800827.1 | 0        |                                    | 200 |
| 2369516  | 3829359  | 2944750  | 1431601  | 2589286  | 2974745  |                                    | 9   |
| 781371.8 | 1170346  | 546326.7 | 624860.2 | 1174098  | 1896000  |                                    | 9   |
| 6000228  | 7527716  | 4499947  | 5209116  | 7196314  | 8654145  | [M+H] <sup>+</sup> 40 <sup>+</sup> | 14  |
| 3486552  | 5810412  | 4066964  | 1690746  | 4767302  | 3363725  |                                    | 13  |
| 55704.9  | 916210.4 | 1124299  | 58944.71 | 824575.7 | 368032.7 | [1124][M+1] <sup>2+</sup>          | 20  |
| 91903056 | 98258889 | 85184493 | 73555575 | 49415697 | 76115523 |                                    | 2   |
| 2471208  | 4071543  | 2571900  | 1134002  | 2766993  | 4372118  |                                    | 9   |
| 4260463  | 4406776  | 4158828  | 5911844  | 4028342  | 3785259  |                                    | 9   |
| 108508.3 | 339190.6 | 320808.1 | 57959.65 | 239059.7 | 144660.8 | [M+2H] <sup>2+</sup> !             | 18  |
| 5350043  | 4644073  | 4488577  | 4466788  | 4392707  | 4302588  |                                    | 409 |
| 1092687  | 1367852  | 441286.8 | 526633.4 | 1138021  | 1889405  |                                    | 9   |
| 589948.3 | 672668.4 | 630742.3 | 274838   | 538803   | 0        |                                    | 9   |
| 2.76E+08 | 631608.4 | 2.81E+08 | 584068   | 2.96E+08 | 454258.1 | [M+H] <sup>+</sup> 39 <sup>+</sup> | 25  |
| 2742045  | 1310025  | 2920358  | 2846349  | 2157110  | 274224.5 | [90][M+1] <sup>2+</sup>            | 2   |
| 494087.1 | 975861.5 | 600718.1 | 362867.6 | 779271.1 | 704536.4 | [M+H] <sup>+</sup> 20 <sup>+</sup> | 8   |
| 744449.3 | 2141347  | 3406937  | 787755.9 | 769554.4 | 667225.1 |                                    | 9   |
| 4413619  | 4443288  | 4904211  | 5120694  | 4642483  | 2616399  | [298][M] <sup>+</sup>              | 4   |
| 533459.7 | 615345.7 | 560663.2 | 630229.6 | 495460.7 | 214590.6 | [386][M+1] <sup>+</sup>            | 112 |
| 4047923  | 4902821  | 4509237  | 2918087  | 3602910  | 5235247  | [701][M+2] <sup>+</sup>            | 25  |
| 1546755  | 2452988  | 2513833  | 2617476  | 1714652  | 1627025  |                                    | 2   |
| 650908.5 | 888465.2 | 423456.1 | 863614.2 | 885060.4 | 773492   | [M+K] <sup>+</sup> 52 <sup>+</sup> | 134 |
| 2853204  | 2155163  | 3109325  | 1650120  | 2725992  | 544520.1 | [910][M+1] <sup>2+</sup>           | 62  |
| 1049047  | 1391968  | 2427835  | 892803.9 | 1207987  | 305794.6 |                                    | 9   |
| 610721.9 | 828783.4 | 722780   | 515651.6 | 864524.8 | 846625.5 |                                    | 9   |
| 2275367  | 4209437  | 6189069  | 1839128  | 2169986  | 805308.9 |                                    | 9   |
| 505151.8 | 541684   | 68643.51 | 615885.5 | 299599.7 | 1051067  |                                    | 81  |
| 5.31E+08 | 8.21E+08 | 4.61E+08 | 4.41E+08 | 5.01E+08 | 9.09E+08 |                                    | 3   |
| 607147.5 | 1796863  | 2716858  | 601392.3 | 885313.4 | 617276.1 |                                    | 9   |
| 1201582  | 1583152  | 1950955  | 831788.9 | 635977.5 | 885981.6 |                                    | 4   |
| 1105447  | 651417.3 | 818716.4 | 204172.4 | 589148.7 | 0        | [1129][M] <sup>3+</sup>            | 68  |
| 693798.1 | 678673.9 | 603815.1 | 951442.1 | 795397   | 366350.5 |                                    | 4   |
| 3086656  | 13218136 | 4569401  | 2587168  | 7527127  | 1838455  | [M+2K] <sup>2+</sup> 4             | 3   |
| 2018500  | 1368303  | 2644243  | 2726916  | 1444885  | 746272.8 |                                    | 462 |

|          |          |          |          |          |          |                                              |     |
|----------|----------|----------|----------|----------|----------|----------------------------------------------|-----|
| 8177222  | 9040372  | 7160363  | 7015659  | 11472429 | 9739909  |                                              | 2   |
| 2081654  | 3981829  | 4297962  | 1451933  | 1329121  | 1675519  |                                              | 9   |
| 1006919  | 0        | 1546372  | 664349.7 | 1123428  | 0        | [M+H] <sup>+</sup> 180                       | 155 |
| 5202064  | 3875569  | 5988142  | 4469325  | 4360314  | 518393.3 | [1268][M+2] <sup>+</sup>                     | 139 |
| 1364541  | 866042.1 | 2393622  | 1438930  | 2098021  | 637297.2 | [M+H] <sup>+</sup> 52                        | 47  |
| 4173343  | 5410021  | 3971576  | 4027143  | 6006462  | 3465353  | [M+K+NH <sub>3</sub> ]                       | 323 |
| 671330.3 | 1562677  | 1927972  | 468695.4 | 788242.1 | 913150.2 |                                              | 9   |
| 3813187  | 7185425  | 7778304  | 2967887  | 4981393  | 3490102  | [342][M]3 <sup>+</sup>                       | 9   |
| 28690744 | 48056971 | 16295693 | 18560303 | 46767065 | 44754699 | [1243][M]2 <sup>+</sup>                      | 2   |
| 1776061  | 4004366  | 5137565  | 789628.2 | 2096144  | 1808631  |                                              | 9   |
| 1201428  | 2023305  | 1093474  | 579301.5 | 1466733  | 2137936  |                                              | 4   |
| 187753.4 | 185772.9 | 214165   | 224599.8 | 182441.4 | 88439.21 | [M+K] <sup>+</sup> 576                       | 43  |
| 2744430  | 1978812  | 2336602  | 2132415  | 1464504  | 3904160  |                                              | 2   |
| 2932472  | 2859131  | 2945636  | 2659268  | 2921663  | 0        |                                              | 9   |
| 397556.7 | 521708.2 | 682480.8 | 458133.7 | 389715.6 | 231643.6 |                                              | 4   |
| 25885852 | 22672685 | 43518268 | 27005015 | 30913319 | 10170771 | [1530][M+1] <sup>+</sup>                     | 33  |
| 16889866 | 26474360 | 21536111 | 14447956 | 17599520 | 24349010 |                                              | 1   |
| 46371678 | 39090900 | 45607978 | 50276245 | 37530562 | 18454323 | [326][M+1] <sup>+</sup>                      | 55  |
| 1105136  | 754384   | 2120310  | 2343040  | 1246197  | 619144.8 | [1526][M] <sup>+</sup>                       | 183 |
| 6449607  | 1019717  | 37994.07 | 3929177  | 3083838  | 5697306  | [M+H-C <sub>6</sub> H <sub>6</sub> ]         | 41  |
| 3545999  | 4625223  | 3447656  | 2373838  | 3349509  | 4546184  |                                              | 4   |
| 855739.8 | 1299412  | 1646582  | 499108.5 | 605480.2 | 0        | [1528][M+1]2 <sup>+</sup>                    | 9   |
| 7508269  | 10179748 | 5678215  | 6688410  | 8751014  | 15054185 | [709][M+1]2 <sup>+</sup>                     | 9   |
| 369247.9 | 681914.4 | 552516.7 | 309975.4 | 376331.4 | 452000.7 | [744][M+1] <sup>+</sup>                      | 135 |
| 5174933  | 6215829  | 4053030  | 2978250  | 4780140  | 8410570  | [986][M] <sup>+</sup> [M+Na] <sup>+</sup> 5  | 110 |
| 459660.6 | 1058010  | 473039.9 | 239812.5 | 645664.4 | 550078.4 | [M+H] <sup>+</sup> 26                        | 39  |
| 264477.5 | 1103142  | 1119223  | 422402.1 | 556351.1 | 522916.5 |                                              | 9   |
| 486852.9 | 1273278  | 811139.5 | 377088.8 | 702219.6 | 2739544  |                                              | 46  |
| 85091611 | 1.17E+08 | 1.41E+08 | 71136695 | 65738005 | 56983052 |                                              | 175 |
| 1911329  | 3515886  | 765937.9 | 3716350  | 4233957  | 2013079  |                                              | 1   |
| 5410565  | 5768781  | 7685960  | 5068280  | 4669806  | 4245332  | [625][M] <sup>+</sup> [M+H-CH <sub>2</sub> ] | 342 |
| 1177305  | 3174146  | 214397.2 | 1265929  | 3434984  | 5913013  | [3M+Na] <sup>+</sup>                         | 11  |
| 5.03E+08 | 215784   | 9.41E+08 | 9.9E+08  | 9.39E+08 | 3.59E+08 | [150][M+1] <sup>+</sup>                      | 22  |
| 3526706  | 4965539  | 4167572  | 2082129  | 3432579  | 4767740  | [726][M+1] <sup>+</sup>                      | 4   |
| 2608207  | 3445373  | 4959780  | 2175265  | 2420721  | 1669128  |                                              | 9   |

|          |          |          |          |          |          |                       |     |
|----------|----------|----------|----------|----------|----------|-----------------------|-----|
| 423305.2 | 1629272  | 972359   | 426147.2 | 742115.2 | 1227042  | [331][M+1]2+          | 1   |
| 946293.7 | 2232967  | 1477113  | 704358.2 | 1323740  | 1793884  | [165][M+1]2+          | 9   |
| 2629010  | 1510184  | 2053522  | 1501228  | 1679114  | 25788.78 |                       | 68  |
| 3165723  | 5970900  | 7930125  | 6104522  | 7009653  | 4461457  |                       | 293 |
| 2755563  | 3508868  | 3618219  | 4700075  | 2896513  | 2443911  | [1433][M]+            | 338 |
| 2028125  | 3606821  | 4093627  | 1312456  | 1140818  | 690572.6 |                       | 7   |
| 130291.5 | 536083.4 | 574591.3 | 146812.8 | 218281.3 | 842710.7 | [940][M+1]2+          | 18  |
| 19343874 | 20132442 | 3920073  | 15109912 | 5844392  | 11646272 | [867][M]+             | 144 |
| 580087.8 | 1593691  | 809930.8 | 1051500  | 1722759  | 1760671  |                       | 9   |
| 2838523  | 3104946  | 2589401  | 1865422  | 2663751  | 3389509  | [1378][M]+ [M+Na]+ 70 | 16  |
| 7110620  | 4975670  | 6681069  | 7913377  | 3586037  | 4289520  | [2M+H+Na              | 268 |
| 5851711  | 8210541  | 6219807  | 4126960  | 5971543  | 8169544  |                       | 4   |
| 3262202  | 786911.9 | 1004638  | 7145624  | 352173.4 | 1192117  | [M+K+NH3              | 6   |
| 880781.8 | 1088623  | 248321.3 | 1329524  | 280147.1 | 222870.4 | [309][M+1]+           | 37  |
| 12359878 | 824726.8 | 412579.3 | 9850709  | 4594502  | 989339   |                       | 52  |
| 1451082  | 2396871  | 1852206  | 1267396  | 1695690  | 1213716  |                       | 9   |
| 4516855  | 8188751  | 7044328  | 8358640  | 4484288  | 5389350  |                       | 15  |
| 1234671  | 1125825  | 1399992  | 760909.9 | 852022.6 | 521024.4 |                       | 9   |
| 138208.4 | 139958.6 | 200300.2 | 76738.62 | 81852.41 | 49841.49 |                       | 462 |
| 7038450  | 10528070 | 5659493  | 5870842  | 8039760  | 15040562 |                       | 9   |
| 825586.7 | 1144551  | 1317558  | 746325.7 | 668089.4 | 549476.8 |                       | 4   |
| 3347500  | 2.73E+09 | 5259549  | 3358791  | 3604562  | 3130415  |                       | 2   |
| 289522.7 | 467860   | 756740   | 349732.1 | 616475.5 | 37703.42 |                       | 4   |
| 476510.7 | 151648.6 | 435632.6 | 578699.9 | 99813.23 | 96528.94 |                       | 440 |
| 2947976  | 1224433  | 2873724  | 2411682  | 2395318  | 3220742  | [474][M+1]2+          | 2   |
| 1891630  | 3019034  | 2000108  | 1066798  | 2061907  | 2472486  |                       | 9   |
| 1675584  | 1954639  | 2049826  | 2326870  | 2501741  | 3075265  | [1618][M+4]2+         | 2   |
| 1E+08    | 1696824  | 20172782 | 92399123 | 1879112  | 88552465 | [M+Na]+ 3'            | 41  |
| 980508   | 1116169  | 2135237  | 0        | 718797.6 | 122075.1 |                       | 1   |
| 3728323  | 5473182  | 1789342  | 3549328  | 2079878  | 4601571  |                       | 2   |
| 2378359  | 4698655  | 2240318  | 2124892  | 5778652  | 5940367  |                       | 2   |
| 15050464 | 4575082  | 3304997  | 2882307  | 4582479  | 19927957 |                       | 96  |
| 2274814  | 4897683  | 6104594  | 1410044  | 2517120  | 1325338  |                       | 9   |
| 694421.2 | 11343372 | 10396465 | 3742561  | 10070396 | 1918252  |                       | 1   |
| 1206897  | 1558602  | 1020574  | 1060961  | 1321167  | 715699.7 |                       | 4   |

|          |          |          |          |          |          |              |     |
|----------|----------|----------|----------|----------|----------|--------------|-----|
| 1139022  | 2493471  | 8035097  | 5487778  | 916827.2 | 3808866  |              | 4   |
| 1206132  | 766861.8 | 512452.3 | 1512849  | 515604.8 | 1689906  |              | 9   |
| 844980.9 | 1732636  | 1008155  | 974750.6 | 651504   | 1088568  | [1608][M+1]+ | 7   |
| 2737181  | 3407224  | 3535772  | 1464683  | 2175641  | 1236496  |              | 4   |
| 77940217 | 79391274 | 67204581 | 68569745 | 86825152 | 87888259 | [470][M]+    | 2   |
| 2003247  | 20804594 | 1266050  | 4.6E+08  | 28454004 | 65858568 | [425][M+1]2+ | 2   |
| 1152789  | 743074.7 | 597066.9 | 880706.7 | 461561.4 | 701837   | [35][M+1]+   | 108 |
| 1813577  | 2894353  | 3883667  | 1324760  | 1922904  | 641009.6 | [967][M]+    | 9   |
| 1107087  | 0        | 1083891  | 1121347  | 1182173  | 255599.6 |              | 9   |
| 1702584  | 3082538  | 5086094  | 1547948  | 1601860  | 770956   |              | 9   |
| 1221398  | 2472022  | 3126744  | 894825.4 | 1196730  | 442633.9 |              | 9   |
| 9636055  | 8095506  | 9025236  | 11892421 | 8452885  | 4329787  |              | 2   |
| 1665020  | 1945007  | 1720644  | 1727624  | 1411457  | 3439299  |              | 2   |
| 370642.7 | 245880.9 | 558213.5 | 379397.6 | 429884.9 | 132499.3 |              | 91  |
| 6438004  | 3985419  | 5469820  | 2114773  | 8434355  | 12451783 | [M+K]+ 39:   | 15  |
| 2726124  | 4678919  | 1810874  | 1880652  | 3820182  | 7727774  |              | 9   |
| 2693683  | 4328294  | 4542878  | 1994210  | 2771848  | 1478931  |              | 9   |
| 11656187 | 7001500  | 2861024  | 6442929  | 6776695  | 5367543  |              | 346 |
| 291962.5 | 606962.4 | 472884.2 | 269063.1 | 202259.7 | 529264.5 |              | 4   |
| 2487732  | 4841466  | 4263327  | 2735586  | 3212500  | 3285575  | [M+H+NH3     | 13  |
| 1376262  | 1825309  | 2246248  | 1314573  | 1323118  | 569807.8 |              | 4   |
| 241403.7 | 260781.3 | 273746.1 | 136400.1 | 236744.5 | 257464.1 | [M+Na]+ 7:   | 64  |
| 1087063  | 2369857  | 3805997  | 847482.9 | 1240740  | 290159.2 |              | 9   |
| 1.44E+09 | 2.68E+09 | 1.98E+09 | 1.31E+09 | 1.39E+09 | 2.3E+09  | [746][M]+    | 1   |
| 4438460  | 4389981  | 4222036  | 4086977  | 3777503  | 6221972  |              | 259 |
| 702077.1 | 850307.1 | 1277778  | 619513.6 | 519253.6 | 1517182  |              | 4   |
| 21711283 | 20457877 | 25888996 | 20498156 | 22608614 | 12815765 |              | 17  |
| 1372719  | 1675541  | 372374.5 | 851504.2 | 1088665  | 2526024  |              | 9   |
| 362497   | 909407.2 | 1398779  | 420102   | 507393.4 | 193332.2 |              | 9   |
| 6533052  | 8833966  | 1704281  | 4195847  | 7101570  | 0        |              | 2   |
| 4858703  | 4479843  | 3849691  | 4663045  | 4276458  | 2557402  | [597][M]+    | 280 |
| 5133789  | 4647206  | 7059209  | 5821976  | 4636184  | 3043066  | [3M+H+K]2    | 121 |
| 1426998  | 1253817  | 1056377  | 1516664  | 1163267  | 630003.3 |              | 9   |
| 4525944  | 3137738  | 6168942  | 6470927  | 5181107  | 2788680  | [1411][M+1]+ | 49  |
| 91219.91 | 307205.6 | 232411.1 | 204829.9 | 97932.78 | 361110.1 | [3M+H]+ 2:   | 16  |

|          |          |          |          |          |          |              |     |
|----------|----------|----------|----------|----------|----------|--------------|-----|
| 955532   | 1379377  | 981455.2 | 745049   | 965389   | 1985421  |              | 4   |
| 2237791  | 4415280  | 2682769  | 1586001  | 1977483  | 2569649  | [336][M]+    | 4   |
| 1150700  | 832070.8 | 1512581  | 1559407  | 428902.1 | 817025   | [1084][M]2+  | 38  |
| 2451596  | 4411819  | 5661022  | 1753550  | 2677342  | 1322930  |              | 9   |
| 859400.9 | 986541.6 | 1337087  | 4086135  | 6259062  | 10595962 |              | 1   |
| 1490804  | 2727080  | 2201558  | 2396546  | 1356123  | 2881051  | [M+2Na]2+    | 23  |
| 9606588  | 12146179 | 11875197 | 7683813  | 8944262  | 9715581  |              | 4   |
| 1282455  | 3274972  | 1226789  | 759557.9 | 1543716  | 2367743  |              | 4   |
| 18890361 | 19721700 | 25307758 | 31502298 | 23308733 | 9536307  | [804][M]+    | 2   |
| 4764223  | 2538118  | 2841926  | 2620921  | 2425831  | 2268579  |              | 263 |
| 2394544  | 1528163  | 1669824  | 1542889  | 1544808  | 425401.6 |              | 488 |
| 692991.8 | 693601.5 | 497391.9 | 819768.2 | 373308   | 588952.6 |              | 68  |
| 1797085  | 672230.1 | 5298647  | 9467063  | 3330886  | 12974514 | [3M+Na]+     | 3   |
| 2197154  | 962103.3 | 1776562  | 1686662  | 1712068  | 845497.2 |              | 84  |
| 5588846  | 5977778  | 4202960  | 7232429  | 2637668  | 1635297  | [3M+2K]2+    | 93  |
| 4323118  | 1608873  | 2573236  | 5480047  | 1970997  | 0        |              | 2   |
| 5875226  | 5587929  | 8429649  | 10432450 | 6956210  | 2324912  |              | 2   |
| 10193006 | 5749205  | 1306973  | 6838829  | 10156796 | 11576653 | [M+H]+ 36:   | 11  |
| 642252.4 | 610353.4 | 932789.8 | 753252.8 | 296025.3 | 230680.3 | [851][M+5]+  | 4   |
| 573440.4 | 871563.9 | 971308.8 | 589348.8 | 414725.3 | 363303.4 |              | 4   |
| 259008.2 | 1395757  | 315542.9 | 245469.8 | 218210.4 | 404763   |              | 35  |
| 40723136 | 45825782 | 35531477 | 33670177 | 42098044 | 52696713 | [1250][M+2]+ | 2   |
| 2052263  | 3976703  | 3270021  | 1596323  | 2555495  | 3372752  |              | 9   |
| 1.23E+08 | 1.11E+08 | 1.63E+08 | 1.18E+08 | 1.22E+08 | 66772384 | [1092][M+1]+ | 23  |
| 71117.07 | 875362.1 | 758956.9 | 488132.8 | 496492.7 | 790459.5 |              | 1   |
| 49827236 | 44483267 | 40063318 | 42347732 | 52926709 | 44412163 | [1296][M]+   | 2   |
| 1926744  | 2461030  | 1666417  | 1256591  | 3955245  | 3194366  |              | 2   |
| 36590392 | 39873723 | 31681530 | 31986536 | 38058101 | 39563741 | [828][M]2+   | 2   |
| 2055685  | 3525869  | 3276613  | 1414302  | 2152655  | 2000330  |              | 9   |
| 2408081  | 3856440  | 5263874  | 1610661  | 2613567  | 1238220  |              | 9   |
| 15205691 | 11503564 | 11670642 | 7349905  | 10004810 | 13406882 |              | 376 |
| 709159.1 | 2917383  | 3485089  | 1705032  | 1453459  | 3968066  | [174][M]+    | 254 |
| 1457311  | 247223.8 | 0        | 714943.2 | 716183.4 | 1392201  |              | 41  |
| 5235246  | 8899941  | 5423602  | 3493939  | 4014471  | 5239201  | [1314][M+1]+ | 101 |
| 1253060  | 2984770  | 2131349  | 1318728  | 1824204  | 1992217  | [216][M]3+   | 9   |



|          |          |          |          |          |          |              |     |
|----------|----------|----------|----------|----------|----------|--------------|-----|
| 5376553  | 8532499  | 3251814  | 12738375 | 8902278  | 5921643  |              | 325 |
| 3131582  | 4339408  | 2788955  | 1800223  | 3363275  | 4022404  |              | 9   |
| 852302.6 | 1004576  | 1342370  | 551569.6 | 1090488  | 963429   |              | 4   |
| 3074028  | 4999471  | 5329162  | 897717.3 | 1899578  | 5073431  | [1255][M+1]+ | 9   |
| 4629165  | 8012001  | 10794809 | 3632050  | 5055610  | 2163300  |              | 9   |
| 5874436  | 10928640 | 5742019  | 6115604  | 4371267  | 4139771  |              | 317 |
| 7778764  | 9324186  | 10102841 | 3835361  | 9594728  | 4331755  | [848][M+1]2+ | 38  |
| 1495658  | 6680257  | 8192723  | 471923.3 | 2737618  | 6738880  | [759][M+1]+  | 20  |
| 1273547  | 1373084  | 1360443  | 488718   | 934589.5 | 1200832  |              | 9   |
| 990607.1 | 1937362  | 937618.4 | 996684.8 | 956760.8 | 2117129  |              | 4   |
| 9.44E+08 | 1.46E+09 | 7.93E+08 | 7.89E+08 | 9.52E+08 | 1.35E+09 | [M+K+HCO     | 3   |
| 1132745  | 1348752  | 1934170  | 1181256  | 1497077  | 703169.5 |              | 4   |
| 313596.4 | 521169.6 | 754714.8 | 462797   | 263391.2 | 424809.8 |              | 78  |
| 968307.3 | 0        | 1765307  | 2462455  | 1530607  | 2145585  |              | 2   |
| 4371570  | 10628400 | 10824143 | 2950178  | 5659182  | 7032610  |              | 9   |
| 428848.1 | 347924.2 | 549466.7 | 476627.1 | 470200.6 | 120156.6 |              | 218 |
| 70649658 | 57613897 | 86745454 | 57015024 | 66796848 | 12178998 |              | 38  |
| 2615737  | 3149078  | 6501318  | 1733550  | 2864164  | 13212519 |              | 1   |
| 1302746  | 1418134  | 1528055  | 1206505  | 2697936  | 3233411  |              | 2   |
| 526772.8 | 1195201  | 2189684  | 537251.6 | 476127.5 | 594311.8 |              | 9   |
| 4931458  | 5596120  | 1705543  | 3370142  | 5414501  | 2373556  |              | 11  |
| 408029.2 | 48929.5  | 726435.5 | 409168.8 | 347936.8 | 532316.5 |              | 9   |
| 3898656  | 7282082  | 6326153  | 3331608  | 7073424  | 2454427  |              | 192 |
| 980675.5 | 1177711  | 2484326  | 21009362 | 20530760 | 10572577 |              | 6   |
| 1827176  | 3872652  | 3081996  | 1394400  | 2350341  | 4036120  | [197][M]3+   | 9   |
| 11459744 | 15072604 | 9866972  | 10720012 | 11773572 | 15653858 |              | 3   |
| 201800.1 | 691718.5 | 647097.4 | 202193.4 | 368423.2 | 207616.2 | [M+H]+ 18!   | 39  |
| 1509250  | 1571072  | 935238   | 1214401  | 1202939  | 1511452  |              | 9   |
| 996525.8 | 257675.8 | 1023432  | 1112960  | 1360709  | 568162   |              | 89  |
| 9298690  | 7687171  | 6066301  | 14324051 | 5326336  | 5315938  |              | 282 |
| 1270721  | 1900995  | 2482702  | 1236411  | 1599544  | 258111.2 |              | 9   |
| 2374441  | 3499300  | 2599251  | 1569030  | 2405770  | 4196990  | [780][M+1]+  | 4   |
| 3.99E+08 | 7.73E+08 | 3.45E+08 | 3.24E+08 | 2.87E+08 | 2.53E+08 |              | 35  |
| 948732.9 | 1197115  | 993878.2 | 617279.9 | 600903.2 | 574185.8 |              | 9   |
| 2782265  | 4564829  | 1554001  | 986507.6 | 2247328  | 5378262  |              | 34  |

|          |          |          |          |          |          |                          |     |
|----------|----------|----------|----------|----------|----------|--------------------------|-----|
| 445379.1 | 0        | 490145.4 | 408248.6 | 676677.3 | 539346.3 | [M+3H-C6H <sub>6</sub> ] | 8   |
| 60026097 | 68687033 | 57741590 | 49044012 | 49803608 | 51918920 |                          | 214 |
| 7611233  | 5485417  | 5691064  | 7286354  | 5912694  | 8576420  |                          | 192 |
| 628961.7 | 600621.6 | 598317.8 | 365945.8 | 496774.4 | 43645.39 |                          | 4   |
| 2092522  | 1911792  | 3082763  | 1978303  | 2205166  | 946863.1 | [M+2H-CO]                | 23  |
| 5966936  | 7005162  | 3507292  | 5434685  | 6915958  | 11595262 | [1288][M]3+              | 2   |
| 13316514 | 3343192  | 11717771 | 15529703 | 15044417 | 2942194  |                          | 1   |
| 520376.3 | 466049.6 | 770893.6 | 413019.1 | 656510.8 | 374925.1 |                          | 4   |
| 5709775  | 4475655  | 4308109  | 8260921  | 4638486  | 2766658  | [M+H-CH <sub>2</sub> ]   | 392 |
| 31657381 | 35897192 | 35689174 | 22406466 | 30527415 | 38736990 | [1164][M]+               | 76  |
| 14916967 | 971032.8 | 6379899  | 12439461 | 506539.9 | 586532.8 | [M+H]+ 25!               | 39  |
| 627029.4 | 2436798  | 1813304  | 614364.8 | 1014263  | 1929310  | [M+H]+ 66!               | 18  |
| 337941.1 | 197509.7 | 666978.4 | 865697.3 | 316182.5 | 261397.1 |                          | 298 |
| 4448071  | 1112497  | 37571.3  | 2818852  | 2444926  | 2067488  | [M+K]+ 10!               | 41  |
| 1590968  | 2115228  | 1912295  | 1535449  | 1792456  | 1433726  |                          | 4   |
| 5327764  | 10123640 | 6194496  | 3083881  | 2662346  | 12070048 |                          | 1   |
| 10888825 | 1615437  | 13377944 | 9615196  | 867136.1 | 2171883  | [748][M]+                | 4   |
| 1009186  | 1811273  | 2942559  | 555263.5 | 1093274  | 715221   |                          | 9   |
| 208933.9 | 368205.7 | 360178.9 | 245188.3 | 305505.5 | 158244.4 | [612][M+1]3+             | 117 |
| 356726.5 | 389114.3 | 659082.3 | 344981.5 | 318010.6 | 205649.2 |                          | 4   |
| 5184429  | 8822493  | 5420700  | 4653686  | 5243043  | 2867142  |                          | 310 |
| 428474.1 | 915156.9 | 1975494  | 696011   | 367278.3 | 0        |                          | 9   |
| 8168440  | 1634347  | 5396221  | 7221369  | 6300944  | 191043.4 | [720][M]+                | 295 |
| 3023865  | 938940.4 | 4055821  | 403721.6 | 418210.9 | 2225745  |                          | 1   |
| 14250187 | 15523161 | 12842089 | 11617795 | 17465491 | 19248034 |                          | 2   |
| 673404.2 | 0        | 1140900  | 644327.9 | 652886.6 | 758928   |                          | 9   |
| 758521   | 10869652 | 845504.8 | 14917370 | 729375.2 | 5685493  | [351][M+1]3+             | 2   |
| 1005644  | 1523395  | 922744.5 | 888115.5 | 1121818  | 2822995  |                          | 9   |
| 360219.8 | 728642.1 | 632638.1 | 265446.3 | 361798.4 | 528555.5 |                          | 4   |
| 10644018 | 9950764  | 2215405  | 4982045  | 13223301 | 20115766 | [M+Na+K+H]               | 3   |
| 942079.5 | 758175.3 | 822588.9 | 1435537  | 870030.6 | 1055097  | [M+H-CO]+                | 159 |
| 2347675  | 1.3E+08  | 1912564  | 2034532  | 1548919  | 29092035 |                          | 2   |
| 657293.7 | 1854651  | 2457381  | 614278.3 | 635199   | 635230.1 |                          | 9   |
| 333410.1 | 431734.9 | 321587   | 329642.9 | 319332.9 | 340322.5 | [1028][M+2]3+            | 16  |
| 212652.9 | 248351.2 | 201665.6 | 132673.9 | 282686.4 | 281211.7 | [1188][M+2]+             | 17  |

|          |          |          |          |          |          |               |     |
|----------|----------|----------|----------|----------|----------|---------------|-----|
| 307808.1 | 1339523  | 954918.2 | 419672.9 | 719701.1 | 566255.3 |               | 9   |
| 1587388  | 3174664  | 4626725  | 1624676  | 2237198  | 720460.9 | [1233][M+1]2+ | 9   |
| 323277.2 | 290530.1 | 358008.6 | 445589.9 | 252392.7 | 536202.9 | [182][M+1]+   | 102 |
| 17359142 | 1594294  | 13984961 | 11499717 | 1127325  | 1515561  | [1142][M+2]3+ | 2   |
| 2237384  | 2112314  | 2012107  | 2783815  | 1093347  | 963905.9 |               | 29  |
| 3602888  | 3727479  | 3151748  | 2683468  | 3731917  | 4811261  | [M+K]+ 31     | 29  |
| 6710638  | 3503188  | 5387704  | 5575523  | 3118848  | 5641057  | [441][M+1]+   | 2   |
| 2867119  | 2389098  | 1834723  | 2998263  | 4620010  | 2085081  |               | 1   |
| 642729.9 | 1384890  | 1636531  | 665205.7 | 820703.6 | 1696369  | [845][M+1]2+  | 9   |
| 496653.9 | 1074046  | 623507.1 | 597286.8 | 668628.6 | 0        |               | 9   |
| 1136462  | 2153535  | 3461597  | 653860.3 | 895718.5 | 489278.8 |               | 9   |
| 650340.9 | 0        | 975206.1 | 924383.4 | 190089.5 | 1010770  |               | 9   |
| 26911668 | 1973124  | 1452076  | 21112517 | 35850496 | 2864905  |               | 9   |
| 1728830  | 5452286  | 5487578  | 2490927  | 7554549  | 1759254  |               | 1   |
| 717839.8 | 1014610  | 919491.2 | 674496.3 | 1251080  | 1059497  |               | 4   |
| 9244881  | 12847221 | 10915178 | 7149406  | 9751328  | 12750420 |               | 4   |
| 62618776 | 80243837 | 19125906 | 59765360 | 64933110 | 1.27E+08 | [M+H]+ 49     | 11  |
| 335260.8 | 351150.6 | 430919.9 | 445088.6 | 266143.8 | 448168.8 |               | 61  |
| 971138.2 | 1474784  | 934771.4 | 375968.2 | 236542   | 1193393  |               | 2   |
| 5880866  | 10742339 | 11644916 | 5975282  | 12934630 | 2953211  |               | 1   |
| 10888989 | 13131934 | 9859910  | 8927226  | 14002959 | 14090752 |               | 2   |
| 299444.2 | 548096.4 | 592664.2 | 159321.5 | 184360.2 | 738885.3 |               | 4   |
| 1763808  | 1092504  | 1807730  | 1059112  | 5222478  | 3534112  |               | 2   |
| 8576169  | 15329963 | 17720373 | 6511624  | 9157252  | 6962774  |               | 9   |
| 12080633 | 13198824 | 3463293  | 10991087 | 7956662  | 11968877 |               | 157 |
| 3532481  | 3663597  | 3090094  | 2586279  | 2211866  | 243204.8 | [M+K]+ 59     | 6   |
| 5115589  | 5860759  | 7593592  | 3831591  | 5218068  | 3232002  |               | 1   |
| 6243381  | 3259885  | 4507785  | 6285008  | 8481399  | 6551548  |               | 2   |
| 655852.9 | 1110531  | 1649429  | 422672.1 | 548322.1 | 138849   | [850][M+1]+   | 9   |
| 533594.7 | 920668.2 | 1028109  | 621321.4 | 505545.7 | 180410.9 |               | 4   |
| 994262.5 | 2143504  | 1730289  | 565039.4 | 1258008  | 1162020  |               | 9   |
| 1805862  | 1390945  | 16145058 | 1317961  | 20837715 | 7719358  |               | 2   |
| 9524638  | 11952088 | 12022038 | 7677918  | 9044775  | 9686242  |               | 4   |
| 1921748  | 1101135  | 1355756  | 1152057  | 2328861  | 4061314  |               | 15  |
| 1175007  | 831595.7 | 1376173  | 1556598  | 586693.4 | 0        |               | 2   |

|          |          |          |          |          |          |              |     |
|----------|----------|----------|----------|----------|----------|--------------|-----|
| 4372027  | 3453191  | 2582799  | 3864726  | 2673588  | 3242029  |              | 68  |
| 2970164  | 1903546  | 2817130  | 2476705  | 2215667  | 938399.6 |              | 2   |
| 9093774  | 9212509  | 8205281  | 9022187  | 8179732  | 6667151  |              | 31  |
| 1807344  | 3336305  | 3486939  | 1093379  | 2216736  | 2052189  |              | 9   |
| 1857063  | 4672774  | 5259618  | 1433134  | 2453963  | 2898369  |              | 9   |
| 149998.6 | 49971.14 | 219739.7 | 145009.2 | 149582.7 | 27678.98 | [1105][M+1]+ | 23  |
| 19510444 | 9031619  | 11726261 | 16796648 | 10141634 | 27983281 |              | 2   |
| 893110.1 | 1508734  | 1903838  | 499471.6 | 1030582  | 642260.4 |              | 9   |
| 4350721  | 5784215  | 2770631  | 3143093  | 5530996  | 11055278 |              | 9   |
| 509835.8 | 798312.1 | 1207927  | 612313.2 | 465716   | 308558.4 |              | 4   |
| 1389421  | 809264   | 851925.4 | 1189404  | 1150178  | 396754.2 |              | 4   |
| 465651.9 | 567504.7 | 446808.7 | 1037054  | 1752839  | 950178.8 | [M+2Na+2I    | 15  |
| 1536579  | 3151229  | 3342127  | 1251998  | 1940236  | 2127528  |              | 9   |
| 74610001 | 1.17E+08 | 64148492 | 57301857 | 62869719 | 1.33E+08 | [745][M]3+   | 3   |
| 805070.4 | 633792.7 | 819634.3 | 838384.3 | 692352.6 | 382074.7 |              | 61  |
| 2867731  | 1837921  | 2123019  | 3181382  | 24346652 | 9250836  | [455][M+1]3+ | 2   |
| 834712.8 | 1157928  | 1258946  | 541918.9 | 1096729  | 793289   | [M+Na]+ 3!   | 8   |
| 415300.6 | 0        | 885979   | 568604.8 | 496853.8 | 244276.3 |              | 9   |
| 2628955  | 3440600  | 4171476  | 1819359  | 2393313  | 2764610  | [773][M]+    | 9   |
| 1540920  | 3177476  | 4016799  | 1168557  | 1693170  | 1663705  |              | 9   |
| 4809359  | 927361.4 | 4201201  | 4207637  | 1874682  | 1636086  |              | 2   |
| 952059.6 | 1980144  | 1286413  | 646173.8 | 1332147  | 1995314  |              | 9   |
| 4576582  | 6428411  | 1238660  | 6095837  | 4318721  | 10535265 |              | 191 |
| 1438490  | 6468812  | 6856671  | 3816276  | 5752963  | 5005478  |              | 1   |
| 1272619  | 2450052  | 834558.4 | 654285.1 | 2284597  | 1346429  |              | 2   |
| 6416477  | 11780027 | 14849079 | 5025623  | 6800019  | 5191863  |              | 9   |
| 4278343  | 6509599  | 9647061  | 1701277  | 3055062  | 3674762  | [263][M+1]3+ | 18  |
| 6063519  | 3339643  | 4307549  | 4994012  | 5745581  | 2979006  |              | 2   |
| 6621053  | 4027988  | 3848214  | 5528219  | 9648997  | 13152209 |              | 2   |
| 1070783  | 1800600  | 623007.4 | 1147282  | 1316551  | 1141154  |              | 4   |
| 2576090  | 4182931  | 5641951  | 1600052  | 1651819  | 2293137  | [M+K+NH3     | 20  |
| 366456.7 | 1036745  | 555093.5 | 310066   | 729164.8 | 654846.9 | [M+K]+ 69!   | 8   |
| 966337.5 | 1296424  | 1070222  | 699064.3 | 738585.3 | 734060.6 |              | 12  |
| 3862937  | 4107748  | 1731059  | 1696169  | 5692099  | 9413149  |              | 3   |
| 127592.7 | 154921.6 | 158592.9 | 161988.9 | 204875.4 | 65923.28 |              | 328 |

|          |          |          |          |          |          |                     |     |
|----------|----------|----------|----------|----------|----------|---------------------|-----|
| 1124724  | 1804992  | 910826.5 | 528118.8 | 788033   | 1008441  | [1515][M]+          | 125 |
| 38353868 | 46394563 | 37979011 | 29385446 | 34540543 | 47884498 | [700][M+1]+         | 31  |
| 1065963  | 2252958  | 4091430  | 700205.4 | 803512.2 | 0        |                     | 9   |
| 11256469 | 383069   | 42310998 | 17148229 | 27693725 | 9431877  |                     | 2   |
| 3032710  | 2653713  | 2082145  | 4249513  | 6067481  | 6134555  |                     | 2   |
| 2669049  | 1070696  | 2250211  | 2008042  | 2043403  | 2201501  |                     | 29  |
| 502706.3 | 410877.7 | 200720.7 | 198328.7 | 414222.7 | 161557.6 | [M+K+NH3            | 16  |
| 237759.4 | 209933.6 | 284953.3 | 125636.4 | 152102.8 | 132227.1 |                     | 43  |
| 460970.2 | 391386.1 | 663863.9 | 440029.4 | 204788   | 634076   |                     | 42  |
| 627470.5 | 1538757  | 1392975  | 303845.9 | 378441.6 | 813819.2 | [578][M+1]+         | 9   |
| 1178213  | 2192123  | 1585259  | 673486.9 | 1345404  | 1942098  |                     | 9   |
| 3098452  | 2311616  | 1257488  | 2040613  | 4467216  | 6752904  |                     | 2   |
| 3724904  | 2186970  | 648748.1 | 2524895  | 2516396  | 10640619 | [3M+H]+ 1           | 11  |
| 4544935  | 5277198  | 4972359  | 4708135  | 4804064  | 4797811  |                     | 407 |
| 1043154  | 1981568  | 1239515  | 884744.3 | 1853777  | 1681937  |                     | 4   |
| 1174174  | 854943.3 | 942922.4 | 728519.9 | 1020714  | 221189.7 |                     | 4   |
| 2.2E+08  | 1.77E+08 | 2.22E+08 | 2.08E+08 | 1.52E+08 | 1.64E+08 | [271][M]+           | 61  |
| 543014.8 | 934082.7 | 410975.2 | 546436.2 | 1082629  | 905499.3 |                     | 241 |
| 50791682 | 87052288 | 67253077 | 93631365 | 1.32E+08 | 78284229 |                     | 22  |
| 1585790  | 2819870  | 1800732  | 2189744  | 2848800  | 5216123  | [45][M+3]2+         | 2   |
| 444454.6 | 647200.4 | 1219307  | 267346.6 | 217884.4 | 427282.4 |                     | 9   |
| 37196238 | 41525556 | 25547030 | 29913847 | 46776347 | 49647830 | [360][M]+           | 2   |
| 2172815  | 4155787  | 4129206  | 1688767  | 3250005  | 2832256  |                     | 9   |
| 446700.9 | 1064977  | 998142.7 | 239285   | 1051871  | 640879.4 |                     | 282 |
| 2294664  | 2093160  | 2673061  | 2735069  | 2232605  | 1530053  | [1253][M+5]+        | 2   |
| 982836.9 | 0        | 2222938  | 899560.7 | 1017827  | 0        |                     | 9   |
| 3366406  | 3029602  | 3589860  | 3115583  | 4589252  | 1192944  |                     | 2   |
| 3202089  | 5535935  | 5174325  | 2923983  | 4105147  | 1466952  |                     | 9   |
| 3597310  | 4942587  | 2456241  | 2811510  | 4687885  | 7684240  |                     | 9   |
| 5175027  | 3936100  | 5572167  | 681177.5 | 7208295  | 492784.1 |                     | 400 |
| 7586450  | 5403213  | 6892164  | 7983109  | 6878067  | 1843636  |                     | 2   |
| 4022608  | 4278187  | 3419875  | 4089049  | 2829998  | 2915120  |                     | 297 |
| 52895062 | 47658076 | 86667381 | 56312036 | 61601248 | 21111510 | [1530][M]+ [2M+Na]+ | 33  |
| 1933693  | 12608276 | 4342065  | 14139621 | 6883154  | 5826213  |                     | 2   |
| 3101240  | 4345371  | 8383680  | 2585770  | 2608774  | 216042.9 |                     | 9   |

|          |          |          |          |          |          |                          |     |
|----------|----------|----------|----------|----------|----------|--------------------------|-----|
| 310499.3 | 567986.5 | 161147.6 | 160195.4 | 203897.9 | 1523889  | [M+Na] <sup>+</sup> 2    | 111 |
| 2664808  | 1631292  | 3758509  | 2651956  | 6000147  | 2821017  | [53][M+2] <sup>2+</sup>  | 1   |
| 697373.6 | 993177.8 | 781492.1 | 371459.2 | 629041.7 | 334522.9 |                          | 4   |
| 5643713  | 5310783  | 5226367  | 7081960  | 4368086  | 4672500  |                          | 192 |
| 1999904  | 3644160  | 1429415  | 1414463  | 2046746  | 2553428  |                          | 4   |
| 902809.3 | 1384992  | 1996437  | 823510.5 | 893875.3 | 800197.7 |                          | 9   |
| 176352   | 260862.1 | 269207.4 | 254345.3 | 224495.5 | 203440.6 |                          | 309 |
| 10713403 | 7222691  | 2255491  | 5577764  | 14440131 | 11318446 |                          | 3   |
| 1124063  | 2829649  | 2237099  | 584058.5 | 724416.9 | 3487112  |                          | 4   |
| 1009935  | 1521242  | 1352994  | 744520.1 | 862553.3 | 331432.9 | [921][M] <sup>3+</sup>   | 9   |
| 6002080  | 4228428  | 6999764  | 4746822  | 1805775  | 9309190  |                          | 348 |
| 31907170 | 40952915 | 14673674 | 23454832 | 15066204 | 24657279 | [491][M] <sup>+</sup>    | 122 |
| 327419.1 | 1020111  | 1091330  | 160024   | 559549.7 | 424008   |                          | 9   |
| 5188184  | 7488951  | 4540576  | 3963197  | 8241323  | 8765053  | [521][M] <sup>+</sup>    | 2   |
| 351621.4 | 679715.5 | 578013.2 | 2021722  | 395938   | 464731.6 |                          | 9   |
| 14437571 | 22259169 | 15823062 | 21962923 | 12747146 | 18558323 | [M+K] <sup>+</sup> 39!   | 15  |
| 944832.6 | 1123663  | 1234069  | 732509.7 | 292744.3 | 187467.6 |                          | 4   |
| 2952700  | 3801587  | 3580632  | 2251840  | 3012407  | 4397425  | [580][M+1] <sup>+</sup>  | 4   |
| 5802581  | 8170599  | 7542886  | 4828827  | 5780020  | 4622335  | [274][M] <sup>3+</sup>   | 9   |
| 20593871 | 13086438 | 4067053  | 906064.8 | 19251473 | 24015294 | [M+K] <sup>+</sup> 54!   | 3   |
| 1377366  | 1765471  | 1602067  | 969519.2 | 1243148  | 1234982  |                          | 4   |
| 977308.2 | 4.62E+08 | 1382590  | 1285380  | 4.34E+08 | 277602.7 | [172][M+1] <sup>2+</sup> | 4   |
| 2226426  | 3902958  | 3270802  | 1472095  | 744213.8 | 3712261  |                          | 39  |
| 90332.91 | 245143   | 308954.9 | 203891.7 | 128004   | 198991.8 | [1506][M+2] <sup>+</sup> | 228 |
| 251051.8 | 237227.5 | 349234.7 | 237271.7 | 177634.9 | 91546    | [974][M+1] <sup>+</sup>  | 245 |
| 1357197  | 723434.1 | 933860.3 | 1363920  | 1236875  | 68218.06 |                          | 4   |
| 339675.8 | 141694.9 | 166560.5 | 315747.5 | 96677.98 | 286397.1 |                          | 63  |
| 83595500 | 1.58E+08 | 1.26E+08 | 87898839 | 6899424  | 47802276 | [53][M+2] <sup>+</sup>   | 1   |
| 879033   | 953685   | 1859624  | 692569.2 | 659710.4 | 697982.5 | [228][M+1] <sup>2+</sup> | 9   |
| 3250924  | 3498554  | 1011621  | 2638419  | 3988615  | 3399177  |                          | 3   |
| 3340070  | 2597413  | 2706760  | 3236349  | 3569298  | 2661634  |                          | 9   |
| 2654842  | 1473525  | 4271553  | 2237046  | 3164245  | 573563   |                          | 28  |
| 2922533  | 1183185  | 2942139  | 2621543  | 2245401  | 829426.5 |                          | 4   |
| 427567.7 | 9587238  | 1043242  | 1298967  | 2761541  | 651912.7 |                          | 18  |
| 957079.3 | 710709.8 | 10404629 | 9728384  | 14029424 | 2299658  |                          | 1   |

|          |          |          |          |          |          |              |     |
|----------|----------|----------|----------|----------|----------|--------------|-----|
| 7449989  | 13235465 | 15435475 | 49052572 | 16324662 | 15192399 | [906][M]3+   | 1   |
| 1134627  | 343248.1 | 344351.4 | 137806.5 | 238735.4 | 1791162  |              | 113 |
| 1244732  | 607515.8 | 473890.2 | 287326.8 | 1570659  | 2129405  | [M+Na]+ 4i   | 28  |
| 4804514  | 2953878  | 1679803  | 2442766  | 3440806  | 6300489  |              | 9   |
| 851881.7 | 1198798  | 1147398  | 698994.1 | 865379.3 | 598446.4 |              | 4   |
| 2179800  | 4810404  | 6967667  | 2591802  | 4999899  | 1899379  | [1142][M]2+  | 2   |
| 1092852  | 1056331  | 1533422  | 832341.7 | 937690.9 | 75466.87 |              | 9   |
| 438378   | 877342   | 236849   | 241199.6 | 438630.7 | 606566.3 |              | 9   |
| 5841314  | 7986388  | 7457301  | 4596624  | 5630488  | 4680272  |              | 9   |
| 286598.9 | 192604.7 | 207623.4 | 216799.8 | 195467.4 | 13346.26 |              | 276 |
| 538224.8 | 1224384  | 1185578  | 414865   | 440725.8 | 739022.8 |              | 9   |
| 4414840  | 8108587  | 3901551  | 2523258  | 263182.5 | 21864680 |              | 3   |
| 1435467  | 1815677  | 3344409  | 1697050  | 1118887  | 444329.2 |              | 9   |
| 2699267  | 1152014  | 2055131  | 2220292  | 3127701  | 2754466  |              | 2   |
| 823494.5 | 760518.9 | 1157425  | 765202.1 | 366221.6 | 306552.7 |              | 68  |
| 3411015  | 4047715  | 2968462  | 2221905  | 5157333  | 4994528  | [505][M+1]2+ | 2   |
| 5933726  | 6670539  | 4287843  | 6994168  | 5491174  | 10164586 |              | 374 |
| 5163793  | 2352311  | 3748281  | 2656163  | 3720258  | 7429457  | [1005][M+1]+ | 2   |
| 2288337  | 2771183  | 2098220  | 3421851  | 1121477  | 745263.9 |              | 2   |
| 2724296  | 2186081  | 2060150  | 2965863  | 5269069  | 3068635  |              | 2   |
| 20257023 | 3663606  | 3583357  | 19770074 | 8629449  | 3307857  | [3M+H+Na     | 21  |
| 138650.4 | 643758.7 | 470694.7 | 0        | 504789.5 | 2553162  |              | 9   |
| 4097854  | 3415180  | 3575008  | 3984498  | 2642314  | 4783476  |              | 2   |
| 4012730  | 727921.1 | 3961653  | 3514164  | 4799303  | 5225377  |              | 396 |
| 46862329 | 58334813 | 59979326 | 37860551 | 44125235 | 47676756 | [619][M]+    | 4   |
| 2031777  | 2955389  | 1633493  | 1332194  | 2012256  | 2906753  | [478][M+1]2+ | 12  |
| 1198812  | 2154554  | 1314133  | 767951.1 | 1382727  | 2128469  | [198][M+1]3+ | 9   |
| 6152328  | 11898564 | 14654302 | 5099566  | 7048165  | 5028258  |              | 9   |
| 2813948  | 3080531  | 2127373  | 3728536  | 2931425  | 4519313  |              | 413 |
| 763131.4 | 1182332  | 830406.1 | 195455.4 | 715839.9 | 220181.4 |              | 242 |
| 2969914  | 610999.1 | 2032747  | 1992710  | 2844338  | 4355785  |              | 9   |
| 1529936  | 760119.9 | 2575821  | 173830.9 | 2110545  | 5632071  |              | 10  |
| 8564639  | 11754500 | 9588772  | 7510946  | 8440495  | 12062816 | [691][M+2]+  | 15  |
| 1201151  | 1434166  | 562517.4 | 1451920  | 663970.4 | 983195.3 | [869][M+1]+  | 159 |
| 829495.8 | 750501.8 | 1144983  | 729204.1 | 692105.7 | 420233.5 |              | 4   |

|          |          |          |          |          |          |                                    |     |
|----------|----------|----------|----------|----------|----------|------------------------------------|-----|
| 1685645  | 1379867  | 641121.3 | 935550.6 | 1935134  | 1919882  |                                    | 1   |
| 724963.8 | 1322398  | 0        | 454639.9 | 976645.3 | 1854933  |                                    | 9   |
| 3057307  | 839123.7 | 754420.2 | 2420959  | 1128648  | 2494782  |                                    | 9   |
| 4829963  | 4980898  | 5789934  | 2533626  | 4000351  | 6050854  | [M+3H-C6H <sub>6</sub> ]           | 35  |
| 553467.8 | 1125762  | 1369468  | 568933.7 | 586296.9 | 391213.7 |                                    | 4   |
| 55602862 | 71330221 | 31652524 | 43331906 | 34203811 | 67968386 | [662][M] <sup>+</sup>              | 125 |
| 1824989  | 2326543  | 2693371  | 1210942  | 2334351  | 1533285  |                                    | 9   |
| 9455609  | 4804808  | 8434460  | 9847107  | 4381484  | 6428291  | [418][M+2] <sup>+</sup>            | 2   |
| 8711971  | 15591442 | 17972366 | 6492173  | 9080021  | 6885811  | [730][M]2 <sup>+</sup>             | 9   |
| 2339496  | 1539482  | 2453565  | 2521219  | 1953327  | 1459810  |                                    | 14  |
| 2066001  | 2815018  | 1815327  | 502665.1 | 1989830  | 2473953  |                                    | 4   |
| 4683587  | 12606769 | 5107424  | 7479514  | 4803437  | 5220333  |                                    | 1   |
| 969727.5 | 2449677  | 7331661  | 945962.7 | 259986.6 | 541041.3 | [M+H] <sup>+</sup> 45 <sup>+</sup> | 41  |
| 2238976  | 1171760  | 2441092  | 2159600  | 1827116  | 0        |                                    | 14  |
| 63802405 | 9591682  | 9696410  | 4074253  | 78026812 | 39764303 | [M+K] <sup>+</sup> 15 <sup>+</sup> | 21  |
| 1996542  | 4891650  | 6704864  | 1610749  | 2316048  | 1190146  |                                    | 9   |
| 11150522 | 3963212  | 1536205  | 11686242 | 3651610  | 6882445  |                                    | 6   |
| 870297.4 | 31491.64 | 215716.5 | 1000365  | 495396.5 | 3167357  |                                    | 9   |
| 1752107  | 1804371  | 1701775  | 1260518  | 1690686  | 793821.1 |                                    | 4   |
| 3949182  | 8864167  | 6083198  | 4366649  | 2273021  | 1410050  |                                    | 2   |
| 2919328  | 6324303  | 515730.5 | 1911600  | 3009786  | 7086911  | [M+H] <sup>+</sup> 38 <sup>+</sup> | 3   |
| 2523228  | 5171392  | 7169730  | 1892055  | 3614338  | 3160314  |                                    | 9   |
| 6082087  | 7139915  | 5628784  | 3716062  | 7909116  | 6611262  |                                    | 2   |
| 3139005  | 2501401  | 2376347  | 2569420  | 2456522  | 1745494  |                                    | 2   |
| 197923.3 | 313979.2 | 227185.1 | 210853.1 | 172418.5 | 62371.25 | [1226][M+1] <sup>+</sup>           | 303 |
| 3646107  | 4072317  | 9016228  | 2868960  | 3414508  | 2180819  | [607][M]3 <sup>+</sup>             | 9   |
| 2160108  | 4718600  | 1663363  | 1058104  | 2567154  | 2082382  |                                    | 97  |
| 182954.6 | 382195.5 | 119737.1 | 145243.4 | 106988.3 | 214698.5 |                                    | 125 |
| 1000946  | 841002.9 | 2207955  | 927095.5 | 693474.4 | 474688   | [81][M+1]3 <sup>+</sup>            | 9   |
| 3131445  | 6E+09    | 7026215  | 4526003  | 2773394  | 2779148  | [603][M+2]3 <sup>+</sup>           | 9   |
| 1832254  | 3496858  | 4693716  | 1201949  | 1947000  | 1258364  |                                    | 9   |
| 8030841  | 7037065  | 5703923  | 7169318  | 9406308  | 8630845  |                                    | 2   |
| 14326455 | 32478019 | 515023.6 | 242503.8 | 70353.93 | 150128.8 | [129][M+1]2 <sup>+</sup>           | 16  |
| 22112751 | 6433244  | 29598566 | 13465430 | 15673485 | 5788764  | [1279][M] <sup>+</sup>             | 52  |
| 921579.3 | 1059811  | 1788920  | 810598.6 | 1019568  | 376585.9 |                                    | 9   |



|          |          |          |          |          |          |               |     |
|----------|----------|----------|----------|----------|----------|---------------|-----|
| 5468121  | 11125484 | 5305893  | 4736019  | 19943807 | 12797525 | [181][M]+     | 218 |
| 1910188  | 2187648  | 2817057  | 1695984  | 1617225  | 259726   |               | 139 |
| 1040136  | 1167289  | 979156.2 | 486257.6 | 1232992  | 2068128  |               | 4   |
| 2322790  | 2696973  | 2497966  | 3173140  | 2400267  | 702621.9 |               | 13  |
| 4399239  | 7768754  | 5685559  | 3236091  | 5820842  | 6917805  |               | 9   |
| 722095.7 | 1015623  | 993641.7 | 486623.2 | 581371.1 | 317703.5 |               | 9   |
| 4779359  | 9012813  | 17777744 | 2283969  | 6016831  | 4197026  |               | 20  |
| 1064392  | 1736187  | 1555153  | 890838.3 | 1077696  | 628344.8 |               | 9   |
| 34624260 | 40741553 | 22291791 | 28147608 | 43680971 | 42412796 |               | 2   |
| 1.6E+08  | 2.04E+08 | 35169790 | 1.94E+08 | 1.58E+08 | 2.61E+08 | [M+Na]+ 3!    | 16  |
| 1402400  | 1602557  | 1521966  | 958430.5 | 1576754  | 2316592  |               | 4   |
| 1923899  | 2419229  | 2272013  | 1359240  | 1635260  | 2087375  |               | 4   |
| 509824.3 | 941453.8 | 1285912  | 1337631  | 465742.4 | 1354758  | [M+Na]+ 7!    | 16  |
| 6176970  | 11067282 | 5561992  | 5143231  | 8097265  | 9125317  |               | 2   |
| 1675722  | 2816424  | 3745567  | 1482434  | 1558007  | 726012.6 |               | 9   |
| 1080459  | 894732.3 | 567242   | 1183912  | 1477114  | 2599588  |               | 2   |
| 3059845  | 28247751 | 969688.7 | 310353.9 | 1131748  | 0        | [508][M+1]+   | 2   |
| 1155812  | 2557568  | 2714187  | 843702.9 | 1774054  | 1546562  |               | 9   |
| 2731499  | 4068095  | 4017906  | 2422254  | 1333105  | 1939321  |               | 4   |
| 1651047  | 2809256  | 1838815  | 1064063  | 2147491  | 2480999  |               | 9   |
| 6536077  | 12532111 | 9636906  | 4815974  | 7589836  | 10360366 | [165][M]2+    | 9   |
| 1436705  | 56360.34 | 1443051  | 1100222  | 1423955  | 3372150  | [1016][M+1]3+ | 9   |
| 1003595  | 953368.9 | 1156401  | 833722.2 | 766816.8 | 0        |               | 9   |
| 3110769  | 3486910  | 2922212  | 3794279  | 3272505  | 3003619  |               | 366 |
| 19482686 | 17195959 | 1715302  | 901489.2 | 19109356 | 3324222  |               | 1   |
| 6952618  | 16389029 | 24629554 | 4687976  | 7997846  | 6371175  | [688][M]+     | 9   |
| 1090562  | 0        | 981164   | 1019306  | 1399160  | 1474746  |               | 9   |
| 591200.7 | 806129.6 | 858734.1 | 437966.7 | 853196.6 | 766810   |               | 4   |
| 5515214  | 6142256  | 682782.8 | 5190404  | 6224172  | 7595298  |               | 11  |
| 581303.8 | 2841968  | 765478.3 | 2922894  | 2945441  | 2774758  |               | 95  |
| 1853178  | 2059804  | 1423999  | 1157833  | 2658439  | 1976689  | [M+H]+ 21!    | 14  |
| 47525127 | 60090967 | 57819157 | 37487239 | 44004979 | 47618516 | [824][M]+     | 4   |
| 720946.3 | 1046109  | 1130177  | 500122.7 | 565594.4 | 98008.47 |               | 4   |
| 896580.1 | 923023.5 | 667039.4 | 313737.1 | 1227341  | 1212111  |               | 9   |
| 1543609  | 2611911  | 2570181  | 2591843  | 5019492  | 2644257  |               | 333 |

|          |          |          |          |          |          |                      |     |
|----------|----------|----------|----------|----------|----------|----------------------|-----|
| 1180354  | 1049775  | 3459159  | 2704661  | 1974384  | 2058676  | [104][M+2]3+         | 9   |
| 37415151 | 40139236 | 32111892 | 32257788 | 37844040 | 39761852 |                      | 2   |
| 927037   | 1505842  | 1685666  | 527331.3 | 803097.6 | 263229.4 |                      | 9   |
| 3526962  | 2864451  | 1474186  | 1471639  | 2096944  | 133205.8 | [2M+2Na+]            | 3   |
| 682464.5 | 1078092  | 786811.6 | 482943.5 | 559011.8 | 765290.4 | [1614][M]+ [M+Na]+ 1 | 33  |
| 537063.5 | 869360.7 | 573965.9 | 918645.4 | 768554.2 | 783930.6 | [3M+2H]2+            | 20  |
| 815849   | 1632600  | 1427404  | 502454.5 | 1045561  | 862417   |                      | 9   |
| 199264.6 | 456282.1 | 513855.8 | 303185.8 | 460052.5 | 405256.7 |                      | 4   |
| 2536537  | 2228877  | 1321659  | 2235912  | 1043402  | 927795.1 | [818][M]+            | 86  |
| 392808.2 | 721170.2 | 564941.8 | 533690.3 | 420031.9 | 147058.2 | [1499][M+1]2+        | 23  |
| 10960385 | 10842681 | 7062718  | 10890628 | 2227535  | 4989216  |                      | 339 |
| 1114728  | 1994192  | 2577307  | 888457.6 | 1312611  | 616850.7 |                      | 9   |
| 22483725 | 31259023 | 24078258 | 14937909 | 21894859 | 33013297 |                      | 4   |
| 244023.7 | 76377.26 | 360673.3 | 345961.4 | 208509.3 | 114340.9 | [1591][M]+           | 69  |
| 4344829  | 3459580  | 4898132  | 2962624  | 2626777  | 5084900  | [774][M]+            | 9   |
| 3578539  | 864427.9 | 2760484  | 3700780  | 1068941  | 2377551  | [430][M+2]2+         | 2   |
| 4862703  | 6633310  | 4725357  | 5318704  | 6293185  | 8070674  |                      | 14  |
| 630709.8 | 1214529  | 2245646  | 527989.9 | 574982.5 | 0        |                      | 9   |
| 732843.6 | 917120.7 | 1041175  | 835285.9 | 457701.2 | 793698.5 |                      | 4   |
| 3776700  | 9125256  | 2785238  | 4145844  | 8197491  | 3799673  |                      | 202 |
| 8.1E+08  | 4753189  | 8.36E+08 | 6.43E+08 | 1724257  | 3671125  | [718][M+2]+          | 4   |
| 568894.1 | 514764.9 | 601583.4 | 501736.4 | 552848.1 | 216556.9 | [1122][M+1]+         | 17  |
| 5117922  | 4517672  | 2874878  | 1254859  | 1943945  | 6247364  | [M+Na+HC             | 15  |
| 5881550  | 6055072  | 5202653  | 9505519  | 4746146  | 3144852  |                      | 4   |
| 5367990  | 11252362 | 8735934  | 4326992  | 5761004  | 10212129 |                      | 9   |
| 850674.4 | 813472.3 | 788744   | 912033.7 | 511298.9 | 234186.2 | [3M+2H]2+            | 268 |
| 493688   | 1063473  | 725963.8 | 649957.3 | 624413.9 | 671223.1 | [M+K]+ 47!           | 33  |
| 3113654  | 1566647  | 1494171  | 1432354  | 3965577  | 3365337  |                      | 2   |
| 9077877  | 16728277 | 10482187 | 14436409 | 14939751 | 6677910  | [M+H-C3H]            | 13  |
| 2384544  | 18418579 | 4162601  | 4505118  | 3611164  | 6450168  |                      | 15  |
| 1574993  | 4196051  | 4064730  | 1042603  | 2087519  | 2408910  |                      | 9   |
| 10492129 | 11694694 | 10065704 | 11276669 | 8483815  | 8064198  | [170][M]+            | 146 |
| 14406614 | 1641584  | 11093122 | 13013113 | 12410580 | 3233739  |                      | 325 |
| 1321783  | 1375993  | 1155908  | 848506.7 | 950043.3 | 1932423  |                      | 4   |
| 891470.9 | 1536733  | 1794677  | 558713.7 | 1492880  | 1258689  |                      | 9   |

|          |          |          |          |          |          |                      |     |
|----------|----------|----------|----------|----------|----------|----------------------|-----|
| 2550083  | 2125215  | 1150463  | 2418793  | 2541915  | 4111067  |                      | 190 |
| 832872.6 | 1133167  | 939295.6 | 1646406  | 898644   | 0        | [3M+2H]2+            | 81  |
| 1653937  | 1996358  | 2765718  | 1820852  | 1175374  | 736377.9 | [M+Na]+ 4:           | 5   |
| 7315223  | 4708373  | 11277915 | 6134377  | 5147552  | 498802.7 | [458][M]2+           | 139 |
| 2520050  | 2259900  | 2439644  | 2822207  | 3095505  | 1791607  | [M+H+Na]2:           | 13  |
| 1691889  | 4099843  | 6582398  | 1307384  | 2071223  | 1628836  | [730][M+2]2+         | 9   |
| 617937.1 | 875739.1 | 1413120  | 621889.7 | 662610.4 | 229337.6 |                      | 8   |
| 1887146  | 3027686  | 3908282  | 1489367  | 2067657  | 820872.4 | [979][M]+            | 9   |
| 740057.8 | 1153812  | 99044.3  | 344509.3 | 1200076  | 1355306  |                      | 9   |
| 914434.9 | 1204415  | 1135608  | 372067.9 | 756712.1 | 1243734  |                      | 4   |
| 3639237  | 1929335  | 2853946  | 3193640  | 5141075  | 7001138  |                      | 2   |
| 4392926  | 4512500  | 4237983  | 3581921  | 6467560  | 933248.1 |                      | 468 |
| 187108.7 | 181114.2 | 321677.8 | 491806.6 | 231390.5 | 97058.98 |                      | 68  |
| 1454892  | 1409382  | 1478137  | 1038701  | 3452181  | 1337341  |                      | 6   |
| 864960.9 | 636558.2 | 1846858  | 548378.7 | 1719480  | 709056.9 | [599][M+1]3+         | 39  |
| 877558.3 | 1824226  | 1605997  | 461418.2 | 1197803  | 1171607  |                      | 9   |
| 299273.7 | 751168.9 | 618113.2 | 320991   | 515902.1 | 113495.9 | [1066][M+1]3+        | 16  |
| 6974894  | 9424708  | 8860999  | 4528097  | 6946523  | 9935787  |                      | 9   |
| 4.27E+08 | 6.31E+08 | 7.42E+08 | 4.04E+08 | 4.04E+08 | 4E+08    | [321][M]+ [M+H]+ 31! | 39  |
| 483277.8 | 930712.2 | 1329936  | 519951.6 | 555662.7 | 340288.6 |                      | 9   |
| 4040055  | 3733255  | 13314073 | 3644064  | 3908178  | 8093517  | [M+Na]+ 2!           | 14  |
| 6198528  | 7329753  | 7303866  | 7457908  | 6882772  | 7008687  | [M+H+HCC             | 95  |
| 450186   | 985863.9 | 940368.6 | 497611.1 | 590928.1 | 560599.5 |                      | 9   |
| 8511438  | 11072906 | 3128951  | 11281258 | 9352580  | 10038921 | [M+Na]+ 4'           | 15  |
| 3279140  | 4456862  | 8296107  | 2387881  | 2537840  | 315896.3 |                      | 9   |
| 28359426 | 7603191  | 7612101  | 2065892  | 30037359 | 9231486  | [M+K]+ 35!           | 11  |
| 550853.2 | 1188108  | 1336439  | 420888.2 | 514061.1 | 2182065  |                      | 9   |
| 5592456  | 7293195  | 5060152  | 4062642  | 6247818  | 6474506  | [M+H]+ 77!           | 13  |
| 846841   | 1234127  | 1004518  | 962380.2 | 877664.4 | 1427855  | [M+K]+ 77!           | 16  |
| 2593793  | 886255.9 | 2310406  | 3260525  | 1355250  | 135457.2 |                      | 2   |
| 1234508  | 1337332  | 155226.3 | 917221.5 | 617666.1 | 735416   |                      | 50  |
| 2020667  | 4308249  | 6393108  | 1731127  | 2259695  | 1092038  |                      | 9   |
| 14158085 | 17905973 | 18624680 | 21128954 | 17063482 | 4412329  |                      | 97  |
| 2835077  | 4120244  | 7122338  | 3848595  | 2491568  | 10514109 |                      | 13  |
| 5003779  | 3481821  | 4776602  | 2870335  | 3397054  | 12573.69 |                      | 68  |

|          |          |          |          |          |          |                      |     |
|----------|----------|----------|----------|----------|----------|----------------------|-----|
| 1831334  | 2031222  | 5132374  | 4793137  | 891204.8 | 3817422  | [M+2H-C6H            | 13  |
| 1006526  | 689500.8 | 766106.6 | 330636.9 | 860573.3 | 558019.4 |                      | 4   |
| 1354494  | 2158964  | 1737931  | 1060779  | 1551090  | 1348812  |                      | 8   |
| 5876618  | 11215914 | 17029304 | 4722613  | 5901402  | 3039466  |                      | 9   |
| 630420.8 | 983834.7 | 29923.84 | 117309.4 | 1302720  | 2121390  | [3M+Na+2H            | 21  |
| 6493677  | 4812330  | 7317980  | 5122779  | 2910265  | 4133575  |                      | 381 |
| 41419833 | 79389992 | 87814151 | 32743302 | 48807837 | 46693729 | [180][M]3+           | 9   |
| 4246806  | 5384238  | 4551794  | 3308416  | 4110201  | 5654429  |                      | 4   |
| 2613179  | 10300954 | 13670393 | 1402798  | 9065689  | 4992598  |                      | 1   |
| 307011.7 | 296978.6 | 366706.8 | 414365.4 | 282097.6 | 86155.74 | [332][M]3+           | 55  |
| 1517063  | 3379154  | 1432104  | 1578532  | 2869599  | 2364423  |                      | 9   |
| 1616383  | 1199547  | 1097540  | 1325615  | 514569.3 | 601170.9 | [928][M]+ [M+Na]+ 4H | 83  |
| 3775801  | 2333819  | 3162815  | 1507700  | 2500847  | 12173.28 | [844][M]2+           | 68  |
| 1510061  | 907103.6 | 1689595  | 2314802  | 1767347  | 2080207  |                      | 2   |
| 252813.5 | 394789.2 | 257578   | 161389.4 | 250930.7 | 262603.8 | [M+Na]+ 3H           | 423 |
| 3220545  | 4735143  | 8635824  | 2608767  | 2687464  | 745284.1 | [603][M+1]3+         | 9   |
| 1003844  | 1224100  | 1004200  | 989615.2 | 495037.6 | 1750686  |                      | 4   |
| 656858.4 | 783581.8 | 786605   | 341832.8 | 760177.6 | 267387.5 |                      | 4   |
| 28323136 | 31247142 | 24961382 | 25523867 | 22201186 | 38785268 |                      | 2   |
| 24922523 | 34061201 | 4262935  | 10460501 | 6143028  | 17124235 |                      | 43  |
| 623576.8 | 620359.1 | 611855.4 | 451113.6 | 688749.2 | 325759.3 |                      | 4   |
| 712066   | 1211651  | 815282.7 | 248345.2 | 592071.6 | 878634.4 |                      | 8   |
| 1089643  | 839392.3 | 1658574  | 1460566  | 866307.5 | 1383508  |                      | 40  |
| 447857.6 | 752654.9 | 824961.4 | 692539.5 | 696049.2 | 663571.4 | [M+H]+ 32H           | 18  |
| 1577305  | 3112487  | 4050192  | 1083878  | 1808365  | 1620181  |                      | 9   |
| 212623.3 | 237882.1 | 187019.5 | 268189.4 | 201700.4 | 89798.96 | [523][M+1]+          | 248 |
| 5429992  | 6661471  | 5670277  | 6119548  | 3977261  | 5531454  |                      | 372 |
| 1188217  | 1387315  | 952606.8 | 782729.1 | 983692.5 | 1684652  |                      | 4   |
| 15389973 | 8730037  | 17804988 | 19668149 | 28556795 | 15525530 |                      | 89  |
| 1445048  | 4434470  | 1726148  | 812745.8 | 2252605  | 1451269  | [3M+2Na]2            | 15  |
| 245284.1 | 341760.9 | 412520.1 | 438345   | 357382.5 | 9179.902 |                      | 246 |
| 3759466  | 6180545  | 3250432  | 2975910  | 3280325  | 4335183  |                      | 226 |
| 4134736  | 6335188  | 5701223  | 3410444  | 4877254  | 5815619  |                      | 208 |
| 2045265  | 2246604  | 1853388  | 1597512  | 1539546  | 2192121  | [806][M+1]+          | 4   |
| 780031.7 | 1329321  | 1537706  | 749216.4 | 1114177  | 775336.8 |                      | 4   |

|          |          |          |          |          |          |                      |     |
|----------|----------|----------|----------|----------|----------|----------------------|-----|
| 1141034  | 1087903  | 76571.14 | 905106.5 | 1730220  | 1200235  |                      | 21  |
| 1480989  | 2351397  | 1665244  | 803732.7 | 1147932  | 1501677  |                      | 4   |
| 17181032 | 18970785 | 18184035 | 15314618 | 17234194 | 12710768 | [568][M]+ [M+H-H2O]  | 25  |
| 3427026  | 3350274  | 2735535  | 4161915  | 4221322  | 3564736  |                      | 404 |
| 2308064  | 8398645  | 13889379 | 2264587  | 23587384 | 19999886 | [M+Na]+ 10           | 11  |
| 766495   | 656871.4 | 942042.4 | 783533.4 | 658328.5 | 240633.4 |                      | 9   |
| 1258466  | 2801643  | 1377494  | 1021545  | 2658263  | 2202732  | [M+2H]2+ 1           | 15  |
| 727469.4 | 931328.9 | 1073209  | 672467.2 | 460249.6 | 330303.7 |                      | 4   |
| 1768396  | 1684903  | 161013.4 | 806128.7 | 2395884  | 1856925  |                      | 11  |
| 557124.5 | 1854596  | 606204.8 | 657754.2 | 1698470  | 1969786  |                      | 1   |
| 1940046  | 4790583  | 5320913  | 1567448  | 2229227  | 3001718  | [747][M+1]2+         | 9   |
| 6962400  | 13533804 | 21395910 | 5305360  | 11688919 | 18635806 |                      | 9   |
| 1.86E+08 | 1.93E+08 | 1.6E+08  | 1.64E+08 | 2.1E+08  | 2.12E+08 | [465][M]2+           | 2   |
| 89542282 | 86800031 | 1.09E+08 | 1.59E+08 | 58790444 | 1.32E+08 |                      | 175 |
| 1140348  | 2134148  | 221352.5 | 695288.3 | 1713013  | 2495003  |                      | 21  |
| 41872928 | 79726484 | 88160370 | 32903049 | 48787072 | 46926844 |                      | 9   |
| 2030398  | 237748.1 | 1141485  | 1221780  | 1316508  | 423897.6 | [M+Na]+ 3:           | 6   |
| 5570418  | 5013395  | 5163754  | 3799227  | 4329750  | 1800246  | [1149][M+1]+         | 4   |
| 1349694  | 1905647  | 2045643  | 1757531  | 1790712  | 3022230  |                      | 4   |
| 6103315  | 1596881  | 7657929  | 6282306  | 10314678 | 5003385  |                      | 6   |
| 1373360  | 3194408  | 3416550  | 1097649  | 1817991  | 2033363  |                      | 9   |
| 466752.2 | 727432.1 | 581595.7 | 521017.1 | 361715.4 | 202935.1 | [M+H+NH3             | 35  |
| 6192494  | 6232125  | 6712146  | 5235698  | 5729577  | 4527979  |                      | 7   |
| 5677526  | 3759159  | 3951115  | 6737641  | 4306601  | 3394628  |                      | 444 |
| 1.35E+08 | 2.11E+08 | 1.57E+08 | 1.27E+08 | 1.33E+08 | 1.81E+08 |                      | 1   |
| 2647113  | 3458265  | 2804937  | 2652452  | 2514188  | 3346688  | [740][M]+ [M+Na]+ 4: | 44  |
| 132638.2 | 189893   | 87400.69 | 64911.24 | 118501.6 | 75293.83 |                      | 336 |
| 1630275  | 2979082  | 3990195  | 1289637  | 1772379  | 866956.1 |                      | 9   |
| 1085962  | 789274.5 | 817076.2 | 985256.6 | 815577.3 | 912441.5 | [M+K]+ 36:           | 12  |
| 885615.9 | 2179868  | 2435718  | 724336.3 | 1429985  | 705510   | [778][M+2]+          | 9   |
| 2483658  | 1752373  | 1703804  | 2388860  | 2401244  | 401151   |                      | 14  |
| 627905.9 | 88562.95 | 2100304  | 593315.4 | 511456.5 | 189782.5 |                      | 9   |
| 1410157  | 1767984  | 2041236  | 1267350  | 1405670  | 907781.2 |                      | 4   |
| 95227.54 | 153746.8 | 1.1E+08  | 201589.8 | 1.2E+08  | 508556.3 |                      | 17  |
| 466874.4 | 879845   | 613509.3 | 234734.3 | 427674.7 | 606499.9 | [3M+Na+K]            | 41  |

|          |          |          |          |          |          |                      |     |
|----------|----------|----------|----------|----------|----------|----------------------|-----|
| 940378.7 | 1124533  | 1326076  | 1634384  | 672160.8 | 1279912  |                      | 42  |
| 3656798  | 2938958  | 3523379  | 4117628  | 2197612  | 1299720  |                      | 2   |
| 5830434  | 11392524 | 16984637 | 4729010  | 6055153  | 3029959  |                      | 9   |
| 347587.1 | 555638.6 | 591004.5 | 111950.5 | 174257.3 | 528715.5 | [3M+2K]2+            | 21  |
| 5385558  | 2304286  | 5924399  | 3869700  | 1742021  | 7354088  |                      | 2   |
| 1.6E+08  | 10713228 | 1.3E+08  | 1.45E+08 | 9996250  | 35182469 |                      | 29  |
| 513610.7 | 828206.7 | 889514.1 | 339950.9 | 475812.9 | 356789.6 | [M+H]+ 27            | 8   |
| 913522.1 | 177719   | 351209.4 | 710067.1 | 1093803  | 2468484  | [1007][M+1]2+        | 9   |
| 1410629  | 2843424  | 1633704  | 982114.1 | 1149552  | 1636014  | [1434][M+1]+         | 137 |
| 3448321  | 380666.1 | 2476337  | 4058585  | 2524720  | 702621.9 | [M+Na]+ 2            | 13  |
| 2691791  | 3483434  | 2817805  | 2240736  | 2008550  | 2912698  | [1374][M+1]+         | 2   |
| 2241562  | 4456718  | 1679060  | 1089423  | 1884704  | 4989668  |                      | 5   |
| 1026996  | 1871018  | 2183422  | 1074612  | 1442034  | 667958.3 |                      | 13  |
| 2136271  | 756107.7 | 2749465  | 1168787  | 1847682  | 1974985  |                      | 52  |
| 1174863  | 489412.6 | 2268661  | 908335.9 | 805891.6 | 210590.8 |                      | 9   |
| 5436320  | 3940250  | 6274686  | 3913019  | 3974192  | 4337134  |                      | 433 |
| 6673785  | 7030932  | 3034076  | 2740905  | 7220027  | 9979394  |                      | 3   |
| 1140153  | 1080672  | 1094604  | 1088285  | 1142595  | 385317.5 |                      | 328 |
| 1455075  | 1872504  | 1079868  | 1055954  | 1449684  | 732808.7 |                      | 29  |
| 4079060  | 6334388  | 5227086  | 3104161  | 4795808  | 5409379  |                      | 9   |
| 53775394 | 12691387 | 1897965  | 69363705 | 41849463 | 71218151 |                      | 92  |
| 342846.3 | 1255148  | 671568.7 | 404637.3 | 802509.8 | 906563.9 |                      | 9   |
| 669292.5 | 3495308  | 3216044  | 1253610  | 1218881  | 2861436  | [2M+3H]3+            | 18  |
| 87938.45 | 184850.1 | 131360.5 | 138551.6 | 128636.1 | 87081.8  |                      | 167 |
| 969487.7 | 325637.8 | 385053.5 | 575720.6 | 2674417  | 888000.7 | [1079][M+1]+         | 49  |
| 2804069  | 3930537  | 2813025  | 2117989  | 2851650  | 3957429  | [739][M]+ [M+Na]+ 4  | 220 |
| 2648056  | 4425592  | 3167580  | 1668911  | 2231511  | 4257370  | [1223][M]+ [M+Na]+ 6 | 101 |
| 14476523 | 20174680 | 4993852  | 9957114  | 8704932  | 15826991 | [908][M]+            | 148 |
| 7919726  | 5416792  | 725785.5 | 7320629  | 1144356  | 3641032  | [817][M+1]+          | 145 |
| 1875171  | 1866814  | 1278126  | 1314361  | 2012600  | 1558994  |                      | 4   |
| 1101750  | 1009475  | 1504067  | 799909.5 | 644220   | 853386.5 |                      | 9   |
| 971785.3 | 974106   | 733679.1 | 1629262  | 409340.3 | 988913.8 | [1403][M+1]+         | 9   |
| 37262064 | 40500812 | 31880177 | 31356787 | 44962586 | 49971949 | [485][M+3]+          | 2   |
| 292378   | 184021.5 | 252011.8 | 169257.5 | 149893.4 | 218332.4 | [5][M+1]+            | 24  |
| 1878746  | 2283460  | 1995780  | 1243113  | 1584790  | 1967115  | [592][M]2+           | 4   |

|          |          |          |          |          |          |              |     |
|----------|----------|----------|----------|----------|----------|--------------|-----|
| 875228.4 | 0        | 2920548  | 700653.7 | 726466.3 | 316880   |              | 9   |
| 4115057  | 3632882  | 4597562  | 2345663  | 5015903  | 7779666  |              | 1   |
| 633382.2 | 0        | 269399.6 | 2163556  | 662441.9 | 0        |              | 1   |
| 4829819  | 25020230 | 1870444  | 6732282  | 41854618 | 27892903 |              | 6   |
| 971676.7 | 1341232  | 555866.5 | 788326.1 | 1330790  | 2069262  |              | 9   |
| 523810.4 | 815031.7 | 1182300  | 1182978  | 564514.5 | 470690.2 |              | 9   |
| 372410.3 | 476253.8 | 397374.5 | 213013.5 | 277432.3 | 300919.4 |              | 440 |
| 2011498  | 2672269  | 1770224  | 1563961  | 2172999  | 3502670  |              | 9   |
| 2415136  | 2350010  | 1706193  | 16122472 | 885198.8 | 17012509 | [264][M]+    | 225 |
| 1240432  | 474222.8 | 1608278  | 639729.9 | 1248789  | 467727   | [806][M+3]2+ | 4   |
| 712280.5 | 1679319  | 1822701  | 519950.7 | 742898.3 | 940773.1 |              | 9   |
| 578340.5 | 1206160  | 1093032  | 501473.9 | 572412.5 | 718917   |              | 9   |
| 494261.1 | 413480.5 | 1192144  | 1443404  | 533507.1 | 793427.3 |              | 483 |
| 1065626  | 1113532  | 914177.7 | 474991.3 | 920174.1 | 1017469  |              | 4   |
| 6.62E+08 | 453273.1 | 7.4E+08  | 1080017  | 774528.8 | 5.14E+08 | [M+K]+ 24    | 24  |
| 3430487  | 6086284  | 2061135  | 1753108  | 8484026  | 2362527  |              | 1   |
| 383717.4 | 1163256  | 775604.3 | 307034.1 | 742738.9 | 709648.2 |              | 4   |
| 1787346  | 4984123  | 2403857  | 6117155  | 1758073  | 4010636  | [M+Na]+ 1    | 6   |
| 657512.4 | 635850.8 | 475841.9 | 368925.2 | 496186.8 | 710581.5 |              | 66  |
| 1781450  | 2992395  | 4120399  | 1276342  | 1879398  | 577007.5 |              | 9   |
| 1920192  | 1418482  | 1958523  | 1277878  | 1493522  | 853554.6 | [1119][M]+   | 17  |
| 3223760  | 3124150  | 3006683  | 3035177  | 2785247  | 3071001  |              | 415 |
| 4978159  | 2769047  | 2669632  | 10270886 | 2285025  | 577869   |              | 314 |
| 74303621 | 37033757 | 17340715 | 43147670 | 36935615 | 53545101 | [M+K+HCO     | 15  |
| 1539368  | 3396442  | 3241631  | 1197003  | 2496460  | 2047526  | [52][M+2]+   | 9   |
| 793039   | 752372.9 | 786648.7 | 543324   | 530369.1 | 460398.9 |              | 37  |
| 3511252  | 808451.6 | 4972354  | 4098649  | 523577.4 | 1753835  | [M+Na]+ 4    | 8   |
| 11415989 | 6551807  | 7425482  | 7882965  | 6349598  | 6964444  |              | 1   |
| 949255.7 | 2272229  | 2528255  | 479223.5 | 999613   | 0        |              | 13  |
| 1472857  | 2638128  | 1425911  | 1673782  | 1258455  | 603409.5 |              | 9   |
| 1183880  | 1810236  | 887430.1 | 711123.3 | 2159125  | 2535323  |              | 97  |
| 1108677  | 1115102  | 1664441  | 1139282  | 1404908  | 988932   | [M+H]+ 34    | 423 |
| 2558187  | 1541618  | 1630665  | 2170262  | 2329003  | 3824078  | [M+3K-H]2    | 14  |
| 10335873 | 16733910 | 4.21E+08 | 4.75E+08 | 10818982 | 10550580 |              | 2   |
| 1266820  | 41463033 | 1120906  | 1712897  | 1470517  | 420090.5 |              | 97  |

|          |          |          |          |          |          |                    |     |
|----------|----------|----------|----------|----------|----------|--------------------|-----|
| 1989563  | 549019.3 | 3099896  | 1912056  | 1714461  | 1115808  |                    | 9   |
| 8647531  | 2933553  | 3237370  | 3685954  | 5753209  | 3069053  | [2M+Na+3I          | 121 |
| 22581540 | 31655754 | 23990745 | 15049003 | 22071821 | 32998515 | [667][M]+          | 4   |
| 878715   | 1222629  | 958872   | 1956368  | 1217107  | 302648.5 |                    | 9   |
| 5791414  | 11625839 | 17568093 | 4442137  | 6221842  | 3250088  |                    | 9   |
| 411669.6 | 673831.7 | 1119957  | 401169.8 | 348652.4 | 116243.2 |                    | 4   |
| 11500178 | 10705683 | 3228872  | 14842742 | 9814071  | 9893862  | [596][M]+ [M+H+NH3 | 44  |
| 1660469  | 1500279  | 5388352  | 1780687  | 11176382 | 3068530  |                    | 1   |
| 2172403  | 2086022  | 1196913  | 1821717  | 574621.7 | 1800940  |                    | 146 |
| 1141884  | 2588889  | 3390190  | 779689.1 | 1565333  | 1371071  | [132][M+1]+        | 9   |
| 557344.3 | 171746.5 | 405601   | 326287   | 341966.6 | 0        |                    | 182 |
| 1349487  | 5.53E+09 | 7343586  | 3.48E+09 | 15097744 | 12968424 |                    | 5   |
| 4973789  | 5044551  | 2700299  | 4193894  | 4661789  | 4451924  |                    | 279 |
| 32419858 | 3258550  | 29037279 | 1224179  | 6883733  | 19288286 |                    | 2   |
| 2867494  | 3068447  | 4905906  | 2756097  | 3039859  | 1589347  | [880][M+1]+        | 23  |
| 4980464  | 15613515 | 15315083 | 6357929  | 6338004  | 11721109 | [2M+3H]3+          | 18  |
| 2.54E+08 | 3.7E+08  | 3.42E+08 | 2.78E+08 | 4.82E+08 | 1.2E+08  | [M+H]+ 43I         | 15  |
| 457985.6 | 670830.3 | 728422   | 653526   | 619278.8 | 599534.5 |                    | 57  |
| 31431134 | 47003738 | 82066955 | 28157644 | 15912295 | 31736196 |                    | 20  |
| 2879091  | 3754213  | 3107845  | 2271481  | 3129862  | 3889955  |                    | 4   |
| 138551.4 | 186479.3 | 257884.2 | 157148.7 | 124388.8 | 74562.8  |                    | 232 |
| 40529669 | 79345946 | 88080267 | 32628021 | 48973343 | 45798303 |                    | 9   |
| 2657354  | 3374720  | 4785624  | 4405498  | 6747359  | 2561545  |                    | 1   |
| 574224.9 | 1361573  | 1148177  | 351049.2 | 627730.4 | 998751   |                    | 9   |
| 6491807  | 3805759  | 2808135  | 4265505  | 7379943  | 3837411  |                    | 253 |
| 1090357  | 6686148  | 1434316  | 773228   | 1701366  | 9287518  |                    | 15  |
| 2608621  | 403118.8 | 2079500  | 1583789  | 444163.2 | 510069.2 |                    | 291 |
| 938809.8 | 550172.3 | 990821.1 | 605606.3 | 983883.4 | 0        |                    | 9   |
| 319406   | 1889128  | 872894.3 | 180388   | 1824038  | 1148373  | [M+H-CO2]          | 97  |
| 1204148  | 3090018  | 3687696  | 1269590  | 4957827  | 6805156  |                    | 1   |
| 5252453  | 3609718  | 4823320  | 6685018  | 4658792  | 4491761  | [M+H]+ 45I         | 253 |
| 5887230  | 5180109  | 9399274  | 6217355  | 6506896  | 2355021  | [1530][M+2]+       | 33  |
| 6682064  | 9000768  | 2819167  | 4302338  | 3191363  | 5204214  | [582][M+1]+        | 125 |
| 2721699  | 4057888  | 5989322  | 1862470  | 2421703  | 1450884  |                    | 9   |
| 5272899  | 3273074  | 5381027  | 4416296  | 3915352  | 3283027  |                    | 2   |



|          |          |          |          |          |          |              |     |
|----------|----------|----------|----------|----------|----------|--------------|-----|
| 1.36E+08 | 2.12E+08 | 1.56E+08 | 1.29E+08 | 1.35E+08 | 1.83E+08 |              | 1   |
| 246756.3 | 665009.4 | 480485.3 | 217337.1 | 391280.9 | 568982.6 | [M+K]+ 32:   | 20  |
| 606810.1 | 1711192  | 1896559  | 494846.6 | 773838.2 | 1029132  |              | 9   |
| 2040072  | 1026004  | 1300966  | 1459046  | 1162234  | 195044.5 |              | 2   |
| 2804086  | 1659601  | 3623254  | 3652056  | 2236919  | 919149.5 |              | 1   |
| 3653799  | 3918604  | 4548342  | 3286153  | 2706428  | 3086895  |              | 9   |
| 567351.4 | 824519.8 | 1030244  | 1424036  | 1405225  | 2614304  | [412][M+2]+  | 9   |
| 5006215  | 14056042 | 8598349  | 4867701  | 8087353  | 9542901  | [1313][M+3]+ | 9   |
| 14766121 | 16426391 | 10410496 | 12445172 | 18029447 | 19335880 | [359][M+2]3+ | 2   |
| 2185505  | 1757059  | 1969761  | 1329822  | 1526597  | 108526.4 | [525][M]2+   | 200 |
| 3276063  | 3839217  | 3218482  | 2963350  | 3906005  | 3474792  |              | 9   |
| 410822.3 | 266192.2 | 335196.2 | 291712.1 | 260262.2 | 90632.16 |              | 271 |
| 804815.8 | 894603.7 | 620977.3 | 809468.4 | 601364   | 441450.9 |              | 277 |
| 4139290  | 3084264  | 2925726  | 3597304  | 2066524  | 820558.6 |              | 40  |
| 2972363  | 3498060  | 2121298  | 1971305  | 3752590  | 5411265  |              | 9   |
| 345893.3 | 335398.4 | 372152.8 | 1095511  | 420319.3 | 375136.5 | [M+H]+ 49:   | 62  |
| 4288858  | 3705141  | 2485007  | 4457434  | 1967027  | 1790445  |              | 2   |
| 0        | 839271.8 | 1084907  | 216556.3 | 303359.9 | 403528.3 |              | 9   |
| 1300222  | 1935457  | 2527147  | 1134678  | 1392600  | 1175822  |              | 9   |
| 5934053  | 4522360  | 4565224  | 6555239  | 5293515  | 9582464  | [519][M+1]2+ | 2   |
| 2334004  | 3300332  | 1976128  | 1587975  | 2454717  | 3273152  |              | 4   |
| 392893.3 | 481882.4 | 434475.9 | 325858.3 | 369331   | 1005752  |              | 4   |
| 8269355  | 3939540  | 2592685  | 7922704  | 1407953  | 3961825  | [M+K+NH3     | 15  |
| 3745471  | 4268483  | 4747307  | 3502240  | 3527091  | 3249424  |              | 13  |
| 1068186  | 1301606  | 1178992  | 1161310  | 1542714  | 510618.7 |              | 4   |
| 3535178  | 4569721  | 6816591  | 2006660  | 4430988  | 2691992  |              | 192 |
| 2324221  | 5076910  | 8257937  | 2057983  | 2611684  | 1513153  | [124][M]3+   | 9   |
| 496582.2 | 479427.4 | 350438.1 | 342891.6 | 248413.8 | 6871.553 |              | 77  |
| 2050503  | 50992.37 | 2185675  | 1773196  | 661617.7 | 587336.1 | [M+K]+ 49:   | 8   |
| 1466574  | 1354024  | 687117.5 | 427481   | 960595.8 | 2906573  |              | 461 |
| 12398143 | 5147451  | 2.32E+08 | 13688480 | 2.69E+08 | 1.12E+08 |              | 1   |
| 1081997  | 916353.5 | 1272191  | 8161324  | 1150899  | 1592288  | [375][M+1]3+ | 2   |
| 901643.4 | 1061107  | 1316442  | 1054950  | 714510.6 | 0        |              | 9   |
| 2412272  | 1767445  | 1805843  | 1530681  | 1518681  | 2501635  |              | 4   |
| 12413115 | 14831101 | 12617610 | 8866055  | 12385345 | 16141295 | [M+Na]+ 6:   | 62  |

|          |          |          |          |          |          |                                               |     |
|----------|----------|----------|----------|----------|----------|-----------------------------------------------|-----|
| 501946.3 | 487294.9 | 335553.9 | 503982.5 | 291845.2 | 268536.3 |                                               | 129 |
| 2659282  | 3749244  | 3506672  | 2303091  | 2400481  | 2808636  |                                               | 4   |
| 1637526  | 1596689  | 2232592  | 1538099  | 1863365  | 1021122  |                                               | 17  |
| 1967325  | 1054027  | 859997.8 | 1670422  | 1678222  | 840543.9 |                                               | 4   |
| 933415.3 | 1458421  | 3243894  | 2762746  | 2161338  | 237953.4 |                                               | 87  |
| 2922781  | 2122670  | 2970264  | 4125315  | 2475055  | 293791.2 |                                               | 2   |
| 1080139  | 339068.9 | 1798479  | 1430252  | 1239532  | 2053388  |                                               | 14  |
| 1276146  | 2142109  | 2350516  | 1692993  | 2224177  | 2342193  | [3M+H+Na                                      | 134 |
| 4010805  | 1308127  | 77681.02 | 4055471  | 1106701  | 598072.4 |                                               | 52  |
| 866140.3 | 636107.9 | 4225458  | 436549.9 | 1298587  | 1453967  |                                               | 9   |
| 5850781  | 5545484  | 1277199  | 6037180  | 11092088 | 8783884  | [M+Na+CF <sub>3</sub>                         | 11  |
| 129368.6 | 66005.25 | 151304.5 | 170676.5 | 195209.8 | 145728.4 |                                               | 102 |
| 1721287  | 4068053  | 3116415  | 1637794  | 1383634  | 430305.4 |                                               | 15  |
| 1081214  | 401572.4 | 744422.9 | 248410.3 | 662027.7 | 0        |                                               | 182 |
| 379312.2 | 562321.9 | 886290.6 | 617547.9 | 576074.6 | 497135.3 |                                               | 338 |
| 9351441  | 10130393 | 9031513  | 8494018  | 10253852 | 7055544  | [1618][M+2] <sup>2+</sup>                     | 2   |
| 341540.5 | 254745   | 530295   | 363722   | 505906.6 | 259004.7 | [1503][M] <sup>+</sup>                        | 328 |
| 47588024 | 44178159 | 71017001 | 53372360 | 61239007 | 77080465 | [M+K] <sup>+</sup> 16:                        | 6   |
| 5223621  | 2179281  | 5686753  | 727963.8 | 775917.9 | 10756408 | [M+K] <sup>+</sup> 38:                        | 5   |
| 1011089  | 1113259  | 1848391  | 952385.8 | 2005132  | 757117   | [3M+H+Na                                      | 28  |
| 3236020  | 2006089  | 2370802  | 2023551  | 2358705  | 1584253  | [M+H+NH <sub>3</sub>                          | 97  |
| 556852.8 | 1120496  | 1370163  | 456356.5 | 708230.7 | 971716.9 |                                               | 9   |
| 7137780  | 7387108  | 5005317  | 4943449  | 42130680 | 9439886  | [504][M] <sup>3+</sup>                        | 2   |
| 5.84E+08 | 401247.3 | 8.64E+08 | 353123.7 | 4.91E+08 | 228210.5 | [M+H-C <sub>5</sub> H <sub>8</sub>            | 18  |
| 200452.6 | 342635.2 | 442379.8 | 316183.7 | 197116   | 298450.5 |                                               | 323 |
| 3.59E+08 | 3.27E+08 | 4.69E+08 | 3.44E+08 | 3.55E+08 | 2.02E+08 | [1092][M] <sup>+</sup> [M+H] <sup>+</sup> 61: | 23  |
| 2419677  | 578595.3 | 89702.49 | 3007412  | 308668.3 | 2212259  |                                               | 1   |
| 2626873  | 2423300  | 1299029  | 1304479  | 2799992  | 856508.7 |                                               | 9   |
| 860171.5 | 847294.3 | 1868692  | 858375.4 | 681190.1 | 645850.2 |                                               | 9   |
| 12076918 | 780070.8 | 329882.2 | 9772513  | 4627534  | 1325971  |                                               | 52  |
| 2767831  | 3654456  | 3513453  | 2334856  | 2624286  | 2845253  |                                               | 4   |
| 750794.4 | 938504.9 | 658241.1 | 591211.9 | 514807   | 420587.7 |                                               | 9   |
| 26690799 | 48484659 | 77815494 | 23451345 | 23185119 | 14880315 | [1420][M] <sup>+</sup>                        | 9   |
| 5160886  | 4418763  | 4749167  | 3942797  | 4874771  | 5100934  | [445][M] <sup>2+</sup>                        | 9   |
| 3646835  | 1618800  | 1002562  | 3484918  | 3782790  | 1759949  | [745][M+1] <sup>3+</sup>                      | 3   |

|          |          |          |          |          |          |              |     |
|----------|----------|----------|----------|----------|----------|--------------|-----|
| 408588.2 | 784941.4 | 872401.2 | 769899.3 | 594608.7 | 200503.5 |              | 4   |
| 9009902  | 9851606  | 4466890  | 7550907  | 9217977  | 9086867  |              | 97  |
| 249731.8 | 223173.5 | 266072.8 | 62393.42 | 298107.3 | 374318.1 | [1176][M+1]+ | 17  |
| 28642801 | 50862583 | 36790388 | 26402061 | 33171959 | 42287548 | [904][M+1]3+ | 1   |
| 820933.9 | 1101925  | 647792.3 | 742842.8 | 840264.9 | 508868   | [49][M+2]+   | 4   |
| 17557480 | 14367542 | 14864198 | 15633253 | 16178076 | 8411713  |              | 2   |
| 49645254 | 60405828 | 24611222 | 20363187 | 40555364 | 56672090 |              | 1   |
| 8271882  | 11071186 | 10985280 | 6568749  | 8005209  | 5913609  |              | 9   |
| 4540858  | 3258266  | 672811.5 | 4275493  | 654718.5 | 2278173  | [575][M]+    | 145 |
| 3702440  | 3712839  | 2911252  | 3714189  | 3804471  | 816240.9 |              | 9   |
| 2382635  | 2183036  | 3034600  | 2654074  | 4158706  | 3468076  |              | 9   |
| 1246750  | 1504521  | 2087479  | 903881.9 | 1228363  | 547007.1 |              | 9   |
| 1055559  | 1513912  | 694666   | 596853.7 | 1303174  | 2127818  |              | 9   |
| 5548034  | 7553489  | 5141208  | 4112018  | 6924016  | 7091176  |              | 13  |
| 172175.3 | 617703.9 | 298476.8 | 141326.2 | 146559.4 | 903426.9 |              | 5   |
| 166806.6 | 218151.5 | 164637.4 | 250664.2 | 259476.6 | 286910.9 | [761][M+1]+  | 292 |
| 1440414  | 1470410  | 2264183  | 1590246  | 1260003  | 977404.6 |              | 9   |
| 721900.9 | 636930   | 846876.6 | 856823.4 | 736820.5 | 179746.3 |              | 506 |
| 1355539  | 0        | 749381.3 | 657351.7 | 686532.7 | 0        | [930][M+1]2+ | 1   |
| 2749390  | 5559265  | 144630.1 | 4221716  | 4017179  | 3877657  |              | 5   |
| 34562225 | 34124094 | 29315270 | 20867817 | 75811299 | 23143650 |              | 92  |
| 2491121  | 3887120  | 2494084  | 1847633  | 3606524  | 3400486  |              | 2   |
| 3786989  | 3727559  | 3678648  | 3723370  | 3412992  | 3407282  | [M+K+NaCl    | 398 |
| 6831606  | 8581613  | 7521768  | 5013287  | 6625899  | 8110446  |              | 4   |
| 6948647  | 8536380  | 6051009  | 4911615  | 7195536  | 8690620  |              | 4   |
| 936915   | 2702051  | 3388836  | 691659.6 | 803733.4 | 1033395  |              | 9   |
| 3670531  | 3619021  | 3154456  | 2963836  | 3225744  | 2890512  |              | 325 |
| 48336898 | 60663078 | 3109100  | 75822189 | 48786739 | 78831729 | [M+H-CH4]    | 11  |
| 1644777  | 2986524  | 2186380  | 1206202  | 2134187  | 2644614  |              | 9   |
| 459447.4 | 1097587  | 502221.2 | 384378.3 | 642496.2 | 1036774  |              | 4   |
| 764501.2 | 1167313  | 568208.9 | 369428.7 | 846480.4 | 434600.5 |              | 4   |
| 8547436  | 2357308  | 3594943  | 8715789  | 2702788  | 1158111  |              | 2   |
| 9092950  | 1869437  | 1114214  | 6121946  | 7362927  | 2498576  | [M+K]+ 204   | 46  |
| 51982281 | 42905585 | 64633057 | 39914440 | 37801272 | 23525463 | [885][M]+    | 1   |
| 57446496 | 53976808 | 57886157 | 59818713 | 58421182 | 50810304 | [587][M]+    | 174 |

|          |          |          |          |          |          |                                               |     |
|----------|----------|----------|----------|----------|----------|-----------------------------------------------|-----|
| 1223357  | 690957   | 698638.3 | 1537281  | 499859   | 1778976  | [M+H] <sup>+</sup> 63:                        | 14  |
| 24509994 | 35476165 | 24413110 | 14125872 | 22798518 | 74964239 | [M+H-CH <sub>4</sub> ]                        | 44  |
| 16761275 | 13563538 | 16504394 | 15663055 | 12443569 | 12970309 | [222][M] <sup>+</sup>                         | 61  |
| 1251891  | 748793.4 | 1099509  | 1436298  | 869573.3 | 615534.2 | [1570][M] <sup>+</sup> [M+H+NH <sub>3</sub>   | 136 |
| 9032012  | 22378477 | 22435924 | 8980863  | 10006167 | 14320670 | [403][M] <sup>2+</sup> [M+2H] <sup>2+</sup> ( | 18  |
| 44141055 | 25511996 | 31403443 | 76789290 | 21042579 | 3956958  |                                               | 175 |
| 660304.9 | 917315   | 861360.8 | 597911.8 | 658811.2 | 214647.2 |                                               | 4   |
| 25698542 | 40644371 | 40019866 | 20525416 | 24315425 | 22590992 | [2M+K] <sup>+</sup> 18                        | 39  |
| 7834220  | 6314683  | 6958661  | 9698656  | 3407161  | 7120534  |                                               | 408 |
| 4933746  | 2890544  | 6060786  | 4803799  | 5846438  | 8350860  |                                               | 421 |
| 6869623  | 5011537  | 5313463  | 2913785  | 4875654  | 8099271  |                                               | 335 |
| 119970.3 | 153872   | 149047.8 | 110358   | 129386   | 58137.57 |                                               | 147 |
| 1593320  | 1131475  | 1093609  | 877887.5 | 987177.3 | 632125.6 | [824][M+1] <sup>+</sup>                       | 4   |
| 2326031  | 4380663  | 2890835  | 1460454  | 3006366  | 4132163  |                                               | 9   |
| 3893291  | 5317232  | 3905650  | 2866310  | 4036759  | 4579488  |                                               | 4   |
| 2037224  | 16695818 | 869512.2 | 568965.5 | 2015606  | 1121788  |                                               | 52  |
| 1442280  | 2892106  | 3386358  | 967974.9 | 1797545  | 1378113  |                                               | 9   |
| 7264849  | 10135824 | 6661544  | 6733690  | 5533855  | 1032280  | [M+K] <sup>+</sup> 41:                        | 46  |
| 40675503 | 53257144 | 61883342 | 42582658 | 43450418 | 30060800 | [145][M] <sup>3+</sup>                        | 9   |
| 1590270  | 1810840  | 1829288  | 1586696  | 1719198  | 895177.5 | [978][M+1] <sup>+</sup>                       | 9   |
| 2175781  | 2740114  | 2387384  | 728414.8 | 1778411  | 3208141  | [M+H+K] <sup>2+</sup>                         | 35  |
| 55389912 | 74704896 | 25112682 | 42097307 | 28952876 | 47741025 | [408][M] <sup>+</sup>                         | 122 |
| 4791370  | 2596244  | 8493239  | 5698374  | 4780588  | 2105851  |                                               | 9   |
| 66076937 | 49386671 | 7714533  | 34702883 | 70118052 | 90245262 |                                               | 3   |
| 24003633 | 21506337 | 4985009  | 6314492  | 58147982 | 14487572 |                                               | 1   |
| 1632432  | 2886564  | 3866113  | 1509350  | 1800985  | 699125.2 |                                               | 9   |
| 854198.8 | 732100.4 | 1005193  | 591471.5 | 570939.9 | 0        | [M+Na+Na]                                     | 13  |
| 3642147  | 2848685  | 5289454  | 1803606  | 3268289  | 2572160  |                                               | 20  |
| 2885155  | 6637138  | 1062256  | 1758287  | 3559679  | 3135166  | [3M+Na] <sup>+</sup> :                        | 29  |
| 896880.9 | 562755   | 314254.1 | 491754.1 | 217057.5 | 1597579  | [285][M+1] <sup>+</sup>                       | 108 |
| 924463.8 | 945199.5 | 2153590  | 634360   | 1090164  | 683788.7 |                                               | 9   |
| 5233275  | 6956036  | 6670547  | 4522201  | 5028929  | 5274913  |                                               | 4   |
| 13134964 | 5039067  | 25490392 | 7533847  | 9349938  | 1989089  |                                               | 188 |
| 712233.9 | 939170.5 | 893664.1 | 668307.3 | 629377.5 | 195359.8 |                                               | 9   |
| 78620981 | 97208405 | 1.18E+08 | 87110089 | 86812904 | 63009599 | [132][M] <sup>+</sup>                         | 9   |

|          |          |          |          |          |          |                     |     |
|----------|----------|----------|----------|----------|----------|---------------------|-----|
| 3142792  | 3566370  | 5095288  | 3040723  | 2536399  | 1455073  | [699][M]+           | 292 |
| 397452.2 | 2170966  | 1545941  | 1614748  | 1220728  | 1438422  | [879][M+2]3+        | 20  |
| 9776252  | 17551583 | 21361440 | 5346328  | 6139235  | 10277503 | [187][M]2+          | 18  |
| 39223103 | 25960223 | 22218101 | 24032136 | 35965455 | 15792187 |                     | 1   |
| 3072579  | 4513275  | 1143214  | 8803529  | 10704863 | 18903215 | [M+H]+ 49!          | 21  |
| 2124678  | 3843949  | 5801846  | 1679997  | 2361217  | 939427.5 | [1604][M]+          | 9   |
| 597968.2 | 495948.3 | 994016.2 | 529489   | 406097.4 | 281770.2 |                     | 4   |
| 686837.8 | 931907.5 | 956749.4 | 645344.3 | 631269.9 | 328770.6 |                     | 4   |
| 28046849 | 19830310 | 7289227  | 15616595 | 25271022 | 30911729 |                     | 3   |
| 1.56E+08 | 3.24E+08 | 1.68E+08 | 35810314 | 67468019 | 44309451 |                     | 90  |
| 1922850  | 1983531  | 2097809  | 1576106  | 1247259  | 1024015  |                     | 4   |
| 7195928  | 6700594  | 6856754  | 7335989  | 6878922  | 6764919  |                     | 174 |
| 2682369  | 3142127  | 1473026  | 2340782  | 1424045  | 969159.4 |                     | 15  |
| 892566.8 | 1118754  | 529363.4 | 757063.1 | 834080.4 | 106142.7 |                     | 4   |
| 645739.1 | 739901.3 | 830962.3 | 398688.2 | 291511.2 | 906786.6 | [M+K]+ 23!          | 5   |
| 1271204  | 1406336  | 1392182  | 630021.5 | 1159072  | 1809621  |                     | 9   |
| 3525813  | 1628444  | 4753603  | 10767381 | 4143628  | 2720780  | [1415][M+1]+        | 265 |
| 538145.8 | 699133.4 | 557821.5 | 561053.2 | 295061.3 | 297998.3 |                     | 168 |
| 1354960  | 2711209  | 3416005  | 925810.2 | 1649800  | 1144502  |                     | 9   |
| 8786895  | 11459187 | 8254380  | 9078889  | 9265328  | 1932953  |                     | 2   |
| 112193.5 | 241861.7 | 354506.7 | 587103.8 | 163667.3 | 860320.4 |                     | 210 |
| 3567303  | 4838635  | 4098478  | 5421837  | 5957648  | 49495060 |                     | 2   |
| 6654168  | 19131953 | 23882999 | 8111980  | 6431197  | 12950156 | [M+K]+ 38!          | 18  |
| 329645.3 | 226564.7 | 446317.1 | 491334.8 | 143947.1 | 234856.3 | [M+H+NH3            | 111 |
| 539920.9 | 1141491  | 954525.4 | 453690.3 | 784414   | 492532.9 |                     | 8   |
| 1750295  | 8491393  | 6692060  | 2727418  | 941225.3 | 19266676 | [M+H]+ 21!          | 15  |
| 10104475 | 11286351 | 4967511  | 8841841  | 17833149 | 21339316 | [10][M]2+ [M+2H-H2O | 3   |
| 5.25E+08 | 1454300  | 5.55E+08 | 2515689  | 4.74E+08 | 1239079  | [M+K]+ 24!          | 24  |
| 826603.6 | 1127408  | 1299398  | 668112.8 | 691330.7 | 675302.4 |                     | 4   |
| 5934522  | 5197903  | 1817551  | 5060895  | 6577658  | 6599394  | [M+2Na]2+           | 13  |
| 50225201 | 19763459 | 21570492 | 28768585 | 44007115 | 12961568 |                     | 15  |
| 2449278  | 2800031  | 2594221  | 1169514  | 1150156  | 3217594  |                     | 4   |
| 659848   | 749168.6 | 582114.2 | 546811.1 | 369508.2 | 198687.8 |                     | 242 |
| 10015573 | 659051.3 | 11937252 | 8236558  | 1098333  | 2743158  |                     | 4   |
| 589400.6 | 911185.4 | 363790.8 | 296855.5 | 615701.8 | 816068.4 |                     | 4   |

|          |          |          |          |          |          |                     |     |
|----------|----------|----------|----------|----------|----------|---------------------|-----|
| 642373   | 561305.7 | 846652.9 | 666307.3 | 652763.4 | 259415.3 | [M+K]+ 57           | 23  |
| 5360389  | 270768.4 | 3629488  | 3787815  | 8053471  | 6769056  | [804][M+1]+         | 2   |
| 705596.9 | 936283.1 | 745450.4 | 701794.1 | 492881.4 | 101357.7 |                     | 4   |
| 2729023  | 4.57E+09 | 5.32E+09 | 7488847  | 2107702  | 2112190  | [427][M]2+          | 2   |
| 6037613  | 4.63E+09 | 11596168 | 2.9E+09  | 3007127  | 7832850  |                     | 4   |
| 1666481  | 1994134  | 1674135  | 974232.1 | 1499042  | 1863772  |                     | 4   |
| 4696846  | 6429483  | 2602182  | 5346718  | 4284731  | 4253560  |                     | 464 |
| 2469570  | 2777640  | 2021609  | 1503749  | 2057781  | 2416640  |                     | 4   |
| 4767911  | 472053.5 | 6606396  | 5103160  | 488459.5 | 2051309  | [M+H]+ 35           | 8   |
| 857614.9 | 272564.1 | 1105319  | 580043.3 | 1229299  | 3835442  |                     | 2   |
| 993506.8 | 353194.1 | 1047997  | 837557.1 | 537745.8 | 1026835  | [M+H]+ 68           | 38  |
| 1.57E+08 | 1.96E+08 | 2.34E+08 | 1.64E+08 | 1.8E+08  | 1.26E+08 | [M+H]+ 35           | 14  |
| 6090245  | 12299044 | 9243876  | 4695555  | 8776639  | 10561943 |                     | 9   |
| 947501.4 | 1041249  | 719306   | 776509.3 | 1211846  | 1348547  | [M+H+NH3            | 8   |
| 21934993 | 803156.2 | 19127844 | 18967986 | 566753.1 | 427926.5 |                     | 168 |
| 1436456  | 1290828  | 1899226  | 1250302  | 893410.5 | 0        |                     | 9   |
| 2222456  | 1858310  | 1917977  | 2793346  | 1781718  | 1267596  |                     | 2   |
| 1133839  | 6349144  | 626227.9 | 3028323  | 5843336  | 4053826  | [2M+Na+K            | 3   |
| 2604705  | 1043195  | 1967427  | 1845138  | 2669146  | 0        |                     | 2   |
| 4842121  | 5024741  | 4938785  | 3874629  | 3677303  | 5326329  | [M+H]+ 47           | 95  |
| 13113325 | 13506736 | 13728052 | 9320801  | 26316920 | 27288070 | [2M+Na+K]           | 26  |
| 521737   | 162208.6 | 593607.4 | 540284.7 | 474086.5 | 87218    |                     | 473 |
| 15413442 | 10267552 | 12685562 | 12995575 | 12075612 | 8646735  |                     | 2   |
| 5852970  | 5954557  | 4716623  | 5279624  | 4748600  | 4489186  | [369][M]+           | 240 |
| 2933285  | 3740159  | 3115790  | 2312003  | 3075369  | 3865090  |                     | 4   |
| 492969.4 | 710203.4 | 850485.6 | 593986.5 | 355531.6 | 700289.7 | [M+K+HCO            | 57  |
| 604413.7 | 488304.9 | 1014328  | 828665.5 | 455056.1 | 685743.3 |                     | 4   |
| 1667621  | 146835.5 | 995407.7 | 793170.9 | 2202527  | 414875.7 |                     | 1   |
| 4401667  | 4328396  | 3803773  | 524596.5 | 346848   | 1120801  |                     | 45  |
| 4303692  | 2100009  | 1154476  | 3915947  | 3015534  | 0        |                     | 81  |
| 7304152  | 12199677 | 4945133  | 24854502 | 1.37E+08 | 17690832 | [67][M]+            | 1   |
| 1047729  | 993813.9 | 440724.7 | 656085.3 | 1347419  | 1542045  |                     | 9   |
| 972279.8 | 1070253  | 760108.3 | 658973.8 | 523674.6 | 280813.3 |                     | 291 |
| 5661802  | 17412834 | 19538324 | 6916578  | 7646247  | 11487919 | [404][M]2+ [M+2H]2+ | 18  |
| 46670659 | 174247.4 | 229824.4 | 38456197 | 37252467 | 24827438 |                     | 119 |

|          |          |          |          |          |          |                          |     |
|----------|----------|----------|----------|----------|----------|--------------------------|-----|
| 1950115  | 696263.3 | 2239179  | 1574207  | 480237.2 | 0        |                          | 1   |
| 7077563  | 12836829 | 9361104  | 4646723  | 8787937  | 10517126 |                          | 9   |
| 905005.4 | 2131667  | 3614635  | 683445.9 | 1046527  | 641352.6 |                          | 9   |
| 1014106  | 1325377  | 1649090  | 729550.7 | 18139768 | 13939460 |                          | 9   |
| 195808.9 | 366067.5 | 304580.4 | 357888.9 | 37743.17 | 251950.5 |                          | 509 |
| 2336125  | 3204132  | 2571433  | 1249492  | 1979563  | 1205504  |                          | 4   |
| 5192662  | 6259093  | 2848307  | 5306560  | 1377541  | 17597591 |                          | 3   |
| 2761043  | 3054790  | 2992662  | 1990891  | 2207666  | 1915801  |                          | 4   |
| 845028.8 | 775233.5 | 737323.4 | 1140312  | 542118.2 | 1420819  | [1546][M+1]+             | 62  |
| 615200.5 | 897187.3 | 1005520  | 467442.8 | 726483.6 | 142811   |                          | 9   |
| 565215.1 | 673391.4 | 445907.7 | 478836.1 | 462354.7 | 1642862  |                          | 9   |
| 2855956  | 5473015  | 4792833  | 2859469  | 5027083  | 1333581  |                          | 2   |
| 1900122  | 1358377  | 2029642  | 1581121  | 1950043  | 211246.2 | [M+Na+CF <sub>3</sub> ]  | 6   |
| 1701250  | 1785521  | 2229282  | 1414485  | 3613173  | 1477458  |                          | 1   |
| 19816096 | 13857106 | 9223448  | 51537908 | 67866390 | 48672443 |                          | 1   |
| 7273401  | 16997441 | 25534166 | 5340690  | 8436703  | 6388985  |                          | 9   |
| 1814366  | 3610178  | 4732645  | 1577390  | 2004038  | 522446.3 |                          | 9   |
| 48411837 | 65810383 | 30487386 | 32274649 | 29629691 | 58672164 | [779][M]+                | 137 |
| 9329429  | 6658299  | 8507031  | 14519096 | 1610088  | 10995016 | [M+Na+Na]                | 404 |
| 490146   | 639077.4 | 440900   | 509771.9 | 558988.9 | 516813.9 | [M+H-HCO]                | 38  |
| 4508291  | 3377097  | 736602.1 | 4349056  | 10737910 | 3122106  | [M+Na+CF <sub>3</sub> ]  | 199 |
| 1342243  | 1024480  | 1892206  | 504464.8 | 1116297  | 2958979  |                          | 4   |
| 2459157  | 3639296  | 1984207  | 1621790  | 1717187  | 2152368  | [934][M+1]+              | 101 |
| 725565.3 | 343793.6 | 361751.5 | 561057.5 | 590297.2 | 199101.2 |                          | 91  |
| 6643839  | 8135257  | 3410252  | 8349951  | 3556963  | 2654686  |                          | 352 |
| 36732427 | 13272690 | 38627540 | 28575705 | 26509514 | 14715597 |                          | 1   |
| 867688   | 1557137  | 558191.7 | 729273.9 | 979032.3 | 974616.9 |                          | 9   |
| 5365302  | 1207253  | 2847809  | 2560633  | 6669803  | 5328276  | [M+2H-C3H <sub>7</sub> ] | 15  |
| 4199130  | 4472416  | 3056011  | 2863985  | 4288957  | 3445554  |                          | 4   |
| 873208.5 | 1226748  | 546498.1 | 874112.5 | 1021598  | 1800344  |                          | 8   |
| 4412782  | 7946264  | 5957696  | 3153023  | 5950032  | 7171506  | [374][M]3+               | 9   |
| 4483330  | 8015838  | 5833912  | 3485577  | 5871994  | 7117892  |                          | 9   |
| 1990427  | 1778889  | 2797538  | 1461759  | 2664557  | 4125873  |                          | 2   |
| 6391577  | 7660521  | 2394132  | 6501705  | 2532903  | 7474576  |                          | 157 |
| 1461572  | 3383563  | 6080196  | 741233.9 | 1599542  | 558525.8 | [M+H]+ 50:               | 20  |

|          |          |          |          |          |          |                     |     |
|----------|----------|----------|----------|----------|----------|---------------------|-----|
| 472164   | 733265.3 | 369338.1 | 272406.6 | 405088.5 | 374676   |                     | 328 |
| 1299184  | 2304704  | 2106836  | 913880.2 | 1403609  | 1782810  |                     | 1   |
| 18758087 | 565947   | 20111424 | 15465093 | 13258211 | 8685242  | [M+Na+Na            | 6   |
| 3653676  | 1068530  | 3404507  | 1059378  | 2688326  | 3283583  |                     | 5   |
| 1238848  | 1832025  | 1682854  | 755909.4 | 1146949  | 1153660  |                     | 97  |
| 13826191 | 480014.5 | 5456542  | 12908559 | 12040488 | 7274333  |                     | 322 |
| 5757114  | 5975644  | 3913616  | 5949289  | 4916842  | 2788584  |                     | 2   |
| 501972.4 | 2441739  | 3291652  | 594336.8 | 1246135  | 905874.1 |                     | 9   |
| 4582242  | 6606217  | 4003726  | 4265637  | 6333456  | 7489447  | [2M+2Na+l           | 14  |
| 821362   | 284855.4 | 702299.4 | 1173785  | 1190319  | 0        |                     | 160 |
| 8177239  | 7652274  | 8475058  | 9329679  | 5758293  | 2165586  |                     | 2   |
| 1618573  | 3179503  | 2035193  | 2343315  | 1837789  | 2185973  |                     | 89  |
| 1829968  | 257334   | 3009439  | 2982621  | 2845304  | 0        |                     | 2   |
| 3317149  | 4160686  | 5128677  | 3244556  | 3017246  | 311557.3 |                     | 9   |
| 3893751  | 4516179  | 3444316  | 3336617  | 4642750  | 5042468  | [359][M+4]3+        | 2   |
| 2342064  | 4236562  | 3172213  | 1140287  | 2704067  | 4593590  | [667][M+1]+         | 4   |
| 2997737  | 1943322  | 3771915  | 4053085  | 3355001  | 1702359  | [1449][M+1]+        | 301 |
| 46091089 | 46802960 | 40527977 | 36852750 | 38592590 | 28546795 | [1368][M]2+         | 2   |
| 3761173  | 3235655  | 4659778  | 4253409  | 2643926  | 3004061  |                     | 9   |
| 366255.4 | 704293   | 997947.5 | 877837   | 683459.8 | 684464.1 |                     | 193 |
| 252625.4 | 353302.6 | 378465.1 | 235662.2 | 294275.4 | 154640.1 |                     | 503 |
| 2866089  | 3846554  | 3306104  | 1989906  | 3619680  | 3394188  | [107][M+1]+         | 9   |
| 6099905  | 5446170  | 3530764  | 5289420  | 7042488  | 6987375  | [108][M]2+          | 9   |
| 221966.4 | 189136.1 | 218549.5 | 130983.1 | 415298.1 | 459561.1 | [M+H-CH3]           | 16  |
| 1101062  | 913490.1 | 601643   | 1098733  | 671606.7 | 757980.4 |                     | 108 |
| 235317.4 | 1120503  | 1284021  | 417623.4 | 259289.5 | 850191.6 | [409][M+1]3+        | 18  |
| 3832285  | 6029705  | 3203946  | 2688783  | 2637564  | 5126210  | [891][M+1]+         | 101 |
| 1493881  | 1710240  | 1436321  | 441980.7 | 1811463  | 2215054  |                     | 4   |
| 16393485 | 14594387 | 13817813 | 12840157 | 9704090  | 11036520 | [1311][M+2]+        | 2   |
| 4.33E+08 | 4.41E+08 | 3.69E+08 | 3.82E+08 | 4.91E+08 | 5.13E+08 | [461][M]+           | 2   |
| 6783751  | 3386969  | 3362781  | 3517942  | 4312204  | 3340266  |                     | 411 |
| 646402.4 | 620023.2 | 142861.2 | 942152.3 | 384488.8 | 753858.5 | [M+H]+ 96           | 12  |
| 1558837  | 2523609  | 2174339  | 895363.5 | 1694560  | 2210960  |                     | 4   |
| 1950574  | 1667860  | 2620756  | 1014702  | 2365412  | 1070253  | [297][M+1]3+        | 38  |
| 19020229 | 48051869 | 54821584 | 19627977 | 16623641 | 29949099 | [727][M]+ [M+H]+ 42 | 39  |



|          |          |          |          |          |          |                      |     |
|----------|----------|----------|----------|----------|----------|----------------------|-----|
| 9407719  | 27140297 | 26507948 | 2259125  | 17197911 | 40928036 | [3M+Na+K]            | 15  |
| 2600523  | 2896444  | 3249807  | 2513851  | 3156505  | 4129404  |                      | 9   |
| 2406263  | 2678312  | 1906233  | 1214032  | 2379105  | 1346313  | [669][M+2]+          | 4   |
| 3237186  | 1550621  | 1987316  | 2454883  | 2209365  | 566315.9 |                      | 4   |
| 809302.6 | 964711.5 | 478886.9 | 682181.8 | 653264.4 | 1321706  |                      | 13  |
| 2198562  | 2983512  | 3736643  | 2179077  | 1575523  | 798006.9 | [M+Na+Na             | 5   |
| 1863912  | 5225019  | 7416426  | 3288843  | 3500893  | 1276969  |                      | 9   |
| 190325.8 | 207484.9 | 164541.3 | 171534.9 | 82601.02 | 86841.45 | [769][M+1]+          | 456 |
| 578006   | 393172.8 | 602514.2 | 1072439  | 642139.6 | 528026.6 |                      | 281 |
| 665460.2 | 813531.5 | 1947339  | 559364.5 | 401112.8 | 0        |                      | 9   |
| 3353980  | 3514862  | 3313167  | 4593846  | 3285257  | 489014.4 |                      | 381 |
| 585353.5 | 731138   | 991543.8 | 687120.7 | 226778   | 165923.9 | [244][M+1]2+         | 19  |
| 244215.9 | 1479258  | 1021100  | 98520.31 | 550719.5 | 844109.8 |                      | 20  |
| 1356726  | 3577671  | 1562166  | 796257.6 | 2618627  | 2166174  | [M+H]+ 47            | 46  |
| 1579757  | 1331271  | 809966.8 | 899276.1 | 656456.7 | 955699.9 | [M+H-C6H8            | 46  |
| 2145935  | 1006976  | 2752247  | 789281.4 | 1698646  | 503807   |                      | 9   |
| 3202480  | 8089084  | 11372364 | 2382771  | 3494419  | 3502696  |                      | 9   |
| 5857557  | 6091600  | 7508966  | 3719402  | 5074328  | 3987186  |                      | 1   |
| 2412466  | 3318873  | 2452007  | 1458610  | 2089071  | 3105665  |                      | 4   |
| 3347999  | 3033554  | 743470.6 | 1649243  | 3954568  | 5464106  | [M+2H-CH4            | 11  |
| 859709.9 | 1705825  | 1600899  | 771411.7 | 1289550  | 1260198  |                      | 4   |
| 1915946  | 3051288  | 1425229  | 1835560  | 2713385  | 3523089  | [M+Na+K+H            | 13  |
| 824830.7 | 1598808  | 10426175 | 504422.6 | 1189600  | 1873116  | [152][M+1]2+         | 9   |
| 1746069  | 2710786  | 4123250  | 4262055  | 2922179  | 2344552  |                      | 2   |
| 1.24E+08 | 1.23E+08 | 1.64E+08 | 1.23E+08 | 94333837 | 30298175 |                      | 19  |
| 4874532  | 8559078  | 4751027  | 4492138  | 3479950  | 7592481  |                      | 4   |
| 760689.8 | 0        | 1383421  | 482526.1 | 394320   | 224596   |                      | 9   |
| 125000.1 | 104119.4 | 229701.6 | 89920.82 | 142415.9 | 30965.14 |                      | 26  |
| 2788825  | 4829499  | 4048995  | 2495755  | 3536507  | 4075568  | [714][M+1]+          | 4   |
| 1620658  | 2142386  | 2121670  | 1408128  | 1640324  | 1732594  |                      | 4   |
| 6954999  | 9932016  | 3953158  | 4681727  | 3831168  | 8912474  | [779][M+1]+          | 137 |
| 1356949  | 556952.4 | 2142209  | 1214511  | 772338.4 | 1169572  |                      | 9   |
| 1242520  | 1609606  | 1109898  | 846247.5 | 1044009  | 1230901  | [1575][M]+ [M+K]+ 10 | 38  |
| 3221910  | 5226474  | 9642390  | 2519173  | 2788140  | 1430271  |                      | 9   |
| 6741660  | 5613082  | 6430044  | 5516961  | 5041158  | 7245981  |                      | 382 |

|          |          |          |          |          |          |                       |     |
|----------|----------|----------|----------|----------|----------|-----------------------|-----|
| 2328216  | 4171891  | 5474851  | 1644058  | 2655188  | 1174801  |                       | 9   |
| 1979815  | 2490269  | 2285831  | 1381974  | 1684441  | 1997685  | [567][M+2]+           | 4   |
| 7279193  | 9505883  | 5987994  | 6453995  | 9814458  | 7582058  | [355][M+3]3+          | 2   |
| 682968   | 537194   | 1768174  | 505413.7 | 645726.3 | 1849492  | [15][M+1]2+           | 1   |
| 812380.4 | 187949.8 | 1684637  | 912132.5 | 910654.8 | 888612.9 |                       | 9   |
| 997753.3 | 1055348  | 1379180  | 766730.9 | 878923.4 | 443451.8 | [1054][M]+ [M+H]+ 580 | 44  |
| 3339305  | 4091725  | 23239519 | 12632743 | 5869177  | 19962623 | [39][M+1]2+           | 1   |
| 1024140  | 1480383  | 961299.2 | 801623.1 | 1316731  | 1184391  |                       | 8   |
| 39616875 | 55209462 | 51387071 | 49753305 | 55880953 | 24457820 |                       | 13  |
| 619346.5 | 73586.16 | 576644.5 | 814310   | 507318.3 | 262489.7 |                       | 156 |
| 78711838 | 1.23E+08 | 69550178 | 63084536 | 74534921 | 1.42E+08 | [M+H]+ 520            | 3   |
| 3525166  | 1675593  | 460656.5 | 2641874  | 473827.5 | 5357637  | [125][M+1]+           | 38  |
| 1676480  | 1249190  | 968080.8 | 958800   | 1909280  | 2433194  |                       | 13  |
| 1469786  | 3484277  | 3925020  | 1367679  | 1428500  | 687907.7 | [1420][M+2]+          | 9   |
| 7428345  | 6481320  | 4508255  | 6536660  | 4045668  | 3810084  | [368][M]+ [M+Na]+ 300 | 77  |
| 1.44E+08 | 1.34E+08 | 2.25E+08 | 1.38E+08 | 1.84E+08 | 67775176 | [M+H]+ 450            | 33  |
| 12194965 | 14051785 | 11227467 | 10467615 | 15650005 | 15382312 | [502][M+1]2+          | 2   |
| 15354229 | 15059330 | 11964459 | 12374469 | 10843704 | 8895881  | [137][M]+             | 117 |
| 2629352  | 3308161  | 5512602  | 2130911  | 2077836  | 401550.5 |                       | 9   |
| 3451681  | 5468201  | 3203951  | 2295484  | 2286368  | 3116096  |                       | 1   |
| 1160634  | 2786978  | 2800360  | 579579.8 | 1725516  | 2891697  | [M+K]+ 560            | 39  |
| 2629933  | 3561909  | 2498116  | 1903250  | 2246891  | 2303036  | [1152][M]+ [M+K]+ 590 | 101 |
| 3016124  | 2139963  | 3098613  | 2440070  | 2951593  | 1372436  | [708][M]2+            | 262 |
| 5059890  | 6123136  | 4948538  | 4367395  | 6012415  | 3196733  | [1117][M+1]+          | 89  |
| 5221601  | 4433633  | 6176207  | 3766464  | 4588803  | 3149807  | [M+H]+ 390            | 6   |
| 920380.1 | 1591929  | 2224566  | 864584.3 | 813963.1 | 188729.4 | [M+Na]+ 200           | 8   |
| 6306017  | 11829150 | 9253093  | 5361977  | 8008165  | 11644994 | [907][M]2+            | 15  |
| 560919.3 | 752433.6 | 1026335  | 424836.1 | 915257.3 | 374511   | [999][M+1]+           | 57  |
| 6281155  | 1596497  | 1876886  | 1087784  | 4190781  | 12499491 | [405][M+2]2+          | 2   |
| 372990.4 | 268839.1 | 727440.8 | 435526.6 | 592189.6 | 167955.8 | [80][M+1]+            | 4   |
| 32333245 | 3432714  | 8630857  | 15597294 | 3287793  | 13249829 | [M+H]+ 470            | 46  |
| 678694.7 | 899244   | 837437.8 | 413224.9 | 613451.1 | 338490.8 |                       | 4   |
| 5012304  | 5385620  | 6237762  | 2983846  | 6922826  | 12275778 | [600][M+1]+           | 28  |
| 1144795  | 1189384  | 2077850  | 971731.1 | 1711842  | 855928.7 |                       | 28  |
| 1269007  | 53239790 | 58974526 | 42879459 | 70925893 | 82227261 | [M+2K]2+ 300          | 3   |

|          |          |          |          |          |          |             |     |
|----------|----------|----------|----------|----------|----------|-------------|-----|
| 1146330  | 27592646 | 21566135 | 12622204 | 2288944  | 7072962  | [96][M+1]3+ | 1   |
| 560466.1 | 871016.2 | 1438538  | 264034.2 | 552344.5 | 0        |             | 9   |
| 3677739  | 2614382  | 4155873  | 4397812  | 2065282  | 459599.1 |             | 97  |
| 1052379  | 1975631  | 2617038  | 1045576  | 1707757  | 1195495  | [M+2H-H2O]  | 20  |
| 567011.1 | 701921.6 | 489841.1 | 602832.9 | 657848.9 | 339280.4 | [M+K]+ 474  | 23  |
| 614938.7 | 1516648  | 1569873  | 719036.5 | 808230.9 | 777047   | [M+K]+ 334  | 46  |
| 118666.9 | 582684.9 | 216765.4 | 115377.5 | 259619.5 | 288102.6 |             | 234 |
| 178706.4 | 1.93E+08 | 3446636  | 2816166  | 75114513 | 6009438  | [M+Na+2K]   | 12  |
| 483532.8 | 736834.4 | 354051.5 | 421985.2 | 174257   | 808881.5 |             | 230 |
| 573661.4 | 1260275  | 1588403  | 251222   | 464365.9 | 436719.3 |             | 9   |
| 1444736  | 1625473  | 1543881  | 1186010  | 1419917  | 686751.6 |             | 9   |
| 15505401 | 27558346 | 13307346 | 6865601  | 16413332 | 26187634 |             | 1   |
| 4087494  | 6844438  | 2296220  | 2008815  | 4847996  | 9193091  | [M+K]+ 484  | 11  |
| 2621564  | 4458683  | 5413242  | 1837808  | 3099097  | 2149525  |             | 9   |
| 4101982  | 3680288  | 3834758  | 4712056  | 4557097  | 3039930  |             | 9   |
| 6117484  | 13301408 | 10598159 | 4466653  | 7882803  | 11936326 |             | 9   |
| 971689   | 619029.3 | 894769.6 | 2621497  | 900808.4 | 426483.3 |             | 317 |
| 6266289  | 8675661  | 5692311  | 7556967  | 5472783  | 5476502  | [M+Na]+ 44  | 189 |
| 1914654  | 3586899  | 4916502  | 1435127  | 1952369  | 1497525  |             | 9   |
| 5513698  | 9612997  | 15070830 | 3886676  | 5593778  | 2829873  |             | 9   |
| 772646.1 | 1973401  | 2603100  | 519533.5 | 1018697  | 535583.5 |             | 9   |
| 3304999  | 1695577  | 1281387  | 325281.8 | 1700651  | 2803679  | [774][M+2]+ | 9   |
| 2386471  | 4272096  | 8450232  | 1927598  | 1891093  | 1043727  |             | 13  |
| 467706   | 412237.3 | 3688132  | 142580.6 | 3543481  | 187990.4 | [821][M+1]+ | 137 |
| 1627604  | 2720666  | 1838220  | 1101054  | 1322648  | 3340255  |             | 4   |
| 741125.8 | 1242543  | 589439.8 | 538813.7 | 1105322  | 1129166  |             | 9   |
| 2732639  | 2828670  | 2484707  | 1710513  | 3105036  | 2416444  | [M+2H-CH4]  | 435 |
| 661100.9 | 1035251  | 2433435  | 703254.6 | 1767942  | 1332285  |             | 20  |
| 583383.4 | 342209.1 | 327021.9 | 190492.5 | 305279.6 | 0        |             | 492 |
| 2278106  | 4231704  | 3006138  | 1654046  | 2727243  | 3205749  |             | 9   |
| 1248817  | 1873864  | 985465.4 | 773705   | 807926.7 | 2769092  |             | 4   |
| 1842738  | 1.1E+09  | 1.11E+09 | 2131319  | 587440.8 | 1522639  | [M+H-C4H8]  | 5   |
| 2372237  | 1729047  | 3471087  | 7037623  | 3022345  | 1986971  |             | 265 |
| 275688.9 | 550505   | 453106.3 | 1253797  | 794448.3 | 375269.1 |             | 210 |
| 553275.3 | 760788.8 | 928850.1 | 435900.2 | 556639.2 | 353915.2 |             | 8   |

|          |          |          |          |          |          |                       |     |
|----------|----------|----------|----------|----------|----------|-----------------------|-----|
| 1261244  | 1617369  | 2869365  | 1001034  | 852741.6 | 0        |                       | 9   |
| 4226539  | 4064700  | 3275034  | 4950431  | 3796760  | 3723596  |                       | 300 |
| 15948869 | 945088.6 | 26391535 | 18436797 | 1106843  | 4842740  |                       | 9   |
| 3364645  | 2698026  | 1780552  | 2928260  | 2384369  | 2564503  |                       | 348 |
| 3027964  | 10188236 | 14429493 | 1499340  | 2200585  | 8523539  | [M+Na]+ 4:            | 6   |
| 1.13E+08 | 2.16E+08 | 1.52E+08 | 1.03E+08 | 1.13E+08 | 2.06E+08 | [M+K]+ 48:            | 15  |
| 2404137  | 5522768  | 5409078  | 1316898  | 3945439  | 1584398  |                       | 9   |
| 219992.2 | 902948.9 | 982830.7 | 2347619  | 522401.4 | 131179.4 | [945][M+1]+           | 165 |
| 805403.1 | 3044594  | 3555389  | 3515763  | 3383477  | 4547536  |                       | 295 |
| 583131.2 | 1870708  | 1570708  | 1036101  | 1240657  | 885713.2 | [2M+Na+3I             | 46  |
| 4427463  | 7884067  | 5724000  | 3222793  | 5893527  | 7149319  | [329][M]2+            | 9   |
| 660114.3 | 937178.3 | 749249.1 | 503173.5 | 397303.2 | 109555.8 |                       | 42  |
| 31131800 | 12031616 | 22938041 | 31230273 | 12307584 | 13469674 | [1253][M+2]+          | 2   |
| 1137188  | 808415.8 | 1962505  | 1256152  | 1267168  | 945556.1 | [12][M+1]3+           | 4   |
| 10130873 | 533908.3 | 4022506  | 5661589  | 12322333 | 13674213 |                       | 46  |
| 9916877  | 7376752  | 8908666  | 8937236  | 4866497  | 9895118  |                       | 2   |
| 617084.4 | 633348.7 | 525270.3 | 425250   | 1897271  | 78510.76 | [M+Na]+ 3:            | 81  |
| 2924357  | 3524546  | 3652250  | 2322153  | 2997208  | 2971382  |                       | 4   |
| 5392260  | 5300040  | 4772989  | 5006042  | 4056841  | 3168059  |                       | 307 |
| 3894251  | 2119322  | 2894628  | 3395092  | 2736622  | 1765565  |                       | 2   |
| 4947777  | 3430114  | 3695665  | 4474757  | 4542375  | 0        | [M+H]+ 14:            | 14  |
| 1514142  | 1486790  | 1742077  | 1432526  | 1286662  | 453796.7 |                       | 4   |
| 501775.8 | 870985.2 | 1169582  | 428596.3 | 462742.2 | 153033.6 |                       | 9   |
| 1033356  | 911664.7 | 1131320  | 1586272  | 1070555  | 876485.3 | [1340][M+2]+          | 209 |
| 4317756  | 808684.3 | 3838038  | 2138380  | 2909918  | 941344.9 | [M+H]+ 32:            | 3   |
| 138390.6 | 524449.6 | 105252.6 | 526532.8 | 87270.34 | 155922.7 |                       | 24  |
| 618165.1 | 852661.2 | 1230272  | 416125.4 | 646457.1 | 469538.7 |                       | 4   |
| 2887700  | 3075292  | 1345720  | 2856493  | 3295933  | 2722590  |                       | 4   |
| 466413.3 | 350696.1 | 327618.6 | 417238.9 | 93802.35 | 191623.2 |                       | 228 |
| 8637842  | 7490789  | 6409286  | 8348677  | 8554383  | 2034365  |                       | 13  |
| 2066913  | 2353563  | 2294985  | 1623210  | 2178682  | 1436738  |                       | 9   |
| 734903.5 | 1054751  | 1682892  | 565952   | 585816.8 | 110277.9 |                       | 9   |
| 819677.7 | 1369439  | 1082524  | 897043.7 | 782964.8 | 952990.3 | [1601][M]+ [M+K]+ 12: | 33  |
| 208880.9 | 2314455  | 0        | 335883.2 | 1360008  | 631014.5 |                       | 2   |
| 1284975  | 1239793  | 1813734  | 1139315  | 1211210  | 903668.5 |                       | 4   |

|          |          |          |          |          |          |                     |     |
|----------|----------|----------|----------|----------|----------|---------------------|-----|
| 9013466  | 16439826 | 8571300  | 5761639  | 7038846  | 8625988  | [1396][M]+ [M+H+NH3 | 101 |
| 983405.7 | 1370397  | 1356115  | 699323.6 | 826470.9 | 947384.5 |                     | 4   |
| 1480498  | 1885917  | 2791643  | 1299317  | 1481977  | 1005529  |                     | 9   |
| 2232148  | 3795725  | 2921699  | 1839288  | 2351378  | 1190013  |                     | 9   |
| 4803825  | 5338264  | 6268815  | 3423176  | 4358480  | 3881610  |                     | 9   |
| 390653.4 | 306019.3 | 669595.3 | 401464.5 | 356539.2 | 213023.5 | [1571][M]+          | 394 |
| 7667632  | 7682389  | 6779135  | 6587520  | 8760840  | 5247780  |                     | 2   |
| 187024   | 400184.1 | 266718.6 | 253702.5 | 169789.5 | 277417.6 | [1171][M+1]+        | 101 |
| 9568322  | 7857293  | 8233835  | 8785529  | 7777401  | 8000712  |                     | 2   |
| 7461963  | 4775075  | 10096753 | 10608080 | 8219707  | 3993714  | [1449][M]+          | 301 |
| 414869.3 | 78755.62 | 645323.8 | 217892.6 | 501329   | 837576.7 |                     | 8   |
| 224004.4 | 2109075  | 404636.5 | 329881.9 | 1584680  | 1467687  |                     | 2   |
| 14588150 | 22443064 | 16157268 | 13189370 | 26664206 | 18472384 | [M+H]+ 42!          | 15  |
| 4108875  | 2471291  | 327779.8 | 1039162  | 6440979  | 10506158 | [247][M+1]2+        | 2   |
| 7267724  | 16941674 | 25287828 | 5078071  | 8052610  | 6538903  |                     | 9   |
| 6230150  | 13356031 | 10618982 | 4512141  | 7985794  | 12059358 |                     | 9   |
| 1358806  | 1125828  | 1013790  | 837445   | 579626.6 | 847722.9 |                     | 4   |
| 890022.6 | 1037758  | 768037   | 636452.6 | 778331.3 | 1176649  | [M+Na]+ 5!          | 220 |
| 4244918  | 3311330  | 4195432  | 3925905  | 3683351  | 1483982  |                     | 7   |
| 8601504  | 16749127 | 18915110 | 6236055  | 9901644  | 10847343 |                     | 9   |
| 2665195  | 3003066  | 1147467  | 1541714  | 3004536  | 3606600  | [M+Na]+ 3!          | 11  |
| 8354395  | 14025180 | 8288902  | 5464039  | 6420214  | 8089973  | [1211][M+1]+        | 101 |
| 500739.8 | 632939.8 | 642390.4 | 432493.1 | 533160.8 | 309802.2 | [M+H]+ 54!          | 42  |
| 6604197  | 5809930  | 2961366  | 7962175  | 6513136  | 9034710  |                     | 1   |
| 845626.5 | 680673   | 612821.2 | 475717.4 | 812632.3 | 10922.32 |                     | 64  |
| 3181216  | 3941539  | 3394113  | 2250684  | 2861770  | 3265175  |                     | 4   |
| 1018549  | 1650832  | 4.2E+08  | 1083721  | 2.43E+08 | 589125.9 |                     | 28  |
| 701883.7 | 1805200  | 1553778  | 558510.4 | 682114.4 | 1361594  |                     | 4   |
| 2221451  | 2712799  | 1969538  | 1297991  | 2141493  | 2570355  |                     | 4   |
| 21350381 | 886358.3 | 1673626  | 18927179 | 3252395  | 16204268 |                     | 2   |
| 662280.6 | 570556.6 | 841160.3 | 648849   | 692241.9 | 341974.6 | [2M+Na+2!           | 23  |
| 4041227  | 3442357  | 5959091  | 3651318  | 4393893  | 1955825  | [976][M]+           | 214 |
| 2799013  | 8839393  | 2352476  | 2182462  | 8464623  | 5389381  | [M+H]+ 47!          | 11  |
| 1970387  | 3886973  | 1669103  | 608896.8 | 1790656  | 5117501  | [1009][M]3+         | 9   |
| 1529761  | 1881665  | 2564391  | 2844174  | 2664659  | 2423681  |                     | 244 |

|          |          |          |          |          |          |                     |     |
|----------|----------|----------|----------|----------|----------|---------------------|-----|
| 5902182  | 618717.6 | 385941.3 | 7036400  | 3578705  | 4824940  |                     | 9   |
| 2724816  | 2162547  | 2931308  | 2235286  | 1241119  | 2290737  |                     | 2   |
| 7261878  | 9840661  | 11726997 | 7567870  | 7611919  | 5945212  |                     | 9   |
| 2222596  | 3042567  | 2306793  | 3977393  | 6555770  | 3529802  |                     | 1   |
| 1403214  | 2844066  | 1269527  | 15934228 | 3072603  | 10176541 | [1366][M+1]2+       | 2   |
| 1181183  | 1168442  | 1372243  | 1008764  | 752942.4 | 912665.2 | [1488][M+1]+        | 100 |
| 1633305  | 2409869  | 1937092  | 1663329  | 1956989  | 2139271  | [1318][M]+ [M+K+NH3 | 134 |
| 18147027 | 22926167 | 22974320 | 14651948 | 16367211 | 17775286 |                     | 4   |
| 3130051  | 2670007  | 3092353  | 4931310  | 1807117  | 3847874  |                     | 190 |
| 36582264 | 37052747 | 33350246 | 39643945 | 74605628 | 29971479 |                     | 236 |
| 0        | 905334.6 | 0        | 82315.83 | 311349.8 | 432484   |                     | 46  |
| 8987529  | 14526551 | 18272507 | 7126947  | 8158132  | 5837040  |                     | 18  |
| 6409245  | 6060570  | 8191353  | 5928586  | 6595428  | 3672665  |                     | 17  |
| 32854929 | 26404112 | 28955930 | 26037522 | 23139059 | 31764826 |                     | 2   |
| 1421493  | 1206411  | 1543760  | 2108480  | 1277610  | 657143.3 | [444][M+1]2+        | 2   |
| 6305018  | 7554188  | 5396546  | 4650534  | 8100074  | 10610426 | [485][M+1]+         | 2   |
| 478020.2 | 158494.8 | 647310.8 | 447443.9 | 214544.8 | 704075.9 | [1030][M+1]3+       | 16  |
| 1088457  | 728290.2 | 518995.7 | 862276.1 | 791615.6 | 36985.01 |                     | 4   |
| 2461718  | 595483.2 | 1969560  | 2117298  | 2436491  | 217936.4 |                     | 9   |
| 2886835  | 3112118  | 1285076  | 2065018  | 1980253  | 5662100  | [M+2K-H]+           | 97  |
| 697010.6 | 1710857  | 1177259  | 1757845  | 2641056  | 384247.7 |                     | 15  |
| 2364173  | 882371.8 | 4368367  | 4200121  | 2806247  | 1731551  |                     | 2   |
| 578120.1 | 1127378  | 1240794  | 701984.6 | 721208.5 | 396381.5 |                     | 4   |
| 26969198 | 36773736 | 30679451 | 18811964 | 25498417 | 33853632 | [724][M+1]+         | 4   |
| 903370.3 | 1597895  | 2017143  | 392468   | 847860.4 | 528177.8 |                     | 9   |
| 7029972  | 6642088  | 1727381  | 2888698  | 8745259  | 12806510 | [M+Na]+ 3!          | 3   |
| 1059862  | 1267360  | 1448107  | 679135.4 | 1216153  | 1081582  | [628][M+1]3+        | 1   |
| 89008726 | 94454345 | 76011682 | 76734540 | 91018367 | 92554607 |                     | 2   |
| 2148991  | 980506.3 | 1162918  | 1720422  | 1954131  | 286767.1 |                     | 4   |
| 1315805  | 1531706  | 1153321  | 935165.8 | 404790.7 | 1788872  | [748][M+1]+         | 4   |
| 2037105  | 3532824  | 3711064  | 1594863  | 2070755  | 2007371  |                     | 9   |
| 1339684  | 2117374  | 1600507  | 1041745  | 1177689  | 2240855  |                     | 4   |
| 18985865 | 27504949 | 19599341 | 32457115 | 24154468 | 6971683  |                     | 2   |
| 9807830  | 6131839  | 12848187 | 29979270 | 9755467  | 7705240  | [1415][M]+          | 265 |
| 10566247 | 5526579  | 5911823  | 6473798  | 279533.2 | 2883483  |                     | 303 |

|          |          |          |          |          |          |               |     |
|----------|----------|----------|----------|----------|----------|---------------|-----|
| 24541259 | 37246002 | 28956072 | 18010836 | 23788902 | 34449455 | [718][M+1]+   | 4   |
| 3251116  | 4789104  | 2518655  | 5374057  | 4471905  | 297405.1 |               | 2   |
| 624022   | 543525.4 | 777616.7 | 577265.5 | 657419.8 | 223614.6 |               | 4   |
| 15780558 | 24275702 | 39273182 | 13470430 | 15184318 | 11889164 |               | 18  |
| 4234606  | 2869540  | 1146073  | 4044494  | 2129591  | 2825374  |               | 2   |
| 7225839  | 10358686 | 6357841  | 1488122  | 6924556  | 9525082  |               | 375 |
| 409301.6 | 1858129  | 1256046  | 352731.9 | 393309.8 | 2754651  | [1131][M+1]3+ | 9   |
| 936559.8 | 1135760  | 1866910  | 870790.2 | 737281.3 | 3305534  |               | 235 |
| 1465568  | 2095585  | 2808230  | 1374221  | 1473846  | 2596345  |               | 1   |
| 1174352  | 1738918  | 351876.3 | 723585.6 | 1319504  | 2010536  |               | 9   |
| 2131752  | 3918848  | 5714922  | 1727210  | 2298999  | 999404.1 |               | 9   |
| 241076.3 | 153114.9 | 524527.5 | 125921   | 230766.7 | 24287.84 |               | 26  |
| 2138472  | 1806697  | 2171736  | 1431515  | 1149603  | 2517255  | [M+K]+ 289    | 5   |
| 119773.2 | 128866.8 | 202324.3 | 208268.6 | 100415.9 | 113697.1 |               | 345 |
| 10280758 | 6910710  | 6453503  | 8103717  | 6259148  | 6201959  |               | 208 |
| 4933994  | 3552727  | 5011646  | 4930135  | 5038167  | 6580202  |               | 209 |
| 414775.7 | 652372.1 | 809055.9 | 512880.4 | 471659.2 | 306721.3 |               | 9   |
| 5051314  | 7247826  | 4766726  | 4785678  | 5361914  | 3317115  |               | 241 |
| 1443947  | 2888581  | 3836389  | 1035608  | 1595679  | 1562640  |               | 9   |
| 3770158  | 6129826  | 5411397  | 4018652  | 3148417  | 4442807  |               | 5   |
| 1924763  | 1099577  | 1858448  | 2306205  | 1491197  | 1628018  | [445][M+1]2+  | 9   |
| 978446.9 | 1686868  | 1457859  | 734017.5 | 1613715  | 6278069  |               | 1   |
| 8104518  | 8723390  | 5741551  | 7328615  | 10772994 | 9934033  | [1353][M]2+   | 2   |
| 45840756 | 46281286 | 28834918 | 36345965 | 45270932 | 43398423 |               | 2   |
| 2488047  | 2088284  | 997270.2 | 1264794  | 2408044  | 1408323  |               | 97  |
| 387623.9 | 714674.5 | 592452.5 | 359256.2 | 604331.4 | 186810.1 |               | 4   |
| 5288757  | 6972774  | 4894020  | 5194186  | 4893756  | 3162363  |               | 272 |
| 2594486  | 4426035  | 8102210  | 2017476  | 2534092  | 661960.8 |               | 9   |
| 1003508  | 2553226  | 1028856  | 855957.3 | 1496007  | 2563466  | [1090][M+4]3+ | 9   |
| 633084.9 | 785293.7 | 898532.1 | 312339.3 | 778673.2 | 628512.7 | [M+Na]+ 10    | 8   |
| 2070174  | 6994670  | 2261140  | 1346681  | 1181875  | 3881532  | [650][M+2]+   | 4   |
| 679631.5 | 418954.1 | 409252.2 | 416554.4 | 492988.3 | 167888.5 |               | 343 |
| 608486.1 | 715051   | 921779.4 | 422724   | 604897.7 | 619743.4 |               | 9   |
| 2251821  | 569582.5 | 564913.5 | 4060367  | 524652.4 | 616008.5 |               | 41  |
| 2413420  | 2984273  | 4572716  | 2824171  | 1374539  | 2037010  |               | 4   |

|          |          |          |          |          |          |              |     |
|----------|----------|----------|----------|----------|----------|--------------|-----|
| 2866634  | 2569466  | 2721013  | 2490718  | 3059337  | 2243417  | [M+Na]+ 2:   | 121 |
| 4112023  | 4957220  | 3482753  | 2308601  | 3918064  | 5199000  | [1240][M]+   | 4   |
| 2201496  | 2453799  | 2652467  | 1338430  | 3865691  | 3596240  | [M+H]+ 78:   | 13  |
| 4622096  | 2194669  | 4216609  | 6980269  | 3406429  | 921159.1 |              | 2   |
| 259787.8 | 347365.6 | 419795.3 | 179872.4 | 201237.3 | 136479.7 | [1584][M+3]+ | 42  |
| 1208135  | 1473789  | 1156322  | 402468.2 | 1277335  | 1656987  |              | 4   |
| 10689009 | 5672514  | 7208765  | 10771107 | 6978351  | 2547211  |              | 2   |
| 272757.5 | 323130.6 | 263381.7 | 331670   | 190291.7 | 188138.1 |              | 23  |
| 4070960  | 3556944  | 2314427  | 4013827  | 3094789  | 834066.5 |              | 9   |
| 349298.9 | 1632583  | 1424789  | 417849.6 | 229884.7 | 1785767  |              | 9   |
| 2.57E+08 | 4.1E+08  | 3.91E+08 | 1.82E+08 | 2.99E+08 | 3.32E+08 | [151][M+1]+  | 18  |
| 4959736  | 3083914  | 1555194  | 9826758  | 3667280  | 3644301  | [299][M+1]+  | 33  |
| 2028756  | 1666569  | 766896.4 | 1163823  | 1814939  | 5151759  | [M+Na]+ 2:   | 11  |
| 310714.9 | 1110790  | 1074703  | 437896.5 | 344941.7 | 568754.4 |              | 4   |
| 2935521  | 1625483  | 4245412  | 2192750  | 5666959  | 808876.7 |              | 2   |
| 2573456  | 2888855  | 1969099  | 1172619  | 2372544  | 1950500  | [927][M]2+   | 4   |
| 2176986  | 4045908  | 3377040  | 1537784  | 2584613  | 4501458  | [1404][M]2+  | 9   |
| 1294410  | 3139585  | 1887206  | 1193224  | 2229394  | 2160592  |              | 9   |
| 889826.6 | 1859514  | 1159604  | 571891.5 | 1280840  | 1606757  |              | 9   |
| 2240810  | 3819258  | 5640012  | 1698609  | 2267722  | 1140802  |              | 9   |
| 1517935  | 3122798  | 3431238  | 1248124  | 2015134  | 618218.7 |              | 9   |
| 960898.9 | 2169297  | 1378022  | 5800309  | 2829715  | 426512.4 | [990][M]+    | 165 |
| 3750046  | 8949721  | 3454701  | 2913682  | 4430060  | 4265913  | [M+H-CH4]    | 189 |
| 4814460  | 3724165  | 1961563  | 6721077  | 4766437  | 5384107  | [M+H]+ 31:   | 346 |
| 1965987  | 1092022  | 3272746  | 934072.5 | 1164013  | 1059263  | [M+K]+ 53:   | 3   |
| 1267947  | 989219   | 2448429  | 814511.6 | 2565429  | 1276576  | [M+Na]+ 1:   | 6   |
| 1122095  | 715980.1 | 7759131  | 1705782  | 738331.3 | 1802389  | [654][M+4]+  | 4   |
| 5258158  | 7018057  | 6660584  | 4482795  | 4996307  | 5235716  |              | 4   |
| 5152122  | 3370858  | 5488262  | 5048942  | 3253031  | 3169165  |              | 2   |
| 1419719  | 445253.6 | 2128014  | 2467305  | 1080676  | 440411.9 |              | 9   |
| 2868015  | 1176069  | 1798471  | 2555541  | 1532979  | 3434129  |              | 2   |
| 2923014  | 3476176  | 4351841  | 4289691  | 2326367  | 535059.3 |              | 2   |
| 2426419  | 2317611  | 1980377  | 2289723  | 2029076  | 910638.4 |              | 4   |
| 5404323  | 6942819  | 6653999  | 4605897  | 5142546  | 5331508  |              | 4   |
| 3504067  | 10031008 | 10088320 | 639700.3 | 2796985  | 1354066  |              | 4   |



|          |          |          |          |          |          |              |     |
|----------|----------|----------|----------|----------|----------|--------------|-----|
| 1768449  | 1397422  | 1443475  | 650911.7 | 13558292 | 6864726  |              | 1   |
| 994015   | 926096.6 | 762107.3 | 454825.2 | 959095.2 | 471374.2 |              | 4   |
| 5320385  | 3701525  | 4548160  | 3701658  | 3755220  | 4779438  |              | 2   |
| 1698010  | 4114808  | 5544606  | 1244048  | 2261041  | 2068182  |              | 9   |
| 650409.2 | 349997   | 1204565  | 994004.6 | 1166575  | 1551279  | [725][M+2]+  | 9   |
| 985589   | 1732707  | 2262479  | 711558.3 | 1396754  | 1026458  |              | 9   |
| 4541394  | 3078058  | 6227896  | 3940313  | 2510803  | 1919588  |              | 2   |
| 1018460  | 1790620  | 1303761  | 521496.6 | 1166586  | 1755238  |              | 9   |
| 1075456  | 1584029  | 1091731  | 552040   | 1269404  | 1940362  |              | 13  |
| 772342.9 | 630859.9 | 877822.4 | 423324.1 | 708357.1 | 585845.6 |              | 9   |
| 614276.2 | 214317.4 | 1231281  | 416954.3 | 259777.6 | 169288   |              | 9   |
| 1101814  | 613310.5 | 989475.6 | 238182.2 | 738084.4 | 373531.5 |              | 91  |
| 656067.8 | 1622821  | 2031222  | 336025.8 | 637946.1 | 956538.9 |              | 9   |
| 984488.7 | 1598038  | 1256778  | 467049.1 | 914010.5 | 1297059  |              | 4   |
| 5389930  | 5985337  | 5021478  | 5250054  | 5575240  | 1735805  | [1610][M]2+  | 2   |
| 31192426 | 1539599  | 37467898 | 27786682 | 1427705  | 3167213  |              | 13  |
| 84390958 | 28554303 | 17458217 | 87703947 | 20581285 | 3657764  |              | 6   |
| 1710836  | 4053031  | 2593962  | 615048.2 | 4369299  | 7298457  | [M+H]+ 41    | 15  |
| 529805.2 | 857598   | 723253.6 | 502024.8 | 681013.6 | 341169.2 |              | 4   |
| 67913552 | 1.06E+08 | 1.27E+08 | 65441738 | 69754113 | 65360428 | [321][M+1]+  | 39  |
| 4699171  | 5157066  | 3815354  | 3611487  | 6222584  | 11289180 | [M+Na]+ 4    | 97  |
| 3578593  | 3519488  | 5674771  | 6877718  | 925396.7 | 3195064  |              | 272 |
| 1756496  | 1870454  | 1629211  | 1205569  | 1615656  | 420583.3 |              | 4   |
| 791894.6 | 1340351  | 1336189  | 122086.6 | 1334505  | 827188.3 | [1124][M]2+  | 20  |
| 17188999 | 26398614 | 10962138 | 12155673 | 16872172 | 36872861 |              | 9   |
| 2.29E+08 | 2.3E+08  | 2.56E+08 | 2.36E+08 | 2.44E+08 | 1.82E+08 | [52][M]+     | 9   |
| 2155281  | 3987252  | 4008141  | 1442846  | 2471534  | 2381125  |              | 9   |
| 7554069  | 3064971  | 5850223  | 6548218  | 3087184  | 2420954  |              | 2   |
| 1509557  | 2849567  | 1771928  | 1076391  | 1920172  | 2184693  |              | 9   |
| 3750485  | 4219235  | 321977.2 | 2572946  | 5141062  | 3325272  | [M+Na]+ 1    | 21  |
| 3667403  | 949971.9 | 563821   | 2832384  | 3321508  | 2857356  |              | 46  |
| 17194368 | 14497076 | 13074656 | 14362506 | 16898680 | 19135437 | [469][M+1]2+ | 2   |
| 646605.4 | 658275.9 | 834814.3 | 1133782  | 426164.6 | 1374324  |              | 9   |
| 1425442  | 1542941  | 1449109  | 2626121  | 1222003  | 1052554  |              | 1   |
| 730685.1 | 651103   | 313264   | 449354.9 | 290594.2 | 15966.77 |              | 145 |

|          |          |          |          |          |          |                     |     |
|----------|----------|----------|----------|----------|----------|---------------------|-----|
| 1128098  | 1355382  | 1368024  | 799985   | 1025013  | 525788.8 |                     | 4   |
| 1816657  | 1744150  | 232302.7 | 4976643  | 1193852  | 1432818  | [M+K]+ 79           | 46  |
| 3851821  | 5601373  | 4447717  | 3594769  | 3718919  | 1314705  | [1580][M+1]+        | 9   |
| 1006209  | 1270133  | 1462700  | 711624.6 | 830743.6 | 639729.1 | [M+H+HCC            | 8   |
| 1100451  | 1273230  | 1332559  | 832623.6 | 1238435  | 1031785  |                     | 4   |
| 723959.6 | 1149131  | 743962.2 | 557164.7 | 774809.7 | 763146.8 |                     | 8   |
| 1029787  | 1122838  | 1289947  | 1033801  | 849346.3 | 373855.1 |                     | 9   |
| 340785.4 | 229035.6 | 199842.1 | 274641   | 153178.9 | 108866.3 |                     | 74  |
| 12645466 | 18111200 | 14163223 | 13737627 | 24832953 | 11175599 | [M+H-CH3]           | 15  |
| 11460240 | 12505119 | 9371123  | 12626607 | 13806993 | 15028628 |                     | 2   |
| 11719474 | 13574869 | 10057501 | 13268912 | 11090800 | 4401178  |                     | 2   |
| 12285961 | 13020918 | 1727075  | 12686149 | 12405854 | 19216907 | [M+K]+ 43           | 3   |
| 765919.1 | 1156278  | 505384.1 | 614398.1 | 1430049  | 1493047  |                     | 4   |
| 520059   | 953310.4 | 843933.5 | 8843193  | 804012.2 | 789951.7 | [773][M+2]+         | 9   |
| 4667554  | 4224571  | 3260982  | 3001211  | 10186471 | 3514991  |                     | 279 |
| 1944778  | 3641248  | 4864045  | 1358379  | 2258919  | 1355109  |                     | 9   |
| 424024.5 | 412902.5 | 660892.2 | 381788.7 | 210108.4 | 245921.8 | [12][M+2]3+         | 4   |
| 1464270  | 1244822  | 1864609  | 13717448 | 21155905 | 7075943  | [M+Na+K+]           | 13  |
| 3711889  | 4012569  | 410899   | 5936729  | 10592666 | 6404654  | [M+Na]+ 3           | 21  |
| 8888960  | 2709385  | 7032759  | 9141786  | 4409688  | 2429319  |                     | 2   |
| 1162952  | 1785559  | 1403524  | 1111766  | 1576375  | 1135155  | [549][M+3]+         | 9   |
| 1750792  | 4150153  | 6509990  | 1383322  | 2217063  | 1267821  | [476][M+1]2+        | 9   |
| 4828841  | 4864443  | 8634055  | 5009149  | 4685987  | 1629006  |                     | 430 |
| 11276341 | 12693346 | 10255931 | 10197498 | 8757822  | 18800002 |                     | 2   |
| 1125859  | 2084960  | 2127696  | 1859838  | 1598440  | 2524382  | [1370][M]2+         | 35  |
| 1.64E+08 | 1.95E+08 | 1.68E+08 | 1.35E+08 | 1.47E+08 | 2.1E+08  | [700][M]+ [M+Na]+ 3 | 31  |
| 3513167  | 4618337  | 3455905  | 2426232  | 3386019  | 4611949  |                     | 4   |
| 1315901  | 2247753  | 1540552  | 869368.4 | 1438350  | 2030137  | [M+3H-CO]           | 81  |
| 3422280  | 2994264  | 2267097  | 1625219  | 5093247  | 4831448  |                     | 2   |
| 408323.3 | 529197.8 | 951914.6 | 210486.1 | 545364.4 | 250073.4 | [2M+2K-H]           | 28  |
| 2358358  | 2478200  | 1273826  | 1962239  | 1706914  | 1958675  | [2M+K]+ 3           | 29  |
| 977708.4 | 1038044  | 1273447  | 717651.3 | 849675   | 552796.4 |                     | 4   |
| 689364.8 | 1068859  | 1531201  | 516315.3 | 606197.9 | 337414.4 | [2M+3Na+]           | 8   |
| 8307706  | 575800.7 | 29063.37 | 9291709  | 3254125  | 469232.7 |                     | 52  |
| 302074.6 | 570464.3 | 547918.5 | 342893.8 | 115518   | 783617.8 | [M+H]+ 39           | 450 |

|          |          |          |          |          |          |                      |     |
|----------|----------|----------|----------|----------|----------|----------------------|-----|
| 580849.2 | 667202.7 | 1317628  | 567148.1 | 1373821  | 568285.9 | [M+H-CH4]            | 14  |
| 6390148  | 17127432 | 10224981 | 3594442  | 1.07E+08 | 13343599 |                      | 1   |
| 4422471  | 7159611  | 6713146  | 6299139  | 6579006  | 6665491  | [3M+3Na-]            | 314 |
| 5912727  | 4215893  | 4661846  | 3822331  | 4370263  | 4474007  |                      | 2   |
| 812494.6 | 2072161  | 2468727  | 1439789  | 1355152  | 1759510  | [1045][M]2 [3M+2K]2+ | 18  |
| 1540331  | 1531611  | 3598940  | 826680.2 | 1545471  | 886171.4 | [1475][M+1]2+        | 9   |
| 2322193  | 2969280  | 2963149  | 1939801  | 2086557  | 2301134  | [115][M+1]2+         | 4   |
| 1171118  | 634957.2 | 1433841  | 973467   | 876892.8 | 220626.1 |                      | 9   |
| 4602157  | 6157362  | 4955525  | 3641274  | 4953149  | 5891482  | [13][M]3+            | 4   |
| 752784.4 | 1214524  | 778470.5 | 651947.3 | 568361.5 | 1238506  |                      | 4   |
| 875637.2 | 1964525  | 2840123  | 1235259  | 1910674  | 829573.7 |                      | 9   |
| 614337.4 | 573258   | 361138.2 | 503801.7 | 447014.1 | 336075.1 | [1053][M]2+          | 117 |
| 452868.9 | 650379.5 | 970331.3 | 1249982  | 244333.7 | 157528   |                      | 113 |
| 764837.9 | 559795.9 | 26699574 | 21617955 | 36511595 | 13931928 |                      | 1   |
| 9053461  | 16860924 | 27223336 | 7539901  | 7884956  | 4414371  | [1420][M+1]+         | 9   |
| 34911940 | 21147927 | 26466337 | 39255953 | 18593228 | 8197063  |                      | 2   |
| 7091819  | 6909971  | 9502971  | 6783671  | 8177566  | 4134907  |                      | 17  |
| 716382.1 | 399480.9 | 829148.7 | 3.65E+08 | 3.7E+08  | 485020.9 |                      | 4   |
| 1140640  | 1238661  | 1027668  | 1208131  | 1094781  | 690647.3 | [645][M]+            | 25  |
| 519384.2 | 1057530  | 1790732  | 296957.1 | 504000.6 | 341326.6 | [263][M+2]3+         | 18  |
| 3110220  | 2497131  | 1026114  | 2828066  | 2947270  | 2146828  |                      | 2   |
| 4732328  | 5766194  | 5078850  | 3711932  | 4603646  | 5190472  |                      | 341 |
| 2.65E+08 | 1.84E+08 | 90876197 | 3.88E+08 | 1.38E+08 | 3.91E+08 | [215][M]+ [M+Na]+ 2! | 12  |
| 3170338  | 1578329  | 3396435  | 2633132  | 1121544  | 155916.1 |                      | 1   |
| 215888.6 | 168418.5 | 1194996  | 338159.6 | 314978.9 | 1033100  |                      | 9   |
| 7297980  | 1341392  | 1240662  | 13347660 | 2321715  | 1188339  | [434][M+1]2+         | 9   |
| 2195098  | 3892340  | 3020537  | 1331341  | 2486789  | 2901990  |                      | 9   |
| 1054921  | 2293122  | 1376566  | 368665.5 | 1691116  | 2691647  |                      | 9   |
| 5595423  | 5292129  | 5059084  | 4785399  | 5220915  | 5163657  |                      | 407 |
| 407439.1 | 485552.1 | 317111.8 | 442737.1 | 328838.7 | 214191.7 | [695][M+2]+          | 119 |
| 33874124 | 48233322 | 60402528 | 28744826 | 28489139 | 23868329 | [M+2H]2+ !           | 18  |
| 21438958 | 30764119 | 24212877 | 17223815 | 18727637 | 30690832 | [1342][M+1]+         | 12  |
| 1830467  | 2342766  | 2464870  | 1963241  | 2188587  | 804955.7 |                      | 4   |
| 490606.9 | 361136.2 | 363931   | 291649.9 | 323466.8 | 165570.9 |                      | 110 |
| 15948652 | 36989338 | 52454972 | 11531076 | 18344832 | 14727653 |                      | 9   |

|          |          |          |          |          |          |                           |     |
|----------|----------|----------|----------|----------|----------|---------------------------|-----|
| 5796404  | 12048895 | 11203930 | 6825189  | 6358399  | 4016257  | [M+H] <sup>+</sup> 38:    | 93  |
| 15588092 | 17422880 | 13722217 | 13223112 | 18379216 | 19025935 |                           | 2   |
| 347873.1 | 1319889  | 16640950 | 6420822  | 1898781  | 4045287  |                           | 9   |
| 602561.1 | 1165455  | 1093348  | 560547.1 | 680656.5 | 463684.9 | [M+H] <sup>+</sup> 35:    | 8   |
| 430597.2 | 324938.8 | 308674.2 | 180663.4 | 272179   | 242899   |                           | 136 |
| 275060.1 | 621242.2 | 510057.8 | 499711.2 | 250798.5 | 339043.7 |                           | 39  |
| 484562.6 | 824554   | 537763.9 | 221385.2 | 714957.8 | 738114.1 | [M+H-H20]                 | 8   |
| 3390705  | 1133474  | 1857099  | 2775513  | 4771411  | 2484959  |                           | 2   |
| 3674413  | 2505650  | 3252124  | 2684849  | 3907099  | 2453622  |                           | 2   |
| 2422286  | 1562417  | 1112764  | 1513260  | 806538.5 | 1858800  | [782][M+1] <sup>+</sup>   | 4   |
| 2241973  | 1684332  | 2286092  | 1644153  | 2149520  | 2231939  |                           | 2   |
| 1050974  | 0        | 1517195  | 755464.2 | 1282376  | 2213732  |                           | 9   |
| 1618283  | 3421443  | 3315389  | 1317398  | 2306888  | 2056806  |                           | 9   |
| 516075.1 | 959656.4 | 929048.2 | 469321.9 | 348787.9 | 322145.7 |                           | 4   |
| 203644.9 | 2224300  | 151379.2 | 241562.8 | 2271564  | 1568740  | [M+H-H20]                 | 288 |
| 2729719  | 3870796  | 3222198  | 1604915  | 3708937  | 2672872  |                           | 9   |
| 1486426  | 1603817  | 752741.4 | 1660316  | 725987.9 | 1312216  |                           | 200 |
| 678708.2 | 2021402  | 4162629  | 1179760  | 850350.8 | 2351889  | [727][M+1] <sup>+</sup>   | 39  |
| 1703531  | 2957864  | 1871952  | 1379641  | 2540076  | 2464169  | [396][M+2] <sup>+</sup>   | 2   |
| 2775230  | 5869700  | 2456390  | 3065444  | 4060096  | 3155648  | [1103][M] <sup>+</sup>    | 2   |
| 1096284  | 1169842  | 994129.8 | 923301.1 | 1051628  | 862066.5 |                           | 4   |
| 5321171  | 4622031  | 4343453  | 6256834  | 4365493  | 2595971  |                           | 2   |
| 406302.4 | 652623.7 | 510928.5 | 514894.8 | 304129.2 | 246082.2 | [M+Na] <sup>+</sup> 5:    | 23  |
| 532615.3 | 368318.5 | 887132.2 | 892809.4 | 578458   | 81657.55 | [1569][M+1] <sup>3+</sup> | 87  |
| 10139332 | 18081583 | 32081430 | 7728163  | 9656311  | 3803932  | [604][M] <sup>2+</sup>    | 9   |
| 616655.7 | 4506762  | 2824136  | 4271549  | 8691339  | 7699919  |                           | 393 |
| 479512.4 | 804352.5 | 587430.1 | 268205.2 | 520647.7 | 18770    |                           | 91  |
| 822821.9 | 1680712  | 1442557  | 848569.7 | 821819.9 | 1349359  |                           | 4   |
| 930452   | 6115060  | 3658406  | 914877.8 | 1867984  | 1562145  | [3M+Na+2]                 | 93  |
| 5041040  | 8726170  | 4057616  | 1875873  | 5446824  | 3783065  |                           | 1   |
| 712940.3 | 1257631  | 854222   | 651395.7 | 716894.7 | 854297.3 |                           | 9   |
| 45486033 | 1260430  | 1235407  | 48270015 | 425555.3 | 1894215  |                           | 12  |
| 1511775  | 4931851  | 1752284  | 2034116  | 3131492  | 2341484  |                           | 2   |
| 412279.8 | 281515.4 | 432502.4 | 677947   | 169067.5 | 530011   |                           | 210 |
| 4031652  | 498085   | 3145977  | 4561835  | 1463014  | 1164300  |                           | 2   |

|          |          |          |          |          |          |                      |     |
|----------|----------|----------|----------|----------|----------|----------------------|-----|
| 32278610 | 12551068 | 4703895  | 29996984 | 28603638 | 6737485  |                      | 1   |
| 4012225  | 5321870  | 1580261  | 2697365  | 1658504  | 3015330  | [491][M+1]+          | 122 |
| 6485467  | 747745.1 | 4720075  | 5433109  | 4370095  | 5547996  | [396][M+2]3+         | 2   |
| 1229932  | 1140423  | 443476.3 | 1321211  | 1481859  | 1604291  |                      | 1   |
| 10715376 | 21607786 | 27096402 | 8229507  | 12216118 | 11189625 | [1373][M]+           | 9   |
| 795904.9 | 2183763  | 2207916  | 1370286  | 457385   | 244508.7 |                      | 2   |
| 654318.6 | 639914.5 | 2646853  | 2948014  | 1516908  | 1719349  |                      | 9   |
| 5790898  | 9519331  | 834618.1 | 4473579  | 10155841 | 4572900  |                      | 84  |
| 2302572  | 279369.5 | 1486127  | 2734586  | 1502650  | 2905343  |                      | 2   |
| 2130187  | 2357614  | 1765265  | 1253153  | 1549011  | 1795079  |                      | 4   |
| 911504   | 1382777  | 1450378  | 675307.2 | 793270.5 | 0        |                      | 9   |
| 975005.1 | 1272749  | 348060.7 | 557388.4 | 1228849  | 1272169  |                      | 1   |
| 3461130  | 1670511  | 1401066  | 2217064  | 5197566  | 3293277  | [M+H]+ 17!           | 3   |
| 36616.94 | 340744.6 | 423999.8 | 33890.77 | 233269.8 | 144592.4 | [1328][M+1]2+        | 20  |
| 847747.6 | 478601.5 | 359700   | 636530.4 | 788680.2 | 264893   |                      | 91  |
| 1636675  | 2262441  | 4974646  | 489050.4 | 1173509  | 2651070  | [M+K]+ 17!           | 13  |
| 14662313 | 10497729 | 12239552 | 11644445 | 11108261 | 9861856  |                      | 2   |
| 17569788 | 27726168 | 15543740 | 10766279 | 12194912 | 23126051 | [964][M]+ [M+Na]+ 5! | 101 |
| 98085842 | 44674169 | 3679754  | 92200986 | 12329974 | 52140993 |                      | 2   |
| 9225143  | 9782026  | 8383713  | 8481581  | 13853064 | 4414978  |                      | 391 |
| 4106851  | 4830055  | 3549780  | 2338944  | 3887223  | 5193643  |                      | 4   |
| 8440128  | 17263783 | 19019623 | 6581896  | 10113208 | 11311130 | [1373][M+2]+         | 9   |
| 2160808  | 3816692  | 5752822  | 1737520  | 2150019  | 1053334  |                      | 9   |
| 379509.1 | 212983   | 195930.3 | 221397.1 | 97099.74 | 357581.5 |                      | 108 |
| 584234.8 | 401961.7 | 687189   | 375145.6 | 466523.2 | 237422.3 | [1119][M+1]+         | 17  |
| 37178081 | 53744298 | 44898140 | 27039372 | 36211165 | 49501892 |                      | 4   |
| 26939193 | 36576452 | 30954745 | 18734292 | 25517701 | 34234315 |                      | 4   |
| 1171798  | 1172771  | 1603319  | 1653279  | 1229544  | 1340262  |                      | 214 |
| 1212950  | 24669317 | 14809096 | 28753423 | 18817847 | 5654233  |                      | 1   |
| 700150.9 | 1465793  | 1989134  | 537721.4 | 889677.7 | 526146   |                      | 9   |
| 27166033 | 1878445  | 2336018  | 26531602 | 1679656  | 998285.1 |                      | 9   |
| 3702330  | 117243   | 608616.7 | 4717898  | 696154.3 | 768581.7 |                      | 358 |
| 7962484  | 844709.2 | 690835.2 | 8633758  | 905102   | 12400269 | [577][M+2]2+         | 9   |
| 1061240  | 1106411  | 4947648  | 5429738  | 1431547  | 2617164  | [396][M+1]+          | 2   |
| 2269988  | 1580400  | 1798016  | 728791.8 | 2281438  | 5643840  |                      | 1   |

|          |          |          |          |          |          |              |     |
|----------|----------|----------|----------|----------|----------|--------------|-----|
| 339050.5 | 155878   | 601102.8 | 1794693  | 551472   | 168800.6 | [1527][M+1]+ | 463 |
| 2919926  | 5169504  | 4987561  | 3066232  | 5139154  | 1463879  |              | 2   |
| 2786115  | 4200597  | 1053976  | 1908178  | 1992082  | 3312182  | [908][M+1]+  | 148 |
| 4732145  | 2832781  | 947701.2 | 4611518  | 2739157  | 5287392  | [M+H]+ 36:   | 3   |
| 301289.1 | 267981.8 | 157736   | 341365.8 | 82416.48 | 125849.3 |              | 69  |
| 669632.6 | 1773635  | 1019124  | 718858.3 | 1021118  | 1226163  |              | 9   |
| 9611585  | 11848094 | 10496039 | 6373090  | 8891510  | 12368412 | [1164][M+1]+ | 76  |
| 47470353 | 34977456 | 41759453 | 46714152 | 45189030 | 35490507 | [1208][M+1]+ | 2   |
| 949250.1 | 31395.9  | 136533.2 | 609761.6 | 786892.5 | 937874.8 |              | 9   |
| 5023588  | 4750253  | 4397856  | 4352182  | 3426994  | 5011604  |              | 190 |
| 2557057  | 1935923  | 2921853  | 3226599  | 724677.6 | 2168044  | [M+H+NH3     | 135 |
| 523145.3 | 953634.8 | 1062076  | 901192.8 | 583933.7 | 1757672  |              | 65  |
| 2279331  | 4408057  | 6275486  | 1943137  | 2211328  | 950761.6 | [675][M]3+   | 9   |
| 1001202  | 1544663  | 2186181  | 801693.9 | 749006.8 | 122890.3 |              | 9   |
| 127996.6 | 132681.5 | 176668.8 | 82129.11 | 97016.76 | 106670.6 |              | 98  |
| 570757.3 | 5790732  | 4033629  | 2292841  | 4001104  | 6714198  |              | 1   |
| 706233.1 | 360970.8 | 890165.3 | 960730.5 | 369144.1 | 402710.7 |              | 160 |
| 5468625  | 3582433  | 2080434  | 4877233  | 13771107 | 2628860  |              | 1   |
| 2119461  | 6767879  | 4638075  | 1338106  | 1112305  | 7660725  | [576][M]2+   | 1   |
| 703440.1 | 1442887  | 1847472  | 627868.8 | 777067   | 96697.59 |              | 9   |
| 349562.2 | 815384.5 | 752101.8 | 280806.3 | 372960.1 | 723704.1 |              | 4   |
| 1298252  | 1831188  | 705223.2 | 989116.4 | 1622668  | 2409940  |              | 9   |
| 5706587  | 3380012  | 5572568  | 5657655  | 5803056  | 8394045  |              | 390 |
| 8098329  | 4805604  | 10482627 | 10122666 | 4473343  | 4052549  |              | 336 |
| 201610.5 | 708414.7 | 533286.3 | 260366   | 611651.3 | 573560.8 |              | 39  |
| 1026698  | 2416570  | 2568835  | 896835.5 | 1831380  | 898660.7 |              | 9   |
| 4249885  | 8460893  | 4348663  | 2945017  | 2758949  | 4116125  |              | 174 |
| 726864.2 | 1021560  | 983919.3 | 714476.6 | 908574.7 | 502127.6 | [553][M+1]+  | 4   |
| 1414887  | 3238341  | 1653108  | 980502.4 | 1444840  | 4885746  |              | 2   |
| 338999.5 | 4609114  | 368283.4 | 231669.9 | 176472.9 | 91739.95 | [M+Na]+ 3!   | 25  |
| 1532117  | 1539846  | 1089743  | 1532174  | 1024594  | 952110.3 |              | 154 |
| 3688282  | 1336325  | 1246011  | 2795842  | 5200717  | 3774897  | [M+Na]+ 1!   | 11  |
| 53194847 | 67940171 | 78924702 | 57702445 | 59034456 | 40561037 | [549][M+1]+  | 9   |
| 1425240  | 3940638  | 799527.5 | 320377   | 969640.5 | 522935.5 |              | 52  |
| 46051932 | 66048095 | 53885491 | 32202641 | 44276277 | 60781881 |              | 4   |

|          |          |          |          |          |          |              |     |
|----------|----------|----------|----------|----------|----------|--------------|-----|
| 568700.6 | 931934.7 | 600794.9 | 892579   | 850323.5 | 758854.1 |              | 4   |
| 3542354  | 1507878  | 2360607  | 4308740  | 1533509  | 328501.2 |              | 2   |
| 745750.7 | 477921.6 | 820862.8 | 1054742  | 176500.3 | 187963.5 | [1593][M]+   | 154 |
| 482480.3 | 374250.5 | 135062.9 | 510476.4 | 148149.8 | 263804.1 | [206][M+2]+  | 103 |
| 4687136  | 8178966  | 2367725  | 3496538  | 5137611  | 10583862 | [2M+3H]3+    | 15  |
| 1592902  | 0        | 894994.7 | 2315265  | 1881809  | 0        | [M+H-CO2]    | 14  |
| 2193799  | 3952965  | 3166421  | 1328047  | 2430750  | 2864725  |              | 9   |
| 1351398  | 2285564  | 2616628  | 942433.7 | 1686083  | 1091252  |              | 9   |
| 249213.1 | 682668   | 549369.3 | 163133.1 | 443846   | 622968   | [M+H-CO]+    | 6   |
| 934302   | 1317567  | 2324957  | 859880.9 | 998189.5 | 1004240  | [M+H-CO]+    | 18  |
| 6729427  | 561520.9 | 1605529  | 6422477  | 9270679  | 1759227  | [3M+2Na]2    | 15  |
| 572324.8 | 629359.8 | 506615.9 | 495482.7 | 294510.5 | 390663.5 | [719][M+2]3+ | 69  |
| 3734674  | 2575978  | 916235.9 | 3285297  | 6622736  | 915044.8 | [M+K+CF3C    | 21  |
| 10628095 | 21442469 | 27171356 | 7992608  | 12225769 | 10829175 |              | 9   |
| 4744597  | 3993673  | 8999565  | 4560203  | 6587878  | 1918515  | [3M+2H]2+    | 28  |
| 1883117  | 2263695  | 6621525  | 7213100  | 3172524  | 2519361  |              | 2   |
| 1894341  | 3105352  | 3607668  | 1095888  | 1658911  | 1125652  |              | 9   |
| 2208446  | 3175422  | 2564015  | 1291992  | 2099649  | 1298949  |              | 4   |
| 1545751  | 1413066  | 2333765  | 1321660  | 977081.4 | 809932.3 |              | 9   |
| 667907   | 2306248  | 6543854  | 2626874  | 2261182  | 2091964  |              | 379 |
| 10901644 | 12432085 | 10421561 | 11060362 | 6329179  | 7967465  |              | 184 |
| 659834.3 | 126904   | 532582.2 | 443986.2 | 638540.6 | 0        |              | 486 |
| 1998721  | 2686152  | 2556818  | 2591190  | 2533564  | 3565202  |              | 366 |
| 3931802  | 3942406  | 3900174  | 3535048  | 3596646  | 2146182  |              | 198 |
| 4030160  | 3167592  | 5941802  | 2819769  | 2545170  | 818025   |              | 1   |
| 1.86E+08 | 1.86E+08 | 1.61E+08 | 1.63E+08 | 2.08E+08 | 2.16E+08 |              | 2   |
| 5531832  | 10787282 | 16193969 | 4330005  | 5630555  | 2909777  |              | 9   |
| 18993900 | 25936343 | 33470147 | 21981613 | 22037494 | 15490760 |              | 9   |
| 1726958  | 1967961  | 1097778  | 712047.9 | 547983.9 | 5757701  | [3M+Na+K]    | 46  |
| 2750042  | 3567448  | 4151416  | 4451593  | 1799258  | 2290704  |              | 2   |
| 3575843  | 4158436  | 1433522  | 2344419  | 5403240  | 11126983 |              | 9   |
| 8068838  | 3992167  | 11527239 | 4361009  | 6236084  | 4702244  | [M+H-C2H4    | 392 |
| 126368.1 | 373762.7 | 389745.1 | 216683.3 | 691184.7 | 539270.9 | [3M+2Na]2    | 28  |
| 3512838  | 1160548  | 5055002  | 3702542  | 3164582  | 2777772  |              | 2   |
| 321494   | 230824.1 | 607780.2 | 433428   | 621929.8 | 304844.1 | [1181][M+1]+ | 35  |

|          |          |          |          |          |          |              |     |
|----------|----------|----------|----------|----------|----------|--------------|-----|
| 173791.4 | 220966.9 | 125362   | 201754.4 | 159041.2 | 67013.52 | [624][M+1]+  | 25  |
| 1657925  | 1582358  | 1703616  | 1231011  | 1384126  | 625039   |              | 4   |
| 747092.7 | 1496191  | 1340767  | 430181.2 | 787124   | 836997.4 | [M+K]+ 50    | 8   |
| 2495682  | 2608949  | 2625648  | 1919325  | 2353860  | 2164762  |              | 4   |
| 1843141  | 1280120  | 570310.9 | 1997671  | 822657.4 | 825886.5 |              | 221 |
| 462628.5 | 1451876  | 538843.2 | 438224.8 | 1051801  | 1013449  |              | 4   |
| 680177.8 | 947530.7 | 629684.4 | 331473.7 | 887151.6 | 962682.3 |              | 9   |
| 127664   | 858546.6 | 593703.1 | 0        | 469678.6 | 149898.8 | [M+K]+ 63    | 46  |
| 51141996 | 27296553 | 11524661 | 36503071 | 34624883 | 25010854 | [M+H-CH2]    | 15  |
| 1330534  | 1004939  | 1769032  | 1437465  | 1685632  | 1405507  | [859][M+1]2+ | 39  |
| 1611845  | 1200497  | 239942.2 | 1122282  | 1490680  | 2128894  | [M+Na+NH     | 11  |
| 631304.7 | 502239.7 | 428736   | 428137.5 | 657204.4 | 405863.9 |              | 4   |
| 3386225  | 2727404  | 3108146  | 2724000  | 2913173  | 1288391  |              | 328 |
| 3.51E+08 | 204463.6 | 6.68E+08 | 1.01E+09 | 9.24E+08 | 2.8E+08  | [24][M]+     | 85  |
| 9826624  | 3195348  | 7781364  | 8935855  | 2509827  | 1149661  | [414][M]3+   | 2   |
| 8412580  | 17121394 | 19412806 | 6993743  | 9950752  | 10579910 |              | 9   |
| 1377144  | 1812300  | 1628520  | 1105166  | 990116.9 | 1979850  |              | 4   |
| 3930971  | 7570638  | 6139584  | 4160717  | 4933480  | 6998062  |              | 1   |
| 454287.7 | 342551   | 225619.8 | 350713.7 | 861262.6 | 743101.3 |              | 91  |
| 7608995  | 13097299 | 7085752  | 4886103  | 3839493  | 5664230  |              | 184 |
| 7.7E+08  | 8.33E+08 | 1299140  | 1635894  | 7.17E+08 | 495588.5 |              | 24  |
| 7770242  | 8286904  | 7111949  | 5668131  | 9018071  | 12876086 | [31][M+2]2+  | 2   |
| 4726235  | 6020197  | 4956833  | 3676737  | 4973316  | 5966392  |              | 4   |
| 1299908  | 12257141 | 9.67E+08 | 9117009  | 6734146  | 13224372 |              | 2   |
| 2930669  | 3221551  | 4351420  | 2591795  | 6451778  | 2024684  |              | 2   |
| 1387563  | 1486639  | 1493033  | 1278273  | 888374.9 | 1871583  | [M+Na]+ 7    | 135 |
| 390286.6 | 626504.3 | 1259765  | 872243.1 | 444408.7 | 1124701  | [M+H]+ 47    | 23  |
| 480000.5 | 402616.7 | 144883.3 | 344637.7 | 340211.9 | 516891.6 |              | 240 |
| 816676   | 2498739  | 3369104  | 1592394  | 910044.4 | 2185548  |              | 5   |
| 2459793  | 3363400  | 2585360  | 1397448  | 2456143  | 3721414  |              | 9   |
| 683818.5 | 1662429  | 2067531  | 411586.1 | 748070.7 | 943366.7 |              | 9   |
| 1687271  | 2661579  | 1241215  | 461986.2 | 3485464  | 4257379  |              | 2   |
| 9994955  | 825237.7 | 36129.79 | 9986063  | 3407207  | 1742504  |              | 52  |
| 5792939  | 4516063  | 6699963  | 5725667  | 4737350  | 2223782  |              | 15  |
| 4226072  | 5004683  | 3689238  | 2590462  | 4064576  | 5221802  | [1254][M]+   | 4   |



|          |          |          |          |          |          |                       |     |
|----------|----------|----------|----------|----------|----------|-----------------------|-----|
| 2246641  | 4649601  | 6866286  | 1594064  | 2558116  | 1116428  |                       | 9   |
| 883163.7 | 0        | 1069512  | 682107.1 | 679964.3 | 568794.8 |                       | 9   |
| 98160.48 | 1121496  | 1179345  | 31573.7  | 334169.2 | 669151.1 | [3M+2Na+]             | 20  |
| 1442335  | 1673826  | 2330270  | 682265.1 | 1470730  | 2753495  | [677][M+2]+           | 9   |
| 3476981  | 2975203  | 3283536  | 3618098  | 4360045  | 3242357  |                       | 321 |
| 1315043  | 2049121  | 1464633  | 405588.7 | 1813694  | 2732153  | [M+Na]+ 2:            | 35  |
| 1622981  | 620878.1 | 412171.2 | 1681315  | 2039417  | 984737.3 |                       | 489 |
| 40799877 | 1.36E+08 | 57863354 | 24884858 | 1.24E+08 | 76246237 | [1289][M]2 [3M+H+K]2  | 3   |
| 69811560 | 99320523 | 78842878 | 53400667 | 59982289 | 95367431 | [1342][M]+            | 12  |
| 1377793  | 2126394  | 1128465  | 1369355  | 1923901  | 5283606  |                       | 2   |
| 7791367  | 5907176  | 5387804  | 10377068 | 13385889 | 5584409  |                       | 2   |
| 1994395  | 37701888 | 12881255 | 2380454  | 36620649 | 5284209  | [M+2H-CH4             | 15  |
| 913930.1 | 588035.2 | 1654732  | 581614.6 | 421106   | 826445.2 | [283][M+1]2+          | 12  |
| 1978403  | 2341057  | 1825738  | 1394642  | 2065571  | 2536975  | [80][M+3]+            | 4   |
| 437592.8 | 860568   | 880362.7 | 559464.5 | 603815.5 | 313843.6 |                       | 157 |
| 7607586  | 4421985  | 6524318  | 6563789  | 7150465  | 6028152  |                       | 321 |
| 3204691  | 5771401  | 1288340  | 235724   | 5890746  | 6692129  |                       | 3   |
| 2498317  | 3035056  | 1876326  | 1958953  | 7513817  | 5845809  |                       | 304 |
| 1605529  | 2699695  | 2516477  | 3122773  | 2735558  | 489125.5 |                       | 1   |
| 9363797  | 651804.7 | 10236677 | 7340048  | 892015.3 | 2302779  |                       | 4   |
| 970028.4 | 950170.9 | 1590021  | 513987.2 | 1114593  | 577254.8 | [M+H]+ 46:            | 28  |
| 2028920  | 3012179  | 2204935  | 1997749  | 2104693  | 1655156  | [1187][M+2]3+         | 2   |
| 1071476  | 1698074  | 1498245  | 964953.6 | 1351012  | 807680.3 |                       | 9   |
| 2495264  | 3247464  | 2474668  | 2094885  | 1942873  | 1905754  | [M+Na]+ 4:            | 97  |
| 1326890  | 1526490  | 1581573  | 887010.1 | 1807790  | 1473034  |                       | 9   |
| 89720896 | 94677967 | 76858694 | 77474814 | 91348185 | 92683643 |                       | 2   |
| 6574267  | 3118284  | 5326669  | 5525397  | 1477197  | 19328804 |                       | 2   |
| 9326090  | 14880335 | 8743373  | 5883735  | 7008566  | 12555442 | [1048][M]+ [M+Na]+ 5: | 101 |
| 6606358  | 4347687  | 3331572  | 1330161  | 6423958  | 9165509  | [M+H]+ 25:            | 3   |
| 871955.4 | 1380318  | 1748243  | 995312.7 | 105912.1 | 936090   |                       | 4   |
| 421892.6 | 679855.5 | 545164   | 2401664  | 563654.5 | 2098929  |                       | 9   |
| 815853.9 | 80193.76 | 1148162  | 1148133  | 315934.6 | 2220233  | [M+Na]+ 4:            | 159 |
| 1807629  | 3039126  | 4116483  | 1792925  | 1723662  | 1042960  |                       | 9   |
| 2954295  | 2741374  | 2761573  | 2814210  | 2585044  | 2784003  |                       | 419 |
| 1683568  | 3022030  | 1989199  | 1143762  | 2219260  | 2581261  |                       | 9   |

|          |          |          |          |          |          |              |     |
|----------|----------|----------|----------|----------|----------|--------------|-----|
| 26059726 | 22004817 | 4692703  | 18368252 | 18954999 | 40250847 |              | 3   |
| 1034933  | 491569.7 | 778191.5 | 855206   | 535372.5 | 81118.19 |              | 4   |
| 2269560  | 1162189  | 312900.1 | 1774436  | 1630648  | 2511711  | [3M+H]+ 3!   | 15  |
| 4872975  | 4753576  | 4826310  | 8124353  | 4367824  | 3716176  |              | 390 |
| 2772393  | 2315878  | 2158332  | 2669360  | 2362169  | 1028997  |              | 2   |
| 2392816  | 131827.3 | 3401979  | 4315145  | 1236189  | 0        |              | 2   |
| 9622794  | 10324650 | 8212858  | 8306163  | 8204829  | 7095341  |              | 277 |
| 1144642  | 1061522  | 1351056  | 1399260  | 1748072  | 1431296  |              | 39  |
| 2230486  | 3320819  | 2763343  | 3086224  | 2068280  | 2988763  |              | 179 |
| 757307.3 | 736489.2 | 3096219  | 2104108  | 1573589  | 2320276  |              | 5   |
| 6782563  | 3219201  | 2486321  | 6861403  | 6314662  | 4710732  | [M+H]+ 31!   | 3   |
| 340707.5 | 724788.9 | 28079462 | 15832051 | 673142.3 | 6338066  | [653][M]2+   | 9   |
| 2270549  | 3078602  | 4647731  | 2330824  | 1822952  | 2720497  |              | 4   |
| 2977119  | 3893880  | 12522772 | 3709976  | 3065250  | 7746778  | [M+H]+ 55!   | 13  |
| 6031280  | 7550647  | 5785566  | 5950194  | 3812470  | 5073343  |              | 386 |
| 1045508  | 1000584  | 887703.7 | 1257705  | 856396.3 | 467642   |              | 9   |
| 2113903  | 3677435  | 4153854  | 1321186  | 1963710  | 1571014  |              | 9   |
| 795369.6 | 1438242  | 1397469  | 557039.8 | 1105391  | 1110823  |              | 4   |
| 762696.5 | 1181683  | 1214417  | 840507.6 | 647631.2 | 179947.9 |              | 4   |
| 5246679  | 853214.8 | 7995011  | 1525742  | 1104983  | 16894492 | [365][M+2]+  | 1   |
| 3703042  | 3633473  | 3390065  | 2714150  | 3607539  | 6163363  |              | 2   |
| 549498.2 | 1869201  | 3068615  | 15031016 | 822928   | 945924.9 |              | 9   |
| 6105328  | 4811104  | 5648280  | 9301961  | 4771786  | 3289591  |              | 2   |
| 10580206 | 21326376 | 26885830 | 8199586  | 12199756 | 10590593 |              | 9   |
| 2651298  | 3513529  | 3518155  | 3551679  | 6784616  | 7840258  |              | 2   |
| 226553.1 | 424287.9 | 722568   | 337498.9 | 339003.7 | 354026.4 | [1585][M+1]+ | 89  |
| 1017972  | 1948834  | 3732980  | 838485.3 | 1177965  | 278827.5 |              | 9   |
| 135967.6 | 342258.6 | 285986.9 | 207774.3 | 171927.1 | 152918.5 |              | 112 |
| 1075216  | 1559504  | 1824004  | 2299048  | 900753.2 | 1898456  |              | 42  |
| 1414049  | 1905583  | 1562496  | 1743992  | 2042027  | 0        |              | 2   |
| 1284939  | 1257582  | 1659147  | 1367654  | 1693696  | 662857.9 | [1092][M+3]+ | 23  |
| 40861401 | 47736875 | 45848815 | 40720564 | 37476881 | 30996672 | [101][M]+    | 35  |
| 668260.2 | 613999.2 | 726441.7 | 852741.2 | 411684.1 | 243021.1 |              | 301 |
| 5959653  | 1891083  | 4583246  | 6434820  | 8373685  | 7111343  |              | 2   |
| 6336534  | 6308222  | 6219696  | 7392457  | 6780814  | 10944578 |              | 2   |

|          |          |          |          |          |          |                       |     |
|----------|----------|----------|----------|----------|----------|-----------------------|-----|
| 1641811  | 2088543  | 1768617  | 1054473  | 1080044  | 2258324  |                       | 4   |
| 5519905  | 7267629  | 5889703  | 4302869  | 5833143  | 7120179  |                       | 4   |
| 695787   | 1091496  | 794960.9 | 407520.4 | 532806.8 | 1078575  | [2M+2Na+]             | 8   |
| 346773.4 | 850293.1 | 1007518  | 370722.2 | 741224.9 | 650639.7 | [63][M+1]3+           | 4   |
| 1.41E+08 | 10656589 | 1.93E+08 | 2472101  | 1.24E+08 | 2726799  | [M+H+HCC              | 13  |
| 10595816 | 12022387 | 1540936  | 3865890  | 2667356  | 20358881 | [M+K+HCO              | 3   |
| 418052.9 | 86060471 | 210295.7 | 371768.6 | 208835.6 | 125338.6 |                       | 61  |
| 6731869  | 2700439  | 6238098  | 4818013  | 4192440  | 4008312  |                       | 2   |
| 475688.7 | 452093.2 | 858812.5 | 320866.4 | 488704.7 | 599158.2 | [M+Na]+ 7:            | 23  |
| 1855682  | 3879448  | 3105183  | 1286427  | 2367858  | 3283979  |                       | 9   |
| 993694.6 | 2404998  | 3253746  | 774454.9 | 1672368  | 1698018  | [1037][M]+ [M+H]+ 56: | 18  |
| 15267029 | 18960559 | 13579680 | 12963644 | 14735165 | 17866021 | [1153][M+1]+          | 2   |
| 2803383  | 3035128  | 6304646  | 28513266 | 3456831  | 21520100 |                       | 3   |
| 2798308  | 4570981  | 4315421  | 5581229  | 4490311  | 4654606  | [M+Na]+ 4:            | 140 |
| 1638977  | 7950857  | 8194265  | 2805769  | 3194988  | 3891636  | [3M+2H]2+             | 20  |
| 400401.6 | 839530   | 521124.5 | 243794.3 | 224214.7 | 390334.5 |                       | 4   |
| 11323513 | 18048425 | 1665729  | 661839.8 | 14991024 | 1733648  | [M+2H-CO              | 15  |
| 10846373 | 6071137  | 6054838  | 6616935  | 8948011  | 5767724  |                       | 335 |
| 2750859  | 3674551  | 3559876  | 2317393  | 2530051  | 2924790  |                       | 4   |
| 664185.6 | 891259.4 | 815128.9 | 569989.2 | 631780.5 | 224876.3 |                       | 8   |
| 3199612  | 4285434  | 2578263  | 2576247  | 2565524  | 5336644  |                       | 2   |
| 1138367  | 1266440  | 1027253  | 1249674  | 1116493  | 640486.3 | [624][M]+             | 25  |
| 7232541  | 7926919  | 6663661  | 12454944 | 6719495  | 5964514  |                       | 337 |
| 4111761  | 6226731  | 3779953  | 5761594  | 8857043  | 4705229  |                       | 250 |
| 5124806  | 4556069  | 9959072  | 5507153  | 6452896  | 1827286  |                       | 28  |
| 1149075  | 919213   | 1658394  | 1608525  | 987963.9 | 975093.8 |                       | 297 |
| 1496690  | 2160883  | 1015102  | 2023693  | 1615497  | 1971346  |                       | 7   |
| 693593.3 | 1885435  | 2763660  | 513714.9 | 692215.6 | 542659   |                       | 9   |
| 511430.6 | 807909.8 | 857642.2 | 640678.4 | 582006   | 602368   |                       | 9   |
| 1030166  | 2318585  | 1640350  | 494054.1 | 1697961  | 1907636  | [3M+3K-H]             | 14  |
| 4285302  | 3539900  | 2524968  | 11170715 | 109829.6 | 1989529  |                       | 224 |
| 424365.5 | 653515.4 | 377247.3 | 325722   | 485337.8 | 512078.8 |                       | 4   |
| 1324536  | 345965.3 | 1538145  | 1252050  | 1112977  | 1396916  | [1095][M]2+           | 7   |
| 5562266  | 7249095  | 6019867  | 4393850  | 5868639  | 7070082  | [80][M]+              | 4   |
| 27061122 | 38921762 | 21105625 | 16969354 | 18919897 | 34765444 | [891][M]+ [M+Na]+ 4:  | 101 |

|          |          |          |          |          |          |              |     |
|----------|----------|----------|----------|----------|----------|--------------|-----|
| 3235707  | 4595572  | 3136770  | 1591058  | 2983776  | 4535968  |              | 4   |
| 1518239  | 1665716  | 115313.6 | 1140254  | 2529758  | 2859519  | [2M+K]+ 1'   | 11  |
| 647451.5 | 975611.8 | 1165524  | 670388   | 508004.9 | 547302.9 |              | 4   |
| 2544244  | 2935861  | 2269888  | 1643054  | 2606518  | 3167105  | [177][M+3]+  | 4   |
| 496813.9 | 0        | 291408.2 | 349102.5 | 426973   | 2122954  |              | 8   |
| 661440.1 | 1376971  | 780336.3 | 743399.9 | 874890.4 | 373629.2 |              | 9   |
| 5938013  | 7694667  | 5057067  | 4118449  | 8315746  | 10147314 | [470][M+3]+  | 2   |
| 3533992  | 5277444  | 1918230  | 2805890  | 4834870  | 7657955  |              | 9   |
| 850982.5 | 0        | 1342133  | 1712884  | 338452.7 | 0        |              | 1   |
| 591514.3 | 1076451  | 1359313  | 501204.6 | 635684.9 | 619176.5 | [M+3H-H2O    | 39  |
| 651281.6 | 1216917  | 1195249  | 759004.2 | 562638.4 | 407670.1 |              | 4   |
| 808340.1 | 1845726  | 1132932  | 500165.5 | 1102611  | 1811588  |              | 4   |
| 1161652  | 1256356  | 1216831  | 146399.5 | 1144511  | 998077.6 |              | 2   |
| 5119516  | 4324886  | 6014230  | 4211938  | 5077525  | 2595135  | [884][M]+    | 17  |
| 635609.9 | 1269335  | 1402606  | 195350.8 | 835128   | 1110243  |              | 13  |
| 2633042  | 5518647  | 2140452  | 2842033  | 6533166  | 6218160  |              | 2   |
| 1027681  | 2325209  | 3370210  | 473535.2 | 1541098  | 1250579  |              | 9   |
| 2508075  | 3318801  | 5745118  | 3982516  | 2990992  | 3121399  |              | 194 |
| 497113.7 | 856209.6 | 458119.5 | 425286.8 | 399462.6 | 420841.7 |              | 4   |
| 565117.8 | 1394291  | 1307021  | 531420.2 | 698880.8 | 233112.4 | [M+Na+NH     | 46  |
| 430579.2 | 393371   | 614726.4 | 217031.9 | 509048.3 | 0        |              | 291 |
| 281981.2 | 380337.4 | 227010.8 | 296052.7 | 303121.2 | 39996.65 |              | 30  |
| 14890700 | 17527476 | 13538922 | 12343600 | 16261795 | 17075409 | [1372][M]+   | 2   |
| 25481486 | 27558748 | 20448561 | 19543915 | 34346801 | 37749190 |              | 2   |
| 689072.8 | 452652.8 | 719284.9 | 507894   | 574497.3 | 1192065  |              | 9   |
| 36459540 | 34711088 | 12756930 | 26201761 | 8514137  | 52274501 |              | 146 |
| 1131993  | 1378781  | 3219947  | 848765.1 | 909499.5 | 2317034  |              | 9   |
| 5560618  | 6876563  | 5003182  | 4349263  | 7056180  | 6699985  |              | 13  |
| 5215599  | 4890102  | 5029761  | 6187688  | 5483135  | 5707008  | [440][M+1]+  | 221 |
| 1911472  | 1296590  | 75653.11 | 1523879  | 1826411  | 2894284  |              | 9   |
| 3550705  | 1.69E+09 | 940982.9 | 1.4E+09  | 2509398  | 2050626  |              | 4   |
| 6089582  | 3180775  | 2061627  | 3728143  | 3525819  | 2614276  | [729][M+1]3+ | 1   |
| 1136098  | 1335068  | 1163201  | 440184.9 | 1096486  | 468448.3 |              | 12  |
| 3688467  | 5235824  | 932145.8 | 3254827  | 4850345  | 7704354  |              | 9   |
| 1.04E+08 | 1.49E+08 | 1.4E+08  | 77358623 | 93516059 | 1.25E+08 | [585][M]+    | 4   |

|          |          |          |          |          |          |                      |     |
|----------|----------|----------|----------|----------|----------|----------------------|-----|
| 2575595  | 3137859  | 2466149  | 1692313  | 2730444  | 3210417  |                      | 4   |
| 13365877 | 1137915  | 857776.4 | 9051355  | 4227748  | 4991099  | [3M+2Na]2            | 46  |
| 6003523  | 7617968  | 6458313  | 4313543  | 5813584  | 8081115  | [172][M+2]2+         | 4   |
| 3515998  | 4691170  | 3303730  | 3549803  | 4128004  | 5166988  |                      | 9   |
| 4374915  | 6543922  | 4762904  | 5932587  | 3267915  | 3043534  | [879][M+1]3+         | 20  |
| 1294174  | 2090951  | 2093254  | 1361469  | 2103883  | 2757790  |                      | 9   |
| 636606.2 | 1193811  | 657781.5 | 428312.1 | 1253438  | 574578.9 |                      | 38  |
| 1819530  | 4682420  | 3881823  | 1721530  | 3489214  | 3620235  | [374][M+1]3+         | 9   |
| 813125   | 771724.5 | 608339   | 731943.6 | 645953.5 | 287882.9 | [M+2Na+K]            | 8   |
| 19877800 | 17781238 | 31854370 | 16876985 | 16162484 | 9082651  | [880][M]+ [M+H]+ 48: | 23  |
| 6083802  | 1356851  | 1208548  | 237797.7 | 1005460  | 7492880  |                      | 4   |
| 2413493  | 2139037  | 1851799  | 1655646  | 2153204  | 1859578  |                      | 4   |
| 165025.7 | 298646.3 | 228060.6 | 266812.4 | 230183.1 | 179868.9 | [926][M+1]+          | 148 |
| 742922.8 | 764648.4 | 898707   | 973351.7 | 733661.5 | 0        |                      | 9   |
